# Supplementary material for: Cytokines Interleukin-1β and Tumor Necrosis Factor-α Regulate Different Transcriptional and Alternative Splicing Networks in Primary β-Cells
Source: PubMed Central journal article supplement — Diabetes. 2009 Nov 23;59(2):358–74. doi: 10.2337/db09-1159 (PMC2809955; doi:10.2337/db09-1159), 2009-11-23
Supplement: supp_db09-1159_Suppl_Table_IX.pdf [file supp_db09-1159_Suppl_Table_IX.pdf]

Suppl. Table IX: Exon array results for cells treated with IL+IFN for 24h

| Probe Set ID | Transcript Cluster ID | exon_id | Gene Title                                                                       | Gene Symbol | Entrez Gene ID | Splicing index | up/down |
|--------------|-----------------------|---------|----------------------------------------------------------------------------------|-------------|----------------|----------------|---------|
| 6139153      | 7123129               | 1185075 | 1-acylglycerol-3-phosphate O-acyltransferase 9                                   | Agpat9      | 305166         | 2,22           | down    |
| 6191235      | 7123129               | 1185087 | 1-acylglycerol-3-phosphate O-acyltransferase 9                                   | Agpat9      | 305166         | 1,84           | up      |
| 6529901      | 7123129               | 1185074 | 1-acylglycerol-3-phosphate O-acyltransferase 9                                   | Agpat9      | 305166         | 1,58           | up      |
| 5684183      | 7123129               | 1185077 | 1-acylglycerol-3-phosphate O-acyltransferase 9                                   | Agpat9      | 305166         | 1,51           | up      |
| 6398999      | 7123129               | 1185084 | 1-acylglycerol-3-phosphate O-acyltransferase 9                                   | Agpat9      | 305166         | 1,48           | up      |
| 6082119      | 7123129               | 1185075 | 1-acylglycerol-3-phosphate O-acyltransferase 9                                   | Agpat9      | 305166         | 1,39           | down    |
| 5951730      | 7123129               | 1185079 | 1-acylglycerol-3-phosphate O-acyltransferase 9                                   | Agpat9      | 305166         | 1,36           | up      |
| 6227440      | 7123129               | 1185090 | 1-acylglycerol-3-phosphate O-acyltransferase 9                                   | Agpat9      | 305166         | 1,36           | down    |
| 6615231      | 7123129               | 1185090 | 1-acylglycerol-3-phosphate O-acyltransferase 9                                   | Agpat9      | 305166         | 1,35           | down    |
| 5940962      | 7123129               | 1185085 | 1-acylglycerol-3-phosphate O-acyltransferase 9                                   | Agpat9      | 305166         | 1,31           | down    |
| 6040880      | 7123129               | 1185081 | 1-acylglycerol-3-phosphate O-acyltransferase 9                                   | Agpat9      | 305166         | 1,27           | up      |
| 6514900      | 7123129               | 1185080 | 1-acylglycerol-3-phosphate O-acyltransferase 9                                   | Agpat9      | 305166         | 1,20           | down    |
| 6052829      | 7123129               | 1185078 | 1-acylglycerol-3-phosphate O-acyltransferase 9                                   | Agpat9      | 305166         | 1,20           | up      |
| 5805844      | 7123129               | 1185085 | 1-acylglycerol-3-phosphate O-acyltransferase 9                                   | Agpat9      | 305166         | 1,19           | down    |
| 5626073      | 7123129               | 1185078 | 1-acylglycerol-3-phosphate O-acyltransferase 9                                   | Agpat9      | 305166         | 1,14           | up      |
| 5822387      | 7123129               | 1185083 | 1-acylglycerol-3-phosphate O-acyltransferase 9                                   | Agpat9      | 305166         | 1,10           | up      |
| 6571098      | 7123129               | 1185082 | 1-acylglycerol-3-phosphate O-acyltransferase 9                                   | Agpat9      | 305166         | 1,07           | down    |
| 5807245      | 7241995               | 1478332 | 1-aminocyclopropane-1-carboxylate synthase homolog (Arabidopsis)(non-functional) | Accs        | 311218         | 2,75           | up      |
| 6379605      | 7241995               | 1478327 | 1-aminocyclopropane-1-carboxylate synthase homolog (Arabidopsis)(non-functional) | Accs        | 311218         | 1,70           | down    |
| 6255177      | 7241995               | 1478334 | 1-aminocyclopropane-1-carboxylate synthase homolog (Arabidopsis)(non-functional) | Accs        | 311218         | 1,33           | down    |
| 6169421      | 7241995               | 1478322 | 1-aminocyclopropane-1-carboxylate synthase homolog (Arabidopsis)(non-functional) | Accs        | 311218         | 1,32           | down    |
| 6407481      | 7241995               | 1478325 | 1-aminocyclopropane-1-carboxylate synthase homolog (Arabidopsis)(non-functional) | Accs        | 311218         | 1,28           | up      |
| 6248676      | 7241995               | 1478330 | 1-aminocyclopropane-1-carboxylate synthase homolog (Arabidopsis)(non-functional) | Accs        | 311218         | 1,27           | down    |
| 6110186      | 7241995               | 1478329 | 1-aminocyclopropane-1-carboxylate synthase homolog (Arabidopsis)(non-functional) | Accs        | 311218         | 1,27           | up      |
| 6272587      | 7241995               | 1478323 | 1-aminocyclopropane-1-carboxylate synthase homolog (Arabidopsis)(non-functional) | Accs        | 311218         | 1,26           | down    |
| 5644567      | 7241995               | 1478326 | 1-aminocyclopropane-1-carboxylate synthase homolog (Arabidopsis)(non-functional) | Accs        | 311218         | 1,22           | up      |
| 6348981      | 7241995               | 1478326 | 1-aminocyclopropane-1-carboxylate synthase homolog (Arabidopsis)(non-functional) | Accs        | 311218         | 1,17           | up      |
| 5871243      | 7241995               | 1478324 | 1-aminocyclopropane-1-carboxylate synthase homolog (Arabidopsis)(non-functional) | Accs        | 311218         | 1,13           | up      |
| 5627369      | 7241995               | 1478331 | 1-aminocyclopropane-1-carboxylate synthase homolog (Arabidopsis)(non-functional) | Accs        | 311218         | 1,12           | down    |
| 6444793      | 7241995               | 1478321 | 1-aminocyclopropane-1-carboxylate synthase homolog (Arabidopsis)(non-functional) | Accs        | 311218         | 1,12           | down    |
| 6588461      | 7241995               | 1478334 | 1-aminocyclopropane-1-carboxylate synthase homolog (Arabidopsis)(non-functional) | Accs        | 311218         | 1,10           | up      |
| 6258074      | 7241995               | 1478321 | 1-aminocyclopropane-1-carboxylate synthase homolog (Arabidopsis)(non-functional) | Accs        | 311218         | 1,05           | up      |
| 6491832      | 7241995               | 1478334 | 1-aminocyclopropane-1-carboxylate synthase homolog (Arabidopsis)(non-functional) | Accs        | 311218         | 1,04           | down    |
| 6722020      | 7241995               | 1478335 | 1-aminocyclopropane-1-carboxylate synthase homolog (Arabidopsis)(non-functional) | Accs        | 311218         | 1,03           | up      |
| 6447075      | 7241995               | 1478326 | 1-aminocyclopropane-1-carboxylate synthase homolog (Arabidopsis)(non-functional) | Accs        | 311218         | 1,03           | down    |
| 6737496      | 7098544               | 1123991 | 2'-5' oligoadenylate synthetase II                                               | Oas1i       | 304507         | 2,29           | up      |
| 6009478      | 7098544               | 1123987 | 2'-5' oligoadenylate synthetase II                                               | Oas1i       | 304507         | 2,00           | up      |
| 6695587      | 7098544               | 1123991 | 2'-5' oligoadenylate synthetase II                                               | Oas1i       | 304507         | 1,81           | down    |
| 5709365      | 7098544               | 1123986 | 2'-5' oligoadenylate synthetase II                                               | Oas1i       | 304507         | 1,56           | down    |
| 6448471      | 7098544               | 1123991 | 2'-5' oligoadenylate synthetase II                                               | Oas1i       | 304507         | 1,40           | up      |
| 6147486      | 7098544               | 1123990 | 2'-5' oligoadenylate synthetase II                                               | Oas1i       | 304507         | 1,21           | up      |
| 6381908      | 7098544               | 1123985 | 2'-5' oligoadenylate synthetase II                                               | Oas1i       | 304507         | 1,20           | down    |
| 6115857      | 7098544               | 1123989 | 2'-5' oligoadenylate synthetase II                                               | Oas1i       | 304507         | 1,05           | up      |
| 6196405      | 7098544               | 1123988 | 2'-5' oligoadenylate synthetase II                                               | Oas1i       | 304507         | 1,03           | down    |
| 5864118      | 7102456               | 1133678 | 2'-5' oligoadenylate synthetase 1K                                               | Oas1k       | 494198         | 2,13           | up      |
| 5786554      | 7102456               | 1133677 | 2'-5' oligoadenylate synthetase 1K                                               | Oas1k       | 494198         | 1,57           | up      |
| 5769351      | 7102456               | 1133680 | 2'-5' oligoadenylate synthetase 1K                                               | Oas1k       | 494198         | 1,43           | down    |
| 6638916      | 7102456               | 1133679 | 2'-5' oligoadenylate synthetase 1K                                               | Oas1k       | 494198         | 1,40           | up      |
| 6604582      | 7102456               | 1133676 | 2'-5' oligoadenylate synthetase 1K                                               | Oas1k       | 494198         | 1,18           | up      |
| 5672696      | 7102456               | 1133681 | 2'-5' oligoadenylate synthetase 1K                                               | Oas1k       | 494198         | 1,17           | down    |
| 5973989      | 7102456               | 1133676 | 2'-5' oligoadenylate synthetase 1K                                               | Oas1k       | 494198         | 1,02           | down    |
| 6725783      | 7102456               | 1133681 | 2'-5' oligoadenylate synthetase 1K                                               | Oas1k       | 494198         | 1,01           | down    |
| 6451268      | 7075780               | 1069975 | 2,4-dienoyl CoA reductase 2, peroxisomal                                         | Decr2       | 64461          | 2,56           | down    |
| 6141378      | 7075780               | 1069973 | 2,4-dienoyl CoA reductase 2, peroxisomal                                         | Decr2       | 64461          | 1,64           | up      |
| 5850028      | 7075780               | 1069970 | 2,4-dienoyl CoA reductase 2, peroxisomal                                         | Decr2       | 64461          | 1,62           | up      |

|         |         |         |                                             |       |        |      |      |
|---------|---------|---------|---------------------------------------------|-------|--------|------|------|
| 6216542 | 7075780 | 1069975 | 2,4-dienoyl CoA reductase 2, peroxisomal    | Decr2 | 64461  | 1,25 | down |
| 6543439 | 7075780 | 1069968 | 2,4-dienoyl CoA reductase 2, peroxisomal    | Decr2 | 64461  | 1,19 | up   |
| 5903591 | 7075780 | 1069971 | 2,4-dienoyl CoA reductase 2, peroxisomal    | Decr2 | 64461  | 1,15 | up   |
| 5627675 | 7075780 | 1069974 | 2,4-dienoyl CoA reductase 2, peroxisomal    | Decr2 | 64461  | 1,15 | down |
| 5910322 | 7075780 | 1069969 | 2,4-dienoyl CoA reductase 2, peroxisomal    | Decr2 | 64461  | 1,10 | down |
| 5828456 | 7075780 | 1069967 | 2,4-dienoyl CoA reductase 2, peroxisomal    | Decr2 | 64461  | 1,08 | down |
| 5825191 | 7075780 | 1069968 | 2,4-dienoyl CoA reductase 2, peroxisomal    | Decr2 | 64461  | 1,08 | down |
| 5946106 | 7075780 | 1069972 | 2,4-dienoyl CoA reductase 2, peroxisomal    | Decr2 | 64461  | 1,04 | down |
| 6271567 | 7075780 | 1069975 | 2,4-dienoyl CoA reductase 2, peroxisomal    | Decr2 | 64461  | 1,01 | down |
| 6390640 | 7098547 | 1124002 | 2'-5' oligoadenylate synthetase 1A          | Oas1a | 192281 | 3,73 | down |
| 6426242 | 7098547 | 1123998 | 2'-5' oligoadenylate synthetase 1A          | Oas1a | 192281 | 3,41 | up   |
| 6542543 | 7098547 | 1123997 | 2'-5' oligoadenylate synthetase 1A          | Oas1a | 192281 | 2,77 | up   |
| 6236607 | 7098547 | 1124000 | 2'-5' oligoadenylate synthetase 1A          | Oas1a | 192281 | 2,31 | down |
| 6275519 | 7098547 | 1124003 | 2'-5' oligoadenylate synthetase 1A          | Oas1a | 192281 | 2,21 | down |
| 5937137 | 7098547 | 1124001 | 2'-5' oligoadenylate synthetase 1A          | Oas1a | 192281 | 1,20 | down |
| 5879969 | 7098547 | 1123996 | 2'-5' oligoadenylate synthetase 1A          | Oas1a | 192281 | 1,06 | down |
| 5620428 | 7098547 | 1123999 | 2'-5' oligoadenylate synthetase 1A          | Oas1a | 192281 | 1,06 | down |
| 6063513 | 7102451 | 1133670 | 2-5 oligoadenylate synthetase 1B            | Oas1b | 246268 | 2,70 | up   |
| 6346138 | 7102451 | 1133666 | 2-5 oligoadenylate synthetase 1B            | Oas1b | 246268 | 1,77 | down |
| 5775546 | 7102451 | 1133668 | 2-5 oligoadenylate synthetase 1B            | Oas1b | 246268 | 1,31 | down |
| 6091554 | 7102451 | 1133671 | 2-5 oligoadenylate synthetase 1B            | Oas1b | 246268 | 1,09 | down |
| 6358784 | 7102451 | 1133667 | 2-5 oligoadenylate synthetase 1B            | Oas1b | 246268 | 1,09 | up   |
| 5747176 | 7102451 | 1133666 | 2-5 oligoadenylate synthetase 1B            | Oas1b | 246268 | 1,07 | down |
| 6724804 | 7102451 | 1133669 | 2-5 oligoadenylate synthetase 1B            | Oas1b | 246268 | 1,03 | down |
| 5696318 | 7102441 | 1133637 | 2'-5' oligoadenylate synthetase 1D          | Oas1d | 304508 | 2,11 | down |
| 5979118 | 7102441 | 1133636 | 2'-5' oligoadenylate synthetase 1D          | Oas1d | 304508 | 1,30 | down |
| 5846825 | 7102441 | 1133637 | 2'-5' oligoadenylate synthetase 1D          | Oas1d | 304508 | 1,29 | up   |
| 6632389 | 7102441 | 1133638 | 2'-5' oligoadenylate synthetase 1D          | Oas1d | 304508 | 1,19 | down |
| 5864058 | 7102441 | 1133637 | 2'-5' oligoadenylate synthetase 1D          | Oas1d | 304508 | 1,15 | up   |
| 5882472 | 7102441 | 1133642 | 2'-5' oligoadenylate synthetase 1D          | Oas1d | 304508 | 1,12 | down |
| 6034364 | 7102441 | 1133641 | 2'-5' oligoadenylate synthetase 1D          | Oas1d | 304508 | 1,08 | up   |
| 6242705 | 7102441 | 1133640 | 2'-5' oligoadenylate synthetase 1D          | Oas1d | 304508 | 1,05 | down |
| 6464771 | 7102441 | 1133639 | 2'-5' oligoadenylate synthetase 1D          | Oas1d | 304508 | 1,05 | up   |
| 6215122 | 7102441 | 1133636 | 2'-5' oligoadenylate synthetase 1D          | Oas1d | 304508 | 1,03 | down |
| 5651934 | 7103001 | 1135104 | 2'-5' oligoadenylate synthetase-like 2      | Oas12 | 304549 | 6,53 | down |
| 6056295 | 7103001 | 1135098 | 2'-5' oligoadenylate synthetase-like 2      | Oas12 | 304549 | 2,09 | up   |
| 6435093 | 7103001 | 1135103 | 2'-5' oligoadenylate synthetase-like 2      | Oas12 | 304549 | 1,60 | down |
| 5656665 | 7103001 | 1135104 | 2'-5' oligoadenylate synthetase-like 2      | Oas12 | 304549 | 1,59 | up   |
| 6215854 | 7103001 | 1135101 | 2'-5' oligoadenylate synthetase-like 2      | Oas12 | 304549 | 1,28 | up   |
| 6486269 | 7103001 | 1135100 | 2'-5' oligoadenylate synthetase-like 2      | Oas12 | 304549 | 1,20 | down |
| 6563387 | 7103001 | 1135099 | 2'-5' oligoadenylate synthetase-like 2      | Oas12 | 304549 | 1,15 | up   |
| 6615309 | 7103001 | 1135102 | 2'-5' oligoadenylate synthetase-like 2      | Oas12 | 304549 | 1,09 | up   |
| 6328359 | 7103432 | 1136220 | 2'-5'-oligoadenylate synthetase 2, 69/71kDa | Oas2  | 363938 | 2,58 | down |
| 6108591 | 7103432 | 1136215 | 2'-5'-oligoadenylate synthetase 2, 69/71kDa | Oas2  | 363938 | 1,85 | up   |
| 6252603 | 7103432 | 1136219 | 2'-5'-oligoadenylate synthetase 2, 69/71kDa | Oas2  | 363938 | 1,83 | up   |
| 6517825 | 7103432 | 1136222 | 2'-5'-oligoadenylate synthetase 2, 69/71kDa | Oas2  | 363938 | 1,73 | down |
| 6337497 | 7103432 | 1136213 | 2'-5'-oligoadenylate synthetase 2, 69/71kDa | Oas2  | 363938 | 1,54 | up   |
| 6251715 | 7103432 | 1136218 | 2'-5'-oligoadenylate synthetase 2, 69/71kDa | Oas2  | 363938 | 1,38 | down |
| 6564864 | 7103432 | 1136213 | 2'-5'-oligoadenylate synthetase 2, 69/71kDa | Oas2  | 363938 | 1,32 | down |
| 5733611 | 7103432 | 1136214 | 2'-5'-oligoadenylate synthetase 2, 69/71kDa | Oas2  | 363938 | 1,25 | down |
| 6172069 | 7103432 | 1136221 | 2'-5'-oligoadenylate synthetase 2, 69/71kDa | Oas2  | 363938 | 1,23 | down |
| 6218833 | 7103432 | 1136212 | 2'-5'-oligoadenylate synthetase 2, 69/71kDa | Oas2  | 363938 | 1,19 | down |
| 6701470 | 7103432 | 1136217 | 2'-5'-oligoadenylate synthetase 2, 69/71kDa | Oas2  | 363938 | 1,15 | down |
| 5854719 | 7103432 | 1136216 | 2'-5'-oligoadenylate synthetase 2, 69/71kDa | Oas2  | 363938 | 1,12 | down |
| 6127610 | 7103432 | 1136212 | 2'-5'-oligoadenylate synthetase 2, 69/71kDa | Oas2  | 363938 | 1,10 | down |
| 5644169 | 7102992 | 1135089 | 2'-5'-oligoadenylate synthetase-like        | Oasl  | 304545 | 2,01 | down |
| 6482496 | 7102992 | 1135085 | 2'-5'-oligoadenylate synthetase-like        | Oasl  | 304545 | 1,52 | down |

|         |         |         |                                                                                             |          |        |      |      |
|---------|---------|---------|---------------------------------------------------------------------------------------------|----------|--------|------|------|
| 5879021 | 7102992 | 1135088 | 2'-5'-oligoadenylate synthetase-like                                                        | Oasl     | 304545 | 1,22 | up   |
| 6237389 | 7102992 | 1135086 | 2'-5'-oligoadenylate synthetase-like                                                        | Oasl     | 304545 | 1,14 | up   |
| 6364778 | 7102992 | 1135083 | 2'-5'-oligoadenylate synthetase-like                                                        | Oasl     | 304545 | 1,13 | down |
| 6072279 | 7102992 | 1135087 | 2'-5'-oligoadenylate synthetase-like                                                        | Oasl     | 304545 | 1,11 | down |
| 5903505 | 7102992 | 1135084 | 2'-5'-oligoadenylate synthetase-like                                                        | Oasl     | 304545 | 1,09 | up   |
| 5975456 | 7102992 | 1135089 | 2'-5'-oligoadenylate synthetase-like                                                        | Oasl     | 304545 | 1,06 | up   |
| 6135576 | 7102992 | 1135084 | 2'-5'-oligoadenylate synthetase-like                                                        | Oasl     | 304545 | 1,05 | up   |
| 5968974 | 7211896 | 1403089 | 3 beta-hydroxysteroid dehydrogenase/delta-5-delta-4 isomerase type II                       | Hsd3b    | 682974 | 1,27 | up   |
| 6279239 | 7211896 | 1403090 | 3 beta-hydroxysteroid dehydrogenase/delta-5-delta-4 isomerase type II                       | Hsd3b    | 682974 | 1,08 | down |
| 6238512 | 7279207 | 1571051 | 3-oxoacid CoA transferase 2A                                                                | Oxct2a   | 366463 | 2,61 | up   |
| 5621988 | 7279207 | 1571051 | 3-oxoacid CoA transferase 2A                                                                | Oxct2a   | 366463 | 1,60 | up   |
| 5939630 | 7279207 | 1571053 | 3-oxoacid CoA transferase 2A                                                                | Oxct2a   | 366463 | 1,37 | down |
| 6197080 | 7279207 | 1571051 | 3-oxoacid CoA transferase 2A                                                                | Oxct2a   | 366463 | 1,36 | down |
| 5924895 | 7279207 | 1571052 | 3-oxoacid CoA transferase 2A                                                                | Oxct2a   | 366463 | 1,04 | down |
| 6634040 | 7120565 | 1178740 | 4-nitrophenylphosphatase domain and non-neuronal SNAP25-like protein homolog 1 (C. elegans) | Nipsnap1 | 360971 | 2,28 | down |
| 5714556 | 7120565 | 1178731 | 4-nitrophenylphosphatase domain and non-neuronal SNAP25-like protein homolog 1 (C. elegans) | Nipsnap1 | 360971 | 1,35 | down |
| 5689516 | 7120565 | 1178742 | 4-nitrophenylphosphatase domain and non-neuronal SNAP25-like protein homolog 1 (C. elegans) | Nipsnap1 | 360971 | 1,25 | up   |
| 6021086 | 7120565 | 1178733 | 4-nitrophenylphosphatase domain and non-neuronal SNAP25-like protein homolog 1 (C. elegans) | Nipsnap1 | 360971 | 1,21 | up   |
| 5669297 | 7120565 | 1178735 | 4-nitrophenylphosphatase domain and non-neuronal SNAP25-like protein homolog 1 (C. elegans) | Nipsnap1 | 360971 | 1,20 | up   |
| 6495335 | 7120565 | 1178737 | 4-nitrophenylphosphatase domain and non-neuronal SNAP25-like protein homolog 1 (C. elegans) | Nipsnap1 | 360971 | 1,11 | up   |
| 5975733 | 7120565 | 1178739 | 4-nitrophenylphosphatase domain and non-neuronal SNAP25-like protein homolog 1 (C. elegans) | Nipsnap1 | 360971 | 1,11 | up   |
| 6635414 | 7120565 | 1178743 | 4-nitrophenylphosphatase domain and non-neuronal SNAP25-like protein homolog 1 (C. elegans) | Nipsnap1 | 360971 | 1,09 | up   |
| 6411386 | 7120565 | 1178734 | 4-nitrophenylphosphatase domain and non-neuronal SNAP25-like protein homolog 1 (C. elegans) | Nipsnap1 | 360971 | 1,06 | down |
| 5977166 | 7120565 | 1178736 | 4-nitrophenylphosphatase domain and non-neuronal SNAP25-like protein homolog 1 (C. elegans) | Nipsnap1 | 360971 | 1,03 | up   |
| 6615295 | 7120565 | 1178738 | 4-nitrophenylphosphatase domain and non-neuronal SNAP25-like protein homolog 1 (C. elegans) | Nipsnap1 | 360971 | 1,00 | up   |
| 6090736 | 7171112 | 1302524 | 5-hydroxytryptamine (serotonin) receptor 4                                                  | Htr4     | 25324  | 2,28 | up   |
| 6153161 | 7171112 | 1302522 | 5-hydroxytryptamine (serotonin) receptor 4                                                  | Htr4     | 25324  | 1,48 | down |
| 6640519 | 7171112 | 1302523 | 5-hydroxytryptamine (serotonin) receptor 4                                                  | Htr4     | 25324  | 1,15 | up   |
| 5865612 | 7171112 | 1302525 | 5-hydroxytryptamine (serotonin) receptor 4                                                  | Htr4     | 25324  | 1,12 | down |
| 6387483 | 7171112 | 1302521 | 5-hydroxytryptamine (serotonin) receptor 4                                                  | Htr4     | 25324  | 1,11 | down |
| 6725860 | 7171112 | 1302521 | 5-hydroxytryptamine (serotonin) receptor 4                                                  | Htr4     | 25324  | 1,04 | up   |
| 5619380 | 7171112 | 1302524 | 5-hydroxytryptamine (serotonin) receptor 4                                                  | Htr4     | 25324  | 1,04 | up   |
| 6360730 | 7171112 | 1302526 | 5-hydroxytryptamine (serotonin) receptor 4                                                  | Htr4     | 25324  | 1,03 | up   |
| 5730998 | 7154584 | 1262105 | 5-methyltetrahydrofolate-homocysteine methyltransferase reductase                           | Mtrr     | 290947 | 2,50 | up   |
| 5669460 | 7154584 | 1262121 | 5-methyltetrahydrofolate-homocysteine methyltransferase reductase                           | Mtrr     | 290947 | 1,91 | down |
| 5781411 | 7154584 | 1262117 | 5-methyltetrahydrofolate-homocysteine methyltransferase reductase                           | Mtrr     | 290947 | 1,53 | up   |
| 5720087 | 7154584 | 1262115 | 5-methyltetrahydrofolate-homocysteine methyltransferase reductase                           | Mtrr     | 290947 | 1,46 | down |
| 6504485 | 7154584 | 1262112 | 5-methyltetrahydrofolate-homocysteine methyltransferase reductase                           | Mtrr     | 290947 | 1,34 | up   |
| 6690693 | 7154584 | 1262118 | 5-methyltetrahydrofolate-homocysteine methyltransferase reductase                           | Mtrr     | 290947 | 1,26 | up   |
| 6488624 | 7154584 | 1262110 | 5-methyltetrahydrofolate-homocysteine methyltransferase reductase                           | Mtrr     | 290947 | 1,21 | up   |
| 6495892 | 7154584 | 1262106 | 5-methyltetrahydrofolate-homocysteine methyltransferase reductase                           | Mtrr     | 290947 | 1,20 | down |
| 5711692 | 7154584 | 1262113 | 5-methyltetrahydrofolate-homocysteine methyltransferase reductase                           | Mtrr     | 290947 | 1,14 | down |
| 6407482 | 7154584 | 1262111 | 5-methyltetrahydrofolate-homocysteine methyltransferase reductase                           | Mtrr     | 290947 | 1,10 | down |
| 5697838 | 7154584 | 1262109 | 5-methyltetrahydrofolate-homocysteine methyltransferase reductase                           | Mtrr     | 290947 | 1,09 | up   |
| 6005324 | 7154584 | 1262113 | 5-methyltetrahydrofolate-homocysteine methyltransferase reductase                           | Mtrr     | 290947 | 1,09 | down |
| 6638684 | 7154584 | 1262116 | 5-methyltetrahydrofolate-homocysteine methyltransferase reductase                           | Mtrr     | 290947 | 1,06 | up   |
| 6567969 | 7154584 | 1262119 | 5-methyltetrahydrofolate-homocysteine methyltransferase reductase                           | Mtrr     | 290947 | 1,05 | down |
| 6248099 | 7154584 | 1262119 | 5-methyltetrahydrofolate-homocysteine methyltransferase reductase                           | Mtrr     | 290947 | 1,03 | up   |
| 6455025 | 7154584 | 1262122 | 5-methyltetrahydrofolate-homocysteine methyltransferase reductase                           | Mtrr     | 290947 | 1,02 | down |
| 5875782 | 7154584 | 1262106 | 5-methyltetrahydrofolate-homocysteine methyltransferase reductase                           | Mtrr     | 290947 | 1,02 | up   |
| 6108420 | 7082672 | 1085396 | 5'-nucleotidase, cytosolic III-like                                                         | Nt5c3l   | 360629 | 3,16 | down |
| 6584009 | 7082672 | 1085397 | 5'-nucleotidase, cytosolic III-like                                                         | Nt5c3l   | 360629 | 1,46 | down |
| 6130011 | 7082672 | 1085391 | 5'-nucleotidase, cytosolic III-like                                                         | Nt5c3l   | 360629 | 1,31 | up   |
| 6248073 | 7082672 | 1085399 | 5'-nucleotidase, cytosolic III-like                                                         | Nt5c3l   | 360629 | 1,30 | up   |
| 6277042 | 7082672 | 1085400 | 5'-nucleotidase, cytosolic III-like                                                         | Nt5c3l   | 360629 | 1,18 | down |
| 5859267 | 7082672 | 1085394 | 5'-nucleotidase, cytosolic III-like                                                         | Nt5c3l   | 360629 | 1,14 | down |
| 5775276 | 7082672 | 1085393 | 5'-nucleotidase, cytosolic III-like                                                         | Nt5c3l   | 360629 | 1,11 | down |

|         |         |         |                                                           |        |        |      |      |
|---------|---------|---------|-----------------------------------------------------------|--------|--------|------|------|
| 6618510 | 7082672 | 1085395 | 5'-nucleotidase, cytosolic III-like                       | Nt5c3l | 360629 | 1,08 | down |
| 6708063 | 7082672 | 1085398 | 5'-nucleotidase, cytosolic III-like                       | Nt5c3l | 360629 | 1,07 | up   |
| 5968169 | 7082672 | 1085392 | 5'-nucleotidase, cytosolic III-like                       | Nt5c3l | 360629 | 1,06 | down |
| 6105191 | 7082672 | 1085401 | 5'-nucleotidase, cytosolic III-like                       | Nt5c3l | 360629 | 1,04 | down |
| 6610158 | 7329185 | 1693629 | 5-oxoprolinase (ATP-hydrolysing)                          | Oplah  | 116684 | 1,87 | up   |
| 5968919 | 7329185 | 1693625 | 5-oxoprolinase (ATP-hydrolysing)                          | Oplah  | 116684 | 1,74 | up   |
| 6370957 | 7329185 | 1693635 | 5-oxoprolinase (ATP-hydrolysing)                          | Oplah  | 116684 | 1,60 | up   |
| 6494408 | 7329185 | 1693624 | 5-oxoprolinase (ATP-hydrolysing)                          | Oplah  | 116684 | 1,56 | up   |
| 6488681 | 7329185 | 1693646 | 5-oxoprolinase (ATP-hydrolysing)                          | Oplah  | 116684 | 1,49 | up   |
| 5636561 | 7329185 | 1693627 | 5-oxoprolinase (ATP-hydrolysing)                          | Oplah  | 116684 | 1,48 | down |
| 5678497 | 7329185 | 1693645 | 5-oxoprolinase (ATP-hydrolysing)                          | Oplah  | 116684 | 1,44 | down |
| 5970989 | 7329185 | 1693646 | 5-oxoprolinase (ATP-hydrolysing)                          | Oplah  | 116684 | 1,43 | up   |
| 6407511 | 7329185 | 1693626 | 5-oxoprolinase (ATP-hydrolysing)                          | Oplah  | 116684 | 1,41 | down |
| 6064554 | 7329185 | 1693627 | 5-oxoprolinase (ATP-hydrolysing)                          | Oplah  | 116684 | 1,37 | down |
| 6013296 | 7329185 | 1693639 | 5-oxoprolinase (ATP-hydrolysing)                          | Oplah  | 116684 | 1,33 | up   |
| 6576477 | 7329185 | 1693643 | 5-oxoprolinase (ATP-hydrolysing)                          | Oplah  | 116684 | 1,30 | up   |
| 5936126 | 7329185 | 1693636 | 5-oxoprolinase (ATP-hydrolysing)                          | Oplah  | 116684 | 1,28 | down |
| 6294035 | 7329185 | 1693642 | 5-oxoprolinase (ATP-hydrolysing)                          | Oplah  | 116684 | 1,24 | down |
| 6491869 | 7329185 | 1693620 | 5-oxoprolinase (ATP-hydrolysing)                          | Oplah  | 116684 | 1,24 | up   |
| 6679991 | 7329185 | 1693623 | 5-oxoprolinase (ATP-hydrolysing)                          | Oplah  | 116684 | 1,23 | down |
| 6205421 | 7329185 | 1693644 | 5-oxoprolinase (ATP-hydrolysing)                          | Oplah  | 116684 | 1,21 | down |
| 5973245 | 7329185 | 1693641 | 5-oxoprolinase (ATP-hydrolysing)                          | Oplah  | 116684 | 1,19 | down |
| 6490430 | 7329185 | 1693638 | 5-oxoprolinase (ATP-hydrolysing)                          | Oplah  | 116684 | 1,19 | down |
| 5734901 | 7329185 | 1693640 | 5-oxoprolinase (ATP-hydrolysing)                          | Oplah  | 116684 | 1,13 | down |
| 6474858 | 7329185 | 1693637 | 5-oxoprolinase (ATP-hydrolysing)                          | Oplah  | 116684 | 1,08 | up   |
| 6664222 | 7329185 | 1693622 | 5-oxoprolinase (ATP-hydrolysing)                          | Oplah  | 116684 | 1,08 | up   |
| 6521530 | 7329185 | 1693621 | 5-oxoprolinase (ATP-hydrolysing)                          | Oplah  | 116684 | 1,06 | up   |
| 6684078 | 7329185 | 1693632 | 5-oxoprolinase (ATP-hydrolysing)                          | Oplah  | 116684 | 1,06 | down |
| 6186997 | 7329185 | 1693631 | 5-oxoprolinase (ATP-hydrolysing)                          | Oplah  | 116684 | 1,04 | up   |
| 6132683 | 7329185 | 1693634 | 5-oxoprolinase (ATP-hydrolysing)                          | Oplah  | 116684 | 1,04 | up   |
| 5641087 | 7329185 | 1693630 | 5-oxoprolinase (ATP-hydrolysing)                          | Oplah  | 116684 | 1,03 | up   |
| 6650915 | 7329185 | 1693628 | 5-oxoprolinase (ATP-hydrolysing)                          | Oplah  | 116684 | 1,02 | up   |
| 5636944 | 7329185 | 1693633 | 5-oxoprolinase (ATP-hydrolysing)                          | Oplah  | 116684 | 1,01 | down |
| 6115158 | 7159665 | 1274322 | 6-phosphofructo-2-kinase/fructose-2,6-biphosphatase 3     | Pfkfb3 | 117276 | 3,86 | down |
| 5942631 | 7159665 | 1274306 | 6-phosphofructo-2-kinase/fructose-2,6-biphosphatase 3     | Pfkfb3 | 117276 | 2,90 | down |
| 6152977 | 7159665 | 1274318 | 6-phosphofructo-2-kinase/fructose-2,6-biphosphatase 3     | Pfkfb3 | 117276 | 2,58 | up   |
| 6181114 | 7159665 | 1274321 | 6-phosphofructo-2-kinase/fructose-2,6-biphosphatase 3     | Pfkfb3 | 117276 | 2,48 | down |
| 5666908 | 7159665 | 1274315 | 6-phosphofructo-2-kinase/fructose-2,6-biphosphatase 3     | Pfkfb3 | 117276 | 1,85 | up   |
| 5737247 | 7159665 | 1274307 | 6-phosphofructo-2-kinase/fructose-2,6-biphosphatase 3     | Pfkfb3 | 117276 | 1,75 | down |
| 6263159 | 7159665 | 1274323 | 6-phosphofructo-2-kinase/fructose-2,6-biphosphatase 3     | Pfkfb3 | 117276 | 1,65 | down |
| 6228567 | 7159665 | 1274320 | 6-phosphofructo-2-kinase/fructose-2,6-biphosphatase 3     | Pfkfb3 | 117276 | 1,56 | down |
| 6129802 | 7159665 | 1274312 | 6-phosphofructo-2-kinase/fructose-2,6-biphosphatase 3     | Pfkfb3 | 117276 | 1,50 | up   |
| 5670352 | 7159665 | 1274319 | 6-phosphofructo-2-kinase/fructose-2,6-biphosphatase 3     | Pfkfb3 | 117276 | 1,46 | up   |
| 6287777 | 7159665 | 1274313 | 6-phosphofructo-2-kinase/fructose-2,6-biphosphatase 3     | Pfkfb3 | 117276 | 1,36 | up   |
| 5648566 | 7159665 | 1274311 | 6-phosphofructo-2-kinase/fructose-2,6-biphosphatase 3     | Pfkfb3 | 117276 | 1,35 | up   |
| 6216325 | 7159665 | 1274317 | 6-phosphofructo-2-kinase/fructose-2,6-biphosphatase 3     | Pfkfb3 | 117276 | 1,32 | down |
| 5889366 | 7159665 | 1274306 | 6-phosphofructo-2-kinase/fructose-2,6-biphosphatase 3     | Pfkfb3 | 117276 | 1,30 | down |
| 5789613 | 7159665 | 1274308 | 6-phosphofructo-2-kinase/fructose-2,6-biphosphatase 3     | Pfkfb3 | 117276 | 1,22 | down |
| 6504948 | 7159665 | 1274310 | 6-phosphofructo-2-kinase/fructose-2,6-biphosphatase 3     | Pfkfb3 | 117276 | 1,20 | up   |
| 5688951 | 7159665 | 1274316 | 6-phosphofructo-2-kinase/fructose-2,6-biphosphatase 3     | Pfkfb3 | 117276 | 1,14 | up   |
| 5700872 | 7159665 | 1274314 | 6-phosphofructo-2-kinase/fructose-2,6-biphosphatase 3     | Pfkfb3 | 117276 | 1,13 | down |
| 6523159 | 7159665 | 1274309 | 6-phosphofructo-2-kinase/fructose-2,6-biphosphatase 3     | Pfkfb3 | 117276 | 1,06 | up   |
| 6700887 | 7210810 | 1400935 | a disintegrin and metallopeptidase domain 15 (metargidin) | Adam15 | 57025  | 2,34 | up   |
| 6703677 | 7210810 | 1400946 | a disintegrin and metallopeptidase domain 15 (metargidin) | Adam15 | 57025  | 1,98 | down |
| 6426258 | 7210810 | 1400938 | a disintegrin and metallopeptidase domain 15 (metargidin) | Adam15 | 57025  | 1,62 | up   |
| 6701240 | 7210810 | 1400957 | a disintegrin and metallopeptidase domain 15 (metargidin) | Adam15 | 57025  | 1,58 | up   |
| 5935986 | 7210810 | 1400944 | a disintegrin and metallopeptidase domain 15 (metargidin) | Adam15 | 57025  | 1,56 | down |

|         |         |         |                                                           |        |        |      |      |
|---------|---------|---------|-----------------------------------------------------------|--------|--------|------|------|
| 5729196 | 7210810 | 1400935 | a disintegrin and metallopeptidase domain 15 (metargidin) | Adam15 | 57025  | 1,54 | up   |
| 6182607 | 7210810 | 1400946 | a disintegrin and metallopeptidase domain 15 (metargidin) | Adam15 | 57025  | 1,52 | up   |
| 6111755 | 7210810 | 1400947 | a disintegrin and metallopeptidase domain 15 (metargidin) | Adam15 | 57025  | 1,48 | up   |
| 5845523 | 7210810 | 1400940 | a disintegrin and metallopeptidase domain 15 (metargidin) | Adam15 | 57025  | 1,48 | down |
| 6209776 | 7210810 | 1400950 | a disintegrin and metallopeptidase domain 15 (metargidin) | Adam15 | 57025  | 1,32 | down |
| 5981079 | 7210810 | 1400955 | a disintegrin and metallopeptidase domain 15 (metargidin) | Adam15 | 57025  | 1,29 | down |
| 5998598 | 7210810 | 1400943 | a disintegrin and metallopeptidase domain 15 (metargidin) | Adam15 | 57025  | 1,28 | down |
| 6708646 | 7210810 | 1400939 | a disintegrin and metallopeptidase domain 15 (metargidin) | Adam15 | 57025  | 1,28 | up   |
| 6185194 | 7210810 | 1400951 | a disintegrin and metallopeptidase domain 15 (metargidin) | Adam15 | 57025  | 1,26 | down |
| 6011889 | 7210810 | 1400937 | a disintegrin and metallopeptidase domain 15 (metargidin) | Adam15 | 57025  | 1,25 | down |
| 6719593 | 7210810 | 1400945 | a disintegrin and metallopeptidase domain 15 (metargidin) | Adam15 | 57025  | 1,22 | down |
| 6085510 | 7210810 | 1400941 | a disintegrin and metallopeptidase domain 15 (metargidin) | Adam15 | 57025  | 1,21 | up   |
| 5895819 | 7210810 | 1400949 | a disintegrin and metallopeptidase domain 15 (metargidin) | Adam15 | 57025  | 1,17 | up   |
| 5897752 | 7210810 | 1400948 | a disintegrin and metallopeptidase domain 15 (metargidin) | Adam15 | 57025  | 1,16 | up   |
| 5888472 | 7210810 | 1400956 | a disintegrin and metallopeptidase domain 15 (metargidin) | Adam15 | 57025  | 1,15 | up   |
| 6005070 | 7210810 | 1400957 | a disintegrin and metallopeptidase domain 15 (metargidin) | Adam15 | 57025  | 1,15 | up   |
| 5650716 | 7210810 | 1400936 | a disintegrin and metallopeptidase domain 15 (metargidin) | Adam15 | 57025  | 1,14 | up   |
| 5738985 | 7210810 | 1400936 | a disintegrin and metallopeptidase domain 15 (metargidin) | Adam15 | 57025  | 1,14 | up   |
| 5844104 | 7210810 | 1400942 | a disintegrin and metallopeptidase domain 15 (metargidin) | Adam15 | 57025  | 1,13 | down |
| 5771980 | 7210810 | 1400952 | a disintegrin and metallopeptidase domain 15 (metargidin) | Adam15 | 57025  | 1,13 | down |
| 5964536 | 7210810 | 1400944 | a disintegrin and metallopeptidase domain 15 (metargidin) | Adam15 | 57025  | 1,11 | up   |
| 6571466 | 7210810 | 1400953 | a disintegrin and metallopeptidase domain 15 (metargidin) | Adam15 | 57025  | 1,09 | up   |
| 6156682 | 7210810 | 1400954 | a disintegrin and metallopeptidase domain 15 (metargidin) | Adam15 | 57025  | 1,07 | down |
| 6560522 | 7210810 | 1400944 | a disintegrin and metallopeptidase domain 15 (metargidin) | Adam15 | 57025  | 1,03 | down |
| 6377729 | 7261580 | 1526745 | A kinase (PRKA) anchor protein (yotiao) 9                 | Akap9  | 246150 | 1,68 | down |
| 6566955 | 7261580 | 1526758 | A kinase (PRKA) anchor protein (yotiao) 9                 | Akap9  | 246150 | 1,38 | down |
| 6653390 | 7261580 | 1526746 | A kinase (PRKA) anchor protein (yotiao) 9                 | Akap9  | 246150 | 1,24 | up   |
| 5904555 | 7261580 | 1526763 | A kinase (PRKA) anchor protein (yotiao) 9                 | Akap9  | 246150 | 1,24 | down |
| 5695889 | 7261580 | 1526759 | A kinase (PRKA) anchor protein (yotiao) 9                 | Akap9  | 246150 | 1,23 | down |
| 6405358 | 7261580 | 1526762 | A kinase (PRKA) anchor protein (yotiao) 9                 | Akap9  | 246150 | 1,22 | down |
| 6443906 | 7261580 | 1526765 | A kinase (PRKA) anchor protein (yotiao) 9                 | Akap9  | 246150 | 1,21 | up   |
| 5802629 | 7261580 | 1526755 | A kinase (PRKA) anchor protein (yotiao) 9                 | Akap9  | 246150 | 1,16 | up   |
| 5672307 | 7261580 | 1526754 | A kinase (PRKA) anchor protein (yotiao) 9                 | Akap9  | 246150 | 1,16 | down |
| 6543739 | 7261580 | 1526751 | A kinase (PRKA) anchor protein (yotiao) 9                 | Akap9  | 246150 | 1,13 | up   |
| 6167647 | 7261580 | 1526757 | A kinase (PRKA) anchor protein (yotiao) 9                 | Akap9  | 246150 | 1,12 | down |
| 6203186 | 7261580 | 1526747 | A kinase (PRKA) anchor protein (yotiao) 9                 | Akap9  | 246150 | 1,09 | up   |
| 6103800 | 7261580 | 1526749 | A kinase (PRKA) anchor protein (yotiao) 9                 | Akap9  | 246150 | 1,06 | down |
| 5742196 | 7261580 | 1526752 | A kinase (PRKA) anchor protein (yotiao) 9                 | Akap9  | 246150 | 1,04 | up   |
| 6572892 | 7261580 | 1526748 | A kinase (PRKA) anchor protein (yotiao) 9                 | Akap9  | 246150 | 1,03 | up   |
| 5872598 | 7261580 | 1526761 | A kinase (PRKA) anchor protein (yotiao) 9                 | Akap9  | 246150 | 1,03 | up   |
| 6691406 | 7261580 | 1526756 | A kinase (PRKA) anchor protein (yotiao) 9                 | Akap9  | 246150 | 1,01 | up   |
| 5969982 | 7261580 | 1526764 | A kinase (PRKA) anchor protein (yotiao) 9                 | Akap9  | 246150 | 1,00 | down |
| 6567780 | 7026578 | 952715  | A kinase (PRKA) anchor protein 12                         | Akap12 | 83425  | 3,50 | down |
| 5916080 | 7026578 | 952719  | A kinase (PRKA) anchor protein 12                         | Akap12 | 83425  | 2,06 | up   |
| 6427730 | 7026578 | 952717  | A kinase (PRKA) anchor protein 12                         | Akap12 | 83425  | 1,93 | up   |
| 6379541 | 7026578 | 952716  | A kinase (PRKA) anchor protein 12                         | Akap12 | 83425  | 1,84 | down |
| 6313994 | 7026578 | 952715  | A kinase (PRKA) anchor protein 12                         | Akap12 | 83425  | 1,50 | down |
| 6272205 | 7026578 | 952717  | A kinase (PRKA) anchor protein 12                         | Akap12 | 83425  | 1,46 | down |
| 6283187 | 7026578 | 952717  | A kinase (PRKA) anchor protein 12                         | Akap12 | 83425  | 1,46 | up   |
| 6396395 | 7026578 | 952713  | A kinase (PRKA) anchor protein 12                         | Akap12 | 83425  | 1,33 | down |
| 6089645 | 7026578 | 952713  | A kinase (PRKA) anchor protein 12                         | Akap12 | 83425  | 1,27 | down |
| 6018267 | 7026578 | 952718  | A kinase (PRKA) anchor protein 12                         | Akap12 | 83425  | 1,19 | up   |
| 6039369 | 7026578 | 952718  | A kinase (PRKA) anchor protein 12                         | Akap12 | 83425  | 1,17 | up   |
| 6565976 | 7026578 | 952717  | A kinase (PRKA) anchor protein 12                         | Akap12 | 83425  | 1,10 | down |
| 6165531 | 7026578 | 952718  | A kinase (PRKA) anchor protein 12                         | Akap12 | 83425  | 1,05 | down |
| 6680764 | 7026578 | 952714  | A kinase (PRKA) anchor protein 12                         | Akap12 | 83425  | 1,03 | down |
| 6635629 | 7026578 | 952717  | A kinase (PRKA) anchor protein 12                         | Akap12 | 83425  | 1,01 | down |

|         |         |         |                                    |       |        |      |      |
|---------|---------|---------|------------------------------------|-------|--------|------|------|
| 6063099 | 7275485 | 1561232 | A kinase (PRKA) anchor protein 2   | Akap2 | 298024 | 2,74 | up   |
| 6592868 | 7275485 | 1561233 | A kinase (PRKA) anchor protein 2   | Akap2 | 298024 | 1,84 | up   |
| 5945636 | 7275485 | 1561233 | A kinase (PRKA) anchor protein 2   | Akap2 | 298024 | 1,53 | down |
| 6190223 | 7275485 | 1561231 | A kinase (PRKA) anchor protein 2   | Akap2 | 298024 | 1,43 | down |
| 5734643 | 7275485 | 1561232 | A kinase (PRKA) anchor protein 2   | Akap2 | 298024 | 1,27 | up   |
| 5803797 | 7275485 | 1561234 | A kinase (PRKA) anchor protein 2   | Akap2 | 298024 | 1,16 | down |
| 5653344 | 7275485 | 1561235 | A kinase (PRKA) anchor protein 2   | Akap2 | 298024 | 1,12 | down |
| 6227700 | 7275485 | 1561233 | A kinase (PRKA) anchor protein 2   | Akap2 | 298024 | 1,11 | up   |
| 6010770 | 7275485 | 1561233 | A kinase (PRKA) anchor protein 2   | Akap2 | 298024 | 1,07 | up   |
| 6679373 | 7275485 | 1561233 | A kinase (PRKA) anchor protein 2   | Akap2 | 298024 | 1,06 | up   |
| 5720544 | 7275485 | 1561233 | A kinase (PRKA) anchor protein 2   | Akap2 | 298024 | 1,05 | down |
| 6126581 | 7275485 | 1561233 | A kinase (PRKA) anchor protein 2   | Akap2 | 298024 | 1,03 | down |
| 6050343 | 7275485 | 1561233 | A kinase (PRKA) anchor protein 2   | Akap2 | 298024 | 1,02 | down |
| 5889874 | 7303954 | 1632434 | abhydrolase domain containing 1    | Abhd1 | 313917 | 2,62 | up   |
| 5853413 | 7303954 | 1632441 | abhydrolase domain containing 1    | Abhd1 | 313917 | 1,59 | down |
| 5810314 | 7303954 | 1632442 | abhydrolase domain containing 1    | Abhd1 | 313917 | 1,43 | down |
| 6438509 | 7303954 | 1632433 | abhydrolase domain containing 1    | Abhd1 | 313917 | 1,29 | down |
| 6306891 | 7303954 | 1632437 | abhydrolase domain containing 1    | Abhd1 | 313917 | 1,20 | up   |
| 5619084 | 7303954 | 1632440 | abhydrolase domain containing 1    | Abhd1 | 313917 | 1,17 | down |
| 6394465 | 7303954 | 1632438 | abhydrolase domain containing 1    | Abhd1 | 313917 | 1,16 | down |
| 5843059 | 7303954 | 1632441 | abhydrolase domain containing 1    | Abhd1 | 313917 | 1,15 | down |
| 5862387 | 7303954 | 1632435 | abhydrolase domain containing 1    | Abhd1 | 313917 | 1,11 | up   |
| 6615890 | 7303954 | 1632439 | abhydrolase domain containing 1    | Abhd1 | 313917 | 1,09 | down |
| 6329960 | 7303954 | 1632434 | abhydrolase domain containing 1    | Abhd1 | 313917 | 1,08 | down |
| 6682124 | 7303954 | 1632436 | abhydrolase domain containing 1    | Abhd1 | 313917 | 1,06 | down |
| 6192786 | 7103027 | 1135211 | acetyl-Coenzyme A carboxylase beta | Acacb | 116719 | 2,01 | down |
| 6041808 | 7103027 | 1135231 | acetyl-Coenzyme A carboxylase beta | Acacb | 116719 | 2,01 | up   |
| 6034010 | 7103027 | 1135215 | acetyl-Coenzyme A carboxylase beta | Acacb | 116719 | 1,96 | down |
| 6518268 | 7103027 | 1135195 | acetyl-Coenzyme A carboxylase beta | Acacb | 116719 | 1,94 | down |
| 6521092 | 7103027 | 1135218 | acetyl-Coenzyme A carboxylase beta | Acacb | 116719 | 1,68 | up   |
| 6239277 | 7103027 | 1135206 | acetyl-Coenzyme A carboxylase beta | Acacb | 116719 | 1,67 | up   |
| 6545824 | 7103027 | 1135238 | acetyl-Coenzyme A carboxylase beta | Acacb | 116719 | 1,59 | up   |
| 6418074 | 7103027 | 1135197 | acetyl-Coenzyme A carboxylase beta | Acacb | 116719 | 1,56 | down |
| 5960373 | 7103027 | 1135220 | acetyl-Coenzyme A carboxylase beta | Acacb | 116719 | 1,50 | down |
| 6366153 | 7103027 | 1135204 | acetyl-Coenzyme A carboxylase beta | Acacb | 116719 | 1,45 | down |
| 6495898 | 7103027 | 1135240 | acetyl-Coenzyme A carboxylase beta | Acacb | 116719 | 1,44 | down |
| 6396753 | 7103027 | 1135224 | acetyl-Coenzyme A carboxylase beta | Acacb | 116719 | 1,44 | up   |
| 6614966 | 7103027 | 1135226 | acetyl-Coenzyme A carboxylase beta | Acacb | 116719 | 1,38 | down |
| 6711875 | 7103027 | 1135199 | acetyl-Coenzyme A carboxylase beta | Acacb | 116719 | 1,38 | up   |
| 5675944 | 7103027 | 1135214 | acetyl-Coenzyme A carboxylase beta | Acacb | 116719 | 1,32 | down |
| 6080897 | 7103027 | 1135196 | acetyl-Coenzyme A carboxylase beta | Acacb | 116719 | 1,29 | up   |
| 5850662 | 7103027 | 1135208 | acetyl-Coenzyme A carboxylase beta | Acacb | 116719 | 1,28 | up   |
| 6318391 | 7103027 | 1135229 | acetyl-Coenzyme A carboxylase beta | Acacb | 116719 | 1,28 | down |
| 5637877 | 7103027 | 1135221 | acetyl-Coenzyme A carboxylase beta | Acacb | 116719 | 1,27 | down |
| 6719243 | 7103027 | 1135228 | acetyl-Coenzyme A carboxylase beta | Acacb | 116719 | 1,27 | down |
| 6146914 | 7103027 | 1135232 | acetyl-Coenzyme A carboxylase beta | Acacb | 116719 | 1,24 | down |
| 6671364 | 7103027 | 1135192 | acetyl-Coenzyme A carboxylase beta | Acacb | 116719 | 1,24 | up   |
| 5751103 | 7103027 | 1135233 | acetyl-Coenzyme A carboxylase beta | Acacb | 116719 | 1,24 | down |
| 6281133 | 7103027 | 1135240 | acetyl-Coenzyme A carboxylase beta | Acacb | 116719 | 1,22 | up   |
| 5661294 | 7103027 | 1135194 | acetyl-Coenzyme A carboxylase beta | Acacb | 116719 | 1,21 | down |
| 6697809 | 7103027 | 1135203 | acetyl-Coenzyme A carboxylase beta | Acacb | 116719 | 1,16 | down |
| 6656928 | 7103027 | 1135234 | acetyl-Coenzyme A carboxylase beta | Acacb | 116719 | 1,16 | up   |
| 6182056 | 7103027 | 1135239 | acetyl-Coenzyme A carboxylase beta | Acacb | 116719 | 1,14 | up   |
| 5748458 | 7103027 | 1135238 | acetyl-Coenzyme A carboxylase beta | Acacb | 116719 | 1,13 | up   |
| 5924657 | 7103027 | 1135216 | acetyl-Coenzyme A carboxylase beta | Acacb | 116719 | 1,13 | down |
| 5878665 | 7103027 | 1135206 | acetyl-Coenzyme A carboxylase beta | Acacb | 116719 | 1,11 | down |
| 5711451 | 7103027 | 1135222 | acetyl-Coenzyme A carboxylase beta | Acacb | 116719 | 1,10 | down |

|         |         |         |                                            |        |        |      |      |
|---------|---------|---------|--------------------------------------------|--------|--------|------|------|
| 6648824 | 7103027 | 1135230 | acetyl-Coenzyme A carboxylase beta         | Acacb  | 116719 | 1,10 | down |
| 6300298 | 7103027 | 1135207 | acetyl-Coenzyme A carboxylase beta         | Acacb  | 116719 | 1,09 | down |
| 6630656 | 7103027 | 1135190 | acetyl-Coenzyme A carboxylase beta         | Acacb  | 116719 | 1,09 | down |
| 6688882 | 7103027 | 1135212 | acetyl-Coenzyme A carboxylase beta         | Acacb  | 116719 | 1,09 | down |
| 6515599 | 7103027 | 1135201 | acetyl-Coenzyme A carboxylase beta         | Acacb  | 116719 | 1,09 | down |
| 6737245 | 7103027 | 1135225 | acetyl-Coenzyme A carboxylase beta         | Acacb  | 116719 | 1,08 | down |
| 6610683 | 7103027 | 1135205 | acetyl-Coenzyme A carboxylase beta         | Acacb  | 116719 | 1,08 | up   |
| 6200744 | 7103027 | 1135223 | acetyl-Coenzyme A carboxylase beta         | Acacb  | 116719 | 1,08 | down |
| 6266072 | 7103027 | 1135220 | acetyl-Coenzyme A carboxylase beta         | Acacb  | 116719 | 1,07 | down |
| 6186442 | 7103027 | 1135227 | acetyl-Coenzyme A carboxylase beta         | Acacb  | 116719 | 1,07 | up   |
| 5721708 | 7103027 | 1135219 | acetyl-Coenzyme A carboxylase beta         | Acacb  | 116719 | 1,06 | down |
| 6678061 | 7103027 | 1135200 | acetyl-Coenzyme A carboxylase beta         | Acacb  | 116719 | 1,06 | up   |
| 6165862 | 7103027 | 1135210 | acetyl-Coenzyme A carboxylase beta         | Acacb  | 116719 | 1,06 | up   |
| 5749714 | 7103027 | 1135213 | acetyl-Coenzyme A carboxylase beta         | Acacb  | 116719 | 1,05 | up   |
| 6652794 | 7103027 | 1135217 | acetyl-Coenzyme A carboxylase beta         | Acacb  | 116719 | 1,04 | down |
| 6740959 | 7103027 | 1135237 | acetyl-Coenzyme A carboxylase beta         | Acacb  | 116719 | 1,03 | down |
| 5756773 | 7103027 | 1135202 | acetyl-Coenzyme A carboxylase beta         | Acacb  | 116719 | 1,03 | up   |
| 6574023 | 7103027 | 1135209 | acetyl-Coenzyme A carboxylase beta         | Acacb  | 116719 | 1,01 | down |
| 5729856 | 7103027 | 1135193 | acetyl-Coenzyme A carboxylase beta         | Acacb  | 116719 | 1,01 | up   |
| 5947918 | 7103027 | 1135198 | acetyl-Coenzyme A carboxylase beta         | Acacb  | 116719 | 1,01 | down |
| 5635096 | 7103027 | 1135191 | acetyl-Coenzyme A carboxylase beta         | Acacb  | 116719 | 1,01 | up   |
| 5810389 | 7103027 | 1135235 | acetyl-Coenzyme A carboxylase beta         | Acacb  | 116719 | 1,00 | up   |
| 5986378 | 7103027 | 1135236 | acetyl-Coenzyme A carboxylase beta         | Acacb  | 116719 | 1,00 | down |
| 6362339 | 7127103 | 1194295 | actin binding LIM protein family, member 2 | Ablim2 | 360958 | 2,54 | up   |
| 6057062 | 7127103 | 1194299 | actin binding LIM protein family, member 2 | Ablim2 | 360958 | 2,02 | down |
| 5650865 | 7127103 | 1194293 | actin binding LIM protein family, member 2 | Ablim2 | 360958 | 1,87 | up   |
| 6469587 | 7127103 | 1194307 | actin binding LIM protein family, member 2 | Ablim2 | 360958 | 1,62 | up   |
| 5699391 | 7127103 | 1194306 | actin binding LIM protein family, member 2 | Ablim2 | 360958 | 1,41 | up   |
| 6412100 | 7127103 | 1194305 | actin binding LIM protein family, member 2 | Ablim2 | 360958 | 1,40 | down |
| 5820231 | 7127103 | 1194297 | actin binding LIM protein family, member 2 | Ablim2 | 360958 | 1,38 | down |
| 5830220 | 7127103 | 1194299 | actin binding LIM protein family, member 2 | Ablim2 | 360958 | 1,36 | up   |
| 5959460 | 7127103 | 1194296 | actin binding LIM protein family, member 2 | Ablim2 | 360958 | 1,32 | down |
| 6193571 | 7127103 | 1194292 | actin binding LIM protein family, member 2 | Ablim2 | 360958 | 1,25 | down |
| 6511931 | 7127103 | 1194298 | actin binding LIM protein family, member 2 | Ablim2 | 360958 | 1,24 | down |
| 5830969 | 7127103 | 1194300 | actin binding LIM protein family, member 2 | Ablim2 | 360958 | 1,20 | up   |
| 6378579 | 7127103 | 1194304 | actin binding LIM protein family, member 2 | Ablim2 | 360958 | 1,19 | up   |
| 5854021 | 7127103 | 1194301 | actin binding LIM protein family, member 2 | Ablim2 | 360958 | 1,16 | down |
| 6032974 | 7127103 | 1194294 | actin binding LIM protein family, member 2 | Ablim2 | 360958 | 1,16 | up   |
| 6374131 | 7127103 | 1194302 | actin binding LIM protein family, member 2 | Ablim2 | 360958 | 1,15 | down |
| 6639974 | 7127103 | 1194291 | actin binding LIM protein family, member 2 | Ablim2 | 360958 | 1,06 | up   |
| 6137274 | 7127103 | 1194303 | actin binding LIM protein family, member 2 | Ablim2 | 360958 | 1,04 | down |
| 5930890 | 7176368 | 1315597 | actin binding LIM protein family, member 3 | Ablim3 | 307395 | 1,49 | down |
| 6711760 | 7176368 | 1315559 | actin binding LIM protein family, member 3 | Ablim3 | 307395 | 1,40 | up   |
| 6309726 | 7243253 | 1481236 | actin, alpha, cardiac muscle 1             | Actc1  | 29275  | 2,18 | down |
| 6318563 | 7243253 | 1481235 | actin, alpha, cardiac muscle 1             | Actc1  | 29275  | 1,47 | down |
| 6223516 | 7243253 | 1481231 | actin, alpha, cardiac muscle 1             | Actc1  | 29275  | 1,28 | up   |
| 6544547 | 7243253 | 1481230 | actin, alpha, cardiac muscle 1             | Actc1  | 29275  | 1,22 | up   |
| 6276633 | 7243253 | 1481234 | actin, alpha, cardiac muscle 1             | Actc1  | 29275  | 1,16 | up   |
| 5659483 | 7243253 | 1481235 | actin, alpha, cardiac muscle 1             | Actc1  | 29275  | 1,16 | up   |
| 6351826 | 7243253 | 1481229 | actin, alpha, cardiac muscle 1             | Actc1  | 29275  | 1,12 | down |
| 6045991 | 7243253 | 1481233 | actin, alpha, cardiac muscle 1             | Actc1  | 29275  | 1,11 | up   |
| 5622270 | 7243253 | 1481233 | actin, alpha, cardiac muscle 1             | Actc1  | 29275  | 1,05 | down |
| 6291293 | 7243253 | 1481236 | actin, alpha, cardiac muscle 1             | Actc1  | 29275  | 1,01 | up   |
| 6163375 | 7243253 | 1481232 | actin, alpha, cardiac muscle 1             | Actc1  | 29275  | 1,00 | down |
| 5844530 | 7115771 | 1166590 | actin, gamma 1                             | Actg1  | 287876 | 1,06 | up   |
| 6334363 | 7266571 | 1538391 | actin, gamma 2, smooth muscle, enteric     | Actg2  | 25365  | 2,21 | up   |
| 6308722 | 7266571 | 1538399 | actin, gamma 2, smooth muscle, enteric     | Actg2  | 25365  | 1,81 | down |

|         |         |         |                                                    |        |        |      |      |
|---------|---------|---------|----------------------------------------------------|--------|--------|------|------|
| 5785704 | 7266571 | 1538396 | actin, gamma 2, smooth muscle, enteric             | Actg2  | 25365  | 1,70 | up   |
| 6066317 | 7266571 | 1538395 | actin, gamma 2, smooth muscle, enteric             | Actg2  | 25365  | 1,66 | up   |
| 5700523 | 7266571 | 1538398 | actin, gamma 2, smooth muscle, enteric             | Actg2  | 25365  | 1,56 | down |
| 6667831 | 7266571 | 1538394 | actin, gamma 2, smooth muscle, enteric             | Actg2  | 25365  | 1,38 | up   |
| 5618001 | 7266571 | 1538397 | actin, gamma 2, smooth muscle, enteric             | Actg2  | 25365  | 1,18 | up   |
| 5807894 | 7266571 | 1538400 | actin, gamma 2, smooth muscle, enteric             | Actg2  | 25365  | 1,11 | up   |
| 6450895 | 7266571 | 1538393 | actin, gamma 2, smooth muscle, enteric             | Actg2  | 25365  | 1,07 | up   |
| 5894614 | 7266571 | 1538399 | actin, gamma 2, smooth muscle, enteric             | Actg2  | 25365  | 1,01 | down |
| 6568307 | 7266571 | 1538392 | actin, gamma 2, smooth muscle, enteric             | Actg2  | 25365  | 1,00 | down |
| 5808607 | 7064134 | 1041422 | actin-binding LIM protein 1                        | Ablim1 | 307989 | 1,26 | up   |
| 6105617 | 7064134 | 1041438 | actin-binding LIM protein 1                        | Ablim1 | 307989 | 1,21 | up   |
| 6692455 | 7064134 | 1041442 | actin-binding LIM protein 1                        | Ablim1 | 307989 | 1,20 | up   |
| 6687015 | 7064134 | 1041423 | actin-binding LIM protein 1                        | Ablim1 | 307989 | 1,17 | down |
| 6339126 | 7064134 | 1041420 | actin-binding LIM protein 1                        | Ablim1 | 307989 | 1,15 | up   |
| 6549708 | 7064134 | 1041415 | actin-binding LIM protein 1                        | Ablim1 | 307989 | 1,15 | up   |
| 6223297 | 7064134 | 1041428 | actin-binding LIM protein 1                        | Ablim1 | 307989 | 1,14 | down |
| 5953826 | 7064134 | 1041438 | actin-binding LIM protein 1                        | Ablim1 | 307989 | 1,14 | up   |
| 6042115 | 7064134 | 1041419 | actin-binding LIM protein 1                        | Ablim1 | 307989 | 1,12 | up   |
| 5689178 | 7064134 | 1041414 | actin-binding LIM protein 1                        | Ablim1 | 307989 | 1,08 | down |
| 6391435 | 7064134 | 1041436 | actin-binding LIM protein 1                        | Ablim1 | 307989 | 1,08 | down |
| 6220311 | 7064134 | 1041430 | actin-binding LIM protein 1                        | Ablim1 | 307989 | 1,06 | down |
| 5989057 | 7064134 | 1041418 | actin-binding LIM protein 1                        | Ablim1 | 307989 | 1,05 | up   |
| 6463497 | 7064134 | 1041427 | actin-binding LIM protein 1                        | Ablim1 | 307989 | 1,05 | down |
| 5827823 | 7064134 | 1041429 | actin-binding LIM protein 1                        | Ablim1 | 307989 | 1,03 | down |
| 6741722 | 7064134 | 1041417 | actin-binding LIM protein 1                        | Ablim1 | 307989 | 1,01 | down |
| 6306794 | 7192902 | 1357758 | actin-like 6A                                      | Actl6a | 361925 | 1,79 | down |
| 6438730 | 7192902 | 1357752 | actin-like 6A                                      | Actl6a | 361925 | 1,71 | down |
| 6061409 | 7192902 | 1357764 | actin-like 6A                                      | Actl6a | 361925 | 1,70 | down |
| 6603439 | 7192902 | 1357754 | actin-like 6A                                      | Actl6a | 361925 | 1,56 | up   |
| 5940955 | 7192902 | 1357751 | actin-like 6A                                      | Actl6a | 361925 | 1,27 | up   |
| 5859384 | 7192902 | 1357766 | actin-like 6A                                      | Actl6a | 361925 | 1,23 | down |
| 5841337 | 7192902 | 1357757 | actin-like 6A                                      | Actl6a | 361925 | 1,19 | up   |
| 5886998 | 7192902 | 1357762 | actin-like 6A                                      | Actl6a | 361925 | 1,18 | up   |
| 6369130 | 7192902 | 1357765 | actin-like 6A                                      | Actl6a | 361925 | 1,15 | up   |
| 6312803 | 7192902 | 1357749 | actin-like 6A                                      | Actl6a | 361925 | 1,15 | down |
| 5876724 | 7192902 | 1357766 | actin-like 6A                                      | Actl6a | 361925 | 1,10 | up   |
| 5666514 | 7192902 | 1357763 | actin-like 6A                                      | Actl6a | 361925 | 1,09 | up   |
| 5783745 | 7192902 | 1357753 | actin-like 6A                                      | Actl6a | 361925 | 1,07 | up   |
| 6085654 | 7192902 | 1357759 | actin-like 6A                                      | Actl6a | 361925 | 1,02 | down |
| 6477006 | 7120550 | 1178697 | activating signal cointegrator 1 complex subunit 2 | Ascc2  | 498402 | 1,70 | up   |
| 6158947 | 7120550 | 1178703 | activating signal cointegrator 1 complex subunit 2 | Ascc2  | 498402 | 1,67 | down |
| 5971662 | 7120550 | 1178681 | activating signal cointegrator 1 complex subunit 2 | Ascc2  | 498402 | 1,34 | up   |
| 6297403 | 7120550 | 1178699 | activating signal cointegrator 1 complex subunit 2 | Ascc2  | 498402 | 1,29 | up   |
| 5931299 | 7120550 | 1178703 | activating signal cointegrator 1 complex subunit 2 | Ascc2  | 498402 | 1,28 | down |
| 6171827 | 7120550 | 1178691 | activating signal cointegrator 1 complex subunit 2 | Ascc2  | 498402 | 1,25 | up   |
| 5745745 | 7120550 | 1178680 | activating signal cointegrator 1 complex subunit 2 | Ascc2  | 498402 | 1,19 | up   |
| 5973865 | 7120550 | 1178696 | activating signal cointegrator 1 complex subunit 2 | Ascc2  | 498402 | 1,17 | up   |
| 5904717 | 7120550 | 1178675 | activating signal cointegrator 1 complex subunit 2 | Ascc2  | 498402 | 1,16 | up   |
| 6052068 | 7120550 | 1178702 | activating signal cointegrator 1 complex subunit 2 | Ascc2  | 498402 | 1,15 | up   |
| 6654131 | 7120550 | 1178700 | activating signal cointegrator 1 complex subunit 2 | Ascc2  | 498402 | 1,15 | down |
| 6310846 | 7120550 | 1178694 | activating signal cointegrator 1 complex subunit 2 | Ascc2  | 498402 | 1,14 | down |
| 6525701 | 7120550 | 1178703 | activating signal cointegrator 1 complex subunit 2 | Ascc2  | 498402 | 1,13 | up   |
| 6455176 | 7120550 | 1178685 | activating signal cointegrator 1 complex subunit 2 | Ascc2  | 498402 | 1,10 | down |
| 6310652 | 7120550 | 1178693 | activating signal cointegrator 1 complex subunit 2 | Ascc2  | 498402 | 1,09 | up   |
| 6065123 | 7120550 | 1178686 | activating signal cointegrator 1 complex subunit 2 | Ascc2  | 498402 | 1,08 | down |
| 6128741 | 7120550 | 1178677 | activating signal cointegrator 1 complex subunit 2 | Ascc2  | 498402 | 1,08 | down |
| 6143124 | 7120550 | 1178682 | activating signal cointegrator 1 complex subunit 2 | Ascc2  | 498402 | 1,04 | up   |



|         |         |         |                                                       |        |        |      |      |
|---------|---------|---------|-------------------------------------------------------|--------|--------|------|------|
| 5964055 | 7120550 | 1178701 | activating signal cointegrator 1 complex subunit 2    | Ascc2  | 498402 | 1,04 | down |
| 5623749 | 7120550 | 1178690 | activating signal cointegrator 1 complex subunit 2    | Ascc2  | 498402 | 1,03 | up   |
| 6503190 | 7120550 | 1178692 | activating signal cointegrator 1 complex subunit 2    | Ascc2  | 498402 | 1,03 | down |
| 6631716 | 7120550 | 1178687 | activating signal cointegrator 1 complex subunit 2    | Ascc2  | 498402 | 1,03 | up   |
| 5847261 | 7259221 | 1520628 | activating transcription factor 7 interacting protein | Atf7ip | 312800 | 2,35 | down |
| 6698614 | 7259221 | 1520619 | activating transcription factor 7 interacting protein | Atf7ip | 312800 | 1,58 | down |
| 5940203 | 7259221 | 1520621 | activating transcription factor 7 interacting protein | Atf7ip | 312800 | 1,23 | up   |
| 6309099 | 7259221 | 1520624 | activating transcription factor 7 interacting protein | Atf7ip | 312800 | 1,13 | down |
| 6533881 | 7259221 | 1520627 | activating transcription factor 7 interacting protein | Atf7ip | 312800 | 1,12 | up   |
| 6299790 | 7259221 | 1520622 | activating transcription factor 7 interacting protein | Atf7ip | 312800 | 1,12 | up   |
| 6255262 | 7259221 | 1520626 | activating transcription factor 7 interacting protein | Atf7ip | 312800 | 1,11 | down |
| 6581704 | 7259221 | 1520627 | activating transcription factor 7 interacting protein | Atf7ip | 312800 | 1,10 | down |
| 6361529 | 7259221 | 1520618 | activating transcription factor 7 interacting protein | Atf7ip | 312800 | 1,06 | down |
| 6330381 | 7259221 | 1520622 | activating transcription factor 7 interacting protein | Atf7ip | 312800 | 1,06 | down |
| 5824065 | 7259221 | 1520618 | activating transcription factor 7 interacting protein | Atf7ip | 312800 | 1,06 | down |
| 5848705 | 7259221 | 1520625 | activating transcription factor 7 interacting protein | Atf7ip | 312800 | 1,00 | down |
| 6461886 | 7320875 | 1674486 | activin A receptor type II-like 1                     | Acvr1l | 25237  | 2,30 | down |
| 6728727 | 7320875 | 1674496 | activin A receptor type II-like 1                     | Acvr1l | 25237  | 1,63 | up   |
| 5906254 | 7320875 | 1674489 | activin A receptor type II-like 1                     | Acvr1l | 25237  | 1,59 | down |
| 6290228 | 7320875 | 1674486 | activin A receptor type II-like 1                     | Acvr1l | 25237  | 1,55 | down |
| 6717175 | 7320875 | 1674496 | activin A receptor type II-like 1                     | Acvr1l | 25237  | 1,50 | down |
| 6706907 | 7320875 | 1674497 | activin A receptor type II-like 1                     | Acvr1l | 25237  | 1,42 | up   |
| 6493152 | 7320875 | 1674496 | activin A receptor type II-like 1                     | Acvr1l | 25237  | 1,40 | down |
| 6032294 | 7320875 | 1674496 | activin A receptor type II-like 1                     | Acvr1l | 25237  | 1,33 | down |
| 6330185 | 7320875 | 1674492 | activin A receptor type II-like 1                     | Acvr1l | 25237  | 1,23 | up   |
| 5887998 | 7320875 | 1674485 | activin A receptor type II-like 1                     | Acvr1l | 25237  | 1,22 | down |
| 6059289 | 7320875 | 1674494 | activin A receptor type II-like 1                     | Acvr1l | 25237  | 1,21 | up   |
| 5905754 | 7320875 | 1674484 | activin A receptor type II-like 1                     | Acvr1l | 25237  | 1,14 | up   |
| 6208984 | 7320875 | 1674484 | activin A receptor type II-like 1                     | Acvr1l | 25237  | 1,13 | up   |
| 6411582 | 7320875 | 1674488 | activin A receptor type II-like 1                     | Acvr1l | 25237  | 1,13 | up   |
| 6619643 | 7320875 | 1674490 | activin A receptor type II-like 1                     | Acvr1l | 25237  | 1,12 | down |
| 6254818 | 7320875 | 1674487 | activin A receptor type II-like 1                     | Acvr1l | 25237  | 1,09 | down |
| 6038926 | 7320875 | 1674493 | activin A receptor type II-like 1                     | Acvr1l | 25237  | 1,06 | down |
| 6521907 | 7320875 | 1674488 | activin A receptor type II-like 1                     | Acvr1l | 25237  | 1,04 | up   |
| 6210692 | 7320875 | 1674495 | activin A receptor type II-like 1                     | Acvr1l | 25237  | 1,04 | up   |
| 6599185 | 7320875 | 1674496 | activin A receptor type II-like 1                     | Acvr1l | 25237  | 1,03 | up   |
| 5700747 | 7320875 | 1674491 | activin A receptor type II-like 1                     | Acvr1l | 25237  | 1,01 | down |
| 5990747 | 7239196 | 1471579 | activin A receptor, type I                            | Acvr1  | 79558  | 2,08 | down |
| 6092675 | 7239196 | 1471577 | activin A receptor, type I                            | Acvr1  | 79558  | 1,91 | down |
| 5787510 | 7239196 | 1471572 | activin A receptor, type I                            | Acvr1  | 79558  | 1,60 | down |
| 5628756 | 7239196 | 1471572 | activin A receptor, type I                            | Acvr1  | 79558  | 1,46 | up   |
| 5897803 | 7239196 | 1471580 | activin A receptor, type I                            | Acvr1  | 79558  | 1,28 | down |
| 6325303 | 7239196 | 1471575 | activin A receptor, type I                            | Acvr1  | 79558  | 1,25 | up   |
| 5648670 | 7239196 | 1471573 | activin A receptor, type I                            | Acvr1  | 79558  | 1,25 | down |
| 6693926 | 7239196 | 1471576 | activin A receptor, type I                            | Acvr1  | 79558  | 1,22 | up   |
| 6506163 | 7239196 | 1471578 | activin A receptor, type I                            | Acvr1  | 79558  | 1,09 | down |
| 6324467 | 7239196 | 1471574 | activin A receptor, type I                            | Acvr1  | 79558  | 1,05 | up   |
| 6623095 | 7239196 | 1471579 | activin A receptor, type I                            | Acvr1  | 79558  | 1,04 | up   |
| 6626885 | 7239196 | 1471579 | activin A receptor, type I                            | Acvr1  | 79558  | 1,02 | down |
| 6511940 | 7239196 | 1471576 | activin A receptor, type I                            | Acvr1  | 79558  | 1,01 | up   |
| 5672711 | 7081748 | 1083337 | acyl-CoA synthetase family member 2                   | Acsf2  | 619561 | 2,13 | up   |
| 6381000 | 7081748 | 1083349 | acyl-CoA synthetase family member 2                   | Acsf2  | 619561 | 1,59 | down |
| 5905567 | 7081748 | 1083336 | acyl-CoA synthetase family member 2                   | Acsf2  | 619561 | 1,46 | down |
| 6726971 | 7081748 | 1083347 | acyl-CoA synthetase family member 2                   | Acsf2  | 619561 | 1,27 | down |
| 6395472 | 7081748 | 1083342 | acyl-CoA synthetase family member 2                   | Acsf2  | 619561 | 1,23 | down |
| 6480623 | 7081748 | 1083358 | acyl-CoA synthetase family member 2                   | Acsf2  | 619561 | 1,21 | down |
| 6216988 | 7081748 | 1083349 | acyl-CoA synthetase family member 2                   | Acsf2  | 619561 | 1,20 | up   |

|         |         |         |                                                |        |        |      |      |
|---------|---------|---------|------------------------------------------------|--------|--------|------|------|
| 5888548 | 7081748 | 1083344 | acyl-CoA synthetase family member 2            | Acsf2  | 619561 | 1,19 | up   |
| 5912545 | 7081748 | 1083353 | acyl-CoA synthetase family member 2            | Acsf2  | 619561 | 1,17 | down |
| 6453126 | 7081748 | 1083352 | acyl-CoA synthetase family member 2            | Acsf2  | 619561 | 1,16 | down |
| 6388684 | 7081748 | 1083355 | acyl-CoA synthetase family member 2            | Acsf2  | 619561 | 1,15 | down |
| 6365148 | 7081748 | 1083350 | acyl-CoA synthetase family member 2            | Acsf2  | 619561 | 1,13 | down |
| 6509407 | 7081748 | 1083354 | acyl-CoA synthetase family member 2            | Acsf2  | 619561 | 1,12 | down |
| 6302614 | 7081748 | 1083341 | acyl-CoA synthetase family member 2            | Acsf2  | 619561 | 1,12 | down |
| 5948903 | 7081748 | 1083340 | acyl-CoA synthetase family member 2            | Acsf2  | 619561 | 1,09 | down |
| 5988218 | 7081748 | 1083348 | acyl-CoA synthetase family member 2            | Acsf2  | 619561 | 1,09 | up   |
| 5736905 | 7081748 | 1083357 | acyl-CoA synthetase family member 2            | Acsf2  | 619561 | 1,08 | up   |
| 6198363 | 7081748 | 1083351 | acyl-CoA synthetase family member 2            | Acsf2  | 619561 | 1,07 | down |
| 6619568 | 7081748 | 1083339 | acyl-CoA synthetase family member 2            | Acsf2  | 619561 | 1,06 | down |
| 6279788 | 7081748 | 1083338 | acyl-CoA synthetase family member 2            | Acsf2  | 619561 | 1,00 | up   |
| 5937196 | 7247817 | 1492006 | acyl-CoA thioesterase 8                        | Acot8  | 170588 | 2,17 | up   |
| 5839203 | 7247817 | 1492010 | acyl-CoA thioesterase 8                        | Acot8  | 170588 | 1,98 | down |
| 6118815 | 7247817 | 1492009 | acyl-CoA thioesterase 8                        | Acot8  | 170588 | 1,32 | up   |
| 6546299 | 7247817 | 1492008 | acyl-CoA thioesterase 8                        | Acot8  | 170588 | 1,18 | up   |
| 6475245 | 7247817 | 1492005 | acyl-CoA thioesterase 8                        | Acot8  | 170588 | 1,12 | down |
| 6299947 | 7247817 | 1492010 | acyl-CoA thioesterase 8                        | Acot8  | 170588 | 1,09 | up   |
| 6001054 | 7247817 | 1492005 | acyl-CoA thioesterase 8                        | Acot8  | 170588 | 1,08 | down |
| 6245672 | 7247817 | 1492007 | acyl-CoA thioesterase 8                        | Acot8  | 170588 | 1,03 | up   |
| 6367742 | 7058149 | 1027311 | ADAM metallopeptidase domain 12                | Adam12 | 679837 | 1,59 | down |
| 6687697 | 7305030 | 1635030 | ADAM metallopeptidase domain 17                | Adam17 | 57027  | 4,16 | down |
| 6667859 | 7305030 | 1635034 | ADAM metallopeptidase domain 17                | Adam17 | 57027  | 1,58 | down |
| 6075687 | 7305030 | 1635047 | ADAM metallopeptidase domain 17                | Adam17 | 57027  | 1,53 | down |
| 6013104 | 7305030 | 1635029 | ADAM metallopeptidase domain 17                | Adam17 | 57027  | 1,50 | up   |
| 5889071 | 7305030 | 1635028 | ADAM metallopeptidase domain 17                | Adam17 | 57027  | 1,43 | down |
| 6636088 | 7305030 | 1635039 | ADAM metallopeptidase domain 17                | Adam17 | 57027  | 1,25 | down |
| 6315945 | 7305030 | 1635041 | ADAM metallopeptidase domain 17                | Adam17 | 57027  | 1,23 | up   |
| 5748860 | 7305030 | 1635040 | ADAM metallopeptidase domain 17                | Adam17 | 57027  | 1,20 | down |
| 6015830 | 7305030 | 1635031 | ADAM metallopeptidase domain 17                | Adam17 | 57027  | 1,19 | down |
| 6191108 | 7305030 | 1635033 | ADAM metallopeptidase domain 17                | Adam17 | 57027  | 1,18 | up   |
| 6102773 | 7305030 | 1635042 | ADAM metallopeptidase domain 17                | Adam17 | 57027  | 1,18 | up   |
| 5622829 | 7305030 | 1635044 | ADAM metallopeptidase domain 17                | Adam17 | 57027  | 1,17 | up   |
| 6525177 | 7305030 | 1635045 | ADAM metallopeptidase domain 17                | Adam17 | 57027  | 1,11 | down |
| 5797415 | 7305030 | 1635032 | ADAM metallopeptidase domain 17                | Adam17 | 57027  | 1,10 | down |
| 6444347 | 7305030 | 1635047 | ADAM metallopeptidase domain 17                | Adam17 | 57027  | 1,09 | down |
| 6657066 | 7305030 | 1635046 | ADAM metallopeptidase domain 17                | Adam17 | 57027  | 1,09 | up   |
| 6213050 | 7305030 | 1635037 | ADAM metallopeptidase domain 17                | Adam17 | 57027  | 1,09 | down |
| 6088127 | 7305030 | 1635043 | ADAM metallopeptidase domain 17                | Adam17 | 57027  | 1,04 | up   |
| 5905395 | 7305030 | 1635038 | ADAM metallopeptidase domain 17                | Adam17 | 57027  | 1,04 | up   |
| 6627896 | 7305030 | 1635035 | ADAM metallopeptidase domain 17                | Adam17 | 57027  | 1,01 | up   |
| 6500463 | 7305030 | 1635036 | ADAM metallopeptidase domain 17                | Adam17 | 57027  | 1,00 | up   |
| 6460283 | 7146964 | 1243204 | ADAM metallopeptidase domain 3A (cyritestin 1) | Adam3a | 57021  | 2,37 | down |
| 6659604 | 7146964 | 1243207 | ADAM metallopeptidase domain 3A (cyritestin 1) | Adam3a | 57021  | 1,91 | up   |
| 6423354 | 7146964 | 1243200 | ADAM metallopeptidase domain 3A (cyritestin 1) | Adam3a | 57021  | 1,63 | up   |
| 6565324 | 7146964 | 1243212 | ADAM metallopeptidase domain 3A (cyritestin 1) | Adam3a | 57021  | 1,60 | down |
| 5715313 | 7146964 | 1243208 | ADAM metallopeptidase domain 3A (cyritestin 1) | Adam3a | 57021  | 1,48 | down |
| 6065540 | 7146964 | 1243209 | ADAM metallopeptidase domain 3A (cyritestin 1) | Adam3a | 57021  | 1,44 | down |
| 6615141 | 7146964 | 1243201 | ADAM metallopeptidase domain 3A (cyritestin 1) | Adam3a | 57021  | 1,38 | up   |
| 6455689 | 7146964 | 1243216 | ADAM metallopeptidase domain 3A (cyritestin 1) | Adam3a | 57021  | 1,33 | down |
| 6104670 | 7146964 | 1243218 | ADAM metallopeptidase domain 3A (cyritestin 1) | Adam3a | 57021  | 1,33 | down |
| 6043436 | 7146964 | 1243215 | ADAM metallopeptidase domain 3A (cyritestin 1) | Adam3a | 57021  | 1,27 | up   |
| 6582653 | 7146964 | 1243213 | ADAM metallopeptidase domain 3A (cyritestin 1) | Adam3a | 57021  | 1,25 | up   |
| 5930916 | 7146964 | 1243217 | ADAM metallopeptidase domain 3A (cyritestin 1) | Adam3a | 57021  | 1,22 | up   |
| 6610402 | 7146964 | 1243219 | ADAM metallopeptidase domain 3A (cyritestin 1) | Adam3a | 57021  | 1,14 | up   |
| 5797536 | 7146964 | 1243206 | ADAM metallopeptidase domain 3A (cyritestin 1) | Adam3a | 57021  | 1,11 | down |

|         |         |         |                                                            |          |        |      |      |
|---------|---------|---------|------------------------------------------------------------|----------|--------|------|------|
| 6716575 | 7146964 | 1243205 | ADAM metallopeptidase domain 3A (cyritestin 1)             | Adam3a   | 57021  | 1,10 | up   |
| 6352511 | 7146964 | 1243213 | ADAM metallopeptidase domain 3A (cyritestin 1)             | Adam3a   | 57021  | 1,09 | up   |
| 6362527 | 7146964 | 1243216 | ADAM metallopeptidase domain 3A (cyritestin 1)             | Adam3a   | 57021  | 1,09 | up   |
| 6280411 | 7146964 | 1243208 | ADAM metallopeptidase domain 3A (cyritestin 1)             | Adam3a   | 57021  | 1,09 | down |
| 6407654 | 7146964 | 1243200 | ADAM metallopeptidase domain 3A (cyritestin 1)             | Adam3a   | 57021  | 1,08 | down |
| 6464988 | 7146964 | 1243211 | ADAM metallopeptidase domain 3A (cyritestin 1)             | Adam3a   | 57021  | 1,07 | up   |
| 6395699 | 7146964 | 1243203 | ADAM metallopeptidase domain 3A (cyritestin 1)             | Adam3a   | 57021  | 1,06 | down |
| 6346082 | 7146964 | 1243214 | ADAM metallopeptidase domain 3A (cyritestin 1)             | Adam3a   | 57021  | 1,06 | up   |
| 6098452 | 7146964 | 1243210 | ADAM metallopeptidase domain 3A (cyritestin 1)             | Adam3a   | 57021  | 1,06 | down |
| 5647716 | 7146964 | 1243202 | ADAM metallopeptidase domain 3A (cyritestin 1)             | Adam3a   | 57021  | 1,05 | up   |
| 6464572 | 7146964 | 1243200 | ADAM metallopeptidase domain 3A (cyritestin 1)             | Adam3a   | 57021  | 1,01 | down |
| 6334601 | 7170845 | 1301893 | ADAM metallopeptidase with thrombospondin type 1 motif, 19 | Adamts19 | 361332 | 2,41 | up   |
| 6108954 | 7170845 | 1301852 | ADAM metallopeptidase with thrombospondin type 1 motif, 19 | Adamts19 | 361332 | 1,91 | up   |
| 6685081 | 7170845 | 1301852 | ADAM metallopeptidase with thrombospondin type 1 motif, 19 | Adamts19 | 361332 | 1,86 | down |
| 5960244 | 7170845 | 1301851 | ADAM metallopeptidase with thrombospondin type 1 motif, 19 | Adamts19 | 361332 | 1,80 | down |
| 6606149 | 7170845 | 1301865 | ADAM metallopeptidase with thrombospondin type 1 motif, 19 | Adamts19 | 361332 | 1,65 | up   |
| 6422011 | 7170845 | 1301863 | ADAM metallopeptidase with thrombospondin type 1 motif, 19 | Adamts19 | 361332 | 1,60 | down |
| 5826985 | 7170845 | 1301887 | ADAM metallopeptidase with thrombospondin type 1 motif, 19 | Adamts19 | 361332 | 1,48 | down |
| 6431355 | 7170845 | 1301880 | ADAM metallopeptidase with thrombospondin type 1 motif, 19 | Adamts19 | 361332 | 1,42 | down |
| 5937768 | 7170845 | 1301851 | ADAM metallopeptidase with thrombospondin type 1 motif, 19 | Adamts19 | 361332 | 1,41 | up   |
| 6506654 | 7170845 | 1301852 | ADAM metallopeptidase with thrombospondin type 1 motif, 19 | Adamts19 | 361332 | 1,32 | up   |
| 6618109 | 7170845 | 1301882 | ADAM metallopeptidase with thrombospondin type 1 motif, 19 | Adamts19 | 361332 | 1,20 | down |
| 6112386 | 7170845 | 1301852 | ADAM metallopeptidase with thrombospondin type 1 motif, 19 | Adamts19 | 361332 | 1,20 | down |
| 6370456 | 7170845 | 1301909 | ADAM metallopeptidase with thrombospondin type 1 motif, 19 | Adamts19 | 361332 | 1,20 | down |
| 5852467 | 7170845 | 1301909 | ADAM metallopeptidase with thrombospondin type 1 motif, 19 | Adamts19 | 361332 | 1,19 | down |
| 6221855 | 7170845 | 1301910 | ADAM metallopeptidase with thrombospondin type 1 motif, 19 | Adamts19 | 361332 | 1,19 | up   |
| 5811465 | 7170845 | 1301890 | ADAM metallopeptidase with thrombospondin type 1 motif, 19 | Adamts19 | 361332 | 1,12 | up   |
| 5736941 | 7170845 | 1301871 | ADAM metallopeptidase with thrombospondin type 1 motif, 19 | Adamts19 | 361332 | 1,08 | up   |
| 6631347 | 7170845 | 1301904 | ADAM metallopeptidase with thrombospondin type 1 motif, 19 | Adamts19 | 361332 | 1,08 | up   |
| 6567457 | 7170845 | 1301876 | ADAM metallopeptidase with thrombospondin type 1 motif, 19 | Adamts19 | 361332 | 1,06 | down |
| 6226015 | 7170845 | 1301862 | ADAM metallopeptidase with thrombospondin type 1 motif, 19 | Adamts19 | 361332 | 1,05 | down |
| 6369979 | 7170845 | 1301867 | ADAM metallopeptidase with thrombospondin type 1 motif, 19 | Adamts19 | 361332 | 1,05 | down |
| 5928867 | 7170845 | 1301884 | ADAM metallopeptidase with thrombospondin type 1 motif, 19 | Adamts19 | 361332 | 1,05 | up   |
| 6064018 | 7170845 | 1301902 | ADAM metallopeptidase with thrombospondin type 1 motif, 19 | Adamts19 | 361332 | 1,04 | down |
| 6000458 | 7170845 | 1301858 | ADAM metallopeptidase with thrombospondin type 1 motif, 19 | Adamts19 | 361332 | 1,03 | up   |
| 6553930 | 7170845 | 1301889 | ADAM metallopeptidase with thrombospondin type 1 motif, 19 | Adamts19 | 361332 | 1,02 | down |
| 6499757 | 7170845 | 1301852 | ADAM metallopeptidase with thrombospondin type 1 motif, 19 | Adamts19 | 361332 | 1,02 | up   |
| 6563008 | 7170845 | 1301860 | ADAM metallopeptidase with thrombospondin type 1 motif, 19 | Adamts19 | 361332 | 1,01 | up   |
| 6066535 | 7170845 | 1301900 | ADAM metallopeptidase with thrombospondin type 1 motif, 19 | Adamts19 | 361332 | 1,01 | up   |
| 5752884 | 7170845 | 1301874 | ADAM metallopeptidase with thrombospondin type 1 motif, 19 | Adamts19 | 361332 | 1,00 | down |
| 5660563 | 7189184 | 1347572 | ADAM metallopeptidase with thrombospondin type 1 motif, 6  | Adamts6  | 361886 | 2,00 | up   |
| 5840588 | 7189184 | 1347601 | ADAM metallopeptidase with thrombospondin type 1 motif, 6  | Adamts6  | 361886 | 2,00 | down |
| 6178464 | 7189184 | 1347601 | ADAM metallopeptidase with thrombospondin type 1 motif, 6  | Adamts6  | 361886 | 1,80 | up   |
| 5727536 | 7189184 | 1347595 | ADAM metallopeptidase with thrombospondin type 1 motif, 6  | Adamts6  | 361886 | 1,68 | up   |
| 6155553 | 7189184 | 1347601 | ADAM metallopeptidase with thrombospondin type 1 motif, 6  | Adamts6  | 361886 | 1,63 | down |
| 5867399 | 7189184 | 1347616 | ADAM metallopeptidase with thrombospondin type 1 motif, 6  | Adamts6  | 361886 | 1,59 | up   |
| 6129623 | 7189184 | 1347617 | ADAM metallopeptidase with thrombospondin type 1 motif, 6  | Adamts6  | 361886 | 1,58 | down |
| 6454457 | 7189184 | 1347587 | ADAM metallopeptidase with thrombospondin type 1 motif, 6  | Adamts6  | 361886 | 1,57 | up   |
| 6077020 | 7189184 | 1347586 | ADAM metallopeptidase with thrombospondin type 1 motif, 6  | Adamts6  | 361886 | 1,56 | up   |
| 6162342 | 7189184 | 1347612 | ADAM metallopeptidase with thrombospondin type 1 motif, 6  | Adamts6  | 361886 | 1,55 | down |
| 6653855 | 7189184 | 1347575 | ADAM metallopeptidase with thrombospondin type 1 motif, 6  | Adamts6  | 361886 | 1,50 | down |
| 5619445 | 7189184 | 1347616 | ADAM metallopeptidase with thrombospondin type 1 motif, 6  | Adamts6  | 361886 | 1,48 | up   |
| 6026304 | 7189184 | 1347617 | ADAM metallopeptidase with thrombospondin type 1 motif, 6  | Adamts6  | 361886 | 1,42 | down |
| 6030370 | 7189184 | 1347581 | ADAM metallopeptidase with thrombospondin type 1 motif, 6  | Adamts6  | 361886 | 1,36 | up   |
| 6276211 | 7189184 | 1347590 | ADAM metallopeptidase with thrombospondin type 1 motif, 6  | Adamts6  | 361886 | 1,35 | up   |
| 5675496 | 7189184 | 1347583 | ADAM metallopeptidase with thrombospondin type 1 motif, 6  | Adamts6  | 361886 | 1,33 | down |
| 6117210 | 7189184 | 1347588 | ADAM metallopeptidase with thrombospondin type 1 motif, 6  | Adamts6  | 361886 | 1,30 | down |

|         |         |         |                                                           |          |        |      |      |
|---------|---------|---------|-----------------------------------------------------------|----------|--------|------|------|
| 6524293 | 7189184 | 1347588 | ADAM metallopeptidase with thrombospondin type 1 motif, 6 | Adamts6  | 361886 | 1,29 | down |
| 6622888 | 7189184 | 1347574 | ADAM metallopeptidase with thrombospondin type 1 motif, 6 | Adamts6  | 361886 | 1,25 | down |
| 6707443 | 7189184 | 1347599 | ADAM metallopeptidase with thrombospondin type 1 motif, 6 | Adamts6  | 361886 | 1,24 | down |
| 5911988 | 7189184 | 1347616 | ADAM metallopeptidase with thrombospondin type 1 motif, 6 | Adamts6  | 361886 | 1,23 | down |
| 5725781 | 7189184 | 1347578 | ADAM metallopeptidase with thrombospondin type 1 motif, 6 | Adamts6  | 361886 | 1,21 | down |
| 6418051 | 7189184 | 1347598 | ADAM metallopeptidase with thrombospondin type 1 motif, 6 | Adamts6  | 361886 | 1,21 | down |
| 6046553 | 7189184 | 1347592 | ADAM metallopeptidase with thrombospondin type 1 motif, 6 | Adamts6  | 361886 | 1,21 | up   |
| 6481982 | 7189184 | 1347611 | ADAM metallopeptidase with thrombospondin type 1 motif, 6 | Adamts6  | 361886 | 1,16 | up   |
| 5715081 | 7189184 | 1347572 | ADAM metallopeptidase with thrombospondin type 1 motif, 6 | Adamts6  | 361886 | 1,15 | up   |
| 6255030 | 7189184 | 1347573 | ADAM metallopeptidase with thrombospondin type 1 motif, 6 | Adamts6  | 361886 | 1,14 | up   |
| 6409605 | 7189184 | 1347616 | ADAM metallopeptidase with thrombospondin type 1 motif, 6 | Adamts6  | 361886 | 1,11 | down |
| 5624631 | 7189184 | 1347573 | ADAM metallopeptidase with thrombospondin type 1 motif, 6 | Adamts6  | 361886 | 1,11 | down |
| 6427885 | 7189184 | 1347597 | ADAM metallopeptidase with thrombospondin type 1 motif, 6 | Adamts6  | 361886 | 1,10 | down |
| 5864955 | 7189184 | 1347594 | ADAM metallopeptidase with thrombospondin type 1 motif, 6 | Adamts6  | 361886 | 1,10 | up   |
| 5855702 | 7189184 | 1347579 | ADAM metallopeptidase with thrombospondin type 1 motif, 6 | Adamts6  | 361886 | 1,06 | up   |
| 6298168 | 7189184 | 1347609 | ADAM metallopeptidase with thrombospondin type 1 motif, 6 | Adamts6  | 361886 | 1,03 | down |
| 5632620 | 7189184 | 1347570 | ADAM metallopeptidase with thrombospondin type 1 motif, 6 | Adamts6  | 361886 | 1,03 | up   |
| 6530646 | 7189184 | 1347591 | ADAM metallopeptidase with thrombospondin type 1 motif, 6 | Adamts6  | 361886 | 1,01 | up   |
| 6007909 | 7189184 | 1347601 | ADAM metallopeptidase with thrombospondin type 1 motif, 6 | Adamts6  | 361886 | 1,01 | up   |
| 5622841 | 7189184 | 1347600 | ADAM metallopeptidase with thrombospondin type 1 motif, 6 | Adamts6  | 361886 | 1,00 | down |
| 6570927 | 7312532 | 1653218 | ADAMTS-like 5                                             | Adamts15 | 314626 | 1,46 | down |
| 6209335 | 7312532 | 1653220 | ADAMTS-like 5                                             | Adamts15 | 314626 | 1,43 | down |
| 6659364 | 7312532 | 1653219 | ADAMTS-like 5                                             | Adamts15 | 314626 | 1,36 | down |
| 6204701 | 7312532 | 1653217 | ADAMTS-like 5                                             | Adamts15 | 314626 | 1,34 | up   |
| 5668341 | 7312532 | 1653217 | ADAMTS-like 5                                             | Adamts15 | 314626 | 1,29 | up   |
| 6244911 | 7312532 | 1653213 | ADAMTS-like 5                                             | Adamts15 | 314626 | 1,04 | down |
| 6330258 | 7312532 | 1653220 | ADAMTS-like 5                                             | Adamts15 | 314626 | 1,02 | up   |
| 6473044 | 7312532 | 1653216 | ADAMTS-like 5                                             | Adamts15 | 314626 | 1,01 | up   |
| 5964931 | 7180943 | 1327469 | adaptor-related protein complex 1, gamma 1 subunit        | Ap1g1    | 171494 | 3,02 | up   |
| 5921747 | 7180943 | 1327453 | adaptor-related protein complex 1, gamma 1 subunit        | Ap1g1    | 171494 | 1,53 | up   |
| 6331058 | 7180943 | 1327466 | adaptor-related protein complex 1, gamma 1 subunit        | Ap1g1    | 171494 | 1,43 | up   |
| 6374013 | 7180943 | 1327460 | adaptor-related protein complex 1, gamma 1 subunit        | Ap1g1    | 171494 | 1,36 | down |
| 5638184 | 7180943 | 1327459 | adaptor-related protein complex 1, gamma 1 subunit        | Ap1g1    | 171494 | 1,33 | down |
| 5760842 | 7180943 | 1327468 | adaptor-related protein complex 1, gamma 1 subunit        | Ap1g1    | 171494 | 1,30 | down |
| 6576647 | 7180943 | 1327469 | adaptor-related protein complex 1, gamma 1 subunit        | Ap1g1    | 171494 | 1,23 | down |
| 6089128 | 7180943 | 1327457 | adaptor-related protein complex 1, gamma 1 subunit        | Ap1g1    | 171494 | 1,22 | up   |
| 5836494 | 7180943 | 1327467 | adaptor-related protein complex 1, gamma 1 subunit        | Ap1g1    | 171494 | 1,22 | down |
| 6172384 | 7180943 | 1327469 | adaptor-related protein complex 1, gamma 1 subunit        | Ap1g1    | 171494 | 1,18 | down |
| 6062326 | 7180943 | 1327454 | adaptor-related protein complex 1, gamma 1 subunit        | Ap1g1    | 171494 | 1,17 | up   |
| 5825106 | 7180943 | 1327457 | adaptor-related protein complex 1, gamma 1 subunit        | Ap1g1    | 171494 | 1,16 | down |
| 6316899 | 7180943 | 1327461 | adaptor-related protein complex 1, gamma 1 subunit        | Ap1g1    | 171494 | 1,16 | down |
| 5924718 | 7180943 | 1327452 | adaptor-related protein complex 1, gamma 1 subunit        | Ap1g1    | 171494 | 1,15 | up   |
| 6315828 | 7180943 | 1327463 | adaptor-related protein complex 1, gamma 1 subunit        | Ap1g1    | 171494 | 1,15 | down |
| 6313737 | 7180943 | 1327462 | adaptor-related protein complex 1, gamma 1 subunit        | Ap1g1    | 171494 | 1,12 | up   |
| 6079323 | 7180943 | 1327450 | adaptor-related protein complex 1, gamma 1 subunit        | Ap1g1    | 171494 | 1,10 | up   |
| 5793027 | 7180943 | 1327469 | adaptor-related protein complex 1, gamma 1 subunit        | Ap1g1    | 171494 | 1,09 | down |
| 6156399 | 7180943 | 1327458 | adaptor-related protein complex 1, gamma 1 subunit        | Ap1g1    | 171494 | 1,09 | down |
| 5974718 | 7180943 | 1327452 | adaptor-related protein complex 1, gamma 1 subunit        | Ap1g1    | 171494 | 1,07 | up   |
| 5787755 | 7180943 | 1327451 | adaptor-related protein complex 1, gamma 1 subunit        | Ap1g1    | 171494 | 1,07 | up   |
| 5770665 | 7180943 | 1327447 | adaptor-related protein complex 1, gamma 1 subunit        | Ap1g1    | 171494 | 1,07 | up   |
| 6291658 | 7180943 | 1327455 | adaptor-related protein complex 1, gamma 1 subunit        | Ap1g1    | 171494 | 1,07 | down |
| 6133850 | 7180943 | 1327469 | adaptor-related protein complex 1, gamma 1 subunit        | Ap1g1    | 171494 | 1,06 | down |
| 6355748 | 7180943 | 1327449 | adaptor-related protein complex 1, gamma 1 subunit        | Ap1g1    | 171494 | 1,04 | up   |
| 6265378 | 7180943 | 1327464 | adaptor-related protein complex 1, gamma 1 subunit        | Ap1g1    | 171494 | 1,03 | up   |
| 6342903 | 7180943 | 1327465 | adaptor-related protein complex 1, gamma 1 subunit        | Ap1g1    | 171494 | 1,01 | down |
| 6600911 | 7180943 | 1327450 | adaptor-related protein complex 1, gamma 1 subunit        | Ap1g1    | 171494 | 1,01 | down |
| 6380079 | 7180943 | 1327456 | adaptor-related protein complex 1, gamma 1 subunit        | Ap1g1    | 171494 | 1,00 | down |

|         |         |         |                                                    |        |        |      |      |
|---------|---------|---------|----------------------------------------------------|--------|--------|------|------|
| 5687229 | 7180943 | 1327466 | adaptor-related protein complex 1, gamma 1 subunit | Ap1g1  | 171494 | 1,00 | up   |
| 6354477 | 7095081 | 1115334 | adaptor-related protein complex 2, mu 1 subunit    | Ap2m1  | 116563 | 1,47 | up   |
| 6470639 | 7095081 | 1115324 | adaptor-related protein complex 2, mu 1 subunit    | Ap2m1  | 116563 | 1,26 | down |
| 6313727 | 7095081 | 1115331 | adaptor-related protein complex 2, mu 1 subunit    | Ap2m1  | 116563 | 1,23 | down |
| 5974306 | 7095081 | 1115329 | adaptor-related protein complex 2, mu 1 subunit    | Ap2m1  | 116563 | 1,17 | down |
| 6541704 | 7095081 | 1115332 | adaptor-related protein complex 2, mu 1 subunit    | Ap2m1  | 116563 | 1,16 | down |
| 5650882 | 7095081 | 1115333 | adaptor-related protein complex 2, mu 1 subunit    | Ap2m1  | 116563 | 1,13 | up   |
| 5862963 | 7095081 | 1115325 | adaptor-related protein complex 2, mu 1 subunit    | Ap2m1  | 116563 | 1,07 | up   |
| 6535624 | 7095081 | 1115334 | adaptor-related protein complex 2, mu 1 subunit    | Ap2m1  | 116563 | 1,04 | up   |
| 5666345 | 7095081 | 1115324 | adaptor-related protein complex 2, mu 1 subunit    | Ap2m1  | 116563 | 1,03 | down |
| 6313775 | 7095081 | 1115328 | adaptor-related protein complex 2, mu 1 subunit    | Ap2m1  | 116563 | 1,02 | down |
| 5850180 | 7095081 | 1115325 | adaptor-related protein complex 2, mu 1 subunit    | Ap2m1  | 116563 | 1,02 | up   |
| 5827265 | 7095081 | 1115326 | adaptor-related protein complex 2, mu 1 subunit    | Ap2m1  | 116563 | 1,02 | down |
| 6373420 | 7095081 | 1115327 | adaptor-related protein complex 2, mu 1 subunit    | Ap2m1  | 116563 | 1,01 | down |
| 6494931 | 7095081 | 1115330 | adaptor-related protein complex 2, mu 1 subunit    | Ap2m1  | 116563 | 1,01 | up   |
| 6270687 | 7095081 | 1115324 | adaptor-related protein complex 2, mu 1 subunit    | Ap2m1  | 116563 | 1,00 | down |
| 6600090 | 7217639 | 1417147 | adenosine deaminase, RNA-specific, B1              | Adarb1 | 25367  | 2,10 | down |
| 5794875 | 7217639 | 1417146 | adenosine deaminase, RNA-specific, B1              | Adarb1 | 25367  | 1,68 | down |
| 6200011 | 7217639 | 1417145 | adenosine deaminase, RNA-specific, B1              | Adarb1 | 25367  | 1,48 | up   |
| 6331952 | 7217639 | 1417141 | adenosine deaminase, RNA-specific, B1              | Adarb1 | 25367  | 1,43 | down |
| 6342249 | 7217639 | 1417142 | adenosine deaminase, RNA-specific, B1              | Adarb1 | 25367  | 1,28 | up   |
| 6664089 | 7217639 | 1417140 | adenosine deaminase, RNA-specific, B1              | Adarb1 | 25367  | 1,28 | up   |
| 5779546 | 7217639 | 1417144 | adenosine deaminase, RNA-specific, B1              | Adarb1 | 25367  | 1,18 | up   |
| 6625769 | 7217639 | 1417148 | adenosine deaminase, RNA-specific, B1              | Adarb1 | 25367  | 1,16 | up   |
| 5896028 | 7217639 | 1417144 | adenosine deaminase, RNA-specific, B1              | Adarb1 | 25367  | 1,12 | down |
| 6736965 | 7217639 | 1417140 | adenosine deaminase, RNA-specific, B1              | Adarb1 | 25367  | 1,11 | up   |
| 6522400 | 7217639 | 1417147 | adenosine deaminase, RNA-specific, B1              | Adarb1 | 25367  | 1,08 | up   |
| 6423752 | 7217639 | 1417143 | adenosine deaminase, RNA-specific, B1              | Adarb1 | 25367  | 1,01 | down |
| 6427824 | 7212698 | 1404869 | adenosine monophosphate deaminase 2 (isoform L)    | Ampd2  | 362015 | 1,78 | down |
| 6371594 | 7212698 | 1404862 | adenosine monophosphate deaminase 2 (isoform L)    | Ampd2  | 362015 | 1,33 | down |
| 6178362 | 7212698 | 1404864 | adenosine monophosphate deaminase 2 (isoform L)    | Ampd2  | 362015 | 1,30 | down |
| 5956996 | 7212698 | 1404852 | adenosine monophosphate deaminase 2 (isoform L)    | Ampd2  | 362015 | 1,25 | down |
| 6094255 | 7212698 | 1404866 | adenosine monophosphate deaminase 2 (isoform L)    | Ampd2  | 362015 | 1,24 | down |
| 5831979 | 7212698 | 1404859 | adenosine monophosphate deaminase 2 (isoform L)    | Ampd2  | 362015 | 1,20 | down |
| 5838478 | 7212698 | 1404857 | adenosine monophosphate deaminase 2 (isoform L)    | Ampd2  | 362015 | 1,20 | down |
| 6001284 | 7212698 | 1404853 | adenosine monophosphate deaminase 2 (isoform L)    | Ampd2  | 362015 | 1,17 | down |
| 6437591 | 7212698 | 1404863 | adenosine monophosphate deaminase 2 (isoform L)    | Ampd2  | 362015 | 1,15 | down |
| 6078598 | 7212698 | 1404856 | adenosine monophosphate deaminase 2 (isoform L)    | Ampd2  | 362015 | 1,15 | down |
| 5712271 | 7212698 | 1404861 | adenosine monophosphate deaminase 2 (isoform L)    | Ampd2  | 362015 | 1,14 | up   |
| 6613623 | 7212698 | 1404867 | adenosine monophosphate deaminase 2 (isoform L)    | Ampd2  | 362015 | 1,14 | up   |
| 5949695 | 7212698 | 1404865 | adenosine monophosphate deaminase 2 (isoform L)    | Ampd2  | 362015 | 1,12 | down |
| 6377619 | 7212698 | 1404858 | adenosine monophosphate deaminase 2 (isoform L)    | Ampd2  | 362015 | 1,09 | down |
| 5860245 | 7212698 | 1404860 | adenosine monophosphate deaminase 2 (isoform L)    | Ampd2  | 362015 | 1,09 | up   |
| 5942920 | 7212698 | 1404863 | adenosine monophosphate deaminase 2 (isoform L)    | Ampd2  | 362015 | 1,06 | up   |
| 6309420 | 7212698 | 1404854 | adenosine monophosphate deaminase 2 (isoform L)    | Ampd2  | 362015 | 1,06 | up   |
| 6103479 | 7212698 | 1404857 | adenosine monophosphate deaminase 2 (isoform L)    | Ampd2  | 362015 | 1,01 | down |
| 5991884 | 7212698 | 1404855 | adenosine monophosphate deaminase 2 (isoform L)    | Ampd2  | 362015 | 1,00 | up   |
| 6117587 | 7035439 | 974518  | adenosine monophosphate deaminase 3                | Ampd3  | 25095  | 2,36 | up   |
| 6159958 | 7035439 | 974522  | adenosine monophosphate deaminase 3                | Ampd3  | 25095  | 1,92 | down |
| 6323337 | 7035439 | 974524  | adenosine monophosphate deaminase 3                | Ampd3  | 25095  | 1,69 | up   |
| 5793062 | 7035439 | 974525  | adenosine monophosphate deaminase 3                | Ampd3  | 25095  | 1,67 | up   |
| 6142147 | 7035439 | 974517  | adenosine monophosphate deaminase 3                | Ampd3  | 25095  | 1,63 | down |
| 5890536 | 7035439 | 974527  | adenosine monophosphate deaminase 3                | Ampd3  | 25095  | 1,51 | down |
| 6429091 | 7035439 | 974521  | adenosine monophosphate deaminase 3                | Ampd3  | 25095  | 1,30 | up   |
| 5940864 | 7035439 | 974520  | adenosine monophosphate deaminase 3                | Ampd3  | 25095  | 1,28 | down |
| 6062165 | 7035439 | 974526  | adenosine monophosphate deaminase 3                | Ampd3  | 25095  | 1,22 | down |
| 6177078 | 7035439 | 974523  | adenosine monophosphate deaminase 3                | Ampd3  | 25095  | 1,21 | down |

|         |         |         |                                     |       |        |      |      |
|---------|---------|---------|-------------------------------------|-------|--------|------|------|
| 5998261 | 7035439 | 974518  | adenosine monophosphate deaminase 3 | Ampd3 | 25095  | 1,17 | down |
| 6134958 | 7035439 | 974519  | adenosine monophosphate deaminase 3 | Ampd3 | 25095  | 1,16 | down |
| 5640590 | 7035439 | 974517  | adenosine monophosphate deaminase 3 | Ampd3 | 25095  | 1,16 | down |
| 6390974 | 7035439 | 974529  | adenosine monophosphate deaminase 3 | Ampd3 | 25095  | 1,15 | down |
| 5989487 | 7035439 | 974528  | adenosine monophosphate deaminase 3 | Ampd3 | 25095  | 1,15 | up   |
| 5984708 | 7035439 | 974530  | adenosine monophosphate deaminase 3 | Ampd3 | 25095  | 1,13 | down |
| 5630337 | 7035439 | 974528  | adenosine monophosphate deaminase 3 | Ampd3 | 25095  | 1,11 | up   |
| 5656838 | 7035439 | 974531  | adenosine monophosphate deaminase 3 | Ampd3 | 25095  | 1,00 | down |
| 6380030 | 7120827 | 1179349 | adenylate cyclase 1 (brain)         | Adcy1 | 305509 | 1,79 | up   |
| 6237884 | 7120827 | 1179347 | adenylate cyclase 1 (brain)         | Adcy1 | 305509 | 1,69 | up   |
| 6565636 | 7120827 | 1179344 | adenylate cyclase 1 (brain)         | Adcy1 | 305509 | 1,62 | down |
| 6114134 | 7120827 | 1179325 | adenylate cyclase 1 (brain)         | Adcy1 | 305509 | 1,41 | up   |
| 5864537 | 7120827 | 1179301 | adenylate cyclase 1 (brain)         | Adcy1 | 305509 | 1,40 | down |
| 5926080 | 7120827 | 1179332 | adenylate cyclase 1 (brain)         | Adcy1 | 305509 | 1,38 | down |
| 6051396 | 7120827 | 1179317 | adenylate cyclase 1 (brain)         | Adcy1 | 305509 | 1,37 | up   |
| 5971454 | 7120827 | 1179329 | adenylate cyclase 1 (brain)         | Adcy1 | 305509 | 1,37 | down |
| 6087249 | 7120827 | 1179324 | adenylate cyclase 1 (brain)         | Adcy1 | 305509 | 1,36 | down |
| 6664250 | 7120827 | 1179340 | adenylate cyclase 1 (brain)         | Adcy1 | 305509 | 1,34 | up   |
| 5732850 | 7120827 | 1179343 | adenylate cyclase 1 (brain)         | Adcy1 | 305509 | 1,34 | down |
| 5837466 | 7120827 | 1179306 | adenylate cyclase 1 (brain)         | Adcy1 | 305509 | 1,30 | down |
| 5992479 | 7120827 | 1179349 | adenylate cyclase 1 (brain)         | Adcy1 | 305509 | 1,27 | up   |
| 6050307 | 7120827 | 1179333 | adenylate cyclase 1 (brain)         | Adcy1 | 305509 | 1,27 | down |
| 6455171 | 7120827 | 1179328 | adenylate cyclase 1 (brain)         | Adcy1 | 305509 | 1,26 | down |
| 6070511 | 7120827 | 1179333 | adenylate cyclase 1 (brain)         | Adcy1 | 305509 | 1,24 | up   |
| 6726064 | 7120827 | 1179323 | adenylate cyclase 1 (brain)         | Adcy1 | 305509 | 1,19 | up   |
| 6178534 | 7120827 | 1179333 | adenylate cyclase 1 (brain)         | Adcy1 | 305509 | 1,18 | up   |
| 6326124 | 7120827 | 1179313 | adenylate cyclase 1 (brain)         | Adcy1 | 305509 | 1,13 | down |
| 6192535 | 7120827 | 1179334 | adenylate cyclase 1 (brain)         | Adcy1 | 305509 | 1,10 | up   |
| 5903240 | 7120827 | 1179349 | adenylate cyclase 1 (brain)         | Adcy1 | 305509 | 1,08 | up   |
| 6465347 | 7120827 | 1179333 | adenylate cyclase 1 (brain)         | Adcy1 | 305509 | 1,07 | down |
| 5740295 | 7120827 | 1179311 | adenylate cyclase 1 (brain)         | Adcy1 | 305509 | 1,05 | up   |
| 6687466 | 7120827 | 1179327 | adenylate cyclase 1 (brain)         | Adcy1 | 305509 | 1,05 | down |
| 5676370 | 7120827 | 1179311 | adenylate cyclase 1 (brain)         | Adcy1 | 305509 | 1,04 | down |
| 6510984 | 7120827 | 1179341 | adenylate cyclase 1 (brain)         | Adcy1 | 305509 | 1,02 | up   |
| 6025810 | 7295800 | 1610637 | adenylate cyclase 3                 | Adcy3 | 64508  | 2,30 | down |
| 6022214 | 7295800 | 1610644 | adenylate cyclase 3                 | Adcy3 | 64508  | 2,06 | up   |
| 5853488 | 7295800 | 1610639 | adenylate cyclase 3                 | Adcy3 | 64508  | 1,92 | up   |
| 6024860 | 7295800 | 1610643 | adenylate cyclase 3                 | Adcy3 | 64508  | 1,53 | up   |
| 5801033 | 7295800 | 1610634 | adenylate cyclase 3                 | Adcy3 | 64508  | 1,53 | up   |
| 5682020 | 7295800 | 1610625 | adenylate cyclase 3                 | Adcy3 | 64508  | 1,37 | down |
| 6163244 | 7295800 | 1610625 | adenylate cyclase 3                 | Adcy3 | 64508  | 1,32 | down |
| 5716510 | 7295800 | 1610635 | adenylate cyclase 3                 | Adcy3 | 64508  | 1,29 | down |
| 6598605 | 7295800 | 1610638 | adenylate cyclase 3                 | Adcy3 | 64508  | 1,26 | up   |
| 6019482 | 7295800 | 1610630 | adenylate cyclase 3                 | Adcy3 | 64508  | 1,21 | up   |
| 6270863 | 7295800 | 1610625 | adenylate cyclase 3                 | Adcy3 | 64508  | 1,20 | down |
| 6719872 | 7295800 | 1610642 | adenylate cyclase 3                 | Adcy3 | 64508  | 1,18 | down |
| 6261759 | 7295800 | 1610632 | adenylate cyclase 3                 | Adcy3 | 64508  | 1,17 | down |
| 6475132 | 7295800 | 1610638 | adenylate cyclase 3                 | Adcy3 | 64508  | 1,13 | up   |
| 6390180 | 7295800 | 1610629 | adenylate cyclase 3                 | Adcy3 | 64508  | 1,10 | down |
| 6368843 | 7295800 | 1610646 | adenylate cyclase 3                 | Adcy3 | 64508  | 1,08 | down |
| 6315057 | 7295800 | 1610627 | adenylate cyclase 3                 | Adcy3 | 64508  | 1,07 | down |
| 6248464 | 7295800 | 1610633 | adenylate cyclase 3                 | Adcy3 | 64508  | 1,06 | up   |
| 6674409 | 7295800 | 1610626 | adenylate cyclase 3                 | Adcy3 | 64508  | 1,06 | up   |
| 5842191 | 7295800 | 1610640 | adenylate cyclase 3                 | Adcy3 | 64508  | 1,06 | down |
| 5669832 | 7295800 | 1610636 | adenylate cyclase 3                 | Adcy3 | 64508  | 1,05 | down |
| 5721311 | 7295800 | 1610645 | adenylate cyclase 3                 | Adcy3 | 64508  | 1,04 | up   |
| 6487179 | 7295800 | 1610624 | adenylate cyclase 3                 | Adcy3 | 64508  | 1,04 | down |

|         |         |         |                                                   |         |        |      |      |
|---------|---------|---------|---------------------------------------------------|---------|--------|------|------|
| 6596490 | 7295800 | 1610628 | adenylate cyclase 3                               | Adcy3   | 64508  | 1,03 | down |
| 6144642 | 7295800 | 1610631 | adenylate cyclase 3                               | Adcy3   | 64508  | 1,02 | down |
| 5972230 | 7295800 | 1610641 | adenylate cyclase 3                               | Adcy3   | 64508  | 1,00 | up   |
| 6017902 | 7093853 | 1112300 | adenylate cyclase 5                               | Adcy5   | 64532  | 2,22 | down |
| 5884158 | 7093853 | 1112288 | adenylate cyclase 5                               | Adcy5   | 64532  | 2,11 | down |
| 6683858 | 7093853 | 1112300 | adenylate cyclase 5                               | Adcy5   | 64532  | 1,53 | up   |
| 5989120 | 7093853 | 1112280 | adenylate cyclase 5                               | Adcy5   | 64532  | 1,48 | down |
| 6334293 | 7093853 | 1112296 | adenylate cyclase 5                               | Adcy5   | 64532  | 1,40 | down |
| 5701111 | 7093853 | 1112291 | adenylate cyclase 5                               | Adcy5   | 64532  | 1,33 | up   |
| 5657871 | 7093853 | 1112289 | adenylate cyclase 5                               | Adcy5   | 64532  | 1,27 | down |
| 6515435 | 7093853 | 1112299 | adenylate cyclase 5                               | Adcy5   | 64532  | 1,27 | up   |
| 5898624 | 7093853 | 1112281 | adenylate cyclase 5                               | Adcy5   | 64532  | 1,24 | down |
| 6172291 | 7093853 | 1112295 | adenylate cyclase 5                               | Adcy5   | 64532  | 1,23 | down |
| 5629245 | 7093853 | 1112298 | adenylate cyclase 5                               | Adcy5   | 64532  | 1,22 | up   |
| 6244713 | 7093853 | 1112285 | adenylate cyclase 5                               | Adcy5   | 64532  | 1,22 | down |
| 6561860 | 7093853 | 1112286 | adenylate cyclase 5                               | Adcy5   | 64532  | 1,20 | up   |
| 6053850 | 7093853 | 1112290 | adenylate cyclase 5                               | Adcy5   | 64532  | 1,19 | down |
| 5930320 | 7093853 | 1112284 | adenylate cyclase 5                               | Adcy5   | 64532  | 1,17 | down |
| 5931331 | 7093853 | 1112293 | adenylate cyclase 5                               | Adcy5   | 64532  | 1,16 | up   |
| 6444242 | 7093853 | 1112287 | adenylate cyclase 5                               | Adcy5   | 64532  | 1,16 | up   |
| 5702554 | 7093853 | 1112281 | adenylate cyclase 5                               | Adcy5   | 64532  | 1,13 | down |
| 6044603 | 7093853 | 1112282 | adenylate cyclase 5                               | Adcy5   | 64532  | 1,12 | up   |
| 5682171 | 7093853 | 1112297 | adenylate cyclase 5                               | Adcy5   | 64532  | 1,09 | down |
| 6731761 | 7093853 | 1112301 | adenylate cyclase 5                               | Adcy5   | 64532  | 1,07 | up   |
| 5732284 | 7093853 | 1112283 | adenylate cyclase 5                               | Adcy5   | 64532  | 1,07 | down |
| 6559404 | 7093853 | 1112294 | adenylate cyclase 5                               | Adcy5   | 64532  | 1,06 | up   |
| 6200047 | 7093853 | 1112292 | adenylate cyclase 5                               | Adcy5   | 64532  | 1,04 | up   |
| 5967970 | 7093853 | 1112300 | adenylate cyclase 5                               | Adcy5   | 64532  | 1,03 | down |
| 6396872 | 7093853 | 1112300 | adenylate cyclase 5                               | Adcy5   | 64532  | 1,01 | up   |
| 6003054 | 7093853 | 1112280 | adenylate cyclase 5                               | Adcy5   | 64532  | 1,00 | down |
| 6150674 | 7279784 | 1572508 | adenylate kinase 2                                | Ak2     | 24184  | 2,48 | up   |
| 5841993 | 7279784 | 1572514 | adenylate kinase 2                                | Ak2     | 24184  | 1,52 | down |
| 5639772 | 7279784 | 1572511 | adenylate kinase 2                                | Ak2     | 24184  | 1,42 | up   |
| 6347600 | 7279784 | 1572513 | adenylate kinase 2                                | Ak2     | 24184  | 1,20 | down |
| 6725014 | 7279784 | 1572512 | adenylate kinase 2                                | Ak2     | 24184  | 1,14 | down |
| 6671909 | 7279784 | 1572509 | adenylate kinase 2                                | Ak2     | 24184  | 1,13 | down |
| 6585271 | 7279784 | 1572510 | adenylate kinase 2                                | Ak2     | 24184  | 1,12 | up   |
| 6439364 | 7277738 | 1567143 | adenylate kinase 3-like 1                         | Ak311   | 29223  | 3,92 | down |
| 5952112 | 7277738 | 1567149 | adenylate kinase 3-like 1                         | Ak311   | 29223  | 1,76 | down |
| 6586292 | 7277738 | 1567147 | adenylate kinase 3-like 1                         | Ak311   | 29223  | 1,52 | down |
| 5774829 | 7277738 | 1567144 | adenylate kinase 3-like 1                         | Ak311   | 29223  | 1,23 | up   |
| 6214954 | 7277738 | 1567148 | adenylate kinase 3-like 1                         | Ak311   | 29223  | 1,21 | down |
| 6629164 | 7277738 | 1567145 | adenylate kinase 3-like 1                         | Ak311   | 29223  | 1,15 | up   |
| 5714837 | 7277738 | 1567147 | adenylate kinase 3-like 1                         | Ak311   | 29223  | 1,06 | down |
| 6746468 | 7277738 | 1567146 | adenylate kinase 3-like 1                         | Ak311   | 29223  | 1,06 | up   |
| 6566542 | 7335637 | 1708462 | adhesion molecule, interacts with CXADR antigen 1 | Amica1  | 315610 | 1,40 | down |
| 5891084 | 7105289 | 1140773 | adiponectin receptor 1                            | Adipor1 | 289036 | 2,17 | down |
| 6253177 | 7105289 | 1140772 | adiponectin receptor 1                            | Adipor1 | 289036 | 1,42 | up   |
| 6234150 | 7105289 | 1140778 | adiponectin receptor 1                            | Adipor1 | 289036 | 1,19 | up   |
| 6098719 | 7105289 | 1140771 | adiponectin receptor 1                            | Adipor1 | 289036 | 1,17 | up   |
| 5781502 | 7105289 | 1140774 | adiponectin receptor 1                            | Adipor1 | 289036 | 1,14 | up   |
| 6263585 | 7105289 | 1140773 | adiponectin receptor 1                            | Adipor1 | 289036 | 1,12 | down |
| 6252984 | 7105289 | 1140777 | adiponectin receptor 1                            | Adipor1 | 289036 | 1,06 | down |
| 6278141 | 7105289 | 1140778 | adiponectin receptor 1                            | Adipor1 | 289036 | 1,06 | down |
| 6355997 | 7105289 | 1140775 | adiponectin receptor 1                            | Adipor1 | 289036 | 1,04 | down |
| 5734268 | 7105289 | 1140778 | adiponectin receptor 1                            | Adipor1 | 289036 | 1,01 | down |
| 5721237 | 7105289 | 1140776 | adiponectin receptor 1                            | Adipor1 | 289036 | 1,01 | up   |

|         |         |         |                                                     |         |        |      |      |
|---------|---------|---------|-----------------------------------------------------|---------|--------|------|------|
| 6300511 | 7236343 | 1464191 | ADP-ribosylation factor GTPase activating protein 1 | Arfgap1 | 246310 | 2,45 | down |
| 6645304 | 7236343 | 1464201 | ADP-ribosylation factor GTPase activating protein 1 | Arfgap1 | 246310 | 1,74 | down |
| 6503795 | 7236343 | 1464201 | ADP-ribosylation factor GTPase activating protein 1 | Arfgap1 | 246310 | 1,40 | down |
| 6171302 | 7236343 | 1464195 | ADP-ribosylation factor GTPase activating protein 1 | Arfgap1 | 246310 | 1,40 | up   |
| 5868829 | 7236343 | 1464201 | ADP-ribosylation factor GTPase activating protein 1 | Arfgap1 | 246310 | 1,26 | down |
| 5971534 | 7236343 | 1464193 | ADP-ribosylation factor GTPase activating protein 1 | Arfgap1 | 246310 | 1,19 | down |
| 6114393 | 7236343 | 1464196 | ADP-ribosylation factor GTPase activating protein 1 | Arfgap1 | 246310 | 1,18 | up   |
| 6186993 | 7236343 | 1464194 | ADP-ribosylation factor GTPase activating protein 1 | Arfgap1 | 246310 | 1,17 | up   |
| 5724646 | 7236343 | 1464203 | ADP-ribosylation factor GTPase activating protein 1 | Arfgap1 | 246310 | 1,10 | up   |
| 6580692 | 7236343 | 1464197 | ADP-ribosylation factor GTPase activating protein 1 | Arfgap1 | 246310 | 1,07 | up   |
| 6409187 | 7236343 | 1464202 | ADP-ribosylation factor GTPase activating protein 1 | Arfgap1 | 246310 | 1,06 | up   |
| 5776523 | 7236343 | 1464198 | ADP-ribosylation factor GTPase activating protein 1 | Arfgap1 | 246310 | 1,05 | up   |
| 6488817 | 7236343 | 1464201 | ADP-ribosylation factor GTPase activating protein 1 | Arfgap1 | 246310 | 1,04 | up   |
| 5807055 | 7236343 | 1464201 | ADP-ribosylation factor GTPase activating protein 1 | Arfgap1 | 246310 | 1,03 | up   |
| 6659628 | 7236343 | 1464199 | ADP-ribosylation factor GTPase activating protein 1 | Arfgap1 | 246310 | 1,03 | down |
| 6729536 | 7236343 | 1464200 | ADP-ribosylation factor GTPase activating protein 1 | Arfgap1 | 246310 | 1,02 | down |
| 5918089 | 7236343 | 1464192 | ADP-ribosylation factor GTPase activating protein 1 | Arfgap1 | 246310 | 1,00 | up   |
| 6150860 | 7369781 | 1795038 | ADP-ribosylation factor-like 13B                    | Arl13b  | 304037 | 2,17 | down |
| 5972866 | 7369781 | 1795031 | ADP-ribosylation factor-like 13B                    | Arl13b  | 304037 | 2,15 | up   |
| 6338455 | 7369781 | 1795029 | ADP-ribosylation factor-like 13B                    | Arl13b  | 304037 | 1,90 | up   |
| 6568790 | 7369781 | 1795035 | ADP-ribosylation factor-like 13B                    | Arl13b  | 304037 | 1,36 | up   |
| 5879365 | 7369781 | 1795030 | ADP-ribosylation factor-like 13B                    | Arl13b  | 304037 | 1,35 | down |
| 6314542 | 7369781 | 1795027 | ADP-ribosylation factor-like 13B                    | Arl13b  | 304037 | 1,21 | down |
| 6088616 | 7369781 | 1795038 | ADP-ribosylation factor-like 13B                    | Arl13b  | 304037 | 1,17 | down |
| 5767839 | 7369781 | 1795028 | ADP-ribosylation factor-like 13B                    | Arl13b  | 304037 | 1,12 | up   |
| 6336936 | 7369781 | 1795032 | ADP-ribosylation factor-like 13B                    | Arl13b  | 304037 | 1,10 | up   |
| 6590033 | 7369781 | 1795036 | ADP-ribosylation factor-like 13B                    | Arl13b  | 304037 | 1,03 | down |
| 6223895 | 7369781 | 1795025 | ADP-ribosylation factor-like 13B                    | Arl13b  | 304037 | 1,02 | up   |
| 6251070 | 7160453 | 1276369 | ADP-ribosylation factor-like 5B                     | Arl5b   | 364788 | 3,61 | up   |
| 5709799 | 7160453 | 1276370 | ADP-ribosylation factor-like 5B                     | Arl5b   | 364788 | 1,27 | down |
| 6196915 | 7160453 | 1276367 | ADP-ribosylation factor-like 5B                     | Arl5b   | 364788 | 1,26 | down |
| 5989881 | 7160453 | 1276365 | ADP-ribosylation factor-like 5B                     | Arl5b   | 364788 | 1,21 | up   |
| 5619996 | 7160453 | 1276369 | ADP-ribosylation factor-like 5B                     | Arl5b   | 364788 | 1,18 | up   |
| 6400060 | 7160453 | 1276368 | ADP-ribosylation factor-like 5B                     | Arl5b   | 364788 | 1,13 | up   |
| 5829878 | 7160453 | 1276366 | ADP-ribosylation factor-like 5B                     | Arl5b   | 364788 | 1,07 | down |
| 6267033 | 7160453 | 1276370 | ADP-ribosylation factor-like 5B                     | Arl5b   | 364788 | 1,06 | down |
| 5772837 | 7105375 | 1140962 | ADP-ribosylation factor-like 8A                     | Arl8a   | 498234 | 4,05 | down |
| 5879878 | 7105375 | 1140967 | ADP-ribosylation factor-like 8A                     | Arl8a   | 498234 | 1,34 | up   |
| 6281000 | 7105375 | 1140965 | ADP-ribosylation factor-like 8A                     | Arl8a   | 498234 | 1,26 | up   |
| 6507629 | 7105375 | 1140968 | ADP-ribosylation factor-like 8A                     | Arl8a   | 498234 | 1,15 | up   |
| 6549266 | 7105375 | 1140964 | ADP-ribosylation factor-like 8A                     | Arl8a   | 498234 | 1,13 | up   |
| 6672387 | 7105375 | 1140963 | ADP-ribosylation factor-like 8A                     | Arl8a   | 498234 | 1,09 | down |
| 5802298 | 7105375 | 1140966 | ADP-ribosylation factor-like 8A                     | Arl8a   | 498234 | 1,05 | up   |
| 6574963 | 7105375 | 1140962 | ADP-ribosylation factor-like 8A                     | Arl8a   | 498234 | 1,05 | down |
| 5775851 | 7105375 | 1140968 | ADP-ribosylation factor-like 8A                     | Arl8a   | 498234 | 1,04 | up   |
| 6733914 | 7245118 | 1485651 | adrenergic, alpha-1D-, receptor                     | Adra1d  | 29413  | 2,10 | up   |
| 5640185 | 7245118 | 1485652 | adrenergic, alpha-1D-, receptor                     | Adra1d  | 29413  | 1,80 | down |
| 5742033 | 7245118 | 1485652 | adrenergic, alpha-1D-, receptor                     | Adra1d  | 29413  | 1,21 | down |
| 6615964 | 7245118 | 1485650 | adrenergic, alpha-1D-, receptor                     | Adra1d  | 29413  | 1,20 | down |
| 6145353 | 7245118 | 1485653 | adrenergic, alpha-1D-, receptor                     | Adra1d  | 29413  | 1,12 | up   |
| 6398445 | 7245118 | 1485653 | adrenergic, alpha-1D-, receptor                     | Adra1d  | 29413  | 1,11 | down |
| 6540916 | 7245118 | 1485653 | adrenergic, alpha-1D-, receptor                     | Adra1d  | 29413  | 1,11 | down |
| 6212543 | 7245118 | 1485652 | adrenergic, alpha-1D-, receptor                     | Adra1d  | 29413  | 1,08 | down |
| 6663635 | 7245118 | 1485653 | adrenergic, alpha-1D-, receptor                     | Adra1d  | 29413  | 1,07 | up   |
| 5972128 | 7245118 | 1485651 | adrenergic, alpha-1D-, receptor                     | Adra1d  | 29413  | 1,04 | up   |
| 6198700 | 7319785 | 1671896 | adrenomedullin 2                                    | Adm2    | 399475 | 2,16 | up   |
| 6743144 | 7319785 | 1671893 | adrenomedullin 2                                    | Adm2    | 399475 | 1,35 | down |



|         |         |         |                                     |       |        |      |      |
|---------|---------|---------|-------------------------------------|-------|--------|------|------|
| 6663844 | 7319785 | 1671896 | adrenomedullin 2                    | Adm2  | 399475 | 1,25 | up   |
| 6484671 | 7319785 | 1671894 | adrenomedullin 2                    | Adm2  | 399475 | 1,18 | up   |
| 6509790 | 7319785 | 1671895 | adrenomedullin 2                    | Adm2  | 399475 | 1,16 | up   |
| 6675710 | 7319785 | 1671895 | adrenomedullin 2                    | Adm2  | 399475 | 1,10 | down |
| 5698540 | 7319785 | 1671895 | adrenomedullin 2                    | Adm2  | 399475 | 1,02 | down |
| 5934295 | 7319785 | 1671893 | adrenomedullin 2                    | Adm2  | 399475 | 1,00 | down |
| 6326835 | 7128704 | 1198032 | aftiphilin                          | Aftph | 305544 | 2,79 | down |
| 6201214 | 7128704 | 1198032 | aftiphilin                          | Aftph | 305544 | 1,39 | down |
| 6439762 | 7033297 | 969403  | aggrecan                            | Acan  | 58968  | 2,11 | up   |
| 6569029 | 7033297 | 969410  | aggrecan                            | Acan  | 58968  | 2,08 | down |
| 5933922 | 7033297 | 969406  | aggrecan                            | Acan  | 58968  | 1,49 | down |
| 6613875 | 7033297 | 969409  | aggrecan                            | Acan  | 58968  | 1,48 | up   |
| 5679642 | 7033297 | 969413  | aggrecan                            | Acan  | 58968  | 1,43 | down |
| 6498666 | 7033297 | 969411  | aggrecan                            | Acan  | 58968  | 1,41 | down |
| 5792164 | 7033297 | 969408  | aggrecan                            | Acan  | 58968  | 1,37 | down |
| 6617722 | 7033297 | 969408  | aggrecan                            | Acan  | 58968  | 1,35 | up   |
| 5941447 | 7033297 | 969408  | aggrecan                            | Acan  | 58968  | 1,33 | up   |
| 5977101 | 7033297 | 969398  | aggrecan                            | Acan  | 58968  | 1,21 | up   |
| 6675000 | 7033297 | 969408  | aggrecan                            | Acan  | 58968  | 1,19 | down |
| 5915368 | 7033297 | 969399  | aggrecan                            | Acan  | 58968  | 1,15 | down |
| 6146374 | 7033297 | 969397  | aggrecan                            | Acan  | 58968  | 1,10 | down |
| 6572675 | 7033297 | 969408  | aggrecan                            | Acan  | 58968  | 1,09 | down |
| 6174680 | 7033297 | 969414  | aggrecan                            | Acan  | 58968  | 1,09 | up   |
| 5885276 | 7033297 | 969407  | aggrecan                            | Acan  | 58968  | 1,08 | up   |
| 6541624 | 7033297 | 969408  | aggrecan                            | Acan  | 58968  | 1,08 | down |
| 5728561 | 7033297 | 969412  | aggrecan                            | Acan  | 58968  | 1,06 | down |
| 6010643 | 7033297 | 969404  | aggrecan                            | Acan  | 58968  | 1,05 | down |
| 6054862 | 7033297 | 969405  | aggrecan                            | Acan  | 58968  | 1,05 | down |
| 6703969 | 7033297 | 969408  | aggrecan                            | Acan  | 58968  | 1,04 | up   |
| 6181279 | 7033297 | 969408  | aggrecan                            | Acan  | 58968  | 1,04 | down |
| 6106056 | 7033297 | 969401  | aggrecan                            | Acan  | 58968  | 1,04 | up   |
| 6607326 | 7033297 | 969400  | aggrecan                            | Acan  | 58968  | 1,03 | up   |
| 6107099 | 7033297 | 969402  | aggrecan                            | Acan  | 58968  | 1,02 | up   |
| 5799724 | 7281188 | 1575804 | agmatine ureohydrolase (agmatinase) | Agmat | 298607 | 1,65 | down |
| 5694463 | 7281188 | 1575805 | agmatine ureohydrolase (agmatinase) | Agmat | 298607 | 1,39 | down |
| 6019617 | 7281188 | 1575806 | agmatine ureohydrolase (agmatinase) | Agmat | 298607 | 1,33 | up   |
| 6554656 | 7281188 | 1575803 | agmatine ureohydrolase (agmatinase) | Agmat | 298607 | 1,31 | down |
| 6270867 | 7281188 | 1575810 | agmatine ureohydrolase (agmatinase) | Agmat | 298607 | 1,16 | down |
| 6301458 | 7281188 | 1575803 | agmatine ureohydrolase (agmatinase) | Agmat | 298607 | 1,13 | down |
| 6345874 | 7281188 | 1575808 | agmatine ureohydrolase (agmatinase) | Agmat | 298607 | 1,06 | up   |
| 5641805 | 7281188 | 1575811 | agmatine ureohydrolase (agmatinase) | Agmat | 298607 | 1,04 | up   |
| 5728878 | 7281188 | 1575803 | agmatine ureohydrolase (agmatinase) | Agmat | 298607 | 1,04 | down |
| 6103169 | 7281188 | 1575807 | agmatine ureohydrolase (agmatinase) | Agmat | 298607 | 1,02 | down |
| 5660723 | 7293870 | 1605859 | agrin                               | Agrn  | 25592  | 3,74 | down |
| 5814122 | 7293870 | 1605884 | agrin                               | Agrn  | 25592  | 2,86 | down |
| 6006194 | 7293870 | 1605858 | agrin                               | Agrn  | 25592  | 2,70 | down |
| 6288380 | 7293870 | 1605884 | agrin                               | Agrn  | 25592  | 2,60 | down |
| 6392617 | 7293870 | 1605868 | agrin                               | Agrn  | 25592  | 2,09 | down |
| 5908888 | 7293870 | 1605856 | agrin                               | Agrn  | 25592  | 2,04 | down |
| 5778430 | 7293870 | 1605859 | agrin                               | Agrn  | 25592  | 2,01 | down |
| 6291195 | 7293870 | 1605874 | agrin                               | Agrn  | 25592  | 1,64 | up   |
| 5957655 | 7293870 | 1605877 | agrin                               | Agrn  | 25592  | 1,61 | up   |
| 5988385 | 7293870 | 1605863 | agrin                               | Agrn  | 25592  | 1,52 | up   |
| 6598535 | 7293870 | 1605867 | agrin                               | Agrn  | 25592  | 1,48 | up   |
| 6360333 | 7293870 | 1605878 | agrin                               | Agrn  | 25592  | 1,46 | down |
| 5895251 | 7293870 | 1605853 | agrin                               | Agrn  | 25592  | 1,42 | up   |
| 6333688 | 7293870 | 1605882 | agrin                               | Agrn  | 25592  | 1,42 | down |

|         |         |         |                                   |        |        |      |      |
|---------|---------|---------|-----------------------------------|--------|--------|------|------|
| 6399048 | 7293870 | 1605877 | agrin                             | Agrrn  | 25592  | 1,42 | up   |
| 6316997 | 7293870 | 1605855 | agrin                             | Agrrn  | 25592  | 1,40 | down |
| 6041590 | 7293870 | 1605883 | agrin                             | Agrrn  | 25592  | 1,40 | down |
| 5839298 | 7293870 | 1605857 | agrin                             | Agrrn  | 25592  | 1,39 | down |
| 6020066 | 7293870 | 1605861 | agrin                             | Agrrn  | 25592  | 1,35 | down |
| 5858959 | 7293870 | 1605875 | agrin                             | Agrrn  | 25592  | 1,29 | up   |
| 5811015 | 7293870 | 1605879 | agrin                             | Agrrn  | 25592  | 1,28 | up   |
| 6716412 | 7293870 | 1605870 | agrin                             | Agrrn  | 25592  | 1,27 | up   |
| 6496651 | 7293870 | 1605881 | agrin                             | Agrrn  | 25592  | 1,27 | up   |
| 6390742 | 7293870 | 1605876 | agrin                             | Agrrn  | 25592  | 1,26 | up   |
| 6027515 | 7293870 | 1605873 | agrin                             | Agrrn  | 25592  | 1,22 | down |
| 6511366 | 7293870 | 1605862 | agrin                             | Agrrn  | 25592  | 1,22 | down |
| 5667382 | 7293870 | 1605854 | agrin                             | Agrrn  | 25592  | 1,21 | down |
| 6272933 | 7293870 | 1605866 | agrin                             | Agrrn  | 25592  | 1,21 | down |
| 5698755 | 7293870 | 1605871 | agrin                             | Agrrn  | 25592  | 1,21 | up   |
| 5711304 | 7293870 | 1605852 | agrin                             | Agrrn  | 25592  | 1,19 | up   |
| 5952972 | 7293870 | 1605851 | agrin                             | Agrrn  | 25592  | 1,19 | up   |
| 6292571 | 7293870 | 1605878 | agrin                             | Agrrn  | 25592  | 1,18 | up   |
| 5909265 | 7293870 | 1605850 | agrin                             | Agrrn  | 25592  | 1,14 | down |
| 6420669 | 7293870 | 1605848 | agrin                             | Agrrn  | 25592  | 1,13 | up   |
| 5872636 | 7293870 | 1605864 | agrin                             | Agrrn  | 25592  | 1,13 | down |
| 5684722 | 7293870 | 1605880 | agrin                             | Agrrn  | 25592  | 1,13 | up   |
| 6566305 | 7293870 | 1605871 | agrin                             | Agrrn  | 25592  | 1,11 | up   |
| 6277750 | 7293870 | 1605882 | agrin                             | Agrrn  | 25592  | 1,06 | up   |
| 5830467 | 7293870 | 1605872 | agrin                             | Agrrn  | 25592  | 1,05 | up   |
| 6710294 | 7293870 | 1605868 | agrin                             | Agrrn  | 25592  | 1,05 | up   |
| 5759961 | 7293870 | 1605859 | agrin                             | Agrrn  | 25592  | 1,05 | down |
| 5968399 | 7293870 | 1605869 | agrin                             | Agrrn  | 25592  | 1,04 | down |
| 5640529 | 7293870 | 1605858 | agrin                             | Agrrn  | 25592  | 1,04 | down |
| 6195123 | 7293870 | 1605849 | agrin                             | Agrrn  | 25592  | 1,04 | down |
| 6462587 | 7293870 | 1605882 | agrin                             | Agrrn  | 25592  | 1,04 | up   |
| 5851446 | 7293870 | 1605865 | agrin                             | Agrrn  | 25592  | 1,02 | up   |
| 5700491 | 7293870 | 1605860 | agrin                             | Agrrn  | 25592  | 1,00 | down |
| 6742736 | 7039589 | 984514  | AHNAK nucleoprotein               | Ahnak  | 191572 | 1,30 | down |
| 5848188 | 7142414 | 1231777 | AIG2-like domain 1                | A2ld1  | 290500 | 2,58 | down |
| 5854804 | 7142414 | 1231780 | AIG2-like domain 1                | A2ld1  | 290500 | 1,74 | up   |
| 6475035 | 7142414 | 1231781 | AIG2-like domain 1                | A2ld1  | 290500 | 1,44 | up   |
| 6714349 | 7142414 | 1231777 | AIG2-like domain 1                | A2ld1  | 290500 | 1,10 | down |
| 5835966 | 7142414 | 1231782 | AIG2-like domain 1                | A2ld1  | 290500 | 1,01 | down |
| 6434838 | 7199758 | 1375241 | alcohol dehydrogenase 1 (class I) | Adh1   | 24172  | 2,20 | up   |
| 6152639 | 7199758 | 1375240 | alcohol dehydrogenase 1 (class I) | Adh1   | 24172  | 2,00 | down |
| 6225541 | 7199758 | 1375243 | alcohol dehydrogenase 1 (class I) | Adh1   | 24172  | 1,86 | down |
| 6178871 | 7199758 | 1375242 | alcohol dehydrogenase 1 (class I) | Adh1   | 24172  | 1,44 | down |
| 6293576 | 7199758 | 1375239 | alcohol dehydrogenase 1 (class I) | Adh1   | 24172  | 1,32 | down |
| 6100515 | 7199758 | 1375239 | alcohol dehydrogenase 1 (class I) | Adh1   | 24172  | 1,20 | up   |
| 6117847 | 7199758 | 1375238 | alcohol dehydrogenase 1 (class I) | Adh1   | 24172  | 1,18 | down |
| 5650082 | 7199758 | 1375238 | alcohol dehydrogenase 1 (class I) | Adh1   | 24172  | 1,15 | down |
| 6077703 | 7199758 | 1375236 | alcohol dehydrogenase 1 (class I) | Adh1   | 24172  | 1,14 | up   |
| 6214089 | 7199758 | 1375239 | alcohol dehydrogenase 1 (class I) | Adh1   | 24172  | 1,09 | up   |
| 5754696 | 7199758 | 1375237 | alcohol dehydrogenase 1 (class I) | Adh1   | 24172  | 1,06 | up   |
| 5723540 | 7199758 | 1375235 | alcohol dehydrogenase 1 (class I) | Adh1   | 24172  | 1,03 | down |
| 6624406 | 7199758 | 1375243 | alcohol dehydrogenase 1 (class I) | Adh1   | 24172  | 1,02 | up   |
| 5864245 | 7199758 | 1375237 | alcohol dehydrogenase 1 (class I) | Adh1   | 24172  | 1,02 | down |
| 6695936 | 7354870 | 1756902 | aldehyde oxidase 3-like 1         | Aox3l1 | 316421 | 2,22 | down |
| 5619842 | 7354870 | 1756915 | aldehyde oxidase 3-like 1         | Aox3l1 | 316421 | 1,85 | up   |
| 6571688 | 7354870 | 1756922 | aldehyde oxidase 3-like 1         | Aox3l1 | 316421 | 1,84 | up   |
| 6637758 | 7354870 | 1756899 | aldehyde oxidase 3-like 1         | Aox3l1 | 316421 | 1,62 | down |

|         |         |         |                                                             |         |        |      |      |
|---------|---------|---------|-------------------------------------------------------------|---------|--------|------|------|
| 6627213 | 7354870 | 1756930 | aldehyde oxidase 3-like 1                                   | Aox3l1  | 316421 | 1,54 | up   |
| 5891489 | 7354870 | 1756904 | aldehyde oxidase 3-like 1                                   | Aox3l1  | 316421 | 1,53 | down |
| 6675129 | 7354870 | 1756919 | aldehyde oxidase 3-like 1                                   | Aox3l1  | 316421 | 1,53 | up   |
| 5735506 | 7354870 | 1756928 | aldehyde oxidase 3-like 1                                   | Aox3l1  | 316421 | 1,53 | up   |
| 6578273 | 7354870 | 1756929 | aldehyde oxidase 3-like 1                                   | Aox3l1  | 316421 | 1,49 | down |
| 6069901 | 7354870 | 1756916 | aldehyde oxidase 3-like 1                                   | Aox3l1  | 316421 | 1,48 | up   |
| 6521756 | 7354870 | 1756901 | aldehyde oxidase 3-like 1                                   | Aox3l1  | 316421 | 1,38 | down |
| 6087603 | 7354870 | 1756931 | aldehyde oxidase 3-like 1                                   | Aox3l1  | 316421 | 1,27 | down |
| 5739806 | 7354870 | 1756925 | aldehyde oxidase 3-like 1                                   | Aox3l1  | 316421 | 1,25 | up   |
| 5958793 | 7354870 | 1756918 | aldehyde oxidase 3-like 1                                   | Aox3l1  | 316421 | 1,24 | down |
| 6526460 | 7354870 | 1756921 | aldehyde oxidase 3-like 1                                   | Aox3l1  | 316421 | 1,22 | up   |
| 6151096 | 7354870 | 1756923 | aldehyde oxidase 3-like 1                                   | Aox3l1  | 316421 | 1,21 | up   |
| 6467918 | 7354870 | 1756926 | aldehyde oxidase 3-like 1                                   | Aox3l1  | 316421 | 1,17 | up   |
| 5678024 | 7354870 | 1756927 | aldehyde oxidase 3-like 1                                   | Aox3l1  | 316421 | 1,16 | down |
| 6266810 | 7354870 | 1756906 | aldehyde oxidase 3-like 1                                   | Aox3l1  | 316421 | 1,11 | up   |
| 5839925 | 7354870 | 1756924 | aldehyde oxidase 3-like 1                                   | Aox3l1  | 316421 | 1,09 | down |
| 6071714 | 7354870 | 1756900 | aldehyde oxidase 3-like 1                                   | Aox3l1  | 316421 | 1,09 | up   |
| 6371612 | 7354870 | 1756912 | aldehyde oxidase 3-like 1                                   | Aox3l1  | 316421 | 1,09 | down |
| 6292480 | 7354870 | 1756914 | aldehyde oxidase 3-like 1                                   | Aox3l1  | 316421 | 1,09 | down |
| 6638790 | 7354870 | 1756908 | aldehyde oxidase 3-like 1                                   | Aox3l1  | 316421 | 1,08 | up   |
| 6358379 | 7354870 | 1756920 | aldehyde oxidase 3-like 1                                   | Aox3l1  | 316421 | 1,08 | down |
| 6614186 | 7354870 | 1756898 | aldehyde oxidase 3-like 1                                   | Aox3l1  | 316421 | 1,07 | up   |
| 6263715 | 7354870 | 1756909 | aldehyde oxidase 3-like 1                                   | Aox3l1  | 316421 | 1,06 | up   |
| 5677438 | 7354870 | 1756911 | aldehyde oxidase 3-like 1                                   | Aox3l1  | 316421 | 1,04 | up   |
| 6522410 | 7354870 | 1756907 | aldehyde oxidase 3-like 1                                   | Aox3l1  | 316421 | 1,04 | up   |
| 6435451 | 7354870 | 1756913 | aldehyde oxidase 3-like 1                                   | Aox3l1  | 316421 | 1,04 | down |
| 5787683 | 7354870 | 1756903 | aldehyde oxidase 3-like 1                                   | Aox3l1  | 316421 | 1,03 | down |
| 6670970 | 7354870 | 1756910 | aldehyde oxidase 3-like 1                                   | Aox3l1  | 316421 | 1,02 | down |
| 6146529 | 7354870 | 1756932 | aldehyde oxidase 3-like 1                                   | Aox3l1  | 316421 | 1,02 | up   |
| 5819769 | 7354870 | 1756905 | aldehyde oxidase 3-like 1                                   | Aox3l1  | 316421 | 1,01 | down |
| 6565854 | 7354870 | 1756917 | aldehyde oxidase 3-like 1                                   | Aox3l1  | 316421 | 1,00 | down |
| 6585156 | 7252383 | 1503522 | aldo-keto reductase family 1, member B10 (aldose reductase) | Akr1b10 | 296972 | 6,11 | up   |
| 6698449 | 7252383 | 1503523 | aldo-keto reductase family 1, member B10 (aldose reductase) | Akr1b10 | 296972 | 4,10 | up   |
| 5990472 | 7252383 | 1503527 | aldo-keto reductase family 1, member B10 (aldose reductase) | Akr1b10 | 296972 | 1,93 | down |
| 5902140 | 7252383 | 1503521 | aldo-keto reductase family 1, member B10 (aldose reductase) | Akr1b10 | 296972 | 1,67 | down |
| 6464522 | 7252383 | 1503528 | aldo-keto reductase family 1, member B10 (aldose reductase) | Akr1b10 | 296972 | 1,40 | down |
| 5898936 | 7252383 | 1503520 | aldo-keto reductase family 1, member B10 (aldose reductase) | Akr1b10 | 296972 | 1,35 | down |
| 5980539 | 7252383 | 1503524 | aldo-keto reductase family 1, member B10 (aldose reductase) | Akr1b10 | 296972 | 1,24 | down |
| 5761227 | 7252383 | 1503527 | aldo-keto reductase family 1, member B10 (aldose reductase) | Akr1b10 | 296972 | 1,21 | down |
| 5861155 | 7252383 | 1503518 | aldo-keto reductase family 1, member B10 (aldose reductase) | Akr1b10 | 296972 | 1,17 | down |
| 5636284 | 7252383 | 1503517 | aldo-keto reductase family 1, member B10 (aldose reductase) | Akr1b10 | 296972 | 1,17 | down |
| 5850008 | 7252383 | 1503519 | aldo-keto reductase family 1, member B10 (aldose reductase) | Akr1b10 | 296972 | 1,10 | up   |
| 6375636 | 7252383 | 1503526 | aldo-keto reductase family 1, member B10 (aldose reductase) | Akr1b10 | 296972 | 1,03 | up   |
| 6443602 | 7252383 | 1503525 | aldo-keto reductase family 1, member B10 (aldose reductase) | Akr1b10 | 296972 | 1,01 | up   |
| 6599369 | 7252396 | 1503547 | aldo-keto reductase family 1, member B7                     | Akr1b7  | 116463 | 2,75 | up   |
| 6385005 | 7252396 | 1503548 | aldo-keto reductase family 1, member B7                     | Akr1b7  | 116463 | 2,15 | up   |
| 6672602 | 7252396 | 1503551 | aldo-keto reductase family 1, member B7                     | Akr1b7  | 116463 | 1,85 | down |
| 5743554 | 7252396 | 1503552 | aldo-keto reductase family 1, member B7                     | Akr1b7  | 116463 | 1,54 | down |
| 5642034 | 7252396 | 1503544 | aldo-keto reductase family 1, member B7                     | Akr1b7  | 116463 | 1,39 | down |
| 6603052 | 7252396 | 1503542 | aldo-keto reductase family 1, member B7                     | Akr1b7  | 116463 | 1,29 | down |
| 6314432 | 7252396 | 1503542 | aldo-keto reductase family 1, member B7                     | Akr1b7  | 116463 | 1,27 | down |
| 6608194 | 7252396 | 1503550 | aldo-keto reductase family 1, member B7                     | Akr1b7  | 116463 | 1,19 | up   |
| 6589752 | 7252396 | 1503543 | aldo-keto reductase family 1, member B7                     | Akr1b7  | 116463 | 1,12 | down |
| 6613605 | 7252396 | 1503552 | aldo-keto reductase family 1, member B7                     | Akr1b7  | 116463 | 1,10 | down |
| 5639352 | 7252396 | 1503545 | aldo-keto reductase family 1, member B7                     | Akr1b7  | 116463 | 1,07 | up   |
| 6014573 | 7252396 | 1503546 | aldo-keto reductase family 1, member B7                     | Akr1b7  | 116463 | 1,02 | down |
| 6333482 | 7252396 | 1503549 | aldo-keto reductase family 1, member B7                     | Akr1b7  | 116463 | 1,01 | up   |

|         |         |         |                                                                                                     |                                              |        |      |      |
|---------|---------|---------|-----------------------------------------------------------------------------------------------------|----------------------------------------------|--------|------|------|
| 5772486 | 7252382 | 1503513 | aldo-keto reductase family 1, member B8                                                             | Akr1b8                                       | 286921 | 3,87 | up   |
| 6017805 | 7252382 | 1503512 | aldo-keto reductase family 1, member B8                                                             | Akr1b8                                       | 286921 | 3,60 | down |
| 6406425 | 7252382 | 1503506 | aldo-keto reductase family 1, member B8                                                             | Akr1b8                                       | 286921 | 3,32 | down |
| 6537267 | 7252382 | 1503508 | aldo-keto reductase family 1, member B8                                                             | Akr1b8                                       | 286921 | 2,74 | up   |
| 6471856 | 7252382 | 1503509 | aldo-keto reductase family 1, member B8                                                             | Akr1b8                                       | 286921 | 2,06 | up   |
| 6061149 | 7252382 | 1503515 | aldo-keto reductase family 1, member B8                                                             | Akr1b8                                       | 286921 | 1,78 | up   |
| 6705980 | 7252382 | 1503506 | aldo-keto reductase family 1, member B8                                                             | Akr1b8                                       | 286921 | 1,63 | down |
| 6490386 | 7252382 | 1503514 | aldo-keto reductase family 1, member B8                                                             | Akr1b8                                       | 286921 | 1,37 | up   |
| 6150769 | 7252382 | 1503511 | aldo-keto reductase family 1, member B8                                                             | Akr1b8                                       | 286921 | 1,37 | up   |
| 6142203 | 7330203 | 1695775 | alpha 1,4-galactosyltransferase                                                                     | A4galt                                       | 63888  | 2,03 | down |
| 6546229 | 7330203 | 1695775 | alpha 1,4-galactosyltransferase                                                                     | A4galt                                       | 63888  | 1,73 | down |
| 6375336 | 7330203 | 1695775 | alpha 1,4-galactosyltransferase                                                                     | A4galt                                       | 63888  | 1,45 | up   |
| 6242600 | 7330203 | 1695775 | alpha 1,4-galactosyltransferase                                                                     | A4galt                                       | 63888  | 1,28 | up   |
| 6115214 | 7330203 | 1695775 | alpha 1,4-galactosyltransferase                                                                     | A4galt                                       | 63888  | 1,24 | up   |
| 5652348 | 7330203 | 1695775 | alpha 1,4-galactosyltransferase                                                                     | A4galt                                       | 63888  | 1,17 | down |
| 5912309 | 7330203 | 1695775 | alpha 1,4-galactosyltransferase                                                                     | A4galt                                       | 63888  | 1,08 | up   |
| 6197928 | 7330203 | 1695774 | alpha 1,4-galactosyltransferase                                                                     | A4galt                                       | 63888  | 1,03 | down |
| 5656809 | 7287119 | 1589558 | alpha-2u globulin PGCL2 /// alpha-2u globulin PGCL1 /// alpha2u globulin                            | LOC259246 /// 09 /// 259246 /// 29           |        | 1,47 | down |
| 5651916 | 7287119 | 1589563 | alpha-2u globulin PGCL2 /// alpha-2u globulin PGCL1 /// alpha-2u globulin PGCL4                     | 109 /// LOC259246 09 /// 259246 /// 25       |        | 1,10 | down |
| 5685518 | 7287119 | 1589561 | alpha-2u globulin PGCL2 /// alpha-2u globulin PGCL1 /// alpha-2u-globulin (L type)                  | LOC259246 /// 09 /// 259246 /// 29           |        | 1,45 | up   |
| 6167549 | 7287119 | 1589563 | alpha-2u globulin PGCL2 /// alpha-2u globulin PGCL1 /// alpha-2u-globulin (L type)                  | LOC259246 /// 09 /// 259246 /// 29           |        | 1,04 | down |
| 6223095 | 7287119 | 1589560 | alpha-2u globulin PGCL3 /// major urinary protein 4 /// alpha-2u globulin PGCL2 /// alpha-2u globul | 18109 /// LOC25924 298109 /// 259246         |        | 1,09 | down |
| 6275685 | 7287119 | 1589559 | alpha-2u globulin PGCL3 /// major urinary protein 4 /// alpha-2u globulin PGCL2 /// alpha-2u globul | 18109 /// LOC259246 /// 09 /// 259246 /// 29 |        | 1,41 | up   |
| 5747738 | 7287119 | 1589557 | alpha-2u-globulin (L type) /// alpha-2u globulin PGCL4                                              | LOC298116 /// Obp 298116 /// 259247          |        | 2,40 | up   |
| 6428332 | 7213945 | 1407837 | alpha-kinase 1                                                                                      | Alpk1                                        | 310879 | 1,41 | up   |
| 5829989 | 7213945 | 1407839 | alpha-kinase 1                                                                                      | Alpk1                                        | 310879 | 1,36 | up   |
| 5773521 | 7213945 | 1407853 | alpha-kinase 1                                                                                      | Alpk1                                        | 310879 | 1,27 | up   |
| 6288029 | 7213945 | 1407838 | alpha-kinase 1                                                                                      | Alpk1                                        | 310879 | 1,20 | up   |
| 5676307 | 7213945 | 1407850 | alpha-kinase 1                                                                                      | Alpk1                                        | 310879 | 1,13 | down |
| 6418702 | 7213945 | 1407842 | alpha-kinase 1                                                                                      | Alpk1                                        | 310879 | 1,12 | down |
| 6726522 | 7213945 | 1407838 | alpha-kinase 1                                                                                      | Alpk1                                        | 310879 | 1,12 | up   |
| 6395115 | 7033504 | 969868  | alpha-kinase 3                                                                                      | Alpk3                                        | 365298 | 1,48 | up   |
| 5776270 | 7190677 | 1351670 | alpha-methylacyl-CoA racemase                                                                       | Amacr                                        | 25284  | 2,81 | down |
| 6312696 | 7190677 | 1351673 | alpha-methylacyl-CoA racemase                                                                       | Amacr                                        | 25284  | 1,56 | down |
| 6319595 | 7190677 | 1351671 | alpha-methylacyl-CoA racemase                                                                       | Amacr                                        | 25284  | 1,37 | up   |
| 6494857 | 7190677 | 1351672 | alpha-methylacyl-CoA racemase                                                                       | Amacr                                        | 25284  | 1,14 | up   |
| 6371392 | 7190677 | 1351674 | alpha-methylacyl-CoA racemase                                                                       | Amacr                                        | 25284  | 1,06 | up   |
| 6329931 | 7190677 | 1351675 | alpha-methylacyl-CoA racemase                                                                       | Amacr                                        | 25284  | 1,02 | down |
| 5965445 | 7340757 | 1721909 | ALS2 C-terminal like                                                                                | Als2cl                                       | 316017 | 2,05 | up   |
| 5977888 | 7340757 | 1721909 | ALS2 C-terminal like                                                                                | Als2cl                                       | 316017 | 1,24 | up   |
| 6080493 | 7340757 | 1721881 | ALS2 C-terminal like                                                                                | Als2cl                                       | 316017 | 1,22 | up   |
| 6285132 | 7340757 | 1721909 | ALS2 C-terminal like                                                                                | Als2cl                                       | 316017 | 1,20 | down |
| 5760922 | 7349751 | 1744416 | aminoacylase 1                                                                                      | Acy1                                         | 300981 | 2,31 | down |
| 6337118 | 7349751 | 1744405 | aminoacylase 1                                                                                      | Acy1                                         | 300981 | 2,12 | up   |
| 5649661 | 7349751 | 1744408 | aminoacylase 1                                                                                      | Acy1                                         | 300981 | 1,48 | up   |
| 6225794 | 7349751 | 1744411 | aminoacylase 1                                                                                      | Acy1                                         | 300981 | 1,37 | down |
| 6207850 | 7349751 | 1744403 | aminoacylase 1                                                                                      | Acy1                                         | 300981 | 1,35 | down |
| 6556839 | 7349751 | 1744417 | aminoacylase 1                                                                                      | Acy1                                         | 300981 | 1,28 | up   |
| 5624146 | 7349751 | 1744413 | aminoacylase 1                                                                                      | Acy1                                         | 300981 | 1,22 | down |
| 6294452 | 7349751 | 1744415 | aminoacylase 1                                                                                      | Acy1                                         | 300981 | 1,21 | up   |
| 5922161 | 7349751 | 1744406 | aminoacylase 1                                                                                      | Acy1                                         | 300981 | 1,21 | up   |
| 6674735 | 7349751 | 1744414 | aminoacylase 1                                                                                      | Acy1                                         | 300981 | 1,19 | down |
| 6419327 | 7349751 | 1744410 | aminoacylase 1                                                                                      | Acy1                                         | 300981 | 1,18 | down |
| 6529247 | 7349751 | 1744412 | aminoacylase 1                                                                                      | Acy1                                         | 300981 | 1,13 | up   |
| 6204660 | 7349751 | 1744404 | aminoacylase 1                                                                                      | Acy1                                         | 300981 | 1,11 | down |
| 6665777 | 7349751 | 1744409 | aminoacylase 1                                                                                      | Acy1                                         | 300981 | 1,09 | up   |
| 5842878 | 7349751 | 1744407 | aminoacylase 1                                                                                      | Acy1                                         | 300981 | 1,04 | up   |

|         |         |         |                                                                                   |         |        |      |      |
|---------|---------|---------|-----------------------------------------------------------------------------------|---------|--------|------|------|
| 6459243 | 7117813 | 1171709 | aminoadipate-semialdehyde dehydrogenase                                           | Aasdh   | 364136 | 2,13 | up   |
| 6202609 | 7117813 | 1171708 | aminoadipate-semialdehyde dehydrogenase                                           | Aasdh   | 364136 | 2,02 | down |
| 5648851 | 7117813 | 1171717 | aminoadipate-semialdehyde dehydrogenase                                           | Aasdh   | 364136 | 1,53 | down |
| 5806076 | 7117813 | 1171716 | aminoadipate-semialdehyde dehydrogenase                                           | Aasdh   | 364136 | 1,47 | down |
| 6012171 | 7117813 | 1171711 | aminoadipate-semialdehyde dehydrogenase                                           | Aasdh   | 364136 | 1,47 | up   |
| 5618383 | 7117813 | 1171703 | aminoadipate-semialdehyde dehydrogenase                                           | Aasdh   | 364136 | 1,32 | down |
| 5919575 | 7117813 | 1171704 | aminoadipate-semialdehyde dehydrogenase                                           | Aasdh   | 364136 | 1,30 | down |
| 5921041 | 7117813 | 1171710 | aminoadipate-semialdehyde dehydrogenase                                           | Aasdh   | 364136 | 1,29 | up   |
| 6326350 | 7117813 | 1171712 | aminoadipate-semialdehyde dehydrogenase                                           | Aasdh   | 364136 | 1,27 | up   |
| 5641253 | 7117813 | 1171702 | aminoadipate-semialdehyde dehydrogenase                                           | Aasdh   | 364136 | 1,26 | up   |
| 6097498 | 7117813 | 1171704 | aminoadipate-semialdehyde dehydrogenase                                           | Aasdh   | 364136 | 1,22 | down |
| 5776274 | 7117813 | 1171702 | aminoadipate-semialdehyde dehydrogenase                                           | Aasdh   | 364136 | 1,20 | up   |
| 6278073 | 7117813 | 1171713 | aminoadipate-semialdehyde dehydrogenase                                           | Aasdh   | 364136 | 1,19 | up   |
| 6008325 | 7117813 | 1171719 | aminoadipate-semialdehyde dehydrogenase                                           | Aasdh   | 364136 | 1,16 | down |
| 5657822 | 7117813 | 1171707 | aminoadipate-semialdehyde dehydrogenase                                           | Aasdh   | 364136 | 1,16 | up   |
| 6689708 | 7117813 | 1171719 | aminoadipate-semialdehyde dehydrogenase                                           | Aasdh   | 364136 | 1,12 | up   |
| 6411087 | 7117813 | 1171704 | aminoadipate-semialdehyde dehydrogenase                                           | Aasdh   | 364136 | 1,11 | up   |
| 6000051 | 7117813 | 1171719 | aminoadipate-semialdehyde dehydrogenase                                           | Aasdh   | 364136 | 1,11 | down |
| 6665764 | 7117813 | 1171713 | aminoadipate-semialdehyde dehydrogenase                                           | Aasdh   | 364136 | 1,05 | down |
| 5799860 | 7117813 | 1171708 | aminoadipate-semialdehyde dehydrogenase                                           | Aasdh   | 364136 | 1,05 | up   |
| 6674431 | 7117813 | 1171713 | aminoadipate-semialdehyde dehydrogenase                                           | Aasdh   | 364136 | 1,03 | up   |
| 6640924 | 7117813 | 1171715 | aminoadipate-semialdehyde dehydrogenase                                           | Aasdh   | 364136 | 1,01 | down |
| 5855780 | 7161420 | 1278768 | aminopeptidase O                                                                  | Npepo   | 290963 | 2,11 | down |
| 6263085 | 7161420 | 1278769 | aminopeptidase O                                                                  | Npepo   | 290963 | 2,06 | down |
| 6727945 | 7161420 | 1278772 | aminopeptidase O                                                                  | Npepo   | 290963 | 1,90 | up   |
| 6374811 | 7161420 | 1278774 | aminopeptidase O                                                                  | Npepo   | 290963 | 1,59 | up   |
| 6525738 | 7161420 | 1278766 | aminopeptidase O                                                                  | Npepo   | 290963 | 1,53 | down |
| 6478413 | 7161420 | 1278767 | aminopeptidase O                                                                  | Npepo   | 290963 | 1,51 | up   |
| 5905076 | 7161420 | 1278775 | aminopeptidase O                                                                  | Npepo   | 290963 | 1,49 | up   |
| 5958415 | 7161420 | 1278765 | aminopeptidase O                                                                  | Npepo   | 290963 | 1,39 | up   |
| 6419758 | 7161420 | 1278764 | aminopeptidase O                                                                  | Npepo   | 290963 | 1,35 | down |
| 6330583 | 7161420 | 1278773 | aminopeptidase O                                                                  | Npepo   | 290963 | 1,28 | up   |
| 6326965 | 7161420 | 1278771 | aminopeptidase O                                                                  | Npepo   | 290963 | 1,23 | down |
| 6101755 | 7161420 | 1278761 | aminopeptidase O                                                                  | Npepo   | 290963 | 1,20 | down |
| 5989668 | 7161420 | 1278763 | aminopeptidase O                                                                  | Npepo   | 290963 | 1,13 | down |
| 5970611 | 7161420 | 1278770 | aminopeptidase O                                                                  | Npepo   | 290963 | 1,09 | up   |
| 6097074 | 7161420 | 1278762 | aminopeptidase O                                                                  | Npepo   | 290963 | 1,07 | up   |
| 5998568 | 7161420 | 1278771 | aminopeptidase O                                                                  | Npepo   | 290963 | 1,01 | up   |
| 6732403 | 7049673 | 1008831 | amyloid beta (A4) precursor-like protein 1                                        | Aplp1   | 502317 | 2,84 | up   |
| 6199142 | 7049673 | 1008823 | amyloid beta (A4) precursor-like protein 1                                        | Aplp1   | 502317 | 2,24 | down |
| 6390245 | 7049673 | 1008826 | amyloid beta (A4) precursor-like protein 1                                        | Aplp1   | 502317 | 1,42 | up   |
| 5654617 | 7049673 | 1008824 | amyloid beta (A4) precursor-like protein 1                                        | Aplp1   | 502317 | 1,34 | down |
| 5851424 | 7049673 | 1008831 | amyloid beta (A4) precursor-like protein 1                                        | Aplp1   | 502317 | 1,30 | down |
| 6130084 | 7049673 | 1008832 | amyloid beta (A4) precursor-like protein 1                                        | Aplp1   | 502317 | 1,30 | up   |
| 6648889 | 7049673 | 1008821 | amyloid beta (A4) precursor-like protein 1                                        | Aplp1   | 502317 | 1,27 | down |
| 6287906 | 7049673 | 1008834 | amyloid beta (A4) precursor-like protein 1                                        | Aplp1   | 502317 | 1,23 | up   |
| 6590243 | 7049673 | 1008821 | amyloid beta (A4) precursor-like protein 1                                        | Aplp1   | 502317 | 1,17 | down |
| 6355959 | 7049673 | 1008825 | amyloid beta (A4) precursor-like protein 1                                        | Aplp1   | 502317 | 1,17 | down |
| 5686852 | 7049673 | 1008829 | amyloid beta (A4) precursor-like protein 1                                        | Aplp1   | 502317 | 1,16 | up   |
| 6047820 | 7049673 | 1008827 | amyloid beta (A4) precursor-like protein 1                                        | Aplp1   | 502317 | 1,12 | up   |
| 6441060 | 7049673 | 1008834 | amyloid beta (A4) precursor-like protein 1                                        | Aplp1   | 502317 | 1,09 | up   |
| 5705554 | 7049673 | 1008828 | amyloid beta (A4) precursor-like protein 1                                        | Aplp1   | 502317 | 1,09 | up   |
| 5741250 | 7049673 | 1008830 | amyloid beta (A4) precursor-like protein 1                                        | Aplp1   | 502317 | 1,05 | up   |
| 6477180 | 7049673 | 1008833 | amyloid beta (A4) precursor-like protein 1                                        | Aplp1   | 502317 | 1,04 | down |
| 6607439 | 7049673 | 1008832 | amyloid beta (A4) precursor-like protein 1                                        | Aplp1   | 502317 | 1,03 | down |
| 6316006 | 7049673 | 1008822 | amyloid beta (A4) precursor-like protein 1                                        | Aplp1   | 502317 | 1,03 | down |
| 6546365 | 7354935 | 1757086 | amyotrophic lateral sclerosis 2 (juvenile) chromosome region, candidate 2 (human) | Als2cr2 | 501146 | 1,62 | down |

|         |         |         |                                                                                   |         |        |      |      |
|---------|---------|---------|-----------------------------------------------------------------------------------|---------|--------|------|------|
| 5928052 | 7354935 | 1757095 | amyotrophic lateral sclerosis 2 (juvenile) chromosome region, candidate 2 (human) | Als2cr2 | 501146 | 1,53 | down |
| 6587315 | 7354935 | 1757104 | amyotrophic lateral sclerosis 2 (juvenile) chromosome region, candidate 2 (human) | Als2cr2 | 501146 | 1,44 | down |
| 6124815 | 7354935 | 1757100 | amyotrophic lateral sclerosis 2 (juvenile) chromosome region, candidate 2 (human) | Als2cr2 | 501146 | 1,38 | down |
| 6661435 | 7354935 | 1757084 | amyotrophic lateral sclerosis 2 (juvenile) chromosome region, candidate 2 (human) | Als2cr2 | 501146 | 1,34 | up   |
| 6101024 | 7354935 | 1757098 | amyotrophic lateral sclerosis 2 (juvenile) chromosome region, candidate 2 (human) | Als2cr2 | 501146 | 1,33 | up   |
| 6563278 | 7354935 | 1757103 | amyotrophic lateral sclerosis 2 (juvenile) chromosome region, candidate 2 (human) | Als2cr2 | 501146 | 1,29 | down |
| 5633351 | 7354935 | 1757094 | amyotrophic lateral sclerosis 2 (juvenile) chromosome region, candidate 2 (human) | Als2cr2 | 501146 | 1,17 | down |
| 5620493 | 7354935 | 1757087 | amyotrophic lateral sclerosis 2 (juvenile) chromosome region, candidate 2 (human) | Als2cr2 | 501146 | 1,15 | down |
| 5827795 | 7354935 | 1757103 | amyotrophic lateral sclerosis 2 (juvenile) chromosome region, candidate 2 (human) | Als2cr2 | 501146 | 1,14 | up   |
| 5854990 | 7354935 | 1757099 | amyotrophic lateral sclerosis 2 (juvenile) chromosome region, candidate 2 (human) | Als2cr2 | 501146 | 1,11 | down |
| 5734502 | 7354935 | 1757097 | amyotrophic lateral sclerosis 2 (juvenile) chromosome region, candidate 2 (human) | Als2cr2 | 501146 | 1,11 | down |
| 6628259 | 7354935 | 1757090 | amyotrophic lateral sclerosis 2 (juvenile) chromosome region, candidate 2 (human) | Als2cr2 | 501146 | 1,10 | up   |
| 6442567 | 7354935 | 1757102 | amyotrophic lateral sclerosis 2 (juvenile) chromosome region, candidate 2 (human) | Als2cr2 | 501146 | 1,06 | down |
| 5853674 | 7295410 | 1609785 | anaplastic lymphoma kinase                                                        | Alk     | 266802 | 1,63 | down |
| 6207797 | 7295410 | 1609783 | anaplastic lymphoma kinase                                                        | Alk     | 266802 | 1,58 | down |
| 6445412 | 7295410 | 1609790 | anaplastic lymphoma kinase                                                        | Alk     | 266802 | 1,52 | up   |
| 6195449 | 7295410 | 1609792 | anaplastic lymphoma kinase                                                        | Alk     | 266802 | 1,30 | down |
| 6352175 | 7295410 | 1609791 | anaplastic lymphoma kinase                                                        | Alk     | 266802 | 1,23 | down |
| 6305708 | 7295410 | 1609786 | anaplastic lymphoma kinase                                                        | Alk     | 266802 | 1,14 | down |
| 6567240 | 7295410 | 1609789 | anaplastic lymphoma kinase                                                        | Alk     | 266802 | 1,10 | up   |
| 6740816 | 7295410 | 1609787 | anaplastic lymphoma kinase                                                        | Alk     | 266802 | 1,07 | down |
| 5742832 | 7295410 | 1609784 | anaplastic lymphoma kinase                                                        | Alk     | 266802 | 1,05 | up   |
| 5673857 | 7295410 | 1609788 | anaplastic lymphoma kinase                                                        | Alk     | 266802 | 1,01 | up   |
| 6299487 | 7339834 | 1719550 | angiomin like 2                                                                   | Amotl2  | 65157  | 2,05 | down |
| 5905495 | 7339834 | 1719556 | angiomin like 2                                                                   | Amotl2  | 65157  | 1,13 | down |
| 5753041 | 7339834 | 1719552 | angiomin like 2                                                                   | Amotl2  | 65157  | 1,08 | up   |
| 5681638 | 7339834 | 1719551 | angiomin like 2                                                                   | Amotl2  | 65157  | 1,02 | down |
| 6371901 | 7342356 | 1725905 | angiomin-like 1                                                                   | Amotl1  | 315430 | 2,31 | up   |
| 6485303 | 7342356 | 1725884 | angiomin-like 1                                                                   | Amotl1  | 315430 | 1,90 | down |
| 6637978 | 7342356 | 1725902 | angiomin-like 1                                                                   | Amotl1  | 315430 | 1,72 | up   |
| 6286881 | 7342356 | 1725878 | angiomin-like 1                                                                   | Amotl1  | 315430 | 1,72 | down |
| 6272484 | 7342356 | 1725876 | angiomin-like 1                                                                   | Amotl1  | 315430 | 1,68 | down |
| 6512439 | 7342356 | 1725883 | angiomin-like 1                                                                   | Amotl1  | 315430 | 1,66 | down |
| 5736857 | 7342356 | 1725886 | angiomin-like 1                                                                   | Amotl1  | 315430 | 1,39 | down |
| 5703633 | 7342356 | 1725881 | angiomin-like 1                                                                   | Amotl1  | 315430 | 1,38 | down |
| 6404790 | 7342356 | 1725888 | angiomin-like 1                                                                   | Amotl1  | 315430 | 1,31 | down |
| 6409035 | 7342356 | 1725887 | angiomin-like 1                                                                   | Amotl1  | 315430 | 1,30 | up   |
| 6433675 | 7342356 | 1725879 | angiomin-like 1                                                                   | Amotl1  | 315430 | 1,27 | down |
| 5989041 | 7342356 | 1725889 | angiomin-like 1                                                                   | Amotl1  | 315430 | 1,21 | up   |
| 6686661 | 7342356 | 1725885 | angiomin-like 1                                                                   | Amotl1  | 315430 | 1,18 | up   |
| 6437815 | 7342356 | 1725896 | angiomin-like 1                                                                   | Amotl1  | 315430 | 1,06 | up   |
| 6371475 | 7342356 | 1725877 | angiomin-like 1                                                                   | Amotl1  | 315430 | 1,02 | up   |
| 6346929 | 7152915 | 1257440 | ankyrin 1, erythrocytic                                                           | Ank1    | 306570 | 2,07 | up   |
| 6613087 | 7152915 | 1257463 | ankyrin 1, erythrocytic                                                           | Ank1    | 306570 | 1,76 | down |
| 6389926 | 7152915 | 1257442 | ankyrin 1, erythrocytic                                                           | Ank1    | 306570 | 1,58 | up   |
| 6630122 | 7152915 | 1257481 | ankyrin 1, erythrocytic                                                           | Ank1    | 306570 | 1,51 | up   |
| 5883319 | 7152915 | 1257447 | ankyrin 1, erythrocytic                                                           | Ank1    | 306570 | 1,51 | up   |
| 5686529 | 7152915 | 1257488 | ankyrin 1, erythrocytic                                                           | Ank1    | 306570 | 1,50 | up   |
| 5916454 | 7152915 | 1257501 | ankyrin 1, erythrocytic                                                           | Ank1    | 306570 | 1,44 | down |
| 6259659 | 7152915 | 1257459 | ankyrin 1, erythrocytic                                                           | Ank1    | 306570 | 1,41 | down |
| 6498597 | 7152915 | 1257469 | ankyrin 1, erythrocytic                                                           | Ank1    | 306570 | 1,37 | down |
| 6142046 | 7152915 | 1257464 | ankyrin 1, erythrocytic                                                           | Ank1    | 306570 | 1,36 | down |
| 6695055 | 7152915 | 1257479 | ankyrin 1, erythrocytic                                                           | Ank1    | 306570 | 1,32 | down |
| 5807994 | 7152915 | 1257450 | ankyrin 1, erythrocytic                                                           | Ank1    | 306570 | 1,31 | down |
| 6578727 | 7152915 | 1257480 | ankyrin 1, erythrocytic                                                           | Ank1    | 306570 | 1,30 | up   |
| 6636866 | 7152915 | 1257468 | ankyrin 1, erythrocytic                                                           | Ank1    | 306570 | 1,28 | down |
| 5634044 | 7152915 | 1257449 | ankyrin 1, erythrocytic                                                           | Ank1    | 306570 | 1,28 | down |

|         |         |         |                         |      |        |      |      |
|---------|---------|---------|-------------------------|------|--------|------|------|
| 6379478 | 7152915 | 1257473 | ankyrin 1, erythrocytic | Ank1 | 306570 | 1,26 | down |
| 6349020 | 7152915 | 1257493 | ankyrin 1, erythrocytic | Ank1 | 306570 | 1,21 | down |
| 5683060 | 7152915 | 1257456 | ankyrin 1, erythrocytic | Ank1 | 306570 | 1,21 | down |
| 6515589 | 7152915 | 1257500 | ankyrin 1, erythrocytic | Ank1 | 306570 | 1,18 | up   |
| 6051460 | 7152915 | 1257437 | ankyrin 1, erythrocytic | Ank1 | 306570 | 1,17 | up   |
| 6289302 | 7152915 | 1257484 | ankyrin 1, erythrocytic | Ank1 | 306570 | 1,15 | down |
| 5970372 | 7152915 | 1257476 | ankyrin 1, erythrocytic | Ank1 | 306570 | 1,14 | down |
| 6358066 | 7152915 | 1257489 | ankyrin 1, erythrocytic | Ank1 | 306570 | 1,14 | up   |
| 6629214 | 7152915 | 1257478 | ankyrin 1, erythrocytic | Ank1 | 306570 | 1,11 | up   |
| 6609054 | 7152915 | 1257441 | ankyrin 1, erythrocytic | Ank1 | 306570 | 1,11 | down |
| 6079465 | 7152915 | 1257462 | ankyrin 1, erythrocytic | Ank1 | 306570 | 1,08 | up   |
| 6730508 | 7152915 | 1257466 | ankyrin 1, erythrocytic | Ank1 | 306570 | 1,08 | down |
| 6329548 | 7152915 | 1257472 | ankyrin 1, erythrocytic | Ank1 | 306570 | 1,08 | down |
| 6505683 | 7152915 | 1257457 | ankyrin 1, erythrocytic | Ank1 | 306570 | 1,07 | down |
| 6627179 | 7152915 | 1257493 | ankyrin 1, erythrocytic | Ank1 | 306570 | 1,05 | up   |
| 6509277 | 7152915 | 1257487 | ankyrin 1, erythrocytic | Ank1 | 306570 | 1,04 | up   |
| 6736540 | 7152915 | 1257486 | ankyrin 1, erythrocytic | Ank1 | 306570 | 1,03 | up   |
| 6074116 | 7152915 | 1257482 | ankyrin 1, erythrocytic | Ank1 | 306570 | 1,03 | up   |
| 5752062 | 7152915 | 1257465 | ankyrin 1, erythrocytic | Ank1 | 306570 | 1,02 | up   |
| 5989611 | 7152915 | 1257458 | ankyrin 1, erythrocytic | Ank1 | 306570 | 1,02 | down |
| 6641871 | 7152915 | 1257477 | ankyrin 1, erythrocytic | Ank1 | 306570 | 1,01 | down |
| 6458944 | 7152915 | 1257439 | ankyrin 1, erythrocytic | Ank1 | 306570 | 1,01 | up   |
| 6467062 | 7152915 | 1257485 | ankyrin 1, erythrocytic | Ank1 | 306570 | 1,01 | up   |
| 6678095 | 7152915 | 1257461 | ankyrin 1, erythrocytic | Ank1 | 306570 | 1,01 | up   |
| 6728238 | 7152915 | 1257460 | ankyrin 1, erythrocytic | Ank1 | 306570 | 1,01 | up   |
| 6271297 | 7152915 | 1257467 | ankyrin 1, erythrocytic | Ank1 | 306570 | 1,01 | up   |
| 6626512 | 7152915 | 1257438 | ankyrin 1, erythrocytic | Ank1 | 306570 | 1,01 | up   |
| 5630018 | 7152915 | 1257438 | ankyrin 1, erythrocytic | Ank1 | 306570 | 1,00 | down |
| 5750008 | 7152915 | 1257475 | ankyrin 1, erythrocytic | Ank1 | 306570 | 1,00 | up   |
| 6245099 | 7213908 | 1407651 | ankyrin 2, neuronal     | Ank2 | 362036 | 2,53 | down |
| 6347385 | 7213908 | 1407685 | ankyrin 2, neuronal     | Ank2 | 362036 | 2,36 | up   |
| 6044714 | 7213908 | 1407695 | ankyrin 2, neuronal     | Ank2 | 362036 | 1,84 | up   |
| 6699942 | 7213908 | 1407698 | ankyrin 2, neuronal     | Ank2 | 362036 | 1,77 | up   |
| 5680006 | 7213908 | 1407701 | ankyrin 2, neuronal     | Ank2 | 362036 | 1,76 | up   |
| 6555567 | 7213908 | 1407690 | ankyrin 2, neuronal     | Ank2 | 362036 | 1,72 | up   |
| 6201626 | 7213908 | 1407750 | ankyrin 2, neuronal     | Ank2 | 362036 | 1,63 | up   |
| 6143133 | 7213908 | 1407684 | ankyrin 2, neuronal     | Ank2 | 362036 | 1,58 | up   |
| 5733952 | 7213908 | 1407651 | ankyrin 2, neuronal     | Ank2 | 362036 | 1,53 | down |
| 6456222 | 7213908 | 1407700 | ankyrin 2, neuronal     | Ank2 | 362036 | 1,53 | up   |
| 5710244 | 7213908 | 1407683 | ankyrin 2, neuronal     | Ank2 | 362036 | 1,51 | up   |
| 5640791 | 7213908 | 1407678 | ankyrin 2, neuronal     | Ank2 | 362036 | 1,46 | up   |
| 6272224 | 7213908 | 1407675 | ankyrin 2, neuronal     | Ank2 | 362036 | 1,41 | down |
| 6111006 | 7213908 | 1407699 | ankyrin 2, neuronal     | Ank2 | 362036 | 1,37 | up   |
| 6725217 | 7213908 | 1407702 | ankyrin 2, neuronal     | Ank2 | 362036 | 1,35 | down |
| 6402477 | 7213908 | 1407638 | ankyrin 2, neuronal     | Ank2 | 362036 | 1,35 | down |
| 6131392 | 7213908 | 1407750 | ankyrin 2, neuronal     | Ank2 | 362036 | 1,35 | up   |
| 6225029 | 7213908 | 1407712 | ankyrin 2, neuronal     | Ank2 | 362036 | 1,31 | down |
| 5698364 | 7213908 | 1407652 | ankyrin 2, neuronal     | Ank2 | 362036 | 1,25 | down |
| 6476341 | 7213908 | 1407696 | ankyrin 2, neuronal     | Ank2 | 362036 | 1,24 | up   |
| 6572945 | 7213908 | 1407717 | ankyrin 2, neuronal     | Ank2 | 362036 | 1,22 | up   |
| 6604780 | 7213908 | 1407651 | ankyrin 2, neuronal     | Ank2 | 362036 | 1,21 | down |
| 6171201 | 7213908 | 1407643 | ankyrin 2, neuronal     | Ank2 | 362036 | 1,18 | up   |
| 6387676 | 7213908 | 1407646 | ankyrin 2, neuronal     | Ank2 | 362036 | 1,14 | down |
| 5946420 | 7213908 | 1407644 | ankyrin 2, neuronal     | Ank2 | 362036 | 1,10 | down |
| 6345247 | 7213908 | 1407703 | ankyrin 2, neuronal     | Ank2 | 362036 | 1,07 | up   |
| 5719238 | 7213908 | 1407700 | ankyrin 2, neuronal     | Ank2 | 362036 | 1,05 | down |
| 6013086 | 7213908 | 1407637 | ankyrin 2, neuronal     | Ank2 | 362036 | 1,03 | up   |

|         |         |         |                                             |        |        |      |      |
|---------|---------|---------|---------------------------------------------|--------|--------|------|------|
| 6046354 | 7213908 | 1407710 | ankyrin 2, neuronal                         | Ank2   | 362036 | 1,02 | up   |
| 5680042 | 7213908 | 1407681 | ankyrin 2, neuronal                         | Ank2   | 362036 | 1,02 | up   |
| 6054185 | 7213908 | 1407641 | ankyrin 2, neuronal                         | Ank2   | 362036 | 1,02 | down |
| 6115552 | 7213908 | 1407676 | ankyrin 2, neuronal                         | Ank2   | 362036 | 1,00 | down |
| 6039798 | 7213908 | 1407690 | ankyrin 2, neuronal                         | Ank2   | 362036 | 1,00 | down |
| 5681934 | 7222244 | 1428247 | ankyrin 3, epithelial                       | Ank3   | 361833 | 2,70 | down |
| 6063066 | 7222244 | 1428285 | ankyrin 3, epithelial                       | Ank3   | 361833 | 1,81 | up   |
| 6537256 | 7222244 | 1428249 | ankyrin 3, epithelial                       | Ank3   | 361833 | 1,65 | up   |
| 6680545 | 7222244 | 1428284 | ankyrin 3, epithelial                       | Ank3   | 361833 | 1,62 | up   |
| 5776578 | 7222244 | 1428248 | ankyrin 3, epithelial                       | Ank3   | 361833 | 1,62 | down |
| 6085958 | 7222244 | 1428278 | ankyrin 3, epithelial                       | Ank3   | 361833 | 1,60 | down |
| 6478665 | 7222244 | 1428250 | ankyrin 3, epithelial                       | Ank3   | 361833 | 1,51 | up   |
| 5694005 | 7222244 | 1428276 | ankyrin 3, epithelial                       | Ank3   | 361833 | 1,48 | up   |
| 6598929 | 7222244 | 1428252 | ankyrin 3, epithelial                       | Ank3   | 361833 | 1,46 | down |
| 6175208 | 7222244 | 1428251 | ankyrin 3, epithelial                       | Ank3   | 361833 | 1,44 | up   |
| 6630887 | 7222244 | 1428244 | ankyrin 3, epithelial                       | Ank3   | 361833 | 1,39 | down |
| 6221220 | 7222244 | 1428259 | ankyrin 3, epithelial                       | Ank3   | 361833 | 1,36 | up   |
| 6448914 | 7222244 | 1428261 | ankyrin 3, epithelial                       | Ank3   | 361833 | 1,35 | up   |
| 6355809 | 7222244 | 1428257 | ankyrin 3, epithelial                       | Ank3   | 361833 | 1,34 | down |
| 6224888 | 7222244 | 1428262 | ankyrin 3, epithelial                       | Ank3   | 361833 | 1,32 | down |
| 5696645 | 7222244 | 1428279 | ankyrin 3, epithelial                       | Ank3   | 361833 | 1,28 | up   |
| 6515175 | 7222244 | 1428260 | ankyrin 3, epithelial                       | Ank3   | 361833 | 1,27 | down |
| 5734430 | 7222244 | 1428246 | ankyrin 3, epithelial                       | Ank3   | 361833 | 1,25 | down |
| 6043101 | 7222244 | 1428255 | ankyrin 3, epithelial                       | Ank3   | 361833 | 1,23 | up   |
| 6672486 | 7222244 | 1428274 | ankyrin 3, epithelial                       | Ank3   | 361833 | 1,19 | down |
| 6607745 | 7222244 | 1428273 | ankyrin 3, epithelial                       | Ank3   | 361833 | 1,17 | up   |
| 5703125 | 7222244 | 1428250 | ankyrin 3, epithelial                       | Ank3   | 361833 | 1,17 | down |
| 6638526 | 7222244 | 1428267 | ankyrin 3, epithelial                       | Ank3   | 361833 | 1,16 | down |
| 6158986 | 7222244 | 1428266 | ankyrin 3, epithelial                       | Ank3   | 361833 | 1,15 | up   |
| 6119681 | 7222244 | 1428271 | ankyrin 3, epithelial                       | Ank3   | 361833 | 1,14 | down |
| 6581575 | 7222244 | 1428282 | ankyrin 3, epithelial                       | Ank3   | 361833 | 1,13 | down |
| 5837764 | 7222244 | 1428275 | ankyrin 3, epithelial                       | Ank3   | 361833 | 1,12 | down |
| 5897436 | 7222244 | 1428253 | ankyrin 3, epithelial                       | Ank3   | 361833 | 1,10 | down |
| 6676452 | 7222244 | 1428281 | ankyrin 3, epithelial                       | Ank3   | 361833 | 1,10 | down |
| 5991215 | 7222244 | 1428256 | ankyrin 3, epithelial                       | Ank3   | 361833 | 1,09 | down |
| 5750870 | 7222244 | 1428258 | ankyrin 3, epithelial                       | Ank3   | 361833 | 1,09 | down |
| 6718359 | 7222244 | 1428283 | ankyrin 3, epithelial                       | Ank3   | 361833 | 1,08 | up   |
| 6584605 | 7222244 | 1428275 | ankyrin 3, epithelial                       | Ank3   | 361833 | 1,07 | up   |
| 6594851 | 7222244 | 1428270 | ankyrin 3, epithelial                       | Ank3   | 361833 | 1,06 | up   |
| 6431249 | 7222244 | 1428254 | ankyrin 3, epithelial                       | Ank3   | 361833 | 1,06 | down |
| 5752795 | 7222244 | 1428265 | ankyrin 3, epithelial                       | Ank3   | 361833 | 1,06 | up   |
| 5668412 | 7222244 | 1428264 | ankyrin 3, epithelial                       | Ank3   | 361833 | 1,06 | down |
| 5923547 | 7222244 | 1428269 | ankyrin 3, epithelial                       | Ank3   | 361833 | 1,05 | down |
| 6104937 | 7222244 | 1428263 | ankyrin 3, epithelial                       | Ank3   | 361833 | 1,05 | up   |
| 5886752 | 7222244 | 1428268 | ankyrin 3, epithelial                       | Ank3   | 361833 | 1,04 | up   |
| 5899013 | 7222244 | 1428277 | ankyrin 3, epithelial                       | Ank3   | 361833 | 1,04 | up   |
| 5771647 | 7222244 | 1428280 | ankyrin 3, epithelial                       | Ank3   | 361833 | 1,04 | up   |
| 5908972 | 7222244 | 1428245 | ankyrin 3, epithelial                       | Ank3   | 361833 | 1,03 | up   |
| 6122269 | 7222244 | 1428248 | ankyrin 3, epithelial                       | Ank3   | 361833 | 1,02 | down |
| 5918122 | 7222244 | 1428261 | ankyrin 3, epithelial                       | Ank3   | 361833 | 1,01 | up   |
| 6615855 | 7222244 | 1428272 | ankyrin 3, epithelial                       | Ank3   | 361833 | 1,00 | down |
| 6716839 | 7069462 | 1054585 | ankyrin repeat and FYVE domain containing 1 | Ankfy1 | 303292 | 1,46 | up   |
| 6267686 | 7069462 | 1054588 | ankyrin repeat and FYVE domain containing 1 | Ankfy1 | 303292 | 1,45 | down |
| 6277144 | 7069462 | 1054590 | ankyrin repeat and FYVE domain containing 1 | Ankfy1 | 303292 | 1,35 | down |
| 5678672 | 7069462 | 1054604 | ankyrin repeat and FYVE domain containing 1 | Ankfy1 | 303292 | 1,31 | up   |
| 5712155 | 7069462 | 1054583 | ankyrin repeat and FYVE domain containing 1 | Ankfy1 | 303292 | 1,29 | up   |
| 5785778 | 7069462 | 1054589 | ankyrin repeat and FYVE domain containing 1 | Ankfy1 | 303292 | 1,27 | down |



|         |         |         |                                                             |        |        |      |      |
|---------|---------|---------|-------------------------------------------------------------|--------|--------|------|------|
| 5865081 | 7069462 | 1054578 | ankyrin repeat and FYVE domain containing 1                 | Ankfy1 | 303292 | 1,22 | up   |
| 6672296 | 7069462 | 1054586 | ankyrin repeat and FYVE domain containing 1                 | Ankfy1 | 303292 | 1,21 | down |
| 5931626 | 7069462 | 1054598 | ankyrin repeat and FYVE domain containing 1                 | Ankfy1 | 303292 | 1,19 | up   |
| 5961240 | 7069462 | 1054597 | ankyrin repeat and FYVE domain containing 1                 | Ankfy1 | 303292 | 1,17 | up   |
| 6606172 | 7069462 | 1054592 | ankyrin repeat and FYVE domain containing 1                 | Ankfy1 | 303292 | 1,17 | down |
| 5761994 | 7069462 | 1054606 | ankyrin repeat and FYVE domain containing 1                 | Ankfy1 | 303292 | 1,16 | down |
| 5972758 | 7069462 | 1054587 | ankyrin repeat and FYVE domain containing 1                 | Ankfy1 | 303292 | 1,15 | up   |
| 6326652 | 7069462 | 1054582 | ankyrin repeat and FYVE domain containing 1                 | Ankfy1 | 303292 | 1,14 | up   |
| 6334806 | 7069462 | 1054593 | ankyrin repeat and FYVE domain containing 1                 | Ankfy1 | 303292 | 1,14 | down |
| 5868967 | 7069462 | 1054584 | ankyrin repeat and FYVE domain containing 1                 | Ankfy1 | 303292 | 1,14 | down |
| 5624935 | 7069462 | 1054599 | ankyrin repeat and FYVE domain containing 1                 | Ankfy1 | 303292 | 1,13 | down |
| 5640103 | 7069462 | 1054578 | ankyrin repeat and FYVE domain containing 1                 | Ankfy1 | 303292 | 1,11 | down |
| 5857005 | 7069462 | 1054582 | ankyrin repeat and FYVE domain containing 1                 | Ankfy1 | 303292 | 1,11 | up   |
| 5673885 | 7069462 | 1054577 | ankyrin repeat and FYVE domain containing 1                 | Ankfy1 | 303292 | 1,07 | up   |
| 6704129 | 7069462 | 1054600 | ankyrin repeat and FYVE domain containing 1                 | Ankfy1 | 303292 | 1,05 | down |
| 6327689 | 7069462 | 1054594 | ankyrin repeat and FYVE domain containing 1                 | Ankfy1 | 303292 | 1,05 | down |
| 5692773 | 7069462 | 1054607 | ankyrin repeat and FYVE domain containing 1                 | Ankfy1 | 303292 | 1,04 | up   |
| 6378354 | 7069462 | 1054601 | ankyrin repeat and FYVE domain containing 1                 | Ankfy1 | 303292 | 1,04 | up   |
| 6067238 | 7069462 | 1054591 | ankyrin repeat and FYVE domain containing 1                 | Ankfy1 | 303292 | 1,03 | up   |
| 5783573 | 7069462 | 1054579 | ankyrin repeat and FYVE domain containing 1                 | Ankfy1 | 303292 | 1,02 | down |
| 6062900 | 7069462 | 1054586 | ankyrin repeat and FYVE domain containing 1                 | Ankfy1 | 303292 | 1,01 | up   |
| 6487805 | 7069462 | 1054603 | ankyrin repeat and FYVE domain containing 1                 | Ankfy1 | 303292 | 1,01 | up   |
| 5696797 | 7069462 | 1054605 | ankyrin repeat and FYVE domain containing 1                 | Ankfy1 | 303292 | 1,00 | up   |
| 5953660 | 7069462 | 1054595 | ankyrin repeat and FYVE domain containing 1                 | Ankfy1 | 303292 | 1,00 | up   |
| 6122728 | 7250671 | 1499045 | ankyrin repeat and IBR domain containing 1                  | Ankib1 | 368062 | 1,48 | down |
| 5617850 | 7250671 | 1499041 | ankyrin repeat and IBR domain containing 1                  | Ankib1 | 368062 | 1,46 | down |
| 6263013 | 7250671 | 1499045 | ankyrin repeat and IBR domain containing 1                  | Ankib1 | 368062 | 1,44 | down |
| 6507746 | 7250671 | 1499022 | ankyrin repeat and IBR domain containing 1                  | Ankib1 | 368062 | 1,35 | down |
| 5833985 | 7250671 | 1499015 | ankyrin repeat and IBR domain containing 1                  | Ankib1 | 368062 | 1,20 | down |
| 5746792 | 7250671 | 1499031 | ankyrin repeat and IBR domain containing 1                  | Ankib1 | 368062 | 1,20 | down |
| 6384930 | 7250671 | 1499039 | ankyrin repeat and IBR domain containing 1                  | Ankib1 | 368062 | 1,20 | up   |
| 6141086 | 7250671 | 1499038 | ankyrin repeat and IBR domain containing 1                  | Ankib1 | 368062 | 1,20 | up   |
| 6262402 | 7250671 | 1499044 | ankyrin repeat and IBR domain containing 1                  | Ankib1 | 368062 | 1,19 | down |
| 6639637 | 7250671 | 1499037 | ankyrin repeat and IBR domain containing 1                  | Ankib1 | 368062 | 1,16 | up   |
| 6306679 | 7250671 | 1499040 | ankyrin repeat and IBR domain containing 1                  | Ankib1 | 368062 | 1,15 | up   |
| 5846650 | 7250671 | 1499024 | ankyrin repeat and IBR domain containing 1                  | Ankib1 | 368062 | 1,11 | down |
| 5618000 | 7250671 | 1499034 | ankyrin repeat and IBR domain containing 1                  | Ankib1 | 368062 | 1,11 | up   |
| 6285717 | 7250671 | 1499026 | ankyrin repeat and IBR domain containing 1                  | Ankib1 | 368062 | 1,09 | up   |
| 6575677 | 7250671 | 1499042 | ankyrin repeat and IBR domain containing 1                  | Ankib1 | 368062 | 1,07 | down |
| 6277260 | 7250671 | 1499043 | ankyrin repeat and IBR domain containing 1                  | Ankib1 | 368062 | 1,06 | down |
| 5802173 | 7250671 | 1499044 | ankyrin repeat and IBR domain containing 1                  | Ankib1 | 368062 | 1,05 | up   |
| 6230025 | 7250671 | 1499018 | ankyrin repeat and IBR domain containing 1                  | Ankib1 | 368062 | 1,04 | up   |
| 6740284 | 7250671 | 1499027 | ankyrin repeat and IBR domain containing 1                  | Ankib1 | 368062 | 1,04 | up   |
| 6008628 | 7250671 | 1499024 | ankyrin repeat and IBR domain containing 1                  | Ankib1 | 368062 | 1,03 | down |
| 6196114 | 7250671 | 1499022 | ankyrin repeat and IBR domain containing 1                  | Ankib1 | 368062 | 1,03 | down |
| 5984826 | 7250671 | 1499028 | ankyrin repeat and IBR domain containing 1                  | Ankib1 | 368062 | 1,02 | up   |
| 6568330 | 7250671 | 1499032 | ankyrin repeat and IBR domain containing 1                  | Ankib1 | 368062 | 1,02 | down |
| 6151013 | 7250671 | 1499017 | ankyrin repeat and IBR domain containing 1                  | Ankib1 | 368062 | 1,02 | down |
| 6661182 | 7072429 | 1061864 | ankyrin repeat and SOCS box-containing 16                   | Asb16  | 498005 | 2,05 | down |
| 5835665 | 7072429 | 1061861 | ankyrin repeat and SOCS box-containing 16                   | Asb16  | 498005 | 1,42 | down |
| 6600295 | 7072429 | 1061861 | ankyrin repeat and SOCS box-containing 16                   | Asb16  | 498005 | 1,18 | up   |
| 6505182 | 7072429 | 1061861 | ankyrin repeat and SOCS box-containing 16                   | Asb16  | 498005 | 1,17 | down |
| 6268820 | 7072429 | 1061862 | ankyrin repeat and SOCS box-containing 16                   | Asb16  | 498005 | 1,16 | up   |
| 5827593 | 7072429 | 1061865 | ankyrin repeat and SOCS box-containing 16                   | Asb16  | 498005 | 1,12 | down |
| 6358743 | 7072429 | 1061861 | ankyrin repeat and SOCS box-containing 16                   | Asb16  | 498005 | 1,07 | down |
| 5700761 | 7072429 | 1061863 | ankyrin repeat and SOCS box-containing 16                   | Asb16  | 498005 | 1,05 | up   |
| 5756526 | 7217143 | 1415618 | ankyrin repeat and sterile alpha motif domain containing 1A | Anks1a | 309639 | 1,65 | down |

|         |         |         |                                                             |          |        |      |      |
|---------|---------|---------|-------------------------------------------------------------|----------|--------|------|------|
| 6063732 | 7217143 | 1415619 | ankyrin repeat and sterile alpha motif domain containing 1A | Anks1a   | 309639 | 1,62 | up   |
| 6157513 | 7217143 | 1415589 | ankyrin repeat and sterile alpha motif domain containing 1A | Anks1a   | 309639 | 1,57 | up   |
| 5814472 | 7217143 | 1415616 | ankyrin repeat and sterile alpha motif domain containing 1A | Anks1a   | 309639 | 1,48 | up   |
| 5728347 | 7217143 | 1415580 | ankyrin repeat and sterile alpha motif domain containing 1A | Anks1a   | 309639 | 1,38 | up   |
| 6201435 | 7217143 | 1415596 | ankyrin repeat and sterile alpha motif domain containing 1A | Anks1a   | 309639 | 1,23 | down |
| 5682698 | 7217143 | 1415587 | ankyrin repeat and sterile alpha motif domain containing 1A | Anks1a   | 309639 | 1,21 | up   |
| 6404225 | 7217143 | 1415611 | ankyrin repeat and sterile alpha motif domain containing 1A | Anks1a   | 309639 | 1,18 | down |
| 6543186 | 7217143 | 1415615 | ankyrin repeat and sterile alpha motif domain containing 1A | Anks1a   | 309639 | 1,17 | down |
| 6045481 | 7217143 | 1415583 | ankyrin repeat and sterile alpha motif domain containing 1A | Anks1a   | 309639 | 1,15 | down |
| 6039916 | 7217143 | 1415593 | ankyrin repeat and sterile alpha motif domain containing 1A | Anks1a   | 309639 | 1,15 | up   |
| 5805682 | 7217143 | 1415609 | ankyrin repeat and sterile alpha motif domain containing 1A | Anks1a   | 309639 | 1,14 | down |
| 5807230 | 7217143 | 1415592 | ankyrin repeat and sterile alpha motif domain containing 1A | Anks1a   | 309639 | 1,14 | down |
| 5931983 | 7217143 | 1415590 | ankyrin repeat and sterile alpha motif domain containing 1A | Anks1a   | 309639 | 1,13 | down |
| 6738734 | 7217143 | 1415603 | ankyrin repeat and sterile alpha motif domain containing 1A | Anks1a   | 309639 | 1,12 | down |
| 6663138 | 7217143 | 1415584 | ankyrin repeat and sterile alpha motif domain containing 1A | Anks1a   | 309639 | 1,11 | up   |
| 5815653 | 7217143 | 1415613 | ankyrin repeat and sterile alpha motif domain containing 1A | Anks1a   | 309639 | 1,10 | up   |
| 6692801 | 7217143 | 1415618 | ankyrin repeat and sterile alpha motif domain containing 1A | Anks1a   | 309639 | 1,08 | up   |
| 6425731 | 7217143 | 1415591 | ankyrin repeat and sterile alpha motif domain containing 1A | Anks1a   | 309639 | 1,07 | down |
| 6051124 | 7217143 | 1415614 | ankyrin repeat and sterile alpha motif domain containing 1A | Anks1a   | 309639 | 1,07 | down |
| 5689048 | 7217143 | 1415608 | ankyrin repeat and sterile alpha motif domain containing 1A | Anks1a   | 309639 | 1,07 | up   |
| 6356084 | 7217143 | 1415610 | ankyrin repeat and sterile alpha motif domain containing 1A | Anks1a   | 309639 | 1,05 | up   |
| 6241507 | 7217143 | 1415588 | ankyrin repeat and sterile alpha motif domain containing 1A | Anks1a   | 309639 | 1,04 | up   |
| 6293274 | 7217143 | 1415612 | ankyrin repeat and sterile alpha motif domain containing 1A | Anks1a   | 309639 | 1,04 | down |
| 6497219 | 7217143 | 1415596 | ankyrin repeat and sterile alpha motif domain containing 1A | Anks1a   | 309639 | 1,03 | up   |
| 6225577 | 7217143 | 1415606 | ankyrin repeat and sterile alpha motif domain containing 1A | Anks1a   | 309639 | 1,01 | down |
| 5793561 | 7059506 | 1030393 | ankyrin repeat domain 13 family, member D                   | Ankrd13d | 361699 | 1,90 | down |
| 5729931 | 7059506 | 1030393 | ankyrin repeat domain 13 family, member D                   | Ankrd13d | 361699 | 1,70 | down |
| 6132172 | 7059506 | 1030388 | ankyrin repeat domain 13 family, member D                   | Ankrd13d | 361699 | 1,57 | down |
| 6272700 | 7059506 | 1030388 | ankyrin repeat domain 13 family, member D                   | Ankrd13d | 361699 | 1,39 | up   |
| 6538724 | 7059506 | 1030390 | ankyrin repeat domain 13 family, member D                   | Ankrd13d | 361699 | 1,38 | up   |
| 6294835 | 7059506 | 1030395 | ankyrin repeat domain 13 family, member D                   | Ankrd13d | 361699 | 1,37 | down |
| 6168931 | 7059506 | 1030397 | ankyrin repeat domain 13 family, member D                   | Ankrd13d | 361699 | 1,35 | up   |
| 5920528 | 7059506 | 1030388 | ankyrin repeat domain 13 family, member D                   | Ankrd13d | 361699 | 1,27 | up   |
| 6533943 | 7059506 | 1030392 | ankyrin repeat domain 13 family, member D                   | Ankrd13d | 361699 | 1,21 | up   |
| 5765698 | 7059506 | 1030399 | ankyrin repeat domain 13 family, member D                   | Ankrd13d | 361699 | 1,20 | down |
| 6635944 | 7059506 | 1030402 | ankyrin repeat domain 13 family, member D                   | Ankrd13d | 361699 | 1,18 | down |
| 6575330 | 7059506 | 1030398 | ankyrin repeat domain 13 family, member D                   | Ankrd13d | 361699 | 1,11 | down |
| 5876937 | 7059506 | 1030402 | ankyrin repeat domain 13 family, member D                   | Ankrd13d | 361699 | 1,05 | down |
| 5785670 | 7059506 | 1030396 | ankyrin repeat domain 13 family, member D                   | Ankrd13d | 361699 | 1,05 | up   |
| 6314435 | 7059506 | 1030389 | ankyrin repeat domain 13 family, member D                   | Ankrd13d | 361699 | 1,04 | up   |
| 6430650 | 7059506 | 1030394 | ankyrin repeat domain 13 family, member D                   | Ankrd13d | 361699 | 1,03 | down |
| 5974866 | 7059506 | 1030399 | ankyrin repeat domain 13 family, member D                   | Ankrd13d | 361699 | 1,02 | up   |
| 5756608 | 7059506 | 1030391 | ankyrin repeat domain 13 family, member D                   | Ankrd13d | 361699 | 1,01 | up   |
| 5920851 | 7120653 | 1178958 | ankyrin repeat domain 36                                    | Ankrd36  | 305491 | 2,08 | down |
| 5809862 | 7120653 | 1178946 | ankyrin repeat domain 36                                    | Ankrd36  | 305491 | 1,36 | down |
| 6738888 | 7120653 | 1178961 | ankyrin repeat domain 36                                    | Ankrd36  | 305491 | 1,32 | up   |
| 6403411 | 7120653 | 1178961 | ankyrin repeat domain 36                                    | Ankrd36  | 305491 | 1,31 | down |
| 6214033 | 7120653 | 1178961 | ankyrin repeat domain 36                                    | Ankrd36  | 305491 | 1,19 | up   |
| 5834921 | 7120653 | 1178960 | ankyrin repeat domain 36                                    | Ankrd36  | 305491 | 1,15 | down |
| 5771578 | 7120653 | 1178952 | ankyrin repeat domain 36                                    | Ankrd36  | 305491 | 1,12 | down |
| 6607819 | 7120653 | 1178961 | ankyrin repeat domain 36                                    | Ankrd36  | 305491 | 1,11 | down |
| 6020454 | 7120653 | 1178956 | ankyrin repeat domain 36                                    | Ankrd36  | 305491 | 1,07 | up   |
| 5706040 | 7120653 | 1178947 | ankyrin repeat domain 36                                    | Ankrd36  | 305491 | 1,05 | down |
| 5726096 | 7120653 | 1178953 | ankyrin repeat domain 36                                    | Ankrd36  | 305491 | 1,04 | down |
| 6730221 | 7120653 | 1178949 | ankyrin repeat domain 36                                    | Ankrd36  | 305491 | 1,03 | up   |
| 6652951 | 7120653 | 1178950 | ankyrin repeat domain 36                                    | Ankrd36  | 305491 | 1,03 | up   |
| 6144829 | 7120653 | 1178957 | ankyrin repeat domain 36                                    | Ankrd36  | 305491 | 1,03 | down |

|         |         |         |                                          |         |        |      |      |
|---------|---------|---------|------------------------------------------|---------|--------|------|------|
| 5923173 | 7120653 | 1178951 | ankyrin repeat domain 36                 | Ankrd36 | 305491 | 1,03 | down |
| 5648200 | 7120653 | 1178954 | ankyrin repeat domain 36                 | Ankrd36 | 305491 | 1,02 | down |
| 6476569 | 7120653 | 1178955 | ankyrin repeat domain 36                 | Ankrd36 | 305491 | 1,01 | up   |
| 6303829 | 7120653 | 1178948 | ankyrin repeat domain 36                 | Ankrd36 | 305491 | 1,00 | up   |
| 5861591 | 7120653 | 1178959 | ankyrin repeat domain 36                 | Ankrd36 | 305491 | 1,00 | up   |
| 5964024 | 7145604 | 1239846 | ankyrin repeat domain 37                 | Ankrd37 | 361149 | 2,14 | up   |
| 6703930 | 7145604 | 1239847 | ankyrin repeat domain 37                 | Ankrd37 | 361149 | 1,86 | up   |
| 6282200 | 7145604 | 1239844 | ankyrin repeat domain 37                 | Ankrd37 | 361149 | 1,48 | down |
| 6236853 | 7145604 | 1239843 | ankyrin repeat domain 37                 | Ankrd37 | 361149 | 1,29 | up   |
| 6470767 | 7145604 | 1239845 | ankyrin repeat domain 37                 | Ankrd37 | 361149 | 1,24 | down |
| 6590441 | 7233012 | 1455416 | ankyrin repeat domain 5                  | Ankrd5  | 296184 | 2,17 | up   |
| 6644799 | 7233012 | 1455425 | ankyrin repeat domain 5                  | Ankrd5  | 296184 | 2,02 | down |
| 5636259 | 7233012 | 1455412 | ankyrin repeat domain 5                  | Ankrd5  | 296184 | 1,44 | down |
| 6667093 | 7233012 | 1455423 | ankyrin repeat domain 5                  | Ankrd5  | 296184 | 1,44 | up   |
| 6342921 | 7233012 | 1455422 | ankyrin repeat domain 5                  | Ankrd5  | 296184 | 1,24 | down |
| 6354534 | 7233012 | 1455414 | ankyrin repeat domain 5                  | Ankrd5  | 296184 | 1,23 | down |
| 6510939 | 7233012 | 1455419 | ankyrin repeat domain 5                  | Ankrd5  | 296184 | 1,09 | down |
| 6399097 | 7233012 | 1455417 | ankyrin repeat domain 5                  | Ankrd5  | 296184 | 1,09 | down |
| 5915745 | 7233012 | 1455424 | ankyrin repeat domain 5                  | Ankrd5  | 296184 | 1,06 | up   |
| 6663608 | 7233012 | 1455420 | ankyrin repeat domain 5                  | Ankrd5  | 296184 | 1,04 | up   |
| 5921213 | 7233012 | 1455415 | ankyrin repeat domain 5                  | Ankrd5  | 296184 | 1,02 | down |
| 6019398 | 7233012 | 1455418 | ankyrin repeat domain 5                  | Ankrd5  | 296184 | 1,01 | down |
| 6203561 | 7233012 | 1455421 | ankyrin repeat domain 5                  | Ankrd5  | 296184 | 1,01 | up   |
| 6443236 | 7370009 | 1795812 | ankyrin repeat domain 57                 | Ankrd57 | 503306 | 2,35 | down |
| 5753766 | 7370009 | 1795812 | ankyrin repeat domain 57                 | Ankrd57 | 503306 | 1,73 | up   |
| 6540539 | 7370009 | 1795812 | ankyrin repeat domain 57                 | Ankrd57 | 503306 | 1,26 | up   |
| 6700730 | 7370009 | 1795812 | ankyrin repeat domain 57                 | Ankrd57 | 503306 | 1,14 | up   |
| 6116451 | 7370009 | 1795811 | ankyrin repeat domain 57                 | Ankrd57 | 503306 | 1,13 | down |
| 6258250 | 7370009 | 1795812 | ankyrin repeat domain 57                 | Ankrd57 | 503306 | 1,11 | up   |
| 5949472 | 7370009 | 1795812 | ankyrin repeat domain 57                 | Ankrd57 | 503306 | 1,04 | down |
| 6123807 | 7370009 | 1795812 | ankyrin repeat domain 57                 | Ankrd57 | 503306 | 1,02 | up   |
| 6397183 | 7337587 | 1713758 | annexin A2                               | Anxa2   | 56611  | 2,15 | down |
| 5719852 | 7337587 | 1713756 | annexin A2                               | Anxa2   | 56611  | 1,70 | down |
| 6478135 | 7337587 | 1713766 | annexin A2                               | Anxa2   | 56611  | 1,61 | down |
| 6103244 | 7337587 | 1713764 | annexin A2                               | Anxa2   | 56611  | 1,60 | up   |
| 6715030 | 7337587 | 1713757 | annexin A2                               | Anxa2   | 56611  | 1,59 | down |
| 6143361 | 7337587 | 1713765 | annexin A2                               | Anxa2   | 56611  | 1,41 | down |
| 6405367 | 7337587 | 1713761 | annexin A2                               | Anxa2   | 56611  | 1,36 | up   |
| 6263067 | 7337587 | 1713763 | annexin A2                               | Anxa2   | 56611  | 1,22 | down |
| 6258157 | 7337587 | 1713762 | annexin A2                               | Anxa2   | 56611  | 1,22 | up   |
| 6442226 | 7337587 | 1713755 | annexin A2                               | Anxa2   | 56611  | 1,20 | up   |
| 5971967 | 7337587 | 1713759 | annexin A2                               | Anxa2   | 56611  | 1,14 | up   |
| 6381298 | 7337587 | 1713760 | annexin A2                               | Anxa2   | 56611  | 1,11 | up   |
| 6234541 | 7337587 | 1713754 | annexin A2                               | Anxa2   | 56611  | 1,08 | up   |
| 6407387 | 7321057 | 1674887 | anti-Mullerian hormone receptor, type II | Amhr2   | 29530  | 2,22 | up   |
| 6450837 | 7321057 | 1674881 | anti-Mullerian hormone receptor, type II | Amhr2   | 29530  | 1,47 | down |
| 5865172 | 7321057 | 1674876 | anti-Mullerian hormone receptor, type II | Amhr2   | 29530  | 1,37 | down |
| 6075204 | 7321057 | 1674882 | anti-Mullerian hormone receptor, type II | Amhr2   | 29530  | 1,22 | up   |
| 5724656 | 7321057 | 1674875 | anti-Mullerian hormone receptor, type II | Amhr2   | 29530  | 1,21 | up   |
| 6605981 | 7321057 | 1674884 | anti-Mullerian hormone receptor, type II | Amhr2   | 29530  | 1,09 | down |
| 6441330 | 7321057 | 1674886 | anti-Mullerian hormone receptor, type II | Amhr2   | 29530  | 1,08 | up   |
| 5765767 | 7321057 | 1674878 | anti-Mullerian hormone receptor, type II | Amhr2   | 29530  | 1,06 | up   |
| 6704915 | 7321057 | 1674877 | anti-Mullerian hormone receptor, type II | Amhr2   | 29530  | 1,06 | up   |
| 5618867 | 7321057 | 1674885 | anti-Mullerian hormone receptor, type II | Amhr2   | 29530  | 1,05 | up   |
| 6325197 | 7321057 | 1674887 | anti-Mullerian hormone receptor, type II | Amhr2   | 29530  | 1,04 | up   |
| 5823432 | 7321057 | 1674888 | anti-Mullerian hormone receptor, type II | Amhr2   | 29530  | 1,01 | down |
| 6051557 | 7321057 | 1674886 | anti-Mullerian hormone receptor, type II | Amhr2   | 29530  | 1,01 | down |

|         |         |         |                                             |        |        |      |      |
|---------|---------|---------|---------------------------------------------|--------|--------|------|------|
| 6283715 | 7321057 | 1674880 | anti-Mullerian hormone receptor, type II    | Amhr2  | 29530  | 1,00 | up   |
| 6540818 | 7321057 | 1674879 | anti-Mullerian hormone receptor, type II    | Amhr2  | 29530  | 1,00 | up   |
| 6559416 | 7321057 | 1674883 | anti-Mullerian hormone receptor, type II    | Amhr2  | 29530  | 1,00 | up   |
| 5973076 | 7041273 | 988590  | APOBEC1 complementation factor              | A1cf   | 170912 | 3,46 | up   |
| 6422934 | 7041273 | 988590  | APOBEC1 complementation factor              | A1cf   | 170912 | 3,39 | up   |
| 5925630 | 7041273 | 988590  | APOBEC1 complementation factor              | A1cf   | 170912 | 3,07 | up   |
| 6211095 | 7041273 | 988587  | APOBEC1 complementation factor              | A1cf   | 170912 | 1,83 | down |
| 6207722 | 7041273 | 988588  | APOBEC1 complementation factor              | A1cf   | 170912 | 1,70 | down |
| 5864713 | 7041273 | 988591  | APOBEC1 complementation factor              | A1cf   | 170912 | 1,56 | down |
| 6077509 | 7041273 | 988589  | APOBEC1 complementation factor              | A1cf   | 170912 | 1,51 | down |
| 6220349 | 7041273 | 988585  | APOBEC1 complementation factor              | A1cf   | 170912 | 1,38 | down |
| 5812894 | 7041273 | 988591  | APOBEC1 complementation factor              | A1cf   | 170912 | 1,31 | up   |
| 6537212 | 7041273 | 988592  | APOBEC1 complementation factor              | A1cf   | 170912 | 1,25 | down |
| 5805182 | 7041273 | 988584  | APOBEC1 complementation factor              | A1cf   | 170912 | 1,15 | up   |
| 6324145 | 7041273 | 988583  | APOBEC1 complementation factor              | A1cf   | 170912 | 1,08 | down |
| 5946507 | 7041273 | 988583  | APOBEC1 complementation factor              | A1cf   | 170912 | 1,07 | up   |
| 6564583 | 7041273 | 988586  | APOBEC1 complementation factor              | A1cf   | 170912 | 1,02 | down |
| 6664039 | 7048681 | 1006865 | apolipoprotein E                            | ApoE   | 25728  | 2,09 | down |
| 6169954 | 7048681 | 1006865 | apolipoprotein E                            | ApoE   | 25728  | 1,38 | up   |
| 5880725 | 7048681 | 1006866 | apolipoprotein E                            | ApoE   | 25728  | 1,15 | up   |
| 6411809 | 7048681 | 1006864 | apolipoprotein E                            | ApoE   | 25728  | 1,08 | up   |
| 5772331 | 7048681 | 1006867 | apolipoprotein E                            | ApoE   | 25728  | 1,05 | down |
| 5753912 | 7048681 | 1006864 | apolipoprotein E                            | ApoE   | 25728  | 1,02 | up   |
| 6534289 | 7329479 | 1694177 | apolipoprotein L 9a                         | Apol9a | 503164 | 3,08 | up   |
| 6030293 | 7329479 | 1694175 | apolipoprotein L 9a                         | Apol9a | 503164 | 2,45 | down |
| 5881446 | 7329479 | 1694173 | apolipoprotein L 9a                         | Apol9a | 503164 | 1,87 | down |
| 5721265 | 7329479 | 1694174 | apolipoprotein L 9a                         | Apol9a | 503164 | 1,45 | down |
| 5866712 | 7329479 | 1694176 | apolipoprotein L 9a                         | Apol9a | 503164 | 1,13 | down |
| 6050944 | 7080812 | 1081168 | apoptosis antagonizing transcription factor | Aatf   | 114512 | 2,64 | down |
| 5987736 | 7080812 | 1081156 | apoptosis antagonizing transcription factor | Aatf   | 114512 | 2,16 | down |
| 6256022 | 7080812 | 1081157 | apoptosis antagonizing transcription factor | Aatf   | 114512 | 2,07 | up   |
| 6001096 | 7080812 | 1081168 | apoptosis antagonizing transcription factor | Aatf   | 114512 | 1,86 | down |
| 6033903 | 7080812 | 1081163 | apoptosis antagonizing transcription factor | Aatf   | 114512 | 1,60 | up   |
| 6106149 | 7080812 | 1081156 | apoptosis antagonizing transcription factor | Aatf   | 114512 | 1,56 | down |
| 5627579 | 7080812 | 1081165 | apoptosis antagonizing transcription factor | Aatf   | 114512 | 1,54 | up   |
| 6261284 | 7080812 | 1081164 | apoptosis antagonizing transcription factor | Aatf   | 114512 | 1,50 | up   |
| 6573631 | 7080812 | 1081168 | apoptosis antagonizing transcription factor | Aatf   | 114512 | 1,33 | down |
| 6324752 | 7080812 | 1081166 | apoptosis antagonizing transcription factor | Aatf   | 114512 | 1,14 | up   |
| 5762639 | 7080812 | 1081158 | apoptosis antagonizing transcription factor | Aatf   | 114512 | 1,12 | down |
| 6415395 | 7080812 | 1081162 | apoptosis antagonizing transcription factor | Aatf   | 114512 | 1,11 | up   |
| 5647405 | 7080812 | 1081168 | apoptosis antagonizing transcription factor | Aatf   | 114512 | 1,10 | up   |
| 5700060 | 7080812 | 1081161 | apoptosis antagonizing transcription factor | Aatf   | 114512 | 1,08 | down |
| 6034882 | 7080812 | 1081160 | apoptosis antagonizing transcription factor | Aatf   | 114512 | 1,04 | up   |
| 6211379 | 7080812 | 1081159 | apoptosis antagonizing transcription factor | Aatf   | 114512 | 1,03 | down |
| 6245097 | 7080812 | 1081167 | apoptosis antagonizing transcription factor | Aatf   | 114512 | 1,01 | down |
| 5617759 | 7323725 | 1680456 | apoptotic peptidase activating factor 1     | Apaf1  | 78963  | 2,19 | down |
| 5823977 | 7323725 | 1680450 | apoptotic peptidase activating factor 1     | Apaf1  | 78963  | 1,93 | up   |
| 6633634 | 7323725 | 1680443 | apoptotic peptidase activating factor 1     | Apaf1  | 78963  | 1,88 | down |
| 6707514 | 7323725 | 1680461 | apoptotic peptidase activating factor 1     | Apaf1  | 78963  | 1,74 | up   |
| 5763728 | 7323725 | 1680463 | apoptotic peptidase activating factor 1     | Apaf1  | 78963  | 1,62 | down |
| 6492124 | 7323725 | 1680466 | apoptotic peptidase activating factor 1     | Apaf1  | 78963  | 1,49 | up   |
| 6616828 | 7323725 | 1680466 | apoptotic peptidase activating factor 1     | Apaf1  | 78963  | 1,49 | down |
| 6619268 | 7323725 | 1680446 | apoptotic peptidase activating factor 1     | Apaf1  | 78963  | 1,47 | up   |
| 5713477 | 7323725 | 1680449 | apoptotic peptidase activating factor 1     | Apaf1  | 78963  | 1,45 | up   |
| 6209852 | 7323725 | 1680453 | apoptotic peptidase activating factor 1     | Apaf1  | 78963  | 1,43 | down |
| 6649829 | 7323725 | 1680448 | apoptotic peptidase activating factor 1     | Apaf1  | 78963  | 1,36 | up   |
| 5778162 | 7323725 | 1680467 | apoptotic peptidase activating factor 1     | Apaf1  | 78963  | 1,32 | down |

|         |         |         |                                                          |        |        |      |      |
|---------|---------|---------|----------------------------------------------------------|--------|--------|------|------|
| 6641136 | 7323725 | 1680445 | apoptotic peptidase activating factor 1                  | Apaf1  | 78963  | 1,29 | down |
| 6644288 | 7323725 | 1680449 | apoptotic peptidase activating factor 1                  | Apaf1  | 78963  | 1,29 | up   |
| 5831704 | 7323725 | 1680459 | apoptotic peptidase activating factor 1                  | Apaf1  | 78963  | 1,27 | up   |
| 5657236 | 7323725 | 1680467 | apoptotic peptidase activating factor 1                  | Apaf1  | 78963  | 1,22 | down |
| 6663541 | 7323725 | 1680447 | apoptotic peptidase activating factor 1                  | Apaf1  | 78963  | 1,18 | up   |
| 6681431 | 7323725 | 1680444 | apoptotic peptidase activating factor 1                  | Apaf1  | 78963  | 1,17 | down |
| 5838404 | 7323725 | 1680458 | apoptotic peptidase activating factor 1                  | Apaf1  | 78963  | 1,17 | up   |
| 6015782 | 7323725 | 1680460 | apoptotic peptidase activating factor 1                  | Apaf1  | 78963  | 1,15 | up   |
| 6618357 | 7323725 | 1680462 | apoptotic peptidase activating factor 1                  | Apaf1  | 78963  | 1,11 | up   |
| 6180627 | 7323725 | 1680467 | apoptotic peptidase activating factor 1                  | Apaf1  | 78963  | 1,11 | down |
| 6030794 | 7323725 | 1680457 | apoptotic peptidase activating factor 1                  | Apaf1  | 78963  | 1,09 | up   |
| 6355215 | 7323725 | 1680465 | apoptotic peptidase activating factor 1                  | Apaf1  | 78963  | 1,05 | up   |
| 6127302 | 7323725 | 1680456 | apoptotic peptidase activating factor 1                  | Apaf1  | 78963  | 1,05 | up   |
| 5992340 | 7323725 | 1680455 | apoptotic peptidase activating factor 1                  | Apaf1  | 78963  | 1,03 | down |
| 6233556 | 7323725 | 1680454 | apoptotic peptidase activating factor 1                  | Apaf1  | 78963  | 1,02 | up   |
| 5657024 | 7323725 | 1680451 | apoptotic peptidase activating factor 1                  | Apaf1  | 78963  | 1,01 | down |
| 6160921 | 7323725 | 1680452 | apoptotic peptidase activating factor 1                  | Apaf1  | 78963  | 1,01 | down |
| 5885574 | 7323725 | 1680464 | apoptotic peptidase activating factor 1                  | Apaf1  | 78963  | 1,01 | up   |
| 6161740 | 7285292 | 1585568 | aquaporin 3                                              | Aqp3   | 65133  | 2,17 | up   |
| 6556532 | 7285292 | 1585573 | aquaporin 3                                              | Aqp3   | 65133  | 1,44 | down |
| 6096046 | 7285292 | 1585572 | aquaporin 3                                              | Aqp3   | 65133  | 1,19 | down |
| 6589590 | 7285292 | 1585569 | aquaporin 3                                              | Aqp3   | 65133  | 1,16 | up   |
| 5932860 | 7285292 | 1585567 | aquaporin 3                                              | Aqp3   | 65133  | 1,13 | down |
| 6494557 | 7285292 | 1585570 | aquaporin 3                                              | Aqp3   | 65133  | 1,06 | up   |
| 6513991 | 7285292 | 1585573 | aquaporin 3                                              | Aqp3   | 65133  | 1,03 | up   |
| 6486139 | 7285292 | 1585571 | aquaporin 3                                              | Aqp3   | 65133  | 1,00 | down |
| 6253510 | 7068995 | 1053635 | arachidonate lipoxygenase 3                              | Aloxe3 | 287424 | 1,74 | up   |
| 5824088 | 7068995 | 1053628 | arachidonate lipoxygenase 3                              | Aloxe3 | 287424 | 1,52 | down |
| 5695541 | 7068995 | 1053634 | arachidonate lipoxygenase 3                              | Aloxe3 | 287424 | 1,46 | down |
| 6006093 | 7068995 | 1053633 | arachidonate lipoxygenase 3                              | Aloxe3 | 287424 | 1,33 | down |
| 5895682 | 7068995 | 1053623 | arachidonate lipoxygenase 3                              | Aloxe3 | 287424 | 1,32 | up   |
| 6744203 | 7068995 | 1053636 | arachidonate lipoxygenase 3                              | Aloxe3 | 287424 | 1,31 | down |
| 6409395 | 7068995 | 1053629 | arachidonate lipoxygenase 3                              | Aloxe3 | 287424 | 1,31 | down |
| 6536725 | 7068995 | 1053625 | arachidonate lipoxygenase 3                              | Aloxe3 | 287424 | 1,21 | down |
| 6184417 | 7068995 | 1053626 | arachidonate lipoxygenase 3                              | Aloxe3 | 287424 | 1,20 | up   |
| 6194526 | 7068995 | 1053627 | arachidonate lipoxygenase 3                              | Aloxe3 | 287424 | 1,13 | up   |
| 5984784 | 7068995 | 1053625 | arachidonate lipoxygenase 3                              | Aloxe3 | 287424 | 1,10 | up   |
| 6572388 | 7068995 | 1053622 | arachidonate lipoxygenase 3                              | Aloxe3 | 287424 | 1,08 | up   |
| 5639211 | 7068995 | 1053634 | arachidonate lipoxygenase 3                              | Aloxe3 | 287424 | 1,05 | down |
| 5856343 | 7068995 | 1053632 | arachidonate lipoxygenase 3                              | Aloxe3 | 287424 | 1,02 | down |
| 6119437 | 7068995 | 1053637 | arachidonate lipoxygenase 3                              | Aloxe3 | 287424 | 1,01 | up   |
| 6448384 | 7068995 | 1053631 | arachidonate lipoxygenase 3                              | Aloxe3 | 287424 | 1,01 | down |
| 6641617 | 7068995 | 1053637 | arachidonate lipoxygenase 3                              | Aloxe3 | 287424 | 1,01 | down |
| 6149036 | 7068995 | 1053630 | arachidonate lipoxygenase 3                              | Aloxe3 | 287424 | 1,00 | down |
| 6692219 | 7079238 | 1077803 | ArfGAP with coiled-coil, ankyrin repeat and PH domains 1 | Acap1  | 287443 | 1,52 | up   |
| 6265831 | 7079238 | 1077805 | ArfGAP with coiled-coil, ankyrin repeat and PH domains 1 | Acap1  | 287443 | 1,49 | down |
| 6193027 | 7079238 | 1077804 | ArfGAP with coiled-coil, ankyrin repeat and PH domains 1 | Acap1  | 287443 | 1,38 | up   |
| 6437657 | 7079238 | 1077805 | ArfGAP with coiled-coil, ankyrin repeat and PH domains 1 | Acap1  | 287443 | 1,31 | up   |
| 6350761 | 7079238 | 1077802 | ArfGAP with coiled-coil, ankyrin repeat and PH domains 1 | Acap1  | 287443 | 1,28 | up   |
| 6006202 | 7079238 | 1077802 | ArfGAP with coiled-coil, ankyrin repeat and PH domains 1 | Acap1  | 287443 | 1,14 | up   |
| 6661073 | 7079238 | 1077802 | ArfGAP with coiled-coil, ankyrin repeat and PH domains 1 | Acap1  | 287443 | 1,09 | down |
| 6617221 | 7282343 | 1578687 | ArfGAP with coiled-coil, ankyrin repeat and PH domains 3 | Acap3  | 313772 | 1,94 | down |
| 6458715 | 7282343 | 1578680 | ArfGAP with coiled-coil, ankyrin repeat and PH domains 3 | Acap3  | 313772 | 1,81 | up   |
| 5925764 | 7282343 | 1578662 | ArfGAP with coiled-coil, ankyrin repeat and PH domains 3 | Acap3  | 313772 | 1,75 | down |
| 5904326 | 7282343 | 1578686 | ArfGAP with coiled-coil, ankyrin repeat and PH domains 3 | Acap3  | 313772 | 1,72 | up   |
| 5717185 | 7282343 | 1578667 | ArfGAP with coiled-coil, ankyrin repeat and PH domains 3 | Acap3  | 313772 | 1,60 | up   |
| 5693237 | 7282343 | 1578692 | ArfGAP with coiled-coil, ankyrin repeat and PH domains 3 | Acap3  | 313772 | 1,57 | up   |

|         |         |         |                                                           |       |        |      |      |
|---------|---------|---------|-----------------------------------------------------------|-------|--------|------|------|
| 5823929 | 7282343 | 1578686 | ArfGAP with coiled-coil, ankyrin repeat and PH domains 3  | Acap3 | 313772 | 1,53 | down |
| 6267628 | 7282343 | 1578669 | ArfGAP with coiled-coil, ankyrin repeat and PH domains 3  | Acap3 | 313772 | 1,52 | down |
| 6641421 | 7282343 | 1578676 | ArfGAP with coiled-coil, ankyrin repeat and PH domains 3  | Acap3 | 313772 | 1,42 | up   |
| 6686133 | 7282343 | 1578670 | ArfGAP with coiled-coil, ankyrin repeat and PH domains 3  | Acap3 | 313772 | 1,40 | down |
| 6017723 | 7282343 | 1578691 | ArfGAP with coiled-coil, ankyrin repeat and PH domains 3  | Acap3 | 313772 | 1,38 | up   |
| 6135490 | 7282343 | 1578690 | ArfGAP with coiled-coil, ankyrin repeat and PH domains 3  | Acap3 | 313772 | 1,31 | up   |
| 6351266 | 7282343 | 1578673 | ArfGAP with coiled-coil, ankyrin repeat and PH domains 3  | Acap3 | 313772 | 1,30 | up   |
| 6470869 | 7282343 | 1578689 | ArfGAP with coiled-coil, ankyrin repeat and PH domains 3  | Acap3 | 313772 | 1,29 | down |
| 6638859 | 7282343 | 1578692 | ArfGAP with coiled-coil, ankyrin repeat and PH domains 3  | Acap3 | 313772 | 1,27 | down |
| 6539326 | 7282343 | 1578672 | ArfGAP with coiled-coil, ankyrin repeat and PH domains 3  | Acap3 | 313772 | 1,26 | up   |
| 6260332 | 7282343 | 1578691 | ArfGAP with coiled-coil, ankyrin repeat and PH domains 3  | Acap3 | 313772 | 1,26 | down |
| 5826245 | 7282343 | 1578686 | ArfGAP with coiled-coil, ankyrin repeat and PH domains 3  | Acap3 | 313772 | 1,26 | down |
| 5664118 | 7282343 | 1578684 | ArfGAP with coiled-coil, ankyrin repeat and PH domains 3  | Acap3 | 313772 | 1,23 | up   |
| 6248054 | 7282343 | 1578679 | ArfGAP with coiled-coil, ankyrin repeat and PH domains 3  | Acap3 | 313772 | 1,21 | up   |
| 6664485 | 7282343 | 1578685 | ArfGAP with coiled-coil, ankyrin repeat and PH domains 3  | Acap3 | 313772 | 1,18 | up   |
| 6034431 | 7282343 | 1578684 | ArfGAP with coiled-coil, ankyrin repeat and PH domains 3  | Acap3 | 313772 | 1,12 | up   |
| 5683422 | 7282343 | 1578675 | ArfGAP with coiled-coil, ankyrin repeat and PH domains 3  | Acap3 | 313772 | 1,09 | up   |
| 6355824 | 7282343 | 1578682 | ArfGAP with coiled-coil, ankyrin repeat and PH domains 3  | Acap3 | 313772 | 1,07 | down |
| 6344437 | 7282343 | 1578671 | ArfGAP with coiled-coil, ankyrin repeat and PH domains 3  | Acap3 | 313772 | 1,07 | down |
| 6198204 | 7282343 | 1578688 | ArfGAP with coiled-coil, ankyrin repeat and PH domains 3  | Acap3 | 313772 | 1,06 | up   |
| 5874786 | 7282343 | 1578692 | ArfGAP with coiled-coil, ankyrin repeat and PH domains 3  | Acap3 | 313772 | 1,06 | up   |
| 6264606 | 7282343 | 1578681 | ArfGAP with coiled-coil, ankyrin repeat and PH domains 3  | Acap3 | 313772 | 1,06 | up   |
| 6486960 | 7282343 | 1578692 | ArfGAP with coiled-coil, ankyrin repeat and PH domains 3  | Acap3 | 313772 | 1,05 | down |
| 5878399 | 7282343 | 1578692 | ArfGAP with coiled-coil, ankyrin repeat and PH domains 3  | Acap3 | 313772 | 1,05 | down |
| 6395737 | 7282343 | 1578663 | ArfGAP with coiled-coil, ankyrin repeat and PH domains 3  | Acap3 | 313772 | 1,04 | down |
| 5876195 | 7282343 | 1578674 | ArfGAP with coiled-coil, ankyrin repeat and PH domains 3  | Acap3 | 313772 | 1,02 | up   |
| 6651701 | 7282343 | 1578683 | ArfGAP with coiled-coil, ankyrin repeat and PH domains 3  | Acap3 | 313772 | 1,01 | down |
| 6120512 | 7096975 | 1119719 | ArfGAP with dual PH domains 1                             | Adap1 | 171097 | 2,25 | down |
| 5849945 | 7096975 | 1119710 | ArfGAP with dual PH domains 1                             | Adap1 | 171097 | 1,75 | down |
| 5931035 | 7096975 | 1119711 | ArfGAP with dual PH domains 1                             | Adap1 | 171097 | 1,58 | up   |
| 5699710 | 7096975 | 1119719 | ArfGAP with dual PH domains 1                             | Adap1 | 171097 | 1,58 | down |
| 5836608 | 7096975 | 1119719 | ArfGAP with dual PH domains 1                             | Adap1 | 171097 | 1,54 | down |
| 5926525 | 7096975 | 1119719 | ArfGAP with dual PH domains 1                             | Adap1 | 171097 | 1,52 | up   |
| 6300037 | 7096975 | 1119719 | ArfGAP with dual PH domains 1                             | Adap1 | 171097 | 1,45 | up   |
| 6587667 | 7096975 | 1119717 | ArfGAP with dual PH domains 1                             | Adap1 | 171097 | 1,38 | up   |
| 6198890 | 7096975 | 1119718 | ArfGAP with dual PH domains 1                             | Adap1 | 171097 | 1,31 | down |
| 6231134 | 7096975 | 1119712 | ArfGAP with dual PH domains 1                             | Adap1 | 171097 | 1,18 | up   |
| 6472742 | 7096975 | 1119714 | ArfGAP with dual PH domains 1                             | Adap1 | 171097 | 1,13 | down |
| 6432215 | 7096975 | 1119719 | ArfGAP with dual PH domains 1                             | Adap1 | 171097 | 1,11 | up   |
| 5896470 | 7096975 | 1119715 | ArfGAP with dual PH domains 1                             | Adap1 | 171097 | 1,06 | up   |
| 5661173 | 7096975 | 1119709 | ArfGAP with dual PH domains 1                             | Adap1 | 171097 | 1,04 | up   |
| 6711869 | 7096975 | 1119716 | ArfGAP with dual PH domains 1                             | Adap1 | 171097 | 1,01 | down |
| 5968662 | 7096975 | 1119713 | ArfGAP with dual PH domains 1                             | Adap1 | 171097 | 1,00 | up   |
| 6160570 | 7260488 | 1523922 | ArfGAP with GTPase domain, ankyrin repeat and PH domain 3 | Agap3 | 362300 | 1,54 | down |
| 5704638 | 7260488 | 1523916 | ArfGAP with GTPase domain, ankyrin repeat and PH domain 3 | Agap3 | 362300 | 1,52 | up   |
| 6530945 | 7260488 | 1523930 | ArfGAP with GTPase domain, ankyrin repeat and PH domain 3 | Agap3 | 362300 | 1,49 | up   |
| 5658959 | 7260488 | 1523911 | ArfGAP with GTPase domain, ankyrin repeat and PH domain 3 | Agap3 | 362300 | 1,39 | up   |
| 5724833 | 7260488 | 1523910 | ArfGAP with GTPase domain, ankyrin repeat and PH domain 3 | Agap3 | 362300 | 1,36 | up   |
| 6441048 | 7260488 | 1523922 | ArfGAP with GTPase domain, ankyrin repeat and PH domain 3 | Agap3 | 362300 | 1,35 | up   |
| 6239821 | 7260488 | 1523925 | ArfGAP with GTPase domain, ankyrin repeat and PH domain 3 | Agap3 | 362300 | 1,24 | down |
| 5775152 | 7260488 | 1523929 | ArfGAP with GTPase domain, ankyrin repeat and PH domain 3 | Agap3 | 362300 | 1,23 | up   |
| 6128435 | 7260488 | 1523913 | ArfGAP with GTPase domain, ankyrin repeat and PH domain 3 | Agap3 | 362300 | 1,20 | up   |
| 6624974 | 7260488 | 1523909 | ArfGAP with GTPase domain, ankyrin repeat and PH domain 3 | Agap3 | 362300 | 1,20 | up   |
| 6026928 | 7260488 | 1523914 | ArfGAP with GTPase domain, ankyrin repeat and PH domain 3 | Agap3 | 362300 | 1,19 | down |
| 6126724 | 7260488 | 1523930 | ArfGAP with GTPase domain, ankyrin repeat and PH domain 3 | Agap3 | 362300 | 1,15 | up   |
| 6378084 | 7260488 | 1523928 | ArfGAP with GTPase domain, ankyrin repeat and PH domain 3 | Agap3 | 362300 | 1,14 | up   |
| 6732718 | 7260488 | 1523921 | ArfGAP with GTPase domain, ankyrin repeat and PH domain 3 | Agap3 | 362300 | 1,10 | up   |

|         |         |         |                                                           |        |        |      |      |
|---------|---------|---------|-----------------------------------------------------------|--------|--------|------|------|
| 6433188 | 7260488 | 1523909 | ArfGAP with GTPase domain, ankyrin repeat and PH domain 3 | Agap3  | 362300 | 1,09 | up   |
| 5984931 | 7260488 | 1523920 | ArfGAP with GTPase domain, ankyrin repeat and PH domain 3 | Agap3  | 362300 | 1,07 | up   |
| 5945073 | 7260488 | 1523912 | ArfGAP with GTPase domain, ankyrin repeat and PH domain 3 | Agap3  | 362300 | 1,04 | up   |
| 6448311 | 7260488 | 1523918 | ArfGAP with GTPase domain, ankyrin repeat and PH domain 3 | Agap3  | 362300 | 1,03 | up   |
| 5825160 | 7260488 | 1523916 | ArfGAP with GTPase domain, ankyrin repeat and PH domain 3 | Agap3  | 362300 | 1,02 | down |
| 5890074 | 7260488 | 1523930 | ArfGAP with GTPase domain, ankyrin repeat and PH domain 3 | Agap3  | 362300 | 1,01 | down |
| 5775506 | 7118864 | 1174358 | ArfGAP with RhoGAP domain, ankyrin repeat and PH domain 2 | Arap2  | 305367 | 2,52 | down |
| 6495966 | 7118864 | 1174363 | ArfGAP with RhoGAP domain, ankyrin repeat and PH domain 2 | Arap2  | 305367 | 1,57 | up   |
| 5873004 | 7118864 | 1174356 | ArfGAP with RhoGAP domain, ankyrin repeat and PH domain 2 | Arap2  | 305367 | 1,44 | up   |
| 6298281 | 7118864 | 1174326 | ArfGAP with RhoGAP domain, ankyrin repeat and PH domain 2 | Arap2  | 305367 | 1,43 | down |
| 6033679 | 7118864 | 1174321 | ArfGAP with RhoGAP domain, ankyrin repeat and PH domain 2 | Arap2  | 305367 | 1,41 | up   |
| 6183358 | 7118864 | 1174358 | ArfGAP with RhoGAP domain, ankyrin repeat and PH domain 2 | Arap2  | 305367 | 1,40 | down |
| 5956465 | 7118864 | 1174335 | ArfGAP with RhoGAP domain, ankyrin repeat and PH domain 2 | Arap2  | 305367 | 1,39 | up   |
| 6148717 | 7118864 | 1174338 | ArfGAP with RhoGAP domain, ankyrin repeat and PH domain 2 | Arap2  | 305367 | 1,36 | up   |
| 6721283 | 7118864 | 1174357 | ArfGAP with RhoGAP domain, ankyrin repeat and PH domain 2 | Arap2  | 305367 | 1,34 | up   |
| 5827254 | 7118864 | 1174363 | ArfGAP with RhoGAP domain, ankyrin repeat and PH domain 2 | Arap2  | 305367 | 1,29 | up   |
| 6688218 | 7118864 | 1174359 | ArfGAP with RhoGAP domain, ankyrin repeat and PH domain 2 | Arap2  | 305367 | 1,29 | up   |
| 6605327 | 7118864 | 1174332 | ArfGAP with RhoGAP domain, ankyrin repeat and PH domain 2 | Arap2  | 305367 | 1,27 | up   |
| 6560011 | 7118864 | 1174347 | ArfGAP with RhoGAP domain, ankyrin repeat and PH domain 2 | Arap2  | 305367 | 1,26 | up   |
| 6401176 | 7118864 | 1174354 | ArfGAP with RhoGAP domain, ankyrin repeat and PH domain 2 | Arap2  | 305367 | 1,25 | up   |
| 6035320 | 7118864 | 1174337 | ArfGAP with RhoGAP domain, ankyrin repeat and PH domain 2 | Arap2  | 305367 | 1,23 | up   |
| 6157645 | 7118864 | 1174334 | ArfGAP with RhoGAP domain, ankyrin repeat and PH domain 2 | Arap2  | 305367 | 1,22 | up   |
| 6300406 | 7118864 | 1174330 | ArfGAP with RhoGAP domain, ankyrin repeat and PH domain 2 | Arap2  | 305367 | 1,21 | down |
| 6193568 | 7118864 | 1174349 | ArfGAP with RhoGAP domain, ankyrin repeat and PH domain 2 | Arap2  | 305367 | 1,19 | up   |
| 6140769 | 7118864 | 1174339 | ArfGAP with RhoGAP domain, ankyrin repeat and PH domain 2 | Arap2  | 305367 | 1,15 | up   |
| 5946418 | 7118864 | 1174340 | ArfGAP with RhoGAP domain, ankyrin repeat and PH domain 2 | Arap2  | 305367 | 1,15 | up   |
| 5734448 | 7118864 | 1174325 | ArfGAP with RhoGAP domain, ankyrin repeat and PH domain 2 | Arap2  | 305367 | 1,15 | up   |
| 6614959 | 7118864 | 1174331 | ArfGAP with RhoGAP domain, ankyrin repeat and PH domain 2 | Arap2  | 305367 | 1,13 | up   |
| 6741135 | 7118864 | 1174362 | ArfGAP with RhoGAP domain, ankyrin repeat and PH domain 2 | Arap2  | 305367 | 1,13 | down |
| 5674122 | 7118864 | 1174361 | ArfGAP with RhoGAP domain, ankyrin repeat and PH domain 2 | Arap2  | 305367 | 1,10 | up   |
| 6006802 | 7118864 | 1174342 | ArfGAP with RhoGAP domain, ankyrin repeat and PH domain 2 | Arap2  | 305367 | 1,10 | down |
| 6428989 | 7118864 | 1174341 | ArfGAP with RhoGAP domain, ankyrin repeat and PH domain 2 | Arap2  | 305367 | 1,10 | up   |
| 5828831 | 7118864 | 1174350 | ArfGAP with RhoGAP domain, ankyrin repeat and PH domain 2 | Arap2  | 305367 | 1,09 | up   |
| 5822431 | 7118864 | 1174343 | ArfGAP with RhoGAP domain, ankyrin repeat and PH domain 2 | Arap2  | 305367 | 1,09 | down |
| 5888246 | 7118864 | 1174328 | ArfGAP with RhoGAP domain, ankyrin repeat and PH domain 2 | Arap2  | 305367 | 1,08 | down |
| 6638396 | 7118864 | 1174355 | ArfGAP with RhoGAP domain, ankyrin repeat and PH domain 2 | Arap2  | 305367 | 1,05 | up   |
| 5926552 | 7118864 | 1174346 | ArfGAP with RhoGAP domain, ankyrin repeat and PH domain 2 | Arap2  | 305367 | 1,03 | down |
| 5951201 | 7118864 | 1174336 | ArfGAP with RhoGAP domain, ankyrin repeat and PH domain 2 | Arap2  | 305367 | 1,03 | up   |
| 6397133 | 7151468 | 1254156 | Arg/Abl-interacting protein ArgBP2                        | Argbp2 | 114901 | 2,44 | up   |
| 5718409 | 7151468 | 1254167 | Arg/Abl-interacting protein ArgBP2                        | Argbp2 | 114901 | 2,07 | down |
| 6168886 | 7151468 | 1254151 | Arg/Abl-interacting protein ArgBP2                        | Argbp2 | 114901 | 2,05 | down |
| 6014142 | 7151468 | 1254146 | Arg/Abl-interacting protein ArgBP2                        | Argbp2 | 114901 | 2,04 | down |
| 5898027 | 7151468 | 1254145 | Arg/Abl-interacting protein ArgBP2                        | Argbp2 | 114901 | 1,82 | down |
| 6616482 | 7151468 | 1254154 | Arg/Abl-interacting protein ArgBP2                        | Argbp2 | 114901 | 1,77 | up   |
| 6541345 | 7151468 | 1254166 | Arg/Abl-interacting protein ArgBP2                        | Argbp2 | 114901 | 1,72 | down |
| 5987679 | 7151468 | 1254147 | Arg/Abl-interacting protein ArgBP2                        | Argbp2 | 114901 | 1,70 | up   |
| 5747520 | 7151468 | 1254161 | Arg/Abl-interacting protein ArgBP2                        | Argbp2 | 114901 | 1,68 | up   |
| 6538998 | 7151468 | 1254163 | Arg/Abl-interacting protein ArgBP2                        | Argbp2 | 114901 | 1,65 | up   |
| 5877518 | 7151468 | 1254156 | Arg/Abl-interacting protein ArgBP2                        | Argbp2 | 114901 | 1,51 | up   |
| 6701006 | 7151468 | 1254163 | Arg/Abl-interacting protein ArgBP2                        | Argbp2 | 114901 | 1,50 | up   |
| 5671356 | 7151468 | 1254152 | Arg/Abl-interacting protein ArgBP2                        | Argbp2 | 114901 | 1,49 | down |
| 5818651 | 7151468 | 1254156 | Arg/Abl-interacting protein ArgBP2                        | Argbp2 | 114901 | 1,46 | up   |
| 5818988 | 7151468 | 1254169 | Arg/Abl-interacting protein ArgBP2                        | Argbp2 | 114901 | 1,44 | up   |
| 6572138 | 7151468 | 1254157 | Arg/Abl-interacting protein ArgBP2                        | Argbp2 | 114901 | 1,42 | down |
| 6248775 | 7151468 | 1254168 | Arg/Abl-interacting protein ArgBP2                        | Argbp2 | 114901 | 1,31 | up   |
| 6592698 | 7151468 | 1254149 | Arg/Abl-interacting protein ArgBP2                        | Argbp2 | 114901 | 1,28 | down |
| 6041232 | 7151468 | 1254162 | Arg/Abl-interacting protein ArgBP2                        | Argbp2 | 114901 | 1,24 | down |

|         |         |         |                                    |        |        |      |      |
|---------|---------|---------|------------------------------------|--------|--------|------|------|
| 6156251 | 7151468 | 1254159 | Arg/Abl-interacting protein ArgBP2 | Argbp2 | 114901 | 1,24 | down |
| 6087516 | 7151468 | 1254169 | Arg/Abl-interacting protein ArgBP2 | Argbp2 | 114901 | 1,23 | down |
| 6117034 | 7151468 | 1254155 | Arg/Abl-interacting protein ArgBP2 | Argbp2 | 114901 | 1,23 | up   |
| 6121053 | 7151468 | 1254164 | Arg/Abl-interacting protein ArgBP2 | Argbp2 | 114901 | 1,20 | up   |
| 5943858 | 7151468 | 1254160 | Arg/Abl-interacting protein ArgBP2 | Argbp2 | 114901 | 1,19 | up   |
| 6607649 | 7151468 | 1254158 | Arg/Abl-interacting protein ArgBP2 | Argbp2 | 114901 | 1,18 | down |
| 5653337 | 7151468 | 1254147 | Arg/Abl-interacting protein ArgBP2 | Argbp2 | 114901 | 1,16 | down |
| 6467388 | 7151468 | 1254150 | Arg/Abl-interacting protein ArgBP2 | Argbp2 | 114901 | 1,14 | down |
| 5949692 | 7151468 | 1254148 | Arg/Abl-interacting protein ArgBP2 | Argbp2 | 114901 | 1,12 | down |
| 6111481 | 7151468 | 1254165 | Arg/Abl-interacting protein ArgBP2 | Argbp2 | 114901 | 1,11 | up   |
| 6151152 | 7151468 | 1254167 | Arg/Abl-interacting protein ArgBP2 | Argbp2 | 114901 | 1,06 | up   |
| 6674895 | 7151468 | 1254153 | Arg/Abl-interacting protein ArgBP2 | Argbp2 | 114901 | 1,03 | down |
| 5709283 | 7151468 | 1254166 | Arg/Abl-interacting protein ArgBP2 | Argbp2 | 114901 | 1,01 | up   |
| 6594390 | 7025757 | 950684  | arginase, liver                    | Arg1   | 29221  | 2,07 | up   |
| 6614993 | 7025757 | 950688  | arginase, liver                    | Arg1   | 29221  | 1,74 | up   |
| 6473822 | 7025757 | 950691  | arginase, liver                    | Arg1   | 29221  | 1,43 | down |
| 6102378 | 7025757 | 950691  | arginase, liver                    | Arg1   | 29221  | 1,39 | down |
| 6125998 | 7025757 | 950687  | arginase, liver                    | Arg1   | 29221  | 1,36 | down |
| 5685085 | 7025757 | 950685  | arginase, liver                    | Arg1   | 29221  | 1,26 | down |
| 5993487 | 7025757 | 950692  | arginase, liver                    | Arg1   | 29221  | 1,25 | down |
| 6696762 | 7025757 | 950690  | arginase, liver                    | Arg1   | 29221  | 1,07 | down |
| 6363596 | 7025757 | 950688  | arginase, liver                    | Arg1   | 29221  | 1,03 | down |
| 5871671 | 7025757 | 950686  | arginase, liver                    | Arg1   | 29221  | 1,03 | up   |
| 6142137 | 7025757 | 950689  | arginase, liver                    | Arg1   | 29221  | 1,01 | up   |
| 6545267 | 7226167 | 1437583 | argininosuccinate synthetase 1     | Ass1   | 25698  | 7,63 | down |
| 6167548 | 7226167 | 1437568 | argininosuccinate synthetase 1     | Ass1   | 25698  | 6,13 | down |
| 6349866 | 7226167 | 1437573 | argininosuccinate synthetase 1     | Ass1   | 25698  | 1,73 | up   |
| 6317537 | 7226167 | 1437574 | argininosuccinate synthetase 1     | Ass1   | 25698  | 1,60 | up   |
| 6584053 | 7226167 | 1437572 | argininosuccinate synthetase 1     | Ass1   | 25698  | 1,53 | up   |
| 6399173 | 7226167 | 1437575 | argininosuccinate synthetase 1     | Ass1   | 25698  | 1,38 | up   |
| 6054220 | 7226167 | 1437576 | argininosuccinate synthetase 1     | Ass1   | 25698  | 1,38 | up   |
| 5912052 | 7226167 | 1437579 | argininosuccinate synthetase 1     | Ass1   | 25698  | 1,34 | up   |
| 6198354 | 7226167 | 1437580 | argininosuccinate synthetase 1     | Ass1   | 25698  | 1,29 | down |
| 6606352 | 7226167 | 1437570 | argininosuccinate synthetase 1     | Ass1   | 25698  | 1,28 | down |
| 6284563 | 7226167 | 1437577 | argininosuccinate synthetase 1     | Ass1   | 25698  | 1,22 | up   |
| 6221232 | 7226167 | 1437571 | argininosuccinate synthetase 1     | Ass1   | 25698  | 1,14 | up   |
| 6590340 | 7226167 | 1437578 | argininosuccinate synthetase 1     | Ass1   | 25698  | 1,10 | down |
| 6343511 | 7226167 | 1437580 | argininosuccinate synthetase 1     | Ass1   | 25698  | 1,08 | down |
| 6448486 | 7226167 | 1437582 | argininosuccinate synthetase 1     | Ass1   | 25698  | 1,06 | down |
| 6743942 | 7226167 | 1437581 | argininosuccinate synthetase 1     | Ass1   | 25698  | 1,05 | down |
| 6600588 | 7226167 | 1437583 | argininosuccinate synthetase 1     | Ass1   | 25698  | 1,04 | up   |
| 5867901 | 7226167 | 1437569 | argininosuccinate synthetase 1     | Ass1   | 25698  | 1,01 | down |
| 6508785 | 7375561 | 1810495 | aristaless related homeobox        | Arx    | 317268 | 2,55 | down |
| 6128869 | 7375561 | 1810505 | aristaless related homeobox        | Arx    | 317268 | 1,75 | down |
| 6095146 | 7375561 | 1810500 | aristaless related homeobox        | Arx    | 317268 | 1,74 | down |
| 5681309 | 7375561 | 1810505 | aristaless related homeobox        | Arx    | 317268 | 1,59 | down |
| 6391664 | 7375561 | 1810499 | aristaless related homeobox        | Arx    | 317268 | 1,32 | up   |
| 6272174 | 7375561 | 1810499 | aristaless related homeobox        | Arx    | 317268 | 1,31 | up   |
| 6247329 | 7375561 | 1810499 | aristaless related homeobox        | Arx    | 317268 | 1,27 | up   |
| 5922272 | 7375561 | 1810499 | aristaless related homeobox        | Arx    | 317268 | 1,23 | down |
| 6429836 | 7375561 | 1810499 | aristaless related homeobox        | Arx    | 317268 | 1,15 | up   |
| 5835692 | 7375561 | 1810503 | aristaless related homeobox        | Arx    | 317268 | 1,11 | up   |
| 6481716 | 7375561 | 1810498 | aristaless related homeobox        | Arx    | 317268 | 1,08 | down |
| 5850664 | 7375561 | 1810505 | aristaless related homeobox        | Arx    | 317268 | 1,06 | down |
| 5930242 | 7375561 | 1810498 | aristaless related homeobox        | Arx    | 317268 | 1,04 | up   |
| 6153680 | 7375561 | 1810499 | aristaless related homeobox        | Arx    | 317268 | 1,02 | down |
| 6169560 | 7073650 | 1064991 | armadillo repeat containing 7      | Armc7  | 287827 | 2,46 | down |



|         |         |         |                                                |        |        |      |      |
|---------|---------|---------|------------------------------------------------|--------|--------|------|------|
| 6151783 | 7073650 | 1064992 | armadillo repeat containing 7                  | Armc7  | 287827 | 1,19 | up   |
| 5940819 | 7073650 | 1064991 | armadillo repeat containing 7                  | Armc7  | 287827 | 1,05 | up   |
| 6247401 | 7073650 | 1064991 | armadillo repeat containing 7                  | Armc7  | 287827 | 1,03 | up   |
| 6283194 | 7073650 | 1064992 | armadillo repeat containing 7                  | Armc7  | 287827 | 1,02 | down |
| 5747526 | 7349313 | 1743101 | armadillo repeat containing 8                  | Armc8  | 315949 | 1,56 | up   |
| 5928409 | 7349313 | 1743101 | armadillo repeat containing 8                  | Armc8  | 315949 | 1,55 | down |
| 6511381 | 7349313 | 1743111 | armadillo repeat containing 8                  | Armc8  | 315949 | 1,43 | down |
| 6528014 | 7349313 | 1743128 | armadillo repeat containing 8                  | Armc8  | 315949 | 1,40 | up   |
| 6320886 | 7349313 | 1743132 | armadillo repeat containing 8                  | Armc8  | 315949 | 1,38 | up   |
| 5910562 | 7349313 | 1743114 | armadillo repeat containing 8                  | Armc8  | 315949 | 1,37 | down |
| 6737052 | 7349313 | 1743113 | armadillo repeat containing 8                  | Armc8  | 315949 | 1,28 | down |
| 5953234 | 7349313 | 1743120 | armadillo repeat containing 8                  | Armc8  | 315949 | 1,25 | up   |
| 6100100 | 7349313 | 1743126 | armadillo repeat containing 8                  | Armc8  | 315949 | 1,23 | up   |
| 6148019 | 7349313 | 1743105 | armadillo repeat containing 8                  | Armc8  | 315949 | 1,23 | up   |
| 6658226 | 7349313 | 1743109 | armadillo repeat containing 8                  | Armc8  | 315949 | 1,23 | up   |
| 5887798 | 7349313 | 1743125 | armadillo repeat containing 8                  | Armc8  | 315949 | 1,15 | up   |
| 6246715 | 7349313 | 1743128 | armadillo repeat containing 8                  | Armc8  | 315949 | 1,11 | up   |
| 5952722 | 7349313 | 1743120 | armadillo repeat containing 8                  | Armc8  | 315949 | 1,11 | up   |
| 5695495 | 7349313 | 1743110 | armadillo repeat containing 8                  | Armc8  | 315949 | 1,10 | up   |
| 5674841 | 7349313 | 1743120 | armadillo repeat containing 8                  | Armc8  | 315949 | 1,10 | up   |
| 5732941 | 7349313 | 1743119 | armadillo repeat containing 8                  | Armc8  | 315949 | 1,08 | up   |
| 5673645 | 7349313 | 1743108 | armadillo repeat containing 8                  | Armc8  | 315949 | 1,08 | down |
| 6250324 | 7349313 | 1743121 | armadillo repeat containing 8                  | Armc8  | 315949 | 1,07 | up   |
| 6701852 | 7349313 | 1743104 | armadillo repeat containing 8                  | Armc8  | 315949 | 1,05 | up   |
| 5959905 | 7349313 | 1743122 | armadillo repeat containing 8                  | Armc8  | 315949 | 1,04 | up   |
| 6091338 | 7349313 | 1743114 | armadillo repeat containing 8                  | Armc8  | 315949 | 1,03 | down |
| 5888568 | 7349313 | 1743124 | armadillo repeat containing 8                  | Armc8  | 315949 | 1,03 | down |
| 5768799 | 7349313 | 1743127 | armadillo repeat containing 8                  | Armc8  | 315949 | 1,01 | down |
| 6531051 | 7349313 | 1743123 | armadillo repeat containing 8                  | Armc8  | 315949 | 1,01 | down |
| 6542705 | 7349313 | 1743122 | armadillo repeat containing 8                  | Armc8  | 315949 | 1,01 | down |
| 6392978 | 7260372 | 1523666 | ARP3 actin-related protein 3 homolog B (yeast) | Actr3b | 362298 | 2,22 | up   |
| 5760911 | 7260372 | 1523670 | ARP3 actin-related protein 3 homolog B (yeast) | Actr3b | 362298 | 1,74 | up   |
| 6713705 | 7260372 | 1523681 | ARP3 actin-related protein 3 homolog B (yeast) | Actr3b | 362298 | 1,47 | down |
| 6259079 | 7260372 | 1523664 | ARP3 actin-related protein 3 homolog B (yeast) | Actr3b | 362298 | 1,45 | up   |
| 6133082 | 7260372 | 1523679 | ARP3 actin-related protein 3 homolog B (yeast) | Actr3b | 362298 | 1,40 | up   |
| 6305636 | 7260372 | 1523674 | ARP3 actin-related protein 3 homolog B (yeast) | Actr3b | 362298 | 1,33 | down |
| 6432716 | 7260372 | 1523678 | ARP3 actin-related protein 3 homolog B (yeast) | Actr3b | 362298 | 1,25 | up   |
| 6431155 | 7260372 | 1523664 | ARP3 actin-related protein 3 homolog B (yeast) | Actr3b | 362298 | 1,13 | down |
| 6126481 | 7260372 | 1523665 | ARP3 actin-related protein 3 homolog B (yeast) | Actr3b | 362298 | 1,12 | down |
| 5929979 | 7260372 | 1523675 | ARP3 actin-related protein 3 homolog B (yeast) | Actr3b | 362298 | 1,11 | down |
| 6040723 | 7260372 | 1523673 | ARP3 actin-related protein 3 homolog B (yeast) | Actr3b | 362298 | 1,04 | up   |
| 5717824 | 7260372 | 1523683 | ARP3 actin-related protein 3 homolog B (yeast) | Actr3b | 362298 | 1,02 | up   |
| 6536144 | 7260372 | 1523671 | ARP3 actin-related protein 3 homolog B (yeast) | Actr3b | 362298 | 1,00 | down |
| 6334982 | 7034498 | 972568  | arrestin, beta 1                               | Arrb1  | 25387  | 2,23 | down |
| 6344876 | 7034498 | 972573  | arrestin, beta 1                               | Arrb1  | 25387  | 1,77 | up   |
| 5902401 | 7034498 | 972578  | arrestin, beta 1                               | Arrb1  | 25387  | 1,62 | down |
| 5639150 | 7034498 | 972570  | arrestin, beta 1                               | Arrb1  | 25387  | 1,36 | up   |
| 6637127 | 7034498 | 972571  | arrestin, beta 1                               | Arrb1  | 25387  | 1,29 | up   |
| 5693004 | 7034498 | 972567  | arrestin, beta 1                               | Arrb1  | 25387  | 1,26 | down |
| 6399357 | 7034498 | 972577  | arrestin, beta 1                               | Arrb1  | 25387  | 1,24 | up   |
| 6717010 | 7034498 | 972572  | arrestin, beta 1                               | Arrb1  | 25387  | 1,24 | down |
| 6235738 | 7034498 | 972576  | arrestin, beta 1                               | Arrb1  | 25387  | 1,20 | down |
| 6651639 | 7034498 | 972569  | arrestin, beta 1                               | Arrb1  | 25387  | 1,15 | up   |
| 5938704 | 7034498 | 972574  | arrestin, beta 1                               | Arrb1  | 25387  | 1,13 | up   |
| 6541182 | 7034498 | 972580  | arrestin, beta 1                               | Arrb1  | 25387  | 1,08 | down |
| 5948525 | 7034498 | 972575  | arrestin, beta 1                               | Arrb1  | 25387  | 1,05 | down |
| 6711253 | 7034498 | 972579  | arrestin, beta 1                               | Arrb1  | 25387  | 1,02 | up   |

|         |         |         |                                                |      |        |      |      |
|---------|---------|---------|------------------------------------------------|------|--------|------|------|
| 5994593 | 7290406 | 1597668 | artemin                                        | Artn | 362572 | 2,42 | up   |
| 6741962 | 7290406 | 1597669 | artemin                                        | Artn | 362572 | 1,78 | up   |
| 5864857 | 7290406 | 1597671 | artemin                                        | Artn | 362572 | 1,61 | down |
| 5966491 | 7290406 | 1597669 | artemin                                        | Artn | 362572 | 1,52 | down |
| 6340353 | 7290406 | 1597669 | artemin                                        | Artn | 362572 | 1,38 | down |
| 5890204 | 7290406 | 1597668 | artemin                                        | Artn | 362572 | 1,24 | up   |
| 5675501 | 7290406 | 1597669 | artemin                                        | Artn | 362572 | 1,17 | up   |
| 6396548 | 7290406 | 1597667 | artemin                                        | Artn | 362572 | 1,07 | up   |
| 5824069 | 7290406 | 1597672 | artemin                                        | Artn | 362572 | 1,06 | up   |
| 6194116 | 7290406 | 1597671 | artemin                                        | Artn | 362572 | 1,05 | down |
| 5733080 | 7290406 | 1597668 | artemin                                        | Artn | 362572 | 1,03 | up   |
| 5960289 | 7290406 | 1597670 | artemin                                        | Artn | 362572 | 1,01 | up   |
| 5907001 | 7305728 | 1637010 | aryl hydrocarbon receptor                      | Ahr  | 25690  | 1,58 | up   |
| 6202970 | 7305728 | 1637015 | aryl hydrocarbon receptor                      | Ahr  | 25690  | 1,57 | down |
| 6412410 | 7305728 | 1637010 | aryl hydrocarbon receptor                      | Ahr  | 25690  | 1,38 | up   |
| 5861061 | 7305728 | 1637009 | aryl hydrocarbon receptor                      | Ahr  | 25690  | 1,36 | down |
| 6636637 | 7305728 | 1637008 | aryl hydrocarbon receptor                      | Ahr  | 25690  | 1,30 | down |
| 6179101 | 7305728 | 1637017 | aryl hydrocarbon receptor                      | Ahr  | 25690  | 1,26 | up   |
| 6480946 | 7305728 | 1637018 | aryl hydrocarbon receptor                      | Ahr  | 25690  | 1,26 | down |
| 5772044 | 7305728 | 1637016 | aryl hydrocarbon receptor                      | Ahr  | 25690  | 1,24 | up   |
| 5641781 | 7305728 | 1637010 | aryl hydrocarbon receptor                      | Ahr  | 25690  | 1,23 | up   |
| 6450565 | 7305728 | 1637010 | aryl hydrocarbon receptor                      | Ahr  | 25690  | 1,18 | down |
| 6013045 | 7305728 | 1637011 | aryl hydrocarbon receptor                      | Ahr  | 25690  | 1,09 | up   |
| 6252739 | 7305728 | 1637010 | aryl hydrocarbon receptor                      | Ahr  | 25690  | 1,08 | up   |
| 6553122 | 7305728 | 1637010 | aryl hydrocarbon receptor                      | Ahr  | 25690  | 1,06 | up   |
| 5836090 | 7305728 | 1637014 | aryl hydrocarbon receptor                      | Ahr  | 25690  | 1,05 | down |
| 6697761 | 7305728 | 1637013 | aryl hydrocarbon receptor                      | Ahr  | 25690  | 1,05 | down |
| 6078595 | 7305728 | 1637012 | aryl hydrocarbon receptor                      | Ahr  | 25690  | 1,05 | up   |
| 5662173 | 7305728 | 1637013 | aryl hydrocarbon receptor                      | Ahr  | 25690  | 1,04 | up   |
| 5781859 | 7305728 | 1637010 | aryl hydrocarbon receptor                      | Ahr  | 25690  | 1,02 | up   |
| 5927924 | 7305728 | 1637019 | aryl hydrocarbon receptor                      | Ahr  | 25690  | 1,01 | up   |
| 6383806 | 7196966 | 1367640 | aryl hydrocarbon receptor nuclear translocator | Arnt | 25242  | 2,28 | down |
| 5929568 | 7196966 | 1367631 | aryl hydrocarbon receptor nuclear translocator | Arnt | 25242  | 2,10 | down |
| 6712088 | 7196966 | 1367634 | aryl hydrocarbon receptor nuclear translocator | Arnt | 25242  | 1,45 | up   |
| 6053360 | 7196966 | 1367644 | aryl hydrocarbon receptor nuclear translocator | Arnt | 25242  | 1,40 | up   |
| 6254791 | 7196966 | 1367634 | aryl hydrocarbon receptor nuclear translocator | Arnt | 25242  | 1,35 | up   |
| 6475821 | 7196966 | 1367650 | aryl hydrocarbon receptor nuclear translocator | Arnt | 25242  | 1,33 | up   |
| 5877052 | 7196966 | 1367636 | aryl hydrocarbon receptor nuclear translocator | Arnt | 25242  | 1,30 | up   |
| 6046516 | 7196966 | 1367630 | aryl hydrocarbon receptor nuclear translocator | Arnt | 25242  | 1,28 | up   |
| 6178310 | 7196966 | 1367635 | aryl hydrocarbon receptor nuclear translocator | Arnt | 25242  | 1,26 | up   |
| 5749068 | 7196966 | 1367643 | aryl hydrocarbon receptor nuclear translocator | Arnt | 25242  | 1,26 | down |
| 5960755 | 7196966 | 1367636 | aryl hydrocarbon receptor nuclear translocator | Arnt | 25242  | 1,25 | up   |
| 6589829 | 7196966 | 1367639 | aryl hydrocarbon receptor nuclear translocator | Arnt | 25242  | 1,25 | up   |
| 5693055 | 7196966 | 1367645 | aryl hydrocarbon receptor nuclear translocator | Arnt | 25242  | 1,20 | up   |
| 6037680 | 7196966 | 1367629 | aryl hydrocarbon receptor nuclear translocator | Arnt | 25242  | 1,17 | up   |
| 6379950 | 7196966 | 1367632 | aryl hydrocarbon receptor nuclear translocator | Arnt | 25242  | 1,17 | up   |
| 6050349 | 7196966 | 1367646 | aryl hydrocarbon receptor nuclear translocator | Arnt | 25242  | 1,14 | up   |
| 6438112 | 7196966 | 1367647 | aryl hydrocarbon receptor nuclear translocator | Arnt | 25242  | 1,14 | down |
| 6582301 | 7196966 | 1367638 | aryl hydrocarbon receptor nuclear translocator | Arnt | 25242  | 1,13 | down |
| 6738716 | 7196966 | 1367641 | aryl hydrocarbon receptor nuclear translocator | Arnt | 25242  | 1,08 | down |
| 5938284 | 7196966 | 1367634 | aryl hydrocarbon receptor nuclear translocator | Arnt | 25242  | 1,06 | down |
| 5991420 | 7196966 | 1367649 | aryl hydrocarbon receptor nuclear translocator | Arnt | 25242  | 1,06 | up   |
| 6301649 | 7196966 | 1367642 | aryl hydrocarbon receptor nuclear translocator | Arnt | 25242  | 1,05 | down |
| 6315340 | 7196966 | 1367651 | aryl hydrocarbon receptor nuclear translocator | Arnt | 25242  | 1,05 | down |
| 6277591 | 7196966 | 1367648 | aryl hydrocarbon receptor nuclear translocator | Arnt | 25242  | 1,05 | down |
| 6171596 | 7196966 | 1367635 | aryl hydrocarbon receptor nuclear translocator | Arnt | 25242  | 1,04 | up   |
| 6222315 | 7196966 | 1367640 | aryl hydrocarbon receptor nuclear translocator | Arnt | 25242  | 1,02 | down |

|         |         |         |                                                                      |      |        |      |      |
|---------|---------|---------|----------------------------------------------------------------------|------|--------|------|------|
| 5832169 | 7196966 | 1367637 | aryl hydrocarbon receptor nuclear translocator                       | Arnt | 25242  | 1,01 | up   |
| 6161566 | 7188458 | 1345737 | arylsulfatase B                                                      | Arsb | 25227  | 1,79 | down |
| 5915857 | 7188458 | 1345737 | arylsulfatase B                                                      | Arsb | 25227  | 1,45 | up   |
| 6182469 | 7188458 | 1345709 | arylsulfatase B                                                      | Arsb | 25227  | 1,42 | down |
| 6137835 | 7188458 | 1345708 | arylsulfatase B                                                      | Arsb | 25227  | 1,40 | down |
| 6512206 | 7188458 | 1345736 | arylsulfatase B                                                      | Arsb | 25227  | 1,33 | down |
| 6639275 | 7188458 | 1345706 | arylsulfatase B                                                      | Arsb | 25227  | 1,27 | down |
| 6217458 | 7188458 | 1345726 | arylsulfatase B                                                      | Arsb | 25227  | 1,24 | up   |
| 6716800 | 7188458 | 1345709 | arylsulfatase B                                                      | Arsb | 25227  | 1,18 | down |
| 6541705 | 7188458 | 1345715 | arylsulfatase B                                                      | Arsb | 25227  | 1,13 | down |
| 6521242 | 7188458 | 1345735 | arylsulfatase B                                                      | Arsb | 25227  | 1,04 | down |
| 5798086 | 7188458 | 1345705 | arylsulfatase B                                                      | Arsb | 25227  | 1,01 | down |
| 6518546 | 7105814 | 1141774 | asp (abnormal spindle) homolog, microcephaly associated (Drosophila) | Aspm | 289054 | 2,10 | down |
| 5942959 | 7105814 | 1141774 | asp (abnormal spindle) homolog, microcephaly associated (Drosophila) | Aspm | 289054 | 1,88 | down |
| 6672222 | 7105814 | 1141803 | asp (abnormal spindle) homolog, microcephaly associated (Drosophila) | Aspm | 289054 | 1,78 | up   |
| 6179095 | 7105814 | 1141789 | asp (abnormal spindle) homolog, microcephaly associated (Drosophila) | Aspm | 289054 | 1,69 | down |
| 6387669 | 7105814 | 1141798 | asp (abnormal spindle) homolog, microcephaly associated (Drosophila) | Aspm | 289054 | 1,63 | up   |
| 6242291 | 7105814 | 1141791 | asp (abnormal spindle) homolog, microcephaly associated (Drosophila) | Aspm | 289054 | 1,52 | up   |
| 6319296 | 7105814 | 1141785 | asp (abnormal spindle) homolog, microcephaly associated (Drosophila) | Aspm | 289054 | 1,50 | down |
| 6279276 | 7105814 | 1141776 | asp (abnormal spindle) homolog, microcephaly associated (Drosophila) | Aspm | 289054 | 1,48 | down |
| 6592296 | 7105814 | 1141794 | asp (abnormal spindle) homolog, microcephaly associated (Drosophila) | Aspm | 289054 | 1,43 | down |
| 6466133 | 7105814 | 1141782 | asp (abnormal spindle) homolog, microcephaly associated (Drosophila) | Aspm | 289054 | 1,31 | down |
| 6575316 | 7105814 | 1141802 | asp (abnormal spindle) homolog, microcephaly associated (Drosophila) | Aspm | 289054 | 1,30 | up   |
| 5782337 | 7105814 | 1141793 | asp (abnormal spindle) homolog, microcephaly associated (Drosophila) | Aspm | 289054 | 1,29 | down |
| 5780628 | 7105814 | 1141784 | asp (abnormal spindle) homolog, microcephaly associated (Drosophila) | Aspm | 289054 | 1,29 | down |
| 6127386 | 7105814 | 1141799 | asp (abnormal spindle) homolog, microcephaly associated (Drosophila) | Aspm | 289054 | 1,29 | up   |
| 6684861 | 7105814 | 1141792 | asp (abnormal spindle) homolog, microcephaly associated (Drosophila) | Aspm | 289054 | 1,29 | up   |
| 5943908 | 7105814 | 1141785 | asp (abnormal spindle) homolog, microcephaly associated (Drosophila) | Aspm | 289054 | 1,28 | up   |
| 6175856 | 7105814 | 1141791 | asp (abnormal spindle) homolog, microcephaly associated (Drosophila) | Aspm | 289054 | 1,24 | up   |
| 6382843 | 7105814 | 1141786 | asp (abnormal spindle) homolog, microcephaly associated (Drosophila) | Aspm | 289054 | 1,22 | up   |
| 5940328 | 7105814 | 1141783 | asp (abnormal spindle) homolog, microcephaly associated (Drosophila) | Aspm | 289054 | 1,19 | down |
| 6224315 | 7105814 | 1141790 | asp (abnormal spindle) homolog, microcephaly associated (Drosophila) | Aspm | 289054 | 1,18 | down |
| 6017191 | 7105814 | 1141802 | asp (abnormal spindle) homolog, microcephaly associated (Drosophila) | Aspm | 289054 | 1,16 | down |
| 6445708 | 7105814 | 1141795 | asp (abnormal spindle) homolog, microcephaly associated (Drosophila) | Aspm | 289054 | 1,15 | up   |
| 5880851 | 7105814 | 1141791 | asp (abnormal spindle) homolog, microcephaly associated (Drosophila) | Aspm | 289054 | 1,12 | up   |
| 6230663 | 7105814 | 1141804 | asp (abnormal spindle) homolog, microcephaly associated (Drosophila) | Aspm | 289054 | 1,11 | up   |
| 5859759 | 7105814 | 1141796 | asp (abnormal spindle) homolog, microcephaly associated (Drosophila) | Aspm | 289054 | 1,11 | up   |
| 5762811 | 7105814 | 1141786 | asp (abnormal spindle) homolog, microcephaly associated (Drosophila) | Aspm | 289054 | 1,11 | up   |
| 5797639 | 7105814 | 1141780 | asp (abnormal spindle) homolog, microcephaly associated (Drosophila) | Aspm | 289054 | 1,09 | up   |
| 5859471 | 7105814 | 1141794 | asp (abnormal spindle) homolog, microcephaly associated (Drosophila) | Aspm | 289054 | 1,09 | up   |
| 5986520 | 7105814 | 1141788 | asp (abnormal spindle) homolog, microcephaly associated (Drosophila) | Aspm | 289054 | 1,08 | up   |
| 5910820 | 7105814 | 1141779 | asp (abnormal spindle) homolog, microcephaly associated (Drosophila) | Aspm | 289054 | 1,07 | up   |
| 5643006 | 7105814 | 1141787 | asp (abnormal spindle) homolog, microcephaly associated (Drosophila) | Aspm | 289054 | 1,06 | up   |
| 5877333 | 7105814 | 1141777 | asp (abnormal spindle) homolog, microcephaly associated (Drosophila) | Aspm | 289054 | 1,06 | up   |
| 6392478 | 7105814 | 1141797 | asp (abnormal spindle) homolog, microcephaly associated (Drosophila) | Aspm | 289054 | 1,04 | down |
| 5649128 | 7105814 | 1141781 | asp (abnormal spindle) homolog, microcephaly associated (Drosophila) | Aspm | 289054 | 1,03 | down |
| 5957665 | 7105814 | 1141800 | asp (abnormal spindle) homolog, microcephaly associated (Drosophila) | Aspm | 289054 | 1,03 | down |
| 5849143 | 7105814 | 1141777 | asp (abnormal spindle) homolog, microcephaly associated (Drosophila) | Aspm | 289054 | 1,02 | down |
| 5854761 | 7105814 | 1141787 | asp (abnormal spindle) homolog, microcephaly associated (Drosophila) | Aspm | 289054 | 1,01 | up   |
| 6637661 | 7283659 | 1581796 | aspartate-beta-hydroxylase                                           | Asph | 312981 | 2,13 | down |
| 5906797 | 7283659 | 1581794 | aspartate-beta-hydroxylase                                           | Asph | 312981 | 1,78 | up   |
| 6307432 | 7283659 | 1581794 | aspartate-beta-hydroxylase                                           | Asph | 312981 | 1,56 | up   |
| 6320308 | 7283659 | 1581794 | aspartate-beta-hydroxylase                                           | Asph | 312981 | 1,42 | up   |
| 5993006 | 7283659 | 1581796 | aspartate-beta-hydroxylase                                           | Asph | 312981 | 1,37 | down |
| 6173038 | 7283659 | 1581797 | aspartate-beta-hydroxylase                                           | Asph | 312981 | 1,29 | down |
| 6242987 | 7283659 | 1581795 | aspartate-beta-hydroxylase                                           | Asph | 312981 | 1,26 | up   |
| 5930131 | 7151063 | 1253067 | aspartylglucosaminidase                                              | Aga  | 290923 | 1,70 | down |

|         |         |         |                                            |        |        |      |      |
|---------|---------|---------|--------------------------------------------|--------|--------|------|------|
| 6424896 | 7151063 | 1253063 | aspartylglucosaminidase                    | Aga    | 290923 | 1,34 | up   |
| 6261318 | 7151063 | 1253064 | aspartylglucosaminidase                    | Aga    | 290923 | 1,25 | up   |
| 5767508 | 7151063 | 1253073 | aspartylglucosaminidase                    | Aga    | 290923 | 1,24 | down |
| 6479341 | 7151063 | 1253062 | aspartylglucosaminidase                    | Aga    | 290923 | 1,24 | down |
| 6572963 | 7151063 | 1253068 | aspartylglucosaminidase                    | Aga    | 290923 | 1,23 | down |
| 6449602 | 7151063 | 1253070 | aspartylglucosaminidase                    | Aga    | 290923 | 1,22 | down |
| 5666897 | 7151063 | 1253069 | aspartylglucosaminidase                    | Aga    | 290923 | 1,11 | down |
| 6126702 | 7151063 | 1253065 | aspartylglucosaminidase                    | Aga    | 290923 | 1,10 | down |
| 6206504 | 7113083 | 1159966 | aspartyl-tRNA synthetase 2 (mitochondrial) | Dars2  | 304919 | 2,23 | down |
| 5751285 | 7113083 | 1159975 | aspartyl-tRNA synthetase 2 (mitochondrial) | Dars2  | 304919 | 1,79 | down |
| 6317345 | 7113083 | 1159970 | aspartyl-tRNA synthetase 2 (mitochondrial) | Dars2  | 304919 | 1,78 | down |
| 5734987 | 7113083 | 1159966 | aspartyl-tRNA synthetase 2 (mitochondrial) | Dars2  | 304919 | 1,42 | down |
| 5635886 | 7113083 | 1159971 | aspartyl-tRNA synthetase 2 (mitochondrial) | Dars2  | 304919 | 1,33 | up   |
| 5837611 | 7113083 | 1159980 | aspartyl-tRNA synthetase 2 (mitochondrial) | Dars2  | 304919 | 1,24 | down |
| 5961303 | 7113083 | 1159963 | aspartyl-tRNA synthetase 2 (mitochondrial) | Dars2  | 304919 | 1,21 | up   |
| 5995714 | 7113083 | 1159967 | aspartyl-tRNA synthetase 2 (mitochondrial) | Dars2  | 304919 | 1,19 | up   |
| 6446439 | 7113083 | 1159977 | aspartyl-tRNA synthetase 2 (mitochondrial) | Dars2  | 304919 | 1,19 | down |
| 5881011 | 7113083 | 1159964 | aspartyl-tRNA synthetase 2 (mitochondrial) | Dars2  | 304919 | 1,18 | down |
| 6198335 | 7113083 | 1159963 | aspartyl-tRNA synthetase 2 (mitochondrial) | Dars2  | 304919 | 1,18 | up   |
| 6707338 | 7113083 | 1159972 | aspartyl-tRNA synthetase 2 (mitochondrial) | Dars2  | 304919 | 1,16 | down |
| 5673313 | 7113083 | 1159969 | aspartyl-tRNA synthetase 2 (mitochondrial) | Dars2  | 304919 | 1,14 | up   |
| 6304189 | 7113083 | 1159973 | aspartyl-tRNA synthetase 2 (mitochondrial) | Dars2  | 304919 | 1,14 | up   |
| 6598995 | 7113083 | 1159978 | aspartyl-tRNA synthetase 2 (mitochondrial) | Dars2  | 304919 | 1,12 | down |
| 6375205 | 7113083 | 1159976 | aspartyl-tRNA synthetase 2 (mitochondrial) | Dars2  | 304919 | 1,10 | up   |
| 5694754 | 7113083 | 1159979 | aspartyl-tRNA synthetase 2 (mitochondrial) | Dars2  | 304919 | 1,09 | down |
| 5841446 | 7113083 | 1159974 | aspartyl-tRNA synthetase 2 (mitochondrial) | Dars2  | 304919 | 1,04 | down |
| 6063592 | 7106752 | 1144031 | astrotactin 1                              | Astn1  | 304900 | 1,44 | down |
| 5816132 | 7106752 | 1144029 | astrotactin 1                              | Astn1  | 304900 | 1,11 | down |
| 5984151 | 7106752 | 1144030 | astrotactin 1                              | Astn1  | 304900 | 1,09 | down |
| 6260822 | 7353382 | 1753229 | AT rich interactive domain 5A (Mrf1 like)  | Arid5a | 316327 | 1,95 | up   |
| 6540412 | 7353382 | 1753228 | AT rich interactive domain 5A (Mrf1 like)  | Arid5a | 316327 | 1,50 | up   |
| 6473765 | 7353382 | 1753227 | AT rich interactive domain 5A (Mrf1 like)  | Arid5a | 316327 | 1,43 | down |
| 6359916 | 7353382 | 1753227 | AT rich interactive domain 5A (Mrf1 like)  | Arid5a | 316327 | 1,28 | up   |
| 6292405 | 7353382 | 1753229 | AT rich interactive domain 5A (Mrf1 like)  | Arid5a | 316327 | 1,05 | down |
| 5626024 | 7057226 | 1025448 | ataxin 2-like                              | Atxn2l | 361649 | 4,65 | down |
| 5852604 | 7057226 | 1025448 | ataxin 2-like                              | Atxn2l | 361649 | 1,41 | down |
| 5741407 | 7057226 | 1025427 | ataxin 2-like                              | Atxn2l | 361649 | 1,34 | down |
| 5873011 | 7057226 | 1025425 | ataxin 2-like                              | Atxn2l | 361649 | 1,33 | down |
| 6166033 | 7057226 | 1025429 | ataxin 2-like                              | Atxn2l | 361649 | 1,30 | up   |
| 6206043 | 7057226 | 1025427 | ataxin 2-like                              | Atxn2l | 361649 | 1,30 | down |
| 6081021 | 7057226 | 1025426 | ataxin 2-like                              | Atxn2l | 361649 | 1,28 | down |
| 5661837 | 7057226 | 1025429 | ataxin 2-like                              | Atxn2l | 361649 | 1,26 | up   |
| 5871173 | 7057226 | 1025432 | ataxin 2-like                              | Atxn2l | 361649 | 1,21 | up   |
| 6533482 | 7057226 | 1025429 | ataxin 2-like                              | Atxn2l | 361649 | 1,19 | up   |
| 6158936 | 7057226 | 1025437 | ataxin 2-like                              | Atxn2l | 361649 | 1,19 | down |
| 6602480 | 7057226 | 1025438 | ataxin 2-like                              | Atxn2l | 361649 | 1,19 | up   |
| 6613400 | 7057226 | 1025438 | ataxin 2-like                              | Atxn2l | 361649 | 1,18 | up   |
| 6029974 | 7057226 | 1025430 | ataxin 2-like                              | Atxn2l | 361649 | 1,18 | up   |
| 6258586 | 7057226 | 1025449 | ataxin 2-like                              | Atxn2l | 361649 | 1,18 | up   |
| 6186598 | 7057226 | 1025443 | ataxin 2-like                              | Atxn2l | 361649 | 1,16 | up   |
| 5974130 | 7057226 | 1025445 | ataxin 2-like                              | Atxn2l | 361649 | 1,16 | down |
| 5863117 | 7057226 | 1025446 | ataxin 2-like                              | Atxn2l | 361649 | 1,14 | down |
| 5759199 | 7057226 | 1025448 | ataxin 2-like                              | Atxn2l | 361649 | 1,14 | down |
| 5996065 | 7057226 | 1025433 | ataxin 2-like                              | Atxn2l | 361649 | 1,13 | up   |
| 6018544 | 7057226 | 1025435 | ataxin 2-like                              | Atxn2l | 361649 | 1,11 | up   |
| 6437809 | 7057226 | 1025427 | ataxin 2-like                              | Atxn2l | 361649 | 1,10 | up   |
| 6170314 | 7057226 | 1025431 | ataxin 2-like                              | Atxn2l | 361649 | 1,09 | up   |

|         |         |         |                                                                              |         |        |      |      |
|---------|---------|---------|------------------------------------------------------------------------------|---------|--------|------|------|
| 6304636 | 7057226 | 1025432 | ataxin 2-like                                                                | Atxn2l  | 361649 | 1,08 | up   |
| 6581764 | 7057226 | 1025439 | ataxin 2-like                                                                | Atxn2l  | 361649 | 1,08 | up   |
| 6383712 | 7057226 | 1025441 | ataxin 2-like                                                                | Atxn2l  | 361649 | 1,07 | up   |
| 6262877 | 7057226 | 1025440 | ataxin 2-like                                                                | Atxn2l  | 361649 | 1,07 | down |
| 6615556 | 7057226 | 1025441 | ataxin 2-like                                                                | Atxn2l  | 361649 | 1,05 | down |
| 5635642 | 7057226 | 1025448 | ataxin 2-like                                                                | Atxn2l  | 361649 | 1,05 | up   |
| 5730947 | 7057226 | 1025428 | ataxin 2-like                                                                | Atxn2l  | 361649 | 1,04 | down |
| 5916803 | 7057226 | 1025436 | ataxin 2-like                                                                | Atxn2l  | 361649 | 1,03 | up   |
| 6446899 | 7057226 | 1025427 | ataxin 2-like                                                                | Atxn2l  | 361649 | 1,03 | down |
| 6077833 | 7057226 | 1025444 | ataxin 2-like                                                                | Atxn2l  | 361649 | 1,03 | up   |
| 6475688 | 7057226 | 1025434 | ataxin 2-like                                                                | Atxn2l  | 361649 | 1,03 | down |
| 6660903 | 7057226 | 1025442 | ataxin 2-like                                                                | Atxn2l  | 361649 | 1,02 | up   |
| 5968818 | 7297274 | 1614633 | ataxin 7-like 1                                                              | Atxn7l1 | 314033 | 1,31 | up   |
| 5749292 | 7297274 | 1614633 | ataxin 7-like 1                                                              | Atxn7l1 | 314033 | 1,14 | up   |
| 6394658 | 7287337 | 1589994 | AT-hook transcription factor                                                 | Akna    | 362530 | 3,26 | up   |
| 6539870 | 7287337 | 1589984 | AT-hook transcription factor                                                 | Akna    | 362530 | 2,71 | down |
| 6072461 | 7287337 | 1589987 | AT-hook transcription factor                                                 | Akna    | 362530 | 2,68 | up   |
| 5838591 | 7287337 | 1589996 | AT-hook transcription factor                                                 | Akna    | 362530 | 2,51 | up   |
| 6120194 | 7287337 | 1589993 | AT-hook transcription factor                                                 | Akna    | 362530 | 2,49 | up   |
| 5729785 | 7287337 | 1589994 | AT-hook transcription factor                                                 | Akna    | 362530 | 2,38 | down |
| 6522448 | 7287337 | 1589982 | AT-hook transcription factor                                                 | Akna    | 362530 | 2,28 | up   |
| 6711280 | 7287337 | 1589992 | AT-hook transcription factor                                                 | Akna    | 362530 | 2,25 | up   |
| 5866648 | 7287337 | 1589997 | AT-hook transcription factor                                                 | Akna    | 362530 | 2,20 | down |
| 6346685 | 7287337 | 1589969 | AT-hook transcription factor                                                 | Akna    | 362530 | 2,17 | up   |
| 6000745 | 7287337 | 1589975 | AT-hook transcription factor                                                 | Akna    | 362530 | 2,14 | down |
| 5625236 | 7287337 | 1589988 | AT-hook transcription factor                                                 | Akna    | 362530 | 2,11 | up   |
| 6190516 | 7287337 | 1589969 | AT-hook transcription factor                                                 | Akna    | 362530 | 1,77 | down |
| 5751463 | 7287337 | 1589979 | AT-hook transcription factor                                                 | Akna    | 362530 | 1,74 | up   |
| 6016620 | 7287337 | 1589971 | AT-hook transcription factor                                                 | Akna    | 362530 | 1,63 | up   |
| 6573001 | 7287337 | 1589972 | AT-hook transcription factor                                                 | Akna    | 362530 | 1,60 | down |
| 6199863 | 7287337 | 1589977 | AT-hook transcription factor                                                 | Akna    | 362530 | 1,53 | up   |
| 6222446 | 7287337 | 1589994 | AT-hook transcription factor                                                 | Akna    | 362530 | 1,49 | up   |
| 6488379 | 7287337 | 1589994 | AT-hook transcription factor                                                 | Akna    | 362530 | 1,43 | up   |
| 6331168 | 7287337 | 1589980 | AT-hook transcription factor                                                 | Akna    | 362530 | 1,43 | up   |
| 6640918 | 7287337 | 1589971 | AT-hook transcription factor                                                 | Akna    | 362530 | 1,40 | up   |
| 6303469 | 7287337 | 1589990 | AT-hook transcription factor                                                 | Akna    | 362530 | 1,37 | up   |
| 5864584 | 7287337 | 1589983 | AT-hook transcription factor                                                 | Akna    | 362530 | 1,34 | down |
| 6206377 | 7287337 | 1589996 | AT-hook transcription factor                                                 | Akna    | 362530 | 1,31 | up   |
| 5942283 | 7287337 | 1589987 | AT-hook transcription factor                                                 | Akna    | 362530 | 1,25 | up   |
| 6163202 | 7287337 | 1589986 | AT-hook transcription factor                                                 | Akna    | 362530 | 1,21 | up   |
| 6744974 | 7287337 | 1589990 | AT-hook transcription factor                                                 | Akna    | 362530 | 1,20 | up   |
| 5821889 | 7287337 | 1589974 | AT-hook transcription factor                                                 | Akna    | 362530 | 1,18 | down |
| 5645468 | 7287337 | 1589990 | AT-hook transcription factor                                                 | Akna    | 362530 | 1,14 | up   |
| 6386896 | 7287337 | 1589973 | AT-hook transcription factor                                                 | Akna    | 362530 | 1,12 | up   |
| 6660795 | 7181442 | 1328886 | ATM interactor                                                               | Atmin   | 315037 | 1,39 | up   |
| 6404385 | 7181442 | 1328886 | ATM interactor                                                               | Atmin   | 315037 | 1,29 | up   |
| 5775623 | 7181442 | 1328886 | ATM interactor                                                               | Atmin   | 315037 | 1,18 | up   |
| 5823051 | 7181442 | 1328886 | ATM interactor                                                               | Atmin   | 315037 | 1,06 | down |
| 6487787 | 7159732 | 1274501 | ATP synthase, H+ transporting, mitochondrial F1 complex, gamma polypeptide 1 | Atp5c1  | 116550 | 2,03 | down |
| 6246821 | 7159732 | 1274500 | ATP synthase, H+ transporting, mitochondrial F1 complex, gamma polypeptide 1 | Atp5c1  | 116550 | 1,51 | up   |
| 6238003 | 7159732 | 1274496 | ATP synthase, H+ transporting, mitochondrial F1 complex, gamma polypeptide 1 | Atp5c1  | 116550 | 1,25 | down |
| 6170950 | 7159732 | 1274494 | ATP synthase, H+ transporting, mitochondrial F1 complex, gamma polypeptide 1 | Atp5c1  | 116550 | 1,20 | up   |
| 5817398 | 7159732 | 1274499 | ATP synthase, H+ transporting, mitochondrial F1 complex, gamma polypeptide 1 | Atp5c1  | 116550 | 1,16 | up   |
| 5642831 | 7159732 | 1274497 | ATP synthase, H+ transporting, mitochondrial F1 complex, gamma polypeptide 1 | Atp5c1  | 116550 | 1,07 | down |
| 6713564 | 7159732 | 1274493 | ATP synthase, H+ transporting, mitochondrial F1 complex, gamma polypeptide 1 | Atp5c1  | 116550 | 1,05 | down |
| 6162547 | 7159732 | 1274498 | ATP synthase, H+ transporting, mitochondrial F1 complex, gamma polypeptide 1 | Atp5c1  | 116550 | 1,04 | down |
| 5990994 | 7159732 | 1274495 | ATP synthase, H+ transporting, mitochondrial F1 complex, gamma polypeptide 1 | Atp5c1  | 116550 | 1,03 | up   |

|         |         |         |                                         |         |        |      |      |
|---------|---------|---------|-----------------------------------------|---------|--------|------|------|
| 6459082 | 7155116 | 1263397 | ATP/GTP binding protein 1               | Agtppb1 | 290986 | 1,69 | down |
| 6665469 | 7155116 | 1263404 | ATP/GTP binding protein 1               | Agtppb1 | 290986 | 1,55 | up   |
| 6591373 | 7155116 | 1263421 | ATP/GTP binding protein 1               | Agtppb1 | 290986 | 1,52 | down |
| 6426612 | 7155116 | 1263390 | ATP/GTP binding protein 1               | Agtppb1 | 290986 | 1,41 | up   |
| 6228486 | 7155116 | 1263443 | ATP/GTP binding protein 1               | Agtppb1 | 290986 | 1,41 | down |
| 6439384 | 7155116 | 1263391 | ATP/GTP binding protein 1               | Agtppb1 | 290986 | 1,36 | up   |
| 6701266 | 7155116 | 1263401 | ATP/GTP binding protein 1               | Agtppb1 | 290986 | 1,31 | up   |
| 6550758 | 7155116 | 1263406 | ATP/GTP binding protein 1               | Agtppb1 | 290986 | 1,31 | down |
| 6671437 | 7155116 | 1263440 | ATP/GTP binding protein 1               | Agtppb1 | 290986 | 1,30 | down |
| 6347335 | 7155116 | 1263412 | ATP/GTP binding protein 1               | Agtppb1 | 290986 | 1,25 | down |
| 5976704 | 7155116 | 1263431 | ATP/GTP binding protein 1               | Agtppb1 | 290986 | 1,21 | down |
| 6733976 | 7155116 | 1263422 | ATP/GTP binding protein 1               | Agtppb1 | 290986 | 1,20 | down |
| 6742351 | 7155116 | 1263392 | ATP/GTP binding protein 1               | Agtppb1 | 290986 | 1,18 | up   |
| 5758259 | 7155116 | 1263427 | ATP/GTP binding protein 1               | Agtppb1 | 290986 | 1,17 | down |
| 5618140 | 7155116 | 1263405 | ATP/GTP binding protein 1               | Agtppb1 | 290986 | 1,17 | down |
| 6263411 | 7155116 | 1263391 | ATP/GTP binding protein 1               | Agtppb1 | 290986 | 1,16 | down |
| 5731357 | 7155116 | 1263394 | ATP/GTP binding protein 1               | Agtppb1 | 290986 | 1,15 | up   |
| 6049599 | 7155116 | 1263442 | ATP/GTP binding protein 1               | Agtppb1 | 290986 | 1,15 | down |
| 6132197 | 7155116 | 1263405 | ATP/GTP binding protein 1               | Agtppb1 | 290986 | 1,14 | up   |
| 6188706 | 7155116 | 1263416 | ATP/GTP binding protein 1               | Agtppb1 | 290986 | 1,14 | down |
| 5912424 | 7155116 | 1263398 | ATP/GTP binding protein 1               | Agtppb1 | 290986 | 1,14 | up   |
| 6692730 | 7155116 | 1263406 | ATP/GTP binding protein 1               | Agtppb1 | 290986 | 1,13 | down |
| 6248300 | 7155116 | 1263439 | ATP/GTP binding protein 1               | Agtppb1 | 290986 | 1,10 | down |
| 6235048 | 7155116 | 1263415 | ATP/GTP binding protein 1               | Agtppb1 | 290986 | 1,10 | up   |
| 6134142 | 7155116 | 1263423 | ATP/GTP binding protein 1               | Agtppb1 | 290986 | 1,07 | down |
| 6006334 | 7155116 | 1263410 | ATP/GTP binding protein 1               | Agtppb1 | 290986 | 1,07 | up   |
| 5790687 | 7155116 | 1263401 | ATP/GTP binding protein 1               | Agtppb1 | 290986 | 1,07 | down |
| 6306284 | 7155116 | 1263413 | ATP/GTP binding protein 1               | Agtppb1 | 290986 | 1,07 | down |
| 6682337 | 7155116 | 1263400 | ATP/GTP binding protein 1               | Agtppb1 | 290986 | 1,06 | down |
| 5916001 | 7155116 | 1263424 | ATP/GTP binding protein 1               | Agtppb1 | 290986 | 1,05 | up   |
| 5673188 | 7155116 | 1263417 | ATP/GTP binding protein 1               | Agtppb1 | 290986 | 1,04 | down |
| 5873509 | 7155116 | 1263399 | ATP/GTP binding protein 1               | Agtppb1 | 290986 | 1,04 | up   |
| 6567658 | 7155116 | 1263443 | ATP/GTP binding protein 1               | Agtppb1 | 290986 | 1,03 | down |
| 6537997 | 7155116 | 1263443 | ATP/GTP binding protein 1               | Agtppb1 | 290986 | 1,03 | down |
| 6157775 | 7061948 | 1036362 | ATPase family, AAA domain containing 1  | Atad1   | 309532 | 1,78 | down |
| 6352464 | 7061948 | 1036359 | ATPase family, AAA domain containing 1  | Atad1   | 309532 | 1,51 | up   |
| 6651641 | 7061948 | 1036360 | ATPase family, AAA domain containing 1  | Atad1   | 309532 | 1,33 | up   |
| 5713157 | 7061948 | 1036371 | ATPase family, AAA domain containing 1  | Atad1   | 309532 | 1,33 | up   |
| 6367533 | 7061948 | 1036366 | ATPase family, AAA domain containing 1  | Atad1   | 309532 | 1,22 | up   |
| 6554326 | 7061948 | 1036369 | ATPase family, AAA domain containing 1  | Atad1   | 309532 | 1,21 | up   |
| 6178276 | 7061948 | 1036359 | ATPase family, AAA domain containing 1  | Atad1   | 309532 | 1,21 | up   |
| 6178446 | 7061948 | 1036376 | ATPase family, AAA domain containing 1  | Atad1   | 309532 | 1,19 | up   |
| 6453252 | 7061948 | 1036364 | ATPase family, AAA domain containing 1  | Atad1   | 309532 | 1,18 | up   |
| 5941960 | 7061948 | 1036372 | ATPase family, AAA domain containing 1  | Atad1   | 309532 | 1,16 | up   |
| 6542116 | 7061948 | 1036370 | ATPase family, AAA domain containing 1  | Atad1   | 309532 | 1,10 | up   |
| 6653006 | 7061948 | 1036360 | ATPase family, AAA domain containing 1  | Atad1   | 309532 | 1,09 | up   |
| 5858911 | 7061948 | 1036366 | ATPase family, AAA domain containing 1  | Atad1   | 309532 | 1,02 | up   |
| 6196828 | 7293763 | 1605718 | ATPase family, AAA domain containing 3A | Atad3a  | 298682 | 2,08 | down |
| 6023249 | 7293763 | 1605714 | ATPase family, AAA domain containing 3A | Atad3a  | 298682 | 1,79 | up   |
| 6386423 | 7293763 | 1605702 | ATPase family, AAA domain containing 3A | Atad3a  | 298682 | 1,57 | up   |
| 5732958 | 7293763 | 1605703 | ATPase family, AAA domain containing 3A | Atad3a  | 298682 | 1,48 | down |
| 6693673 | 7293763 | 1605704 | ATPase family, AAA domain containing 3A | Atad3a  | 298682 | 1,34 | up   |
| 5959715 | 7293763 | 1605716 | ATPase family, AAA domain containing 3A | Atad3a  | 298682 | 1,33 | down |
| 5841098 | 7293763 | 1605702 | ATPase family, AAA domain containing 3A | Atad3a  | 298682 | 1,33 | down |
| 6166705 | 7293763 | 1605713 | ATPase family, AAA domain containing 3A | Atad3a  | 298682 | 1,25 | up   |
| 6375855 | 7293763 | 1605710 | ATPase family, AAA domain containing 3A | Atad3a  | 298682 | 1,20 | down |
| 5892396 | 7293763 | 1605709 | ATPase family, AAA domain containing 3A | Atad3a  | 298682 | 1,20 | up   |

|         |         |         |                                                                          |         |        |      |      |
|---------|---------|---------|--------------------------------------------------------------------------|---------|--------|------|------|
| 5680091 | 7293763 | 1605711 | ATPase family, AAA domain containing 3A                                  | Atad3a  | 298682 | 1,17 | up   |
| 6583267 | 7293763 | 1605707 | ATPase family, AAA domain containing 3A                                  | Atad3a  | 298682 | 1,15 | down |
| 6155492 | 7293763 | 1605706 | ATPase family, AAA domain containing 3A                                  | Atad3a  | 298682 | 1,14 | up   |
| 5923998 | 7293763 | 1605705 | ATPase family, AAA domain containing 3A                                  | Atad3a  | 298682 | 1,13 | up   |
| 6007608 | 7293763 | 1605702 | ATPase family, AAA domain containing 3A                                  | Atad3a  | 298682 | 1,12 | down |
| 5626704 | 7293763 | 1605708 | ATPase family, AAA domain containing 3A                                  | Atad3a  | 298682 | 1,10 | up   |
| 6669331 | 7293763 | 1605702 | ATPase family, AAA domain containing 3A                                  | Atad3a  | 298682 | 1,08 | down |
| 5900293 | 7293763 | 1605715 | ATPase family, AAA domain containing 3A                                  | Atad3a  | 298682 | 1,07 | down |
| 6168812 | 7293763 | 1605718 | ATPase family, AAA domain containing 3A                                  | Atad3a  | 298682 | 1,03 | up   |
| 6043333 | 7293763 | 1605712 | ATPase family, AAA domain containing 3A                                  | Atad3a  | 298682 | 1,01 | down |
| 6465257 | 7150047 | 1250764 | ATPase type 13A1                                                         | Atp13a1 | 290673 | 1,77 | down |
| 5639536 | 7150047 | 1250781 | ATPase type 13A1                                                         | Atp13a1 | 290673 | 1,54 | down |
| 6226054 | 7150047 | 1250766 | ATPase type 13A1                                                         | Atp13a1 | 290673 | 1,39 | up   |
| 6073429 | 7150047 | 1250778 | ATPase type 13A1                                                         | Atp13a1 | 290673 | 1,31 | up   |
| 6558086 | 7150047 | 1250768 | ATPase type 13A1                                                         | Atp13a1 | 290673 | 1,30 | up   |
| 5717188 | 7150047 | 1250773 | ATPase type 13A1                                                         | Atp13a1 | 290673 | 1,22 | up   |
| 6240170 | 7150047 | 1250778 | ATPase type 13A1                                                         | Atp13a1 | 290673 | 1,20 | up   |
| 6011489 | 7150047 | 1250765 | ATPase type 13A1                                                         | Atp13a1 | 290673 | 1,20 | down |
| 6382184 | 7150047 | 1250776 | ATPase type 13A1                                                         | Atp13a1 | 290673 | 1,20 | up   |
| 6020546 | 7150047 | 1250763 | ATPase type 13A1                                                         | Atp13a1 | 290673 | 1,20 | down |
| 6096306 | 7150047 | 1250768 | ATPase type 13A1                                                         | Atp13a1 | 290673 | 1,20 | up   |
| 6609404 | 7150047 | 1250770 | ATPase type 13A1                                                         | Atp13a1 | 290673 | 1,20 | up   |
| 5913569 | 7150047 | 1250776 | ATPase type 13A1                                                         | Atp13a1 | 290673 | 1,11 | up   |
| 6354247 | 7150047 | 1250783 | ATPase type 13A1                                                         | Atp13a1 | 290673 | 1,11 | down |
| 5705473 | 7150047 | 1250779 | ATPase type 13A1                                                         | Atp13a1 | 290673 | 1,10 | up   |
| 6470817 | 7150047 | 1250768 | ATPase type 13A1                                                         | Atp13a1 | 290673 | 1,09 | down |
| 6515836 | 7150047 | 1250776 | ATPase type 13A1                                                         | Atp13a1 | 290673 | 1,07 | down |
| 6314919 | 7150047 | 1250776 | ATPase type 13A1                                                         | Atp13a1 | 290673 | 1,07 | up   |
| 5725084 | 7150047 | 1250780 | ATPase type 13A1                                                         | Atp13a1 | 290673 | 1,05 | down |
| 6550162 | 7150047 | 1250776 | ATPase type 13A1                                                         | Atp13a1 | 290673 | 1,04 | up   |
| 6058303 | 7150047 | 1250772 | ATPase type 13A1                                                         | Atp13a1 | 290673 | 1,04 | up   |
| 5902784 | 7150047 | 1250769 | ATPase type 13A1                                                         | Atp13a1 | 290673 | 1,04 | up   |
| 6381756 | 7150047 | 1250764 | ATPase type 13A1                                                         | Atp13a1 | 290673 | 1,04 | down |
| 6593725 | 7150047 | 1250774 | ATPase type 13A1                                                         | Atp13a1 | 290673 | 1,02 | up   |
| 5725416 | 7150047 | 1250777 | ATPase type 13A1                                                         | Atp13a1 | 290673 | 1,01 | down |
| 5848177 | 7150047 | 1250771 | ATPase type 13A1                                                         | Atp13a1 | 290673 | 1,01 | up   |
| 6493667 | 7150047 | 1250774 | ATPase type 13A1                                                         | Atp13a1 | 290673 | 1,00 | down |
| 6162295 | 7150047 | 1250775 | ATPase type 13A1                                                         | Atp13a1 | 290673 | 1,00 | down |
| 5916959 | 7089080 | 1101173 | ATPase type 13A4                                                         | Atp13a4 | 288026 | 1,54 | up   |
| 6552744 | 7089080 | 1101129 | ATPase type 13A4                                                         | Atp13a4 | 288026 | 1,22 | up   |
| 5645682 | 7089080 | 1101129 | ATPase type 13A4                                                         | Atp13a4 | 288026 | 1,22 | up   |
| 6108478 | 7089080 | 1101127 | ATPase type 13A4                                                         | Atp13a4 | 288026 | 1,08 | down |
| 6012767 | 7118356 | 1173149 | ATPase, aminophospholipid transporter (APLT), class I, type 8A, member 1 | Atp8a1  | 289615 | 2,58 | up   |
| 6132279 | 7118356 | 1173119 | ATPase, aminophospholipid transporter (APLT), class I, type 8A, member 1 | Atp8a1  | 289615 | 1,64 | down |
| 5966415 | 7118356 | 1173131 | ATPase, aminophospholipid transporter (APLT), class I, type 8A, member 1 | Atp8a1  | 289615 | 1,55 | up   |
| 6064249 | 7118356 | 1173143 | ATPase, aminophospholipid transporter (APLT), class I, type 8A, member 1 | Atp8a1  | 289615 | 1,54 | down |
| 6699121 | 7118356 | 1173158 | ATPase, aminophospholipid transporter (APLT), class I, type 8A, member 1 | Atp8a1  | 289615 | 1,54 | down |
| 5643586 | 7118356 | 1173141 | ATPase, aminophospholipid transporter (APLT), class I, type 8A, member 1 | Atp8a1  | 289615 | 1,52 | up   |
| 6674531 | 7118356 | 1173139 | ATPase, aminophospholipid transporter (APLT), class I, type 8A, member 1 | Atp8a1  | 289615 | 1,44 | up   |
| 6317605 | 7118356 | 1173157 | ATPase, aminophospholipid transporter (APLT), class I, type 8A, member 1 | Atp8a1  | 289615 | 1,40 | down |
| 5776234 | 7118356 | 1173155 | ATPase, aminophospholipid transporter (APLT), class I, type 8A, member 1 | Atp8a1  | 289615 | 1,34 | up   |
| 6445329 | 7118356 | 1173133 | ATPase, aminophospholipid transporter (APLT), class I, type 8A, member 1 | Atp8a1  | 289615 | 1,28 | up   |
| 5922432 | 7118356 | 1173105 | ATPase, aminophospholipid transporter (APLT), class I, type 8A, member 1 | Atp8a1  | 289615 | 1,25 | up   |
| 6097102 | 7118356 | 1173134 | ATPase, aminophospholipid transporter (APLT), class I, type 8A, member 1 | Atp8a1  | 289615 | 1,23 | up   |
| 6327251 | 7118356 | 1173177 | ATPase, aminophospholipid transporter (APLT), class I, type 8A, member 1 | Atp8a1  | 289615 | 1,22 | up   |
| 6281637 | 7118356 | 1173157 | ATPase, aminophospholipid transporter (APLT), class I, type 8A, member 1 | Atp8a1  | 289615 | 1,19 | down |
| 6235880 | 7118356 | 1173182 | ATPase, aminophospholipid transporter (APLT), class I, type 8A, member 1 | Atp8a1  | 289615 | 1,19 | up   |

|         |         |         |                                                                          |        |        |      |      |
|---------|---------|---------|--------------------------------------------------------------------------|--------|--------|------|------|
| 5699954 | 7118356 | 1173152 | ATPase, aminophospholipid transporter (APLT), class I, type 8A, member 1 | Atp8a1 | 289615 | 1,18 | down |
| 6487794 | 7118356 | 1173142 | ATPase, aminophospholipid transporter (APLT), class I, type 8A, member 1 | Atp8a1 | 289615 | 1,18 | up   |
| 6492330 | 7118356 | 1173181 | ATPase, aminophospholipid transporter (APLT), class I, type 8A, member 1 | Atp8a1 | 289615 | 1,18 | down |
| 6059569 | 7118356 | 1173172 | ATPase, aminophospholipid transporter (APLT), class I, type 8A, member 1 | Atp8a1 | 289615 | 1,16 | down |
| 5800853 | 7118356 | 1173165 | ATPase, aminophospholipid transporter (APLT), class I, type 8A, member 1 | Atp8a1 | 289615 | 1,15 | up   |
| 6642127 | 7118356 | 1173167 | ATPase, aminophospholipid transporter (APLT), class I, type 8A, member 1 | Atp8a1 | 289615 | 1,13 | up   |
| 5855460 | 7118356 | 1173105 | ATPase, aminophospholipid transporter (APLT), class I, type 8A, member 1 | Atp8a1 | 289615 | 1,13 | down |
| 6682168 | 7118356 | 1173148 | ATPase, aminophospholipid transporter (APLT), class I, type 8A, member 1 | Atp8a1 | 289615 | 1,12 | down |
| 6409665 | 7118356 | 1173117 | ATPase, aminophospholipid transporter (APLT), class I, type 8A, member 1 | Atp8a1 | 289615 | 1,11 | down |
| 6605005 | 7118356 | 1173201 | ATPase, aminophospholipid transporter (APLT), class I, type 8A, member 1 | Atp8a1 | 289615 | 1,11 | down |
| 6247124 | 7118356 | 1173147 | ATPase, aminophospholipid transporter (APLT), class I, type 8A, member 1 | Atp8a1 | 289615 | 1,11 | up   |
| 5713034 | 7118356 | 1173198 | ATPase, aminophospholipid transporter (APLT), class I, type 8A, member 1 | Atp8a1 | 289615 | 1,11 | down |
| 6316818 | 7118356 | 1173116 | ATPase, aminophospholipid transporter (APLT), class I, type 8A, member 1 | Atp8a1 | 289615 | 1,10 | up   |
| 6613573 | 7118356 | 1173118 | ATPase, aminophospholipid transporter (APLT), class I, type 8A, member 1 | Atp8a1 | 289615 | 1,10 | up   |
| 5984886 | 7118356 | 1173197 | ATPase, aminophospholipid transporter (APLT), class I, type 8A, member 1 | Atp8a1 | 289615 | 1,07 | up   |
| 6164612 | 7118356 | 1173188 | ATPase, aminophospholipid transporter (APLT), class I, type 8A, member 1 | Atp8a1 | 289615 | 1,05 | down |
| 5983779 | 7118356 | 1173202 | ATPase, aminophospholipid transporter (APLT), class I, type 8A, member 1 | Atp8a1 | 289615 | 1,05 | down |
| 6056022 | 7118356 | 1173127 | ATPase, aminophospholipid transporter (APLT), class I, type 8A, member 1 | Atp8a1 | 289615 | 1,05 | up   |
| 6194701 | 7118356 | 1173187 | ATPase, aminophospholipid transporter (APLT), class I, type 8A, member 1 | Atp8a1 | 289615 | 1,04 | up   |
| 6689366 | 7118356 | 1173178 | ATPase, aminophospholipid transporter (APLT), class I, type 8A, member 1 | Atp8a1 | 289615 | 1,04 | down |
| 6517094 | 7118356 | 1173146 | ATPase, aminophospholipid transporter (APLT), class I, type 8A, member 1 | Atp8a1 | 289615 | 1,03 | up   |
| 6094155 | 7118356 | 1173189 | ATPase, aminophospholipid transporter (APLT), class I, type 8A, member 1 | Atp8a1 | 289615 | 1,02 | down |
| 5745366 | 7118356 | 1173137 | ATPase, aminophospholipid transporter (APLT), class I, type 8A, member 1 | Atp8a1 | 289615 | 1,02 | down |
| 6621609 | 7118356 | 1173183 | ATPase, aminophospholipid transporter (APLT), class I, type 8A, member 1 | Atp8a1 | 289615 | 1,01 | down |
| 5971396 | 7118356 | 1173138 | ATPase, aminophospholipid transporter (APLT), class I, type 8A, member 1 | Atp8a1 | 289615 | 1,01 | down |
| 6468631 | 7118356 | 1173106 | ATPase, aminophospholipid transporter (APLT), class I, type 8A, member 1 | Atp8a1 | 289615 | 1,00 | up   |
| 5865789 | 7268482 | 1543722 | ATPase, Ca++ transporting, plasma membrane 2                             | Atp2b2 | 24215  | 2,90 | up   |
| 5677600 | 7268482 | 1543720 | ATPase, Ca++ transporting, plasma membrane 2                             | Atp2b2 | 24215  | 2,09 | up   |
| 6665168 | 7268482 | 1543709 | ATPase, Ca++ transporting, plasma membrane 2                             | Atp2b2 | 24215  | 1,92 | down |
| 6703548 | 7268482 | 1543714 | ATPase, Ca++ transporting, plasma membrane 2                             | Atp2b2 | 24215  | 1,81 | up   |
| 5912570 | 7268482 | 1543716 | ATPase, Ca++ transporting, plasma membrane 2                             | Atp2b2 | 24215  | 1,67 | down |
| 5727345 | 7268482 | 1543712 | ATPase, Ca++ transporting, plasma membrane 2                             | Atp2b2 | 24215  | 1,61 | down |
| 6360152 | 7268482 | 1543702 | ATPase, Ca++ transporting, plasma membrane 2                             | Atp2b2 | 24215  | 1,56 | down |
| 6082423 | 7268482 | 1543718 | ATPase, Ca++ transporting, plasma membrane 2                             | Atp2b2 | 24215  | 1,55 | down |
| 6614619 | 7268482 | 1543703 | ATPase, Ca++ transporting, plasma membrane 2                             | Atp2b2 | 24215  | 1,54 | up   |
| 6264907 | 7268482 | 1543708 | ATPase, Ca++ transporting, plasma membrane 2                             | Atp2b2 | 24215  | 1,41 | up   |
| 5651753 | 7268482 | 1543717 | ATPase, Ca++ transporting, plasma membrane 2                             | Atp2b2 | 24215  | 1,35 | down |
| 5649256 | 7268482 | 1543721 | ATPase, Ca++ transporting, plasma membrane 2                             | Atp2b2 | 24215  | 1,33 | up   |
| 6265406 | 7268482 | 1543715 | ATPase, Ca++ transporting, plasma membrane 2                             | Atp2b2 | 24215  | 1,33 | down |
| 6366295 | 7268482 | 1543707 | ATPase, Ca++ transporting, plasma membrane 2                             | Atp2b2 | 24215  | 1,30 | down |
| 6738498 | 7268482 | 1543711 | ATPase, Ca++ transporting, plasma membrane 2                             | Atp2b2 | 24215  | 1,29 | up   |
| 5885728 | 7268482 | 1543705 | ATPase, Ca++ transporting, plasma membrane 2                             | Atp2b2 | 24215  | 1,21 | down |
| 6190575 | 7268482 | 1543706 | ATPase, Ca++ transporting, plasma membrane 2                             | Atp2b2 | 24215  | 1,15 | down |
| 6715251 | 7268482 | 1543710 | ATPase, Ca++ transporting, plasma membrane 2                             | Atp2b2 | 24215  | 1,14 | up   |
| 5832200 | 7268482 | 1543704 | ATPase, Ca++ transporting, plasma membrane 2                             | Atp2b2 | 24215  | 1,12 | up   |
| 6511693 | 7268482 | 1543701 | ATPase, Ca++ transporting, plasma membrane 2                             | Atp2b2 | 24215  | 1,09 | down |
| 6518671 | 7268482 | 1543719 | ATPase, Ca++ transporting, plasma membrane 2                             | Atp2b2 | 24215  | 1,09 | down |
| 5728221 | 7268482 | 1543713 | ATPase, Ca++ transporting, plasma membrane 2                             | Atp2b2 | 24215  | 1,06 | up   |
| 6025041 | 7268482 | 1543719 | ATPase, Ca++ transporting, plasma membrane 2                             | Atp2b2 | 24215  | 1,01 | down |
| 5876550 | 7378504 | 1817477 | ATPase, Ca++ transporting, plasma membrane 3                             | Atp2b3 | 29599  | 2,63 | down |
| 5955244 | 7378504 | 1817471 | ATPase, Ca++ transporting, plasma membrane 3                             | Atp2b3 | 29599  | 2,26 | down |
| 6290594 | 7378504 | 1817476 | ATPase, Ca++ transporting, plasma membrane 3                             | Atp2b3 | 29599  | 2,10 | down |
| 6098748 | 7378504 | 1817463 | ATPase, Ca++ transporting, plasma membrane 3                             | Atp2b3 | 29599  | 1,72 | up   |
| 6523600 | 7378504 | 1817461 | ATPase, Ca++ transporting, plasma membrane 3                             | Atp2b3 | 29599  | 1,70 | up   |
| 5798234 | 7378504 | 1817465 | ATPase, Ca++ transporting, plasma membrane 3                             | Atp2b3 | 29599  | 1,67 | up   |
| 6352180 | 7378504 | 1817465 | ATPase, Ca++ transporting, plasma membrane 3                             | Atp2b3 | 29599  | 1,66 | up   |
| 6366938 | 7378504 | 1817481 | ATPase, Ca++ transporting, plasma membrane 3                             | Atp2b3 | 29599  | 1,55 | down |



|         |         |         |                                              |        |        |      |      |
|---------|---------|---------|----------------------------------------------|--------|--------|------|------|
| 5713513 | 7378504 | 1817475 | ATPase, Ca++ transporting, plasma membrane 3 | Atp2b3 | 29599  | 1,47 | down |
| 6077351 | 7378504 | 1817467 | ATPase, Ca++ transporting, plasma membrane 3 | Atp2b3 | 29599  | 1,47 | down |
| 6446347 | 7378504 | 1817469 | ATPase, Ca++ transporting, plasma membrane 3 | Atp2b3 | 29599  | 1,41 | down |
| 5621884 | 7378504 | 1817468 | ATPase, Ca++ transporting, plasma membrane 3 | Atp2b3 | 29599  | 1,34 | up   |
| 6231195 | 7378504 | 1817470 | ATPase, Ca++ transporting, plasma membrane 3 | Atp2b3 | 29599  | 1,30 | down |
| 5985733 | 7378504 | 1817480 | ATPase, Ca++ transporting, plasma membrane 3 | Atp2b3 | 29599  | 1,30 | up   |
| 5743191 | 7378504 | 1817482 | ATPase, Ca++ transporting, plasma membrane 3 | Atp2b3 | 29599  | 1,30 | down |
| 5885816 | 7378504 | 1817474 | ATPase, Ca++ transporting, plasma membrane 3 | Atp2b3 | 29599  | 1,28 | down |
| 6183491 | 7378504 | 1817472 | ATPase, Ca++ transporting, plasma membrane 3 | Atp2b3 | 29599  | 1,27 | down |
| 5794924 | 7378504 | 1817461 | ATPase, Ca++ transporting, plasma membrane 3 | Atp2b3 | 29599  | 1,25 | up   |
| 5752859 | 7378504 | 1817482 | ATPase, Ca++ transporting, plasma membrane 3 | Atp2b3 | 29599  | 1,24 | down |
| 5868039 | 7378504 | 1817462 | ATPase, Ca++ transporting, plasma membrane 3 | Atp2b3 | 29599  | 1,22 | up   |
| 6573361 | 7378504 | 1817473 | ATPase, Ca++ transporting, plasma membrane 3 | Atp2b3 | 29599  | 1,22 | down |
| 5761844 | 7378504 | 1817482 | ATPase, Ca++ transporting, plasma membrane 3 | Atp2b3 | 29599  | 1,22 | down |
| 6270592 | 7378504 | 1817466 | ATPase, Ca++ transporting, plasma membrane 3 | Atp2b3 | 29599  | 1,19 | up   |
| 6365488 | 7378504 | 1817464 | ATPase, Ca++ transporting, plasma membrane 3 | Atp2b3 | 29599  | 1,19 | up   |
| 6238939 | 7378504 | 1817478 | ATPase, Ca++ transporting, plasma membrane 3 | Atp2b3 | 29599  | 1,15 | up   |
| 5927404 | 7378504 | 1817479 | ATPase, Ca++ transporting, plasma membrane 3 | Atp2b3 | 29599  | 1,11 | down |
| 6498185 | 7378504 | 1817481 | ATPase, Ca++ transporting, plasma membrane 3 | Atp2b3 | 29599  | 1,11 | down |
| 6101440 | 7378504 | 1817463 | ATPase, Ca++ transporting, plasma membrane 3 | Atp2b3 | 29599  | 1,07 | up   |
| 6449186 | 7111227 | 1155317 | ATPase, Ca++ transporting, plasma membrane 4 | Atp2b4 | 29600  | 2,14 | down |
| 6153389 | 7111227 | 1155330 | ATPase, Ca++ transporting, plasma membrane 4 | Atp2b4 | 29600  | 2,13 | up   |
| 5964649 | 7111227 | 1155319 | ATPase, Ca++ transporting, plasma membrane 4 | Atp2b4 | 29600  | 1,85 | down |
| 5882711 | 7111227 | 1155321 | ATPase, Ca++ transporting, plasma membrane 4 | Atp2b4 | 29600  | 1,53 | down |
| 6729959 | 7111227 | 1155332 | ATPase, Ca++ transporting, plasma membrane 4 | Atp2b4 | 29600  | 1,47 | up   |
| 5944034 | 7111227 | 1155331 | ATPase, Ca++ transporting, plasma membrane 4 | Atp2b4 | 29600  | 1,46 | down |
| 6420961 | 7111227 | 1155336 | ATPase, Ca++ transporting, plasma membrane 4 | Atp2b4 | 29600  | 1,45 | up   |
| 6431738 | 7111227 | 1155318 | ATPase, Ca++ transporting, plasma membrane 4 | Atp2b4 | 29600  | 1,43 | up   |
| 6242569 | 7111227 | 1155324 | ATPase, Ca++ transporting, plasma membrane 4 | Atp2b4 | 29600  | 1,38 | down |
| 5729789 | 7111227 | 1155327 | ATPase, Ca++ transporting, plasma membrane 4 | Atp2b4 | 29600  | 1,37 | up   |
| 6376341 | 7111227 | 1155317 | ATPase, Ca++ transporting, plasma membrane 4 | Atp2b4 | 29600  | 1,36 | down |
| 5690712 | 7111227 | 1155335 | ATPase, Ca++ transporting, plasma membrane 4 | Atp2b4 | 29600  | 1,36 | up   |
| 6726948 | 7111227 | 1155320 | ATPase, Ca++ transporting, plasma membrane 4 | Atp2b4 | 29600  | 1,33 | down |
| 5630298 | 7111227 | 1155325 | ATPase, Ca++ transporting, plasma membrane 4 | Atp2b4 | 29600  | 1,32 | up   |
| 6157677 | 7111227 | 1155323 | ATPase, Ca++ transporting, plasma membrane 4 | Atp2b4 | 29600  | 1,30 | down |
| 6096368 | 7111227 | 1155328 | ATPase, Ca++ transporting, plasma membrane 4 | Atp2b4 | 29600  | 1,30 | up   |
| 6145303 | 7111227 | 1155322 | ATPase, Ca++ transporting, plasma membrane 4 | Atp2b4 | 29600  | 1,24 | down |
| 6544666 | 7111227 | 1155326 | ATPase, Ca++ transporting, plasma membrane 4 | Atp2b4 | 29600  | 1,22 | down |
| 6073477 | 7111227 | 1155334 | ATPase, Ca++ transporting, plasma membrane 4 | Atp2b4 | 29600  | 1,12 | up   |
| 6126454 | 7111227 | 1155333 | ATPase, Ca++ transporting, plasma membrane 4 | Atp2b4 | 29600  | 1,06 | up   |
| 6647614 | 7111227 | 1155318 | ATPase, Ca++ transporting, plasma membrane 4 | Atp2b4 | 29600  | 1,05 | down |
| 6289234 | 7111227 | 1155335 | ATPase, Ca++ transporting, plasma membrane 4 | Atp2b4 | 29600  | 1,04 | up   |
| 6544634 | 7111227 | 1155329 | ATPase, Ca++ transporting, plasma membrane 4 | Atp2b4 | 29600  | 1,00 | up   |
| 5867930 | 7032204 | 966172  | ATPase, class V, type 10A                    | Atp10a | 365266 | 1,92 | up   |
| 6303552 | 7032204 | 966167  | ATPase, class V, type 10A                    | Atp10a | 365266 | 1,75 | up   |
| 6732174 | 7032204 | 966164  | ATPase, class V, type 10A                    | Atp10a | 365266 | 1,43 | up   |
| 6700789 | 7032204 | 966160  | ATPase, class V, type 10A                    | Atp10a | 365266 | 1,37 | down |
| 5956503 | 7032204 | 966161  | ATPase, class V, type 10A                    | Atp10a | 365266 | 1,27 | up   |
| 5979348 | 7032204 | 966157  | ATPase, class V, type 10A                    | Atp10a | 365266 | 1,25 | down |
| 5891271 | 7032204 | 966162  | ATPase, class V, type 10A                    | Atp10a | 365266 | 1,15 | up   |
| 6602293 | 7032204 | 966165  | ATPase, class V, type 10A                    | Atp10a | 365266 | 1,14 | up   |
| 5806654 | 7032204 | 966155  | ATPase, class V, type 10A                    | Atp10a | 365266 | 1,12 | down |
| 5953151 | 7032204 | 966170  | ATPase, class V, type 10A                    | Atp10a | 365266 | 1,09 | down |
| 6036438 | 7032204 | 966120  | ATPase, class V, type 10A                    | Atp10a | 365266 | 1,09 | up   |
| 5703750 | 7032204 | 966173  | ATPase, class V, type 10A                    | Atp10a | 365266 | 1,08 | up   |
| 6575634 | 7032204 | 966173  | ATPase, class V, type 10A                    | Atp10a | 365266 | 1,04 | down |
| 6476797 | 7032204 | 966169  | ATPase, class V, type 10A                    | Atp10a | 365266 | 1,04 | up   |

|         |         |         |                                                  |          |        |      |      |
|---------|---------|---------|--------------------------------------------------|----------|--------|------|------|
| 6307143 | 7032204 | 966166  | ATPase, class V, type 10A                        | Atp10a   | 365266 | 1,03 | up   |
| 5730159 | 7032204 | 966173  | ATPase, class V, type 10A                        | Atp10a   | 365266 | 1,03 | up   |
| 6219227 | 7032204 | 966163  | ATPase, class V, type 10A                        | Atp10a   | 365266 | 1,02 | down |
| 6028222 | 7125160 | 1189574 | ATPase, class V, type 10D                        | Atp10d   | 360932 | 2,14 | down |
| 5793860 | 7125160 | 1189577 | ATPase, class V, type 10D                        | Atp10d   | 360932 | 1,73 | down |
| 5949922 | 7125160 | 1189564 | ATPase, class V, type 10D                        | Atp10d   | 360932 | 1,68 | up   |
| 6359482 | 7125160 | 1189590 | ATPase, class V, type 10D                        | Atp10d   | 360932 | 1,67 | up   |
| 6712648 | 7125160 | 1189599 | ATPase, class V, type 10D                        | Atp10d   | 360932 | 1,61 | up   |
| 6320627 | 7125160 | 1189590 | ATPase, class V, type 10D                        | Atp10d   | 360932 | 1,56 | up   |
| 6437102 | 7125160 | 1189586 | ATPase, class V, type 10D                        | Atp10d   | 360932 | 1,54 | down |
| 6385871 | 7125160 | 1189574 | ATPase, class V, type 10D                        | Atp10d   | 360932 | 1,54 | down |
| 6599721 | 7125160 | 1189567 | ATPase, class V, type 10D                        | Atp10d   | 360932 | 1,51 | down |
| 6406755 | 7125160 | 1189576 | ATPase, class V, type 10D                        | Atp10d   | 360932 | 1,43 | down |
| 6528964 | 7125160 | 1189575 | ATPase, class V, type 10D                        | Atp10d   | 360932 | 1,41 | down |
| 5723715 | 7125160 | 1189570 | ATPase, class V, type 10D                        | Atp10d   | 360932 | 1,36 | down |
| 6399667 | 7125160 | 1189597 | ATPase, class V, type 10D                        | Atp10d   | 360932 | 1,35 | up   |
| 5754981 | 7125160 | 1189600 | ATPase, class V, type 10D                        | Atp10d   | 360932 | 1,35 | down |
| 6212698 | 7125160 | 1189564 | ATPase, class V, type 10D                        | Atp10d   | 360932 | 1,28 | up   |
| 6266279 | 7125160 | 1189565 | ATPase, class V, type 10D                        | Atp10d   | 360932 | 1,24 | down |
| 6675621 | 7125160 | 1189584 | ATPase, class V, type 10D                        | Atp10d   | 360932 | 1,18 | down |
| 6465442 | 7125160 | 1189600 | ATPase, class V, type 10D                        | Atp10d   | 360932 | 1,17 | up   |
| 6655406 | 7125160 | 1189607 | ATPase, class V, type 10D                        | Atp10d   | 360932 | 1,15 | up   |
| 6356083 | 7125160 | 1189569 | ATPase, class V, type 10D                        | Atp10d   | 360932 | 1,13 | down |
| 6456833 | 7125160 | 1189588 | ATPase, class V, type 10D                        | Atp10d   | 360932 | 1,10 | up   |
| 5774907 | 7125160 | 1189595 | ATPase, class V, type 10D                        | Atp10d   | 360932 | 1,08 | down |
| 5725193 | 7125160 | 1189585 | ATPase, class V, type 10D                        | Atp10d   | 360932 | 1,07 | up   |
| 6675417 | 7125160 | 1189580 | ATPase, class V, type 10D                        | Atp10d   | 360932 | 1,06 | up   |
| 5979015 | 7125160 | 1189564 | ATPase, class V, type 10D                        | Atp10d   | 360932 | 1,06 | up   |
| 5670029 | 7125160 | 1189583 | ATPase, class V, type 10D                        | Atp10d   | 360932 | 1,03 | up   |
| 5662550 | 7125160 | 1189597 | ATPase, class V, type 10D                        | Atp10d   | 360932 | 1,03 | down |
| 6362148 | 7125160 | 1189600 | ATPase, class V, type 10D                        | Atp10d   | 360932 | 1,03 | down |
| 6187294 | 7125160 | 1189592 | ATPase, class V, type 10D                        | Atp10d   | 360932 | 1,02 | up   |
| 5694889 | 7125160 | 1189564 | ATPase, class V, type 10D                        | Atp10d   | 360932 | 1,02 | down |
| 6013490 | 7125160 | 1189582 | ATPase, class V, type 10D                        | Atp10d   | 360932 | 1,01 | down |
| 6349091 | 7125160 | 1189589 | ATPase, class V, type 10D                        | Atp10d   | 360932 | 1,01 | up   |
| 6743193 | 7193056 | 1358287 | ATPase, class VI, type 11B                       | Atp11b   | 361929 | 1,58 | down |
| 6308707 | 7193056 | 1358278 | ATPase, class VI, type 11B                       | Atp11b   | 361929 | 1,26 | down |
| 6583720 | 7193056 | 1358280 | ATPase, class VI, type 11B                       | Atp11b   | 361929 | 1,24 | up   |
| 6184554 | 7193056 | 1358280 | ATPase, class VI, type 11B                       | Atp11b   | 361929 | 1,23 | down |
| 6359041 | 7193056 | 1358284 | ATPase, class VI, type 11B                       | Atp11b   | 361929 | 1,18 | down |
| 6264174 | 7193056 | 1358279 | ATPase, class VI, type 11B                       | Atp11b   | 361929 | 1,16 | down |
| 6299856 | 7193056 | 1358287 | ATPase, class VI, type 11B                       | Atp11b   | 361929 | 1,13 | down |
| 6595229 | 7384509 | 1830719 | Atpase, class VI, type 11C                       | Atp11c   | 317599 | 1,80 | down |
| 5955119 | 7384509 | 1830719 | Atpase, class VI, type 11C                       | Atp11c   | 317599 | 1,19 | down |
| 5946554 | 7384509 | 1830719 | Atpase, class VI, type 11C                       | Atp11c   | 317599 | 1,12 | up   |
| 6462012 | 7384509 | 1830719 | Atpase, class VI, type 11C                       | Atp11c   | 317599 | 1,09 | up   |
| 6325774 | 7263805 | 1532174 | ATPase, H+ transporting, lysosomal V0 subunit A4 | Atp6v0a4 | 296981 | 2,68 | up   |
| 6300685 | 7263805 | 1532181 | ATPase, H+ transporting, lysosomal V0 subunit A4 | Atp6v0a4 | 296981 | 1,75 | down |
| 6319960 | 7263805 | 1532179 | ATPase, H+ transporting, lysosomal V0 subunit A4 | Atp6v0a4 | 296981 | 1,68 | up   |
| 6605731 | 7263805 | 1532177 | ATPase, H+ transporting, lysosomal V0 subunit A4 | Atp6v0a4 | 296981 | 1,65 | up   |
| 6051521 | 7263805 | 1532194 | ATPase, H+ transporting, lysosomal V0 subunit A4 | Atp6v0a4 | 296981 | 1,65 | up   |
| 5844016 | 7263805 | 1532174 | ATPase, H+ transporting, lysosomal V0 subunit A4 | Atp6v0a4 | 296981 | 1,61 | down |
| 6197784 | 7263805 | 1532189 | ATPase, H+ transporting, lysosomal V0 subunit A4 | Atp6v0a4 | 296981 | 1,57 | up   |
| 6489989 | 7263805 | 1532183 | ATPase, H+ transporting, lysosomal V0 subunit A4 | Atp6v0a4 | 296981 | 1,39 | up   |
| 6173733 | 7263805 | 1532186 | ATPase, H+ transporting, lysosomal V0 subunit A4 | Atp6v0a4 | 296981 | 1,38 | down |
| 6290660 | 7263805 | 1532180 | ATPase, H+ transporting, lysosomal V0 subunit A4 | Atp6v0a4 | 296981 | 1,23 | down |
| 6621867 | 7263805 | 1532187 | ATPase, H+ transporting, lysosomal V0 subunit A4 | Atp6v0a4 | 296981 | 1,20 | down |

|         |         |         |                                                           |          |        |      |      |
|---------|---------|---------|-----------------------------------------------------------|----------|--------|------|------|
| 5808638 | 7263805 | 1532191 | ATPase, H+ transporting, lysosomal V0 subunit A4          | Atp6v0a4 | 296981 | 1,19 | down |
| 6046375 | 7263805 | 1532176 | ATPase, H+ transporting, lysosomal V0 subunit A4          | Atp6v0a4 | 296981 | 1,16 | up   |
| 6186926 | 7263805 | 1532178 | ATPase, H+ transporting, lysosomal V0 subunit A4          | Atp6v0a4 | 296981 | 1,15 | down |
| 6113140 | 7263805 | 1532194 | ATPase, H+ transporting, lysosomal V0 subunit A4          | Atp6v0a4 | 296981 | 1,12 | up   |
| 6188574 | 7263805 | 1532177 | ATPase, H+ transporting, lysosomal V0 subunit A4          | Atp6v0a4 | 296981 | 1,11 | up   |
| 6508242 | 7263805 | 1532175 | ATPase, H+ transporting, lysosomal V0 subunit A4          | Atp6v0a4 | 296981 | 1,09 | down |
| 6180574 | 7263805 | 1532188 | ATPase, H+ transporting, lysosomal V0 subunit A4          | Atp6v0a4 | 296981 | 1,08 | up   |
| 6313808 | 7263805 | 1532184 | ATPase, H+ transporting, lysosomal V0 subunit A4          | Atp6v0a4 | 296981 | 1,06 | down |
| 5748869 | 7263805 | 1532192 | ATPase, H+ transporting, lysosomal V0 subunit A4          | Atp6v0a4 | 296981 | 1,01 | down |
| 5644928 | 7263805 | 1532185 | ATPase, H+ transporting, lysosomal V0 subunit A4          | Atp6v0a4 | 296981 | 1,00 | up   |
| 6744857 | 7263805 | 1532193 | ATPase, H+ transporting, lysosomal V0 subunit A4          | Atp6v0a4 | 296981 | 1,00 | up   |
| 5724084 | 7132116 | 1206568 | ATPase, H+/K+ transporting, nongastric, alpha polypeptide | Atp12a   | 171028 | 2,47 | down |
| 5929705 | 7132116 | 1206569 | ATPase, H+/K+ transporting, nongastric, alpha polypeptide | Atp12a   | 171028 | 1,47 | up   |
| 6131623 | 7132116 | 1206572 | ATPase, H+/K+ transporting, nongastric, alpha polypeptide | Atp12a   | 171028 | 1,46 | up   |
| 5687478 | 7132116 | 1206585 | ATPase, H+/K+ transporting, nongastric, alpha polypeptide | Atp12a   | 171028 | 1,38 | up   |
| 5826202 | 7132116 | 1206566 | ATPase, H+/K+ transporting, nongastric, alpha polypeptide | Atp12a   | 171028 | 1,34 | down |
| 6328534 | 7132116 | 1206565 | ATPase, H+/K+ transporting, nongastric, alpha polypeptide | Atp12a   | 171028 | 1,32 | down |
| 6515184 | 7132116 | 1206588 | ATPase, H+/K+ transporting, nongastric, alpha polypeptide | Atp12a   | 171028 | 1,31 | up   |
| 6417218 | 7132116 | 1206582 | ATPase, H+/K+ transporting, nongastric, alpha polypeptide | Atp12a   | 171028 | 1,29 | down |
| 6535206 | 7132116 | 1206566 | ATPase, H+/K+ transporting, nongastric, alpha polypeptide | Atp12a   | 171028 | 1,28 | down |
| 5828261 | 7132116 | 1206579 | ATPase, H+/K+ transporting, nongastric, alpha polypeptide | Atp12a   | 171028 | 1,28 | up   |
| 6643135 | 7132116 | 1206581 | ATPase, H+/K+ transporting, nongastric, alpha polypeptide | Atp12a   | 171028 | 1,26 | up   |
| 5673168 | 7132116 | 1206575 | ATPase, H+/K+ transporting, nongastric, alpha polypeptide | Atp12a   | 171028 | 1,24 | down |
| 6728536 | 7132116 | 1206574 | ATPase, H+/K+ transporting, nongastric, alpha polypeptide | Atp12a   | 171028 | 1,22 | down |
| 6070873 | 7132116 | 1206583 | ATPase, H+/K+ transporting, nongastric, alpha polypeptide | Atp12a   | 171028 | 1,17 | up   |
| 6598275 | 7132116 | 1206587 | ATPase, H+/K+ transporting, nongastric, alpha polypeptide | Atp12a   | 171028 | 1,16 | up   |
| 5803429 | 7132116 | 1206570 | ATPase, H+/K+ transporting, nongastric, alpha polypeptide | Atp12a   | 171028 | 1,14 | down |
| 6402066 | 7132116 | 1206568 | ATPase, H+/K+ transporting, nongastric, alpha polypeptide | Atp12a   | 171028 | 1,13 | up   |
| 6533236 | 7132116 | 1206566 | ATPase, H+/K+ transporting, nongastric, alpha polypeptide | Atp12a   | 171028 | 1,13 | down |
| 5945602 | 7132116 | 1206576 | ATPase, H+/K+ transporting, nongastric, alpha polypeptide | Atp12a   | 171028 | 1,11 | down |
| 6028380 | 7132116 | 1206580 | ATPase, H+/K+ transporting, nongastric, alpha polypeptide | Atp12a   | 171028 | 1,09 | up   |
| 6100919 | 7132116 | 1206577 | ATPase, H+/K+ transporting, nongastric, alpha polypeptide | Atp12a   | 171028 | 1,09 | up   |
| 6098228 | 7132116 | 1206586 | ATPase, H+/K+ transporting, nongastric, alpha polypeptide | Atp12a   | 171028 | 1,08 | down |
| 5907819 | 7132116 | 1206573 | ATPase, H+/K+ transporting, nongastric, alpha polypeptide | Atp12a   | 171028 | 1,08 | down |
| 6144075 | 7132116 | 1206584 | ATPase, H+/K+ transporting, nongastric, alpha polypeptide | Atp12a   | 171028 | 1,07 | up   |
| 6507185 | 7132116 | 1206578 | ATPase, H+/K+ transporting, nongastric, alpha polypeptide | Atp12a   | 171028 | 1,06 | down |
| 6141240 | 7132116 | 1206571 | ATPase, H+/K+ transporting, nongastric, alpha polypeptide | Atp12a   | 171028 | 1,06 | up   |
| 6081542 | 7132116 | 1206567 | ATPase, H+/K+ transporting, nongastric, alpha polypeptide | Atp12a   | 171028 | 1,04 | down |
| 6736763 | 7132116 | 1206566 | ATPase, H+/K+ transporting, nongastric, alpha polypeptide | Atp12a   | 171028 | 1,03 | up   |
| 5700305 | 7212141 | 1403614 | ATPase, Na+/K+ transporting, alpha 1 polypeptide          | Atp1a1   | 24211  | 1,77 | up   |
| 6152456 | 7212141 | 1403600 | ATPase, Na+/K+ transporting, alpha 1 polypeptide          | Atp1a1   | 24211  | 1,66 | up   |
| 6187652 | 7212141 | 1403600 | ATPase, Na+/K+ transporting, alpha 1 polypeptide          | Atp1a1   | 24211  | 1,54 | down |
| 6336561 | 7212141 | 1403614 | ATPase, Na+/K+ transporting, alpha 1 polypeptide          | Atp1a1   | 24211  | 1,50 | up   |
| 6360762 | 7212141 | 1403601 | ATPase, Na+/K+ transporting, alpha 1 polypeptide          | Atp1a1   | 24211  | 1,45 | up   |
| 6119196 | 7212141 | 1403619 | ATPase, Na+/K+ transporting, alpha 1 polypeptide          | Atp1a1   | 24211  | 1,33 | down |
| 6247765 | 7212141 | 1403608 | ATPase, Na+/K+ transporting, alpha 1 polypeptide          | Atp1a1   | 24211  | 1,30 | up   |
| 6069793 | 7212141 | 1403618 | ATPase, Na+/K+ transporting, alpha 1 polypeptide          | Atp1a1   | 24211  | 1,28 | down |
| 5970012 | 7212141 | 1403603 | ATPase, Na+/K+ transporting, alpha 1 polypeptide          | Atp1a1   | 24211  | 1,23 | up   |
| 6470070 | 7212141 | 1403612 | ATPase, Na+/K+ transporting, alpha 1 polypeptide          | Atp1a1   | 24211  | 1,21 | down |
| 5644089 | 7212141 | 1403601 | ATPase, Na+/K+ transporting, alpha 1 polypeptide          | Atp1a1   | 24211  | 1,19 | up   |
| 6622932 | 7212141 | 1403606 | ATPase, Na+/K+ transporting, alpha 1 polypeptide          | Atp1a1   | 24211  | 1,18 | up   |
| 6648897 | 7212141 | 1403616 | ATPase, Na+/K+ transporting, alpha 1 polypeptide          | Atp1a1   | 24211  | 1,14 | down |
| 6680414 | 7212141 | 1403617 | ATPase, Na+/K+ transporting, alpha 1 polypeptide          | Atp1a1   | 24211  | 1,14 | down |
| 5859800 | 7212141 | 1403607 | ATPase, Na+/K+ transporting, alpha 1 polypeptide          | Atp1a1   | 24211  | 1,12 | up   |
| 6017189 | 7212141 | 1403605 | ATPase, Na+/K+ transporting, alpha 1 polypeptide          | Atp1a1   | 24211  | 1,09 | up   |
| 5881299 | 7212141 | 1403611 | ATPase, Na+/K+ transporting, alpha 1 polypeptide          | Atp1a1   | 24211  | 1,09 | down |
| 5681703 | 7212141 | 1403615 | ATPase, Na+/K+ transporting, alpha 1 polypeptide          | Atp1a1   | 24211  | 1,09 | down |

|         |         |         |                                                     |        |        |      |      |
|---------|---------|---------|-----------------------------------------------------|--------|--------|------|------|
| 6430674 | 7212141 | 1403619 | ATPase, Na+/K+ transporting, alpha 1 polypeptide    | Atp1a1 | 24211  | 1,07 | down |
| 5789810 | 7212141 | 1403618 | ATPase, Na+/K+ transporting, alpha 1 polypeptide    | Atp1a1 | 24211  | 1,05 | down |
| 6099964 | 7212141 | 1403609 | ATPase, Na+/K+ transporting, alpha 1 polypeptide    | Atp1a1 | 24211  | 1,05 | up   |
| 6087723 | 7212141 | 1403610 | ATPase, Na+/K+ transporting, alpha 1 polypeptide    | Atp1a1 | 24211  | 1,00 | down |
| 6223339 | 7113385 | 1160802 | ATPase, Na+/K+ transporting, beta 1 polypeptide     | Atp1b1 | 25650  | 2,57 | up   |
| 6261370 | 7113385 | 1160800 | ATPase, Na+/K+ transporting, beta 1 polypeptide     | Atp1b1 | 25650  | 1,26 | down |
| 6006071 | 7113385 | 1160796 | ATPase, Na+/K+ transporting, beta 1 polypeptide     | Atp1b1 | 25650  | 1,18 | up   |
| 6370602 | 7113385 | 1160797 | ATPase, Na+/K+ transporting, beta 1 polypeptide     | Atp1b1 | 25650  | 1,10 | down |
| 5795898 | 7113385 | 1160802 | ATPase, Na+/K+ transporting, beta 1 polypeptide     | Atp1b1 | 25650  | 1,09 | up   |
| 6039942 | 7113385 | 1160799 | ATPase, Na+/K+ transporting, beta 1 polypeptide     | Atp1b1 | 25650  | 1,08 | down |
| 5784541 | 7113385 | 1160801 | ATPase, Na+/K+ transporting, beta 1 polypeptide     | Atp1b1 | 25650  | 1,08 | up   |
| 5750170 | 7113385 | 1160798 | ATPase, Na+/K+ transporting, beta 1 polypeptide     | Atp1b1 | 25650  | 1,06 | down |
| 5758438 | 7113385 | 1160802 | ATPase, Na+/K+ transporting, beta 1 polypeptide     | Atp1b1 | 25650  | 1,06 | up   |
| 6481881 | 7113385 | 1160797 | ATPase, Na+/K+ transporting, beta 1 polypeptide     | Atp1b1 | 25650  | 1,03 | up   |
| 6507187 | 7113385 | 1160796 | ATPase, Na+/K+ transporting, beta 1 polypeptide     | Atp1b1 | 25650  | 1,03 | up   |
| 6567423 | 7113385 | 1160798 | ATPase, Na+/K+ transporting, beta 1 polypeptide     | Atp1b1 | 25650  | 1,02 | down |
| 6404271 | 7113385 | 1160796 | ATPase, Na+/K+ transporting, beta 1 polypeptide     | Atp1b1 | 25650  | 1,01 | down |
| 6589057 | 7079070 | 1077533 | ATPase, Na+/K+ transporting, beta 2 polypeptide     | Atp1b2 | 24214  | 2,16 | up   |
| 6360137 | 7079070 | 1077531 | ATPase, Na+/K+ transporting, beta 2 polypeptide     | Atp1b2 | 24214  | 1,83 | down |
| 5913925 | 7079070 | 1077532 | ATPase, Na+/K+ transporting, beta 2 polypeptide     | Atp1b2 | 24214  | 1,54 | down |
| 5877059 | 7079070 | 1077530 | ATPase, Na+/K+ transporting, beta 2 polypeptide     | Atp1b2 | 24214  | 1,42 | down |
| 5669119 | 7079070 | 1077533 | ATPase, Na+/K+ transporting, beta 2 polypeptide     | Atp1b2 | 24214  | 1,41 | up   |
| 6223512 | 7079070 | 1077528 | ATPase, Na+/K+ transporting, beta 2 polypeptide     | Atp1b2 | 24214  | 1,38 | down |
| 6189412 | 7079070 | 1077527 | ATPase, Na+/K+ transporting, beta 2 polypeptide     | Atp1b2 | 24214  | 1,30 | down |
| 5833275 | 7079070 | 1077529 | ATPase, Na+/K+ transporting, beta 2 polypeptide     | Atp1b2 | 24214  | 1,05 | up   |
| 6013569 | 7079070 | 1077533 | ATPase, Na+/K+ transporting, beta 2 polypeptide     | Atp1b2 | 24214  | 1,04 | up   |
| 6588965 | 7198644 | 1372327 | ATP-binding cassette, sub-family A (ABC1), member 4 | Abca4  | 310836 | 2,34 | up   |
| 6402049 | 7198644 | 1372350 | ATP-binding cassette, sub-family A (ABC1), member 4 | Abca4  | 310836 | 1,96 | up   |
| 6218911 | 7198644 | 1372345 | ATP-binding cassette, sub-family A (ABC1), member 4 | Abca4  | 310836 | 1,74 | up   |
| 6562339 | 7198644 | 1372309 | ATP-binding cassette, sub-family A (ABC1), member 4 | Abca4  | 310836 | 1,67 | up   |
| 5669931 | 7198644 | 1372288 | ATP-binding cassette, sub-family A (ABC1), member 4 | Abca4  | 310836 | 1,62 | down |
| 5779588 | 7198644 | 1372324 | ATP-binding cassette, sub-family A (ABC1), member 4 | Abca4  | 310836 | 1,57 | up   |
| 6216590 | 7198644 | 1372338 | ATP-binding cassette, sub-family A (ABC1), member 4 | Abca4  | 310836 | 1,57 | up   |
| 6429495 | 7198644 | 1372319 | ATP-binding cassette, sub-family A (ABC1), member 4 | Abca4  | 310836 | 1,44 | down |
| 6541989 | 7198644 | 1372321 | ATP-binding cassette, sub-family A (ABC1), member 4 | Abca4  | 310836 | 1,35 | up   |
| 6071166 | 7198644 | 1372343 | ATP-binding cassette, sub-family A (ABC1), member 4 | Abca4  | 310836 | 1,34 | down |
| 6413107 | 7198644 | 1372327 | ATP-binding cassette, sub-family A (ABC1), member 4 | Abca4  | 310836 | 1,33 | down |
| 5712441 | 7198644 | 1372316 | ATP-binding cassette, sub-family A (ABC1), member 4 | Abca4  | 310836 | 1,33 | down |
| 5753268 | 7198644 | 1372355 | ATP-binding cassette, sub-family A (ABC1), member 4 | Abca4  | 310836 | 1,31 | up   |
| 5905592 | 7198644 | 1372347 | ATP-binding cassette, sub-family A (ABC1), member 4 | Abca4  | 310836 | 1,30 | down |
| 6136714 | 7198644 | 1372267 | ATP-binding cassette, sub-family A (ABC1), member 4 | Abca4  | 310836 | 1,28 | down |
| 5782000 | 7198644 | 1372351 | ATP-binding cassette, sub-family A (ABC1), member 4 | Abca4  | 310836 | 1,27 | down |
| 6634044 | 7198644 | 1372311 | ATP-binding cassette, sub-family A (ABC1), member 4 | Abca4  | 310836 | 1,25 | down |
| 6152975 | 7198644 | 1372308 | ATP-binding cassette, sub-family A (ABC1), member 4 | Abca4  | 310836 | 1,20 | down |
| 6534786 | 7198644 | 1372315 | ATP-binding cassette, sub-family A (ABC1), member 4 | Abca4  | 310836 | 1,18 | down |
| 6479159 | 7198644 | 1372344 | ATP-binding cassette, sub-family A (ABC1), member 4 | Abca4  | 310836 | 1,18 | down |
| 6263941 | 7198644 | 1372323 | ATP-binding cassette, sub-family A (ABC1), member 4 | Abca4  | 310836 | 1,17 | down |
| 5951290 | 7198644 | 1372323 | ATP-binding cassette, sub-family A (ABC1), member 4 | Abca4  | 310836 | 1,17 | up   |
| 6271057 | 7198644 | 1372293 | ATP-binding cassette, sub-family A (ABC1), member 4 | Abca4  | 310836 | 1,16 | down |
| 6160972 | 7198644 | 1372273 | ATP-binding cassette, sub-family A (ABC1), member 4 | Abca4  | 310836 | 1,15 | down |
| 6384288 | 7198644 | 1372348 | ATP-binding cassette, sub-family A (ABC1), member 4 | Abca4  | 310836 | 1,15 | up   |
| 6324190 | 7198644 | 1372325 | ATP-binding cassette, sub-family A (ABC1), member 4 | Abca4  | 310836 | 1,14 | down |
| 6595051 | 7198644 | 1372356 | ATP-binding cassette, sub-family A (ABC1), member 4 | Abca4  | 310836 | 1,13 | up   |
| 5855338 | 7198644 | 1372353 | ATP-binding cassette, sub-family A (ABC1), member 4 | Abca4  | 310836 | 1,12 | down |
| 5859160 | 7198644 | 1372349 | ATP-binding cassette, sub-family A (ABC1), member 4 | Abca4  | 310836 | 1,10 | down |
| 5737873 | 7198644 | 1372335 | ATP-binding cassette, sub-family A (ABC1), member 4 | Abca4  | 310836 | 1,10 | up   |
| 6661924 | 7198644 | 1372323 | ATP-binding cassette, sub-family A (ABC1), member 4 | Abca4  | 310836 | 1,09 | up   |

|         |         |         |                                                      |        |        |      |      |
|---------|---------|---------|------------------------------------------------------|--------|--------|------|------|
| 6693967 | 7198644 | 1372337 | ATP-binding cassette, sub-family A (ABC1), member 4  | Abca4  | 310836 | 1,09 | down |
| 5989743 | 7198644 | 1372310 | ATP-binding cassette, sub-family A (ABC1), member 4  | Abca4  | 310836 | 1,09 | down |
| 5776198 | 7198644 | 1372276 | ATP-binding cassette, sub-family A (ABC1), member 4  | Abca4  | 310836 | 1,08 | down |
| 6417025 | 7198644 | 1372336 | ATP-binding cassette, sub-family A (ABC1), member 4  | Abca4  | 310836 | 1,07 | up   |
| 6373981 | 7198644 | 1372317 | ATP-binding cassette, sub-family A (ABC1), member 4  | Abca4  | 310836 | 1,07 | up   |
| 5671319 | 7198644 | 1372291 | ATP-binding cassette, sub-family A (ABC1), member 4  | Abca4  | 310836 | 1,07 | up   |
| 6287987 | 7198644 | 1372290 | ATP-binding cassette, sub-family A (ABC1), member 4  | Abca4  | 310836 | 1,06 | up   |
| 5748162 | 7198644 | 1372303 | ATP-binding cassette, sub-family A (ABC1), member 4  | Abca4  | 310836 | 1,06 | up   |
| 5751753 | 7198644 | 1372301 | ATP-binding cassette, sub-family A (ABC1), member 4  | Abca4  | 310836 | 1,05 | down |
| 6217005 | 7198644 | 1372282 | ATP-binding cassette, sub-family A (ABC1), member 4  | Abca4  | 310836 | 1,03 | down |
| 6372142 | 7198644 | 1372308 | ATP-binding cassette, sub-family A (ABC1), member 4  | Abca4  | 310836 | 1,03 | down |
| 5729199 | 7198644 | 1372292 | ATP-binding cassette, sub-family A (ABC1), member 4  | Abca4  | 310836 | 1,03 | up   |
| 6240042 | 7198644 | 1372318 | ATP-binding cassette, sub-family A (ABC1), member 4  | Abca4  | 310836 | 1,03 | up   |
| 6708439 | 7198644 | 1372294 | ATP-binding cassette, sub-family A (ABC1), member 4  | Abca4  | 310836 | 1,03 | down |
| 5860285 | 7198644 | 1372272 | ATP-binding cassette, sub-family A (ABC1), member 4  | Abca4  | 310836 | 1,03 | down |
| 6163883 | 7198644 | 1372354 | ATP-binding cassette, sub-family A (ABC1), member 4  | Abca4  | 310836 | 1,02 | down |
| 6624451 | 7198644 | 1372320 | ATP-binding cassette, sub-family A (ABC1), member 4  | Abca4  | 310836 | 1,02 | down |
| 6705822 | 7198644 | 1372302 | ATP-binding cassette, sub-family A (ABC1), member 4  | Abca4  | 310836 | 1,02 | up   |
| 5974708 | 7198644 | 1372333 | ATP-binding cassette, sub-family A (ABC1), member 4  | Abca4  | 310836 | 1,02 | up   |
| 5657461 | 7198644 | 1372341 | ATP-binding cassette, sub-family A (ABC1), member 4  | Abca4  | 310836 | 1,02 | up   |
| 5768085 | 7198644 | 1372322 | ATP-binding cassette, sub-family A (ABC1), member 4  | Abca4  | 310836 | 1,00 | up   |
| 6073546 | 7198644 | 1372280 | ATP-binding cassette, sub-family A (ABC1), member 4  | Abca4  | 310836 | 1,00 | up   |
| 6440259 | 7198644 | 1372330 | ATP-binding cassette, sub-family A (ABC1), member 4  | Abca4  | 310836 | 1,00 | up   |
| 5632434 | 7198644 | 1372281 | ATP-binding cassette, sub-family A (ABC1), member 4  | Abca4  | 310836 | 1,00 | down |
| 6380000 | 7083965 | 1088225 | ATP-binding cassette, sub-family A (ABC1), member 8a | Abca8a | 303638 | 2,11 | down |
| 5847207 | 7083965 | 1088238 | ATP-binding cassette, sub-family A (ABC1), member 8a | Abca8a | 303638 | 1,78 | down |
| 5804504 | 7083965 | 1088253 | ATP-binding cassette, sub-family A (ABC1), member 8a | Abca8a | 303638 | 1,71 | up   |
| 6346267 | 7083965 | 1088223 | ATP-binding cassette, sub-family A (ABC1), member 8a | Abca8a | 303638 | 1,41 | up   |
| 5736728 | 7083965 | 1088254 | ATP-binding cassette, sub-family A (ABC1), member 8a | Abca8a | 303638 | 1,38 | down |
| 6185075 | 7083965 | 1088245 | ATP-binding cassette, sub-family A (ABC1), member 8a | Abca8a | 303638 | 1,37 | down |
| 6650927 | 7083965 | 1088225 | ATP-binding cassette, sub-family A (ABC1), member 8a | Abca8a | 303638 | 1,30 | down |
| 6611186 | 7083965 | 1088250 | ATP-binding cassette, sub-family A (ABC1), member 8a | Abca8a | 303638 | 1,29 | down |
| 6152870 | 7083965 | 1088251 | ATP-binding cassette, sub-family A (ABC1), member 8a | Abca8a | 303638 | 1,28 | down |
| 6612645 | 7083965 | 1088221 | ATP-binding cassette, sub-family A (ABC1), member 8a | Abca8a | 303638 | 1,26 | down |
| 6697639 | 7083965 | 1088227 | ATP-binding cassette, sub-family A (ABC1), member 8a | Abca8a | 303638 | 1,26 | down |
| 6671489 | 7083965 | 1088219 | ATP-binding cassette, sub-family A (ABC1), member 8a | Abca8a | 303638 | 1,25 | up   |
| 5617712 | 7083965 | 1088230 | ATP-binding cassette, sub-family A (ABC1), member 8a | Abca8a | 303638 | 1,25 | down |
| 6459578 | 7083965 | 1088215 | ATP-binding cassette, sub-family A (ABC1), member 8a | Abca8a | 303638 | 1,25 | down |
| 6107558 | 7083965 | 1088227 | ATP-binding cassette, sub-family A (ABC1), member 8a | Abca8a | 303638 | 1,21 | up   |
| 5796408 | 7083965 | 1088248 | ATP-binding cassette, sub-family A (ABC1), member 8a | Abca8a | 303638 | 1,18 | down |
| 6197745 | 7083965 | 1088235 | ATP-binding cassette, sub-family A (ABC1), member 8a | Abca8a | 303638 | 1,15 | up   |
| 6086364 | 7083965 | 1088217 | ATP-binding cassette, sub-family A (ABC1), member 8a | Abca8a | 303638 | 1,15 | down |
| 5667752 | 7083965 | 1088234 | ATP-binding cassette, sub-family A (ABC1), member 8a | Abca8a | 303638 | 1,12 | up   |
| 5753443 | 7083965 | 1088213 | ATP-binding cassette, sub-family A (ABC1), member 8a | Abca8a | 303638 | 1,12 | down |
| 6029000 | 7083965 | 1088240 | ATP-binding cassette, sub-family A (ABC1), member 8a | Abca8a | 303638 | 1,11 | down |
| 5629262 | 7083965 | 1088241 | ATP-binding cassette, sub-family A (ABC1), member 8a | Abca8a | 303638 | 1,11 | up   |
| 6420806 | 7083965 | 1088229 | ATP-binding cassette, sub-family A (ABC1), member 8a | Abca8a | 303638 | 1,11 | down |
| 6317916 | 7083965 | 1088228 | ATP-binding cassette, sub-family A (ABC1), member 8a | Abca8a | 303638 | 1,10 | up   |
| 5905006 | 7083965 | 1088237 | ATP-binding cassette, sub-family A (ABC1), member 8a | Abca8a | 303638 | 1,10 | up   |
| 6148980 | 7083965 | 1088232 | ATP-binding cassette, sub-family A (ABC1), member 8a | Abca8a | 303638 | 1,08 | up   |
| 6656268 | 7083965 | 1088247 | ATP-binding cassette, sub-family A (ABC1), member 8a | Abca8a | 303638 | 1,07 | down |
| 5939153 | 7083965 | 1088224 | ATP-binding cassette, sub-family A (ABC1), member 8a | Abca8a | 303638 | 1,06 | up   |
| 5626810 | 7083965 | 1088243 | ATP-binding cassette, sub-family A (ABC1), member 8a | Abca8a | 303638 | 1,06 | up   |
| 6233734 | 7083965 | 1088218 | ATP-binding cassette, sub-family A (ABC1), member 8a | Abca8a | 303638 | 1,05 | up   |
| 6574989 | 7083965 | 1088214 | ATP-binding cassette, sub-family A (ABC1), member 8a | Abca8a | 303638 | 1,04 | up   |
| 6243622 | 7083965 | 1088242 | ATP-binding cassette, sub-family A (ABC1), member 8a | Abca8a | 303638 | 1,03 | down |
| 6147149 | 7083965 | 1088239 | ATP-binding cassette, sub-family A (ABC1), member 8a | Abca8a | 303638 | 1,01 | up   |

|         |         |         |                                                         |        |        |      |      |
|---------|---------|---------|---------------------------------------------------------|--------|--------|------|------|
| 6664912 | 7083965 | 1088222 | ATP-binding cassette, sub-family A (ABC1), member 8a    | Abca8a | 303638 | 1,01 | up   |
| 6122837 | 7083965 | 1088245 | ATP-binding cassette, sub-family A (ABC1), member 8a    | Abca8a | 303638 | 1,01 | up   |
| 6514559 | 7083965 | 1088219 | ATP-binding cassette, sub-family A (ABC1), member 8a    | Abca8a | 303638 | 1,00 | up   |
| 5844751 | 7083965 | 1088226 | ATP-binding cassette, sub-family A (ABC1), member 8a    | Abca8a | 303638 | 1,00 | up   |
| 5790347 | 7083965 | 1088213 | ATP-binding cassette, sub-family A (ABC1), member 8a    | Abca8a | 303638 | 1,00 | up   |
| 5839011 | 7083965 | 1088231 | ATP-binding cassette, sub-family A (ABC1), member 8a    | Abca8a | 303638 | 1,00 | up   |
| 6068315 | 7083965 | 1088246 | ATP-binding cassette, sub-family A (ABC1), member 8a    | Abca8a | 303638 | 1,00 | up   |
| 6218551 | 7083965 | 1088216 | ATP-binding cassette, sub-family A (ABC1), member 8a    | Abca8a | 303638 | 1,00 | up   |
| 6574248 | 7250393 | 1498340 | ATP-binding cassette, sub-family B (MDR/TAP), member 1  | Abcb1  | 170913 | 5,27 | down |
| 6007333 | 7250393 | 1498314 | ATP-binding cassette, sub-family B (MDR/TAP), member 1  | Abcb1  | 170913 | 4,53 | down |
| 6253952 | 7250393 | 1498313 | ATP-binding cassette, sub-family B (MDR/TAP), member 1  | Abcb1  | 170913 | 3,77 | down |
| 6284395 | 7250393 | 1498339 | ATP-binding cassette, sub-family B (MDR/TAP), member 1  | Abcb1  | 170913 | 3,72 | down |
| 6358410 | 7250393 | 1498333 | ATP-binding cassette, sub-family B (MDR/TAP), member 1  | Abcb1  | 170913 | 3,36 | up   |
| 5782776 | 7250393 | 1498331 | ATP-binding cassette, sub-family B (MDR/TAP), member 1  | Abcb1  | 170913 | 2,06 | down |
| 5619823 | 7250393 | 1498326 | ATP-binding cassette, sub-family B (MDR/TAP), member 1  | Abcb1  | 170913 | 2,01 | down |
| 6098828 | 7250393 | 1498317 | ATP-binding cassette, sub-family B (MDR/TAP), member 1  | Abcb1  | 170913 | 1,99 | up   |
| 6625428 | 7250393 | 1498319 | ATP-binding cassette, sub-family B (MDR/TAP), member 1  | Abcb1  | 170913 | 1,91 | down |
| 6097230 | 7250393 | 1498328 | ATP-binding cassette, sub-family B (MDR/TAP), member 1  | Abcb1  | 170913 | 1,85 | down |
| 6167416 | 7250393 | 1498339 | ATP-binding cassette, sub-family B (MDR/TAP), member 1  | Abcb1  | 170913 | 1,84 | down |
| 6703837 | 7250393 | 1498318 | ATP-binding cassette, sub-family B (MDR/TAP), member 1  | Abcb1  | 170913 | 1,74 | up   |
| 6721437 | 7250393 | 1498334 | ATP-binding cassette, sub-family B (MDR/TAP), member 1  | Abcb1  | 170913 | 1,66 | up   |
| 6739095 | 7250393 | 1498315 | ATP-binding cassette, sub-family B (MDR/TAP), member 1  | Abcb1  | 170913 | 1,66 | up   |
| 6016868 | 7250393 | 1498324 | ATP-binding cassette, sub-family B (MDR/TAP), member 1  | Abcb1  | 170913 | 1,58 | up   |
| 6231297 | 7250393 | 1498320 | ATP-binding cassette, sub-family B (MDR/TAP), member 1  | Abcb1  | 170913 | 1,52 | up   |
| 6276903 | 7250393 | 1498330 | ATP-binding cassette, sub-family B (MDR/TAP), member 1  | Abcb1  | 170913 | 1,39 | up   |
| 6272544 | 7250393 | 1498335 | ATP-binding cassette, sub-family B (MDR/TAP), member 1  | Abcb1  | 170913 | 1,38 | up   |
| 5980846 | 7250393 | 1498334 | ATP-binding cassette, sub-family B (MDR/TAP), member 1  | Abcb1  | 170913 | 1,37 | down |
| 6198334 | 7250393 | 1498321 | ATP-binding cassette, sub-family B (MDR/TAP), member 1  | Abcb1  | 170913 | 1,36 | up   |
| 5698086 | 7250393 | 1498339 | ATP-binding cassette, sub-family B (MDR/TAP), member 1  | Abcb1  | 170913 | 1,34 | down |
| 5742066 | 7250393 | 1498338 | ATP-binding cassette, sub-family B (MDR/TAP), member 1  | Abcb1  | 170913 | 1,31 | up   |
| 6361510 | 7250393 | 1498327 | ATP-binding cassette, sub-family B (MDR/TAP), member 1  | Abcb1  | 170913 | 1,26 | up   |
| 6469306 | 7250393 | 1498322 | ATP-binding cassette, sub-family B (MDR/TAP), member 1  | Abcb1  | 170913 | 1,26 | down |
| 6282355 | 7250393 | 1498325 | ATP-binding cassette, sub-family B (MDR/TAP), member 1  | Abcb1  | 170913 | 1,26 | down |
| 6327593 | 7250393 | 1498332 | ATP-binding cassette, sub-family B (MDR/TAP), member 1  | Abcb1  | 170913 | 1,24 | down |
| 5840139 | 7250393 | 1498329 | ATP-binding cassette, sub-family B (MDR/TAP), member 1  | Abcb1  | 170913 | 1,15 | down |
| 6145358 | 7250393 | 1498337 | ATP-binding cassette, sub-family B (MDR/TAP), member 1  | Abcb1  | 170913 | 1,08 | up   |
| 6267936 | 7250393 | 1498323 | ATP-binding cassette, sub-family B (MDR/TAP), member 1  | Abcb1  | 170913 | 1,05 | up   |
| 6626563 | 7250393 | 1498316 | ATP-binding cassette, sub-family B (MDR/TAP), member 1  | Abcb1  | 170913 | 1,03 | down |
| 5895570 | 7250393 | 1498336 | ATP-binding cassette, sub-family B (MDR/TAP), member 1  | Abcb1  | 170913 | 1,02 | up   |
| 6221184 | 7250403 | 1498379 | ATP-binding cassette, sub-family B (MDR/TAP), member 1B | Abcb1b | 24646  | 4,95 | down |
| 6228271 | 7250403 | 1498378 | ATP-binding cassette, sub-family B (MDR/TAP), member 1B | Abcb1b | 24646  | 4,93 | down |
| 5847446 | 7250403 | 1498364 | ATP-binding cassette, sub-family B (MDR/TAP), member 1B | Abcb1b | 24646  | 4,45 | down |
| 6417916 | 7250403 | 1498358 | ATP-binding cassette, sub-family B (MDR/TAP), member 1B | Abcb1b | 24646  | 3,92 | down |
| 6153883 | 7250403 | 1498361 | ATP-binding cassette, sub-family B (MDR/TAP), member 1B | Abcb1b | 24646  | 3,18 | down |
| 6741153 | 7250403 | 1498366 | ATP-binding cassette, sub-family B (MDR/TAP), member 1B | Abcb1b | 24646  | 2,23 | up   |
| 6129825 | 7250403 | 1498381 | ATP-binding cassette, sub-family B (MDR/TAP), member 1B | Abcb1b | 24646  | 1,76 | down |
| 6531383 | 7250403 | 1498355 | ATP-binding cassette, sub-family B (MDR/TAP), member 1B | Abcb1b | 24646  | 1,71 | up   |
| 6286851 | 7250403 | 1498360 | ATP-binding cassette, sub-family B (MDR/TAP), member 1B | Abcb1b | 24646  | 1,66 | up   |
| 6597141 | 7250403 | 1498357 | ATP-binding cassette, sub-family B (MDR/TAP), member 1B | Abcb1b | 24646  | 1,65 | up   |
| 6171255 | 7250403 | 1498359 | ATP-binding cassette, sub-family B (MDR/TAP), member 1B | Abcb1b | 24646  | 1,59 | up   |
| 5650532 | 7250403 | 1498363 | ATP-binding cassette, sub-family B (MDR/TAP), member 1B | Abcb1b | 24646  | 1,56 | up   |
| 5760636 | 7250403 | 1498375 | ATP-binding cassette, sub-family B (MDR/TAP), member 1B | Abcb1b | 24646  | 1,55 | up   |
| 5741873 | 7250403 | 1498367 | ATP-binding cassette, sub-family B (MDR/TAP), member 1B | Abcb1b | 24646  | 1,50 | down |
| 5975570 | 7250403 | 1498365 | ATP-binding cassette, sub-family B (MDR/TAP), member 1B | Abcb1b | 24646  | 1,49 | down |
| 5730001 | 7250403 | 1498376 | ATP-binding cassette, sub-family B (MDR/TAP), member 1B | Abcb1b | 24646  | 1,47 | down |
| 5658451 | 7250403 | 1498356 | ATP-binding cassette, sub-family B (MDR/TAP), member 1B | Abcb1b | 24646  | 1,45 | down |
| 6410145 | 7250403 | 1498370 | ATP-binding cassette, sub-family B (MDR/TAP), member 1B | Abcb1b | 24646  | 1,41 | up   |

|         |         |         |                                                          |        |        |      |      |
|---------|---------|---------|----------------------------------------------------------|--------|--------|------|------|
| 6299354 | 7250403 | 1498357 | ATP-binding cassette, sub-family B (MDR/TAP), member 1B  | Abcb1b | 24646  | 1,32 | down |
| 5729475 | 7250403 | 1498374 | ATP-binding cassette, sub-family B (MDR/TAP), member 1B  | Abcb1b | 24646  | 1,31 | down |
| 5800715 | 7250403 | 1498372 | ATP-binding cassette, sub-family B (MDR/TAP), member 1B  | Abcb1b | 24646  | 1,25 | up   |
| 6611732 | 7250403 | 1498373 | ATP-binding cassette, sub-family B (MDR/TAP), member 1B  | Abcb1b | 24646  | 1,20 | up   |
| 6617983 | 7250403 | 1498369 | ATP-binding cassette, sub-family B (MDR/TAP), member 1B  | Abcb1b | 24646  | 1,16 | down |
| 6079384 | 7250403 | 1498362 | ATP-binding cassette, sub-family B (MDR/TAP), member 1B  | Abcb1b | 24646  | 1,15 | up   |
| 5695568 | 7250403 | 1498359 | ATP-binding cassette, sub-family B (MDR/TAP), member 1B  | Abcb1b | 24646  | 1,12 | down |
| 6566984 | 7250403 | 1498380 | ATP-binding cassette, sub-family B (MDR/TAP), member 1B  | Abcb1b | 24646  | 1,08 | up   |
| 6326477 | 7250403 | 1498377 | ATP-binding cassette, sub-family B (MDR/TAP), member 1B  | Abcb1b | 24646  | 1,08 | down |
| 6247446 | 7250403 | 1498368 | ATP-binding cassette, sub-family B (MDR/TAP), member 1B  | Abcb1b | 24646  | 1,02 | down |
| 6282170 | 7250403 | 1498371 | ATP-binding cassette, sub-family B (MDR/TAP), member 1B  | Abcb1b | 24646  | 1,02 | up   |
| 5813985 | 7250417 | 1498414 | ATP-binding cassette, sub-family B (MDR/TAP), member 4   | Abcb4  | 24891  | 4,55 | up   |
| 6657348 | 7250417 | 1498409 | ATP-binding cassette, sub-family B (MDR/TAP), member 4   | Abcb4  | 24891  | 1,71 | down |
| 5865732 | 7250417 | 1498428 | ATP-binding cassette, sub-family B (MDR/TAP), member 4   | Abcb4  | 24891  | 1,63 | up   |
| 6369272 | 7250417 | 1498419 | ATP-binding cassette, sub-family B (MDR/TAP), member 4   | Abcb4  | 24891  | 1,55 | up   |
| 5947346 | 7250417 | 1498411 | ATP-binding cassette, sub-family B (MDR/TAP), member 4   | Abcb4  | 24891  | 1,52 | down |
| 5828129 | 7250417 | 1498421 | ATP-binding cassette, sub-family B (MDR/TAP), member 4   | Abcb4  | 24891  | 1,39 | down |
| 6257094 | 7250417 | 1498417 | ATP-binding cassette, sub-family B (MDR/TAP), member 4   | Abcb4  | 24891  | 1,37 | down |
| 5842791 | 7250417 | 1498407 | ATP-binding cassette, sub-family B (MDR/TAP), member 4   | Abcb4  | 24891  | 1,32 | up   |
| 5683292 | 7250417 | 1498415 | ATP-binding cassette, sub-family B (MDR/TAP), member 4   | Abcb4  | 24891  | 1,31 | down |
| 6347525 | 7250417 | 1498427 | ATP-binding cassette, sub-family B (MDR/TAP), member 4   | Abcb4  | 24891  | 1,31 | down |
| 5809317 | 7250417 | 1498408 | ATP-binding cassette, sub-family B (MDR/TAP), member 4   | Abcb4  | 24891  | 1,20 | down |
| 6508924 | 7250417 | 1498420 | ATP-binding cassette, sub-family B (MDR/TAP), member 4   | Abcb4  | 24891  | 1,17 | down |
| 5753312 | 7250417 | 1498410 | ATP-binding cassette, sub-family B (MDR/TAP), member 4   | Abcb4  | 24891  | 1,15 | down |
| 6488481 | 7250417 | 1498418 | ATP-binding cassette, sub-family B (MDR/TAP), member 4   | Abcb4  | 24891  | 1,15 | down |
| 5910306 | 7250417 | 1498425 | ATP-binding cassette, sub-family B (MDR/TAP), member 4   | Abcb4  | 24891  | 1,13 | up   |
| 6441881 | 7250417 | 1498426 | ATP-binding cassette, sub-family B (MDR/TAP), member 4   | Abcb4  | 24891  | 1,13 | down |
| 6610466 | 7250417 | 1498404 | ATP-binding cassette, sub-family B (MDR/TAP), member 4   | Abcb4  | 24891  | 1,11 | down |
| 6097121 | 7250417 | 1498412 | ATP-binding cassette, sub-family B (MDR/TAP), member 4   | Abcb4  | 24891  | 1,10 | down |
| 5900790 | 7250417 | 1498422 | ATP-binding cassette, sub-family B (MDR/TAP), member 4   | Abcb4  | 24891  | 1,10 | up   |
| 5633359 | 7250417 | 1498424 | ATP-binding cassette, sub-family B (MDR/TAP), member 4   | Abcb4  | 24891  | 1,09 | up   |
| 6564372 | 7250417 | 1498406 | ATP-binding cassette, sub-family B (MDR/TAP), member 4   | Abcb4  | 24891  | 1,07 | down |
| 6109372 | 7250417 | 1498406 | ATP-binding cassette, sub-family B (MDR/TAP), member 4   | Abcb4  | 24891  | 1,07 | down |
| 6693277 | 7250417 | 1498429 | ATP-binding cassette, sub-family B (MDR/TAP), member 4   | Abcb4  | 24891  | 1,06 | up   |
| 5649552 | 7250417 | 1498405 | ATP-binding cassette, sub-family B (MDR/TAP), member 4   | Abcb4  | 24891  | 1,04 | up   |
| 6298172 | 7250417 | 1498423 | ATP-binding cassette, sub-family B (MDR/TAP), member 4   | Abcb4  | 24891  | 1,02 | down |
| 6431894 | 7250417 | 1498430 | ATP-binding cassette, sub-family B (MDR/TAP), member 4   | Abcb4  | 24891  | 1,01 | down |
| 6569813 | 7250417 | 1498416 | ATP-binding cassette, sub-family B (MDR/TAP), member 4   | Abcb4  | 24891  | 1,01 | down |
| 6685683 | 7250417 | 1498413 | ATP-binding cassette, sub-family B (MDR/TAP), member 4   | Abcb4  | 24891  | 1,00 | up   |
| 6453750 | 7098148 | 1123071 | ATP-binding cassette, sub-family B (MDR/TAP), member 9   | Abcb9  | 63886  | 2,35 | up   |
| 5952332 | 7098148 | 1123060 | ATP-binding cassette, sub-family B (MDR/TAP), member 9   | Abcb9  | 63886  | 2,07 | down |
| 6643380 | 7098148 | 1123059 | ATP-binding cassette, sub-family B (MDR/TAP), member 9   | Abcb9  | 63886  | 1,65 | up   |
| 6338555 | 7098148 | 1123065 | ATP-binding cassette, sub-family B (MDR/TAP), member 9   | Abcb9  | 63886  | 1,60 | up   |
| 5985681 | 7098148 | 1123064 | ATP-binding cassette, sub-family B (MDR/TAP), member 9   | Abcb9  | 63886  | 1,42 | up   |
| 5955059 | 7098148 | 1123060 | ATP-binding cassette, sub-family B (MDR/TAP), member 9   | Abcb9  | 63886  | 1,40 | down |
| 6223018 | 7098148 | 1123062 | ATP-binding cassette, sub-family B (MDR/TAP), member 9   | Abcb9  | 63886  | 1,38 | down |
| 6297275 | 7098148 | 1123063 | ATP-binding cassette, sub-family B (MDR/TAP), member 9   | Abcb9  | 63886  | 1,37 | down |
| 6652007 | 7098148 | 1123070 | ATP-binding cassette, sub-family B (MDR/TAP), member 9   | Abcb9  | 63886  | 1,25 | down |
| 6268232 | 7098148 | 1123072 | ATP-binding cassette, sub-family B (MDR/TAP), member 9   | Abcb9  | 63886  | 1,20 | down |
| 5911374 | 7098148 | 1123068 | ATP-binding cassette, sub-family B (MDR/TAP), member 9   | Abcb9  | 63886  | 1,18 | down |
| 6072121 | 7098148 | 1123069 | ATP-binding cassette, sub-family B (MDR/TAP), member 9   | Abcb9  | 63886  | 1,14 | up   |
| 6715827 | 7098148 | 1123066 | ATP-binding cassette, sub-family B (MDR/TAP), member 9   | Abcb9  | 63886  | 1,12 | down |
| 5953932 | 7098148 | 1123067 | ATP-binding cassette, sub-family B (MDR/TAP), member 9   | Abcb9  | 63886  | 1,07 | down |
| 6001448 | 7098148 | 1123061 | ATP-binding cassette, sub-family B (MDR/TAP), member 9   | Abcb9  | 63886  | 1,02 | up   |
| 6726362 | 7098148 | 1123070 | ATP-binding cassette, sub-family B (MDR/TAP), member 9   | Abcb9  | 63886  | 1,01 | down |
| 6423201 | 7352044 | 1750004 | ATP-binding cassette, sub-family C (CFTR/MRP), member 10 | Abcc10 | 316231 | 3,11 | down |
| 5794836 | 7352044 | 1750015 | ATP-binding cassette, sub-family C (CFTR/MRP), member 10 | Abcc10 | 316231 | 2,05 | down |

|         |         |         |                                                             |         |        |      |      |
|---------|---------|---------|-------------------------------------------------------------|---------|--------|------|------|
| 6495949 | 7352044 | 1750023 | ATP-binding cassette, sub-family C (CFTR/MRP), member 10    | Abcc10  | 316231 | 1,75 | down |
| 6142945 | 7352044 | 1750017 | ATP-binding cassette, sub-family C (CFTR/MRP), member 10    | Abcc10  | 316231 | 1,63 | down |
| 6479011 | 7352044 | 1750020 | ATP-binding cassette, sub-family C (CFTR/MRP), member 10    | Abcc10  | 316231 | 1,58 | up   |
| 5871188 | 7352044 | 1750012 | ATP-binding cassette, sub-family C (CFTR/MRP), member 10    | Abcc10  | 316231 | 1,48 | down |
| 5852980 | 7352044 | 1750011 | ATP-binding cassette, sub-family C (CFTR/MRP), member 10    | Abcc10  | 316231 | 1,42 | down |
| 6627084 | 7352044 | 1750004 | ATP-binding cassette, sub-family C (CFTR/MRP), member 10    | Abcc10  | 316231 | 1,38 | up   |
| 6297926 | 7352044 | 1750004 | ATP-binding cassette, sub-family C (CFTR/MRP), member 10    | Abcc10  | 316231 | 1,34 | down |
| 6333449 | 7352044 | 1750004 | ATP-binding cassette, sub-family C (CFTR/MRP), member 10    | Abcc10  | 316231 | 1,31 | down |
| 6235295 | 7352044 | 1750014 | ATP-binding cassette, sub-family C (CFTR/MRP), member 10    | Abcc10  | 316231 | 1,31 | down |
| 6055249 | 7352044 | 1750009 | ATP-binding cassette, sub-family C (CFTR/MRP), member 10    | Abcc10  | 316231 | 1,22 | up   |
| 6077685 | 7352044 | 1750005 | ATP-binding cassette, sub-family C (CFTR/MRP), member 10    | Abcc10  | 316231 | 1,21 | down |
| 5722772 | 7352044 | 1750004 | ATP-binding cassette, sub-family C (CFTR/MRP), member 10    | Abcc10  | 316231 | 1,20 | up   |
| 5886459 | 7352044 | 1750021 | ATP-binding cassette, sub-family C (CFTR/MRP), member 10    | Abcc10  | 316231 | 1,18 | down |
| 6717766 | 7352044 | 1750011 | ATP-binding cassette, sub-family C (CFTR/MRP), member 10    | Abcc10  | 316231 | 1,14 | up   |
| 6436650 | 7352044 | 1750008 | ATP-binding cassette, sub-family C (CFTR/MRP), member 10    | Abcc10  | 316231 | 1,13 | down |
| 6174018 | 7352044 | 1750004 | ATP-binding cassette, sub-family C (CFTR/MRP), member 10    | Abcc10  | 316231 | 1,12 | up   |
| 6021223 | 7352044 | 1750007 | ATP-binding cassette, sub-family C (CFTR/MRP), member 10    | Abcc10  | 316231 | 1,11 | up   |
| 5671248 | 7352044 | 1750018 | ATP-binding cassette, sub-family C (CFTR/MRP), member 10    | Abcc10  | 316231 | 1,10 | down |
| 5765729 | 7352044 | 1750013 | ATP-binding cassette, sub-family C (CFTR/MRP), member 10    | Abcc10  | 316231 | 1,07 | down |
| 6572422 | 7352044 | 1750019 | ATP-binding cassette, sub-family C (CFTR/MRP), member 10    | Abcc10  | 316231 | 1,07 | up   |
| 6301144 | 7352044 | 1750004 | ATP-binding cassette, sub-family C (CFTR/MRP), member 10    | Abcc10  | 316231 | 1,06 | up   |
| 6316011 | 7352044 | 1750016 | ATP-binding cassette, sub-family C (CFTR/MRP), member 10    | Abcc10  | 316231 | 1,05 | up   |
| 5792624 | 7352044 | 1750010 | ATP-binding cassette, sub-family C (CFTR/MRP), member 10    | Abcc10  | 316231 | 1,01 | up   |
| 5709900 | 7213582 | 1406928 | ATP-binding cassette, sub-family D (ALD), member 3          | Abcd3   | 25270  | 2,13 | up   |
| 6055839 | 7213582 | 1406934 | ATP-binding cassette, sub-family D (ALD), member 3          | Abcd3   | 25270  | 1,78 | up   |
| 6464418 | 7213582 | 1406932 | ATP-binding cassette, sub-family D (ALD), member 3          | Abcd3   | 25270  | 1,54 | up   |
| 5999187 | 7213582 | 1406928 | ATP-binding cassette, sub-family D (ALD), member 3          | Abcd3   | 25270  | 1,45 | up   |
| 6531328 | 7213582 | 1406945 | ATP-binding cassette, sub-family D (ALD), member 3          | Abcd3   | 25270  | 1,41 | down |
| 6733366 | 7213582 | 1406927 | ATP-binding cassette, sub-family D (ALD), member 3          | Abcd3   | 25270  | 1,41 | down |
| 6525900 | 7213582 | 1406928 | ATP-binding cassette, sub-family D (ALD), member 3          | Abcd3   | 25270  | 1,40 | up   |
| 6438638 | 7213582 | 1406943 | ATP-binding cassette, sub-family D (ALD), member 3          | Abcd3   | 25270  | 1,38 | up   |
| 6640689 | 7213582 | 1406931 | ATP-binding cassette, sub-family D (ALD), member 3          | Abcd3   | 25270  | 1,33 | up   |
| 5748663 | 7213582 | 1406933 | ATP-binding cassette, sub-family D (ALD), member 3          | Abcd3   | 25270  | 1,31 | up   |
| 6434151 | 7213582 | 1406950 | ATP-binding cassette, sub-family D (ALD), member 3          | Abcd3   | 25270  | 1,30 | down |
| 6345831 | 7213582 | 1406940 | ATP-binding cassette, sub-family D (ALD), member 3          | Abcd3   | 25270  | 1,25 | up   |
| 6280465 | 7213582 | 1406946 | ATP-binding cassette, sub-family D (ALD), member 3          | Abcd3   | 25270  | 1,23 | up   |
| 6066731 | 7213582 | 1406941 | ATP-binding cassette, sub-family D (ALD), member 3          | Abcd3   | 25270  | 1,21 | down |
| 6314507 | 7213582 | 1406928 | ATP-binding cassette, sub-family D (ALD), member 3          | Abcd3   | 25270  | 1,20 | down |
| 5888259 | 7213582 | 1406949 | ATP-binding cassette, sub-family D (ALD), member 3          | Abcd3   | 25270  | 1,20 | up   |
| 5787178 | 7213582 | 1406947 | ATP-binding cassette, sub-family D (ALD), member 3          | Abcd3   | 25270  | 1,18 | down |
| 6540224 | 7213582 | 1406935 | ATP-binding cassette, sub-family D (ALD), member 3          | Abcd3   | 25270  | 1,17 | down |
| 6501312 | 7213582 | 1406928 | ATP-binding cassette, sub-family D (ALD), member 3          | Abcd3   | 25270  | 1,15 | up   |
| 6083481 | 7213582 | 1406940 | ATP-binding cassette, sub-family D (ALD), member 3          | Abcd3   | 25270  | 1,15 | down |
| 6700084 | 7213582 | 1406936 | ATP-binding cassette, sub-family D (ALD), member 3          | Abcd3   | 25270  | 1,12 | down |
| 5637451 | 7213582 | 1406937 | ATP-binding cassette, sub-family D (ALD), member 3          | Abcd3   | 25270  | 1,11 | up   |
| 6277852 | 7213582 | 1406929 | ATP-binding cassette, sub-family D (ALD), member 3          | Abcd3   | 25270  | 1,11 | up   |
| 6588854 | 7213582 | 1406938 | ATP-binding cassette, sub-family D (ALD), member 3          | Abcd3   | 25270  | 1,11 | down |
| 5763901 | 7213582 | 1406944 | ATP-binding cassette, sub-family D (ALD), member 3          | Abcd3   | 25270  | 1,07 | up   |
| 6112863 | 7213582 | 1406948 | ATP-binding cassette, sub-family D (ALD), member 3          | Abcd3   | 25270  | 1,06 | up   |
| 6635052 | 7213582 | 1406930 | ATP-binding cassette, sub-family D (ALD), member 3          | Abcd3   | 25270  | 1,04 | up   |
| 5886189 | 7213582 | 1406939 | ATP-binding cassette, sub-family D (ALD), member 3          | Abcd3   | 25270  | 1,04 | down |
| 6615663 | 7213582 | 1406942 | ATP-binding cassette, sub-family D (ALD), member 3          | Abcd3   | 25270  | 1,00 | up   |
| 6027852 | 7122815 | 1184292 | ATP-binding cassette, sub-family G (WHITE), member 3-like 1 | Abcg311 | 289453 | 2,40 | up   |
| 6604709 | 7122815 | 1184291 | ATP-binding cassette, sub-family G (WHITE), member 3-like 1 | Abcg311 | 289453 | 2,18 | up   |
| 6040515 | 7122815 | 1184289 | ATP-binding cassette, sub-family G (WHITE), member 3-like 1 | Abcg311 | 289453 | 2,08 | up   |
| 6447997 | 7122815 | 1184294 | ATP-binding cassette, sub-family G (WHITE), member 3-like 1 | Abcg311 | 289453 | 1,89 | down |
| 6136263 | 7122815 | 1184293 | ATP-binding cassette, sub-family G (WHITE), member 3-like 1 | Abcg311 | 289453 | 1,77 | up   |



|         |         |         |                                                                                                                                           |         |        |      |      |
|---------|---------|---------|-------------------------------------------------------------------------------------------------------------------------------------------|---------|--------|------|------|
| 6108078 | 7122815 | 1184281 | ATP-binding cassette, sub-family G (WHITE), member 3-like 1                                                                               | Abcg311 | 289453 | 1,73 | down |
| 6328271 | 7122815 | 1184283 | ATP-binding cassette, sub-family G (WHITE), member 3-like 1                                                                               | Abcg311 | 289453 | 1,71 | down |
| 5761941 | 7122815 | 1184279 | ATP-binding cassette, sub-family G (WHITE), member 3-like 1                                                                               | Abcg311 | 289453 | 1,56 | down |
| 6356892 | 7122815 | 1184284 | ATP-binding cassette, sub-family G (WHITE), member 3-like 1                                                                               | Abcg311 | 289453 | 1,53 | down |
| 6256577 | 7122815 | 1184287 | ATP-binding cassette, sub-family G (WHITE), member 3-like 1                                                                               | Abcg311 | 289453 | 1,47 | up   |
| 6741627 | 7122815 | 1184290 | ATP-binding cassette, sub-family G (WHITE), member 3-like 1                                                                               | Abcg311 | 289453 | 1,46 | up   |
| 6105979 | 7122815 | 1184285 | ATP-binding cassette, sub-family G (WHITE), member 3-like 1                                                                               | Abcg311 | 289453 | 1,28 | down |
| 6405294 | 7122815 | 1184288 | ATP-binding cassette, sub-family G (WHITE), member 3-like 1                                                                               | Abcg311 | 289453 | 1,15 | down |
| 6617253 | 7122815 | 1184282 | ATP-binding cassette, sub-family G (WHITE), member 3-like 1                                                                               | Abcg311 | 289453 | 1,13 | down |
| 5718248 | 7122815 | 1184280 | ATP-binding cassette, sub-family G (WHITE), member 3-like 1                                                                               | Abcg311 | 289453 | 1,12 | down |
| 5785795 | 7122815 | 1184286 | ATP-binding cassette, sub-family G (WHITE), member 3-like 1                                                                               | Abcg311 | 289453 | 1,02 | down |
| 6057098 | 7122778 | 1184199 | ATP-binding cassette, sub-family G (WHITE), member 3-like 2                                                                               | Abcg312 | 360910 | 3,75 | down |
| 6014882 | 7122778 | 1184200 | ATP-binding cassette, sub-family G (WHITE), member 3-like 2                                                                               | Abcg312 | 360910 | 2,55 | down |
| 6479309 | 7122778 | 1184194 | ATP-binding cassette, sub-family G (WHITE), member 3-like 2                                                                               | Abcg312 | 360910 | 1,94 | down |
| 6547548 | 7122778 | 1184197 | ATP-binding cassette, sub-family G (WHITE), member 3-like 2 /// similar to ATP-binding cassette, sxcg312 /// LOC3609 360910 /// 360997    |         |        | 2,71 | down |
| 6072686 | 7122778 | 1184208 | ATP-binding cassette, sub-family G (WHITE), member 3-like 2 /// similar to ATP-binding cassette, sxcg312 /// LOC3609 360910 /// 360997    |         |        | 2,29 | down |
| 6709638 | 7122778 | 1184195 | ATP-binding cassette, sub-family G (WHITE), member 3-like 2 /// similar to ATP-binding cassette, sxcg312 /// LOC3609 360910 /// 360997    |         |        | 2,11 | down |
| 5867655 | 7122778 | 1184207 | ATP-binding cassette, sub-family G (WHITE), member 3-like 2 /// similar to ATP-binding cassette, sxcg312 /// LOC3609 360910 /// 360997    |         |        | 1,52 | down |
| 6474229 | 7122778 | 1184196 | ATP-binding cassette, sub-family G (WHITE), member 3-like 2 /// similar to ATP-binding cassette, sxcg312 /// LOC3609 360910 /// 360997    |         |        | 1,52 | up   |
| 6408537 | 7122778 | 1184204 | ATP-binding cassette, sub-family G (WHITE), member 3-like 2 /// similar to ATP-binding cassette, sxcg312 /// LOC3609 360910 /// 360997    |         |        | 1,51 | down |
| 6240618 | 7122778 | 1184206 | ATP-binding cassette, sub-family G (WHITE), member 3-like 2 /// similar to ATP-binding cassette, sxcg312 /// LOC3609 360910 /// 360997    |         |        | 1,44 | up   |
| 6237195 | 7122778 | 1184193 | ATP-binding cassette, sub-family G (WHITE), member 3-like 2 /// similar to ATP-binding cassette, sxcg312 /// LOC3609 360910 /// 360997    |         |        | 1,11 | up   |
| 6182140 | 7122778 | 1184202 | ATP-binding cassette, sub-family G (WHITE), member 3-like 2 /// similar to ATP-binding cassette, sxcg312 /// LOC3609 360910 /// 360997    |         |        | 1,03 | up   |
| 5729540 | 7122778 | 1184205 | ATP-binding cassette, sub-family G (WHITE), member 3-like 2 /// similar to ATP-binding cassette, s2 /// LOC360997 ///10 /// 360997 /// 49 |         |        | 2,97 | up   |
| 6153643 | 7122778 | 1184193 | ATP-binding cassette, sub-family G (WHITE), member 3-like 2 /// similar to ATP-binding cassette, s2 /// LOC360997 ///10 /// 360997 /// 49 |         |        | 2,25 | up   |
| 5791168 | 7122778 | 1184201 | ATP-binding cassette, sub-family G (WHITE), member 3-like 2 /// similar to ATP-binding cassette, s2 /// LOC360997 ///10 /// 360997 /// 49 |         |        | 2,06 | up   |
| 6695863 | 7122778 | 1184203 | ATP-binding cassette, sub-family G (WHITE), member 3-like 2 /// similar to ATP-binding cassette, s2 /// LOC360997 ///10 /// 360997 /// 49 |         |        | 1,81 | up   |
| 6389927 | 7122778 | 1184205 | ATP-binding cassette, sub-family G (WHITE), member 3-like 2 /// similar to ATP-binding cassette, s2 /// LOC360997 ///10 /// 360997 /// 49 |         |        | 1,59 | up   |
| 6203931 | 7122778 | 1184198 | ATP-binding cassette, sub-family G (WHITE), member 3-like 2 /// similar to ATP-binding cassette, s2 /// LOC360997 ///10 /// 360997 /// 49 |         |        | 1,04 | down |
| 6675147 | 7344713 | 1732185 | ATP-binding cassette, sub-family G (WHITE), member 4                                                                                      | Abcg4   | 300664 | 2,38 | down |
| 6246303 | 7344713 | 1732171 | ATP-binding cassette, sub-family G (WHITE), member 4                                                                                      | Abcg4   | 300664 | 1,71 | up   |
| 5977669 | 7344713 | 1732186 | ATP-binding cassette, sub-family G (WHITE), member 4                                                                                      | Abcg4   | 300664 | 1,56 | down |
| 5705073 | 7344713 | 1732173 | ATP-binding cassette, sub-family G (WHITE), member 4                                                                                      | Abcg4   | 300664 | 1,40 | up   |
| 6140422 | 7344713 | 1732168 | ATP-binding cassette, sub-family G (WHITE), member 4                                                                                      | Abcg4   | 300664 | 1,38 | down |
| 6061895 | 7344713 | 1732168 | ATP-binding cassette, sub-family G (WHITE), member 4                                                                                      | Abcg4   | 300664 | 1,37 | up   |
| 5647857 | 7344713 | 1732168 | ATP-binding cassette, sub-family G (WHITE), member 4                                                                                      | Abcg4   | 300664 | 1,31 | down |
| 6475610 | 7344713 | 1732168 | ATP-binding cassette, sub-family G (WHITE), member 4                                                                                      | Abcg4   | 300664 | 1,31 | up   |
| 6263772 | 7344713 | 1732172 | ATP-binding cassette, sub-family G (WHITE), member 4                                                                                      | Abcg4   | 300664 | 1,23 | down |
| 6695871 | 7344713 | 1732182 | ATP-binding cassette, sub-family G (WHITE), member 4                                                                                      | Abcg4   | 300664 | 1,22 | up   |
| 6175949 | 7344713 | 1732183 | ATP-binding cassette, sub-family G (WHITE), member 4                                                                                      | Abcg4   | 300664 | 1,18 | down |
| 5943865 | 7344713 | 1732175 | ATP-binding cassette, sub-family G (WHITE), member 4                                                                                      | Abcg4   | 300664 | 1,18 | down |
| 5725908 | 7344713 | 1732174 | ATP-binding cassette, sub-family G (WHITE), member 4                                                                                      | Abcg4   | 300664 | 1,16 | up   |
| 5834316 | 7344713 | 1732168 | ATP-binding cassette, sub-family G (WHITE), member 4                                                                                      | Abcg4   | 300664 | 1,16 | down |
| 6496293 | 7344713 | 1732180 | ATP-binding cassette, sub-family G (WHITE), member 4                                                                                      | Abcg4   | 300664 | 1,12 | up   |
| 6428174 | 7344713 | 1732169 | ATP-binding cassette, sub-family G (WHITE), member 4                                                                                      | Abcg4   | 300664 | 1,10 | up   |
| 5991381 | 7344713 | 1732181 | ATP-binding cassette, sub-family G (WHITE), member 4                                                                                      | Abcg4   | 300664 | 1,09 | down |
| 6413954 | 7344713 | 1732176 | ATP-binding cassette, sub-family G (WHITE), member 4                                                                                      | Abcg4   | 300664 | 1,06 | up   |
| 6158226 | 7344713 | 1732170 | ATP-binding cassette, sub-family G (WHITE), member 4                                                                                      | Abcg4   | 300664 | 1,04 | down |
| 6118845 | 7344713 | 1732177 | ATP-binding cassette, sub-family G (WHITE), member 4                                                                                      | Abcg4   | 300664 | 1,04 | up   |
| 6392889 | 7344713 | 1732168 | ATP-binding cassette, sub-family G (WHITE), member 4                                                                                      | Abcg4   | 300664 | 1,03 | up   |
| 6714112 | 7269494 | 1545958 | atrophin 1                                                                                                                                | Atn1    | 29515  | 2,39 | up   |
| 6265663 | 7269494 | 1545953 | atrophin 1                                                                                                                                | Atn1    | 29515  | 1,54 | down |
| 6358894 | 7269494 | 1545948 | atrophin 1                                                                                                                                | Atn1    | 29515  | 1,36 | down |
| 6360359 | 7269494 | 1545951 | atrophin 1                                                                                                                                | Atn1    | 29515  | 1,26 | up   |
| 6352627 | 7269494 | 1545954 | atrophin 1                                                                                                                                | Atn1    | 29515  | 1,26 | down |
| 6113575 | 7269494 | 1545954 | atrophin 1                                                                                                                                | Atn1    | 29515  | 1,23 | up   |
| 5663531 | 7269494 | 1545954 | atrophin 1                                                                                                                                | Atn1    | 29515  | 1,23 | up   |

|         |         |         |                                            |       |       |      |      |
|---------|---------|---------|--------------------------------------------|-------|-------|------|------|
| 6237154 | 7269494 | 1545956 | atrophin 1                                 | Atn1  | 29515 | 1,22 | up   |
| 6152954 | 7269494 | 1545948 | atrophin 1                                 | Atn1  | 29515 | 1,19 | down |
| 6532908 | 7269494 | 1545950 | atrophin 1                                 | Atn1  | 29515 | 1,18 | down |
| 6110138 | 7269494 | 1545955 | atrophin 1                                 | Atn1  | 29515 | 1,17 | down |
| 6497805 | 7269494 | 1545954 | atrophin 1                                 | Atn1  | 29515 | 1,16 | down |
| 5737579 | 7269494 | 1545957 | atrophin 1                                 | Atn1  | 29515 | 1,13 | up   |
| 6053649 | 7269494 | 1545954 | atrophin 1                                 | Atn1  | 29515 | 1,10 | down |
| 6322181 | 7269494 | 1545954 | atrophin 1                                 | Atn1  | 29515 | 1,09 | up   |
| 5668649 | 7269494 | 1545953 | atrophin 1                                 | Atn1  | 29515 | 1,08 | down |
| 6655494 | 7269494 | 1545954 | atrophin 1                                 | Atn1  | 29515 | 1,06 | up   |
| 6459335 | 7269494 | 1545949 | atrophin 1                                 | Atn1  | 29515 | 1,04 | up   |
| 6572205 | 7269494 | 1545957 | atrophin 1                                 | Atn1  | 29515 | 1,04 | up   |
| 6529518 | 7269494 | 1545957 | atrophin 1                                 | Atn1  | 29515 | 1,03 | up   |
| 6697419 | 7269494 | 1545952 | atrophin 1                                 | Atn1  | 29515 | 1,01 | down |
| 6495750 | 7269494 | 1545954 | atrophin 1                                 | Atn1  | 29515 | 1,01 | up   |
| 6122883 | 7232643 | 1454421 | attractin                                  | Atrn  | 83526 | 2,20 | down |
| 6577628 | 7232643 | 1454402 | attractin                                  | Atrn  | 83526 | 1,55 | up   |
| 5885040 | 7232643 | 1454426 | attractin                                  | Atrn  | 83526 | 1,54 | down |
| 5758088 | 7232643 | 1454423 | attractin                                  | Atrn  | 83526 | 1,53 | down |
| 5745072 | 7232643 | 1454417 | attractin                                  | Atrn  | 83526 | 1,51 | down |
| 6513329 | 7232643 | 1454431 | attractin                                  | Atrn  | 83526 | 1,47 | up   |
| 6355743 | 7232643 | 1454427 | attractin                                  | Atrn  | 83526 | 1,43 | up   |
| 6699765 | 7232643 | 1454430 | attractin                                  | Atrn  | 83526 | 1,40 | up   |
| 6282210 | 7232643 | 1454409 | attractin                                  | Atrn  | 83526 | 1,25 | up   |
| 5742444 | 7232643 | 1454425 | attractin                                  | Atrn  | 83526 | 1,23 | up   |
| 6355573 | 7232643 | 1454416 | attractin                                  | Atrn  | 83526 | 1,21 | down |
| 6156786 | 7232643 | 1454419 | attractin                                  | Atrn  | 83526 | 1,20 | down |
| 6625448 | 7232643 | 1454428 | attractin                                  | Atrn  | 83526 | 1,20 | up   |
| 6047068 | 7232643 | 1454430 | attractin                                  | Atrn  | 83526 | 1,19 | down |
| 5738966 | 7232643 | 1454429 | attractin                                  | Atrn  | 83526 | 1,16 | down |
| 6086173 | 7232643 | 1454404 | attractin                                  | Atrn  | 83526 | 1,14 | down |
| 6380776 | 7232643 | 1454406 | attractin                                  | Atrn  | 83526 | 1,13 | down |
| 6252778 | 7232643 | 1454400 | attractin                                  | Atrn  | 83526 | 1,12 | up   |
| 6307202 | 7232643 | 1454401 | attractin                                  | Atrn  | 83526 | 1,12 | up   |
| 6531888 | 7232643 | 1454414 | attractin                                  | Atrn  | 83526 | 1,10 | up   |
| 6182431 | 7232643 | 1454431 | attractin                                  | Atrn  | 83526 | 1,10 | up   |
| 6264009 | 7232643 | 1454413 | attractin                                  | Atrn  | 83526 | 1,09 | down |
| 6312225 | 7232643 | 1454431 | attractin                                  | Atrn  | 83526 | 1,09 | down |
| 6703393 | 7232643 | 1454418 | attractin                                  | Atrn  | 83526 | 1,08 | up   |
| 6132779 | 7232643 | 1454431 | attractin                                  | Atrn  | 83526 | 1,08 | up   |
| 6632550 | 7232643 | 1454424 | attractin                                  | Atrn  | 83526 | 1,07 | up   |
| 5727213 | 7232643 | 1454422 | attractin                                  | Atrn  | 83526 | 1,06 | up   |
| 6011085 | 7232643 | 1454400 | attractin                                  | Atrn  | 83526 | 1,06 | down |
| 6312342 | 7232643 | 1454408 | attractin                                  | Atrn  | 83526 | 1,06 | down |
| 5699910 | 7232643 | 1454418 | attractin                                  | Atrn  | 83526 | 1,05 | down |
| 6677513 | 7232643 | 1454405 | attractin                                  | Atrn  | 83526 | 1,05 | down |
| 5689673 | 7232643 | 1454431 | attractin                                  | Atrn  | 83526 | 1,05 | down |
| 5744367 | 7232643 | 1454420 | attractin                                  | Atrn  | 83526 | 1,04 | up   |
| 5823171 | 7232643 | 1454415 | attractin                                  | Atrn  | 83526 | 1,04 | down |
| 6126377 | 7232643 | 1454404 | attractin                                  | Atrn  | 83526 | 1,03 | up   |
| 6639161 | 7232643 | 1454407 | attractin                                  | Atrn  | 83526 | 1,03 | up   |
| 6087431 | 7232643 | 1454410 | attractin                                  | Atrn  | 83526 | 1,02 | up   |
| 5985812 | 7232643 | 1454403 | attractin                                  | Atrn  | 83526 | 1,01 | up   |
| 6016051 | 7232643 | 1454412 | attractin                                  | Atrn  | 83526 | 1,01 | up   |
| 6522597 | 7232643 | 1454411 | attractin                                  | Atrn  | 83526 | 1,00 | down |
| 5945076 | 7077604 | 1074416 | ATX1 antioxidant protein 1 homolog (yeast) | Atox1 | 84355 | 2,27 | down |
| 6175185 | 7077604 | 1074419 | ATX1 antioxidant protein 1 homolog (yeast) | Atox1 | 84355 | 1,43 | up   |

|         |         |         |                                              |          |        |      |      |
|---------|---------|---------|----------------------------------------------|----------|--------|------|------|
| 6156916 | 7077604 | 1074417 | ATX1 antioxidant protein 1 homolog (yeast)   | Atox1    | 84355  | 1,21 | down |
| 6096758 | 7077604 | 1074418 | ATX1 antioxidant protein 1 homolog (yeast)   | Atox1    | 84355  | 1,14 | down |
| 6692601 | 7077604 | 1074415 | ATX1 antioxidant protein 1 homolog (yeast)   | Atox1    | 84355  | 1,10 | down |
| 6349743 | 7282319 | 1578597 | aurora kinase A interacting protein 1        | Aurkaip1 | 298687 | 2,46 | up   |
| 6283840 | 7282319 | 1578599 | aurora kinase A interacting protein 1        | Aurkaip1 | 298687 | 2,43 | down |
| 6488945 | 7282319 | 1578596 | aurora kinase A interacting protein 1        | Aurkaip1 | 298687 | 1,31 | down |
| 6274831 | 7282319 | 1578597 | aurora kinase A interacting protein 1        | Aurkaip1 | 298687 | 1,29 | up   |
| 5690368 | 7282319 | 1578598 | aurora kinase A interacting protein 1        | Aurkaip1 | 298687 | 1,21 | up   |
| 6407711 | 7282319 | 1578597 | aurora kinase A interacting protein 1        | Aurkaip1 | 298687 | 1,18 | down |
| 5792952 | 7282319 | 1578597 | aurora kinase A interacting protein 1        | Aurkaip1 | 298687 | 1,09 | down |
| 6586961 | 7282319 | 1578596 | aurora kinase A interacting protein 1        | Aurkaip1 | 298687 | 1,08 | down |
| 5721526 | 7282319 | 1578597 | aurora kinase A interacting protein 1        | Aurkaip1 | 298687 | 1,02 | down |
| 6253097 | 7202145 | 1380725 | autophagy-related 10 (S. cerevisiae)         | Atg10    | 688555 | 2,14 | up   |
| 5718882 | 7202145 | 1380672 | autophagy-related 10 (S. cerevisiae)         | Atg10    | 688555 | 1,71 | down |
| 5953454 | 7202145 | 1380687 | autophagy-related 10 (S. cerevisiae)         | Atg10    | 688555 | 1,20 | up   |
| 5769802 | 7202145 | 1380671 | autophagy-related 10 (S. cerevisiae)         | Atg10    | 688555 | 1,17 | down |
| 6449173 | 7202145 | 1380673 | autophagy-related 10 (S. cerevisiae)         | Atg10    | 688555 | 1,10 | down |
| 6509115 | 7202145 | 1380719 | autophagy-related 10 (S. cerevisiae)         | Atg10    | 688555 | 1,07 | up   |
| 5847394 | 7202145 | 1380694 | autophagy-related 10 (S. cerevisiae)         | Atg10    | 688555 | 1,05 | up   |
| 5651986 | 7350918 | 1747301 | AXIN1 up-regulated 1                         | Axud1    | 363165 | 2,00 | up   |
| 6276030 | 7350918 | 1747300 | AXIN1 up-regulated 1                         | Axud1    | 363165 | 1,98 | up   |
| 6520156 | 7350918 | 1747300 | AXIN1 up-regulated 1                         | Axud1    | 363165 | 1,70 | up   |
| 6518044 | 7350918 | 1747304 | AXIN1 up-regulated 1                         | Axud1    | 363165 | 1,55 | up   |
| 6494169 | 7350918 | 1747305 | AXIN1 up-regulated 1                         | Axud1    | 363165 | 1,45 | down |
| 6131634 | 7350918 | 1747302 | AXIN1 up-regulated 1                         | Axud1    | 363165 | 1,28 | up   |
| 6395499 | 7049010 | 1007578 | Axl receptor tyrosine kinase                 | Axl      | 308444 | 2,49 | down |
| 6477888 | 7049010 | 1007587 | Axl receptor tyrosine kinase                 | Axl      | 308444 | 1,73 | up   |
| 5962720 | 7049010 | 1007576 | Axl receptor tyrosine kinase                 | Axl      | 308444 | 1,61 | down |
| 6366809 | 7049010 | 1007582 | Axl receptor tyrosine kinase                 | Axl      | 308444 | 1,53 | down |
| 5697376 | 7049010 | 1007584 | Axl receptor tyrosine kinase                 | Axl      | 308444 | 1,49 | up   |
| 6654912 | 7049010 | 1007572 | Axl receptor tyrosine kinase                 | Axl      | 308444 | 1,35 | up   |
| 6448905 | 7049010 | 1007586 | Axl receptor tyrosine kinase                 | Axl      | 308444 | 1,34 | up   |
| 5908030 | 7049010 | 1007588 | Axl receptor tyrosine kinase                 | Axl      | 308444 | 1,31 | down |
| 6060354 | 7049010 | 1007585 | Axl receptor tyrosine kinase                 | Axl      | 308444 | 1,29 | up   |
| 6566700 | 7049010 | 1007574 | Axl receptor tyrosine kinase                 | Axl      | 308444 | 1,13 | down |
| 6146421 | 7049010 | 1007570 | Axl receptor tyrosine kinase                 | Axl      | 308444 | 1,12 | up   |
| 5797382 | 7049010 | 1007580 | Axl receptor tyrosine kinase                 | Axl      | 308444 | 1,10 | down |
| 5892151 | 7049010 | 1007571 | Axl receptor tyrosine kinase                 | Axl      | 308444 | 1,09 | down |
| 6017253 | 7049010 | 1007575 | Axl receptor tyrosine kinase                 | Axl      | 308444 | 1,08 | down |
| 6126142 | 7049010 | 1007573 | Axl receptor tyrosine kinase                 | Axl      | 308444 | 1,07 | up   |
| 5815298 | 7049010 | 1007583 | Axl receptor tyrosine kinase                 | Axl      | 308444 | 1,05 | down |
| 6454170 | 7049010 | 1007581 | Axl receptor tyrosine kinase                 | Axl      | 308444 | 1,03 | up   |
| 5854848 | 7049010 | 1007579 | Axl receptor tyrosine kinase                 | Axl      | 308444 | 1,01 | down |
| 6054465 | 7049010 | 1007577 | Axl receptor tyrosine kinase                 | Axl      | 308444 | 1,01 | up   |
| 5782051 | 7234691 | 1459998 | bactericidal/permeability-increasing protein | Bpi      | 296321 | 2,59 | up   |
| 5870046 | 7234691 | 1459997 | bactericidal/permeability-increasing protein | Bpi      | 296321 | 1,65 | up   |
| 6731201 | 7234691 | 1459983 | bactericidal/permeability-increasing protein | Bpi      | 296321 | 1,29 | up   |
| 5771146 | 7234691 | 1459992 | bactericidal/permeability-increasing protein | Bpi      | 296321 | 1,21 | down |
| 6358526 | 7234691 | 1459985 | bactericidal/permeability-increasing protein | Bpi      | 296321 | 1,21 | down |
| 6365260 | 7234691 | 1459983 | bactericidal/permeability-increasing protein | Bpi      | 296321 | 1,21 | up   |
| 6444224 | 7234691 | 1459990 | bactericidal/permeability-increasing protein | Bpi      | 296321 | 1,19 | up   |
| 6438749 | 7234691 | 1459990 | bactericidal/permeability-increasing protein | Bpi      | 296321 | 1,18 | up   |
| 5969094 | 7234691 | 1459995 | bactericidal/permeability-increasing protein | Bpi      | 296321 | 1,15 | down |
| 6030684 | 7234691 | 1459991 | bactericidal/permeability-increasing protein | Bpi      | 296321 | 1,12 | down |
| 5762461 | 7234691 | 1459993 | bactericidal/permeability-increasing protein | Bpi      | 296321 | 1,06 | up   |
| 6050542 | 7234691 | 1459989 | bactericidal/permeability-increasing protein | Bpi      | 296321 | 1,06 | up   |
| 6508892 | 7234691 | 1459994 | bactericidal/permeability-increasing protein | Bpi      | 296321 | 1,06 | down |

|         |         |         |                                              |          |        |      |      |
|---------|---------|---------|----------------------------------------------|----------|--------|------|------|
| 6227057 | 7234691 | 1459984 | bactericidal/permeability-increasing protein | Bpi      | 296321 | 1,04 | down |
| 6053240 | 7234691 | 1459987 | bactericidal/permeability-increasing protein | Bpi      | 296321 | 1,03 | down |
| 6683641 | 7234691 | 1459986 | bactericidal/permeability-increasing protein | Bpi      | 296321 | 1,03 | down |
| 5634444 | 7234691 | 1459996 | bactericidal/permeability-increasing protein | Bpi      | 296321 | 1,02 | up   |
| 5731508 | 7234691 | 1459983 | bactericidal/permeability-increasing protein | Bpi      | 296321 | 1,01 | down |
| 6478874 | 7234691 | 1459988 | bactericidal/permeability-increasing protein | Bpi      | 296321 | 1,01 | up   |
| 6668882 | 7341989 | 1725049 | baculoviral IAP repeat-containing 2          | Birc2    | 60371  | 4,70 | up   |
| 6289602 | 7341989 | 1725044 | baculoviral IAP repeat-containing 2          | Birc2    | 60371  | 2,32 | down |
| 5784401 | 7341989 | 1725048 | baculoviral IAP repeat-containing 2          | Birc2    | 60371  | 2,10 | up   |
| 5901021 | 7341989 | 1725044 | baculoviral IAP repeat-containing 2          | Birc2    | 60371  | 1,91 | down |
| 5825327 | 7341989 | 1725051 | baculoviral IAP repeat-containing 2          | Birc2    | 60371  | 1,64 | up   |
| 6147360 | 7341989 | 1725045 | baculoviral IAP repeat-containing 2          | Birc2    | 60371  | 1,60 | up   |
| 6708661 | 7341989 | 1725048 | baculoviral IAP repeat-containing 2          | Birc2    | 60371  | 1,59 | up   |
| 6220210 | 7341989 | 1725052 | baculoviral IAP repeat-containing 2          | Birc2    | 60371  | 1,56 | up   |
| 5744629 | 7341989 | 1725044 | baculoviral IAP repeat-containing 2          | Birc2    | 60371  | 1,42 | down |
| 6531718 | 7341989 | 1725050 | baculoviral IAP repeat-containing 2          | Birc2    | 60371  | 1,38 | up   |
| 5936281 | 7341989 | 1725044 | baculoviral IAP repeat-containing 2          | Birc2    | 60371  | 1,34 | down |
| 6570921 | 7341989 | 1725052 | baculoviral IAP repeat-containing 2          | Birc2    | 60371  | 1,33 | up   |
| 6329510 | 7341989 | 1725052 | baculoviral IAP repeat-containing 2          | Birc2    | 60371  | 1,26 | down |
| 6473187 | 7341989 | 1725052 | baculoviral IAP repeat-containing 2          | Birc2    | 60371  | 1,23 | up   |
| 6447598 | 7341989 | 1725045 | baculoviral IAP repeat-containing 2          | Birc2    | 60371  | 1,15 | down |
| 6294155 | 7341989 | 1725045 | baculoviral IAP repeat-containing 2          | Birc2    | 60371  | 1,14 | down |
| 6585015 | 7341989 | 1725047 | baculoviral IAP repeat-containing 2          | Birc2    | 60371  | 1,12 | down |
| 6713727 | 7341989 | 1725046 | baculoviral IAP repeat-containing 2          | Birc2    | 60371  | 1,09 | up   |
| 5786327 | 7341989 | 1725052 | baculoviral IAP repeat-containing 2          | Birc2    | 60371  | 1,01 | up   |
| 5679629 | 7341999 | 1725071 | baculoviral IAP repeat-containing 3          | Birc3    | 78971  | 5,91 | down |
| 6158470 | 7341999 | 1725066 | baculoviral IAP repeat-containing 3          | Birc3    | 78971  | 3,47 | down |
| 5787669 | 7341999 | 1725070 | baculoviral IAP repeat-containing 3          | Birc3    | 78971  | 2,26 | down |
| 6232897 | 7341999 | 1725069 | baculoviral IAP repeat-containing 3          | Birc3    | 78971  | 1,86 | up   |
| 5903319 | 7341999 | 1725063 | baculoviral IAP repeat-containing 3          | Birc3    | 78971  | 1,41 | down |
| 5856477 | 7341999 | 1725062 | baculoviral IAP repeat-containing 3          | Birc3    | 78971  | 1,23 | up   |
| 6686061 | 7341999 | 1725067 | baculoviral IAP repeat-containing 3          | Birc3    | 78971  | 1,17 | up   |
| 6630065 | 7341999 | 1725068 | baculoviral IAP repeat-containing 3          | Birc3    | 78971  | 1,16 | up   |
| 6361270 | 7341999 | 1725065 | baculoviral IAP repeat-containing 3          | Birc3    | 78971  | 1,14 | up   |
| 6300405 | 7341999 | 1725064 | baculoviral IAP repeat-containing 3          | Birc3    | 78971  | 1,12 | up   |
| 6048217 | 7096589 | 1118524 | BAIL-associated protein 2-like 1             | Baiap211 | 304282 | 2,73 | up   |
| 6038878 | 7096589 | 1118520 | BAIL-associated protein 2-like 1             | Baiap211 | 304282 | 2,11 | up   |
| 5848655 | 7096589 | 1118513 | BAIL-associated protein 2-like 1             | Baiap211 | 304282 | 1,70 | down |
| 6189706 | 7096589 | 1118515 | BAIL-associated protein 2-like 1             | Baiap211 | 304282 | 1,60 | up   |
| 5770650 | 7096589 | 1118504 | BAIL-associated protein 2-like 1             | Baiap211 | 304282 | 1,47 | down |
| 5987137 | 7096589 | 1118517 | BAIL-associated protein 2-like 1             | Baiap211 | 304282 | 1,37 | up   |
| 5895948 | 7096589 | 1118514 | BAIL-associated protein 2-like 1             | Baiap211 | 304282 | 1,36 | down |
| 6227589 | 7096589 | 1118525 | BAIL-associated protein 2-like 1             | Baiap211 | 304282 | 1,34 | up   |
| 6193479 | 7096589 | 1118507 | BAIL-associated protein 2-like 1             | Baiap211 | 304282 | 1,30 | up   |
| 6601871 | 7096589 | 1118529 | BAIL-associated protein 2-like 1             | Baiap211 | 304282 | 1,30 | down |
| 6347987 | 7096589 | 1118527 | BAIL-associated protein 2-like 1             | Baiap211 | 304282 | 1,19 | up   |
| 6540679 | 7096589 | 1118504 | BAIL-associated protein 2-like 1             | Baiap211 | 304282 | 1,18 | down |
| 6286105 | 7096589 | 1118528 | BAIL-associated protein 2-like 1             | Baiap211 | 304282 | 1,10 | up   |
| 6039084 | 7096589 | 1118521 | BAIL-associated protein 2-like 1             | Baiap211 | 304282 | 1,09 | down |
| 6530182 | 7096589 | 1118506 | BAIL-associated protein 2-like 1             | Baiap211 | 304282 | 1,05 | down |
| 6559888 | 7096589 | 1118523 | BAIL-associated protein 2-like 1             | Baiap211 | 304282 | 1,03 | up   |
| 5935866 | 7059648 | 1030691 | Bardet-Biedl syndrome 1 homolog (human)      | Bbs1     | 309156 | 2,28 | up   |
| 6027744 | 7059648 | 1030675 | Bardet-Biedl syndrome 1 homolog (human)      | Bbs1     | 309156 | 2,09 | down |
| 5650782 | 7059648 | 1030680 | Bardet-Biedl syndrome 1 homolog (human)      | Bbs1     | 309156 | 1,62 | up   |
| 6241283 | 7059648 | 1030689 | Bardet-Biedl syndrome 1 homolog (human)      | Bbs1     | 309156 | 1,34 | up   |
| 5961934 | 7059648 | 1030684 | Bardet-Biedl syndrome 1 homolog (human)      | Bbs1     | 309156 | 1,29 | up   |
| 6689821 | 7059648 | 1030687 | Bardet-Biedl syndrome 1 homolog (human)      | Bbs1     | 309156 | 1,29 | down |

|         |         |         |                                                      |        |        |      |      |
|---------|---------|---------|------------------------------------------------------|--------|--------|------|------|
| 5989461 | 7059648 | 1030690 | Bardet-Biedl syndrome 1 homolog (human)              | Bbs1   | 309156 | 1,24 | down |
| 6421680 | 7059648 | 1030676 | Bardet-Biedl syndrome 1 homolog (human)              | Bbs1   | 309156 | 1,18 | up   |
| 6124731 | 7059648 | 1030679 | Bardet-Biedl syndrome 1 homolog (human)              | Bbs1   | 309156 | 1,15 | down |
| 6631997 | 7059648 | 1030688 | Bardet-Biedl syndrome 1 homolog (human)              | Bbs1   | 309156 | 1,14 | up   |
| 5762351 | 7059648 | 1030692 | Bardet-Biedl syndrome 1 homolog (human)              | Bbs1   | 309156 | 1,13 | down |
| 6519708 | 7059648 | 1030678 | Bardet-Biedl syndrome 1 homolog (human)              | Bbs1   | 309156 | 1,12 | down |
| 6033907 | 7059648 | 1030685 | Bardet-Biedl syndrome 1 homolog (human)              | Bbs1   | 309156 | 1,11 | down |
| 6367384 | 7059648 | 1030683 | Bardet-Biedl syndrome 1 homolog (human)              | Bbs1   | 309156 | 1,10 | down |
| 5779377 | 7059648 | 1030677 | Bardet-Biedl syndrome 1 homolog (human)              | Bbs1   | 309156 | 1,09 | up   |
| 6200033 | 7059648 | 1030681 | Bardet-Biedl syndrome 1 homolog (human)              | Bbs1   | 309156 | 1,07 | down |
| 5910228 | 7059648 | 1030675 | Bardet-Biedl syndrome 1 homolog (human)              | Bbs1   | 309156 | 1,04 | down |
| 6014705 | 7059648 | 1030675 | Bardet-Biedl syndrome 1 homolog (human)              | Bbs1   | 309156 | 1,02 | up   |
| 5728597 | 7059648 | 1030682 | Bardet-Biedl syndrome 1 homolog (human)              | Bbs1   | 309156 | 1,00 | down |
| 6486908 | 7207686 | 1393642 | Bardet-Biedl syndrome 7                              | Bbs7   | 361930 | 2,03 | up   |
| 6005507 | 7207686 | 1393639 | Bardet-Biedl syndrome 7                              | Bbs7   | 361930 | 1,68 | down |
| 6139431 | 7207686 | 1393625 | Bardet-Biedl syndrome 7                              | Bbs7   | 361930 | 1,61 | down |
| 5814609 | 7207686 | 1393630 | Bardet-Biedl syndrome 7                              | Bbs7   | 361930 | 1,61 | up   |
| 6369239 | 7207686 | 1393629 | Bardet-Biedl syndrome 7                              | Bbs7   | 361930 | 1,47 | down |
| 6397408 | 7207686 | 1393638 | Bardet-Biedl syndrome 7                              | Bbs7   | 361930 | 1,36 | down |
| 6691740 | 7207686 | 1393643 | Bardet-Biedl syndrome 7                              | Bbs7   | 361930 | 1,35 | down |
| 6403054 | 7207686 | 1393626 | Bardet-Biedl syndrome 7                              | Bbs7   | 361930 | 1,31 | down |
| 6744936 | 7207686 | 1393635 | Bardet-Biedl syndrome 7                              | Bbs7   | 361930 | 1,24 | up   |
| 6021290 | 7207686 | 1393636 | Bardet-Biedl syndrome 7                              | Bbs7   | 361930 | 1,19 | up   |
| 6221452 | 7207686 | 1393639 | Bardet-Biedl syndrome 7                              | Bbs7   | 361930 | 1,17 | down |
| 5682433 | 7207686 | 1393627 | Bardet-Biedl syndrome 7                              | Bbs7   | 361930 | 1,17 | down |
| 6443201 | 7207686 | 1393641 | Bardet-Biedl syndrome 7                              | Bbs7   | 361930 | 1,15 | down |
| 6109605 | 7207686 | 1393624 | Bardet-Biedl syndrome 7                              | Bbs7   | 361930 | 1,15 | up   |
| 5973924 | 7207686 | 1393634 | Bardet-Biedl syndrome 7                              | Bbs7   | 361930 | 1,13 | up   |
| 6123287 | 7207686 | 1393628 | Bardet-Biedl syndrome 7                              | Bbs7   | 361930 | 1,11 | down |
| 6338715 | 7207686 | 1393632 | Bardet-Biedl syndrome 7                              | Bbs7   | 361930 | 1,11 | down |
| 5699220 | 7207686 | 1393626 | Bardet-Biedl syndrome 7                              | Bbs7   | 361930 | 1,10 | down |
| 6368034 | 7207686 | 1393631 | Bardet-Biedl syndrome 7                              | Bbs7   | 361930 | 1,09 | up   |
| 6160026 | 7207686 | 1393633 | Bardet-Biedl syndrome 7                              | Bbs7   | 361930 | 1,09 | down |
| 6407232 | 7207686 | 1393640 | Bardet-Biedl syndrome 7                              | Bbs7   | 361930 | 1,08 | down |
| 5968950 | 7207686 | 1393643 | Bardet-Biedl syndrome 7                              | Bbs7   | 361930 | 1,04 | up   |
| 6326834 | 7207686 | 1393637 | Bardet-Biedl syndrome 7                              | Bbs7   | 361930 | 1,04 | down |
| 6656723 | 7048702 | 1006923 | basal cell adhesion molecule                         | Bcam   | 78958  | 2,08 | down |
| 5735310 | 7048702 | 1006912 | basal cell adhesion molecule                         | Bcam   | 78958  | 1,83 | up   |
| 5791330 | 7048702 | 1006912 | basal cell adhesion molecule                         | Bcam   | 78958  | 1,80 | up   |
| 5707169 | 7048702 | 1006919 | basal cell adhesion molecule                         | Bcam   | 78958  | 1,46 | up   |
| 5902281 | 7048702 | 1006918 | basal cell adhesion molecule                         | Bcam   | 78958  | 1,46 | down |
| 6409768 | 7048702 | 1006913 | basal cell adhesion molecule                         | Bcam   | 78958  | 1,39 | down |
| 6326587 | 7048702 | 1006920 | basal cell adhesion molecule                         | Bcam   | 78958  | 1,37 | down |
| 5799092 | 7048702 | 1006921 | basal cell adhesion molecule                         | Bcam   | 78958  | 1,33 | down |
| 6694963 | 7048702 | 1006911 | basal cell adhesion molecule                         | Bcam   | 78958  | 1,31 | up   |
| 6176013 | 7048702 | 1006911 | basal cell adhesion molecule                         | Bcam   | 78958  | 1,28 | down |
| 6515887 | 7048702 | 1006917 | basal cell adhesion molecule                         | Bcam   | 78958  | 1,24 | up   |
| 6571831 | 7048702 | 1006916 | basal cell adhesion molecule                         | Bcam   | 78958  | 1,19 | down |
| 6435870 | 7048702 | 1006924 | basal cell adhesion molecule                         | Bcam   | 78958  | 1,18 | down |
| 6331176 | 7048702 | 1006914 | basal cell adhesion molecule                         | Bcam   | 78958  | 1,15 | down |
| 5968247 | 7048702 | 1006923 | basal cell adhesion molecule                         | Bcam   | 78958  | 1,13 | up   |
| 5731522 | 7048702 | 1006911 | basal cell adhesion molecule                         | Bcam   | 78958  | 1,06 | up   |
| 6745631 | 7048702 | 1006923 | basal cell adhesion molecule                         | Bcam   | 78958  | 1,06 | down |
| 6032485 | 7048702 | 1006922 | basal cell adhesion molecule                         | Bcam   | 78958  | 1,06 | up   |
| 6711084 | 7048702 | 1006915 | basal cell adhesion molecule                         | Bcam   | 78958  | 1,05 | up   |
| 6055335 | 7048702 | 1006925 | basal cell adhesion molecule                         | Bcam   | 78958  | 1,01 | up   |
| 6117887 | 7377146 | 1814104 | basic helix-loop-helix domain containing, class B, 9 | Bhlhb9 | 317407 | 2,15 | up   |

|         |         |         |                                                       |        |        |      |      |
|---------|---------|---------|-------------------------------------------------------|--------|--------|------|------|
| 5800241 | 7377146 | 1814106 | basic helix-loop-helix domain containing, class B, 9  | Bhlhb9 | 317407 | 1,39 | down |
| 6728102 | 7377146 | 1814104 | basic helix-loop-helix domain containing, class B, 9  | Bhlhb9 | 317407 | 1,37 | down |
| 5653568 | 7377146 | 1814104 | basic helix-loop-helix domain containing, class B, 9  | Bhlhb9 | 317407 | 1,26 | up   |
| 6095177 | 7377146 | 1814104 | basic helix-loop-helix domain containing, class B, 9  | Bhlhb9 | 317407 | 1,26 | down |
| 6717231 | 7377146 | 1814105 | basic helix-loop-helix domain containing, class B, 9  | Bhlhb9 | 317407 | 1,24 | up   |
| 6216005 | 7377146 | 1814105 | basic helix-loop-helix domain containing, class B, 9  | Bhlhb9 | 317407 | 1,13 | down |
| 6430531 | 7377146 | 1814105 | basic helix-loop-helix domain containing, class B, 9  | Bhlhb9 | 317407 | 1,01 | up   |
| 6342762 | 7257144 | 1515589 | basic helix-loop-helix domain containing, class B2    | Bhlhb2 | 79431  | 3,87 | down |
| 6629309 | 7257144 | 1515594 | basic helix-loop-helix domain containing, class B2    | Bhlhb2 | 79431  | 1,66 | up   |
| 6168974 | 7257144 | 1515590 | basic helix-loop-helix domain containing, class B2    | Bhlhb2 | 79431  | 1,58 | down |
| 6025454 | 7257144 | 1515593 | basic helix-loop-helix domain containing, class B2    | Bhlhb2 | 79431  | 1,31 | up   |
| 6151848 | 7257144 | 1515592 | basic helix-loop-helix domain containing, class B2    | Bhlhb2 | 79431  | 1,23 | up   |
| 6096327 | 7257144 | 1515589 | basic helix-loop-helix domain containing, class B2    | Bhlhb2 | 79431  | 1,16 | down |
| 6449214 | 7257144 | 1515593 | basic helix-loop-helix domain containing, class B2    | Bhlhb2 | 79431  | 1,15 | up   |
| 5873882 | 7257144 | 1515591 | basic helix-loop-helix domain containing, class B2    | Bhlhb2 | 79431  | 1,07 | down |
| 6739864 | 7257144 | 1515594 | basic helix-loop-helix domain containing, class B2    | Bhlhb2 | 79431  | 1,01 | up   |
| 6630693 | 7271485 | 1551350 | basic helix-loop-helix domain containing, class B3    | Bhlhb3 | 117095 | 2,52 | down |
| 5731372 | 7271485 | 1551346 | basic helix-loop-helix domain containing, class B3    | Bhlhb3 | 117095 | 1,38 | down |
| 6333359 | 7271485 | 1551350 | basic helix-loop-helix domain containing, class B3    | Bhlhb3 | 117095 | 1,29 | up   |
| 6210926 | 7271485 | 1551353 | basic helix-loop-helix domain containing, class B3    | Bhlhb3 | 117095 | 1,24 | up   |
| 6599722 | 7271485 | 1551350 | basic helix-loop-helix domain containing, class B3    | Bhlhb3 | 117095 | 1,23 | up   |
| 6185444 | 7271485 | 1551350 | basic helix-loop-helix domain containing, class B3    | Bhlhb3 | 117095 | 1,17 | up   |
| 6558610 | 7271485 | 1551346 | basic helix-loop-helix domain containing, class B3    | Bhlhb3 | 117095 | 1,14 | down |
| 5995367 | 7271485 | 1551348 | basic helix-loop-helix domain containing, class B3    | Bhlhb3 | 117095 | 1,13 | down |
| 5685871 | 7271485 | 1551351 | basic helix-loop-helix domain containing, class B3    | Bhlhb3 | 117095 | 1,07 | down |
| 5887494 | 7271485 | 1551352 | basic helix-loop-helix domain containing, class B3    | Bhlhb3 | 117095 | 1,03 | up   |
| 6025517 | 7271485 | 1551349 | basic helix-loop-helix domain containing, class B3    | Bhlhb3 | 117095 | 1,01 | down |
| 5746392 | 7271485 | 1551347 | basic helix-loop-helix domain containing, class B3    | Bhlhb3 | 117095 | 1,00 | up   |
| 6228697 | 7039265 | 983651  | basic leucine zipper transcription factor, ATF-like 2 | Batf2  | 309178 | 2,31 | down |
| 5640151 | 7288170 | 1592350 | basonuclin 2                                          | Bnc2   | 298189 | 2,12 | down |
| 6374021 | 7288170 | 1592321 | basonuclin 2                                          | Bnc2   | 298189 | 2,08 | up   |
| 6106498 | 7288170 | 1592361 | basonuclin 2                                          | Bnc2   | 298189 | 2,00 | up   |
| 6562457 | 7288170 | 1592348 | basonuclin 2                                          | Bnc2   | 298189 | 1,62 | up   |
| 6383075 | 7288170 | 1592327 | basonuclin 2                                          | Bnc2   | 298189 | 1,36 | up   |
| 6187918 | 7288170 | 1592303 | basonuclin 2                                          | Bnc2   | 298189 | 1,28 | down |
| 5844262 | 7288170 | 1592348 | basonuclin 2                                          | Bnc2   | 298189 | 1,25 | down |
| 5861287 | 7288170 | 1592361 | basonuclin 2                                          | Bnc2   | 298189 | 1,11 | up   |
| 6623202 | 7288170 | 1592288 | basonuclin 2                                          | Bnc2   | 298189 | 1,09 | down |
| 6446610 | 7288170 | 1592303 | basonuclin 2                                          | Bnc2   | 298189 | 1,06 | down |
| 5976475 | 7288170 | 1592303 | basonuclin 2                                          | Bnc2   | 298189 | 1,01 | up   |
| 6429425 | 7048723 | 1006956 | B-cell CLL/lymphoma 3                                 | Bcl3   | 680611 | 8,10 | down |
| 5965197 | 7048723 | 1006948 | B-cell CLL/lymphoma 3                                 | Bcl3   | 680611 | 2,66 | up   |
| 6612212 | 7048723 | 1006954 | B-cell CLL/lymphoma 3                                 | Bcl3   | 680611 | 2,29 | up   |
| 5641634 | 7048723 | 1006955 | B-cell CLL/lymphoma 3                                 | Bcl3   | 680611 | 2,01 | up   |
| 5877247 | 7048723 | 1006956 | B-cell CLL/lymphoma 3                                 | Bcl3   | 680611 | 1,85 | down |
| 6081744 | 7048723 | 1006950 | B-cell CLL/lymphoma 3                                 | Bcl3   | 680611 | 1,53 | up   |
| 6076844 | 7048723 | 1006952 | B-cell CLL/lymphoma 3                                 | Bcl3   | 680611 | 1,49 | down |
| 6254187 | 7048723 | 1006949 | B-cell CLL/lymphoma 3                                 | Bcl3   | 680611 | 1,35 | down |
| 5861046 | 7048723 | 1006951 | B-cell CLL/lymphoma 3                                 | Bcl3   | 680611 | 1,21 | down |
| 6034429 | 7048723 | 1006953 | B-cell CLL/lymphoma 3                                 | Bcl3   | 680611 | 1,17 | down |
| 6213226 | 7221055 | 1425394 | BCL2-antagonist/killer 1                              | Bak1   | 116502 | 2,42 | down |
| 5881396 | 7221055 | 1425395 | BCL2-antagonist/killer 1                              | Bak1   | 116502 | 1,77 | down |
| 5774276 | 7221055 | 1425394 | BCL2-antagonist/killer 1                              | Bak1   | 116502 | 1,63 | down |
| 5815221 | 7221055 | 1425391 | BCL2-antagonist/killer 1                              | Bak1   | 116502 | 1,53 | up   |
| 6199140 | 7221055 | 1425390 | BCL2-antagonist/killer 1                              | Bak1   | 116502 | 1,46 | up   |
| 6262184 | 7221055 | 1425392 | BCL2-antagonist/killer 1                              | Bak1   | 116502 | 1,27 | down |
| 6194540 | 7221055 | 1425390 | BCL2-antagonist/killer 1                              | Bak1   | 116502 | 1,23 | down |

|         |         |         |                                              |        |        |      |      |
|---------|---------|---------|----------------------------------------------|--------|--------|------|------|
| 5891981 | 7221055 | 1425390 | BCL2-antagonist/killer 1                     | Bak1   | 116502 | 1,18 | up   |
| 6307232 | 7221055 | 1425391 | BCL2-antagonist/killer 1                     | Bak1   | 116502 | 1,02 | down |
| 6402587 | 7221055 | 1425393 | BCL2-antagonist/killer 1                     | Bak1   | 116502 | 1,01 | down |
| 5684840 | 7070869 | 1058489 | benzodiazapine receptor associated protein 1 | Bzrap1 | 287609 | 2,89 | down |
| 5929812 | 7070869 | 1058493 | benzodiazapine receptor associated protein 1 | Bzrap1 | 287609 | 1,78 | down |
| 5626575 | 7070869 | 1058489 | benzodiazapine receptor associated protein 1 | Bzrap1 | 287609 | 1,55 | down |
| 5962074 | 7070869 | 1058484 | benzodiazapine receptor associated protein 1 | Bzrap1 | 287609 | 1,55 | down |
| 5763484 | 7070869 | 1058474 | benzodiazapine receptor associated protein 1 | Bzrap1 | 287609 | 1,54 | down |
| 6606592 | 7070869 | 1058481 | benzodiazapine receptor associated protein 1 | Bzrap1 | 287609 | 1,49 | down |
| 6371044 | 7070869 | 1058485 | benzodiazapine receptor associated protein 1 | Bzrap1 | 287609 | 1,49 | up   |
| 6488072 | 7070869 | 1058501 | benzodiazapine receptor associated protein 1 | Bzrap1 | 287609 | 1,48 | down |
| 6292670 | 7070869 | 1058489 | benzodiazapine receptor associated protein 1 | Bzrap1 | 287609 | 1,47 | up   |
| 6402640 | 7070869 | 1058475 | benzodiazapine receptor associated protein 1 | Bzrap1 | 287609 | 1,47 | up   |
| 6481950 | 7070869 | 1058482 | benzodiazapine receptor associated protein 1 | Bzrap1 | 287609 | 1,44 | down |
| 6034938 | 7070869 | 1058492 | benzodiazapine receptor associated protein 1 | Bzrap1 | 287609 | 1,42 | down |
| 6285270 | 7070869 | 1058497 | benzodiazapine receptor associated protein 1 | Bzrap1 | 287609 | 1,36 | down |
| 6716118 | 7070869 | 1058491 | benzodiazapine receptor associated protein 1 | Bzrap1 | 287609 | 1,34 | down |
| 6009592 | 7070869 | 1058479 | benzodiazapine receptor associated protein 1 | Bzrap1 | 287609 | 1,31 | up   |
| 6310859 | 7070869 | 1058494 | benzodiazapine receptor associated protein 1 | Bzrap1 | 287609 | 1,29 | down |
| 6232646 | 7070869 | 1058476 | benzodiazapine receptor associated protein 1 | Bzrap1 | 287609 | 1,25 | down |
| 5704883 | 7070869 | 1058499 | benzodiazapine receptor associated protein 1 | Bzrap1 | 287609 | 1,25 | down |
| 6005727 | 7070869 | 1058490 | benzodiazapine receptor associated protein 1 | Bzrap1 | 287609 | 1,24 | up   |
| 5640104 | 7070869 | 1058496 | benzodiazapine receptor associated protein 1 | Bzrap1 | 287609 | 1,23 | down |
| 6081799 | 7070869 | 1058495 | benzodiazapine receptor associated protein 1 | Bzrap1 | 287609 | 1,23 | up   |
| 6433193 | 7070869 | 1058471 | benzodiazapine receptor associated protein 1 | Bzrap1 | 287609 | 1,19 | up   |
| 5827261 | 7070869 | 1058482 | benzodiazapine receptor associated protein 1 | Bzrap1 | 287609 | 1,19 | down |
| 5922070 | 7070869 | 1058488 | benzodiazapine receptor associated protein 1 | Bzrap1 | 287609 | 1,18 | down |
| 5899060 | 7070869 | 1058495 | benzodiazapine receptor associated protein 1 | Bzrap1 | 287609 | 1,18 | up   |
| 6611256 | 7070869 | 1058491 | benzodiazapine receptor associated protein 1 | Bzrap1 | 287609 | 1,17 | up   |
| 6279229 | 7070869 | 1058487 | benzodiazapine receptor associated protein 1 | Bzrap1 | 287609 | 1,17 | down |
| 5789564 | 7070869 | 1058480 | benzodiazapine receptor associated protein 1 | Bzrap1 | 287609 | 1,16 | down |
| 6362265 | 7070869 | 1058470 | benzodiazapine receptor associated protein 1 | Bzrap1 | 287609 | 1,13 | up   |
| 6027533 | 7070869 | 1058473 | benzodiazapine receptor associated protein 1 | Bzrap1 | 287609 | 1,12 | up   |
| 6119117 | 7070869 | 1058502 | benzodiazapine receptor associated protein 1 | Bzrap1 | 287609 | 1,12 | up   |
| 6640851 | 7070869 | 1058477 | benzodiazapine receptor associated protein 1 | Bzrap1 | 287609 | 1,12 | up   |
| 5754964 | 7070869 | 1058478 | benzodiazapine receptor associated protein 1 | Bzrap1 | 287609 | 1,11 | down |
| 6528589 | 7070869 | 1058491 | benzodiazapine receptor associated protein 1 | Bzrap1 | 287609 | 1,10 | down |
| 6650806 | 7070869 | 1058491 | benzodiazapine receptor associated protein 1 | Bzrap1 | 287609 | 1,10 | up   |
| 5627395 | 7070869 | 1058498 | benzodiazapine receptor associated protein 1 | Bzrap1 | 287609 | 1,10 | down |
| 6695811 | 7070869 | 1058502 | benzodiazapine receptor associated protein 1 | Bzrap1 | 287609 | 1,09 | up   |
| 6618242 | 7070869 | 1058486 | benzodiazapine receptor associated protein 1 | Bzrap1 | 287609 | 1,09 | up   |
| 6304830 | 7070869 | 1058489 | benzodiazapine receptor associated protein 1 | Bzrap1 | 287609 | 1,08 | down |
| 6320000 | 7070869 | 1058484 | benzodiazapine receptor associated protein 1 | Bzrap1 | 287609 | 1,08 | down |
| 5780184 | 7070869 | 1058491 | benzodiazapine receptor associated protein 1 | Bzrap1 | 287609 | 1,07 | up   |
| 6568261 | 7070869 | 1058502 | benzodiazapine receptor associated protein 1 | Bzrap1 | 287609 | 1,05 | down |
| 5922451 | 7070869 | 1058481 | benzodiazapine receptor associated protein 1 | Bzrap1 | 287609 | 1,05 | up   |
| 6416499 | 7070869 | 1058474 | benzodiazapine receptor associated protein 1 | Bzrap1 | 287609 | 1,04 | down |
| 6698355 | 7070869 | 1058491 | benzodiazapine receptor associated protein 1 | Bzrap1 | 287609 | 1,03 | down |
| 5820327 | 7070869 | 1058472 | benzodiazapine receptor associated protein 1 | Bzrap1 | 287609 | 1,00 | up   |
| 5958215 | 7315206 | 1660010 | bestrophin 3                                 | Best3  | 314847 | 1,65 | up   |
| 6144221 | 7315206 | 1660034 | bestrophin 3                                 | Best3  | 314847 | 1,30 | down |
| 6072704 | 7343381 | 1728453 | beta-galactosidase-like protein              | Bin2a  | 494244 | 2,21 | down |
| 5876867 | 7343381 | 1728443 | beta-galactosidase-like protein              | Bin2a  | 494244 | 1,97 | up   |
| 6404129 | 7343381 | 1728443 | beta-galactosidase-like protein              | Bin2a  | 494244 | 1,66 | down |
| 6011737 | 7343381 | 1728447 | beta-galactosidase-like protein              | Bin2a  | 494244 | 1,52 | up   |
| 6291495 | 7343381 | 1728451 | beta-galactosidase-like protein              | Bin2a  | 494244 | 1,41 | up   |
| 6097340 | 7343381 | 1728452 | beta-galactosidase-like protein              | Bin2a  | 494244 | 1,37 | down |

|         |         |         |                                                   |       |        |      |      |
|---------|---------|---------|---------------------------------------------------|-------|--------|------|------|
| 5783592 | 7343381 | 1728456 | beta-galactosidase-like protein                   | Bin2a | 494244 | 1,36 | down |
| 6322344 | 7343381 | 1728441 | beta-galactosidase-like protein                   | Bin2a | 494244 | 1,31 | down |
| 6528963 | 7343381 | 1728457 | beta-galactosidase-like protein                   | Bin2a | 494244 | 1,30 | down |
| 6145540 | 7343381 | 1728442 | beta-galactosidase-like protein                   | Bin2a | 494244 | 1,22 | up   |
| 5970996 | 7343381 | 1728458 | beta-galactosidase-like protein                   | Bin2a | 494244 | 1,20 | up   |
| 6297077 | 7343381 | 1728445 | beta-galactosidase-like protein                   | Bin2a | 494244 | 1,19 | down |
| 6322338 | 7343381 | 1728453 | beta-galactosidase-like protein                   | Bin2a | 494244 | 1,16 | up   |
| 5714052 | 7343381 | 1728449 | beta-galactosidase-like protein                   | Bin2a | 494244 | 1,15 | up   |
| 5750919 | 7343381 | 1728446 | beta-galactosidase-like protein                   | Bin2a | 494244 | 1,13 | down |
| 6360153 | 7343381 | 1728454 | beta-galactosidase-like protein                   | Bin2a | 494244 | 1,12 | up   |
| 6031513 | 7343381 | 1728455 | beta-galactosidase-like protein                   | Bin2a | 494244 | 1,10 | up   |
| 6679749 | 7343381 | 1728459 | beta-galactosidase-like protein                   | Bin2a | 494244 | 1,08 | down |
| 6552244 | 7343381 | 1728440 | beta-galactosidase-like protein                   | Bin2a | 494244 | 1,04 | up   |
| 5987232 | 7343381 | 1728450 | beta-galactosidase-like protein                   | Bin2a | 494244 | 1,02 | up   |
| 6429911 | 7343381 | 1728448 | beta-galactosidase-like protein                   | Bin2a | 494244 | 1,00 | up   |
| 6503692 | 7343381 | 1728460 | beta-galactosidase-like protein                   | Bin2a | 494244 | 1,00 | up   |
| 6632138 | 7343381 | 1728444 | beta-galactosidase-like protein                   | Bin2a | 494244 | 1,00 | up   |
| 6153135 | 7202449 | 1381295 | betaine-homocysteine methyltransferase            | Bhmt  | 81508  | 2,14 | down |
| 5968173 | 7202449 | 1381297 | betaine-homocysteine methyltransferase            | Bhmt  | 81508  | 1,54 | down |
| 6598661 | 7202449 | 1381302 | betaine-homocysteine methyltransferase            | Bhmt  | 81508  | 1,47 | up   |
| 6342215 | 7202449 | 1381296 | betaine-homocysteine methyltransferase            | Bhmt  | 81508  | 1,34 | down |
| 6557076 | 7202449 | 1381298 | betaine-homocysteine methyltransferase            | Bhmt  | 81508  | 1,32 | up   |
| 5677239 | 7202449 | 1381303 | betaine-homocysteine methyltransferase            | Bhmt  | 81508  | 1,19 | down |
| 5819320 | 7202449 | 1381299 | betaine-homocysteine methyltransferase            | Bhmt  | 81508  | 1,08 | up   |
| 6724215 | 7202449 | 1381301 | betaine-homocysteine methyltransferase            | Bhmt  | 81508  | 1,05 | up   |
| 6376147 | 7202449 | 1381300 | betaine-homocysteine methyltransferase            | Bhmt  | 81508  | 1,00 | down |
| 6183129 | 7335700 | 1708718 | beta-site APP cleaving enzyme 1                   | Bace1 | 29392  | 1,27 | down |
| 5757380 | 7335700 | 1708719 | beta-site APP cleaving enzyme 1                   | Bace1 | 29392  | 1,22 | up   |
| 6219484 | 7335700 | 1708717 | beta-site APP cleaving enzyme 1                   | Bace1 | 29392  | 1,12 | down |
| 6690501 | 7335700 | 1708721 | beta-site APP cleaving enzyme 1                   | Bace1 | 29392  | 1,08 | up   |
| 6006335 | 7335700 | 1708723 | beta-site APP cleaving enzyme 1                   | Bace1 | 29392  | 1,07 | down |
| 6030772 | 7335700 | 1708722 | beta-site APP cleaving enzyme 1                   | Bace1 | 29392  | 1,06 | up   |
| 6742441 | 7335700 | 1708725 | beta-site APP cleaving enzyme 1                   | Bace1 | 29392  | 1,05 | down |
| 6325359 | 7335700 | 1708724 | beta-site APP cleaving enzyme 1                   | Bace1 | 29392  | 1,05 | up   |
| 5864172 | 7335700 | 1708720 | beta-site APP cleaving enzyme 1                   | Bace1 | 29392  | 1,03 | down |
| 5716476 | 7335700 | 1708717 | beta-site APP cleaving enzyme 1                   | Bace1 | 29392  | 1,03 | down |
| 6489331 | 7260066 | 1522889 | bicaudal D homolog 1 (Drosophila)                 | Bicd1 | 362466 | 1,76 | up   |
| 6013731 | 7260066 | 1522904 | bicaudal D homolog 1 (Drosophila)                 | Bicd1 | 362466 | 1,73 | up   |
| 5914015 | 7260066 | 1522898 | bicaudal D homolog 1 (Drosophila)                 | Bicd1 | 362466 | 1,31 | up   |
| 6249465 | 7260066 | 1522885 | bicaudal D homolog 1 (Drosophila)                 | Bicd1 | 362466 | 1,24 | down |
| 5844202 | 7260066 | 1522903 | bicaudal D homolog 1 (Drosophila)                 | Bicd1 | 362466 | 1,23 | down |
| 6141436 | 7260066 | 1522904 | bicaudal D homolog 1 (Drosophila)                 | Bicd1 | 362466 | 1,22 | up   |
| 6735326 | 7260066 | 1522885 | bicaudal D homolog 1 (Drosophila)                 | Bicd1 | 362466 | 1,19 | down |
| 6301102 | 7260066 | 1522904 | bicaudal D homolog 1 (Drosophila)                 | Bicd1 | 362466 | 1,18 | up   |
| 6396884 | 7260066 | 1522889 | bicaudal D homolog 1 (Drosophila)                 | Bicd1 | 362466 | 1,17 | down |
| 5852712 | 7260066 | 1522890 | bicaudal D homolog 1 (Drosophila)                 | Bicd1 | 362466 | 1,15 | down |
| 6666179 | 7260066 | 1522903 | bicaudal D homolog 1 (Drosophila)                 | Bicd1 | 362466 | 1,08 | down |
| 5818596 | 7260066 | 1522899 | bicaudal D homolog 1 (Drosophila)                 | Bicd1 | 362466 | 1,04 | down |
| 6675164 | 7260066 | 1522896 | bicaudal D homolog 1 (Drosophila)                 | Bicd1 | 362466 | 1,03 | down |
| 6687385 | 7260066 | 1522897 | bicaudal D homolog 1 (Drosophila)                 | Bicd1 | 362466 | 1,03 | up   |
| 6010870 | 7029985 | 960591  | biliverdin reductase B (flavin reductase (NADPH)) | Blvrb | 292737 | 2,16 | up   |
| 6205377 | 7029985 | 960587  | biliverdin reductase B (flavin reductase (NADPH)) | Blvrb | 292737 | 1,39 | down |
| 5994249 | 7029985 | 960593  | biliverdin reductase B (flavin reductase (NADPH)) | Blvrb | 292737 | 1,28 | up   |
| 6348597 | 7029985 | 960596  | biliverdin reductase B (flavin reductase (NADPH)) | Blvrb | 292737 | 1,24 | up   |
| 6501712 | 7029985 | 960587  | biliverdin reductase B (flavin reductase (NADPH)) | Blvrb | 292737 | 1,10 | down |
| 6469418 | 7029985 | 960594  | biliverdin reductase B (flavin reductase (NADPH)) | Blvrb | 292737 | 1,04 | down |
| 6305467 | 7029985 | 960595  | biliverdin reductase B (flavin reductase (NADPH)) | Blvrb | 292737 | 1,02 | down |



|         |         |         |                                         |       |        |      |      |
|---------|---------|---------|-----------------------------------------|-------|--------|------|------|
| 6356223 | 7123421 | 1185825 | BMP-2 inducible kinase                  | Bmp2k | 498333 | 2,06 | down |
| 6526284 | 7123421 | 1185821 | BMP-2 inducible kinase                  | Bmp2k | 498333 | 1,83 | down |
| 6086567 | 7123421 | 1185839 | BMP-2 inducible kinase                  | Bmp2k | 498333 | 1,62 | up   |
| 6046971 | 7123421 | 1185834 | BMP-2 inducible kinase                  | Bmp2k | 498333 | 1,41 | up   |
| 5669317 | 7123421 | 1185828 | BMP-2 inducible kinase                  | Bmp2k | 498333 | 1,32 | down |
| 6480892 | 7123421 | 1185825 | BMP-2 inducible kinase                  | Bmp2k | 498333 | 1,28 | down |
| 6746852 | 7123421 | 1185836 | BMP-2 inducible kinase                  | Bmp2k | 498333 | 1,26 | up   |
| 6391620 | 7123421 | 1185831 | BMP-2 inducible kinase                  | Bmp2k | 498333 | 1,19 | up   |
| 6536991 | 7123421 | 1185833 | BMP-2 inducible kinase                  | Bmp2k | 498333 | 1,15 | up   |
| 6631080 | 7123421 | 1185821 | BMP-2 inducible kinase                  | Bmp2k | 498333 | 1,15 | down |
| 5648570 | 7123421 | 1185825 | BMP-2 inducible kinase                  | Bmp2k | 498333 | 1,12 | down |
| 6116793 | 7123421 | 1185840 | BMP-2 inducible kinase                  | Bmp2k | 498333 | 1,06 | down |
| 6361680 | 7123421 | 1185831 | BMP-2 inducible kinase                  | Bmp2k | 498333 | 1,04 | down |
| 5852853 | 7123421 | 1185830 | BMP-2 inducible kinase                  | Bmp2k | 498333 | 1,02 | up   |
| 6041602 | 7123421 | 1185812 | BMP-2 inducible kinase                  | Bmp2k | 498333 | 1,00 | up   |
| 5886975 | 7123310 | 1185436 | bone morphogenetic protein 3            | Bmp3  | 25667  | 2,13 | down |
| 5722639 | 7123310 | 1185437 | bone morphogenetic protein 3            | Bmp3  | 25667  | 1,39 | up   |
| 6626251 | 7123310 | 1185438 | bone morphogenetic protein 3            | Bmp3  | 25667  | 1,21 | up   |
| 5940733 | 7123310 | 1185438 | bone morphogenetic protein 3            | Bmp3  | 25667  | 1,21 | up   |
| 6293809 | 7123310 | 1185438 | bone morphogenetic protein 3            | Bmp3  | 25667  | 1,06 | up   |
| 6531494 | 7163498 | 1283411 | bone morphogenetic protein 6            | Bmp6  | 25644  | 2,31 | down |
| 6543591 | 7163498 | 1283409 | bone morphogenetic protein 6            | Bmp6  | 25644  | 1,85 | up   |
| 5981693 | 7163498 | 1283410 | bone morphogenetic protein 6            | Bmp6  | 25644  | 1,78 | up   |
| 6296252 | 7163498 | 1283414 | bone morphogenetic protein 6            | Bmp6  | 25644  | 1,62 | down |
| 5618854 | 7163498 | 1283414 | bone morphogenetic protein 6            | Bmp6  | 25644  | 1,57 | down |
| 5929060 | 7163498 | 1283413 | bone morphogenetic protein 6            | Bmp6  | 25644  | 1,39 | up   |
| 5895656 | 7163498 | 1283414 | bone morphogenetic protein 6            | Bmp6  | 25644  | 1,37 | down |
| 6066129 | 7163498 | 1283412 | bone morphogenetic protein 6            | Bmp6  | 25644  | 1,12 | down |
| 6726255 | 7163498 | 1283414 | bone morphogenetic protein 6            | Bmp6  | 25644  | 1,07 | up   |
| 5978684 | 7290814 | 1598679 | bone morphogenetic protein 8a           | Bmp8a | 680931 | 2,20 | up   |
| 6644159 | 7290814 | 1598679 | bone morphogenetic protein 8a           | Bmp8a | 680931 | 1,72 | up   |
| 5847006 | 7290814 | 1598679 | bone morphogenetic protein 8a           | Bmp8a | 680931 | 1,44 | down |
| 5885308 | 7290814 | 1598672 | bone morphogenetic protein 8a           | Bmp8a | 680931 | 1,37 | down |
| 6143620 | 7290814 | 1598672 | bone morphogenetic protein 8a           | Bmp8a | 680931 | 1,26 | up   |
| 6268744 | 7290814 | 1598675 | bone morphogenetic protein 8a           | Bmp8a | 680931 | 1,24 | down |
| 6675402 | 7290814 | 1598679 | bone morphogenetic protein 8a           | Bmp8a | 680931 | 1,21 | up   |
| 6440188 | 7290814 | 1598679 | bone morphogenetic protein 8a           | Bmp8a | 680931 | 1,09 | down |
| 6663444 | 7290814 | 1598671 | bone morphogenetic protein 8a           | Bmp8a | 680931 | 1,09 | up   |
| 6056078 | 7290814 | 1598665 | bone morphogenetic protein 8a           | Bmp8a | 680931 | 1,06 | down |
| 6068501 | 7290814 | 1598665 | bone morphogenetic protein 8a           | Bmp8a | 680931 | 1,03 | up   |
| 5711099 | 7290814 | 1598670 | bone morphogenetic protein 8a           | Bmp8a | 680931 | 1,01 | up   |
| 6046198 | 7290814 | 1598679 | bone morphogenetic protein 8a           | Bmp8a | 680931 | 1,01 | up   |
| 6585948 | 7290814 | 1598676 | bone morphogenetic protein 8a           | Bmp8a | 680931 | 1,01 | up   |
| 6185618 | 7318084 | 1667933 | brain-specific angiogenesis inhibitor 1 | Bai1  | 362931 | 2,16 | up   |
| 5692228 | 7318084 | 1667935 | brain-specific angiogenesis inhibitor 1 | Bai1  | 362931 | 1,59 | up   |
| 6165519 | 7318084 | 1667910 | brain-specific angiogenesis inhibitor 1 | Bai1  | 362931 | 1,58 | down |
| 6613687 | 7318084 | 1667939 | brain-specific angiogenesis inhibitor 1 | Bai1  | 362931 | 1,57 | down |
| 6709504 | 7318084 | 1667925 | brain-specific angiogenesis inhibitor 1 | Bai1  | 362931 | 1,56 | down |
| 6701901 | 7318084 | 1667908 | brain-specific angiogenesis inhibitor 1 | Bai1  | 362931 | 1,53 | down |
| 5719931 | 7318084 | 1667939 | brain-specific angiogenesis inhibitor 1 | Bai1  | 362931 | 1,52 | down |
| 6240142 | 7318084 | 1667942 | brain-specific angiogenesis inhibitor 1 | Bai1  | 362931 | 1,47 | up   |
| 6219326 | 7318084 | 1667904 | brain-specific angiogenesis inhibitor 1 | Bai1  | 362931 | 1,43 | down |
| 6476639 | 7318084 | 1667939 | brain-specific angiogenesis inhibitor 1 | Bai1  | 362931 | 1,40 | down |
| 5696011 | 7318084 | 1667937 | brain-specific angiogenesis inhibitor 1 | Bai1  | 362931 | 1,39 | down |
| 6459180 | 7318084 | 1667902 | brain-specific angiogenesis inhibitor 1 | Bai1  | 362931 | 1,39 | up   |
| 6649946 | 7318084 | 1667938 | brain-specific angiogenesis inhibitor 1 | Bai1  | 362931 | 1,38 | down |
| 6203159 | 7318084 | 1667918 | brain-specific angiogenesis inhibitor 1 | Bai1  | 362931 | 1,30 | up   |

|         |         |         |                                              |       |        |      |      |
|---------|---------|---------|----------------------------------------------|-------|--------|------|------|
| 5856147 | 7318084 | 1667909 | brain-specific angiogenesis inhibitor 1      | Bai1  | 362931 | 1,30 | down |
| 5932026 | 7318084 | 1667913 | brain-specific angiogenesis inhibitor 1      | Bai1  | 362931 | 1,28 | up   |
| 6482767 | 7318084 | 1667905 | brain-specific angiogenesis inhibitor 1      | Bai1  | 362931 | 1,27 | up   |
| 6521770 | 7318084 | 1667917 | brain-specific angiogenesis inhibitor 1      | Bai1  | 362931 | 1,26 | up   |
| 6525420 | 7318084 | 1667908 | brain-specific angiogenesis inhibitor 1      | Bai1  | 362931 | 1,24 | up   |
| 6706613 | 7318084 | 1667932 | brain-specific angiogenesis inhibitor 1      | Bai1  | 362931 | 1,24 | down |
| 6248599 | 7318084 | 1667912 | brain-specific angiogenesis inhibitor 1      | Bai1  | 362931 | 1,22 | down |
| 5665277 | 7318084 | 1667942 | brain-specific angiogenesis inhibitor 1      | Bai1  | 362931 | 1,19 | up   |
| 5903853 | 7318084 | 1667940 | brain-specific angiogenesis inhibitor 1      | Bai1  | 362931 | 1,17 | down |
| 6561261 | 7318084 | 1667931 | brain-specific angiogenesis inhibitor 1      | Bai1  | 362931 | 1,17 | up   |
| 5629500 | 7318084 | 1667941 | brain-specific angiogenesis inhibitor 1      | Bai1  | 362931 | 1,16 | down |
| 6259944 | 7318084 | 1667929 | brain-specific angiogenesis inhibitor 1      | Bai1  | 362931 | 1,11 | down |
| 5948892 | 7318084 | 1667934 | brain-specific angiogenesis inhibitor 1      | Bai1  | 362931 | 1,11 | down |
| 5677735 | 7318084 | 1667906 | brain-specific angiogenesis inhibitor 1      | Bai1  | 362931 | 1,09 | up   |
| 6343226 | 7318084 | 1667915 | brain-specific angiogenesis inhibitor 1      | Bai1  | 362931 | 1,07 | down |
| 6213701 | 7318084 | 1667930 | brain-specific angiogenesis inhibitor 1      | Bai1  | 362931 | 1,07 | up   |
| 6193204 | 7318084 | 1667914 | brain-specific angiogenesis inhibitor 1      | Bai1  | 362931 | 1,05 | down |
| 5764004 | 7318084 | 1667907 | brain-specific angiogenesis inhibitor 1      | Bai1  | 362931 | 1,04 | up   |
| 6346612 | 7318084 | 1667911 | brain-specific angiogenesis inhibitor 1      | Bai1  | 362931 | 1,02 | up   |
| 6320814 | 7318084 | 1667919 | brain-specific angiogenesis inhibitor 1      | Bai1  | 362931 | 1,01 | down |
| 5835184 | 7318084 | 1667927 | brain-specific angiogenesis inhibitor 1      | Bai1  | 362931 | 1,01 | up   |
| 6427637 | 7279881 | 1572745 | brain-specific angiogenesis inhibitor 2      | Bai2  | 313058 | 2,36 | down |
| 6115306 | 7279881 | 1572747 | brain-specific angiogenesis inhibitor 2      | Bai2  | 313058 | 1,77 | down |
| 6009735 | 7279881 | 1572716 | brain-specific angiogenesis inhibitor 2      | Bai2  | 313058 | 1,62 | down |
| 6619332 | 7279881 | 1572742 | brain-specific angiogenesis inhibitor 2      | Bai2  | 313058 | 1,51 | down |
| 6486360 | 7279881 | 1572732 | brain-specific angiogenesis inhibitor 2      | Bai2  | 313058 | 1,44 | down |
| 6658118 | 7279881 | 1572728 | brain-specific angiogenesis inhibitor 2      | Bai2  | 313058 | 1,43 | down |
| 6627103 | 7279881 | 1572716 | brain-specific angiogenesis inhibitor 2      | Bai2  | 313058 | 1,36 | down |
| 5793187 | 7279881 | 1572731 | brain-specific angiogenesis inhibitor 2      | Bai2  | 313058 | 1,35 | down |
| 6582005 | 7279881 | 1572726 | brain-specific angiogenesis inhibitor 2      | Bai2  | 313058 | 1,33 | down |
| 6557309 | 7279881 | 1572729 | brain-specific angiogenesis inhibitor 2      | Bai2  | 313058 | 1,33 | down |
| 6709056 | 7279881 | 1572720 | brain-specific angiogenesis inhibitor 2      | Bai2  | 313058 | 1,33 | down |
| 6066592 | 7279881 | 1572730 | brain-specific angiogenesis inhibitor 2      | Bai2  | 313058 | 1,31 | up   |
| 5895152 | 7279881 | 1572716 | brain-specific angiogenesis inhibitor 2      | Bai2  | 313058 | 1,30 | down |
| 6370572 | 7279881 | 1572738 | brain-specific angiogenesis inhibitor 2      | Bai2  | 313058 | 1,29 | up   |
| 6656478 | 7279881 | 1572721 | brain-specific angiogenesis inhibitor 2      | Bai2  | 313058 | 1,24 | up   |
| 6674694 | 7279881 | 1572736 | brain-specific angiogenesis inhibitor 2      | Bai2  | 313058 | 1,22 | up   |
| 5662188 | 7279881 | 1572737 | brain-specific angiogenesis inhibitor 2      | Bai2  | 313058 | 1,20 | down |
| 5976103 | 7279881 | 1572724 | brain-specific angiogenesis inhibitor 2      | Bai2  | 313058 | 1,19 | down |
| 6627269 | 7279881 | 1572740 | brain-specific angiogenesis inhibitor 2      | Bai2  | 313058 | 1,19 | up   |
| 5963378 | 7279881 | 1572746 | brain-specific angiogenesis inhibitor 2      | Bai2  | 313058 | 1,18 | down |
| 6365374 | 7279881 | 1572738 | brain-specific angiogenesis inhibitor 2      | Bai2  | 313058 | 1,17 | down |
| 6585941 | 7279881 | 1572746 | brain-specific angiogenesis inhibitor 2      | Bai2  | 313058 | 1,17 | up   |
| 6238558 | 7279881 | 1572736 | brain-specific angiogenesis inhibitor 2      | Bai2  | 313058 | 1,17 | down |
| 5636403 | 7279881 | 1572723 | brain-specific angiogenesis inhibitor 2      | Bai2  | 313058 | 1,16 | up   |
| 6700090 | 7279881 | 1572744 | brain-specific angiogenesis inhibitor 2      | Bai2  | 313058 | 1,16 | up   |
| 5829650 | 7279881 | 1572734 | brain-specific angiogenesis inhibitor 2      | Bai2  | 313058 | 1,13 | down |
| 5938534 | 7279881 | 1572722 | brain-specific angiogenesis inhibitor 2      | Bai2  | 313058 | 1,11 | down |
| 6552665 | 7279881 | 1572719 | brain-specific angiogenesis inhibitor 2      | Bai2  | 313058 | 1,11 | up   |
| 6432046 | 7279881 | 1572736 | brain-specific angiogenesis inhibitor 2      | Bai2  | 313058 | 1,10 | down |
| 6463420 | 7279881 | 1572729 | brain-specific angiogenesis inhibitor 2      | Bai2  | 313058 | 1,09 | up   |
| 5648745 | 7279881 | 1572741 | brain-specific angiogenesis inhibitor 2      | Bai2  | 313058 | 1,07 | down |
| 6385731 | 7279881 | 1572733 | brain-specific angiogenesis inhibitor 2      | Bai2  | 313058 | 1,06 | up   |
| 6686149 | 7279881 | 1572727 | brain-specific angiogenesis inhibitor 2      | Bai2  | 313058 | 1,04 | up   |
| 6739885 | 7279881 | 1572725 | brain-specific angiogenesis inhibitor 2      | Bai2  | 313058 | 1,03 | down |
| 6056548 | 7279881 | 1572743 | brain-specific angiogenesis inhibitor 2      | Bai2  | 313058 | 1,01 | up   |
| 5850843 | 7271115 | 1550299 | branched chain aminotransferase 1, cytosolic | Bcat1 | 29592  | 8,74 | down |

|         |         |         |                                                |        |        |      |      |
|---------|---------|---------|------------------------------------------------|--------|--------|------|------|
| 6307065 | 7271115 | 1550298 | branched chain aminotransferase 1, cytosolic   | Bcat1  | 29592  | 3,58 | down |
| 6629637 | 7271115 | 1550289 | branched chain aminotransferase 1, cytosolic   | Bcat1  | 29592  | 1,43 | down |
| 6093308 | 7271115 | 1550295 | branched chain aminotransferase 1, cytosolic   | Bcat1  | 29592  | 1,30 | up   |
| 6145812 | 7271115 | 1550293 | branched chain aminotransferase 1, cytosolic   | Bcat1  | 29592  | 1,25 | up   |
| 5885046 | 7271115 | 1550296 | branched chain aminotransferase 1, cytosolic   | Bcat1  | 29592  | 1,23 | up   |
| 6742745 | 7271115 | 1550290 | branched chain aminotransferase 1, cytosolic   | Bcat1  | 29592  | 1,22 | up   |
| 6264997 | 7271115 | 1550289 | branched chain aminotransferase 1, cytosolic   | Bcat1  | 29592  | 1,21 | up   |
| 5951501 | 7271115 | 1550289 | branched chain aminotransferase 1, cytosolic   | Bcat1  | 29592  | 1,17 | down |
| 6321141 | 7271115 | 1550294 | branched chain aminotransferase 1, cytosolic   | Bcat1  | 29592  | 1,14 | down |
| 6274057 | 7271115 | 1550289 | branched chain aminotransferase 1, cytosolic   | Bcat1  | 29592  | 1,13 | up   |
| 6558376 | 7271115 | 1550291 | branched chain aminotransferase 1, cytosolic   | Bcat1  | 29592  | 1,09 | down |
| 6416046 | 7271115 | 1550297 | branched chain aminotransferase 1, cytosolic   | Bcat1  | 29592  | 1,09 | down |
| 6001757 | 7271115 | 1550292 | branched chain aminotransferase 1, cytosolic   | Bcat1  | 29592  | 1,07 | up   |
| 5846101 | 7271115 | 1550297 | branched chain aminotransferase 1, cytosolic   | Bcat1  | 29592  | 1,01 | up   |
| 6370142 | 7070668 | 1057890 | breast carcinoma amplified sequence 3          | Bcas3  | 363662 | 2,23 | up   |
| 6260411 | 7070668 | 1057888 | breast carcinoma amplified sequence 3          | Bcas3  | 363662 | 1,60 | up   |
| 6281672 | 7070668 | 1057906 | breast carcinoma amplified sequence 3          | Bcas3  | 363662 | 1,57 | down |
| 6546301 | 7070668 | 1057900 | breast carcinoma amplified sequence 3          | Bcas3  | 363662 | 1,45 | down |
| 6575637 | 7070668 | 1057893 | breast carcinoma amplified sequence 3          | Bcas3  | 363662 | 1,41 | down |
| 5902019 | 7070668 | 1057891 | breast carcinoma amplified sequence 3          | Bcas3  | 363662 | 1,39 | up   |
| 6539885 | 7070668 | 1057901 | breast carcinoma amplified sequence 3          | Bcas3  | 363662 | 1,30 | down |
| 6474626 | 7070668 | 1057906 | breast carcinoma amplified sequence 3          | Bcas3  | 363662 | 1,30 | up   |
| 6541836 | 7070668 | 1057918 | breast carcinoma amplified sequence 3          | Bcas3  | 363662 | 1,27 | down |
| 6420861 | 7070668 | 1057908 | breast carcinoma amplified sequence 3          | Bcas3  | 363662 | 1,22 | down |
| 6077659 | 7070668 | 1057892 | breast carcinoma amplified sequence 3          | Bcas3  | 363662 | 1,21 | up   |
| 5634160 | 7070668 | 1057916 | breast carcinoma amplified sequence 3          | Bcas3  | 363662 | 1,21 | down |
| 6503621 | 7070668 | 1057911 | breast carcinoma amplified sequence 3          | Bcas3  | 363662 | 1,19 | down |
| 5902554 | 7070668 | 1057895 | breast carcinoma amplified sequence 3          | Bcas3  | 363662 | 1,19 | down |
| 6738595 | 7070668 | 1057913 | breast carcinoma amplified sequence 3          | Bcas3  | 363662 | 1,12 | up   |
| 6376616 | 7070668 | 1057918 | breast carcinoma amplified sequence 3          | Bcas3  | 363662 | 1,08 | down |
| 5760064 | 7070668 | 1057910 | breast carcinoma amplified sequence 3          | Bcas3  | 363662 | 1,06 | down |
| 6625619 | 7070668 | 1057912 | breast carcinoma amplified sequence 3          | Bcas3  | 363662 | 1,03 | up   |
| 6399569 | 7101860 | 1132306 | Bri3 binding protein                           | Bri3bp | 498176 | 2,24 | down |
| 5626665 | 7101860 | 1132306 | Bri3 binding protein                           | Bri3bp | 498176 | 1,20 | down |
| 6303083 | 7101860 | 1132304 | Bri3 binding protein                           | Bri3bp | 498176 | 1,18 | up   |
| 6370200 | 7101860 | 1132303 | Bri3 binding protein                           | Bri3bp | 498176 | 1,10 | up   |
| 6299930 | 7101860 | 1132304 | Bri3 binding protein                           | Bri3bp | 498176 | 1,07 | up   |
| 6710295 | 7101860 | 1132305 | Bri3 binding protein                           | Bri3bp | 498176 | 1,04 | up   |
| 6711279 | 7101860 | 1132306 | Bri3 binding protein                           | Bri3bp | 498176 | 1,02 | up   |
| 6340373 | 7223833 | 1431973 | brix domain containing 1                       | Bxdc1  | 294436 | 2,02 | up   |
| 5927627 | 7223833 | 1431972 | brix domain containing 1                       | Bxdc1  | 294436 | 1,91 | down |
| 6243050 | 7223833 | 1431979 | brix domain containing 1                       | Bxdc1  | 294436 | 1,52 | up   |
| 5995217 | 7223833 | 1431974 | brix domain containing 1                       | Bxdc1  | 294436 | 1,48 | up   |
| 6119996 | 7223833 | 1431982 | brix domain containing 1                       | Bxdc1  | 294436 | 1,38 | down |
| 5909179 | 7223833 | 1431977 | brix domain containing 1                       | Bxdc1  | 294436 | 1,35 | up   |
| 6003949 | 7223833 | 1431978 | brix domain containing 1                       | Bxdc1  | 294436 | 1,24 | down |
| 5730934 | 7223833 | 1431974 | brix domain containing 1                       | Bxdc1  | 294436 | 1,22 | down |
| 5689101 | 7223833 | 1431983 | brix domain containing 1                       | Bxdc1  | 294436 | 1,18 | down |
| 6693014 | 7223833 | 1431981 | brix domain containing 1                       | Bxdc1  | 294436 | 1,09 | up   |
| 5735292 | 7223833 | 1431980 | brix domain containing 1                       | Bxdc1  | 294436 | 1,09 | up   |
| 6446595 | 7231557 | 1451561 | bromo adjacent homology domain containing 1    | Bahd1  | 362194 | 1,32 | down |
| 6501407 | 7231557 | 1451570 | bromo adjacent homology domain containing 1    | Bahd1  | 362194 | 1,31 | up   |
| 5936307 | 7239303 | 1471978 | bromodomain adjacent to zinc finger domain, 2B | Baz2b  | 317627 | 2,18 | down |
| 6694701 | 7239303 | 1471985 | bromodomain adjacent to zinc finger domain, 2B | Baz2b  | 317627 | 1,91 | down |
| 6593717 | 7239303 | 1471964 | bromodomain adjacent to zinc finger domain, 2B | Baz2b  | 317627 | 1,86 | down |
| 6140693 | 7239303 | 1472001 | bromodomain adjacent to zinc finger domain, 2B | Baz2b  | 317627 | 1,74 | up   |
| 6741302 | 7239303 | 1471979 | bromodomain adjacent to zinc finger domain, 2B | Baz2b  | 317627 | 1,73 | down |

|         |         |         |                                                |       |        |      |      |
|---------|---------|---------|------------------------------------------------|-------|--------|------|------|
| 5906573 | 7239303 | 1471943 | bromodomain adjacent to zinc finger domain, 2B | Baz2b | 317627 | 1,57 | up   |
| 6738275 | 7239303 | 1471946 | bromodomain adjacent to zinc finger domain, 2B | Baz2b | 317627 | 1,52 | up   |
| 6489429 | 7239303 | 1471953 | bromodomain adjacent to zinc finger domain, 2B | Baz2b | 317627 | 1,47 | up   |
| 6280723 | 7239303 | 1471940 | bromodomain adjacent to zinc finger domain, 2B | Baz2b | 317627 | 1,39 | up   |
| 5817435 | 7239303 | 1471997 | bromodomain adjacent to zinc finger domain, 2B | Baz2b | 317627 | 1,38 | up   |
| 6043280 | 7239303 | 1471973 | bromodomain adjacent to zinc finger domain, 2B | Baz2b | 317627 | 1,34 | up   |
| 6111497 | 7239303 | 1471956 | bromodomain adjacent to zinc finger domain, 2B | Baz2b | 317627 | 1,34 | down |
| 5705248 | 7239303 | 1471942 | bromodomain adjacent to zinc finger domain, 2B | Baz2b | 317627 | 1,33 | up   |
| 6580013 | 7239303 | 1471965 | bromodomain adjacent to zinc finger domain, 2B | Baz2b | 317627 | 1,32 | down |
| 5774419 | 7239303 | 1471945 | bromodomain adjacent to zinc finger domain, 2B | Baz2b | 317627 | 1,31 | down |
| 5723666 | 7239303 | 1471943 | bromodomain adjacent to zinc finger domain, 2B | Baz2b | 317627 | 1,30 | up   |
| 5882248 | 7239303 | 1471954 | bromodomain adjacent to zinc finger domain, 2B | Baz2b | 317627 | 1,27 | down |
| 6346385 | 7239303 | 1471986 | bromodomain adjacent to zinc finger domain, 2B | Baz2b | 317627 | 1,27 | up   |
| 5919833 | 7239303 | 1471970 | bromodomain adjacent to zinc finger domain, 2B | Baz2b | 317627 | 1,26 | down |
| 6438114 | 7239303 | 1471947 | bromodomain adjacent to zinc finger domain, 2B | Baz2b | 317627 | 1,25 | up   |
| 6422632 | 7239303 | 1471977 | bromodomain adjacent to zinc finger domain, 2B | Baz2b | 317627 | 1,25 | up   |
| 6577813 | 7239303 | 1471978 | bromodomain adjacent to zinc finger domain, 2B | Baz2b | 317627 | 1,24 | down |
| 6413010 | 7239303 | 1471938 | bromodomain adjacent to zinc finger domain, 2B | Baz2b | 317627 | 1,22 | up   |
| 6128006 | 7239303 | 1471957 | bromodomain adjacent to zinc finger domain, 2B | Baz2b | 317627 | 1,20 | up   |
| 6375957 | 7239303 | 1471947 | bromodomain adjacent to zinc finger domain, 2B | Baz2b | 317627 | 1,19 | down |
| 6503631 | 7239303 | 1471972 | bromodomain adjacent to zinc finger domain, 2B | Baz2b | 317627 | 1,19 | up   |
| 5900907 | 7239303 | 1471974 | bromodomain adjacent to zinc finger domain, 2B | Baz2b | 317627 | 1,19 | down |
| 5812815 | 7239303 | 1471948 | bromodomain adjacent to zinc finger domain, 2B | Baz2b | 317627 | 1,19 | up   |
| 6696047 | 7239303 | 1471969 | bromodomain adjacent to zinc finger domain, 2B | Baz2b | 317627 | 1,19 | up   |
| 6009995 | 7239303 | 1471978 | bromodomain adjacent to zinc finger domain, 2B | Baz2b | 317627 | 1,18 | down |
| 6231894 | 7239303 | 1471952 | bromodomain adjacent to zinc finger domain, 2B | Baz2b | 317627 | 1,18 | up   |
| 6456359 | 7239303 | 1471958 | bromodomain adjacent to zinc finger domain, 2B | Baz2b | 317627 | 1,17 | up   |
| 5845876 | 7239303 | 1471952 | bromodomain adjacent to zinc finger domain, 2B | Baz2b | 317627 | 1,14 | up   |
| 6178408 | 7239303 | 1471941 | bromodomain adjacent to zinc finger domain, 2B | Baz2b | 317627 | 1,14 | up   |
| 6040759 | 7239303 | 1471959 | bromodomain adjacent to zinc finger domain, 2B | Baz2b | 317627 | 1,11 | up   |
| 5819111 | 7239303 | 1471951 | bromodomain adjacent to zinc finger domain, 2B | Baz2b | 317627 | 1,11 | down |
| 6142509 | 7239303 | 1471971 | bromodomain adjacent to zinc finger domain, 2B | Baz2b | 317627 | 1,09 | down |
| 6298048 | 7239303 | 1471966 | bromodomain adjacent to zinc finger domain, 2B | Baz2b | 317627 | 1,09 | up   |
| 6454346 | 7239303 | 1471973 | bromodomain adjacent to zinc finger domain, 2B | Baz2b | 317627 | 1,08 | up   |
| 5851111 | 7239303 | 1471947 | bromodomain adjacent to zinc finger domain, 2B | Baz2b | 317627 | 1,07 | down |
| 6598532 | 7239303 | 1471949 | bromodomain adjacent to zinc finger domain, 2B | Baz2b | 317627 | 1,07 | down |
| 5826766 | 7239303 | 1471952 | bromodomain adjacent to zinc finger domain, 2B | Baz2b | 317627 | 1,06 | down |
| 6655942 | 7239303 | 1471992 | bromodomain adjacent to zinc finger domain, 2B | Baz2b | 317627 | 1,06 | up   |
| 5828270 | 7239303 | 1471974 | bromodomain adjacent to zinc finger domain, 2B | Baz2b | 317627 | 1,04 | down |
| 5764567 | 7239303 | 1471950 | bromodomain adjacent to zinc finger domain, 2B | Baz2b | 317627 | 1,04 | up   |
| 5797951 | 7239303 | 1471942 | bromodomain adjacent to zinc finger domain, 2B | Baz2b | 317627 | 1,04 | up   |
| 6051355 | 7239303 | 1471966 | bromodomain adjacent to zinc finger domain, 2B | Baz2b | 317627 | 1,04 | down |
| 6539006 | 7239303 | 1471955 | bromodomain adjacent to zinc finger domain, 2B | Baz2b | 317627 | 1,03 | up   |
| 6405919 | 7239303 | 1471975 | bromodomain adjacent to zinc finger domain, 2B | Baz2b | 317627 | 1,03 | down |
| 5784542 | 7239303 | 1471939 | bromodomain adjacent to zinc finger domain, 2B | Baz2b | 317627 | 1,02 | down |
| 6296866 | 7239303 | 1471962 | bromodomain adjacent to zinc finger domain, 2B | Baz2b | 317627 | 1,01 | up   |
| 6364256 | 7330582 | 1696866 | bromodomain containing 1                       | Brd1  | 315210 | 1,96 | down |
| 6486867 | 7330582 | 1696867 | bromodomain containing 1                       | Brd1  | 315210 | 1,32 | down |
| 6539165 | 7330582 | 1696868 | bromodomain containing 1                       | Brd1  | 315210 | 1,28 | up   |
| 6020601 | 7330582 | 1696864 | bromodomain containing 1                       | Brd1  | 315210 | 1,26 | down |
| 5970249 | 7330582 | 1696871 | bromodomain containing 1                       | Brd1  | 315210 | 1,25 | up   |
| 5944797 | 7330582 | 1696860 | bromodomain containing 1                       | Brd1  | 315210 | 1,20 | down |
| 6261988 | 7330582 | 1696859 | bromodomain containing 1                       | Brd1  | 315210 | 1,18 | down |
| 6495640 | 7330582 | 1696871 | bromodomain containing 1                       | Brd1  | 315210 | 1,17 | up   |
| 6485201 | 7330582 | 1696858 | bromodomain containing 1                       | Brd1  | 315210 | 1,10 | up   |
| 5996764 | 7330582 | 1696862 | bromodomain containing 1                       | Brd1  | 315210 | 1,09 | down |
| 5690971 | 7330582 | 1696865 | bromodomain containing 1                       | Brd1  | 315210 | 1,07 | up   |

|         |         |         |                                                |         |        |      |      |
|---------|---------|---------|------------------------------------------------|---------|--------|------|------|
| 6442256 | 7330582 | 1696869 | bromodomain containing 1                       | Brd1    | 315210 | 1,06 | up   |
| 5823694 | 7330582 | 1696861 | bromodomain containing 1                       | Brd1    | 315210 | 1,04 | down |
| 6578599 | 7330582 | 1696858 | bromodomain containing 1                       | Brd1    | 315210 | 1,01 | down |
| 6293111 | 7312250 | 1652649 | bruno-like 5, RNA binding protein (Drosophila) | Brunol5 | 314647 | 2,28 | down |
| 5756488 | 7312250 | 1652654 | bruno-like 5, RNA binding protein (Drosophila) | Brunol5 | 314647 | 1,91 | down |
| 5920059 | 7312250 | 1652654 | bruno-like 5, RNA binding protein (Drosophila) | Brunol5 | 314647 | 1,71 | down |
| 6292017 | 7312250 | 1652645 | bruno-like 5, RNA binding protein (Drosophila) | Brunol5 | 314647 | 1,67 | up   |
| 6397179 | 7312250 | 1652640 | bruno-like 5, RNA binding protein (Drosophila) | Brunol5 | 314647 | 1,57 | up   |
| 6054101 | 7312250 | 1652651 | bruno-like 5, RNA binding protein (Drosophila) | Brunol5 | 314647 | 1,54 | down |
| 5974749 | 7312250 | 1652643 | bruno-like 5, RNA binding protein (Drosophila) | Brunol5 | 314647 | 1,36 | up   |
| 6341287 | 7312250 | 1652650 | bruno-like 5, RNA binding protein (Drosophila) | Brunol5 | 314647 | 1,36 | up   |
| 5960988 | 7312250 | 1652653 | bruno-like 5, RNA binding protein (Drosophila) | Brunol5 | 314647 | 1,31 | down |
| 6657968 | 7312250 | 1652646 | bruno-like 5, RNA binding protein (Drosophila) | Brunol5 | 314647 | 1,26 | up   |
| 5953566 | 7312250 | 1652652 | bruno-like 5, RNA binding protein (Drosophila) | Brunol5 | 314647 | 1,25 | up   |
| 5898600 | 7312250 | 1652647 | bruno-like 5, RNA binding protein (Drosophila) | Brunol5 | 314647 | 1,23 | down |
| 6490835 | 7312250 | 1652648 | bruno-like 5, RNA binding protein (Drosophila) | Brunol5 | 314647 | 1,15 | up   |
| 6202020 | 7312250 | 1652644 | bruno-like 5, RNA binding protein (Drosophila) | Brunol5 | 314647 | 1,13 | up   |
| 6159141 | 7312250 | 1652655 | bruno-like 5, RNA binding protein (Drosophila) | Brunol5 | 314647 | 1,12 | up   |
| 6624171 | 7312250 | 1652641 | bruno-like 5, RNA binding protein (Drosophila) | Brunol5 | 314647 | 1,04 | down |
| 6030109 | 7312250 | 1652651 | bruno-like 5, RNA binding protein (Drosophila) | Brunol5 | 314647 | 1,00 | down |
| 6081143 | 7053714 | 1018007 | BTB (POZ) domain containing 1                  | Btbd1   | 293060 | 2,04 | up   |
| 6712100 | 7053714 | 1018007 | BTB (POZ) domain containing 1                  | Btbd1   | 293060 | 1,31 | up   |
| 6688936 | 7053714 | 1018003 | BTB (POZ) domain containing 1                  | Btbd1   | 293060 | 1,29 | down |
| 6239838 | 7053714 | 1018005 | BTB (POZ) domain containing 1                  | Btbd1   | 293060 | 1,24 | down |
| 5915414 | 7053714 | 1017999 | BTB (POZ) domain containing 1                  | Btbd1   | 293060 | 1,23 | up   |
| 6557803 | 7053714 | 1018006 | BTB (POZ) domain containing 1                  | Btbd1   | 293060 | 1,16 | down |
| 6549250 | 7053714 | 1018001 | BTB (POZ) domain containing 1                  | Btbd1   | 293060 | 1,13 | down |
| 5665394 | 7053714 | 1018002 | BTB (POZ) domain containing 1                  | Btbd1   | 293060 | 1,08 | down |
| 6247196 | 7053714 | 1018000 | BTB (POZ) domain containing 1                  | Btbd1   | 293060 | 1,02 | down |
| 6517670 | 7053714 | 1018004 | BTB (POZ) domain containing 1                  | Btbd1   | 293060 | 1,01 | down |
| 6601457 | 7053714 | 1018003 | BTB (POZ) domain containing 1                  | Btbd1   | 293060 | 1,01 | down |
| 5955462 | 7037442 | 979079  | BTB (POZ) domain containing 16                 | Btbd16  | 361658 | 2,20 | up   |
| 6275944 | 7037442 | 979087  | BTB (POZ) domain containing 16                 | Btbd16  | 361658 | 2,04 | down |
| 6155482 | 7037442 | 979081  | BTB (POZ) domain containing 16                 | Btbd16  | 361658 | 1,67 | down |
| 6253615 | 7037442 | 979082  | BTB (POZ) domain containing 16                 | Btbd16  | 361658 | 1,64 | down |
| 6359342 | 7037442 | 979076  | BTB (POZ) domain containing 16                 | Btbd16  | 361658 | 1,47 | up   |
| 5889266 | 7037442 | 979080  | BTB (POZ) domain containing 16                 | Btbd16  | 361658 | 1,47 | up   |
| 5684054 | 7037442 | 979084  | BTB (POZ) domain containing 16                 | Btbd16  | 361658 | 1,42 | up   |
| 6412164 | 7037442 | 979083  | BTB (POZ) domain containing 16                 | Btbd16  | 361658 | 1,35 | down |
| 6634191 | 7037442 | 979086  | BTB (POZ) domain containing 16                 | Btbd16  | 361658 | 1,34 | up   |
| 6222962 | 7037442 | 979090  | BTB (POZ) domain containing 16                 | Btbd16  | 361658 | 1,16 | up   |
| 6110709 | 7037442 | 979077  | BTB (POZ) domain containing 16                 | Btbd16  | 361658 | 1,15 | down |
| 6650281 | 7037442 | 979078  | BTB (POZ) domain containing 16                 | Btbd16  | 361658 | 1,14 | up   |
| 5721548 | 7037442 | 979075  | BTB (POZ) domain containing 16                 | Btbd16  | 361658 | 1,09 | down |
| 5970653 | 7037442 | 979085  | BTB (POZ) domain containing 16                 | Btbd16  | 361658 | 1,08 | down |
| 5888686 | 7037442 | 979089  | BTB (POZ) domain containing 16                 | Btbd16  | 361658 | 1,07 | down |
| 5669739 | 7037442 | 979077  | BTB (POZ) domain containing 16                 | Btbd16  | 361658 | 1,04 | up   |
| 6157601 | 7037442 | 979091  | BTB (POZ) domain containing 16                 | Btbd16  | 361658 | 1,01 | up   |
| 5768162 | 7037442 | 979074  | BTB (POZ) domain containing 16                 | Btbd16  | 361658 | 1,00 | up   |
| 6033262 | 7037442 | 979088  | BTB (POZ) domain containing 16                 | Btbd16  | 361658 | 1,00 | up   |
| 6083729 | 7312465 | 1653055 | BTB (POZ) domain containing 2                  | Btbd2   | 500793 | 1,35 | down |
| 6517587 | 7233106 | 1455663 | BTB (POZ) domain containing 3                  | Btbd3   | 311462 | 2,19 | down |
| 6530143 | 7233106 | 1455663 | BTB (POZ) domain containing 3                  | Btbd3   | 311462 | 1,30 | up   |
| 5812867 | 7233106 | 1455672 | BTB (POZ) domain containing 3                  | Btbd3   | 311462 | 1,25 | down |
| 6691243 | 7233106 | 1455665 | BTB (POZ) domain containing 3                  | Btbd3   | 311462 | 1,09 | down |
| 5698350 | 7233106 | 1455672 | BTB (POZ) domain containing 3                  | Btbd3   | 311462 | 1,08 | down |
| 6697935 | 7233106 | 1455672 | BTB (POZ) domain containing 3                  | Btbd3   | 311462 | 1,03 | up   |

|         |         |         |                                                                     |           |        |      |      |
|---------|---------|---------|---------------------------------------------------------------------|-----------|--------|------|------|
| 6357532 | 7233106 | 1455664 | BTB (POZ) domain containing 3                                       | Btbdb3    | 311462 | 1,02 | down |
| 5828620 | 7086522 | 1093934 | BTB and CNC homology 1, basic leucine zipper transcription factor 1 | Bach1     | 304127 | 3,44 | down |
| 5673865 | 7086522 | 1093950 | BTB and CNC homology 1, basic leucine zipper transcription factor 1 | Bach1     | 304127 | 1,89 | up   |
| 6085597 | 7086522 | 1093950 | BTB and CNC homology 1, basic leucine zipper transcription factor 1 | Bach1     | 304127 | 1,69 | up   |
| 5648037 | 7086522 | 1093940 | BTB and CNC homology 1, basic leucine zipper transcription factor 1 | Bach1     | 304127 | 1,55 | up   |
| 6087978 | 7086522 | 1093942 | BTB and CNC homology 1, basic leucine zipper transcription factor 1 | Bach1     | 304127 | 1,47 | up   |
| 6677173 | 7086522 | 1093943 | BTB and CNC homology 1, basic leucine zipper transcription factor 1 | Bach1     | 304127 | 1,35 | up   |
| 6374432 | 7086522 | 1093940 | BTB and CNC homology 1, basic leucine zipper transcription factor 1 | Bach1     | 304127 | 1,17 | up   |
| 6103678 | 7086522 | 1093933 | BTB and CNC homology 1, basic leucine zipper transcription factor 1 | Bach1     | 304127 | 1,04 | down |
| 5720052 | 7086522 | 1093950 | BTB and CNC homology 1, basic leucine zipper transcription factor 1 | Bach1     | 304127 | 1,00 | up   |
| 6077644 | 7372840 | 1803757 | C1GALT1-specific chaperone 1                                        | C1galt1c1 | 302499 | 1,18 | down |
| 6703400 | 7372840 | 1803758 | C1GALT1-specific chaperone 1                                        | C1galt1c1 | 302499 | 1,17 | up   |
| 6187408 | 7372840 | 1803755 | C1GALT1-specific chaperone 1                                        | C1galt1c1 | 302499 | 1,03 | down |
| 5791956 | 7372840 | 1803754 | C1GALT1-specific chaperone 1                                        | C1galt1c1 | 302499 | 1,02 | up   |
| 6336380 | 7130447 | 1202664 | Ca <sup>++</sup> -dependent secretion activator                     | Cadps     | 26989  | 2,54 | up   |
| 6080595 | 7130447 | 1202684 | Ca <sup>++</sup> -dependent secretion activator                     | Cadps     | 26989  | 1,45 | down |
| 6532734 | 7130447 | 1202689 | Ca <sup>++</sup> -dependent secretion activator                     | Cadps     | 26989  | 1,32 | down |
| 5944343 | 7130447 | 1202680 | Ca <sup>++</sup> -dependent secretion activator                     | Cadps     | 26989  | 1,28 | up   |
| 6364491 | 7130447 | 1202675 | Ca <sup>++</sup> -dependent secretion activator                     | Cadps     | 26989  | 1,28 | up   |
| 5809979 | 7130447 | 1202664 | Ca <sup>++</sup> -dependent secretion activator                     | Cadps     | 26989  | 1,24 | up   |
| 5759125 | 7130447 | 1202686 | Ca <sup>++</sup> -dependent secretion activator                     | Cadps     | 26989  | 1,21 | down |
| 5881431 | 7130447 | 1202673 | Ca <sup>++</sup> -dependent secretion activator                     | Cadps     | 26989  | 1,20 | up   |
| 5771733 | 7130447 | 1202664 | Ca <sup>++</sup> -dependent secretion activator                     | Cadps     | 26989  | 1,20 | down |
| 6586207 | 7130447 | 1202688 | Ca <sup>++</sup> -dependent secretion activator                     | Cadps     | 26989  | 1,19 | down |
| 5884341 | 7130447 | 1202679 | Ca <sup>++</sup> -dependent secretion activator                     | Cadps     | 26989  | 1,17 | down |
| 6227152 | 7130447 | 1202670 | Ca <sup>++</sup> -dependent secretion activator                     | Cadps     | 26989  | 1,15 | down |
| 6283469 | 7130447 | 1202682 | Ca <sup>++</sup> -dependent secretion activator                     | Cadps     | 26989  | 1,14 | down |
| 6192561 | 7130447 | 1202683 | Ca <sup>++</sup> -dependent secretion activator                     | Cadps     | 26989  | 1,14 | up   |
| 6234138 | 7130447 | 1202668 | Ca <sup>++</sup> -dependent secretion activator                     | Cadps     | 26989  | 1,14 | down |
| 6689474 | 7130447 | 1202667 | Ca <sup>++</sup> -dependent secretion activator                     | Cadps     | 26989  | 1,07 | down |
| 6212125 | 7130447 | 1202687 | Ca <sup>++</sup> -dependent secretion activator                     | Cadps     | 26989  | 1,07 | down |
| 5871241 | 7130447 | 1202681 | Ca <sup>++</sup> -dependent secretion activator                     | Cadps     | 26989  | 1,06 | up   |
| 6016621 | 7130447 | 1202665 | Ca <sup>++</sup> -dependent secretion activator                     | Cadps     | 26989  | 1,06 | down |
| 6526515 | 7130447 | 1202674 | Ca <sup>++</sup> -dependent secretion activator                     | Cadps     | 26989  | 1,05 | down |
| 6122071 | 7130447 | 1202671 | Ca <sup>++</sup> -dependent secretion activator                     | Cadps     | 26989  | 1,05 | up   |
| 6002362 | 7130447 | 1202676 | Ca <sup>++</sup> -dependent secretion activator                     | Cadps     | 26989  | 1,05 | up   |
| 5699926 | 7130447 | 1202677 | Ca <sup>++</sup> -dependent secretion activator                     | Cadps     | 26989  | 1,05 | up   |
| 6359257 | 7130447 | 1202684 | Ca <sup>++</sup> -dependent secretion activator                     | Cadps     | 26989  | 1,04 | up   |
| 6621005 | 7130447 | 1202669 | Ca <sup>++</sup> -dependent secretion activator                     | Cadps     | 26989  | 1,04 | up   |
| 6403927 | 7130447 | 1202685 | Ca <sup>++</sup> -dependent secretion activator                     | Cadps     | 26989  | 1,03 | up   |
| 6456891 | 7130447 | 1202666 | Ca <sup>++</sup> -dependent secretion activator                     | Cadps     | 26989  | 1,02 | up   |
| 6220972 | 7130447 | 1202672 | Ca <sup>++</sup> -dependent secretion activator                     | Cadps     | 26989  | 1,01 | down |
| 5823688 | 7130447 | 1202678 | Ca <sup>++</sup> -dependent secretion activator                     | Cadps     | 26989  | 1,01 | down |
| 6070301 | 7222782 | 1429484 | cadherin 23 (otocadherin)                                           | Cdh23     | 114102 | 2,12 | down |
| 5964295 | 7222782 | 1429461 | cadherin 23 (otocadherin)                                           | Cdh23     | 114102 | 1,97 | down |
| 5737606 | 7222782 | 1429453 | cadherin 23 (otocadherin)                                           | Cdh23     | 114102 | 1,79 | down |
| 6026604 | 7222782 | 1429469 | cadherin 23 (otocadherin)                                           | Cdh23     | 114102 | 1,68 | down |
| 5806706 | 7222782 | 1429483 | cadherin 23 (otocadherin)                                           | Cdh23     | 114102 | 1,64 | down |
| 6380614 | 7222782 | 1429463 | cadherin 23 (otocadherin)                                           | Cdh23     | 114102 | 1,63 | down |
| 6021125 | 7222782 | 1429454 | cadherin 23 (otocadherin)                                           | Cdh23     | 114102 | 1,59 | down |
| 6376445 | 7222782 | 1429474 | cadherin 23 (otocadherin)                                           | Cdh23     | 114102 | 1,59 | up   |
| 5848260 | 7222782 | 1429478 | cadherin 23 (otocadherin)                                           | Cdh23     | 114102 | 1,57 | up   |
| 6155929 | 7222782 | 1429467 | cadherin 23 (otocadherin)                                           | Cdh23     | 114102 | 1,57 | up   |
| 5799623 | 7222782 | 1429480 | cadherin 23 (otocadherin)                                           | Cdh23     | 114102 | 1,54 | down |
| 6242523 | 7222782 | 1429438 | cadherin 23 (otocadherin)                                           | Cdh23     | 114102 | 1,50 | up   |
| 5968991 | 7222782 | 1429456 | cadherin 23 (otocadherin)                                           | Cdh23     | 114102 | 1,50 | up   |
| 5834131 | 7222782 | 1429464 | cadherin 23 (otocadherin)                                           | Cdh23     | 114102 | 1,50 | up   |

|         |         |         |                                            |       |        |      |      |
|---------|---------|---------|--------------------------------------------|-------|--------|------|------|
| 6165875 | 7222782 | 1429425 | cadherin 23 (otocadherin)                  | Cdh23 | 114102 | 1,49 | down |
| 6282912 | 7222782 | 1429445 | cadherin 23 (otocadherin)                  | Cdh23 | 114102 | 1,47 | down |
| 6085000 | 7222782 | 1429421 | cadherin 23 (otocadherin)                  | Cdh23 | 114102 | 1,41 | down |
| 6425945 | 7222782 | 1429462 | cadherin 23 (otocadherin)                  | Cdh23 | 114102 | 1,38 | up   |
| 5948700 | 7222782 | 1429468 | cadherin 23 (otocadherin)                  | Cdh23 | 114102 | 1,37 | down |
| 5715901 | 7222782 | 1429437 | cadherin 23 (otocadherin)                  | Cdh23 | 114102 | 1,36 | down |
| 6464213 | 7222782 | 1429481 | cadherin 23 (otocadherin)                  | Cdh23 | 114102 | 1,34 | up   |
| 6032949 | 7222782 | 1429423 | cadherin 23 (otocadherin)                  | Cdh23 | 114102 | 1,33 | up   |
| 6702520 | 7222782 | 1429487 | cadherin 23 (otocadherin)                  | Cdh23 | 114102 | 1,30 | up   |
| 6110109 | 7222782 | 1429457 | cadherin 23 (otocadherin)                  | Cdh23 | 114102 | 1,27 | down |
| 6703988 | 7222782 | 1429447 | cadherin 23 (otocadherin)                  | Cdh23 | 114102 | 1,26 | down |
| 6026895 | 7222782 | 1429424 | cadherin 23 (otocadherin)                  | Cdh23 | 114102 | 1,22 | down |
| 5836701 | 7222782 | 1429485 | cadherin 23 (otocadherin)                  | Cdh23 | 114102 | 1,22 | down |
| 5975830 | 7222782 | 1429466 | cadherin 23 (otocadherin)                  | Cdh23 | 114102 | 1,22 | down |
| 6405983 | 7222782 | 1429470 | cadherin 23 (otocadherin)                  | Cdh23 | 114102 | 1,22 | down |
| 6245745 | 7222782 | 1429448 | cadherin 23 (otocadherin)                  | Cdh23 | 114102 | 1,21 | down |
| 6251185 | 7222782 | 1429433 | cadherin 23 (otocadherin)                  | Cdh23 | 114102 | 1,21 | down |
| 5789249 | 7222782 | 1429446 | cadherin 23 (otocadherin)                  | Cdh23 | 114102 | 1,19 | up   |
| 6591101 | 7222782 | 1429443 | cadherin 23 (otocadherin)                  | Cdh23 | 114102 | 1,19 | down |
| 6111243 | 7222782 | 1429459 | cadherin 23 (otocadherin)                  | Cdh23 | 114102 | 1,18 | down |
| 6044630 | 7222782 | 1429471 | cadherin 23 (otocadherin)                  | Cdh23 | 114102 | 1,17 | down |
| 6071385 | 7222782 | 1429465 | cadherin 23 (otocadherin)                  | Cdh23 | 114102 | 1,17 | up   |
| 6289394 | 7222782 | 1429476 | cadherin 23 (otocadherin)                  | Cdh23 | 114102 | 1,17 | down |
| 6595248 | 7222782 | 1429426 | cadherin 23 (otocadherin)                  | Cdh23 | 114102 | 1,15 | down |
| 6654631 | 7222782 | 1429432 | cadherin 23 (otocadherin)                  | Cdh23 | 114102 | 1,13 | down |
| 5938675 | 7222782 | 1429442 | cadherin 23 (otocadherin)                  | Cdh23 | 114102 | 1,13 | down |
| 6196507 | 7222782 | 1429450 | cadherin 23 (otocadherin)                  | Cdh23 | 114102 | 1,11 | down |
| 6285954 | 7222782 | 1429458 | cadherin 23 (otocadherin)                  | Cdh23 | 114102 | 1,11 | up   |
| 5939591 | 7222782 | 1429479 | cadherin 23 (otocadherin)                  | Cdh23 | 114102 | 1,10 | up   |
| 5768078 | 7222782 | 1429429 | cadherin 23 (otocadherin)                  | Cdh23 | 114102 | 1,10 | up   |
| 6613375 | 7222782 | 1429472 | cadherin 23 (otocadherin)                  | Cdh23 | 114102 | 1,10 | up   |
| 5651557 | 7222782 | 1429486 | cadherin 23 (otocadherin)                  | Cdh23 | 114102 | 1,09 | down |
| 5941828 | 7222782 | 1429452 | cadherin 23 (otocadherin)                  | Cdh23 | 114102 | 1,08 | up   |
| 5782687 | 7222782 | 1429460 | cadherin 23 (otocadherin)                  | Cdh23 | 114102 | 1,08 | down |
| 5846908 | 7222782 | 1429428 | cadherin 23 (otocadherin)                  | Cdh23 | 114102 | 1,08 | up   |
| 6715640 | 7222782 | 1429435 | cadherin 23 (otocadherin)                  | Cdh23 | 114102 | 1,07 | down |
| 5888209 | 7222782 | 1429431 | cadherin 23 (otocadherin)                  | Cdh23 | 114102 | 1,07 | down |
| 6737476 | 7222782 | 1429440 | cadherin 23 (otocadherin)                  | Cdh23 | 114102 | 1,07 | up   |
| 6329902 | 7222782 | 1429477 | cadherin 23 (otocadherin)                  | Cdh23 | 114102 | 1,07 | down |
| 6430657 | 7222782 | 1429444 | cadherin 23 (otocadherin)                  | Cdh23 | 114102 | 1,07 | down |
| 6012331 | 7222782 | 1429434 | cadherin 23 (otocadherin)                  | Cdh23 | 114102 | 1,06 | up   |
| 6101847 | 7222782 | 1429482 | cadherin 23 (otocadherin)                  | Cdh23 | 114102 | 1,06 | up   |
| 5737620 | 7222782 | 1429451 | cadherin 23 (otocadherin)                  | Cdh23 | 114102 | 1,05 | up   |
| 6196693 | 7222782 | 1429430 | cadherin 23 (otocadherin)                  | Cdh23 | 114102 | 1,05 | down |
| 6666067 | 7222782 | 1429422 | cadherin 23 (otocadherin)                  | Cdh23 | 114102 | 1,03 | down |
| 6274866 | 7222782 | 1429449 | cadherin 23 (otocadherin)                  | Cdh23 | 114102 | 1,02 | down |
| 5998415 | 7222782 | 1429455 | cadherin 23 (otocadherin)                  | Cdh23 | 114102 | 1,02 | up   |
| 6118577 | 7222782 | 1429475 | cadherin 23 (otocadherin)                  | Cdh23 | 114102 | 1,01 | up   |
| 5698143 | 7222782 | 1429473 | cadherin 23 (otocadherin)                  | Cdh23 | 114102 | 1,01 | down |
| 6580139 | 7222782 | 1429439 | cadherin 23 (otocadherin)                  | Cdh23 | 114102 | 1,01 | down |
| 6272230 | 7222782 | 1429427 | cadherin 23 (otocadherin)                  | Cdh23 | 114102 | 1,01 | down |
| 6138509 | 7222782 | 1429441 | cadherin 23 (otocadherin)                  | Cdh23 | 114102 | 1,00 | up   |
| 6713998 | 7222782 | 1429436 | cadherin 23 (otocadherin)                  | Cdh23 | 114102 | 1,00 | up   |
| 6016426 | 7180732 | 1326737 | cadherin 3, type 1, P-cadherin (placental) | Cdh3  | 116777 | 1,37 | up   |
| 6407055 | 7180732 | 1326736 | cadherin 3, type 1, P-cadherin (placental) | Cdh3  | 116777 | 1,09 | down |
| 5780480 | 7205267 | 1387906 | cadherin 6                                 | Cdh6  | 25409  | 2,11 | down |
| 6111803 | 7205267 | 1387904 | cadherin 6                                 | Cdh6  | 25409  | 1,70 | down |

|         |         |         |                                                                               |        |       |      |      |
|---------|---------|---------|-------------------------------------------------------------------------------|--------|-------|------|------|
| 6487253 | 7205267 | 1387906 | cadherin 6                                                                    | Cdh6   | 25409 | 1,59 | down |
| 5651970 | 7205267 | 1387900 | cadherin 6                                                                    | Cdh6   | 25409 | 1,52 | down |
| 6403691 | 7205267 | 1387905 | cadherin 6                                                                    | Cdh6   | 25409 | 1,42 | up   |
| 5926164 | 7205267 | 1387901 | cadherin 6                                                                    | Cdh6   | 25409 | 1,34 | up   |
| 6219114 | 7205267 | 1387906 | cadherin 6                                                                    | Cdh6   | 25409 | 1,28 | up   |
| 6719668 | 7205267 | 1387905 | cadherin 6                                                                    | Cdh6   | 25409 | 1,24 | down |
| 6628008 | 7205267 | 1387897 | cadherin 6                                                                    | Cdh6   | 25409 | 1,23 | up   |
| 6669816 | 7205267 | 1387898 | cadherin 6                                                                    | Cdh6   | 25409 | 1,21 | up   |
| 5686542 | 7205267 | 1387900 | cadherin 6                                                                    | Cdh6   | 25409 | 1,19 | down |
| 6082071 | 7205267 | 1387899 | cadherin 6                                                                    | Cdh6   | 25409 | 1,17 | up   |
| 6397170 | 7205267 | 1387902 | cadherin 6                                                                    | Cdh6   | 25409 | 1,10 | down |
| 5746649 | 7205267 | 1387896 | cadherin 6                                                                    | Cdh6   | 25409 | 1,05 | down |
| 5679942 | 7205267 | 1387903 | cadherin 6                                                                    | Cdh6   | 25409 | 1,01 | down |
| 6621181 | 7212718 | 1404938 | cadherin, EGF LAG seven-pass G-type receptor 2 (flamingo homolog, Drosophila) | Celsr2 | 83465 | 2,39 | up   |
| 6245419 | 7212718 | 1404944 | cadherin, EGF LAG seven-pass G-type receptor 2 (flamingo homolog, Drosophila) | Celsr2 | 83465 | 2,11 | down |
| 5675858 | 7212718 | 1404938 | cadherin, EGF LAG seven-pass G-type receptor 2 (flamingo homolog, Drosophila) | Celsr2 | 83465 | 2,01 | down |
| 6539810 | 7212718 | 1404954 | cadherin, EGF LAG seven-pass G-type receptor 2 (flamingo homolog, Drosophila) | Celsr2 | 83465 | 1,79 | down |
| 6367502 | 7212718 | 1404941 | cadherin, EGF LAG seven-pass G-type receptor 2 (flamingo homolog, Drosophila) | Celsr2 | 83465 | 1,76 | down |
| 6305177 | 7212718 | 1404947 | cadherin, EGF LAG seven-pass G-type receptor 2 (flamingo homolog, Drosophila) | Celsr2 | 83465 | 1,72 | down |
| 5933205 | 7212718 | 1404944 | cadherin, EGF LAG seven-pass G-type receptor 2 (flamingo homolog, Drosophila) | Celsr2 | 83465 | 1,64 | down |
| 5846134 | 7212718 | 1404960 | cadherin, EGF LAG seven-pass G-type receptor 2 (flamingo homolog, Drosophila) | Celsr2 | 83465 | 1,60 | down |
| 6177121 | 7212718 | 1404937 | cadherin, EGF LAG seven-pass G-type receptor 2 (flamingo homolog, Drosophila) | Celsr2 | 83465 | 1,60 | down |
| 5932325 | 7212718 | 1404945 | cadherin, EGF LAG seven-pass G-type receptor 2 (flamingo homolog, Drosophila) | Celsr2 | 83465 | 1,54 | down |
| 6005958 | 7212718 | 1404950 | cadherin, EGF LAG seven-pass G-type receptor 2 (flamingo homolog, Drosophila) | Celsr2 | 83465 | 1,53 | up   |
| 6351155 | 7212718 | 1404942 | cadherin, EGF LAG seven-pass G-type receptor 2 (flamingo homolog, Drosophila) | Celsr2 | 83465 | 1,50 | down |
| 6112143 | 7212718 | 1404940 | cadherin, EGF LAG seven-pass G-type receptor 2 (flamingo homolog, Drosophila) | Celsr2 | 83465 | 1,50 | down |
| 6505764 | 7212718 | 1404937 | cadherin, EGF LAG seven-pass G-type receptor 2 (flamingo homolog, Drosophila) | Celsr2 | 83465 | 1,49 | up   |
| 6481446 | 7212718 | 1404941 | cadherin, EGF LAG seven-pass G-type receptor 2 (flamingo homolog, Drosophila) | Celsr2 | 83465 | 1,41 | down |
| 6086903 | 7212718 | 1404943 | cadherin, EGF LAG seven-pass G-type receptor 2 (flamingo homolog, Drosophila) | Celsr2 | 83465 | 1,40 | down |
| 5651932 | 7212718 | 1404944 | cadherin, EGF LAG seven-pass G-type receptor 2 (flamingo homolog, Drosophila) | Celsr2 | 83465 | 1,37 | down |
| 5769502 | 7212718 | 1404963 | cadherin, EGF LAG seven-pass G-type receptor 2 (flamingo homolog, Drosophila) | Celsr2 | 83465 | 1,37 | up   |
| 6636445 | 7212718 | 1404951 | cadherin, EGF LAG seven-pass G-type receptor 2 (flamingo homolog, Drosophila) | Celsr2 | 83465 | 1,36 | down |
| 5942845 | 7212718 | 1404939 | cadherin, EGF LAG seven-pass G-type receptor 2 (flamingo homolog, Drosophila) | Celsr2 | 83465 | 1,35 | up   |
| 6136164 | 7212718 | 1404959 | cadherin, EGF LAG seven-pass G-type receptor 2 (flamingo homolog, Drosophila) | Celsr2 | 83465 | 1,34 | down |
| 5780132 | 7212718 | 1404952 | cadherin, EGF LAG seven-pass G-type receptor 2 (flamingo homolog, Drosophila) | Celsr2 | 83465 | 1,33 | up   |
| 6153084 | 7212718 | 1404948 | cadherin, EGF LAG seven-pass G-type receptor 2 (flamingo homolog, Drosophila) | Celsr2 | 83465 | 1,33 | up   |
| 5887592 | 7212718 | 1404940 | cadherin, EGF LAG seven-pass G-type receptor 2 (flamingo homolog, Drosophila) | Celsr2 | 83465 | 1,32 | up   |
| 6214493 | 7212718 | 1404955 | cadherin, EGF LAG seven-pass G-type receptor 2 (flamingo homolog, Drosophila) | Celsr2 | 83465 | 1,28 | down |
| 6430644 | 7212718 | 1404942 | cadherin, EGF LAG seven-pass G-type receptor 2 (flamingo homolog, Drosophila) | Celsr2 | 83465 | 1,24 | down |
| 6428183 | 7212718 | 1404966 | cadherin, EGF LAG seven-pass G-type receptor 2 (flamingo homolog, Drosophila) | Celsr2 | 83465 | 1,24 | up   |
| 5732789 | 7212718 | 1404946 | cadherin, EGF LAG seven-pass G-type receptor 2 (flamingo homolog, Drosophila) | Celsr2 | 83465 | 1,23 | up   |
| 6522079 | 7212718 | 1404956 | cadherin, EGF LAG seven-pass G-type receptor 2 (flamingo homolog, Drosophila) | Celsr2 | 83465 | 1,22 | up   |
| 5667437 | 7212718 | 1404958 | cadherin, EGF LAG seven-pass G-type receptor 2 (flamingo homolog, Drosophila) | Celsr2 | 83465 | 1,20 | up   |
| 5989678 | 7212718 | 1404962 | cadherin, EGF LAG seven-pass G-type receptor 2 (flamingo homolog, Drosophila) | Celsr2 | 83465 | 1,19 | down |
| 5822282 | 7212718 | 1404953 | cadherin, EGF LAG seven-pass G-type receptor 2 (flamingo homolog, Drosophila) | Celsr2 | 83465 | 1,10 | down |
| 6046069 | 7212718 | 1404957 | cadherin, EGF LAG seven-pass G-type receptor 2 (flamingo homolog, Drosophila) | Celsr2 | 83465 | 1,06 | down |
| 6686984 | 7212718 | 1404949 | cadherin, EGF LAG seven-pass G-type receptor 2 (flamingo homolog, Drosophila) | Celsr2 | 83465 | 1,05 | up   |
| 5655635 | 7212718 | 1404961 | cadherin, EGF LAG seven-pass G-type receptor 2 (flamingo homolog, Drosophila) | Celsr2 | 83465 | 1,04 | down |
| 6154054 | 7212718 | 1404964 | cadherin, EGF LAG seven-pass G-type receptor 2 (flamingo homolog, Drosophila) | Celsr2 | 83465 | 1,00 | up   |
| 5654120 | 7340453 | 1721186 | cadherin, EGF LAG seven-pass G-type receptor 3 (flamingo homolog, Drosophila) | Celsr3 | 83466 | 2,27 | down |
| 5996067 | 7340453 | 1721159 | cadherin, EGF LAG seven-pass G-type receptor 3 (flamingo homolog, Drosophila) | Celsr3 | 83466 | 1,52 | up   |
| 5984636 | 7340453 | 1721182 | cadherin, EGF LAG seven-pass G-type receptor 3 (flamingo homolog, Drosophila) | Celsr3 | 83466 | 1,45 | down |
| 6349970 | 7340453 | 1721166 | cadherin, EGF LAG seven-pass G-type receptor 3 (flamingo homolog, Drosophila) | Celsr3 | 83466 | 1,42 | down |
| 5988256 | 7340453 | 1721181 | cadherin, EGF LAG seven-pass G-type receptor 3 (flamingo homolog, Drosophila) | Celsr3 | 83466 | 1,32 | down |
| 6215565 | 7340453 | 1721174 | cadherin, EGF LAG seven-pass G-type receptor 3 (flamingo homolog, Drosophila) | Celsr3 | 83466 | 1,27 | up   |
| 5976935 | 7340453 | 1721189 | cadherin, EGF LAG seven-pass G-type receptor 3 (flamingo homolog, Drosophila) | Celsr3 | 83466 | 1,26 | down |
| 6101515 | 7340453 | 1721188 | cadherin, EGF LAG seven-pass G-type receptor 3 (flamingo homolog, Drosophila) | Celsr3 | 83466 | 1,24 | down |



|         |         |         |                                                                               |          |        |      |      |
|---------|---------|---------|-------------------------------------------------------------------------------|----------|--------|------|------|
| 6488871 | 7340453 | 1721182 | cadherin, EGF LAG seven-pass G-type receptor 3 (flamingo homolog, Drosophila) | Celsr3   | 83466  | 1,23 | down |
| 5962110 | 7340453 | 1721155 | cadherin, EGF LAG seven-pass G-type receptor 3 (flamingo homolog, Drosophila) | Celsr3   | 83466  | 1,22 | down |
| 5655309 | 7340453 | 1721173 | cadherin, EGF LAG seven-pass G-type receptor 3 (flamingo homolog, Drosophila) | Celsr3   | 83466  | 1,22 | up   |
| 5731631 | 7340453 | 1721178 | cadherin, EGF LAG seven-pass G-type receptor 3 (flamingo homolog, Drosophila) | Celsr3   | 83466  | 1,21 | up   |
| 6122247 | 7340453 | 1721186 | cadherin, EGF LAG seven-pass G-type receptor 3 (flamingo homolog, Drosophila) | Celsr3   | 83466  | 1,21 | up   |
| 6094382 | 7340453 | 1721175 | cadherin, EGF LAG seven-pass G-type receptor 3 (flamingo homolog, Drosophila) | Celsr3   | 83466  | 1,21 | up   |
| 6111889 | 7340453 | 1721165 | cadherin, EGF LAG seven-pass G-type receptor 3 (flamingo homolog, Drosophila) | Celsr3   | 83466  | 1,20 | down |
| 6015774 | 7340453 | 1721162 | cadherin, EGF LAG seven-pass G-type receptor 3 (flamingo homolog, Drosophila) | Celsr3   | 83466  | 1,19 | up   |
| 5710009 | 7340453 | 1721172 | cadherin, EGF LAG seven-pass G-type receptor 3 (flamingo homolog, Drosophila) | Celsr3   | 83466  | 1,17 | up   |
| 6617592 | 7340453 | 1721155 | cadherin, EGF LAG seven-pass G-type receptor 3 (flamingo homolog, Drosophila) | Celsr3   | 83466  | 1,15 | up   |
| 6672682 | 7340453 | 1721155 | cadherin, EGF LAG seven-pass G-type receptor 3 (flamingo homolog, Drosophila) | Celsr3   | 83466  | 1,15 | down |
| 6293039 | 7340453 | 1721179 | cadherin, EGF LAG seven-pass G-type receptor 3 (flamingo homolog, Drosophila) | Celsr3   | 83466  | 1,15 | up   |
| 6725563 | 7340453 | 1721176 | cadherin, EGF LAG seven-pass G-type receptor 3 (flamingo homolog, Drosophila) | Celsr3   | 83466  | 1,14 | up   |
| 6581144 | 7340453 | 1721180 | cadherin, EGF LAG seven-pass G-type receptor 3 (flamingo homolog, Drosophila) | Celsr3   | 83466  | 1,14 | down |
| 5901476 | 7340453 | 1721169 | cadherin, EGF LAG seven-pass G-type receptor 3 (flamingo homolog, Drosophila) | Celsr3   | 83466  | 1,14 | up   |
| 6473998 | 7340453 | 1721189 | cadherin, EGF LAG seven-pass G-type receptor 3 (flamingo homolog, Drosophila) | Celsr3   | 83466  | 1,13 | up   |
| 5652421 | 7340453 | 1721163 | cadherin, EGF LAG seven-pass G-type receptor 3 (flamingo homolog, Drosophila) | Celsr3   | 83466  | 1,13 | down |
| 5885886 | 7340453 | 1721177 | cadherin, EGF LAG seven-pass G-type receptor 3 (flamingo homolog, Drosophila) | Celsr3   | 83466  | 1,13 | up   |
| 6138356 | 7340453 | 1721171 | cadherin, EGF LAG seven-pass G-type receptor 3 (flamingo homolog, Drosophila) | Celsr3   | 83466  | 1,13 | up   |
| 6024761 | 7340453 | 1721188 | cadherin, EGF LAG seven-pass G-type receptor 3 (flamingo homolog, Drosophila) | Celsr3   | 83466  | 1,12 | down |
| 5681774 | 7340453 | 1721157 | cadherin, EGF LAG seven-pass G-type receptor 3 (flamingo homolog, Drosophila) | Celsr3   | 83466  | 1,12 | up   |
| 5867082 | 7340453 | 1721160 | cadherin, EGF LAG seven-pass G-type receptor 3 (flamingo homolog, Drosophila) | Celsr3   | 83466  | 1,12 | up   |
| 6604071 | 7340453 | 1721185 | cadherin, EGF LAG seven-pass G-type receptor 3 (flamingo homolog, Drosophila) | Celsr3   | 83466  | 1,10 | up   |
| 6270274 | 7340453 | 1721156 | cadherin, EGF LAG seven-pass G-type receptor 3 (flamingo homolog, Drosophila) | Celsr3   | 83466  | 1,08 | up   |
| 6260583 | 7340453 | 1721168 | cadherin, EGF LAG seven-pass G-type receptor 3 (flamingo homolog, Drosophila) | Celsr3   | 83466  | 1,08 | up   |
| 6470087 | 7340453 | 1721184 | cadherin, EGF LAG seven-pass G-type receptor 3 (flamingo homolog, Drosophila) | Celsr3   | 83466  | 1,07 | up   |
| 6568153 | 7340453 | 1721187 | cadherin, EGF LAG seven-pass G-type receptor 3 (flamingo homolog, Drosophila) | Celsr3   | 83466  | 1,07 | down |
| 5833899 | 7340453 | 1721155 | cadherin, EGF LAG seven-pass G-type receptor 3 (flamingo homolog, Drosophila) | Celsr3   | 83466  | 1,06 | up   |
| 6068164 | 7340453 | 1721183 | cadherin, EGF LAG seven-pass G-type receptor 3 (flamingo homolog, Drosophila) | Celsr3   | 83466  | 1,05 | down |
| 6424949 | 7340453 | 1721188 | cadherin, EGF LAG seven-pass G-type receptor 3 (flamingo homolog, Drosophila) | Celsr3   | 83466  | 1,04 | down |
| 5871437 | 7340453 | 1721164 | cadherin, EGF LAG seven-pass G-type receptor 3 (flamingo homolog, Drosophila) | Celsr3   | 83466  | 1,04 | down |
| 6061187 | 7340453 | 1721170 | cadherin, EGF LAG seven-pass G-type receptor 3 (flamingo homolog, Drosophila) | Celsr3   | 83466  | 1,03 | down |
| 6157313 | 7340453 | 1721158 | cadherin, EGF LAG seven-pass G-type receptor 3 (flamingo homolog, Drosophila) | Celsr3   | 83466  | 1,02 | up   |
| 5719114 | 7340453 | 1721167 | cadherin, EGF LAG seven-pass G-type receptor 3 (flamingo homolog, Drosophila) | Celsr3   | 83466  | 1,02 | up   |
| 6366676 | 7340453 | 1721155 | cadherin, EGF LAG seven-pass G-type receptor 3 (flamingo homolog, Drosophila) | Celsr3   | 83466  | 1,02 | down |
| 5974162 | 7340453 | 1721155 | cadherin, EGF LAG seven-pass G-type receptor 3 (flamingo homolog, Drosophila) | Celsr3   | 83466  | 1,02 | up   |
| 6641802 | 7340453 | 1721161 | cadherin, EGF LAG seven-pass G-type receptor 3 (flamingo homolog, Drosophila) | Celsr3   | 83466  | 1,00 | down |
| 6188235 | 7056254 | 1023336 | calcitonin/calcitonin-related polypeptide, alpha                              | Calca    | 24241  | 2,16 | down |
| 6384359 | 7056254 | 1023334 | calcitonin/calcitonin-related polypeptide, alpha                              | Calca    | 24241  | 2,12 | up   |
| 6080546 | 7056254 | 1023333 | calcitonin/calcitonin-related polypeptide, alpha                              | Calca    | 24241  | 1,61 | down |
| 6062707 | 7056254 | 1023335 | calcitonin/calcitonin-related polypeptide, alpha                              | Calca    | 24241  | 1,39 | up   |
| 6360216 | 7056254 | 1023337 | calcitonin/calcitonin-related polypeptide, alpha                              | Calca    | 24241  | 1,25 | down |
| 6590191 | 7056254 | 1023332 | calcitonin/calcitonin-related polypeptide, alpha                              | Calca    | 24241  | 1,17 | down |
| 6605337 | 7098907 | 1125055 | calcium binding protein 1                                                     | Cabp1    | 171051 | 2,03 | down |
| 5945224 | 7098907 | 1125058 | calcium binding protein 1                                                     | Cabp1    | 171051 | 1,55 | up   |
| 6575122 | 7098907 | 1125053 | calcium binding protein 1                                                     | Cabp1    | 171051 | 1,25 | down |
| 6482032 | 7098907 | 1125057 | calcium binding protein 1                                                     | Cabp1    | 171051 | 1,17 | down |
| 5981900 | 7098907 | 1125054 | calcium binding protein 1                                                     | Cabp1    | 171051 | 1,14 | up   |
| 5749246 | 7098907 | 1125056 | calcium binding protein 1                                                     | Cabp1    | 171051 | 1,08 | up   |
| 6573119 | 7340147 | 1720571 | calcium channel, voltage-dependent, alpha 2/delta subunit 2                   | Cacna2d2 | 300992 | 2,12 | down |
| 6732720 | 7340147 | 1720551 | calcium channel, voltage-dependent, alpha 2/delta subunit 2                   | Cacna2d2 | 300992 | 1,86 | down |
| 6192424 | 7340147 | 1720558 | calcium channel, voltage-dependent, alpha 2/delta subunit 2                   | Cacna2d2 | 300992 | 1,76 | down |
| 6344346 | 7340147 | 1720577 | calcium channel, voltage-dependent, alpha 2/delta subunit 2                   | Cacna2d2 | 300992 | 1,67 | down |
| 6348019 | 7340147 | 1720555 | calcium channel, voltage-dependent, alpha 2/delta subunit 2                   | Cacna2d2 | 300992 | 1,66 | down |
| 6626755 | 7340147 | 1720565 | calcium channel, voltage-dependent, alpha 2/delta subunit 2                   | Cacna2d2 | 300992 | 1,53 | down |
| 6316339 | 7340147 | 1720579 | calcium channel, voltage-dependent, alpha 2/delta subunit 2                   | Cacna2d2 | 300992 | 1,49 | down |
| 5645060 | 7340147 | 1720578 | calcium channel, voltage-dependent, alpha 2/delta subunit 2                   | Cacna2d2 | 300992 | 1,43 | down |

|         |         |         |                                                             |          |        |      |      |
|---------|---------|---------|-------------------------------------------------------------|----------|--------|------|------|
| 6459655 | 7340147 | 1720563 | calcium channel, voltage-dependent, alpha 2/delta subunit 2 | Cacna2d2 | 300992 | 1,43 | up   |
| 6404992 | 7340147 | 1720567 | calcium channel, voltage-dependent, alpha 2/delta subunit 2 | Cacna2d2 | 300992 | 1,42 | down |
| 5856665 | 7340147 | 1720568 | calcium channel, voltage-dependent, alpha 2/delta subunit 2 | Cacna2d2 | 300992 | 1,37 | down |
| 5645675 | 7340147 | 1720546 | calcium channel, voltage-dependent, alpha 2/delta subunit 2 | Cacna2d2 | 300992 | 1,36 | up   |
| 6306014 | 7340147 | 1720550 | calcium channel, voltage-dependent, alpha 2/delta subunit 2 | Cacna2d2 | 300992 | 1,33 | down |
| 6042598 | 7340147 | 1720574 | calcium channel, voltage-dependent, alpha 2/delta subunit 2 | Cacna2d2 | 300992 | 1,32 | down |
| 5834778 | 7340147 | 1720564 | calcium channel, voltage-dependent, alpha 2/delta subunit 2 | Cacna2d2 | 300992 | 1,31 | up   |
| 6003383 | 7340147 | 1720549 | calcium channel, voltage-dependent, alpha 2/delta subunit 2 | Cacna2d2 | 300992 | 1,31 | up   |
| 6220909 | 7340147 | 1720543 | calcium channel, voltage-dependent, alpha 2/delta subunit 2 | Cacna2d2 | 300992 | 1,27 | up   |
| 6391155 | 7340147 | 1720545 | calcium channel, voltage-dependent, alpha 2/delta subunit 2 | Cacna2d2 | 300992 | 1,27 | up   |
| 5790205 | 7340147 | 1720559 | calcium channel, voltage-dependent, alpha 2/delta subunit 2 | Cacna2d2 | 300992 | 1,23 | down |
| 6365051 | 7340147 | 1720561 | calcium channel, voltage-dependent, alpha 2/delta subunit 2 | Cacna2d2 | 300992 | 1,22 | down |
| 6369971 | 7340147 | 1720548 | calcium channel, voltage-dependent, alpha 2/delta subunit 2 | Cacna2d2 | 300992 | 1,18 | up   |
| 6134519 | 7340147 | 1720570 | calcium channel, voltage-dependent, alpha 2/delta subunit 2 | Cacna2d2 | 300992 | 1,18 | down |
| 6610374 | 7340147 | 1720577 | calcium channel, voltage-dependent, alpha 2/delta subunit 2 | Cacna2d2 | 300992 | 1,17 | down |
| 6167846 | 7340147 | 1720569 | calcium channel, voltage-dependent, alpha 2/delta subunit 2 | Cacna2d2 | 300992 | 1,16 | down |
| 6133060 | 7340147 | 1720573 | calcium channel, voltage-dependent, alpha 2/delta subunit 2 | Cacna2d2 | 300992 | 1,16 | up   |
| 6697033 | 7340147 | 1720560 | calcium channel, voltage-dependent, alpha 2/delta subunit 2 | Cacna2d2 | 300992 | 1,15 | down |
| 6166634 | 7340147 | 1720547 | calcium channel, voltage-dependent, alpha 2/delta subunit 2 | Cacna2d2 | 300992 | 1,15 | up   |
| 6032884 | 7340147 | 1720576 | calcium channel, voltage-dependent, alpha 2/delta subunit 2 | Cacna2d2 | 300992 | 1,14 | up   |
| 6066299 | 7340147 | 1720572 | calcium channel, voltage-dependent, alpha 2/delta subunit 2 | Cacna2d2 | 300992 | 1,12 | down |
| 6716385 | 7340147 | 1720554 | calcium channel, voltage-dependent, alpha 2/delta subunit 2 | Cacna2d2 | 300992 | 1,11 | down |
| 5990685 | 7340147 | 1720562 | calcium channel, voltage-dependent, alpha 2/delta subunit 2 | Cacna2d2 | 300992 | 1,10 | up   |
| 6412668 | 7340147 | 1720566 | calcium channel, voltage-dependent, alpha 2/delta subunit 2 | Cacna2d2 | 300992 | 1,09 | up   |
| 5624055 | 7340147 | 1720553 | calcium channel, voltage-dependent, alpha 2/delta subunit 2 | Cacna2d2 | 300992 | 1,09 | up   |
| 5996935 | 7340147 | 1720557 | calcium channel, voltage-dependent, alpha 2/delta subunit 2 | Cacna2d2 | 300992 | 1,08 | up   |
| 6189251 | 7340147 | 1720556 | calcium channel, voltage-dependent, alpha 2/delta subunit 2 | Cacna2d2 | 300992 | 1,07 | up   |
| 6588313 | 7340147 | 1720552 | calcium channel, voltage-dependent, alpha 2/delta subunit 2 | Cacna2d2 | 300992 | 1,05 | up   |
| 6335357 | 7340147 | 1720575 | calcium channel, voltage-dependent, alpha 2/delta subunit 2 | Cacna2d2 | 300992 | 1,04 | down |
| 6099133 | 7340147 | 1720544 | calcium channel, voltage-dependent, alpha 2/delta subunit 2 | Cacna2d2 | 300992 | 1,04 | down |
| 5867608 | 7340147 | 1720542 | calcium channel, voltage-dependent, alpha 2/delta subunit 2 | Cacna2d2 | 300992 | 1,04 | down |
| 5790265 | 7257893 | 1517456 | calcium channel, voltage-dependent, alpha 2/delta subunit 4 | Cacna2d4 | 312668 | 1,22 | up   |
| 6316773 | 7148574 | 1247440 | calcium channel, voltage-dependent, alpha2/delta subunit 3  | Cacna2d3 | 306243 | 2,25 | down |
| 6247257 | 7148574 | 1247434 | calcium channel, voltage-dependent, alpha2/delta subunit 3  | Cacna2d3 | 306243 | 2,12 | down |
| 5822162 | 7148574 | 1247428 | calcium channel, voltage-dependent, alpha2/delta subunit 3  | Cacna2d3 | 306243 | 1,63 | down |
| 5960682 | 7148574 | 1247441 | calcium channel, voltage-dependent, alpha2/delta subunit 3  | Cacna2d3 | 306243 | 1,57 | down |
| 6280816 | 7148574 | 1247424 | calcium channel, voltage-dependent, alpha2/delta subunit 3  | Cacna2d3 | 306243 | 1,46 | down |
| 5784374 | 7148574 | 1247427 | calcium channel, voltage-dependent, alpha2/delta subunit 3  | Cacna2d3 | 306243 | 1,45 | down |
| 5691639 | 7148574 | 1247416 | calcium channel, voltage-dependent, alpha2/delta subunit 3  | Cacna2d3 | 306243 | 1,44 | up   |
| 6695856 | 7148574 | 1247447 | calcium channel, voltage-dependent, alpha2/delta subunit 3  | Cacna2d3 | 306243 | 1,36 | down |
| 6282015 | 7148574 | 1247415 | calcium channel, voltage-dependent, alpha2/delta subunit 3  | Cacna2d3 | 306243 | 1,34 | up   |
| 6309353 | 7148574 | 1247435 | calcium channel, voltage-dependent, alpha2/delta subunit 3  | Cacna2d3 | 306243 | 1,33 | down |
| 6231268 | 7148574 | 1247438 | calcium channel, voltage-dependent, alpha2/delta subunit 3  | Cacna2d3 | 306243 | 1,31 | up   |
| 5734667 | 7148574 | 1247436 | calcium channel, voltage-dependent, alpha2/delta subunit 3  | Cacna2d3 | 306243 | 1,31 | down |
| 6599451 | 7148574 | 1247412 | calcium channel, voltage-dependent, alpha2/delta subunit 3  | Cacna2d3 | 306243 | 1,30 | up   |
| 5683966 | 7148574 | 1247421 | calcium channel, voltage-dependent, alpha2/delta subunit 3  | Cacna2d3 | 306243 | 1,25 | up   |
| 5651285 | 7148574 | 1247446 | calcium channel, voltage-dependent, alpha2/delta subunit 3  | Cacna2d3 | 306243 | 1,25 | up   |
| 5805191 | 7148574 | 1247448 | calcium channel, voltage-dependent, alpha2/delta subunit 3  | Cacna2d3 | 306243 | 1,22 | down |
| 6212478 | 7148574 | 1247443 | calcium channel, voltage-dependent, alpha2/delta subunit 3  | Cacna2d3 | 306243 | 1,20 | down |
| 5894376 | 7148574 | 1247442 | calcium channel, voltage-dependent, alpha2/delta subunit 3  | Cacna2d3 | 306243 | 1,19 | up   |
| 5835237 | 7148574 | 1247417 | calcium channel, voltage-dependent, alpha2/delta subunit 3  | Cacna2d3 | 306243 | 1,18 | down |
| 6035815 | 7148574 | 1247414 | calcium channel, voltage-dependent, alpha2/delta subunit 3  | Cacna2d3 | 306243 | 1,18 | down |
| 5876318 | 7148574 | 1247433 | calcium channel, voltage-dependent, alpha2/delta subunit 3  | Cacna2d3 | 306243 | 1,18 | down |
| 5910174 | 7148574 | 1247437 | calcium channel, voltage-dependent, alpha2/delta subunit 3  | Cacna2d3 | 306243 | 1,17 | down |
| 5648191 | 7148574 | 1247418 | calcium channel, voltage-dependent, alpha2/delta subunit 3  | Cacna2d3 | 306243 | 1,15 | down |
| 5774312 | 7148574 | 1247444 | calcium channel, voltage-dependent, alpha2/delta subunit 3  | Cacna2d3 | 306243 | 1,14 | down |
| 5959428 | 7148574 | 1247426 | calcium channel, voltage-dependent, alpha2/delta subunit 3  | Cacna2d3 | 306243 | 1,14 | up   |

|         |         |         |                                                              |          |        |      |      |
|---------|---------|---------|--------------------------------------------------------------|----------|--------|------|------|
| 6645587 | 7148574 | 1247430 | calcium channel, voltage-dependent, alpha2/delta subunit 3   | Cacna2d3 | 306243 | 1,14 | down |
| 6678661 | 7148574 | 1247422 | calcium channel, voltage-dependent, alpha2/delta subunit 3   | Cacna2d3 | 306243 | 1,11 | up   |
| 6309649 | 7148574 | 1247445 | calcium channel, voltage-dependent, alpha2/delta subunit 3   | Cacna2d3 | 306243 | 1,10 | up   |
| 5823166 | 7148574 | 1247419 | calcium channel, voltage-dependent, alpha2/delta subunit 3   | Cacna2d3 | 306243 | 1,08 | up   |
| 5784465 | 7148574 | 1247420 | calcium channel, voltage-dependent, alpha2/delta subunit 3   | Cacna2d3 | 306243 | 1,06 | down |
| 6546769 | 7148574 | 1247422 | calcium channel, voltage-dependent, alpha2/delta subunit 3   | Cacna2d3 | 306243 | 1,06 | up   |
| 6260265 | 7148574 | 1247439 | calcium channel, voltage-dependent, alpha2/delta subunit 3   | Cacna2d3 | 306243 | 1,05 | down |
| 6467479 | 7148574 | 1247432 | calcium channel, voltage-dependent, alpha2/delta subunit 3   | Cacna2d3 | 306243 | 1,05 | up   |
| 6018780 | 7148574 | 1247425 | calcium channel, voltage-dependent, alpha2/delta subunit 3   | Cacna2d3 | 306243 | 1,05 | down |
| 5706697 | 7148574 | 1247423 | calcium channel, voltage-dependent, alpha2/delta subunit 3   | Cacna2d3 | 306243 | 1,04 | up   |
| 6569407 | 7148574 | 1247413 | calcium channel, voltage-dependent, alpha2/delta subunit 3   | Cacna2d3 | 306243 | 1,03 | up   |
| 5958293 | 7148574 | 1247429 | calcium channel, voltage-dependent, alpha2/delta subunit 3   | Cacna2d3 | 306243 | 1,01 | down |
| 6261650 | 7148574 | 1247431 | calcium channel, voltage-dependent, alpha2/delta subunit 3   | Cacna2d3 | 306243 | 1,00 | up   |
| 6609323 | 7083754 | 1087765 | calcium channel, voltage-dependent, gamma subunit 5          | Cacng5   | 140726 | 2,35 | up   |
| 5988670 | 7083754 | 1087769 | calcium channel, voltage-dependent, gamma subunit 5          | Cacng5   | 140726 | 1,55 | up   |
| 5798739 | 7083754 | 1087764 | calcium channel, voltage-dependent, gamma subunit 5          | Cacng5   | 140726 | 1,51 | up   |
| 6502955 | 7083754 | 1087770 | calcium channel, voltage-dependent, gamma subunit 5          | Cacng5   | 140726 | 1,29 | up   |
| 6012935 | 7083754 | 1087766 | calcium channel, voltage-dependent, gamma subunit 5          | Cacng5   | 140726 | 1,26 | down |
| 5707157 | 7083754 | 1087768 | calcium channel, voltage-dependent, gamma subunit 5          | Cacng5   | 140726 | 1,10 | down |
| 5658596 | 7083754 | 1087767 | calcium channel, voltage-dependent, gamma subunit 5          | Cacng5   | 140726 | 1,04 | down |
| 6605970 | 7268979 | 1544829 | calcium channel, voltage-dependent, L type, alpha 1C subunit | Cacna1c  | 24239  | 2,70 | up   |
| 6347931 | 7268979 | 1544807 | calcium channel, voltage-dependent, L type, alpha 1C subunit | Cacna1c  | 24239  | 1,84 | up   |
| 6291173 | 7268979 | 1544829 | calcium channel, voltage-dependent, L type, alpha 1C subunit | Cacna1c  | 24239  | 1,81 | up   |
| 6746326 | 7268979 | 1544816 | calcium channel, voltage-dependent, L type, alpha 1C subunit | Cacna1c  | 24239  | 1,80 | down |
| 6425719 | 7268979 | 1544787 | calcium channel, voltage-dependent, L type, alpha 1C subunit | Cacna1c  | 24239  | 1,79 | down |
| 5863045 | 7268979 | 1544783 | calcium channel, voltage-dependent, L type, alpha 1C subunit | Cacna1c  | 24239  | 1,40 | up   |
| 6282398 | 7268979 | 1544779 | calcium channel, voltage-dependent, L type, alpha 1C subunit | Cacna1c  | 24239  | 1,38 | down |
| 6489618 | 7268979 | 1544810 | calcium channel, voltage-dependent, L type, alpha 1C subunit | Cacna1c  | 24239  | 1,37 | down |
| 6562217 | 7268979 | 1544822 | calcium channel, voltage-dependent, L type, alpha 1C subunit | Cacna1c  | 24239  | 1,36 | up   |
| 5972243 | 7268979 | 1544803 | calcium channel, voltage-dependent, L type, alpha 1C subunit | Cacna1c  | 24239  | 1,34 | down |
| 6353282 | 7268979 | 1544805 | calcium channel, voltage-dependent, L type, alpha 1C subunit | Cacna1c  | 24239  | 1,34 | up   |
| 6436581 | 7268979 | 1544791 | calcium channel, voltage-dependent, L type, alpha 1C subunit | Cacna1c  | 24239  | 1,31 | up   |
| 6575154 | 7268979 | 1544793 | calcium channel, voltage-dependent, L type, alpha 1C subunit | Cacna1c  | 24239  | 1,28 | down |
| 6358786 | 7268979 | 1544804 | calcium channel, voltage-dependent, L type, alpha 1C subunit | Cacna1c  | 24239  | 1,26 | up   |
| 6042719 | 7268979 | 1544799 | calcium channel, voltage-dependent, L type, alpha 1C subunit | Cacna1c  | 24239  | 1,24 | up   |
| 6640986 | 7268979 | 1544788 | calcium channel, voltage-dependent, L type, alpha 1C subunit | Cacna1c  | 24239  | 1,23 | up   |
| 6149601 | 7268979 | 1544783 | calcium channel, voltage-dependent, L type, alpha 1C subunit | Cacna1c  | 24239  | 1,23 | up   |
| 6274881 | 7268979 | 1544785 | calcium channel, voltage-dependent, L type, alpha 1C subunit | Cacna1c  | 24239  | 1,22 | up   |
| 6295460 | 7268979 | 1544814 | calcium channel, voltage-dependent, L type, alpha 1C subunit | Cacna1c  | 24239  | 1,21 | up   |
| 6010162 | 7268979 | 1544828 | calcium channel, voltage-dependent, L type, alpha 1C subunit | Cacna1c  | 24239  | 1,20 | down |
| 6180955 | 7268979 | 1544799 | calcium channel, voltage-dependent, L type, alpha 1C subunit | Cacna1c  | 24239  | 1,20 | down |
| 6299375 | 7268979 | 1544828 | calcium channel, voltage-dependent, L type, alpha 1C subunit | Cacna1c  | 24239  | 1,20 | down |
| 5718443 | 7268979 | 1544784 | calcium channel, voltage-dependent, L type, alpha 1C subunit | Cacna1c  | 24239  | 1,20 | down |
| 5974084 | 7268979 | 1544823 | calcium channel, voltage-dependent, L type, alpha 1C subunit | Cacna1c  | 24239  | 1,19 | up   |
| 6601562 | 7268979 | 1544798 | calcium channel, voltage-dependent, L type, alpha 1C subunit | Cacna1c  | 24239  | 1,18 | up   |
| 6253007 | 7268979 | 1544796 | calcium channel, voltage-dependent, L type, alpha 1C subunit | Cacna1c  | 24239  | 1,18 | up   |
| 5660396 | 7268979 | 1544806 | calcium channel, voltage-dependent, L type, alpha 1C subunit | Cacna1c  | 24239  | 1,18 | down |
| 6303595 | 7268979 | 1544808 | calcium channel, voltage-dependent, L type, alpha 1C subunit | Cacna1c  | 24239  | 1,17 | down |
| 5905763 | 7268979 | 1544780 | calcium channel, voltage-dependent, L type, alpha 1C subunit | Cacna1c  | 24239  | 1,16 | down |
| 6144174 | 7268979 | 1544809 | calcium channel, voltage-dependent, L type, alpha 1C subunit | Cacna1c  | 24239  | 1,15 | up   |
| 6650441 | 7268979 | 1544802 | calcium channel, voltage-dependent, L type, alpha 1C subunit | Cacna1c  | 24239  | 1,15 | down |
| 5712911 | 7268979 | 1544826 | calcium channel, voltage-dependent, L type, alpha 1C subunit | Cacna1c  | 24239  | 1,15 | down |
| 6173865 | 7268979 | 1544811 | calcium channel, voltage-dependent, L type, alpha 1C subunit | Cacna1c  | 24239  | 1,14 | up   |
| 5907539 | 7268979 | 1544786 | calcium channel, voltage-dependent, L type, alpha 1C subunit | Cacna1c  | 24239  | 1,14 | down |
| 6684796 | 7268979 | 1544780 | calcium channel, voltage-dependent, L type, alpha 1C subunit | Cacna1c  | 24239  | 1,14 | down |
| 6162332 | 7268979 | 1544800 | calcium channel, voltage-dependent, L type, alpha 1C subunit | Cacna1c  | 24239  | 1,13 | down |
| 5954810 | 7268979 | 1544781 | calcium channel, voltage-dependent, L type, alpha 1C subunit | Cacna1c  | 24239  | 1,12 | up   |

|         |         |         |                                                              |         |        |      |      |
|---------|---------|---------|--------------------------------------------------------------|---------|--------|------|------|
| 5984321 | 7268979 | 1544790 | calcium channel, voltage-dependent, L type, alpha 1C subunit | Cacna1c | 24239  | 1,10 | down |
| 6698809 | 7268979 | 1544825 | calcium channel, voltage-dependent, L type, alpha 1C subunit | Cacna1c | 24239  | 1,09 | up   |
| 6437447 | 7268979 | 1544801 | calcium channel, voltage-dependent, L type, alpha 1C subunit | Cacna1c | 24239  | 1,09 | down |
| 5929983 | 7268979 | 1544795 | calcium channel, voltage-dependent, L type, alpha 1C subunit | Cacna1c | 24239  | 1,09 | down |
| 5946971 | 7268979 | 1544821 | calcium channel, voltage-dependent, L type, alpha 1C subunit | Cacna1c | 24239  | 1,08 | up   |
| 6534834 | 7268979 | 1544792 | calcium channel, voltage-dependent, L type, alpha 1C subunit | Cacna1c | 24239  | 1,08 | down |
| 6312455 | 7268979 | 1544794 | calcium channel, voltage-dependent, L type, alpha 1C subunit | Cacna1c | 24239  | 1,08 | down |
| 6045398 | 7268979 | 1544827 | calcium channel, voltage-dependent, L type, alpha 1C subunit | Cacna1c | 24239  | 1,07 | up   |
| 6533747 | 7268979 | 1544815 | calcium channel, voltage-dependent, L type, alpha 1C subunit | Cacna1c | 24239  | 1,06 | down |
| 6398997 | 7268979 | 1544814 | calcium channel, voltage-dependent, L type, alpha 1C subunit | Cacna1c | 24239  | 1,06 | down |
| 5973537 | 7268979 | 1544824 | calcium channel, voltage-dependent, L type, alpha 1C subunit | Cacna1c | 24239  | 1,06 | down |
| 5845924 | 7268979 | 1544797 | calcium channel, voltage-dependent, L type, alpha 1C subunit | Cacna1c | 24239  | 1,06 | down |
| 6712759 | 7268979 | 1544782 | calcium channel, voltage-dependent, L type, alpha 1C subunit | Cacna1c | 24239  | 1,05 | up   |
| 5696351 | 7268979 | 1544826 | calcium channel, voltage-dependent, L type, alpha 1C subunit | Cacna1c | 24239  | 1,05 | down |
| 5849884 | 7268979 | 1544818 | calcium channel, voltage-dependent, L type, alpha 1C subunit | Cacna1c | 24239  | 1,04 | up   |
| 6157646 | 7268979 | 1544813 | calcium channel, voltage-dependent, L type, alpha 1C subunit | Cacna1c | 24239  | 1,04 | up   |
| 6090330 | 7268979 | 1544819 | calcium channel, voltage-dependent, L type, alpha 1C subunit | Cacna1c | 24239  | 1,03 | up   |
| 6460567 | 7268979 | 1544814 | calcium channel, voltage-dependent, L type, alpha 1C subunit | Cacna1c | 24239  | 1,03 | down |
| 5956043 | 7268979 | 1544812 | calcium channel, voltage-dependent, L type, alpha 1C subunit | Cacna1c | 24239  | 1,03 | up   |
| 6105397 | 7268979 | 1544820 | calcium channel, voltage-dependent, L type, alpha 1C subunit | Cacna1c | 24239  | 1,02 | down |
| 6231912 | 7268979 | 1544817 | calcium channel, voltage-dependent, L type, alpha 1C subunit | Cacna1c | 24239  | 1,02 | down |
| 6422213 | 7268979 | 1544789 | calcium channel, voltage-dependent, L type, alpha 1C subunit | Cacna1c | 24239  | 1,01 | up   |
| 6627210 | 7268979 | 1544816 | calcium channel, voltage-dependent, L type, alpha 1C subunit | Cacna1c | 24239  | 1,01 | up   |
| 5619182 | 7268979 | 1544778 | calcium channel, voltage-dependent, L type, alpha 1C subunit | Cacna1c | 24239  | 1,00 | up   |
| 5971321 | 7236652 | 1464923 | calcium channel, voltage-dependent, N type, alpha 1B subunit | Cacna1b | 257648 | 2,91 | up   |
| 6476900 | 7236652 | 1464880 | calcium channel, voltage-dependent, N type, alpha 1B subunit | Cacna1b | 257648 | 1,70 | up   |
| 5628855 | 7236652 | 1464888 | calcium channel, voltage-dependent, N type, alpha 1B subunit | Cacna1b | 257648 | 1,69 | up   |
| 6442572 | 7236652 | 1464914 | calcium channel, voltage-dependent, N type, alpha 1B subunit | Cacna1b | 257648 | 1,63 | up   |
| 6624579 | 7236652 | 1464895 | calcium channel, voltage-dependent, N type, alpha 1B subunit | Cacna1b | 257648 | 1,61 | up   |
| 6554600 | 7236652 | 1464879 | calcium channel, voltage-dependent, N type, alpha 1B subunit | Cacna1b | 257648 | 1,60 | down |
| 5805807 | 7236652 | 1464911 | calcium channel, voltage-dependent, N type, alpha 1B subunit | Cacna1b | 257648 | 1,53 | down |
| 6393218 | 7236652 | 1464884 | calcium channel, voltage-dependent, N type, alpha 1B subunit | Cacna1b | 257648 | 1,51 | up   |
| 5653883 | 7236652 | 1464876 | calcium channel, voltage-dependent, N type, alpha 1B subunit | Cacna1b | 257648 | 1,50 | down |
| 6498245 | 7236652 | 1464898 | calcium channel, voltage-dependent, N type, alpha 1B subunit | Cacna1b | 257648 | 1,50 | down |
| 6547963 | 7236652 | 1464882 | calcium channel, voltage-dependent, N type, alpha 1B subunit | Cacna1b | 257648 | 1,48 | down |
| 5856789 | 7236652 | 1464886 | calcium channel, voltage-dependent, N type, alpha 1B subunit | Cacna1b | 257648 | 1,44 | up   |
| 5803586 | 7236652 | 1464878 | calcium channel, voltage-dependent, N type, alpha 1B subunit | Cacna1b | 257648 | 1,42 | up   |
| 5709783 | 7236652 | 1464915 | calcium channel, voltage-dependent, N type, alpha 1B subunit | Cacna1b | 257648 | 1,41 | down |
| 6071161 | 7236652 | 1464902 | calcium channel, voltage-dependent, N type, alpha 1B subunit | Cacna1b | 257648 | 1,38 | up   |
| 6700864 | 7236652 | 1464892 | calcium channel, voltage-dependent, N type, alpha 1B subunit | Cacna1b | 257648 | 1,36 | down |
| 5681197 | 7236652 | 1464922 | calcium channel, voltage-dependent, N type, alpha 1B subunit | Cacna1b | 257648 | 1,35 | down |
| 6680539 | 7236652 | 1464919 | calcium channel, voltage-dependent, N type, alpha 1B subunit | Cacna1b | 257648 | 1,33 | down |
| 6567583 | 7236652 | 1464877 | calcium channel, voltage-dependent, N type, alpha 1B subunit | Cacna1b | 257648 | 1,29 | down |
| 6073667 | 7236652 | 1464906 | calcium channel, voltage-dependent, N type, alpha 1B subunit | Cacna1b | 257648 | 1,27 | down |
| 5699327 | 7236652 | 1464890 | calcium channel, voltage-dependent, N type, alpha 1B subunit | Cacna1b | 257648 | 1,27 | down |
| 5919376 | 7236652 | 1464905 | calcium channel, voltage-dependent, N type, alpha 1B subunit | Cacna1b | 257648 | 1,25 | up   |
| 5685144 | 7236652 | 1464878 | calcium channel, voltage-dependent, N type, alpha 1B subunit | Cacna1b | 257648 | 1,25 | up   |
| 6330424 | 7236652 | 1464912 | calcium channel, voltage-dependent, N type, alpha 1B subunit | Cacna1b | 257648 | 1,23 | up   |
| 6724135 | 7236652 | 1464889 | calcium channel, voltage-dependent, N type, alpha 1B subunit | Cacna1b | 257648 | 1,22 | down |
| 6452785 | 7236652 | 1464916 | calcium channel, voltage-dependent, N type, alpha 1B subunit | Cacna1b | 257648 | 1,22 | down |
| 5705366 | 7236652 | 1464900 | calcium channel, voltage-dependent, N type, alpha 1B subunit | Cacna1b | 257648 | 1,20 | down |
| 6370147 | 7236652 | 1464885 | calcium channel, voltage-dependent, N type, alpha 1B subunit | Cacna1b | 257648 | 1,20 | down |
| 5693682 | 7236652 | 1464896 | calcium channel, voltage-dependent, N type, alpha 1B subunit | Cacna1b | 257648 | 1,19 | up   |
| 6716140 | 7236652 | 1464891 | calcium channel, voltage-dependent, N type, alpha 1B subunit | Cacna1b | 257648 | 1,19 | down |
| 6723785 | 7236652 | 1464923 | calcium channel, voltage-dependent, N type, alpha 1B subunit | Cacna1b | 257648 | 1,17 | up   |
| 5953563 | 7236652 | 1464923 | calcium channel, voltage-dependent, N type, alpha 1B subunit | Cacna1b | 257648 | 1,17 | up   |
| 6648581 | 7236652 | 1464908 | calcium channel, voltage-dependent, N type, alpha 1B subunit | Cacna1b | 257648 | 1,17 | down |

|         |         |         |                                                                |         |        |      |      |
|---------|---------|---------|----------------------------------------------------------------|---------|--------|------|------|
| 5690407 | 7236652 | 1464903 | calcium channel, voltage-dependent, N type, alpha 1B subunit   | Cacna1b | 257648 | 1,16 | up   |
| 5895445 | 7236652 | 1464877 | calcium channel, voltage-dependent, N type, alpha 1B subunit   | Cacna1b | 257648 | 1,16 | up   |
| 6515344 | 7236652 | 1464913 | calcium channel, voltage-dependent, N type, alpha 1B subunit   | Cacna1b | 257648 | 1,15 | down |
| 5652403 | 7236652 | 1464904 | calcium channel, voltage-dependent, N type, alpha 1B subunit   | Cacna1b | 257648 | 1,12 | up   |
| 5978791 | 7236652 | 1464909 | calcium channel, voltage-dependent, N type, alpha 1B subunit   | Cacna1b | 257648 | 1,11 | up   |
| 6378756 | 7236652 | 1464881 | calcium channel, voltage-dependent, N type, alpha 1B subunit   | Cacna1b | 257648 | 1,11 | up   |
| 6504476 | 7236652 | 1464911 | calcium channel, voltage-dependent, N type, alpha 1B subunit   | Cacna1b | 257648 | 1,09 | down |
| 6337671 | 7236652 | 1464907 | calcium channel, voltage-dependent, N type, alpha 1B subunit   | Cacna1b | 257648 | 1,08 | down |
| 6634697 | 7236652 | 1464897 | calcium channel, voltage-dependent, N type, alpha 1B subunit   | Cacna1b | 257648 | 1,07 | up   |
| 6230828 | 7236652 | 1464901 | calcium channel, voltage-dependent, N type, alpha 1B subunit   | Cacna1b | 257648 | 1,07 | down |
| 6195943 | 7236652 | 1464903 | calcium channel, voltage-dependent, N type, alpha 1B subunit   | Cacna1b | 257648 | 1,07 | up   |
| 5719705 | 7236652 | 1464921 | calcium channel, voltage-dependent, N type, alpha 1B subunit   | Cacna1b | 257648 | 1,06 | up   |
| 5998194 | 7236652 | 1464887 | calcium channel, voltage-dependent, N type, alpha 1B subunit   | Cacna1b | 257648 | 1,05 | up   |
| 6047224 | 7236652 | 1464899 | calcium channel, voltage-dependent, N type, alpha 1B subunit   | Cacna1b | 257648 | 1,04 | down |
| 5845214 | 7236652 | 1464894 | calcium channel, voltage-dependent, N type, alpha 1B subunit   | Cacna1b | 257648 | 1,03 | up   |
| 6680638 | 7236652 | 1464918 | calcium channel, voltage-dependent, N type, alpha 1B subunit   | Cacna1b | 257648 | 1,03 | down |
| 5693289 | 7236652 | 1464910 | calcium channel, voltage-dependent, N type, alpha 1B subunit   | Cacna1b | 257648 | 1,01 | up   |
| 5784178 | 7236652 | 1464883 | calcium channel, voltage-dependent, N type, alpha 1B subunit   | Cacna1b | 257648 | 1,01 | up   |
| 6552597 | 7236652 | 1464920 | calcium channel, voltage-dependent, N type, alpha 1B subunit   | Cacna1b | 257648 | 1,01 | down |
| 6326611 | 7236652 | 1464917 | calcium channel, voltage-dependent, N type, alpha 1B subunit   | Cacna1b | 257648 | 1,01 | down |
| 6146157 | 7236652 | 1464904 | calcium channel, voltage-dependent, N type, alpha 1B subunit   | Cacna1b | 257648 | 1,01 | down |
| 6098253 | 7236652 | 1464893 | calcium channel, voltage-dependent, N type, alpha 1B subunit   | Cacna1b | 257648 | 1,00 | down |
| 6524052 | 7184073 | 1335828 | calcium channel, voltage-dependent, P/Q type, alpha 1A subunit | Cacna1a | 25398  | 2,48 | up   |
| 6394527 | 7184073 | 1335829 | calcium channel, voltage-dependent, P/Q type, alpha 1A subunit | Cacna1a | 25398  | 2,15 | up   |
| 5875411 | 7184073 | 1335819 | calcium channel, voltage-dependent, P/Q type, alpha 1A subunit | Cacna1a | 25398  | 1,75 | down |
| 5655079 | 7184073 | 1335808 | calcium channel, voltage-dependent, P/Q type, alpha 1A subunit | Cacna1a | 25398  | 1,72 | up   |
| 6428418 | 7184073 | 1335847 | calcium channel, voltage-dependent, P/Q type, alpha 1A subunit | Cacna1a | 25398  | 1,69 | down |
| 5641130 | 7184073 | 1335829 | calcium channel, voltage-dependent, P/Q type, alpha 1A subunit | Cacna1a | 25398  | 1,63 | up   |
| 5954008 | 7184073 | 1335830 | calcium channel, voltage-dependent, P/Q type, alpha 1A subunit | Cacna1a | 25398  | 1,62 | up   |
| 6446961 | 7184073 | 1335839 | calcium channel, voltage-dependent, P/Q type, alpha 1A subunit | Cacna1a | 25398  | 1,56 | up   |
| 6313279 | 7184073 | 1335805 | calcium channel, voltage-dependent, P/Q type, alpha 1A subunit | Cacna1a | 25398  | 1,53 | down |
| 5951927 | 7184073 | 1335836 | calcium channel, voltage-dependent, P/Q type, alpha 1A subunit | Cacna1a | 25398  | 1,51 | up   |
| 6648801 | 7184073 | 1335838 | calcium channel, voltage-dependent, P/Q type, alpha 1A subunit | Cacna1a | 25398  | 1,51 | up   |
| 6613515 | 7184073 | 1335821 | calcium channel, voltage-dependent, P/Q type, alpha 1A subunit | Cacna1a | 25398  | 1,50 | down |
| 6599668 | 7184073 | 1335823 | calcium channel, voltage-dependent, P/Q type, alpha 1A subunit | Cacna1a | 25398  | 1,49 | down |
| 6288265 | 7184073 | 1335802 | calcium channel, voltage-dependent, P/Q type, alpha 1A subunit | Cacna1a | 25398  | 1,48 | up   |
| 6122731 | 7184073 | 1335825 | calcium channel, voltage-dependent, P/Q type, alpha 1A subunit | Cacna1a | 25398  | 1,44 | up   |
| 5786596 | 7184073 | 1335827 | calcium channel, voltage-dependent, P/Q type, alpha 1A subunit | Cacna1a | 25398  | 1,38 | down |
| 6236315 | 7184073 | 1335831 | calcium channel, voltage-dependent, P/Q type, alpha 1A subunit | Cacna1a | 25398  | 1,36 | up   |
| 5997470 | 7184073 | 1335800 | calcium channel, voltage-dependent, P/Q type, alpha 1A subunit | Cacna1a | 25398  | 1,33 | up   |
| 6490812 | 7184073 | 1335806 | calcium channel, voltage-dependent, P/Q type, alpha 1A subunit | Cacna1a | 25398  | 1,33 | up   |
| 6044788 | 7184073 | 1335809 | calcium channel, voltage-dependent, P/Q type, alpha 1A subunit | Cacna1a | 25398  | 1,29 | down |
| 6717827 | 7184073 | 1335847 | calcium channel, voltage-dependent, P/Q type, alpha 1A subunit | Cacna1a | 25398  | 1,29 | down |
| 5752722 | 7184073 | 1335804 | calcium channel, voltage-dependent, P/Q type, alpha 1A subunit | Cacna1a | 25398  | 1,27 | up   |
| 6568025 | 7184073 | 1335818 | calcium channel, voltage-dependent, P/Q type, alpha 1A subunit | Cacna1a | 25398  | 1,26 | down |
| 6047036 | 7184073 | 1335807 | calcium channel, voltage-dependent, P/Q type, alpha 1A subunit | Cacna1a | 25398  | 1,26 | up   |
| 6278342 | 7184073 | 1335829 | calcium channel, voltage-dependent, P/Q type, alpha 1A subunit | Cacna1a | 25398  | 1,25 | up   |
| 6222953 | 7184073 | 1335810 | calcium channel, voltage-dependent, P/Q type, alpha 1A subunit | Cacna1a | 25398  | 1,24 | down |
| 5917492 | 7184073 | 1335837 | calcium channel, voltage-dependent, P/Q type, alpha 1A subunit | Cacna1a | 25398  | 1,21 | down |
| 6042459 | 7184073 | 1335835 | calcium channel, voltage-dependent, P/Q type, alpha 1A subunit | Cacna1a | 25398  | 1,21 | down |
| 6712741 | 7184073 | 1335822 | calcium channel, voltage-dependent, P/Q type, alpha 1A subunit | Cacna1a | 25398  | 1,21 | up   |
| 5657636 | 7184073 | 1335826 | calcium channel, voltage-dependent, P/Q type, alpha 1A subunit | Cacna1a | 25398  | 1,18 | up   |
| 5815761 | 7184073 | 1335824 | calcium channel, voltage-dependent, P/Q type, alpha 1A subunit | Cacna1a | 25398  | 1,15 | down |
| 6069593 | 7184073 | 1335840 | calcium channel, voltage-dependent, P/Q type, alpha 1A subunit | Cacna1a | 25398  | 1,14 | up   |
| 5758821 | 7184073 | 1335816 | calcium channel, voltage-dependent, P/Q type, alpha 1A subunit | Cacna1a | 25398  | 1,13 | down |
| 5701554 | 7184073 | 1335814 | calcium channel, voltage-dependent, P/Q type, alpha 1A subunit | Cacna1a | 25398  | 1,13 | up   |
| 5705904 | 7184073 | 1335812 | calcium channel, voltage-dependent, P/Q type, alpha 1A subunit | Cacna1a | 25398  | 1,12 | up   |

|         |         |         |                                                                |         |       |      |      |
|---------|---------|---------|----------------------------------------------------------------|---------|-------|------|------|
| 5671867 | 7184073 | 1335813 | calcium channel, voltage-dependent, P/Q type, alpha 1A subunit | Cacna1a | 25398 | 1,11 | down |
| 6283078 | 7184073 | 1335844 | calcium channel, voltage-dependent, P/Q type, alpha 1A subunit | Cacna1a | 25398 | 1,11 | up   |
| 6546340 | 7184073 | 1335843 | calcium channel, voltage-dependent, P/Q type, alpha 1A subunit | Cacna1a | 25398 | 1,09 | up   |
| 6343605 | 7184073 | 1335846 | calcium channel, voltage-dependent, P/Q type, alpha 1A subunit | Cacna1a | 25398 | 1,09 | down |
| 6377217 | 7184073 | 1335817 | calcium channel, voltage-dependent, P/Q type, alpha 1A subunit | Cacna1a | 25398 | 1,09 | down |
| 6076291 | 7184073 | 1335845 | calcium channel, voltage-dependent, P/Q type, alpha 1A subunit | Cacna1a | 25398 | 1,08 | down |
| 6413385 | 7184073 | 1335843 | calcium channel, voltage-dependent, P/Q type, alpha 1A subunit | Cacna1a | 25398 | 1,07 | down |
| 6711943 | 7184073 | 1335847 | calcium channel, voltage-dependent, P/Q type, alpha 1A subunit | Cacna1a | 25398 | 1,06 | up   |
| 6071216 | 7184073 | 1335820 | calcium channel, voltage-dependent, P/Q type, alpha 1A subunit | Cacna1a | 25398 | 1,06 | down |
| 5971097 | 7184073 | 1335803 | calcium channel, voltage-dependent, P/Q type, alpha 1A subunit | Cacna1a | 25398 | 1,05 | down |
| 6087574 | 7184073 | 1335842 | calcium channel, voltage-dependent, P/Q type, alpha 1A subunit | Cacna1a | 25398 | 1,05 | down |
| 6419824 | 7184073 | 1335815 | calcium channel, voltage-dependent, P/Q type, alpha 1A subunit | Cacna1a | 25398 | 1,04 | up   |
| 6586604 | 7184073 | 1335834 | calcium channel, voltage-dependent, P/Q type, alpha 1A subunit | Cacna1a | 25398 | 1,03 | up   |
| 5912039 | 7184073 | 1335801 | calcium channel, voltage-dependent, P/Q type, alpha 1A subunit | Cacna1a | 25398 | 1,03 | down |
| 5894920 | 7184073 | 1335833 | calcium channel, voltage-dependent, P/Q type, alpha 1A subunit | Cacna1a | 25398 | 1,02 | up   |
| 6414787 | 7184073 | 1335832 | calcium channel, voltage-dependent, P/Q type, alpha 1A subunit | Cacna1a | 25398 | 1,02 | up   |
| 6476174 | 7184073 | 1335841 | calcium channel, voltage-dependent, P/Q type, alpha 1A subunit | Cacna1a | 25398 | 1,01 | down |
| 6226449 | 7184073 | 1335811 | calcium channel, voltage-dependent, P/Q type, alpha 1A subunit | Cacna1a | 25398 | 1,00 | down |
| 6279645 | 7112511 | 1158453 | calcium channel, voltage-dependent, R type, alpha 1E subunit   | Cacna1e | 54234 | 2,23 | down |
| 5713387 | 7112511 | 1158435 | calcium channel, voltage-dependent, R type, alpha 1E subunit   | Cacna1e | 54234 | 1,80 | down |
| 5716514 | 7112511 | 1158410 | calcium channel, voltage-dependent, R type, alpha 1E subunit   | Cacna1e | 54234 | 1,75 | down |
| 6623490 | 7112511 | 1158405 | calcium channel, voltage-dependent, R type, alpha 1E subunit   | Cacna1e | 54234 | 1,74 | down |
| 6680787 | 7112511 | 1158416 | calcium channel, voltage-dependent, R type, alpha 1E subunit   | Cacna1e | 54234 | 1,60 | up   |
| 6426268 | 7112511 | 1158430 | calcium channel, voltage-dependent, R type, alpha 1E subunit   | Cacna1e | 54234 | 1,57 | up   |
| 6612369 | 7112511 | 1158433 | calcium channel, voltage-dependent, R type, alpha 1E subunit   | Cacna1e | 54234 | 1,54 | up   |
| 5810409 | 7112511 | 1158426 | calcium channel, voltage-dependent, R type, alpha 1E subunit   | Cacna1e | 54234 | 1,52 | up   |
| 6556446 | 7112511 | 1158451 | calcium channel, voltage-dependent, R type, alpha 1E subunit   | Cacna1e | 54234 | 1,44 | up   |
| 6730199 | 7112511 | 1158445 | calcium channel, voltage-dependent, R type, alpha 1E subunit   | Cacna1e | 54234 | 1,35 | up   |
| 6415673 | 7112511 | 1158442 | calcium channel, voltage-dependent, R type, alpha 1E subunit   | Cacna1e | 54234 | 1,30 | up   |
| 6687487 | 7112511 | 1158423 | calcium channel, voltage-dependent, R type, alpha 1E subunit   | Cacna1e | 54234 | 1,26 | down |
| 5829382 | 7112511 | 1158436 | calcium channel, voltage-dependent, R type, alpha 1E subunit   | Cacna1e | 54234 | 1,26 | down |
| 5692190 | 7112511 | 1158413 | calcium channel, voltage-dependent, R type, alpha 1E subunit   | Cacna1e | 54234 | 1,25 | up   |
| 6591824 | 7112511 | 1158408 | calcium channel, voltage-dependent, R type, alpha 1E subunit   | Cacna1e | 54234 | 1,24 | down |
| 5955517 | 7112511 | 1158434 | calcium channel, voltage-dependent, R type, alpha 1E subunit   | Cacna1e | 54234 | 1,24 | up   |
| 6086084 | 7112511 | 1158429 | calcium channel, voltage-dependent, R type, alpha 1E subunit   | Cacna1e | 54234 | 1,23 | down |
| 6366760 | 7112511 | 1158422 | calcium channel, voltage-dependent, R type, alpha 1E subunit   | Cacna1e | 54234 | 1,23 | down |
| 5850104 | 7112511 | 1158437 | calcium channel, voltage-dependent, R type, alpha 1E subunit   | Cacna1e | 54234 | 1,21 | down |
| 6557893 | 7112511 | 1158432 | calcium channel, voltage-dependent, R type, alpha 1E subunit   | Cacna1e | 54234 | 1,20 | down |
| 5896059 | 7112511 | 1158409 | calcium channel, voltage-dependent, R type, alpha 1E subunit   | Cacna1e | 54234 | 1,20 | up   |
| 6313331 | 7112511 | 1158428 | calcium channel, voltage-dependent, R type, alpha 1E subunit   | Cacna1e | 54234 | 1,19 | down |
| 6461408 | 7112511 | 1158448 | calcium channel, voltage-dependent, R type, alpha 1E subunit   | Cacna1e | 54234 | 1,19 | up   |
| 6389602 | 7112511 | 1158417 | calcium channel, voltage-dependent, R type, alpha 1E subunit   | Cacna1e | 54234 | 1,18 | down |
| 5917892 | 7112511 | 1158443 | calcium channel, voltage-dependent, R type, alpha 1E subunit   | Cacna1e | 54234 | 1,16 | down |
| 6640204 | 7112511 | 1158449 | calcium channel, voltage-dependent, R type, alpha 1E subunit   | Cacna1e | 54234 | 1,16 | up   |
| 5895641 | 7112511 | 1158450 | calcium channel, voltage-dependent, R type, alpha 1E subunit   | Cacna1e | 54234 | 1,15 | up   |
| 5856211 | 7112511 | 1158452 | calcium channel, voltage-dependent, R type, alpha 1E subunit   | Cacna1e | 54234 | 1,14 | down |
| 6641235 | 7112511 | 1158414 | calcium channel, voltage-dependent, R type, alpha 1E subunit   | Cacna1e | 54234 | 1,13 | up   |
| 5755346 | 7112511 | 1158427 | calcium channel, voltage-dependent, R type, alpha 1E subunit   | Cacna1e | 54234 | 1,12 | up   |
| 6599024 | 7112511 | 1158436 | calcium channel, voltage-dependent, R type, alpha 1E subunit   | Cacna1e | 54234 | 1,10 | down |
| 6621295 | 7112511 | 1158421 | calcium channel, voltage-dependent, R type, alpha 1E subunit   | Cacna1e | 54234 | 1,10 | down |
| 5725888 | 7112511 | 1158439 | calcium channel, voltage-dependent, R type, alpha 1E subunit   | Cacna1e | 54234 | 1,10 | up   |
| 6588677 | 7112511 | 1158438 | calcium channel, voltage-dependent, R type, alpha 1E subunit   | Cacna1e | 54234 | 1,09 | down |
| 5798180 | 7112511 | 1158415 | calcium channel, voltage-dependent, R type, alpha 1E subunit   | Cacna1e | 54234 | 1,07 | down |
| 6489307 | 7112511 | 1158446 | calcium channel, voltage-dependent, R type, alpha 1E subunit   | Cacna1e | 54234 | 1,06 | up   |
| 6559778 | 7112511 | 1158417 | calcium channel, voltage-dependent, R type, alpha 1E subunit   | Cacna1e | 54234 | 1,06 | up   |
| 6591441 | 7112511 | 1158406 | calcium channel, voltage-dependent, R type, alpha 1E subunit   | Cacna1e | 54234 | 1,06 | up   |
| 5778662 | 7112511 | 1158419 | calcium channel, voltage-dependent, R type, alpha 1E subunit   | Cacna1e | 54234 | 1,05 | up   |

|         |         |         |                                                              |         |       |      |      |
|---------|---------|---------|--------------------------------------------------------------|---------|-------|------|------|
| 5676921 | 7112511 | 1158412 | calcium channel, voltage-dependent, R type, alpha 1E subunit | Cacna1e | 54234 | 1,04 | up   |
| 6004300 | 7112511 | 1158441 | calcium channel, voltage-dependent, R type, alpha 1E subunit | Cacna1e | 54234 | 1,04 | up   |
| 5729335 | 7112511 | 1158431 | calcium channel, voltage-dependent, R type, alpha 1E subunit | Cacna1e | 54234 | 1,04 | up   |
| 6570584 | 7112511 | 1158444 | calcium channel, voltage-dependent, R type, alpha 1E subunit | Cacna1e | 54234 | 1,04 | up   |
| 5633770 | 7112511 | 1158406 | calcium channel, voltage-dependent, R type, alpha 1E subunit | Cacna1e | 54234 | 1,03 | up   |
| 6119436 | 7112511 | 1158438 | calcium channel, voltage-dependent, R type, alpha 1E subunit | Cacna1e | 54234 | 1,02 | down |
| 5772533 | 7112511 | 1158424 | calcium channel, voltage-dependent, R type, alpha 1E subunit | Cacna1e | 54234 | 1,02 | down |
| 6089712 | 7112511 | 1158440 | calcium channel, voltage-dependent, R type, alpha 1E subunit | Cacna1e | 54234 | 1,02 | up   |
| 5821321 | 7112511 | 1158420 | calcium channel, voltage-dependent, R type, alpha 1E subunit | Cacna1e | 54234 | 1,01 | up   |
| 6066123 | 7112511 | 1158453 | calcium channel, voltage-dependent, R type, alpha 1E subunit | Cacna1e | 54234 | 1,01 | up   |
| 5721757 | 7112511 | 1158407 | calcium channel, voltage-dependent, R type, alpha 1E subunit | Cacna1e | 54234 | 1,01 | down |
| 6114853 | 7112511 | 1158418 | calcium channel, voltage-dependent, R type, alpha 1E subunit | Cacna1e | 54234 | 1,01 | down |
| 5695032 | 7112511 | 1158411 | calcium channel, voltage-dependent, R type, alpha 1E subunit | Cacna1e | 54234 | 1,00 | up   |
| 5959197 | 7112511 | 1158425 | calcium channel, voltage-dependent, R type, alpha 1E subunit | Cacna1e | 54234 | 1,00 | up   |
| 6429414 | 7112511 | 1158447 | calcium channel, voltage-dependent, R type, alpha 1E subunit | Cacna1e | 54234 | 1,00 | down |
| 5806314 | 7081722 | 1083232 | calcium channel, voltage-dependent, T type, alpha 1G subunit | Cacna1g | 29717 | 2,05 | down |
| 6745010 | 7081722 | 1083252 | calcium channel, voltage-dependent, T type, alpha 1G subunit | Cacna1g | 29717 | 1,80 | down |
| 6284105 | 7081722 | 1083257 | calcium channel, voltage-dependent, T type, alpha 1G subunit | Cacna1g | 29717 | 1,67 | down |
| 6661966 | 7081722 | 1083233 | calcium channel, voltage-dependent, T type, alpha 1G subunit | Cacna1g | 29717 | 1,59 | up   |
| 6028457 | 7081722 | 1083251 | calcium channel, voltage-dependent, T type, alpha 1G subunit | Cacna1g | 29717 | 1,57 | down |
| 5637925 | 7081722 | 1083252 | calcium channel, voltage-dependent, T type, alpha 1G subunit | Cacna1g | 29717 | 1,57 | down |
| 6061037 | 7081722 | 1083239 | calcium channel, voltage-dependent, T type, alpha 1G subunit | Cacna1g | 29717 | 1,55 | up   |
| 6404857 | 7081722 | 1083226 | calcium channel, voltage-dependent, T type, alpha 1G subunit | Cacna1g | 29717 | 1,50 | up   |
| 6665000 | 7081722 | 1083231 | calcium channel, voltage-dependent, T type, alpha 1G subunit | Cacna1g | 29717 | 1,49 | down |
| 6632218 | 7081722 | 1083248 | calcium channel, voltage-dependent, T type, alpha 1G subunit | Cacna1g | 29717 | 1,47 | up   |
| 6532792 | 7081722 | 1083259 | calcium channel, voltage-dependent, T type, alpha 1G subunit | Cacna1g | 29717 | 1,45 | up   |
| 5725259 | 7081722 | 1083229 | calcium channel, voltage-dependent, T type, alpha 1G subunit | Cacna1g | 29717 | 1,43 | down |
| 6643904 | 7081722 | 1083252 | calcium channel, voltage-dependent, T type, alpha 1G subunit | Cacna1g | 29717 | 1,39 | down |
| 5828880 | 7081722 | 1083229 | calcium channel, voltage-dependent, T type, alpha 1G subunit | Cacna1g | 29717 | 1,33 | down |
| 5844991 | 7081722 | 1083241 | calcium channel, voltage-dependent, T type, alpha 1G subunit | Cacna1g | 29717 | 1,33 | up   |
| 6364162 | 7081722 | 1083236 | calcium channel, voltage-dependent, T type, alpha 1G subunit | Cacna1g | 29717 | 1,32 | up   |
| 5866318 | 7081722 | 1083230 | calcium channel, voltage-dependent, T type, alpha 1G subunit | Cacna1g | 29717 | 1,30 | down |
| 5997497 | 7081722 | 1083252 | calcium channel, voltage-dependent, T type, alpha 1G subunit | Cacna1g | 29717 | 1,29 | down |
| 5819741 | 7081722 | 1083250 | calcium channel, voltage-dependent, T type, alpha 1G subunit | Cacna1g | 29717 | 1,25 | down |
| 6402725 | 7081722 | 1083228 | calcium channel, voltage-dependent, T type, alpha 1G subunit | Cacna1g | 29717 | 1,20 | up   |
| 5683715 | 7081722 | 1083246 | calcium channel, voltage-dependent, T type, alpha 1G subunit | Cacna1g | 29717 | 1,20 | down |
| 6042980 | 7081722 | 1083237 | calcium channel, voltage-dependent, T type, alpha 1G subunit | Cacna1g | 29717 | 1,15 | down |
| 6121770 | 7081722 | 1083252 | calcium channel, voltage-dependent, T type, alpha 1G subunit | Cacna1g | 29717 | 1,15 | up   |
| 5774311 | 7081722 | 1083242 | calcium channel, voltage-dependent, T type, alpha 1G subunit | Cacna1g | 29717 | 1,14 | up   |
| 5971305 | 7081722 | 1083258 | calcium channel, voltage-dependent, T type, alpha 1G subunit | Cacna1g | 29717 | 1,14 | up   |
| 6563976 | 7081722 | 1083244 | calcium channel, voltage-dependent, T type, alpha 1G subunit | Cacna1g | 29717 | 1,13 | down |
| 6322224 | 7081722 | 1083225 | calcium channel, voltage-dependent, T type, alpha 1G subunit | Cacna1g | 29717 | 1,11 | down |
| 6380409 | 7081722 | 1083235 | calcium channel, voltage-dependent, T type, alpha 1G subunit | Cacna1g | 29717 | 1,11 | up   |
| 5978946 | 7081722 | 1083245 | calcium channel, voltage-dependent, T type, alpha 1G subunit | Cacna1g | 29717 | 1,10 | down |
| 6359912 | 7081722 | 1083243 | calcium channel, voltage-dependent, T type, alpha 1G subunit | Cacna1g | 29717 | 1,09 | down |
| 5857958 | 7081722 | 1083256 | calcium channel, voltage-dependent, T type, alpha 1G subunit | Cacna1g | 29717 | 1,08 | down |
| 6738489 | 7081722 | 1083234 | calcium channel, voltage-dependent, T type, alpha 1G subunit | Cacna1g | 29717 | 1,08 | up   |
| 6601769 | 7081722 | 1083247 | calcium channel, voltage-dependent, T type, alpha 1G subunit | Cacna1g | 29717 | 1,08 | down |
| 6181262 | 7081722 | 1083254 | calcium channel, voltage-dependent, T type, alpha 1G subunit | Cacna1g | 29717 | 1,07 | up   |
| 6059214 | 7081722 | 1083253 | calcium channel, voltage-dependent, T type, alpha 1G subunit | Cacna1g | 29717 | 1,06 | up   |
| 5695895 | 7081722 | 1083227 | calcium channel, voltage-dependent, T type, alpha 1G subunit | Cacna1g | 29717 | 1,04 | up   |
| 5903436 | 7081722 | 1083259 | calcium channel, voltage-dependent, T type, alpha 1G subunit | Cacna1g | 29717 | 1,04 | down |
| 6240238 | 7081722 | 1083252 | calcium channel, voltage-dependent, T type, alpha 1G subunit | Cacna1g | 29717 | 1,03 | up   |
| 5671228 | 7081722 | 1083240 | calcium channel, voltage-dependent, T type, alpha 1G subunit | Cacna1g | 29717 | 1,03 | down |
| 6661155 | 7081722 | 1083249 | calcium channel, voltage-dependent, T type, alpha 1G subunit | Cacna1g | 29717 | 1,01 | up   |
| 6102018 | 7081722 | 1083255 | calcium channel, voltage-dependent, T type, alpha 1G subunit | Cacna1g | 29717 | 1,01 | up   |
| 5630099 | 7081722 | 1083224 | calcium channel, voltage-dependent, T type, alpha 1G subunit | Cacna1g | 29717 | 1,00 | up   |

|         |         |         |                                                              |         |        |      |      |
|---------|---------|---------|--------------------------------------------------------------|---------|--------|------|------|
| 6466805 | 7081722 | 1083238 | calcium channel, voltage-dependent, T type, alpha 1G subunit | Cacna1g | 29717  | 1,00 | down |
| 5715715 | 7161982 | 1280140 | calcium modulating ligand                                    | Cam1g   | 81715  | 2,19 | up   |
| 6381457 | 7161982 | 1280139 | calcium modulating ligand                                    | Cam1g   | 81715  | 1,64 | up   |
| 6124717 | 7161982 | 1280138 | calcium modulating ligand                                    | Cam1g   | 81715  | 1,63 | down |
| 6329172 | 7161982 | 1280137 | calcium modulating ligand                                    | Cam1g   | 81715  | 1,35 | down |
| 6047213 | 7161982 | 1280135 | calcium modulating ligand                                    | Cam1g   | 81715  | 1,19 | down |
| 6667933 | 7161982 | 1280136 | calcium modulating ligand                                    | Cam1g   | 81715  | 1,18 | down |
| 5722229 | 7115630 | 1166291 | calcium/calmodulin-dependent protein kinase IG               | Camk1g  | 171358 | 2,53 | up   |
| 6523531 | 7115630 | 1166279 | calcium/calmodulin-dependent protein kinase IG               | Camk1g  | 171358 | 1,32 | up   |
| 6115123 | 7115630 | 1166285 | calcium/calmodulin-dependent protein kinase IG               | Camk1g  | 171358 | 1,30 | up   |
| 6670392 | 7115630 | 1166281 | calcium/calmodulin-dependent protein kinase IG               | Camk1g  | 171358 | 1,30 | down |
| 6640439 | 7115630 | 1166286 | calcium/calmodulin-dependent protein kinase IG               | Camk1g  | 171358 | 1,27 | down |
| 5868649 | 7115630 | 1166280 | calcium/calmodulin-dependent protein kinase IG               | Camk1g  | 171358 | 1,21 | down |
| 6341316 | 7115630 | 1166282 | calcium/calmodulin-dependent protein kinase IG               | Camk1g  | 171358 | 1,17 | up   |
| 6435203 | 7115630 | 1166279 | calcium/calmodulin-dependent protein kinase IG               | Camk1g  | 171358 | 1,14 | up   |
| 5826038 | 7115630 | 1166291 | calcium/calmodulin-dependent protein kinase IG               | Camk1g  | 171358 | 1,13 | down |
| 5705226 | 7115630 | 1166290 | calcium/calmodulin-dependent protein kinase IG               | Camk1g  | 171358 | 1,11 | down |
| 6718295 | 7115630 | 1166284 | calcium/calmodulin-dependent protein kinase IG               | Camk1g  | 171358 | 1,10 | down |
| 6386621 | 7115630 | 1166283 | calcium/calmodulin-dependent protein kinase IG               | Camk1g  | 171358 | 1,10 | down |
| 5705772 | 7115630 | 1166287 | calcium/calmodulin-dependent protein kinase IG               | Camk1g  | 171358 | 1,06 | down |
| 5702838 | 7115630 | 1166289 | calcium/calmodulin-dependent protein kinase IG               | Camk1g  | 171358 | 1,04 | down |
| 5855493 | 7115630 | 1166286 | calcium/calmodulin-dependent protein kinase IG               | Camk1g  | 171358 | 1,01 | up   |
| 6335697 | 7115630 | 1166288 | calcium/calmodulin-dependent protein kinase IG               | Camk1g  | 171358 | 1,00 | up   |
| 6315318 | 7093768 | 1112069 | calcium-sensing receptor                                     | Casr    | 24247  | 2,63 | down |
| 6630411 | 7093768 | 1112076 | calcium-sensing receptor                                     | Casr    | 24247  | 2,41 | up   |
| 5689912 | 7093768 | 1112075 | calcium-sensing receptor                                     | Casr    | 24247  | 1,71 | down |
| 5693272 | 7093768 | 1112077 | calcium-sensing receptor                                     | Casr    | 24247  | 1,67 | up   |
| 6222973 | 7093768 | 1112068 | calcium-sensing receptor                                     | Casr    | 24247  | 1,61 | up   |
| 6352097 | 7093768 | 1112072 | calcium-sensing receptor                                     | Casr    | 24247  | 1,56 | down |
| 5718382 | 7093768 | 1112075 | calcium-sensing receptor                                     | Casr    | 24247  | 1,41 | down |
| 6361950 | 7093768 | 1112071 | calcium-sensing receptor                                     | Casr    | 24247  | 1,37 | down |
| 6648461 | 7093768 | 1112069 | calcium-sensing receptor                                     | Casr    | 24247  | 1,33 | down |
| 6407337 | 7093768 | 1112070 | calcium-sensing receptor                                     | Casr    | 24247  | 1,27 | up   |
| 5727744 | 7093768 | 1112074 | calcium-sensing receptor                                     | Casr    | 24247  | 1,26 | down |
| 6248830 | 7093768 | 1112069 | calcium-sensing receptor                                     | Casr    | 24247  | 1,23 | up   |
| 6432872 | 7093768 | 1112073 | calcium-sensing receptor                                     | Casr    | 24247  | 1,23 | down |
| 5999840 | 7093768 | 1112069 | calcium-sensing receptor                                     | Casr    | 24247  | 1,20 | down |
| 5704608 | 7093768 | 1112069 | calcium-sensing receptor                                     | Casr    | 24247  | 1,14 | up   |
| 5828674 | 7093768 | 1112067 | calcium-sensing receptor                                     | Casr    | 24247  | 1,04 | up   |
| 6399271 | 7030224 | 961124  | calpain 12                                                   | Capn12  | 308476 | 1,88 | down |
| 6149612 | 7030224 | 961127  | calpain 12                                                   | Capn12  | 308476 | 1,73 | up   |
| 6715518 | 7030224 | 961123  | calpain 12                                                   | Capn12  | 308476 | 1,64 | up   |
| 5700808 | 7030224 | 961116  | calpain 12                                                   | Capn12  | 308476 | 1,53 | down |
| 5982794 | 7030224 | 961132  | calpain 12                                                   | Capn12  | 308476 | 1,38 | up   |
| 5936246 | 7030224 | 961130  | calpain 12                                                   | Capn12  | 308476 | 1,35 | down |
| 6713490 | 7030224 | 961119  | calpain 12                                                   | Capn12  | 308476 | 1,29 | down |
| 6182845 | 7030224 | 961118  | calpain 12                                                   | Capn12  | 308476 | 1,20 | down |
| 6433409 | 7030224 | 961121  | calpain 12                                                   | Capn12  | 308476 | 1,18 | up   |
| 6276141 | 7030224 | 961137  | calpain 12                                                   | Capn12  | 308476 | 1,16 | down |
| 6170994 | 7030224 | 961122  | calpain 12                                                   | Capn12  | 308476 | 1,14 | down |
| 6590890 | 7030224 | 961117  | calpain 12                                                   | Capn12  | 308476 | 1,12 | up   |
| 6131773 | 7030224 | 961126  | calpain 12                                                   | Capn12  | 308476 | 1,10 | down |
| 6389467 | 7030224 | 961125  | calpain 12                                                   | Capn12  | 308476 | 1,10 | up   |
| 6448624 | 7030224 | 961128  | calpain 12                                                   | Capn12  | 308476 | 1,09 | up   |
| 6696508 | 7030224 | 961136  | calpain 12                                                   | Capn12  | 308476 | 1,07 | up   |
| 6483623 | 7030224 | 961131  | calpain 12                                                   | Capn12  | 308476 | 1,06 | up   |
| 6185175 | 7030224 | 961137  | calpain 12                                                   | Capn12  | 308476 | 1,06 | up   |



|         |         |         |                          |        |        |      |      |
|---------|---------|---------|--------------------------|--------|--------|------|------|
| 6308275 | 7030224 | 961129  | calpain 12               | Capn12 | 308476 | 1,05 | up   |
| 5811704 | 7030224 | 961120  | calpain 12               | Capn12 | 308476 | 1,03 | down |
| 6409438 | 7030224 | 961124  | calpain 12               | Capn12 | 308476 | 1,02 | up   |
| 6624414 | 7030224 | 961135  | calpain 12               | Capn12 | 308476 | 1,01 | down |
| 6013816 | 7295379 | 1609579 | calpain 13               | Capn13 | 362701 | 2,02 | down |
| 6512839 | 7295379 | 1609564 | calpain 13               | Capn13 | 362701 | 1,98 | down |
| 6576468 | 7295379 | 1609562 | calpain 13               | Capn13 | 362701 | 1,75 | down |
| 6429602 | 7295379 | 1609578 | calpain 13               | Capn13 | 362701 | 1,51 | down |
| 5705522 | 7295379 | 1609568 | calpain 13               | Capn13 | 362701 | 1,49 | up   |
| 6152748 | 7295379 | 1609576 | calpain 13               | Capn13 | 362701 | 1,48 | down |
| 6028995 | 7295379 | 1609579 | calpain 13               | Capn13 | 362701 | 1,20 | up   |
| 5812658 | 7295379 | 1609571 | calpain 13               | Capn13 | 362701 | 1,20 | up   |
| 6482751 | 7295379 | 1609565 | calpain 13               | Capn13 | 362701 | 1,20 | down |
| 6060340 | 7295379 | 1609565 | calpain 13               | Capn13 | 362701 | 1,18 | up   |
| 5927740 | 7295379 | 1609567 | calpain 13               | Capn13 | 362701 | 1,17 | up   |
| 6157053 | 7295379 | 1609581 | calpain 13               | Capn13 | 362701 | 1,12 | down |
| 5817349 | 7295379 | 1609577 | calpain 13               | Capn13 | 362701 | 1,12 | down |
| 6424985 | 7295379 | 1609575 | calpain 13               | Capn13 | 362701 | 1,11 | up   |
| 6454622 | 7295379 | 1609574 | calpain 13               | Capn13 | 362701 | 1,11 | down |
| 6001911 | 7295379 | 1609560 | calpain 13               | Capn13 | 362701 | 1,09 | down |
| 5699713 | 7295379 | 1609573 | calpain 13               | Capn13 | 362701 | 1,07 | up   |
| 5658167 | 7295379 | 1609560 | calpain 13               | Capn13 | 362701 | 1,05 | down |
| 6313634 | 7295379 | 1609570 | calpain 13               | Capn13 | 362701 | 1,04 | up   |
| 6657293 | 7295379 | 1609561 | calpain 13               | Capn13 | 362701 | 1,04 | up   |
| 5871610 | 7295379 | 1609580 | calpain 13               | Capn13 | 362701 | 1,02 | up   |
| 5807893 | 7295379 | 1609572 | calpain 13               | Capn13 | 362701 | 1,01 | down |
| 6451426 | 7295379 | 1609569 | calpain 13               | Capn13 | 362701 | 1,01 | up   |
| 6028893 | 7295379 | 1609566 | calpain 13               | Capn13 | 362701 | 1,01 | up   |
| 5779171 | 7295379 | 1609563 | calpain 13               | Capn13 | 362701 | 1,00 | up   |
| 6421059 | 7108561 | 1148782 | calpain 8                | Capn8  | 170808 | 2,06 | up   |
| 6380137 | 7108561 | 1148759 | calpain 8                | Capn8  | 170808 | 1,94 | down |
| 6185854 | 7108561 | 1148762 | calpain 8                | Capn8  | 170808 | 1,93 | up   |
| 6498228 | 7108561 | 1148761 | calpain 8                | Capn8  | 170808 | 1,70 | down |
| 5777582 | 7108561 | 1148760 | calpain 8                | Capn8  | 170808 | 1,45 | up   |
| 6577339 | 7108561 | 1148766 | calpain 8                | Capn8  | 170808 | 1,43 | up   |
| 6107567 | 7108561 | 1148770 | calpain 8                | Capn8  | 170808 | 1,37 | down |
| 6311052 | 7108561 | 1148773 | calpain 8                | Capn8  | 170808 | 1,25 | down |
| 6690616 | 7108561 | 1148781 | calpain 8                | Capn8  | 170808 | 1,22 | down |
| 5821860 | 7108561 | 1148780 | calpain 8                | Capn8  | 170808 | 1,21 | down |
| 6611846 | 7108561 | 1148774 | calpain 8                | Capn8  | 170808 | 1,16 | up   |
| 5691269 | 7108561 | 1148778 | calpain 8                | Capn8  | 170808 | 1,14 | down |
| 6253637 | 7108561 | 1148773 | calpain 8                | Capn8  | 170808 | 1,12 | down |
| 6330647 | 7108561 | 1148763 | calpain 8                | Capn8  | 170808 | 1,09 | down |
| 6173085 | 7108561 | 1148777 | calpain 8                | Capn8  | 170808 | 1,09 | down |
| 6077280 | 7108561 | 1148767 | calpain 8                | Capn8  | 170808 | 1,08 | up   |
| 5683157 | 7108561 | 1148779 | calpain 8                | Capn8  | 170808 | 1,08 | up   |
| 5621774 | 7108561 | 1148772 | calpain 8                | Capn8  | 170808 | 1,08 | up   |
| 6727038 | 7108561 | 1148771 | calpain 8                | Capn8  | 170808 | 1,06 | up   |
| 5809181 | 7108561 | 1148764 | calpain 8                | Capn8  | 170808 | 1,05 | up   |
| 6424689 | 7108561 | 1148768 | calpain 8                | Capn8  | 170808 | 1,05 | down |
| 6594324 | 7108561 | 1148775 | calpain 8                | Capn8  | 170808 | 1,05 | down |
| 5827028 | 7108561 | 1148765 | calpain 8                | Capn8  | 170808 | 1,03 | down |
| 6646155 | 7108561 | 1148776 | calpain 8                | Capn8  | 170808 | 1,03 | up   |
| 6056837 | 7108561 | 1148769 | calpain 8                | Capn8  | 170808 | 1,03 | down |
| 6604926 | 7183182 | 1333559 | calpain, small subunit 2 | Capns2 | 679870 | 1,79 | up   |
| 6255479 | 7183182 | 1333559 | calpain, small subunit 2 | Capns2 | 679870 | 1,45 | up   |
| 6473997 | 7183182 | 1333559 | calpain, small subunit 2 | Capns2 | 679870 | 1,33 | down |

|         |         |         |                                                  |         |        |      |      |
|---------|---------|---------|--------------------------------------------------|---------|--------|------|------|
| 6244327 | 7201367 | 1379080 | calpastatin                                      | Cast    | 25403  | 2,20 | up   |
| 6466618 | 7201367 | 1379057 | calpastatin                                      | Cast    | 25403  | 1,35 | up   |
| 5898357 | 7201367 | 1379071 | calpastatin                                      | Cast    | 25403  | 1,33 | down |
| 5699423 | 7201367 | 1379058 | calpastatin                                      | Cast    | 25403  | 1,29 | up   |
| 5634381 | 7201367 | 1379068 | calpastatin                                      | Cast    | 25403  | 1,28 | down |
| 6612444 | 7201367 | 1379067 | calpastatin                                      | Cast    | 25403  | 1,25 | down |
| 6734340 | 7201367 | 1379073 | calpastatin                                      | Cast    | 25403  | 1,22 | down |
| 6552864 | 7201367 | 1379062 | calpastatin                                      | Cast    | 25403  | 1,21 | up   |
| 6556178 | 7201367 | 1379052 | calpastatin                                      | Cast    | 25403  | 1,19 | down |
| 5684900 | 7201367 | 1379066 | calpastatin                                      | Cast    | 25403  | 1,17 | down |
| 5968385 | 7201367 | 1379070 | calpastatin                                      | Cast    | 25403  | 1,17 | down |
| 6309682 | 7201367 | 1379060 | calpastatin                                      | Cast    | 25403  | 1,16 | up   |
| 6689634 | 7201367 | 1379078 | calpastatin                                      | Cast    | 25403  | 1,14 | up   |
| 6693087 | 7201367 | 1379054 | calpastatin                                      | Cast    | 25403  | 1,13 | down |
| 5958328 | 7201367 | 1379063 | calpastatin                                      | Cast    | 25403  | 1,13 | up   |
| 6740518 | 7201367 | 1379065 | calpastatin                                      | Cast    | 25403  | 1,12 | down |
| 6092907 | 7201367 | 1379077 | calpastatin                                      | Cast    | 25403  | 1,10 | down |
| 6157488 | 7201367 | 1379064 | calpastatin                                      | Cast    | 25403  | 1,10 | down |
| 6736870 | 7201367 | 1379075 | calpastatin                                      | Cast    | 25403  | 1,08 | down |
| 6688639 | 7201367 | 1379059 | calpastatin                                      | Cast    | 25403  | 1,08 | up   |
| 6530842 | 7201367 | 1379069 | calpastatin                                      | Cast    | 25403  | 1,07 | up   |
| 5803588 | 7201367 | 1379072 | calpastatin                                      | Cast    | 25403  | 1,05 | down |
| 6322518 | 7201367 | 1379053 | calpastatin                                      | Cast    | 25403  | 1,04 | down |
| 5947964 | 7201367 | 1379079 | calpastatin                                      | Cast    | 25403  | 1,04 | down |
| 6408832 | 7201367 | 1379061 | calpastatin                                      | Cast    | 25403  | 1,04 | up   |
| 6015394 | 7201367 | 1379069 | calpastatin                                      | Cast    | 25403  | 1,03 | down |
| 5813544 | 7201367 | 1379074 | calpastatin                                      | Cast    | 25403  | 1,02 | down |
| 6006920 | 7201367 | 1379076 | calpastatin                                      | Cast    | 25403  | 1,02 | up   |
| 6421264 | 7201367 | 1379056 | calpastatin                                      | Cast    | 25403  | 1,01 | up   |
| 6426602 | 7201367 | 1379055 | calpastatin                                      | Cast    | 25403  | 1,01 | down |
| 6491160 | 7281577 | 1576870 | calsyntenin 1                                    | Clstn1  | 313717 | 1,68 | up   |
| 6393192 | 7269429 | 1545836 | calsyntenin 3                                    | Clstn3  | 171393 | 2,39 | up   |
| 6736096 | 7269429 | 1545849 | calsyntenin 3                                    | Clstn3  | 171393 | 1,92 | up   |
| 5902617 | 7269429 | 1545853 | calsyntenin 3                                    | Clstn3  | 171393 | 1,69 | up   |
| 6212332 | 7269429 | 1545852 | calsyntenin 3                                    | Clstn3  | 171393 | 1,52 | down |
| 6332725 | 7269429 | 1545847 | calsyntenin 3                                    | Clstn3  | 171393 | 1,41 | down |
| 6288369 | 7269429 | 1545850 | calsyntenin 3                                    | Clstn3  | 171393 | 1,40 | down |
| 6553081 | 7269429 | 1545842 | calsyntenin 3                                    | Clstn3  | 171393 | 1,28 | up   |
| 6418037 | 7269429 | 1545841 | calsyntenin 3                                    | Clstn3  | 171393 | 1,28 | up   |
| 6688361 | 7269429 | 1545844 | calsyntenin 3                                    | Clstn3  | 171393 | 1,28 | up   |
| 6381819 | 7269429 | 1545840 | calsyntenin 3                                    | Clstn3  | 171393 | 1,25 | down |
| 6746118 | 7269429 | 1545848 | calsyntenin 3                                    | Clstn3  | 171393 | 1,19 | down |
| 6483912 | 7269429 | 1545843 | calsyntenin 3                                    | Clstn3  | 171393 | 1,18 | down |
| 6264882 | 7269429 | 1545838 | calsyntenin 3                                    | Clstn3  | 171393 | 1,17 | up   |
| 5742766 | 7269429 | 1545851 | calsyntenin 3                                    | Clstn3  | 171393 | 1,15 | down |
| 6410135 | 7269429 | 1545837 | calsyntenin 3                                    | Clstn3  | 171393 | 1,07 | up   |
| 6334186 | 7269429 | 1545846 | calsyntenin 3                                    | Clstn3  | 171393 | 1,07 | up   |
| 6021758 | 7269429 | 1545845 | calsyntenin 3                                    | Clstn3  | 171393 | 1,01 | up   |
| 6190396 | 7241772 | 1477818 | cAMP responsive element binding protein 3-like 1 | Creb311 | 362165 | 2,60 | down |
| 6651923 | 7241772 | 1477809 | cAMP responsive element binding protein 3-like 1 | Creb311 | 362165 | 1,67 | down |
| 6037948 | 7241772 | 1477820 | cAMP responsive element binding protein 3-like 1 | Creb311 | 362165 | 1,58 | down |
| 6086526 | 7241772 | 1477820 | cAMP responsive element binding protein 3-like 1 | Creb311 | 362165 | 1,50 | down |
| 5835602 | 7241772 | 1477820 | cAMP responsive element binding protein 3-like 1 | Creb311 | 362165 | 1,49 | up   |
| 6196457 | 7241772 | 1477811 | cAMP responsive element binding protein 3-like 1 | Creb311 | 362165 | 1,46 | down |
| 5987317 | 7241772 | 1477812 | cAMP responsive element binding protein 3-like 1 | Creb311 | 362165 | 1,37 | up   |
| 5977146 | 7241772 | 1477815 | cAMP responsive element binding protein 3-like 1 | Creb311 | 362165 | 1,32 | up   |
| 5857070 | 7241772 | 1477810 | cAMP responsive element binding protein 3-like 1 | Creb311 | 362165 | 1,31 | up   |

|         |         |         |                                                  |         |        |      |      |
|---------|---------|---------|--------------------------------------------------|---------|--------|------|------|
| 6397480 | 7241772 | 1477819 | cAMP responsive element binding protein 3-like 1 | Creb3l1 | 362165 | 1,28 | up   |
| 5659807 | 7241772 | 1477820 | cAMP responsive element binding protein 3-like 1 | Creb3l1 | 362165 | 1,23 | down |
| 6560900 | 7241772 | 1477820 | cAMP responsive element binding protein 3-like 1 | Creb3l1 | 362165 | 1,18 | up   |
| 5736059 | 7241772 | 1477813 | cAMP responsive element binding protein 3-like 1 | Creb3l1 | 362165 | 1,16 | up   |
| 6195086 | 7241772 | 1477818 | cAMP responsive element binding protein 3-like 1 | Creb3l1 | 362165 | 1,16 | up   |
| 5746565 | 7241772 | 1477817 | cAMP responsive element binding protein 3-like 1 | Creb3l1 | 362165 | 1,15 | up   |
| 6367335 | 7241772 | 1477814 | cAMP responsive element binding protein 3-like 1 | Creb3l1 | 362165 | 1,13 | up   |
| 6023393 | 7241772 | 1477811 | cAMP responsive element binding protein 3-like 1 | Creb3l1 | 362165 | 1,12 | down |
| 6512211 | 7241772 | 1477815 | cAMP responsive element binding protein 3-like 1 | Creb3l1 | 362165 | 1,06 | up   |
| 6583990 | 7241772 | 1477808 | cAMP responsive element binding protein 3-like 1 | Creb3l1 | 362165 | 1,02 | down |
| 6457349 | 7241772 | 1477816 | cAMP responsive element binding protein 3-like 1 | Creb3l1 | 362165 | 1,02 | up   |
| 6604217 | 7312357 | 1652859 | cAMP responsive element binding protein 3-like 3 | Creb3l3 | 314638 | 2,17 | down |
| 5814803 | 7312357 | 1652852 | cAMP responsive element binding protein 3-like 3 | Creb3l3 | 314638 | 1,97 | up   |
| 5942165 | 7312357 | 1652860 | cAMP responsive element binding protein 3-like 3 | Creb3l3 | 314638 | 1,59 | up   |
| 6412054 | 7312357 | 1652856 | cAMP responsive element binding protein 3-like 3 | Creb3l3 | 314638 | 1,38 | down |
| 5800354 | 7312357 | 1652852 | cAMP responsive element binding protein 3-like 3 | Creb3l3 | 314638 | 1,37 | up   |
| 6114497 | 7312357 | 1652854 | cAMP responsive element binding protein 3-like 3 | Creb3l3 | 314638 | 1,31 | down |
| 6085762 | 7312357 | 1652861 | cAMP responsive element binding protein 3-like 3 | Creb3l3 | 314638 | 1,25 | up   |
| 6117433 | 7312357 | 1652856 | cAMP responsive element binding protein 3-like 3 | Creb3l3 | 314638 | 1,12 | down |
| 5977734 | 7312357 | 1652854 | cAMP responsive element binding protein 3-like 3 | Creb3l3 | 314638 | 1,12 | up   |
| 6531620 | 7312357 | 1652855 | cAMP responsive element binding protein 3-like 3 | Creb3l3 | 314638 | 1,10 | up   |
| 5869330 | 7312357 | 1652861 | cAMP responsive element binding protein 3-like 3 | Creb3l3 | 314638 | 1,07 | down |
| 6011697 | 7312357 | 1652861 | cAMP responsive element binding protein 3-like 3 | Creb3l3 | 314638 | 1,02 | down |
| 6393259 | 7312357 | 1652857 | cAMP responsive element binding protein 3-like 3 | Creb3l3 | 314638 | 1,01 | up   |
| 5666449 | 7312357 | 1652853 | cAMP responsive element binding protein 3-like 3 | Creb3l3 | 314638 | 1,01 | up   |
| 5854382 | 7312357 | 1652858 | cAMP responsive element binding protein 3-like 3 | Creb3l3 | 314638 | 1,00 | up   |
| 6410390 | 7158671 | 1271975 | cAMP responsive element modulator                | Creb3l3 | 314638 | 1,00 | up   |
| 5835847 | 7158671 | 1271973 | cAMP responsive element modulator                | Creb3l3 | 314638 | 1,00 | up   |
| 5993934 | 7158671 | 1271972 | cAMP responsive element modulator                | Creb3l3 | 314638 | 1,00 | up   |
| 6708039 | 7158671 | 1271978 | cAMP responsive element modulator                | Creb3l3 | 314638 | 1,00 | up   |
| 6207883 | 7158671 | 1271973 | cAMP responsive element modulator                | Creb3l3 | 314638 | 1,00 | up   |
| 6639301 | 7158671 | 1271974 | cAMP responsive element modulator                | Creb3l3 | 314638 | 1,00 | up   |
| 6346919 | 7158671 | 1271976 | cAMP responsive element modulator                | Creb3l3 | 314638 | 1,00 | up   |
| 6484983 | 7158671 | 1271975 | cAMP responsive element modulator                | Creb3l3 | 314638 | 1,00 | up   |
| 6239081 | 7158671 | 1271979 | cAMP responsive element modulator                | Creb3l3 | 314638 | 1,00 | up   |
| 6655252 | 7158671 | 1271969 | cAMP responsive element modulator                | Creb3l3 | 314638 | 1,00 | up   |
| 5845564 | 7158671 | 1271969 | cAMP responsive element modulator                | Creb3l3 | 314638 | 1,00 | up   |
| 6059094 | 7158671 | 1271977 | cAMP responsive element modulator                | Creb3l3 | 314638 | 1,00 | up   |
| 5839777 | 7158671 | 1271970 | cAMP responsive element modulator                | Creb3l3 | 314638 | 1,00 | up   |
| 5646701 | 7158671 | 1271968 | cAMP responsive element modulator                | Creb3l3 | 314638 | 1,00 | up   |
| 6636921 | 7158671 | 1271971 | cAMP responsive element modulator                | Creb3l3 | 314638 | 1,00 | up   |
| 5821555 | 7071950 | 1060858 | cancer susceptibility candidate 3                | Creb3l3 | 314638 | 1,00 | up   |
| 6587841 | 7071950 | 1060869 | cancer susceptibility candidate 3                | Creb3l3 | 314638 | 1,00 | up   |
| 6062057 | 7071950 | 1060868 | cancer susceptibility candidate 3                | Creb3l3 | 314638 | 1,00 | up   |
| 6703213 | 7071950 | 1060865 | cancer susceptibility candidate 3                | Creb3l3 | 314638 | 1,00 | up   |
| 5801447 | 7071950 | 1060870 | cancer susceptibility candidate 3                | Creb3l3 | 314638 | 1,00 | up   |
| 6175018 | 7071950 | 1060863 | cancer susceptibility candidate 3                | Creb3l3 | 314638 | 1,00 | up   |
| 6746082 | 7071950 | 1060862 | cancer susceptibility candidate 3                | Creb3l3 | 314638 | 1,00 | up   |
| 6091172 | 7071950 | 1060858 | cancer susceptibility candidate 3                | Creb3l3 | 314638 | 1,00 | up   |
| 5962067 | 7071950 | 1060868 | cancer susceptibility candidate 3                | Creb3l3 | 314638 | 1,00 | up   |
| 6612981 | 7071950 | 1060867 | cancer susceptibility candidate 3                | Creb3l3 | 314638 | 1,00 | up   |
| 5752219 | 7071950 | 1060866 | cancer susceptibility candidate 3                | Creb3l3 | 314638 | 1,00 | up   |
| 6558324 | 7071950 | 1060864 | cancer susceptibility candidate 3                | Creb3l3 | 314638 | 1,00 | up   |
| 5769226 | 7071950 | 1060859 | cancer susceptibility candidate 3                | Creb3l3 | 314638 | 1,00 | up   |
| 6615485 | 7071950 | 1060861 | cancer susceptibility candidate 3                | Creb3l3 | 314638 | 1,00 | up   |
| 6121228 | 7071950 | 1060860 | cancer susceptibility candidate 3                | Creb3l3 | 314638 | 1,00 | up   |
| 6111874 | 7097583 | 1121277 | CAP-GLY domain containing linker protein 2       | Creb3l3 | 314638 | 1,00 | up   |

|         |         |         |                                                                                  |       |        |      |      |
|---------|---------|---------|----------------------------------------------------------------------------------|-------|--------|------|------|
| 6286601 | 7097583 | 1121291 | CAP-GLY domain containing linker protein 2                                       | Clip2 | 29264  | 1,64 | up   |
| 5719818 | 7097583 | 1121293 | CAP-GLY domain containing linker protein 2                                       | Clip2 | 29264  | 1,61 | up   |
| 6434897 | 7097583 | 1121278 | CAP-GLY domain containing linker protein 2                                       | Clip2 | 29264  | 1,61 | down |
| 6650221 | 7097583 | 1121293 | CAP-GLY domain containing linker protein 2                                       | Clip2 | 29264  | 1,59 | down |
| 6085004 | 7097583 | 1121276 | CAP-GLY domain containing linker protein 2                                       | Clip2 | 29264  | 1,44 | down |
| 6113692 | 7097583 | 1121276 | CAP-GLY domain containing linker protein 2                                       | Clip2 | 29264  | 1,43 | down |
| 6090408 | 7097583 | 1121281 | CAP-GLY domain containing linker protein 2                                       | Clip2 | 29264  | 1,42 | up   |
| 6740098 | 7097583 | 1121279 | CAP-GLY domain containing linker protein 2                                       | Clip2 | 29264  | 1,39 | up   |
| 6744022 | 7097583 | 1121290 | CAP-GLY domain containing linker protein 2                                       | Clip2 | 29264  | 1,31 | up   |
| 6061511 | 7097583 | 1121283 | CAP-GLY domain containing linker protein 2                                       | Clip2 | 29264  | 1,30 | down |
| 6359631 | 7097583 | 1121280 | CAP-GLY domain containing linker protein 2                                       | Clip2 | 29264  | 1,29 | up   |
| 5728799 | 7097583 | 1121287 | CAP-GLY domain containing linker protein 2                                       | Clip2 | 29264  | 1,29 | up   |
| 6647884 | 7097583 | 1121292 | CAP-GLY domain containing linker protein 2                                       | Clip2 | 29264  | 1,28 | up   |
| 5810051 | 7097583 | 1121293 | CAP-GLY domain containing linker protein 2                                       | Clip2 | 29264  | 1,27 | up   |
| 5819758 | 7097583 | 1121293 | CAP-GLY domain containing linker protein 2                                       | Clip2 | 29264  | 1,16 | down |
| 6178695 | 7097583 | 1121276 | CAP-GLY domain containing linker protein 2                                       | Clip2 | 29264  | 1,16 | up   |
| 5952520 | 7097583 | 1121285 | CAP-GLY domain containing linker protein 2                                       | Clip2 | 29264  | 1,14 | down |
| 6565201 | 7097583 | 1121286 | CAP-GLY domain containing linker protein 2                                       | Clip2 | 29264  | 1,11 | down |
| 6482283 | 7097583 | 1121288 | CAP-GLY domain containing linker protein 2                                       | Clip2 | 29264  | 1,10 | up   |
| 6505610 | 7097583 | 1121282 | CAP-GLY domain containing linker protein 2                                       | Clip2 | 29264  | 1,09 | down |
| 5996675 | 7097583 | 1121289 | CAP-GLY domain containing linker protein 2                                       | Clip2 | 29264  | 1,06 | down |
| 6737148 | 7097583 | 1121284 | CAP-GLY domain containing linker protein 2                                       | Clip2 | 29264  | 1,00 | up   |
| 5930324 | 7303767 | 1631871 | CAP-GLY domain containing linker protein family, member 4                        | Clip4 | 298801 | 2,50 | down |
| 6454218 | 7303767 | 1631871 | CAP-GLY domain containing linker protein family, member 4                        | Clip4 | 298801 | 1,78 | up   |
| 5762196 | 7303767 | 1631881 | CAP-GLY domain containing linker protein family, member 4                        | Clip4 | 298801 | 1,51 | down |
| 6056152 | 7303767 | 1631872 | CAP-GLY domain containing linker protein family, member 4                        | Clip4 | 298801 | 1,51 | down |
| 6229361 | 7303767 | 1631882 | CAP-GLY domain containing linker protein family, member 4                        | Clip4 | 298801 | 1,42 | up   |
| 5712358 | 7303767 | 1631870 | CAP-GLY domain containing linker protein family, member 4                        | Clip4 | 298801 | 1,41 | up   |
| 6409292 | 7303767 | 1631878 | CAP-GLY domain containing linker protein family, member 4                        | Clip4 | 298801 | 1,36 | down |
| 6242359 | 7303767 | 1631869 | CAP-GLY domain containing linker protein family, member 4                        | Clip4 | 298801 | 1,23 | down |
| 6709606 | 7303767 | 1631876 | CAP-GLY domain containing linker protein family, member 4                        | Clip4 | 298801 | 1,16 | down |
| 6723957 | 7303767 | 1631879 | CAP-GLY domain containing linker protein family, member 4                        | Clip4 | 298801 | 1,13 | up   |
| 6280972 | 7303767 | 1631874 | CAP-GLY domain containing linker protein family, member 4                        | Clip4 | 298801 | 1,12 | down |
| 6461476 | 7303767 | 1631873 | CAP-GLY domain containing linker protein family, member 4                        | Clip4 | 298801 | 1,08 | down |
| 6442869 | 7303767 | 1631880 | CAP-GLY domain containing linker protein family, member 4                        | Clip4 | 298801 | 1,06 | up   |
| 6064448 | 7303767 | 1631869 | CAP-GLY domain containing linker protein family, member 4                        | Clip4 | 298801 | 1,04 | down |
| 5751129 | 7303767 | 1631875 | CAP-GLY domain containing linker protein family, member 4                        | Clip4 | 298801 | 1,01 | up   |
| 6543156 | 7303767 | 1631877 | CAP-GLY domain containing linker protein family, member 4                        | Clip4 | 298801 | 1,00 | down |
| 5868358 | 7303947 | 1632404 | carbamoyl-phosphate synthetase 2, aspartate transcarbamylase, and dihydroorotase | Cad   | 24240  | 2,64 | down |
| 6712449 | 7303947 | 1632398 | carbamoyl-phosphate synthetase 2, aspartate transcarbamylase, and dihydroorotase | Cad   | 24240  | 1,85 | up   |
| 6059111 | 7303947 | 1632397 | carbamoyl-phosphate synthetase 2, aspartate transcarbamylase, and dihydroorotase | Cad   | 24240  | 1,66 | up   |
| 5793290 | 7303947 | 1632404 | carbamoyl-phosphate synthetase 2, aspartate transcarbamylase, and dihydroorotase | Cad   | 24240  | 1,55 | down |
| 5737218 | 7303947 | 1632392 | carbamoyl-phosphate synthetase 2, aspartate transcarbamylase, and dihydroorotase | Cad   | 24240  | 1,48 | down |
| 5846685 | 7303947 | 1632401 | carbamoyl-phosphate synthetase 2, aspartate transcarbamylase, and dihydroorotase | Cad   | 24240  | 1,46 | up   |
| 5783002 | 7303947 | 1632378 | carbamoyl-phosphate synthetase 2, aspartate transcarbamylase, and dihydroorotase | Cad   | 24240  | 1,42 | down |
| 5699460 | 7303947 | 1632402 | carbamoyl-phosphate synthetase 2, aspartate transcarbamylase, and dihydroorotase | Cad   | 24240  | 1,39 | down |
| 6529348 | 7303947 | 1632403 | carbamoyl-phosphate synthetase 2, aspartate transcarbamylase, and dihydroorotase | Cad   | 24240  | 1,38 | up   |
| 6319098 | 7303947 | 1632370 | carbamoyl-phosphate synthetase 2, aspartate transcarbamylase, and dihydroorotase | Cad   | 24240  | 1,38 | down |
| 6034817 | 7303947 | 1632402 | carbamoyl-phosphate synthetase 2, aspartate transcarbamylase, and dihydroorotase | Cad   | 24240  | 1,34 | up   |
| 6326728 | 7303947 | 1632390 | carbamoyl-phosphate synthetase 2, aspartate transcarbamylase, and dihydroorotase | Cad   | 24240  | 1,30 | down |
| 6225707 | 7303947 | 1632400 | carbamoyl-phosphate synthetase 2, aspartate transcarbamylase, and dihydroorotase | Cad   | 24240  | 1,29 | up   |
| 6174574 | 7303947 | 1632399 | carbamoyl-phosphate synthetase 2, aspartate transcarbamylase, and dihydroorotase | Cad   | 24240  | 1,29 | up   |
| 6746309 | 7303947 | 1632368 | carbamoyl-phosphate synthetase 2, aspartate transcarbamylase, and dihydroorotase | Cad   | 24240  | 1,28 | down |
| 6170400 | 7303947 | 1632395 | carbamoyl-phosphate synthetase 2, aspartate transcarbamylase, and dihydroorotase | Cad   | 24240  | 1,26 | up   |
| 5644274 | 7303947 | 1632388 | carbamoyl-phosphate synthetase 2, aspartate transcarbamylase, and dihydroorotase | Cad   | 24240  | 1,25 | down |
| 6657977 | 7303947 | 1632369 | carbamoyl-phosphate synthetase 2, aspartate transcarbamylase, and dihydroorotase | Cad   | 24240  | 1,24 | down |
| 6687182 | 7303947 | 1632377 | carbamoyl-phosphate synthetase 2, aspartate transcarbamylase, and dihydroorotase | Cad   | 24240  | 1,22 | up   |

|         |         |         |                                                                                  |        |        |      |      |
|---------|---------|---------|----------------------------------------------------------------------------------|--------|--------|------|------|
| 6657108 | 7303947 | 1632380 | carbamoyl-phosphate synthetase 2, aspartate transcarbamylase, and dihydroorotase | Cad    | 24240  | 1,21 | down |
| 5768520 | 7303947 | 1632364 | carbamoyl-phosphate synthetase 2, aspartate transcarbamylase, and dihydroorotase | Cad    | 24240  | 1,20 | down |
| 6455653 | 7303947 | 1632398 | carbamoyl-phosphate synthetase 2, aspartate transcarbamylase, and dihydroorotase | Cad    | 24240  | 1,19 | up   |
| 5671089 | 7303947 | 1632392 | carbamoyl-phosphate synthetase 2, aspartate transcarbamylase, and dihydroorotase | Cad    | 24240  | 1,19 | down |
| 6056663 | 7303947 | 1632386 | carbamoyl-phosphate synthetase 2, aspartate transcarbamylase, and dihydroorotase | Cad    | 24240  | 1,18 | down |
| 6154071 | 7303947 | 1632387 | carbamoyl-phosphate synthetase 2, aspartate transcarbamylase, and dihydroorotase | Cad    | 24240  | 1,18 | up   |
| 6248279 | 7303947 | 1632394 | carbamoyl-phosphate synthetase 2, aspartate transcarbamylase, and dihydroorotase | Cad    | 24240  | 1,17 | down |
| 6430777 | 7303947 | 1632362 | carbamoyl-phosphate synthetase 2, aspartate transcarbamylase, and dihydroorotase | Cad    | 24240  | 1,16 | down |
| 5939234 | 7303947 | 1632367 | carbamoyl-phosphate synthetase 2, aspartate transcarbamylase, and dihydroorotase | Cad    | 24240  | 1,16 | down |
| 6549809 | 7303947 | 1632370 | carbamoyl-phosphate synthetase 2, aspartate transcarbamylase, and dihydroorotase | Cad    | 24240  | 1,15 | up   |
| 6457975 | 7303947 | 1632391 | carbamoyl-phosphate synthetase 2, aspartate transcarbamylase, and dihydroorotase | Cad    | 24240  | 1,14 | up   |
| 6609716 | 7303947 | 1632379 | carbamoyl-phosphate synthetase 2, aspartate transcarbamylase, and dihydroorotase | Cad    | 24240  | 1,13 | down |
| 6321780 | 7303947 | 1632393 | carbamoyl-phosphate synthetase 2, aspartate transcarbamylase, and dihydroorotase | Cad    | 24240  | 1,12 | up   |
| 6000669 | 7303947 | 1632371 | carbamoyl-phosphate synthetase 2, aspartate transcarbamylase, and dihydroorotase | Cad    | 24240  | 1,11 | up   |
| 5620232 | 7303947 | 1632372 | carbamoyl-phosphate synthetase 2, aspartate transcarbamylase, and dihydroorotase | Cad    | 24240  | 1,10 | up   |
| 6074914 | 7303947 | 1632383 | carbamoyl-phosphate synthetase 2, aspartate transcarbamylase, and dihydroorotase | Cad    | 24240  | 1,10 | up   |
| 6544213 | 7303947 | 1632374 | carbamoyl-phosphate synthetase 2, aspartate transcarbamylase, and dihydroorotase | Cad    | 24240  | 1,09 | down |
| 6004224 | 7303947 | 1632365 | carbamoyl-phosphate synthetase 2, aspartate transcarbamylase, and dihydroorotase | Cad    | 24240  | 1,08 | down |
| 6445936 | 7303947 | 1632385 | carbamoyl-phosphate synthetase 2, aspartate transcarbamylase, and dihydroorotase | Cad    | 24240  | 1,08 | down |
| 6379390 | 7303947 | 1632366 | carbamoyl-phosphate synthetase 2, aspartate transcarbamylase, and dihydroorotase | Cad    | 24240  | 1,07 | up   |
| 6590703 | 7303947 | 1632396 | carbamoyl-phosphate synthetase 2, aspartate transcarbamylase, and dihydroorotase | Cad    | 24240  | 1,07 | down |
| 6052751 | 7303947 | 1632381 | carbamoyl-phosphate synthetase 2, aspartate transcarbamylase, and dihydroorotase | Cad    | 24240  | 1,07 | up   |
| 5854643 | 7303947 | 1632384 | carbamoyl-phosphate synthetase 2, aspartate transcarbamylase, and dihydroorotase | Cad    | 24240  | 1,06 | up   |
| 6315052 | 7303947 | 1632398 | carbamoyl-phosphate synthetase 2, aspartate transcarbamylase, and dihydroorotase | Cad    | 24240  | 1,04 | up   |
| 5638009 | 7303947 | 1632382 | carbamoyl-phosphate synthetase 2, aspartate transcarbamylase, and dihydroorotase | Cad    | 24240  | 1,03 | down |
| 5961759 | 7303947 | 1632376 | carbamoyl-phosphate synthetase 2, aspartate transcarbamylase, and dihydroorotase | Cad    | 24240  | 1,03 | down |
| 6591025 | 7303947 | 1632363 | carbamoyl-phosphate synthetase 2, aspartate transcarbamylase, and dihydroorotase | Cad    | 24240  | 1,03 | up   |
| 6247677 | 7303947 | 1632375 | carbamoyl-phosphate synthetase 2, aspartate transcarbamylase, and dihydroorotase | Cad    | 24240  | 1,03 | down |
| 6219615 | 7303947 | 1632389 | carbamoyl-phosphate synthetase 2, aspartate transcarbamylase, and dihydroorotase | Cad    | 24240  | 1,03 | up   |
| 5932160 | 7303947 | 1632373 | carbamoyl-phosphate synthetase 2, aspartate transcarbamylase, and dihydroorotase | Cad    | 24240  | 1,01 | down |
| 6703743 | 7303947 | 1632362 | carbamoyl-phosphate synthetase 2, aspartate transcarbamylase, and dihydroorotase | Cad    | 24240  | 1,01 | down |
| 6427157 | 7361389 | 1772975 | carbohydrate sulfotransferase 10                                                 | Chst10 | 140568 | 2,34 | up   |
| 6013584 | 7361389 | 1772974 | carbohydrate sulfotransferase 10                                                 | Chst10 | 140568 | 1,39 | down |
| 5938599 | 7361389 | 1772974 | carbohydrate sulfotransferase 10                                                 | Chst10 | 140568 | 1,28 | up   |
| 6741764 | 7361389 | 1772969 | carbohydrate sulfotransferase 10                                                 | Chst10 | 140568 | 1,25 | down |
| 5966318 | 7361389 | 1772971 | carbohydrate sulfotransferase 10                                                 | Chst10 | 140568 | 1,18 | down |
| 5724330 | 7361389 | 1772970 | carbohydrate sulfotransferase 10                                                 | Chst10 | 140568 | 1,16 | down |
| 6706100 | 7361389 | 1772973 | carbohydrate sulfotransferase 10                                                 | Chst10 | 140568 | 1,12 | down |
| 5865579 | 7361389 | 1772972 | carbohydrate sulfotransferase 10                                                 | Chst10 | 140568 | 1,01 | up   |
| 6381750 | 7361389 | 1772970 | carbohydrate sulfotransferase 10                                                 | Chst10 | 140568 | 1,00 | up   |
| 6523004 | 7031587 | 964138  | carbonic anhydrase 11                                                            | Car11  | 308588 | 2,29 | down |
| 6640520 | 7031587 | 964135  | carbonic anhydrase 11                                                            | Car11  | 308588 | 1,79 | down |
| 6413683 | 7031587 | 964137  | carbonic anhydrase 11                                                            | Car11  | 308588 | 1,69 | up   |
| 5857183 | 7031587 | 964132  | carbonic anhydrase 11                                                            | Car11  | 308588 | 1,52 | down |
| 6429899 | 7031587 | 964139  | carbonic anhydrase 11                                                            | Car11  | 308588 | 1,37 | up   |
| 6481860 | 7031587 | 964139  | carbonic anhydrase 11                                                            | Car11  | 308588 | 1,37 | up   |
| 5659451 | 7031587 | 964136  | carbonic anhydrase 11                                                            | Car11  | 308588 | 1,31 | down |
| 6619805 | 7031587 | 964134  | carbonic anhydrase 11                                                            | Car11  | 308588 | 1,30 | down |
| 6715013 | 7031587 | 964131  | carbonic anhydrase 11                                                            | Car11  | 308588 | 1,29 | down |
| 6691337 | 7031587 | 964133  | carbonic anhydrase 11                                                            | Car11  | 308588 | 1,10 | up   |
| 5741994 | 7031587 | 964139  | carbonic anhydrase 11                                                            | Car11  | 308588 | 1,10 | up   |
| 6638094 | 7031587 | 964138  | carbonic anhydrase 11                                                            | Car11  | 308588 | 1,09 | up   |
| 6340206 | 7031587 | 964131  | carbonic anhydrase 11                                                            | Car11  | 308588 | 1,01 | up   |
| 5634158 | 7237267 | 1466424 | carboxyl ester lipase                                                            | Cel    | 24254  | 2,15 | down |
| 5912318 | 7237267 | 1466422 | carboxyl ester lipase                                                            | Cel    | 24254  | 1,64 | down |
| 5891193 | 7237267 | 1466430 | carboxyl ester lipase                                                            | Cel    | 24254  | 1,58 | up   |
| 6550694 | 7237267 | 1466425 | carboxyl ester lipase                                                            | Cel    | 24254  | 1,45 | up   |

|         |         |         |                                              |                                      |        |      |      |
|---------|---------|---------|----------------------------------------------|--------------------------------------|--------|------|------|
| 6015756 | 7237267 | 1466427 | carboxyl ester lipase                        | Cel                                  | 24254  | 1,40 | down |
| 5763629 | 7237267 | 1466428 | carboxyl ester lipase                        | Cel                                  | 24254  | 1,39 | up   |
| 6230930 | 7237267 | 1466432 | carboxyl ester lipase                        | Cel                                  | 24254  | 1,37 | up   |
| 5996965 | 7237267 | 1466423 | carboxyl ester lipase                        | Cel                                  | 24254  | 1,23 | up   |
| 6552120 | 7237267 | 1466431 | carboxyl ester lipase                        | Cel                                  | 24254  | 1,11 | up   |
| 5945607 | 7237267 | 1466426 | carboxyl ester lipase                        | Cel                                  | 24254  | 1,04 | up   |
| 5999960 | 7237267 | 1466429 | carboxyl ester lipase                        | Cel                                  | 24254  | 1,00 | up   |
| 6545987 | 7179054 | 1322543 | carboxylesterase 3                           | Ces3                                 | 113902 | 1,60 | down |
| 6221132 | 7179054 | 1322553 | carboxylesterase 3                           | Ces3                                 | 113902 | 1,30 | up   |
| 6125613 | 7179054 | 1322551 | carboxylesterase 3                           | Ces3                                 | 113902 | 1,13 | up   |
| 6067438 | 7179054 | 1322547 | carboxylesterase 3                           | Ces3                                 | 113902 | 1,05 | down |
| 6205762 | 7179054 | 1322550 | carboxylesterase 3                           | Ces3                                 | 113902 | 1,03 | down |
| 6269243 | 7179054 | 1322546 | carboxylesterase 3 /// carboxylesterase-like | Ces3 /// LOC29186: 113902 /// 291863 |        | 2,10 | up   |
| 5713163 | 7179054 | 1322556 | carboxylesterase 3 /// carboxylesterase-like | Ces3 /// LOC29186: 113902 /// 291863 |        | 1,61 | down |
| 6227711 | 7179054 | 1322556 | carboxylesterase 3 /// carboxylesterase-like | Ces3 /// LOC29186: 113902 /// 291863 |        | 1,41 | up   |
| 6323351 | 7179054 | 1322545 | carboxylesterase 3 /// carboxylesterase-like | Ces3 /// LOC29186: 113902 /// 291863 |        | 1,19 | down |
| 6241135 | 7179054 | 1322555 | carboxylesterase 3 /// carboxylesterase-like | Ces3 /// LOC29186: 113902 /// 291863 |        | 1,15 | down |
| 6635699 | 7179054 | 1322556 | carboxylesterase 3 /// carboxylesterase-like | Ces3 /// LOC29186: 113902 /// 291863 |        | 1,10 | down |
| 6552647 | 7179054 | 1322543 | carboxylesterase 3 /// carboxylesterase-like | Ces3 /// LOC29186: 113902 /// 291863 |        | 1,09 | down |
| 6622971 | 7179054 | 1322552 | carboxylesterase 3 /// carboxylesterase-like | Ces3 /// LOC29186: 113902 /// 291863 |        | 1,06 | up   |
| 6170119 | 7179054 | 1322549 | carboxylesterase 3 /// carboxylesterase-like | Ces3 /// LOC29186: 113902 /// 291863 |        | 1,05 | down |
| 6248989 | 7179054 | 1322544 | carboxylesterase 3 /// carboxylesterase-like | Ces3 /// LOC29186: 113902 /// 291863 |        | 1,04 | up   |
| 6586030 | 7179054 | 1322548 | carboxylesterase 3 /// carboxylesterase-like | Ces3 /// LOC29186: 113902 /// 291863 |        | 1,01 | up   |
| 6261717 | 7179054 | 1322557 | carboxylesterase 3 /// carboxylesterase-like | Ces3 /// LOC29186: 113902 /// 291863 |        | 1,00 | up   |
| 6404398 | 7179054 | 1322554 | carboxylesterase 3 /// carboxylesterase-like | Ces3 /// LOC29186: 113902 /// 291863 |        | 1,00 | up   |
| 6445818 | 7182297 | 1331356 | carboxylesterase 6                           | Ces6                                 | 246252 | 3,07 | down |
| 6497884 | 7182297 | 1331353 | carboxylesterase 6                           | Ces6                                 | 246252 | 1,72 | down |
| 6019803 | 7182297 | 1331359 | carboxylesterase 6                           | Ces6                                 | 246252 | 1,48 | up   |
| 6193461 | 7182297 | 1331358 | carboxylesterase 6                           | Ces6                                 | 246252 | 1,45 | up   |
| 6586696 | 7182297 | 1331362 | carboxylesterase 6                           | Ces6                                 | 246252 | 1,42 | down |
| 6361798 | 7182297 | 1331352 | carboxylesterase 6                           | Ces6                                 | 246252 | 1,34 | up   |
| 6015046 | 7182297 | 1331363 | carboxylesterase 6                           | Ces6                                 | 246252 | 1,17 | down |
| 5994236 | 7182297 | 1331360 | carboxylesterase 6                           | Ces6                                 | 246252 | 1,16 | up   |
| 5873818 | 7182297 | 1331361 | carboxylesterase 6                           | Ces6                                 | 246252 | 1,12 | up   |
| 6568577 | 7182297 | 1331355 | carboxylesterase 6                           | Ces6                                 | 246252 | 1,11 | up   |
| 6504335 | 7182297 | 1331354 | carboxylesterase 6                           | Ces6                                 | 246252 | 1,09 | up   |
| 6092302 | 7182297 | 1331357 | carboxylesterase 6                           | Ces6                                 | 246252 | 1,07 | down |
| 6396797 | 7182297 | 1331356 | carboxylesterase 6                           | Ces6                                 | 246252 | 1,07 | up   |
| 6537450 | 7182297 | 1331351 | carboxylesterase 6                           | Ces6                                 | 246252 | 1,03 | down |
| 5657425 | 7252144 | 1502791 | carboxypeptidase A2 (pancreatic)             | Cpa2                                 | 296959 | 2,36 | up   |
| 6450197 | 7252144 | 1502789 | carboxypeptidase A2 (pancreatic)             | Cpa2                                 | 296959 | 1,46 | up   |
| 5803732 | 7252144 | 1502785 | carboxypeptidase A2 (pancreatic)             | Cpa2                                 | 296959 | 1,43 | down |
| 6227447 | 7252144 | 1502788 | carboxypeptidase A2 (pancreatic)             | Cpa2                                 | 296959 | 1,43 | down |
| 6738402 | 7252144 | 1502786 | carboxypeptidase A2 (pancreatic)             | Cpa2                                 | 296959 | 1,14 | up   |
| 6104630 | 7252144 | 1502784 | carboxypeptidase A2 (pancreatic)             | Cpa2                                 | 296959 | 1,08 | down |
| 6153437 | 7252144 | 1502783 | carboxypeptidase A2 (pancreatic)             | Cpa2                                 | 296959 | 1,07 | up   |
| 6562629 | 7252144 | 1502782 | carboxypeptidase A2 (pancreatic)             | Cpa2                                 | 296959 | 1,03 | up   |
| 6737676 | 7252144 | 1502787 | carboxypeptidase A2 (pancreatic)             | Cpa2                                 | 296959 | 1,02 | down |
| 5886247 | 7252144 | 1502781 | carboxypeptidase A2 (pancreatic)             | Cpa2                                 | 296959 | 1,01 | up   |
| 6521424 | 7252144 | 1502790 | carboxypeptidase A2 (pancreatic)             | Cpa2                                 | 296959 | 1,01 | up   |
| 6015251 | 7206843 | 1391421 | carboxypeptidase B1 (tissue)                 | Cpb1                                 | 24271  | 2,31 | up   |
| 6405871 | 7206843 | 1391415 | carboxypeptidase B1 (tissue)                 | Cpb1                                 | 24271  | 1,52 | down |
| 5822020 | 7206843 | 1391417 | carboxypeptidase B1 (tissue)                 | Cpb1                                 | 24271  | 1,42 | down |
| 6176302 | 7206843 | 1391420 | carboxypeptidase B1 (tissue)                 | Cpb1                                 | 24271  | 1,36 | down |
| 6195139 | 7206843 | 1391418 | carboxypeptidase B1 (tissue)                 | Cpb1                                 | 24271  | 1,32 | up   |
| 5912238 | 7206843 | 1391423 | carboxypeptidase B1 (tissue)                 | Cpb1                                 | 24271  | 1,28 | down |
| 6631099 | 7206843 | 1391417 | carboxypeptidase B1 (tissue)                 | Cpb1                                 | 24271  | 1,20 | up   |

|         |         |         |                                                 |        |        |      |      |
|---------|---------|---------|-------------------------------------------------|--------|--------|------|------|
| 5983836 | 7206843 | 1391424 | carboxypeptidase B1 (tissue)                    | Cpb1   | 24271  | 1,08 | up   |
| 6125125 | 7206843 | 1391419 | carboxypeptidase B1 (tissue)                    | Cpb1   | 24271  | 1,06 | down |
| 6478011 | 7206843 | 1391416 | carboxypeptidase B1 (tissue)                    | Cpb1   | 24271  | 1,04 | up   |
| 6057334 | 7206843 | 1391422 | carboxypeptidase B1 (tissue)                    | Cpb1   | 24271  | 1,04 | down |
| 6657316 | 7206843 | 1391415 | carboxypeptidase B1 (tissue)                    | Cpb1   | 24271  | 1,04 | down |
| 6217652 | 7120108 | 1177677 | carboxypeptidase Z                              | Cpz    | 83575  | 2,20 | down |
| 6301256 | 7120108 | 1177686 | carboxypeptidase Z                              | Cpz    | 83575  | 1,53 | up   |
| 6201411 | 7120108 | 1177686 | carboxypeptidase Z                              | Cpz    | 83575  | 1,42 | up   |
| 6535018 | 7120108 | 1177686 | carboxypeptidase Z                              | Cpz    | 83575  | 1,40 | up   |
| 6430275 | 7120108 | 1177683 | carboxypeptidase Z                              | Cpz    | 83575  | 1,37 | up   |
| 6422826 | 7120108 | 1177684 | carboxypeptidase Z                              | Cpz    | 83575  | 1,34 | down |
| 6408183 | 7120108 | 1177675 | carboxypeptidase Z                              | Cpz    | 83575  | 1,33 | up   |
| 6272468 | 7120108 | 1177681 | carboxypeptidase Z                              | Cpz    | 83575  | 1,26 | up   |
| 6585872 | 7120108 | 1177676 | carboxypeptidase Z                              | Cpz    | 83575  | 1,17 | up   |
| 6085836 | 7120108 | 1177678 | carboxypeptidase Z                              | Cpz    | 83575  | 1,13 | up   |
| 5838440 | 7120108 | 1177685 | carboxypeptidase Z                              | Cpz    | 83575  | 1,10 | down |
| 6545268 | 7120108 | 1177686 | carboxypeptidase Z                              | Cpz    | 83575  | 1,07 | up   |
| 5727734 | 7120108 | 1177680 | carboxypeptidase Z                              | Cpz    | 83575  | 1,05 | down |
| 6303809 | 7120108 | 1177679 | carboxypeptidase Z                              | Cpz    | 83575  | 1,05 | up   |
| 6661892 | 7120108 | 1177682 | carboxypeptidase Z                              | Cpz    | 83575  | 1,03 | up   |
| 6571576 | 7235794 | 1462880 | Cas scaffolding protein family member 4         | Cass4  | 296409 | 1,45 | down |
| 5952573 | 7235794 | 1462880 | Cas scaffolding protein family member 4         | Cass4  | 296409 | 1,18 | down |
| 6344161 | 7085242 | 1091086 | casein kinase 1, delta                          | Csnk1d | 64462  | 2,72 | down |
| 6651404 | 7085242 | 1091083 | casein kinase 1, delta                          | Csnk1d | 64462  | 1,36 | down |
| 5662438 | 7085242 | 1091081 | casein kinase 1, delta                          | Csnk1d | 64462  | 1,30 | up   |
| 6365567 | 7085242 | 1091085 | casein kinase 1, delta                          | Csnk1d | 64462  | 1,25 | down |
| 5871081 | 7085242 | 1091083 | casein kinase 1, delta                          | Csnk1d | 64462  | 1,16 | up   |
| 6461041 | 7085242 | 1091089 | casein kinase 1, delta                          | Csnk1d | 64462  | 1,13 | up   |
| 5934835 | 7085242 | 1091088 | casein kinase 1, delta                          | Csnk1d | 64462  | 1,13 | down |
| 6437954 | 7085242 | 1091080 | casein kinase 1, delta                          | Csnk1d | 64462  | 1,12 | up   |
| 6035010 | 7085242 | 1091082 | casein kinase 1, delta                          | Csnk1d | 64462  | 1,12 | up   |
| 5925395 | 7085242 | 1091080 | casein kinase 1, delta                          | Csnk1d | 64462  | 1,08 | up   |
| 5848052 | 7085242 | 1091087 | casein kinase 1, delta                          | Csnk1d | 64462  | 1,07 | down |
| 5730025 | 7085242 | 1091083 | casein kinase 1, delta                          | Csnk1d | 64462  | 1,06 | down |
| 5690636 | 7085242 | 1091084 | casein kinase 1, delta                          | Csnk1d | 64462  | 1,06 | down |
| 5882014 | 7329802 | 1694912 | casein kinase 1, epsilon                        | Csnk1e | 58822  | 2,18 | up   |
| 6676515 | 7329802 | 1694920 | casein kinase 1, epsilon                        | Csnk1e | 58822  | 1,91 | up   |
| 6647286 | 7329802 | 1694911 | casein kinase 1, epsilon                        | Csnk1e | 58822  | 1,58 | down |
| 5664926 | 7329802 | 1694912 | casein kinase 1, epsilon                        | Csnk1e | 58822  | 1,46 | down |
| 5791862 | 7329802 | 1694922 | casein kinase 1, epsilon                        | Csnk1e | 58822  | 1,37 | up   |
| 6133141 | 7329802 | 1694918 | casein kinase 1, epsilon                        | Csnk1e | 58822  | 1,26 | up   |
| 5865341 | 7329802 | 1694919 | casein kinase 1, epsilon                        | Csnk1e | 58822  | 1,13 | up   |
| 5681743 | 7329802 | 1694910 | casein kinase 1, epsilon                        | Csnk1e | 58822  | 1,10 | down |
| 5860665 | 7329802 | 1694917 | casein kinase 1, epsilon                        | Csnk1e | 58822  | 1,09 | down |
| 5886737 | 7329802 | 1694921 | casein kinase 1, epsilon                        | Csnk1e | 58822  | 1,09 | down |
| 5900641 | 7329802 | 1694913 | casein kinase 1, epsilon                        | Csnk1e | 58822  | 1,08 | up   |
| 6686192 | 7329802 | 1694914 | casein kinase 1, epsilon                        | Csnk1e | 58822  | 1,08 | down |
| 6523876 | 7332570 | 1701732 | caspase 4, apoptosis-related cysteine peptidase | Casp4  | 114555 | 3,04 | down |
| 6490637 | 7332570 | 1701734 | caspase 4, apoptosis-related cysteine peptidase | Casp4  | 114555 | 2,51 | up   |
| 5939936 | 7332570 | 1701737 | caspase 4, apoptosis-related cysteine peptidase | Casp4  | 114555 | 2,49 | down |
| 6665227 | 7332570 | 1701735 | caspase 4, apoptosis-related cysteine peptidase | Casp4  | 114555 | 2,17 | up   |
| 5994357 | 7332570 | 1701731 | caspase 4, apoptosis-related cysteine peptidase | Casp4  | 114555 | 1,94 | down |
| 6515331 | 7332570 | 1701733 | caspase 4, apoptosis-related cysteine peptidase | Casp4  | 114555 | 1,33 | up   |
| 6202145 | 7332570 | 1701732 | caspase 4, apoptosis-related cysteine peptidase | Casp4  | 114555 | 1,32 | up   |
| 6210375 | 7332570 | 1701736 | caspase 4, apoptosis-related cysteine peptidase | Casp4  | 114555 | 1,10 | down |
| 6586119 | 7332570 | 1701732 | caspase 4, apoptosis-related cysteine peptidase | Casp4  | 114555 | 1,03 | down |
| 6726216 | 7199147 | 1373648 | caspase 6                                       | Casp6  | 83584  | 2,21 | down |

|         |         |         |                                               |          |        |      |      |
|---------|---------|---------|-----------------------------------------------|----------|--------|------|------|
| 5953251 | 7199147 | 1373649 | caspase 6                                     | Casp6    | 83584  | 2,18 | down |
| 5910902 | 7199147 | 1373652 | caspase 6                                     | Casp6    | 83584  | 1,79 | up   |
| 6618446 | 7199147 | 1373654 | caspase 6                                     | Casp6    | 83584  | 1,57 | up   |
| 6697501 | 7199147 | 1373653 | caspase 6                                     | Casp6    | 83584  | 1,17 | down |
| 6087012 | 7199147 | 1373647 | caspase 6                                     | Casp6    | 83584  | 1,13 | up   |
| 6191298 | 7199147 | 1373651 | caspase 6                                     | Casp6    | 83584  | 1,11 | down |
| 5654160 | 7199147 | 1373650 | caspase 6                                     | Casp6    | 83584  | 1,10 | up   |
| 6683467 | 7199147 | 1373655 | caspase 6                                     | Casp6    | 83584  | 1,08 | down |
| 6424125 | 7043433 | 993764  | caspase 7                                     | Casp7    | 64026  | 2,56 | up   |
| 6714667 | 7043433 | 993770  | caspase 7                                     | Casp7    | 64026  | 1,73 | up   |
| 6187764 | 7043433 | 993767  | caspase 7                                     | Casp7    | 64026  | 1,42 | down |
| 6082516 | 7043433 | 993768  | caspase 7                                     | Casp7    | 64026  | 1,31 | down |
| 6092199 | 7043433 | 993766  | caspase 7                                     | Casp7    | 64026  | 1,23 | up   |
| 6582450 | 7043433 | 993769  | caspase 7                                     | Casp7    | 64026  | 1,13 | down |
| 6251544 | 7043433 | 993769  | caspase 7                                     | Casp7    | 64026  | 1,10 | down |
| 6169655 | 7043433 | 993765  | caspase 7                                     | Casp7    | 64026  | 1,01 | up   |
| 5725038 | 7236978 | 1465688 | caspase recruitment domain family, member 9   | Card9    | 64171  | 2,07 | up   |
| 6213740 | 7236978 | 1465680 | caspase recruitment domain family, member 9   | Card9    | 64171  | 1,90 | down |
| 6297476 | 7236978 | 1465682 | caspase recruitment domain family, member 9   | Card9    | 64171  | 1,51 | down |
| 6677927 | 7236978 | 1465683 | caspase recruitment domain family, member 9   | Card9    | 64171  | 1,43 | down |
| 6503723 | 7236978 | 1465684 | caspase recruitment domain family, member 9   | Card9    | 64171  | 1,42 | up   |
| 6370019 | 7236978 | 1465679 | caspase recruitment domain family, member 9   | Card9    | 64171  | 1,42 | up   |
| 6681088 | 7236978 | 1465677 | caspase recruitment domain family, member 9   | Card9    | 64171  | 1,37 | up   |
| 5914859 | 7236978 | 1465678 | caspase recruitment domain family, member 9   | Card9    | 64171  | 1,36 | up   |
| 5953922 | 7236978 | 1465687 | caspase recruitment domain family, member 9   | Card9    | 64171  | 1,23 | down |
| 6719506 | 7236978 | 1465686 | caspase recruitment domain family, member 9   | Card9    | 64171  | 1,19 | down |
| 6439526 | 7236978 | 1465681 | caspase recruitment domain family, member 9   | Card9    | 64171  | 1,15 | down |
| 6539341 | 7236978 | 1465689 | caspase recruitment domain family, member 9   | Card9    | 64171  | 1,11 | down |
| 6738144 | 7236978 | 1465685 | caspase recruitment domain family, member 9   | Card9    | 64171  | 1,08 | down |
| 5648727 | 7281575 | 1576848 | catenin, beta-interacting protein 1           | Ctnnbip1 | 503000 | 2,09 | up   |
| 6518414 | 7281575 | 1576852 | catenin, beta-interacting protein 1           | Ctnnbip1 | 503000 | 1,54 | down |
| 6473338 | 7281575 | 1576853 | catenin, beta-interacting protein 1           | Ctnnbip1 | 503000 | 1,30 | up   |
| 6672467 | 7281575 | 1576852 | catenin, beta-interacting protein 1           | Ctnnbip1 | 503000 | 1,27 | down |
| 6474225 | 7281575 | 1576843 | catenin, beta-interacting protein 1           | Ctnnbip1 | 503000 | 1,09 | down |
| 6604862 | 7281575 | 1576847 | catenin, beta-interacting protein 1           | Ctnnbip1 | 503000 | 1,09 | up   |
| 6529914 | 7154893 | 1262916 | cathepsin M                                   | Ctsm     | 306720 | 2,37 | up   |
| 5661375 | 7154893 | 1262913 | cathepsin M                                   | Ctsm     | 306720 | 1,58 | up   |
| 6076258 | 7154893 | 1262916 | cathepsin M                                   | Ctsm     | 306720 | 1,53 | up   |
| 5887303 | 7154893 | 1262912 | cathepsin M                                   | Ctsm     | 306720 | 1,23 | down |
| 6249784 | 7154893 | 1262914 | cathepsin M                                   | Ctsm     | 306720 | 1,14 | down |
| 5903714 | 7154893 | 1262917 | cathepsin M                                   | Ctsm     | 306720 | 1,12 | down |
| 5663062 | 7154893 | 1262911 | cathepsin M                                   | Ctsm     | 306720 | 1,09 | up   |
| 6393715 | 7154893 | 1262915 | cathepsin M                                   | Ctsm     | 306720 | 1,08 | down |
| 6681692 | 7154893 | 1262914 | cathepsin M                                   | Ctsm     | 306720 | 1,02 | down |
| 5778840 | 7030644 | 962024  | CCAAT/enhancer binding protein (C/EBP), alpha | Cebpa    | 24252  | 2,10 | up   |
| 6405119 | 7030644 | 962024  | CCAAT/enhancer binding protein (C/EBP), alpha | Cebpa    | 24252  | 1,37 | down |
| 5881589 | 7030644 | 962024  | CCAAT/enhancer binding protein (C/EBP), alpha | Cebpa    | 24252  | 1,24 | down |
| 6644767 | 7030644 | 962024  | CCAAT/enhancer binding protein (C/EBP), alpha | Cebpa    | 24252  | 1,08 | up   |
| 5754181 | 7030644 | 962024  | CCAAT/enhancer binding protein (C/EBP), alpha | Cebpa    | 24252  | 1,02 | up   |
| 5963859 | 7235544 | 1462205 | CCAAT/enhancer binding protein (C/EBP), beta  | Cebpb    | 24253  | 4,29 | down |
| 6335379 | 7235544 | 1462205 | CCAAT/enhancer binding protein (C/EBP), beta  | Cebpb    | 24253  | 4,19 | down |
| 6669084 | 7235544 | 1462205 | CCAAT/enhancer binding protein (C/EBP), beta  | Cebpb    | 24253  | 1,43 | up   |
| 5879125 | 7235544 | 1462205 | CCAAT/enhancer binding protein (C/EBP), beta  | Cebpb    | 24253  | 1,35 | up   |
| 6466575 | 7235544 | 1462205 | CCAAT/enhancer binding protein (C/EBP), beta  | Cebpb    | 24253  | 1,34 | down |
| 6397806 | 7235544 | 1462206 | CCAAT/enhancer binding protein (C/EBP), beta  | Cebpb    | 24253  | 1,29 | up   |
| 6417368 | 7235544 | 1462206 | CCAAT/enhancer binding protein (C/EBP), beta  | Cebpb    | 24253  | 1,28 | up   |
| 5754940 | 7235544 | 1462205 | CCAAT/enhancer binding protein (C/EBP), beta  | Cebpb    | 24253  | 1,16 | up   |



|         |         |         |                                                  |        |        |      |      |
|---------|---------|---------|--------------------------------------------------|--------|--------|------|------|
| 6173680 | 7146000 | 1240654 | CCR4-NOT transcription complex, subunit 7        | Cnot7  | 306492 | 1,63 | down |
| 6638092 | 7146000 | 1240656 | CCR4-NOT transcription complex, subunit 7        | Cnot7  | 306492 | 1,60 | down |
| 6217748 | 7146000 | 1240657 | CCR4-NOT transcription complex, subunit 7        | Cnot7  | 306492 | 1,33 | down |
| 5809758 | 7146000 | 1240662 | CCR4-NOT transcription complex, subunit 7        | Cnot7  | 306492 | 1,25 | up   |
| 5864464 | 7146000 | 1240659 | CCR4-NOT transcription complex, subunit 7        | Cnot7  | 306492 | 1,16 | up   |
| 5685239 | 7146000 | 1240660 | CCR4-NOT transcription complex, subunit 7        | Cnot7  | 306492 | 1,13 | up   |
| 6018555 | 7146000 | 1240658 | CCR4-NOT transcription complex, subunit 7        | Cnot7  | 306492 | 1,07 | down |
| 6061757 | 7146000 | 1240663 | CCR4-NOT transcription complex, subunit 7        | Cnot7  | 306492 | 1,05 | up   |
| 5677022 | 7146000 | 1240663 | CCR4-NOT transcription complex, subunit 7        | Cnot7  | 306492 | 1,01 | up   |
| 6098877 | 7057462 | 1025859 | Cd2 (cytoplasmic tail) binding protein 2         | Cd2bp2 | 293505 | 1,22 | down |
| 6358034 | 7057462 | 1025862 | Cd2 (cytoplasmic tail) binding protein 2         | Cd2bp2 | 293505 | 1,19 | down |
| 6510277 | 7057462 | 1025859 | Cd2 (cytoplasmic tail) binding protein 2         | Cd2bp2 | 293505 | 1,16 | down |
| 6470358 | 7057462 | 1025861 | Cd2 (cytoplasmic tail) binding protein 2         | Cd2bp2 | 293505 | 1,09 | down |
| 6179702 | 7057462 | 1025860 | Cd2 (cytoplasmic tail) binding protein 2         | Cd2bp2 | 293505 | 1,08 | down |
| 5886232 | 7057462 | 1025859 | Cd2 (cytoplasmic tail) binding protein 2         | Cd2bp2 | 293505 | 1,07 | down |
| 6703685 | 7057462 | 1025862 | Cd2 (cytoplasmic tail) binding protein 2         | Cd2bp2 | 293505 | 1,04 | up   |
| 6344968 | 7057462 | 1025859 | Cd2 (cytoplasmic tail) binding protein 2         | Cd2bp2 | 293505 | 1,03 | down |
| 6368857 | 7219866 | 1422723 | CD24 molecule                                    | Cd24   | 25145  | 2,28 | up   |
| 5926988 | 7219866 | 1422723 | CD24 molecule                                    | Cd24   | 25145  | 1,85 | up   |
| 6536829 | 7219866 | 1422723 | CD24 molecule                                    | Cd24   | 25145  | 1,71 | up   |
| 6301198 | 7219866 | 1422722 | CD24 molecule                                    | Cd24   | 25145  | 1,44 | up   |
| 5977262 | 7219866 | 1422722 | CD24 molecule                                    | Cd24   | 25145  | 1,30 | up   |
| 5698119 | 7219866 | 1422723 | CD24 molecule                                    | Cd24   | 25145  | 1,20 | up   |
| 6049760 | 7219866 | 1422723 | CD24 molecule                                    | Cd24   | 25145  | 1,06 | down |
| 6564111 | 7219866 | 1422723 | CD24 molecule                                    | Cd24   | 25145  | 1,05 | down |
| 6060582 | 7219866 | 1422723 | CD24 molecule                                    | Cd24   | 25145  | 1,05 | down |
| 5821697 | 7219866 | 1422723 | CD24 molecule                                    | Cd24   | 25145  | 1,04 | up   |
| 5730469 | 7219866 | 1422723 | CD24 molecule                                    | Cd24   | 25145  | 1,03 | down |
| 6580811 | 7041061 | 988084  | CD274 molecule                                   | Cd274  | 499342 | 1,18 | up   |
| 6636214 | 7352385 | 1750837 | CD2-associated protein                           | Cd2ap  | 316258 | 2,85 | down |
| 6705493 | 7352385 | 1750845 | CD2-associated protein                           | Cd2ap  | 316258 | 2,30 | down |
| 6708867 | 7352385 | 1750850 | CD2-associated protein                           | Cd2ap  | 316258 | 1,72 | down |
| 5656646 | 7352385 | 1750842 | CD2-associated protein                           | Cd2ap  | 316258 | 1,64 | up   |
| 6370391 | 7352385 | 1750841 | CD2-associated protein                           | Cd2ap  | 316258 | 1,37 | down |
| 6345775 | 7352385 | 1750843 | CD2-associated protein                           | Cd2ap  | 316258 | 1,34 | down |
| 6493587 | 7352385 | 1750836 | CD2-associated protein                           | Cd2ap  | 316258 | 1,23 | up   |
| 6335356 | 7352385 | 1750851 | CD2-associated protein                           | Cd2ap  | 316258 | 1,19 | up   |
| 5665451 | 7352385 | 1750846 | CD2-associated protein                           | Cd2ap  | 316258 | 1,17 | down |
| 6416491 | 7352385 | 1750845 | CD2-associated protein                           | Cd2ap  | 316258 | 1,15 | up   |
| 5765192 | 7352385 | 1750838 | CD2-associated protein                           | Cd2ap  | 316258 | 1,14 | up   |
| 6263845 | 7352385 | 1750848 | CD2-associated protein                           | Cd2ap  | 316258 | 1,10 | down |
| 6155798 | 7352385 | 1750849 | CD2-associated protein                           | Cd2ap  | 316258 | 1,06 | up   |
| 6007297 | 7352385 | 1750844 | CD2-associated protein                           | Cd2ap  | 316258 | 1,04 | up   |
| 6297695 | 7352385 | 1750840 | CD2-associated protein                           | Cd2ap  | 316258 | 1,04 | down |
| 6444313 | 7352385 | 1750839 | CD2-associated protein                           | Cd2ap  | 316258 | 1,03 | down |
| 5700594 | 7352385 | 1750835 | CD2-associated protein                           | Cd2ap  | 316258 | 1,02 | down |
| 5762192 | 7352385 | 1750847 | CD2-associated protein                           | Cd2ap  | 316258 | 1,01 | up   |
| 6657488 | 7352385 | 1750839 | CD2-associated protein                           | Cd2ap  | 316258 | 1,01 | down |
| 5977076 | 7352385 | 1750847 | CD2-associated protein                           | Cd2ap  | 316258 | 1,00 | up   |
| 6100015 | 7235393 | 1461710 | CD40 molecule, TNF receptor superfamily member 5 | Cd40   | 171369 | 3,45 | up   |
| 6074592 | 7235393 | 1461708 | CD40 molecule, TNF receptor superfamily member 5 | Cd40   | 171369 | 2,88 | up   |
| 6041326 | 7235393 | 1461705 | CD40 molecule, TNF receptor superfamily member 5 | Cd40   | 171369 | 1,90 | down |
| 5874545 | 7235393 | 1461709 | CD40 molecule, TNF receptor superfamily member 5 | Cd40   | 171369 | 1,74 | up   |
| 5948637 | 7235393 | 1461716 | CD40 molecule, TNF receptor superfamily member 5 | Cd40   | 171369 | 1,72 | up   |
| 6071858 | 7235393 | 1461717 | CD40 molecule, TNF receptor superfamily member 5 | Cd40   | 171369 | 1,45 | down |
| 6715883 | 7235393 | 1461707 | CD40 molecule, TNF receptor superfamily member 5 | Cd40   | 171369 | 1,38 | up   |
| 6100046 | 7235393 | 1461719 | CD40 molecule, TNF receptor superfamily member 5 | Cd40   | 171369 | 1,35 | up   |

|         |         |         |                                                                           |      |        |      |      |
|---------|---------|---------|---------------------------------------------------------------------------|------|--------|------|------|
| 5767989 | 7235393 | 1461715 | CD40 molecule, TNF receptor superfamily member 5                          | Cd40 | 171369 | 1,09 | down |
| 6623152 | 7235393 | 1461719 | CD40 molecule, TNF receptor superfamily member 5                          | Cd40 | 171369 | 1,08 | down |
| 6115320 | 7242411 | 1479243 | Cd44 molecule                                                             | Cd44 | 25406  | 5,60 | down |
| 6533970 | 7242411 | 1479240 | Cd44 molecule                                                             | Cd44 | 25406  | 4,13 | down |
| 6489714 | 7242411 | 1479248 | Cd44 molecule                                                             | Cd44 | 25406  | 3,86 | up   |
| 6251718 | 7242411 | 1479239 | Cd44 molecule                                                             | Cd44 | 25406  | 3,64 | down |
| 6308129 | 7242411 | 1479244 | Cd44 molecule                                                             | Cd44 | 25406  | 3,64 | down |
| 5870718 | 7242411 | 1479242 | Cd44 molecule                                                             | Cd44 | 25406  | 3,07 | down |
| 5872959 | 7242411 | 1479231 | Cd44 molecule                                                             | Cd44 | 25406  | 2,73 | up   |
| 5969176 | 7242411 | 1479241 | Cd44 molecule                                                             | Cd44 | 25406  | 2,62 | down |
| 6338479 | 7242411 | 1479236 | Cd44 molecule                                                             | Cd44 | 25406  | 2,51 | down |
| 6457865 | 7242411 | 1479241 | Cd44 molecule                                                             | Cd44 | 25406  | 2,42 | down |
| 6244536 | 7242411 | 1479246 | Cd44 molecule                                                             | Cd44 | 25406  | 2,38 | up   |
| 5783798 | 7242411 | 1479249 | Cd44 molecule                                                             | Cd44 | 25406  | 2,27 | up   |
| 6434447 | 7242411 | 1479247 | Cd44 molecule                                                             | Cd44 | 25406  | 2,13 | up   |
| 6293760 | 7242411 | 1479245 | Cd44 molecule                                                             | Cd44 | 25406  | 1,99 | up   |
| 6729789 | 7242411 | 1479234 | Cd44 molecule                                                             | Cd44 | 25406  | 1,96 | up   |
| 6340517 | 7242411 | 1479232 | Cd44 molecule                                                             | Cd44 | 25406  | 1,84 | up   |
| 5994625 | 7242411 | 1479229 | Cd44 molecule                                                             | Cd44 | 25406  | 1,56 | up   |
| 5843073 | 7242411 | 1479235 | Cd44 molecule                                                             | Cd44 | 25406  | 1,55 | down |
| 5825076 | 7242411 | 1479230 | Cd44 molecule                                                             | Cd44 | 25406  | 1,48 | up   |
| 6569321 | 7242411 | 1479233 | Cd44 molecule                                                             | Cd44 | 25406  | 1,43 | up   |
| 5890377 | 7242411 | 1479238 | Cd44 molecule                                                             | Cd44 | 25406  | 1,24 | down |
| 6630737 | 7242411 | 1479237 | Cd44 molecule                                                             | Cd44 | 25406  | 1,10 | down |
| 6257241 | 7060370 | 1032350 | Cd6 molecule                                                              | Cd6  | 25752  | 2,03 | down |
| 5637267 | 7060370 | 1032353 | Cd6 molecule                                                              | Cd6  | 25752  | 1,87 | up   |
| 6688111 | 7060370 | 1032355 | Cd6 molecule                                                              | Cd6  | 25752  | 1,80 | up   |
| 6432331 | 7060370 | 1032348 | Cd6 molecule                                                              | Cd6  | 25752  | 1,61 | down |
| 6678404 | 7060370 | 1032349 | Cd6 molecule                                                              | Cd6  | 25752  | 1,53 | down |
| 6375248 | 7060370 | 1032359 | Cd6 molecule                                                              | Cd6  | 25752  | 1,49 | up   |
| 6003099 | 7060370 | 1032349 | Cd6 molecule                                                              | Cd6  | 25752  | 1,43 | up   |
| 6008772 | 7060370 | 1032347 | Cd6 molecule                                                              | Cd6  | 25752  | 1,25 | down |
| 6690587 | 7060370 | 1032354 | Cd6 molecule                                                              | Cd6  | 25752  | 1,24 | up   |
| 5955312 | 7060370 | 1032348 | Cd6 molecule                                                              | Cd6  | 25752  | 1,23 | up   |
| 6208488 | 7060370 | 1032358 | Cd6 molecule                                                              | Cd6  | 25752  | 1,17 | down |
| 6048896 | 7060370 | 1032351 | Cd6 molecule                                                              | Cd6  | 25752  | 1,16 | up   |
| 5968517 | 7060370 | 1032349 | Cd6 molecule                                                              | Cd6  | 25752  | 1,13 | down |
| 6264059 | 7060370 | 1032352 | Cd6 molecule                                                              | Cd6  | 25752  | 1,10 | down |
| 6456196 | 7060370 | 1032348 | Cd6 molecule                                                              | Cd6  | 25752  | 1,06 | down |
| 6151274 | 7060370 | 1032356 | Cd6 molecule                                                              | Cd6  | 25752  | 1,03 | down |
| 6075361 | 7060370 | 1032348 | Cd6 molecule                                                              | Cd6  | 25752  | 1,03 | down |
| 6721818 | 7060370 | 1032357 | Cd6 molecule                                                              | Cd6  | 25752  | 1,01 | up   |
| 6329823 | 7270038 | 1547250 | Cd69 molecule                                                             | Cd69 | 29187  | 6,16 | down |
| 5721404 | 7270038 | 1547246 | Cd69 molecule                                                             | Cd69 | 29187  | 2,76 | up   |
| 6181648 | 7270038 | 1547245 | Cd69 molecule                                                             | Cd69 | 29187  | 2,46 | down |
| 6182521 | 7270038 | 1547247 | Cd69 molecule                                                             | Cd69 | 29187  | 1,95 | up   |
| 6258061 | 7270038 | 1547249 | Cd69 molecule                                                             | Cd69 | 29187  | 1,73 | up   |
| 5928284 | 7270038 | 1547248 | Cd69 molecule                                                             | Cd69 | 29187  | 1,66 | up   |
| 6007764 | 7170979 | 1302167 | Cd74 molecule, major histocompatibility complex, class II invariant chain | Cd74 | 25599  | 2,46 | down |
| 6255822 | 7170979 | 1302166 | Cd74 molecule, major histocompatibility complex, class II invariant chain | Cd74 | 25599  | 1,49 | up   |
| 6183597 | 7170979 | 1302161 | Cd74 molecule, major histocompatibility complex, class II invariant chain | Cd74 | 25599  | 1,32 | down |
| 6578400 | 7170979 | 1302163 | Cd74 molecule, major histocompatibility complex, class II invariant chain | Cd74 | 25599  | 1,27 | up   |
| 5727419 | 7170979 | 1302160 | Cd74 molecule, major histocompatibility complex, class II invariant chain | Cd74 | 25599  | 1,27 | up   |
| 5954234 | 7170979 | 1302162 | Cd74 molecule, major histocompatibility complex, class II invariant chain | Cd74 | 25599  | 1,13 | up   |
| 5995166 | 7170979 | 1302164 | Cd74 molecule, major histocompatibility complex, class II invariant chain | Cd74 | 25599  | 1,06 | down |
| 6086666 | 7170979 | 1302165 | Cd74 molecule, major histocompatibility complex, class II invariant chain | Cd74 | 25599  | 1,00 | up   |
| 6555737 | 7241972 | 1478250 | Cd82 molecule                                                             | Cd82 | 83628  | 3,02 | down |

|         |         |         |                                                        |        |        |      |      |
|---------|---------|---------|--------------------------------------------------------|--------|--------|------|------|
| 6569483 | 7241972 | 1478260 | Cd82 molecule                                          | Cd82   | 83628  | 1,75 | down |
| 6031210 | 7241972 | 1478259 | Cd82 molecule                                          | Cd82   | 83628  | 1,49 | down |
| 5987939 | 7241972 | 1478250 | Cd82 molecule                                          | Cd82   | 83628  | 1,40 | up   |
| 6715340 | 7241972 | 1478258 | Cd82 molecule                                          | Cd82   | 83628  | 1,38 | down |
| 6333416 | 7241972 | 1478251 | Cd82 molecule                                          | Cd82   | 83628  | 1,34 | up   |
| 6305710 | 7241972 | 1478255 | Cd82 molecule                                          | Cd82   | 83628  | 1,19 | up   |
| 5840543 | 7241972 | 1478254 | Cd82 molecule                                          | Cd82   | 83628  | 1,14 | up   |
| 5941347 | 7241972 | 1478250 | Cd82 molecule                                          | Cd82   | 83628  | 1,12 | down |
| 6474668 | 7241972 | 1478253 | Cd82 molecule                                          | Cd82   | 83628  | 1,12 | up   |
| 6079009 | 7241972 | 1478257 | Cd82 molecule                                          | Cd82   | 83628  | 1,05 | up   |
| 5658912 | 7241972 | 1478252 | Cd82 molecule                                          | Cd82   | 83628  | 1,03 | up   |
| 6446012 | 7241972 | 1478256 | Cd82 molecule                                          | Cd82   | 83628  | 1,02 | down |
| 5722922 | 7246271 | 1488548 | CD93 molecule                                          | Cd93   | 84398  | 2,01 | down |
| 5708697 | 7246271 | 1488549 | CD93 molecule                                          | Cd93   | 84398  | 1,90 | down |
| 5784046 | 7246271 | 1488548 | CD93 molecule                                          | Cd93   | 84398  | 1,40 | up   |
| 5860112 | 7246271 | 1488549 | CD93 molecule                                          | Cd93   | 84398  | 1,26 | up   |
| 5713096 | 7246271 | 1488549 | CD93 molecule                                          | Cd93   | 84398  | 1,22 | down |
| 6220905 | 7246271 | 1488550 | CD93 molecule                                          | Cd93   | 84398  | 1,22 | down |
| 6586189 | 7246271 | 1488549 | CD93 molecule                                          | Cd93   | 84398  | 1,20 | down |
| 6417533 | 7246271 | 1488551 | CD93 molecule                                          | Cd93   | 84398  | 1,19 | down |
| 6147084 | 7246271 | 1488550 | CD93 molecule                                          | Cd93   | 84398  | 1,19 | up   |
| 5726645 | 7246271 | 1488551 | CD93 molecule                                          | Cd93   | 84398  | 1,18 | down |
| 6608550 | 7246271 | 1488551 | CD93 molecule                                          | Cd93   | 84398  | 1,16 | up   |
| 5964238 | 7246271 | 1488549 | CD93 molecule                                          | Cd93   | 84398  | 1,15 | up   |
| 6226700 | 7246271 | 1488549 | CD93 molecule                                          | Cd93   | 84398  | 1,13 | up   |
| 6418970 | 7246271 | 1488551 | CD93 molecule                                          | Cd93   | 84398  | 1,11 | down |
| 6414871 | 7246271 | 1488549 | CD93 molecule                                          | Cd93   | 84398  | 1,10 | up   |
| 5746965 | 7246271 | 1488549 | CD93 molecule                                          | Cd93   | 84398  | 1,09 | up   |
| 5711996 | 7246271 | 1488549 | CD93 molecule                                          | Cd93   | 84398  | 1,09 | up   |
| 5627673 | 7246271 | 1488549 | CD93 molecule                                          | Cd93   | 84398  | 1,01 | up   |
| 5820050 | 7246271 | 1488551 | CD93 molecule                                          | Cd93   | 84398  | 1,01 | up   |
| 5847294 | 7246271 | 1488549 | CD93 molecule                                          | Cd93   | 84398  | 1,01 | up   |
| 6392810 | 7130030 | 1201366 | CD99 molecule-like 2                                   | Cd99I2 | 171485 | 2,07 | up   |
| 5626649 | 7130030 | 1201375 | CD99 molecule-like 2                                   | Cd99I2 | 171485 | 1,61 | up   |
| 6685531 | 7130030 | 1201368 | CD99 molecule-like 2                                   | Cd99I2 | 171485 | 1,52 | up   |
| 5694162 | 7130030 | 1201375 | CD99 molecule-like 2                                   | Cd99I2 | 171485 | 1,37 | down |
| 5856555 | 7130030 | 1201369 | CD99 molecule-like 2                                   | Cd99I2 | 171485 | 1,36 | down |
| 5646994 | 7130030 | 1201366 | CD99 molecule-like 2                                   | Cd99I2 | 171485 | 1,32 | down |
| 5700926 | 7130030 | 1201373 | CD99 molecule-like 2                                   | Cd99I2 | 171485 | 1,29 | down |
| 5622778 | 7130030 | 1201374 | CD99 molecule-like 2                                   | Cd99I2 | 171485 | 1,29 | down |
| 6411526 | 7130030 | 1201371 | CD99 molecule-like 2                                   | Cd99I2 | 171485 | 1,18 | down |
| 6392019 | 7130030 | 1201372 | CD99 molecule-like 2                                   | Cd99I2 | 171485 | 1,16 | up   |
| 6563734 | 7130030 | 1201370 | CD99 molecule-like 2                                   | Cd99I2 | 171485 | 1,11 | down |
| 6136481 | 7130030 | 1201376 | CD99 molecule-like 2                                   | Cd99I2 | 171485 | 1,05 | down |
| 6712414 | 7067386 | 1049554 | CDC like kinase 4                                      | Clk4   | 287269 | 2,66 | down |
| 5820483 | 7067386 | 1049552 | CDC like kinase 4                                      | Clk4   | 287269 | 1,52 | down |
| 6131595 | 7067386 | 1049548 | CDC like kinase 4                                      | Clk4   | 287269 | 1,42 | down |
| 5645327 | 7067386 | 1049553 | CDC like kinase 4                                      | Clk4   | 287269 | 1,39 | down |
| 6729393 | 7067386 | 1049546 | CDC like kinase 4                                      | Clk4   | 287269 | 1,31 | up   |
| 5815330 | 7067386 | 1049547 | CDC like kinase 4                                      | Clk4   | 287269 | 1,18 | up   |
| 5741253 | 7067386 | 1049555 | CDC like kinase 4                                      | Clk4   | 287269 | 1,16 | up   |
| 5640069 | 7067386 | 1049551 | CDC like kinase 4                                      | Clk4   | 287269 | 1,15 | down |
| 6571036 | 7067386 | 1049549 | CDC like kinase 4                                      | Clk4   | 287269 | 1,06 | up   |
| 6191483 | 7067386 | 1049550 | CDC like kinase 4                                      | Clk4   | 287269 | 1,01 | down |
| 5807687 | 7067386 | 1049545 | CDC like kinase 4                                      | Clk4   | 287269 | 1,01 | down |
| 6606007 | 7067386 | 1049546 | CDC like kinase 4                                      | Clk4   | 287269 | 1,01 | up   |
| 5937801 | 7154655 | 1262341 | CDC14 cell division cycle 14 homolog B (S. cerevisiae) | Cdc14b | 361195 | 2,06 | down |

|         |         |         |                                                        |          |        |      |      |
|---------|---------|---------|--------------------------------------------------------|----------|--------|------|------|
| 6294530 | 7154655 | 1262326 | CDC14 cell division cycle 14 homolog B (S. cerevisiae) | Cdc14b   | 361195 | 1,73 | down |
| 6051637 | 7154655 | 1262328 | CDC14 cell division cycle 14 homolog B (S. cerevisiae) | Cdc14b   | 361195 | 1,72 | down |
| 5629160 | 7154655 | 1262320 | CDC14 cell division cycle 14 homolog B (S. cerevisiae) | Cdc14b   | 361195 | 1,71 | down |
| 6253860 | 7154655 | 1262331 | CDC14 cell division cycle 14 homolog B (S. cerevisiae) | Cdc14b   | 361195 | 1,55 | up   |
| 6660678 | 7154655 | 1262322 | CDC14 cell division cycle 14 homolog B (S. cerevisiae) | Cdc14b   | 361195 | 1,52 | down |
| 5878563 | 7154655 | 1262340 | CDC14 cell division cycle 14 homolog B (S. cerevisiae) | Cdc14b   | 361195 | 1,43 | up   |
| 6397485 | 7154655 | 1262327 | CDC14 cell division cycle 14 homolog B (S. cerevisiae) | Cdc14b   | 361195 | 1,42 | down |
| 6189491 | 7154655 | 1262330 | CDC14 cell division cycle 14 homolog B (S. cerevisiae) | Cdc14b   | 361195 | 1,39 | down |
| 5989006 | 7154655 | 1262318 | CDC14 cell division cycle 14 homolog B (S. cerevisiae) | Cdc14b   | 361195 | 1,18 | up   |
| 5992158 | 7154655 | 1262337 | CDC14 cell division cycle 14 homolog B (S. cerevisiae) | Cdc14b   | 361195 | 1,18 | up   |
| 5785266 | 7154655 | 1262329 | CDC14 cell division cycle 14 homolog B (S. cerevisiae) | Cdc14b   | 361195 | 1,18 | down |
| 6269429 | 7154655 | 1262325 | CDC14 cell division cycle 14 homolog B (S. cerevisiae) | Cdc14b   | 361195 | 1,15 | down |
| 6245678 | 7154655 | 1262341 | CDC14 cell division cycle 14 homolog B (S. cerevisiae) | Cdc14b   | 361195 | 1,12 | down |
| 6733220 | 7154655 | 1262342 | CDC14 cell division cycle 14 homolog B (S. cerevisiae) | Cdc14b   | 361195 | 1,10 | down |
| 6074831 | 7154655 | 1262321 | CDC14 cell division cycle 14 homolog B (S. cerevisiae) | Cdc14b   | 361195 | 1,09 | down |
| 6047933 | 7154655 | 1262341 | CDC14 cell division cycle 14 homolog B (S. cerevisiae) | Cdc14b   | 361195 | 1,04 | up   |
| 5790726 | 7154655 | 1262332 | CDC14 cell division cycle 14 homolog B (S. cerevisiae) | Cdc14b   | 361195 | 1,00 | up   |
| 6564751 | 7162389 | 1281188 | CDC28 protein kinase regulatory subunit 2              | Cks2     | 498709 | 1,45 | up   |
| 6021325 | 7162389 | 1281185 | CDC28 protein kinase regulatory subunit 2              | Cks2     | 498709 | 1,33 | up   |
| 5885875 | 7162389 | 1281186 | CDC28 protein kinase regulatory subunit 2              | Cks2     | 498709 | 1,14 | down |
| 5829019 | 7039280 | 983768  | CDC42 binding protein kinase gamma (DMPK-like)         | Cdc42bpg | 293693 | 2,96 | up   |
| 5948180 | 7039280 | 983743  | CDC42 binding protein kinase gamma (DMPK-like)         | Cdc42bpg | 293693 | 1,81 | down |
| 6549175 | 7039280 | 983768  | CDC42 binding protein kinase gamma (DMPK-like)         | Cdc42bpg | 293693 | 1,80 | up   |
| 6089419 | 7039280 | 983753  | CDC42 binding protein kinase gamma (DMPK-like)         | Cdc42bpg | 293693 | 1,65 | up   |
| 6374959 | 7039280 | 983741  | CDC42 binding protein kinase gamma (DMPK-like)         | Cdc42bpg | 293693 | 1,65 | up   |
| 6329879 | 7039280 | 983766  | CDC42 binding protein kinase gamma (DMPK-like)         | Cdc42bpg | 293693 | 1,60 | up   |
| 5787915 | 7039280 | 983737  | CDC42 binding protein kinase gamma (DMPK-like)         | Cdc42bpg | 293693 | 1,53 | down |
| 5969066 | 7039280 | 983761  | CDC42 binding protein kinase gamma (DMPK-like)         | Cdc42bpg | 293693 | 1,46 | down |
| 6254010 | 7039280 | 983750  | CDC42 binding protein kinase gamma (DMPK-like)         | Cdc42bpg | 293693 | 1,39 | down |
| 5831241 | 7039280 | 983763  | CDC42 binding protein kinase gamma (DMPK-like)         | Cdc42bpg | 293693 | 1,37 | up   |
| 6351505 | 7039280 | 983742  | CDC42 binding protein kinase gamma (DMPK-like)         | Cdc42bpg | 293693 | 1,29 | down |
| 5815262 | 7039280 | 983758  | CDC42 binding protein kinase gamma (DMPK-like)         | Cdc42bpg | 293693 | 1,28 | up   |
| 6745141 | 7039280 | 983756  | CDC42 binding protein kinase gamma (DMPK-like)         | Cdc42bpg | 293693 | 1,26 | down |
| 6317154 | 7039280 | 983740  | CDC42 binding protein kinase gamma (DMPK-like)         | Cdc42bpg | 293693 | 1,23 | down |
| 6401851 | 7039280 | 983747  | CDC42 binding protein kinase gamma (DMPK-like)         | Cdc42bpg | 293693 | 1,23 | down |
| 5711897 | 7039280 | 983755  | CDC42 binding protein kinase gamma (DMPK-like)         | Cdc42bpg | 293693 | 1,21 | up   |
| 6096993 | 7039280 | 983762  | CDC42 binding protein kinase gamma (DMPK-like)         | Cdc42bpg | 293693 | 1,20 | up   |
| 6638551 | 7039280 | 983749  | CDC42 binding protein kinase gamma (DMPK-like)         | Cdc42bpg | 293693 | 1,20 | up   |
| 6495906 | 7039280 | 983745  | CDC42 binding protein kinase gamma (DMPK-like)         | Cdc42bpg | 293693 | 1,20 | up   |
| 6009743 | 7039280 | 983766  | CDC42 binding protein kinase gamma (DMPK-like)         | Cdc42bpg | 293693 | 1,19 | up   |
| 6138429 | 7039280 | 983738  | CDC42 binding protein kinase gamma (DMPK-like)         | Cdc42bpg | 293693 | 1,18 | down |
| 5993489 | 7039280 | 983748  | CDC42 binding protein kinase gamma (DMPK-like)         | Cdc42bpg | 293693 | 1,17 | down |
| 6221010 | 7039280 | 983736  | CDC42 binding protein kinase gamma (DMPK-like)         | Cdc42bpg | 293693 | 1,17 | down |
| 5802703 | 7039280 | 983739  | CDC42 binding protein kinase gamma (DMPK-like)         | Cdc42bpg | 293693 | 1,16 | down |
| 6139570 | 7039280 | 983751  | CDC42 binding protein kinase gamma (DMPK-like)         | Cdc42bpg | 293693 | 1,16 | up   |
| 6666541 | 7039280 | 983734  | CDC42 binding protein kinase gamma (DMPK-like)         | Cdc42bpg | 293693 | 1,16 | down |
| 5886767 | 7039280 | 983733  | CDC42 binding protein kinase gamma (DMPK-like)         | Cdc42bpg | 293693 | 1,15 | up   |
| 6249409 | 7039280 | 983741  | CDC42 binding protein kinase gamma (DMPK-like)         | Cdc42bpg | 293693 | 1,14 | up   |
| 6533769 | 7039280 | 983735  | CDC42 binding protein kinase gamma (DMPK-like)         | Cdc42bpg | 293693 | 1,09 | down |
| 5997908 | 7039280 | 983760  | CDC42 binding protein kinase gamma (DMPK-like)         | Cdc42bpg | 293693 | 1,09 | up   |
| 6067325 | 7039280 | 983744  | CDC42 binding protein kinase gamma (DMPK-like)         | Cdc42bpg | 293693 | 1,08 | down |
| 6287494 | 7039280 | 983759  | CDC42 binding protein kinase gamma (DMPK-like)         | Cdc42bpg | 293693 | 1,07 | up   |
| 6647482 | 7039280 | 983731  | CDC42 binding protein kinase gamma (DMPK-like)         | Cdc42bpg | 293693 | 1,06 | up   |
| 6508494 | 7039280 | 983746  | CDC42 binding protein kinase gamma (DMPK-like)         | Cdc42bpg | 293693 | 1,03 | down |
| 6640118 | 7039280 | 983752  | CDC42 binding protein kinase gamma (DMPK-like)         | Cdc42bpg | 293693 | 1,02 | down |
| 6283891 | 7039280 | 983764  | CDC42 binding protein kinase gamma (DMPK-like)         | Cdc42bpg | 293693 | 1,02 | up   |
| 6466093 | 7039280 | 983732  | CDC42 binding protein kinase gamma (DMPK-like)         | Cdc42bpg | 293693 | 1,00 | up   |

|         |         |         |                                                |          |        |      |      |
|---------|---------|---------|------------------------------------------------|----------|--------|------|------|
| 6471148 | 7039280 | 983757  | CDC42 binding protein kinase gamma (DMPK-like) | Cdc42bpg | 293693 | 1,00 | up   |
| 6479918 | 7039280 | 983765  | CDC42 binding protein kinase gamma (DMPK-like) | Cdc42bpg | 293693 | 1,00 | up   |
| 6096711 | 7039280 | 983754  | CDC42 binding protein kinase gamma (DMPK-like) | Cdc42bpg | 293693 | 1,00 | up   |
| 6364348 | 7088432 | 1099410 | Cdc42 GTPase-activating protein                | Cdgap    | 288093 | 2,01 | up   |
| 6713367 | 7088432 | 1099420 | Cdc42 GTPase-activating protein                | Cdgap    | 288093 | 1,83 | up   |
| 6501366 | 7088432 | 1099412 | Cdc42 GTPase-activating protein                | Cdgap    | 288093 | 1,41 | up   |
| 5930998 | 7088432 | 1099416 | Cdc42 GTPase-activating protein                | Cdgap    | 288093 | 1,39 | up   |
| 6555271 | 7088432 | 1099408 | Cdc42 GTPase-activating protein                | Cdgap    | 288093 | 1,35 | up   |
| 6348291 | 7088432 | 1099421 | Cdc42 GTPase-activating protein                | Cdgap    | 288093 | 1,30 | up   |
| 6610556 | 7088432 | 1099421 | Cdc42 GTPase-activating protein                | Cdgap    | 288093 | 1,30 | down |
| 6072112 | 7088432 | 1099411 | Cdc42 GTPase-activating protein                | Cdgap    | 288093 | 1,28 | down |
| 6387679 | 7088432 | 1099409 | Cdc42 GTPase-activating protein                | Cdgap    | 288093 | 1,27 | down |
| 6579125 | 7088432 | 1099413 | Cdc42 GTPase-activating protein                | Cdgap    | 288093 | 1,18 | down |
| 5924849 | 7088432 | 1099421 | Cdc42 GTPase-activating protein                | Cdgap    | 288093 | 1,16 | up   |
| 5699487 | 7088432 | 1099419 | Cdc42 GTPase-activating protein                | Cdgap    | 288093 | 1,07 | down |
| 6453569 | 7088432 | 1099418 | Cdc42 GTPase-activating protein                | Cdgap    | 288093 | 1,05 | down |
| 6220873 | 7088432 | 1099393 | Cdc42 GTPase-activating protein                | Cdgap    | 288093 | 1,03 | down |
| 6642150 | 7038971 | 982985  | CDK2-associated protein 2                      | Cdk2ap2  | 688405 | 1,69 | up   |
| 6161655 | 7038971 | 982983  | CDK2-associated protein 2                      | Cdk2ap2  | 688405 | 1,69 | down |
| 6009763 | 7038971 | 982983  | CDK2-associated protein 2                      | Cdk2ap2  | 688405 | 1,35 | down |
| 5797860 | 7038971 | 982984  | CDK2-associated protein 2                      | Cdk2ap2  | 688405 | 1,26 | up   |
| 6432674 | 7038971 | 982985  | CDK2-associated protein 2                      | Cdk2ap2  | 688405 | 1,21 | up   |
| 5664555 | 7038971 | 982983  | CDK2-associated protein 2                      | Cdk2ap2  | 688405 | 1,14 | up   |
| 6205198 | 7038971 | 982983  | CDK2-associated protein 2                      | Cdk2ap2  | 688405 | 1,11 | up   |
| 6495626 | 7038971 | 982985  | CDK2-associated protein 2                      | Cdk2ap2  | 688405 | 1,04 | up   |
| 5706644 | 7226277 | 1437991 | CDKN1A interacting zinc finger protein 1       | Ciz1     | 296639 | 2,17 | up   |
| 5939052 | 7226277 | 1437975 | CDKN1A interacting zinc finger protein 1       | Ciz1     | 296639 | 2,06 | down |
| 5786115 | 7226277 | 1437984 | CDKN1A interacting zinc finger protein 1       | Ciz1     | 296639 | 1,92 | up   |
| 5785975 | 7226277 | 1437985 | CDKN1A interacting zinc finger protein 1       | Ciz1     | 296639 | 1,87 | up   |
| 6386848 | 7226277 | 1437993 | CDKN1A interacting zinc finger protein 1       | Ciz1     | 296639 | 1,65 | up   |
| 6331620 | 7226277 | 1437992 | CDKN1A interacting zinc finger protein 1       | Ciz1     | 296639 | 1,63 | up   |
| 5870077 | 7226277 | 1437976 | CDKN1A interacting zinc finger protein 1       | Ciz1     | 296639 | 1,45 | down |
| 6710285 | 7226277 | 1437976 | CDKN1A interacting zinc finger protein 1       | Ciz1     | 296639 | 1,32 | down |
| 6476327 | 7226277 | 1437989 | CDKN1A interacting zinc finger protein 1       | Ciz1     | 296639 | 1,30 | up   |
| 6058166 | 7226277 | 1437983 | CDKN1A interacting zinc finger protein 1       | Ciz1     | 296639 | 1,30 | down |
| 5718357 | 7226277 | 1437984 | CDKN1A interacting zinc finger protein 1       | Ciz1     | 296639 | 1,29 | down |
| 6362841 | 7226277 | 1437994 | CDKN1A interacting zinc finger protein 1       | Ciz1     | 296639 | 1,28 | up   |
| 5829923 | 7226277 | 1437977 | CDKN1A interacting zinc finger protein 1       | Ciz1     | 296639 | 1,28 | up   |
| 6443531 | 7226277 | 1437985 | CDKN1A interacting zinc finger protein 1       | Ciz1     | 296639 | 1,27 | up   |
| 6739657 | 7226277 | 1437986 | CDKN1A interacting zinc finger protein 1       | Ciz1     | 296639 | 1,26 | up   |
| 5831766 | 7226277 | 1437984 | CDKN1A interacting zinc finger protein 1       | Ciz1     | 296639 | 1,24 | down |
| 6250542 | 7226277 | 1437990 | CDKN1A interacting zinc finger protein 1       | Ciz1     | 296639 | 1,20 | up   |
| 6047873 | 7226277 | 1437993 | CDKN1A interacting zinc finger protein 1       | Ciz1     | 296639 | 1,14 | down |
| 6353511 | 7226277 | 1437984 | CDKN1A interacting zinc finger protein 1       | Ciz1     | 296639 | 1,12 | up   |
| 5651595 | 7226277 | 1437982 | CDKN1A interacting zinc finger protein 1       | Ciz1     | 296639 | 1,11 | up   |
| 5954936 | 7226277 | 1437976 | CDKN1A interacting zinc finger protein 1       | Ciz1     | 296639 | 1,10 | down |
| 5922991 | 7226277 | 1437992 | CDKN1A interacting zinc finger protein 1       | Ciz1     | 296639 | 1,10 | down |
| 6379125 | 7226277 | 1437985 | CDKN1A interacting zinc finger protein 1       | Ciz1     | 296639 | 1,09 | down |
| 6140382 | 7226277 | 1437979 | CDKN1A interacting zinc finger protein 1       | Ciz1     | 296639 | 1,07 | down |
| 6415582 | 7226277 | 1437975 | CDKN1A interacting zinc finger protein 1       | Ciz1     | 296639 | 1,06 | down |
| 6184068 | 7226277 | 1437982 | CDKN1A interacting zinc finger protein 1       | Ciz1     | 296639 | 1,06 | down |
| 5787535 | 7226277 | 1437978 | CDKN1A interacting zinc finger protein 1       | Ciz1     | 296639 | 1,03 | down |
| 6395130 | 7226277 | 1437988 | CDKN1A interacting zinc finger protein 1       | Ciz1     | 296639 | 1,03 | up   |
| 6519329 | 7114274 | 1162820 | cell adhesion molecule 3                       | Cadm3    | 360882 | 1,41 | down |
| 6112946 | 7114274 | 1162817 | cell adhesion molecule 3                       | Cadm3    | 360882 | 1,37 | down |
| 6337392 | 7114274 | 1162821 | cell adhesion molecule 3                       | Cadm3    | 360882 | 1,22 | down |
| 6521108 | 7114274 | 1162823 | cell adhesion molecule 3                       | Cadm3    | 360882 | 1,21 | up   |

|         |         |         |                                              |        |        |      |      |
|---------|---------|---------|----------------------------------------------|--------|--------|------|------|
| 6618885 | 7114274 | 1162814 | cell adhesion molecule 3                     | Cadm3  | 360882 | 1,09 | up   |
| 6392722 | 7114274 | 1162814 | cell adhesion molecule 3                     | Cadm3  | 360882 | 1,08 | up   |
| 6341762 | 7114274 | 1162815 | cell adhesion molecule 3                     | Cadm3  | 360882 | 1,05 | up   |
| 5980170 | 7114274 | 1162816 | cell adhesion molecule 3                     | Cadm3  | 360882 | 1,05 | up   |
| 6428993 | 7114274 | 1162822 | cell adhesion molecule 3                     | Cadm3  | 360882 | 1,04 | up   |
| 6497723 | 7114274 | 1162814 | cell adhesion molecule 3                     | Cadm3  | 360882 | 1,02 | up   |
| 6675929 | 7114274 | 1162814 | cell adhesion molecule 3                     | Cadm3  | 360882 | 1,01 | up   |
| 6315840 | 7337902 | 1714548 | cell cycle progression 1                     | Ccp1   | 363098 | 2,01 | up   |
| 6026388 | 7337902 | 1714541 | cell cycle progression 1                     | Ccp1   | 363098 | 1,31 | down |
| 6540962 | 7337902 | 1714542 | cell cycle progression 1                     | Ccp1   | 363098 | 1,25 | down |
| 6423415 | 7337902 | 1714547 | cell cycle progression 1                     | Ccp1   | 363098 | 1,21 | down |
| 6005018 | 7337902 | 1714547 | cell cycle progression 1                     | Ccp1   | 363098 | 1,19 | up   |
| 5661789 | 7337902 | 1714538 | cell cycle progression 1                     | Ccp1   | 363098 | 1,14 | up   |
| 5658117 | 7337902 | 1714546 | cell cycle progression 1                     | Ccp1   | 363098 | 1,07 | down |
| 5947683 | 7337902 | 1714548 | cell cycle progression 1                     | Ccp1   | 363098 | 1,06 | up   |
| 6257841 | 7337902 | 1714544 | cell cycle progression 1                     | Ccp1   | 363098 | 1,06 | down |
| 6293362 | 7337902 | 1714545 | cell cycle progression 1                     | Ccp1   | 363098 | 1,05 | down |
| 5986432 | 7337902 | 1714540 | cell cycle progression 1                     | Ccp1   | 363098 | 1,03 | down |
| 6134552 | 7268451 | 1543631 | cell death-inducing DFFA-like effector c     | Cidec  | 500292 | 3,54 | down |
| 5673259 | 7268451 | 1543626 | cell death-inducing DFFA-like effector c     | Cidec  | 500292 | 2,84 | down |
| 5699919 | 7268451 | 1543631 | cell death-inducing DFFA-like effector c     | Cidec  | 500292 | 2,08 | down |
| 6473618 | 7268451 | 1543626 | cell death-inducing DFFA-like effector c     | Cidec  | 500292 | 1,76 | up   |
| 5626572 | 7268451 | 1543629 | cell death-inducing DFFA-like effector c     | Cidec  | 500292 | 1,56 | down |
| 6269561 | 7268451 | 1543628 | cell death-inducing DFFA-like effector c     | Cidec  | 500292 | 1,48 | up   |
| 5741754 | 7268451 | 1543627 | cell death-inducing DFFA-like effector c     | Cidec  | 500292 | 1,19 | up   |
| 5816957 | 7268451 | 1543630 | cell death-inducing DFFA-like effector c     | Cidec  | 500292 | 1,17 | up   |
| 6441468 | 7268451 | 1543626 | cell death-inducing DFFA-like effector c     | Cidec  | 500292 | 1,10 | up   |
| 5830448 | 7268451 | 1543626 | cell death-inducing DFFA-like effector c     | Cidec  | 500292 | 1,00 | down |
| 6356578 | 7292247 | 1601862 | cell division cycle 42 (GTP binding protein) | Cdc42  | 64465  | 2,36 | down |
| 6564007 | 7292247 | 1601861 | cell division cycle 42 (GTP binding protein) | Cdc42  | 64465  | 1,29 | down |
| 6404212 | 7292247 | 1601859 | cell division cycle 42 (GTP binding protein) | Cdc42  | 64465  | 1,14 | down |
| 6266801 | 7292247 | 1601858 | cell division cycle 42 (GTP binding protein) | Cdc42  | 64465  | 1,14 | up   |
| 5845270 | 7292247 | 1601858 | cell division cycle 42 (GTP binding protein) | Cdc42  | 64465  | 1,13 | up   |
| 6197050 | 7292247 | 1601860 | cell division cycle 42 (GTP binding protein) | Cdc42  | 64465  | 1,06 | up   |
| 5636612 | 7292247 | 1601856 | cell division cycle 42 (GTP binding protein) | Cdc42  | 64465  | 1,00 | down |
| 6084514 | 7295612 | 1610169 | cell growth regulator with EF hand domain 1  | Cgref1 | 245918 | 2,72 | up   |
| 5701507 | 7295612 | 1610171 | cell growth regulator with EF hand domain 1  | Cgref1 | 245918 | 1,39 | up   |
| 6438736 | 7295612 | 1610171 | cell growth regulator with EF hand domain 1  | Cgref1 | 245918 | 1,27 | up   |
| 6015978 | 7295612 | 1610171 | cell growth regulator with EF hand domain 1  | Cgref1 | 245918 | 1,19 | down |
| 5919364 | 7295612 | 1610170 | cell growth regulator with EF hand domain 1  | Cgref1 | 245918 | 1,19 | up   |
| 6535875 | 7295612 | 1610171 | cell growth regulator with EF hand domain 1  | Cgref1 | 245918 | 1,10 | down |
| 6243231 | 7295612 | 1610171 | cell growth regulator with EF hand domain 1  | Cgref1 | 245918 | 1,10 | down |
| 6513829 | 7295612 | 1610167 | cell growth regulator with EF hand domain 1  | Cgref1 | 245918 | 1,03 | down |
| 6002585 | 7295612 | 1610168 | cell growth regulator with EF hand domain 1  | Cgref1 | 245918 | 1,00 | down |
| 6160153 | 7117482 | 1170848 | centromere protein C 1                       | Cenpc1 | 305270 | 2,53 | up   |
| 6595813 | 7117482 | 1170853 | centromere protein C 1                       | Cenpc1 | 305270 | 1,72 | up   |
| 6015367 | 7117482 | 1170850 | centromere protein C 1                       | Cenpc1 | 305270 | 1,52 | up   |
| 6371409 | 7117482 | 1170851 | centromere protein C 1                       | Cenpc1 | 305270 | 1,47 | down |
| 6514985 | 7117482 | 1170864 | centromere protein C 1                       | Cenpc1 | 305270 | 1,44 | down |
| 5685139 | 7117482 | 1170860 | centromere protein C 1                       | Cenpc1 | 305270 | 1,39 | down |
| 5904877 | 7117482 | 1170850 | centromere protein C 1                       | Cenpc1 | 305270 | 1,26 | down |
| 5916973 | 7117482 | 1170862 | centromere protein C 1                       | Cenpc1 | 305270 | 1,23 | down |
| 6243693 | 7117482 | 1170863 | centromere protein C 1                       | Cenpc1 | 305270 | 1,23 | up   |
| 5944313 | 7117482 | 1170846 | centromere protein C 1                       | Cenpc1 | 305270 | 1,20 | down |
| 6559136 | 7117482 | 1170856 | centromere protein C 1                       | Cenpc1 | 305270 | 1,19 | up   |
| 6663871 | 7117482 | 1170854 | centromere protein C 1                       | Cenpc1 | 305270 | 1,18 | up   |
| 6238377 | 7117482 | 1170857 | centromere protein C 1                       | Cenpc1 | 305270 | 1,18 | down |

|         |         |         |                                   |        |        |      |      |
|---------|---------|---------|-----------------------------------|--------|--------|------|------|
| 5749654 | 7117482 | 1170852 | centromere protein C 1            | Cenpc1 | 305270 | 1,16 | down |
| 5992633 | 7117482 | 1170861 | centromere protein C 1            | Cenpc1 | 305270 | 1,15 | up   |
| 5814590 | 7117482 | 1170855 | centromere protein C 1            | Cenpc1 | 305270 | 1,14 | down |
| 5795294 | 7117482 | 1170859 | centromere protein C 1            | Cenpc1 | 305270 | 1,10 | up   |
| 6210545 | 7117482 | 1170847 | centromere protein C 1            | Cenpc1 | 305270 | 1,09 | down |
| 6201814 | 7117482 | 1170858 | centromere protein C 1            | Cenpc1 | 305270 | 1,08 | up   |
| 6140640 | 7117482 | 1170849 | centromere protein C 1            | Cenpc1 | 305270 | 1,06 | up   |
| 5944214 | 7184981 | 1337847 | centromere protein T              | Cenpt  | 307805 | 2,03 | up   |
| 5801704 | 7184981 | 1337841 | centromere protein T              | Cenpt  | 307805 | 1,99 | down |
| 5620640 | 7184981 | 1337843 | centromere protein T              | Cenpt  | 307805 | 1,76 | down |
| 5768234 | 7184981 | 1337845 | centromere protein T              | Cenpt  | 307805 | 1,57 | down |
| 5802576 | 7184981 | 1337845 | centromere protein T              | Cenpt  | 307805 | 1,56 | up   |
| 6739331 | 7184981 | 1337842 | centromere protein T              | Cenpt  | 307805 | 1,51 | up   |
| 5965847 | 7184981 | 1337846 | centromere protein T              | Cenpt  | 307805 | 1,33 | down |
| 6545005 | 7184981 | 1337847 | centromere protein T              | Cenpt  | 307805 | 1,32 | down |
| 6371742 | 7184981 | 1337842 | centromere protein T              | Cenpt  | 307805 | 1,32 | down |
| 6596089 | 7184981 | 1337848 | centromere protein T              | Cenpt  | 307805 | 1,30 | down |
| 6575560 | 7184981 | 1337836 | centromere protein T              | Cenpt  | 307805 | 1,24 | down |
| 5915320 | 7184981 | 1337854 | centromere protein T              | Cenpt  | 307805 | 1,22 | up   |
| 5896001 | 7184981 | 1337849 | centromere protein T              | Cenpt  | 307805 | 1,14 | up   |
| 6476867 | 7184981 | 1337854 | centromere protein T              | Cenpt  | 307805 | 1,12 | up   |
| 5892128 | 7184981 | 1337843 | centromere protein T              | Cenpt  | 307805 | 1,09 | up   |
| 6733062 | 7184981 | 1337835 | centromere protein T              | Cenpt  | 307805 | 1,08 | down |
| 5810198 | 7184981 | 1337838 | centromere protein T              | Cenpt  | 307805 | 1,06 | up   |
| 6288916 | 7184981 | 1337850 | centromere protein T              | Cenpt  | 307805 | 1,06 | up   |
| 6649077 | 7244287 | 1484042 | centrosomal protein 152           | Cep152 | 311391 | 1,98 | down |
| 5893665 | 7244287 | 1484078 | centrosomal protein 152           | Cep152 | 311391 | 1,27 | up   |
| 6149089 | 7234401 | 1459343 | centrosomal protein 250kDa        | Cep250 | 311573 | 2,40 | up   |
| 6313021 | 7234401 | 1459338 | centrosomal protein 250kDa        | Cep250 | 311573 | 2,07 | down |
| 5665565 | 7234401 | 1459346 | centrosomal protein 250kDa        | Cep250 | 311573 | 1,73 | down |
| 6081220 | 7234401 | 1459342 | centrosomal protein 250kDa        | Cep250 | 311573 | 1,72 | up   |
| 6554276 | 7234401 | 1459339 | centrosomal protein 250kDa        | Cep250 | 311573 | 1,70 | down |
| 6738305 | 7234401 | 1459350 | centrosomal protein 250kDa        | Cep250 | 311573 | 1,65 | up   |
| 5970335 | 7234401 | 1459334 | centrosomal protein 250kDa        | Cep250 | 311573 | 1,57 | down |
| 6204732 | 7234401 | 1459349 | centrosomal protein 250kDa        | Cep250 | 311573 | 1,40 | up   |
| 6479943 | 7234401 | 1459348 | centrosomal protein 250kDa        | Cep250 | 311573 | 1,33 | up   |
| 6209228 | 7234401 | 1459344 | centrosomal protein 250kDa        | Cep250 | 311573 | 1,29 | down |
| 6562535 | 7234401 | 1459342 | centrosomal protein 250kDa        | Cep250 | 311573 | 1,25 | up   |
| 6512483 | 7234401 | 1459340 | centrosomal protein 250kDa        | Cep250 | 311573 | 1,24 | down |
| 6059930 | 7234401 | 1459341 | centrosomal protein 250kDa        | Cep250 | 311573 | 1,21 | down |
| 6488501 | 7234401 | 1459350 | centrosomal protein 250kDa        | Cep250 | 311573 | 1,19 | up   |
| 5963609 | 7234401 | 1459351 | centrosomal protein 250kDa        | Cep250 | 311573 | 1,17 | down |
| 6366570 | 7234401 | 1459335 | centrosomal protein 250kDa        | Cep250 | 311573 | 1,11 | down |
| 6361705 | 7234401 | 1459336 | centrosomal protein 250kDa        | Cep250 | 311573 | 1,10 | up   |
| 5927113 | 7234401 | 1459347 | centrosomal protein 250kDa        | Cep250 | 311573 | 1,03 | down |
| 5763482 | 7234401 | 1459341 | centrosomal protein 250kDa        | Cep250 | 311573 | 1,01 | up   |
| 6326506 | 7234401 | 1459345 | centrosomal protein 250kDa        | Cep250 | 311573 | 1,01 | down |
| 6510179 | 7134776 | 1212982 | ceroid-lipofuscinosis, neuronal 5 | Cln5   | 306128 | 1,30 | down |
| 5664963 | 7134776 | 1212975 | ceroid-lipofuscinosis, neuronal 5 | Cln5   | 306128 | 1,26 | down |
| 5648806 | 7134776 | 1212982 | ceroid-lipofuscinosis, neuronal 5 | Cln5   | 306128 | 1,24 | up   |
| 5769395 | 7192307 | 1355987 | ceruloplasmin                     | Cp     | 24268  | 8,52 | down |
| 6185896 | 7192307 | 1355999 | ceruloplasmin                     | Cp     | 24268  | 4,50 | down |
| 6304110 | 7192307 | 1355984 | ceruloplasmin                     | Cp     | 24268  | 3,46 | down |
| 5846700 | 7192307 | 1355988 | ceruloplasmin                     | Cp     | 24268  | 2,62 | down |
| 6172181 | 7192307 | 1356001 | ceruloplasmin                     | Cp     | 24268  | 2,29 | up   |
| 6450013 | 7192307 | 1355993 | ceruloplasmin                     | Cp     | 24268  | 2,05 | down |
| 5645095 | 7192307 | 1355994 | ceruloplasmin                     | Cp     | 24268  | 2,02 | up   |

|         |         |         |                                                            |       |        |      |      |
|---------|---------|---------|------------------------------------------------------------|-------|--------|------|------|
| 6092076 | 7192307 | 1355991 | ceruloplasmin                                              | Cp    | 24268  | 1,93 | down |
| 6396813 | 7192307 | 1355990 | ceruloplasmin                                              | Cp    | 24268  | 1,79 | up   |
| 6003440 | 7192307 | 1356002 | ceruloplasmin                                              | Cp    | 24268  | 1,74 | down |
| 6020185 | 7192307 | 1355987 | ceruloplasmin                                              | Cp    | 24268  | 1,71 | down |
| 6706339 | 7192307 | 1355995 | ceruloplasmin                                              | Cp    | 24268  | 1,64 | up   |
| 6142453 | 7192307 | 1355994 | ceruloplasmin                                              | Cp    | 24268  | 1,60 | up   |
| 6449929 | 7192307 | 1356000 | ceruloplasmin                                              | Cp    | 24268  | 1,59 | up   |
| 6139601 | 7192307 | 1355986 | ceruloplasmin                                              | Cp    | 24268  | 1,49 | up   |
| 6364812 | 7192307 | 1355997 | ceruloplasmin                                              | Cp    | 24268  | 1,46 | down |
| 6183835 | 7192307 | 1355988 | ceruloplasmin                                              | Cp    | 24268  | 1,31 | up   |
| 6731921 | 7192307 | 1355985 | ceruloplasmin                                              | Cp    | 24268  | 1,29 | down |
| 5665881 | 7192307 | 1355989 | ceruloplasmin                                              | Cp    | 24268  | 1,22 | up   |
| 6594105 | 7192307 | 1355996 | ceruloplasmin                                              | Cp    | 24268  | 1,06 | down |
| 5935112 | 7192307 | 1355992 | ceruloplasmin                                              | Cp    | 24268  | 1,04 | up   |
| 6687074 | 7192307 | 1355998 | ceruloplasmin                                              | Cp    | 24268  | 1,01 | up   |
| 6028710 | 7231595 | 1451702 | ChaC, cation transport regulator homolog 1 (E. coli)       | Chac1 | 362196 | 2,25 | down |
| 5995239 | 7231595 | 1451703 | ChaC, cation transport regulator homolog 1 (E. coli)       | Chac1 | 362196 | 1,55 | up   |
| 5993107 | 7231595 | 1451704 | ChaC, cation transport regulator homolog 1 (E. coli)       | Chac1 | 362196 | 1,26 | down |
| 6100347 | 7231595 | 1451702 | ChaC, cation transport regulator homolog 1 (E. coli)       | Chac1 | 362196 | 1,07 | up   |
| 5866904 | 7231595 | 1451704 | ChaC, cation transport regulator homolog 1 (E. coli)       | Chac1 | 362196 | 1,05 | up   |
| 6733877 | 7231595 | 1451702 | ChaC, cation transport regulator homolog 1 (E. coli)       | Chac1 | 362196 | 1,03 | down |
| 5718176 | 7114652 | 1163900 | chaperone, ABC1 activity of bc1 complex homolog (S. pombe) | Cabc1 | 360887 | 3,11 | up   |
| 6730844 | 7114652 | 1163894 | chaperone, ABC1 activity of bc1 complex homolog (S. pombe) | Cabc1 | 360887 | 2,84 | up   |
| 6062805 | 7114652 | 1163900 | chaperone, ABC1 activity of bc1 complex homolog (S. pombe) | Cabc1 | 360887 | 2,36 | up   |
| 5739178 | 7114652 | 1163896 | chaperone, ABC1 activity of bc1 complex homolog (S. pombe) | Cabc1 | 360887 | 2,21 | down |
| 6382956 | 7114652 | 1163900 | chaperone, ABC1 activity of bc1 complex homolog (S. pombe) | Cabc1 | 360887 | 2,01 | up   |
| 6156369 | 7114652 | 1163889 | chaperone, ABC1 activity of bc1 complex homolog (S. pombe) | Cabc1 | 360887 | 1,99 | down |
| 5682179 | 7114652 | 1163891 | chaperone, ABC1 activity of bc1 complex homolog (S. pombe) | Cabc1 | 360887 | 1,80 | down |
| 6711066 | 7114652 | 1163892 | chaperone, ABC1 activity of bc1 complex homolog (S. pombe) | Cabc1 | 360887 | 1,73 | down |
| 5624532 | 7114652 | 1163897 | chaperone, ABC1 activity of bc1 complex homolog (S. pombe) | Cabc1 | 360887 | 1,46 | down |
| 6364123 | 7114652 | 1163888 | chaperone, ABC1 activity of bc1 complex homolog (S. pombe) | Cabc1 | 360887 | 1,44 | up   |
| 5793551 | 7114652 | 1163890 | chaperone, ABC1 activity of bc1 complex homolog (S. pombe) | Cabc1 | 360887 | 1,35 | down |
| 6299297 | 7114652 | 1163886 | chaperone, ABC1 activity of bc1 complex homolog (S. pombe) | Cabc1 | 360887 | 1,34 | up   |
| 6639753 | 7114652 | 1163899 | chaperone, ABC1 activity of bc1 complex homolog (S. pombe) | Cabc1 | 360887 | 1,34 | up   |
| 5694510 | 7114652 | 1163887 | chaperone, ABC1 activity of bc1 complex homolog (S. pombe) | Cabc1 | 360887 | 1,30 | down |
| 5810342 | 7114652 | 1163895 | chaperone, ABC1 activity of bc1 complex homolog (S. pombe) | Cabc1 | 360887 | 1,28 | up   |
| 5933290 | 7114652 | 1163893 | chaperone, ABC1 activity of bc1 complex homolog (S. pombe) | Cabc1 | 360887 | 1,21 | down |
| 5708547 | 7114652 | 1163886 | chaperone, ABC1 activity of bc1 complex homolog (S. pombe) | Cabc1 | 360887 | 1,19 | up   |
| 5812855 | 7114652 | 1163898 | chaperone, ABC1 activity of bc1 complex homolog (S. pombe) | Cabc1 | 360887 | 1,14 | down |
| 6493975 | 7114652 | 1163887 | chaperone, ABC1 activity of bc1 complex homolog (S. pombe) | Cabc1 | 360887 | 1,07 | up   |
| 5877766 | 7196065 | 1365726 | chaperonin containing Tcp1, subunit 3 (gamma)              | Cct3  | 295230 | 2,15 | down |
| 5735581 | 7196065 | 1365726 | chaperonin containing Tcp1, subunit 3 (gamma)              | Cct3  | 295230 | 1,97 | down |
| 6035748 | 7196065 | 1365718 | chaperonin containing Tcp1, subunit 3 (gamma)              | Cct3  | 295230 | 1,49 | up   |
| 5785121 | 7196065 | 1365725 | chaperonin containing Tcp1, subunit 3 (gamma)              | Cct3  | 295230 | 1,43 | up   |
| 5919243 | 7196065 | 1365716 | chaperonin containing Tcp1, subunit 3 (gamma)              | Cct3  | 295230 | 1,30 | down |
| 6284469 | 7196065 | 1365717 | chaperonin containing Tcp1, subunit 3 (gamma)              | Cct3  | 295230 | 1,30 | down |
| 6553649 | 7196065 | 1365723 | chaperonin containing Tcp1, subunit 3 (gamma)              | Cct3  | 295230 | 1,21 | down |
| 5617859 | 7196065 | 1365712 | chaperonin containing Tcp1, subunit 3 (gamma)              | Cct3  | 295230 | 1,21 | up   |
| 6491999 | 7196065 | 1365721 | chaperonin containing Tcp1, subunit 3 (gamma)              | Cct3  | 295230 | 1,20 | up   |
| 5841477 | 7196065 | 1365724 | chaperonin containing Tcp1, subunit 3 (gamma)              | Cct3  | 295230 | 1,14 | down |
| 6741939 | 7196065 | 1365713 | chaperonin containing Tcp1, subunit 3 (gamma)              | Cct3  | 295230 | 1,11 | up   |
| 5783368 | 7196065 | 1365719 | chaperonin containing Tcp1, subunit 3 (gamma)              | Cct3  | 295230 | 1,10 | down |
| 6641760 | 7196065 | 1365715 | chaperonin containing Tcp1, subunit 3 (gamma)              | Cct3  | 295230 | 1,06 | down |
| 6365549 | 7196065 | 1365714 | chaperonin containing Tcp1, subunit 3 (gamma)              | Cct3  | 295230 | 1,04 | up   |
| 5953402 | 7196065 | 1365720 | chaperonin containing Tcp1, subunit 3 (gamma)              | Cct3  | 295230 | 1,04 | down |
| 6409984 | 7196065 | 1365722 | chaperonin containing Tcp1, subunit 3 (gamma)              | Cct3  | 295230 | 1,03 | up   |
| 6649368 | 7121804 | 1181611 | chaperonin containing Tcp1, subunit 4 (delta)              | Cct4  | 29374  | 2,42 | down |



|         |         |         |                                                 |        |        |       |      |
|---------|---------|---------|-------------------------------------------------|--------|--------|-------|------|
| 6517242 | 7121804 | 1181612 | chaperonin containing Tcp1, subunit 4 (delta)   | Cct4   | 29374  | 1,46  | down |
| 6412230 | 7121804 | 1181625 | chaperonin containing Tcp1, subunit 4 (delta)   | Cct4   | 29374  | 1,41  | down |
| 6282521 | 7121804 | 1181620 | chaperonin containing Tcp1, subunit 4 (delta)   | Cct4   | 29374  | 1,34  | up   |
| 6634038 | 7121804 | 1181618 | chaperonin containing Tcp1, subunit 4 (delta)   | Cct4   | 29374  | 1,32  | up   |
| 6608058 | 7121804 | 1181623 | chaperonin containing Tcp1, subunit 4 (delta)   | Cct4   | 29374  | 1,30  | up   |
| 5625419 | 7121804 | 1181615 | chaperonin containing Tcp1, subunit 4 (delta)   | Cct4   | 29374  | 1,25  | up   |
| 6549333 | 7121804 | 1181617 | chaperonin containing Tcp1, subunit 4 (delta)   | Cct4   | 29374  | 1,13  | up   |
| 6433577 | 7121804 | 1181613 | chaperonin containing Tcp1, subunit 4 (delta)   | Cct4   | 29374  | 1,12  | up   |
| 5771185 | 7121804 | 1181616 | chaperonin containing Tcp1, subunit 4 (delta)   | Cct4   | 29374  | 1,11  | down |
| 6675835 | 7121804 | 1181621 | chaperonin containing Tcp1, subunit 4 (delta)   | Cct4   | 29374  | 1,07  | up   |
| 6221891 | 7121804 | 1181622 | chaperonin containing Tcp1, subunit 4 (delta)   | Cct4   | 29374  | 1,07  | up   |
| 6017788 | 7121804 | 1181624 | chaperonin containing Tcp1, subunit 4 (delta)   | Cct4   | 29374  | 1,05  | down |
| 5994266 | 7121804 | 1181619 | chaperonin containing Tcp1, subunit 4 (delta)   | Cct4   | 29374  | 1,01  | up   |
| 5946385 | 7121804 | 1181614 | chaperonin containing Tcp1, subunit 4 (delta)   | Cct4   | 29374  | 1,00  | up   |
| 6178415 | 7097827 | 1122038 | chaperonin containing Tcp1, subunit 6A (zeta 1) | Cct6a  | 288620 | 2,58  | down |
| 5621886 | 7097827 | 1122045 | chaperonin containing Tcp1, subunit 6A (zeta 1) | Cct6a  | 288620 | 1,68  | up   |
| 6612118 | 7097827 | 1122048 | chaperonin containing Tcp1, subunit 6A (zeta 1) | Cct6a  | 288620 | 1,62  | up   |
| 6415816 | 7097827 | 1122035 | chaperonin containing Tcp1, subunit 6A (zeta 1) | Cct6a  | 288620 | 1,43  | down |
| 6224006 | 7097827 | 1122039 | chaperonin containing Tcp1, subunit 6A (zeta 1) | Cct6a  | 288620 | 1,25  | up   |
| 6040583 | 7097827 | 1122047 | chaperonin containing Tcp1, subunit 6A (zeta 1) | Cct6a  | 288620 | 1,22  | up   |
| 5673748 | 7097827 | 1122042 | chaperonin containing Tcp1, subunit 6A (zeta 1) | Cct6a  | 288620 | 1,19  | up   |
| 6587386 | 7097827 | 1122036 | chaperonin containing Tcp1, subunit 6A (zeta 1) | Cct6a  | 288620 | 1,17  | up   |
| 6547141 | 7097827 | 1122044 | chaperonin containing Tcp1, subunit 6A (zeta 1) | Cct6a  | 288620 | 1,17  | down |
| 6547754 | 7097827 | 1122046 | chaperonin containing Tcp1, subunit 6A (zeta 1) | Cct6a  | 288620 | 1,11  | down |
| 6576646 | 7097827 | 1122040 | chaperonin containing Tcp1, subunit 6A (zeta 1) | Cct6a  | 288620 | 1,06  | down |
| 6687845 | 7097827 | 1122041 | chaperonin containing Tcp1, subunit 6A (zeta 1) | Cct6a  | 288620 | 1,06  | down |
| 5691465 | 7097827 | 1122043 | chaperonin containing Tcp1, subunit 6A (zeta 1) | Cct6a  | 288620 | 1,03  | up   |
| 5940992 | 7097827 | 1122037 | chaperonin containing Tcp1, subunit 6A (zeta 1) | Cct6a  | 288620 | 1,02  | down |
| 6131463 | 7097827 | 1122048 | chaperonin containing Tcp1, subunit 6A (zeta 1) | Cct6a  | 288620 | 1,01  | down |
| 5827720 | 7070338 | 1056985 | chemokine (C-C motif) ligand 2                  | Ccl2   | 24770  | 15,74 | down |
| 6087932 | 7070338 | 1056989 | chemokine (C-C motif) ligand 2                  | Ccl2   | 24770  | 4,27  | down |
| 5921871 | 7070338 | 1056987 | chemokine (C-C motif) ligand 2                  | Ccl2   | 24770  | 2,60  | up   |
| 5878091 | 7070338 | 1056988 | chemokine (C-C motif) ligand 2                  | Ccl2   | 24770  | 1,91  | up   |
| 6643693 | 7070338 | 1056988 | chemokine (C-C motif) ligand 2                  | Ccl2   | 24770  | 1,20  | down |
| 5809474 | 7070338 | 1056986 | chemokine (C-C motif) ligand 2                  | Ccl2   | 24770  | 1,12  | up   |
| 6368153 | 7356847 | 1761781 | chemokine (C-C motif) ligand 20                 | Ccl20  | 29538  | 5,95  | down |
| 6656884 | 7356847 | 1761781 | chemokine (C-C motif) ligand 20                 | Ccl20  | 29538  | 3,69  | down |
| 6236483 | 7356847 | 1761782 | chemokine (C-C motif) ligand 20                 | Ccl20  | 29538  | 2,66  | up   |
| 6700626 | 7356847 | 1761783 | chemokine (C-C motif) ligand 20                 | Ccl20  | 29538  | 2,06  | up   |
| 5625408 | 7356847 | 1761784 | chemokine (C-C motif) ligand 20                 | Ccl20  | 29538  | 2,05  | up   |
| 5840029 | 7080732 | 1080987 | chemokine (C-C motif) ligand 5                  | Ccl5   | 81780  | 4,12  | down |
| 6195065 | 7080732 | 1080985 | chemokine (C-C motif) ligand 5                  | Ccl5   | 81780  | 3,37  | up   |
| 6557841 | 7080732 | 1080985 | chemokine (C-C motif) ligand 5                  | Ccl5   | 81780  | 2,06  | down |
| 6234530 | 7080732 | 1080986 | chemokine (C-C motif) ligand 5                  | Ccl5   | 81780  | 1,94  | down |
| 5938690 | 7080732 | 1080984 | chemokine (C-C motif) ligand 5                  | Ccl5   | 81780  | 1,23  | up   |
| 6496023 | 7070340 | 1056991 | chemokine (C-C motif) ligand 7                  | Ccl7   | 287561 | 3,35  | down |
| 6248689 | 7070340 | 1056993 | chemokine (C-C motif) ligand 7                  | Ccl7   | 287561 | 2,42  | up   |
| 6619848 | 7070340 | 1056992 | chemokine (C-C motif) ligand 7                  | Ccl7   | 287561 | 2,16  | down |
| 6642560 | 7070340 | 1056994 | chemokine (C-C motif) ligand 7                  | Ccl7   | 287561 | 1,61  | up   |
| 5723149 | 7070340 | 1056992 | chemokine (C-C motif) ligand 7                  | Ccl7   | 287561 | 1,38  | up   |
| 5852359 | 7070340 | 1056994 | chemokine (C-C motif) ligand 7                  | Ccl7   | 287561 | 1,23  | down |
| 6194316 | 7182777 | 1332706 | chemokine (C-X3-C motif) ligand 1               | Cx3cl1 | 89808  | 2,91  | up   |
| 6537078 | 7182777 | 1332706 | chemokine (C-X3-C motif) ligand 1               | Cx3cl1 | 89808  | 2,27  | down |
| 6132125 | 7182777 | 1332706 | chemokine (C-X3-C motif) ligand 1               | Cx3cl1 | 89808  | 1,57  | down |
| 6492261 | 7182777 | 1332707 | chemokine (C-X3-C motif) ligand 1               | Cx3cl1 | 89808  | 1,50  | up   |
| 6486637 | 7182777 | 1332705 | chemokine (C-X3-C motif) ligand 1               | Cx3cl1 | 89808  | 1,22  | down |
| 6376132 | 7182777 | 1332708 | chemokine (C-X3-C motif) ligand 1               | Cx3cl1 | 89808  | 1,14  | down |

|         |         |         |                                                                                |        |        |       |      |
|---------|---------|---------|--------------------------------------------------------------------------------|--------|--------|-------|------|
| 5917576 | 7182777 | 1332706 | chemokine (C-X3-C motif) ligand 1                                              | Cx3cl1 | 89808  | 1,05  | up   |
| 5802966 | 7182777 | 1332706 | chemokine (C-X3-C motif) ligand 1                                              | Cx3cl1 | 89808  | 1,04  | up   |
| 5733309 | 7182777 | 1332706 | chemokine (C-X3-C motif) ligand 1                                              | Cx3cl1 | 89808  | 1,03  | down |
| 6689441 | 7123885 | 1186818 | chemokine (C-X-C motif) ligand 1 (melanoma growth stimulating activity, alpha) | Cxcl1  | 81503  | 9,94  | down |
| 6188771 | 7123885 | 1186818 | chemokine (C-X-C motif) ligand 1 (melanoma growth stimulating activity, alpha) | Cxcl1  | 81503  | 8,80  | down |
| 5773833 | 7123885 | 1186818 | chemokine (C-X-C motif) ligand 1 (melanoma growth stimulating activity, alpha) | Cxcl1  | 81503  | 4,72  | down |
| 6294417 | 7123885 | 1186816 | chemokine (C-X-C motif) ligand 1 (melanoma growth stimulating activity, alpha) | Cxcl1  | 81503  | 3,81  | up   |
| 6460629 | 7123885 | 1186815 | chemokine (C-X-C motif) ligand 1 (melanoma growth stimulating activity, alpha) | Cxcl1  | 81503  | 3,04  | up   |
| 6162736 | 7123885 | 1186817 | chemokine (C-X-C motif) ligand 1 (melanoma growth stimulating activity, alpha) | Cxcl1  | 81503  | 1,79  | up   |
| 6284588 | 7116933 | 1169532 | chemokine (C-X-C motif) ligand 10                                              | Cxcl10 | 245920 | 13,12 | down |
| 5701565 | 7116933 | 1169532 | chemokine (C-X-C motif) ligand 10                                              | Cxcl10 | 245920 | 5,29  | down |
| 5780587 | 7116933 | 1169534 | chemokine (C-X-C motif) ligand 10                                              | Cxcl10 | 245920 | 1,63  | down |
| 6433818 | 7116933 | 1169535 | chemokine (C-X-C motif) ligand 10                                              | Cxcl10 | 245920 | 1,56  | up   |
| 6325647 | 7116933 | 1169535 | chemokine (C-X-C motif) ligand 10                                              | Cxcl10 | 245920 | 1,55  | up   |
| 5631231 | 7116933 | 1169533 | chemokine (C-X-C motif) ligand 10                                              | Cxcl10 | 245920 | 1,35  | down |
| 6531806 | 7116933 | 1169536 | chemokine (C-X-C motif) ligand 10                                              | Cxcl10 | 245920 | 1,33  | down |
| 5651799 | 7116931 | 1169530 | chemokine (C-X-C motif) ligand 11                                              | Cxcl11 | 305236 | 4,10  | down |
| 5633763 | 7116931 | 1169527 | chemokine (C-X-C motif) ligand 11                                              | Cxcl11 | 305236 | 1,52  | up   |
| 6128487 | 7116931 | 1169528 | chemokine (C-X-C motif) ligand 11                                              | Cxcl11 | 305236 | 1,43  | up   |
| 6503672 | 7116931 | 1169529 | chemokine (C-X-C motif) ligand 11                                              | Cxcl11 | 305236 | 1,00  | down |
| 5689139 | 7079368 | 1078074 | chemokine (C-X-C motif) ligand 16                                              | Cxcl16 | 497942 | 2,71  | down |
| 6390188 | 7079368 | 1078071 | chemokine (C-X-C motif) ligand 16                                              | Cxcl16 | 497942 | 1,26  | down |
| 5899586 | 7079368 | 1078073 | chemokine (C-X-C motif) ligand 16                                              | Cxcl16 | 497942 | 1,13  | up   |
| 6588716 | 7079368 | 1078072 | chemokine (C-X-C motif) ligand 16                                              | Cxcl16 | 497942 | 1,12  | up   |
| 6569082 | 7079368 | 1078070 | chemokine (C-X-C motif) ligand 16                                              | Cxcl16 | 497942 | 1,09  | up   |
| 5839731 | 7079368 | 1078070 | chemokine (C-X-C motif) ligand 16                                              | Cxcl16 | 497942 | 1,08  | down |
| 6613179 | 7123883 | 1186804 | chemokine (C-X-C motif) ligand 2                                               | Cxcl2  | 114105 | 2,43  | down |
| 5983093 | 7123883 | 1186805 | chemokine (C-X-C motif) ligand 2                                               | Cxcl2  | 114105 | 2,04  | down |
| 6017193 | 7123883 | 1186807 | chemokine (C-X-C motif) ligand 2                                               | Cxcl2  | 114105 | 1,28  | down |
| 5858252 | 7123883 | 1186808 | chemokine (C-X-C motif) ligand 2                                               | Cxcl2  | 114105 | 1,13  | up   |
| 5903630 | 7123883 | 1186804 | chemokine (C-X-C motif) ligand 2                                               | Cxcl2  | 114105 | 1,10  | up   |
| 6011819 | 7123883 | 1186806 | chemokine (C-X-C motif) ligand 2                                               | Cxcl2  | 114105 | 1,07  | up   |
| 6513331 | 7123895 | 1186837 | chemokine (C-X-C motif) ligand 3                                               | Cxcl3  | 171551 | 5,01  | up   |
| 6734662 | 7123895 | 1186835 | chemokine (C-X-C motif) ligand 3                                               | Cxcl3  | 171551 | 1,62  | down |
| 6256241 | 7123895 | 1186834 | chemokine (C-X-C motif) ligand 3                                               | Cxcl3  | 171551 | 1,59  | down |
| 6342837 | 7123895 | 1186836 | chemokine (C-X-C motif) ligand 3                                               | Cxcl3  | 171551 | 1,36  | up   |
| 6152063 | 7123895 | 1186833 | chemokine (C-X-C motif) ligand 3                                               | Cxcl3  | 171551 | 1,07  | down |
| 6495215 | 7123895 | 1186838 | chemokine (C-X-C motif) ligand 3                                               | Cxcl3  | 171551 | 1,04  | down |
| 6500964 | 7116938 | 1169541 | chemokine (C-X-C motif) ligand 9                                               | Cxcl9  | 246759 | 36,11 | down |
| 5754679 | 7116938 | 1169544 | chemokine (C-X-C motif) ligand 9                                               | Cxcl9  | 246759 | 3,63  | up   |
| 6384458 | 7116938 | 1169543 | chemokine (C-X-C motif) ligand 9                                               | Cxcl9  | 246759 | 3,29  | down |
| 6593607 | 7116938 | 1169546 | chemokine (C-X-C motif) ligand 9                                               | Cxcl9  | 246759 | 3,07  | up   |
| 6500752 | 7116938 | 1169546 | chemokine (C-X-C motif) ligand 9                                               | Cxcl9  | 246759 | 1,52  | up   |
| 5856721 | 7116938 | 1169545 | chemokine (C-X-C motif) ligand 9                                               | Cxcl9  | 246759 | 1,30  | down |
| 6062432 | 7116938 | 1169542 | chemokine (C-X-C motif) ligand 9                                               | Cxcl9  | 246759 | 1,22  | down |
| 6344066 | 7344093 | 1730345 | CHK1 checkpoint homolog (S. pombe)                                             | Chek1  | 140583 | 2,35  | down |
| 6251914 | 7344093 | 1730349 | CHK1 checkpoint homolog (S. pombe)                                             | Chek1  | 140583 | 2,05  | down |
| 5960887 | 7344093 | 1730351 | CHK1 checkpoint homolog (S. pombe)                                             | Chek1  | 140583 | 2,00  | up   |
| 6137001 | 7344093 | 1730344 | CHK1 checkpoint homolog (S. pombe)                                             | Chek1  | 140583 | 1,41  | down |
| 6675234 | 7344093 | 1730345 | CHK1 checkpoint homolog (S. pombe)                                             | Chek1  | 140583 | 1,34  | up   |
| 5947504 | 7344093 | 1730342 | CHK1 checkpoint homolog (S. pombe)                                             | Chek1  | 140583 | 1,31  | down |
| 6396448 | 7344093 | 1730351 | CHK1 checkpoint homolog (S. pombe)                                             | Chek1  | 140583 | 1,28  | up   |
| 6138195 | 7344093 | 1730343 | CHK1 checkpoint homolog (S. pombe)                                             | Chek1  | 140583 | 1,24  | up   |
| 6149664 | 7344093 | 1730346 | CHK1 checkpoint homolog (S. pombe)                                             | Chek1  | 140583 | 1,21  | down |
| 6355854 | 7344093 | 1730341 | CHK1 checkpoint homolog (S. pombe)                                             | Chek1  | 140583 | 1,19  | up   |
| 6012187 | 7344093 | 1730350 | CHK1 checkpoint homolog (S. pombe)                                             | Chek1  | 140583 | 1,13  | up   |
| 5797227 | 7344093 | 1730349 | CHK1 checkpoint homolog (S. pombe)                                             | Chek1  | 140583 | 1,08  | down |

|         |         |         |                                    |         |        |      |      |
|---------|---------|---------|------------------------------------|---------|--------|------|------|
| 6628688 | 7344093 | 1730352 | CHK1 checkpoint homolog (S. pombe) | Chek1   | 140583 | 1,05 | up   |
| 5743778 | 7344093 | 1730348 | CHK1 checkpoint homolog (S. pombe) | Chek1   | 140583 | 1,04 | up   |
| 6198329 | 7344093 | 1730347 | CHK1 checkpoint homolog (S. pombe) | Chek1   | 140583 | 1,04 | up   |
| 5753726 | 7344093 | 1730341 | CHK1 checkpoint homolog (S. pombe) | Chek1   | 140583 | 1,01 | down |
| 6142951 | 7374466 | 1807853 | chloride channel 4-2               | Clcn4-2 | 60586  | 3,03 | up   |
| 6195624 | 7374466 | 1807860 | chloride channel 4-2               | Clcn4-2 | 60586  | 2,01 | up   |
| 6607364 | 7374466 | 1807857 | chloride channel 4-2               | Clcn4-2 | 60586  | 1,68 | up   |
| 6662314 | 7374466 | 1807856 | chloride channel 4-2               | Clcn4-2 | 60586  | 1,53 | up   |
| 5904792 | 7374466 | 1807864 | chloride channel 4-2               | Clcn4-2 | 60586  | 1,48 | up   |
| 5902106 | 7374466 | 1807858 | chloride channel 4-2               | Clcn4-2 | 60586  | 1,47 | down |
| 6297781 | 7374466 | 1807862 | chloride channel 4-2               | Clcn4-2 | 60586  | 1,44 | down |
| 6017165 | 7374466 | 1807862 | chloride channel 4-2               | Clcn4-2 | 60586  | 1,37 | up   |
| 6254459 | 7374466 | 1807865 | chloride channel 4-2               | Clcn4-2 | 60586  | 1,32 | down |
| 5861755 | 7374466 | 1807867 | chloride channel 4-2               | Clcn4-2 | 60586  | 1,21 | up   |
| 6124188 | 7374466 | 1807866 | chloride channel 4-2               | Clcn4-2 | 60586  | 1,15 | down |
| 5626501 | 7374466 | 1807862 | chloride channel 4-2               | Clcn4-2 | 60586  | 1,11 | down |
| 5762436 | 7374466 | 1807859 | chloride channel 4-2               | Clcn4-2 | 60586  | 1,09 | up   |
| 5984739 | 7374466 | 1807855 | chloride channel 4-2               | Clcn4-2 | 60586  | 1,09 | down |
| 5731469 | 7374466 | 1807861 | chloride channel 4-2               | Clcn4-2 | 60586  | 1,08 | up   |
| 6035395 | 7374466 | 1807854 | chloride channel 4-2               | Clcn4-2 | 60586  | 1,01 | down |
| 6704692 | 7374466 | 1807863 | chloride channel 4-2               | Clcn4-2 | 60586  | 1,00 | up   |
| 5902913 | 7065661 | 1045289 | chloride channel 7                 | Clcn7   | 29233  | 2,07 | down |
| 5704099 | 7065661 | 1045307 | chloride channel 7                 | Clcn7   | 29233  | 1,54 | down |
| 6197367 | 7065661 | 1045290 | chloride channel 7                 | Clcn7   | 29233  | 1,42 | down |
| 6464047 | 7065661 | 1045306 | chloride channel 7                 | Clcn7   | 29233  | 1,30 | down |
| 6100862 | 7065661 | 1045295 | chloride channel 7                 | Clcn7   | 29233  | 1,29 | down |
| 5621048 | 7065661 | 1045300 | chloride channel 7                 | Clcn7   | 29233  | 1,29 | up   |
| 5898240 | 7065661 | 1045309 | chloride channel 7                 | Clcn7   | 29233  | 1,29 | up   |
| 6609020 | 7065661 | 1045310 | chloride channel 7                 | Clcn7   | 29233  | 1,27 | up   |
| 5704272 | 7065661 | 1045303 | chloride channel 7                 | Clcn7   | 29233  | 1,27 | up   |
| 5622307 | 7065661 | 1045296 | chloride channel 7                 | Clcn7   | 29233  | 1,24 | up   |
| 6162731 | 7065661 | 1045297 | chloride channel 7                 | Clcn7   | 29233  | 1,17 | down |
| 5956612 | 7065661 | 1045302 | chloride channel 7                 | Clcn7   | 29233  | 1,14 | up   |
| 6218178 | 7065661 | 1045299 | chloride channel 7                 | Clcn7   | 29233  | 1,14 | down |
| 6628932 | 7065661 | 1045311 | chloride channel 7                 | Clcn7   | 29233  | 1,13 | down |
| 5892176 | 7065661 | 1045308 | chloride channel 7                 | Clcn7   | 29233  | 1,12 | down |
| 6407868 | 7065661 | 1045301 | chloride channel 7                 | Clcn7   | 29233  | 1,11 | up   |
| 6738659 | 7065661 | 1045304 | chloride channel 7                 | Clcn7   | 29233  | 1,11 | up   |
| 6331382 | 7065661 | 1045313 | chloride channel 7                 | Clcn7   | 29233  | 1,09 | down |
| 6002967 | 7065661 | 1045293 | chloride channel 7                 | Clcn7   | 29233  | 1,09 | down |
| 5729092 | 7065661 | 1045305 | chloride channel 7                 | Clcn7   | 29233  | 1,05 | down |
| 5977845 | 7065661 | 1045291 | chloride channel 7                 | Clcn7   | 29233  | 1,04 | down |
| 6403006 | 7065661 | 1045292 | chloride channel 7                 | Clcn7   | 29233  | 1,04 | down |
| 6222610 | 7065661 | 1045312 | chloride channel 7                 | Clcn7   | 29233  | 1,03 | up   |
| 6314292 | 7065661 | 1045314 | chloride channel 7                 | Clcn7   | 29233  | 1,02 | down |
| 5695543 | 7065661 | 1045294 | chloride channel 7                 | Clcn7   | 29233  | 1,01 | up   |
| 6435808 | 7065661 | 1045298 | chloride channel 7                 | Clcn7   | 29233  | 1,01 | up   |
| 6703428 | 7292565 | 1602642 | chloride channel Ka                | Clcnka  | 79425  | 2,03 | down |
| 6496421 | 7292565 | 1602625 | chloride channel Ka                | Clcnka  | 79425  | 1,73 | up   |
| 5905892 | 7292565 | 1602633 | chloride channel Ka                | Clcnka  | 79425  | 1,61 | down |
| 6435655 | 7292565 | 1602639 | chloride channel Ka                | Clcnka  | 79425  | 1,57 | down |
| 5781180 | 7292565 | 1602625 | chloride channel Ka                | Clcnka  | 79425  | 1,48 | down |
| 6211651 | 7292565 | 1602638 | chloride channel Ka                | Clcnka  | 79425  | 1,47 | down |
| 5745330 | 7292565 | 1602634 | chloride channel Ka                | Clcnka  | 79425  | 1,43 | up   |
| 6080858 | 7292565 | 1602632 | chloride channel Ka                | Clcnka  | 79425  | 1,36 | up   |
| 5646696 | 7292565 | 1602629 | chloride channel Ka                | Clcnka  | 79425  | 1,28 | down |
| 5903431 | 7292565 | 1602641 | chloride channel Ka                | Clcnka  | 79425  | 1,21 | down |

|         |         |         |                                  |        |       |      |      |
|---------|---------|---------|----------------------------------|--------|-------|------|------|
| 5850328 | 7292565 | 1602626 | chloride channel Ka              | Clcnka | 79425 | 1,17 | down |
| 5895923 | 7292565 | 1602635 | chloride channel Ka              | Clcnka | 79425 | 1,17 | up   |
| 5809147 | 7292565 | 1602640 | chloride channel Ka              | Clcnka | 79425 | 1,14 | up   |
| 5712586 | 7292565 | 1602627 | chloride channel Ka              | Clcnka | 79425 | 1,13 | down |
| 5656853 | 7292565 | 1602628 | chloride channel Ka              | Clcnka | 79425 | 1,12 | up   |
| 6722827 | 7292565 | 1602636 | chloride channel Ka              | Clcnka | 79425 | 1,12 | down |
| 6335957 | 7292565 | 1602630 | chloride channel Ka              | Clcnka | 79425 | 1,04 | down |
| 6409011 | 7292565 | 1602630 | chloride channel Ka              | Clcnka | 79425 | 1,03 | down |
| 6489187 | 7292565 | 1602631 | chloride channel Ka              | Clcnka | 79425 | 1,03 | down |
| 6225593 | 7292565 | 1602637 | chloride channel Ka              | Clcnka | 79425 | 1,02 | up   |
| 6149190 | 7292570 | 1602664 | chloride channel Kb              | Clcnkb | 79430 | 2,10 | down |
| 6417877 | 7292570 | 1602660 | chloride channel Kb              | Clcnkb | 79430 | 1,71 | down |
| 6043696 | 7292570 | 1602652 | chloride channel Kb              | Clcnkb | 79430 | 1,68 | up   |
| 5954653 | 7292570 | 1602667 | chloride channel Kb              | Clcnkb | 79430 | 1,68 | down |
| 6288762 | 7292570 | 1602662 | chloride channel Kb              | Clcnkb | 79430 | 1,50 | down |
| 6070694 | 7292570 | 1602654 | chloride channel Kb              | Clcnkb | 79430 | 1,37 | up   |
| 6302715 | 7292570 | 1602665 | chloride channel Kb              | Clcnkb | 79430 | 1,37 | down |
| 6035233 | 7292570 | 1602668 | chloride channel Kb              | Clcnkb | 79430 | 1,30 | up   |
| 6584327 | 7292570 | 1602653 | chloride channel Kb              | Clcnkb | 79430 | 1,28 | up   |
| 6488662 | 7292570 | 1602650 | chloride channel Kb              | Clcnkb | 79430 | 1,21 | up   |
| 5892074 | 7292570 | 1602661 | chloride channel Kb              | Clcnkb | 79430 | 1,21 | down |
| 6534293 | 7292570 | 1602657 | chloride channel Kb              | Clcnkb | 79430 | 1,21 | down |
| 6193112 | 7292570 | 1602656 | chloride channel Kb              | Clcnkb | 79430 | 1,18 | up   |
| 6587138 | 7292570 | 1602660 | chloride channel Kb              | Clcnkb | 79430 | 1,17 | up   |
| 5690649 | 7292570 | 1602655 | chloride channel Kb              | Clcnkb | 79430 | 1,15 | up   |
| 5892494 | 7292570 | 1602666 | chloride channel Kb              | Clcnkb | 79430 | 1,15 | down |
| 6192959 | 7292570 | 1602651 | chloride channel Kb              | Clcnkb | 79430 | 1,12 | up   |
| 5686525 | 7292570 | 1602663 | chloride channel Kb              | Clcnkb | 79430 | 1,08 | up   |
| 6236136 | 7292570 | 1602658 | chloride channel Kb              | Clcnkb | 79430 | 1,05 | down |
| 5813368 | 7292570 | 1602666 | chloride channel Kb              | Clcnkb | 79430 | 1,04 | up   |
| 6169181 | 7292570 | 1602659 | chloride channel Kb              | Clcnkb | 79430 | 1,03 | up   |
| 6553174 | 7359845 | 1769282 | chloride intracellular channel 5 | Clc5   | 94272 | 3,31 | up   |
| 6347340 | 7359845 | 1769280 | chloride intracellular channel 5 | Clc5   | 94272 | 1,53 | down |
| 5902039 | 7359845 | 1769278 | chloride intracellular channel 5 | Clc5   | 94272 | 1,45 | down |
| 6639631 | 7359845 | 1769275 | chloride intracellular channel 5 | Clc5   | 94272 | 1,42 | up   |
| 6435215 | 7359845 | 1769281 | chloride intracellular channel 5 | Clc5   | 94272 | 1,25 | up   |
| 6617198 | 7359845 | 1769276 | chloride intracellular channel 5 | Clc5   | 94272 | 1,23 | down |
| 6305378 | 7359845 | 1769279 | chloride intracellular channel 5 | Clc5   | 94272 | 1,12 | down |
| 6005169 | 7359845 | 1769277 | chloride intracellular channel 5 | Clc5   | 94272 | 1,11 | up   |
| 5622768 | 7038898 | 982841  | choline kinase alpha             | Chka   | 29194 | 7,88 | down |
| 6702682 | 7038898 | 982842  | choline kinase alpha             | Chka   | 29194 | 4,67 | down |
| 6518452 | 7038898 | 982847  | choline kinase alpha             | Chka   | 29194 | 1,79 | up   |
| 5846602 | 7038898 | 982853  | choline kinase alpha             | Chka   | 29194 | 1,69 | up   |
| 6683490 | 7038898 | 982848  | choline kinase alpha             | Chka   | 29194 | 1,58 | up   |
| 6453248 | 7038898 | 982842  | choline kinase alpha             | Chka   | 29194 | 1,46 | down |
| 5861363 | 7038898 | 982842  | choline kinase alpha             | Chka   | 29194 | 1,40 | down |
| 6494864 | 7038898 | 982844  | choline kinase alpha             | Chka   | 29194 | 1,27 | up   |
| 6572644 | 7038898 | 982852  | choline kinase alpha             | Chka   | 29194 | 1,24 | down |
| 5707539 | 7038898 | 982846  | choline kinase alpha             | Chka   | 29194 | 1,20 | up   |
| 6370448 | 7038898 | 982849  | choline kinase alpha             | Chka   | 29194 | 1,15 | up   |
| 5947197 | 7038898 | 982842  | choline kinase alpha             | Chka   | 29194 | 1,14 | down |
| 5642058 | 7038898 | 982851  | choline kinase alpha             | Chka   | 29194 | 1,14 | up   |
| 5659883 | 7038898 | 982850  | choline kinase alpha             | Chka   | 29194 | 1,14 | down |
| 5636276 | 7038898 | 982845  | choline kinase alpha             | Chka   | 29194 | 1,14 | down |
| 5788787 | 7038898 | 982853  | choline kinase alpha             | Chka   | 29194 | 1,05 | up   |
| 5805380 | 7038898 | 982842  | choline kinase alpha             | Chka   | 29194 | 1,02 | down |
| 5790433 | 7038898 | 982843  | choline kinase alpha             | Chka   | 29194 | 1,00 | up   |

|         |         |         |                                                   |        |        |      |      |
|---------|---------|---------|---------------------------------------------------|--------|--------|------|------|
| 5998505 | 7323516 | 1679811 | choline phosphotransferase 1                      | Chpt1  | 362866 | 2,69 | down |
| 6626571 | 7323516 | 1679804 | choline phosphotransferase 1                      | Chpt1  | 362866 | 1,78 | down |
| 5684606 | 7323516 | 1679805 | choline phosphotransferase 1                      | Chpt1  | 362866 | 1,58 | down |
| 6525433 | 7323516 | 1679812 | choline phosphotransferase 1                      | Chpt1  | 362866 | 1,52 | down |
| 5781082 | 7323516 | 1679808 | choline phosphotransferase 1                      | Chpt1  | 362866 | 1,45 | up   |
| 6504124 | 7323516 | 1679809 | choline phosphotransferase 1                      | Chpt1  | 362866 | 1,36 | up   |
| 6191843 | 7323516 | 1679811 | choline phosphotransferase 1                      | Chpt1  | 362866 | 1,34 | up   |
| 6159392 | 7323516 | 1679813 | choline phosphotransferase 1                      | Chpt1  | 362866 | 1,17 | down |
| 6029794 | 7323516 | 1679806 | choline phosphotransferase 1                      | Chpt1  | 362866 | 1,17 | up   |
| 6392198 | 7323516 | 1679803 | choline phosphotransferase 1                      | Chpt1  | 362866 | 1,09 | down |
| 5706017 | 7323516 | 1679810 | choline phosphotransferase 1                      | Chpt1  | 362866 | 1,09 | up   |
| 6375078 | 7323516 | 1679807 | choline phosphotransferase 1                      | Chpt1  | 362866 | 1,06 | up   |
| 6084971 | 7240290 | 1474544 | cholinergic receptor, nicotinic, alpha 1 (muscle) | Chrna1 | 79557  | 2,17 | up   |
| 5818766 | 7240290 | 1474541 | cholinergic receptor, nicotinic, alpha 1 (muscle) | Chrna1 | 79557  | 1,45 | up   |
| 6488069 | 7240290 | 1474546 | cholinergic receptor, nicotinic, alpha 1 (muscle) | Chrna1 | 79557  | 1,22 | down |
| 5888617 | 7240290 | 1474550 | cholinergic receptor, nicotinic, alpha 1 (muscle) | Chrna1 | 79557  | 1,16 | down |
| 5963491 | 7240290 | 1474543 | cholinergic receptor, nicotinic, alpha 1 (muscle) | Chrna1 | 79557  | 1,16 | down |
| 6361907 | 7240290 | 1474542 | cholinergic receptor, nicotinic, alpha 1 (muscle) | Chrna1 | 79557  | 1,15 | up   |
| 5909534 | 7240290 | 1474545 | cholinergic receptor, nicotinic, alpha 1 (muscle) | Chrna1 | 79557  | 1,14 | up   |
| 6432761 | 7240290 | 1474550 | cholinergic receptor, nicotinic, alpha 1 (muscle) | Chrna1 | 79557  | 1,09 | down |
| 6286764 | 7240290 | 1474542 | cholinergic receptor, nicotinic, alpha 1 (muscle) | Chrna1 | 79557  | 1,08 | down |
| 6723951 | 7240290 | 1474547 | cholinergic receptor, nicotinic, alpha 1 (muscle) | Chrna1 | 79557  | 1,06 | up   |
| 5831376 | 7240290 | 1474549 | cholinergic receptor, nicotinic, alpha 1 (muscle) | Chrna1 | 79557  | 1,03 | up   |
| 6443909 | 7240290 | 1474548 | cholinergic receptor, nicotinic, alpha 1 (muscle) | Chrna1 | 79557  | 1,02 | up   |
| 6625858 | 7357158 | 1762564 | cholinergic receptor, nicotinic, delta            | Chrnd  | 54240  | 2,21 | up   |
| 5898219 | 7357158 | 1762569 | cholinergic receptor, nicotinic, delta            | Chrnd  | 54240  | 1,33 | up   |
| 6543357 | 7357158 | 1762562 | cholinergic receptor, nicotinic, delta            | Chrnd  | 54240  | 1,32 | down |
| 6336811 | 7357158 | 1762567 | cholinergic receptor, nicotinic, delta            | Chrnd  | 54240  | 1,21 | down |
| 6428765 | 7357158 | 1762572 | cholinergic receptor, nicotinic, delta            | Chrnd  | 54240  | 1,18 | down |
| 6306555 | 7357158 | 1762563 | cholinergic receptor, nicotinic, delta            | Chrnd  | 54240  | 1,14 | down |
| 6055985 | 7357158 | 1762568 | cholinergic receptor, nicotinic, delta            | Chrnd  | 54240  | 1,13 | down |
| 6719707 | 7357158 | 1762570 | cholinergic receptor, nicotinic, delta            | Chrnd  | 54240  | 1,11 | up   |
| 6150837 | 7357158 | 1762564 | cholinergic receptor, nicotinic, delta            | Chrnd  | 54240  | 1,10 | up   |
| 6202144 | 7357158 | 1762566 | cholinergic receptor, nicotinic, delta            | Chrnd  | 54240  | 1,09 | down |
| 5857667 | 7357158 | 1762565 | cholinergic receptor, nicotinic, delta            | Chrnd  | 54240  | 1,02 | down |
| 5912070 | 7357158 | 1762571 | cholinergic receptor, nicotinic, delta            | Chrnd  | 54240  | 1,01 | down |
| 5941507 | 7357164 | 1762587 | cholinergic receptor, nicotinic, gamma            | Chrng  | 25753  | 2,06 | down |
| 5911377 | 7357164 | 1762578 | cholinergic receptor, nicotinic, gamma            | Chrng  | 25753  | 1,41 | up   |
| 6679594 | 7357164 | 1762590 | cholinergic receptor, nicotinic, gamma            | Chrng  | 25753  | 1,40 | down |
| 6520592 | 7357164 | 1762584 | cholinergic receptor, nicotinic, gamma            | Chrng  | 25753  | 1,32 | down |
| 6068103 | 7357164 | 1762586 | cholinergic receptor, nicotinic, gamma            | Chrng  | 25753  | 1,32 | down |
| 6679890 | 7357164 | 1762589 | cholinergic receptor, nicotinic, gamma            | Chrng  | 25753  | 1,30 | down |
| 6470382 | 7357164 | 1762586 | cholinergic receptor, nicotinic, gamma            | Chrng  | 25753  | 1,26 | up   |
| 6491476 | 7357164 | 1762588 | cholinergic receptor, nicotinic, gamma            | Chrng  | 25753  | 1,25 | down |
| 6435873 | 7357164 | 1762578 | cholinergic receptor, nicotinic, gamma            | Chrng  | 25753  | 1,23 | up   |
| 6192889 | 7357164 | 1762579 | cholinergic receptor, nicotinic, gamma            | Chrng  | 25753  | 1,18 | down |
| 6100783 | 7357164 | 1762582 | cholinergic receptor, nicotinic, gamma            | Chrng  | 25753  | 1,10 | up   |
| 6454009 | 7357164 | 1762581 | cholinergic receptor, nicotinic, gamma            | Chrng  | 25753  | 1,06 | down |
| 6358919 | 7357164 | 1762589 | cholinergic receptor, nicotinic, gamma            | Chrng  | 25753  | 1,04 | up   |
| 6541940 | 7357164 | 1762580 | cholinergic receptor, nicotinic, gamma            | Chrng  | 25753  | 1,03 | up   |
| 6078796 | 7357164 | 1762585 | cholinergic receptor, nicotinic, gamma            | Chrng  | 25753  | 1,03 | down |
| 6616530 | 7357164 | 1762587 | cholinergic receptor, nicotinic, gamma            | Chrng  | 25753  | 1,03 | down |
| 6036845 | 7357164 | 1762581 | cholinergic receptor, nicotinic, gamma            | Chrng  | 25753  | 1,00 | up   |
| 6741031 | 7357164 | 1762583 | cholinergic receptor, nicotinic, gamma            | Chrng  | 25753  | 1,00 | up   |
| 6723990 | 7336548 | 1710921 | chondroitin sulfate proteoglycan 4                | Cspg4  | 81651  | 2,40 | up   |
| 6223752 | 7336548 | 1710923 | chondroitin sulfate proteoglycan 4                | Cspg4  | 81651  | 1,46 | up   |
| 6595887 | 7336548 | 1710924 | chondroitin sulfate proteoglycan 4                | Cspg4  | 81651  | 1,40 | up   |

|         |         |         |                                                    |       |        |      |      |
|---------|---------|---------|----------------------------------------------------|-------|--------|------|------|
| 6402046 | 7336548 | 1710926 | chondroitin sulfate proteoglycan 4                 | Cspg4 | 81651  | 1,39 | down |
| 6661010 | 7336548 | 1710925 | chondroitin sulfate proteoglycan 4                 | Cspg4 | 81651  | 1,36 | down |
| 6399648 | 7336548 | 1710918 | chondroitin sulfate proteoglycan 4                 | Cspg4 | 81651  | 1,34 | down |
| 6362400 | 7336548 | 1710918 | chondroitin sulfate proteoglycan 4                 | Cspg4 | 81651  | 1,30 | up   |
| 6259250 | 7336548 | 1710920 | chondroitin sulfate proteoglycan 4                 | Cspg4 | 81651  | 1,26 | down |
| 6265113 | 7336548 | 1710918 | chondroitin sulfate proteoglycan 4                 | Cspg4 | 81651  | 1,26 | down |
| 6033405 | 7336548 | 1710919 | chondroitin sulfate proteoglycan 4                 | Cspg4 | 81651  | 1,20 | down |
| 5698155 | 7336548 | 1710923 | chondroitin sulfate proteoglycan 4                 | Cspg4 | 81651  | 1,18 | down |
| 6139058 | 7336548 | 1710921 | chondroitin sulfate proteoglycan 4                 | Cspg4 | 81651  | 1,16 | down |
| 6185730 | 7336548 | 1710922 | chondroitin sulfate proteoglycan 4                 | Cspg4 | 81651  | 1,15 | up   |
| 5636187 | 7336548 | 1710915 | chondroitin sulfate proteoglycan 4                 | Cspg4 | 81651  | 1,10 | down |
| 6306936 | 7336548 | 1710915 | chondroitin sulfate proteoglycan 4                 | Cspg4 | 81651  | 1,07 | up   |
| 6272449 | 7336548 | 1710917 | chondroitin sulfate proteoglycan 4                 | Cspg4 | 81651  | 1,06 | down |
| 6442939 | 7336548 | 1710926 | chondroitin sulfate proteoglycan 4                 | Cspg4 | 81651  | 1,05 | up   |
| 5819473 | 7336548 | 1710925 | chondroitin sulfate proteoglycan 4                 | Cspg4 | 81651  | 1,05 | up   |
| 5621579 | 7336548 | 1710918 | chondroitin sulfate proteoglycan 4                 | Cspg4 | 81651  | 1,05 | down |
| 5784353 | 7336548 | 1710916 | chondroitin sulfate proteoglycan 4                 | Cspg4 | 81651  | 1,03 | down |
| 6598509 | 7336548 | 1710926 | chondroitin sulfate proteoglycan 4                 | Cspg4 | 81651  | 1,02 | down |
| 6605419 | 7336548 | 1710917 | chondroitin sulfate proteoglycan 4                 | Cspg4 | 81651  | 1,02 | down |
| 6443830 | 7340657 | 1721628 | chondroitin sulfate proteoglycan 5                 | Cspg5 | 50568  | 3,21 | down |
| 6428048 | 7340657 | 1721628 | chondroitin sulfate proteoglycan 5                 | Cspg5 | 50568  | 1,67 | down |
| 6426333 | 7340657 | 1721631 | chondroitin sulfate proteoglycan 5                 | Cspg5 | 50568  | 1,48 | up   |
| 6699732 | 7340657 | 1721630 | chondroitin sulfate proteoglycan 5                 | Cspg5 | 50568  | 1,44 | up   |
| 6707606 | 7340657 | 1721631 | chondroitin sulfate proteoglycan 5                 | Cspg5 | 50568  | 1,42 | up   |
| 6201550 | 7340657 | 1721628 | chondroitin sulfate proteoglycan 5                 | Cspg5 | 50568  | 1,38 | down |
| 6467330 | 7340657 | 1721632 | chondroitin sulfate proteoglycan 5                 | Cspg5 | 50568  | 1,35 | up   |
| 5729838 | 7340657 | 1721629 | chondroitin sulfate proteoglycan 5                 | Cspg5 | 50568  | 1,30 | down |
| 5791488 | 7340657 | 1721628 | chondroitin sulfate proteoglycan 5                 | Cspg5 | 50568  | 1,14 | up   |
| 6532391 | 7340657 | 1721628 | chondroitin sulfate proteoglycan 5                 | Cspg5 | 50568  | 1,12 | down |
| 6069931 | 7340657 | 1721628 | chondroitin sulfate proteoglycan 5                 | Cspg5 | 50568  | 1,08 | down |
| 6655286 | 7340657 | 1721628 | chondroitin sulfate proteoglycan 5                 | Cspg5 | 50568  | 1,05 | down |
| 6083079 | 7340657 | 1721630 | chondroitin sulfate proteoglycan 5                 | Cspg5 | 50568  | 1,03 | down |
| 6230338 | 7095021 | 1115122 | chordin                                            | Chrd  | 117275 | 1,47 | down |
| 5684603 | 7095021 | 1115125 | chordin                                            | Chrd  | 117275 | 1,35 | down |
| 5809786 | 7095021 | 1115120 | chordin                                            | Chrd  | 117275 | 1,22 | down |
| 5695811 | 7095021 | 1115121 | chordin                                            | Chrd  | 117275 | 1,19 | up   |
| 5710283 | 7095021 | 1115124 | chordin                                            | Chrd  | 117275 | 1,07 | up   |
| 5778022 | 7095021 | 1115125 | chordin                                            | Chrd  | 117275 | 1,06 | up   |
| 6695504 | 7071648 | 1060191 | chromobox homolog 1 (HP1 beta homolog Drosophila ) | Cbx1  | 360609 | 1,20 | up   |
| 6445236 | 7071648 | 1060192 | chromobox homolog 1 (HP1 beta homolog Drosophila ) | Cbx1  | 360609 | 1,17 | up   |
| 5784429 | 7071648 | 1060195 | chromobox homolog 1 (HP1 beta homolog Drosophila ) | Cbx1  | 360609 | 1,13 | down |
| 6404196 | 7329864 | 1695045 | chromobox homolog 6                                | Cbx6  | 315136 | 2,23 | up   |
| 5905100 | 7329864 | 1695044 | chromobox homolog 6                                | Cbx6  | 315136 | 1,96 | up   |
| 5757791 | 7329864 | 1695044 | chromobox homolog 6                                | Cbx6  | 315136 | 1,46 | down |
| 6007535 | 7329864 | 1695047 | chromobox homolog 6                                | Cbx6  | 315136 | 1,43 | up   |
| 6205152 | 7329864 | 1695045 | chromobox homolog 6                                | Cbx6  | 315136 | 1,25 | down |
| 6532171 | 7329864 | 1695044 | chromobox homolog 6                                | Cbx6  | 315136 | 1,24 | down |
| 6275469 | 7329864 | 1695046 | chromobox homolog 6                                | Cbx6  | 315136 | 1,22 | up   |
| 6079967 | 7329864 | 1695048 | chromobox homolog 6                                | Cbx6  | 315136 | 1,07 | down |
| 5862935 | 7329864 | 1695044 | chromobox homolog 6                                | Cbx6  | 315136 | 1,05 | down |
| 6735910 | 7329864 | 1695044 | chromobox homolog 6                                | Cbx6  | 315136 | 1,02 | up   |
| 5851845 | 7329864 | 1695049 | chromobox homolog 6                                | Cbx6  | 315136 | 1,02 | up   |
| 6660327 | 7329878 | 1695064 | chromobox homolog 7                                | Cbx7  | 362962 | 3,12 | down |
| 6633388 | 7329878 | 1695068 | chromobox homolog 7                                | Cbx7  | 362962 | 1,47 | down |
| 5995153 | 7329878 | 1695065 | chromobox homolog 7                                | Cbx7  | 362962 | 1,46 | up   |
| 6332845 | 7329878 | 1695063 | chromobox homolog 7                                | Cbx7  | 362962 | 1,19 | up   |
| 6373198 | 7329878 | 1695063 | chromobox homolog 7                                | Cbx7  | 362962 | 1,15 | down |

|         |         |         |                                             |      |        |      |      |
|---------|---------|---------|---------------------------------------------|------|--------|------|------|
| 5969578 | 7329878 | 1695066 | chromobox homolog 7                         | Cbx7 | 362962 | 1,13 | up   |
| 6247840 | 7329878 | 1695063 | chromobox homolog 7                         | Cbx7 | 362962 | 1,10 | up   |
| 6280967 | 7329878 | 1695067 | chromobox homolog 7                         | Cbx7 | 362962 | 1,06 | down |
| 6208763 | 7329878 | 1695069 | chromobox homolog 7                         | Cbx7 | 362962 | 1,03 | up   |
| 5745157 | 7078982 | 1077323 | chromodomain helicase DNA binding protein 3 | Chd3 | 303241 | 1,83 | down |
| 6002801 | 7078982 | 1077327 | chromodomain helicase DNA binding protein 3 | Chd3 | 303241 | 1,62 | up   |
| 6418518 | 7078982 | 1077344 | chromodomain helicase DNA binding protein 3 | Chd3 | 303241 | 1,58 | up   |
| 5737022 | 7078982 | 1077335 | chromodomain helicase DNA binding protein 3 | Chd3 | 303241 | 1,43 | down |
| 6145589 | 7078982 | 1077315 | chromodomain helicase DNA binding protein 3 | Chd3 | 303241 | 1,39 | down |
| 6495252 | 7078982 | 1077311 | chromodomain helicase DNA binding protein 3 | Chd3 | 303241 | 1,38 | down |
| 6344159 | 7078982 | 1077344 | chromodomain helicase DNA binding protein 3 | Chd3 | 303241 | 1,37 | down |
| 5857345 | 7078982 | 1077322 | chromodomain helicase DNA binding protein 3 | Chd3 | 303241 | 1,29 | down |
| 6380598 | 7078982 | 1077328 | chromodomain helicase DNA binding protein 3 | Chd3 | 303241 | 1,26 | down |
| 6523380 | 7078982 | 1077345 | chromodomain helicase DNA binding protein 3 | Chd3 | 303241 | 1,25 | down |
| 5865087 | 7078982 | 1077329 | chromodomain helicase DNA binding protein 3 | Chd3 | 303241 | 1,21 | down |
| 6283468 | 7078982 | 1077331 | chromodomain helicase DNA binding protein 3 | Chd3 | 303241 | 1,21 | up   |
| 5890070 | 7078982 | 1077310 | chromodomain helicase DNA binding protein 3 | Chd3 | 303241 | 1,20 | up   |
| 6426861 | 7078982 | 1077309 | chromodomain helicase DNA binding protein 3 | Chd3 | 303241 | 1,18 | down |
| 6449766 | 7078982 | 1077312 | chromodomain helicase DNA binding protein 3 | Chd3 | 303241 | 1,17 | up   |
| 5778137 | 7078982 | 1077339 | chromodomain helicase DNA binding protein 3 | Chd3 | 303241 | 1,16 | up   |
| 6114077 | 7078982 | 1077326 | chromodomain helicase DNA binding protein 3 | Chd3 | 303241 | 1,16 | up   |
| 6708505 | 7078982 | 1077321 | chromodomain helicase DNA binding protein 3 | Chd3 | 303241 | 1,15 | down |
| 6195690 | 7078982 | 1077346 | chromodomain helicase DNA binding protein 3 | Chd3 | 303241 | 1,14 | down |
| 6521967 | 7078982 | 1077344 | chromodomain helicase DNA binding protein 3 | Chd3 | 303241 | 1,12 | down |
| 6189997 | 7078982 | 1077316 | chromodomain helicase DNA binding protein 3 | Chd3 | 303241 | 1,10 | down |
| 6567307 | 7078982 | 1077311 | chromodomain helicase DNA binding protein 3 | Chd3 | 303241 | 1,10 | down |
| 5836995 | 7078982 | 1077320 | chromodomain helicase DNA binding protein 3 | Chd3 | 303241 | 1,08 | down |
| 5636897 | 7078982 | 1077342 | chromodomain helicase DNA binding protein 3 | Chd3 | 303241 | 1,08 | down |
| 6003379 | 7078982 | 1077319 | chromodomain helicase DNA binding protein 3 | Chd3 | 303241 | 1,08 | down |
| 5708453 | 7078982 | 1077330 | chromodomain helicase DNA binding protein 3 | Chd3 | 303241 | 1,08 | down |
| 5821231 | 7078982 | 1077338 | chromodomain helicase DNA binding protein 3 | Chd3 | 303241 | 1,07 | up   |
| 6515270 | 7078982 | 1077333 | chromodomain helicase DNA binding protein 3 | Chd3 | 303241 | 1,07 | up   |
| 6027886 | 7078982 | 1077318 | chromodomain helicase DNA binding protein 3 | Chd3 | 303241 | 1,06 | up   |
| 6713853 | 7078982 | 1077314 | chromodomain helicase DNA binding protein 3 | Chd3 | 303241 | 1,06 | down |
| 6034490 | 7078982 | 1077317 | chromodomain helicase DNA binding protein 3 | Chd3 | 303241 | 1,06 | down |
| 6155737 | 7078982 | 1077334 | chromodomain helicase DNA binding protein 3 | Chd3 | 303241 | 1,06 | down |
| 6723971 | 7078982 | 1077336 | chromodomain helicase DNA binding protein 3 | Chd3 | 303241 | 1,05 | down |
| 5638196 | 7078982 | 1077343 | chromodomain helicase DNA binding protein 3 | Chd3 | 303241 | 1,04 | up   |
| 5744554 | 7078982 | 1077339 | chromodomain helicase DNA binding protein 3 | Chd3 | 303241 | 1,04 | up   |
| 6235150 | 7078982 | 1077313 | chromodomain helicase DNA binding protein 3 | Chd3 | 303241 | 1,03 | down |
| 6112125 | 7078982 | 1077337 | chromodomain helicase DNA binding protein 3 | Chd3 | 303241 | 1,03 | up   |
| 6399455 | 7078982 | 1077324 | chromodomain helicase DNA binding protein 3 | Chd3 | 303241 | 1,03 | down |
| 6063113 | 7078982 | 1077340 | chromodomain helicase DNA binding protein 3 | Chd3 | 303241 | 1,02 | down |
| 6204346 | 7078982 | 1077332 | chromodomain helicase DNA binding protein 3 | Chd3 | 303241 | 1,00 | down |
| 6104233 | 7078982 | 1077325 | chromodomain helicase DNA binding protein 3 | Chd3 | 303241 | 1,00 | up   |
| 6160842 | 7258455 | 1518724 | chromodomain helicase DNA binding protein 4 | Chd4 | 117535 | 1,06 | down |
| 6389599 | 7247512 | 1491199 | chromodomain helicase DNA binding protein 6 | Chd6 | 311607 | 1,92 | down |
| 5768665 | 7247512 | 1491206 | chromodomain helicase DNA binding protein 6 | Chd6 | 311607 | 1,88 | down |
| 6712927 | 7247512 | 1491217 | chromodomain helicase DNA binding protein 6 | Chd6 | 311607 | 1,78 | down |
| 6504885 | 7247512 | 1491205 | chromodomain helicase DNA binding protein 6 | Chd6 | 311607 | 1,50 | up   |
| 6148159 | 7247512 | 1491200 | chromodomain helicase DNA binding protein 6 | Chd6 | 311607 | 1,43 | down |
| 5879507 | 7247512 | 1491221 | chromodomain helicase DNA binding protein 6 | Chd6 | 311607 | 1,41 | up   |
| 6426850 | 7247512 | 1491221 | chromodomain helicase DNA binding protein 6 | Chd6 | 311607 | 1,38 | down |
| 6060716 | 7247512 | 1491215 | chromodomain helicase DNA binding protein 6 | Chd6 | 311607 | 1,38 | down |
| 6340051 | 7247512 | 1491232 | chromodomain helicase DNA binding protein 6 | Chd6 | 311607 | 1,36 | up   |
| 5832887 | 7247512 | 1491205 | chromodomain helicase DNA binding protein 6 | Chd6 | 311607 | 1,35 | down |
| 6565931 | 7247512 | 1491190 | chromodomain helicase DNA binding protein 6 | Chd6 | 311607 | 1,35 | down |

|         |         |         |                                             |      |        |      |      |
|---------|---------|---------|---------------------------------------------|------|--------|------|------|
| 6262022 | 7247512 | 1491202 | chromodomain helicase DNA binding protein 6 | Chd6 | 311607 | 1,30 | down |
| 6543382 | 7247512 | 1491230 | chromodomain helicase DNA binding protein 6 | Chd6 | 311607 | 1,28 | up   |
| 6294372 | 7247512 | 1491185 | chromodomain helicase DNA binding protein 6 | Chd6 | 311607 | 1,25 | up   |
| 6613413 | 7247512 | 1491226 | chromodomain helicase DNA binding protein 6 | Chd6 | 311607 | 1,22 | down |
| 5968248 | 7247512 | 1491233 | chromodomain helicase DNA binding protein 6 | Chd6 | 311607 | 1,18 | up   |
| 5634747 | 7247512 | 1491207 | chromodomain helicase DNA binding protein 6 | Chd6 | 311607 | 1,16 | down |
| 6510657 | 7247512 | 1491195 | chromodomain helicase DNA binding protein 6 | Chd6 | 311607 | 1,16 | up   |
| 6706948 | 7247512 | 1491204 | chromodomain helicase DNA binding protein 6 | Chd6 | 311607 | 1,16 | down |
| 5791774 | 7247512 | 1491196 | chromodomain helicase DNA binding protein 6 | Chd6 | 311607 | 1,15 | up   |
| 5994191 | 7247512 | 1491212 | chromodomain helicase DNA binding protein 6 | Chd6 | 311607 | 1,15 | up   |
| 5958966 | 7247512 | 1491211 | chromodomain helicase DNA binding protein 6 | Chd6 | 311607 | 1,15 | down |
| 5959806 | 7247512 | 1491197 | chromodomain helicase DNA binding protein 6 | Chd6 | 311607 | 1,14 | up   |
| 5998543 | 7247512 | 1491222 | chromodomain helicase DNA binding protein 6 | Chd6 | 311607 | 1,14 | up   |
| 6179120 | 7247512 | 1491186 | chromodomain helicase DNA binding protein 6 | Chd6 | 311607 | 1,13 | down |
| 5853063 | 7247512 | 1491203 | chromodomain helicase DNA binding protein 6 | Chd6 | 311607 | 1,10 | down |
| 5877460 | 7247512 | 1491209 | chromodomain helicase DNA binding protein 6 | Chd6 | 311607 | 1,09 | down |
| 6274432 | 7247512 | 1491230 | chromodomain helicase DNA binding protein 6 | Chd6 | 311607 | 1,09 | up   |
| 6657012 | 7247512 | 1491194 | chromodomain helicase DNA binding protein 6 | Chd6 | 311607 | 1,08 | up   |
| 5617741 | 7247512 | 1491223 | chromodomain helicase DNA binding protein 6 | Chd6 | 311607 | 1,08 | down |
| 6477792 | 7247512 | 1491214 | chromodomain helicase DNA binding protein 6 | Chd6 | 311607 | 1,07 | down |
| 6603756 | 7247512 | 1491198 | chromodomain helicase DNA binding protein 6 | Chd6 | 311607 | 1,07 | down |
| 6234007 | 7247512 | 1491191 | chromodomain helicase DNA binding protein 6 | Chd6 | 311607 | 1,07 | up   |
| 5720027 | 7247512 | 1491208 | chromodomain helicase DNA binding protein 6 | Chd6 | 311607 | 1,07 | up   |
| 6646440 | 7247512 | 1491213 | chromodomain helicase DNA binding protein 6 | Chd6 | 311607 | 1,06 | down |
| 6735506 | 7247512 | 1491219 | chromodomain helicase DNA binding protein 6 | Chd6 | 311607 | 1,06 | down |
| 6564286 | 7247512 | 1491200 | chromodomain helicase DNA binding protein 6 | Chd6 | 311607 | 1,04 | up   |
| 6687080 | 7247512 | 1491186 | chromodomain helicase DNA binding protein 6 | Chd6 | 311607 | 1,03 | down |
| 6014388 | 7247512 | 1491220 | chromodomain helicase DNA binding protein 6 | Chd6 | 311607 | 1,03 | up   |
| 6143358 | 7247512 | 1491205 | chromodomain helicase DNA binding protein 6 | Chd6 | 311607 | 1,03 | down |
| 5976027 | 7247512 | 1491216 | chromodomain helicase DNA binding protein 6 | Chd6 | 311607 | 1,02 | down |
| 6422912 | 7247512 | 1491228 | chromodomain helicase DNA binding protein 6 | Chd6 | 311607 | 1,02 | down |
| 5728070 | 7247512 | 1491201 | chromodomain helicase DNA binding protein 6 | Chd6 | 311607 | 1,01 | down |
| 6727756 | 7272577 | 1554271 | chromodomain helicase DNA binding protein 7 | Chd7 | 312974 | 2,63 | down |
| 6645140 | 7272577 | 1554250 | chromodomain helicase DNA binding protein 7 | Chd7 | 312974 | 1,84 | up   |
| 6021113 | 7272577 | 1554279 | chromodomain helicase DNA binding protein 7 | Chd7 | 312974 | 1,70 | down |
| 6121317 | 7272577 | 1554246 | chromodomain helicase DNA binding protein 7 | Chd7 | 312974 | 1,70 | up   |
| 6684885 | 7272577 | 1554278 | chromodomain helicase DNA binding protein 7 | Chd7 | 312974 | 1,62 | down |
| 6581734 | 7272577 | 1554252 | chromodomain helicase DNA binding protein 7 | Chd7 | 312974 | 1,45 | up   |
| 5923476 | 7272577 | 1554276 | chromodomain helicase DNA binding protein 7 | Chd7 | 312974 | 1,44 | down |
| 6224007 | 7272577 | 1554275 | chromodomain helicase DNA binding protein 7 | Chd7 | 312974 | 1,44 | down |
| 6647371 | 7272577 | 1554250 | chromodomain helicase DNA binding protein 7 | Chd7 | 312974 | 1,37 | up   |
| 5793504 | 7272577 | 1554222 | chromodomain helicase DNA binding protein 7 | Chd7 | 312974 | 1,36 | up   |
| 6514806 | 7272577 | 1554263 | chromodomain helicase DNA binding protein 7 | Chd7 | 312974 | 1,34 | down |
| 6157710 | 7272577 | 1554278 | chromodomain helicase DNA binding protein 7 | Chd7 | 312974 | 1,32 | down |
| 5721792 | 7272577 | 1554282 | chromodomain helicase DNA binding protein 7 | Chd7 | 312974 | 1,27 | down |
| 6576778 | 7272577 | 1554282 | chromodomain helicase DNA binding protein 7 | Chd7 | 312974 | 1,24 | down |
| 6128864 | 7272577 | 1554255 | chromodomain helicase DNA binding protein 7 | Chd7 | 312974 | 1,22 | up   |
| 6723210 | 7272577 | 1554276 | chromodomain helicase DNA binding protein 7 | Chd7 | 312974 | 1,22 | up   |
| 6115607 | 7272577 | 1554209 | chromodomain helicase DNA binding protein 7 | Chd7 | 312974 | 1,22 | down |
| 5995611 | 7272577 | 1554241 | chromodomain helicase DNA binding protein 7 | Chd7 | 312974 | 1,20 | up   |
| 6442459 | 7272577 | 1554270 | chromodomain helicase DNA binding protein 7 | Chd7 | 312974 | 1,20 | down |
| 6099565 | 7272577 | 1554222 | chromodomain helicase DNA binding protein 7 | Chd7 | 312974 | 1,20 | up   |
| 6593903 | 7272577 | 1554228 | chromodomain helicase DNA binding protein 7 | Chd7 | 312974 | 1,18 | down |
| 6434366 | 7272577 | 1554243 | chromodomain helicase DNA binding protein 7 | Chd7 | 312974 | 1,18 | up   |
| 6171226 | 7272577 | 1554272 | chromodomain helicase DNA binding protein 7 | Chd7 | 312974 | 1,18 | down |
| 6566538 | 7272577 | 1554246 | chromodomain helicase DNA binding protein 7 | Chd7 | 312974 | 1,16 | down |
| 6593410 | 7272577 | 1554257 | chromodomain helicase DNA binding protein 7 | Chd7 | 312974 | 1,15 | down |



|         |         |         |                                             |       |        |      |      |
|---------|---------|---------|---------------------------------------------|-------|--------|------|------|
| 5666633 | 7272577 | 1554273 | chromodomain helicase DNA binding protein 7 | Chd7  | 312974 | 1,15 | down |
| 6528294 | 7272577 | 1554280 | chromodomain helicase DNA binding protein 7 | Chd7  | 312974 | 1,13 | down |
| 6445933 | 7272577 | 1554282 | chromodomain helicase DNA binding protein 7 | Chd7  | 312974 | 1,13 | down |
| 5763726 | 7272577 | 1554259 | chromodomain helicase DNA binding protein 7 | Chd7  | 312974 | 1,13 | down |
| 6637704 | 7272577 | 1554254 | chromodomain helicase DNA binding protein 7 | Chd7  | 312974 | 1,13 | down |
| 6223754 | 7272577 | 1554244 | chromodomain helicase DNA binding protein 7 | Chd7  | 312974 | 1,13 | up   |
| 6279076 | 7272577 | 1554234 | chromodomain helicase DNA binding protein 7 | Chd7  | 312974 | 1,12 | up   |
| 6099854 | 7272577 | 1554242 | chromodomain helicase DNA binding protein 7 | Chd7  | 312974 | 1,11 | up   |
| 5929637 | 7272577 | 1554268 | chromodomain helicase DNA binding protein 7 | Chd7  | 312974 | 1,08 | down |
| 6483721 | 7272577 | 1554209 | chromodomain helicase DNA binding protein 7 | Chd7  | 312974 | 1,08 | down |
| 6311088 | 7272577 | 1554253 | chromodomain helicase DNA binding protein 7 | Chd7  | 312974 | 1,06 | up   |
| 6545815 | 7272577 | 1554209 | chromodomain helicase DNA binding protein 7 | Chd7  | 312974 | 1,06 | down |
| 5677028 | 7272577 | 1554258 | chromodomain helicase DNA binding protein 7 | Chd7  | 312974 | 1,06 | down |
| 6242680 | 7272577 | 1554232 | chromodomain helicase DNA binding protein 7 | Chd7  | 312974 | 1,06 | up   |
| 6218224 | 7272577 | 1554245 | chromodomain helicase DNA binding protein 7 | Chd7  | 312974 | 1,05 | up   |
| 6353249 | 7272577 | 1554267 | chromodomain helicase DNA binding protein 7 | Chd7  | 312974 | 1,05 | down |
| 6045230 | 7272577 | 1554256 | chromodomain helicase DNA binding protein 7 | Chd7  | 312974 | 1,03 | down |
| 6236852 | 7272577 | 1554247 | chromodomain helicase DNA binding protein 7 | Chd7  | 312974 | 1,03 | up   |
| 6471804 | 7272577 | 1554269 | chromodomain helicase DNA binding protein 7 | Chd7  | 312974 | 1,02 | up   |
| 5856292 | 7272577 | 1554264 | chromodomain helicase DNA binding protein 7 | Chd7  | 312974 | 1,02 | up   |
| 6038624 | 7272577 | 1554231 | chromodomain helicase DNA binding protein 7 | Chd7  | 312974 | 1,01 | down |
| 6538510 | 7272577 | 1554222 | chromodomain helicase DNA binding protein 7 | Chd7  | 312974 | 1,01 | up   |
| 6489489 | 7272577 | 1554208 | chromodomain helicase DNA binding protein 7 | Chd7  | 312974 | 1,00 | up   |
| 6230714 | 7163740 | 1283920 | chromodomain protein, Y chromosome-like     | Cdyl  | 361237 | 2,07 | down |
| 6324875 | 7163740 | 1283919 | chromodomain protein, Y chromosome-like     | Cdyl  | 361237 | 1,66 | up   |
| 6719220 | 7163740 | 1283917 | chromodomain protein, Y chromosome-like     | Cdyl  | 361237 | 1,48 | down |
| 6046114 | 7163740 | 1283915 | chromodomain protein, Y chromosome-like     | Cdyl  | 361237 | 1,28 | up   |
| 6427213 | 7163740 | 1283918 | chromodomain protein, Y chromosome-like     | Cdyl  | 361237 | 1,27 | down |
| 5944461 | 7163740 | 1283921 | chromodomain protein, Y chromosome-like     | Cdyl  | 361237 | 1,17 | up   |
| 6557052 | 7163740 | 1283916 | chromodomain protein, Y chromosome-like     | Cdyl  | 361237 | 1,15 | up   |
| 6489978 | 7163740 | 1283914 | chromodomain protein, Y chromosome-like     | Cdyl  | 361237 | 1,13 | down |
| 6269198 | 7163740 | 1283913 | chromodomain protein, Y chromosome-like     | Cdyl  | 361237 | 1,07 | up   |
| 5810146 | 7163740 | 1283922 | chromodomain protein, Y chromosome-like     | Cdyl  | 361237 | 1,03 | down |
| 6707836 | 7292517 | 1602525 | ciliary rootlet coiled-coil, rootletin      | Crocc | 313663 | 1,74 | down |
| 6112065 | 7292517 | 1602527 | ciliary rootlet coiled-coil, rootletin      | Crocc | 313663 | 1,62 | up   |
| 6557053 | 7292517 | 1602532 | ciliary rootlet coiled-coil, rootletin      | Crocc | 313663 | 1,59 | up   |
| 6020627 | 7292517 | 1602528 | ciliary rootlet coiled-coil, rootletin      | Crocc | 313663 | 1,55 | up   |
| 6576541 | 7292517 | 1602534 | ciliary rootlet coiled-coil, rootletin      | Crocc | 313663 | 1,53 | up   |
| 6572485 | 7292517 | 1602523 | ciliary rootlet coiled-coil, rootletin      | Crocc | 313663 | 1,43 | down |
| 5861647 | 7292517 | 1602535 | ciliary rootlet coiled-coil, rootletin      | Crocc | 313663 | 1,41 | up   |
| 5659849 | 7292517 | 1602526 | ciliary rootlet coiled-coil, rootletin      | Crocc | 313663 | 1,38 | up   |
| 6439328 | 7292517 | 1602541 | ciliary rootlet coiled-coil, rootletin      | Crocc | 313663 | 1,36 | up   |
| 6314454 | 7292517 | 1602536 | ciliary rootlet coiled-coil, rootletin      | Crocc | 313663 | 1,35 | down |
| 6059249 | 7292517 | 1602533 | ciliary rootlet coiled-coil, rootletin      | Crocc | 313663 | 1,31 | down |
| 6548722 | 7292517 | 1602531 | ciliary rootlet coiled-coil, rootletin      | Crocc | 313663 | 1,28 | down |
| 5835357 | 7292517 | 1602527 | ciliary rootlet coiled-coil, rootletin      | Crocc | 313663 | 1,24 | down |
| 6515708 | 7292517 | 1602530 | ciliary rootlet coiled-coil, rootletin      | Crocc | 313663 | 1,22 | down |
| 6376771 | 7292517 | 1602544 | ciliary rootlet coiled-coil, rootletin      | Crocc | 313663 | 1,21 | down |
| 5966783 | 7292517 | 1602521 | ciliary rootlet coiled-coil, rootletin      | Crocc | 313663 | 1,16 | up   |
| 6429925 | 7292517 | 1602537 | ciliary rootlet coiled-coil, rootletin      | Crocc | 313663 | 1,14 | up   |
| 6625270 | 7292517 | 1602545 | ciliary rootlet coiled-coil, rootletin      | Crocc | 313663 | 1,13 | up   |
| 5901379 | 7292517 | 1602530 | ciliary rootlet coiled-coil, rootletin      | Crocc | 313663 | 1,13 | up   |
| 6140276 | 7292517 | 1602524 | ciliary rootlet coiled-coil, rootletin      | Crocc | 313663 | 1,12 | down |
| 6667936 | 7292517 | 1602539 | ciliary rootlet coiled-coil, rootletin      | Crocc | 313663 | 1,10 | up   |
| 6333199 | 7292517 | 1602529 | ciliary rootlet coiled-coil, rootletin      | Crocc | 313663 | 1,08 | up   |
| 6646343 | 7292517 | 1602542 | ciliary rootlet coiled-coil, rootletin      | Crocc | 313663 | 1,07 | up   |
| 5892295 | 7292517 | 1602543 | ciliary rootlet coiled-coil, rootletin      | Crocc | 313663 | 1,04 | up   |

|         |         |         |                                                      |       |        |      |      |
|---------|---------|---------|------------------------------------------------------|-------|--------|------|------|
| 6694851 | 7211363 | 1402035 | cingulin                                             | Cgn   | 310655 | 1,10 | up   |
| 5799546 | 7211363 | 1402035 | cingulin                                             | Cgn   | 310655 | 1,09 | down |
| 6719811 | 7211363 | 1402035 | cingulin                                             | Cgn   | 310655 | 1,08 | down |
| 6331522 | 7211363 | 1402035 | cingulin                                             | Cgn   | 310655 | 1,07 | down |
| 5728620 | 7135736 | 1215394 | citrate lyase beta like                              | Clybl | 306198 | 2,12 | down |
| 6027290 | 7135736 | 1215353 | citrate lyase beta like                              | Clybl | 306198 | 1,74 | up   |
| 5963705 | 7135736 | 1215390 | citrate lyase beta like                              | Clybl | 306198 | 1,64 | down |
| 6344464 | 7135736 | 1215391 | citrate lyase beta like                              | Clybl | 306198 | 1,48 | up   |
| 5732667 | 7135736 | 1215401 | citrate lyase beta like                              | Clybl | 306198 | 1,40 | down |
| 6314652 | 7135736 | 1215365 | citrate lyase beta like                              | Clybl | 306198 | 1,37 | up   |
| 6422782 | 7135736 | 1215390 | citrate lyase beta like                              | Clybl | 306198 | 1,36 | down |
| 6245847 | 7135736 | 1215401 | citrate lyase beta like                              | Clybl | 306198 | 1,13 | up   |
| 5962551 | 7135736 | 1215387 | citrate lyase beta like                              | Clybl | 306198 | 1,02 | down |
| 6493389 | 7135736 | 1215392 | citrate lyase beta like                              | Clybl | 306198 | 1,00 | down |
| 6697970 | 7102841 | 1134771 | citron (rho-interacting, serine/threonine kinase 21) | Cit   | 83620  | 3,19 | down |
| 6476052 | 7102841 | 1134784 | citron (rho-interacting, serine/threonine kinase 21) | Cit   | 83620  | 1,76 | up   |
| 5626301 | 7102841 | 1134774 | citron (rho-interacting, serine/threonine kinase 21) | Cit   | 83620  | 1,73 | up   |
| 6416053 | 7102841 | 1134773 | citron (rho-interacting, serine/threonine kinase 21) | Cit   | 83620  | 1,68 | down |
| 5675034 | 7102841 | 1134776 | citron (rho-interacting, serine/threonine kinase 21) | Cit   | 83620  | 1,66 | down |
| 6448592 | 7102841 | 1134769 | citron (rho-interacting, serine/threonine kinase 21) | Cit   | 83620  | 1,63 | down |
| 6263483 | 7102841 | 1134756 | citron (rho-interacting, serine/threonine kinase 21) | Cit   | 83620  | 1,62 | up   |
| 5770060 | 7102841 | 1134763 | citron (rho-interacting, serine/threonine kinase 21) | Cit   | 83620  | 1,59 | up   |
| 6448908 | 7102841 | 1134771 | citron (rho-interacting, serine/threonine kinase 21) | Cit   | 83620  | 1,56 | down |
| 6594810 | 7102841 | 1134770 | citron (rho-interacting, serine/threonine kinase 21) | Cit   | 83620  | 1,54 | up   |
| 6315078 | 7102841 | 1134760 | citron (rho-interacting, serine/threonine kinase 21) | Cit   | 83620  | 1,50 | down |
| 6676765 | 7102841 | 1134761 | citron (rho-interacting, serine/threonine kinase 21) | Cit   | 83620  | 1,50 | down |
| 6335389 | 7102841 | 1134762 | citron (rho-interacting, serine/threonine kinase 21) | Cit   | 83620  | 1,48 | up   |
| 5878387 | 7102841 | 1134767 | citron (rho-interacting, serine/threonine kinase 21) | Cit   | 83620  | 1,48 | up   |
| 6441615 | 7102841 | 1134768 | citron (rho-interacting, serine/threonine kinase 21) | Cit   | 83620  | 1,48 | up   |
| 6420472 | 7102841 | 1134759 | citron (rho-interacting, serine/threonine kinase 21) | Cit   | 83620  | 1,37 | down |
| 6156667 | 7102841 | 1134775 | citron (rho-interacting, serine/threonine kinase 21) | Cit   | 83620  | 1,34 | up   |
| 6103827 | 7102841 | 1134783 | citron (rho-interacting, serine/threonine kinase 21) | Cit   | 83620  | 1,33 | down |
| 6474038 | 7102841 | 1134766 | citron (rho-interacting, serine/threonine kinase 21) | Cit   | 83620  | 1,31 | up   |
| 6274070 | 7102841 | 1134765 | citron (rho-interacting, serine/threonine kinase 21) | Cit   | 83620  | 1,30 | down |
| 6360158 | 7102841 | 1134786 | citron (rho-interacting, serine/threonine kinase 21) | Cit   | 83620  | 1,25 | down |
| 6387796 | 7102841 | 1134779 | citron (rho-interacting, serine/threonine kinase 21) | Cit   | 83620  | 1,24 | up   |
| 6318520 | 7102841 | 1134758 | citron (rho-interacting, serine/threonine kinase 21) | Cit   | 83620  | 1,24 | down |
| 6674335 | 7102841 | 1134753 | citron (rho-interacting, serine/threonine kinase 21) | Cit   | 83620  | 1,20 | down |
| 5771965 | 7102841 | 1134778 | citron (rho-interacting, serine/threonine kinase 21) | Cit   | 83620  | 1,20 | up   |
| 6443796 | 7102841 | 1134777 | citron (rho-interacting, serine/threonine kinase 21) | Cit   | 83620  | 1,19 | down |
| 6233020 | 7102841 | 1134788 | citron (rho-interacting, serine/threonine kinase 21) | Cit   | 83620  | 1,18 | up   |
| 6704891 | 7102841 | 1134785 | citron (rho-interacting, serine/threonine kinase 21) | Cit   | 83620  | 1,12 | up   |
| 6002201 | 7102841 | 1134755 | citron (rho-interacting, serine/threonine kinase 21) | Cit   | 83620  | 1,12 | up   |
| 6731738 | 7102841 | 1134754 | citron (rho-interacting, serine/threonine kinase 21) | Cit   | 83620  | 1,10 | up   |
| 6730018 | 7102841 | 1134787 | citron (rho-interacting, serine/threonine kinase 21) | Cit   | 83620  | 1,09 | down |
| 6007210 | 7102841 | 1134764 | citron (rho-interacting, serine/threonine kinase 21) | Cit   | 83620  | 1,08 | up   |
| 5825908 | 7102841 | 1134780 | citron (rho-interacting, serine/threonine kinase 21) | Cit   | 83620  | 1,07 | down |
| 5625459 | 7102841 | 1134782 | citron (rho-interacting, serine/threonine kinase 21) | Cit   | 83620  | 1,06 | down |
| 6740727 | 7102841 | 1134789 | citron (rho-interacting, serine/threonine kinase 21) | Cit   | 83620  | 1,06 | up   |
| 5866008 | 7102841 | 1134790 | citron (rho-interacting, serine/threonine kinase 21) | Cit   | 83620  | 1,06 | down |
| 6149858 | 7102841 | 1134772 | citron (rho-interacting, serine/threonine kinase 21) | Cit   | 83620  | 1,04 | down |
| 6591380 | 7102841 | 1134781 | citron (rho-interacting, serine/threonine kinase 21) | Cit   | 83620  | 1,02 | up   |
| 6031543 | 7102841 | 1134757 | citron (rho-interacting, serine/threonine kinase 21) | Cit   | 83620  | 1,01 | down |
| 6279606 | 7350530 | 1746233 | CKLF-like MARVEL transmembrane domain containing 7   | Cmtm7 | 501065 | 1,24 | up   |
| 5768272 | 7350530 | 1746232 | CKLF-like MARVEL transmembrane domain containing 7   | Cmtm7 | 501065 | 1,22 | up   |
| 6214603 | 7350530 | 1746242 | CKLF-like MARVEL transmembrane domain containing 7   | Cmtm7 | 501065 | 1,21 | up   |
| 6101332 | 7350530 | 1746237 | CKLF-like MARVEL transmembrane domain containing 7   | Cmtm7 | 501065 | 1,18 | up   |

|         |         |         |                                                    |       |        |      |      |
|---------|---------|---------|----------------------------------------------------|-------|--------|------|------|
| 6195373 | 7350530 | 1746242 | CKLF-like MARVEL transmembrane domain containing 7 | Cmtm7 | 501065 | 1,15 | up   |
| 6430975 | 7350530 | 1746235 | CKLF-like MARVEL transmembrane domain containing 7 | Cmtm7 | 501065 | 1,05 | down |
| 5717286 | 7279555 | 1571975 | claspin homolog (Xenopus laevis)                   | Clspn | 298534 | 2,78 | down |
| 5816551 | 7279555 | 1571974 | claspin homolog (Xenopus laevis)                   | Clspn | 298534 | 2,56 | down |
| 6167080 | 7279555 | 1571976 | claspin homolog (Xenopus laevis)                   | Clspn | 298534 | 1,76 | up   |
| 5798633 | 7279555 | 1571955 | claspin homolog (Xenopus laevis)                   | Clspn | 298534 | 1,67 | up   |
| 6360818 | 7279555 | 1571948 | claspin homolog (Xenopus laevis)                   | Clspn | 298534 | 1,60 | down |
| 6561130 | 7279555 | 1571971 | claspin homolog (Xenopus laevis)                   | Clspn | 298534 | 1,49 | down |
| 6307425 | 7279555 | 1571961 | claspin homolog (Xenopus laevis)                   | Clspn | 298534 | 1,48 | down |
| 6628181 | 7279555 | 1571973 | claspin homolog (Xenopus laevis)                   | Clspn | 298534 | 1,47 | up   |
| 6021023 | 7279555 | 1571969 | claspin homolog (Xenopus laevis)                   | Clspn | 298534 | 1,33 | up   |
| 6396493 | 7279555 | 1571972 | claspin homolog (Xenopus laevis)                   | Clspn | 298534 | 1,29 | up   |
| 6600727 | 7279555 | 1571968 | claspin homolog (Xenopus laevis)                   | Clspn | 298534 | 1,28 | down |
| 5869050 | 7279555 | 1571974 | claspin homolog (Xenopus laevis)                   | Clspn | 298534 | 1,25 | down |
| 6437941 | 7279555 | 1571959 | claspin homolog (Xenopus laevis)                   | Clspn | 298534 | 1,25 | up   |
| 6374144 | 7279555 | 1571946 | claspin homolog (Xenopus laevis)                   | Clspn | 298534 | 1,23 | up   |
| 5943357 | 7279555 | 1571963 | claspin homolog (Xenopus laevis)                   | Clspn | 298534 | 1,19 | down |
| 5879254 | 7279555 | 1571959 | claspin homolog (Xenopus laevis)                   | Clspn | 298534 | 1,15 | down |
| 6102706 | 7279555 | 1571949 | claspin homolog (Xenopus laevis)                   | Clspn | 298534 | 1,14 | up   |
| 6301642 | 7279555 | 1571962 | claspin homolog (Xenopus laevis)                   | Clspn | 298534 | 1,12 | down |
| 5642891 | 7279555 | 1571960 | claspin homolog (Xenopus laevis)                   | Clspn | 298534 | 1,11 | down |
| 6067088 | 7279555 | 1571966 | claspin homolog (Xenopus laevis)                   | Clspn | 298534 | 1,07 | up   |
| 6497955 | 7279555 | 1571956 | claspin homolog (Xenopus laevis)                   | Clspn | 298534 | 1,07 | up   |
| 6126810 | 7279555 | 1571949 | claspin homolog (Xenopus laevis)                   | Clspn | 298534 | 1,06 | up   |
| 6259742 | 7279555 | 1571963 | claspin homolog (Xenopus laevis)                   | Clspn | 298534 | 1,05 | down |
| 6047412 | 7279555 | 1571954 | claspin homolog (Xenopus laevis)                   | Clspn | 298534 | 1,05 | up   |
| 6025847 | 7279555 | 1571947 | claspin homolog (Xenopus laevis)                   | Clspn | 298534 | 1,05 | up   |
| 6419348 | 7279555 | 1571957 | claspin homolog (Xenopus laevis)                   | Clspn | 298534 | 1,04 | down |
| 6136218 | 7279555 | 1571958 | claspin homolog (Xenopus laevis)                   | Clspn | 298534 | 1,04 | up   |
| 5835927 | 7279555 | 1571964 | claspin homolog (Xenopus laevis)                   | Clspn | 298534 | 1,01 | up   |
| 6735991 | 7279555 | 1571967 | claspin homolog (Xenopus laevis)                   | Clspn | 298534 | 1,01 | down |
| 6325094 | 7279555 | 1571970 | claspin homolog (Xenopus laevis)                   | Clspn | 298534 | 1,01 | down |
| 6046993 | 7279555 | 1571965 | claspin homolog (Xenopus laevis)                   | Clspn | 298534 | 1,00 | down |
| 6189729 | 7074519 | 1067165 | class II transactivator                            | Ciita | 85483  | 2,53 | down |
| 6302271 | 7074519 | 1067162 | class II transactivator                            | Ciita | 85483  | 1,81 | up   |
| 6323880 | 7074519 | 1067170 | class II transactivator                            | Ciita | 85483  | 1,68 | up   |
| 6722858 | 7074519 | 1067167 | class II transactivator                            | Ciita | 85483  | 1,52 | up   |
| 5955766 | 7074519 | 1067169 | class II transactivator                            | Ciita | 85483  | 1,49 | up   |
| 5833503 | 7074519 | 1067156 | class II transactivator                            | Ciita | 85483  | 1,44 | down |
| 6306081 | 7074519 | 1067155 | class II transactivator                            | Ciita | 85483  | 1,35 | up   |
| 5854972 | 7074519 | 1067157 | class II transactivator                            | Ciita | 85483  | 1,31 | up   |
| 6464431 | 7074519 | 1067171 | class II transactivator                            | Ciita | 85483  | 1,28 | down |
| 5991482 | 7074519 | 1067161 | class II transactivator                            | Ciita | 85483  | 1,26 | down |
| 6109065 | 7074519 | 1067166 | class II transactivator                            | Ciita | 85483  | 1,18 | up   |
| 5838475 | 7074519 | 1067175 | class II transactivator                            | Ciita | 85483  | 1,17 | up   |
| 6615071 | 7074519 | 1067175 | class II transactivator                            | Ciita | 85483  | 1,17 | up   |
| 5761658 | 7074519 | 1067159 | class II transactivator                            | Ciita | 85483  | 1,13 | down |
| 6694075 | 7074519 | 1067158 | class II transactivator                            | Ciita | 85483  | 1,13 | up   |
| 5735344 | 7074519 | 1067168 | class II transactivator                            | Ciita | 85483  | 1,12 | down |
| 6421374 | 7074519 | 1067160 | class II transactivator                            | Ciita | 85483  | 1,11 | up   |
| 6659153 | 7074519 | 1067163 | class II transactivator                            | Ciita | 85483  | 1,10 | up   |
| 5914473 | 7074519 | 1067164 | class II transactivator                            | Ciita | 85483  | 1,07 | down |
| 6711155 | 7074519 | 1067173 | class II transactivator                            | Ciita | 85483  | 1,05 | up   |
| 5711421 | 7074519 | 1067172 | class II transactivator                            | Ciita | 85483  | 1,04 | down |
| 6134072 | 7097535 | 1121116 | claudin 4                                          | Cldn4 | 304407 | 2,08 | down |
| 5804245 | 7097535 | 1121115 | claudin 4                                          | Cldn4 | 304407 | 1,15 | up   |
| 6281573 | 7065357 | 1044742 | claudin 6                                          | Cldn6 | 287098 | 2,23 | up   |

|         |         |         |                                                        |        |        |      |      |
|---------|---------|---------|--------------------------------------------------------|--------|--------|------|------|
| 5781789 | 7065357 | 1044743 | claudin 6                                              | Cldn6  | 287098 | 1,21 | up   |
| 6501072 | 7100210 | 1128144 | cleavage and polyadenylation specific factor 4         | Cpsf4  | 304277 | 1,91 | up   |
| 5741905 | 7100210 | 1128146 | cleavage and polyadenylation specific factor 4         | Cpsf4  | 304277 | 1,62 | up   |
| 6566365 | 7100210 | 1128147 | cleavage and polyadenylation specific factor 4         | Cpsf4  | 304277 | 1,52 | up   |
| 5959683 | 7100210 | 1128151 | cleavage and polyadenylation specific factor 4         | Cpsf4  | 304277 | 1,34 | up   |
| 6632134 | 7100210 | 1128146 | cleavage and polyadenylation specific factor 4         | Cpsf4  | 304277 | 1,19 | up   |
| 6280805 | 7100210 | 1128142 | cleavage and polyadenylation specific factor 4         | Cpsf4  | 304277 | 1,19 | down |
| 6398343 | 7100210 | 1128149 | cleavage and polyadenylation specific factor 4         | Cpsf4  | 304277 | 1,14 | up   |
| 5631138 | 7100210 | 1128145 | cleavage and polyadenylation specific factor 4         | Cpsf4  | 304277 | 1,13 | up   |
| 6010163 | 7100210 | 1128136 | cleavage and polyadenylation specific factor 4         | Cpsf4  | 304277 | 1,06 | up   |
| 6148846 | 7100210 | 1128135 | cleavage and polyadenylation specific factor 4         | Cpsf4  | 304277 | 1,04 | up   |
| 6185525 | 7232438 | 1453826 | c-mer proto-oncogene tyrosine kinase                   | Mertk  | 65037  | 2,37 | up   |
| 6340605 | 7232438 | 1453843 | c-mer proto-oncogene tyrosine kinase                   | Mertk  | 65037  | 2,02 | up   |
| 5872807 | 7232438 | 1453835 | c-mer proto-oncogene tyrosine kinase                   | Mertk  | 65037  | 2,01 | up   |
| 6577201 | 7232438 | 1453827 | c-mer proto-oncogene tyrosine kinase                   | Mertk  | 65037  | 1,69 | down |
| 6733148 | 7232438 | 1453840 | c-mer proto-oncogene tyrosine kinase                   | Mertk  | 65037  | 1,60 | up   |
| 6491177 | 7232438 | 1453828 | c-mer proto-oncogene tyrosine kinase                   | Mertk  | 65037  | 1,48 | down |
| 6438120 | 7232438 | 1453829 | c-mer proto-oncogene tyrosine kinase                   | Mertk  | 65037  | 1,37 | down |
| 6048863 | 7232438 | 1453826 | c-mer proto-oncogene tyrosine kinase                   | Mertk  | 65037  | 1,27 | down |
| 5797460 | 7232438 | 1453838 | c-mer proto-oncogene tyrosine kinase                   | Mertk  | 65037  | 1,24 | down |
| 5856009 | 7232438 | 1453827 | c-mer proto-oncogene tyrosine kinase                   | Mertk  | 65037  | 1,19 | down |
| 6070912 | 7232438 | 1453839 | c-mer proto-oncogene tyrosine kinase                   | Mertk  | 65037  | 1,18 | up   |
| 6181307 | 7232438 | 1453837 | c-mer proto-oncogene tyrosine kinase                   | Mertk  | 65037  | 1,16 | down |
| 5673717 | 7232438 | 1453833 | c-mer proto-oncogene tyrosine kinase                   | Mertk  | 65037  | 1,16 | up   |
| 6637769 | 7232438 | 1453825 | c-mer proto-oncogene tyrosine kinase                   | Mertk  | 65037  | 1,13 | up   |
| 6054021 | 7232438 | 1453842 | c-mer proto-oncogene tyrosine kinase                   | Mertk  | 65037  | 1,07 | up   |
| 6511534 | 7232438 | 1453831 | c-mer proto-oncogene tyrosine kinase                   | Mertk  | 65037  | 1,06 | up   |
| 6373052 | 7232438 | 1453830 | c-mer proto-oncogene tyrosine kinase                   | Mertk  | 65037  | 1,04 | up   |
| 6019240 | 7232438 | 1453832 | c-mer proto-oncogene tyrosine kinase                   | Mertk  | 65037  | 1,04 | down |
| 6384308 | 7232438 | 1453841 | c-mer proto-oncogene tyrosine kinase                   | Mertk  | 65037  | 1,01 | down |
| 6201762 | 7232438 | 1453834 | c-mer proto-oncogene tyrosine kinase                   | Mertk  | 65037  | 1,01 | down |
| 6217164 | 7232438 | 1453836 | c-mer proto-oncogene tyrosine kinase                   | Mertk  | 65037  | 1,00 | up   |
| 5660297 | 7045969 | 1000818 | Cnksr family member 3                                  | Cnksr3 | 308113 | 4,37 | down |
| 6146931 | 7045969 | 1000816 | Cnksr family member 3                                  | Cnksr3 | 308113 | 2,72 | down |
| 5999553 | 7045969 | 1000824 | Cnksr family member 3                                  | Cnksr3 | 308113 | 2,01 | up   |
| 5712743 | 7045969 | 1000821 | Cnksr family member 3                                  | Cnksr3 | 308113 | 1,97 | up   |
| 6586857 | 7045969 | 1000818 | Cnksr family member 3                                  | Cnksr3 | 308113 | 1,49 | down |
| 6039562 | 7045969 | 1000815 | Cnksr family member 3                                  | Cnksr3 | 308113 | 1,46 | down |
| 5978456 | 7045969 | 1000814 | Cnksr family member 3                                  | Cnksr3 | 308113 | 1,45 | up   |
| 6460948 | 7045969 | 1000825 | Cnksr family member 3                                  | Cnksr3 | 308113 | 1,42 | up   |
| 6029543 | 7045969 | 1000817 | Cnksr family member 3                                  | Cnksr3 | 308113 | 1,38 | up   |
| 5682846 | 7045969 | 1000814 | Cnksr family member 3                                  | Cnksr3 | 308113 | 1,29 | down |
| 5651708 | 7045969 | 1000815 | Cnksr family member 3                                  | Cnksr3 | 308113 | 1,21 | up   |
| 6291698 | 7045969 | 1000826 | Cnksr family member 3                                  | Cnksr3 | 308113 | 1,20 | down |
| 6518141 | 7045969 | 1000823 | Cnksr family member 3                                  | Cnksr3 | 308113 | 1,15 | down |
| 5639163 | 7045969 | 1000820 | Cnksr family member 3                                  | Cnksr3 | 308113 | 1,14 | up   |
| 6681465 | 7045969 | 1000816 | Cnksr family member 3                                  | Cnksr3 | 308113 | 1,14 | up   |
| 6297040 | 7045969 | 1000814 | Cnksr family member 3                                  | Cnksr3 | 308113 | 1,05 | down |
| 5911839 | 7045969 | 1000815 | Cnksr family member 3                                  | Cnksr3 | 308113 | 1,04 | down |
| 5948580 | 7045969 | 1000814 | Cnksr family member 3                                  | Cnksr3 | 308113 | 1,04 | down |
| 6498962 | 7045969 | 1000819 | Cnksr family member 3                                  | Cnksr3 | 308113 | 1,01 | up   |
| 6064549 | 7045969 | 1000822 | Cnksr family member 3                                  | Cnksr3 | 308113 | 1,01 | up   |
| 6309012 | 7198615 | 1372170 | coagulation factor III (thromboplastin, tissue factor) | F3     | 25584  | 3,68 | down |
| 5828521 | 7198615 | 1372170 | coagulation factor III (thromboplastin, tissue factor) | F3     | 25584  | 2,30 | down |
| 5658349 | 7198615 | 1372165 | coagulation factor III (thromboplastin, tissue factor) | F3     | 25584  | 2,00 | down |
| 5765858 | 7198615 | 1372168 | coagulation factor III (thromboplastin, tissue factor) | F3     | 25584  | 1,45 | up   |
| 5807339 | 7198615 | 1372170 | coagulation factor III (thromboplastin, tissue factor) | F3     | 25584  | 1,42 | down |

|         |         |         |                                                        |    |        |      |      |
|---------|---------|---------|--------------------------------------------------------|----|--------|------|------|
| 5902272 | 7198615 | 1372170 | coagulation factor III (thromboplastin, tissue factor) | F3 | 25584  | 1,31 | up   |
| 6426771 | 7198615 | 1372168 | coagulation factor III (thromboplastin, tissue factor) | F3 | 25584  | 1,26 | up   |
| 6705210 | 7198615 | 1372166 | coagulation factor III (thromboplastin, tissue factor) | F3 | 25584  | 1,23 | up   |
| 6694489 | 7198615 | 1372169 | coagulation factor III (thromboplastin, tissue factor) | F3 | 25584  | 1,20 | up   |
| 6144093 | 7198615 | 1372170 | coagulation factor III (thromboplastin, tissue factor) | F3 | 25584  | 1,06 | up   |
| 5668661 | 7198615 | 1372167 | coagulation factor III (thromboplastin, tissue factor) | F3 | 25584  | 1,03 | up   |
| 5707144 | 7167700 | 1293617 | coagulation factor VIII, procoagulant component        | F8 | 302470 | 2,57 | up   |
| 5705127 | 7167700 | 1293605 | coagulation factor VIII, procoagulant component        | F8 | 302470 | 2,28 | down |
| 6247403 | 7167700 | 1293607 | coagulation factor VIII, procoagulant component        | F8 | 302470 | 1,93 | up   |
| 6006381 | 7167700 | 1293604 | coagulation factor VIII, procoagulant component        | F8 | 302470 | 1,67 | up   |
| 5959906 | 7167700 | 1293604 | coagulation factor VIII, procoagulant component        | F8 | 302470 | 1,65 | up   |
| 5729005 | 7167700 | 1293604 | coagulation factor VIII, procoagulant component        | F8 | 302470 | 1,63 | up   |
| 6450091 | 7167700 | 1293604 | coagulation factor VIII, procoagulant component        | F8 | 302470 | 1,58 | down |
| 6366714 | 7167700 | 1293604 | coagulation factor VIII, procoagulant component        | F8 | 302470 | 1,58 | up   |
| 6728029 | 7167700 | 1293605 | coagulation factor VIII, procoagulant component        | F8 | 302470 | 1,52 | up   |
| 5823923 | 7167700 | 1293594 | coagulation factor VIII, procoagulant component        | F8 | 302470 | 1,50 | up   |
| 6089736 | 7167700 | 1293597 | coagulation factor VIII, procoagulant component        | F8 | 302470 | 1,49 | up   |
| 6442559 | 7167700 | 1293597 | coagulation factor VIII, procoagulant component        | F8 | 302470 | 1,46 | down |
| 6161399 | 7167700 | 1293604 | coagulation factor VIII, procoagulant component        | F8 | 302470 | 1,42 | up   |
| 5659223 | 7167700 | 1293604 | coagulation factor VIII, procoagulant component        | F8 | 302470 | 1,42 | down |
| 5917742 | 7167700 | 1293608 | coagulation factor VIII, procoagulant component        | F8 | 302470 | 1,37 | down |
| 6153048 | 7167700 | 1293596 | coagulation factor VIII, procoagulant component        | F8 | 302470 | 1,33 | up   |
| 6258969 | 7167700 | 1293618 | coagulation factor VIII, procoagulant component        | F8 | 302470 | 1,29 | up   |
| 6742748 | 7167700 | 1293601 | coagulation factor VIII, procoagulant component        | F8 | 302470 | 1,28 | down |
| 6146326 | 7167700 | 1293609 | coagulation factor VIII, procoagulant component        | F8 | 302470 | 1,27 | down |
| 6193128 | 7167700 | 1293616 | coagulation factor VIII, procoagulant component        | F8 | 302470 | 1,26 | up   |
| 6182905 | 7167700 | 1293604 | coagulation factor VIII, procoagulant component        | F8 | 302470 | 1,25 | up   |
| 5647390 | 7167700 | 1293596 | coagulation factor VIII, procoagulant component        | F8 | 302470 | 1,25 | down |
| 6641811 | 7167700 | 1293615 | coagulation factor VIII, procoagulant component        | F8 | 302470 | 1,25 | down |
| 5814124 | 7167700 | 1293616 | coagulation factor VIII, procoagulant component        | F8 | 302470 | 1,20 | down |
| 6571549 | 7167700 | 1293592 | coagulation factor VIII, procoagulant component        | F8 | 302470 | 1,17 | down |
| 6737400 | 7167700 | 1293594 | coagulation factor VIII, procoagulant component        | F8 | 302470 | 1,16 | up   |
| 6231461 | 7167700 | 1293611 | coagulation factor VIII, procoagulant component        | F8 | 302470 | 1,15 | up   |
| 5846618 | 7167700 | 1293614 | coagulation factor VIII, procoagulant component        | F8 | 302470 | 1,15 | down |
| 5694102 | 7167700 | 1293609 | coagulation factor VIII, procoagulant component        | F8 | 302470 | 1,15 | up   |
| 5885476 | 7167700 | 1293605 | coagulation factor VIII, procoagulant component        | F8 | 302470 | 1,14 | down |
| 5963818 | 7167700 | 1293619 | coagulation factor VIII, procoagulant component        | F8 | 302470 | 1,13 | down |
| 5857873 | 7167700 | 1293599 | coagulation factor VIII, procoagulant component        | F8 | 302470 | 1,12 | down |
| 6713645 | 7167700 | 1293606 | coagulation factor VIII, procoagulant component        | F8 | 302470 | 1,12 | up   |
| 5661114 | 7167700 | 1293598 | coagulation factor VIII, procoagulant component        | F8 | 302470 | 1,11 | up   |
| 6368329 | 7167700 | 1293605 | coagulation factor VIII, procoagulant component        | F8 | 302470 | 1,10 | up   |
| 5972659 | 7167700 | 1293616 | coagulation factor VIII, procoagulant component        | F8 | 302470 | 1,10 | down |
| 5934716 | 7167700 | 1293593 | coagulation factor VIII, procoagulant component        | F8 | 302470 | 1,10 | down |
| 6308684 | 7167700 | 1293603 | coagulation factor VIII, procoagulant component        | F8 | 302470 | 1,07 | down |
| 6133518 | 7167700 | 1293612 | coagulation factor VIII, procoagulant component        | F8 | 302470 | 1,07 | up   |
| 6296549 | 7167700 | 1293608 | coagulation factor VIII, procoagulant component        | F8 | 302470 | 1,05 | up   |
| 6255430 | 7167700 | 1293592 | coagulation factor VIII, procoagulant component        | F8 | 302470 | 1,05 | up   |
| 6585775 | 7167700 | 1293604 | coagulation factor VIII, procoagulant component        | F8 | 302470 | 1,04 | down |
| 6258792 | 7167700 | 1293593 | coagulation factor VIII, procoagulant component        | F8 | 302470 | 1,03 | down |
| 6123930 | 7167700 | 1293595 | coagulation factor VIII, procoagulant component        | F8 | 302470 | 1,03 | down |
| 6132513 | 7167700 | 1293598 | coagulation factor VIII, procoagulant component        | F8 | 302470 | 1,03 | down |
| 6734642 | 7167700 | 1293597 | coagulation factor VIII, procoagulant component        | F8 | 302470 | 1,02 | up   |
| 6045915 | 7167700 | 1293613 | coagulation factor VIII, procoagulant component        | F8 | 302470 | 1,02 | up   |
| 6451701 | 7167700 | 1293596 | coagulation factor VIII, procoagulant component        | F8 | 302470 | 1,02 | up   |
| 6115704 | 7167700 | 1293600 | coagulation factor VIII, procoagulant component        | F8 | 302470 | 1,02 | down |
| 6207162 | 7167700 | 1293606 | coagulation factor VIII, procoagulant component        | F8 | 302470 | 1,01 | up   |
| 5720970 | 7167700 | 1293592 | coagulation factor VIII, procoagulant component        | F8 | 302470 | 1,01 | down |

|         |         |         |                                                 |         |        |      |      |
|---------|---------|---------|-------------------------------------------------|---------|--------|------|------|
| 5828649 | 7167700 | 1293610 | coagulation factor VIII, procoagulant component | F8      | 302470 | 1,00 | up   |
| 6479765 | 7167700 | 1293605 | coagulation factor VIII, procoagulant component | F8      | 302470 | 1,00 | up   |
| 6719023 | 7149934 | 1250512 | coatomer protein complex, subunit epsilon       | Cope    | 290659 | 2,46 | down |
| 6546690 | 7149934 | 1250513 | coatomer protein complex, subunit epsilon       | Cope    | 290659 | 1,27 | down |
| 6589929 | 7149934 | 1250522 | coatomer protein complex, subunit epsilon       | Cope    | 290659 | 1,25 | down |
| 5823437 | 7149934 | 1250520 | coatomer protein complex, subunit epsilon       | Cope    | 290659 | 1,23 | down |
| 6515626 | 7149934 | 1250513 | coatomer protein complex, subunit epsilon       | Cope    | 290659 | 1,22 | down |
| 5784583 | 7149934 | 1250512 | coatomer protein complex, subunit epsilon       | Cope    | 290659 | 1,16 | up   |
| 5923552 | 7149934 | 1250520 | coatomer protein complex, subunit epsilon       | Cope    | 290659 | 1,12 | down |
| 5765787 | 7149934 | 1250523 | coatomer protein complex, subunit epsilon       | Cope    | 290659 | 1,05 | up   |
| 6574068 | 7149934 | 1250514 | coatomer protein complex, subunit epsilon       | Cope    | 290659 | 1,05 | up   |
| 6140454 | 7149934 | 1250516 | coatomer protein complex, subunit epsilon       | Cope    | 290659 | 1,04 | up   |
| 6445201 | 7149934 | 1250516 | coatomer protein complex, subunit epsilon       | Cope    | 290659 | 1,02 | down |
| 6549831 | 7149934 | 1250515 | coatomer protein complex, subunit epsilon       | Cope    | 290659 | 1,01 | down |
| 6146709 | 7255911 | 1512236 | coatomer protein complex, subunit gamma         | Copg    | 297428 | 1,76 | down |
| 5685330 | 7255911 | 1512211 | coatomer protein complex, subunit gamma         | Copg    | 297428 | 1,76 | down |
| 5923643 | 7255911 | 1512209 | coatomer protein complex, subunit gamma         | Copg    | 297428 | 1,24 | up   |
| 6343707 | 7255911 | 1512235 | coatomer protein complex, subunit gamma         | Copg    | 297428 | 1,21 | down |
| 6378160 | 7255911 | 1512214 | coatomer protein complex, subunit gamma         | Copg    | 297428 | 1,20 | up   |
| 5999693 | 7255911 | 1512213 | coatomer protein complex, subunit gamma         | Copg    | 297428 | 1,18 | up   |
| 5967874 | 7255911 | 1512229 | coatomer protein complex, subunit gamma         | Copg    | 297428 | 1,17 | up   |
| 6267423 | 7255911 | 1512235 | coatomer protein complex, subunit gamma         | Copg    | 297428 | 1,16 | up   |
| 6408821 | 7255911 | 1512225 | coatomer protein complex, subunit gamma         | Copg    | 297428 | 1,13 | down |
| 6192333 | 7255911 | 1512220 | coatomer protein complex, subunit gamma         | Copg    | 297428 | 1,13 | down |
| 6137564 | 7255911 | 1512233 | coatomer protein complex, subunit gamma         | Copg    | 297428 | 1,13 | down |
| 6428660 | 7255911 | 1512231 | coatomer protein complex, subunit gamma         | Copg    | 297428 | 1,12 | down |
| 6355892 | 7255911 | 1512234 | coatomer protein complex, subunit gamma         | Copg    | 297428 | 1,12 | up   |
| 6204840 | 7255911 | 1512226 | coatomer protein complex, subunit gamma         | Copg    | 297428 | 1,08 | up   |
| 6146269 | 7255911 | 1512209 | coatomer protein complex, subunit gamma         | Copg    | 297428 | 1,07 | up   |
| 6020682 | 7255911 | 1512218 | coatomer protein complex, subunit gamma         | Copg    | 297428 | 1,05 | up   |
| 5620845 | 7255911 | 1512229 | coatomer protein complex, subunit gamma         | Copg    | 297428 | 1,05 | up   |
| 5670268 | 7255911 | 1512225 | coatomer protein complex, subunit gamma         | Copg    | 297428 | 1,04 | up   |
| 6662515 | 7255911 | 1512219 | coatomer protein complex, subunit gamma         | Copg    | 297428 | 1,02 | down |
| 5949818 | 7255911 | 1512232 | coatomer protein complex, subunit gamma         | Copg    | 297428 | 1,02 | down |
| 6587437 | 7255911 | 1512221 | coatomer protein complex, subunit gamma         | Copg    | 297428 | 1,01 | down |
| 6252257 | 7255911 | 1512230 | coatomer protein complex, subunit gamma         | Copg    | 297428 | 1,01 | up   |
| 5765785 | 7255911 | 1512228 | coatomer protein complex, subunit gamma         | Copg    | 297428 | 1,01 | up   |
| 6397582 | 7255911 | 1512231 | coatomer protein complex, subunit gamma         | Copg    | 297428 | 1,01 | down |
| 5689180 | 7255911 | 1512215 | coatomer protein complex, subunit gamma         | Copg    | 297428 | 1,01 | down |
| 6351229 | 7255911 | 1512227 | coatomer protein complex, subunit gamma         | Copg    | 297428 | 1,00 | down |
| 6156495 | 7255911 | 1512217 | coatomer protein complex, subunit gamma         | Copg    | 297428 | 1,00 | down |
| 6275048 | 7122140 | 1182740 | coiled coil domain containing 88A               | Ccdc88a | 305605 | 1,21 | down |
| 6347917 | 7278715 | 1569910 | coiled-coil domain containing 17                | Ccdc17  | 500528 | 2,32 | up   |
| 5705348 | 7278715 | 1569916 | coiled-coil domain containing 17                | Ccdc17  | 500528 | 2,13 | down |
| 6444118 | 7278715 | 1569909 | coiled-coil domain containing 17                | Ccdc17  | 500528 | 1,99 | up   |
| 6266486 | 7278715 | 1569917 | coiled-coil domain containing 17                | Ccdc17  | 500528 | 1,77 | down |
| 6518627 | 7278715 | 1569910 | coiled-coil domain containing 17                | Ccdc17  | 500528 | 1,73 | up   |
| 6310434 | 7278715 | 1569913 | coiled-coil domain containing 17                | Ccdc17  | 500528 | 1,57 | down |
| 5997971 | 7278715 | 1569909 | coiled-coil domain containing 17                | Ccdc17  | 500528 | 1,55 | up   |
| 6359310 | 7278715 | 1569914 | coiled-coil domain containing 17                | Ccdc17  | 500528 | 1,53 | up   |
| 5694789 | 7278715 | 1569916 | coiled-coil domain containing 17                | Ccdc17  | 500528 | 1,49 | down |
| 6179644 | 7278715 | 1569916 | coiled-coil domain containing 17                | Ccdc17  | 500528 | 1,31 | up   |
| 6575284 | 7278715 | 1569912 | coiled-coil domain containing 17                | Ccdc17  | 500528 | 1,23 | down |
| 6710956 | 7278715 | 1569908 | coiled-coil domain containing 17                | Ccdc17  | 500528 | 1,23 | up   |
| 5735698 | 7278715 | 1569915 | coiled-coil domain containing 17                | Ccdc17  | 500528 | 1,22 | up   |
| 6248533 | 7278715 | 1569914 | coiled-coil domain containing 17                | Ccdc17  | 500528 | 1,21 | up   |
| 6542894 | 7278715 | 1569917 | coiled-coil domain containing 17                | Ccdc17  | 500528 | 1,19 | down |

|         |         |         |                                  |        |        |      |      |
|---------|---------|---------|----------------------------------|--------|--------|------|------|
| 6294024 | 7278715 | 1569912 | coiled-coil domain containing 17 | Ccdc17 | 500528 | 1,19 | down |
| 6378049 | 7278715 | 1569914 | coiled-coil domain containing 17 | Ccdc17 | 500528 | 1,17 | down |
| 5675260 | 7278715 | 1569913 | coiled-coil domain containing 17 | Ccdc17 | 500528 | 1,10 | down |
| 5873749 | 7278715 | 1569907 | coiled-coil domain containing 17 | Ccdc17 | 500528 | 1,06 | down |
| 6236600 | 7278715 | 1569909 | coiled-coil domain containing 17 | Ccdc17 | 500528 | 1,05 | down |
| 5755335 | 7278715 | 1569916 | coiled-coil domain containing 17 | Ccdc17 | 500528 | 1,04 | up   |
| 5868414 | 7278715 | 1569914 | coiled-coil domain containing 17 | Ccdc17 | 500528 | 1,04 | down |
| 6438312 | 7278715 | 1569907 | coiled-coil domain containing 17 | Ccdc17 | 500528 | 1,04 | down |
| 5873604 | 7278715 | 1569911 | coiled-coil domain containing 17 | Ccdc17 | 500528 | 1,02 | down |
| 6465809 | 7278715 | 1569916 | coiled-coil domain containing 17 | Ccdc17 | 500528 | 1,01 | up   |
| 5716977 | 7278715 | 1569914 | coiled-coil domain containing 17 | Ccdc17 | 500528 | 1,00 | up   |
| 6744713 | 7291828 | 1600928 | coiled-coil domain containing 21 | Ccdc21 | 362622 | 2,11 | down |
| 5840082 | 7291828 | 1600932 | coiled-coil domain containing 21 | Ccdc21 | 362622 | 1,57 | down |
| 6655025 | 7291828 | 1600930 | coiled-coil domain containing 21 | Ccdc21 | 362622 | 1,53 | up   |
| 6507244 | 7291828 | 1600928 | coiled-coil domain containing 21 | Ccdc21 | 362622 | 1,52 | down |
| 6051537 | 7291828 | 1600928 | coiled-coil domain containing 21 | Ccdc21 | 362622 | 1,34 | up   |
| 6737720 | 7291828 | 1600925 | coiled-coil domain containing 21 | Ccdc21 | 362622 | 1,33 | up   |
| 6502605 | 7291828 | 1600927 | coiled-coil domain containing 21 | Ccdc21 | 362622 | 1,28 | up   |
| 5932762 | 7291828 | 1600924 | coiled-coil domain containing 21 | Ccdc21 | 362622 | 1,28 | down |
| 6286788 | 7291828 | 1600933 | coiled-coil domain containing 21 | Ccdc21 | 362622 | 1,28 | down |
| 6506958 | 7291828 | 1600924 | coiled-coil domain containing 21 | Ccdc21 | 362622 | 1,26 | up   |
| 6132591 | 7291828 | 1600929 | coiled-coil domain containing 21 | Ccdc21 | 362622 | 1,22 | down |
| 5738364 | 7291828 | 1600929 | coiled-coil domain containing 21 | Ccdc21 | 362622 | 1,22 | up   |
| 6461670 | 7291828 | 1600937 | coiled-coil domain containing 21 | Ccdc21 | 362622 | 1,18 | down |
| 6446827 | 7291828 | 1600934 | coiled-coil domain containing 21 | Ccdc21 | 362622 | 1,14 | up   |
| 5626369 | 7291828 | 1600940 | coiled-coil domain containing 21 | Ccdc21 | 362622 | 1,12 | down |
| 6480158 | 7291828 | 1600934 | coiled-coil domain containing 21 | Ccdc21 | 362622 | 1,07 | down |
| 6228389 | 7291828 | 1600934 | coiled-coil domain containing 21 | Ccdc21 | 362622 | 1,05 | up   |
| 6340363 | 7291828 | 1600935 | coiled-coil domain containing 21 | Ccdc21 | 362622 | 1,03 | up   |
| 6705427 | 7291828 | 1600934 | coiled-coil domain containing 21 | Ccdc21 | 362622 | 1,03 | down |
| 6586759 | 7291828 | 1600931 | coiled-coil domain containing 21 | Ccdc21 | 362622 | 1,02 | down |
| 6143078 | 7346285 | 1735719 | coiled-coil domain containing 33 | Ccdc33 | 315712 | 2,11 | up   |
| 5767478 | 7346285 | 1735725 | coiled-coil domain containing 33 | Ccdc33 | 315712 | 1,92 | up   |
| 6372134 | 7346285 | 1735735 | coiled-coil domain containing 33 | Ccdc33 | 315712 | 1,56 | down |
| 6373399 | 7346285 | 1735729 | coiled-coil domain containing 33 | Ccdc33 | 315712 | 1,51 | down |
| 5764026 | 7346285 | 1735731 | coiled-coil domain containing 33 | Ccdc33 | 315712 | 1,46 | up   |
| 6204824 | 7346285 | 1735723 | coiled-coil domain containing 33 | Ccdc33 | 315712 | 1,45 | up   |
| 6434297 | 7346285 | 1735733 | coiled-coil domain containing 33 | Ccdc33 | 315712 | 1,44 | up   |
| 5745742 | 7346285 | 1735720 | coiled-coil domain containing 33 | Ccdc33 | 315712 | 1,41 | down |
| 6422543 | 7346285 | 1735722 | coiled-coil domain containing 33 | Ccdc33 | 315712 | 1,31 | down |
| 6478392 | 7346285 | 1735732 | coiled-coil domain containing 33 | Ccdc33 | 315712 | 1,31 | up   |
| 5808774 | 7346285 | 1735726 | coiled-coil domain containing 33 | Ccdc33 | 315712 | 1,31 | up   |
| 6379522 | 7346285 | 1735736 | coiled-coil domain containing 33 | Ccdc33 | 315712 | 1,23 | up   |
| 6570170 | 7346285 | 1735728 | coiled-coil domain containing 33 | Ccdc33 | 315712 | 1,15 | up   |
| 6274797 | 7346285 | 1735738 | coiled-coil domain containing 33 | Ccdc33 | 315712 | 1,15 | down |
| 5746124 | 7346285 | 1735719 | coiled-coil domain containing 33 | Ccdc33 | 315712 | 1,10 | down |
| 5750871 | 7346285 | 1735719 | coiled-coil domain containing 33 | Ccdc33 | 315712 | 1,08 | up   |
| 6740486 | 7346285 | 1735723 | coiled-coil domain containing 33 | Ccdc33 | 315712 | 1,05 | up   |
| 5651798 | 7346285 | 1735730 | coiled-coil domain containing 33 | Ccdc33 | 315712 | 1,04 | down |
| 6421265 | 7346285 | 1735737 | coiled-coil domain containing 33 | Ccdc33 | 315712 | 1,02 | up   |
| 6511437 | 7346285 | 1735724 | coiled-coil domain containing 33 | Ccdc33 | 315712 | 1,02 | up   |
| 5977336 | 7346285 | 1735732 | coiled-coil domain containing 33 | Ccdc33 | 315712 | 1,02 | down |
| 6407188 | 7346285 | 1735727 | coiled-coil domain containing 33 | Ccdc33 | 315712 | 1,01 | down |
| 5659903 | 7346285 | 1735734 | coiled-coil domain containing 33 | Ccdc33 | 315712 | 1,00 | down |
| 6202153 | 7346285 | 1735721 | coiled-coil domain containing 33 | Ccdc33 | 315712 | 1,00 | down |
| 5718838 | 7267204 | 1539857 | coiled-coil domain containing 37 | Ccdc37 | 297444 | 1,04 | down |
| 5876490 | 7313913 | 1656886 | coiled-coil domain containing 41 | Ccdc41 | 366872 | 2,11 | up   |

|         |         |         |                                   |         |        |      |      |
|---------|---------|---------|-----------------------------------|---------|--------|------|------|
| 5819212 | 7313913 | 1656895 | coiled-coil domain containing 41  | Ccdc41  | 366872 | 1,77 | down |
| 5977325 | 7313913 | 1656887 | coiled-coil domain containing 41  | Ccdc41  | 366872 | 1,71 | up   |
| 5916266 | 7313913 | 1656892 | coiled-coil domain containing 41  | Ccdc41  | 366872 | 1,62 | down |
| 6718167 | 7313913 | 1656885 | coiled-coil domain containing 41  | Ccdc41  | 366872 | 1,60 | up   |
| 5737372 | 7313913 | 1656884 | coiled-coil domain containing 41  | Ccdc41  | 366872 | 1,55 | up   |
| 6486802 | 7313913 | 1656890 | coiled-coil domain containing 41  | Ccdc41  | 366872 | 1,52 | down |
| 5852812 | 7313913 | 1656895 | coiled-coil domain containing 41  | Ccdc41  | 366872 | 1,43 | down |
| 6173794 | 7313913 | 1656883 | coiled-coil domain containing 41  | Ccdc41  | 366872 | 1,31 | up   |
| 6412129 | 7313913 | 1656882 | coiled-coil domain containing 41  | Ccdc41  | 366872 | 1,29 | down |
| 5683092 | 7313913 | 1656888 | coiled-coil domain containing 41  | Ccdc41  | 366872 | 1,25 | up   |
| 6615220 | 7313913 | 1656891 | coiled-coil domain containing 41  | Ccdc41  | 366872 | 1,24 | down |
| 6292058 | 7313913 | 1656880 | coiled-coil domain containing 41  | Ccdc41  | 366872 | 1,21 | up   |
| 6347034 | 7313913 | 1656889 | coiled-coil domain containing 41  | Ccdc41  | 366872 | 1,19 | down |
| 6222089 | 7313913 | 1656893 | coiled-coil domain containing 41  | Ccdc41  | 366872 | 1,16 | down |
| 5980948 | 7313913 | 1656894 | coiled-coil domain containing 41  | Ccdc41  | 366872 | 1,09 | up   |
| 6429648 | 7313913 | 1656891 | coiled-coil domain containing 41  | Ccdc41  | 366872 | 1,09 | up   |
| 6424571 | 7313913 | 1656885 | coiled-coil domain containing 41  | Ccdc41  | 366872 | 1,09 | down |
| 6418011 | 7313913 | 1656896 | coiled-coil domain containing 41  | Ccdc41  | 366872 | 1,05 | down |
| 6045092 | 7313913 | 1656881 | coiled-coil domain containing 41  | Ccdc41  | 366872 | 1,01 | down |
| 6686336 | 7098831 | 1124865 | coiled-coil domain containing 60  | Ccdc60  | 498190 | 1,46 | down |
| 6103122 | 7098831 | 1124832 | coiled-coil domain containing 60  | Ccdc60  | 498190 | 1,28 | down |
| 6213052 | 7098831 | 1124856 | coiled-coil domain containing 60  | Ccdc60  | 498190 | 1,23 | down |
| 6176097 | 7098831 | 1124858 | coiled-coil domain containing 60  | Ccdc60  | 498190 | 1,13 | up   |
| 6573416 | 7098831 | 1124866 | coiled-coil domain containing 60  | Ccdc60  | 498190 | 1,11 | up   |
| 6159120 | 7098831 | 1124851 | coiled-coil domain containing 60  | Ccdc60  | 498190 | 1,07 | up   |
| 6512949 | 7098831 | 1124832 | coiled-coil domain containing 60  | Ccdc60  | 498190 | 1,06 | up   |
| 6620891 | 7098831 | 1124864 | coiled-coil domain containing 60  | Ccdc60  | 498190 | 1,04 | down |
| 6511878 | 7098831 | 1124867 | coiled-coil domain containing 60  | Ccdc60  | 498190 | 1,03 | down |
| 6490389 | 7098867 | 1124962 | coiled-coil domain containing 64  | Ccdc64  | 304537 | 2,41 | up   |
| 6316201 | 7098867 | 1124933 | coiled-coil domain containing 64  | Ccdc64  | 304537 | 1,26 | down |
| 6469336 | 7098867 | 1124962 | coiled-coil domain containing 64  | Ccdc64  | 304537 | 1,15 | up   |
| 6693090 | 7098867 | 1124946 | coiled-coil domain containing 64  | Ccdc64  | 304537 | 1,12 | down |
| 6117779 | 7098867 | 1124956 | coiled-coil domain containing 64  | Ccdc64  | 304537 | 1,12 | down |
| 6612899 | 7098867 | 1124959 | coiled-coil domain containing 64  | Ccdc64  | 304537 | 1,11 | up   |
| 5651472 | 7098867 | 1124933 | coiled-coil domain containing 64  | Ccdc64  | 304537 | 1,08 | up   |
| 6746728 | 7098867 | 1124946 | coiled-coil domain containing 64  | Ccdc64  | 304537 | 1,06 | up   |
| 6482610 | 7098867 | 1124929 | coiled-coil domain containing 64  | Ccdc64  | 304537 | 1,02 | up   |
| 6032275 | 7309734 | 1646942 | coiled-coil domain containing 88C | Ccdc88c | 362770 | 1,28 | down |
| 6688052 | 7309734 | 1646874 | coiled-coil domain containing 88C | Ccdc88c | 362770 | 1,11 | down |
| 6169425 | 7156372 | 1266715 | coiled-coil domain containing 90A | Ccdc90a | 291034 | 1,01 | up   |
| 5657995 | 7057344 | 1025667 | coiled-coil domain containing 95  | Ccdc95  | 293494 | 2,61 | down |
| 5700150 | 7057344 | 1025667 | coiled-coil domain containing 95  | Ccdc95  | 293494 | 1,33 | down |
| 6086389 | 7057344 | 1025666 | coiled-coil domain containing 95  | Ccdc95  | 293494 | 1,28 | down |
| 5686022 | 7057344 | 1025669 | coiled-coil domain containing 95  | Ccdc95  | 293494 | 1,24 | down |
| 6280546 | 7057344 | 1025672 | coiled-coil domain containing 95  | Ccdc95  | 293494 | 1,23 | down |
| 5881676 | 7057344 | 1025667 | coiled-coil domain containing 95  | Ccdc95  | 293494 | 1,20 | up   |
| 5709303 | 7057344 | 1025667 | coiled-coil domain containing 95  | Ccdc95  | 293494 | 1,14 | down |
| 6337451 | 7057344 | 1025670 | coiled-coil domain containing 95  | Ccdc95  | 293494 | 1,10 | down |
| 6274873 | 7057344 | 1025668 | coiled-coil domain containing 95  | Ccdc95  | 293494 | 1,08 | up   |
| 6406826 | 7057344 | 1025673 | coiled-coil domain containing 95  | Ccdc95  | 293494 | 1,07 | up   |
| 5826335 | 7057344 | 1025668 | coiled-coil domain containing 95  | Ccdc95  | 293494 | 1,00 | up   |
| 6556573 | 7057344 | 1025671 | coiled-coil domain containing 95  | Ccdc95  | 293494 | 1,00 | up   |
| 5945310 | 7270243 | 1547793 | cold shock domain protein A       | Csda    | 83807  | 2,81 | down |
| 6320596 | 7270243 | 1547795 | cold shock domain protein A       | Csda    | 83807  | 1,98 | down |
| 6033920 | 7270243 | 1547785 | cold shock domain protein A       | Csda    | 83807  | 1,53 | down |
| 5727325 | 7270243 | 1547792 | cold shock domain protein A       | Csda    | 83807  | 1,36 | down |
| 6602501 | 7270243 | 1547791 | cold shock domain protein A       | Csda    | 83807  | 1,34 | up   |



|         |         |         |                             |        |       |      |      |
|---------|---------|---------|-----------------------------|--------|-------|------|------|
| 6484162 | 7270243 | 1547795 | cold shock domain protein A | Csda   | 83807 | 1,23 | down |
| 5949930 | 7270243 | 1547787 | cold shock domain protein A | Csda   | 83807 | 1,22 | up   |
| 6031996 | 7270243 | 1547786 | cold shock domain protein A | Csda   | 83807 | 1,18 | up   |
| 6243164 | 7270243 | 1547785 | cold shock domain protein A | Csda   | 83807 | 1,14 | up   |
| 5879921 | 7270243 | 1547796 | cold shock domain protein A | Csda   | 83807 | 1,14 | down |
| 6165138 | 7270243 | 1547789 | cold shock domain protein A | Csda   | 83807 | 1,10 | up   |
| 6376326 | 7270243 | 1547794 | cold shock domain protein A | Csda   | 83807 | 1,08 | down |
| 6587831 | 7270243 | 1547790 | cold shock domain protein A | Csda   | 83807 | 1,07 | down |
| 6257602 | 7270243 | 1547788 | cold shock domain protein A | Csda   | 83807 | 1,03 | up   |
| 5978032 | 7331446 | 1699301 | collagen, type II, alpha 1  | Col2a1 | 25412 | 2,92 | up   |
| 5822897 | 7331446 | 1699340 | collagen, type II, alpha 1  | Col2a1 | 25412 | 2,45 | up   |
| 6295629 | 7331446 | 1699319 | collagen, type II, alpha 1  | Col2a1 | 25412 | 2,34 | down |
| 5631499 | 7331446 | 1699335 | collagen, type II, alpha 1  | Col2a1 | 25412 | 2,05 | up   |
| 6173981 | 7331446 | 1699308 | collagen, type II, alpha 1  | Col2a1 | 25412 | 1,96 | up   |
| 5758459 | 7331446 | 1699327 | collagen, type II, alpha 1  | Col2a1 | 25412 | 1,92 | down |
| 5810477 | 7331446 | 1699311 | collagen, type II, alpha 1  | Col2a1 | 25412 | 1,90 | up   |
| 6174598 | 7331446 | 1699338 | collagen, type II, alpha 1  | Col2a1 | 25412 | 1,75 | up   |
| 6640310 | 7331446 | 1699330 | collagen, type II, alpha 1  | Col2a1 | 25412 | 1,67 | up   |
| 6566173 | 7331446 | 1699334 | collagen, type II, alpha 1  | Col2a1 | 25412 | 1,60 | up   |
| 5988224 | 7331446 | 1699343 | collagen, type II, alpha 1  | Col2a1 | 25412 | 1,53 | down |
| 5927230 | 7331446 | 1699321 | collagen, type II, alpha 1  | Col2a1 | 25412 | 1,49 | up   |
| 6517716 | 7331446 | 1699346 | collagen, type II, alpha 1  | Col2a1 | 25412 | 1,49 | up   |
| 6324997 | 7331446 | 1699313 | collagen, type II, alpha 1  | Col2a1 | 25412 | 1,49 | up   |
| 6700077 | 7331446 | 1699347 | collagen, type II, alpha 1  | Col2a1 | 25412 | 1,46 | down |
| 6482024 | 7331446 | 1699312 | collagen, type II, alpha 1  | Col2a1 | 25412 | 1,45 | up   |
| 6239575 | 7331446 | 1699336 | collagen, type II, alpha 1  | Col2a1 | 25412 | 1,43 | down |
| 5828615 | 7331446 | 1699318 | collagen, type II, alpha 1  | Col2a1 | 25412 | 1,40 | up   |
| 5790345 | 7331446 | 1699342 | collagen, type II, alpha 1  | Col2a1 | 25412 | 1,40 | down |
| 6626325 | 7331446 | 1699322 | collagen, type II, alpha 1  | Col2a1 | 25412 | 1,39 | down |
| 6707301 | 7331446 | 1699331 | collagen, type II, alpha 1  | Col2a1 | 25412 | 1,38 | up   |
| 6221205 | 7331446 | 1699309 | collagen, type II, alpha 1  | Col2a1 | 25412 | 1,35 | down |
| 5795387 | 7331446 | 1699313 | collagen, type II, alpha 1  | Col2a1 | 25412 | 1,34 | up   |
| 5777712 | 7331446 | 1699326 | collagen, type II, alpha 1  | Col2a1 | 25412 | 1,30 | down |
| 6599008 | 7331446 | 1699298 | collagen, type II, alpha 1  | Col2a1 | 25412 | 1,24 | down |
| 5671297 | 7331446 | 1699325 | collagen, type II, alpha 1  | Col2a1 | 25412 | 1,22 | down |
| 5871070 | 7331446 | 1699344 | collagen, type II, alpha 1  | Col2a1 | 25412 | 1,21 | down |
| 6278238 | 7331446 | 1699315 | collagen, type II, alpha 1  | Col2a1 | 25412 | 1,21 | down |
| 6663354 | 7331446 | 1699307 | collagen, type II, alpha 1  | Col2a1 | 25412 | 1,20 | down |
| 6608512 | 7331446 | 1699345 | collagen, type II, alpha 1  | Col2a1 | 25412 | 1,20 | down |
| 6172040 | 7331446 | 1699306 | collagen, type II, alpha 1  | Col2a1 | 25412 | 1,19 | up   |
| 5639735 | 7331446 | 1699330 | collagen, type II, alpha 1  | Col2a1 | 25412 | 1,19 | up   |
| 5854220 | 7331446 | 1699333 | collagen, type II, alpha 1  | Col2a1 | 25412 | 1,18 | down |
| 6151999 | 7331446 | 1699310 | collagen, type II, alpha 1  | Col2a1 | 25412 | 1,18 | up   |
| 6257035 | 7331446 | 1699304 | collagen, type II, alpha 1  | Col2a1 | 25412 | 1,16 | down |
| 6392381 | 7331446 | 1699323 | collagen, type II, alpha 1  | Col2a1 | 25412 | 1,14 | down |
| 6217065 | 7331446 | 1699339 | collagen, type II, alpha 1  | Col2a1 | 25412 | 1,14 | up   |
| 6327101 | 7331446 | 1699300 | collagen, type II, alpha 1  | Col2a1 | 25412 | 1,14 | down |
| 5780540 | 7331446 | 1699314 | collagen, type II, alpha 1  | Col2a1 | 25412 | 1,13 | up   |
| 6382321 | 7331446 | 1699297 | collagen, type II, alpha 1  | Col2a1 | 25412 | 1,12 | up   |
| 5667428 | 7331446 | 1699316 | collagen, type II, alpha 1  | Col2a1 | 25412 | 1,12 | up   |
| 6625080 | 7331446 | 1699341 | collagen, type II, alpha 1  | Col2a1 | 25412 | 1,12 | down |
| 6703722 | 7331446 | 1699296 | collagen, type II, alpha 1  | Col2a1 | 25412 | 1,12 | up   |
| 6187179 | 7331446 | 1699299 | collagen, type II, alpha 1  | Col2a1 | 25412 | 1,12 | down |
| 5679814 | 7331446 | 1699317 | collagen, type II, alpha 1  | Col2a1 | 25412 | 1,09 | down |
| 6450578 | 7331446 | 1699302 | collagen, type II, alpha 1  | Col2a1 | 25412 | 1,09 | up   |
| 6094200 | 7331446 | 1699296 | collagen, type II, alpha 1  | Col2a1 | 25412 | 1,07 | down |
| 6008792 | 7331446 | 1699332 | collagen, type II, alpha 1  | Col2a1 | 25412 | 1,07 | down |

|         |         |         |                            |        |        |      |      |
|---------|---------|---------|----------------------------|--------|--------|------|------|
| 6049346 | 7331446 | 1699328 | collagen, type II, alpha 1 | Col2a1 | 25412  | 1,06 | up   |
| 5619738 | 7331446 | 1699320 | collagen, type II, alpha 1 | Col2a1 | 25412  | 1,05 | up   |
| 6542787 | 7331446 | 1699348 | collagen, type II, alpha 1 | Col2a1 | 25412  | 1,04 | down |
| 6171453 | 7331446 | 1699324 | collagen, type II, alpha 1 | Col2a1 | 25412  | 1,04 | down |
| 6076085 | 7331446 | 1699303 | collagen, type II, alpha 1 | Col2a1 | 25412  | 1,04 | down |
| 6023937 | 7331446 | 1699305 | collagen, type II, alpha 1 | Col2a1 | 25412  | 1,03 | up   |
| 6210051 | 7331446 | 1699348 | collagen, type II, alpha 1 | Col2a1 | 25412  | 1,02 | down |
| 6649444 | 7331446 | 1699337 | collagen, type II, alpha 1 | Col2a1 | 25412  | 1,02 | up   |
| 6136224 | 7331446 | 1699307 | collagen, type II, alpha 1 | Col2a1 | 25412  | 1,01 | down |
| 5690049 | 7331446 | 1699329 | collagen, type II, alpha 1 | Col2a1 | 25412  | 1,01 | up   |
| 6558733 | 7147828 | 1245514 | collagen, type IV, alpha 1 | Col4a1 | 290905 | 2,49 | up   |
| 6580970 | 7147828 | 1245538 | collagen, type IV, alpha 1 | Col4a1 | 290905 | 2,20 | up   |
| 6087471 | 7147828 | 1245569 | collagen, type IV, alpha 1 | Col4a1 | 290905 | 2,05 | down |
| 6257377 | 7147828 | 1245556 | collagen, type IV, alpha 1 | Col4a1 | 290905 | 1,98 | down |
| 6258844 | 7147828 | 1245546 | collagen, type IV, alpha 1 | Col4a1 | 290905 | 1,94 | up   |
| 6323465 | 7147828 | 1245532 | collagen, type IV, alpha 1 | Col4a1 | 290905 | 1,93 | down |
| 6017768 | 7147828 | 1245568 | collagen, type IV, alpha 1 | Col4a1 | 290905 | 1,73 | up   |
| 5827476 | 7147828 | 1245544 | collagen, type IV, alpha 1 | Col4a1 | 290905 | 1,67 | down |
| 5733585 | 7147828 | 1245519 | collagen, type IV, alpha 1 | Col4a1 | 290905 | 1,63 | down |
| 6616618 | 7147828 | 1245563 | collagen, type IV, alpha 1 | Col4a1 | 290905 | 1,60 | down |
| 5973393 | 7147828 | 1245545 | collagen, type IV, alpha 1 | Col4a1 | 290905 | 1,55 | up   |
| 6500794 | 7147828 | 1245559 | collagen, type IV, alpha 1 | Col4a1 | 290905 | 1,53 | down |
| 6391328 | 7147828 | 1245527 | collagen, type IV, alpha 1 | Col4a1 | 290905 | 1,53 | up   |
| 6119679 | 7147828 | 1245517 | collagen, type IV, alpha 1 | Col4a1 | 290905 | 1,52 | up   |
| 5791333 | 7147828 | 1245569 | collagen, type IV, alpha 1 | Col4a1 | 290905 | 1,49 | up   |
| 5989129 | 7147828 | 1245543 | collagen, type IV, alpha 1 | Col4a1 | 290905 | 1,47 | down |
| 6683898 | 7147828 | 1245547 | collagen, type IV, alpha 1 | Col4a1 | 290905 | 1,46 | up   |
| 5970291 | 7147828 | 1245534 | collagen, type IV, alpha 1 | Col4a1 | 290905 | 1,41 | down |
| 5748661 | 7147828 | 1245532 | collagen, type IV, alpha 1 | Col4a1 | 290905 | 1,37 | down |
| 6300989 | 7147828 | 1245535 | collagen, type IV, alpha 1 | Col4a1 | 290905 | 1,35 | up   |
| 5970497 | 7147828 | 1245540 | collagen, type IV, alpha 1 | Col4a1 | 290905 | 1,34 | up   |
| 6101702 | 7147828 | 1245521 | collagen, type IV, alpha 1 | Col4a1 | 290905 | 1,33 | down |
| 6071861 | 7147828 | 1245549 | collagen, type IV, alpha 1 | Col4a1 | 290905 | 1,32 | up   |
| 6556680 | 7147828 | 1245569 | collagen, type IV, alpha 1 | Col4a1 | 290905 | 1,32 | down |
| 5856209 | 7147828 | 1245533 | collagen, type IV, alpha 1 | Col4a1 | 290905 | 1,31 | up   |
| 5679363 | 7147828 | 1245520 | collagen, type IV, alpha 1 | Col4a1 | 290905 | 1,31 | up   |
| 5991337 | 7147828 | 1245515 | collagen, type IV, alpha 1 | Col4a1 | 290905 | 1,30 | down |
| 6313448 | 7147828 | 1245513 | collagen, type IV, alpha 1 | Col4a1 | 290905 | 1,30 | down |
| 6250748 | 7147828 | 1245539 | collagen, type IV, alpha 1 | Col4a1 | 290905 | 1,28 | up   |
| 6162775 | 7147828 | 1245548 | collagen, type IV, alpha 1 | Col4a1 | 290905 | 1,27 | up   |
| 5649845 | 7147828 | 1245553 | collagen, type IV, alpha 1 | Col4a1 | 290905 | 1,22 | down |
| 5923227 | 7147828 | 1245512 | collagen, type IV, alpha 1 | Col4a1 | 290905 | 1,22 | down |
| 6327269 | 7147828 | 1245525 | collagen, type IV, alpha 1 | Col4a1 | 290905 | 1,21 | up   |
| 6470142 | 7147828 | 1245569 | collagen, type IV, alpha 1 | Col4a1 | 290905 | 1,20 | up   |
| 6324401 | 7147828 | 1245550 | collagen, type IV, alpha 1 | Col4a1 | 290905 | 1,20 | up   |
| 6588263 | 7147828 | 1245569 | collagen, type IV, alpha 1 | Col4a1 | 290905 | 1,20 | up   |
| 6054629 | 7147828 | 1245547 | collagen, type IV, alpha 1 | Col4a1 | 290905 | 1,20 | up   |
| 5882928 | 7147828 | 1245542 | collagen, type IV, alpha 1 | Col4a1 | 290905 | 1,19 | up   |
| 6443817 | 7147828 | 1245569 | collagen, type IV, alpha 1 | Col4a1 | 290905 | 1,17 | up   |
| 6096351 | 7147828 | 1245557 | collagen, type IV, alpha 1 | Col4a1 | 290905 | 1,17 | down |
| 5948146 | 7147828 | 1245560 | collagen, type IV, alpha 1 | Col4a1 | 290905 | 1,15 | up   |
| 6048586 | 7147828 | 1245530 | collagen, type IV, alpha 1 | Col4a1 | 290905 | 1,14 | up   |
| 6606913 | 7147828 | 1245554 | collagen, type IV, alpha 1 | Col4a1 | 290905 | 1,14 | down |
| 5663204 | 7147828 | 1245565 | collagen, type IV, alpha 1 | Col4a1 | 290905 | 1,13 | up   |
| 5675487 | 7147828 | 1245496 | collagen, type IV, alpha 1 | Col4a1 | 290905 | 1,13 | up   |
| 6099922 | 7147828 | 1245569 | collagen, type IV, alpha 1 | Col4a1 | 290905 | 1,10 | up   |
| 6620335 | 7147828 | 1245569 | collagen, type IV, alpha 1 | Col4a1 | 290905 | 1,10 | up   |

|         |         |         |                            |        |        |      |      |
|---------|---------|---------|----------------------------|--------|--------|------|------|
| 6413101 | 7147828 | 1245564 | collagen, type IV, alpha 1 | Col4a1 | 290905 | 1,08 | up   |
| 6724160 | 7147828 | 1245558 | collagen, type IV, alpha 1 | Col4a1 | 290905 | 1,08 | down |
| 5927023 | 7147828 | 1245518 | collagen, type IV, alpha 1 | Col4a1 | 290905 | 1,08 | up   |
| 6261091 | 7147828 | 1245552 | collagen, type IV, alpha 1 | Col4a1 | 290905 | 1,07 | down |
| 6002773 | 7147828 | 1245523 | collagen, type IV, alpha 1 | Col4a1 | 290905 | 1,07 | up   |
| 6107636 | 7147828 | 1245522 | collagen, type IV, alpha 1 | Col4a1 | 290905 | 1,07 | down |
| 6129793 | 7147828 | 1245526 | collagen, type IV, alpha 1 | Col4a1 | 290905 | 1,05 | down |
| 6163403 | 7147828 | 1245506 | collagen, type IV, alpha 1 | Col4a1 | 290905 | 1,05 | up   |
| 5764486 | 7147828 | 1245531 | collagen, type IV, alpha 1 | Col4a1 | 290905 | 1,04 | down |
| 6117613 | 7147828 | 1245562 | collagen, type IV, alpha 1 | Col4a1 | 290905 | 1,04 | down |
| 6284999 | 7147828 | 1245567 | collagen, type IV, alpha 1 | Col4a1 | 290905 | 1,04 | down |
| 5790087 | 7147828 | 1245549 | collagen, type IV, alpha 1 | Col4a1 | 290905 | 1,04 | up   |
| 6077691 | 7147828 | 1245516 | collagen, type IV, alpha 1 | Col4a1 | 290905 | 1,02 | down |
| 6339035 | 7147828 | 1245561 | collagen, type IV, alpha 1 | Col4a1 | 290905 | 1,02 | up   |
| 5759743 | 7147828 | 1245541 | collagen, type IV, alpha 1 | Col4a1 | 290905 | 1,01 | down |
| 5816622 | 7147828 | 1245496 | collagen, type IV, alpha 1 | Col4a1 | 290905 | 1,01 | up   |
| 6484590 | 7147828 | 1245554 | collagen, type IV, alpha 1 | Col4a1 | 290905 | 1,01 | up   |
| 5893147 | 7380497 | 1821876 | collagen, type IV, alpha 5 | Col4a5 | 363457 | 1,47 | down |
| 6610834 | 7380497 | 1821880 | collagen, type IV, alpha 5 | Col4a5 | 363457 | 1,31 | down |
| 6183768 | 7380497 | 1821821 | collagen, type IV, alpha 5 | Col4a5 | 363457 | 1,16 | up   |
| 5664849 | 7380497 | 1821880 | collagen, type IV, alpha 5 | Col4a5 | 363457 | 1,13 | up   |
| 6422513 | 7225634 | 1436224 | collagen, type V, alpha 1  | Col5a1 | 85490  | 3,55 | up   |
| 5781921 | 7225634 | 1436222 | collagen, type V, alpha 1  | Col5a1 | 85490  | 2,48 | up   |
| 6301299 | 7225634 | 1436211 | collagen, type V, alpha 1  | Col5a1 | 85490  | 2,48 | down |
| 5788081 | 7225634 | 1436230 | collagen, type V, alpha 1  | Col5a1 | 85490  | 2,18 | down |
| 6602721 | 7225634 | 1436196 | collagen, type V, alpha 1  | Col5a1 | 85490  | 2,09 | up   |
| 5626266 | 7225634 | 1436226 | collagen, type V, alpha 1  | Col5a1 | 85490  | 2,05 | up   |
| 6022529 | 7225634 | 1436208 | collagen, type V, alpha 1  | Col5a1 | 85490  | 1,84 | down |
| 6548293 | 7225634 | 1436237 | collagen, type V, alpha 1  | Col5a1 | 85490  | 1,83 | down |
| 6276516 | 7225634 | 1436227 | collagen, type V, alpha 1  | Col5a1 | 85490  | 1,74 | down |
| 6190966 | 7225634 | 1436207 | collagen, type V, alpha 1  | Col5a1 | 85490  | 1,74 | down |
| 6324302 | 7225634 | 1436220 | collagen, type V, alpha 1  | Col5a1 | 85490  | 1,68 | up   |
| 6149553 | 7225634 | 1436214 | collagen, type V, alpha 1  | Col5a1 | 85490  | 1,65 | up   |
| 5733751 | 7225634 | 1436194 | collagen, type V, alpha 1  | Col5a1 | 85490  | 1,63 | up   |
| 5910881 | 7225634 | 1436236 | collagen, type V, alpha 1  | Col5a1 | 85490  | 1,59 | down |
| 6594881 | 7225634 | 1436243 | collagen, type V, alpha 1  | Col5a1 | 85490  | 1,58 | up   |
| 6595295 | 7225634 | 1436229 | collagen, type V, alpha 1  | Col5a1 | 85490  | 1,57 | up   |
| 6106625 | 7225634 | 1436189 | collagen, type V, alpha 1  | Col5a1 | 85490  | 1,49 | up   |
| 5952809 | 7225634 | 1436219 | collagen, type V, alpha 1  | Col5a1 | 85490  | 1,46 | up   |
| 6245158 | 7225634 | 1436191 | collagen, type V, alpha 1  | Col5a1 | 85490  | 1,46 | down |
| 6204707 | 7225634 | 1436231 | collagen, type V, alpha 1  | Col5a1 | 85490  | 1,44 | up   |
| 6410519 | 7225634 | 1436232 | collagen, type V, alpha 1  | Col5a1 | 85490  | 1,40 | down |
| 6162946 | 7225634 | 1436245 | collagen, type V, alpha 1  | Col5a1 | 85490  | 1,40 | up   |
| 6197868 | 7225634 | 1436205 | collagen, type V, alpha 1  | Col5a1 | 85490  | 1,40 | down |
| 5714287 | 7225634 | 1436248 | collagen, type V, alpha 1  | Col5a1 | 85490  | 1,39 | down |
| 6591656 | 7225634 | 1436202 | collagen, type V, alpha 1  | Col5a1 | 85490  | 1,34 | down |
| 5800033 | 7225634 | 1436193 | collagen, type V, alpha 1  | Col5a1 | 85490  | 1,32 | up   |
| 6656005 | 7225634 | 1436198 | collagen, type V, alpha 1  | Col5a1 | 85490  | 1,31 | down |
| 6073554 | 7225634 | 1436221 | collagen, type V, alpha 1  | Col5a1 | 85490  | 1,30 | down |
| 5668831 | 7225634 | 1436190 | collagen, type V, alpha 1  | Col5a1 | 85490  | 1,27 | down |
| 6294259 | 7225634 | 1436215 | collagen, type V, alpha 1  | Col5a1 | 85490  | 1,27 | up   |
| 5665108 | 7225634 | 1436225 | collagen, type V, alpha 1  | Col5a1 | 85490  | 1,20 | down |
| 6497090 | 7225634 | 1436206 | collagen, type V, alpha 1  | Col5a1 | 85490  | 1,20 | down |
| 5962789 | 7225634 | 1436201 | collagen, type V, alpha 1  | Col5a1 | 85490  | 1,20 | down |
| 6277341 | 7225634 | 1436209 | collagen, type V, alpha 1  | Col5a1 | 85490  | 1,19 | down |
| 6515347 | 7225634 | 1436249 | collagen, type V, alpha 1  | Col5a1 | 85490  | 1,17 | up   |
| 6151812 | 7225634 | 1436203 | collagen, type V, alpha 1  | Col5a1 | 85490  | 1,16 | up   |

|         |         |         |                           |        |       |      |      |
|---------|---------|---------|---------------------------|--------|-------|------|------|
| 6082265 | 7225634 | 1436234 | collagen, type V, alpha 1 | Col5a1 | 85490 | 1,16 | down |
| 6462858 | 7225634 | 1436199 | collagen, type V, alpha 1 | Col5a1 | 85490 | 1,16 | up   |
| 6187772 | 7225634 | 1436233 | collagen, type V, alpha 1 | Col5a1 | 85490 | 1,16 | down |
| 5870468 | 7225634 | 1436210 | collagen, type V, alpha 1 | Col5a1 | 85490 | 1,14 | up   |
| 6563026 | 7225634 | 1436240 | collagen, type V, alpha 1 | Col5a1 | 85490 | 1,14 | down |
| 6721783 | 7225634 | 1436213 | collagen, type V, alpha 1 | Col5a1 | 85490 | 1,13 | up   |
| 5754900 | 7225634 | 1436244 | collagen, type V, alpha 1 | Col5a1 | 85490 | 1,13 | down |
| 5795909 | 7225634 | 1436238 | collagen, type V, alpha 1 | Col5a1 | 85490 | 1,13 | down |
| 5872714 | 7225634 | 1436246 | collagen, type V, alpha 1 | Col5a1 | 85490 | 1,13 | down |
| 6341600 | 7225634 | 1436235 | collagen, type V, alpha 1 | Col5a1 | 85490 | 1,13 | up   |
| 6631708 | 7225634 | 1436204 | collagen, type V, alpha 1 | Col5a1 | 85490 | 1,13 | up   |
| 6499816 | 7225634 | 1436195 | collagen, type V, alpha 1 | Col5a1 | 85490 | 1,10 | up   |
| 5777419 | 7225634 | 1436223 | collagen, type V, alpha 1 | Col5a1 | 85490 | 1,09 | down |
| 6230883 | 7225634 | 1436250 | collagen, type V, alpha 1 | Col5a1 | 85490 | 1,08 | up   |
| 6701087 | 7225634 | 1436212 | collagen, type V, alpha 1 | Col5a1 | 85490 | 1,06 | down |
| 6161716 | 7225634 | 1436247 | collagen, type V, alpha 1 | Col5a1 | 85490 | 1,06 | up   |
| 6246649 | 7225634 | 1436188 | collagen, type V, alpha 1 | Col5a1 | 85490 | 1,06 | up   |
| 6660241 | 7225634 | 1436200 | collagen, type V, alpha 1 | Col5a1 | 85490 | 1,06 | down |
| 6687133 | 7225634 | 1436228 | collagen, type V, alpha 1 | Col5a1 | 85490 | 1,05 | up   |
| 6383035 | 7225634 | 1436197 | collagen, type V, alpha 1 | Col5a1 | 85490 | 1,04 | down |
| 6043958 | 7225634 | 1436239 | collagen, type V, alpha 1 | Col5a1 | 85490 | 1,02 | up   |
| 5881168 | 7225634 | 1436216 | collagen, type V, alpha 1 | Col5a1 | 85490 | 1,02 | down |
| 5693876 | 7225634 | 1436218 | collagen, type V, alpha 1 | Col5a1 | 85490 | 1,01 | up   |
| 6689769 | 7225634 | 1436242 | collagen, type V, alpha 1 | Col5a1 | 85490 | 1,00 | up   |
| 5917648 | 7225634 | 1436251 | collagen, type V, alpha 1 | Col5a1 | 85490 | 1,00 | down |
| 5809976 | 7225634 | 1436241 | collagen, type V, alpha 1 | Col5a1 | 85490 | 1,00 | up   |
| 6026445 | 7225634 | 1436192 | collagen, type V, alpha 1 | Col5a1 | 85490 | 1,00 | up   |
| 5960494 | 7225634 | 1436187 | collagen, type V, alpha 1 | Col5a1 | 85490 | 1,00 | down |
| 5686344 | 7361881 | 1773915 | collagen, type V, alpha 2 | Col5a2 | 85250 | 2,28 | up   |
| 5692015 | 7361881 | 1773921 | collagen, type V, alpha 2 | Col5a2 | 85250 | 1,87 | down |
| 6520371 | 7361881 | 1773920 | collagen, type V, alpha 2 | Col5a2 | 85250 | 1,63 | down |
| 6723414 | 7361881 | 1773919 | collagen, type V, alpha 2 | Col5a2 | 85250 | 1,26 | up   |
| 6695787 | 7361881 | 1773917 | collagen, type V, alpha 2 | Col5a2 | 85250 | 1,19 | up   |
| 6093885 | 7361881 | 1773922 | collagen, type V, alpha 2 | Col5a2 | 85250 | 1,10 | down |
| 6208061 | 7361881 | 1773913 | collagen, type V, alpha 2 | Col5a2 | 85250 | 1,09 | up   |
| 5623563 | 7361881 | 1773914 | collagen, type V, alpha 2 | Col5a2 | 85250 | 1,05 | down |
| 6549686 | 7361881 | 1773923 | collagen, type V, alpha 2 | Col5a2 | 85250 | 1,05 | up   |
| 5708856 | 7361881 | 1773913 | collagen, type V, alpha 2 | Col5a2 | 85250 | 1,03 | down |
| 6492007 | 7361881 | 1773916 | collagen, type V, alpha 2 | Col5a2 | 85250 | 1,02 | up   |
| 5882683 | 7361881 | 1773918 | collagen, type V, alpha 2 | Col5a2 | 85250 | 1,01 | up   |
| 6573886 | 7342881 | 1727097 | collagen, type V, alpha 3 | Col5a3 | 60379 | 2,48 | down |
| 6227288 | 7342881 | 1727082 | collagen, type V, alpha 3 | Col5a3 | 60379 | 2,01 | up   |
| 6619847 | 7342881 | 1727070 | collagen, type V, alpha 3 | Col5a3 | 60379 | 2,00 | down |
| 6657870 | 7342881 | 1727068 | collagen, type V, alpha 3 | Col5a3 | 60379 | 1,84 | down |
| 6184521 | 7342881 | 1727106 | collagen, type V, alpha 3 | Col5a3 | 60379 | 1,76 | down |
| 6460970 | 7342881 | 1727118 | collagen, type V, alpha 3 | Col5a3 | 60379 | 1,75 | down |
| 6602045 | 7342881 | 1727091 | collagen, type V, alpha 3 | Col5a3 | 60379 | 1,65 | down |
| 6420832 | 7342881 | 1727109 | collagen, type V, alpha 3 | Col5a3 | 60379 | 1,63 | up   |
| 6409266 | 7342881 | 1727128 | collagen, type V, alpha 3 | Col5a3 | 60379 | 1,63 | up   |
| 6511083 | 7342881 | 1727090 | collagen, type V, alpha 3 | Col5a3 | 60379 | 1,62 | down |
| 6128024 | 7342881 | 1727110 | collagen, type V, alpha 3 | Col5a3 | 60379 | 1,57 | down |
| 6669838 | 7342881 | 1727073 | collagen, type V, alpha 3 | Col5a3 | 60379 | 1,50 | up   |
| 6080046 | 7342881 | 1727071 | collagen, type V, alpha 3 | Col5a3 | 60379 | 1,50 | up   |
| 5964683 | 7342881 | 1727130 | collagen, type V, alpha 3 | Col5a3 | 60379 | 1,46 | down |
| 6403327 | 7342881 | 1727113 | collagen, type V, alpha 3 | Col5a3 | 60379 | 1,43 | down |
| 6669533 | 7342881 | 1727108 | collagen, type V, alpha 3 | Col5a3 | 60379 | 1,42 | down |
| 6482146 | 7342881 | 1727098 | collagen, type V, alpha 3 | Col5a3 | 60379 | 1,41 | up   |

|         |         |         |                            |         |        |      |      |
|---------|---------|---------|----------------------------|---------|--------|------|------|
| 6184001 | 7342881 | 1727089 | collagen, type V, alpha 3  | Col5a3  | 60379  | 1,38 | down |
| 6529033 | 7342881 | 1727081 | collagen, type V, alpha 3  | Col5a3  | 60379  | 1,38 | up   |
| 6344012 | 7342881 | 1727095 | collagen, type V, alpha 3  | Col5a3  | 60379  | 1,37 | down |
| 6658534 | 7342881 | 1727121 | collagen, type V, alpha 3  | Col5a3  | 60379  | 1,35 | down |
| 6697258 | 7342881 | 1727084 | collagen, type V, alpha 3  | Col5a3  | 60379  | 1,34 | down |
| 5768782 | 7342881 | 1727126 | collagen, type V, alpha 3  | Col5a3  | 60379  | 1,32 | down |
| 5939099 | 7342881 | 1727131 | collagen, type V, alpha 3  | Col5a3  | 60379  | 1,31 | up   |
| 6536673 | 7342881 | 1727083 | collagen, type V, alpha 3  | Col5a3  | 60379  | 1,30 | up   |
| 6687570 | 7342881 | 1727078 | collagen, type V, alpha 3  | Col5a3  | 60379  | 1,29 | down |
| 6069826 | 7342881 | 1727114 | collagen, type V, alpha 3  | Col5a3  | 60379  | 1,26 | down |
| 6140894 | 7342881 | 1727100 | collagen, type V, alpha 3  | Col5a3  | 60379  | 1,26 | up   |
| 6322439 | 7342881 | 1727115 | collagen, type V, alpha 3  | Col5a3  | 60379  | 1,25 | up   |
| 5807679 | 7342881 | 1727104 | collagen, type V, alpha 3  | Col5a3  | 60379  | 1,24 | down |
| 5982025 | 7342881 | 1727127 | collagen, type V, alpha 3  | Col5a3  | 60379  | 1,24 | up   |
| 6363294 | 7342881 | 1727069 | collagen, type V, alpha 3  | Col5a3  | 60379  | 1,23 | up   |
| 6518975 | 7342881 | 1727129 | collagen, type V, alpha 3  | Col5a3  | 60379  | 1,22 | down |
| 5868624 | 7342881 | 1727093 | collagen, type V, alpha 3  | Col5a3  | 60379  | 1,20 | down |
| 6361312 | 7342881 | 1727105 | collagen, type V, alpha 3  | Col5a3  | 60379  | 1,20 | down |
| 6568216 | 7342881 | 1727072 | collagen, type V, alpha 3  | Col5a3  | 60379  | 1,18 | down |
| 6693103 | 7342881 | 1727107 | collagen, type V, alpha 3  | Col5a3  | 60379  | 1,17 | up   |
| 5690004 | 7342881 | 1727096 | collagen, type V, alpha 3  | Col5a3  | 60379  | 1,17 | down |
| 5853929 | 7342881 | 1727092 | collagen, type V, alpha 3  | Col5a3  | 60379  | 1,15 | down |
| 5826414 | 7342881 | 1727102 | collagen, type V, alpha 3  | Col5a3  | 60379  | 1,14 | down |
| 5653467 | 7342881 | 1727067 | collagen, type V, alpha 3  | Col5a3  | 60379  | 1,13 | up   |
| 5934837 | 7342881 | 1727116 | collagen, type V, alpha 3  | Col5a3  | 60379  | 1,12 | up   |
| 6253297 | 7342881 | 1727099 | collagen, type V, alpha 3  | Col5a3  | 60379  | 1,11 | down |
| 6192991 | 7342881 | 1727077 | collagen, type V, alpha 3  | Col5a3  | 60379  | 1,10 | down |
| 6141694 | 7342881 | 1727088 | collagen, type V, alpha 3  | Col5a3  | 60379  | 1,10 | down |
| 6321458 | 7342881 | 1727103 | collagen, type V, alpha 3  | Col5a3  | 60379  | 1,09 | down |
| 6210971 | 7342881 | 1727085 | collagen, type V, alpha 3  | Col5a3  | 60379  | 1,09 | down |
| 5830447 | 7342881 | 1727075 | collagen, type V, alpha 3  | Col5a3  | 60379  | 1,07 | up   |
| 5892115 | 7342881 | 1727120 | collagen, type V, alpha 3  | Col5a3  | 60379  | 1,07 | up   |
| 6585120 | 7342881 | 1727074 | collagen, type V, alpha 3  | Col5a3  | 60379  | 1,07 | up   |
| 6038774 | 7342881 | 1727123 | collagen, type V, alpha 3  | Col5a3  | 60379  | 1,06 | up   |
| 6245202 | 7342881 | 1727111 | collagen, type V, alpha 3  | Col5a3  | 60379  | 1,06 | up   |
| 6412942 | 7342881 | 1727074 | collagen, type V, alpha 3  | Col5a3  | 60379  | 1,06 | up   |
| 6418762 | 7342881 | 1727112 | collagen, type V, alpha 3  | Col5a3  | 60379  | 1,06 | up   |
| 6583119 | 7342881 | 1727117 | collagen, type V, alpha 3  | Col5a3  | 60379  | 1,06 | up   |
| 6706476 | 7342881 | 1727076 | collagen, type V, alpha 3  | Col5a3  | 60379  | 1,06 | up   |
| 5890397 | 7342881 | 1727132 | collagen, type V, alpha 3  | Col5a3  | 60379  | 1,06 | up   |
| 6715093 | 7342881 | 1727087 | collagen, type V, alpha 3  | Col5a3  | 60379  | 1,05 | up   |
| 5665622 | 7342881 | 1727080 | collagen, type V, alpha 3  | Col5a3  | 60379  | 1,05 | up   |
| 6064942 | 7342881 | 1727101 | collagen, type V, alpha 3  | Col5a3  | 60379  | 1,05 | down |
| 6351771 | 7342881 | 1727066 | collagen, type V, alpha 3  | Col5a3  | 60379  | 1,05 | up   |
| 6491462 | 7342881 | 1727125 | collagen, type V, alpha 3  | Col5a3  | 60379  | 1,04 | up   |
| 5917822 | 7342881 | 1727070 | collagen, type V, alpha 3  | Col5a3  | 60379  | 1,04 | down |
| 6546160 | 7342881 | 1727094 | collagen, type V, alpha 3  | Col5a3  | 60379  | 1,04 | down |
| 5771313 | 7342881 | 1727086 | collagen, type V, alpha 3  | Col5a3  | 60379  | 1,03 | down |
| 5805219 | 7342881 | 1727119 | collagen, type V, alpha 3  | Col5a3  | 60379  | 1,02 | down |
| 6616788 | 7342881 | 1727079 | collagen, type V, alpha 3  | Col5a3  | 60379  | 1,02 | down |
| 6109638 | 7342881 | 1727124 | collagen, type V, alpha 3  | Col5a3  | 60379  | 1,02 | up   |
| 6741528 | 7342881 | 1727122 | collagen, type V, alpha 3  | Col5a3  | 60379  | 1,01 | up   |
| 5877919 | 7342881 | 1727065 | collagen, type V, alpha 3  | Col5a3  | 60379  | 1,00 | up   |
| 5796285 | 7217679 | 1417291 | collagen, type VI, alpha 1 | Col6a1  | 294337 | 1,29 | down |
| 6335226 | 7219304 | 1421276 | collagen, type X, alpha 1  | Col10a1 | 25681  | 3,01 | down |
| 6577327 | 7219304 | 1421277 | collagen, type X, alpha 1  | Col10a1 | 25681  | 1,65 | down |
| 6700638 | 7219304 | 1421275 | collagen, type X, alpha 1  | Col10a1 | 25681  | 1,30 | up   |

|         |         |         |                            |          |        |      |      |
|---------|---------|---------|----------------------------|----------|--------|------|------|
| 5678373 | 7219304 | 1421275 | collagen, type X, alpha 1  | Coll10a1 | 25681  | 1,16 | up   |
| 6102769 | 7219304 | 1421275 | collagen, type X, alpha 1  | Coll10a1 | 25681  | 1,13 | down |
| 5935315 | 7219304 | 1421277 | collagen, type X, alpha 1  | Coll10a1 | 25681  | 1,13 | down |
| 6738512 | 7219304 | 1421275 | collagen, type X, alpha 1  | Coll10a1 | 25681  | 1,12 | up   |
| 5796178 | 7219304 | 1421278 | collagen, type X, alpha 1  | Coll10a1 | 25681  | 1,09 | up   |
| 6438268 | 7219304 | 1421275 | collagen, type X, alpha 1  | Coll10a1 | 25681  | 1,06 | up   |
| 5796078 | 7219304 | 1421275 | collagen, type X, alpha 1  | Coll10a1 | 25681  | 1,02 | up   |
| 5951426 | 7198210 | 1371021 | collagen, type XI, alpha 1 | Coll11a1 | 25654  | 1,78 | up   |
| 5731305 | 7198210 | 1371018 | collagen, type XI, alpha 1 | Coll11a1 | 25654  | 1,74 | down |
| 5693804 | 7198210 | 1371019 | collagen, type XI, alpha 1 | Coll11a1 | 25654  | 1,53 | down |
| 6335909 | 7198210 | 1371026 | collagen, type XI, alpha 1 | Coll11a1 | 25654  | 1,51 | up   |
| 5800677 | 7198210 | 1371017 | collagen, type XI, alpha 1 | Coll11a1 | 25654  | 1,43 | up   |
| 6168189 | 7198210 | 1371020 | collagen, type XI, alpha 1 | Coll11a1 | 25654  | 1,34 | up   |
| 6546600 | 7198210 | 1371012 | collagen, type XI, alpha 1 | Coll11a1 | 25654  | 1,27 | up   |
| 5649861 | 7198210 | 1371011 | collagen, type XI, alpha 1 | Coll11a1 | 25654  | 1,18 | up   |
| 6368634 | 7198210 | 1371013 | collagen, type XI, alpha 1 | Coll11a1 | 25654  | 1,16 | down |
| 6289981 | 7198210 | 1371024 | collagen, type XI, alpha 1 | Coll11a1 | 25654  | 1,09 | up   |
| 6281955 | 7198210 | 1371023 | collagen, type XI, alpha 1 | Coll11a1 | 25654  | 1,06 | down |
| 6379452 | 7198210 | 1371014 | collagen, type XI, alpha 1 | Coll11a1 | 25654  | 1,05 | down |
| 6291861 | 7198210 | 1371016 | collagen, type XI, alpha 1 | Coll11a1 | 25654  | 1,03 | up   |
| 6329034 | 7198210 | 1371022 | collagen, type XI, alpha 1 | Coll11a1 | 25654  | 1,02 | down |
| 6168606 | 7198210 | 1371025 | collagen, type XI, alpha 1 | Coll11a1 | 25654  | 1,00 | down |
| 6506188 | 7220967 | 1425159 | collagen, type XI, alpha 2 | Coll11a2 | 294279 | 4,25 | up   |
| 6330471 | 7220967 | 1425167 | collagen, type XI, alpha 2 | Coll11a2 | 294279 | 3,13 | up   |
| 6688942 | 7220967 | 1425187 | collagen, type XI, alpha 2 | Coll11a2 | 294279 | 2,73 | down |
| 6186018 | 7220967 | 1425151 | collagen, type XI, alpha 2 | Coll11a2 | 294279 | 2,20 | down |
| 6135432 | 7220967 | 1425191 | collagen, type XI, alpha 2 | Coll11a2 | 294279 | 2,03 | down |
| 5864422 | 7220967 | 1425171 | collagen, type XI, alpha 2 | Coll11a2 | 294279 | 2,03 | down |
| 5717971 | 7220967 | 1425154 | collagen, type XI, alpha 2 | Coll11a2 | 294279 | 1,81 | up   |
| 6358386 | 7220967 | 1425162 | collagen, type XI, alpha 2 | Coll11a2 | 294279 | 1,68 | up   |
| 5699424 | 7220967 | 1425165 | collagen, type XI, alpha 2 | Coll11a2 | 294279 | 1,58 | down |
| 6642252 | 7220967 | 1425173 | collagen, type XI, alpha 2 | Coll11a2 | 294279 | 1,55 | up   |
| 5930362 | 7220967 | 1425203 | collagen, type XI, alpha 2 | Coll11a2 | 294279 | 1,53 | down |
| 6519298 | 7220967 | 1425207 | collagen, type XI, alpha 2 | Coll11a2 | 294279 | 1,48 | up   |
| 6239380 | 7220967 | 1425174 | collagen, type XI, alpha 2 | Coll11a2 | 294279 | 1,45 | up   |
| 6440199 | 7220967 | 1425183 | collagen, type XI, alpha 2 | Coll11a2 | 294279 | 1,43 | up   |
| 6298772 | 7220967 | 1425192 | collagen, type XI, alpha 2 | Coll11a2 | 294279 | 1,42 | down |
| 6266813 | 7220967 | 1425207 | collagen, type XI, alpha 2 | Coll11a2 | 294279 | 1,38 | up   |
| 5673740 | 7220967 | 1425166 | collagen, type XI, alpha 2 | Coll11a2 | 294279 | 1,38 | down |
| 6083800 | 7220967 | 1425186 | collagen, type XI, alpha 2 | Coll11a2 | 294279 | 1,37 | down |
| 6326711 | 7220967 | 1425200 | collagen, type XI, alpha 2 | Coll11a2 | 294279 | 1,36 | up   |
| 6148838 | 7220967 | 1425195 | collagen, type XI, alpha 2 | Coll11a2 | 294279 | 1,35 | down |
| 6287361 | 7220967 | 1425189 | collagen, type XI, alpha 2 | Coll11a2 | 294279 | 1,33 | up   |
| 6537755 | 7220967 | 1425148 | collagen, type XI, alpha 2 | Coll11a2 | 294279 | 1,32 | down |
| 5810114 | 7220967 | 1425176 | collagen, type XI, alpha 2 | Coll11a2 | 294279 | 1,31 | down |
| 6342330 | 7220967 | 1425181 | collagen, type XI, alpha 2 | Coll11a2 | 294279 | 1,28 | up   |
| 5944110 | 7220967 | 1425161 | collagen, type XI, alpha 2 | Coll11a2 | 294279 | 1,27 | down |
| 6406093 | 7220967 | 1425178 | collagen, type XI, alpha 2 | Coll11a2 | 294279 | 1,25 | down |
| 6426571 | 7220967 | 1425146 | collagen, type XI, alpha 2 | Coll11a2 | 294279 | 1,23 | up   |
| 6548570 | 7220967 | 1425149 | collagen, type XI, alpha 2 | Coll11a2 | 294279 | 1,23 | down |
| 6552270 | 7220967 | 1425205 | collagen, type XI, alpha 2 | Coll11a2 | 294279 | 1,22 | down |
| 6312799 | 7220967 | 1425202 | collagen, type XI, alpha 2 | Coll11a2 | 294279 | 1,22 | down |
| 5817474 | 7220967 | 1425158 | collagen, type XI, alpha 2 | Coll11a2 | 294279 | 1,22 | up   |
| 6263167 | 7220967 | 1425150 | collagen, type XI, alpha 2 | Coll11a2 | 294279 | 1,22 | down |
| 6607963 | 7220967 | 1425197 | collagen, type XI, alpha 2 | Coll11a2 | 294279 | 1,21 | up   |
| 6037941 | 7220967 | 1425164 | collagen, type XI, alpha 2 | Coll11a2 | 294279 | 1,18 | down |
| 5855075 | 7220967 | 1425201 | collagen, type XI, alpha 2 | Coll11a2 | 294279 | 1,17 | up   |

|         |         |         |                             |          |        |      |      |
|---------|---------|---------|-----------------------------|----------|--------|------|------|
| 6686636 | 7220967 | 1425172 | collagen, type XI, alpha 2  | Coll1a2  | 294279 | 1,17 | up   |
| 5640621 | 7220967 | 1425196 | collagen, type XI, alpha 2  | Coll1a2  | 294279 | 1,16 | up   |
| 5933376 | 7220967 | 1425193 | collagen, type XI, alpha 2  | Coll1a2  | 294279 | 1,15 | up   |
| 5775392 | 7220967 | 1425160 | collagen, type XI, alpha 2  | Coll1a2  | 294279 | 1,14 | down |
| 6628047 | 7220967 | 1425156 | collagen, type XI, alpha 2  | Coll1a2  | 294279 | 1,14 | down |
| 5843681 | 7220967 | 1425147 | collagen, type XI, alpha 2  | Coll1a2  | 294279 | 1,12 | down |
| 6491056 | 7220967 | 1425163 | collagen, type XI, alpha 2  | Coll1a2  | 294279 | 1,10 | up   |
| 5842562 | 7220967 | 1425184 | collagen, type XI, alpha 2  | Coll1a2  | 294279 | 1,10 | down |
| 6524706 | 7220967 | 1425155 | collagen, type XI, alpha 2  | Coll1a2  | 294279 | 1,10 | down |
| 6204931 | 7220967 | 1425165 | collagen, type XI, alpha 2  | Coll1a2  | 294279 | 1,09 | down |
| 6191351 | 7220967 | 1425157 | collagen, type XI, alpha 2  | Coll1a2  | 294279 | 1,09 | down |
| 6395521 | 7220967 | 1425179 | collagen, type XI, alpha 2  | Coll1a2  | 294279 | 1,09 | down |
| 5935438 | 7220967 | 1425199 | collagen, type XI, alpha 2  | Coll1a2  | 294279 | 1,09 | up   |
| 6229507 | 7220967 | 1425204 | collagen, type XI, alpha 2  | Coll1a2  | 294279 | 1,08 | down |
| 6247161 | 7220967 | 1425206 | collagen, type XI, alpha 2  | Coll1a2  | 294279 | 1,07 | down |
| 6558214 | 7220967 | 1425185 | collagen, type XI, alpha 2  | Coll1a2  | 294279 | 1,07 | down |
| 5640150 | 7220967 | 1425182 | collagen, type XI, alpha 2  | Coll1a2  | 294279 | 1,07 | up   |
| 6695077 | 7220967 | 1425194 | collagen, type XI, alpha 2  | Coll1a2  | 294279 | 1,07 | down |
| 5863208 | 7220967 | 1425153 | collagen, type XI, alpha 2  | Coll1a2  | 294279 | 1,07 | up   |
| 6259929 | 7220967 | 1425177 | collagen, type XI, alpha 2  | Coll1a2  | 294279 | 1,06 | up   |
| 6255563 | 7220967 | 1425198 | collagen, type XI, alpha 2  | Coll1a2  | 294279 | 1,05 | down |
| 5698202 | 7220967 | 1425152 | collagen, type XI, alpha 2  | Coll1a2  | 294279 | 1,05 | down |
| 5675395 | 7220967 | 1425188 | collagen, type XI, alpha 2  | Coll1a2  | 294279 | 1,04 | up   |
| 5708845 | 7220967 | 1425169 | collagen, type XI, alpha 2  | Coll1a2  | 294279 | 1,03 | up   |
| 6675169 | 7220967 | 1425170 | collagen, type XI, alpha 2  | Coll1a2  | 294279 | 1,03 | up   |
| 6073964 | 7220967 | 1425168 | collagen, type XI, alpha 2  | Coll1a2  | 294279 | 1,03 | down |
| 5791764 | 7220967 | 1425190 | collagen, type XI, alpha 2  | Coll1a2  | 294279 | 1,03 | down |
| 6518860 | 7220967 | 1425180 | collagen, type XI, alpha 2  | Coll1a2  | 294279 | 1,02 | up   |
| 6548085 | 7220967 | 1425175 | collagen, type XI, alpha 2  | Coll1a2  | 294279 | 1,02 | up   |
| 6375106 | 7317088 | 1665029 | collagen, type XIV, alpha 1 | Coll14a1 | 314981 | 2,77 | down |
| 6093387 | 7317088 | 1665051 | collagen, type XIV, alpha 1 | Coll14a1 | 314981 | 2,23 | down |
| 6143383 | 7317088 | 1664998 | collagen, type XIV, alpha 1 | Coll14a1 | 314981 | 2,05 | down |
| 6370246 | 7317088 | 1665047 | collagen, type XIV, alpha 1 | Coll14a1 | 314981 | 1,92 | up   |
| 6532825 | 7317088 | 1665026 | collagen, type XIV, alpha 1 | Coll14a1 | 314981 | 1,70 | up   |
| 5950544 | 7317088 | 1665002 | collagen, type XIV, alpha 1 | Coll14a1 | 314981 | 1,60 | down |
| 5850830 | 7317088 | 1664995 | collagen, type XIV, alpha 1 | Coll14a1 | 314981 | 1,57 | up   |
| 6626380 | 7317088 | 1664990 | collagen, type XIV, alpha 1 | Coll14a1 | 314981 | 1,55 | down |
| 5761536 | 7317088 | 1665018 | collagen, type XIV, alpha 1 | Coll14a1 | 314981 | 1,55 | down |
| 6612650 | 7317088 | 1664994 | collagen, type XIV, alpha 1 | Coll14a1 | 314981 | 1,50 | down |
| 6148884 | 7317088 | 1665028 | collagen, type XIV, alpha 1 | Coll14a1 | 314981 | 1,48 | down |
| 5677716 | 7317088 | 1665036 | collagen, type XIV, alpha 1 | Coll14a1 | 314981 | 1,47 | up   |
| 5986792 | 7317088 | 1665032 | collagen, type XIV, alpha 1 | Coll14a1 | 314981 | 1,46 | up   |
| 6327391 | 7317088 | 1665012 | collagen, type XIV, alpha 1 | Coll14a1 | 314981 | 1,45 | up   |
| 5962673 | 7317088 | 1664998 | collagen, type XIV, alpha 1 | Coll14a1 | 314981 | 1,41 | down |
| 6283297 | 7317088 | 1665030 | collagen, type XIV, alpha 1 | Coll14a1 | 314981 | 1,37 | up   |
| 5827210 | 7317088 | 1665025 | collagen, type XIV, alpha 1 | Coll14a1 | 314981 | 1,35 | down |
| 6119125 | 7317088 | 1665042 | collagen, type XIV, alpha 1 | Coll14a1 | 314981 | 1,34 | down |
| 6337490 | 7317088 | 1665000 | collagen, type XIV, alpha 1 | Coll14a1 | 314981 | 1,34 | down |
| 6223446 | 7317088 | 1664991 | collagen, type XIV, alpha 1 | Coll14a1 | 314981 | 1,31 | down |
| 6325692 | 7317088 | 1664993 | collagen, type XIV, alpha 1 | Coll14a1 | 314981 | 1,28 | up   |
| 5904477 | 7317088 | 1665020 | collagen, type XIV, alpha 1 | Coll14a1 | 314981 | 1,24 | up   |
| 6526986 | 7317088 | 1664996 | collagen, type XIV, alpha 1 | Coll14a1 | 314981 | 1,21 | up   |
| 5909981 | 7317088 | 1665059 | collagen, type XIV, alpha 1 | Coll14a1 | 314981 | 1,21 | up   |
| 5789875 | 7317088 | 1665016 | collagen, type XIV, alpha 1 | Coll14a1 | 314981 | 1,20 | up   |
| 6738432 | 7317088 | 1664986 | collagen, type XIV, alpha 1 | Coll14a1 | 314981 | 1,19 | up   |
| 6236204 | 7317088 | 1665037 | collagen, type XIV, alpha 1 | Coll14a1 | 314981 | 1,19 | up   |
| 6364320 | 7317088 | 1665060 | collagen, type XIV, alpha 1 | Coll14a1 | 314981 | 1,18 | up   |

|         |         |         |                              |          |        |      |      |
|---------|---------|---------|------------------------------|----------|--------|------|------|
| 5758373 | 7317088 | 1665051 | collagen, type XIV, alpha 1  | Coll14a1 | 314981 | 1,17 | up   |
| 5971199 | 7317088 | 1665039 | collagen, type XIV, alpha 1  | Coll14a1 | 314981 | 1,16 | up   |
| 6393779 | 7317088 | 1665041 | collagen, type XIV, alpha 1  | Coll14a1 | 314981 | 1,14 | up   |
| 6018208 | 7317088 | 1664997 | collagen, type XIV, alpha 1  | Coll14a1 | 314981 | 1,12 | up   |
| 5969703 | 7317088 | 1665027 | collagen, type XIV, alpha 1  | Coll14a1 | 314981 | 1,11 | down |
| 6204342 | 7317088 | 1665009 | collagen, type XIV, alpha 1  | Coll14a1 | 314981 | 1,11 | down |
| 5658514 | 7317088 | 1665035 | collagen, type XIV, alpha 1  | Coll14a1 | 314981 | 1,10 | down |
| 6111207 | 7317088 | 1665056 | collagen, type XIV, alpha 1  | Coll14a1 | 314981 | 1,10 | up   |
| 5621493 | 7317088 | 1664999 | collagen, type XIV, alpha 1  | Coll14a1 | 314981 | 1,09 | down |
| 5735288 | 7317088 | 1665008 | collagen, type XIV, alpha 1  | Coll14a1 | 314981 | 1,08 | down |
| 5784668 | 7317088 | 1665057 | collagen, type XIV, alpha 1  | Coll14a1 | 314981 | 1,06 | up   |
| 6313130 | 7317088 | 1665007 | collagen, type XIV, alpha 1  | Coll14a1 | 314981 | 1,06 | down |
| 5905993 | 7317088 | 1665034 | collagen, type XIV, alpha 1  | Coll14a1 | 314981 | 1,05 | down |
| 6187768 | 7317088 | 1665022 | collagen, type XIV, alpha 1  | Coll14a1 | 314981 | 1,04 | up   |
| 6147300 | 7317088 | 1665024 | collagen, type XIV, alpha 1  | Coll14a1 | 314981 | 1,04 | up   |
| 5958003 | 7317088 | 1665021 | collagen, type XIV, alpha 1  | Coll14a1 | 314981 | 1,04 | down |
| 6528062 | 7317088 | 1665017 | collagen, type XIV, alpha 1  | Coll14a1 | 314981 | 1,03 | down |
| 6392734 | 7317088 | 1664987 | collagen, type XIV, alpha 1  | Coll14a1 | 314981 | 1,03 | down |
| 6222930 | 7317088 | 1665011 | collagen, type XIV, alpha 1  | Coll14a1 | 314981 | 1,02 | down |
| 5790048 | 7317088 | 1665001 | collagen, type XIV, alpha 1  | Coll14a1 | 314981 | 1,01 | up   |
| 6726890 | 7317088 | 1665048 | collagen, type XIV, alpha 1  | Coll14a1 | 314981 | 1,00 | down |
| 6359781 | 7274892 | 1559585 | collagen, type XV, alpha 1   | Coll15a1 | 298069 | 1,32 | down |
| 5703435 | 7274892 | 1559585 | collagen, type XV, alpha 1   | Coll15a1 | 298069 | 1,18 | up   |
| 5665185 | 7274892 | 1559584 | collagen, type XV, alpha 1   | Coll15a1 | 298069 | 1,03 | up   |
| 6624026 | 7279949 | 1572836 | collagen, type XVI, alpha 1  | Coll16a1 | 366474 | 2,25 | down |
| 5740776 | 7279949 | 1572846 | collagen, type XVI, alpha 1  | Coll16a1 | 366474 | 1,73 | up   |
| 6589129 | 7279949 | 1572844 | collagen, type XVI, alpha 1  | Coll16a1 | 366474 | 1,50 | down |
| 5935269 | 7279949 | 1572831 | collagen, type XVI, alpha 1  | Coll16a1 | 366474 | 1,47 | up   |
| 5817323 | 7279949 | 1572838 | collagen, type XVI, alpha 1  | Coll16a1 | 366474 | 1,45 | down |
| 5663978 | 7279949 | 1572832 | collagen, type XVI, alpha 1  | Coll16a1 | 366474 | 1,45 | down |
| 6142734 | 7279949 | 1572842 | collagen, type XVI, alpha 1  | Coll16a1 | 366474 | 1,45 | down |
| 5983989 | 7279949 | 1572846 | collagen, type XVI, alpha 1  | Coll16a1 | 366474 | 1,30 | down |
| 6609210 | 7279949 | 1572839 | collagen, type XVI, alpha 1  | Coll16a1 | 366474 | 1,25 | up   |
| 6372314 | 7279949 | 1572845 | collagen, type XVI, alpha 1  | Coll16a1 | 366474 | 1,21 | up   |
| 6441722 | 7279949 | 1572840 | collagen, type XVI, alpha 1  | Coll16a1 | 366474 | 1,20 | up   |
| 6451490 | 7279949 | 1572830 | collagen, type XVI, alpha 1  | Coll16a1 | 366474 | 1,20 | up   |
| 5772416 | 7279949 | 1572837 | collagen, type XVI, alpha 1  | Coll16a1 | 366474 | 1,19 | down |
| 6333650 | 7279949 | 1572847 | collagen, type XVI, alpha 1  | Coll16a1 | 366474 | 1,18 | down |
| 5621320 | 7279949 | 1572846 | collagen, type XVI, alpha 1  | Coll16a1 | 366474 | 1,12 | down |
| 5867221 | 7279949 | 1572830 | collagen, type XVI, alpha 1  | Coll16a1 | 366474 | 1,11 | up   |
| 5682229 | 7279949 | 1572843 | collagen, type XVI, alpha 1  | Coll16a1 | 366474 | 1,10 | up   |
| 6354976 | 7279949 | 1572833 | collagen, type XVI, alpha 1  | Coll16a1 | 366474 | 1,09 | up   |
| 6056656 | 7279949 | 1572835 | collagen, type XVI, alpha 1  | Coll16a1 | 366474 | 1,08 | up   |
| 5618644 | 7279949 | 1572849 | collagen, type XVI, alpha 1  | Coll16a1 | 366474 | 1,05 | down |
| 6357297 | 7279949 | 1572841 | collagen, type XVI, alpha 1  | Coll16a1 | 366474 | 1,03 | down |
| 5634723 | 7279949 | 1572834 | collagen, type XVI, alpha 1  | Coll16a1 | 366474 | 1,03 | up   |
| 5925245 | 7279949 | 1572848 | collagen, type XVI, alpha 1  | Coll16a1 | 366474 | 1,01 | down |
| 5779224 | 7063515 | 1039651 | collagen, type XVII, alpha 1 | Coll17a1 | 294027 | 2,86 | down |
| 6389292 | 7063515 | 1039646 | collagen, type XVII, alpha 1 | Coll17a1 | 294027 | 2,76 | down |
| 5899682 | 7063515 | 1039669 | collagen, type XVII, alpha 1 | Coll17a1 | 294027 | 2,03 | up   |
| 6670338 | 7063515 | 1039672 | collagen, type XVII, alpha 1 | Coll17a1 | 294027 | 1,98 | down |
| 6493236 | 7063515 | 1039660 | collagen, type XVII, alpha 1 | Coll17a1 | 294027 | 1,70 | up   |
| 5751430 | 7063515 | 1039671 | collagen, type XVII, alpha 1 | Coll17a1 | 294027 | 1,69 | up   |
| 5934359 | 7063515 | 1039664 | collagen, type XVII, alpha 1 | Coll17a1 | 294027 | 1,55 | down |
| 5749099 | 7063515 | 1039633 | collagen, type XVII, alpha 1 | Coll17a1 | 294027 | 1,55 | up   |
| 5740238 | 7063515 | 1039645 | collagen, type XVII, alpha 1 | Coll17a1 | 294027 | 1,44 | down |
| 6145586 | 7063515 | 1039631 | collagen, type XVII, alpha 1 | Coll17a1 | 294027 | 1,43 | down |



|         |         |         |                               |         |        |      |      |
|---------|---------|---------|-------------------------------|---------|--------|------|------|
| 6436277 | 7063515 | 1039666 | collagen, type XVII, alpha 1  | Col17a1 | 294027 | 1,42 | up   |
| 6640064 | 7063515 | 1039656 | collagen, type XVII, alpha 1  | Col17a1 | 294027 | 1,40 | down |
| 6710849 | 7063515 | 1039639 | collagen, type XVII, alpha 1  | Col17a1 | 294027 | 1,38 | down |
| 6224323 | 7063515 | 1039630 | collagen, type XVII, alpha 1  | Col17a1 | 294027 | 1,36 | up   |
| 6005225 | 7063515 | 1039650 | collagen, type XVII, alpha 1  | Col17a1 | 294027 | 1,35 | down |
| 5643237 | 7063515 | 1039658 | collagen, type XVII, alpha 1  | Col17a1 | 294027 | 1,35 | down |
| 5877110 | 7063515 | 1039678 | collagen, type XVII, alpha 1  | Col17a1 | 294027 | 1,31 | down |
| 6286990 | 7063515 | 1039662 | collagen, type XVII, alpha 1  | Col17a1 | 294027 | 1,27 | down |
| 6267715 | 7063515 | 1039630 | collagen, type XVII, alpha 1  | Col17a1 | 294027 | 1,25 | down |
| 6686578 | 7063515 | 1039657 | collagen, type XVII, alpha 1  | Col17a1 | 294027 | 1,24 | down |
| 5943709 | 7063515 | 1039659 | collagen, type XVII, alpha 1  | Col17a1 | 294027 | 1,22 | down |
| 6175254 | 7063515 | 1039675 | collagen, type XVII, alpha 1  | Col17a1 | 294027 | 1,21 | up   |
| 5736274 | 7063515 | 1039677 | collagen, type XVII, alpha 1  | Col17a1 | 294027 | 1,21 | up   |
| 6253013 | 7063515 | 1039672 | collagen, type XVII, alpha 1  | Col17a1 | 294027 | 1,20 | down |
| 6489602 | 7063515 | 1039655 | collagen, type XVII, alpha 1  | Col17a1 | 294027 | 1,20 | down |
| 6193830 | 7063515 | 1039637 | collagen, type XVII, alpha 1  | Col17a1 | 294027 | 1,20 | up   |
| 5961202 | 7063515 | 1039687 | collagen, type XVII, alpha 1  | Col17a1 | 294027 | 1,18 | up   |
| 5867174 | 7063515 | 1039640 | collagen, type XVII, alpha 1  | Col17a1 | 294027 | 1,18 | down |
| 6221746 | 7063515 | 1039632 | collagen, type XVII, alpha 1  | Col17a1 | 294027 | 1,18 | up   |
| 5931100 | 7063515 | 1039683 | collagen, type XVII, alpha 1  | Col17a1 | 294027 | 1,16 | down |
| 6302546 | 7063515 | 1039649 | collagen, type XVII, alpha 1  | Col17a1 | 294027 | 1,14 | down |
| 5825796 | 7063515 | 1039671 | collagen, type XVII, alpha 1  | Col17a1 | 294027 | 1,14 | down |
| 6277781 | 7063515 | 1039670 | collagen, type XVII, alpha 1  | Col17a1 | 294027 | 1,13 | up   |
| 6528434 | 7063515 | 1039630 | collagen, type XVII, alpha 1  | Col17a1 | 294027 | 1,13 | down |
| 6008309 | 7063515 | 1039683 | collagen, type XVII, alpha 1  | Col17a1 | 294027 | 1,13 | up   |
| 6259998 | 7063515 | 1039644 | collagen, type XVII, alpha 1  | Col17a1 | 294027 | 1,11 | up   |
| 6527036 | 7063515 | 1039638 | collagen, type XVII, alpha 1  | Col17a1 | 294027 | 1,11 | up   |
| 6542354 | 7063515 | 1039684 | collagen, type XVII, alpha 1  | Col17a1 | 294027 | 1,10 | up   |
| 6175522 | 7063515 | 1039648 | collagen, type XVII, alpha 1  | Col17a1 | 294027 | 1,10 | down |
| 6703576 | 7063515 | 1039690 | collagen, type XVII, alpha 1  | Col17a1 | 294027 | 1,10 | down |
| 6220512 | 7063515 | 1039688 | collagen, type XVII, alpha 1  | Col17a1 | 294027 | 1,08 | up   |
| 6084825 | 7063515 | 1039691 | collagen, type XVII, alpha 1  | Col17a1 | 294027 | 1,08 | up   |
| 5743987 | 7063515 | 1039681 | collagen, type XVII, alpha 1  | Col17a1 | 294027 | 1,08 | up   |
| 6700232 | 7063515 | 1039672 | collagen, type XVII, alpha 1  | Col17a1 | 294027 | 1,07 | down |
| 5645386 | 7063515 | 1039654 | collagen, type XVII, alpha 1  | Col17a1 | 294027 | 1,06 | up   |
| 5618009 | 7063515 | 1039695 | collagen, type XVII, alpha 1  | Col17a1 | 294027 | 1,05 | up   |
| 5684998 | 7063515 | 1039661 | collagen, type XVII, alpha 1  | Col17a1 | 294027 | 1,05 | up   |
| 5954731 | 7063515 | 1039685 | collagen, type XVII, alpha 1  | Col17a1 | 294027 | 1,05 | up   |
| 5733645 | 7063515 | 1039642 | collagen, type XVII, alpha 1  | Col17a1 | 294027 | 1,03 | down |
| 5906970 | 7063515 | 1039689 | collagen, type XVII, alpha 1  | Col17a1 | 294027 | 1,03 | down |
| 6595702 | 7063515 | 1039679 | collagen, type XVII, alpha 1  | Col17a1 | 294027 | 1,03 | down |
| 5754524 | 7063515 | 1039641 | collagen, type XVII, alpha 1  | Col17a1 | 294027 | 1,02 | up   |
| 5744048 | 7063515 | 1039634 | collagen, type XVII, alpha 1  | Col17a1 | 294027 | 1,02 | down |
| 6134280 | 7063515 | 1039667 | collagen, type XVII, alpha 1  | Col17a1 | 294027 | 1,02 | up   |
| 5955379 | 7063515 | 1039647 | collagen, type XVII, alpha 1  | Col17a1 | 294027 | 1,02 | up   |
| 6402861 | 7063515 | 1039635 | collagen, type XVII, alpha 1  | Col17a1 | 294027 | 1,02 | down |
| 6385564 | 7063515 | 1039672 | collagen, type XVII, alpha 1  | Col17a1 | 294027 | 1,01 | down |
| 5627488 | 7063515 | 1039686 | collagen, type XVII, alpha 1  | Col17a1 | 294027 | 1,00 | up   |
| 5631731 | 7063515 | 1039674 | collagen, type XVII, alpha 1  | Col17a1 | 294027 | 1,00 | up   |
| 5871086 | 7217650 | 1417208 | collagen, type XVIII, alpha 1 | Col18a1 | 85251  | 1,12 | down |
| 6382958 | 7217650 | 1417207 | collagen, type XVIII, alpha 1 | Col18a1 | 85251  | 1,10 | up   |
| 6508253 | 7217650 | 1417209 | collagen, type XVIII, alpha 1 | Col18a1 | 85251  | 1,08 | up   |
| 6206572 | 7217650 | 1417210 | collagen, type XVIII, alpha 1 | Col18a1 | 85251  | 1,05 | up   |
| 5896456 | 7236358 | 1464233 | collagen, type XX, alpha 1    | Col20a1 | 311716 | 3,07 | down |
| 6490537 | 7236358 | 1464228 | collagen, type XX, alpha 1    | Col20a1 | 311716 | 1,55 | down |
| 6527300 | 7236358 | 1464222 | collagen, type XX, alpha 1    | Col20a1 | 311716 | 1,47 | up   |
| 6661860 | 7236358 | 1464233 | collagen, type XX, alpha 1    | Col20a1 | 311716 | 1,44 | up   |

|         |         |         |                              |         |        |      |      |
|---------|---------|---------|------------------------------|---------|--------|------|------|
| 6704813 | 7236358 | 1464226 | collagen, type XX, alpha 1   | Col20a1 | 311716 | 1,30 | down |
| 5649301 | 7236358 | 1464232 | collagen, type XX, alpha 1   | Col20a1 | 311716 | 1,25 | up   |
| 5775144 | 7236358 | 1464221 | collagen, type XX, alpha 1   | Col20a1 | 311716 | 1,24 | down |
| 6542102 | 7236358 | 1464223 | collagen, type XX, alpha 1   | Col20a1 | 311716 | 1,23 | down |
| 6107848 | 7236358 | 1464231 | collagen, type XX, alpha 1   | Col20a1 | 311716 | 1,20 | up   |
| 6611285 | 7236358 | 1464229 | collagen, type XX, alpha 1   | Col20a1 | 311716 | 1,09 | down |
| 6301504 | 7236358 | 1464218 | collagen, type XX, alpha 1   | Col20a1 | 311716 | 1,09 | down |
| 6436922 | 7236358 | 1464234 | collagen, type XX, alpha 1   | Col20a1 | 311716 | 1,07 | up   |
| 5834347 | 7236358 | 1464224 | collagen, type XX, alpha 1   | Col20a1 | 311716 | 1,07 | down |
| 5626226 | 7236358 | 1464230 | collagen, type XX, alpha 1   | Col20a1 | 311716 | 1,06 | down |
| 6745977 | 7236358 | 1464218 | collagen, type XX, alpha 1   | Col20a1 | 311716 | 1,04 | up   |
| 5745971 | 7236358 | 1464233 | collagen, type XX, alpha 1   | Col20a1 | 311716 | 1,04 | down |
| 5638399 | 7328695 | 1692360 | collagen, type XXII, alpha 1 | Col22a1 | 315071 | 2,04 | down |
| 5922634 | 7328695 | 1692315 | collagen, type XXII, alpha 1 | Col22a1 | 315071 | 1,89 | down |
| 5995648 | 7328695 | 1692354 | collagen, type XXII, alpha 1 | Col22a1 | 315071 | 1,87 | down |
| 6292005 | 7328695 | 1692328 | collagen, type XXII, alpha 1 | Col22a1 | 315071 | 1,71 | down |
| 6083504 | 7328695 | 1692337 | collagen, type XXII, alpha 1 | Col22a1 | 315071 | 1,70 | up   |
| 6320408 | 7328695 | 1692299 | collagen, type XXII, alpha 1 | Col22a1 | 315071 | 1,69 | up   |
| 6026529 | 7328695 | 1692274 | collagen, type XXII, alpha 1 | Col22a1 | 315071 | 1,58 | down |
| 5895921 | 7328695 | 1692365 | collagen, type XXII, alpha 1 | Col22a1 | 315071 | 1,57 | up   |
| 6498621 | 7328695 | 1692329 | collagen, type XXII, alpha 1 | Col22a1 | 315071 | 1,56 | down |
| 6672784 | 7328695 | 1692291 | collagen, type XXII, alpha 1 | Col22a1 | 315071 | 1,54 | down |
| 5848169 | 7328695 | 1692366 | collagen, type XXII, alpha 1 | Col22a1 | 315071 | 1,53 | up   |
| 6712010 | 7328695 | 1692362 | collagen, type XXII, alpha 1 | Col22a1 | 315071 | 1,46 | up   |
| 6701557 | 7328695 | 1692355 | collagen, type XXII, alpha 1 | Col22a1 | 315071 | 1,41 | up   |
| 6071683 | 7328695 | 1692267 | collagen, type XXII, alpha 1 | Col22a1 | 315071 | 1,40 | down |
| 5750213 | 7328695 | 1692319 | collagen, type XXII, alpha 1 | Col22a1 | 315071 | 1,39 | down |
| 6657584 | 7328695 | 1692298 | collagen, type XXII, alpha 1 | Col22a1 | 315071 | 1,35 | down |
| 5932214 | 7328695 | 1692278 | collagen, type XXII, alpha 1 | Col22a1 | 315071 | 1,33 | up   |
| 5855845 | 7328695 | 1692283 | collagen, type XXII, alpha 1 | Col22a1 | 315071 | 1,29 | down |
| 5693388 | 7328695 | 1692331 | collagen, type XXII, alpha 1 | Col22a1 | 315071 | 1,29 | up   |
| 5957431 | 7328695 | 1692276 | collagen, type XXII, alpha 1 | Col22a1 | 315071 | 1,25 | up   |
| 6020990 | 7328695 | 1692324 | collagen, type XXII, alpha 1 | Col22a1 | 315071 | 1,25 | down |
| 6056547 | 7328695 | 1692268 | collagen, type XXII, alpha 1 | Col22a1 | 315071 | 1,23 | up   |
| 6339452 | 7328695 | 1692348 | collagen, type XXII, alpha 1 | Col22a1 | 315071 | 1,20 | down |
| 5680343 | 7328695 | 1692274 | collagen, type XXII, alpha 1 | Col22a1 | 315071 | 1,20 | down |
| 6197435 | 7328695 | 1692372 | collagen, type XXII, alpha 1 | Col22a1 | 315071 | 1,20 | down |
| 6554961 | 7328695 | 1692280 | collagen, type XXII, alpha 1 | Col22a1 | 315071 | 1,19 | down |
| 5820738 | 7328695 | 1692351 | collagen, type XXII, alpha 1 | Col22a1 | 315071 | 1,19 | down |
| 5803468 | 7328695 | 1692282 | collagen, type XXII, alpha 1 | Col22a1 | 315071 | 1,19 | down |
| 5932661 | 7328695 | 1692369 | collagen, type XXII, alpha 1 | Col22a1 | 315071 | 1,19 | up   |
| 6508181 | 7328695 | 1692317 | collagen, type XXII, alpha 1 | Col22a1 | 315071 | 1,19 | down |
| 6128386 | 7328695 | 1692326 | collagen, type XXII, alpha 1 | Col22a1 | 315071 | 1,18 | down |
| 6746704 | 7328695 | 1692343 | collagen, type XXII, alpha 1 | Col22a1 | 315071 | 1,18 | down |
| 5653714 | 7328695 | 1692269 | collagen, type XXII, alpha 1 | Col22a1 | 315071 | 1,17 | up   |
| 6725168 | 7328695 | 1692322 | collagen, type XXII, alpha 1 | Col22a1 | 315071 | 1,16 | down |
| 5937465 | 7328695 | 1692325 | collagen, type XXII, alpha 1 | Col22a1 | 315071 | 1,16 | up   |
| 5858920 | 7328695 | 1692286 | collagen, type XXII, alpha 1 | Col22a1 | 315071 | 1,16 | down |
| 5845972 | 7328695 | 1692353 | collagen, type XXII, alpha 1 | Col22a1 | 315071 | 1,15 | down |
| 5924338 | 7328695 | 1692333 | collagen, type XXII, alpha 1 | Col22a1 | 315071 | 1,14 | up   |
| 5888205 | 7328695 | 1692307 | collagen, type XXII, alpha 1 | Col22a1 | 315071 | 1,14 | down |
| 6363768 | 7328695 | 1692312 | collagen, type XXII, alpha 1 | Col22a1 | 315071 | 1,12 | up   |
| 5691586 | 7328695 | 1692350 | collagen, type XXII, alpha 1 | Col22a1 | 315071 | 1,11 | up   |
| 6002579 | 7328695 | 1692295 | collagen, type XXII, alpha 1 | Col22a1 | 315071 | 1,10 | down |
| 6138841 | 7328695 | 1692269 | collagen, type XXII, alpha 1 | Col22a1 | 315071 | 1,10 | down |
| 5956733 | 7328695 | 1692272 | collagen, type XXII, alpha 1 | Col22a1 | 315071 | 1,10 | up   |
| 6112152 | 7328695 | 1692306 | collagen, type XXII, alpha 1 | Col22a1 | 315071 | 1,10 | down |

|         |         |         |                               |         |        |      |      |
|---------|---------|---------|-------------------------------|---------|--------|------|------|
| 6706106 | 7328695 | 1692361 | collagen, type XXII, alpha 1  | Col22a1 | 315071 | 1,08 | up   |
| 6481769 | 7328695 | 1692340 | collagen, type XXII, alpha 1  | Col22a1 | 315071 | 1,08 | down |
| 6710236 | 7328695 | 1692296 | collagen, type XXII, alpha 1  | Col22a1 | 315071 | 1,07 | up   |
| 6443838 | 7328695 | 1692302 | collagen, type XXII, alpha 1  | Col22a1 | 315071 | 1,07 | down |
| 5822615 | 7328695 | 1692348 | collagen, type XXII, alpha 1  | Col22a1 | 315071 | 1,06 | up   |
| 6363569 | 7328695 | 1692294 | collagen, type XXII, alpha 1  | Col22a1 | 315071 | 1,06 | up   |
| 6136901 | 7328695 | 1692359 | collagen, type XXII, alpha 1  | Col22a1 | 315071 | 1,06 | up   |
| 6659561 | 7328695 | 1692380 | collagen, type XXII, alpha 1  | Col22a1 | 315071 | 1,05 | up   |
| 6455302 | 7328695 | 1692327 | collagen, type XXII, alpha 1  | Col22a1 | 315071 | 1,04 | up   |
| 5708138 | 7328695 | 1692281 | collagen, type XXII, alpha 1  | Col22a1 | 315071 | 1,04 | up   |
| 6336616 | 7328695 | 1692339 | collagen, type XXII, alpha 1  | Col22a1 | 315071 | 1,03 | down |
| 6698358 | 7328695 | 1692290 | collagen, type XXII, alpha 1  | Col22a1 | 315071 | 1,03 | down |
| 6494911 | 7328695 | 1692299 | collagen, type XXII, alpha 1  | Col22a1 | 315071 | 1,03 | down |
| 5628264 | 7328695 | 1692358 | collagen, type XXII, alpha 1  | Col22a1 | 315071 | 1,02 | up   |
| 6511982 | 7328695 | 1692305 | collagen, type XXII, alpha 1  | Col22a1 | 315071 | 1,02 | up   |
| 5685827 | 7328695 | 1692279 | collagen, type XXII, alpha 1  | Col22a1 | 315071 | 1,02 | down |
| 5939201 | 7328695 | 1692349 | collagen, type XXII, alpha 1  | Col22a1 | 315071 | 1,02 | down |
| 6011608 | 7328695 | 1692347 | collagen, type XXII, alpha 1  | Col22a1 | 315071 | 1,01 | down |
| 6298964 | 7328695 | 1692356 | collagen, type XXII, alpha 1  | Col22a1 | 315071 | 1,00 | down |
| 6257760 | 7328695 | 1692330 | collagen, type XXII, alpha 1  | Col22a1 | 315071 | 1,00 | up   |
| 6443464 | 7067406 | 1049583 | collagen, type XXIII, alpha 1 | Col23a1 | 353303 | 2,74 | down |
| 6708536 | 7067406 | 1049584 | collagen, type XXIII, alpha 1 | Col23a1 | 353303 | 2,02 | down |
| 6527175 | 7067406 | 1049586 | collagen, type XXIII, alpha 1 | Col23a1 | 353303 | 1,77 | down |
| 5674945 | 7067406 | 1049595 | collagen, type XXIII, alpha 1 | Col23a1 | 353303 | 1,64 | up   |
| 5837708 | 7067406 | 1049577 | collagen, type XXIII, alpha 1 | Col23a1 | 353303 | 1,46 | up   |
| 5798192 | 7067406 | 1049587 | collagen, type XXIII, alpha 1 | Col23a1 | 353303 | 1,46 | down |
| 6614300 | 7067406 | 1049598 | collagen, type XXIII, alpha 1 | Col23a1 | 353303 | 1,37 | down |
| 6197069 | 7067406 | 1049576 | collagen, type XXIII, alpha 1 | Col23a1 | 353303 | 1,33 | down |
| 6288089 | 7067406 | 1049575 | collagen, type XXIII, alpha 1 | Col23a1 | 353303 | 1,32 | down |
| 6090335 | 7067406 | 1049581 | collagen, type XXIII, alpha 1 | Col23a1 | 353303 | 1,28 | up   |
| 6719074 | 7067406 | 1049588 | collagen, type XXIII, alpha 1 | Col23a1 | 353303 | 1,26 | up   |
| 6716987 | 7067406 | 1049580 | collagen, type XXIII, alpha 1 | Col23a1 | 353303 | 1,24 | down |
| 6341994 | 7067406 | 1049585 | collagen, type XXIII, alpha 1 | Col23a1 | 353303 | 1,24 | down |
| 6196233 | 7067406 | 1049599 | collagen, type XXIII, alpha 1 | Col23a1 | 353303 | 1,23 | down |
| 6586548 | 7067406 | 1049597 | collagen, type XXIII, alpha 1 | Col23a1 | 353303 | 1,20 | down |
| 5721890 | 7067406 | 1049593 | collagen, type XXIII, alpha 1 | Col23a1 | 353303 | 1,16 | down |
| 6117157 | 7067406 | 1049600 | collagen, type XXIII, alpha 1 | Col23a1 | 353303 | 1,13 | up   |
| 6605691 | 7067406 | 1049601 | collagen, type XXIII, alpha 1 | Col23a1 | 353303 | 1,10 | down |
| 6637724 | 7067406 | 1049594 | collagen, type XXIII, alpha 1 | Col23a1 | 353303 | 1,09 | up   |
| 6591059 | 7067406 | 1049582 | collagen, type XXIII, alpha 1 | Col23a1 | 353303 | 1,08 | down |
| 6310876 | 7067406 | 1049579 | collagen, type XXIII, alpha 1 | Col23a1 | 353303 | 1,07 | down |
| 5711470 | 7067406 | 1049601 | collagen, type XXIII, alpha 1 | Col23a1 | 353303 | 1,06 | up   |
| 5865510 | 7067406 | 1049596 | collagen, type XXIII, alpha 1 | Col23a1 | 353303 | 1,06 | up   |
| 6146977 | 7067406 | 1049592 | collagen, type XXIII, alpha 1 | Col23a1 | 353303 | 1,06 | up   |
| 6222935 | 7067406 | 1049589 | collagen, type XXIII, alpha 1 | Col23a1 | 353303 | 1,06 | up   |
| 6685515 | 7067406 | 1049575 | collagen, type XXIII, alpha 1 | Col23a1 | 353303 | 1,06 | up   |
| 6457727 | 7067406 | 1049578 | collagen, type XXIII, alpha 1 | Col23a1 | 353303 | 1,06 | up   |
| 6297247 | 7067406 | 1049590 | collagen, type XXIII, alpha 1 | Col23a1 | 353303 | 1,02 | up   |
| 5792312 | 7275821 | 1562085 | collagen, type XXVII, alpha 1 | Col27a1 | 298101 | 2,08 | up   |
| 5654532 | 7275821 | 1562093 | collagen, type XXVII, alpha 1 | Col27a1 | 298101 | 1,86 | up   |
| 6520506 | 7275821 | 1562092 | collagen, type XXVII, alpha 1 | Col27a1 | 298101 | 1,83 | up   |
| 5742764 | 7275821 | 1562049 | collagen, type XXVII, alpha 1 | Col27a1 | 298101 | 1,78 | down |
| 6379953 | 7275821 | 1562079 | collagen, type XXVII, alpha 1 | Col27a1 | 298101 | 1,69 | down |
| 5806415 | 7275821 | 1562055 | collagen, type XXVII, alpha 1 | Col27a1 | 298101 | 1,67 | up   |
| 5964186 | 7275821 | 1562082 | collagen, type XXVII, alpha 1 | Col27a1 | 298101 | 1,65 | up   |
| 5851823 | 7275821 | 1562059 | collagen, type XXVII, alpha 1 | Col27a1 | 298101 | 1,54 | up   |
| 6608712 | 7275821 | 1562068 | collagen, type XXVII, alpha 1 | Col27a1 | 298101 | 1,54 | up   |

|         |         |         |                                                                                             |         |        |      |      |
|---------|---------|---------|---------------------------------------------------------------------------------------------|---------|--------|------|------|
| 6062990 | 7275821 | 1562070 | collagen, type XXVII, alpha 1                                                               | Col27a1 | 298101 | 1,53 | down |
| 5883555 | 7275821 | 1562052 | collagen, type XXVII, alpha 1                                                               | Col27a1 | 298101 | 1,52 | up   |
| 6591660 | 7275821 | 1562088 | collagen, type XXVII, alpha 1                                                               | Col27a1 | 298101 | 1,51 | up   |
| 6530608 | 7275821 | 1562040 | collagen, type XXVII, alpha 1                                                               | Col27a1 | 298101 | 1,46 | down |
| 6564039 | 7275821 | 1562047 | collagen, type XXVII, alpha 1                                                               | Col27a1 | 298101 | 1,41 | up   |
| 5751479 | 7275821 | 1562044 | collagen, type XXVII, alpha 1                                                               | Col27a1 | 298101 | 1,35 | up   |
| 6648903 | 7275821 | 1562071 | collagen, type XXVII, alpha 1                                                               | Col27a1 | 298101 | 1,35 | up   |
| 5655902 | 7275821 | 1562067 | collagen, type XXVII, alpha 1                                                               | Col27a1 | 298101 | 1,33 | up   |
| 6446982 | 7275821 | 1562053 | collagen, type XXVII, alpha 1                                                               | Col27a1 | 298101 | 1,31 | down |
| 6225143 | 7275821 | 1562043 | collagen, type XXVII, alpha 1                                                               | Col27a1 | 298101 | 1,30 | down |
| 5900573 | 7275821 | 1562041 | collagen, type XXVII, alpha 1                                                               | Col27a1 | 298101 | 1,26 | down |
| 6569133 | 7275821 | 1562042 | collagen, type XXVII, alpha 1                                                               | Col27a1 | 298101 | 1,24 | down |
| 6649038 | 7275821 | 1562078 | collagen, type XXVII, alpha 1                                                               | Col27a1 | 298101 | 1,23 | down |
| 5668466 | 7275821 | 1562072 | collagen, type XXVII, alpha 1                                                               | Col27a1 | 298101 | 1,20 | up   |
| 5656986 | 7275821 | 1562096 | collagen, type XXVII, alpha 1                                                               | Col27a1 | 298101 | 1,17 | up   |
| 5670654 | 7275821 | 1562051 | collagen, type XXVII, alpha 1                                                               | Col27a1 | 298101 | 1,17 | up   |
| 5952025 | 7275821 | 1562058 | collagen, type XXVII, alpha 1                                                               | Col27a1 | 298101 | 1,15 | down |
| 5839334 | 7275821 | 1562065 | collagen, type XXVII, alpha 1                                                               | Col27a1 | 298101 | 1,15 | up   |
| 6519289 | 7275821 | 1562045 | collagen, type XXVII, alpha 1                                                               | Col27a1 | 298101 | 1,14 | up   |
| 6205671 | 7275821 | 1562086 | collagen, type XXVII, alpha 1                                                               | Col27a1 | 298101 | 1,14 | down |
| 6714818 | 7275821 | 1562056 | collagen, type XXVII, alpha 1                                                               | Col27a1 | 298101 | 1,13 | down |
| 6051129 | 7275821 | 1562087 | collagen, type XXVII, alpha 1                                                               | Col27a1 | 298101 | 1,13 | up   |
| 5895530 | 7275821 | 1562073 | collagen, type XXVII, alpha 1                                                               | Col27a1 | 298101 | 1,13 | down |
| 6220856 | 7275821 | 1562063 | collagen, type XXVII, alpha 1                                                               | Col27a1 | 298101 | 1,13 | down |
| 6567197 | 7275821 | 1562069 | collagen, type XXVII, alpha 1                                                               | Col27a1 | 298101 | 1,13 | up   |
| 6605190 | 7275821 | 1562091 | collagen, type XXVII, alpha 1                                                               | Col27a1 | 298101 | 1,12 | up   |
| 6481853 | 7275821 | 1562054 | collagen, type XXVII, alpha 1                                                               | Col27a1 | 298101 | 1,12 | up   |
| 5872068 | 7275821 | 1562042 | collagen, type XXVII, alpha 1                                                               | Col27a1 | 298101 | 1,11 | down |
| 5984200 | 7275821 | 1562099 | collagen, type XXVII, alpha 1                                                               | Col27a1 | 298101 | 1,10 | up   |
| 5766776 | 7275821 | 1562066 | collagen, type XXVII, alpha 1                                                               | Col27a1 | 298101 | 1,09 | down |
| 6648828 | 7275821 | 1562064 | collagen, type XXVII, alpha 1                                                               | Col27a1 | 298101 | 1,09 | down |
| 6228505 | 7275821 | 1562048 | collagen, type XXVII, alpha 1                                                               | Col27a1 | 298101 | 1,09 | down |
| 6426339 | 7275821 | 1562075 | collagen, type XXVII, alpha 1                                                               | Col27a1 | 298101 | 1,08 | up   |
| 6595484 | 7275821 | 1562089 | collagen, type XXVII, alpha 1                                                               | Col27a1 | 298101 | 1,08 | up   |
| 6563837 | 7275821 | 1562081 | collagen, type XXVII, alpha 1                                                               | Col27a1 | 298101 | 1,07 | down |
| 6113195 | 7275821 | 1562084 | collagen, type XXVII, alpha 1                                                               | Col27a1 | 298101 | 1,06 | down |
| 6388358 | 7275821 | 1562095 | collagen, type XXVII, alpha 1                                                               | Col27a1 | 298101 | 1,06 | down |
| 5707223 | 7275821 | 1562076 | collagen, type XXVII, alpha 1                                                               | Col27a1 | 298101 | 1,06 | down |
| 6345424 | 7275821 | 1562042 | collagen, type XXVII, alpha 1                                                               | Col27a1 | 298101 | 1,06 | down |
| 6421858 | 7275821 | 1562094 | collagen, type XXVII, alpha 1                                                               | Col27a1 | 298101 | 1,05 | down |
| 6310892 | 7275821 | 1562090 | collagen, type XXVII, alpha 1                                                               | Col27a1 | 298101 | 1,05 | up   |
| 6048329 | 7275821 | 1562080 | collagen, type XXVII, alpha 1                                                               | Col27a1 | 298101 | 1,05 | down |
| 5728158 | 7275821 | 1562062 | collagen, type XXVII, alpha 1                                                               | Col27a1 | 298101 | 1,05 | down |
| 6406943 | 7275821 | 1562050 | collagen, type XXVII, alpha 1                                                               | Col27a1 | 298101 | 1,05 | up   |
| 6244381 | 7275821 | 1562083 | collagen, type XXVII, alpha 1                                                               | Col27a1 | 298101 | 1,04 | up   |
| 5951108 | 7275821 | 1562057 | collagen, type XXVII, alpha 1                                                               | Col27a1 | 298101 | 1,04 | up   |
| 6492533 | 7275821 | 1562061 | collagen, type XXVII, alpha 1                                                               | Col27a1 | 298101 | 1,04 | down |
| 5817494 | 7275821 | 1562074 | collagen, type XXVII, alpha 1                                                               | Col27a1 | 298101 | 1,03 | down |
| 6501166 | 7275821 | 1562046 | collagen, type XXVII, alpha 1                                                               | Col27a1 | 298101 | 1,02 | up   |
| 6192691 | 7275821 | 1562060 | collagen, type XXVII, alpha 1                                                               | Col27a1 | 298101 | 1,02 | down |
| 5832794 | 7275821 | 1562077 | collagen, type XXVII, alpha 1                                                               | Col27a1 | 298101 | 1,01 | up   |
| 6062123 | 7275821 | 1562039 | collagen, type XXVII, alpha 1                                                               | Col27a1 | 298101 | 1,01 | down |
| 5791065 | 7275821 | 1562098 | collagen, type XXVII, alpha 1                                                               | Col27a1 | 298101 | 1,00 | up   |
| 6436610 | 7275821 | 1562097 | collagen, type XXVII, alpha 1                                                               | Col27a1 | 298101 | 1,00 | down |
| 5850143 | 7148838 | 1248121 | collagen-like tail subunit (single strand of homotrimer) of asymmetric acetylcholinesterase | Colq    | 29755  | 2,20 | up   |
| 6622948 | 7148838 | 1248122 | collagen-like tail subunit (single strand of homotrimer) of asymmetric acetylcholinesterase | Colq    | 29755  | 2,15 | up   |
| 6373471 | 7148838 | 1248126 | collagen-like tail subunit (single strand of homotrimer) of asymmetric acetylcholinesterase | Colq    | 29755  | 1,85 | down |

|         |         |         |                                                                                             |        |        |      |      |
|---------|---------|---------|---------------------------------------------------------------------------------------------|--------|--------|------|------|
| 6255992 | 7148838 | 1248116 | collagen-like tail subunit (single strand of homotrimer) of asymmetric acetylcholinesterase | Colq   | 29755  | 1,43 | up   |
| 6096398 | 7148838 | 1248129 | collagen-like tail subunit (single strand of homotrimer) of asymmetric acetylcholinesterase | Colq   | 29755  | 1,43 | up   |
| 5984208 | 7148838 | 1248118 | collagen-like tail subunit (single strand of homotrimer) of asymmetric acetylcholinesterase | Colq   | 29755  | 1,36 | down |
| 6619181 | 7148838 | 1248120 | collagen-like tail subunit (single strand of homotrimer) of asymmetric acetylcholinesterase | Colq   | 29755  | 1,35 | up   |
| 6392835 | 7148838 | 1248130 | collagen-like tail subunit (single strand of homotrimer) of asymmetric acetylcholinesterase | Colq   | 29755  | 1,27 | up   |
| 6672277 | 7148838 | 1248127 | collagen-like tail subunit (single strand of homotrimer) of asymmetric acetylcholinesterase | Colq   | 29755  | 1,22 | down |
| 6336982 | 7148838 | 1248114 | collagen-like tail subunit (single strand of homotrimer) of asymmetric acetylcholinesterase | Colq   | 29755  | 1,16 | up   |
| 6449594 | 7148838 | 1248119 | collagen-like tail subunit (single strand of homotrimer) of asymmetric acetylcholinesterase | Colq   | 29755  | 1,16 | down |
| 5646259 | 7148838 | 1248123 | collagen-like tail subunit (single strand of homotrimer) of asymmetric acetylcholinesterase | Colq   | 29755  | 1,11 | down |
| 6116939 | 7148838 | 1248124 | collagen-like tail subunit (single strand of homotrimer) of asymmetric acetylcholinesterase | Colq   | 29755  | 1,10 | up   |
| 6326299 | 7148838 | 1248115 | collagen-like tail subunit (single strand of homotrimer) of asymmetric acetylcholinesterase | Colq   | 29755  | 1,08 | up   |
| 6051743 | 7148838 | 1248128 | collagen-like tail subunit (single strand of homotrimer) of asymmetric acetylcholinesterase | Colq   | 29755  | 1,06 | down |
| 5814118 | 7148838 | 1248125 | collagen-like tail subunit (single strand of homotrimer) of asymmetric acetylcholinesterase | Colq   | 29755  | 1,02 | up   |
| 6041814 | 7148838 | 1248117 | collagen-like tail subunit (single strand of homotrimer) of asymmetric acetylcholinesterase | Colq   | 29755  | 1,02 | up   |
| 5713494 | 7212626 | 1404712 | colony stimulating factor 1 (macrophage)                                                    | Csf1   | 78965  | 3,80 | down |
| 5774566 | 7212626 | 1404716 | colony stimulating factor 1 (macrophage)                                                    | Csf1   | 78965  | 2,64 | up   |
| 6330336 | 7212626 | 1404708 | colony stimulating factor 1 (macrophage)                                                    | Csf1   | 78965  | 2,39 | down |
| 5742887 | 7212626 | 1404708 | colony stimulating factor 1 (macrophage)                                                    | Csf1   | 78965  | 2,35 | down |
| 6440350 | 7212626 | 1404715 | colony stimulating factor 1 (macrophage)                                                    | Csf1   | 78965  | 2,27 | up   |
| 6232127 | 7212626 | 1404712 | colony stimulating factor 1 (macrophage)                                                    | Csf1   | 78965  | 1,99 | down |
| 6005055 | 7212626 | 1404711 | colony stimulating factor 1 (macrophage)                                                    | Csf1   | 78965  | 1,49 | up   |
| 6388120 | 7212626 | 1404712 | colony stimulating factor 1 (macrophage)                                                    | Csf1   | 78965  | 1,45 | up   |
| 5781564 | 7212626 | 1404713 | colony stimulating factor 1 (macrophage)                                                    | Csf1   | 78965  | 1,38 | down |
| 5817698 | 7212626 | 1404716 | colony stimulating factor 1 (macrophage)                                                    | Csf1   | 78965  | 1,34 | up   |
| 5793197 | 7212626 | 1404714 | colony stimulating factor 1 (macrophage)                                                    | Csf1   | 78965  | 1,31 | up   |
| 6174544 | 7212626 | 1404716 | colony stimulating factor 1 (macrophage)                                                    | Csf1   | 78965  | 1,25 | down |
| 5945323 | 7212626 | 1404708 | colony stimulating factor 1 (macrophage)                                                    | Csf1   | 78965  | 1,17 | down |
| 6087692 | 7212626 | 1404710 | colony stimulating factor 1 (macrophage)                                                    | Csf1   | 78965  | 1,14 | down |
| 6075637 | 7212626 | 1404712 | colony stimulating factor 1 (macrophage)                                                    | Csf1   | 78965  | 1,13 | down |
| 6446401 | 7212626 | 1404708 | colony stimulating factor 1 (macrophage)                                                    | Csf1   | 78965  | 1,10 | down |
| 5645694 | 7212626 | 1404709 | colony stimulating factor 1 (macrophage)                                                    | Csf1   | 78965  | 1,01 | up   |
| 6062994 | 7318578 | 1668904 | colony stimulating factor 2 receptor, beta, low-affinity (granulocyte-macrophage)           | Csf2rb | 171081 | 2,17 | down |
| 5802847 | 7318578 | 1668902 | colony stimulating factor 2 receptor, beta, low-affinity (granulocyte-macrophage)           | Csf2rb | 171081 | 2,00 | up   |
| 5721036 | 7318578 | 1668904 | colony stimulating factor 2 receptor, beta, low-affinity (granulocyte-macrophage)           | Csf2rb | 171081 | 1,83 | up   |
| 5918351 | 7318578 | 1668904 | colony stimulating factor 2 receptor, beta, low-affinity (granulocyte-macrophage)           | Csf2rb | 171081 | 1,75 | up   |
| 6547375 | 7318578 | 1668897 | colony stimulating factor 2 receptor, beta, low-affinity (granulocyte-macrophage)           | Csf2rb | 171081 | 1,53 | down |
| 6299748 | 7318578 | 1668895 | colony stimulating factor 2 receptor, beta, low-affinity (granulocyte-macrophage)           | Csf2rb | 171081 | 1,52 | down |
| 5937943 | 7318578 | 1668903 | colony stimulating factor 2 receptor, beta, low-affinity (granulocyte-macrophage)           | Csf2rb | 171081 | 1,49 | down |
| 5748441 | 7318578 | 1668901 | colony stimulating factor 2 receptor, beta, low-affinity (granulocyte-macrophage)           | Csf2rb | 171081 | 1,42 | down |
| 6445070 | 7318578 | 1668904 | colony stimulating factor 2 receptor, beta, low-affinity (granulocyte-macrophage)           | Csf2rb | 171081 | 1,37 | down |
| 6445608 | 7318578 | 1668896 | colony stimulating factor 2 receptor, beta, low-affinity (granulocyte-macrophage)           | Csf2rb | 171081 | 1,30 | down |
| 6090837 | 7318578 | 1668904 | colony stimulating factor 2 receptor, beta, low-affinity (granulocyte-macrophage)           | Csf2rb | 171081 | 1,29 | up   |
| 6533008 | 7318578 | 1668899 | colony stimulating factor 2 receptor, beta, low-affinity (granulocyte-macrophage)           | Csf2rb | 171081 | 1,28 | down |
| 6402297 | 7318578 | 1668897 | colony stimulating factor 2 receptor, beta, low-affinity (granulocyte-macrophage)           | Csf2rb | 171081 | 1,26 | up   |
| 5833421 | 7318578 | 1668892 | colony stimulating factor 2 receptor, beta, low-affinity (granulocyte-macrophage)           | Csf2rb | 171081 | 1,23 | up   |
| 6568608 | 7318578 | 1668893 | colony stimulating factor 2 receptor, beta, low-affinity (granulocyte-macrophage)           | Csf2rb | 171081 | 1,15 | down |
| 5952964 | 7318578 | 1668904 | colony stimulating factor 2 receptor, beta, low-affinity (granulocyte-macrophage)           | Csf2rb | 171081 | 1,15 | up   |
| 6274592 | 7318578 | 1668904 | colony stimulating factor 2 receptor, beta, low-affinity (granulocyte-macrophage)           | Csf2rb | 171081 | 1,10 | up   |
| 6121487 | 7318578 | 1668894 | colony stimulating factor 2 receptor, beta, low-affinity (granulocyte-macrophage)           | Csf2rb | 171081 | 1,09 | down |
| 6248046 | 7318578 | 1668892 | colony stimulating factor 2 receptor, beta, low-affinity (granulocyte-macrophage)           | Csf2rb | 171081 | 1,07 | up   |
| 6124985 | 7318578 | 1668894 | colony stimulating factor 2 receptor, beta, low-affinity (granulocyte-macrophage)           | Csf2rb | 171081 | 1,04 | up   |
| 6500332 | 7318578 | 1668900 | colony stimulating factor 2 receptor, beta, low-affinity (granulocyte-macrophage)           | Csf2rb | 171081 | 1,04 | down |
| 6055554 | 7318578 | 1668896 | colony stimulating factor 2 receptor, beta, low-affinity (granulocyte-macrophage)           | Csf2rb | 171081 | 1,04 | up   |
| 5973495 | 7318578 | 1668904 | colony stimulating factor 2 receptor, beta, low-affinity (granulocyte-macrophage)           | Csf2rb | 171081 | 1,02 | up   |
| 6558663 | 7318578 | 1668898 | colony stimulating factor 2 receptor, beta, low-affinity (granulocyte-macrophage)           | Csf2rb | 171081 | 1,02 | down |
| 5870069 | 7279489 | 1571781 | colony stimulating factor 3 receptor (granulocyte)                                          | Csf3r  | 298518 | 2,84 | up   |
| 6001172 | 7279489 | 1571795 | colony stimulating factor 3 receptor (granulocyte)                                          | Csf3r  | 298518 | 1,77 | down |

|         |         |         |                                                    |       |        |       |      |
|---------|---------|---------|----------------------------------------------------|-------|--------|-------|------|
| 6160975 | 7279489 | 1571798 | colony stimulating factor 3 receptor (granulocyte) | Csf3r | 298518 | 1,76  | down |
| 6632972 | 7279489 | 1571798 | colony stimulating factor 3 receptor (granulocyte) | Csf3r | 298518 | 1,73  | down |
| 6447931 | 7279489 | 1571784 | colony stimulating factor 3 receptor (granulocyte) | Csf3r | 298518 | 1,59  | up   |
| 6345635 | 7279489 | 1571797 | colony stimulating factor 3 receptor (granulocyte) | Csf3r | 298518 | 1,48  | up   |
| 5647432 | 7279489 | 1571792 | colony stimulating factor 3 receptor (granulocyte) | Csf3r | 298518 | 1,45  | up   |
| 6005664 | 7279489 | 1571796 | colony stimulating factor 3 receptor (granulocyte) | Csf3r | 298518 | 1,42  | down |
| 5999459 | 7279489 | 1571793 | colony stimulating factor 3 receptor (granulocyte) | Csf3r | 298518 | 1,30  | up   |
| 6675023 | 7279489 | 1571783 | colony stimulating factor 3 receptor (granulocyte) | Csf3r | 298518 | 1,22  | down |
| 6629351 | 7279489 | 1571789 | colony stimulating factor 3 receptor (granulocyte) | Csf3r | 298518 | 1,18  | up   |
| 6632504 | 7279489 | 1571787 | colony stimulating factor 3 receptor (granulocyte) | Csf3r | 298518 | 1,16  | down |
| 5709135 | 7279489 | 1571784 | colony stimulating factor 3 receptor (granulocyte) | Csf3r | 298518 | 1,10  | down |
| 5880531 | 7279489 | 1571786 | colony stimulating factor 3 receptor (granulocyte) | Csf3r | 298518 | 1,09  | up   |
| 6698233 | 7279489 | 1571797 | colony stimulating factor 3 receptor (granulocyte) | Csf3r | 298518 | 1,05  | down |
| 6246161 | 7279489 | 1571788 | colony stimulating factor 3 receptor (granulocyte) | Csf3r | 298518 | 1,04  | up   |
| 6455644 | 7279489 | 1571794 | colony stimulating factor 3 receptor (granulocyte) | Csf3r | 298518 | 1,03  | up   |
| 6546540 | 7279489 | 1571782 | colony stimulating factor 3 receptor (granulocyte) | Csf3r | 298518 | 1,02  | down |
| 5889326 | 7279489 | 1571785 | colony stimulating factor 3 receptor (granulocyte) | Csf3r | 298518 | 1,01  | down |
| 6056713 | 7279489 | 1571791 | colony stimulating factor 3 receptor (granulocyte) | Csf3r | 298518 | 1,00  | down |
| 6704712 | 7141151 | 1228922 | COMM domain containing 6                           | Comm6 | 498559 | 1,64  | up   |
| 6477581 | 7141151 | 1228924 | COMM domain containing 6                           | Comm6 | 498559 | 1,36  | up   |
| 5888057 | 7141151 | 1228927 | COMM domain containing 6                           | Comm6 | 498559 | 1,32  | up   |
| 6006540 | 7141151 | 1228924 | COMM domain containing 6                           | Comm6 | 498559 | 1,27  | up   |
| 6643307 | 7141151 | 1228927 | COMM domain containing 6                           | Comm6 | 498559 | 1,18  | down |
| 6423745 | 7141151 | 1228922 | COMM domain containing 6                           | Comm6 | 498559 | 1,13  | down |
| 5917119 | 7141151 | 1228924 | COMM domain containing 6                           | Comm6 | 498559 | 1,06  | up   |
| 5971694 | 7141151 | 1228927 | COMM domain containing 6                           | Comm6 | 498559 | 1,06  | down |
| 6523518 | 7115728 | 1166532 | complement component (3b/4b) receptor 1-like       | Cr1l  | 54243  | 2,94  | down |
| 5882845 | 7115728 | 1166524 | complement component (3b/4b) receptor 1-like       | Cr1l  | 54243  | 1,60  | up   |
| 5879271 | 7115728 | 1166529 | complement component (3b/4b) receptor 1-like       | Cr1l  | 54243  | 1,44  | up   |
| 6210062 | 7115728 | 1166528 | complement component (3b/4b) receptor 1-like       | Cr1l  | 54243  | 1,26  | down |
| 6722126 | 7115728 | 1166523 | complement component (3b/4b) receptor 1-like       | Cr1l  | 54243  | 1,20  | down |
| 5737674 | 7115728 | 1166525 | complement component (3b/4b) receptor 1-like       | Cr1l  | 54243  | 1,20  | up   |
| 6629459 | 7115728 | 1166530 | complement component (3b/4b) receptor 1-like       | Cr1l  | 54243  | 1,16  | up   |
| 6554962 | 7115728 | 1166528 | complement component (3b/4b) receptor 1-like       | Cr1l  | 54243  | 1,13  | up   |
| 6268669 | 7115728 | 1166527 | complement component (3b/4b) receptor 1-like       | Cr1l  | 54243  | 1,11  | down |
| 5992450 | 7115728 | 1166526 | complement component (3b/4b) receptor 1-like       | Cr1l  | 54243  | 1,10  | down |
| 6417267 | 7115728 | 1166522 | complement component (3b/4b) receptor 1-like       | Cr1l  | 54243  | 1,07  | up   |
| 6400969 | 7115728 | 1166522 | complement component (3b/4b) receptor 1-like       | Cr1l  | 54243  | 1,02  | down |
| 5632760 | 7115728 | 1166531 | complement component (3b/4b) receptor 1-like       | Cr1l  | 54243  | 1,02  | down |
| 6433755 | 7115728 | 1166532 | complement component (3b/4b) receptor 1-like       | Cr1l  | 54243  | 1,01  | down |
| 6104957 | 7258323 | 1518478 | complement component 1, r subcomponent             | Cr1r  | 312705 | 14,14 | up   |
| 6324241 | 7258323 | 1518475 | complement component 1, r subcomponent             | Cr1r  | 312705 | 8,38  | up   |
| 6080797 | 7258323 | 1518480 | complement component 1, r subcomponent             | Cr1r  | 312705 | 8,16  | up   |
| 5939433 | 7258323 | 1518476 | complement component 1, r subcomponent             | Cr1r  | 312705 | 5,14  | up   |
| 5988892 | 7258323 | 1518482 | complement component 1, r subcomponent             | Cr1r  | 312705 | 4,04  | up   |
| 6326421 | 7258323 | 1518477 | complement component 1, r subcomponent             | Cr1r  | 312705 | 3,75  | up   |
| 6707899 | 7258323 | 1518477 | complement component 1, r subcomponent             | Cr1r  | 312705 | 2,31  | up   |
| 5931422 | 7258323 | 1518474 | complement component 1, r subcomponent             | Cr1r  | 312705 | 1,77  | up   |
| 5850274 | 7258323 | 1518471 | complement component 1, r subcomponent             | Cr1r  | 312705 | 1,28  | up   |
| 6706790 | 7258323 | 1518479 | complement component 1, r subcomponent             | Cr1r  | 312705 | 1,27  | up   |
| 6317247 | 7258323 | 1518481 | complement component 1, r subcomponent             | Cr1r  | 312705 | 1,26  | down |
| 5740483 | 7258323 | 1518482 | complement component 1, r subcomponent             | Cr1r  | 312705 | 1,14  | down |
| 6016803 | 7258323 | 1518474 | complement component 1, r subcomponent             | Cr1r  | 312705 | 1,04  | up   |
| 6394600 | 7269448 | 1545886 | complement component 1, s subcomponent             | Cr1s  | 192262 | 4,73  | down |
| 6313085 | 7269448 | 1545880 | complement component 1, s subcomponent             | Cr1s  | 192262 | 2,89  | down |
| 6074943 | 7269448 | 1545881 | complement component 1, s subcomponent             | Cr1s  | 192262 | 2,22  | up   |
| 6128130 | 7269448 | 1545883 | complement component 1, s subcomponent             | Cr1s  | 192262 | 2,16  | up   |

|         |         |         |                                               |       |        |       |      |
|---------|---------|---------|-----------------------------------------------|-------|--------|-------|------|
| 6281501 | 7269448 | 1545884 | complement component 1, s subcomponent        | C1s   | 192262 | 1,85  | up   |
| 6139849 | 7269448 | 1545885 | complement component 1, s subcomponent        | C1s   | 192262 | 1,70  | down |
| 5827223 | 7269448 | 1545879 | complement component 1, s subcomponent        | C1s   | 192262 | 1,52  | up   |
| 6471210 | 7269448 | 1545878 | complement component 1, s subcomponent        | C1s   | 192262 | 1,33  | up   |
| 5647304 | 7269448 | 1545877 | complement component 1, s subcomponent        | C1s   | 192262 | 1,25  | up   |
| 6625463 | 7269448 | 1545874 | complement component 1, s subcomponent        | C1s   | 192262 | 1,24  | down |
| 5662949 | 7269448 | 1545882 | complement component 1, s subcomponent        | C1s   | 192262 | 1,24  | up   |
| 5678326 | 7269448 | 1545876 | complement component 1, s subcomponent        | C1s   | 192262 | 1,12  | up   |
| 5851904 | 7269448 | 1545875 | complement component 1, s subcomponent        | C1s   | 192262 | 1,00  | down |
| 5658858 | 7371642 | 1800596 | complement component 3                        | C3    | 24232  | 12,06 | down |
| 6373041 | 7371642 | 1800638 | complement component 3                        | C3    | 24232  | 11,63 | down |
| 6442401 | 7371642 | 1800621 | complement component 3                        | C3    | 24232  | 6,24  | down |
| 6700008 | 7371642 | 1800607 | complement component 3                        | C3    | 24232  | 5,02  | down |
| 5636418 | 7371642 | 1800632 | complement component 3                        | C3    | 24232  | 3,53  | up   |
| 5800464 | 7371642 | 1800638 | complement component 3                        | C3    | 24232  | 3,32  | down |
| 5746009 | 7371642 | 1800625 | complement component 3                        | C3    | 24232  | 2,83  | down |
| 6618475 | 7371642 | 1800606 | complement component 3                        | C3    | 24232  | 2,74  | down |
| 6699431 | 7371642 | 1800631 | complement component 3                        | C3    | 24232  | 2,60  | up   |
| 6472422 | 7371642 | 1800605 | complement component 3                        | C3    | 24232  | 2,34  | down |
| 6287600 | 7371642 | 1800619 | complement component 3                        | C3    | 24232  | 2,26  | up   |
| 6253972 | 7371642 | 1800629 | complement component 3                        | C3    | 24232  | 2,22  | up   |
| 6145714 | 7371642 | 1800604 | complement component 3                        | C3    | 24232  | 2,13  | down |
| 5919926 | 7371642 | 1800597 | complement component 3                        | C3    | 24232  | 2,07  | down |
| 5830932 | 7371642 | 1800602 | complement component 3                        | C3    | 24232  | 2,04  | down |
| 6358673 | 7371642 | 1800630 | complement component 3                        | C3    | 24232  | 2,01  | up   |
| 5956845 | 7371642 | 1800601 | complement component 3                        | C3    | 24232  | 2,00  | down |
| 5662068 | 7371642 | 1800612 | complement component 3                        | C3    | 24232  | 1,91  | up   |
| 6122202 | 7371642 | 1800616 | complement component 3                        | C3    | 24232  | 1,84  | down |
| 6579413 | 7371642 | 1800628 | complement component 3                        | C3    | 24232  | 1,77  | up   |
| 5883192 | 7371642 | 1800613 | complement component 3                        | C3    | 24232  | 1,67  | up   |
| 6620119 | 7371642 | 1800626 | complement component 3                        | C3    | 24232  | 1,64  | down |
| 6073825 | 7371642 | 1800635 | complement component 3                        | C3    | 24232  | 1,62  | up   |
| 6267262 | 7371642 | 1800635 | complement component 3                        | C3    | 24232  | 1,61  | up   |
| 6703436 | 7371642 | 1800617 | complement component 3                        | C3    | 24232  | 1,59  | up   |
| 5948670 | 7371642 | 1800623 | complement component 3                        | C3    | 24232  | 1,52  | up   |
| 6573373 | 7371642 | 1800620 | complement component 3                        | C3    | 24232  | 1,51  | down |
| 5880442 | 7371642 | 1800610 | complement component 3                        | C3    | 24232  | 1,48  | down |
| 6186298 | 7371642 | 1800616 | complement component 3                        | C3    | 24232  | 1,42  | up   |
| 5729810 | 7371642 | 1800611 | complement component 3                        | C3    | 24232  | 1,39  | up   |
| 5880554 | 7371642 | 1800614 | complement component 3                        | C3    | 24232  | 1,39  | up   |
| 5696544 | 7371642 | 1800603 | complement component 3                        | C3    | 24232  | 1,35  | down |
| 6666543 | 7371642 | 1800633 | complement component 3                        | C3    | 24232  | 1,27  | up   |
| 6060260 | 7371642 | 1800615 | complement component 3                        | C3    | 24232  | 1,25  | up   |
| 6025551 | 7371642 | 1800636 | complement component 3                        | C3    | 24232  | 1,23  | down |
| 6723575 | 7371642 | 1800598 | complement component 3                        | C3    | 24232  | 1,20  | down |
| 6274947 | 7371642 | 1800627 | complement component 3                        | C3    | 24232  | 1,19  | up   |
| 5796343 | 7371642 | 1800621 | complement component 3                        | C3    | 24232  | 1,17  | up   |
| 6388324 | 7371642 | 1800618 | complement component 3                        | C3    | 24232  | 1,14  | down |
| 6392367 | 7371642 | 1800622 | complement component 3                        | C3    | 24232  | 1,13  | up   |
| 6543043 | 7371642 | 1800610 | complement component 3                        | C3    | 24232  | 1,11  | up   |
| 5977363 | 7371642 | 1800599 | complement component 3                        | C3    | 24232  | 1,05  | up   |
| 6437265 | 7371642 | 1800624 | complement component 3                        | C3    | 24232  | 1,04  | up   |
| 6151612 | 7371642 | 1800600 | complement component 3                        | C3    | 24232  | 1,04  | down |
| 6670916 | 7371642 | 1800608 | complement component 3                        | C3    | 24232  | 1,01  | up   |
| 6701257 | 7110906 | 1154528 | complement component 4 binding protein, alpha | C4bpa | 24235  | 3,61  | down |
| 6377646 | 7110906 | 1154536 | complement component 4 binding protein, alpha | C4bpa | 24235  | 2,80  | up   |
| 5939297 | 7110906 | 1154527 | complement component 4 binding protein, alpha | C4bpa | 24235  | 2,48  | down |

|         |         |         |                                                  |        |        |      |      |
|---------|---------|---------|--------------------------------------------------|--------|--------|------|------|
| 5953502 | 7110906 | 1154528 | complement component 4 binding protein, alpha    | C4bpa  | 24235  | 2,37 | down |
| 6211857 | 7110906 | 1154532 | complement component 4 binding protein, alpha    | C4bpa  | 24235  | 2,09 | up   |
| 5834395 | 7110906 | 1154535 | complement component 4 binding protein, alpha    | C4bpa  | 24235  | 1,87 | up   |
| 5972104 | 7110906 | 1154531 | complement component 4 binding protein, alpha    | C4bpa  | 24235  | 1,67 | up   |
| 6503816 | 7110906 | 1154533 | complement component 4 binding protein, alpha    | C4bpa  | 24235  | 1,59 | up   |
| 6207014 | 7110906 | 1154539 | complement component 4 binding protein, alpha    | C4bpa  | 24235  | 1,57 | up   |
| 6323359 | 7110906 | 1154538 | complement component 4 binding protein, alpha    | C4bpa  | 24235  | 1,53 | up   |
| 6500744 | 7110906 | 1154529 | complement component 4 binding protein, alpha    | C4bpa  | 24235  | 1,52 | down |
| 6267932 | 7110906 | 1154537 | complement component 4 binding protein, alpha    | C4bpa  | 24235  | 1,46 | up   |
| 5657218 | 7110906 | 1154530 | complement component 4 binding protein, alpha    | C4bpa  | 24235  | 1,42 | down |
| 6381961 | 7110906 | 1154538 | complement component 4 binding protein, alpha    | C4bpa  | 24235  | 1,26 | down |
| 6679284 | 7110906 | 1154534 | complement component 4 binding protein, alpha    | C4bpa  | 24235  | 1,09 | up   |
| 5892729 | 7110911 | 1154545 | complement component 4 binding protein, beta     | C4bpb  | 24236  | 2,03 | down |
| 6240165 | 7110911 | 1154549 | complement component 4 binding protein, beta     | C4bpb  | 24236  | 1,63 | up   |
| 5902928 | 7110911 | 1154551 | complement component 4 binding protein, beta     | C4bpb  | 24236  | 1,57 | up   |
| 6500891 | 7110911 | 1154546 | complement component 4 binding protein, beta     | C4bpb  | 24236  | 1,54 | down |
| 6725989 | 7110911 | 1154548 | complement component 4 binding protein, beta     | C4bpb  | 24236  | 1,43 | up   |
| 6041087 | 7110911 | 1154551 | complement component 4 binding protein, beta     | C4bpb  | 24236  | 1,31 | down |
| 6570116 | 7110911 | 1154547 | complement component 4 binding protein, beta     | C4bpb  | 24236  | 1,20 | down |
| 5701663 | 7110911 | 1154550 | complement component 4 binding protein, beta     | C4bpb  | 24236  | 1,17 | up   |
| 6707558 | 7190247 | 1350350 | complement component 6                           | C6     | 24237  | 2,75 | up   |
| 5992500 | 7190247 | 1350363 | complement component 6                           | C6     | 24237  | 1,91 | down |
| 6543200 | 7190247 | 1350361 | complement component 6                           | C6     | 24237  | 1,84 | down |
| 5911154 | 7190247 | 1350364 | complement component 6                           | C6     | 24237  | 1,63 | down |
| 6570696 | 7190247 | 1350348 | complement component 6                           | C6     | 24237  | 1,58 | up   |
| 6285968 | 7190247 | 1350356 | complement component 6                           | C6     | 24237  | 1,51 | up   |
| 6441280 | 7190247 | 1350355 | complement component 6                           | C6     | 24237  | 1,48 | down |
| 5791055 | 7190247 | 1350358 | complement component 6                           | C6     | 24237  | 1,32 | down |
| 6743004 | 7190247 | 1350349 | complement component 6                           | C6     | 24237  | 1,32 | up   |
| 5948975 | 7190247 | 1350351 | complement component 6                           | C6     | 24237  | 1,29 | up   |
| 6490200 | 7190247 | 1350354 | complement component 6                           | C6     | 24237  | 1,26 | up   |
| 5958499 | 7190247 | 1350359 | complement component 6                           | C6     | 24237  | 1,24 | down |
| 5902509 | 7190247 | 1350351 | complement component 6                           | C6     | 24237  | 1,19 | down |
| 6322297 | 7190247 | 1350364 | complement component 6                           | C6     | 24237  | 1,18 | down |
| 6061421 | 7190247 | 1350352 | complement component 6                           | C6     | 24237  | 1,13 | down |
| 6430614 | 7190247 | 1350353 | complement component 6                           | C6     | 24237  | 1,13 | up   |
| 6630455 | 7190247 | 1350362 | complement component 6                           | C6     | 24237  | 1,09 | down |
| 6000529 | 7190247 | 1350360 | complement component 6                           | C6     | 24237  | 1,06 | down |
| 5841437 | 7190247 | 1350357 | complement component 6                           | C6     | 24237  | 1,03 | up   |
| 5964517 | 7190372 | 1350687 | complement component 9                           | C9     | 117512 | 2,12 | down |
| 6468557 | 7190372 | 1350677 | complement component 9                           | C9     | 117512 | 2,11 | down |
| 6434568 | 7190372 | 1350682 | complement component 9                           | C9     | 117512 | 2,06 | down |
| 5883231 | 7190372 | 1350680 | complement component 9                           | C9     | 117512 | 1,66 | up   |
| 5995218 | 7190372 | 1350681 | complement component 9                           | C9     | 117512 | 1,50 | up   |
| 6465646 | 7190372 | 1350682 | complement component 9                           | C9     | 117512 | 1,42 | up   |
| 6034588 | 7190372 | 1350684 | complement component 9                           | C9     | 117512 | 1,28 | up   |
| 5989754 | 7190372 | 1350679 | complement component 9                           | C9     | 117512 | 1,27 | up   |
| 5631663 | 7190372 | 1350685 | complement component 9                           | C9     | 117512 | 1,17 | down |
| 6620662 | 7190372 | 1350678 | complement component 9                           | C9     | 117512 | 1,11 | down |
| 6571571 | 7190372 | 1350679 | complement component 9                           | C9     | 117512 | 1,10 | down |
| 6712997 | 7190372 | 1350683 | complement component 9                           | C9     | 117512 | 1,09 | up   |
| 5839357 | 7190372 | 1350686 | complement component 9                           | C9     | 117512 | 1,07 | down |
| 6350990 | 7291853 | 1600979 | connector enhancer of kinase suppressor of Ras 1 | Cnksr1 | 298545 | 1,74 | down |
| 6423065 | 7291853 | 1600986 | connector enhancer of kinase suppressor of Ras 1 | Cnksr1 | 298545 | 1,53 | up   |
| 6417083 | 7291853 | 1600976 | connector enhancer of kinase suppressor of Ras 1 | Cnksr1 | 298545 | 1,53 | up   |
| 6251706 | 7291853 | 1600980 | connector enhancer of kinase suppressor of Ras 1 | Cnksr1 | 298545 | 1,52 | down |
| 6612787 | 7291853 | 1600971 | connector enhancer of kinase suppressor of Ras 1 | Cnksr1 | 298545 | 1,50 | up   |



|         |         |         |                                                  |         |        |      |      |
|---------|---------|---------|--------------------------------------------------|---------|--------|------|------|
| 6373327 | 7291853 | 1600975 | connector enhancer of kinase suppressor of Ras 1 | Cnksr1  | 298545 | 1,41 | up   |
| 5872274 | 7291853 | 1600970 | connector enhancer of kinase suppressor of Ras 1 | Cnksr1  | 298545 | 1,37 | down |
| 5688834 | 7291853 | 1600983 | connector enhancer of kinase suppressor of Ras 1 | Cnksr1  | 298545 | 1,37 | up   |
| 5754231 | 7291853 | 1600972 | connector enhancer of kinase suppressor of Ras 1 | Cnksr1  | 298545 | 1,35 | down |
| 6228396 | 7291853 | 1600974 | connector enhancer of kinase suppressor of Ras 1 | Cnksr1  | 298545 | 1,32 | up   |
| 6550348 | 7291853 | 1600978 | connector enhancer of kinase suppressor of Ras 1 | Cnksr1  | 298545 | 1,32 | up   |
| 5660222 | 7291853 | 1600984 | connector enhancer of kinase suppressor of Ras 1 | Cnksr1  | 298545 | 1,30 | up   |
| 6632679 | 7291853 | 1600988 | connector enhancer of kinase suppressor of Ras 1 | Cnksr1  | 298545 | 1,26 | down |
| 5908146 | 7291853 | 1600981 | connector enhancer of kinase suppressor of Ras 1 | Cnksr1  | 298545 | 1,25 | down |
| 6525366 | 7291853 | 1600973 | connector enhancer of kinase suppressor of Ras 1 | Cnksr1  | 298545 | 1,22 | down |
| 6255225 | 7291853 | 1600968 | connector enhancer of kinase suppressor of Ras 1 | Cnksr1  | 298545 | 1,22 | down |
| 6345658 | 7291853 | 1600972 | connector enhancer of kinase suppressor of Ras 1 | Cnksr1  | 298545 | 1,20 | up   |
| 5828963 | 7291853 | 1600988 | connector enhancer of kinase suppressor of Ras 1 | Cnksr1  | 298545 | 1,20 | down |
| 5677930 | 7291853 | 1600980 | connector enhancer of kinase suppressor of Ras 1 | Cnksr1  | 298545 | 1,16 | down |
| 6539887 | 7291853 | 1600985 | connector enhancer of kinase suppressor of Ras 1 | Cnksr1  | 298545 | 1,15 | down |
| 6238097 | 7291853 | 1600982 | connector enhancer of kinase suppressor of Ras 1 | Cnksr1  | 298545 | 1,12 | up   |
| 5947431 | 7291853 | 1600987 | connector enhancer of kinase suppressor of Ras 1 | Cnksr1  | 298545 | 1,11 | up   |
| 6531699 | 7291853 | 1600982 | connector enhancer of kinase suppressor of Ras 1 | Cnksr1  | 298545 | 1,09 | up   |
| 6306655 | 7291853 | 1600989 | connector enhancer of kinase suppressor of Ras 1 | Cnksr1  | 298545 | 1,08 | down |
| 6096448 | 7291853 | 1600969 | connector enhancer of kinase suppressor of Ras 1 | Cnksr1  | 298545 | 1,07 | up   |
| 6256244 | 7291853 | 1600976 | connector enhancer of kinase suppressor of Ras 1 | Cnksr1  | 298545 | 1,03 | down |
| 6534989 | 7320042 | 1672545 | contactin 1                                      | Cntn1   | 117258 | 2,15 | down |
| 6404835 | 7320042 | 1672534 | contactin 1                                      | Cntn1   | 117258 | 2,00 | up   |
| 6126847 | 7320042 | 1672529 | contactin 1                                      | Cntn1   | 117258 | 1,83 | up   |
| 5947204 | 7320042 | 1672530 | contactin 1                                      | Cntn1   | 117258 | 1,73 | down |
| 5962115 | 7320042 | 1672533 | contactin 1                                      | Cntn1   | 117258 | 1,40 | up   |
| 6222602 | 7320042 | 1672529 | contactin 1                                      | Cntn1   | 117258 | 1,38 | up   |
| 6156127 | 7320042 | 1672538 | contactin 1                                      | Cntn1   | 117258 | 1,34 | down |
| 6311855 | 7320042 | 1672547 | contactin 1                                      | Cntn1   | 117258 | 1,33 | down |
| 6383149 | 7320042 | 1672548 | contactin 1                                      | Cntn1   | 117258 | 1,31 | down |
| 6584161 | 7320042 | 1672544 | contactin 1                                      | Cntn1   | 117258 | 1,31 | down |
| 6211777 | 7320042 | 1672551 | contactin 1                                      | Cntn1   | 117258 | 1,31 | up   |
| 6338735 | 7320042 | 1672536 | contactin 1                                      | Cntn1   | 117258 | 1,30 | up   |
| 6686478 | 7320042 | 1672546 | contactin 1                                      | Cntn1   | 117258 | 1,30 | down |
| 6259818 | 7320042 | 1672531 | contactin 1                                      | Cntn1   | 117258 | 1,27 | up   |
| 6634594 | 7320042 | 1672549 | contactin 1                                      | Cntn1   | 117258 | 1,27 | down |
| 5731561 | 7320042 | 1672532 | contactin 1                                      | Cntn1   | 117258 | 1,26 | down |
| 6376403 | 7320042 | 1672537 | contactin 1                                      | Cntn1   | 117258 | 1,25 | up   |
| 5807898 | 7320042 | 1672540 | contactin 1                                      | Cntn1   | 117258 | 1,25 | down |
| 6711584 | 7320042 | 1672543 | contactin 1                                      | Cntn1   | 117258 | 1,21 | up   |
| 6311305 | 7320042 | 1672542 | contactin 1                                      | Cntn1   | 117258 | 1,14 | up   |
| 6539852 | 7320042 | 1672535 | contactin 1                                      | Cntn1   | 117258 | 1,09 | up   |
| 5978378 | 7320042 | 1672550 | contactin 1                                      | Cntn1   | 117258 | 1,09 | down |
| 6442624 | 7320042 | 1672548 | contactin 1                                      | Cntn1   | 117258 | 1,08 | up   |
| 5760763 | 7320042 | 1672534 | contactin 1                                      | Cntn1   | 117258 | 1,07 | up   |
| 6559862 | 7320042 | 1672539 | contactin 1                                      | Cntn1   | 117258 | 1,04 | up   |
| 5894783 | 7320042 | 1672541 | contactin 1                                      | Cntn1   | 117258 | 1,00 | up   |
| 6203967 | 7181169 | 1328160 | contactin associated protein-like 4              | Cntnap4 | 307865 | 2,01 | down |
| 6655280 | 7181169 | 1328159 | contactin associated protein-like 4              | Cntnap4 | 307865 | 1,60 | down |
| 6701351 | 7181169 | 1328140 | contactin associated protein-like 4              | Cntnap4 | 307865 | 1,58 | down |
| 6064086 | 7181169 | 1328131 | contactin associated protein-like 4              | Cntnap4 | 307865 | 1,48 | up   |
| 6696761 | 7181169 | 1328139 | contactin associated protein-like 4              | Cntnap4 | 307865 | 1,43 | down |
| 6673440 | 7181169 | 1328158 | contactin associated protein-like 4              | Cntnap4 | 307865 | 1,31 | down |
| 6423952 | 7181169 | 1328155 | contactin associated protein-like 4              | Cntnap4 | 307865 | 1,29 | down |
| 5831325 | 7181169 | 1328145 | contactin associated protein-like 4              | Cntnap4 | 307865 | 1,28 | down |
| 5723172 | 7181169 | 1328109 | contactin associated protein-like 4              | Cntnap4 | 307865 | 1,24 | up   |
| 6331423 | 7181169 | 1328139 | contactin associated protein-like 4              | Cntnap4 | 307865 | 1,22 | down |

|         |         |         |                                                                    |         |        |      |      |
|---------|---------|---------|--------------------------------------------------------------------|---------|--------|------|------|
| 5629706 | 7181169 | 1328123 | contactin associated protein-like 4                                | Cntnap4 | 307865 | 1,22 | down |
| 6280618 | 7181169 | 1328160 | contactin associated protein-like 4                                | Cntnap4 | 307865 | 1,20 | down |
| 6483796 | 7181169 | 1328160 | contactin associated protein-like 4                                | Cntnap4 | 307865 | 1,19 | up   |
| 6446547 | 7181169 | 1328109 | contactin associated protein-like 4                                | Cntnap4 | 307865 | 1,19 | up   |
| 6531626 | 7181169 | 1328104 | contactin associated protein-like 4                                | Cntnap4 | 307865 | 1,19 | down |
| 6565042 | 7181169 | 1328092 | contactin associated protein-like 4                                | Cntnap4 | 307865 | 1,17 | up   |
| 6219205 | 7181169 | 1328146 | contactin associated protein-like 4                                | Cntnap4 | 307865 | 1,17 | up   |
| 6728483 | 7181169 | 1328142 | contactin associated protein-like 4                                | Cntnap4 | 307865 | 1,16 | down |
| 6278061 | 7181169 | 1328135 | contactin associated protein-like 4                                | Cntnap4 | 307865 | 1,15 | down |
| 6494872 | 7181169 | 1328160 | contactin associated protein-like 4                                | Cntnap4 | 307865 | 1,14 | up   |
| 6557300 | 7181169 | 1328154 | contactin associated protein-like 4                                | Cntnap4 | 307865 | 1,12 | up   |
| 5728860 | 7181169 | 1328160 | contactin associated protein-like 4                                | Cntnap4 | 307865 | 1,12 | down |
| 6137767 | 7181169 | 1328160 | contactin associated protein-like 4                                | Cntnap4 | 307865 | 1,11 | up   |
| 6557470 | 7181169 | 1328151 | contactin associated protein-like 4                                | Cntnap4 | 307865 | 1,08 | up   |
| 5837255 | 7181169 | 1328160 | contactin associated protein-like 4                                | Cntnap4 | 307865 | 1,08 | up   |
| 6544606 | 7181169 | 1328147 | contactin associated protein-like 4                                | Cntnap4 | 307865 | 1,05 | up   |
| 5768509 | 7181169 | 1328128 | contactin associated protein-like 4                                | Cntnap4 | 307865 | 1,04 | down |
| 5815719 | 7181169 | 1328130 | contactin associated protein-like 4                                | Cntnap4 | 307865 | 1,04 | up   |
| 5860068 | 7181169 | 1328152 | contactin associated protein-like 4                                | Cntnap4 | 307865 | 1,03 | up   |
| 6596713 | 7181169 | 1328135 | contactin associated protein-like 4                                | Cntnap4 | 307865 | 1,03 | up   |
| 6242869 | 7181169 | 1328144 | contactin associated protein-like 4                                | Cntnap4 | 307865 | 1,03 | up   |
| 6283530 | 7181169 | 1328136 | contactin associated protein-like 4                                | Cntnap4 | 307865 | 1,01 | down |
| 6270337 | 7244305 | 1484199 | COP9 constitutive photomorphogenic homolog subunit 2 (Arabidopsis) | Cops2   | 261736 | 2,20 | down |
| 5931559 | 7244305 | 1484203 | COP9 constitutive photomorphogenic homolog subunit 2 (Arabidopsis) | Cops2   | 261736 | 1,72 | up   |
| 6462266 | 7244305 | 1484201 | COP9 constitutive photomorphogenic homolog subunit 2 (Arabidopsis) | Cops2   | 261736 | 1,60 | down |
| 6647175 | 7244305 | 1484196 | COP9 constitutive photomorphogenic homolog subunit 2 (Arabidopsis) | Cops2   | 261736 | 1,56 | down |
| 5792227 | 7244305 | 1484194 | COP9 constitutive photomorphogenic homolog subunit 2 (Arabidopsis) | Cops2   | 261736 | 1,34 | down |
| 5734026 | 7244305 | 1484191 | COP9 constitutive photomorphogenic homolog subunit 2 (Arabidopsis) | Cops2   | 261736 | 1,29 | up   |
| 6023621 | 7244305 | 1484191 | COP9 constitutive photomorphogenic homolog subunit 2 (Arabidopsis) | Cops2   | 261736 | 1,27 | up   |
| 6689798 | 7244305 | 1484193 | COP9 constitutive photomorphogenic homolog subunit 2 (Arabidopsis) | Cops2   | 261736 | 1,22 | up   |
| 5810307 | 7244305 | 1484195 | COP9 constitutive photomorphogenic homolog subunit 2 (Arabidopsis) | Cops2   | 261736 | 1,21 | down |
| 6609263 | 7244305 | 1484198 | COP9 constitutive photomorphogenic homolog subunit 2 (Arabidopsis) | Cops2   | 261736 | 1,18 | up   |
| 5964083 | 7244305 | 1484192 | COP9 constitutive photomorphogenic homolog subunit 2 (Arabidopsis) | Cops2   | 261736 | 1,18 | up   |
| 6443645 | 7244305 | 1484191 | COP9 constitutive photomorphogenic homolog subunit 2 (Arabidopsis) | Cops2   | 261736 | 1,13 | up   |
| 6513582 | 7244305 | 1484198 | COP9 constitutive photomorphogenic homolog subunit 2 (Arabidopsis) | Cops2   | 261736 | 1,12 | down |
| 6120453 | 7244305 | 1484202 | COP9 constitutive photomorphogenic homolog subunit 2 (Arabidopsis) | Cops2   | 261736 | 1,07 | down |
| 5639986 | 7244305 | 1484200 | COP9 constitutive photomorphogenic homolog subunit 2 (Arabidopsis) | Cops2   | 261736 | 1,06 | down |
| 5864918 | 7244305 | 1484197 | COP9 constitutive photomorphogenic homolog subunit 2 (Arabidopsis) | Cops2   | 261736 | 1,06 | down |
| 6176090 | 7244305 | 1484204 | COP9 constitutive photomorphogenic homolog subunit 2 (Arabidopsis) | Cops2   | 261736 | 1,06 | down |
| 5895362 | 7244305 | 1484204 | COP9 constitutive photomorphogenic homolog subunit 2 (Arabidopsis) | Cops2   | 261736 | 1,02 | down |
| 6301255 | 7078117 | 1075371 | COP9 constitutive photomorphogenic homolog subunit 3 (Arabidopsis) | Cops3   | 287367 | 2,10 | down |
| 5902785 | 7078117 | 1075373 | COP9 constitutive photomorphogenic homolog subunit 3 (Arabidopsis) | Cops3   | 287367 | 1,58 | down |
| 6299427 | 7078117 | 1075380 | COP9 constitutive photomorphogenic homolog subunit 3 (Arabidopsis) | Cops3   | 287367 | 1,27 | down |
| 6259432 | 7078117 | 1075371 | COP9 constitutive photomorphogenic homolog subunit 3 (Arabidopsis) | Cops3   | 287367 | 1,22 | up   |
| 6483487 | 7078117 | 1075382 | COP9 constitutive photomorphogenic homolog subunit 3 (Arabidopsis) | Cops3   | 287367 | 1,22 | up   |
| 6150202 | 7078117 | 1075381 | COP9 constitutive photomorphogenic homolog subunit 3 (Arabidopsis) | Cops3   | 287367 | 1,18 | down |
| 5687365 | 7078117 | 1075375 | COP9 constitutive photomorphogenic homolog subunit 3 (Arabidopsis) | Cops3   | 287367 | 1,17 | up   |
| 6330426 | 7078117 | 1075377 | COP9 constitutive photomorphogenic homolog subunit 3 (Arabidopsis) | Cops3   | 287367 | 1,16 | up   |
| 6028549 | 7078117 | 1075374 | COP9 constitutive photomorphogenic homolog subunit 3 (Arabidopsis) | Cops3   | 287367 | 1,14 | up   |
| 6205133 | 7078117 | 1075372 | COP9 constitutive photomorphogenic homolog subunit 3 (Arabidopsis) | Cops3   | 287367 | 1,13 | up   |
| 6131094 | 7078117 | 1075379 | COP9 constitutive photomorphogenic homolog subunit 3 (Arabidopsis) | Cops3   | 287367 | 1,08 | up   |
| 6358498 | 7078117 | 1075378 | COP9 constitutive photomorphogenic homolog subunit 3 (Arabidopsis) | Cops3   | 287367 | 1,05 | up   |
| 6498029 | 7078117 | 1075376 | COP9 constitutive photomorphogenic homolog subunit 3 (Arabidopsis) | Cops3   | 287367 | 1,02 | down |
| 6726048 | 7078117 | 1075380 | COP9 constitutive photomorphogenic homolog subunit 3 (Arabidopsis) | Cops3   | 287367 | 1,00 | down |
| 5847396 | 7221247 | 1425824 | copine V                                                           | Cpne5   | 309650 | 2,00 | down |
| 5849632 | 7221247 | 1425855 | copine V                                                           | Cpne5   | 309650 | 1,72 | up   |
| 6117061 | 7221247 | 1425846 | copine V                                                           | Cpne5   | 309650 | 1,42 | up   |

|         |         |         |                                                                                     |         |        |      |      |
|---------|---------|---------|-------------------------------------------------------------------------------------|---------|--------|------|------|
| 5994404 | 7221247 | 1425843 | copine V                                                                            | Cpne5   | 309650 | 1,30 | down |
| 5872218 | 7221247 | 1425857 | copine V                                                                            | Cpne5   | 309650 | 1,27 | up   |
| 6601499 | 7221247 | 1425838 | copine V                                                                            | Cpne5   | 309650 | 1,26 | down |
| 6387666 | 7221247 | 1425837 | copine V                                                                            | Cpne5   | 309650 | 1,26 | down |
| 5933717 | 7221247 | 1425829 | copine V                                                                            | Cpne5   | 309650 | 1,25 | down |
| 6743255 | 7221247 | 1425830 | copine V                                                                            | Cpne5   | 309650 | 1,23 | up   |
| 5694792 | 7221247 | 1425832 | copine V                                                                            | Cpne5   | 309650 | 1,19 | down |
| 6616394 | 7221247 | 1425836 | copine V                                                                            | Cpne5   | 309650 | 1,13 | down |
| 5666095 | 7221247 | 1425826 | copine V                                                                            | Cpne5   | 309650 | 1,11 | down |
| 6499257 | 7221247 | 1425857 | copine V                                                                            | Cpne5   | 309650 | 1,09 | down |
| 6249877 | 7221247 | 1425847 | copine V                                                                            | Cpne5   | 309650 | 1,09 | up   |
| 6167722 | 7221247 | 1425849 | copine V                                                                            | Cpne5   | 309650 | 1,08 | down |
| 5694507 | 7221247 | 1425834 | copine V                                                                            | Cpne5   | 309650 | 1,07 | down |
| 5665260 | 7221247 | 1425822 | copine V                                                                            | Cpne5   | 309650 | 1,06 | up   |
| 5657105 | 7221247 | 1425828 | copine V                                                                            | Cpne5   | 309650 | 1,05 | down |
| 6722972 | 7221247 | 1425827 | copine V                                                                            | Cpne5   | 309650 | 1,04 | up   |
| 6284701 | 7221247 | 1425848 | copine V                                                                            | Cpne5   | 309650 | 1,04 | down |
| 6540743 | 7221247 | 1425839 | copine V                                                                            | Cpne5   | 309650 | 1,04 | down |
| 6164742 | 7221247 | 1425825 | copine V                                                                            | Cpne5   | 309650 | 1,03 | up   |
| 6579562 | 7221247 | 1425856 | copine V                                                                            | Cpne5   | 309650 | 1,01 | up   |
| 6016973 | 7221247 | 1425823 | copine V                                                                            | Cpne5   | 309650 | 1,01 | up   |
| 6600575 | 7092406 | 1108789 | coproporphyrinogen oxidase                                                          | Cpox    | 304024 | 2,07 | down |
| 6033506 | 7092406 | 1108787 | coproporphyrinogen oxidase                                                          | Cpox    | 304024 | 1,45 | up   |
| 5914146 | 7092406 | 1108780 | coproporphyrinogen oxidase                                                          | Cpox    | 304024 | 1,43 | up   |
| 5783517 | 7092406 | 1108780 | coproporphyrinogen oxidase                                                          | Cpox    | 304024 | 1,41 | up   |
| 6626043 | 7092406 | 1108788 | coproporphyrinogen oxidase                                                          | Cpox    | 304024 | 1,39 | up   |
| 6360382 | 7092406 | 1108780 | coproporphyrinogen oxidase                                                          | Cpox    | 304024 | 1,21 | down |
| 6708816 | 7092406 | 1108780 | coproporphyrinogen oxidase                                                          | Cpox    | 304024 | 1,19 | down |
| 6502964 | 7092406 | 1108781 | coproporphyrinogen oxidase                                                          | Cpox    | 304024 | 1,09 | up   |
| 6265748 | 7092406 | 1108784 | coproporphyrinogen oxidase                                                          | Cpox    | 304024 | 1,03 | up   |
| 6022817 | 7092406 | 1108780 | coproporphyrinogen oxidase                                                          | Cpox    | 304024 | 1,03 | down |
| 5836618 | 7092406 | 1108786 | coproporphyrinogen oxidase                                                          | Cpox    | 304024 | 1,01 | up   |
| 6642666 | 7251008 | 1499975 | core 1 synthase, glycoprotein-N-acetylgalactosamine 3-beta-galactosyltransferase, 1 | Clgalt1 | 65044  | 2,25 | down |
| 6649395 | 7251008 | 1499977 | core 1 synthase, glycoprotein-N-acetylgalactosamine 3-beta-galactosyltransferase, 1 | Clgalt1 | 65044  | 1,38 | down |
| 6044654 | 7251008 | 1499975 | core 1 synthase, glycoprotein-N-acetylgalactosamine 3-beta-galactosyltransferase, 1 | Clgalt1 | 65044  | 1,26 | up   |
| 6457885 | 7251008 | 1499976 | core 1 synthase, glycoprotein-N-acetylgalactosamine 3-beta-galactosyltransferase, 1 | Clgalt1 | 65044  | 1,10 | down |
| 5919552 | 7251008 | 1499977 | core 1 synthase, glycoprotein-N-acetylgalactosamine 3-beta-galactosyltransferase, 1 | Clgalt1 | 65044  | 1,08 | down |
| 6478055 | 7251008 | 1499974 | core 1 synthase, glycoprotein-N-acetylgalactosamine 3-beta-galactosyltransferase, 1 | Clgalt1 | 65044  | 1,07 | down |
| 5884581 | 7251008 | 1499975 | core 1 synthase, glycoprotein-N-acetylgalactosamine 3-beta-galactosyltransferase, 1 | Clgalt1 | 65044  | 1,03 | up   |
| 6240812 | 7285914 | 1586709 | coronin, actin binding protein 2A                                                   | Coro2a  | 313235 | 2,19 | down |
| 6635686 | 7285914 | 1586706 | coronin, actin binding protein 2A                                                   | Coro2a  | 313235 | 1,46 | down |
| 5690300 | 7285914 | 1586704 | coronin, actin binding protein 2A                                                   | Coro2a  | 313235 | 1,40 | down |
| 6549339 | 7285914 | 1586710 | coronin, actin binding protein 2A                                                   | Coro2a  | 313235 | 1,21 | up   |
| 6404530 | 7285914 | 1586712 | coronin, actin binding protein 2A                                                   | Coro2a  | 313235 | 1,18 | up   |
| 5731467 | 7285914 | 1586703 | coronin, actin binding protein 2A                                                   | Coro2a  | 313235 | 1,12 | up   |
| 6433628 | 7285914 | 1586711 | coronin, actin binding protein 2A                                                   | Coro2a  | 313235 | 1,10 | up   |
| 6698642 | 7285914 | 1586713 | coronin, actin binding protein 2A                                                   | Coro2a  | 313235 | 1,07 | down |
| 5619509 | 7285914 | 1586705 | coronin, actin binding protein 2A                                                   | Coro2a  | 313235 | 1,07 | up   |
| 6086227 | 7285914 | 1586702 | coronin, actin binding protein 2A                                                   | Coro2a  | 313235 | 1,04 | down |
| 5935402 | 7285914 | 1586707 | coronin, actin binding protein 2A                                                   | Coro2a  | 313235 | 1,03 | up   |
| 6382835 | 7285914 | 1586708 | coronin, actin binding protein 2A                                                   | Coro2a  | 313235 | 1,00 | up   |
| 6178031 | 7080299 | 1080095 | coronin, actin binding protein 6                                                    | Coro6   | 245982 | 2,24 | down |
| 6223532 | 7080299 | 1080088 | coronin, actin binding protein 6                                                    | Coro6   | 245982 | 2,16 | up   |
| 6713999 | 7080299 | 1080087 | coronin, actin binding protein 6                                                    | Coro6   | 245982 | 1,76 | down |
| 6358459 | 7080299 | 1080090 | coronin, actin binding protein 6                                                    | Coro6   | 245982 | 1,58 | up   |
| 6030968 | 7080299 | 1080086 | coronin, actin binding protein 6                                                    | Coro6   | 245982 | 1,50 | down |
| 5841382 | 7080299 | 1080095 | coronin, actin binding protein 6                                                    | Coro6   | 245982 | 1,39 | up   |

|         |         |         |                                                |         |        |      |      |
|---------|---------|---------|------------------------------------------------|---------|--------|------|------|
| 6172253 | 7080299 | 1080093 | coronin, actin binding protein 6               | Coro6   | 245982 | 1,35 | up   |
| 6269926 | 7080299 | 1080089 | coronin, actin binding protein 6               | Coro6   | 245982 | 1,25 | down |
| 5711990 | 7080299 | 1080084 | coronin, actin binding protein 6               | Coro6   | 245982 | 1,25 | down |
| 6347821 | 7080299 | 1080085 | coronin, actin binding protein 6               | Coro6   | 245982 | 1,22 | up   |
| 5910420 | 7080299 | 1080092 | coronin, actin binding protein 6               | Coro6   | 245982 | 1,15 | up   |
| 6420023 | 7080299 | 1080095 | coronin, actin binding protein 6               | Coro6   | 245982 | 1,13 | up   |
| 6406217 | 7080299 | 1080091 | coronin, actin binding protein 6               | Coro6   | 245982 | 1,12 | down |
| 6622419 | 7080299 | 1080094 | coronin, actin binding protein 6               | Coro6   | 245982 | 1,09 | down |
| 6187637 | 7080299 | 1080094 | coronin, actin binding protein 6               | Coro6   | 245982 | 1,06 | down |
| 5924361 | 7080299 | 1080091 | coronin, actin binding protein 6               | Coro6   | 245982 | 1,06 | down |
| 5792423 | 7072608 | 1062306 | corticotropin releasing hormone receptor 1     | Crhr1   | 58959  | 3,37 | down |
| 6096386 | 7072608 | 1062300 | corticotropin releasing hormone receptor 1     | Crhr1   | 58959  | 1,79 | down |
| 6620080 | 7072608 | 1062302 | corticotropin releasing hormone receptor 1     | Crhr1   | 58959  | 1,42 | down |
| 6042126 | 7072608 | 1062299 | corticotropin releasing hormone receptor 1     | Crhr1   | 58959  | 1,20 | up   |
| 6054437 | 7072608 | 1062303 | corticotropin releasing hormone receptor 1     | Crhr1   | 58959  | 1,17 | up   |
| 5774226 | 7072608 | 1062297 | corticotropin releasing hormone receptor 1     | Crhr1   | 58959  | 1,17 | up   |
| 6349628 | 7072608 | 1062297 | corticotropin releasing hormone receptor 1     | Crhr1   | 58959  | 1,15 | up   |
| 6699101 | 7072608 | 1062308 | corticotropin releasing hormone receptor 1     | Crhr1   | 58959  | 1,14 | up   |
| 6221617 | 7072608 | 1062309 | corticotropin releasing hormone receptor 1     | Crhr1   | 58959  | 1,10 | down |
| 5774943 | 7072608 | 1062301 | corticotropin releasing hormone receptor 1     | Crhr1   | 58959  | 1,09 | up   |
| 6361070 | 7072608 | 1062305 | corticotropin releasing hormone receptor 1     | Crhr1   | 58959  | 1,05 | up   |
| 5915164 | 7072608 | 1062307 | corticotropin releasing hormone receptor 1     | Crhr1   | 58959  | 1,03 | up   |
| 5982311 | 7072608 | 1062304 | corticotropin releasing hormone receptor 1     | Crhr1   | 58959  | 1,02 | down |
| 6649024 | 7072608 | 1062298 | corticotropin releasing hormone receptor 1     | Crhr1   | 58959  | 1,02 | up   |
| 5836942 | 7072608 | 1062298 | corticotropin releasing hormone receptor 1     | Crhr1   | 58959  | 1,00 | up   |
| 5708086 | 7186220 | 1340760 | COX4 neighbor                                  | Cox4nb  | 361425 | 2,51 | down |
| 5802729 | 7186220 | 1340758 | COX4 neighbor                                  | Cox4nb  | 361425 | 1,98 | up   |
| 6713781 | 7186220 | 1340755 | COX4 neighbor                                  | Cox4nb  | 361425 | 1,23 | down |
| 6618905 | 7186220 | 1340759 | COX4 neighbor                                  | Cox4nb  | 361425 | 1,22 | up   |
| 6059417 | 7186220 | 1340757 | COX4 neighbor                                  | Cox4nb  | 361425 | 1,09 | up   |
| 6651671 | 7186220 | 1340756 | COX4 neighbor                                  | Cox4nb  | 361425 | 1,07 | up   |
| 6566328 | 7201680 | 1379712 | coxsackie virus and adenovirus receptor-like 1 | Cxadr1l | 361873 | 2,05 | down |
| 5883765 | 7201680 | 1379712 | coxsackie virus and adenovirus receptor-like 1 | Cxadr1l | 361873 | 1,52 | up   |
| 6275393 | 7201680 | 1379713 | coxsackie virus and adenovirus receptor-like 1 | Cxadr1l | 361873 | 1,48 | down |
| 6167900 | 7201680 | 1379711 | coxsackie virus and adenovirus receptor-like 1 | Cxadr1l | 361873 | 1,48 | down |
| 5641149 | 7201680 | 1379713 | coxsackie virus and adenovirus receptor-like 1 | Cxadr1l | 361873 | 1,43 | down |
| 6379113 | 7201680 | 1379711 | coxsackie virus and adenovirus receptor-like 1 | Cxadr1l | 361873 | 1,39 | up   |
| 6435729 | 7201680 | 1379706 | coxsackie virus and adenovirus receptor-like 1 | Cxadr1l | 361873 | 1,21 | up   |
| 6196586 | 7201680 | 1379710 | coxsackie virus and adenovirus receptor-like 1 | Cxadr1l | 361873 | 1,17 | up   |
| 6686443 | 7201680 | 1379712 | coxsackie virus and adenovirus receptor-like 1 | Cxadr1l | 361873 | 1,15 | down |
| 6257228 | 7201680 | 1379710 | coxsackie virus and adenovirus receptor-like 1 | Cxadr1l | 361873 | 1,08 | down |
| 6718476 | 7201680 | 1379708 | coxsackie virus and adenovirus receptor-like 1 | Cxadr1l | 361873 | 1,08 | up   |
| 5732539 | 7201680 | 1379707 | coxsackie virus and adenovirus receptor-like 1 | Cxadr1l | 361873 | 1,04 | down |
| 6666741 | 7201680 | 1379709 | coxsackie virus and adenovirus receptor-like 1 | Cxadr1l | 361873 | 1,03 | up   |
| 6079264 | 7201680 | 1379708 | coxsackie virus and adenovirus receptor-like 1 | Cxadr1l | 361873 | 1,00 | up   |
| 6570994 | 7107966 | 1146926 | C-reactive protein, pentraxin-related          | Crp     | 25419  | 2,59 | up   |
| 6544543 | 7107966 | 1146928 | C-reactive protein, pentraxin-related          | Crp     | 25419  | 1,65 | down |
| 5904917 | 7107966 | 1146926 | C-reactive protein, pentraxin-related          | Crp     | 25419  | 1,55 | up   |
| 6079565 | 7107966 | 1146927 | C-reactive protein, pentraxin-related          | Crp     | 25419  | 1,31 | down |
| 5745620 | 7107966 | 1146927 | C-reactive protein, pentraxin-related          | Crp     | 25419  | 1,26 | down |
| 5751934 | 7310704 | 1649085 | creatine kinase, brain                         | Ckb     | 24264  | 2,48 | up   |
| 5659771 | 7310704 | 1649077 | creatine kinase, brain                         | Ckb     | 24264  | 1,84 | up   |
| 5910869 | 7310704 | 1649081 | creatine kinase, brain                         | Ckb     | 24264  | 1,78 | up   |
| 5987828 | 7310704 | 1649078 | creatine kinase, brain                         | Ckb     | 24264  | 1,60 | down |
| 6487385 | 7310704 | 1649078 | creatine kinase, brain                         | Ckb     | 24264  | 1,36 | down |
| 6113931 | 7310704 | 1649084 | creatine kinase, brain                         | Ckb     | 24264  | 1,35 | down |
| 6502513 | 7310704 | 1649080 | creatine kinase, brain                         | Ckb     | 24264  | 1,31 | down |

|         |         |         |                                                           |         |        |      |      |
|---------|---------|---------|-----------------------------------------------------------|---------|--------|------|------|
| 5621815 | 7310704 | 1649083 | creatine kinase, brain                                    | Ckb     | 24264  | 1,26 | down |
| 6088000 | 7310704 | 1649082 | creatine kinase, brain                                    | Ckb     | 24264  | 1,17 | up   |
| 6394200 | 7310704 | 1649079 | creatine kinase, brain                                    | Ckb     | 24264  | 1,15 | up   |
| 6354062 | 7231820 | 1452230 | creatine kinase, mitochondrial 1, ubiquitous              | Ckmt1   | 29593  | 2,00 | down |
| 5723028 | 7231820 | 1452238 | creatine kinase, mitochondrial 1, ubiquitous              | Ckmt1   | 29593  | 1,45 | down |
| 5851597 | 7231820 | 1452230 | creatine kinase, mitochondrial 1, ubiquitous              | Ckmt1   | 29593  | 1,18 | down |
| 5849376 | 7231820 | 1452236 | creatine kinase, mitochondrial 1, ubiquitous              | Ckmt1   | 29593  | 1,14 | down |
| 6467715 | 7231820 | 1452231 | creatine kinase, mitochondrial 1, ubiquitous              | Ckmt1   | 29593  | 1,11 | up   |
| 6297700 | 7231820 | 1452230 | creatine kinase, mitochondrial 1, ubiquitous              | Ckmt1   | 29593  | 1,09 | up   |
| 6439374 | 7231820 | 1452232 | creatine kinase, mitochondrial 1, ubiquitous              | Ckmt1   | 29593  | 1,08 | up   |
| 5717293 | 7231820 | 1452233 | creatine kinase, mitochondrial 1, ubiquitous              | Ckmt1   | 29593  | 1,06 | up   |
| 6105315 | 7231820 | 1452237 | creatine kinase, mitochondrial 1, ubiquitous              | Ckmt1   | 29593  | 1,02 | up   |
| 5772835 | 7231820 | 1452234 | creatine kinase, mitochondrial 1, ubiquitous              | Ckmt1   | 29593  | 1,01 | up   |
| 5667908 | 7231820 | 1452235 | creatine kinase, mitochondrial 1, ubiquitous              | Ckmt1   | 29593  | 1,00 | down |
| 6719923 | 7303515 | 1630946 | crooked neck pre-mRNA splicing factor-like 1 (Drosophila) | Crnkl1  | 116481 | 2,11 | down |
| 6085029 | 7303515 | 1630947 | crooked neck pre-mRNA splicing factor-like 1 (Drosophila) | Crnkl1  | 116481 | 1,45 | up   |
| 6108128 | 7303515 | 1630947 | crooked neck pre-mRNA splicing factor-like 1 (Drosophila) | Crnkl1a | 116481 | 1,01 | up   |
| 5795893 | 7223099 | 1430276 | c-ros oncogene 1 , receptor tyrosine kinase               | Ros1    | 25346  | 4,49 | up   |
| 6017153 | 7223099 | 1430254 | c-ros oncogene 1 , receptor tyrosine kinase               | Ros1    | 25346  | 3,07 | down |
| 6105935 | 7223099 | 1430242 | c-ros oncogene 1 , receptor tyrosine kinase               | Ros1    | 25346  | 2,83 | up   |
| 6664303 | 7223099 | 1430277 | c-ros oncogene 1 , receptor tyrosine kinase               | Ros1    | 25346  | 2,75 | up   |
| 6576821 | 7223099 | 1430253 | c-ros oncogene 1 , receptor tyrosine kinase               | Ros1    | 25346  | 2,68 | up   |
| 6014631 | 7223099 | 1430275 | c-ros oncogene 1 , receptor tyrosine kinase               | Ros1    | 25346  | 2,18 | up   |
| 6744067 | 7223099 | 1430274 | c-ros oncogene 1 , receptor tyrosine kinase               | Ros1    | 25346  | 2,18 | up   |
| 6189538 | 7223099 | 1430238 | c-ros oncogene 1 , receptor tyrosine kinase               | Ros1    | 25346  | 2,18 | up   |
| 5758969 | 7223099 | 1430243 | c-ros oncogene 1 , receptor tyrosine kinase               | Ros1    | 25346  | 2,03 | up   |
| 6357837 | 7223099 | 1430271 | c-ros oncogene 1 , receptor tyrosine kinase               | Ros1    | 25346  | 1,98 | up   |
| 6287082 | 7223099 | 1430278 | c-ros oncogene 1 , receptor tyrosine kinase               | Ros1    | 25346  | 1,97 | up   |
| 6335329 | 7223099 | 1430257 | c-ros oncogene 1 , receptor tyrosine kinase               | Ros1    | 25346  | 1,94 | down |
| 6111816 | 7223099 | 1430251 | c-ros oncogene 1 , receptor tyrosine kinase               | Ros1    | 25346  | 1,89 | up   |
| 6272592 | 7223099 | 1430259 | c-ros oncogene 1 , receptor tyrosine kinase               | Ros1    | 25346  | 1,85 | down |
| 6564361 | 7223099 | 1430272 | c-ros oncogene 1 , receptor tyrosine kinase               | Ros1    | 25346  | 1,77 | up   |
| 6016597 | 7223099 | 1430252 | c-ros oncogene 1 , receptor tyrosine kinase               | Ros1    | 25346  | 1,67 | down |
| 6043500 | 7223099 | 1430269 | c-ros oncogene 1 , receptor tyrosine kinase               | Ros1    | 25346  | 1,66 | up   |
| 5720500 | 7223099 | 1430265 | c-ros oncogene 1 , receptor tyrosine kinase               | Ros1    | 25346  | 1,51 | up   |
| 6134962 | 7223099 | 1430278 | c-ros oncogene 1 , receptor tyrosine kinase               | Ros1    | 25346  | 1,48 | up   |
| 5779078 | 7223099 | 1430260 | c-ros oncogene 1 , receptor tyrosine kinase               | Ros1    | 25346  | 1,47 | down |
| 6075525 | 7223099 | 1430258 | c-ros oncogene 1 , receptor tyrosine kinase               | Ros1    | 25346  | 1,43 | down |
| 6286198 | 7223099 | 1430241 | c-ros oncogene 1 , receptor tyrosine kinase               | Ros1    | 25346  | 1,42 | up   |
| 6175372 | 7223099 | 1430255 | c-ros oncogene 1 , receptor tyrosine kinase               | Ros1    | 25346  | 1,41 | down |
| 6350905 | 7223099 | 1430248 | c-ros oncogene 1 , receptor tyrosine kinase               | Ros1    | 25346  | 1,40 | down |
| 6096575 | 7223099 | 1430266 | c-ros oncogene 1 , receptor tyrosine kinase               | Ros1    | 25346  | 1,38 | down |
| 6002676 | 7223099 | 1430265 | c-ros oncogene 1 , receptor tyrosine kinase               | Ros1    | 25346  | 1,37 | down |
| 6621580 | 7223099 | 1430273 | c-ros oncogene 1 , receptor tyrosine kinase               | Ros1    | 25346  | 1,36 | up   |
| 5710332 | 7223099 | 1430270 | c-ros oncogene 1 , receptor tyrosine kinase               | Ros1    | 25346  | 1,32 | up   |
| 6132096 | 7223099 | 1430248 | c-ros oncogene 1 , receptor tyrosine kinase               | Ros1    | 25346  | 1,30 | up   |
| 5651222 | 7223099 | 1430251 | c-ros oncogene 1 , receptor tyrosine kinase               | Ros1    | 25346  | 1,29 | down |
| 5832760 | 7223099 | 1430249 | c-ros oncogene 1 , receptor tyrosine kinase               | Ros1    | 25346  | 1,24 | up   |
| 5765954 | 7223099 | 1430250 | c-ros oncogene 1 , receptor tyrosine kinase               | Ros1    | 25346  | 1,22 | up   |
| 6090587 | 7223099 | 1430232 | c-ros oncogene 1 , receptor tyrosine kinase               | Ros1    | 25346  | 1,21 | up   |
| 5868551 | 7223099 | 1430234 | c-ros oncogene 1 , receptor tyrosine kinase               | Ros1    | 25346  | 1,20 | down |
| 6134363 | 7223099 | 1430261 | c-ros oncogene 1 , receptor tyrosine kinase               | Ros1    | 25346  | 1,20 | down |
| 6488595 | 7223099 | 1430264 | c-ros oncogene 1 , receptor tyrosine kinase               | Ros1    | 25346  | 1,17 | up   |
| 5899855 | 7223099 | 1430262 | c-ros oncogene 1 , receptor tyrosine kinase               | Ros1    | 25346  | 1,15 | down |
| 5909310 | 7223099 | 1430256 | c-ros oncogene 1 , receptor tyrosine kinase               | Ros1    | 25346  | 1,14 | up   |
| 6021603 | 7223099 | 1430235 | c-ros oncogene 1 , receptor tyrosine kinase               | Ros1    | 25346  | 1,14 | down |
| 6011728 | 7223099 | 1430271 | c-ros oncogene 1 , receptor tyrosine kinase               | Ros1    | 25346  | 1,12 | up   |

|         |         |         |                                                                                        |        |        |      |      |
|---------|---------|---------|----------------------------------------------------------------------------------------|--------|--------|------|------|
| 6061898 | 7223099 | 1430245 | c-ros oncogene 1 , receptor tyrosine kinase                                            | Ros1   | 25346  | 1,12 | down |
| 5785978 | 7223099 | 1430233 | c-ros oncogene 1 , receptor tyrosine kinase                                            | Ros1   | 25346  | 1,11 | up   |
| 6339167 | 7223099 | 1430266 | c-ros oncogene 1 , receptor tyrosine kinase                                            | Ros1   | 25346  | 1,10 | up   |
| 6120217 | 7223099 | 1430237 | c-ros oncogene 1 , receptor tyrosine kinase                                            | Ros1   | 25346  | 1,10 | up   |
| 5963184 | 7223099 | 1430251 | c-ros oncogene 1 , receptor tyrosine kinase                                            | Ros1   | 25346  | 1,08 | down |
| 6491505 | 7223099 | 1430258 | c-ros oncogene 1 , receptor tyrosine kinase                                            | Ros1   | 25346  | 1,07 | down |
| 6349470 | 7223099 | 1430240 | c-ros oncogene 1 , receptor tyrosine kinase                                            | Ros1   | 25346  | 1,07 | down |
| 6199623 | 7223099 | 1430246 | c-ros oncogene 1 , receptor tyrosine kinase                                            | Ros1   | 25346  | 1,06 | up   |
| 6158010 | 7223099 | 1430244 | c-ros oncogene 1 , receptor tyrosine kinase                                            | Ros1   | 25346  | 1,05 | down |
| 6578017 | 7223099 | 1430267 | c-ros oncogene 1 , receptor tyrosine kinase                                            | Ros1   | 25346  | 1,05 | down |
| 6028324 | 7223099 | 1430247 | c-ros oncogene 1 , receptor tyrosine kinase                                            | Ros1   | 25346  | 1,05 | up   |
| 6729210 | 7223099 | 1430263 | c-ros oncogene 1 , receptor tyrosine kinase                                            | Ros1   | 25346  | 1,02 | up   |
| 6474206 | 7223099 | 1430268 | c-ros oncogene 1 , receptor tyrosine kinase                                            | Ros1   | 25346  | 1,02 | down |
| 5986258 | 7223099 | 1430255 | c-ros oncogene 1 , receptor tyrosine kinase                                            | Ros1   | 25346  | 1,01 | down |
| 5796502 | 7223099 | 1430239 | c-ros oncogene 1 , receptor tyrosine kinase                                            | Ros1   | 25346  | 1,01 | up   |
| 5716139 | 7223099 | 1430236 | c-ros oncogene 1 , receptor tyrosine kinase                                            | Ros1   | 25346  | 1,01 | up   |
| 6700959 | 7223099 | 1430271 | c-ros oncogene 1 , receptor tyrosine kinase                                            | Ros1   | 25346  | 1,00 | down |
| 6108763 | 7363787 | 1778648 | crystallin, beta A2                                                                    | Cryba2 | 286925 | 2,55 | up   |
| 6475518 | 7363787 | 1778649 | crystallin, beta A2                                                                    | Cryba2 | 286925 | 2,24 | down |
| 6017343 | 7363787 | 1778650 | crystallin, beta A2                                                                    | Cryba2 | 286925 | 1,67 | down |
| 5916668 | 7363787 | 1778651 | crystallin, beta A2                                                                    | Cryba2 | 286925 | 1,32 | down |
| 6572747 | 7363787 | 1778652 | crystallin, beta A2                                                                    | Cryba2 | 286925 | 1,18 | down |
| 5644064 | 7138556 | 1222444 | crystallin, lambda 1                                                                   | Cry11  | 290277 | 2,03 | down |
| 6026545 | 7138556 | 1222437 | crystallin, lambda 1                                                                   | Cry11  | 290277 | 1,34 | down |
| 6124221 | 7138556 | 1222438 | crystallin, lambda 1                                                                   | Cry11  | 290277 | 1,24 | down |
| 6601149 | 7138556 | 1222439 | crystallin, lambda 1                                                                   | Cry11  | 290277 | 1,17 | down |
| 5691556 | 7138556 | 1222442 | crystallin, lambda 1                                                                   | Cry11  | 290277 | 1,17 | up   |
| 5780586 | 7138556 | 1222443 | crystallin, lambda 1                                                                   | Cry11  | 290277 | 1,13 | down |
| 5682596 | 7138556 | 1222441 | crystallin, lambda 1                                                                   | Cry11  | 290277 | 1,11 | up   |
| 6420129 | 7138556 | 1222440 | crystallin, lambda 1                                                                   | Cry11  | 290277 | 1,08 | up   |
| 6223031 | 7138556 | 1222439 | crystallin, lambda 1                                                                   | Cry11  | 290277 | 1,08 | up   |
| 5732258 | 7138556 | 1222445 | crystallin, lambda 1                                                                   | Cry11  | 290277 | 1,03 | down |
| 6601971 | 7346229 | 1735585 | c-src tyrosine kinase                                                                  | Csk    | 315707 | 3,00 | down |
| 6593999 | 7346229 | 1735590 | c-src tyrosine kinase                                                                  | Csk    | 315707 | 1,30 | down |
| 6078735 | 7346229 | 1735592 | c-src tyrosine kinase                                                                  | Csk    | 315707 | 1,28 | up   |
| 6241354 | 7346229 | 1735580 | c-src tyrosine kinase                                                                  | Csk    | 315707 | 1,25 | down |
| 6366910 | 7346229 | 1735583 | c-src tyrosine kinase                                                                  | Csk    | 315707 | 1,22 | up   |
| 6606196 | 7346229 | 1735581 | c-src tyrosine kinase                                                                  | Csk    | 315707 | 1,16 | up   |
| 6737745 | 7346229 | 1735582 | c-src tyrosine kinase                                                                  | Csk    | 315707 | 1,12 | down |
| 6321029 | 7346229 | 1735587 | c-src tyrosine kinase                                                                  | Csk    | 315707 | 1,10 | up   |
| 5962562 | 7346229 | 1735591 | c-src tyrosine kinase                                                                  | Csk    | 315707 | 1,05 | up   |
| 5895197 | 7346229 | 1735588 | c-src tyrosine kinase                                                                  | Csk    | 315707 | 1,05 | down |
| 6089208 | 7346229 | 1735579 | c-src tyrosine kinase                                                                  | Csk    | 315707 | 1,02 | up   |
| 5619806 | 7346229 | 1735584 | c-src tyrosine kinase                                                                  | Csk    | 315707 | 1,01 | up   |
| 5682372 | 7346229 | 1735586 | c-src tyrosine kinase                                                                  | Csk    | 315707 | 1,00 | down |
| 6305823 | 7356027 | 1759981 | CTD (carboxy-terminal domain, RNA polymerase II, polypeptide A) small phosphatase 1    | Ctdsp1 | 363249 | 2,34 | down |
| 6439126 | 7356027 | 1759985 | CTD (carboxy-terminal domain, RNA polymerase II, polypeptide A) small phosphatase 1    | Ctdsp1 | 363249 | 1,20 | down |
| 6090600 | 7356027 | 1759987 | CTD (carboxy-terminal domain, RNA polymerase II, polypeptide A) small phosphatase 1    | Ctdsp1 | 363249 | 1,18 | up   |
| 5820893 | 7356027 | 1759983 | CTD (carboxy-terminal domain, RNA polymerase II, polypeptide A) small phosphatase 1    | Ctdsp1 | 363249 | 1,14 | down |
| 5862579 | 7356027 | 1759984 | CTD (carboxy-terminal domain, RNA polymerase II, polypeptide A) small phosphatase 1    | Ctdsp1 | 363249 | 1,07 | down |
| 6721398 | 7356027 | 1759985 | CTD (carboxy-terminal domain, RNA polymerase II, polypeptide A) small phosphatase 1    | Ctdsp1 | 363249 | 1,06 | down |
| 5945379 | 7356027 | 1759986 | CTD (carboxy-terminal domain, RNA polymerase II, polypeptide A) small phosphatase 1    | Ctdsp1 | 363249 | 1,06 | down |
| 6413042 | 7356027 | 1759978 | CTD (carboxy-terminal domain, RNA polymerase II, polypeptide A) small phosphatase 1    | Ctdsp1 | 363249 | 1,01 | down |
| 5929870 | 7356027 | 1759986 | CTD (carboxy-terminal domain, RNA polymerase II, polypeptide A) small phosphatase 1    | Ctdsp1 | 363249 | 1,00 | up   |
| 6327539 | 7341264 | 1723360 | CTD (carboxy-terminal domain, RNA polymerase II, polypeptide A) small phosphatase-like | Ctdspl | 301056 | 2,14 | down |
| 6272268 | 7341264 | 1723365 | CTD (carboxy-terminal domain, RNA polymerase II, polypeptide A) small phosphatase-like | Ctdspl | 301056 | 1,87 | down |
| 6113213 | 7341264 | 1723357 | CTD (carboxy-terminal domain, RNA polymerase II, polypeptide A) small phosphatase-like | Ctdspl | 301056 | 1,29 | down |

|         |         |         |                                                                                        |        |        |      |      |
|---------|---------|---------|----------------------------------------------------------------------------------------|--------|--------|------|------|
| 6626946 | 7341264 | 1723367 | CTD (carboxy-terminal domain, RNA polymerase II, polypeptide A) small phosphatase-like | Ctdspl | 301056 | 1,28 | down |
| 6269869 | 7341264 | 1723367 | CTD (carboxy-terminal domain, RNA polymerase II, polypeptide A) small phosphatase-like | Ctdspl | 301056 | 1,15 | down |
| 6146266 | 7341264 | 1723366 | CTD (carboxy-terminal domain, RNA polymerase II, polypeptide A) small phosphatase-like | Ctdspl | 301056 | 1,13 | down |
| 5881690 | 7341264 | 1723348 | CTD (carboxy-terminal domain, RNA polymerase II, polypeptide A) small phosphatase-like | Ctdspl | 301056 | 1,11 | up   |
| 6600197 | 7341264 | 1723355 | CTD (carboxy-terminal domain, RNA polymerase II, polypeptide A) small phosphatase-like | Ctdspl | 301056 | 1,07 | up   |
| 6534785 | 7341264 | 1723353 | CTD (carboxy-terminal domain, RNA polymerase II, polypeptide A) small phosphatase-like | Ctdspl | 301056 | 1,04 | up   |
| 6682460 | 7381168 | 1823183 | CTP synthase II                                                                        | Ctps2  | 619580 | 2,08 | up   |
| 6111181 | 7381168 | 1823192 | CTP synthase II                                                                        | Ctps2  | 619580 | 1,95 | down |
| 6481575 | 7381168 | 1823174 | CTP synthase II                                                                        | Ctps2  | 619580 | 1,36 | down |
| 6227132 | 7381168 | 1823189 | CTP synthase II                                                                        | Ctps2  | 619580 | 1,35 | up   |
| 6360052 | 7381168 | 1823182 | CTP synthase II                                                                        | Ctps2  | 619580 | 1,33 | down |
| 6506097 | 7381168 | 1823175 | CTP synthase II                                                                        | Ctps2  | 619580 | 1,31 | down |
| 5678130 | 7381168 | 1823188 | CTP synthase II                                                                        | Ctps2  | 619580 | 1,28 | down |
| 6046873 | 7381168 | 1823175 | CTP synthase II                                                                        | Ctps2  | 619580 | 1,25 | down |
| 6393549 | 7381168 | 1823178 | CTP synthase II                                                                        | Ctps2  | 619580 | 1,24 | up   |
| 5846703 | 7381168 | 1823181 | CTP synthase II                                                                        | Ctps2  | 619580 | 1,23 | up   |
| 6734685 | 7381168 | 1823179 | CTP synthase II                                                                        | Ctps2  | 619580 | 1,21 | up   |
| 5860624 | 7381168 | 1823187 | CTP synthase II                                                                        | Ctps2  | 619580 | 1,20 | down |
| 6124238 | 7381168 | 1823184 | CTP synthase II                                                                        | Ctps2  | 619580 | 1,12 | up   |
| 6343096 | 7381168 | 1823176 | CTP synthase II                                                                        | Ctps2  | 619580 | 1,12 | up   |
| 6044762 | 7381168 | 1823189 | CTP synthase II                                                                        | Ctps2  | 619580 | 1,10 | up   |
| 6396688 | 7381168 | 1823190 | CTP synthase II                                                                        | Ctps2  | 619580 | 1,09 | down |
| 6619558 | 7381168 | 1823191 | CTP synthase II                                                                        | Ctps2  | 619580 | 1,09 | down |
| 6302296 | 7381168 | 1823185 | CTP synthase II                                                                        | Ctps2  | 619580 | 1,04 | down |
| 6420759 | 7381168 | 1823180 | CTP synthase II                                                                        | Ctps2  | 619580 | 1,03 | down |
| 6308362 | 7381168 | 1823177 | CTP synthase II                                                                        | Ctps2  | 619580 | 1,03 | up   |
| 6607194 | 7381168 | 1823186 | CTP synthase II                                                                        | Ctps2  | 619580 | 1,02 | down |
| 6450399 | 7381168 | 1823191 | CTP synthase II                                                                        | Ctps2  | 619580 | 1,01 | down |
| 6354388 | 7269385 | 1545753 | C-type lectin domain family 4, member e                                                | Clec4e | 450223 | 2,16 | down |
| 5934565 | 7269385 | 1545752 | C-type lectin domain family 4, member e                                                | Clec4e | 450223 | 1,82 | down |
| 6713022 | 7269385 | 1545750 | C-type lectin domain family 4, member e                                                | Clec4e | 450223 | 1,53 | up   |
| 6574449 | 7269385 | 1545751 | C-type lectin domain family 4, member e                                                | Clec4e | 450223 | 1,16 | up   |
| 6284305 | 7269385 | 1545749 | C-type lectin domain family 4, member e                                                | Clec4e | 450223 | 1,11 | up   |
| 6560157 | 7269385 | 1545748 | C-type lectin domain family 4, member e                                                | Clec4e | 450223 | 1,09 | up   |
| 6051080 | 7269385 | 1545750 | C-type lectin domain family 4, member e                                                | Clec4e | 450223 | 1,07 | down |
| 6142365 | 7147416 | 1244467 | CUB and Sushi multiple domains 1                                                       | Csmd1  | 364634 | 2,07 | up   |
| 5847414 | 7147416 | 1244421 | CUB and Sushi multiple domains 1                                                       | Csmd1  | 364634 | 2,00 | up   |
| 6160265 | 7147416 | 1244389 | CUB and Sushi multiple domains 1                                                       | Csmd1  | 364634 | 1,92 | up   |
| 6101926 | 7147416 | 1244444 | CUB and Sushi multiple domains 1                                                       | Csmd1  | 364634 | 1,90 | up   |
| 6701921 | 7147416 | 1244443 | CUB and Sushi multiple domains 1                                                       | Csmd1  | 364634 | 1,89 | up   |
| 5689964 | 7147416 | 1244442 | CUB and Sushi multiple domains 1                                                       | Csmd1  | 364634 | 1,82 | up   |
| 6407081 | 7147416 | 1244430 | CUB and Sushi multiple domains 1                                                       | Csmd1  | 364634 | 1,78 | up   |
| 6461527 | 7147416 | 1244477 | CUB and Sushi multiple domains 1                                                       | Csmd1  | 364634 | 1,76 | down |
| 6503846 | 7147416 | 1244402 | CUB and Sushi multiple domains 1                                                       | Csmd1  | 364634 | 1,75 | down |
| 6009216 | 7147416 | 1244433 | CUB and Sushi multiple domains 1                                                       | Csmd1  | 364634 | 1,63 | down |
| 6346348 | 7147416 | 1244465 | CUB and Sushi multiple domains 1                                                       | Csmd1  | 364634 | 1,61 | up   |
| 6413763 | 7147416 | 1244433 | CUB and Sushi multiple domains 1                                                       | Csmd1  | 364634 | 1,60 | down |
| 6431407 | 7147416 | 1244361 | CUB and Sushi multiple domains 1                                                       | Csmd1  | 364634 | 1,55 | up   |
| 6500887 | 7147416 | 1244424 | CUB and Sushi multiple domains 1                                                       | Csmd1  | 364634 | 1,42 | up   |
| 6499566 | 7147416 | 1244386 | CUB and Sushi multiple domains 1                                                       | Csmd1  | 364634 | 1,41 | up   |
| 6217946 | 7147416 | 1244463 | CUB and Sushi multiple domains 1                                                       | Csmd1  | 364634 | 1,41 | down |
| 6120726 | 7147416 | 1244473 | CUB and Sushi multiple domains 1                                                       | Csmd1  | 364634 | 1,41 | up   |
| 6730876 | 7147416 | 1244399 | CUB and Sushi multiple domains 1                                                       | Csmd1  | 364634 | 1,39 | up   |
| 6170196 | 7147416 | 1244418 | CUB and Sushi multiple domains 1                                                       | Csmd1  | 364634 | 1,38 | down |
| 6165969 | 7147416 | 1244466 | CUB and Sushi multiple domains 1                                                       | Csmd1  | 364634 | 1,37 | up   |
| 6612807 | 7147416 | 1244304 | CUB and Sushi multiple domains 1                                                       | Csmd1  | 364634 | 1,35 | up   |
| 6630847 | 7147416 | 1244471 | CUB and Sushi multiple domains 1                                                       | Csmd1  | 364634 | 1,34 | up   |

|         |         |         |                                  |       |        |      |      |
|---------|---------|---------|----------------------------------|-------|--------|------|------|
| 6450821 | 7147416 | 1244363 | CUB and Sushi multiple domains 1 | Csmd1 | 364634 | 1,32 | up   |
| 6395524 | 7147416 | 1244486 | CUB and Sushi multiple domains 1 | Csmd1 | 364634 | 1,30 | up   |
| 5619026 | 7147416 | 1244425 | CUB and Sushi multiple domains 1 | Csmd1 | 364634 | 1,28 | up   |
| 5754750 | 7147416 | 1244487 | CUB and Sushi multiple domains 1 | Csmd1 | 364634 | 1,26 | down |
| 6574024 | 7147416 | 1244446 | CUB and Sushi multiple domains 1 | Csmd1 | 364634 | 1,26 | down |
| 5625601 | 7147416 | 1244356 | CUB and Sushi multiple domains 1 | Csmd1 | 364634 | 1,23 | down |
| 6496508 | 7147416 | 1244373 | CUB and Sushi multiple domains 1 | Csmd1 | 364634 | 1,22 | up   |
| 5628114 | 7147416 | 1244478 | CUB and Sushi multiple domains 1 | Csmd1 | 364634 | 1,21 | down |
| 6477735 | 7147416 | 1244448 | CUB and Sushi multiple domains 1 | Csmd1 | 364634 | 1,20 | up   |
| 6310630 | 7147416 | 1244480 | CUB and Sushi multiple domains 1 | Csmd1 | 364634 | 1,18 | down |
| 6188051 | 7147416 | 1244470 | CUB and Sushi multiple domains 1 | Csmd1 | 364634 | 1,18 | up   |
| 6612302 | 7147416 | 1244409 | CUB and Sushi multiple domains 1 | Csmd1 | 364634 | 1,17 | down |
| 5834947 | 7147416 | 1244398 | CUB and Sushi multiple domains 1 | Csmd1 | 364634 | 1,17 | down |
| 6410036 | 7147416 | 1244439 | CUB and Sushi multiple domains 1 | Csmd1 | 364634 | 1,16 | down |
| 6088289 | 7147416 | 1244415 | CUB and Sushi multiple domains 1 | Csmd1 | 364634 | 1,15 | down |
| 5756725 | 7147416 | 1244445 | CUB and Sushi multiple domains 1 | Csmd1 | 364634 | 1,14 | up   |
| 6094296 | 7147416 | 1244481 | CUB and Sushi multiple domains 1 | Csmd1 | 364634 | 1,14 | down |
| 6124370 | 7147416 | 1244431 | CUB and Sushi multiple domains 1 | Csmd1 | 364634 | 1,14 | up   |
| 6365459 | 7147416 | 1244398 | CUB and Sushi multiple domains 1 | Csmd1 | 364634 | 1,14 | up   |
| 6667534 | 7147416 | 1244395 | CUB and Sushi multiple domains 1 | Csmd1 | 364634 | 1,14 | down |
| 6009438 | 7147416 | 1244392 | CUB and Sushi multiple domains 1 | Csmd1 | 364634 | 1,13 | down |
| 5985598 | 7147416 | 1244417 | CUB and Sushi multiple domains 1 | Csmd1 | 364634 | 1,13 | down |
| 5705669 | 7147416 | 1244385 | CUB and Sushi multiple domains 1 | Csmd1 | 364634 | 1,13 | up   |
| 6411361 | 7147416 | 1244472 | CUB and Sushi multiple domains 1 | Csmd1 | 364634 | 1,12 | down |
| 5676203 | 7147416 | 1244484 | CUB and Sushi multiple domains 1 | Csmd1 | 364634 | 1,12 | up   |
| 5714839 | 7147416 | 1244474 | CUB and Sushi multiple domains 1 | Csmd1 | 364634 | 1,12 | down |
| 6611353 | 7147416 | 1244351 | CUB and Sushi multiple domains 1 | Csmd1 | 364634 | 1,11 | down |
| 6499875 | 7147416 | 1244410 | CUB and Sushi multiple domains 1 | Csmd1 | 364634 | 1,11 | down |
| 6009136 | 7147416 | 1244455 | CUB and Sushi multiple domains 1 | Csmd1 | 364634 | 1,11 | up   |
| 6019193 | 7147416 | 1244423 | CUB and Sushi multiple domains 1 | Csmd1 | 364634 | 1,10 | up   |
| 6125074 | 7147416 | 1244483 | CUB and Sushi multiple domains 1 | Csmd1 | 364634 | 1,10 | up   |
| 6404690 | 7147416 | 1244389 | CUB and Sushi multiple domains 1 | Csmd1 | 364634 | 1,09 | down |
| 6312234 | 7147416 | 1244419 | CUB and Sushi multiple domains 1 | Csmd1 | 364634 | 1,09 | up   |
| 6455987 | 7147416 | 1244435 | CUB and Sushi multiple domains 1 | Csmd1 | 364634 | 1,09 | up   |
| 5779236 | 7147416 | 1244479 | CUB and Sushi multiple domains 1 | Csmd1 | 364634 | 1,08 | up   |
| 6015131 | 7147416 | 1244488 | CUB and Sushi multiple domains 1 | Csmd1 | 364634 | 1,08 | up   |
| 5737269 | 7147416 | 1244427 | CUB and Sushi multiple domains 1 | Csmd1 | 364634 | 1,08 | down |
| 6151390 | 7147416 | 1244425 | CUB and Sushi multiple domains 1 | Csmd1 | 364634 | 1,07 | down |
| 6092963 | 7147416 | 1244426 | CUB and Sushi multiple domains 1 | Csmd1 | 364634 | 1,06 | up   |
| 5796721 | 7147416 | 1244413 | CUB and Sushi multiple domains 1 | Csmd1 | 364634 | 1,05 | up   |
| 6539544 | 7147416 | 1244387 | CUB and Sushi multiple domains 1 | Csmd1 | 364634 | 1,05 | down |
| 5693080 | 7147416 | 1244422 | CUB and Sushi multiple domains 1 | Csmd1 | 364634 | 1,04 | down |
| 6560831 | 7147416 | 1244373 | CUB and Sushi multiple domains 1 | Csmd1 | 364634 | 1,04 | down |
| 6441125 | 7147416 | 1244288 | CUB and Sushi multiple domains 1 | Csmd1 | 364634 | 1,03 | down |
| 6225372 | 7147416 | 1244396 | CUB and Sushi multiple domains 1 | Csmd1 | 364634 | 1,03 | up   |
| 6213789 | 7147416 | 1244460 | CUB and Sushi multiple domains 1 | Csmd1 | 364634 | 1,03 | up   |
| 5831980 | 7147416 | 1244342 | CUB and Sushi multiple domains 1 | Csmd1 | 364634 | 1,03 | up   |
| 5652042 | 7147416 | 1244460 | CUB and Sushi multiple domains 1 | Csmd1 | 364634 | 1,01 | down |
| 6107838 | 7147416 | 1244456 | CUB and Sushi multiple domains 1 | Csmd1 | 364634 | 1,01 | up   |
| 6576331 | 7147416 | 1244376 | CUB and Sushi multiple domains 1 | Csmd1 | 364634 | 1,01 | up   |
| 6165282 | 7147416 | 1244301 | CUB and Sushi multiple domains 1 | Csmd1 | 364634 | 1,01 | up   |
| 6692858 | 7147416 | 1244441 | CUB and Sushi multiple domains 1 | Csmd1 | 364634 | 1,00 | up   |
| 6279759 | 7147416 | 1244391 | CUB and Sushi multiple domains 1 | Csmd1 | 364634 | 1,00 | down |
| 6008158 | 7372840 | 1803777 | cullin 4B                        | Cul4b | 302502 | 2,04 | up   |
| 6316586 | 7372840 | 1803765 | cullin 4B                        | Cul4b | 302502 | 1,65 | up   |
| 6016556 | 7372840 | 1803789 | cullin 4B                        | Cul4b | 302502 | 1,54 | down |
| 6087300 | 7372840 | 1803783 | cullin 4B                        | Cul4b | 302502 | 1,47 | up   |



|         |         |         |                                                            |       |        |      |      |
|---------|---------|---------|------------------------------------------------------------|-------|--------|------|------|
| 5674923 | 7372840 | 1803776 | cullin 4B                                                  | Cul4b | 302502 | 1,46 | down |
| 6079630 | 7372840 | 1803780 | cullin 4B                                                  | Cul4b | 302502 | 1,42 | up   |
| 5898431 | 7372840 | 1803771 | cullin 4B                                                  | Cul4b | 302502 | 1,38 | up   |
| 6347079 | 7372840 | 1803768 | cullin 4B                                                  | Cul4b | 302502 | 1,35 | up   |
| 6464681 | 7372840 | 1803784 | cullin 4B                                                  | Cul4b | 302502 | 1,26 | up   |
| 6226885 | 7372840 | 1803779 | cullin 4B                                                  | Cul4b | 302502 | 1,24 | up   |
| 5676594 | 7372840 | 1803770 | cullin 4B                                                  | Cul4b | 302502 | 1,23 | down |
| 6481057 | 7372840 | 1803782 | cullin 4B                                                  | Cul4b | 302502 | 1,22 | up   |
| 6516858 | 7372840 | 1803789 | cullin 4B                                                  | Cul4b | 302502 | 1,18 | down |
| 6451914 | 7372840 | 1803787 | cullin 4B                                                  | Cul4b | 302502 | 1,17 | up   |
| 5831328 | 7372840 | 1803766 | cullin 4B                                                  | Cul4b | 302502 | 1,17 | up   |
| 5947292 | 7372840 | 1803785 | cullin 4B                                                  | Cul4b | 302502 | 1,12 | down |
| 6310825 | 7372840 | 1803781 | cullin 4B                                                  | Cul4b | 302502 | 1,11 | down |
| 5868312 | 7372840 | 1803770 | cullin 4B                                                  | Cul4b | 302502 | 1,09 | down |
| 5628198 | 7372840 | 1803774 | cullin 4B                                                  | Cul4b | 302502 | 1,09 | down |
| 5949845 | 7372840 | 1803770 | cullin 4B                                                  | Cul4b | 302502 | 1,09 | up   |
| 6451328 | 7372840 | 1803775 | cullin 4B                                                  | Cul4b | 302502 | 1,08 | up   |
| 5898244 | 7372840 | 1803788 | cullin 4B                                                  | Cul4b | 302502 | 1,07 | down |
| 6624276 | 7372840 | 1803772 | cullin 4B                                                  | Cul4b | 302502 | 1,03 | up   |
| 6636667 | 7372840 | 1803786 | cullin 4B                                                  | Cul4b | 302502 | 1,02 | up   |
| 6585475 | 7372840 | 1803770 | cullin 4B                                                  | Cul4b | 302502 | 1,01 | up   |
| 6603060 | 7372840 | 1803778 | cullin 4B                                                  | Cul4b | 302502 | 1,00 | down |
| 6524852 | 7257586 | 1516761 | cullin-associated and neddylation-dissociated 2 (putative) | Cand2 | 192226 | 2,08 | up   |
| 5849471 | 7257586 | 1516758 | cullin-associated and neddylation-dissociated 2 (putative) | Cand2 | 192226 | 1,78 | up   |
| 5633375 | 7257586 | 1516774 | cullin-associated and neddylation-dissociated 2 (putative) | Cand2 | 192226 | 1,57 | down |
| 6062961 | 7257586 | 1516764 | cullin-associated and neddylation-dissociated 2 (putative) | Cand2 | 192226 | 1,30 | up   |
| 5969966 | 7257586 | 1516765 | cullin-associated and neddylation-dissociated 2 (putative) | Cand2 | 192226 | 1,27 | down |
| 6022873 | 7257586 | 1516766 | cullin-associated and neddylation-dissociated 2 (putative) | Cand2 | 192226 | 1,22 | down |
| 6306207 | 7257586 | 1516773 | cullin-associated and neddylation-dissociated 2 (putative) | Cand2 | 192226 | 1,20 | up   |
| 6220740 | 7257586 | 1516768 | cullin-associated and neddylation-dissociated 2 (putative) | Cand2 | 192226 | 1,16 | down |
| 6374300 | 7257586 | 1516762 | cullin-associated and neddylation-dissociated 2 (putative) | Cand2 | 192226 | 1,16 | down |
| 6369245 | 7257586 | 1516763 | cullin-associated and neddylation-dissociated 2 (putative) | Cand2 | 192226 | 1,15 | down |
| 6512175 | 7257586 | 1516759 | cullin-associated and neddylation-dissociated 2 (putative) | Cand2 | 192226 | 1,13 | down |
| 6550369 | 7257586 | 1516758 | cullin-associated and neddylation-dissociated 2 (putative) | Cand2 | 192226 | 1,12 | up   |
| 6610871 | 7257586 | 1516760 | cullin-associated and neddylation-dissociated 2 (putative) | Cand2 | 192226 | 1,11 | up   |
| 6583629 | 7257586 | 1516771 | cullin-associated and neddylation-dissociated 2 (putative) | Cand2 | 192226 | 1,05 | up   |
| 5962362 | 7257586 | 1516769 | cullin-associated and neddylation-dissociated 2 (putative) | Cand2 | 192226 | 1,04 | down |
| 6262538 | 7257586 | 1516772 | cullin-associated and neddylation-dissociated 2 (putative) | Cand2 | 192226 | 1,02 | down |
| 6386414 | 7257586 | 1516767 | cullin-associated and neddylation-dissociated 2 (putative) | Cand2 | 192226 | 1,02 | down |
| 5891147 | 7257586 | 1516770 | cullin-associated and neddylation-dissociated 2 (putative) | Cand2 | 192226 | 1,00 | up   |
| 6167566 | 7098411 | 1123724 | cut-like homeobox 2                                        | Cux2  | 288665 | 3,17 | down |
| 6094832 | 7098411 | 1123737 | cut-like homeobox 2                                        | Cux2  | 288665 | 2,16 | down |
| 5964347 | 7098411 | 1123737 | cut-like homeobox 2                                        | Cux2  | 288665 | 2,06 | down |
| 6161184 | 7098411 | 1123733 | cut-like homeobox 2                                        | Cux2  | 288665 | 1,85 | down |
| 6375234 | 7098411 | 1123736 | cut-like homeobox 2                                        | Cux2  | 288665 | 1,69 | down |
| 6164123 | 7098411 | 1123714 | cut-like homeobox 2                                        | Cux2  | 288665 | 1,64 | down |
| 6384311 | 7098411 | 1123720 | cut-like homeobox 2                                        | Cux2  | 288665 | 1,58 | up   |
| 5895976 | 7098411 | 1123704 | cut-like homeobox 2                                        | Cux2  | 288665 | 1,41 | up   |
| 6569983 | 7098411 | 1123737 | cut-like homeobox 2                                        | Cux2  | 288665 | 1,34 | down |
| 5870698 | 7098411 | 1123709 | cut-like homeobox 2                                        | Cux2  | 288665 | 1,32 | down |
| 6476481 | 7098411 | 1123726 | cut-like homeobox 2                                        | Cux2  | 288665 | 1,31 | up   |
| 6304754 | 7098411 | 1123737 | cut-like homeobox 2                                        | Cux2  | 288665 | 1,27 | up   |
| 6281481 | 7098411 | 1123726 | cut-like homeobox 2                                        | Cux2  | 288665 | 1,22 | up   |
| 6146315 | 7098411 | 1123725 | cut-like homeobox 2                                        | Cux2  | 288665 | 1,13 | down |
| 6357094 | 7098411 | 1123713 | cut-like homeobox 2                                        | Cux2  | 288665 | 1,08 | up   |
| 6162317 | 7098411 | 1123727 | cut-like homeobox 2                                        | Cux2  | 288665 | 1,07 | up   |
| 5843088 | 7098411 | 1123721 | cut-like homeobox 2                                        | Cux2  | 288665 | 1,05 | up   |

|         |         |         |                                             |         |        |      |      |
|---------|---------|---------|---------------------------------------------|---------|--------|------|------|
| 6128077 | 7098411 | 1123722 | cut-like homeobox 2                         | Cux2    | 288665 | 1,05 | down |
| 6525377 | 7098411 | 1123716 | cut-like homeobox 2                         | Cux2    | 288665 | 1,03 | down |
| 5860920 | 7098411 | 1123715 | cut-like homeobox 2                         | Cux2    | 288665 | 1,03 | down |
| 5658070 | 7098411 | 1123713 | cut-like homeobox 2                         | Cux2    | 288665 | 1,02 | up   |
| 6362192 | 7098411 | 1123734 | cut-like homeobox 2                         | Cux2    | 288665 | 1,02 | up   |
| 5623729 | 7311648 | 1651371 | CWF19-like 2, cell cycle control (S. pombe) | Cwf19I2 | 362804 | 2,84 | down |
| 6582842 | 7311648 | 1651368 | CWF19-like 2, cell cycle control (S. pombe) | Cwf19I2 | 362804 | 2,54 | down |
| 5963454 | 7311648 | 1651369 | CWF19-like 2, cell cycle control (S. pombe) | Cwf19I2 | 362804 | 1,69 | down |
| 6393009 | 7311648 | 1651367 | CWF19-like 2, cell cycle control (S. pombe) | Cwf19I2 | 362804 | 1,64 | up   |
| 5867793 | 7311648 | 1651366 | CWF19-like 2, cell cycle control (S. pombe) | Cwf19I2 | 362804 | 1,61 | up   |
| 6691134 | 7311648 | 1651379 | CWF19-like 2, cell cycle control (S. pombe) | Cwf19I2 | 362804 | 1,43 | up   |
| 5654655 | 7311648 | 1651378 | CWF19-like 2, cell cycle control (S. pombe) | Cwf19I2 | 362804 | 1,40 | down |
| 5970921 | 7311648 | 1651370 | CWF19-like 2, cell cycle control (S. pombe) | Cwf19I2 | 362804 | 1,38 | up   |
| 6053210 | 7311648 | 1651373 | CWF19-like 2, cell cycle control (S. pombe) | Cwf19I2 | 362804 | 1,27 | down |
| 5904147 | 7311648 | 1651376 | CWF19-like 2, cell cycle control (S. pombe) | Cwf19I2 | 362804 | 1,17 | up   |
| 6107029 | 7311648 | 1651386 | CWF19-like 2, cell cycle control (S. pombe) | Cwf19I2 | 362804 | 1,15 | up   |
| 5773970 | 7311648 | 1651380 | CWF19-like 2, cell cycle control (S. pombe) | Cwf19I2 | 362804 | 1,15 | up   |
| 6035130 | 7311648 | 1651368 | CWF19-like 2, cell cycle control (S. pombe) | Cwf19I2 | 362804 | 1,13 | down |
| 6658329 | 7311648 | 1651377 | CWF19-like 2, cell cycle control (S. pombe) | Cwf19I2 | 362804 | 1,10 | down |
| 6545862 | 7311648 | 1651385 | CWF19-like 2, cell cycle control (S. pombe) | Cwf19I2 | 362804 | 1,09 | down |
| 6575117 | 7311648 | 1651372 | CWF19-like 2, cell cycle control (S. pombe) | Cwf19I2 | 362804 | 1,09 | up   |
| 5640078 | 7311648 | 1651381 | CWF19-like 2, cell cycle control (S. pombe) | Cwf19I2 | 362804 | 1,04 | up   |
| 5991452 | 7311648 | 1651383 | CWF19-like 2, cell cycle control (S. pombe) | Cwf19I2 | 362804 | 1,04 | down |
| 5966379 | 7311648 | 1651382 | CWF19-like 2, cell cycle control (S. pombe) | Cwf19I2 | 362804 | 1,03 | down |
| 6319735 | 7311648 | 1651369 | CWF19-like 2, cell cycle control (S. pombe) | Cwf19I2 | 362804 | 1,02 | up   |
| 5920818 | 7311648 | 1651384 | CWF19-like 2, cell cycle control (S. pombe) | Cwf19I2 | 362804 | 1,01 | down |
| 6109533 | 7311648 | 1651378 | CWF19-like 2, cell cycle control (S. pombe) | Cwf19I2 | 362804 | 1,01 | down |
| 6638420 | 7203074 | 1382789 | cyclin B1                                   | Ccnb1   | 25203  | 2,07 | down |
| 6160400 | 7203074 | 1382792 | cyclin B1                                   | Ccnb1   | 25203  | 1,41 | up   |
| 6118319 | 7203074 | 1382787 | cyclin B1                                   | Ccnb1   | 25203  | 1,18 | up   |
| 6526186 | 7203074 | 1382786 | cyclin B1                                   | Ccnb1   | 25203  | 1,17 | down |
| 6016262 | 7203074 | 1382784 | cyclin B1                                   | Ccnb1   | 25203  | 1,13 | up   |
| 6398904 | 7203074 | 1382791 | cyclin B1                                   | Ccnb1   | 25203  | 1,12 | down |
| 6191333 | 7203074 | 1382788 | cyclin B1                                   | Ccnb1   | 25203  | 1,12 | up   |
| 5812672 | 7203074 | 1382785 | cyclin B1                                   | Ccnb1   | 25203  | 1,05 | up   |
| 6499127 | 7203074 | 1382790 | cyclin B1                                   | Ccnb1   | 25203  | 1,02 | down |
| 5709982 | 7050384 | 1010455 | cyclin E1                                   | Ccne1   | 25729  | 2,09 | down |
| 6156315 | 7050384 | 1010447 | cyclin E1                                   | Ccne1   | 25729  | 1,83 | up   |
| 6356623 | 7050384 | 1010449 | cyclin E1                                   | Ccne1   | 25729  | 1,37 | down |
| 5785349 | 7050384 | 1010448 | cyclin E1                                   | Ccne1   | 25729  | 1,26 | up   |
| 5802904 | 7050384 | 1010454 | cyclin E1                                   | Ccne1   | 25729  | 1,24 | down |
| 6166203 | 7050384 | 1010453 | cyclin E1                                   | Ccne1   | 25729  | 1,22 | down |
| 5722109 | 7050384 | 1010447 | cyclin E1                                   | Ccne1   | 25729  | 1,15 | down |
| 5827600 | 7050384 | 1010452 | cyclin E1                                   | Ccne1   | 25729  | 1,13 | down |
| 6591424 | 7050384 | 1010456 | cyclin E1                                   | Ccne1   | 25729  | 1,12 | up   |
| 5759462 | 7050384 | 1010447 | cyclin E1                                   | Ccne1   | 25729  | 1,09 | up   |
| 6600605 | 7050384 | 1010451 | cyclin E1                                   | Ccne1   | 25729  | 1,03 | up   |
| 5846396 | 7050384 | 1010450 | cyclin E1                                   | Ccne1   | 25729  | 1,03 | down |
| 6526154 | 7050384 | 1010459 | cyclin E1                                   | Ccne1   | 25729  | 1,02 | down |
| 6066127 | 7050384 | 1010457 | cyclin E1                                   | Ccne1   | 25729  | 1,01 | up   |
| 5663349 | 7209338 | 1397450 | cyclin L1                                   | Ccnl1   | 114121 | 2,06 | up   |
| 6545661 | 7209338 | 1397454 | cyclin L1                                   | Ccnl1   | 114121 | 1,77 | down |
| 6533085 | 7209338 | 1397451 | cyclin L1                                   | Ccnl1   | 114121 | 1,69 | down |
| 5705823 | 7209338 | 1397454 | cyclin L1                                   | Ccnl1   | 114121 | 1,50 | down |
| 6615069 | 7209338 | 1397446 | cyclin L1                                   | Ccnl1   | 114121 | 1,48 | down |
| 6611290 | 7209338 | 1397448 | cyclin L1                                   | Ccnl1   | 114121 | 1,40 | up   |
| 5619276 | 7209338 | 1397449 | cyclin L1                                   | Ccnl1   | 114121 | 1,37 | down |

|         |         |         |                                                      |        |        |      |      |
|---------|---------|---------|------------------------------------------------------|--------|--------|------|------|
| 5911285 | 7209338 | 1397442 | cyclin L1                                            | Ccn1l  | 114121 | 1,33 | up   |
| 5963549 | 7209338 | 1397454 | cyclin L1                                            | Ccn1l  | 114121 | 1,28 | up   |
| 5841586 | 7209338 | 1397454 | cyclin L1                                            | Ccn1l  | 114121 | 1,23 | up   |
| 5732742 | 7209338 | 1397454 | cyclin L1                                            | Ccn1l  | 114121 | 1,21 | down |
| 6433931 | 7209338 | 1397444 | cyclin L1                                            | Ccn1l  | 114121 | 1,21 | down |
| 5794266 | 7209338 | 1397443 | cyclin L1                                            | Ccn1l  | 114121 | 1,20 | up   |
| 6468440 | 7209338 | 1397445 | cyclin L1                                            | Ccn1l  | 114121 | 1,15 | up   |
| 6588684 | 7209338 | 1397451 | cyclin L1                                            | Ccn1l  | 114121 | 1,12 | up   |
| 6177037 | 7209338 | 1397447 | cyclin L1                                            | Ccn1l  | 114121 | 1,10 | up   |
| 5862380 | 7209338 | 1397442 | cyclin L1                                            | Ccn1l  | 114121 | 1,07 | down |
| 5693458 | 7209338 | 1397453 | cyclin L1                                            | Ccn1l  | 114121 | 1,03 | down |
| 5745898 | 7209338 | 1397452 | cyclin L1                                            | Ccn1l  | 114121 | 1,01 | up   |
| 6297504 | 7059051 | 1029397 | cyclin-dependent kinase inhibitor 1C (P57)           | Cdkn1c | 246060 | 2,08 | down |
| 5811386 | 7059051 | 1029397 | cyclin-dependent kinase inhibitor 1C (P57)           | Cdkn1c | 246060 | 1,76 | up   |
| 6184742 | 7059051 | 1029399 | cyclin-dependent kinase inhibitor 1C (P57)           | Cdkn1c | 246060 | 1,44 | down |
| 6429942 | 7059051 | 1029395 | cyclin-dependent kinase inhibitor 1C (P57)           | Cdkn1c | 246060 | 1,42 | up   |
| 5936933 | 7059051 | 1029397 | cyclin-dependent kinase inhibitor 1C (P57)           | Cdkn1c | 246060 | 1,20 | down |
| 5773867 | 7059051 | 1029400 | cyclin-dependent kinase inhibitor 1C (P57)           | Cdkn1c | 246060 | 1,19 | down |
| 5899052 | 7059051 | 1029398 | cyclin-dependent kinase inhibitor 1C (P57)           | Cdkn1c | 246060 | 1,03 | down |
| 6074351 | 7059051 | 1029400 | cyclin-dependent kinase inhibitor 1C (P57)           | Cdkn1c | 246060 | 1,03 | down |
| 6048294 | 7059051 | 1029398 | cyclin-dependent kinase inhibitor 1C (P57)           | Cdkn1c | 246060 | 1,02 | up   |
| 5685556 | 7059051 | 1029396 | cyclin-dependent kinase inhibitor 1C (P57)           | Cdkn1c | 246060 | 1,00 | up   |
| 6301446 | 7059051 | 1029398 | cyclin-dependent kinase inhibitor 1C (P57)           | Cdkn1c | 246060 | 1,00 | up   |
| 5868348 | 7307467 | 1641221 | cyclin-dependent kinase-like 1 (CDC2-related kinase) | Cdkl1  | 314198 | 2,17 | down |
| 6579616 | 7307467 | 1641215 | cyclin-dependent kinase-like 1 (CDC2-related kinase) | Cdkl1  | 314198 | 1,43 | up   |
| 6745167 | 7307467 | 1641212 | cyclin-dependent kinase-like 1 (CDC2-related kinase) | Cdkl1  | 314198 | 1,37 | up   |
| 6622964 | 7307467 | 1641218 | cyclin-dependent kinase-like 1 (CDC2-related kinase) | Cdkl1  | 314198 | 1,14 | down |
| 6684258 | 7307467 | 1641213 | cyclin-dependent kinase-like 1 (CDC2-related kinase) | Cdkl1  | 314198 | 1,14 | up   |
| 5996233 | 7307467 | 1641217 | cyclin-dependent kinase-like 1 (CDC2-related kinase) | Cdkl1  | 314198 | 1,12 | down |
| 6067502 | 7307467 | 1641214 | cyclin-dependent kinase-like 1 (CDC2-related kinase) | Cdkl1  | 314198 | 1,10 | down |
| 6506161 | 7307467 | 1641216 | cyclin-dependent kinase-like 1 (CDC2-related kinase) | Cdkl1  | 314198 | 1,05 | up   |
| 6577822 | 7307467 | 1641219 | cyclin-dependent kinase-like 1 (CDC2-related kinase) | Cdkl1  | 314198 | 1,03 | down |
| 6532600 | 7307467 | 1641220 | cyclin-dependent kinase-like 1 (CDC2-related kinase) | Cdkl1  | 314198 | 1,02 | up   |
| 5651794 | 7314821 | 1659018 | cysteine and glycine-rich protein 2                  | Csrp2  | 29317  | 2,04 | down |
| 6710306 | 7314821 | 1659016 | cysteine and glycine-rich protein 2                  | Csrp2  | 29317  | 1,93 | down |
| 6339794 | 7314821 | 1659017 | cysteine and glycine-rich protein 2                  | Csrp2  | 29317  | 1,58 | down |
| 6459833 | 7314821 | 1659018 | cysteine and glycine-rich protein 2                  | Csrp2  | 29317  | 1,53 | down |
| 6014536 | 7314821 | 1659018 | cysteine and glycine-rich protein 2                  | Csrp2  | 29317  | 1,29 | down |
| 5819359 | 7314821 | 1659018 | cysteine and glycine-rich protein 2                  | Csrp2  | 29317  | 1,16 | up   |
| 6100787 | 7314821 | 1659015 | cysteine and glycine-rich protein 2                  | Csrp2  | 29317  | 1,08 | up   |
| 5960099 | 7314821 | 1659019 | cysteine and glycine-rich protein 2                  | Csrp2  | 29317  | 1,06 | up   |
| 5921457 | 7332099 | 1700807 | cysteine sulfinic acid decarboxylase                 | Csad   | 60356  | 2,57 | up   |
| 6656497 | 7332099 | 1700803 | cysteine sulfinic acid decarboxylase                 | Csad   | 60356  | 1,87 | down |
| 6118198 | 7332099 | 1700796 | cysteine sulfinic acid decarboxylase                 | Csad   | 60356  | 1,71 | up   |
| 6685359 | 7332099 | 1700794 | cysteine sulfinic acid decarboxylase                 | Csad   | 60356  | 1,70 | down |
| 5732737 | 7332099 | 1700792 | cysteine sulfinic acid decarboxylase                 | Csad   | 60356  | 1,63 | up   |
| 5891926 | 7332099 | 1700799 | cysteine sulfinic acid decarboxylase                 | Csad   | 60356  | 1,60 | up   |
| 6251375 | 7332099 | 1700802 | cysteine sulfinic acid decarboxylase                 | Csad   | 60356  | 1,59 | up   |
| 6644329 | 7332099 | 1700792 | cysteine sulfinic acid decarboxylase                 | Csad   | 60356  | 1,57 | up   |
| 5766912 | 7332099 | 1700805 | cysteine sulfinic acid decarboxylase                 | Csad   | 60356  | 1,53 | down |
| 6236959 | 7332099 | 1700801 | cysteine sulfinic acid decarboxylase                 | Csad   | 60356  | 1,48 | down |
| 6668038 | 7332099 | 1700798 | cysteine sulfinic acid decarboxylase                 | Csad   | 60356  | 1,47 | down |
| 6666108 | 7332099 | 1700791 | cysteine sulfinic acid decarboxylase                 | Csad   | 60356  | 1,41 | down |
| 6175686 | 7332099 | 1700804 | cysteine sulfinic acid decarboxylase                 | Csad   | 60356  | 1,36 | up   |
| 6349165 | 7332099 | 1700797 | cysteine sulfinic acid decarboxylase                 | Csad   | 60356  | 1,17 | up   |
| 6237408 | 7332099 | 1700793 | cysteine sulfinic acid decarboxylase                 | Csad   | 60356  | 1,16 | down |
| 5936784 | 7332099 | 1700806 | cysteine sulfinic acid decarboxylase                 | Csad   | 60356  | 1,11 | up   |

|         |         |         |                                                          |          |        |      |      |
|---------|---------|---------|----------------------------------------------------------|----------|--------|------|------|
| 6491377 | 7332099 | 1700800 | cysteine sulfinic acid decarboxylase                     | Csad     | 60356  | 1,11 | down |
| 6353164 | 7332099 | 1700795 | cysteine sulfinic acid decarboxylase                     | Csad     | 60356  | 1,03 | up   |
| 5649356 | 7376206 | 1811979 | cysteine-rich hydrophobic domain 1                       | Chic1    | 363484 | 1,32 | down |
| 6513207 | 7376206 | 1811972 | cysteine-rich hydrophobic domain 1                       | Chic1    | 363484 | 1,11 | up   |
| 6296482 | 7302155 | 1627302 | cysteine-rich protein 2                                  | Crip2    | 338401 | 2,16 | down |
| 6105619 | 7302155 | 1627298 | cysteine-rich protein 2                                  | Crip2    | 338401 | 1,81 | up   |
| 5904258 | 7302155 | 1627301 | cysteine-rich protein 2                                  | Crip2    | 338401 | 1,45 | up   |
| 5836477 | 7302155 | 1627299 | cysteine-rich protein 2                                  | Crip2    | 338401 | 1,43 | down |
| 5709774 | 7302155 | 1627302 | cysteine-rich protein 2                                  | Crip2    | 338401 | 1,24 | down |
| 5812115 | 7302155 | 1627303 | cysteine-rich protein 2                                  | Crip2    | 338401 | 1,18 | down |
| 6209047 | 7302155 | 1627300 | cysteine-rich protein 2                                  | Crip2    | 338401 | 1,17 | down |
| 6226061 | 7302155 | 1627305 | cysteine-rich protein 2                                  | Crip2    | 338401 | 1,12 | down |
| 5844566 | 7302155 | 1627304 | cysteine-rich protein 2                                  | Crip2    | 338401 | 1,02 | up   |
| 6667790 | 7282430 | 1578881 | cysteine-rich secretory protein LCCL domain containing 1 | Crispld1 | 316482 | 3,20 | up   |
| 6282836 | 7282430 | 1578881 | cysteine-rich secretory protein LCCL domain containing 1 | Crispld1 | 316482 | 2,99 | up   |
| 6623819 | 7282430 | 1578880 | cysteine-rich secretory protein LCCL domain containing 1 | Crispld1 | 316482 | 2,01 | down |
| 6432115 | 7282430 | 1578881 | cysteine-rich secretory protein LCCL domain containing 1 | Crispld1 | 316482 | 1,92 | up   |
| 6203096 | 7282430 | 1578874 | cysteine-rich secretory protein LCCL domain containing 1 | Crispld1 | 316482 | 1,83 | up   |
| 5870790 | 7282430 | 1578864 | cysteine-rich secretory protein LCCL domain containing 1 | Crispld1 | 316482 | 1,67 | down |
| 5963829 | 7282430 | 1578871 | cysteine-rich secretory protein LCCL domain containing 1 | Crispld1 | 316482 | 1,60 | down |
| 5687371 | 7282430 | 1578874 | cysteine-rich secretory protein LCCL domain containing 1 | Crispld1 | 316482 | 1,41 | down |
| 6148295 | 7282430 | 1578868 | cysteine-rich secretory protein LCCL domain containing 1 | Crispld1 | 316482 | 1,38 | up   |
| 6274230 | 7282430 | 1578865 | cysteine-rich secretory protein LCCL domain containing 1 | Crispld1 | 316482 | 1,37 | down |
| 5748882 | 7282430 | 1578880 | cysteine-rich secretory protein LCCL domain containing 1 | Crispld1 | 316482 | 1,33 | down |
| 6346898 | 7282430 | 1578877 | cysteine-rich secretory protein LCCL domain containing 1 | Crispld1 | 316482 | 1,25 | down |
| 6493009 | 7282430 | 1578872 | cysteine-rich secretory protein LCCL domain containing 1 | Crispld1 | 316482 | 1,20 | down |
| 5633786 | 7282430 | 1578870 | cysteine-rich secretory protein LCCL domain containing 1 | Crispld1 | 316482 | 1,18 | down |
| 5952100 | 7282430 | 1578864 | cysteine-rich secretory protein LCCL domain containing 1 | Crispld1 | 316482 | 1,17 | down |
| 6741978 | 7282430 | 1578865 | cysteine-rich secretory protein LCCL domain containing 1 | Crispld1 | 316482 | 1,17 | down |
| 5967803 | 7282430 | 1578867 | cysteine-rich secretory protein LCCL domain containing 1 | Crispld1 | 316482 | 1,11 | down |
| 6666420 | 7282430 | 1578875 | cysteine-rich secretory protein LCCL domain containing 1 | Crispld1 | 316482 | 1,10 | up   |
| 6420674 | 7282430 | 1578876 | cysteine-rich secretory protein LCCL domain containing 1 | Crispld1 | 316482 | 1,09 | down |
| 6154179 | 7282430 | 1578869 | cysteine-rich secretory protein LCCL domain containing 1 | Crispld1 | 316482 | 1,06 | up   |
| 6587229 | 7282430 | 1578866 | cysteine-rich secretory protein LCCL domain containing 1 | Crispld1 | 316482 | 1,02 | up   |
| 6344181 | 7282430 | 1578873 | cysteine-rich secretory protein LCCL domain containing 1 | Crispld1 | 316482 | 1,02 | up   |
| 6431137 | 7296860 | 1613439 | cytidine monophosphate (UMP-CMP) kinase 2, mitochondrial | Cmpk2    | 314004 | 1,89 | down |
| 6272054 | 7296860 | 1613437 | cytidine monophosphate (UMP-CMP) kinase 2, mitochondrial | Cmpk2    | 314004 | 1,75 | up   |
| 6190723 | 7296860 | 1613438 | cytidine monophosphate (UMP-CMP) kinase 2, mitochondrial | Cmpk2    | 314004 | 1,72 | up   |
| 6211752 | 7296860 | 1613435 | cytidine monophosphate (UMP-CMP) kinase 2, mitochondrial | Cmpk2    | 314004 | 1,67 | up   |
| 6122175 | 7296860 | 1613435 | cytidine monophosphate (UMP-CMP) kinase 2, mitochondrial | Cmpk2    | 314004 | 1,50 | down |
| 5786104 | 7296860 | 1613440 | cytidine monophosphate (UMP-CMP) kinase 2, mitochondrial | Cmpk2    | 314004 | 1,31 | up   |
| 6577360 | 7296860 | 1613439 | cytidine monophosphate (UMP-CMP) kinase 2, mitochondrial | Cmpk2    | 314004 | 1,17 | down |
| 6688514 | 7296860 | 1613439 | cytidine monophosphate (UMP-CMP) kinase 2, mitochondrial | Cmpk2    | 314004 | 1,14 | down |
| 6369627 | 7296860 | 1613440 | cytidine monophosphate (UMP-CMP) kinase 2, mitochondrial | Cmpk2    | 314004 | 1,05 | down |
| 5832037 | 7039697 | 984753  | cytochrome b, ascorbate dependent 3                      | Cybasc3  | 361729 | 2,19 | down |
| 6457167 | 7039697 | 984754  | cytochrome b, ascorbate dependent 3                      | Cybasc3  | 361729 | 1,72 | down |
| 5891884 | 7039697 | 984753  | cytochrome b, ascorbate dependent 3                      | Cybasc3  | 361729 | 1,43 | up   |
| 6089519 | 7039697 | 984751  | cytochrome b, ascorbate dependent 3                      | Cybasc3  | 361729 | 1,41 | up   |
| 5912614 | 7039697 | 984750  | cytochrome b, ascorbate dependent 3                      | Cybasc3  | 361729 | 1,32 | up   |
| 6167454 | 7039697 | 984754  | cytochrome b, ascorbate dependent 3                      | Cybasc3  | 361729 | 1,22 | up   |
| 5713697 | 7039697 | 984754  | cytochrome b, ascorbate dependent 3                      | Cybasc3  | 361729 | 1,17 | down |
| 6032681 | 7039697 | 984754  | cytochrome b, ascorbate dependent 3                      | Cybasc3  | 361729 | 1,14 | down |
| 5631953 | 7039697 | 984754  | cytochrome b, ascorbate dependent 3                      | Cybasc3  | 361729 | 1,11 | down |
| 5799280 | 7039697 | 984752  | cytochrome b, ascorbate dependent 3                      | Cybasc3  | 361729 | 1,08 | up   |
| 5620900 | 7039697 | 984749  | cytochrome b, ascorbate dependent 3                      | Cybasc3  | 361729 | 1,06 | down |
| 6541275 | 7039697 | 984748  | cytochrome b, ascorbate dependent 3                      | Cybasc3  | 361729 | 1,02 | up   |
| 6352424 | 7379801 | 1820327 | cytochrome b-245, beta polypeptide                       | Cybb     | 66021  | 2,90 | up   |

|         |         |         |                                                        |         |        |      |      |
|---------|---------|---------|--------------------------------------------------------|---------|--------|------|------|
| 5925037 | 7379801 | 1820338 | cytochrome b-245, beta polypeptide                     | Cybb    | 66021  | 2,42 | down |
| 6663063 | 7379801 | 1820337 | cytochrome b-245, beta polypeptide                     | Cybb    | 66021  | 2,22 | down |
| 5757022 | 7379801 | 1820332 | cytochrome b-245, beta polypeptide                     | Cybb    | 66021  | 1,97 | up   |
| 5964421 | 7379801 | 1820339 | cytochrome b-245, beta polypeptide                     | Cybb    | 66021  | 1,89 | down |
| 6696934 | 7379801 | 1820334 | cytochrome b-245, beta polypeptide                     | Cybb    | 66021  | 1,71 | up   |
| 6614162 | 7379801 | 1820326 | cytochrome b-245, beta polypeptide                     | Cybb    | 66021  | 1,62 | up   |
| 6734774 | 7379801 | 1820333 | cytochrome b-245, beta polypeptide                     | Cybb    | 66021  | 1,46 | down |
| 5776519 | 7379801 | 1820336 | cytochrome b-245, beta polypeptide                     | Cybb    | 66021  | 1,40 | down |
| 5816855 | 7379801 | 1820327 | cytochrome b-245, beta polypeptide                     | Cybb    | 66021  | 1,39 | down |
| 5756871 | 7379801 | 1820330 | cytochrome b-245, beta polypeptide                     | Cybb    | 66021  | 1,38 | up   |
| 6126289 | 7379801 | 1820331 | cytochrome b-245, beta polypeptide                     | Cybb    | 66021  | 1,25 | up   |
| 6369732 | 7379801 | 1820335 | cytochrome b-245, beta polypeptide                     | Cybb    | 66021  | 1,24 | down |
| 6581853 | 7379801 | 1820328 | cytochrome b-245, beta polypeptide                     | Cybb    | 66021  | 1,20 | up   |
| 5838473 | 7379801 | 1820329 | cytochrome b-245, beta polypeptide                     | Cybb    | 66021  | 1,04 | up   |
| 6198952 | 7312739 | 1653739 | cytochrome P450 4F5                                    | Cyp4f5  | 286905 | 4,01 | up   |
| 5692523 | 7312739 | 1653750 | cytochrome P450 4F5                                    | Cyp4f5  | 286905 | 2,19 | up   |
| 5785230 | 7312739 | 1653738 | cytochrome P450 4F5                                    | Cyp4f5  | 286905 | 1,55 | down |
| 6432803 | 7312739 | 1653747 | cytochrome P450 4F5                                    | Cyp4f5  | 286905 | 1,51 | down |
| 6150646 | 7312739 | 1653748 | cytochrome P450 4F5                                    | Cyp4f5  | 286905 | 1,46 | down |
| 5809039 | 7312739 | 1653738 | cytochrome P450 4F5                                    | Cyp4f5  | 286905 | 1,39 | down |
| 5898696 | 7312739 | 1653741 | cytochrome P450 4F5                                    | Cyp4f5  | 286905 | 1,37 | down |
| 5753894 | 7312739 | 1653742 | cytochrome P450 4F5                                    | Cyp4f5  | 286905 | 1,32 | up   |
| 6156926 | 7312739 | 1653751 | cytochrome P450 4F5                                    | Cyp4f5  | 286905 | 1,30 | down |
| 6658568 | 7312739 | 1653746 | cytochrome P450 4F5                                    | Cyp4f5  | 286905 | 1,21 | down |
| 6567926 | 7312739 | 1653737 | cytochrome P450 4F5                                    | Cyp4f5  | 286905 | 1,19 | down |
| 6272701 | 7312739 | 1653745 | cytochrome P450 4F5                                    | Cyp4f5  | 286905 | 1,14 | down |
| 6406477 | 7312739 | 1653740 | cytochrome P450 4F5                                    | Cyp4f5  | 286905 | 1,10 | down |
| 6563579 | 7312739 | 1653749 | cytochrome P450 4F5                                    | Cyp4f5  | 286905 | 1,10 | down |
| 5753425 | 7312739 | 1653744 | cytochrome P450 4F5                                    | Cyp4f5  | 286905 | 1,09 | up   |
| 5817011 | 7312739 | 1653743 | cytochrome P450 4F5                                    | Cyp4f5  | 286905 | 1,05 | up   |
| 5634474 | 7290111 | 1596968 | cytochrome P450 4X1                                    | Cyp4x1  | 246767 | 2,33 | down |
| 5870942 | 7290111 | 1596963 | cytochrome P450 4X1                                    | Cyp4x1  | 246767 | 1,40 | down |
| 5699861 | 7290111 | 1596969 | cytochrome P450 4X1                                    | Cyp4x1  | 246767 | 1,36 | up   |
| 5853651 | 7290111 | 1596970 | cytochrome P450 4X1                                    | Cyp4x1  | 246767 | 1,30 | down |
| 6052000 | 7290111 | 1596966 | cytochrome P450 4X1                                    | Cyp4x1  | 246767 | 1,20 | up   |
| 6486623 | 7290111 | 1596961 | cytochrome P450 4X1                                    | Cyp4x1  | 246767 | 1,16 | up   |
| 6333854 | 7290111 | 1596967 | cytochrome P450 4X1                                    | Cyp4x1  | 246767 | 1,12 | up   |
| 5806022 | 7290111 | 1596962 | cytochrome P450 4X1                                    | Cyp4x1  | 246767 | 1,06 | up   |
| 5625251 | 7290111 | 1596959 | cytochrome P450 4X1                                    | Cyp4x1  | 246767 | 1,05 | down |
| 6248241 | 7290111 | 1596967 | cytochrome P450 4X1                                    | Cyp4x1  | 246767 | 1,03 | up   |
| 5698748 | 7290111 | 1596965 | cytochrome P450 4X1                                    | Cyp4x1  | 246767 | 1,03 | up   |
| 6651302 | 7290111 | 1596959 | cytochrome P450 4X1                                    | Cyp4x1  | 246767 | 1,01 | up   |
| 5892502 | 7290111 | 1596960 | cytochrome P450 4X1                                    | Cyp4x1  | 246767 | 1,01 | down |
| 5687021 | 7290111 | 1596964 | cytochrome P450 4X1                                    | Cyp4x1  | 246767 | 1,00 | down |
| 6557966 | 7345842 | 1734727 | cytochrome P450, family 19, subfamily a, polypeptide 1 | Cyp19a1 | 25147  | 2,08 | down |
| 5701575 | 7345842 | 1734724 | cytochrome P450, family 19, subfamily a, polypeptide 1 | Cyp19a1 | 25147  | 1,45 | down |
| 6200093 | 7345842 | 1734725 | cytochrome P450, family 19, subfamily a, polypeptide 1 | Cyp19a1 | 25147  | 1,12 | down |
| 6645893 | 7345842 | 1734729 | cytochrome P450, family 19, subfamily a, polypeptide 1 | Cyp19a1 | 25147  | 1,08 | up   |
| 6674454 | 7345842 | 1734721 | cytochrome P450, family 19, subfamily a, polypeptide 1 | Cyp19a1 | 25147  | 1,05 | down |
| 6460688 | 7345842 | 1734728 | cytochrome P450, family 19, subfamily a, polypeptide 1 | Cyp19a1 | 25147  | 1,04 | down |
| 5662417 | 7345842 | 1734723 | cytochrome P450, family 19, subfamily a, polypeptide 1 | Cyp19a1 | 25147  | 1,03 | up   |
| 6175668 | 7345842 | 1734722 | cytochrome P450, family 19, subfamily a, polypeptide 1 | Cyp19a1 | 25147  | 1,02 | up   |
| 6701923 | 7345842 | 1734726 | cytochrome P450, family 19, subfamily a, polypeptide 1 | Cyp19a1 | 25147  | 1,02 | up   |
| 6191975 | 7356120 | 1760152 | cytochrome P450, family 27, subfamily a, polypeptide 1 | Cyp27a1 | 301517 | 2,83 | up   |
| 6604733 | 7356120 | 1760143 | cytochrome P450, family 27, subfamily a, polypeptide 1 | Cyp27a1 | 301517 | 1,85 | down |
| 6342218 | 7356120 | 1760146 | cytochrome P450, family 27, subfamily a, polypeptide 1 | Cyp27a1 | 301517 | 1,65 | up   |
| 6204207 | 7356120 | 1760152 | cytochrome P450, family 27, subfamily a, polypeptide 1 | Cyp27a1 | 301517 | 1,30 | down |

|         |         |         |                                                                                                                       |                  |        |      |      |
|---------|---------|---------|-----------------------------------------------------------------------------------------------------------------------|------------------|--------|------|------|
| 6143513 | 7356120 | 1760145 | cytochrome P450, family 27, subfamily a, polypeptide 1                                                                | Cyp27a1          | 301517 | 1,29 | down |
| 6497963 | 7356120 | 1760151 | cytochrome P450, family 27, subfamily a, polypeptide 1                                                                | Cyp27a1          | 301517 | 1,17 | up   |
| 6188414 | 7356120 | 1760149 | cytochrome P450, family 27, subfamily a, polypeptide 1                                                                | Cyp27a1          | 301517 | 1,17 | up   |
| 6607733 | 7356120 | 1760150 | cytochrome P450, family 27, subfamily a, polypeptide 1                                                                | Cyp27a1          | 301517 | 1,16 | down |
| 6735539 | 7356120 | 1760151 | cytochrome P450, family 27, subfamily a, polypeptide 1                                                                | Cyp27a1          | 301517 | 1,14 | down |
| 6192836 | 7356120 | 1760144 | cytochrome P450, family 27, subfamily a, polypeptide 1                                                                | Cyp27a1          | 301517 | 1,12 | down |
| 6414633 | 7356120 | 1760142 | cytochrome P450, family 27, subfamily a, polypeptide 1                                                                | Cyp27a1          | 301517 | 1,10 | up   |
| 6315010 | 7356120 | 1760148 | cytochrome P450, family 27, subfamily a, polypeptide 1                                                                | Cyp27a1          | 301517 | 1,09 | down |
| 5895638 | 7356120 | 1760147 | cytochrome P450, family 27, subfamily a, polypeptide 1                                                                | Cyp27a1          | 301517 | 1,05 | down |
| 6302254 | 7356120 | 1760143 | cytochrome P450, family 27, subfamily a, polypeptide 1                                                                | Cyp27a1          | 301517 | 1,03 | up   |
| 6071842 | 7290141 | 1597027 | cytochrome P450, family 4, subfamily a, polypeptide 2 /// cytochrome P450, family 4, subfamily a, p Cyp4a2 /// Cyp4a3 | 24306 /// 298423 | 1,60   | down |      |
| 5631515 | 7290141 | 1597026 | cytochrome P450, family 4, subfamily a, polypeptide 2 /// cytochrome P450, family 4, subfamily a, p Cyp4a2 /// Cyp4a3 | 24306 /// 298423 | 1,48   | down |      |
| 6215468 | 7290141 | 1597029 | cytochrome P450, family 4, subfamily a, polypeptide 2 /// cytochrome P450, family 4, subfamily a, p Cyp4a2 /// Cyp4a3 | 24306 /// 298423 | 1,20   | up   |      |
| 5844408 | 7290141 | 1597026 | cytochrome P450, family 4, subfamily a, polypeptide 2 /// cytochrome P450, family 4, subfamily a, p Cyp4a2 /// Cyp4a3 | 24306 /// 298423 | 1,10   | up   |      |
| 6336904 | 7290141 | 1597022 | cytochrome P450, family 4, subfamily a, polypeptide 2 /// cytochrome P450, family 4, subfamily a, p Cyp4a2 /// Cyp4a3 | 24306 /// 298423 | 1,05   | up   |      |
| 6617059 | 7290141 | 1597023 | cytochrome P450, family 4, subfamily a, polypeptide 2 /// cytochrome P450, family 4, subfamily a, p Cyp4a2 /// Cyp4a3 | 24306 /// 298423 | 1,03   | down |      |
| 6100616 | 7290141 | 1597032 | cytochrome P450, family 4, subfamily a, polypeptide 3                                                                 | Cyp4a3           | 298423 | 2,01 | down |
| 6207365 | 7290141 | 1597031 | cytochrome P450, family 4, subfamily a, polypeptide 3                                                                 | Cyp4a3           | 298423 | 1,56 | down |
| 6707668 | 7290141 | 1597025 | cytochrome P450, family 4, subfamily a, polypeptide 3                                                                 | Cyp4a3           | 298423 | 1,33 | up   |
| 5763176 | 7290141 | 1597021 | cytochrome P450, family 4, subfamily a, polypeptide 3                                                                 | Cyp4a3           | 298423 | 1,30 | up   |
| 5941625 | 7290141 | 1597030 | cytochrome P450, family 4, subfamily a, polypeptide 3                                                                 | Cyp4a3           | 298423 | 1,11 | down |
| 6665063 | 7290141 | 1597024 | cytochrome P450, family 4, subfamily a, polypeptide 3                                                                 | Cyp4a3           | 298423 | 1,09 | down |
| 6547131 | 7290141 | 1597028 | cytochrome P450, family 4, subfamily a, polypeptide 3                                                                 | Cyp4a3           | 298423 | 1,04 | up   |
| 6220291 | 7143971 | 1235934 | cytochrome P450, family 4, subfamily f, polypeptide 18                                                                | Cyp4f18          | 290623 | 1,95 | down |
| 5816637 | 7143971 | 1235925 | cytochrome P450, family 4, subfamily f, polypeptide 18                                                                | Cyp4f18          | 290623 | 1,55 | up   |
| 6413386 | 7143971 | 1235931 | cytochrome P450, family 4, subfamily f, polypeptide 18                                                                | Cyp4f18          | 290623 | 1,52 | down |
| 5697801 | 7143971 | 1235923 | cytochrome P450, family 4, subfamily f, polypeptide 18                                                                | Cyp4f18          | 290623 | 1,40 | down |
| 6296836 | 7143971 | 1235935 | cytochrome P450, family 4, subfamily f, polypeptide 18                                                                | Cyp4f18          | 290623 | 1,30 | down |
| 6149212 | 7143971 | 1235928 | cytochrome P450, family 4, subfamily f, polypeptide 18                                                                | Cyp4f18          | 290623 | 1,20 | down |
| 5696530 | 7143971 | 1235935 | cytochrome P450, family 4, subfamily f, polypeptide 18                                                                | Cyp4f18          | 290623 | 1,13 | up   |
| 5869564 | 7143971 | 1235926 | cytochrome P450, family 4, subfamily f, polypeptide 18                                                                | Cyp4f18          | 290623 | 1,12 | up   |
| 5701902 | 7143971 | 1235921 | cytochrome P450, family 4, subfamily f, polypeptide 18                                                                | Cyp4f18          | 290623 | 1,11 | down |
| 5647383 | 7143971 | 1235926 | cytochrome P450, family 4, subfamily f, polypeptide 18                                                                | Cyp4f18          | 290623 | 1,10 | down |
| 6454216 | 7143971 | 1235929 | cytochrome P450, family 4, subfamily f, polypeptide 18                                                                | Cyp4f18          | 290623 | 1,06 | down |
| 5736198 | 7143971 | 1235935 | cytochrome P450, family 4, subfamily f, polypeptide 18                                                                | Cyp4f18          | 290623 | 1,03 | up   |
| 6564916 | 7143971 | 1235933 | cytochrome P450, family 4, subfamily f, polypeptide 18                                                                | Cyp4f18          | 290623 | 1,03 | up   |
| 6244144 | 7143971 | 1235924 | cytochrome P450, family 4, subfamily f, polypeptide 18                                                                | Cyp4f18          | 290623 | 1,00 | up   |
| 6188893 | 7143971 | 1235930 | cytochrome P450, family 4, subfamily f, polypeptide 18                                                                | Cyp4f18          | 290623 | 1,00 | up   |
| 5668313 | 7301616 | 1625901 | cytochrome P450, family 46, subfamily a, polypeptide 1                                                                | Cyp46a1          | 362782 | 2,16 | up   |
| 5714939 | 7301616 | 1625896 | cytochrome P450, family 46, subfamily a, polypeptide 1                                                                | Cyp46a1          | 362782 | 1,69 | up   |
| 6122953 | 7301616 | 1625909 | cytochrome P450, family 46, subfamily a, polypeptide 1                                                                | Cyp46a1          | 362782 | 1,63 | down |
| 6032931 | 7301616 | 1625908 | cytochrome P450, family 46, subfamily a, polypeptide 1                                                                | Cyp46a1          | 362782 | 1,61 | down |
| 6155274 | 7301616 | 1625907 | cytochrome P450, family 46, subfamily a, polypeptide 1                                                                | Cyp46a1          | 362782 | 1,58 | down |
| 6000918 | 7301616 | 1625911 | cytochrome P450, family 46, subfamily a, polypeptide 1                                                                | Cyp46a1          | 362782 | 1,44 | up   |
| 5963567 | 7301616 | 1625893 | cytochrome P450, family 46, subfamily a, polypeptide 1                                                                | Cyp46a1          | 362782 | 1,43 | down |
| 6023254 | 7301616 | 1625908 | cytochrome P450, family 46, subfamily a, polypeptide 1                                                                | Cyp46a1          | 362782 | 1,22 | up   |
| 5732111 | 7301616 | 1625904 | cytochrome P450, family 46, subfamily a, polypeptide 1                                                                | Cyp46a1          | 362782 | 1,14 | up   |
| 5868073 | 7301616 | 1625897 | cytochrome P450, family 46, subfamily a, polypeptide 1                                                                | Cyp46a1          | 362782 | 1,11 | up   |
| 6439130 | 7301616 | 1625906 | cytochrome P450, family 46, subfamily a, polypeptide 1                                                                | Cyp46a1          | 362782 | 1,11 | down |
| 6216851 | 7301616 | 1625892 | cytochrome P450, family 46, subfamily a, polypeptide 1                                                                | Cyp46a1          | 362782 | 1,08 | up   |
| 5861210 | 7301616 | 1625912 | cytochrome P450, family 46, subfamily a, polypeptide 1                                                                | Cyp46a1          | 362782 | 1,07 | up   |
| 5897593 | 7301616 | 1625910 | cytochrome P450, family 46, subfamily a, polypeptide 1                                                                | Cyp46a1          | 362782 | 1,06 | down |
| 5621480 | 7301616 | 1625889 | cytochrome P450, family 46, subfamily a, polypeptide 1                                                                | Cyp46a1          | 362782 | 1,05 | up   |
| 5820195 | 7301616 | 1625905 | cytochrome P450, family 46, subfamily a, polypeptide 1                                                                | Cyp46a1          | 362782 | 1,03 | down |
| 6562086 | 7301616 | 1625902 | cytochrome P450, family 46, subfamily a, polypeptide 1                                                                | Cyp46a1          | 362782 | 1,02 | down |
| 6518432 | 7248318 | 1493342 | cytochrome P450, subfamily 24                                                                                         | Cyp24a1          | 25279  | 2,29 | down |
| 5645250 | 7248318 | 1493336 | cytochrome P450, subfamily 24                                                                                         | Cyp24a1          | 25279  | 1,81 | up   |

|         |         |         |                                                            |         |        |      |      |
|---------|---------|---------|------------------------------------------------------------|---------|--------|------|------|
| 6616472 | 7248318 | 1493342 | cytochrome P450, subfamily 24                              | Cyp24a1 | 25279  | 1,51 | up   |
| 6581650 | 7248318 | 1493332 | cytochrome P450, subfamily 24                              | Cyp24a1 | 25279  | 1,43 | down |
| 6248947 | 7248318 | 1493340 | cytochrome P450, subfamily 24                              | Cyp24a1 | 25279  | 1,37 | down |
| 6444433 | 7248318 | 1493342 | cytochrome P450, subfamily 24                              | Cyp24a1 | 25279  | 1,28 | up   |
| 6695570 | 7248318 | 1493334 | cytochrome P450, subfamily 24                              | Cyp24a1 | 25279  | 1,19 | down |
| 6664309 | 7248318 | 1493339 | cytochrome P450, subfamily 24                              | Cyp24a1 | 25279  | 1,18 | down |
| 5929851 | 7248318 | 1493341 | cytochrome P450, subfamily 24                              | Cyp24a1 | 25279  | 1,15 | down |
| 6062584 | 7248318 | 1493337 | cytochrome P450, subfamily 24                              | Cyp24a1 | 25279  | 1,14 | down |
| 6341315 | 7248318 | 1493333 | cytochrome P450, subfamily 24                              | Cyp24a1 | 25279  | 1,13 | up   |
| 5629569 | 7248318 | 1493342 | cytochrome P450, subfamily 24                              | Cyp24a1 | 25279  | 1,11 | down |
| 6670902 | 7248318 | 1493332 | cytochrome P450, subfamily 24                              | Cyp24a1 | 25279  | 1,06 | up   |
| 6180711 | 7248318 | 1493331 | cytochrome P450, subfamily 24                              | Cyp24a1 | 25279  | 1,03 | up   |
| 5755502 | 7248318 | 1493338 | cytochrome P450, subfamily 24                              | Cyp24a1 | 25279  | 1,02 | up   |
| 6191258 | 7248318 | 1493335 | cytochrome P450, subfamily 24                              | Cyp24a1 | 25279  | 1,00 | down |
| 5625324 | 7248318 | 1493342 | cytochrome P450, subfamily 24                              | Cyp24a1 | 25279  | 1,00 | up   |
| 5663085 | 7340125 | 1720451 | cytokine inducible SH2-containing protein                  | Cish    | 83681  | 1,85 | down |
| 6692337 | 7340125 | 1720450 | cytokine inducible SH2-containing protein                  | Cish    | 83681  | 1,42 | up   |
| 6144737 | 7340125 | 1720451 | cytokine inducible SH2-containing protein                  | Cish    | 83681  | 1,17 | up   |
| 5757034 | 7340125 | 1720447 | cytokine inducible SH2-containing protein                  | Cish    | 83681  | 1,13 | down |
| 6140983 | 7340977 | 1722457 | cytoplasmic linker associated protein 2                    | Clasp2  | 114514 | 3,02 | up   |
| 6124129 | 7340977 | 1722476 | cytoplasmic linker associated protein 2                    | Clasp2  | 114514 | 1,56 | up   |
| 6140511 | 7340977 | 1722476 | cytoplasmic linker associated protein 2                    | Clasp2  | 114514 | 1,48 | down |
| 5714176 | 7340977 | 1722486 | cytoplasmic linker associated protein 2                    | Clasp2  | 114514 | 1,42 | up   |
| 6584312 | 7340977 | 1722459 | cytoplasmic linker associated protein 2                    | Clasp2  | 114514 | 1,42 | down |
| 6136728 | 7340977 | 1722458 | cytoplasmic linker associated protein 2                    | Clasp2  | 114514 | 1,29 | up   |
| 6162013 | 7340977 | 1722471 | cytoplasmic linker associated protein 2                    | Clasp2  | 114514 | 1,29 | down |
| 5657077 | 7340977 | 1722475 | cytoplasmic linker associated protein 2                    | Clasp2  | 114514 | 1,29 | down |
| 5651856 | 7340977 | 1722463 | cytoplasmic linker associated protein 2                    | Clasp2  | 114514 | 1,26 | down |
| 6321871 | 7340977 | 1722461 | cytoplasmic linker associated protein 2                    | Clasp2  | 114514 | 1,23 | down |
| 6114470 | 7340977 | 1722474 | cytoplasmic linker associated protein 2                    | Clasp2  | 114514 | 1,23 | down |
| 5840915 | 7340977 | 1722468 | cytoplasmic linker associated protein 2                    | Clasp2  | 114514 | 1,22 | up   |
| 6471215 | 7340977 | 1722465 | cytoplasmic linker associated protein 2                    | Clasp2  | 114514 | 1,22 | down |
| 6398083 | 7340977 | 1722479 | cytoplasmic linker associated protein 2                    | Clasp2  | 114514 | 1,21 | down |
| 6341214 | 7340977 | 1722473 | cytoplasmic linker associated protein 2                    | Clasp2  | 114514 | 1,17 | down |
| 5771283 | 7340977 | 1722485 | cytoplasmic linker associated protein 2                    | Clasp2  | 114514 | 1,15 | up   |
| 6315291 | 7340977 | 1722467 | cytoplasmic linker associated protein 2                    | Clasp2  | 114514 | 1,13 | down |
| 6572566 | 7340977 | 1722470 | cytoplasmic linker associated protein 2                    | Clasp2  | 114514 | 1,12 | up   |
| 5891111 | 7340977 | 1722487 | cytoplasmic linker associated protein 2                    | Clasp2  | 114514 | 1,12 | down |
| 6496798 | 7340977 | 1722462 | cytoplasmic linker associated protein 2                    | Clasp2  | 114514 | 1,11 | up   |
| 5679860 | 7340977 | 1722483 | cytoplasmic linker associated protein 2                    | Clasp2  | 114514 | 1,10 | up   |
| 6550635 | 7340977 | 1722464 | cytoplasmic linker associated protein 2                    | Clasp2  | 114514 | 1,10 | down |
| 6218474 | 7340977 | 1722461 | cytoplasmic linker associated protein 2                    | Clasp2  | 114514 | 1,10 | down |
| 6516130 | 7340977 | 1722478 | cytoplasmic linker associated protein 2                    | Clasp2  | 114514 | 1,09 | up   |
| 5755088 | 7340977 | 1722482 | cytoplasmic linker associated protein 2                    | Clasp2  | 114514 | 1,09 | down |
| 6601696 | 7340977 | 1722477 | cytoplasmic linker associated protein 2                    | Clasp2  | 114514 | 1,08 | up   |
| 5910027 | 7340977 | 1722481 | cytoplasmic linker associated protein 2                    | Clasp2  | 114514 | 1,04 | up   |
| 6037645 | 7340977 | 1722484 | cytoplasmic linker associated protein 2                    | Clasp2  | 114514 | 1,02 | up   |
| 6009883 | 7340977 | 1722472 | cytoplasmic linker associated protein 2                    | Clasp2  | 114514 | 1,01 | down |
| 5636305 | 7340977 | 1722466 | cytoplasmic linker associated protein 2                    | Clasp2  | 114514 | 1,01 | down |
| 6486954 | 7340977 | 1722469 | cytoplasmic linker associated protein 2                    | Clasp2  | 114514 | 1,01 | up   |
| 6472100 | 7340977 | 1722460 | cytoplasmic linker associated protein 2                    | Clasp2  | 114514 | 1,01 | up   |
| 5797701 | 7340977 | 1722480 | cytoplasmic linker associated protein 2                    | Clasp2  | 114514 | 1,00 | up   |
| 5950571 | 7031596 | 964149  | D site of albumin promoter (albumin D-box) binding protein | Dbp     | 24309  | 3,36 | down |
| 6643109 | 7031596 | 964150  | D site of albumin promoter (albumin D-box) binding protein | Dbp     | 24309  | 1,36 | down |
| 6214938 | 7031596 | 964148  | D site of albumin promoter (albumin D-box) binding protein | Dbp     | 24309  | 1,18 | down |
| 6705679 | 7031596 | 964152  | D site of albumin promoter (albumin D-box) binding protein | Dbp     | 24309  | 1,14 | down |
| 5708248 | 7031596 | 964148  | D site of albumin promoter (albumin D-box) binding protein | Dbp     | 24309  | 1,12 | down |

|         |         |         |                                                                              |         |        |      |      |
|---------|---------|---------|------------------------------------------------------------------------------|---------|--------|------|------|
| 6207773 | 7031596 | 964153  | D site of albumin promoter (albumin D-box) binding protein                   | Dbp     | 24309  | 1,11 | up   |
| 5941297 | 7031596 | 964152  | D site of albumin promoter (albumin D-box) binding protein                   | Dbp     | 24309  | 1,08 | up   |
| 5790188 | 7031596 | 964151  | D site of albumin promoter (albumin D-box) binding protein                   | Dbp     | 24309  | 1,02 | down |
| 6399755 | 7226521 | 1438736 | DAB2 interacting protein                                                     | Dab2ip  | 192126 | 2,67 | up   |
| 5935750 | 7226521 | 1438736 | DAB2 interacting protein                                                     | Dab2ip  | 192126 | 1,45 | up   |
| 6542688 | 7226521 | 1438731 | DAB2 interacting protein                                                     | Dab2ip  | 192126 | 1,34 | down |
| 6053490 | 7226521 | 1438731 | DAB2 interacting protein                                                     | Dab2ip  | 192126 | 1,33 | up   |
| 5693401 | 7226521 | 1438731 | DAB2 interacting protein                                                     | Dab2ip  | 192126 | 1,28 | down |
| 6677781 | 7226521 | 1438734 | DAB2 interacting protein                                                     | Dab2ip  | 192126 | 1,24 | up   |
| 6398396 | 7226521 | 1438736 | DAB2 interacting protein                                                     | Dab2ip  | 192126 | 1,21 | down |
| 6367931 | 7226521 | 1438724 | DAB2 interacting protein                                                     | Dab2ip  | 192126 | 1,20 | up   |
| 5857819 | 7226521 | 1438731 | DAB2 interacting protein                                                     | Dab2ip  | 192126 | 1,20 | down |
| 6554565 | 7226521 | 1438722 | DAB2 interacting protein                                                     | Dab2ip  | 192126 | 1,18 | down |
| 6244493 | 7226521 | 1438724 | DAB2 interacting protein                                                     | Dab2ip  | 192126 | 1,18 | down |
| 6443505 | 7226521 | 1438726 | DAB2 interacting protein                                                     | Dab2ip  | 192126 | 1,17 | down |
| 6229480 | 7226521 | 1438731 | DAB2 interacting protein                                                     | Dab2ip  | 192126 | 1,14 | down |
| 6136305 | 7226521 | 1438730 | DAB2 interacting protein                                                     | Dab2ip  | 192126 | 1,11 | down |
| 6034923 | 7226521 | 1438733 | DAB2 interacting protein                                                     | Dab2ip  | 192126 | 1,09 | up   |
| 6704524 | 7226521 | 1438732 | DAB2 interacting protein                                                     | Dab2ip  | 192126 | 1,08 | down |
| 6101127 | 7226521 | 1438729 | DAB2 interacting protein                                                     | Dab2ip  | 192126 | 1,06 | down |
| 5800654 | 7226521 | 1438727 | DAB2 interacting protein                                                     | Dab2ip  | 192126 | 1,02 | up   |
| 5660288 | 7226521 | 1438725 | DAB2 interacting protein                                                     | Dab2ip  | 192126 | 1,02 | down |
| 6688243 | 7226521 | 1438728 | DAB2 interacting protein                                                     | Dab2ip  | 192126 | 1,01 | up   |
| 5781164 | 7226521 | 1438735 | DAB2 interacting protein                                                     | Dab2ip  | 192126 | 1,00 | up   |
| 5781591 | 7376566 | 1812886 | dachshund homolog 2 (Drosophila)                                             | Dach2   | 302333 | 1,77 | up   |
| 6687420 | 7376566 | 1812848 | dachshund homolog 2 (Drosophila)                                             | Dach2   | 302333 | 1,06 | down |
| 5653183 | 7340377 | 1721029 | DALR anticodon binding domain containing 3                                   | Dalrd3  | 363146 | 2,81 | down |
| 5899510 | 7340377 | 1721024 | DALR anticodon binding domain containing 3                                   | Dalrd3  | 363146 | 2,11 | up   |
| 6118202 | 7340377 | 1721018 | DALR anticodon binding domain containing 3                                   | Dalrd3  | 363146 | 1,71 | up   |
| 5796622 | 7340377 | 1721029 | DALR anticodon binding domain containing 3                                   | Dalrd3  | 363146 | 1,70 | down |
| 5859934 | 7340377 | 1721021 | DALR anticodon binding domain containing 3                                   | Dalrd3  | 363146 | 1,31 | up   |
| 5736174 | 7340377 | 1721025 | DALR anticodon binding domain containing 3                                   | Dalrd3  | 363146 | 1,27 | up   |
| 5629951 | 7340377 | 1721028 | DALR anticodon binding domain containing 3                                   | Dalrd3  | 363146 | 1,23 | down |
| 6071869 | 7340377 | 1721020 | DALR anticodon binding domain containing 3                                   | Dalrd3  | 363146 | 1,21 | up   |
| 6289898 | 7340377 | 1721022 | DALR anticodon binding domain containing 3                                   | Dalrd3  | 363146 | 1,18 | up   |
| 6266430 | 7340377 | 1721026 | DALR anticodon binding domain containing 3                                   | Dalrd3  | 363146 | 1,12 | up   |
| 5981732 | 7340377 | 1721023 | DALR anticodon binding domain containing 3                                   | Dalrd3  | 363146 | 1,11 | up   |
| 6412688 | 7340377 | 1721020 | DALR anticodon binding domain containing 3                                   | Dalrd3  | 363146 | 1,08 | up   |
| 6667314 | 7340377 | 1721019 | DALR anticodon binding domain containing 3                                   | Dalrd3  | 363146 | 1,08 | up   |
| 6535585 | 7340377 | 1721019 | DALR anticodon binding domain containing 3                                   | Dalrd3  | 363146 | 1,07 | up   |
| 5961071 | 7340377 | 1721027 | DALR anticodon binding domain containing 3                                   | Dalrd3  | 363146 | 1,03 | down |
| 5725340 | 7142081 | 1230949 | DAZ interacting protein 1                                                    | Dzip1   | 364475 | 1,82 | down |
| 6474077 | 7142081 | 1230949 | DAZ interacting protein 1                                                    | Dzip1   | 364475 | 1,31 | up   |
| 6540179 | 7142081 | 1230965 | DAZ interacting protein 1                                                    | Dzip1   | 364475 | 1,26 | up   |
| 5928229 | 7142081 | 1230957 | DAZ interacting protein 1                                                    | Dzip1   | 364475 | 1,22 | down |
| 6154061 | 7142081 | 1230964 | DAZ interacting protein 1                                                    | Dzip1   | 364475 | 1,18 | down |
| 6328658 | 7142081 | 1230955 | DAZ interacting protein 1                                                    | Dzip1   | 364475 | 1,11 | up   |
| 5799164 | 7142081 | 1230952 | DAZ interacting protein 1                                                    | Dzip1   | 364475 | 1,09 | down |
| 6002327 | 7142081 | 1230985 | DAZ interacting protein 1                                                    | Dzip1   | 364475 | 1,01 | up   |
| 5888257 | 7124991 | 1189271 | DCN1, defective in cullin neddylation 1, domain containing 4 (S. cerevisiae) | Dcun1d4 | 360928 | 2,00 | down |
| 6565889 | 7124991 | 1189266 | DCN1, defective in cullin neddylation 1, domain containing 4 (S. cerevisiae) | Dcun1d4 | 360928 | 1,57 | up   |
| 5894148 | 7124991 | 1189287 | DCN1, defective in cullin neddylation 1, domain containing 4 (S. cerevisiae) | Dcun1d4 | 360928 | 1,41 | up   |
| 6349899 | 7124991 | 1189283 | DCN1, defective in cullin neddylation 1, domain containing 4 (S. cerevisiae) | Dcun1d4 | 360928 | 1,25 | down |
| 6665758 | 7124991 | 1189280 | DCN1, defective in cullin neddylation 1, domain containing 4 (S. cerevisiae) | Dcun1d4 | 360928 | 1,16 | down |
| 5856029 | 7124991 | 1189266 | DCN1, defective in cullin neddylation 1, domain containing 4 (S. cerevisiae) | Dcun1d4 | 360928 | 1,15 | down |
| 6597280 | 7124991 | 1189290 | DCN1, defective in cullin neddylation 1, domain containing 4 (S. cerevisiae) | Dcun1d4 | 360928 | 1,15 | up   |
| 6006277 | 7124991 | 1189286 | DCN1, defective in cullin neddylation 1, domain containing 4 (S. cerevisiae) | Dcun1d4 | 360928 | 1,08 | up   |



|         |         |         |                                                                              |         |        |      |      |
|---------|---------|---------|------------------------------------------------------------------------------|---------|--------|------|------|
| 6119560 | 7124991 | 1189274 | DCN1, defective in cullin neddylation 1, domain containing 4 (S. cerevisiae) | Dcun1d4 | 360928 | 1,05 | down |
| 6658878 | 7124991 | 1189282 | DCN1, defective in cullin neddylation 1, domain containing 4 (S. cerevisiae) | Dcun1d4 | 360928 | 1,04 | up   |
| 6660734 | 7124991 | 1189267 | DCN1, defective in cullin neddylation 1, domain containing 4 (S. cerevisiae) | Dcun1d4 | 360928 | 1,04 | down |
| 5710619 | 7124991 | 1189266 | DCN1, defective in cullin neddylation 1, domain containing 4 (S. cerevisiae) | Dcun1d4 | 360928 | 1,04 | down |
| 6049765 | 7124991 | 1189266 | DCN1, defective in cullin neddylation 1, domain containing 4 (S. cerevisiae) | Dcun1d4 | 360928 | 1,04 | down |
| 6023344 | 7124991 | 1189279 | DCN1, defective in cullin neddylation 1, domain containing 4 (S. cerevisiae) | Dcun1d4 | 360928 | 1,00 | down |
| 5865945 | 7210822 | 1400983 | DC-STAMP domain containing 1                                                 | Dcst1   | 295246 | 1,11 | down |
| 6571670 | 7146872 | 1242917 | DDHD domain containing 2                                                     | Ddh2    | 680971 | 2,17 | down |
| 5967419 | 7146872 | 1242917 | DDHD domain containing 2                                                     | Ddh2    | 680971 | 1,38 | down |
| 6575207 | 7146872 | 1242917 | DDHD domain containing 2                                                     | Ddh2    | 680971 | 1,05 | up   |
| 5793297 | 7221817 | 1427153 | D-dopachrome tautomerase                                                     | Ddt     | 29318  | 1,18 | down |
| 6192020 | 7221817 | 1427152 | D-dopachrome tautomerase                                                     | Ddt     | 29318  | 1,15 | up   |
| 6457955 | 7221817 | 1427151 | D-dopachrome tautomerase                                                     | Ddt     | 29318  | 1,04 | up   |
| 6247985 | 7221817 | 1427153 | D-dopachrome tautomerase                                                     | Ddt     | 29318  | 1,03 | up   |
| 6108480 | 7221817 | 1427151 | D-dopachrome tautomerase                                                     | Ddt     | 29318  | 1,01 | down |
| 5917577 | 7343985 | 1730150 | DEAD (Asp-Glu-Ala-Asp) box polypeptide 25                                    | Ddx25   | 58856  | 2,13 | up   |
| 5959703 | 7343985 | 1730149 | DEAD (Asp-Glu-Ala-Asp) box polypeptide 25                                    | Ddx25   | 58856  | 1,77 | up   |
| 6207774 | 7343985 | 1730139 | DEAD (Asp-Glu-Ala-Asp) box polypeptide 25                                    | Ddx25   | 58856  | 1,71 | up   |
| 5719212 | 7343985 | 1730141 | DEAD (Asp-Glu-Ala-Asp) box polypeptide 25                                    | Ddx25   | 58856  | 1,48 | up   |
| 5651446 | 7343985 | 1730145 | DEAD (Asp-Glu-Ala-Asp) box polypeptide 25                                    | Ddx25   | 58856  | 1,42 | up   |
| 6372705 | 7343985 | 1730142 | DEAD (Asp-Glu-Ala-Asp) box polypeptide 25                                    | Ddx25   | 58856  | 1,40 | down |
| 6171031 | 7343985 | 1730144 | DEAD (Asp-Glu-Ala-Asp) box polypeptide 25                                    | Ddx25   | 58856  | 1,39 | down |
| 6393522 | 7343985 | 1730140 | DEAD (Asp-Glu-Ala-Asp) box polypeptide 25                                    | Ddx25   | 58856  | 1,36 | up   |
| 5929868 | 7343985 | 1730143 | DEAD (Asp-Glu-Ala-Asp) box polypeptide 25                                    | Ddx25   | 58856  | 1,32 | down |
| 6711544 | 7343985 | 1730142 | DEAD (Asp-Glu-Ala-Asp) box polypeptide 25                                    | Ddx25   | 58856  | 1,22 | down |
| 5742079 | 7343985 | 1730146 | DEAD (Asp-Glu-Ala-Asp) box polypeptide 25                                    | Ddx25   | 58856  | 1,19 | up   |
| 5948090 | 7343985 | 1730147 | DEAD (Asp-Glu-Ala-Asp) box polypeptide 25                                    | Ddx25   | 58856  | 1,06 | down |
| 6063632 | 7343985 | 1730138 | DEAD (Asp-Glu-Ala-Asp) box polypeptide 25                                    | Ddx25   | 58856  | 1,06 | down |
| 6277839 | 7343985 | 1730148 | DEAD (Asp-Glu-Ala-Asp) box polypeptide 25                                    | Ddx25   | 58856  | 1,06 | down |
| 6410360 | 7302787 | 1628874 | DEAH (Asp-Glu-Ala-Asp/His) box polypeptide 57                                | Dhx57   | 366532 | 1,32 | down |
| 6366205 | 7302787 | 1628879 | DEAH (Asp-Glu-Ala-Asp/His) box polypeptide 57                                | Dhx57   | 366532 | 1,32 | up   |
| 6399946 | 7302787 | 1628875 | DEAH (Asp-Glu-Ala-Asp/His) box polypeptide 57                                | Dhx57   | 366532 | 1,23 | up   |
| 6720869 | 7302787 | 1628878 | DEAH (Asp-Glu-Ala-Asp/His) box polypeptide 57                                | Dhx57   | 366532 | 1,13 | down |
| 6177995 | 7302787 | 1628874 | DEAH (Asp-Glu-Ala-Asp/His) box polypeptide 57                                | Dhx57   | 366532 | 1,11 | up   |
| 5992063 | 7302787 | 1628880 | DEAH (Asp-Glu-Ala-Asp/His) box polypeptide 57                                | Dhx57   | 366532 | 1,10 | down |
| 6640598 | 7302787 | 1628881 | DEAH (Asp-Glu-Ala-Asp/His) box polypeptide 57                                | Dhx57   | 366532 | 1,09 | down |
| 6740426 | 7302787 | 1628877 | DEAH (Asp-Glu-Ala-Asp/His) box polypeptide 57                                | Dhx57   | 366532 | 1,07 | down |
| 6571884 | 7302787 | 1628882 | DEAH (Asp-Glu-Ala-Asp/His) box polypeptide 57                                | Dhx57   | 366532 | 1,02 | up   |
| 5680964 | 7302787 | 1628873 | DEAH (Asp-Glu-Ala-Asp/His) box polypeptide 57                                | Dhx57   | 366532 | 1,01 | down |
| 5639121 | 7220454 | 1424121 | DEAH (Asp-Glu-Ala-His) box polypeptide 16                                    | Dhx16   | 294232 | 2,28 | up   |
| 6703674 | 7220454 | 1424134 | DEAH (Asp-Glu-Ala-His) box polypeptide 16                                    | Dhx16   | 294232 | 1,79 | up   |
| 6331675 | 7220454 | 1424122 | DEAH (Asp-Glu-Ala-His) box polypeptide 16                                    | Dhx16   | 294232 | 1,62 | up   |
| 6721131 | 7220454 | 1424119 | DEAH (Asp-Glu-Ala-His) box polypeptide 16                                    | Dhx16   | 294232 | 1,52 | down |
| 6305211 | 7220454 | 1424135 | DEAH (Asp-Glu-Ala-His) box polypeptide 16                                    | Dhx16   | 294232 | 1,43 | down |
| 5793047 | 7220454 | 1424120 | DEAH (Asp-Glu-Ala-His) box polypeptide 16                                    | Dhx16   | 294232 | 1,33 | down |
| 5940817 | 7220454 | 1424125 | DEAH (Asp-Glu-Ala-His) box polypeptide 16                                    | Dhx16   | 294232 | 1,32 | up   |
| 6607163 | 7220454 | 1424132 | DEAH (Asp-Glu-Ala-His) box polypeptide 16                                    | Dhx16   | 294232 | 1,27 | up   |
| 6017621 | 7220454 | 1424138 | DEAH (Asp-Glu-Ala-His) box polypeptide 16                                    | Dhx16   | 294232 | 1,26 | down |
| 6625744 | 7220454 | 1424128 | DEAH (Asp-Glu-Ala-His) box polypeptide 16                                    | Dhx16   | 294232 | 1,25 | up   |
| 5869340 | 7220454 | 1424136 | DEAH (Asp-Glu-Ala-His) box polypeptide 16                                    | Dhx16   | 294232 | 1,23 | down |
| 5995885 | 7220454 | 1424127 | DEAH (Asp-Glu-Ala-His) box polypeptide 16                                    | Dhx16   | 294232 | 1,20 | up   |
| 5630500 | 7220454 | 1424131 | DEAH (Asp-Glu-Ala-His) box polypeptide 16                                    | Dhx16   | 294232 | 1,14 | down |
| 5672836 | 7220454 | 1424133 | DEAH (Asp-Glu-Ala-His) box polypeptide 16                                    | Dhx16   | 294232 | 1,14 | up   |
| 6682833 | 7220454 | 1424123 | DEAH (Asp-Glu-Ala-His) box polypeptide 16                                    | Dhx16   | 294232 | 1,13 | up   |
| 6195542 | 7220454 | 1424126 | DEAH (Asp-Glu-Ala-His) box polypeptide 16                                    | Dhx16   | 294232 | 1,12 | up   |
| 6557821 | 7220454 | 1424136 | DEAH (Asp-Glu-Ala-His) box polypeptide 16                                    | Dhx16   | 294232 | 1,10 | down |
| 6371404 | 7220454 | 1424129 | DEAH (Asp-Glu-Ala-His) box polypeptide 16                                    | Dhx16   | 294232 | 1,06 | down |

|         |         |         |                                           |        |        |      |      |
|---------|---------|---------|-------------------------------------------|--------|--------|------|------|
| 6506636 | 7220454 | 1424130 | DEAH (Asp-Glu-Ala-His) box polypeptide 16 | Dhx16  | 294232 | 1,05 | down |
| 6625108 | 7220454 | 1424124 | DEAH (Asp-Glu-Ala-His) box polypeptide 16 | Dhx16  | 294232 | 1,04 | down |
| 5991159 | 7220454 | 1424137 | DEAH (Asp-Glu-Ala-His) box polypeptide 16 | Dhx16  | 294232 | 1,04 | down |
| 5886170 | 7185315 | 1338611 | DEAH (Asp-Glu-Ala-His) box polypeptide 38 | Dhx38  | 292007 | 2,76 | up   |
| 5782069 | 7185315 | 1338594 | DEAH (Asp-Glu-Ala-His) box polypeptide 38 | Dhx38  | 292007 | 1,52 | down |
| 6228683 | 7185315 | 1338591 | DEAH (Asp-Glu-Ala-His) box polypeptide 38 | Dhx38  | 292007 | 1,48 | up   |
| 5647183 | 7185315 | 1338616 | DEAH (Asp-Glu-Ala-His) box polypeptide 38 | Dhx38  | 292007 | 1,34 | down |
| 6716180 | 7185315 | 1338590 | DEAH (Asp-Glu-Ala-His) box polypeptide 38 | Dhx38  | 292007 | 1,34 | down |
| 5876438 | 7185315 | 1338601 | DEAH (Asp-Glu-Ala-His) box polypeptide 38 | Dhx38  | 292007 | 1,32 | up   |
| 5811226 | 7185315 | 1338600 | DEAH (Asp-Glu-Ala-His) box polypeptide 38 | Dhx38  | 292007 | 1,29 | up   |
| 5967036 | 7185315 | 1338589 | DEAH (Asp-Glu-Ala-His) box polypeptide 38 | Dhx38  | 292007 | 1,25 | up   |
| 6540246 | 7185315 | 1338612 | DEAH (Asp-Glu-Ala-His) box polypeptide 38 | Dhx38  | 292007 | 1,25 | up   |
| 5970768 | 7185315 | 1338603 | DEAH (Asp-Glu-Ala-His) box polypeptide 38 | Dhx38  | 292007 | 1,24 | down |
| 5768346 | 7185315 | 1338599 | DEAH (Asp-Glu-Ala-His) box polypeptide 38 | Dhx38  | 292007 | 1,23 | up   |
| 5950831 | 7185315 | 1338606 | DEAH (Asp-Glu-Ala-His) box polypeptide 38 | Dhx38  | 292007 | 1,22 | up   |
| 5825715 | 7185315 | 1338604 | DEAH (Asp-Glu-Ala-His) box polypeptide 38 | Dhx38  | 292007 | 1,17 | up   |
| 6031647 | 7185315 | 1338615 | DEAH (Asp-Glu-Ala-His) box polypeptide 38 | Dhx38  | 292007 | 1,17 | up   |
| 6306109 | 7185315 | 1338593 | DEAH (Asp-Glu-Ala-His) box polypeptide 38 | Dhx38  | 292007 | 1,16 | down |
| 6741579 | 7185315 | 1338604 | DEAH (Asp-Glu-Ala-His) box polypeptide 38 | Dhx38  | 292007 | 1,12 | down |
| 5789692 | 7185315 | 1338602 | DEAH (Asp-Glu-Ala-His) box polypeptide 38 | Dhx38  | 292007 | 1,12 | down |
| 5828149 | 7185315 | 1338614 | DEAH (Asp-Glu-Ala-His) box polypeptide 38 | Dhx38  | 292007 | 1,12 | down |
| 6468149 | 7185315 | 1338608 | DEAH (Asp-Glu-Ala-His) box polypeptide 38 | Dhx38  | 292007 | 1,10 | up   |
| 6060373 | 7185315 | 1338607 | DEAH (Asp-Glu-Ala-His) box polypeptide 38 | Dhx38  | 292007 | 1,10 | down |
| 6524036 | 7185315 | 1338613 | DEAH (Asp-Glu-Ala-His) box polypeptide 38 | Dhx38  | 292007 | 1,10 | up   |
| 6489055 | 7185315 | 1338599 | DEAH (Asp-Glu-Ala-His) box polypeptide 38 | Dhx38  | 292007 | 1,09 | up   |
| 5866026 | 7185315 | 1338595 | DEAH (Asp-Glu-Ala-His) box polypeptide 38 | Dhx38  | 292007 | 1,09 | down |
| 6726250 | 7185315 | 1338609 | DEAH (Asp-Glu-Ala-His) box polypeptide 38 | Dhx38  | 292007 | 1,07 | up   |
| 6206435 | 7185315 | 1338596 | DEAH (Asp-Glu-Ala-His) box polypeptide 38 | Dhx38  | 292007 | 1,02 | down |
| 5706465 | 7185315 | 1338592 | DEAH (Asp-Glu-Ala-His) box polypeptide 38 | Dhx38  | 292007 | 1,01 | up   |
| 6681492 | 7185315 | 1338597 | DEAH (Asp-Glu-Ala-His) box polypeptide 38 | Dhx38  | 292007 | 1,01 | up   |
| 6327237 | 7185315 | 1338605 | DEAH (Asp-Glu-Ala-His) box polypeptide 38 | Dhx38  | 292007 | 1,00 | down |
| 5820489 | 7337419 | 1713122 | death-associated kinase 2                 | Dapk2  | 300799 | 2,76 | up   |
| 6625663 | 7337419 | 1713117 | death-associated kinase 2                 | Dapk2  | 300799 | 1,68 | up   |
| 5688322 | 7337419 | 1713121 | death-associated kinase 2                 | Dapk2  | 300799 | 1,50 | up   |
| 6639922 | 7337419 | 1713120 | death-associated kinase 2                 | Dapk2  | 300799 | 1,31 | up   |
| 6539108 | 7337419 | 1713114 | death-associated kinase 2                 | Dapk2  | 300799 | 1,17 | up   |
| 6179705 | 7337419 | 1713118 | death-associated kinase 2                 | Dapk2  | 300799 | 1,13 | up   |
| 6502046 | 7337419 | 1713119 | death-associated kinase 2                 | Dapk2  | 300799 | 1,11 | down |
| 6346222 | 7337419 | 1713115 | death-associated kinase 2                 | Dapk2  | 300799 | 1,10 | up   |
| 5820187 | 7337419 | 1713123 | death-associated kinase 2                 | Dapk2  | 300799 | 1,10 | down |
| 5695498 | 7337419 | 1713116 | death-associated kinase 2                 | Dapk2  | 300799 | 1,05 | up   |
| 5891949 | 7378997 | 1818627 | dedicator of cytokinesis 11               | Dock11 | 313438 | 1,49 | down |
| 6619059 | 7378997 | 1818620 | dedicator of cytokinesis 11               | Dock11 | 313438 | 1,43 | down |
| 6299110 | 7378997 | 1818629 | dedicator of cytokinesis 11               | Dock11 | 313438 | 1,20 | down |
| 5883165 | 7378997 | 1818625 | dedicator of cytokinesis 11               | Dock11 | 313438 | 1,18 | up   |
| 5764690 | 7378997 | 1818634 | dedicator of cytokinesis 11               | Dock11 | 313438 | 1,18 | down |
| 6502137 | 7378997 | 1818630 | dedicator of cytokinesis 11               | Dock11 | 313438 | 1,17 | down |
| 6653758 | 7378997 | 1818625 | dedicator of cytokinesis 11               | Dock11 | 313438 | 1,12 | down |
| 6588492 | 7378997 | 1818624 | dedicator of cytokinesis 11               | Dock11 | 313438 | 1,11 | down |
| 6661663 | 7378997 | 1818623 | dedicator of cytokinesis 11               | Dock11 | 313438 | 1,10 | down |
| 6228623 | 7378997 | 1818626 | dedicator of cytokinesis 11               | Dock11 | 313438 | 1,09 | down |
| 5661157 | 7378997 | 1818630 | dedicator of cytokinesis 11               | Dock11 | 313438 | 1,07 | down |
| 6435747 | 7378997 | 1818633 | dedicator of cytokinesis 11               | Dock11 | 313438 | 1,03 | down |
| 6439128 | 7378997 | 1818632 | dedicator of cytokinesis 11               | Dock11 | 313438 | 1,03 | down |
| 6077072 | 7378997 | 1818620 | dedicator of cytokinesis 11               | Dock11 | 313438 | 1,03 | down |
| 6590920 | 7378997 | 1818628 | dedicator of cytokinesis 11               | Dock11 | 313438 | 1,01 | up   |
| 6348215 | 7076160 | 1070986 | dedicator of cytokinesis 2                | Dock2  | 360509 | 2,15 | up   |

|         |         |         |                             |       |        |      |      |
|---------|---------|---------|-----------------------------|-------|--------|------|------|
| 6568761 | 7076160 | 1070986 | dedicator of cytokinesis 2  | Dock2 | 360509 | 1,90 | up   |
| 5755350 | 7076160 | 1070911 | dedicator of cytokinesis 2  | Dock2 | 360509 | 1,86 | down |
| 6173975 | 7076160 | 1070890 | dedicator of cytokinesis 2  | Dock2 | 360509 | 1,72 | down |
| 5855793 | 7076160 | 1070957 | dedicator of cytokinesis 2  | Dock2 | 360509 | 1,68 | down |
| 6420017 | 7076160 | 1070954 | dedicator of cytokinesis 2  | Dock2 | 360509 | 1,52 | down |
| 6481619 | 7076160 | 1070966 | dedicator of cytokinesis 2  | Dock2 | 360509 | 1,51 | down |
| 6737817 | 7076160 | 1070907 | dedicator of cytokinesis 2  | Dock2 | 360509 | 1,50 | up   |
| 6149424 | 7076160 | 1070978 | dedicator of cytokinesis 2  | Dock2 | 360509 | 1,47 | up   |
| 6094863 | 7076160 | 1070977 | dedicator of cytokinesis 2  | Dock2 | 360509 | 1,46 | up   |
| 6230375 | 7076160 | 1070882 | dedicator of cytokinesis 2  | Dock2 | 360509 | 1,46 | down |
| 6261178 | 7076160 | 1070881 | dedicator of cytokinesis 2  | Dock2 | 360509 | 1,44 | up   |
| 5844965 | 7076160 | 1070976 | dedicator of cytokinesis 2  | Dock2 | 360509 | 1,42 | up   |
| 6157055 | 7076160 | 1070957 | dedicator of cytokinesis 2  | Dock2 | 360509 | 1,42 | down |
| 6371139 | 7076160 | 1070948 | dedicator of cytokinesis 2  | Dock2 | 360509 | 1,37 | up   |
| 5793122 | 7076160 | 1070952 | dedicator of cytokinesis 2  | Dock2 | 360509 | 1,36 | down |
| 6152981 | 7076160 | 1070967 | dedicator of cytokinesis 2  | Dock2 | 360509 | 1,36 | up   |
| 6504113 | 7076160 | 1070892 | dedicator of cytokinesis 2  | Dock2 | 360509 | 1,35 | up   |
| 5636720 | 7076160 | 1070877 | dedicator of cytokinesis 2  | Dock2 | 360509 | 1,33 | down |
| 6171666 | 7076160 | 1070947 | dedicator of cytokinesis 2  | Dock2 | 360509 | 1,33 | down |
| 6176484 | 7076160 | 1070900 | dedicator of cytokinesis 2  | Dock2 | 360509 | 1,32 | down |
| 5796817 | 7076160 | 1070975 | dedicator of cytokinesis 2  | Dock2 | 360509 | 1,30 | up   |
| 5918417 | 7076160 | 1070959 | dedicator of cytokinesis 2  | Dock2 | 360509 | 1,30 | down |
| 6571763 | 7076160 | 1070891 | dedicator of cytokinesis 2  | Dock2 | 360509 | 1,28 | up   |
| 5910678 | 7076160 | 1070896 | dedicator of cytokinesis 2  | Dock2 | 360509 | 1,27 | down |
| 6646723 | 7076160 | 1070973 | dedicator of cytokinesis 2  | Dock2 | 360509 | 1,25 | up   |
| 6319477 | 7076160 | 1070889 | dedicator of cytokinesis 2  | Dock2 | 360509 | 1,24 | up   |
| 6426264 | 7076160 | 1070905 | dedicator of cytokinesis 2  | Dock2 | 360509 | 1,23 | down |
| 6162216 | 7076160 | 1070873 | dedicator of cytokinesis 2  | Dock2 | 360509 | 1,22 | down |
| 5903108 | 7076160 | 1070882 | dedicator of cytokinesis 2  | Dock2 | 360509 | 1,17 | down |
| 6667086 | 7076160 | 1070874 | dedicator of cytokinesis 2  | Dock2 | 360509 | 1,16 | up   |
| 6593770 | 7076160 | 1070880 | dedicator of cytokinesis 2  | Dock2 | 360509 | 1,16 | up   |
| 6073137 | 7076160 | 1070955 | dedicator of cytokinesis 2  | Dock2 | 360509 | 1,15 | down |
| 6604967 | 7076160 | 1070895 | dedicator of cytokinesis 2  | Dock2 | 360509 | 1,14 | down |
| 5818606 | 7076160 | 1070910 | dedicator of cytokinesis 2  | Dock2 | 360509 | 1,13 | up   |
| 5804576 | 7076160 | 1070969 | dedicator of cytokinesis 2  | Dock2 | 360509 | 1,12 | down |
| 6499708 | 7076160 | 1070893 | dedicator of cytokinesis 2  | Dock2 | 360509 | 1,11 | down |
| 6589221 | 7076160 | 1070974 | dedicator of cytokinesis 2  | Dock2 | 360509 | 1,11 | down |
| 5776910 | 7076160 | 1070884 | dedicator of cytokinesis 2  | Dock2 | 360509 | 1,10 | down |
| 6133534 | 7076160 | 1070946 | dedicator of cytokinesis 2  | Dock2 | 360509 | 1,07 | up   |
| 6246483 | 7076160 | 1070968 | dedicator of cytokinesis 2  | Dock2 | 360509 | 1,07 | up   |
| 6162734 | 7076160 | 1070898 | dedicator of cytokinesis 2  | Dock2 | 360509 | 1,07 | up   |
| 5673943 | 7076160 | 1070878 | dedicator of cytokinesis 2  | Dock2 | 360509 | 1,06 | up   |
| 6408463 | 7076160 | 1070981 | dedicator of cytokinesis 2  | Dock2 | 360509 | 1,06 | up   |
| 6235892 | 7076160 | 1070964 | dedicator of cytokinesis 2  | Dock2 | 360509 | 1,05 | down |
| 5760791 | 7076160 | 1070876 | dedicator of cytokinesis 2  | Dock2 | 360509 | 1,04 | down |
| 5789587 | 7076160 | 1070961 | dedicator of cytokinesis 2  | Dock2 | 360509 | 1,04 | down |
| 6407234 | 7076160 | 1070956 | dedicator of cytokinesis 2  | Dock2 | 360509 | 1,04 | up   |
| 6494870 | 7076160 | 1070875 | dedicator of cytokinesis 2  | Dock2 | 360509 | 1,03 | up   |
| 5882972 | 7076160 | 1070967 | dedicator of cytokinesis 2  | Dock2 | 360509 | 1,02 | up   |
| 6535542 | 7076160 | 1070972 | dedicator of cytokinesis 2  | Dock2 | 360509 | 1,02 | down |
| 6076502 | 7076160 | 1070906 | dedicator of cytokinesis 2  | Dock2 | 360509 | 1,02 | down |
| 6151757 | 7076160 | 1070958 | dedicator of cytokinesis 2  | Dock2 | 360509 | 1,01 | down |
| 6163181 | 7076160 | 1070938 | dedicator of cytokinesis 2  | Dock2 | 360509 | 1,00 | down |
| 6532325 | 7349817 | 1744648 | dedicator of cyto-kinesis 3 | Dock3 | 315992 | 2,49 | up   |
| 5808612 | 7349817 | 1744592 | dedicator of cyto-kinesis 3 | Dock3 | 315992 | 2,25 | up   |
| 6056733 | 7349817 | 1744621 | dedicator of cyto-kinesis 3 | Dock3 | 315992 | 2,10 | up   |
| 5882451 | 7349817 | 1744622 | dedicator of cyto-kinesis 3 | Dock3 | 315992 | 1,95 | down |

|         |         |         |                             |       |        |      |      |
|---------|---------|---------|-----------------------------|-------|--------|------|------|
| 6612187 | 7349817 | 1744652 | dedicator of cyto-kinesis 3 | Dock3 | 315992 | 1,94 | up   |
| 6686195 | 7349817 | 1744646 | dedicator of cyto-kinesis 3 | Dock3 | 315992 | 1,89 | up   |
| 5874419 | 7349817 | 1744638 | dedicator of cyto-kinesis 3 | Dock3 | 315992 | 1,80 | up   |
| 6502039 | 7349817 | 1744616 | dedicator of cyto-kinesis 3 | Dock3 | 315992 | 1,74 | up   |
| 5630477 | 7349817 | 1744654 | dedicator of cyto-kinesis 3 | Dock3 | 315992 | 1,66 | up   |
| 5685188 | 7349817 | 1744650 | dedicator of cyto-kinesis 3 | Dock3 | 315992 | 1,61 | down |
| 6738251 | 7349817 | 1744591 | dedicator of cyto-kinesis 3 | Dock3 | 315992 | 1,61 | up   |
| 6728780 | 7349817 | 1744649 | dedicator of cyto-kinesis 3 | Dock3 | 315992 | 1,55 | up   |
| 6612561 | 7349817 | 1744633 | dedicator of cyto-kinesis 3 | Dock3 | 315992 | 1,55 | up   |
| 6292892 | 7349817 | 1744606 | dedicator of cyto-kinesis 3 | Dock3 | 315992 | 1,53 | up   |
| 6306901 | 7349817 | 1744631 | dedicator of cyto-kinesis 3 | Dock3 | 315992 | 1,52 | up   |
| 5630317 | 7349817 | 1744594 | dedicator of cyto-kinesis 3 | Dock3 | 315992 | 1,51 | down |
| 6310015 | 7349817 | 1744650 | dedicator of cyto-kinesis 3 | Dock3 | 315992 | 1,46 | up   |
| 6385701 | 7349817 | 1744618 | dedicator of cyto-kinesis 3 | Dock3 | 315992 | 1,46 | up   |
| 6273394 | 7349817 | 1744604 | dedicator of cyto-kinesis 3 | Dock3 | 315992 | 1,46 | up   |
| 6237809 | 7349817 | 1744615 | dedicator of cyto-kinesis 3 | Dock3 | 315992 | 1,44 | down |
| 5623464 | 7349817 | 1744610 | dedicator of cyto-kinesis 3 | Dock3 | 315992 | 1,39 | up   |
| 6694371 | 7349817 | 1744620 | dedicator of cyto-kinesis 3 | Dock3 | 315992 | 1,37 | up   |
| 6568756 | 7349817 | 1744623 | dedicator of cyto-kinesis 3 | Dock3 | 315992 | 1,37 | up   |
| 5879239 | 7349817 | 1744585 | dedicator of cyto-kinesis 3 | Dock3 | 315992 | 1,36 | up   |
| 6501565 | 7349817 | 1744612 | dedicator of cyto-kinesis 3 | Dock3 | 315992 | 1,35 | down |
| 6296140 | 7349817 | 1744636 | dedicator of cyto-kinesis 3 | Dock3 | 315992 | 1,32 | up   |
| 6165403 | 7349817 | 1744634 | dedicator of cyto-kinesis 3 | Dock3 | 315992 | 1,30 | down |
| 5802958 | 7349817 | 1744617 | dedicator of cyto-kinesis 3 | Dock3 | 315992 | 1,29 | down |
| 5720318 | 7349817 | 1744640 | dedicator of cyto-kinesis 3 | Dock3 | 315992 | 1,21 | up   |
| 5860114 | 7349817 | 1744625 | dedicator of cyto-kinesis 3 | Dock3 | 315992 | 1,19 | up   |
| 5881469 | 7349817 | 1744626 | dedicator of cyto-kinesis 3 | Dock3 | 315992 | 1,18 | down |
| 5843374 | 7349817 | 1744622 | dedicator of cyto-kinesis 3 | Dock3 | 315992 | 1,18 | down |
| 5727970 | 7349817 | 1744662 | dedicator of cyto-kinesis 3 | Dock3 | 315992 | 1,16 | down |
| 6486839 | 7349817 | 1744609 | dedicator of cyto-kinesis 3 | Dock3 | 315992 | 1,14 | down |
| 6670549 | 7349817 | 1744632 | dedicator of cyto-kinesis 3 | Dock3 | 315992 | 1,13 | down |
| 5883736 | 7349817 | 1744624 | dedicator of cyto-kinesis 3 | Dock3 | 315992 | 1,13 | down |
| 6198829 | 7349817 | 1744621 | dedicator of cyto-kinesis 3 | Dock3 | 315992 | 1,12 | down |
| 5885428 | 7349817 | 1744593 | dedicator of cyto-kinesis 3 | Dock3 | 315992 | 1,10 | down |
| 6368226 | 7349817 | 1744594 | dedicator of cyto-kinesis 3 | Dock3 | 315992 | 1,10 | up   |
| 6264821 | 7349817 | 1744614 | dedicator of cyto-kinesis 3 | Dock3 | 315992 | 1,09 | down |
| 5892071 | 7349817 | 1744659 | dedicator of cyto-kinesis 3 | Dock3 | 315992 | 1,09 | down |
| 5944844 | 7349817 | 1744638 | dedicator of cyto-kinesis 3 | Dock3 | 315992 | 1,09 | down |
| 6065879 | 7349817 | 1744637 | dedicator of cyto-kinesis 3 | Dock3 | 315992 | 1,09 | down |
| 5677155 | 7349817 | 1744630 | dedicator of cyto-kinesis 3 | Dock3 | 315992 | 1,08 | down |
| 6360175 | 7349817 | 1744656 | dedicator of cyto-kinesis 3 | Dock3 | 315992 | 1,07 | up   |
| 5892811 | 7349817 | 1744635 | dedicator of cyto-kinesis 3 | Dock3 | 315992 | 1,07 | down |
| 5955440 | 7349817 | 1744629 | dedicator of cyto-kinesis 3 | Dock3 | 315992 | 1,05 | up   |
| 6401953 | 7349817 | 1744611 | dedicator of cyto-kinesis 3 | Dock3 | 315992 | 1,05 | down |
| 6239848 | 7349817 | 1744620 | dedicator of cyto-kinesis 3 | Dock3 | 315992 | 1,04 | up   |
| 6644682 | 7349817 | 1744650 | dedicator of cyto-kinesis 3 | Dock3 | 315992 | 1,04 | up   |
| 6371353 | 7349817 | 1744603 | dedicator of cyto-kinesis 3 | Dock3 | 315992 | 1,04 | down |
| 6313334 | 7349817 | 1744595 | dedicator of cyto-kinesis 3 | Dock3 | 315992 | 1,03 | up   |
| 6310496 | 7349817 | 1744639 | dedicator of cyto-kinesis 3 | Dock3 | 315992 | 1,03 | up   |
| 6128769 | 7349817 | 1744586 | dedicator of cyto-kinesis 3 | Dock3 | 315992 | 1,02 | down |
| 6237918 | 7349817 | 1744593 | dedicator of cyto-kinesis 3 | Dock3 | 315992 | 1,01 | down |
| 5622020 | 7349817 | 1744588 | dedicator of cyto-kinesis 3 | Dock3 | 315992 | 1,00 | down |
| 6590519 | 7343052 | 1727518 | dedicator of cytokinesis 6  | Dock6 | 367039 | 2,26 | up   |
| 6488991 | 7343052 | 1727519 | dedicator of cytokinesis 6  | Dock6 | 367039 | 1,89 | down |
| 6016301 | 7343052 | 1727547 | dedicator of cytokinesis 6  | Dock6 | 367039 | 1,85 | down |
| 6363061 | 7343052 | 1727553 | dedicator of cytokinesis 6  | Dock6 | 367039 | 1,62 | down |
| 6368287 | 7343052 | 1727549 | dedicator of cytokinesis 6  | Dock6 | 367039 | 1,61 | up   |

|         |         |         |                            |       |        |      |      |
|---------|---------|---------|----------------------------|-------|--------|------|------|
| 6233960 | 7343052 | 1727536 | dedicator of cytokinesis 6 | Dock6 | 367039 | 1,55 | down |
| 6292815 | 7343052 | 1727505 | dedicator of cytokinesis 6 | Dock6 | 367039 | 1,41 | up   |
| 6067186 | 7343052 | 1727507 | dedicator of cytokinesis 6 | Dock6 | 367039 | 1,39 | down |
| 5716538 | 7343052 | 1727501 | dedicator of cytokinesis 6 | Dock6 | 367039 | 1,38 | up   |
| 6123599 | 7343052 | 1727521 | dedicator of cytokinesis 6 | Dock6 | 367039 | 1,36 | down |
| 6333159 | 7343052 | 1727507 | dedicator of cytokinesis 6 | Dock6 | 367039 | 1,36 | down |
| 6089642 | 7343052 | 1727519 | dedicator of cytokinesis 6 | Dock6 | 367039 | 1,35 | down |
| 6548939 | 7343052 | 1727529 | dedicator of cytokinesis 6 | Dock6 | 367039 | 1,35 | down |
| 6574747 | 7343052 | 1727508 | dedicator of cytokinesis 6 | Dock6 | 367039 | 1,33 | up   |
| 6382684 | 7343052 | 1727550 | dedicator of cytokinesis 6 | Dock6 | 367039 | 1,31 | down |
| 6072479 | 7343052 | 1727524 | dedicator of cytokinesis 6 | Dock6 | 367039 | 1,30 | down |
| 6587522 | 7343052 | 1727509 | dedicator of cytokinesis 6 | Dock6 | 367039 | 1,30 | down |
| 5989182 | 7343052 | 1727532 | dedicator of cytokinesis 6 | Dock6 | 367039 | 1,30 | down |
| 5943567 | 7343052 | 1727545 | dedicator of cytokinesis 6 | Dock6 | 367039 | 1,28 | down |
| 6250228 | 7343052 | 1727540 | dedicator of cytokinesis 6 | Dock6 | 367039 | 1,27 | up   |
| 6553691 | 7343052 | 1727530 | dedicator of cytokinesis 6 | Dock6 | 367039 | 1,26 | down |
| 6191312 | 7343052 | 1727535 | dedicator of cytokinesis 6 | Dock6 | 367039 | 1,24 | up   |
| 5744378 | 7343052 | 1727515 | dedicator of cytokinesis 6 | Dock6 | 367039 | 1,22 | down |
| 6386771 | 7343052 | 1727526 | dedicator of cytokinesis 6 | Dock6 | 367039 | 1,20 | down |
| 6590944 | 7343052 | 1727514 | dedicator of cytokinesis 6 | Dock6 | 367039 | 1,19 | up   |
| 5969432 | 7343052 | 1727510 | dedicator of cytokinesis 6 | Dock6 | 367039 | 1,19 | up   |
| 6625166 | 7343052 | 1727513 | dedicator of cytokinesis 6 | Dock6 | 367039 | 1,18 | down |
| 6666486 | 7343052 | 1727519 | dedicator of cytokinesis 6 | Dock6 | 367039 | 1,18 | up   |
| 6480170 | 7343052 | 1727517 | dedicator of cytokinesis 6 | Dock6 | 367039 | 1,17 | down |
| 6005933 | 7343052 | 1727544 | dedicator of cytokinesis 6 | Dock6 | 367039 | 1,17 | down |
| 6499372 | 7343052 | 1727523 | dedicator of cytokinesis 6 | Dock6 | 367039 | 1,13 | up   |
| 6282337 | 7343052 | 1727503 | dedicator of cytokinesis 6 | Dock6 | 367039 | 1,12 | up   |
| 6618327 | 7343052 | 1727546 | dedicator of cytokinesis 6 | Dock6 | 367039 | 1,12 | down |
| 6610451 | 7343052 | 1727504 | dedicator of cytokinesis 6 | Dock6 | 367039 | 1,12 | up   |
| 5869156 | 7343052 | 1727522 | dedicator of cytokinesis 6 | Dock6 | 367039 | 1,12 | down |
| 5878071 | 7343052 | 1727551 | dedicator of cytokinesis 6 | Dock6 | 367039 | 1,11 | up   |
| 6414962 | 7343052 | 1727512 | dedicator of cytokinesis 6 | Dock6 | 367039 | 1,10 | up   |
| 6270147 | 7343052 | 1727533 | dedicator of cytokinesis 6 | Dock6 | 367039 | 1,09 | down |
| 6230256 | 7343052 | 1727502 | dedicator of cytokinesis 6 | Dock6 | 367039 | 1,09 | up   |
| 5635602 | 7343052 | 1727534 | dedicator of cytokinesis 6 | Dock6 | 367039 | 1,08 | down |
| 5919941 | 7343052 | 1727525 | dedicator of cytokinesis 6 | Dock6 | 367039 | 1,08 | down |
| 5619477 | 7343052 | 1727542 | dedicator of cytokinesis 6 | Dock6 | 367039 | 1,07 | down |
| 6381288 | 7343052 | 1727527 | dedicator of cytokinesis 6 | Dock6 | 367039 | 1,06 | up   |
| 5714395 | 7343052 | 1727541 | dedicator of cytokinesis 6 | Dock6 | 367039 | 1,06 | up   |
| 6006575 | 7343052 | 1727520 | dedicator of cytokinesis 6 | Dock6 | 367039 | 1,06 | up   |
| 5902522 | 7343052 | 1727518 | dedicator of cytokinesis 6 | Dock6 | 367039 | 1,06 | down |
| 5848315 | 7343052 | 1727552 | dedicator of cytokinesis 6 | Dock6 | 367039 | 1,05 | up   |
| 5762277 | 7343052 | 1727540 | dedicator of cytokinesis 6 | Dock6 | 367039 | 1,05 | up   |
| 5785954 | 7343052 | 1727548 | dedicator of cytokinesis 6 | Dock6 | 367039 | 1,05 | up   |
| 6514265 | 7343052 | 1727543 | dedicator of cytokinesis 6 | Dock6 | 367039 | 1,04 | up   |
| 6320641 | 7343052 | 1727531 | dedicator of cytokinesis 6 | Dock6 | 367039 | 1,02 | down |
| 6590146 | 7343052 | 1727543 | dedicator of cytokinesis 6 | Dock6 | 367039 | 1,02 | up   |
| 6685625 | 7343052 | 1727506 | dedicator of cytokinesis 6 | Dock6 | 367039 | 1,02 | down |
| 6013369 | 7343052 | 1727516 | dedicator of cytokinesis 6 | Dock6 | 367039 | 1,02 | down |
| 5628661 | 7343052 | 1727511 | dedicator of cytokinesis 6 | Dock6 | 367039 | 1,02 | up   |
| 6312497 | 7289075 | 1594441 | dedicator of cytokinesis 7 | Dock7 | 313388 | 2,19 | up   |
| 5783556 | 7289075 | 1594444 | dedicator of cytokinesis 7 | Dock7 | 313388 | 2,01 | up   |
| 5818347 | 7289075 | 1594446 | dedicator of cytokinesis 7 | Dock7 | 313388 | 1,64 | down |
| 6625717 | 7289075 | 1594443 | dedicator of cytokinesis 7 | Dock7 | 313388 | 1,55 | down |
| 6490670 | 7289075 | 1594494 | dedicator of cytokinesis 7 | Dock7 | 313388 | 1,42 | up   |
| 6716952 | 7289075 | 1594487 | dedicator of cytokinesis 7 | Dock7 | 313388 | 1,39 | down |
| 6214277 | 7289075 | 1594485 | dedicator of cytokinesis 7 | Dock7 | 313388 | 1,22 | down |

|         |         |         |                            |       |        |      |      |
|---------|---------|---------|----------------------------|-------|--------|------|------|
| 6598765 | 7289075 | 1594489 | dedicator of cytokinesis 7 | Dock7 | 313388 | 1,21 | down |
| 6059932 | 7289075 | 1594440 | dedicator of cytokinesis 7 | Dock7 | 313388 | 1,21 | up   |
| 5619762 | 7289075 | 1594490 | dedicator of cytokinesis 7 | Dock7 | 313388 | 1,18 | down |
| 6383161 | 7289075 | 1594442 | dedicator of cytokinesis 7 | Dock7 | 313388 | 1,17 | up   |
| 5716612 | 7289075 | 1594492 | dedicator of cytokinesis 7 | Dock7 | 313388 | 1,16 | up   |
| 5960572 | 7289075 | 1594447 | dedicator of cytokinesis 7 | Dock7 | 313388 | 1,15 | down |
| 5787586 | 7289075 | 1594495 | dedicator of cytokinesis 7 | Dock7 | 313388 | 1,13 | down |
| 6604358 | 7289075 | 1594482 | dedicator of cytokinesis 7 | Dock7 | 313388 | 1,10 | down |
| 6643438 | 7289075 | 1594445 | dedicator of cytokinesis 7 | Dock7 | 313388 | 1,04 | down |
| 6524964 | 7289075 | 1594488 | dedicator of cytokinesis 7 | Dock7 | 313388 | 1,03 | down |
| 5679488 | 7289075 | 1594478 | dedicator of cytokinesis 7 | Dock7 | 313388 | 1,03 | down |
| 6265110 | 7289075 | 1594493 | dedicator of cytokinesis 7 | Dock7 | 313388 | 1,03 | down |
| 5930214 | 7289075 | 1594486 | dedicator of cytokinesis 7 | Dock7 | 313388 | 1,02 | down |
| 6040979 | 7040674 | 987067  | dedicator of cytokinesis 8 | Dock8 | 499337 | 2,31 | up   |
| 5743230 | 7040674 | 987034  | dedicator of cytokinesis 8 | Dock8 | 499337 | 1,94 | up   |
| 6098897 | 7040674 | 987049  | dedicator of cytokinesis 8 | Dock8 | 499337 | 1,87 | up   |
| 5747846 | 7040674 | 987064  | dedicator of cytokinesis 8 | Dock8 | 499337 | 1,71 | down |
| 6133687 | 7040674 | 987063  | dedicator of cytokinesis 8 | Dock8 | 499337 | 1,53 | down |
| 5759066 | 7040674 | 986999  | dedicator of cytokinesis 8 | Dock8 | 499337 | 1,52 | up   |
| 6023081 | 7040674 | 987058  | dedicator of cytokinesis 8 | Dock8 | 499337 | 1,52 | down |
| 6110188 | 7040674 | 987059  | dedicator of cytokinesis 8 | Dock8 | 499337 | 1,52 | down |
| 6087970 | 7040674 | 987069  | dedicator of cytokinesis 8 | Dock8 | 499337 | 1,47 | down |
| 5912069 | 7040674 | 987071  | dedicator of cytokinesis 8 | Dock8 | 499337 | 1,45 | up   |
| 6647379 | 7040674 | 987060  | dedicator of cytokinesis 8 | Dock8 | 499337 | 1,44 | up   |
| 5882657 | 7040674 | 987011  | dedicator of cytokinesis 8 | Dock8 | 499337 | 1,44 | up   |
| 5911799 | 7040674 | 987044  | dedicator of cytokinesis 8 | Dock8 | 499337 | 1,43 | down |
| 6223753 | 7040674 | 987056  | dedicator of cytokinesis 8 | Dock8 | 499337 | 1,39 | up   |
| 6642041 | 7040674 | 987040  | dedicator of cytokinesis 8 | Dock8 | 499337 | 1,38 | down |
| 5906606 | 7040674 | 987019  | dedicator of cytokinesis 8 | Dock8 | 499337 | 1,33 | down |
| 6252152 | 7040674 | 987046  | dedicator of cytokinesis 8 | Dock8 | 499337 | 1,33 | down |
| 5965293 | 7040674 | 987016  | dedicator of cytokinesis 8 | Dock8 | 499337 | 1,31 | down |
| 5919354 | 7040674 | 987035  | dedicator of cytokinesis 8 | Dock8 | 499337 | 1,31 | down |
| 6157725 | 7040674 | 987039  | dedicator of cytokinesis 8 | Dock8 | 499337 | 1,28 | down |
| 5988390 | 7040674 | 987014  | dedicator of cytokinesis 8 | Dock8 | 499337 | 1,27 | down |
| 5853418 | 7040674 | 987073  | dedicator of cytokinesis 8 | Dock8 | 499337 | 1,22 | up   |
| 5890601 | 7040674 | 987067  | dedicator of cytokinesis 8 | Dock8 | 499337 | 1,21 | down |
| 6522869 | 7040674 | 987005  | dedicator of cytokinesis 8 | Dock8 | 499337 | 1,21 | down |
| 5752599 | 7040674 | 987053  | dedicator of cytokinesis 8 | Dock8 | 499337 | 1,18 | up   |
| 6248130 | 7040674 | 987051  | dedicator of cytokinesis 8 | Dock8 | 499337 | 1,18 | down |
| 6625265 | 7040674 | 987037  | dedicator of cytokinesis 8 | Dock8 | 499337 | 1,17 | up   |
| 6321220 | 7040674 | 987010  | dedicator of cytokinesis 8 | Dock8 | 499337 | 1,16 | down |
| 6477783 | 7040674 | 987017  | dedicator of cytokinesis 8 | Dock8 | 499337 | 1,15 | down |
| 5997636 | 7040674 | 987008  | dedicator of cytokinesis 8 | Dock8 | 499337 | 1,11 | down |
| 6657706 | 7040674 | 987011  | dedicator of cytokinesis 8 | Dock8 | 499337 | 1,10 | down |
| 5730767 | 7040674 | 987020  | dedicator of cytokinesis 8 | Dock8 | 499337 | 1,10 | down |
| 5828102 | 7040674 | 987030  | dedicator of cytokinesis 8 | Dock8 | 499337 | 1,10 | down |
| 6593644 | 7040674 | 987012  | dedicator of cytokinesis 8 | Dock8 | 499337 | 1,10 | up   |
| 6105912 | 7040674 | 987033  | dedicator of cytokinesis 8 | Dock8 | 499337 | 1,09 | down |
| 6650602 | 7040674 | 987021  | dedicator of cytokinesis 8 | Dock8 | 499337 | 1,09 | down |
| 6572786 | 7040674 | 987048  | dedicator of cytokinesis 8 | Dock8 | 499337 | 1,08 | down |
| 6717760 | 7040674 | 987057  | dedicator of cytokinesis 8 | Dock8 | 499337 | 1,06 | up   |
| 6261877 | 7040674 | 987032  | dedicator of cytokinesis 8 | Dock8 | 499337 | 1,06 | up   |
| 5708470 | 7040674 | 987043  | dedicator of cytokinesis 8 | Dock8 | 499337 | 1,05 | down |
| 6741568 | 7040674 | 987065  | dedicator of cytokinesis 8 | Dock8 | 499337 | 1,05 | down |
| 6160990 | 7040674 | 987062  | dedicator of cytokinesis 8 | Dock8 | 499337 | 1,05 | down |
| 5780213 | 7040674 | 987047  | dedicator of cytokinesis 8 | Dock8 | 499337 | 1,04 | up   |
| 6037689 | 7040674 | 987028  | dedicator of cytokinesis 8 | Dock8 | 499337 | 1,03 | down |

|         |         |         |                            |       |        |      |      |
|---------|---------|---------|----------------------------|-------|--------|------|------|
| 5827034 | 7040674 | 987054  | dedicator of cytokinesis 8 | Dock8 | 499337 | 1,02 | up   |
| 6150611 | 7040674 | 987055  | dedicator of cytokinesis 8 | Dock8 | 499337 | 1,02 | up   |
| 5625425 | 7040674 | 987037  | dedicator of cytokinesis 8 | Dock8 | 499337 | 1,02 | down |
| 5898102 | 7040674 | 987066  | dedicator of cytokinesis 8 | Dock8 | 499337 | 1,01 | down |
| 5670104 | 7040674 | 987018  | dedicator of cytokinesis 8 | Dock8 | 499337 | 1,01 | down |
| 6666169 | 7040674 | 987036  | dedicator of cytokinesis 8 | Dock8 | 499337 | 1,00 | up   |
| 6648446 | 7142321 | 1231495 | dedicator of cytokinesis 9 | Dock9 | 259237 | 2,28 | down |
| 6365724 | 7142321 | 1231473 | dedicator of cytokinesis 9 | Dock9 | 259237 | 1,77 | down |
| 6124374 | 7142321 | 1231485 | dedicator of cytokinesis 9 | Dock9 | 259237 | 1,63 | down |
| 5771719 | 7142321 | 1231508 | dedicator of cytokinesis 9 | Dock9 | 259237 | 1,57 | up   |
| 6660366 | 7142321 | 1231532 | dedicator of cytokinesis 9 | Dock9 | 259237 | 1,52 | down |
| 6655479 | 7142321 | 1231523 | dedicator of cytokinesis 9 | Dock9 | 259237 | 1,44 | up   |
| 5742164 | 7142321 | 1231494 | dedicator of cytokinesis 9 | Dock9 | 259237 | 1,43 | down |
| 5725921 | 7142321 | 1231502 | dedicator of cytokinesis 9 | Dock9 | 259237 | 1,38 | up   |
| 6495462 | 7142321 | 1231509 | dedicator of cytokinesis 9 | Dock9 | 259237 | 1,33 | up   |
| 6335291 | 7142321 | 1231545 | dedicator of cytokinesis 9 | Dock9 | 259237 | 1,33 | up   |
| 6167603 | 7142321 | 1231492 | dedicator of cytokinesis 9 | Dock9 | 259237 | 1,33 | down |
| 5877710 | 7142321 | 1231543 | dedicator of cytokinesis 9 | Dock9 | 259237 | 1,31 | down |
| 6176235 | 7142321 | 1231550 | dedicator of cytokinesis 9 | Dock9 | 259237 | 1,31 | up   |
| 5625009 | 7142321 | 1231538 | dedicator of cytokinesis 9 | Dock9 | 259237 | 1,26 | down |
| 6281615 | 7142321 | 1231540 | dedicator of cytokinesis 9 | Dock9 | 259237 | 1,25 | up   |
| 6130543 | 7142321 | 1231511 | dedicator of cytokinesis 9 | Dock9 | 259237 | 1,25 | up   |
| 6507866 | 7142321 | 1231486 | dedicator of cytokinesis 9 | Dock9 | 259237 | 1,21 | up   |
| 6497173 | 7142321 | 1231498 | dedicator of cytokinesis 9 | Dock9 | 259237 | 1,21 | down |
| 5620139 | 7142321 | 1231504 | dedicator of cytokinesis 9 | Dock9 | 259237 | 1,19 | up   |
| 6156469 | 7142321 | 1231516 | dedicator of cytokinesis 9 | Dock9 | 259237 | 1,19 | down |
| 6428986 | 7142321 | 1231526 | dedicator of cytokinesis 9 | Dock9 | 259237 | 1,19 | down |
| 6298935 | 7142321 | 1231483 | dedicator of cytokinesis 9 | Dock9 | 259237 | 1,17 | up   |
| 6278025 | 7142321 | 1231474 | dedicator of cytokinesis 9 | Dock9 | 259237 | 1,16 | down |
| 6249320 | 7142321 | 1231544 | dedicator of cytokinesis 9 | Dock9 | 259237 | 1,13 | down |
| 5987909 | 7142321 | 1231475 | dedicator of cytokinesis 9 | Dock9 | 259237 | 1,13 | down |
| 6012596 | 7142321 | 1231493 | dedicator of cytokinesis 9 | Dock9 | 259237 | 1,13 | up   |
| 5630624 | 7142321 | 1231473 | dedicator of cytokinesis 9 | Dock9 | 259237 | 1,13 | down |
| 6157868 | 7142321 | 1231533 | dedicator of cytokinesis 9 | Dock9 | 259237 | 1,12 | down |
| 5933671 | 7142321 | 1231534 | dedicator of cytokinesis 9 | Dock9 | 259237 | 1,12 | down |
| 6037624 | 7142321 | 1231532 | dedicator of cytokinesis 9 | Dock9 | 259237 | 1,12 | down |
| 6516013 | 7142321 | 1231536 | dedicator of cytokinesis 9 | Dock9 | 259237 | 1,11 | up   |
| 5670085 | 7142321 | 1231505 | dedicator of cytokinesis 9 | Dock9 | 259237 | 1,10 | up   |
| 5802831 | 7142321 | 1231496 | dedicator of cytokinesis 9 | Dock9 | 259237 | 1,10 | up   |
| 6688878 | 7142321 | 1231527 | dedicator of cytokinesis 9 | Dock9 | 259237 | 1,10 | down |
| 6181429 | 7142321 | 1231473 | dedicator of cytokinesis 9 | Dock9 | 259237 | 1,10 | up   |
| 5770956 | 7142321 | 1231523 | dedicator of cytokinesis 9 | Dock9 | 259237 | 1,09 | down |
| 6253837 | 7142321 | 1231481 | dedicator of cytokinesis 9 | Dock9 | 259237 | 1,09 | up   |
| 6269807 | 7142321 | 1231490 | dedicator of cytokinesis 9 | Dock9 | 259237 | 1,09 | up   |
| 5834421 | 7142321 | 1231510 | dedicator of cytokinesis 9 | Dock9 | 259237 | 1,09 | down |
| 6683589 | 7142321 | 1231488 | dedicator of cytokinesis 9 | Dock9 | 259237 | 1,08 | up   |
| 5983444 | 7142321 | 1231517 | dedicator of cytokinesis 9 | Dock9 | 259237 | 1,08 | down |
| 6438079 | 7142321 | 1231473 | dedicator of cytokinesis 9 | Dock9 | 259237 | 1,08 | up   |
| 5738026 | 7142321 | 1231546 | dedicator of cytokinesis 9 | Dock9 | 259237 | 1,08 | up   |
| 5832607 | 7142321 | 1231512 | dedicator of cytokinesis 9 | Dock9 | 259237 | 1,07 | up   |
| 6520532 | 7142321 | 1231521 | dedicator of cytokinesis 9 | Dock9 | 259237 | 1,07 | up   |
| 6137106 | 7142321 | 1231537 | dedicator of cytokinesis 9 | Dock9 | 259237 | 1,05 | up   |
| 6627161 | 7142321 | 1231522 | dedicator of cytokinesis 9 | Dock9 | 259237 | 1,05 | up   |
| 5716527 | 7142321 | 1231478 | dedicator of cytokinesis 9 | Dock9 | 259237 | 1,04 | up   |
| 6334684 | 7142321 | 1231489 | dedicator of cytokinesis 9 | Dock9 | 259237 | 1,04 | down |
| 5733091 | 7142321 | 1231517 | dedicator of cytokinesis 9 | Dock9 | 259237 | 1,03 | down |
| 5927599 | 7142321 | 1231499 | dedicator of cytokinesis 9 | Dock9 | 259237 | 1,02 | down |

|         |         |         |                                                         |       |        |      |      |
|---------|---------|---------|---------------------------------------------------------|-------|--------|------|------|
| 6300099 | 7142321 | 1231527 | dedicator of cytokinesis 9                              | Dock9 | 259237 | 1,02 | down |
| 6119044 | 7142321 | 1231510 | dedicator of cytokinesis 9                              | Dock9 | 259237 | 1,01 | up   |
| 6486710 | 7142321 | 1231514 | dedicator of cytokinesis 9                              | Dock9 | 259237 | 1,01 | down |
| 6397499 | 7142321 | 1231535 | dedicator of cytokinesis 9                              | Dock9 | 259237 | 1,00 | down |
| 6044525 | 7058768 | 1028799 | deformed epidermal autoregulatory factor 1 (Drosophila) | Deaf1 | 83632  | 2,68 | up   |
| 6706870 | 7058768 | 1028799 | deformed epidermal autoregulatory factor 1 (Drosophila) | Deaf1 | 83632  | 1,74 | up   |
| 5778958 | 7058768 | 1028790 | deformed epidermal autoregulatory factor 1 (Drosophila) | Deaf1 | 83632  | 1,74 | up   |
| 5806604 | 7058768 | 1028799 | deformed epidermal autoregulatory factor 1 (Drosophila) | Deaf1 | 83632  | 1,57 | up   |
| 6094678 | 7058768 | 1028787 | deformed epidermal autoregulatory factor 1 (Drosophila) | Deaf1 | 83632  | 1,55 | down |
| 5675411 | 7058768 | 1028799 | deformed epidermal autoregulatory factor 1 (Drosophila) | Deaf1 | 83632  | 1,47 | up   |
| 6227807 | 7058768 | 1028788 | deformed epidermal autoregulatory factor 1 (Drosophila) | Deaf1 | 83632  | 1,39 | down |
| 6473906 | 7058768 | 1028796 | deformed epidermal autoregulatory factor 1 (Drosophila) | Deaf1 | 83632  | 1,36 | up   |
| 5960970 | 7058768 | 1028791 | deformed epidermal autoregulatory factor 1 (Drosophila) | Deaf1 | 83632  | 1,16 | down |
| 6737066 | 7058768 | 1028792 | deformed epidermal autoregulatory factor 1 (Drosophila) | Deaf1 | 83632  | 1,14 | down |
| 6597555 | 7058768 | 1028797 | deformed epidermal autoregulatory factor 1 (Drosophila) | Deaf1 | 83632  | 1,13 | up   |
| 6677201 | 7058768 | 1028793 | deformed epidermal autoregulatory factor 1 (Drosophila) | Deaf1 | 83632  | 1,11 | down |
| 6707651 | 7058768 | 1028795 | deformed epidermal autoregulatory factor 1 (Drosophila) | Deaf1 | 83632  | 1,08 | down |
| 6393456 | 7058768 | 1028794 | deformed epidermal autoregulatory factor 1 (Drosophila) | Deaf1 | 83632  | 1,07 | up   |
| 6150050 | 7058768 | 1028789 | deformed epidermal autoregulatory factor 1 (Drosophila) | Deaf1 | 83632  | 1,06 | down |
| 6409387 | 7058768 | 1028790 | deformed epidermal autoregulatory factor 1 (Drosophila) | Deaf1 | 83632  | 1,06 | down |
| 6430321 | 7058768 | 1028798 | deformed epidermal autoregulatory factor 1 (Drosophila) | Deaf1 | 83632  | 1,05 | down |
| 6739360 | 7058768 | 1028799 | deformed epidermal autoregulatory factor 1 (Drosophila) | Deaf1 | 83632  | 1,02 | down |
| 6663319 | 7138299 | 1221813 | dehydrogenase/reductase (SDR family) member 1           | Dhrs1 | 290234 | 3,07 | up   |
| 5843858 | 7138299 | 1221813 | dehydrogenase/reductase (SDR family) member 1           | Dhrs1 | 290234 | 1,22 | up   |
| 5978268 | 7138299 | 1221812 | dehydrogenase/reductase (SDR family) member 1           | Dhrs1 | 290234 | 1,17 | down |
| 6158436 | 7138299 | 1221807 | dehydrogenase/reductase (SDR family) member 1           | Dhrs1 | 290234 | 1,13 | down |
| 5960618 | 7138299 | 1221810 | dehydrogenase/reductase (SDR family) member 1           | Dhrs1 | 290234 | 1,12 | down |
| 6365074 | 7138299 | 1221809 | dehydrogenase/reductase (SDR family) member 1           | Dhrs1 | 290234 | 1,10 | up   |
| 6505685 | 7138299 | 1221804 | dehydrogenase/reductase (SDR family) member 1           | Dhrs1 | 290234 | 1,10 | down |
| 5917228 | 7138299 | 1221806 | dehydrogenase/reductase (SDR family) member 1           | Dhrs1 | 290234 | 1,09 | up   |
| 6421172 | 7138299 | 1221805 | dehydrogenase/reductase (SDR family) member 1           | Dhrs1 | 290234 | 1,09 | down |
| 6366280 | 7138299 | 1221808 | dehydrogenase/reductase (SDR family) member 1           | Dhrs1 | 290234 | 1,05 | down |
| 5800605 | 7138299 | 1221811 | dehydrogenase/reductase (SDR family) member 1           | Dhrs1 | 290234 | 1,05 | down |
| 6389820 | 7138299 | 1221803 | dehydrogenase/reductase (SDR family) member 1           | Dhrs1 | 290234 | 1,04 | down |
| 5842998 | 7131838 | 1206001 | dehydrogenase/reductase (SDR family) member 4           | Dhrs4 | 266686 | 2,23 | up   |
| 5681232 | 7131838 | 1205995 | dehydrogenase/reductase (SDR family) member 4           | Dhrs4 | 266686 | 2,09 | up   |
| 6254284 | 7131838 | 1205995 | dehydrogenase/reductase (SDR family) member 4           | Dhrs4 | 266686 | 1,93 | up   |
| 6627070 | 7131838 | 1206000 | dehydrogenase/reductase (SDR family) member 4           | Dhrs4 | 266686 | 1,69 | down |
| 5681937 | 7131838 | 1205997 | dehydrogenase/reductase (SDR family) member 4           | Dhrs4 | 266686 | 1,58 | down |
| 5651907 | 7131838 | 1206002 | dehydrogenase/reductase (SDR family) member 4           | Dhrs4 | 266686 | 1,49 | down |
| 6464847 | 7131838 | 1206003 | dehydrogenase/reductase (SDR family) member 4           | Dhrs4 | 266686 | 1,44 | up   |
| 6013989 | 7131838 | 1205999 | dehydrogenase/reductase (SDR family) member 4           | Dhrs4 | 266686 | 1,37 | down |
| 6471264 | 7131838 | 1205996 | dehydrogenase/reductase (SDR family) member 4           | Dhrs4 | 266686 | 1,31 | up   |
| 6712277 | 7131838 | 1206000 | dehydrogenase/reductase (SDR family) member 4           | Dhrs4 | 266686 | 1,25 | up   |
| 6377219 | 7131838 | 1205998 | dehydrogenase/reductase (SDR family) member 4           | Dhrs4 | 266686 | 1,07 | up   |
| 6702219 | 7131838 | 1205995 | dehydrogenase/reductase (SDR family) member 4           | Dhrs4 | 266686 | 1,01 | up   |
| 6421191 | 7307688 | 1641933 | dehydrogenase/reductase (SDR family) member 7           | Dhrs7 | 299131 | 2,09 | down |
| 5830097 | 7307688 | 1641934 | dehydrogenase/reductase (SDR family) member 7           | Dhrs7 | 299131 | 2,05 | down |
| 6726376 | 7307688 | 1641928 | dehydrogenase/reductase (SDR family) member 7           | Dhrs7 | 299131 | 1,92 | up   |
| 5761610 | 7307688 | 1641930 | dehydrogenase/reductase (SDR family) member 7           | Dhrs7 | 299131 | 1,40 | up   |
| 6054137 | 7307688 | 1641932 | dehydrogenase/reductase (SDR family) member 7           | Dhrs7 | 299131 | 1,39 | down |
| 6287284 | 7307688 | 1641929 | dehydrogenase/reductase (SDR family) member 7           | Dhrs7 | 299131 | 1,30 | up   |
| 6167779 | 7307688 | 1641928 | dehydrogenase/reductase (SDR family) member 7           | Dhrs7 | 299131 | 1,19 | down |
| 6193968 | 7307688 | 1641931 | dehydrogenase/reductase (SDR family) member 7           | Dhrs7 | 299131 | 1,12 | down |
| 6678118 | 7307688 | 1641935 | dehydrogenase/reductase (SDR family) member 7           | Dhrs7 | 299131 | 1,06 | up   |
| 6362392 | 7146093 | 1240976 | deleted in liver cancer 1                               | Dlc1  | 58834  | 2,41 | down |
| 6203162 | 7146093 | 1240985 | deleted in liver cancer 1                               | Dlc1  | 58834  | 2,40 | down |



|         |         |         |                                     |       |        |      |      |
|---------|---------|---------|-------------------------------------|-------|--------|------|------|
| 6097567 | 7146093 | 1240968 | deleted in liver cancer 1           | Dlc1  | 58834  | 2,21 | down |
| 6351433 | 7146093 | 1240972 | deleted in liver cancer 1           | Dlc1  | 58834  | 2,08 | down |
| 6459740 | 7146093 | 1240984 | deleted in liver cancer 1           | Dlc1  | 58834  | 1,81 | down |
| 6645120 | 7146093 | 1240981 | deleted in liver cancer 1           | Dlc1  | 58834  | 1,64 | down |
| 6173999 | 7146093 | 1240976 | deleted in liver cancer 1           | Dlc1  | 58834  | 1,64 | down |
| 5845664 | 7146093 | 1240961 | deleted in liver cancer 1           | Dlc1  | 58834  | 1,54 | down |
| 6212119 | 7146093 | 1240983 | deleted in liver cancer 1           | Dlc1  | 58834  | 1,46 | down |
| 6022501 | 7146093 | 1240974 | deleted in liver cancer 1           | Dlc1  | 58834  | 1,42 | down |
| 5919066 | 7146093 | 1240983 | deleted in liver cancer 1           | Dlc1  | 58834  | 1,38 | up   |
| 6297338 | 7146093 | 1240967 | deleted in liver cancer 1           | Dlc1  | 58834  | 1,38 | down |
| 5946277 | 7146093 | 1240960 | deleted in liver cancer 1           | Dlc1  | 58834  | 1,27 | down |
| 6317400 | 7146093 | 1240977 | deleted in liver cancer 1           | Dlc1  | 58834  | 1,24 | up   |
| 6078198 | 7146093 | 1240980 | deleted in liver cancer 1           | Dlc1  | 58834  | 1,24 | down |
| 6226275 | 7146093 | 1240982 | deleted in liver cancer 1           | Dlc1  | 58834  | 1,15 | up   |
| 5782500 | 7146093 | 1240973 | deleted in liver cancer 1           | Dlc1  | 58834  | 1,11 | down |
| 6114195 | 7146093 | 1240984 | deleted in liver cancer 1           | Dlc1  | 58834  | 1,11 | up   |
| 6074350 | 7037488 | 979295  | deleted in malignant brain tumors 1 | Dmbt1 | 170568 | 1,85 | up   |
| 6528635 | 7037488 | 979265  | deleted in malignant brain tumors 1 | Dmbt1 | 170568 | 1,83 | up   |
| 6187283 | 7037488 | 979286  | deleted in malignant brain tumors 1 | Dmbt1 | 170568 | 1,81 | up   |
| 6207118 | 7037488 | 979266  | deleted in malignant brain tumors 1 | Dmbt1 | 170568 | 1,67 | up   |
| 6446564 | 7037488 | 979284  | deleted in malignant brain tumors 1 | Dmbt1 | 170568 | 1,65 | down |
| 6209744 | 7037488 | 979296  | deleted in malignant brain tumors 1 | Dmbt1 | 170568 | 1,62 | down |
| 6717802 | 7037488 | 979299  | deleted in malignant brain tumors 1 | Dmbt1 | 170568 | 1,60 | up   |
| 5778569 | 7037488 | 979297  | deleted in malignant brain tumors 1 | Dmbt1 | 170568 | 1,54 | down |
| 6419967 | 7037488 | 979293  | deleted in malignant brain tumors 1 | Dmbt1 | 170568 | 1,50 | up   |
| 6669123 | 7037488 | 979278  | deleted in malignant brain tumors 1 | Dmbt1 | 170568 | 1,49 | down |
| 6095710 | 7037488 | 979257  | deleted in malignant brain tumors 1 | Dmbt1 | 170568 | 1,48 | down |
| 6484677 | 7037488 | 979272  | deleted in malignant brain tumors 1 | Dmbt1 | 170568 | 1,46 | down |
| 6614095 | 7037488 | 979292  | deleted in malignant brain tumors 1 | Dmbt1 | 170568 | 1,44 | up   |
| 5928472 | 7037488 | 979300  | deleted in malignant brain tumors 1 | Dmbt1 | 170568 | 1,40 | down |
| 6348340 | 7037488 | 979279  | deleted in malignant brain tumors 1 | Dmbt1 | 170568 | 1,35 | down |
| 6439779 | 7037488 | 979284  | deleted in malignant brain tumors 1 | Dmbt1 | 170568 | 1,33 | down |
| 6182481 | 7037488 | 979276  | deleted in malignant brain tumors 1 | Dmbt1 | 170568 | 1,32 | down |
| 6044339 | 7037488 | 979282  | deleted in malignant brain tumors 1 | Dmbt1 | 170568 | 1,31 | up   |
| 6266118 | 7037488 | 979297  | deleted in malignant brain tumors 1 | Dmbt1 | 170568 | 1,31 | down |
| 5758983 | 7037488 | 979273  | deleted in malignant brain tumors 1 | Dmbt1 | 170568 | 1,25 | down |
| 6557127 | 7037488 | 979256  | deleted in malignant brain tumors 1 | Dmbt1 | 170568 | 1,25 | up   |
| 5997221 | 7037488 | 979272  | deleted in malignant brain tumors 1 | Dmbt1 | 170568 | 1,23 | down |
| 6200099 | 7037488 | 979261  | deleted in malignant brain tumors 1 | Dmbt1 | 170568 | 1,22 | down |
| 6733333 | 7037488 | 979286  | deleted in malignant brain tumors 1 | Dmbt1 | 170568 | 1,21 | up   |
| 6305371 | 7037488 | 979262  | deleted in malignant brain tumors 1 | Dmbt1 | 170568 | 1,20 | down |
| 5716461 | 7037488 | 979258  | deleted in malignant brain tumors 1 | Dmbt1 | 170568 | 1,20 | up   |
| 6098703 | 7037488 | 979270  | deleted in malignant brain tumors 1 | Dmbt1 | 170568 | 1,19 | up   |
| 6377118 | 7037488 | 979267  | deleted in malignant brain tumors 1 | Dmbt1 | 170568 | 1,19 | down |
| 6705924 | 7037488 | 979259  | deleted in malignant brain tumors 1 | Dmbt1 | 170568 | 1,19 | down |
| 6347721 | 7037488 | 979283  | deleted in malignant brain tumors 1 | Dmbt1 | 170568 | 1,19 | up   |
| 6585866 | 7037488 | 979274  | deleted in malignant brain tumors 1 | Dmbt1 | 170568 | 1,19 | up   |
| 6379088 | 7037488 | 979268  | deleted in malignant brain tumors 1 | Dmbt1 | 170568 | 1,18 | up   |
| 5682388 | 7037488 | 979285  | deleted in malignant brain tumors 1 | Dmbt1 | 170568 | 1,15 | up   |
| 6542318 | 7037488 | 979275  | deleted in malignant brain tumors 1 | Dmbt1 | 170568 | 1,12 | up   |
| 6126374 | 7037488 | 979261  | deleted in malignant brain tumors 1 | Dmbt1 | 170568 | 1,11 | up   |
| 5624138 | 7037488 | 979302  | deleted in malignant brain tumors 1 | Dmbt1 | 170568 | 1,10 | down |
| 6507522 | 7037488 | 979260  | deleted in malignant brain tumors 1 | Dmbt1 | 170568 | 1,10 | up   |
| 6509074 | 7037488 | 979303  | deleted in malignant brain tumors 1 | Dmbt1 | 170568 | 1,10 | down |
| 5710068 | 7037488 | 979271  | deleted in malignant brain tumors 1 | Dmbt1 | 170568 | 1,09 | down |
| 6507382 | 7037488 | 979263  | deleted in malignant brain tumors 1 | Dmbt1 | 170568 | 1,09 | down |
| 6195131 | 7037488 | 979294  | deleted in malignant brain tumors 1 | Dmbt1 | 170568 | 1,08 | up   |

|         |         |         |                                        |         |        |      |      |
|---------|---------|---------|----------------------------------------|---------|--------|------|------|
| 5751078 | 7037488 | 979289  | deleted in malignant brain tumors 1    | Dmbt1   | 170568 | 1,07 | down |
| 6709701 | 7037488 | 979301  | deleted in malignant brain tumors 1    | Dmbt1   | 170568 | 1,06 | down |
| 6105899 | 7037488 | 979281  | deleted in malignant brain tumors 1    | Dmbt1   | 170568 | 1,06 | up   |
| 6109487 | 7037488 | 979295  | deleted in malignant brain tumors 1    | Dmbt1   | 170568 | 1,05 | up   |
| 6116995 | 7037488 | 979288  | deleted in malignant brain tumors 1    | Dmbt1   | 170568 | 1,04 | down |
| 6646326 | 7037488 | 979269  | deleted in malignant brain tumors 1    | Dmbt1   | 170568 | 1,03 | down |
| 6447723 | 7037488 | 979264  | deleted in malignant brain tumors 1    | Dmbt1   | 170568 | 1,03 | up   |
| 6226287 | 7037488 | 979290  | deleted in malignant brain tumors 1    | Dmbt1   | 170568 | 1,02 | up   |
| 5685260 | 7037488 | 979277  | deleted in malignant brain tumors 1    | Dmbt1   | 170568 | 1,02 | up   |
| 5841979 | 7037488 | 979295  | deleted in malignant brain tumors 1    | Dmbt1   | 170568 | 1,02 | up   |
| 5850004 | 7037488 | 979298  | deleted in malignant brain tumors 1    | Dmbt1   | 170568 | 1,02 | up   |
| 6206643 | 7037488 | 979284  | deleted in malignant brain tumors 1    | Dmbt1   | 170568 | 1,02 | up   |
| 6224451 | 7037488 | 979287  | deleted in malignant brain tumors 1    | Dmbt1   | 170568 | 1,02 | up   |
| 6601647 | 7037488 | 979291  | deleted in malignant brain tumors 1    | Dmbt1   | 170568 | 1,02 | up   |
| 6742336 | 7037488 | 979302  | deleted in malignant brain tumors 1    | Dmbt1   | 170568 | 1,01 | down |
| 5986501 | 7037488 | 979272  | deleted in malignant brain tumors 1    | Dmbt1   | 170568 | 1,00 | down |
| 5857197 | 7364655 | 1780718 | delta/notch-like EGF repeat containing | Dner    | 316573 | 2,88 | up   |
| 5757641 | 7364655 | 1780719 | delta/notch-like EGF repeat containing | Dner    | 316573 | 2,38 | up   |
| 6196129 | 7364655 | 1780716 | delta/notch-like EGF repeat containing | Dner    | 316573 | 1,69 | up   |
| 6509533 | 7364655 | 1780712 | delta/notch-like EGF repeat containing | Dner    | 316573 | 1,51 | down |
| 6519118 | 7364655 | 1780717 | delta/notch-like EGF repeat containing | Dner    | 316573 | 1,38 | down |
| 6459899 | 7364655 | 1780710 | delta/notch-like EGF repeat containing | Dner    | 316573 | 1,22 | up   |
| 5871292 | 7364655 | 1780711 | delta/notch-like EGF repeat containing | Dner    | 316573 | 1,09 | down |
| 6640811 | 7364655 | 1780713 | delta/notch-like EGF repeat containing | Dner    | 316573 | 1,08 | down |
| 6179867 | 7364655 | 1780715 | delta/notch-like EGF repeat containing | Dner    | 316573 | 1,07 | up   |
| 6104608 | 7364655 | 1780714 | delta/notch-like EGF repeat containing | Dner    | 316573 | 1,05 | down |
| 6031908 | 7047097 | 1003765 | delta-like 1 (Drosophila)              | DIII    | 84010  | 2,16 | up   |
| 6198945 | 7047097 | 1003773 | delta-like 1 (Drosophila)              | DIII    | 84010  | 1,76 | down |
| 6029479 | 7047097 | 1003766 | delta-like 1 (Drosophila)              | DIII    | 84010  | 1,65 | down |
| 5872380 | 7047097 | 1003769 | delta-like 1 (Drosophila)              | DIII    | 84010  | 1,53 | down |
| 6251074 | 7047097 | 1003764 | delta-like 1 (Drosophila)              | DIII    | 84010  | 1,53 | up   |
| 6235085 | 7047097 | 1003762 | delta-like 1 (Drosophila)              | DIII    | 84010  | 1,39 | down |
| 5669423 | 7047097 | 1003762 | delta-like 1 (Drosophila)              | DIII    | 84010  | 1,33 | up   |
| 5777791 | 7047097 | 1003770 | delta-like 1 (Drosophila)              | DIII    | 84010  | 1,31 | up   |
| 5805262 | 7047097 | 1003768 | delta-like 1 (Drosophila)              | DIII    | 84010  | 1,28 | up   |
| 6045020 | 7047097 | 1003763 | delta-like 1 (Drosophila)              | DIII    | 84010  | 1,11 | up   |
| 5780001 | 7047097 | 1003773 | delta-like 1 (Drosophila)              | DIII    | 84010  | 1,11 | up   |
| 5766741 | 7047097 | 1003771 | delta-like 1 (Drosophila)              | DIII    | 84010  | 1,06 | up   |
| 6467930 | 7047097 | 1003765 | delta-like 1 (Drosophila)              | DIII    | 84010  | 1,03 | down |
| 6463078 | 7047097 | 1003772 | delta-like 1 (Drosophila)              | DIII    | 84010  | 1,02 | down |
| 6586859 | 7047097 | 1003767 | delta-like 1 (Drosophila)              | DIII    | 84010  | 1,02 | down |
| 5917044 | 7088621 | 1099846 | deltex 3-like (Drosophila)             | Dtx3l   | 498089 | 2,72 | down |
| 5790835 | 7088621 | 1099853 | deltex 3-like (Drosophila)             | Dtx3l   | 498089 | 2,01 | up   |
| 6092856 | 7088621 | 1099851 | deltex 3-like (Drosophila)             | Dtx3l   | 498089 | 1,69 | up   |
| 6123476 | 7088621 | 1099852 | deltex 3-like (Drosophila)             | Dtx3l   | 498089 | 1,40 | up   |
| 6701276 | 7088621 | 1099849 | deltex 3-like (Drosophila)             | Dtx3l   | 498089 | 1,27 | up   |
| 6293271 | 7088621 | 1099847 | deltex 3-like (Drosophila)             | Dtx3l   | 498089 | 1,27 | up   |
| 5650642 | 7331605 | 1699646 | dendrin                                | Ddn     | 25113  | 2,10 | down |
| 6403050 | 7331605 | 1699646 | dendrin                                | Ddn     | 25113  | 1,75 | down |
| 6646481 | 7331605 | 1699645 | dendrin                                | Ddn     | 25113  | 1,69 | up   |
| 6465142 | 7331605 | 1699646 | dendrin                                | Ddn     | 25113  | 1,47 | down |
| 6273397 | 7331605 | 1699647 | dendrin                                | Ddn     | 25113  | 1,47 | down |
| 5878538 | 7331605 | 1699647 | dendrin                                | Ddn     | 25113  | 1,38 | down |
| 6638337 | 7331605 | 1699646 | dendrin                                | Ddn     | 25113  | 1,18 | up   |
| 6579317 | 7331605 | 1699646 | dendrin                                | Ddn     | 25113  | 1,11 | up   |
| 6497149 | 7238115 | 1468558 | DENN/MADD domain containing 1A         | Dennd1a | 311913 | 2,21 | up   |
| 5654121 | 7238115 | 1468557 | DENN/MADD domain containing 1A         | Dennd1a | 311913 | 1,49 | up   |

|         |         |         |                                         |         |        |      |      |
|---------|---------|---------|-----------------------------------------|---------|--------|------|------|
| 6469535 | 7238115 | 1468558 | DENN/MADD domain containing 1A          | Dennd1a | 311913 | 1,40 | up   |
| 6277382 | 7238115 | 1468558 | DENN/MADD domain containing 1A          | Dennd1a | 311913 | 1,37 | down |
| 6118957 | 7238115 | 1468558 | DENN/MADD domain containing 1A          | Dennd1a | 311913 | 1,34 | up   |
| 5652674 | 7238115 | 1468560 | DENN/MADD domain containing 1A          | Dennd1a | 311913 | 1,31 | up   |
| 6260291 | 7238115 | 1468558 | DENN/MADD domain containing 1A          | Dennd1a | 311913 | 1,30 | up   |
| 6723697 | 7238115 | 1468557 | DENN/MADD domain containing 1A          | Dennd1a | 311913 | 1,23 | down |
| 5618622 | 7238115 | 1468558 | DENN/MADD domain containing 1A          | Dennd1a | 311913 | 1,11 | up   |
| 6457093 | 7238115 | 1468557 | DENN/MADD domain containing 1A          | Dennd1a | 311913 | 1,08 | up   |
| 5878815 | 7238115 | 1468557 | DENN/MADD domain containing 1A          | Dennd1a | 311913 | 1,06 | down |
| 5718833 | 7197820 | 1370092 | DENN/MADD domain containing 2D          | Dennd2d | 310772 | 2,34 | up   |
| 6387889 | 7197820 | 1370093 | DENN/MADD domain containing 2D          | Dennd2d | 310772 | 2,21 | up   |
| 5856190 | 7197820 | 1370101 | DENN/MADD domain containing 2D          | Dennd2d | 310772 | 2,15 | up   |
| 6372753 | 7197820 | 1370085 | DENN/MADD domain containing 2D          | Dennd2d | 310772 | 1,77 | down |
| 6243263 | 7197820 | 1370100 | DENN/MADD domain containing 2D          | Dennd2d | 310772 | 1,53 | down |
| 6337515 | 7197820 | 1370103 | DENN/MADD domain containing 2D          | Dennd2d | 310772 | 1,52 | up   |
| 6604594 | 7197820 | 1370102 | DENN/MADD domain containing 2D          | Dennd2d | 310772 | 1,50 | up   |
| 6044874 | 7197820 | 1370095 | DENN/MADD domain containing 2D          | Dennd2d | 310772 | 1,42 | up   |
| 6048553 | 7197820 | 1370095 | DENN/MADD domain containing 2D          | Dennd2d | 310772 | 1,27 | up   |
| 6273129 | 7197820 | 1370091 | DENN/MADD domain containing 2D          | Dennd2d | 310772 | 1,22 | up   |
| 5941428 | 7197820 | 1370088 | DENN/MADD domain containing 2D          | Dennd2d | 310772 | 1,04 | down |
| 6673039 | 7197820 | 1370090 | DENN/MADD domain containing 2D          | Dennd2d | 310772 | 1,00 | up   |
| 5724436 | 7197820 | 1370094 | DENN/MADD domain containing 2D          | Dennd2d | 310772 | 1,00 | up   |
| 6131064 | 7124111 | 1187276 | deoxycytidine kinase                    | Dck     | 79127  | 2,26 | down |
| 6336088 | 7124111 | 1187276 | deoxycytidine kinase                    | Dck     | 79127  | 1,67 | down |
| 6550412 | 7124111 | 1187273 | deoxycytidine kinase                    | Dck     | 79127  | 1,48 | up   |
| 5867932 | 7124111 | 1187271 | deoxycytidine kinase                    | Dck     | 79127  | 1,44 | up   |
| 6694605 | 7124111 | 1187270 | deoxycytidine kinase                    | Dck     | 79127  | 1,43 | up   |
| 6480094 | 7124111 | 1187275 | deoxycytidine kinase                    | Dck     | 79127  | 1,32 | down |
| 6631579 | 7124111 | 1187272 | deoxycytidine kinase                    | Dck     | 79127  | 1,19 | up   |
| 6214002 | 7124111 | 1187274 | deoxycytidine kinase                    | Dck     | 79127  | 1,13 | up   |
| 6241965 | 7321942 | 1676499 | deoxyhypusine hydroxylase/monooxygenase | Dohh    | 314644 | 2,00 | down |
| 5997556 | 7321942 | 1676499 | deoxyhypusine hydroxylase/monooxygenase | Dohh    | 314644 | 1,64 | up   |
| 6723793 | 7321942 | 1676498 | deoxyhypusine hydroxylase/monooxygenase | Dohh    | 314644 | 1,62 | up   |
| 5629027 | 7321942 | 1676497 | deoxyhypusine hydroxylase/monooxygenase | Dohh    | 314644 | 1,52 | down |
| 5646138 | 7321942 | 1676497 | deoxyhypusine hydroxylase/monooxygenase | Dohh    | 314644 | 1,29 | down |
| 6571789 | 7321942 | 1676501 | deoxyhypusine hydroxylase/monooxygenase | Dohh    | 314644 | 1,07 | down |
| 5751011 | 7321942 | 1676501 | deoxyhypusine hydroxylase/monooxygenase | Dohh    | 314644 | 1,01 | down |
| 6056833 | 7321942 | 1676498 | deoxyhypusine hydroxylase/monooxygenase | Dohh    | 314644 | 1,01 | up   |
| 6484509 | 7321942 | 1676500 | deoxyhypusine hydroxylase/monooxygenase | Dohh    | 314644 | 1,01 | up   |
| 5917743 | 7083103 | 1086446 | dephospho-CoA kinase domain containing  | Dcakd   | 360639 | 2,08 | down |
| 6609971 | 7083103 | 1086446 | dephospho-CoA kinase domain containing  | Dcakd   | 360639 | 1,87 | down |
| 6578468 | 7083103 | 1086443 | dephospho-CoA kinase domain containing  | Dcakd   | 360639 | 1,38 | up   |
| 6370379 | 7083103 | 1086442 | dephospho-CoA kinase domain containing  | Dcakd   | 360639 | 1,29 | down |
| 6372873 | 7083103 | 1086441 | dephospho-CoA kinase domain containing  | Dcakd   | 360639 | 1,15 | up   |
| 6172187 | 7083103 | 1086444 | dephospho-CoA kinase domain containing  | Dcakd   | 360639 | 1,14 | down |
| 6397921 | 7083103 | 1086445 | dephospho-CoA kinase domain containing  | Dcakd   | 360639 | 1,03 | up   |
| 5767846 | 7030549 | 961803  | dermokine                               | Dmkn    | 361548 | 2,59 | down |
| 5705273 | 7030549 | 961790  | dermokine                               | Dmkn    | 361548 | 1,58 | up   |
| 6241167 | 7030549 | 961799  | dermokine                               | Dmkn    | 361548 | 1,53 | down |
| 5852160 | 7030549 | 961793  | dermokine                               | Dmkn    | 361548 | 1,42 | up   |
| 5673585 | 7030549 | 961794  | dermokine                               | Dmkn    | 361548 | 1,39 | down |
| 6200826 | 7030549 | 961797  | dermokine                               | Dmkn    | 361548 | 1,38 | up   |
| 5916123 | 7030549 | 961803  | dermokine                               | Dmkn    | 361548 | 1,34 | down |
| 6191006 | 7030549 | 961784  | dermokine                               | Dmkn    | 361548 | 1,32 | down |
| 6006264 | 7030549 | 961791  | dermokine                               | Dmkn    | 361548 | 1,28 | up   |
| 6655052 | 7030549 | 961795  | dermokine                               | Dmkn    | 361548 | 1,26 | down |
| 6557721 | 7030549 | 961792  | dermokine                               | Dmkn    | 361548 | 1,15 | down |

|         |         |         |                             |      |        |      |      |
|---------|---------|---------|-----------------------------|------|--------|------|------|
| 6302976 | 7030549 | 961789  | dermokine                   | Dmkn | 361548 | 1,14 | up   |
| 6651789 | 7030549 | 961787  | dermokine                   | Dmkn | 361548 | 1,13 | down |
| 6261672 | 7030549 | 961788  | dermokine                   | Dmkn | 361548 | 1,13 | down |
| 6354518 | 7030549 | 961785  | dermokine                   | Dmkn | 361548 | 1,10 | up   |
| 5627800 | 7030549 | 961800  | dermokine                   | Dmkn | 361548 | 1,04 | down |
| 5699113 | 7030549 | 961799  | dermokine                   | Dmkn | 361548 | 1,03 | up   |
| 5992472 | 7030549 | 961799  | dermokine                   | Dmkn | 361548 | 1,03 | up   |
| 6547380 | 7030549 | 961803  | dermokine                   | Dmkn | 361548 | 1,03 | down |
| 5927679 | 7030549 | 961786  | dermokine                   | Dmkn | 361548 | 1,03 | up   |
| 6147871 | 7030549 | 961796  | dermokine                   | Dmkn | 361548 | 1,02 | up   |
| 6065899 | 7241745 | 1477760 | diacylglycerol kinase zeta  | Dgkz | 81821  | 2,13 | down |
| 6615348 | 7241745 | 1477759 | diacylglycerol kinase zeta  | Dgkz | 81821  | 1,68 | down |
| 6514249 | 7241745 | 1477747 | diacylglycerol kinase zeta  | Dgkz | 81821  | 1,43 | down |
| 5806104 | 7241745 | 1477746 | diacylglycerol kinase zeta  | Dgkz | 81821  | 1,39 | up   |
| 6304954 | 7241745 | 1477763 | diacylglycerol kinase zeta  | Dgkz | 81821  | 1,39 | down |
| 6608083 | 7241745 | 1477772 | diacylglycerol kinase zeta  | Dgkz | 81821  | 1,26 | up   |
| 6560578 | 7241745 | 1477748 | diacylglycerol kinase zeta  | Dgkz | 81821  | 1,24 | down |
| 6009518 | 7241745 | 1477749 | diacylglycerol kinase zeta  | Dgkz | 81821  | 1,23 | up   |
| 5655540 | 7241745 | 1477750 | diacylglycerol kinase zeta  | Dgkz | 81821  | 1,21 | up   |
| 5880515 | 7241745 | 1477745 | diacylglycerol kinase zeta  | Dgkz | 81821  | 1,20 | up   |
| 6037674 | 7241745 | 1477756 | diacylglycerol kinase zeta  | Dgkz | 81821  | 1,19 | down |
| 5714824 | 7241745 | 1477751 | diacylglycerol kinase zeta  | Dgkz | 81821  | 1,19 | up   |
| 6119306 | 7241745 | 1477771 | diacylglycerol kinase zeta  | Dgkz | 81821  | 1,17 | up   |
| 6112592 | 7241745 | 1477764 | diacylglycerol kinase zeta  | Dgkz | 81821  | 1,17 | up   |
| 6129048 | 7241745 | 1477741 | diacylglycerol kinase zeta  | Dgkz | 81821  | 1,16 | up   |
| 6195332 | 7241745 | 1477761 | diacylglycerol kinase zeta  | Dgkz | 81821  | 1,16 | up   |
| 5720881 | 7241745 | 1477769 | diacylglycerol kinase zeta  | Dgkz | 81821  | 1,15 | down |
| 6388833 | 7241745 | 1477741 | diacylglycerol kinase zeta  | Dgkz | 81821  | 1,14 | down |
| 5874906 | 7241745 | 1477755 | diacylglycerol kinase zeta  | Dgkz | 81821  | 1,13 | down |
| 6061136 | 7241745 | 1477765 | diacylglycerol kinase zeta  | Dgkz | 81821  | 1,12 | up   |
| 5873496 | 7241745 | 1477747 | diacylglycerol kinase zeta  | Dgkz | 81821  | 1,12 | down |
| 6148769 | 7241745 | 1477753 | diacylglycerol kinase zeta  | Dgkz | 81821  | 1,12 | down |
| 6124449 | 7241745 | 1477768 | diacylglycerol kinase zeta  | Dgkz | 81821  | 1,11 | up   |
| 5831354 | 7241745 | 1477742 | diacylglycerol kinase zeta  | Dgkz | 81821  | 1,11 | down |
| 6261260 | 7241745 | 1477741 | diacylglycerol kinase zeta  | Dgkz | 81821  | 1,10 | down |
| 5663335 | 7241745 | 1477758 | diacylglycerol kinase zeta  | Dgkz | 81821  | 1,07 | up   |
| 6453350 | 7241745 | 1477744 | diacylglycerol kinase zeta  | Dgkz | 81821  | 1,06 | down |
| 5967213 | 7241745 | 1477741 | diacylglycerol kinase zeta  | Dgkz | 81821  | 1,06 | up   |
| 6369701 | 7241745 | 1477767 | diacylglycerol kinase zeta  | Dgkz | 81821  | 1,06 | up   |
| 6465354 | 7241745 | 1477754 | diacylglycerol kinase zeta  | Dgkz | 81821  | 1,04 | up   |
| 5771010 | 7241745 | 1477752 | diacylglycerol kinase zeta  | Dgkz | 81821  | 1,04 | up   |
| 6396704 | 7241745 | 1477743 | diacylglycerol kinase zeta  | Dgkz | 81821  | 1,02 | down |
| 5722490 | 7241745 | 1477762 | diacylglycerol kinase zeta  | Dgkz | 81821  | 1,02 | up   |
| 5630992 | 7241745 | 1477757 | diacylglycerol kinase zeta  | Dgkz | 81821  | 1,01 | up   |
| 5938255 | 7241745 | 1477770 | diacylglycerol kinase zeta  | Dgkz | 81821  | 1,00 | down |
| 6298395 | 7241745 | 1477766 | diacylglycerol kinase zeta  | Dgkz | 81821  | 1,00 | up   |
| 6255532 | 7297505 | 1615378 | diacylglycerol kinase, beta | Dgkb | 54248  | 2,29 | down |
| 6534417 | 7297505 | 1615379 | diacylglycerol kinase, beta | Dgkb | 54248  | 2,18 | down |
| 5668175 | 7297505 | 1615391 | diacylglycerol kinase, beta | Dgkb | 54248  | 1,97 | down |
| 6389092 | 7297505 | 1615379 | diacylglycerol kinase, beta | Dgkb | 54248  | 1,68 | up   |
| 5680081 | 7297505 | 1615375 | diacylglycerol kinase, beta | Dgkb | 54248  | 1,67 | up   |
| 6274837 | 7297505 | 1615382 | diacylglycerol kinase, beta | Dgkb | 54248  | 1,66 | down |
| 6280817 | 7297505 | 1615374 | diacylglycerol kinase, beta | Dgkb | 54248  | 1,62 | up   |
| 6100817 | 7297505 | 1615384 | diacylglycerol kinase, beta | Dgkb | 54248  | 1,59 | down |
| 6309831 | 7297505 | 1615374 | diacylglycerol kinase, beta | Dgkb | 54248  | 1,48 | up   |
| 6346662 | 7297505 | 1615387 | diacylglycerol kinase, beta | Dgkb | 54248  | 1,45 | down |
| 6073831 | 7297505 | 1615397 | diacylglycerol kinase, beta | Dgkb | 54248  | 1,44 | up   |

|         |         |         |                                                    |       |       |      |      |
|---------|---------|---------|----------------------------------------------------|-------|-------|------|------|
| 6734783 | 7297505 | 1615392 | diacylglycerol kinase, beta                        | Dgkb  | 54248 | 1,39 | up   |
| 5778029 | 7297505 | 1615394 | diacylglycerol kinase, beta                        | Dgkb  | 54248 | 1,36 | up   |
| 6503701 | 7297505 | 1615377 | diacylglycerol kinase, beta                        | Dgkb  | 54248 | 1,30 | down |
| 6712498 | 7297505 | 1615396 | diacylglycerol kinase, beta                        | Dgkb  | 54248 | 1,29 | up   |
| 6659065 | 7297505 | 1615393 | diacylglycerol kinase, beta                        | Dgkb  | 54248 | 1,19 | up   |
| 6046959 | 7297505 | 1615376 | diacylglycerol kinase, beta                        | Dgkb  | 54248 | 1,17 | down |
| 6538946 | 7297505 | 1615388 | diacylglycerol kinase, beta                        | Dgkb  | 54248 | 1,16 | up   |
| 5901990 | 7297505 | 1615395 | diacylglycerol kinase, beta                        | Dgkb  | 54248 | 1,13 | up   |
| 5750200 | 7297505 | 1615386 | diacylglycerol kinase, beta                        | Dgkb  | 54248 | 1,11 | up   |
| 6633703 | 7297505 | 1615389 | diacylglycerol kinase, beta                        | Dgkb  | 54248 | 1,10 | down |
| 6021091 | 7297505 | 1615381 | diacylglycerol kinase, beta                        | Dgkb  | 54248 | 1,06 | up   |
| 6163224 | 7297505 | 1615380 | diacylglycerol kinase, beta                        | Dgkb  | 54248 | 1,06 | down |
| 6271897 | 7297505 | 1615390 | diacylglycerol kinase, beta                        | Dgkb  | 54248 | 1,04 | down |
| 6674249 | 7297505 | 1615383 | diacylglycerol kinase, beta                        | Dgkb  | 54248 | 1,03 | down |
| 5751135 | 7297505 | 1615385 | diacylglycerol kinase, beta                        | Dgkb  | 54248 | 1,00 | down |
| 6005089 | 7089490 | 1102344 | diacylglycerol kinase, gamma                       | Dgkg  | 25666 | 2,39 | up   |
| 6508853 | 7089490 | 1102341 | diacylglycerol kinase, gamma                       | Dgkg  | 25666 | 2,10 | down |
| 6035647 | 7089490 | 1102364 | diacylglycerol kinase, gamma                       | Dgkg  | 25666 | 1,81 | up   |
| 6066243 | 7089490 | 1102342 | diacylglycerol kinase, gamma                       | Dgkg  | 25666 | 1,74 | up   |
| 5685307 | 7089490 | 1102354 | diacylglycerol kinase, gamma                       | Dgkg  | 25666 | 1,71 | down |
| 6173450 | 7089490 | 1102350 | diacylglycerol kinase, gamma                       | Dgkg  | 25666 | 1,59 | up   |
| 6610208 | 7089490 | 1102344 | diacylglycerol kinase, gamma                       | Dgkg  | 25666 | 1,56 | down |
| 6410902 | 7089490 | 1102360 | diacylglycerol kinase, gamma                       | Dgkg  | 25666 | 1,50 | down |
| 5969704 | 7089490 | 1102363 | diacylglycerol kinase, gamma                       | Dgkg  | 25666 | 1,29 | up   |
| 6170383 | 7089490 | 1102340 | diacylglycerol kinase, gamma                       | Dgkg  | 25666 | 1,29 | down |
| 6725707 | 7089490 | 1102361 | diacylglycerol kinase, gamma                       | Dgkg  | 25666 | 1,28 | up   |
| 6524464 | 7089490 | 1102351 | diacylglycerol kinase, gamma                       | Dgkg  | 25666 | 1,22 | down |
| 6327022 | 7089490 | 1102349 | diacylglycerol kinase, gamma                       | Dgkg  | 25666 | 1,15 | up   |
| 5658694 | 7089490 | 1102359 | diacylglycerol kinase, gamma                       | Dgkg  | 25666 | 1,14 | down |
| 6564855 | 7089490 | 1102347 | diacylglycerol kinase, gamma                       | Dgkg  | 25666 | 1,13 | up   |
| 5974812 | 7089490 | 1102353 | diacylglycerol kinase, gamma                       | Dgkg  | 25666 | 1,12 | up   |
| 6587529 | 7089490 | 1102343 | diacylglycerol kinase, gamma                       | Dgkg  | 25666 | 1,12 | up   |
| 6246463 | 7089490 | 1102356 | diacylglycerol kinase, gamma                       | Dgkg  | 25666 | 1,12 | up   |
| 6539898 | 7089490 | 1102355 | diacylglycerol kinase, gamma                       | Dgkg  | 25666 | 1,10 | down |
| 6144972 | 7089490 | 1102346 | diacylglycerol kinase, gamma                       | Dgkg  | 25666 | 1,09 | down |
| 5650913 | 7089490 | 1102340 | diacylglycerol kinase, gamma                       | Dgkg  | 25666 | 1,08 | up   |
| 5691640 | 7089490 | 1102357 | diacylglycerol kinase, gamma                       | Dgkg  | 25666 | 1,07 | up   |
| 6525082 | 7089490 | 1102352 | diacylglycerol kinase, gamma                       | Dgkg  | 25666 | 1,04 | down |
| 5879876 | 7089490 | 1102358 | diacylglycerol kinase, gamma                       | Dgkg  | 25666 | 1,04 | down |
| 6106291 | 7089490 | 1102350 | diacylglycerol kinase, gamma                       | Dgkg  | 25666 | 1,03 | down |
| 6478234 | 7089490 | 1102362 | diacylglycerol kinase, gamma                       | Dgkg  | 25666 | 1,01 | up   |
| 5660691 | 7089490 | 1102348 | diacylglycerol kinase, gamma                       | Dgkg  | 25666 | 1,00 | up   |
| 6570124 | 7329245 | 1693738 | diacylglycerol O-acyltransferase homolog 1 (mouse) | Dgat1 | 84497 | 2,10 | up   |
| 6620870 | 7329245 | 1693747 | diacylglycerol O-acyltransferase homolog 1 (mouse) | Dgat1 | 84497 | 1,68 | down |
| 6261788 | 7329245 | 1693737 | diacylglycerol O-acyltransferase homolog 1 (mouse) | Dgat1 | 84497 | 1,44 | up   |
| 6638570 | 7329245 | 1693744 | diacylglycerol O-acyltransferase homolog 1 (mouse) | Dgat1 | 84497 | 1,44 | down |
| 6395080 | 7329245 | 1693742 | diacylglycerol O-acyltransferase homolog 1 (mouse) | Dgat1 | 84497 | 1,40 | up   |
| 6050010 | 7329245 | 1693736 | diacylglycerol O-acyltransferase homolog 1 (mouse) | Dgat1 | 84497 | 1,38 | up   |
| 6314138 | 7329245 | 1693746 | diacylglycerol O-acyltransferase homolog 1 (mouse) | Dgat1 | 84497 | 1,36 | down |
| 6271073 | 7329245 | 1693735 | diacylglycerol O-acyltransferase homolog 1 (mouse) | Dgat1 | 84497 | 1,31 | up   |
| 6414191 | 7329245 | 1693739 | diacylglycerol O-acyltransferase homolog 1 (mouse) | Dgat1 | 84497 | 1,31 | up   |
| 6625856 | 7329245 | 1693732 | diacylglycerol O-acyltransferase homolog 1 (mouse) | Dgat1 | 84497 | 1,29 | up   |
| 6064000 | 7329245 | 1693733 | diacylglycerol O-acyltransferase homolog 1 (mouse) | Dgat1 | 84497 | 1,21 | down |
| 6347671 | 7329245 | 1693734 | diacylglycerol O-acyltransferase homolog 1 (mouse) | Dgat1 | 84497 | 1,19 | down |
| 5684811 | 7329245 | 1693747 | diacylglycerol O-acyltransferase homolog 1 (mouse) | Dgat1 | 84497 | 1,19 | down |
| 5645652 | 7329245 | 1693747 | diacylglycerol O-acyltransferase homolog 1 (mouse) | Dgat1 | 84497 | 1,14 | down |
| 5958886 | 7329245 | 1693743 | diacylglycerol O-acyltransferase homolog 1 (mouse) | Dgat1 | 84497 | 1,10 | down |

|         |         |         |                                                              |        |        |      |      |
|---------|---------|---------|--------------------------------------------------------------|--------|--------|------|------|
| 5958476 | 7329245 | 1693745 | diacylglycerol O-acyltransferase homolog 1 (mouse)           | Dgat1  | 84497  | 1,09 | down |
| 5715183 | 7329245 | 1693741 | diacylglycerol O-acyltransferase homolog 1 (mouse)           | Dgat1  | 84497  | 1,06 | down |
| 6690645 | 7329245 | 1693740 | diacylglycerol O-acyltransferase homolog 1 (mouse)           | Dgat1  | 84497  | 1,02 | up   |
| 6144225 | 7329245 | 1693731 | diacylglycerol O-acyltransferase homolog 1 (mouse)           | Dgat1  | 84497  | 1,00 | down |
| 6483803 | 7376820 | 1813416 | diaphanous homolog 2 (Drosophila)                            | Diaph2 | 317189 | 1,24 | down |
| 6427008 | 7376820 | 1813434 | diaphanous homolog 2 (Drosophila)                            | Diaph2 | 317189 | 1,20 | down |
| 5967807 | 7376820 | 1813440 | diaphanous homolog 2 (Drosophila)                            | Diaph2 | 317189 | 1,06 | down |
| 6239914 | 7185324 | 1338643 | dihydroorotate dehydrogenase                                 | Dhodh  | 65156  | 2,04 | up   |
| 6175504 | 7185324 | 1338639 | dihydroorotate dehydrogenase                                 | Dhodh  | 65156  | 1,40 | up   |
| 6417482 | 7185324 | 1338636 | dihydroorotate dehydrogenase                                 | Dhodh  | 65156  | 1,39 | down |
| 5749040 | 7185324 | 1338638 | dihydroorotate dehydrogenase                                 | Dhodh  | 65156  | 1,31 | up   |
| 5920982 | 7185324 | 1338643 | dihydroorotate dehydrogenase                                 | Dhodh  | 65156  | 1,30 | down |
| 6449297 | 7185324 | 1338642 | dihydroorotate dehydrogenase                                 | Dhodh  | 65156  | 1,21 | up   |
| 6181519 | 7185324 | 1338640 | dihydroorotate dehydrogenase                                 | Dhodh  | 65156  | 1,13 | down |
| 5899864 | 7185324 | 1338644 | dihydroorotate dehydrogenase                                 | Dhodh  | 65156  | 1,12 | up   |
| 5693352 | 7185324 | 1338641 | dihydroorotate dehydrogenase                                 | Dhodh  | 65156  | 1,12 | down |
| 6380108 | 7185324 | 1338637 | dihydroorotate dehydrogenase                                 | Dhodh  | 65156  | 1,03 | down |
| 6361553 | 7180668 | 1326582 | dihydrouridine synthase 2-like, SMM1 homolog (S. cerevisiae) | Dus2l  | 291978 | 2,01 | down |
| 6224304 | 7180668 | 1326570 | dihydrouridine synthase 2-like, SMM1 homolog (S. cerevisiae) | Dus2l  | 291978 | 1,79 | up   |
| 6637973 | 7180668 | 1326566 | dihydrouridine synthase 2-like, SMM1 homolog (S. cerevisiae) | Dus2l  | 291978 | 1,60 | down |
| 6231217 | 7180668 | 1326569 | dihydrouridine synthase 2-like, SMM1 homolog (S. cerevisiae) | Dus2l  | 291978 | 1,50 | up   |
| 6095278 | 7180668 | 1326582 | dihydrouridine synthase 2-like, SMM1 homolog (S. cerevisiae) | Dus2l  | 291978 | 1,45 | down |
| 6435068 | 7180668 | 1326581 | dihydrouridine synthase 2-like, SMM1 homolog (S. cerevisiae) | Dus2l  | 291978 | 1,32 | down |
| 6158665 | 7180668 | 1326577 | dihydrouridine synthase 2-like, SMM1 homolog (S. cerevisiae) | Dus2l  | 291978 | 1,25 | up   |
| 6113726 | 7180668 | 1326566 | dihydrouridine synthase 2-like, SMM1 homolog (S. cerevisiae) | Dus2l  | 291978 | 1,22 | up   |
| 6661297 | 7180668 | 1326576 | dihydrouridine synthase 2-like, SMM1 homolog (S. cerevisiae) | Dus2l  | 291978 | 1,22 | up   |
| 6626039 | 7180668 | 1326571 | dihydrouridine synthase 2-like, SMM1 homolog (S. cerevisiae) | Dus2l  | 291978 | 1,21 | down |
| 5892255 | 7180668 | 1326580 | dihydrouridine synthase 2-like, SMM1 homolog (S. cerevisiae) | Dus2l  | 291978 | 1,17 | down |
| 6699482 | 7180668 | 1326572 | dihydrouridine synthase 2-like, SMM1 homolog (S. cerevisiae) | Dus2l  | 291978 | 1,15 | up   |
| 6189454 | 7180668 | 1326573 | dihydrouridine synthase 2-like, SMM1 homolog (S. cerevisiae) | Dus2l  | 291978 | 1,14 | up   |
| 6020433 | 7180668 | 1326579 | dihydrouridine synthase 2-like, SMM1 homolog (S. cerevisiae) | Dus2l  | 291978 | 1,12 | down |
| 5712530 | 7180668 | 1326574 | dihydrouridine synthase 2-like, SMM1 homolog (S. cerevisiae) | Dus2l  | 291978 | 1,11 | up   |
| 5900835 | 7180668 | 1326578 | dihydrouridine synthase 2-like, SMM1 homolog (S. cerevisiae) | Dus2l  | 291978 | 1,06 | down |
| 6258241 | 7180668 | 1326565 | dihydrouridine synthase 2-like, SMM1 homolog (S. cerevisiae) | Dus2l  | 291978 | 1,03 | up   |
| 6151926 | 7180668 | 1326575 | dihydrouridine synthase 2-like, SMM1 homolog (S. cerevisiae) | Dus2l  | 291978 | 1,03 | up   |
| 6510197 | 7370415 | 1796850 | dihydrouridine synthase 3-like (S. cerevisiae)               | Dus3l  | 301122 | 1,56 | down |
| 5857370 | 7370415 | 1796853 | dihydrouridine synthase 3-like (S. cerevisiae)               | Dus3l  | 301122 | 1,40 | up   |
| 6665946 | 7370415 | 1796852 | dihydrouridine synthase 3-like (S. cerevisiae)               | Dus3l  | 301122 | 1,37 | down |
| 5625106 | 7370415 | 1796853 | dihydrouridine synthase 3-like (S. cerevisiae)               | Dus3l  | 301122 | 1,35 | up   |
| 5861126 | 7370415 | 1796855 | dihydrouridine synthase 3-like (S. cerevisiae)               | Dus3l  | 301122 | 1,30 | up   |
| 5971994 | 7370415 | 1796852 | dihydrouridine synthase 3-like (S. cerevisiae)               | Dus3l  | 301122 | 1,29 | up   |
| 6082623 | 7370415 | 1796853 | dihydrouridine synthase 3-like (S. cerevisiae)               | Dus3l  | 301122 | 1,24 | up   |
| 5941946 | 7370415 | 1796850 | dihydrouridine synthase 3-like (S. cerevisiae)               | Dus3l  | 301122 | 1,22 | down |
| 6018670 | 7370415 | 1796850 | dihydrouridine synthase 3-like (S. cerevisiae)               | Dus3l  | 301122 | 1,12 | down |
| 5649745 | 7370415 | 1796854 | dihydrouridine synthase 3-like (S. cerevisiae)               | Dus3l  | 301122 | 1,09 | down |
| 6014067 | 7370415 | 1796853 | dihydrouridine synthase 3-like (S. cerevisiae)               | Dus3l  | 301122 | 1,07 | up   |
| 6706015 | 7370415 | 1796853 | dihydrouridine synthase 3-like (S. cerevisiae)               | Dus3l  | 301122 | 1,04 | down |
| 6030612 | 7370415 | 1796853 | dihydrouridine synthase 3-like (S. cerevisiae)               | Dus3l  | 301122 | 1,04 | up   |
| 6077486 | 7370415 | 1796853 | dihydrouridine synthase 3-like (S. cerevisiae)               | Dus3l  | 301122 | 1,03 | up   |
| 5925960 | 7370415 | 1796851 | dihydrouridine synthase 3-like (S. cerevisiae)               | Dus3l  | 301122 | 1,01 | down |
| 6330927 | 7200432 | 1376628 | dimethylarginine dimethylaminohydrolase 1                    | Ddah1  | 64157  | 2,64 | down |
| 6630462 | 7200432 | 1376628 | dimethylarginine dimethylaminohydrolase 1                    | Ddah1  | 64157  | 1,21 | up   |
| 6236440 | 7200432 | 1376627 | dimethylarginine dimethylaminohydrolase 1                    | Ddah1  | 64157  | 1,16 | down |
| 6027164 | 7200432 | 1376626 | dimethylarginine dimethylaminohydrolase 1                    | Ddah1  | 64157  | 1,12 | up   |
| 6024647 | 7200432 | 1376630 | dimethylarginine dimethylaminohydrolase 1                    | Ddah1  | 64157  | 1,11 | down |
| 5786778 | 7200432 | 1376629 | dimethylarginine dimethylaminohydrolase 1                    | Ddah1  | 64157  | 1,06 | up   |
| 5755231 | 7200432 | 1376625 | dimethylarginine dimethylaminohydrolase 1                    | Ddah1  | 64157  | 1,06 | up   |

|         |         |         |                                                                                                                                          |           |        |      |      |
|---------|---------|---------|------------------------------------------------------------------------------------------------------------------------------------------|-----------|--------|------|------|
| 5697261 | 7196187 | 1365988 | Dingo protein                                                                                                                            | LOC499653 | 499653 | 2,17 | down |
| 5634713 | 7196187 | 1365990 | Dingo protein                                                                                                                            | LOC499653 | 499653 | 1,90 | down |
| 6567221 | 7196187 | 1365987 | Dingo protein                                                                                                                            | LOC499653 | 499653 | 1,87 | up   |
| 6686856 | 7196187 | 1365963 | Dingo protein                                                                                                                            | LOC499653 | 499653 | 1,81 | up   |
| 6160785 | 7196187 | 1365962 | Dingo protein                                                                                                                            | LOC499653 | 499653 | 1,57 | up   |
| 6368139 | 7196187 | 1365970 | Dingo protein                                                                                                                            | LOC499653 | 499653 | 1,53 | down |
| 5988393 | 7196187 | 1365966 | Dingo protein                                                                                                                            | LOC499653 | 499653 | 1,41 | up   |
| 6714070 | 7196187 | 1365973 | Dingo protein                                                                                                                            | LOC499653 | 499653 | 1,33 | down |
| 6358177 | 7196187 | 1365988 | Dingo protein                                                                                                                            | LOC499653 | 499653 | 1,32 | down |
| 5787169 | 7196187 | 1365988 | Dingo protein                                                                                                                            | LOC499653 | 499653 | 1,27 | up   |
| 6057975 | 7196187 | 1365979 | Dingo protein                                                                                                                            | LOC499653 | 499653 | 1,27 | up   |
| 6247015 | 7196187 | 1365985 | Dingo protein                                                                                                                            | LOC499653 | 499653 | 1,26 | down |
| 6715109 | 7196187 | 1365961 | Dingo protein                                                                                                                            | LOC499653 | 499653 | 1,26 | up   |
| 6680711 | 7196187 | 1365970 | Dingo protein                                                                                                                            | LOC499653 | 499653 | 1,23 | down |
| 6471253 | 7196187 | 1365958 | Dingo protein                                                                                                                            | LOC499653 | 499653 | 1,23 | up   |
| 6112453 | 7196187 | 1365974 | Dingo protein                                                                                                                            | LOC499653 | 499653 | 1,21 | down |
| 5988035 | 7196187 | 1365989 | Dingo protein                                                                                                                            | LOC499653 | 499653 | 1,20 | up   |
| 6388733 | 7196187 | 1365971 | Dingo protein                                                                                                                            | LOC499653 | 499653 | 1,20 | down |
| 6729307 | 7196187 | 1365957 | Dingo protein                                                                                                                            | LOC499653 | 499653 | 1,20 | down |
| 6462208 | 7196187 | 1365975 | Dingo protein                                                                                                                            | LOC499653 | 499653 | 1,19 | up   |
| 5618812 | 7196187 | 1365986 | Dingo protein                                                                                                                            | LOC499653 | 499653 | 1,19 | up   |
| 6566511 | 7196187 | 1365967 | Dingo protein                                                                                                                            | LOC499653 | 499653 | 1,17 | down |
| 6180703 | 7196187 | 1365972 | Dingo protein                                                                                                                            | LOC499653 | 499653 | 1,16 | down |
| 5994131 | 7196187 | 1365988 | Dingo protein                                                                                                                            | LOC499653 | 499653 | 1,16 | up   |
| 5944011 | 7196187 | 1365978 | Dingo protein                                                                                                                            | LOC499653 | 499653 | 1,16 | up   |
| 5702379 | 7196187 | 1365957 | Dingo protein                                                                                                                            | LOC499653 | 499653 | 1,16 | up   |
| 6422387 | 7196187 | 1365965 | Dingo protein                                                                                                                            | LOC499653 | 499653 | 1,15 | up   |
| 6305887 | 7196187 | 1365953 | Dingo protein                                                                                                                            | LOC499653 | 499653 | 1,14 | up   |
| 5705457 | 7196187 | 1365960 | Dingo protein                                                                                                                            | LOC499653 | 499653 | 1,12 | down |
| 5796314 | 7196187 | 1365976 | Dingo protein                                                                                                                            | LOC499653 | 499653 | 1,11 | down |
| 6569301 | 7196187 | 1365984 | Dingo protein                                                                                                                            | LOC499653 | 499653 | 1,09 | down |
| 6012934 | 7196187 | 1365953 | Dingo protein                                                                                                                            | LOC499653 | 499653 | 1,09 | up   |
| 6576128 | 7196187 | 1365988 | Dingo protein                                                                                                                            | LOC499653 | 499653 | 1,09 | up   |
| 5801539 | 7196187 | 1365954 | Dingo protein                                                                                                                            | LOC499653 | 499653 | 1,09 | up   |
| 6364769 | 7196187 | 1365959 | Dingo protein                                                                                                                            | LOC499653 | 499653 | 1,07 | down |
| 5850776 | 7196187 | 1365978 | Dingo protein                                                                                                                            | LOC499653 | 499653 | 1,07 | up   |
| 6219148 | 7196187 | 1365983 | Dingo protein                                                                                                                            | LOC499653 | 499653 | 1,07 | down |
| 6272877 | 7196187 | 1365980 | Dingo protein                                                                                                                            | LOC499653 | 499653 | 1,06 | up   |
| 6624434 | 7196187 | 1365977 | Dingo protein                                                                                                                            | LOC499653 | 499653 | 1,03 | down |
| 6075212 | 7196187 | 1365982 | Dingo protein                                                                                                                            | LOC499653 | 499653 | 1,03 | up   |
| 6225410 | 7196187 | 1365965 | Dingo protein                                                                                                                            | LOC499653 | 499653 | 1,01 | down |
| 6230322 | 7196187 | 1365954 | Dingo protein                                                                                                                            | LOC499653 | 499653 | 1,00 | up   |
| 6140082 | 7196187 | 1365981 | Dingo protein                                                                                                                            | LOC499653 | 499653 | 1,00 | down |
| 6131700 | 7217747 | 1417466 | DIP2 disco-interacting protein 2 homolog A (Drosophila) /// similar to Disco-interacting protein 2 hoip2a /// LOC68768 690211 /// 687682 |           |        | 1,13 | down |
| 5727181 | 7217747 | 1417512 | DIP2 disco-interacting protein 2 homolog A (Drosophila) /// similar to Disco-interacting protein 2 hoip2a /// LOC68768 690211 /// 687682 |           |        | 1,08 | up   |
| 6013208 | 7320735 | 1674190 | DIP2 disco-interacting protein 2 homolog B (Drosophila)                                                                                  | Dip2b     | 300231 | 1,39 | down |
| 5676712 | 7367994 | 1789236 | dipeptidyl peptidase 9                                                                                                                   | Dpp9      | 301130 | 1,79 | up   |
| 6316624 | 7367994 | 1789257 | dipeptidyl peptidase 9                                                                                                                   | Dpp9      | 301130 | 1,45 | down |
| 6600825 | 7367994 | 1789249 | dipeptidyl peptidase 9                                                                                                                   | Dpp9      | 301130 | 1,32 | up   |
| 6040212 | 7367994 | 1789253 | dipeptidyl peptidase 9                                                                                                                   | Dpp9      | 301130 | 1,21 | down |
| 6473119 | 7367994 | 1789248 | dipeptidyl peptidase 9                                                                                                                   | Dpp9      | 301130 | 1,20 | down |
| 6256375 | 7367994 | 1789264 | dipeptidyl peptidase 9                                                                                                                   | Dpp9      | 301130 | 1,16 | up   |
| 6350545 | 7367994 | 1789259 | dipeptidyl peptidase 9                                                                                                                   | Dpp9      | 301130 | 1,13 | up   |
| 5994381 | 7367994 | 1789258 | dipeptidyl peptidase 9                                                                                                                   | Dpp9      | 301130 | 1,11 | up   |
| 6237473 | 7367994 | 1789237 | dipeptidyl peptidase 9                                                                                                                   | Dpp9      | 301130 | 1,11 | down |
| 6052098 | 7367994 | 1789246 | dipeptidyl peptidase 9                                                                                                                   | Dpp9      | 301130 | 1,11 | down |
| 6519986 | 7367994 | 1789247 | dipeptidyl peptidase 9                                                                                                                   | Dpp9      | 301130 | 1,10 | down |

|         |         |         |                        |      |        |      |      |
|---------|---------|---------|------------------------|------|--------|------|------|
| 6404281 | 7367994 | 1789250 | dipeptidyl peptidase 9 | Dpp9 | 301130 | 1,09 | down |
| 6461085 | 7367994 | 1789260 | dipeptidyl peptidase 9 | Dpp9 | 301130 | 1,08 | down |
| 6314083 | 7367994 | 1789261 | dipeptidyl peptidase 9 | Dpp9 | 301130 | 1,08 | down |
| 6107182 | 7367994 | 1789240 | dipeptidyl peptidase 9 | Dpp9 | 301130 | 1,06 | down |
| 6290056 | 7367994 | 1789254 | dipeptidyl peptidase 9 | Dpp9 | 301130 | 1,05 | up   |
| 5864317 | 7367994 | 1789265 | dipeptidyl peptidase 9 | Dpp9 | 301130 | 1,04 | up   |
| 6196939 | 7367994 | 1789252 | dipeptidyl peptidase 9 | Dpp9 | 301130 | 1,04 | down |
| 6450064 | 7367994 | 1789247 | dipeptidyl peptidase 9 | Dpp9 | 301130 | 1,03 | up   |
| 6478190 | 7367994 | 1789266 | dipeptidyl peptidase 9 | Dpp9 | 301130 | 1,03 | up   |
| 6305923 | 7367994 | 1789262 | dipeptidyl peptidase 9 | Dpp9 | 301130 | 1,00 | up   |
| 6294171 | 7260307 | 1523419 | dipeptidylpeptidase 6  | Dpp6 | 29272  | 2,75 | up   |
| 6361411 | 7260307 | 1523419 | dipeptidylpeptidase 6  | Dpp6 | 29272  | 2,44 | up   |
| 6172139 | 7260307 | 1523407 | dipeptidylpeptidase 6  | Dpp6 | 29272  | 2,38 | up   |
| 6063996 | 7260307 | 1523406 | dipeptidylpeptidase 6  | Dpp6 | 29272  | 1,66 | down |
| 5787741 | 7260307 | 1523417 | dipeptidylpeptidase 6  | Dpp6 | 29272  | 1,65 | up   |
| 6055158 | 7260307 | 1523399 | dipeptidylpeptidase 6  | Dpp6 | 29272  | 1,54 | down |
| 6678400 | 7260307 | 1523397 | dipeptidylpeptidase 6  | Dpp6 | 29272  | 1,54 | up   |
| 5948572 | 7260307 | 1523396 | dipeptidylpeptidase 6  | Dpp6 | 29272  | 1,47 | up   |
| 6412427 | 7260307 | 1523403 | dipeptidylpeptidase 6  | Dpp6 | 29272  | 1,41 | up   |
| 6461473 | 7260307 | 1523415 | dipeptidylpeptidase 6  | Dpp6 | 29272  | 1,40 | down |
| 5794592 | 7260307 | 1523395 | dipeptidylpeptidase 6  | Dpp6 | 29272  | 1,38 | down |
| 6334152 | 7260307 | 1523398 | dipeptidylpeptidase 6  | Dpp6 | 29272  | 1,33 | down |
| 5961961 | 7260307 | 1523408 | dipeptidylpeptidase 6  | Dpp6 | 29272  | 1,32 | up   |
| 6463236 | 7260307 | 1523394 | dipeptidylpeptidase 6  | Dpp6 | 29272  | 1,30 | down |
| 5674446 | 7260307 | 1523400 | dipeptidylpeptidase 6  | Dpp6 | 29272  | 1,24 | down |
| 5793799 | 7260307 | 1523404 | dipeptidylpeptidase 6  | Dpp6 | 29272  | 1,23 | up   |
| 6662810 | 7260307 | 1523402 | dipeptidylpeptidase 6  | Dpp6 | 29272  | 1,20 | down |
| 5868487 | 7260307 | 1523405 | dipeptidylpeptidase 6  | Dpp6 | 29272  | 1,17 | down |
| 6610818 | 7260307 | 1523410 | dipeptidylpeptidase 6  | Dpp6 | 29272  | 1,15 | up   |
| 6100361 | 7260307 | 1523393 | dipeptidylpeptidase 6  | Dpp6 | 29272  | 1,15 | up   |
| 6375571 | 7260307 | 1523411 | dipeptidylpeptidase 6  | Dpp6 | 29272  | 1,11 | down |
| 5838017 | 7260307 | 1523401 | dipeptidylpeptidase 6  | Dpp6 | 29272  | 1,11 | up   |
| 5870852 | 7260307 | 1523414 | dipeptidylpeptidase 6  | Dpp6 | 29272  | 1,11 | down |
| 6293548 | 7260307 | 1523409 | dipeptidylpeptidase 6  | Dpp6 | 29272  | 1,09 | up   |
| 6545474 | 7260307 | 1523416 | dipeptidylpeptidase 6  | Dpp6 | 29272  | 1,09 | up   |
| 6181567 | 7260307 | 1523412 | dipeptidylpeptidase 6  | Dpp6 | 29272  | 1,08 | down |
| 6381779 | 7260307 | 1523418 | dipeptidylpeptidase 6  | Dpp6 | 29272  | 1,01 | up   |
| 6392588 | 7260307 | 1523413 | dipeptidylpeptidase 6  | Dpp6 | 29272  | 1,01 | down |
| 5686526 | 7337250 | 1712745 | dipeptidylpeptidase 8  | Dpp8 | 315758 | 2,50 | down |
| 6511430 | 7337250 | 1712745 | dipeptidylpeptidase 8  | Dpp8 | 315758 | 1,92 | down |
| 5768058 | 7337250 | 1712721 | dipeptidylpeptidase 8  | Dpp8 | 315758 | 1,57 | up   |
| 6624492 | 7337250 | 1712745 | dipeptidylpeptidase 8  | Dpp8 | 315758 | 1,43 | down |
| 6107097 | 7337250 | 1712728 | dipeptidylpeptidase 8  | Dpp8 | 315758 | 1,36 | up   |
| 5647191 | 7337250 | 1712735 | dipeptidylpeptidase 8  | Dpp8 | 315758 | 1,36 | down |
| 5692631 | 7337250 | 1712734 | dipeptidylpeptidase 8  | Dpp8 | 315758 | 1,21 | up   |
| 6334876 | 7337250 | 1712742 | dipeptidylpeptidase 8  | Dpp8 | 315758 | 1,20 | down |
| 6238887 | 7337250 | 1712725 | dipeptidylpeptidase 8  | Dpp8 | 315758 | 1,15 | down |
| 6088859 | 7337250 | 1712740 | dipeptidylpeptidase 8  | Dpp8 | 315758 | 1,09 | up   |
| 5933878 | 7337250 | 1712733 | dipeptidylpeptidase 8  | Dpp8 | 315758 | 1,09 | down |
| 6198636 | 7337250 | 1712736 | dipeptidylpeptidase 8  | Dpp8 | 315758 | 1,09 | up   |
| 6351251 | 7337250 | 1712732 | dipeptidylpeptidase 8  | Dpp8 | 315758 | 1,08 | up   |
| 5770296 | 7337250 | 1712726 | dipeptidylpeptidase 8  | Dpp8 | 315758 | 1,07 | down |
| 6217181 | 7337250 | 1712737 | dipeptidylpeptidase 8  | Dpp8 | 315758 | 1,07 | down |
| 6422639 | 7337250 | 1712730 | dipeptidylpeptidase 8  | Dpp8 | 315758 | 1,06 | down |
| 6368315 | 7337250 | 1712729 | dipeptidylpeptidase 8  | Dpp8 | 315758 | 1,06 | down |
| 6394021 | 7337250 | 1712723 | dipeptidylpeptidase 8  | Dpp8 | 315758 | 1,05 | up   |
| 6635394 | 7337250 | 1712741 | dipeptidylpeptidase 8  | Dpp8 | 315758 | 1,03 | up   |



|         |         |         |                                                        |        |        |      |      |
|---------|---------|---------|--------------------------------------------------------|--------|--------|------|------|
| 5847097 | 7337250 | 1712727 | dipeptidylpeptidase 8                                  | Dpp8   | 315758 | 1,03 | up   |
| 5982734 | 7337250 | 1712724 | dipeptidylpeptidase 8                                  | Dpp8   | 315758 | 1,02 | up   |
| 6724881 | 7337250 | 1712722 | dipeptidylpeptidase 8                                  | Dpp8   | 315758 | 1,01 | down |
| 6484710 | 7337250 | 1712736 | dipeptidylpeptidase 8                                  | Dpp8   | 315758 | 1,01 | down |
| 5735613 | 7337250 | 1712743 | dipeptidylpeptidase 8                                  | Dpp8   | 315758 | 1,01 | up   |
| 6154623 | 7337250 | 1712731 | dipeptidylpeptidase 8                                  | Dpp8   | 315758 | 1,00 | up   |
| 6201756 | 7337250 | 1712744 | dipeptidylpeptidase 8                                  | Dpp8   | 315758 | 1,00 | up   |
| 6703309 | 7277904 | 1567790 | disabled homolog 1 (Drosophila)                        | Dab1   | 266729 | 2,21 | up   |
| 6727086 | 7277904 | 1567787 | disabled homolog 1 (Drosophila)                        | Dab1   | 266729 | 1,93 | down |
| 6212266 | 7277904 | 1567795 | disabled homolog 1 (Drosophila)                        | Dab1   | 266729 | 1,92 | down |
| 5730790 | 7277904 | 1567794 | disabled homolog 1 (Drosophila)                        | Dab1   | 266729 | 1,63 | down |
| 5860105 | 7277904 | 1567794 | disabled homolog 1 (Drosophila)                        | Dab1   | 266729 | 1,50 | up   |
| 6188859 | 7277904 | 1567789 | disabled homolog 1 (Drosophila)                        | Dab1   | 266729 | 1,43 | up   |
| 5954445 | 7277904 | 1567793 | disabled homolog 1 (Drosophila)                        | Dab1   | 266729 | 1,39 | down |
| 5991473 | 7277904 | 1567791 | disabled homolog 1 (Drosophila)                        | Dab1   | 266729 | 1,36 | up   |
| 6067648 | 7277904 | 1567796 | disabled homolog 1 (Drosophila)                        | Dab1   | 266729 | 1,24 | up   |
| 6335381 | 7277904 | 1567793 | disabled homolog 1 (Drosophila)                        | Dab1   | 266729 | 1,20 | down |
| 6561268 | 7277904 | 1567784 | disabled homolog 1 (Drosophila)                        | Dab1   | 266729 | 1,10 | up   |
| 6217388 | 7277904 | 1567785 | disabled homolog 1 (Drosophila)                        | Dab1   | 266729 | 1,06 | up   |
| 5722378 | 7277904 | 1567786 | disabled homolog 1 (Drosophila)                        | Dab1   | 266729 | 1,06 | down |
| 6592422 | 7277904 | 1567794 | disabled homolog 1 (Drosophila)                        | Dab1   | 266729 | 1,05 | up   |
| 6493888 | 7277904 | 1567792 | disabled homolog 1 (Drosophila)                        | Dab1   | 266729 | 1,05 | up   |
| 6085891 | 7277904 | 1567788 | disabled homolog 1 (Drosophila)                        | Dab1   | 266729 | 1,00 | down |
| 5708090 | 7358788 | 1766862 | discs, large (Drosophila) homolog-associated protein 1 | Dlgap1 | 65040  | 2,04 | down |
| 6547712 | 7358788 | 1766858 | discs, large (Drosophila) homolog-associated protein 1 | Dlgap1 | 65040  | 1,89 | down |
| 5632820 | 7358788 | 1766864 | discs, large (Drosophila) homolog-associated protein 1 | Dlgap1 | 65040  | 1,76 | down |
| 6015921 | 7358788 | 1766852 | discs, large (Drosophila) homolog-associated protein 1 | Dlgap1 | 65040  | 1,62 | down |
| 6014965 | 7358788 | 1766859 | discs, large (Drosophila) homolog-associated protein 1 | Dlgap1 | 65040  | 1,28 | down |
| 6274447 | 7358788 | 1766855 | discs, large (Drosophila) homolog-associated protein 1 | Dlgap1 | 65040  | 1,27 | up   |
| 5698943 | 7358788 | 1766854 | discs, large (Drosophila) homolog-associated protein 1 | Dlgap1 | 65040  | 1,26 | down |
| 6738474 | 7358788 | 1766856 | discs, large (Drosophila) homolog-associated protein 1 | Dlgap1 | 65040  | 1,14 | down |
| 5932658 | 7358788 | 1766860 | discs, large (Drosophila) homolog-associated protein 1 | Dlgap1 | 65040  | 1,12 | up   |
| 6167827 | 7358788 | 1766862 | discs, large (Drosophila) homolog-associated protein 1 | Dlgap1 | 65040  | 1,11 | down |
| 5681999 | 7358788 | 1766862 | discs, large (Drosophila) homolog-associated protein 1 | Dlgap1 | 65040  | 1,08 | up   |
| 5885376 | 7358788 | 1766865 | discs, large (Drosophila) homolog-associated protein 1 | Dlgap1 | 65040  | 1,06 | up   |
| 5772300 | 7358788 | 1766866 | discs, large (Drosophila) homolog-associated protein 1 | Dlgap1 | 65040  | 1,05 | down |
| 6095789 | 7358788 | 1766855 | discs, large (Drosophila) homolog-associated protein 1 | Dlgap1 | 65040  | 1,04 | down |
| 5752923 | 7358788 | 1766866 | discs, large (Drosophila) homolog-associated protein 1 | Dlgap1 | 65040  | 1,04 | up   |
| 6626441 | 7358788 | 1766868 | discs, large (Drosophila) homolog-associated protein 1 | Dlgap1 | 65040  | 1,04 | up   |
| 5909671 | 7358788 | 1766867 | discs, large (Drosophila) homolog-associated protein 1 | Dlgap1 | 65040  | 1,04 | up   |
| 6352186 | 7358788 | 1766857 | discs, large (Drosophila) homolog-associated protein 1 | Dlgap1 | 65040  | 1,02 | up   |
| 6530797 | 7358788 | 1766861 | discs, large (Drosophila) homolog-associated protein 1 | Dlgap1 | 65040  | 1,01 | up   |
| 6376356 | 7358788 | 1766863 | discs, large (Drosophila) homolog-associated protein 1 | Dlgap1 | 65040  | 1,01 | down |
| 5853811 | 7034056 | 971211  | discs, large homolog 2 (Drosophila)                    | Dlg2   | 64053  | 2,36 | up   |
| 6264636 | 7034056 | 971190  | discs, large homolog 2 (Drosophila)                    | Dlg2   | 64053  | 2,24 | down |
| 6425806 | 7034056 | 971203  | discs, large homolog 2 (Drosophila)                    | Dlg2   | 64053  | 2,02 | up   |
| 6555344 | 7034056 | 971207  | discs, large homolog 2 (Drosophila)                    | Dlg2   | 64053  | 1,97 | up   |
| 5663264 | 7034056 | 971208  | discs, large homolog 2 (Drosophila)                    | Dlg2   | 64053  | 1,76 | up   |
| 6107829 | 7034056 | 971197  | discs, large homolog 2 (Drosophila)                    | Dlg2   | 64053  | 1,63 | down |
| 6352103 | 7034056 | 971204  | discs, large homolog 2 (Drosophila)                    | Dlg2   | 64053  | 1,58 | up   |
| 6737726 | 7034056 | 971202  | discs, large homolog 2 (Drosophila)                    | Dlg2   | 64053  | 1,47 | up   |
| 6549252 | 7034056 | 971196  | discs, large homolog 2 (Drosophila)                    | Dlg2   | 64053  | 1,40 | down |
| 5681407 | 7034056 | 971200  | discs, large homolog 2 (Drosophila)                    | Dlg2   | 64053  | 1,39 | down |
| 6251614 | 7034056 | 971201  | discs, large homolog 2 (Drosophila)                    | Dlg2   | 64053  | 1,24 | down |
| 6010638 | 7034056 | 971191  | discs, large homolog 2 (Drosophila)                    | Dlg2   | 64053  | 1,24 | down |
| 6214699 | 7034056 | 971194  | discs, large homolog 2 (Drosophila)                    | Dlg2   | 64053  | 1,23 | up   |
| 6688706 | 7034056 | 971206  | discs, large homolog 2 (Drosophila)                    | Dlg2   | 64053  | 1,23 | up   |

|         |         |         |                                     |      |        |      |      |
|---------|---------|---------|-------------------------------------|------|--------|------|------|
| 5880249 | 7034056 | 971192  | discs, large homolog 2 (Drosophila) | Dlg2 | 64053  | 1,23 | up   |
| 5621919 | 7034056 | 971199  | discs, large homolog 2 (Drosophila) | Dlg2 | 64053  | 1,22 | down |
| 6302520 | 7034056 | 971193  | discs, large homolog 2 (Drosophila) | Dlg2 | 64053  | 1,19 | down |
| 6072982 | 7034056 | 971210  | discs, large homolog 2 (Drosophila) | Dlg2 | 64053  | 1,19 | up   |
| 6534324 | 7034056 | 971198  | discs, large homolog 2 (Drosophila) | Dlg2 | 64053  | 1,17 | down |
| 6474602 | 7034056 | 971205  | discs, large homolog 2 (Drosophila) | Dlg2 | 64053  | 1,14 | up   |
| 5644700 | 7034056 | 971189  | discs, large homolog 2 (Drosophila) | Dlg2 | 64053  | 1,14 | down |
| 6326220 | 7034056 | 971189  | discs, large homolog 2 (Drosophila) | Dlg2 | 64053  | 1,12 | down |
| 5850260 | 7034056 | 971195  | discs, large homolog 2 (Drosophila) | Dlg2 | 64053  | 1,08 | up   |
| 6290319 | 7034056 | 971209  | discs, large homolog 2 (Drosophila) | Dlg2 | 64053  | 1,06 | up   |
| 5915851 | 7375958 | 1811484 | discs, large homolog 3 (Drosophila) | Dlg3 | 58948  | 2,08 | up   |
| 6235952 | 7375958 | 1811479 | discs, large homolog 3 (Drosophila) | Dlg3 | 58948  | 1,62 | up   |
| 5755526 | 7375958 | 1811496 | discs, large homolog 3 (Drosophila) | Dlg3 | 58948  | 1,58 | up   |
| 6013707 | 7375958 | 1811487 | discs, large homolog 3 (Drosophila) | Dlg3 | 58948  | 1,57 | up   |
| 6653462 | 7375958 | 1811479 | discs, large homolog 3 (Drosophila) | Dlg3 | 58948  | 1,52 | up   |
| 6356643 | 7375958 | 1811480 | discs, large homolog 3 (Drosophila) | Dlg3 | 58948  | 1,52 | up   |
| 6331307 | 7375958 | 1811491 | discs, large homolog 3 (Drosophila) | Dlg3 | 58948  | 1,47 | down |
| 6289287 | 7375958 | 1811493 | discs, large homolog 3 (Drosophila) | Dlg3 | 58948  | 1,42 | down |
| 5780648 | 7375958 | 1811481 | discs, large homolog 3 (Drosophila) | Dlg3 | 58948  | 1,32 | up   |
| 6292500 | 7375958 | 1811485 | discs, large homolog 3 (Drosophila) | Dlg3 | 58948  | 1,32 | up   |
| 6335832 | 7375958 | 1811490 | discs, large homolog 3 (Drosophila) | Dlg3 | 58948  | 1,28 | down |
| 6070347 | 7375958 | 1811492 | discs, large homolog 3 (Drosophila) | Dlg3 | 58948  | 1,27 | down |
| 6718423 | 7375958 | 1811486 | discs, large homolog 3 (Drosophila) | Dlg3 | 58948  | 1,25 | up   |
| 6418605 | 7375958 | 1811482 | discs, large homolog 3 (Drosophila) | Dlg3 | 58948  | 1,20 | up   |
| 6417912 | 7375958 | 1811495 | discs, large homolog 3 (Drosophila) | Dlg3 | 58948  | 1,10 | down |
| 6060689 | 7375958 | 1811498 | discs, large homolog 3 (Drosophila) | Dlg3 | 58948  | 1,08 | down |
| 6690496 | 7375958 | 1811483 | discs, large homolog 3 (Drosophila) | Dlg3 | 58948  | 1,08 | up   |
| 6339706 | 7375958 | 1811497 | discs, large homolog 3 (Drosophila) | Dlg3 | 58948  | 1,07 | up   |
| 5722979 | 7375958 | 1811489 | discs, large homolog 3 (Drosophila) | Dlg3 | 58948  | 1,06 | up   |
| 6447592 | 7375958 | 1811499 | discs, large homolog 3 (Drosophila) | Dlg3 | 58948  | 1,05 | up   |
| 6369945 | 7375958 | 1811494 | discs, large homolog 3 (Drosophila) | Dlg3 | 58948  | 1,04 | down |
| 5907661 | 7375958 | 1811488 | discs, large homolog 3 (Drosophila) | Dlg3 | 58948  | 1,01 | down |
| 6377928 | 7129578 | 1200075 | discs, large homolog 5 (Drosophila) | Dlg5 | 305645 | 2,32 | down |
| 6702602 | 7129578 | 1200047 | discs, large homolog 5 (Drosophila) | Dlg5 | 305645 | 1,74 | up   |
| 6080814 | 7129578 | 1200053 | discs, large homolog 5 (Drosophila) | Dlg5 | 305645 | 1,73 | up   |
| 6645228 | 7129578 | 1200046 | discs, large homolog 5 (Drosophila) | Dlg5 | 305645 | 1,51 | down |
| 5728317 | 7129578 | 1200043 | discs, large homolog 5 (Drosophila) | Dlg5 | 305645 | 1,49 | down |
| 6030898 | 7129578 | 1200062 | discs, large homolog 5 (Drosophila) | Dlg5 | 305645 | 1,48 | up   |
| 5829481 | 7129578 | 1200063 | discs, large homolog 5 (Drosophila) | Dlg5 | 305645 | 1,47 | up   |
| 6500987 | 7129578 | 1200045 | discs, large homolog 5 (Drosophila) | Dlg5 | 305645 | 1,44 | down |
| 6608120 | 7129578 | 1200057 | discs, large homolog 5 (Drosophila) | Dlg5 | 305645 | 1,42 | down |
| 6593885 | 7129578 | 1200075 | discs, large homolog 5 (Drosophila) | Dlg5 | 305645 | 1,37 | down |
| 5688983 | 7129578 | 1200075 | discs, large homolog 5 (Drosophila) | Dlg5 | 305645 | 1,30 | down |
| 6119011 | 7129578 | 1200075 | discs, large homolog 5 (Drosophila) | Dlg5 | 305645 | 1,28 | up   |
| 6691832 | 7129578 | 1200053 | discs, large homolog 5 (Drosophila) | Dlg5 | 305645 | 1,23 | down |
| 6125576 | 7129578 | 1200072 | discs, large homolog 5 (Drosophila) | Dlg5 | 305645 | 1,20 | down |
| 5633271 | 7129578 | 1200068 | discs, large homolog 5 (Drosophila) | Dlg5 | 305645 | 1,18 | up   |
| 6493292 | 7129578 | 1200055 | discs, large homolog 5 (Drosophila) | Dlg5 | 305645 | 1,17 | up   |
| 6065375 | 7129578 | 1200044 | discs, large homolog 5 (Drosophila) | Dlg5 | 305645 | 1,17 | up   |
| 5753102 | 7129578 | 1200061 | discs, large homolog 5 (Drosophila) | Dlg5 | 305645 | 1,13 | up   |
| 5668512 | 7129578 | 1200052 | discs, large homolog 5 (Drosophila) | Dlg5 | 305645 | 1,12 | up   |
| 6672136 | 7129578 | 1200042 | discs, large homolog 5 (Drosophila) | Dlg5 | 305645 | 1,12 | up   |
| 6377028 | 7129578 | 1200071 | discs, large homolog 5 (Drosophila) | Dlg5 | 305645 | 1,12 | down |
| 6442360 | 7129578 | 1200074 | discs, large homolog 5 (Drosophila) | Dlg5 | 305645 | 1,07 | up   |
| 5891572 | 7129578 | 1200075 | discs, large homolog 5 (Drosophila) | Dlg5 | 305645 | 1,06 | up   |
| 6270330 | 7129578 | 1200075 | discs, large homolog 5 (Drosophila) | Dlg5 | 305645 | 1,06 | up   |
| 6597583 | 7129578 | 1200059 | discs, large homolog 5 (Drosophila) | Dlg5 | 305645 | 1,05 | down |

|         |         |         |                                                        |        |        |      |      |
|---------|---------|---------|--------------------------------------------------------|--------|--------|------|------|
| 6303653 | 7129578 | 1200075 | discs, large homolog 5 (Drosophila)                    | Dlg5   | 305645 | 1,05 | up   |
| 6490724 | 7129578 | 1200050 | discs, large homolog 5 (Drosophila)                    | Dlg5   | 305645 | 1,05 | down |
| 6577800 | 7129578 | 1200049 | discs, large homolog 5 (Drosophila)                    | Dlg5   | 305645 | 1,05 | up   |
| 6303609 | 7129578 | 1200069 | discs, large homolog 5 (Drosophila)                    | Dlg5   | 305645 | 1,04 | down |
| 5716168 | 7129578 | 1200075 | discs, large homolog 5 (Drosophila)                    | Dlg5   | 305645 | 1,04 | up   |
| 5736555 | 7129578 | 1200048 | discs, large homolog 5 (Drosophila)                    | Dlg5   | 305645 | 1,04 | up   |
| 6028900 | 7129578 | 1200075 | discs, large homolog 5 (Drosophila)                    | Dlg5   | 305645 | 1,04 | up   |
| 6633038 | 7129578 | 1200060 | discs, large homolog 5 (Drosophila)                    | Dlg5   | 305645 | 1,03 | down |
| 6287202 | 7129578 | 1200056 | discs, large homolog 5 (Drosophila)                    | Dlg5   | 305645 | 1,02 | down |
| 6459805 | 7129578 | 1200054 | discs, large homolog 5 (Drosophila)                    | Dlg5   | 305645 | 1,02 | up   |
| 5898738 | 7129578 | 1200063 | discs, large homolog 5 (Drosophila)                    | Dlg5   | 305645 | 1,00 | down |
| 5993670 | 7234514 | 1459621 | discs, large homolog-associated protein 4 (Drosophila) | Dlgap4 | 286930 | 2,41 | up   |
| 5754281 | 7234514 | 1459615 | discs, large homolog-associated protein 4 (Drosophila) | Dlgap4 | 286930 | 2,22 | down |
| 6167499 | 7234514 | 1459612 | discs, large homolog-associated protein 4 (Drosophila) | Dlgap4 | 286930 | 1,66 | down |
| 5645604 | 7234514 | 1459616 | discs, large homolog-associated protein 4 (Drosophila) | Dlgap4 | 286930 | 1,65 | down |
| 6714295 | 7234514 | 1459619 | discs, large homolog-associated protein 4 (Drosophila) | Dlgap4 | 286930 | 1,61 | up   |
| 6471997 | 7234514 | 1459617 | discs, large homolog-associated protein 4 (Drosophila) | Dlgap4 | 286930 | 1,58 | up   |
| 6124186 | 7234514 | 1459612 | discs, large homolog-associated protein 4 (Drosophila) | Dlgap4 | 286930 | 1,40 | down |
| 6299980 | 7234514 | 1459618 | discs, large homolog-associated protein 4 (Drosophila) | Dlgap4 | 286930 | 1,12 | down |
| 5789243 | 7234514 | 1459622 | discs, large homolog-associated protein 4 (Drosophila) | Dlgap4 | 286930 | 1,07 | down |
| 6197546 | 7234514 | 1459614 | discs, large homolog-associated protein 4 (Drosophila) | Dlgap4 | 286930 | 1,05 | up   |
| 6001082 | 7234514 | 1459613 | discs, large homolog-associated protein 4 (Drosophila) | Dlgap4 | 286930 | 1,02 | up   |
| 5673404 | 7114934 | 1164521 | dispatched homolog 1 (Drosophila)                      | Disp1  | 289338 | 1,54 | up   |
| 6434834 | 7114934 | 1164518 | dispatched homolog 1 (Drosophila)                      | Disp1  | 289338 | 1,48 | down |
| 5749631 | 7114934 | 1164519 | dispatched homolog 1 (Drosophila)                      | Disp1  | 289338 | 1,45 | up   |
| 6243979 | 7114934 | 1164518 | dispatched homolog 1 (Drosophila)                      | Disp1  | 289338 | 1,38 | down |
| 6424239 | 7114934 | 1164528 | dispatched homolog 1 (Drosophila)                      | Disp1  | 289338 | 1,15 | up   |
| 6654744 | 7114934 | 1164520 | dispatched homolog 1 (Drosophila)                      | Disp1  | 289338 | 1,09 | up   |
| 6599039 | 7114934 | 1164522 | dispatched homolog 1 (Drosophila)                      | Disp1  | 289338 | 1,07 | down |
| 6698433 | 7114934 | 1164526 | dispatched homolog 1 (Drosophila)                      | Disp1  | 289338 | 1,05 | up   |
| 6311154 | 7231533 | 1451502 | dispatched homolog 2 (Drosophila)                      | Disp2  | 311324 | 1,64 | down |
| 6011147 | 7231533 | 1451502 | dispatched homolog 2 (Drosophila)                      | Disp2  | 311324 | 1,55 | down |
| 5745731 | 7231533 | 1451504 | dispatched homolog 2 (Drosophila)                      | Disp2  | 311324 | 1,48 | up   |
| 5655374 | 7231533 | 1451501 | dispatched homolog 2 (Drosophila)                      | Disp2  | 311324 | 1,40 | down |
| 5777455 | 7231533 | 1451504 | dispatched homolog 2 (Drosophila)                      | Disp2  | 311324 | 1,34 | up   |
| 6285078 | 7231533 | 1451500 | dispatched homolog 2 (Drosophila)                      | Disp2  | 311324 | 1,24 | down |
| 6304771 | 7231533 | 1451504 | dispatched homolog 2 (Drosophila)                      | Disp2  | 311324 | 1,20 | up   |
| 6164846 | 7231533 | 1451504 | dispatched homolog 2 (Drosophila)                      | Disp2  | 311324 | 1,19 | up   |
| 5977972 | 7231533 | 1451504 | dispatched homolog 2 (Drosophila)                      | Disp2  | 311324 | 1,18 | down |
| 5709392 | 7231533 | 1451504 | dispatched homolog 2 (Drosophila)                      | Disp2  | 311324 | 1,10 | down |
| 6170325 | 7231533 | 1451503 | dispatched homolog 2 (Drosophila)                      | Disp2  | 311324 | 1,05 | down |
| 6236407 | 7231533 | 1451503 | dispatched homolog 2 (Drosophila)                      | Disp2  | 311324 | 1,03 | down |
| 5840403 | 7231533 | 1451502 | dispatched homolog 2 (Drosophila)                      | Disp2  | 311324 | 1,03 | down |
| 5662196 | 7081810 | 1083546 | distal-less homeobox 4                                 | Dlx4   | 303469 | 2,02 | down |
| 5673937 | 7081810 | 1083552 | distal-less homeobox 4                                 | Dlx4   | 303469 | 1,85 | up   |
| 6215971 | 7081810 | 1083552 | distal-less homeobox 4                                 | Dlx4   | 303469 | 1,54 | up   |
| 6493687 | 7081810 | 1083549 | distal-less homeobox 4                                 | Dlx4   | 303469 | 1,35 | down |
| 6109002 | 7081810 | 1083547 | distal-less homeobox 4                                 | Dlx4   | 303469 | 1,22 | up   |
| 6024775 | 7081810 | 1083548 | distal-less homeobox 4                                 | Dlx4   | 303469 | 1,08 | down |
| 6660309 | 7081810 | 1083550 | distal-less homeobox 4                                 | Dlx4   | 303469 | 1,06 | down |
| 6267436 | 7345465 | 1733829 | DIX domain containing 1                                | Dixdc1 | 363062 | 1,97 | up   |
| 5862928 | 7345465 | 1733819 | DIX domain containing 1                                | Dixdc1 | 363062 | 1,83 | down |
| 6223917 | 7345465 | 1733821 | DIX domain containing 1                                | Dixdc1 | 363062 | 1,56 | up   |
| 6671327 | 7345465 | 1733846 | DIX domain containing 1                                | Dixdc1 | 363062 | 1,50 | down |
| 6190068 | 7345465 | 1733826 | DIX domain containing 1                                | Dixdc1 | 363062 | 1,37 | down |
| 6739667 | 7345465 | 1733819 | DIX domain containing 1                                | Dixdc1 | 363062 | 1,35 | down |
| 6717501 | 7345465 | 1733851 | DIX domain containing 1                                | Dixdc1 | 363062 | 1,29 | up   |

|         |         |         |                          |        |        |      |      |
|---------|---------|---------|--------------------------|--------|--------|------|------|
| 6073327 | 7345465 | 1733820 | DIX domain containing 1  | Dixdc1 | 363062 | 1,27 | down |
| 5720655 | 7345465 | 1733838 | DIX domain containing 1  | Dixdc1 | 363062 | 1,22 | down |
| 6551858 | 7345465 | 1733828 | DIX domain containing 1  | Dixdc1 | 363062 | 1,20 | down |
| 5881916 | 7345465 | 1733837 | DIX domain containing 1  | Dixdc1 | 363062 | 1,19 | up   |
| 5682166 | 7345465 | 1733845 | DIX domain containing 1  | Dixdc1 | 363062 | 1,18 | up   |
| 6722336 | 7345465 | 1733831 | DIX domain containing 1  | Dixdc1 | 363062 | 1,17 | up   |
| 5773568 | 7345465 | 1733819 | DIX domain containing 1  | Dixdc1 | 363062 | 1,17 | up   |
| 6389998 | 7345465 | 1733819 | DIX domain containing 1  | Dixdc1 | 363062 | 1,15 | down |
| 6133156 | 7345465 | 1733819 | DIX domain containing 1  | Dixdc1 | 363062 | 1,15 | up   |
| 6370099 | 7345465 | 1733833 | DIX domain containing 1  | Dixdc1 | 363062 | 1,14 | down |
| 6189362 | 7345465 | 1733824 | DIX domain containing 1  | Dixdc1 | 363062 | 1,10 | down |
| 6061482 | 7345465 | 1733847 | DIX domain containing 1  | Dixdc1 | 363062 | 1,08 | up   |
| 6242773 | 7345465 | 1733830 | DIX domain containing 1  | Dixdc1 | 363062 | 1,07 | up   |
| 6278461 | 7345465 | 1733819 | DIX domain containing 1  | Dixdc1 | 363062 | 1,06 | up   |
| 6459759 | 7345465 | 1733846 | DIX domain containing 1  | Dixdc1 | 363062 | 1,03 | up   |
| 6094717 | 7345465 | 1733834 | DIX domain containing 1  | Dixdc1 | 363062 | 1,03 | up   |
| 5668473 | 7345465 | 1733832 | DIX domain containing 1  | Dixdc1 | 363062 | 1,02 | up   |
| 6303606 | 7278352 | 1569014 | DMRT-like family A2      | Dmrta2 | 313471 | 2,23 | up   |
| 5897445 | 7278352 | 1569016 | DMRT-like family A2      | Dmrta2 | 313471 | 1,71 | down |
| 6149317 | 7278352 | 1569014 | DMRT-like family A2      | Dmrta2 | 313471 | 1,49 | up   |
| 5926625 | 7278352 | 1569016 | DMRT-like family A2      | Dmrta2 | 313471 | 1,37 | down |
| 6267320 | 7278352 | 1569016 | DMRT-like family A2      | Dmrta2 | 313471 | 1,19 | down |
| 6380261 | 7278352 | 1569016 | DMRT-like family A2      | Dmrta2 | 313471 | 1,17 | up   |
| 6233284 | 7278352 | 1569016 | DMRT-like family A2      | Dmrta2 | 313471 | 1,13 | up   |
| 6235105 | 7278352 | 1569014 | DMRT-like family A2      | Dmrta2 | 313471 | 1,11 | up   |
| 6240976 | 7278352 | 1569016 | DMRT-like family A2      | Dmrta2 | 313471 | 1,09 | up   |
| 6227959 | 7278352 | 1569016 | DMRT-like family A2      | Dmrta2 | 313471 | 1,08 | up   |
| 5664868 | 7278352 | 1569016 | DMRT-like family A2      | Dmrta2 | 313471 | 1,06 | up   |
| 5664439 | 7278352 | 1569016 | DMRT-like family A2      | Dmrta2 | 313471 | 1,05 | down |
| 5663083 | 7278352 | 1569012 | DMRT-like family A2      | Dmrta2 | 313471 | 1,04 | down |
| 6241210 | 7278352 | 1569016 | DMRT-like family A2      | Dmrta2 | 313471 | 1,02 | down |
| 6277077 | 7278352 | 1569014 | DMRT-like family A2      | Dmrta2 | 313471 | 1,02 | down |
| 5709551 | 7278352 | 1569016 | DMRT-like family A2      | Dmrta2 | 313471 | 1,01 | down |
| 6061710 | 7278352 | 1569014 | DMRT-like family A2      | Dmrta2 | 313471 | 1,00 | up   |
| 6260072 | 7278352 | 1569016 | DMRT-like family A2      | Dmrta2 | 313471 | 1,00 | up   |
| 6216192 | 7234100 | 1458626 | DNA methyltransferase 3B | Dnmt3b | 444985 | 2,08 | down |
| 6107408 | 7234100 | 1458623 | DNA methyltransferase 3B | Dnmt3b | 444985 | 1,96 | up   |
| 6457561 | 7234100 | 1458633 | DNA methyltransferase 3B | Dnmt3b | 444985 | 1,86 | up   |
| 5837505 | 7234100 | 1458627 | DNA methyltransferase 3B | Dnmt3b | 444985 | 1,48 | down |
| 6633663 | 7234100 | 1458617 | DNA methyltransferase 3B | Dnmt3b | 444985 | 1,47 | up   |
| 6040131 | 7234100 | 1458635 | DNA methyltransferase 3B | Dnmt3b | 444985 | 1,39 | down |
| 5984026 | 7234100 | 1458614 | DNA methyltransferase 3B | Dnmt3b | 444985 | 1,37 | up   |
| 6181676 | 7234100 | 1458621 | DNA methyltransferase 3B | Dnmt3b | 444985 | 1,36 | up   |
| 5945770 | 7234100 | 1458617 | DNA methyltransferase 3B | Dnmt3b | 444985 | 1,29 | down |
| 6043092 | 7234100 | 1458616 | DNA methyltransferase 3B | Dnmt3b | 444985 | 1,29 | up   |
| 6260973 | 7234100 | 1458612 | DNA methyltransferase 3B | Dnmt3b | 444985 | 1,25 | up   |
| 5915078 | 7234100 | 1458628 | DNA methyltransferase 3B | Dnmt3b | 444985 | 1,23 | up   |
| 6425791 | 7234100 | 1458634 | DNA methyltransferase 3B | Dnmt3b | 444985 | 1,23 | up   |
| 6569857 | 7234100 | 1458621 | DNA methyltransferase 3B | Dnmt3b | 444985 | 1,21 | down |
| 6202433 | 7234100 | 1458624 | DNA methyltransferase 3B | Dnmt3b | 444985 | 1,21 | up   |
| 6311797 | 7234100 | 1458629 | DNA methyltransferase 3B | Dnmt3b | 444985 | 1,21 | up   |
| 6076922 | 7234100 | 1458620 | DNA methyltransferase 3B | Dnmt3b | 444985 | 1,17 | up   |
| 5634578 | 7234100 | 1458618 | DNA methyltransferase 3B | Dnmt3b | 444985 | 1,13 | up   |
| 6546698 | 7234100 | 1458634 | DNA methyltransferase 3B | Dnmt3b | 444985 | 1,11 | down |
| 6292151 | 7234100 | 1458615 | DNA methyltransferase 3B | Dnmt3b | 444985 | 1,10 | up   |
| 6497939 | 7234100 | 1458622 | DNA methyltransferase 3B | Dnmt3b | 444985 | 1,10 | down |
| 6581752 | 7234100 | 1458613 | DNA methyltransferase 3B | Dnmt3b | 444985 | 1,08 | up   |

|         |         |         |                                             |        |        |      |      |
|---------|---------|---------|---------------------------------------------|--------|--------|------|------|
| 5898548 | 7234100 | 1458611 | DNA methyltransferase 3B                    | Dnmt3b | 444985 | 1,07 | up   |
| 5869772 | 7234100 | 1458613 | DNA methyltransferase 3B                    | Dnmt3b | 444985 | 1,06 | down |
| 6038650 | 7234100 | 1458630 | DNA methyltransferase 3B                    | Dnmt3b | 444985 | 1,04 | up   |
| 5667603 | 7234100 | 1458625 | DNA methyltransferase 3B                    | Dnmt3b | 444985 | 1,04 | up   |
| 6084899 | 7234100 | 1458626 | DNA methyltransferase 3B                    | Dnmt3b | 444985 | 1,04 | down |
| 5742853 | 7234100 | 1458619 | DNA methyltransferase 3B                    | Dnmt3b | 444985 | 1,04 | down |
| 6339007 | 7234100 | 1458631 | DNA methyltransferase 3B                    | Dnmt3b | 444985 | 1,03 | up   |
| 6398566 | 7234100 | 1458632 | DNA methyltransferase 3B                    | Dnmt3b | 444985 | 1,02 | up   |
| 5623072 | 7234100 | 1458626 | DNA methyltransferase 3B                    | Dnmt3b | 444985 | 1,01 | up   |
| 6356823 | 7292657 | 1602847 | DNA-damage inducible protein 2              | Ddi2   | 313668 | 2,98 | down |
| 6318979 | 7292657 | 1602845 | DNA-damage inducible protein 2              | Ddi2   | 313668 | 1,23 | up   |
| 5727663 | 7292657 | 1602847 | DNA-damage inducible protein 2              | Ddi2   | 313668 | 1,23 | down |
| 6329697 | 7292657 | 1602837 | DNA-damage inducible protein 2              | Ddi2   | 313668 | 1,21 | down |
| 5905162 | 7292657 | 1602836 | DNA-damage inducible protein 2              | Ddi2   | 313668 | 1,19 | up   |
| 6178356 | 7292657 | 1602845 | DNA-damage inducible protein 2              | Ddi2   | 313668 | 1,15 | up   |
| 5772540 | 7292657 | 1602836 | DNA-damage inducible protein 2              | Ddi2   | 313668 | 1,13 | down |
| 6155442 | 7292657 | 1602842 | DNA-damage inducible protein 2              | Ddi2   | 313668 | 1,13 | up   |
| 6085689 | 7292657 | 1602841 | DNA-damage inducible protein 2              | Ddi2   | 313668 | 1,11 | down |
| 5638105 | 7292657 | 1602844 | DNA-damage inducible protein 2              | Ddi2   | 313668 | 1,11 | down |
| 6581380 | 7292657 | 1602843 | DNA-damage inducible protein 2              | Ddi2   | 313668 | 1,10 | up   |
| 6246820 | 7292657 | 1602846 | DNA-damage inducible protein 2              | Ddi2   | 313668 | 1,07 | down |
| 6611116 | 7292657 | 1602840 | DNA-damage inducible protein 2              | Ddi2   | 313668 | 1,07 | down |
| 5730394 | 7292657 | 1602847 | DNA-damage inducible protein 2              | Ddi2   | 313668 | 1,06 | up   |
| 6287195 | 7292657 | 1602836 | DNA-damage inducible protein 2              | Ddi2   | 313668 | 1,05 | down |
| 6379163 | 7292657 | 1602836 | DNA-damage inducible protein 2              | Ddi2   | 313668 | 1,03 | down |
| 6147390 | 7292657 | 1602836 | DNA-damage inducible protein 2              | Ddi2   | 313668 | 1,00 | down |
| 6008189 | 7184231 | 1336146 | DnaJ (Hsp40) homolog, subfamily B, member 1 | Dnajb1 | 361384 | 2,41 | down |
| 6615142 | 7184231 | 1336143 | DnaJ (Hsp40) homolog, subfamily B, member 1 | Dnajb1 | 361384 | 2,40 | down |
| 6268304 | 7184231 | 1336146 | DnaJ (Hsp40) homolog, subfamily B, member 1 | Dnajb1 | 361384 | 1,26 | up   |
| 6082627 | 7184231 | 1336145 | DnaJ (Hsp40) homolog, subfamily B, member 1 | Dnajb1 | 361384 | 1,24 | up   |
| 6313161 | 7184231 | 1336143 | DnaJ (Hsp40) homolog, subfamily B, member 1 | Dnajb1 | 361384 | 1,22 | down |
| 5871337 | 7184231 | 1336144 | DnaJ (Hsp40) homolog, subfamily B, member 1 | Dnajb1 | 361384 | 1,20 | up   |
| 5794021 | 7184231 | 1336143 | DnaJ (Hsp40) homolog, subfamily B, member 1 | Dnajb1 | 361384 | 1,06 | down |
| 6586990 | 7249852 | 1497196 | DnaJ (Hsp40) homolog, subfamily C, member 2 | Dnajc2 | 116456 | 2,50 | down |
| 5841650 | 7249852 | 1497194 | DnaJ (Hsp40) homolog, subfamily C, member 2 | Dnajc2 | 116456 | 1,68 | up   |
| 6092642 | 7249852 | 1497181 | DnaJ (Hsp40) homolog, subfamily C, member 2 | Dnajc2 | 116456 | 1,55 | up   |
| 6131940 | 7249852 | 1497182 | DnaJ (Hsp40) homolog, subfamily C, member 2 | Dnajc2 | 116456 | 1,42 | up   |
| 5921546 | 7249852 | 1497181 | DnaJ (Hsp40) homolog, subfamily C, member 2 | Dnajc2 | 116456 | 1,35 | up   |
| 6105195 | 7249852 | 1497180 | DnaJ (Hsp40) homolog, subfamily C, member 2 | Dnajc2 | 116456 | 1,35 | down |
| 6382347 | 7249852 | 1497192 | DnaJ (Hsp40) homolog, subfamily C, member 2 | Dnajc2 | 116456 | 1,29 | down |
| 6505825 | 7249852 | 1497185 | DnaJ (Hsp40) homolog, subfamily C, member 2 | Dnajc2 | 116456 | 1,27 | up   |
| 6144002 | 7249852 | 1497196 | DnaJ (Hsp40) homolog, subfamily C, member 2 | Dnajc2 | 116456 | 1,25 | down |
| 5706532 | 7249852 | 1497195 | DnaJ (Hsp40) homolog, subfamily C, member 2 | Dnajc2 | 116456 | 1,25 | down |
| 6276883 | 7249852 | 1497188 | DnaJ (Hsp40) homolog, subfamily C, member 2 | Dnajc2 | 116456 | 1,23 | up   |
| 5939714 | 7249852 | 1497193 | DnaJ (Hsp40) homolog, subfamily C, member 2 | Dnajc2 | 116456 | 1,21 | down |
| 6351597 | 7249852 | 1497191 | DnaJ (Hsp40) homolog, subfamily C, member 2 | Dnajc2 | 116456 | 1,21 | up   |
| 6494142 | 7249852 | 1497184 | DnaJ (Hsp40) homolog, subfamily C, member 2 | Dnajc2 | 116456 | 1,21 | up   |
| 6034449 | 7249852 | 1497187 | DnaJ (Hsp40) homolog, subfamily C, member 2 | Dnajc2 | 116456 | 1,18 | down |
| 5660158 | 7249852 | 1497186 | DnaJ (Hsp40) homolog, subfamily C, member 2 | Dnajc2 | 116456 | 1,15 | down |
| 5797658 | 7249852 | 1497188 | DnaJ (Hsp40) homolog, subfamily C, member 2 | Dnajc2 | 116456 | 1,14 | up   |
| 6373054 | 7249852 | 1497190 | DnaJ (Hsp40) homolog, subfamily C, member 2 | Dnajc2 | 116456 | 1,13 | down |
| 6204714 | 7249852 | 1497181 | DnaJ (Hsp40) homolog, subfamily C, member 2 | Dnajc2 | 116456 | 1,10 | down |
| 6621703 | 7249852 | 1497189 | DnaJ (Hsp40) homolog, subfamily C, member 2 | Dnajc2 | 116456 | 1,10 | up   |
| 6607611 | 7249852 | 1497192 | DnaJ (Hsp40) homolog, subfamily C, member 2 | Dnajc2 | 116456 | 1,07 | down |
| 5746423 | 7249852 | 1497195 | DnaJ (Hsp40) homolog, subfamily C, member 2 | Dnajc2 | 116456 | 1,06 | up   |
| 6162143 | 7249852 | 1497183 | DnaJ (Hsp40) homolog, subfamily C, member 2 | Dnajc2 | 116456 | 1,06 | up   |
| 6442471 | 7249852 | 1497188 | DnaJ (Hsp40) homolog, subfamily C, member 2 | Dnajc2 | 116456 | 1,04 | up   |

|         |         |         |                                                                              |        |        |      |      |
|---------|---------|---------|------------------------------------------------------------------------------|--------|--------|------|------|
| 6444754 | 7277742 | 1567208 | DnaJ (Hsp40) homolog, subfamily C, member 6                                  | Dnajc6 | 313409 | 1,41 | up   |
| 5875029 | 7277742 | 1567189 | DnaJ (Hsp40) homolog, subfamily C, member 6                                  | Dnajc6 | 313409 | 1,35 | down |
| 6719443 | 7277742 | 1567206 | DnaJ (Hsp40) homolog, subfamily C, member 6                                  | Dnajc6 | 313409 | 1,28 | down |
| 6440052 | 7277742 | 1567204 | DnaJ (Hsp40) homolog, subfamily C, member 6                                  | Dnajc6 | 313409 | 1,27 | down |
| 5785319 | 7277742 | 1567202 | DnaJ (Hsp40) homolog, subfamily C, member 6                                  | Dnajc6 | 313409 | 1,24 | up   |
| 6234461 | 7277742 | 1567192 | DnaJ (Hsp40) homolog, subfamily C, member 6                                  | Dnajc6 | 313409 | 1,13 | down |
| 6067712 | 7277742 | 1567206 | DnaJ (Hsp40) homolog, subfamily C, member 6                                  | Dnajc6 | 313409 | 1,12 | down |
| 6435290 | 7277742 | 1567209 | DnaJ (Hsp40) homolog, subfamily C, member 6                                  | Dnajc6 | 313409 | 1,10 | up   |
| 6117124 | 7277742 | 1567203 | DnaJ (Hsp40) homolog, subfamily C, member 6                                  | Dnajc6 | 313409 | 1,10 | up   |
| 6596070 | 7277742 | 1567187 | DnaJ (Hsp40) homolog, subfamily C, member 6                                  | Dnajc6 | 313409 | 1,09 | up   |
| 6133949 | 7277742 | 1567193 | DnaJ (Hsp40) homolog, subfamily C, member 6                                  | Dnajc6 | 313409 | 1,08 | down |
| 5884171 | 7277742 | 1567198 | DnaJ (Hsp40) homolog, subfamily C, member 6                                  | Dnajc6 | 313409 | 1,08 | up   |
| 6506048 | 7277742 | 1567206 | DnaJ (Hsp40) homolog, subfamily C, member 6                                  | Dnajc6 | 313409 | 1,08 | down |
| 6631979 | 7277742 | 1567188 | DnaJ (Hsp40) homolog, subfamily C, member 6                                  | Dnajc6 | 313409 | 1,07 | down |
| 6698860 | 7277742 | 1567205 | DnaJ (Hsp40) homolog, subfamily C, member 6                                  | Dnajc6 | 313409 | 1,05 | up   |
| 6620059 | 7277742 | 1567196 | DnaJ (Hsp40) homolog, subfamily C, member 6                                  | Dnajc6 | 313409 | 1,05 | up   |
| 6277659 | 7277742 | 1567210 | DnaJ (Hsp40) homolog, subfamily C, member 6                                  | Dnajc6 | 313409 | 1,05 | up   |
| 6027539 | 7277742 | 1567195 | DnaJ (Hsp40) homolog, subfamily C, member 6                                  | Dnajc6 | 313409 | 1,04 | up   |
| 6531369 | 7277742 | 1567207 | DnaJ (Hsp40) homolog, subfamily C, member 6                                  | Dnajc6 | 313409 | 1,04 | down |
| 6536459 | 7277742 | 1567194 | DnaJ (Hsp40) homolog, subfamily C, member 6                                  | Dnajc6 | 313409 | 1,03 | down |
| 6581975 | 7277742 | 1567160 | DnaJ (Hsp40) homolog, subfamily C, member 6                                  | Dnajc6 | 313409 | 1,01 | down |
| 6564622 | 7178752 | 1321790 | docking protein 4                                                            | Dok4   | 361364 | 1,43 | down |
| 6346142 | 7178752 | 1321789 | docking protein 4                                                            | Dok4   | 361364 | 1,35 | down |
| 6151894 | 7178752 | 1321791 | docking protein 4                                                            | Dok4   | 361364 | 1,22 | down |
| 6248782 | 7178752 | 1321784 | docking protein 4                                                            | Dok4   | 361364 | 1,14 | up   |
| 5640679 | 7178752 | 1321782 | docking protein 4                                                            | Dok4   | 361364 | 1,13 | up   |
| 5667976 | 7178752 | 1321791 | docking protein 4                                                            | Dok4   | 361364 | 1,11 | down |
| 6040207 | 7178752 | 1321784 | docking protein 4                                                            | Dok4   | 361364 | 1,10 | up   |
| 6205465 | 7178752 | 1321787 | docking protein 4                                                            | Dok4   | 361364 | 1,09 | up   |
| 6121927 | 7178752 | 1321788 | docking protein 4                                                            | Dok4   | 361364 | 1,05 | up   |
| 5835183 | 7178752 | 1321786 | docking protein 4                                                            | Dok4   | 361364 | 1,04 | up   |
| 6480366 | 7178752 | 1321782 | docking protein 4                                                            | Dok4   | 361364 | 1,01 | up   |
| 6195606 | 7178752 | 1321784 | docking protein 4                                                            | Dok4   | 361364 | 1,00 | down |
| 6742442 | 7065530 | 1044962 | dodecenoyl-Coenzyme A delta isomerase (3,2 trans-enoyl-Coenzyme A isomerase) | Dci    | 29740  | 2,06 | down |
| 5904945 | 7065530 | 1044958 | dodecenoyl-Coenzyme A delta isomerase (3,2 trans-enoyl-Coenzyme A isomerase) | Dci    | 29740  | 1,68 | down |
| 6545454 | 7065530 | 1044960 | dodecenoyl-Coenzyme A delta isomerase (3,2 trans-enoyl-Coenzyme A isomerase) | Dci    | 29740  | 1,40 | up   |
| 5884586 | 7065530 | 1044964 | dodecenoyl-Coenzyme A delta isomerase (3,2 trans-enoyl-Coenzyme A isomerase) | Dci    | 29740  | 1,34 | up   |
| 5854667 | 7065530 | 1044959 | dodecenoyl-Coenzyme A delta isomerase (3,2 trans-enoyl-Coenzyme A isomerase) | Dci    | 29740  | 1,15 | down |
| 5737060 | 7065530 | 1044963 | dodecenoyl-Coenzyme A delta isomerase (3,2 trans-enoyl-Coenzyme A isomerase) | Dci    | 29740  | 1,08 | down |
| 6004535 | 7065530 | 1044961 | dodecenoyl-Coenzyme A delta isomerase (3,2 trans-enoyl-Coenzyme A isomerase) | Dci    | 29740  | 1,05 | down |
| 6705100 | 7065530 | 1044965 | dodecenoyl-Coenzyme A delta isomerase (3,2 trans-enoyl-Coenzyme A isomerase) | Dci    | 29740  | 1,01 | down |
| 5915242 | 7220685 | 1424652 | DOM-3 homolog Z (C. elegans)                                                 | Dom3z  | 361799 | 2,36 | up   |
| 5700757 | 7220685 | 1424658 | DOM-3 homolog Z (C. elegans)                                                 | Dom3z  | 361799 | 1,99 | down |
| 6596643 | 7220685 | 1424652 | DOM-3 homolog Z (C. elegans)                                                 | Dom3z  | 361799 | 1,62 | up   |
| 5875013 | 7220685 | 1424655 | DOM-3 homolog Z (C. elegans)                                                 | Dom3z  | 361799 | 1,37 | down |
| 6394764 | 7220685 | 1424653 | DOM-3 homolog Z (C. elegans)                                                 | Dom3z  | 361799 | 1,28 | up   |
| 6242459 | 7220685 | 1424654 | DOM-3 homolog Z (C. elegans)                                                 | Dom3z  | 361799 | 1,23 | up   |
| 6364390 | 7220685 | 1424652 | DOM-3 homolog Z (C. elegans)                                                 | Dom3z  | 361799 | 1,23 | up   |
| 5704058 | 7220685 | 1424656 | DOM-3 homolog Z (C. elegans)                                                 | Dom3z  | 361799 | 1,21 | down |
| 6444846 | 7220685 | 1424659 | DOM-3 homolog Z (C. elegans)                                                 | Dom3z  | 361799 | 1,08 | down |
| 6616947 | 7220685 | 1424657 | DOM-3 homolog Z (C. elegans)                                                 | Dom3z  | 361799 | 1,04 | up   |
| 5958573 | 7220685 | 1424655 | DOM-3 homolog Z (C. elegans)                                                 | Dom3z  | 361799 | 1,02 | up   |
| 6151510 | 7220685 | 1424655 | DOM-3 homolog Z (C. elegans)                                                 | Dom3z  | 361799 | 1,02 | up   |
| 5984742 | 7128240 | 1196937 | dopa decarboxylase (aromatic L-amino acid decarboxylase)                     | Ddc    | 24311  | 2,88 | up   |
| 6226905 | 7128240 | 1196937 | dopa decarboxylase (aromatic L-amino acid decarboxylase)                     | Ddc    | 24311  | 2,69 | up   |
| 6565935 | 7128240 | 1196940 | dopa decarboxylase (aromatic L-amino acid decarboxylase)                     | Ddc    | 24311  | 1,96 | up   |
| 6640068 | 7128240 | 1196940 | dopa decarboxylase (aromatic L-amino acid decarboxylase)                     | Ddc    | 24311  | 1,47 | up   |

|         |         |         |                                                          |        |        |      |      |
|---------|---------|---------|----------------------------------------------------------|--------|--------|------|------|
| 6206531 | 7128240 | 1196950 | dopa decarboxylase (aromatic L-amino acid decarboxylase) | Ddc    | 24311  | 1,45 | down |
| 5876227 | 7128240 | 1196939 | dopa decarboxylase (aromatic L-amino acid decarboxylase) | Ddc    | 24311  | 1,43 | down |
| 5799098 | 7128240 | 1196946 | dopa decarboxylase (aromatic L-amino acid decarboxylase) | Ddc    | 24311  | 1,42 | up   |
| 6102979 | 7128240 | 1196937 | dopa decarboxylase (aromatic L-amino acid decarboxylase) | Ddc    | 24311  | 1,41 | up   |
| 5743040 | 7128240 | 1196945 | dopa decarboxylase (aromatic L-amino acid decarboxylase) | Ddc    | 24311  | 1,38 | down |
| 5811849 | 7128240 | 1196937 | dopa decarboxylase (aromatic L-amino acid decarboxylase) | Ddc    | 24311  | 1,29 | up   |
| 5817658 | 7128240 | 1196941 | dopa decarboxylase (aromatic L-amino acid decarboxylase) | Ddc    | 24311  | 1,24 | down |
| 5864191 | 7128240 | 1196948 | dopa decarboxylase (aromatic L-amino acid decarboxylase) | Ddc    | 24311  | 1,23 | down |
| 5836901 | 7128240 | 1196942 | dopa decarboxylase (aromatic L-amino acid decarboxylase) | Ddc    | 24311  | 1,18 | down |
| 5652390 | 7128240 | 1196937 | dopa decarboxylase (aromatic L-amino acid decarboxylase) | Ddc    | 24311  | 1,17 | down |
| 6292831 | 7128240 | 1196944 | dopa decarboxylase (aromatic L-amino acid decarboxylase) | Ddc    | 24311  | 1,15 | down |
| 6654008 | 7128240 | 1196938 | dopa decarboxylase (aromatic L-amino acid decarboxylase) | Ddc    | 24311  | 1,14 | down |
| 6692406 | 7128240 | 1196947 | dopa decarboxylase (aromatic L-amino acid decarboxylase) | Ddc    | 24311  | 1,13 | up   |
| 6686864 | 7128240 | 1196943 | dopa decarboxylase (aromatic L-amino acid decarboxylase) | Ddc    | 24311  | 1,05 | down |
| 6065961 | 7128240 | 1196949 | dopa decarboxylase (aromatic L-amino acid decarboxylase) | Ddc    | 24311  | 1,05 | up   |
| 6576396 | 7128240 | 1196937 | dopa decarboxylase (aromatic L-amino acid decarboxylase) | Ddc    | 24311  | 1,00 | down |
| 5868869 | 7086966 | 1095234 | dopey family member 2                                    | Dopey2 | 304077 | 1,41 | up   |
| 6645641 | 7086966 | 1095291 | dopey family member 2                                    | Dopey2 | 304077 | 1,11 | up   |
| 5936608 | 7230886 | 1449564 | doublecortin domain containing 5                         | Dcdc5  | 295980 | 2,86 | down |
| 6000916 | 7230886 | 1449550 | doublecortin domain containing 5                         | Dcdc5  | 295980 | 2,23 | down |
| 6062544 | 7230886 | 1449555 | doublecortin domain containing 5                         | Dcdc5  | 295980 | 1,63 | down |
| 6341157 | 7230886 | 1449553 | doublecortin domain containing 5                         | Dcdc5  | 295980 | 1,51 | down |
| 6227419 | 7230886 | 1449566 | doublecortin domain containing 5                         | Dcdc5  | 295980 | 1,39 | up   |
| 6289661 | 7230886 | 1449560 | doublecortin domain containing 5                         | Dcdc5  | 295980 | 1,39 | up   |
| 6474880 | 7230886 | 1449567 | doublecortin domain containing 5                         | Dcdc5  | 295980 | 1,36 | up   |
| 6384190 | 7230886 | 1449568 | doublecortin domain containing 5                         | Dcdc5  | 295980 | 1,31 | down |
| 5927867 | 7230886 | 1449565 | doublecortin domain containing 5                         | Dcdc5  | 295980 | 1,30 | up   |
| 6683853 | 7230886 | 1449559 | doublecortin domain containing 5                         | Dcdc5  | 295980 | 1,24 | up   |
| 5978512 | 7230886 | 1449552 | doublecortin domain containing 5                         | Dcdc5  | 295980 | 1,23 | up   |
| 6604939 | 7230886 | 1449562 | doublecortin domain containing 5                         | Dcdc5  | 295980 | 1,20 | down |
| 5684035 | 7230886 | 1449561 | doublecortin domain containing 5                         | Dcdc5  | 295980 | 1,20 | down |
| 6630498 | 7230886 | 1449532 | doublecortin domain containing 5                         | Dcdc5  | 295980 | 1,08 | up   |
| 6337443 | 7230886 | 1449560 | doublecortin domain containing 5                         | Dcdc5  | 295980 | 1,07 | down |
| 6592448 | 7230886 | 1449548 | doublecortin domain containing 5                         | Dcdc5  | 295980 | 1,07 | down |
| 6367549 | 7230886 | 1449548 | doublecortin domain containing 5                         | Dcdc5  | 295980 | 1,07 | down |
| 6158990 | 7230886 | 1449568 | doublecortin domain containing 5                         | Dcdc5  | 295980 | 1,04 | down |
| 6694322 | 7230886 | 1449554 | doublecortin domain containing 5                         | Dcdc5  | 295980 | 1,04 | up   |
| 6218698 | 7230886 | 1449561 | doublecortin domain containing 5                         | Dcdc5  | 295980 | 1,01 | up   |
| 6618447 | 7230886 | 1449556 | doublecortin domain containing 5                         | Dcdc5  | 295980 | 1,01 | up   |
| 6303437 | 7194202 | 1361298 | doublecortin-like kinase 1                               | Dclk1  | 83825  | 4,36 | up   |
| 6736405 | 7194202 | 1361295 | doublecortin-like kinase 1                               | Dclk1  | 83825  | 2,58 | up   |
| 6299017 | 7194202 | 1361308 | doublecortin-like kinase 1                               | Dclk1  | 83825  | 1,66 | up   |
| 5873889 | 7194202 | 1361296 | doublecortin-like kinase 1                               | Dclk1  | 83825  | 1,47 | up   |
| 6596800 | 7194202 | 1361307 | doublecortin-like kinase 1                               | Dclk1  | 83825  | 1,45 | down |
| 6261852 | 7194202 | 1361306 | doublecortin-like kinase 1                               | Dclk1  | 83825  | 1,44 | down |
| 6572695 | 7194202 | 1361301 | doublecortin-like kinase 1                               | Dclk1  | 83825  | 1,42 | down |
| 6515615 | 7194202 | 1361310 | doublecortin-like kinase 1                               | Dclk1  | 83825  | 1,40 | down |
| 6212388 | 7194202 | 1361305 | doublecortin-like kinase 1                               | Dclk1  | 83825  | 1,40 | down |
| 5943948 | 7194202 | 1361302 | doublecortin-like kinase 1                               | Dclk1  | 83825  | 1,29 | down |
| 6270264 | 7194202 | 1361304 | doublecortin-like kinase 1                               | Dclk1  | 83825  | 1,29 | down |
| 6124103 | 7194202 | 1361309 | doublecortin-like kinase 1                               | Dclk1  | 83825  | 1,26 | down |
| 6498992 | 7194202 | 1361299 | doublecortin-like kinase 1                               | Dclk1  | 83825  | 1,20 | down |
| 6308950 | 7194202 | 1361300 | doublecortin-like kinase 1                               | Dclk1  | 83825  | 1,11 | up   |
| 5710005 | 7194202 | 1361303 | doublecortin-like kinase 1                               | Dclk1  | 83825  | 1,04 | up   |
| 6039067 | 7091695 | 1107203 | downstream neighbor of SON                               | Donson | 288257 | 2,93 | down |
| 6670977 | 7091695 | 1107197 | downstream neighbor of SON                               | Donson | 288257 | 2,55 | down |
| 6009497 | 7091695 | 1107202 | downstream neighbor of SON                               | Donson | 288257 | 1,83 | down |

|         |         |         |                                            |         |        |      |      |
|---------|---------|---------|--------------------------------------------|---------|--------|------|------|
| 5680970 | 7091695 | 1107201 | downstream neighbor of SON                 | Donson  | 288257 | 1,68 | up   |
| 6131844 | 7091695 | 1107199 | downstream neighbor of SON                 | Donson  | 288257 | 1,56 | up   |
| 6713513 | 7091695 | 1107193 | downstream neighbor of SON                 | Donson  | 288257 | 1,42 | down |
| 5750345 | 7091695 | 1107201 | downstream neighbor of SON                 | Donson  | 288257 | 1,27 | up   |
| 6201046 | 7091695 | 1107196 | downstream neighbor of SON                 | Donson  | 288257 | 1,21 | up   |
| 5913626 | 7091695 | 1107194 | downstream neighbor of SON                 | Donson  | 288257 | 1,21 | down |
| 5804398 | 7091695 | 1107195 | downstream neighbor of SON                 | Donson  | 288257 | 1,18 | up   |
| 6448769 | 7091695 | 1107198 | downstream neighbor of SON                 | Donson  | 288257 | 1,18 | up   |
| 5975520 | 7091695 | 1107195 | downstream neighbor of SON                 | Donson  | 288257 | 1,08 | down |
| 6009807 | 7091695 | 1107200 | downstream neighbor of SON                 | Donson  | 288257 | 1,05 | up   |
| 6507962 | 7091695 | 1107197 | downstream neighbor of SON                 | Donson  | 288257 | 1,04 | down |
| 6431307 | 7148904 | 1248288 | DPH3, KTI11 homolog (S. cerevisiae)        | Dph3    | 680594 | 2,08 | down |
| 6683106 | 7148904 | 1248292 | DPH3, KTI11 homolog (S. cerevisiae)        | Dph3    | 680594 | 1,42 | up   |
| 6146146 | 7148904 | 1248292 | DPH3, KTI11 homolog (S. cerevisiae)        | Dph3    | 680594 | 1,38 | down |
| 6578079 | 7148904 | 1248291 | DPH3, KTI11 homolog (S. cerevisiae)        | Dph3    | 680594 | 1,29 | down |
| 6461393 | 7148904 | 1248293 | DPH3, KTI11 homolog (S. cerevisiae)        | Dph3    | 680594 | 1,21 | up   |
| 6430962 | 7148904 | 1248294 | DPH3, KTI11 homolog (S. cerevisiae)        | Dph3    | 680594 | 1,19 | up   |
| 6075582 | 7148904 | 1248292 | DPH3, KTI11 homolog (S. cerevisiae)        | Dph3    | 680594 | 1,14 | up   |
| 6344651 | 7148904 | 1248290 | DPH3, KTI11 homolog (S. cerevisiae)        | Dph3    | 680594 | 1,13 | down |
| 6320555 | 7148904 | 1248292 | DPH3, KTI11 homolog (S. cerevisiae)        | Dph3    | 680594 | 1,11 | down |
| 6239631 | 7148904 | 1248289 | DPH3, KTI11 homolog (S. cerevisiae)        | Dph3    | 680594 | 1,05 | up   |
| 6525025 | 7148904 | 1248292 | DPH3, KTI11 homolog (S. cerevisiae)        | Dph3    | 680594 | 1,05 | down |
| 6336368 | 7148904 | 1248294 | DPH3, KTI11 homolog (S. cerevisiae)        | Dph3    | 680594 | 1,03 | up   |
| 6471348 | 7148904 | 1248292 | DPH3, KTI11 homolog (S. cerevisiae)        | Dph3    | 680594 | 1,02 | down |
| 5886360 | 7343250 | 1728033 | dpy-19-like 1 (C. elegans)                 | Dpy1911 | 315496 | 1,11 | up   |
| 5841340 | 7232197 | 1453222 | DTW domain containing 1                    | Dtwd1   | 296119 | 2,37 | up   |
| 6014346 | 7232197 | 1453225 | DTW domain containing 1                    | Dtwd1   | 296119 | 1,70 | down |
| 6567506 | 7232197 | 1453224 | DTW domain containing 1                    | Dtwd1   | 296119 | 1,36 | up   |
| 6488483 | 7232197 | 1453226 | DTW domain containing 1                    | Dtwd1   | 296119 | 1,27 | up   |
| 6000302 | 7232197 | 1453222 | DTW domain containing 1                    | Dtwd1   | 296119 | 1,26 | up   |
| 5910729 | 7232197 | 1453224 | DTW domain containing 1                    | Dtwd1   | 296119 | 1,21 | up   |
| 6403170 | 7232197 | 1453223 | DTW domain containing 1                    | Dtwd1   | 296119 | 1,17 | down |
| 6449746 | 7232197 | 1453222 | DTW domain containing 1                    | Dtwd1   | 296119 | 1,10 | down |
| 6616896 | 7270397 | 1548128 | dual specificity phosphatase 16            | Dusp16  | 297682 | 2,09 | up   |
| 6009947 | 7270397 | 1548129 | dual specificity phosphatase 16            | Dusp16  | 297682 | 1,37 | up   |
| 6261493 | 7270397 | 1548126 | dual specificity phosphatase 16            | Dusp16  | 297682 | 1,35 | up   |
| 6590078 | 7270397 | 1548136 | dual specificity phosphatase 16            | Dusp16  | 297682 | 1,33 | up   |
| 5648471 | 7270397 | 1548132 | dual specificity phosphatase 16            | Dusp16  | 297682 | 1,29 | up   |
| 5740871 | 7270397 | 1548124 | dual specificity phosphatase 16            | Dusp16  | 297682 | 1,29 | down |
| 6266454 | 7270397 | 1548126 | dual specificity phosphatase 16            | Dusp16  | 297682 | 1,15 | up   |
| 6335314 | 7270397 | 1548126 | dual specificity phosphatase 16            | Dusp16  | 297682 | 1,11 | down |
| 5778207 | 7270397 | 1548125 | dual specificity phosphatase 16            | Dusp16  | 297682 | 1,09 | down |
| 5723281 | 7270397 | 1548137 | dual specificity phosphatase 16            | Dusp16  | 297682 | 1,04 | down |
| 6725725 | 7152381 | 1256261 | dual specificity phosphatase 26 (putative) | Dusp26  | 306527 | 2,21 | down |
| 6686915 | 7152381 | 1256260 | dual specificity phosphatase 26 (putative) | Dusp26  | 306527 | 1,97 | up   |
| 6562819 | 7152381 | 1256257 | dual specificity phosphatase 26 (putative) | Dusp26  | 306527 | 1,88 | up   |
| 5683364 | 7152381 | 1256261 | dual specificity phosphatase 26 (putative) | Dusp26  | 306527 | 1,44 | down |
| 6633322 | 7152381 | 1256259 | dual specificity phosphatase 26 (putative) | Dusp26  | 306527 | 1,12 | up   |
| 6020713 | 7152381 | 1256257 | dual specificity phosphatase 26 (putative) | Dusp26  | 306527 | 1,10 | down |
| 6115140 | 7152381 | 1256258 | dual specificity phosphatase 26 (putative) | Dusp26  | 306527 | 1,07 | up   |
| 6159700 | 7152381 | 1256257 | dual specificity phosphatase 26 (putative) | Dusp26  | 306527 | 1,04 | up   |
| 6093647 | 7378524 | 1817524 | dual specificity phosphatase 9             | Dusp9   | 293847 | 2,69 | up   |
| 6294227 | 7378524 | 1817525 | dual specificity phosphatase 9             | Dusp9   | 293847 | 1,88 | down |
| 6514457 | 7378524 | 1817522 | dual specificity phosphatase 9             | Dusp9   | 293847 | 1,52 | up   |
| 6135899 | 7378524 | 1817522 | dual specificity phosphatase 9             | Dusp9   | 293847 | 1,40 | down |
| 6030005 | 7378524 | 1817522 | dual specificity phosphatase 9             | Dusp9   | 293847 | 1,40 | down |
| 6044539 | 7378524 | 1817522 | dual specificity phosphatase 9             | Dusp9   | 293847 | 1,35 | up   |



|         |         |         |                                                                   |        |        |      |      |
|---------|---------|---------|-------------------------------------------------------------------|--------|--------|------|------|
| 6271944 | 7378524 | 1817521 | dual specificity phosphatase 9                                    | Dusp9  | 293847 | 1,16 | down |
| 5870078 | 7378524 | 1817524 | dual specificity phosphatase 9                                    | Dusp9  | 293847 | 1,13 | up   |
| 6129342 | 7378524 | 1817525 | dual specificity phosphatase 9                                    | Dusp9  | 293847 | 1,12 | down |
| 6112564 | 7378524 | 1817524 | dual specificity phosphatase 9                                    | Dusp9  | 293847 | 1,10 | down |
| 6103145 | 7378524 | 1817523 | dual specificity phosphatase 9                                    | Dusp9  | 293847 | 1,06 | down |
| 5973626 | 7378524 | 1817522 | dual specificity phosphatase 9                                    | Dusp9  | 293847 | 1,06 | up   |
| 6025075 | 7378524 | 1817522 | dual specificity phosphatase 9                                    | Dusp9  | 293847 | 1,02 | up   |
| 6388531 | 7378524 | 1817524 | dual specificity phosphatase 9                                    | Dusp9  | 293847 | 1,02 | up   |
| 5984108 | 7030127 | 960868  | dual-specificity tyrosine-(Y)-phosphorylation regulated kinase 1b | Dyrk1b | 308468 | 2,16 | up   |
| 5687963 | 7030127 | 960862  | dual-specificity tyrosine-(Y)-phosphorylation regulated kinase 1b | Dyrk1b | 308468 | 1,96 | down |
| 6593116 | 7030127 | 960867  | dual-specificity tyrosine-(Y)-phosphorylation regulated kinase 1b | Dyrk1b | 308468 | 1,80 | down |
| 6375438 | 7030127 | 960868  | dual-specificity tyrosine-(Y)-phosphorylation regulated kinase 1b | Dyrk1b | 308468 | 1,62 | up   |
| 5978373 | 7030127 | 960859  | dual-specificity tyrosine-(Y)-phosphorylation regulated kinase 1b | Dyrk1b | 308468 | 1,56 | down |
| 6555848 | 7030127 | 960860  | dual-specificity tyrosine-(Y)-phosphorylation regulated kinase 1b | Dyrk1b | 308468 | 1,55 | down |
| 6688185 | 7030127 | 960868  | dual-specificity tyrosine-(Y)-phosphorylation regulated kinase 1b | Dyrk1b | 308468 | 1,54 | up   |
| 5666604 | 7030127 | 960864  | dual-specificity tyrosine-(Y)-phosphorylation regulated kinase 1b | Dyrk1b | 308468 | 1,53 | down |
| 5695977 | 7030127 | 960858  | dual-specificity tyrosine-(Y)-phosphorylation regulated kinase 1b | Dyrk1b | 308468 | 1,43 | up   |
| 5682533 | 7030127 | 960861  | dual-specificity tyrosine-(Y)-phosphorylation regulated kinase 1b | Dyrk1b | 308468 | 1,42 | down |
| 5698747 | 7030127 | 960856  | dual-specificity tyrosine-(Y)-phosphorylation regulated kinase 1b | Dyrk1b | 308468 | 1,39 | up   |
| 5964627 | 7030127 | 960868  | dual-specificity tyrosine-(Y)-phosphorylation regulated kinase 1b | Dyrk1b | 308468 | 1,39 | up   |
| 6714713 | 7030127 | 960864  | dual-specificity tyrosine-(Y)-phosphorylation regulated kinase 1b | Dyrk1b | 308468 | 1,38 | down |
| 6186940 | 7030127 | 960865  | dual-specificity tyrosine-(Y)-phosphorylation regulated kinase 1b | Dyrk1b | 308468 | 1,28 | down |
| 5705103 | 7110959 | 1154682 | dual-specificity tyrosine-(Y)-phosphorylation regulated kinase 3  | Dyrk3  | 304775 | 2,26 | up   |
| 5892540 | 7110959 | 1154683 | dual-specificity tyrosine-(Y)-phosphorylation regulated kinase 3  | Dyrk3  | 304775 | 1,04 | up   |
| 5832832 | 7237624 | 1467197 | dynamin 1                                                         | Dnm1   | 140694 | 2,19 | up   |
| 6576409 | 7237624 | 1467201 | dynamin 1                                                         | Dnm1   | 140694 | 1,70 | down |
| 6573999 | 7237624 | 1467203 | dynamin 1                                                         | Dnm1   | 140694 | 1,54 | down |
| 5663636 | 7237624 | 1467199 | dynamin 1                                                         | Dnm1   | 140694 | 1,44 | down |
| 6074777 | 7237624 | 1467200 | dynamin 1                                                         | Dnm1   | 140694 | 1,43 | down |
| 6683224 | 7237624 | 1467192 | dynamin 1                                                         | Dnm1   | 140694 | 1,43 | up   |
| 6581845 | 7237624 | 1467189 | dynamin 1                                                         | Dnm1   | 140694 | 1,37 | up   |
| 6060168 | 7237624 | 1467205 | dynamin 1                                                         | Dnm1   | 140694 | 1,23 | down |
| 5682696 | 7237624 | 1467202 | dynamin 1                                                         | Dnm1   | 140694 | 1,22 | up   |
| 5799783 | 7237624 | 1467196 | dynamin 1                                                         | Dnm1   | 140694 | 1,22 | down |
| 5712949 | 7237624 | 1467194 | dynamin 1                                                         | Dnm1   | 140694 | 1,18 | up   |
| 5967542 | 7237624 | 1467187 | dynamin 1                                                         | Dnm1   | 140694 | 1,16 | down |
| 5913411 | 7237624 | 1467189 | dynamin 1                                                         | Dnm1   | 140694 | 1,16 | up   |
| 6188625 | 7237624 | 1467195 | dynamin 1                                                         | Dnm1   | 140694 | 1,14 | up   |
| 6614947 | 7237624 | 1467191 | dynamin 1                                                         | Dnm1   | 140694 | 1,11 | up   |
| 5731799 | 7237624 | 1467188 | dynamin 1                                                         | Dnm1   | 140694 | 1,10 | down |
| 6517671 | 7237624 | 1467188 | dynamin 1                                                         | Dnm1   | 140694 | 1,09 | up   |
| 5912055 | 7237624 | 1467206 | dynamin 1                                                         | Dnm1   | 140694 | 1,05 | down |
| 6100656 | 7237624 | 1467204 | dynamin 1                                                         | Dnm1   | 140694 | 1,05 | up   |
| 5712111 | 7237624 | 1467190 | dynamin 1                                                         | Dnm1   | 140694 | 1,04 | down |
| 5951251 | 7237624 | 1467198 | dynamin 1                                                         | Dnm1   | 140694 | 1,03 | down |
| 6596632 | 7237624 | 1467193 | dynamin 1                                                         | Dnm1   | 140694 | 1,01 | down |
| 6061791 | 7113169 | 1160175 | dynamin 3                                                         | Dnm3   | 171574 | 2,05 | down |
| 6383892 | 7113169 | 1160181 | dynamin 3                                                         | Dnm3   | 171574 | 1,67 | up   |
| 6302037 | 7113169 | 1160192 | dynamin 3                                                         | Dnm3   | 171574 | 1,66 | up   |
| 5771489 | 7113169 | 1160174 | dynamin 3                                                         | Dnm3   | 171574 | 1,45 | down |
| 5650954 | 7113169 | 1160179 | dynamin 3                                                         | Dnm3   | 171574 | 1,32 | down |
| 5799664 | 7113169 | 1160174 | dynamin 3                                                         | Dnm3   | 171574 | 1,29 | down |
| 5644448 | 7113169 | 1160193 | dynamin 3                                                         | Dnm3   | 171574 | 1,27 | down |
| 5684071 | 7113169 | 1160193 | dynamin 3                                                         | Dnm3   | 171574 | 1,20 | down |
| 6647235 | 7113169 | 1160172 | dynamin 3                                                         | Dnm3   | 171574 | 1,18 | down |
| 5763214 | 7113169 | 1160177 | dynamin 3                                                         | Dnm3   | 171574 | 1,14 | up   |
| 6662428 | 7113169 | 1160173 | dynamin 3                                                         | Dnm3   | 171574 | 1,14 | down |

|         |         |         |                                    |         |        |      |      |
|---------|---------|---------|------------------------------------|---------|--------|------|------|
| 6004997 | 7113169 | 1160186 | dynamamin 3                        | Dnm3    | 171574 | 1,14 | down |
| 6687289 | 7113169 | 1160191 | dynamamin 3                        | Dnm3    | 171574 | 1,12 | up   |
| 6641411 | 7113169 | 1160187 | dynamamin 3                        | Dnm3    | 171574 | 1,09 | up   |
| 6531655 | 7113169 | 1160182 | dynamamin 3                        | Dnm3    | 171574 | 1,07 | down |
| 6055872 | 7113169 | 1160185 | dynamamin 3                        | Dnm3    | 171574 | 1,07 | down |
| 6049928 | 7113169 | 1160178 | dynamamin 3                        | Dnm3    | 171574 | 1,05 | down |
| 6678541 | 7113169 | 1160183 | dynamamin 3                        | Dnm3    | 171574 | 1,05 | up   |
| 5697034 | 7113169 | 1160174 | dynamamin 3                        | Dnm3    | 171574 | 1,04 | down |
| 5771944 | 7113169 | 1160188 | dynamamin 3                        | Dnm3    | 171574 | 1,03 | down |
| 6589493 | 7113169 | 1160175 | dynamamin 3                        | Dnm3    | 171574 | 1,02 | down |
| 6620487 | 7113169 | 1160189 | dynamamin 3                        | Dnm3    | 171574 | 1,01 | down |
| 6040655 | 7113169 | 1160172 | dynamamin 3                        | Dnm3    | 171574 | 1,00 | up   |
| 6694062 | 7113169 | 1160176 | dynamamin 3                        | Dnm3    | 171574 | 1,00 | down |
| 6470809 | 7113169 | 1160190 | dynamamin 3                        | Dnm3    | 171574 | 1,00 | down |
| 5659312 | 7113169 | 1160184 | dynamamin 3                        | Dnm3    | 171574 | 1,00 | up   |
| 5968420 | 7113169 | 1160175 | dynamamin 3                        | Dnm3    | 171574 | 1,00 | up   |
| 6513105 | 7113169 | 1160180 | dynamamin 3                        | Dnm3    | 171574 | 1,00 | up   |
| 5820112 | 7341958 | 1724925 | dynein cytoplasmic 2 heavy chain 1 | Dync2h1 | 65209  | 2,12 | down |
| 6068207 | 7341958 | 1724935 | dynein cytoplasmic 2 heavy chain 1 | Dync2h1 | 65209  | 2,00 | down |
| 5948194 | 7341958 | 1724898 | dynein cytoplasmic 2 heavy chain 1 | Dync2h1 | 65209  | 1,97 | up   |
| 6292574 | 7341958 | 1724856 | dynein cytoplasmic 2 heavy chain 1 | Dync2h1 | 65209  | 1,96 | down |
| 5702530 | 7341958 | 1724890 | dynein cytoplasmic 2 heavy chain 1 | Dync2h1 | 65209  | 1,95 | up   |
| 5885933 | 7341958 | 1724899 | dynein cytoplasmic 2 heavy chain 1 | Dync2h1 | 65209  | 1,85 | up   |
| 6102425 | 7341958 | 1724929 | dynein cytoplasmic 2 heavy chain 1 | Dync2h1 | 65209  | 1,73 | down |
| 6217980 | 7341958 | 1724859 | dynein cytoplasmic 2 heavy chain 1 | Dync2h1 | 65209  | 1,73 | up   |
| 6044447 | 7341958 | 1724886 | dynein cytoplasmic 2 heavy chain 1 | Dync2h1 | 65209  | 1,70 | down |
| 5967571 | 7341958 | 1724877 | dynein cytoplasmic 2 heavy chain 1 | Dync2h1 | 65209  | 1,67 | up   |
| 5829549 | 7341958 | 1724888 | dynein cytoplasmic 2 heavy chain 1 | Dync2h1 | 65209  | 1,63 | down |
| 6681831 | 7341958 | 1724873 | dynein cytoplasmic 2 heavy chain 1 | Dync2h1 | 65209  | 1,61 | down |
| 6555997 | 7341958 | 1724921 | dynein cytoplasmic 2 heavy chain 1 | Dync2h1 | 65209  | 1,57 | down |
| 6567683 | 7341958 | 1724876 | dynein cytoplasmic 2 heavy chain 1 | Dync2h1 | 65209  | 1,54 | down |
| 6663920 | 7341958 | 1724916 | dynein cytoplasmic 2 heavy chain 1 | Dync2h1 | 65209  | 1,54 | down |
| 6592290 | 7341958 | 1724857 | dynein cytoplasmic 2 heavy chain 1 | Dync2h1 | 65209  | 1,54 | up   |
| 6036434 | 7341958 | 1724915 | dynein cytoplasmic 2 heavy chain 1 | Dync2h1 | 65209  | 1,53 | up   |
| 6201376 | 7341958 | 1724928 | dynein cytoplasmic 2 heavy chain 1 | Dync2h1 | 65209  | 1,50 | up   |
| 6676940 | 7341958 | 1724858 | dynein cytoplasmic 2 heavy chain 1 | Dync2h1 | 65209  | 1,48 | up   |
| 6344873 | 7341958 | 1724879 | dynein cytoplasmic 2 heavy chain 1 | Dync2h1 | 65209  | 1,45 | up   |
| 6586561 | 7341958 | 1724875 | dynein cytoplasmic 2 heavy chain 1 | Dync2h1 | 65209  | 1,44 | down |
| 6590108 | 7341958 | 1724892 | dynein cytoplasmic 2 heavy chain 1 | Dync2h1 | 65209  | 1,42 | up   |
| 5837033 | 7341958 | 1724865 | dynein cytoplasmic 2 heavy chain 1 | Dync2h1 | 65209  | 1,41 | down |
| 6205844 | 7341958 | 1724907 | dynein cytoplasmic 2 heavy chain 1 | Dync2h1 | 65209  | 1,41 | down |
| 6242694 | 7341958 | 1724914 | dynein cytoplasmic 2 heavy chain 1 | Dync2h1 | 65209  | 1,39 | up   |
| 6026216 | 7341958 | 1724925 | dynein cytoplasmic 2 heavy chain 1 | Dync2h1 | 65209  | 1,37 | up   |
| 6378332 | 7341958 | 1724861 | dynein cytoplasmic 2 heavy chain 1 | Dync2h1 | 65209  | 1,36 | up   |
| 5916736 | 7341958 | 1724936 | dynein cytoplasmic 2 heavy chain 1 | Dync2h1 | 65209  | 1,35 | down |
| 5793480 | 7341958 | 1724867 | dynein cytoplasmic 2 heavy chain 1 | Dync2h1 | 65209  | 1,34 | down |
| 6490655 | 7341958 | 1724895 | dynein cytoplasmic 2 heavy chain 1 | Dync2h1 | 65209  | 1,32 | down |
| 6544678 | 7341958 | 1724924 | dynein cytoplasmic 2 heavy chain 1 | Dync2h1 | 65209  | 1,32 | down |
| 6479007 | 7341958 | 1724903 | dynein cytoplasmic 2 heavy chain 1 | Dync2h1 | 65209  | 1,31 | down |
| 6242208 | 7341958 | 1724912 | dynein cytoplasmic 2 heavy chain 1 | Dync2h1 | 65209  | 1,31 | up   |
| 5908892 | 7341958 | 1724922 | dynein cytoplasmic 2 heavy chain 1 | Dync2h1 | 65209  | 1,30 | down |
| 5844254 | 7341958 | 1724909 | dynein cytoplasmic 2 heavy chain 1 | Dync2h1 | 65209  | 1,29 | down |
| 6453372 | 7341958 | 1724887 | dynein cytoplasmic 2 heavy chain 1 | Dync2h1 | 65209  | 1,26 | up   |
| 6189846 | 7341958 | 1724913 | dynein cytoplasmic 2 heavy chain 1 | Dync2h1 | 65209  | 1,26 | up   |
| 6158507 | 7341958 | 1724941 | dynein cytoplasmic 2 heavy chain 1 | Dync2h1 | 65209  | 1,25 | down |
| 6436544 | 7341958 | 1724882 | dynein cytoplasmic 2 heavy chain 1 | Dync2h1 | 65209  | 1,24 | up   |
| 6523632 | 7341958 | 1724860 | dynein cytoplasmic 2 heavy chain 1 | Dync2h1 | 65209  | 1,24 | down |

|         |         |         |                                    |         |        |      |      |
|---------|---------|---------|------------------------------------|---------|--------|------|------|
| 6029328 | 7341958 | 1724902 | dynein cytoplasmic 2 heavy chain 1 | Dync2h1 | 65209  | 1,23 | up   |
| 6214464 | 7341958 | 1724940 | dynein cytoplasmic 2 heavy chain 1 | Dync2h1 | 65209  | 1,22 | up   |
| 5829016 | 7341958 | 1724940 | dynein cytoplasmic 2 heavy chain 1 | Dync2h1 | 65209  | 1,22 | down |
| 6584192 | 7341958 | 1724911 | dynein cytoplasmic 2 heavy chain 1 | Dync2h1 | 65209  | 1,22 | down |
| 5717826 | 7341958 | 1724893 | dynein cytoplasmic 2 heavy chain 1 | Dync2h1 | 65209  | 1,21 | up   |
| 5807938 | 7341958 | 1724880 | dynein cytoplasmic 2 heavy chain 1 | Dync2h1 | 65209  | 1,20 | down |
| 6284786 | 7341958 | 1724885 | dynein cytoplasmic 2 heavy chain 1 | Dync2h1 | 65209  | 1,19 | up   |
| 6521692 | 7341958 | 1724914 | dynein cytoplasmic 2 heavy chain 1 | Dync2h1 | 65209  | 1,19 | up   |
| 6127044 | 7341958 | 1724872 | dynein cytoplasmic 2 heavy chain 1 | Dync2h1 | 65209  | 1,19 | up   |
| 6297447 | 7341958 | 1724900 | dynein cytoplasmic 2 heavy chain 1 | Dync2h1 | 65209  | 1,18 | down |
| 5729938 | 7341958 | 1724874 | dynein cytoplasmic 2 heavy chain 1 | Dync2h1 | 65209  | 1,17 | down |
| 5930211 | 7341958 | 1724917 | dynein cytoplasmic 2 heavy chain 1 | Dync2h1 | 65209  | 1,16 | down |
| 6320297 | 7341958 | 1724864 | dynein cytoplasmic 2 heavy chain 1 | Dync2h1 | 65209  | 1,16 | down |
| 5715951 | 7341958 | 1724906 | dynein cytoplasmic 2 heavy chain 1 | Dync2h1 | 65209  | 1,15 | up   |
| 6011086 | 7341958 | 1724902 | dynein cytoplasmic 2 heavy chain 1 | Dync2h1 | 65209  | 1,15 | up   |
| 6097613 | 7341958 | 1724881 | dynein cytoplasmic 2 heavy chain 1 | Dync2h1 | 65209  | 1,14 | up   |
| 6215898 | 7341958 | 1724930 | dynein cytoplasmic 2 heavy chain 1 | Dync2h1 | 65209  | 1,14 | up   |
| 6697093 | 7341958 | 1724939 | dynein cytoplasmic 2 heavy chain 1 | Dync2h1 | 65209  | 1,14 | down |
| 5963828 | 7341958 | 1724934 | dynein cytoplasmic 2 heavy chain 1 | Dync2h1 | 65209  | 1,13 | down |
| 5758738 | 7341958 | 1724891 | dynein cytoplasmic 2 heavy chain 1 | Dync2h1 | 65209  | 1,13 | down |
| 6582933 | 7341958 | 1724889 | dynein cytoplasmic 2 heavy chain 1 | Dync2h1 | 65209  | 1,13 | up   |
| 6234683 | 7341958 | 1724870 | dynein cytoplasmic 2 heavy chain 1 | Dync2h1 | 65209  | 1,11 | up   |
| 6561947 | 7341958 | 1724926 | dynein cytoplasmic 2 heavy chain 1 | Dync2h1 | 65209  | 1,11 | up   |
| 5684360 | 7341958 | 1724932 | dynein cytoplasmic 2 heavy chain 1 | Dync2h1 | 65209  | 1,10 | up   |
| 6282966 | 7341958 | 1724901 | dynein cytoplasmic 2 heavy chain 1 | Dync2h1 | 65209  | 1,10 | up   |
| 6552315 | 7341958 | 1724931 | dynein cytoplasmic 2 heavy chain 1 | Dync2h1 | 65209  | 1,10 | up   |
| 5942091 | 7341958 | 1724920 | dynein cytoplasmic 2 heavy chain 1 | Dync2h1 | 65209  | 1,10 | up   |
| 5692975 | 7341958 | 1724927 | dynein cytoplasmic 2 heavy chain 1 | Dync2h1 | 65209  | 1,09 | down |
| 5871278 | 7341958 | 1724868 | dynein cytoplasmic 2 heavy chain 1 | Dync2h1 | 65209  | 1,09 | down |
| 5872673 | 7341958 | 1724863 | dynein cytoplasmic 2 heavy chain 1 | Dync2h1 | 65209  | 1,09 | up   |
| 6479342 | 7341958 | 1724896 | dynein cytoplasmic 2 heavy chain 1 | Dync2h1 | 65209  | 1,08 | down |
| 6408902 | 7341958 | 1724937 | dynein cytoplasmic 2 heavy chain 1 | Dync2h1 | 65209  | 1,07 | down |
| 5658856 | 7341958 | 1724864 | dynein cytoplasmic 2 heavy chain 1 | Dync2h1 | 65209  | 1,07 | down |
| 6488952 | 7341958 | 1724884 | dynein cytoplasmic 2 heavy chain 1 | Dync2h1 | 65209  | 1,06 | down |
| 5776526 | 7341958 | 1724883 | dynein cytoplasmic 2 heavy chain 1 | Dync2h1 | 65209  | 1,06 | up   |
| 5842887 | 7341958 | 1724905 | dynein cytoplasmic 2 heavy chain 1 | Dync2h1 | 65209  | 1,06 | up   |
| 5972479 | 7341958 | 1724933 | dynein cytoplasmic 2 heavy chain 1 | Dync2h1 | 65209  | 1,06 | up   |
| 6202864 | 7341958 | 1724910 | dynein cytoplasmic 2 heavy chain 1 | Dync2h1 | 65209  | 1,05 | up   |
| 6280455 | 7341958 | 1724894 | dynein cytoplasmic 2 heavy chain 1 | Dync2h1 | 65209  | 1,05 | up   |
| 6483710 | 7341958 | 1724938 | dynein cytoplasmic 2 heavy chain 1 | Dync2h1 | 65209  | 1,05 | up   |
| 5668465 | 7341958 | 1724878 | dynein cytoplasmic 2 heavy chain 1 | Dync2h1 | 65209  | 1,05 | down |
| 6375019 | 7341958 | 1724895 | dynein cytoplasmic 2 heavy chain 1 | Dync2h1 | 65209  | 1,03 | down |
| 5651291 | 7341958 | 1724910 | dynein cytoplasmic 2 heavy chain 1 | Dync2h1 | 65209  | 1,03 | up   |
| 5849339 | 7341958 | 1724908 | dynein cytoplasmic 2 heavy chain 1 | Dync2h1 | 65209  | 1,02 | up   |
| 6080348 | 7341958 | 1724866 | dynein cytoplasmic 2 heavy chain 1 | Dync2h1 | 65209  | 1,02 | up   |
| 6068251 | 7341958 | 1724904 | dynein cytoplasmic 2 heavy chain 1 | Dync2h1 | 65209  | 1,02 | up   |
| 6686448 | 7341958 | 1724919 | dynein cytoplasmic 2 heavy chain 1 | Dync2h1 | 65209  | 1,02 | up   |
| 6636401 | 7341958 | 1724897 | dynein cytoplasmic 2 heavy chain 1 | Dync2h1 | 65209  | 1,02 | down |
| 6727599 | 7341958 | 1724906 | dynein cytoplasmic 2 heavy chain 1 | Dync2h1 | 65209  | 1,02 | up   |
| 5658038 | 7341958 | 1724871 | dynein cytoplasmic 2 heavy chain 1 | Dync2h1 | 65209  | 1,01 | up   |
| 6110443 | 7341958 | 1724862 | dynein cytoplasmic 2 heavy chain 1 | Dync2h1 | 65209  | 1,01 | down |
| 6003291 | 7341958 | 1724918 | dynein cytoplasmic 2 heavy chain 1 | Dync2h1 | 65209  | 1,01 | up   |
| 5871606 | 7341958 | 1724923 | dynein cytoplasmic 2 heavy chain 1 | Dync2h1 | 65209  | 1,00 | up   |
| 6732672 | 7341958 | 1724941 | dynein cytoplasmic 2 heavy chain 1 | Dync2h1 | 65209  | 1,00 | down |
| 6689413 | 7341958 | 1724869 | dynein cytoplasmic 2 heavy chain 1 | Dync2h1 | 65209  | 1,00 | down |
| 6445768 | 7084792 | 1090327 | dynein, axonemal, heavy chain 17   | Dnah17  | 287845 | 2,25 | up   |
| 5641763 | 7084792 | 1090355 | dynein, axonemal, heavy chain 17   | Dnah17  | 287845 | 1,89 | down |

|         |         |         |                                        |        |        |      |      |
|---------|---------|---------|----------------------------------------|--------|--------|------|------|
| 6031419 | 7084792 | 1090343 | dynein, axonemal, heavy chain 17       | Dnah17 | 287845 | 1,73 | down |
| 6167620 | 7084792 | 1090342 | dynein, axonemal, heavy chain 17       | Dnah17 | 287845 | 1,60 | down |
| 6370621 | 7084792 | 1090358 | dynein, axonemal, heavy chain 17       | Dnah17 | 287845 | 1,55 | down |
| 5755748 | 7084792 | 1090330 | dynein, axonemal, heavy chain 17       | Dnah17 | 287845 | 1,52 | down |
| 5737709 | 7084792 | 1090350 | dynein, axonemal, heavy chain 17       | Dnah17 | 287845 | 1,42 | down |
| 6517275 | 7084792 | 1090360 | dynein, axonemal, heavy chain 17       | Dnah17 | 287845 | 1,42 | down |
| 6596019 | 7084792 | 1090336 | dynein, axonemal, heavy chain 17       | Dnah17 | 287845 | 1,39 | down |
| 5939635 | 7084792 | 1090325 | dynein, axonemal, heavy chain 17       | Dnah17 | 287845 | 1,38 | up   |
| 6458626 | 7084792 | 1090359 | dynein, axonemal, heavy chain 17       | Dnah17 | 287845 | 1,31 | down |
| 6194173 | 7084792 | 1090352 | dynein, axonemal, heavy chain 17       | Dnah17 | 287845 | 1,27 | up   |
| 5660132 | 7084792 | 1090348 | dynein, axonemal, heavy chain 17       | Dnah17 | 287845 | 1,23 | up   |
| 5721626 | 7084792 | 1090320 | dynein, axonemal, heavy chain 17       | Dnah17 | 287845 | 1,21 | down |
| 5995495 | 7084792 | 1090332 | dynein, axonemal, heavy chain 17       | Dnah17 | 287845 | 1,20 | down |
| 6274912 | 7084792 | 1090353 | dynein, axonemal, heavy chain 17       | Dnah17 | 287845 | 1,19 | down |
| 5961880 | 7084792 | 1090324 | dynein, axonemal, heavy chain 17       | Dnah17 | 287845 | 1,18 | down |
| 6364087 | 7084792 | 1090346 | dynein, axonemal, heavy chain 17       | Dnah17 | 287845 | 1,17 | down |
| 6253641 | 7084792 | 1090326 | dynein, axonemal, heavy chain 17       | Dnah17 | 287845 | 1,17 | up   |
| 5707272 | 7084792 | 1090323 | dynein, axonemal, heavy chain 17       | Dnah17 | 287845 | 1,14 | up   |
| 5986280 | 7084792 | 1090320 | dynein, axonemal, heavy chain 17       | Dnah17 | 287845 | 1,14 | down |
| 5858124 | 7084792 | 1090349 | dynein, axonemal, heavy chain 17       | Dnah17 | 287845 | 1,13 | up   |
| 5788559 | 7084792 | 1090331 | dynein, axonemal, heavy chain 17       | Dnah17 | 287845 | 1,12 | down |
| 6404467 | 7084792 | 1090356 | dynein, axonemal, heavy chain 17       | Dnah17 | 287845 | 1,12 | up   |
| 6368355 | 7084792 | 1090338 | dynein, axonemal, heavy chain 17       | Dnah17 | 287845 | 1,11 | up   |
| 6705708 | 7084792 | 1090357 | dynein, axonemal, heavy chain 17       | Dnah17 | 287845 | 1,10 | down |
| 6303238 | 7084792 | 1090354 | dynein, axonemal, heavy chain 17       | Dnah17 | 287845 | 1,07 | down |
| 6667804 | 7084792 | 1090344 | dynein, axonemal, heavy chain 17       | Dnah17 | 287845 | 1,07 | up   |
| 6371978 | 7084792 | 1090337 | dynein, axonemal, heavy chain 17       | Dnah17 | 287845 | 1,07 | up   |
| 6668823 | 7084792 | 1090347 | dynein, axonemal, heavy chain 17       | Dnah17 | 287845 | 1,06 | up   |
| 6434953 | 7084792 | 1090345 | dynein, axonemal, heavy chain 17       | Dnah17 | 287845 | 1,05 | down |
| 5848419 | 7084792 | 1090328 | dynein, axonemal, heavy chain 17       | Dnah17 | 287845 | 1,05 | up   |
| 6743469 | 7084792 | 1090321 | dynein, axonemal, heavy chain 17       | Dnah17 | 287845 | 1,05 | up   |
| 6498235 | 7084792 | 1090333 | dynein, axonemal, heavy chain 17       | Dnah17 | 287845 | 1,05 | up   |
| 6358718 | 7084792 | 1090335 | dynein, axonemal, heavy chain 17       | Dnah17 | 287845 | 1,04 | down |
| 6020605 | 7084792 | 1090334 | dynein, axonemal, heavy chain 17       | Dnah17 | 287845 | 1,03 | down |
| 5691082 | 7084792 | 1090322 | dynein, axonemal, heavy chain 17       | Dnah17 | 287845 | 1,02 | down |
| 6368525 | 7217434 | 1416395 | dynein, axonemal, heavy chain 8        | Dnah8  | 207117 | 1,83 | up   |
| 5731552 | 7217434 | 1416391 | dynein, axonemal, heavy chain 8        | Dnah8  | 207117 | 1,36 | up   |
| 5654807 | 7217434 | 1416396 | dynein, axonemal, heavy chain 8        | Dnah8  | 207117 | 1,19 | down |
| 6640523 | 7217434 | 1416394 | dynein, axonemal, heavy chain 8        | Dnah8  | 207117 | 1,11 | down |
| 6400165 | 7073553 | 1064694 | dynein, axonemal, intermediate chain 2 | Dnai2  | 360654 | 2,42 | up   |
| 5693842 | 7073553 | 1064683 | dynein, axonemal, intermediate chain 2 | Dnai2  | 360654 | 1,58 | up   |
| 5977252 | 7073553 | 1064692 | dynein, axonemal, intermediate chain 2 | Dnai2  | 360654 | 1,55 | down |
| 5623352 | 7073553 | 1064694 | dynein, axonemal, intermediate chain 2 | Dnai2  | 360654 | 1,28 | up   |
| 6383276 | 7073553 | 1064690 | dynein, axonemal, intermediate chain 2 | Dnai2  | 360654 | 1,21 | down |
| 6288136 | 7073553 | 1064686 | dynein, axonemal, intermediate chain 2 | Dnai2  | 360654 | 1,15 | up   |
| 5742169 | 7073553 | 1064691 | dynein, axonemal, intermediate chain 2 | Dnai2  | 360654 | 1,13 | up   |
| 6454034 | 7073553 | 1064685 | dynein, axonemal, intermediate chain 2 | Dnai2  | 360654 | 1,12 | down |
| 5838635 | 7073553 | 1064693 | dynein, axonemal, intermediate chain 2 | Dnai2  | 360654 | 1,07 | down |
| 6602864 | 7073553 | 1064694 | dynein, axonemal, intermediate chain 2 | Dnai2  | 360654 | 1,05 | down |
| 6019455 | 7073553 | 1064687 | dynein, axonemal, intermediate chain 2 | Dnai2  | 360654 | 1,04 | down |
| 6476899 | 7073553 | 1064689 | dynein, axonemal, intermediate chain 2 | Dnai2  | 360654 | 1,04 | up   |
| 6579031 | 7073553 | 1064684 | dynein, axonemal, intermediate chain 2 | Dnai2  | 360654 | 1,02 | down |
| 6438916 | 7073553 | 1064682 | dynein, axonemal, intermediate chain 2 | Dnai2  | 360654 | 1,02 | down |
| 6210202 | 7073553 | 1064688 | dynein, axonemal, intermediate chain 2 | Dnai2  | 360654 | 1,00 | up   |
| 5850192 | 7329850 | 1695016 | dynein, axonemal, light chain 4        | Dnal4  | 300078 | 2,05 | up   |
| 5941396 | 7329850 | 1695013 | dynein, axonemal, light chain 4        | Dnal4  | 300078 | 1,71 | up   |
| 6693083 | 7329850 | 1695014 | dynein, axonemal, light chain 4        | Dnal4  | 300078 | 1,68 | down |

|         |         |         |                                 |       |        |      |      |
|---------|---------|---------|---------------------------------|-------|--------|------|------|
| 6653806 | 7329850 | 1695014 | dynein, axonemal, light chain 4 | Dnal4 | 300078 | 1,65 | down |
| 6459587 | 7329850 | 1695013 | dynein, axonemal, light chain 4 | Dnal4 | 300078 | 1,22 | up   |
| 6354349 | 7329850 | 1695016 | dynein, axonemal, light chain 4 | Dnal4 | 300078 | 1,22 | up   |
| 6212354 | 7329850 | 1695015 | dynein, axonemal, light chain 4 | Dnal4 | 300078 | 1,04 | up   |
| 6152009 | 7255522 | 1511388 | dysferlin                       | Dysf  | 312492 | 2,85 | down |
| 6290846 | 7255522 | 1511425 | dysferlin                       | Dysf  | 312492 | 1,88 | up   |
| 6592216 | 7255522 | 1511408 | dysferlin                       | Dysf  | 312492 | 1,86 | up   |
| 6287836 | 7255522 | 1511391 | dysferlin                       | Dysf  | 312492 | 1,84 | up   |
| 6489486 | 7255522 | 1511426 | dysferlin                       | Dysf  | 312492 | 1,81 | up   |
| 6123826 | 7255522 | 1511432 | dysferlin                       | Dysf  | 312492 | 1,67 | down |
| 5699977 | 7255522 | 1511445 | dysferlin                       | Dysf  | 312492 | 1,61 | down |
| 6400474 | 7255522 | 1511395 | dysferlin                       | Dysf  | 312492 | 1,56 | down |
| 6078115 | 7255522 | 1511396 | dysferlin                       | Dysf  | 312492 | 1,51 | down |
| 6461904 | 7255522 | 1511442 | dysferlin                       | Dysf  | 312492 | 1,48 | up   |
| 6505561 | 7255522 | 1511444 | dysferlin                       | Dysf  | 312492 | 1,44 | down |
| 5793017 | 7255522 | 1511406 | dysferlin                       | Dysf  | 312492 | 1,40 | up   |
| 6392024 | 7255522 | 1511446 | dysferlin                       | Dysf  | 312492 | 1,40 | up   |
| 5800533 | 7255522 | 1511392 | dysferlin                       | Dysf  | 312492 | 1,35 | down |
| 6587369 | 7255522 | 1511407 | dysferlin                       | Dysf  | 312492 | 1,35 | up   |
| 6062672 | 7255522 | 1511424 | dysferlin                       | Dysf  | 312492 | 1,33 | down |
| 6427600 | 7255522 | 1511416 | dysferlin                       | Dysf  | 312492 | 1,33 | up   |
| 5651052 | 7255522 | 1511412 | dysferlin                       | Dysf  | 312492 | 1,29 | up   |
| 5653569 | 7255522 | 1511400 | dysferlin                       | Dysf  | 312492 | 1,29 | up   |
| 5907081 | 7255522 | 1511398 | dysferlin                       | Dysf  | 312492 | 1,27 | down |
| 6534952 | 7255522 | 1511429 | dysferlin                       | Dysf  | 312492 | 1,26 | down |
| 6646999 | 7255522 | 1511440 | dysferlin                       | Dysf  | 312492 | 1,26 | up   |
| 5658181 | 7255522 | 1511438 | dysferlin                       | Dysf  | 312492 | 1,25 | up   |
| 6679059 | 7255522 | 1511415 | dysferlin                       | Dysf  | 312492 | 1,25 | down |
| 5752676 | 7255522 | 1511437 | dysferlin                       | Dysf  | 312492 | 1,23 | up   |
| 5741670 | 7255522 | 1511397 | dysferlin                       | Dysf  | 312492 | 1,19 | down |
| 5925271 | 7255522 | 1511443 | dysferlin                       | Dysf  | 312492 | 1,19 | down |
| 6111279 | 7255522 | 1511448 | dysferlin                       | Dysf  | 312492 | 1,19 | down |
| 5761045 | 7255522 | 1511435 | dysferlin                       | Dysf  | 312492 | 1,17 | down |
| 5820197 | 7255522 | 1511405 | dysferlin                       | Dysf  | 312492 | 1,17 | up   |
| 5620888 | 7255522 | 1511399 | dysferlin                       | Dysf  | 312492 | 1,16 | up   |
| 6402524 | 7255522 | 1511447 | dysferlin                       | Dysf  | 312492 | 1,15 | down |
| 6489524 | 7255522 | 1511390 | dysferlin                       | Dysf  | 312492 | 1,14 | down |
| 5928579 | 7255522 | 1511434 | dysferlin                       | Dysf  | 312492 | 1,13 | up   |
| 6311673 | 7255522 | 1511417 | dysferlin                       | Dysf  | 312492 | 1,10 | up   |
| 6206117 | 7255522 | 1511422 | dysferlin                       | Dysf  | 312492 | 1,10 | up   |
| 6715770 | 7255522 | 1511393 | dysferlin                       | Dysf  | 312492 | 1,08 | up   |
| 6340637 | 7255522 | 1511418 | dysferlin                       | Dysf  | 312492 | 1,07 | up   |
| 5895526 | 7255522 | 1511430 | dysferlin                       | Dysf  | 312492 | 1,06 | up   |
| 6172479 | 7255522 | 1511421 | dysferlin                       | Dysf  | 312492 | 1,05 | up   |
| 5739264 | 7255522 | 1511431 | dysferlin                       | Dysf  | 312492 | 1,05 | down |
| 6237336 | 7255522 | 1511402 | dysferlin                       | Dysf  | 312492 | 1,04 | up   |
| 6184841 | 7255522 | 1511436 | dysferlin                       | Dysf  | 312492 | 1,04 | up   |
| 5883687 | 7255522 | 1511394 | dysferlin                       | Dysf  | 312492 | 1,04 | down |
| 5863570 | 7255522 | 1511439 | dysferlin                       | Dysf  | 312492 | 1,04 | up   |
| 5765792 | 7255522 | 1511441 | dysferlin                       | Dysf  | 312492 | 1,03 | up   |
| 6370749 | 7255522 | 1511404 | dysferlin                       | Dysf  | 312492 | 1,02 | up   |
| 6387919 | 7255522 | 1511414 | dysferlin                       | Dysf  | 312492 | 1,02 | down |
| 6258031 | 7255522 | 1511447 | dysferlin                       | Dysf  | 312492 | 1,01 | up   |
| 6065374 | 7255522 | 1511427 | dysferlin                       | Dysf  | 312492 | 1,01 | up   |
| 6414617 | 7255522 | 1511413 | dysferlin                       | Dysf  | 312492 | 1,00 | up   |
| 6328219 | 7353232 | 1752843 | dystonin                        | Dst   | 316313 | 1,61 | down |
| 6016277 | 7353232 | 1752779 | dystonin                        | Dst   | 316313 | 1,58 | down |

|         |         |         |          |     |        |      |      |
|---------|---------|---------|----------|-----|--------|------|------|
| 5733155 | 7353232 | 1752815 | dystonin | Dst | 316313 | 1,50 | up   |
| 6284444 | 7353232 | 1752837 | dystonin | Dst | 316313 | 1,50 | down |
| 5623760 | 7353232 | 1752780 | dystonin | Dst | 316313 | 1,46 | down |
| 6106774 | 7353232 | 1752826 | dystonin | Dst | 316313 | 1,45 | up   |
| 5939594 | 7353232 | 1752817 | dystonin | Dst | 316313 | 1,44 | up   |
| 6432847 | 7353232 | 1752852 | dystonin | Dst | 316313 | 1,39 | up   |
| 6729863 | 7353232 | 1752829 | dystonin | Dst | 316313 | 1,38 | up   |
| 6608736 | 7353232 | 1752836 | dystonin | Dst | 316313 | 1,37 | down |
| 6647594 | 7353232 | 1752823 | dystonin | Dst | 316313 | 1,36 | up   |
| 5991627 | 7353232 | 1752763 | dystonin | Dst | 316313 | 1,35 | up   |
| 5639586 | 7353232 | 1752760 | dystonin | Dst | 316313 | 1,35 | up   |
| 5744935 | 7353232 | 1752766 | dystonin | Dst | 316313 | 1,34 | up   |
| 5799708 | 7353232 | 1752762 | dystonin | Dst | 316313 | 1,34 | up   |
| 6712545 | 7353232 | 1752746 | dystonin | Dst | 316313 | 1,34 | down |
| 6699701 | 7353232 | 1752788 | dystonin | Dst | 316313 | 1,32 | up   |
| 5919214 | 7353232 | 1752806 | dystonin | Dst | 316313 | 1,32 | down |
| 6671481 | 7353232 | 1752758 | dystonin | Dst | 316313 | 1,32 | up   |
| 6164794 | 7353232 | 1752776 | dystonin | Dst | 316313 | 1,31 | down |
| 6722839 | 7353232 | 1752789 | dystonin | Dst | 316313 | 1,30 | down |
| 5867651 | 7353232 | 1752724 | dystonin | Dst | 316313 | 1,30 | up   |
| 6140684 | 7353232 | 1752798 | dystonin | Dst | 316313 | 1,30 | down |
| 5633447 | 7353232 | 1752754 | dystonin | Dst | 316313 | 1,29 | down |
| 6635700 | 7353232 | 1752752 | dystonin | Dst | 316313 | 1,28 | down |
| 6734072 | 7353232 | 1752843 | dystonin | Dst | 316313 | 1,28 | down |
| 6350185 | 7353232 | 1752755 | dystonin | Dst | 316313 | 1,27 | down |
| 5924951 | 7353232 | 1752783 | dystonin | Dst | 316313 | 1,26 | up   |
| 6267156 | 7353232 | 1752757 | dystonin | Dst | 316313 | 1,26 | down |
| 5977398 | 7353232 | 1752792 | dystonin | Dst | 316313 | 1,25 | down |
| 6083218 | 7353232 | 1752753 | dystonin | Dst | 316313 | 1,25 | down |
| 5701556 | 7353232 | 1752809 | dystonin | Dst | 316313 | 1,22 | up   |
| 5860306 | 7353232 | 1752729 | dystonin | Dst | 316313 | 1,21 | up   |
| 6203320 | 7353232 | 1752818 | dystonin | Dst | 316313 | 1,19 | up   |
| 6643164 | 7353232 | 1752822 | dystonin | Dst | 316313 | 1,19 | up   |
| 6369935 | 7353232 | 1752774 | dystonin | Dst | 316313 | 1,19 | down |
| 5823921 | 7353232 | 1752794 | dystonin | Dst | 316313 | 1,19 | down |
| 5647083 | 7353232 | 1752830 | dystonin | Dst | 316313 | 1,18 | up   |
| 5697415 | 7353232 | 1752812 | dystonin | Dst | 316313 | 1,18 | up   |
| 6261323 | 7353232 | 1752838 | dystonin | Dst | 316313 | 1,17 | up   |
| 6251061 | 7353232 | 1752751 | dystonin | Dst | 316313 | 1,17 | down |
| 6378606 | 7353232 | 1752825 | dystonin | Dst | 316313 | 1,17 | down |
| 5991775 | 7353232 | 1752820 | dystonin | Dst | 316313 | 1,16 | down |
| 6342768 | 7353232 | 1752768 | dystonin | Dst | 316313 | 1,16 | down |
| 5976087 | 7353232 | 1752814 | dystonin | Dst | 316313 | 1,15 | up   |
| 5723587 | 7353232 | 1752749 | dystonin | Dst | 316313 | 1,15 | up   |
| 5907297 | 7353232 | 1752735 | dystonin | Dst | 316313 | 1,15 | up   |
| 5710131 | 7353232 | 1752777 | dystonin | Dst | 316313 | 1,14 | down |
| 5863120 | 7353232 | 1752860 | dystonin | Dst | 316313 | 1,14 | down |
| 6047970 | 7353232 | 1752819 | dystonin | Dst | 316313 | 1,14 | up   |
| 6137769 | 7353232 | 1752775 | dystonin | Dst | 316313 | 1,14 | down |
| 5889075 | 7353232 | 1752847 | dystonin | Dst | 316313 | 1,13 | down |
| 5692647 | 7353232 | 1752790 | dystonin | Dst | 316313 | 1,13 | down |
| 6133995 | 7353232 | 1752781 | dystonin | Dst | 316313 | 1,13 | up   |
| 6167970 | 7353232 | 1752861 | dystonin | Dst | 316313 | 1,12 | down |
| 6034802 | 7353232 | 1752759 | dystonin | Dst | 316313 | 1,12 | down |
| 6061207 | 7353232 | 1752767 | dystonin | Dst | 316313 | 1,12 | down |
| 6130371 | 7353232 | 1752832 | dystonin | Dst | 316313 | 1,12 | up   |
| 6571279 | 7353232 | 1752841 | dystonin | Dst | 316313 | 1,11 | down |

|         |         |         |                    |      |        |      |      |
|---------|---------|---------|--------------------|------|--------|------|------|
| 6271243 | 7353232 | 1752765 | dystonin           | Dst  | 316313 | 1,11 | down |
| 6738895 | 7353232 | 1752799 | dystonin           | Dst  | 316313 | 1,11 | down |
| 6604942 | 7353232 | 1752777 | dystonin           | Dst  | 316313 | 1,11 | up   |
| 6053505 | 7353232 | 1752761 | dystonin           | Dst  | 316313 | 1,10 | down |
| 6720344 | 7353232 | 1752821 | dystonin           | Dst  | 316313 | 1,10 | down |
| 6629806 | 7353232 | 1752778 | dystonin           | Dst  | 316313 | 1,09 | up   |
| 6268516 | 7353232 | 1752750 | dystonin           | Dst  | 316313 | 1,08 | down |
| 6701854 | 7353232 | 1752769 | dystonin           | Dst  | 316313 | 1,08 | up   |
| 5969248 | 7353232 | 1752840 | dystonin           | Dst  | 316313 | 1,08 | down |
| 6145915 | 7353232 | 1752861 | dystonin           | Dst  | 316313 | 1,08 | down |
| 5844381 | 7353232 | 1752764 | dystonin           | Dst  | 316313 | 1,08 | down |
| 6686442 | 7353232 | 1752799 | dystonin           | Dst  | 316313 | 1,08 | up   |
| 6367552 | 7353232 | 1752742 | dystonin           | Dst  | 316313 | 1,08 | up   |
| 6154769 | 7353232 | 1752777 | dystonin           | Dst  | 316313 | 1,07 | up   |
| 6131589 | 7353232 | 1752782 | dystonin           | Dst  | 316313 | 1,07 | down |
| 6718037 | 7353232 | 1752860 | dystonin           | Dst  | 316313 | 1,06 | up   |
| 5996351 | 7353232 | 1752846 | dystonin           | Dst  | 316313 | 1,06 | up   |
| 6206388 | 7353232 | 1752797 | dystonin           | Dst  | 316313 | 1,06 | down |
| 6409808 | 7353232 | 1752746 | dystonin           | Dst  | 316313 | 1,05 | up   |
| 5906793 | 7353232 | 1752860 | dystonin           | Dst  | 316313 | 1,05 | down |
| 5925076 | 7353232 | 1752777 | dystonin           | Dst  | 316313 | 1,05 | up   |
| 6262933 | 7353232 | 1752791 | dystonin           | Dst  | 316313 | 1,05 | down |
| 5854006 | 7353232 | 1752854 | dystonin           | Dst  | 316313 | 1,05 | up   |
| 5999156 | 7353232 | 1752807 | dystonin           | Dst  | 316313 | 1,05 | down |
| 6109679 | 7353232 | 1752777 | dystonin           | Dst  | 316313 | 1,05 | up   |
| 6137014 | 7353232 | 1752745 | dystonin           | Dst  | 316313 | 1,05 | down |
| 5694194 | 7353232 | 1752732 | dystonin           | Dst  | 316313 | 1,04 | down |
| 6226030 | 7353232 | 1752831 | dystonin           | Dst  | 316313 | 1,04 | up   |
| 6475497 | 7353232 | 1752777 | dystonin           | Dst  | 316313 | 1,04 | up   |
| 5913255 | 7353232 | 1752796 | dystonin           | Dst  | 316313 | 1,04 | up   |
| 6199887 | 7353232 | 1752844 | dystonin           | Dst  | 316313 | 1,04 | down |
| 6566661 | 7353232 | 1752850 | dystonin           | Dst  | 316313 | 1,03 | up   |
| 5701211 | 7353232 | 1752835 | dystonin           | Dst  | 316313 | 1,03 | up   |
| 6248462 | 7353232 | 1752731 | dystonin           | Dst  | 316313 | 1,03 | down |
| 6413100 | 7353232 | 1752859 | dystonin           | Dst  | 316313 | 1,03 | up   |
| 6538101 | 7353232 | 1752811 | dystonin           | Dst  | 316313 | 1,03 | down |
| 6427678 | 7353232 | 1752813 | dystonin           | Dst  | 316313 | 1,03 | up   |
| 6518311 | 7353232 | 1752834 | dystonin           | Dst  | 316313 | 1,03 | up   |
| 6659502 | 7353232 | 1752751 | dystonin           | Dst  | 316313 | 1,03 | down |
| 6367150 | 7353232 | 1752861 | dystonin           | Dst  | 316313 | 1,03 | down |
| 6142312 | 7353232 | 1752793 | dystonin           | Dst  | 316313 | 1,03 | down |
| 6057818 | 7353232 | 1752795 | dystonin           | Dst  | 316313 | 1,02 | up   |
| 6453491 | 7353232 | 1752810 | dystonin           | Dst  | 316313 | 1,02 | down |
| 6252041 | 7353232 | 1752804 | dystonin           | Dst  | 316313 | 1,01 | down |
| 5828485 | 7353232 | 1752805 | dystonin           | Dst  | 316313 | 1,01 | down |
| 6571513 | 7353232 | 1752710 | dystonin           | Dst  | 316313 | 1,01 | down |
| 6156654 | 7353232 | 1752816 | dystonin           | Dst  | 316313 | 1,01 | up   |
| 6434606 | 7353232 | 1752790 | dystonin           | Dst  | 316313 | 1,01 | up   |
| 6147335 | 7353232 | 1752785 | dystonin           | Dst  | 316313 | 1,01 | down |
| 5762511 | 7353232 | 1752756 | dystonin           | Dst  | 316313 | 1,01 | up   |
| 6292259 | 7353232 | 1752743 | dystonin           | Dst  | 316313 | 1,01 | down |
| 5797821 | 7353232 | 1752784 | dystonin           | Dst  | 316313 | 1,01 | down |
| 5898618 | 7353232 | 1752786 | dystonin           | Dst  | 316313 | 1,00 | down |
| 6576056 | 7168439 | 1295700 | dystrobrevin alpha | Dtna | 307548 | 1,73 | up   |
| 6092971 | 7168439 | 1295661 | dystrobrevin alpha | Dtna | 307548 | 1,67 | up   |
| 6462416 | 7168439 | 1295703 | dystrobrevin alpha | Dtna | 307548 | 1,62 | down |
| 5712622 | 7168439 | 1295706 | dystrobrevin alpha | Dtna | 307548 | 1,26 | down |

|         |         |         |                            |       |        |      |      |
|---------|---------|---------|----------------------------|-------|--------|------|------|
| 5999922 | 7168439 | 1295703 | dystrobrevin alpha         | Dtna  | 307548 | 1,20 | down |
| 5979451 | 7168439 | 1295655 | dystrobrevin alpha         | Dtna  | 307548 | 1,12 | up   |
| 5884419 | 7168439 | 1295663 | dystrobrevin alpha         | Dtna  | 307548 | 1,10 | down |
| 6140866 | 7168439 | 1295712 | dystrobrevin alpha         | Dtna  | 307548 | 1,08 | up   |
| 5946053 | 7168439 | 1295705 | dystrobrevin alpha         | Dtna  | 307548 | 1,03 | up   |
| 6416562 | 7168439 | 1295712 | dystrobrevin alpha         | Dtna  | 307548 | 1,03 | down |
| 5856484 | 7168439 | 1295701 | dystrobrevin alpha         | Dtna  | 307548 | 1,02 | down |
| 5866932 | 7168439 | 1295705 | dystrobrevin alpha         | Dtna  | 307548 | 1,01 | down |
| 6243832 | 7319094 | 1670029 | E1A binding protein p300   | Ep300 | 170915 | 2,64 | down |
| 6132470 | 7319094 | 1670026 | E1A binding protein p300   | Ep300 | 170915 | 1,20 | up   |
| 5645190 | 7319094 | 1670027 | E1A binding protein p300   | Ep300 | 170915 | 1,10 | down |
| 6473474 | 7319094 | 1670028 | E1A binding protein p300   | Ep300 | 170915 | 1,07 | down |
| 6570637 | 7319094 | 1670028 | E1A binding protein p300   | Ep300 | 170915 | 1,06 | up   |
| 5839054 | 7111427 | 1155773 | E74-like factor 3          | Elf3  | 304815 | 3,74 | down |
| 6681541 | 7111427 | 1155771 | E74-like factor 3          | Elf3  | 304815 | 2,40 | up   |
| 6032151 | 7111427 | 1155766 | E74-like factor 3          | Elf3  | 304815 | 1,40 | up   |
| 6617361 | 7111427 | 1155768 | E74-like factor 3          | Elf3  | 304815 | 1,35 | up   |
| 6574964 | 7111427 | 1155771 | E74-like factor 3          | Elf3  | 304815 | 1,29 | down |
| 5972504 | 7111427 | 1155770 | E74-like factor 3          | Elf3  | 304815 | 1,18 | up   |
| 5777413 | 7111427 | 1155765 | E74-like factor 3          | Elf3  | 304815 | 1,17 | up   |
| 5733335 | 7111427 | 1155772 | E74-like factor 3          | Elf3  | 304815 | 1,17 | up   |
| 5854651 | 7111427 | 1155769 | E74-like factor 3          | Elf3  | 304815 | 1,14 | down |
| 6258373 | 7111427 | 1155767 | E74-like factor 3          | Elf3  | 304815 | 1,07 | up   |
| 6387960 | 7111427 | 1155764 | E74-like factor 3          | Elf3  | 304815 | 1,01 | up   |
| 6412982 | 7058339 | 1027845 | early B-cell factor 3      | Ebf3  | 361668 | 2,27 | down |
| 5905292 | 7058339 | 1027849 | early B-cell factor 3      | Ebf3  | 361668 | 1,71 | up   |
| 6540255 | 7058339 | 1027850 | early B-cell factor 3      | Ebf3  | 361668 | 1,58 | up   |
| 6572742 | 7058339 | 1027844 | early B-cell factor 3      | Ebf3  | 361668 | 1,36 | down |
| 6733519 | 7058339 | 1027847 | early B-cell factor 3      | Ebf3  | 361668 | 1,29 | up   |
| 6045070 | 7058339 | 1027844 | early B-cell factor 3      | Ebf3  | 361668 | 1,22 | down |
| 5827349 | 7058339 | 1027848 | early B-cell factor 3      | Ebf3  | 361668 | 1,11 | down |
| 5930996 | 7169197 | 1297701 | early growth response 1    | Egr1  | 24330  | 2,08 | up   |
| 6187476 | 7169197 | 1297704 | early growth response 1    | Egr1  | 24330  | 1,41 | up   |
| 5773526 | 7169197 | 1297703 | early growth response 1    | Egr1  | 24330  | 1,39 | down |
| 6589348 | 7169197 | 1297702 | early growth response 1    | Egr1  | 24330  | 1,39 | up   |
| 6118173 | 7169197 | 1297701 | early growth response 1    | Egr1  | 24330  | 1,34 | down |
| 6370899 | 7169197 | 1297702 | early growth response 1    | Egr1  | 24330  | 1,16 | down |
| 5715627 | 7169197 | 1297701 | early growth response 1    | Egr1  | 24330  | 1,14 | up   |
| 6178144 | 7169197 | 1297702 | early growth response 1    | Egr1  | 24330  | 1,12 | down |
| 5639290 | 7169197 | 1297702 | early growth response 1    | Egr1  | 24330  | 1,11 | down |
| 6188970 | 7169197 | 1297703 | early growth response 1    | Egr1  | 24330  | 1,10 | down |
| 6728822 | 7169197 | 1297702 | early growth response 1    | Egr1  | 24330  | 1,07 | down |
| 6649162 | 7169197 | 1297701 | early growth response 1    | Egr1  | 24330  | 1,06 | up   |
| 6168555 | 7169197 | 1297702 | early growth response 1    | Egr1  | 24330  | 1,06 | up   |
| 5788032 | 7169197 | 1297701 | early growth response 1    | Egr1  | 24330  | 1,05 | up   |
| 5968922 | 7266726 | 1538794 | early growth response 4    | Egr4  | 25129  | 2,02 | up   |
| 6641372 | 7266726 | 1538795 | early growth response 4    | Egr4  | 25129  | 1,40 | down |
| 5827598 | 7266726 | 1538795 | early growth response 4    | Egr4  | 25129  | 1,32 | down |
| 6215145 | 7266726 | 1538796 | early growth response 4    | Egr4  | 25129  | 1,10 | down |
| 6687609 | 7266726 | 1538796 | early growth response 4    | Egr4  | 25129  | 1,00 | up   |
| 6221045 | 7343093 | 1727661 | ECSIT homolog (Drosophila) | Ecsit | 300447 | 2,01 | up   |
| 5734443 | 7343093 | 1727661 | ECSIT homolog (Drosophila) | Ecsit | 300447 | 1,64 | down |
| 5774683 | 7343093 | 1727660 | ECSIT homolog (Drosophila) | Ecsit | 300447 | 1,23 | up   |
| 5816869 | 7343093 | 1727659 | ECSIT homolog (Drosophila) | Ecsit | 300447 | 1,21 | down |
| 6032032 | 7343093 | 1727665 | ECSIT homolog (Drosophila) | Ecsit | 300447 | 1,18 | up   |
| 6229212 | 7343093 | 1727663 | ECSIT homolog (Drosophila) | Ecsit | 300447 | 1,16 | down |
| 6644314 | 7343093 | 1727658 | ECSIT homolog (Drosophila) | Ecsit | 300447 | 1,12 | up   |



|         |         |         |                                                    |        |        |      |      |
|---------|---------|---------|----------------------------------------------------|--------|--------|------|------|
| 6665576 | 7343093 | 1727659 | ECSIT homolog (Drosophila)                         | Ecsit  | 300447 | 1,09 | down |
| 5718078 | 7343093 | 1727662 | ECSIT homolog (Drosophila)                         | Ecsit  | 300447 | 1,04 | up   |
| 6236486 | 7343093 | 1727664 | ECSIT homolog (Drosophila)                         | Ecsit  | 300447 | 1,03 | up   |
| 6019014 | 7375937 | 1811368 | ectodysplasin-A                                    | Eda    | 302424 | 1,35 | down |
| 6467070 | 7225246 | 1435183 | ectonucleoside triphosphate diphosphohydrolase 2   | Entpd2 | 64467  | 2,50 | down |
| 6369644 | 7225246 | 1435181 | ectonucleoside triphosphate diphosphohydrolase 2   | Entpd2 | 64467  | 2,50 | down |
| 5730072 | 7225246 | 1435176 | ectonucleoside triphosphate diphosphohydrolase 2   | Entpd2 | 64467  | 1,86 | up   |
| 5753858 | 7225246 | 1435178 | ectonucleoside triphosphate diphosphohydrolase 2   | Entpd2 | 64467  | 1,84 | up   |
| 6537600 | 7225246 | 1435183 | ectonucleoside triphosphate diphosphohydrolase 2   | Entpd2 | 64467  | 1,80 | down |
| 5904861 | 7225246 | 1435179 | ectonucleoside triphosphate diphosphohydrolase 2   | Entpd2 | 64467  | 1,58 | up   |
| 6550914 | 7225246 | 1435183 | ectonucleoside triphosphate diphosphohydrolase 2   | Entpd2 | 64467  | 1,54 | down |
| 6431854 | 7225246 | 1435181 | ectonucleoside triphosphate diphosphohydrolase 2   | Entpd2 | 64467  | 1,22 | down |
| 6294648 | 7225246 | 1435177 | ectonucleoside triphosphate diphosphohydrolase 2   | Entpd2 | 64467  | 1,20 | up   |
| 5918830 | 7225246 | 1435174 | ectonucleoside triphosphate diphosphohydrolase 2   | Entpd2 | 64467  | 1,09 | up   |
| 6255654 | 7225246 | 1435182 | ectonucleoside triphosphate diphosphohydrolase 2   | Entpd2 | 64467  | 1,05 | down |
| 6130761 | 7225246 | 1435175 | ectonucleoside triphosphate diphosphohydrolase 2   | Entpd2 | 64467  | 1,03 | up   |
| 6553156 | 7225246 | 1435180 | ectonucleoside triphosphate diphosphohydrolase 2   | Entpd2 | 64467  | 1,01 | up   |
| 6487913 | 7233787 | 1457894 | ectonucleoside triphosphate diphosphohydrolase 6   | Entpd6 | 85260  | 2,12 | down |
| 5910817 | 7233787 | 1457899 | ectonucleoside triphosphate diphosphohydrolase 6   | Entpd6 | 85260  | 1,67 | down |
| 5632611 | 7233787 | 1457903 | ectonucleoside triphosphate diphosphohydrolase 6   | Entpd6 | 85260  | 1,48 | up   |
| 5839847 | 7233787 | 1457898 | ectonucleoside triphosphate diphosphohydrolase 6   | Entpd6 | 85260  | 1,48 | up   |
| 5990096 | 7233787 | 1457895 | ectonucleoside triphosphate diphosphohydrolase 6   | Entpd6 | 85260  | 1,46 | up   |
| 5957983 | 7233787 | 1457897 | ectonucleoside triphosphate diphosphohydrolase 6   | Entpd6 | 85260  | 1,27 | down |
| 6203652 | 7233787 | 1457905 | ectonucleoside triphosphate diphosphohydrolase 6   | Entpd6 | 85260  | 1,18 | down |
| 6272538 | 7233787 | 1457900 | ectonucleoside triphosphate diphosphohydrolase 6   | Entpd6 | 85260  | 1,17 | up   |
| 6362810 | 7233787 | 1457904 | ectonucleoside triphosphate diphosphohydrolase 6   | Entpd6 | 85260  | 1,17 | up   |
| 6602951 | 7233787 | 1457907 | ectonucleoside triphosphate diphosphohydrolase 6   | Entpd6 | 85260  | 1,15 | down |
| 6066281 | 7233787 | 1457895 | ectonucleoside triphosphate diphosphohydrolase 6   | Entpd6 | 85260  | 1,15 | up   |
| 6495268 | 7233787 | 1457901 | ectonucleoside triphosphate diphosphohydrolase 6   | Entpd6 | 85260  | 1,11 | up   |
| 5698781 | 7233787 | 1457901 | ectonucleoside triphosphate diphosphohydrolase 6   | Entpd6 | 85260  | 1,10 | up   |
| 6152428 | 7233787 | 1457896 | ectonucleoside triphosphate diphosphohydrolase 6   | Entpd6 | 85260  | 1,08 | up   |
| 6300057 | 7233787 | 1457902 | ectonucleoside triphosphate diphosphohydrolase 6   | Entpd6 | 85260  | 1,07 | down |
| 6687326 | 7233787 | 1457908 | ectonucleoside triphosphate diphosphohydrolase 6   | Entpd6 | 85260  | 1,06 | down |
| 5801860 | 7233787 | 1457906 | ectonucleoside triphosphate diphosphohydrolase 6   | Entpd6 | 85260  | 1,05 | up   |
| 6421387 | 7233787 | 1457895 | ectonucleoside triphosphate diphosphohydrolase 6   | Entpd6 | 85260  | 1,04 | down |
| 6568635 | 7025785 | 950785  | ectonucleotide pyrophosphatase/phosphodiesterase 1 | Enpp1  | 85496  | 2,41 | down |
| 6621577 | 7025785 | 950786  | ectonucleotide pyrophosphatase/phosphodiesterase 1 | Enpp1  | 85496  | 2,22 | up   |
| 6235025 | 7025785 | 950780  | ectonucleotide pyrophosphatase/phosphodiesterase 1 | Enpp1  | 85496  | 1,93 | up   |
| 6105171 | 7025785 | 950771  | ectonucleotide pyrophosphatase/phosphodiesterase 1 | Enpp1  | 85496  | 1,77 | up   |
| 5920937 | 7025785 | 950795  | ectonucleotide pyrophosphatase/phosphodiesterase 1 | Enpp1  | 85496  | 1,60 | up   |
| 6729729 | 7025785 | 950790  | ectonucleotide pyrophosphatase/phosphodiesterase 1 | Enpp1  | 85496  | 1,58 | up   |
| 6136620 | 7025785 | 950783  | ectonucleotide pyrophosphatase/phosphodiesterase 1 | Enpp1  | 85496  | 1,49 | down |
| 6181335 | 7025785 | 950784  | ectonucleotide pyrophosphatase/phosphodiesterase 1 | Enpp1  | 85496  | 1,47 | down |
| 5818568 | 7025785 | 950782  | ectonucleotide pyrophosphatase/phosphodiesterase 1 | Enpp1  | 85496  | 1,39 | down |
| 6133349 | 7025785 | 950778  | ectonucleotide pyrophosphatase/phosphodiesterase 1 | Enpp1  | 85496  | 1,37 | up   |
| 6289972 | 7025785 | 950781  | ectonucleotide pyrophosphatase/phosphodiesterase 1 | Enpp1  | 85496  | 1,24 | down |
| 6025563 | 7025785 | 950789  | ectonucleotide pyrophosphatase/phosphodiesterase 1 | Enpp1  | 85496  | 1,20 | down |
| 5912980 | 7025785 | 950775  | ectonucleotide pyrophosphatase/phosphodiesterase 1 | Enpp1  | 85496  | 1,18 | up   |
| 5638090 | 7025785 | 950794  | ectonucleotide pyrophosphatase/phosphodiesterase 1 | Enpp1  | 85496  | 1,18 | down |
| 5668638 | 7025785 | 950773  | ectonucleotide pyrophosphatase/phosphodiesterase 1 | Enpp1  | 85496  | 1,18 | up   |
| 6020663 | 7025785 | 950791  | ectonucleotide pyrophosphatase/phosphodiesterase 1 | Enpp1  | 85496  | 1,16 | down |
| 6236268 | 7025785 | 950772  | ectonucleotide pyrophosphatase/phosphodiesterase 1 | Enpp1  | 85496  | 1,16 | up   |
| 6640663 | 7025785 | 950777  | ectonucleotide pyrophosphatase/phosphodiesterase 1 | Enpp1  | 85496  | 1,13 | down |
| 5882343 | 7025785 | 950770  | ectonucleotide pyrophosphatase/phosphodiesterase 1 | Enpp1  | 85496  | 1,12 | up   |
| 6226546 | 7025785 | 950793  | ectonucleotide pyrophosphatase/phosphodiesterase 1 | Enpp1  | 85496  | 1,11 | down |
| 6463575 | 7025785 | 950793  | ectonucleotide pyrophosphatase/phosphodiesterase 1 | Enpp1  | 85496  | 1,09 | down |
| 6420360 | 7025785 | 950779  | ectonucleotide pyrophosphatase/phosphodiesterase 1 | Enpp1  | 85496  | 1,08 | down |

|         |         |         |                                                      |         |        |      |      |
|---------|---------|---------|------------------------------------------------------|---------|--------|------|------|
| 6699484 | 7025785 | 950787  | ectonucleotide pyrophosphatase/phosphodiesterase 1   | Enpp1   | 85496  | 1,06 | up   |
| 5818106 | 7025785 | 950776  | ectonucleotide pyrophosphatase/phosphodiesterase 1   | Enpp1   | 85496  | 1,05 | down |
| 6037222 | 7025785 | 950774  | ectonucleotide pyrophosphatase/phosphodiesterase 1   | Enpp1   | 85496  | 1,05 | down |
| 6568770 | 7025785 | 950788  | ectonucleotide pyrophosphatase/phosphodiesterase 1   | Enpp1   | 85496  | 1,05 | down |
| 5666929 | 7025785 | 950792  | ectonucleotide pyrophosphatase/phosphodiesterase 1   | Enpp1   | 85496  | 1,04 | down |
| 5672453 | 7352252 | 1750566 | ectonucleotide pyrophosphatase/phosphodiesterase 4   | Enpp4   | 301261 | 2,12 | down |
| 6671532 | 7352252 | 1750566 | ectonucleotide pyrophosphatase/phosphodiesterase 4   | Enpp4   | 301261 | 1,82 | down |
| 6426006 | 7352252 | 1750570 | ectonucleotide pyrophosphatase/phosphodiesterase 4   | Enpp4   | 301261 | 1,46 | up   |
| 6327940 | 7352252 | 1750574 | ectonucleotide pyrophosphatase/phosphodiesterase 4   | Enpp4   | 301261 | 1,46 | down |
| 6176555 | 7352252 | 1750574 | ectonucleotide pyrophosphatase/phosphodiesterase 4   | Enpp4   | 301261 | 1,40 | up   |
| 5623224 | 7352252 | 1750574 | ectonucleotide pyrophosphatase/phosphodiesterase 4   | Enpp4   | 301261 | 1,36 | down |
| 6309153 | 7352252 | 1750571 | ectonucleotide pyrophosphatase/phosphodiesterase 4   | Enpp4   | 301261 | 1,25 | up   |
| 6058664 | 7352252 | 1750574 | ectonucleotide pyrophosphatase/phosphodiesterase 4   | Enpp4   | 301261 | 1,24 | up   |
| 6597486 | 7352252 | 1750574 | ectonucleotide pyrophosphatase/phosphodiesterase 4   | Enpp4   | 301261 | 1,21 | down |
| 6366708 | 7352252 | 1750574 | ectonucleotide pyrophosphatase/phosphodiesterase 4   | Enpp4   | 301261 | 1,14 | up   |
| 6394484 | 7352252 | 1750574 | ectonucleotide pyrophosphatase/phosphodiesterase 4   | Enpp4   | 301261 | 1,14 | up   |
| 6699317 | 7352252 | 1750574 | ectonucleotide pyrophosphatase/phosphodiesterase 4   | Enpp4   | 301261 | 1,11 | down |
| 5906565 | 7352252 | 1750570 | ectonucleotide pyrophosphatase/phosphodiesterase 4   | Enpp4   | 301261 | 1,04 | up   |
| 6176645 | 7352252 | 1750574 | ectonucleotide pyrophosphatase/phosphodiesterase 4   | Enpp4   | 301261 | 1,00 | down |
| 6204293 | 7158920 | 1272510 | EDAR-associated death domain                         | Edaradd | 498769 | 1,16 | up   |
| 6600309 | 7370508 | 1797228 | EF hand calcium binding domain 1                     | Efcab1  | 301957 | 1,84 | down |
| 5766363 | 7370508 | 1797234 | EF hand calcium binding domain 1                     | Efcab1  | 301957 | 1,79 | up   |
| 5740711 | 7370508 | 1797231 | EF hand calcium binding domain 1                     | Efcab1  | 301957 | 1,45 | up   |
| 5696044 | 7370508 | 1797230 | EF hand calcium binding domain 1                     | Efcab1  | 301957 | 1,34 | down |
| 6037789 | 7370508 | 1797234 | EF hand calcium binding domain 1                     | Efcab1  | 301957 | 1,26 | down |
| 5870568 | 7370508 | 1797232 | EF hand calcium binding domain 1                     | Efcab1  | 301957 | 1,16 | down |
| 6674055 | 7370508 | 1797233 | EF hand calcium binding domain 1                     | Efcab1  | 301957 | 1,10 | up   |
| 5805221 | 7370508 | 1797228 | EF hand calcium binding domain 1                     | Efcab1  | 301957 | 1,05 | down |
| 5834410 | 7330238 | 1695969 | EF-hand calcium binding domain 6                     | Efcab6  | 315179 | 1,12 | down |
| 6633459 | 7352635 | 1751441 | EF-hand domain (C-terminal) containing 1             | Efhc1   | 301295 | 3,20 | down |
| 6042152 | 7352635 | 1751450 | EF-hand domain (C-terminal) containing 1             | Efhc1   | 301295 | 2,23 | down |
| 6500761 | 7352635 | 1751440 | EF-hand domain (C-terminal) containing 1             | Efhc1   | 301295 | 1,76 | down |
| 6023256 | 7352635 | 1751448 | EF-hand domain (C-terminal) containing 1             | Efhc1   | 301295 | 1,66 | down |
| 6424716 | 7352635 | 1751451 | EF-hand domain (C-terminal) containing 1             | Efhc1   | 301295 | 1,45 | up   |
| 6570240 | 7352635 | 1751449 | EF-hand domain (C-terminal) containing 1             | Efhc1   | 301295 | 1,37 | down |
| 6698894 | 7352635 | 1751453 | EF-hand domain (C-terminal) containing 1             | Efhc1   | 301295 | 1,31 | down |
| 6469422 | 7352635 | 1751442 | EF-hand domain (C-terminal) containing 1             | Efhc1   | 301295 | 1,31 | down |
| 5626644 | 7352635 | 1751452 | EF-hand domain (C-terminal) containing 1             | Efhc1   | 301295 | 1,15 | down |
| 5637156 | 7352635 | 1751454 | EF-hand domain (C-terminal) containing 1             | Efhc1   | 301295 | 1,04 | up   |
| 6573111 | 7352635 | 1751446 | EF-hand domain (C-terminal) containing 1             | Efhc1   | 301295 | 1,02 | up   |
| 6393899 | 7204831 | 1386778 | EGF-like, fibronectin type III and laminin G domains | Egflam  | 365691 | 2,16 | down |
| 6646185 | 7204831 | 1386776 | EGF-like, fibronectin type III and laminin G domains | Egflam  | 365691 | 1,89 | up   |
| 6038944 | 7204831 | 1386767 | EGF-like, fibronectin type III and laminin G domains | Egflam  | 365691 | 1,83 | up   |
| 5759280 | 7204831 | 1386764 | EGF-like, fibronectin type III and laminin G domains | Egflam  | 365691 | 1,34 | down |
| 6132443 | 7204831 | 1386773 | EGF-like, fibronectin type III and laminin G domains | Egflam  | 365691 | 1,29 | up   |
| 6186389 | 7204831 | 1386764 | EGF-like, fibronectin type III and laminin G domains | Egflam  | 365691 | 1,23 | down |
| 6362634 | 7204831 | 1386797 | EGF-like, fibronectin type III and laminin G domains | Egflam  | 365691 | 1,21 | down |
| 6574045 | 7204831 | 1386783 | EGF-like, fibronectin type III and laminin G domains | Egflam  | 365691 | 1,20 | down |
| 5890210 | 7204831 | 1386812 | EGF-like, fibronectin type III and laminin G domains | Egflam  | 365691 | 1,19 | down |
| 5840206 | 7204831 | 1386784 | EGF-like, fibronectin type III and laminin G domains | Egflam  | 365691 | 1,15 | down |
| 6167706 | 7204831 | 1386812 | EGF-like, fibronectin type III and laminin G domains | Egflam  | 365691 | 1,15 | up   |
| 5693031 | 7204831 | 1386762 | EGF-like, fibronectin type III and laminin G domains | Egflam  | 365691 | 1,14 | down |
| 6272394 | 7204831 | 1386790 | EGF-like, fibronectin type III and laminin G domains | Egflam  | 365691 | 1,14 | up   |
| 5712658 | 7204831 | 1386798 | EGF-like, fibronectin type III and laminin G domains | Egflam  | 365691 | 1,09 | up   |
| 6074657 | 7204831 | 1386792 | EGF-like, fibronectin type III and laminin G domains | Egflam  | 365691 | 1,09 | up   |
| 6032073 | 7204831 | 1386812 | EGF-like, fibronectin type III and laminin G domains | Egflam  | 365691 | 1,07 | up   |
| 6700582 | 7204831 | 1386762 | EGF-like, fibronectin type III and laminin G domains | Egflam  | 365691 | 1,06 | up   |

|         |         |         |                                                      |        |        |      |      |
|---------|---------|---------|------------------------------------------------------|--------|--------|------|------|
| 6002712 | 7204831 | 1386763 | EGF-like, fibronectin type III and laminin G domains | Egflam | 365691 | 1,05 | down |
| 6113757 | 7204831 | 1386781 | EGF-like, fibronectin type III and laminin G domains | Egflam | 365691 | 1,05 | down |
| 5793839 | 7204831 | 1386775 | EGF-like, fibronectin type III and laminin G domains | Egflam | 365691 | 1,03 | up   |
| 6105143 | 7204831 | 1386782 | EGF-like, fibronectin type III and laminin G domains | Egflam | 365691 | 1,02 | down |
| 6069716 | 7204831 | 1386780 | EGF-like, fibronectin type III and laminin G domains | Egflam | 365691 | 1,02 | up   |
| 6528369 | 7204831 | 1386777 | EGF-like, fibronectin type III and laminin G domains | Egflam | 365691 | 1,02 | down |
| 6467587 | 7204831 | 1386769 | EGF-like, fibronectin type III and laminin G domains | Egflam | 365691 | 1,01 | down |
| 6136769 | 7204831 | 1386788 | EGF-like, fibronectin type III and laminin G domains | Egflam | 365691 | 1,01 | down |
| 5934181 | 7204831 | 1386774 | EGF-like, fibronectin type III and laminin G domains | Egflam | 365691 | 1,01 | down |
| 5633081 | 7225393 | 1435580 | EGF-like-domain, multiple 7                          | Egfl7  | 245963 | 2,78 | down |
| 6595440 | 7225393 | 1435582 | EGF-like-domain, multiple 7                          | Egfl7  | 245963 | 1,73 | up   |
| 6621708 | 7225393 | 1435584 | EGF-like-domain, multiple 7                          | Egfl7  | 245963 | 1,66 | down |
| 6664333 | 7225393 | 1435578 | EGF-like-domain, multiple 7                          | Egfl7  | 245963 | 1,48 | up   |
| 6680233 | 7225393 | 1435585 | EGF-like-domain, multiple 7                          | Egfl7  | 245963 | 1,43 | up   |
| 6067658 | 7225393 | 1435581 | EGF-like-domain, multiple 7                          | Egfl7  | 245963 | 1,18 | down |
| 6705395 | 7225393 | 1435583 | EGF-like-domain, multiple 7                          | Egfl7  | 245963 | 1,15 | up   |
| 6179743 | 7225393 | 1435576 | EGF-like-domain, multiple 7                          | Egfl7  | 245963 | 1,13 | down |
| 6692695 | 7225393 | 1435579 | EGF-like-domain, multiple 7                          | Egfl7  | 245963 | 1,13 | down |
| 6357982 | 7225393 | 1435575 | EGF-like-domain, multiple 7                          | Egfl7  | 245963 | 1,09 | down |
| 6295493 | 7225393 | 1435581 | EGF-like-domain, multiple 7                          | Egfl7  | 245963 | 1,07 | down |
| 6003193 | 7225393 | 1435577 | EGF-like-domain, multiple 7                          | Egfl7  | 245963 | 1,07 | down |
| 5730105 | 7049079 | 1007688 | EGL nine homolog 2 (C. elegans)                      | Egln2  | 308457 | 2,32 | down |
| 6239781 | 7049079 | 1007692 | EGL nine homolog 2 (C. elegans)                      | Egln2  | 308457 | 1,90 | down |
| 6148868 | 7049079 | 1007692 | EGL nine homolog 2 (C. elegans)                      | Egln2  | 308457 | 1,29 | down |
| 6613355 | 7049079 | 1007687 | EGL nine homolog 2 (C. elegans)                      | Egln2  | 308457 | 1,19 | down |
| 6208572 | 7049079 | 1007688 | EGL nine homolog 2 (C. elegans)                      | Egln2  | 308457 | 1,19 | down |
| 5975285 | 7049079 | 1007692 | EGL nine homolog 2 (C. elegans)                      | Egln2  | 308457 | 1,18 | down |
| 6145709 | 7049079 | 1007691 | EGL nine homolog 2 (C. elegans)                      | Egln2  | 308457 | 1,14 | up   |
| 6074875 | 7049079 | 1007690 | EGL nine homolog 2 (C. elegans)                      | Egln2  | 308457 | 1,08 | up   |
| 6402943 | 7049079 | 1007692 | EGL nine homolog 2 (C. elegans)                      | Egln2  | 308457 | 1,03 | up   |
| 6662905 | 7049079 | 1007689 | EGL nine homolog 2 (C. elegans)                      | Egln2  | 308457 | 1,00 | up   |
| 6129363 | 7306585 | 1639359 | EGL nine homolog 3 (C. elegans)                      | Egln3  | 54702  | 2,68 | down |
| 6074362 | 7306585 | 1639359 | EGL nine homolog 3 (C. elegans)                      | Egln3  | 54702  | 1,93 | down |
| 6491758 | 7306585 | 1639357 | EGL nine homolog 3 (C. elegans)                      | Egln3  | 54702  | 1,44 | up   |
| 6515065 | 7306585 | 1639356 | EGL nine homolog 3 (C. elegans)                      | Egln3  | 54702  | 1,32 | up   |
| 6150997 | 7306585 | 1639355 | EGL nine homolog 3 (C. elegans)                      | Egln3  | 54702  | 1,26 | up   |
| 5820590 | 7306585 | 1639358 | EGL nine homolog 3 (C. elegans)                      | Egln3  | 54702  | 1,26 | up   |
| 6188339 | 7306585 | 1639355 | EGL nine homolog 3 (C. elegans)                      | Egln3  | 54702  | 1,18 | down |
| 6118354 | 7306585 | 1639359 | EGL nine homolog 3 (C. elegans)                      | Egln3  | 54702  | 1,07 | down |
| 6357974 | 7243648 | 1482491 | EH-domain containing 4                               | Ehd4   | 192204 | 3,00 | down |
| 6001263 | 7243648 | 1482489 | EH-domain containing 4                               | Ehd4   | 192204 | 1,62 | down |
| 5949560 | 7243648 | 1482491 | EH-domain containing 4                               | Ehd4   | 192204 | 1,34 | up   |
| 6182913 | 7243648 | 1482491 | EH-domain containing 4                               | Ehd4   | 192204 | 1,31 | down |
| 6654728 | 7243648 | 1482493 | EH-domain containing 4                               | Ehd4   | 192204 | 1,28 | up   |
| 6655424 | 7243648 | 1482492 | EH-domain containing 4                               | Ehd4   | 192204 | 1,27 | down |
| 6050004 | 7243648 | 1482494 | EH-domain containing 4                               | Ehd4   | 192204 | 1,25 | down |
| 5962217 | 7243648 | 1482496 | EH-domain containing 4                               | Ehd4   | 192204 | 1,24 | down |
| 6010023 | 7243648 | 1482490 | EH-domain containing 4                               | Ehd4   | 192204 | 1,21 | up   |
| 6312553 | 7243648 | 1482491 | EH-domain containing 4                               | Ehd4   | 192204 | 1,14 | up   |
| 6248456 | 7243648 | 1482495 | EH-domain containing 4                               | Ehd4   | 192204 | 1,05 | down |
| 6641569 | 7243648 | 1482491 | EH-domain containing 4                               | Ehd4   | 192204 | 1,00 | up   |
| 6069009 | 7097541 | 1121150 | elastin                                              | Eln    | 25043  | 2,78 | up   |
| 6609456 | 7097541 | 1121167 | elastin                                              | Eln    | 25043  | 2,04 | down |
| 6469133 | 7097541 | 1121176 | elastin                                              | Eln    | 25043  | 1,67 | down |
| 6157140 | 7097541 | 1121149 | elastin                                              | Eln    | 25043  | 1,66 | up   |
| 5841126 | 7097541 | 1121174 | elastin                                              | Eln    | 25043  | 1,54 | down |
| 5654488 | 7097541 | 1121169 | elastin                                              | Eln    | 25043  | 1,49 | down |

|         |         |         |                                            |      |        |      |      |
|---------|---------|---------|--------------------------------------------|------|--------|------|------|
| 5625620 | 7097541 | 1121177 | elastin                                    | Eln  | 25043  | 1,47 | up   |
| 5742680 | 7097541 | 1121155 | elastin                                    | Eln  | 25043  | 1,47 | up   |
| 6308319 | 7097541 | 1121182 | elastin                                    | Eln  | 25043  | 1,35 | down |
| 5725631 | 7097541 | 1121165 | elastin                                    | Eln  | 25043  | 1,35 | down |
| 5825557 | 7097541 | 1121183 | elastin                                    | Eln  | 25043  | 1,34 | up   |
| 5846801 | 7097541 | 1121180 | elastin                                    | Eln  | 25043  | 1,33 | up   |
| 6309779 | 7097541 | 1121165 | elastin                                    | Eln  | 25043  | 1,32 | down |
| 5736254 | 7097541 | 1121159 | elastin                                    | Eln  | 25043  | 1,31 | up   |
| 6691076 | 7097541 | 1121158 | elastin                                    | Eln  | 25043  | 1,28 | down |
| 5670943 | 7097541 | 1121173 | elastin                                    | Eln  | 25043  | 1,27 | down |
| 5988401 | 7097541 | 1121161 | elastin                                    | Eln  | 25043  | 1,27 | up   |
| 6569835 | 7097541 | 1121148 | elastin                                    | Eln  | 25043  | 1,25 | down |
| 5813767 | 7097541 | 1121157 | elastin                                    | Eln  | 25043  | 1,23 | down |
| 6522291 | 7097541 | 1121163 | elastin                                    | Eln  | 25043  | 1,23 | up   |
| 6440305 | 7097541 | 1121171 | elastin                                    | Eln  | 25043  | 1,22 | down |
| 6415846 | 7097541 | 1121162 | elastin                                    | Eln  | 25043  | 1,19 | down |
| 5848544 | 7097541 | 1121147 | elastin                                    | Eln  | 25043  | 1,19 | down |
| 6248057 | 7097541 | 1121168 | elastin                                    | Eln  | 25043  | 1,19 | down |
| 6090308 | 7097541 | 1121152 | elastin                                    | Eln  | 25043  | 1,18 | down |
| 6444490 | 7097541 | 1121153 | elastin                                    | Eln  | 25043  | 1,18 | up   |
| 6561389 | 7097541 | 1121172 | elastin                                    | Eln  | 25043  | 1,18 | up   |
| 6469800 | 7097541 | 1121160 | elastin                                    | Eln  | 25043  | 1,17 | up   |
| 6094083 | 7097541 | 1121156 | elastin                                    | Eln  | 25043  | 1,16 | up   |
| 5974856 | 7097541 | 1121177 | elastin                                    | Eln  | 25043  | 1,15 | up   |
| 6360678 | 7097541 | 1121169 | elastin                                    | Eln  | 25043  | 1,12 | down |
| 6660647 | 7097541 | 1121179 | elastin                                    | Eln  | 25043  | 1,10 | up   |
| 6408496 | 7097541 | 1121151 | elastin                                    | Eln  | 25043  | 1,10 | down |
| 6541975 | 7097541 | 1121183 | elastin                                    | Eln  | 25043  | 1,10 | down |
| 6270848 | 7097541 | 1121166 | elastin                                    | Eln  | 25043  | 1,08 | up   |
| 5991874 | 7097541 | 1121178 | elastin                                    | Eln  | 25043  | 1,06 | up   |
| 6429272 | 7097541 | 1121181 | elastin                                    | Eln  | 25043  | 1,05 | up   |
| 6721099 | 7097541 | 1121154 | elastin                                    | Eln  | 25043  | 1,04 | up   |
| 6672522 | 7097541 | 1121154 | elastin                                    | Eln  | 25043  | 1,03 | down |
| 6019730 | 7097541 | 1121175 | elastin                                    | Eln  | 25043  | 1,03 | down |
| 6294324 | 7097541 | 1121164 | elastin                                    | Eln  | 25043  | 1,02 | up   |
| 6611611 | 7097541 | 1121165 | elastin                                    | Eln  | 25043  | 1,02 | down |
| 5682566 | 7097541 | 1121183 | elastin                                    | Eln  | 25043  | 1,02 | up   |
| 6620145 | 7097541 | 1121169 | elastin                                    | Eln  | 25043  | 1,01 | down |
| 6637330 | 7097541 | 1121170 | elastin                                    | Eln  | 25043  | 1,01 | down |
| 6092664 | 7142931 | 1233229 | ELKS/RAB6-interacting/CAST family member 2 | Erc2 | 259269 | 2,17 | up   |
| 6243749 | 7142931 | 1233218 | ELKS/RAB6-interacting/CAST family member 2 | Erc2 | 259269 | 1,68 | up   |
| 5923814 | 7142931 | 1233221 | ELKS/RAB6-interacting/CAST family member 2 | Erc2 | 259269 | 1,56 | up   |
| 6639743 | 7142931 | 1233225 | ELKS/RAB6-interacting/CAST family member 2 | Erc2 | 259269 | 1,41 | down |
| 6668200 | 7142931 | 1233222 | ELKS/RAB6-interacting/CAST family member 2 | Erc2 | 259269 | 1,39 | down |
| 6454554 | 7142931 | 1233217 | ELKS/RAB6-interacting/CAST family member 2 | Erc2 | 259269 | 1,32 | down |
| 5898553 | 7142931 | 1233220 | ELKS/RAB6-interacting/CAST family member 2 | Erc2 | 259269 | 1,29 | up   |
| 6499561 | 7142931 | 1233214 | ELKS/RAB6-interacting/CAST family member 2 | Erc2 | 259269 | 1,29 | down |
| 6188070 | 7142931 | 1233224 | ELKS/RAB6-interacting/CAST family member 2 | Erc2 | 259269 | 1,22 | down |
| 5900349 | 7142931 | 1233215 | ELKS/RAB6-interacting/CAST family member 2 | Erc2 | 259269 | 1,20 | up   |
| 6327570 | 7142931 | 1233215 | ELKS/RAB6-interacting/CAST family member 2 | Erc2 | 259269 | 1,14 | up   |
| 5829501 | 7142931 | 1233228 | ELKS/RAB6-interacting/CAST family member 2 | Erc2 | 259269 | 1,12 | up   |
| 5739815 | 7142931 | 1233226 | ELKS/RAB6-interacting/CAST family member 2 | Erc2 | 259269 | 1,06 | down |
| 6350603 | 7142931 | 1233227 | ELKS/RAB6-interacting/CAST family member 2 | Erc2 | 259269 | 1,06 | up   |
| 6225266 | 7142931 | 1233216 | ELKS/RAB6-interacting/CAST family member 2 | Erc2 | 259269 | 1,06 | down |
| 5831114 | 7142931 | 1233227 | ELKS/RAB6-interacting/CAST family member 2 | Erc2 | 259269 | 1,03 | down |
| 6478748 | 7142931 | 1233223 | ELKS/RAB6-interacting/CAST family member 2 | Erc2 | 259269 | 1,03 | down |
| 6695679 | 7142931 | 1233224 | ELKS/RAB6-interacting/CAST family member 2 | Erc2 | 259269 | 1,03 | down |

|         |         |         |                                                                                |         |        |      |      |
|---------|---------|---------|--------------------------------------------------------------------------------|---------|--------|------|------|
| 5728946 | 7033616 | 970193  | elongation factor Tu GTP binding domain containing 1                           | Eftud1  | 308789 | 1,86 | down |
| 6737518 | 7033616 | 970205  | elongation factor Tu GTP binding domain containing 1                           | Eftud1  | 308789 | 1,74 | up   |
| 6239718 | 7033616 | 970198  | elongation factor Tu GTP binding domain containing 1                           | Eftud1  | 308789 | 1,70 | down |
| 6553245 | 7033616 | 970229  | elongation factor Tu GTP binding domain containing 1                           | Eftud1  | 308789 | 1,63 | down |
| 5629598 | 7033616 | 970230  | elongation factor Tu GTP binding domain containing 1                           | Eftud1  | 308789 | 1,48 | up   |
| 5750861 | 7033616 | 970202  | elongation factor Tu GTP binding domain containing 1                           | Eftud1  | 308789 | 1,47 | up   |
| 6197372 | 7033616 | 970236  | elongation factor Tu GTP binding domain containing 1                           | Eftud1  | 308789 | 1,42 | down |
| 6495670 | 7033616 | 970193  | elongation factor Tu GTP binding domain containing 1                           | Eftud1  | 308789 | 1,37 | up   |
| 6169303 | 7033616 | 970234  | elongation factor Tu GTP binding domain containing 1                           | Eftud1  | 308789 | 1,33 | up   |
| 6341868 | 7033616 | 970197  | elongation factor Tu GTP binding domain containing 1                           | Eftud1  | 308789 | 1,30 | up   |
| 6024496 | 7033616 | 970205  | elongation factor Tu GTP binding domain containing 1                           | Eftud1  | 308789 | 1,27 | up   |
| 6512564 | 7033616 | 970206  | elongation factor Tu GTP binding domain containing 1                           | Eftud1  | 308789 | 1,27 | up   |
| 6359424 | 7033616 | 970228  | elongation factor Tu GTP binding domain containing 1                           | Eftud1  | 308789 | 1,27 | up   |
| 6288107 | 7033616 | 970206  | elongation factor Tu GTP binding domain containing 1                           | Eftud1  | 308789 | 1,27 | down |
| 5757893 | 7033616 | 970196  | elongation factor Tu GTP binding domain containing 1                           | Eftud1  | 308789 | 1,23 | up   |
| 6269572 | 7033616 | 970189  | elongation factor Tu GTP binding domain containing 1                           | Eftud1  | 308789 | 1,21 | up   |
| 5952300 | 7033616 | 970220  | elongation factor Tu GTP binding domain containing 1                           | Eftud1  | 308789 | 1,19 | up   |
| 6261676 | 7033616 | 970199  | elongation factor Tu GTP binding domain containing 1                           | Eftud1  | 308789 | 1,18 | down |
| 5870405 | 7033616 | 970188  | elongation factor Tu GTP binding domain containing 1                           | Eftud1  | 308789 | 1,15 | down |
| 6203628 | 7033616 | 970207  | elongation factor Tu GTP binding domain containing 1                           | Eftud1  | 308789 | 1,14 | up   |
| 5764579 | 7033616 | 970203  | elongation factor Tu GTP binding domain containing 1                           | Eftud1  | 308789 | 1,13 | down |
| 6352386 | 7033616 | 970190  | elongation factor Tu GTP binding domain containing 1                           | Eftud1  | 308789 | 1,08 | down |
| 5647343 | 7033616 | 970201  | elongation factor Tu GTP binding domain containing 1                           | Eftud1  | 308789 | 1,07 | up   |
| 5871390 | 7033616 | 970234  | elongation factor Tu GTP binding domain containing 1                           | Eftud1  | 308789 | 1,06 | down |
| 6720294 | 7033616 | 970198  | elongation factor Tu GTP binding domain containing 1                           | Eftud1  | 308789 | 1,06 | up   |
| 6636022 | 7033616 | 970236  | elongation factor Tu GTP binding domain containing 1                           | Eftud1  | 308789 | 1,05 | down |
| 5836007 | 7033616 | 970200  | elongation factor Tu GTP binding domain containing 1                           | Eftud1  | 308789 | 1,05 | up   |
| 6597051 | 7033616 | 970228  | elongation factor Tu GTP binding domain containing 1                           | Eftud1  | 308789 | 1,03 | up   |
| 6520081 | 7156546 | 1267128 | elongation of very long chain fatty acids (FEN1/Elo2, SUR4/Elo3, yeast)-like 2 | Elov12  | 498728 | 2,19 | up   |
| 5857084 | 7156546 | 1267146 | elongation of very long chain fatty acids (FEN1/Elo2, SUR4/Elo3, yeast)-like 2 | Elov12  | 498728 | 1,92 | up   |
| 6710239 | 7156546 | 1267140 | elongation of very long chain fatty acids (FEN1/Elo2, SUR4/Elo3, yeast)-like 2 | Elov12  | 498728 | 1,73 | down |
| 6065181 | 7156546 | 1267137 | elongation of very long chain fatty acids (FEN1/Elo2, SUR4/Elo3, yeast)-like 2 | Elov12  | 498728 | 1,58 | down |
| 6200688 | 7156546 | 1267144 | elongation of very long chain fatty acids (FEN1/Elo2, SUR4/Elo3, yeast)-like 2 | Elov12  | 498728 | 1,40 | down |
| 5767305 | 7156546 | 1267146 | elongation of very long chain fatty acids (FEN1/Elo2, SUR4/Elo3, yeast)-like 2 | Elov12  | 498728 | 1,31 | up   |
| 6317341 | 7156546 | 1267143 | elongation of very long chain fatty acids (FEN1/Elo2, SUR4/Elo3, yeast)-like 2 | Elov12  | 498728 | 1,30 | up   |
| 6532934 | 7156546 | 1267146 | elongation of very long chain fatty acids (FEN1/Elo2, SUR4/Elo3, yeast)-like 2 | Elov12  | 498728 | 1,27 | down |
| 6730729 | 7156546 | 1267136 | elongation of very long chain fatty acids (FEN1/Elo2, SUR4/Elo3, yeast)-like 2 | Elov12  | 498728 | 1,25 | down |
| 6364905 | 7156546 | 1267143 | elongation of very long chain fatty acids (FEN1/Elo2, SUR4/Elo3, yeast)-like 2 | Elov12  | 498728 | 1,24 | down |
| 6051214 | 7156546 | 1267139 | elongation of very long chain fatty acids (FEN1/Elo2, SUR4/Elo3, yeast)-like 2 | Elov12  | 498728 | 1,16 | up   |
| 5767334 | 7156546 | 1267140 | elongation of very long chain fatty acids (FEN1/Elo2, SUR4/Elo3, yeast)-like 2 | Elov12  | 498728 | 1,16 | down |
| 5807827 | 7156546 | 1267145 | elongation of very long chain fatty acids (FEN1/Elo2, SUR4/Elo3, yeast)-like 2 | Elov12  | 498728 | 1,11 | up   |
| 6042539 | 7156546 | 1267140 | elongation of very long chain fatty acids (FEN1/Elo2, SUR4/Elo3, yeast)-like 2 | Elov12  | 498728 | 1,01 | up   |
| 5941350 | 7341375 | 1723561 | endonuclease G-like 1                                                          | Endog11 | 301062 | 2,50 | down |
| 5797772 | 7341375 | 1723557 | endonuclease G-like 1                                                          | Endog11 | 301062 | 1,88 | down |
| 6090402 | 7341375 | 1723561 | endonuclease G-like 1                                                          | Endog11 | 301062 | 1,47 | down |
| 6718149 | 7341375 | 1723551 | endonuclease G-like 1                                                          | Endog11 | 301062 | 1,46 | up   |
| 5848015 | 7341375 | 1723556 | endonuclease G-like 1                                                          | Endog11 | 301062 | 1,26 | up   |
| 6060280 | 7341375 | 1723551 | endonuclease G-like 1                                                          | Endog11 | 301062 | 1,25 | up   |
| 5677364 | 7341375 | 1723554 | endonuclease G-like 1                                                          | Endog11 | 301062 | 1,13 | down |
| 5713892 | 7341375 | 1723555 | endonuclease G-like 1                                                          | Endog11 | 301062 | 1,11 | up   |
| 6431454 | 7270592 | 1548563 | endoplasmic reticulum protein 27                                               | Erp27   | 297698 | 2,97 | down |
| 6117993 | 7270592 | 1548561 | endoplasmic reticulum protein 27                                               | Erp27   | 297698 | 1,87 | up   |
| 6234597 | 7270592 | 1548559 | endoplasmic reticulum protein 27                                               | Erp27   | 297698 | 1,35 | down |
| 6229315 | 7270592 | 1548562 | endoplasmic reticulum protein 27                                               | Erp27   | 297698 | 1,30 | up   |
| 5952601 | 7270592 | 1548564 | endoplasmic reticulum protein 27                                               | Erp27   | 297698 | 1,26 | up   |
| 6189696 | 7270592 | 1548556 | endoplasmic reticulum protein 27                                               | Erp27   | 297698 | 1,16 | down |
| 6629215 | 7270592 | 1548557 | endoplasmic reticulum protein 27                                               | Erp27   | 297698 | 1,10 | down |

|         |         |         |                                |        |        |      |      |
|---------|---------|---------|--------------------------------|--------|--------|------|------|
| 5690192 | 7095047 | 1115243 | endothelin-converting enzyme 2 | Ece2   | 408243 | 2,62 | up   |
| 5707352 | 7095047 | 1115241 | endothelin-converting enzyme 2 | Ece2   | 408243 | 1,94 | up   |
| 6203598 | 7095047 | 1115237 | endothelin-converting enzyme 2 | Ece2   | 408243 | 1,67 | up   |
| 6494527 | 7095047 | 1115235 | endothelin-converting enzyme 2 | Ece2   | 408243 | 1,60 | down |
| 5956374 | 7095047 | 1115236 | endothelin-converting enzyme 2 | Ece2   | 408243 | 1,59 | down |
| 6680858 | 7095047 | 1115229 | endothelin-converting enzyme 2 | Ece2   | 408243 | 1,50 | up   |
| 6208597 | 7095047 | 1115230 | endothelin-converting enzyme 2 | Ece2   | 408243 | 1,48 | up   |
| 6087668 | 7095047 | 1115238 | endothelin-converting enzyme 2 | Ece2   | 408243 | 1,39 | up   |
| 5689195 | 7095047 | 1115228 | endothelin-converting enzyme 2 | Ece2   | 408243 | 1,33 | down |
| 6397922 | 7095047 | 1115232 | endothelin-converting enzyme 2 | Ece2   | 408243 | 1,29 | down |
| 6298457 | 7095047 | 1115225 | endothelin-converting enzyme 2 | Ece2   | 408243 | 1,27 | up   |
| 6259792 | 7095047 | 1115242 | endothelin-converting enzyme 2 | Ece2   | 408243 | 1,27 | down |
| 5858023 | 7095047 | 1115239 | endothelin-converting enzyme 2 | Ece2   | 408243 | 1,18 | down |
| 6277273 | 7095047 | 1115227 | endothelin-converting enzyme 2 | Ece2   | 408243 | 1,16 | up   |
| 6462017 | 7095047 | 1115226 | endothelin-converting enzyme 2 | Ece2   | 408243 | 1,15 | down |
| 5707723 | 7095047 | 1115240 | endothelin-converting enzyme 2 | Ece2   | 408243 | 1,13 | down |
| 6658806 | 7095047 | 1115234 | endothelin-converting enzyme 2 | Ece2   | 408243 | 1,12 | up   |
| 5805953 | 7095047 | 1115231 | endothelin-converting enzyme 2 | Ece2   | 408243 | 1,08 | down |
| 5793657 | 7095047 | 1115233 | endothelin-converting enzyme 2 | Ece2   | 408243 | 1,05 | down |
| 6346748 | 7369822 | 1795124 | engrailed homeobox 1           | En1    | 685360 | 2,00 | up   |
| 5749628 | 7369822 | 1795123 | engrailed homeobox 1           | En1    | 685360 | 1,48 | up   |
| 6121936 | 7369822 | 1795128 | engrailed homeobox 1           | En1    | 685360 | 1,19 | up   |
| 6355913 | 7369822 | 1795123 | engrailed homeobox 1           | En1    | 685360 | 1,16 | down |
| 6148627 | 7369822 | 1795123 | engrailed homeobox 1           | En1    | 685360 | 1,11 | down |
| 6507411 | 7369822 | 1795128 | engrailed homeobox 1           | En1    | 685360 | 1,05 | down |
| 6206907 | 7369822 | 1795128 | engrailed homeobox 1           | En1    | 685360 | 1,03 | down |
| 6561206 | 7369822 | 1795128 | engrailed homeobox 1           | En1    | 685360 | 1,01 | up   |
| 6548760 | 7369822 | 1795129 | engrailed homeobox 1           | En1    | 685360 | 1,00 | down |
| 5938622 | 7369822 | 1795123 | engrailed homeobox 1           | En1    | 685360 | 1,00 | down |
| 6218515 | 7164949 | 1286353 | engulfment and cell motility 1 | Elmo1  | 361251 | 2,84 | down |
| 5963359 | 7164949 | 1286365 | engulfment and cell motility 1 | Elmo1  | 361251 | 2,64 | down |
| 5655252 | 7164949 | 1286355 | engulfment and cell motility 1 | Elmo1  | 361251 | 2,21 | down |
| 5729400 | 7164949 | 1286353 | engulfment and cell motility 1 | Elmo1  | 361251 | 2,07 | down |
| 5622309 | 7164949 | 1286437 | engulfment and cell motility 1 | Elmo1  | 361251 | 1,81 | up   |
| 6057417 | 7164949 | 1286451 | engulfment and cell motility 1 | Elmo1  | 361251 | 1,80 | up   |
| 5750238 | 7164949 | 1286362 | engulfment and cell motility 1 | Elmo1  | 361251 | 1,74 | down |
| 6473972 | 7164949 | 1286359 | engulfment and cell motility 1 | Elmo1  | 361251 | 1,60 | down |
| 5675979 | 7164949 | 1286396 | engulfment and cell motility 1 | Elmo1  | 361251 | 1,58 | up   |
| 5756492 | 7164949 | 1286440 | engulfment and cell motility 1 | Elmo1  | 361251 | 1,54 | up   |
| 6071640 | 7164949 | 1286430 | engulfment and cell motility 1 | Elmo1  | 361251 | 1,46 | up   |
| 6292465 | 7164949 | 1286428 | engulfment and cell motility 1 | Elmo1  | 361251 | 1,45 | up   |
| 6266825 | 7164949 | 1286455 | engulfment and cell motility 1 | Elmo1  | 361251 | 1,44 | up   |
| 6488298 | 7164949 | 1286427 | engulfment and cell motility 1 | Elmo1  | 361251 | 1,41 | up   |
| 6017177 | 7164949 | 1286364 | engulfment and cell motility 1 | Elmo1  | 361251 | 1,40 | down |
| 6450473 | 7164949 | 1286450 | engulfment and cell motility 1 | Elmo1  | 361251 | 1,38 | up   |
| 6100529 | 7164949 | 1286425 | engulfment and cell motility 1 | Elmo1  | 361251 | 1,36 | up   |
| 5917837 | 7164949 | 1286418 | engulfment and cell motility 1 | Elmo1  | 361251 | 1,29 | up   |
| 6493174 | 7164949 | 1286411 | engulfment and cell motility 1 | Elmo1  | 361251 | 1,25 | up   |
| 6705758 | 7164949 | 1286434 | engulfment and cell motility 1 | Elmo1  | 361251 | 1,19 | up   |
| 5818237 | 7164949 | 1286481 | engulfment and cell motility 1 | Elmo1  | 361251 | 1,15 | down |
| 6442976 | 7164949 | 1286423 | engulfment and cell motility 1 | Elmo1  | 361251 | 1,07 | up   |
| 5965588 | 7164949 | 1286424 | engulfment and cell motility 1 | Elmo1  | 361251 | 1,00 | down |
| 6356221 | 7123196 | 1185208 | enolase-phosphatase 1          | Enoph1 | 305177 | 3,07 | down |
| 6377883 | 7123196 | 1185209 | enolase-phosphatase 1          | Enoph1 | 305177 | 1,69 | down |
| 6233944 | 7123196 | 1185203 | enolase-phosphatase 1          | Enoph1 | 305177 | 1,28 | up   |
| 5668415 | 7123196 | 1185209 | enolase-phosphatase 1          | Enoph1 | 305177 | 1,25 | up   |
| 5750981 | 7123196 | 1185204 | enolase-phosphatase 1          | Enoph1 | 305177 | 1,18 | up   |

|         |         |         |                                                           |        |        |      |      |
|---------|---------|---------|-----------------------------------------------------------|--------|--------|------|------|
| 5697941 | 7123196 | 1185207 | enolase-phosphatase 1                                     | Enoph1 | 305177 | 1,15 | up   |
| 6649979 | 7123196 | 1185206 | enolase-phosphatase 1                                     | Enoph1 | 305177 | 1,13 | up   |
| 5658863 | 7123196 | 1185205 | enolase-phosphatase 1                                     | Enoph1 | 305177 | 1,03 | up   |
| 6660462 | 7278178 | 1568587 | enoyl Coenzyme A hydratase domain containing 2            | Echdc2 | 298381 | 2,13 | down |
| 5763864 | 7278178 | 1568589 | enoyl Coenzyme A hydratase domain containing 2            | Echdc2 | 298381 | 1,71 | up   |
| 5633257 | 7278178 | 1568586 | enoyl Coenzyme A hydratase domain containing 2            | Echdc2 | 298381 | 1,52 | down |
| 6380368 | 7278178 | 1568590 | enoyl Coenzyme A hydratase domain containing 2            | Echdc2 | 298381 | 1,45 | up   |
| 6207429 | 7278178 | 1568585 | enoyl Coenzyme A hydratase domain containing 2            | Echdc2 | 298381 | 1,40 | down |
| 5714536 | 7278178 | 1568591 | enoyl Coenzyme A hydratase domain containing 2            | Echdc2 | 298381 | 1,13 | down |
| 6312046 | 7278178 | 1568593 | enoyl Coenzyme A hydratase domain containing 2            | Echdc2 | 298381 | 1,10 | up   |
| 5771265 | 7278178 | 1568588 | enoyl Coenzyme A hydratase domain containing 2            | Echdc2 | 298381 | 1,09 | up   |
| 6360218 | 7278178 | 1568593 | enoyl Coenzyme A hydratase domain containing 2            | Echdc2 | 298381 | 1,09 | down |
| 6563729 | 7278178 | 1568592 | enoyl Coenzyme A hydratase domain containing 2            | Echdc2 | 298381 | 1,04 | down |
| 6384662 | 7058599 | 1028487 | enoyl Coenzyme A hydratase, short chain, 1, mitochondrial | Echs1  | 140547 | 2,66 | down |
| 6186090 | 7058599 | 1028489 | enoyl Coenzyme A hydratase, short chain, 1, mitochondrial | Echs1  | 140547 | 1,47 | up   |
| 5781076 | 7058599 | 1028485 | enoyl Coenzyme A hydratase, short chain, 1, mitochondrial | Echs1  | 140547 | 1,41 | up   |
| 5726912 | 7058599 | 1028486 | enoyl Coenzyme A hydratase, short chain, 1, mitochondrial | Echs1  | 140547 | 1,40 | down |
| 6376575 | 7058599 | 1028493 | enoyl Coenzyme A hydratase, short chain, 1, mitochondrial | Echs1  | 140547 | 1,18 | down |
| 5707493 | 7058599 | 1028488 | enoyl Coenzyme A hydratase, short chain, 1, mitochondrial | Echs1  | 140547 | 1,10 | up   |
| 6052654 | 7058599 | 1028491 | enoyl Coenzyme A hydratase, short chain, 1, mitochondrial | Echs1  | 140547 | 1,06 | up   |
| 5674343 | 7058599 | 1028490 | enoyl Coenzyme A hydratase, short chain, 1, mitochondrial | Echs1  | 140547 | 1,00 | down |
| 6430571 | 7058599 | 1028492 | enoyl Coenzyme A hydratase, short chain, 1, mitochondrial | Echs1  | 140547 | 1,00 | down |
| 5772831 | 7090144 | 1103758 | Eph receptor A3                                           | Epha3  | 29210  | 2,09 | up   |
| 6095019 | 7090144 | 1103750 | Eph receptor A3                                           | Epha3  | 29210  | 1,46 | up   |
| 6452307 | 7090144 | 1103763 | Eph receptor A3                                           | Epha3  | 29210  | 1,43 | up   |
| 5667266 | 7090144 | 1103752 | Eph receptor A3                                           | Epha3  | 29210  | 1,37 | up   |
| 6505357 | 7090144 | 1103755 | Eph receptor A3                                           | Epha3  | 29210  | 1,24 | down |
| 6727088 | 7090144 | 1103753 | Eph receptor A3                                           | Epha3  | 29210  | 1,18 | up   |
| 6311607 | 7090144 | 1103760 | Eph receptor A3                                           | Epha3  | 29210  | 1,09 | down |
| 6177774 | 7090144 | 1103765 | Eph receptor A3                                           | Epha3  | 29210  | 1,09 | down |
| 5914311 | 7090144 | 1103749 | Eph receptor A3                                           | Epha3  | 29210  | 1,08 | down |
| 6349774 | 7090144 | 1103757 | Eph receptor A3                                           | Epha3  | 29210  | 1,06 | up   |
| 5630884 | 7090144 | 1103764 | Eph receptor A3                                           | Epha3  | 29210  | 1,04 | down |
| 5693124 | 7090144 | 1103759 | Eph receptor A3                                           | Epha3  | 29210  | 1,04 | up   |
| 6560296 | 7090144 | 1103762 | Eph receptor A3                                           | Epha3  | 29210  | 1,03 | down |
| 5721800 | 7090144 | 1103754 | Eph receptor A3                                           | Epha3  | 29210  | 1,02 | up   |
| 5676825 | 7090144 | 1103751 | Eph receptor A3                                           | Epha3  | 29210  | 1,02 | down |
| 5736137 | 7090144 | 1103761 | Eph receptor A3                                           | Epha3  | 29210  | 1,02 | up   |
| 6599082 | 7090144 | 1103753 | Eph receptor A3                                           | Epha3  | 29210  | 1,00 | up   |
| 5671670 | 7090144 | 1103756 | Eph receptor A3                                           | Epha3  | 29210  | 1,00 | down |
| 5831410 | 7087282 | 1096243 | Eph receptor A6                                           | Epha6  | 29202  | 1,70 | down |
| 6340902 | 7087282 | 1096244 | Eph receptor A6                                           | Epha6  | 29202  | 1,46 | up   |
| 6586934 | 7087282 | 1096242 | Eph receptor A6                                           | Epha6  | 29202  | 1,22 | down |
| 6545564 | 7087282 | 1096243 | Eph receptor A6                                           | Epha6  | 29202  | 1,11 | down |
| 5748553 | 7087282 | 1096144 | Eph receptor A6                                           | Epha6  | 29202  | 1,07 | up   |
| 6224111 | 7292178 | 1601737 | Eph receptor A8                                           | Epha8  | 60589  | 1,36 | up   |
| 6397651 | 7292178 | 1601735 | Eph receptor A8                                           | Epha8  | 60589  | 1,18 | up   |
| 5881965 | 7292178 | 1601739 | Eph receptor A8                                           | Epha8  | 60589  | 1,13 | up   |
| 5747456 | 7292178 | 1601736 | Eph receptor A8                                           | Epha8  | 60589  | 1,08 | down |
| 6156008 | 7292178 | 1601738 | Eph receptor A8                                           | Epha8  | 60589  | 1,04 | down |
| 6341173 | 7292178 | 1601740 | Eph receptor A8                                           | Epha8  | 60589  | 1,02 | down |
| 5632762 | 7292178 | 1601741 | Eph receptor A8                                           | Epha8  | 60589  | 1,01 | up   |
| 6363539 | 7253088 | 1505129 | Eph receptor B6                                           | Ephb6  | 312275 | 2,58 | down |
| 6244574 | 7253088 | 1505128 | Eph receptor B6                                           | Ephb6  | 312275 | 2,14 | down |
| 6421022 | 7253088 | 1505119 | Eph receptor B6                                           | Ephb6  | 312275 | 1,60 | down |
| 5984662 | 7253088 | 1505122 | Eph receptor B6                                           | Ephb6  | 312275 | 1,53 | up   |
| 5856206 | 7253088 | 1505124 | Eph receptor B6                                           | Ephb6  | 312275 | 1,50 | down |

|         |         |         |                                                  |       |        |      |      |
|---------|---------|---------|--------------------------------------------------|-------|--------|------|------|
| 6254681 | 7253088 | 1505109 | Eph receptor B6                                  | Ephb6 | 312275 | 1,31 | up   |
| 6201910 | 7253088 | 1505126 | Eph receptor B6                                  | Ephb6 | 312275 | 1,30 | down |
| 5900021 | 7253088 | 1505118 | Eph receptor B6                                  | Ephb6 | 312275 | 1,30 | up   |
| 6449916 | 7253088 | 1505120 | Eph receptor B6                                  | Ephb6 | 312275 | 1,28 | down |
| 6112802 | 7253088 | 1505125 | Eph receptor B6                                  | Ephb6 | 312275 | 1,25 | down |
| 6003716 | 7253088 | 1505116 | Eph receptor B6                                  | Ephb6 | 312275 | 1,21 | down |
| 6300968 | 7253088 | 1505109 | Eph receptor B6                                  | Ephb6 | 312275 | 1,20 | up   |
| 5648019 | 7253088 | 1505117 | Eph receptor B6                                  | Ephb6 | 312275 | 1,13 | up   |
| 6483917 | 7253088 | 1505132 | Eph receptor B6                                  | Ephb6 | 312275 | 1,12 | up   |
| 5640692 | 7253088 | 1505115 | Eph receptor B6                                  | Ephb6 | 312275 | 1,08 | down |
| 5918823 | 7253088 | 1505130 | Eph receptor B6                                  | Ephb6 | 312275 | 1,08 | down |
| 6021725 | 7253088 | 1505113 | Eph receptor B6                                  | Ephb6 | 312275 | 1,07 | up   |
| 5884750 | 7253088 | 1505123 | Eph receptor B6                                  | Ephb6 | 312275 | 1,04 | up   |
| 5981859 | 7253088 | 1505127 | Eph receptor B6                                  | Ephb6 | 312275 | 1,04 | up   |
| 6298335 | 7253088 | 1505109 | Eph receptor B6                                  | Ephb6 | 312275 | 1,03 | up   |
| 5882339 | 7253088 | 1505131 | Eph receptor B6                                  | Ephb6 | 312275 | 1,02 | down |
| 6539672 | 7253088 | 1505114 | Eph receptor B6                                  | Ephb6 | 312275 | 1,01 | down |
| 6681194 | 7253088 | 1505121 | Eph receptor B6                                  | Ephb6 | 312275 | 1,00 | up   |
| 6283260 | 7117526 | 1170983 | EphA5                                            | Epha5 | 79208  | 1,66 | down |
| 5986200 | 7117526 | 1171031 | EphA5                                            | Epha5 | 79208  | 1,59 | up   |
| 6686297 | 7117526 | 1171030 | EphA5                                            | Epha5 | 79208  | 1,57 | down |
| 5830489 | 7117526 | 1171015 | EphA5                                            | Epha5 | 79208  | 1,50 | up   |
| 6063084 | 7117526 | 1171009 | EphA5                                            | Epha5 | 79208  | 1,47 | down |
| 5640354 | 7117526 | 1171026 | EphA5                                            | Epha5 | 79208  | 1,44 | up   |
| 6110503 | 7117526 | 1170976 | EphA5                                            | Epha5 | 79208  | 1,43 | down |
| 6680825 | 7117526 | 1171021 | EphA5                                            | Epha5 | 79208  | 1,40 | down |
| 5729407 | 7117526 | 1170987 | EphA5                                            | Epha5 | 79208  | 1,37 | down |
| 6433664 | 7117526 | 1171028 | EphA5                                            | Epha5 | 79208  | 1,36 | down |
| 6101730 | 7117526 | 1170976 | EphA5                                            | Epha5 | 79208  | 1,31 | down |
| 6607737 | 7117526 | 1171027 | EphA5                                            | Epha5 | 79208  | 1,31 | down |
| 6684318 | 7117526 | 1170976 | EphA5                                            | Epha5 | 79208  | 1,25 | up   |
| 6466415 | 7117526 | 1171025 | EphA5                                            | Epha5 | 79208  | 1,22 | down |
| 6154671 | 7117526 | 1171010 | EphA5                                            | Epha5 | 79208  | 1,14 | up   |
| 6658919 | 7117526 | 1171002 | EphA5                                            | Epha5 | 79208  | 1,12 | down |
| 6382082 | 7117526 | 1171020 | EphA5                                            | Epha5 | 79208  | 1,10 | down |
| 6715130 | 7117526 | 1171019 | EphA5                                            | Epha5 | 79208  | 1,10 | up   |
| 6294312 | 7117526 | 1171008 | EphA5                                            | Epha5 | 79208  | 1,03 | up   |
| 6297062 | 7210794 | 1400899 | ephrin A1                                        | Efna1 | 94268  | 2,23 | up   |
| 6609046 | 7210794 | 1400898 | ephrin A1                                        | Efna1 | 94268  | 1,46 | up   |
| 6543343 | 7210794 | 1400896 | ephrin A1                                        | Efna1 | 94268  | 1,21 | up   |
| 5953558 | 7210794 | 1400895 | ephrin A1                                        | Efna1 | 94268  | 1,14 | down |
| 6061917 | 7210794 | 1400900 | ephrin A1                                        | Efna1 | 94268  | 1,09 | up   |
| 5890646 | 7210794 | 1400897 | ephrin A1                                        | Efna1 | 94268  | 1,08 | down |
| 6551309 | 7123853 | 1186753 | epiregulin                                       | Ereg  | 59325  | 1,93 | down |
| 6657966 | 7123853 | 1186749 | epiregulin                                       | Ereg  | 59325  | 1,65 | up   |
| 5667946 | 7123853 | 1186750 | epiregulin                                       | Ereg  | 59325  | 1,58 | up   |
| 6081983 | 7123853 | 1186751 | epiregulin                                       | Ereg  | 59325  | 1,21 | up   |
| 6669612 | 7123853 | 1186753 | epiregulin                                       | Ereg  | 59325  | 1,17 | down |
| 5942818 | 7123853 | 1186752 | epiregulin                                       | Ereg  | 59325  | 1,14 | up   |
| 6712147 | 7207069 | 1392016 | epithelial cell transforming sequence 2 oncogene | Ect2  | 361921 | 1,73 | down |
| 5899870 | 7207069 | 1392012 | epithelial cell transforming sequence 2 oncogene | Ect2  | 361921 | 1,21 | up   |
| 6564650 | 7207069 | 1392007 | epithelial cell transforming sequence 2 oncogene | Ect2  | 361921 | 1,19 | down |
| 5832385 | 7207069 | 1392013 | epithelial cell transforming sequence 2 oncogene | Ect2  | 361921 | 1,06 | down |
| 5656336 | 7207069 | 1392007 | epithelial cell transforming sequence 2 oncogene | Ect2  | 361921 | 1,04 | up   |
| 6261629 | 7207069 | 1392014 | epithelial cell transforming sequence 2 oncogene | Ect2  | 361921 | 1,04 | up   |
| 6416535 | 7207069 | 1392015 | epithelial cell transforming sequence 2 oncogene | Ect2  | 361921 | 1,02 | up   |
| 6188562 | 7207069 | 1392011 | epithelial cell transforming sequence 2 oncogene | Ect2  | 361921 | 1,02 | up   |



|         |         |         |                                                   |          |        |      |      |
|---------|---------|---------|---------------------------------------------------|----------|--------|------|------|
| 6274261 | 7064843 | 1043180 | epithelial membrane protein 2                     | Emp2     | 360468 | 2,39 | down |
| 6617117 | 7064843 | 1043181 | epithelial membrane protein 2                     | Emp2     | 360468 | 2,25 | up   |
| 6681498 | 7064843 | 1043185 | epithelial membrane protein 2                     | Emp2     | 360468 | 2,19 | up   |
| 6428871 | 7064843 | 1043183 | epithelial membrane protein 2                     | Emp2     | 360468 | 2,16 | down |
| 6461589 | 7064843 | 1043181 | epithelial membrane protein 2                     | Emp2     | 360468 | 1,33 | up   |
| 6462383 | 7064843 | 1043182 | epithelial membrane protein 2                     | Emp2     | 360468 | 1,12 | up   |
| 6424952 | 7064843 | 1043184 | epithelial membrane protein 2                     | Emp2     | 360468 | 1,02 | down |
| 6512312 | 7114725 | 1164038 | epoxide hydrolase 1, microsomal                   | Ephx1    | 25315  | 2,61 | up   |
| 5904228 | 7114725 | 1164045 | epoxide hydrolase 1, microsomal                   | Ephx1    | 25315  | 1,83 | down |
| 5924424 | 7114725 | 1164044 | epoxide hydrolase 1, microsomal                   | Ephx1    | 25315  | 1,81 | down |
| 6573143 | 7114725 | 1164046 | epoxide hydrolase 1, microsomal                   | Ephx1    | 25315  | 1,26 | down |
| 5963049 | 7114725 | 1164042 | epoxide hydrolase 1, microsomal                   | Ephx1    | 25315  | 1,19 | up   |
| 6052946 | 7114725 | 1164039 | epoxide hydrolase 1, microsomal                   | Ephx1    | 25315  | 1,19 | up   |
| 5779507 | 7114725 | 1164040 | epoxide hydrolase 1, microsomal                   | Ephx1    | 25315  | 1,12 | up   |
| 6291351 | 7114725 | 1164043 | epoxide hydrolase 1, microsomal                   | Ephx1    | 25315  | 1,10 | up   |
| 5789026 | 7114725 | 1164041 | epoxide hydrolase 1, microsomal                   | Ephx1    | 25315  | 1,08 | down |
| 6709013 | 7246993 | 1490078 | ER degradation enhancer, mannosidase alpha-like 2 | Edem2    | 296304 | 2,50 | up   |
| 6539507 | 7246993 | 1490079 | ER degradation enhancer, mannosidase alpha-like 2 | Edem2    | 296304 | 1,83 | up   |
| 6454863 | 7246993 | 1490089 | ER degradation enhancer, mannosidase alpha-like 2 | Edem2    | 296304 | 1,62 | up   |
| 6558244 | 7246993 | 1490089 | ER degradation enhancer, mannosidase alpha-like 2 | Edem2    | 296304 | 1,38 | up   |
| 6308798 | 7246993 | 1490086 | ER degradation enhancer, mannosidase alpha-like 2 | Edem2    | 296304 | 1,35 | down |
| 6126860 | 7246993 | 1490088 | ER degradation enhancer, mannosidase alpha-like 2 | Edem2    | 296304 | 1,34 | down |
| 6057374 | 7246993 | 1490085 | ER degradation enhancer, mannosidase alpha-like 2 | Edem2    | 296304 | 1,22 | up   |
| 5935510 | 7246993 | 1490082 | ER degradation enhancer, mannosidase alpha-like 2 | Edem2    | 296304 | 1,16 | up   |
| 6278896 | 7246993 | 1490079 | ER degradation enhancer, mannosidase alpha-like 2 | Edem2    | 296304 | 1,15 | down |
| 5941066 | 7246993 | 1490084 | ER degradation enhancer, mannosidase alpha-like 2 | Edem2    | 296304 | 1,12 | down |
| 6664061 | 7246993 | 1490080 | ER degradation enhancer, mannosidase alpha-like 2 | Edem2    | 296304 | 1,06 | up   |
| 5720422 | 7246993 | 1490083 | ER degradation enhancer, mannosidase alpha-like 2 | Edem2    | 296304 | 1,03 | down |
| 6429678 | 7246993 | 1490087 | ER degradation enhancer, mannosidase alpha-like 2 | Edem2    | 296304 | 1,02 | down |
| 6651587 | 7246993 | 1490081 | ER degradation enhancer, mannosidase alpha-like 2 | Edem2    | 296304 | 1,01 | up   |
| 6647134 | 7044906 | 998136  | erythrocyte membrane protein band 4.1-like 2      | Epb4.112 | 309557 | 1,93 | down |
| 5757451 | 7044906 | 998155  | erythrocyte membrane protein band 4.1-like 2      | Epb4.112 | 309557 | 1,67 | up   |
| 5698843 | 7044906 | 998144  | erythrocyte membrane protein band 4.1-like 2      | Epb4.112 | 309557 | 1,52 | down |
| 6206821 | 7044906 | 998117  | erythrocyte membrane protein band 4.1-like 2      | Epb4.112 | 309557 | 1,45 | down |
| 5683029 | 7044906 | 998113  | erythrocyte membrane protein band 4.1-like 2      | Epb4.112 | 309557 | 1,44 | down |
| 6241360 | 7044906 | 998131  | erythrocyte membrane protein band 4.1-like 2      | Epb4.112 | 309557 | 1,43 | down |
| 6030466 | 7044906 | 998145  | erythrocyte membrane protein band 4.1-like 2      | Epb4.112 | 309557 | 1,32 | up   |
| 6217480 | 7044906 | 998117  | erythrocyte membrane protein band 4.1-like 2      | Epb4.112 | 309557 | 1,27 | up   |
| 6575304 | 7044906 | 998124  | erythrocyte membrane protein band 4.1-like 2      | Epb4.112 | 309557 | 1,26 | up   |
| 6674174 | 7044906 | 998109  | erythrocyte membrane protein band 4.1-like 2      | Epb4.112 | 309557 | 1,26 | down |
| 5637214 | 7044906 | 998114  | erythrocyte membrane protein band 4.1-like 2      | Epb4.112 | 309557 | 1,25 | up   |
| 6018515 | 7044906 | 998128  | erythrocyte membrane protein band 4.1-like 2      | Epb4.112 | 309557 | 1,25 | down |
| 6086850 | 7044906 | 998119  | erythrocyte membrane protein band 4.1-like 2      | Epb4.112 | 309557 | 1,24 | down |
| 6325065 | 7044906 | 998130  | erythrocyte membrane protein band 4.1-like 2      | Epb4.112 | 309557 | 1,22 | down |
| 6370211 | 7044906 | 998118  | erythrocyte membrane protein band 4.1-like 2      | Epb4.112 | 309557 | 1,21 | up   |
| 6510620 | 7044906 | 998127  | erythrocyte membrane protein band 4.1-like 2      | Epb4.112 | 309557 | 1,19 | up   |
| 6118686 | 7044906 | 998107  | erythrocyte membrane protein band 4.1-like 2      | Epb4.112 | 309557 | 1,17 | down |
| 6673254 | 7044906 | 998134  | erythrocyte membrane protein band 4.1-like 2      | Epb4.112 | 309557 | 1,12 | down |
| 6532203 | 7044906 | 998130  | erythrocyte membrane protein band 4.1-like 2      | Epb4.112 | 309557 | 1,09 | up   |
| 5721754 | 7044906 | 998116  | erythrocyte membrane protein band 4.1-like 2      | Epb4.112 | 309557 | 1,09 | up   |
| 6518667 | 7044906 | 998128  | erythrocyte membrane protein band 4.1-like 2      | Epb4.112 | 309557 | 1,07 | down |
| 6374116 | 7044906 | 998127  | erythrocyte membrane protein band 4.1-like 2      | Epb4.112 | 309557 | 1,05 | up   |
| 6149498 | 7044906 | 998139  | erythrocyte membrane protein band 4.1-like 2      | Epb4.112 | 309557 | 1,05 | up   |
| 6140083 | 7044906 | 998121  | erythrocyte membrane protein band 4.1-like 2      | Epb4.112 | 309557 | 1,05 | down |
| 6625721 | 7044906 | 998132  | erythrocyte membrane protein band 4.1-like 2      | Epb4.112 | 309557 | 1,04 | down |
| 5721236 | 7044906 | 998140  | erythrocyte membrane protein band 4.1-like 2      | Epb4.112 | 309557 | 1,02 | down |
| 6550976 | 7044906 | 998146  | erythrocyte membrane protein band 4.1-like 2      | Epb4.112 | 309557 | 1,01 | up   |

|         |         |         |                                                       |           |        |      |      |
|---------|---------|---------|-------------------------------------------------------|-----------|--------|------|------|
| 5648968 | 7174281 | 1310869 | erythrocyte protein band 4.1-like 4a                  | Epb4.114a | 307514 | 1,67 | down |
| 6067285 | 7174281 | 1310858 | erythrocyte protein band 4.1-like 4a                  | Epb4.114a | 307514 | 1,38 | up   |
| 6198381 | 7174281 | 1310851 | erythrocyte protein band 4.1-like 4a                  | Epb4.114a | 307514 | 1,38 | down |
| 6246084 | 7174281 | 1310857 | erythrocyte protein band 4.1-like 4a                  | Epb4.114a | 307514 | 1,36 | up   |
| 6702095 | 7174281 | 1310870 | erythrocyte protein band 4.1-like 4a                  | Epb4.114a | 307514 | 1,35 | up   |
| 6387949 | 7174281 | 1310845 | erythrocyte protein band 4.1-like 4a                  | Epb4.114a | 307514 | 1,26 | up   |
| 5876087 | 7174281 | 1310854 | erythrocyte protein band 4.1-like 4a                  | Epb4.114a | 307514 | 1,25 | up   |
| 6247574 | 7174281 | 1310845 | erythrocyte protein band 4.1-like 4a                  | Epb4.114a | 307514 | 1,24 | up   |
| 5903988 | 7174281 | 1310866 | erythrocyte protein band 4.1-like 4a                  | Epb4.114a | 307514 | 1,23 | up   |
| 6066993 | 7174281 | 1310842 | erythrocyte protein band 4.1-like 4a                  | Epb4.114a | 307514 | 1,14 | up   |
| 5736456 | 7174281 | 1310859 | erythrocyte protein band 4.1-like 4a                  | Epb4.114a | 307514 | 1,14 | down |
| 6724243 | 7174281 | 1310847 | erythrocyte protein band 4.1-like 4a                  | Epb4.114a | 307514 | 1,11 | down |
| 6685775 | 7174281 | 1310843 | erythrocyte protein band 4.1-like 4a                  | Epb4.114a | 307514 | 1,10 | up   |
| 5898489 | 7174281 | 1310872 | erythrocyte protein band 4.1-like 4a                  | Epb4.114a | 307514 | 1,10 | up   |
| 6263738 | 7174281 | 1310850 | erythrocyte protein band 4.1-like 4a                  | Epb4.114a | 307514 | 1,05 | down |
| 6462360 | 7174281 | 1310874 | erythrocyte protein band 4.1-like 4a                  | Epb4.114a | 307514 | 1,03 | up   |
| 6413737 | 7174281 | 1310871 | erythrocyte protein band 4.1-like 4a                  | Epb4.114a | 307514 | 1,03 | down |
| 5804730 | 7174281 | 1310873 | erythrocyte protein band 4.1-like 4a                  | Epb4.114a | 307514 | 1,03 | up   |
| 5712566 | 7174281 | 1310855 | erythrocyte protein band 4.1-like 4a                  | Epb4.114a | 307514 | 1,01 | down |
| 6350728 | 7139825 | 1225346 | erythrocyte protein band 4.9                          | Epb4.9    | 361069 | 2,30 | up   |
| 6159489 | 7139825 | 1225335 | erythrocyte protein band 4.9                          | Epb4.9    | 361069 | 2,25 | up   |
| 6358554 | 7139825 | 1225333 | erythrocyte protein band 4.9                          | Epb4.9    | 361069 | 1,60 | up   |
| 6430764 | 7139825 | 1225336 | erythrocyte protein band 4.9                          | Epb4.9    | 361069 | 1,46 | up   |
| 5977632 | 7139825 | 1225339 | erythrocyte protein band 4.9                          | Epb4.9    | 361069 | 1,41 | down |
| 6400154 | 7139825 | 1225353 | erythrocyte protein band 4.9                          | Epb4.9    | 361069 | 1,39 | down |
| 6732566 | 7139825 | 1225343 | erythrocyte protein band 4.9                          | Epb4.9    | 361069 | 1,36 | down |
| 5936724 | 7139825 | 1225348 | erythrocyte protein band 4.9                          | Epb4.9    | 361069 | 1,33 | down |
| 5721168 | 7139825 | 1225345 | erythrocyte protein band 4.9                          | Epb4.9    | 361069 | 1,29 | down |
| 6541947 | 7139825 | 1225337 | erythrocyte protein band 4.9                          | Epb4.9    | 361069 | 1,27 | up   |
| 6198221 | 7139825 | 1225334 | erythrocyte protein band 4.9                          | Epb4.9    | 361069 | 1,24 | up   |
| 6173466 | 7139825 | 1225340 | erythrocyte protein band 4.9                          | Epb4.9    | 361069 | 1,22 | up   |
| 6166758 | 7139825 | 1225353 | erythrocyte protein band 4.9                          | Epb4.9    | 361069 | 1,11 | down |
| 6288563 | 7139825 | 1225353 | erythrocyte protein band 4.9                          | Epb4.9    | 361069 | 1,11 | up   |
| 5632147 | 7139825 | 1225342 | erythrocyte protein band 4.9                          | Epb4.9    | 361069 | 1,06 | up   |
| 5943187 | 7139825 | 1225338 | erythrocyte protein band 4.9                          | Epb4.9    | 361069 | 1,04 | down |
| 5996308 | 7139825 | 1225357 | erythrocyte protein band 4.9                          | Epb4.9    | 361069 | 1,03 | down |
| 5692698 | 7139825 | 1225333 | erythrocyte protein band 4.9                          | Epb4.9    | 361069 | 1,02 | down |
| 6328226 | 7139825 | 1225341 | erythrocyte protein band 4.9                          | Epb4.9    | 361069 | 1,00 | down |
| 5646376 | 7316647 | 1664071 | estrogen receptor binding site associated, antigen, 9 | Ebag9     | 299864 | 2,29 | down |
| 6602757 | 7316647 | 1664065 | estrogen receptor binding site associated, antigen, 9 | Ebag9     | 299864 | 1,78 | up   |
| 6385301 | 7316647 | 1664072 | estrogen receptor binding site associated, antigen, 9 | Ebag9     | 299864 | 1,49 | down |
| 6545900 | 7316647 | 1664065 | estrogen receptor binding site associated, antigen, 9 | Ebag9     | 299864 | 1,38 | up   |
| 6278527 | 7316647 | 1664066 | estrogen receptor binding site associated, antigen, 9 | Ebag9     | 299864 | 1,34 | up   |
| 5634464 | 7316647 | 1664068 | estrogen receptor binding site associated, antigen, 9 | Ebag9     | 299864 | 1,17 | down |
| 6692396 | 7316647 | 1664067 | estrogen receptor binding site associated, antigen, 9 | Ebag9     | 299864 | 1,12 | down |
| 6178540 | 7316647 | 1664070 | estrogen receptor binding site associated, antigen, 9 | Ebag9     | 299864 | 1,08 | down |
| 6134689 | 7316647 | 1664069 | estrogen receptor binding site associated, antigen, 9 | Ebag9     | 299864 | 1,05 | up   |
| 6605604 | 7242451 | 1479338 | ets homologous factor                                 | Ehf       | 295965 | 2,54 | up   |
| 6725833 | 7242451 | 1479345 | ets homologous factor                                 | Ehf       | 295965 | 1,99 | down |
| 6443925 | 7242451 | 1479344 | ets homologous factor                                 | Ehf       | 295965 | 1,70 | up   |
| 6623576 | 7242451 | 1479351 | ets homologous factor                                 | Ehf       | 295965 | 1,56 | down |
| 6667315 | 7242451 | 1479346 | ets homologous factor                                 | Ehf       | 295965 | 1,29 | up   |
| 5721745 | 7242451 | 1479340 | ets homologous factor                                 | Ehf       | 295965 | 1,16 | down |
| 6358179 | 7242451 | 1479342 | ets homologous factor                                 | Ehf       | 295965 | 1,10 | down |
| 5778298 | 7242451 | 1479343 | ets homologous factor                                 | Ehf       | 295965 | 1,09 | up   |
| 5750526 | 7242451 | 1479339 | ets homologous factor                                 | Ehf       | 295965 | 1,06 | down |
| 6389907 | 7220672 | 1424611 | euchromatic histone lysine N-methyltransferase 2      | Ehmt2     | 361798 | 4,27 | down |

|         |         |         |                                                    |        |        |      |      |
|---------|---------|---------|----------------------------------------------------|--------|--------|------|------|
| 6487086 | 7220672 | 1424625 | euchromatic histone lysine N-methyltransferase 2   | Ehmt2  | 361798 | 1,84 | up   |
| 6435607 | 7220672 | 1424619 | euchromatic histone lysine N-methyltransferase 2   | Ehmt2  | 361798 | 1,44 | up   |
| 5774070 | 7220672 | 1424624 | euchromatic histone lysine N-methyltransferase 2   | Ehmt2  | 361798 | 1,28 | down |
| 6052008 | 7220672 | 1424620 | euchromatic histone lysine N-methyltransferase 2   | Ehmt2  | 361798 | 1,27 | up   |
| 6180442 | 7220672 | 1424607 | euchromatic histone lysine N-methyltransferase 2   | Ehmt2  | 361798 | 1,27 | down |
| 5936564 | 7220672 | 1424618 | euchromatic histone lysine N-methyltransferase 2   | Ehmt2  | 361798 | 1,19 | up   |
| 5767610 | 7220672 | 1424626 | euchromatic histone lysine N-methyltransferase 2   | Ehmt2  | 361798 | 1,18 | up   |
| 6156561 | 7220672 | 1424621 | euchromatic histone lysine N-methyltransferase 2   | Ehmt2  | 361798 | 1,17 | down |
| 6684577 | 7220672 | 1424623 | euchromatic histone lysine N-methyltransferase 2   | Ehmt2  | 361798 | 1,16 | down |
| 6437827 | 7220672 | 1424627 | euchromatic histone lysine N-methyltransferase 2   | Ehmt2  | 361798 | 1,16 | up   |
| 6320608 | 7220672 | 1424613 | euchromatic histone lysine N-methyltransferase 2   | Ehmt2  | 361798 | 1,15 | up   |
| 5645055 | 7220672 | 1424610 | euchromatic histone lysine N-methyltransferase 2   | Ehmt2  | 361798 | 1,13 | down |
| 6121416 | 7220672 | 1424615 | euchromatic histone lysine N-methyltransferase 2   | Ehmt2  | 361798 | 1,08 | down |
| 6672024 | 7220672 | 1424612 | euchromatic histone lysine N-methyltransferase 2   | Ehmt2  | 361798 | 1,07 | up   |
| 6123855 | 7220672 | 1424614 | euchromatic histone lysine N-methyltransferase 2   | Ehmt2  | 361798 | 1,07 | up   |
| 5749032 | 7220672 | 1424622 | euchromatic histone lysine N-methyltransferase 2   | Ehmt2  | 361798 | 1,06 | up   |
| 6331888 | 7220672 | 1424606 | euchromatic histone lysine N-methyltransferase 2   | Ehmt2  | 361798 | 1,05 | down |
| 5713527 | 7220672 | 1424617 | euchromatic histone lysine N-methyltransferase 2   | Ehmt2  | 361798 | 1,04 | up   |
| 5963621 | 7220672 | 1424605 | euchromatic histone lysine N-methyltransferase 2   | Ehmt2  | 361798 | 1,04 | up   |
| 5622296 | 7220672 | 1424608 | euchromatic histone lysine N-methyltransferase 2   | Ehmt2  | 361798 | 1,04 | up   |
| 6162522 | 7220672 | 1424629 | euchromatic histone lysine N-methyltransferase 2   | Ehmt2  | 361798 | 1,03 | down |
| 5747391 | 7220672 | 1424616 | euchromatic histone lysine N-methyltransferase 2   | Ehmt2  | 361798 | 1,02 | down |
| 6655995 | 7220672 | 1424613 | euchromatic histone lysine N-methyltransferase 2   | Ehmt2  | 361798 | 1,02 | down |
| 6514057 | 7220672 | 1424628 | euchromatic histone lysine N-methyltransferase 2   | Ehmt2  | 361798 | 1,02 | down |
| 5677852 | 7220672 | 1424609 | euchromatic histone lysine N-methyltransferase 2   | Ehmt2  | 361798 | 1,01 | up   |
| 6201395 | 7036394 | 976768  | eukaryotic elongation factor-2 kinase              | Eef2k  | 25435  | 2,33 | down |
| 6312901 | 7036394 | 976772  | eukaryotic elongation factor-2 kinase              | Eef2k  | 25435  | 2,18 | down |
| 5960580 | 7036394 | 976762  | eukaryotic elongation factor-2 kinase              | Eef2k  | 25435  | 1,79 | up   |
| 5744762 | 7036394 | 976757  | eukaryotic elongation factor-2 kinase              | Eef2k  | 25435  | 1,68 | down |
| 5787833 | 7036394 | 976755  | eukaryotic elongation factor-2 kinase              | Eef2k  | 25435  | 1,67 | down |
| 6495757 | 7036394 | 976769  | eukaryotic elongation factor-2 kinase              | Eef2k  | 25435  | 1,54 | up   |
| 6359914 | 7036394 | 976768  | eukaryotic elongation factor-2 kinase              | Eef2k  | 25435  | 1,33 | down |
| 6733499 | 7036394 | 976758  | eukaryotic elongation factor-2 kinase              | Eef2k  | 25435  | 1,27 | up   |
| 5945109 | 7036394 | 976755  | eukaryotic elongation factor-2 kinase              | Eef2k  | 25435  | 1,26 | up   |
| 6329010 | 7036394 | 976759  | eukaryotic elongation factor-2 kinase              | Eef2k  | 25435  | 1,24 | down |
| 6635577 | 7036394 | 976763  | eukaryotic elongation factor-2 kinase              | Eef2k  | 25435  | 1,23 | up   |
| 6683957 | 7036394 | 976764  | eukaryotic elongation factor-2 kinase              | Eef2k  | 25435  | 1,22 | up   |
| 6510560 | 7036394 | 976760  | eukaryotic elongation factor-2 kinase              | Eef2k  | 25435  | 1,20 | up   |
| 5670417 | 7036394 | 976761  | eukaryotic elongation factor-2 kinase              | Eef2k  | 25435  | 1,20 | up   |
| 6714939 | 7036394 | 976766  | eukaryotic elongation factor-2 kinase              | Eef2k  | 25435  | 1,18 | down |
| 5851984 | 7036394 | 976771  | eukaryotic elongation factor-2 kinase              | Eef2k  | 25435  | 1,18 | down |
| 6254140 | 7036394 | 976773  | eukaryotic elongation factor-2 kinase              | Eef2k  | 25435  | 1,17 | down |
| 5872962 | 7036394 | 976762  | eukaryotic elongation factor-2 kinase              | Eef2k  | 25435  | 1,15 | down |
| 6186383 | 7036394 | 976765  | eukaryotic elongation factor-2 kinase              | Eef2k  | 25435  | 1,14 | down |
| 5873474 | 7036394 | 976756  | eukaryotic elongation factor-2 kinase              | Eef2k  | 25435  | 1,12 | down |
| 6476629 | 7036394 | 976767  | eukaryotic elongation factor-2 kinase              | Eef2k  | 25435  | 1,09 | down |
| 6739628 | 7036394 | 976756  | eukaryotic elongation factor-2 kinase              | Eef2k  | 25435  | 1,08 | down |
| 6252551 | 7036394 | 976770  | eukaryotic elongation factor-2 kinase              | Eef2k  | 25435  | 1,03 | up   |
| 5666327 | 7248954 | 1494907 | eukaryotic translation elongation factor 1 alpha 2 | Eef1a2 | 24799  | 2,24 | down |
| 6241040 | 7248954 | 1494906 | eukaryotic translation elongation factor 1 alpha 2 | Eef1a2 | 24799  | 1,60 | up   |
| 6501708 | 7248954 | 1494898 | eukaryotic translation elongation factor 1 alpha 2 | Eef1a2 | 24799  | 1,33 | up   |
| 6324413 | 7248954 | 1494907 | eukaryotic translation elongation factor 1 alpha 2 | Eef1a2 | 24799  | 1,32 | down |
| 6302419 | 7248954 | 1494904 | eukaryotic translation elongation factor 1 alpha 2 | Eef1a2 | 24799  | 1,31 | down |
| 6221224 | 7248954 | 1494899 | eukaryotic translation elongation factor 1 alpha 2 | Eef1a2 | 24799  | 1,28 | down |
| 6586976 | 7248954 | 1494900 | eukaryotic translation elongation factor 1 alpha 2 | Eef1a2 | 24799  | 1,11 | up   |
| 5629786 | 7248954 | 1494905 | eukaryotic translation elongation factor 1 alpha 2 | Eef1a2 | 24799  | 1,10 | down |
| 6521094 | 7248954 | 1494903 | eukaryotic translation elongation factor 1 alpha 2 | Eef1a2 | 24799  | 1,05 | down |

|         |         |         |                                                           |         |        |      |      |
|---------|---------|---------|-----------------------------------------------------------|---------|--------|------|------|
| 6164233 | 7248954 | 1494902 | eukaryotic translation elongation factor 1 alpha 2        | Eef1a2  | 24799  | 1,02 | up   |
| 5956985 | 7248954 | 1494901 | eukaryotic translation elongation factor 1 alpha 2        | Eef1a2  | 24799  | 1,01 | up   |
| 6479543 | 7231484 | 1451376 | eukaryotic translation initiation factor 2 alpha kinase 4 | Eif2ak4 | 114859 | 1,38 | down |
| 6596131 | 7231484 | 1451374 | eukaryotic translation initiation factor 2 alpha kinase 4 | Eif2ak4 | 114859 | 1,37 | down |
| 5871981 | 7231484 | 1451375 | eukaryotic translation initiation factor 2 alpha kinase 4 | Eif2ak4 | 114859 | 1,34 | down |
| 6065477 | 7231484 | 1451374 | eukaryotic translation initiation factor 2 alpha kinase 4 | Eif2ak4 | 114859 | 1,26 | up   |
| 6018299 | 7231484 | 1451377 | eukaryotic translation initiation factor 2 alpha kinase 4 | Eif2ak4 | 114859 | 1,15 | down |
| 6707404 | 7194356 | 1361638 | eukaryotic translation initiation factor 2A               | Eif2a   | 502531 | 2,91 | down |
| 5741600 | 7194356 | 1361622 | eukaryotic translation initiation factor 2A               | Eif2a   | 502531 | 1,88 | down |
| 6203274 | 7194356 | 1361638 | eukaryotic translation initiation factor 2A               | Eif2a   | 502531 | 1,41 | up   |
| 6727252 | 7194356 | 1361630 | eukaryotic translation initiation factor 2A               | Eif2a   | 502531 | 1,32 | down |
| 5726749 | 7194356 | 1361626 | eukaryotic translation initiation factor 2A               | Eif2a   | 502531 | 1,32 | down |
| 5650396 | 7194356 | 1361628 | eukaryotic translation initiation factor 2A               | Eif2a   | 502531 | 1,30 | down |
| 6645843 | 7194356 | 1361636 | eukaryotic translation initiation factor 2A               | Eif2a   | 502531 | 1,25 | up   |
| 6159116 | 7194356 | 1361633 | eukaryotic translation initiation factor 2A               | Eif2a   | 502531 | 1,24 | up   |
| 5989075 | 7194356 | 1361623 | eukaryotic translation initiation factor 2A               | Eif2a   | 502531 | 1,21 | up   |
| 5978086 | 7194356 | 1361635 | eukaryotic translation initiation factor 2A               | Eif2a   | 502531 | 1,21 | down |
| 5799468 | 7194356 | 1361635 | eukaryotic translation initiation factor 2A               | Eif2a   | 502531 | 1,19 | down |
| 5767393 | 7194356 | 1361631 | eukaryotic translation initiation factor 2A               | Eif2a   | 502531 | 1,18 | up   |
| 6682958 | 7194356 | 1361626 | eukaryotic translation initiation factor 2A               | Eif2a   | 502531 | 1,13 | down |
| 6582909 | 7194356 | 1361629 | eukaryotic translation initiation factor 2A               | Eif2a   | 502531 | 1,12 | up   |
| 6244771 | 7194356 | 1361634 | eukaryotic translation initiation factor 2A               | Eif2a   | 502531 | 1,12 | up   |
| 6445769 | 7194356 | 1361632 | eukaryotic translation initiation factor 2A               | Eif2a   | 502531 | 1,10 | up   |
| 5618271 | 7267802 | 1541887 | eukaryotic translation initiation factor 4E member 3      | Eif4e3  | 297481 | 2,40 | up   |
| 6489608 | 7267802 | 1541890 | eukaryotic translation initiation factor 4E member 3      | Eif4e3  | 297481 | 1,90 | up   |
| 6152850 | 7267802 | 1541903 | eukaryotic translation initiation factor 4E member 3      | Eif4e3  | 297481 | 1,58 | up   |
| 6042601 | 7267802 | 1541896 | eukaryotic translation initiation factor 4E member 3      | Eif4e3  | 297481 | 1,56 | up   |
| 5879494 | 7267802 | 1541906 | eukaryotic translation initiation factor 4E member 3      | Eif4e3  | 297481 | 1,34 | up   |
| 6608597 | 7267802 | 1541894 | eukaryotic translation initiation factor 4E member 3      | Eif4e3  | 297481 | 1,32 | up   |
| 6066444 | 7267802 | 1541895 | eukaryotic translation initiation factor 4E member 3      | Eif4e3  | 297481 | 1,08 | up   |
| 6191765 | 7353614 | 1753718 | eukaryotic translation initiation factor 5B               | Eif5b   | 308306 | 1,44 | down |
| 5967390 | 7353614 | 1753727 | eukaryotic translation initiation factor 5B               | Eif5b   | 308306 | 1,35 | down |
| 6488297 | 7353614 | 1753719 | eukaryotic translation initiation factor 5B               | Eif5b   | 308306 | 1,35 | down |
| 6299292 | 7353614 | 1753731 | eukaryotic translation initiation factor 5B               | Eif5b   | 308306 | 1,32 | up   |
| 6560117 | 7353614 | 1753717 | eukaryotic translation initiation factor 5B               | Eif5b   | 308306 | 1,30 | up   |
| 5721375 | 7353614 | 1753720 | eukaryotic translation initiation factor 5B               | Eif5b   | 308306 | 1,30 | up   |
| 5656825 | 7353614 | 1753733 | eukaryotic translation initiation factor 5B               | Eif5b   | 308306 | 1,20 | up   |
| 5632737 | 7353614 | 1753722 | eukaryotic translation initiation factor 5B               | Eif5b   | 308306 | 1,14 | down |
| 5869591 | 7353614 | 1753729 | eukaryotic translation initiation factor 5B               | Eif5b   | 308306 | 1,13 | down |
| 6687215 | 7353614 | 1753734 | eukaryotic translation initiation factor 5B               | Eif5b   | 308306 | 1,12 | up   |
| 6599585 | 7353614 | 1753726 | eukaryotic translation initiation factor 5B               | Eif5b   | 308306 | 1,11 | up   |
| 5629524 | 7353614 | 1753735 | eukaryotic translation initiation factor 5B               | Eif5b   | 308306 | 1,10 | up   |
| 6059942 | 7353614 | 1753724 | eukaryotic translation initiation factor 5B               | Eif5b   | 308306 | 1,09 | up   |
| 6354695 | 7353614 | 1753715 | eukaryotic translation initiation factor 5B               | Eif5b   | 308306 | 1,06 | up   |
| 6484409 | 7353614 | 1753721 | eukaryotic translation initiation factor 5B               | Eif5b   | 308306 | 1,05 | down |
| 6138653 | 7353614 | 1753725 | eukaryotic translation initiation factor 5B               | Eif5b   | 308306 | 1,02 | up   |
| 6641742 | 7353614 | 1753730 | eukaryotic translation initiation factor 5B               | Eif5b   | 308306 | 1,02 | up   |
| 6458544 | 7353614 | 1753718 | eukaryotic translation initiation factor 5B               | Eif5b   | 308306 | 1,02 | up   |
| 5869141 | 7127801 | 1195863 | Ewing sarcoma breakpoint region 1                         | Ewsr1   | 289752 | 2,08 | down |
| 6087699 | 7127801 | 1195863 | Ewing sarcoma breakpoint region 1                         | Ewsr1   | 289752 | 1,78 | down |
| 6665210 | 7127801 | 1195866 | Ewing sarcoma breakpoint region 1                         | Ewsr1   | 289752 | 1,69 | down |
| 6372057 | 7127801 | 1195875 | Ewing sarcoma breakpoint region 1                         | Ewsr1   | 289752 | 1,58 | down |
| 6094637 | 7127801 | 1195871 | Ewing sarcoma breakpoint region 1                         | Ewsr1   | 289752 | 1,55 | down |
| 5665914 | 7127801 | 1195880 | Ewing sarcoma breakpoint region 1                         | Ewsr1   | 289752 | 1,51 | up   |
| 6490654 | 7127801 | 1195867 | Ewing sarcoma breakpoint region 1                         | Ewsr1   | 289752 | 1,50 | down |
| 6078800 | 7127801 | 1195870 | Ewing sarcoma breakpoint region 1                         | Ewsr1   | 289752 | 1,48 | up   |
| 6237609 | 7127801 | 1195863 | Ewing sarcoma breakpoint region 1                         | Ewsr1   | 289752 | 1,28 | down |

|         |         |         |                                                                                       |        |        |      |      |
|---------|---------|---------|---------------------------------------------------------------------------------------|--------|--------|------|------|
| 5737015 | 7127801 | 1195863 | Ewing sarcoma breakpoint region 1                                                     | Ewsr1  | 289752 | 1,25 | down |
| 5968555 | 7127801 | 1195861 | Ewing sarcoma breakpoint region 1                                                     | Ewsr1  | 289752 | 1,24 | down |
| 5975448 | 7127801 | 1195864 | Ewing sarcoma breakpoint region 1                                                     | Ewsr1  | 289752 | 1,24 | down |
| 5889830 | 7127801 | 1195862 | Ewing sarcoma breakpoint region 1                                                     | Ewsr1  | 289752 | 1,20 | down |
| 6106908 | 7127801 | 1195878 | Ewing sarcoma breakpoint region 1                                                     | Ewsr1  | 289752 | 1,12 | down |
| 5619954 | 7127801 | 1195873 | Ewing sarcoma breakpoint region 1                                                     | Ewsr1  | 289752 | 1,11 | down |
| 5665470 | 7127801 | 1195879 | Ewing sarcoma breakpoint region 1                                                     | Ewsr1  | 289752 | 1,09 | down |
| 5956984 | 7127801 | 1195875 | Ewing sarcoma breakpoint region 1                                                     | Ewsr1  | 289752 | 1,06 | down |
| 6174672 | 7127801 | 1195874 | Ewing sarcoma breakpoint region 1                                                     | Ewsr1  | 289752 | 1,04 | up   |
| 6011263 | 7127801 | 1195865 | Ewing sarcoma breakpoint region 1                                                     | Ewsr1  | 289752 | 1,01 | down |
| 6634334 | 7127801 | 1195868 | Ewing sarcoma breakpoint region 1                                                     | Ewsr1  | 289752 | 1,01 | down |
| 5960695 | 7127801 | 1195868 | Ewing sarcoma breakpoint region 1                                                     | Ewsr1  | 289752 | 1,01 | up   |
| 5830838 | 7143381 | 1234477 | excision repair cross-complementing rodent repair deficiency, complementation group 6 | Erc6   | 306274 | 2,23 | down |
| 5824315 | 7143381 | 1234481 | excision repair cross-complementing rodent repair deficiency, complementation group 6 | Erc6   | 306274 | 1,96 | down |
| 6476949 | 7143381 | 1234487 | excision repair cross-complementing rodent repair deficiency, complementation group 6 | Erc6   | 306274 | 1,66 | down |
| 6505636 | 7143381 | 1234472 | excision repair cross-complementing rodent repair deficiency, complementation group 6 | Erc6   | 306274 | 1,35 | down |
| 6520035 | 7143381 | 1234485 | excision repair cross-complementing rodent repair deficiency, complementation group 6 | Erc6   | 306274 | 1,34 | down |
| 6701633 | 7143381 | 1234493 | excision repair cross-complementing rodent repair deficiency, complementation group 6 | Erc6   | 306274 | 1,30 | down |
| 6040429 | 7143381 | 1234478 | excision repair cross-complementing rodent repair deficiency, complementation group 6 | Erc6   | 306274 | 1,28 | up   |
| 6718265 | 7143381 | 1234489 | excision repair cross-complementing rodent repair deficiency, complementation group 6 | Erc6   | 306274 | 1,27 | down |
| 6174761 | 7143381 | 1234494 | excision repair cross-complementing rodent repair deficiency, complementation group 6 | Erc6   | 306274 | 1,26 | up   |
| 6557443 | 7143381 | 1234491 | excision repair cross-complementing rodent repair deficiency, complementation group 6 | Erc6   | 306274 | 1,24 | down |
| 6607818 | 7143381 | 1234486 | excision repair cross-complementing rodent repair deficiency, complementation group 6 | Erc6   | 306274 | 1,24 | up   |
| 6563647 | 7143381 | 1234490 | excision repair cross-complementing rodent repair deficiency, complementation group 6 | Erc6   | 306274 | 1,20 | down |
| 6590273 | 7143381 | 1234495 | excision repair cross-complementing rodent repair deficiency, complementation group 6 | Erc6   | 306274 | 1,19 | down |
| 6506068 | 7143381 | 1234497 | excision repair cross-complementing rodent repair deficiency, complementation group 6 | Erc6   | 306274 | 1,19 | up   |
| 6494039 | 7143381 | 1234484 | excision repair cross-complementing rodent repair deficiency, complementation group 6 | Erc6   | 306274 | 1,10 | up   |
| 6200862 | 7143381 | 1234489 | excision repair cross-complementing rodent repair deficiency, complementation group 6 | Erc6   | 306274 | 1,08 | up   |
| 6657828 | 7143381 | 1234497 | excision repair cross-complementing rodent repair deficiency, complementation group 6 | Erc6   | 306274 | 1,08 | down |
| 6319093 | 7143381 | 1234471 | excision repair cross-complementing rodent repair deficiency, complementation group 6 | Erc6   | 306274 | 1,06 | up   |
| 5892974 | 7143381 | 1234471 | excision repair cross-complementing rodent repair deficiency, complementation group 6 | Erc6   | 306274 | 1,06 | up   |
| 6345022 | 7143381 | 1234488 | excision repair cross-complementing rodent repair deficiency, complementation group 6 | Erc6   | 306274 | 1,05 | up   |
| 6298598 | 7143381 | 1234492 | excision repair cross-complementing rodent repair deficiency, complementation group 6 | Erc6   | 306274 | 1,04 | down |
| 5753104 | 7143381 | 1234471 | excision repair cross-complementing rodent repair deficiency, complementation group 6 | Erc6   | 306274 | 1,04 | down |
| 6654747 | 7143381 | 1234476 | excision repair cross-complementing rodent repair deficiency, complementation group 6 | Erc6   | 306274 | 1,03 | up   |
| 6316888 | 7143381 | 1234471 | excision repair cross-complementing rodent repair deficiency, complementation group 6 | Erc6   | 306274 | 1,02 | down |
| 5704229 | 7143381 | 1234498 | excision repair cross-complementing rodent repair deficiency, complementation group 6 | Erc6   | 306274 | 1,00 | down |
| 5827362 | 7189404 | 1348203 | excision repair cross-complementing rodent repair deficiency, complementation group 8 | Erc8   | 310071 | 1,91 | down |
| 6176428 | 7189404 | 1348203 | excision repair cross-complementing rodent repair deficiency, complementation group 8 | Erc8   | 310071 | 1,77 | up   |
| 6739173 | 7189404 | 1348201 | excision repair cross-complementing rodent repair deficiency, complementation group 8 | Erc8   | 310071 | 1,74 | up   |
| 5892714 | 7189404 | 1348200 | excision repair cross-complementing rodent repair deficiency, complementation group 8 | Erc8   | 310071 | 1,37 | up   |
| 6394371 | 7189404 | 1348202 | excision repair cross-complementing rodent repair deficiency, complementation group 8 | Erc8   | 310071 | 1,35 | up   |
| 6488373 | 7189404 | 1348194 | excision repair cross-complementing rodent repair deficiency, complementation group 8 | Erc8   | 310071 | 1,29 | up   |
| 6483135 | 7189404 | 1348191 | excision repair cross-complementing rodent repair deficiency, complementation group 8 | Erc8   | 310071 | 1,22 | down |
| 6166289 | 7189404 | 1348199 | excision repair cross-complementing rodent repair deficiency, complementation group 8 | Erc8   | 310071 | 1,19 | up   |
| 5783539 | 7189404 | 1348188 | excision repair cross-complementing rodent repair deficiency, complementation group 8 | Erc8   | 310071 | 1,18 | down |
| 6251476 | 7189404 | 1348189 | excision repair cross-complementing rodent repair deficiency, complementation group 8 | Erc8   | 310071 | 1,18 | down |
| 6553302 | 7189404 | 1348201 | excision repair cross-complementing rodent repair deficiency, complementation group 8 | Erc8   | 310071 | 1,17 | down |
| 6666940 | 7189404 | 1348203 | excision repair cross-complementing rodent repair deficiency, complementation group 8 | Erc8   | 310071 | 1,06 | down |
| 6028806 | 7189404 | 1348192 | excision repair cross-complementing rodent repair deficiency, complementation group 8 | Erc8   | 310071 | 1,06 | down |
| 5628957 | 7189404 | 1348195 | excision repair cross-complementing rodent repair deficiency, complementation group 8 | Erc8   | 310071 | 1,02 | up   |
| 6086446 | 7189404 | 1348203 | excision repair cross-complementing rodent repair deficiency, complementation group 8 | Erc8   | 310071 | 1,01 | up   |
| 6108813 | 7189404 | 1348203 | excision repair cross-complementing rodent repair deficiency, complementation group 8 | Erc8   | 310071 | 1,01 | down |
| 6145457 | 7189404 | 1348197 | excision repair cross-complementing rodent repair deficiency, complementation group 8 | Erc8   | 310071 | 1,01 | down |
| 5963732 | 7184850 | 1337601 | exocyst complex component 3-like                                                      | Exoc31 | 291961 | 1,65 | up   |
| 5646482 | 7184850 | 1337606 | exocyst complex component 3-like                                                      | Exoc31 | 291961 | 1,56 | down |
| 6326116 | 7184850 | 1337612 | exocyst complex component 3-like                                                      | Exoc31 | 291961 | 1,51 | down |

|         |         |         |                                  |        |        |      |      |
|---------|---------|---------|----------------------------------|--------|--------|------|------|
| 6538614 | 7184850 | 1337610 | exocyst complex component 3-like | Exoc31 | 291961 | 1,48 | up   |
| 6698126 | 7184850 | 1337605 | exocyst complex component 3-like | Exoc31 | 291961 | 1,40 | up   |
| 5701410 | 7184850 | 1337611 | exocyst complex component 3-like | Exoc31 | 291961 | 1,38 | up   |
| 6458779 | 7184850 | 1337608 | exocyst complex component 3-like | Exoc31 | 291961 | 1,30 | up   |
| 5740883 | 7184850 | 1337612 | exocyst complex component 3-like | Exoc31 | 291961 | 1,27 | down |
| 5658581 | 7184850 | 1337600 | exocyst complex component 3-like | Exoc31 | 291961 | 1,20 | down |
| 6238659 | 7184850 | 1337610 | exocyst complex component 3-like | Exoc31 | 291961 | 1,19 | up   |
| 5817769 | 7184850 | 1337601 | exocyst complex component 3-like | Exoc31 | 291961 | 1,12 | down |
| 6239849 | 7184850 | 1337603 | exocyst complex component 3-like | Exoc31 | 291961 | 1,10 | up   |
| 6095863 | 7184850 | 1337607 | exocyst complex component 3-like | Exoc31 | 291961 | 1,08 | down |
| 6571731 | 7184850 | 1337601 | exocyst complex component 3-like | Exoc31 | 291961 | 1,05 | down |
| 5877861 | 7184850 | 1337604 | exocyst complex component 3-like | Exoc31 | 291961 | 1,02 | up   |
| 6110485 | 7184850 | 1337600 | exocyst complex component 3-like | Exoc31 | 291961 | 1,02 | down |
| 6293526 | 7184850 | 1337602 | exocyst complex component 3-like | Exoc31 | 291961 | 1,00 | up   |
| 6594681 | 7184850 | 1337601 | exocyst complex component 3-like | Exoc31 | 291961 | 1,00 | up   |
| 6515821 | 7252339 | 1503283 | exocyst complex component 4      | Exoc4  | 116654 | 1,38 | up   |
| 5911517 | 7252339 | 1503266 | exocyst complex component 4      | Exoc4  | 116654 | 1,24 | down |
| 6456427 | 7252339 | 1503322 | exocyst complex component 4      | Exoc4  | 116654 | 1,21 | up   |
| 5669531 | 7252339 | 1503272 | exocyst complex component 4      | Exoc4  | 116654 | 1,20 | down |
| 5657133 | 7252339 | 1503333 | exocyst complex component 4      | Exoc4  | 116654 | 1,20 | up   |
| 6576102 | 7252339 | 1503322 | exocyst complex component 4      | Exoc4  | 116654 | 1,18 | down |
| 5962430 | 7252339 | 1503252 | exocyst complex component 4      | Exoc4  | 116654 | 1,17 | up   |
| 6608616 | 7252339 | 1503357 | exocyst complex component 4      | Exoc4  | 116654 | 1,14 | down |
| 5921012 | 7252339 | 1503285 | exocyst complex component 4      | Exoc4  | 116654 | 1,14 | down |
| 5777439 | 7252339 | 1503344 | exocyst complex component 4      | Exoc4  | 116654 | 1,10 | down |
| 6196056 | 7252339 | 1503355 | exocyst complex component 4      | Exoc4  | 116654 | 1,10 | down |
| 6276171 | 7252339 | 1503339 | exocyst complex component 4      | Exoc4  | 116654 | 1,08 | up   |
| 6167195 | 7252339 | 1503260 | exocyst complex component 4      | Exoc4  | 116654 | 1,06 | down |
| 5886020 | 7252339 | 1503249 | exocyst complex component 4      | Exoc4  | 116654 | 1,05 | up   |
| 6477606 | 7252339 | 1503262 | exocyst complex component 4      | Exoc4  | 116654 | 1,04 | up   |
| 6031824 | 7252339 | 1503358 | exocyst complex component 4      | Exoc4  | 116654 | 1,03 | up   |
| 6072275 | 7252339 | 1503299 | exocyst complex component 4      | Exoc4  | 116654 | 1,03 | up   |
| 5847611 | 7252339 | 1503258 | exocyst complex component 4      | Exoc4  | 116654 | 1,02 | up   |
| 6562248 | 7252339 | 1503370 | exocyst complex component 4      | Exoc4  | 116654 | 1,00 | down |
| 6727667 | 7084659 | 1089988 | exocyst complex component 7      | Exoc7  | 64632  | 2,03 | down |
| 6068215 | 7084659 | 1089989 | exocyst complex component 7      | Exoc7  | 64632  | 1,81 | down |
| 5902559 | 7084659 | 1089986 | exocyst complex component 7      | Exoc7  | 64632  | 1,76 | down |
| 5816714 | 7084659 | 1089987 | exocyst complex component 7      | Exoc7  | 64632  | 1,63 | down |
| 5741750 | 7084659 | 1089993 | exocyst complex component 7      | Exoc7  | 64632  | 1,58 | up   |
| 6670397 | 7084659 | 1089991 | exocyst complex component 7      | Exoc7  | 64632  | 1,48 | down |
| 6326291 | 7084659 | 1090003 | exocyst complex component 7      | Exoc7  | 64632  | 1,47 | up   |
| 6579237 | 7084659 | 1090002 | exocyst complex component 7      | Exoc7  | 64632  | 1,43 | down |
| 6052298 | 7084659 | 1089997 | exocyst complex component 7      | Exoc7  | 64632  | 1,38 | up   |
| 6679112 | 7084659 | 1089996 | exocyst complex component 7      | Exoc7  | 64632  | 1,25 | up   |
| 6515650 | 7084659 | 1089990 | exocyst complex component 7      | Exoc7  | 64632  | 1,22 | down |
| 5668260 | 7084659 | 1090001 | exocyst complex component 7      | Exoc7  | 64632  | 1,21 | up   |
| 6099668 | 7084659 | 1089995 | exocyst complex component 7      | Exoc7  | 64632  | 1,16 | down |
| 5793012 | 7084659 | 1089999 | exocyst complex component 7      | Exoc7  | 64632  | 1,15 | up   |
| 6303658 | 7084659 | 1089992 | exocyst complex component 7      | Exoc7  | 64632  | 1,14 | down |
| 5913631 | 7084659 | 1089994 | exocyst complex component 7      | Exoc7  | 64632  | 1,12 | down |
| 6318300 | 7084659 | 1090000 | exocyst complex component 7      | Exoc7  | 64632  | 1,06 | up   |
| 6171268 | 7084659 | 1089998 | exocyst complex component 7      | Exoc7  | 64632  | 1,02 | up   |
| 6245441 | 7108122 | 1147391 | exonuclease 1                    | Exo1   | 305000 | 2,09 | down |
| 5673349 | 7108122 | 1147400 | exonuclease 1                    | Exo1   | 305000 | 1,56 | down |
| 6357667 | 7108122 | 1147394 | exonuclease 1                    | Exo1   | 305000 | 1,44 | down |
| 6044992 | 7108122 | 1147389 | exonuclease 1                    | Exo1   | 305000 | 1,42 | down |
| 5955289 | 7108122 | 1147385 | exonuclease 1                    | Exo1   | 305000 | 1,36 | down |

|         |         |         |                                                     |       |        |      |      |
|---------|---------|---------|-----------------------------------------------------|-------|--------|------|------|
| 6592124 | 7108122 | 1147397 | exonuclease 1                                       | Exo1  | 305000 | 1,33 | down |
| 6100581 | 7108122 | 1147390 | exonuclease 1                                       | Exo1  | 305000 | 1,21 | down |
| 6303091 | 7108122 | 1147394 | exonuclease 1                                       | Exo1  | 305000 | 1,20 | down |
| 5803188 | 7108122 | 1147401 | exonuclease 1                                       | Exo1  | 305000 | 1,14 | up   |
| 6124709 | 7108122 | 1147399 | exonuclease 1                                       | Exo1  | 305000 | 1,13 | up   |
| 6357440 | 7108122 | 1147398 | exonuclease 1                                       | Exo1  | 305000 | 1,09 | up   |
| 5901575 | 7108122 | 1147392 | exonuclease 1                                       | Exo1  | 305000 | 1,07 | down |
| 6426185 | 7108122 | 1147393 | exonuclease 1                                       | Exo1  | 305000 | 1,05 | down |
| 5652395 | 7108122 | 1147387 | exonuclease 1                                       | Exo1  | 305000 | 1,04 | up   |
| 5909459 | 7108122 | 1147388 | exonuclease 1                                       | Exo1  | 305000 | 1,04 | down |
| 5831968 | 7108122 | 1147401 | exonuclease 1                                       | Exo1  | 305000 | 1,01 | down |
| 6123128 | 7108122 | 1147394 | exonuclease 1                                       | Exo1  | 305000 | 1,01 | down |
| 5814237 | 7138580 | 1222484 | exportin 4                                          | Xpo4  | 290280 | 2,53 | down |
| 5865705 | 7138580 | 1222491 | exportin 4                                          | Xpo4  | 290280 | 1,53 | up   |
| 5627633 | 7138580 | 1222473 | exportin 4                                          | Xpo4  | 290280 | 1,50 | up   |
| 5814077 | 7138580 | 1222481 | exportin 4                                          | Xpo4  | 290280 | 1,37 | down |
| 6650087 | 7138580 | 1222493 | exportin 4                                          | Xpo4  | 290280 | 1,37 | up   |
| 6334662 | 7138580 | 1222475 | exportin 4                                          | Xpo4  | 290280 | 1,34 | up   |
| 5728703 | 7138580 | 1222485 | exportin 4                                          | Xpo4  | 290280 | 1,29 | up   |
| 6090420 | 7138580 | 1222498 | exportin 4                                          | Xpo4  | 290280 | 1,29 | up   |
| 6158985 | 7138580 | 1222504 | exportin 4                                          | Xpo4  | 290280 | 1,25 | up   |
| 5789336 | 7138580 | 1222502 | exportin 4                                          | Xpo4  | 290280 | 1,25 | up   |
| 6179438 | 7138580 | 1222478 | exportin 4                                          | Xpo4  | 290280 | 1,24 | up   |
| 6466087 | 7138580 | 1222476 | exportin 4                                          | Xpo4  | 290280 | 1,23 | up   |
| 5640005 | 7138580 | 1222483 | exportin 4                                          | Xpo4  | 290280 | 1,22 | down |
| 5708407 | 7138580 | 1222488 | exportin 4                                          | Xpo4  | 290280 | 1,20 | up   |
| 6505031 | 7138580 | 1222506 | exportin 4                                          | Xpo4  | 290280 | 1,19 | down |
| 6036564 | 7138580 | 1222500 | exportin 4                                          | Xpo4  | 290280 | 1,18 | up   |
| 6236744 | 7138580 | 1222477 | exportin 4                                          | Xpo4  | 290280 | 1,18 | down |
| 6635343 | 7138580 | 1222480 | exportin 4                                          | Xpo4  | 290280 | 1,17 | up   |
| 6579143 | 7138580 | 1222507 | exportin 4                                          | Xpo4  | 290280 | 1,14 | up   |
| 5800613 | 7138580 | 1222492 | exportin 4                                          | Xpo4  | 290280 | 1,13 | up   |
| 6244103 | 7138580 | 1222486 | exportin 4                                          | Xpo4  | 290280 | 1,13 | up   |
| 6469551 | 7138580 | 1222496 | exportin 4                                          | Xpo4  | 290280 | 1,12 | up   |
| 6550802 | 7138580 | 1222481 | exportin 4                                          | Xpo4  | 290280 | 1,10 | down |
| 5695847 | 7138580 | 1222474 | exportin 4                                          | Xpo4  | 290280 | 1,05 | up   |
| 6621917 | 7138580 | 1222494 | exportin 4                                          | Xpo4  | 290280 | 1,05 | down |
| 6162306 | 7138580 | 1222499 | exportin 4                                          | Xpo4  | 290280 | 1,03 | down |
| 6061673 | 7138580 | 1222478 | exportin 4                                          | Xpo4  | 290280 | 1,01 | down |
| 6236194 | 7138580 | 1222499 | exportin 4                                          | Xpo4  | 290280 | 1,01 | down |
| 6005342 | 7138580 | 1222487 | exportin 4                                          | Xpo4  | 290280 | 1,01 | up   |
| 6571502 | 7138580 | 1222482 | exportin 4                                          | Xpo4  | 290280 | 1,01 | down |
| 5662102 | 7138580 | 1222495 | exportin 4                                          | Xpo4  | 290280 | 1,01 | up   |
| 5647299 | 7138580 | 1222472 | exportin 4                                          | Xpo4  | 290280 | 1,00 | down |
| 6378791 | 7321029 | 1674802 | extra spindle poles like 1 ( <i>S. cerevisiae</i> ) | Espl1 | 315330 | 1,16 | up   |
| 5744745 | 7321029 | 1674833 | extra spindle poles like 1 ( <i>S. cerevisiae</i> ) | Espl1 | 315330 | 1,15 | up   |
| 6711053 | 7046271 | 1001495 | ezrin                                               | Ezr   | 54319  | 2,44 | down |
| 6196438 | 7046271 | 1001495 | ezrin                                               | Ezr   | 54319  | 2,08 | down |
| 6693990 | 7046271 | 1001490 | ezrin                                               | Ezr   | 54319  | 1,55 | up   |
| 5964755 | 7046271 | 1001492 | ezrin                                               | Ezr   | 54319  | 1,53 | up   |
| 6232116 | 7046271 | 1001485 | ezrin                                               | Ezr   | 54319  | 1,50 | down |
| 6014334 | 7046271 | 1001486 | ezrin                                               | Ezr   | 54319  | 1,39 | down |
| 5998117 | 7046271 | 1001488 | ezrin                                               | Ezr   | 54319  | 1,35 | down |
| 5627004 | 7046271 | 1001494 | ezrin                                               | Ezr   | 54319  | 1,22 | down |
| 5980531 | 7046271 | 1001484 | ezrin                                               | Ezr   | 54319  | 1,22 | up   |
| 6223958 | 7046271 | 1001493 | ezrin                                               | Ezr   | 54319  | 1,16 | up   |
| 6011763 | 7046271 | 1001491 | ezrin                                               | Ezr   | 54319  | 1,09 | down |

|         |         |         |                                                |          |        |      |      |
|---------|---------|---------|------------------------------------------------|----------|--------|------|------|
| 6639910 | 7046271 | 1001483 | ezrin                                          | Ezr      | 54319  | 1,06 | down |
| 6215634 | 7046271 | 1001487 | ezrin                                          | Ezr      | 54319  | 1,06 | up   |
| 6358476 | 7046271 | 1001482 | ezrin                                          | Ezr      | 54319  | 1,03 | up   |
| 6077667 | 7046271 | 1001489 | ezrin                                          | Ezr      | 54319  | 1,02 | up   |
| 5895686 | 7073731 | 1065331 | family with sequence similarity 100, member B  | Fam100b  | 287840 | 2,38 | up   |
| 6487009 | 7073731 | 1065333 | family with sequence similarity 100, member B  | Fam100b  | 287840 | 1,44 | up   |
| 6110898 | 7073731 | 1065333 | family with sequence similarity 100, member B  | Fam100b  | 287840 | 1,18 | down |
| 6706117 | 7073731 | 1065330 | family with sequence similarity 100, member B  | Fam100b  | 287840 | 1,16 | down |
| 6350902 | 7079887 | 1079288 | family with sequence similarity 101, member B  | Fam101b  | 287534 | 2,39 | down |
| 6029108 | 7079887 | 1079286 | family with sequence similarity 101, member B  | Fam101b  | 287534 | 2,29 | down |
| 6127903 | 7079887 | 1079287 | family with sequence similarity 101, member B  | Fam101b  | 287534 | 1,21 | up   |
| 5758205 | 7079887 | 1079286 | family with sequence similarity 101, member B  | Fam101b  | 287534 | 1,13 | up   |
| 6291784 | 7079887 | 1079288 | family with sequence similarity 101, member B  | Fam101b  | 287534 | 1,09 | up   |
| 6262175 | 7084176 | 1089016 | family with sequence similarity 104, member A  | Fam104a  | 619573 | 2,60 | up   |
| 6592137 | 7084176 | 1089012 | family with sequence similarity 104, member A  | Fam104a  | 619573 | 1,25 | up   |
| 6679029 | 7084176 | 1089012 | family with sequence similarity 104, member A  | Fam104a  | 619573 | 1,23 | up   |
| 6226890 | 7084176 | 1089012 | family with sequence similarity 104, member A  | Fam104a  | 619573 | 1,19 | down |
| 6434541 | 7084176 | 1089015 | family with sequence similarity 104, member A  | Fam104a  | 619573 | 1,02 | down |
| 6673019 | 7053878 | 1018369 | family with sequence similarity 108, member C1 | Fam108c1 | 361601 | 2,33 | down |
| 6413748 | 7053878 | 1018369 | family with sequence similarity 108, member C1 | Fam108c1 | 361601 | 1,39 | down |
| 6646597 | 7053878 | 1018369 | family with sequence similarity 108, member C1 | Fam108c1 | 361601 | 1,27 | up   |
| 5918365 | 7053878 | 1018354 | family with sequence similarity 108, member C1 | Fam108c1 | 361601 | 1,26 | up   |
| 6350288 | 7053878 | 1018354 | family with sequence similarity 108, member C1 | Fam108c1 | 361601 | 1,18 | up   |
| 5734047 | 7053878 | 1018355 | family with sequence similarity 108, member C1 | Fam108c1 | 361601 | 1,09 | up   |
| 5955296 | 7053878 | 1018369 | family with sequence similarity 108, member C1 | Fam108c1 | 361601 | 1,08 | down |
| 6242960 | 7053878 | 1018368 | family with sequence similarity 108, member C1 | Fam108c1 | 361601 | 1,02 | up   |
| 6515789 | 7264274 | 1533165 | family with sequence similarity 115, member C  | Fam115c  | 680422 | 1,49 | down |
| 5972462 | 7264274 | 1533164 | family with sequence similarity 115, member C  | Fam115c  | 680422 | 1,40 | down |
| 6050409 | 7319486 | 1670934 | family with sequence similarity 118, member A  | Fam118a  | 300120 | 3,02 | up   |
| 6391434 | 7319486 | 1670933 | family with sequence similarity 118, member A  | Fam118a  | 300120 | 2,03 | up   |
| 5723025 | 7319486 | 1670941 | family with sequence similarity 118, member A  | Fam118a  | 300120 | 1,90 | down |
| 5859105 | 7319486 | 1670943 | family with sequence similarity 118, member A  | Fam118a  | 300120 | 1,33 | down |
| 5789308 | 7319486 | 1670938 | family with sequence similarity 118, member A  | Fam118a  | 300120 | 1,32 | up   |
| 6399433 | 7319486 | 1670937 | family with sequence similarity 118, member A  | Fam118a  | 300120 | 1,12 | down |
| 5853934 | 7319486 | 1670936 | family with sequence similarity 118, member A  | Fam118a  | 300120 | 1,09 | down |
| 6663765 | 7319486 | 1670940 | family with sequence similarity 118, member A  | Fam118a  | 300120 | 1,06 | up   |
| 6034000 | 7027797 | 956277  | family with sequence similarity 120B           | Fam120b  | 308218 | 2,06 | up   |
| 6685914 | 7027797 | 956311  | family with sequence similarity 120B           | Fam120b  | 308218 | 1,77 | down |
| 5628281 | 7027797 | 956311  | family with sequence similarity 120B           | Fam120b  | 308218 | 1,67 | down |
| 5984800 | 7027797 | 956286  | family with sequence similarity 120B           | Fam120b  | 308218 | 1,56 | down |
| 6253550 | 7027797 | 956277  | family with sequence similarity 120B           | Fam120b  | 308218 | 1,47 | up   |
| 5955088 | 7027797 | 956309  | family with sequence similarity 120B           | Fam120b  | 308218 | 1,45 | up   |
| 6029453 | 7027797 | 956279  | family with sequence similarity 120B           | Fam120b  | 308218 | 1,35 | up   |
| 6166177 | 7027797 | 956311  | family with sequence similarity 120B           | Fam120b  | 308218 | 1,28 | down |
| 6448383 | 7027797 | 956304  | family with sequence similarity 120B           | Fam120b  | 308218 | 1,27 | up   |
| 5754832 | 7027797 | 956297  | family with sequence similarity 120B           | Fam120b  | 308218 | 1,22 | down |
| 6691266 | 7027797 | 956277  | family with sequence similarity 120B           | Fam120b  | 308218 | 1,20 | up   |
| 5975472 | 7027797 | 956297  | family with sequence similarity 120B           | Fam120b  | 308218 | 1,20 | down |
| 6557317 | 7027797 | 956278  | family with sequence similarity 120B           | Fam120b  | 308218 | 1,20 | up   |
| 5647247 | 7027797 | 956303  | family with sequence similarity 120B           | Fam120b  | 308218 | 1,20 | down |
| 5646655 | 7027797 | 956285  | family with sequence similarity 120B           | Fam120b  | 308218 | 1,17 | up   |
| 6074497 | 7027797 | 956278  | family with sequence similarity 120B           | Fam120b  | 308218 | 1,06 | up   |
| 6443764 | 7027797 | 956300  | family with sequence similarity 120B           | Fam120b  | 308218 | 1,01 | down |
| 5970171 | 7353284 | 1752977 | family with sequence similarity 123C           | Fam123c  | 501122 | 1,55 | down |
| 6060278 | 7144064 | 1236123 | family with sequence similarity 125, member A  | Fam125a  | 290635 | 2,15 | down |
| 5958481 | 7144064 | 1236124 | family with sequence similarity 125, member A  | Fam125a  | 290635 | 1,21 | up   |
| 6538183 | 7144064 | 1236129 | family with sequence similarity 125, member A  | Fam125a  | 290635 | 1,21 | down |



|         |         |         |                                                |          |        |      |      |
|---------|---------|---------|------------------------------------------------|----------|--------|------|------|
| 5892496 | 7144064 | 1236125 | family with sequence similarity 125, member A  | Fam125a  | 290635 | 1,15 | up   |
| 6404272 | 7144064 | 1236126 | family with sequence similarity 125, member A  | Fam125a  | 290635 | 1,15 | down |
| 6578680 | 7144064 | 1236130 | family with sequence similarity 125, member A  | Fam125a  | 290635 | 1,13 | down |
| 5802130 | 7144064 | 1236123 | family with sequence similarity 125, member A  | Fam125a  | 290635 | 1,12 | down |
| 6608535 | 7144064 | 1236131 | family with sequence similarity 125, member A  | Fam125a  | 290635 | 1,08 | up   |
| 6619527 | 7144064 | 1236128 | family with sequence similarity 125, member A  | Fam125a  | 290635 | 1,06 | down |
| 6467741 | 7144064 | 1236132 | family with sequence similarity 125, member A  | Fam125a  | 290635 | 1,06 | up   |
| 6612755 | 7144064 | 1236127 | family with sequence similarity 125, member A  | Fam125a  | 290635 | 1,03 | down |
| 5637412 | 7226301 | 1438088 | family with sequence similarity 129, member B  | Fam129b  | 362115 | 1,96 | down |
| 6350865 | 7226301 | 1438084 | family with sequence similarity 129, member B  | Fam129b  | 362115 | 1,46 | up   |
| 6557675 | 7226301 | 1438071 | family with sequence similarity 129, member B  | Fam129b  | 362115 | 1,43 | up   |
| 6269685 | 7226301 | 1438087 | family with sequence similarity 129, member B  | Fam129b  | 362115 | 1,38 | up   |
| 5846382 | 7226301 | 1438094 | family with sequence similarity 129, member B  | Fam129b  | 362115 | 1,31 | down |
| 6037358 | 7226301 | 1438083 | family with sequence similarity 129, member B  | Fam129b  | 362115 | 1,30 | up   |
| 6121811 | 7226301 | 1438089 | family with sequence similarity 129, member B  | Fam129b  | 362115 | 1,26 | down |
| 6105731 | 7226301 | 1438082 | family with sequence similarity 129, member B  | Fam129b  | 362115 | 1,16 | down |
| 5646268 | 7226301 | 1438092 | family with sequence similarity 129, member B  | Fam129b  | 362115 | 1,14 | up   |
| 6456884 | 7226301 | 1438093 | family with sequence similarity 129, member B  | Fam129b  | 362115 | 1,12 | down |
| 6648798 | 7226301 | 1438081 | family with sequence similarity 129, member B  | Fam129b  | 362115 | 1,10 | down |
| 5806211 | 7226301 | 1438095 | family with sequence similarity 129, member B  | Fam129b  | 362115 | 1,10 | down |
| 6438391 | 7226301 | 1438091 | family with sequence similarity 129, member B  | Fam129b  | 362115 | 1,07 | down |
| 6280408 | 7226301 | 1438090 | family with sequence similarity 129, member B  | Fam129b  | 362115 | 1,03 | up   |
| 5970134 | 7226301 | 1438095 | family with sequence similarity 129, member B  | Fam129b  | 362115 | 1,01 | up   |
| 6468125 | 7265259 | 1535449 | family with sequence similarity 13, member A1  | Fam13a1  | 362378 | 2,05 | up   |
| 5685013 | 7265259 | 1535465 | family with sequence similarity 13, member A1  | Fam13a1  | 362378 | 1,72 | up   |
| 5869013 | 7265259 | 1535461 | family with sequence similarity 13, member A1  | Fam13a1  | 362378 | 1,58 | down |
| 5634267 | 7265259 | 1535458 | family with sequence similarity 13, member A1  | Fam13a1  | 362378 | 1,49 | up   |
| 6358265 | 7265259 | 1535459 | family with sequence similarity 13, member A1  | Fam13a1  | 362378 | 1,40 | down |
| 6707068 | 7265259 | 1535451 | family with sequence similarity 13, member A1  | Fam13a1  | 362378 | 1,39 | down |
| 6400993 | 7265259 | 1535457 | family with sequence similarity 13, member A1  | Fam13a1  | 362378 | 1,24 | up   |
| 6692468 | 7265259 | 1535438 | family with sequence similarity 13, member A1  | Fam13a1  | 362378 | 1,11 | down |
| 6071666 | 7265259 | 1535456 | family with sequence similarity 13, member A1  | Fam13a1  | 362378 | 1,08 | down |
| 6498203 | 7265259 | 1535468 | family with sequence similarity 13, member A1  | Fam13a1  | 362378 | 1,02 | up   |
| 6267937 | 7278029 | 1568167 | family with sequence similarity 151, member A  | Fam151a  | 313430 | 2,18 | up   |
| 5677659 | 7278029 | 1568161 | family with sequence similarity 151, member A  | Fam151a  | 313430 | 1,23 | down |
| 6708024 | 7278029 | 1568162 | family with sequence similarity 151, member A  | Fam151a  | 313430 | 1,19 | down |
| 6102659 | 7278029 | 1568165 | family with sequence similarity 151, member A  | Fam151a  | 313430 | 1,17 | down |
| 6194790 | 7278029 | 1568164 | family with sequence similarity 151, member A  | Fam151a  | 313430 | 1,17 | up   |
| 6125289 | 7278029 | 1568166 | family with sequence similarity 151, member A  | Fam151a  | 313430 | 1,12 | up   |
| 5917912 | 7278029 | 1568159 | family with sequence similarity 151, member A  | Fam151a  | 313430 | 1,09 | down |
| 6055715 | 7278029 | 1568160 | family with sequence similarity 151, member A  | Fam151a  | 313430 | 1,05 | down |
| 5892740 | 7278029 | 1568165 | family with sequence similarity 151, member A  | Fam151a  | 313430 | 1,04 | up   |
| 6158027 | 7278029 | 1568163 | family with sequence similarity 151, member A  | Fam151a  | 313430 | 1,01 | down |
| 5666079 | 7043515 | 994003  | family with sequence similarity 160, member B1 | Fam160b1 | 361774 | 1,21 | up   |
| 6518233 | 7043515 | 994003  | family with sequence similarity 160, member B1 | Fam160b1 | 361774 | 1,21 | down |
| 6117857 | 7043515 | 994019  | family with sequence similarity 160, member B1 | Fam160b1 | 361774 | 1,10 | down |
| 6181989 | 7139824 | 1225332 | family with sequence similarity 160, member B2 | Fam160b2 | 306015 | 1,85 | up   |
| 6077150 | 7139824 | 1225317 | family with sequence similarity 160, member B2 | Fam160b2 | 306015 | 1,47 | up   |
| 5635951 | 7139824 | 1225318 | family with sequence similarity 160, member B2 | Fam160b2 | 306015 | 1,44 | down |
| 5792270 | 7139824 | 1225321 | family with sequence similarity 160, member B2 | Fam160b2 | 306015 | 1,42 | down |
| 6309467 | 7139824 | 1225317 | family with sequence similarity 160, member B2 | Fam160b2 | 306015 | 1,30 | up   |
| 6512813 | 7139824 | 1225326 | family with sequence similarity 160, member B2 | Fam160b2 | 306015 | 1,29 | down |
| 6225189 | 7139824 | 1225330 | family with sequence similarity 160, member B2 | Fam160b2 | 306015 | 1,26 | up   |
| 6006856 | 7139824 | 1225322 | family with sequence similarity 160, member B2 | Fam160b2 | 306015 | 1,22 | down |
| 5808044 | 7139824 | 1225329 | family with sequence similarity 160, member B2 | Fam160b2 | 306015 | 1,17 | up   |
| 5686944 | 7139824 | 1225328 | family with sequence similarity 160, member B2 | Fam160b2 | 306015 | 1,14 | up   |
| 5925352 | 7139824 | 1225319 | family with sequence similarity 160, member B2 | Fam160b2 | 306015 | 1,14 | up   |

|         |         |         |                                                |          |        |      |      |
|---------|---------|---------|------------------------------------------------|----------|--------|------|------|
| 6145719 | 7139824 | 1225329 | family with sequence similarity 160, member B2 | Fam160b2 | 306015 | 1,14 | up   |
| 6181842 | 7139824 | 1225323 | family with sequence similarity 160, member B2 | Fam160b2 | 306015 | 1,13 | up   |
| 6508801 | 7139824 | 1225324 | family with sequence similarity 160, member B2 | Fam160b2 | 306015 | 1,08 | down |
| 5856682 | 7139824 | 1225325 | family with sequence similarity 160, member B2 | Fam160b2 | 306015 | 1,06 | down |
| 6579970 | 7139824 | 1225319 | family with sequence similarity 160, member B2 | Fam160b2 | 306015 | 1,05 | up   |
| 6146847 | 7139824 | 1225327 | family with sequence similarity 160, member B2 | Fam160b2 | 306015 | 1,02 | down |
| 5710925 | 7139824 | 1225320 | family with sequence similarity 160, member B2 | Fam160b2 | 306015 | 1,01 | up   |
| 5942352 | 7139824 | 1225320 | family with sequence similarity 160, member B2 | Fam160b2 | 306015 | 1,00 | up   |
| 6172499 | 7303777 | 1631901 | family with sequence similarity 179, member A  | Fam179a  | 313892 | 1,05 | down |
| 5893337 | 7263652 | 1531632 | family with sequence similarity 180, member A  | Fam180a  | 362336 | 2,02 | down |
| 6477568 | 7263652 | 1531642 | family with sequence similarity 180, member A  | Fam180a  | 362336 | 1,05 | up   |
| 5808024 | 7263652 | 1531642 | family with sequence similarity 180, member A  | Fam180a  | 362336 | 1,04 | up   |
| 6134898 | 7263652 | 1531630 | family with sequence similarity 180, member A  | Fam180a  | 362336 | 1,02 | down |
| 6378858 | 7263652 | 1531642 | family with sequence similarity 180, member A  | Fam180a  | 362336 | 1,01 | down |
| 5815241 | 7263652 | 1531630 | family with sequence similarity 180, member A  | Fam180a  | 362336 | 1,00 | up   |
| 6282056 | 7257651 | 1516921 | family with sequence similarity 21, member C   | Fam21c   | 297530 | 2,67 | down |
| 5818915 | 7257651 | 1516917 | family with sequence similarity 21, member C   | Fam21c   | 297530 | 1,55 | down |
| 6311587 | 7257651 | 1516897 | family with sequence similarity 21, member C   | Fam21c   | 297530 | 1,53 | down |
| 6564098 | 7257651 | 1516903 | family with sequence similarity 21, member C   | Fam21c   | 297530 | 1,44 | up   |
| 6014301 | 7257651 | 1516915 | family with sequence similarity 21, member C   | Fam21c   | 297530 | 1,41 | down |
| 6406524 | 7257651 | 1516909 | family with sequence similarity 21, member C   | Fam21c   | 297530 | 1,41 | up   |
| 5835563 | 7257651 | 1516920 | family with sequence similarity 21, member C   | Fam21c   | 297530 | 1,37 | up   |
| 6048124 | 7257651 | 1516925 | family with sequence similarity 21, member C   | Fam21c   | 297530 | 1,33 | down |
| 6620923 | 7257651 | 1516908 | family with sequence similarity 21, member C   | Fam21c   | 297530 | 1,28 | down |
| 6103035 | 7257651 | 1516923 | family with sequence similarity 21, member C   | Fam21c   | 297530 | 1,26 | up   |
| 5649463 | 7257651 | 1516924 | family with sequence similarity 21, member C   | Fam21c   | 297530 | 1,24 | up   |
| 6084904 | 7257651 | 1516926 | family with sequence similarity 21, member C   | Fam21c   | 297530 | 1,24 | down |
| 6592024 | 7257651 | 1516924 | family with sequence similarity 21, member C   | Fam21c   | 297530 | 1,23 | up   |
| 6124968 | 7257651 | 1516907 | family with sequence similarity 21, member C   | Fam21c   | 297530 | 1,23 | up   |
| 5768624 | 7257651 | 1516898 | family with sequence similarity 21, member C   | Fam21c   | 297530 | 1,20 | down |
| 5930165 | 7257651 | 1516923 | family with sequence similarity 21, member C   | Fam21c   | 297530 | 1,20 | down |
| 6093580 | 7257651 | 1516904 | family with sequence similarity 21, member C   | Fam21c   | 297530 | 1,20 | up   |
| 6707628 | 7257651 | 1516906 | family with sequence similarity 21, member C   | Fam21c   | 297530 | 1,19 | down |
| 5740090 | 7257651 | 1516916 | family with sequence similarity 21, member C   | Fam21c   | 297530 | 1,19 | up   |
| 6022095 | 7257651 | 1516901 | family with sequence similarity 21, member C   | Fam21c   | 297530 | 1,18 | up   |
| 6040870 | 7257651 | 1516900 | family with sequence similarity 21, member C   | Fam21c   | 297530 | 1,18 | down |
| 5946819 | 7257651 | 1516913 | family with sequence similarity 21, member C   | Fam21c   | 297530 | 1,17 | down |
| 5756653 | 7257651 | 1516905 | family with sequence similarity 21, member C   | Fam21c   | 297530 | 1,16 | up   |
| 6509136 | 7257651 | 1516917 | family with sequence similarity 21, member C   | Fam21c   | 297530 | 1,11 | up   |
| 5677657 | 7257651 | 1516902 | family with sequence similarity 21, member C   | Fam21c   | 297530 | 1,10 | up   |
| 5961133 | 7257651 | 1516914 | family with sequence similarity 21, member C   | Fam21c   | 297530 | 1,09 | down |
| 5774720 | 7257651 | 1516899 | family with sequence similarity 21, member C   | Fam21c   | 297530 | 1,08 | down |
| 6435532 | 7257651 | 1516911 | family with sequence similarity 21, member C   | Fam21c   | 297530 | 1,08 | down |
| 6542546 | 7257651 | 1516912 | family with sequence similarity 21, member C   | Fam21c   | 297530 | 1,07 | up   |
| 5773451 | 7257651 | 1516923 | family with sequence similarity 21, member C   | Fam21c   | 297530 | 1,07 | up   |
| 6347811 | 7257651 | 1516922 | family with sequence similarity 21, member C   | Fam21c   | 297530 | 1,04 | up   |
| 6393255 | 7257651 | 1516919 | family with sequence similarity 21, member C   | Fam21c   | 297530 | 1,03 | down |
| 6383676 | 7257651 | 1516918 | family with sequence similarity 21, member C   | Fam21c   | 297530 | 1,02 | down |
| 6280145 | 7257651 | 1516910 | family with sequence similarity 21, member C   | Fam21c   | 297530 | 1,02 | up   |
| 6473143 | 7288284 | 1592654 | family with sequence similarity 29, member A   | Fam29a   | 366403 | 2,05 | up   |
| 6651363 | 7288284 | 1592669 | family with sequence similarity 29, member A   | Fam29a   | 366403 | 1,61 | up   |
| 5975073 | 7288284 | 1592668 | family with sequence similarity 29, member A   | Fam29a   | 366403 | 1,49 | down |
| 5982886 | 7288284 | 1592666 | family with sequence similarity 29, member A   | Fam29a   | 366403 | 1,42 | up   |
| 5771986 | 7288284 | 1592660 | family with sequence similarity 29, member A   | Fam29a   | 366403 | 1,33 | up   |
| 5847929 | 7288284 | 1592657 | family with sequence similarity 29, member A   | Fam29a   | 366403 | 1,33 | up   |
| 6736707 | 7288284 | 1592667 | family with sequence similarity 29, member A   | Fam29a   | 366403 | 1,31 | up   |
| 5769161 | 7288284 | 1592663 | family with sequence similarity 29, member A   | Fam29a   | 366403 | 1,23 | down |

|         |         |         |                                              |        |        |      |      |
|---------|---------|---------|----------------------------------------------|--------|--------|------|------|
| 6529613 | 7288284 | 1592652 | family with sequence similarity 29, member A | Fam29a | 366403 | 1,18 | up   |
| 6166972 | 7288284 | 1592648 | family with sequence similarity 29, member A | Fam29a | 366403 | 1,14 | up   |
| 6543272 | 7288284 | 1592648 | family with sequence similarity 29, member A | Fam29a | 366403 | 1,13 | up   |
| 6040553 | 7288284 | 1592662 | family with sequence similarity 29, member A | Fam29a | 366403 | 1,11 | up   |
| 5769177 | 7288284 | 1592655 | family with sequence similarity 29, member A | Fam29a | 366403 | 1,08 | down |
| 6722504 | 7288284 | 1592654 | family with sequence similarity 29, member A | Fam29a | 366403 | 1,07 | down |
| 6710458 | 7288284 | 1592661 | family with sequence similarity 29, member A | Fam29a | 366403 | 1,07 | down |
| 6085924 | 7288284 | 1592656 | family with sequence similarity 29, member A | Fam29a | 366403 | 1,03 | down |
| 5804081 | 7288284 | 1592658 | family with sequence similarity 29, member A | Fam29a | 366403 | 1,02 | down |
| 6304507 | 7288284 | 1592669 | family with sequence similarity 29, member A | Fam29a | 366403 | 1,02 | down |
| 6176425 | 7288284 | 1592653 | family with sequence similarity 29, member A | Fam29a | 366403 | 1,01 | down |
| 6435571 | 7186305 | 1341033 | family with sequence similarity 38, member A | Fam38a | 361430 | 3,28 | up   |
| 5983257 | 7186305 | 1341024 | family with sequence similarity 38, member A | Fam38a | 361430 | 2,63 | up   |
| 5921878 | 7186305 | 1341025 | family with sequence similarity 38, member A | Fam38a | 361430 | 2,53 | up   |
| 6113456 | 7186305 | 1341002 | family with sequence similarity 38, member A | Fam38a | 361430 | 2,08 | up   |
| 5904510 | 7186305 | 1341034 | family with sequence similarity 38, member A | Fam38a | 361430 | 1,97 | up   |
| 5936354 | 7186305 | 1341030 | family with sequence similarity 38, member A | Fam38a | 361430 | 1,94 | up   |
| 5643889 | 7186305 | 1341026 | family with sequence similarity 38, member A | Fam38a | 361430 | 1,75 | up   |
| 6366856 | 7186305 | 1341028 | family with sequence similarity 38, member A | Fam38a | 361430 | 1,74 | up   |
| 6254469 | 7186305 | 1341019 | family with sequence similarity 38, member A | Fam38a | 361430 | 1,54 | up   |
| 6224105 | 7186305 | 1341010 | family with sequence similarity 38, member A | Fam38a | 361430 | 1,50 | up   |
| 5717490 | 7186305 | 1341014 | family with sequence similarity 38, member A | Fam38a | 361430 | 1,49 | up   |
| 6535303 | 7186305 | 1341013 | family with sequence similarity 38, member A | Fam38a | 361430 | 1,44 | down |
| 6727258 | 7186305 | 1341031 | family with sequence similarity 38, member A | Fam38a | 361430 | 1,41 | down |
| 6026242 | 7186305 | 1341012 | family with sequence similarity 38, member A | Fam38a | 361430 | 1,41 | up   |
| 6455989 | 7186305 | 1341011 | family with sequence similarity 38, member A | Fam38a | 361430 | 1,39 | up   |
| 6592713 | 7186305 | 1341035 | family with sequence similarity 38, member A | Fam38a | 361430 | 1,39 | up   |
| 5842430 | 7186305 | 1341029 | family with sequence similarity 38, member A | Fam38a | 361430 | 1,31 | up   |
| 6554457 | 7186305 | 1341004 | family with sequence similarity 38, member A | Fam38a | 361430 | 1,30 | up   |
| 6224494 | 7186305 | 1341032 | family with sequence similarity 38, member A | Fam38a | 361430 | 1,26 | up   |
| 6361095 | 7186305 | 1341022 | family with sequence similarity 38, member A | Fam38a | 361430 | 1,25 | up   |
| 6442497 | 7186305 | 1341009 | family with sequence similarity 38, member A | Fam38a | 361430 | 1,23 | up   |
| 5996057 | 7186305 | 1341027 | family with sequence similarity 38, member A | Fam38a | 361430 | 1,20 | down |
| 6402612 | 7186305 | 1341000 | family with sequence similarity 38, member A | Fam38a | 361430 | 1,19 | down |
| 6728670 | 7186305 | 1341002 | family with sequence similarity 38, member A | Fam38a | 361430 | 1,18 | down |
| 6679579 | 7186305 | 1341008 | family with sequence similarity 38, member A | Fam38a | 361430 | 1,17 | up   |
| 5904210 | 7186305 | 1341005 | family with sequence similarity 38, member A | Fam38a | 361430 | 1,14 | down |
| 6367621 | 7186305 | 1341001 | family with sequence similarity 38, member A | Fam38a | 361430 | 1,14 | down |
| 5982484 | 7186305 | 1341002 | family with sequence similarity 38, member A | Fam38a | 361430 | 1,13 | down |
| 5920884 | 7186305 | 1341017 | family with sequence similarity 38, member A | Fam38a | 361430 | 1,13 | up   |
| 6388338 | 7186305 | 1341002 | family with sequence similarity 38, member A | Fam38a | 361430 | 1,11 | up   |
| 6164727 | 7186305 | 1341023 | family with sequence similarity 38, member A | Fam38a | 361430 | 1,09 | down |
| 5788053 | 7186305 | 1341009 | family with sequence similarity 38, member A | Fam38a | 361430 | 1,09 | down |
| 6040124 | 7186305 | 1341031 | family with sequence similarity 38, member A | Fam38a | 361430 | 1,08 | down |
| 5956434 | 7186305 | 1341020 | family with sequence similarity 38, member A | Fam38a | 361430 | 1,06 | up   |
| 6741557 | 7186305 | 1341016 | family with sequence similarity 38, member A | Fam38a | 361430 | 1,05 | down |
| 5696497 | 7186305 | 1341018 | family with sequence similarity 38, member A | Fam38a | 361430 | 1,05 | up   |
| 5851283 | 7186305 | 1341007 | family with sequence similarity 38, member A | Fam38a | 361430 | 1,04 | down |
| 6419363 | 7186305 | 1341002 | family with sequence similarity 38, member A | Fam38a | 361430 | 1,04 | down |
| 5625040 | 7186305 | 1341021 | family with sequence similarity 38, member A | Fam38a | 361430 | 1,03 | up   |
| 6155431 | 7186305 | 1341006 | family with sequence similarity 38, member A | Fam38a | 361430 | 1,02 | down |
| 5858217 | 7212587 | 1404634 | family with sequence similarity 40, member A | Fam40a | 362012 | 1,26 | up   |
| 6575573 | 7212587 | 1404638 | family with sequence similarity 40, member A | Fam40a | 362012 | 1,22 | up   |
| 5983826 | 7212587 | 1404634 | family with sequence similarity 40, member A | Fam40a | 362012 | 1,11 | down |
| 5910418 | 7212587 | 1404636 | family with sequence similarity 40, member A | Fam40a | 362012 | 1,08 | up   |
| 5784576 | 7094346 | 1113394 | family with sequence similarity 43, member A | Fam43a | 288031 | 2,00 | down |
| 6557059 | 7094346 | 1113394 | family with sequence similarity 43, member A | Fam43a | 288031 | 1,79 | up   |

|         |         |         |                                               |         |        |      |      |
|---------|---------|---------|-----------------------------------------------|---------|--------|------|------|
| 5635527 | 7094346 | 1113394 | family with sequence similarity 43, member A  | Fam43a  | 288031 | 1,51 | down |
| 6018581 | 7094346 | 1113394 | family with sequence similarity 43, member A  | Fam43a  | 288031 | 1,29 | down |
| 5827575 | 7094346 | 1113394 | family with sequence similarity 43, member A  | Fam43a  | 288031 | 1,24 | down |
| 6292534 | 7094346 | 1113394 | family with sequence similarity 43, member A  | Fam43a  | 288031 | 1,01 | down |
| 5937107 | 7251998 | 1502402 | family with sequence similarity 71, member F1 | Fam71f1 | 500061 | 2,24 | up   |
| 6248004 | 7251998 | 1502401 | family with sequence similarity 71, member F1 | Fam71f1 | 500061 | 1,54 | down |
| 5762240 | 7251998 | 1502400 | family with sequence similarity 71, member F1 | Fam71f1 | 500061 | 1,52 | down |
| 5795743 | 7251998 | 1502405 | family with sequence similarity 71, member F1 | Fam71f1 | 500061 | 1,14 | down |
| 6544820 | 7251998 | 1502399 | family with sequence similarity 71, member F1 | Fam71f1 | 500061 | 1,12 | up   |
| 6216405 | 7251998 | 1502403 | family with sequence similarity 71, member F1 | Fam71f1 | 500061 | 1,09 | up   |
| 6128858 | 7251998 | 1502400 | family with sequence similarity 71, member F1 | Fam71f1 | 500061 | 1,08 | up   |
| 6661544 | 7251998 | 1502400 | family with sequence similarity 71, member F1 | Fam71f1 | 500061 | 1,07 | up   |
| 5812239 | 7251998 | 1502401 | family with sequence similarity 71, member F1 | Fam71f1 | 500061 | 1,03 | down |
| 6039660 | 7251998 | 1502400 | family with sequence similarity 71, member F1 | Fam71f1 | 500061 | 1,02 | down |
| 5825845 | 7251998 | 1502404 | family with sequence similarity 71, member F1 | Fam71f1 | 500061 | 1,01 | up   |
| 6189380 | 7332989 | 1702612 | family with sequence similarity 76, member B  | Fam76b  | 367021 | 2,42 | up   |
| 6560702 | 7332989 | 1702605 | family with sequence similarity 76, member B  | Fam76b  | 367021 | 1,72 | up   |
| 5921938 | 7332989 | 1702604 | family with sequence similarity 76, member B  | Fam76b  | 367021 | 1,36 | up   |
| 6231656 | 7332989 | 1702608 | family with sequence similarity 76, member B  | Fam76b  | 367021 | 1,35 | down |
| 6209115 | 7332989 | 1702609 | family with sequence similarity 76, member B  | Fam76b  | 367021 | 1,31 | down |
| 5901254 | 7332989 | 1702606 | family with sequence similarity 76, member B  | Fam76b  | 367021 | 1,30 | up   |
| 6308727 | 7332989 | 1702607 | family with sequence similarity 76, member B  | Fam76b  | 367021 | 1,29 | up   |
| 6667023 | 7332989 | 1702613 | family with sequence similarity 76, member B  | Fam76b  | 367021 | 1,28 | down |
| 6044429 | 7332989 | 1702603 | family with sequence similarity 76, member B  | Fam76b  | 367021 | 1,25 | up   |
| 6014162 | 7332989 | 1702610 | family with sequence similarity 76, member B  | Fam76b  | 367021 | 1,21 | up   |
| 5807711 | 7332989 | 1702606 | family with sequence similarity 76, member B  | Fam76b  | 367021 | 1,19 | down |
| 6460783 | 7332989 | 1702607 | family with sequence similarity 76, member B  | Fam76b  | 367021 | 1,15 | up   |
| 6199360 | 7332989 | 1702603 | family with sequence similarity 76, member B  | Fam76b  | 367021 | 1,13 | up   |
| 5969668 | 7332989 | 1702615 | family with sequence similarity 76, member B  | Fam76b  | 367021 | 1,12 | up   |
| 6666647 | 7332989 | 1702615 | family with sequence similarity 76, member B  | Fam76b  | 367021 | 1,08 | up   |
| 6351273 | 7332989 | 1702614 | family with sequence similarity 76, member B  | Fam76b  | 367021 | 1,03 | up   |
| 6681570 | 7332989 | 1702607 | family with sequence similarity 76, member B  | Fam76b  | 367021 | 1,02 | up   |
| 6687656 | 7065094 | 1044112 | family with sequence similarity 86, member A  | Fam86a  | 302931 | 2,03 | down |
| 6580128 | 7065094 | 1044115 | family with sequence similarity 86, member A  | Fam86a  | 302931 | 1,73 | up   |
| 5677519 | 7065094 | 1044110 | family with sequence similarity 86, member A  | Fam86a  | 302931 | 1,22 | up   |
| 6242687 | 7065094 | 1044108 | family with sequence similarity 86, member A  | Fam86a  | 302931 | 1,21 | down |
| 6033741 | 7065094 | 1044109 | family with sequence similarity 86, member A  | Fam86a  | 302931 | 1,20 | up   |
| 6269799 | 7065094 | 1044111 | family with sequence similarity 86, member A  | Fam86a  | 302931 | 1,17 | down |
| 5752027 | 7065094 | 1044114 | family with sequence similarity 86, member A  | Fam86a  | 302931 | 1,16 | down |
| 5927667 | 7065094 | 1044107 | family with sequence similarity 86, member A  | Fam86a  | 302931 | 1,07 | up   |
| 6465228 | 7186443 | 1341290 | Fanconi anemia, complementation group A       | Fanca   | 361435 | 2,26 | up   |
| 6671238 | 7186443 | 1341313 | Fanconi anemia, complementation group A       | Fanca   | 361435 | 1,98 | up   |
| 5985763 | 7186443 | 1341278 | Fanconi anemia, complementation group A       | Fanca   | 361435 | 1,78 | down |
| 6651042 | 7186443 | 1341278 | Fanconi anemia, complementation group A       | Fanca   | 361435 | 1,74 | down |
| 6366004 | 7186443 | 1341271 | Fanconi anemia, complementation group A       | Fanca   | 361435 | 1,72 | down |
| 6011116 | 7186443 | 1341298 | Fanconi anemia, complementation group A       | Fanca   | 361435 | 1,68 | up   |
| 6592061 | 7186443 | 1341307 | Fanconi anemia, complementation group A       | Fanca   | 361435 | 1,63 | down |
| 6260940 | 7186443 | 1341299 | Fanconi anemia, complementation group A       | Fanca   | 361435 | 1,63 | down |
| 5799785 | 7186443 | 1341302 | Fanconi anemia, complementation group A       | Fanca   | 361435 | 1,60 | down |
| 6349613 | 7186443 | 1341306 | Fanconi anemia, complementation group A       | Fanca   | 361435 | 1,57 | down |
| 6239861 | 7186443 | 1341282 | Fanconi anemia, complementation group A       | Fanca   | 361435 | 1,46 | up   |
| 6202203 | 7186443 | 1341277 | Fanconi anemia, complementation group A       | Fanca   | 361435 | 1,39 | down |
| 5737021 | 7186443 | 1341304 | Fanconi anemia, complementation group A       | Fanca   | 361435 | 1,37 | down |
| 6496957 | 7186443 | 1341309 | Fanconi anemia, complementation group A       | Fanca   | 361435 | 1,35 | down |
| 6102258 | 7186443 | 1341290 | Fanconi anemia, complementation group A       | Fanca   | 361435 | 1,34 | up   |
| 5787128 | 7186443 | 1341279 | Fanconi anemia, complementation group A       | Fanca   | 361435 | 1,31 | up   |
| 6590967 | 7186443 | 1341287 | Fanconi anemia, complementation group A       | Fanca   | 361435 | 1,28 | down |

|         |         |         |                                           |         |        |      |      |
|---------|---------|---------|-------------------------------------------|---------|--------|------|------|
| 5751674 | 7186443 | 1341275 | Fanconi anemia, complementation group A   | Fanca   | 361435 | 1,25 | down |
| 5770230 | 7186443 | 1341276 | Fanconi anemia, complementation group A   | Fanca   | 361435 | 1,25 | down |
| 6621055 | 7186443 | 1341305 | Fanconi anemia, complementation group A   | Fanca   | 361435 | 1,22 | down |
| 6647863 | 7186443 | 1341286 | Fanconi anemia, complementation group A   | Fanca   | 361435 | 1,19 | up   |
| 6044000 | 7186443 | 1341308 | Fanconi anemia, complementation group A   | Fanca   | 361435 | 1,18 | up   |
| 5698793 | 7186443 | 1341315 | Fanconi anemia, complementation group A   | Fanca   | 361435 | 1,17 | down |
| 5972464 | 7186443 | 1341303 | Fanconi anemia, complementation group A   | Fanca   | 361435 | 1,16 | down |
| 5823398 | 7186443 | 1341274 | Fanconi anemia, complementation group A   | Fanca   | 361435 | 1,15 | up   |
| 5849492 | 7186443 | 1341295 | Fanconi anemia, complementation group A   | Fanca   | 361435 | 1,12 | down |
| 6339541 | 7186443 | 1341273 | Fanconi anemia, complementation group A   | Fanca   | 361435 | 1,10 | up   |
| 6621210 | 7186443 | 1341292 | Fanconi anemia, complementation group A   | Fanca   | 361435 | 1,07 | down |
| 5630601 | 7186443 | 1341270 | Fanconi anemia, complementation group A   | Fanca   | 361435 | 1,06 | up   |
| 6575253 | 7186443 | 1341312 | Fanconi anemia, complementation group A   | Fanca   | 361435 | 1,05 | down |
| 6063886 | 7186443 | 1341284 | Fanconi anemia, complementation group A   | Fanca   | 361435 | 1,04 | up   |
| 5851028 | 7186443 | 1341313 | Fanconi anemia, complementation group A   | Fanca   | 361435 | 1,04 | up   |
| 5882296 | 7186443 | 1341276 | Fanconi anemia, complementation group A   | Fanca   | 361435 | 1,04 | up   |
| 6346839 | 7186443 | 1341300 | Fanconi anemia, complementation group A   | Fanca   | 361435 | 1,04 | up   |
| 6709719 | 7186443 | 1341289 | Fanconi anemia, complementation group A   | Fanca   | 361435 | 1,03 | up   |
| 6021991 | 7186443 | 1341288 | Fanconi anemia, complementation group A   | Fanca   | 361435 | 1,03 | up   |
| 6064289 | 7186443 | 1341285 | Fanconi anemia, complementation group A   | Fanca   | 361435 | 1,03 | down |
| 6447225 | 7186443 | 1341272 | Fanconi anemia, complementation group A   | Fanca   | 361435 | 1,02 | up   |
| 5717841 | 7186443 | 1341268 | Fanconi anemia, complementation group A   | Fanca   | 361435 | 1,01 | up   |
| 6715948 | 7186443 | 1341314 | Fanconi anemia, complementation group A   | Fanca   | 361435 | 1,01 | up   |
| 6133991 | 7186443 | 1341283 | Fanconi anemia, complementation group A   | Fanca   | 361435 | 1,01 | down |
| 6392368 | 7186443 | 1341269 | Fanconi anemia, complementation group A   | Fanca   | 361435 | 1,01 | up   |
| 5987774 | 7299527 | 1620594 | farnesyltransferase, CAAX box, beta       | Fntb    | 64511  | 2,01 | up   |
| 6277294 | 7299527 | 1620595 | farnesyltransferase, CAAX box, beta       | Fntb    | 64511  | 1,28 | down |
| 6391140 | 7299527 | 1620603 | farnesyltransferase, CAAX box, beta       | Fntb    | 64511  | 1,28 | up   |
| 6492956 | 7299527 | 1620602 | farnesyltransferase, CAAX box, beta       | Fntb    | 64511  | 1,27 | down |
| 6045607 | 7299527 | 1620599 | farnesyltransferase, CAAX box, beta       | Fntb    | 64511  | 1,26 | down |
| 6479694 | 7299527 | 1620604 | farnesyltransferase, CAAX box, beta       | Fntb    | 64511  | 1,16 | down |
| 5682969 | 7299527 | 1620601 | farnesyltransferase, CAAX box, beta       | Fntb    | 64511  | 1,13 | down |
| 5845013 | 7299527 | 1620596 | farnesyltransferase, CAAX box, beta       | Fntb    | 64511  | 1,12 | up   |
| 5934084 | 7299527 | 1620600 | farnesyltransferase, CAAX box, beta       | Fntb    | 64511  | 1,10 | up   |
| 5747992 | 7299527 | 1620593 | farnesyltransferase, CAAX box, beta       | Fntb    | 64511  | 1,09 | down |
| 6280649 | 7299527 | 1620598 | farnesyltransferase, CAAX box, beta       | Fntb    | 64511  | 1,08 | down |
| 5929049 | 7299527 | 1620592 | farnesyltransferase, CAAX box, beta       | Fntb    | 64511  | 1,04 | up   |
| 5908773 | 7299527 | 1620597 | farnesyltransferase, CAAX box, beta       | Fntb    | 64511  | 1,03 | up   |
| 5709847 | 7041442 | 989067  | Fas (TNF receptor superfamily, member 6)  | Fas     | 246097 | 3,95 | up   |
| 6202358 | 7041442 | 989070  | Fas (TNF receptor superfamily, member 6)  | Fas     | 246097 | 3,36 | down |
| 5951208 | 7041442 | 989070  | Fas (TNF receptor superfamily, member 6)  | Fas     | 246097 | 2,29 | down |
| 6240655 | 7041442 | 989069  | Fas (TNF receptor superfamily, member 6)  | Fas     | 246097 | 2,05 | down |
| 6076806 | 7041442 | 989066  | Fas (TNF receptor superfamily, member 6)  | Fas     | 246097 | 1,98 | down |
| 6178910 | 7041442 | 989068  | Fas (TNF receptor superfamily, member 6)  | Fas     | 246097 | 1,62 | up   |
| 6250592 | 7041442 | 989062  | Fas (TNF receptor superfamily, member 6)  | Fas     | 246097 | 1,61 | up   |
| 6300034 | 7041442 | 989068  | Fas (TNF receptor superfamily, member 6)  | Fas     | 246097 | 1,58 | up   |
| 6408797 | 7041442 | 989061  | Fas (TNF receptor superfamily, member 6)  | Fas     | 246097 | 1,57 | up   |
| 5766843 | 7041442 | 989064  | Fas (TNF receptor superfamily, member 6)  | Fas     | 246097 | 1,48 | up   |
| 6742193 | 7041442 | 989070  | Fas (TNF receptor superfamily, member 6)  | Fas     | 246097 | 1,27 | up   |
| 6175052 | 7041442 | 989065  | Fas (TNF receptor superfamily, member 6)  | Fas     | 246097 | 1,20 | up   |
| 6574573 | 7041442 | 989070  | Fas (TNF receptor superfamily, member 6)  | Fas     | 246097 | 1,16 | down |
| 5830281 | 7041442 | 989063  | Fas (TNF receptor superfamily, member 6)  | Fas     | 246097 | 1,13 | down |
| 5747707 | 7059249 | 1029753 | Fas (TNFRSF6)-associated via death domain | Fadd    | 266610 | 2,01 | down |
| 6021430 | 7059249 | 1029752 | Fas (TNFRSF6)-associated via death domain | Fadd    | 266610 | 1,30 | down |
| 6029932 | 7059249 | 1029751 | Fas (TNFRSF6)-associated via death domain | Fadd    | 266610 | 1,29 | down |
| 5912775 | 7059249 | 1029752 | Fas (TNFRSF6)-associated via death domain | Fadd    | 266610 | 1,06 | up   |
| 5650036 | 7355302 | 1758272 | FAST kinase domains 2                     | Fastkd2 | 301463 | 2,33 | up   |

|         |         |         |                                         |         |        |      |      |
|---------|---------|---------|-----------------------------------------|---------|--------|------|------|
| 6514477 | 7355302 | 1758269 | FAST kinase domains 2                   | Fastkd2 | 301463 | 2,11 | down |
| 5940833 | 7355302 | 1758265 | FAST kinase domains 2                   | Fastkd2 | 301463 | 1,51 | down |
| 6643827 | 7355302 | 1758273 | FAST kinase domains 2                   | Fastkd2 | 301463 | 1,44 | down |
| 6547550 | 7355302 | 1758271 | FAST kinase domains 2                   | Fastkd2 | 301463 | 1,40 | up   |
| 6096647 | 7355302 | 1758265 | FAST kinase domains 2                   | Fastkd2 | 301463 | 1,39 | down |
| 5715143 | 7355302 | 1758266 | FAST kinase domains 2                   | Fastkd2 | 301463 | 1,38 | down |
| 6197292 | 7355302 | 1758267 | FAST kinase domains 2                   | Fastkd2 | 301463 | 1,37 | up   |
| 6391004 | 7355302 | 1758269 | FAST kinase domains 2                   | Fastkd2 | 301463 | 1,37 | up   |
| 6435081 | 7355302 | 1758265 | FAST kinase domains 2                   | Fastkd2 | 301463 | 1,26 | down |
| 6161488 | 7355302 | 1758274 | FAST kinase domains 2                   | Fastkd2 | 301463 | 1,13 | down |
| 6556268 | 7355302 | 1758270 | FAST kinase domains 2                   | Fastkd2 | 301463 | 1,13 | down |
| 6741960 | 7355302 | 1758268 | FAST kinase domains 2                   | Fastkd2 | 301463 | 1,12 | up   |
| 6068730 | 7355302 | 1758276 | FAST kinase domains 2                   | Fastkd2 | 301463 | 1,07 | up   |
| 6351768 | 7355302 | 1758275 | FAST kinase domains 2                   | Fastkd2 | 301463 | 1,07 | down |
| 6373860 | 7355302 | 1758265 | FAST kinase domains 2                   | Fastkd2 | 301463 | 1,04 | down |
| 5793123 | 7225291 | 1435297 | F-box and WD repeat domain containing 5 | Fbxw5   | 362081 | 1,19 | down |
| 6190773 | 7225291 | 1435296 | F-box and WD repeat domain containing 5 | Fbxw5   | 362081 | 1,19 | down |
| 6538531 | 7225291 | 1435298 | F-box and WD repeat domain containing 5 | Fbxw5   | 362081 | 1,16 | down |
| 5859063 | 7225291 | 1435295 | F-box and WD repeat domain containing 5 | Fbxw5   | 362081 | 1,14 | down |
| 6688880 | 7225291 | 1435298 | F-box and WD repeat domain containing 5 | Fbxw5   | 362081 | 1,12 | down |
| 6601959 | 7225291 | 1435294 | F-box and WD repeat domain containing 5 | Fbxw5   | 362081 | 1,08 | down |
| 6712649 | 7225291 | 1435294 | F-box and WD repeat domain containing 5 | Fbxw5   | 362081 | 1,08 | down |
| 5720244 | 7225291 | 1435295 | F-box and WD repeat domain containing 5 | Fbxw5   | 362081 | 1,07 | down |
| 5764427 | 7225291 | 1435295 | F-box and WD repeat domain containing 5 | Fbxw5   | 362081 | 1,04 | up   |
| 5741531 | 7225291 | 1435295 | F-box and WD repeat domain containing 5 | Fbxw5   | 362081 | 1,02 | up   |
| 6591298 | 7225291 | 1435293 | F-box and WD repeat domain containing 5 | Fbxw5   | 362081 | 1,01 | up   |
| 6132313 | 7183927 | 1335498 | F-box and WD repeat domain containing 9 | Fbxw9   | 288921 | 2,18 | up   |
| 6237771 | 7183927 | 1335497 | F-box and WD repeat domain containing 9 | Fbxw9   | 288921 | 1,63 | down |
| 6039125 | 7183927 | 1335499 | F-box and WD repeat domain containing 9 | Fbxw9   | 288921 | 1,58 | down |
| 6176820 | 7183927 | 1335499 | F-box and WD repeat domain containing 9 | Fbxw9   | 288921 | 1,57 | up   |
| 5762312 | 7183927 | 1335500 | F-box and WD repeat domain containing 9 | Fbxw9   | 288921 | 1,27 | up   |
| 6082430 | 7183927 | 1335505 | F-box and WD repeat domain containing 9 | Fbxw9   | 288921 | 1,19 | up   |
| 6267986 | 7183927 | 1335497 | F-box and WD repeat domain containing 9 | Fbxw9   | 288921 | 1,18 | down |
| 6162667 | 7183927 | 1335497 | F-box and WD repeat domain containing 9 | Fbxw9   | 288921 | 1,16 | down |
| 5905806 | 7183927 | 1335498 | F-box and WD repeat domain containing 9 | Fbxw9   | 288921 | 1,12 | down |
| 6667295 | 7183927 | 1335498 | F-box and WD repeat domain containing 9 | Fbxw9   | 288921 | 1,12 | down |
| 5714753 | 7183927 | 1335497 | F-box and WD repeat domain containing 9 | Fbxw9   | 288921 | 1,09 | down |
| 5750361 | 7183927 | 1335501 | F-box and WD repeat domain containing 9 | Fbxw9   | 288921 | 1,08 | up   |
| 5862876 | 7183927 | 1335499 | F-box and WD repeat domain containing 9 | Fbxw9   | 288921 | 1,02 | down |
| 6619010 | 7183927 | 1335501 | F-box and WD repeat domain containing 9 | Fbxw9   | 288921 | 1,01 | down |
| 6495839 | 7183927 | 1335497 | F-box and WD repeat domain containing 9 | Fbxw9   | 288921 | 1,01 | up   |
| 5707727 | 7102708 | 1134322 | F-box protein 21                        | Fbxo21  | 360818 | 2,35 | up   |
| 6047440 | 7102708 | 1134322 | F-box protein 21                        | Fbxo21  | 360818 | 1,71 | down |
| 5618422 | 7102708 | 1134310 | F-box protein 21                        | Fbxo21  | 360818 | 1,48 | up   |
| 5884052 | 7102708 | 1134312 | F-box protein 21                        | Fbxo21  | 360818 | 1,29 | up   |
| 6502145 | 7102708 | 1134308 | F-box protein 21                        | Fbxo21  | 360818 | 1,25 | up   |
| 5968091 | 7102708 | 1134318 | F-box protein 21                        | Fbxo21  | 360818 | 1,24 | down |
| 6024880 | 7102708 | 1134304 | F-box protein 21                        | Fbxo21  | 360818 | 1,23 | down |
| 6052289 | 7102708 | 1134311 | F-box protein 21                        | Fbxo21  | 360818 | 1,18 | down |
| 6603211 | 7102708 | 1134307 | F-box protein 21                        | Fbxo21  | 360818 | 1,16 | down |
| 6279842 | 7102708 | 1134321 | F-box protein 21                        | Fbxo21  | 360818 | 1,12 | down |
| 5646560 | 7102708 | 1134304 | F-box protein 21                        | Fbxo21  | 360818 | 1,10 | down |
| 5998686 | 7102708 | 1134305 | F-box protein 21                        | Fbxo21  | 360818 | 1,09 | up   |
| 6285918 | 7102708 | 1134314 | F-box protein 21                        | Fbxo21  | 360818 | 1,06 | up   |
| 6204802 | 7102708 | 1134315 | F-box protein 21                        | Fbxo21  | 360818 | 1,01 | down |
| 6323697 | 7102708 | 1134320 | F-box protein 21                        | Fbxo21  | 360818 | 1,00 | down |
| 5935008 | 7101094 | 1130223 | F-box protein 24                        | Fbxo24  | 304374 | 1,70 | down |

|         |         |         |                  |        |        |      |      |
|---------|---------|---------|------------------|--------|--------|------|------|
| 5798959 | 7101094 | 1130214 | F-box protein 24 | Fbxo24 | 304374 | 1,60 | down |
| 6352888 | 7101094 | 1130223 | F-box protein 24 | Fbxo24 | 304374 | 1,32 | down |
| 6116650 | 7101094 | 1130215 | F-box protein 24 | Fbxo24 | 304374 | 1,29 | up   |
| 5751373 | 7101094 | 1130217 | F-box protein 24 | Fbxo24 | 304374 | 1,22 | up   |
| 6124705 | 7101094 | 1130220 | F-box protein 24 | Fbxo24 | 304374 | 1,19 | down |
| 6550901 | 7101094 | 1130216 | F-box protein 24 | Fbxo24 | 304374 | 1,18 | up   |
| 6384302 | 7101094 | 1130226 | F-box protein 24 | Fbxo24 | 304374 | 1,16 | up   |
| 6099391 | 7101094 | 1130219 | F-box protein 24 | Fbxo24 | 304374 | 1,12 | down |
| 6103349 | 7101094 | 1130223 | F-box protein 24 | Fbxo24 | 304374 | 1,10 | down |
| 6300581 | 7101094 | 1130221 | F-box protein 24 | Fbxo24 | 304374 | 1,10 | up   |
| 5710347 | 7101094 | 1130224 | F-box protein 24 | Fbxo24 | 304374 | 1,09 | down |
| 6144707 | 7101094 | 1130213 | F-box protein 24 | Fbxo24 | 304374 | 1,07 | down |
| 5967843 | 7024951 | 948244  | F-box protein 30 | Fbxo30 | 308283 | 2,26 | down |
| 6635956 | 7024951 | 948246  | F-box protein 30 | Fbxo30 | 308283 | 1,24 | up   |
| 5629636 | 7024951 | 948245  | F-box protein 30 | Fbxo30 | 308283 | 1,03 | up   |
| 6153402 | 7024951 | 948247  | F-box protein 30 | Fbxo30 | 308283 | 1,01 | down |
| 5747230 | 7176409 | 1315693 | F-box protein 38 | Fbxo38 | 307390 | 2,54 | up   |
| 6551879 | 7176409 | 1315669 | F-box protein 38 | Fbxo38 | 307390 | 1,58 | up   |
| 5820820 | 7176409 | 1315687 | F-box protein 38 | Fbxo38 | 307390 | 1,47 | down |
| 5733765 | 7176409 | 1315672 | F-box protein 38 | Fbxo38 | 307390 | 1,42 | down |
| 6488043 | 7176409 | 1315671 | F-box protein 38 | Fbxo38 | 307390 | 1,34 | up   |
| 5891516 | 7176409 | 1315668 | F-box protein 38 | Fbxo38 | 307390 | 1,30 | up   |
| 6567821 | 7176409 | 1315673 | F-box protein 38 | Fbxo38 | 307390 | 1,26 | down |
| 6469431 | 7176409 | 1315689 | F-box protein 38 | Fbxo38 | 307390 | 1,22 | up   |
| 6371581 | 7176409 | 1315680 | F-box protein 38 | Fbxo38 | 307390 | 1,21 | up   |
| 5643441 | 7176409 | 1315681 | F-box protein 38 | Fbxo38 | 307390 | 1,20 | down |
| 5799231 | 7176409 | 1315678 | F-box protein 38 | Fbxo38 | 307390 | 1,19 | down |
| 6465880 | 7176409 | 1315679 | F-box protein 38 | Fbxo38 | 307390 | 1,19 | down |
| 6102822 | 7176409 | 1315686 | F-box protein 38 | Fbxo38 | 307390 | 1,19 | up   |
| 6418362 | 7176409 | 1315668 | F-box protein 38 | Fbxo38 | 307390 | 1,11 | up   |
| 6715225 | 7176409 | 1315677 | F-box protein 38 | Fbxo38 | 307390 | 1,10 | up   |
| 5952592 | 7176409 | 1315690 | F-box protein 38 | Fbxo38 | 307390 | 1,09 | up   |
| 6553004 | 7176409 | 1315683 | F-box protein 38 | Fbxo38 | 307390 | 1,05 | down |
| 5839133 | 7176409 | 1315670 | F-box protein 38 | Fbxo38 | 307390 | 1,04 | up   |
| 6006804 | 7176409 | 1315674 | F-box protein 38 | Fbxo38 | 307390 | 1,04 | up   |
| 5890411 | 7176409 | 1315682 | F-box protein 38 | Fbxo38 | 307390 | 1,04 | down |
| 6203039 | 7176409 | 1315688 | F-box protein 38 | Fbxo38 | 307390 | 1,04 | up   |
| 6370146 | 7176409 | 1315691 | F-box protein 38 | Fbxo38 | 307390 | 1,04 | down |
| 6575680 | 7176409 | 1315677 | F-box protein 38 | Fbxo38 | 307390 | 1,02 | up   |
| 5731153 | 7176409 | 1315685 | F-box protein 38 | Fbxo38 | 307390 | 1,02 | down |
| 6285085 | 7176409 | 1315684 | F-box protein 38 | Fbxo38 | 307390 | 1,01 | up   |
| 6670126 | 7293040 | 1603869 | F-box protein 6  | Fbxo6  | 192351 | 2,51 | down |
| 5649826 | 7293040 | 1603864 | F-box protein 6  | Fbxo6  | 192351 | 1,33 | down |
| 6163246 | 7293040 | 1603865 | F-box protein 6  | Fbxo6  | 192351 | 1,32 | up   |
| 6203962 | 7293040 | 1603866 | F-box protein 6  | Fbxo6  | 192351 | 1,26 | up   |
| 6596212 | 7293040 | 1603867 | F-box protein 6  | Fbxo6  | 192351 | 1,25 | down |
| 6568322 | 7293040 | 1603868 | F-box protein 6  | Fbxo6  | 192351 | 1,12 | up   |
| 5689589 | 7323057 | 1678760 | F-box protein 7  | Fbxo7  | 366854 | 2,11 | down |
| 6196362 | 7323057 | 1678751 | F-box protein 7  | Fbxo7  | 366854 | 1,83 | down |
| 5999359 | 7323057 | 1678752 | F-box protein 7  | Fbxo7  | 366854 | 1,81 | down |
| 5690124 | 7323057 | 1678752 | F-box protein 7  | Fbxo7  | 366854 | 1,22 | up   |
| 6604576 | 7323057 | 1678751 | F-box protein 7  | Fbxo7  | 366854 | 1,21 | down |
| 6075152 | 7323057 | 1678754 | F-box protein 7  | Fbxo7  | 366854 | 1,19 | up   |
| 6229576 | 7323057 | 1678753 | F-box protein 7  | Fbxo7  | 366854 | 1,19 | up   |
| 6467229 | 7323057 | 1678756 | F-box protein 7  | Fbxo7  | 366854 | 1,10 | up   |
| 5906818 | 7323057 | 1678752 | F-box protein 7  | Fbxo7  | 366854 | 1,07 | down |
| 5980187 | 7323057 | 1678759 | F-box protein 7  | Fbxo7  | 366854 | 1,07 | up   |

|         |         |         |                              |        |        |      |      |
|---------|---------|---------|------------------------------|--------|--------|------|------|
| 6008588 | 7323057 | 1678757 | F-box protein 7              | Fbxo7  | 366854 | 1,06 | up   |
| 6742076 | 7323057 | 1678755 | F-box protein 7              | Fbxo7  | 366854 | 1,06 | up   |
| 6052354 | 7323057 | 1678752 | F-box protein 7              | Fbxo7  | 366854 | 1,05 | up   |
| 5864210 | 7323057 | 1678752 | F-box protein 7              | Fbxo7  | 366854 | 1,03 | up   |
| 5791139 | 7323057 | 1678758 | F-box protein 7              | Fbxo7  | 366854 | 1,01 | down |
| 6343648 | 7347783 | 1739660 | f-box protein 9              | Fbxo9  | 300849 | 2,36 | up   |
| 5707187 | 7347783 | 1739649 | f-box protein 9              | Fbxo9  | 300849 | 1,95 | up   |
| 6636665 | 7347783 | 1739661 | f-box protein 9              | Fbxo9  | 300849 | 1,59 | down |
| 5676485 | 7347783 | 1739661 | f-box protein 9              | Fbxo9  | 300849 | 1,38 | up   |
| 6193057 | 7347783 | 1739648 | f-box protein 9              | Fbxo9  | 300849 | 1,35 | up   |
| 5966713 | 7347783 | 1739658 | f-box protein 9              | Fbxo9  | 300849 | 1,32 | down |
| 6282971 | 7347783 | 1739648 | f-box protein 9              | Fbxo9  | 300849 | 1,29 | up   |
| 5955788 | 7347783 | 1739649 | f-box protein 9              | Fbxo9  | 300849 | 1,28 | up   |
| 6491210 | 7347783 | 1739652 | f-box protein 9              | Fbxo9  | 300849 | 1,26 | down |
| 6333092 | 7347783 | 1739657 | f-box protein 9              | Fbxo9  | 300849 | 1,17 | down |
| 6183302 | 7347783 | 1739655 | f-box protein 9              | Fbxo9  | 300849 | 1,17 | down |
| 6595511 | 7347783 | 1739653 | f-box protein 9              | Fbxo9  | 300849 | 1,14 | down |
| 5997861 | 7347783 | 1739656 | f-box protein 9              | Fbxo9  | 300849 | 1,10 | down |
| 6246122 | 7347783 | 1739650 | f-box protein 9              | Fbxo9  | 300849 | 1,07 | down |
| 6089220 | 7347783 | 1739651 | f-box protein 9              | Fbxo9  | 300849 | 1,06 | up   |
| 6349237 | 7347783 | 1739654 | f-box protein 9              | Fbxo9  | 300849 | 1,06 | down |
| 5696191 | 7347783 | 1739659 | f-box protein 9              | Fbxo9  | 300849 | 1,05 | up   |
| 6668218 | 7174650 | 1311728 | FCH and double SH3 domains 1 | Fchsd1 | 307482 | 2,15 | up   |
| 6192629 | 7174650 | 1311717 | FCH and double SH3 domains 1 | Fchsd1 | 307482 | 1,95 | up   |
| 6531804 | 7174650 | 1311718 | FCH and double SH3 domains 1 | Fchsd1 | 307482 | 1,51 | up   |
| 5965054 | 7174650 | 1311720 | FCH and double SH3 domains 1 | Fchsd1 | 307482 | 1,49 | down |
| 5632076 | 7174650 | 1311723 | FCH and double SH3 domains 1 | Fchsd1 | 307482 | 1,35 | up   |
| 6163837 | 7174650 | 1311726 | FCH and double SH3 domains 1 | Fchsd1 | 307482 | 1,32 | down |
| 6184768 | 7174650 | 1311714 | FCH and double SH3 domains 1 | Fchsd1 | 307482 | 1,30 | down |
| 5901862 | 7174650 | 1311725 | FCH and double SH3 domains 1 | Fchsd1 | 307482 | 1,28 | up   |
| 6132942 | 7174650 | 1311715 | FCH and double SH3 domains 1 | Fchsd1 | 307482 | 1,27 | down |
| 6426189 | 7174650 | 1311712 | FCH and double SH3 domains 1 | Fchsd1 | 307482 | 1,23 | up   |
| 6725612 | 7174650 | 1311714 | FCH and double SH3 domains 1 | Fchsd1 | 307482 | 1,22 | down |
| 5760122 | 7174650 | 1311721 | FCH and double SH3 domains 1 | Fchsd1 | 307482 | 1,20 | down |
| 6374962 | 7174650 | 1311727 | FCH and double SH3 domains 1 | Fchsd1 | 307482 | 1,14 | down |
| 5961693 | 7174650 | 1311712 | FCH and double SH3 domains 1 | Fchsd1 | 307482 | 1,13 | down |
| 5956851 | 7174650 | 1311726 | FCH and double SH3 domains 1 | Fchsd1 | 307482 | 1,12 | down |
| 5802120 | 7174650 | 1311716 | FCH and double SH3 domains 1 | Fchsd1 | 307482 | 1,11 | up   |
| 6257613 | 7174650 | 1311719 | FCH and double SH3 domains 1 | Fchsd1 | 307482 | 1,10 | up   |
| 5706272 | 7174650 | 1311726 | FCH and double SH3 domains 1 | Fchsd1 | 307482 | 1,07 | down |
| 6177318 | 7174650 | 1311729 | FCH and double SH3 domains 1 | Fchsd1 | 307482 | 1,05 | up   |
| 5909174 | 7174650 | 1311724 | FCH and double SH3 domains 1 | Fchsd1 | 307482 | 1,04 | down |
| 5724622 | 7174650 | 1311722 | FCH and double SH3 domains 1 | Fchsd1 | 307482 | 1,03 | up   |
| 6200942 | 7174650 | 1311713 | FCH and double SH3 domains 1 | Fchsd1 | 307482 | 1,02 | down |
| 5855263 | 7247005 | 1490130 | fer-1-like 4 (C. elegans)    | Fer114 | 296307 | 2,11 | up   |
| 6013266 | 7247005 | 1490113 | fer-1-like 4 (C. elegans)    | Fer114 | 296307 | 1,90 | down |
| 6104100 | 7247005 | 1490125 | fer-1-like 4 (C. elegans)    | Fer114 | 296307 | 1,80 | up   |
| 6313814 | 7247005 | 1490110 | fer-1-like 4 (C. elegans)    | Fer114 | 296307 | 1,71 | up   |
| 6697095 | 7247005 | 1490125 | fer-1-like 4 (C. elegans)    | Fer114 | 296307 | 1,60 | down |
| 6546433 | 7247005 | 1490115 | fer-1-like 4 (C. elegans)    | Fer114 | 296307 | 1,47 | down |
| 5751665 | 7247005 | 1490121 | fer-1-like 4 (C. elegans)    | Fer114 | 296307 | 1,33 | up   |
| 6262285 | 7247005 | 1490128 | fer-1-like 4 (C. elegans)    | Fer114 | 296307 | 1,32 | down |
| 5776495 | 7247005 | 1490112 | fer-1-like 4 (C. elegans)    | Fer114 | 296307 | 1,26 | up   |
| 5688265 | 7247005 | 1490122 | fer-1-like 4 (C. elegans)    | Fer114 | 296307 | 1,25 | down |
| 6228560 | 7247005 | 1490116 | fer-1-like 4 (C. elegans)    | Fer114 | 296307 | 1,22 | down |
| 5771903 | 7247005 | 1490111 | fer-1-like 4 (C. elegans)    | Fer114 | 296307 | 1,20 | down |
| 6547989 | 7247005 | 1490126 | fer-1-like 4 (C. elegans)    | Fer114 | 296307 | 1,11 | down |



|         |         |         |                           |        |        |      |      |
|---------|---------|---------|---------------------------|--------|--------|------|------|
| 6005471 | 7247005 | 1490118 | fer-1-like 4 (C. elegans) | Fer114 | 296307 | 1,09 | down |
| 5740451 | 7247005 | 1490129 | fer-1-like 4 (C. elegans) | Fer114 | 296307 | 1,07 | down |
| 6412136 | 7247005 | 1490114 | fer-1-like 4 (C. elegans) | Fer114 | 296307 | 1,07 | down |
| 5942582 | 7247005 | 1490111 | fer-1-like 4 (C. elegans) | Fer114 | 296307 | 1,06 | down |
| 6647727 | 7247005 | 1490120 | fer-1-like 4 (C. elegans) | Fer114 | 296307 | 1,06 | up   |
| 5930139 | 7247005 | 1490111 | fer-1-like 4 (C. elegans) | Fer114 | 296307 | 1,05 | down |
| 5972705 | 7247005 | 1490127 | fer-1-like 4 (C. elegans) | Fer114 | 296307 | 1,03 | up   |
| 6183591 | 7247005 | 1490110 | fer-1-like 4 (C. elegans) | Fer114 | 296307 | 1,03 | up   |
| 6355029 | 7247005 | 1490124 | fer-1-like 4 (C. elegans) | Fer114 | 296307 | 1,02 | down |
| 6361911 | 7247005 | 1490123 | fer-1-like 4 (C. elegans) | Fer114 | 296307 | 1,00 | up   |
| 5774501 | 7247005 | 1490117 | fer-1-like 4 (C. elegans) | Fer114 | 296307 | 1,00 | up   |
| 5898373 | 7210288 | 1399814 | FH2 domain containing 1   | Fhdc1  | 295161 | 2,02 | down |
| 6173557 | 7210288 | 1399826 | FH2 domain containing 1   | Fhdc1  | 295161 | 1,91 | down |
| 6126563 | 7210288 | 1399819 | FH2 domain containing 1   | Fhdc1  | 295161 | 1,53 | down |
| 5928815 | 7210288 | 1399823 | FH2 domain containing 1   | Fhdc1  | 295161 | 1,48 | up   |
| 6236688 | 7210288 | 1399825 | FH2 domain containing 1   | Fhdc1  | 295161 | 1,41 | up   |
| 6118197 | 7210288 | 1399825 | FH2 domain containing 1   | Fhdc1  | 295161 | 1,41 | up   |
| 6330231 | 7210288 | 1399821 | FH2 domain containing 1   | Fhdc1  | 295161 | 1,23 | down |
| 6042819 | 7210288 | 1399814 | FH2 domain containing 1   | Fhdc1  | 295161 | 1,18 | up   |
| 6149358 | 7210288 | 1399825 | FH2 domain containing 1   | Fhdc1  | 295161 | 1,17 | down |
| 6003789 | 7210288 | 1399814 | FH2 domain containing 1   | Fhdc1  | 295161 | 1,12 | down |
| 6668940 | 7210288 | 1399814 | FH2 domain containing 1   | Fhdc1  | 295161 | 1,11 | down |
| 6139902 | 7210288 | 1399814 | FH2 domain containing 1   | Fhdc1  | 295161 | 1,10 | up   |
| 6692932 | 7210288 | 1399820 | FH2 domain containing 1   | Fhdc1  | 295161 | 1,08 | down |
| 6632470 | 7210288 | 1399824 | FH2 domain containing 1   | Fhdc1  | 295161 | 1,05 | down |
| 6218632 | 7210288 | 1399814 | FH2 domain containing 1   | Fhdc1  | 295161 | 1,03 | down |
| 5966691 | 7210288 | 1399825 | FH2 domain containing 1   | Fhdc1  | 295161 | 1,03 | up   |
| 5971485 | 7210288 | 1399825 | FH2 domain containing 1   | Fhdc1  | 295161 | 1,02 | down |
| 5962137 | 7210288 | 1399817 | FH2 domain containing 1   | Fhdc1  | 295161 | 1,02 | up   |
| 6502131 | 7210288 | 1399825 | FH2 domain containing 1   | Fhdc1  | 295161 | 1,01 | down |
| 5770839 | 7210288 | 1399813 | FH2 domain containing 1   | Fhdc1  | 295161 | 1,01 | down |
| 6084535 | 7210288 | 1399818 | FH2 domain containing 1   | Fhdc1  | 295161 | 1,00 | up   |
| 6522613 | 7030126 | 960852  | fibrillarin               | Fbl    | 292747 | 2,15 | down |
| 6236488 | 7030126 | 960848  | fibrillarin               | Fbl    | 292747 | 2,04 | down |
| 6407994 | 7030126 | 960844  | fibrillarin               | Fbl    | 292747 | 1,82 | down |
| 5680921 | 7030126 | 960850  | fibrillarin               | Fbl    | 292747 | 1,73 | up   |
| 6572972 | 7030126 | 960853  | fibrillarin               | Fbl    | 292747 | 1,47 | down |
| 5862672 | 7030126 | 960849  | fibrillarin               | Fbl    | 292747 | 1,28 | up   |
| 5680920 | 7030126 | 960854  | fibrillarin               | Fbl    | 292747 | 1,04 | down |
| 6476991 | 7030126 | 960851  | fibrillarin               | Fbl    | 292747 | 1,02 | up   |
| 6260263 | 7195524 | 1364502 | fibrinogen alpha chain    | Fga    | 361969 | 2,38 | down |
| 6363725 | 7195524 | 1364506 | fibrinogen alpha chain    | Fga    | 361969 | 1,67 | up   |
| 6249033 | 7195524 | 1364506 | fibrinogen alpha chain    | Fga    | 361969 | 1,22 | up   |
| 6378518 | 7195524 | 1364505 | fibrinogen alpha chain    | Fga    | 361969 | 1,21 | up   |
| 6525939 | 7195524 | 1364507 | fibrinogen alpha chain    | Fga    | 361969 | 1,16 | up   |
| 5777572 | 7195524 | 1364506 | fibrinogen alpha chain    | Fga    | 361969 | 1,16 | up   |
| 5683521 | 7195524 | 1364503 | fibrinogen alpha chain    | Fga    | 361969 | 1,15 | down |
| 5926340 | 7195524 | 1364504 | fibrinogen alpha chain    | Fga    | 361969 | 1,05 | up   |
| 6193601 | 7195524 | 1364506 | fibrinogen alpha chain    | Fga    | 361969 | 1,03 | down |
| 6195041 | 7210154 | 1399496 | fibrinogen beta chain     | Fgb    | 24366  | 3,00 | down |
| 5679382 | 7210154 | 1399496 | fibrinogen beta chain     | Fgb    | 24366  | 1,39 | up   |
| 6592165 | 7210154 | 1399490 | fibrinogen beta chain     | Fgb    | 24366  | 1,36 | down |
| 6556920 | 7210154 | 1399488 | fibrinogen beta chain     | Fgb    | 24366  | 1,35 | down |
| 6663767 | 7210154 | 1399495 | fibrinogen beta chain     | Fgb    | 24366  | 1,24 | down |
| 5839721 | 7210154 | 1399488 | fibrinogen beta chain     | Fgb    | 24366  | 1,19 | up   |
| 6233430 | 7210154 | 1399492 | fibrinogen beta chain     | Fgb    | 24366  | 1,12 | up   |
| 6604167 | 7210154 | 1399494 | fibrinogen beta chain     | Fgb    | 24366  | 1,11 | down |

|         |         |         |                                     |       |       |      |      |
|---------|---------|---------|-------------------------------------|-------|-------|------|------|
| 5915022 | 7210154 | 1399489 | fibrinogen beta chain               | Fgb   | 24366 | 1,08 | up   |
| 6161129 | 7210154 | 1399493 | fibrinogen beta chain               | Fgb   | 24366 | 1,08 | up   |
| 6744744 | 7210154 | 1399491 | fibrinogen beta chain               | Fgb   | 24366 | 1,04 | up   |
| 5973859 | 7152781 | 1257157 | Fibroblast growth factor receptor 1 | Fgfr1 | 79114 | 2,08 | down |
| 6702879 | 7152781 | 1257165 | Fibroblast growth factor receptor 1 | Fgfr1 | 79114 | 1,78 | down |
| 6363411 | 7152781 | 1257166 | Fibroblast growth factor receptor 1 | Fgfr1 | 79114 | 1,45 | up   |
| 6717126 | 7152781 | 1257169 | Fibroblast growth factor receptor 1 | Fgfr1 | 79114 | 1,42 | down |
| 6105632 | 7152781 | 1257168 | Fibroblast growth factor receptor 1 | Fgfr1 | 79114 | 1,41 | up   |
| 5785385 | 7152781 | 1257170 | Fibroblast growth factor receptor 1 | Fgfr1 | 79114 | 1,39 | up   |
| 6007465 | 7152781 | 1257158 | Fibroblast growth factor receptor 1 | Fgfr1 | 79114 | 1,37 | down |
| 6192322 | 7152781 | 1257164 | Fibroblast growth factor receptor 1 | Fgfr1 | 79114 | 1,35 | up   |
| 6417720 | 7152781 | 1257162 | Fibroblast growth factor receptor 1 | Fgfr1 | 79114 | 1,28 | down |
| 5833135 | 7152781 | 1257156 | Fibroblast growth factor receptor 1 | Fgfr1 | 79114 | 1,26 | up   |
| 6629002 | 7152781 | 1257164 | Fibroblast growth factor receptor 1 | Fgfr1 | 79114 | 1,24 | down |
| 6067838 | 7152781 | 1257163 | Fibroblast growth factor receptor 1 | Fgfr1 | 79114 | 1,22 | up   |
| 6512589 | 7152781 | 1257167 | Fibroblast growth factor receptor 1 | Fgfr1 | 79114 | 1,18 | down |
| 6469444 | 7152781 | 1257159 | Fibroblast growth factor receptor 1 | Fgfr1 | 79114 | 1,18 | down |
| 5937722 | 7152781 | 1257160 | Fibroblast growth factor receptor 1 | Fgfr1 | 79114 | 1,17 | down |
| 5914864 | 7152781 | 1257167 | Fibroblast growth factor receptor 1 | Fgfr1 | 79114 | 1,08 | down |
| 6336498 | 7152781 | 1257154 | Fibroblast growth factor receptor 1 | Fgfr1 | 79114 | 1,05 | down |
| 6341952 | 7152781 | 1257161 | Fibroblast growth factor receptor 1 | Fgfr1 | 79114 | 1,05 | down |
| 6413934 | 7152781 | 1257169 | Fibroblast growth factor receptor 1 | Fgfr1 | 79114 | 1,04 | up   |
| 5915576 | 7127377 | 1195014 | fibroblast growth factor receptor 3 | Fgfr3 | 84489 | 2,18 | down |
| 6482448 | 7127377 | 1195016 | fibroblast growth factor receptor 3 | Fgfr3 | 84489 | 1,91 | down |
| 6028796 | 7127377 | 1195003 | fibroblast growth factor receptor 3 | Fgfr3 | 84489 | 1,56 | up   |
| 5994185 | 7127377 | 1195009 | fibroblast growth factor receptor 3 | Fgfr3 | 84489 | 1,54 | up   |
| 6259110 | 7127377 | 1195017 | fibroblast growth factor receptor 3 | Fgfr3 | 84489 | 1,34 | up   |
| 6492669 | 7127377 | 1195007 | fibroblast growth factor receptor 3 | Fgfr3 | 84489 | 1,24 | down |
| 6228498 | 7127377 | 1195018 | fibroblast growth factor receptor 3 | Fgfr3 | 84489 | 1,21 | up   |
| 5657575 | 7127377 | 1195004 | fibroblast growth factor receptor 3 | Fgfr3 | 84489 | 1,21 | down |
| 6714671 | 7127377 | 1195005 | fibroblast growth factor receptor 3 | Fgfr3 | 84489 | 1,17 | down |
| 6217557 | 7127377 | 1195011 | fibroblast growth factor receptor 3 | Fgfr3 | 84489 | 1,15 | down |
| 6745569 | 7127377 | 1195011 | fibroblast growth factor receptor 3 | Fgfr3 | 84489 | 1,10 | down |
| 6409494 | 7127377 | 1195010 | fibroblast growth factor receptor 3 | Fgfr3 | 84489 | 1,08 | down |
| 6406118 | 7127377 | 1195015 | fibroblast growth factor receptor 3 | Fgfr3 | 84489 | 1,06 | down |
| 6004282 | 7127377 | 1195013 | fibroblast growth factor receptor 3 | Fgfr3 | 84489 | 1,05 | down |
| 5806972 | 7127377 | 1195006 | fibroblast growth factor receptor 3 | Fgfr3 | 84489 | 1,03 | down |
| 5647881 | 7127377 | 1195008 | fibroblast growth factor receptor 3 | Fgfr3 | 84489 | 1,01 | up   |
| 5816307 | 7127377 | 1195019 | fibroblast growth factor receptor 3 | Fgfr3 | 84489 | 1,00 | down |
| 6396009 | 7127377 | 1195012 | fibroblast growth factor receptor 3 | Fgfr3 | 84489 | 1,00 | up   |
| 6181298 | 7162083 | 1280326 | fibroblast growth factor receptor 4 | Fgfr4 | 25114 | 2,25 | up   |
| 6413773 | 7162083 | 1280337 | fibroblast growth factor receptor 4 | Fgfr4 | 25114 | 1,87 | up   |
| 6249807 | 7162083 | 1280334 | fibroblast growth factor receptor 4 | Fgfr4 | 25114 | 1,63 | down |
| 6177089 | 7162083 | 1280324 | fibroblast growth factor receptor 4 | Fgfr4 | 25114 | 1,51 | up   |
| 6685502 | 7162083 | 1280335 | fibroblast growth factor receptor 4 | Fgfr4 | 25114 | 1,49 | up   |
| 5632687 | 7162083 | 1280337 | fibroblast growth factor receptor 4 | Fgfr4 | 25114 | 1,37 | down |
| 6090642 | 7162083 | 1280336 | fibroblast growth factor receptor 4 | Fgfr4 | 25114 | 1,32 | up   |
| 5672470 | 7162083 | 1280331 | fibroblast growth factor receptor 4 | Fgfr4 | 25114 | 1,20 | up   |
| 6613155 | 7162083 | 1280324 | fibroblast growth factor receptor 4 | Fgfr4 | 25114 | 1,19 | down |
| 6594988 | 7162083 | 1280333 | fibroblast growth factor receptor 4 | Fgfr4 | 25114 | 1,19 | down |
| 6289634 | 7162083 | 1280332 | fibroblast growth factor receptor 4 | Fgfr4 | 25114 | 1,16 | down |
| 5659130 | 7162083 | 1280330 | fibroblast growth factor receptor 4 | Fgfr4 | 25114 | 1,14 | down |
| 6164634 | 7162083 | 1280327 | fibroblast growth factor receptor 4 | Fgfr4 | 25114 | 1,14 | down |
| 5669285 | 7162083 | 1280325 | fibroblast growth factor receptor 4 | Fgfr4 | 25114 | 1,13 | down |
| 5980543 | 7162083 | 1280328 | fibroblast growth factor receptor 4 | Fgfr4 | 25114 | 1,08 | down |
| 6213329 | 7162083 | 1280329 | fibroblast growth factor receptor 4 | Fgfr4 | 25114 | 1,05 | up   |
| 6676847 | 7162083 | 1280325 | fibroblast growth factor receptor 4 | Fgfr4 | 25114 | 1,05 | up   |

|         |         |         |                                          |       |        |      |      |
|---------|---------|---------|------------------------------------------|-------|--------|------|------|
| 5963523 | 7363541 | 1778046 | fibronectin 1                            | Fn1   | 25661  | 9,61 | up   |
| 5910280 | 7363541 | 1778000 | fibronectin 1                            | Fn1   | 25661  | 3,00 | up   |
| 5988126 | 7363541 | 1778046 | fibronectin 1                            | Fn1   | 25661  | 2,75 | up   |
| 6234629 | 7363541 | 1778000 | fibronectin 1                            | Fn1   | 25661  | 2,25 | up   |
| 6567035 | 7363541 | 1778046 | fibronectin 1                            | Fn1   | 25661  | 1,80 | up   |
| 6445237 | 7363541 | 1778036 | fibronectin 1                            | Fn1   | 25661  | 1,58 | up   |
| 6418498 | 7363541 | 1778002 | fibronectin 1                            | Fn1   | 25661  | 1,57 | up   |
| 6266820 | 7363541 | 1778030 | fibronectin 1                            | Fn1   | 25661  | 1,48 | down |
| 6432577 | 7363541 | 1778038 | fibronectin 1                            | Fn1   | 25661  | 1,43 | down |
| 5726812 | 7363541 | 1778041 | fibronectin 1                            | Fn1   | 25661  | 1,40 | up   |
| 6491411 | 7363541 | 1778044 | fibronectin 1                            | Fn1   | 25661  | 1,39 | down |
| 5635547 | 7363541 | 1778029 | fibronectin 1                            | Fn1   | 25661  | 1,33 | down |
| 6142821 | 7363541 | 1778007 | fibronectin 1                            | Fn1   | 25661  | 1,32 | up   |
| 6659969 | 7363541 | 1778045 | fibronectin 1                            | Fn1   | 25661  | 1,29 | down |
| 6385002 | 7363541 | 1778005 | fibronectin 1                            | Fn1   | 25661  | 1,25 | down |
| 6242113 | 7363541 | 1778039 | fibronectin 1                            | Fn1   | 25661  | 1,23 | up   |
| 6205584 | 7363541 | 1778007 | fibronectin 1                            | Fn1   | 25661  | 1,22 | up   |
| 6063858 | 7363541 | 1778025 | fibronectin 1                            | Fn1   | 25661  | 1,22 | down |
| 6474218 | 7363541 | 1778035 | fibronectin 1                            | Fn1   | 25661  | 1,21 | down |
| 5958877 | 7363541 | 1778014 | fibronectin 1                            | Fn1   | 25661  | 1,20 | up   |
| 6593795 | 7363541 | 1778032 | fibronectin 1                            | Fn1   | 25661  | 1,20 | down |
| 6525434 | 7363541 | 1778031 | fibronectin 1                            | Fn1   | 25661  | 1,20 | up   |
| 6162019 | 7363541 | 1778021 | fibronectin 1                            | Fn1   | 25661  | 1,19 | down |
| 5686173 | 7363541 | 1778033 | fibronectin 1                            | Fn1   | 25661  | 1,17 | up   |
| 5687085 | 7363541 | 1778022 | fibronectin 1                            | Fn1   | 25661  | 1,16 | down |
| 6317570 | 7363541 | 1778001 | fibronectin 1                            | Fn1   | 25661  | 1,16 | down |
| 6673753 | 7363541 | 1778028 | fibronectin 1                            | Fn1   | 25661  | 1,14 | down |
| 6457680 | 7363541 | 1778021 | fibronectin 1                            | Fn1   | 25661  | 1,13 | down |
| 6294499 | 7363541 | 1778015 | fibronectin 1                            | Fn1   | 25661  | 1,13 | down |
| 5770566 | 7363541 | 1778026 | fibronectin 1                            | Fn1   | 25661  | 1,12 | down |
| 5742121 | 7363541 | 1778040 | fibronectin 1                            | Fn1   | 25661  | 1,11 | down |
| 5631376 | 7363541 | 1778016 | fibronectin 1                            | Fn1   | 25661  | 1,11 | down |
| 5665659 | 7363541 | 1778023 | fibronectin 1                            | Fn1   | 25661  | 1,11 | down |
| 5775595 | 7363541 | 1778034 | fibronectin 1                            | Fn1   | 25661  | 1,10 | up   |
| 6208238 | 7363541 | 1778037 | fibronectin 1                            | Fn1   | 25661  | 1,10 | up   |
| 5765379 | 7363541 | 1778006 | fibronectin 1                            | Fn1   | 25661  | 1,09 | down |
| 5899407 | 7363541 | 1778020 | fibronectin 1                            | Fn1   | 25661  | 1,09 | up   |
| 6504433 | 7363541 | 1778010 | fibronectin 1                            | Fn1   | 25661  | 1,08 | down |
| 5626556 | 7363541 | 1778043 | fibronectin 1                            | Fn1   | 25661  | 1,08 | up   |
| 5741347 | 7363541 | 1778000 | fibronectin 1                            | Fn1   | 25661  | 1,08 | up   |
| 6514715 | 7363541 | 1778013 | fibronectin 1                            | Fn1   | 25661  | 1,07 | down |
| 5652686 | 7363541 | 1778000 | fibronectin 1                            | Fn1   | 25661  | 1,07 | up   |
| 6248074 | 7363541 | 1778042 | fibronectin 1                            | Fn1   | 25661  | 1,06 | down |
| 5690501 | 7363541 | 1778004 | fibronectin 1                            | Fn1   | 25661  | 1,06 | up   |
| 6351661 | 7363541 | 1778027 | fibronectin 1                            | Fn1   | 25661  | 1,06 | down |
| 6635785 | 7363541 | 1778007 | fibronectin 1                            | Fn1   | 25661  | 1,05 | up   |
| 6721400 | 7363541 | 1778008 | fibronectin 1                            | Fn1   | 25661  | 1,04 | down |
| 5678244 | 7363541 | 1778024 | fibronectin 1                            | Fn1   | 25661  | 1,04 | up   |
| 6492125 | 7363541 | 1778017 | fibronectin 1                            | Fn1   | 25661  | 1,03 | up   |
| 6003922 | 7363541 | 1778003 | fibronectin 1                            | Fn1   | 25661  | 1,02 | up   |
| 5654017 | 7363541 | 1778011 | fibronectin 1                            | Fn1   | 25661  | 1,02 | down |
| 6681721 | 7363541 | 1778009 | fibronectin 1                            | Fn1   | 25661  | 1,02 | down |
| 5856947 | 7363541 | 1778012 | fibronectin 1                            | Fn1   | 25661  | 1,02 | down |
| 5679508 | 7363541 | 1778019 | fibronectin 1                            | Fn1   | 25661  | 1,00 | down |
| 6665710 | 7363541 | 1778018 | fibronectin 1                            | Fn1   | 25661  | 1,00 | down |
| 5985354 | 7279806 | 1572561 | fibronectin type III domain containing 5 | Fndc5 | 260327 | 2,81 | up   |
| 6060430 | 7279806 | 1572561 | fibronectin type III domain containing 5 | Fndc5 | 260327 | 1,80 | down |

|         |         |         |                                              |        |        |      |      |
|---------|---------|---------|----------------------------------------------|--------|--------|------|------|
| 5892998 | 7279806 | 1572563 | fibronectin type III domain containing 5     | Fndc5  | 260327 | 1,64 | up   |
| 6738118 | 7279806 | 1572562 | fibronectin type III domain containing 5     | Fndc5  | 260327 | 1,38 | up   |
| 6182423 | 7279806 | 1572564 | fibronectin type III domain containing 5     | Fndc5  | 260327 | 1,28 | up   |
| 6122212 | 7279806 | 1572562 | fibronectin type III domain containing 5     | Fndc5  | 260327 | 1,03 | up   |
| 6648244 | 7212804 | 1405148 | fibronectin type III domain containing 7     | Fndc7  | 310787 | 2,04 | up   |
| 6262378 | 7212804 | 1405138 | fibronectin type III domain containing 7     | Fndc7  | 310787 | 1,87 | down |
| 6409535 | 7212804 | 1405135 | fibronectin type III domain containing 7     | Fndc7  | 310787 | 1,72 | down |
| 6502761 | 7212804 | 1405137 | fibronectin type III domain containing 7     | Fndc7  | 310787 | 1,46 | down |
| 6264429 | 7212804 | 1405139 | fibronectin type III domain containing 7     | Fndc7  | 310787 | 1,33 | up   |
| 6731353 | 7212804 | 1405143 | fibronectin type III domain containing 7     | Fndc7  | 310787 | 1,28 | up   |
| 5883640 | 7212804 | 1405145 | fibronectin type III domain containing 7     | Fndc7  | 310787 | 1,24 | up   |
| 6669925 | 7212804 | 1405136 | fibronectin type III domain containing 7     | Fndc7  | 310787 | 1,23 | down |
| 5661295 | 7212804 | 1405141 | fibronectin type III domain containing 7     | Fndc7  | 310787 | 1,19 | up   |
| 6262798 | 7212804 | 1405140 | fibronectin type III domain containing 7     | Fndc7  | 310787 | 1,19 | down |
| 6328014 | 7212804 | 1405147 | fibronectin type III domain containing 7     | Fndc7  | 310787 | 1,17 | up   |
| 6170664 | 7212804 | 1405148 | fibronectin type III domain containing 7     | Fndc7  | 310787 | 1,15 | up   |
| 6526740 | 7212804 | 1405136 | fibronectin type III domain containing 7     | Fndc7  | 310787 | 1,14 | up   |
| 5801712 | 7212804 | 1405148 | fibronectin type III domain containing 7     | Fndc7  | 310787 | 1,14 | up   |
| 6080563 | 7212804 | 1405144 | fibronectin type III domain containing 7     | Fndc7  | 310787 | 1,13 | down |
| 6589304 | 7212804 | 1405147 | fibronectin type III domain containing 7     | Fndc7  | 310787 | 1,09 | down |
| 5949468 | 7212804 | 1405134 | fibronectin type III domain containing 7     | Fndc7  | 310787 | 1,06 | up   |
| 6130746 | 7212804 | 1405141 | fibronectin type III domain containing 7     | Fndc7  | 310787 | 1,06 | down |
| 6185624 | 7212804 | 1405142 | fibronectin type III domain containing 7     | Fndc7  | 310787 | 1,01 | down |
| 6668106 | 7256191 | 1512874 | fibulin 2                                    | Fbln2  | 282583 | 1,18 | down |
| 6034174 | 7256191 | 1512872 | fibulin 2                                    | Fbln2  | 282583 | 1,14 | down |
| 5987696 | 7256191 | 1512877 | fibulin 2                                    | Fbln2  | 282583 | 1,11 | down |
| 6407510 | 7256191 | 1512873 | fibulin 2                                    | Fbln2  | 282583 | 1,10 | down |
| 6297311 | 7256191 | 1512878 | fibulin 2                                    | Fbln2  | 282583 | 1,07 | up   |
| 6692175 | 7256191 | 1512871 | fibulin 2                                    | Fbln2  | 282583 | 1,06 | up   |
| 6372869 | 7256191 | 1512871 | fibulin 2                                    | Fbln2  | 282583 | 1,03 | down |
| 6331244 | 7347975 | 1740013 | filamin A interacting protein 1              | Filip1 | 246776 | 2,28 | down |
| 5854803 | 7347975 | 1740015 | filamin A interacting protein 1              | Filip1 | 246776 | 1,31 | up   |
| 6388990 | 7347975 | 1740016 | filamin A interacting protein 1              | Filip1 | 246776 | 1,31 | up   |
| 6086683 | 7347975 | 1740014 | filamin A interacting protein 1              | Filip1 | 246776 | 1,17 | down |
| 6212791 | 7347975 | 1740015 | filamin A interacting protein 1              | Filip1 | 246776 | 1,11 | up   |
| 5692083 | 7292624 | 1602756 | filamin binding LIM protein 1                | Fblim1 | 362650 | 2,32 | down |
| 6572080 | 7292624 | 1602755 | filamin binding LIM protein 1                | Fblim1 | 362650 | 2,31 | down |
| 6240753 | 7292624 | 1602754 | filamin binding LIM protein 1                | Fblim1 | 362650 | 1,71 | down |
| 5667405 | 7292624 | 1602755 | filamin binding LIM protein 1                | Fblim1 | 362650 | 1,52 | up   |
| 6598629 | 7292624 | 1602752 | filamin binding LIM protein 1                | Fblim1 | 362650 | 1,34 | up   |
| 6227477 | 7292624 | 1602753 | filamin binding LIM protein 1                | Fblim1 | 362650 | 1,24 | up   |
| 6665154 | 7292624 | 1602757 | filamin binding LIM protein 1                | Fblim1 | 362650 | 1,21 | down |
| 5655654 | 7292624 | 1602756 | filamin binding LIM protein 1                | Fblim1 | 362650 | 1,14 | down |
| 5995107 | 7292624 | 1602750 | filamin binding LIM protein 1                | Fblim1 | 362650 | 1,04 | down |
| 6093543 | 7252051 | 1502485 | filamin C, gamma (actin binding protein 280) | Flnc   | 362332 | 2,37 | up   |
| 6722717 | 7252051 | 1502508 | filamin C, gamma (actin binding protein 280) | Flnc   | 362332 | 2,29 | up   |
| 5803699 | 7252051 | 1502518 | filamin C, gamma (actin binding protein 280) | Flnc   | 362332 | 1,79 | down |
| 6320851 | 7252051 | 1502510 | filamin C, gamma (actin binding protein 280) | Flnc   | 362332 | 1,76 | down |
| 5639927 | 7252051 | 1502506 | filamin C, gamma (actin binding protein 280) | Flnc   | 362332 | 1,65 | up   |
| 5659687 | 7252051 | 1502484 | filamin C, gamma (actin binding protein 280) | Flnc   | 362332 | 1,54 | up   |
| 5847685 | 7252051 | 1502519 | filamin C, gamma (actin binding protein 280) | Flnc   | 362332 | 1,52 | up   |
| 6509271 | 7252051 | 1502528 | filamin C, gamma (actin binding protein 280) | Flnc   | 362332 | 1,50 | up   |
| 5731616 | 7252051 | 1502474 | filamin C, gamma (actin binding protein 280) | Flnc   | 362332 | 1,48 | down |
| 5669123 | 7252051 | 1502528 | filamin C, gamma (actin binding protein 280) | Flnc   | 362332 | 1,35 | down |
| 5937012 | 7252051 | 1502494 | filamin C, gamma (actin binding protein 280) | Flnc   | 362332 | 1,33 | up   |
| 6215379 | 7252051 | 1502507 | filamin C, gamma (actin binding protein 280) | Flnc   | 362332 | 1,31 | down |
| 5818282 | 7252051 | 1502526 | filamin C, gamma (actin binding protein 280) | Flnc   | 362332 | 1,30 | up   |

|         |         |         |                                              |      |        |      |      |
|---------|---------|---------|----------------------------------------------|------|--------|------|------|
| 5750947 | 7252051 | 1502487 | filamin C, gamma (actin binding protein 280) | Flnc | 362332 | 1,30 | down |
| 5827097 | 7252051 | 1502509 | filamin C, gamma (actin binding protein 280) | Flnc | 362332 | 1,29 | down |
| 6502177 | 7252051 | 1502491 | filamin C, gamma (actin binding protein 280) | Flnc | 362332 | 1,27 | up   |
| 6227064 | 7252051 | 1502511 | filamin C, gamma (actin binding protein 280) | Flnc | 362332 | 1,27 | up   |
| 6060039 | 7252051 | 1502514 | filamin C, gamma (actin binding protein 280) | Flnc | 362332 | 1,25 | down |
| 6537177 | 7252051 | 1502482 | filamin C, gamma (actin binding protein 280) | Flnc | 362332 | 1,24 | down |
| 6068274 | 7252051 | 1502517 | filamin C, gamma (actin binding protein 280) | Flnc | 362332 | 1,23 | down |
| 6348220 | 7252051 | 1502520 | filamin C, gamma (actin binding protein 280) | Flnc | 362332 | 1,22 | down |
| 5919300 | 7252051 | 1502503 | filamin C, gamma (actin binding protein 280) | Flnc | 362332 | 1,20 | down |
| 5705808 | 7252051 | 1502524 | filamin C, gamma (actin binding protein 280) | Flnc | 362332 | 1,19 | up   |
| 6245407 | 7252051 | 1502525 | filamin C, gamma (actin binding protein 280) | Flnc | 362332 | 1,18 | up   |
| 6048419 | 7252051 | 1502522 | filamin C, gamma (actin binding protein 280) | Flnc | 362332 | 1,17 | down |
| 5959677 | 7252051 | 1502492 | filamin C, gamma (actin binding protein 280) | Flnc | 362332 | 1,17 | up   |
| 6616664 | 7252051 | 1502495 | filamin C, gamma (actin binding protein 280) | Flnc | 362332 | 1,16 | down |
| 6297867 | 7252051 | 1502497 | filamin C, gamma (actin binding protein 280) | Flnc | 362332 | 1,16 | up   |
| 5725844 | 7252051 | 1502500 | filamin C, gamma (actin binding protein 280) | Flnc | 362332 | 1,15 | up   |
| 5686290 | 7252051 | 1502499 | filamin C, gamma (actin binding protein 280) | Flnc | 362332 | 1,14 | down |
| 6285118 | 7252051 | 1502515 | filamin C, gamma (actin binding protein 280) | Flnc | 362332 | 1,14 | down |
| 6049370 | 7252051 | 1502498 | filamin C, gamma (actin binding protein 280) | Flnc | 362332 | 1,14 | down |
| 5978763 | 7252051 | 1502526 | filamin C, gamma (actin binding protein 280) | Flnc | 362332 | 1,12 | down |
| 6307649 | 7252051 | 1502483 | filamin C, gamma (actin binding protein 280) | Flnc | 362332 | 1,10 | up   |
| 6188258 | 7252051 | 1502516 | filamin C, gamma (actin binding protein 280) | Flnc | 362332 | 1,09 | down |
| 6035255 | 7252051 | 1502490 | filamin C, gamma (actin binding protein 280) | Flnc | 362332 | 1,08 | down |
| 6583490 | 7252051 | 1502502 | filamin C, gamma (actin binding protein 280) | Flnc | 362332 | 1,08 | up   |
| 5918226 | 7252051 | 1502486 | filamin C, gamma (actin binding protein 280) | Flnc | 362332 | 1,07 | up   |
| 6338741 | 7252051 | 1502489 | filamin C, gamma (actin binding protein 280) | Flnc | 362332 | 1,06 | down |
| 6032380 | 7252051 | 1502512 | filamin C, gamma (actin binding protein 280) | Flnc | 362332 | 1,05 | up   |
| 5977021 | 7252051 | 1502501 | filamin C, gamma (actin binding protein 280) | Flnc | 362332 | 1,04 | up   |
| 6536249 | 7252051 | 1502505 | filamin C, gamma (actin binding protein 280) | Flnc | 362332 | 1,03 | up   |
| 5653626 | 7252051 | 1502496 | filamin C, gamma (actin binding protein 280) | Flnc | 362332 | 1,03 | down |
| 6241748 | 7252051 | 1502493 | filamin C, gamma (actin binding protein 280) | Flnc | 362332 | 1,03 | down |
| 5911348 | 7252051 | 1502479 | filamin C, gamma (actin binding protein 280) | Flnc | 362332 | 1,02 | up   |
| 6501361 | 7252051 | 1502513 | filamin C, gamma (actin binding protein 280) | Flnc | 362332 | 1,02 | down |
| 6616191 | 7252051 | 1502529 | filamin C, gamma (actin binding protein 280) | Flnc | 362332 | 1,02 | up   |
| 5652906 | 7252051 | 1502474 | filamin C, gamma (actin binding protein 280) | Flnc | 362332 | 1,02 | up   |
| 5755176 | 7252051 | 1502474 | filamin C, gamma (actin binding protein 280) | Flnc | 362332 | 1,02 | up   |
| 5862581 | 7252051 | 1502523 | filamin C, gamma (actin binding protein 280) | Flnc | 362332 | 1,02 | up   |
| 5811158 | 7252051 | 1502521 | filamin C, gamma (actin binding protein 280) | Flnc | 362332 | 1,02 | up   |
| 6339023 | 7252051 | 1502504 | filamin C, gamma (actin binding protein 280) | Flnc | 362332 | 1,00 | down |
| 6424989 | 7378637 | 1817788 | filamin, alpha                               | Flna | 293860 | 2,39 | down |
| 5630382 | 7378637 | 1817799 | filamin, alpha                               | Flna | 293860 | 1,83 | up   |
| 5665149 | 7378637 | 1817788 | filamin, alpha                               | Flna | 293860 | 1,76 | down |
| 6321917 | 7378637 | 1817822 | filamin, alpha                               | Flna | 293860 | 1,73 | up   |
| 5872327 | 7378637 | 1817805 | filamin, alpha                               | Flna | 293860 | 1,54 | down |
| 6396459 | 7378637 | 1817829 | filamin, alpha                               | Flna | 293860 | 1,51 | up   |
| 6677062 | 7378637 | 1817798 | filamin, alpha                               | Flna | 293860 | 1,47 | up   |
| 5940254 | 7378637 | 1817800 | filamin, alpha                               | Flna | 293860 | 1,46 | down |
| 5647607 | 7378637 | 1817815 | filamin, alpha                               | Flna | 293860 | 1,46 | up   |
| 5786797 | 7378637 | 1817825 | filamin, alpha                               | Flna | 293860 | 1,45 | up   |
| 5754807 | 7378637 | 1817828 | filamin, alpha                               | Flna | 293860 | 1,43 | up   |
| 6219369 | 7378637 | 1817833 | filamin, alpha                               | Flna | 293860 | 1,43 | down |
| 5710497 | 7378637 | 1817803 | filamin, alpha                               | Flna | 293860 | 1,39 | up   |
| 6478433 | 7378637 | 1817791 | filamin, alpha                               | Flna | 293860 | 1,37 | down |
| 5994893 | 7378637 | 1817809 | filamin, alpha                               | Flna | 293860 | 1,36 | up   |
| 6510816 | 7378637 | 1817813 | filamin, alpha                               | Flna | 293860 | 1,33 | up   |
| 6519702 | 7378637 | 1817820 | filamin, alpha                               | Flna | 293860 | 1,32 | up   |
| 5804125 | 7378637 | 1817829 | filamin, alpha                               | Flna | 293860 | 1,29 | up   |

|         |         |         |                                                         |       |        |      |      |
|---------|---------|---------|---------------------------------------------------------|-------|--------|------|------|
| 6436876 | 7378637 | 1817823 | filamin, alpha                                          | Flna  | 293860 | 1,29 | down |
| 5975553 | 7378637 | 1817808 | filamin, alpha                                          | Flna  | 293860 | 1,29 | up   |
| 5851971 | 7378637 | 1817789 | filamin, alpha                                          | Flna  | 293860 | 1,28 | up   |
| 6067453 | 7378637 | 1817792 | filamin, alpha                                          | Flna  | 293860 | 1,28 | down |
| 5807256 | 7378637 | 1817817 | filamin, alpha                                          | Flna  | 293860 | 1,28 | up   |
| 6437573 | 7378637 | 1817810 | filamin, alpha                                          | Flna  | 293860 | 1,23 | up   |
| 5725495 | 7378637 | 1817830 | filamin, alpha                                          | Flna  | 293860 | 1,22 | up   |
| 6424942 | 7378637 | 1817804 | filamin, alpha                                          | Flna  | 293860 | 1,21 | down |
| 6454051 | 7378637 | 1817832 | filamin, alpha                                          | Flna  | 293860 | 1,21 | down |
| 5773696 | 7378637 | 1817831 | filamin, alpha                                          | Flna  | 293860 | 1,21 | up   |
| 6469871 | 7378637 | 1817821 | filamin, alpha                                          | Flna  | 293860 | 1,20 | down |
| 6645908 | 7378637 | 1817795 | filamin, alpha                                          | Flna  | 293860 | 1,20 | down |
| 5644122 | 7378637 | 1817827 | filamin, alpha                                          | Flna  | 293860 | 1,19 | up   |
| 5914868 | 7378637 | 1817819 | filamin, alpha                                          | Flna  | 293860 | 1,17 | down |
| 6616832 | 7378637 | 1817826 | filamin, alpha                                          | Flna  | 293860 | 1,16 | up   |
| 6290852 | 7378637 | 1817824 | filamin, alpha                                          | Flna  | 293860 | 1,16 | up   |
| 5844462 | 7378637 | 1817788 | filamin, alpha                                          | Flna  | 293860 | 1,14 | down |
| 6467254 | 7378637 | 1817812 | filamin, alpha                                          | Flna  | 293860 | 1,14 | up   |
| 6121619 | 7378637 | 1817806 | filamin, alpha                                          | Flna  | 293860 | 1,12 | up   |
| 6082876 | 7378637 | 1817829 | filamin, alpha                                          | Flna  | 293860 | 1,12 | up   |
| 6323115 | 7378637 | 1817832 | filamin, alpha                                          | Flna  | 293860 | 1,12 | up   |
| 6103365 | 7378637 | 1817818 | filamin, alpha                                          | Flna  | 293860 | 1,11 | up   |
| 5876638 | 7378637 | 1817790 | filamin, alpha                                          | Flna  | 293860 | 1,11 | down |
| 6516709 | 7378637 | 1817811 | filamin, alpha                                          | Flna  | 293860 | 1,10 | up   |
| 6584249 | 7378637 | 1817796 | filamin, alpha                                          | Flna  | 293860 | 1,10 | up   |
| 6405766 | 7378637 | 1817794 | filamin, alpha                                          | Flna  | 293860 | 1,10 | down |
| 6499286 | 7378637 | 1817807 | filamin, alpha                                          | Flna  | 293860 | 1,08 | down |
| 5855140 | 7378637 | 1817793 | filamin, alpha                                          | Flna  | 293860 | 1,06 | down |
| 5908366 | 7378637 | 1817801 | filamin, alpha                                          | Flna  | 293860 | 1,06 | up   |
| 6205371 | 7378637 | 1817797 | filamin, alpha                                          | Flna  | 293860 | 1,06 | up   |
| 6659978 | 7378637 | 1817814 | filamin, alpha                                          | Flna  | 293860 | 1,06 | up   |
| 6379422 | 7378637 | 1817802 | filamin, alpha                                          | Flna  | 293860 | 1,05 | up   |
| 5739429 | 7378637 | 1817831 | filamin, alpha                                          | Flna  | 293860 | 1,02 | down |
| 6518591 | 7281475 | 1576512 | FK506 binding protein 12-rapamycin associated protein 1 | Frap1 | 56718  | 2,09 | down |
| 6588697 | 7281475 | 1576494 | FK506 binding protein 12-rapamycin associated protein 1 | Frap1 | 56718  | 1,61 | down |
| 6661522 | 7281475 | 1576499 | FK506 binding protein 12-rapamycin associated protein 1 | Frap1 | 56718  | 1,45 | up   |
| 5787513 | 7281475 | 1576458 | FK506 binding protein 12-rapamycin associated protein 1 | Frap1 | 56718  | 1,38 | down |
| 6671984 | 7281475 | 1576459 | FK506 binding protein 12-rapamycin associated protein 1 | Frap1 | 56718  | 1,38 | down |
| 6595856 | 7281475 | 1576465 | FK506 binding protein 12-rapamycin associated protein 1 | Frap1 | 56718  | 1,33 | up   |
| 5757965 | 7281475 | 1576510 | FK506 binding protein 12-rapamycin associated protein 1 | Frap1 | 56718  | 1,33 | up   |
| 5923553 | 7281475 | 1576500 | FK506 binding protein 12-rapamycin associated protein 1 | Frap1 | 56718  | 1,33 | down |
| 6681248 | 7281475 | 1576460 | FK506 binding protein 12-rapamycin associated protein 1 | Frap1 | 56718  | 1,31 | up   |
| 5653404 | 7281475 | 1576484 | FK506 binding protein 12-rapamycin associated protein 1 | Frap1 | 56718  | 1,31 | down |
| 5741861 | 7281475 | 1576505 | FK506 binding protein 12-rapamycin associated protein 1 | Frap1 | 56718  | 1,30 | up   |
| 6208453 | 7281475 | 1576488 | FK506 binding protein 12-rapamycin associated protein 1 | Frap1 | 56718  | 1,30 | down |
| 5894924 | 7281475 | 1576463 | FK506 binding protein 12-rapamycin associated protein 1 | Frap1 | 56718  | 1,25 | up   |
| 6431960 | 7281475 | 1576490 | FK506 binding protein 12-rapamycin associated protein 1 | Frap1 | 56718  | 1,24 | down |
| 6221876 | 7281475 | 1576470 | FK506 binding protein 12-rapamycin associated protein 1 | Frap1 | 56718  | 1,24 | up   |
| 6335854 | 7281475 | 1576504 | FK506 binding protein 12-rapamycin associated protein 1 | Frap1 | 56718  | 1,23 | up   |
| 6376629 | 7281475 | 1576497 | FK506 binding protein 12-rapamycin associated protein 1 | Frap1 | 56718  | 1,22 | up   |
| 6126412 | 7281475 | 1576482 | FK506 binding protein 12-rapamycin associated protein 1 | Frap1 | 56718  | 1,19 | down |
| 6171383 | 7281475 | 1576471 | FK506 binding protein 12-rapamycin associated protein 1 | Frap1 | 56718  | 1,18 | up   |
| 5647502 | 7281475 | 1576457 | FK506 binding protein 12-rapamycin associated protein 1 | Frap1 | 56718  | 1,18 | up   |
| 6111341 | 7281475 | 1576481 | FK506 binding protein 12-rapamycin associated protein 1 | Frap1 | 56718  | 1,17 | down |
| 6298579 | 7281475 | 1576467 | FK506 binding protein 12-rapamycin associated protein 1 | Frap1 | 56718  | 1,16 | up   |
| 6045358 | 7281475 | 1576462 | FK506 binding protein 12-rapamycin associated protein 1 | Frap1 | 56718  | 1,16 | down |
| 6097724 | 7281475 | 1576514 | FK506 binding protein 12-rapamycin associated protein 1 | Frap1 | 56718  | 1,16 | up   |

|         |         |         |                                                         |        |        |      |      |
|---------|---------|---------|---------------------------------------------------------|--------|--------|------|------|
| 6465452 | 7281475 | 1576478 | FK506 binding protein 12-rapamycin associated protein 1 | Frap1  | 56718  | 1,15 | up   |
| 5742739 | 7281475 | 1576501 | FK506 binding protein 12-rapamycin associated protein 1 | Frap1  | 56718  | 1,14 | up   |
| 6003596 | 7281475 | 1576494 | FK506 binding protein 12-rapamycin associated protein 1 | Frap1  | 56718  | 1,14 | up   |
| 6061323 | 7281475 | 1576485 | FK506 binding protein 12-rapamycin associated protein 1 | Frap1  | 56718  | 1,14 | down |
| 6590522 | 7281475 | 1576492 | FK506 binding protein 12-rapamycin associated protein 1 | Frap1  | 56718  | 1,12 | down |
| 5851449 | 7281475 | 1576495 | FK506 binding protein 12-rapamycin associated protein 1 | Frap1  | 56718  | 1,10 | down |
| 6346926 | 7281475 | 1576514 | FK506 binding protein 12-rapamycin associated protein 1 | Frap1  | 56718  | 1,09 | up   |
| 6252135 | 7281475 | 1576469 | FK506 binding protein 12-rapamycin associated protein 1 | Frap1  | 56718  | 1,09 | up   |
| 6617157 | 7281475 | 1576477 | FK506 binding protein 12-rapamycin associated protein 1 | Frap1  | 56718  | 1,09 | up   |
| 5877340 | 7281475 | 1576476 | FK506 binding protein 12-rapamycin associated protein 1 | Frap1  | 56718  | 1,09 | up   |
| 6273295 | 7281475 | 1576480 | FK506 binding protein 12-rapamycin associated protein 1 | Frap1  | 56718  | 1,08 | up   |
| 5961658 | 7281475 | 1576491 | FK506 binding protein 12-rapamycin associated protein 1 | Frap1  | 56718  | 1,08 | down |
| 5653372 | 7281475 | 1576506 | FK506 binding protein 12-rapamycin associated protein 1 | Frap1  | 56718  | 1,07 | up   |
| 5976838 | 7281475 | 1576468 | FK506 binding protein 12-rapamycin associated protein 1 | Frap1  | 56718  | 1,07 | up   |
| 6154185 | 7281475 | 1576464 | FK506 binding protein 12-rapamycin associated protein 1 | Frap1  | 56718  | 1,06 | down |
| 6632005 | 7281475 | 1576486 | FK506 binding protein 12-rapamycin associated protein 1 | Frap1  | 56718  | 1,06 | down |
| 6629838 | 7281475 | 1576493 | FK506 binding protein 12-rapamycin associated protein 1 | Frap1  | 56718  | 1,06 | down |
| 5736535 | 7281475 | 1576513 | FK506 binding protein 12-rapamycin associated protein 1 | Frap1  | 56718  | 1,06 | up   |
| 6707937 | 7281475 | 1576479 | FK506 binding protein 12-rapamycin associated protein 1 | Frap1  | 56718  | 1,05 | down |
| 6506422 | 7281475 | 1576511 | FK506 binding protein 12-rapamycin associated protein 1 | Frap1  | 56718  | 1,05 | down |
| 5821186 | 7281475 | 1576473 | FK506 binding protein 12-rapamycin associated protein 1 | Frap1  | 56718  | 1,05 | down |
| 6547964 | 7281475 | 1576475 | FK506 binding protein 12-rapamycin associated protein 1 | Frap1  | 56718  | 1,04 | up   |
| 6657797 | 7281475 | 1576487 | FK506 binding protein 12-rapamycin associated protein 1 | Frap1  | 56718  | 1,04 | down |
| 6591300 | 7281475 | 1576502 | FK506 binding protein 12-rapamycin associated protein 1 | Frap1  | 56718  | 1,04 | up   |
| 5911020 | 7281475 | 1576483 | FK506 binding protein 12-rapamycin associated protein 1 | Frap1  | 56718  | 1,04 | up   |
| 6586171 | 7281475 | 1576489 | FK506 binding protein 12-rapamycin associated protein 1 | Frap1  | 56718  | 1,03 | up   |
| 6319680 | 7281475 | 1576498 | FK506 binding protein 12-rapamycin associated protein 1 | Frap1  | 56718  | 1,03 | down |
| 5858828 | 7281475 | 1576461 | FK506 binding protein 12-rapamycin associated protein 1 | Frap1  | 56718  | 1,03 | up   |
| 6174668 | 7281475 | 1576496 | FK506 binding protein 12-rapamycin associated protein 1 | Frap1  | 56718  | 1,03 | down |
| 6723987 | 7281475 | 1576507 | FK506 binding protein 12-rapamycin associated protein 1 | Frap1  | 56718  | 1,02 | up   |
| 5826934 | 7281475 | 1576508 | FK506 binding protein 12-rapamycin associated protein 1 | Frap1  | 56718  | 1,01 | up   |
| 6076507 | 7281475 | 1576472 | FK506 binding protein 12-rapamycin associated protein 1 | Frap1  | 56718  | 1,01 | down |
| 5861867 | 7281475 | 1576509 | FK506 binding protein 12-rapamycin associated protein 1 | Frap1  | 56718  | 1,01 | down |
| 6150134 | 7281475 | 1576466 | FK506 binding protein 12-rapamycin associated protein 1 | Frap1  | 56718  | 1,01 | down |
| 6216951 | 7281475 | 1576474 | FK506 binding protein 12-rapamycin associated protein 1 | Frap1  | 56718  | 1,00 | up   |
| 6454671 | 7281475 | 1576503 | FK506 binding protein 12-rapamycin associated protein 1 | Frap1  | 56718  | 1,00 | down |
| 6343963 | 7264964 | 1534928 | FK506 binding protein 14                                | Fkbp14 | 362366 | 2,16 | down |
| 6176451 | 7264964 | 1534931 | FK506 binding protein 14                                | Fkbp14 | 362366 | 1,94 | up   |
| 6549396 | 7264964 | 1534932 | FK506 binding protein 14                                | Fkbp14 | 362366 | 1,26 | up   |
| 6600233 | 7264964 | 1534930 | FK506 binding protein 14                                | Fkbp14 | 362366 | 1,23 | down |
| 5737108 | 7264964 | 1534929 | FK506 binding protein 14                                | Fkbp14 | 362366 | 1,07 | down |
| 6704902 | 7113261 | 1160469 | flavin containing monooxygenase 6                       | Fmo6   | 304922 | 2,12 | up   |
| 5787992 | 7113261 | 1160477 | flavin containing monooxygenase 6                       | Fmo6   | 304922 | 1,46 | up   |
| 5638088 | 7113261 | 1160476 | flavin containing monooxygenase 6                       | Fmo6   | 304922 | 1,44 | down |
| 5996447 | 7113261 | 1160470 | flavin containing monooxygenase 6                       | Fmo6   | 304922 | 1,31 | up   |
| 6036439 | 7113261 | 1160469 | flavin containing monooxygenase 6                       | Fmo6   | 304922 | 1,24 | down |
| 5762810 | 7113261 | 1160473 | flavin containing monooxygenase 6                       | Fmo6   | 304922 | 1,18 | down |
| 5721204 | 7113261 | 1160475 | flavin containing monooxygenase 6                       | Fmo6   | 304922 | 1,11 | up   |
| 6716691 | 7113261 | 1160474 | flavin containing monooxygenase 6                       | Fmo6   | 304922 | 1,09 | down |
| 6662828 | 7113261 | 1160469 | flavin containing monooxygenase 6                       | Fmo6   | 304922 | 1,08 | down |
| 6742291 | 7113261 | 1160480 | flavin containing monooxygenase 6                       | Fmo6   | 304922 | 1,06 | down |
| 6574721 | 7113261 | 1160480 | flavin containing monooxygenase 6                       | Fmo6   | 304922 | 1,03 | down |
| 6183113 | 7078187 | 1075540 | flightless I homolog (Drosophila)                       | Flii   | 287375 | 2,17 | down |
| 6316097 | 7078187 | 1075548 | flightless I homolog (Drosophila)                       | Flii   | 287375 | 1,36 | down |
| 5688768 | 7078187 | 1075534 | flightless I homolog (Drosophila)                       | Flii   | 287375 | 1,34 | down |
| 5634575 | 7078187 | 1075550 | flightless I homolog (Drosophila)                       | Flii   | 287375 | 1,32 | down |
| 5970911 | 7078187 | 1075539 | flightless I homolog (Drosophila)                       | Flii   | 287375 | 1,32 | up   |

|         |         |         |                                   |       |        |      |      |
|---------|---------|---------|-----------------------------------|-------|--------|------|------|
| 6730192 | 7078187 | 1075551 | flightless I homolog (Drosophila) | Flii  | 287375 | 1,30 | up   |
| 6382128 | 7078187 | 1075552 | flightless I homolog (Drosophila) | Flii  | 287375 | 1,29 | up   |
| 6463668 | 7078187 | 1075556 | flightless I homolog (Drosophila) | Flii  | 287375 | 1,28 | up   |
| 6291999 | 7078187 | 1075542 | flightless I homolog (Drosophila) | Flii  | 287375 | 1,26 | up   |
| 6178532 | 7078187 | 1075543 | flightless I homolog (Drosophila) | Flii  | 287375 | 1,22 | down |
| 6716088 | 7078187 | 1075541 | flightless I homolog (Drosophila) | Flii  | 287375 | 1,20 | down |
| 5855991 | 7078187 | 1075559 | flightless I homolog (Drosophila) | Flii  | 287375 | 1,18 | down |
| 5848782 | 7078187 | 1075545 | flightless I homolog (Drosophila) | Flii  | 287375 | 1,17 | down |
| 6624638 | 7078187 | 1075537 | flightless I homolog (Drosophila) | Flii  | 287375 | 1,17 | down |
| 5959312 | 7078187 | 1075558 | flightless I homolog (Drosophila) | Flii  | 287375 | 1,17 | down |
| 6396975 | 7078187 | 1075555 | flightless I homolog (Drosophila) | Flii  | 287375 | 1,17 | up   |
| 5699682 | 7078187 | 1075553 | flightless I homolog (Drosophila) | Flii  | 287375 | 1,16 | up   |
| 5896961 | 7078187 | 1075538 | flightless I homolog (Drosophila) | Flii  | 287375 | 1,15 | down |
| 6406717 | 7078187 | 1075541 | flightless I homolog (Drosophila) | Flii  | 287375 | 1,14 | down |
| 6268927 | 7078187 | 1075546 | flightless I homolog (Drosophila) | Flii  | 287375 | 1,11 | up   |
| 6481952 | 7078187 | 1075563 | flightless I homolog (Drosophila) | Flii  | 287375 | 1,10 | down |
| 6090271 | 7078187 | 1075557 | flightless I homolog (Drosophila) | Flii  | 287375 | 1,10 | up   |
| 6079196 | 7078187 | 1075533 | flightless I homolog (Drosophila) | Flii  | 287375 | 1,09 | down |
| 5943778 | 7078187 | 1075560 | flightless I homolog (Drosophila) | Flii  | 287375 | 1,08 | down |
| 6087888 | 7078187 | 1075540 | flightless I homolog (Drosophila) | Flii  | 287375 | 1,07 | up   |
| 6269458 | 7078187 | 1075549 | flightless I homolog (Drosophila) | Flii  | 287375 | 1,07 | down |
| 5836525 | 7078187 | 1075541 | flightless I homolog (Drosophila) | Flii  | 287375 | 1,07 | up   |
| 6330347 | 7078187 | 1075536 | flightless I homolog (Drosophila) | Flii  | 287375 | 1,04 | up   |
| 6209796 | 7078187 | 1075561 | flightless I homolog (Drosophila) | Flii  | 287375 | 1,03 | up   |
| 5683482 | 7078187 | 1075554 | flightless I homolog (Drosophila) | Flii  | 287375 | 1,02 | up   |
| 6020906 | 7078187 | 1075544 | flightless I homolog (Drosophila) | Flii  | 287375 | 1,02 | down |
| 6553847 | 7078187 | 1075562 | flightless I homolog (Drosophila) | Flii  | 287375 | 1,01 | up   |
| 5703647 | 7078187 | 1075547 | flightless I homolog (Drosophila) | Flii  | 287375 | 1,00 | up   |
| 5770113 | 7078187 | 1075535 | flightless I homolog (Drosophila) | Flii  | 287375 | 1,00 | up   |
| 6297665 | 7069885 | 1055756 | flotillin 2                       | Flot2 | 83764  | 2,18 | down |
| 5940458 | 7069885 | 1055766 | flotillin 2                       | Flot2 | 83764  | 1,69 | up   |
| 6104056 | 7069885 | 1055757 | flotillin 2                       | Flot2 | 83764  | 1,66 | down |
| 5626499 | 7069885 | 1055757 | flotillin 2                       | Flot2 | 83764  | 1,58 | down |
| 6094238 | 7069885 | 1055761 | flotillin 2                       | Flot2 | 83764  | 1,52 | down |
| 6348414 | 7069885 | 1055767 | flotillin 2                       | Flot2 | 83764  | 1,34 | up   |
| 6706813 | 7069885 | 1055758 | flotillin 2                       | Flot2 | 83764  | 1,30 | down |
| 6062220 | 7069885 | 1055768 | flotillin 2                       | Flot2 | 83764  | 1,22 | up   |
| 6287377 | 7069885 | 1055764 | flotillin 2                       | Flot2 | 83764  | 1,21 | down |
| 6044163 | 7069885 | 1055763 | flotillin 2                       | Flot2 | 83764  | 1,17 | up   |
| 6661700 | 7069885 | 1055762 | flotillin 2                       | Flot2 | 83764  | 1,11 | down |
| 6240620 | 7069885 | 1055765 | flotillin 2                       | Flot2 | 83764  | 1,04 | up   |
| 5848684 | 7069885 | 1055769 | flotillin 2                       | Flot2 | 83764  | 1,04 | up   |
| 6691633 | 7069885 | 1055760 | flotillin 2                       | Flot2 | 83764  | 1,04 | down |
| 6153016 | 7069885 | 1055770 | flotillin 2                       | Flot2 | 83764  | 1,01 | up   |
| 6212113 | 7069885 | 1055759 | flotillin 2                       | Flot2 | 83764  | 1,00 | up   |
| 5932670 | 7096389 | 1118077 | fms-related tyrosine kinase 1     | Flt1  | 54251  | 2,03 | down |
| 6660906 | 7096389 | 1118056 | fms-related tyrosine kinase 1     | Flt1  | 54251  | 1,83 | up   |
| 6328578 | 7096389 | 1118073 | fms-related tyrosine kinase 1     | Flt1  | 54251  | 1,65 | up   |
| 5849148 | 7096389 | 1118062 | fms-related tyrosine kinase 1     | Flt1  | 54251  | 1,58 | down |
| 6701568 | 7096389 | 1118050 | fms-related tyrosine kinase 1     | Flt1  | 54251  | 1,57 | down |
| 6663927 | 7096389 | 1118068 | fms-related tyrosine kinase 1     | Flt1  | 54251  | 1,50 | down |
| 6486501 | 7096389 | 1118054 | fms-related tyrosine kinase 1     | Flt1  | 54251  | 1,50 | up   |
| 6173605 | 7096389 | 1118067 | fms-related tyrosine kinase 1     | Flt1  | 54251  | 1,46 | up   |
| 5820472 | 7096389 | 1118065 | fms-related tyrosine kinase 1     | Flt1  | 54251  | 1,44 | up   |
| 6343428 | 7096389 | 1118055 | fms-related tyrosine kinase 1     | Flt1  | 54251  | 1,43 | up   |
| 5975235 | 7096389 | 1118071 | fms-related tyrosine kinase 1     | Flt1  | 54251  | 1,41 | down |
| 6534955 | 7096389 | 1118048 | fms-related tyrosine kinase 1     | Flt1  | 54251  | 1,40 | up   |



|         |         |         |                               |       |        |      |      |
|---------|---------|---------|-------------------------------|-------|--------|------|------|
| 5869787 | 7096389 | 1118057 | fms-related tyrosine kinase 1 | Flt1  | 54251  | 1,24 | up   |
| 6611060 | 7096389 | 1118063 | fms-related tyrosine kinase 1 | Flt1  | 54251  | 1,23 | up   |
| 6631502 | 7096389 | 1118064 | fms-related tyrosine kinase 1 | Flt1  | 54251  | 1,20 | down |
| 5770061 | 7096389 | 1118060 | fms-related tyrosine kinase 1 | Flt1  | 54251  | 1,17 | up   |
| 6385722 | 7096389 | 1118070 | fms-related tyrosine kinase 1 | Flt1  | 54251  | 1,12 | up   |
| 6439516 | 7096389 | 1118058 | fms-related tyrosine kinase 1 | Flt1  | 54251  | 1,11 | up   |
| 6559568 | 7096389 | 1118061 | fms-related tyrosine kinase 1 | Flt1  | 54251  | 1,10 | down |
| 6679798 | 7096389 | 1118066 | fms-related tyrosine kinase 1 | Flt1  | 54251  | 1,08 | down |
| 6175639 | 7096389 | 1118047 | fms-related tyrosine kinase 1 | Flt1  | 54251  | 1,08 | up   |
| 6418396 | 7096389 | 1118049 | fms-related tyrosine kinase 1 | Flt1  | 54251  | 1,05 | down |
| 6228495 | 7096389 | 1118047 | fms-related tyrosine kinase 1 | Flt1  | 54251  | 1,04 | down |
| 6254641 | 7096389 | 1118061 | fms-related tyrosine kinase 1 | Flt1  | 54251  | 1,03 | up   |
| 6472813 | 7096389 | 1118060 | fms-related tyrosine kinase 1 | Flt1  | 54251  | 1,03 | down |
| 6339387 | 7096389 | 1118072 | fms-related tyrosine kinase 1 | Flt1  | 54251  | 1,02 | up   |
| 6050505 | 7096389 | 1118051 | fms-related tyrosine kinase 1 | Flt1  | 54251  | 1,02 | down |
| 5988581 | 7096389 | 1118052 | fms-related tyrosine kinase 1 | Flt1  | 54251  | 1,01 | down |
| 6205568 | 7096389 | 1118069 | fms-related tyrosine kinase 1 | Flt1  | 54251  | 1,01 | up   |
| 5813521 | 7096389 | 1118059 | fms-related tyrosine kinase 1 | Flt1  | 54251  | 1,00 | down |
| 5972233 | 7096389 | 1118076 | fms-related tyrosine kinase 1 | Flt1  | 54251  | 1,00 | up   |
| 6195360 | 7096389 | 1118053 | fms-related tyrosine kinase 1 | Flt1  | 54251  | 1,00 | up   |
| 5769766 | 7096389 | 1118074 | fms-related tyrosine kinase 1 | Flt1  | 54251  | 1,00 | up   |
| 6290168 | 7096389 | 1118075 | fms-related tyrosine kinase 1 | Flt1  | 54251  | 1,00 | up   |
| 6335102 | 7096389 | 1118077 | fms-related tyrosine kinase 1 | Flt1  | 54251  | 1,00 | up   |
| 5890011 | 7204090 | 1385370 | follistatin                   | Fst   | 24373  | 2,24 | down |
| 6331014 | 7204090 | 1385366 | follistatin                   | Fst   | 24373  | 1,87 | up   |
| 6204622 | 7204090 | 1385367 | follistatin                   | Fst   | 24373  | 1,45 | down |
| 5834602 | 7204090 | 1385365 | follistatin                   | Fst   | 24373  | 1,29 | up   |
| 6043536 | 7204090 | 1385367 | follistatin                   | Fst   | 24373  | 1,16 | up   |
| 6024376 | 7204090 | 1385368 | follistatin                   | Fst   | 24373  | 1,14 | down |
| 5990532 | 7204090 | 1385369 | follistatin                   | Fst   | 24373  | 1,06 | up   |
| 6496133 | 7204090 | 1385366 | follistatin                   | Fst   | 24373  | 1,02 | down |
| 5949374 | 7067518 | 1049896 | follistatin-like 4            | Fstl4 | 303130 | 2,02 | up   |
| 6556469 | 7067518 | 1049953 | follistatin-like 4            | Fstl4 | 303130 | 1,82 | down |
| 6662586 | 7067518 | 1049874 | follistatin-like 4            | Fstl4 | 303130 | 1,46 | up   |
| 5809128 | 7067518 | 1049952 | follistatin-like 4            | Fstl4 | 303130 | 1,37 | up   |
| 6089304 | 7067518 | 1049943 | follistatin-like 4            | Fstl4 | 303130 | 1,35 | down |
| 6676423 | 7067518 | 1049908 | follistatin-like 4            | Fstl4 | 303130 | 1,33 | down |
| 5899259 | 7067518 | 1049881 | follistatin-like 4            | Fstl4 | 303130 | 1,23 | down |
| 6519931 | 7067518 | 1049932 | follistatin-like 4            | Fstl4 | 303130 | 1,20 | down |
| 6415265 | 7067518 | 1049869 | follistatin-like 4            | Fstl4 | 303130 | 1,15 | down |
| 5741134 | 7067518 | 1049946 | follistatin-like 4            | Fstl4 | 303130 | 1,15 | up   |
| 5643687 | 7067518 | 1049954 | follistatin-like 4            | Fstl4 | 303130 | 1,12 | down |
| 6291809 | 7067518 | 1049945 | follistatin-like 4            | Fstl4 | 303130 | 1,12 | up   |
| 5770598 | 7067518 | 1049947 | follistatin-like 4            | Fstl4 | 303130 | 1,08 | down |
| 6255911 | 7067518 | 1049942 | follistatin-like 4            | Fstl4 | 303130 | 1,07 | up   |
| 6737770 | 7067518 | 1049954 | follistatin-like 4            | Fstl4 | 303130 | 1,04 | up   |
| 6540608 | 7067518 | 1049910 | follistatin-like 4            | Fstl4 | 303130 | 1,01 | down |
| 6586269 | 7067518 | 1049937 | follistatin-like 4            | Fstl4 | 303130 | 1,00 | down |
| 6152048 | 7306908 | 1640055 | forkhead box A1               | Foxa1 | 25098  | 2,28 | up   |
| 5781281 | 7306908 | 1640056 | forkhead box A1               | Foxa1 | 25098  | 1,68 | up   |
| 6125706 | 7306908 | 1640055 | forkhead box A1               | Foxa1 | 25098  | 1,38 | up   |
| 6746659 | 7306908 | 1640055 | forkhead box A1               | Foxa1 | 25098  | 1,23 | down |
| 5646642 | 7306908 | 1640055 | forkhead box A1               | Foxa1 | 25098  | 1,15 | up   |
| 5826257 | 7306908 | 1640055 | forkhead box A1               | Foxa1 | 25098  | 1,12 | down |
| 6527885 | 7306908 | 1640055 | forkhead box A1               | Foxa1 | 25098  | 1,05 | down |
| 6159909 | 7306908 | 1640055 | forkhead box A1               | Foxa1 | 25098  | 1,04 | down |
| 6188330 | 7306908 | 1640055 | forkhead box A1               | Foxa1 | 25098  | 1,04 | up   |

|         |         |         |                                                  |       |        |      |      |
|---------|---------|---------|--------------------------------------------------|-------|--------|------|------|
| 6597039 | 7306908 | 1640054 | forkhead box A1                                  | Foxa1 | 25098  | 1,03 | down |
| 5993551 | 7306908 | 1640055 | forkhead box A1                                  | Foxa1 | 25098  | 1,02 | up   |
| 5822091 | 7306908 | 1640055 | forkhead box A1                                  | Foxa1 | 25098  | 1,02 | down |
| 6523608 | 7274821 | 1559410 | forkhead box E1 (thyroid transcription factor 2) | Foxe1 | 192274 | 2,51 | up   |
| 5771002 | 7274821 | 1559410 | forkhead box E1 (thyroid transcription factor 2) | Foxe1 | 192274 | 1,41 | up   |
| 6181011 | 7274821 | 1559410 | forkhead box E1 (thyroid transcription factor 2) | Foxe1 | 192274 | 1,29 | down |
| 5724733 | 7274821 | 1559412 | forkhead box E1 (thyroid transcription factor 2) | Foxe1 | 192274 | 1,19 | up   |
| 6028389 | 7274821 | 1559412 | forkhead box E1 (thyroid transcription factor 2) | Foxe1 | 192274 | 1,16 | up   |
| 5798344 | 7274821 | 1559412 | forkhead box E1 (thyroid transcription factor 2) | Foxe1 | 192274 | 1,16 | down |
| 6686539 | 7274821 | 1559411 | forkhead box E1 (thyroid transcription factor 2) | Foxe1 | 192274 | 1,15 | up   |
| 6274376 | 7274821 | 1559412 | forkhead box E1 (thyroid transcription factor 2) | Foxe1 | 192274 | 1,08 | down |
| 5840144 | 7274821 | 1559410 | forkhead box E1 (thyroid transcription factor 2) | Foxe1 | 192274 | 1,04 | down |
| 6439964 | 7274821 | 1559412 | forkhead box E1 (thyroid transcription factor 2) | Foxe1 | 192274 | 1,01 | up   |
| 6239664 | 7274821 | 1559412 | forkhead box E1 (thyroid transcription factor 2) | Foxe1 | 192274 | 1,00 | down |
| 6599289 | 7297880 | 1616357 | forkhead box G1                                  | Foxg1 | 24370  | 2,05 | down |
| 6345002 | 7297880 | 1616357 | forkhead box G1                                  | Foxg1 | 24370  | 1,57 | up   |
| 5944180 | 7297880 | 1616359 | forkhead box G1                                  | Foxg1 | 24370  | 1,13 | up   |
| 6599112 | 7297880 | 1616357 | forkhead box G1                                  | Foxg1 | 24370  | 1,12 | up   |
| 6266730 | 7297880 | 1616357 | forkhead box G1                                  | Foxg1 | 24370  | 1,08 | up   |
| 5836940 | 7297880 | 1616358 | forkhead box G1                                  | Foxg1 | 24370  | 1,01 | up   |
| 5905154 | 7297880 | 1616358 | forkhead box G1                                  | Foxg1 | 24370  | 1,00 | down |
| 6423216 | 7309646 | 1646556 | forkhead box N3                                  | Foxn3 | 314374 | 2,18 | down |
| 6590007 | 7309646 | 1646489 | forkhead box N3                                  | Foxn3 | 314374 | 2,10 | down |
| 5666510 | 7309646 | 1646527 | forkhead box N3                                  | Foxn3 | 314374 | 1,47 | down |
| 6264866 | 7309646 | 1646489 | forkhead box N3                                  | Foxn3 | 314374 | 1,19 | up   |
| 6452819 | 7309646 | 1646514 | forkhead box N3                                  | Foxn3 | 314374 | 1,15 | down |
| 6519154 | 7309646 | 1646493 | forkhead box N3                                  | Foxn3 | 314374 | 1,11 | up   |
| 5826033 | 7309646 | 1646489 | forkhead box N3                                  | Foxn3 | 314374 | 1,07 | up   |
| 6682167 | 7309646 | 1646565 | forkhead box N3                                  | Foxn3 | 314374 | 1,03 | down |
| 5639381 | 7309646 | 1646545 | forkhead box N3                                  | Foxn3 | 314374 | 1,01 | down |
| 6741430 | 7309646 | 1646489 | forkhead box N3                                  | Foxn3 | 314374 | 1,00 | down |
| 6160611 | 7193959 | 1360603 | forkhead box O1                                  | Foxo1 | 84482  | 1,67 | down |
| 6356887 | 7193959 | 1360610 | forkhead box O1                                  | Foxo1 | 84482  | 1,01 | down |
| 6660813 | 7267802 | 1541796 | forkhead box P1                                  | Foxp1 | 297480 | 1,83 | down |
| 6645491 | 7267802 | 1541778 | forkhead box P1                                  | Foxp1 | 297480 | 1,59 | down |
| 6475705 | 7267802 | 1541769 | forkhead box P1                                  | Foxp1 | 297480 | 1,41 | down |
| 6211212 | 7267802 | 1541734 | forkhead box P1                                  | Foxp1 | 297480 | 1,34 | down |
| 6561658 | 7267802 | 1541744 | forkhead box P1                                  | Foxp1 | 297480 | 1,34 | down |
| 5999619 | 7267802 | 1541745 | forkhead box P1                                  | Foxp1 | 297480 | 1,30 | down |
| 6466224 | 7267802 | 1541754 | forkhead box P1                                  | Foxp1 | 297480 | 1,24 | down |
| 6688169 | 7267802 | 1541741 | forkhead box P1                                  | Foxp1 | 297480 | 1,23 | up   |
| 6050900 | 7267802 | 1541817 | forkhead box P1                                  | Foxp1 | 297480 | 1,21 | down |
| 5844360 | 7267802 | 1541763 | forkhead box P1                                  | Foxp1 | 297480 | 1,21 | up   |
| 6406262 | 7267802 | 1541738 | forkhead box P1                                  | Foxp1 | 297480 | 1,21 | up   |
| 6316307 | 7267802 | 1541754 | forkhead box P1                                  | Foxp1 | 297480 | 1,19 | down |
| 6419157 | 7267802 | 1541743 | forkhead box P1                                  | Foxp1 | 297480 | 1,18 | down |
| 6540853 | 7267802 | 1541780 | forkhead box P1                                  | Foxp1 | 297480 | 1,18 | down |
| 6723306 | 7267802 | 1541746 | forkhead box P1                                  | Foxp1 | 297480 | 1,13 | down |
| 6176912 | 7267802 | 1541758 | forkhead box P1                                  | Foxp1 | 297480 | 1,11 | up   |
| 5653675 | 7267802 | 1541774 | forkhead box P1                                  | Foxp1 | 297480 | 1,09 | up   |
| 6690082 | 7267802 | 1541774 | forkhead box P1                                  | Foxp1 | 297480 | 1,09 | up   |
| 5921580 | 7267802 | 1541734 | forkhead box P1                                  | Foxp1 | 297480 | 1,06 | up   |
| 6012665 | 7351844 | 1749478 | forkhead box P4                                  | Foxp4 | 363185 | 1,42 | up   |
| 6141573 | 7351844 | 1749494 | forkhead box P4                                  | Foxp4 | 363185 | 1,36 | up   |
| 6025961 | 7351844 | 1749500 | forkhead box P4                                  | Foxp4 | 363185 | 1,35 | up   |
| 6204418 | 7351844 | 1749507 | forkhead box P4                                  | Foxp4 | 363185 | 1,32 | down |
| 6730035 | 7351844 | 1749498 | forkhead box P4                                  | Foxp4 | 363185 | 1,29 | down |

|         |         |         |                                     |       |        |       |      |
|---------|---------|---------|-------------------------------------|-------|--------|-------|------|
| 5764039 | 7351844 | 1749499 | forkhead box P4                     | Foxp4 | 363185 | 1,21  | up   |
| 5842033 | 7351844 | 1749495 | forkhead box P4                     | Foxp4 | 363185 | 1,18  | down |
| 6540419 | 7351844 | 1749497 | forkhead box P4                     | Foxp4 | 363185 | 1,17  | up   |
| 6102176 | 7351844 | 1749504 | forkhead box P4                     | Foxp4 | 363185 | 1,16  | up   |
| 5825769 | 7351844 | 1749507 | forkhead box P4                     | Foxp4 | 363185 | 1,15  | down |
| 6092961 | 7351844 | 1749491 | forkhead box P4                     | Foxp4 | 363185 | 1,13  | down |
| 5672403 | 7351844 | 1749496 | forkhead box P4                     | Foxp4 | 363185 | 1,13  | up   |
| 6276935 | 7351844 | 1749505 | forkhead box P4                     | Foxp4 | 363185 | 1,12  | down |
| 5786442 | 7351844 | 1749503 | forkhead box P4                     | Foxp4 | 363185 | 1,10  | down |
| 6075782 | 7351844 | 1749492 | forkhead box P4                     | Foxp4 | 363185 | 1,06  | up   |
| 6118362 | 7351844 | 1749482 | forkhead box P4                     | Foxp4 | 363185 | 1,00  | down |
| 5903871 | 7221613 | 1426797 | formiminotransferase cyclodeaminase | Ftcd  | 89833  | 1,41  | down |
| 6678989 | 7221613 | 1426798 | formiminotransferase cyclodeaminase | Ftcd  | 89833  | 1,39  | up   |
| 6523458 | 7221613 | 1426792 | formiminotransferase cyclodeaminase | Ftcd  | 89833  | 1,31  | up   |
| 5620510 | 7221613 | 1426796 | formiminotransferase cyclodeaminase | Ftcd  | 89833  | 1,28  | up   |
| 5705939 | 7221613 | 1426799 | formiminotransferase cyclodeaminase | Ftcd  | 89833  | 1,24  | down |
| 5782839 | 7221613 | 1426795 | formiminotransferase cyclodeaminase | Ftcd  | 89833  | 1,21  | up   |
| 6382482 | 7221613 | 1426792 | formiminotransferase cyclodeaminase | Ftcd  | 89833  | 1,15  | down |
| 6307442 | 7221613 | 1426789 | formiminotransferase cyclodeaminase | Ftcd  | 89833  | 1,13  | down |
| 5978852 | 7221613 | 1426787 | formiminotransferase cyclodeaminase | Ftcd  | 89833  | 1,13  | up   |
| 5922940 | 7221613 | 1426788 | formiminotransferase cyclodeaminase | Ftcd  | 89833  | 1,10  | up   |
| 6574798 | 7221613 | 1426786 | formiminotransferase cyclodeaminase | Ftcd  | 89833  | 1,06  | down |
| 6257111 | 7221613 | 1426793 | formiminotransferase cyclodeaminase | Ftcd  | 89833  | 1,05  | up   |
| 6394266 | 7221613 | 1426791 | formiminotransferase cyclodeaminase | Ftcd  | 89833  | 1,03  | up   |
| 6068658 | 7221613 | 1426790 | formiminotransferase cyclodeaminase | Ftcd  | 89833  | 1,02  | up   |
| 6508358 | 7221613 | 1426794 | formiminotransferase cyclodeaminase | Ftcd  | 89833  | 1,02  | up   |
| 5774599 | 7108062 | 1147155 | formin 2                            | Fmn2  | 289262 | 15,52 | up   |
| 5672134 | 7108062 | 1147137 | formin 2                            | Fmn2  | 289262 | 2,17  | up   |
| 5686906 | 7108062 | 1147137 | formin 2                            | Fmn2  | 289262 | 1,74  | down |
| 5875650 | 7108062 | 1147155 | formin 2                            | Fmn2  | 289262 | 1,64  | up   |
| 6445569 | 7108062 | 1147142 | formin 2                            | Fmn2  | 289262 | 1,62  | down |
| 6133282 | 7108062 | 1147154 | formin 2                            | Fmn2  | 289262 | 1,55  | up   |
| 6529559 | 7108062 | 1147164 | formin 2                            | Fmn2  | 289262 | 1,52  | up   |
| 6200080 | 7108062 | 1147147 | formin 2                            | Fmn2  | 289262 | 1,43  | down |
| 6274076 | 7108062 | 1147137 | formin 2                            | Fmn2  | 289262 | 1,37  | up   |
| 5862848 | 7108062 | 1147183 | formin 2                            | Fmn2  | 289262 | 1,30  | down |
| 5787120 | 7108062 | 1147137 | formin 2                            | Fmn2  | 289262 | 1,30  | down |
| 5688896 | 7108062 | 1147155 | formin 2                            | Fmn2  | 289262 | 1,27  | up   |
| 5752699 | 7108062 | 1147189 | formin 2                            | Fmn2  | 289262 | 1,27  | down |
| 6736960 | 7108062 | 1147173 | formin 2                            | Fmn2  | 289262 | 1,26  | up   |
| 5895951 | 7108062 | 1147170 | formin 2                            | Fmn2  | 289262 | 1,24  | down |
| 6681213 | 7108062 | 1147191 | formin 2                            | Fmn2  | 289262 | 1,22  | down |
| 6367099 | 7108062 | 1147137 | formin 2                            | Fmn2  | 289262 | 1,20  | down |
| 6248771 | 7108062 | 1147154 | formin 2                            | Fmn2  | 289262 | 1,19  | up   |
| 6152852 | 7108062 | 1147150 | formin 2                            | Fmn2  | 289262 | 1,17  | down |
| 6251292 | 7108062 | 1147165 | formin 2                            | Fmn2  | 289262 | 1,16  | up   |
| 5801136 | 7108062 | 1147137 | formin 2                            | Fmn2  | 289262 | 1,10  | up   |
| 6011538 | 7108062 | 1147157 | formin 2                            | Fmn2  | 289262 | 1,09  | up   |
| 6737347 | 7108062 | 1147179 | formin 2                            | Fmn2  | 289262 | 1,08  | up   |
| 5971543 | 7108062 | 1147172 | formin 2                            | Fmn2  | 289262 | 1,06  | up   |
| 5827031 | 7108062 | 1147174 | formin 2                            | Fmn2  | 289262 | 1,05  | down |
| 6069220 | 7108062 | 1147154 | formin 2                            | Fmn2  | 289262 | 1,05  | up   |
| 5656282 | 7108062 | 1147137 | formin 2                            | Fmn2  | 289262 | 1,04  | up   |
| 5900076 | 7108062 | 1147155 | formin 2                            | Fmn2  | 289262 | 1,04  | up   |
| 6291820 | 7108062 | 1147171 | formin 2                            | Fmn2  | 289262 | 1,01  | down |
| 6357971 | 7237530 | 1466999 | formin binding protein 1            | Fnbp1 | 192348 | 2,57  | up   |
| 6092659 | 7237530 | 1466995 | formin binding protein 1            | Fnbp1 | 192348 | 2,33  | down |

|         |         |         |                                |       |        |      |      |
|---------|---------|---------|--------------------------------|-------|--------|------|------|
| 6600507 | 7237530 | 1466995 | formin binding protein 1       | Fnbp1 | 192348 | 1,90 | down |
| 5998770 | 7237530 | 1466997 | formin binding protein 1       | Fnbp1 | 192348 | 1,77 | up   |
| 6633485 | 7237530 | 1467000 | formin binding protein 1       | Fnbp1 | 192348 | 1,48 | down |
| 6651313 | 7237530 | 1467003 | formin binding protein 1       | Fnbp1 | 192348 | 1,46 | up   |
| 6373220 | 7237530 | 1466993 | formin binding protein 1       | Fnbp1 | 192348 | 1,45 | down |
| 5961555 | 7237530 | 1466991 | formin binding protein 1       | Fnbp1 | 192348 | 1,38 | up   |
| 5795538 | 7237530 | 1467001 | formin binding protein 1       | Fnbp1 | 192348 | 1,34 | up   |
| 6062141 | 7237530 | 1466994 | formin binding protein 1       | Fnbp1 | 192348 | 1,32 | down |
| 6015696 | 7237530 | 1466990 | formin binding protein 1       | Fnbp1 | 192348 | 1,30 | down |
| 6615871 | 7237530 | 1466996 | formin binding protein 1       | Fnbp1 | 192348 | 1,16 | up   |
| 5958101 | 7237530 | 1466998 | formin binding protein 1       | Fnbp1 | 192348 | 1,16 | down |
| 6200044 | 7237530 | 1466992 | formin binding protein 1       | Fnbp1 | 192348 | 1,10 | down |
| 5862181 | 7237530 | 1467002 | formin binding protein 1       | Fnbp1 | 192348 | 1,05 | down |
| 6070538 | 7229885 | 1447142 | formin binding protein 4       | Fnbp4 | 311183 | 3,40 | down |
| 6001346 | 7229885 | 1447141 | formin binding protein 4       | Fnbp4 | 311183 | 2,16 | up   |
| 6635429 | 7229885 | 1447142 | formin binding protein 4       | Fnbp4 | 311183 | 1,34 | down |
| 5687061 | 7229885 | 1447140 | formin binding protein 4       | Fnbp4 | 311183 | 1,34 | up   |
| 5835632 | 7229885 | 1447142 | formin binding protein 4       | Fnbp4 | 311183 | 1,32 | up   |
| 6628034 | 7229885 | 1447141 | formin binding protein 4       | Fnbp4 | 311183 | 1,19 | up   |
| 5822090 | 7229885 | 1447139 | formin binding protein 4       | Fnbp4 | 311183 | 1,14 | down |
| 6170192 | 7229885 | 1447141 | formin binding protein 4       | Fnbp4 | 311183 | 1,08 | up   |
| 6393243 | 7229885 | 1447141 | formin binding protein 4       | Fnbp4 | 311183 | 1,02 | down |
| 6661828 | 7039170 | 983434  | fos-like antigen 1             | Fos11 | 25445  | 4,03 | up   |
| 6657406 | 7039170 | 983434  | fos-like antigen 1             | Fos11 | 25445  | 1,60 | up   |
| 6508220 | 7039170 | 983435  | fos-like antigen 1             | Fos11 | 25445  | 1,58 | up   |
| 6032279 | 7039170 | 983431  | fos-like antigen 1             | Fos11 | 25445  | 1,27 | down |
| 6253648 | 7039170 | 983434  | fos-like antigen 1             | Fos11 | 25445  | 1,09 | down |
| 5705849 | 7039170 | 983431  | fos-like antigen 1             | Fos11 | 25445  | 1,06 | down |
| 6079701 | 7039170 | 983434  | fos-like antigen 1             | Fos11 | 25445  | 1,04 | up   |
| 6734738 | 7039170 | 983432  | fos-like antigen 1             | Fos11 | 25445  | 1,03 | down |
| 6296092 | 7039170 | 983433  | fos-like antigen 1             | Fos11 | 25445  | 1,02 | down |
| 5882900 | 7049875 | 1009147 | free fatty acid receptor 3     | Ffar3 | 365228 | 3,94 | up   |
| 5994094 | 7049875 | 1009148 | free fatty acid receptor 3     | Ffar3 | 365228 | 1,39 | down |
| 6715711 | 7049875 | 1009147 | free fatty acid receptor 3     | Ffar3 | 365228 | 1,26 | down |
| 6267694 | 7049875 | 1009147 | free fatty acid receptor 3     | Ffar3 | 365228 | 1,06 | down |
| 6508951 | 7240852 | 1476253 | frizzled-related protein       | Frzb  | 295691 | 2,47 | up   |
| 5969916 | 7240852 | 1476243 | frizzled-related protein       | Frzb  | 295691 | 2,10 | up   |
| 6587435 | 7240852 | 1476243 | frizzled-related protein       | Frzb  | 295691 | 1,90 | up   |
| 6400073 | 7240852 | 1476243 | frizzled-related protein       | Frzb  | 295691 | 1,48 | down |
| 6732302 | 7240852 | 1476250 | frizzled-related protein       | Frzb  | 295691 | 1,28 | down |
| 6494638 | 7240852 | 1476246 | frizzled-related protein       | Frzb  | 295691 | 1,27 | down |
| 6043023 | 7240852 | 1476248 | frizzled-related protein       | Frzb  | 295691 | 1,25 | down |
| 6303615 | 7240852 | 1476245 | frizzled-related protein       | Frzb  | 295691 | 1,22 | down |
| 6413286 | 7240852 | 1476252 | frizzled-related protein       | Frzb  | 295691 | 1,02 | up   |
| 6158245 | 7074164 | 1066387 | fructosamine 3 kinase          | Fn3k  | 498034 | 1,54 | down |
| 6728252 | 7074164 | 1066386 | fructosamine 3 kinase          | Fn3k  | 498034 | 1,30 | down |
| 6264184 | 7074164 | 1066385 | fructosamine 3 kinase          | Fn3k  | 498034 | 1,18 | down |
| 6734222 | 7074164 | 1066388 | fructosamine 3 kinase          | Fn3k  | 498034 | 1,08 | down |
| 6130473 | 7074164 | 1066388 | fructosamine 3 kinase          | Fn3k  | 498034 | 1,06 | up   |
| 6221283 | 7074164 | 1066386 | fructosamine 3 kinase          | Fn3k  | 498034 | 1,06 | up   |
| 6031133 | 7373633 | 1805695 | Ftsj homolog 1 (E. coli)       | Ftsj1 | 363450 | 1,14 | down |
| 6016254 | 7280588 | 1574144 | fucosidase, alpha-L- 1, tissue | Fuca1 | 24375  | 2,33 | up   |
| 6149753 | 7280588 | 1574152 | fucosidase, alpha-L- 1, tissue | Fuca1 | 24375  | 1,36 | up   |
| 6632337 | 7280588 | 1574146 | fucosidase, alpha-L- 1, tissue | Fuca1 | 24375  | 1,34 | up   |
| 6717916 | 7280588 | 1574150 | fucosidase, alpha-L- 1, tissue | Fuca1 | 24375  | 1,32 | down |
| 6033582 | 7280588 | 1574147 | fucosidase, alpha-L- 1, tissue | Fuca1 | 24375  | 1,25 | down |
| 5828024 | 7280588 | 1574148 | fucosidase, alpha-L- 1, tissue | Fuca1 | 24375  | 1,19 | up   |

|         |         |         |                                                             |         |        |      |      |
|---------|---------|---------|-------------------------------------------------------------|---------|--------|------|------|
| 6183854 | 7280588 | 1574149 | fucosidase, alpha-L- 1, tissue                              | Fuca1   | 24375  | 1,15 | down |
| 5991528 | 7280588 | 1574151 | fucosidase, alpha-L- 1, tissue                              | Fuca1   | 24375  | 1,11 | up   |
| 5656211 | 7280588 | 1574144 | fucosidase, alpha-L- 1, tissue                              | Fuca1   | 24375  | 1,09 | up   |
| 5906839 | 7280588 | 1574145 | fucosidase, alpha-L- 1, tissue                              | Fuca1   | 24375  | 1,04 | down |
| 6119968 | 7037185 | 978399  | fusion, derived from t(12;16) malignant liposarcoma (human) | Fus     | 317385 | 2,48 | down |
| 6239491 | 7037185 | 978412  | fusion, derived from t(12;16) malignant liposarcoma (human) | Fus     | 317385 | 1,68 | down |
| 6251167 | 7037185 | 978409  | fusion, derived from t(12;16) malignant liposarcoma (human) | Fus     | 317385 | 1,31 | up   |
| 5753130 | 7037185 | 978400  | fusion, derived from t(12;16) malignant liposarcoma (human) | Fus     | 317385 | 1,29 | down |
| 5982770 | 7037185 | 978410  | fusion, derived from t(12;16) malignant liposarcoma (human) | Fus     | 317385 | 1,29 | up   |
| 5844356 | 7037185 | 978403  | fusion, derived from t(12;16) malignant liposarcoma (human) | Fus     | 317385 | 1,21 | up   |
| 6207078 | 7037185 | 978405  | fusion, derived from t(12;16) malignant liposarcoma (human) | Fus     | 317385 | 1,15 | up   |
| 6121886 | 7037185 | 978402  | fusion, derived from t(12;16) malignant liposarcoma (human) | Fus     | 317385 | 1,14 | down |
| 5627620 | 7037185 | 978412  | fusion, derived from t(12;16) malignant liposarcoma (human) | Fus     | 317385 | 1,14 | up   |
| 6250184 | 7037185 | 978398  | fusion, derived from t(12;16) malignant liposarcoma (human) | Fus     | 317385 | 1,10 | down |
| 5992342 | 7037185 | 978411  | fusion, derived from t(12;16) malignant liposarcoma (human) | Fus     | 317385 | 1,07 | up   |
| 5981439 | 7037185 | 978407  | fusion, derived from t(12;16) malignant liposarcoma (human) | Fus     | 317385 | 1,05 | up   |
| 6161826 | 7037185 | 978408  | fusion, derived from t(12;16) malignant liposarcoma (human) | Fus     | 317385 | 1,05 | up   |
| 6436165 | 7037185 | 978404  | fusion, derived from t(12;16) malignant liposarcoma (human) | Fus     | 317385 | 1,05 | down |
| 5984601 | 7037185 | 978401  | fusion, derived from t(12;16) malignant liposarcoma (human) | Fus     | 317385 | 1,05 | up   |
| 5749412 | 7037185 | 978406  | fusion, derived from t(12;16) malignant liposarcoma (human) | Fus     | 317385 | 1,05 | down |
| 5870183 | 7268847 | 1544533 | FXYP domain-containing ion transport regulator 4            | Fxyd4   | 64190  | 2,54 | up   |
| 5820839 | 7268847 | 1544535 | FXYP domain-containing ion transport regulator 4            | Fxyd4   | 64190  | 1,89 | down |
| 6099813 | 7268847 | 1544532 | FXYP domain-containing ion transport regulator 4            | Fxyd4   | 64190  | 1,67 | up   |
| 6157414 | 7268847 | 1544535 | FXYP domain-containing ion transport regulator 4            | Fxyd4   | 64190  | 1,56 | down |
| 6425049 | 7268847 | 1544534 | FXYP domain-containing ion transport regulator 4            | Fxyd4   | 64190  | 1,19 | up   |
| 6312149 | 7268847 | 1544536 | FXYP domain-containing ion transport regulator 4            | Fxyd4   | 64190  | 1,15 | up   |
| 6526264 | 7268847 | 1544535 | FXYP domain-containing ion transport regulator 4            | Fxyd4   | 64190  | 1,11 | up   |
| 5732927 | 7268847 | 1544536 | FXYP domain-containing ion transport regulator 4            | Fxyd4   | 64190  | 1,11 | down |
| 5735516 | 7268847 | 1544531 | FXYP domain-containing ion transport regulator 4            | Fxyd4   | 64190  | 1,09 | up   |
| 6104900 | 7268847 | 1544530 | FXYP domain-containing ion transport regulator 4            | Fxyd4   | 64190  | 1,07 | down |
| 5876184 | 7268847 | 1544533 | FXYP domain-containing ion transport regulator 4            | Fxyd4   | 64190  | 1,02 | up   |
| 6635876 | 7050155 | 1009774 | G patch domain containing 1                                 | Gpatch1 | 292810 | 2,47 | down |
| 6645149 | 7050155 | 1009762 | G patch domain containing 1                                 | Gpatch1 | 292810 | 1,45 | up   |
| 5649458 | 7050155 | 1009759 | G patch domain containing 1                                 | Gpatch1 | 292810 | 1,45 | down |
| 5729579 | 7050155 | 1009757 | G patch domain containing 1                                 | Gpatch1 | 292810 | 1,30 | up   |
| 6604348 | 7050155 | 1009764 | G patch domain containing 1                                 | Gpatch1 | 292810 | 1,28 | down |
| 6366381 | 7050155 | 1009756 | G patch domain containing 1                                 | Gpatch1 | 292810 | 1,28 | down |
| 6699679 | 7050155 | 1009768 | G patch domain containing 1                                 | Gpatch1 | 292810 | 1,27 | up   |
| 6258774 | 7050155 | 1009758 | G patch domain containing 1                                 | Gpatch1 | 292810 | 1,21 | up   |
| 6369847 | 7050155 | 1009767 | G patch domain containing 1                                 | Gpatch1 | 292810 | 1,20 | up   |
| 6195029 | 7050155 | 1009771 | G patch domain containing 1                                 | Gpatch1 | 292810 | 1,20 | down |
| 5795427 | 7050155 | 1009765 | G patch domain containing 1                                 | Gpatch1 | 292810 | 1,19 | down |
| 6622737 | 7050155 | 1009770 | G patch domain containing 1                                 | Gpatch1 | 292810 | 1,14 | down |
| 5654614 | 7050155 | 1009756 | G patch domain containing 1                                 | Gpatch1 | 292810 | 1,13 | down |
| 5872463 | 7050155 | 1009769 | G patch domain containing 1                                 | Gpatch1 | 292810 | 1,12 | down |
| 6537172 | 7050155 | 1009773 | G patch domain containing 1                                 | Gpatch1 | 292810 | 1,12 | up   |
| 5954463 | 7050155 | 1009772 | G patch domain containing 1                                 | Gpatch1 | 292810 | 1,11 | down |
| 6019678 | 7050155 | 1009766 | G patch domain containing 1                                 | Gpatch1 | 292810 | 1,10 | up   |
| 6390202 | 7050155 | 1009765 | G patch domain containing 1                                 | Gpatch1 | 292810 | 1,09 | up   |
| 6709827 | 7050155 | 1009773 | G patch domain containing 1                                 | Gpatch1 | 292810 | 1,09 | up   |
| 6300677 | 7050155 | 1009774 | G patch domain containing 1                                 | Gpatch1 | 292810 | 1,07 | down |
| 5628127 | 7050155 | 1009761 | G patch domain containing 1                                 | Gpatch1 | 292810 | 1,06 | down |
| 6351477 | 7050155 | 1009760 | G patch domain containing 1                                 | Gpatch1 | 292810 | 1,06 | down |
| 5857417 | 7050155 | 1009763 | G patch domain containing 1                                 | Gpatch1 | 292810 | 1,06 | up   |
| 6132478 | 7196024 | 1365593 | G patch domain containing 4                                 | Gpatch4 | 295228 | 2,19 | up   |
| 6147675 | 7196024 | 1365595 | G patch domain containing 4                                 | Gpatch4 | 295228 | 2,07 | down |
| 6012329 | 7196024 | 1365589 | G patch domain containing 4                                 | Gpatch4 | 295228 | 1,70 | down |

|         |         |         |                                |         |        |      |      |
|---------|---------|---------|--------------------------------|---------|--------|------|------|
| 6683254 | 7196024 | 1365590 | G patch domain containing 4    | Gpatch4 | 295228 | 1,65 | up   |
| 6630351 | 7196024 | 1365592 | G patch domain containing 4    | Gpatch4 | 295228 | 1,45 | down |
| 6724827 | 7196024 | 1365595 | G patch domain containing 4    | Gpatch4 | 295228 | 1,24 | down |
| 6710486 | 7196024 | 1365595 | G patch domain containing 4    | Gpatch4 | 295228 | 1,24 | down |
| 6386597 | 7196024 | 1365596 | G patch domain containing 4    | Gpatch4 | 295228 | 1,19 | down |
| 6041260 | 7196024 | 1365591 | G patch domain containing 4    | Gpatch4 | 295228 | 1,16 | up   |
| 5776477 | 7196024 | 1365589 | G patch domain containing 4    | Gpatch4 | 295228 | 1,06 | up   |
| 6449118 | 7196024 | 1365594 | G patch domain containing 4    | Gpatch4 | 295228 | 1,00 | down |
| 6312630 | 7359908 | 1769488 | G protein-coupled receptor 116 | Gpr116  | 245977 | 2,01 | up   |
| 5714973 | 7359908 | 1769485 | G protein-coupled receptor 116 | Gpr116  | 245977 | 1,82 | down |
| 6061025 | 7359908 | 1769482 | G protein-coupled receptor 116 | Gpr116  | 245977 | 1,56 | up   |
| 5788966 | 7359908 | 1769486 | G protein-coupled receptor 116 | Gpr116  | 245977 | 1,52 | down |
| 5955299 | 7359908 | 1769481 | G protein-coupled receptor 116 | Gpr116  | 245977 | 1,44 | down |
| 6282264 | 7359908 | 1769476 | G protein-coupled receptor 116 | Gpr116  | 245977 | 1,42 | down |
| 5925660 | 7359908 | 1769475 | G protein-coupled receptor 116 | Gpr116  | 245977 | 1,37 | down |
| 5955505 | 7359908 | 1769477 | G protein-coupled receptor 116 | Gpr116  | 245977 | 1,31 | down |
| 6125181 | 7359908 | 1769492 | G protein-coupled receptor 116 | Gpr116  | 245977 | 1,27 | up   |
| 5667797 | 7359908 | 1769487 | G protein-coupled receptor 116 | Gpr116  | 245977 | 1,25 | up   |
| 5658412 | 7359908 | 1769484 | G protein-coupled receptor 116 | Gpr116  | 245977 | 1,24 | up   |
| 6630307 | 7359908 | 1769479 | G protein-coupled receptor 116 | Gpr116  | 245977 | 1,19 | down |
| 6678303 | 7359908 | 1769480 | G protein-coupled receptor 116 | Gpr116  | 245977 | 1,15 | up   |
| 5997994 | 7359908 | 1769477 | G protein-coupled receptor 116 | Gpr116  | 245977 | 1,13 | down |
| 5768788 | 7359908 | 1769489 | G protein-coupled receptor 116 | Gpr116  | 245977 | 1,12 | down |
| 6689459 | 7359908 | 1769477 | G protein-coupled receptor 116 | Gpr116  | 245977 | 1,10 | down |
| 6699651 | 7359908 | 1769474 | G protein-coupled receptor 116 | Gpr116  | 245977 | 1,09 | up   |
| 6318646 | 7359908 | 1769491 | G protein-coupled receptor 116 | Gpr116  | 245977 | 1,08 | up   |
| 5804631 | 7359908 | 1769483 | G protein-coupled receptor 116 | Gpr116  | 245977 | 1,08 | up   |
| 5842442 | 7359908 | 1769478 | G protein-coupled receptor 116 | Gpr116  | 245977 | 1,06 | down |
| 5737610 | 7359908 | 1769473 | G protein-coupled receptor 116 | Gpr116  | 245977 | 1,04 | up   |
| 5915593 | 7359908 | 1769490 | G protein-coupled receptor 116 | Gpr116  | 245977 | 1,02 | down |
| 6281684 | 7384075 | 1829478 | G protein-coupled receptor 119 | Gpr119  | 302813 | 6,29 | up   |
| 5722262 | 7384075 | 1829480 | G protein-coupled receptor 119 | Gpr119  | 302813 | 1,91 | down |
| 5786660 | 7384075 | 1829479 | G protein-coupled receptor 119 | Gpr119  | 302813 | 1,39 | up   |
| 6481972 | 7384075 | 1829477 | G protein-coupled receptor 119 | Gpr119  | 302813 | 1,08 | up   |
| 6502870 | 7044349 | 996664  | G protein-coupled receptor 126 | Gpr126  | 308376 | 2,07 | down |
| 6109649 | 7044349 | 996686  | G protein-coupled receptor 126 | Gpr126  | 308376 | 1,54 | up   |
| 6454509 | 7044349 | 996675  | G protein-coupled receptor 126 | Gpr126  | 308376 | 1,53 | up   |
| 6438812 | 7044349 | 996663  | G protein-coupled receptor 126 | Gpr126  | 308376 | 1,48 | down |
| 6579705 | 7044349 | 996681  | G protein-coupled receptor 126 | Gpr126  | 308376 | 1,46 | down |
| 5843635 | 7044349 | 996673  | G protein-coupled receptor 126 | Gpr126  | 308376 | 1,46 | up   |
| 6580019 | 7044349 | 996672  | G protein-coupled receptor 126 | Gpr126  | 308376 | 1,39 | down |
| 5936837 | 7044349 | 996695  | G protein-coupled receptor 126 | Gpr126  | 308376 | 1,36 | down |
| 5922370 | 7044349 | 996694  | G protein-coupled receptor 126 | Gpr126  | 308376 | 1,35 | up   |
| 5652774 | 7044349 | 996692  | G protein-coupled receptor 126 | Gpr126  | 308376 | 1,31 | down |
| 6492159 | 7044349 | 996667  | G protein-coupled receptor 126 | Gpr126  | 308376 | 1,30 | up   |
| 6565748 | 7044349 | 996666  | G protein-coupled receptor 126 | Gpr126  | 308376 | 1,30 | down |
| 6022825 | 7044349 | 996677  | G protein-coupled receptor 126 | Gpr126  | 308376 | 1,28 | down |
| 6117875 | 7044349 | 996683  | G protein-coupled receptor 126 | Gpr126  | 308376 | 1,23 | up   |
| 6229089 | 7044349 | 996678  | G protein-coupled receptor 126 | Gpr126  | 308376 | 1,23 | down |
| 6655962 | 7044349 | 996674  | G protein-coupled receptor 126 | Gpr126  | 308376 | 1,20 | down |
| 6155886 | 7044349 | 996677  | G protein-coupled receptor 126 | Gpr126  | 308376 | 1,18 | down |
| 6608975 | 7044349 | 996685  | G protein-coupled receptor 126 | Gpr126  | 308376 | 1,18 | up   |
| 6194706 | 7044349 | 996691  | G protein-coupled receptor 126 | Gpr126  | 308376 | 1,16 | up   |
| 6580650 | 7044349 | 996679  | G protein-coupled receptor 126 | Gpr126  | 308376 | 1,15 | up   |
| 5636499 | 7044349 | 996681  | G protein-coupled receptor 126 | Gpr126  | 308376 | 1,15 | down |
| 6609246 | 7044349 | 996664  | G protein-coupled receptor 126 | Gpr126  | 308376 | 1,15 | up   |
| 6246983 | 7044349 | 996672  | G protein-coupled receptor 126 | Gpr126  | 308376 | 1,11 | down |

|         |         |         |                                                         |         |        |      |      |
|---------|---------|---------|---------------------------------------------------------|---------|--------|------|------|
| 6367334 | 7044349 | 996664  | G protein-coupled receptor 126                          | Gpr126  | 308376 | 1,11 | down |
| 5739644 | 7044349 | 996689  | G protein-coupled receptor 126                          | Gpr126  | 308376 | 1,06 | down |
| 6248494 | 7044349 | 996688  | G protein-coupled receptor 126                          | Gpr126  | 308376 | 1,06 | up   |
| 6037822 | 7044349 | 996663  | G protein-coupled receptor 126                          | Gpr126  | 308376 | 1,06 | up   |
| 6252783 | 7044349 | 996682  | G protein-coupled receptor 126                          | Gpr126  | 308376 | 1,05 | up   |
| 5932466 | 7044349 | 996687  | G protein-coupled receptor 126                          | Gpr126  | 308376 | 1,04 | down |
| 6032008 | 7044349 | 996690  | G protein-coupled receptor 126                          | Gpr126  | 308376 | 1,03 | down |
| 5682845 | 7044349 | 996663  | G protein-coupled receptor 126                          | Gpr126  | 308376 | 1,03 | up   |
| 5850356 | 7044349 | 996667  | G protein-coupled receptor 126                          | Gpr126  | 308376 | 1,00 | up   |
| 5928788 | 7044349 | 996674  | G protein-coupled receptor 126                          | Gpr126  | 308376 | 1,00 | up   |
| 6495018 | 7082098 | 1084112 | G protein-coupled receptor 179                          | Gpr179  | 287657 | 1,35 | down |
| 5878188 | 7111418 | 1155750 | G protein-coupled receptor 37-like 1                    | Gpr3711 | 252939 | 2,04 | up   |
| 5627120 | 7111418 | 1155751 | G protein-coupled receptor 37-like 1                    | Gpr3711 | 252939 | 1,69 | down |
| 5907475 | 7111418 | 1155751 | G protein-coupled receptor 37-like 1                    | Gpr3711 | 252939 | 1,36 | down |
| 6566569 | 7111418 | 1155751 | G protein-coupled receptor 37-like 1                    | Gpr3711 | 252939 | 1,21 | down |
| 5639022 | 7111418 | 1155749 | G protein-coupled receptor 37-like 1                    | Gpr3711 | 252939 | 1,03 | down |
| 6049710 | 7182739 | 1332580 | G protein-coupled receptor 97                           | Gpr97   | 291854 | 1,09 | up   |
| 6205883 | 7385253 | 1832223 | G protein-coupled receptor associated sorting protein 1 | Gprasp1 | 171407 | 2,34 | up   |
| 5760078 | 7385253 | 1832223 | G protein-coupled receptor associated sorting protein 1 | Gprasp1 | 171407 | 2,25 | up   |
| 5822737 | 7385253 | 1832223 | G protein-coupled receptor associated sorting protein 1 | Gprasp1 | 171407 | 1,99 | up   |
| 5786036 | 7385253 | 1832224 | G protein-coupled receptor associated sorting protein 1 | Gprasp1 | 171407 | 1,62 | up   |
| 5886208 | 7385253 | 1832224 | G protein-coupled receptor associated sorting protein 1 | Gprasp1 | 171407 | 1,54 | down |
| 6425736 | 7385253 | 1832224 | G protein-coupled receptor associated sorting protein 1 | Gprasp1 | 171407 | 1,50 | up   |
| 6402424 | 7385253 | 1832225 | G protein-coupled receptor associated sorting protein 1 | Gprasp1 | 171407 | 1,40 | up   |
| 6674559 | 7385253 | 1832224 | G protein-coupled receptor associated sorting protein 1 | Gprasp1 | 171407 | 1,27 | down |
| 6482018 | 7385253 | 1832223 | G protein-coupled receptor associated sorting protein 1 | Gprasp1 | 171407 | 1,19 | down |
| 5774378 | 7385253 | 1832224 | G protein-coupled receptor associated sorting protein 1 | Gprasp1 | 171407 | 1,16 | up   |
| 6373413 | 7385253 | 1832224 | G protein-coupled receptor associated sorting protein 1 | Gprasp1 | 171407 | 1,12 | down |
| 6280710 | 7385253 | 1832223 | G protein-coupled receptor associated sorting protein 1 | Gprasp1 | 171407 | 1,02 | up   |
| 5810599 | 7073573 | 1064752 | G protein-coupled receptor, family C, group 5, member C | Gprc5c  | 287805 | 1,66 | up   |
| 6447420 | 7073573 | 1064745 | G protein-coupled receptor, family C, group 5, member C | Gprc5c  | 287805 | 1,48 | down |
| 5729526 | 7073573 | 1064747 | G protein-coupled receptor, family C, group 5, member C | Gprc5c  | 287805 | 1,31 | down |
| 5666733 | 7073573 | 1064754 | G protein-coupled receptor, family C, group 5, member C | Gprc5c  | 287805 | 1,30 | up   |
| 6190914 | 7073573 | 1064754 | G protein-coupled receptor, family C, group 5, member C | Gprc5c  | 287805 | 1,29 | up   |
| 6744420 | 7073573 | 1064754 | G protein-coupled receptor, family C, group 5, member C | Gprc5c  | 287805 | 1,26 | down |
| 6031544 | 7073573 | 1064754 | G protein-coupled receptor, family C, group 5, member C | Gprc5c  | 287805 | 1,26 | up   |
| 6558846 | 7073573 | 1064746 | G protein-coupled receptor, family C, group 5, member C | Gprc5c  | 287805 | 1,23 | up   |
| 6437817 | 7073573 | 1064745 | G protein-coupled receptor, family C, group 5, member C | Gprc5c  | 287805 | 1,19 | down |
| 6671677 | 7073573 | 1064754 | G protein-coupled receptor, family C, group 5, member C | Gprc5c  | 287805 | 1,18 | up   |
| 6104966 | 7073573 | 1064751 | G protein-coupled receptor, family C, group 5, member C | Gprc5c  | 287805 | 1,18 | up   |
| 6208648 | 7073573 | 1064753 | G protein-coupled receptor, family C, group 5, member C | Gprc5c  | 287805 | 1,15 | up   |
| 6096988 | 7073573 | 1064752 | G protein-coupled receptor, family C, group 5, member C | Gprc5c  | 287805 | 1,15 | down |
| 6258349 | 7073573 | 1064754 | G protein-coupled receptor, family C, group 5, member C | Gprc5c  | 287805 | 1,14 | down |
| 5957312 | 7073573 | 1064754 | G protein-coupled receptor, family C, group 5, member C | Gprc5c  | 287805 | 1,03 | up   |
| 6077399 | 7073573 | 1064754 | G protein-coupled receptor, family C, group 5, member C | Gprc5c  | 287805 | 1,02 | down |
| 6244714 | 7073573 | 1064750 | G protein-coupled receptor, family C, group 5, member C | Gprc5c  | 287805 | 1,02 | down |
| 6269601 | 7155624 | 1264727 | G protein-regulated inducer of neurite outgrowth 1      | Gprin1  | 364676 | 1,06 | up   |
| 6315390 | 7115625 | 1166237 | G0/G1switch 2                                           | G0s2    | 289388 | 2,71 | down |
| 5880877 | 7115625 | 1166237 | G0/G1switch 2                                           | G0s2    | 289388 | 1,48 | up   |
| 6329803 | 7115625 | 1166236 | G0/G1switch 2                                           | G0s2    | 289388 | 1,32 | up   |
| 6691627 | 7375673 | 1810744 | G1 to S phase transition 2                              | Gspt2   | 501582 | 2,82 | down |
| 5759591 | 7375673 | 1810744 | G1 to S phase transition 2                              | Gspt2   | 501582 | 1,40 | down |
| 5667543 | 7375673 | 1810745 | G1 to S phase transition 2                              | Gspt2   | 501582 | 1,33 | up   |
| 5877794 | 7375673 | 1810744 | G1 to S phase transition 2                              | Gspt2   | 501582 | 1,17 | up   |
| 6066196 | 7375673 | 1810745 | G1 to S phase transition 2                              | Gspt2   | 501582 | 1,03 | down |
| 6553684 | 7274318 | 1558296 | galactose-1-phosphate uridylyltransferase               | Galt    | 298003 | 2,50 | up   |
| 6506021 | 7274318 | 1558300 | galactose-1-phosphate uridylyltransferase               | Galt    | 298003 | 1,85 | up   |

|         |         |         |                                                                                                                                         |                            |                          |      |      |
|---------|---------|---------|-----------------------------------------------------------------------------------------------------------------------------------------|----------------------------|--------------------------|------|------|
| 6088285 | 7274318 | 1558298 | galactose-1-phosphate uridylyltransferase                                                                                               | Galt                       | 298003                   | 1,35 | up   |
| 6550991 | 7274318 | 1558295 | galactose-1-phosphate uridylyltransferase                                                                                               | Galt                       | 298003                   | 1,33 | down |
| 6416830 | 7274318 | 1558303 | galactose-1-phosphate uridylyltransferase                                                                                               | Galt                       | 298003                   | 1,33 | down |
| 6289000 | 7274318 | 1558294 | galactose-1-phosphate uridylyltransferase                                                                                               | Galt                       | 298003                   | 1,31 | up   |
| 6688154 | 7274318 | 1558299 | galactose-1-phosphate uridylyltransferase                                                                                               | Galt                       | 298003                   | 1,26 | up   |
| 5673695 | 7274318 | 1558302 | galactose-1-phosphate uridylyltransferase                                                                                               | Galt                       | 298003                   | 1,11 | down |
| 5908974 | 7274318 | 1558297 | galactose-1-phosphate uridylyltransferase                                                                                               | Galt                       | 298003                   | 1,11 | down |
| 6087838 | 7274318 | 1558301 | galactose-1-phosphate uridylyltransferase                                                                                               | Galt                       | 298003                   | 1,09 | down |
| 6725906 | 7274318 | 1558304 | galactose-1-phosphate uridylyltransferase                                                                                               | Galt                       | 298003                   | 1,03 | down |
| 5940966 | 7274318 | 1558304 | galactose-1-phosphate uridylyltransferase                                                                                               | Galt                       | 298003                   | 1,01 | down |
| 6395842 | 7274318 | 1558294 | galactose-1-phosphate uridylyltransferase                                                                                               | Galt                       | 298003                   | 1,01 | down |
| 6092617 | 7341002 | 1722561 | galactosidase, beta 1                                                                                                                   | Glb1                       | 316033                   | 2,53 | up   |
| 6025629 | 7341002 | 1722551 | galactosidase, beta 1                                                                                                                   | Glb1                       | 316033                   | 2,40 | down |
| 6717300 | 7341002 | 1722544 | galactosidase, beta 1                                                                                                                   | Glb1                       | 316033                   | 2,17 | down |
| 5907261 | 7341002 | 1722550 | galactosidase, beta 1                                                                                                                   | Glb1                       | 316033                   | 2,05 | down |
| 6256956 | 7341002 | 1722541 | galactosidase, beta 1                                                                                                                   | Glb1                       | 316033                   | 2,05 | down |
| 5793819 | 7341002 | 1722561 | galactosidase, beta 1                                                                                                                   | Glb1                       | 316033                   | 1,91 | down |
| 5964907 | 7341002 | 1722553 | galactosidase, beta 1                                                                                                                   | Glb1                       | 316033                   | 1,91 | down |
| 5700151 | 7341002 | 1722545 | galactosidase, beta 1                                                                                                                   | Glb1                       | 316033                   | 1,90 | down |
| 5756538 | 7341002 | 1722539 | galactosidase, beta 1                                                                                                                   | Glb1                       | 316033                   | 1,85 | down |
| 6670820 | 7341002 | 1722555 | galactosidase, beta 1                                                                                                                   | Glb1                       | 316033                   | 1,85 | down |
| 5846373 | 7341002 | 1722543 | galactosidase, beta 1                                                                                                                   | Glb1                       | 316033                   | 1,85 | down |
| 6687603 | 7341002 | 1722546 | galactosidase, beta 1                                                                                                                   | Glb1                       | 316033                   | 1,59 | down |
| 6489721 | 7341002 | 1722554 | galactosidase, beta 1                                                                                                                   | Glb1                       | 316033                   | 1,56 | down |
| 6051756 | 7341002 | 1722540 | galactosidase, beta 1                                                                                                                   | Glb1                       | 316033                   | 1,42 | down |
| 6060718 | 7341002 | 1722537 | galactosidase, beta 1                                                                                                                   | Glb1                       | 316033                   | 1,40 | down |
| 5755127 | 7341002 | 1722561 | galactosidase, beta 1                                                                                                                   | Glb1                       | 316033                   | 1,33 | down |
| 5829336 | 7341002 | 1722538 | galactosidase, beta 1                                                                                                                   | Glb1                       | 316033                   | 1,32 | down |
| 6297843 | 7341002 | 1722530 | galactosidase, beta 1                                                                                                                   | Glb1                       | 316033                   | 1,25 | up   |
| 6045846 | 7341002 | 1722530 | galactosidase, beta 1                                                                                                                   | Glb1                       | 316033                   | 1,02 | up   |
| 6680994 | 7363922 | 1778861 | galactosidase, beta 1-like                                                                                                              | Glb11                      | 301525                   | 2,13 | down |
| 6219722 | 7363922 | 1778866 | galactosidase, beta 1-like                                                                                                              | Glb11                      | 301525                   | 2,01 | down |
| 6396655 | 7363922 | 1778858 | galactosidase, beta 1-like                                                                                                              | Glb11                      | 301525                   | 1,65 | down |
| 5751956 | 7363922 | 1778859 | galactosidase, beta 1-like                                                                                                              | Glb11                      | 301525                   | 1,50 | down |
| 6518282 | 7363922 | 1778867 | galactosidase, beta 1-like                                                                                                              | Glb11                      | 301525                   | 1,49 | up   |
| 5633044 | 7363922 | 1778869 | galactosidase, beta 1-like                                                                                                              | Glb11                      | 301525                   | 1,41 | down |
| 6102427 | 7363922 | 1778864 | galactosidase, beta 1-like                                                                                                              | Glb11                      | 301525                   | 1,34 | down |
| 6462365 | 7363922 | 1778871 | galactosidase, beta 1-like                                                                                                              | Glb11                      | 301525                   | 1,33 | down |
| 6077121 | 7363922 | 1778868 | galactosidase, beta 1-like                                                                                                              | Glb11                      | 301525                   | 1,29 | up   |
| 5783964 | 7363922 | 1778856 | galactosidase, beta 1-like                                                                                                              | Glb11                      | 301525                   | 1,29 | down |
| 6712577 | 7363922 | 1778860 | galactosidase, beta 1-like                                                                                                              | Glb11                      | 301525                   | 1,27 | down |
| 6584530 | 7363922 | 1778868 | galactosidase, beta 1-like                                                                                                              | Glb11                      | 301525                   | 1,27 | up   |
| 6631597 | 7363922 | 1778857 | galactosidase, beta 1-like                                                                                                              | Glb11                      | 301525                   | 1,23 | down |
| 6334102 | 7363922 | 1778860 | galactosidase, beta 1-like                                                                                                              | Glb11                      | 301525                   | 1,19 | down |
| 6734778 | 7363922 | 1778870 | galactosidase, beta 1-like                                                                                                              | Glb11                      | 301525                   | 1,19 | down |
| 5817659 | 7363922 | 1778867 | galactosidase, beta 1-like                                                                                                              | Glb11                      | 301525                   | 1,16 | down |
| 6231005 | 7363922 | 1778865 | galactosidase, beta 1-like                                                                                                              | Glb11                      | 301525                   | 1,15 | down |
| 6289873 | 7363922 | 1778870 | galactosidase, beta 1-like                                                                                                              | Glb11                      | 301525                   | 1,07 | up   |
| 6160003 | 7363922 | 1778863 | galactosidase, beta 1-like                                                                                                              | Glb11                      | 301525                   | 1,04 | down |
| 6029073 | 7310851 | 1649616 | gamma-2a immunoglobulin heavy chain                                                                                                     | IgG-2a                     | 367586                   | 1,42 | down |
| 6613064 | 7310851 | 1649632 | gamma-2a immunoglobulin heavy chain                                                                                                     | IgG-2a                     | 367586                   | 1,08 | up   |
| 5693719 | 7310851 | 1649635 | gamma-2a immunoglobulin heavy chain                                                                                                     | IgG-2a                     | 367586                   | 1,06 | up   |
| 6595425 | 7310851 | 1649615 | gamma-2a immunoglobulin heavy chain                                                                                                     | IgG-2a                     | 367586                   | 1,03 | up   |
| 6695643 | 7310851 | 1649617 | gamma-2a immunoglobulin heavy chain                                                                                                     | IgG-2a                     | 367586                   | 1,01 | up   |
| 5972528 | 7310851 | 1649636 | gamma-2a immunoglobulin heavy chain                                                                                                     | IgG-2a                     | 367586                   | 1,01 | down |
| 5733925 | 7310851 | 1649614 | gamma-2a immunoglobulin heavy chain /// Immunoglobulin heavy chain (gamma polypeptide)                                                  | IgG-2a /// Ighg            | 367586 /// 299354        | 1,99 | up   |
| 6253409 | 7310851 | 1649618 | gamma-2a immunoglobulin heavy chain /// Immunoglobulin heavy chain (gamma polypeptide) /// imG-2a /// Ighg /// Igh-86 /// 299354 /// 29 | IgG-2a /// Ighg /// Igh-86 | 367586 /// 299354 /// 29 | 1,36 | down |



|         |         |         |                                                    |        |        |      |      |
|---------|---------|---------|----------------------------------------------------|--------|--------|------|------|
| 5834153 | 7125168 | 1189621 | gamma-aminobutyric acid (GABA) A receptor, beta 1  | Gabrb1 | 25450  | 2,08 | up   |
| 6627168 | 7125168 | 1189617 | gamma-aminobutyric acid (GABA) A receptor, beta 1  | Gabrb1 | 25450  | 1,80 | up   |
| 6369146 | 7125168 | 1189616 | gamma-aminobutyric acid (GABA) A receptor, beta 1  | Gabrb1 | 25450  | 1,61 | down |
| 6097062 | 7125168 | 1189616 | gamma-aminobutyric acid (GABA) A receptor, beta 1  | Gabrb1 | 25450  | 1,33 | down |
| 6329720 | 7125168 | 1189620 | gamma-aminobutyric acid (GABA) A receptor, beta 1  | Gabrb1 | 25450  | 1,28 | up   |
| 5846179 | 7125168 | 1189623 | gamma-aminobutyric acid (GABA) A receptor, beta 1  | Gabrb1 | 25450  | 1,16 | up   |
| 5879699 | 7125168 | 1189625 | gamma-aminobutyric acid (GABA) A receptor, beta 1  | Gabrb1 | 25450  | 1,12 | up   |
| 6711601 | 7125168 | 1189619 | gamma-aminobutyric acid (GABA) A receptor, beta 1  | Gabrb1 | 25450  | 1,10 | up   |
| 6255876 | 7125168 | 1189622 | gamma-aminobutyric acid (GABA) A receptor, beta 1  | Gabrb1 | 25450  | 1,10 | up   |
| 6604306 | 7125168 | 1189616 | gamma-aminobutyric acid (GABA) A receptor, beta 1  | Gabrb1 | 25450  | 1,09 | down |
| 6346087 | 7125168 | 1189624 | gamma-aminobutyric acid (GABA) A receptor, beta 1  | Gabrb1 | 25450  | 1,06 | down |
| 6095665 | 7125168 | 1189621 | gamma-aminobutyric acid (GABA) A receptor, beta 1  | Gabrb1 | 25450  | 1,05 | down |
| 5661316 | 7125168 | 1189618 | gamma-aminobutyric acid (GABA) A receptor, beta 1  | Gabrb1 | 25450  | 1,02 | down |
| 5734680 | 7032152 | 966032  | gamma-aminobutyric acid (GABA) A receptor, beta 3  | Gabrb3 | 24922  | 2,54 | down |
| 6290485 | 7032152 | 966029  | gamma-aminobutyric acid (GABA) A receptor, beta 3  | Gabrb3 | 24922  | 1,34 | up   |
| 5768027 | 7032152 | 966029  | gamma-aminobutyric acid (GABA) A receptor, beta 3  | Gabrb3 | 24922  | 1,34 | up   |
| 6219432 | 7032152 | 966037  | gamma-aminobutyric acid (GABA) A receptor, beta 3  | Gabrb3 | 24922  | 1,33 | down |
| 6501181 | 7032152 | 966029  | gamma-aminobutyric acid (GABA) A receptor, beta 3  | Gabrb3 | 24922  | 1,30 | up   |
| 5780736 | 7032152 | 966031  | gamma-aminobutyric acid (GABA) A receptor, beta 3  | Gabrb3 | 24922  | 1,29 | up   |
| 6007640 | 7032152 | 966030  | gamma-aminobutyric acid (GABA) A receptor, beta 3  | Gabrb3 | 24922  | 1,17 | up   |
| 5852020 | 7032152 | 966033  | gamma-aminobutyric acid (GABA) A receptor, beta 3  | Gabrb3 | 24922  | 1,16 | down |
| 6242468 | 7032152 | 966038  | gamma-aminobutyric acid (GABA) A receptor, beta 3  | Gabrb3 | 24922  | 1,15 | down |
| 5843855 | 7032152 | 966036  | gamma-aminobutyric acid (GABA) A receptor, beta 3  | Gabrb3 | 24922  | 1,15 | up   |
| 5853834 | 7032152 | 966039  | gamma-aminobutyric acid (GABA) A receptor, beta 3  | Gabrb3 | 24922  | 1,13 | up   |
| 6480539 | 7032152 | 966035  | gamma-aminobutyric acid (GABA) A receptor, beta 3  | Gabrb3 | 24922  | 1,12 | down |
| 5838138 | 7032152 | 966034  | gamma-aminobutyric acid (GABA) A receptor, beta 3  | Gabrb3 | 24922  | 1,05 | up   |
| 5667195 | 7118247 | 1172861 | gamma-aminobutyric acid (GABA) A receptor, gamma 1 | Gabrg1 | 140674 | 2,19 | up   |
| 6596155 | 7118247 | 1172865 | gamma-aminobutyric acid (GABA) A receptor, gamma 1 | Gabrg1 | 140674 | 1,69 | down |
| 5798327 | 7118247 | 1172858 | gamma-aminobutyric acid (GABA) A receptor, gamma 1 | Gabrg1 | 140674 | 1,20 | up   |
| 5855103 | 7118247 | 1172861 | gamma-aminobutyric acid (GABA) A receptor, gamma 1 | Gabrg1 | 140674 | 1,17 | down |
| 5890766 | 7118247 | 1172863 | gamma-aminobutyric acid (GABA) A receptor, gamma 1 | Gabrg1 | 140674 | 1,16 | down |
| 5617964 | 7118247 | 1172864 | gamma-aminobutyric acid (GABA) A receptor, gamma 1 | Gabrg1 | 140674 | 1,14 | up   |
| 6294682 | 7118247 | 1172860 | gamma-aminobutyric acid (GABA) A receptor, gamma 1 | Gabrg1 | 140674 | 1,09 | down |
| 6297317 | 7118247 | 1172862 | gamma-aminobutyric acid (GABA) A receptor, gamma 1 | Gabrg1 | 140674 | 1,05 | down |
| 6530784 | 7118247 | 1172861 | gamma-aminobutyric acid (GABA) A receptor, gamma 1 | Gabrg1 | 140674 | 1,04 | up   |
| 6561865 | 7118247 | 1172866 | gamma-aminobutyric acid (GABA) A receptor, gamma 1 | Gabrg1 | 140674 | 1,01 | down |
| 6241659 | 7118247 | 1172859 | gamma-aminobutyric acid (GABA) A receptor, gamma 1 | Gabrg1 | 140674 | 1,00 | down |
| 5996144 | 7118247 | 1172859 | gamma-aminobutyric acid (GABA) A receptor, gamma 1 | Gabrg1 | 140674 | 1,00 | up   |
| 6387751 | 7051876 | 1013514 | gamma-aminobutyric acid (GABA) A receptor, gamma 3 | Gabrg3 | 79211  | 4,59 | down |
| 6243187 | 7051876 | 1013507 | gamma-aminobutyric acid (GABA) A receptor, gamma 3 | Gabrg3 | 79211  | 2,28 | up   |
| 6241349 | 7051876 | 1013511 | gamma-aminobutyric acid (GABA) A receptor, gamma 3 | Gabrg3 | 79211  | 2,25 | up   |
| 5732012 | 7051876 | 1013514 | gamma-aminobutyric acid (GABA) A receptor, gamma 3 | Gabrg3 | 79211  | 2,19 | down |
| 5734042 | 7051876 | 1013506 | gamma-aminobutyric acid (GABA) A receptor, gamma 3 | Gabrg3 | 79211  | 1,94 | up   |
| 6100312 | 7051876 | 1013514 | gamma-aminobutyric acid (GABA) A receptor, gamma 3 | Gabrg3 | 79211  | 1,82 | down |
| 5782600 | 7051876 | 1013509 | gamma-aminobutyric acid (GABA) A receptor, gamma 3 | Gabrg3 | 79211  | 1,66 | up   |
| 6587785 | 7051876 | 1013510 | gamma-aminobutyric acid (GABA) A receptor, gamma 3 | Gabrg3 | 79211  | 1,49 | down |
| 6180890 | 7051876 | 1013505 | gamma-aminobutyric acid (GABA) A receptor, gamma 3 | Gabrg3 | 79211  | 1,41 | down |
| 6192790 | 7051876 | 1013511 | gamma-aminobutyric acid (GABA) A receptor, gamma 3 | Gabrg3 | 79211  | 1,34 | up   |
| 5983896 | 7051876 | 1013512 | gamma-aminobutyric acid (GABA) A receptor, gamma 3 | Gabrg3 | 79211  | 1,30 | up   |
| 6571134 | 7051876 | 1013508 | gamma-aminobutyric acid (GABA) A receptor, gamma 3 | Gabrg3 | 79211  | 1,13 | up   |
| 6492128 | 7051876 | 1013513 | gamma-aminobutyric acid (GABA) A receptor, gamma 3 | Gabrg3 | 79211  | 1,08 | down |
| 5662269 | 7051876 | 1013504 | gamma-aminobutyric acid (GABA) A receptor, gamma 3 | Gabrg3 | 79211  | 1,00 | down |
| 6312983 | 7220292 | 1423776 | gamma-aminobutyric acid (GABA) B receptor 1        | Gabbr1 | 81657  | 2,54 | up   |
| 6686338 | 7220292 | 1423754 | gamma-aminobutyric acid (GABA) B receptor 1        | Gabbr1 | 81657  | 1,69 | up   |
| 6345237 | 7220292 | 1423771 | gamma-aminobutyric acid (GABA) B receptor 1        | Gabbr1 | 81657  | 1,61 | down |
| 6579621 | 7220292 | 1423770 | gamma-aminobutyric acid (GABA) B receptor 1        | Gabbr1 | 81657  | 1,58 | down |
| 6374156 | 7220292 | 1423758 | gamma-aminobutyric acid (GABA) B receptor 1        | Gabbr1 | 81657  | 1,55 | up   |

|         |         |         |                                                            |        |        |      |      |
|---------|---------|---------|------------------------------------------------------------|--------|--------|------|------|
| 6378786 | 7220292 | 1423774 | gamma-aminobutyric acid (GABA) B receptor 1                | Gabbr1 | 81657  | 1,42 | down |
| 5893750 | 7220292 | 1423754 | gamma-aminobutyric acid (GABA) B receptor 1                | Gabbr1 | 81657  | 1,39 | up   |
| 5749315 | 7220292 | 1423755 | gamma-aminobutyric acid (GABA) B receptor 1                | Gabbr1 | 81657  | 1,37 | up   |
| 5797342 | 7220292 | 1423769 | gamma-aminobutyric acid (GABA) B receptor 1                | Gabbr1 | 81657  | 1,34 | down |
| 6442485 | 7220292 | 1423775 | gamma-aminobutyric acid (GABA) B receptor 1                | Gabbr1 | 81657  | 1,28 | down |
| 5997306 | 7220292 | 1423754 | gamma-aminobutyric acid (GABA) B receptor 1                | Gabbr1 | 81657  | 1,24 | down |
| 6720092 | 7220292 | 1423759 | gamma-aminobutyric acid (GABA) B receptor 1                | Gabbr1 | 81657  | 1,24 | down |
| 6043824 | 7220292 | 1423762 | gamma-aminobutyric acid (GABA) B receptor 1                | Gabbr1 | 81657  | 1,22 | up   |
| 6562710 | 7220292 | 1423768 | gamma-aminobutyric acid (GABA) B receptor 1                | Gabbr1 | 81657  | 1,21 | down |
| 5949477 | 7220292 | 1423766 | gamma-aminobutyric acid (GABA) B receptor 1                | Gabbr1 | 81657  | 1,20 | down |
| 6549234 | 7220292 | 1423767 | gamma-aminobutyric acid (GABA) B receptor 1                | Gabbr1 | 81657  | 1,15 | down |
| 5836306 | 7220292 | 1423761 | gamma-aminobutyric acid (GABA) B receptor 1                | Gabbr1 | 81657  | 1,13 | up   |
| 5828133 | 7220292 | 1423757 | gamma-aminobutyric acid (GABA) B receptor 1                | Gabbr1 | 81657  | 1,12 | down |
| 6216609 | 7220292 | 1423763 | gamma-aminobutyric acid (GABA) B receptor 1                | Gabbr1 | 81657  | 1,11 | up   |
| 5694797 | 7220292 | 1423765 | gamma-aminobutyric acid (GABA) B receptor 1                | Gabbr1 | 81657  | 1,06 | down |
| 5754951 | 7220292 | 1423771 | gamma-aminobutyric acid (GABA) B receptor 1                | Gabbr1 | 81657  | 1,05 | down |
| 5955829 | 7220292 | 1423760 | gamma-aminobutyric acid (GABA) B receptor 1                | Gabbr1 | 81657  | 1,05 | up   |
| 6134377 | 7220292 | 1423754 | gamma-aminobutyric acid (GABA) B receptor 1                | Gabbr1 | 81657  | 1,03 | up   |
| 6444307 | 7220292 | 1423753 | gamma-aminobutyric acid (GABA) B receptor 1                | Gabbr1 | 81657  | 1,03 | up   |
| 6137859 | 7220292 | 1423764 | gamma-aminobutyric acid (GABA) B receptor 1                | Gabbr1 | 81657  | 1,01 | up   |
| 6139858 | 7220292 | 1423756 | gamma-aminobutyric acid (GABA) B receptor 1                | Gabbr1 | 81657  | 1,00 | down |
| 6106871 | 7285948 | 1586765 | gamma-aminobutyric acid (GABA) B receptor 2                | Gabbr2 | 83633  | 2,03 | up   |
| 5847771 | 7285948 | 1586765 | gamma-aminobutyric acid (GABA) B receptor 2                | Gabbr2 | 83633  | 1,94 | up   |
| 6662688 | 7285948 | 1586765 | gamma-aminobutyric acid (GABA) B receptor 2                | Gabbr2 | 83633  | 1,70 | up   |
| 5652302 | 7285948 | 1586766 | gamma-aminobutyric acid (GABA) B receptor 2                | Gabbr2 | 83633  | 1,68 | down |
| 6547951 | 7285948 | 1586769 | gamma-aminobutyric acid (GABA) B receptor 2                | Gabbr2 | 83633  | 1,52 | up   |
| 5696196 | 7285948 | 1586782 | gamma-aminobutyric acid (GABA) B receptor 2                | Gabbr2 | 83633  | 1,46 | down |
| 5911692 | 7285948 | 1586780 | gamma-aminobutyric acid (GABA) B receptor 2                | Gabbr2 | 83633  | 1,44 | down |
| 6082012 | 7285948 | 1586784 | gamma-aminobutyric acid (GABA) B receptor 2                | Gabbr2 | 83633  | 1,42 | down |
| 6062367 | 7285948 | 1586776 | gamma-aminobutyric acid (GABA) B receptor 2                | Gabbr2 | 83633  | 1,41 | up   |
| 5753361 | 7285948 | 1586766 | gamma-aminobutyric acid (GABA) B receptor 2                | Gabbr2 | 83633  | 1,39 | up   |
| 6714386 | 7285948 | 1586767 | gamma-aminobutyric acid (GABA) B receptor 2                | Gabbr2 | 83633  | 1,33 | up   |
| 5969770 | 7285948 | 1586774 | gamma-aminobutyric acid (GABA) B receptor 2                | Gabbr2 | 83633  | 1,32 | down |
| 6206092 | 7285948 | 1586771 | gamma-aminobutyric acid (GABA) B receptor 2                | Gabbr2 | 83633  | 1,26 | down |
| 5894055 | 7285948 | 1586765 | gamma-aminobutyric acid (GABA) B receptor 2                | Gabbr2 | 83633  | 1,22 | up   |
| 5784923 | 7285948 | 1586773 | gamma-aminobutyric acid (GABA) B receptor 2                | Gabbr2 | 83633  | 1,17 | down |
| 6290621 | 7285948 | 1586783 | gamma-aminobutyric acid (GABA) B receptor 2                | Gabbr2 | 83633  | 1,14 | down |
| 5800480 | 7285948 | 1586765 | gamma-aminobutyric acid (GABA) B receptor 2                | Gabbr2 | 83633  | 1,14 | down |
| 6494166 | 7285948 | 1586777 | gamma-aminobutyric acid (GABA) B receptor 2                | Gabbr2 | 83633  | 1,12 | up   |
| 6391508 | 7285948 | 1586768 | gamma-aminobutyric acid (GABA) B receptor 2                | Gabbr2 | 83633  | 1,12 | up   |
| 6179771 | 7285948 | 1586778 | gamma-aminobutyric acid (GABA) B receptor 2                | Gabbr2 | 83633  | 1,11 | down |
| 6255497 | 7285948 | 1586772 | gamma-aminobutyric acid (GABA) B receptor 2                | Gabbr2 | 83633  | 1,09 | up   |
| 6248395 | 7285948 | 1586770 | gamma-aminobutyric acid (GABA) B receptor 2                | Gabbr2 | 83633  | 1,08 | up   |
| 6444335 | 7285948 | 1586779 | gamma-aminobutyric acid (GABA) B receptor 2                | Gabbr2 | 83633  | 1,04 | up   |
| 6194548 | 7285948 | 1586784 | gamma-aminobutyric acid (GABA) B receptor 2                | Gabbr2 | 83633  | 1,04 | down |
| 6124375 | 7285948 | 1586775 | gamma-aminobutyric acid (GABA) B receptor 2                | Gabbr2 | 83633  | 1,02 | down |
| 5977347 | 7285948 | 1586781 | gamma-aminobutyric acid (GABA) B receptor 2                | Gabbr2 | 83633  | 1,00 | up   |
| 5644893 | 7118234 | 1172833 | gamma-aminobutyric acid (GABA-A) receptor, subunit alpha 2 | Gabra2 | 289606 | 2,34 | up   |
| 6655729 | 7118234 | 1172836 | gamma-aminobutyric acid (GABA-A) receptor, subunit alpha 2 | Gabra2 | 289606 | 1,79 | up   |
| 6540300 | 7118234 | 1172844 | gamma-aminobutyric acid (GABA-A) receptor, subunit alpha 2 | Gabra2 | 289606 | 1,57 | down |
| 6145484 | 7118234 | 1172835 | gamma-aminobutyric acid (GABA-A) receptor, subunit alpha 2 | Gabra2 | 289606 | 1,49 | down |
| 6296225 | 7118234 | 1172839 | gamma-aminobutyric acid (GABA-A) receptor, subunit alpha 2 | Gabra2 | 289606 | 1,41 | down |
| 6334184 | 7118234 | 1172841 | gamma-aminobutyric acid (GABA-A) receptor, subunit alpha 2 | Gabra2 | 289606 | 1,22 | up   |
| 5636810 | 7118234 | 1172838 | gamma-aminobutyric acid (GABA-A) receptor, subunit alpha 2 | Gabra2 | 289606 | 1,15 | up   |
| 6413078 | 7118234 | 1172822 | gamma-aminobutyric acid (GABA-A) receptor, subunit alpha 2 | Gabra2 | 289606 | 1,06 | up   |
| 6693633 | 7118234 | 1172835 | gamma-aminobutyric acid (GABA-A) receptor, subunit alpha 2 | Gabra2 | 289606 | 1,06 | down |
| 5737390 | 7118234 | 1172823 | gamma-aminobutyric acid (GABA-A) receptor, subunit alpha 2 | Gabra2 | 289606 | 1,04 | up   |

|         |         |         |                                                               |        |        |      |      |
|---------|---------|---------|---------------------------------------------------------------|--------|--------|------|------|
| 6021553 | 7069429 | 1054503 | gamma-glutamyl transferase 6                                  | Ggt6   | 408206 | 2,34 | up   |
| 6489781 | 7069429 | 1054503 | gamma-glutamyl transferase 6                                  | Ggt6   | 408206 | 1,62 | down |
| 6199552 | 7069429 | 1054501 | gamma-glutamyl transferase 6                                  | Ggt6   | 408206 | 1,58 | up   |
| 6252423 | 7069429 | 1054501 | gamma-glutamyl transferase 6                                  | Ggt6   | 408206 | 1,50 | down |
| 5948522 | 7069429 | 1054503 | gamma-glutamyl transferase 6                                  | Ggt6   | 408206 | 1,46 | up   |
| 6741608 | 7069429 | 1054502 | gamma-glutamyl transferase 6                                  | Ggt6   | 408206 | 1,13 | up   |
| 6297890 | 7069429 | 1054503 | gamma-glutamyl transferase 6                                  | Ggt6   | 408206 | 1,05 | down |
| 6477120 | 7069429 | 1054500 | gamma-glutamyl transferase 6                                  | Ggt6   | 408206 | 1,04 | down |
| 6712542 | 7318143 | 1668094 | gasdermin D                                                   | Gsdmd  | 315084 | 2,68 | up   |
| 6699560 | 7318143 | 1668093 | gasdermin D                                                   | Gsdmd  | 315084 | 1,97 | up   |
| 5814642 | 7318143 | 1668089 | gasdermin D                                                   | Gsdmd  | 315084 | 1,64 | up   |
| 5666782 | 7318143 | 1668093 | gasdermin D                                                   | Gsdmd  | 315084 | 1,37 | down |
| 5951713 | 7318143 | 1668091 | gasdermin D                                                   | Gsdmd  | 315084 | 1,34 | down |
| 6234713 | 7318143 | 1668090 | gasdermin D                                                   | Gsdmd  | 315084 | 1,20 | up   |
| 6572221 | 7318143 | 1668094 | gasdermin D                                                   | Gsdmd  | 315084 | 1,14 | up   |
| 6165488 | 7318143 | 1668094 | gasdermin D                                                   | Gsdmd  | 315084 | 1,07 | up   |
| 5800586 | 7318143 | 1668094 | gasdermin D                                                   | Gsdmd  | 315084 | 1,07 | down |
| 6229785 | 7318143 | 1668094 | gasdermin D                                                   | Gsdmd  | 315084 | 1,06 | up   |
| 5842558 | 7318143 | 1668094 | gasdermin D                                                   | Gsdmd  | 315084 | 1,06 | down |
| 6570802 | 7318143 | 1668094 | gasdermin D                                                   | Gsdmd  | 315084 | 1,05 | up   |
| 6389438 | 7318143 | 1668091 | gasdermin D                                                   | Gsdmd  | 315084 | 1,05 | down |
| 5645717 | 7318143 | 1668091 | gasdermin D                                                   | Gsdmd  | 315084 | 1,03 | down |
| 6041652 | 7318143 | 1668092 | gasdermin D                                                   | Gsdmd  | 315084 | 1,03 | down |
| 5888694 | 7318143 | 1668088 | gasdermin D                                                   | Gsdmd  | 315084 | 1,00 | up   |
| 6490236 | 7102889 | 1134861 | GCN1 general control of amino-acid synthesis 1-like 1 (yeast) | Gcn111 | 690632 | 2,14 | down |
| 5991052 | 7102889 | 1134859 | GCN1 general control of amino-acid synthesis 1-like 1 (yeast) | Gcn111 | 690632 | 1,86 | down |
| 6068277 | 7102889 | 1134866 | GCN1 general control of amino-acid synthesis 1-like 1 (yeast) | Gcn111 | 690632 | 1,56 | up   |
| 6405679 | 7102889 | 1134851 | GCN1 general control of amino-acid synthesis 1-like 1 (yeast) | Gcn111 | 690632 | 1,48 | down |
| 6251096 | 7102889 | 1134880 | GCN1 general control of amino-acid synthesis 1-like 1 (yeast) | Gcn111 | 690632 | 1,36 | down |
| 6552105 | 7102889 | 1134872 | GCN1 general control of amino-acid synthesis 1-like 1 (yeast) | Gcn111 | 690632 | 1,35 | up   |
| 6277540 | 7102889 | 1134869 | GCN1 general control of amino-acid synthesis 1-like 1 (yeast) | Gcn111 | 690632 | 1,32 | up   |
| 5949333 | 7102889 | 1134853 | GCN1 general control of amino-acid synthesis 1-like 1 (yeast) | Gcn111 | 690632 | 1,28 | up   |
| 6367338 | 7102889 | 1134873 | GCN1 general control of amino-acid synthesis 1-like 1 (yeast) | Gcn111 | 690632 | 1,26 | up   |
| 6407334 | 7102889 | 1134878 | GCN1 general control of amino-acid synthesis 1-like 1 (yeast) | Gcn111 | 690632 | 1,23 | up   |
| 6265866 | 7102889 | 1134876 | GCN1 general control of amino-acid synthesis 1-like 1 (yeast) | Gcn111 | 690632 | 1,22 | up   |
| 6636046 | 7102889 | 1134881 | GCN1 general control of amino-acid synthesis 1-like 1 (yeast) | Gcn111 | 690632 | 1,17 | down |
| 5969869 | 7102889 | 1134874 | GCN1 general control of amino-acid synthesis 1-like 1 (yeast) | Gcn111 | 690632 | 1,15 | up   |
| 6697781 | 7102889 | 1134851 | GCN1 general control of amino-acid synthesis 1-like 1 (yeast) | Gcn111 | 690632 | 1,12 | up   |
| 6555470 | 7102889 | 1134860 | GCN1 general control of amino-acid synthesis 1-like 1 (yeast) | Gcn111 | 690632 | 1,12 | up   |
| 5906701 | 7102889 | 1134882 | GCN1 general control of amino-acid synthesis 1-like 1 (yeast) | Gcn111 | 690632 | 1,11 | up   |
| 6627969 | 7102889 | 1134871 | GCN1 general control of amino-acid synthesis 1-like 1 (yeast) | Gcn111 | 690632 | 1,10 | up   |
| 5845274 | 7102889 | 1134854 | GCN1 general control of amino-acid synthesis 1-like 1 (yeast) | Gcn111 | 690632 | 1,07 | up   |
| 6668079 | 7102889 | 1134864 | GCN1 general control of amino-acid synthesis 1-like 1 (yeast) | Gcn111 | 690632 | 1,07 | down |
| 5968022 | 7102889 | 1134852 | GCN1 general control of amino-acid synthesis 1-like 1 (yeast) | Gcn111 | 690632 | 1,06 | down |
| 5846262 | 7102889 | 1134863 | GCN1 general control of amino-acid synthesis 1-like 1 (yeast) | Gcn111 | 690632 | 1,06 | down |
| 6039511 | 7102889 | 1134870 | GCN1 general control of amino-acid synthesis 1-like 1 (yeast) | Gcn111 | 690632 | 1,03 | down |
| 6563987 | 7102889 | 1134862 | GCN1 general control of amino-acid synthesis 1-like 1 (yeast) | Gcn111 | 690632 | 1,03 | down |
| 6721068 | 7102889 | 1134865 | GCN1 general control of amino-acid synthesis 1-like 1 (yeast) | Gcn111 | 690632 | 1,03 | up   |
| 6544427 | 7102889 | 1134858 | GCN1 general control of amino-acid synthesis 1-like 1 (yeast) | Gcn111 | 690632 | 1,01 | down |
| 6164774 | 7102889 | 1134855 | GCN1 general control of amino-acid synthesis 1-like 1 (yeast) | Gcn111 | 690632 | 1,01 | down |
| 6570055 | 7157189 | 1268588 | GDP-mannose 4, 6-dehydratase                                  | Gmds   | 291095 | 2,44 | up   |
| 5964021 | 7157189 | 1268604 | GDP-mannose 4, 6-dehydratase                                  | Gmds   | 291095 | 1,61 | up   |
| 6262509 | 7157189 | 1268607 | GDP-mannose 4, 6-dehydratase                                  | Gmds   | 291095 | 1,31 | up   |
| 6148297 | 7157189 | 1268633 | GDP-mannose 4, 6-dehydratase                                  | Gmds   | 291095 | 1,20 | down |
| 6553384 | 7157189 | 1268606 | GDP-mannose 4, 6-dehydratase                                  | Gmds   | 291095 | 1,18 | up   |
| 5688057 | 7157189 | 1268625 | GDP-mannose 4, 6-dehydratase                                  | Gmds   | 291095 | 1,17 | down |
| 6457329 | 7157189 | 1268659 | GDP-mannose 4, 6-dehydratase                                  | Gmds   | 291095 | 1,06 | up   |

|         |         |         |                                                        |        |        |      |      |
|---------|---------|---------|--------------------------------------------------------|--------|--------|------|------|
| 6192107 | 7157189 | 1268683 | GDP-mannose 4, 6-dehydratase                           | Gmgs   | 291095 | 1,06 | up   |
| 5973170 | 7157189 | 1268660 | GDP-mannose 4, 6-dehydratase                           | Gmgs   | 291095 | 1,06 | up   |
| 6138668 | 7157189 | 1268626 | GDP-mannose 4, 6-dehydratase                           | Gmgs   | 291095 | 1,04 | down |
| 6480968 | 7157189 | 1268685 | GDP-mannose 4, 6-dehydratase                           | Gmgs   | 291095 | 1,00 | up   |
| 6236403 | 7178644 | 1321607 | gene trap locus 3                                      | Gtl3   | 307642 | 1,22 | down |
| 6285559 | 7178644 | 1321612 | gene trap locus 3                                      | Gtl3   | 307642 | 1,15 | down |
| 5726275 | 7178644 | 1321607 | gene trap locus 3                                      | Gtl3   | 307642 | 1,14 | down |
| 6609505 | 7178644 | 1321611 | gene trap locus 3                                      | Gtl3   | 307642 | 1,10 | down |
| 6656769 | 7178644 | 1321610 | gene trap locus 3                                      | Gtl3   | 307642 | 1,09 | up   |
| 5909854 | 7178644 | 1321608 | gene trap locus 3                                      | Gtl3   | 307642 | 1,08 | down |
| 5716076 | 7178644 | 1321609 | gene trap locus 3                                      | Gtl3   | 307642 | 1,06 | down |
| 6439028 | 7178644 | 1321612 | gene trap locus 3                                      | Gtl3   | 307642 | 1,03 | down |
| 6095671 | 7178644 | 1321607 | gene trap locus 3                                      | Gtl3   | 307642 | 1,02 | up   |
| 6066460 | 7088538 | 1099641 | general transcription factor IIE, polypeptide 1, alpha | Gtf2e1 | 303918 | 2,15 | up   |
| 6371908 | 7088538 | 1099640 | general transcription factor IIE, polypeptide 1, alpha | Gtf2e1 | 303918 | 1,42 | up   |
| 6142612 | 7088538 | 1099632 | general transcription factor IIE, polypeptide 1, alpha | Gtf2e1 | 303918 | 1,06 | down |
| 5819336 | 7088538 | 1099639 | general transcription factor IIE, polypeptide 1, alpha | Gtf2e1 | 303918 | 1,06 | down |
| 6631771 | 7088538 | 1099641 | general transcription factor IIE, polypeptide 1, alpha | Gtf2e1 | 303918 | 1,00 | down |
| 6001949 | 7203018 | 1382658 | general transcription factor IIH, polypeptide 2        | Gtf2h2 | 294693 | 2,61 | down |
| 6374775 | 7203018 | 1382647 | general transcription factor IIH, polypeptide 2        | Gtf2h2 | 294693 | 1,40 | down |
| 5630163 | 7203018 | 1382656 | general transcription factor IIH, polypeptide 2        | Gtf2h2 | 294693 | 1,32 | up   |
| 6243931 | 7203018 | 1382659 | general transcription factor IIH, polypeptide 2        | Gtf2h2 | 294693 | 1,21 | up   |
| 6362888 | 7203018 | 1382650 | general transcription factor IIH, polypeptide 2        | Gtf2h2 | 294693 | 1,21 | up   |
| 5801152 | 7203018 | 1382659 | general transcription factor IIH, polypeptide 2        | Gtf2h2 | 294693 | 1,14 | up   |
| 5797741 | 7203018 | 1382652 | general transcription factor IIH, polypeptide 2        | Gtf2h2 | 294693 | 1,13 | up   |
| 6271169 | 7203018 | 1382650 | general transcription factor IIH, polypeptide 2        | Gtf2h2 | 294693 | 1,10 | up   |
| 6617721 | 7203018 | 1382644 | general transcription factor IIH, polypeptide 2        | Gtf2h2 | 294693 | 1,09 | up   |
| 5849625 | 7203018 | 1382649 | general transcription factor IIH, polypeptide 2        | Gtf2h2 | 294693 | 1,06 | up   |
| 6529314 | 7203018 | 1382654 | general transcription factor IIH, polypeptide 2        | Gtf2h2 | 294693 | 1,05 | up   |
| 6453929 | 7203018 | 1382645 | general transcription factor IIH, polypeptide 2        | Gtf2h2 | 294693 | 1,05 | up   |
| 6098351 | 7203018 | 1382653 | general transcription factor IIH, polypeptide 2        | Gtf2h2 | 294693 | 1,05 | up   |
| 5858470 | 7203018 | 1382648 | general transcription factor IIH, polypeptide 2        | Gtf2h2 | 294693 | 1,04 | up   |
| 6717373 | 7203018 | 1382644 | general transcription factor IIH, polypeptide 2        | Gtf2h2 | 294693 | 1,04 | up   |
| 6193673 | 7203018 | 1382657 | general transcription factor IIH, polypeptide 2        | Gtf2h2 | 294693 | 1,01 | down |
| 5670579 | 7203018 | 1382646 | general transcription factor IIH, polypeptide 2        | Gtf2h2 | 294693 | 1,00 | down |
| 6646854 | 7181452 | 1328924 | gigaxonin                                              | Gan    | 307893 | 2,03 | down |
| 6394364 | 7181452 | 1328930 | gigaxonin                                              | Gan    | 307893 | 1,93 | down |
| 5650078 | 7181452 | 1328921 | gigaxonin                                              | Gan    | 307893 | 1,81 | down |
| 6495062 | 7181452 | 1328928 | gigaxonin                                              | Gan    | 307893 | 1,50 | down |
| 6097678 | 7181452 | 1328915 | gigaxonin                                              | Gan    | 307893 | 1,47 | up   |
| 5706862 | 7181452 | 1328927 | gigaxonin                                              | Gan    | 307893 | 1,40 | up   |
| 6354398 | 7181452 | 1328929 | gigaxonin                                              | Gan    | 307893 | 1,20 | down |
| 6011407 | 7181452 | 1328923 | gigaxonin                                              | Gan    | 307893 | 1,18 | down |
| 6428832 | 7181452 | 1328931 | gigaxonin                                              | Gan    | 307893 | 1,14 | down |
| 5901483 | 7181452 | 1328925 | gigaxonin                                              | Gan    | 307893 | 1,08 | down |
| 6676521 | 7181452 | 1328931 | gigaxonin                                              | Gan    | 307893 | 1,06 | up   |
| 6736318 | 7181452 | 1328926 | gigaxonin                                              | Gan    | 307893 | 1,01 | up   |
| 6542041 | 7182679 | 1332417 | GINS complex subunit 3 (Psf3 homolog)                  | Gins3  | 307639 | 2,33 | up   |
| 5755303 | 7182679 | 1332418 | GINS complex subunit 3 (Psf3 homolog)                  | Gins3  | 307639 | 2,20 | up   |
| 6191342 | 7182679 | 1332417 | GINS complex subunit 3 (Psf3 homolog)                  | Gins3  | 307639 | 1,59 | down |
| 5804118 | 7182679 | 1332417 | GINS complex subunit 3 (Psf3 homolog)                  | Gins3  | 307639 | 1,54 | up   |
| 6495433 | 7182679 | 1332417 | GINS complex subunit 3 (Psf3 homolog)                  | Gins3  | 307639 | 1,41 | down |
| 6572464 | 7182679 | 1332418 | GINS complex subunit 3 (Psf3 homolog)                  | Gins3  | 307639 | 1,36 | up   |
| 6067787 | 7182679 | 1332418 | GINS complex subunit 3 (Psf3 homolog)                  | Gins3  | 307639 | 1,33 | up   |
| 5630092 | 7182679 | 1332420 | GINS complex subunit 3 (Psf3 homolog)                  | Gins3  | 307639 | 1,24 | up   |
| 5859691 | 7182679 | 1332417 | GINS complex subunit 3 (Psf3 homolog)                  | Gins3  | 307639 | 1,19 | down |
| 5818969 | 7182679 | 1332420 | GINS complex subunit 3 (Psf3 homolog)                  | Gins3  | 307639 | 1,19 | up   |

|         |         |         |                                             |        |        |      |      |
|---------|---------|---------|---------------------------------------------|--------|--------|------|------|
| 5743454 | 7182679 | 1332421 | GINS complex subunit 3 (Psf3 homolog)       | Gins3  | 307639 | 1,17 | down |
| 6161186 | 7182679 | 1332417 | GINS complex subunit 3 (Psf3 homolog)       | Gins3  | 307639 | 1,15 | down |
| 6419716 | 7182679 | 1332417 | GINS complex subunit 3 (Psf3 homolog)       | Gins3  | 307639 | 1,09 | up   |
| 5992565 | 7182679 | 1332417 | GINS complex subunit 3 (Psf3 homolog)       | Gins3  | 307639 | 1,07 | down |
| 5873810 | 7312333 | 1652754 | GIPC PDZ domain containing family, member 3 | Gipc3  | 500789 | 2,49 | down |
| 5934999 | 7312333 | 1652757 | GIPC PDZ domain containing family, member 3 | Gipc3  | 500789 | 2,42 | up   |
| 6144102 | 7312333 | 1652758 | GIPC PDZ domain containing family, member 3 | Gipc3  | 500789 | 1,52 | up   |
| 5924488 | 7312333 | 1652759 | GIPC PDZ domain containing family, member 3 | Gipc3  | 500789 | 1,35 | down |
| 6592512 | 7312333 | 1652759 | GIPC PDZ domain containing family, member 3 | Gipc3  | 500789 | 1,25 | down |
| 5955430 | 7312333 | 1652754 | GIPC PDZ domain containing family, member 3 | Gipc3  | 500789 | 1,20 | up   |
| 6324610 | 7312333 | 1652759 | GIPC PDZ domain containing family, member 3 | Gipc3  | 500789 | 1,18 | down |
| 5809627 | 7312333 | 1652755 | GIPC PDZ domain containing family, member 3 | Gipc3  | 500789 | 1,09 | up   |
| 6521184 | 7312333 | 1652756 | GIPC PDZ domain containing family, member 3 | Gipc3  | 500789 | 1,08 | up   |
| 6267842 | 7274593 | 1558816 | GLI pathogenesis-related 2                  | Glipr2 | 679819 | 1,29 | up   |
| 6589180 | 7326245 | 1686393 | GLI-Kruppel family member GLI1              | Gli1   | 140589 | 1,07 | up   |
| 6042067 | 7110330 | 1152893 | GLI-Kruppel family member GLI2              | Gli2   | 304729 | 2,25 | down |
| 6093404 | 7110330 | 1152885 | GLI-Kruppel family member GLI2              | Gli2   | 304729 | 1,64 | down |
| 6172018 | 7110330 | 1152907 | GLI-Kruppel family member GLI2              | Gli2   | 304729 | 1,61 | down |
| 5717342 | 7110330 | 1152890 | GLI-Kruppel family member GLI2              | Gli2   | 304729 | 1,39 | down |
| 6243664 | 7110330 | 1152892 | GLI-Kruppel family member GLI2              | Gli2   | 304729 | 1,39 | down |
| 5657189 | 7110330 | 1152887 | GLI-Kruppel family member GLI2              | Gli2   | 304729 | 1,31 | down |
| 5998251 | 7110330 | 1152886 | GLI-Kruppel family member GLI2              | Gli2   | 304729 | 1,29 | down |
| 5808078 | 7110330 | 1152897 | GLI-Kruppel family member GLI2              | Gli2   | 304729 | 1,21 | down |
| 5953477 | 7110330 | 1152893 | GLI-Kruppel family member GLI2              | Gli2   | 304729 | 1,11 | up   |
| 6006878 | 7110330 | 1152891 | GLI-Kruppel family member GLI2              | Gli2   | 304729 | 1,09 | up   |
| 6591255 | 7110330 | 1152907 | GLI-Kruppel family member GLI2              | Gli2   | 304729 | 1,08 | up   |
| 6617759 | 7110330 | 1152885 | GLI-Kruppel family member GLI2              | Gli2   | 304729 | 1,07 | down |
| 6336511 | 7110330 | 1152889 | GLI-Kruppel family member GLI2              | Gli2   | 304729 | 1,06 | up   |
| 6159447 | 7110330 | 1152888 | GLI-Kruppel family member GLI2              | Gli2   | 304729 | 1,05 | up   |
| 6314084 | 7110330 | 1152896 | GLI-Kruppel family member GLI2              | Gli2   | 304729 | 1,00 | down |
| 6601947 | 7217445 | 1416468 | glucagon-like peptide 1 receptor            | Glp1r  | 25051  | 2,28 | up   |
| 6073728 | 7217445 | 1416479 | glucagon-like peptide 1 receptor            | Glp1r  | 25051  | 1,36 | up   |
| 6495815 | 7217445 | 1416478 | glucagon-like peptide 1 receptor            | Glp1r  | 25051  | 1,22 | down |
| 6258749 | 7217445 | 1416479 | glucagon-like peptide 1 receptor            | Glp1r  | 25051  | 1,21 | up   |
| 5620370 | 7217445 | 1416473 | glucagon-like peptide 1 receptor            | Glp1r  | 25051  | 1,19 | down |
| 6038250 | 7217445 | 1416480 | glucagon-like peptide 1 receptor            | Glp1r  | 25051  | 1,15 | down |
| 6025733 | 7217445 | 1416470 | glucagon-like peptide 1 receptor            | Glp1r  | 25051  | 1,11 | down |
| 6507110 | 7217445 | 1416472 | glucagon-like peptide 1 receptor            | Glp1r  | 25051  | 1,07 | down |
| 5901366 | 7217445 | 1416469 | glucagon-like peptide 1 receptor            | Glp1r  | 25051  | 1,03 | down |
| 5689073 | 7217445 | 1416476 | glucagon-like peptide 1 receptor            | Glp1r  | 25051  | 1,02 | down |
| 6024417 | 7217445 | 1416471 | glucagon-like peptide 1 receptor            | Glp1r  | 25051  | 1,02 | up   |
| 6449980 | 7217445 | 1416475 | glucagon-like peptide 1 receptor            | Glp1r  | 25051  | 1,01 | up   |
| 6598017 | 7217445 | 1416474 | glucagon-like peptide 1 receptor            | Glp1r  | 25051  | 1,01 | down |
| 6337491 | 7217445 | 1416477 | glucagon-like peptide 1 receptor            | Glp1r  | 25051  | 1,00 | down |
| 5960647 | 7078806 | 1076966 | glucagon-like peptide 2 receptor            | Glp2r  | 60432  | 2,24 | down |
| 6008419 | 7078806 | 1076959 | glucagon-like peptide 2 receptor            | Glp2r  | 60432  | 1,21 | down |
| 5738724 | 7078806 | 1076956 | glucagon-like peptide 2 receptor            | Glp2r  | 60432  | 1,09 | up   |
| 6173062 | 7078806 | 1076954 | glucagon-like peptide 2 receptor            | Glp2r  | 60432  | 1,08 | up   |
| 6387581 | 7078806 | 1076960 | glucagon-like peptide 2 receptor            | Glp2r  | 60432  | 1,07 | up   |
| 6089095 | 7078806 | 1076963 | glucagon-like peptide 2 receptor            | Glp2r  | 60432  | 1,06 | up   |
| 6382426 | 7078806 | 1076961 | glucagon-like peptide 2 receptor            | Glp2r  | 60432  | 1,06 | up   |
| 5941730 | 7078806 | 1076958 | glucagon-like peptide 2 receptor            | Glp2r  | 60432  | 1,05 | up   |
| 6668280 | 7078806 | 1076962 | glucagon-like peptide 2 receptor            | Glp2r  | 60432  | 1,05 | up   |
| 6597305 | 7078806 | 1076964 | glucagon-like peptide 2 receptor            | Glp2r  | 60432  | 1,04 | up   |
| 5629070 | 7078806 | 1076965 | glucagon-like peptide 2 receptor            | Glp2r  | 60432  | 1,02 | down |
| 6246079 | 7078806 | 1076955 | glucagon-like peptide 2 receptor            | Glp2r  | 60432  | 1,01 | down |
| 6339757 | 7078806 | 1076960 | glucagon-like peptide 2 receptor            | Glp2r  | 60432  | 1,01 | down |

|         |         |         |                                                           |       |        |      |      |
|---------|---------|---------|-----------------------------------------------------------|-------|--------|------|------|
| 5657086 | 7078806 | 1076957 | glucagon-like peptide 2 receptor                          | Glp2r | 60432  | 1,00 | up   |
| 6379357 | 7127894 | 1196086 | glucokinase                                               | Gck   | 24385  | 2,05 | up   |
| 6252277 | 7127894 | 1196082 | glucokinase                                               | Gck   | 24385  | 1,70 | down |
| 6224674 | 7127894 | 1196080 | glucokinase                                               | Gck   | 24385  | 1,66 | down |
| 6172541 | 7127894 | 1196081 | glucokinase                                               | Gck   | 24385  | 1,40 | down |
| 6278165 | 7127894 | 1196079 | glucokinase                                               | Gck   | 24385  | 1,36 | down |
| 6296565 | 7127894 | 1196077 | glucokinase                                               | Gck   | 24385  | 1,35 | down |
| 6181977 | 7127894 | 1196083 | glucokinase                                               | Gck   | 24385  | 1,34 | down |
| 6220760 | 7127894 | 1196084 | glucokinase                                               | Gck   | 24385  | 1,33 | up   |
| 5772637 | 7127894 | 1196085 | glucokinase                                               | Gck   | 24385  | 1,25 | up   |
| 5786560 | 7127894 | 1196084 | glucokinase                                               | Gck   | 24385  | 1,22 | up   |
| 6480809 | 7127894 | 1196075 | glucokinase                                               | Gck   | 24385  | 1,21 | down |
| 6199545 | 7127894 | 1196082 | glucokinase                                               | Gck   | 24385  | 1,11 | down |
| 6432505 | 7127894 | 1196078 | glucokinase                                               | Gck   | 24385  | 1,11 | down |
| 5929711 | 7127894 | 1196076 | glucokinase                                               | Gck   | 24385  | 1,06 | down |
| 6169427 | 7163357 | 1283040 | glucosaminyl (N-acetyl) transferase 2, I-branching enzyme | Gcnt2 | 306860 | 2,23 | up   |
| 6521763 | 7163357 | 1283039 | glucosaminyl (N-acetyl) transferase 2, I-branching enzyme | Gcnt2 | 306860 | 1,40 | up   |
| 6611298 | 7163357 | 1283038 | glucosaminyl (N-acetyl) transferase 2, I-branching enzyme | Gcnt2 | 306860 | 1,37 | down |
| 6249022 | 7163357 | 1283042 | glucosaminyl (N-acetyl) transferase 2, I-branching enzyme | Gcnt2 | 306860 | 1,23 | down |
| 5826836 | 7163357 | 1283040 | glucosaminyl (N-acetyl) transferase 2, I-branching enzyme | Gcnt2 | 306860 | 1,20 | down |
| 6735811 | 7163357 | 1283042 | glucosaminyl (N-acetyl) transferase 2, I-branching enzyme | Gcnt2 | 306860 | 1,12 | down |
| 5641628 | 7163357 | 1283037 | glucosaminyl (N-acetyl) transferase 2, I-branching enzyme | Gcnt2 | 306860 | 1,10 | down |
| 5694550 | 7163357 | 1283042 | glucosaminyl (N-acetyl) transferase 2, I-branching enzyme | Gcnt2 | 306860 | 1,02 | down |
| 5729398 | 7347246 | 1738064 | glucosaminyl (N-acetyl) transferase 3, mucin type         | Gcnt3 | 286976 | 2,30 | up   |
| 5923560 | 7347246 | 1738064 | glucosaminyl (N-acetyl) transferase 3, mucin type         | Gcnt3 | 286976 | 1,51 | up   |
| 6194568 | 7347246 | 1738065 | glucosaminyl (N-acetyl) transferase 3, mucin type         | Gcnt3 | 286976 | 1,25 | down |
| 6020034 | 7347246 | 1738064 | glucosaminyl (N-acetyl) transferase 3, mucin type         | Gcnt3 | 286976 | 1,16 | down |
| 5671279 | 7347246 | 1738065 | glucosaminyl (N-acetyl) transferase 3, mucin type         | Gcnt3 | 286976 | 1,14 | down |
| 6253647 | 7347246 | 1738063 | glucosaminyl (N-acetyl) transferase 3, mucin type         | Gcnt3 | 286976 | 1,13 | down |
| 6033321 | 7347246 | 1738065 | glucosaminyl (N-acetyl) transferase 3, mucin type         | Gcnt3 | 286976 | 1,09 | down |
| 6285961 | 7267311 | 1540177 | glutamate receptor interacting protein 2                  | Grip2 | 171571 | 2,17 | down |
| 6738831 | 7267311 | 1540186 | glutamate receptor interacting protein 2                  | Grip2 | 171571 | 2,05 | up   |
| 6496329 | 7267311 | 1540179 | glutamate receptor interacting protein 2                  | Grip2 | 171571 | 2,04 | up   |
| 5798721 | 7267311 | 1540176 | glutamate receptor interacting protein 2                  | Grip2 | 171571 | 1,60 | up   |
| 6251648 | 7267311 | 1540173 | glutamate receptor interacting protein 2                  | Grip2 | 171571 | 1,60 | down |
| 6464922 | 7267311 | 1540177 | glutamate receptor interacting protein 2                  | Grip2 | 171571 | 1,43 | up   |
| 6084743 | 7267311 | 1540184 | glutamate receptor interacting protein 2                  | Grip2 | 171571 | 1,42 | down |
| 6641690 | 7267311 | 1540188 | glutamate receptor interacting protein 2                  | Grip2 | 171571 | 1,41 | up   |
| 6571179 | 7267311 | 1540192 | glutamate receptor interacting protein 2                  | Grip2 | 171571 | 1,40 | down |
| 5624264 | 7267311 | 1540186 | glutamate receptor interacting protein 2                  | Grip2 | 171571 | 1,35 | up   |
| 6527400 | 7267311 | 1540196 | glutamate receptor interacting protein 2                  | Grip2 | 171571 | 1,30 | up   |
| 6533729 | 7267311 | 1540186 | glutamate receptor interacting protein 2                  | Grip2 | 171571 | 1,25 | up   |
| 5872551 | 7267311 | 1540191 | glutamate receptor interacting protein 2                  | Grip2 | 171571 | 1,25 | up   |
| 6485484 | 7267311 | 1540175 | glutamate receptor interacting protein 2                  | Grip2 | 171571 | 1,24 | down |
| 6172964 | 7267311 | 1540188 | glutamate receptor interacting protein 2                  | Grip2 | 171571 | 1,19 | down |
| 5796521 | 7267311 | 1540181 | glutamate receptor interacting protein 2                  | Grip2 | 171571 | 1,19 | down |
| 6575368 | 7267311 | 1540180 | glutamate receptor interacting protein 2                  | Grip2 | 171571 | 1,18 | up   |
| 6335634 | 7267311 | 1540198 | glutamate receptor interacting protein 2                  | Grip2 | 171571 | 1,14 | up   |
| 6460964 | 7267311 | 1540183 | glutamate receptor interacting protein 2                  | Grip2 | 171571 | 1,13 | down |
| 6354142 | 7267311 | 1540195 | glutamate receptor interacting protein 2                  | Grip2 | 171571 | 1,12 | down |
| 6722848 | 7267311 | 1540185 | glutamate receptor interacting protein 2                  | Grip2 | 171571 | 1,12 | down |
| 6170775 | 7267311 | 1540197 | glutamate receptor interacting protein 2                  | Grip2 | 171571 | 1,10 | down |
| 6524645 | 7267311 | 1540189 | glutamate receptor interacting protein 2                  | Grip2 | 171571 | 1,10 | down |
| 5726063 | 7267311 | 1540187 | glutamate receptor interacting protein 2                  | Grip2 | 171571 | 1,08 | up   |
| 6188470 | 7267311 | 1540176 | glutamate receptor interacting protein 2                  | Grip2 | 171571 | 1,08 | up   |
| 5840930 | 7267311 | 1540172 | glutamate receptor interacting protein 2                  | Grip2 | 171571 | 1,06 | down |
| 6571614 | 7267311 | 1540198 | glutamate receptor interacting protein 2                  | Grip2 | 171571 | 1,05 | up   |

|         |         |         |                                          |       |        |      |      |
|---------|---------|---------|------------------------------------------|-------|--------|------|------|
| 6265183 | 7267311 | 1540190 | glutamate receptor interacting protein 2 | Grip2 | 171571 | 1,04 | down |
| 5624286 | 7267311 | 1540197 | glutamate receptor interacting protein 2 | Grip2 | 171571 | 1,04 | up   |
| 6161168 | 7267311 | 1540178 | glutamate receptor interacting protein 2 | Grip2 | 171571 | 1,03 | up   |
| 5876108 | 7267311 | 1540194 | glutamate receptor interacting protein 2 | Grip2 | 171571 | 1,03 | down |
| 6530479 | 7267311 | 1540182 | glutamate receptor interacting protein 2 | Grip2 | 171571 | 1,02 | down |
| 6571774 | 7267311 | 1540174 | glutamate receptor interacting protein 2 | Grip2 | 171571 | 1,02 | down |
| 6408260 | 7267311 | 1540193 | glutamate receptor interacting protein 2 | Grip2 | 171571 | 1,01 | down |
| 6387882 | 7378827 | 1818138 | glutamate receptor, ionotropic, AMPA 3   | Gria3 | 29628  | 2,02 | down |
| 5923317 | 7378827 | 1818134 | glutamate receptor, ionotropic, AMPA 3   | Gria3 | 29628  | 1,96 | down |
| 6091911 | 7378827 | 1818135 | glutamate receptor, ionotropic, AMPA 3   | Gria3 | 29628  | 1,89 | down |
| 6501822 | 7378827 | 1818148 | glutamate receptor, ionotropic, AMPA 3   | Gria3 | 29628  | 1,88 | up   |
| 6308206 | 7378827 | 1818138 | glutamate receptor, ionotropic, AMPA 3   | Gria3 | 29628  | 1,83 | down |
| 6583717 | 7378827 | 1818136 | glutamate receptor, ionotropic, AMPA 3   | Gria3 | 29628  | 1,69 | down |
| 6692984 | 7378827 | 1818146 | glutamate receptor, ionotropic, AMPA 3   | Gria3 | 29628  | 1,69 | up   |
| 5778106 | 7378827 | 1818151 | glutamate receptor, ionotropic, AMPA 3   | Gria3 | 29628  | 1,67 | up   |
| 6014282 | 7378827 | 1818150 | glutamate receptor, ionotropic, AMPA 3   | Gria3 | 29628  | 1,62 | down |
| 5978336 | 7378827 | 1818149 | glutamate receptor, ionotropic, AMPA 3   | Gria3 | 29628  | 1,55 | up   |
| 5850608 | 7378827 | 1818144 | glutamate receptor, ionotropic, AMPA 3   | Gria3 | 29628  | 1,30 | down |
| 6715607 | 7378827 | 1818147 | glutamate receptor, ionotropic, AMPA 3   | Gria3 | 29628  | 1,28 | up   |
| 6405912 | 7378827 | 1818139 | glutamate receptor, ionotropic, AMPA 3   | Gria3 | 29628  | 1,28 | up   |
| 6684215 | 7378827 | 1818141 | glutamate receptor, ionotropic, AMPA 3   | Gria3 | 29628  | 1,24 | up   |
| 5885600 | 7378827 | 1818145 | glutamate receptor, ionotropic, AMPA 3   | Gria3 | 29628  | 1,14 | up   |
| 5890174 | 7378827 | 1818143 | glutamate receptor, ionotropic, AMPA 3   | Gria3 | 29628  | 1,11 | up   |
| 5707532 | 7378827 | 1818140 | glutamate receptor, ionotropic, AMPA 3   | Gria3 | 29628  | 1,08 | down |
| 6350536 | 7378827 | 1818142 | glutamate receptor, ionotropic, AMPA 3   | Gria3 | 29628  | 1,07 | up   |
| 5868430 | 7378827 | 1818150 | glutamate receptor, ionotropic, AMPA 3   | Gria3 | 29628  | 1,06 | up   |
| 5631467 | 7378827 | 1818148 | glutamate receptor, ionotropic, AMPA 3   | Gria3 | 29628  | 1,05 | down |
| 6171768 | 7378827 | 1818137 | glutamate receptor, ionotropic, AMPA 3   | Gria3 | 29628  | 1,04 | up   |
| 5842501 | 7210001 | 1399150 | glutamate receptor, ionotropic, AMPA 2   | Gria2 | 29627  | 3,13 | up   |
| 5730604 | 7210001 | 1399139 | glutamate receptor, ionotropic, AMPA 2   | Gria2 | 29627  | 2,17 | down |
| 6562329 | 7210001 | 1399153 | glutamate receptor, ionotropic, AMPA 2   | Gria2 | 29627  | 2,08 | up   |
| 5869559 | 7210001 | 1399157 | glutamate receptor, ionotropic, AMPA 2   | Gria2 | 29627  | 1,79 | up   |
| 6091495 | 7210001 | 1399143 | glutamate receptor, ionotropic, AMPA 2   | Gria2 | 29627  | 1,42 | up   |
| 6279663 | 7210001 | 1399144 | glutamate receptor, ionotropic, AMPA 2   | Gria2 | 29627  | 1,37 | down |
| 5712325 | 7210001 | 1399145 | glutamate receptor, ionotropic, AMPA 2   | Gria2 | 29627  | 1,33 | up   |
| 6512727 | 7210001 | 1399147 | glutamate receptor, ionotropic, AMPA 2   | Gria2 | 29627  | 1,27 | down |
| 5845163 | 7210001 | 1399140 | glutamate receptor, ionotropic, AMPA 2   | Gria2 | 29627  | 1,26 | down |
| 6353229 | 7210001 | 1399142 | glutamate receptor, ionotropic, AMPA 2   | Gria2 | 29627  | 1,20 | down |
| 6278753 | 7210001 | 1399152 | glutamate receptor, ionotropic, AMPA 2   | Gria2 | 29627  | 1,19 | down |
| 6721337 | 7210001 | 1399146 | glutamate receptor, ionotropic, AMPA 2   | Gria2 | 29627  | 1,18 | down |
| 5880722 | 7210001 | 1399155 | glutamate receptor, ionotropic, AMPA 2   | Gria2 | 29627  | 1,16 | down |
| 6000746 | 7210001 | 1399148 | glutamate receptor, ionotropic, AMPA 2   | Gria2 | 29627  | 1,15 | down |
| 5858128 | 7210001 | 1399141 | glutamate receptor, ionotropic, AMPA 2   | Gria2 | 29627  | 1,10 | up   |
| 6450124 | 7210001 | 1399149 | glutamate receptor, ionotropic, AMPA 2   | Gria2 | 29627  | 1,08 | down |
| 6097715 | 7210001 | 1399141 | glutamate receptor, ionotropic, AMPA 2   | Gria2 | 29627  | 1,07 | down |
| 5647256 | 7210001 | 1399156 | glutamate receptor, ionotropic, AMPA 2   | Gria2 | 29627  | 1,06 | up   |
| 6641322 | 7210001 | 1399156 | glutamate receptor, ionotropic, AMPA 2   | Gria2 | 29627  | 1,03 | down |
| 5661659 | 7210001 | 1399151 | glutamate receptor, ionotropic, AMPA 2   | Gria2 | 29627  | 1,03 | down |
| 5729134 | 7210001 | 1399154 | glutamate receptor, ionotropic, AMPA 2   | Gria2 | 29627  | 1,02 | down |
| 6494964 | 7210001 | 1399157 | glutamate receptor, ionotropic, AMPA 2   | Gria2 | 29627  | 1,01 | up   |
| 5993083 | 7210001 | 1399140 | glutamate receptor, ionotropic, AMPA 2   | Gria2 | 29627  | 1,00 | down |
| 5787660 | 7341881 | 1724665 | glutamate receptor, ionotropic, AMPA4    | Gria4 | 29629  | 2,33 | down |
| 6556873 | 7341881 | 1724677 | glutamate receptor, ionotropic, AMPA4    | Gria4 | 29629  | 1,98 | down |
| 5871227 | 7341881 | 1724666 | glutamate receptor, ionotropic, AMPA4    | Gria4 | 29629  | 1,89 | down |
| 6406665 | 7341881 | 1724680 | glutamate receptor, ionotropic, AMPA4    | Gria4 | 29629  | 1,81 | up   |
| 6358071 | 7341881 | 1724675 | glutamate receptor, ionotropic, AMPA4    | Gria4 | 29629  | 1,62 | up   |
| 6333153 | 7341881 | 1724679 | glutamate receptor, ionotropic, AMPA4    | Gria4 | 29629  | 1,60 | up   |

|         |         |         |                                           |       |        |      |      |
|---------|---------|---------|-------------------------------------------|-------|--------|------|------|
| 6568877 | 7341881 | 1724669 | glutamate receptor, ionotropic, AMPA4     | Gria4 | 29629  | 1,59 | down |
| 6471328 | 7341881 | 1724670 | glutamate receptor, ionotropic, AMPA4     | Gria4 | 29629  | 1,53 | up   |
| 6616517 | 7341881 | 1724676 | glutamate receptor, ionotropic, AMPA4     | Gria4 | 29629  | 1,48 | down |
| 6243284 | 7341881 | 1724673 | glutamate receptor, ionotropic, AMPA4     | Gria4 | 29629  | 1,41 | up   |
| 6225009 | 7341881 | 1724673 | glutamate receptor, ionotropic, AMPA4     | Gria4 | 29629  | 1,33 | up   |
| 6527675 | 7341881 | 1724672 | glutamate receptor, ionotropic, AMPA4     | Gria4 | 29629  | 1,27 | up   |
| 6597220 | 7341881 | 1724674 | glutamate receptor, ionotropic, AMPA4     | Gria4 | 29629  | 1,21 | up   |
| 5987051 | 7341881 | 1724667 | glutamate receptor, ionotropic, AMPA4     | Gria4 | 29629  | 1,12 | up   |
| 5849642 | 7341881 | 1724678 | glutamate receptor, ionotropic, AMPA4     | Gria4 | 29629  | 1,06 | up   |
| 6205138 | 7341881 | 1724663 | glutamate receptor, ionotropic, AMPA4     | Gria4 | 29629  | 1,06 | down |
| 5710103 | 7341881 | 1724679 | glutamate receptor, ionotropic, AMPA4     | Gria4 | 29629  | 1,04 | up   |
| 5731237 | 7341881 | 1724668 | glutamate receptor, ionotropic, AMPA4     | Gria4 | 29629  | 1,02 | down |
| 5697542 | 7341881 | 1724664 | glutamate receptor, ionotropic, AMPA4     | Gria4 | 29629  | 1,02 | up   |
| 6255864 | 7341881 | 1724671 | glutamate receptor, ionotropic, AMPA4     | Gria4 | 29629  | 1,01 | up   |
| 6199909 | 7279469 | 1571687 | glutamate receptor, ionotropic, kainate 3 | Grik3 | 298521 | 2,46 | down |
| 6020965 | 7279469 | 1571678 | glutamate receptor, ionotropic, kainate 3 | Grik3 | 298521 | 2,17 | up   |
| 6491560 | 7279469 | 1571684 | glutamate receptor, ionotropic, kainate 3 | Grik3 | 298521 | 1,94 | down |
| 5679681 | 7279469 | 1571689 | glutamate receptor, ionotropic, kainate 3 | Grik3 | 298521 | 1,64 | down |
| 5843006 | 7279469 | 1571676 | glutamate receptor, ionotropic, kainate 3 | Grik3 | 298521 | 1,38 | down |
| 6354048 | 7279469 | 1571680 | glutamate receptor, ionotropic, kainate 3 | Grik3 | 298521 | 1,27 | down |
| 6244647 | 7279469 | 1571690 | glutamate receptor, ionotropic, kainate 3 | Grik3 | 298521 | 1,20 | up   |
| 6008684 | 7279469 | 1571688 | glutamate receptor, ionotropic, kainate 3 | Grik3 | 298521 | 1,19 | up   |
| 5906796 | 7279469 | 1571689 | glutamate receptor, ionotropic, kainate 3 | Grik3 | 298521 | 1,17 | up   |
| 6374012 | 7279469 | 1571685 | glutamate receptor, ionotropic, kainate 3 | Grik3 | 298521 | 1,12 | down |
| 6332238 | 7279469 | 1571681 | glutamate receptor, ionotropic, kainate 3 | Grik3 | 298521 | 1,12 | up   |
| 6286739 | 7279469 | 1571679 | glutamate receptor, ionotropic, kainate 3 | Grik3 | 298521 | 1,12 | up   |
| 6362233 | 7279469 | 1571682 | glutamate receptor, ionotropic, kainate 3 | Grik3 | 298521 | 1,11 | down |
| 5744604 | 7279469 | 1571688 | glutamate receptor, ionotropic, kainate 3 | Grik3 | 298521 | 1,10 | down |
| 5804825 | 7279469 | 1571683 | glutamate receptor, ionotropic, kainate 3 | Grik3 | 298521 | 1,10 | up   |
| 6377746 | 7279469 | 1571673 | glutamate receptor, ionotropic, kainate 3 | Grik3 | 298521 | 1,09 | up   |
| 5629608 | 7279469 | 1571674 | glutamate receptor, ionotropic, kainate 3 | Grik3 | 298521 | 1,09 | up   |
| 5877028 | 7279469 | 1571675 | glutamate receptor, ionotropic, kainate 3 | Grik3 | 298521 | 1,03 | down |
| 6365335 | 7279469 | 1571674 | glutamate receptor, ionotropic, kainate 3 | Grik3 | 298521 | 1,02 | up   |
| 6130185 | 7279469 | 1571686 | glutamate receptor, ionotropic, kainate 3 | Grik3 | 298521 | 1,01 | down |
| 6602569 | 7279469 | 1571677 | glutamate receptor, ionotropic, kainate 3 | Grik3 | 298521 | 1,00 | down |
| 5857418 | 7048873 | 1007287 | glutamate receptor, ionotropic, kainate 5 | Grik5 | 24407  | 2,31 | up   |
| 6543903 | 7048873 | 1007304 | glutamate receptor, ionotropic, kainate 5 | Grik5 | 24407  | 1,74 | up   |
| 6425340 | 7048873 | 1007287 | glutamate receptor, ionotropic, kainate 5 | Grik5 | 24407  | 1,45 | up   |
| 5662570 | 7048873 | 1007307 | glutamate receptor, ionotropic, kainate 5 | Grik5 | 24407  | 1,35 | down |
| 6056939 | 7048873 | 1007298 | glutamate receptor, ionotropic, kainate 5 | Grik5 | 24407  | 1,34 | down |
| 6298841 | 7048873 | 1007289 | glutamate receptor, ionotropic, kainate 5 | Grik5 | 24407  | 1,32 | down |
| 6734713 | 7048873 | 1007291 | glutamate receptor, ionotropic, kainate 5 | Grik5 | 24407  | 1,30 | down |
| 5912081 | 7048873 | 1007299 | glutamate receptor, ionotropic, kainate 5 | Grik5 | 24407  | 1,24 | down |
| 5685908 | 7048873 | 1007287 | glutamate receptor, ionotropic, kainate 5 | Grik5 | 24407  | 1,20 | up   |
| 5648525 | 7048873 | 1007287 | glutamate receptor, ionotropic, kainate 5 | Grik5 | 24407  | 1,19 | down |
| 6513397 | 7048873 | 1007303 | glutamate receptor, ionotropic, kainate 5 | Grik5 | 24407  | 1,19 | down |
| 6566641 | 7048873 | 1007301 | glutamate receptor, ionotropic, kainate 5 | Grik5 | 24407  | 1,17 | down |
| 6509750 | 7048873 | 1007302 | glutamate receptor, ionotropic, kainate 5 | Grik5 | 24407  | 1,14 | down |
| 6430298 | 7048873 | 1007306 | glutamate receptor, ionotropic, kainate 5 | Grik5 | 24407  | 1,11 | down |
| 6162038 | 7048873 | 1007292 | glutamate receptor, ionotropic, kainate 5 | Grik5 | 24407  | 1,10 | up   |
| 6053633 | 7048873 | 1007300 | glutamate receptor, ionotropic, kainate 5 | Grik5 | 24407  | 1,09 | up   |
| 6094456 | 7048873 | 1007293 | glutamate receptor, ionotropic, kainate 5 | Grik5 | 24407  | 1,09 | down |
| 6517361 | 7048873 | 1007295 | glutamate receptor, ionotropic, kainate 5 | Grik5 | 24407  | 1,07 | up   |
| 5673434 | 7048873 | 1007288 | glutamate receptor, ionotropic, kainate 5 | Grik5 | 24407  | 1,06 | up   |
| 6392746 | 7048873 | 1007304 | glutamate receptor, ionotropic, kainate 5 | Grik5 | 24407  | 1,05 | down |
| 5858909 | 7048873 | 1007306 | glutamate receptor, ionotropic, kainate 5 | Grik5 | 24407  | 1,05 | down |
| 6146471 | 7048873 | 1007305 | glutamate receptor, ionotropic, kainate 5 | Grik5 | 24407  | 1,04 | down |



|         |         |         |                                                              |        |        |      |      |
|---------|---------|---------|--------------------------------------------------------------|--------|--------|------|------|
| 6519297 | 7048873 | 1007290 | glutamate receptor, ionotropic, kainate 5                    | Grik5  | 24407  | 1,03 | up   |
| 5689816 | 7048873 | 1007297 | glutamate receptor, ionotropic, kainate 5                    | Grik5  | 24407  | 1,02 | down |
| 5637137 | 7048873 | 1007288 | glutamate receptor, ionotropic, kainate 5                    | Grik5  | 24407  | 1,02 | down |
| 5784966 | 7048873 | 1007294 | glutamate receptor, ionotropic, kainate 5                    | Grik5  | 24407  | 1,00 | down |
| 6524896 | 7048873 | 1007296 | glutamate receptor, ionotropic, kainate 5                    | Grik5  | 24407  | 1,00 | up   |
| 6033860 | 7236770 | 1465180 | glutamate receptor, ionotropic, N-methyl D-aspartate 1       | Grin1  | 24408  | 3,47 | up   |
| 6174453 | 7236770 | 1465191 | glutamate receptor, ionotropic, N-methyl D-aspartate 1       | Grin1  | 24408  | 2,23 | down |
| 5926261 | 7236770 | 1465181 | glutamate receptor, ionotropic, N-methyl D-aspartate 1       | Grin1  | 24408  | 2,05 | up   |
| 5922414 | 7236770 | 1465197 | glutamate receptor, ionotropic, N-methyl D-aspartate 1       | Grin1  | 24408  | 1,94 | up   |
| 6163377 | 7236770 | 1465184 | glutamate receptor, ionotropic, N-methyl D-aspartate 1       | Grin1  | 24408  | 1,93 | down |
| 5724922 | 7236770 | 1465192 | glutamate receptor, ionotropic, N-methyl D-aspartate 1       | Grin1  | 24408  | 1,90 | up   |
| 5773298 | 7236770 | 1465193 | glutamate receptor, ionotropic, N-methyl D-aspartate 1       | Grin1  | 24408  | 1,59 | down |
| 6147869 | 7236770 | 1465179 | glutamate receptor, ionotropic, N-methyl D-aspartate 1       | Grin1  | 24408  | 1,57 | up   |
| 5774910 | 7236770 | 1465179 | glutamate receptor, ionotropic, N-methyl D-aspartate 1       | Grin1  | 24408  | 1,44 | up   |
| 5976648 | 7236770 | 1465198 | glutamate receptor, ionotropic, N-methyl D-aspartate 1       | Grin1  | 24408  | 1,36 | up   |
| 5709479 | 7236770 | 1465186 | glutamate receptor, ionotropic, N-methyl D-aspartate 1       | Grin1  | 24408  | 1,32 | up   |
| 6268664 | 7236770 | 1465188 | glutamate receptor, ionotropic, N-methyl D-aspartate 1       | Grin1  | 24408  | 1,27 | down |
| 5786901 | 7236770 | 1465200 | glutamate receptor, ionotropic, N-methyl D-aspartate 1       | Grin1  | 24408  | 1,24 | down |
| 5909825 | 7236770 | 1465182 | glutamate receptor, ionotropic, N-methyl D-aspartate 1       | Grin1  | 24408  | 1,22 | down |
| 6316258 | 7236770 | 1465179 | glutamate receptor, ionotropic, N-methyl D-aspartate 1       | Grin1  | 24408  | 1,17 | down |
| 6289887 | 7236770 | 1465195 | glutamate receptor, ionotropic, N-methyl D-aspartate 1       | Grin1  | 24408  | 1,14 | down |
| 6073946 | 7236770 | 1465199 | glutamate receptor, ionotropic, N-methyl D-aspartate 1       | Grin1  | 24408  | 1,14 | up   |
| 6369196 | 7236770 | 1465189 | glutamate receptor, ionotropic, N-methyl D-aspartate 1       | Grin1  | 24408  | 1,08 | down |
| 6272469 | 7236770 | 1465190 | glutamate receptor, ionotropic, N-methyl D-aspartate 1       | Grin1  | 24408  | 1,08 | up   |
| 5934925 | 7236770 | 1465196 | glutamate receptor, ionotropic, N-methyl D-aspartate 1       | Grin1  | 24408  | 1,07 | down |
| 6512545 | 7236770 | 1465186 | glutamate receptor, ionotropic, N-methyl D-aspartate 1       | Grin1  | 24408  | 1,07 | down |
| 6238938 | 7236770 | 1465194 | glutamate receptor, ionotropic, N-methyl D-aspartate 1       | Grin1  | 24408  | 1,07 | down |
| 6320504 | 7236770 | 1465185 | glutamate receptor, ionotropic, N-methyl D-aspartate 1       | Grin1  | 24408  | 1,05 | up   |
| 6608443 | 7236770 | 1465183 | glutamate receptor, ionotropic, N-methyl D-aspartate 1       | Grin1  | 24408  | 1,05 | down |
| 6554637 | 7236770 | 1465187 | glutamate receptor, ionotropic, N-methyl D-aspartate 1       | Grin1  | 24408  | 1,01 | down |
| 6012846 | 7370910 | 1798538 | glutamate receptor, ionotropic, N-methyl D-aspartate-like 1A | Grin1a | 192147 | 1,31 | down |
| 5760065 | 7349790 | 1744501 | glutamate receptor, metabotropic 2                           | Grm2   | 24415  | 2,19 | up   |
| 5639324 | 7349790 | 1744508 | glutamate receptor, metabotropic 2                           | Grm2   | 24415  | 1,55 | up   |
| 6125022 | 7349790 | 1744501 | glutamate receptor, metabotropic 2                           | Grm2   | 24415  | 1,46 | up   |
| 6580541 | 7349790 | 1744506 | glutamate receptor, metabotropic 2                           | Grm2   | 24415  | 1,36 | up   |
| 6624656 | 7349790 | 1744504 | glutamate receptor, metabotropic 2                           | Grm2   | 24415  | 1,31 | down |
| 5761200 | 7349790 | 1744503 | glutamate receptor, metabotropic 2                           | Grm2   | 24415  | 1,30 | up   |
| 6631065 | 7349790 | 1744509 | glutamate receptor, metabotropic 2                           | Grm2   | 24415  | 1,21 | down |
| 5722213 | 7349790 | 1744502 | glutamate receptor, metabotropic 2                           | Grm2   | 24415  | 1,20 | down |
| 6471088 | 7349790 | 1744505 | glutamate receptor, metabotropic 2                           | Grm2   | 24415  | 1,17 | down |
| 6400911 | 7349790 | 1744506 | glutamate receptor, metabotropic 2                           | Grm2   | 24415  | 1,15 | down |
| 6097381 | 7349790 | 1744510 | glutamate receptor, metabotropic 2                           | Grm2   | 24415  | 1,09 | up   |
| 5845833 | 7349790 | 1744506 | glutamate receptor, metabotropic 2                           | Grm2   | 24415  | 1,08 | up   |
| 5902053 | 7349790 | 1744501 | glutamate receptor, metabotropic 2                           | Grm2   | 24415  | 1,07 | up   |
| 6662327 | 7349790 | 1744501 | glutamate receptor, metabotropic 2                           | Grm2   | 24415  | 1,05 | up   |
| 5932226 | 7349790 | 1744507 | glutamate receptor, metabotropic 2                           | Grm2   | 24415  | 1,01 | up   |
| 6409414 | 7067335 | 1049463 | glutamate receptor, metabotropic 6                           | Grm6   | 24419  | 2,09 | down |
| 5635136 | 7067335 | 1049468 | glutamate receptor, metabotropic 6                           | Grm6   | 24419  | 1,81 | down |
| 6172831 | 7067335 | 1049464 | glutamate receptor, metabotropic 6                           | Grm6   | 24419  | 1,60 | up   |
| 5770587 | 7067335 | 1049472 | glutamate receptor, metabotropic 6                           | Grm6   | 24419  | 1,58 | down |
| 5886780 | 7067335 | 1049463 | glutamate receptor, metabotropic 6                           | Grm6   | 24419  | 1,50 | down |
| 6296097 | 7067335 | 1049466 | glutamate receptor, metabotropic 6                           | Grm6   | 24419  | 1,48 | up   |
| 5687656 | 7067335 | 1049471 | glutamate receptor, metabotropic 6                           | Grm6   | 24419  | 1,22 | down |
| 6112904 | 7067335 | 1049465 | glutamate receptor, metabotropic 6                           | Grm6   | 24419  | 1,21 | down |
| 6296678 | 7067335 | 1049469 | glutamate receptor, metabotropic 6                           | Grm6   | 24419  | 1,15 | down |
| 5877353 | 7067335 | 1049470 | glutamate receptor, metabotropic 6                           | Grm6   | 24419  | 1,15 | up   |
| 6643850 | 7067335 | 1049467 | glutamate receptor, metabotropic 6                           | Grm6   | 24419  | 1,10 | down |

|         |         |         |                                              |       |        |      |      |
|---------|---------|---------|----------------------------------------------|-------|--------|------|------|
| 5830559 | 7067335 | 1049462 | glutamate receptor, metabotropic 6           | Grm6  | 24419  | 1,02 | up   |
| 5807429 | 7067335 | 1049473 | glutamate receptor, metabotropic 6           | Grm6  | 24419  | 1,00 | up   |
| 5982204 | 7338247 | 1715520 | glutamate-cysteine ligase, catalytic subunit | Gclc  | 25283  | 2,70 | down |
| 6380889 | 7338247 | 1715510 | glutamate-cysteine ligase, catalytic subunit | Gclc  | 25283  | 1,72 | down |
| 5720819 | 7338247 | 1715511 | glutamate-cysteine ligase, catalytic subunit | Gclc  | 25283  | 1,48 | up   |
| 6292045 | 7338247 | 1715510 | glutamate-cysteine ligase, catalytic subunit | Gclc  | 25283  | 1,45 | down |
| 5825289 | 7338247 | 1715518 | glutamate-cysteine ligase, catalytic subunit | Gclc  | 25283  | 1,40 | up   |
| 6387087 | 7338247 | 1715523 | glutamate-cysteine ligase, catalytic subunit | Gclc  | 25283  | 1,39 | down |
| 6121141 | 7338247 | 1715513 | glutamate-cysteine ligase, catalytic subunit | Gclc  | 25283  | 1,26 | up   |
| 6051975 | 7338247 | 1715512 | glutamate-cysteine ligase, catalytic subunit | Gclc  | 25283  | 1,25 | up   |
| 6368908 | 7338247 | 1715517 | glutamate-cysteine ligase, catalytic subunit | Gclc  | 25283  | 1,25 | up   |
| 6659677 | 7338247 | 1715515 | glutamate-cysteine ligase, catalytic subunit | Gclc  | 25283  | 1,25 | up   |
| 6412050 | 7338247 | 1715516 | glutamate-cysteine ligase, catalytic subunit | Gclc  | 25283  | 1,22 | up   |
| 6601061 | 7338247 | 1715525 | glutamate-cysteine ligase, catalytic subunit | Gclc  | 25283  | 1,19 | down |
| 5764604 | 7338247 | 1715519 | glutamate-cysteine ligase, catalytic subunit | Gclc  | 25283  | 1,17 | up   |
| 6080947 | 7338247 | 1715515 | glutamate-cysteine ligase, catalytic subunit | Gclc  | 25283  | 1,13 | down |
| 5839946 | 7338247 | 1715526 | glutamate-cysteine ligase, catalytic subunit | Gclc  | 25283  | 1,13 | down |
| 6678558 | 7338247 | 1715521 | glutamate-cysteine ligase, catalytic subunit | Gclc  | 25283  | 1,08 | down |
| 6647683 | 7338247 | 1715524 | glutamate-cysteine ligase, catalytic subunit | Gclc  | 25283  | 1,08 | up   |
| 5840705 | 7338247 | 1715523 | glutamate-cysteine ligase, catalytic subunit | Gclc  | 25283  | 1,04 | down |
| 6723979 | 7338247 | 1715522 | glutamate-cysteine ligase, catalytic subunit | Gclc  | 25283  | 1,04 | up   |
| 6607890 | 7338247 | 1715518 | glutamate-cysteine ligase, catalytic subunit | Gclc  | 25283  | 1,03 | up   |
| 6562496 | 7338247 | 1715514 | glutamate-cysteine ligase, catalytic subunit | Gclc  | 25283  | 1,01 | down |
| 6079929 | 7187674 | 1343856 | glutaredoxin 1 (thioltransferase)            | Glxr1 | 64045  | 3,84 | up   |
| 5772607 | 7187674 | 1343856 | glutaredoxin 1 (thioltransferase)            | Glxr1 | 64045  | 1,64 | down |
| 6138379 | 7187674 | 1343858 | glutaredoxin 1 (thioltransferase)            | Glxr1 | 64045  | 1,44 | down |
| 6208841 | 7187674 | 1343857 | glutaredoxin 1 (thioltransferase)            | Glxr1 | 64045  | 1,13 | up   |
| 6431977 | 7308065 | 1642792 | glutathione peroxidase 2                     | Gpx2  | 29326  | 2,08 | up   |
| 6260993 | 7308065 | 1642791 | glutathione peroxidase 2                     | Gpx2  | 29326  | 1,87 | down |
| 6478156 | 7308065 | 1642795 | glutathione peroxidase 2                     | Gpx2  | 29326  | 1,69 | down |
| 6150128 | 7308065 | 1642794 | glutathione peroxidase 2                     | Gpx2  | 29326  | 1,34 | down |
| 6148284 | 7308065 | 1642793 | glutathione peroxidase 2                     | Gpx2  | 29326  | 1,16 | up   |
| 6677218 | 7308065 | 1642793 | glutathione peroxidase 2                     | Gpx2  | 29326  | 1,16 | up   |
| 6309723 | 7308065 | 1642794 | glutathione peroxidase 2                     | Gpx2  | 29326  | 1,14 | down |
| 5619478 | 7308065 | 1642794 | glutathione peroxidase 2                     | Gpx2  | 29326  | 1,05 | up   |
| 6497997 | 7042805 | 992222  | glutathione S-transferase omega 2            | Gsto2 | 309465 | 2,15 | up   |
| 5668253 | 7042805 | 992218  | glutathione S-transferase omega 2            | Gsto2 | 309465 | 1,51 | down |
| 6122001 | 7042805 | 992225  | glutathione S-transferase omega 2            | Gsto2 | 309465 | 1,40 | up   |
| 6399477 | 7042805 | 992218  | glutathione S-transferase omega 2            | Gsto2 | 309465 | 1,36 | down |
| 5776170 | 7042805 | 992219  | glutathione S-transferase omega 2            | Gsto2 | 309465 | 1,35 | up   |
| 6621731 | 7042805 | 992220  | glutathione S-transferase omega 2            | Gsto2 | 309465 | 1,32 | up   |
| 6384571 | 7042805 | 992219  | glutathione S-transferase omega 2            | Gsto2 | 309465 | 1,17 | up   |
| 6636066 | 7042805 | 992222  | glutathione S-transferase omega 2            | Gsto2 | 309465 | 1,13 | up   |
| 6436746 | 7042805 | 992226  | glutathione S-transferase omega 2            | Gsto2 | 309465 | 1,13 | down |
| 6132339 | 7042805 | 992223  | glutathione S-transferase omega 2            | Gsto2 | 309465 | 1,11 | down |
| 6656068 | 7042805 | 992221  | glutathione S-transferase omega 2            | Gsto2 | 309465 | 1,09 | down |
| 6344139 | 7042805 | 992220  | glutathione S-transferase omega 2            | Gsto2 | 309465 | 1,04 | down |
| 5888385 | 7042805 | 992224  | glutathione S-transferase omega 2            | Gsto2 | 309465 | 1,02 | up   |
| 6110613 | 7212638 | 1404757 | glutathione S-transferase, mu 7              | Gstm7 | 81869  | 2,78 | up   |
| 5808626 | 7212638 | 1404754 | glutathione S-transferase, mu 7              | Gstm7 | 81869  | 1,37 | down |
| 6357686 | 7212638 | 1404755 | glutathione S-transferase, mu 7              | Gstm7 | 81869  | 1,29 | down |
| 5622577 | 7212638 | 1404749 | glutathione S-transferase, mu 7              | Gstm7 | 81869  | 1,19 | up   |
| 5996325 | 7212638 | 1404752 | glutathione S-transferase, mu 7              | Gstm7 | 81869  | 1,14 | down |
| 5816012 | 7212638 | 1404753 | glutathione S-transferase, mu 7              | Gstm7 | 81869  | 1,14 | down |
| 6216373 | 7212638 | 1404756 | glutathione S-transferase, mu 7              | Gstm7 | 81869  | 1,14 | up   |
| 6419661 | 7212638 | 1404750 | glutathione S-transferase, mu 7              | Gstm7 | 81869  | 1,11 | down |
| 5885618 | 7212638 | 1404751 | glutathione S-transferase, mu 7              | Gstm7 | 81869  | 1,10 | up   |

|         |         |         |                                                |       |        |      |      |
|---------|---------|---------|------------------------------------------------|-------|--------|------|------|
| 6287997 | 7339387 | 1718372 | glycerol kinase 5 (putative)                   | Gk5   | 367146 | 2,10 | down |
| 6501145 | 7339387 | 1718372 | glycerol kinase 5 (putative)                   | Gk5   | 367146 | 1,02 | up   |
| 5727089 | 7320712 | 1674093 | glycerol-3-phosphate dehydrogenase 1 (soluble) | Gpd1  | 60666  | 2,02 | down |
| 5937264 | 7320712 | 1674086 | glycerol-3-phosphate dehydrogenase 1 (soluble) | Gpd1  | 60666  | 1,36 | down |
| 6551154 | 7320712 | 1674092 | glycerol-3-phosphate dehydrogenase 1 (soluble) | Gpd1  | 60666  | 1,33 | up   |
| 6641409 | 7320712 | 1674093 | glycerol-3-phosphate dehydrogenase 1 (soluble) | Gpd1  | 60666  | 1,28 | up   |
| 6150253 | 7320712 | 1674092 | glycerol-3-phosphate dehydrogenase 1 (soluble) | Gpd1  | 60666  | 1,28 | down |
| 6075019 | 7320712 | 1674088 | glycerol-3-phosphate dehydrogenase 1 (soluble) | Gpd1  | 60666  | 1,22 | down |
| 6685159 | 7320712 | 1674092 | glycerol-3-phosphate dehydrogenase 1 (soluble) | Gpd1  | 60666  | 1,11 | up   |
| 6437689 | 7320712 | 1674087 | glycerol-3-phosphate dehydrogenase 1 (soluble) | Gpd1  | 60666  | 1,09 | down |
| 5637977 | 7320712 | 1674084 | glycerol-3-phosphate dehydrogenase 1 (soluble) | Gpd1  | 60666  | 1,08 | up   |
| 5999854 | 7320712 | 1674092 | glycerol-3-phosphate dehydrogenase 1 (soluble) | Gpd1  | 60666  | 1,05 | up   |
| 6249321 | 7320712 | 1674090 | glycerol-3-phosphate dehydrogenase 1 (soluble) | Gpd1  | 60666  | 1,03 | up   |
| 5927902 | 7320712 | 1674093 | glycerol-3-phosphate dehydrogenase 1 (soluble) | Gpd1  | 60666  | 1,03 | down |
| 5963889 | 7320712 | 1674089 | glycerol-3-phosphate dehydrogenase 1 (soluble) | Gpd1  | 60666  | 1,02 | up   |
| 5754875 | 7320712 | 1674091 | glycerol-3-phosphate dehydrogenase 1 (soluble) | Gpd1  | 60666  | 1,02 | up   |
| 5670498 | 7320712 | 1674085 | glycerol-3-phosphate dehydrogenase 1 (soluble) | Gpd1  | 60666  | 1,01 | up   |
| 6310312 | 7253531 | 1506301 | glycoprotein (transmembrane) nmb               | Gpnmb | 113955 | 2,64 | down |
| 6558013 | 7253531 | 1506292 | glycoprotein (transmembrane) nmb               | Gpnmb | 113955 | 1,90 | down |
| 5997323 | 7253531 | 1506297 | glycoprotein (transmembrane) nmb               | Gpnmb | 113955 | 1,77 | up   |
| 6103932 | 7253531 | 1506298 | glycoprotein (transmembrane) nmb               | Gpnmb | 113955 | 1,42 | down |
| 6003400 | 7253531 | 1506297 | glycoprotein (transmembrane) nmb               | Gpnmb | 113955 | 1,31 | up   |
| 5677685 | 7253531 | 1506299 | glycoprotein (transmembrane) nmb               | Gpnmb | 113955 | 1,30 | up   |
| 5718958 | 7253531 | 1506292 | glycoprotein (transmembrane) nmb               | Gpnmb | 113955 | 1,26 | up   |
| 5848063 | 7253531 | 1506296 | glycoprotein (transmembrane) nmb               | Gpnmb | 113955 | 1,26 | up   |
| 5993652 | 7253531 | 1506293 | glycoprotein (transmembrane) nmb               | Gpnmb | 113955 | 1,22 | up   |
| 5782339 | 7253531 | 1506303 | glycoprotein (transmembrane) nmb               | Gpnmb | 113955 | 1,17 | down |
| 6018871 | 7253531 | 1506295 | glycoprotein (transmembrane) nmb               | Gpnmb | 113955 | 1,16 | down |
| 5692697 | 7253531 | 1506302 | glycoprotein (transmembrane) nmb               | Gpnmb | 113955 | 1,14 | down |
| 5987686 | 7253531 | 1506294 | glycoprotein (transmembrane) nmb               | Gpnmb | 113955 | 1,09 | down |
| 5724544 | 7253531 | 1506300 | glycoprotein (transmembrane) nmb               | Gpnmb | 113955 | 1,04 | up   |
| 5873675 | 7056707 | 1024355 | glycoprotein 2 (zymogen granule membrane)      | Gp2   | 171459 | 2,65 | up   |
| 6169963 | 7056707 | 1024345 | glycoprotein 2 (zymogen granule membrane)      | Gp2   | 171459 | 2,28 | up   |
| 5815273 | 7056707 | 1024350 | glycoprotein 2 (zymogen granule membrane)      | Gp2   | 171459 | 1,56 | down |
| 6682546 | 7056707 | 1024348 | glycoprotein 2 (zymogen granule membrane)      | Gp2   | 171459 | 1,45 | up   |
| 6172057 | 7056707 | 1024355 | glycoprotein 2 (zymogen granule membrane)      | Gp2   | 171459 | 1,44 | up   |
| 6591598 | 7056707 | 1024347 | glycoprotein 2 (zymogen granule membrane)      | Gp2   | 171459 | 1,30 | down |
| 5753866 | 7056707 | 1024351 | glycoprotein 2 (zymogen granule membrane)      | Gp2   | 171459 | 1,22 | down |
| 6449605 | 7056707 | 1024352 | glycoprotein 2 (zymogen granule membrane)      | Gp2   | 171459 | 1,17 | down |
| 6351315 | 7056707 | 1024346 | glycoprotein 2 (zymogen granule membrane)      | Gp2   | 171459 | 1,13 | up   |
| 6655095 | 7056707 | 1024353 | glycoprotein 2 (zymogen granule membrane)      | Gp2   | 171459 | 1,05 | down |
| 6068810 | 7056707 | 1024354 | glycoprotein 2 (zymogen granule membrane)      | Gp2   | 171459 | 1,04 | down |
| 5834222 | 7056707 | 1024356 | glycoprotein 2 (zymogen granule membrane)      | Gp2   | 171459 | 1,02 | up   |
| 6610716 | 7056707 | 1024349 | glycoprotein 2 (zymogen granule membrane)      | Gp2   | 171459 | 1,02 | down |
| 5799899 | 7255892 | 1512187 | glycoprotein IX (platelet)                     | Gp9   | 502858 | 2,20 | up   |
| 6394316 | 7255892 | 1512187 | glycoprotein IX (platelet)                     | Gp9   | 502858 | 1,22 | up   |
| 5844774 | 7255892 | 1512187 | glycoprotein IX (platelet)                     | Gp9   | 502858 | 1,12 | up   |
| 6560283 | 7255892 | 1512187 | glycoprotein IX (platelet)                     | Gp9   | 502858 | 1,04 | down |
| 6458650 | 7255892 | 1512187 | glycoprotein IX (platelet)                     | Gp9   | 502858 | 1,04 | up   |
| 6436457 | 7237907 | 1468081 | glycoprotein, alpha-galactosyltransferase 1    | Ggta1 | 246766 | 2,60 | down |
| 6629399 | 7237907 | 1468082 | glycoprotein, alpha-galactosyltransferase 1    | Ggta1 | 246766 | 1,49 | up   |
| 6577928 | 7237907 | 1468082 | glycoprotein, alpha-galactosyltransferase 1    | Ggta1 | 246766 | 1,41 | up   |
| 5625071 | 7237907 | 1468080 | glycoprotein, alpha-galactosyltransferase 1    | Ggta1 | 246766 | 1,33 | down |
| 5806658 | 7237907 | 1468077 | glycoprotein, alpha-galactosyltransferase 1    | Ggta1 | 246766 | 1,27 | up   |
| 6150278 | 7237907 | 1468075 | glycoprotein, alpha-galactosyltransferase 1    | Ggta1 | 246766 | 1,26 | down |
| 5657159 | 7237907 | 1468076 | glycoprotein, alpha-galactosyltransferase 1    | Ggta1 | 246766 | 1,17 | up   |
| 6574494 | 7237907 | 1468081 | glycoprotein, alpha-galactosyltransferase 1    | Ggta1 | 246766 | 1,09 | up   |

|         |         |         |                                                                          |        |        |      |      |
|---------|---------|---------|--------------------------------------------------------------------------|--------|--------|------|------|
| 6189459 | 7318268 | 1668292 | glycosylphosphatidylinositol anchor attachment protein 1 homolog (yeast) | Gpaa1  | 300046 | 2,63 | up   |
| 5786666 | 7318268 | 1668280 | glycosylphosphatidylinositol anchor attachment protein 1 homolog (yeast) | Gpaa1  | 300046 | 1,90 | up   |
| 6563198 | 7318268 | 1668285 | glycosylphosphatidylinositol anchor attachment protein 1 homolog (yeast) | Gpaa1  | 300046 | 1,50 | up   |
| 5655525 | 7318268 | 1668286 | glycosylphosphatidylinositol anchor attachment protein 1 homolog (yeast) | Gpaa1  | 300046 | 1,34 | down |
| 5918517 | 7318268 | 1668291 | glycosylphosphatidylinositol anchor attachment protein 1 homolog (yeast) | Gpaa1  | 300046 | 1,27 | up   |
| 6372370 | 7318268 | 1668283 | glycosylphosphatidylinositol anchor attachment protein 1 homolog (yeast) | Gpaa1  | 300046 | 1,27 | up   |
| 5806140 | 7318268 | 1668284 | glycosylphosphatidylinositol anchor attachment protein 1 homolog (yeast) | Gpaa1  | 300046 | 1,23 | down |
| 5833525 | 7318268 | 1668288 | glycosylphosphatidylinositol anchor attachment protein 1 homolog (yeast) | Gpaa1  | 300046 | 1,18 | up   |
| 5806267 | 7318268 | 1668282 | glycosylphosphatidylinositol anchor attachment protein 1 homolog (yeast) | Gpaa1  | 300046 | 1,15 | down |
| 6274513 | 7318268 | 1668289 | glycosylphosphatidylinositol anchor attachment protein 1 homolog (yeast) | Gpaa1  | 300046 | 1,14 | down |
| 6409369 | 7318268 | 1668287 | glycosylphosphatidylinositol anchor attachment protein 1 homolog (yeast) | Gpaa1  | 300046 | 1,07 | down |
| 6354854 | 7318268 | 1668285 | glycosylphosphatidylinositol anchor attachment protein 1 homolog (yeast) | Gpaa1  | 300046 | 1,05 | down |
| 6351486 | 7318268 | 1668281 | glycosylphosphatidylinositol anchor attachment protein 1 homolog (yeast) | Gpaa1  | 300046 | 1,05 | up   |
| 6570714 | 7318268 | 1668289 | glycosylphosphatidylinositol anchor attachment protein 1 homolog (yeast) | Gpaa1  | 300046 | 1,04 | up   |
| 5839480 | 7318268 | 1668290 | glycosylphosphatidylinositol anchor attachment protein 1 homolog (yeast) | Gpaa1  | 300046 | 1,01 | down |
| 6156351 | 7238414 | 1469575 | glycosyltransferase-like domain containing 1                             | Gtdc1  | 362129 | 1,89 | down |
| 6384963 | 7238414 | 1469538 | glycosyltransferase-like domain containing 1                             | Gtdc1  | 362129 | 1,61 | up   |
| 5740086 | 7238414 | 1469539 | glycosyltransferase-like domain containing 1                             | Gtdc1  | 362129 | 1,55 | up   |
| 5725360 | 7238414 | 1469559 | glycosyltransferase-like domain containing 1                             | Gtdc1  | 362129 | 1,47 | down |
| 6162543 | 7238414 | 1469537 | glycosyltransferase-like domain containing 1                             | Gtdc1  | 362129 | 1,43 | up   |
| 5625465 | 7238414 | 1469559 | glycosyltransferase-like domain containing 1                             | Gtdc1  | 362129 | 1,30 | up   |
| 5904731 | 7238414 | 1469569 | glycosyltransferase-like domain containing 1                             | Gtdc1  | 362129 | 1,29 | up   |
| 6407084 | 7238414 | 1469578 | glycosyltransferase-like domain containing 1                             | Gtdc1  | 362129 | 1,26 | down |
| 5804885 | 7238414 | 1469552 | glycosyltransferase-like domain containing 1                             | Gtdc1  | 362129 | 1,20 | up   |
| 6475701 | 7238414 | 1469544 | glycosyltransferase-like domain containing 1                             | Gtdc1  | 362129 | 1,17 | down |
| 5787720 | 7238414 | 1469547 | glycosyltransferase-like domain containing 1                             | Gtdc1  | 362129 | 1,05 | down |
| 6511168 | 7238414 | 1469543 | glycosyltransferase-like domain containing 1                             | Gtdc1  | 362129 | 1,04 | down |
| 6696846 | 7238414 | 1469559 | glycosyltransferase-like domain containing 1                             | Gtdc1  | 362129 | 1,01 | down |
| 6360955 | 7238199 | 1468925 | golgi autoantigen, golgin subfamily a, 1                                 | Golga1 | 311919 | 2,32 | down |
| 6478237 | 7238199 | 1468927 | golgi autoantigen, golgin subfamily a, 1                                 | Golga1 | 311919 | 1,67 | down |
| 6278125 | 7238199 | 1468931 | golgi autoantigen, golgin subfamily a, 1                                 | Golga1 | 311919 | 1,55 | down |
| 6363386 | 7238199 | 1468915 | golgi autoantigen, golgin subfamily a, 1                                 | Golga1 | 311919 | 1,52 | down |
| 6395980 | 7238199 | 1468926 | golgi autoantigen, golgin subfamily a, 1                                 | Golga1 | 311919 | 1,42 | down |
| 6129160 | 7238199 | 1468916 | golgi autoantigen, golgin subfamily a, 1                                 | Golga1 | 311919 | 1,42 | up   |
| 5829434 | 7238199 | 1468911 | golgi autoantigen, golgin subfamily a, 1                                 | Golga1 | 311919 | 1,36 | down |
| 6664787 | 7238199 | 1468932 | golgi autoantigen, golgin subfamily a, 1                                 | Golga1 | 311919 | 1,31 | up   |
| 6318527 | 7238199 | 1468911 | golgi autoantigen, golgin subfamily a, 1                                 | Golga1 | 311919 | 1,26 | down |
| 6125860 | 7238199 | 1468920 | golgi autoantigen, golgin subfamily a, 1                                 | Golga1 | 311919 | 1,24 | up   |
| 6339021 | 7238199 | 1468911 | golgi autoantigen, golgin subfamily a, 1                                 | Golga1 | 311919 | 1,23 | up   |
| 5703921 | 7238199 | 1468912 | golgi autoantigen, golgin subfamily a, 1                                 | Golga1 | 311919 | 1,23 | down |
| 6551217 | 7238199 | 1468924 | golgi autoantigen, golgin subfamily a, 1                                 | Golga1 | 311919 | 1,18 | up   |
| 6210908 | 7238199 | 1468918 | golgi autoantigen, golgin subfamily a, 1                                 | Golga1 | 311919 | 1,17 | up   |
| 6185113 | 7238199 | 1468910 | golgi autoantigen, golgin subfamily a, 1                                 | Golga1 | 311919 | 1,15 | up   |
| 6100430 | 7238199 | 1468923 | golgi autoantigen, golgin subfamily a, 1                                 | Golga1 | 311919 | 1,14 | down |
| 6325377 | 7238199 | 1468933 | golgi autoantigen, golgin subfamily a, 1                                 | Golga1 | 311919 | 1,13 | up   |
| 5905448 | 7238199 | 1468928 | golgi autoantigen, golgin subfamily a, 1                                 | Golga1 | 311919 | 1,13 | up   |
| 6730547 | 7238199 | 1468921 | golgi autoantigen, golgin subfamily a, 1                                 | Golga1 | 311919 | 1,12 | down |
| 5661687 | 7238199 | 1468912 | golgi autoantigen, golgin subfamily a, 1                                 | Golga1 | 311919 | 1,10 | down |
| 6399419 | 7238199 | 1468932 | golgi autoantigen, golgin subfamily a, 1                                 | Golga1 | 311919 | 1,06 | up   |
| 6141347 | 7238199 | 1468930 | golgi autoantigen, golgin subfamily a, 1                                 | Golga1 | 311919 | 1,06 | down |
| 5887279 | 7238199 | 1468922 | golgi autoantigen, golgin subfamily a, 1                                 | Golga1 | 311919 | 1,06 | down |
| 5677552 | 7238199 | 1468914 | golgi autoantigen, golgin subfamily a, 1                                 | Golga1 | 311919 | 1,05 | up   |
| 6107654 | 7238199 | 1468926 | golgi autoantigen, golgin subfamily a, 1                                 | Golga1 | 311919 | 1,02 | down |
| 5697133 | 7238199 | 1468934 | golgi autoantigen, golgin subfamily a, 1                                 | Golga1 | 311919 | 1,02 | up   |
| 6479641 | 7238199 | 1468929 | golgi autoantigen, golgin subfamily a, 1                                 | Golga1 | 311919 | 1,01 | down |
| 6725847 | 7238199 | 1468913 | golgi autoantigen, golgin subfamily a, 1                                 | Golga1 | 311919 | 1,01 | up   |
| 6100398 | 7238199 | 1468922 | golgi autoantigen, golgin subfamily a, 1                                 | Golga1 | 311919 | 1,01 | up   |

|         |         |         |                                                         |         |        |      |      |
|---------|---------|---------|---------------------------------------------------------|---------|--------|------|------|
| 6659734 | 7238199 | 1468919 | golgi autoantigen, golgin subfamily a, 1                | Golga1  | 311919 | 1,01 | up   |
| 5912102 | 7341243 | 1723224 | golgi autoantigen, golgin subfamily a, 4                | Golga4  | 501069 | 1,42 | up   |
| 6662944 | 7341243 | 1723226 | golgi autoantigen, golgin subfamily a, 4                | Golga4  | 501069 | 1,40 | up   |
| 6516036 | 7341243 | 1723221 | golgi autoantigen, golgin subfamily a, 4                | Golga4  | 501069 | 1,22 | up   |
| 5631097 | 7341243 | 1723228 | golgi autoantigen, golgin subfamily a, 4                | Golga4  | 501069 | 1,13 | up   |
| 6320548 | 7341243 | 1723234 | golgi autoantigen, golgin subfamily a, 4                | Golga4  | 501069 | 1,11 | up   |
| 6325875 | 7341243 | 1723227 | golgi autoantigen, golgin subfamily a, 4                | Golga4  | 501069 | 1,09 | up   |
| 5805238 | 7341243 | 1723220 | golgi autoantigen, golgin subfamily a, 4                | Golga4  | 501069 | 1,09 | down |
| 5943782 | 7341243 | 1723220 | golgi autoantigen, golgin subfamily a, 4                | Golga4  | 501069 | 1,08 | up   |
| 6744617 | 7341243 | 1723229 | golgi autoantigen, golgin subfamily a, 4                | Golga4  | 501069 | 1,02 | up   |
| 6065047 | 7341243 | 1723222 | golgi autoantigen, golgin subfamily a, 4                | Golga4  | 501069 | 1,01 | down |
| 6415515 | 7147056 | 1243512 | golgi autoantigen, golgin subfamily a, 7                | Golga7  | 361171 | 2,15 | up   |
| 6366931 | 7147056 | 1243509 | golgi autoantigen, golgin subfamily a, 7                | Golga7  | 361171 | 1,39 | up   |
| 6739058 | 7147056 | 1243513 | golgi autoantigen, golgin subfamily a, 7                | Golga7  | 361171 | 1,22 | up   |
| 5904152 | 7147056 | 1243513 | golgi autoantigen, golgin subfamily a, 7                | Golga7  | 361171 | 1,15 | down |
| 5655203 | 7147056 | 1243508 | golgi autoantigen, golgin subfamily a, 7                | Golga7  | 361171 | 1,13 | down |
| 6018439 | 7147056 | 1243513 | golgi autoantigen, golgin subfamily a, 7                | Golga7  | 361171 | 1,10 | up   |
| 5718035 | 7147056 | 1243510 | golgi autoantigen, golgin subfamily a, 7                | Golga7  | 361171 | 1,02 | down |
| 5703791 | 7147056 | 1243511 | golgi autoantigen, golgin subfamily a, 7                | Golga7  | 361171 | 1,01 | up   |
| 6108232 | 7209811 | 1398667 | golgi integral membrane protein 4                       | Golim4  | 310526 | 1,63 | down |
| 5794268 | 7209811 | 1398665 | golgi integral membrane protein 4                       | Golim4  | 310526 | 1,46 | up   |
| 5844353 | 7209811 | 1398672 | golgi integral membrane protein 4                       | Golim4  | 310526 | 1,39 | up   |
| 5755460 | 7209811 | 1398672 | golgi integral membrane protein 4                       | Golim4  | 310526 | 1,36 | up   |
| 6049152 | 7209811 | 1398669 | golgi integral membrane protein 4                       | Golim4  | 310526 | 1,24 | up   |
| 6235287 | 7209811 | 1398671 | golgi integral membrane protein 4                       | Golim4  | 310526 | 1,18 | down |
| 6307586 | 7209811 | 1398664 | golgi integral membrane protein 4                       | Golim4  | 310526 | 1,16 | up   |
| 6626560 | 7209811 | 1398666 | golgi integral membrane protein 4                       | Golim4  | 310526 | 1,12 | down |
| 5831029 | 7209811 | 1398670 | golgi integral membrane protein 4                       | Golim4  | 310526 | 1,11 | up   |
| 6667527 | 7209811 | 1398668 | golgi integral membrane protein 4                       | Golim4  | 310526 | 1,09 | down |
| 5622862 | 7209811 | 1398664 | golgi integral membrane protein 4                       | Golim4  | 310526 | 1,01 | up   |
| 6711979 | 7209811 | 1398671 | golgi integral membrane protein 4                       | Golim4  | 310526 | 1,00 | up   |
| 5927520 | 7225370 | 1435509 | G-protein signaling modulator 1 (AGS3-like, C. elegans) | Gpsm1   | 246254 | 2,34 | up   |
| 6640138 | 7225370 | 1435511 | G-protein signaling modulator 1 (AGS3-like, C. elegans) | Gpsm1   | 246254 | 1,96 | down |
| 5941214 | 7225370 | 1435510 | G-protein signaling modulator 1 (AGS3-like, C. elegans) | Gpsm1   | 246254 | 1,91 | up   |
| 6172595 | 7225370 | 1435515 | G-protein signaling modulator 1 (AGS3-like, C. elegans) | Gpsm1   | 246254 | 1,69 | up   |
| 5912529 | 7225370 | 1435508 | G-protein signaling modulator 1 (AGS3-like, C. elegans) | Gpsm1   | 246254 | 1,67 | up   |
| 5840766 | 7225370 | 1435512 | G-protein signaling modulator 1 (AGS3-like, C. elegans) | Gpsm1   | 246254 | 1,66 | up   |
| 6309485 | 7225370 | 1435519 | G-protein signaling modulator 1 (AGS3-like, C. elegans) | Gpsm1   | 246254 | 1,59 | down |
| 5644711 | 7225370 | 1435508 | G-protein signaling modulator 1 (AGS3-like, C. elegans) | Gpsm1   | 246254 | 1,49 | up   |
| 5886276 | 7225370 | 1435516 | G-protein signaling modulator 1 (AGS3-like, C. elegans) | Gpsm1   | 246254 | 1,38 | up   |
| 6735653 | 7225370 | 1435522 | G-protein signaling modulator 1 (AGS3-like, C. elegans) | Gpsm1   | 246254 | 1,35 | down |
| 6501212 | 7225370 | 1435514 | G-protein signaling modulator 1 (AGS3-like, C. elegans) | Gpsm1   | 246254 | 1,33 | up   |
| 5763792 | 7225370 | 1435521 | G-protein signaling modulator 1 (AGS3-like, C. elegans) | Gpsm1   | 246254 | 1,33 | down |
| 6534917 | 7225370 | 1435518 | G-protein signaling modulator 1 (AGS3-like, C. elegans) | Gpsm1   | 246254 | 1,26 | up   |
| 6125603 | 7225370 | 1435522 | G-protein signaling modulator 1 (AGS3-like, C. elegans) | Gpsm1   | 246254 | 1,20 | down |
| 6132089 | 7225370 | 1435520 | G-protein signaling modulator 1 (AGS3-like, C. elegans) | Gpsm1   | 246254 | 1,19 | down |
| 5655391 | 7225370 | 1435513 | G-protein signaling modulator 1 (AGS3-like, C. elegans) | Gpsm1   | 246254 | 1,19 | up   |
| 6228702 | 7225370 | 1435519 | G-protein signaling modulator 1 (AGS3-like, C. elegans) | Gpsm1   | 246254 | 1,17 | down |
| 5681552 | 7225370 | 1435517 | G-protein signaling modulator 1 (AGS3-like, C. elegans) | Gpsm1   | 246254 | 1,04 | up   |
| 5907498 | 7088164 | 1098458 | GRAM domain containing 1C                               | Gramd1c | 360717 | 1,46 | up   |
| 5682361 | 7336854 | 1711685 | GRAM domain containing 2                                | Gramd2  | 300761 | 1,17 | up   |
| 6189266 | 7319627 | 1671260 | GRAM domain containing 4                                | Gramd4  | 315203 | 2,03 | up   |
| 6109905 | 7319627 | 1671267 | GRAM domain containing 4                                | Gramd4  | 315203 | 1,73 | down |
| 6410460 | 7319627 | 1671257 | GRAM domain containing 4                                | Gramd4  | 315203 | 1,57 | up   |
| 6104314 | 7319627 | 1671249 | GRAM domain containing 4                                | Gramd4  | 315203 | 1,57 | up   |
| 6130783 | 7319627 | 1671250 | GRAM domain containing 4                                | Gramd4  | 315203 | 1,57 | down |
| 6193019 | 7319627 | 1671232 | GRAM domain containing 4                                | Gramd4  | 315203 | 1,53 | down |

|         |         |         |                                              |         |        |      |      |
|---------|---------|---------|----------------------------------------------|---------|--------|------|------|
| 6294255 | 7319627 | 1671241 | GRAM domain containing 4                     | Gramd4  | 315203 | 1,52 | up   |
| 5762285 | 7319627 | 1671254 | GRAM domain containing 4                     | Gramd4  | 315203 | 1,49 | down |
| 6554266 | 7319627 | 1671240 | GRAM domain containing 4                     | Gramd4  | 315203 | 1,47 | down |
| 5652492 | 7319627 | 1671263 | GRAM domain containing 4                     | Gramd4  | 315203 | 1,46 | down |
| 6697677 | 7319627 | 1671267 | GRAM domain containing 4                     | Gramd4  | 315203 | 1,44 | down |
| 6254763 | 7319627 | 1671264 | GRAM domain containing 4                     | Gramd4  | 315203 | 1,41 | down |
| 5824980 | 7319627 | 1671255 | GRAM domain containing 4                     | Gramd4  | 315203 | 1,28 | down |
| 5990775 | 7319627 | 1671258 | GRAM domain containing 4                     | Gramd4  | 315203 | 1,27 | up   |
| 6044074 | 7319627 | 1671262 | GRAM domain containing 4                     | Gramd4  | 315203 | 1,25 | up   |
| 6086580 | 7319627 | 1671256 | GRAM domain containing 4                     | Gramd4  | 315203 | 1,25 | up   |
| 6200795 | 7319627 | 1671252 | GRAM domain containing 4                     | Gramd4  | 315203 | 1,24 | up   |
| 6308671 | 7319627 | 1671253 | GRAM domain containing 4                     | Gramd4  | 315203 | 1,22 | down |
| 6223055 | 7319627 | 1671265 | GRAM domain containing 4                     | Gramd4  | 315203 | 1,14 | down |
| 5667912 | 7319627 | 1671266 | GRAM domain containing 4                     | Gramd4  | 315203 | 1,08 | down |
| 6702349 | 7319627 | 1671259 | GRAM domain containing 4                     | Gramd4  | 315203 | 1,01 | up   |
| 6043892 | 7235092 | 1461079 | granulosa cell HMG-box protein 1             | Gcx1    | 311615 | 2,49 | down |
| 6158881 | 7235092 | 1461088 | granulosa cell HMG-box protein 1             | Gcx1    | 311615 | 1,68 | down |
| 6613961 | 7235092 | 1461081 | granulosa cell HMG-box protein 1             | Gcx1    | 311615 | 1,67 | up   |
| 6524954 | 7235092 | 1461089 | granulosa cell HMG-box protein 1             | Gcx1    | 311615 | 1,31 | down |
| 5811591 | 7235092 | 1461081 | granulosa cell HMG-box protein 1             | Gcx1    | 311615 | 1,30 | down |
| 6424116 | 7235092 | 1461084 | granulosa cell HMG-box protein 1             | Gcx1    | 311615 | 1,22 | down |
| 6001442 | 7235092 | 1461082 | granulosa cell HMG-box protein 1             | Gcx1    | 311615 | 1,17 | up   |
| 6567533 | 7235092 | 1461086 | granulosa cell HMG-box protein 1             | Gcx1    | 311615 | 1,15 | down |
| 5959285 | 7235092 | 1461089 | granulosa cell HMG-box protein 1             | Gcx1    | 311615 | 1,15 | down |
| 6358077 | 7235092 | 1461083 | granulosa cell HMG-box protein 1             | Gcx1    | 311615 | 1,12 | up   |
| 6169123 | 7235092 | 1461085 | granulosa cell HMG-box protein 1             | Gcx1    | 311615 | 1,11 | up   |
| 6172424 | 7235092 | 1461087 | granulosa cell HMG-box protein 1             | Gcx1    | 311615 | 1,07 | up   |
| 5896046 | 7235092 | 1461080 | granulosa cell HMG-box protein 1             | Gcx1    | 311615 | 1,06 | down |
| 6626692 | 7235092 | 1461086 | granulosa cell HMG-box protein 1             | Gcx1    | 311615 | 1,06 | up   |
| 5995861 | 7235092 | 1461086 | granulosa cell HMG-box protein 1             | Gcx1    | 311615 | 1,05 | down |
| 5712385 | 7138456 | 1222179 | granzyme B                                   | Gzmb    | 171528 | 2,17 | up   |
| 5700071 | 7138456 | 1222182 | granzyme B                                   | Gzmb    | 171528 | 1,35 | down |
| 6589603 | 7138456 | 1222178 | granzyme B                                   | Gzmb    | 171528 | 1,28 | down |
| 6547730 | 7138456 | 1222180 | granzyme B                                   | Gzmb    | 171528 | 1,21 | up   |
| 6216895 | 7138456 | 1222181 | granzyme B                                   | Gzmb    | 171528 | 1,12 | up   |
| 6088380 | 7138456 | 1222178 | granzyme B                                   | Gzmb    | 171528 | 1,08 | down |
| 5753943 | 7138456 | 1222178 | granzyme B                                   | Gzmb    | 171528 | 1,07 | down |
| 6368677 | 7138456 | 1222178 | granzyme B                                   | Gzmb    | 171528 | 1,04 | up   |
| 6141789 | 7180166 | 1325238 | GRB2-associated binding protein 1            | Gab1    | 361388 | 2,41 | down |
| 6654389 | 7180166 | 1325233 | GRB2-associated binding protein 1            | Gab1    | 361388 | 1,27 | up   |
| 6100785 | 7180166 | 1325227 | GRB2-associated binding protein 1            | Gab1    | 361388 | 1,20 | up   |
| 6496963 | 7180166 | 1325247 | GRB2-associated binding protein 1            | Gab1    | 361388 | 1,19 | up   |
| 6740303 | 7180166 | 1325245 | GRB2-associated binding protein 1            | Gab1    | 361388 | 1,18 | up   |
| 5781136 | 7180166 | 1325238 | GRB2-associated binding protein 1            | Gab1    | 361388 | 1,18 | down |
| 6699558 | 7180166 | 1325246 | GRB2-associated binding protein 1            | Gab1    | 361388 | 1,15 | down |
| 6672658 | 7180166 | 1325248 | GRB2-associated binding protein 1            | Gab1    | 361388 | 1,10 | up   |
| 5899995 | 7180166 | 1325245 | GRB2-associated binding protein 1            | Gab1    | 361388 | 1,10 | down |
| 5633502 | 7180166 | 1325241 | GRB2-associated binding protein 1            | Gab1    | 361388 | 1,07 | up   |
| 6394467 | 7180166 | 1325244 | GRB2-associated binding protein 1            | Gab1    | 361388 | 1,04 | up   |
| 5698043 | 7180166 | 1325236 | GRB2-associated binding protein 1            | Gab1    | 361388 | 1,04 | up   |
| 6458750 | 7180166 | 1325240 | GRB2-associated binding protein 1            | Gab1    | 361388 | 1,04 | down |
| 5804518 | 7180166 | 1325238 | GRB2-associated binding protein 1            | Gab1    | 361388 | 1,04 | down |
| 5794242 | 7322066 | 1676750 | growth arrest and DNA-damage-inducible, beta | Gadd45b | 299626 | 4,14 | down |
| 5723516 | 7322066 | 1676754 | growth arrest and DNA-damage-inducible, beta | Gadd45b | 299626 | 2,27 | down |
| 5735005 | 7322066 | 1676754 | growth arrest and DNA-damage-inducible, beta | Gadd45b | 299626 | 2,17 | up   |
| 5936827 | 7322066 | 1676752 | growth arrest and DNA-damage-inducible, beta | Gadd45b | 299626 | 2,02 | up   |
| 6113570 | 7322066 | 1676753 | growth arrest and DNA-damage-inducible, beta | Gadd45b | 299626 | 1,18 | up   |

|         |         |         |                                                                     |            |        |      |      |
|---------|---------|---------|---------------------------------------------------------------------|------------|--------|------|------|
| 5840097 | 7322066 | 1676751 | growth arrest and DNA-damage-inducible, beta                        | Gadd45b    | 299626 | 1,10 | down |
| 6392477 | 7184026 | 1335671 | growth arrest and DNA-damage-inducible, gamma interacting protein 1 | Gadd45gip1 | 288916 | 2,29 | down |
| 6059206 | 7184026 | 1335671 | growth arrest and DNA-damage-inducible, gamma interacting protein 1 | Gadd45gip1 | 288916 | 1,80 | down |
| 5738560 | 7184026 | 1335671 | growth arrest and DNA-damage-inducible, gamma interacting protein 1 | Gadd45gip1 | 288916 | 1,26 | up   |
| 5624709 | 7184026 | 1335672 | growth arrest and DNA-damage-inducible, gamma interacting protein 1 | Gadd45gip1 | 288916 | 1,11 | up   |
| 6567906 | 7184026 | 1335672 | growth arrest and DNA-damage-inducible, gamma interacting protein 1 | Gadd45gip1 | 288916 | 1,10 | up   |
| 5777514 | 7184026 | 1335673 | growth arrest and DNA-damage-inducible, gamma interacting protein 1 | Gadd45gip1 | 288916 | 1,07 | down |
| 5898403 | 7184026 | 1335672 | growth arrest and DNA-damage-inducible, gamma interacting protein 1 | Gadd45gip1 | 288916 | 1,06 | up   |
| 6052010 | 7075371 | 1069136 | growth factor, augmenter of liver regeneration                      | Gfer       | 27100  | 4,67 | down |
| 5652366 | 7075371 | 1069136 | growth factor, augmenter of liver regeneration                      | Gfer       | 27100  | 2,04 | down |
| 5891488 | 7075371 | 1069132 | growth factor, augmenter of liver regeneration                      | Gfer       | 27100  | 1,57 | up   |
| 5751669 | 7075371 | 1069133 | growth factor, augmenter of liver regeneration                      | Gfer       | 27100  | 1,46 | up   |
| 6685472 | 7075371 | 1069135 | growth factor, augmenter of liver regeneration                      | Gfer       | 27100  | 1,42 | down |
| 6020432 | 7075371 | 1069134 | growth factor, augmenter of liver regeneration                      | Gfer       | 27100  | 1,37 | up   |
| 6212758 | 7075371 | 1069135 | growth factor, augmenter of liver regeneration                      | Gfer       | 27100  | 1,29 | up   |
| 6547916 | 7204548 | 1386286 | growth hormone receptor                                             | Ghr        | 25235  | 2,06 | up   |
| 6420098 | 7204548 | 1386285 | growth hormone receptor                                             | Ghr        | 25235  | 1,52 | up   |
| 6644537 | 7204548 | 1386284 | growth hormone receptor                                             | Ghr        | 25235  | 1,16 | up   |
| 6706391 | 7204548 | 1386282 | growth hormone receptor                                             | Ghr        | 25235  | 1,16 | up   |
| 6408634 | 7204548 | 1386283 | growth hormone receptor                                             | Ghr        | 25235  | 1,14 | down |
| 6000883 | 7204548 | 1386287 | growth hormone receptor                                             | Ghr        | 25235  | 1,13 | up   |
| 5836630 | 7204548 | 1386292 | growth hormone receptor                                             | Ghr        | 25235  | 1,12 | up   |
| 5765782 | 7204548 | 1386293 | growth hormone receptor                                             | Ghr        | 25235  | 1,11 | down |
| 6589487 | 7204548 | 1386291 | growth hormone receptor                                             | Ghr        | 25235  | 1,10 | up   |
| 6191549 | 7204548 | 1386289 | growth hormone receptor                                             | Ghr        | 25235  | 1,09 | down |
| 6400353 | 7204548 | 1386290 | growth hormone receptor                                             | Ghr        | 25235  | 1,08 | down |
| 5935282 | 7204548 | 1386288 | growth hormone receptor                                             | Ghr        | 25235  | 1,08 | up   |
| 5671485 | 7204548 | 1386283 | growth hormone receptor                                             | Ghr        | 25235  | 1,02 | up   |
| 6122584 | 7204548 | 1386282 | growth hormone receptor                                             | Ghr        | 25235  | 1,02 | down |
| 5712568 | 7204548 | 1386288 | growth hormone receptor                                             | Ghr        | 25235  | 1,00 | up   |
| 5915996 | 7254053 | 1507649 | growth hormone releasing hormone receptor                           | Ghrhr      | 25321  | 2,63 | up   |
| 5758501 | 7254053 | 1507645 | growth hormone releasing hormone receptor                           | Ghrhr      | 25321  | 2,16 | up   |
| 6676718 | 7254053 | 1507646 | growth hormone releasing hormone receptor                           | Ghrhr      | 25321  | 1,64 | up   |
| 6660261 | 7254053 | 1507647 | growth hormone releasing hormone receptor                           | Ghrhr      | 25321  | 1,56 | up   |
| 6691460 | 7254053 | 1507642 | growth hormone releasing hormone receptor                           | Ghrhr      | 25321  | 1,51 | down |
| 6175025 | 7254053 | 1507652 | growth hormone releasing hormone receptor                           | Ghrhr      | 25321  | 1,50 | down |
| 6616927 | 7254053 | 1507643 | growth hormone releasing hormone receptor                           | Ghrhr      | 25321  | 1,44 | up   |
| 6578067 | 7254053 | 1507644 | growth hormone releasing hormone receptor                           | Ghrhr      | 25321  | 1,34 | up   |
| 6383772 | 7254053 | 1507649 | growth hormone releasing hormone receptor                           | Ghrhr      | 25321  | 1,31 | up   |
| 5617709 | 7254053 | 1507650 | growth hormone releasing hormone receptor                           | Ghrhr      | 25321  | 1,27 | down |
| 5929495 | 7254053 | 1507652 | growth hormone releasing hormone receptor                           | Ghrhr      | 25321  | 1,22 | up   |
| 5685655 | 7254053 | 1507641 | growth hormone releasing hormone receptor                           | Ghrhr      | 25321  | 1,20 | up   |
| 6008238 | 7254053 | 1507640 | growth hormone releasing hormone receptor                           | Ghrhr      | 25321  | 1,19 | down |
| 6237163 | 7254053 | 1507639 | growth hormone releasing hormone receptor                           | Ghrhr      | 25321  | 1,15 | up   |
| 6596016 | 7254053 | 1507652 | growth hormone releasing hormone receptor                           | Ghrhr      | 25321  | 1,10 | down |
| 6305004 | 7254053 | 1507638 | growth hormone releasing hormone receptor                           | Ghrhr      | 25321  | 1,09 | up   |
| 6232899 | 7254053 | 1507651 | growth hormone releasing hormone receptor                           | Ghrhr      | 25321  | 1,00 | up   |
| 6246023 | 7237814 | 1467814 | GTPase activating protein and VPS9 domains 1                        | Gapvd1     | 311880 | 1,36 | up   |
| 6395220 | 7237814 | 1467847 | GTPase activating protein and VPS9 domains 1                        | Gapvd1     | 311880 | 1,26 | down |
| 6277106 | 7237814 | 1467849 | GTPase activating protein and VPS9 domains 1                        | Gapvd1     | 311880 | 1,19 | down |
| 5661017 | 7237814 | 1467845 | GTPase activating protein and VPS9 domains 1                        | Gapvd1     | 311880 | 1,08 | up   |
| 6051153 | 7237814 | 1467848 | GTPase activating protein and VPS9 domains 1                        | Gapvd1     | 311880 | 1,06 | down |
| 6717249 | 7088072 | 1098277 | GTP-binding protein 8 (putative)                                    | Gtpbp8     | 360714 | 2,07 | up   |
| 6237441 | 7088072 | 1098281 | GTP-binding protein 8 (putative)                                    | Gtpbp8     | 360714 | 1,39 | down |
| 6367701 | 7088072 | 1098279 | GTP-binding protein 8 (putative)                                    | Gtpbp8     | 360714 | 1,35 | up   |
| 6381934 | 7088072 | 1098280 | GTP-binding protein 8 (putative)                                    | Gtpbp8     | 360714 | 1,33 | up   |
| 6033870 | 7088072 | 1098283 | GTP-binding protein 8 (putative)                                    | Gtpbp8     | 360714 | 1,23 | down |

|         |         |         |                                                         |        |        |       |      |
|---------|---------|---------|---------------------------------------------------------|--------|--------|-------|------|
| 6290372 | 7088072 | 1098277 | GTP-binding protein 8 (putative)                        | Gtpbp8 | 360714 | 1,19  | down |
| 5881721 | 7088072 | 1098278 | GTP-binding protein 8 (putative)                        | Gtpbp8 | 360714 | 1,12  | down |
| 6729362 | 7088072 | 1098282 | GTP-binding protein 8 (putative)                        | Gtpbp8 | 360714 | 1,06  | up   |
| 6510557 | 7200505 | 1376820 | guanine nucleotide binding protein (G protein), gamma 5 | Gng5   | 79218  | 3,18  | down |
| 6341622 | 7200505 | 1376820 | guanine nucleotide binding protein (G protein), gamma 5 | Gng5   | 79218  | 2,01  | up   |
| 5731757 | 7200505 | 1376822 | guanine nucleotide binding protein (G protein), gamma 5 | Gng5   | 79218  | 1,67  | down |
| 6299681 | 7200505 | 1376821 | guanine nucleotide binding protein (G protein), gamma 5 | Gng5   | 79218  | 1,49  | up   |
| 6301406 | 7200505 | 1376822 | guanine nucleotide binding protein (G protein), gamma 5 | Gng5   | 79218  | 1,34  | up   |
| 6148449 | 7200505 | 1376820 | guanine nucleotide binding protein (G protein), gamma 5 | Gng5   | 79218  | 1,02  | down |
| 5628015 | 7349943 | 1744899 | guanine nucleotide binding protein, alpha transducing 1 | Gnat1  | 363143 | 2,56  | down |
| 6742331 | 7349943 | 1744893 | guanine nucleotide binding protein, alpha transducing 1 | Gnat1  | 363143 | 1,53  | down |
| 6169436 | 7349943 | 1744896 | guanine nucleotide binding protein, alpha transducing 1 | Gnat1  | 363143 | 1,52  | down |
| 6720325 | 7349943 | 1744899 | guanine nucleotide binding protein, alpha transducing 1 | Gnat1  | 363143 | 1,29  | down |
| 5878609 | 7349943 | 1744895 | guanine nucleotide binding protein, alpha transducing 1 | Gnat1  | 363143 | 1,27  | up   |
| 6479145 | 7349943 | 1744897 | guanine nucleotide binding protein, alpha transducing 1 | Gnat1  | 363143 | 1,19  | down |
| 5775417 | 7349943 | 1744891 | guanine nucleotide binding protein, alpha transducing 1 | Gnat1  | 363143 | 1,11  | up   |
| 6485768 | 7349943 | 1744898 | guanine nucleotide binding protein, alpha transducing 1 | Gnat1  | 363143 | 1,09  | up   |
| 6692868 | 7349943 | 1744894 | guanine nucleotide binding protein, alpha transducing 1 | Gnat1  | 363143 | 1,05  | up   |
| 5688460 | 7349943 | 1744890 | guanine nucleotide binding protein, alpha transducing 1 | Gnat1  | 363143 | 1,03  | down |
| 6278081 | 7148721 | 1247783 | guanine nucleotide binding protein-like 3 (nucleolar)   | Gnl3   | 290556 | 2,22  | down |
| 6452277 | 7148721 | 1247784 | guanine nucleotide binding protein-like 3 (nucleolar)   | Gnl3   | 290556 | 1,99  | down |
| 5775625 | 7148721 | 1247795 | guanine nucleotide binding protein-like 3 (nucleolar)   | Gnl3   | 290556 | 1,88  | up   |
| 6086888 | 7148721 | 1247782 | guanine nucleotide binding protein-like 3 (nucleolar)   | Gnl3   | 290556 | 1,84  | down |
| 6317045 | 7148721 | 1247786 | guanine nucleotide binding protein-like 3 (nucleolar)   | Gnl3   | 290556 | 1,61  | down |
| 6055813 | 7148721 | 1247791 | guanine nucleotide binding protein-like 3 (nucleolar)   | Gnl3   | 290556 | 1,44  | down |
| 5869361 | 7148721 | 1247788 | guanine nucleotide binding protein-like 3 (nucleolar)   | Gnl3   | 290556 | 1,25  | up   |
| 5895938 | 7148721 | 1247794 | guanine nucleotide binding protein-like 3 (nucleolar)   | Gnl3   | 290556 | 1,19  | down |
| 6315913 | 7148721 | 1247792 | guanine nucleotide binding protein-like 3 (nucleolar)   | Gnl3   | 290556 | 1,18  | up   |
| 6049385 | 7148721 | 1247793 | guanine nucleotide binding protein-like 3 (nucleolar)   | Gnl3   | 290556 | 1,16  | down |
| 5975346 | 7148721 | 1247789 | guanine nucleotide binding protein-like 3 (nucleolar)   | Gnl3   | 290556 | 1,15  | up   |
| 6632659 | 7148721 | 1247787 | guanine nucleotide binding protein-like 3 (nucleolar)   | Gnl3   | 290556 | 1,11  | up   |
| 6013226 | 7148721 | 1247790 | guanine nucleotide binding protein-like 3 (nucleolar)   | Gnl3   | 290556 | 1,09  | down |
| 6372384 | 7148721 | 1247796 | guanine nucleotide binding protein-like 3 (nucleolar)   | Gnl3   | 290556 | 1,03  | down |
| 6039232 | 7148721 | 1247785 | guanine nucleotide binding protein-like 3 (nucleolar)   | Gnl3   | 290556 | 1,02  | up   |
| 6557545 | 7162996 | 1282246 | guanosine monophosphate reductase                       | Gmpr   | 117533 | 2,53  | down |
| 5962261 | 7162996 | 1282251 | guanosine monophosphate reductase                       | Gmpr   | 117533 | 1,44  | up   |
| 6429830 | 7162996 | 1282243 | guanosine monophosphate reductase                       | Gmpr   | 117533 | 1,28  | down |
| 5618210 | 7162996 | 1282250 | guanosine monophosphate reductase                       | Gmpr   | 117533 | 1,18  | up   |
| 6196866 | 7162996 | 1282248 | guanosine monophosphate reductase                       | Gmpr   | 117533 | 1,17  | down |
| 6409309 | 7162996 | 1282247 | guanosine monophosphate reductase                       | Gmpr   | 117533 | 1,16  | down |
| 6400218 | 7162996 | 1282245 | guanosine monophosphate reductase                       | Gmpr   | 117533 | 1,15  | up   |
| 6358780 | 7162996 | 1282251 | guanosine monophosphate reductase                       | Gmpr   | 117533 | 1,07  | down |
| 5823105 | 7162996 | 1282244 | guanosine monophosphate reductase                       | Gmpr   | 117533 | 1,05  | up   |
| 5940631 | 7162996 | 1282249 | guanosine monophosphate reductase                       | Gmpr   | 117533 | 1,03  | up   |
| 5891968 | 7200128 | 1375981 | guanylate binding protein 2                             | Gbp2   | 171164 | 17,78 | down |
| 6468900 | 7200128 | 1375982 | guanylate binding protein 2                             | Gbp2   | 171164 | 2,80  | down |
| 5963536 | 7200128 | 1375983 | guanylate binding protein 2                             | Gbp2   | 171164 | 2,46  | up   |
| 5726773 | 7200128 | 1375989 | guanylate binding protein 2                             | Gbp2   | 171164 | 2,40  | up   |
| 6176140 | 7200128 | 1375987 | guanylate binding protein 2                             | Gbp2   | 171164 | 2,40  | down |
| 6296413 | 7200128 | 1375984 | guanylate binding protein 2                             | Gbp2   | 171164 | 2,26  | down |
| 6355647 | 7200128 | 1375985 | guanylate binding protein 2                             | Gbp2   | 171164 | 2,19  | up   |
| 6407077 | 7200128 | 1375990 | guanylate binding protein 2                             | Gbp2   | 171164 | 2,17  | up   |
| 6391060 | 7200128 | 1375988 | guanylate binding protein 2                             | Gbp2   | 171164 | 1,20  | up   |
| 6215275 | 7200128 | 1375986 | guanylate binding protein 2                             | Gbp2   | 171164 | 1,12  | down |
| 6274914 | 7200128 | 1375990 | guanylate binding protein 2                             | Gbp2   | 171164 | 1,02  | up   |
| 6423169 | 7034407 | 972326  | guanylate cyclase 2d                                    | Gucy2d | 113911 | 2,46  | up   |
| 6661748 | 7034407 | 972315  | guanylate cyclase 2d                                    | Gucy2d | 113911 | 1,47  | down |



|         |         |         |                                   |         |        |      |      |
|---------|---------|---------|-----------------------------------|---------|--------|------|------|
| 6294001 | 7034407 | 972320  | guanylate cyclase 2d              | Gucy2d  | 113911 | 1,41 | down |
| 6675355 | 7034407 | 972318  | guanylate cyclase 2d              | Gucy2d  | 113911 | 1,37 | down |
| 6666273 | 7034407 | 972310  | guanylate cyclase 2d              | Gucy2d  | 113911 | 1,36 | down |
| 6569258 | 7034407 | 972321  | guanylate cyclase 2d              | Gucy2d  | 113911 | 1,30 | down |
| 6054534 | 7034407 | 972314  | guanylate cyclase 2d              | Gucy2d  | 113911 | 1,29 | down |
| 6074029 | 7034407 | 972324  | guanylate cyclase 2d              | Gucy2d  | 113911 | 1,26 | up   |
| 5744054 | 7034407 | 972317  | guanylate cyclase 2d              | Gucy2d  | 113911 | 1,23 | down |
| 6321521 | 7034407 | 972325  | guanylate cyclase 2d              | Gucy2d  | 113911 | 1,19 | down |
| 5929528 | 7034407 | 972310  | guanylate cyclase 2d              | Gucy2d  | 113911 | 1,17 | up   |
| 5948418 | 7034407 | 972323  | guanylate cyclase 2d              | Gucy2d  | 113911 | 1,13 | up   |
| 5721161 | 7034407 | 972318  | guanylate cyclase 2d              | Gucy2d  | 113911 | 1,12 | down |
| 6652412 | 7034407 | 972310  | guanylate cyclase 2d              | Gucy2d  | 113911 | 1,10 | down |
| 6589087 | 7034407 | 972313  | guanylate cyclase 2d              | Gucy2d  | 113911 | 1,08 | down |
| 5845630 | 7034407 | 972326  | guanylate cyclase 2d              | Gucy2d  | 113911 | 1,07 | up   |
| 5705588 | 7034407 | 972316  | guanylate cyclase 2d              | Gucy2d  | 113911 | 1,07 | up   |
| 6043139 | 7034407 | 972312  | guanylate cyclase 2d              | Gucy2d  | 113911 | 1,06 | up   |
| 6072244 | 7034407 | 972327  | guanylate cyclase 2d              | Gucy2d  | 113911 | 1,05 | down |
| 6587177 | 7034407 | 972311  | guanylate cyclase 2d              | Gucy2d  | 113911 | 1,04 | up   |
| 5677000 | 7034407 | 972322  | guanylate cyclase 2d              | Gucy2d  | 113911 | 1,04 | down |
| 6732617 | 7034407 | 972319  | guanylate cyclase 2d              | Gucy2d  | 113911 | 1,03 | up   |
| 5671592 | 7078953 | 1077279 | guanylate cyclase 2e              | Gucy2e  | 79222  | 2,41 | up   |
| 6048050 | 7078953 | 1077270 | guanylate cyclase 2e              | Gucy2e  | 79222  | 1,56 | up   |
| 6512679 | 7078953 | 1077275 | guanylate cyclase 2e              | Gucy2e  | 79222  | 1,38 | down |
| 6406307 | 7078953 | 1077269 | guanylate cyclase 2e              | Gucy2e  | 79222  | 1,38 | up   |
| 5825574 | 7078953 | 1077263 | guanylate cyclase 2e              | Gucy2e  | 79222  | 1,35 | up   |
| 6117637 | 7078953 | 1077276 | guanylate cyclase 2e              | Gucy2e  | 79222  | 1,34 | down |
| 6105547 | 7078953 | 1077271 | guanylate cyclase 2e              | Gucy2e  | 79222  | 1,31 | down |
| 6516549 | 7078953 | 1077274 | guanylate cyclase 2e              | Gucy2e  | 79222  | 1,26 | up   |
| 6682987 | 7078953 | 1077276 | guanylate cyclase 2e              | Gucy2e  | 79222  | 1,24 | down |
| 6009684 | 7078953 | 1077268 | guanylate cyclase 2e              | Gucy2e  | 79222  | 1,22 | up   |
| 6682716 | 7078953 | 1077264 | guanylate cyclase 2e              | Gucy2e  | 79222  | 1,22 | down |
| 5796468 | 7078953 | 1077265 | guanylate cyclase 2e              | Gucy2e  | 79222  | 1,19 | up   |
| 6732407 | 7078953 | 1077279 | guanylate cyclase 2e              | Gucy2e  | 79222  | 1,16 | down |
| 5800765 | 7078953 | 1077277 | guanylate cyclase 2e              | Gucy2e  | 79222  | 1,15 | up   |
| 6426565 | 7078953 | 1077267 | guanylate cyclase 2e              | Gucy2e  | 79222  | 1,11 | down |
| 6504424 | 7078953 | 1077273 | guanylate cyclase 2e              | Gucy2e  | 79222  | 1,11 | up   |
| 6019699 | 7078953 | 1077261 | guanylate cyclase 2e              | Gucy2e  | 79222  | 1,10 | up   |
| 6416680 | 7078953 | 1077262 | guanylate cyclase 2e              | Gucy2e  | 79222  | 1,04 | down |
| 5695196 | 7078953 | 1077278 | guanylate cyclase 2e              | Gucy2e  | 79222  | 1,04 | up   |
| 5883063 | 7078953 | 1077266 | guanylate cyclase 2e              | Gucy2e  | 79222  | 1,02 | up   |
| 5699262 | 7078953 | 1077272 | guanylate cyclase 2e              | Gucy2e  | 79222  | 1,00 | up   |
| 6382798 | 7359460 | 1768468 | guanylate cyclase activator 1B    | Gucal1b | 316218 | 2,08 | down |
| 6056662 | 7359460 | 1768474 | guanylate cyclase activator 1B    | Gucal1b | 316218 | 1,76 | down |
| 6399750 | 7359460 | 1768470 | guanylate cyclase activator 1B    | Gucal1b | 316218 | 1,63 | down |
| 6673745 | 7359460 | 1768468 | guanylate cyclase activator 1B    | Gucal1b | 316218 | 1,29 | up   |
| 6409661 | 7359460 | 1768467 | guanylate cyclase activator 1B    | Gucal1b | 316218 | 1,23 | down |
| 6419861 | 7359460 | 1768469 | guanylate cyclase activator 1B    | Gucal1b | 316218 | 1,07 | down |
| 6062136 | 7359460 | 1768474 | guanylate cyclase activator 1B    | Gucal1b | 316218 | 1,02 | up   |
| 6311391 | 7365763 | 1783143 | gypsy retrotransposon integrase 1 | Gin1    | 316687 | 2,04 | up   |
| 6592136 | 7365763 | 1783149 | gypsy retrotransposon integrase 1 | Gin1    | 316687 | 1,89 | down |
| 6480351 | 7365763 | 1783144 | gypsy retrotransposon integrase 1 | Gin1    | 316687 | 1,34 | down |
| 6609230 | 7365763 | 1783142 | gypsy retrotransposon integrase 1 | Gin1    | 316687 | 1,32 | up   |
| 6294811 | 7365763 | 1783150 | gypsy retrotransposon integrase 1 | Gin1    | 316687 | 1,28 | down |
| 6053604 | 7365763 | 1783145 | gypsy retrotransposon integrase 1 | Gin1    | 316687 | 1,19 | down |
| 6394112 | 7365763 | 1783147 | gypsy retrotransposon integrase 1 | Gin1    | 316687 | 1,14 | up   |
| 6676176 | 7365763 | 1783148 | gypsy retrotransposon integrase 1 | Gin1    | 316687 | 1,10 | up   |
| 5837801 | 7365763 | 1783143 | gypsy retrotransposon integrase 1 | Gin1    | 316687 | 1,10 | up   |

|         |         |         |                                              |        |        |      |      |
|---------|---------|---------|----------------------------------------------|--------|--------|------|------|
| 6686988 | 7365763 | 1783151 | gypsy retrotransposon integrase 1            | Gin1   | 316687 | 1,01 | up   |
| 6177968 | 7365763 | 1783146 | gypsy retrotransposon integrase 1            | Gin1   | 316687 | 1,00 | up   |
| 6499838 | 7257630 | 1516850 | H1 histone family, member O, oocyte-specific | H1foo  | 502875 | 3,11 | down |
| 5942061 | 7257630 | 1516851 | H1 histone family, member O, oocyte-specific | H1foo  | 502875 | 1,11 | down |
| 6220273 | 7257630 | 1516854 | H1 histone family, member O, oocyte-specific | H1foo  | 502875 | 1,08 | up   |
| 5789752 | 7257630 | 1516852 | H1 histone family, member O, oocyte-specific | H1foo  | 502875 | 1,02 | up   |
| 6053126 | 7257630 | 1516854 | H1 histone family, member O, oocyte-specific | H1foo  | 502875 | 1,01 | down |
| 6471285 | 7257630 | 1516853 | H1 histone family, member O, oocyte-specific | H1foo  | 502875 | 1,00 | down |
| 5946919 | 7222873 | 1429840 | H2A histone family, member Y2                | H2afy2 | 361844 | 2,09 | down |
| 6312138 | 7222873 | 1429840 | H2A histone family, member Y2                | H2afy2 | 361844 | 1,48 | down |
| 5717616 | 7222873 | 1429837 | H2A histone family, member Y2                | H2afy2 | 361844 | 1,39 | up   |
| 6549935 | 7222873 | 1429839 | H2A histone family, member Y2                | H2afy2 | 361844 | 1,27 | down |
| 6027286 | 7222873 | 1429835 | H2A histone family, member Y2                | H2afy2 | 361844 | 1,24 | up   |
| 5790905 | 7222873 | 1429831 | H2A histone family, member Y2                | H2afy2 | 361844 | 1,19 | up   |
| 6445864 | 7222873 | 1429831 | H2A histone family, member Y2                | H2afy2 | 361844 | 1,12 | down |
| 6192006 | 7222873 | 1429833 | H2A histone family, member Y2                | H2afy2 | 361844 | 1,11 | up   |
| 6577869 | 7222873 | 1429832 | H2A histone family, member Y2                | H2afy2 | 361844 | 1,03 | up   |
| 6093380 | 7222873 | 1429842 | H2A histone family, member Y2                | H2afy2 | 361844 | 1,03 | down |
| 6411735 | 7222873 | 1429838 | H2A histone family, member Y2                | H2afy2 | 361844 | 1,03 | up   |
| 6468456 | 7365255 | 1782060 | hairy and enhancer of split 6 (Drosophila)   | Hes6   | 316626 | 2,10 | down |
| 6205345 | 7365255 | 1782060 | hairy and enhancer of split 6 (Drosophila)   | Hes6   | 316626 | 1,41 | up   |
| 5980960 | 7365255 | 1782057 | hairy and enhancer of split 6 (Drosophila)   | Hes6   | 316626 | 1,36 | up   |
| 6233789 | 7365255 | 1782060 | hairy and enhancer of split 6 (Drosophila)   | Hes6   | 316626 | 1,23 | down |
| 6119188 | 7365255 | 1782058 | hairy and enhancer of split 6 (Drosophila)   | Hes6   | 316626 | 1,20 | down |
| 6211169 | 7365255 | 1782058 | hairy and enhancer of split 6 (Drosophila)   | Hes6   | 316626 | 1,18 | down |
| 5715670 | 7365255 | 1782060 | hairy and enhancer of split 6 (Drosophila)   | Hes6   | 316626 | 1,17 | down |
| 6035946 | 7365255 | 1782060 | hairy and enhancer of split 6 (Drosophila)   | Hes6   | 316626 | 1,14 | up   |
| 5954510 | 7365255 | 1782059 | hairy and enhancer of split 6 (Drosophila)   | Hes6   | 316626 | 1,04 | up   |
| 6634804 | 7365255 | 1782058 | hairy and enhancer of split 6 (Drosophila)   | Hes6   | 316626 | 1,02 | down |
| 5959538 | 7165954 | 1288785 | HEAT repeat containing 1                     | Heatr1 | 361262 | 1,56 | up   |
| 5955765 | 7165954 | 1288808 | HEAT repeat containing 1                     | Heatr1 | 361262 | 1,52 | up   |
| 6422677 | 7165954 | 1288770 | HEAT repeat containing 1                     | Heatr1 | 361262 | 1,50 | up   |
| 6128725 | 7165954 | 1288783 | HEAT repeat containing 1                     | Heatr1 | 361262 | 1,46 | up   |
| 5964900 | 7165954 | 1288780 | HEAT repeat containing 1                     | Heatr1 | 361262 | 1,44 | up   |
| 6229149 | 7165954 | 1288773 | HEAT repeat containing 1                     | Heatr1 | 361262 | 1,40 | down |
| 5701616 | 7165954 | 1288800 | HEAT repeat containing 1                     | Heatr1 | 361262 | 1,38 | down |
| 5988057 | 7165954 | 1288772 | HEAT repeat containing 1                     | Heatr1 | 361262 | 1,35 | up   |
| 5719450 | 7165954 | 1288778 | HEAT repeat containing 1                     | Heatr1 | 361262 | 1,31 | up   |
| 5921449 | 7165954 | 1288792 | HEAT repeat containing 1                     | Heatr1 | 361262 | 1,28 | down |
| 6392341 | 7165954 | 1288775 | HEAT repeat containing 1                     | Heatr1 | 361262 | 1,28 | down |
| 6645165 | 7165954 | 1288803 | HEAT repeat containing 1                     | Heatr1 | 361262 | 1,26 | down |
| 5696490 | 7165954 | 1288770 | HEAT repeat containing 1                     | Heatr1 | 361262 | 1,24 | up   |
| 5898308 | 7165954 | 1288796 | HEAT repeat containing 1                     | Heatr1 | 361262 | 1,23 | up   |
| 6530971 | 7165954 | 1288797 | HEAT repeat containing 1                     | Heatr1 | 361262 | 1,21 | down |
| 6539548 | 7165954 | 1288804 | HEAT repeat containing 1                     | Heatr1 | 361262 | 1,21 | up   |
| 6112305 | 7165954 | 1288801 | HEAT repeat containing 1                     | Heatr1 | 361262 | 1,20 | down |
| 5799331 | 7165954 | 1288787 | HEAT repeat containing 1                     | Heatr1 | 361262 | 1,18 | up   |
| 5699753 | 7165954 | 1288799 | HEAT repeat containing 1                     | Heatr1 | 361262 | 1,16 | down |
| 6293794 | 7165954 | 1288802 | HEAT repeat containing 1                     | Heatr1 | 361262 | 1,15 | up   |
| 6403602 | 7165954 | 1288803 | HEAT repeat containing 1                     | Heatr1 | 361262 | 1,13 | up   |
| 6343385 | 7165954 | 1288768 | HEAT repeat containing 1                     | Heatr1 | 361262 | 1,11 | up   |
| 5704186 | 7165954 | 1288776 | HEAT repeat containing 1                     | Heatr1 | 361262 | 1,11 | down |
| 5949913 | 7165954 | 1288795 | HEAT repeat containing 1                     | Heatr1 | 361262 | 1,11 | up   |
| 6611940 | 7165954 | 1288784 | HEAT repeat containing 1                     | Heatr1 | 361262 | 1,10 | down |
| 6537365 | 7165954 | 1288782 | HEAT repeat containing 1                     | Heatr1 | 361262 | 1,10 | up   |
| 6052672 | 7165954 | 1288793 | HEAT repeat containing 1                     | Heatr1 | 361262 | 1,10 | up   |
| 6332586 | 7165954 | 1288770 | HEAT repeat containing 1                     | Heatr1 | 361262 | 1,10 | up   |

|         |         |         |                                                                    |                   |                  |      |      |
|---------|---------|---------|--------------------------------------------------------------------|-------------------|------------------|------|------|
| 6302089 | 7165954 | 1288791 | HEAT repeat containing 1                                           | Heatr1            | 361262           | 1,10 | down |
| 6341492 | 7165954 | 1288767 | HEAT repeat containing 1                                           | Heatr1            | 361262           | 1,08 | down |
| 6311827 | 7165954 | 1288767 | HEAT repeat containing 1                                           | Heatr1            | 361262           | 1,08 | down |
| 6513037 | 7165954 | 1288770 | HEAT repeat containing 1                                           | Heatr1            | 361262           | 1,07 | up   |
| 6456481 | 7165954 | 1288807 | HEAT repeat containing 1                                           | Heatr1            | 361262           | 1,07 | down |
| 5990945 | 7165954 | 1288769 | HEAT repeat containing 1                                           | Heatr1            | 361262           | 1,06 | up   |
| 6613783 | 7165954 | 1288805 | HEAT repeat containing 1                                           | Heatr1            | 361262           | 1,05 | up   |
| 5856730 | 7165954 | 1288774 | HEAT repeat containing 1                                           | Heatr1            | 361262           | 1,05 | up   |
| 6413046 | 7165954 | 1288794 | HEAT repeat containing 1                                           | Heatr1            | 361262           | 1,05 | down |
| 6636199 | 7165954 | 1288806 | HEAT repeat containing 1                                           | Heatr1            | 361262           | 1,05 | down |
| 6690619 | 7165954 | 1288798 | HEAT repeat containing 1                                           | Heatr1            | 361262           | 1,05 | down |
| 6690030 | 7165954 | 1288788 | HEAT repeat containing 1                                           | Heatr1            | 361262           | 1,04 | up   |
| 6450855 | 7165954 | 1288786 | HEAT repeat containing 1                                           | Heatr1            | 361262           | 1,03 | down |
| 5813573 | 7165954 | 1288809 | HEAT repeat containing 1                                           | Heatr1            | 361262           | 1,03 | up   |
| 5671940 | 7165954 | 1288770 | HEAT repeat containing 1                                           | Heatr1            | 361262           | 1,03 | down |
| 6601536 | 7165954 | 1288777 | HEAT repeat containing 1                                           | Heatr1            | 361262           | 1,03 | down |
| 5702934 | 7165954 | 1288790 | HEAT repeat containing 1                                           | Heatr1            | 361262           | 1,03 | up   |
| 5705766 | 7165954 | 1288789 | HEAT repeat containing 1                                           | Heatr1            | 361262           | 1,00 | down |
| 5670821 | 7070511 | 1057473 | HEAT repeat containing 6                                           | Heatr6            | 497972           | 2,06 | up   |
| 6309961 | 7070511 | 1057466 | HEAT repeat containing 6                                           | Heatr6            | 497972           | 1,74 | up   |
| 6655951 | 7070511 | 1057467 | HEAT repeat containing 6                                           | Heatr6            | 497972           | 1,61 | up   |
| 6484093 | 7070511 | 1057452 | HEAT repeat containing 6                                           | Heatr6            | 497972           | 1,54 | down |
| 6262889 | 7070511 | 1057469 | HEAT repeat containing 6                                           | Heatr6            | 497972           | 1,50 | up   |
| 5675116 | 7070511 | 1057473 | HEAT repeat containing 6                                           | Heatr6            | 497972           | 1,48 | down |
| 6104927 | 7070511 | 1057472 | HEAT repeat containing 6                                           | Heatr6            | 497972           | 1,44 | up   |
| 6741806 | 7070511 | 1057456 | HEAT repeat containing 6                                           | Heatr6            | 497972           | 1,42 | down |
| 6003666 | 7070511 | 1057471 | HEAT repeat containing 6                                           | Heatr6            | 497972           | 1,39 | up   |
| 6189559 | 7070511 | 1057465 | HEAT repeat containing 6                                           | Heatr6            | 497972           | 1,39 | up   |
| 5819744 | 7070511 | 1057475 | HEAT repeat containing 6                                           | Heatr6            | 497972           | 1,26 | up   |
| 6491186 | 7070511 | 1057464 | HEAT repeat containing 6                                           | Heatr6            | 497972           | 1,23 | up   |
| 6167219 | 7070511 | 1057454 | HEAT repeat containing 6                                           | Heatr6            | 497972           | 1,23 | up   |
| 6001687 | 7070511 | 1057462 | HEAT repeat containing 6                                           | Heatr6            | 497972           | 1,22 | down |
| 6475596 | 7070511 | 1057462 | HEAT repeat containing 6                                           | Heatr6            | 497972           | 1,18 | up   |
| 6042788 | 7070511 | 1057463 | HEAT repeat containing 6                                           | Heatr6            | 497972           | 1,17 | up   |
| 6482638 | 7070511 | 1057470 | HEAT repeat containing 6                                           | Heatr6            | 497972           | 1,16 | up   |
| 6153102 | 7070511 | 1057460 | HEAT repeat containing 6                                           | Heatr6            | 497972           | 1,13 | up   |
| 5712156 | 7070511 | 1057468 | HEAT repeat containing 6                                           | Heatr6            | 497972           | 1,12 | down |
| 6581441 | 7070511 | 1057458 | HEAT repeat containing 6                                           | Heatr6            | 497972           | 1,10 | up   |
| 5870137 | 7070511 | 1057462 | HEAT repeat containing 6                                           | Heatr6            | 497972           | 1,08 | up   |
| 6642125 | 7070511 | 1057466 | HEAT repeat containing 6                                           | Heatr6            | 497972           | 1,07 | up   |
| 6455236 | 7070511 | 1057455 | HEAT repeat containing 6                                           | Heatr6            | 497972           | 1,05 | up   |
| 5896717 | 7070511 | 1057461 | HEAT repeat containing 6                                           | Heatr6            | 497972           | 1,02 | down |
| 5712583 | 7070511 | 1057463 | HEAT repeat containing 6                                           | Heatr6            | 497972           | 1,01 | down |
| 6081072 | 7216806 | 1414694 | heat shock 70kD protein 1A /// heat shock 70kD protein 1B (mapped) | Hspa1a /// Hspa1b | 24472 /// 294254 | 2,03 | up   |
| 5786500 | 7216806 | 1414693 | heat shock 70kD protein 1A /// heat shock 70kD protein 1B (mapped) | Hspa1a /// Hspa1b | 24472 /// 294254 | 1,65 | up   |
| 5688823 | 7216806 | 1414693 | heat shock 70kD protein 1B (mapped)                                | Hspa1b            | 294254           | 2,86 | down |
| 6430397 | 7216806 | 1414694 | heat shock 70kD protein 1B (mapped)                                | Hspa1b            | 294254           | 1,79 | down |
| 5899922 | 7077365 | 1073896 | heat shock protein 4                                               | Hspa4             | 266759           | 2,49 | down |
| 6088683 | 7077365 | 1073896 | heat shock protein 4                                               | Hspa4             | 266759           | 2,00 | down |
| 6375026 | 7077365 | 1073898 | heat shock protein 4                                               | Hspa4             | 266759           | 1,68 | down |
| 6042286 | 7077365 | 1073905 | heat shock protein 4                                               | Hspa4             | 266759           | 1,47 | up   |
| 6695983 | 7077365 | 1073896 | heat shock protein 4                                               | Hspa4             | 266759           | 1,42 | down |
| 6228651 | 7077365 | 1073897 | heat shock protein 4                                               | Hspa4             | 266759           | 1,38 | down |
| 5734587 | 7077365 | 1073916 | heat shock protein 4                                               | Hspa4             | 266759           | 1,31 | down |
| 6678677 | 7077365 | 1073911 | heat shock protein 4                                               | Hspa4             | 266759           | 1,27 | up   |
| 6151473 | 7077365 | 1073912 | heat shock protein 4                                               | Hspa4             | 266759           | 1,24 | up   |
| 6684178 | 7077365 | 1073916 | heat shock protein 4                                               | Hspa4             | 266759           | 1,24 | up   |

|         |         |         |                                                                                             |       |        |      |      |
|---------|---------|---------|---------------------------------------------------------------------------------------------|-------|--------|------|------|
| 6336261 | 7077365 | 1073914 | heat shock protein 4                                                                        | Hspa4 | 266759 | 1,22 | up   |
| 5866018 | 7077365 | 1073903 | heat shock protein 4                                                                        | Hspa4 | 266759 | 1,22 | down |
| 5748383 | 7077365 | 1073909 | heat shock protein 4                                                                        | Hspa4 | 266759 | 1,21 | up   |
| 6220688 | 7077365 | 1073913 | heat shock protein 4                                                                        | Hspa4 | 266759 | 1,19 | down |
| 6338892 | 7077365 | 1073899 | heat shock protein 4                                                                        | Hspa4 | 266759 | 1,16 | down |
| 6360756 | 7077365 | 1073915 | heat shock protein 4                                                                        | Hspa4 | 266759 | 1,15 | down |
| 5701090 | 7077365 | 1073910 | heat shock protein 4                                                                        | Hspa4 | 266759 | 1,13 | up   |
| 6606198 | 7077365 | 1073908 | heat shock protein 4                                                                        | Hspa4 | 266759 | 1,08 | up   |
| 6505693 | 7077365 | 1073906 | heat shock protein 4                                                                        | Hspa4 | 266759 | 1,08 | down |
| 6005780 | 7077365 | 1073904 | heat shock protein 4                                                                        | Hspa4 | 266759 | 1,06 | up   |
| 6581957 | 7077365 | 1073907 | heat shock protein 4                                                                        | Hspa4 | 266759 | 1,04 | down |
| 6132482 | 7077365 | 1073902 | heat shock protein 4                                                                        | Hspa4 | 266759 | 1,03 | up   |
| 6320125 | 7077365 | 1073900 | heat shock protein 4                                                                        | Hspa4 | 266759 | 1,01 | up   |
| 6000798 | 7077365 | 1073901 | heat shock protein 4                                                                        | Hspa4 | 266759 | 1,01 | up   |
| 6652185 | 7098824 | 1124803 | heat shock protein 8                                                                        | Hspb8 | 113906 | 3,32 | down |
| 6414277 | 7098824 | 1124805 | heat shock protein 8                                                                        | Hspb8 | 113906 | 2,62 | up   |
| 6087105 | 7098824 | 1124803 | heat shock protein 8                                                                        | Hspb8 | 113906 | 2,07 | up   |
| 6116423 | 7098824 | 1124803 | heat shock protein 8                                                                        | Hspb8 | 113906 | 1,96 | down |
| 6498043 | 7098824 | 1124804 | heat shock protein 8                                                                        | Hspb8 | 113906 | 1,13 | up   |
| 6185187 | 7098824 | 1124806 | heat shock protein 8                                                                        | Hspb8 | 113906 | 1,08 | up   |
| 6317304 | 7174411 | 1311171 | heat shock protein 9                                                                        | Hspa9 | 291671 | 2,06 | down |
| 6107411 | 7174411 | 1311175 | heat shock protein 9                                                                        | Hspa9 | 291671 | 1,54 | down |
| 6584698 | 7174411 | 1311176 | heat shock protein 9                                                                        | Hspa9 | 291671 | 1,51 | down |
| 6728860 | 7174411 | 1311181 | heat shock protein 9                                                                        | Hspa9 | 291671 | 1,29 | up   |
| 6302633 | 7174411 | 1311184 | heat shock protein 9                                                                        | Hspa9 | 291671 | 1,25 | down |
| 6498468 | 7174411 | 1311183 | heat shock protein 9                                                                        | Hspa9 | 291671 | 1,20 | up   |
| 5825850 | 7174411 | 1311172 | heat shock protein 9                                                                        | Hspa9 | 291671 | 1,16 | down |
| 6322529 | 7174411 | 1311186 | heat shock protein 9                                                                        | Hspa9 | 291671 | 1,13 | down |
| 5695419 | 7174411 | 1311174 | heat shock protein 9                                                                        | Hspa9 | 291671 | 1,13 | down |
| 5841865 | 7174411 | 1311170 | heat shock protein 9                                                                        | Hspa9 | 291671 | 1,11 | up   |
| 6345254 | 7174411 | 1311187 | heat shock protein 9                                                                        | Hspa9 | 291671 | 1,10 | up   |
| 6038344 | 7174411 | 1311182 | heat shock protein 9                                                                        | Hspa9 | 291671 | 1,10 | up   |
| 5948470 | 7174411 | 1311185 | heat shock protein 9                                                                        | Hspa9 | 291671 | 1,09 | up   |
| 5681489 | 7174411 | 1311179 | heat shock protein 9                                                                        | Hspa9 | 291671 | 1,09 | down |
| 6307512 | 7174411 | 1311176 | heat shock protein 9                                                                        | Hspa9 | 291671 | 1,05 | up   |
| 6493005 | 7174411 | 1311176 | heat shock protein 9                                                                        | Hspa9 | 291671 | 1,04 | up   |
| 5737266 | 7174411 | 1311178 | heat shock protein 9                                                                        | Hspa9 | 291671 | 1,03 | up   |
| 6633363 | 7174411 | 1311180 | heat shock protein 9                                                                        | Hspa9 | 291671 | 1,03 | down |
| 6468407 | 7174411 | 1311173 | heat shock protein 9                                                                        | Hspa9 | 291671 | 1,02 | down |
| 5840127 | 7174411 | 1311177 | heat shock protein 9                                                                        | Hspa9 | 291671 | 1,01 | up   |
| 6302385 | 7337425 | 1713132 | hect (homologous to the E6-AP (UBE3A) carboxyl terminus) domain and RCC1 (CHC1)-like domain | Herc1 | 315771 | 1,61 | down |
| 5851678 | 7337425 | 1713222 | hect (homologous to the E6-AP (UBE3A) carboxyl terminus) domain and RCC1 (CHC1)-like domain | Herc1 | 315771 | 1,21 | down |
| 5674554 | 7337425 | 1713175 | hect (homologous to the E6-AP (UBE3A) carboxyl terminus) domain and RCC1 (CHC1)-like domain | Herc1 | 315771 | 1,08 | down |
| 6743331 | 7032094 | 965773  | hect domain and RLD 2                                                                       | Herc2 | 308669 | 2,13 | down |
| 5730029 | 7032094 | 965804  | hect domain and RLD 2                                                                       | Herc2 | 308669 | 1,80 | up   |
| 5835226 | 7032094 | 965724  | hect domain and RLD 2                                                                       | Herc2 | 308669 | 1,56 | up   |
| 6259761 | 7032094 | 965721  | hect domain and RLD 2                                                                       | Herc2 | 308669 | 1,52 | up   |
| 5684658 | 7032094 | 965763  | hect domain and RLD 2                                                                       | Herc2 | 308669 | 1,51 | up   |
| 6614509 | 7032094 | 965771  | hect domain and RLD 2                                                                       | Herc2 | 308669 | 1,47 | up   |
| 5854223 | 7032094 | 965746  | hect domain and RLD 2                                                                       | Herc2 | 308669 | 1,46 | up   |
| 6447316 | 7032094 | 965718  | hect domain and RLD 2                                                                       | Herc2 | 308669 | 1,44 | down |
| 6576967 | 7032094 | 965795  | hect domain and RLD 2                                                                       | Herc2 | 308669 | 1,38 | up   |
| 6730106 | 7032094 | 965792  | hect domain and RLD 2                                                                       | Herc2 | 308669 | 1,35 | up   |
| 6253349 | 7032094 | 965748  | hect domain and RLD 2                                                                       | Herc2 | 308669 | 1,35 | down |
| 5988652 | 7032094 | 965776  | hect domain and RLD 2                                                                       | Herc2 | 308669 | 1,35 | up   |
| 5999830 | 7032094 | 965806  | hect domain and RLD 2                                                                       | Herc2 | 308669 | 1,34 | down |
| 6111170 | 7032094 | 965767  | hect domain and RLD 2                                                                       | Herc2 | 308669 | 1,32 | up   |

|         |         |        |                       |       |        |      |      |
|---------|---------|--------|-----------------------|-------|--------|------|------|
| 5803251 | 7032094 | 965801 | hect domain and RLD 2 | Herc2 | 308669 | 1,31 | down |
| 6051016 | 7032094 | 965758 | hect domain and RLD 2 | Herc2 | 308669 | 1,31 | up   |
| 6502337 | 7032094 | 965750 | hect domain and RLD 2 | Herc2 | 308669 | 1,28 | down |
| 5891182 | 7032094 | 965787 | hect domain and RLD 2 | Herc2 | 308669 | 1,28 | up   |
| 5656542 | 7032094 | 965723 | hect domain and RLD 2 | Herc2 | 308669 | 1,27 | up   |
| 6351752 | 7032094 | 965780 | hect domain and RLD 2 | Herc2 | 308669 | 1,24 | down |
| 6737619 | 7032094 | 965728 | hect domain and RLD 2 | Herc2 | 308669 | 1,24 | down |
| 5736774 | 7032094 | 965733 | hect domain and RLD 2 | Herc2 | 308669 | 1,21 | down |
| 6399374 | 7032094 | 965814 | hect domain and RLD 2 | Herc2 | 308669 | 1,21 | down |
| 5844162 | 7032094 | 965753 | hect domain and RLD 2 | Herc2 | 308669 | 1,20 | down |
| 6564594 | 7032094 | 965775 | hect domain and RLD 2 | Herc2 | 308669 | 1,20 | up   |
| 6422995 | 7032094 | 965764 | hect domain and RLD 2 | Herc2 | 308669 | 1,20 | down |
| 5797325 | 7032094 | 965736 | hect domain and RLD 2 | Herc2 | 308669 | 1,20 | down |
| 5998910 | 7032094 | 965770 | hect domain and RLD 2 | Herc2 | 308669 | 1,20 | up   |
| 6047927 | 7032094 | 965738 | hect domain and RLD 2 | Herc2 | 308669 | 1,19 | down |
| 5768990 | 7032094 | 965814 | hect domain and RLD 2 | Herc2 | 308669 | 1,19 | down |
| 6712869 | 7032094 | 965793 | hect domain and RLD 2 | Herc2 | 308669 | 1,18 | up   |
| 5803785 | 7032094 | 965785 | hect domain and RLD 2 | Herc2 | 308669 | 1,18 | up   |
| 6579128 | 7032094 | 965722 | hect domain and RLD 2 | Herc2 | 308669 | 1,16 | up   |
| 6309738 | 7032094 | 965725 | hect domain and RLD 2 | Herc2 | 308669 | 1,16 | up   |
| 6492333 | 7032094 | 965799 | hect domain and RLD 2 | Herc2 | 308669 | 1,16 | down |
| 5996478 | 7032094 | 965735 | hect domain and RLD 2 | Herc2 | 308669 | 1,16 | up   |
| 6079010 | 7032094 | 965732 | hect domain and RLD 2 | Herc2 | 308669 | 1,15 | down |
| 6585100 | 7032094 | 965809 | hect domain and RLD 2 | Herc2 | 308669 | 1,14 | down |
| 5627945 | 7032094 | 965743 | hect domain and RLD 2 | Herc2 | 308669 | 1,14 | up   |
| 6451899 | 7032094 | 965789 | hect domain and RLD 2 | Herc2 | 308669 | 1,13 | up   |
| 5879479 | 7032094 | 965755 | hect domain and RLD 2 | Herc2 | 308669 | 1,12 | down |
| 5881204 | 7032094 | 965749 | hect domain and RLD 2 | Herc2 | 308669 | 1,12 | down |
| 6401677 | 7032094 | 965734 | hect domain and RLD 2 | Herc2 | 308669 | 1,12 | down |
| 6614359 | 7032094 | 965754 | hect domain and RLD 2 | Herc2 | 308669 | 1,12 | up   |
| 6584457 | 7032094 | 965802 | hect domain and RLD 2 | Herc2 | 308669 | 1,11 | up   |
| 5835319 | 7032094 | 965784 | hect domain and RLD 2 | Herc2 | 308669 | 1,11 | down |
| 6114441 | 7032094 | 965744 | hect domain and RLD 2 | Herc2 | 308669 | 1,11 | up   |
| 6547451 | 7032094 | 965794 | hect domain and RLD 2 | Herc2 | 308669 | 1,10 | down |
| 5794496 | 7032094 | 965810 | hect domain and RLD 2 | Herc2 | 308669 | 1,10 | up   |
| 6363032 | 7032094 | 965779 | hect domain and RLD 2 | Herc2 | 308669 | 1,10 | down |
| 6589492 | 7032094 | 965748 | hect domain and RLD 2 | Herc2 | 308669 | 1,10 | down |
| 6637806 | 7032094 | 965782 | hect domain and RLD 2 | Herc2 | 308669 | 1,10 | down |
| 5822137 | 7032094 | 965741 | hect domain and RLD 2 | Herc2 | 308669 | 1,09 | down |
| 6680807 | 7032094 | 965797 | hect domain and RLD 2 | Herc2 | 308669 | 1,09 | up   |
| 6571114 | 7032094 | 965786 | hect domain and RLD 2 | Herc2 | 308669 | 1,09 | up   |
| 5889379 | 7032094 | 965788 | hect domain and RLD 2 | Herc2 | 308669 | 1,08 | up   |
| 6673554 | 7032094 | 965772 | hect domain and RLD 2 | Herc2 | 308669 | 1,08 | down |
| 6038140 | 7032094 | 965783 | hect domain and RLD 2 | Herc2 | 308669 | 1,08 | down |
| 5922189 | 7032094 | 965765 | hect domain and RLD 2 | Herc2 | 308669 | 1,08 | down |
| 6740461 | 7032094 | 965730 | hect domain and RLD 2 | Herc2 | 308669 | 1,08 | down |
| 6551295 | 7032094 | 965777 | hect domain and RLD 2 | Herc2 | 308669 | 1,07 | up   |
| 6722807 | 7032094 | 965720 | hect domain and RLD 2 | Herc2 | 308669 | 1,07 | down |
| 6407929 | 7032094 | 965742 | hect domain and RLD 2 | Herc2 | 308669 | 1,06 | up   |
| 6632105 | 7032094 | 965809 | hect domain and RLD 2 | Herc2 | 308669 | 1,06 | up   |
| 6140899 | 7032094 | 965765 | hect domain and RLD 2 | Herc2 | 308669 | 1,06 | down |
| 5680452 | 7032094 | 965766 | hect domain and RLD 2 | Herc2 | 308669 | 1,05 | down |
| 5716135 | 7032094 | 965727 | hect domain and RLD 2 | Herc2 | 308669 | 1,05 | up   |
| 6439113 | 7032094 | 965726 | hect domain and RLD 2 | Herc2 | 308669 | 1,05 | up   |
| 6325619 | 7032094 | 965717 | hect domain and RLD 2 | Herc2 | 308669 | 1,05 | up   |
| 5848221 | 7032094 | 965747 | hect domain and RLD 2 | Herc2 | 308669 | 1,05 | up   |
| 5980535 | 7032094 | 965778 | hect domain and RLD 2 | Herc2 | 308669 | 1,05 | down |

|         |         |         |                                    |          |        |      |      |
|---------|---------|---------|------------------------------------|----------|--------|------|------|
| 6461707 | 7032094 | 965781  | hect domain and RLD 2              | Herc2    | 308669 | 1,04 | down |
| 5824227 | 7032094 | 965813  | hect domain and RLD 2              | Herc2    | 308669 | 1,04 | up   |
| 5999731 | 7032094 | 965759  | hect domain and RLD 2              | Herc2    | 308669 | 1,04 | up   |
| 6621029 | 7032094 | 965740  | hect domain and RLD 2              | Herc2    | 308669 | 1,04 | up   |
| 6204922 | 7032094 | 965760  | hect domain and RLD 2              | Herc2    | 308669 | 1,04 | up   |
| 5977662 | 7032094 | 965805  | hect domain and RLD 2              | Herc2    | 308669 | 1,04 | down |
| 6026582 | 7032094 | 965811  | hect domain and RLD 2              | Herc2    | 308669 | 1,04 | up   |
| 6543538 | 7032094 | 965761  | hect domain and RLD 2              | Herc2    | 308669 | 1,04 | down |
| 6715021 | 7032094 | 965790  | hect domain and RLD 2              | Herc2    | 308669 | 1,03 | up   |
| 5958227 | 7032094 | 965771  | hect domain and RLD 2              | Herc2    | 308669 | 1,03 | down |
| 5685625 | 7032094 | 965769  | hect domain and RLD 2              | Herc2    | 308669 | 1,03 | up   |
| 6516329 | 7032094 | 965768  | hect domain and RLD 2              | Herc2    | 308669 | 1,03 | down |
| 6360928 | 7032094 | 965729  | hect domain and RLD 2              | Herc2    | 308669 | 1,03 | down |
| 6194547 | 7032094 | 965762  | hect domain and RLD 2              | Herc2    | 308669 | 1,02 | up   |
| 5739565 | 7032094 | 965791  | hect domain and RLD 2              | Herc2    | 308669 | 1,02 | down |
| 5644680 | 7032094 | 965798  | hect domain and RLD 2              | Herc2    | 308669 | 1,02 | up   |
| 6376649 | 7032094 | 965737  | hect domain and RLD 2              | Herc2    | 308669 | 1,02 | up   |
| 5632656 | 7032094 | 965796  | hect domain and RLD 2              | Herc2    | 308669 | 1,02 | up   |
| 5910116 | 7032094 | 965757  | hect domain and RLD 2              | Herc2    | 308669 | 1,01 | down |
| 6143591 | 7032094 | 965808  | hect domain and RLD 2              | Herc2    | 308669 | 1,01 | down |
| 5692159 | 7032094 | 965812  | hect domain and RLD 2              | Herc2    | 308669 | 1,01 | down |
| 6692861 | 7032094 | 965731  | hect domain and RLD 2              | Herc2    | 308669 | 1,01 | down |
| 6287268 | 7032094 | 965774  | hect domain and RLD 2              | Herc2    | 308669 | 1,01 | down |
| 6072836 | 7032094 | 965745  | hect domain and RLD 2              | Herc2    | 308669 | 1,01 | up   |
| 5779266 | 7032094 | 965739  | hect domain and RLD 2              | Herc2    | 308669 | 1,00 | up   |
| 5755349 | 7041584 | 989442  | HECT domain containing 2           | Hectd2   | 309514 | 1,99 | down |
| 6033878 | 7041584 | 989447  | HECT domain containing 2           | Hectd2   | 309514 | 1,94 | down |
| 6739195 | 7041584 | 989451  | HECT domain containing 2           | Hectd2   | 309514 | 1,57 | up   |
| 6405599 | 7041584 | 989450  | HECT domain containing 2           | Hectd2   | 309514 | 1,51 | down |
| 6407290 | 7041584 | 989448  | HECT domain containing 2           | Hectd2   | 309514 | 1,46 | up   |
| 6189064 | 7041584 | 989449  | HECT domain containing 2           | Hectd2   | 309514 | 1,37 | down |
| 5778939 | 7041584 | 989446  | HECT domain containing 2           | Hectd2   | 309514 | 1,28 | up   |
| 6283400 | 7041584 | 989446  | HECT domain containing 2           | Hectd2   | 309514 | 1,12 | down |
| 6602450 | 7041584 | 989443  | HECT domain containing 2           | Hectd2   | 309514 | 1,08 | up   |
| 6688470 | 7055435 | 1021548 | hemopexin                          | Hpx      | 58917  | 7,84 | down |
| 6650953 | 7055435 | 1021538 | hemopexin                          | Hpx      | 58917  | 5,42 | down |
| 5845298 | 7055435 | 1021542 | hemopexin                          | Hpx      | 58917  | 1,64 | up   |
| 5983191 | 7055435 | 1021547 | hemopexin                          | Hpx      | 58917  | 1,63 | up   |
| 5657947 | 7055435 | 1021544 | hemopexin                          | Hpx      | 58917  | 1,62 | up   |
| 5985209 | 7055435 | 1021541 | hemopexin                          | Hpx      | 58917  | 1,55 | down |
| 5681682 | 7055435 | 1021540 | hemopexin                          | Hpx      | 58917  | 1,52 | up   |
| 5730377 | 7055435 | 1021546 | hemopexin                          | Hpx      | 58917  | 1,35 | down |
| 5697460 | 7055435 | 1021539 | hemopexin                          | Hpx      | 58917  | 1,20 | down |
| 6616743 | 7055435 | 1021545 | hemopexin                          | Hpx      | 58917  | 1,19 | up   |
| 6556499 | 7055435 | 1021543 | hemopexin                          | Hpx      | 58917  | 1,15 | up   |
| 6659695 | 7261768 | 1527167 | HEPACAM family member 2            | Hepacam2 | 296846 | 1,38 | down |
| 5713492 | 7261768 | 1527175 | HEPACAM family member 2            | Hepacam2 | 296846 | 1,35 | down |
| 5709592 | 7261768 | 1527176 | HEPACAM family member 2            | Hepacam2 | 296846 | 1,29 | down |
| 6381873 | 7261768 | 1527180 | HEPACAM family member 2            | Hepacam2 | 296846 | 1,29 | up   |
| 6164554 | 7261768 | 1527170 | HEPACAM family member 2            | Hepacam2 | 296846 | 1,12 | down |
| 6025142 | 7261768 | 1527174 | HEPACAM family member 2            | Hepacam2 | 296846 | 1,07 | up   |
| 6416887 | 7261768 | 1527169 | HEPACAM family member 2            | Hepacam2 | 296846 | 1,04 | down |
| 5645122 | 7261768 | 1527171 | HEPACAM family member 2            | Hepacam2 | 296846 | 1,02 | down |
| 5664595 | 7261768 | 1527166 | HEPACAM family member 2            | Hepacam2 | 296846 | 1,01 | down |
| 5755213 | 7127197 | 1194563 | hepatocyte growth factor activator | Hgfac    | 58947  | 2,53 | up   |
| 6225476 | 7127197 | 1194560 | hepatocyte growth factor activator | Hgfac    | 58947  | 1,60 | up   |
| 5819435 | 7127197 | 1194565 | hepatocyte growth factor activator | Hgfac    | 58947  | 1,49 | down |

|         |         |         |                                                   |           |        |      |      |
|---------|---------|---------|---------------------------------------------------|-----------|--------|------|------|
| 6413084 | 7127197 | 1194557 | hepatocyte growth factor activator                | Hgfac     | 58947  | 1,48 | down |
| 5640496 | 7127197 | 1194564 | hepatocyte growth factor activator                | Hgfac     | 58947  | 1,37 | up   |
| 5868629 | 7127197 | 1194553 | hepatocyte growth factor activator                | Hgfac     | 58947  | 1,26 | up   |
| 6079562 | 7127197 | 1194555 | hepatocyte growth factor activator                | Hgfac     | 58947  | 1,25 | down |
| 6527008 | 7127197 | 1194556 | hepatocyte growth factor activator                | Hgfac     | 58947  | 1,21 | down |
| 5786776 | 7127197 | 1194565 | hepatocyte growth factor activator                | Hgfac     | 58947  | 1,17 | down |
| 6552435 | 7127197 | 1194561 | hepatocyte growth factor activator                | Hgfac     | 58947  | 1,15 | down |
| 6219741 | 7127197 | 1194559 | hepatocyte growth factor activator                | Hgfac     | 58947  | 1,13 | up   |
| 5777853 | 7127197 | 1194551 | hepatocyte growth factor activator                | Hgfac     | 58947  | 1,10 | up   |
| 6702158 | 7127197 | 1194562 | hepatocyte growth factor activator                | Hgfac     | 58947  | 1,05 | down |
| 5731360 | 7127197 | 1194558 | hepatocyte growth factor activator                | Hgfac     | 58947  | 1,03 | up   |
| 6272703 | 7127197 | 1194554 | hepatocyte growth factor activator                | Hgfac     | 58947  | 1,03 | up   |
| 6727782 | 7127197 | 1194552 | hepatocyte growth factor activator                | Hgfac     | 58947  | 1,02 | up   |
| 6042635 | 7235138 | 1461199 | hepatocyte nuclear factor 4, alpha                | Hnf4a     | 25735  | 3,45 | up   |
| 5856412 | 7235138 | 1461198 | hepatocyte nuclear factor 4, alpha                | Hnf4a     | 25735  | 1,76 | down |
| 6481726 | 7235138 | 1461193 | hepatocyte nuclear factor 4, alpha                | Hnf4a     | 25735  | 1,69 | down |
| 6506095 | 7235138 | 1461191 | hepatocyte nuclear factor 4, alpha                | Hnf4a     | 25735  | 1,65 | up   |
| 6148002 | 7235138 | 1461190 | hepatocyte nuclear factor 4, alpha                | Hnf4a     | 25735  | 1,61 | up   |
| 6584408 | 7235138 | 1461195 | hepatocyte nuclear factor 4, alpha                | Hnf4a     | 25735  | 1,46 | down |
| 5988209 | 7235138 | 1461200 | hepatocyte nuclear factor 4, alpha                | Hnf4a     | 25735  | 1,44 | up   |
| 6555660 | 7235138 | 1461192 | hepatocyte nuclear factor 4, alpha                | Hnf4a     | 25735  | 1,29 | up   |
| 5714181 | 7235138 | 1461194 | hepatocyte nuclear factor 4, alpha                | Hnf4a     | 25735  | 1,22 | down |
| 6022697 | 7235138 | 1461196 | hepatocyte nuclear factor 4, alpha                | Hnf4a     | 25735  | 1,13 | up   |
| 5803661 | 7235138 | 1461199 | hepatocyte nuclear factor 4, alpha                | Hnf4a     | 25735  | 1,08 | up   |
| 5831539 | 7235138 | 1461197 | hepatocyte nuclear factor 4, alpha                | Hnf4a     | 25735  | 1,01 | down |
| 6185196 | 7264745 | 1534268 | heterogeneous nuclear ribonucleoprotein A2/B1     | Hnrnpa2b1 | 362361 | 1,42 | down |
| 6470255 | 7264745 | 1534275 | heterogeneous nuclear ribonucleoprotein A2/B1     | Hnrnpa2b1 | 362361 | 1,30 | down |
| 6229803 | 7264745 | 1534277 | heterogeneous nuclear ribonucleoprotein A2/B1     | Hnrnpa2b1 | 362361 | 1,18 | down |
| 6090256 | 7264745 | 1534272 | heterogeneous nuclear ribonucleoprotein A2/B1     | Hnrnpa2b1 | 362361 | 1,16 | up   |
| 6085486 | 7264745 | 1534274 | heterogeneous nuclear ribonucleoprotein A2/B1     | Hnrnpa2b1 | 362361 | 1,15 | up   |
| 6306325 | 7264745 | 1534271 | heterogeneous nuclear ribonucleoprotein A2/B1     | Hnrnpa2b1 | 362361 | 1,14 | up   |
| 6426156 | 7264745 | 1534269 | heterogeneous nuclear ribonucleoprotein A2/B1     | Hnrnpa2b1 | 362361 | 1,06 | down |
| 6116165 | 7264745 | 1534270 | heterogeneous nuclear ribonucleoprotein A2/B1     | Hnrnpa2b1 | 362361 | 1,05 | down |
| 6263103 | 7264745 | 1534273 | heterogeneous nuclear ribonucleoprotein A2/B1     | Hnrnpa2b1 | 362361 | 1,05 | down |
| 5745335 | 7137646 | 1220435 | heterogeneous nuclear ribonucleoprotein C (C1/C2) | Hnrnpc    | 290046 | 2,07 | up   |
| 5760138 | 7137646 | 1220439 | heterogeneous nuclear ribonucleoprotein C (C1/C2) | Hnrnpc    | 290046 | 1,51 | up   |
| 6196407 | 7137646 | 1220430 | heterogeneous nuclear ribonucleoprotein C (C1/C2) | Hnrnpc    | 290046 | 1,44 | up   |
| 6626119 | 7137646 | 1220433 | heterogeneous nuclear ribonucleoprotein C (C1/C2) | Hnrnpc    | 290046 | 1,41 | up   |
| 5871886 | 7137646 | 1220434 | heterogeneous nuclear ribonucleoprotein C (C1/C2) | Hnrnpc    | 290046 | 1,34 | up   |
| 5976900 | 7137646 | 1220430 | heterogeneous nuclear ribonucleoprotein C (C1/C2) | Hnrnpc    | 290046 | 1,31 | up   |
| 5781270 | 7137646 | 1220430 | heterogeneous nuclear ribonucleoprotein C (C1/C2) | Hnrnpc    | 290046 | 1,23 | up   |
| 6379835 | 7137646 | 1220436 | heterogeneous nuclear ribonucleoprotein C (C1/C2) | Hnrnpc    | 290046 | 1,22 | up   |
| 6420921 | 7137646 | 1220432 | heterogeneous nuclear ribonucleoprotein C (C1/C2) | Hnrnpc    | 290046 | 1,16 | up   |
| 6302515 | 7116540 | 1168644 | heterogeneous nuclear ribonucleoprotein D-like    | Hnrpdl    | 305178 | 1,50 | up   |
| 6156793 | 7116540 | 1168637 | heterogeneous nuclear ribonucleoprotein D-like    | Hnrpdl    | 305178 | 1,44 | up   |
| 6615208 | 7116540 | 1168640 | heterogeneous nuclear ribonucleoprotein D-like    | Hnrpdl    | 305178 | 1,28 | up   |
| 5999050 | 7116540 | 1168641 | heterogeneous nuclear ribonucleoprotein D-like    | Hnrpdl    | 305178 | 1,27 | up   |
| 6107565 | 7116540 | 1168637 | heterogeneous nuclear ribonucleoprotein D-like    | Hnrpdl    | 305178 | 1,17 | down |
| 6306707 | 7116540 | 1168643 | heterogeneous nuclear ribonucleoprotein D-like    | Hnrpdl    | 305178 | 1,16 | up   |
| 5997003 | 7116540 | 1168642 | heterogeneous nuclear ribonucleoprotein D-like    | Hnrpdl    | 305178 | 1,14 | up   |
| 5987711 | 7116540 | 1168645 | heterogeneous nuclear ribonucleoprotein D-like    | Hnrpdl    | 305178 | 1,12 | up   |
| 5986040 | 7116540 | 1168639 | heterogeneous nuclear ribonucleoprotein D-like    | Hnrpdl    | 305178 | 1,10 | up   |
| 6505435 | 7116540 | 1168645 | heterogeneous nuclear ribonucleoprotein D-like    | Hnrpdl    | 305178 | 1,01 | up   |
| 5948047 | 7266497 | 1538161 | hexokinase 2                                      | Hk2       | 25059  | 3,52 | up   |
| 5666920 | 7266497 | 1538171 | hexokinase 2                                      | Hk2       | 25059  | 2,76 | down |
| 6378345 | 7266497 | 1538179 | hexokinase 2                                      | Hk2       | 25059  | 2,17 | down |
| 5752287 | 7266497 | 1538169 | hexokinase 2                                      | Hk2       | 25059  | 1,97 | down |

|         |         |         |                                                            |       |           |      |      |
|---------|---------|---------|------------------------------------------------------------|-------|-----------|------|------|
| 5902148 | 7266497 | 1538163 | hexokinase 2                                               | Hk2   | 25059     | 1,97 | up   |
| 6570940 | 7266497 | 1538178 | hexokinase 2                                               | Hk2   | 25059     | 1,96 | up   |
| 5839690 | 7266497 | 1538177 | hexokinase 2                                               | Hk2   | 25059     | 1,74 | down |
| 6066179 | 7266497 | 1538166 | hexokinase 2                                               | Hk2   | 25059     | 1,55 | up   |
| 5847171 | 7266497 | 1538172 | hexokinase 2                                               | Hk2   | 25059     | 1,49 | up   |
| 6215765 | 7266497 | 1538168 | hexokinase 2                                               | Hk2   | 25059     | 1,48 | down |
| 5783012 | 7266497 | 1538174 | hexokinase 2                                               | Hk2   | 25059     | 1,45 | down |
| 5973422 | 7266497 | 1538175 | hexokinase 2                                               | Hk2   | 25059     | 1,36 | down |
| 5959948 | 7266497 | 1538170 | hexokinase 2                                               | Hk2   | 25059     | 1,31 | up   |
| 5976515 | 7266497 | 1538162 | hexokinase 2                                               | Hk2   | 25059     | 1,23 | down |
| 5911587 | 7266497 | 1538176 | hexokinase 2                                               | Hk2   | 25059     | 1,21 | down |
| 6300173 | 7266497 | 1538164 | hexokinase 2                                               | Hk2   | 25059     | 1,19 | up   |
| 6036304 | 7266497 | 1538165 | hexokinase 2                                               | Hk2   | 25059     | 1,09 | down |
| 5911383 | 7266497 | 1538173 | hexokinase 2                                               | Hk2   | 25059     | 1,08 | up   |
| 5870610 | 7266497 | 1538167 | hexokinase 2                                               | Hk2   | 25059     | 1,04 | down |
| 6462641 | 7336831 | 1711572 | hexosaminidase A                                           | Hexa  | 300757    | 4,68 | up   |
| 6121140 | 7336831 | 1711577 | hexosaminidase A                                           | Hexa  | 300757    | 1,54 | up   |
| 6404370 | 7336831 | 1711578 | hexosaminidase A                                           | Hexa  | 300757    | 1,40 | up   |
| 5653739 | 7336831 | 1711567 | hexosaminidase A                                           | Hexa  | 300757    | 1,35 | down |
| 5843775 | 7336831 | 1711574 | hexosaminidase A                                           | Hexa  | 300757    | 1,32 | up   |
| 5725013 | 7336831 | 1711566 | hexosaminidase A                                           | Hexa  | 300757    | 1,28 | down |
| 5744704 | 7336831 | 1711576 | hexosaminidase A                                           | Hexa  | 300757    | 1,27 | up   |
| 6381379 | 7336831 | 1711569 | hexosaminidase A                                           | Hexa  | 300757    | 1,23 | down |
| 6379437 | 7336831 | 1711564 | hexosaminidase A                                           | Hexa  | 300757    | 1,22 | down |
| 5820730 | 7336831 | 1711573 | hexosaminidase A                                           | Hexa  | 300757    | 1,15 | down |
| 6598208 | 7336831 | 1711571 | hexosaminidase A                                           | Hexa  | 300757    | 1,14 | down |
| 6157417 | 7336831 | 1711565 | hexosaminidase A                                           | Hexa  | 300757    | 1,14 | down |
| 5911378 | 7336831 | 1711575 | hexosaminidase A                                           | Hexa  | 300757    | 1,12 | up   |
| 6676631 | 7336831 | 1711568 | hexosaminidase A                                           | Hexa  | 300757    | 1,09 | down |
| 6558104 | 7336831 | 1711570 | hexosaminidase A                                           | Hexa  | 300757    | 1,05 | down |
| 6739229 | 7293266 | 1604447 | hexose-6-phosphate dehydrogenase (glucose 1-dehydrogenase) | H6pd  | 298655    | 1,55 | up   |
| 6725004 | 7293266 | 1604446 | hexose-6-phosphate dehydrogenase (glucose 1-dehydrogenase) | H6pd  | 298655    | 1,44 | down |
| 6562869 | 7293266 | 1604453 | hexose-6-phosphate dehydrogenase (glucose 1-dehydrogenase) | H6pd  | 298655    | 1,29 | down |
| 5836064 | 7293266 | 1604446 | hexose-6-phosphate dehydrogenase (glucose 1-dehydrogenase) | H6pd  | 298655    | 1,21 | down |
| 6213397 | 7293266 | 1604446 | hexose-6-phosphate dehydrogenase (glucose 1-dehydrogenase) | H6pd  | 298655    | 1,20 | down |
| 5849029 | 7293266 | 1604449 | hexose-6-phosphate dehydrogenase (glucose 1-dehydrogenase) | H6pd  | 298655    | 1,16 | up   |
| 6178381 | 7293266 | 1604447 | hexose-6-phosphate dehydrogenase (glucose 1-dehydrogenase) | H6pd  | 298655    | 1,15 | down |
| 6329171 | 7293266 | 1604446 | hexose-6-phosphate dehydrogenase (glucose 1-dehydrogenase) | H6pd  | 298655    | 1,10 | up   |
| 5694135 | 7293266 | 1604450 | hexose-6-phosphate dehydrogenase (glucose 1-dehydrogenase) | H6pd  | 298655    | 1,09 | up   |
| 5759923 | 7293266 | 1604448 | hexose-6-phosphate dehydrogenase (glucose 1-dehydrogenase) | H6pd  | 298655    | 1,08 | up   |
| 6423243 | 7293266 | 1604446 | hexose-6-phosphate dehydrogenase (glucose 1-dehydrogenase) | H6pd  | 298655    | 1,04 | up   |
| 6710745 | 7291803 | 1600886 | high mobility group nucleosomal binding domain 2           | Hmgn2 | 114637    | 2,07 | down |
| 6669928 | 7291803 | 1600884 | high mobility group nucleosomal binding domain 2           | Hmgn2 | 114637    | 1,45 | up   |
| 5923110 | 7291803 | 1600885 | high mobility group nucleosomal binding domain 2           | Hmgn2 | 114637    | 1,26 | up   |
| 5991882 | 7291803 | 1600883 | high mobility group nucleosomal binding domain 2           | Hmgn2 | 114637    | 1,23 | up   |
| 5730414 | 7291803 | 1600885 | high mobility group nucleosomal binding domain 2           | Hmgn2 | 114637    | 1,22 | down |
| 5958466 | 7291803 | 1600882 | high mobility group nucleosomal binding domain 2           | Hmgn2 | 114637    | 1,15 | down |
| 6096104 | 7291803 | 1600882 | high mobility group nucleosomal binding domain 2           | Hmgn2 | 114637    | 1,05 | up   |
| 6026245 | 7213228 | 1405993 | hippocampus abundant gene transcript 1                     | Hiat1 | 100134827 | 1,66 | down |
| 6589108 | 7213228 | 1405999 | hippocampus abundant gene transcript 1                     | Hiat1 | 100134827 | 1,31 | down |
| 6734652 | 7213228 | 1406000 | hippocampus abundant gene transcript 1                     | Hiat1 | 100134827 | 1,30 | down |
| 6616024 | 7213228 | 1405996 | hippocampus abundant gene transcript 1                     | Hiat1 | 100134827 | 1,18 | up   |
| 5784515 | 7213228 | 1406007 | hippocampus abundant gene transcript 1                     | Hiat1 | 100134827 | 1,18 | up   |
| 6090827 | 7213228 | 1405992 | hippocampus abundant gene transcript 1                     | Hiat1 | 100134827 | 1,17 | up   |
| 6071676 | 7213228 | 1405990 | hippocampus abundant gene transcript 1                     | Hiat1 | 100134827 | 1,14 | up   |
| 5820772 | 7213228 | 1406003 | hippocampus abundant gene transcript 1                     | Hiat1 | 100134827 | 1,14 | down |
| 6510250 | 7213228 | 1405990 | hippocampus abundant gene transcript 1                     | Hiat1 | 100134827 | 1,12 | up   |



|         |         |         |                                                                       |           |           |      |      |
|---------|---------|---------|-----------------------------------------------------------------------|-----------|-----------|------|------|
| 5848866 | 7213228 | 1405995 | hippocampus abundant gene transcript 1                                | Hiat1     | 100134827 | 1,11 | up   |
| 5881869 | 7213228 | 1405997 | hippocampus abundant gene transcript 1                                | Hiat1     | 100134827 | 1,03 | down |
| 6355643 | 7213228 | 1405991 | hippocampus abundant gene transcript 1                                | Hiat1     | 100134827 | 1,02 | down |
| 5954817 | 7213228 | 1405996 | hippocampus abundant gene transcript 1                                | Hiat1     | 100134827 | 1,02 | down |
| 5750636 | 7213228 | 1405990 | hippocampus abundant gene transcript 1                                | Hiat1     | 100134827 | 1,02 | up   |
| 5757815 | 7213228 | 1405998 | hippocampus abundant gene transcript 1                                | Hiat1     | 100134827 | 1,02 | up   |
| 5821814 | 7095868 | 1116764 | HIR histone cell cycle regulation defective homolog A (S. cerevisiae) | Hira      | 363849    | 2,06 | down |
| 6104864 | 7095868 | 1116760 | HIR histone cell cycle regulation defective homolog A (S. cerevisiae) | Hira      | 363849    | 1,58 | up   |
| 6524934 | 7095868 | 1116759 | HIR histone cell cycle regulation defective homolog A (S. cerevisiae) | Hira      | 363849    | 1,35 | up   |
| 5663254 | 7095868 | 1116772 | HIR histone cell cycle regulation defective homolog A (S. cerevisiae) | Hira      | 363849    | 1,34 | up   |
| 6674457 | 7095868 | 1116771 | HIR histone cell cycle regulation defective homolog A (S. cerevisiae) | Hira      | 363849    | 1,28 | up   |
| 5746818 | 7095868 | 1116794 | HIR histone cell cycle regulation defective homolog A (S. cerevisiae) | Hira      | 363849    | 1,24 | up   |
| 6609098 | 7095868 | 1116759 | HIR histone cell cycle regulation defective homolog A (S. cerevisiae) | Hira      | 363849    | 1,22 | up   |
| 6069597 | 7095868 | 1116786 | HIR histone cell cycle regulation defective homolog A (S. cerevisiae) | Hira      | 363849    | 1,20 | down |
| 6410558 | 7095868 | 1116769 | HIR histone cell cycle regulation defective homolog A (S. cerevisiae) | Hira      | 363849    | 1,17 | up   |
| 6507133 | 7095868 | 1116805 | HIR histone cell cycle regulation defective homolog A (S. cerevisiae) | Hira      | 363849    | 1,17 | down |
| 5935134 | 7095868 | 1116778 | HIR histone cell cycle regulation defective homolog A (S. cerevisiae) | Hira      | 363849    | 1,17 | down |
| 6585040 | 7095868 | 1116766 | HIR histone cell cycle regulation defective homolog A (S. cerevisiae) | Hira      | 363849    | 1,15 | down |
| 5959731 | 7095868 | 1116799 | HIR histone cell cycle regulation defective homolog A (S. cerevisiae) | Hira      | 363849    | 1,15 | down |
| 6603546 | 7095868 | 1116777 | HIR histone cell cycle regulation defective homolog A (S. cerevisiae) | Hira      | 363849    | 1,13 | up   |
| 6045978 | 7095868 | 1116783 | HIR histone cell cycle regulation defective homolog A (S. cerevisiae) | Hira      | 363849    | 1,12 | up   |
| 6335816 | 7095868 | 1116767 | HIR histone cell cycle regulation defective homolog A (S. cerevisiae) | Hira      | 363849    | 1,11 | down |
| 5869647 | 7095868 | 1116789 | HIR histone cell cycle regulation defective homolog A (S. cerevisiae) | Hira      | 363849    | 1,10 | down |
| 6706215 | 7095868 | 1116781 | HIR histone cell cycle regulation defective homolog A (S. cerevisiae) | Hira      | 363849    | 1,10 | up   |
| 5703460 | 7095868 | 1116768 | HIR histone cell cycle regulation defective homolog A (S. cerevisiae) | Hira      | 363849    | 1,08 | up   |
| 5917786 | 7095868 | 1116797 | HIR histone cell cycle regulation defective homolog A (S. cerevisiae) | Hira      | 363849    | 1,08 | down |
| 5858882 | 7095868 | 1116791 | HIR histone cell cycle regulation defective homolog A (S. cerevisiae) | Hira      | 363849    | 1,08 | up   |
| 6052267 | 7095868 | 1116773 | HIR histone cell cycle regulation defective homolog A (S. cerevisiae) | Hira      | 363849    | 1,07 | down |
| 5982799 | 7095868 | 1116795 | HIR histone cell cycle regulation defective homolog A (S. cerevisiae) | Hira      | 363849    | 1,06 | down |
| 5924965 | 7095868 | 1116790 | HIR histone cell cycle regulation defective homolog A (S. cerevisiae) | Hira      | 363849    | 1,03 | up   |
| 6568511 | 7095868 | 1116759 | HIR histone cell cycle regulation defective homolog A (S. cerevisiae) | Hira      | 363849    | 1,03 | up   |
| 6737451 | 7095868 | 1116778 | HIR histone cell cycle regulation defective homolog A (S. cerevisiae) | Hira      | 363849    | 1,02 | up   |
| 5891987 | 7095868 | 1116770 | HIR histone cell cycle regulation defective homolog A (S. cerevisiae) | Hira      | 363849    | 1,02 | up   |
| 5901291 | 7095868 | 1116785 | HIR histone cell cycle regulation defective homolog A (S. cerevisiae) | Hira      | 363849    | 1,01 | up   |
| 5745440 | 7095868 | 1116805 | HIR histone cell cycle regulation defective homolog A (S. cerevisiae) | Hira      | 363849    | 1,00 | up   |
| 6313499 | 7095868 | 1116792 | HIR histone cell cycle regulation defective homolog A (S. cerevisiae) | Hira      | 363849    | 1,00 | up   |
| 5916222 | 7216919 | 1415032 | histocompatibility 2, class II antigen E alpha                        | H2-Ea     | 294269    | 2,17 | down |
| 6370498 | 7216919 | 1415034 | histocompatibility 2, class II antigen E alpha                        | H2-Ea     | 294269    | 2,09 | down |
| 6265065 | 7216919 | 1415036 | histocompatibility 2, class II antigen E alpha                        | H2-Ea     | 294269    | 1,45 | up   |
| 5929473 | 7216919 | 1415033 | histocompatibility 2, class II antigen E alpha                        | H2-Ea     | 294269    | 1,23 | up   |
| 5656627 | 7216919 | 1415034 | histocompatibility 2, class II antigen E alpha                        | H2-Ea     | 294269    | 1,18 | up   |
| 6369474 | 7216919 | 1415035 | histocompatibility 2, class II antigen E alpha                        | H2-Ea     | 294269    | 1,14 | up   |
| 6206316 | 7216919 | 1415035 | histocompatibility 2, class II antigen E alpha                        | H2-Ea     | 294269    | 1,11 | up   |
| 5944113 | 7216406 | 1413934 | histocompatibility 2, M region locus 10.6                             | H2-M10.6  | 414787    | 2,56 | up   |
| 6150866 | 7216406 | 1413936 | histocompatibility 2, M region locus 10.6                             | H2-M10.6  | 414787    | 1,97 | down |
| 6161527 | 7216406 | 1413936 | histocompatibility 2, M region locus 10.6                             | H2-M10.6  | 414787    | 1,47 | up   |
| 5653098 | 7216406 | 1413937 | histocompatibility 2, M region locus 10.6                             | H2-M10.6  | 414787    | 1,32 | up   |
| 5714759 | 7216406 | 1413935 | histocompatibility 2, M region locus 10.6                             | H2-M10.6  | 414787    | 1,29 | down |
| 6547895 | 7216406 | 1413933 | histocompatibility 2, M region locus 10.6                             | H2-M10.6  | 414787    | 1,25 | down |
| 5708759 | 7216406 | 1413934 | histocompatibility 2, M region locus 10.6                             | H2-M10.6  | 414787    | 1,04 | up   |
| 5727457 | 7220278 | 1423734 | histocompatibility 2, M region locus 3                                | H2-M3     | 24747     | 2,40 | up   |
| 6421806 | 7220278 | 1423735 | histocompatibility 2, M region locus 3                                | H2-M3     | 24747     | 1,60 | up   |
| 6220252 | 7220278 | 1423732 | histocompatibility 2, M region locus 3                                | H2-M3     | 24747     | 1,41 | down |
| 5747548 | 7220278 | 1423731 | histocompatibility 2, M region locus 3                                | H2-M3     | 24747     | 1,39 | down |
| 5691684 | 7220278 | 1423736 | histocompatibility 2, M region locus 3                                | H2-M3     | 24747     | 1,28 | down |
| 6204352 | 7220278 | 1423733 | histocompatibility 2, M region locus 3                                | H2-M3     | 24747     | 1,05 | up   |
| 5971359 | 7216562 | 1414193 | histocompatibility 2, T region locus 24                               | RT1-T24-1 | 361787    | 4,33 | up   |

|         |         |         |                                                                                                         |                               |               |      |      |
|---------|---------|---------|---------------------------------------------------------------------------------------------------------|-------------------------------|---------------|------|------|
| 6193977 | 7216562 | 1414189 | histocompatibility 2, T region locus 24                                                                 | RT1-T24-1                     | 361787        | 2,72 | down |
| 5824423 | 7216562 | 1414193 | histocompatibility 2, T region locus 24                                                                 | RT1-T24-1                     | 361787        | 2,32 | down |
| 6495453 | 7216562 | 1414194 | histocompatibility 2, T region locus 24                                                                 | RT1-T24-1                     | 361787        | 2,09 | up   |
| 6490490 | 7216540 | 1414167 | histocompatibility 2, T region locus 24                                                                 | H2-T24                        | 414784        | 1,98 | up   |
| 6355099 | 7216540 | 1414163 | histocompatibility 2, T region locus 24                                                                 | H2-T24                        | 414784        | 1,51 | down |
| 5903059 | 7216562 | 1414190 | histocompatibility 2, T region locus 24                                                                 | RT1-T24-1                     | 361787        | 1,47 | down |
| 6470445 | 7216562 | 1414191 | histocompatibility 2, T region locus 24                                                                 | RT1-T24-1                     | 361787        | 1,34 | down |
| 5629474 | 7216562 | 1414192 | histocompatibility 2, T region locus 24                                                                 | RT1-T24-1                     | 361787        | 1,08 | up   |
| 6584293 | 7216540 | 1414164 | histocompatibility 2, T region locus 24 /// histocompatibility 2, T region locus 24 /// MHC class IRT// | RT1-T24-1 /// LC84 ///        | 361787 /// 36 | 2,15 | down |
| 6109003 | 7216540 | 1414165 | histocompatibility 2, T region locus 24 /// histocompatibility 2, T region locus 24 /// MHC class IRT// | RT1-T24-1 /// LC84 ///        | 361787 /// 36 | 1,45 | down |
| 5905166 | 7216540 | 1414166 | histocompatibility 2, T region locus 24 /// MHC class IRT1.O type 149 processed pseudogene              | 2-T24 /// LOC3602: 414784 /// | 360231        | 2,33 | up   |
| 6199191 | 7216540 | 1414162 | histocompatibility 2, T region locus 24 /// MHC class IRT1.O type 149 processed pseudogene              | 2-T24 /// LOC3602: 414784 /// | 360231        | 1,12 | up   |
| 6545254 | 7228650 | 1444208 | histone acetyltransferase 1                                                                             | Hat1                          | 296501        | 2,55 | down |
| 5640499 | 7228650 | 1444209 | histone acetyltransferase 1                                                                             | Hat1                          | 296501        | 1,65 | down |
| 5837991 | 7228650 | 1444210 | histone acetyltransferase 1                                                                             | Hat1                          | 296501        | 1,53 | down |
| 5745990 | 7228650 | 1444206 | histone acetyltransferase 1                                                                             | Hat1                          | 296501        | 1,42 | down |
| 6417744 | 7228650 | 1444210 | histone acetyltransferase 1                                                                             | Hat1                          | 296501        | 1,39 | up   |
| 6488900 | 7228650 | 1444212 | histone acetyltransferase 1                                                                             | Hat1                          | 296501        | 1,37 | down |
| 5664110 | 7228650 | 1444202 | histone acetyltransferase 1                                                                             | Hat1                          | 296501        | 1,30 | up   |
| 6082879 | 7228650 | 1444204 | histone acetyltransferase 1                                                                             | Hat1                          | 296501        | 1,29 | up   |
| 5855930 | 7228650 | 1444207 | histone acetyltransferase 1                                                                             | Hat1                          | 296501        | 1,14 | down |
| 6003412 | 7228650 | 1444211 | histone acetyltransferase 1                                                                             | Hat1                          | 296501        | 1,08 | down |
| 6589530 | 7228650 | 1444209 | histone acetyltransferase 1                                                                             | Hat1                          | 296501        | 1,07 | down |
| 6132667 | 7228650 | 1444203 | histone acetyltransferase 1                                                                             | Hat1                          | 296501        | 1,03 | up   |
| 6218242 | 7228650 | 1444205 | histone acetyltransferase 1                                                                             | Hat1                          | 296501        | 1,01 | down |
| 5947251 | 7291318 | 1599960 | histone deacetylase 1                                                                                   | Hdac1                         | 297893        | 1,48 | down |
| 5731857 | 7291318 | 1599959 | histone deacetylase 1                                                                                   | Hdac1                         | 297893        | 1,24 | up   |
| 6049603 | 7291318 | 1599961 | histone deacetylase 1                                                                                   | Hdac1                         | 297893        | 1,22 | up   |
| 6142089 | 7291318 | 1599966 | histone deacetylase 1                                                                                   | Hdac1                         | 297893        | 1,15 | up   |
| 6301005 | 7291318 | 1599969 | histone deacetylase 1                                                                                   | Hdac1                         | 297893        | 1,14 | down |
| 5998451 | 7291318 | 1599973 | histone deacetylase 1                                                                                   | Hdac1                         | 297893        | 1,14 | down |
| 5818804 | 7291318 | 1599958 | histone deacetylase 1                                                                                   | Hdac1                         | 297893        | 1,13 | down |
| 5899058 | 7291318 | 1599965 | histone deacetylase 1                                                                                   | Hdac1                         | 297893        | 1,13 | down |
| 5831681 | 7291318 | 1599963 | histone deacetylase 1                                                                                   | Hdac1                         | 297893        | 1,09 | up   |
| 5916883 | 7291318 | 1599967 | histone deacetylase 1                                                                                   | Hdac1                         | 297893        | 1,09 | down |
| 6348371 | 7291318 | 1599971 | histone deacetylase 1                                                                                   | Hdac1                         | 297893        | 1,09 | down |
| 6286039 | 7291318 | 1599972 | histone deacetylase 1                                                                                   | Hdac1                         | 297893        | 1,09 | down |
| 6327035 | 7291318 | 1599962 | histone deacetylase 1                                                                                   | Hdac1                         | 297893        | 1,06 | up   |
| 5631536 | 7291318 | 1599964 | histone deacetylase 1                                                                                   | Hdac1                         | 297893        | 1,02 | down |
| 5666543 | 7373678 | 1805880 | histone deacetylase 6                                                                                   | Hdac6                         | 84581         | 1,23 | up   |
| 5874870 | 7373678 | 1805879 | histone deacetylase 6                                                                                   | Hdac6                         | 84581         | 1,06 | down |
| 5713804 | 7373678 | 1805879 | histone deacetylase 6                                                                                   | Hdac6                         | 84581         | 1,05 | up   |
| 6260803 | 7220618 | 1424432 | HLA-B associated transcript 4                                                                           | Bat4                          | 415064        | 2,34 | down |
| 6043932 | 7220618 | 1424433 | HLA-B associated transcript 4                                                                           | Bat4                          | 415064        | 1,12 | up   |
| 6292893 | 7220618 | 1424432 | HLA-B associated transcript 4                                                                           | Bat4                          | 415064        | 1,05 | down |
| 5661571 | 7091954 | 1107734 | holocarboxylase synthetase (biotin-(propionyl-Coenzyme A-carboxylase (ATP-hydrolysing)) ligase)         | Hlcs                          | 288240        | 3,58 | up   |
| 5999122 | 7091954 | 1107730 | holocarboxylase synthetase (biotin-(propionyl-Coenzyme A-carboxylase (ATP-hydrolysing)) ligase)         | Hlcs                          | 288240        | 2,29 | down |
| 5706048 | 7091954 | 1107703 | holocarboxylase synthetase (biotin-(propionyl-Coenzyme A-carboxylase (ATP-hydrolysing)) ligase)         | Hlcs                          | 288240        | 1,08 | up   |
| 5811257 | 7374493 | 1807956 | holocytochrome c synthetase                                                                             | Hccs                          | 317444        | 1,14 | up   |
| 5736805 | 7374493 | 1807955 | holocytochrome c synthetase                                                                             | Hccs                          | 317444        | 1,07 | down |
| 6069266 | 7374493 | 1807962 | holocytochrome c synthetase                                                                             | Hccs                          | 317444        | 1,06 | up   |
| 6182192 | 7264797 | 1534435 | homeo box A4                                                                                            | Hoxa4                         | 24453         | 1,43 | down |
| 6549100 | 7264797 | 1534435 | homeo box A4                                                                                            | Hoxa4                         | 24453         | 1,21 | down |
| 5838959 | 7264797 | 1534435 | homeo box A4                                                                                            | Hoxa4                         | 24453         | 1,11 | up   |
| 6428165 | 7264797 | 1534435 | homeo box A4                                                                                            | Hoxa4                         | 24453         | 1,01 | down |
| 6024830 | 7264797 | 1534440 | homeo box A5                                                                                            | Hoxa5                         | 79241         | 1,65 | down |
| 5785131 | 7264797 | 1534441 | homeo box A5                                                                                            | Hoxa5                         | 79241         | 1,17 | up   |

|         |         |         |                                                       |            |        |      |      |
|---------|---------|---------|-------------------------------------------------------|------------|--------|------|------|
| 6122533 | 7264797 | 1534439 | homeo box A5                                          | Hoxa5      | 79241  | 1,08 | down |
| 6357483 | 7138089 | 1221345 | homeobox and leucine zipper encoding                  | Homez      | 260325 | 2,21 | up   |
| 5980071 | 7138089 | 1221345 | homeobox and leucine zipper encoding                  | Homez      | 260325 | 1,39 | up   |
| 6013336 | 7138089 | 1221345 | homeobox and leucine zipper encoding                  | Homez      | 260325 | 1,37 | up   |
| 6711338 | 7138089 | 1221344 | homeobox and leucine zipper encoding                  | Homez      | 260325 | 1,29 | down |
| 6000902 | 7138089 | 1221345 | homeobox and leucine zipper encoding                  | Homez      | 260325 | 1,19 | down |
| 6383850 | 7138089 | 1221345 | homeobox and leucine zipper encoding                  | Homez      | 260325 | 1,16 | up   |
| 5660103 | 7138089 | 1221345 | homeobox and leucine zipper encoding                  | Homez      | 260325 | 1,13 | up   |
| 5808769 | 7138089 | 1221345 | homeobox and leucine zipper encoding                  | Homez      | 260325 | 1,10 | down |
| 6652683 | 7138089 | 1221344 | homeobox and leucine zipper encoding                  | Homez      | 260325 | 1,06 | down |
| 6439463 | 7212285 | 1403960 | homeodomain interacting protein kinase 1              | Hipk1      | 365895 | 1,59 | down |
| 6702856 | 7212285 | 1403960 | homeodomain interacting protein kinase 1              | Hipk1      | 365895 | 1,43 | down |
| 6580189 | 7212285 | 1403960 | homeodomain interacting protein kinase 1              | Hipk1      | 365895 | 1,42 | up   |
| 5953586 | 7212285 | 1403987 | homeodomain interacting protein kinase 1              | Hipk1      | 365895 | 1,26 | down |
| 5726174 | 7212285 | 1403977 | homeodomain interacting protein kinase 1              | Hipk1      | 365895 | 1,25 | down |
| 6551041 | 7212285 | 1403961 | homeodomain interacting protein kinase 1              | Hipk1      | 365895 | 1,23 | up   |
| 5723303 | 7212285 | 1403971 | homeodomain interacting protein kinase 1              | Hipk1      | 365895 | 1,20 | down |
| 6702963 | 7212285 | 1403981 | homeodomain interacting protein kinase 1              | Hipk1      | 365895 | 1,16 | down |
| 5725497 | 7212285 | 1403960 | homeodomain interacting protein kinase 1              | Hipk1      | 365895 | 1,13 | up   |
| 6560503 | 7212285 | 1403963 | homeodomain interacting protein kinase 1              | Hipk1      | 365895 | 1,11 | down |
| 5959920 | 7212285 | 1403961 | homeodomain interacting protein kinase 1              | Hipk1      | 365895 | 1,11 | up   |
| 6710821 | 7212285 | 1403966 | homeodomain interacting protein kinase 1              | Hipk1      | 365895 | 1,10 | up   |
| 6558814 | 7212285 | 1403978 | homeodomain interacting protein kinase 1              | Hipk1      | 365895 | 1,10 | down |
| 6499733 | 7212285 | 1403984 | homeodomain interacting protein kinase 1              | Hipk1      | 365895 | 1,09 | up   |
| 5996154 | 7212285 | 1403960 | homeodomain interacting protein kinase 1              | Hipk1      | 365895 | 1,08 | up   |
| 5758109 | 7212285 | 1403965 | homeodomain interacting protein kinase 1              | Hipk1      | 365895 | 1,08 | down |
| 6242136 | 7212285 | 1403960 | homeodomain interacting protein kinase 1              | Hipk1      | 365895 | 1,08 | up   |
| 6744953 | 7212285 | 1403979 | homeodomain interacting protein kinase 1              | Hipk1      | 365895 | 1,05 | down |
| 6557311 | 7212285 | 1403973 | homeodomain interacting protein kinase 1              | Hipk1      | 365895 | 1,05 | down |
| 6189778 | 7212285 | 1403981 | homeodomain interacting protein kinase 1              | Hipk1      | 365895 | 1,05 | down |
| 6359078 | 7212285 | 1403962 | homeodomain interacting protein kinase 1              | Hipk1      | 365895 | 1,04 | down |
| 6628146 | 7212285 | 1403975 | homeodomain interacting protein kinase 1              | Hipk1      | 365895 | 1,03 | down |
| 6639954 | 7212285 | 1403964 | homeodomain interacting protein kinase 1              | Hipk1      | 365895 | 1,02 | down |
| 6674705 | 7212285 | 1403976 | homeodomain interacting protein kinase 1              | Hipk1      | 365895 | 1,00 | down |
| 6371065 | 7212285 | 1403973 | homeodomain interacting protein kinase 1              | Hipk1      | 365895 | 1,00 | down |
| 6452969 | 7217573 | 1416948 | homolog of zebrafish ES1                              | RGD1303003 | 294326 | 2,16 | down |
| 5654118 | 7217573 | 1416947 | homolog of zebrafish ES1                              | RGD1303003 | 294326 | 1,28 | down |
| 5980469 | 7217573 | 1416951 | homolog of zebrafish ES1                              | RGD1303003 | 294326 | 1,27 | up   |
| 6207765 | 7217573 | 1416954 | homolog of zebrafish ES1                              | RGD1303003 | 294326 | 1,21 | down |
| 5661811 | 7217573 | 1416952 | homolog of zebrafish ES1                              | RGD1303003 | 294326 | 1,20 | up   |
| 5897192 | 7217573 | 1416953 | homolog of zebrafish ES1                              | RGD1303003 | 294326 | 1,09 | down |
| 6177984 | 7217573 | 1416952 | homolog of zebrafish ES1                              | RGD1303003 | 294326 | 1,08 | down |
| 6439612 | 7217573 | 1416949 | homolog of zebrafish ES1                              | RGD1303003 | 294326 | 1,05 | down |
| 6001267 | 7217573 | 1416950 | homolog of zebrafish ES1                              | RGD1303003 | 294326 | 1,04 | up   |
| 6129510 | 7273421 | 1556308 | hormone-regulated proliferation associated protein 20 | Hrpap20    | 362495 | 2,20 | up   |
| 6479185 | 7273421 | 1556307 | hormone-regulated proliferation associated protein 20 | Hrpap20    | 362495 | 1,73 | up   |
| 6099108 | 7273421 | 1556306 | hormone-regulated proliferation associated protein 20 | Hrpap20    | 362495 | 1,66 | down |
| 6355344 | 7273421 | 1556309 | hormone-regulated proliferation associated protein 20 | Hrpap20    | 362495 | 1,08 | down |
| 6052746 | 7273421 | 1556306 | hormone-regulated proliferation associated protein 20 | Hrpap20    | 362495 | 1,03 | up   |
| 5626667 | 7093820 | 1112184 | Hspb associated protein 1                             | Hspbap1    | 171460 | 2,59 | down |
| 5972703 | 7093820 | 1112181 | Hspb associated protein 1                             | Hspbap1    | 171460 | 2,07 | down |
| 5779255 | 7093820 | 1112186 | Hspb associated protein 1                             | Hspbap1    | 171460 | 1,51 | up   |
| 6028487 | 7093820 | 1112182 | Hspb associated protein 1                             | Hspbap1    | 171460 | 1,49 | down |
| 6144325 | 7093820 | 1112185 | Hspb associated protein 1                             | Hspbap1    | 171460 | 1,48 | up   |
| 6540451 | 7093820 | 1112188 | Hspb associated protein 1                             | Hspbap1    | 171460 | 1,45 | down |
| 5943743 | 7093820 | 1112181 | Hspb associated protein 1                             | Hspbap1    | 171460 | 1,39 | down |
| 6345839 | 7093820 | 1112183 | Hspb associated protein 1                             | Hspbap1    | 171460 | 1,23 | up   |

|         |         |         |                                                                |         |        |      |      |
|---------|---------|---------|----------------------------------------------------------------|---------|--------|------|------|
| 5647830 | 7093820 | 1112185 | Hspb associated protein 1                                      | Hspbap1 | 171460 | 1,22 | down |
| 6713682 | 7093820 | 1112184 | Hspb associated protein 1                                      | Hspbap1 | 171460 | 1,09 | down |
| 6402933 | 7093820 | 1112187 | Hspb associated protein 1                                      | Hspbap1 | 171460 | 1,05 | down |
| 6694399 | 7279073 | 1570750 | human immunodeficiency virus type I enhancer binding protein 3 | Hivep3  | 313557 | 2,51 | down |
| 5883947 | 7279073 | 1570742 | human immunodeficiency virus type I enhancer binding protein 3 | Hivep3  | 313557 | 1,75 | up   |
| 5650688 | 7279073 | 1570753 | human immunodeficiency virus type I enhancer binding protein 3 | Hivep3  | 313557 | 1,68 | up   |
| 6447908 | 7279073 | 1570753 | human immunodeficiency virus type I enhancer binding protein 3 | Hivep3  | 313557 | 1,58 | down |
| 6476166 | 7279073 | 1570755 | human immunodeficiency virus type I enhancer binding protein 3 | Hivep3  | 313557 | 1,33 | up   |
| 6184777 | 7279073 | 1570730 | human immunodeficiency virus type I enhancer binding protein 3 | Hivep3  | 313557 | 1,31 | down |
| 6476389 | 7279073 | 1570753 | human immunodeficiency virus type I enhancer binding protein 3 | Hivep3  | 313557 | 1,31 | down |
| 5868301 | 7279073 | 1570742 | human immunodeficiency virus type I enhancer binding protein 3 | Hivep3  | 313557 | 1,22 | up   |
| 6413378 | 7279073 | 1570754 | human immunodeficiency virus type I enhancer binding protein 3 | Hivep3  | 313557 | 1,20 | up   |
| 6589606 | 7279073 | 1570741 | human immunodeficiency virus type I enhancer binding protein 3 | Hivep3  | 313557 | 1,17 | up   |
| 5874695 | 7279073 | 1570753 | human immunodeficiency virus type I enhancer binding protein 3 | Hivep3  | 313557 | 1,14 | down |
| 5796006 | 7279073 | 1570730 | human immunodeficiency virus type I enhancer binding protein 3 | Hivep3  | 313557 | 1,13 | down |
| 6289210 | 7279073 | 1570744 | human immunodeficiency virus type I enhancer binding protein 3 | Hivep3  | 313557 | 1,09 | down |
| 6318292 | 7279073 | 1570742 | human immunodeficiency virus type I enhancer binding protein 3 | Hivep3  | 313557 | 1,09 | down |
| 5964049 | 7279073 | 1570749 | human immunodeficiency virus type I enhancer binding protein 3 | Hivep3  | 313557 | 1,06 | up   |
| 6100709 | 7279073 | 1570754 | human immunodeficiency virus type I enhancer binding protein 3 | Hivep3  | 313557 | 1,05 | up   |
| 6196516 | 7279073 | 1570753 | human immunodeficiency virus type I enhancer binding protein 3 | Hivep3  | 313557 | 1,00 | up   |
| 6645221 | 7082646 | 1085328 | huntingtin-associated protein 1                                | Hap1    | 29430  | 2,19 | up   |
| 6148519 | 7082646 | 1085331 | huntingtin-associated protein 1                                | Hap1    | 29430  | 1,87 | down |
| 6473317 | 7082646 | 1085335 | huntingtin-associated protein 1                                | Hap1    | 29430  | 1,71 | up   |
| 6252995 | 7082646 | 1085328 | huntingtin-associated protein 1                                | Hap1    | 29430  | 1,53 | up   |
| 6642737 | 7082646 | 1085335 | huntingtin-associated protein 1                                | Hap1    | 29430  | 1,52 | down |
| 6316013 | 7082646 | 1085329 | huntingtin-associated protein 1                                | Hap1    | 29430  | 1,50 | down |
| 5844416 | 7082646 | 1085328 | huntingtin-associated protein 1                                | Hap1    | 29430  | 1,43 | up   |
| 5802855 | 7082646 | 1085331 | huntingtin-associated protein 1                                | Hap1    | 29430  | 1,41 | up   |
| 6186630 | 7082646 | 1085328 | huntingtin-associated protein 1                                | Hap1    | 29430  | 1,34 | up   |
| 6378677 | 7082646 | 1085337 | huntingtin-associated protein 1                                | Hap1    | 29430  | 1,33 | down |
| 5867724 | 7082646 | 1085339 | huntingtin-associated protein 1                                | Hap1    | 29430  | 1,33 | down |
| 6218873 | 7082646 | 1085330 | huntingtin-associated protein 1                                | Hap1    | 29430  | 1,32 | down |
| 5978048 | 7082646 | 1085329 | huntingtin-associated protein 1                                | Hap1    | 29430  | 1,29 | up   |
| 6432435 | 7082646 | 1085334 | huntingtin-associated protein 1                                | Hap1    | 29430  | 1,26 | down |
| 6488139 | 7082646 | 1085333 | huntingtin-associated protein 1                                | Hap1    | 29430  | 1,25 | down |
| 5647805 | 7082646 | 1085329 | huntingtin-associated protein 1                                | Hap1    | 29430  | 1,15 | up   |
| 6245001 | 7082646 | 1085339 | huntingtin-associated protein 1                                | Hap1    | 29430  | 1,12 | up   |
| 6422687 | 7082646 | 1085328 | huntingtin-associated protein 1                                | Hap1    | 29430  | 1,12 | up   |
| 5823567 | 7082646 | 1085338 | huntingtin-associated protein 1                                | Hap1    | 29430  | 1,09 | down |
| 6690777 | 7082646 | 1085328 | huntingtin-associated protein 1                                | Hap1    | 29430  | 1,06 | down |
| 5624171 | 7082646 | 1085332 | huntingtin-associated protein 1                                | Hap1    | 29430  | 1,05 | up   |
| 6004446 | 7082646 | 1085336 | huntingtin-associated protein 1                                | Hap1    | 29430  | 1,03 | down |
| 6574231 | 7082646 | 1085338 | huntingtin-associated protein 1                                | Hap1    | 29430  | 1,01 | down |
| 6710202 | 7181001 | 1327701 | hydrocephalus inducing                                         | Hydin   | 292017 | 1,80 | down |
| 6395318 | 7181001 | 1327650 | hydrocephalus inducing                                         | Hydin   | 292017 | 1,80 | up   |
| 6046199 | 7181001 | 1327700 | hydrocephalus inducing                                         | Hydin   | 292017 | 1,76 | down |
| 6510422 | 7181001 | 1327677 | hydrocephalus inducing                                         | Hydin   | 292017 | 1,75 | down |
| 6562980 | 7181001 | 1327684 | hydrocephalus inducing                                         | Hydin   | 292017 | 1,69 | up   |
| 6280004 | 7181001 | 1327720 | hydrocephalus inducing                                         | Hydin   | 292017 | 1,63 | down |
| 5890428 | 7181001 | 1327715 | hydrocephalus inducing                                         | Hydin   | 292017 | 1,56 | up   |
| 6132676 | 7181001 | 1327645 | hydrocephalus inducing                                         | Hydin   | 292017 | 1,52 | down |
| 5914822 | 7181001 | 1327675 | hydrocephalus inducing                                         | Hydin   | 292017 | 1,49 | up   |
| 6632592 | 7181001 | 1327696 | hydrocephalus inducing                                         | Hydin   | 292017 | 1,44 | down |
| 6227145 | 7181001 | 1327710 | hydrocephalus inducing                                         | Hydin   | 292017 | 1,41 | up   |
| 6337010 | 7181001 | 1327655 | hydrocephalus inducing                                         | Hydin   | 292017 | 1,41 | up   |
| 5854139 | 7181001 | 1327718 | hydrocephalus inducing                                         | Hydin   | 292017 | 1,37 | up   |
| 6644143 | 7181001 | 1327698 | hydrocephalus inducing                                         | Hydin   | 292017 | 1,36 | down |

|         |         |         |                        |       |        |      |      |
|---------|---------|---------|------------------------|-------|--------|------|------|
| 6330633 | 7181001 | 1327697 | hydrocephalus inducing | Hydin | 292017 | 1,36 | down |
| 5983457 | 7181001 | 1327688 | hydrocephalus inducing | Hydin | 292017 | 1,35 | down |
| 6346146 | 7181001 | 1327692 | hydrocephalus inducing | Hydin | 292017 | 1,34 | down |
| 6295716 | 7181001 | 1327709 | hydrocephalus inducing | Hydin | 292017 | 1,31 | up   |
| 6740578 | 7181001 | 1327704 | hydrocephalus inducing | Hydin | 292017 | 1,30 | up   |
| 6466399 | 7181001 | 1327665 | hydrocephalus inducing | Hydin | 292017 | 1,30 | down |
| 6642987 | 7181001 | 1327714 | hydrocephalus inducing | Hydin | 292017 | 1,29 | up   |
| 6704192 | 7181001 | 1327679 | hydrocephalus inducing | Hydin | 292017 | 1,28 | down |
| 6565677 | 7181001 | 1327657 | hydrocephalus inducing | Hydin | 292017 | 1,27 | up   |
| 6728921 | 7181001 | 1327702 | hydrocephalus inducing | Hydin | 292017 | 1,27 | down |
| 6114174 | 7181001 | 1327719 | hydrocephalus inducing | Hydin | 292017 | 1,26 | up   |
| 5777566 | 7181001 | 1327703 | hydrocephalus inducing | Hydin | 292017 | 1,26 | down |
| 6673038 | 7181001 | 1327671 | hydrocephalus inducing | Hydin | 292017 | 1,22 | down |
| 6052115 | 7181001 | 1327676 | hydrocephalus inducing | Hydin | 292017 | 1,22 | down |
| 6031853 | 7181001 | 1327664 | hydrocephalus inducing | Hydin | 292017 | 1,20 | up   |
| 6309787 | 7181001 | 1327652 | hydrocephalus inducing | Hydin | 292017 | 1,20 | down |
| 5738612 | 7181001 | 1327717 | hydrocephalus inducing | Hydin | 292017 | 1,20 | up   |
| 6726858 | 7181001 | 1327654 | hydrocephalus inducing | Hydin | 292017 | 1,18 | down |
| 6707097 | 7181001 | 1327669 | hydrocephalus inducing | Hydin | 292017 | 1,18 | down |
| 6404635 | 7181001 | 1327673 | hydrocephalus inducing | Hydin | 292017 | 1,15 | up   |
| 5755198 | 7181001 | 1327672 | hydrocephalus inducing | Hydin | 292017 | 1,15 | up   |
| 5623078 | 7181001 | 1327697 | hydrocephalus inducing | Hydin | 292017 | 1,15 | up   |
| 5874752 | 7181001 | 1327699 | hydrocephalus inducing | Hydin | 292017 | 1,14 | down |
| 6685496 | 7181001 | 1327685 | hydrocephalus inducing | Hydin | 292017 | 1,14 | down |
| 5790307 | 7181001 | 1327644 | hydrocephalus inducing | Hydin | 292017 | 1,12 | up   |
| 6514161 | 7181001 | 1327670 | hydrocephalus inducing | Hydin | 292017 | 1,12 | up   |
| 6182432 | 7181001 | 1327694 | hydrocephalus inducing | Hydin | 292017 | 1,12 | down |
| 6156393 | 7181001 | 1327712 | hydrocephalus inducing | Hydin | 292017 | 1,12 | down |
| 5960387 | 7181001 | 1327719 | hydrocephalus inducing | Hydin | 292017 | 1,12 | down |
| 6729946 | 7181001 | 1327691 | hydrocephalus inducing | Hydin | 292017 | 1,11 | down |
| 6615916 | 7181001 | 1327675 | hydrocephalus inducing | Hydin | 292017 | 1,11 | up   |
| 6157709 | 7181001 | 1327676 | hydrocephalus inducing | Hydin | 292017 | 1,10 | up   |
| 6613618 | 7181001 | 1327705 | hydrocephalus inducing | Hydin | 292017 | 1,10 | up   |
| 6052483 | 7181001 | 1327673 | hydrocephalus inducing | Hydin | 292017 | 1,10 | down |
| 6061086 | 7181001 | 1327681 | hydrocephalus inducing | Hydin | 292017 | 1,09 | down |
| 6516914 | 7181001 | 1327648 | hydrocephalus inducing | Hydin | 292017 | 1,08 | down |
| 5638777 | 7181001 | 1327682 | hydrocephalus inducing | Hydin | 292017 | 1,07 | down |
| 6690759 | 7181001 | 1327702 | hydrocephalus inducing | Hydin | 292017 | 1,07 | up   |
| 5844051 | 7181001 | 1327719 | hydrocephalus inducing | Hydin | 292017 | 1,06 | up   |
| 6350829 | 7181001 | 1327707 | hydrocephalus inducing | Hydin | 292017 | 1,06 | down |
| 6622717 | 7181001 | 1327653 | hydrocephalus inducing | Hydin | 292017 | 1,05 | up   |
| 6333387 | 7181001 | 1327656 | hydrocephalus inducing | Hydin | 292017 | 1,05 | up   |
| 6042109 | 7181001 | 1327678 | hydrocephalus inducing | Hydin | 292017 | 1,05 | down |
| 5990983 | 7181001 | 1327686 | hydrocephalus inducing | Hydin | 292017 | 1,04 | up   |
| 6630790 | 7181001 | 1327663 | hydrocephalus inducing | Hydin | 292017 | 1,04 | up   |
| 5761727 | 7181001 | 1327680 | hydrocephalus inducing | Hydin | 292017 | 1,04 | up   |
| 5659121 | 7181001 | 1327701 | hydrocephalus inducing | Hydin | 292017 | 1,04 | down |
| 5668876 | 7181001 | 1327712 | hydrocephalus inducing | Hydin | 292017 | 1,03 | down |
| 6095772 | 7181001 | 1327660 | hydrocephalus inducing | Hydin | 292017 | 1,03 | up   |
| 5955672 | 7181001 | 1327658 | hydrocephalus inducing | Hydin | 292017 | 1,03 | up   |
| 6562414 | 7181001 | 1327651 | hydrocephalus inducing | Hydin | 292017 | 1,02 | down |
| 6389901 | 7181001 | 1327673 | hydrocephalus inducing | Hydin | 292017 | 1,02 | up   |
| 6594293 | 7181001 | 1327673 | hydrocephalus inducing | Hydin | 292017 | 1,01 | up   |
| 5646664 | 7181001 | 1327673 | hydrocephalus inducing | Hydin | 292017 | 1,00 | up   |
| 6069092 | 7181001 | 1327687 | hydrocephalus inducing | Hydin | 292017 | 1,00 | up   |
| 6371390 | 7181001 | 1327706 | hydrocephalus inducing | Hydin | 292017 | 1,00 | up   |
| 6618520 | 7181001 | 1327675 | hydrocephalus inducing | Hydin | 292017 | 1,00 | up   |

|         |         |         |                                                                                                        |                  |                   |      |      |
|---------|---------|---------|--------------------------------------------------------------------------------------------------------|------------------|-------------------|------|------|
| 6695181 | 7181001 | 1327716 | hydrocephalus inducing                                                                                 | Hydin            | 292017            | 1,00 | down |
| 6214633 | 7181001 | 1327662 | hydrocephalus inducing                                                                                 | Hydin            | 292017            | 1,00 | up   |
| 5643148 | 7245424 | 1486235 | hydroxyacid oxidase 1, liver                                                                           | Hao1             | 311446            | 2,08 | up   |
| 5749783 | 7245424 | 1486239 | hydroxyacid oxidase 1, liver                                                                           | Hao1             | 311446            | 1,51 | up   |
| 6309561 | 7245424 | 1486238 | hydroxyacid oxidase 1, liver                                                                           | Hao1             | 311446            | 1,45 | down |
| 6210400 | 7245424 | 1486231 | hydroxyacid oxidase 1, liver                                                                           | Hao1             | 311446            | 1,45 | up   |
| 6230578 | 7245424 | 1486237 | hydroxyacid oxidase 1, liver                                                                           | Hao1             | 311446            | 1,40 | down |
| 6482400 | 7245424 | 1486233 | hydroxyacid oxidase 1, liver                                                                           | Hao1             | 311446            | 1,29 | down |
| 6031775 | 7245424 | 1486231 | hydroxyacid oxidase 1, liver                                                                           | Hao1             | 311446            | 1,17 | down |
| 5834457 | 7245424 | 1486240 | hydroxyacid oxidase 1, liver                                                                           | Hao1             | 311446            | 1,14 | down |
| 6451305 | 7245424 | 1486241 | hydroxyacid oxidase 1, liver                                                                           | Hao1             | 311446            | 1,10 | up   |
| 5996809 | 7245424 | 1486232 | hydroxyacid oxidase 1, liver                                                                           | Hao1             | 311446            | 1,07 | down |
| 6033092 | 7075573 | 1069662 | hydroxyacylglutathione hydrolase-like                                                                  | Haghl            | 302995            | 2,05 | down |
| 6180704 | 7075573 | 1069661 | hydroxyacylglutathione hydrolase-like                                                                  | Haghl            | 302995            | 1,36 | down |
| 6703536 | 7075573 | 1069664 | hydroxyacylglutathione hydrolase-like                                                                  | Haghl            | 302995            | 1,27 | down |
| 6140406 | 7075573 | 1069658 | hydroxyacylglutathione hydrolase-like                                                                  | Haghl            | 302995            | 1,20 | up   |
| 5835100 | 7075573 | 1069659 | hydroxyacylglutathione hydrolase-like                                                                  | Haghl            | 302995            | 1,17 | up   |
| 5748497 | 7075573 | 1069662 | hydroxyacylglutathione hydrolase-like                                                                  | Haghl            | 302995            | 1,16 | down |
| 5776720 | 7075573 | 1069662 | hydroxyacylglutathione hydrolase-like                                                                  | Haghl            | 302995            | 1,11 | up   |
| 6489797 | 7075573 | 1069664 | hydroxyacylglutathione hydrolase-like                                                                  | Haghl            | 302995            | 1,08 | down |
| 5840759 | 7075573 | 1069658 | hydroxyacylglutathione hydrolase-like                                                                  | Haghl            | 302995            | 1,07 | down |
| 6669910 | 7075573 | 1069660 | hydroxyacylglutathione hydrolase-like                                                                  | Haghl            | 302995            | 1,07 | up   |
| 6635696 | 7075573 | 1069661 | hydroxyacylglutathione hydrolase-like                                                                  | Haghl            | 302995            | 1,05 | down |
| 6192294 | 7075573 | 1069658 | hydroxyacylglutathione hydrolase-like                                                                  | Haghl            | 302995            | 1,04 | up   |
| 6337558 | 7075573 | 1069663 | hydroxyacylglutathione hydrolase-like                                                                  | Haghl            | 302995            | 1,04 | up   |
| 6063883 | 7075573 | 1069663 | hydroxyacylglutathione hydrolase-like                                                                  | Haghl            | 302995            | 1,03 | up   |
| 5684642 | 7075573 | 1069663 | hydroxyacylglutathione hydrolase-like                                                                  | Haghl            | 302995            | 1,03 | down |
| 6105999 | 7075573 | 1069658 | hydroxyacylglutathione hydrolase-like                                                                  | Haghl            | 302995            | 1,03 | up   |
| 6342497 | 7211896 | 1403092 | hydroxy-delta-5-steroid dehydrogenase, 3 beta- and steroid delta-isomerase 1                           | Hsd3b1           | 360348            | 2,14 | up   |
| 5775215 | 7211896 | 1403092 | hydroxy-delta-5-steroid dehydrogenase, 3 beta- and steroid delta-isomerase 1                           | Hsd3b1           | 360348            | 1,27 | up   |
| 5769337 | 7211896 | 1403091 | hydroxy-delta-5-steroid dehydrogenase, 3 beta- and steroid delta-isomerase 1                           | Hsd3b1           | 360348            | 1,06 | down |
| 6652945 | 7211896 | 1403094 | hydroxy-delta-5-steroid dehydrogenase, 3 beta- and steroid delta-isomerase 1 /// 3 beta-hydroxysteroid | Hsd3b1 /// Hsd3b | 360348 /// 682974 | 1,97 | down |
| 5771768 | 7211896 | 1403093 | hydroxy-delta-5-steroid dehydrogenase, 3 beta- and steroid delta-isomerase 1 /// 3 beta-hydroxysteroid | Hsd3b1 /// Hsd3b | 360348 /// 682974 | 1,42 | down |
| 6340732 | 7211896 | 1403094 | hydroxy-delta-5-steroid dehydrogenase, 3 beta- and steroid delta-isomerase 1 /// 3 beta-hydroxysteroid | Hsd3b1 /// Hsd3b | 360348 /// 682974 | 1,41 | down |
| 5977500 | 7211896 | 1403094 | hydroxy-delta-5-steroid dehydrogenase, 3 beta- and steroid delta-isomerase 1 /// 3 beta-hydroxysteroid | Hsd3b1 /// Hsd3b | 360348 /// 682974 | 1,21 | up   |
| 6685780 | 7211896 | 1403095 | hydroxy-delta-5-steroid dehydrogenase, 3 beta- and steroid delta-isomerase 1 /// 3 beta-hydroxysteroid | Hsd3b1 /// Hsd3b | 360348 /// 682974 | 1,06 | down |
| 6705698 | 7170376 | 1300385 | hydroxysteroid (17-beta) dehydrogenase 4                                                               | Hsd17b4          | 79244             | 2,11 | up   |
| 6652880 | 7170376 | 1300394 | hydroxysteroid (17-beta) dehydrogenase 4                                                               | Hsd17b4          | 79244             | 1,98 | up   |
| 5650336 | 7170376 | 1300392 | hydroxysteroid (17-beta) dehydrogenase 4                                                               | Hsd17b4          | 79244             | 1,64 | down |
| 6619017 | 7170376 | 1300384 | hydroxysteroid (17-beta) dehydrogenase 4                                                               | Hsd17b4          | 79244             | 1,44 | down |
| 6315234 | 7170376 | 1300376 | hydroxysteroid (17-beta) dehydrogenase 4                                                               | Hsd17b4          | 79244             | 1,43 | down |
| 6356930 | 7170376 | 1300386 | hydroxysteroid (17-beta) dehydrogenase 4                                                               | Hsd17b4          | 79244             | 1,33 | down |
| 6561449 | 7170376 | 1300391 | hydroxysteroid (17-beta) dehydrogenase 4                                                               | Hsd17b4          | 79244             | 1,32 | up   |
| 6425621 | 7170376 | 1300375 | hydroxysteroid (17-beta) dehydrogenase 4                                                               | Hsd17b4          | 79244             | 1,32 | up   |
| 5728947 | 7170376 | 1300372 | hydroxysteroid (17-beta) dehydrogenase 4                                                               | Hsd17b4          | 79244             | 1,30 | up   |
| 6240179 | 7170376 | 1300394 | hydroxysteroid (17-beta) dehydrogenase 4                                                               | Hsd17b4          | 79244             | 1,30 | up   |
| 6519137 | 7170376 | 1300389 | hydroxysteroid (17-beta) dehydrogenase 4                                                               | Hsd17b4          | 79244             | 1,29 | down |
| 6544674 | 7170376 | 1300379 | hydroxysteroid (17-beta) dehydrogenase 4                                                               | Hsd17b4          | 79244             | 1,28 | down |
| 5769020 | 7170376 | 1300390 | hydroxysteroid (17-beta) dehydrogenase 4                                                               | Hsd17b4          | 79244             | 1,28 | up   |
| 5910991 | 7170376 | 1300388 | hydroxysteroid (17-beta) dehydrogenase 4                                                               | Hsd17b4          | 79244             | 1,25 | down |
| 5706074 | 7170376 | 1300377 | hydroxysteroid (17-beta) dehydrogenase 4                                                               | Hsd17b4          | 79244             | 1,23 | up   |
| 6490649 | 7170376 | 1300373 | hydroxysteroid (17-beta) dehydrogenase 4                                                               | Hsd17b4          | 79244             | 1,23 | up   |
| 6116822 | 7170376 | 1300378 | hydroxysteroid (17-beta) dehydrogenase 4                                                               | Hsd17b4          | 79244             | 1,22 | down |
| 5714063 | 7170376 | 1300387 | hydroxysteroid (17-beta) dehydrogenase 4                                                               | Hsd17b4          | 79244             | 1,20 | down |
| 5861459 | 7170376 | 1300370 | hydroxysteroid (17-beta) dehydrogenase 4                                                               | Hsd17b4          | 79244             | 1,11 | up   |
| 5767530 | 7170376 | 1300374 | hydroxysteroid (17-beta) dehydrogenase 4                                                               | Hsd17b4          | 79244             | 1,10 | up   |
| 6364483 | 7170376 | 1300380 | hydroxysteroid (17-beta) dehydrogenase 4                                                               | Hsd17b4          | 79244             | 1,10 | down |

|         |         |         |                                                                         |              |           |      |      |
|---------|---------|---------|-------------------------------------------------------------------------|--------------|-----------|------|------|
| 5777194 | 7170376 | 1300375 | hydroxysteroid (17-beta) dehydrogenase 4                                | Hsd17b4      | 79244     | 1,09 | up   |
| 6620798 | 7170376 | 1300381 | hydroxysteroid (17-beta) dehydrogenase 4                                | Hsd17b4      | 79244     | 1,08 | down |
| 5789878 | 7170376 | 1300382 | hydroxysteroid (17-beta) dehydrogenase 4                                | Hsd17b4      | 79244     | 1,08 | up   |
| 6679333 | 7170376 | 1300392 | hydroxysteroid (17-beta) dehydrogenase 4                                | Hsd17b4      | 79244     | 1,04 | up   |
| 6277586 | 7170376 | 1300371 | hydroxysteroid (17-beta) dehydrogenase 4                                | Hsd17b4      | 79244     | 1,03 | down |
| 5956701 | 7170376 | 1300393 | hydroxysteroid (17-beta) dehydrogenase 4                                | Hsd17b4      | 79244     | 1,03 | down |
| 5775856 | 7170376 | 1300383 | hydroxysteroid (17-beta) dehydrogenase 4                                | Hsd17b4      | 79244     | 1,01 | up   |
| 6706838 | 7079808 | 1079059 | hypermethylated in cancer 1                                             | Hic1         | 303310    | 3,21 | down |
| 6467317 | 7079808 | 1079059 | hypermethylated in cancer 1                                             | Hic1         | 303310    | 1,35 | up   |
| 5700090 | 7079808 | 1079059 | hypermethylated in cancer 1                                             | Hic1         | 303310    | 1,35 | down |
| 6176778 | 7079808 | 1079059 | hypermethylated in cancer 1                                             | Hic1         | 303310    | 1,32 | up   |
| 6608514 | 7079808 | 1079059 | hypermethylated in cancer 1                                             | Hic1         | 303310    | 1,18 | up   |
| 6665275 | 7079808 | 1079060 | hypermethylated in cancer 1                                             | Hic1         | 303310    | 1,12 | up   |
| 6051237 | 7079808 | 1079060 | hypermethylated in cancer 1                                             | Hic1         | 303310    | 1,10 | up   |
| 5867962 | 7079808 | 1079059 | hypermethylated in cancer 1                                             | Hic1         | 303310    | 1,10 | down |
| 6575615 | 7079808 | 1079061 | hypermethylated in cancer 1                                             | Hic1         | 303310    | 1,10 | down |
| 6270668 | 7079808 | 1079060 | hypermethylated in cancer 1                                             | Hic1         | 303310    | 1,10 | down |
| 6092825 | 7079808 | 1079059 | hypermethylated in cancer 1                                             | Hic1         | 303310    | 1,09 | up   |
| 6278435 | 7079808 | 1079060 | hypermethylated in cancer 1                                             | Hic1         | 303310    | 1,08 | down |
| 6107672 | 7079808 | 1079059 | hypermethylated in cancer 1                                             | Hic1         | 303310    | 1,07 | down |
| 5991953 | 7079808 | 1079058 | hypermethylated in cancer 1                                             | Hic1         | 303310    | 1,04 | up   |
| 6022429 | 7079808 | 1079061 | hypermethylated in cancer 1                                             | Hic1         | 303310    | 1,04 | down |
| 5638189 | 7189987 | 1349806 | hyperpolarization-activated cyclic nucleotide-gated potassium channel 1 | Hcn1         | 84390     | 2,62 | up   |
| 6516832 | 7189987 | 1349812 | hyperpolarization-activated cyclic nucleotide-gated potassium channel 1 | Hcn1         | 84390     | 1,63 | down |
| 6127387 | 7189987 | 1349811 | hyperpolarization-activated cyclic nucleotide-gated potassium channel 1 | Hcn1         | 84390     | 1,60 | up   |
| 6701013 | 7189987 | 1349806 | hyperpolarization-activated cyclic nucleotide-gated potassium channel 1 | Hcn1         | 84390     | 1,56 | down |
| 6363162 | 7189987 | 1349813 | hyperpolarization-activated cyclic nucleotide-gated potassium channel 1 | Hcn1         | 84390     | 1,32 | down |
| 6658298 | 7189987 | 1349813 | hyperpolarization-activated cyclic nucleotide-gated potassium channel 1 | Hcn1         | 84390     | 1,25 | up   |
| 6033333 | 7189987 | 1349810 | hyperpolarization-activated cyclic nucleotide-gated potassium channel 1 | Hcn1         | 84390     | 1,24 | down |
| 5709030 | 7189987 | 1349808 | hyperpolarization-activated cyclic nucleotide-gated potassium channel 1 | Hcn1         | 84390     | 1,17 | down |
| 6047610 | 7189987 | 1349809 | hyperpolarization-activated cyclic nucleotide-gated potassium channel 1 | Hcn1         | 84390     | 1,15 | up   |
| 5701181 | 7189987 | 1349806 | hyperpolarization-activated cyclic nucleotide-gated potassium channel 1 | Hcn1         | 84390     | 1,15 | up   |
| 6662754 | 7189987 | 1349806 | hyperpolarization-activated cyclic nucleotide-gated potassium channel 1 | Hcn1         | 84390     | 1,13 | up   |
| 6107427 | 7189987 | 1349811 | hyperpolarization-activated cyclic nucleotide-gated potassium channel 1 | Hcn1         | 84390     | 1,10 | down |
| 5684294 | 7189987 | 1349809 | hyperpolarization-activated cyclic nucleotide-gated potassium channel 1 | Hcn1         | 84390     | 1,09 | up   |
| 5722121 | 7189987 | 1349807 | hyperpolarization-activated cyclic nucleotide-gated potassium channel 1 | Hcn1         | 84390     | 1,05 | up   |
| 5873953 | 7189987 | 1349813 | hyperpolarization-activated cyclic nucleotide-gated potassium channel 1 | Hcn1         | 84390     | 1,04 | up   |
| 6451834 | 7189987 | 1349808 | hyperpolarization-activated cyclic nucleotide-gated potassium channel 1 | Hcn1         | 84390     | 1,04 | up   |
| 5799276 | 7291386 | 1600071 | hypocretin (orexin) receptor 1                                          | Hcrtr1       | 25593     | 2,42 | down |
| 6383972 | 7291386 | 1600069 | hypocretin (orexin) receptor 1                                          | Hcrtr1       | 25593     | 1,55 | down |
| 5910293 | 7291386 | 1600070 | hypocretin (orexin) receptor 1                                          | Hcrtr1       | 25593     | 1,51 | down |
| 5744260 | 7291386 | 1600069 | hypocretin (orexin) receptor 1                                          | Hcrtr1       | 25593     | 1,31 | down |
| 5937844 | 7291386 | 1600063 | hypocretin (orexin) receptor 1                                          | Hcrtr1       | 25593     | 1,19 | up   |
| 5854065 | 7291386 | 1600072 | hypocretin (orexin) receptor 1                                          | Hcrtr1       | 25593     | 1,18 | up   |
| 5855225 | 7291386 | 1600067 | hypocretin (orexin) receptor 1                                          | Hcrtr1       | 25593     | 1,15 | down |
| 6277259 | 7291386 | 1600063 | hypocretin (orexin) receptor 1                                          | Hcrtr1       | 25593     | 1,11 | up   |
| 5973631 | 7291386 | 1600065 | hypocretin (orexin) receptor 1                                          | Hcrtr1       | 25593     | 1,10 | down |
| 6185205 | 7291386 | 1600069 | hypocretin (orexin) receptor 1                                          | Hcrtr1       | 25593     | 1,09 | up   |
| 6641288 | 7291386 | 1600068 | hypocretin (orexin) receptor 1                                          | Hcrtr1       | 25593     | 1,07 | up   |
| 6743151 | 7291386 | 1600069 | hypocretin (orexin) receptor 1                                          | Hcrtr1       | 25593     | 1,03 | down |
| 6437697 | 7291386 | 1600064 | hypocretin (orexin) receptor 1                                          | Hcrtr1       | 25593     | 1,03 | down |
| 6561913 | 7291386 | 1600066 | hypocretin (orexin) receptor 1                                          | Hcrtr1       | 25593     | 1,01 | down |
| 6625824 | 7345456 | 1733792 | hypothetical LOC100151767                                               | LOC100151767 | 100151767 | 1,71 | up   |
| 5764500 | 7345456 | 1733789 | hypothetical LOC100151767                                               | LOC100151767 | 100151767 | 1,67 | up   |
| 6482511 | 7345456 | 1733788 | hypothetical LOC100151767                                               | LOC100151767 | 100151767 | 1,65 | up   |
| 5810118 | 7345456 | 1733790 | hypothetical LOC100151767                                               | LOC100151767 | 100151767 | 1,44 | down |
| 5732648 | 7345456 | 1733787 | hypothetical LOC100151767                                               | LOC100151767 | 100151767 | 1,11 | up   |

|         |         |         |                           |              |           |      |      |
|---------|---------|---------|---------------------------|--------------|-----------|------|------|
| 6352309 | 7345456 | 1733791 | hypothetical LOC100151767 | LOC100151767 | 100151767 | 1,04 | up   |
| 6514523 | 7274780 | 1559207 | hypothetical LOC298077    | RGD1305807   | 298077    | 3,21 | up   |
| 6540806 | 7274780 | 1559198 | hypothetical LOC298077    | RGD1305807   | 298077    | 3,00 | up   |
| 6432878 | 7274780 | 1559196 | hypothetical LOC298077    | RGD1305807   | 298077    | 2,53 | up   |
| 6692761 | 7274780 | 1559205 | hypothetical LOC298077    | RGD1305807   | 298077    | 2,18 | up   |
| 5843744 | 7274780 | 1559189 | hypothetical LOC298077    | RGD1305807   | 298077    | 2,14 | up   |
| 6488212 | 7274780 | 1559204 | hypothetical LOC298077    | RGD1305807   | 298077    | 2,13 | up   |
| 5917714 | 7274780 | 1559187 | hypothetical LOC298077    | RGD1305807   | 298077    | 2,00 | up   |
| 5669381 | 7274780 | 1559206 | hypothetical LOC298077    | RGD1305807   | 298077    | 1,82 | up   |
| 6717905 | 7274780 | 1559207 | hypothetical LOC298077    | RGD1305807   | 298077    | 1,79 | up   |
| 6662964 | 7274780 | 1559190 | hypothetical LOC298077    | RGD1305807   | 298077    | 1,74 | up   |
| 5674211 | 7274780 | 1559192 | hypothetical LOC298077    | RGD1305807   | 298077    | 1,64 | up   |
| 6483952 | 7274780 | 1559193 | hypothetical LOC298077    | RGD1305807   | 298077    | 1,49 | up   |
| 6654815 | 7274780 | 1559202 | hypothetical LOC298077    | RGD1305807   | 298077    | 1,39 | up   |
| 6323130 | 7274780 | 1559195 | hypothetical LOC298077    | RGD1305807   | 298077    | 1,34 | up   |
| 6151986 | 7274780 | 1559188 | hypothetical LOC298077    | RGD1305807   | 298077    | 1,23 | up   |
| 6682324 | 7274780 | 1559201 | hypothetical LOC298077    | RGD1305807   | 298077    | 1,15 | down |
| 6382294 | 7274780 | 1559191 | hypothetical LOC298077    | RGD1305807   | 298077    | 1,13 | up   |
| 5701839 | 7274780 | 1559203 | hypothetical LOC298077    | RGD1305807   | 298077    | 1,11 | up   |
| 6322813 | 7274780 | 1559182 | hypothetical LOC298077    | RGD1305807   | 298077    | 1,02 | up   |
| 5981788 | 7231958 | 1452574 | hypothetical LOC302884    | MGC105649    | 302884    | 3,03 | up   |
| 5794807 | 7231958 | 1452577 | hypothetical LOC302884    | MGC105649    | 302884    | 1,98 | up   |
| 5941839 | 7231958 | 1452577 | hypothetical LOC302884    | MGC105649    | 302884    | 1,80 | down |
| 5631098 | 7231958 | 1452577 | hypothetical LOC302884    | MGC105649    | 302884    | 1,77 | down |
| 6423962 | 7231958 | 1452577 | hypothetical LOC302884    | MGC105649    | 302884    | 1,64 | down |
| 5673656 | 7231958 | 1452577 | hypothetical LOC302884    | MGC105649    | 302884    | 1,43 | up   |
| 5821390 | 7231958 | 1452577 | hypothetical LOC302884    | MGC105649    | 302884    | 1,38 | up   |
| 5709168 | 7231958 | 1452575 | hypothetical LOC302884    | MGC105649    | 302884    | 1,24 | up   |
| 6248166 | 7231958 | 1452577 | hypothetical LOC302884    | MGC105649    | 302884    | 1,14 | up   |
| 5828079 | 7231958 | 1452574 | hypothetical LOC302884    | MGC105649    | 302884    | 1,12 | up   |
| 5648642 | 7085226 | 1091059 | hypothetical LOC303743    | RGD1307119   | 303743    | 2,17 | down |
| 5941338 | 7085226 | 1091058 | hypothetical LOC303743    | RGD1307119   | 303743    | 1,71 | up   |
| 6722223 | 7085226 | 1091056 | hypothetical LOC303743    | RGD1307119   | 303743    | 1,51 | up   |
| 6300114 | 7085226 | 1091058 | hypothetical LOC303743    | RGD1307119   | 303743    | 1,07 | down |
| 6501950 | 7085226 | 1091058 | hypothetical LOC303743    | RGD1307119   | 303743    | 1,05 | down |
| 5749584 | 7085226 | 1091059 | hypothetical LOC303743    | RGD1307119   | 303743    | 1,05 | up   |
| 5767636 | 7085226 | 1091056 | hypothetical LOC303743    | RGD1307119   | 303743    | 1,04 | down |
| 5791211 | 7085226 | 1091057 | hypothetical LOC303743    | RGD1307119   | 303743    | 1,03 | down |
| 6205448 | 7085226 | 1091058 | hypothetical LOC303743    | RGD1307119   | 303743    | 1,01 | down |
| 6437576 | 7059449 | 1030300 | hypothetical LOC309150    | RGD1308234   | 309150    | 1,80 | down |
| 6141787 | 7059449 | 1030302 | hypothetical LOC309150    | RGD1308234   | 309150    | 1,57 | up   |
| 6471638 | 7059449 | 1030297 | hypothetical LOC309150    | RGD1308234   | 309150    | 1,56 | down |
| 6658195 | 7059449 | 1030300 | hypothetical LOC309150    | RGD1308234   | 309150    | 1,54 | up   |
| 6086899 | 7059449 | 1030297 | hypothetical LOC309150    | RGD1308234   | 309150    | 1,39 | down |
| 6555452 | 7059449 | 1030299 | hypothetical LOC309150    | RGD1308234   | 309150    | 1,37 | down |
| 5858420 | 7059449 | 1030303 | hypothetical LOC309150    | RGD1308234   | 309150    | 1,27 | up   |
| 6130359 | 7059449 | 1030303 | hypothetical LOC309150    | RGD1308234   | 309150    | 1,26 | down |
| 6237777 | 7059449 | 1030298 | hypothetical LOC309150    | RGD1308234   | 309150    | 1,21 | down |
| 6329220 | 7059449 | 1030297 | hypothetical LOC309150    | RGD1308234   | 309150    | 1,18 | up   |
| 6248043 | 7059449 | 1030297 | hypothetical LOC309150    | RGD1308234   | 309150    | 1,13 | down |
| 6001651 | 7059449 | 1030301 | hypothetical LOC309150    | RGD1308234   | 309150    | 1,10 | up   |
| 6164158 | 7059449 | 1030297 | hypothetical LOC309150    | RGD1308234   | 309150    | 1,09 | up   |
| 5728085 | 7059449 | 1030301 | hypothetical LOC309150    | RGD1308234   | 309150    | 1,08 | up   |
| 5634087 | 7059449 | 1030298 | hypothetical LOC309150    | RGD1308234   | 309150    | 1,03 | up   |
| 6734265 | 7059449 | 1030301 | hypothetical LOC309150    | RGD1308234   | 309150    | 1,01 | down |
| 5970789 | 7368489 | 1791034 | hypothetical LOC313936    | LOC313936    | 313936    | 1,40 | down |
| 5949389 | 7368489 | 1791034 | hypothetical LOC313936    | LOC313936    | 313936    | 1,27 | down |



|         |         |         |                                   |           |           |      |      |
|---------|---------|---------|-----------------------------------|-----------|-----------|------|------|
| 6115184 | 7368489 | 1791031 | hypothetical LOC313936            | LOC313936 | 313936    | 1,23 | down |
| 5838253 | 7368489 | 1791030 | hypothetical LOC313936            | LOC313936 | 313936    | 1,22 | down |
| 5657473 | 7368489 | 1791028 | hypothetical LOC313936            | LOC313936 | 313936    | 1,17 | down |
| 6514130 | 7368489 | 1791033 | hypothetical LOC313936            | LOC313936 | 313936    | 1,14 | up   |
| 5968908 | 7368489 | 1791034 | hypothetical LOC313936            | LOC313936 | 313936    | 1,13 | down |
| 6389857 | 7368489 | 1791027 | hypothetical LOC313936            | LOC313936 | 313936    | 1,12 | down |
| 5712657 | 7368489 | 1791029 | hypothetical LOC313936            | LOC313936 | 313936    | 1,11 | up   |
| 5735958 | 7368489 | 1791034 | hypothetical LOC313936            | LOC313936 | 313936    | 1,10 | down |
| 5807151 | 7368489 | 1791031 | hypothetical LOC313936            | LOC313936 | 313936    | 1,04 | down |
| 5782786 | 7370779 | 1798156 | hypothetical LOC363301            | LOC363301 | 363301    | 1,94 | up   |
| 5952099 | 7370779 | 1798159 | hypothetical LOC363301            | LOC363301 | 363301    | 1,32 | up   |
| 5923776 | 7370779 | 1798158 | hypothetical LOC363301            | LOC363301 | 363301    | 1,27 | up   |
| 6236956 | 7194172 | 1361175 | hypothetical LOC499618            | LOC499618 | 499618    | 2,19 | up   |
| 6294308 | 7194172 | 1361170 | hypothetical LOC499618            | LOC499618 | 499618    | 1,61 | up   |
| 5733561 | 7194172 | 1361184 | hypothetical LOC499618            | LOC499618 | 499618    | 1,39 | down |
| 6333313 | 7194172 | 1361171 | hypothetical LOC499618            | LOC499618 | 499618    | 1,30 | up   |
| 5935080 | 7194172 | 1361178 | hypothetical LOC499618            | LOC499618 | 499618    | 1,23 | up   |
| 6723806 | 7194172 | 1361174 | hypothetical LOC499618            | LOC499618 | 499618    | 1,17 | up   |
| 6297539 | 7194172 | 1361184 | hypothetical LOC499618            | LOC499618 | 499618    | 1,11 | up   |
| 6505046 | 7194172 | 1361184 | hypothetical LOC499618            | LOC499618 | 499618    | 1,10 | up   |
| 6242084 | 7194172 | 1361185 | hypothetical LOC499618            | LOC499618 | 499618    | 1,10 | up   |
| 6615974 | 7194172 | 1361181 | hypothetical LOC499618            | LOC499618 | 499618    | 1,09 | up   |
| 5867029 | 7194172 | 1361184 | hypothetical LOC499618            | LOC499618 | 499618    | 1,07 | down |
| 6462441 | 7194172 | 1361184 | hypothetical LOC499618            | LOC499618 | 499618    | 1,07 | up   |
| 5703231 | 7194172 | 1361184 | hypothetical LOC499618            | LOC499618 | 499618    | 1,04 | up   |
| 6123831 | 7194172 | 1361179 | hypothetical LOC499618            | LOC499618 | 499618    | 1,01 | up   |
| 6370278 | 7368565 | 1791272 | hypothetical LOC501092            | LOC501092 | 501092    | 1,31 | up   |
| 6687773 | 7370853 | 1798413 | hypothetical LOC501212            | LOC501212 | 501212    | 2,46 | up   |
| 5666143 | 7113142 | 1160115 | hypothetical protein Dd25         | Dd25      | 360863    | 2,31 | up   |
| 5799981 | 7113142 | 1160121 | hypothetical protein Dd25         | Dd25      | 360863    | 1,31 | down |
| 6111977 | 7113142 | 1160116 | hypothetical protein Dd25         | Dd25      | 360863    | 1,27 | up   |
| 6685822 | 7113142 | 1160120 | hypothetical protein Dd25         | Dd25      | 360863    | 1,22 | down |
| 5755436 | 7113142 | 1160101 | hypothetical protein Dd25         | Dd25      | 360863    | 1,22 | down |
| 5637327 | 7113142 | 1160112 | hypothetical protein Dd25         | Dd25      | 360863    | 1,21 | up   |
| 6009990 | 7113142 | 1160110 | hypothetical protein Dd25         | Dd25      | 360863    | 1,21 | up   |
| 5768030 | 7113142 | 1160101 | hypothetical protein Dd25         | Dd25      | 360863    | 1,20 | down |
| 6164209 | 7113142 | 1160123 | hypothetical protein Dd25         | Dd25      | 360863    | 1,19 | down |
| 6042504 | 7113142 | 1160114 | hypothetical protein Dd25         | Dd25      | 360863    | 1,19 | down |
| 6120784 | 7113142 | 1160118 | hypothetical protein Dd25         | Dd25      | 360863    | 1,13 | up   |
| 6107813 | 7113142 | 1160119 | hypothetical protein Dd25         | Dd25      | 360863    | 1,13 | up   |
| 5932993 | 7113142 | 1160108 | hypothetical protein Dd25         | Dd25      | 360863    | 1,11 | down |
| 6470688 | 7113142 | 1160107 | hypothetical protein Dd25         | Dd25      | 360863    | 1,10 | up   |
| 5769154 | 7113142 | 1160105 | hypothetical protein Dd25         | Dd25      | 360863    | 1,10 | up   |
| 6002079 | 7113142 | 1160113 | hypothetical protein Dd25         | Dd25      | 360863    | 1,09 | down |
| 6698837 | 7113142 | 1160103 | hypothetical protein Dd25         | Dd25      | 360863    | 1,09 | up   |
| 6224682 | 7113142 | 1160117 | hypothetical protein Dd25         | Dd25      | 360863    | 1,09 | up   |
| 5688946 | 7113142 | 1160102 | hypothetical protein Dd25         | Dd25      | 360863    | 1,07 | down |
| 6596475 | 7113142 | 1160104 | hypothetical protein Dd25         | Dd25      | 360863    | 1,06 | up   |
| 6560687 | 7113142 | 1160111 | hypothetical protein Dd25         | Dd25      | 360863    | 1,03 | up   |
| 6231759 | 7113142 | 1160106 | hypothetical protein Dd25         | Dd25      | 360863    | 1,03 | down |
| 6093914 | 7113142 | 1160122 | hypothetical protein Dd25         | Dd25      | 360863    | 1,01 | down |
| 5762977 | 7113142 | 1160109 | hypothetical protein Dd25         | Dd25      | 360863    | 1,00 | up   |
| 5730297 | 7345655 | 1734342 | hypothetical protein LOC100125362 | rCG_58138 | 100125362 | 2,43 | down |
| 5786535 | 7345655 | 1734340 | hypothetical protein LOC100125362 | rCG_58138 | 100125362 | 1,64 | up   |
| 5818934 | 7345655 | 1734341 | hypothetical protein LOC100125362 | rCG_58138 | 100125362 | 1,28 | up   |
| 6600285 | 7345655 | 1734341 | hypothetical protein LOC100125362 | rCG_58138 | 100125362 | 1,05 | down |
| 6306696 | 7345655 | 1734342 | hypothetical protein LOC100125362 | rCG_58138 | 100125362 | 1,04 | down |

|         |         |         |                                                                                                                                                   |              |           |      |      |
|---------|---------|---------|---------------------------------------------------------------------------------------------------------------------------------------------------|--------------|-----------|------|------|
| 6325507 | 7231655 | 1451904 | hypothetical protein LOC100137086                                                                                                                 | LOC100137086 | 100137086 | 1,68 | down |
| 5986829 | 7231655 | 1451908 | hypothetical protein LOC100137086                                                                                                                 | LOC100137086 | 100137086 | 1,39 | up   |
| 5636748 | 7231655 | 1451911 | hypothetical protein LOC100137086                                                                                                                 | LOC100137086 | 100137086 | 1,36 | up   |
| 6327443 | 7231655 | 1451910 | hypothetical protein LOC100137086                                                                                                                 | LOC100137086 | 100137086 | 1,33 | down |
| 5795148 | 7231655 | 1451907 | hypothetical protein LOC100137086                                                                                                                 | LOC100137086 | 100137086 | 1,27 | up   |
| 5842452 | 7231655 | 1451905 | hypothetical protein LOC100137086                                                                                                                 | LOC100137086 | 100137086 | 1,19 | down |
| 6216955 | 7231655 | 1451910 | hypothetical protein LOC100137086                                                                                                                 | LOC100137086 | 100137086 | 1,18 | up   |
| 6689323 | 7231655 | 1451905 | hypothetical protein LOC100137086                                                                                                                 | LOC100137086 | 100137086 | 1,15 | up   |
| 6459787 | 7231655 | 1451906 | hypothetical protein LOC100137086                                                                                                                 | LOC100137086 | 100137086 | 1,11 | down |
| 6021894 | 7231655 | 1451909 | hypothetical protein LOC100137086                                                                                                                 | LOC100137086 | 100137086 | 1,03 | up   |
| 6157658 | 7176275 | 1315331 | hypothetical protein LOC361335                                                                                                                    | LOC361335    | 361335    | 1,15 | up   |
| 6089934 | 7061550 | 1035298 | hypothetical protein LOC499339                                                                                                                    | LOC499339    | 499339    | 2,66 | down |
| 6675121 | 7061550 | 1035301 | hypothetical protein LOC499339                                                                                                                    | LOC499339    | 499339    | 1,86 | down |
| 5791461 | 7061550 | 1035286 | hypothetical protein LOC499339                                                                                                                    | LOC499339    | 499339    | 1,85 | up   |
| 6144271 | 7061550 | 1035285 | hypothetical protein LOC499339                                                                                                                    | LOC499339    | 499339    | 1,78 | up   |
| 5870254 | 7061550 | 1035296 | hypothetical protein LOC499339                                                                                                                    | LOC499339    | 499339    | 1,66 | down |
| 5913168 | 7061550 | 1035294 | hypothetical protein LOC499339                                                                                                                    | LOC499339    | 499339    | 1,48 | up   |
| 6398244 | 7061550 | 1035284 | hypothetical protein LOC499339                                                                                                                    | LOC499339    | 499339    | 1,43 | down |
| 5916585 | 7061550 | 1035279 | hypothetical protein LOC499339                                                                                                                    | LOC499339    | 499339    | 1,37 | down |
| 6699066 | 7061550 | 1035292 | hypothetical protein LOC499339                                                                                                                    | LOC499339    | 499339    | 1,37 | up   |
| 5917990 | 7061550 | 1035290 | hypothetical protein LOC499339                                                                                                                    | LOC499339    | 499339    | 1,37 | down |
| 5872610 | 7061550 | 1035299 | hypothetical protein LOC499339                                                                                                                    | LOC499339    | 499339    | 1,36 | up   |
| 5920390 | 7061550 | 1035297 | hypothetical protein LOC499339                                                                                                                    | LOC499339    | 499339    | 1,31 | up   |
| 6197971 | 7061550 | 1035289 | hypothetical protein LOC499339                                                                                                                    | LOC499339    | 499339    | 1,26 | up   |
| 5797098 | 7061550 | 1035295 | hypothetical protein LOC499339                                                                                                                    | LOC499339    | 499339    | 1,24 | up   |
| 6231102 | 7061550 | 1035281 | hypothetical protein LOC499339                                                                                                                    | LOC499339    | 499339    | 1,20 | down |
| 6057891 | 7061550 | 1035293 | hypothetical protein LOC499339                                                                                                                    | LOC499339    | 499339    | 1,08 | up   |
| 5765742 | 7061550 | 1035300 | hypothetical protein LOC499339                                                                                                                    | LOC499339    | 499339    | 1,02 | up   |
| 5785034 | 7061550 | 1035280 | hypothetical protein LOC499339                                                                                                                    | LOC499339    | 499339    | 1,01 | down |
| 6374068 | 7333434 | 1703573 | hypothetical protein LOC500956                                                                                                                    | LOC500956    | 500956    | 2,26 | down |
| 5847297 | 7333434 | 1703568 | hypothetical protein LOC500956                                                                                                                    | LOC500956    | 500956    | 2,13 | up   |
| 6050508 | 7333434 | 1703572 | hypothetical protein LOC500956                                                                                                                    | LOC500956    | 500956    | 2,01 | down |
| 6389203 | 7333434 | 1703572 | hypothetical protein LOC500956                                                                                                                    | LOC500956    | 500956    | 1,83 | down |
| 5876891 | 7333434 | 1703574 | hypothetical protein LOC500956                                                                                                                    | LOC500956    | 500956    | 1,64 | down |
| 6657257 | 7333434 | 1703573 | hypothetical protein LOC500956                                                                                                                    | LOC500956    | 500956    | 1,48 | down |
| 6626361 | 7333434 | 1703567 | hypothetical protein LOC500956                                                                                                                    | LOC500956    | 500956    | 1,33 | up   |
| 6119803 | 7333434 | 1703570 | hypothetical protein LOC500956                                                                                                                    | LOC500956    | 500956    | 1,32 | up   |
| 6629877 | 7333434 | 1703571 | hypothetical protein LOC500956                                                                                                                    | LOC500956    | 500956    | 1,30 | up   |
| 6173718 | 7333434 | 1703569 | hypothetical protein LOC500956                                                                                                                    | LOC500956    | 500956    | 1,30 | up   |
| 5890547 | 7333434 | 1703572 | hypothetical protein LOC500956                                                                                                                    | LOC500956    | 500956    | 1,30 | up   |
| 6236451 | 7333434 | 1703574 | hypothetical protein LOC500956                                                                                                                    | LOC500956    | 500956    | 1,04 | up   |
| 6248648 | 7369954 | 1795670 | hypothetical protein LOC501396                                                                                                                    | LOC501396    | 501396    | 1,32 | down |
| 6327921 | 7369954 | 1795663 | hypothetical protein LOC501396 /// hypothetical protein LOC688586 /// similar to hypothetical prote:688586 /// LOC69: 688586 /// 691633           | LOC501396    | 501396    | 1,13 | down |
| 6335971 | 7369954 | 1795662 | hypothetical protein LOC501396 /// hypothetical protein LOC688586 /// similar to hypothetical prote:688586 /// LOC691633 /// 86 /// 691633 /// 50 | LOC501396    | 501396    | 1,51 | down |
| 6689892 | 7369954 | 1795665 | hypothetical protein LOC501396 /// similar to hypothetical protein LOC501396 /// similar to hypothe:688586 /// LOC691594 /// 96 /// 691594 /// 69 | LOC501396    | 501396    | 2,45 | down |
| 6330778 | 7374324 | 1807540 | hypothetical protein LOC501546                                                                                                                    | LOC501546    | 501546    | 1,48 | down |
| 6338951 | 7374324 | 1807443 | hypothetical protein LOC501546                                                                                                                    | LOC501546    | 501546    | 1,27 | up   |
| 6428094 | 7374324 | 1807474 | hypothetical protein LOC501546                                                                                                                    | LOC501546    | 501546    | 1,10 | up   |
| 6047524 | 7374324 | 1807445 | hypothetical protein LOC501546                                                                                                                    | LOC501546    | 501546    | 1,06 | down |
| 6041595 | 7229061 | 1445257 | hypothetical protein LOC679513                                                                                                                    | LOC679513    | 679513    | 1,17 | down |
| 5659073 | 7229061 | 1445257 | hypothetical protein LOC679513                                                                                                                    | LOC679513    | 679513    | 1,12 | up   |
| 5812344 | 7190524 | 1351171 | hypothetical protein LOC679830                                                                                                                    | LOC679830    | 679830    | 2,54 | down |
| 6588860 | 7190524 | 1351171 | hypothetical protein LOC679830                                                                                                                    | LOC679830    | 679830    | 1,67 | down |
| 6425516 | 7190524 | 1351171 | hypothetical protein LOC679830                                                                                                                    | LOC679830    | 679830    | 1,57 | down |
| 6396156 | 7190524 | 1351179 | hypothetical protein LOC679830                                                                                                                    | LOC679830    | 679830    | 1,46 | up   |
| 6366551 | 7190524 | 1351183 | hypothetical protein LOC679830                                                                                                                    | LOC679830    | 679830    | 1,41 | down |
| 6639218 | 7190524 | 1351174 | hypothetical protein LOC679830                                                                                                                    | LOC679830    | 679830    | 1,29 | up   |

|         |         |         |                                |           |        |      |      |
|---------|---------|---------|--------------------------------|-----------|--------|------|------|
| 6459700 | 7190524 | 1351179 | hypothetical protein LOC679830 | LOC679830 | 679830 | 1,16 | up   |
| 5911896 | 7190524 | 1351180 | hypothetical protein LOC679830 | LOC679830 | 679830 | 1,11 | up   |
| 6715023 | 7190524 | 1351178 | hypothetical protein LOC679830 | LOC679830 | 679830 | 1,10 | up   |
| 6673384 | 7190524 | 1351176 | hypothetical protein LOC679830 | LOC679830 | 679830 | 1,08 | down |
| 5914228 | 7190524 | 1351182 | hypothetical protein LOC679830 | LOC679830 | 679830 | 1,06 | down |
| 6741460 | 7190524 | 1351181 | hypothetical protein LOC679830 | LOC679830 | 679830 | 1,06 | up   |
| 6416237 | 7190524 | 1351190 | hypothetical protein LOC679859 | LOC679859 | 679859 | 1,23 | down |
| 5663044 | 7190524 | 1351191 | hypothetical protein LOC679859 | LOC679859 | 679859 | 1,11 | up   |
| 6327681 | 7190524 | 1351191 | hypothetical protein LOC679859 | LOC679859 | 679859 | 1,05 | down |
| 6742501 | 7120010 | 1177382 | hypothetical protein LOC680039 | LOC680039 | 680039 | 2,81 | down |
| 5718692 | 7120010 | 1177372 | hypothetical protein LOC680039 | LOC680039 | 680039 | 2,00 | down |
| 6465556 | 7120010 | 1177383 | hypothetical protein LOC680039 | LOC680039 | 680039 | 1,32 | down |
| 5883900 | 7120010 | 1177386 | hypothetical protein LOC680039 | LOC680039 | 680039 | 1,28 | down |
| 5776806 | 7120010 | 1177381 | hypothetical protein LOC680039 | LOC680039 | 680039 | 1,26 | down |
| 6729337 | 7120010 | 1177388 | hypothetical protein LOC680039 | LOC680039 | 680039 | 1,18 | up   |
| 6700078 | 7120010 | 1177389 | hypothetical protein LOC680039 | LOC680039 | 680039 | 1,18 | down |
| 6682887 | 7120010 | 1177388 | hypothetical protein LOC680039 | LOC680039 | 680039 | 1,17 | up   |
| 6295152 | 7120010 | 1177374 | hypothetical protein LOC680039 | LOC680039 | 680039 | 1,12 | up   |
| 5877104 | 7120010 | 1177374 | hypothetical protein LOC680039 | LOC680039 | 680039 | 1,10 | up   |
| 5834430 | 7120010 | 1177383 | hypothetical protein LOC680039 | LOC680039 | 680039 | 1,09 | down |
| 6264352 | 7120010 | 1177383 | hypothetical protein LOC680039 | LOC680039 | 680039 | 1,08 | up   |
| 5871238 | 7120010 | 1177385 | hypothetical protein LOC680039 | LOC680039 | 680039 | 1,08 | up   |
| 6474943 | 7120010 | 1177383 | hypothetical protein LOC680039 | LOC680039 | 680039 | 1,06 | down |
| 6556411 | 7120010 | 1177389 | hypothetical protein LOC680039 | LOC680039 | 680039 | 1,02 | up   |
| 6237433 | 7383655 | 1828575 | hypothetical protein LOC680282 | LOC680282 | 680282 | 1,76 | down |
| 6261381 | 7383655 | 1828573 | hypothetical protein LOC680282 | LOC680282 | 680282 | 1,42 | up   |
| 6743610 | 7383655 | 1828576 | hypothetical protein LOC680282 | LOC680282 | 680282 | 1,18 | down |
| 5896010 | 7383655 | 1828576 | hypothetical protein LOC680282 | LOC680282 | 680282 | 1,17 | down |
| 5849123 | 7383655 | 1828576 | hypothetical protein LOC680282 | LOC680282 | 680282 | 1,10 | down |
| 6139161 | 7383655 | 1828576 | hypothetical protein LOC680282 | LOC680282 | 680282 | 1,00 | up   |
| 5892153 | 7247334 | 1490820 | hypothetical protein LOC680485 | LOC680485 | 680485 | 3,62 | down |
| 6359761 | 7247334 | 1490815 | hypothetical protein LOC680485 | LOC680485 | 680485 | 2,49 | up   |
| 6542198 | 7247334 | 1490813 | hypothetical protein LOC680485 | LOC680485 | 680485 | 2,41 | up   |
| 5752954 | 7247334 | 1490821 | hypothetical protein LOC680485 | LOC680485 | 680485 | 1,26 | down |
| 5706769 | 7227775 | 1441791 | hypothetical protein LOC680630 | LOC680630 | 680630 | 1,32 | down |
| 6267052 | 7227775 | 1441791 | hypothetical protein LOC680630 | LOC680630 | 680630 | 1,02 | down |
| 6105550 | 7227775 | 1441790 | hypothetical protein LOC680630 | LOC680630 | 680630 | 1,01 | up   |
| 6168193 | 7127691 | 1195642 | hypothetical protein LOC681091 | LOC681091 | 681091 | 1,26 | down |
| 6482027 | 7127691 | 1195640 | hypothetical protein LOC681091 | LOC681091 | 681091 | 1,23 | up   |
| 5827978 | 7294851 | 1608360 | hypothetical protein LOC681150 | LOC681150 | 681150 | 1,63 | down |
| 5968107 | 7044349 | 996706  | hypothetical protein LOC681235 | LOC681235 | 681235 | 1,88 | up   |
| 6083612 | 7044349 | 996707  | hypothetical protein LOC681235 | LOC681235 | 681235 | 1,16 | down |
| 5900889 | 7160846 | 1277346 | hypothetical protein LOC681411 | LOC681411 | 681411 | 1,63 | down |
| 6175779 | 7160846 | 1277346 | hypothetical protein LOC681411 | LOC681411 | 681411 | 1,62 | down |
| 6168764 | 7093835 | 1112252 | hypothetical protein LOC684680 | LOC684680 | 684680 | 1,15 | up   |
| 6014111 | 7097305 | 1120448 | hypothetical protein LOC684993 | LOC684993 | 684993 | 1,49 | up   |
| 6087030 | 7097305 | 1120447 | hypothetical protein LOC684993 | LOC684993 | 684993 | 1,41 | down |
| 5952965 | 7097305 | 1120449 | hypothetical protein LOC684993 | LOC684993 | 684993 | 1,28 | down |
| 6112181 | 7097305 | 1120448 | hypothetical protein LOC684993 | LOC684993 | 684993 | 1,27 | down |
| 5739391 | 7097305 | 1120446 | hypothetical protein LOC684993 | LOC684993 | 684993 | 1,24 | down |
| 6366040 | 7097305 | 1120449 | hypothetical protein LOC684993 | LOC684993 | 684993 | 1,20 | down |
| 6689280 | 7097305 | 1120448 | hypothetical protein LOC684993 | LOC684993 | 684993 | 1,13 | up   |
| 6402337 | 7038659 | 982163  | hypothetical protein LOC685283 | LOC685283 | 685283 | 2,02 | down |
| 5675269 | 7038659 | 982163  | hypothetical protein LOC685283 | LOC685283 | 685283 | 1,27 | up   |
| 6474502 | 7038659 | 982163  | hypothetical protein LOC685283 | LOC685283 | 685283 | 1,26 | up   |
| 5854279 | 7038659 | 982163  | hypothetical protein LOC685283 | LOC685283 | 685283 | 1,20 | down |
| 6356327 | 7038659 | 982163  | hypothetical protein LOC685283 | LOC685283 | 685283 | 1,14 | down |

|         |         |         |                                |           |        |      |      |
|---------|---------|---------|--------------------------------|-----------|--------|------|------|
| 6741328 | 7038659 | 982163  | hypothetical protein LOC685283 | LOC685283 | 685283 | 1,00 | up   |
| 6285700 | 7264745 | 1534266 | hypothetical protein LOC685548 | LOC685548 | 685548 | 1,51 | up   |
| 6730758 | 7264745 | 1534266 | hypothetical protein LOC685548 | LOC685548 | 685548 | 1,48 | up   |
| 5798623 | 7264745 | 1534265 | hypothetical protein LOC685548 | LOC685548 | 685548 | 1,31 | down |
| 6716476 | 7264745 | 1534265 | hypothetical protein LOC685548 | LOC685548 | 685548 | 1,11 | up   |
| 6471138 | 7264745 | 1534267 | hypothetical protein LOC685548 | LOC685548 | 685548 | 1,08 | up   |
| 5788882 | 7264745 | 1534266 | hypothetical protein LOC685548 | LOC685548 | 685548 | 1,03 | down |
| 6160245 | 7369166 | 1793390 | hypothetical protein LOC685594 | LOC685594 | 685594 | 2,27 | down |
| 6365534 | 7369166 | 1793391 | hypothetical protein LOC685594 | LOC685594 | 685594 | 2,08 | down |
| 6339417 | 7237346 | 1466594 | hypothetical protein LOC685663 | LOC685663 | 685663 | 1,42 | up   |
| 6020226 | 7237346 | 1466591 | hypothetical protein LOC685663 | LOC685663 | 685663 | 1,33 | down |
| 5856413 | 7237346 | 1466594 | hypothetical protein LOC685663 | LOC685663 | 685663 | 1,00 | up   |
| 6312442 | 7237346 | 1466594 | hypothetical protein LOC685663 | LOC685663 | 685663 | 1,00 | up   |
| 5779651 | 7358048 | 1764788 | hypothetical protein LOC685917 | LOC685917 | 685917 | 1,44 | up   |
| 6159983 | 7358048 | 1764789 | hypothetical protein LOC685917 | LOC685917 | 685917 | 1,09 | up   |
| 6626714 | 7279810 | 1572573 | hypothetical protein LOC685947 | LOC685947 | 685947 | 1,32 | down |
| 6481363 | 7167325 | 1292548 | hypothetical protein LOC686299 | LOC686299 | 686299 | 1,04 | down |
| 6647899 | 7147791 | 1245415 | hypothetical protein LOC686835 | LOC686835 | 686835 | 1,40 | down |
| 6539909 | 7147791 | 1245410 | hypothetical protein LOC686835 | LOC686835 | 686835 | 1,22 | up   |
| 6343065 | 7147791 | 1245413 | hypothetical protein LOC686835 | LOC686835 | 686835 | 1,17 | down |
| 6142791 | 7147791 | 1245413 | hypothetical protein LOC686835 | LOC686835 | 686835 | 1,03 | down |
| 5795810 | 7102369 | 1133434 | hypothetical protein LOC687361 | LOC687361 | 687361 | 1,11 | up   |
| 6609878 | 7056333 | 1023673 | hypothetical protein LOC687429 | LOC687429 | 687429 | 1,26 | up   |
| 5952729 | 7083031 | 1086276 | hypothetical protein LOC688211 | LOC688211 | 688211 | 1,63 | down |
| 6109851 | 7083031 | 1086277 | hypothetical protein LOC688211 | LOC688211 | 688211 | 1,56 | down |
| 6397393 | 7083031 | 1086278 | hypothetical protein LOC688211 | LOC688211 | 688211 | 1,46 | down |
| 6191055 | 7083031 | 1086276 | hypothetical protein LOC688211 | LOC688211 | 688211 | 1,40 | down |
| 6002470 | 7083031 | 1086276 | hypothetical protein LOC688211 | LOC688211 | 688211 | 1,30 | up   |
| 5655841 | 7083031 | 1086277 | hypothetical protein LOC688211 | LOC688211 | 688211 | 1,28 | down |
| 6608815 | 7083031 | 1086276 | hypothetical protein LOC688211 | LOC688211 | 688211 | 1,28 | up   |
| 5746851 | 7083031 | 1086277 | hypothetical protein LOC688211 | LOC688211 | 688211 | 1,18 | up   |
| 5947305 | 7083031 | 1086277 | hypothetical protein LOC688211 | LOC688211 | 688211 | 1,17 | up   |
| 6410107 | 7083031 | 1086277 | hypothetical protein LOC688211 | LOC688211 | 688211 | 1,14 | down |
| 6430566 | 7083031 | 1086279 | hypothetical protein LOC688211 | LOC688211 | 688211 | 1,07 | up   |
| 6448309 | 7083031 | 1086291 | hypothetical protein LOC688211 | LOC688211 | 688211 | 1,02 | up   |
| 6505258 | 7184850 | 1337594 | hypothetical protein LOC688736 | MGC116202 | 688736 | 2,14 | down |
| 6131871 | 7184850 | 1337599 | hypothetical protein LOC688736 | MGC116202 | 688736 | 1,77 | up   |
| 6013382 | 7184850 | 1337591 | hypothetical protein LOC688736 | MGC116202 | 688736 | 1,57 | up   |
| 6094964 | 7184850 | 1337599 | hypothetical protein LOC688736 | MGC116202 | 688736 | 1,53 | down |
| 6400625 | 7184850 | 1337592 | hypothetical protein LOC688736 | MGC116202 | 688736 | 1,46 | down |
| 5903596 | 7184850 | 1337599 | hypothetical protein LOC688736 | MGC116202 | 688736 | 1,37 | up   |
| 6217450 | 7184850 | 1337599 | hypothetical protein LOC688736 | MGC116202 | 688736 | 1,25 | down |
| 5771533 | 7184850 | 1337599 | hypothetical protein LOC688736 | MGC116202 | 688736 | 1,25 | down |
| 6354327 | 7184850 | 1337599 | hypothetical protein LOC688736 | MGC116202 | 688736 | 1,23 | down |
| 6581182 | 7184850 | 1337592 | hypothetical protein LOC688736 | MGC116202 | 688736 | 1,18 | down |
| 6104739 | 7184850 | 1337595 | hypothetical protein LOC688736 | MGC116202 | 688736 | 1,13 | up   |
| 6376746 | 7184850 | 1337599 | hypothetical protein LOC688736 | MGC116202 | 688736 | 1,13 | up   |
| 6537882 | 7184850 | 1337591 | hypothetical protein LOC688736 | MGC116202 | 688736 | 1,03 | down |
| 6720933 | 7184850 | 1337593 | hypothetical protein LOC688736 | MGC116202 | 688736 | 1,02 | down |
| 6658702 | 7184850 | 1337595 | hypothetical protein LOC688736 | MGC116202 | 688736 | 1,00 | down |
| 6319723 | 7105780 | 1141689 | hypothetical protein LOC688764 | LOC688764 | 688764 | 1,51 | up   |
| 6425781 | 7155866 | 1265339 | hypothetical protein LOC689165 | LOC689165 | 689165 | 1,30 | down |
| 5756065 | 7155866 | 1265339 | hypothetical protein LOC689165 | LOC689165 | 689165 | 1,10 | up   |
| 5769954 | 7267802 | 1541865 | hypothetical protein LOC689252 | LOC689252 | 689252 | 1,56 | down |
| 6131249 | 7267802 | 1541873 | hypothetical protein LOC689252 | LOC689252 | 689252 | 1,48 | down |
| 5959005 | 7252513 | 1503831 | hypothetical protein LOC689574 | LOC689574 | 689574 | 1,51 | up   |
| 6684805 | 7252513 | 1503833 | hypothetical protein LOC689574 | LOC689574 | 689574 | 1,28 | down |

|         |         |         |                                |           |        |      |      |
|---------|---------|---------|--------------------------------|-----------|--------|------|------|
| 6349291 | 7252513 | 1503833 | hypothetical protein LOC689574 | LOC689574 | 689574 | 1,12 | up   |
| 6335743 | 7252513 | 1503829 | hypothetical protein LOC689574 | LOC689574 | 689574 | 1,09 | down |
| 6024011 | 7252513 | 1503832 | hypothetical protein LOC689574 | LOC689574 | 689574 | 1,07 | down |
| 6574990 | 7280425 | 1573808 | hypothetical protein LOC689656 | LOC689656 | 689656 | 1,03 | down |
| 6270825 | 7122585 | 1183684 | hypothetical protein LOC689986 | LOC689986 | 689986 | 1,23 | up   |
| 5916105 | 7122585 | 1183684 | hypothetical protein LOC689986 | LOC689986 | 689986 | 1,18 | up   |
| 6476869 | 7122585 | 1183684 | hypothetical protein LOC689986 | LOC689986 | 689986 | 1,08 | down |
| 6333797 | 7122585 | 1183684 | hypothetical protein LOC689986 | LOC689986 | 689986 | 1,05 | up   |
| 5829701 | 7208710 | 1395900 | hypothetical protein LOC690333 | LOC690333 | 690333 | 2,30 | down |
| 6237184 | 7208710 | 1395895 | hypothetical protein LOC690333 | LOC690333 | 690333 | 1,37 | up   |
| 5727493 | 7208710 | 1395893 | hypothetical protein LOC690333 | LOC690333 | 690333 | 1,26 | down |
| 6738669 | 7208710 | 1395892 | hypothetical protein LOC690333 | LOC690333 | 690333 | 1,20 | up   |
| 6346733 | 7208710 | 1395893 | hypothetical protein LOC690333 | LOC690333 | 690333 | 1,19 | down |
| 5943407 | 7208710 | 1395895 | hypothetical protein LOC690333 | LOC690333 | 690333 | 1,18 | down |
| 5654469 | 7208710 | 1395895 | hypothetical protein LOC690333 | LOC690333 | 690333 | 1,17 | up   |
| 6714558 | 7208710 | 1395893 | hypothetical protein LOC690333 | LOC690333 | 690333 | 1,16 | down |
| 6181372 | 7208710 | 1395892 | hypothetical protein LOC690333 | LOC690333 | 690333 | 1,10 | up   |
| 6250580 | 7208710 | 1395901 | hypothetical protein LOC690333 | LOC690333 | 690333 | 1,08 | down |
| 6165709 | 7208710 | 1395894 | hypothetical protein LOC690333 | LOC690333 | 690333 | 1,05 | up   |
| 6178340 | 7280959 | 1575040 | hypothetical protein LOC690449 | LOC690449 | 690449 | 1,59 | down |
| 6048345 | 7181026 | 1327832 | hypothetical protein LOC690682 | LOC690682 | 690682 | 1,42 | up   |
| 5848275 | 7181026 | 1327837 | hypothetical protein LOC690682 | LOC690682 | 690682 | 1,12 | up   |
| 5990356 | 7370853 | 1798412 | hypothetical protein LOC690822 | LOC690822 | 690822 | 1,27 | down |
| 5707136 | 7073995 | 1066034 | hypothetical protein LOC690871 | LOC690871 | 690871 | 2,16 | down |
| 6393904 | 7073995 | 1066033 | hypothetical protein LOC690871 | LOC690871 | 690871 | 1,37 | up   |
| 6737442 | 7073995 | 1066032 | hypothetical protein LOC690871 | LOC690871 | 690871 | 1,07 | up   |
| 5814967 | 7073995 | 1066034 | hypothetical protein LOC690871 | LOC690871 | 690871 | 1,04 | up   |
| 6325921 | 7067939 | 1050948 | hypothetical protein LOC691259 | LOC691259 | 691259 | 2,47 | up   |
| 5776139 | 7067939 | 1050952 | hypothetical protein LOC691259 | LOC691259 | 691259 | 1,55 | down |
| 5918144 | 7067939 | 1050953 | hypothetical protein LOC691259 | LOC691259 | 691259 | 1,43 | down |
| 6677532 | 7067939 | 1050957 | hypothetical protein LOC691259 | LOC691259 | 691259 | 1,22 | up   |
| 6703251 | 7067939 | 1050957 | hypothetical protein LOC691259 | LOC691259 | 691259 | 1,16 | up   |
| 5829831 | 7067939 | 1050956 | hypothetical protein LOC691259 | LOC691259 | 691259 | 1,13 | down |
| 5932345 | 7067939 | 1050951 | hypothetical protein LOC691259 | LOC691259 | 691259 | 1,11 | down |
| 6504724 | 7067939 | 1050954 | hypothetical protein LOC691259 | LOC691259 | 691259 | 1,09 | up   |
| 6666587 | 7067939 | 1050949 | hypothetical protein LOC691259 | LOC691259 | 691259 | 1,05 | up   |
| 6476543 | 7067939 | 1050957 | hypothetical protein LOC691259 | LOC691259 | 691259 | 1,04 | up   |
| 6240391 | 7368555 | 1791225 | hypothetical protein LOC691473 | LOC691473 | 691473 | 1,12 | down |
| 6051641 | 7368555 | 1791228 | hypothetical protein LOC691476 | LOC691476 | 691476 | 2,02 | up   |
| 6213295 | 7231152 | 1450274 | hypothetical protein LOC691543 | LOC691543 | 691543 | 4,27 | up   |
| 6255494 | 7231152 | 1450269 | hypothetical protein LOC691543 | LOC691543 | 691543 | 3,54 | up   |
| 6092303 | 7231152 | 1450264 | hypothetical protein LOC691543 | LOC691543 | 691543 | 3,21 | up   |
| 5935087 | 7231152 | 1450273 | hypothetical protein LOC691543 | LOC691543 | 691543 | 3,06 | up   |
| 6209316 | 7231152 | 1450277 | hypothetical protein LOC691543 | LOC691543 | 691543 | 3,04 | up   |
| 6135404 | 7231152 | 1450272 | hypothetical protein LOC691543 | LOC691543 | 691543 | 2,84 | up   |
| 5845122 | 7231152 | 1450267 | hypothetical protein LOC691543 | LOC691543 | 691543 | 2,79 | up   |
| 6271899 | 7231152 | 1450270 | hypothetical protein LOC691543 | LOC691543 | 691543 | 2,51 | up   |
| 5780797 | 7231152 | 1450268 | hypothetical protein LOC691543 | LOC691543 | 691543 | 2,19 | up   |
| 5714982 | 7231152 | 1450277 | hypothetical protein LOC691543 | LOC691543 | 691543 | 2,07 | up   |
| 6011877 | 7231152 | 1450277 | hypothetical protein LOC691543 | LOC691543 | 691543 | 1,92 | up   |
| 5692263 | 7231152 | 1450271 | hypothetical protein LOC691543 | LOC691543 | 691543 | 1,61 | up   |
| 6006056 | 7231152 | 1450269 | hypothetical protein LOC691543 | LOC691543 | 691543 | 1,56 | up   |
| 6569180 | 7337314 | 1712896 | hypothetical protein LOC691572 | LOC691572 | 691572 | 2,05 | down |
| 6173579 | 7337314 | 1712894 | hypothetical protein LOC691572 | LOC691572 | 691572 | 1,52 | up   |
| 6594560 | 7337314 | 1712890 | hypothetical protein LOC691572 | LOC691572 | 691572 | 1,45 | down |
| 6225759 | 7337314 | 1712892 | hypothetical protein LOC691572 | LOC691572 | 691572 | 1,13 | up   |
| 6238163 | 7337314 | 1712897 | hypothetical protein LOC691572 | LOC691572 | 691572 | 1,10 | down |

|         |         |         |                                                                                                  |                                   |                   |      |      |
|---------|---------|---------|--------------------------------------------------------------------------------------------------|-----------------------------------|-------------------|------|------|
| 6526836 | 7337314 | 1712894 | hypothetical protein LOC691572                                                                   | LOC691572                         | 691572            | 1,08 | up   |
| 6350543 | 7337314 | 1712894 | hypothetical protein LOC691572                                                                   | LOC691572                         | 691572            | 1,06 | down |
| 6555111 | 7337314 | 1712895 | hypothetical protein LOC691572                                                                   | LOC691572                         | 691572            | 1,05 | up   |
| 5912891 | 7337314 | 1712893 | hypothetical protein LOC691572                                                                   | LOC691572                         | 691572            | 1,05 | down |
| 5964826 | 7048444 | 1006493 | hypoxia inducible factor 3, alpha subunit                                                        | Hif3a                             | 64345             | 2,81 | down |
| 6570021 | 7048444 | 1006497 | hypoxia inducible factor 3, alpha subunit                                                        | Hif3a                             | 64345             | 1,43 | up   |
| 5736354 | 7048444 | 1006498 | hypoxia inducible factor 3, alpha subunit                                                        | Hif3a                             | 64345             | 1,39 | up   |
| 6603459 | 7048444 | 1006495 | hypoxia inducible factor 3, alpha subunit                                                        | Hif3a                             | 64345             | 1,36 | down |
| 6543813 | 7048444 | 1006494 | hypoxia inducible factor 3, alpha subunit                                                        | Hif3a                             | 64345             | 1,31 | up   |
| 6182176 | 7048444 | 1006500 | hypoxia inducible factor 3, alpha subunit                                                        | Hif3a                             | 64345             | 1,25 | down |
| 6222683 | 7048444 | 1006496 | hypoxia inducible factor 3, alpha subunit                                                        | Hif3a                             | 64345             | 1,19 | down |
| 6562601 | 7048444 | 1006501 | hypoxia inducible factor 3, alpha subunit                                                        | Hif3a                             | 64345             | 1,19 | up   |
| 5634016 | 7048444 | 1006499 | hypoxia inducible factor 3, alpha subunit                                                        | Hif3a                             | 64345             | 1,17 | up   |
| 6398634 | 7048444 | 1006489 | hypoxia inducible factor 3, alpha subunit                                                        | Hif3a                             | 64345             | 1,12 | up   |
| 6700315 | 7048444 | 1006492 | hypoxia inducible factor 3, alpha subunit                                                        | Hif3a                             | 64345             | 1,09 | up   |
| 6086204 | 7048444 | 1006493 | hypoxia inducible factor 3, alpha subunit                                                        | Hif3a                             | 64345             | 1,07 | up   |
| 6180600 | 7048444 | 1006491 | hypoxia inducible factor 3, alpha subunit                                                        | Hif3a                             | 64345             | 1,06 | up   |
| 5639963 | 7048444 | 1006490 | hypoxia inducible factor 3, alpha subunit                                                        | Hif3a                             | 64345             | 1,03 | up   |
| 5806168 | 7060310 | 1032233 | IIIIG9 protein                                                                                   | liig9                             | 252958            | 2,26 | down |
| 6129707 | 7060310 | 1032225 | IIIIG9 protein                                                                                   | liig9                             | 252958            | 2,02 | down |
| 5772265 | 7060310 | 1032225 | IIIIG9 protein                                                                                   | liig9                             | 252958            | 1,71 | down |
| 5870007 | 7060310 | 1032220 | IIIIG9 protein                                                                                   | liig9                             | 252958            | 1,45 | down |
| 5770796 | 7060310 | 1032231 | IIIIG9 protein                                                                                   | liig9                             | 252958            | 1,42 | down |
| 6682134 | 7060310 | 1032226 | IIIIG9 protein                                                                                   | liig9                             | 252958            | 1,25 | up   |
| 6055569 | 7060310 | 1032230 | IIIIG9 protein                                                                                   | liig9                             | 252958            | 1,22 | up   |
| 6676365 | 7060310 | 1032222 | IIIIG9 protein                                                                                   | liig9                             | 252958            | 1,21 | up   |
| 6636136 | 7060310 | 1032232 | IIIIG9 protein                                                                                   | liig9                             | 252958            | 1,20 | down |
| 6222228 | 7060310 | 1032224 | IIIIG9 protein                                                                                   | liig9                             | 252958            | 1,15 | down |
| 5989399 | 7060310 | 1032232 | IIIIG9 protein                                                                                   | liig9                             | 252958            | 1,11 | up   |
| 5940394 | 7060310 | 1032221 | IIIIG9 protein                                                                                   | liig9                             | 252958            | 1,09 | up   |
| 5764372 | 7060310 | 1032223 | IIIIG9 protein                                                                                   | liig9                             | 252958            | 1,07 | down |
| 5970161 | 7060310 | 1032229 | IIIIG9 protein                                                                                   | liig9                             | 252958            | 1,05 | up   |
| 6120088 | 7060310 | 1032227 | IIIIG9 protein                                                                                   | liig9                             | 252958            | 1,04 | up   |
| 6306233 | 7060310 | 1032228 | IIIIG9 protein                                                                                   | liig9                             | 252958            | 1,00 | up   |
| 5773474 | 7076940 | 1073085 | immunity-related GTPase family, M                                                                | Irgm                              | 303090            | 2,26 | down |
| 6517101 | 7076940 | 1073087 | immunity-related GTPase family, M                                                                | Irgm                              | 303090            | 1,56 | down |
| 6366602 | 7076940 | 1073085 | immunity-related GTPase family, M                                                                | Irgm                              | 303090            | 1,52 | up   |
| 6412491 | 7076940 | 1073086 | immunity-related GTPase family, M                                                                | Irgm                              | 303090            | 1,12 | down |
| 6167148 | 7076940 | 1073086 | immunity-related GTPase family, M                                                                | Irgm                              | 303090            | 1,11 | up   |
| 5941862 | 7076940 | 1073085 | immunity-related GTPase family, M                                                                | Irgm                              | 303090            | 1,07 | down |
| 6169632 | 7310851 | 1649601 | immunoglobulin heavy chain (alpha polypeptide) (mapped)                                          | Igha_mapped                       | 314487            | 1,46 | down |
| 6714617 | 7310851 | 1649627 | immunoglobulin heavy chain (alpha polypeptide) (mapped)                                          | Igha_mapped                       | 314487            | 1,27 | down |
| 5824951 | 7310851 | 1649628 | immunoglobulin heavy chain (alpha polypeptide) (mapped)                                          | Igha_mapped                       | 314487            | 1,26 | up   |
| 5787671 | 7310851 | 1649600 | immunoglobulin heavy chain (alpha polypeptide) (mapped)                                          | Igha_mapped                       | 314487            | 1,22 | up   |
| 6394005 | 7310851 | 1649603 | immunoglobulin heavy chain (alpha polypeptide) (mapped)                                          | Igha_mapped                       | 314487            | 1,15 | up   |
| 6125170 | 7310851 | 1649603 | immunoglobulin heavy chain (alpha polypeptide) (mapped)                                          | Igha_mapped                       | 314487            | 1,11 | up   |
| 5885129 | 7310851 | 1649601 | immunoglobulin heavy chain (alpha polypeptide) (mapped)                                          | Igha_mapped                       | 314487            | 1,06 | down |
| 6183730 | 7310851 | 1649602 | immunoglobulin heavy chain (alpha polypeptide) (mapped)                                          | Igha_mapped                       | 314487            | 1,03 | up   |
| 6620262 | 7310851 | 1649637 | immunoglobulin heavy chain (alpha polypeptide) (mapped)                                          | Igha_mapped                       | 314487            | 1,01 | up   |
| 6707824 | 7310851 | 1649626 | immunoglobulin heavy chain (alpha polypeptide) (mapped) /// gamma-2a immunoglobulin heavy cha/// | IgG-2a /// LOC3 367586 /// 314509 |                   | 1,12 | up   |
| 6279240 | 7310851 | 1649636 | Immunoglobulin heavy chain (gamma polypeptide)                                                   | Ighg                              | 299354            | 1,69 | down |
| 6116304 | 7310851 | 1649611 | Immunoglobulin heavy chain (gamma polypeptide)                                                   | Ighg                              | 299354            | 1,36 | up   |
| 5980573 | 7310851 | 1649612 | Immunoglobulin heavy chain (gamma polypeptide)                                                   | Ighg                              | 299354            | 1,09 | down |
| 6143395 | 7310851 | 1649609 | Immunoglobulin heavy chain (gamma polypeptide)                                                   | Ighg                              | 299354            | 1,08 | down |
| 6478795 | 7310851 | 1649610 | Immunoglobulin heavy chain (gamma polypeptide)                                                   | Ighg                              | 299354            | 1,08 | up   |
| 6168951 | 7310851 | 1649608 | Immunoglobulin heavy chain (gamma polypeptide) /// immunoglobulin heavy chain 1a (serum IgG2a    | Ighg /// Igh-1a                   | 299354 /// 299352 | 1,38 | down |
| 5835235 | 7310851 | 1649613 | Immunoglobulin heavy chain (gamma polypeptide) /// immunoglobulin heavy chain 1a (serum IgG2a    | Ighg /// Igh-1a                   | 299354 /// 299352 | 1,08 | down |

|         |         |         |                                             |        |        |      |      |
|---------|---------|---------|---------------------------------------------|--------|--------|------|------|
| 5982509 | 7310851 | 1649625 | immunoglobulin heavy chain 1a (serum IgG2a) | Igh-1a | 299352 | 2,07 | down |
| 6306840 | 7310851 | 1649607 | immunoglobulin heavy chain 1a (serum IgG2a) | Igh-1a | 299352 | 1,64 | up   |
| 6218092 | 7310851 | 1649604 | immunoglobulin heavy chain 1a (serum IgG2a) | Igh-1a | 299352 | 1,07 | down |
| 6183490 | 7310851 | 1649605 | immunoglobulin heavy chain 1a (serum IgG2a) | Igh-1a | 299352 | 1,05 | down |
| 6403192 | 7310851 | 1649606 | immunoglobulin heavy chain 1a (serum IgG2a) | Igh-1a | 299352 | 1,05 | up   |
| 5972664 | 7310851 | 1649608 | immunoglobulin heavy chain 1a (serum IgG2a) | Igh-1a | 299352 | 1,01 | down |
| 6651256 | 7384127 | 1829623 | immunoglobulin superfamily, member 1        | Igsf1  | 302822 | 2,27 | up   |
| 6562241 | 7384127 | 1829627 | immunoglobulin superfamily, member 1        | Igsf1  | 302822 | 1,62 | up   |
| 5782451 | 7384127 | 1829626 | immunoglobulin superfamily, member 1        | Igsf1  | 302822 | 1,58 | up   |
| 5728022 | 7384127 | 1829637 | immunoglobulin superfamily, member 1        | Igsf1  | 302822 | 1,48 | down |
| 6451918 | 7384127 | 1829634 | immunoglobulin superfamily, member 1        | Igsf1  | 302822 | 1,48 | down |
| 5856538 | 7384127 | 1829637 | immunoglobulin superfamily, member 1        | Igsf1  | 302822 | 1,46 | down |
| 5714535 | 7384127 | 1829639 | immunoglobulin superfamily, member 1        | Igsf1  | 302822 | 1,45 | down |
| 5670119 | 7384127 | 1829638 | immunoglobulin superfamily, member 1        | Igsf1  | 302822 | 1,43 | down |
| 6704433 | 7384127 | 1829630 | immunoglobulin superfamily, member 1        | Igsf1  | 302822 | 1,33 | up   |
| 5685235 | 7384127 | 1829633 | immunoglobulin superfamily, member 1        | Igsf1  | 302822 | 1,31 | down |
| 5815698 | 7384127 | 1829628 | immunoglobulin superfamily, member 1        | Igsf1  | 302822 | 1,30 | up   |
| 6312148 | 7384127 | 1829635 | immunoglobulin superfamily, member 1        | Igsf1  | 302822 | 1,21 | down |
| 5705542 | 7384127 | 1829636 | immunoglobulin superfamily, member 1        | Igsf1  | 302822 | 1,20 | up   |
| 6269235 | 7384127 | 1829629 | immunoglobulin superfamily, member 1        | Igsf1  | 302822 | 1,19 | up   |
| 5653796 | 7384127 | 1829639 | immunoglobulin superfamily, member 1        | Igsf1  | 302822 | 1,17 | down |
| 6267905 | 7384127 | 1829631 | immunoglobulin superfamily, member 1        | Igsf1  | 302822 | 1,16 | up   |
| 6110422 | 7384127 | 1829632 | immunoglobulin superfamily, member 1        | Igsf1  | 302822 | 1,14 | up   |
| 6691890 | 7384127 | 1829632 | immunoglobulin superfamily, member 1        | Igsf1  | 302822 | 1,14 | down |
| 6623212 | 7384127 | 1829620 | immunoglobulin superfamily, member 1        | Igsf1  | 302822 | 1,14 | up   |
| 5926052 | 7384127 | 1829625 | immunoglobulin superfamily, member 1        | Igsf1  | 302822 | 1,07 | down |
| 6705760 | 7384127 | 1829622 | immunoglobulin superfamily, member 1        | Igsf1  | 302822 | 1,05 | up   |
| 6547217 | 7384127 | 1829636 | immunoglobulin superfamily, member 1        | Igsf1  | 302822 | 1,04 | down |
| 6346071 | 7384127 | 1829640 | immunoglobulin superfamily, member 1        | Igsf1  | 302822 | 1,04 | up   |
| 6429075 | 7384127 | 1829621 | immunoglobulin superfamily, member 1        | Igsf1  | 302822 | 1,03 | down |
| 6099488 | 7384127 | 1829624 | immunoglobulin superfamily, member 1        | Igsf1  | 302822 | 1,02 | down |
| 5942764 | 7384127 | 1829624 | immunoglobulin superfamily, member 1        | Igsf1  | 302822 | 1,02 | up   |
| 6298965 | 7384127 | 1829636 | immunoglobulin superfamily, member 1        | Igsf1  | 302822 | 1,02 | down |
| 6093105 | 7107901 | 1146777 | immunoglobulin superfamily, member 8        | Igsf8  | 304979 | 5,15 | down |
| 5942068 | 7107901 | 1146779 | immunoglobulin superfamily, member 8        | Igsf8  | 304979 | 1,31 | up   |
| 6726648 | 7107901 | 1146777 | immunoglobulin superfamily, member 8        | Igsf8  | 304979 | 1,29 | down |
| 6241378 | 7107901 | 1146779 | immunoglobulin superfamily, member 8        | Igsf8  | 304979 | 1,21 | down |
| 6423506 | 7107901 | 1146780 | immunoglobulin superfamily, member 8        | Igsf8  | 304979 | 1,19 | down |
| 6257900 | 7107901 | 1146778 | immunoglobulin superfamily, member 8        | Igsf8  | 304979 | 1,19 | down |
| 5742586 | 7107901 | 1146779 | immunoglobulin superfamily, member 8        | Igsf8  | 304979 | 1,16 | down |
| 6549597 | 7107901 | 1146781 | immunoglobulin superfamily, member 8        | Igsf8  | 304979 | 1,14 | up   |
| 5853183 | 7107901 | 1146781 | immunoglobulin superfamily, member 8        | Igsf8  | 304979 | 1,09 | up   |
| 5881747 | 7107901 | 1146782 | immunoglobulin superfamily, member 8        | Igsf8  | 304979 | 1,07 | up   |
| 6420097 | 7107901 | 1146782 | immunoglobulin superfamily, member 8        | Igsf8  | 304979 | 1,06 | down |
| 6203503 | 7107901 | 1146783 | immunoglobulin superfamily, member 8        | Igsf8  | 304979 | 1,05 | down |
| 6467535 | 7107926 | 1146847 | immunoglobulin superfamily, member 9        | Igsf9  | 304982 | 3,02 | down |
| 6563890 | 7107926 | 1146849 | immunoglobulin superfamily, member 9        | Igsf9  | 304982 | 2,80 | down |
| 6062239 | 7107926 | 1146828 | immunoglobulin superfamily, member 9        | Igsf9  | 304982 | 1,67 | down |
| 5887547 | 7107926 | 1146848 | immunoglobulin superfamily, member 9        | Igsf9  | 304982 | 1,66 | down |
| 6442059 | 7107926 | 1146835 | immunoglobulin superfamily, member 9        | Igsf9  | 304982 | 1,59 | down |
| 6543024 | 7107926 | 1146826 | immunoglobulin superfamily, member 9        | Igsf9  | 304982 | 1,53 | up   |
| 5856756 | 7107926 | 1146848 | immunoglobulin superfamily, member 9        | Igsf9  | 304982 | 1,50 | up   |
| 6101940 | 7107926 | 1146848 | immunoglobulin superfamily, member 9        | Igsf9  | 304982 | 1,44 | up   |
| 5932612 | 7107926 | 1146832 | immunoglobulin superfamily, member 9        | Igsf9  | 304982 | 1,38 | down |
| 6477925 | 7107926 | 1146844 | immunoglobulin superfamily, member 9        | Igsf9  | 304982 | 1,33 | down |
| 6526672 | 7107926 | 1146845 | immunoglobulin superfamily, member 9        | Igsf9  | 304982 | 1,33 | down |
| 6049389 | 7107926 | 1146831 | immunoglobulin superfamily, member 9        | Igsf9  | 304982 | 1,28 | up   |

|         |         |         |                                      |       |        |      |      |
|---------|---------|---------|--------------------------------------|-------|--------|------|------|
| 6703683 | 7107926 | 1146841 | immunoglobulin superfamily, member 9 | Igsf9 | 304982 | 1,26 | up   |
| 5952971 | 7107926 | 1146852 | immunoglobulin superfamily, member 9 | Igsf9 | 304982 | 1,25 | down |
| 6651768 | 7107926 | 1146827 | immunoglobulin superfamily, member 9 | Igsf9 | 304982 | 1,25 | down |
| 5818250 | 7107926 | 1146846 | immunoglobulin superfamily, member 9 | Igsf9 | 304982 | 1,22 | up   |
| 5839873 | 7107926 | 1146845 | immunoglobulin superfamily, member 9 | Igsf9 | 304982 | 1,22 | down |
| 6539944 | 7107926 | 1146827 | immunoglobulin superfamily, member 9 | Igsf9 | 304982 | 1,17 | down |
| 6410743 | 7107926 | 1146836 | immunoglobulin superfamily, member 9 | Igsf9 | 304982 | 1,16 | down |
| 5758470 | 7107926 | 1146834 | immunoglobulin superfamily, member 9 | Igsf9 | 304982 | 1,10 | up   |
| 6615327 | 7107926 | 1146851 | immunoglobulin superfamily, member 9 | Igsf9 | 304982 | 1,10 | up   |
| 6553557 | 7107926 | 1146843 | immunoglobulin superfamily, member 9 | Igsf9 | 304982 | 1,10 | up   |
| 6039458 | 7107926 | 1146828 | immunoglobulin superfamily, member 9 | Igsf9 | 304982 | 1,09 | down |
| 6225666 | 7107926 | 1146845 | immunoglobulin superfamily, member 9 | Igsf9 | 304982 | 1,09 | up   |
| 5892087 | 7107926 | 1146842 | immunoglobulin superfamily, member 9 | Igsf9 | 304982 | 1,08 | up   |
| 6049094 | 7107926 | 1146833 | immunoglobulin superfamily, member 9 | Igsf9 | 304982 | 1,03 | up   |
| 5718266 | 7107926 | 1146838 | immunoglobulin superfamily, member 9 | Igsf9 | 304982 | 1,02 | up   |
| 6457330 | 7134773 | 1212966 | immunoresponsive 1 homolog (mouse)   | Irg1  | 306127 | 5,27 | down |
| 6700427 | 7134773 | 1212969 | immunoresponsive 1 homolog (mouse)   | Irg1  | 306127 | 2,15 | up   |
| 5704934 | 7134773 | 1212971 | immunoresponsive 1 homolog (mouse)   | Irg1  | 306127 | 1,53 | up   |
| 6472315 | 7134773 | 1212972 | immunoresponsive 1 homolog (mouse)   | Irg1  | 306127 | 1,35 | up   |
| 5766432 | 7134773 | 1212970 | immunoresponsive 1 homolog (mouse)   | Irg1  | 306127 | 1,32 | up   |
| 6329446 | 7134773 | 1212971 | immunoresponsive 1 homolog (mouse)   | Irg1  | 306127 | 1,23 | up   |
| 6618291 | 7134773 | 1212968 | immunoresponsive 1 homolog (mouse)   | Irg1  | 306127 | 1,12 | up   |
| 5991710 | 7138243 | 1221663 | importin 4                           | Ipo4  | 290228 | 2,91 | down |
| 6631106 | 7138243 | 1221669 | importin 4                           | Ipo4  | 290228 | 1,87 | down |
| 6329992 | 7138243 | 1221686 | importin 4                           | Ipo4  | 290228 | 1,71 | down |
| 5872264 | 7138243 | 1221687 | importin 4                           | Ipo4  | 290228 | 1,49 | down |
| 6496678 | 7138243 | 1221676 | importin 4                           | Ipo4  | 290228 | 1,46 | up   |
| 6328976 | 7138243 | 1221668 | importin 4                           | Ipo4  | 290228 | 1,44 | up   |
| 5907388 | 7138243 | 1221661 | importin 4                           | Ipo4  | 290228 | 1,41 | up   |
| 5639098 | 7138243 | 1221667 | importin 4                           | Ipo4  | 290228 | 1,39 | up   |
| 6705542 | 7138243 | 1221660 | importin 4                           | Ipo4  | 290228 | 1,39 | down |
| 6544256 | 7138243 | 1221673 | importin 4                           | Ipo4  | 290228 | 1,38 | up   |
| 6734390 | 7138243 | 1221660 | importin 4                           | Ipo4  | 290228 | 1,25 | up   |
| 6563882 | 7138243 | 1221667 | importin 4                           | Ipo4  | 290228 | 1,24 | down |
| 6497191 | 7138243 | 1221675 | importin 4                           | Ipo4  | 290228 | 1,23 | up   |
| 6550157 | 7138243 | 1221684 | importin 4                           | Ipo4  | 290228 | 1,21 | down |
| 5842068 | 7138243 | 1221664 | importin 4                           | Ipo4  | 290228 | 1,20 | down |
| 6430772 | 7138243 | 1221684 | importin 4                           | Ipo4  | 290228 | 1,16 | down |
| 6578057 | 7138243 | 1221670 | importin 4                           | Ipo4  | 290228 | 1,14 | down |
| 6320266 | 7138243 | 1221678 | importin 4                           | Ipo4  | 290228 | 1,14 | up   |
| 6079079 | 7138243 | 1221662 | importin 4                           | Ipo4  | 290228 | 1,13 | up   |
| 6024900 | 7138243 | 1221679 | importin 4                           | Ipo4  | 290228 | 1,12 | up   |
| 6484799 | 7138243 | 1221671 | importin 4                           | Ipo4  | 290228 | 1,12 | up   |
| 6169245 | 7138243 | 1221681 | importin 4                           | Ipo4  | 290228 | 1,11 | up   |
| 5778836 | 7138243 | 1221664 | importin 4                           | Ipo4  | 290228 | 1,11 | down |
| 6360407 | 7138243 | 1221663 | importin 4                           | Ipo4  | 290228 | 1,09 | up   |
| 6308819 | 7138243 | 1221682 | importin 4                           | Ipo4  | 290228 | 1,09 | up   |
| 6108917 | 7138243 | 1221685 | importin 4                           | Ipo4  | 290228 | 1,09 | up   |
| 6534586 | 7138243 | 1221666 | importin 4                           | Ipo4  | 290228 | 1,07 | down |
| 5701391 | 7138243 | 1221680 | importin 4                           | Ipo4  | 290228 | 1,06 | down |
| 5870217 | 7138243 | 1221674 | importin 4                           | Ipo4  | 290228 | 1,06 | up   |
| 6049451 | 7138243 | 1221665 | importin 4                           | Ipo4  | 290228 | 1,04 | down |
| 6344446 | 7138243 | 1221683 | importin 4                           | Ipo4  | 290228 | 1,03 | down |
| 5677695 | 7138243 | 1221672 | importin 4                           | Ipo4  | 290228 | 1,02 | up   |
| 6298401 | 7138243 | 1221687 | importin 4                           | Ipo4  | 290228 | 1,01 | down |
| 6466360 | 7146975 | 1243262 | indoleamine-pyrrole 2,3 dioxygenase  | Indo  | 66029  | 6,64 | down |
| 5877868 | 7146975 | 1243268 | indoleamine-pyrrole 2,3 dioxygenase  | Indo  | 66029  | 2,64 | up   |



|         |         |         |                                                                                             |        |        |      |      |
|---------|---------|---------|---------------------------------------------------------------------------------------------|--------|--------|------|------|
| 6689139 | 7146975 | 1243262 | indoleamine-pyrrole 2,3 dioxygenase                                                         | Indo   | 66029  | 2,15 | down |
| 6399413 | 7146975 | 1243267 | indoleamine-pyrrole 2,3 dioxygenase                                                         | Indo   | 66029  | 2,05 | up   |
| 6257329 | 7146975 | 1243264 | indoleamine-pyrrole 2,3 dioxygenase                                                         | Indo   | 66029  | 1,76 | down |
| 6388956 | 7146975 | 1243266 | indoleamine-pyrrole 2,3 dioxygenase                                                         | Indo   | 66029  | 1,74 | up   |
| 6499144 | 7146975 | 1243269 | indoleamine-pyrrole 2,3 dioxygenase                                                         | Indo   | 66029  | 1,56 | up   |
| 6412126 | 7146975 | 1243269 | indoleamine-pyrrole 2,3 dioxygenase                                                         | Indo   | 66029  | 1,39 | down |
| 6005325 | 7146975 | 1243265 | indoleamine-pyrrole 2,3 dioxygenase                                                         | Indo   | 66029  | 1,12 | up   |
| 6509872 | 7146975 | 1243263 | indoleamine-pyrrole 2,3 dioxygenase                                                         | Indo   | 66029  | 1,03 | down |
| 6692536 | 7146982 | 1243293 | indoleamine-pyrrole 2,3 dioxygenase-like 1                                                  | Indo11 | 681319 | 3,56 | up   |
| 6410617 | 7286561 | 1588371 | inhibitor of kappa light polypeptide enhancer in B-cells, kinase complex-associated protein | Ikbkap | 140934 | 2,64 | down |
| 6556242 | 7286561 | 1588344 | inhibitor of kappa light polypeptide enhancer in B-cells, kinase complex-associated protein | Ikbkap | 140934 | 2,02 | down |
| 6502701 | 7286561 | 1588370 | inhibitor of kappa light polypeptide enhancer in B-cells, kinase complex-associated protein | Ikbkap | 140934 | 1,76 | down |
| 6624928 | 7286561 | 1588357 | inhibitor of kappa light polypeptide enhancer in B-cells, kinase complex-associated protein | Ikbkap | 140934 | 1,62 | up   |
| 5950591 | 7286561 | 1588341 | inhibitor of kappa light polypeptide enhancer in B-cells, kinase complex-associated protein | Ikbkap | 140934 | 1,49 | down |
| 6201009 | 7286561 | 1588361 | inhibitor of kappa light polypeptide enhancer in B-cells, kinase complex-associated protein | Ikbkap | 140934 | 1,46 | up   |
| 6257397 | 7286561 | 1588364 | inhibitor of kappa light polypeptide enhancer in B-cells, kinase complex-associated protein | Ikbkap | 140934 | 1,46 | up   |
| 6008977 | 7286561 | 1588350 | inhibitor of kappa light polypeptide enhancer in B-cells, kinase complex-associated protein | Ikbkap | 140934 | 1,36 | up   |
| 6499565 | 7286561 | 1588368 | inhibitor of kappa light polypeptide enhancer in B-cells, kinase complex-associated protein | Ikbkap | 140934 | 1,35 | up   |
| 5627609 | 7286561 | 1588342 | inhibitor of kappa light polypeptide enhancer in B-cells, kinase complex-associated protein | Ikbkap | 140934 | 1,29 | down |
| 6159283 | 7286561 | 1588343 | inhibitor of kappa light polypeptide enhancer in B-cells, kinase complex-associated protein | Ikbkap | 140934 | 1,26 | down |
| 5693910 | 7286561 | 1588373 | inhibitor of kappa light polypeptide enhancer in B-cells, kinase complex-associated protein | Ikbkap | 140934 | 1,26 | up   |
| 6102123 | 7286561 | 1588374 | inhibitor of kappa light polypeptide enhancer in B-cells, kinase complex-associated protein | Ikbkap | 140934 | 1,26 | up   |
| 6069031 | 7286561 | 1588372 | inhibitor of kappa light polypeptide enhancer in B-cells, kinase complex-associated protein | Ikbkap | 140934 | 1,25 | up   |
| 5838492 | 7286561 | 1588349 | inhibitor of kappa light polypeptide enhancer in B-cells, kinase complex-associated protein | Ikbkap | 140934 | 1,24 | down |
| 6649394 | 7286561 | 1588371 | inhibitor of kappa light polypeptide enhancer in B-cells, kinase complex-associated protein | Ikbkap | 140934 | 1,24 | down |
| 5842454 | 7286561 | 1588355 | inhibitor of kappa light polypeptide enhancer in B-cells, kinase complex-associated protein | Ikbkap | 140934 | 1,23 | up   |
| 6512316 | 7286561 | 1588345 | inhibitor of kappa light polypeptide enhancer in B-cells, kinase complex-associated protein | Ikbkap | 140934 | 1,18 | down |
| 6186063 | 7286561 | 1588358 | inhibitor of kappa light polypeptide enhancer in B-cells, kinase complex-associated protein | Ikbkap | 140934 | 1,18 | down |
| 6630304 | 7286561 | 1588365 | inhibitor of kappa light polypeptide enhancer in B-cells, kinase complex-associated protein | Ikbkap | 140934 | 1,17 | up   |
| 6173117 | 7286561 | 1588367 | inhibitor of kappa light polypeptide enhancer in B-cells, kinase complex-associated protein | Ikbkap | 140934 | 1,16 | up   |
| 6690888 | 7286561 | 1588369 | inhibitor of kappa light polypeptide enhancer in B-cells, kinase complex-associated protein | Ikbkap | 140934 | 1,15 | up   |
| 6403393 | 7286561 | 1588347 | inhibitor of kappa light polypeptide enhancer in B-cells, kinase complex-associated protein | Ikbkap | 140934 | 1,14 | down |
| 6415922 | 7286561 | 1588354 | inhibitor of kappa light polypeptide enhancer in B-cells, kinase complex-associated protein | Ikbkap | 140934 | 1,11 | up   |
| 6202876 | 7286561 | 1588351 | inhibitor of kappa light polypeptide enhancer in B-cells, kinase complex-associated protein | Ikbkap | 140934 | 1,11 | down |
| 6067882 | 7286561 | 1588360 | inhibitor of kappa light polypeptide enhancer in B-cells, kinase complex-associated protein | Ikbkap | 140934 | 1,11 | up   |
| 5843920 | 7286561 | 1588352 | inhibitor of kappa light polypeptide enhancer in B-cells, kinase complex-associated protein | Ikbkap | 140934 | 1,10 | down |
| 6218519 | 7286561 | 1588375 | inhibitor of kappa light polypeptide enhancer in B-cells, kinase complex-associated protein | Ikbkap | 140934 | 1,09 | up   |
| 5630535 | 7286561 | 1588346 | inhibitor of kappa light polypeptide enhancer in B-cells, kinase complex-associated protein | Ikbkap | 140934 | 1,08 | up   |
| 5748334 | 7286561 | 1588352 | inhibitor of kappa light polypeptide enhancer in B-cells, kinase complex-associated protein | Ikbkap | 140934 | 1,08 | down |
| 5820905 | 7286561 | 1588356 | inhibitor of kappa light polypeptide enhancer in B-cells, kinase complex-associated protein | Ikbkap | 140934 | 1,07 | up   |
| 5834918 | 7286561 | 1588369 | inhibitor of kappa light polypeptide enhancer in B-cells, kinase complex-associated protein | Ikbkap | 140934 | 1,07 | down |
| 5820689 | 7286561 | 1588359 | inhibitor of kappa light polypeptide enhancer in B-cells, kinase complex-associated protein | Ikbkap | 140934 | 1,06 | up   |
| 6098418 | 7286561 | 1588370 | inhibitor of kappa light polypeptide enhancer in B-cells, kinase complex-associated protein | Ikbkap | 140934 | 1,04 | down |
| 6544177 | 7286561 | 1588366 | inhibitor of kappa light polypeptide enhancer in B-cells, kinase complex-associated protein | Ikbkap | 140934 | 1,03 | down |
| 6587556 | 7286561 | 1588353 | inhibitor of kappa light polypeptide enhancer in B-cells, kinase complex-associated protein | Ikbkap | 140934 | 1,02 | down |
| 6449223 | 7286561 | 1588376 | inhibitor of kappa light polypeptide enhancer in B-cells, kinase complex-associated protein | Ikbkap | 140934 | 1,01 | down |
| 5820589 | 7286561 | 1588348 | inhibitor of kappa light polypeptide enhancer in B-cells, kinase complex-associated protein | Ikbkap | 140934 | 1,00 | up   |
| 6074461 | 7286561 | 1588362 | inhibitor of kappa light polypeptide enhancer in B-cells, kinase complex-associated protein | Ikbkap | 140934 | 1,00 | up   |
| 5834961 | 7286561 | 1588363 | inhibitor of kappa light polypeptide enhancer in B-cells, kinase complex-associated protein | Ikbkap | 140934 | 1,00 | down |
| 6229832 | 7266530 | 1538287 | INO80 complex subunit B                                                                     | Ino80b | 500225 | 2,38 | up   |
| 6519217 | 7266530 | 1538288 | INO80 complex subunit B                                                                     | Ino80b | 500225 | 1,51 | up   |
| 6713103 | 7266530 | 1538285 | INO80 complex subunit B                                                                     | Ino80b | 500225 | 1,41 | up   |
| 6359330 | 7266530 | 1538285 | INO80 complex subunit B                                                                     | Ino80b | 500225 | 1,19 | down |
| 5898475 | 7266530 | 1538285 | INO80 complex subunit B                                                                     | Ino80b | 500225 | 1,08 | up   |
| 5989897 | 7266530 | 1538286 | INO80 complex subunit B                                                                     | Ino80b | 500225 | 1,06 | down |
| 6640128 | 7257111 | 1515540 | inositol 1,4,5-triphosphate receptor, type 1                                                | Itrp1  | 25262  | 2,18 | down |
| 5977239 | 7257111 | 1515511 | inositol 1,4,5-triphosphate receptor, type 1                                                | Itrp1  | 25262  | 2,08 | up   |

|         |         |         |                                              |       |       |      |      |
|---------|---------|---------|----------------------------------------------|-------|-------|------|------|
| 5849054 | 7257111 | 1515516 | inositol 1,4,5-triphosphate receptor, type 1 | Itpr1 | 25262 | 1,96 | up   |
| 5721609 | 7257111 | 1515490 | inositol 1,4,5-triphosphate receptor, type 1 | Itpr1 | 25262 | 1,74 | down |
| 6307582 | 7257111 | 1515488 | inositol 1,4,5-triphosphate receptor, type 1 | Itpr1 | 25262 | 1,70 | up   |
| 6302882 | 7257111 | 1515487 | inositol 1,4,5-triphosphate receptor, type 1 | Itpr1 | 25262 | 1,60 | down |
| 5621761 | 7257111 | 1515522 | inositol 1,4,5-triphosphate receptor, type 1 | Itpr1 | 25262 | 1,58 | up   |
| 5922338 | 7257111 | 1515545 | inositol 1,4,5-triphosphate receptor, type 1 | Itpr1 | 25262 | 1,58 | down |
| 6446710 | 7257111 | 1515524 | inositol 1,4,5-triphosphate receptor, type 1 | Itpr1 | 25262 | 1,56 | up   |
| 6355736 | 7257111 | 1515492 | inositol 1,4,5-triphosphate receptor, type 1 | Itpr1 | 25262 | 1,49 | down |
| 5901853 | 7257111 | 1515526 | inositol 1,4,5-triphosphate receptor, type 1 | Itpr1 | 25262 | 1,42 | up   |
| 6177602 | 7257111 | 1515546 | inositol 1,4,5-triphosphate receptor, type 1 | Itpr1 | 25262 | 1,40 | down |
| 5669637 | 7257111 | 1515532 | inositol 1,4,5-triphosphate receptor, type 1 | Itpr1 | 25262 | 1,39 | down |
| 5854545 | 7257111 | 1515507 | inositol 1,4,5-triphosphate receptor, type 1 | Itpr1 | 25262 | 1,38 | up   |
| 6320808 | 7257111 | 1515510 | inositol 1,4,5-triphosphate receptor, type 1 | Itpr1 | 25262 | 1,38 | down |
| 5674601 | 7257111 | 1515527 | inositol 1,4,5-triphosphate receptor, type 1 | Itpr1 | 25262 | 1,36 | up   |
| 5773911 | 7257111 | 1515509 | inositol 1,4,5-triphosphate receptor, type 1 | Itpr1 | 25262 | 1,36 | up   |
| 5926800 | 7257111 | 1515491 | inositol 1,4,5-triphosphate receptor, type 1 | Itpr1 | 25262 | 1,35 | down |
| 6578976 | 7257111 | 1515541 | inositol 1,4,5-triphosphate receptor, type 1 | Itpr1 | 25262 | 1,34 | down |
| 6349109 | 7257111 | 1515505 | inositol 1,4,5-triphosphate receptor, type 1 | Itpr1 | 25262 | 1,34 | up   |
| 6103316 | 7257111 | 1515499 | inositol 1,4,5-triphosphate receptor, type 1 | Itpr1 | 25262 | 1,33 | down |
| 5715918 | 7257111 | 1515533 | inositol 1,4,5-triphosphate receptor, type 1 | Itpr1 | 25262 | 1,33 | up   |
| 6699950 | 7257111 | 1515489 | inositol 1,4,5-triphosphate receptor, type 1 | Itpr1 | 25262 | 1,32 | down |
| 6529672 | 7257111 | 1515534 | inositol 1,4,5-triphosphate receptor, type 1 | Itpr1 | 25262 | 1,32 | up   |
| 6245599 | 7257111 | 1515519 | inositol 1,4,5-triphosphate receptor, type 1 | Itpr1 | 25262 | 1,27 | up   |
| 6702570 | 7257111 | 1515503 | inositol 1,4,5-triphosphate receptor, type 1 | Itpr1 | 25262 | 1,26 | up   |
| 6597522 | 7257111 | 1515544 | inositol 1,4,5-triphosphate receptor, type 1 | Itpr1 | 25262 | 1,25 | up   |
| 5674985 | 7257111 | 1515534 | inositol 1,4,5-triphosphate receptor, type 1 | Itpr1 | 25262 | 1,21 | down |
| 6143805 | 7257111 | 1515536 | inositol 1,4,5-triphosphate receptor, type 1 | Itpr1 | 25262 | 1,20 | up   |
| 6457839 | 7257111 | 1515531 | inositol 1,4,5-triphosphate receptor, type 1 | Itpr1 | 25262 | 1,20 | down |
| 5754535 | 7257111 | 1515523 | inositol 1,4,5-triphosphate receptor, type 1 | Itpr1 | 25262 | 1,20 | up   |
| 5831482 | 7257111 | 1515510 | inositol 1,4,5-triphosphate receptor, type 1 | Itpr1 | 25262 | 1,20 | up   |
| 5635653 | 7257111 | 1515497 | inositol 1,4,5-triphosphate receptor, type 1 | Itpr1 | 25262 | 1,20 | up   |
| 6479290 | 7257111 | 1515538 | inositol 1,4,5-triphosphate receptor, type 1 | Itpr1 | 25262 | 1,19 | down |
| 6454192 | 7257111 | 1515518 | inositol 1,4,5-triphosphate receptor, type 1 | Itpr1 | 25262 | 1,18 | down |
| 5790799 | 7257111 | 1515535 | inositol 1,4,5-triphosphate receptor, type 1 | Itpr1 | 25262 | 1,17 | up   |
| 6103199 | 7257111 | 1515547 | inositol 1,4,5-triphosphate receptor, type 1 | Itpr1 | 25262 | 1,16 | down |
| 6741995 | 7257111 | 1515517 | inositol 1,4,5-triphosphate receptor, type 1 | Itpr1 | 25262 | 1,16 | down |
| 6045014 | 7257111 | 1515520 | inositol 1,4,5-triphosphate receptor, type 1 | Itpr1 | 25262 | 1,15 | down |
| 6356471 | 7257111 | 1515542 | inositol 1,4,5-triphosphate receptor, type 1 | Itpr1 | 25262 | 1,14 | down |
| 6329852 | 7257111 | 1515512 | inositol 1,4,5-triphosphate receptor, type 1 | Itpr1 | 25262 | 1,14 | up   |
| 5622746 | 7257111 | 1515524 | inositol 1,4,5-triphosphate receptor, type 1 | Itpr1 | 25262 | 1,14 | up   |
| 5927635 | 7257111 | 1515548 | inositol 1,4,5-triphosphate receptor, type 1 | Itpr1 | 25262 | 1,14 | up   |
| 5698991 | 7257111 | 1515530 | inositol 1,4,5-triphosphate receptor, type 1 | Itpr1 | 25262 | 1,13 | up   |
| 6094254 | 7257111 | 1515501 | inositol 1,4,5-triphosphate receptor, type 1 | Itpr1 | 25262 | 1,13 | up   |
| 6451332 | 7257111 | 1515528 | inositol 1,4,5-triphosphate receptor, type 1 | Itpr1 | 25262 | 1,13 | down |
| 6715032 | 7257111 | 1515508 | inositol 1,4,5-triphosphate receptor, type 1 | Itpr1 | 25262 | 1,12 | up   |
| 5797315 | 7257111 | 1515506 | inositol 1,4,5-triphosphate receptor, type 1 | Itpr1 | 25262 | 1,12 | up   |
| 6271541 | 7257111 | 1515498 | inositol 1,4,5-triphosphate receptor, type 1 | Itpr1 | 25262 | 1,12 | up   |
| 6263737 | 7257111 | 1515502 | inositol 1,4,5-triphosphate receptor, type 1 | Itpr1 | 25262 | 1,10 | down |
| 6654695 | 7257111 | 1515514 | inositol 1,4,5-triphosphate receptor, type 1 | Itpr1 | 25262 | 1,10 | up   |
| 6664457 | 7257111 | 1515493 | inositol 1,4,5-triphosphate receptor, type 1 | Itpr1 | 25262 | 1,10 | down |
| 6352721 | 7257111 | 1515538 | inositol 1,4,5-triphosphate receptor, type 1 | Itpr1 | 25262 | 1,09 | up   |
| 6669912 | 7257111 | 1515537 | inositol 1,4,5-triphosphate receptor, type 1 | Itpr1 | 25262 | 1,09 | down |
| 6384137 | 7257111 | 1515543 | inositol 1,4,5-triphosphate receptor, type 1 | Itpr1 | 25262 | 1,08 | up   |
| 6735410 | 7257111 | 1515525 | inositol 1,4,5-triphosphate receptor, type 1 | Itpr1 | 25262 | 1,08 | up   |
| 6613603 | 7257111 | 1515515 | inositol 1,4,5-triphosphate receptor, type 1 | Itpr1 | 25262 | 1,07 | up   |
| 6198081 | 7257111 | 1515500 | inositol 1,4,5-triphosphate receptor, type 1 | Itpr1 | 25262 | 1,07 | down |
| 6074957 | 7257111 | 1515529 | inositol 1,4,5-triphosphate receptor, type 1 | Itpr1 | 25262 | 1,07 | up   |

|         |         |         |                                              |        |        |      |      |
|---------|---------|---------|----------------------------------------------|--------|--------|------|------|
| 6654084 | 7257111 | 1515496 | inositol 1,4,5-triphosphate receptor, type 1 | Itp1   | 25262  | 1,05 | up   |
| 6368535 | 7257111 | 1515504 | inositol 1,4,5-triphosphate receptor, type 1 | Itp1   | 25262  | 1,05 | up   |
| 6606770 | 7257111 | 1515513 | inositol 1,4,5-triphosphate receptor, type 1 | Itp1   | 25262  | 1,03 | down |
| 5752521 | 7257111 | 1515495 | inositol 1,4,5-triphosphate receptor, type 1 | Itp1   | 25262  | 1,03 | up   |
| 6220629 | 7257111 | 1515494 | inositol 1,4,5-triphosphate receptor, type 1 | Itp1   | 25262  | 1,02 | down |
| 6391607 | 7257111 | 1515521 | inositol 1,4,5-triphosphate receptor, type 1 | Itp1   | 25262  | 1,01 | up   |
| 6268596 | 7257111 | 1515539 | inositol 1,4,5-triphosphate receptor, type 1 | Itp1   | 25262  | 1,01 | down |
| 5835498 | 7231634 | 1451783 | inositol 1,4,5-trisphosphate 3-kinase A      | Itpka  | 81677  | 2,29 | down |
| 6023477 | 7231634 | 1451789 | inositol 1,4,5-trisphosphate 3-kinase A      | Itpka  | 81677  | 1,41 | up   |
| 6188750 | 7231634 | 1451783 | inositol 1,4,5-trisphosphate 3-kinase A      | Itpka  | 81677  | 1,34 | down |
| 6621726 | 7231634 | 1451783 | inositol 1,4,5-trisphosphate 3-kinase A      | Itpka  | 81677  | 1,15 | up   |
| 6289443 | 7231634 | 1451783 | inositol 1,4,5-trisphosphate 3-kinase A      | Itpka  | 81677  | 1,11 | down |
| 6056674 | 7231634 | 1451784 | inositol 1,4,5-trisphosphate 3-kinase A      | Itpka  | 81677  | 1,10 | down |
| 5911969 | 7231634 | 1451790 | inositol 1,4,5-trisphosphate 3-kinase A      | Itpka  | 81677  | 1,10 | down |
| 6187043 | 7231634 | 1451785 | inositol 1,4,5-trisphosphate 3-kinase A      | Itpka  | 81677  | 1,08 | up   |
| 6071788 | 7231634 | 1451787 | inositol 1,4,5-trisphosphate 3-kinase A      | Itpka  | 81677  | 1,07 | up   |
| 6511500 | 7231634 | 1451783 | inositol 1,4,5-trisphosphate 3-kinase A      | Itpka  | 81677  | 1,05 | up   |
| 6587307 | 7231634 | 1451788 | inositol 1,4,5-trisphosphate 3-kinase A      | Itpka  | 81677  | 1,02 | up   |
| 5734699 | 7231634 | 1451786 | inositol 1,4,5-trisphosphate 3-kinase A      | Itpka  | 81677  | 1,01 | up   |
| 6698091 | 7354261 | 1755402 | inositol polyphosphate-1-phosphatase         | Inpp1  | 316376 | 2,89 | down |
| 6008342 | 7354261 | 1755402 | inositol polyphosphate-1-phosphatase         | Inpp1  | 316376 | 2,12 | down |
| 5793625 | 7354261 | 1755404 | inositol polyphosphate-1-phosphatase         | Inpp1  | 316376 | 1,46 | up   |
| 5849404 | 7354261 | 1755406 | inositol polyphosphate-1-phosphatase         | Inpp1  | 316376 | 1,26 | up   |
| 6198266 | 7354261 | 1755406 | inositol polyphosphate-1-phosphatase         | Inpp1  | 316376 | 1,19 | up   |
| 6645567 | 7354261 | 1755407 | inositol polyphosphate-1-phosphatase         | Inpp1  | 316376 | 1,15 | up   |
| 5623589 | 7354261 | 1755406 | inositol polyphosphate-1-phosphatase         | Inpp1  | 316376 | 1,14 | up   |
| 6263578 | 7354261 | 1755405 | inositol polyphosphate-1-phosphatase         | Inpp1  | 316376 | 1,06 | down |
| 6075331 | 7354261 | 1755403 | inositol polyphosphate-1-phosphatase         | Inpp1  | 316376 | 1,06 | up   |
| 6354904 | 7354261 | 1755402 | inositol polyphosphate-1-phosphatase         | Inpp1  | 316376 | 1,04 | up   |
| 6412632 | 7260283 | 1523366 | insulin induced gene 1                       | Insig1 | 64194  | 2,72 | down |
| 6009826 | 7260283 | 1523365 | insulin induced gene 1                       | Insig1 | 64194  | 1,18 | up   |
| 6277783 | 7260283 | 1523361 | insulin induced gene 1                       | Insig1 | 64194  | 1,13 | up   |
| 6442695 | 7260283 | 1523363 | insulin induced gene 1                       | Insig1 | 64194  | 1,11 | down |
| 6372133 | 7260283 | 1523366 | insulin induced gene 1                       | Insig1 | 64194  | 1,10 | down |
| 5651919 | 7260283 | 1523364 | insulin induced gene 1                       | Insig1 | 64194  | 1,08 | up   |
| 6177603 | 7260283 | 1523365 | insulin induced gene 1                       | Insig1 | 64194  | 1,06 | down |
| 6585131 | 7260283 | 1523362 | insulin induced gene 1                       | Insig1 | 64194  | 1,06 | down |
| 5858661 | 7260283 | 1523366 | insulin induced gene 1                       | Insig1 | 64194  | 1,02 | down |
| 5735580 | 7233442 | 1456945 | insulinoma-associated 1                      | Insm1  | 366210 | 2,57 | up   |
| 6411303 | 7233442 | 1456944 | insulinoma-associated 1                      | Insm1  | 366210 | 1,21 | up   |
| 6641526 | 7233442 | 1456944 | insulinoma-associated 1                      | Insm1  | 366210 | 1,11 | down |
| 5664531 | 7233442 | 1456948 | insulinoma-associated 1                      | Insm1  | 366210 | 1,06 | up   |
| 5762716 | 7233442 | 1456944 | insulinoma-associated 1                      | Insm1  | 366210 | 1,06 | down |
| 6350461 | 7233442 | 1456948 | insulinoma-associated 1                      | Insm1  | 366210 | 1,05 | up   |
| 5947160 | 7233442 | 1456944 | insulinoma-associated 1                      | Insm1  | 366210 | 1,05 | up   |
| 5841307 | 7233442 | 1456947 | insulinoma-associated 1                      | Insm1  | 366210 | 1,02 | down |
| 6718553 | 7233442 | 1456944 | insulinoma-associated 1                      | Insm1  | 366210 | 1,02 | down |
| 6652514 | 7233442 | 1456948 | insulinoma-associated 1                      | Insm1  | 366210 | 1,01 | down |
| 6718482 | 7382937 | 1827141 | integral membrane protein 2A                 | Itm2a  | 317218 | 2,10 | down |
| 5740889 | 7382937 | 1827142 | integral membrane protein 2A                 | Itm2a  | 317218 | 1,83 | down |
| 6210132 | 7382937 | 1827138 | integral membrane protein 2A                 | Itm2a  | 317218 | 1,53 | up   |
| 6378536 | 7382937 | 1827138 | integral membrane protein 2A                 | Itm2a  | 317218 | 1,40 | down |
| 6290927 | 7382937 | 1827143 | integral membrane protein 2A                 | Itm2a  | 317218 | 1,37 | up   |
| 6123161 | 7382937 | 1827139 | integral membrane protein 2A                 | Itm2a  | 317218 | 1,21 | up   |
| 6343369 | 7382937 | 1827140 | integral membrane protein 2A                 | Itm2a  | 317218 | 1,13 | down |
| 6345950 | 7382937 | 1827143 | integral membrane protein 2A                 | Itm2a  | 317218 | 1,05 | up   |
| 5991649 | 7199369 | 1374231 | integrator complex subunit 12                | Ints12 | 295448 | 2,27 | up   |

|         |         |         |                                           |        |        |      |      |
|---------|---------|---------|-------------------------------------------|--------|--------|------|------|
| 6333349 | 7199369 | 1374228 | integrator complex subunit 12             | Ints12 | 295448 | 2,07 | down |
| 6468051 | 7199369 | 1374227 | integrator complex subunit 12             | Ints12 | 295448 | 1,74 | up   |
| 6616503 | 7199369 | 1374229 | integrator complex subunit 12             | Ints12 | 295448 | 1,63 | down |
| 6712444 | 7199369 | 1374232 | integrator complex subunit 12             | Ints12 | 295448 | 1,49 | down |
| 6463379 | 7199369 | 1374230 | integrator complex subunit 12             | Ints12 | 295448 | 1,05 | up   |
| 6424729 | 7199369 | 1374232 | integrator complex subunit 12             | Ints12 | 295448 | 1,02 | down |
| 6652106 | 7139026 | 1223512 | integrator complex subunit 6              | Ints6  | 361057 | 1,74 | down |
| 5943286 | 7139026 | 1223520 | integrator complex subunit 6              | Ints6  | 361057 | 1,61 | up   |
| 6053785 | 7139026 | 1223510 | integrator complex subunit 6              | Ints6  | 361057 | 1,37 | down |
| 6292591 | 7139026 | 1223516 | integrator complex subunit 6              | Ints6  | 361057 | 1,23 | down |
| 6098652 | 7139026 | 1223509 | integrator complex subunit 6              | Ints6  | 361057 | 1,20 | up   |
| 6161750 | 7139026 | 1223517 | integrator complex subunit 6              | Ints6  | 361057 | 1,18 | up   |
| 6264397 | 7139026 | 1223513 | integrator complex subunit 6              | Ints6  | 361057 | 1,15 | down |
| 5789129 | 7139026 | 1223514 | integrator complex subunit 6              | Ints6  | 361057 | 1,08 | down |
| 6418461 | 7139026 | 1223514 | integrator complex subunit 6              | Ints6  | 361057 | 1,01 | up   |
| 6329945 | 7139026 | 1223514 | integrator complex subunit 6              | Ints6  | 361057 | 1,01 | up   |
| 5748215 | 7311937 | 1652001 | integrin alpha 7                          | Itga7  | 81008  | 2,61 | up   |
| 6091867 | 7311937 | 1652007 | integrin alpha 7                          | Itga7  | 81008  | 1,98 | down |
| 6562415 | 7311937 | 1651990 | integrin alpha 7                          | Itga7  | 81008  | 1,89 | up   |
| 6057013 | 7311937 | 1651991 | integrin alpha 7                          | Itga7  | 81008  | 1,69 | up   |
| 5972950 | 7311937 | 1652010 | integrin alpha 7                          | Itga7  | 81008  | 1,62 | up   |
| 6466763 | 7311937 | 1651999 | integrin alpha 7                          | Itga7  | 81008  | 1,48 | down |
| 6213788 | 7311937 | 1651997 | integrin alpha 7                          | Itga7  | 81008  | 1,46 | up   |
| 5875492 | 7311937 | 1652008 | integrin alpha 7                          | Itga7  | 81008  | 1,43 | up   |
| 6248388 | 7311937 | 1651985 | integrin alpha 7                          | Itga7  | 81008  | 1,38 | down |
| 6314880 | 7311937 | 1652011 | integrin alpha 7                          | Itga7  | 81008  | 1,36 | down |
| 5778960 | 7311937 | 1651996 | integrin alpha 7                          | Itga7  | 81008  | 1,32 | down |
| 5943041 | 7311937 | 1652010 | integrin alpha 7                          | Itga7  | 81008  | 1,26 | down |
| 5771722 | 7311937 | 1651994 | integrin alpha 7                          | Itga7  | 81008  | 1,25 | up   |
| 5936914 | 7311937 | 1651986 | integrin alpha 7                          | Itga7  | 81008  | 1,24 | up   |
| 6583449 | 7311937 | 1651988 | integrin alpha 7                          | Itga7  | 81008  | 1,20 | up   |
| 6650702 | 7311937 | 1652002 | integrin alpha 7                          | Itga7  | 81008  | 1,17 | up   |
| 6526730 | 7311937 | 1652003 | integrin alpha 7                          | Itga7  | 81008  | 1,16 | up   |
| 6348855 | 7311937 | 1651987 | integrin alpha 7                          | Itga7  | 81008  | 1,16 | down |
| 5899743 | 7311937 | 1652005 | integrin alpha 7                          | Itga7  | 81008  | 1,15 | up   |
| 6599599 | 7311937 | 1651989 | integrin alpha 7                          | Itga7  | 81008  | 1,12 | up   |
| 6134559 | 7311937 | 1651998 | integrin alpha 7                          | Itga7  | 81008  | 1,10 | up   |
| 6602034 | 7311937 | 1651993 | integrin alpha 7                          | Itga7  | 81008  | 1,09 | up   |
| 5705979 | 7311937 | 1651995 | integrin alpha 7                          | Itga7  | 81008  | 1,08 | down |
| 6027122 | 7311937 | 1651985 | integrin alpha 7                          | Itga7  | 81008  | 1,05 | up   |
| 6642392 | 7311937 | 1652000 | integrin alpha 7                          | Itga7  | 81008  | 1,05 | down |
| 5877289 | 7311937 | 1651992 | integrin alpha 7                          | Itga7  | 81008  | 1,04 | up   |
| 6592260 | 7311937 | 1652009 | integrin alpha 7                          | Itga7  | 81008  | 1,04 | up   |
| 5767798 | 7311937 | 1652011 | integrin alpha 7                          | Itga7  | 81008  | 1,03 | down |
| 6230037 | 7311937 | 1652004 | integrin alpha 7                          | Itga7  | 81008  | 1,03 | down |
| 6503812 | 7311937 | 1652006 | integrin alpha 7                          | Itga7  | 81008  | 1,02 | down |
| 6697990 | 7269918 | 1546938 | integrin alpha FG-GAP repeat containing 2 | Itfg2  | 362441 | 1,41 | down |
| 6585511 | 7269918 | 1546935 | integrin alpha FG-GAP repeat containing 2 | Itfg2  | 362441 | 1,37 | up   |
| 6050733 | 7269918 | 1546948 | integrin alpha FG-GAP repeat containing 2 | Itfg2  | 362441 | 1,34 | up   |
| 6131825 | 7269918 | 1546939 | integrin alpha FG-GAP repeat containing 2 | Itfg2  | 362441 | 1,34 | down |
| 5681201 | 7269918 | 1546944 | integrin alpha FG-GAP repeat containing 2 | Itfg2  | 362441 | 1,34 | up   |
| 5802561 | 7269918 | 1546936 | integrin alpha FG-GAP repeat containing 2 | Itfg2  | 362441 | 1,29 | up   |
| 6277323 | 7269918 | 1546946 | integrin alpha FG-GAP repeat containing 2 | Itfg2  | 362441 | 1,28 | down |
| 6217430 | 7269918 | 1546941 | integrin alpha FG-GAP repeat containing 2 | Itfg2  | 362441 | 1,22 | down |
| 6470525 | 7269918 | 1546942 | integrin alpha FG-GAP repeat containing 2 | Itfg2  | 362441 | 1,19 | down |
| 6201484 | 7269918 | 1546945 | integrin alpha FG-GAP repeat containing 2 | Itfg2  | 362441 | 1,19 | up   |
| 6607828 | 7269918 | 1546936 | integrin alpha FG-GAP repeat containing 2 | Itfg2  | 362441 | 1,17 | down |

|         |         |         |                                           |       |        |      |      |
|---------|---------|---------|-------------------------------------------|-------|--------|------|------|
| 6196295 | 7269918 | 1546947 | integrin alpha FG-GAP repeat containing 2 | Itfg2 | 362441 | 1,15 | down |
| 6128250 | 7269918 | 1546937 | integrin alpha FG-GAP repeat containing 2 | Itfg2 | 362441 | 1,15 | up   |
| 6345319 | 7269918 | 1546940 | integrin alpha FG-GAP repeat containing 2 | Itfg2 | 362441 | 1,05 | down |
| 5675560 | 7073691 | 1065223 | integrin beta 4                           | Itgb4 | 25724  | 2,21 | down |
| 6149365 | 7073691 | 1065239 | integrin beta 4                           | Itgb4 | 25724  | 2,20 | down |
| 5860928 | 7073691 | 1065245 | integrin beta 4                           | Itgb4 | 25724  | 2,04 | up   |
| 6717352 | 7073691 | 1065254 | integrin beta 4                           | Itgb4 | 25724  | 1,96 | down |
| 6548262 | 7073691 | 1065240 | integrin beta 4                           | Itgb4 | 25724  | 1,55 | up   |
| 6325278 | 7073691 | 1065218 | integrin beta 4                           | Itgb4 | 25724  | 1,49 | down |
| 6507561 | 7073691 | 1065219 | integrin beta 4                           | Itgb4 | 25724  | 1,41 | down |
| 6604280 | 7073691 | 1065249 | integrin beta 4                           | Itgb4 | 25724  | 1,37 | down |
| 5661534 | 7073691 | 1065230 | integrin beta 4                           | Itgb4 | 25724  | 1,33 | up   |
| 6263599 | 7073691 | 1065228 | integrin beta 4                           | Itgb4 | 25724  | 1,31 | up   |
| 6159076 | 7073691 | 1065241 | integrin beta 4                           | Itgb4 | 25724  | 1,31 | up   |
| 6005867 | 7073691 | 1065248 | integrin beta 4                           | Itgb4 | 25724  | 1,31 | up   |
| 6041836 | 7073691 | 1065224 | integrin beta 4                           | Itgb4 | 25724  | 1,30 | down |
| 6612976 | 7073691 | 1065233 | integrin beta 4                           | Itgb4 | 25724  | 1,28 | up   |
| 6017012 | 7073691 | 1065222 | integrin beta 4                           | Itgb4 | 25724  | 1,22 | up   |
| 6257764 | 7073691 | 1065244 | integrin beta 4                           | Itgb4 | 25724  | 1,22 | down |
| 6284505 | 7073691 | 1065251 | integrin beta 4                           | Itgb4 | 25724  | 1,19 | down |
| 6154943 | 7073691 | 1065231 | integrin beta 4                           | Itgb4 | 25724  | 1,18 | down |
| 5869597 | 7073691 | 1065234 | integrin beta 4                           | Itgb4 | 25724  | 1,18 | up   |
| 6593975 | 7073691 | 1065232 | integrin beta 4                           | Itgb4 | 25724  | 1,15 | down |
| 6318739 | 7073691 | 1065229 | integrin beta 4                           | Itgb4 | 25724  | 1,15 | up   |
| 6198100 | 7073691 | 1065226 | integrin beta 4                           | Itgb4 | 25724  | 1,14 | up   |
| 6665402 | 7073691 | 1065221 | integrin beta 4                           | Itgb4 | 25724  | 1,14 | down |
| 6674058 | 7073691 | 1065237 | integrin beta 4                           | Itgb4 | 25724  | 1,12 | up   |
| 5808148 | 7073691 | 1065253 | integrin beta 4                           | Itgb4 | 25724  | 1,12 | up   |
| 6681998 | 7073691 | 1065220 | integrin beta 4                           | Itgb4 | 25724  | 1,10 | up   |
| 5704564 | 7073691 | 1065246 | integrin beta 4                           | Itgb4 | 25724  | 1,10 | up   |
| 6503457 | 7073691 | 1065238 | integrin beta 4                           | Itgb4 | 25724  | 1,08 | up   |
| 6051643 | 7073691 | 1065217 | integrin beta 4                           | Itgb4 | 25724  | 1,07 | down |
| 6511677 | 7073691 | 1065250 | integrin beta 4                           | Itgb4 | 25724  | 1,07 | down |
| 6398383 | 7073691 | 1065243 | integrin beta 4                           | Itgb4 | 25724  | 1,07 | down |
| 6614126 | 7073691 | 1065235 | integrin beta 4                           | Itgb4 | 25724  | 1,06 | up   |
| 5981083 | 7073691 | 1065227 | integrin beta 4                           | Itgb4 | 25724  | 1,05 | down |
| 5833131 | 7073691 | 1065236 | integrin beta 4                           | Itgb4 | 25724  | 1,05 | up   |
| 6089132 | 7073691 | 1065225 | integrin beta 4                           | Itgb4 | 25724  | 1,04 | up   |
| 5631726 | 7073691 | 1065242 | integrin beta 4                           | Itgb4 | 25724  | 1,03 | up   |
| 5788922 | 7073691 | 1065255 | integrin beta 4                           | Itgb4 | 25724  | 1,02 | up   |
| 5650295 | 7073691 | 1065247 | integrin beta 4                           | Itgb4 | 25724  | 1,01 | up   |
| 5956303 | 7073691 | 1065252 | integrin beta 4                           | Itgb4 | 25724  | 1,00 | down |
| 6235600 | 7311391 | 1650852 | integrin beta 8                           | Itgb8 | 362800 | 2,19 | down |
| 5676830 | 7311391 | 1650863 | integrin beta 8                           | Itgb8 | 362800 | 1,75 | up   |
| 6208884 | 7311391 | 1650855 | integrin beta 8                           | Itgb8 | 362800 | 1,34 | down |
| 6401882 | 7311391 | 1650851 | integrin beta 8                           | Itgb8 | 362800 | 1,31 | down |
| 6105177 | 7311391 | 1650858 | integrin beta 8                           | Itgb8 | 362800 | 1,23 | down |
| 5725621 | 7311391 | 1650863 | integrin beta 8                           | Itgb8 | 362800 | 1,17 | down |
| 6623207 | 7311391 | 1650854 | integrin beta 8                           | Itgb8 | 362800 | 1,16 | down |
| 5808857 | 7311391 | 1650872 | integrin beta 8                           | Itgb8 | 362800 | 1,15 | down |
| 6016509 | 7311391 | 1650861 | integrin beta 8                           | Itgb8 | 362800 | 1,14 | up   |
| 6483818 | 7311391 | 1650872 | integrin beta 8                           | Itgb8 | 362800 | 1,13 | up   |
| 5968451 | 7311391 | 1650862 | integrin beta 8                           | Itgb8 | 362800 | 1,08 | down |
| 6148154 | 7311391 | 1650872 | integrin beta 8                           | Itgb8 | 362800 | 1,07 | up   |
| 6744618 | 7311391 | 1650860 | integrin beta 8                           | Itgb8 | 362800 | 1,06 | down |
| 5631819 | 7311391 | 1650853 | integrin beta 8                           | Itgb8 | 362800 | 1,00 | up   |
| 6577478 | 7311391 | 1650859 | integrin beta 8                           | Itgb8 | 362800 | 1,00 | down |

|         |         |         |                    |        |        |      |      |
|---------|---------|---------|--------------------|--------|--------|------|------|
| 6426718 | 7197138 | 1368011 | integrin, alpha 10 | Itga10 | 310683 | 2,22 | down |
| 6602126 | 7197138 | 1368000 | integrin, alpha 10 | Itga10 | 310683 | 2,14 | up   |
| 6573301 | 7197138 | 1368005 | integrin, alpha 10 | Itga10 | 310683 | 1,56 | up   |
| 6511200 | 7197138 | 1368008 | integrin, alpha 10 | Itga10 | 310683 | 1,34 | up   |
| 6374786 | 7197138 | 1368009 | integrin, alpha 10 | Itga10 | 310683 | 1,29 | up   |
| 5929462 | 7197138 | 1368012 | integrin, alpha 10 | Itga10 | 310683 | 1,21 | up   |
| 6270405 | 7197138 | 1368007 | integrin, alpha 10 | Itga10 | 310683 | 1,20 | up   |
| 6291149 | 7197138 | 1368002 | integrin, alpha 10 | Itga10 | 310683 | 1,15 | down |
| 5663797 | 7197138 | 1368003 | integrin, alpha 10 | Itga10 | 310683 | 1,15 | up   |
| 5724439 | 7197138 | 1368006 | integrin, alpha 10 | Itga10 | 310683 | 1,10 | down |
| 5750520 | 7197138 | 1368004 | integrin, alpha 10 | Itga10 | 310683 | 1,10 | down |
| 6141677 | 7197138 | 1368004 | integrin, alpha 10 | Itga10 | 310683 | 1,08 | up   |
| 6528288 | 7197138 | 1368010 | integrin, alpha 10 | Itga10 | 310683 | 1,08 | down |
| 6696335 | 7197138 | 1368005 | integrin, alpha 10 | Itga10 | 310683 | 1,05 | down |
| 6688929 | 7197138 | 1368001 | integrin, alpha 10 | Itga10 | 310683 | 1,02 | down |
| 5903480 | 7197138 | 1368010 | integrin, alpha 10 | Itga10 | 310683 | 1,01 | up   |
| 6528381 | 7037222 | 978520  | integrin, alpha D  | Itgad  | 64350  | 3,18 | down |
| 6170425 | 7037222 | 978546  | integrin, alpha D  | Itgad  | 64350  | 2,29 | up   |
| 6039750 | 7037222 | 978527  | integrin, alpha D  | Itgad  | 64350  | 1,83 | down |
| 5751049 | 7037222 | 978537  | integrin, alpha D  | Itgad  | 64350  | 1,75 | down |
| 5695765 | 7037222 | 978532  | integrin, alpha D  | Itgad  | 64350  | 1,68 | down |
| 6363552 | 7037222 | 978521  | integrin, alpha D  | Itgad  | 64350  | 1,52 | up   |
| 5777765 | 7037222 | 978534  | integrin, alpha D  | Itgad  | 64350  | 1,46 | up   |
| 5684714 | 7037222 | 978533  | integrin, alpha D  | Itgad  | 64350  | 1,40 | up   |
| 6307956 | 7037222 | 978523  | integrin, alpha D  | Itgad  | 64350  | 1,39 | up   |
| 5735515 | 7037222 | 978544  | integrin, alpha D  | Itgad  | 64350  | 1,32 | up   |
| 6370353 | 7037222 | 978542  | integrin, alpha D  | Itgad  | 64350  | 1,32 | down |
| 6704474 | 7037222 | 978540  | integrin, alpha D  | Itgad  | 64350  | 1,30 | down |
| 6464717 | 7037222 | 978532  | integrin, alpha D  | Itgad  | 64350  | 1,29 | down |
| 6613639 | 7037222 | 978525  | integrin, alpha D  | Itgad  | 64350  | 1,23 | up   |
| 6563830 | 7037222 | 978548  | integrin, alpha D  | Itgad  | 64350  | 1,20 | up   |
| 6527680 | 7037222 | 978549  | integrin, alpha D  | Itgad  | 64350  | 1,20 | down |
| 6024871 | 7037222 | 978526  | integrin, alpha D  | Itgad  | 64350  | 1,18 | up   |
| 6301618 | 7037222 | 978522  | integrin, alpha D  | Itgad  | 64350  | 1,16 | up   |
| 6310172 | 7037222 | 978536  | integrin, alpha D  | Itgad  | 64350  | 1,16 | down |
| 6716130 | 7037222 | 978530  | integrin, alpha D  | Itgad  | 64350  | 1,15 | down |
| 6428995 | 7037222 | 978527  | integrin, alpha D  | Itgad  | 64350  | 1,13 | up   |
| 5649822 | 7037222 | 978528  | integrin, alpha D  | Itgad  | 64350  | 1,13 | down |
| 5780617 | 7037222 | 978541  | integrin, alpha D  | Itgad  | 64350  | 1,13 | down |
| 6545740 | 7037222 | 978524  | integrin, alpha D  | Itgad  | 64350  | 1,11 | up   |
| 5820243 | 7037222 | 978545  | integrin, alpha D  | Itgad  | 64350  | 1,08 | down |
| 6630265 | 7037222 | 978539  | integrin, alpha D  | Itgad  | 64350  | 1,08 | up   |
| 6244156 | 7037222 | 978549  | integrin, alpha D  | Itgad  | 64350  | 1,06 | up   |
| 6294261 | 7037222 | 978538  | integrin, alpha D  | Itgad  | 64350  | 1,06 | up   |
| 6401503 | 7037222 | 978529  | integrin, alpha D  | Itgad  | 64350  | 1,05 | up   |
| 6726194 | 7037222 | 978535  | integrin, alpha D  | Itgad  | 64350  | 1,03 | up   |
| 6354443 | 7037222 | 978547  | integrin, alpha D  | Itgad  | 64350  | 1,03 | down |
| 6168056 | 7037222 | 978543  | integrin, alpha D  | Itgad  | 64350  | 1,03 | down |
| 6125734 | 7037222 | 978531  | integrin, alpha D  | Itgad  | 64350  | 1,02 | up   |
| 6677843 | 7037222 | 978527  | integrin, alpha D  | Itgad  | 64350  | 1,02 | up   |
| 6487494 | 7037222 | 978537  | integrin, alpha D  | Itgad  | 64350  | 1,00 | down |
| 6433583 | 7239369 | 1472205 | integrin, beta 6   | Itgb6  | 311061 | 2,89 | down |
| 6140412 | 7239369 | 1472217 | integrin, beta 6   | Itgb6  | 311061 | 1,49 | down |
| 6106032 | 7239369 | 1472209 | integrin, beta 6   | Itgb6  | 311061 | 1,39 | up   |
| 6373149 | 7239369 | 1472207 | integrin, beta 6   | Itgb6  | 311061 | 1,35 | down |
| 6078712 | 7239369 | 1472209 | integrin, beta 6   | Itgb6  | 311061 | 1,34 | up   |
| 6167055 | 7239369 | 1472208 | integrin, beta 6   | Itgb6  | 311061 | 1,26 | up   |

|         |         |         |                                                     |         |        |      |      |
|---------|---------|---------|-----------------------------------------------------|---------|--------|------|------|
| 6702902 | 7239369 | 1472218 | integrin, beta 6                                    | Itgb6   | 311061 | 1,24 | up   |
| 6671338 | 7239369 | 1472219 | integrin, beta 6                                    | Itgb6   | 311061 | 1,19 | up   |
| 6000214 | 7239369 | 1472210 | integrin, beta 6                                    | Itgb6   | 311061 | 1,14 | down |
| 6179662 | 7239369 | 1472217 | integrin, beta 6                                    | Itgb6   | 311061 | 1,14 | down |
| 6464030 | 7239369 | 1472211 | integrin, beta 6                                    | Itgb6   | 311061 | 1,11 | down |
| 5769483 | 7239369 | 1472213 | integrin, beta 6                                    | Itgb6   | 311061 | 1,10 | down |
| 5729425 | 7239369 | 1472214 | integrin, beta 6                                    | Itgb6   | 311061 | 1,06 | down |
| 5908590 | 7239369 | 1472212 | integrin, beta 6                                    | Itgb6   | 311061 | 1,02 | up   |
| 6645708 | 7239369 | 1472216 | integrin, beta 6                                    | Itgb6   | 311061 | 1,02 | up   |
| 5765638 | 7239369 | 1472215 | integrin, beta 6                                    | Itgb6   | 311061 | 1,02 | down |
| 6195577 | 7239369 | 1472206 | integrin, beta 6                                    | Itgb6   | 311061 | 1,01 | up   |
| 6146668 | 7045955 | 1000749 | interactor protein for cytohesin exchange factors 1 | Ipcef1  | 361474 | 5,49 | up   |
| 6491124 | 7045955 | 1000737 | interactor protein for cytohesin exchange factors 1 | Ipcef1  | 361474 | 5,15 | down |
| 6321260 | 7045955 | 1000754 | interactor protein for cytohesin exchange factors 1 | Ipcef1  | 361474 | 4,84 | down |
| 6504211 | 7045955 | 1000754 | interactor protein for cytohesin exchange factors 1 | Ipcef1  | 361474 | 4,80 | down |
| 6066641 | 7045955 | 1000740 | interactor protein for cytohesin exchange factors 1 | Ipcef1  | 361474 | 3,92 | up   |
| 5810668 | 7045955 | 1000736 | interactor protein for cytohesin exchange factors 1 | Ipcef1  | 361474 | 2,96 | up   |
| 6194989 | 7045955 | 1000748 | interactor protein for cytohesin exchange factors 1 | Ipcef1  | 361474 | 2,92 | up   |
| 6011612 | 7045955 | 1000737 | interactor protein for cytohesin exchange factors 1 | Ipcef1  | 361474 | 2,84 | up   |
| 5903140 | 7045955 | 1000747 | interactor protein for cytohesin exchange factors 1 | Ipcef1  | 361474 | 2,75 | up   |
| 5886652 | 7045955 | 1000740 | interactor protein for cytohesin exchange factors 1 | Ipcef1  | 361474 | 2,42 | up   |
| 5908286 | 7045955 | 1000736 | interactor protein for cytohesin exchange factors 1 | Ipcef1  | 361474 | 2,19 | down |
| 6604684 | 7045955 | 1000752 | interactor protein for cytohesin exchange factors 1 | Ipcef1  | 361474 | 2,10 | down |
| 6613630 | 7045955 | 1000736 | interactor protein for cytohesin exchange factors 1 | Ipcef1  | 361474 | 1,46 | up   |
| 5983216 | 7045955 | 1000745 | interactor protein for cytohesin exchange factors 1 | Ipcef1  | 361474 | 1,38 | up   |
| 6269323 | 7045955 | 1000736 | interactor protein for cytohesin exchange factors 1 | Ipcef1  | 361474 | 1,38 | up   |
| 6064524 | 7333460 | 1703632 | intercellular adhesion molecule 1                   | Icam1   | 25464  | 5,83 | up   |
| 6663738 | 7333460 | 1703624 | intercellular adhesion molecule 1                   | Icam1   | 25464  | 4,75 | down |
| 6472158 | 7333460 | 1703625 | intercellular adhesion molecule 1                   | Icam1   | 25464  | 1,79 | down |
| 6105288 | 7333460 | 1703631 | intercellular adhesion molecule 1                   | Icam1   | 25464  | 1,41 | down |
| 6137107 | 7333460 | 1703626 | intercellular adhesion molecule 1                   | Icam1   | 25464  | 1,40 | up   |
| 5640225 | 7333460 | 1703633 | intercellular adhesion molecule 1                   | Icam1   | 25464  | 1,32 | down |
| 6465284 | 7333460 | 1703630 | intercellular adhesion molecule 1                   | Icam1   | 25464  | 1,19 | up   |
| 5757177 | 7333460 | 1703627 | intercellular adhesion molecule 1                   | Icam1   | 25464  | 1,18 | up   |
| 5837747 | 7333460 | 1703628 | intercellular adhesion molecule 1                   | Icam1   | 25464  | 1,07 | down |
| 5646659 | 7333460 | 1703629 | intercellular adhesion molecule 1                   | Icam1   | 25464  | 1,06 | down |
| 6530440 | 7333460 | 1703626 | intercellular adhesion molecule 1                   | Icam1   | 25464  | 1,03 | down |
| 6244516 | 7067089 | 1048924 | interferon gamma inducible protein 47               | Ifi47   | 246208 | 4,53 | down |
| 5790369 | 7067089 | 1048925 | interferon gamma inducible protein 47               | Ifi47   | 246208 | 1,56 | up   |
| 5975949 | 7067089 | 1048926 | interferon gamma inducible protein 47               | Ifi47   | 246208 | 1,18 | up   |
| 6681560 | 7067089 | 1048925 | interferon gamma inducible protein 47               | Ifi47   | 246208 | 1,17 | up   |
| 5966964 | 7067089 | 1048925 | interferon gamma inducible protein 47               | Ifi47   | 246208 | 1,05 | down |
| 6117081 | 7252058 | 1502548 | interferon regulatory factor 5                      | Irf5    | 296953 | 2,36 | up   |
| 6194436 | 7252058 | 1502550 | interferon regulatory factor 5                      | Irf5    | 296953 | 1,71 | up   |
| 6563077 | 7252058 | 1502553 | interferon regulatory factor 5                      | Irf5    | 296953 | 1,64 | up   |
| 5705712 | 7252058 | 1502549 | interferon regulatory factor 5                      | Irf5    | 296953 | 1,59 | down |
| 6551031 | 7252058 | 1502549 | interferon regulatory factor 5                      | Irf5    | 296953 | 1,57 | down |
| 6396370 | 7252058 | 1502542 | interferon regulatory factor 5                      | Irf5    | 296953 | 1,45 | down |
| 6572819 | 7252058 | 1502546 | interferon regulatory factor 5                      | Irf5    | 296953 | 1,42 | up   |
| 6544721 | 7252058 | 1502551 | interferon regulatory factor 5                      | Irf5    | 296953 | 1,40 | up   |
| 5699698 | 7252058 | 1502547 | interferon regulatory factor 5                      | Irf5    | 296953 | 1,30 | down |
| 6674607 | 7252058 | 1502545 | interferon regulatory factor 5                      | Irf5    | 296953 | 1,14 | down |
| 6540116 | 7252058 | 1502552 | interferon regulatory factor 5                      | Irf5    | 296953 | 1,12 | up   |
| 6228446 | 7252058 | 1502549 | interferon regulatory factor 5                      | Irf5    | 296953 | 1,09 | down |
| 6664708 | 7195998 | 1365553 | interferon stimulated exonuclease gene 20-like 2    | Isg20l2 | 361977 | 2,00 | up   |
| 6672054 | 7195998 | 1365552 | interferon stimulated exonuclease gene 20-like 2    | Isg20l2 | 361977 | 1,24 | down |
| 6123258 | 7195998 | 1365551 | interferon stimulated exonuclease gene 20-like 2    | Isg20l2 | 361977 | 1,09 | up   |

|         |         |         |                                                             |         |        |      |      |
|---------|---------|---------|-------------------------------------------------------------|---------|--------|------|------|
| 6470164 | 7195998 | 1365551 | interferon stimulated exonuclease gene 20-like 2            | Isg20l2 | 361977 | 1,01 | down |
| 5653623 | 7293880 | 1605898 | interferon, alpha-inducible protein (clone IFI-15K)         | G1p2    | 298693 | 2,72 | down |
| 6665757 | 7293880 | 1605898 | interferon, alpha-inducible protein (clone IFI-15K)         | G1p2    | 298693 | 2,55 | up   |
| 5849956 | 7293880 | 1605899 | interferon, alpha-inducible protein (clone IFI-15K)         | G1p2    | 298693 | 1,01 | up   |
| 6740143 | 7215722 | 1412260 | interferon-induced protein 44                               | Ifi44   | 310969 | 2,84 | down |
| 5868049 | 7215722 | 1412263 | interferon-induced protein 44                               | Ifi44   | 310969 | 2,62 | up   |
| 6468757 | 7215722 | 1412270 | interferon-induced protein 44                               | Ifi44   | 310969 | 2,48 | down |
| 6731623 | 7215722 | 1412269 | interferon-induced protein 44                               | Ifi44   | 310969 | 2,32 | up   |
| 5864289 | 7215722 | 1412269 | interferon-induced protein 44                               | Ifi44   | 310969 | 2,20 | up   |
| 6184026 | 7215722 | 1412268 | interferon-induced protein 44                               | Ifi44   | 310969 | 1,77 | up   |
| 6097166 | 7215722 | 1412270 | interferon-induced protein 44                               | Ifi44   | 310969 | 1,66 | down |
| 5963580 | 7215722 | 1412260 | interferon-induced protein 44                               | Ifi44   | 310969 | 1,58 | down |
| 5747588 | 7215722 | 1412269 | interferon-induced protein 44                               | Ifi44   | 310969 | 1,56 | up   |
| 5842249 | 7215722 | 1412264 | interferon-induced protein 44                               | Ifi44   | 310969 | 1,39 | up   |
| 5679435 | 7215722 | 1412260 | interferon-induced protein 44                               | Ifi44   | 310969 | 1,30 | down |
| 6377285 | 7215722 | 1412269 | interferon-induced protein 44                               | Ifi44   | 310969 | 1,25 | up   |
| 6545369 | 7215722 | 1412260 | interferon-induced protein 44                               | Ifi44   | 310969 | 1,17 | up   |
| 6234758 | 7215722 | 1412267 | interferon-induced protein 44                               | Ifi44   | 310969 | 1,12 | down |
| 6586895 | 7215722 | 1412262 | interferon-induced protein 44                               | Ifi44   | 310969 | 1,06 | up   |
| 6513850 | 7215722 | 1412261 | interferon-induced protein 44                               | Ifi44   | 310969 | 1,05 | down |
| 5967365 | 7041465 | 989112  | interferon-induced protein with tetratricopeptide repeats 2 | Ifit2   | 294091 | 2,06 | up   |
| 6336777 | 7041465 | 989111  | interferon-induced protein with tetratricopeptide repeats 2 | Ifit2   | 294091 | 1,52 | down |
| 5856184 | 7041465 | 989111  | interferon-induced protein with tetratricopeptide repeats 2 | Ifit2   | 294091 | 1,34 | down |
| 6323553 | 7041465 | 989112  | interferon-induced protein with tetratricopeptide repeats 2 | Ifit2   | 294091 | 1,01 | down |
| 6708341 | 7225120 | 1434941 | interleukin 1 receptor antagonist                           | Il1rn   | 60582  | 2,00 | down |
| 6430755 | 7225120 | 1434943 | interleukin 1 receptor antagonist                           | Il1rn   | 60582  | 1,56 | up   |
| 6068845 | 7225120 | 1434944 | interleukin 1 receptor antagonist                           | Il1rn   | 60582  | 1,43 | up   |
| 5926980 | 7225120 | 1434944 | interleukin 1 receptor antagonist                           | Il1rn   | 60582  | 1,35 | up   |
| 5802796 | 7225120 | 1434942 | interleukin 1 receptor antagonist                           | Il1rn   | 60582  | 1,33 | down |
| 6339254 | 7225120 | 1434941 | interleukin 1 receptor antagonist                           | Il1rn   | 60582  | 1,14 | up   |
| 6635308 | 7066739 | 1047992 | interleukin 12b                                             | Il12b   | 64546  | 2,97 | up   |
| 5823615 | 7066739 | 1047994 | interleukin 12b                                             | Il12b   | 64546  | 1,55 | down |
| 5654353 | 7066739 | 1047991 | interleukin 12b                                             | Il12b   | 64546  | 1,49 | down |
| 6624591 | 7066739 | 1047993 | interleukin 12b                                             | Il12b   | 64546  | 1,22 | down |
| 6505784 | 7066739 | 1047995 | interleukin 12b                                             | Il12b   | 64546  | 1,19 | up   |
| 6714978 | 7066739 | 1047990 | interleukin 12b                                             | Il12b   | 64546  | 1,00 | up   |
| 6608886 | 7180064 | 1325054 | interleukin 15                                              | Il15    | 25670  | 3,40 | down |
| 6619104 | 7180064 | 1325045 | interleukin 15                                              | Il15    | 25670  | 3,12 | down |
| 5648320 | 7180064 | 1325051 | interleukin 15                                              | Il15    | 25670  | 2,54 | down |
| 6745272 | 7180064 | 1325049 | interleukin 15                                              | Il15    | 25670  | 1,59 | up   |
| 5858117 | 7180064 | 1325053 | interleukin 15                                              | Il15    | 25670  | 1,56 | down |
| 6252968 | 7180064 | 1325047 | interleukin 15                                              | Il15    | 25670  | 1,52 | down |
| 6346734 | 7180064 | 1325050 | interleukin 15                                              | Il15    | 25670  | 1,52 | up   |
| 6214446 | 7180064 | 1325050 | interleukin 15                                              | Il15    | 25670  | 1,42 | up   |
| 5856391 | 7180064 | 1325052 | interleukin 15                                              | Il15    | 25670  | 1,16 | up   |
| 6170178 | 7180064 | 1325048 | interleukin 15                                              | Il15    | 25670  | 1,11 | up   |
| 6373298 | 7180064 | 1325046 | interleukin 15                                              | Il15    | 25670  | 1,09 | up   |
| 5877860 | 7180064 | 1325052 | interleukin 15                                              | Il15    | 25670  | 1,06 | down |
| 5857595 | 7257976 | 1517704 | interleukin 17 receptor A                                   | Il17ra  | 312679 | 1,79 | up   |
| 5984304 | 7257976 | 1517697 | interleukin 17 receptor A                                   | Il17ra  | 312679 | 1,79 | down |
| 6344930 | 7257976 | 1517707 | interleukin 17 receptor A                                   | Il17ra  | 312679 | 1,50 | up   |
| 6373251 | 7257976 | 1517710 | interleukin 17 receptor A                                   | Il17ra  | 312679 | 1,43 | up   |
| 6538807 | 7257976 | 1517698 | interleukin 17 receptor A                                   | Il17ra  | 312679 | 1,41 | up   |
| 6183635 | 7257976 | 1517709 | interleukin 17 receptor A                                   | Il17ra  | 312679 | 1,35 | up   |
| 6323077 | 7257976 | 1517701 | interleukin 17 receptor A                                   | Il17ra  | 312679 | 1,31 | up   |
| 6576094 | 7257976 | 1517702 | interleukin 17 receptor A                                   | Il17ra  | 312679 | 1,24 | up   |
| 6122011 | 7257976 | 1517700 | interleukin 17 receptor A                                   | Il17ra  | 312679 | 1,15 | up   |



|         |         |         |                                 |        |        |      |      |
|---------|---------|---------|---------------------------------|--------|--------|------|------|
| 6674997 | 7257976 | 1517699 | interleukin 17 receptor A       | Il17ra | 312679 | 1,13 | up   |
| 6252032 | 7257976 | 1517703 | interleukin 17 receptor A       | Il17ra | 312679 | 1,10 | up   |
| 6274953 | 7257976 | 1517708 | interleukin 17 receptor A       | Il17ra | 312679 | 1,09 | up   |
| 5783347 | 7257404 | 1516178 | interleukin 17 receptor E       | Il17re | 362417 | 2,86 | down |
| 6140258 | 7257404 | 1516169 | interleukin 17 receptor E       | Il17re | 362417 | 1,92 | up   |
| 6162434 | 7257404 | 1516178 | interleukin 17 receptor E       | Il17re | 362417 | 1,36 | down |
| 6508470 | 7257404 | 1516178 | interleukin 17 receptor E       | Il17re | 362417 | 1,32 | up   |
| 5845755 | 7257404 | 1516167 | interleukin 17 receptor E       | Il17re | 362417 | 1,30 | down |
| 6422950 | 7257404 | 1516177 | interleukin 17 receptor E       | Il17re | 362417 | 1,28 | down |
| 6260339 | 7257404 | 1516178 | interleukin 17 receptor E       | Il17re | 362417 | 1,19 | up   |
| 6100662 | 7257404 | 1516171 | interleukin 17 receptor E       | Il17re | 362417 | 1,19 | up   |
| 6256895 | 7257404 | 1516168 | interleukin 17 receptor E       | Il17re | 362417 | 1,16 | up   |
| 5971661 | 7257404 | 1516173 | interleukin 17 receptor E       | Il17re | 362417 | 1,15 | up   |
| 6003327 | 7257404 | 1516170 | interleukin 17 receptor E       | Il17re | 362417 | 1,14 | up   |
| 6188851 | 7257404 | 1516167 | interleukin 17 receptor E       | Il17re | 362417 | 1,12 | up   |
| 6314030 | 7257404 | 1516167 | interleukin 17 receptor E       | Il17re | 362417 | 1,09 | down |
| 6511776 | 7257404 | 1516175 | interleukin 17 receptor E       | Il17re | 362417 | 1,08 | up   |
| 6718656 | 7257404 | 1516176 | interleukin 17 receptor E       | Il17re | 362417 | 1,07 | down |
| 5874328 | 7257404 | 1516174 | interleukin 17 receptor E       | Il17re | 362417 | 1,07 | down |
| 6516065 | 7257404 | 1516172 | interleukin 17 receptor E       | Il17re | 362417 | 1,06 | down |
| 5862082 | 7257404 | 1516166 | interleukin 17 receptor E       | Il17re | 362417 | 1,05 | up   |
| 5847859 | 7257404 | 1516178 | interleukin 17 receptor E       | Il17re | 362417 | 1,05 | up   |
| 5728665 | 7257404 | 1516165 | interleukin 17 receptor E       | Il17re | 362417 | 1,01 | down |
| 5775261 | 7055111 | 1020954 | interleukin 18 binding protein  | Il18bp | 84388  | 4,79 | down |
| 6703233 | 7055111 | 1020958 | interleukin 18 binding protein  | Il18bp | 84388  | 2,45 | down |
| 5996430 | 7055111 | 1020955 | interleukin 18 binding protein  | Il18bp | 84388  | 1,58 | up   |
| 6685678 | 7055111 | 1020956 | interleukin 18 binding protein  | Il18bp | 84388  | 1,53 | up   |
| 6566023 | 7055111 | 1020956 | interleukin 18 binding protein  | Il18bp | 84388  | 1,52 | down |
| 6297372 | 7055111 | 1020957 | interleukin 18 binding protein  | Il18bp | 84388  | 1,40 | up   |
| 6681531 | 7166444 | 1290121 | interleukin 2 receptor, alpha   | Il2ra  | 25704  | 2,88 | down |
| 6481314 | 7166444 | 1290124 | interleukin 2 receptor, alpha   | Il2ra  | 25704  | 1,83 | down |
| 6047949 | 7166444 | 1290127 | interleukin 2 receptor, alpha   | Il2ra  | 25704  | 1,34 | up   |
| 5832908 | 7166444 | 1290126 | interleukin 2 receptor, alpha   | Il2ra  | 25704  | 1,28 | up   |
| 5826665 | 7166444 | 1290121 | interleukin 2 receptor, alpha   | Il2ra  | 25704  | 1,13 | up   |
| 6168108 | 7166444 | 1290122 | interleukin 2 receptor, alpha   | Il2ra  | 25704  | 1,09 | up   |
| 6428891 | 7166444 | 1290125 | interleukin 2 receptor, alpha   | Il2ra  | 25704  | 1,09 | down |
| 6730179 | 7166444 | 1290121 | interleukin 2 receptor, alpha   | Il2ra  | 25704  | 1,03 | down |
| 5885052 | 7166444 | 1290123 | interleukin 2 receptor, alpha   | Il2ra  | 25704  | 1,02 | down |
| 5809342 | 7179914 | 1324710 | interleukin 27 receptor, alpha  | Il27ra | 288905 | 2,26 | up   |
| 6472361 | 7179914 | 1324720 | interleukin 27 receptor, alpha  | Il27ra | 288905 | 2,26 | down |
| 6595485 | 7179914 | 1324710 | interleukin 27 receptor, alpha  | Il27ra | 288905 | 1,40 | down |
| 5826995 | 7179914 | 1324713 | interleukin 27 receptor, alpha  | Il27ra | 288905 | 1,33 | down |
| 6041053 | 7179914 | 1324723 | interleukin 27 receptor, alpha  | Il27ra | 288905 | 1,28 | up   |
| 5866510 | 7179914 | 1324716 | interleukin 27 receptor, alpha  | Il27ra | 288905 | 1,23 | down |
| 5957830 | 7179914 | 1324715 | interleukin 27 receptor, alpha  | Il27ra | 288905 | 1,23 | up   |
| 6251282 | 7179914 | 1324714 | interleukin 27 receptor, alpha  | Il27ra | 288905 | 1,21 | down |
| 6058337 | 7179914 | 1324721 | interleukin 27 receptor, alpha  | Il27ra | 288905 | 1,14 | up   |
| 5683898 | 7179914 | 1324724 | interleukin 27 receptor, alpha  | Il27ra | 288905 | 1,11 | down |
| 5745170 | 7179914 | 1324712 | interleukin 27 receptor, alpha  | Il27ra | 288905 | 1,08 | up   |
| 5908316 | 7179914 | 1324711 | interleukin 27 receptor, alpha  | Il27ra | 288905 | 1,06 | up   |
| 5878066 | 7179914 | 1324724 | interleukin 27 receptor, alpha  | Il27ra | 288905 | 1,04 | down |
| 6109864 | 7179914 | 1324724 | interleukin 27 receptor, alpha  | Il27ra | 288905 | 1,04 | up   |
| 6702858 | 7189647 | 1348938 | interleukin 6 signal transducer | Il6st  | 25205  | 2,37 | up   |
| 6722161 | 7189647 | 1348938 | interleukin 6 signal transducer | Il6st  | 25205  | 1,65 | down |
| 6162016 | 7189647 | 1348941 | interleukin 6 signal transducer | Il6st  | 25205  | 1,57 | down |
| 6408927 | 7189647 | 1348926 | interleukin 6 signal transducer | Il6st  | 25205  | 1,38 | down |
| 5647842 | 7189647 | 1348931 | interleukin 6 signal transducer | Il6st  | 25205  | 1,30 | up   |

|         |         |         |                                            |       |        |      |      |
|---------|---------|---------|--------------------------------------------|-------|--------|------|------|
| 6540336 | 7189647 | 1348940 | interleukin 6 signal transducer            | Il6st | 25205  | 1,29 | down |
| 6234510 | 7189647 | 1348936 | interleukin 6 signal transducer            | Il6st | 25205  | 1,17 | up   |
| 6177351 | 7189647 | 1348934 | interleukin 6 signal transducer            | Il6st | 25205  | 1,16 | down |
| 6154225 | 7189647 | 1348927 | interleukin 6 signal transducer            | Il6st | 25205  | 1,15 | down |
| 5842697 | 7189647 | 1348930 | interleukin 6 signal transducer            | Il6st | 25205  | 1,15 | down |
| 6708480 | 7189647 | 1348940 | interleukin 6 signal transducer            | Il6st | 25205  | 1,11 | down |
| 6544439 | 7189647 | 1348935 | interleukin 6 signal transducer            | Il6st | 25205  | 1,10 | up   |
| 6371690 | 7189647 | 1348929 | interleukin 6 signal transducer            | Il6st | 25205  | 1,09 | up   |
| 6048859 | 7189647 | 1348928 | interleukin 6 signal transducer            | Il6st | 25205  | 1,08 | down |
| 5686537 | 7189647 | 1348937 | interleukin 6 signal transducer            | Il6st | 25205  | 1,04 | down |
| 6733654 | 7189647 | 1348939 | interleukin 6 signal transducer            | Il6st | 25205  | 1,02 | up   |
| 6227855 | 7189647 | 1348932 | interleukin 6 signal transducer            | Il6st | 25205  | 1,02 | down |
| 5883015 | 7189647 | 1348933 | interleukin 6 signal transducer            | Il6st | 25205  | 1,01 | down |
| 5627353 | 7204929 | 1387145 | interleukin 7 receptor                     | Il7r  | 294797 | 1,49 | up   |
| 6432725 | 7204929 | 1387143 | interleukin 7 receptor                     | Il7r  | 294797 | 1,38 | down |
| 6136896 | 7204929 | 1387151 | interleukin 7 receptor                     | Il7r  | 294797 | 1,22 | down |
| 6585751 | 7204929 | 1387146 | interleukin 7 receptor                     | Il7r  | 294797 | 1,17 | up   |
| 6689394 | 7204929 | 1387144 | interleukin 7 receptor                     | Il7r  | 294797 | 1,09 | up   |
| 5742901 | 7204929 | 1387153 | interleukin 7 receptor                     | Il7r  | 294797 | 1,07 | down |
| 5734764 | 7204929 | 1387143 | interleukin 7 receptor                     | Il7r  | 294797 | 1,07 | up   |
| 6574012 | 7204929 | 1387143 | interleukin 7 receptor                     | Il7r  | 294797 | 1,07 | down |
| 6332717 | 7204929 | 1387150 | interleukin 7 receptor                     | Il7r  | 294797 | 1,04 | up   |
| 6275423 | 7204929 | 1387152 | interleukin 7 receptor                     | Il7r  | 294797 | 1,02 | up   |
| 5976898 | 7204929 | 1387146 | interleukin 7 receptor                     | Il7r  | 294797 | 1,00 | up   |
| 6303851 | 7204929 | 1387148 | interleukin 7 receptor                     | Il7r  | 294797 | 1,00 | up   |
| 6108818 | 7257441 | 1516300 | interleukin-1 receptor-associated kinase 2 | Irak2 | 362418 | 2,10 | up   |
| 5804510 | 7257441 | 1516300 | interleukin-1 receptor-associated kinase 2 | Irak2 | 362418 | 2,00 | up   |
| 6172685 | 7257441 | 1516308 | interleukin-1 receptor-associated kinase 2 | Irak2 | 362418 | 1,89 | up   |
| 6475778 | 7257441 | 1516304 | interleukin-1 receptor-associated kinase 2 | Irak2 | 362418 | 1,89 | down |
| 6600609 | 7257441 | 1516295 | interleukin-1 receptor-associated kinase 2 | Irak2 | 362418 | 1,81 | down |
| 6062101 | 7257441 | 1516290 | interleukin-1 receptor-associated kinase 2 | Irak2 | 362418 | 1,65 | down |
| 6388590 | 7257441 | 1516307 | interleukin-1 receptor-associated kinase 2 | Irak2 | 362418 | 1,53 | down |
| 5706932 | 7257441 | 1516303 | interleukin-1 receptor-associated kinase 2 | Irak2 | 362418 | 1,52 | up   |
| 5820949 | 7257441 | 1516309 | interleukin-1 receptor-associated kinase 2 | Irak2 | 362418 | 1,24 | up   |
| 6050104 | 7257441 | 1516295 | interleukin-1 receptor-associated kinase 2 | Irak2 | 362418 | 1,23 | down |
| 6121862 | 7257441 | 1516301 | interleukin-1 receptor-associated kinase 2 | Irak2 | 362418 | 1,19 | up   |
| 5658732 | 7257441 | 1516302 | interleukin-1 receptor-associated kinase 2 | Irak2 | 362418 | 1,17 | up   |
| 6009989 | 7257441 | 1516302 | interleukin-1 receptor-associated kinase 2 | Irak2 | 362418 | 1,16 | down |
| 5910766 | 7257441 | 1516291 | interleukin-1 receptor-associated kinase 2 | Irak2 | 362418 | 1,10 | up   |
| 6034957 | 7257441 | 1516299 | interleukin-1 receptor-associated kinase 2 | Irak2 | 362418 | 1,07 | up   |
| 6398840 | 7257441 | 1516309 | interleukin-1 receptor-associated kinase 2 | Irak2 | 362418 | 1,04 | up   |
| 6622770 | 7371001 | 1798841 | intersectin 2                              | Itsn2 | 313934 | 2,05 | up   |
| 6032242 | 7371001 | 1798850 | intersectin 2                              | Itsn2 | 313934 | 1,76 | up   |
| 5709323 | 7371001 | 1798846 | intersectin 2                              | Itsn2 | 313934 | 1,70 | up   |
| 6563664 | 7371001 | 1798886 | intersectin 2                              | Itsn2 | 313934 | 1,62 | up   |
| 5790534 | 7371001 | 1798847 | intersectin 2                              | Itsn2 | 313934 | 1,57 | up   |
| 5695887 | 7371001 | 1798837 | intersectin 2                              | Itsn2 | 313934 | 1,49 | down |
| 6106356 | 7371001 | 1798837 | intersectin 2                              | Itsn2 | 313934 | 1,40 | up   |
| 6328896 | 7371001 | 1798837 | intersectin 2                              | Itsn2 | 313934 | 1,38 | up   |
| 6706808 | 7371001 | 1798883 | intersectin 2                              | Itsn2 | 313934 | 1,35 | up   |
| 6621008 | 7371001 | 1798858 | intersectin 2                              | Itsn2 | 313934 | 1,33 | up   |
| 5972729 | 7371001 | 1798874 | intersectin 2                              | Itsn2 | 313934 | 1,26 | down |
| 6156629 | 7371001 | 1798842 | intersectin 2                              | Itsn2 | 313934 | 1,26 | up   |
| 6073992 | 7371001 | 1798854 | intersectin 2                              | Itsn2 | 313934 | 1,26 | down |
| 5860295 | 7371001 | 1798838 | intersectin 2                              | Itsn2 | 313934 | 1,25 | up   |
| 5962558 | 7371001 | 1798844 | intersectin 2                              | Itsn2 | 313934 | 1,23 | down |
| 6481460 | 7371001 | 1798860 | intersectin 2                              | Itsn2 | 313934 | 1,23 | up   |

|         |         |         |                                                     |       |        |      |      |
|---------|---------|---------|-----------------------------------------------------|-------|--------|------|------|
| 5902778 | 7371001 | 1798855 | intersectin 2                                       | Its2  | 313934 | 1,22 | down |
| 5697054 | 7371001 | 1798877 | intersectin 2                                       | Its2  | 313934 | 1,21 | up   |
| 5809045 | 7371001 | 1798853 | intersectin 2                                       | Its2  | 313934 | 1,18 | down |
| 6310567 | 7371001 | 1798880 | intersectin 2                                       | Its2  | 313934 | 1,17 | up   |
| 6153061 | 7371001 | 1798881 | intersectin 2                                       | Its2  | 313934 | 1,16 | down |
| 6034663 | 7371001 | 1798873 | intersectin 2                                       | Its2  | 313934 | 1,15 | up   |
| 5922645 | 7371001 | 1798868 | intersectin 2                                       | Its2  | 313934 | 1,15 | up   |
| 5768694 | 7371001 | 1798883 | intersectin 2                                       | Its2  | 313934 | 1,11 | up   |
| 5852018 | 7371001 | 1798887 | intersectin 2                                       | Its2  | 313934 | 1,10 | down |
| 6434159 | 7371001 | 1798845 | intersectin 2                                       | Its2  | 313934 | 1,10 | down |
| 5969381 | 7371001 | 1798865 | intersectin 2                                       | Its2  | 313934 | 1,09 | up   |
| 6150992 | 7371001 | 1798889 | intersectin 2                                       | Its2  | 313934 | 1,09 | down |
| 6289759 | 7371001 | 1798884 | intersectin 2                                       | Its2  | 313934 | 1,09 | up   |
| 6249822 | 7371001 | 1798879 | intersectin 2                                       | Its2  | 313934 | 1,07 | down |
| 6603027 | 7371001 | 1798856 | intersectin 2                                       | Its2  | 313934 | 1,06 | up   |
| 5900365 | 7371001 | 1798843 | intersectin 2                                       | Its2  | 313934 | 1,06 | down |
| 6084391 | 7371001 | 1798882 | intersectin 2                                       | Its2  | 313934 | 1,05 | down |
| 5642409 | 7371001 | 1798861 | intersectin 2                                       | Its2  | 313934 | 1,04 | up   |
| 6246597 | 7371001 | 1798859 | intersectin 2                                       | Its2  | 313934 | 1,03 | down |
| 6741250 | 7371001 | 1798864 | intersectin 2                                       | Its2  | 313934 | 1,03 | up   |
| 5861490 | 7371001 | 1798885 | intersectin 2                                       | Its2  | 313934 | 1,02 | down |
| 6734067 | 7371001 | 1798876 | intersectin 2                                       | Its2  | 313934 | 1,02 | up   |
| 6317129 | 7371001 | 1798888 | intersectin 2                                       | Its2  | 313934 | 1,01 | up   |
| 6560135 | 7371001 | 1798857 | intersectin 2                                       | Its2  | 313934 | 1,01 | down |
| 5826148 | 7235076 | 1461019 | intraflagellar transport 52 homolog (Chlamydomonas) | Ift52 | 362265 | 2,41 | down |
| 6351701 | 7235076 | 1461030 | intraflagellar transport 52 homolog (Chlamydomonas) | Ift52 | 362265 | 1,52 | down |
| 6189116 | 7235076 | 1461024 | intraflagellar transport 52 homolog (Chlamydomonas) | Ift52 | 362265 | 1,28 | up   |
| 5779227 | 7235076 | 1461033 | intraflagellar transport 52 homolog (Chlamydomonas) | Ift52 | 362265 | 1,23 | up   |
| 6046278 | 7235076 | 1461027 | intraflagellar transport 52 homolog (Chlamydomonas) | Ift52 | 362265 | 1,23 | down |
| 5874630 | 7235076 | 1461025 | intraflagellar transport 52 homolog (Chlamydomonas) | Ift52 | 362265 | 1,22 | up   |
| 6274900 | 7235076 | 1461028 | intraflagellar transport 52 homolog (Chlamydomonas) | Ift52 | 362265 | 1,22 | up   |
| 5845460 | 7235076 | 1461021 | intraflagellar transport 52 homolog (Chlamydomonas) | Ift52 | 362265 | 1,15 | down |
| 6398498 | 7235076 | 1461022 | intraflagellar transport 52 homolog (Chlamydomonas) | Ift52 | 362265 | 1,11 | down |
| 5646605 | 7235076 | 1461033 | intraflagellar transport 52 homolog (Chlamydomonas) | Ift52 | 362265 | 1,09 | up   |
| 6702421 | 7235076 | 1461020 | intraflagellar transport 52 homolog (Chlamydomonas) | Ift52 | 362265 | 1,08 | down |
| 6267824 | 7235076 | 1461026 | intraflagellar transport 52 homolog (Chlamydomonas) | Ift52 | 362265 | 1,06 | up   |
| 5854070 | 7235076 | 1461032 | intraflagellar transport 52 homolog (Chlamydomonas) | Ift52 | 362265 | 1,05 | up   |
| 5981286 | 7235076 | 1461033 | intraflagellar transport 52 homolog (Chlamydomonas) | Ift52 | 362265 | 1,04 | up   |
| 6301326 | 7235076 | 1461023 | intraflagellar transport 52 homolog (Chlamydomonas) | Ift52 | 362265 | 1,02 | up   |
| 6062928 | 7098313 | 1123512 | intraflagellar transport 81 homolog (Chlamydomonas) | Ift81 | 373066 | 2,14 | down |
| 6016494 | 7098313 | 1123507 | intraflagellar transport 81 homolog (Chlamydomonas) | Ift81 | 373066 | 1,65 | up   |
| 6156720 | 7098313 | 1123514 | intraflagellar transport 81 homolog (Chlamydomonas) | Ift81 | 373066 | 1,64 | up   |
| 6636532 | 7098313 | 1123513 | intraflagellar transport 81 homolog (Chlamydomonas) | Ift81 | 373066 | 1,60 | down |
| 6657102 | 7098313 | 1123500 | intraflagellar transport 81 homolog (Chlamydomonas) | Ift81 | 373066 | 1,41 | down |
| 6175413 | 7098313 | 1123513 | intraflagellar transport 81 homolog (Chlamydomonas) | Ift81 | 373066 | 1,35 | up   |
| 6241183 | 7098313 | 1123515 | intraflagellar transport 81 homolog (Chlamydomonas) | Ift81 | 373066 | 1,33 | up   |
| 5982275 | 7098313 | 1123498 | intraflagellar transport 81 homolog (Chlamydomonas) | Ift81 | 373066 | 1,28 | up   |
| 5976943 | 7098313 | 1123499 | intraflagellar transport 81 homolog (Chlamydomonas) | Ift81 | 373066 | 1,25 | up   |
| 6228523 | 7098313 | 1123502 | intraflagellar transport 81 homolog (Chlamydomonas) | Ift81 | 373066 | 1,25 | up   |
| 6213242 | 7098313 | 1123495 | intraflagellar transport 81 homolog (Chlamydomonas) | Ift81 | 373066 | 1,24 | up   |
| 6604707 | 7098313 | 1123509 | intraflagellar transport 81 homolog (Chlamydomonas) | Ift81 | 373066 | 1,22 | down |
| 5936134 | 7098313 | 1123508 | intraflagellar transport 81 homolog (Chlamydomonas) | Ift81 | 373066 | 1,22 | up   |
| 5909125 | 7098313 | 1123506 | intraflagellar transport 81 homolog (Chlamydomonas) | Ift81 | 373066 | 1,21 | down |
| 6077965 | 7098313 | 1123496 | intraflagellar transport 81 homolog (Chlamydomonas) | Ift81 | 373066 | 1,18 | down |
| 6549629 | 7098313 | 1123504 | intraflagellar transport 81 homolog (Chlamydomonas) | Ift81 | 373066 | 1,16 | down |
| 6404869 | 7098313 | 1123511 | intraflagellar transport 81 homolog (Chlamydomonas) | Ift81 | 373066 | 1,16 | down |
| 5640637 | 7098313 | 1123505 | intraflagellar transport 81 homolog (Chlamydomonas) | Ift81 | 373066 | 1,14 | up   |

|         |         |         |                                                             |        |        |      |      |
|---------|---------|---------|-------------------------------------------------------------|--------|--------|------|------|
| 6582843 | 7098313 | 1123510 | intraflagellar transport 81 homolog (Chlamydomonas)         | Ift81  | 373066 | 1,11 | down |
| 5739810 | 7098313 | 1123503 | intraflagellar transport 81 homolog (Chlamydomonas)         | Ift81  | 373066 | 1,09 | up   |
| 5646086 | 7098313 | 1123501 | intraflagellar transport 81 homolog (Chlamydomonas)         | Ift81  | 373066 | 1,09 | down |
| 6731734 | 7098313 | 1123513 | intraflagellar transport 81 homolog (Chlamydomonas)         | Ift81  | 373066 | 1,05 | down |
| 5969044 | 7098313 | 1123497 | intraflagellar transport 81 homolog (Chlamydomonas)         | Ift81  | 373066 | 1,02 | down |
| 5789413 | 7132263 | 1206896 | intraflagellar transport 88 homolog (Chlamydomonas)         | Ift88  | 305918 | 2,16 | up   |
| 5705196 | 7132263 | 1206898 | intraflagellar transport 88 homolog (Chlamydomonas)         | Ift88  | 305918 | 1,58 | down |
| 5791569 | 7132263 | 1206922 | intraflagellar transport 88 homolog (Chlamydomonas)         | Ift88  | 305918 | 1,54 | up   |
| 6346401 | 7132263 | 1206894 | intraflagellar transport 88 homolog (Chlamydomonas)         | Ift88  | 305918 | 1,53 | down |
| 5878088 | 7132263 | 1206904 | intraflagellar transport 88 homolog (Chlamydomonas)         | Ift88  | 305918 | 1,44 | up   |
| 6619216 | 7132263 | 1206899 | intraflagellar transport 88 homolog (Chlamydomonas)         | Ift88  | 305918 | 1,39 | up   |
| 6335325 | 7132263 | 1206906 | intraflagellar transport 88 homolog (Chlamydomonas)         | Ift88  | 305918 | 1,38 | down |
| 6650048 | 7132263 | 1206917 | intraflagellar transport 88 homolog (Chlamydomonas)         | Ift88  | 305918 | 1,33 | up   |
| 6596979 | 7132263 | 1206890 | intraflagellar transport 88 homolog (Chlamydomonas)         | Ift88  | 305918 | 1,31 | down |
| 6223241 | 7132263 | 1206912 | intraflagellar transport 88 homolog (Chlamydomonas)         | Ift88  | 305918 | 1,29 | up   |
| 6478163 | 7132263 | 1206908 | intraflagellar transport 88 homolog (Chlamydomonas)         | Ift88  | 305918 | 1,20 | down |
| 6290216 | 7132263 | 1206913 | intraflagellar transport 88 homolog (Chlamydomonas)         | Ift88  | 305918 | 1,17 | down |
| 5890071 | 7132263 | 1206891 | intraflagellar transport 88 homolog (Chlamydomonas)         | Ift88  | 305918 | 1,14 | down |
| 6632089 | 7132263 | 1206903 | intraflagellar transport 88 homolog (Chlamydomonas)         | Ift88  | 305918 | 1,14 | down |
| 6011079 | 7132263 | 1206920 | intraflagellar transport 88 homolog (Chlamydomonas)         | Ift88  | 305918 | 1,13 | up   |
| 6536185 | 7132263 | 1206897 | intraflagellar transport 88 homolog (Chlamydomonas)         | Ift88  | 305918 | 1,12 | down |
| 6514534 | 7132263 | 1206911 | intraflagellar transport 88 homolog (Chlamydomonas)         | Ift88  | 305918 | 1,12 | up   |
| 6405713 | 7132263 | 1206895 | intraflagellar transport 88 homolog (Chlamydomonas)         | Ift88  | 305918 | 1,10 | up   |
| 6110373 | 7132263 | 1206901 | intraflagellar transport 88 homolog (Chlamydomonas)         | Ift88  | 305918 | 1,09 | down |
| 6597192 | 7132263 | 1206922 | intraflagellar transport 88 homolog (Chlamydomonas)         | Ift88  | 305918 | 1,07 | up   |
| 6098899 | 7132263 | 1206900 | intraflagellar transport 88 homolog (Chlamydomonas)         | Ift88  | 305918 | 1,04 | down |
| 6246912 | 7132263 | 1206902 | intraflagellar transport 88 homolog (Chlamydomonas)         | Ift88  | 305918 | 1,03 | up   |
| 5696801 | 7132263 | 1206922 | intraflagellar transport 88 homolog (Chlamydomonas)         | Ift88  | 305918 | 1,03 | up   |
| 6533414 | 7132263 | 1206915 | intraflagellar transport 88 homolog (Chlamydomonas)         | Ift88  | 305918 | 1,03 | down |
| 5911128 | 7132263 | 1206899 | intraflagellar transport 88 homolog (Chlamydomonas)         | Ift88  | 305918 | 1,03 | down |
| 5864626 | 7132263 | 1206914 | intraflagellar transport 88 homolog (Chlamydomonas)         | Ift88  | 305918 | 1,02 | down |
| 6695500 | 7132263 | 1206893 | intraflagellar transport 88 homolog (Chlamydomonas)         | Ift88  | 305918 | 1,02 | down |
| 6688980 | 7132263 | 1206909 | intraflagellar transport 88 homolog (Chlamydomonas)         | Ift88  | 305918 | 1,00 | up   |
| 6303248 | 7193403 | 1359201 | inturned planar cell polarity effector homolog (Drosophila) | Intu   | 361938 | 1,50 | up   |
| 6383505 | 7193403 | 1359178 | inturned planar cell polarity effector homolog (Drosophila) | Intu   | 361938 | 1,06 | up   |
| 5910334 | 7269267 | 1545497 | IQ motif and Sec7 domain 3                                  | Iqsec3 | 404781 | 2,09 | up   |
| 5683499 | 7269267 | 1545495 | IQ motif and Sec7 domain 3                                  | Iqsec3 | 404781 | 2,06 | up   |
| 6681902 | 7269267 | 1545495 | IQ motif and Sec7 domain 3                                  | Iqsec3 | 404781 | 1,73 | down |
| 6330098 | 7269267 | 1545506 | IQ motif and Sec7 domain 3                                  | Iqsec3 | 404781 | 1,66 | up   |
| 5997621 | 7269267 | 1545495 | IQ motif and Sec7 domain 3                                  | Iqsec3 | 404781 | 1,55 | down |
| 5924000 | 7269267 | 1545499 | IQ motif and Sec7 domain 3                                  | Iqsec3 | 404781 | 1,41 | up   |
| 5678979 | 7269267 | 1545495 | IQ motif and Sec7 domain 3                                  | Iqsec3 | 404781 | 1,40 | up   |
| 5954891 | 7269267 | 1545501 | IQ motif and Sec7 domain 3                                  | Iqsec3 | 404781 | 1,38 | down |
| 5992821 | 7269267 | 1545503 | IQ motif and Sec7 domain 3                                  | Iqsec3 | 404781 | 1,36 | up   |
| 6130114 | 7269267 | 1545502 | IQ motif and Sec7 domain 3                                  | Iqsec3 | 404781 | 1,32 | down |
| 6489639 | 7269267 | 1545509 | IQ motif and Sec7 domain 3                                  | Iqsec3 | 404781 | 1,26 | up   |
| 6710631 | 7269267 | 1545495 | IQ motif and Sec7 domain 3                                  | Iqsec3 | 404781 | 1,24 | up   |
| 6614217 | 7269267 | 1545495 | IQ motif and Sec7 domain 3                                  | Iqsec3 | 404781 | 1,21 | up   |
| 6241780 | 7269267 | 1545506 | IQ motif and Sec7 domain 3                                  | Iqsec3 | 404781 | 1,18 | down |
| 6476191 | 7269267 | 1545498 | IQ motif and Sec7 domain 3                                  | Iqsec3 | 404781 | 1,18 | up   |
| 6656030 | 7269267 | 1545500 | IQ motif and Sec7 domain 3                                  | Iqsec3 | 404781 | 1,15 | down |
| 5847018 | 7269267 | 1545506 | IQ motif and Sec7 domain 3                                  | Iqsec3 | 404781 | 1,15 | up   |
| 6024510 | 7269267 | 1545509 | IQ motif and Sec7 domain 3                                  | Iqsec3 | 404781 | 1,14 | up   |
| 6668830 | 7269267 | 1545504 | IQ motif and Sec7 domain 3                                  | Iqsec3 | 404781 | 1,11 | up   |
| 6466136 | 7269267 | 1545495 | IQ motif and Sec7 domain 3                                  | Iqsec3 | 404781 | 1,09 | down |
| 6616434 | 7269267 | 1545505 | IQ motif and Sec7 domain 3                                  | Iqsec3 | 404781 | 1,07 | down |
| 6501913 | 7269267 | 1545495 | IQ motif and Sec7 domain 3                                  | Iqsec3 | 404781 | 1,06 | down |

|         |         |         |                                                 |        |        |      |      |
|---------|---------|---------|-------------------------------------------------|--------|--------|------|------|
| 5732662 | 7269267 | 1545508 | IQ motif and Sec7 domain 3                      | Iqsec3 | 404781 | 1,05 | down |
| 5846541 | 7269267 | 1545507 | IQ motif and Sec7 domain 3                      | Iqsec3 | 404781 | 1,04 | down |
| 6343990 | 7269267 | 1545496 | IQ motif and Sec7 domain 3                      | Iqsec3 | 404781 | 1,02 | up   |
| 6037834 | 7269267 | 1545496 | IQ motif and Sec7 domain 3                      | Iqsec3 | 404781 | 1,01 | down |
| 6172065 | 7269267 | 1545496 | IQ motif and Sec7 domain 3                      | Iqsec3 | 404781 | 1,00 | up   |
| 6113975 | 7269267 | 1545509 | IQ motif and Sec7 domain 3                      | Iqsec3 | 404781 | 1,00 | up   |
| 5818200 | 7113483 | 1161023 | IQ motif and WD repeats 1                       | Iqwd1  | 289181 | 1,80 | up   |
| 6018669 | 7113483 | 1161009 | IQ motif and WD repeats 1                       | Iqwd1  | 289181 | 1,11 | up   |
| 6277107 | 7093752 | 1111999 | IQ motif containing B1                          | Iqcb1  | 303915 | 1,51 | down |
| 5800130 | 7093752 | 1112004 | IQ motif containing B1                          | Iqcb1  | 303915 | 1,36 | up   |
| 6076125 | 7093752 | 1111993 | IQ motif containing B1                          | Iqcb1  | 303915 | 1,32 | down |
| 6587994 | 7093752 | 1112003 | IQ motif containing B1                          | Iqcb1  | 303915 | 1,27 | up   |
| 5942093 | 7093752 | 1112006 | IQ motif containing B1                          | Iqcb1  | 303915 | 1,23 | up   |
| 6451355 | 7093752 | 1111992 | IQ motif containing B1                          | Iqcb1  | 303915 | 1,22 | down |
| 5821192 | 7093752 | 1111992 | IQ motif containing B1                          | Iqcb1  | 303915 | 1,22 | down |
| 5757939 | 7093752 | 1111992 | IQ motif containing B1                          | Iqcb1  | 303915 | 1,21 | up   |
| 6056861 | 7093752 | 1112007 | IQ motif containing B1                          | Iqcb1  | 303915 | 1,20 | up   |
| 6422144 | 7093752 | 1111995 | IQ motif containing B1                          | Iqcb1  | 303915 | 1,15 | down |
| 6688610 | 7093752 | 1112008 | IQ motif containing B1                          | Iqcb1  | 303915 | 1,14 | down |
| 6670468 | 7093752 | 1111992 | IQ motif containing B1                          | Iqcb1  | 303915 | 1,13 | down |
| 6342047 | 7093752 | 1111994 | IQ motif containing B1                          | Iqcb1  | 303915 | 1,10 | down |
| 5666361 | 7093752 | 1111995 | IQ motif containing B1                          | Iqcb1  | 303915 | 1,10 | down |
| 5686334 | 7093752 | 1111992 | IQ motif containing B1                          | Iqcb1  | 303915 | 1,05 | down |
| 6719556 | 7093752 | 1112000 | IQ motif containing B1                          | Iqcb1  | 303915 | 1,04 | up   |
| 6085536 | 7093752 | 1111996 | IQ motif containing B1                          | Iqcb1  | 303915 | 1,04 | down |
| 5929364 | 7093752 | 1112005 | IQ motif containing B1                          | Iqcb1  | 303915 | 1,03 | down |
| 6061356 | 7102474 | 1133742 | IQ motif containing D                           | Iqcd   | 498184 | 2,26 | down |
| 6304690 | 7102474 | 1133743 | IQ motif containing D                           | Iqcd   | 498184 | 1,18 | up   |
| 5883969 | 7102474 | 1133741 | IQ motif containing D                           | Iqcd   | 498184 | 1,15 | up   |
| 6277765 | 7102474 | 1133740 | IQ motif containing D                           | Iqcd   | 498184 | 1,15 | up   |
| 6313653 | 7102474 | 1133743 | IQ motif containing D                           | Iqcd   | 498184 | 1,11 | down |
| 6459388 | 7102474 | 1133739 | IQ motif containing D                           | Iqcd   | 498184 | 1,08 | down |
| 6546503 | 7102474 | 1133744 | IQ motif containing D                           | Iqcd   | 498184 | 1,03 | up   |
| 5747482 | 7102474 | 1133738 | IQ motif containing D                           | Iqcd   | 498184 | 1,02 | up   |
| 6278393 | 7196029 | 1365601 | IQ motif containing GTPase activating protein 3 | Iqgap3 | 310621 | 1,24 | down |
| 6344864 | 7183190 | 1333640 | iroquois homeobox 6                             | Irx6   | 307715 | 2,16 | up   |
| 6401332 | 7183190 | 1333640 | iroquois homeobox 6                             | Irx6   | 307715 | 1,39 | down |
| 6352006 | 7183190 | 1333645 | iroquois homeobox 6                             | Irx6   | 307715 | 1,35 | up   |
| 6675166 | 7183190 | 1333640 | iroquois homeobox 6                             | Irx6   | 307715 | 1,30 | down |
| 6718156 | 7183190 | 1333643 | iroquois homeobox 6                             | Irx6   | 307715 | 1,10 | down |
| 6230333 | 7183190 | 1333642 | iroquois homeobox 6                             | Irx6   | 307715 | 1,09 | up   |
| 6143221 | 7183190 | 1333639 | iroquois homeobox 6                             | Irx6   | 307715 | 1,06 | up   |
| 6301817 | 7183190 | 1333645 | iroquois homeobox 6                             | Irx6   | 307715 | 1,06 | down |
| 5919334 | 7183190 | 1333645 | iroquois homeobox 6                             | Irx6   | 307715 | 1,01 | down |
| 6261908 | 7183190 | 1333645 | iroquois homeobox 6                             | Irx6   | 307715 | 1,01 | down |
| 6616542 | 7183190 | 1333644 | iroquois homeobox 6                             | Irx6   | 307715 | 1,01 | down |
| 6191624 | 7262114 | 1528008 | islet cell autoantigen 1                        | Ica1   | 81024  | 1,69 | down |
| 6594492 | 7262114 | 1528012 | islet cell autoantigen 1                        | Ica1   | 81024  | 1,43 | down |
| 5883150 | 7262114 | 1528005 | islet cell autoantigen 1                        | Ica1   | 81024  | 1,36 | down |
| 6130433 | 7262114 | 1528017 | islet cell autoantigen 1                        | Ica1   | 81024  | 1,34 | up   |
| 5828726 | 7262114 | 1528003 | islet cell autoantigen 1                        | Ica1   | 81024  | 1,28 | up   |
| 6458447 | 7262114 | 1528015 | islet cell autoantigen 1                        | Ica1   | 81024  | 1,26 | up   |
| 5918495 | 7262114 | 1528006 | islet cell autoantigen 1                        | Ica1   | 81024  | 1,15 | down |
| 5793952 | 7262114 | 1528002 | islet cell autoantigen 1                        | Ica1   | 81024  | 1,13 | down |
| 6563305 | 7262114 | 1528004 | islet cell autoantigen 1                        | Ica1   | 81024  | 1,12 | up   |
| 6379955 | 7262114 | 1528009 | islet cell autoantigen 1                        | Ica1   | 81024  | 1,12 | up   |
| 6227762 | 7262114 | 1528016 | islet cell autoantigen 1                        | Ica1   | 81024  | 1,10 | up   |

|         |         |         |                          |      |       |      |      |
|---------|---------|---------|--------------------------|------|-------|------|------|
| 6688175 | 7262114 | 1528013 | islet cell autoantigen 1 | Ica1 | 81024 | 1,08 | down |
| 5929209 | 7262114 | 1528011 | islet cell autoantigen 1 | Ica1 | 81024 | 1,05 | down |
| 6188686 | 7262114 | 1528007 | islet cell autoantigen 1 | Ica1 | 81024 | 1,05 | down |
| 5803721 | 7262114 | 1528010 | islet cell autoantigen 1 | Ica1 | 81024 | 1,00 | up   |
| 5893729 | 7262114 | 1528014 | islet cell autoantigen 1 | Ica1 | 81024 | 1,00 | up   |
| 6356596 | 7245570 | 1486670 | jagged 1                 | Jag1 | 29146 | 2,89 | down |
| 6141231 | 7245570 | 1486646 | jagged 1                 | Jag1 | 29146 | 2,17 | down |
| 6470321 | 7245570 | 1486645 | jagged 1                 | Jag1 | 29146 | 1,91 | down |
| 5970277 | 7245570 | 1486663 | jagged 1                 | Jag1 | 29146 | 1,85 | down |
| 5787564 | 7245570 | 1486665 | jagged 1                 | Jag1 | 29146 | 1,82 | down |
| 5909678 | 7245570 | 1486649 | jagged 1                 | Jag1 | 29146 | 1,59 | up   |
| 6731583 | 7245570 | 1486658 | jagged 1                 | Jag1 | 29146 | 1,44 | up   |
| 5806811 | 7245570 | 1486662 | jagged 1                 | Jag1 | 29146 | 1,43 | down |
| 6177332 | 7245570 | 1486647 | jagged 1                 | Jag1 | 29146 | 1,41 | up   |
| 5850944 | 7245570 | 1486651 | jagged 1                 | Jag1 | 29146 | 1,40 | up   |
| 6712960 | 7245570 | 1486655 | jagged 1                 | Jag1 | 29146 | 1,39 | up   |
| 6637479 | 7245570 | 1486650 | jagged 1                 | Jag1 | 29146 | 1,34 | up   |
| 6650836 | 7245570 | 1486669 | jagged 1                 | Jag1 | 29146 | 1,32 | up   |
| 5707236 | 7245570 | 1486667 | jagged 1                 | Jag1 | 29146 | 1,32 | up   |
| 5666385 | 7245570 | 1486661 | jagged 1                 | Jag1 | 29146 | 1,25 | up   |
| 6447500 | 7245570 | 1486664 | jagged 1                 | Jag1 | 29146 | 1,25 | up   |
| 6116459 | 7245570 | 1486652 | jagged 1                 | Jag1 | 29146 | 1,25 | up   |
| 6542016 | 7245570 | 1486665 | jagged 1                 | Jag1 | 29146 | 1,23 | down |
| 5636884 | 7245570 | 1486668 | jagged 1                 | Jag1 | 29146 | 1,23 | up   |
| 6462119 | 7245570 | 1486660 | jagged 1                 | Jag1 | 29146 | 1,16 | up   |
| 6410979 | 7245570 | 1486654 | jagged 1                 | Jag1 | 29146 | 1,12 | up   |
| 5806825 | 7245570 | 1486657 | jagged 1                 | Jag1 | 29146 | 1,09 | down |
| 6267280 | 7245570 | 1486666 | jagged 1                 | Jag1 | 29146 | 1,07 | down |
| 6491950 | 7245570 | 1486648 | jagged 1                 | Jag1 | 29146 | 1,05 | up   |
| 5955201 | 7245570 | 1486653 | jagged 1                 | Jag1 | 29146 | 1,04 | down |
| 6354571 | 7245570 | 1486656 | jagged 1                 | Jag1 | 29146 | 1,02 | up   |
| 6559894 | 7245570 | 1486659 | jagged 1                 | Jag1 | 29146 | 1,01 | up   |
| 6537283 | 7310810 | 1649354 | jagged 2                 | Jag2 | 29147 | 2,13 | down |
| 5965089 | 7310810 | 1649352 | jagged 2                 | Jag2 | 29147 | 1,71 | down |
| 5620799 | 7310810 | 1649349 | jagged 2                 | Jag2 | 29147 | 1,63 | down |
| 5931675 | 7310810 | 1649355 | jagged 2                 | Jag2 | 29147 | 1,62 | down |
| 5670767 | 7310810 | 1649337 | jagged 2                 | Jag2 | 29147 | 1,53 | down |
| 6336106 | 7310810 | 1649341 | jagged 2                 | Jag2 | 29147 | 1,52 | down |
| 6400009 | 7310810 | 1649361 | jagged 2                 | Jag2 | 29147 | 1,24 | up   |
| 6371014 | 7310810 | 1649364 | jagged 2                 | Jag2 | 29147 | 1,24 | up   |
| 6440431 | 7310810 | 1649346 | jagged 2                 | Jag2 | 29147 | 1,23 | down |
| 5852499 | 7310810 | 1649338 | jagged 2                 | Jag2 | 29147 | 1,17 | up   |
| 6097057 | 7310810 | 1649345 | jagged 2                 | Jag2 | 29147 | 1,16 | down |
| 6479143 | 7310810 | 1649344 | jagged 2                 | Jag2 | 29147 | 1,14 | down |
| 6265465 | 7310810 | 1649340 | jagged 2                 | Jag2 | 29147 | 1,14 | down |
| 6334452 | 7310810 | 1649343 | jagged 2                 | Jag2 | 29147 | 1,14 | up   |
| 5994596 | 7310810 | 1649353 | jagged 2                 | Jag2 | 29147 | 1,11 | up   |
| 6693602 | 7310810 | 1649362 | jagged 2                 | Jag2 | 29147 | 1,10 | down |
| 5815590 | 7310810 | 1649339 | jagged 2                 | Jag2 | 29147 | 1,10 | up   |
| 6254703 | 7310810 | 1649356 | jagged 2                 | Jag2 | 29147 | 1,07 | up   |
| 6182879 | 7310810 | 1649347 | jagged 2                 | Jag2 | 29147 | 1,07 | up   |
| 6140630 | 7310810 | 1649348 | jagged 2                 | Jag2 | 29147 | 1,07 | down |
| 6586414 | 7310810 | 1649357 | jagged 2                 | Jag2 | 29147 | 1,06 | up   |
| 5700923 | 7310810 | 1649368 | jagged 2                 | Jag2 | 29147 | 1,06 | up   |
| 6390162 | 7310810 | 1649351 | jagged 2                 | Jag2 | 29147 | 1,06 | up   |
| 5703320 | 7310810 | 1649350 | jagged 2                 | Jag2 | 29147 | 1,03 | up   |
| 6394537 | 7310810 | 1649340 | jagged 2                 | Jag2 | 29147 | 1,02 | down |

|         |         |         |                               |       |        |      |      |
|---------|---------|---------|-------------------------------|-------|--------|------|------|
| 6500466 | 7310810 | 1649342 | jagged 2                      | Jag2  | 29147  | 1,01 | down |
| 6353515 | 7041050 | 988040  | Janus kinase 2                | Jak2  | 24514  | 3,44 | down |
| 6605198 | 7041050 | 988037  | Janus kinase 2                | Jak2  | 24514  | 1,92 | down |
| 6104975 | 7041050 | 988030  | Janus kinase 2                | Jak2  | 24514  | 1,75 | up   |
| 5719932 | 7041050 | 988039  | Janus kinase 2                | Jak2  | 24514  | 1,55 | up   |
| 6532144 | 7041050 | 988036  | Janus kinase 2                | Jak2  | 24514  | 1,38 | up   |
| 5739756 | 7041050 | 988038  | Janus kinase 2                | Jak2  | 24514  | 1,32 | up   |
| 6592389 | 7041050 | 988045  | Janus kinase 2                | Jak2  | 24514  | 1,28 | up   |
| 6392550 | 7041050 | 988029  | Janus kinase 2                | Jak2  | 24514  | 1,26 | down |
| 5977605 | 7041050 | 988052  | Janus kinase 2                | Jak2  | 24514  | 1,25 | up   |
| 6564338 | 7041050 | 988055  | Janus kinase 2                | Jak2  | 24514  | 1,25 | down |
| 6737860 | 7041050 | 988040  | Janus kinase 2                | Jak2  | 24514  | 1,25 | up   |
| 6393539 | 7041050 | 988033  | Janus kinase 2                | Jak2  | 24514  | 1,23 | down |
| 6531237 | 7041050 | 988043  | Janus kinase 2                | Jak2  | 24514  | 1,21 | down |
| 5692305 | 7041050 | 988031  | Janus kinase 2                | Jak2  | 24514  | 1,21 | down |
| 6689868 | 7041050 | 988049  | Janus kinase 2                | Jak2  | 24514  | 1,19 | up   |
| 6214771 | 7041050 | 988044  | Janus kinase 2                | Jak2  | 24514  | 1,18 | down |
| 6386101 | 7041050 | 988046  | Janus kinase 2                | Jak2  | 24514  | 1,14 | down |
| 5671561 | 7041050 | 988054  | Janus kinase 2                | Jak2  | 24514  | 1,13 | down |
| 5704886 | 7041050 | 988041  | Janus kinase 2                | Jak2  | 24514  | 1,12 | down |
| 6658532 | 7041050 | 988053  | Janus kinase 2                | Jak2  | 24514  | 1,11 | up   |
| 6472971 | 7041050 | 988047  | Janus kinase 2                | Jak2  | 24514  | 1,09 | up   |
| 5664257 | 7041050 | 988033  | Janus kinase 2                | Jak2  | 24514  | 1,09 | up   |
| 6681926 | 7041050 | 988051  | Janus kinase 2                | Jak2  | 24514  | 1,08 | down |
| 6266362 | 7041050 | 988032  | Janus kinase 2                | Jak2  | 24514  | 1,05 | down |
| 5829573 | 7041050 | 988042  | Janus kinase 2                | Jak2  | 24514  | 1,05 | down |
| 6236523 | 7041050 | 988034  | Janus kinase 2                | Jak2  | 24514  | 1,04 | up   |
| 6729078 | 7041050 | 988048  | Janus kinase 2                | Jak2  | 24514  | 1,04 | up   |
| 6609269 | 7041050 | 988054  | Janus kinase 2                | Jak2  | 24514  | 1,04 | down |
| 6280783 | 7041050 | 988050  | Janus kinase 2                | Jak2  | 24514  | 1,02 | up   |
| 6463579 | 7041050 | 988035  | Janus kinase 2                | Jak2  | 24514  | 1,02 | up   |
| 5732283 | 7065811 | 1045689 | jumonji domain containing 8   | Jmjd8 | 360498 | 2,27 | up   |
| 6367088 | 7065811 | 1045689 | jumonji domain containing 8   | Jmjd8 | 360498 | 1,73 | up   |
| 6280276 | 7065811 | 1045695 | jumonji domain containing 8   | Jmjd8 | 360498 | 1,34 | down |
| 6430045 | 7065811 | 1045689 | jumonji domain containing 8   | Jmjd8 | 360498 | 1,25 | down |
| 6014039 | 7065811 | 1045694 | jumonji domain containing 8   | Jmjd8 | 360498 | 1,24 | down |
| 5756435 | 7065811 | 1045697 | jumonji domain containing 8   | Jmjd8 | 360498 | 1,23 | down |
| 6262345 | 7065811 | 1045690 | jumonji domain containing 8   | Jmjd8 | 360498 | 1,23 | up   |
| 6571922 | 7065811 | 1045691 | jumonji domain containing 8   | Jmjd8 | 360498 | 1,19 | down |
| 5651040 | 7065811 | 1045689 | jumonji domain containing 8   | Jmjd8 | 360498 | 1,10 | down |
| 5992888 | 7065811 | 1045696 | jumonji domain containing 8   | Jmjd8 | 360498 | 1,10 | down |
| 5899593 | 7065811 | 1045693 | jumonji domain containing 8   | Jmjd8 | 360498 | 1,08 | down |
| 5856526 | 7065811 | 1045692 | jumonji domain containing 8   | Jmjd8 | 360498 | 1,07 | down |
| 6739321 | 7065811 | 1045697 | jumonji domain containing 8   | Jmjd8 | 360498 | 1,07 | up   |
| 6358344 | 7065811 | 1045689 | jumonji domain containing 8   | Jmjd8 | 360498 | 1,06 | down |
| 5940294 | 7059778 | 1031002 | K(lysine) acetyltransferase 5 | Kat5  | 192218 | 2,07 | down |
| 6602042 | 7059778 | 1031008 | K(lysine) acetyltransferase 5 | Kat5  | 192218 | 1,74 | up   |
| 5629129 | 7059778 | 1031007 | K(lysine) acetyltransferase 5 | Kat5  | 192218 | 1,36 | down |
| 5850205 | 7059778 | 1030999 | K(lysine) acetyltransferase 5 | Kat5  | 192218 | 1,28 | down |
| 6152051 | 7059778 | 1030998 | K(lysine) acetyltransferase 5 | Kat5  | 192218 | 1,23 | down |
| 5755305 | 7059778 | 1031010 | K(lysine) acetyltransferase 5 | Kat5  | 192218 | 1,23 | up   |
| 6243464 | 7059778 | 1031000 | K(lysine) acetyltransferase 5 | Kat5  | 192218 | 1,22 | up   |
| 6256420 | 7059778 | 1031009 | K(lysine) acetyltransferase 5 | Kat5  | 192218 | 1,20 | down |
| 6323258 | 7059778 | 1031003 | K(lysine) acetyltransferase 5 | Kat5  | 192218 | 1,18 | up   |
| 6430295 | 7059778 | 1031006 | K(lysine) acetyltransferase 5 | Kat5  | 192218 | 1,11 | down |
| 6356152 | 7059778 | 1031005 | K(lysine) acetyltransferase 5 | Kat5  | 192218 | 1,03 | up   |
| 6166982 | 7059778 | 1031001 | K(lysine) acetyltransferase 5 | Kat5  | 192218 | 1,02 | down |

|         |         |         |                               |       |        |      |      |
|---------|---------|---------|-------------------------------|-------|--------|------|------|
| 6428645 | 7059778 | 1031011 | K(lysine) acetyltransferase 5 | Kat5  | 192218 | 1,01 | up   |
| 5872194 | 7059778 | 1031004 | K(lysine) acetyltransferase 5 | Kat5  | 192218 | 1,00 | down |
| 6451782 | 7088723 | 1100102 | kalirin, RhoGEF kinase        | Kalrn | 84009  | 3,43 | down |
| 6218217 | 7088723 | 1100128 | kalirin, RhoGEF kinase        | Kalrn | 84009  | 2,00 | down |
| 6507555 | 7088723 | 1100159 | kalirin, RhoGEF kinase        | Kalrn | 84009  | 1,72 | down |
| 6118258 | 7088723 | 1100130 | kalirin, RhoGEF kinase        | Kalrn | 84009  | 1,70 | down |
| 5895761 | 7088723 | 1100146 | kalirin, RhoGEF kinase        | Kalrn | 84009  | 1,70 | down |
| 6477403 | 7088723 | 1100160 | kalirin, RhoGEF kinase        | Kalrn | 84009  | 1,69 | down |
| 6351786 | 7088723 | 1100126 | kalirin, RhoGEF kinase        | Kalrn | 84009  | 1,65 | down |
| 5947745 | 7088723 | 1100124 | kalirin, RhoGEF kinase        | Kalrn | 84009  | 1,65 | down |
| 6023101 | 7088723 | 1100116 | kalirin, RhoGEF kinase        | Kalrn | 84009  | 1,62 | up   |
| 6582056 | 7088723 | 1100145 | kalirin, RhoGEF kinase        | Kalrn | 84009  | 1,58 | down |
| 6268999 | 7088723 | 1100151 | kalirin, RhoGEF kinase        | Kalrn | 84009  | 1,58 | down |
| 6342491 | 7088723 | 1100153 | kalirin, RhoGEF kinase        | Kalrn | 84009  | 1,57 | down |
| 6308389 | 7088723 | 1100117 | kalirin, RhoGEF kinase        | Kalrn | 84009  | 1,56 | up   |
| 6320809 | 7088723 | 1100137 | kalirin, RhoGEF kinase        | Kalrn | 84009  | 1,55 | up   |
| 6222804 | 7088723 | 1100103 | kalirin, RhoGEF kinase        | Kalrn | 84009  | 1,52 | up   |
| 6137803 | 7088723 | 1100106 | kalirin, RhoGEF kinase        | Kalrn | 84009  | 1,51 | up   |
| 5944628 | 7088723 | 1100144 | kalirin, RhoGEF kinase        | Kalrn | 84009  | 1,51 | up   |
| 5839972 | 7088723 | 1100157 | kalirin, RhoGEF kinase        | Kalrn | 84009  | 1,46 | up   |
| 6037013 | 7088723 | 1100108 | kalirin, RhoGEF kinase        | Kalrn | 84009  | 1,46 | down |
| 6497618 | 7088723 | 1100120 | kalirin, RhoGEF kinase        | Kalrn | 84009  | 1,42 | up   |
| 6426486 | 7088723 | 1100161 | kalirin, RhoGEF kinase        | Kalrn | 84009  | 1,42 | up   |
| 6231123 | 7088723 | 1100107 | kalirin, RhoGEF kinase        | Kalrn | 84009  | 1,38 | up   |
| 6120824 | 7088723 | 1100142 | kalirin, RhoGEF kinase        | Kalrn | 84009  | 1,35 | down |
| 6561755 | 7088723 | 1100127 | kalirin, RhoGEF kinase        | Kalrn | 84009  | 1,34 | down |
| 6160173 | 7088723 | 1100133 | kalirin, RhoGEF kinase        | Kalrn | 84009  | 1,34 | up   |
| 6483252 | 7088723 | 1100119 | kalirin, RhoGEF kinase        | Kalrn | 84009  | 1,33 | up   |
| 6061362 | 7088723 | 1100149 | kalirin, RhoGEF kinase        | Kalrn | 84009  | 1,32 | down |
| 6390854 | 7088723 | 1100112 | kalirin, RhoGEF kinase        | Kalrn | 84009  | 1,30 | up   |
| 5960067 | 7088723 | 1100129 | kalirin, RhoGEF kinase        | Kalrn | 84009  | 1,30 | up   |
| 6680802 | 7088723 | 1100131 | kalirin, RhoGEF kinase        | Kalrn | 84009  | 1,28 | up   |
| 6385663 | 7088723 | 1100115 | kalirin, RhoGEF kinase        | Kalrn | 84009  | 1,26 | up   |
| 6102991 | 7088723 | 1100162 | kalirin, RhoGEF kinase        | Kalrn | 84009  | 1,25 | down |
| 6565569 | 7088723 | 1100134 | kalirin, RhoGEF kinase        | Kalrn | 84009  | 1,23 | down |
| 6620905 | 7088723 | 1100121 | kalirin, RhoGEF kinase        | Kalrn | 84009  | 1,22 | up   |
| 5866295 | 7088723 | 1100112 | kalirin, RhoGEF kinase        | Kalrn | 84009  | 1,21 | down |
| 5664880 | 7088723 | 1100113 | kalirin, RhoGEF kinase        | Kalrn | 84009  | 1,20 | up   |
| 6075400 | 7088723 | 1100141 | kalirin, RhoGEF kinase        | Kalrn | 84009  | 1,20 | up   |
| 6649600 | 7088723 | 1100112 | kalirin, RhoGEF kinase        | Kalrn | 84009  | 1,20 | down |
| 5927850 | 7088723 | 1100113 | kalirin, RhoGEF kinase        | Kalrn | 84009  | 1,19 | up   |
| 6028317 | 7088723 | 1100147 | kalirin, RhoGEF kinase        | Kalrn | 84009  | 1,18 | up   |
| 5961792 | 7088723 | 1100104 | kalirin, RhoGEF kinase        | Kalrn | 84009  | 1,16 | down |
| 6020532 | 7088723 | 1100136 | kalirin, RhoGEF kinase        | Kalrn | 84009  | 1,16 | down |
| 5722998 | 7088723 | 1100150 | kalirin, RhoGEF kinase        | Kalrn | 84009  | 1,16 | down |
| 6030955 | 7088723 | 1100163 | kalirin, RhoGEF kinase        | Kalrn | 84009  | 1,15 | up   |
| 5714699 | 7088723 | 1100138 | kalirin, RhoGEF kinase        | Kalrn | 84009  | 1,15 | up   |
| 5752480 | 7088723 | 1100154 | kalirin, RhoGEF kinase        | Kalrn | 84009  | 1,13 | up   |
| 6663669 | 7088723 | 1100112 | kalirin, RhoGEF kinase        | Kalrn | 84009  | 1,13 | down |
| 5633555 | 7088723 | 1100139 | kalirin, RhoGEF kinase        | Kalrn | 84009  | 1,12 | up   |
| 5880103 | 7088723 | 1100118 | kalirin, RhoGEF kinase        | Kalrn | 84009  | 1,12 | up   |
| 5981616 | 7088723 | 1100158 | kalirin, RhoGEF kinase        | Kalrn | 84009  | 1,11 | up   |
| 6079746 | 7088723 | 1100132 | kalirin, RhoGEF kinase        | Kalrn | 84009  | 1,10 | up   |
| 5916443 | 7088723 | 1100143 | kalirin, RhoGEF kinase        | Kalrn | 84009  | 1,10 | down |
| 6380558 | 7088723 | 1100113 | kalirin, RhoGEF kinase        | Kalrn | 84009  | 1,09 | down |
| 6054444 | 7088723 | 1100111 | kalirin, RhoGEF kinase        | Kalrn | 84009  | 1,08 | up   |
| 5696280 | 7088723 | 1100105 | kalirin, RhoGEF kinase        | Kalrn | 84009  | 1,07 | down |



|         |         |         |                                            |                                          |        |      |      |
|---------|---------|---------|--------------------------------------------|------------------------------------------|--------|------|------|
| 5704085 | 7088723 | 1100113 | kalirin, RhoGEF kinase                     | Kalrn                                    | 84009  | 1,07 | up   |
| 6621587 | 7088723 | 1100123 | kalirin, RhoGEF kinase                     | Kalrn                                    | 84009  | 1,07 | down |
| 6384866 | 7088723 | 1100152 | kalirin, RhoGEF kinase                     | Kalrn                                    | 84009  | 1,06 | up   |
| 5646169 | 7088723 | 1100109 | kalirin, RhoGEF kinase                     | Kalrn                                    | 84009  | 1,06 | down |
| 6630559 | 7088723 | 1100136 | kalirin, RhoGEF kinase                     | Kalrn                                    | 84009  | 1,06 | up   |
| 6537395 | 7088723 | 1100112 | kalirin, RhoGEF kinase                     | Kalrn                                    | 84009  | 1,06 | down |
| 5729118 | 7088723 | 1100110 | kalirin, RhoGEF kinase                     | Kalrn                                    | 84009  | 1,05 | down |
| 6065189 | 7088723 | 1100156 | kalirin, RhoGEF kinase                     | Kalrn                                    | 84009  | 1,05 | down |
| 6226641 | 7088723 | 1100155 | kalirin, RhoGEF kinase                     | Kalrn                                    | 84009  | 1,04 | up   |
| 6497934 | 7088723 | 1100122 | kalirin, RhoGEF kinase                     | Kalrn                                    | 84009  | 1,04 | up   |
| 6384961 | 7088723 | 1100114 | kalirin, RhoGEF kinase                     | Kalrn                                    | 84009  | 1,04 | down |
| 6694343 | 7088723 | 1100140 | kalirin, RhoGEF kinase                     | Kalrn                                    | 84009  | 1,04 | up   |
| 6492604 | 7088723 | 1100148 | kalirin, RhoGEF kinase                     | Kalrn                                    | 84009  | 1,04 | up   |
| 5985950 | 7088723 | 1100125 | kalirin, RhoGEF kinase                     | Kalrn                                    | 84009  | 1,03 | up   |
| 5930679 | 7088723 | 1100156 | kalirin, RhoGEF kinase                     | Kalrn                                    | 84009  | 1,01 | up   |
| 6241373 | 7050641 | 1010961 | kallikrein /// tonin /// kallikrein 1      | 292861 /// Ton /// B61 /// 24841 /// 292 |        | 1,08 | down |
| 5795938 | 7209566 | 1398044 | karyopherin alpha 4 (importin alpha 3)     | Kpna4                                    | 361959 | 2,03 | down |
| 5974936 | 7209566 | 1398057 | karyopherin alpha 4 (importin alpha 3)     | Kpna4                                    | 361959 | 1,93 | down |
| 6530802 | 7209566 | 1398045 | karyopherin alpha 4 (importin alpha 3)     | Kpna4                                    | 361959 | 1,62 | up   |
| 6211156 | 7209566 | 1398055 | karyopherin alpha 4 (importin alpha 3)     | Kpna4                                    | 361959 | 1,42 | up   |
| 5758323 | 7209566 | 1398054 | karyopherin alpha 4 (importin alpha 3)     | Kpna4                                    | 361959 | 1,23 | down |
| 6308654 | 7209566 | 1398049 | karyopherin alpha 4 (importin alpha 3)     | Kpna4                                    | 361959 | 1,23 | down |
| 5849907 | 7209566 | 1398056 | karyopherin alpha 4 (importin alpha 3)     | Kpna4                                    | 361959 | 1,21 | up   |
| 5827787 | 7209566 | 1398043 | karyopherin alpha 4 (importin alpha 3)     | Kpna4                                    | 361959 | 1,19 | up   |
| 6691651 | 7209566 | 1398048 | karyopherin alpha 4 (importin alpha 3)     | Kpna4                                    | 361959 | 1,17 | down |
| 5977965 | 7209566 | 1398042 | karyopherin alpha 4 (importin alpha 3)     | Kpna4                                    | 361959 | 1,11 | up   |
| 5737225 | 7209566 | 1398041 | karyopherin alpha 4 (importin alpha 3)     | Kpna4                                    | 361959 | 1,10 | down |
| 6200208 | 7209566 | 1398050 | karyopherin alpha 4 (importin alpha 3)     | Kpna4                                    | 361959 | 1,09 | down |
| 5706521 | 7209566 | 1398051 | karyopherin alpha 4 (importin alpha 3)     | Kpna4                                    | 361959 | 1,08 | down |
| 6366700 | 7209566 | 1398041 | karyopherin alpha 4 (importin alpha 3)     | Kpna4                                    | 361959 | 1,07 | up   |
| 6300415 | 7209566 | 1398047 | karyopherin alpha 4 (importin alpha 3)     | Kpna4                                    | 361959 | 1,05 | down |
| 5673556 | 7209566 | 1398053 | karyopherin alpha 4 (importin alpha 3)     | Kpna4                                    | 361959 | 1,04 | down |
| 6418777 | 7209566 | 1398058 | karyopherin alpha 4 (importin alpha 3)     | Kpna4                                    | 361959 | 1,03 | down |
| 5623866 | 7209566 | 1398046 | karyopherin alpha 4 (importin alpha 3)     | Kpna4                                    | 361959 | 1,00 | up   |
| 6554957 | 7209566 | 1398052 | karyopherin alpha 4 (importin alpha 3)     | Kpna4                                    | 361959 | 1,00 | down |
| 6056202 | 7024721 | 947624  | katanin p60 (ATPase-containing) subunit A1 | Katna1                                   | 292464 | 2,09 | down |
| 6284413 | 7024721 | 947629  | katanin p60 (ATPase-containing) subunit A1 | Katna1                                   | 292464 | 1,95 | down |
| 5999587 | 7024721 | 947621  | katanin p60 (ATPase-containing) subunit A1 | Katna1                                   | 292464 | 1,91 | up   |
| 5903531 | 7024721 | 947628  | katanin p60 (ATPase-containing) subunit A1 | Katna1                                   | 292464 | 1,21 | up   |
| 6639895 | 7024721 | 947627  | katanin p60 (ATPase-containing) subunit A1 | Katna1                                   | 292464 | 1,13 | up   |
| 6058202 | 7024721 | 947625  | katanin p60 (ATPase-containing) subunit A1 | Katna1                                   | 292464 | 1,12 | up   |
| 5763655 | 7024721 | 947626  | katanin p60 (ATPase-containing) subunit A1 | Katna1                                   | 292464 | 1,04 | down |
| 6208751 | 7024721 | 947620  | katanin p60 (ATPase-containing) subunit A1 | Katna1                                   | 292464 | 1,04 | up   |
| 5619616 | 7024721 | 947621  | katanin p60 (ATPase-containing) subunit A1 | Katna1                                   | 292464 | 1,03 | down |
| 5807452 | 7024721 | 947622  | katanin p60 (ATPase-containing) subunit A1 | Katna1                                   | 292464 | 1,02 | up   |
| 6579846 | 7024721 | 947623  | katanin p60 (ATPase-containing) subunit A1 | Katna1                                   | 292464 | 1,02 | down |
| 6581598 | 7298920 | 1618832 | kelch domain containing 2                  | Klhdc2                                   | 299113 | 3,02 | down |
| 5753797 | 7298920 | 1618826 | kelch domain containing 2                  | Klhdc2                                   | 299113 | 1,67 | up   |
| 6303958 | 7298920 | 1618833 | kelch domain containing 2                  | Klhdc2                                   | 299113 | 1,65 | down |
| 5799945 | 7298920 | 1618828 | kelch domain containing 2                  | Klhdc2                                   | 299113 | 1,31 | up   |
| 6129110 | 7298920 | 1618830 | kelch domain containing 2                  | Klhdc2                                   | 299113 | 1,25 | up   |
| 6168699 | 7298920 | 1618825 | kelch domain containing 2                  | Klhdc2                                   | 299113 | 1,22 | up   |
| 6590189 | 7298920 | 1618828 | kelch domain containing 2                  | Klhdc2                                   | 299113 | 1,12 | up   |
| 6307360 | 7298920 | 1618824 | kelch domain containing 2                  | Klhdc2                                   | 299113 | 1,08 | up   |
| 5798556 | 7298920 | 1618827 | kelch domain containing 2                  | Klhdc2                                   | 299113 | 1,06 | down |
| 6470820 | 7298920 | 1618831 | kelch domain containing 2                  | Klhdc2                                   | 299113 | 1,06 | down |
| 6675516 | 7298920 | 1618829 | kelch domain containing 2                  | Klhdc2                                   | 299113 | 1,04 | down |

|         |         |         |                            |        |        |      |      |
|---------|---------|---------|----------------------------|--------|--------|------|------|
| 6468698 | 7298920 | 1618822 | kelch domain containing 2  | Klhdc2 | 299113 | 1,02 | up   |
| 6308423 | 7373038 | 1804296 | kelch-like 13 (Drosophila) | Klhl13 | 313445 | 2,12 | down |
| 6433424 | 7373038 | 1804297 | kelch-like 13 (Drosophila) | Klhl13 | 313445 | 1,83 | up   |
| 6165425 | 7373038 | 1804295 | kelch-like 13 (Drosophila) | Klhl13 | 313445 | 1,65 | down |
| 6044430 | 7373038 | 1804297 | kelch-like 13 (Drosophila) | Klhl13 | 313445 | 1,45 | down |
| 6663894 | 7113085 | 1159984 | kelch-like 20 (Drosophila) | Klhl20 | 304920 | 2,35 | up   |
| 6643542 | 7113085 | 1159990 | kelch-like 20 (Drosophila) | Klhl20 | 304920 | 1,57 | down |
| 6025710 | 7113085 | 1160003 | kelch-like 20 (Drosophila) | Klhl20 | 304920 | 1,49 | down |
| 6045823 | 7113085 | 1159985 | kelch-like 20 (Drosophila) | Klhl20 | 304920 | 1,47 | up   |
| 5848101 | 7113085 | 1159993 | kelch-like 20 (Drosophila) | Klhl20 | 304920 | 1,35 | up   |
| 5852678 | 7113085 | 1159988 | kelch-like 20 (Drosophila) | Klhl20 | 304920 | 1,30 | up   |
| 6316796 | 7113085 | 1159984 | kelch-like 20 (Drosophila) | Klhl20 | 304920 | 1,26 | down |
| 6067351 | 7113085 | 1159998 | kelch-like 20 (Drosophila) | Klhl20 | 304920 | 1,25 | up   |
| 6553913 | 7113085 | 1159984 | kelch-like 20 (Drosophila) | Klhl20 | 304920 | 1,24 | down |
| 6689268 | 7113085 | 1159991 | kelch-like 20 (Drosophila) | Klhl20 | 304920 | 1,24 | up   |
| 5956881 | 7113085 | 1159994 | kelch-like 20 (Drosophila) | Klhl20 | 304920 | 1,22 | down |
| 6442264 | 7113085 | 1159987 | kelch-like 20 (Drosophila) | Klhl20 | 304920 | 1,14 | up   |
| 5960365 | 7113085 | 1159989 | kelch-like 20 (Drosophila) | Klhl20 | 304920 | 1,11 | up   |
| 5920318 | 7113085 | 1159992 | kelch-like 20 (Drosophila) | Klhl20 | 304920 | 1,07 | up   |
| 6330912 | 7113085 | 1160005 | kelch-like 20 (Drosophila) | Klhl20 | 304920 | 1,06 | down |
| 6734792 | 7082471 | 1084896 | keratin 12                 | Krt12  | 360625 | 2,16 | down |
| 6735863 | 7082471 | 1084894 | keratin 12                 | Krt12  | 360625 | 1,90 | up   |
| 5736596 | 7082471 | 1084900 | keratin 12                 | Krt12  | 360625 | 1,61 | down |
| 6658077 | 7082471 | 1084899 | keratin 12                 | Krt12  | 360625 | 1,43 | up   |
| 6351230 | 7082471 | 1084900 | keratin 12                 | Krt12  | 360625 | 1,17 | down |
| 5808849 | 7082471 | 1084897 | keratin 12                 | Krt12  | 360625 | 1,12 | down |
| 5838641 | 7082471 | 1084893 | keratin 12                 | Krt12  | 360625 | 1,12 | up   |
| 6643099 | 7082471 | 1084893 | keratin 12                 | Krt12  | 360625 | 1,05 | down |
| 6222024 | 7082471 | 1084898 | keratin 12                 | Krt12  | 360625 | 1,05 | down |
| 6320156 | 7082471 | 1084895 | keratin 12                 | Krt12  | 360625 | 1,01 | up   |
| 6193172 | 7191382 | 1353516 | keratin 18                 | Krt18  | 294853 | 2,39 | down |
| 5789573 | 7191382 | 1353517 | keratin 18                 | Krt18  | 294853 | 1,48 | up   |
| 6080586 | 7191382 | 1353516 | keratin 18                 | Krt18  | 294853 | 1,18 | up   |
| 5667517 | 7191382 | 1353516 | keratin 18                 | Krt18  | 294853 | 1,11 | up   |
| 5668835 | 7082611 | 1085221 | keratin 19                 | Krt19  | 360626 | 4,82 | down |
| 5843864 | 7082611 | 1085222 | keratin 19                 | Krt19  | 360626 | 1,47 | down |
| 5781443 | 7082611 | 1085226 | keratin 19                 | Krt19  | 360626 | 1,27 | up   |
| 6146499 | 7082611 | 1085225 | keratin 19                 | Krt19  | 360626 | 1,19 | up   |
| 6389612 | 7082611 | 1085227 | keratin 19                 | Krt19  | 360626 | 1,11 | down |
| 6148024 | 7082611 | 1085224 | keratin 19                 | Krt19  | 360626 | 1,06 | down |
| 6638331 | 7082611 | 1085223 | keratin 19                 | Krt19  | 360626 | 1,05 | down |
| 6130508 | 7082611 | 1085223 | keratin 19                 | Krt19  | 360626 | 1,05 | up   |
| 5876320 | 7332059 | 1700725 | keratin 78                 | Krt78  | 685672 | 1,73 | up   |
| 6440174 | 7332059 | 1700725 | keratin 78                 | Krt78  | 685672 | 1,17 | down |
| 6214890 | 7320963 | 1674651 | keratin 86                 | Krt86  | 407760 | 2,11 | up   |
| 6286201 | 7320963 | 1674649 | keratin 86                 | Krt86  | 407760 | 1,31 | down |
| 5953378 | 7320963 | 1674654 | keratin 86                 | Krt86  | 407760 | 1,26 | up   |
| 6335980 | 7320963 | 1674656 | keratin 86                 | Krt86  | 407760 | 1,24 | down |
| 6199490 | 7320963 | 1674648 | keratin 86                 | Krt86  | 407760 | 1,22 | down |
| 6126683 | 7320963 | 1674655 | keratin 86                 | Krt86  | 407760 | 1,15 | down |
| 6484837 | 7320963 | 1674652 | keratin 86                 | Krt86  | 407760 | 1,12 | down |
| 5867353 | 7320963 | 1674648 | keratin 86                 | Krt86  | 407760 | 1,11 | down |
| 5967766 | 7320963 | 1674653 | keratin 86                 | Krt86  | 407760 | 1,09 | down |
| 6487884 | 7320963 | 1674650 | keratin 86                 | Krt86  | 407760 | 1,06 | down |
| 6304227 | 7320963 | 1674656 | keratin 86                 | Krt86  | 407760 | 1,01 | up   |
| 5629600 | 7082619 | 1085248 | keratin 9                  | Krt9   | 266717 | 2,31 | down |
| 6363895 | 7082619 | 1085244 | keratin 9                  | Krt9   | 266717 | 1,20 | down |

|         |         |         |                                                                     |         |        |      |      |
|---------|---------|---------|---------------------------------------------------------------------|---------|--------|------|------|
| 6200441 | 7082619 | 1085250 | keratin 9                                                           | Krt9    | 266717 | 1,14 | up   |
| 6277312 | 7082619 | 1085247 | keratin 9                                                           | Krt9    | 266717 | 1,13 | up   |
| 5859631 | 7082619 | 1085245 | keratin 9                                                           | Krt9    | 266717 | 1,07 | up   |
| 5644976 | 7082619 | 1085251 | keratin 9                                                           | Krt9    | 266717 | 1,05 | up   |
| 5690659 | 7082619 | 1085246 | keratin 9                                                           | Krt9    | 266717 | 1,05 | down |
| 5685098 | 7082619 | 1085249 | keratin 9                                                           | Krt9    | 266717 | 1,01 | up   |
| 5712340 | 7291370 | 1600041 | KH domain containing, RNA binding, signal transduction associated 1 | Khdrbs1 | 117268 | 2,48 | down |
| 6267477 | 7291370 | 1600042 | KH domain containing, RNA binding, signal transduction associated 1 | Khdrbs1 | 117268 | 2,02 | down |
| 6436647 | 7291370 | 1600039 | KH domain containing, RNA binding, signal transduction associated 1 | Khdrbs1 | 117268 | 1,40 | up   |
| 5886950 | 7291370 | 1600040 | KH domain containing, RNA binding, signal transduction associated 1 | Khdrbs1 | 117268 | 1,34 | up   |
| 6150786 | 7291370 | 1600042 | KH domain containing, RNA binding, signal transduction associated 1 | Khdrbs1 | 117268 | 1,32 | down |
| 6461816 | 7291370 | 1600040 | KH domain containing, RNA binding, signal transduction associated 1 | Khdrbs1 | 117268 | 1,31 | down |
| 5783201 | 7291370 | 1600041 | KH domain containing, RNA binding, signal transduction associated 1 | Khdrbs1 | 117268 | 1,31 | up   |
| 6402813 | 7291370 | 1600036 | KH domain containing, RNA binding, signal transduction associated 1 | Khdrbs1 | 117268 | 1,19 | up   |
| 5952257 | 7291370 | 1600037 | KH domain containing, RNA binding, signal transduction associated 1 | Khdrbs1 | 117268 | 1,15 | up   |
| 6614527 | 7291370 | 1600038 | KH domain containing, RNA binding, signal transduction associated 1 | Khdrbs1 | 117268 | 1,15 | up   |
| 5882350 | 7291370 | 1600041 | KH domain containing, RNA binding, signal transduction associated 1 | Khdrbs1 | 117268 | 1,11 | down |
| 5871622 | 7291370 | 1600041 | KH domain containing, RNA binding, signal transduction associated 1 | Khdrbs1 | 117268 | 1,05 | up   |
| 5772804 | 7291370 | 1600038 | KH domain containing, RNA binding, signal transduction associated 1 | Khdrbs1 | 117268 | 1,04 | down |
| 6662101 | 7317826 | 1667246 | KH domain containing, RNA binding, signal transduction associated 3 | Khdrbs3 | 64015  | 2,07 | up   |
| 5738577 | 7317826 | 1667249 | KH domain containing, RNA binding, signal transduction associated 3 | Khdrbs3 | 64015  | 1,16 | down |
| 6528830 | 7317826 | 1667247 | KH domain containing, RNA binding, signal transduction associated 3 | Khdrbs3 | 64015  | 1,15 | up   |
| 5808514 | 7317826 | 1667245 | KH domain containing, RNA binding, signal transduction associated 3 | Khdrbs3 | 64015  | 1,14 | down |
| 6319858 | 7317826 | 1667248 | KH domain containing, RNA binding, signal transduction associated 3 | Khdrbs3 | 64015  | 1,12 | down |
| 6136990 | 7317826 | 1667244 | KH domain containing, RNA binding, signal transduction associated 3 | Khdrbs3 | 64015  | 1,11 | up   |
| 5760151 | 7317826 | 1667243 | KH domain containing, RNA binding, signal transduction associated 3 | Khdrbs3 | 64015  | 1,11 | down |
| 5999955 | 7317826 | 1667250 | KH domain containing, RNA binding, signal transduction associated 3 | Khdrbs3 | 64015  | 1,10 | up   |
| 5949542 | 7317826 | 1667243 | KH domain containing, RNA binding, signal transduction associated 3 | Khdrbs3 | 64015  | 1,03 | down |
| 6188475 | 7367946 | 1788943 | KH-type splicing regulatory protein                                 | Khsrp   | 171137 | 2,17 | up   |
| 5890409 | 7367946 | 1788943 | KH-type splicing regulatory protein                                 | Khsrp   | 171137 | 1,42 | down |
| 5835015 | 7367946 | 1788952 | KH-type splicing regulatory protein                                 | Khsrp   | 171137 | 1,38 | down |
| 5931162 | 7367946 | 1788943 | KH-type splicing regulatory protein                                 | Khsrp   | 171137 | 1,36 | down |
| 6521899 | 7367946 | 1788946 | KH-type splicing regulatory protein                                 | Khsrp   | 171137 | 1,31 | down |
| 5914772 | 7367946 | 1788956 | KH-type splicing regulatory protein                                 | Khsrp   | 171137 | 1,23 | up   |
| 5999404 | 7367946 | 1788951 | KH-type splicing regulatory protein                                 | Khsrp   | 171137 | 1,14 | up   |
| 6171276 | 7367946 | 1788957 | KH-type splicing regulatory protein                                 | Khsrp   | 171137 | 1,12 | up   |
| 5935237 | 7367946 | 1788962 | KH-type splicing regulatory protein                                 | Khsrp   | 171137 | 1,12 | down |
| 6279968 | 7367946 | 1788950 | KH-type splicing regulatory protein                                 | Khsrp   | 171137 | 1,12 | down |
| 6402851 | 7367946 | 1788945 | KH-type splicing regulatory protein                                 | Khsrp   | 171137 | 1,11 | down |
| 6654918 | 7367946 | 1788965 | KH-type splicing regulatory protein                                 | Khsrp   | 171137 | 1,09 | up   |
| 6729709 | 7367946 | 1788954 | KH-type splicing regulatory protein                                 | Khsrp   | 171137 | 1,08 | up   |
| 5907882 | 7367946 | 1788959 | KH-type splicing regulatory protein                                 | Khsrp   | 171137 | 1,07 | up   |
| 5893940 | 7367946 | 1788961 | KH-type splicing regulatory protein                                 | Khsrp   | 171137 | 1,04 | up   |
| 6455413 | 7367946 | 1788960 | KH-type splicing regulatory protein                                 | Khsrp   | 171137 | 1,03 | down |
| 6156530 | 7367946 | 1788953 | KH-type splicing regulatory protein                                 | Khsrp   | 171137 | 1,02 | down |
| 5858265 | 7367946 | 1788955 | KH-type splicing regulatory protein                                 | Khsrp   | 171137 | 1,01 | down |
| 6411350 | 7367946 | 1788958 | KH-type splicing regulatory protein                                 | Khsrp   | 171137 | 1,01 | up   |
| 6648745 | 7367946 | 1788949 | KH-type splicing regulatory protein                                 | Khsrp   | 171137 | 1,01 | up   |
| 5853975 | 7367946 | 1788947 | KH-type splicing regulatory protein                                 | Khsrp   | 171137 | 1,01 | down |
| 6495838 | 7367946 | 1788943 | KH-type splicing regulatory protein                                 | Khsrp   | 171137 | 1,00 | down |
| 5977366 | 7270895 | 1549509 | kidney specific organic anion transporter                           | Slc21a4 | 80899  | 3,07 | up   |
| 6167641 | 7270895 | 1549502 | kidney specific organic anion transporter                           | Slc21a4 | 80899  | 1,62 | up   |
| 5927951 | 7270895 | 1549501 | kidney specific organic anion transporter                           | Slc21a4 | 80899  | 1,54 | down |
| 6069315 | 7270895 | 1549503 | kidney specific organic anion transporter                           | Slc21a4 | 80899  | 1,47 | up   |
| 6408642 | 7270895 | 1549493 | kidney specific organic anion transporter                           | Slc21a4 | 80899  | 1,39 | down |
| 5768811 | 7270895 | 1549505 | kidney specific organic anion transporter                           | Slc21a4 | 80899  | 1,30 | down |
| 6092549 | 7270895 | 1549504 | kidney specific organic anion transporter                           | Slc21a4 | 80899  | 1,30 | up   |

|         |         |         |                                           |         |        |      |      |
|---------|---------|---------|-------------------------------------------|---------|--------|------|------|
| 6541877 | 7270895 | 1549500 | kidney specific organic anion transporter | Slc21a4 | 80899  | 1,25 | up   |
| 5761446 | 7270895 | 1549498 | kidney specific organic anion transporter | Slc21a4 | 80899  | 1,22 | up   |
| 5794718 | 7270895 | 1549496 | kidney specific organic anion transporter | Slc21a4 | 80899  | 1,22 | down |
| 6499313 | 7270895 | 1549498 | kidney specific organic anion transporter | Slc21a4 | 80899  | 1,20 | up   |
| 5930517 | 7270895 | 1549501 | kidney specific organic anion transporter | Slc21a4 | 80899  | 1,16 | down |
| 6008847 | 7270895 | 1549495 | kidney specific organic anion transporter | Slc21a4 | 80899  | 1,14 | down |
| 6648102 | 7270895 | 1549507 | kidney specific organic anion transporter | Slc21a4 | 80899  | 1,10 | up   |
| 5831473 | 7270895 | 1549504 | kidney specific organic anion transporter | Slc21a4 | 80899  | 1,09 | up   |
| 5994786 | 7270895 | 1549506 | kidney specific organic anion transporter | Slc21a4 | 80899  | 1,09 | up   |
| 6304515 | 7270895 | 1549509 | kidney specific organic anion transporter | Slc21a4 | 80899  | 1,08 | down |
| 6548858 | 7270895 | 1549497 | kidney specific organic anion transporter | Slc21a4 | 80899  | 1,06 | down |
| 6024609 | 7270895 | 1549506 | kidney specific organic anion transporter | Slc21a4 | 80899  | 1,05 | down |
| 6154310 | 7270895 | 1549505 | kidney specific organic anion transporter | Slc21a4 | 80899  | 1,01 | up   |
| 6288337 | 7270895 | 1549508 | kidney specific organic anion transporter | Slc21a4 | 80899  | 1,01 | up   |
| 5851573 | 7270895 | 1549501 | kidney specific organic anion transporter | Slc21a4 | 80899  | 1,01 | up   |
| 6219053 | 7270895 | 1549494 | kidney specific organic anion transporter | Slc21a4 | 80899  | 1,00 | down |
| 5840063 | 7270895 | 1549499 | kidney specific organic anion transporter | Slc21a4 | 80899  | 1,00 | down |
| 6295940 | 7270895 | 1549502 | kidney specific organic anion transporter | Slc21a4 | 80899  | 1,00 | up   |
| 6432971 | 7131103 | 1204344 | kinectin 1                                | Ktn1    | 361029 | 1,81 | up   |
| 5645606 | 7131103 | 1204361 | kinectin 1                                | Ktn1    | 361029 | 1,80 | up   |
| 5716072 | 7131103 | 1204365 | kinectin 1                                | Ktn1    | 361029 | 1,64 | up   |
| 5721011 | 7131103 | 1204364 | kinectin 1                                | Ktn1    | 361029 | 1,58 | down |
| 5672586 | 7131103 | 1204363 | kinectin 1                                | Ktn1    | 361029 | 1,53 | down |
| 6471289 | 7131103 | 1204357 | kinectin 1                                | Ktn1    | 361029 | 1,47 | down |
| 6423967 | 7131103 | 1204338 | kinectin 1                                | Ktn1    | 361029 | 1,46 | down |
| 6316610 | 7131103 | 1204352 | kinectin 1                                | Ktn1    | 361029 | 1,45 | down |
| 6072242 | 7131103 | 1204347 | kinectin 1                                | Ktn1    | 361029 | 1,42 | down |
| 6242779 | 7131103 | 1204345 | kinectin 1                                | Ktn1    | 361029 | 1,38 | up   |
| 6300097 | 7131103 | 1204346 | kinectin 1                                | Ktn1    | 361029 | 1,38 | up   |
| 6543152 | 7131103 | 1204333 | kinectin 1                                | Ktn1    | 361029 | 1,37 | down |
| 5802965 | 7131103 | 1204323 | kinectin 1                                | Ktn1    | 361029 | 1,34 | up   |
| 5802430 | 7131103 | 1204321 | kinectin 1                                | Ktn1    | 361029 | 1,32 | down |
| 5634625 | 7131103 | 1204328 | kinectin 1                                | Ktn1    | 361029 | 1,28 | up   |
| 6405161 | 7131103 | 1204367 | kinectin 1                                | Ktn1    | 361029 | 1,27 | down |
| 6497930 | 7131103 | 1204351 | kinectin 1                                | Ktn1    | 361029 | 1,24 | down |
| 6722995 | 7131103 | 1204330 | kinectin 1                                | Ktn1    | 361029 | 1,24 | down |
| 6213089 | 7131103 | 1204366 | kinectin 1                                | Ktn1    | 361029 | 1,22 | down |
| 6116626 | 7131103 | 1204327 | kinectin 1                                | Ktn1    | 361029 | 1,19 | up   |
| 6346243 | 7131103 | 1204337 | kinectin 1                                | Ktn1    | 361029 | 1,18 | up   |
| 6135828 | 7131103 | 1204324 | kinectin 1                                | Ktn1    | 361029 | 1,18 | down |
| 6460842 | 7131103 | 1204339 | kinectin 1                                | Ktn1    | 361029 | 1,17 | up   |
| 6025369 | 7131103 | 1204360 | kinectin 1                                | Ktn1    | 361029 | 1,16 | down |
| 6542889 | 7131103 | 1204343 | kinectin 1                                | Ktn1    | 361029 | 1,15 | up   |
| 6367417 | 7131103 | 1204348 | kinectin 1                                | Ktn1    | 361029 | 1,15 | up   |
| 6735411 | 7131103 | 1204350 | kinectin 1                                | Ktn1    | 361029 | 1,14 | up   |
| 6311411 | 7131103 | 1204359 | kinectin 1                                | Ktn1    | 361029 | 1,13 | down |
| 5673234 | 7131103 | 1204342 | kinectin 1                                | Ktn1    | 361029 | 1,11 | up   |
| 6211396 | 7131103 | 1204334 | kinectin 1                                | Ktn1    | 361029 | 1,10 | down |
| 6184038 | 7131103 | 1204368 | kinectin 1                                | Ktn1    | 361029 | 1,10 | down |
| 5820456 | 7131103 | 1204329 | kinectin 1                                | Ktn1    | 361029 | 1,08 | down |
| 6117529 | 7131103 | 1204336 | kinectin 1                                | Ktn1    | 361029 | 1,08 | down |
| 6000684 | 7131103 | 1204354 | kinectin 1                                | Ktn1    | 361029 | 1,07 | up   |
| 6099597 | 7131103 | 1204340 | kinectin 1                                | Ktn1    | 361029 | 1,06 | down |
| 6290731 | 7131103 | 1204323 | kinectin 1                                | Ktn1    | 361029 | 1,06 | down |
| 6067282 | 7131103 | 1204335 | kinectin 1                                | Ktn1    | 361029 | 1,05 | down |
| 6241733 | 7131103 | 1204353 | kinectin 1                                | Ktn1    | 361029 | 1,05 | down |
| 6514716 | 7131103 | 1204325 | kinectin 1                                | Ktn1    | 361029 | 1,03 | down |

|         |         |         |                           |        |        |      |      |
|---------|---------|---------|---------------------------|--------|--------|------|------|
| 6501559 | 7131103 | 1204331 | kinectin 1                | Ktn1   | 361029 | 1,03 | up   |
| 6306088 | 7131103 | 1204355 | kinectin 1                | Ktn1   | 361029 | 1,03 | down |
| 6575346 | 7131103 | 1204362 | kinectin 1                | Ktn1   | 361029 | 1,02 | up   |
| 5903694 | 7131103 | 1204326 | kinectin 1                | Ktn1   | 361029 | 1,02 | up   |
| 5758924 | 7131103 | 1204364 | kinectin 1                | Ktn1   | 361029 | 1,01 | down |
| 5897330 | 7131103 | 1204349 | kinectin 1                | Ktn1   | 361029 | 1,01 | up   |
| 6692516 | 7156170 | 1266274 | kinesin family member 13A | Kif13a | 308173 | 2,83 | up   |
| 5787938 | 7156170 | 1266278 | kinesin family member 13A | Kif13a | 308173 | 1,83 | up   |
| 6626596 | 7156170 | 1266248 | kinesin family member 13A | Kif13a | 308173 | 1,65 | down |
| 5986019 | 7156170 | 1266276 | kinesin family member 13A | Kif13a | 308173 | 1,64 | down |
| 6029373 | 7156170 | 1266230 | kinesin family member 13A | Kif13a | 308173 | 1,63 | up   |
| 5709711 | 7156170 | 1266255 | kinesin family member 13A | Kif13a | 308173 | 1,59 | up   |
| 6148205 | 7156170 | 1266267 | kinesin family member 13A | Kif13a | 308173 | 1,48 | up   |
| 6071329 | 7156170 | 1266247 | kinesin family member 13A | Kif13a | 308173 | 1,47 | up   |
| 5734358 | 7156170 | 1266279 | kinesin family member 13A | Kif13a | 308173 | 1,43 | down |
| 5958685 | 7156170 | 1266282 | kinesin family member 13A | Kif13a | 308173 | 1,43 | up   |
| 5873211 | 7156170 | 1266265 | kinesin family member 13A | Kif13a | 308173 | 1,40 | down |
| 5861703 | 7156170 | 1266287 | kinesin family member 13A | Kif13a | 308173 | 1,29 | down |
| 5672260 | 7156170 | 1266264 | kinesin family member 13A | Kif13a | 308173 | 1,26 | up   |
| 6532536 | 7156170 | 1266245 | kinesin family member 13A | Kif13a | 308173 | 1,21 | up   |
| 6254798 | 7156170 | 1266275 | kinesin family member 13A | Kif13a | 308173 | 1,15 | up   |
| 5744057 | 7156170 | 1266261 | kinesin family member 13A | Kif13a | 308173 | 1,14 | down |
| 6500866 | 7156170 | 1266266 | kinesin family member 13A | Kif13a | 308173 | 1,13 | down |
| 6709693 | 7156170 | 1266246 | kinesin family member 13A | Kif13a | 308173 | 1,11 | up   |
| 6511219 | 7156170 | 1266252 | kinesin family member 13A | Kif13a | 308173 | 1,11 | down |
| 5802281 | 7156170 | 1266263 | kinesin family member 13A | Kif13a | 308173 | 1,10 | down |
| 5995931 | 7156170 | 1266256 | kinesin family member 13A | Kif13a | 308173 | 1,10 | up   |
| 6175233 | 7156170 | 1266254 | kinesin family member 13A | Kif13a | 308173 | 1,09 | down |
| 5770581 | 7156170 | 1266277 | kinesin family member 13A | Kif13a | 308173 | 1,09 | up   |
| 6557619 | 7156170 | 1266249 | kinesin family member 13A | Kif13a | 308173 | 1,08 | up   |
| 6218818 | 7156170 | 1266262 | kinesin family member 13A | Kif13a | 308173 | 1,08 | up   |
| 5960253 | 7156170 | 1266257 | kinesin family member 13A | Kif13a | 308173 | 1,06 | up   |
| 6088488 | 7156170 | 1266281 | kinesin family member 13A | Kif13a | 308173 | 1,04 | up   |
| 6693249 | 7156170 | 1266286 | kinesin family member 13A | Kif13a | 308173 | 1,03 | up   |
| 6394399 | 7156170 | 1266253 | kinesin family member 13A | Kif13a | 308173 | 1,02 | up   |
| 6643886 | 7156170 | 1266267 | kinesin family member 13A | Kif13a | 308173 | 1,02 | down |
| 5652319 | 7156170 | 1266269 | kinesin family member 13A | Kif13a | 308173 | 1,01 | down |
| 6486067 | 7156170 | 1266287 | kinesin family member 13A | Kif13a | 308173 | 1,01 | up   |
| 6112698 | 7156170 | 1266268 | kinesin family member 13A | Kif13a | 308173 | 1,00 | up   |
| 5963002 | 7156170 | 1266280 | kinesin family member 13A | Kif13a | 308173 | 1,00 | up   |
| 6062447 | 7156170 | 1266271 | kinesin family member 13A | Kif13a | 308173 | 1,00 | down |
| 6529086 | 7156170 | 1266258 | kinesin family member 13A | Kif13a | 308173 | 1,00 | down |
| 6083252 | 7156170 | 1266272 | kinesin family member 13A | Kif13a | 308173 | 1,00 | up   |
| 6596123 | 7073563 | 1064716 | kinesin family member 19A | Kif19a | 303659 | 2,04 | up   |
| 6193250 | 7073563 | 1064706 | kinesin family member 19A | Kif19a | 303659 | 1,84 | down |
| 5993440 | 7073563 | 1064717 | kinesin family member 19A | Kif19a | 303659 | 1,83 | up   |
| 6042873 | 7073563 | 1064721 | kinesin family member 19A | Kif19a | 303659 | 1,56 | down |
| 5698183 | 7073563 | 1064722 | kinesin family member 19A | Kif19a | 303659 | 1,42 | down |
| 5889131 | 7073563 | 1064706 | kinesin family member 19A | Kif19a | 303659 | 1,27 | up   |
| 6349890 | 7073563 | 1064723 | kinesin family member 19A | Kif19a | 303659 | 1,27 | up   |
| 6430070 | 7073563 | 1064714 | kinesin family member 19A | Kif19a | 303659 | 1,18 | up   |
| 5876536 | 7073563 | 1064710 | kinesin family member 19A | Kif19a | 303659 | 1,16 | up   |
| 5973073 | 7073563 | 1064718 | kinesin family member 19A | Kif19a | 303659 | 1,15 | up   |
| 5946665 | 7073563 | 1064720 | kinesin family member 19A | Kif19a | 303659 | 1,09 | up   |
| 6013186 | 7073563 | 1064709 | kinesin family member 19A | Kif19a | 303659 | 1,09 | up   |
| 5823787 | 7073563 | 1064719 | kinesin family member 19A | Kif19a | 303659 | 1,05 | down |
| 5654129 | 7073563 | 1064720 | kinesin family member 19A | Kif19a | 303659 | 1,04 | down |

|         |         |         |                           |        |        |      |      |
|---------|---------|---------|---------------------------|--------|--------|------|------|
| 6694989 | 7073563 | 1064715 | kinesin family member 19A | Kif19a | 303659 | 1,02 | down |
| 6119992 | 7073563 | 1064719 | kinesin family member 19A | Kif19a | 303659 | 1,01 | up   |
| 6310984 | 7073563 | 1064711 | kinesin family member 19A | Kif19a | 303659 | 1,01 | up   |
| 6312219 | 7155210 | 1263686 | kinesin family member 27  | Kif27  | 246209 | 2,24 | down |
| 6686057 | 7155210 | 1263687 | kinesin family member 27  | Kif27  | 246209 | 1,70 | down |
| 6102287 | 7155210 | 1263680 | kinesin family member 27  | Kif27  | 246209 | 1,65 | down |
| 5856293 | 7155210 | 1263674 | kinesin family member 27  | Kif27  | 246209 | 1,49 | up   |
| 6549656 | 7155210 | 1263678 | kinesin family member 27  | Kif27  | 246209 | 1,40 | down |
| 6095492 | 7155210 | 1263672 | kinesin family member 27  | Kif27  | 246209 | 1,39 | up   |
| 6182455 | 7155210 | 1263673 | kinesin family member 27  | Kif27  | 246209 | 1,34 | up   |
| 5855384 | 7155210 | 1263677 | kinesin family member 27  | Kif27  | 246209 | 1,31 | down |
| 5789992 | 7155210 | 1263675 | kinesin family member 27  | Kif27  | 246209 | 1,28 | up   |
| 6166944 | 7155210 | 1263681 | kinesin family member 27  | Kif27  | 246209 | 1,22 | up   |
| 6504492 | 7155210 | 1263671 | kinesin family member 27  | Kif27  | 246209 | 1,22 | up   |
| 6370400 | 7155210 | 1263684 | kinesin family member 27  | Kif27  | 246209 | 1,17 | up   |
| 6700671 | 7155210 | 1263685 | kinesin family member 27  | Kif27  | 246209 | 1,16 | down |
| 5840990 | 7155210 | 1263676 | kinesin family member 27  | Kif27  | 246209 | 1,14 | up   |
| 5644835 | 7155210 | 1263682 | kinesin family member 27  | Kif27  | 246209 | 1,11 | up   |
| 6706788 | 7155210 | 1263679 | kinesin family member 27  | Kif27  | 246209 | 1,09 | up   |
| 6735110 | 7155210 | 1263688 | kinesin family member 27  | Kif27  | 246209 | 1,06 | down |
| 6104028 | 7155210 | 1263683 | kinesin family member 27  | Kif27  | 246209 | 1,06 | up   |
| 6600069 | 7155210 | 1263672 | kinesin family member 27  | Kif27  | 246209 | 1,05 | up   |
| 5790361 | 7155210 | 1263674 | kinesin family member 27  | Kif27  | 246209 | 1,04 | down |
| 6161887 | 7290296 | 1597390 | kinesin family member 2C  | Kif2c  | 171529 | 2,00 | down |
| 5714337 | 7290296 | 1597396 | kinesin family member 2C  | Kif2c  | 171529 | 1,43 | down |
| 6636603 | 7290296 | 1597381 | kinesin family member 2C  | Kif2c  | 171529 | 1,42 | up   |
| 6628780 | 7290296 | 1597393 | kinesin family member 2C  | Kif2c  | 171529 | 1,41 | up   |
| 5910573 | 7290296 | 1597397 | kinesin family member 2C  | Kif2c  | 171529 | 1,38 | down |
| 5781188 | 7290296 | 1597385 | kinesin family member 2C  | Kif2c  | 171529 | 1,31 | down |
| 6329891 | 7290296 | 1597398 | kinesin family member 2C  | Kif2c  | 171529 | 1,27 | down |
| 6048526 | 7290296 | 1597400 | kinesin family member 2C  | Kif2c  | 171529 | 1,25 | up   |
| 6244467 | 7290296 | 1597393 | kinesin family member 2C  | Kif2c  | 171529 | 1,24 | up   |
| 6706014 | 7290296 | 1597379 | kinesin family member 2C  | Kif2c  | 171529 | 1,22 | up   |
| 6028682 | 7290296 | 1597388 | kinesin family member 2C  | Kif2c  | 171529 | 1,18 | down |
| 6034956 | 7290296 | 1597392 | kinesin family member 2C  | Kif2c  | 171529 | 1,17 | up   |
| 6081570 | 7290296 | 1597386 | kinesin family member 2C  | Kif2c  | 171529 | 1,09 | down |
| 6057609 | 7290296 | 1597389 | kinesin family member 2C  | Kif2c  | 171529 | 1,09 | down |
| 5651764 | 7290296 | 1597380 | kinesin family member 2C  | Kif2c  | 171529 | 1,07 | up   |
| 6691779 | 7290296 | 1597383 | kinesin family member 2C  | Kif2c  | 171529 | 1,06 | down |
| 6369553 | 7290296 | 1597395 | kinesin family member 2C  | Kif2c  | 171529 | 1,06 | down |
| 6414442 | 7290296 | 1597387 | kinesin family member 2C  | Kif2c  | 171529 | 1,05 | down |
| 5705305 | 7290296 | 1597384 | kinesin family member 2C  | Kif2c  | 171529 | 1,04 | down |
| 6112452 | 7290296 | 1597379 | kinesin family member 2C  | Kif2c  | 171529 | 1,03 | down |
| 6313197 | 7290296 | 1597382 | kinesin family member 2C  | Kif2c  | 171529 | 1,03 | up   |
| 6622405 | 7290296 | 1597391 | kinesin family member 2C  | Kif2c  | 171529 | 1,00 | up   |
| 5646163 | 7326239 | 1686338 | kinesin family member 5A  | Kif5a  | 314906 | 2,10 | up   |
| 6549342 | 7326239 | 1686332 | kinesin family member 5A  | Kif5a  | 314906 | 1,85 | up   |
| 6008642 | 7326239 | 1686334 | kinesin family member 5A  | Kif5a  | 314906 | 1,68 | down |
| 6088587 | 7326239 | 1686320 | kinesin family member 5A  | Kif5a  | 314906 | 1,43 | up   |
| 6371962 | 7326239 | 1686335 | kinesin family member 5A  | Kif5a  | 314906 | 1,42 | down |
| 5771277 | 7326239 | 1686322 | kinesin family member 5A  | Kif5a  | 314906 | 1,42 | down |
| 6493805 | 7326239 | 1686323 | kinesin family member 5A  | Kif5a  | 314906 | 1,33 | down |
| 5959648 | 7326239 | 1686344 | kinesin family member 5A  | Kif5a  | 314906 | 1,31 | down |
| 6286559 | 7326239 | 1686342 | kinesin family member 5A  | Kif5a  | 314906 | 1,30 | up   |
| 6301013 | 7326239 | 1686345 | kinesin family member 5A  | Kif5a  | 314906 | 1,25 | up   |
| 6147398 | 7326239 | 1686340 | kinesin family member 5A  | Kif5a  | 314906 | 1,23 | up   |
| 6424707 | 7326239 | 1686336 | kinesin family member 5A  | Kif5a  | 314906 | 1,23 | up   |

|         |         |         |                          |       |        |      |      |
|---------|---------|---------|--------------------------|-------|--------|------|------|
| 6375352 | 7326239 | 1686339 | kinesin family member 5A | Kif5a | 314906 | 1,22 | up   |
| 5646495 | 7326239 | 1686338 | kinesin family member 5A | Kif5a | 314906 | 1,22 | down |
| 5750081 | 7326239 | 1686332 | kinesin family member 5A | Kif5a | 314906 | 1,20 | down |
| 5807374 | 7326239 | 1686319 | kinesin family member 5A | Kif5a | 314906 | 1,17 | down |
| 6269282 | 7326239 | 1686347 | kinesin family member 5A | Kif5a | 314906 | 1,17 | up   |
| 6611072 | 7326239 | 1686321 | kinesin family member 5A | Kif5a | 314906 | 1,16 | up   |
| 6030862 | 7326239 | 1686343 | kinesin family member 5A | Kif5a | 314906 | 1,14 | up   |
| 6084901 | 7326239 | 1686341 | kinesin family member 5A | Kif5a | 314906 | 1,13 | down |
| 6148840 | 7326239 | 1686328 | kinesin family member 5A | Kif5a | 314906 | 1,12 | up   |
| 6404331 | 7326239 | 1686348 | kinesin family member 5A | Kif5a | 314906 | 1,12 | up   |
| 5747479 | 7326239 | 1686333 | kinesin family member 5A | Kif5a | 314906 | 1,11 | up   |
| 5864906 | 7326239 | 1686330 | kinesin family member 5A | Kif5a | 314906 | 1,10 | down |
| 6256886 | 7326239 | 1686329 | kinesin family member 5A | Kif5a | 314906 | 1,08 | down |
| 5972426 | 7326239 | 1686346 | kinesin family member 5A | Kif5a | 314906 | 1,08 | down |
| 6204115 | 7326239 | 1686337 | kinesin family member 5A | Kif5a | 314906 | 1,05 | up   |
| 6577346 | 7326239 | 1686327 | kinesin family member 5A | Kif5a | 314906 | 1,03 | down |
| 6604612 | 7326239 | 1686324 | kinesin family member 5A | Kif5a | 314906 | 1,03 | down |
| 6340664 | 7326239 | 1686331 | kinesin family member 5A | Kif5a | 314906 | 1,03 | down |
| 6170733 | 7326239 | 1686319 | kinesin family member 5A | Kif5a | 314906 | 1,03 | down |
| 5898924 | 7326239 | 1686325 | kinesin family member 5A | Kif5a | 314906 | 1,03 | up   |
| 6097456 | 7326239 | 1686326 | kinesin family member 5A | Kif5a | 314906 | 1,01 | up   |
| 6698589 | 7326239 | 1686348 | kinesin family member 5A | Kif5a | 314906 | 1,01 | down |
| 6253408 | 7359554 | 1768664 | kinesin light chain 4    | Klc4  | 316226 | 2,07 | up   |
| 5936394 | 7359554 | 1768656 | kinesin light chain 4    | Klc4  | 316226 | 1,77 | up   |
| 5975823 | 7359554 | 1768660 | kinesin light chain 4    | Klc4  | 316226 | 1,58 | down |
| 6578909 | 7359554 | 1768650 | kinesin light chain 4    | Klc4  | 316226 | 1,46 | up   |
| 6743487 | 7359554 | 1768666 | kinesin light chain 4    | Klc4  | 316226 | 1,39 | down |
| 6352003 | 7359554 | 1768650 | kinesin light chain 4    | Klc4  | 316226 | 1,39 | up   |
| 5915991 | 7359554 | 1768652 | kinesin light chain 4    | Klc4  | 316226 | 1,34 | up   |
| 6325437 | 7359554 | 1768657 | kinesin light chain 4    | Klc4  | 316226 | 1,33 | up   |
| 6147471 | 7359554 | 1768653 | kinesin light chain 4    | Klc4  | 316226 | 1,23 | down |
| 5967956 | 7359554 | 1768655 | kinesin light chain 4    | Klc4  | 316226 | 1,22 | down |
| 6406821 | 7359554 | 1768664 | kinesin light chain 4    | Klc4  | 316226 | 1,20 | up   |
| 5822330 | 7359554 | 1768662 | kinesin light chain 4    | Klc4  | 316226 | 1,18 | up   |
| 6491595 | 7359554 | 1768665 | kinesin light chain 4    | Klc4  | 316226 | 1,16 | down |
| 6423108 | 7359554 | 1768666 | kinesin light chain 4    | Klc4  | 316226 | 1,16 | down |
| 6679249 | 7359554 | 1768650 | kinesin light chain 4    | Klc4  | 316226 | 1,10 | down |
| 6341849 | 7359554 | 1768654 | kinesin light chain 4    | Klc4  | 316226 | 1,06 | down |
| 6279904 | 7359554 | 1768663 | kinesin light chain 4    | Klc4  | 316226 | 1,06 | up   |
| 6282084 | 7359554 | 1768661 | kinesin light chain 4    | Klc4  | 316226 | 1,05 | up   |
| 5960839 | 7359554 | 1768651 | kinesin light chain 4    | Klc4  | 316226 | 1,05 | up   |
| 5931865 | 7359554 | 1768659 | kinesin light chain 4    | Klc4  | 316226 | 1,04 | down |
| 6166030 | 7359554 | 1768664 | kinesin light chain 4    | Klc4  | 316226 | 1,02 | up   |
| 5875870 | 7359554 | 1768658 | kinesin light chain 4    | Klc4  | 316226 | 1,00 | down |
| 6467569 | 7102113 | 1132802 | kinetochore associated 1 | Kntc1 | 304477 | 2,60 | down |
| 5738578 | 7102113 | 1132799 | kinetochore associated 1 | Kntc1 | 304477 | 2,41 | down |
| 5697786 | 7102113 | 1132824 | kinetochore associated 1 | Kntc1 | 304477 | 1,90 | down |
| 6633492 | 7102113 | 1132804 | kinetochore associated 1 | Kntc1 | 304477 | 1,87 | down |
| 6332736 | 7102113 | 1132796 | kinetochore associated 1 | Kntc1 | 304477 | 1,78 | down |
| 5636159 | 7102113 | 1132844 | kinetochore associated 1 | Kntc1 | 304477 | 1,62 | up   |
| 6712800 | 7102113 | 1132794 | kinetochore associated 1 | Kntc1 | 304477 | 1,61 | up   |
| 6264939 | 7102113 | 1132812 | kinetochore associated 1 | Kntc1 | 304477 | 1,48 | down |
| 6134735 | 7102113 | 1132851 | kinetochore associated 1 | Kntc1 | 304477 | 1,42 | down |
| 5887379 | 7102113 | 1132792 | kinetochore associated 1 | Kntc1 | 304477 | 1,42 | down |
| 5731649 | 7102113 | 1132816 | kinetochore associated 1 | Kntc1 | 304477 | 1,42 | up   |
| 6239657 | 7102113 | 1132817 | kinetochore associated 1 | Kntc1 | 304477 | 1,40 | down |
| 6528080 | 7102113 | 1132823 | kinetochore associated 1 | Kntc1 | 304477 | 1,31 | up   |

|         |         |         |                          |       |        |      |      |
|---------|---------|---------|--------------------------|-------|--------|------|------|
| 6380753 | 7102113 | 1132850 | kinetochore associated 1 | Kntc1 | 304477 | 1,31 | down |
| 6231926 | 7102113 | 1132822 | kinetochore associated 1 | Kntc1 | 304477 | 1,30 | down |
| 5956305 | 7102113 | 1132848 | kinetochore associated 1 | Kntc1 | 304477 | 1,30 | down |
| 6410920 | 7102113 | 1132826 | kinetochore associated 1 | Kntc1 | 304477 | 1,29 | down |
| 6096251 | 7102113 | 1132809 | kinetochore associated 1 | Kntc1 | 304477 | 1,29 | up   |
| 6598333 | 7102113 | 1132807 | kinetochore associated 1 | Kntc1 | 304477 | 1,28 | down |
| 6475953 | 7102113 | 1132806 | kinetochore associated 1 | Kntc1 | 304477 | 1,26 | down |
| 6730513 | 7102113 | 1132811 | kinetochore associated 1 | Kntc1 | 304477 | 1,26 | down |
| 6404139 | 7102113 | 1132834 | kinetochore associated 1 | Kntc1 | 304477 | 1,25 | down |
| 5763593 | 7102113 | 1132805 | kinetochore associated 1 | Kntc1 | 304477 | 1,25 | down |
| 6361982 | 7102113 | 1132814 | kinetochore associated 1 | Kntc1 | 304477 | 1,22 | down |
| 5916259 | 7102113 | 1132790 | kinetochore associated 1 | Kntc1 | 304477 | 1,20 | down |
| 5879018 | 7102113 | 1132846 | kinetochore associated 1 | Kntc1 | 304477 | 1,18 | down |
| 5955797 | 7102113 | 1132832 | kinetochore associated 1 | Kntc1 | 304477 | 1,18 | down |
| 5709465 | 7102113 | 1132830 | kinetochore associated 1 | Kntc1 | 304477 | 1,16 | up   |
| 6624343 | 7102113 | 1132821 | kinetochore associated 1 | Kntc1 | 304477 | 1,15 | down |
| 6180310 | 7102113 | 1132787 | kinetochore associated 1 | Kntc1 | 304477 | 1,14 | up   |
| 6595382 | 7102113 | 1132789 | kinetochore associated 1 | Kntc1 | 304477 | 1,13 | up   |
| 6437085 | 7102113 | 1132797 | kinetochore associated 1 | Kntc1 | 304477 | 1,13 | up   |
| 6368074 | 7102113 | 1132818 | kinetochore associated 1 | Kntc1 | 304477 | 1,12 | down |
| 6225781 | 7102113 | 1132828 | kinetochore associated 1 | Kntc1 | 304477 | 1,12 | up   |
| 5810851 | 7102113 | 1132842 | kinetochore associated 1 | Kntc1 | 304477 | 1,11 | up   |
| 5738793 | 7102113 | 1132843 | kinetochore associated 1 | Kntc1 | 304477 | 1,11 | up   |
| 6323436 | 7102113 | 1132838 | kinetochore associated 1 | Kntc1 | 304477 | 1,10 | down |
| 6709889 | 7102113 | 1132836 | kinetochore associated 1 | Kntc1 | 304477 | 1,10 | up   |
| 6484736 | 7102113 | 1132833 | kinetochore associated 1 | Kntc1 | 304477 | 1,10 | down |
| 6281190 | 7102113 | 1132831 | kinetochore associated 1 | Kntc1 | 304477 | 1,10 | down |
| 6243313 | 7102113 | 1132785 | kinetochore associated 1 | Kntc1 | 304477 | 1,10 | up   |
| 6141397 | 7102113 | 1132842 | kinetochore associated 1 | Kntc1 | 304477 | 1,10 | down |
| 6546496 | 7102113 | 1132827 | kinetochore associated 1 | Kntc1 | 304477 | 1,08 | down |
| 6063602 | 7102113 | 1132849 | kinetochore associated 1 | Kntc1 | 304477 | 1,07 | down |
| 5841819 | 7102113 | 1132825 | kinetochore associated 1 | Kntc1 | 304477 | 1,07 | down |
| 6168210 | 7102113 | 1132788 | kinetochore associated 1 | Kntc1 | 304477 | 1,07 | up   |
| 6642126 | 7102113 | 1132826 | kinetochore associated 1 | Kntc1 | 304477 | 1,07 | down |
| 5921868 | 7102113 | 1132847 | kinetochore associated 1 | Kntc1 | 304477 | 1,06 | up   |
| 5877156 | 7102113 | 1132828 | kinetochore associated 1 | Kntc1 | 304477 | 1,05 | up   |
| 6066190 | 7102113 | 1132820 | kinetochore associated 1 | Kntc1 | 304477 | 1,05 | down |
| 6605945 | 7102113 | 1132793 | kinetochore associated 1 | Kntc1 | 304477 | 1,05 | down |
| 6519393 | 7102113 | 1132795 | kinetochore associated 1 | Kntc1 | 304477 | 1,04 | down |
| 6416684 | 7102113 | 1132819 | kinetochore associated 1 | Kntc1 | 304477 | 1,04 | down |
| 6694906 | 7102113 | 1132852 | kinetochore associated 1 | Kntc1 | 304477 | 1,04 | down |
| 6056875 | 7102113 | 1132836 | kinetochore associated 1 | Kntc1 | 304477 | 1,04 | down |
| 6320390 | 7102113 | 1132803 | kinetochore associated 1 | Kntc1 | 304477 | 1,04 | up   |
| 5861828 | 7102113 | 1132829 | kinetochore associated 1 | Kntc1 | 304477 | 1,02 | up   |
| 5899161 | 7102113 | 1132810 | kinetochore associated 1 | Kntc1 | 304477 | 1,02 | down |
| 6736849 | 7102113 | 1132837 | kinetochore associated 1 | Kntc1 | 304477 | 1,01 | down |
| 6041665 | 7102113 | 1132800 | kinetochore associated 1 | Kntc1 | 304477 | 1,01 | down |
| 6724955 | 7102113 | 1132815 | kinetochore associated 1 | Kntc1 | 304477 | 1,00 | up   |
| 5699521 | 7314316 | 1657933 | KIT ligand               | Kitlg | 60427  | 2,25 | down |
| 5622635 | 7314316 | 1657925 | KIT ligand               | Kitlg | 60427  | 2,05 | down |
| 6132415 | 7314316 | 1657928 | KIT ligand               | Kitlg | 60427  | 1,46 | up   |
| 6185781 | 7314316 | 1657926 | KIT ligand               | Kitlg | 60427  | 1,40 | up   |
| 5943058 | 7314316 | 1657929 | KIT ligand               | Kitlg | 60427  | 1,25 | up   |
| 6690842 | 7314316 | 1657935 | KIT ligand               | Kitlg | 60427  | 1,20 | up   |
| 5762732 | 7314316 | 1657930 | KIT ligand               | Kitlg | 60427  | 1,17 | down |
| 6475667 | 7314316 | 1657934 | KIT ligand               | Kitlg | 60427  | 1,15 | down |
| 5910925 | 7314316 | 1657935 | KIT ligand               | Kitlg | 60427  | 1,15 | down |



|         |         |         |                                       |       |        |      |      |
|---------|---------|---------|---------------------------------------|-------|--------|------|------|
| 6305879 | 7314316 | 1657931 | KIT ligand                            | Kitlg | 60427  | 1,14 | up   |
| 6256647 | 7314316 | 1657932 | KIT ligand                            | Kitlg | 60427  | 1,14 | down |
| 6598598 | 7314316 | 1657927 | KIT ligand                            | Kitlg | 60427  | 1,03 | up   |
| 6144230 | 7289069 | 1594397 | KN motif and ankyrin repeat domains 4 | Kank4 | 313385 | 1,53 | up   |
| 5796720 | 7289069 | 1594398 | KN motif and ankyrin repeat domains 4 | Kank4 | 313385 | 1,44 | up   |
| 6052845 | 7289069 | 1594392 | KN motif and ankyrin repeat domains 4 | Kank4 | 313385 | 1,26 | up   |
| 5784466 | 7289069 | 1594400 | KN motif and ankyrin repeat domains 4 | Kank4 | 313385 | 1,19 | up   |
| 6144788 | 7289069 | 1594401 | KN motif and ankyrin repeat domains 4 | Kank4 | 313385 | 1,17 | down |
| 6424277 | 7289069 | 1594395 | KN motif and ankyrin repeat domains 4 | Kank4 | 313385 | 1,14 | down |
| 6720355 | 7289069 | 1594405 | KN motif and ankyrin repeat domains 4 | Kank4 | 313385 | 1,11 | up   |
| 6518856 | 7289069 | 1594394 | KN motif and ankyrin repeat domains 4 | Kank4 | 313385 | 1,06 | down |
| 5839540 | 7289069 | 1594402 | KN motif and ankyrin repeat domains 4 | Kank4 | 313385 | 1,04 | down |
| 6242171 | 7289069 | 1594392 | KN motif and ankyrin repeat domains 4 | Kank4 | 313385 | 1,01 | down |
| 6346726 | 7253408 | 1505932 | KRAB-A domain containing 1            | Krba1 | 362358 | 1,11 | down |
| 5689610 | 7253408 | 1505932 | KRAB-A domain containing 1            | Krba1 | 362358 | 1,10 | up   |
| 5755244 | 7253408 | 1505954 | KRAB-A domain containing 1            | Krba1 | 362358 | 1,10 | down |
| 6360184 | 7261592 | 1526852 | KRIT1, ankyrin repeat containing      | Krit1 | 362317 | 1,45 | down |
| 6707379 | 7261592 | 1526841 | KRIT1, ankyrin repeat containing      | Krit1 | 362317 | 1,37 | up   |
| 6304740 | 7261592 | 1526844 | KRIT1, ankyrin repeat containing      | Krit1 | 362317 | 1,36 | down |
| 5922063 | 7261592 | 1526854 | KRIT1, ankyrin repeat containing      | Krit1 | 362317 | 1,32 | up   |
| 6032583 | 7261592 | 1526839 | KRIT1, ankyrin repeat containing      | Krit1 | 362317 | 1,27 | up   |
| 6234477 | 7261592 | 1526847 | KRIT1, ankyrin repeat containing      | Krit1 | 362317 | 1,24 | down |
| 6253483 | 7261592 | 1526843 | KRIT1, ankyrin repeat containing      | Krit1 | 362317 | 1,23 | up   |
| 6411693 | 7261592 | 1526849 | KRIT1, ankyrin repeat containing      | Krit1 | 362317 | 1,22 | up   |
| 6321510 | 7261592 | 1526840 | KRIT1, ankyrin repeat containing      | Krit1 | 362317 | 1,21 | down |
| 5866324 | 7261592 | 1526845 | KRIT1, ankyrin repeat containing      | Krit1 | 362317 | 1,15 | up   |
| 6494520 | 7261592 | 1526836 | KRIT1, ankyrin repeat containing      | Krit1 | 362317 | 1,11 | up   |
| 6293750 | 7261592 | 1526848 | KRIT1, ankyrin repeat containing      | Krit1 | 362317 | 1,10 | down |
| 6221866 | 7261592 | 1526850 | KRIT1, ankyrin repeat containing      | Krit1 | 362317 | 1,09 | down |
| 6463980 | 7261592 | 1526853 | KRIT1, ankyrin repeat containing      | Krit1 | 362317 | 1,04 | up   |
| 6494987 | 7261592 | 1526837 | KRIT1, ankyrin repeat containing      | Krit1 | 362317 | 1,03 | down |
| 6090626 | 7261592 | 1526843 | KRIT1, ankyrin repeat containing      | Krit1 | 362317 | 1,03 | down |
| 6074273 | 7261592 | 1526851 | KRIT1, ankyrin repeat containing      | Krit1 | 362317 | 1,01 | down |
| 5821797 | 7261592 | 1526857 | KRIT1, ankyrin repeat containing      | Krit1 | 362317 | 1,00 | up   |
| 5844441 | 7141061 | 1228646 | Kruppel-like factor 12                | Klf12 | 306110 | 1,51 | up   |
| 5885458 | 7141061 | 1228645 | Kruppel-like factor 12                | Klf12 | 306110 | 1,41 | up   |
| 6085448 | 7141061 | 1228645 | Kruppel-like factor 12                | Klf12 | 306110 | 1,39 | up   |
| 6360035 | 7141061 | 1228719 | Kruppel-like factor 12                | Klf12 | 306110 | 1,28 | down |
| 6302285 | 7141061 | 1228644 | Kruppel-like factor 12                | Klf12 | 306110 | 1,27 | down |
| 5967203 | 7141061 | 1228679 | Kruppel-like factor 12                | Klf12 | 306110 | 1,27 | up   |
| 6137572 | 7141061 | 1228645 | Kruppel-like factor 12                | Klf12 | 306110 | 1,20 | down |
| 6023906 | 7141061 | 1228709 | Kruppel-like factor 12                | Klf12 | 306110 | 1,19 | up   |
| 6202705 | 7141061 | 1228700 | Kruppel-like factor 12                | Klf12 | 306110 | 1,08 | up   |
| 5753518 | 7141061 | 1228648 | Kruppel-like factor 12                | Klf12 | 306110 | 1,06 | up   |
| 6727013 | 7141061 | 1228687 | Kruppel-like factor 12                | Klf12 | 306110 | 1,06 | down |
| 6227837 | 7141061 | 1228668 | Kruppel-like factor 12                | Klf12 | 306110 | 1,03 | down |
| 6028890 | 7149521 | 1249827 | Kruppel-like factor 2 (lung)          | Klf2  | 306330 | 2,32 | up   |
| 6690360 | 7149521 | 1249826 | Kruppel-like factor 2 (lung)          | Klf2  | 306330 | 1,30 | up   |
| 6238838 | 7149521 | 1249828 | Kruppel-like factor 2 (lung)          | Klf2  | 306330 | 1,27 | down |
| 6424368 | 7149521 | 1249826 | Kruppel-like factor 2 (lung)          | Klf2  | 306330 | 1,09 | up   |
| 6355387 | 7149521 | 1249827 | Kruppel-like factor 2 (lung)          | Klf2  | 306330 | 1,07 | up   |
| 6184381 | 7149521 | 1249827 | Kruppel-like factor 2 (lung)          | Klf2  | 306330 | 1,02 | up   |
| 6665352 | 7134502 | 1212365 | Kruppel-like factor 5                 | Klf5  | 84410  | 2,51 | up   |
| 6736781 | 7134502 | 1212364 | Kruppel-like factor 5                 | Klf5  | 84410  | 2,45 | down |
| 6061838 | 7134502 | 1212366 | Kruppel-like factor 5                 | Klf5  | 84410  | 2,06 | up   |
| 5746655 | 7134502 | 1212367 | Kruppel-like factor 5                 | Klf5  | 84410  | 1,47 | down |
| 6659288 | 7134502 | 1212365 | Kruppel-like factor 5                 | Klf5  | 84410  | 1,45 | up   |

|         |         |         |                                              |         |        |      |      |
|---------|---------|---------|----------------------------------------------|---------|--------|------|------|
| 6357287 | 7166280 | 1289725 | Kruppel-like factor 6                        | Klf6    | 58954  | 2,22 | down |
| 6280446 | 7166280 | 1289728 | Kruppel-like factor 6                        | Klf6    | 58954  | 1,38 | up   |
| 5789286 | 7166280 | 1289725 | Kruppel-like factor 6                        | Klf6    | 58954  | 1,32 | down |
| 6016178 | 7166280 | 1289724 | Kruppel-like factor 6                        | Klf6    | 58954  | 1,18 | up   |
| 5759124 | 7166280 | 1289729 | Kruppel-like factor 6                        | Klf6    | 58954  | 1,14 | up   |
| 6470750 | 7166280 | 1289726 | Kruppel-like factor 6                        | Klf6    | 58954  | 1,13 | down |
| 6693689 | 7166280 | 1289725 | Kruppel-like factor 6                        | Klf6    | 58954  | 1,09 | down |
| 5873800 | 7166280 | 1289727 | Kruppel-like factor 6                        | Klf6    | 58954  | 1,05 | down |
| 5994313 | 7244553 | 1484648 | Kv channel interacting protein 3, calsenilin | Kcnip3  | 65199  | 2,40 | up   |
| 6100433 | 7244553 | 1484646 | Kv channel interacting protein 3, calsenilin | Kcnip3  | 65199  | 2,12 | up   |
| 5771775 | 7244553 | 1484647 | Kv channel interacting protein 3, calsenilin | Kcnip3  | 65199  | 1,42 | down |
| 5735074 | 7244553 | 1484651 | Kv channel interacting protein 3, calsenilin | Kcnip3  | 65199  | 1,36 | up   |
| 5746013 | 7244553 | 1484650 | Kv channel interacting protein 3, calsenilin | Kcnip3  | 65199  | 1,21 | up   |
| 6290863 | 7244553 | 1484645 | Kv channel interacting protein 3, calsenilin | Kcnip3  | 65199  | 1,12 | down |
| 6141662 | 7244553 | 1484644 | Kv channel interacting protein 3, calsenilin | Kcnip3  | 65199  | 1,07 | down |
| 5680316 | 7244553 | 1484649 | Kv channel interacting protein 3, calsenilin | Kcnip3  | 65199  | 1,07 | up   |
| 6253430 | 7063140 | 1039027 | Kv channel-interacting protein 2             | Kcnip2  | 56817  | 2,44 | up   |
| 6041780 | 7063140 | 1039037 | Kv channel-interacting protein 2             | Kcnip2  | 56817  | 1,70 | down |
| 6459080 | 7063140 | 1039029 | Kv channel-interacting protein 2             | Kcnip2  | 56817  | 1,46 | down |
| 5778153 | 7063140 | 1039028 | Kv channel-interacting protein 2             | Kcnip2  | 56817  | 1,38 | down |
| 6491972 | 7063140 | 1039033 | Kv channel-interacting protein 2             | Kcnip2  | 56817  | 1,35 | up   |
| 6044243 | 7063140 | 1039034 | Kv channel-interacting protein 2             | Kcnip2  | 56817  | 1,21 | up   |
| 6349941 | 7063140 | 1039027 | Kv channel-interacting protein 2             | Kcnip2  | 56817  | 1,17 | up   |
| 5749471 | 7063140 | 1039032 | Kv channel-interacting protein 2             | Kcnip2  | 56817  | 1,15 | down |
| 5662150 | 7063140 | 1039035 | Kv channel-interacting protein 2             | Kcnip2  | 56817  | 1,14 | down |
| 6708534 | 7063140 | 1039036 | Kv channel-interacting protein 2             | Kcnip2  | 56817  | 1,10 | up   |
| 6519233 | 7063140 | 1039031 | Kv channel-interacting protein 2             | Kcnip2  | 56817  | 1,08 | down |
| 6489007 | 7063140 | 1039030 | Kv channel-interacting protein 2             | Kcnip2  | 56817  | 1,00 | down |
| 6525563 | 7025670 | 950426  | l(3)mbt-like 3 (Drosophila)                  | L3mbtl3 | 309550 | 2,17 | down |
| 6134888 | 7025670 | 950439  | l(3)mbt-like 3 (Drosophila)                  | L3mbtl3 | 309550 | 1,90 | up   |
| 6594350 | 7025670 | 950435  | l(3)mbt-like 3 (Drosophila)                  | L3mbtl3 | 309550 | 1,84 | down |
| 5725293 | 7025670 | 950407  | l(3)mbt-like 3 (Drosophila)                  | L3mbtl3 | 309550 | 1,68 | up   |
| 6125663 | 7025670 | 950411  | l(3)mbt-like 3 (Drosophila)                  | L3mbtl3 | 309550 | 1,45 | up   |
| 6560016 | 7025670 | 950428  | l(3)mbt-like 3 (Drosophila)                  | L3mbtl3 | 309550 | 1,34 | up   |
| 6430336 | 7025670 | 950442  | l(3)mbt-like 3 (Drosophila)                  | L3mbtl3 | 309550 | 1,31 | down |
| 6470499 | 7025670 | 950418  | l(3)mbt-like 3 (Drosophila)                  | L3mbtl3 | 309550 | 1,26 | up   |
| 5966834 | 7025670 | 950440  | l(3)mbt-like 3 (Drosophila)                  | L3mbtl3 | 309550 | 1,25 | down |
| 6216141 | 7025670 | 950441  | l(3)mbt-like 3 (Drosophila)                  | L3mbtl3 | 309550 | 1,23 | down |
| 5869486 | 7025670 | 950434  | l(3)mbt-like 3 (Drosophila)                  | L3mbtl3 | 309550 | 1,23 | down |
| 5791650 | 7025670 | 950417  | l(3)mbt-like 3 (Drosophila)                  | L3mbtl3 | 309550 | 1,22 | down |
| 6202946 | 7025670 | 950439  | l(3)mbt-like 3 (Drosophila)                  | L3mbtl3 | 309550 | 1,19 | up   |
| 5967518 | 7025670 | 950423  | l(3)mbt-like 3 (Drosophila)                  | L3mbtl3 | 309550 | 1,19 | down |
| 5760915 | 7025670 | 950438  | l(3)mbt-like 3 (Drosophila)                  | L3mbtl3 | 309550 | 1,16 | up   |
| 5846536 | 7025670 | 950414  | l(3)mbt-like 3 (Drosophila)                  | L3mbtl3 | 309550 | 1,15 | up   |
| 5664700 | 7025670 | 950415  | l(3)mbt-like 3 (Drosophila)                  | L3mbtl3 | 309550 | 1,11 | up   |
| 6732381 | 7025670 | 950443  | l(3)mbt-like 3 (Drosophila)                  | L3mbtl3 | 309550 | 1,10 | up   |
| 5972676 | 7025670 | 950432  | l(3)mbt-like 3 (Drosophila)                  | L3mbtl3 | 309550 | 1,09 | up   |
| 5736644 | 7025670 | 950420  | l(3)mbt-like 3 (Drosophila)                  | L3mbtl3 | 309550 | 1,05 | down |
| 6045029 | 7025670 | 950416  | l(3)mbt-like 3 (Drosophila)                  | L3mbtl3 | 309550 | 1,04 | up   |
| 6208343 | 7025670 | 950421  | l(3)mbt-like 3 (Drosophila)                  | L3mbtl3 | 309550 | 1,04 | down |
| 6592229 | 7025670 | 950429  | l(3)mbt-like 3 (Drosophila)                  | L3mbtl3 | 309550 | 1,02 | down |
| 6029717 | 7384956 | 1831736 | L1 cell adhesion molecule                    | L1cam   | 50687  | 2,28 | up   |
| 6023700 | 7384956 | 1831729 | L1 cell adhesion molecule                    | L1cam   | 50687  | 1,65 | up   |
| 6564135 | 7384956 | 1831721 | L1 cell adhesion molecule                    | L1cam   | 50687  | 1,55 | down |
| 6436783 | 7384956 | 1831733 | L1 cell adhesion molecule                    | L1cam   | 50687  | 1,49 | up   |
| 6269718 | 7384956 | 1831732 | L1 cell adhesion molecule                    | L1cam   | 50687  | 1,32 | down |
| 6466161 | 7384956 | 1831742 | L1 cell adhesion molecule                    | L1cam   | 50687  | 1,30 | up   |

|         |         |         |                                              |       |        |      |      |
|---------|---------|---------|----------------------------------------------|-------|--------|------|------|
| 6019744 | 7384956 | 1831731 | L1 cell adhesion molecule                    | L1cam | 50687  | 1,28 | down |
| 6010452 | 7384956 | 1831725 | L1 cell adhesion molecule                    | L1cam | 50687  | 1,27 | down |
| 6076648 | 7384956 | 1831724 | L1 cell adhesion molecule                    | L1cam | 50687  | 1,25 | up   |
| 5934698 | 7384956 | 1831737 | L1 cell adhesion molecule                    | L1cam | 50687  | 1,24 | up   |
| 6620909 | 7384956 | 1831722 | L1 cell adhesion molecule                    | L1cam | 50687  | 1,24 | up   |
| 5854961 | 7384956 | 1831723 | L1 cell adhesion molecule                    | L1cam | 50687  | 1,22 | down |
| 5824066 | 7384956 | 1831717 | L1 cell adhesion molecule                    | L1cam | 50687  | 1,21 | down |
| 5793390 | 7384956 | 1831741 | L1 cell adhesion molecule                    | L1cam | 50687  | 1,20 | down |
| 5682561 | 7384956 | 1831738 | L1 cell adhesion molecule                    | L1cam | 50687  | 1,18 | up   |
| 6268314 | 7384956 | 1831728 | L1 cell adhesion molecule                    | L1cam | 50687  | 1,15 | down |
| 5873326 | 7384956 | 1831719 | L1 cell adhesion molecule                    | L1cam | 50687  | 1,14 | down |
| 6215946 | 7384956 | 1831739 | L1 cell adhesion molecule                    | L1cam | 50687  | 1,13 | up   |
| 5819789 | 7384956 | 1831734 | L1 cell adhesion molecule                    | L1cam | 50687  | 1,12 | up   |
| 6608088 | 7384956 | 1831722 | L1 cell adhesion molecule                    | L1cam | 50687  | 1,10 | up   |
| 5665377 | 7384956 | 1831720 | L1 cell adhesion molecule                    | L1cam | 50687  | 1,10 | up   |
| 6082783 | 7384956 | 1831729 | L1 cell adhesion molecule                    | L1cam | 50687  | 1,09 | down |
| 6127858 | 7384956 | 1831740 | L1 cell adhesion molecule                    | L1cam | 50687  | 1,09 | down |
| 6122686 | 7384956 | 1831718 | L1 cell adhesion molecule                    | L1cam | 50687  | 1,05 | down |
| 6353696 | 7384956 | 1831727 | L1 cell adhesion molecule                    | L1cam | 50687  | 1,05 | down |
| 5987327 | 7384956 | 1831726 | L1 cell adhesion molecule                    | L1cam | 50687  | 1,05 | up   |
| 6165392 | 7384956 | 1831716 | L1 cell adhesion molecule                    | L1cam | 50687  | 1,05 | up   |
| 6535801 | 7384956 | 1831742 | L1 cell adhesion molecule                    | L1cam | 50687  | 1,04 | up   |
| 6023163 | 7384956 | 1831728 | L1 cell adhesion molecule                    | L1cam | 50687  | 1,03 | down |
| 6680119 | 7384956 | 1831735 | L1 cell adhesion molecule                    | L1cam | 50687  | 1,01 | down |
| 6563320 | 7384956 | 1831730 | L1 cell adhesion molecule                    | L1cam | 50687  | 1,00 | down |
| 6316296 | 7067828 | 1050799 | La ribonucleoprotein domain family, member 1 | Larp1 | 303158 | 1,52 | down |
| 6631595 | 7067828 | 1050799 | La ribonucleoprotein domain family, member 1 | Larp1 | 303158 | 1,17 | down |
| 5757123 | 7067828 | 1050799 | La ribonucleoprotein domain family, member 1 | Larp1 | 303158 | 1,02 | down |
| 6475423 | 7340766 | 1721949 | lactotransferrin                             | Ltf   | 301034 | 2,24 | up   |
| 6207589 | 7340766 | 1721945 | lactotransferrin                             | Ltf   | 301034 | 1,89 | down |
| 5767808 | 7340766 | 1721951 | lactotransferrin                             | Ltf   | 301034 | 1,50 | down |
| 5677179 | 7340766 | 1721954 | lactotransferrin                             | Ltf   | 301034 | 1,41 | up   |
| 6280052 | 7340766 | 1721955 | lactotransferrin                             | Ltf   | 301034 | 1,30 | down |
| 6541328 | 7340766 | 1721953 | lactotransferrin                             | Ltf   | 301034 | 1,29 | up   |
| 6330829 | 7340766 | 1721942 | lactotransferrin                             | Ltf   | 301034 | 1,25 | down |
| 6397718 | 7340766 | 1721948 | lactotransferrin                             | Ltf   | 301034 | 1,22 | up   |
| 6050260 | 7340766 | 1721958 | lactotransferrin                             | Ltf   | 301034 | 1,21 | up   |
| 5907808 | 7340766 | 1721950 | lactotransferrin                             | Ltf   | 301034 | 1,21 | down |
| 5931944 | 7340766 | 1721957 | lactotransferrin                             | Ltf   | 301034 | 1,21 | down |
| 6078164 | 7340766 | 1721958 | lactotransferrin                             | Ltf   | 301034 | 1,20 | up   |
| 6271126 | 7340766 | 1721952 | lactotransferrin                             | Ltf   | 301034 | 1,14 | down |
| 6441923 | 7340766 | 1721943 | lactotransferrin                             | Ltf   | 301034 | 1,14 | down |
| 6736043 | 7340766 | 1721947 | lactotransferrin                             | Ltf   | 301034 | 1,07 | up   |
| 5669572 | 7340766 | 1721944 | lactotransferrin                             | Ltf   | 301034 | 1,04 | up   |
| 5884669 | 7340766 | 1721940 | lactotransferrin                             | Ltf   | 301034 | 1,04 | up   |
| 6281574 | 7340766 | 1721959 | lactotransferrin                             | Ltf   | 301034 | 1,04 | up   |
| 6297625 | 7340766 | 1721948 | lactotransferrin                             | Ltf   | 301034 | 1,03 | down |
| 6523599 | 7340766 | 1721946 | lactotransferrin                             | Ltf   | 301034 | 1,02 | down |
| 6483840 | 7340766 | 1721949 | lactotransferrin                             | Ltf   | 301034 | 1,02 | down |
| 6488580 | 7105449 | 1141134 | ladinin 1                                    | Lad1  | 313325 | 1,44 | down |
| 6303329 | 7105449 | 1141130 | ladinin 1                                    | Lad1  | 313325 | 1,29 | up   |
| 6012082 | 7105449 | 1141134 | ladinin 1                                    | Lad1  | 313325 | 1,22 | up   |
| 6424075 | 7105449 | 1141128 | ladinin 1                                    | Lad1  | 313325 | 1,16 | up   |
| 6179528 | 7105449 | 1141126 | ladinin 1                                    | Lad1  | 313325 | 1,12 | up   |
| 5643674 | 7105449 | 1141134 | ladinin 1                                    | Lad1  | 313325 | 1,10 | up   |
| 6580281 | 7105449 | 1141134 | ladinin 1                                    | Lad1  | 313325 | 1,08 | down |
| 6357114 | 7105449 | 1141133 | ladinin 1                                    | Lad1  | 313325 | 1,06 | up   |

|         |         |         |                  |       |        |      |      |
|---------|---------|---------|------------------|-------|--------|------|------|
| 6041463 | 7105449 | 1141130 | ladinin 1        | Lad1  | 313325 | 1,06 | down |
| 6253683 | 7105449 | 1141127 | ladinin 1        | Lad1  | 313325 | 1,06 | up   |
| 5960591 | 7105449 | 1141132 | ladinin 1        | Lad1  | 313325 | 1,04 | up   |
| 6100478 | 7105449 | 1141127 | ladinin 1        | Lad1  | 313325 | 1,04 | up   |
| 5741215 | 7105449 | 1141129 | ladinin 1        | Lad1  | 313325 | 1,02 | up   |
| 5966384 | 7105449 | 1141134 | ladinin 1        | Lad1  | 313325 | 1,00 | up   |
| 6408125 | 7210664 | 1400664 | lamin A          | Lmna  | 60374  | 2,14 | down |
| 6339725 | 7210664 | 1400676 | lamin A          | Lmna  | 60374  | 1,75 | down |
| 5903132 | 7210664 | 1400665 | lamin A          | Lmna  | 60374  | 1,46 | down |
| 6624722 | 7210664 | 1400672 | lamin A          | Lmna  | 60374  | 1,45 | up   |
| 5822286 | 7210664 | 1400664 | lamin A          | Lmna  | 60374  | 1,40 | down |
| 6200751 | 7210664 | 1400666 | lamin A          | Lmna  | 60374  | 1,33 | down |
| 6559901 | 7210664 | 1400671 | lamin A          | Lmna  | 60374  | 1,31 | up   |
| 6598164 | 7210664 | 1400676 | lamin A          | Lmna  | 60374  | 1,20 | down |
| 5632082 | 7210664 | 1400674 | lamin A          | Lmna  | 60374  | 1,16 | up   |
| 6395250 | 7210664 | 1400675 | lamin A          | Lmna  | 60374  | 1,15 | up   |
| 5749978 | 7210664 | 1400664 | lamin A          | Lmna  | 60374  | 1,10 | down |
| 6084381 | 7210664 | 1400670 | lamin A          | Lmna  | 60374  | 1,08 | up   |
| 6199493 | 7210664 | 1400665 | lamin A          | Lmna  | 60374  | 1,07 | up   |
| 6607551 | 7210664 | 1400668 | lamin A          | Lmna  | 60374  | 1,05 | down |
| 6212722 | 7210664 | 1400669 | lamin A          | Lmna  | 60374  | 1,03 | down |
| 6360525 | 7210664 | 1400667 | lamin A          | Lmna  | 60374  | 1,02 | up   |
| 5838108 | 7210664 | 1400673 | lamin A          | Lmna  | 60374  | 1,02 | up   |
| 6046643 | 7210664 | 1400676 | lamin A          | Lmna  | 60374  | 1,01 | up   |
| 6599563 | 7358623 | 1766247 | laminin, alpha 1 | Lama1 | 316758 | 2,16 | down |
| 6681138 | 7358623 | 1766264 | laminin, alpha 1 | Lama1 | 316758 | 2,13 | up   |
| 6470483 | 7358623 | 1766299 | laminin, alpha 1 | Lama1 | 316758 | 1,76 | up   |
| 5930077 | 7358623 | 1766248 | laminin, alpha 1 | Lama1 | 316758 | 1,75 | down |
| 5834216 | 7358623 | 1766282 | laminin, alpha 1 | Lama1 | 316758 | 1,60 | down |
| 6043330 | 7358623 | 1766301 | laminin, alpha 1 | Lama1 | 316758 | 1,55 | up   |
| 6066326 | 7358623 | 1766255 | laminin, alpha 1 | Lama1 | 316758 | 1,53 | up   |
| 5794097 | 7358623 | 1766259 | laminin, alpha 1 | Lama1 | 316758 | 1,53 | up   |
| 6362044 | 7358623 | 1766293 | laminin, alpha 1 | Lama1 | 316758 | 1,49 | down |
| 5769353 | 7358623 | 1766285 | laminin, alpha 1 | Lama1 | 316758 | 1,41 | down |
| 6613934 | 7358623 | 1766235 | laminin, alpha 1 | Lama1 | 316758 | 1,40 | up   |
| 6008925 | 7358623 | 1766246 | laminin, alpha 1 | Lama1 | 316758 | 1,38 | down |
| 6432211 | 7358623 | 1766245 | laminin, alpha 1 | Lama1 | 316758 | 1,37 | down |
| 5917090 | 7358623 | 1766249 | laminin, alpha 1 | Lama1 | 316758 | 1,37 | down |
| 6101098 | 7358623 | 1766273 | laminin, alpha 1 | Lama1 | 316758 | 1,35 | down |
| 5919580 | 7358623 | 1766268 | laminin, alpha 1 | Lama1 | 316758 | 1,34 | up   |
| 6371915 | 7358623 | 1766289 | laminin, alpha 1 | Lama1 | 316758 | 1,33 | down |
| 6650520 | 7358623 | 1766228 | laminin, alpha 1 | Lama1 | 316758 | 1,32 | down |
| 6372275 | 7358623 | 1766297 | laminin, alpha 1 | Lama1 | 316758 | 1,31 | up   |
| 6454929 | 7358623 | 1766271 | laminin, alpha 1 | Lama1 | 316758 | 1,30 | down |
| 6255998 | 7358623 | 1766227 | laminin, alpha 1 | Lama1 | 316758 | 1,28 | up   |
| 6148189 | 7358623 | 1766305 | laminin, alpha 1 | Lama1 | 316758 | 1,28 | down |
| 6098480 | 7358623 | 1766267 | laminin, alpha 1 | Lama1 | 316758 | 1,27 | up   |
| 6687681 | 7358623 | 1766278 | laminin, alpha 1 | Lama1 | 316758 | 1,27 | down |
| 5956110 | 7358623 | 1766262 | laminin, alpha 1 | Lama1 | 316758 | 1,26 | up   |
| 6346246 | 7358623 | 1766275 | laminin, alpha 1 | Lama1 | 316758 | 1,24 | down |
| 5882015 | 7358623 | 1766294 | laminin, alpha 1 | Lama1 | 316758 | 1,24 | down |
| 6197447 | 7358623 | 1766239 | laminin, alpha 1 | Lama1 | 316758 | 1,23 | down |
| 6706525 | 7358623 | 1766283 | laminin, alpha 1 | Lama1 | 316758 | 1,21 | down |
| 5952264 | 7358623 | 1766248 | laminin, alpha 1 | Lama1 | 316758 | 1,21 | up   |
| 6544412 | 7358623 | 1766277 | laminin, alpha 1 | Lama1 | 316758 | 1,20 | down |
| 6394869 | 7358623 | 1766300 | laminin, alpha 1 | Lama1 | 316758 | 1,17 | up   |
| 5665304 | 7358623 | 1766280 | laminin, alpha 1 | Lama1 | 316758 | 1,17 | down |

|         |         |         |                          |       |        |      |      |
|---------|---------|---------|--------------------------|-------|--------|------|------|
| 6314169 | 7358623 | 1766250 | laminin, alpha 1         | Lama1 | 316758 | 1,16 | up   |
| 5877894 | 7358623 | 1766271 | laminin, alpha 1         | Lama1 | 316758 | 1,15 | down |
| 5807196 | 7358623 | 1766258 | laminin, alpha 1         | Lama1 | 316758 | 1,15 | up   |
| 6409411 | 7358623 | 1766244 | laminin, alpha 1         | Lama1 | 316758 | 1,14 | down |
| 6019379 | 7358623 | 1766262 | laminin, alpha 1         | Lama1 | 316758 | 1,13 | down |
| 5804810 | 7358623 | 1766291 | laminin, alpha 1         | Lama1 | 316758 | 1,13 | down |
| 6628945 | 7358623 | 1766241 | laminin, alpha 1         | Lama1 | 316758 | 1,13 | down |
| 6037784 | 7358623 | 1766304 | laminin, alpha 1         | Lama1 | 316758 | 1,12 | up   |
| 6244177 | 7358623 | 1766240 | laminin, alpha 1         | Lama1 | 316758 | 1,11 | up   |
| 5730380 | 7358623 | 1766288 | laminin, alpha 1         | Lama1 | 316758 | 1,11 | down |
| 6051684 | 7358623 | 1766260 | laminin, alpha 1         | Lama1 | 316758 | 1,10 | down |
| 5930980 | 7358623 | 1766263 | laminin, alpha 1         | Lama1 | 316758 | 1,10 | up   |
| 5900262 | 7358623 | 1766296 | laminin, alpha 1         | Lama1 | 316758 | 1,10 | down |
| 5917450 | 7358623 | 1766287 | laminin, alpha 1         | Lama1 | 316758 | 1,09 | down |
| 5799246 | 7358623 | 1766276 | laminin, alpha 1         | Lama1 | 316758 | 1,09 | up   |
| 6252328 | 7358623 | 1766265 | laminin, alpha 1         | Lama1 | 316758 | 1,08 | up   |
| 5771197 | 7358623 | 1766298 | laminin, alpha 1         | Lama1 | 316758 | 1,08 | down |
| 6508730 | 7358623 | 1766251 | laminin, alpha 1         | Lama1 | 316758 | 1,07 | up   |
| 5703347 | 7358623 | 1766270 | laminin, alpha 1         | Lama1 | 316758 | 1,07 | up   |
| 6404872 | 7358623 | 1766275 | laminin, alpha 1         | Lama1 | 316758 | 1,07 | up   |
| 5674321 | 7358623 | 1766236 | laminin, alpha 1         | Lama1 | 316758 | 1,06 | up   |
| 6230164 | 7358623 | 1766290 | laminin, alpha 1         | Lama1 | 316758 | 1,06 | down |
| 5693949 | 7358623 | 1766305 | laminin, alpha 1         | Lama1 | 316758 | 1,06 | down |
| 5807297 | 7358623 | 1766305 | laminin, alpha 1         | Lama1 | 316758 | 1,05 | down |
| 5633483 | 7358623 | 1766281 | laminin, alpha 1         | Lama1 | 316758 | 1,05 | up   |
| 6442787 | 7358623 | 1766272 | laminin, alpha 1         | Lama1 | 316758 | 1,04 | up   |
| 6292839 | 7358623 | 1766256 | laminin, alpha 1         | Lama1 | 316758 | 1,04 | up   |
| 6699358 | 7358623 | 1766261 | laminin, alpha 1         | Lama1 | 316758 | 1,04 | down |
| 5756389 | 7358623 | 1766284 | laminin, alpha 1         | Lama1 | 316758 | 1,03 | up   |
| 6422018 | 7358623 | 1766269 | laminin, alpha 1         | Lama1 | 316758 | 1,03 | down |
| 6726345 | 7358623 | 1766256 | laminin, alpha 1         | Lama1 | 316758 | 1,03 | down |
| 5653247 | 7358623 | 1766265 | laminin, alpha 1         | Lama1 | 316758 | 1,03 | up   |
| 6065005 | 7358623 | 1766266 | laminin, alpha 1         | Lama1 | 316758 | 1,03 | up   |
| 5902560 | 7358623 | 1766286 | laminin, alpha 1         | Lama1 | 316758 | 1,02 | down |
| 5993295 | 7358623 | 1766258 | laminin, alpha 1         | Lama1 | 316758 | 1,02 | down |
| 5676497 | 7358623 | 1766253 | laminin, alpha 1         | Lama1 | 316758 | 1,02 | up   |
| 5952072 | 7358623 | 1766274 | laminin, alpha 1         | Lama1 | 316758 | 1,01 | up   |
| 6339632 | 7358623 | 1766292 | laminin, alpha 1         | Lama1 | 316758 | 1,00 | down |
| 5800274 | 7358623 | 1766295 | laminin, alpha 1         | Lama1 | 316758 | 1,00 | up   |
| 6632131 | 7248790 | 1494501 | laminin, alpha 5         | Lama5 | 140433 | 1,46 | up   |
| 5671617 | 7248790 | 1494501 | laminin, alpha 5         | Lama5 | 140433 | 1,40 | up   |
| 6079005 | 7248790 | 1494502 | laminin, alpha 5         | Lama5 | 140433 | 1,38 | down |
| 5876580 | 7248790 | 1494500 | laminin, alpha 5         | Lama5 | 140433 | 1,20 | down |
| 6012919 | 7248790 | 1494501 | laminin, alpha 5         | Lama5 | 140433 | 1,15 | up   |
| 5929759 | 7109292 | 1150733 | laminin, beta 3          | Lamb3 | 305078 | 1,71 | up   |
| 6144689 | 7109292 | 1150732 | laminin, beta 3          | Lamb3 | 305078 | 1,70 | up   |
| 6344999 | 7109292 | 1150732 | laminin, beta 3          | Lamb3 | 305078 | 1,24 | down |
| 5960854 | 7109292 | 1150734 | laminin, beta 3          | Lamb3 | 305078 | 1,08 | up   |
| 5865871 | 7138580 | 1222516 | large tumor suppressor 2 | Lats2 | 305922 | 1,51 | down |
| 5787956 | 7138580 | 1222519 | large tumor suppressor 2 | Lats2 | 305922 | 1,50 | down |
| 6065275 | 7138580 | 1222510 | large tumor suppressor 2 | Lats2 | 305922 | 1,50 | down |
| 6395572 | 7138580 | 1222510 | large tumor suppressor 2 | Lats2 | 305922 | 1,46 | down |
| 5671814 | 7138580 | 1222514 | large tumor suppressor 2 | Lats2 | 305922 | 1,45 | up   |
| 6497011 | 7138580 | 1222519 | large tumor suppressor 2 | Lats2 | 305922 | 1,44 | down |
| 5842484 | 7138580 | 1222513 | large tumor suppressor 2 | Lats2 | 305922 | 1,37 | down |
| 5836408 | 7138580 | 1222512 | large tumor suppressor 2 | Lats2 | 305922 | 1,33 | down |
| 6161490 | 7138580 | 1222514 | large tumor suppressor 2 | Lats2 | 305922 | 1,17 | up   |

|         |         |         |                                                          |       |        |      |      |
|---------|---------|---------|----------------------------------------------------------|-------|--------|------|------|
| 6338848 | 7138580 | 1222511 | large tumor suppressor 2                                 | Lats2 | 305922 | 1,15 | down |
| 5876715 | 7138580 | 1222510 | large tumor suppressor 2                                 | Lats2 | 305922 | 1,06 | up   |
| 6632603 | 7303587 | 1631222 | latent transforming growth factor beta binding protein 1 | Ltbp1 | 59107  | 3,21 | up   |
| 5830893 | 7303587 | 1631225 | latent transforming growth factor beta binding protein 1 | Ltbp1 | 59107  | 1,66 | up   |
| 6108225 | 7303587 | 1631210 | latent transforming growth factor beta binding protein 1 | Ltbp1 | 59107  | 1,65 | down |
| 6321122 | 7303587 | 1631226 | latent transforming growth factor beta binding protein 1 | Ltbp1 | 59107  | 1,61 | down |
| 6320775 | 7303587 | 1631212 | latent transforming growth factor beta binding protein 1 | Ltbp1 | 59107  | 1,44 | down |
| 6315431 | 7303587 | 1631226 | latent transforming growth factor beta binding protein 1 | Ltbp1 | 59107  | 1,36 | down |
| 6526453 | 7303587 | 1631207 | latent transforming growth factor beta binding protein 1 | Ltbp1 | 59107  | 1,33 | down |
| 6558117 | 7303587 | 1631198 | latent transforming growth factor beta binding protein 1 | Ltbp1 | 59107  | 1,28 | down |
| 5803235 | 7303587 | 1631211 | latent transforming growth factor beta binding protein 1 | Ltbp1 | 59107  | 1,26 | up   |
| 6382755 | 7303587 | 1631195 | latent transforming growth factor beta binding protein 1 | Ltbp1 | 59107  | 1,26 | up   |
| 5812114 | 7303587 | 1631220 | latent transforming growth factor beta binding protein 1 | Ltbp1 | 59107  | 1,22 | down |
| 5634681 | 7303587 | 1631222 | latent transforming growth factor beta binding protein 1 | Ltbp1 | 59107  | 1,21 | up   |
| 6359407 | 7303587 | 1631214 | latent transforming growth factor beta binding protein 1 | Ltbp1 | 59107  | 1,19 | up   |
| 5985764 | 7303587 | 1631200 | latent transforming growth factor beta binding protein 1 | Ltbp1 | 59107  | 1,16 | down |
| 6731112 | 7303587 | 1631213 | latent transforming growth factor beta binding protein 1 | Ltbp1 | 59107  | 1,16 | up   |
| 6152830 | 7303587 | 1631203 | latent transforming growth factor beta binding protein 1 | Ltbp1 | 59107  | 1,16 | down |
| 6394344 | 7303587 | 1631215 | latent transforming growth factor beta binding protein 1 | Ltbp1 | 59107  | 1,15 | up   |
| 5641436 | 7303587 | 1631208 | latent transforming growth factor beta binding protein 1 | Ltbp1 | 59107  | 1,14 | down |
| 6456739 | 7303587 | 1631194 | latent transforming growth factor beta binding protein 1 | Ltbp1 | 59107  | 1,13 | up   |
| 5705046 | 7303587 | 1631216 | latent transforming growth factor beta binding protein 1 | Ltbp1 | 59107  | 1,13 | down |
| 6634357 | 7303587 | 1631197 | latent transforming growth factor beta binding protein 1 | Ltbp1 | 59107  | 1,13 | down |
| 6435606 | 7303587 | 1631218 | latent transforming growth factor beta binding protein 1 | Ltbp1 | 59107  | 1,11 | down |
| 5768222 | 7303587 | 1631209 | latent transforming growth factor beta binding protein 1 | Ltbp1 | 59107  | 1,11 | up   |
| 5977606 | 7303587 | 1631206 | latent transforming growth factor beta binding protein 1 | Ltbp1 | 59107  | 1,08 | up   |
| 5782437 | 7303587 | 1631216 | latent transforming growth factor beta binding protein 1 | Ltbp1 | 59107  | 1,07 | down |
| 6360861 | 7303587 | 1631201 | latent transforming growth factor beta binding protein 1 | Ltbp1 | 59107  | 1,07 | down |
| 6177155 | 7303587 | 1631196 | latent transforming growth factor beta binding protein 1 | Ltbp1 | 59107  | 1,07 | down |
| 6648260 | 7303587 | 1631202 | latent transforming growth factor beta binding protein 1 | Ltbp1 | 59107  | 1,06 | down |
| 6364479 | 7303587 | 1631221 | latent transforming growth factor beta binding protein 1 | Ltbp1 | 59107  | 1,05 | down |
| 6101540 | 7303587 | 1631226 | latent transforming growth factor beta binding protein 1 | Ltbp1 | 59107  | 1,05 | down |
| 6093331 | 7303587 | 1631204 | latent transforming growth factor beta binding protein 1 | Ltbp1 | 59107  | 1,05 | down |
| 5702987 | 7303587 | 1631219 | latent transforming growth factor beta binding protein 1 | Ltbp1 | 59107  | 1,04 | up   |
| 5942731 | 7303587 | 1631217 | latent transforming growth factor beta binding protein 1 | Ltbp1 | 59107  | 1,04 | up   |
| 6624556 | 7303587 | 1631226 | latent transforming growth factor beta binding protein 1 | Ltbp1 | 59107  | 1,04 | up   |
| 6509685 | 7303587 | 1631227 | latent transforming growth factor beta binding protein 1 | Ltbp1 | 59107  | 1,03 | up   |
| 6192378 | 7303587 | 1631223 | latent transforming growth factor beta binding protein 1 | Ltbp1 | 59107  | 1,03 | up   |
| 5755652 | 7303587 | 1631199 | latent transforming growth factor beta binding protein 1 | Ltbp1 | 59107  | 1,03 | up   |
| 5824454 | 7303587 | 1631205 | latent transforming growth factor beta binding protein 1 | Ltbp1 | 59107  | 1,02 | down |
| 5672749 | 7303587 | 1631224 | latent transforming growth factor beta binding protein 1 | Ltbp1 | 59107  | 1,01 | up   |
| 6023729 | 7308754 | 1644460 | latent transforming growth factor beta binding protein 2 | Ltbp2 | 59106  | 2,45 | up   |
| 5695205 | 7308754 | 1644451 | latent transforming growth factor beta binding protein 2 | Ltbp2 | 59106  | 2,40 | up   |
| 6028148 | 7308754 | 1644466 | latent transforming growth factor beta binding protein 2 | Ltbp2 | 59106  | 1,75 | down |
| 6093469 | 7308754 | 1644442 | latent transforming growth factor beta binding protein 2 | Ltbp2 | 59106  | 1,63 | down |
| 5859117 | 7308754 | 1644454 | latent transforming growth factor beta binding protein 2 | Ltbp2 | 59106  | 1,54 | down |
| 5850378 | 7308754 | 1644461 | latent transforming growth factor beta binding protein 2 | Ltbp2 | 59106  | 1,52 | down |
| 6304858 | 7308754 | 1644457 | latent transforming growth factor beta binding protein 2 | Ltbp2 | 59106  | 1,43 | down |
| 5833838 | 7308754 | 1644467 | latent transforming growth factor beta binding protein 2 | Ltbp2 | 59106  | 1,32 | up   |
| 6313877 | 7308754 | 1644456 | latent transforming growth factor beta binding protein 2 | Ltbp2 | 59106  | 1,31 | down |
| 5877192 | 7308754 | 1644452 | latent transforming growth factor beta binding protein 2 | Ltbp2 | 59106  | 1,28 | up   |
| 6485827 | 7308754 | 1644450 | latent transforming growth factor beta binding protein 2 | Ltbp2 | 59106  | 1,24 | up   |
| 6394940 | 7308754 | 1644458 | latent transforming growth factor beta binding protein 2 | Ltbp2 | 59106  | 1,24 | up   |
| 5913494 | 7308754 | 1644462 | latent transforming growth factor beta binding protein 2 | Ltbp2 | 59106  | 1,21 | down |
| 5941272 | 7308754 | 1644453 | latent transforming growth factor beta binding protein 2 | Ltbp2 | 59106  | 1,20 | up   |
| 5674176 | 7308754 | 1644463 | latent transforming growth factor beta binding protein 2 | Ltbp2 | 59106  | 1,20 | down |
| 5645001 | 7308754 | 1644440 | latent transforming growth factor beta binding protein 2 | Ltbp2 | 59106  | 1,20 | up   |

|         |         |         |                                                          |       |        |      |      |
|---------|---------|---------|----------------------------------------------------------|-------|--------|------|------|
| 6482195 | 7308754 | 1644443 | latent transforming growth factor beta binding protein 2 | Ltbp2 | 59106  | 1,17 | up   |
| 6169591 | 7308754 | 1644436 | latent transforming growth factor beta binding protein 2 | Ltbp2 | 59106  | 1,15 | down |
| 5833073 | 7308754 | 1644439 | latent transforming growth factor beta binding protein 2 | Ltbp2 | 59106  | 1,14 | up   |
| 6277915 | 7308754 | 1644437 | latent transforming growth factor beta binding protein 2 | Ltbp2 | 59106  | 1,11 | up   |
| 6668701 | 7308754 | 1644464 | latent transforming growth factor beta binding protein 2 | Ltbp2 | 59106  | 1,10 | down |
| 6122383 | 7308754 | 1644434 | latent transforming growth factor beta binding protein 2 | Ltbp2 | 59106  | 1,08 | up   |
| 6208447 | 7308754 | 1644449 | latent transforming growth factor beta binding protein 2 | Ltbp2 | 59106  | 1,08 | up   |
| 6340367 | 7308754 | 1644455 | latent transforming growth factor beta binding protein 2 | Ltbp2 | 59106  | 1,07 | down |
| 6157849 | 7308754 | 1644459 | latent transforming growth factor beta binding protein 2 | Ltbp2 | 59106  | 1,05 | up   |
| 6270612 | 7308754 | 1644448 | latent transforming growth factor beta binding protein 2 | Ltbp2 | 59106  | 1,05 | up   |
| 5708585 | 7308754 | 1644465 | latent transforming growth factor beta binding protein 2 | Ltbp2 | 59106  | 1,05 | down |
| 6485078 | 7308754 | 1644438 | latent transforming growth factor beta binding protein 2 | Ltbp2 | 59106  | 1,03 | up   |
| 6635559 | 7308754 | 1644447 | latent transforming growth factor beta binding protein 2 | Ltbp2 | 59106  | 1,03 | down |
| 6670414 | 7308754 | 1644462 | latent transforming growth factor beta binding protein 2 | Ltbp2 | 59106  | 1,03 | down |
| 5879287 | 7308754 | 1644435 | latent transforming growth factor beta binding protein 2 | Ltbp2 | 59106  | 1,02 | up   |
| 6644245 | 7308754 | 1644445 | latent transforming growth factor beta binding protein 2 | Ltbp2 | 59106  | 1,02 | up   |
| 6043129 | 7308754 | 1644444 | latent transforming growth factor beta binding protein 2 | Ltbp2 | 59106  | 1,02 | up   |
| 6693816 | 7308754 | 1644441 | latent transforming growth factor beta binding protein 2 | Ltbp2 | 59106  | 1,01 | down |
| 6693993 | 7308754 | 1644446 | latent transforming growth factor beta binding protein 2 | Ltbp2 | 59106  | 1,01 | up   |
| 6548789 | 7308754 | 1644456 | latent transforming growth factor beta binding protein 2 | Ltbp2 | 59106  | 1,01 | up   |
| 6498879 | 7308754 | 1644467 | latent transforming growth factor beta binding protein 2 | Ltbp2 | 59106  | 1,00 | up   |
| 6537695 | 7039223 | 983559  | latent transforming growth factor beta binding protein 3 | Ltbp3 | 83838  | 1,62 | down |
| 6568422 | 7039223 | 983558  | latent transforming growth factor beta binding protein 3 | Ltbp3 | 83838  | 1,28 | up   |
| 5876702 | 7039223 | 983557  | latent transforming growth factor beta binding protein 3 | Ltbp3 | 83838  | 1,19 | down |
| 6138868 | 7039223 | 983557  | latent transforming growth factor beta binding protein 3 | Ltbp3 | 83838  | 1,11 | up   |
| 6128071 | 7039223 | 983557  | latent transforming growth factor beta binding protein 3 | Ltbp3 | 83838  | 1,07 | down |
| 5684164 | 7124489 | 1188093 | latrophilin 3                                            | Lphn3 | 170641 | 2,13 | up   |
| 6467736 | 7124489 | 1188094 | latrophilin 3                                            | Lphn3 | 170641 | 1,61 | up   |
| 5667260 | 7124489 | 1188092 | latrophilin 3                                            | Lphn3 | 170641 | 1,46 | up   |
| 6374239 | 7124489 | 1188085 | latrophilin 3                                            | Lphn3 | 170641 | 1,46 | up   |
| 6428675 | 7124489 | 1188088 | latrophilin 3                                            | Lphn3 | 170641 | 1,46 | up   |
| 6368484 | 7124489 | 1188078 | latrophilin 3                                            | Lphn3 | 170641 | 1,45 | down |
| 6743697 | 7124489 | 1188090 | latrophilin 3                                            | Lphn3 | 170641 | 1,43 | up   |
| 6115722 | 7124489 | 1188081 | latrophilin 3                                            | Lphn3 | 170641 | 1,41 | up   |
| 6208095 | 7124489 | 1188098 | latrophilin 3                                            | Lphn3 | 170641 | 1,37 | down |
| 6354004 | 7124489 | 1188079 | latrophilin 3                                            | Lphn3 | 170641 | 1,36 | up   |
| 6715209 | 7124489 | 1188080 | latrophilin 3                                            | Lphn3 | 170641 | 1,34 | up   |
| 6652980 | 7124489 | 1188100 | latrophilin 3                                            | Lphn3 | 170641 | 1,29 | down |
| 5829850 | 7124489 | 1188102 | latrophilin 3                                            | Lphn3 | 170641 | 1,29 | down |
| 5794028 | 7124489 | 1188096 | latrophilin 3                                            | Lphn3 | 170641 | 1,29 | down |
| 6409772 | 7124489 | 1188078 | latrophilin 3                                            | Lphn3 | 170641 | 1,28 | down |
| 5955678 | 7124489 | 1188103 | latrophilin 3                                            | Lphn3 | 170641 | 1,25 | up   |
| 6140564 | 7124489 | 1188087 | latrophilin 3                                            | Lphn3 | 170641 | 1,23 | down |
| 6467431 | 7124489 | 1188104 | latrophilin 3                                            | Lphn3 | 170641 | 1,22 | up   |
| 6460857 | 7124489 | 1188082 | latrophilin 3                                            | Lphn3 | 170641 | 1,14 | down |
| 6387412 | 7124489 | 1188104 | latrophilin 3                                            | Lphn3 | 170641 | 1,12 | up   |
| 6559935 | 7124489 | 1188083 | latrophilin 3                                            | Lphn3 | 170641 | 1,10 | down |
| 6454665 | 7124489 | 1188101 | latrophilin 3                                            | Lphn3 | 170641 | 1,09 | down |
| 5912124 | 7124489 | 1188095 | latrophilin 3                                            | Lphn3 | 170641 | 1,08 | down |
| 6108076 | 7124489 | 1188099 | latrophilin 3                                            | Lphn3 | 170641 | 1,08 | up   |
| 6361466 | 7124489 | 1188093 | latrophilin 3                                            | Lphn3 | 170641 | 1,08 | down |
| 6014741 | 7124489 | 1188086 | latrophilin 3                                            | Lphn3 | 170641 | 1,08 | up   |
| 6465689 | 7124489 | 1188097 | latrophilin 3                                            | Lphn3 | 170641 | 1,06 | up   |
| 6225425 | 7124489 | 1188084 | latrophilin 3                                            | Lphn3 | 170641 | 1,04 | up   |
| 6046555 | 7124489 | 1188091 | latrophilin 3                                            | Lphn3 | 170641 | 1,02 | down |
| 5943074 | 7124489 | 1188089 | latrophilin 3                                            | Lphn3 | 170641 | 1,02 | down |
| 6428314 | 7124489 | 1188100 | latrophilin 3                                            | Lphn3 | 170641 | 1,01 | up   |

|         |         |         |                                         |         |        |      |      |
|---------|---------|---------|-----------------------------------------|---------|--------|------|------|
| 6507045 | 7346687 | 1736700 | LBXCOR1 homolog (mouse)                 | Lbxcor1 | 315748 | 1,53 | down |
| 5641302 | 7348125 | 1740422 | Leber congenital amaurosis 5 (human)    | Lca5    | 300866 | 2,30 | up   |
| 6744969 | 7348125 | 1740417 | Leber congenital amaurosis 5 (human)    | Lca5    | 300866 | 1,95 | down |
| 5916797 | 7348125 | 1740417 | Leber congenital amaurosis 5 (human)    | Lca5    | 300866 | 1,68 | up   |
| 6430794 | 7348125 | 1740416 | Leber congenital amaurosis 5 (human)    | Lca5    | 300866 | 1,58 | down |
| 5969852 | 7348125 | 1740421 | Leber congenital amaurosis 5 (human)    | Lca5    | 300866 | 1,55 | up   |
| 6577675 | 7348125 | 1740417 | Leber congenital amaurosis 5 (human)    | Lca5    | 300866 | 1,41 | down |
| 5993620 | 7348125 | 1740423 | Leber congenital amaurosis 5 (human)    | Lca5    | 300866 | 1,40 | up   |
| 6141350 | 7348125 | 1740417 | Leber congenital amaurosis 5 (human)    | Lca5    | 300866 | 1,40 | up   |
| 5861913 | 7348125 | 1740417 | Leber congenital amaurosis 5 (human)    | Lca5    | 300866 | 1,39 | up   |
| 5878797 | 7348125 | 1740419 | Leber congenital amaurosis 5 (human)    | Lca5    | 300866 | 1,33 | down |
| 6736732 | 7348125 | 1740420 | Leber congenital amaurosis 5 (human)    | Lca5    | 300866 | 1,32 | down |
| 6406573 | 7348125 | 1740417 | Leber congenital amaurosis 5 (human)    | Lca5    | 300866 | 1,18 | down |
| 5884396 | 7348125 | 1740415 | Leber congenital amaurosis 5 (human)    | Lca5    | 300866 | 1,18 | down |
| 6073224 | 7348125 | 1740414 | Leber congenital amaurosis 5 (human)    | Lca5    | 300866 | 1,14 | down |
| 6303075 | 7348125 | 1740424 | Leber congenital amaurosis 5 (human)    | Lca5    | 300866 | 1,05 | up   |
| 5694462 | 7348125 | 1740418 | Leber congenital amaurosis 5 (human)    | Lca5    | 300866 | 1,05 | up   |
| 6248626 | 7348125 | 1740417 | Leber congenital amaurosis 5 (human)    | Lca5    | 300866 | 1,03 | down |
| 6732478 | 7348125 | 1740416 | Leber congenital amaurosis 5 (human)    | Lca5    | 300866 | 1,03 | down |
| 6170599 | 7348125 | 1740425 | Leber congenital amaurosis 5 (human)    | Lca5    | 300866 | 1,03 | down |
| 5691613 | 7348125 | 1740423 | Leber congenital amaurosis 5 (human)    | Lca5    | 300866 | 1,02 | up   |
| 5966188 | 7080131 | 1079792 | lectin, galactose binding, soluble 5    | Lgals5  | 25475  | 2,38 | up   |
| 6257488 | 7080131 | 1079794 | lectin, galactose binding, soluble 5    | Lgals5  | 25475  | 1,94 | up   |
| 6337592 | 7080131 | 1079796 | lectin, galactose binding, soluble 5    | Lgals5  | 25475  | 1,91 | down |
| 5981956 | 7080131 | 1079795 | lectin, galactose binding, soluble 5    | Lgals5  | 25475  | 1,15 | up   |
| 5620316 | 7080131 | 1079793 | lectin, galactose binding, soluble 5    | Lgals5  | 25475  | 1,07 | down |
| 6145439 | 7080134 | 1079805 | lectin, galactoside-binding, soluble, 9 | Lgals9  | 25476  | 3,63 | down |
| 5716369 | 7080134 | 1079804 | lectin, galactoside-binding, soluble, 9 | Lgals9  | 25476  | 3,50 | up   |
| 6725448 | 7080134 | 1079810 | lectin, galactoside-binding, soluble, 9 | Lgals9  | 25476  | 2,52 | down |
| 5929969 | 7080134 | 1079810 | lectin, galactoside-binding, soluble, 9 | Lgals9  | 25476  | 2,32 | down |
| 5970110 | 7080134 | 1079800 | lectin, galactoside-binding, soluble, 9 | Lgals9  | 25476  | 1,91 | up   |
| 5674768 | 7080134 | 1079807 | lectin, galactoside-binding, soluble, 9 | Lgals9  | 25476  | 1,59 | up   |
| 6717738 | 7080134 | 1079808 | lectin, galactoside-binding, soluble, 9 | Lgals9  | 25476  | 1,50 | down |
| 6194270 | 7080134 | 1079802 | lectin, galactoside-binding, soluble, 9 | Lgals9  | 25476  | 1,28 | down |
| 5696134 | 7080134 | 1079803 | lectin, galactoside-binding, soluble, 9 | Lgals9  | 25476  | 1,16 | up   |
| 6032786 | 7080134 | 1079801 | lectin, galactoside-binding, soluble, 9 | Lgals9  | 25476  | 1,09 | down |
| 6150360 | 7080134 | 1079809 | lectin, galactoside-binding, soluble, 9 | Lgals9  | 25476  | 1,06 | down |
| 5857702 | 7100307 | 1128398 | lemur tyrosine kinase 2                 | Lmtk2   | 304286 | 1,58 | up   |
| 6608260 | 7100307 | 1128408 | lemur tyrosine kinase 2                 | Lmtk2   | 304286 | 1,36 | up   |
| 5898299 | 7100307 | 1128403 | lemur tyrosine kinase 2                 | Lmtk2   | 304286 | 1,30 | up   |
| 5673991 | 7100307 | 1128393 | lemur tyrosine kinase 2                 | Lmtk2   | 304286 | 1,12 | up   |
| 6285056 | 7100307 | 1128402 | lemur tyrosine kinase 2                 | Lmtk2   | 304286 | 1,11 | up   |
| 6066627 | 7100307 | 1128391 | lemur tyrosine kinase 2                 | Lmtk2   | 304286 | 1,11 | down |
| 6414644 | 7100307 | 1128390 | lemur tyrosine kinase 2                 | Lmtk2   | 304286 | 1,11 | down |
| 6211437 | 7100307 | 1128408 | lemur tyrosine kinase 2                 | Lmtk2   | 304286 | 1,10 | up   |
| 6265169 | 7100307 | 1128399 | lemur tyrosine kinase 2                 | Lmtk2   | 304286 | 1,08 | down |
| 6211774 | 7100307 | 1128395 | lemur tyrosine kinase 2                 | Lmtk2   | 304286 | 1,05 | down |
| 6699152 | 7100307 | 1128401 | lemur tyrosine kinase 2                 | Lmtk2   | 304286 | 1,05 | down |
| 6301051 | 7100307 | 1128400 | lemur tyrosine kinase 2                 | Lmtk2   | 304286 | 1,02 | up   |
| 5697150 | 7100307 | 1128388 | lemur tyrosine kinase 2                 | Lmtk2   | 304286 | 1,02 | down |
| 6164261 | 7100307 | 1128387 | lemur tyrosine kinase 2                 | Lmtk2   | 304286 | 1,01 | up   |
| 5936574 | 7277745 | 1567233 | leptin receptor                         | Lepr    | 24536  | 1,99 | down |
| 6211967 | 7277745 | 1567232 | leptin receptor                         | Lepr    | 24536  | 1,55 | up   |
| 5890414 | 7277745 | 1567231 | leptin receptor                         | Lepr    | 24536  | 1,53 | up   |
| 5618521 | 7277745 | 1567227 | leptin receptor                         | Lepr    | 24536  | 1,50 | up   |
| 5684413 | 7277745 | 1567221 | leptin receptor                         | Lepr    | 24536  | 1,49 | up   |
| 5826939 | 7277745 | 1567230 | leptin receptor                         | Lepr    | 24536  | 1,39 | down |



|         |         |         |                                                            |                 |                 |      |      |
|---------|---------|---------|------------------------------------------------------------|-----------------|-----------------|------|------|
| 6510961 | 7277745 | 1567229 | leptin receptor                                            | Lepr            | 24536           | 1,36 | down |
| 6716692 | 7277745 | 1567224 | leptin receptor                                            | Lepr            | 24536           | 1,31 | up   |
| 6115388 | 7277745 | 1567220 | leptin receptor                                            | Lepr            | 24536           | 1,26 | up   |
| 6691340 | 7277745 | 1567223 | leptin receptor                                            | Lepr            | 24536           | 1,22 | up   |
| 6525817 | 7277745 | 1567225 | leptin receptor                                            | Lepr            | 24536           | 1,20 | up   |
| 5943315 | 7277745 | 1567222 | leptin receptor                                            | Lepr            | 24536           | 1,18 | down |
| 5900566 | 7277745 | 1567219 | leptin receptor                                            | Lepr            | 24536           | 1,16 | down |
| 5858497 | 7277745 | 1567228 | leptin receptor                                            | Lepr            | 24536           | 1,16 | up   |
| 6083002 | 7277745 | 1567225 | leptin receptor                                            | Lepr            | 24536           | 1,14 | down |
| 6360297 | 7277745 | 1567233 | leptin receptor                                            | Lepr            | 24536           | 1,13 | down |
| 5758362 | 7277745 | 1567234 | leptin receptor                                            | Lepr            | 24536           | 1,09 | down |
| 6259502 | 7277745 | 1567220 | leptin receptor                                            | Lepr            | 24536           | 1,06 | down |
| 6143612 | 7277745 | 1567226 | leptin receptor                                            | Lepr            | 24536           | 1,01 | up   |
| 6597387 | 7277745 | 1567218 | leptin receptor overlapping transcript                     | Leprot          | 56766           | 2,02 | up   |
| 6213432 | 7277745 | 1567218 | leptin receptor overlapping transcript                     | Leprot          | 56766           | 1,83 | down |
| 6183583 | 7277745 | 1567218 | leptin receptor overlapping transcript                     | Leprot          | 56766           | 1,43 | up   |
| 6695876 | 7277745 | 1567218 | leptin receptor overlapping transcript                     | Leprot          | 56766           | 1,32 | up   |
| 6074695 | 7277745 | 1567218 | leptin receptor overlapping transcript                     | Leprot          | 56766           | 1,17 | up   |
| 6531276 | 7277745 | 1567218 | leptin receptor overlapping transcript                     | Leprot          | 56766           | 1,16 | down |
| 6075890 | 7277745 | 1567217 | leptin receptor overlapping transcript                     | Leprot          | 56766           | 1,09 | up   |
| 6051622 | 7277745 | 1567216 | leptin receptor overlapping transcript                     | Leprot          | 56766           | 1,08 | up   |
| 6632327 | 7277745 | 1567215 | leptin receptor overlapping transcript                     | Leprot          | 56766           | 1,05 | up   |
| 6044372 | 7277745 | 1567214 | leptin receptor overlapping transcript /// leptin receptor | Leprot /// Lepr | 56766 /// 24536 | 1,03 | up   |
| 6601203 | 7357599 | 1763614 | leucine rich repeat (in FLII) interacting protein 1        | Lrrfip1         | 367314          | 2,37 | down |
| 5956712 | 7357599 | 1763614 | leucine rich repeat (in FLII) interacting protein 1        | Lrrfip1         | 367314          | 2,08 | down |
| 5865594 | 7357599 | 1763608 | leucine rich repeat (in FLII) interacting protein 1        | Lrrfip1         | 367314          | 1,92 | down |
| 5792635 | 7357599 | 1763607 | leucine rich repeat (in FLII) interacting protein 1        | Lrrfip1         | 367314          | 1,68 | up   |
| 5982181 | 7357599 | 1763612 | leucine rich repeat (in FLII) interacting protein 1        | Lrrfip1         | 367314          | 1,63 | down |
| 6124157 | 7357599 | 1763616 | leucine rich repeat (in FLII) interacting protein 1        | Lrrfip1         | 367314          | 1,60 | up   |
| 6719551 | 7357599 | 1763613 | leucine rich repeat (in FLII) interacting protein 1        | Lrrfip1         | 367314          | 1,38 | up   |
| 5760509 | 7357599 | 1763614 | leucine rich repeat (in FLII) interacting protein 1        | Lrrfip1         | 367314          | 1,31 | down |
| 6606626 | 7357599 | 1763614 | leucine rich repeat (in FLII) interacting protein 1        | Lrrfip1         | 367314          | 1,30 | up   |
| 5919777 | 7357599 | 1763614 | leucine rich repeat (in FLII) interacting protein 1        | Lrrfip1         | 367314          | 1,25 | down |
| 5643528 | 7357599 | 1763610 | leucine rich repeat (in FLII) interacting protein 1        | Lrrfip1         | 367314          | 1,17 | up   |
| 6457884 | 7357599 | 1763611 | leucine rich repeat (in FLII) interacting protein 1        | Lrrfip1         | 367314          | 1,12 | down |
| 5994890 | 7357599 | 1763615 | leucine rich repeat (in FLII) interacting protein 1        | Lrrfip1         | 367314          | 1,03 | up   |
| 5626075 | 7357599 | 1763614 | leucine rich repeat (in FLII) interacting protein 1        | Lrrfip1         | 367314          | 1,02 | down |
| 5670415 | 7357599 | 1763609 | leucine rich repeat (in FLII) interacting protein 1        | Lrrfip1         | 367314          | 1,01 | down |
| 6311886 | 7357599 | 1763615 | leucine rich repeat (in FLII) interacting protein 1        | Lrrfip1         | 367314          | 1,00 | up   |
| 6224998 | 7196769 | 1367278 | leucine rich repeat and Ig domain containing 4             | Lingo4          | 499668          | 1,65 | down |
| 5686982 | 7196769 | 1367277 | leucine rich repeat and Ig domain containing 4             | Lingo4          | 499668          | 1,47 | down |
| 6025624 | 7196769 | 1367266 | leucine rich repeat and Ig domain containing 4             | Lingo4          | 499668          | 1,40 | down |
| 6121238 | 7196769 | 1367265 | leucine rich repeat and Ig domain containing 4             | Lingo4          | 499668          | 1,36 | up   |
| 5756242 | 7196769 | 1367276 | leucine rich repeat and Ig domain containing 4             | Lingo4          | 499668          | 1,27 | down |
| 6219418 | 7196769 | 1367268 | leucine rich repeat and Ig domain containing 4             | Lingo4          | 499668          | 1,14 | up   |
| 6006809 | 7196769 | 1367269 | leucine rich repeat and Ig domain containing 4             | Lingo4          | 499668          | 1,09 | down |
| 5835907 | 7196769 | 1367267 | leucine rich repeat and Ig domain containing 4             | Lingo4          | 499668          | 1,09 | up   |
| 6035218 | 7196769 | 1367261 | leucine rich repeat and Ig domain containing 4             | Lingo4          | 499668          | 1,07 | down |
| 5741970 | 7196769 | 1367277 | leucine rich repeat and Ig domain containing 4             | Lingo4          | 499668          | 1,07 | down |
| 6279073 | 7196769 | 1367276 | leucine rich repeat and Ig domain containing 4             | Lingo4          | 499668          | 1,01 | up   |
| 5934831 | 7237699 | 1467384 | leucine rich repeat and sterile alpha motif containing 1   | Lrsam1          | 311866          | 2,00 | up   |
| 6435261 | 7237699 | 1467371 | leucine rich repeat and sterile alpha motif containing 1   | Lrsam1          | 311866          | 1,82 | down |
| 6303742 | 7237699 | 1467397 | leucine rich repeat and sterile alpha motif containing 1   | Lrsam1          | 311866          | 1,66 | down |
| 5684275 | 7237699 | 1467378 | leucine rich repeat and sterile alpha motif containing 1   | Lrsam1          | 311866          | 1,65 | down |
| 6672400 | 7237699 | 1467381 | leucine rich repeat and sterile alpha motif containing 1   | Lrsam1          | 311866          | 1,55 | up   |
| 6447362 | 7237699 | 1467391 | leucine rich repeat and sterile alpha motif containing 1   | Lrsam1          | 311866          | 1,52 | down |
| 5900624 | 7237699 | 1467396 | leucine rich repeat and sterile alpha motif containing 1   | Lrsam1          | 311866          | 1,52 | down |

|         |         |         |                                                          |        |        |      |      |
|---------|---------|---------|----------------------------------------------------------|--------|--------|------|------|
| 6101111 | 7237699 | 1467374 | leucine rich repeat and sterile alpha motif containing 1 | Lrsam1 | 311866 | 1,50 | down |
| 6551117 | 7237699 | 1467389 | leucine rich repeat and sterile alpha motif containing 1 | Lrsam1 | 311866 | 1,49 | up   |
| 6627023 | 7237699 | 1467371 | leucine rich repeat and sterile alpha motif containing 1 | Lrsam1 | 311866 | 1,35 | up   |
| 6348109 | 7237699 | 1467399 | leucine rich repeat and sterile alpha motif containing 1 | Lrsam1 | 311866 | 1,35 | down |
| 6633928 | 7237699 | 1467400 | leucine rich repeat and sterile alpha motif containing 1 | Lrsam1 | 311866 | 1,31 | down |
| 5622342 | 7237699 | 1467387 | leucine rich repeat and sterile alpha motif containing 1 | Lrsam1 | 311866 | 1,26 | up   |
| 6266014 | 7237699 | 1467382 | leucine rich repeat and sterile alpha motif containing 1 | Lrsam1 | 311866 | 1,26 | up   |
| 6528664 | 7237699 | 1467375 | leucine rich repeat and sterile alpha motif containing 1 | Lrsam1 | 311866 | 1,23 | down |
| 5629660 | 7237699 | 1467372 | leucine rich repeat and sterile alpha motif containing 1 | Lrsam1 | 311866 | 1,22 | down |
| 6197862 | 7237699 | 1467383 | leucine rich repeat and sterile alpha motif containing 1 | Lrsam1 | 311866 | 1,19 | down |
| 5767510 | 7237699 | 1467373 | leucine rich repeat and sterile alpha motif containing 1 | Lrsam1 | 311866 | 1,17 | up   |
| 6304845 | 7237699 | 1467386 | leucine rich repeat and sterile alpha motif containing 1 | Lrsam1 | 311866 | 1,17 | down |
| 5940556 | 7237699 | 1467376 | leucine rich repeat and sterile alpha motif containing 1 | Lrsam1 | 311866 | 1,13 | up   |
| 6342844 | 7237699 | 1467388 | leucine rich repeat and sterile alpha motif containing 1 | Lrsam1 | 311866 | 1,12 | up   |
| 6050371 | 7237699 | 1467377 | leucine rich repeat and sterile alpha motif containing 1 | Lrsam1 | 311866 | 1,08 | up   |
| 5760086 | 7237699 | 1467385 | leucine rich repeat and sterile alpha motif containing 1 | Lrsam1 | 311866 | 1,08 | up   |
| 5936941 | 7237699 | 1467401 | leucine rich repeat and sterile alpha motif containing 1 | Lrsam1 | 311866 | 1,07 | up   |
| 6296634 | 7237699 | 1467395 | leucine rich repeat and sterile alpha motif containing 1 | Lrsam1 | 311866 | 1,06 | down |
| 5700104 | 7237699 | 1467401 | leucine rich repeat and sterile alpha motif containing 1 | Lrsam1 | 311866 | 1,05 | down |
| 6144617 | 7237699 | 1467394 | leucine rich repeat and sterile alpha motif containing 1 | Lrsam1 | 311866 | 1,05 | down |
| 6488372 | 7290174 | 1597130 | leucine rich repeat containing 41                        | Lrrc41 | 362566 | 2,43 | down |
| 6429507 | 7290174 | 1597130 | leucine rich repeat containing 41                        | Lrrc41 | 362566 | 1,42 | up   |
| 6432989 | 7290174 | 1597125 | leucine rich repeat containing 41                        | Lrrc41 | 362566 | 1,22 | up   |
| 6359756 | 7290174 | 1597122 | leucine rich repeat containing 41                        | Lrrc41 | 362566 | 1,19 | down |
| 6138510 | 7290174 | 1597120 | leucine rich repeat containing 41                        | Lrrc41 | 362566 | 1,15 | up   |
| 6362283 | 7290174 | 1597126 | leucine rich repeat containing 41                        | Lrrc41 | 362566 | 1,15 | down |
| 5865738 | 7290174 | 1597128 | leucine rich repeat containing 41                        | Lrrc41 | 362566 | 1,14 | up   |
| 5932828 | 7290174 | 1597129 | leucine rich repeat containing 41                        | Lrrc41 | 362566 | 1,08 | down |
| 6689647 | 7290174 | 1597124 | leucine rich repeat containing 41                        | Lrrc41 | 362566 | 1,03 | down |
| 6602085 | 7290174 | 1597121 | leucine rich repeat containing 41                        | Lrrc41 | 362566 | 1,03 | up   |
| 6734608 | 7290174 | 1597123 | leucine rich repeat containing 41                        | Lrrc41 | 362566 | 1,03 | down |
| 6151845 | 7290174 | 1597127 | leucine rich repeat containing 41                        | Lrrc41 | 362566 | 1,01 | up   |
| 6593567 | 7181584 | 1329415 | leucine rich repeat containing 50                        | Lrrc50 | 361419 | 2,14 | up   |
| 6492726 | 7181584 | 1329416 | leucine rich repeat containing 50                        | Lrrc50 | 361419 | 1,79 | down |
| 6117261 | 7181584 | 1329407 | leucine rich repeat containing 50                        | Lrrc50 | 361419 | 1,63 | up   |
| 5932063 | 7181584 | 1329418 | leucine rich repeat containing 50                        | Lrrc50 | 361419 | 1,35 | down |
| 6028591 | 7181584 | 1329410 | leucine rich repeat containing 50                        | Lrrc50 | 361419 | 1,33 | up   |
| 5691595 | 7181584 | 1329412 | leucine rich repeat containing 50                        | Lrrc50 | 361419 | 1,32 | up   |
| 5936375 | 7181584 | 1329413 | leucine rich repeat containing 50                        | Lrrc50 | 361419 | 1,30 | down |
| 5990259 | 7181584 | 1329417 | leucine rich repeat containing 50                        | Lrrc50 | 361419 | 1,20 | down |
| 6513686 | 7181584 | 1329414 | leucine rich repeat containing 50                        | Lrrc50 | 361419 | 1,18 | up   |
| 6652785 | 7181584 | 1329417 | leucine rich repeat containing 50                        | Lrrc50 | 361419 | 1,12 | down |
| 5672560 | 7181584 | 1329411 | leucine rich repeat containing 50                        | Lrrc50 | 361419 | 1,08 | down |
| 6237703 | 7181584 | 1329417 | leucine rich repeat containing 50                        | Lrrc50 | 361419 | 1,08 | down |
| 5844773 | 7181584 | 1329408 | leucine rich repeat containing 50                        | Lrrc50 | 361419 | 1,06 | up   |
| 6263058 | 7181584 | 1329409 | leucine rich repeat containing 50                        | Lrrc50 | 361419 | 1,03 | up   |
| 6342356 | 7181584 | 1329417 | leucine rich repeat containing 50                        | Lrrc50 | 361419 | 1,02 | down |
| 6076344 | 7241163 | 1476822 | leucine rich repeat containing 55                        | Lrrc55 | 311171 | 1,90 | up   |
| 6317124 | 7241163 | 1476823 | leucine rich repeat containing 55                        | Lrrc55 | 311171 | 1,79 | up   |
| 6064538 | 7241163 | 1476819 | leucine rich repeat containing 55                        | Lrrc55 | 311171 | 1,71 | up   |
| 6094946 | 7241163 | 1476819 | leucine rich repeat containing 55                        | Lrrc55 | 311171 | 1,50 | down |
| 5805767 | 7241163 | 1476822 | leucine rich repeat containing 55                        | Lrrc55 | 311171 | 1,44 | down |
| 5785236 | 7241163 | 1476819 | leucine rich repeat containing 55                        | Lrrc55 | 311171 | 1,12 | up   |
| 5903329 | 7241163 | 1476820 | leucine rich repeat containing 55                        | Lrrc55 | 311171 | 1,07 | down |
| 6309630 | 7241163 | 1476819 | leucine rich repeat containing 55                        | Lrrc55 | 311171 | 1,06 | down |
| 6513574 | 7257038 | 1515288 | leucine rich repeat neuronal 1                           | Lrrn1  | 500280 | 2,36 | down |
| 6018261 | 7257038 | 1515288 | leucine rich repeat neuronal 1                           | Lrrn1  | 500280 | 1,77 | down |

|         |         |         |                                                                     |        |        |      |      |
|---------|---------|---------|---------------------------------------------------------------------|--------|--------|------|------|
| 6650684 | 7105057 | 1140309 | leucine rich repeat neuronal 2                                      | Lrrn2  | 289020 | 1,22 | up   |
| 6336039 | 7255120 | 1510366 | leucine rich repeat transmembrane neuronal 1                        | LRRTM1 | 679668 | 2,70 | down |
| 6436029 | 7255120 | 1510369 | leucine rich repeat transmembrane neuronal 1                        | LRRTM1 | 679668 | 2,12 | down |
| 6478510 | 7255120 | 1510374 | leucine rich repeat transmembrane neuronal 1                        | LRRTM1 | 679668 | 1,53 | up   |
| 6463627 | 7255120 | 1510367 | leucine rich repeat transmembrane neuronal 1                        | LRRTM1 | 679668 | 1,21 | up   |
| 5918747 | 7255120 | 1510366 | leucine rich repeat transmembrane neuronal 1                        | LRRTM1 | 679668 | 1,18 | down |
| 6491227 | 7255120 | 1510366 | leucine rich repeat transmembrane neuronal 1                        | LRRTM1 | 679668 | 1,11 | up   |
| 6675985 | 7255120 | 1510368 | leucine rich repeat transmembrane neuronal 1                        | LRRTM1 | 679668 | 1,02 | down |
| 6595790 | 7302327 | 1627696 | leucine zipper protein 5                                            | Luzp5  | 362798 | 1,46 | up   |
| 6725219 | 7302327 | 1627669 | leucine zipper protein 5                                            | Luzp5  | 362798 | 1,32 | down |
| 6258427 | 7120275 | 1178073 | leucine zipper-EF-hand containing transmembrane protein 1           | Letm1  | 305457 | 2,19 | down |
| 6234892 | 7120275 | 1178081 | leucine zipper-EF-hand containing transmembrane protein 1           | Letm1  | 305457 | 1,77 | up   |
| 5824736 | 7120275 | 1178083 | leucine zipper-EF-hand containing transmembrane protein 1           | Letm1  | 305457 | 1,59 | down |
| 5966719 | 7120275 | 1178079 | leucine zipper-EF-hand containing transmembrane protein 1           | Letm1  | 305457 | 1,57 | up   |
| 6536168 | 7120275 | 1178073 | leucine zipper-EF-hand containing transmembrane protein 1           | Letm1  | 305457 | 1,26 | down |
| 6003311 | 7120275 | 1178074 | leucine zipper-EF-hand containing transmembrane protein 1           | Letm1  | 305457 | 1,20 | down |
| 6116322 | 7120275 | 1178086 | leucine zipper-EF-hand containing transmembrane protein 1           | Letm1  | 305457 | 1,20 | up   |
| 6246093 | 7120275 | 1178077 | leucine zipper-EF-hand containing transmembrane protein 1           | Letm1  | 305457 | 1,19 | up   |
| 6742649 | 7120275 | 1178076 | leucine zipper-EF-hand containing transmembrane protein 1           | Letm1  | 305457 | 1,19 | up   |
| 6732732 | 7120275 | 1178075 | leucine zipper-EF-hand containing transmembrane protein 1           | Letm1  | 305457 | 1,17 | up   |
| 6538553 | 7120275 | 1178086 | leucine zipper-EF-hand containing transmembrane protein 1           | Letm1  | 305457 | 1,14 | down |
| 6312301 | 7120275 | 1178075 | leucine zipper-EF-hand containing transmembrane protein 1           | Letm1  | 305457 | 1,10 | down |
| 5995165 | 7120275 | 1178086 | leucine zipper-EF-hand containing transmembrane protein 1           | Letm1  | 305457 | 1,10 | down |
| 6030657 | 7120275 | 1178075 | leucine zipper-EF-hand containing transmembrane protein 1           | Letm1  | 305457 | 1,08 | down |
| 6744594 | 7120275 | 1178078 | leucine zipper-EF-hand containing transmembrane protein 1           | Letm1  | 305457 | 1,06 | up   |
| 6110036 | 7120275 | 1178082 | leucine zipper-EF-hand containing transmembrane protein 1           | Letm1  | 305457 | 1,05 | down |
| 5828560 | 7120275 | 1178075 | leucine zipper-EF-hand containing transmembrane protein 1           | Letm1  | 305457 | 1,05 | down |
| 5994733 | 7120275 | 1178084 | leucine zipper-EF-hand containing transmembrane protein 1           | Letm1  | 305457 | 1,03 | down |
| 6744446 | 7120275 | 1178080 | leucine zipper-EF-hand containing transmembrane protein 1           | Letm1  | 305457 | 1,02 | up   |
| 6058352 | 7120275 | 1178085 | leucine zipper-EF-hand containing transmembrane protein 1           | Letm1  | 305457 | 1,02 | up   |
| 6632397 | 7120275 | 1178075 | leucine zipper-EF-hand containing transmembrane protein 1           | Letm1  | 305457 | 1,00 | up   |
| 5781081 | 7052385 | 1014769 | leucine-rich repeat kinase 1                                        | Lrrk1  | 308703 | 3,57 | up   |
| 5986973 | 7052385 | 1014770 | leucine-rich repeat kinase 1                                        | Lrrk1  | 308703 | 1,71 | up   |
| 5830327 | 7052385 | 1014770 | leucine-rich repeat kinase 1                                        | Lrrk1  | 308703 | 1,25 | down |
| 6700621 | 7052385 | 1014816 | leucine-rich repeat kinase 1                                        | Lrrk1  | 308703 | 1,19 | up   |
| 6428450 | 7052385 | 1014769 | leucine-rich repeat kinase 1                                        | Lrrk1  | 308703 | 1,03 | up   |
| 5739317 | 7052385 | 1014770 | leucine-rich repeat kinase 1                                        | Lrrk1  | 308703 | 1,02 | down |
| 6610509 | 7052385 | 1014816 | leucine-rich repeat kinase 1                                        | Lrrk1  | 308703 | 1,01 | down |
| 6275849 | 7140113 | 1226072 | leucine-rich repeats and calponin homology (CH) domain containing 1 | Lrch1  | 502020 | 2,32 | up   |
| 6394000 | 7140113 | 1226089 | leucine-rich repeats and calponin homology (CH) domain containing 1 | Lrch1  | 502020 | 1,78 | down |
| 6135163 | 7140113 | 1226077 | leucine-rich repeats and calponin homology (CH) domain containing 1 | Lrch1  | 502020 | 1,60 | up   |
| 6653709 | 7140113 | 1226061 | leucine-rich repeats and calponin homology (CH) domain containing 1 | Lrch1  | 502020 | 1,51 | down |
| 6635526 | 7140113 | 1226074 | leucine-rich repeats and calponin homology (CH) domain containing 1 | Lrch1  | 502020 | 1,48 | up   |
| 6140819 | 7140113 | 1226046 | leucine-rich repeats and calponin homology (CH) domain containing 1 | Lrch1  | 502020 | 1,46 | up   |
| 6062388 | 7140113 | 1226067 | leucine-rich repeats and calponin homology (CH) domain containing 1 | Lrch1  | 502020 | 1,42 | up   |
| 6000783 | 7140113 | 1226046 | leucine-rich repeats and calponin homology (CH) domain containing 1 | Lrch1  | 502020 | 1,41 | down |
| 6233365 | 7140113 | 1226073 | leucine-rich repeats and calponin homology (CH) domain containing 1 | Lrch1  | 502020 | 1,38 | up   |
| 6192717 | 7140113 | 1226062 | leucine-rich repeats and calponin homology (CH) domain containing 1 | Lrch1  | 502020 | 1,26 | up   |
| 6291083 | 7140113 | 1226071 | leucine-rich repeats and calponin homology (CH) domain containing 1 | Lrch1  | 502020 | 1,22 | up   |
| 6188854 | 7140113 | 1226069 | leucine-rich repeats and calponin homology (CH) domain containing 1 | Lrch1  | 502020 | 1,21 | up   |
| 6463975 | 7140113 | 1226058 | leucine-rich repeats and calponin homology (CH) domain containing 1 | Lrch1  | 502020 | 1,19 | up   |
| 6612775 | 7140113 | 1226049 | leucine-rich repeats and calponin homology (CH) domain containing 1 | Lrch1  | 502020 | 1,18 | up   |
| 6574775 | 7140113 | 1226052 | leucine-rich repeats and calponin homology (CH) domain containing 1 | Lrch1  | 502020 | 1,16 | down |
| 6025874 | 7140113 | 1226056 | leucine-rich repeats and calponin homology (CH) domain containing 1 | Lrch1  | 502020 | 1,16 | up   |
| 6234125 | 7140113 | 1226078 | leucine-rich repeats and calponin homology (CH) domain containing 1 | Lrch1  | 502020 | 1,15 | up   |
| 6139434 | 7140113 | 1226051 | leucine-rich repeats and calponin homology (CH) domain containing 1 | Lrch1  | 502020 | 1,09 | down |
| 5801651 | 7140113 | 1226060 | leucine-rich repeats and calponin homology (CH) domain containing 1 | Lrch1  | 502020 | 1,06 | down |

|         |         |         |                                                                                               |         |        |      |      |
|---------|---------|---------|-----------------------------------------------------------------------------------------------|---------|--------|------|------|
| 5694014 | 7140113 | 1226064 | leucine-rich repeats and calponin homology (CH) domain containing 1                           | Lrch1   | 502020 | 1,02 | up   |
| 5661753 | 7155340 | 1264090 | leukocyte cell-derived chemotaxin 2                                                           | Lect2   | 361205 | 2,15 | up   |
| 6669035 | 7155340 | 1264096 | leukocyte cell-derived chemotaxin 2                                                           | Lect2   | 361205 | 1,59 | up   |
| 6396366 | 7155340 | 1264089 | leukocyte cell-derived chemotaxin 2                                                           | Lect2   | 361205 | 1,13 | down |
| 6236115 | 7155340 | 1264092 | leukocyte cell-derived chemotaxin 2                                                           | Lect2   | 361205 | 1,08 | up   |
| 6508123 | 7155340 | 1264095 | leukocyte cell-derived chemotaxin 2                                                           | Lect2   | 361205 | 1,01 | up   |
| 6661761 | 7155340 | 1264095 | leukocyte cell-derived chemotaxin 2                                                           | Lect2   | 361205 | 1,01 | down |
| 5878139 | 7155340 | 1264091 | leukocyte cell-derived chemotaxin 2                                                           | Lect2   | 361205 | 1,01 | down |
| 6590846 | 7028278 | 957322  | leukocyte immunoglobulin-like receptor, subfamily B (with TM and ITIM domains), member 3-like | Lilrb3l | 361493 | 2,32 | down |
| 6209022 | 7028278 | 957316  | leukocyte immunoglobulin-like receptor, subfamily B (with TM and ITIM domains), member 3-like | Lilrb3l | 361493 | 1,45 | up   |
| 6105975 | 7028278 | 957323  | leukocyte immunoglobulin-like receptor, subfamily B (with TM and ITIM domains), member 3-like | Lilrb3l | 361493 | 1,30 | up   |
| 6590097 | 7028278 | 957317  | leukocyte immunoglobulin-like receptor, subfamily B (with TM and ITIM domains), member 3-like | Lilrb3l | 361493 | 1,22 | down |
| 6402544 | 7028278 | 957321  | leukocyte immunoglobulin-like receptor, subfamily B (with TM and ITIM domains), member 3-like | Lilrb3l | 361493 | 1,18 | down |
| 6566374 | 7028278 | 957319  | leukocyte immunoglobulin-like receptor, subfamily B (with TM and ITIM domains), member 3-like | Lilrb3l | 361493 | 1,18 | down |
| 6066845 | 7028278 | 957320  | leukocyte immunoglobulin-like receptor, subfamily B (with TM and ITIM domains), member 3-like | Lilrb3l | 361493 | 1,07 | up   |
| 6075041 | 7028278 | 957318  | leukocyte immunoglobulin-like receptor, subfamily B (with TM and ITIM domains), member 3-like | Lilrb3l | 361493 | 1,02 | down |
| 6067567 | 7048014 | 1005627 | leukocyte receptor cluster (LRC) member 8                                                     | Leng8   | 361506 | 1,67 | down |
| 6548857 | 7048014 | 1005629 | leukocyte receptor cluster (LRC) member 8                                                     | Leng8   | 361506 | 1,45 | down |
| 6731204 | 7048014 | 1005622 | leukocyte receptor cluster (LRC) member 8                                                     | Leng8   | 361506 | 1,37 | down |
| 6235432 | 7048014 | 1005628 | leukocyte receptor cluster (LRC) member 8                                                     | Leng8   | 361506 | 1,31 | down |
| 6259526 | 7048014 | 1005630 | leukocyte receptor cluster (LRC) member 8                                                     | Leng8   | 361506 | 1,19 | up   |
| 6603632 | 7048014 | 1005621 | leukocyte receptor cluster (LRC) member 8                                                     | Leng8   | 361506 | 1,15 | down |
| 6254247 | 7048014 | 1005631 | leukocyte receptor cluster (LRC) member 8                                                     | Leng8   | 361506 | 1,13 | up   |
| 6491908 | 7048014 | 1005637 | leukocyte receptor cluster (LRC) member 8                                                     | Leng8   | 361506 | 1,11 | up   |
| 6126140 | 7048014 | 1005626 | leukocyte receptor cluster (LRC) member 8                                                     | Leng8   | 361506 | 1,06 | up   |
| 6028582 | 7048014 | 1005621 | leukocyte receptor cluster (LRC) member 8                                                     | Leng8   | 361506 | 1,06 | up   |
| 6242467 | 7048014 | 1005621 | leukocyte receptor cluster (LRC) member 8                                                     | Leng8   | 361506 | 1,05 | down |
| 6400784 | 7048014 | 1005632 | leukocyte receptor cluster (LRC) member 8                                                     | Leng8   | 361506 | 1,04 | up   |
| 5636563 | 7048014 | 1005633 | leukocyte receptor cluster (LRC) member 8                                                     | Leng8   | 361506 | 1,03 | down |
| 6034464 | 7048014 | 1005623 | leukocyte receptor cluster (LRC) member 8                                                     | Leng8   | 361506 | 1,03 | down |
| 5678178 | 7048014 | 1005621 | leukocyte receptor cluster (LRC) member 8                                                     | Leng8   | 361506 | 1,02 | down |
| 6596765 | 7048014 | 1005621 | leukocyte receptor cluster (LRC) member 8                                                     | Leng8   | 361506 | 1,01 | up   |
| 6097297 | 7048014 | 1005625 | leukocyte receptor cluster (LRC) member 8                                                     | Leng8   | 361506 | 1,01 | down |
| 5933284 | 7048014 | 1005621 | leukocyte receptor cluster (LRC) member 8                                                     | Leng8   | 361506 | 1,00 | down |
| 5990464 | 7048014 | 1005624 | leukocyte receptor cluster (LRC) member 8                                                     | Leng8   | 361506 | 1,00 | up   |
| 6722586 | 7048014 | 1005634 | leukocyte receptor cluster (LRC) member 8                                                     | Leng8   | 361506 | 1,00 | up   |
| 5774359 | 7243627 | 1482345 | leukocyte receptor tyrosine kinase                                                            | Ltk     | 311337 | 2,23 | up   |
| 6103507 | 7243627 | 1482348 | leukocyte receptor tyrosine kinase                                                            | Ltk     | 311337 | 1,94 | up   |
| 6665038 | 7243627 | 1482351 | leukocyte receptor tyrosine kinase                                                            | Ltk     | 311337 | 1,50 | up   |
| 6572304 | 7243627 | 1482354 | leukocyte receptor tyrosine kinase                                                            | Ltk     | 311337 | 1,48 | up   |
| 6585552 | 7243627 | 1482346 | leukocyte receptor tyrosine kinase                                                            | Ltk     | 311337 | 1,43 | up   |
| 6171356 | 7243627 | 1482350 | leukocyte receptor tyrosine kinase                                                            | Ltk     | 311337 | 1,39 | up   |
| 6327855 | 7243627 | 1482350 | leukocyte receptor tyrosine kinase                                                            | Ltk     | 311337 | 1,33 | down |
| 5643250 | 7243627 | 1482348 | leukocyte receptor tyrosine kinase                                                            | Ltk     | 311337 | 1,31 | up   |
| 6673892 | 7243627 | 1482349 | leukocyte receptor tyrosine kinase                                                            | Ltk     | 311337 | 1,21 | up   |
| 5899951 | 7243627 | 1482346 | leukocyte receptor tyrosine kinase                                                            | Ltk     | 311337 | 1,18 | up   |
| 5624901 | 7243627 | 1482345 | leukocyte receptor tyrosine kinase                                                            | Ltk     | 311337 | 1,14 | down |
| 6337065 | 7243627 | 1482357 | leukocyte receptor tyrosine kinase                                                            | Ltk     | 311337 | 1,13 | down |
| 5915773 | 7243627 | 1482356 | leukocyte receptor tyrosine kinase                                                            | Ltk     | 311337 | 1,13 | up   |
| 6593295 | 7243627 | 1482352 | leukocyte receptor tyrosine kinase                                                            | Ltk     | 311337 | 1,11 | down |
| 6684058 | 7243627 | 1482352 | leukocyte receptor tyrosine kinase                                                            | Ltk     | 311337 | 1,10 | down |
| 5746927 | 7243627 | 1482347 | leukocyte receptor tyrosine kinase                                                            | Ltk     | 311337 | 1,06 | down |
| 6550235 | 7243627 | 1482353 | leukocyte receptor tyrosine kinase                                                            | Ltk     | 311337 | 1,03 | down |
| 6047185 | 7243627 | 1482346 | leukocyte receptor tyrosine kinase                                                            | Ltk     | 311337 | 1,02 | up   |
| 6355154 | 7243627 | 1482356 | leukocyte receptor tyrosine kinase                                                            | Ltk     | 311337 | 1,00 | up   |
| 6060175 | 7100600 | 1129122 | LFNG O-fucosylpeptide 3-beta-N-acetylglucosaminyltransferase                                  | Lfng    | 170905 | 2,35 | up   |
| 6033761 | 7100600 | 1129120 | LFNG O-fucosylpeptide 3-beta-N-acetylglucosaminyltransferase                                  | Lfng    | 170905 | 2,04 | down |

|         |         |         |                                                                 |       |        |      |      |
|---------|---------|---------|-----------------------------------------------------------------|-------|--------|------|------|
| 5626933 | 7100600 | 1129118 | LFNG O-fucosylpeptide 3-beta-N-acetylglucosaminyltransferase    | Lfng  | 170905 | 1,54 | down |
| 6009447 | 7100600 | 1129117 | LFNG O-fucosylpeptide 3-beta-N-acetylglucosaminyltransferase    | Lfng  | 170905 | 1,35 | up   |
| 6489668 | 7100600 | 1129121 | LFNG O-fucosylpeptide 3-beta-N-acetylglucosaminyltransferase    | Lfng  | 170905 | 1,31 | down |
| 5734031 | 7100600 | 1129115 | LFNG O-fucosylpeptide 3-beta-N-acetylglucosaminyltransferase    | Lfng  | 170905 | 1,19 | down |
| 6385579 | 7100600 | 1129116 | LFNG O-fucosylpeptide 3-beta-N-acetylglucosaminyltransferase    | Lfng  | 170905 | 1,12 | down |
| 5690451 | 7100600 | 1129123 | LFNG O-fucosylpeptide 3-beta-N-acetylglucosaminyltransferase    | Lfng  | 170905 | 1,12 | up   |
| 6727955 | 7100600 | 1129115 | LFNG O-fucosylpeptide 3-beta-N-acetylglucosaminyltransferase    | Lfng  | 170905 | 1,10 | down |
| 6063713 | 7100600 | 1129119 | LFNG O-fucosylpeptide 3-beta-N-acetylglucosaminyltransferase    | Lfng  | 170905 | 1,09 | down |
| 5665624 | 7100600 | 1129123 | LFNG O-fucosylpeptide 3-beta-N-acetylglucosaminyltransferase    | Lfng  | 170905 | 1,04 | up   |
| 6460647 | 7100600 | 1129123 | LFNG O-fucosylpeptide 3-beta-N-acetylglucosaminyltransferase    | Lfng  | 170905 | 1,02 | up   |
| 6622937 | 7100600 | 1129123 | LFNG O-fucosylpeptide 3-beta-N-acetylglucosaminyltransferase    | Lfng  | 170905 | 1,02 | up   |
| 6076972 | 7117951 | 1172092 | ligand of numb-protein X 1                                      | Lnx1  | 360926 | 2,18 | down |
| 5933779 | 7117951 | 1172093 | ligand of numb-protein X 1                                      | Lnx1  | 360926 | 1,54 | up   |
| 6604265 | 7117951 | 1172081 | ligand of numb-protein X 1                                      | Lnx1  | 360926 | 1,50 | up   |
| 6136792 | 7117951 | 1172085 | ligand of numb-protein X 1                                      | Lnx1  | 360926 | 1,38 | up   |
| 6057836 | 7117951 | 1172089 | ligand of numb-protein X 1                                      | Lnx1  | 360926 | 1,29 | down |
| 5899331 | 7117951 | 1172068 | ligand of numb-protein X 1                                      | Lnx1  | 360926 | 1,24 | down |
| 5848454 | 7117951 | 1172072 | ligand of numb-protein X 1                                      | Lnx1  | 360926 | 1,22 | up   |
| 6280538 | 7117951 | 1172079 | ligand of numb-protein X 1                                      | Lnx1  | 360926 | 1,21 | up   |
| 6434035 | 7117951 | 1172088 | ligand of numb-protein X 1                                      | Lnx1  | 360926 | 1,19 | up   |
| 6442845 | 7117951 | 1172089 | ligand of numb-protein X 1                                      | Lnx1  | 360926 | 1,17 | down |
| 5665777 | 7117951 | 1172079 | ligand of numb-protein X 1                                      | Lnx1  | 360926 | 1,16 | up   |
| 6242191 | 7117951 | 1172081 | ligand of numb-protein X 1                                      | Lnx1  | 360926 | 1,15 | up   |
| 6388986 | 7117951 | 1172071 | ligand of numb-protein X 1                                      | Lnx1  | 360926 | 1,11 | up   |
| 6593993 | 7117951 | 1172080 | ligand of numb-protein X 1                                      | Lnx1  | 360926 | 1,09 | up   |
| 6015668 | 7117951 | 1172087 | ligand of numb-protein X 1                                      | Lnx1  | 360926 | 1,08 | up   |
| 5856062 | 7117951 | 1172072 | ligand of numb-protein X 1                                      | Lnx1  | 360926 | 1,05 | down |
| 5780944 | 7117951 | 1172070 | ligand of numb-protein X 1                                      | Lnx1  | 360926 | 1,03 | down |
| 5679708 | 7168876 | 1296929 | LIM and senescent cell antigen like domains 2                   | Lims2 | 361303 | 2,10 | up   |
| 6223696 | 7168876 | 1296926 | LIM and senescent cell antigen like domains 2                   | Lims2 | 361303 | 1,54 | up   |
| 5930248 | 7168876 | 1296928 | LIM and senescent cell antigen like domains 2                   | Lims2 | 361303 | 1,42 | down |
| 6249489 | 7168876 | 1296930 | LIM and senescent cell antigen like domains 2                   | Lims2 | 361303 | 1,38 | down |
| 6296837 | 7168876 | 1296930 | LIM and senescent cell antigen like domains 2                   | Lims2 | 361303 | 1,31 | up   |
| 5713278 | 7168876 | 1296927 | LIM and senescent cell antigen like domains 2                   | Lims2 | 361303 | 1,22 | up   |
| 5909114 | 7168876 | 1296930 | LIM and senescent cell antigen like domains 2                   | Lims2 | 361303 | 1,20 | down |
| 5674407 | 7168876 | 1296930 | LIM and senescent cell antigen like domains 2                   | Lims2 | 361303 | 1,17 | down |
| 6436883 | 7168876 | 1296931 | LIM and senescent cell antigen like domains 2                   | Lims2 | 361303 | 1,13 | down |
| 6485534 | 7168876 | 1296922 | LIM and senescent cell antigen like domains 2                   | Lims2 | 361303 | 1,10 | up   |
| 6045857 | 7168876 | 1296924 | LIM and senescent cell antigen like domains 2                   | Lims2 | 361303 | 1,09 | up   |
| 6436846 | 7168876 | 1296931 | LIM and senescent cell antigen like domains 2                   | Lims2 | 361303 | 1,07 | down |
| 6649842 | 7168876 | 1296925 | LIM and senescent cell antigen like domains 2                   | Lims2 | 361303 | 1,07 | up   |
| 5847785 | 7168876 | 1296923 | LIM and senescent cell antigen like domains 2                   | Lims2 | 361303 | 1,05 | down |
| 6710069 | 7168876 | 1296929 | LIM and senescent cell antigen like domains 2                   | Lims2 | 361303 | 1,05 | down |
| 6134655 | 7331757 | 1700034 | LIM domain and actin binding 1                                  | Lima1 | 300228 | 1,92 | up   |
| 5958580 | 7331757 | 1700032 | LIM domain and actin binding 1                                  | Lima1 | 300228 | 1,11 | down |
| 6737107 | 7331757 | 1700036 | LIM domain and actin binding 1                                  | Lima1 | 300228 | 1,09 | down |
| 6307426 | 7094687 | 1114327 | LIM domain containing preferred translocation partner in lipoma | Lpp   | 288010 | 2,08 | down |
| 6504962 | 7094687 | 1114317 | LIM domain containing preferred translocation partner in lipoma | Lpp   | 288010 | 1,90 | down |
| 5837325 | 7094687 | 1114324 | LIM domain containing preferred translocation partner in lipoma | Lpp   | 288010 | 1,43 | up   |
| 6167860 | 7094687 | 1114319 | LIM domain containing preferred translocation partner in lipoma | Lpp   | 288010 | 1,42 | up   |
| 6650810 | 7094687 | 1114326 | LIM domain containing preferred translocation partner in lipoma | Lpp   | 288010 | 1,36 | down |
| 6420027 | 7094687 | 1114325 | LIM domain containing preferred translocation partner in lipoma | Lpp   | 288010 | 1,30 | up   |
| 6735594 | 7094687 | 1114323 | LIM domain containing preferred translocation partner in lipoma | Lpp   | 288010 | 1,26 | up   |
| 6104386 | 7094687 | 1114321 | LIM domain containing preferred translocation partner in lipoma | Lpp   | 288010 | 1,21 | down |
| 6112881 | 7094687 | 1114320 | LIM domain containing preferred translocation partner in lipoma | Lpp   | 288010 | 1,15 | up   |
| 5635142 | 7094687 | 1114325 | LIM domain containing preferred translocation partner in lipoma | Lpp   | 288010 | 1,06 | up   |
| 5855915 | 7094687 | 1114322 | LIM domain containing preferred translocation partner in lipoma | Lpp   | 288010 | 1,05 | down |

|         |         |         |                                                                 |       |        |      |      |
|---------|---------|---------|-----------------------------------------------------------------|-------|--------|------|------|
| 5948026 | 7094687 | 1114318 | LIM domain containing preferred translocation partner in lipoma | Lpp   | 288010 | 1,04 | up   |
| 6372464 | 7094687 | 1114323 | LIM domain containing preferred translocation partner in lipoma | Lpp   | 288010 | 1,02 | down |
| 5895758 | 7094687 | 1114323 | LIM domain containing preferred translocation partner in lipoma | Lpp   | 288010 | 1,01 | down |
| 6440377 | 7097556 | 1121213 | LIM domain kinase 1                                             | Limk1 | 65172  | 2,32 | up   |
| 5631967 | 7097556 | 1121222 | LIM domain kinase 1                                             | Limk1 | 65172  | 1,76 | down |
| 5806541 | 7097556 | 1121220 | LIM domain kinase 1                                             | Limk1 | 65172  | 1,49 | up   |
| 5687757 | 7097556 | 1121207 | LIM domain kinase 1                                             | Limk1 | 65172  | 1,32 | down |
| 5623107 | 7097556 | 1121217 | LIM domain kinase 1                                             | Limk1 | 65172  | 1,29 | up   |
| 5834365 | 7097556 | 1121219 | LIM domain kinase 1                                             | Limk1 | 65172  | 1,29 | down |
| 6482851 | 7097556 | 1121216 | LIM domain kinase 1                                             | Limk1 | 65172  | 1,25 | down |
| 6670637 | 7097556 | 1121210 | LIM domain kinase 1                                             | Limk1 | 65172  | 1,18 | down |
| 5870420 | 7097556 | 1121215 | LIM domain kinase 1                                             | Limk1 | 65172  | 1,18 | up   |
| 5951297 | 7097556 | 1121214 | LIM domain kinase 1                                             | Limk1 | 65172  | 1,17 | up   |
| 5809712 | 7097556 | 1121211 | LIM domain kinase 1                                             | Limk1 | 65172  | 1,16 | down |
| 6665404 | 7097556 | 1121206 | LIM domain kinase 1                                             | Limk1 | 65172  | 1,16 | down |
| 6133072 | 7097556 | 1121205 | LIM domain kinase 1                                             | Limk1 | 65172  | 1,15 | down |
| 6323831 | 7097556 | 1121209 | LIM domain kinase 1                                             | Limk1 | 65172  | 1,10 | up   |
| 6118247 | 7097556 | 1121212 | LIM domain kinase 1                                             | Limk1 | 65172  | 1,09 | down |
| 6346066 | 7097556 | 1121208 | LIM domain kinase 1                                             | Limk1 | 65172  | 1,08 | up   |
| 6416501 | 7097556 | 1121205 | LIM domain kinase 1                                             | Limk1 | 65172  | 1,06 | up   |
| 6305899 | 7097556 | 1121218 | LIM domain kinase 1                                             | Limk1 | 65172  | 1,05 | down |
| 6257608 | 7097556 | 1121221 | LIM domain kinase 1                                             | Limk1 | 65172  | 1,03 | up   |
| 6377013 | 7230698 | 1449073 | LIM domain only 2                                               | Lmo2  | 362176 | 1,82 | up   |
| 6501126 | 7230698 | 1449073 | LIM domain only 2                                               | Lmo2  | 362176 | 1,79 | up   |
| 6032821 | 7230698 | 1449067 | LIM domain only 2                                               | Lmo2  | 362176 | 1,54 | down |
| 5709706 | 7230698 | 1449070 | LIM domain only 2                                               | Lmo2  | 362176 | 1,39 | up   |
| 6689357 | 7230698 | 1449067 | LIM domain only 2                                               | Lmo2  | 362176 | 1,27 | up   |
| 6446894 | 7230698 | 1449067 | LIM domain only 2                                               | Lmo2  | 362176 | 1,20 | down |
| 5742552 | 7112606 | 1158754 | LIM homeobox 4                                                  | Lhx4  | 360858 | 2,26 | up   |
| 6431597 | 7112606 | 1158786 | LIM homeobox 4                                                  | Lhx4  | 360858 | 1,51 | up   |
| 6139108 | 7112606 | 1158752 | LIM homeobox 4                                                  | Lhx4  | 360858 | 1,48 | down |
| 5923469 | 7112606 | 1158751 | LIM homeobox 4                                                  | Lhx4  | 360858 | 1,46 | up   |
| 6122165 | 7112606 | 1158754 | LIM homeobox 4                                                  | Lhx4  | 360858 | 1,44 | down |
| 5919006 | 7112606 | 1158751 | LIM homeobox 4                                                  | Lhx4  | 360858 | 1,30 | down |
| 5945493 | 7112606 | 1158768 | LIM homeobox 4                                                  | Lhx4  | 360858 | 1,24 | up   |
| 6529875 | 7112606 | 1158786 | LIM homeobox 4                                                  | Lhx4  | 360858 | 1,22 | down |
| 6681122 | 7112606 | 1158752 | LIM homeobox 4                                                  | Lhx4  | 360858 | 1,09 | up   |
| 6023210 | 7112606 | 1158757 | LIM homeobox 4                                                  | Lhx4  | 360858 | 1,08 | up   |
| 6408720 | 7112606 | 1158786 | LIM homeobox 4                                                  | Lhx4  | 360858 | 1,08 | down |
| 5803805 | 7112606 | 1158751 | LIM homeobox 4                                                  | Lhx4  | 360858 | 1,02 | down |
| 6549182 | 7112606 | 1158751 | LIM homeobox 4                                                  | Lhx4  | 360858 | 1,01 | down |
| 6078912 | 7107503 | 1145767 | LIM homeobox transcription factor 1 alpha                       | Lmx1a | 289201 | 1,75 | down |
| 5808917 | 7107503 | 1145767 | LIM homeobox transcription factor 1 alpha                       | Lmx1a | 289201 | 1,48 | down |
| 6555717 | 7107503 | 1145767 | LIM homeobox transcription factor 1 alpha                       | Lmx1a | 289201 | 1,46 | up   |
| 6287434 | 7107503 | 1145805 | LIM homeobox transcription factor 1 alpha                       | Lmx1a | 289201 | 1,40 | up   |
| 5794624 | 7107503 | 1145803 | LIM homeobox transcription factor 1 alpha                       | Lmx1a | 289201 | 1,31 | up   |
| 6269366 | 7107503 | 1145804 | LIM homeobox transcription factor 1 alpha                       | Lmx1a | 289201 | 1,26 | down |
| 5694096 | 7107503 | 1145767 | LIM homeobox transcription factor 1 alpha                       | Lmx1a | 289201 | 1,24 | up   |
| 6044514 | 7107503 | 1145770 | LIM homeobox transcription factor 1 alpha                       | Lmx1a | 289201 | 1,23 | up   |
| 5638464 | 7107503 | 1145799 | LIM homeobox transcription factor 1 alpha                       | Lmx1a | 289201 | 1,20 | down |
| 5818935 | 7107503 | 1145792 | LIM homeobox transcription factor 1 alpha                       | Lmx1a | 289201 | 1,13 | down |
| 6708804 | 7107503 | 1145805 | LIM homeobox transcription factor 1 alpha                       | Lmx1a | 289201 | 1,09 | down |
| 6364438 | 7107503 | 1145802 | LIM homeobox transcription factor 1 alpha                       | Lmx1a | 289201 | 1,03 | down |
| 6214589 | 7107503 | 1145792 | LIM homeobox transcription factor 1 alpha                       | Lmx1a | 289201 | 1,03 | up   |
| 6433488 | 7225317 | 1435361 | lipocalin 10                                                    | Lcn10 | 499756 | 1,27 | down |
| 6658397 | 7225317 | 1435362 | lipocalin 10                                                    | Lcn10 | 499756 | 1,22 | down |
| 5833224 | 7225317 | 1435354 | lipocalin 10                                                    | Lcn10 | 499756 | 1,17 | up   |

|         |         |         |                                                   |           |        |       |      |
|---------|---------|---------|---------------------------------------------------|-----------|--------|-------|------|
| 6447730 | 7225317 | 1435355 | lipocalin 10                                      | Lcn10     | 499756 | 1,16  | down |
| 6601901 | 7225317 | 1435360 | lipocalin 10                                      | Lcn10     | 499756 | 1,11  | down |
| 6305506 | 7225317 | 1435359 | lipocalin 10                                      | Lcn10     | 499756 | 1,10  | up   |
| 5969550 | 7225317 | 1435357 | lipocalin 10                                      | Lcn10     | 499756 | 1,05  | up   |
| 6736095 | 7237648 | 1467244 | lipocalin 2                                       | Lcn2      | 170496 | 36,23 | down |
| 5850941 | 7237648 | 1467244 | lipocalin 2                                       | Lcn2      | 170496 | 4,12  | down |
| 5705579 | 7237648 | 1467240 | lipocalin 2                                       | Lcn2      | 170496 | 3,07  | up   |
| 6498785 | 7237648 | 1467241 | lipocalin 2                                       | Lcn2      | 170496 | 2,42  | up   |
| 6086593 | 7237648 | 1467242 | lipocalin 2                                       | Lcn2      | 170496 | 1,86  | up   |
| 5929350 | 7237648 | 1467243 | lipocalin 2                                       | Lcn2      | 170496 | 1,73  | up   |
| 6240332 | 7237648 | 1467239 | lipocalin 2                                       | Lcn2      | 170496 | 1,02  | up   |
| 6700359 | 7260636 | 1524367 | lipoma HMGIC fusion partner-like 3                | Lhfp13    | 499977 | 2,08  | down |
| 6597424 | 7260636 | 1524325 | lipoma HMGIC fusion partner-like 3                | Lhfp13    | 499977 | 1,30  | up   |
| 6105560 | 7260636 | 1524325 | lipoma HMGIC fusion partner-like 3                | Lhfp13    | 499977 | 1,08  | down |
| 5724600 | 7260636 | 1524325 | lipoma HMGIC fusion partner-like 3                | Lhfp13    | 499977 | 1,07  | up   |
| 6535977 | 7260636 | 1524332 | lipoma HMGIC fusion partner-like 3                | Lhfp13    | 499977 | 1,01  | up   |
| 6546515 | 7260636 | 1524325 | lipoma HMGIC fusion partner-like 3                | Lhfp13    | 499977 | 1,01  | down |
| 6426431 | 7098175 | 1123133 | LOC360807                                         | LOC360807 | 360807 | 2,34  | down |
| 5988937 | 7098175 | 1123125 | LOC360807                                         | LOC360807 | 360807 | 1,86  | down |
| 5828792 | 7098175 | 1123129 | LOC360807                                         | LOC360807 | 360807 | 1,69  | down |
| 5831334 | 7098175 | 1123128 | LOC360807                                         | LOC360807 | 360807 | 1,52  | down |
| 6017527 | 7098175 | 1123130 | LOC360807                                         | LOC360807 | 360807 | 1,37  | up   |
| 6319468 | 7098175 | 1123126 | LOC360807                                         | LOC360807 | 360807 | 1,25  | up   |
| 6484243 | 7098175 | 1123127 | LOC360807                                         | LOC360807 | 360807 | 1,14  | down |
| 6231456 | 7098175 | 1123137 | LOC360807                                         | LOC360807 | 360807 | 1,12  | up   |
| 5946684 | 7098175 | 1123136 | LOC360807                                         | LOC360807 | 360807 | 1,11  | up   |
| 6664028 | 7098175 | 1123135 | LOC360807                                         | LOC360807 | 360807 | 1,07  | up   |
| 6686700 | 7098175 | 1123132 | LOC360807                                         | LOC360807 | 360807 | 1,03  | down |
| 6393957 | 7098175 | 1123134 | LOC360807                                         | LOC360807 | 360807 | 1,03  | up   |
| 6680922 | 7098175 | 1123130 | LOC360807                                         | LOC360807 | 360807 | 1,03  | up   |
| 6448759 | 7098175 | 1123131 | LOC360807                                         | LOC360807 | 360807 | 1,00  | up   |
| 5669969 | 7306629 | 1639457 | LOC500651                                         | MGC112883 | 500651 | 1,46  | down |
| 5751440 | 7306629 | 1639456 | LOC500651                                         | MGC112883 | 500651 | 1,08  | down |
| 5969870 | 7306629 | 1639456 | LOC500651                                         | MGC112883 | 500651 | 1,07  | down |
| 6130603 | 7367969 | 1789105 | lon peptidase 1, mitochondrial                    | Lonp1     | 170916 | 2,66  | down |
| 6263106 | 7367969 | 1789099 | lon peptidase 1, mitochondrial                    | Lonp1     | 170916 | 1,54  | up   |
| 6431954 | 7367969 | 1789088 | lon peptidase 1, mitochondrial                    | Lonp1     | 170916 | 1,36  | down |
| 6023605 | 7367969 | 1789091 | lon peptidase 1, mitochondrial                    | Lonp1     | 170916 | 1,25  | down |
| 6104963 | 7367969 | 1789090 | lon peptidase 1, mitochondrial                    | Lonp1     | 170916 | 1,25  | up   |
| 6173497 | 7367969 | 1789101 | lon peptidase 1, mitochondrial                    | Lonp1     | 170916 | 1,24  | up   |
| 6022174 | 7367969 | 1789095 | lon peptidase 1, mitochondrial                    | Lonp1     | 170916 | 1,24  | down |
| 6479094 | 7367969 | 1789087 | lon peptidase 1, mitochondrial                    | Lonp1     | 170916 | 1,22  | down |
| 6194718 | 7367969 | 1789103 | lon peptidase 1, mitochondrial                    | Lonp1     | 170916 | 1,18  | up   |
| 6414782 | 7367969 | 1789100 | lon peptidase 1, mitochondrial                    | Lonp1     | 170916 | 1,16  | up   |
| 6036187 | 7367969 | 1789093 | lon peptidase 1, mitochondrial                    | Lonp1     | 170916 | 1,16  | up   |
| 6604495 | 7367969 | 1789094 | lon peptidase 1, mitochondrial                    | Lonp1     | 170916 | 1,15  | up   |
| 6264914 | 7367969 | 1789104 | lon peptidase 1, mitochondrial                    | Lonp1     | 170916 | 1,12  | up   |
| 6305909 | 7367969 | 1789102 | lon peptidase 1, mitochondrial                    | Lonp1     | 170916 | 1,11  | up   |
| 5899658 | 7367969 | 1789092 | lon peptidase 1, mitochondrial                    | Lonp1     | 170916 | 1,10  | down |
| 5640404 | 7367969 | 1789103 | lon peptidase 1, mitochondrial                    | Lonp1     | 170916 | 1,04  | down |
| 6665246 | 7367969 | 1789105 | lon peptidase 1, mitochondrial                    | Lonp1     | 170916 | 1,04  | down |
| 6228511 | 7367969 | 1789094 | lon peptidase 1, mitochondrial                    | Lonp1     | 170916 | 1,03  | down |
| 6082057 | 7367969 | 1789105 | lon peptidase 1, mitochondrial                    | Lonp1     | 170916 | 1,02  | down |
| 6642405 | 7367969 | 1789097 | lon peptidase 1, mitochondrial                    | Lonp1     | 170916 | 1,01  | down |
| 6176023 | 7378981 | 1818537 | LON peptidase N-terminal domain and ring finger 3 | Lonrf3    | 298322 | 2,97  | up   |
| 5659523 | 7378981 | 1818553 | LON peptidase N-terminal domain and ring finger 3 | Lonrf3    | 298322 | 2,72  | down |
| 5673134 | 7378981 | 1818536 | LON peptidase N-terminal domain and ring finger 3 | Lonrf3    | 298322 | 2,08  | up   |

|         |         |         |                                                    |        |        |      |      |
|---------|---------|---------|----------------------------------------------------|--------|--------|------|------|
| 6288356 | 7378981 | 1818543 | LON peptidase N-terminal domain and ring finger 3  | Lonrf3 | 298322 | 1,90 | up   |
| 5731338 | 7378981 | 1818538 | LON peptidase N-terminal domain and ring finger 3  | Lonrf3 | 298322 | 1,81 | up   |
| 6281895 | 7378981 | 1818545 | LON peptidase N-terminal domain and ring finger 3  | Lonrf3 | 298322 | 1,48 | up   |
| 6671178 | 7378981 | 1818539 | LON peptidase N-terminal domain and ring finger 3  | Lonrf3 | 298322 | 1,46 | down |
| 6377183 | 7378981 | 1818541 | LON peptidase N-terminal domain and ring finger 3  | Lonrf3 | 298322 | 1,43 | up   |
| 6511757 | 7378981 | 1818548 | LON peptidase N-terminal domain and ring finger 3  | Lonrf3 | 298322 | 1,40 | down |
| 6138296 | 7378981 | 1818545 | LON peptidase N-terminal domain and ring finger 3  | Lonrf3 | 298322 | 1,36 | up   |
| 6124245 | 7378981 | 1818553 | LON peptidase N-terminal domain and ring finger 3  | Lonrf3 | 298322 | 1,32 | down |
| 6714539 | 7378981 | 1818554 | LON peptidase N-terminal domain and ring finger 3  | Lonrf3 | 298322 | 1,26 | down |
| 6226851 | 7378981 | 1818533 | LON peptidase N-terminal domain and ring finger 3  | Lonrf3 | 298322 | 1,25 | down |
| 6140431 | 7378981 | 1818546 | LON peptidase N-terminal domain and ring finger 3  | Lonrf3 | 298322 | 1,23 | down |
| 6547979 | 7378981 | 1818553 | LON peptidase N-terminal domain and ring finger 3  | Lonrf3 | 298322 | 1,20 | down |
| 5799332 | 7378981 | 1818551 | LON peptidase N-terminal domain and ring finger 3  | Lonrf3 | 298322 | 1,20 | up   |
| 6714204 | 7378981 | 1818534 | LON peptidase N-terminal domain and ring finger 3  | Lonrf3 | 298322 | 1,06 | down |
| 5720411 | 7230017 | 1447459 | low density lipoprotein receptor-related protein 4 | Lrp4   | 83469  | 4,05 | up   |
| 5938428 | 7230017 | 1447440 | low density lipoprotein receptor-related protein 4 | Lrp4   | 83469  | 2,40 | up   |
| 6047868 | 7230017 | 1447437 | low density lipoprotein receptor-related protein 4 | Lrp4   | 83469  | 1,77 | down |
| 6057267 | 7230017 | 1447432 | low density lipoprotein receptor-related protein 4 | Lrp4   | 83469  | 1,71 | up   |
| 6348580 | 7230017 | 1447444 | low density lipoprotein receptor-related protein 4 | Lrp4   | 83469  | 1,63 | down |
| 6291009 | 7230017 | 1447464 | low density lipoprotein receptor-related protein 4 | Lrp4   | 83469  | 1,48 | down |
| 5979647 | 7230017 | 1447435 | low density lipoprotein receptor-related protein 4 | Lrp4   | 83469  | 1,43 | up   |
| 5638682 | 7230017 | 1447452 | low density lipoprotein receptor-related protein 4 | Lrp4   | 83469  | 1,39 | up   |
| 6312146 | 7230017 | 1447441 | low density lipoprotein receptor-related protein 4 | Lrp4   | 83469  | 1,33 | down |
| 5939938 | 7230017 | 1447461 | low density lipoprotein receptor-related protein 4 | Lrp4   | 83469  | 1,31 | up   |
| 6426653 | 7230017 | 1447457 | low density lipoprotein receptor-related protein 4 | Lrp4   | 83469  | 1,30 | down |
| 5658261 | 7230017 | 1447428 | low density lipoprotein receptor-related protein 4 | Lrp4   | 83469  | 1,28 | down |
| 6278375 | 7230017 | 1447461 | low density lipoprotein receptor-related protein 4 | Lrp4   | 83469  | 1,26 | up   |
| 6553650 | 7230017 | 1447443 | low density lipoprotein receptor-related protein 4 | Lrp4   | 83469  | 1,22 | up   |
| 5721915 | 7230017 | 1447449 | low density lipoprotein receptor-related protein 4 | Lrp4   | 83469  | 1,21 | down |
| 6389226 | 7230017 | 1447447 | low density lipoprotein receptor-related protein 4 | Lrp4   | 83469  | 1,20 | down |
| 6424539 | 7230017 | 1447429 | low density lipoprotein receptor-related protein 4 | Lrp4   | 83469  | 1,18 | down |
| 6442275 | 7230017 | 1447441 | low density lipoprotein receptor-related protein 4 | Lrp4   | 83469  | 1,18 | up   |
| 6448241 | 7230017 | 1447445 | low density lipoprotein receptor-related protein 4 | Lrp4   | 83469  | 1,15 | up   |
| 6094461 | 7230017 | 1447434 | low density lipoprotein receptor-related protein 4 | Lrp4   | 83469  | 1,15 | down |
| 5965632 | 7230017 | 1447453 | low density lipoprotein receptor-related protein 4 | Lrp4   | 83469  | 1,14 | down |
| 6407906 | 7230017 | 1447463 | low density lipoprotein receptor-related protein 4 | Lrp4   | 83469  | 1,14 | down |
| 5917942 | 7230017 | 1447459 | low density lipoprotein receptor-related protein 4 | Lrp4   | 83469  | 1,14 | down |
| 6406294 | 7230017 | 1447456 | low density lipoprotein receptor-related protein 4 | Lrp4   | 83469  | 1,13 | up   |
| 6247363 | 7230017 | 1447455 | low density lipoprotein receptor-related protein 4 | Lrp4   | 83469  | 1,12 | up   |
| 6446123 | 7230017 | 1447464 | low density lipoprotein receptor-related protein 4 | Lrp4   | 83469  | 1,11 | down |
| 5851977 | 7230017 | 1447431 | low density lipoprotein receptor-related protein 4 | Lrp4   | 83469  | 1,11 | up   |
| 6373741 | 7230017 | 1447462 | low density lipoprotein receptor-related protein 4 | Lrp4   | 83469  | 1,09 | up   |
| 6559403 | 7230017 | 1447430 | low density lipoprotein receptor-related protein 4 | Lrp4   | 83469  | 1,09 | up   |
| 6735012 | 7230017 | 1447442 | low density lipoprotein receptor-related protein 4 | Lrp4   | 83469  | 1,09 | up   |
| 6579441 | 7230017 | 1447439 | low density lipoprotein receptor-related protein 4 | Lrp4   | 83469  | 1,08 | down |
| 6576969 | 7230017 | 1447448 | low density lipoprotein receptor-related protein 4 | Lrp4   | 83469  | 1,07 | up   |
| 6325618 | 7230017 | 1447440 | low density lipoprotein receptor-related protein 4 | Lrp4   | 83469  | 1,06 | down |
| 6167817 | 7230017 | 1447450 | low density lipoprotein receptor-related protein 4 | Lrp4   | 83469  | 1,06 | down |
| 6371891 | 7230017 | 1447451 | low density lipoprotein receptor-related protein 4 | Lrp4   | 83469  | 1,05 | up   |
| 6270827 | 7230017 | 1447460 | low density lipoprotein receptor-related protein 4 | Lrp4   | 83469  | 1,05 | up   |
| 6548899 | 7230017 | 1447458 | low density lipoprotein receptor-related protein 4 | Lrp4   | 83469  | 1,05 | up   |
| 6340691 | 7230017 | 1447433 | low density lipoprotein receptor-related protein 4 | Lrp4   | 83469  | 1,04 | down |
| 6307504 | 7230017 | 1447432 | low density lipoprotein receptor-related protein 4 | Lrp4   | 83469  | 1,04 | up   |
| 6415257 | 7230017 | 1447436 | low density lipoprotein receptor-related protein 4 | Lrp4   | 83469  | 1,02 | up   |
| 5683726 | 7230017 | 1447438 | low density lipoprotein receptor-related protein 4 | Lrp4   | 83469  | 1,02 | down |
| 6223672 | 7230017 | 1447427 | low density lipoprotein receptor-related protein 4 | Lrp4   | 83469  | 1,02 | up   |
| 6482041 | 7230017 | 1447446 | low density lipoprotein receptor-related protein 4 | Lrp4   | 83469  | 1,01 | up   |



|         |         |         |                                                                            |       |        |      |      |
|---------|---------|---------|----------------------------------------------------------------------------|-------|--------|------|------|
| 6334988 | 7230017 | 1447464 | low density lipoprotein receptor-related protein 4                         | Lrp4  | 83469  | 1,01 | down |
| 6270232 | 7230017 | 1447426 | low density lipoprotein receptor-related protein 4                         | Lrp4  | 83469  | 1,01 | up   |
| 6062595 | 7230017 | 1447454 | low density lipoprotein receptor-related protein 4                         | Lrp4  | 83469  | 1,01 | up   |
| 6551234 | 7326271 | 1686453 | low density lipoprotein-related protein 1 (alpha-2-macroglobulin receptor) | Lrp1  | 299858 | 2,07 | up   |
| 6222483 | 7326271 | 1686454 | low density lipoprotein-related protein 1 (alpha-2-macroglobulin receptor) | Lrp1  | 299858 | 1,83 | up   |
| 5966852 | 7326271 | 1686456 | low density lipoprotein-related protein 1 (alpha-2-macroglobulin receptor) | Lrp1  | 299858 | 1,59 | up   |
| 6017867 | 7326271 | 1686455 | low density lipoprotein-related protein 1 (alpha-2-macroglobulin receptor) | Lrp1  | 299858 | 1,54 | down |
| 6275360 | 7326271 | 1686457 | low density lipoprotein-related protein 1 (alpha-2-macroglobulin receptor) | Lrp1  | 299858 | 1,22 | down |
| 5917682 | 7326271 | 1686458 | low density lipoprotein-related protein 1 (alpha-2-macroglobulin receptor) | Lrp1  | 299858 | 1,16 | up   |
| 5860263 | 7326271 | 1686458 | low density lipoprotein-related protein 1 (alpha-2-macroglobulin receptor) | Lrp1  | 299858 | 1,12 | up   |
| 5894592 | 7326271 | 1686453 | low density lipoprotein-related protein 1 (alpha-2-macroglobulin receptor) | Lrp1  | 299858 | 1,04 | down |
| 5855204 | 7238252 | 1469192 | low density lipoprotein-related protein 1B (deleted in tumors)             | Lrp1b | 311926 | 2,57 | up   |
| 6719285 | 7238252 | 1469173 | low density lipoprotein-related protein 1B (deleted in tumors)             | Lrp1b | 311926 | 2,18 | down |
| 5628551 | 7238252 | 1469165 | low density lipoprotein-related protein 1B (deleted in tumors)             | Lrp1b | 311926 | 2,00 | down |
| 5695607 | 7238252 | 1469138 | low density lipoprotein-related protein 1B (deleted in tumors)             | Lrp1b | 311926 | 1,93 | up   |
| 6603280 | 7238252 | 1469103 | low density lipoprotein-related protein 1B (deleted in tumors)             | Lrp1b | 311926 | 1,87 | down |
| 6184171 | 7238252 | 1469136 | low density lipoprotein-related protein 1B (deleted in tumors)             | Lrp1b | 311926 | 1,80 | up   |
| 6129854 | 7238252 | 1469107 | low density lipoprotein-related protein 1B (deleted in tumors)             | Lrp1b | 311926 | 1,79 | down |
| 5696816 | 7238252 | 1469203 | low density lipoprotein-related protein 1B (deleted in tumors)             | Lrp1b | 311926 | 1,72 | down |
| 6557361 | 7238252 | 1469245 | low density lipoprotein-related protein 1B (deleted in tumors)             | Lrp1b | 311926 | 1,68 | down |
| 6112602 | 7238252 | 1469097 | low density lipoprotein-related protein 1B (deleted in tumors)             | Lrp1b | 311926 | 1,68 | up   |
| 6163526 | 7238252 | 1469223 | low density lipoprotein-related protein 1B (deleted in tumors)             | Lrp1b | 311926 | 1,50 | down |
| 6028197 | 7238252 | 1469205 | low density lipoprotein-related protein 1B (deleted in tumors)             | Lrp1b | 311926 | 1,47 | up   |
| 6365964 | 7238252 | 1469222 | low density lipoprotein-related protein 1B (deleted in tumors)             | Lrp1b | 311926 | 1,45 | down |
| 6011816 | 7238252 | 1469200 | low density lipoprotein-related protein 1B (deleted in tumors)             | Lrp1b | 311926 | 1,44 | down |
| 5731248 | 7238252 | 1469256 | low density lipoprotein-related protein 1B (deleted in tumors)             | Lrp1b | 311926 | 1,39 | up   |
| 5739997 | 7238252 | 1469235 | low density lipoprotein-related protein 1B (deleted in tumors)             | Lrp1b | 311926 | 1,37 | down |
| 5703403 | 7238252 | 1469106 | low density lipoprotein-related protein 1B (deleted in tumors)             | Lrp1b | 311926 | 1,34 | down |
| 6537743 | 7238252 | 1469221 | low density lipoprotein-related protein 1B (deleted in tumors)             | Lrp1b | 311926 | 1,33 | down |
| 5910494 | 7238252 | 1469152 | low density lipoprotein-related protein 1B (deleted in tumors)             | Lrp1b | 311926 | 1,32 | down |
| 6611435 | 7238252 | 1469224 | low density lipoprotein-related protein 1B (deleted in tumors)             | Lrp1b | 311926 | 1,30 | up   |
| 6076265 | 7238252 | 1469240 | low density lipoprotein-related protein 1B (deleted in tumors)             | Lrp1b | 311926 | 1,30 | up   |
| 5678825 | 7238252 | 1469195 | low density lipoprotein-related protein 1B (deleted in tumors)             | Lrp1b | 311926 | 1,30 | down |
| 6617790 | 7238252 | 1469098 | low density lipoprotein-related protein 1B (deleted in tumors)             | Lrp1b | 311926 | 1,28 | down |
| 5934386 | 7238252 | 1469085 | low density lipoprotein-related protein 1B (deleted in tumors)             | Lrp1b | 311926 | 1,27 | down |
| 5793289 | 7238252 | 1469132 | low density lipoprotein-related protein 1B (deleted in tumors)             | Lrp1b | 311926 | 1,27 | up   |
| 6714724 | 7238252 | 1469132 | low density lipoprotein-related protein 1B (deleted in tumors)             | Lrp1b | 311926 | 1,26 | down |
| 5618667 | 7238252 | 1469118 | low density lipoprotein-related protein 1B (deleted in tumors)             | Lrp1b | 311926 | 1,25 | down |
| 6576022 | 7238252 | 1469293 | low density lipoprotein-related protein 1B (deleted in tumors)             | Lrp1b | 311926 | 1,25 | down |
| 6047191 | 7238252 | 1469122 | low density lipoprotein-related protein 1B (deleted in tumors)             | Lrp1b | 311926 | 1,25 | down |
| 6611128 | 7238252 | 1469100 | low density lipoprotein-related protein 1B (deleted in tumors)             | Lrp1b | 311926 | 1,21 | down |
| 6414541 | 7238252 | 1469204 | low density lipoprotein-related protein 1B (deleted in tumors)             | Lrp1b | 311926 | 1,21 | down |
| 5949965 | 7238252 | 1469112 | low density lipoprotein-related protein 1B (deleted in tumors)             | Lrp1b | 311926 | 1,21 | down |
| 6053733 | 7238252 | 1469110 | low density lipoprotein-related protein 1B (deleted in tumors)             | Lrp1b | 311926 | 1,21 | down |
| 5671328 | 7238252 | 1469181 | low density lipoprotein-related protein 1B (deleted in tumors)             | Lrp1b | 311926 | 1,19 | up   |
| 6578946 | 7238252 | 1469206 | low density lipoprotein-related protein 1B (deleted in tumors)             | Lrp1b | 311926 | 1,18 | down |
| 6313661 | 7238252 | 1469224 | low density lipoprotein-related protein 1B (deleted in tumors)             | Lrp1b | 311926 | 1,17 | up   |
| 6443747 | 7238252 | 1469136 | low density lipoprotein-related protein 1B (deleted in tumors)             | Lrp1b | 311926 | 1,17 | down |
| 6427665 | 7238252 | 1469095 | low density lipoprotein-related protein 1B (deleted in tumors)             | Lrp1b | 311926 | 1,17 | down |
| 5841412 | 7238252 | 1469244 | low density lipoprotein-related protein 1B (deleted in tumors)             | Lrp1b | 311926 | 1,16 | down |
| 6237994 | 7238252 | 1469104 | low density lipoprotein-related protein 1B (deleted in tumors)             | Lrp1b | 311926 | 1,16 | down |
| 5695000 | 7238252 | 1469213 | low density lipoprotein-related protein 1B (deleted in tumors)             | Lrp1b | 311926 | 1,15 | down |
| 6144650 | 7238252 | 1469214 | low density lipoprotein-related protein 1B (deleted in tumors)             | Lrp1b | 311926 | 1,15 | down |
| 6673221 | 7238252 | 1469088 | low density lipoprotein-related protein 1B (deleted in tumors)             | Lrp1b | 311926 | 1,15 | down |
| 6528566 | 7238252 | 1469197 | low density lipoprotein-related protein 1B (deleted in tumors)             | Lrp1b | 311926 | 1,15 | down |
| 6577648 | 7238252 | 1469087 | low density lipoprotein-related protein 1B (deleted in tumors)             | Lrp1b | 311926 | 1,14 | down |
| 6496034 | 7238252 | 1469216 | low density lipoprotein-related protein 1B (deleted in tumors)             | Lrp1b | 311926 | 1,14 | up   |

|         |         |         |                                                                |       |        |      |      |
|---------|---------|---------|----------------------------------------------------------------|-------|--------|------|------|
| 6010827 | 7238252 | 1469175 | low density lipoprotein-related protein 1B (deleted in tumors) | Lrp1b | 311926 | 1,14 | up   |
| 6029978 | 7238252 | 1469164 | low density lipoprotein-related protein 1B (deleted in tumors) | Lrp1b | 311926 | 1,13 | down |
| 6114321 | 7238252 | 1469166 | low density lipoprotein-related protein 1B (deleted in tumors) | Lrp1b | 311926 | 1,12 | down |
| 5995370 | 7238252 | 1469096 | low density lipoprotein-related protein 1B (deleted in tumors) | Lrp1b | 311926 | 1,12 | down |
| 6112728 | 7238252 | 1469085 | low density lipoprotein-related protein 1B (deleted in tumors) | Lrp1b | 311926 | 1,11 | down |
| 5738146 | 7238252 | 1469099 | low density lipoprotein-related protein 1B (deleted in tumors) | Lrp1b | 311926 | 1,11 | down |
| 5752702 | 7238252 | 1469086 | low density lipoprotein-related protein 1B (deleted in tumors) | Lrp1b | 311926 | 1,11 | up   |
| 6481078 | 7238252 | 1469102 | low density lipoprotein-related protein 1B (deleted in tumors) | Lrp1b | 311926 | 1,11 | down |
| 6193440 | 7238252 | 1469093 | low density lipoprotein-related protein 1B (deleted in tumors) | Lrp1b | 311926 | 1,11 | down |
| 6603210 | 7238252 | 1469105 | low density lipoprotein-related protein 1B (deleted in tumors) | Lrp1b | 311926 | 1,10 | up   |
| 5720443 | 7238252 | 1469153 | low density lipoprotein-related protein 1B (deleted in tumors) | Lrp1b | 311926 | 1,10 | down |
| 5867359 | 7238252 | 1469131 | low density lipoprotein-related protein 1B (deleted in tumors) | Lrp1b | 311926 | 1,09 | up   |
| 5820909 | 7238252 | 1469174 | low density lipoprotein-related protein 1B (deleted in tumors) | Lrp1b | 311926 | 1,08 | up   |
| 6202854 | 7238252 | 1469201 | low density lipoprotein-related protein 1B (deleted in tumors) | Lrp1b | 311926 | 1,08 | down |
| 6284958 | 7238252 | 1469163 | low density lipoprotein-related protein 1B (deleted in tumors) | Lrp1b | 311926 | 1,08 | up   |
| 6264104 | 7238252 | 1469191 | low density lipoprotein-related protein 1B (deleted in tumors) | Lrp1b | 311926 | 1,07 | up   |
| 5995793 | 7238252 | 1469143 | low density lipoprotein-related protein 1B (deleted in tumors) | Lrp1b | 311926 | 1,07 | down |
| 6530153 | 7238252 | 1469141 | low density lipoprotein-related protein 1B (deleted in tumors) | Lrp1b | 311926 | 1,07 | down |
| 6659588 | 7238252 | 1469113 | low density lipoprotein-related protein 1B (deleted in tumors) | Lrp1b | 311926 | 1,06 | up   |
| 6619401 | 7238252 | 1469120 | low density lipoprotein-related protein 1B (deleted in tumors) | Lrp1b | 311926 | 1,06 | down |
| 6524210 | 7238252 | 1469196 | low density lipoprotein-related protein 1B (deleted in tumors) | Lrp1b | 311926 | 1,06 | up   |
| 6645923 | 7238252 | 1469092 | low density lipoprotein-related protein 1B (deleted in tumors) | Lrp1b | 311926 | 1,06 | up   |
| 6740420 | 7238252 | 1469126 | low density lipoprotein-related protein 1B (deleted in tumors) | Lrp1b | 311926 | 1,05 | up   |
| 5680816 | 7238252 | 1469257 | low density lipoprotein-related protein 1B (deleted in tumors) | Lrp1b | 311926 | 1,05 | down |
| 6699133 | 7238252 | 1469202 | low density lipoprotein-related protein 1B (deleted in tumors) | Lrp1b | 311926 | 1,04 | down |
| 6495311 | 7238252 | 1469152 | low density lipoprotein-related protein 1B (deleted in tumors) | Lrp1b | 311926 | 1,04 | up   |
| 6379417 | 7238252 | 1469199 | low density lipoprotein-related protein 1B (deleted in tumors) | Lrp1b | 311926 | 1,04 | up   |
| 6335297 | 7238252 | 1469182 | low density lipoprotein-related protein 1B (deleted in tumors) | Lrp1b | 311926 | 1,03 | up   |
| 5684574 | 7238252 | 1469121 | low density lipoprotein-related protein 1B (deleted in tumors) | Lrp1b | 311926 | 1,03 | up   |
| 6159591 | 7238252 | 1469168 | low density lipoprotein-related protein 1B (deleted in tumors) | Lrp1b | 311926 | 1,03 | up   |
| 6426334 | 7238252 | 1469089 | low density lipoprotein-related protein 1B (deleted in tumors) | Lrp1b | 311926 | 1,03 | down |
| 5977384 | 7238252 | 1469192 | low density lipoprotein-related protein 1B (deleted in tumors) | Lrp1b | 311926 | 1,03 | down |
| 6028623 | 7238252 | 1469196 | low density lipoprotein-related protein 1B (deleted in tumors) | Lrp1b | 311926 | 1,02 | up   |
| 6697158 | 7238252 | 1469271 | low density lipoprotein-related protein 1B (deleted in tumors) | Lrp1b | 311926 | 1,02 | down |
| 6710672 | 7238252 | 1469140 | low density lipoprotein-related protein 1B (deleted in tumors) | Lrp1b | 311926 | 1,02 | down |
| 6615822 | 7238252 | 1469108 | low density lipoprotein-related protein 1B (deleted in tumors) | Lrp1b | 311926 | 1,02 | down |
| 5968084 | 7238252 | 1469135 | low density lipoprotein-related protein 1B (deleted in tumors) | Lrp1b | 311926 | 1,02 | up   |
| 6357664 | 7238252 | 1469198 | low density lipoprotein-related protein 1B (deleted in tumors) | Lrp1b | 311926 | 1,02 | down |
| 6319851 | 7238252 | 1469142 | low density lipoprotein-related protein 1B (deleted in tumors) | Lrp1b | 311926 | 1,01 | up   |
| 5833551 | 7238252 | 1469144 | low density lipoprotein-related protein 1B (deleted in tumors) | Lrp1b | 311926 | 1,01 | down |
| 5884529 | 7238252 | 1469139 | low density lipoprotein-related protein 1B (deleted in tumors) | Lrp1b | 311926 | 1,01 | down |
| 6281145 | 7238252 | 1469132 | low density lipoprotein-related protein 1B (deleted in tumors) | Lrp1b | 311926 | 1,01 | down |
| 5769587 | 7238252 | 1469175 | low density lipoprotein-related protein 1B (deleted in tumors) | Lrp1b | 311926 | 1,01 | up   |
| 6056268 | 7238252 | 1469122 | low density lipoprotein-related protein 1B (deleted in tumors) | Lrp1b | 311926 | 1,00 | down |
| 5862882 | 7238252 | 1469109 | low density lipoprotein-related protein 1B (deleted in tumors) | Lrp1b | 311926 | 1,00 | up   |
| 6217371 | 7238252 | 1469127 | low density lipoprotein-related protein 1B (deleted in tumors) | Lrp1b | 311926 | 1,00 | up   |
| 5672926 | 7238252 | 1469211 | low density lipoprotein-related protein 1B (deleted in tumors) | Lrp1b | 311926 | 1,00 | up   |
| 5706610 | 7238252 | 1469178 | low density lipoprotein-related protein 1B (deleted in tumors) | Lrp1b | 311926 | 1,00 | up   |
| 5793520 | 7238252 | 1469140 | low density lipoprotein-related protein 1B (deleted in tumors) | Lrp1b | 311926 | 1,00 | up   |
| 6067155 | 7238252 | 1469137 | low density lipoprotein-related protein 1B (deleted in tumors) | Lrp1b | 311926 | 1,00 | up   |
| 6183215 | 7238252 | 1469181 | low density lipoprotein-related protein 1B (deleted in tumors) | Lrp1b | 311926 | 1,00 | up   |
| 6344375 | 7238252 | 1469101 | low density lipoprotein-related protein 1B (deleted in tumors) | Lrp1b | 311926 | 1,00 | up   |
| 6476270 | 7238252 | 1469153 | low density lipoprotein-related protein 1B (deleted in tumors) | Lrp1b | 311926 | 1,00 | up   |
| 6485438 | 7238252 | 1469168 | low density lipoprotein-related protein 1B (deleted in tumors) | Lrp1b | 311926 | 1,00 | up   |
| 6581465 | 7238252 | 1469123 | low density lipoprotein-related protein 1B (deleted in tumors) | Lrp1b | 311926 | 1,00 | up   |
| 6535280 | 7238252 | 1469167 | low density lipoprotein-related protein 1B (deleted in tumors) | Lrp1b | 311926 | 1,00 | up   |
| 5627327 | 7238252 | 1469119 | low density lipoprotein-related protein 1B (deleted in tumors) | Lrp1b | 311926 | 1,00 | up   |

|         |         |         |                                                             |      |        |      |      |
|---------|---------|---------|-------------------------------------------------------------|------|--------|------|------|
| 6473019 | 7361037 | 1772248 | lung-inducible neuralized-related C3HC4 RING domain protein | Linc | 316326 | 3,11 | down |
| 6694026 | 7361037 | 1772248 | lung-inducible neuralized-related C3HC4 RING domain protein | Linc | 316326 | 2,95 | down |
| 6708226 | 7361037 | 1772248 | lung-inducible neuralized-related C3HC4 RING domain protein | Linc | 316326 | 2,92 | down |
| 5723708 | 7361037 | 1772245 | lung-inducible neuralized-related C3HC4 RING domain protein | Linc | 316326 | 2,16 | up   |
| 5644958 | 7361037 | 1772245 | lung-inducible neuralized-related C3HC4 RING domain protein | Linc | 316326 | 1,78 | up   |
| 6301953 | 7361037 | 1772246 | lung-inducible neuralized-related C3HC4 RING domain protein | Linc | 316326 | 1,56 | up   |
| 5817475 | 7361037 | 1772247 | lung-inducible neuralized-related C3HC4 RING domain protein | Linc | 316326 | 1,12 | down |
| 6050269 | 7361037 | 1772244 | lung-inducible neuralized-related C3HC4 RING domain protein | Linc | 316326 | 1,01 | up   |
| 6080555 | 7328985 | 1693171 | lymphocyte antigen 6 complex, locus H                       | Ly6h | 300025 | 2,14 | up   |
| 6649667 | 7328985 | 1693170 | lymphocyte antigen 6 complex, locus H                       | Ly6h | 300025 | 1,99 | up   |
| 5973588 | 7328985 | 1693167 | lymphocyte antigen 6 complex, locus H                       | Ly6h | 300025 | 1,43 | up   |
| 5714016 | 7328985 | 1693168 | lymphocyte antigen 6 complex, locus H                       | Ly6h | 300025 | 1,08 | up   |
| 6348016 | 7328985 | 1693167 | lymphocyte antigen 6 complex, locus H                       | Ly6h | 300025 | 1,06 | up   |
| 6447706 | 7328985 | 1693169 | lymphocyte antigen 6 complex, locus H                       | Ly6h | 300025 | 1,05 | up   |
| 6112328 | 7133474 | 1209899 | lymphocyte cytosolic protein 1                              | Lcp1 | 306071 | 2,65 | down |
| 6075979 | 7133474 | 1209887 | lymphocyte cytosolic protein 1                              | Lcp1 | 306071 | 2,19 | up   |
| 6409005 | 7133474 | 1209899 | lymphocyte cytosolic protein 1                              | Lcp1 | 306071 | 2,02 | down |
| 5652083 | 7133474 | 1209895 | lymphocyte cytosolic protein 1                              | Lcp1 | 306071 | 1,80 | up   |
| 5905385 | 7133474 | 1209885 | lymphocyte cytosolic protein 1                              | Lcp1 | 306071 | 1,73 | down |
| 6469278 | 7133474 | 1209892 | lymphocyte cytosolic protein 1                              | Lcp1 | 306071 | 1,64 | down |
| 6232466 | 7133474 | 1209898 | lymphocyte cytosolic protein 1                              | Lcp1 | 306071 | 1,61 | down |
| 5887999 | 7133474 | 1209885 | lymphocyte cytosolic protein 1                              | Lcp1 | 306071 | 1,60 | down |
| 6453663 | 7133474 | 1209894 | lymphocyte cytosolic protein 1                              | Lcp1 | 306071 | 1,49 | up   |
| 5802081 | 7133474 | 1209884 | lymphocyte cytosolic protein 1                              | Lcp1 | 306071 | 1,47 | down |
| 6610099 | 7133474 | 1209898 | lymphocyte cytosolic protein 1                              | Lcp1 | 306071 | 1,43 | down |
| 6315499 | 7133474 | 1209888 | lymphocyte cytosolic protein 1                              | Lcp1 | 306071 | 1,42 | up   |
| 6574507 | 7133474 | 1209886 | lymphocyte cytosolic protein 1                              | Lcp1 | 306071 | 1,40 | up   |
| 6502996 | 7133474 | 1209899 | lymphocyte cytosolic protein 1                              | Lcp1 | 306071 | 1,38 | down |
| 6576702 | 7133474 | 1209897 | lymphocyte cytosolic protein 1                              | Lcp1 | 306071 | 1,38 | down |
| 6206278 | 7133474 | 1209889 | lymphocyte cytosolic protein 1                              | Lcp1 | 306071 | 1,32 | up   |
| 6432854 | 7133474 | 1209890 | lymphocyte cytosolic protein 1                              | Lcp1 | 306071 | 1,28 | down |
| 6185152 | 7133474 | 1209899 | lymphocyte cytosolic protein 1                              | Lcp1 | 306071 | 1,21 | down |
| 6538703 | 7133474 | 1209891 | lymphocyte cytosolic protein 1                              | Lcp1 | 306071 | 1,17 | up   |
| 6351118 | 7133474 | 1209893 | lymphocyte cytosolic protein 1                              | Lcp1 | 306071 | 1,08 | up   |
| 5902768 | 7133474 | 1209883 | lymphocyte cytosolic protein 1                              | Lcp1 | 306071 | 1,06 | up   |
| 6578651 | 7133474 | 1209896 | lymphocyte cytosolic protein 1                              | Lcp1 | 306071 | 1,03 | up   |
| 5621228 | 7066185 | 1046521 | lymphocyte cytosolic protein 2                              | Lcp2 | 155918 | 2,12 | down |
| 5780965 | 7066185 | 1046527 | lymphocyte cytosolic protein 2                              | Lcp2 | 155918 | 1,74 | down |
| 5930099 | 7066185 | 1046523 | lymphocyte cytosolic protein 2                              | Lcp2 | 155918 | 1,57 | down |
| 6299575 | 7066185 | 1046525 | lymphocyte cytosolic protein 2                              | Lcp2 | 155918 | 1,54 | up   |
| 6680781 | 7066185 | 1046515 | lymphocyte cytosolic protein 2                              | Lcp2 | 155918 | 1,43 | up   |
| 6187993 | 7066185 | 1046522 | lymphocyte cytosolic protein 2                              | Lcp2 | 155918 | 1,35 | down |
| 5725168 | 7066185 | 1046528 | lymphocyte cytosolic protein 2                              | Lcp2 | 155918 | 1,30 | down |
| 6515576 | 7066185 | 1046520 | lymphocyte cytosolic protein 2                              | Lcp2 | 155918 | 1,25 | up   |
| 6695862 | 7066185 | 1046519 | lymphocyte cytosolic protein 2                              | Lcp2 | 155918 | 1,22 | down |
| 5852754 | 7066185 | 1046529 | lymphocyte cytosolic protein 2                              | Lcp2 | 155918 | 1,18 | up   |
| 5839280 | 7066185 | 1046526 | lymphocyte cytosolic protein 2                              | Lcp2 | 155918 | 1,12 | up   |
| 5847042 | 7066185 | 1046530 | lymphocyte cytosolic protein 2                              | Lcp2 | 155918 | 1,11 | up   |
| 6733468 | 7066185 | 1046514 | lymphocyte cytosolic protein 2                              | Lcp2 | 155918 | 1,08 | up   |
| 5767074 | 7066185 | 1046516 | lymphocyte cytosolic protein 2                              | Lcp2 | 155918 | 1,07 | up   |
| 6445757 | 7066185 | 1046517 | lymphocyte cytosolic protein 2                              | Lcp2 | 155918 | 1,07 | up   |
| 6450781 | 7066185 | 1046518 | lymphocyte cytosolic protein 2                              | Lcp2 | 155918 | 1,04 | up   |
| 5801380 | 7066185 | 1046524 | lymphocyte cytosolic protein 2                              | Lcp2 | 155918 | 1,04 | down |
| 6162743 | 7066185 | 1046531 | lymphocyte cytosolic protein 2                              | Lcp2 | 155918 | 1,04 | up   |
| 6005811 | 7259807 | 1522250 | lymphoid-restricted membrane protein                        | Lrmp | 500361 | 2,04 | down |
| 5782093 | 7259807 | 1522250 | lymphoid-restricted membrane protein                        | Lrmp | 500361 | 1,71 | up   |
| 6230557 | 7259807 | 1522229 | lymphoid-restricted membrane protein                        | Lrmp | 500361 | 1,47 | down |

|         |         |         |                                                           |           |        |      |      |
|---------|---------|---------|-----------------------------------------------------------|-----------|--------|------|------|
| 5964630 | 7259807 | 1522227 | lymphoid-restricted membrane protein                      | Lrmp      | 500361 | 1,25 | down |
| 6142656 | 7259807 | 1522241 | lymphoid-restricted membrane protein                      | Lrmp      | 500361 | 1,24 | down |
| 5936764 | 7259807 | 1522248 | lymphoid-restricted membrane protein                      | Lrmp      | 500361 | 1,16 | up   |
| 5886601 | 7259807 | 1522249 | lymphoid-restricted membrane protein                      | Lrmp      | 500361 | 1,15 | down |
| 6146139 | 7259807 | 1522243 | lymphoid-restricted membrane protein                      | Lrmp      | 500361 | 1,14 | up   |
| 6162015 | 7259807 | 1522223 | lymphoid-restricted membrane protein                      | Lrmp      | 500361 | 1,09 | up   |
| 6246375 | 7259807 | 1522228 | lymphoid-restricted membrane protein                      | Lrmp      | 500361 | 1,08 | up   |
| 6166346 | 7259807 | 1522247 | lymphoid-restricted membrane protein                      | Lrmp      | 500361 | 1,07 | up   |
| 6469839 | 7259807 | 1522244 | lymphoid-restricted membrane protein                      | Lrmp      | 500361 | 1,06 | down |
| 6438050 | 7259807 | 1522236 | lymphoid-restricted membrane protein                      | Lrmp      | 500361 | 1,05 | up   |
| 6270101 | 7259807 | 1522245 | lymphoid-restricted membrane protein                      | Lrmp      | 500361 | 1,04 | up   |
| 6726200 | 7259807 | 1522240 | lymphoid-restricted membrane protein                      | Lrmp      | 500361 | 1,04 | up   |
| 6149738 | 7259807 | 1522246 | lymphoid-restricted membrane protein                      | Lrmp      | 500361 | 1,04 | down |
| 6228662 | 7259807 | 1522223 | lymphoid-restricted membrane protein                      | Lrmp      | 500361 | 1,04 | up   |
| 6125387 | 7259807 | 1522242 | lymphoid-restricted membrane protein                      | Lrmp      | 500361 | 1,03 | up   |
| 5633021 | 7259807 | 1522234 | lymphoid-restricted membrane protein                      | Lrmp      | 500361 | 1,02 | up   |
| 5761287 | 7259807 | 1522227 | lymphoid-restricted membrane protein                      | Lrmp      | 500361 | 1,01 | up   |
| 6064818 | 7259807 | 1522230 | lymphoid-restricted membrane protein                      | Lrmp      | 500361 | 1,01 | up   |
| 6585513 | 7259807 | 1522235 | lymphoid-restricted membrane protein                      | Lrmp      | 500361 | 1,00 | down |
| 6104205 | 7220595 | 1424379 | lymphotoxin beta (TNF superfamily, member 3)              | Ltb       | 361795 | 5,55 | up   |
| 6596502 | 7220595 | 1424381 | lymphotoxin beta (TNF superfamily, member 3)              | Ltb       | 361795 | 2,10 | up   |
| 5974639 | 7220595 | 1424382 | lymphotoxin beta (TNF superfamily, member 3)              | Ltb       | 361795 | 1,76 | down |
| 6192648 | 7220595 | 1424380 | lymphotoxin beta (TNF superfamily, member 3)              | Ltb       | 361795 | 1,65 | up   |
| 6398560 | 7220595 | 1424382 | lymphotoxin beta (TNF superfamily, member 3)              | Ltb       | 361795 | 1,41 | down |
| 5620873 | 7220595 | 1424382 | lymphotoxin beta (TNF superfamily, member 3)              | Ltb       | 361795 | 1,11 | down |
| 5793016 | 7220595 | 1424381 | lymphotoxin beta (TNF superfamily, member 3)              | Ltb       | 361795 | 1,08 | up   |
| 5713025 | 7338101 | 1715195 | LysM, putative peptidoglycan-binding, domain containing 2 | Lysmd2    | 300839 | 1,22 | up   |
| 5887965 | 7338101 | 1715196 | LysM, putative peptidoglycan-binding, domain containing 2 | Lysmd2    | 300839 | 1,18 | up   |
| 6702080 | 7338101 | 1715192 | LysM, putative peptidoglycan-binding, domain containing 2 | Lysmd2    | 300839 | 1,15 | up   |
| 6734805 | 7338101 | 1715196 | LysM, putative peptidoglycan-binding, domain containing 2 | Lysmd2    | 300839 | 1,01 | up   |
| 6499140 | 7150043 | 1250730 | lysophosphatidic acid receptor 2                          | Lpar2     | 498609 | 2,02 | down |
| 5793988 | 7150043 | 1250733 | lysophosphatidic acid receptor 2                          | Lpar2     | 498609 | 1,65 | down |
| 5722122 | 7150043 | 1250732 | lysophosphatidic acid receptor 2                          | Lpar2     | 498609 | 1,28 | up   |
| 6685340 | 7150043 | 1250729 | lysophosphatidic acid receptor 2                          | Lpar2     | 498609 | 1,19 | up   |
| 5702191 | 7150043 | 1250730 | lysophosphatidic acid receptor 2                          | Lpar2     | 498609 | 1,04 | down |
| 5801631 | 7183182 | 1333552 | lysophosphatidylcholine acyltransferase 2                 | Lpcat2    | 307713 | 1,86 | up   |
| 6302817 | 7231137 | 1450204 | lysophosphatidylcholine acyltransferase 4                 | Lpcat4    | 296048 | 1,58 | down |
| 6064122 | 7231137 | 1450194 | lysophosphatidylcholine acyltransferase 4                 | Lpcat4    | 296048 | 1,55 | down |
| 6335482 | 7231137 | 1450208 | lysophosphatidylcholine acyltransferase 4                 | Lpcat4    | 296048 | 1,27 | up   |
| 6421159 | 7231137 | 1450198 | lysophosphatidylcholine acyltransferase 4                 | Lpcat4    | 296048 | 1,27 | down |
| 5872415 | 7231137 | 1450208 | lysophosphatidylcholine acyltransferase 4                 | Lpcat4    | 296048 | 1,24 | down |
| 5737179 | 7231137 | 1450196 | lysophosphatidylcholine acyltransferase 4                 | Lpcat4    | 296048 | 1,18 | down |
| 6314423 | 7231137 | 1450207 | lysophosphatidylcholine acyltransferase 4                 | Lpcat4    | 296048 | 1,18 | down |
| 6150087 | 7231137 | 1450197 | lysophosphatidylcholine acyltransferase 4                 | Lpcat4    | 296048 | 1,16 | down |
| 6696183 | 7231137 | 1450205 | lysophosphatidylcholine acyltransferase 4                 | Lpcat4    | 296048 | 1,10 | down |
| 6348085 | 7231137 | 1450206 | lysophosphatidylcholine acyltransferase 4                 | Lpcat4    | 296048 | 1,08 | down |
| 6225612 | 7231137 | 1450199 | lysophosphatidylcholine acyltransferase 4                 | Lpcat4    | 296048 | 1,06 | up   |
| 6053595 | 7231137 | 1450198 | lysophosphatidylcholine acyltransferase 4                 | Lpcat4    | 296048 | 1,04 | down |
| 6405761 | 7231137 | 1450201 | lysophosphatidylcholine acyltransferase 4                 | Lpcat4    | 296048 | 1,03 | up   |
| 6171285 | 7231137 | 1450198 | lysophosphatidylcholine acyltransferase 4                 | Lpcat4    | 296048 | 1,02 | up   |
| 6379296 | 7231137 | 1450203 | lysophosphatidylcholine acyltransferase 4                 | Lpcat4    | 296048 | 1,01 | up   |
| 6074920 | 7302020 | 1627011 | lysophospholipase                                         | LOC246266 | 246266 | 2,15 | up   |
| 6621492 | 7302020 | 1627006 | lysophospholipase                                         | LOC246266 | 246266 | 1,87 | up   |
| 6711793 | 7302020 | 1627000 | lysophospholipase                                         | LOC246266 | 246266 | 1,67 | down |
| 5719286 | 7302020 | 1627007 | lysophospholipase                                         | LOC246266 | 246266 | 1,48 | down |
| 5725283 | 7302020 | 1627004 | lysophospholipase                                         | LOC246266 | 246266 | 1,44 | up   |
| 5888845 | 7302020 | 1627008 | lysophospholipase                                         | LOC246266 | 246266 | 1,39 | down |

|         |         |         |                                 |           |        |      |      |
|---------|---------|---------|---------------------------------|-----------|--------|------|------|
| 6505541 | 7302020 | 1626998 | lysophospholipase               | LOC246266 | 246266 | 1,33 | down |
| 6419310 | 7302020 | 1626999 | lysophospholipase               | LOC246266 | 246266 | 1,26 | down |
| 6292967 | 7302020 | 1627009 | lysophospholipase               | LOC246266 | 246266 | 1,19 | down |
| 6062694 | 7302020 | 1627001 | lysophospholipase               | LOC246266 | 246266 | 1,18 | down |
| 6323672 | 7302020 | 1627013 | lysophospholipase               | LOC246266 | 246266 | 1,14 | down |
| 5965745 | 7302020 | 1627003 | lysophospholipase               | LOC246266 | 246266 | 1,12 | up   |
| 6237136 | 7302020 | 1627002 | lysophospholipase               | LOC246266 | 246266 | 1,07 | up   |
| 5902989 | 7302020 | 1626998 | lysophospholipase               | LOC246266 | 246266 | 1,07 | down |
| 6052111 | 7302020 | 1627012 | lysophospholipase               | LOC246266 | 246266 | 1,07 | down |
| 6084801 | 7302020 | 1627010 | lysophospholipase               | LOC246266 | 246266 | 1,02 | up   |
| 5841907 | 7302020 | 1627005 | lysophospholipase               | LOC246266 | 246266 | 1,00 | up   |
| 6640558 | 7283161 | 1580641 | lysophospholipase 1             | Lypla1    | 25514  | 2,61 | up   |
| 5862860 | 7283161 | 1580643 | lysophospholipase 1             | Lypla1    | 25514  | 1,60 | down |
| 5882469 | 7283161 | 1580643 | lysophospholipase 1             | Lypla1    | 25514  | 1,39 | down |
| 5685521 | 7283161 | 1580636 | lysophospholipase 1             | Lypla1    | 25514  | 1,18 | down |
| 5715875 | 7283161 | 1580634 | lysophospholipase 1             | Lypla1    | 25514  | 1,16 | up   |
| 5776072 | 7283161 | 1580635 | lysophospholipase 1             | Lypla1    | 25514  | 1,13 | up   |
| 6720135 | 7283161 | 1580639 | lysophospholipase 1             | Lypla1    | 25514  | 1,11 | up   |
| 5997471 | 7283161 | 1580640 | lysophospholipase 1             | Lypla1    | 25514  | 1,11 | down |
| 5998638 | 7283161 | 1580638 | lysophospholipase 1             | Lypla1    | 25514  | 1,09 | up   |
| 5652535 | 7283161 | 1580637 | lysophospholipase 1             | Lypla1    | 25514  | 1,05 | down |
| 6184800 | 7283161 | 1580642 | lysophospholipase 1             | Lypla1    | 25514  | 1,04 | down |
| 6165568 | 7283161 | 1580634 | lysophospholipase 1             | Lypla1    | 25514  | 1,04 | down |
| 6604407 | 7283161 | 1580634 | lysophospholipase 1             | Lypla1    | 25514  | 1,00 | up   |
| 6104010 | 7165825 | 1288434 | lysosomal trafficking regulator | Lyst      | 85419  | 1,76 | up   |
| 6637960 | 7165825 | 1288464 | lysosomal trafficking regulator | Lyst      | 85419  | 1,71 | down |
| 6458440 | 7165825 | 1288466 | lysosomal trafficking regulator | Lyst      | 85419  | 1,69 | up   |
| 5685216 | 7165825 | 1288466 | lysosomal trafficking regulator | Lyst      | 85419  | 1,61 | up   |
| 6402653 | 7165825 | 1288449 | lysosomal trafficking regulator | Lyst      | 85419  | 1,48 | up   |
| 6032138 | 7165825 | 1288433 | lysosomal trafficking regulator | Lyst      | 85419  | 1,47 | down |
| 5692747 | 7165825 | 1288431 | lysosomal trafficking regulator | Lyst      | 85419  | 1,45 | up   |
| 6193147 | 7165825 | 1288445 | lysosomal trafficking regulator | Lyst      | 85419  | 1,41 | down |
| 6225563 | 7165825 | 1288465 | lysosomal trafficking regulator | Lyst      | 85419  | 1,41 | down |
| 6120895 | 7165825 | 1288465 | lysosomal trafficking regulator | Lyst      | 85419  | 1,41 | up   |
| 6338195 | 7165825 | 1288422 | lysosomal trafficking regulator | Lyst      | 85419  | 1,38 | down |
| 6365911 | 7165825 | 1288466 | lysosomal trafficking regulator | Lyst      | 85419  | 1,36 | up   |
| 5650463 | 7165825 | 1288430 | lysosomal trafficking regulator | Lyst      | 85419  | 1,36 | down |
| 6417646 | 7165825 | 1288436 | lysosomal trafficking regulator | Lyst      | 85419  | 1,36 | up   |
| 6673340 | 7165825 | 1288419 | lysosomal trafficking regulator | Lyst      | 85419  | 1,36 | up   |
| 6114991 | 7165825 | 1288435 | lysosomal trafficking regulator | Lyst      | 85419  | 1,35 | up   |
| 5959619 | 7165825 | 1288465 | lysosomal trafficking regulator | Lyst      | 85419  | 1,34 | up   |
| 6363044 | 7165825 | 1288423 | lysosomal trafficking regulator | Lyst      | 85419  | 1,31 | down |
| 5820926 | 7165825 | 1288447 | lysosomal trafficking regulator | Lyst      | 85419  | 1,29 | down |
| 5924546 | 7165825 | 1288442 | lysosomal trafficking regulator | Lyst      | 85419  | 1,28 | down |
| 6729568 | 7165825 | 1288449 | lysosomal trafficking regulator | Lyst      | 85419  | 1,28 | up   |
| 5636776 | 7165825 | 1288459 | lysosomal trafficking regulator | Lyst      | 85419  | 1,28 | down |
| 6102601 | 7165825 | 1288449 | lysosomal trafficking regulator | Lyst      | 85419  | 1,27 | up   |
| 5662272 | 7165825 | 1288466 | lysosomal trafficking regulator | Lyst      | 85419  | 1,25 | down |
| 6519054 | 7165825 | 1288441 | lysosomal trafficking regulator | Lyst      | 85419  | 1,22 | down |
| 5629167 | 7165825 | 1288468 | lysosomal trafficking regulator | Lyst      | 85419  | 1,19 | up   |
| 5733478 | 7165825 | 1288428 | lysosomal trafficking regulator | Lyst      | 85419  | 1,18 | up   |
| 6122042 | 7165825 | 1288425 | lysosomal trafficking regulator | Lyst      | 85419  | 1,18 | up   |
| 6331274 | 7165825 | 1288451 | lysosomal trafficking regulator | Lyst      | 85419  | 1,17 | down |
| 6008427 | 7165825 | 1288444 | lysosomal trafficking regulator | Lyst      | 85419  | 1,17 | down |
| 5972574 | 7165825 | 1288458 | lysosomal trafficking regulator | Lyst      | 85419  | 1,17 | up   |
| 6166212 | 7165825 | 1288466 | lysosomal trafficking regulator | Lyst      | 85419  | 1,17 | up   |
| 6022973 | 7165825 | 1288449 | lysosomal trafficking regulator | Lyst      | 85419  | 1,17 | down |

|         |         |         |                                 |         |        |      |      |
|---------|---------|---------|---------------------------------|---------|--------|------|------|
| 6018928 | 7165825 | 1288424 | lysosomal trafficking regulator | Lyst    | 85419  | 1,16 | down |
| 6279814 | 7165825 | 1288444 | lysosomal trafficking regulator | Lyst    | 85419  | 1,16 | up   |
| 6082531 | 7165825 | 1288465 | lysosomal trafficking regulator | Lyst    | 85419  | 1,15 | up   |
| 6627008 | 7165825 | 1288424 | lysosomal trafficking regulator | Lyst    | 85419  | 1,15 | down |
| 6462613 | 7165825 | 1288455 | lysosomal trafficking regulator | Lyst    | 85419  | 1,15 | up   |
| 5671751 | 7165825 | 1288450 | lysosomal trafficking regulator | Lyst    | 85419  | 1,15 | up   |
| 5860449 | 7165825 | 1288418 | lysosomal trafficking regulator | Lyst    | 85419  | 1,14 | up   |
| 5852766 | 7165825 | 1288455 | lysosomal trafficking regulator | Lyst    | 85419  | 1,14 | down |
| 6366573 | 7165825 | 1288443 | lysosomal trafficking regulator | Lyst    | 85419  | 1,14 | down |
| 5946694 | 7165825 | 1288462 | lysosomal trafficking regulator | Lyst    | 85419  | 1,13 | up   |
| 5710997 | 7165825 | 1288460 | lysosomal trafficking regulator | Lyst    | 85419  | 1,12 | down |
| 6171236 | 7165825 | 1288456 | lysosomal trafficking regulator | Lyst    | 85419  | 1,11 | up   |
| 5667162 | 7165825 | 1288465 | lysosomal trafficking regulator | Lyst    | 85419  | 1,10 | down |
| 6688308 | 7165825 | 1288465 | lysosomal trafficking regulator | Lyst    | 85419  | 1,10 | down |
| 5855081 | 7165825 | 1288437 | lysosomal trafficking regulator | Lyst    | 85419  | 1,10 | down |
| 6519408 | 7165825 | 1288431 | lysosomal trafficking regulator | Lyst    | 85419  | 1,10 | up   |
| 5752946 | 7165825 | 1288425 | lysosomal trafficking regulator | Lyst    | 85419  | 1,09 | down |
| 6481985 | 7165825 | 1288425 | lysosomal trafficking regulator | Lyst    | 85419  | 1,08 | down |
| 6442625 | 7165825 | 1288464 | lysosomal trafficking regulator | Lyst    | 85419  | 1,08 | up   |
| 5661011 | 7165825 | 1288461 | lysosomal trafficking regulator | Lyst    | 85419  | 1,08 | down |
| 6540373 | 7165825 | 1288448 | lysosomal trafficking regulator | Lyst    | 85419  | 1,08 | up   |
| 5687405 | 7165825 | 1288446 | lysosomal trafficking regulator | Lyst    | 85419  | 1,07 | down |
| 5758956 | 7165825 | 1288452 | lysosomal trafficking regulator | Lyst    | 85419  | 1,07 | down |
| 6362483 | 7165825 | 1288465 | lysosomal trafficking regulator | Lyst    | 85419  | 1,07 | up   |
| 6540177 | 7165825 | 1288437 | lysosomal trafficking regulator | Lyst    | 85419  | 1,06 | down |
| 6561598 | 7165825 | 1288426 | lysosomal trafficking regulator | Lyst    | 85419  | 1,06 | up   |
| 6244794 | 7165825 | 1288456 | lysosomal trafficking regulator | Lyst    | 85419  | 1,06 | down |
| 6671905 | 7165825 | 1288440 | lysosomal trafficking regulator | Lyst    | 85419  | 1,05 | up   |
| 5681166 | 7165825 | 1288463 | lysosomal trafficking regulator | Lyst    | 85419  | 1,05 | up   |
| 6549515 | 7165825 | 1288429 | lysosomal trafficking regulator | Lyst    | 85419  | 1,04 | down |
| 6302480 | 7165825 | 1288421 | lysosomal trafficking regulator | Lyst    | 85419  | 1,04 | up   |
| 6060826 | 7165825 | 1288467 | lysosomal trafficking regulator | Lyst    | 85419  | 1,04 | up   |
| 5856002 | 7165825 | 1288420 | lysosomal trafficking regulator | Lyst    | 85419  | 1,04 | down |
| 6244502 | 7165825 | 1288467 | lysosomal trafficking regulator | Lyst    | 85419  | 1,04 | up   |
| 6161449 | 7165825 | 1288466 | lysosomal trafficking regulator | Lyst    | 85419  | 1,03 | up   |
| 6349939 | 7165825 | 1288453 | lysosomal trafficking regulator | Lyst    | 85419  | 1,03 | down |
| 6230840 | 7165825 | 1288439 | lysosomal trafficking regulator | Lyst    | 85419  | 1,03 | down |
| 6094781 | 7165825 | 1288438 | lysosomal trafficking regulator | Lyst    | 85419  | 1,03 | up   |
| 5848552 | 7165825 | 1288431 | lysosomal trafficking regulator | Lyst    | 85419  | 1,03 | up   |
| 6319377 | 7165825 | 1288449 | lysosomal trafficking regulator | Lyst    | 85419  | 1,03 | up   |
| 6038919 | 7165825 | 1288432 | lysosomal trafficking regulator | Lyst    | 85419  | 1,02 | up   |
| 5932101 | 7165825 | 1288427 | lysosomal trafficking regulator | Lyst    | 85419  | 1,01 | up   |
| 6283279 | 7165825 | 1288457 | lysosomal trafficking regulator | Lyst    | 85419  | 1,01 | up   |
| 6637703 | 7165825 | 1288457 | lysosomal trafficking regulator | Lyst    | 85419  | 1,01 | down |
| 5767556 | 7165825 | 1288454 | lysosomal trafficking regulator | Lyst    | 85419  | 1,00 | up   |
| 6471778 | 7039352 | 984004  | MACRO domain containing 1       | Macrodl | 246233 | 2,07 | down |
| 5713896 | 7039352 | 984009  | MACRO domain containing 1       | Macrodl | 246233 | 1,58 | up   |
| 6445007 | 7039352 | 984002  | MACRO domain containing 1       | Macrodl | 246233 | 1,43 | up   |
| 5970109 | 7039352 | 984001  | MACRO domain containing 1       | Macrodl | 246233 | 1,37 | up   |
| 6136939 | 7039352 | 984003  | MACRO domain containing 1       | Macrodl | 246233 | 1,33 | down |
| 6509358 | 7039352 | 984007  | MACRO domain containing 1       | Macrodl | 246233 | 1,32 | down |
| 5817122 | 7039352 | 984011  | MACRO domain containing 1       | Macrodl | 246233 | 1,23 | down |
| 6680579 | 7039352 | 984010  | MACRO domain containing 1       | Macrodl | 246233 | 1,20 | up   |
| 6290791 | 7039352 | 984008  | MACRO domain containing 1       | Macrodl | 246233 | 1,20 | down |
| 6720522 | 7039352 | 984006  | MACRO domain containing 1       | Macrodl | 246233 | 1,12 | up   |
| 6596087 | 7039352 | 984011  | MACRO domain containing 1       | Macrodl | 246233 | 1,12 | up   |
| 6513411 | 7039352 | 984005  | MACRO domain containing 1       | Macrodl | 246233 | 1,01 | down |

|         |         |         |                                                                   |        |        |      |      |
|---------|---------|---------|-------------------------------------------------------------------|--------|--------|------|------|
| 5795929 | 7340333 | 1720933 | Macrophage stimulating 1 (hepatocyte growth factor-like)          | Mst1   | 24566  | 2,09 | down |
| 6741169 | 7340333 | 1720927 | Macrophage stimulating 1 (hepatocyte growth factor-like)          | Mst1   | 24566  | 1,94 | down |
| 5819712 | 7340333 | 1720923 | Macrophage stimulating 1 (hepatocyte growth factor-like)          | Mst1   | 24566  | 1,78 | up   |
| 6043927 | 7340333 | 1720925 | Macrophage stimulating 1 (hepatocyte growth factor-like)          | Mst1   | 24566  | 1,75 | up   |
| 6154608 | 7340333 | 1720919 | Macrophage stimulating 1 (hepatocyte growth factor-like)          | Mst1   | 24566  | 1,37 | down |
| 6457729 | 7340333 | 1720934 | Macrophage stimulating 1 (hepatocyte growth factor-like)          | Mst1   | 24566  | 1,36 | down |
| 5900550 | 7340333 | 1720927 | Macrophage stimulating 1 (hepatocyte growth factor-like)          | Mst1   | 24566  | 1,31 | up   |
| 6443148 | 7340333 | 1720922 | Macrophage stimulating 1 (hepatocyte growth factor-like)          | Mst1   | 24566  | 1,29 | up   |
| 5643179 | 7340333 | 1720937 | Macrophage stimulating 1 (hepatocyte growth factor-like)          | Mst1   | 24566  | 1,23 | down |
| 6519377 | 7340333 | 1720929 | Macrophage stimulating 1 (hepatocyte growth factor-like)          | Mst1   | 24566  | 1,22 | down |
| 5959411 | 7340333 | 1720936 | Macrophage stimulating 1 (hepatocyte growth factor-like)          | Mst1   | 24566  | 1,18 | up   |
| 5716639 | 7340333 | 1720921 | Macrophage stimulating 1 (hepatocyte growth factor-like)          | Mst1   | 24566  | 1,17 | down |
| 5913073 | 7340333 | 1720922 | Macrophage stimulating 1 (hepatocyte growth factor-like)          | Mst1   | 24566  | 1,17 | down |
| 6426361 | 7340333 | 1720930 | Macrophage stimulating 1 (hepatocyte growth factor-like)          | Mst1   | 24566  | 1,12 | up   |
| 6728949 | 7340333 | 1720931 | Macrophage stimulating 1 (hepatocyte growth factor-like)          | Mst1   | 24566  | 1,10 | up   |
| 6024507 | 7340333 | 1720935 | Macrophage stimulating 1 (hepatocyte growth factor-like)          | Mst1   | 24566  | 1,07 | down |
| 6396302 | 7340333 | 1720928 | Macrophage stimulating 1 (hepatocyte growth factor-like)          | Mst1   | 24566  | 1,06 | down |
| 6380481 | 7340333 | 1720938 | Macrophage stimulating 1 (hepatocyte growth factor-like)          | Mst1   | 24566  | 1,05 | down |
| 5709106 | 7340333 | 1720926 | Macrophage stimulating 1 (hepatocyte growth factor-like)          | Mst1   | 24566  | 1,05 | up   |
| 5714471 | 7340333 | 1720924 | Macrophage stimulating 1 (hepatocyte growth factor-like)          | Mst1   | 24566  | 1,04 | down |
| 5688483 | 7340333 | 1720920 | Macrophage stimulating 1 (hepatocyte growth factor-like)          | Mst1   | 24566  | 1,03 | down |
| 5714595 | 7340333 | 1720932 | Macrophage stimulating 1 (hepatocyte growth factor-like)          | Mst1   | 24566  | 1,03 | up   |
| 6440712 | 7340333 | 1720937 | Macrophage stimulating 1 (hepatocyte growth factor-like)          | Mst1   | 24566  | 1,01 | up   |
| 6089947 | 7340333 | 1720927 | Macrophage stimulating 1 (hepatocyte growth factor-like)          | Mst1   | 24566  | 1,01 | down |
| 5877948 | 7340263 | 1720768 | macrophage stimulating 1 receptor (c-met-related tyrosine kinase) | Mst1r  | 300999 | 2,68 | down |
| 6306823 | 7340263 | 1720751 | macrophage stimulating 1 receptor (c-met-related tyrosine kinase) | Mst1r  | 300999 | 1,90 | down |
| 6484668 | 7340263 | 1720757 | macrophage stimulating 1 receptor (c-met-related tyrosine kinase) | Mst1r  | 300999 | 1,81 | down |
| 6419459 | 7340263 | 1720756 | macrophage stimulating 1 receptor (c-met-related tyrosine kinase) | Mst1r  | 300999 | 1,74 | down |
| 6099511 | 7340263 | 1720748 | macrophage stimulating 1 receptor (c-met-related tyrosine kinase) | Mst1r  | 300999 | 1,53 | up   |
| 5639157 | 7340263 | 1720761 | macrophage stimulating 1 receptor (c-met-related tyrosine kinase) | Mst1r  | 300999 | 1,48 | down |
| 6741636 | 7340263 | 1720748 | macrophage stimulating 1 receptor (c-met-related tyrosine kinase) | Mst1r  | 300999 | 1,45 | down |
| 6342303 | 7340263 | 1720754 | macrophage stimulating 1 receptor (c-met-related tyrosine kinase) | Mst1r  | 300999 | 1,35 | up   |
| 6444565 | 7340263 | 1720764 | macrophage stimulating 1 receptor (c-met-related tyrosine kinase) | Mst1r  | 300999 | 1,34 | up   |
| 6733902 | 7340263 | 1720755 | macrophage stimulating 1 receptor (c-met-related tyrosine kinase) | Mst1r  | 300999 | 1,26 | down |
| 6151470 | 7340263 | 1720765 | macrophage stimulating 1 receptor (c-met-related tyrosine kinase) | Mst1r  | 300999 | 1,25 | up   |
| 6681593 | 7340263 | 1720763 | macrophage stimulating 1 receptor (c-met-related tyrosine kinase) | Mst1r  | 300999 | 1,22 | up   |
| 6338778 | 7340263 | 1720750 | macrophage stimulating 1 receptor (c-met-related tyrosine kinase) | Mst1r  | 300999 | 1,18 | down |
| 6680601 | 7340263 | 1720763 | macrophage stimulating 1 receptor (c-met-related tyrosine kinase) | Mst1r  | 300999 | 1,18 | down |
| 6074219 | 7340263 | 1720758 | macrophage stimulating 1 receptor (c-met-related tyrosine kinase) | Mst1r  | 300999 | 1,17 | down |
| 6640151 | 7340263 | 1720761 | macrophage stimulating 1 receptor (c-met-related tyrosine kinase) | Mst1r  | 300999 | 1,10 | up   |
| 6237417 | 7340263 | 1720759 | macrophage stimulating 1 receptor (c-met-related tyrosine kinase) | Mst1r  | 300999 | 1,09 | up   |
| 5821560 | 7340263 | 1720762 | macrophage stimulating 1 receptor (c-met-related tyrosine kinase) | Mst1r  | 300999 | 1,08 | down |
| 6708086 | 7340263 | 1720758 | macrophage stimulating 1 receptor (c-met-related tyrosine kinase) | Mst1r  | 300999 | 1,06 | down |
| 6099036 | 7340263 | 1720767 | macrophage stimulating 1 receptor (c-met-related tyrosine kinase) | Mst1r  | 300999 | 1,06 | up   |
| 5894202 | 7340263 | 1720753 | macrophage stimulating 1 receptor (c-met-related tyrosine kinase) | Mst1r  | 300999 | 1,06 | down |
| 6011402 | 7340263 | 1720767 | macrophage stimulating 1 receptor (c-met-related tyrosine kinase) | Mst1r  | 300999 | 1,06 | down |
| 6249944 | 7340263 | 1720752 | macrophage stimulating 1 receptor (c-met-related tyrosine kinase) | Mst1r  | 300999 | 1,01 | down |
| 6357674 | 7340263 | 1720761 | macrophage stimulating 1 receptor (c-met-related tyrosine kinase) | Mst1r  | 300999 | 1,01 | up   |
| 5877109 | 7340263 | 1720749 | macrophage stimulating 1 receptor (c-met-related tyrosine kinase) | Mst1r  | 300999 | 1,01 | down |
| 5957609 | 7340263 | 1720768 | macrophage stimulating 1 receptor (c-met-related tyrosine kinase) | Mst1r  | 300999 | 1,00 | up   |
| 6423759 | 7281451 | 1576379 | MAD2 mitotic arrest deficient-like 2 (yeast)                      | Mad2I2 | 313702 | 3,86 | down |
| 6455026 | 7281451 | 1576379 | MAD2 mitotic arrest deficient-like 2 (yeast)                      | Mad2I2 | 313702 | 2,24 | down |
| 5851897 | 7281451 | 1576378 | MAD2 mitotic arrest deficient-like 2 (yeast)                      | Mad2I2 | 313702 | 1,68 | up   |
| 5712877 | 7281451 | 1576379 | MAD2 mitotic arrest deficient-like 2 (yeast)                      | Mad2I2 | 313702 | 1,46 | down |
| 6383971 | 7281451 | 1576378 | MAD2 mitotic arrest deficient-like 2 (yeast)                      | Mad2I2 | 313702 | 1,37 | up   |
| 6744059 | 7281451 | 1576376 | MAD2 mitotic arrest deficient-like 2 (yeast)                      | Mad2I2 | 313702 | 1,36 | up   |
| 6515469 | 7281451 | 1576372 | MAD2 mitotic arrest deficient-like 2 (yeast)                      | Mad2I2 | 313702 | 1,36 | down |

|         |         |         |                                                      |         |        |      |      |
|---------|---------|---------|------------------------------------------------------|---------|--------|------|------|
| 6439584 | 7281451 | 1576371 | MAD2 mitotic arrest deficient-like 2 (yeast)         | Mad2l2  | 313702 | 1,29 | down |
| 6140466 | 7281451 | 1576377 | MAD2 mitotic arrest deficient-like 2 (yeast)         | Mad2l2  | 313702 | 1,28 | up   |
| 6555818 | 7281451 | 1576375 | MAD2 mitotic arrest deficient-like 2 (yeast)         | Mad2l2  | 313702 | 1,28 | up   |
| 6009337 | 7281451 | 1576373 | MAD2 mitotic arrest deficient-like 2 (yeast)         | Mad2l2  | 313702 | 1,07 | up   |
| 5724318 | 7281451 | 1576374 | MAD2 mitotic arrest deficient-like 2 (yeast)         | Mad2l2  | 313702 | 1,01 | up   |
| 6400635 | 7290775 | 1598603 | major facilitator superfamily domain containing 2    | Mfsd2   | 298504 | 2,33 | down |
| 6104144 | 7290775 | 1598596 | major facilitator superfamily domain containing 2    | Mfsd2   | 298504 | 1,45 | down |
| 6291203 | 7290775 | 1598593 | major facilitator superfamily domain containing 2    | Mfsd2   | 298504 | 1,43 | down |
| 6442958 | 7290775 | 1598592 | major facilitator superfamily domain containing 2    | Mfsd2   | 298504 | 1,36 | up   |
| 6440440 | 7290775 | 1598595 | major facilitator superfamily domain containing 2    | Mfsd2   | 298504 | 1,29 | down |
| 5845901 | 7290775 | 1598591 | major facilitator superfamily domain containing 2    | Mfsd2   | 298504 | 1,24 | up   |
| 6568630 | 7290775 | 1598597 | major facilitator superfamily domain containing 2    | Mfsd2   | 298504 | 1,24 | down |
| 6412345 | 7290775 | 1598593 | major facilitator superfamily domain containing 2    | Mfsd2   | 298504 | 1,23 | down |
| 6587660 | 7290775 | 1598600 | major facilitator superfamily domain containing 2    | Mfsd2   | 298504 | 1,21 | down |
| 6049689 | 7290775 | 1598604 | major facilitator superfamily domain containing 2    | Mfsd2   | 298504 | 1,20 | down |
| 6590552 | 7290775 | 1598602 | major facilitator superfamily domain containing 2    | Mfsd2   | 298504 | 1,18 | down |
| 6532438 | 7290775 | 1598599 | major facilitator superfamily domain containing 2    | Mfsd2   | 298504 | 1,17 | up   |
| 6426589 | 7290775 | 1598598 | major facilitator superfamily domain containing 2    | Mfsd2   | 298504 | 1,13 | down |
| 5933108 | 7290775 | 1598590 | major facilitator superfamily domain containing 2    | Mfsd2   | 298504 | 1,04 | up   |
| 6029568 | 7290775 | 1598590 | major facilitator superfamily domain containing 2    | Mfsd2   | 298504 | 1,02 | up   |
| 5784307 | 7115907 | 1166944 | major facilitator superfamily domain containing 7    | Mfsd7   | 305625 | 2,31 | down |
| 5822256 | 7115907 | 1166941 | major facilitator superfamily domain containing 7    | Mfsd7   | 305625 | 1,77 | down |
| 5921355 | 7115907 | 1166953 | major facilitator superfamily domain containing 7    | Mfsd7   | 305625 | 1,57 | down |
| 5962206 | 7115907 | 1166941 | major facilitator superfamily domain containing 7    | Mfsd7   | 305625 | 1,24 | up   |
| 6595803 | 7115907 | 1166954 | major facilitator superfamily domain containing 7    | Mfsd7   | 305625 | 1,20 | down |
| 6001193 | 7115907 | 1166943 | major facilitator superfamily domain containing 7    | Mfsd7   | 305625 | 1,20 | down |
| 6207791 | 7115907 | 1166952 | major facilitator superfamily domain containing 7    | Mfsd7   | 305625 | 1,19 | up   |
| 6080261 | 7115907 | 1166950 | major facilitator superfamily domain containing 7    | Mfsd7   | 305625 | 1,12 | up   |
| 6264089 | 7115907 | 1166947 | major facilitator superfamily domain containing 7    | Mfsd7   | 305625 | 1,12 | down |
| 6508677 | 7115907 | 1166941 | major facilitator superfamily domain containing 7    | Mfsd7   | 305625 | 1,11 | up   |
| 5855944 | 7115907 | 1166953 | major facilitator superfamily domain containing 7    | Mfsd7   | 305625 | 1,04 | up   |
| 5928401 | 7115907 | 1166945 | major facilitator superfamily domain containing 7    | Mfsd7   | 305625 | 1,03 | up   |
| 6396211 | 7115907 | 1166948 | major facilitator superfamily domain containing 7    | Mfsd7   | 305625 | 1,02 | down |
| 6545130 | 7115907 | 1166949 | major facilitator superfamily domain containing 7    | Mfsd7   | 305625 | 1,01 | up   |
| 6660203 | 7207971 | 1394319 | major facilitator superfamily domain containing 8    | Mfsd8   | 361939 | 1,58 | up   |
| 6627759 | 7207971 | 1394326 | major facilitator superfamily domain containing 8    | Mfsd8   | 361939 | 1,53 | down |
| 5845519 | 7207971 | 1394314 | major facilitator superfamily domain containing 8    | Mfsd8   | 361939 | 1,26 | up   |
| 5665049 | 7207971 | 1394323 | major facilitator superfamily domain containing 8    | Mfsd8   | 361939 | 1,21 | down |
| 5762470 | 7207971 | 1394327 | major facilitator superfamily domain containing 8    | Mfsd8   | 361939 | 1,20 | up   |
| 5656925 | 7207971 | 1394327 | major facilitator superfamily domain containing 8    | Mfsd8   | 361939 | 1,14 | up   |
| 6285929 | 7207971 | 1394331 | major facilitator superfamily domain containing 8    | Mfsd8   | 361939 | 1,11 | down |
| 5729173 | 7207971 | 1394323 | major facilitator superfamily domain containing 8    | Mfsd8   | 361939 | 1,11 | up   |
| 6647505 | 7207971 | 1394318 | major facilitator superfamily domain containing 8    | Mfsd8   | 361939 | 1,09 | down |
| 6072957 | 7207971 | 1394317 | major facilitator superfamily domain containing 8    | Mfsd8   | 361939 | 1,07 | up   |
| 6638316 | 7207971 | 1394332 | major facilitator superfamily domain containing 8    | Mfsd8   | 361939 | 1,06 | up   |
| 6212424 | 7207971 | 1394322 | major facilitator superfamily domain containing 8    | Mfsd8   | 361939 | 1,05 | up   |
| 6068751 | 7207971 | 1394326 | major facilitator superfamily domain containing 8    | Mfsd8   | 361939 | 1,03 | up   |
| 6136158 | 7207971 | 1394313 | major facilitator superfamily domain containing 8    | Mfsd8   | 361939 | 1,03 | down |
| 5714569 | 7220942 | 1425094 | major histocompatibility complex, class II, DM alpha | Hla-dma | 294274 | 2,42 | up   |
| 6675680 | 7220942 | 1425092 | major histocompatibility complex, class II, DM alpha | Hla-dma | 294274 | 1,19 | down |
| 5737701 | 7220942 | 1425095 | major histocompatibility complex, class II, DM alpha | Hla-dma | 294274 | 1,15 | down |
| 5811293 | 7220942 | 1425095 | major histocompatibility complex, class II, DM alpha | Hla-dma | 294274 | 1,08 | up   |
| 6568267 | 7220942 | 1425093 | major histocompatibility complex, class II, DM alpha | Hla-dma | 294274 | 1,04 | down |
| 5915079 | 7220942 | 1425096 | major histocompatibility complex, class II, DM alpha | Hla-dma | 294274 | 1,00 | down |
| 6226039 | 7311773 | 1651620 | major intrinsic protein of lens fiber                | Mip     | 25480  | 2,71 | down |
| 5992700 | 7311773 | 1651615 | major intrinsic protein of lens fiber                | Mip     | 25480  | 1,56 | down |
| 6625474 | 7311773 | 1651619 | major intrinsic protein of lens fiber                | Mip     | 25480  | 1,32 | down |



|         |         |         |                                                                                                                                           |       |        |      |      |
|---------|---------|---------|-------------------------------------------------------------------------------------------------------------------------------------------|-------|--------|------|------|
| 5786906 | 7311773 | 1651619 | major intrinsic protein of lens fiber                                                                                                     | Mip   | 25480  | 1,22 | down |
| 5752499 | 7311773 | 1651621 | major intrinsic protein of lens fiber                                                                                                     | Mip   | 25480  | 1,16 | up   |
| 5958561 | 7311773 | 1651623 | major intrinsic protein of lens fiber                                                                                                     | Mip   | 25480  | 1,12 | up   |
| 6529899 | 7311773 | 1651618 | major intrinsic protein of lens fiber                                                                                                     | Mip   | 25480  | 1,09 | down |
| 5913454 | 7311773 | 1651622 | major intrinsic protein of lens fiber                                                                                                     | Mip   | 25480  | 1,07 | down |
| 6604759 | 7311773 | 1651616 | major intrinsic protein of lens fiber                                                                                                     | Mip   | 25480  | 1,07 | up   |
| 5756964 | 7311773 | 1651620 | major intrinsic protein of lens fiber                                                                                                     | Mip   | 25480  | 1,03 | up   |
| 5848190 | 7311773 | 1651620 | major intrinsic protein of lens fiber                                                                                                     | Mip   | 25480  | 1,03 | down |
| 6643719 | 7311773 | 1651620 | major intrinsic protein of lens fiber                                                                                                     | Mip   | 25480  | 1,02 | up   |
| 5706016 | 7287119 | 1589562 | major urinary protein 4 /// alpha-2u globulin PGCL2 /// alpha-2u globulin PGCL1 /// alpha-2u-globul LOC259246 /// LO 09 /// 259246 /// 29 |       |        | 1,07 | up   |
| 6585458 | 7287119 | 1589556 | major urinary protein 4 /// alpha-2u globulin PGCL2 /// alpha-2u globulin PGCL1 /// alpha-2u-globul // LOC259246 /// 09 /// 259246 /// 29 |       |        | 1,20 | up   |
| 6222440 | 7146459 | 1241986 | MAK16 homolog (S. cerevisiae)                                                                                                             | Mak16 | 306526 | 2,00 | up   |
| 6115510 | 7146459 | 1241985 | MAK16 homolog (S. cerevisiae)                                                                                                             | Mak16 | 306526 | 1,35 | down |
| 6470818 | 7146459 | 1241989 | MAK16 homolog (S. cerevisiae)                                                                                                             | Mak16 | 306526 | 1,28 | down |
| 5683991 | 7146459 | 1241987 | MAK16 homolog (S. cerevisiae)                                                                                                             | Mak16 | 306526 | 1,24 | up   |
| 5641464 | 7146459 | 1241993 | MAK16 homolog (S. cerevisiae)                                                                                                             | Mak16 | 306526 | 1,22 | down |
| 5896225 | 7146459 | 1241994 | MAK16 homolog (S. cerevisiae)                                                                                                             | Mak16 | 306526 | 1,18 | down |
| 6547714 | 7146459 | 1241991 | MAK16 homolog (S. cerevisiae)                                                                                                             | Mak16 | 306526 | 1,09 | up   |
| 6429452 | 7146459 | 1241988 | MAK16 homolog (S. cerevisiae)                                                                                                             | Mak16 | 306526 | 1,06 | down |
| 6276778 | 7146459 | 1241992 | MAK16 homolog (S. cerevisiae)                                                                                                             | Mak16 | 306526 | 1,05 | up   |
| 6646559 | 7146459 | 1241990 | MAK16 homolog (S. cerevisiae)                                                                                                             | Mak16 | 306526 | 1,01 | down |
| 6244857 | 7257576 | 1516739 | makorin, ring finger protein, 2                                                                                                           | Mkrm2 | 297525 | 2,48 | up   |
| 6066603 | 7257576 | 1516744 | makorin, ring finger protein, 2                                                                                                           | Mkrm2 | 297525 | 1,63 | up   |
| 6217034 | 7257576 | 1516740 | makorin, ring finger protein, 2                                                                                                           | Mkrm2 | 297525 | 1,51 | down |
| 5648054 | 7257576 | 1516743 | makorin, ring finger protein, 2                                                                                                           | Mkrm2 | 297525 | 1,36 | up   |
| 6105886 | 7257576 | 1516748 | makorin, ring finger protein, 2                                                                                                           | Mkrm2 | 297525 | 1,25 | down |
| 6068654 | 7257576 | 1516741 | makorin, ring finger protein, 2                                                                                                           | Mkrm2 | 297525 | 1,24 | down |
| 6677259 | 7257576 | 1516747 | makorin, ring finger protein, 2                                                                                                           | Mkrm2 | 297525 | 1,16 | down |
| 5917850 | 7257576 | 1516742 | makorin, ring finger protein, 2                                                                                                           | Mkrm2 | 297525 | 1,16 | up   |
| 5676664 | 7257576 | 1516746 | makorin, ring finger protein, 2                                                                                                           | Mkrm2 | 297525 | 1,13 | up   |
| 6637215 | 7257576 | 1516742 | makorin, ring finger protein, 2                                                                                                           | Mkrm2 | 297525 | 1,11 | up   |
| 6651170 | 7257576 | 1516741 | makorin, ring finger protein, 2                                                                                                           | Mkrm2 | 297525 | 1,02 | up   |
| 6126873 | 7257576 | 1516745 | makorin, ring finger protein, 2                                                                                                           | Mkrm2 | 297525 | 1,00 | up   |
| 6222928 | 7317026 | 1664874 | mal, T-cell differentiation protein 2                                                                                                     | Mal2  | 362911 | 2,10 | down |
| 6104913 | 7317026 | 1664875 | mal, T-cell differentiation protein 2                                                                                                     | Mal2  | 362911 | 1,29 | up   |
| 5672119 | 7317026 | 1664875 | mal, T-cell differentiation protein 2                                                                                                     | Mal2  | 362911 | 1,14 | down |
| 6462534 | 7317026 | 1664877 | mal, T-cell differentiation protein 2                                                                                                     | Mal2  | 362911 | 1,10 | down |
| 6437081 | 7317026 | 1664875 | mal, T-cell differentiation protein 2                                                                                                     | Mal2  | 362911 | 1,08 | up   |
| 6410172 | 7317026 | 1664876 | mal, T-cell differentiation protein 2                                                                                                     | Mal2  | 362911 | 1,07 | down |
| 6193248 | 7317026 | 1664877 | mal, T-cell differentiation protein 2                                                                                                     | Mal2  | 362911 | 1,07 | up   |
| 6660035 | 7317026 | 1664874 | mal, T-cell differentiation protein 2                                                                                                     | Mal2  | 362911 | 1,05 | up   |
| 5852003 | 7317026 | 1664877 | mal, T-cell differentiation protein 2                                                                                                     | Mal2  | 362911 | 1,01 | up   |
| 6228164 | 7378878 | 1818320 | malignant T cell amplified sequence 1                                                                                                     | Mcts1 | 302500 | 1,57 | up   |
| 6274632 | 7378878 | 1818319 | malignant T cell amplified sequence 1                                                                                                     | Mcts1 | 302500 | 1,54 | up   |
| 6274679 | 7378878 | 1818321 | malignant T cell amplified sequence 1                                                                                                     | Mcts1 | 302500 | 1,39 | up   |
| 6652490 | 7378878 | 1818328 | malignant T cell amplified sequence 1                                                                                                     | Mcts1 | 302500 | 1,29 | up   |
| 6142714 | 7378878 | 1818326 | malignant T cell amplified sequence 1                                                                                                     | Mcts1 | 302500 | 1,24 | up   |
| 6651804 | 7378878 | 1818327 | malignant T cell amplified sequence 1                                                                                                     | Mcts1 | 302500 | 1,18 | down |
| 6291962 | 7378878 | 1818328 | malignant T cell amplified sequence 1                                                                                                     | Mcts1 | 302500 | 1,16 | up   |
| 6207308 | 7378878 | 1818325 | malignant T cell amplified sequence 1                                                                                                     | Mcts1 | 302500 | 1,15 | down |
| 6679052 | 7378878 | 1818328 | malignant T cell amplified sequence 1                                                                                                     | Mcts1 | 302500 | 1,00 | down |
| 5873223 | 7307276 | 1640817 | MAM domain containing glycosylphosphatidylinositol anchor 2                                                                               | Mdga2 | 314180 | 2,45 | down |
| 5843918 | 7307276 | 1640812 | MAM domain containing glycosylphosphatidylinositol anchor 2                                                                               | Mdga2 | 314180 | 1,60 | down |
| 6619507 | 7307276 | 1640815 | MAM domain containing glycosylphosphatidylinositol anchor 2                                                                               | Mdga2 | 314180 | 1,49 | down |
| 5668117 | 7307276 | 1640801 | MAM domain containing glycosylphosphatidylinositol anchor 2                                                                               | Mdga2 | 314180 | 1,48 | down |
| 6258186 | 7307276 | 1640810 | MAM domain containing glycosylphosphatidylinositol anchor 2                                                                               | Mdga2 | 314180 | 1,31 | up   |
| 6314300 | 7307276 | 1640808 | MAM domain containing glycosylphosphatidylinositol anchor 2                                                                               | Mdga2 | 314180 | 1,25 | up   |

|         |         |         |                                                             |         |        |      |      |
|---------|---------|---------|-------------------------------------------------------------|---------|--------|------|------|
| 6502749 | 7307276 | 1640806 | MAM domain containing glycosylphosphatidylinositol anchor 2 | Mdga2   | 314180 | 1,21 | up   |
| 6190236 | 7307276 | 1640802 | MAM domain containing glycosylphosphatidylinositol anchor 2 | Mdga2   | 314180 | 1,16 | down |
| 6044391 | 7307276 | 1640811 | MAM domain containing glycosylphosphatidylinositol anchor 2 | Mdga2   | 314180 | 1,15 | down |
| 6293913 | 7307276 | 1640805 | MAM domain containing glycosylphosphatidylinositol anchor 2 | Mdga2   | 314180 | 1,13 | down |
| 5868392 | 7307276 | 1640806 | MAM domain containing glycosylphosphatidylinositol anchor 2 | Mdga2   | 314180 | 1,09 | up   |
| 5979351 | 7307276 | 1640803 | MAM domain containing glycosylphosphatidylinositol anchor 2 | Mdga2   | 314180 | 1,09 | up   |
| 6516493 | 7307276 | 1640809 | MAM domain containing glycosylphosphatidylinositol anchor 2 | Mdga2   | 314180 | 1,09 | up   |
| 6461394 | 7307276 | 1640816 | MAM domain containing glycosylphosphatidylinositol anchor 2 | Mdga2   | 314180 | 1,08 | down |
| 5821497 | 7307276 | 1640807 | MAM domain containing glycosylphosphatidylinositol anchor 2 | Mdga2   | 314180 | 1,05 | up   |
| 6017551 | 7307276 | 1640813 | MAM domain containing glycosylphosphatidylinositol anchor 2 | Mdga2   | 314180 | 1,03 | up   |
| 6116543 | 7307276 | 1640817 | MAM domain containing glycosylphosphatidylinositol anchor 2 | Mdga2   | 314180 | 1,02 | up   |
| 5687527 | 7307276 | 1640804 | MAM domain containing glycosylphosphatidylinositol anchor 2 | Mdga2   | 314180 | 1,01 | down |
| 6214080 | 7307276 | 1640817 | MAM domain containing glycosylphosphatidylinositol anchor 2 | Mdga2   | 314180 | 1,01 | up   |
| 5767829 | 7307276 | 1640814 | MAM domain containing glycosylphosphatidylinositol anchor 2 | Mdga2   | 314180 | 1,00 | down |
| 6493968 | 7160415 | 1276227 | mannose receptor, C type 1                                  | Mrc1    | 291327 | 2,30 | up   |
| 6622437 | 7160415 | 1276193 | mannose receptor, C type 1                                  | Mrc1    | 291327 | 1,54 | up   |
| 6454638 | 7160415 | 1276224 | mannose receptor, C type 1                                  | Mrc1    | 291327 | 1,44 | up   |
| 6618398 | 7160415 | 1276190 | mannose receptor, C type 1                                  | Mrc1    | 291327 | 1,44 | up   |
| 6420214 | 7160415 | 1276231 | mannose receptor, C type 1                                  | Mrc1    | 291327 | 1,37 | up   |
| 6199937 | 7160415 | 1276221 | mannose receptor, C type 1                                  | Mrc1    | 291327 | 1,36 | up   |
| 6160225 | 7160415 | 1276199 | mannose receptor, C type 1                                  | Mrc1    | 291327 | 1,35 | down |
| 6740147 | 7160415 | 1276196 | mannose receptor, C type 1                                  | Mrc1    | 291327 | 1,26 | up   |
| 6203223 | 7160415 | 1276204 | mannose receptor, C type 1                                  | Mrc1    | 291327 | 1,22 | up   |
| 5736887 | 7160415 | 1276202 | mannose receptor, C type 1                                  | Mrc1    | 291327 | 1,20 | down |
| 6411135 | 7160415 | 1276200 | mannose receptor, C type 1                                  | Mrc1    | 291327 | 1,16 | down |
| 6548423 | 7160415 | 1276226 | mannose receptor, C type 1                                  | Mrc1    | 291327 | 1,15 | up   |
| 6588273 | 7160415 | 1276203 | mannose receptor, C type 1                                  | Mrc1    | 291327 | 1,14 | up   |
| 6094068 | 7160415 | 1276215 | mannose receptor, C type 1                                  | Mrc1    | 291327 | 1,14 | down |
| 5679067 | 7160415 | 1276210 | mannose receptor, C type 1                                  | Mrc1    | 291327 | 1,14 | down |
| 6422238 | 7160415 | 1276225 | mannose receptor, C type 1                                  | Mrc1    | 291327 | 1,13 | down |
| 6521554 | 7160415 | 1276213 | mannose receptor, C type 1                                  | Mrc1    | 291327 | 1,12 | up   |
| 6015181 | 7160415 | 1276198 | mannose receptor, C type 1                                  | Mrc1    | 291327 | 1,11 | down |
| 6190047 | 7160415 | 1276197 | mannose receptor, C type 1                                  | Mrc1    | 291327 | 1,09 | down |
| 5872139 | 7160415 | 1276228 | mannose receptor, C type 1                                  | Mrc1    | 291327 | 1,09 | up   |
| 6384016 | 7160415 | 1276204 | mannose receptor, C type 1                                  | Mrc1    | 291327 | 1,09 | down |
| 6021772 | 7160415 | 1276231 | mannose receptor, C type 1                                  | Mrc1    | 291327 | 1,09 | up   |
| 6461368 | 7160415 | 1276229 | mannose receptor, C type 1                                  | Mrc1    | 291327 | 1,07 | up   |
| 6513459 | 7160415 | 1276217 | mannose receptor, C type 1                                  | Mrc1    | 291327 | 1,06 | up   |
| 6686545 | 7160415 | 1276216 | mannose receptor, C type 1                                  | Mrc1    | 291327 | 1,06 | down |
| 6055153 | 7160415 | 1276219 | mannose receptor, C type 1                                  | Mrc1    | 291327 | 1,05 | up   |
| 6626097 | 7160415 | 1276222 | mannose receptor, C type 1                                  | Mrc1    | 291327 | 1,04 | down |
| 5953870 | 7160415 | 1276218 | mannose receptor, C type 1                                  | Mrc1    | 291327 | 1,04 | down |
| 6646573 | 7160415 | 1276201 | mannose receptor, C type 1                                  | Mrc1    | 291327 | 1,02 | down |
| 6610994 | 7160415 | 1276195 | mannose receptor, C type 1                                  | Mrc1    | 291327 | 1,02 | down |
| 6706732 | 7160415 | 1276230 | mannose receptor, C type 1                                  | Mrc1    | 291327 | 1,01 | up   |
| 6628602 | 7160415 | 1276208 | mannose receptor, C type 1                                  | Mrc1    | 291327 | 1,01 | down |
| 5684185 | 7160415 | 1276231 | mannose receptor, C type 1                                  | Mrc1    | 291327 | 1,00 | up   |
| 6058891 | 7367990 | 1789220 | mannose-6-phosphate receptor binding protein 1              | M6prbp1 | 316130 | 1,76 | down |
| 6023894 | 7367990 | 1789223 | mannose-6-phosphate receptor binding protein 1              | M6prbp1 | 316130 | 1,35 | down |
| 6078960 | 7367990 | 1789217 | mannose-6-phosphate receptor binding protein 1              | M6prbp1 | 316130 | 1,15 | down |
| 6522616 | 7367990 | 1789219 | mannose-6-phosphate receptor binding protein 1              | M6prbp1 | 316130 | 1,09 | down |
| 6641959 | 7367990 | 1789227 | mannose-6-phosphate receptor binding protein 1              | M6prbp1 | 316130 | 1,00 | down |
| 6635501 | 7291909 | 1601133 | mannosidase, alpha, class 1C, member 1                      | Man1c1  | 362625 | 1,89 | down |
| 5660012 | 7291909 | 1601133 | mannosidase, alpha, class 1C, member 1                      | Man1c1  | 362625 | 1,32 | down |
| 5898928 | 7291909 | 1601106 | mannosidase, alpha, class 1C, member 1                      | Man1c1  | 362625 | 1,23 | down |
| 6642975 | 7291909 | 1601094 | mannosidase, alpha, class 1C, member 1                      | Man1c1  | 362625 | 1,16 | down |
| 5695190 | 7291909 | 1601092 | mannosidase, alpha, class 1C, member 1                      | Man1c1  | 362625 | 1,12 | down |

|         |         |         |                                        |        |        |      |      |
|---------|---------|---------|----------------------------------------|--------|--------|------|------|
| 6257853 | 7291909 | 1601091 | mannosidase, alpha, class 1C, member 1 | Man1c1 | 362625 | 1,12 | up   |
| 6219599 | 7291909 | 1601098 | mannosidase, alpha, class 1C, member 1 | Man1c1 | 362625 | 1,11 | down |
| 5627068 | 7291909 | 1601102 | mannosidase, alpha, class 1C, member 1 | Man1c1 | 362625 | 1,09 | down |
| 6029822 | 7291909 | 1601119 | mannosidase, alpha, class 1C, member 1 | Man1c1 | 362625 | 1,06 | down |
| 6630960 | 7291909 | 1601105 | mannosidase, alpha, class 1C, member 1 | Man1c1 | 362625 | 1,04 | up   |
| 5887837 | 7291909 | 1601093 | mannosidase, alpha, class 1C, member 1 | Man1c1 | 362625 | 1,04 | down |
| 5865173 | 7291909 | 1601096 | mannosidase, alpha, class 1C, member 1 | Man1c1 | 362625 | 1,02 | down |
| 6133211 | 7291909 | 1601103 | mannosidase, alpha, class 1C, member 1 | Man1c1 | 362625 | 1,01 | down |
| 6379945 | 7291909 | 1601133 | mannosidase, alpha, class 1C, member 1 | Man1c1 | 362625 | 1,01 | up   |
| 6708697 | 7291909 | 1601095 | mannosidase, alpha, class 1C, member 1 | Man1c1 | 362625 | 1,00 | up   |
| 6742362 | 7183904 | 1335464 | mannosidase, alpha, class 2B, member 1 | Man2b1 | 361378 | 2,45 | up   |
| 6616565 | 7183904 | 1335441 | mannosidase, alpha, class 2B, member 1 | Man2b1 | 361378 | 1,80 | up   |
| 6464170 | 7183904 | 1335449 | mannosidase, alpha, class 2B, member 1 | Man2b1 | 361378 | 1,51 | up   |
| 6656996 | 7183904 | 1335452 | mannosidase, alpha, class 2B, member 1 | Man2b1 | 361378 | 1,42 | down |
| 6005358 | 7183904 | 1335442 | mannosidase, alpha, class 2B, member 1 | Man2b1 | 361378 | 1,37 | up   |
| 6453748 | 7183904 | 1335459 | mannosidase, alpha, class 2B, member 1 | Man2b1 | 361378 | 1,35 | down |
| 5876460 | 7183904 | 1335460 | mannosidase, alpha, class 2B, member 1 | Man2b1 | 361378 | 1,35 | down |
| 5622591 | 7183904 | 1335454 | mannosidase, alpha, class 2B, member 1 | Man2b1 | 361378 | 1,31 | down |
| 6050946 | 7183904 | 1335443 | mannosidase, alpha, class 2B, member 1 | Man2b1 | 361378 | 1,31 | down |
| 5843301 | 7183904 | 1335441 | mannosidase, alpha, class 2B, member 1 | Man2b1 | 361378 | 1,31 | up   |
| 5984509 | 7183904 | 1335453 | mannosidase, alpha, class 2B, member 1 | Man2b1 | 361378 | 1,30 | down |
| 5963838 | 7183904 | 1335455 | mannosidase, alpha, class 2B, member 1 | Man2b1 | 361378 | 1,22 | down |
| 6368185 | 7183904 | 1335457 | mannosidase, alpha, class 2B, member 1 | Man2b1 | 361378 | 1,21 | up   |
| 6133533 | 7183904 | 1335445 | mannosidase, alpha, class 2B, member 1 | Man2b1 | 361378 | 1,17 | up   |
| 5864494 | 7183904 | 1335456 | mannosidase, alpha, class 2B, member 1 | Man2b1 | 361378 | 1,17 | down |
| 6639713 | 7183904 | 1335451 | mannosidase, alpha, class 2B, member 1 | Man2b1 | 361378 | 1,16 | up   |
| 6137696 | 7183904 | 1335464 | mannosidase, alpha, class 2B, member 1 | Man2b1 | 361378 | 1,14 | down |
| 6543932 | 7183904 | 1335458 | mannosidase, alpha, class 2B, member 1 | Man2b1 | 361378 | 1,12 | up   |
| 6706127 | 7183904 | 1335446 | mannosidase, alpha, class 2B, member 1 | Man2b1 | 361378 | 1,12 | down |
| 6534929 | 7183904 | 1335463 | mannosidase, alpha, class 2B, member 1 | Man2b1 | 361378 | 1,12 | down |
| 5971993 | 7183904 | 1335449 | mannosidase, alpha, class 2B, member 1 | Man2b1 | 361378 | 1,10 | up   |
| 5674234 | 7183904 | 1335461 | mannosidase, alpha, class 2B, member 1 | Man2b1 | 361378 | 1,07 | down |
| 5690085 | 7183904 | 1335462 | mannosidase, alpha, class 2B, member 1 | Man2b1 | 361378 | 1,07 | down |
| 6307707 | 7183904 | 1335448 | mannosidase, alpha, class 2B, member 1 | Man2b1 | 361378 | 1,06 | up   |
| 6322600 | 7183904 | 1335450 | mannosidase, alpha, class 2B, member 1 | Man2b1 | 361378 | 1,06 | down |
| 6567985 | 7183904 | 1335447 | mannosidase, alpha, class 2B, member 1 | Man2b1 | 361378 | 1,02 | down |
| 6173643 | 7183904 | 1335452 | mannosidase, alpha, class 2B, member 1 | Man2b1 | 361378 | 1,01 | up   |
| 5821855 | 7183904 | 1335444 | mannosidase, alpha, class 2B, member 1 | Man2b1 | 361378 | 1,00 | down |
| 5805703 | 7199536 | 1374690 | mannosidase, beta A, lysosomal         | Manba  | 310864 | 2,22 | down |
| 6375518 | 7199536 | 1374695 | mannosidase, beta A, lysosomal         | Manba  | 310864 | 1,60 | down |
| 6451243 | 7199536 | 1374693 | mannosidase, beta A, lysosomal         | Manba  | 310864 | 1,56 | down |
| 6159576 | 7199536 | 1374690 | mannosidase, beta A, lysosomal         | Manba  | 310864 | 1,52 | down |
| 6694656 | 7199536 | 1374702 | mannosidase, beta A, lysosomal         | Manba  | 310864 | 1,42 | up   |
| 5998852 | 7199536 | 1374706 | mannosidase, beta A, lysosomal         | Manba  | 310864 | 1,30 | up   |
| 6213343 | 7199536 | 1374710 | mannosidase, beta A, lysosomal         | Manba  | 310864 | 1,28 | down |
| 6684857 | 7199536 | 1374694 | mannosidase, beta A, lysosomal         | Manba  | 310864 | 1,25 | down |
| 6297346 | 7199536 | 1374701 | mannosidase, beta A, lysosomal         | Manba  | 310864 | 1,25 | down |
| 6519904 | 7199536 | 1374704 | mannosidase, beta A, lysosomal         | Manba  | 310864 | 1,20 | up   |
| 5880662 | 7199536 | 1374705 | mannosidase, beta A, lysosomal         | Manba  | 310864 | 1,10 | up   |
| 6084013 | 7199536 | 1374702 | mannosidase, beta A, lysosomal         | Manba  | 310864 | 1,09 | up   |
| 6613729 | 7199536 | 1374713 | mannosidase, beta A, lysosomal         | Manba  | 310864 | 1,09 | up   |
| 5750515 | 7199536 | 1374713 | mannosidase, beta A, lysosomal         | Manba  | 310864 | 1,07 | down |
| 5989168 | 7199536 | 1374703 | mannosidase, beta A, lysosomal         | Manba  | 310864 | 1,06 | down |
| 6526620 | 7199536 | 1374712 | mannosidase, beta A, lysosomal         | Manba  | 310864 | 1,05 | up   |
| 6730244 | 7199536 | 1374699 | mannosidase, beta A, lysosomal         | Manba  | 310864 | 1,05 | up   |
| 6295066 | 7199536 | 1374698 | mannosidase, beta A, lysosomal         | Manba  | 310864 | 1,04 | down |
| 6565416 | 7199536 | 1374705 | mannosidase, beta A, lysosomal         | Manba  | 310864 | 1,02 | down |

|         |         |         |                                              |        |        |      |      |
|---------|---------|---------|----------------------------------------------|--------|--------|------|------|
| 5789614 | 7199536 | 1374711 | mannosidase, beta A, lysosomal               | Manba  | 310864 | 1,01 | down |
| 5631545 | 7199536 | 1374697 | mannosidase, beta A, lysosomal               | Manba  | 310864 | 1,00 | down |
| 6528106 | 7115090 | 1164829 | MAP/microtubule affinity-regulating kinase 1 | Mark1  | 117016 | 2,30 | down |
| 6581077 | 7115090 | 1164825 | MAP/microtubule affinity-regulating kinase 1 | Mark1  | 117016 | 1,74 | up   |
| 6179162 | 7115090 | 1164835 | MAP/microtubule affinity-regulating kinase 1 | Mark1  | 117016 | 1,73 | up   |
| 6579022 | 7115090 | 1164831 | MAP/microtubule affinity-regulating kinase 1 | Mark1  | 117016 | 1,55 | down |
| 5955193 | 7115090 | 1164828 | MAP/microtubule affinity-regulating kinase 1 | Mark1  | 117016 | 1,48 | up   |
| 6373001 | 7115090 | 1164831 | MAP/microtubule affinity-regulating kinase 1 | Mark1  | 117016 | 1,45 | down |
| 5701992 | 7115090 | 1164826 | MAP/microtubule affinity-regulating kinase 1 | Mark1  | 117016 | 1,39 | up   |
| 6519968 | 7115090 | 1164832 | MAP/microtubule affinity-regulating kinase 1 | Mark1  | 117016 | 1,31 | up   |
| 5946213 | 7115090 | 1164831 | MAP/microtubule affinity-regulating kinase 1 | Mark1  | 117016 | 1,29 | down |
| 6339918 | 7115090 | 1164822 | MAP/microtubule affinity-regulating kinase 1 | Mark1  | 117016 | 1,28 | up   |
| 6154766 | 7115090 | 1164821 | MAP/microtubule affinity-regulating kinase 1 | Mark1  | 117016 | 1,23 | down |
| 5757497 | 7115090 | 1164824 | MAP/microtubule affinity-regulating kinase 1 | Mark1  | 117016 | 1,17 | up   |
| 6332222 | 7115090 | 1164826 | MAP/microtubule affinity-regulating kinase 1 | Mark1  | 117016 | 1,15 | down |
| 5991262 | 7115090 | 1164827 | MAP/microtubule affinity-regulating kinase 1 | Mark1  | 117016 | 1,14 | up   |
| 6411778 | 7115090 | 1164833 | MAP/microtubule affinity-regulating kinase 1 | Mark1  | 117016 | 1,13 | down |
| 6202901 | 7115090 | 1164834 | MAP/microtubule affinity-regulating kinase 1 | Mark1  | 117016 | 1,13 | down |
| 5938203 | 7115090 | 1164836 | MAP/microtubule affinity-regulating kinase 1 | Mark1  | 117016 | 1,10 | down |
| 6198782 | 7115090 | 1164825 | MAP/microtubule affinity-regulating kinase 1 | Mark1  | 117016 | 1,10 | up   |
| 6356548 | 7115090 | 1164823 | MAP/microtubule affinity-regulating kinase 1 | Mark1  | 117016 | 1,09 | up   |
| 6684752 | 7115090 | 1164823 | MAP/microtubule affinity-regulating kinase 1 | Mark1  | 117016 | 1,08 | up   |
| 5890429 | 7115090 | 1164838 | MAP/microtubule affinity-regulating kinase 1 | Mark1  | 117016 | 1,07 | down |
| 5723161 | 7115090 | 1164830 | MAP/microtubule affinity-regulating kinase 1 | Mark1  | 117016 | 1,02 | down |
| 5716802 | 7115090 | 1164837 | MAP/microtubule affinity-regulating kinase 1 | Mark1  | 117016 | 1,01 | down |
| 6695888 | 7060100 | 1031762 | MAP/microtubule affinity-regulating kinase 2 | Mark2  | 60328  | 2,13 | down |
| 6530808 | 7060100 | 1031747 | MAP/microtubule affinity-regulating kinase 2 | Mark2  | 60328  | 1,52 | down |
| 6684040 | 7060100 | 1031748 | MAP/microtubule affinity-regulating kinase 2 | Mark2  | 60328  | 1,39 | down |
| 5773648 | 7060100 | 1031746 | MAP/microtubule affinity-regulating kinase 2 | Mark2  | 60328  | 1,34 | up   |
| 5681713 | 7060100 | 1031751 | MAP/microtubule affinity-regulating kinase 2 | Mark2  | 60328  | 1,32 | up   |
| 6133418 | 7060100 | 1031760 | MAP/microtubule affinity-regulating kinase 2 | Mark2  | 60328  | 1,28 | up   |
| 5808818 | 7060100 | 1031756 | MAP/microtubule affinity-regulating kinase 2 | Mark2  | 60328  | 1,27 | up   |
| 6623050 | 7060100 | 1031759 | MAP/microtubule affinity-regulating kinase 2 | Mark2  | 60328  | 1,26 | down |
| 6257080 | 7060100 | 1031748 | MAP/microtubule affinity-regulating kinase 2 | Mark2  | 60328  | 1,25 | up   |
| 6656279 | 7060100 | 1031745 | MAP/microtubule affinity-regulating kinase 2 | Mark2  | 60328  | 1,24 | up   |
| 6516398 | 7060100 | 1031758 | MAP/microtubule affinity-regulating kinase 2 | Mark2  | 60328  | 1,22 | up   |
| 6178463 | 7060100 | 1031754 | MAP/microtubule affinity-regulating kinase 2 | Mark2  | 60328  | 1,22 | up   |
| 6670194 | 7060100 | 1031757 | MAP/microtubule affinity-regulating kinase 2 | Mark2  | 60328  | 1,20 | down |
| 6249258 | 7060100 | 1031762 | MAP/microtubule affinity-regulating kinase 2 | Mark2  | 60328  | 1,16 | down |
| 6334887 | 7060100 | 1031755 | MAP/microtubule affinity-regulating kinase 2 | Mark2  | 60328  | 1,15 | up   |
| 5875752 | 7060100 | 1031748 | MAP/microtubule affinity-regulating kinase 2 | Mark2  | 60328  | 1,14 | down |
| 6406908 | 7060100 | 1031753 | MAP/microtubule affinity-regulating kinase 2 | Mark2  | 60328  | 1,13 | up   |
| 6198699 | 7060100 | 1031761 | MAP/microtubule affinity-regulating kinase 2 | Mark2  | 60328  | 1,12 | down |
| 6594647 | 7060100 | 1031750 | MAP/microtubule affinity-regulating kinase 2 | Mark2  | 60328  | 1,09 | up   |
| 6514867 | 7060100 | 1031755 | MAP/microtubule affinity-regulating kinase 2 | Mark2  | 60328  | 1,05 | down |
| 5944634 | 7060100 | 1031752 | MAP/microtubule affinity-regulating kinase 2 | Mark2  | 60328  | 1,03 | up   |
| 6408121 | 7060100 | 1031761 | MAP/microtubule affinity-regulating kinase 2 | Mark2  | 60328  | 1,03 | up   |
| 6325633 | 7060100 | 1031749 | MAP/microtubule affinity-regulating kinase 2 | Mark2  | 60328  | 1,01 | up   |
| 6678332 | 7291032 | 1599343 | MAP7 domain containing 1                     | Map7d1 | 681287 | 2,18 | up   |
| 5741742 | 7291032 | 1599332 | MAP7 domain containing 1                     | Map7d1 | 681287 | 2,04 | up   |
| 5645949 | 7291032 | 1599330 | MAP7 domain containing 1                     | Map7d1 | 681287 | 1,76 | up   |
| 6511484 | 7291032 | 1599337 | MAP7 domain containing 1                     | Map7d1 | 681287 | 1,71 | down |
| 6173305 | 7291032 | 1599339 | MAP7 domain containing 1                     | Map7d1 | 681287 | 1,41 | down |
| 6014186 | 7291032 | 1599332 | MAP7 domain containing 1                     | Map7d1 | 681287 | 1,40 | up   |
| 6342458 | 7291032 | 1599332 | MAP7 domain containing 1                     | Map7d1 | 681287 | 1,38 | down |
| 6623784 | 7291032 | 1599335 | MAP7 domain containing 1                     | Map7d1 | 681287 | 1,34 | up   |
| 6616044 | 7291032 | 1599340 | MAP7 domain containing 1                     | Map7d1 | 681287 | 1,33 | up   |

|         |         |         |                                |        |        |      |      |
|---------|---------|---------|--------------------------------|--------|--------|------|------|
| 6117812 | 7291032 | 1599345 | MAP7 domain containing 1       | Map7d1 | 681287 | 1,32 | up   |
| 6099112 | 7291032 | 1599340 | MAP7 domain containing 1       | Map7d1 | 681287 | 1,22 | down |
| 5840112 | 7291032 | 1599337 | MAP7 domain containing 1       | Map7d1 | 681287 | 1,22 | down |
| 6243741 | 7291032 | 1599339 | MAP7 domain containing 1       | Map7d1 | 681287 | 1,21 | up   |
| 6341219 | 7291032 | 1599332 | MAP7 domain containing 1       | Map7d1 | 681287 | 1,20 | down |
| 5691978 | 7291032 | 1599337 | MAP7 domain containing 1       | Map7d1 | 681287 | 1,15 | down |
| 5627288 | 7291032 | 1599333 | MAP7 domain containing 1       | Map7d1 | 681287 | 1,13 | up   |
| 6489881 | 7291032 | 1599336 | MAP7 domain containing 1       | Map7d1 | 681287 | 1,13 | up   |
| 6033294 | 7291032 | 1599341 | MAP7 domain containing 1       | Map7d1 | 681287 | 1,13 | down |
| 6708579 | 7291032 | 1599346 | MAP7 domain containing 1       | Map7d1 | 681287 | 1,12 | down |
| 5913750 | 7291032 | 1599342 | MAP7 domain containing 1       | Map7d1 | 681287 | 1,05 | up   |
| 5953769 | 7291032 | 1599333 | MAP7 domain containing 1       | Map7d1 | 681287 | 1,05 | up   |
| 6745202 | 7291032 | 1599344 | MAP7 domain containing 1       | Map7d1 | 681287 | 1,05 | up   |
| 6540106 | 7291032 | 1599334 | MAP7 domain containing 1       | Map7d1 | 681287 | 1,02 | down |
| 5825995 | 7291032 | 1599347 | MAP7 domain containing 1       | Map7d1 | 681287 | 1,01 | up   |
| 6379159 | 7291032 | 1599346 | MAP7 domain containing 1       | Map7d1 | 681287 | 1,01 | down |
| 5721856 | 7291032 | 1599337 | MAP7 domain containing 1       | Map7d1 | 681287 | 1,00 | up   |
| 6552214 | 7208436 | 1395316 | mastermind like 3 (Drosophila) | Maml3  | 310405 | 1,62 | down |
| 6450990 | 7208436 | 1395318 | mastermind like 3 (Drosophila) | Maml3  | 310405 | 1,55 | down |
| 5734825 | 7208436 | 1395347 | mastermind like 3 (Drosophila) | Maml3  | 310405 | 1,35 | up   |
| 6209947 | 7208436 | 1395320 | mastermind like 3 (Drosophila) | Maml3  | 310405 | 1,25 | up   |
| 6619837 | 7208436 | 1395347 | mastermind like 3 (Drosophila) | Maml3  | 310405 | 1,17 | down |
| 6133085 | 7208436 | 1395321 | mastermind like 3 (Drosophila) | Maml3  | 310405 | 1,14 | up   |
| 6080211 | 7208436 | 1395316 | mastermind like 3 (Drosophila) | Maml3  | 310405 | 1,10 | up   |
| 6569462 | 7208436 | 1395347 | mastermind like 3 (Drosophila) | Maml3  | 310405 | 1,09 | up   |
| 5640128 | 7208436 | 1395347 | mastermind like 3 (Drosophila) | Maml3  | 310405 | 1,08 | up   |
| 5740902 | 7208436 | 1395316 | mastermind like 3 (Drosophila) | Maml3  | 310405 | 1,06 | up   |
| 6295317 | 7208436 | 1395347 | mastermind like 3 (Drosophila) | Maml3  | 310405 | 1,02 | down |
| 5796330 | 7208436 | 1395347 | mastermind like 3 (Drosophila) | Maml3  | 310405 | 1,01 | down |
| 6347833 | 7316054 | 1662262 | matrilin 2                     | Matn2  | 299996 | 2,65 | up   |
| 5766573 | 7316054 | 1662283 | matrilin 2                     | Matn2  | 299996 | 2,32 | down |
| 6398650 | 7316054 | 1662300 | matrilin 2                     | Matn2  | 299996 | 1,97 | up   |
| 6463940 | 7316054 | 1662299 | matrilin 2                     | Matn2  | 299996 | 1,92 | down |
| 6738318 | 7316054 | 1662271 | matrilin 2                     | Matn2  | 299996 | 1,62 | down |
| 5679590 | 7316054 | 1662295 | matrilin 2                     | Matn2  | 299996 | 1,45 | down |
| 6272973 | 7316054 | 1662298 | matrilin 2                     | Matn2  | 299996 | 1,36 | down |
| 6619103 | 7316054 | 1662284 | matrilin 2                     | Matn2  | 299996 | 1,20 | down |
| 5997659 | 7316054 | 1662293 | matrilin 2                     | Matn2  | 299996 | 1,18 | down |
| 6460929 | 7316054 | 1662286 | matrilin 2                     | Matn2  | 299996 | 1,18 | down |
| 5970062 | 7316054 | 1662289 | matrilin 2                     | Matn2  | 299996 | 1,18 | up   |
| 6651210 | 7316054 | 1662288 | matrilin 2                     | Matn2  | 299996 | 1,15 | up   |
| 6066756 | 7316054 | 1662297 | matrilin 2                     | Matn2  | 299996 | 1,14 | up   |
| 5985316 | 7316054 | 1662302 | matrilin 2                     | Matn2  | 299996 | 1,13 | up   |
| 6661784 | 7316054 | 1662301 | matrilin 2                     | Matn2  | 299996 | 1,12 | down |
| 6484059 | 7316054 | 1662301 | matrilin 2                     | Matn2  | 299996 | 1,10 | up   |
| 6651362 | 7316054 | 1662282 | matrilin 2                     | Matn2  | 299996 | 1,06 | up   |
| 5652341 | 7332679 | 1701943 | matrix metallopeptidase 10     | Mmp10  | 117061 | 3,38 | up   |
| 6630900 | 7332679 | 1701947 | matrix metallopeptidase 10     | Mmp10  | 117061 | 1,66 | down |
| 6646371 | 7332679 | 1701942 | matrix metallopeptidase 10     | Mmp10  | 117061 | 1,53 | up   |
| 6556471 | 7332679 | 1701947 | matrix metallopeptidase 10     | Mmp10  | 117061 | 1,37 | up   |
| 6215455 | 7332679 | 1701942 | matrix metallopeptidase 10     | Mmp10  | 117061 | 1,29 | down |
| 5788488 | 7332679 | 1701951 | matrix metallopeptidase 10     | Mmp10  | 117061 | 1,25 | up   |
| 6202247 | 7332679 | 1701951 | matrix metallopeptidase 10     | Mmp10  | 117061 | 1,24 | up   |
| 6056728 | 7332679 | 1701946 | matrix metallopeptidase 10     | Mmp10  | 117061 | 1,22 | up   |
| 5731796 | 7332679 | 1701948 | matrix metallopeptidase 10     | Mmp10  | 117061 | 1,18 | down |
| 5675506 | 7332679 | 1701944 | matrix metallopeptidase 10     | Mmp10  | 117061 | 1,18 | up   |
| 6605788 | 7332679 | 1701949 | matrix metallopeptidase 10     | Mmp10  | 117061 | 1,11 | down |

|         |         |         |                            |       |        |      |      |
|---------|---------|---------|----------------------------|-------|--------|------|------|
| 6601780 | 7332679 | 1701951 | matrix metallopeptidase 10 | Mmp10 | 117061 | 1,09 | down |
| 5981654 | 7332679 | 1701948 | matrix metallopeptidase 10 | Mmp10 | 117061 | 1,06 | down |
| 5781442 | 7332679 | 1701950 | matrix metallopeptidase 10 | Mmp10 | 117061 | 1,03 | up   |
| 6448968 | 7332679 | 1701945 | matrix metallopeptidase 10 | Mmp10 | 117061 | 1,01 | up   |
| 6363354 | 7332650 | 1701872 | matrix metallopeptidase 13 | Mmp13 | 171052 | 2,67 | down |
| 6654844 | 7332650 | 1701882 | matrix metallopeptidase 13 | Mmp13 | 171052 | 1,43 | up   |
| 5831259 | 7332650 | 1701874 | matrix metallopeptidase 13 | Mmp13 | 171052 | 1,31 | up   |
| 5763760 | 7332650 | 1701878 | matrix metallopeptidase 13 | Mmp13 | 171052 | 1,25 | down |
| 5991651 | 7332650 | 1701880 | matrix metallopeptidase 13 | Mmp13 | 171052 | 1,22 | down |
| 6034946 | 7332650 | 1701875 | matrix metallopeptidase 13 | Mmp13 | 171052 | 1,15 | up   |
| 6431302 | 7332650 | 1701882 | matrix metallopeptidase 13 | Mmp13 | 171052 | 1,15 | up   |
| 6618067 | 7332650 | 1701876 | matrix metallopeptidase 13 | Mmp13 | 171052 | 1,14 | up   |
| 6314326 | 7332650 | 1701876 | matrix metallopeptidase 13 | Mmp13 | 171052 | 1,14 | down |
| 5698905 | 7332650 | 1701881 | matrix metallopeptidase 13 | Mmp13 | 171052 | 1,08 | down |
| 5886760 | 7332650 | 1701873 | matrix metallopeptidase 13 | Mmp13 | 171052 | 1,07 | up   |
| 5806797 | 7332650 | 1701879 | matrix metallopeptidase 13 | Mmp13 | 171052 | 1,05 | down |
| 6433172 | 7332650 | 1701880 | matrix metallopeptidase 13 | Mmp13 | 171052 | 1,02 | down |
| 6210728 | 7273057 | 1555532 | matrix metallopeptidase 16 | Mmp16 | 65205  | 2,18 | down |
| 6472672 | 7273057 | 1555528 | matrix metallopeptidase 16 | Mmp16 | 65205  | 1,93 | down |
| 6023750 | 7273057 | 1555529 | matrix metallopeptidase 16 | Mmp16 | 65205  | 1,64 | down |
| 6417101 | 7273057 | 1555528 | matrix metallopeptidase 16 | Mmp16 | 65205  | 1,34 | down |
| 5750191 | 7273057 | 1555537 | matrix metallopeptidase 16 | Mmp16 | 65205  | 1,30 | down |
| 6176017 | 7273057 | 1555531 | matrix metallopeptidase 16 | Mmp16 | 65205  | 1,23 | down |
| 6435561 | 7273057 | 1555534 | matrix metallopeptidase 16 | Mmp16 | 65205  | 1,17 | up   |
| 5841192 | 7273057 | 1555535 | matrix metallopeptidase 16 | Mmp16 | 65205  | 1,13 | up   |
| 6342847 | 7273057 | 1555528 | matrix metallopeptidase 16 | Mmp16 | 65205  | 1,13 | up   |
| 6059443 | 7273057 | 1555536 | matrix metallopeptidase 16 | Mmp16 | 65205  | 1,12 | down |
| 5817429 | 7273057 | 1555528 | matrix metallopeptidase 16 | Mmp16 | 65205  | 1,08 | up   |
| 6593983 | 7273057 | 1555537 | matrix metallopeptidase 16 | Mmp16 | 65205  | 1,08 | up   |
| 6130287 | 7273057 | 1555528 | matrix metallopeptidase 16 | Mmp16 | 65205  | 1,07 | up   |
| 6690916 | 7273057 | 1555537 | matrix metallopeptidase 16 | Mmp16 | 65205  | 1,07 | down |
| 5818668 | 7273057 | 1555529 | matrix metallopeptidase 16 | Mmp16 | 65205  | 1,05 | up   |
| 6599435 | 7273057 | 1555533 | matrix metallopeptidase 16 | Mmp16 | 65205  | 1,02 | up   |
| 5624656 | 7273057 | 1555530 | matrix metallopeptidase 16 | Mmp16 | 65205  | 1,02 | up   |
| 6719292 | 7183186 | 1333591 | matrix metallopeptidase 2  | Mmp2  | 81686  | 2,13 | up   |
| 5885304 | 7183186 | 1333587 | matrix metallopeptidase 2  | Mmp2  | 81686  | 1,59 | up   |
| 5648823 | 7183186 | 1333586 | matrix metallopeptidase 2  | Mmp2  | 81686  | 1,24 | down |
| 6351823 | 7183186 | 1333592 | matrix metallopeptidase 2  | Mmp2  | 81686  | 1,21 | up   |
| 5824387 | 7183186 | 1333597 | matrix metallopeptidase 2  | Mmp2  | 81686  | 1,20 | down |
| 6283215 | 7183186 | 1333596 | matrix metallopeptidase 2  | Mmp2  | 81686  | 1,19 | down |
| 6253302 | 7183186 | 1333588 | matrix metallopeptidase 2  | Mmp2  | 81686  | 1,18 | up   |
| 5712575 | 7183186 | 1333593 | matrix metallopeptidase 2  | Mmp2  | 81686  | 1,16 | down |
| 5850744 | 7183186 | 1333590 | matrix metallopeptidase 2  | Mmp2  | 81686  | 1,15 | down |
| 6327512 | 7183186 | 1333597 | matrix metallopeptidase 2  | Mmp2  | 81686  | 1,12 | down |
| 6539240 | 7183186 | 1333594 | matrix metallopeptidase 2  | Mmp2  | 81686  | 1,08 | down |
| 5834180 | 7183186 | 1333584 | matrix metallopeptidase 2  | Mmp2  | 81686  | 1,05 | down |
| 6462553 | 7183186 | 1333589 | matrix metallopeptidase 2  | Mmp2  | 81686  | 1,05 | down |
| 6459507 | 7183186 | 1333585 | matrix metallopeptidase 2  | Mmp2  | 81686  | 1,04 | down |
| 5869126 | 7183186 | 1333595 | matrix metallopeptidase 2  | Mmp2  | 81686  | 1,02 | up   |
| 6469361 | 7332664 | 1701917 | matrix metallopeptidase 3  | Mmp3  | 171045 | 2,38 | down |
| 5818900 | 7332664 | 1701912 | matrix metallopeptidase 3  | Mmp3  | 171045 | 1,75 | down |
| 6461907 | 7332664 | 1701911 | matrix metallopeptidase 3  | Mmp3  | 171045 | 1,60 | up   |
| 6594885 | 7332664 | 1701916 | matrix metallopeptidase 3  | Mmp3  | 171045 | 1,50 | down |
| 5666039 | 7332664 | 1701914 | matrix metallopeptidase 3  | Mmp3  | 171045 | 1,47 | down |
| 5723961 | 7332664 | 1701915 | matrix metallopeptidase 3  | Mmp3  | 171045 | 1,47 | up   |
| 6029585 | 7332664 | 1701912 | matrix metallopeptidase 3  | Mmp3  | 171045 | 1,33 | down |
| 5881980 | 7332664 | 1701917 | matrix metallopeptidase 3  | Mmp3  | 171045 | 1,23 | up   |

|         |         |         |                                          |      |        |      |      |
|---------|---------|---------|------------------------------------------|------|--------|------|------|
| 6213504 | 7332664 | 1701911 | matrix metallopeptidase 3                | Mmp3 | 171045 | 1,20 | up   |
| 5704401 | 7332664 | 1701913 | matrix metallopeptidase 3                | Mmp3 | 171045 | 1,18 | up   |
| 5707623 | 7332664 | 1701910 | matrix metallopeptidase 3                | Mmp3 | 171045 | 1,09 | up   |
| 5768959 | 7332664 | 1701908 | matrix metallopeptidase 3                | Mmp3 | 171045 | 1,07 | up   |
| 6286224 | 7332664 | 1701918 | matrix metallopeptidase 3                | Mmp3 | 171045 | 1,06 | up   |
| 6212996 | 7332664 | 1701909 | matrix metallopeptidase 3                | Mmp3 | 171045 | 1,03 | down |
| 6334035 | 7235378 | 1461642 | matrix metallopeptidase 9                | Mmp9 | 81687  | 3,60 | up   |
| 6745559 | 7235378 | 1461641 | matrix metallopeptidase 9                | Mmp9 | 81687  | 1,81 | up   |
| 6317790 | 7235378 | 1461652 | matrix metallopeptidase 9                | Mmp9 | 81687  | 1,62 | down |
| 5898562 | 7235378 | 1461646 | matrix metallopeptidase 9                | Mmp9 | 81687  | 1,47 | down |
| 6292411 | 7235378 | 1461638 | matrix metallopeptidase 9                | Mmp9 | 81687  | 1,37 | down |
| 5769552 | 7235378 | 1461645 | matrix metallopeptidase 9                | Mmp9 | 81687  | 1,30 | up   |
| 6174505 | 7235378 | 1461649 | matrix metallopeptidase 9                | Mmp9 | 81687  | 1,19 | down |
| 6272964 | 7235378 | 1461647 | matrix metallopeptidase 9                | Mmp9 | 81687  | 1,16 | up   |
| 6598826 | 7235378 | 1461650 | matrix metallopeptidase 9                | Mmp9 | 81687  | 1,14 | down |
| 6609566 | 7235378 | 1461640 | matrix metallopeptidase 9                | Mmp9 | 81687  | 1,11 | down |
| 5935259 | 7235378 | 1461648 | matrix metallopeptidase 9                | Mmp9 | 81687  | 1,09 | down |
| 6582190 | 7235378 | 1461643 | matrix metallopeptidase 9                | Mmp9 | 81687  | 1,09 | up   |
| 6127485 | 7235378 | 1461652 | matrix metallopeptidase 9                | Mmp9 | 81687  | 1,08 | down |
| 6407444 | 7235378 | 1461639 | matrix metallopeptidase 9                | Mmp9 | 81687  | 1,08 | down |
| 5862708 | 7235378 | 1461651 | matrix metallopeptidase 9                | Mmp9 | 81687  | 1,06 | up   |
| 6078094 | 7235378 | 1461644 | matrix metallopeptidase 9                | Mmp9 | 81687  | 1,05 | up   |
| 5670040 | 7235378 | 1461642 | matrix metallopeptidase 9                | Mmp9 | 81687  | 1,03 | down |
| 5972249 | 7043189 | 993061  | MAX interactor 1                         | Mxi1 | 25701  | 2,17 | up   |
| 6573734 | 7043189 | 993067  | MAX interactor 1                         | Mxi1 | 25701  | 1,26 | down |
| 6089514 | 7043189 | 993066  | MAX interactor 1                         | Mxi1 | 25701  | 1,14 | up   |
| 6349756 | 7043189 | 993065  | MAX interactor 1                         | Mxi1 | 25701  | 1,12 | down |
| 5787771 | 7043189 | 993064  | MAX interactor 1                         | Mxi1 | 25701  | 1,09 | down |
| 6364926 | 7043189 | 993063  | MAX interactor 1                         | Mxi1 | 25701  | 1,07 | down |
| 5882982 | 7043189 | 993067  | MAX interactor 1                         | Mxi1 | 25701  | 1,03 | up   |
| 5781661 | 7043189 | 993062  | MAX interactor 1                         | Mxi1 | 25701  | 1,03 | down |
| 6249054 | 7072225 | 1061401 | MAX-like protein X                       | MLx  | 360631 | 1,45 | down |
| 6226958 | 7072225 | 1061402 | MAX-like protein X                       | MLx  | 360631 | 1,27 | down |
| 6455550 | 7072225 | 1061404 | MAX-like protein X                       | MLx  | 360631 | 1,22 | down |
| 6421553 | 7072225 | 1061405 | MAX-like protein X                       | MLx  | 360631 | 1,16 | down |
| 5921393 | 7072225 | 1061403 | MAX-like protein X                       | MLx  | 360631 | 1,14 | up   |
| 6333065 | 7072225 | 1061405 | MAX-like protein X                       | MLx  | 360631 | 1,13 | down |
| 6204334 | 7072225 | 1061407 | MAX-like protein X                       | MLx  | 360631 | 1,13 | down |
| 6374605 | 7072225 | 1061406 | MAX-like protein X                       | MLx  | 360631 | 1,06 | down |
| 5958294 | 7072225 | 1061401 | MAX-like protein X                       | MLx  | 360631 | 1,03 | up   |
| 6050836 | 7072225 | 1061401 | MAX-like protein X                       | MLx  | 360631 | 1,03 | up   |
| 6150680 | 7072225 | 1061401 | MAX-like protein X                       | MLx  | 360631 | 1,02 | up   |
| 6272173 | 7072225 | 1061401 | MAX-like protein X                       | MLx  | 360631 | 1,00 | up   |
| 5944865 | 7322009 | 1676622 | megakaryocyte-associated tyrosine kinase | Matk | 60450  | 2,31 | up   |
| 6389875 | 7322009 | 1676616 | megakaryocyte-associated tyrosine kinase | Matk | 60450  | 1,82 | down |
| 6513752 | 7322009 | 1676617 | megakaryocyte-associated tyrosine kinase | Matk | 60450  | 1,46 | up   |
| 6536935 | 7322009 | 1676612 | megakaryocyte-associated tyrosine kinase | Matk | 60450  | 1,40 | down |
| 6468543 | 7322009 | 1676613 | megakaryocyte-associated tyrosine kinase | Matk | 60450  | 1,31 | down |
| 6382177 | 7322009 | 1676618 | megakaryocyte-associated tyrosine kinase | Matk | 60450  | 1,19 | down |
| 6488446 | 7322009 | 1676610 | megakaryocyte-associated tyrosine kinase | Matk | 60450  | 1,15 | down |
| 5720324 | 7322009 | 1676615 | megakaryocyte-associated tyrosine kinase | Matk | 60450  | 1,13 | up   |
| 6486630 | 7322009 | 1676621 | megakaryocyte-associated tyrosine kinase | Matk | 60450  | 1,13 | up   |
| 6493822 | 7322009 | 1676614 | megakaryocyte-associated tyrosine kinase | Matk | 60450  | 1,11 | up   |
| 6691537 | 7322009 | 1676620 | megakaryocyte-associated tyrosine kinase | Matk | 60450  | 1,09 | down |
| 6062521 | 7322009 | 1676611 | megakaryocyte-associated tyrosine kinase | Matk | 60450  | 1,08 | down |
| 5630894 | 7322009 | 1676612 | megakaryocyte-associated tyrosine kinase | Matk | 60450  | 1,08 | down |
| 6269917 | 7322009 | 1676619 | megakaryocyte-associated tyrosine kinase | Matk | 60450  | 1,03 | up   |

|         |         |         |                                                                              |       |        |      |      |
|---------|---------|---------|------------------------------------------------------------------------------|-------|--------|------|------|
| 6108010 | 7322009 | 1676618 | megakaryocyte-associated tyrosine kinase                                     | Matk  | 60450  | 1,02 | down |
| 6221341 | 7330623 | 1696953 | megalencephalic leukoencephalopathy with subcortical cysts 1 homolog (human) | Mlc1  | 315215 | 2,27 | down |
| 6633191 | 7330623 | 1696946 | megalencephalic leukoencephalopathy with subcortical cysts 1 homolog (human) | Mlc1  | 315215 | 1,85 | up   |
| 6312723 | 7330623 | 1696956 | megalencephalic leukoencephalopathy with subcortical cysts 1 homolog (human) | Mlc1  | 315215 | 1,83 | down |
| 5848794 | 7330623 | 1696955 | megalencephalic leukoencephalopathy with subcortical cysts 1 homolog (human) | Mlc1  | 315215 | 1,52 | up   |
| 5857724 | 7330623 | 1696951 | megalencephalic leukoencephalopathy with subcortical cysts 1 homolog (human) | Mlc1  | 315215 | 1,51 | down |
| 5872842 | 7330623 | 1696949 | megalencephalic leukoencephalopathy with subcortical cysts 1 homolog (human) | Mlc1  | 315215 | 1,39 | down |
| 6038510 | 7330623 | 1696960 | megalencephalic leukoencephalopathy with subcortical cysts 1 homolog (human) | Mlc1  | 315215 | 1,33 | up   |
| 5806761 | 7330623 | 1696945 | megalencephalic leukoencephalopathy with subcortical cysts 1 homolog (human) | Mlc1  | 315215 | 1,30 | up   |
| 5916715 | 7330623 | 1696952 | megalencephalic leukoencephalopathy with subcortical cysts 1 homolog (human) | Mlc1  | 315215 | 1,27 | down |
| 6697086 | 7330623 | 1696958 | megalencephalic leukoencephalopathy with subcortical cysts 1 homolog (human) | Mlc1  | 315215 | 1,24 | down |
| 6340058 | 7330623 | 1696946 | megalencephalic leukoencephalopathy with subcortical cysts 1 homolog (human) | Mlc1  | 315215 | 1,15 | down |
| 5632095 | 7330623 | 1696950 | megalencephalic leukoencephalopathy with subcortical cysts 1 homolog (human) | Mlc1  | 315215 | 1,11 | up   |
| 6009397 | 7330623 | 1696957 | megalencephalic leukoencephalopathy with subcortical cysts 1 homolog (human) | Mlc1  | 315215 | 1,10 | up   |
| 5629428 | 7330623 | 1696946 | megalencephalic leukoencephalopathy with subcortical cysts 1 homolog (human) | Mlc1  | 315215 | 1,05 | down |
| 5892766 | 7330623 | 1696944 | megalencephalic leukoencephalopathy with subcortical cysts 1 homolog (human) | Mlc1  | 315215 | 1,00 | up   |
| 6298303 | 7128539 | 1197674 | Meis homeobox 1                                                              | Meis1 | 686117 | 1,51 | down |
| 6001830 | 7128539 | 1197667 | Meis homeobox 1                                                              | Meis1 | 686117 | 1,36 | down |
| 6343650 | 7128539 | 1197667 | Meis homeobox 1                                                              | Meis1 | 686117 | 1,31 | down |
| 5810813 | 7128539 | 1197667 | Meis homeobox 1                                                              | Meis1 | 686117 | 1,29 | up   |
| 6530358 | 7128539 | 1197669 | Meis homeobox 1                                                              | Meis1 | 686117 | 1,27 | down |
| 6369212 | 7128539 | 1197665 | Meis homeobox 1                                                              | Meis1 | 686117 | 1,26 | up   |
| 6561869 | 7128539 | 1197692 | Meis homeobox 1                                                              | Meis1 | 686117 | 1,26 | down |
| 6344881 | 7128539 | 1197664 | Meis homeobox 1                                                              | Meis1 | 686117 | 1,25 | up   |
| 5841723 | 7128539 | 1197697 | Meis homeobox 1                                                              | Meis1 | 686117 | 1,22 | up   |
| 5988713 | 7128539 | 1197702 | Meis homeobox 1                                                              | Meis1 | 686117 | 1,17 | up   |
| 6045376 | 7128539 | 1197695 | Meis homeobox 1                                                              | Meis1 | 686117 | 1,17 | down |
| 5728217 | 7128539 | 1197677 | Meis homeobox 1                                                              | Meis1 | 686117 | 1,10 | up   |
| 6196433 | 7128539 | 1197699 | Meis homeobox 1                                                              | Meis1 | 686117 | 1,05 | down |
| 6680837 | 7128539 | 1197688 | Meis homeobox 1                                                              | Meis1 | 686117 | 1,01 | up   |
| 6389586 | 7029078 | 958875  | Meis homeobox 3                                                              | Meis3 | 361514 | 1,42 | up   |
| 6417268 | 7029078 | 958878  | Meis homeobox 3                                                              | Meis3 | 361514 | 1,32 | down |
| 5939755 | 7029078 | 958875  | Meis homeobox 3                                                              | Meis3 | 361514 | 1,22 | down |
| 5749769 | 7029078 | 958884  | Meis homeobox 3                                                              | Meis3 | 361514 | 1,22 | down |
| 6045129 | 7029078 | 958883  | Meis homeobox 3                                                              | Meis3 | 361514 | 1,21 | up   |
| 6534120 | 7029078 | 958876  | Meis homeobox 3                                                              | Meis3 | 361514 | 1,20 | up   |
| 5767945 | 7029078 | 958872  | Meis homeobox 3                                                              | Meis3 | 361514 | 1,12 | up   |
| 6402186 | 7029078 | 958875  | Meis homeobox 3                                                              | Meis3 | 361514 | 1,11 | down |
| 6127606 | 7029078 | 958879  | Meis homeobox 3                                                              | Meis3 | 361514 | 1,10 | down |
| 6322770 | 7029078 | 958877  | Meis homeobox 3                                                              | Meis3 | 361514 | 1,09 | down |
| 5740671 | 7029078 | 958880  | Meis homeobox 3                                                              | Meis3 | 361514 | 1,08 | up   |
| 5962574 | 7029078 | 958881  | Meis homeobox 3                                                              | Meis3 | 361514 | 1,06 | up   |
| 6662186 | 7029078 | 958882  | Meis homeobox 3                                                              | Meis3 | 361514 | 1,00 | down |
| 5643493 | 7243363 | 1481615 | Meis1, myeloid ecotropic viral integration site 1 homolog 2                  | Meis2 | 311311 | 2,98 | down |
| 6466614 | 7243363 | 1481624 | Meis1, myeloid ecotropic viral integration site 1 homolog 2                  | Meis2 | 311311 | 1,75 | down |
| 6306492 | 7243363 | 1481582 | Meis1, myeloid ecotropic viral integration site 1 homolog 2                  | Meis2 | 311311 | 1,62 | up   |
| 6728310 | 7243363 | 1481582 | Meis1, myeloid ecotropic viral integration site 1 homolog 2                  | Meis2 | 311311 | 1,59 | up   |
| 5787533 | 7243363 | 1481603 | Meis1, myeloid ecotropic viral integration site 1 homolog 2                  | Meis2 | 311311 | 1,57 | up   |
| 6264492 | 7243363 | 1481615 | Meis1, myeloid ecotropic viral integration site 1 homolog 2                  | Meis2 | 311311 | 1,50 | down |
| 6481807 | 7243363 | 1481620 | Meis1, myeloid ecotropic viral integration site 1 homolog 2                  | Meis2 | 311311 | 1,50 | up   |
| 6198261 | 7243363 | 1481619 | Meis1, myeloid ecotropic viral integration site 1 homolog 2                  | Meis2 | 311311 | 1,43 | down |
| 6553353 | 7243363 | 1481582 | Meis1, myeloid ecotropic viral integration site 1 homolog 2                  | Meis2 | 311311 | 1,38 | down |
| 6606393 | 7243363 | 1481624 | Meis1, myeloid ecotropic viral integration site 1 homolog 2                  | Meis2 | 311311 | 1,36 | down |
| 6056491 | 7243363 | 1481582 | Meis1, myeloid ecotropic viral integration site 1 homolog 2                  | Meis2 | 311311 | 1,33 | up   |
| 6152648 | 7243363 | 1481587 | Meis1, myeloid ecotropic viral integration site 1 homolog 2                  | Meis2 | 311311 | 1,26 | down |
| 6295724 | 7243363 | 1481584 | Meis1, myeloid ecotropic viral integration site 1 homolog 2                  | Meis2 | 311311 | 1,26 | down |
| 5792471 | 7243363 | 1481594 | Meis1, myeloid ecotropic viral integration site 1 homolog 2                  | Meis2 | 311311 | 1,26 | down |



|         |         |         |                                                                      |        |        |      |      |
|---------|---------|---------|----------------------------------------------------------------------|--------|--------|------|------|
| 5704531 | 7243363 | 1481582 | Meis1, myeloid ecotropic viral integration site 1 homolog 2          | Meis2  | 311311 | 1,24 | down |
| 6310451 | 7243363 | 1481623 | Meis1, myeloid ecotropic viral integration site 1 homolog 2          | Meis2  | 311311 | 1,23 | down |
| 6353800 | 7243363 | 1481582 | Meis1, myeloid ecotropic viral integration site 1 homolog 2          | Meis2  | 311311 | 1,20 | up   |
| 5951238 | 7243363 | 1481582 | Meis1, myeloid ecotropic viral integration site 1 homolog 2          | Meis2  | 311311 | 1,16 | down |
| 5868010 | 7243363 | 1481621 | Meis1, myeloid ecotropic viral integration site 1 homolog 2          | Meis2  | 311311 | 1,06 | up   |
| 5945900 | 7322260 | 1677067 | melanoma associated antigen (mutated) 1                              | Mum1   | 362838 | 2,28 | down |
| 6068330 | 7322260 | 1677065 | melanoma associated antigen (mutated) 1                              | Mum1   | 362838 | 1,27 | up   |
| 5818389 | 7322260 | 1677068 | melanoma associated antigen (mutated) 1                              | Mum1   | 362838 | 1,26 | down |
| 5706482 | 7322260 | 1677069 | melanoma associated antigen (mutated) 1                              | Mum1   | 362838 | 1,14 | up   |
| 6378262 | 7322260 | 1677074 | melanoma associated antigen (mutated) 1                              | Mum1   | 362838 | 1,12 | up   |
| 6610317 | 7322260 | 1677064 | melanoma associated antigen (mutated) 1                              | Mum1   | 362838 | 1,11 | down |
| 6047552 | 7322260 | 1677066 | melanoma associated antigen (mutated) 1                              | Mum1   | 362838 | 1,11 | down |
| 6676705 | 7322260 | 1677062 | melanoma associated antigen (mutated) 1                              | Mum1   | 362838 | 1,11 | up   |
| 6355605 | 7322260 | 1677070 | melanoma associated antigen (mutated) 1                              | Mum1   | 362838 | 1,08 | up   |
| 6234210 | 7322260 | 1677073 | melanoma associated antigen (mutated) 1                              | Mum1   | 362838 | 1,05 | down |
| 5930832 | 7322260 | 1677071 | melanoma associated antigen (mutated) 1                              | Mum1   | 362838 | 1,04 | up   |
| 6183282 | 7322260 | 1677062 | melanoma associated antigen (mutated) 1                              | Mum1   | 362838 | 1,02 | down |
| 5978838 | 7322260 | 1677066 | melanoma associated antigen (mutated) 1                              | Mum1   | 362838 | 1,02 | up   |
| 5801959 | 7322260 | 1677067 | melanoma associated antigen (mutated) 1                              | Mum1   | 362838 | 1,01 | down |
| 6530208 | 7363568 | 1778141 | melanoregulin                                                        | Mreg   | 501162 | 1,16 | up   |
| 6658914 | 7151519 | 1254303 | melatonin receptor 1A                                                | Mtnr1a | 114211 | 1,16 | down |
| 6319821 | 7151519 | 1254297 | melatonin receptor 1A                                                | Mtnr1a | 114211 | 1,07 | up   |
| 6519359 | 7312575 | 1653360 | membralin                                                            | Mbrl   | 299608 | 1,72 | down |
| 5853559 | 7312575 | 1653360 | membralin                                                            | Mbrl   | 299608 | 1,36 | up   |
| 6678663 | 7312575 | 1653355 | membralin                                                            | Mbrl   | 299608 | 1,31 | down |
| 6064749 | 7312575 | 1653359 | membralin                                                            | Mbrl   | 299608 | 1,30 | up   |
| 6261964 | 7312575 | 1653354 | membralin                                                            | Mbrl   | 299608 | 1,30 | down |
| 6675432 | 7312575 | 1653357 | membralin                                                            | Mbrl   | 299608 | 1,14 | down |
| 6088829 | 7312575 | 1653356 | membralin                                                            | Mbrl   | 299608 | 1,07 | up   |
| 6535082 | 7312575 | 1653358 | membralin                                                            | Mbrl   | 299608 | 1,07 | up   |
| 6475156 | 7312575 | 1653353 | membralin                                                            | Mbrl   | 299608 | 1,06 | down |
| 6019793 | 7312575 | 1653359 | membralin                                                            | Mbrl   | 299608 | 1,03 | up   |
| 6064020 | 7312575 | 1653359 | membralin                                                            | Mbrl   | 299608 | 1,01 | up   |
| 6343851 | 7312575 | 1653359 | membralin                                                            | Mbrl   | 299608 | 1,01 | down |
| 6424905 | 7212308 | 1404019 | membrane associated guanylate kinase, WW and PDZ domain containing 3 | Magi3  | 245903 | 2,45 | down |
| 6294277 | 7212308 | 1404034 | membrane associated guanylate kinase, WW and PDZ domain containing 3 | Magi3  | 245903 | 2,02 | up   |
| 6279125 | 7212308 | 1404024 | membrane associated guanylate kinase, WW and PDZ domain containing 3 | Magi3  | 245903 | 1,92 | up   |
| 6170654 | 7212308 | 1404015 | membrane associated guanylate kinase, WW and PDZ domain containing 3 | Magi3  | 245903 | 1,64 | down |
| 5674835 | 7212308 | 1404023 | membrane associated guanylate kinase, WW and PDZ domain containing 3 | Magi3  | 245903 | 1,56 | down |
| 6067736 | 7212308 | 1404015 | membrane associated guanylate kinase, WW and PDZ domain containing 3 | Magi3  | 245903 | 1,44 | up   |
| 6621989 | 7212308 | 1404022 | membrane associated guanylate kinase, WW and PDZ domain containing 3 | Magi3  | 245903 | 1,39 | up   |
| 6151160 | 7212308 | 1404030 | membrane associated guanylate kinase, WW and PDZ domain containing 3 | Magi3  | 245903 | 1,30 | down |
| 6682420 | 7212308 | 1404025 | membrane associated guanylate kinase, WW and PDZ domain containing 3 | Magi3  | 245903 | 1,29 | down |
| 6578232 | 7212308 | 1404028 | membrane associated guanylate kinase, WW and PDZ domain containing 3 | Magi3  | 245903 | 1,28 | up   |
| 5668216 | 7212308 | 1404016 | membrane associated guanylate kinase, WW and PDZ domain containing 3 | Magi3  | 245903 | 1,28 | up   |
| 5929301 | 7212308 | 1404027 | membrane associated guanylate kinase, WW and PDZ domain containing 3 | Magi3  | 245903 | 1,25 | up   |
| 5812062 | 7212308 | 1404033 | membrane associated guanylate kinase, WW and PDZ domain containing 3 | Magi3  | 245903 | 1,16 | down |
| 6367868 | 7212308 | 1404017 | membrane associated guanylate kinase, WW and PDZ domain containing 3 | Magi3  | 245903 | 1,13 | up   |
| 6728002 | 7212308 | 1404035 | membrane associated guanylate kinase, WW and PDZ domain containing 3 | Magi3  | 245903 | 1,12 | down |
| 5745527 | 7212308 | 1404018 | membrane associated guanylate kinase, WW and PDZ domain containing 3 | Magi3  | 245903 | 1,12 | down |
| 6502643 | 7212308 | 1404015 | membrane associated guanylate kinase, WW and PDZ domain containing 3 | Magi3  | 245903 | 1,11 | down |
| 6272516 | 7212308 | 1404031 | membrane associated guanylate kinase, WW and PDZ domain containing 3 | Magi3  | 245903 | 1,08 | down |
| 5685599 | 7212308 | 1404021 | membrane associated guanylate kinase, WW and PDZ domain containing 3 | Magi3  | 245903 | 1,07 | down |
| 6543030 | 7212308 | 1404020 | membrane associated guanylate kinase, WW and PDZ domain containing 3 | Magi3  | 245903 | 1,06 | down |
| 6418477 | 7212308 | 1404026 | membrane associated guanylate kinase, WW and PDZ domain containing 3 | Magi3  | 245903 | 1,05 | up   |
| 5986838 | 7212308 | 1404035 | membrane associated guanylate kinase, WW and PDZ domain containing 3 | Magi3  | 245903 | 1,05 | down |
| 6165642 | 7212308 | 1404032 | membrane associated guanylate kinase, WW and PDZ domain containing 3 | Magi3  | 245903 | 1,04 | down |

|         |         |         |                                                                      |        |        |      |      |
|---------|---------|---------|----------------------------------------------------------------------|--------|--------|------|------|
| 6639766 | 7212308 | 1404029 | membrane associated guanylate kinase, WW and PDZ domain containing 3 | Magi3  | 245903 | 1,03 | down |
| 6410237 | 7212308 | 1404034 | membrane associated guanylate kinase, WW and PDZ domain containing 3 | Magi3  | 245903 | 1,00 | down |
| 5820981 | 7253602 | 1506480 | membrane protein, palmitoylated 6 (MAGUK p55 subfamily member 6)     | Mpp6   | 362359 | 2,17 | down |
| 6299979 | 7253602 | 1506480 | membrane protein, palmitoylated 6 (MAGUK p55 subfamily member 6)     | Mpp6   | 362359 | 1,60 | down |
| 6560436 | 7253602 | 1506491 | membrane protein, palmitoylated 6 (MAGUK p55 subfamily member 6)     | Mpp6   | 362359 | 1,32 | down |
| 5860613 | 7253602 | 1506484 | membrane protein, palmitoylated 6 (MAGUK p55 subfamily member 6)     | Mpp6   | 362359 | 1,29 | up   |
| 6239645 | 7253602 | 1506488 | membrane protein, palmitoylated 6 (MAGUK p55 subfamily member 6)     | Mpp6   | 362359 | 1,23 | up   |
| 6243181 | 7253602 | 1506487 | membrane protein, palmitoylated 6 (MAGUK p55 subfamily member 6)     | Mpp6   | 362359 | 1,13 | up   |
| 5644188 | 7253602 | 1506485 | membrane protein, palmitoylated 6 (MAGUK p55 subfamily member 6)     | Mpp6   | 362359 | 1,09 | up   |
| 6744905 | 7253602 | 1506492 | membrane protein, palmitoylated 6 (MAGUK p55 subfamily member 6)     | Mpp6   | 362359 | 1,09 | up   |
| 6511620 | 7150348 | 1251398 | membrane-associated ring finger (C3HC4) 1                            | March1 | 361135 | 2,06 | down |
| 5854394 | 7150348 | 1251382 | membrane-associated ring finger (C3HC4) 1                            | March1 | 361135 | 1,05 | up   |
| 5724497 | 7150348 | 1251385 | membrane-associated ring finger (C3HC4) 1                            | March1 | 361135 | 1,04 | down |
| 6591212 | 7150348 | 1251393 | membrane-associated ring finger (C3HC4) 1                            | March1 | 361135 | 1,03 | up   |
| 6236003 | 7150348 | 1251405 | membrane-associated ring finger (C3HC4) 1                            | March1 | 361135 | 1,01 | down |
| 6271869 | 7150348 | 1251382 | membrane-associated ring finger (C3HC4) 1                            | March1 | 361135 | 1,01 | down |
| 5829594 | 7363576 | 1778170 | membrane-associated ring finger (C3HC4) 4                            | March4 | 367295 | 1,02 | down |
| 6195248 | 7041635 | 989633  | membrane-associated ring finger (C3HC4) 5                            | March5 | 294079 | 1,79 | down |
| 6369937 | 7041635 | 989637  | membrane-associated ring finger (C3HC4) 5                            | March5 | 294079 | 1,69 | up   |
| 6184117 | 7041635 | 989636  | membrane-associated ring finger (C3HC4) 5                            | March5 | 294079 | 1,57 | up   |
| 6687094 | 7041635 | 989639  | membrane-associated ring finger (C3HC4) 5                            | March5 | 294079 | 1,22 | up   |
| 6080410 | 7041635 | 989641  | membrane-associated ring finger (C3HC4) 5                            | March5 | 294079 | 1,19 | down |
| 5948811 | 7041635 | 989638  | membrane-associated ring finger (C3HC4) 5                            | March5 | 294079 | 1,18 | up   |
| 6248620 | 7041635 | 989640  | membrane-associated ring finger (C3HC4) 5                            | March5 | 294079 | 1,06 | up   |
| 6613259 | 7227870 | 1442102 | membrane-associated ring finger (C3HC4) 7                            | March7 | 311059 | 2,10 | down |
| 6710304 | 7227870 | 1442105 | membrane-associated ring finger (C3HC4) 7                            | March7 | 311059 | 1,99 | up   |
| 6217376 | 7227870 | 1442110 | membrane-associated ring finger (C3HC4) 7                            | March7 | 311059 | 1,66 | down |
| 6480847 | 7227870 | 1442109 | membrane-associated ring finger (C3HC4) 7                            | March7 | 311059 | 1,20 | up   |
| 5711015 | 7227870 | 1442103 | membrane-associated ring finger (C3HC4) 7                            | March7 | 311059 | 1,10 | down |
| 5846326 | 7227870 | 1442107 | membrane-associated ring finger (C3HC4) 7                            | March7 | 311059 | 1,09 | up   |
| 6175827 | 7227870 | 1442106 | membrane-associated ring finger (C3HC4) 7                            | March7 | 311059 | 1,09 | up   |
| 5930234 | 7227870 | 1442108 | membrane-associated ring finger (C3HC4) 7                            | March7 | 311059 | 1,04 | up   |
| 6108318 | 7227870 | 1442104 | membrane-associated ring finger (C3HC4) 7                            | March7 | 311059 | 1,03 | up   |
| 5661049 | 7251414 | 1501010 | met proto-oncogene                                                   | Met    | 24553  | 2,26 | down |
| 6016380 | 7251414 | 1501011 | met proto-oncogene                                                   | Met    | 24553  | 1,79 | down |
| 6485700 | 7251414 | 1501012 | met proto-oncogene                                                   | Met    | 24553  | 1,47 | up   |
| 6312786 | 7251414 | 1501018 | met proto-oncogene                                                   | Met    | 24553  | 1,45 | down |
| 5908798 | 7251414 | 1501022 | met proto-oncogene                                                   | Met    | 24553  | 1,35 | up   |
| 5920172 | 7251414 | 1501013 | met proto-oncogene                                                   | Met    | 24553  | 1,34 | down |
| 6222122 | 7251414 | 1501013 | met proto-oncogene                                                   | Met    | 24553  | 1,29 | down |
| 6234437 | 7251414 | 1501009 | met proto-oncogene                                                   | Met    | 24553  | 1,27 | up   |
| 5716522 | 7251414 | 1501023 | met proto-oncogene                                                   | Met    | 24553  | 1,26 | down |
| 6183552 | 7251414 | 1501017 | met proto-oncogene                                                   | Met    | 24553  | 1,26 | up   |
| 6421056 | 7251414 | 1501023 | met proto-oncogene                                                   | Met    | 24553  | 1,18 | down |
| 5763549 | 7251414 | 1501004 | met proto-oncogene                                                   | Met    | 24553  | 1,17 | down |
| 6139728 | 7251414 | 1501021 | met proto-oncogene                                                   | Met    | 24553  | 1,15 | up   |
| 5723306 | 7251414 | 1501016 | met proto-oncogene                                                   | Met    | 24553  | 1,15 | up   |
| 5896979 | 7251414 | 1501007 | met proto-oncogene                                                   | Met    | 24553  | 1,13 | up   |
| 5706038 | 7251414 | 1501010 | met proto-oncogene                                                   | Met    | 24553  | 1,11 | down |
| 6441448 | 7251414 | 1501005 | met proto-oncogene                                                   | Met    | 24553  | 1,10 | down |
| 5774937 | 7251414 | 1501004 | met proto-oncogene                                                   | Met    | 24553  | 1,10 | up   |
| 6208688 | 7251414 | 1501015 | met proto-oncogene                                                   | Met    | 24553  | 1,09 | up   |
| 5620600 | 7251414 | 1501019 | met proto-oncogene                                                   | Met    | 24553  | 1,08 | up   |
| 5736422 | 7251414 | 1501007 | met proto-oncogene                                                   | Met    | 24553  | 1,07 | down |
| 5924834 | 7251414 | 1501006 | met proto-oncogene                                                   | Met    | 24553  | 1,06 | down |
| 6645522 | 7251414 | 1501008 | met proto-oncogene                                                   | Met    | 24553  | 1,06 | up   |
| 5795919 | 7251414 | 1501014 | met proto-oncogene                                                   | Met    | 24553  | 1,05 | up   |

|         |         |         |                                                                                                |        |        |      |      |
|---------|---------|---------|------------------------------------------------------------------------------------------------|--------|--------|------|------|
| 5695180 | 7251414 | 1501015 | met proto-oncogene                                                                             | Met    | 24553  | 1,03 | up   |
| 6417161 | 7251414 | 1501020 | met proto-oncogene                                                                             | Met    | 24553  | 1,02 | down |
| 6580390 | 7182917 | 1332974 | metallothionein 1a                                                                             | Mt1a   | 24567  | 5,97 | down |
| 6510346 | 7182917 | 1332972 | metallothionein 1a                                                                             | Mt1a   | 24567  | 1,19 | up   |
| 6433979 | 7182917 | 1332971 | metallothionein 1a                                                                             | Mt1a   | 24567  | 1,10 | up   |
| 6254479 | 7182917 | 1332973 | metallothionein 1a                                                                             | Mt1a   | 24567  | 1,10 | up   |
| 6108822 | 7143867 | 1235736 | methionine adenosyltransferase I, alpha                                                        | Mat1a  | 25331  | 2,57 | down |
| 5692870 | 7143867 | 1235729 | methionine adenosyltransferase I, alpha                                                        | Mat1a  | 25331  | 1,38 | down |
| 6188657 | 7143867 | 1235731 | methionine adenosyltransferase I, alpha                                                        | Mat1a  | 25331  | 1,35 | down |
| 6719369 | 7143867 | 1235736 | methionine adenosyltransferase I, alpha                                                        | Mat1a  | 25331  | 1,29 | down |
| 5955206 | 7143867 | 1235735 | methionine adenosyltransferase I, alpha                                                        | Mat1a  | 25331  | 1,29 | up   |
| 5693203 | 7143867 | 1235735 | methionine adenosyltransferase I, alpha                                                        | Mat1a  | 25331  | 1,21 | up   |
| 6666788 | 7143867 | 1235730 | methionine adenosyltransferase I, alpha                                                        | Mat1a  | 25331  | 1,16 | up   |
| 6370235 | 7143867 | 1235732 | methionine adenosyltransferase I, alpha                                                        | Mat1a  | 25331  | 1,16 | down |
| 5984361 | 7143867 | 1235734 | methionine adenosyltransferase I, alpha                                                        | Mat1a  | 25331  | 1,08 | up   |
| 6151923 | 7143867 | 1235733 | methionine adenosyltransferase I, alpha                                                        | Mat1a  | 25331  | 1,03 | down |
| 6737932 | 7143867 | 1235736 | methionine adenosyltransferase I, alpha                                                        | Mat1a  | 25331  | 1,03 | up   |
| 6375963 | 7228656 | 1444225 | methionine aminopeptidase 1D                                                                   | Map1d  | 311748 | 2,36 | up   |
| 5733020 | 7228656 | 1444244 | methionine aminopeptidase 1D                                                                   | Map1d  | 311748 | 1,74 | up   |
| 6460675 | 7228656 | 1444251 | methionine aminopeptidase 1D                                                                   | Map1d  | 311748 | 1,60 | up   |
| 6517097 | 7228656 | 1444252 | methionine aminopeptidase 1D                                                                   | Map1d  | 311748 | 1,39 | down |
| 6219559 | 7228656 | 1444225 | methionine aminopeptidase 1D                                                                   | Map1d  | 311748 | 1,27 | up   |
| 6218279 | 7228656 | 1444245 | methionine aminopeptidase 1D                                                                   | Map1d  | 311748 | 1,15 | down |
| 5952630 | 7228656 | 1444254 | methionine aminopeptidase 1D                                                                   | Map1d  | 311748 | 1,14 | down |
| 6398489 | 7228656 | 1444247 | methionine aminopeptidase 1D                                                                   | Map1d  | 311748 | 1,09 | down |
| 5882865 | 7228656 | 1444253 | methionine aminopeptidase 1D                                                                   | Map1d  | 311748 | 1,08 | down |
| 6387600 | 7228656 | 1444242 | methionine aminopeptidase 1D                                                                   | Map1d  | 311748 | 1,05 | up   |
| 6076477 | 7228656 | 1444254 | methionine aminopeptidase 1D                                                                   | Map1d  | 311748 | 1,00 | down |
| 6146385 | 7228656 | 1444243 | methionine aminopeptidase 1D                                                                   | Map1d  | 311748 | 1,00 | up   |
| 5634551 | 7202917 | 1382490 | methylcrotonoyl-Coenzyme A carboxylase 2 (beta)                                                | Mccc2  | 361884 | 2,56 | up   |
| 6556138 | 7202917 | 1382488 | methylcrotonoyl-Coenzyme A carboxylase 2 (beta)                                                | Mccc2  | 361884 | 2,02 | up   |
| 6684114 | 7202917 | 1382493 | methylcrotonoyl-Coenzyme A carboxylase 2 (beta)                                                | Mccc2  | 361884 | 1,65 | down |
| 6259639 | 7202917 | 1382504 | methylcrotonoyl-Coenzyme A carboxylase 2 (beta)                                                | Mccc2  | 361884 | 1,43 | down |
| 5634010 | 7202917 | 1382498 | methylcrotonoyl-Coenzyme A carboxylase 2 (beta)                                                | Mccc2  | 361884 | 1,40 | down |
| 5882029 | 7202917 | 1382503 | methylcrotonoyl-Coenzyme A carboxylase 2 (beta)                                                | Mccc2  | 361884 | 1,35 | up   |
| 5899687 | 7202917 | 1382489 | methylcrotonoyl-Coenzyme A carboxylase 2 (beta)                                                | Mccc2  | 361884 | 1,30 | up   |
| 5981085 | 7202917 | 1382497 | methylcrotonoyl-Coenzyme A carboxylase 2 (beta)                                                | Mccc2  | 361884 | 1,24 | down |
| 6573750 | 7202917 | 1382502 | methylcrotonoyl-Coenzyme A carboxylase 2 (beta)                                                | Mccc2  | 361884 | 1,20 | down |
| 6569457 | 7202917 | 1382501 | methylcrotonoyl-Coenzyme A carboxylase 2 (beta)                                                | Mccc2  | 361884 | 1,19 | up   |
| 6742751 | 7202917 | 1382493 | methylcrotonoyl-Coenzyme A carboxylase 2 (beta)                                                | Mccc2  | 361884 | 1,15 | up   |
| 5983633 | 7202917 | 1382496 | methylcrotonoyl-Coenzyme A carboxylase 2 (beta)                                                | Mccc2  | 361884 | 1,14 | down |
| 6450162 | 7202917 | 1382504 | methylcrotonoyl-Coenzyme A carboxylase 2 (beta)                                                | Mccc2  | 361884 | 1,13 | up   |
| 6192964 | 7202917 | 1382494 | methylcrotonoyl-Coenzyme A carboxylase 2 (beta)                                                | Mccc2  | 361884 | 1,13 | up   |
| 6250638 | 7202917 | 1382500 | methylcrotonoyl-Coenzyme A carboxylase 2 (beta)                                                | Mccc2  | 361884 | 1,12 | down |
| 5884251 | 7202917 | 1382495 | methylcrotonoyl-Coenzyme A carboxylase 2 (beta)                                                | Mccc2  | 361884 | 1,11 | up   |
| 6018390 | 7202917 | 1382499 | methylcrotonoyl-Coenzyme A carboxylase 2 (beta)                                                | Mccc2  | 361884 | 1,10 | up   |
| 6190923 | 7202917 | 1382487 | methylcrotonoyl-Coenzyme A carboxylase 2 (beta)                                                | Mccc2  | 361884 | 1,07 | up   |
| 6634765 | 7202917 | 1382491 | methylcrotonoyl-Coenzyme A carboxylase 2 (beta)                                                | Mccc2  | 361884 | 1,04 | up   |
| 6289402 | 7202917 | 1382492 | methylcrotonoyl-Coenzyme A carboxylase 2 (beta)                                                | Mccc2  | 361884 | 1,03 | up   |
| 6333422 | 7299481 | 1620434 | methylenetetrahydrofolate dehydrogenase (NADP+ dependent) 1, methenyltetrahydrofolate cyclohyd | Mthfd1 | 64300  | 2,07 | down |
| 6549202 | 7299481 | 1620440 | methylenetetrahydrofolate dehydrogenase (NADP+ dependent) 1, methenyltetrahydrofolate cyclohyd | Mthfd1 | 64300  | 1,96 | up   |
| 6088471 | 7299481 | 1620457 | methylenetetrahydrofolate dehydrogenase (NADP+ dependent) 1, methenyltetrahydrofolate cyclohyd | Mthfd1 | 64300  | 1,82 | up   |
| 5942183 | 7299481 | 1620453 | methylenetetrahydrofolate dehydrogenase (NADP+ dependent) 1, methenyltetrahydrofolate cyclohyd | Mthfd1 | 64300  | 1,80 | up   |
| 6491103 | 7299481 | 1620439 | methylenetetrahydrofolate dehydrogenase (NADP+ dependent) 1, methenyltetrahydrofolate cyclohyd | Mthfd1 | 64300  | 1,50 | down |
| 5874617 | 7299481 | 1620433 | methylenetetrahydrofolate dehydrogenase (NADP+ dependent) 1, methenyltetrahydrofolate cyclohyd | Mthfd1 | 64300  | 1,50 | down |
| 6741361 | 7299481 | 1620435 | methylenetetrahydrofolate dehydrogenase (NADP+ dependent) 1, methenyltetrahydrofolate cyclohyd | Mthfd1 | 64300  | 1,44 | down |
| 6040027 | 7299481 | 1620441 | methylenetetrahydrofolate dehydrogenase (NADP+ dependent) 1, methenyltetrahydrofolate cyclohyd | Mthfd1 | 64300  | 1,40 | down |

|         |         |         |                                                                                                                                             |         |        |      |      |
|---------|---------|---------|---------------------------------------------------------------------------------------------------------------------------------------------|---------|--------|------|------|
| 5979545 | 7299481 | 1620458 | methylenetetrahydrofolate dehydrogenase (NADP+ dependent) 1, methenyltetrahydrofolate cyclohyd                                              | Mthfd1  | 64300  | 1,39 | down |
| 6697482 | 7299481 | 1620460 | methylenetetrahydrofolate dehydrogenase (NADP+ dependent) 1, methenyltetrahydrofolate cyclohyd                                              | Mthfd1  | 64300  | 1,38 | down |
| 6198243 | 7299481 | 1620450 | methylenetetrahydrofolate dehydrogenase (NADP+ dependent) 1, methenyltetrahydrofolate cyclohyd                                              | Mthfd1  | 64300  | 1,37 | down |
| 6517378 | 7299481 | 1620456 | methylenetetrahydrofolate dehydrogenase (NADP+ dependent) 1, methenyltetrahydrofolate cyclohyd                                              | Mthfd1  | 64300  | 1,36 | up   |
| 5736719 | 7299481 | 1620444 | methylenetetrahydrofolate dehydrogenase (NADP+ dependent) 1, methenyltetrahydrofolate cyclohyd                                              | Mthfd1  | 64300  | 1,36 | down |
| 6030492 | 7299481 | 1620448 | methylenetetrahydrofolate dehydrogenase (NADP+ dependent) 1, methenyltetrahydrofolate cyclohyd                                              | Mthfd1  | 64300  | 1,33 | up   |
| 6256326 | 7299481 | 1620454 | methylenetetrahydrofolate dehydrogenase (NADP+ dependent) 1, methenyltetrahydrofolate cyclohyd                                              | Mthfd1  | 64300  | 1,32 | down |
| 6661938 | 7299481 | 1620459 | methylenetetrahydrofolate dehydrogenase (NADP+ dependent) 1, methenyltetrahydrofolate cyclohyd                                              | Mthfd1  | 64300  | 1,32 | up   |
| 6641603 | 7299481 | 1620446 | methylenetetrahydrofolate dehydrogenase (NADP+ dependent) 1, methenyltetrahydrofolate cyclohyd                                              | Mthfd1  | 64300  | 1,27 | up   |
| 6696546 | 7299481 | 1620443 | methylenetetrahydrofolate dehydrogenase (NADP+ dependent) 1, methenyltetrahydrofolate cyclohyd                                              | Mthfd1  | 64300  | 1,20 | up   |
| 6013473 | 7299481 | 1620436 | methylenetetrahydrofolate dehydrogenase (NADP+ dependent) 1, methenyltetrahydrofolate cyclohyd                                              | Mthfd1  | 64300  | 1,16 | down |
| 6531673 | 7299481 | 1620447 | methylenetetrahydrofolate dehydrogenase (NADP+ dependent) 1, methenyltetrahydrofolate cyclohyd                                              | Mthfd1  | 64300  | 1,15 | up   |
| 6729463 | 7299481 | 1620445 | methylenetetrahydrofolate dehydrogenase (NADP+ dependent) 1, methenyltetrahydrofolate cyclohyd                                              | Mthfd1  | 64300  | 1,10 | down |
| 5843108 | 7299481 | 1620452 | methylenetetrahydrofolate dehydrogenase (NADP+ dependent) 1, methenyltetrahydrofolate cyclohyd                                              | Mthfd1  | 64300  | 1,10 | up   |
| 5710904 | 7299481 | 1620451 | methylenetetrahydrofolate dehydrogenase (NADP+ dependent) 1, methenyltetrahydrofolate cyclohyd                                              | Mthfd1  | 64300  | 1,09 | up   |
| 6572777 | 7299481 | 1620433 | methylenetetrahydrofolate dehydrogenase (NADP+ dependent) 1, methenyltetrahydrofolate cyclohyd                                              | Mthfd1  | 64300  | 1,09 | down |
| 5994076 | 7299481 | 1620442 | methylenetetrahydrofolate dehydrogenase (NADP+ dependent) 1, methenyltetrahydrofolate cyclohyd                                              | Mthfd1  | 64300  | 1,07 | up   |
| 6006228 | 7299481 | 1620438 | methylenetetrahydrofolate dehydrogenase (NADP+ dependent) 1, methenyltetrahydrofolate cyclohyd                                              | Mthfd1  | 64300  | 1,06 | up   |
| 5754108 | 7299481 | 1620437 | methylenetetrahydrofolate dehydrogenase (NADP+ dependent) 1, methenyltetrahydrofolate cyclohyd                                              | Mthfd1  | 64300  | 1,03 | down |
| 6527787 | 7299481 | 1620449 | methylenetetrahydrofolate dehydrogenase (NADP+ dependent) 1, methenyltetrahydrofolate cyclohyd                                              | Mthfd1  | 64300  | 1,01 | up   |
| 6285440 | 7299481 | 1620455 | methylenetetrahydrofolate dehydrogenase (NADP+ dependent) 1, methenyltetrahydrofolate cyclohyd                                              | Mthfd1  | 64300  | 1,01 | up   |
| 6549930 | 7180243 | 1325513 | methylmalonic aciduria (cobalamin deficiency) cblA type                                                                                     | Mmaa    | 291939 | 1,99 | down |
| 5734197 | 7180243 | 1325503 | methylmalonic aciduria (cobalamin deficiency) cblA type                                                                                     | Mmaa    | 291939 | 1,91 | up   |
| 5753349 | 7180243 | 1325514 | methylmalonic aciduria (cobalamin deficiency) cblA type                                                                                     | Mmaa    | 291939 | 1,49 | up   |
| 6411786 | 7180243 | 1325513 | methylmalonic aciduria (cobalamin deficiency) cblA type                                                                                     | Mmaa    | 291939 | 1,26 | up   |
| 6072887 | 7180243 | 1325513 | methylmalonic aciduria (cobalamin deficiency) cblA type                                                                                     | Mmaa    | 291939 | 1,11 | up   |
| 6355657 | 7180243 | 1325506 | methylmalonic aciduria (cobalamin deficiency) cblA type                                                                                     | Mmaa    | 291939 | 1,09 | up   |
| 5661170 | 7180243 | 1325514 | methylmalonic aciduria (cobalamin deficiency) cblA type                                                                                     | Mmaa    | 291939 | 1,07 | down |
| 6094451 | 7180243 | 1325503 | methylmalonic aciduria (cobalamin deficiency) cblA type                                                                                     | Mmaa    | 291939 | 1,06 | up   |
| 6288199 | 7180243 | 1325510 | methylmalonic aciduria (cobalamin deficiency) cblA type                                                                                     | Mmaa    | 291939 | 1,04 | down |
| 6315817 | 7180243 | 1325511 | methylmalonic aciduria (cobalamin deficiency) cblA type                                                                                     | Mmaa    | 291939 | 1,04 | down |
| 6092102 | 7180243 | 1325513 | methylmalonic aciduria (cobalamin deficiency) cblA type                                                                                     | Mmaa    | 291939 | 1,02 | up   |
| 5820442 | 7226099 | 1437318 | methyltransferase like 11A                                                                                                                  | Mettl1a | 362103 | 2,16 | down |
| 6200177 | 7226099 | 1437317 | methyltransferase like 11A                                                                                                                  | Mettl1a | 362103 | 1,86 | up   |
| 6111108 | 7226099 | 1437316 | methyltransferase like 11A                                                                                                                  | Mettl1a | 362103 | 1,48 | up   |
| 6376456 | 7226099 | 1437315 | methyltransferase like 11A                                                                                                                  | Mettl1a | 362103 | 1,39 | down |
| 6221032 | 7226099 | 1437314 | methyltransferase like 11A                                                                                                                  | Mettl1a | 362103 | 1,32 | down |
| 5730463 | 7226099 | 1437315 | methyltransferase like 11A                                                                                                                  | Mettl1a | 362103 | 1,17 | down |
| 6596416 | 7226099 | 1437314 | methyltransferase like 11A                                                                                                                  | Mettl1a | 362103 | 1,14 | up   |
| 6353573 | 7072748 | 1062585 | methyltransferase like 2                                                                                                                    | Mettl2  | 363687 | 2,29 | down |
| 6634958 | 7072748 | 1062592 | methyltransferase like 2                                                                                                                    | Mettl2  | 363687 | 1,45 | up   |
| 6509193 | 7072748 | 1062585 | methyltransferase like 2                                                                                                                    | Mettl2  | 363687 | 1,39 | down |
| 5724969 | 7072748 | 1062588 | methyltransferase like 2                                                                                                                    | Mettl2  | 363687 | 1,37 | down |
| 5874514 | 7072748 | 1062593 | methyltransferase like 2                                                                                                                    | Mettl2  | 363687 | 1,35 | up   |
| 6214590 | 7072748 | 1062589 | methyltransferase like 2                                                                                                                    | Mettl2  | 363687 | 1,34 | up   |
| 6134278 | 7072748 | 1062586 | methyltransferase like 2                                                                                                                    | Mettl2  | 363687 | 1,30 | down |
| 6232727 | 7072748 | 1062593 | methyltransferase like 2                                                                                                                    | Mettl2  | 363687 | 1,29 | down |
| 5655078 | 7072748 | 1062593 | methyltransferase like 2                                                                                                                    | Mettl2  | 363687 | 1,17 | up   |
| 5918179 | 7072748 | 1062591 | methyltransferase like 2                                                                                                                    | Mettl2  | 363687 | 1,17 | down |
| 5921831 | 7072748 | 1062590 | methyltransferase like 2                                                                                                                    | Mettl2  | 363687 | 1,10 | up   |
| 6450258 | 7072748 | 1062587 | methyltransferase like 2                                                                                                                    | Mettl2  | 363687 | 1,09 | up   |
| 6073732 | 7216994 | 1415204 | MHC class I RT1.Aa alpha-chain /// RT1 class I, A3 /// RT1 class Ib, locus Aw2 /// RT1 class Ia, locu /// RT1-Aw2 /// R'09627 /// 24737 /// |         |        | 1,05 | down |
| 6068621 | 7216994 | 1415204 | MHC class I RT1.Aa alpha-chain /// RT1 class I, A3 /// RT1 class Ib, locus Aw2 /// RT1 class Ia, locu /// RT1-Aw2 /// R'09627 /// 24737 /// |         |        | 1,03 | down |
| 5858952 | 7153136 | 1258016 | microcephalin 1                                                                                                                             | Mcph1   | 306594 | 1,23 | down |
| 6260408 | 7179756 | 1324356 | microtubule associated serine/threonine kinase 1                                                                                            | MAST1   | 353118 | 2,10 | down |
| 6188231 | 7179756 | 1324373 | microtubule associated serine/threonine kinase 1                                                                                            | MAST1   | 353118 | 1,96 | down |
| 5843898 | 7179756 | 1324361 | microtubule associated serine/threonine kinase 1                                                                                            | MAST1   | 353118 | 1,82 | up   |

|         |         |         |                                                  |       |        |      |      |
|---------|---------|---------|--------------------------------------------------|-------|--------|------|------|
| 6055356 | 7179756 | 1324372 | microtubule associated serine/threonine kinase 1 | MAST1 | 353118 | 1,68 | down |
| 5668014 | 7179756 | 1324359 | microtubule associated serine/threonine kinase 1 | MAST1 | 353118 | 1,62 | up   |
| 6489628 | 7179756 | 1324357 | microtubule associated serine/threonine kinase 1 | MAST1 | 353118 | 1,56 | up   |
| 5965253 | 7179756 | 1324366 | microtubule associated serine/threonine kinase 1 | MAST1 | 353118 | 1,55 | down |
| 5843522 | 7179756 | 1324365 | microtubule associated serine/threonine kinase 1 | MAST1 | 353118 | 1,51 | down |
| 6572872 | 7179756 | 1324378 | microtubule associated serine/threonine kinase 1 | MAST1 | 353118 | 1,49 | down |
| 6609990 | 7179756 | 1324358 | microtubule associated serine/threonine kinase 1 | MAST1 | 353118 | 1,45 | down |
| 5700249 | 7179756 | 1324362 | microtubule associated serine/threonine kinase 1 | MAST1 | 353118 | 1,45 | down |
| 6652540 | 7179756 | 1324373 | microtubule associated serine/threonine kinase 1 | MAST1 | 353118 | 1,43 | up   |
| 6615196 | 7179756 | 1324377 | microtubule associated serine/threonine kinase 1 | MAST1 | 353118 | 1,43 | down |
| 6098540 | 7179756 | 1324353 | microtubule associated serine/threonine kinase 1 | MAST1 | 353118 | 1,40 | down |
| 5701508 | 7179756 | 1324363 | microtubule associated serine/threonine kinase 1 | MAST1 | 353118 | 1,36 | down |
| 6673512 | 7179756 | 1324355 | microtubule associated serine/threonine kinase 1 | MAST1 | 353118 | 1,35 | down |
| 5953205 | 7179756 | 1324354 | microtubule associated serine/threonine kinase 1 | MAST1 | 353118 | 1,25 | down |
| 5789284 | 7179756 | 1324352 | microtubule associated serine/threonine kinase 1 | MAST1 | 353118 | 1,23 | up   |
| 5960411 | 7179756 | 1324371 | microtubule associated serine/threonine kinase 1 | MAST1 | 353118 | 1,21 | up   |
| 5893962 | 7179756 | 1324364 | microtubule associated serine/threonine kinase 1 | MAST1 | 353118 | 1,21 | up   |
| 6379046 | 7179756 | 1324367 | microtubule associated serine/threonine kinase 1 | MAST1 | 353118 | 1,20 | up   |
| 5648405 | 7179756 | 1324370 | microtubule associated serine/threonine kinase 1 | MAST1 | 353118 | 1,19 | up   |
| 6629455 | 7179756 | 1324378 | microtubule associated serine/threonine kinase 1 | MAST1 | 353118 | 1,14 | up   |
| 6669566 | 7179756 | 1324374 | microtubule associated serine/threonine kinase 1 | MAST1 | 353118 | 1,14 | up   |
| 5944135 | 7179756 | 1324378 | microtubule associated serine/threonine kinase 1 | MAST1 | 353118 | 1,06 | up   |
| 5970990 | 7179756 | 1324375 | microtubule associated serine/threonine kinase 1 | MAST1 | 353118 | 1,05 | down |
| 5715603 | 7179756 | 1324369 | microtubule associated serine/threonine kinase 1 | MAST1 | 353118 | 1,05 | down |
| 5843237 | 7179756 | 1324368 | microtubule associated serine/threonine kinase 1 | MAST1 | 353118 | 1,02 | up   |
| 5763123 | 7179756 | 1324360 | microtubule associated serine/threonine kinase 1 | MAST1 | 353118 | 1,01 | up   |
| 6573409 | 7355552 | 1758778 | microtubule-associated protein 2                 | Map2  | 25595  | 3,43 | up   |
| 6085930 | 7355552 | 1758769 | microtubule-associated protein 2                 | Map2  | 25595  | 2,56 | up   |
| 6732301 | 7355552 | 1758771 | microtubule-associated protein 2                 | Map2  | 25595  | 2,07 | up   |
| 5786355 | 7355552 | 1758770 | microtubule-associated protein 2                 | Map2  | 25595  | 1,73 | up   |
| 6050102 | 7355552 | 1758774 | microtubule-associated protein 2                 | Map2  | 25595  | 1,57 | down |
| 5720857 | 7355552 | 1758776 | microtubule-associated protein 2                 | Map2  | 25595  | 1,54 | down |
| 6167937 | 7355552 | 1758779 | microtubule-associated protein 2                 | Map2  | 25595  | 1,42 | down |
| 5732759 | 7355552 | 1758771 | microtubule-associated protein 2                 | Map2  | 25595  | 1,32 | up   |
| 5853125 | 7355552 | 1758778 | microtubule-associated protein 2                 | Map2  | 25595  | 1,24 | down |
| 5624204 | 7355552 | 1758774 | microtubule-associated protein 2                 | Map2  | 25595  | 1,20 | down |
| 6324804 | 7355552 | 1758781 | microtubule-associated protein 2                 | Map2  | 25595  | 1,19 | down |
| 6235843 | 7355552 | 1758773 | microtubule-associated protein 2                 | Map2  | 25595  | 1,16 | down |
| 6445063 | 7355552 | 1758783 | microtubule-associated protein 2                 | Map2  | 25595  | 1,14 | up   |
| 6102156 | 7355552 | 1758777 | microtubule-associated protein 2                 | Map2  | 25595  | 1,08 | down |
| 5720084 | 7355552 | 1758775 | microtubule-associated protein 2                 | Map2  | 25595  | 1,08 | down |
| 5775358 | 7355552 | 1758782 | microtubule-associated protein 2                 | Map2  | 25595  | 1,06 | down |
| 6625718 | 7355552 | 1758780 | microtubule-associated protein 2                 | Map2  | 25595  | 1,04 | up   |
| 6546989 | 7355552 | 1758772 | microtubule-associated protein 2                 | Map2  | 25595  | 1,03 | down |
| 6209380 | 7355552 | 1758783 | microtubule-associated protein 2                 | Map2  | 25595  | 1,01 | down |
| 6054564 | 7072614 | 1062317 | microtubule-associated protein tau               | Mapt  | 29477  | 2,52 | down |
| 5649076 | 7072614 | 1062326 | microtubule-associated protein tau               | Mapt  | 29477  | 2,25 | up   |
| 6270440 | 7072614 | 1062315 | microtubule-associated protein tau               | Mapt  | 29477  | 1,78 | down |
| 6031211 | 7072614 | 1062320 | microtubule-associated protein tau               | Mapt  | 29477  | 1,48 | up   |
| 6195183 | 7072614 | 1062320 | microtubule-associated protein tau               | Mapt  | 29477  | 1,44 | down |
| 6045706 | 7072614 | 1062322 | microtubule-associated protein tau               | Mapt  | 29477  | 1,43 | up   |
| 6066316 | 7072614 | 1062318 | microtubule-associated protein tau               | Mapt  | 29477  | 1,29 | up   |
| 5662762 | 7072614 | 1062325 | microtubule-associated protein tau               | Mapt  | 29477  | 1,25 | up   |
| 6645191 | 7072614 | 1062319 | microtubule-associated protein tau               | Mapt  | 29477  | 1,24 | down |
| 5942606 | 7072614 | 1062316 | microtubule-associated protein tau               | Mapt  | 29477  | 1,19 | up   |
| 6226692 | 7072614 | 1062328 | microtubule-associated protein tau               | Mapt  | 29477  | 1,17 | up   |
| 6472865 | 7072614 | 1062329 | microtubule-associated protein tau               | Mapt  | 29477  | 1,12 | down |

|         |         |         |                                                 |       |        |      |      |
|---------|---------|---------|-------------------------------------------------|-------|--------|------|------|
| 5910727 | 7072614 | 1062324 | microtubule-associated protein tau              | Mapt  | 29477  | 1,05 | up   |
| 6244899 | 7072614 | 1062321 | microtubule-associated protein tau              | Mapt  | 29477  | 1,04 | up   |
| 6558641 | 7072614 | 1062327 | microtubule-associated protein tau              | Mapt  | 29477  | 1,03 | down |
| 6467631 | 7072614 | 1062323 | microtubule-associated protein tau              | Mapt  | 29477  | 1,03 | down |
| 6058023 | 7072614 | 1062320 | microtubule-associated protein tau              | Mapt  | 29477  | 1,02 | down |
| 6741657 | 7167823 | 1293863 | mindbomb homolog 1 (Drosophila)                 | Mib1  | 307594 | 1,95 | up   |
| 5934944 | 7167823 | 1293892 | mindbomb homolog 1 (Drosophila)                 | Mib1  | 307594 | 1,62 | up   |
| 6049932 | 7167823 | 1293890 | mindbomb homolog 1 (Drosophila)                 | Mib1  | 307594 | 1,34 | up   |
| 5757604 | 7167823 | 1293875 | mindbomb homolog 1 (Drosophila)                 | Mib1  | 307594 | 1,32 | down |
| 6606959 | 7167823 | 1293891 | mindbomb homolog 1 (Drosophila)                 | Mib1  | 307594 | 1,30 | up   |
| 5937411 | 7167823 | 1293863 | mindbomb homolog 1 (Drosophila)                 | Mib1  | 307594 | 1,25 | down |
| 6549353 | 7167823 | 1293877 | mindbomb homolog 1 (Drosophila)                 | Mib1  | 307594 | 1,19 | down |
| 6102899 | 7167823 | 1293867 | mindbomb homolog 1 (Drosophila)                 | Mib1  | 307594 | 1,18 | up   |
| 6223192 | 7167823 | 1293873 | mindbomb homolog 1 (Drosophila)                 | Mib1  | 307594 | 1,17 | down |
| 6638582 | 7167823 | 1293879 | mindbomb homolog 1 (Drosophila)                 | Mib1  | 307594 | 1,13 | down |
| 5759164 | 7167823 | 1293868 | mindbomb homolog 1 (Drosophila)                 | Mib1  | 307594 | 1,11 | down |
| 5948002 | 7167823 | 1293888 | mindbomb homolog 1 (Drosophila)                 | Mib1  | 307594 | 1,11 | down |
| 5725625 | 7167823 | 1293885 | mindbomb homolog 1 (Drosophila)                 | Mib1  | 307594 | 1,10 | down |
| 6374644 | 7167823 | 1293869 | mindbomb homolog 1 (Drosophila)                 | Mib1  | 307594 | 1,09 | up   |
| 5848616 | 7167823 | 1293889 | mindbomb homolog 1 (Drosophila)                 | Mib1  | 307594 | 1,08 | up   |
| 6724620 | 7167823 | 1293871 | mindbomb homolog 1 (Drosophila)                 | Mib1  | 307594 | 1,07 | down |
| 5639410 | 7167823 | 1293872 | mindbomb homolog 1 (Drosophila)                 | Mib1  | 307594 | 1,06 | up   |
| 6265415 | 7167823 | 1293876 | mindbomb homolog 1 (Drosophila)                 | Mib1  | 307594 | 1,06 | up   |
| 5632153 | 7167823 | 1293894 | mindbomb homolog 1 (Drosophila)                 | Mib1  | 307594 | 1,05 | up   |
| 5816914 | 7167823 | 1293883 | mindbomb homolog 1 (Drosophila)                 | Mib1  | 307594 | 1,03 | down |
| 6301405 | 7167823 | 1293877 | mindbomb homolog 1 (Drosophila)                 | Mib1  | 307594 | 1,03 | up   |
| 5896783 | 7167823 | 1293882 | mindbomb homolog 1 (Drosophila)                 | Mib1  | 307594 | 1,03 | up   |
| 5710130 | 7167823 | 1293888 | mindbomb homolog 1 (Drosophila)                 | Mib1  | 307594 | 1,02 | down |
| 6302957 | 7167823 | 1293885 | mindbomb homolog 1 (Drosophila)                 | Mib1  | 307594 | 1,01 | up   |
| 6045540 | 7167823 | 1293874 | mindbomb homolog 1 (Drosophila)                 | Mib1  | 307594 | 1,00 | down |
| 6342492 | 7160053 | 1275380 | minichromosome maintenance complex component 10 | Mcm10 | 307126 | 2,43 | down |
| 6541620 | 7160053 | 1275391 | minichromosome maintenance complex component 10 | Mcm10 | 307126 | 1,62 | down |
| 5923720 | 7160053 | 1275389 | minichromosome maintenance complex component 10 | Mcm10 | 307126 | 1,57 | up   |
| 5768760 | 7160053 | 1275396 | minichromosome maintenance complex component 10 | Mcm10 | 307126 | 1,53 | down |
| 6639109 | 7160053 | 1275398 | minichromosome maintenance complex component 10 | Mcm10 | 307126 | 1,42 | up   |
| 6595489 | 7160053 | 1275378 | minichromosome maintenance complex component 10 | Mcm10 | 307126 | 1,31 | down |
| 6658972 | 7160053 | 1275383 | minichromosome maintenance complex component 10 | Mcm10 | 307126 | 1,29 | up   |
| 6386602 | 7160053 | 1275386 | minichromosome maintenance complex component 10 | Mcm10 | 307126 | 1,22 | down |
| 6473226 | 7160053 | 1275381 | minichromosome maintenance complex component 10 | Mcm10 | 307126 | 1,19 | up   |
| 6745249 | 7160053 | 1275400 | minichromosome maintenance complex component 10 | Mcm10 | 307126 | 1,17 | down |
| 6228999 | 7160053 | 1275381 | minichromosome maintenance complex component 10 | Mcm10 | 307126 | 1,15 | down |
| 6548781 | 7160053 | 1275397 | minichromosome maintenance complex component 10 | Mcm10 | 307126 | 1,13 | up   |
| 6135151 | 7160053 | 1275395 | minichromosome maintenance complex component 10 | Mcm10 | 307126 | 1,09 | up   |
| 5642336 | 7160053 | 1275392 | minichromosome maintenance complex component 10 | Mcm10 | 307126 | 1,08 | down |
| 5879035 | 7160053 | 1275392 | minichromosome maintenance complex component 10 | Mcm10 | 307126 | 1,07 | down |
| 5804441 | 7160053 | 1275390 | minichromosome maintenance complex component 10 | Mcm10 | 307126 | 1,07 | up   |
| 6236758 | 7160053 | 1275393 | minichromosome maintenance complex component 10 | Mcm10 | 307126 | 1,05 | up   |
| 5704933 | 7160053 | 1275381 | minichromosome maintenance complex component 10 | Mcm10 | 307126 | 1,05 | up   |
| 6215403 | 7160053 | 1275384 | minichromosome maintenance complex component 10 | Mcm10 | 307126 | 1,05 | up   |
| 6036614 | 7160053 | 1275385 | minichromosome maintenance complex component 10 | Mcm10 | 307126 | 1,02 | down |
| 6686719 | 7160053 | 1275394 | minichromosome maintenance complex component 10 | Mcm10 | 307126 | 1,02 | down |
| 6002980 | 7160053 | 1275379 | minichromosome maintenance complex component 10 | Mcm10 | 307126 | 1,01 | up   |
| 5679862 | 7160053 | 1275399 | minichromosome maintenance complex component 10 | Mcm10 | 307126 | 1,01 | down |
| 5719226 | 7210713 | 1400748 | misato homolog 1 (Drosophila)                   | Msto1 | 295237 | 2,00 | down |
| 5944287 | 7210713 | 1400758 | misato homolog 1 (Drosophila)                   | Msto1 | 295237 | 2,00 | down |
| 6405129 | 7210713 | 1400753 | misato homolog 1 (Drosophila)                   | Msto1 | 295237 | 1,77 | up   |
| 5901916 | 7210713 | 1400757 | misato homolog 1 (Drosophila)                   | Msto1 | 295237 | 1,71 | up   |

|         |         |         |                                                                 |         |        |      |      |
|---------|---------|---------|-----------------------------------------------------------------|---------|--------|------|------|
| 6434333 | 7210713 | 1400754 | misato homolog 1 (Drosophila)                                   | Msto1   | 295237 | 1,57 | up   |
| 6722361 | 7210713 | 1400758 | misato homolog 1 (Drosophila)                                   | Msto1   | 295237 | 1,54 | up   |
| 5953729 | 7210713 | 1400747 | misato homolog 1 (Drosophila)                                   | Msto1   | 295237 | 1,43 | up   |
| 5737711 | 7210713 | 1400750 | misato homolog 1 (Drosophila)                                   | Msto1   | 295237 | 1,38 | up   |
| 6254835 | 7210713 | 1400753 | misato homolog 1 (Drosophila)                                   | Msto1   | 295237 | 1,26 | up   |
| 6579254 | 7210713 | 1400755 | misato homolog 1 (Drosophila)                                   | Msto1   | 295237 | 1,24 | down |
| 6619931 | 7210713 | 1400747 | misato homolog 1 (Drosophila)                                   | Msto1   | 295237 | 1,10 | down |
| 5915695 | 7210713 | 1400749 | misato homolog 1 (Drosophila)                                   | Msto1   | 295237 | 1,08 | up   |
| 6743938 | 7210713 | 1400751 | misato homolog 1 (Drosophila)                                   | Msto1   | 295237 | 1,06 | up   |
| 5731912 | 7210713 | 1400756 | misato homolog 1 (Drosophila)                                   | Msto1   | 295237 | 1,05 | down |
| 6460335 | 7210713 | 1400754 | misato homolog 1 (Drosophila)                                   | Msto1   | 295237 | 1,04 | down |
| 6422226 | 7210713 | 1400753 | misato homolog 1 (Drosophila)                                   | Msto1   | 295237 | 1,01 | up   |
| 6064021 | 7361254 | 1772683 | MIT, microtubule interacting and transport, domain containing 1 | Mitd1   | 363219 | 2,22 | down |
| 6300861 | 7361254 | 1772682 | MIT, microtubule interacting and transport, domain containing 1 | Mitd1   | 363219 | 2,20 | down |
| 5699463 | 7361254 | 1772685 | MIT, microtubule interacting and transport, domain containing 1 | Mitd1   | 363219 | 1,54 | up   |
| 6051730 | 7361254 | 1772684 | MIT, microtubule interacting and transport, domain containing 1 | Mitd1   | 363219 | 1,51 | up   |
| 6444475 | 7361254 | 1772686 | MIT, microtubule interacting and transport, domain containing 1 | Mitd1   | 363219 | 1,44 | down |
| 5766422 | 7361254 | 1772680 | MIT, microtubule interacting and transport, domain containing 1 | Mitd1   | 363219 | 1,39 | up   |
| 5643041 | 7361254 | 1772679 | MIT, microtubule interacting and transport, domain containing 1 | Mitd1   | 363219 | 1,37 | down |
| 5917467 | 7361254 | 1772681 | MIT, microtubule interacting and transport, domain containing 1 | Mitd1   | 363219 | 1,21 | up   |
| 6134501 | 7361254 | 1772683 | MIT, microtubule interacting and transport, domain containing 1 | Mitd1   | 363219 | 1,21 | up   |
| 6509746 | 7361254 | 1772680 | MIT, microtubule interacting and transport, domain containing 1 | Mitd1   | 363219 | 1,06 | down |
| 6739774 | 7221256 | 1425886 | mitochondrial carrier homolog 1 (C. elegans)                    | Mtch1   | 294313 | 1,60 | down |
| 6510655 | 7221256 | 1425886 | mitochondrial carrier homolog 1 (C. elegans)                    | Mtch1   | 294313 | 1,53 | up   |
| 5696450 | 7221256 | 1425874 | mitochondrial carrier homolog 1 (C. elegans)                    | Mtch1   | 294313 | 1,30 | down |
| 6287369 | 7221256 | 1425876 | mitochondrial carrier homolog 1 (C. elegans)                    | Mtch1   | 294313 | 1,26 | down |
| 6711379 | 7221256 | 1425877 | mitochondrial carrier homolog 1 (C. elegans)                    | Mtch1   | 294313 | 1,24 | down |
| 6262014 | 7221256 | 1425875 | mitochondrial carrier homolog 1 (C. elegans)                    | Mtch1   | 294313 | 1,18 | up   |
| 6535461 | 7221256 | 1425873 | mitochondrial carrier homolog 1 (C. elegans)                    | Mtch1   | 294313 | 1,17 | down |
| 6196782 | 7221256 | 1425877 | mitochondrial carrier homolog 1 (C. elegans)                    | Mtch1   | 294313 | 1,11 | up   |
| 6607422 | 7221256 | 1425884 | mitochondrial carrier homolog 1 (C. elegans)                    | Mtch1   | 294313 | 1,09 | down |
| 6434301 | 7221256 | 1425879 | mitochondrial carrier homolog 1 (C. elegans)                    | Mtch1   | 294313 | 1,09 | up   |
| 6372140 | 7221256 | 1425873 | mitochondrial carrier homolog 1 (C. elegans)                    | Mtch1   | 294313 | 1,09 | down |
| 5768571 | 7221256 | 1425883 | mitochondrial carrier homolog 1 (C. elegans)                    | Mtch1   | 294313 | 1,08 | up   |
| 6349285 | 7221256 | 1425874 | mitochondrial carrier homolog 1 (C. elegans)                    | Mtch1   | 294313 | 1,06 | down |
| 5652392 | 7221256 | 1425881 | mitochondrial carrier homolog 1 (C. elegans)                    | Mtch1   | 294313 | 1,06 | up   |
| 6037438 | 7221256 | 1425882 | mitochondrial carrier homolog 1 (C. elegans)                    | Mtch1   | 294313 | 1,03 | down |
| 5943880 | 7221256 | 1425878 | mitochondrial carrier homolog 1 (C. elegans)                    | Mtch1   | 294313 | 1,02 | up   |
| 6077078 | 7084557 | 1089844 | mitochondrial ribosomal protein L38                             | Mrpl38  | 303685 | 2,03 | down |
| 6400317 | 7084557 | 1089844 | mitochondrial ribosomal protein L38                             | Mrpl38  | 303685 | 1,60 | down |
| 6554353 | 7084557 | 1089839 | mitochondrial ribosomal protein L38                             | Mrpl38  | 303685 | 1,45 | up   |
| 6218410 | 7084557 | 1089843 | mitochondrial ribosomal protein L38                             | Mrpl38  | 303685 | 1,35 | down |
| 6430733 | 7084557 | 1089840 | mitochondrial ribosomal protein L38                             | Mrpl38  | 303685 | 1,26 | up   |
| 5635682 | 7084557 | 1089838 | mitochondrial ribosomal protein L38                             | Mrpl38  | 303685 | 1,18 | down |
| 6265995 | 7084557 | 1089841 | mitochondrial ribosomal protein L38                             | Mrpl38  | 303685 | 1,14 | up   |
| 6373585 | 7084557 | 1089837 | mitochondrial ribosomal protein L38                             | Mrpl38  | 303685 | 1,11 | up   |
| 6463441 | 7084557 | 1089836 | mitochondrial ribosomal protein L38                             | Mrpl38  | 303685 | 1,09 | up   |
| 6366316 | 7084557 | 1089839 | mitochondrial ribosomal protein L38                             | Mrpl38  | 303685 | 1,06 | down |
| 6157671 | 7084557 | 1089842 | mitochondrial ribosomal protein L38                             | Mrpl38  | 303685 | 1,04 | up   |
| 6188207 | 7324071 | 1681448 | mitochondrial ribosomal protein L42                             | Mrpl42  | 299743 | 1,78 | down |
| 5757011 | 7324071 | 1681444 | mitochondrial ribosomal protein L42                             | Mrpl42  | 299743 | 1,70 | down |
| 5969500 | 7324071 | 1681447 | mitochondrial ribosomal protein L42                             | Mrpl42  | 299743 | 1,48 | up   |
| 5880318 | 7324071 | 1681447 | mitochondrial ribosomal protein L42                             | Mrpl42  | 299743 | 1,24 | up   |
| 6277039 | 7324071 | 1681446 | mitochondrial ribosomal protein L42                             | Mrpl42  | 299743 | 1,23 | down |
| 5619873 | 7324071 | 1681445 | mitochondrial ribosomal protein L42                             | Mrpl42  | 299743 | 1,17 | up   |
| 6335535 | 7324071 | 1681443 | mitochondrial ribosomal protein L42                             | Mrpl42  | 299743 | 1,13 | down |
| 6527481 | 7359683 | 1768871 | mitochondrial ribosomal protein S18A                            | Mrps18a | 301249 | 2,15 | up   |

|         |         |         |                                      |         |        |      |      |
|---------|---------|---------|--------------------------------------|---------|--------|------|------|
| 6090627 | 7359683 | 1768870 | mitochondrial ribosomal protein S18A | Mrps18a | 301249 | 1,25 | up   |
| 5971400 | 7359683 | 1768874 | mitochondrial ribosomal protein S18A | Mrps18a | 301249 | 1,25 | down |
| 6670974 | 7359683 | 1768873 | mitochondrial ribosomal protein S18A | Mrps18a | 301249 | 1,16 | up   |
| 6123929 | 7359683 | 1768871 | mitochondrial ribosomal protein S18A | Mrps18a | 301249 | 1,14 | up   |
| 5678769 | 7359683 | 1768869 | mitochondrial ribosomal protein S18A | Mrps18a | 301249 | 1,13 | down |
| 6102224 | 7359683 | 1768872 | mitochondrial ribosomal protein S18A | Mrps18a | 301249 | 1,01 | down |
| 6001573 | 7267344 | 1540264 | mitochondrial ribosomal protein S25  | Mrps25  | 297459 | 2,09 | down |
| 5845489 | 7267344 | 1540264 | mitochondrial ribosomal protein S25  | Mrps25  | 297459 | 1,51 | up   |
| 6658342 | 7267344 | 1540266 | mitochondrial ribosomal protein S25  | Mrps25  | 297459 | 1,11 | down |
| 6236975 | 7267344 | 1540267 | mitochondrial ribosomal protein S25  | Mrps25  | 297459 | 1,08 | down |
| 5793353 | 7267344 | 1540268 | mitochondrial ribosomal protein S25  | Mrps25  | 297459 | 1,04 | up   |
| 5878816 | 7267344 | 1540265 | mitochondrial ribosomal protein S25  | Mrps25  | 297459 | 1,01 | down |
| 6481158 | 7188829 | 1346657 | mitochondrial ribosomal protein S27  | Mrps27  | 361883 | 2,16 | down |
| 6117824 | 7188829 | 1346652 | mitochondrial ribosomal protein S27  | Mrps27  | 361883 | 1,59 | up   |
| 5643422 | 7188829 | 1346650 | mitochondrial ribosomal protein S27  | Mrps27  | 361883 | 1,42 | down |
| 6060035 | 7188829 | 1346653 | mitochondrial ribosomal protein S27  | Mrps27  | 361883 | 1,41 | up   |
| 6133239 | 7188829 | 1346651 | mitochondrial ribosomal protein S27  | Mrps27  | 361883 | 1,30 | up   |
| 6326259 | 7152974 | 1257663 | mitochondrial ribosomal protein S31  | Mrps31  | 290850 | 2,24 | down |
| 5780709 | 7152974 | 1257662 | mitochondrial ribosomal protein S31  | Mrps31  | 290850 | 1,55 | down |
| 6379275 | 7152974 | 1257654 | mitochondrial ribosomal protein S31  | Mrps31  | 290850 | 1,45 | down |
| 6004728 | 7152974 | 1257662 | mitochondrial ribosomal protein S31  | Mrps31  | 290850 | 1,37 | up   |
| 5810637 | 7152974 | 1257662 | mitochondrial ribosomal protein S31  | Mrps31  | 290850 | 1,19 | down |
| 6179267 | 7152974 | 1257663 | mitochondrial ribosomal protein S31  | Mrps31  | 290850 | 1,17 | up   |
| 6072365 | 7152974 | 1257660 | mitochondrial ribosomal protein S31  | Mrps31  | 290850 | 1,16 | up   |
| 6069465 | 7152974 | 1257655 | mitochondrial ribosomal protein S31  | Mrps31  | 290850 | 1,08 | up   |
| 6740482 | 7152974 | 1257659 | mitochondrial ribosomal protein S31  | Mrps31  | 290850 | 1,06 | up   |
| 5730932 | 7152974 | 1257655 | mitochondrial ribosomal protein S31  | Mrps31  | 290850 | 1,05 | down |
| 6255341 | 7152974 | 1257663 | mitochondrial ribosomal protein S31  | Mrps31  | 290850 | 1,03 | up   |
| 6405239 | 7152974 | 1257661 | mitochondrial ribosomal protein S31  | Mrps31  | 290850 | 1,02 | down |
| 5915680 | 7152974 | 1257656 | mitochondrial ribosomal protein S31  | Mrps31  | 290850 | 1,00 | up   |
| 6272463 | 7353997 | 1754692 | mitochondrial ribosomal protein S9   | Mrps9   | 301371 | 2,16 | down |
| 6651820 | 7353997 | 1754703 | mitochondrial ribosomal protein S9   | Mrps9   | 301371 | 1,62 | up   |
| 6589014 | 7353997 | 1754696 | mitochondrial ribosomal protein S9   | Mrps9   | 301371 | 1,26 | up   |
| 5681732 | 7353997 | 1754700 | mitochondrial ribosomal protein S9   | Mrps9   | 301371 | 1,26 | down |
| 5809725 | 7353997 | 1754709 | mitochondrial ribosomal protein S9   | Mrps9   | 301371 | 1,19 | down |
| 5662193 | 7353997 | 1754709 | mitochondrial ribosomal protein S9   | Mrps9   | 301371 | 1,17 | down |
| 6422476 | 7353997 | 1754703 | mitochondrial ribosomal protein S9   | Mrps9   | 301371 | 1,17 | up   |
| 6448976 | 7353997 | 1754684 | mitochondrial ribosomal protein S9   | Mrps9   | 301371 | 1,17 | down |
| 6614600 | 7353997 | 1754686 | mitochondrial ribosomal protein S9   | Mrps9   | 301371 | 1,14 | down |
| 6540972 | 7353997 | 1754699 | mitochondrial ribosomal protein S9   | Mrps9   | 301371 | 1,12 | up   |
| 5631043 | 7353997 | 1754710 | mitochondrial ribosomal protein S9   | Mrps9   | 301371 | 1,11 | up   |
| 6288530 | 7353997 | 1754691 | mitochondrial ribosomal protein S9   | Mrps9   | 301371 | 1,08 | down |
| 5783905 | 7353997 | 1754711 | mitochondrial ribosomal protein S9   | Mrps9   | 301371 | 1,06 | up   |
| 6670724 | 7192885 | 1357724 | mitofusin 1                          | Mfn1    | 192647 | 2,31 | down |
| 5673124 | 7192885 | 1357712 | mitofusin 1                          | Mfn1    | 192647 | 1,53 | up   |
| 6719130 | 7192885 | 1357717 | mitofusin 1                          | Mfn1    | 192647 | 1,35 | down |
| 6383614 | 7192885 | 1357714 | mitofusin 1                          | Mfn1    | 192647 | 1,29 | up   |
| 5975785 | 7192885 | 1357711 | mitofusin 1                          | Mfn1    | 192647 | 1,27 | up   |
| 6219390 | 7192885 | 1357718 | mitofusin 1                          | Mfn1    | 192647 | 1,19 | down |
| 6050085 | 7192885 | 1357712 | mitofusin 1                          | Mfn1    | 192647 | 1,14 | up   |
| 6488604 | 7192885 | 1357716 | mitofusin 1                          | Mfn1    | 192647 | 1,13 | down |
| 5984383 | 7192885 | 1357721 | mitofusin 1                          | Mfn1    | 192647 | 1,13 | down |
| 6518045 | 7192885 | 1357723 | mitofusin 1                          | Mfn1    | 192647 | 1,12 | up   |
| 6227351 | 7192885 | 1357722 | mitofusin 1                          | Mfn1    | 192647 | 1,11 | down |
| 6670994 | 7192885 | 1357715 | mitofusin 1                          | Mfn1    | 192647 | 1,11 | up   |
| 5879845 | 7192885 | 1357713 | mitofusin 1                          | Mfn1    | 192647 | 1,05 | up   |
| 5888827 | 7192885 | 1357719 | mitofusin 1                          | Mfn1    | 192647 | 1,03 | down |



|         |         |         |                                                    |         |        |      |      |
|---------|---------|---------|----------------------------------------------------|---------|--------|------|------|
| 6169275 | 7192885 | 1357720 | mitofusin 1                                        | Mfn1    | 192647 | 1,02 | up   |
| 6556630 | 7116263 | 1167990 | mitogen activated protein kinase 10                | Mapk10  | 25272  | 2,03 | up   |
| 5988101 | 7116263 | 1167994 | mitogen activated protein kinase 10                | Mapk10  | 25272  | 1,82 | up   |
| 5859926 | 7116263 | 1167992 | mitogen activated protein kinase 10                | Mapk10  | 25272  | 1,65 | down |
| 6054120 | 7116263 | 1167989 | mitogen activated protein kinase 10                | Mapk10  | 25272  | 1,52 | up   |
| 6072167 | 7116263 | 1167997 | mitogen activated protein kinase 10                | Mapk10  | 25272  | 1,36 | up   |
| 5905270 | 7116263 | 1167987 | mitogen activated protein kinase 10                | Mapk10  | 25272  | 1,33 | down |
| 6017655 | 7116263 | 1167993 | mitogen activated protein kinase 10                | Mapk10  | 25272  | 1,29 | down |
| 6248339 | 7116263 | 1167989 | mitogen activated protein kinase 10                | Mapk10  | 25272  | 1,25 | up   |
| 5968097 | 7116263 | 1167995 | mitogen activated protein kinase 10                | Mapk10  | 25272  | 1,18 | up   |
| 5941829 | 7116263 | 1167988 | mitogen activated protein kinase 10                | Mapk10  | 25272  | 1,15 | down |
| 5880773 | 7116263 | 1167991 | mitogen activated protein kinase 10                | Mapk10  | 25272  | 1,14 | down |
| 6225405 | 7116263 | 1167996 | mitogen activated protein kinase 10                | Mapk10  | 25272  | 1,11 | down |
| 6523636 | 7116263 | 1167988 | mitogen activated protein kinase 10                | Mapk10  | 25272  | 1,09 | up   |
| 6356667 | 7116263 | 1167995 | mitogen activated protein kinase 10                | Mapk10  | 25272  | 1,09 | down |
| 6432561 | 7116263 | 1167987 | mitogen activated protein kinase 10                | Mapk10  | 25272  | 1,08 | up   |
| 6113212 | 7116263 | 1167994 | mitogen activated protein kinase 10                | Mapk10  | 25272  | 1,05 | down |
| 5837850 | 7116263 | 1167998 | mitogen activated protein kinase 10                | Mapk10  | 25272  | 1,02 | down |
| 6364208 | 7116263 | 1167999 | mitogen activated protein kinase 10                | Mapk10  | 25272  | 1,01 | down |
| 5760106 | 7116263 | 1167990 | mitogen activated protein kinase 10                | Mapk10  | 25272  | 1,00 | down |
| 5685883 | 7217257 | 1415847 | mitogen activated protein kinase 13                | Mapk13  | 29513  | 2,12 | down |
| 5887577 | 7217257 | 1415839 | mitogen activated protein kinase 13                | Mapk13  | 29513  | 1,40 | down |
| 6082507 | 7217257 | 1415846 | mitogen activated protein kinase 13                | Mapk13  | 29513  | 1,39 | up   |
| 6114834 | 7217257 | 1415845 | mitogen activated protein kinase 13                | Mapk13  | 29513  | 1,34 | down |
| 6182622 | 7217257 | 1415837 | mitogen activated protein kinase 13                | Mapk13  | 29513  | 1,27 | down |
| 6429546 | 7217257 | 1415841 | mitogen activated protein kinase 13                | Mapk13  | 29513  | 1,21 | up   |
| 6262721 | 7217257 | 1415835 | mitogen activated protein kinase 13                | Mapk13  | 29513  | 1,17 | up   |
| 5887654 | 7217257 | 1415842 | mitogen activated protein kinase 13                | Mapk13  | 29513  | 1,15 | up   |
| 5728064 | 7217257 | 1415840 | mitogen activated protein kinase 13                | Mapk13  | 29513  | 1,13 | up   |
| 5640407 | 7217257 | 1415838 | mitogen activated protein kinase 13                | Mapk13  | 29513  | 1,09 | down |
| 5734561 | 7217257 | 1415836 | mitogen activated protein kinase 13                | Mapk13  | 29513  | 1,09 | down |
| 6478441 | 7217257 | 1415844 | mitogen activated protein kinase 13                | Mapk13  | 29513  | 1,07 | up   |
| 6367829 | 7217257 | 1415843 | mitogen activated protein kinase 13                | Mapk13  | 29513  | 1,02 | down |
| 6485439 | 7231653 | 1451899 | mitogen activated protein kinase binding protein 1 | Mapkbp1 | 362197 | 1,89 | up   |
| 6062713 | 7231653 | 1451895 | mitogen activated protein kinase binding protein 1 | Mapkbp1 | 362197 | 1,82 | down |
| 5895398 | 7231653 | 1451879 | mitogen activated protein kinase binding protein 1 | Mapkbp1 | 362197 | 1,78 | down |
| 6493901 | 7231653 | 1451894 | mitogen activated protein kinase binding protein 1 | Mapkbp1 | 362197 | 1,62 | down |
| 5886061 | 7231653 | 1451877 | mitogen activated protein kinase binding protein 1 | Mapkbp1 | 362197 | 1,46 | up   |
| 6416869 | 7231653 | 1451884 | mitogen activated protein kinase binding protein 1 | Mapkbp1 | 362197 | 1,43 | down |
| 6011350 | 7231653 | 1451898 | mitogen activated protein kinase binding protein 1 | Mapkbp1 | 362197 | 1,42 | down |
| 6178145 | 7231653 | 1451871 | mitogen activated protein kinase binding protein 1 | Mapkbp1 | 362197 | 1,40 | down |
| 6404489 | 7231653 | 1451899 | mitogen activated protein kinase binding protein 1 | Mapkbp1 | 362197 | 1,37 | up   |
| 6089218 | 7231653 | 1451901 | mitogen activated protein kinase binding protein 1 | Mapkbp1 | 362197 | 1,36 | up   |
| 6712046 | 7231653 | 1451875 | mitogen activated protein kinase binding protein 1 | Mapkbp1 | 362197 | 1,34 | up   |
| 6217595 | 7231653 | 1451879 | mitogen activated protein kinase binding protein 1 | Mapkbp1 | 362197 | 1,33 | up   |
| 6161673 | 7231653 | 1451878 | mitogen activated protein kinase binding protein 1 | Mapkbp1 | 362197 | 1,30 | up   |
| 5814748 | 7231653 | 1451885 | mitogen activated protein kinase binding protein 1 | Mapkbp1 | 362197 | 1,29 | down |
| 6690687 | 7231653 | 1451890 | mitogen activated protein kinase binding protein 1 | Mapkbp1 | 362197 | 1,29 | down |
| 5633951 | 7231653 | 1451880 | mitogen activated protein kinase binding protein 1 | Mapkbp1 | 362197 | 1,28 | down |
| 6736896 | 7231653 | 1451882 | mitogen activated protein kinase binding protein 1 | Mapkbp1 | 362197 | 1,24 | down |
| 6343525 | 7231653 | 1451876 | mitogen activated protein kinase binding protein 1 | Mapkbp1 | 362197 | 1,22 | up   |
| 5961058 | 7231653 | 1451892 | mitogen activated protein kinase binding protein 1 | Mapkbp1 | 362197 | 1,21 | down |
| 5855687 | 7231653 | 1451866 | mitogen activated protein kinase binding protein 1 | Mapkbp1 | 362197 | 1,19 | down |
| 6558372 | 7231653 | 1451886 | mitogen activated protein kinase binding protein 1 | Mapkbp1 | 362197 | 1,17 | up   |
| 5792963 | 7231653 | 1451900 | mitogen activated protein kinase binding protein 1 | Mapkbp1 | 362197 | 1,16 | up   |
| 6612139 | 7231653 | 1451874 | mitogen activated protein kinase binding protein 1 | Mapkbp1 | 362197 | 1,15 | down |
| 5738054 | 7231653 | 1451887 | mitogen activated protein kinase binding protein 1 | Mapkbp1 | 362197 | 1,13 | up   |

|         |         |         |                                                    |         |        |      |      |
|---------|---------|---------|----------------------------------------------------|---------|--------|------|------|
| 5629442 | 7231653 | 1451880 | mitogen activated protein kinase binding protein 1 | Mapkbp1 | 362197 | 1,12 | up   |
| 5815722 | 7231653 | 1451866 | mitogen activated protein kinase binding protein 1 | Mapkbp1 | 362197 | 1,11 | up   |
| 5987416 | 7231653 | 1451893 | mitogen activated protein kinase binding protein 1 | Mapkbp1 | 362197 | 1,11 | down |
| 6730682 | 7231653 | 1451897 | mitogen activated protein kinase binding protein 1 | Mapkbp1 | 362197 | 1,11 | up   |
| 6116321 | 7231653 | 1451877 | mitogen activated protein kinase binding protein 1 | Mapkbp1 | 362197 | 1,11 | down |
| 5817824 | 7231653 | 1451896 | mitogen activated protein kinase binding protein 1 | Mapkbp1 | 362197 | 1,05 | down |
| 5652700 | 7231653 | 1451888 | mitogen activated protein kinase binding protein 1 | Mapkbp1 | 362197 | 1,04 | up   |
| 6093952 | 7231653 | 1451881 | mitogen activated protein kinase binding protein 1 | Mapkbp1 | 362197 | 1,02 | down |
| 6040091 | 7231653 | 1451894 | mitogen activated protein kinase binding protein 1 | Mapkbp1 | 362197 | 1,02 | down |
| 5904778 | 7231653 | 1451890 | mitogen activated protein kinase binding protein 1 | Mapkbp1 | 362197 | 1,02 | up   |
| 6085113 | 7231653 | 1451883 | mitogen activated protein kinase binding protein 1 | Mapkbp1 | 362197 | 1,01 | down |
| 5689362 | 7049184 | 1007929 | mitogen activated protein kinase kinase kinase 10  | Map3k10 | 308463 | 2,66 | up   |
| 6225263 | 7049184 | 1007937 | mitogen activated protein kinase kinase kinase 10  | Map3k10 | 308463 | 1,10 | down |
| 5710025 | 7049184 | 1007928 | mitogen activated protein kinase kinase kinase 10  | Map3k10 | 308463 | 1,10 | down |
| 6103605 | 7049184 | 1007937 | mitogen activated protein kinase kinase kinase 10  | Map3k10 | 308463 | 1,07 | up   |
| 6417338 | 7049184 | 1007929 | mitogen activated protein kinase kinase kinase 10  | Map3k10 | 308463 | 1,04 | down |
| 6156227 | 7318156 | 1668148 | mitogen-activated protein kinase 15                | Mapk15  | 286997 | 2,61 | down |
| 5958811 | 7318156 | 1668143 | mitogen-activated protein kinase 15                | Mapk15  | 286997 | 2,52 | down |
| 6596927 | 7318156 | 1668141 | mitogen-activated protein kinase 15                | Mapk15  | 286997 | 2,06 | down |
| 5876215 | 7318156 | 1668136 | mitogen-activated protein kinase 15                | Mapk15  | 286997 | 1,89 | up   |
| 6524044 | 7318156 | 1668145 | mitogen-activated protein kinase 15                | Mapk15  | 286997 | 1,79 | up   |
| 5886262 | 7318156 | 1668139 | mitogen-activated protein kinase 15                | Mapk15  | 286997 | 1,38 | up   |
| 6674302 | 7318156 | 1668140 | mitogen-activated protein kinase 15                | Mapk15  | 286997 | 1,30 | up   |
| 5991908 | 7318156 | 1668138 | mitogen-activated protein kinase 15                | Mapk15  | 286997 | 1,27 | down |
| 5997028 | 7318156 | 1668142 | mitogen-activated protein kinase 15                | Mapk15  | 286997 | 1,22 | down |
| 6692378 | 7318156 | 1668144 | mitogen-activated protein kinase 15                | Mapk15  | 286997 | 1,20 | down |
| 6247343 | 7318156 | 1668134 | mitogen-activated protein kinase 15                | Mapk15  | 286997 | 1,19 | up   |
| 5691706 | 7318156 | 1668147 | mitogen-activated protein kinase 15                | Mapk15  | 286997 | 1,19 | up   |
| 6743816 | 7318156 | 1668146 | mitogen-activated protein kinase 15                | Mapk15  | 286997 | 1,13 | down |
| 6078067 | 7318156 | 1668142 | mitogen-activated protein kinase 15                | Mapk15  | 286997 | 1,10 | up   |
| 6591732 | 7318156 | 1668135 | mitogen-activated protein kinase 15                | Mapk15  | 286997 | 1,07 | up   |
| 5743842 | 7318156 | 1668137 | mitogen-activated protein kinase 15                | Mapk15  | 286997 | 1,04 | up   |
| 6144228 | 7318156 | 1668147 | mitogen-activated protein kinase 15                | Mapk15  | 286997 | 1,00 | down |
| 6089309 | 7177180 | 1317770 | mitogen-activated protein kinase 4                 | Mapk4   | 54268  | 1,80 | up   |
| 5834292 | 7177180 | 1317778 | mitogen-activated protein kinase 4                 | Mapk4   | 54268  | 1,10 | down |
| 5847014 | 7177180 | 1317769 | mitogen-activated protein kinase 4                 | Mapk4   | 54268  | 1,06 | down |
| 5967457 | 7149008 | 1248601 | mitogen-activated protein kinase 8                 | Mapk8   | 116554 | 2,17 | up   |
| 5697710 | 7149008 | 1248608 | mitogen-activated protein kinase 8                 | Mapk8   | 116554 | 1,40 | up   |
| 6235230 | 7149008 | 1248602 | mitogen-activated protein kinase 8                 | Mapk8   | 116554 | 1,33 | down |
| 6355612 | 7149008 | 1248596 | mitogen-activated protein kinase 8                 | Mapk8   | 116554 | 1,29 | up   |
| 5861845 | 7149008 | 1248598 | mitogen-activated protein kinase 8                 | Mapk8   | 116554 | 1,28 | up   |
| 5735680 | 7149008 | 1248616 | mitogen-activated protein kinase 8                 | Mapk8   | 116554 | 1,25 | down |
| 6004975 | 7149008 | 1248595 | mitogen-activated protein kinase 8                 | Mapk8   | 116554 | 1,21 | up   |
| 5995482 | 7149008 | 1248598 | mitogen-activated protein kinase 8                 | Mapk8   | 116554 | 1,21 | up   |
| 5697557 | 7149008 | 1248595 | mitogen-activated protein kinase 8                 | Mapk8   | 116554 | 1,13 | down |
| 6388266 | 7149008 | 1248599 | mitogen-activated protein kinase 8                 | Mapk8   | 116554 | 1,13 | up   |
| 6243867 | 7149008 | 1248607 | mitogen-activated protein kinase 8                 | Mapk8   | 116554 | 1,12 | down |
| 5673932 | 7149008 | 1248599 | mitogen-activated protein kinase 8                 | Mapk8   | 116554 | 1,08 | up   |
| 6688725 | 7149008 | 1248603 | mitogen-activated protein kinase 8                 | Mapk8   | 116554 | 1,06 | up   |
| 6372791 | 7149008 | 1248608 | mitogen-activated protein kinase 8                 | Mapk8   | 116554 | 1,06 | up   |
| 6447486 | 7149008 | 1248604 | mitogen-activated protein kinase 8                 | Mapk8   | 116554 | 1,04 | down |
| 6161971 | 7158619 | 1271804 | mitogen-activated protein kinase kinase kinase 8   | Map3k8  | 116596 | 2,20 | up   |
| 6702543 | 7158619 | 1271801 | mitogen-activated protein kinase kinase kinase 8   | Map3k8  | 116596 | 1,77 | up   |
| 5725311 | 7158619 | 1271799 | mitogen-activated protein kinase kinase kinase 8   | Map3k8  | 116596 | 1,39 | up   |
| 6145327 | 7158619 | 1271797 | mitogen-activated protein kinase kinase kinase 8   | Map3k8  | 116596 | 1,29 | down |
| 6115991 | 7158619 | 1271797 | mitogen-activated protein kinase kinase kinase 8   | Map3k8  | 116596 | 1,28 | down |
| 6362978 | 7158619 | 1271800 | mitogen-activated protein kinase kinase kinase 8   | Map3k8  | 116596 | 1,19 | up   |

|         |         |         |                                                             |          |        |      |      |
|---------|---------|---------|-------------------------------------------------------------|----------|--------|------|------|
| 5960425 | 7158619 | 1271798 | mitogen-activated protein kinase kinase kinase 8            | Map3k8   | 116596 | 1,12 | up   |
| 6389084 | 7158619 | 1271802 | mitogen-activated protein kinase kinase kinase 8            | Map3k8   | 116596 | 1,10 | up   |
| 5924617 | 7158619 | 1271803 | mitogen-activated protein kinase kinase kinase 8            | Map3k8   | 116596 | 1,05 | down |
| 6421956 | 7158619 | 1271805 | mitogen-activated protein kinase kinase kinase 8            | Map3k8   | 116596 | 1,03 | up   |
| 5649888 | 7302860 | 1629026 | mitogen-activated protein kinase kinase kinase kinase 3     | Map4k3   | 170920 | 1,93 | down |
| 5734957 | 7302860 | 1629040 | mitogen-activated protein kinase kinase kinase kinase 3     | Map4k3   | 170920 | 1,84 | down |
| 6272695 | 7302860 | 1629024 | mitogen-activated protein kinase kinase kinase kinase 3     | Map4k3   | 170920 | 1,63 | down |
| 5865415 | 7302860 | 1629054 | mitogen-activated protein kinase kinase kinase kinase 3     | Map4k3   | 170920 | 1,46 | down |
| 6081826 | 7302860 | 1629055 | mitogen-activated protein kinase kinase kinase kinase 3     | Map4k3   | 170920 | 1,43 | down |
| 6101950 | 7302860 | 1629028 | mitogen-activated protein kinase kinase kinase kinase 3     | Map4k3   | 170920 | 1,36 | up   |
| 5716672 | 7302860 | 1629039 | mitogen-activated protein kinase kinase kinase kinase 3     | Map4k3   | 170920 | 1,34 | up   |
| 6128416 | 7302860 | 1629021 | mitogen-activated protein kinase kinase kinase kinase 3     | Map4k3   | 170920 | 1,34 | down |
| 6414198 | 7302860 | 1629048 | mitogen-activated protein kinase kinase kinase kinase 3     | Map4k3   | 170920 | 1,32 | down |
| 6522906 | 7302860 | 1629006 | mitogen-activated protein kinase kinase kinase kinase 3     | Map4k3   | 170920 | 1,31 | down |
| 5682187 | 7302860 | 1629005 | mitogen-activated protein kinase kinase kinase kinase 3     | Map4k3   | 170920 | 1,30 | up   |
| 5717587 | 7302860 | 1629041 | mitogen-activated protein kinase kinase kinase kinase 3     | Map4k3   | 170920 | 1,30 | down |
| 6722791 | 7302860 | 1629045 | mitogen-activated protein kinase kinase kinase kinase 3     | Map4k3   | 170920 | 1,27 | down |
| 5804192 | 7302860 | 1629063 | mitogen-activated protein kinase kinase kinase kinase 3     | Map4k3   | 170920 | 1,26 | up   |
| 5853306 | 7302860 | 1629013 | mitogen-activated protein kinase kinase kinase kinase 3     | Map4k3   | 170920 | 1,25 | up   |
| 6320168 | 7302860 | 1629015 | mitogen-activated protein kinase kinase kinase kinase 3     | Map4k3   | 170920 | 1,24 | up   |
| 5882976 | 7302860 | 1629017 | mitogen-activated protein kinase kinase kinase kinase 3     | Map4k3   | 170920 | 1,18 | up   |
| 5766048 | 7302860 | 1629024 | mitogen-activated protein kinase kinase kinase kinase 3     | Map4k3   | 170920 | 1,16 | down |
| 5644153 | 7302860 | 1629016 | mitogen-activated protein kinase kinase kinase kinase 3     | Map4k3   | 170920 | 1,16 | up   |
| 5960128 | 7302860 | 1629038 | mitogen-activated protein kinase kinase kinase kinase 3     | Map4k3   | 170920 | 1,15 | down |
| 5918194 | 7302860 | 1629010 | mitogen-activated protein kinase kinase kinase kinase 3     | Map4k3   | 170920 | 1,14 | up   |
| 6180439 | 7302860 | 1629035 | mitogen-activated protein kinase kinase kinase kinase 3     | Map4k3   | 170920 | 1,12 | down |
| 6302826 | 7302860 | 1629047 | mitogen-activated protein kinase kinase kinase kinase 3     | Map4k3   | 170920 | 1,11 | up   |
| 5708957 | 7302860 | 1629034 | mitogen-activated protein kinase kinase kinase kinase 3     | Map4k3   | 170920 | 1,11 | down |
| 5688701 | 7302860 | 1629019 | mitogen-activated protein kinase kinase kinase kinase 3     | Map4k3   | 170920 | 1,11 | up   |
| 5957199 | 7302860 | 1629039 | mitogen-activated protein kinase kinase kinase kinase 3     | Map4k3   | 170920 | 1,11 | down |
| 6741805 | 7302860 | 1629022 | mitogen-activated protein kinase kinase kinase kinase 3     | Map4k3   | 170920 | 1,10 | down |
| 6171158 | 7302860 | 1629012 | mitogen-activated protein kinase kinase kinase kinase 3     | Map4k3   | 170920 | 1,09 | up   |
| 5718484 | 7302860 | 1629011 | mitogen-activated protein kinase kinase kinase kinase 3     | Map4k3   | 170920 | 1,07 | up   |
| 5868316 | 7302860 | 1629043 | mitogen-activated protein kinase kinase kinase kinase 3     | Map4k3   | 170920 | 1,07 | down |
| 6270324 | 7302860 | 1629030 | mitogen-activated protein kinase kinase kinase kinase 3     | Map4k3   | 170920 | 1,07 | down |
| 6072165 | 7302860 | 1629018 | mitogen-activated protein kinase kinase kinase kinase 3     | Map4k3   | 170920 | 1,04 | up   |
| 5726095 | 7302860 | 1629046 | mitogen-activated protein kinase kinase kinase kinase 3     | Map4k3   | 170920 | 1,02 | down |
| 6034703 | 7302860 | 1629023 | mitogen-activated protein kinase kinase kinase kinase 3     | Map4k3   | 170920 | 1,01 | up   |
| 6005071 | 7302860 | 1629027 | mitogen-activated protein kinase kinase kinase kinase 3     | Map4k3   | 170920 | 1,00 | up   |
| 5978986 | 7307473 | 1641303 | mitogen-activated protein kinase kinase kinase kinase 5     | Map4k5   | 503027 | 4,29 | down |
| 6603486 | 7307473 | 1641255 | mitogen-activated protein kinase kinase kinase kinase 5     | Map4k5   | 503027 | 1,21 | up   |
| 6585982 | 7307473 | 1641303 | mitogen-activated protein kinase kinase kinase kinase 5     | Map4k5   | 503027 | 1,12 | up   |
| 6031643 | 7307473 | 1641303 | mitogen-activated protein kinase kinase kinase kinase 5     | Map4k5   | 503027 | 1,00 | down |
| 6225335 | 7349824 | 1744685 | mitogen-activated protein kinase-activated protein kinase 3 | Mapkapk3 | 315994 | 2,31 | down |
| 5645309 | 7349824 | 1744690 | mitogen-activated protein kinase-activated protein kinase 3 | Mapkapk3 | 315994 | 1,66 | up   |
| 6455659 | 7349824 | 1744689 | mitogen-activated protein kinase-activated protein kinase 3 | Mapkapk3 | 315994 | 1,57 | down |
| 6271753 | 7349824 | 1744688 | mitogen-activated protein kinase-activated protein kinase 3 | Mapkapk3 | 315994 | 1,55 | up   |
| 5670819 | 7349824 | 1744690 | mitogen-activated protein kinase-activated protein kinase 3 | Mapkapk3 | 315994 | 1,50 | down |
| 5981603 | 7349824 | 1744683 | mitogen-activated protein kinase-activated protein kinase 3 | Mapkapk3 | 315994 | 1,48 | down |
| 5814427 | 7349824 | 1744687 | mitogen-activated protein kinase-activated protein kinase 3 | Mapkapk3 | 315994 | 1,48 | up   |
| 6093397 | 7349824 | 1744681 | mitogen-activated protein kinase-activated protein kinase 3 | Mapkapk3 | 315994 | 1,40 | up   |
| 5961790 | 7349824 | 1744684 | mitogen-activated protein kinase-activated protein kinase 3 | Mapkapk3 | 315994 | 1,29 | up   |
| 5925818 | 7349824 | 1744689 | mitogen-activated protein kinase-activated protein kinase 3 | Mapkapk3 | 315994 | 1,21 | up   |
| 6635601 | 7349824 | 1744680 | mitogen-activated protein kinase-activated protein kinase 3 | Mapkapk3 | 315994 | 1,18 | up   |
| 6622713 | 7349824 | 1744682 | mitogen-activated protein kinase-activated protein kinase 3 | Mapkapk3 | 315994 | 1,13 | up   |
| 5932878 | 7349824 | 1744686 | mitogen-activated protein kinase-activated protein kinase 3 | Mapkapk3 | 315994 | 1,08 | down |
| 5888355 | 7349824 | 1744683 | mitogen-activated protein kinase-activated protein kinase 3 | Mapkapk3 | 315994 | 1,06 | up   |

|         |         |         |                                                             |            |        |      |      |
|---------|---------|---------|-------------------------------------------------------------|------------|--------|------|------|
| 5867857 | 7349824 | 1744691 | mitogen-activated protein kinase-activated protein kinase 3 | Mapkapk3   | 315994 | 1,03 | up   |
| 5830661 | 7349824 | 1744679 | mitogen-activated protein kinase-activated protein kinase 3 | Mapkapk3   | 315994 | 1,02 | down |
| 6510710 | 7349824 | 1744679 | mitogen-activated protein kinase-activated protein kinase 3 | Mapkapk3   | 315994 | 1,02 | down |
| 6490545 | 7117751 | 1171573 | MMR_HSR1 domain containing protein RGD1359460               | RGD1359460 | 289562 | 2,60 | up   |
| 6174860 | 7117751 | 1171573 | MMR_HSR1 domain containing protein RGD1359460               | RGD1359460 | 289562 | 1,40 | down |
| 6011139 | 7117751 | 1171573 | MMR_HSR1 domain containing protein RGD1359460               | RGD1359460 | 289562 | 1,39 | down |
| 6643199 | 7117751 | 1171578 | MMR_HSR1 domain containing protein RGD1359460               | RGD1359460 | 289562 | 1,35 | down |
| 5680647 | 7117751 | 1171576 | MMR_HSR1 domain containing protein RGD1359460               | RGD1359460 | 289562 | 1,21 | up   |
| 6596160 | 7117751 | 1171575 | MMR_HSR1 domain containing protein RGD1359460               | RGD1359460 | 289562 | 1,16 | up   |
| 5656470 | 7117751 | 1171578 | MMR_HSR1 domain containing protein RGD1359460               | RGD1359460 | 289562 | 1,13 | up   |
| 5886872 | 7117751 | 1171573 | MMR_HSR1 domain containing protein RGD1359460               | RGD1359460 | 289562 | 1,06 | down |
| 6274237 | 7117751 | 1171574 | MMR_HSR1 domain containing protein RGD1359460               | RGD1359460 | 289562 | 1,06 | down |
| 6180542 | 7117751 | 1171577 | MMR_HSR1 domain containing protein RGD1359460               | RGD1359460 | 289562 | 1,01 | down |
| 6223501 | 7284934 | 1584916 | MOB1, Mps One Binder kinase activator-like 2B (yeast)       | Mobk12b    | 366352 | 2,08 | down |
| 5954642 | 7284934 | 1584888 | MOB1, Mps One Binder kinase activator-like 2B (yeast)       | Mobk12b    | 366352 | 1,90 | up   |
| 6422887 | 7284934 | 1584902 | MOB1, Mps One Binder kinase activator-like 2B (yeast)       | Mobk12b    | 366352 | 1,48 | up   |
| 6564814 | 7284934 | 1584885 | MOB1, Mps One Binder kinase activator-like 2B (yeast)       | Mobk12b    | 366352 | 1,47 | up   |
| 5668744 | 7284934 | 1584915 | MOB1, Mps One Binder kinase activator-like 2B (yeast)       | Mobk12b    | 366352 | 1,45 | up   |
| 6287458 | 7284934 | 1584886 | MOB1, Mps One Binder kinase activator-like 2B (yeast)       | Mobk12b    | 366352 | 1,25 | up   |
| 6022478 | 7284934 | 1584887 | MOB1, Mps One Binder kinase activator-like 2B (yeast)       | Mobk12b    | 366352 | 1,16 | down |
| 5821527 | 7284934 | 1584915 | MOB1, Mps One Binder kinase activator-like 2B (yeast)       | Mobk12b    | 366352 | 1,06 | up   |
| 5661957 | 7284934 | 1584887 | MOB1, Mps One Binder kinase activator-like 2B (yeast)       | Mobk12b    | 366352 | 1,00 | down |
| 6001813 | 7165644 | 1288009 | mohawk homeobox                                             | Mkx        | 291228 | 1,47 | down |
| 5678020 | 7168519 | 1295873 | molybdenum cofactor sulfurase                               | Mocos      | 361300 | 2,13 | up   |
| 6713244 | 7168519 | 1295881 | molybdenum cofactor sulfurase                               | Mocos      | 361300 | 1,53 | down |
| 6417891 | 7168519 | 1295874 | molybdenum cofactor sulfurase                               | Mocos      | 361300 | 1,48 | up   |
| 6411246 | 7168519 | 1295869 | molybdenum cofactor sulfurase                               | Mocos      | 361300 | 1,46 | up   |
| 6452526 | 7168519 | 1295864 | molybdenum cofactor sulfurase                               | Mocos      | 361300 | 1,36 | down |
| 6190661 | 7168519 | 1295868 | molybdenum cofactor sulfurase                               | Mocos      | 361300 | 1,34 | down |
| 5708671 | 7168519 | 1295872 | molybdenum cofactor sulfurase                               | Mocos      | 361300 | 1,34 | down |
| 5943951 | 7168519 | 1295870 | molybdenum cofactor sulfurase                               | Mocos      | 361300 | 1,33 | up   |
| 5953429 | 7168519 | 1295874 | molybdenum cofactor sulfurase                               | Mocos      | 361300 | 1,32 | up   |
| 5878552 | 7168519 | 1295871 | molybdenum cofactor sulfurase                               | Mocos      | 361300 | 1,32 | up   |
| 6225481 | 7168519 | 1295864 | molybdenum cofactor sulfurase                               | Mocos      | 361300 | 1,29 | up   |
| 5828870 | 7168519 | 1295876 | molybdenum cofactor sulfurase                               | Mocos      | 361300 | 1,28 | down |
| 6695886 | 7168519 | 1295879 | molybdenum cofactor sulfurase                               | Mocos      | 361300 | 1,18 | up   |
| 6322790 | 7168519 | 1295867 | molybdenum cofactor sulfurase                               | Mocos      | 361300 | 1,17 | down |
| 6037005 | 7168519 | 1295874 | molybdenum cofactor sulfurase                               | Mocos      | 361300 | 1,15 | up   |
| 5961367 | 7168519 | 1295885 | molybdenum cofactor sulfurase                               | Mocos      | 361300 | 1,12 | down |
| 6453341 | 7168519 | 1295877 | molybdenum cofactor sulfurase                               | Mocos      | 361300 | 1,11 | up   |
| 6294641 | 7168519 | 1295866 | molybdenum cofactor sulfurase                               | Mocos      | 361300 | 1,09 | down |
| 6605663 | 7168519 | 1295884 | molybdenum cofactor sulfurase                               | Mocos      | 361300 | 1,09 | down |
| 6210258 | 7168519 | 1295883 | molybdenum cofactor sulfurase                               | Mocos      | 361300 | 1,09 | down |
| 6381101 | 7168519 | 1295884 | molybdenum cofactor sulfurase                               | Mocos      | 361300 | 1,07 | down |
| 5777987 | 7168519 | 1295864 | molybdenum cofactor sulfurase                               | Mocos      | 361300 | 1,02 | up   |
| 5811089 | 7168519 | 1295875 | molybdenum cofactor sulfurase                               | Mocos      | 361300 | 1,01 | down |
| 5895228 | 7181193 | 1328290 | MON1 homolog b (yeast)                                      | Mon1b      | 307868 | 1,42 | down |
| 5927400 | 7181193 | 1328292 | MON1 homolog b (yeast)                                      | Mon1b      | 307868 | 1,36 | down |
| 5871430 | 7181193 | 1328292 | MON1 homolog b (yeast)                                      | Mon1b      | 307868 | 1,31 | down |
| 5624981 | 7181193 | 1328292 | MON1 homolog b (yeast)                                      | Mon1b      | 307868 | 1,23 | down |
| 6093705 | 7181193 | 1328288 | MON1 homolog b (yeast)                                      | Mon1b      | 307868 | 1,19 | up   |
| 6697530 | 7181193 | 1328291 | MON1 homolog b (yeast)                                      | Mon1b      | 307868 | 1,12 | down |
| 6416432 | 7181193 | 1328292 | MON1 homolog b (yeast)                                      | Mon1b      | 307868 | 1,12 | up   |
| 5817231 | 7181193 | 1328288 | MON1 homolog b (yeast)                                      | Mon1b      | 307868 | 1,07 | up   |
| 6050793 | 7373289 | 1804803 | monoamine oxidase B                                         | Maob       | 25750  | 3,17 | up   |
| 6177830 | 7373289 | 1804792 | monoamine oxidase B                                         | Maob       | 25750  | 2,37 | up   |
| 6465863 | 7373289 | 1804798 | monoamine oxidase B                                         | Maob       | 25750  | 1,41 | up   |

|         |         |         |                                   |       |        |      |      |
|---------|---------|---------|-----------------------------------|-------|--------|------|------|
| 6500053 | 7373289 | 1804797 | monoamine oxidase B               | Maob  | 25750  | 1,36 | down |
| 5996267 | 7373289 | 1804798 | monoamine oxidase B               | Maob  | 25750  | 1,33 | up   |
| 5930447 | 7373289 | 1804796 | monoamine oxidase B               | Maob  | 25750  | 1,20 | down |
| 6476218 | 7373289 | 1804801 | monoamine oxidase B               | Maob  | 25750  | 1,20 | down |
| 5739825 | 7373289 | 1804804 | monoamine oxidase B               | Maob  | 25750  | 1,13 | up   |
| 6443031 | 7373289 | 1804794 | monoamine oxidase B               | Maob  | 25750  | 1,13 | down |
| 5983612 | 7373289 | 1804806 | monoamine oxidase B               | Maob  | 25750  | 1,08 | down |
| 5861364 | 7373289 | 1804802 | monoamine oxidase B               | Maob  | 25750  | 1,07 | down |
| 6057628 | 7373289 | 1804793 | monoamine oxidase B               | Maob  | 25750  | 1,06 | down |
| 6113669 | 7373289 | 1804800 | monoamine oxidase B               | Maob  | 25750  | 1,06 | down |
| 6365736 | 7373289 | 1804807 | monoamine oxidase B               | Maob  | 25750  | 1,04 | down |
| 5802979 | 7373289 | 1804805 | monoamine oxidase B               | Maob  | 25750  | 1,04 | up   |
| 6553418 | 7373289 | 1804795 | monoamine oxidase B               | Maob  | 25750  | 1,01 | up   |
| 6663901 | 7373289 | 1804799 | monoamine oxidase B               | Maob  | 25750  | 1,00 | up   |
| 5924146 | 7044988 | 998436  | monooxygenase, DBH-like 1         | Moxd1 | 294119 | 2,14 | down |
| 6077085 | 7044988 | 998440  | monooxygenase, DBH-like 1         | Moxd1 | 294119 | 1,75 | up   |
| 6222760 | 7044988 | 998424  | monooxygenase, DBH-like 1         | Moxd1 | 294119 | 1,69 | down |
| 6024635 | 7044988 | 998437  | monooxygenase, DBH-like 1         | Moxd1 | 294119 | 1,67 | down |
| 5851041 | 7044988 | 998424  | monooxygenase, DBH-like 1         | Moxd1 | 294119 | 1,55 | down |
| 6518947 | 7044988 | 998434  | monooxygenase, DBH-like 1         | Moxd1 | 294119 | 1,51 | down |
| 6670339 | 7044988 | 998424  | monooxygenase, DBH-like 1         | Moxd1 | 294119 | 1,49 | down |
| 5995395 | 7044988 | 998439  | monooxygenase, DBH-like 1         | Moxd1 | 294119 | 1,45 | up   |
| 6664069 | 7044988 | 998453  | monooxygenase, DBH-like 1         | Moxd1 | 294119 | 1,37 | up   |
| 6632700 | 7044988 | 998424  | monooxygenase, DBH-like 1         | Moxd1 | 294119 | 1,36 | down |
| 6324353 | 7044988 | 998438  | monooxygenase, DBH-like 1         | Moxd1 | 294119 | 1,36 | up   |
| 6330227 | 7044988 | 998424  | monooxygenase, DBH-like 1         | Moxd1 | 294119 | 1,26 | down |
| 6729994 | 7044988 | 998426  | monooxygenase, DBH-like 1         | Moxd1 | 294119 | 1,23 | up   |
| 5746686 | 7044988 | 998453  | monooxygenase, DBH-like 1         | Moxd1 | 294119 | 1,10 | up   |
| 6289716 | 7044988 | 998438  | monooxygenase, DBH-like 1         | Moxd1 | 294119 | 1,09 | up   |
| 5990944 | 7120427 | 1178435 | MORC family CW-type zinc finger 2 | Morc2 | 289736 | 1,92 | up   |
| 6323480 | 7120427 | 1178433 | MORC family CW-type zinc finger 2 | Morc2 | 289736 | 1,77 | down |
| 5640498 | 7120427 | 1178442 | MORC family CW-type zinc finger 2 | Morc2 | 289736 | 1,49 | down |
| 6157580 | 7120427 | 1178448 | MORC family CW-type zinc finger 2 | Morc2 | 289736 | 1,32 | up   |
| 5793407 | 7120427 | 1178439 | MORC family CW-type zinc finger 2 | Morc2 | 289736 | 1,30 | up   |
| 6016217 | 7120427 | 1178446 | MORC family CW-type zinc finger 2 | Morc2 | 289736 | 1,29 | up   |
| 5868891 | 7120427 | 1178438 | MORC family CW-type zinc finger 2 | Morc2 | 289736 | 1,27 | up   |
| 6348494 | 7120427 | 1178447 | MORC family CW-type zinc finger 2 | Morc2 | 289736 | 1,24 | up   |
| 6649701 | 7120427 | 1178437 | MORC family CW-type zinc finger 2 | Morc2 | 289736 | 1,21 | down |
| 5672657 | 7120427 | 1178428 | MORC family CW-type zinc finger 2 | Morc2 | 289736 | 1,21 | down |
| 5892922 | 7120427 | 1178442 | MORC family CW-type zinc finger 2 | Morc2 | 289736 | 1,21 | up   |
| 6038209 | 7120427 | 1178442 | MORC family CW-type zinc finger 2 | Morc2 | 289736 | 1,20 | down |
| 5868186 | 7120427 | 1178446 | MORC family CW-type zinc finger 2 | Morc2 | 289736 | 1,20 | up   |
| 6600536 | 7120427 | 1178431 | MORC family CW-type zinc finger 2 | Morc2 | 289736 | 1,17 | down |
| 5802952 | 7120427 | 1178432 | MORC family CW-type zinc finger 2 | Morc2 | 289736 | 1,14 | up   |
| 6602009 | 7120427 | 1178442 | MORC family CW-type zinc finger 2 | Morc2 | 289736 | 1,12 | down |
| 5834607 | 7120427 | 1178440 | MORC family CW-type zinc finger 2 | Morc2 | 289736 | 1,12 | down |
| 6384453 | 7120427 | 1178444 | MORC family CW-type zinc finger 2 | Morc2 | 289736 | 1,12 | up   |
| 6616477 | 7120427 | 1178434 | MORC family CW-type zinc finger 2 | Morc2 | 289736 | 1,11 | up   |
| 6275955 | 7120427 | 1178436 | MORC family CW-type zinc finger 2 | Morc2 | 289736 | 1,11 | up   |
| 5954919 | 7120427 | 1178430 | MORC family CW-type zinc finger 2 | Morc2 | 289736 | 1,10 | down |
| 6019105 | 7120427 | 1178448 | MORC family CW-type zinc finger 2 | Morc2 | 289736 | 1,09 | up   |
| 6404198 | 7120427 | 1178445 | MORC family CW-type zinc finger 2 | Morc2 | 289736 | 1,07 | up   |
| 5676853 | 7120427 | 1178429 | MORC family CW-type zinc finger 2 | Morc2 | 289736 | 1,05 | up   |
| 6647998 | 7120427 | 1178443 | MORC family CW-type zinc finger 2 | Morc2 | 289736 | 1,04 | down |
| 6108184 | 7120427 | 1178441 | MORC family CW-type zinc finger 2 | Morc2 | 289736 | 1,02 | down |
| 6742177 | 7383823 | 1828932 | MORC family CW-type zinc finger 4 | Morc4 | 315914 | 1,66 | down |
| 5957104 | 7383823 | 1828951 | MORC family CW-type zinc finger 4 | Morc4 | 315914 | 1,57 | down |

|         |         |         |                                                            |         |        |      |      |
|---------|---------|---------|------------------------------------------------------------|---------|--------|------|------|
| 5986932 | 7383823 | 1828932 | MORC family CW-type zinc finger 4                          | Morc4   | 315914 | 1,48 | up   |
| 6627018 | 7383823 | 1828953 | MORC family CW-type zinc finger 4                          | Morc4   | 315914 | 1,28 | up   |
| 6027434 | 7383823 | 1828950 | MORC family CW-type zinc finger 4                          | Morc4   | 315914 | 1,21 | up   |
| 5964212 | 7383823 | 1828952 | MORC family CW-type zinc finger 4                          | Morc4   | 315914 | 1,20 | up   |
| 6165242 | 7383823 | 1828932 | MORC family CW-type zinc finger 4                          | Morc4   | 315914 | 1,09 | up   |
| 6083414 | 7383823 | 1828949 | MORC family CW-type zinc finger 4                          | Morc4   | 315914 | 1,05 | down |
| 6488572 | 7319740 | 1671787 | Mov10I1, Moloney leukemia virus 10-like 1, homolog (mouse) | Mov10I1 | 300141 | 2,80 | up   |
| 6038681 | 7319740 | 1671764 | Mov10I1, Moloney leukemia virus 10-like 1, homolog (mouse) | Mov10I1 | 300141 | 1,65 | up   |
| 5722345 | 7319740 | 1671786 | Mov10I1, Moloney leukemia virus 10-like 1, homolog (mouse) | Mov10I1 | 300141 | 1,62 | down |
| 5998434 | 7319740 | 1671765 | Mov10I1, Moloney leukemia virus 10-like 1, homolog (mouse) | Mov10I1 | 300141 | 1,54 | up   |
| 6336791 | 7319740 | 1671768 | Mov10I1, Moloney leukemia virus 10-like 1, homolog (mouse) | Mov10I1 | 300141 | 1,49 | down |
| 5828439 | 7319740 | 1671761 | Mov10I1, Moloney leukemia virus 10-like 1, homolog (mouse) | Mov10I1 | 300141 | 1,37 | up   |
| 6622309 | 7319740 | 1671763 | Mov10I1, Moloney leukemia virus 10-like 1, homolog (mouse) | Mov10I1 | 300141 | 1,31 | up   |
| 6242685 | 7319740 | 1671781 | Mov10I1, Moloney leukemia virus 10-like 1, homolog (mouse) | Mov10I1 | 300141 | 1,31 | down |
| 6167654 | 7319740 | 1671771 | Mov10I1, Moloney leukemia virus 10-like 1, homolog (mouse) | Mov10I1 | 300141 | 1,28 | down |
| 6050052 | 7319740 | 1671765 | Mov10I1, Moloney leukemia virus 10-like 1, homolog (mouse) | Mov10I1 | 300141 | 1,28 | up   |
| 5733688 | 7319740 | 1671773 | Mov10I1, Moloney leukemia virus 10-like 1, homolog (mouse) | Mov10I1 | 300141 | 1,20 | down |
| 6553775 | 7319740 | 1671786 | Mov10I1, Moloney leukemia virus 10-like 1, homolog (mouse) | Mov10I1 | 300141 | 1,20 | up   |
| 6017374 | 7319740 | 1671778 | Mov10I1, Moloney leukemia virus 10-like 1, homolog (mouse) | Mov10I1 | 300141 | 1,19 | up   |
| 5811400 | 7319740 | 1671788 | Mov10I1, Moloney leukemia virus 10-like 1, homolog (mouse) | Mov10I1 | 300141 | 1,17 | up   |
| 6165889 | 7319740 | 1671784 | Mov10I1, Moloney leukemia virus 10-like 1, homolog (mouse) | Mov10I1 | 300141 | 1,16 | down |
| 5754034 | 7319740 | 1671760 | Mov10I1, Moloney leukemia virus 10-like 1, homolog (mouse) | Mov10I1 | 300141 | 1,14 | down |
| 6171545 | 7319740 | 1671782 | Mov10I1, Moloney leukemia virus 10-like 1, homolog (mouse) | Mov10I1 | 300141 | 1,12 | up   |
| 6435297 | 7319740 | 1671783 | Mov10I1, Moloney leukemia virus 10-like 1, homolog (mouse) | Mov10I1 | 300141 | 1,11 | up   |
| 6357791 | 7319740 | 1671767 | Mov10I1, Moloney leukemia virus 10-like 1, homolog (mouse) | Mov10I1 | 300141 | 1,10 | up   |
| 6247308 | 7319740 | 1671762 | Mov10I1, Moloney leukemia virus 10-like 1, homolog (mouse) | Mov10I1 | 300141 | 1,07 | down |
| 6222999 | 7319740 | 1671780 | Mov10I1, Moloney leukemia virus 10-like 1, homolog (mouse) | Mov10I1 | 300141 | 1,07 | up   |
| 6192123 | 7319740 | 1671772 | Mov10I1, Moloney leukemia virus 10-like 1, homolog (mouse) | Mov10I1 | 300141 | 1,06 | up   |
| 5943457 | 7319740 | 1671770 | Mov10I1, Moloney leukemia virus 10-like 1, homolog (mouse) | Mov10I1 | 300141 | 1,05 | down |
| 6427718 | 7319740 | 1671785 | Mov10I1, Moloney leukemia virus 10-like 1, homolog (mouse) | Mov10I1 | 300141 | 1,04 | down |
| 6322625 | 7319740 | 1671776 | Mov10I1, Moloney leukemia virus 10-like 1, homolog (mouse) | Mov10I1 | 300141 | 1,04 | up   |
| 5842904 | 7319740 | 1671779 | Mov10I1, Moloney leukemia virus 10-like 1, homolog (mouse) | Mov10I1 | 300141 | 1,03 | down |
| 6438257 | 7319740 | 1671766 | Mov10I1, Moloney leukemia virus 10-like 1, homolog (mouse) | Mov10I1 | 300141 | 1,03 | down |
| 6020416 | 7319740 | 1671777 | Mov10I1, Moloney leukemia virus 10-like 1, homolog (mouse) | Mov10I1 | 300141 | 1,01 | up   |
| 5720770 | 7319740 | 1671765 | Mov10I1, Moloney leukemia virus 10-like 1, homolog (mouse) | Mov10I1 | 300141 | 1,00 | up   |
| 5870989 | 7094008 | 1112609 | mucin 13, cell surface associated                          | Muc13   | 207126 | 2,74 | up   |
| 6547829 | 7094008 | 1112611 | mucin 13, cell surface associated                          | Muc13   | 207126 | 1,27 | up   |
| 6093089 | 7094008 | 1112613 | mucin 13, cell surface associated                          | Muc13   | 207126 | 1,14 | down |
| 5859619 | 7094008 | 1112608 | mucin 13, cell surface associated                          | Muc13   | 207126 | 1,11 | up   |
| 5718358 | 7094008 | 1112616 | mucin 13, cell surface associated                          | Muc13   | 207126 | 1,05 | up   |
| 6097475 | 7094008 | 1112614 | mucin 13, cell surface associated                          | Muc13   | 207126 | 1,02 | up   |
| 5762590 | 7094008 | 1112612 | mucin 13, cell surface associated                          | Muc13   | 207126 | 1,01 | up   |
| 6085843 | 7094008 | 1112610 | mucin 13, cell surface associated                          | Muc13   | 207126 | 1,01 | up   |
| 6402687 | 7094139 | 1112918 | mucin 4, cell surface associated                           | Muc4    | 303887 | 2,07 | up   |
| 6677765 | 7094139 | 1112901 | mucin 4, cell surface associated                           | Muc4    | 303887 | 1,71 | up   |
| 5807911 | 7094139 | 1112889 | mucin 4, cell surface associated                           | Muc4    | 303887 | 1,67 | down |
| 6376039 | 7094139 | 1112915 | mucin 4, cell surface associated                           | Muc4    | 303887 | 1,59 | down |
| 6558116 | 7094139 | 1112907 | mucin 4, cell surface associated                           | Muc4    | 303887 | 1,58 | down |
| 6269050 | 7094139 | 1112908 | mucin 4, cell surface associated                           | Muc4    | 303887 | 1,43 | down |
| 6287725 | 7094139 | 1112891 | mucin 4, cell surface associated                           | Muc4    | 303887 | 1,42 | up   |
| 5829131 | 7094139 | 1112921 | mucin 4, cell surface associated                           | Muc4    | 303887 | 1,32 | up   |
| 6011314 | 7094139 | 1112902 | mucin 4, cell surface associated                           | Muc4    | 303887 | 1,29 | down |
| 6194031 | 7094139 | 1112905 | mucin 4, cell surface associated                           | Muc4    | 303887 | 1,26 | up   |
| 6697729 | 7094139 | 1112917 | mucin 4, cell surface associated                           | Muc4    | 303887 | 1,26 | down |
| 6075613 | 7094139 | 1112906 | mucin 4, cell surface associated                           | Muc4    | 303887 | 1,26 | up   |
| 6060347 | 7094139 | 1112916 | mucin 4, cell surface associated                           | Muc4    | 303887 | 1,24 | down |
| 6336956 | 7094139 | 1112892 | mucin 4, cell surface associated                           | Muc4    | 303887 | 1,22 | up   |

|         |         |         |                                  |        |        |      |      |
|---------|---------|---------|----------------------------------|--------|--------|------|------|
| 6573971 | 7094139 | 1112898 | mucin 4, cell surface associated | Muc4   | 303887 | 1,21 | down |
| 6184104 | 7094139 | 1112890 | mucin 4, cell surface associated | Muc4   | 303887 | 1,21 | down |
| 5793140 | 7094139 | 1112916 | mucin 4, cell surface associated | Muc4   | 303887 | 1,21 | down |
| 5828335 | 7094139 | 1112921 | mucin 4, cell surface associated | Muc4   | 303887 | 1,20 | down |
| 5984100 | 7094139 | 1112916 | mucin 4, cell surface associated | Muc4   | 303887 | 1,19 | down |
| 5663535 | 7094139 | 1112916 | mucin 4, cell surface associated | Muc4   | 303887 | 1,18 | down |
| 5842492 | 7094139 | 1112889 | mucin 4, cell surface associated | Muc4   | 303887 | 1,16 | up   |
| 5641535 | 7094139 | 1112916 | mucin 4, cell surface associated | Muc4   | 303887 | 1,12 | down |
| 6647512 | 7094139 | 1112895 | mucin 4, cell surface associated | Muc4   | 303887 | 1,11 | up   |
| 6259353 | 7094139 | 1112899 | mucin 4, cell surface associated | Muc4   | 303887 | 1,09 | down |
| 5996509 | 7094139 | 1112904 | mucin 4, cell surface associated | Muc4   | 303887 | 1,07 | down |
| 6140594 | 7094139 | 1112893 | mucin 4, cell surface associated | Muc4   | 303887 | 1,06 | down |
| 5846143 | 7094139 | 1112916 | mucin 4, cell surface associated | Muc4   | 303887 | 1,06 | up   |
| 6685295 | 7094139 | 1112900 | mucin 4, cell surface associated | Muc4   | 303887 | 1,03 | up   |
| 6140304 | 7094139 | 1112909 | mucin 4, cell surface associated | Muc4   | 303887 | 1,02 | up   |
| 5642686 | 7094139 | 1112910 | mucin 4, cell surface associated | Muc4   | 303887 | 1,02 | up   |
| 6631163 | 7094139 | 1112921 | mucin 4, cell surface associated | Muc4   | 303887 | 1,02 | up   |
| 6324140 | 7094139 | 1112896 | mucin 4, cell surface associated | Muc4   | 303887 | 1,02 | up   |
| 6345072 | 7094139 | 1112903 | mucin 4, cell surface associated | Muc4   | 303887 | 1,01 | down |
| 6315769 | 7094139 | 1112913 | mucin 4, cell surface associated | Muc4   | 303887 | 1,01 | up   |
| 6495078 | 7094139 | 1112911 | mucin 4, cell surface associated | Muc4   | 303887 | 1,00 | up   |
| 6644399 | 7058761 | 1028758 | mucin and cadherin like          | Mucdhl | 171554 | 4,30 | down |
| 5695892 | 7058761 | 1028764 | mucin and cadherin like          | Mucdhl | 171554 | 1,79 | up   |
| 6510155 | 7058761 | 1028761 | mucin and cadherin like          | Mucdhl | 171554 | 1,54 | up   |
| 6218069 | 7058761 | 1028760 | mucin and cadherin like          | Mucdhl | 171554 | 1,48 | down |
| 6585570 | 7058761 | 1028765 | mucin and cadherin like          | Mucdhl | 171554 | 1,43 | down |
| 6558563 | 7058761 | 1028759 | mucin and cadherin like          | Mucdhl | 171554 | 1,41 | down |
| 6740028 | 7058761 | 1028774 | mucin and cadherin like          | Mucdhl | 171554 | 1,33 | down |
| 6632595 | 7058761 | 1028772 | mucin and cadherin like          | Mucdhl | 171554 | 1,27 | up   |
| 6087589 | 7058761 | 1028762 | mucin and cadherin like          | Mucdhl | 171554 | 1,20 | down |
| 5977012 | 7058761 | 1028761 | mucin and cadherin like          | Mucdhl | 171554 | 1,19 | up   |
| 6380442 | 7058761 | 1028760 | mucin and cadherin like          | Mucdhl | 171554 | 1,18 | up   |
| 6188568 | 7058761 | 1028771 | mucin and cadherin like          | Mucdhl | 171554 | 1,17 | up   |
| 5826682 | 7058761 | 1028767 | mucin and cadherin like          | Mucdhl | 171554 | 1,11 | up   |
| 5947956 | 7058761 | 1028763 | mucin and cadherin like          | Mucdhl | 171554 | 1,10 | down |
| 6694427 | 7058761 | 1028758 | mucin and cadherin like          | Mucdhl | 171554 | 1,06 | down |
| 5885427 | 7058761 | 1028769 | mucin and cadherin like          | Mucdhl | 171554 | 1,05 | up   |
| 6158174 | 7058761 | 1028768 | mucin and cadherin like          | Mucdhl | 171554 | 1,04 | down |
| 6537835 | 7058761 | 1028766 | mucin and cadherin like          | Mucdhl | 171554 | 1,04 | up   |
| 6356124 | 7058761 | 1028770 | mucin and cadherin like          | Mucdhl | 171554 | 1,03 | down |
| 6009548 | 7058761 | 1028773 | mucin and cadherin like          | Mucdhl | 171554 | 1,02 | down |
| 6381109 | 7058761 | 1028759 | mucin and cadherin like          | Mucdhl | 171554 | 1,00 | down |
| 6540378 | 7058761 | 1028774 | mucin and cadherin like          | Mucdhl | 171554 | 1,00 | up   |
| 6187489 | 7170764 | 1301454 | multiple EGF-like domains 10     | Megf10 | 291445 | 1,49 | up   |
| 6664406 | 7170764 | 1301453 | multiple EGF-like domains 10     | Megf10 | 291445 | 1,21 | down |
| 6019842 | 7170764 | 1301458 | multiple EGF-like domains 10     | Megf10 | 291445 | 1,10 | up   |
| 6334563 | 7170764 | 1301461 | multiple EGF-like domains 10     | Megf10 | 291445 | 1,07 | down |
| 6246159 | 7170764 | 1301465 | multiple EGF-like domains 10     | Megf10 | 291445 | 1,07 | down |
| 6121937 | 7337224 | 1712630 | multiple EGF-like-domains 11     | Megf11 | 691517 | 1,37 | up   |
| 6577028 | 7337224 | 1712628 | multiple EGF-like-domains 11     | Megf11 | 691517 | 1,22 | up   |
| 5944571 | 7337224 | 1712542 | multiple EGF-like-domains 11     | Megf11 | 691517 | 1,13 | up   |
| 6248969 | 7337224 | 1712627 | multiple EGF-like-domains 11     | Megf11 | 691517 | 1,12 | up   |
| 6565261 | 7337224 | 1712571 | multiple EGF-like-domains 11     | Megf11 | 691517 | 1,00 | down |
| 6378497 | 7039284 | 983772  | multiple endocrine neoplasia 1   | Men1   | 29417  | 3,00 | down |
| 6612090 | 7039284 | 983777  | multiple endocrine neoplasia 1   | Men1   | 29417  | 1,38 | down |
| 6021235 | 7039284 | 983781  | multiple endocrine neoplasia 1   | Men1   | 29417  | 1,34 | down |
| 6523209 | 7039284 | 983773  | multiple endocrine neoplasia 1   | Men1   | 29417  | 1,29 | up   |

|         |         |         |                                            |       |        |      |      |
|---------|---------|---------|--------------------------------------------|-------|--------|------|------|
| 6530949 | 7039284 | 983774  | multiple endocrine neoplasia 1             | Men1  | 29417  | 1,24 | up   |
| 6539621 | 7039284 | 983772  | multiple endocrine neoplasia 1             | Men1  | 29417  | 1,20 | up   |
| 6257782 | 7039284 | 983776  | multiple endocrine neoplasia 1             | Men1  | 29417  | 1,19 | up   |
| 5675598 | 7039284 | 983781  | multiple endocrine neoplasia 1             | Men1  | 29417  | 1,19 | down |
| 5932263 | 7039284 | 983779  | multiple endocrine neoplasia 1             | Men1  | 29417  | 1,18 | down |
| 6330597 | 7039284 | 983778  | multiple endocrine neoplasia 1             | Men1  | 29417  | 1,10 | up   |
| 5699112 | 7039284 | 983775  | multiple endocrine neoplasia 1             | Men1  | 29417  | 1,03 | down |
| 6743958 | 7039284 | 983780  | multiple endocrine neoplasia 1             | Men1  | 29417  | 1,02 | down |
| 6444145 | 7039284 | 983782  | multiple endocrine neoplasia 1             | Men1  | 29417  | 1,01 | down |
| 6446461 | 7102951 | 1134986 | Musashi homolog 1(Drosophila)              | Msi1  | 259272 | 2,51 | down |
| 6586291 | 7102951 | 1134978 | Musashi homolog 1(Drosophila)              | Msi1  | 259272 | 2,08 | down |
| 6499552 | 7102951 | 1134983 | Musashi homolog 1(Drosophila)              | Msi1  | 259272 | 2,05 | up   |
| 6744626 | 7102951 | 1134980 | Musashi homolog 1(Drosophila)              | Msi1  | 259272 | 2,01 | down |
| 5627902 | 7102951 | 1134987 | Musashi homolog 1(Drosophila)              | Msi1  | 259272 | 1,94 | up   |
| 5716284 | 7102951 | 1134978 | Musashi homolog 1(Drosophila)              | Msi1  | 259272 | 1,79 | down |
| 6438943 | 7102951 | 1134985 | Musashi homolog 1(Drosophila)              | Msi1  | 259272 | 1,69 | up   |
| 6268007 | 7102951 | 1134977 | Musashi homolog 1(Drosophila)              | Msi1  | 259272 | 1,53 | down |
| 6193505 | 7102951 | 1134984 | Musashi homolog 1(Drosophila)              | Msi1  | 259272 | 1,49 | up   |
| 6170832 | 7102951 | 1134988 | Musashi homolog 1(Drosophila)              | Msi1  | 259272 | 1,28 | down |
| 5849459 | 7102951 | 1134979 | Musashi homolog 1(Drosophila)              | Msi1  | 259272 | 1,13 | up   |
| 6125625 | 7102951 | 1134981 | Musashi homolog 1(Drosophila)              | Msi1  | 259272 | 1,08 | up   |
| 6560756 | 7102951 | 1134982 | Musashi homolog 1(Drosophila)              | Msi1  | 259272 | 1,02 | up   |
| 6203900 | 7349310 | 1743094 | muscle RAS oncogene homolog                | Mras  | 25482  | 3,27 | down |
| 6355413 | 7349310 | 1743094 | muscle RAS oncogene homolog                | Mras  | 25482  | 2,16 | down |
| 6241525 | 7349310 | 1743091 | muscle RAS oncogene homolog                | Mras  | 25482  | 1,86 | up   |
| 6454229 | 7349310 | 1743089 | muscle RAS oncogene homolog                | Mras  | 25482  | 1,59 | down |
| 6292274 | 7349310 | 1743093 | muscle RAS oncogene homolog                | Mras  | 25482  | 1,56 | up   |
| 6447163 | 7349310 | 1743090 | muscle RAS oncogene homolog                | Mras  | 25482  | 1,37 | up   |
| 6414318 | 7349310 | 1743094 | muscle RAS oncogene homolog                | Mras  | 25482  | 1,25 | down |
| 5798616 | 7349310 | 1743088 | muscle RAS oncogene homolog                | Mras  | 25482  | 1,21 | up   |
| 5957798 | 7349310 | 1743092 | muscle RAS oncogene homolog                | Mras  | 25482  | 1,07 | up   |
| 5812914 | 7275525 | 1561344 | muscle, skeletal, receptor tyrosine kinase | Musk  | 81725  | 2,15 | down |
| 6342126 | 7275525 | 1561349 | muscle, skeletal, receptor tyrosine kinase | Musk  | 81725  | 1,88 | down |
| 6123482 | 7275525 | 1561341 | muscle, skeletal, receptor tyrosine kinase | Musk  | 81725  | 1,71 | up   |
| 6223226 | 7275525 | 1561348 | muscle, skeletal, receptor tyrosine kinase | Musk  | 81725  | 1,70 | down |
| 6054985 | 7275525 | 1561342 | muscle, skeletal, receptor tyrosine kinase | Musk  | 81725  | 1,30 | down |
| 6366792 | 7275525 | 1561353 | muscle, skeletal, receptor tyrosine kinase | Musk  | 81725  | 1,28 | up   |
| 6028881 | 7275525 | 1561341 | muscle, skeletal, receptor tyrosine kinase | Musk  | 81725  | 1,26 | up   |
| 6024954 | 7275525 | 1561352 | muscle, skeletal, receptor tyrosine kinase | Musk  | 81725  | 1,18 | down |
| 6556385 | 7275525 | 1561343 | muscle, skeletal, receptor tyrosine kinase | Musk  | 81725  | 1,17 | up   |
| 6469246 | 7275525 | 1561342 | muscle, skeletal, receptor tyrosine kinase | Musk  | 81725  | 1,16 | up   |
| 6037802 | 7275525 | 1561351 | muscle, skeletal, receptor tyrosine kinase | Musk  | 81725  | 1,12 | up   |
| 5918922 | 7275525 | 1561353 | muscle, skeletal, receptor tyrosine kinase | Musk  | 81725  | 1,08 | down |
| 6254489 | 7275525 | 1561345 | muscle, skeletal, receptor tyrosine kinase | Musk  | 81725  | 1,07 | up   |
| 6495014 | 7275525 | 1561346 | muscle, skeletal, receptor tyrosine kinase | Musk  | 81725  | 1,06 | down |
| 5681365 | 7275525 | 1561350 | muscle, skeletal, receptor tyrosine kinase | Musk  | 81725  | 1,04 | down |
| 5632336 | 7275525 | 1561347 | muscle, skeletal, receptor tyrosine kinase | Musk  | 81725  | 1,02 | down |
| 5939422 | 7384179 | 1829772 | muscleblind-like 3 (Drosophila)            | Mbnl3 | 302492 | 2,15 | down |
| 5780698 | 7384179 | 1829783 | muscleblind-like 3 (Drosophila)            | Mbnl3 | 302492 | 1,44 | up   |
| 5715055 | 7384179 | 1829770 | muscleblind-like 3 (Drosophila)            | Mbnl3 | 302492 | 1,32 | down |
| 6478653 | 7384179 | 1829775 | muscleblind-like 3 (Drosophila)            | Mbnl3 | 302492 | 1,14 | up   |
| 5963009 | 7384179 | 1829776 | muscleblind-like 3 (Drosophila)            | Mbnl3 | 302492 | 1,10 | up   |
| 5850478 | 7384179 | 1829777 | muscleblind-like 3 (Drosophila)            | Mbnl3 | 302492 | 1,07 | up   |
| 6154087 | 7384179 | 1829775 | muscleblind-like 3 (Drosophila)            | Mbnl3 | 302492 | 1,05 | up   |
| 6161709 | 7384179 | 1829779 | muscleblind-like 3 (Drosophila)            | Mbnl3 | 302492 | 1,04 | down |
| 6388329 | 7384179 | 1829783 | muscleblind-like 3 (Drosophila)            | Mbnl3 | 302492 | 1,03 | up   |
| 5966339 | 7384179 | 1829779 | muscleblind-like 3 (Drosophila)            | Mbnl3 | 302492 | 1,02 | down |



|         |         |         |                                                 |      |        |      |      |
|---------|---------|---------|-------------------------------------------------|------|--------|------|------|
| 6655804 | 7236492 | 1464547 | myelin transcription factor 1                   | Myt1 | 362291 | 2,93 | up   |
| 5978262 | 7236492 | 1464567 | myelin transcription factor 1                   | Myt1 | 362291 | 1,68 | down |
| 5900030 | 7236492 | 1464557 | myelin transcription factor 1                   | Myt1 | 362291 | 1,60 | up   |
| 5854045 | 7236492 | 1464547 | myelin transcription factor 1                   | Myt1 | 362291 | 1,55 | down |
| 6667945 | 7236492 | 1464561 | myelin transcription factor 1                   | Myt1 | 362291 | 1,46 | up   |
| 6091620 | 7236492 | 1464567 | myelin transcription factor 1                   | Myt1 | 362291 | 1,42 | up   |
| 5841182 | 7236492 | 1464546 | myelin transcription factor 1                   | Myt1 | 362291 | 1,30 | up   |
| 5685754 | 7236492 | 1464551 | myelin transcription factor 1                   | Myt1 | 362291 | 1,21 | down |
| 6723288 | 7236492 | 1464554 | myelin transcription factor 1                   | Myt1 | 362291 | 1,21 | up   |
| 6461973 | 7236492 | 1464567 | myelin transcription factor 1                   | Myt1 | 362291 | 1,20 | down |
| 6426109 | 7236492 | 1464550 | myelin transcription factor 1                   | Myt1 | 362291 | 1,20 | down |
| 6017382 | 7236492 | 1464555 | myelin transcription factor 1                   | Myt1 | 362291 | 1,17 | up   |
| 6645348 | 7236492 | 1464558 | myelin transcription factor 1                   | Myt1 | 362291 | 1,17 | up   |
| 6484421 | 7236492 | 1464559 | myelin transcription factor 1                   | Myt1 | 362291 | 1,16 | down |
| 5766018 | 7236492 | 1464549 | myelin transcription factor 1                   | Myt1 | 362291 | 1,14 | down |
| 6560103 | 7236492 | 1464556 | myelin transcription factor 1                   | Myt1 | 362291 | 1,12 | down |
| 6576042 | 7236492 | 1464563 | myelin transcription factor 1                   | Myt1 | 362291 | 1,09 | up   |
| 5948055 | 7236492 | 1464548 | myelin transcription factor 1                   | Myt1 | 362291 | 1,09 | up   |
| 6215242 | 7236492 | 1464546 | myelin transcription factor 1                   | Myt1 | 362291 | 1,09 | up   |
| 6360114 | 7236492 | 1464562 | myelin transcription factor 1                   | Myt1 | 362291 | 1,05 | up   |
| 6646180 | 7236492 | 1464567 | myelin transcription factor 1                   | Myt1 | 362291 | 1,05 | up   |
| 6599123 | 7236492 | 1464566 | myelin transcription factor 1                   | Myt1 | 362291 | 1,05 | up   |
| 6410791 | 7236492 | 1464564 | myelin transcription factor 1                   | Myt1 | 362291 | 1,04 | up   |
| 6746615 | 7236492 | 1464553 | myelin transcription factor 1                   | Myt1 | 362291 | 1,04 | down |
| 6344520 | 7236492 | 1464547 | myelin transcription factor 1                   | Myt1 | 362291 | 1,04 | up   |
| 5687220 | 7236492 | 1464567 | myelin transcription factor 1                   | Myt1 | 362291 | 1,02 | down |
| 5907604 | 7236492 | 1464546 | myelin transcription factor 1                   | Myt1 | 362291 | 1,01 | down |
| 6623938 | 7049916 | 1009204 | myelin-associated glycoprotein                  | Mag  | 29409  | 1,55 | down |
| 6523260 | 7049916 | 1009207 | myelin-associated glycoprotein                  | Mag  | 29409  | 1,52 | up   |
| 5769909 | 7049916 | 1009202 | myelin-associated glycoprotein                  | Mag  | 29409  | 1,50 | up   |
| 6424814 | 7049916 | 1009201 | myelin-associated glycoprotein                  | Mag  | 29409  | 1,46 | up   |
| 6224156 | 7049916 | 1009207 | myelin-associated glycoprotein                  | Mag  | 29409  | 1,40 | up   |
| 5688723 | 7049916 | 1009206 | myelin-associated glycoprotein                  | Mag  | 29409  | 1,39 | down |
| 6259153 | 7049916 | 1009198 | myelin-associated glycoprotein                  | Mag  | 29409  | 1,18 | up   |
| 5625165 | 7049916 | 1009200 | myelin-associated glycoprotein                  | Mag  | 29409  | 1,16 | up   |
| 6319226 | 7049916 | 1009197 | myelin-associated glycoprotein                  | Mag  | 29409  | 1,10 | up   |
| 6697543 | 7049916 | 1009209 | myelin-associated glycoprotein                  | Mag  | 29409  | 1,10 | down |
| 6067354 | 7049916 | 1009202 | myelin-associated glycoprotein                  | Mag  | 29409  | 1,09 | down |
| 6215116 | 7049916 | 1009205 | myelin-associated glycoprotein                  | Mag  | 29409  | 1,07 | down |
| 5827182 | 7049916 | 1009203 | myelin-associated glycoprotein                  | Mag  | 29409  | 1,05 | down |
| 6717110 | 7049916 | 1009208 | myelin-associated glycoprotein                  | Mag  | 29409  | 1,01 | up   |
| 6006134 | 7341439 | 1723704 | myelin-associated oligodendrocyte basic protein | Mobp | 25037  | 3,96 | down |
| 5979977 | 7341439 | 1723711 | myelin-associated oligodendrocyte basic protein | Mobp | 25037  | 2,34 | up   |
| 6243151 | 7341439 | 1723712 | myelin-associated oligodendrocyte basic protein | Mobp | 25037  | 1,95 | up   |
| 5741906 | 7341439 | 1723707 | myelin-associated oligodendrocyte basic protein | Mobp | 25037  | 1,35 | down |
| 6515002 | 7341439 | 1723706 | myelin-associated oligodendrocyte basic protein | Mobp | 25037  | 1,28 | up   |
| 5857851 | 7341439 | 1723710 | myelin-associated oligodendrocyte basic protein | Mobp | 25037  | 1,23 | up   |
| 6496743 | 7341439 | 1723707 | myelin-associated oligodendrocyte basic protein | Mobp | 25037  | 1,21 | down |
| 5865009 | 7341439 | 1723710 | myelin-associated oligodendrocyte basic protein | Mobp | 25037  | 1,18 | up   |
| 6723173 | 7341439 | 1723708 | myelin-associated oligodendrocyte basic protein | Mobp | 25037  | 1,18 | down |
| 6145959 | 7341439 | 1723702 | myelin-associated oligodendrocyte basic protein | Mobp | 25037  | 1,17 | up   |
| 5863862 | 7341439 | 1723708 | myelin-associated oligodendrocyte basic protein | Mobp | 25037  | 1,17 | down |
| 6209561 | 7341439 | 1723708 | myelin-associated oligodendrocyte basic protein | Mobp | 25037  | 1,17 | up   |
| 5688168 | 7341439 | 1723705 | myelin-associated oligodendrocyte basic protein | Mobp | 25037  | 1,13 | down |
| 5728361 | 7341439 | 1723703 | myelin-associated oligodendrocyte basic protein | Mobp | 25037  | 1,12 | up   |
| 5747527 | 7341439 | 1723708 | myelin-associated oligodendrocyte basic protein | Mobp | 25037  | 1,11 | up   |
| 5922896 | 7341439 | 1723712 | myelin-associated oligodendrocyte basic protein | Mobp | 25037  | 1,08 | up   |

|         |         |         |                                                                                                |       |        |      |      |
|---------|---------|---------|------------------------------------------------------------------------------------------------|-------|--------|------|------|
| 5725070 | 7341439 | 1723704 | myelin-associated oligodendrocyte basic protein                                                | Mobp  | 25037  | 1,03 | down |
| 6535465 | 7341439 | 1723710 | myelin-associated oligodendrocyte basic protein                                                | Mobp  | 25037  | 1,00 | down |
| 6611276 | 7317471 | 1666229 | myelocytomatosis oncogene                                                                      | Myc   | 24577  | 3,21 | down |
| 6745472 | 7317471 | 1666226 | myelocytomatosis oncogene                                                                      | Myc   | 24577  | 2,71 | up   |
| 6189374 | 7317471 | 1666225 | myelocytomatosis oncogene                                                                      | Myc   | 24577  | 2,64 | down |
| 6218948 | 7317471 | 1666225 | myelocytomatosis oncogene                                                                      | Myc   | 24577  | 1,82 | up   |
| 6410640 | 7317471 | 1666227 | myelocytomatosis oncogene                                                                      | Myc   | 24577  | 1,57 | up   |
| 6442901 | 7317471 | 1666228 | myelocytomatosis oncogene                                                                      | Myc   | 24577  | 1,02 | up   |
| 6024214 | 7367952 | 1789009 | myeloid/lymphoid or mixed-lineage leukemia (trithorax homolog, Drosophila); translocated to, 1 | Mllt1 | 301119 | 2,41 | down |
| 6556292 | 7367952 | 1789019 | myeloid/lymphoid or mixed-lineage leukemia (trithorax homolog, Drosophila); translocated to, 1 | Mllt1 | 301119 | 1,46 | down |
| 6584290 | 7367952 | 1789020 | myeloid/lymphoid or mixed-lineage leukemia (trithorax homolog, Drosophila); translocated to, 1 | Mllt1 | 301119 | 1,28 | down |
| 6017184 | 7367952 | 1789007 | myeloid/lymphoid or mixed-lineage leukemia (trithorax homolog, Drosophila); translocated to, 1 | Mllt1 | 301119 | 1,26 | up   |
| 6581382 | 7367952 | 1788993 | myeloid/lymphoid or mixed-lineage leukemia (trithorax homolog, Drosophila); translocated to, 1 | Mllt1 | 301119 | 1,21 | up   |
| 5872731 | 7367952 | 1788998 | myeloid/lymphoid or mixed-lineage leukemia (trithorax homolog, Drosophila); translocated to, 1 | Mllt1 | 301119 | 1,20 | up   |
| 5710817 | 7367952 | 1789018 | myeloid/lymphoid or mixed-lineage leukemia (trithorax homolog, Drosophila); translocated to, 1 | Mllt1 | 301119 | 1,18 | down |
| 5962413 | 7367952 | 1789014 | myeloid/lymphoid or mixed-lineage leukemia (trithorax homolog, Drosophila); translocated to, 1 | Mllt1 | 301119 | 1,17 | up   |
| 6027042 | 7367952 | 1789017 | myeloid/lymphoid or mixed-lineage leukemia (trithorax homolog, Drosophila); translocated to, 1 | Mllt1 | 301119 | 1,08 | up   |
| 6652078 | 7367952 | 1789016 | myeloid/lymphoid or mixed-lineage leukemia (trithorax homolog, Drosophila); translocated to, 1 | Mllt1 | 301119 | 1,06 | up   |
| 6652096 | 7367952 | 1789020 | myeloid/lymphoid or mixed-lineage leukemia (trithorax homolog, Drosophila); translocated to, 1 | Mllt1 | 301119 | 1,05 | down |
| 6248077 | 7367952 | 1789012 | myeloid/lymphoid or mixed-lineage leukemia (trithorax homolog, Drosophila); translocated to, 1 | Mllt1 | 301119 | 1,02 | down |
| 5940797 | 7367952 | 1789000 | myeloid/lymphoid or mixed-lineage leukemia (trithorax homolog, Drosophila); translocated to, 1 | Mllt1 | 301119 | 1,01 | down |
| 5689269 | 7071741 | 1060453 | myeloid/lymphoid or mixed-lineage leukemia (trithorax homolog, Drosophila); translocated to, 6 | Mllt6 | 303504 | 1,63 | up   |
| 5806187 | 7071741 | 1060460 | myeloid/lymphoid or mixed-lineage leukemia (trithorax homolog, Drosophila); translocated to, 6 | Mllt6 | 303504 | 1,44 | down |
| 6235395 | 7071741 | 1060451 | myeloid/lymphoid or mixed-lineage leukemia (trithorax homolog, Drosophila); translocated to, 6 | Mllt6 | 303504 | 1,33 | down |
| 5675705 | 7071741 | 1060448 | myeloid/lymphoid or mixed-lineage leukemia (trithorax homolog, Drosophila); translocated to, 6 | Mllt6 | 303504 | 1,32 | down |
| 6558430 | 7071741 | 1060446 | myeloid/lymphoid or mixed-lineage leukemia (trithorax homolog, Drosophila); translocated to, 6 | Mllt6 | 303504 | 1,31 | up   |
| 6279562 | 7071741 | 1060460 | myeloid/lymphoid or mixed-lineage leukemia (trithorax homolog, Drosophila); translocated to, 6 | Mllt6 | 303504 | 1,28 | up   |
| 6420903 | 7071741 | 1060448 | myeloid/lymphoid or mixed-lineage leukemia (trithorax homolog, Drosophila); translocated to, 6 | Mllt6 | 303504 | 1,24 | down |
| 6616003 | 7071741 | 1060458 | myeloid/lymphoid or mixed-lineage leukemia (trithorax homolog, Drosophila); translocated to, 6 | Mllt6 | 303504 | 1,23 | up   |
| 6209632 | 7071741 | 1060443 | myeloid/lymphoid or mixed-lineage leukemia (trithorax homolog, Drosophila); translocated to, 6 | Mllt6 | 303504 | 1,21 | down |
| 6437943 | 7071741 | 1060450 | myeloid/lymphoid or mixed-lineage leukemia (trithorax homolog, Drosophila); translocated to, 6 | Mllt6 | 303504 | 1,17 | down |
| 6478347 | 7071741 | 1060445 | myeloid/lymphoid or mixed-lineage leukemia (trithorax homolog, Drosophila); translocated to, 6 | Mllt6 | 303504 | 1,14 | up   |
| 6359975 | 7071741 | 1060450 | myeloid/lymphoid or mixed-lineage leukemia (trithorax homolog, Drosophila); translocated to, 6 | Mllt6 | 303504 | 1,13 | down |
| 6171680 | 7071741 | 1060446 | myeloid/lymphoid or mixed-lineage leukemia (trithorax homolog, Drosophila); translocated to, 6 | Mllt6 | 303504 | 1,11 | up   |
| 6058347 | 7071741 | 1060452 | myeloid/lymphoid or mixed-lineage leukemia (trithorax homolog, Drosophila); translocated to, 6 | Mllt6 | 303504 | 1,10 | up   |
| 6228466 | 7071741 | 1060457 | myeloid/lymphoid or mixed-lineage leukemia (trithorax homolog, Drosophila); translocated to, 6 | Mllt6 | 303504 | 1,10 | down |
| 6457455 | 7071741 | 1060455 | myeloid/lymphoid or mixed-lineage leukemia (trithorax homolog, Drosophila); translocated to, 6 | Mllt6 | 303504 | 1,10 | up   |
| 5899230 | 7071741 | 1060444 | myeloid/lymphoid or mixed-lineage leukemia (trithorax homolog, Drosophila); translocated to, 6 | Mllt6 | 303504 | 1,08 | up   |
| 6404849 | 7071741 | 1060455 | myeloid/lymphoid or mixed-lineage leukemia (trithorax homolog, Drosophila); translocated to, 6 | Mllt6 | 303504 | 1,07 | up   |
| 5729371 | 7071741 | 1060456 | myeloid/lymphoid or mixed-lineage leukemia (trithorax homolog, Drosophila); translocated to, 6 | Mllt6 | 303504 | 1,07 | down |
| 6501052 | 7071741 | 1060454 | myeloid/lymphoid or mixed-lineage leukemia (trithorax homolog, Drosophila); translocated to, 6 | Mllt6 | 303504 | 1,05 | up   |
| 6125078 | 7071741 | 1060447 | myeloid/lymphoid or mixed-lineage leukemia (trithorax homolog, Drosophila); translocated to, 6 | Mllt6 | 303504 | 1,05 | up   |
| 6238367 | 7071741 | 1060455 | myeloid/lymphoid or mixed-lineage leukemia (trithorax homolog, Drosophila); translocated to, 6 | Mllt6 | 303504 | 1,04 | up   |
| 6321467 | 7071741 | 1060442 | myeloid/lymphoid or mixed-lineage leukemia (trithorax homolog, Drosophila); translocated to, 6 | Mllt6 | 303504 | 1,02 | down |
| 6346204 | 7071741 | 1060441 | myeloid/lymphoid or mixed-lineage leukemia (trithorax homolog, Drosophila); translocated to, 6 | Mllt6 | 303504 | 1,01 | down |
| 6449027 | 7344838 | 1732424 | myeloid/lymphoid or mixed-lineage leukemia 1                                                   | Mll1  | 315606 | 1,63 | down |
| 6188732 | 7344838 | 1732426 | myeloid/lymphoid or mixed-lineage leukemia 1                                                   | Mll1  | 315606 | 1,56 | up   |
| 6555870 | 7344838 | 1732452 | myeloid/lymphoid or mixed-lineage leukemia 1                                                   | Mll1  | 315606 | 1,42 | down |
| 5721054 | 7344838 | 1732460 | myeloid/lymphoid or mixed-lineage leukemia 1                                                   | Mll1  | 315606 | 1,41 | up   |
| 5995246 | 7344838 | 1732449 | myeloid/lymphoid or mixed-lineage leukemia 1                                                   | Mll1  | 315606 | 1,33 | up   |
| 6222212 | 7344838 | 1732451 | myeloid/lymphoid or mixed-lineage leukemia 1                                                   | Mll1  | 315606 | 1,29 | up   |
| 6552207 | 7344838 | 1732452 | myeloid/lymphoid or mixed-lineage leukemia 1                                                   | Mll1  | 315606 | 1,29 | down |
| 6458281 | 7344838 | 1732417 | myeloid/lymphoid or mixed-lineage leukemia 1                                                   | Mll1  | 315606 | 1,28 | down |
| 5769609 | 7344838 | 1732447 | myeloid/lymphoid or mixed-lineage leukemia 1                                                   | Mll1  | 315606 | 1,27 | up   |
| 5637814 | 7344838 | 1732438 | myeloid/lymphoid or mixed-lineage leukemia 1                                                   | Mll1  | 315606 | 1,26 | down |
| 5784482 | 7344838 | 1732423 | myeloid/lymphoid or mixed-lineage leukemia 1                                                   | Mll1  | 315606 | 1,25 | down |
| 5899215 | 7344838 | 1732427 | myeloid/lymphoid or mixed-lineage leukemia 1                                                   | Mll1  | 315606 | 1,24 | up   |

|         |         |         |                                              |       |        |      |      |
|---------|---------|---------|----------------------------------------------|-------|--------|------|------|
| 6481197 | 7344838 | 1732420 | myeloid/lymphoid or mixed-lineage leukemia 1 | Mll1  | 315606 | 1,24 | up   |
| 5681398 | 7344838 | 1732448 | myeloid/lymphoid or mixed-lineage leukemia 1 | Mll1  | 315606 | 1,23 | up   |
| 5933400 | 7344838 | 1732452 | myeloid/lymphoid or mixed-lineage leukemia 1 | Mll1  | 315606 | 1,21 | up   |
| 6255774 | 7344838 | 1732446 | myeloid/lymphoid or mixed-lineage leukemia 1 | Mll1  | 315606 | 1,21 | down |
| 6422583 | 7344838 | 1732447 | myeloid/lymphoid or mixed-lineage leukemia 1 | Mll1  | 315606 | 1,19 | down |
| 5664330 | 7344838 | 1732425 | myeloid/lymphoid or mixed-lineage leukemia 1 | Mll1  | 315606 | 1,18 | down |
| 5944094 | 7344838 | 1732428 | myeloid/lymphoid or mixed-lineage leukemia 1 | Mll1  | 315606 | 1,17 | up   |
| 5898230 | 7344838 | 1732431 | myeloid/lymphoid or mixed-lineage leukemia 1 | Mll1  | 315606 | 1,16 | up   |
| 6256823 | 7344838 | 1732441 | myeloid/lymphoid or mixed-lineage leukemia 1 | Mll1  | 315606 | 1,15 | up   |
| 6270810 | 7344838 | 1732452 | myeloid/lymphoid or mixed-lineage leukemia 1 | Mll1  | 315606 | 1,13 | up   |
| 5709313 | 7344838 | 1732430 | myeloid/lymphoid or mixed-lineage leukemia 1 | Mll1  | 315606 | 1,13 | up   |
| 6403284 | 7344838 | 1732445 | myeloid/lymphoid or mixed-lineage leukemia 1 | Mll1  | 315606 | 1,12 | up   |
| 6712772 | 7344838 | 1732421 | myeloid/lymphoid or mixed-lineage leukemia 1 | Mll1  | 315606 | 1,11 | up   |
| 6350480 | 7344838 | 1732452 | myeloid/lymphoid or mixed-lineage leukemia 1 | Mll1  | 315606 | 1,10 | down |
| 6490892 | 7344838 | 1732419 | myeloid/lymphoid or mixed-lineage leukemia 1 | Mll1  | 315606 | 1,10 | up   |
| 6622447 | 7344838 | 1732452 | myeloid/lymphoid or mixed-lineage leukemia 1 | Mll1  | 315606 | 1,09 | up   |
| 6705134 | 7344838 | 1732421 | myeloid/lymphoid or mixed-lineage leukemia 1 | Mll1  | 315606 | 1,08 | down |
| 6212864 | 7344838 | 1732434 | myeloid/lymphoid or mixed-lineage leukemia 1 | Mll1  | 315606 | 1,08 | down |
| 6402934 | 7344838 | 1732443 | myeloid/lymphoid or mixed-lineage leukemia 1 | Mll1  | 315606 | 1,08 | down |
| 6175667 | 7344838 | 1732432 | myeloid/lymphoid or mixed-lineage leukemia 1 | Mll1  | 315606 | 1,07 | up   |
| 5937401 | 7344838 | 1732435 | myeloid/lymphoid or mixed-lineage leukemia 1 | Mll1  | 315606 | 1,07 | up   |
| 6024924 | 7344838 | 1732442 | myeloid/lymphoid or mixed-lineage leukemia 1 | Mll1  | 315606 | 1,06 | up   |
| 5641093 | 7344838 | 1732454 | myeloid/lymphoid or mixed-lineage leukemia 1 | Mll1  | 315606 | 1,06 | up   |
| 5813848 | 7344838 | 1732424 | myeloid/lymphoid or mixed-lineage leukemia 1 | Mll1  | 315606 | 1,06 | up   |
| 5744682 | 7344838 | 1732416 | myeloid/lymphoid or mixed-lineage leukemia 1 | Mll1  | 315606 | 1,06 | down |
| 6283792 | 7344838 | 1732452 | myeloid/lymphoid or mixed-lineage leukemia 1 | Mll1  | 315606 | 1,05 | up   |
| 5939956 | 7344838 | 1732439 | myeloid/lymphoid or mixed-lineage leukemia 1 | Mll1  | 315606 | 1,05 | up   |
| 6012862 | 7344838 | 1732452 | myeloid/lymphoid or mixed-lineage leukemia 1 | Mll1  | 315606 | 1,05 | up   |
| 6044794 | 7344838 | 1732437 | myeloid/lymphoid or mixed-lineage leukemia 1 | Mll1  | 315606 | 1,05 | up   |
| 6559911 | 7344838 | 1732436 | myeloid/lymphoid or mixed-lineage leukemia 1 | Mll1  | 315606 | 1,03 | down |
| 6427047 | 7344838 | 1732444 | myeloid/lymphoid or mixed-lineage leukemia 1 | Mll1  | 315606 | 1,03 | up   |
| 6370526 | 7344838 | 1732440 | myeloid/lymphoid or mixed-lineage leukemia 1 | Mll1  | 315606 | 1,03 | up   |
| 6237979 | 7344838 | 1732452 | myeloid/lymphoid or mixed-lineage leukemia 1 | Mll1  | 315606 | 1,02 | down |
| 6205932 | 7344838 | 1732429 | myeloid/lymphoid or mixed-lineage leukemia 1 | Mll1  | 315606 | 1,02 | up   |
| 6449534 | 7344838 | 1732433 | myeloid/lymphoid or mixed-lineage leukemia 1 | Mll1  | 315606 | 1,02 | up   |
| 6264980 | 7344838 | 1732447 | myeloid/lymphoid or mixed-lineage leukemia 1 | Mll1  | 315606 | 1,02 | down |
| 6085456 | 7344838 | 1732418 | myeloid/lymphoid or mixed-lineage leukemia 1 | Mll1  | 315606 | 1,02 | up   |
| 5888913 | 7344838 | 1732418 | myeloid/lymphoid or mixed-lineage leukemia 1 | Mll1  | 315606 | 1,02 | up   |
| 6648449 | 7344838 | 1732422 | myeloid/lymphoid or mixed-lineage leukemia 1 | Mll1  | 315606 | 1,00 | down |
| 6497453 | 7344838 | 1732423 | myeloid/lymphoid or mixed-lineage leukemia 1 | Mll1  | 315606 | 1,00 | down |
| 5846356 | 7107071 | 1144795 | myocilin                                     | Myoc  | 81523  | 2,22 | up   |
| 6019368 | 7107071 | 1144793 | myocilin                                     | Myoc  | 81523  | 1,68 | down |
| 5755364 | 7107071 | 1144794 | myocilin                                     | Myoc  | 81523  | 1,66 | up   |
| 6717338 | 7107071 | 1144793 | myocilin                                     | Myoc  | 81523  | 1,65 | down |
| 5934827 | 7107071 | 1144793 | myocilin                                     | Myoc  | 81523  | 1,16 | down |
| 5725213 | 7107071 | 1144796 | myocilin                                     | Myoc  | 81523  | 1,10 | down |
| 6691777 | 7107071 | 1144795 | myocilin                                     | Myoc  | 81523  | 1,08 | up   |
| 6247159 | 7149975 | 1250604 | myocyte enhancer factor 2B                   | Mef2b | 498607 | 2,71 | up   |
| 6155538 | 7149975 | 1250606 | myocyte enhancer factor 2B                   | Mef2b | 498607 | 2,51 | up   |
| 5644742 | 7149975 | 1250610 | myocyte enhancer factor 2B                   | Mef2b | 498607 | 2,00 | up   |
| 6627705 | 7149975 | 1250605 | myocyte enhancer factor 2B                   | Mef2b | 498607 | 1,46 | down |
| 6551221 | 7149975 | 1250610 | myocyte enhancer factor 2B                   | Mef2b | 498607 | 1,45 | down |
| 6407749 | 7149975 | 1250603 | myocyte enhancer factor 2B                   | Mef2b | 498607 | 1,38 | up   |
| 6453956 | 7149975 | 1250607 | myocyte enhancer factor 2B                   | Mef2b | 498607 | 1,17 | down |
| 5626047 | 7149975 | 1250603 | myocyte enhancer factor 2B                   | Mef2b | 498607 | 1,14 | down |
| 6582668 | 7149975 | 1250609 | myocyte enhancer factor 2B                   | Mef2b | 498607 | 1,14 | down |
| 6425223 | 7149975 | 1250606 | myocyte enhancer factor 2B                   | Mef2b | 498607 | 1,13 | down |

|         |         |         |                                         |       |        |      |      |
|---------|---------|---------|-----------------------------------------|-------|--------|------|------|
| 6706301 | 7149975 | 1250608 | myocyte enhancer factor 2B              | Mef2b | 498607 | 1,05 | down |
| 5933173 | 7149975 | 1250603 | myocyte enhancer factor 2B              | Mef2b | 498607 | 1,04 | down |
| 6588407 | 7251318 | 1500753 | MyoD family inhibitor domain containing | Mdfic | 362325 | 2,12 | up   |
| 6408558 | 7251318 | 1500763 | MyoD family inhibitor domain containing | Mdfic | 362325 | 1,63 | down |
| 6368040 | 7251318 | 1500762 | MyoD family inhibitor domain containing | Mdfic | 362325 | 1,03 | up   |
| 5804985 | 7251318 | 1500747 | MyoD family inhibitor domain containing | Mdfic | 362325 | 1,01 | down |
| 6132128 | 7251318 | 1500749 | MyoD family inhibitor domain containing | Mdfic | 362325 | 1,00 | up   |
| 5922129 | 7251318 | 1500746 | MyoD family inhibitor domain containing | Mdfic | 362325 | 1,00 | up   |
| 5799047 | 7062233 | 1037184 | myoferlin                               | Myof  | 309499 | 1,67 | down |
| 5788594 | 7062233 | 1037184 | myoferlin                               | Myof  | 309499 | 1,67 | down |
| 5908744 | 7062233 | 1037245 | myoferlin                               | Myof  | 309499 | 1,09 | up   |
| 5715504 | 7062233 | 1037265 | myoferlin                               | Myof  | 309499 | 1,03 | down |
| 5791130 | 7358859 | 1766992 | myomesin 1                              | Myom1 | 316740 | 1,32 | up   |
| 6126388 | 7358859 | 1766997 | myomesin 1                              | Myom1 | 316740 | 1,23 | down |
| 6375008 | 7358859 | 1766995 | myomesin 1                              | Myom1 | 316740 | 1,10 | up   |
| 6706408 | 7358859 | 1766991 | myomesin 1                              | Myom1 | 316740 | 1,04 | up   |
| 6466245 | 7280570 | 1574094 | myomesin family, member 3               | Myom3 | 313625 | 2,52 | down |
| 6549845 | 7280570 | 1574084 | myomesin family, member 3               | Myom3 | 313625 | 1,86 | down |
| 6551736 | 7280570 | 1574093 | myomesin family, member 3               | Myom3 | 313625 | 1,81 | down |
| 6430942 | 7280570 | 1574080 | myomesin family, member 3               | Myom3 | 313625 | 1,65 | up   |
| 6598393 | 7280570 | 1574098 | myomesin family, member 3               | Myom3 | 313625 | 1,62 | down |
| 6221455 | 7280570 | 1574065 | myomesin family, member 3               | Myom3 | 313625 | 1,62 | down |
| 6390387 | 7280570 | 1574064 | myomesin family, member 3               | Myom3 | 313625 | 1,48 | up   |
| 6125738 | 7280570 | 1574096 | myomesin family, member 3               | Myom3 | 313625 | 1,48 | down |
| 6716967 | 7280570 | 1574078 | myomesin family, member 3               | Myom3 | 313625 | 1,46 | up   |
| 6619809 | 7280570 | 1574073 | myomesin family, member 3               | Myom3 | 313625 | 1,43 | down |
| 6195467 | 7280570 | 1574057 | myomesin family, member 3               | Myom3 | 313625 | 1,37 | up   |
| 6312268 | 7280570 | 1574075 | myomesin family, member 3               | Myom3 | 313625 | 1,36 | up   |
| 6346790 | 7280570 | 1574071 | myomesin family, member 3               | Myom3 | 313625 | 1,32 | up   |
| 6482442 | 7280570 | 1574077 | myomesin family, member 3               | Myom3 | 313625 | 1,31 | up   |
| 5860622 | 7280570 | 1574070 | myomesin family, member 3               | Myom3 | 313625 | 1,31 | down |
| 6198930 | 7280570 | 1574082 | myomesin family, member 3               | Myom3 | 313625 | 1,29 | down |
| 5796442 | 7280570 | 1574068 | myomesin family, member 3               | Myom3 | 313625 | 1,24 | down |
| 6677307 | 7280570 | 1574083 | myomesin family, member 3               | Myom3 | 313625 | 1,22 | down |
| 5692344 | 7280570 | 1574058 | myomesin family, member 3               | Myom3 | 313625 | 1,21 | down |
| 6651582 | 7280570 | 1574097 | myomesin family, member 3               | Myom3 | 313625 | 1,15 | up   |
| 5887008 | 7280570 | 1574067 | myomesin family, member 3               | Myom3 | 313625 | 1,11 | down |
| 6283593 | 7280570 | 1574066 | myomesin family, member 3               | Myom3 | 313625 | 1,09 | up   |
| 5735377 | 7280570 | 1574060 | myomesin family, member 3               | Myom3 | 313625 | 1,08 | down |
| 5921164 | 7280570 | 1574091 | myomesin family, member 3               | Myom3 | 313625 | 1,06 | up   |
| 6455583 | 7280570 | 1574069 | myomesin family, member 3               | Myom3 | 313625 | 1,06 | down |
| 6735515 | 7280570 | 1574059 | myomesin family, member 3               | Myom3 | 313625 | 1,05 | up   |
| 6091084 | 7280570 | 1574087 | myomesin family, member 3               | Myom3 | 313625 | 1,04 | down |
| 6399421 | 7280570 | 1574095 | myomesin family, member 3               | Myom3 | 313625 | 1,04 | up   |
| 6002118 | 7280570 | 1574074 | myomesin family, member 3               | Myom3 | 313625 | 1,04 | down |
| 6281245 | 7280570 | 1574076 | myomesin family, member 3               | Myom3 | 313625 | 1,03 | up   |
| 5674338 | 7280570 | 1574088 | myomesin family, member 3               | Myom3 | 313625 | 1,03 | down |
| 6619668 | 7280570 | 1574086 | myomesin family, member 3               | Myom3 | 313625 | 1,02 | up   |
| 6400085 | 7280570 | 1574085 | myomesin family, member 3               | Myom3 | 313625 | 1,02 | down |
| 5883281 | 7280570 | 1574063 | myomesin family, member 3               | Myom3 | 313625 | 1,01 | up   |
| 6474452 | 7337664 | 1713920 | myosin IE                               | Myo1e | 25484  | 2,35 | up   |
| 6579863 | 7337664 | 1713933 | myosin IE                               | Myo1e | 25484  | 1,73 | down |
| 5771257 | 7337664 | 1713927 | myosin IE                               | Myo1e | 25484  | 1,68 | up   |
| 6497189 | 7337664 | 1713919 | myosin IE                               | Myo1e | 25484  | 1,57 | down |
| 6093823 | 7337664 | 1713925 | myosin IE                               | Myo1e | 25484  | 1,39 | down |
| 6161865 | 7337664 | 1713938 | myosin IE                               | Myo1e | 25484  | 1,36 | up   |
| 6038124 | 7337664 | 1713924 | myosin IE                               | Myo1e | 25484  | 1,34 | up   |

|         |         |         |            |       |        |      |      |
|---------|---------|---------|------------|-------|--------|------|------|
| 6621205 | 7337664 | 1713942 | myosin IE  | Myole | 25484  | 1,33 | down |
| 6545403 | 7337664 | 1713931 | myosin IE  | Myole | 25484  | 1,27 | down |
| 6049192 | 7337664 | 1713935 | myosin IE  | Myole | 25484  | 1,27 | up   |
| 6235853 | 7337664 | 1713941 | myosin IE  | Myole | 25484  | 1,23 | up   |
| 5916024 | 7337664 | 1713926 | myosin IE  | Myole | 25484  | 1,23 | up   |
| 6172491 | 7337664 | 1713934 | myosin IE  | Myole | 25484  | 1,21 | down |
| 6635291 | 7337664 | 1713921 | myosin IE  | Myole | 25484  | 1,20 | up   |
| 6730543 | 7337664 | 1713946 | myosin IE  | Myole | 25484  | 1,16 | down |
| 6648203 | 7337664 | 1713937 | myosin IE  | Myole | 25484  | 1,16 | up   |
| 6480562 | 7337664 | 1713922 | myosin IE  | Myole | 25484  | 1,16 | up   |
| 6109481 | 7337664 | 1713923 | myosin IE  | Myole | 25484  | 1,13 | up   |
| 5651679 | 7337664 | 1713928 | myosin IE  | Myole | 25484  | 1,13 | down |
| 6295601 | 7337664 | 1713943 | myosin IE  | Myole | 25484  | 1,12 | down |
| 6685658 | 7337664 | 1713945 | myosin IE  | Myole | 25484  | 1,12 | down |
| 6050172 | 7337664 | 1713944 | myosin IE  | Myole | 25484  | 1,10 | down |
| 6147239 | 7337664 | 1713939 | myosin IE  | Myole | 25484  | 1,08 | down |
| 5965239 | 7337664 | 1713936 | myosin IE  | Myole | 25484  | 1,07 | up   |
| 6344754 | 7337664 | 1713941 | myosin IE  | Myole | 25484  | 1,06 | up   |
| 5768072 | 7337664 | 1713932 | myosin IE  | Myole | 25484  | 1,05 | down |
| 6449903 | 7337664 | 1713929 | myosin IE  | Myole | 25484  | 1,05 | up   |
| 6708567 | 7337664 | 1713946 | myosin IE  | Myole | 25484  | 1,05 | up   |
| 5696790 | 7337664 | 1713940 | myosin IE  | Myole | 25484  | 1,04 | down |
| 6035516 | 7337664 | 1713930 | myosin IE  | Myole | 25484  | 1,02 | down |
| 6477597 | 7337664 | 1713946 | myosin IE  | Myole | 25484  | 1,01 | down |
| 6734354 | 7312903 | 1654093 | myosin IF  | Myolf | 314654 | 2,27 | down |
| 6006121 | 7312903 | 1654089 | myosin IF  | Myolf | 314654 | 1,73 | down |
| 6495600 | 7312903 | 1654115 | myosin IF  | Myolf | 314654 | 1,49 | down |
| 6386386 | 7312903 | 1654113 | myosin IF  | Myolf | 314654 | 1,46 | down |
| 6332698 | 7312903 | 1654096 | myosin IF  | Myolf | 314654 | 1,32 | up   |
| 5979120 | 7312903 | 1654109 | myosin IF  | Myolf | 314654 | 1,29 | down |
| 6017900 | 7312903 | 1654106 | myosin IF  | Myolf | 314654 | 1,26 | up   |
| 6008579 | 7312903 | 1654104 | myosin IF  | Myolf | 314654 | 1,24 | down |
| 5624547 | 7312903 | 1654092 | myosin IF  | Myolf | 314654 | 1,21 | down |
| 6726930 | 7312903 | 1654116 | myosin IF  | Myolf | 314654 | 1,20 | up   |
| 6086048 | 7312903 | 1654102 | myosin IF  | Myolf | 314654 | 1,20 | up   |
| 6616707 | 7312903 | 1654114 | myosin IF  | Myolf | 314654 | 1,18 | down |
| 6081706 | 7312903 | 1654118 | myosin IF  | Myolf | 314654 | 1,18 | down |
| 6689813 | 7312903 | 1654091 | myosin IF  | Myolf | 314654 | 1,17 | up   |
| 6044566 | 7312903 | 1654088 | myosin IF  | Myolf | 314654 | 1,16 | up   |
| 5846623 | 7312903 | 1654108 | myosin IF  | Myolf | 314654 | 1,15 | up   |
| 5688974 | 7312903 | 1654090 | myosin IF  | Myolf | 314654 | 1,15 | up   |
| 6569551 | 7312903 | 1654113 | myosin IF  | Myolf | 314654 | 1,12 | down |
| 5697942 | 7312903 | 1654100 | myosin IF  | Myolf | 314654 | 1,11 | up   |
| 6280709 | 7312903 | 1654112 | myosin IF  | Myolf | 314654 | 1,09 | down |
| 6452001 | 7312903 | 1654111 | myosin IF  | Myolf | 314654 | 1,09 | down |
| 6004714 | 7312903 | 1654110 | myosin IF  | Myolf | 314654 | 1,06 | up   |
| 6533429 | 7312903 | 1654115 | myosin IF  | Myolf | 314654 | 1,06 | up   |
| 5995077 | 7312903 | 1654094 | myosin IF  | Myolf | 314654 | 1,05 | up   |
| 5657254 | 7312903 | 1654115 | myosin IF  | Myolf | 314654 | 1,05 | down |
| 6100879 | 7312903 | 1654099 | myosin IF  | Myolf | 314654 | 1,02 | down |
| 6205897 | 7312903 | 1654103 | myosin IF  | Myolf | 314654 | 1,02 | up   |
| 6448075 | 7312903 | 1654105 | myosin IF  | Myolf | 314654 | 1,01 | up   |
| 6559689 | 7312903 | 1654118 | myosin IF  | Myolf | 314654 | 1,01 | up   |
| 5999871 | 7312903 | 1654086 | myosin IF  | Myolf | 314654 | 1,01 | down |
| 6046775 | 7312903 | 1654087 | myosin IF  | Myolf | 314654 | 1,00 | down |
| 5700799 | 7143988 | 1235962 | myosin IXb | Myo9b | 25486  | 2,21 | down |
| 6083350 | 7143988 | 1235989 | myosin IXb | Myo9b | 25486  | 2,00 | down |

|         |         |         |                                                   |        |        |      |      |
|---------|---------|---------|---------------------------------------------------|--------|--------|------|------|
| 5737589 | 7143988 | 1235983 | myosin IXb                                        | Myo9b  | 25486  | 1,94 | down |
| 6088170 | 7143988 | 1236001 | myosin IXb                                        | Myo9b  | 25486  | 1,83 | down |
| 6431626 | 7143988 | 1235985 | myosin IXb                                        | Myo9b  | 25486  | 1,81 | down |
| 5634956 | 7143988 | 1235976 | myosin IXb                                        | Myo9b  | 25486  | 1,70 | down |
| 6259469 | 7143988 | 1235969 | myosin IXb                                        | Myo9b  | 25486  | 1,48 | up   |
| 5871731 | 7143988 | 1235991 | myosin IXb                                        | Myo9b  | 25486  | 1,47 | up   |
| 6576781 | 7143988 | 1235978 | myosin IXb                                        | Myo9b  | 25486  | 1,39 | up   |
| 5629953 | 7143988 | 1235994 | myosin IXb                                        | Myo9b  | 25486  | 1,38 | down |
| 6589994 | 7143988 | 1235974 | myosin IXb                                        | Myo9b  | 25486  | 1,36 | up   |
| 5924104 | 7143988 | 1235990 | myosin IXb                                        | Myo9b  | 25486  | 1,35 | up   |
| 6150476 | 7143988 | 1235968 | myosin IXb                                        | Myo9b  | 25486  | 1,29 | up   |
| 6490039 | 7143988 | 1235981 | myosin IXb                                        | Myo9b  | 25486  | 1,28 | up   |
| 5956255 | 7143988 | 1235997 | myosin IXb                                        | Myo9b  | 25486  | 1,27 | down |
| 6149399 | 7143988 | 1235967 | myosin IXb                                        | Myo9b  | 25486  | 1,25 | up   |
| 6269045 | 7143988 | 1235986 | myosin IXb                                        | Myo9b  | 25486  | 1,24 | up   |
| 6397498 | 7143988 | 1235970 | myosin IXb                                        | Myo9b  | 25486  | 1,20 | up   |
| 6576534 | 7143988 | 1235966 | myosin IXb                                        | Myo9b  | 25486  | 1,19 | up   |
| 6183899 | 7143988 | 1235977 | myosin IXb                                        | Myo9b  | 25486  | 1,19 | up   |
| 6081459 | 7143988 | 1235993 | myosin IXb                                        | Myo9b  | 25486  | 1,17 | up   |
| 5755863 | 7143988 | 1235996 | myosin IXb                                        | Myo9b  | 25486  | 1,13 | up   |
| 6588101 | 7143988 | 1235993 | myosin IXb                                        | Myo9b  | 25486  | 1,11 | down |
| 6248134 | 7143988 | 1235962 | myosin IXb                                        | Myo9b  | 25486  | 1,11 | up   |
| 5819501 | 7143988 | 1235992 | myosin IXb                                        | Myo9b  | 25486  | 1,10 | up   |
| 6080379 | 7143988 | 1235980 | myosin IXb                                        | Myo9b  | 25486  | 1,08 | down |
| 5856007 | 7143988 | 1235995 | myosin IXb                                        | Myo9b  | 25486  | 1,08 | up   |
| 5704787 | 7143988 | 1235971 | myosin IXb                                        | Myo9b  | 25486  | 1,08 | down |
| 6063306 | 7143988 | 1235972 | myosin IXb                                        | Myo9b  | 25486  | 1,07 | down |
| 6154771 | 7143988 | 1235964 | myosin IXb                                        | Myo9b  | 25486  | 1,07 | down |
| 5737306 | 7143988 | 1235998 | myosin IXb                                        | Myo9b  | 25486  | 1,07 | up   |
| 6374900 | 7143988 | 1236000 | myosin IXb                                        | Myo9b  | 25486  | 1,06 | up   |
| 5774097 | 7143988 | 1235979 | myosin IXb                                        | Myo9b  | 25486  | 1,04 | up   |
| 5871497 | 7143988 | 1235984 | myosin IXb                                        | Myo9b  | 25486  | 1,04 | down |
| 6329253 | 7143988 | 1235973 | myosin IXb                                        | Myo9b  | 25486  | 1,04 | up   |
| 6197517 | 7143988 | 1235988 | myosin IXb                                        | Myo9b  | 25486  | 1,03 | down |
| 6689755 | 7143988 | 1235987 | myosin IXb                                        | Myo9b  | 25486  | 1,03 | up   |
| 5872098 | 7143988 | 1235975 | myosin IXb                                        | Myo9b  | 25486  | 1,02 | down |
| 5726976 | 7143988 | 1235963 | myosin IXb                                        | Myo9b  | 25486  | 1,02 | up   |
| 6530125 | 7143988 | 1235982 | myosin IXb                                        | Myo9b  | 25486  | 1,01 | up   |
| 5643690 | 7143988 | 1235999 | myosin IXb                                        | Myo9b  | 25486  | 1,01 | down |
| 6070424 | 7143988 | 1235985 | myosin IXb                                        | Myo9b  | 25486  | 1,00 | up   |
| 6100258 | 7143988 | 1235965 | myosin IXb                                        | Myo9b  | 25486  | 1,00 | up   |
| 6710545 | 7163002 | 1282277 | myosin regulatory light chain interacting protein | Myliip | 306825 | 2,08 | up   |
| 6037059 | 7163002 | 1282284 | myosin regulatory light chain interacting protein | Myliip | 306825 | 1,93 | down |
| 6596673 | 7163002 | 1282277 | myosin regulatory light chain interacting protein | Myliip | 306825 | 1,44 | up   |
| 6148636 | 7163002 | 1282284 | myosin regulatory light chain interacting protein | Myliip | 306825 | 1,40 | down |
| 5805087 | 7163002 | 1282278 | myosin regulatory light chain interacting protein | Myliip | 306825 | 1,25 | up   |
| 6531460 | 7163002 | 1282277 | myosin regulatory light chain interacting protein | Myliip | 306825 | 1,18 | up   |
| 6639576 | 7163002 | 1282275 | myosin regulatory light chain interacting protein | Myliip | 306825 | 1,15 | down |
| 6724332 | 7163002 | 1282284 | myosin regulatory light chain interacting protein | Myliip | 306825 | 1,12 | up   |
| 6549085 | 7163002 | 1282279 | myosin regulatory light chain interacting protein | Myliip | 306825 | 1,12 | down |
| 5851807 | 7163002 | 1282280 | myosin regulatory light chain interacting protein | Myliip | 306825 | 1,02 | down |
| 5654810 | 7163002 | 1282276 | myosin regulatory light chain interacting protein | Myliip | 306825 | 1,02 | down |
| 5904339 | 7163002 | 1282281 | myosin regulatory light chain interacting protein | Myliip | 306825 | 1,01 | down |
| 5986517 | 7153875 | 1259775 | myosin XVI                                        | Myo16  | 192253 | 2,60 | down |
| 6347495 | 7153875 | 1259774 | myosin XVI                                        | Myo16  | 192253 | 2,35 | down |
| 6044819 | 7153875 | 1259784 | myosin XVI                                        | Myo16  | 192253 | 2,34 | down |
| 5904292 | 7153875 | 1259797 | myosin XVI                                        | Myo16  | 192253 | 2,15 | up   |

|         |         |         |                                       |       |        |      |      |
|---------|---------|---------|---------------------------------------|-------|--------|------|------|
| 5793451 | 7153875 | 1259775 | myosin XVI                            | Myo16 | 192253 | 2,08 | up   |
| 5720731 | 7153875 | 1259781 | myosin XVI                            | Myo16 | 192253 | 1,96 | down |
| 6387006 | 7153875 | 1259779 | myosin XVI                            | Myo16 | 192253 | 1,91 | down |
| 5889465 | 7153875 | 1259783 | myosin XVI                            | Myo16 | 192253 | 1,90 | down |
| 5657875 | 7153875 | 1259772 | myosin XVI                            | Myo16 | 192253 | 1,89 | down |
| 6337793 | 7153875 | 1259771 | myosin XVI                            | Myo16 | 192253 | 1,77 | down |
| 5620532 | 7153875 | 1259791 | myosin XVI                            | Myo16 | 192253 | 1,77 | up   |
| 6113699 | 7153875 | 1259803 | myosin XVI                            | Myo16 | 192253 | 1,75 | up   |
| 5849202 | 7153875 | 1259777 | myosin XVI                            | Myo16 | 192253 | 1,71 | down |
| 5995193 | 7153875 | 1259773 | myosin XVI                            | Myo16 | 192253 | 1,70 | down |
| 6228439 | 7153875 | 1259790 | myosin XVI                            | Myo16 | 192253 | 1,69 | up   |
| 5731177 | 7153875 | 1259800 | myosin XVI                            | Myo16 | 192253 | 1,64 | up   |
| 5754258 | 7153875 | 1259774 | myosin XVI                            | Myo16 | 192253 | 1,62 | down |
| 6627582 | 7153875 | 1259782 | myosin XVI                            | Myo16 | 192253 | 1,62 | down |
| 6353839 | 7153875 | 1259771 | myosin XVI                            | Myo16 | 192253 | 1,58 | down |
| 5685388 | 7153875 | 1259780 | myosin XVI                            | Myo16 | 192253 | 1,57 | down |
| 6210125 | 7153875 | 1259799 | myosin XVI                            | Myo16 | 192253 | 1,56 | up   |
| 6123554 | 7153875 | 1259798 | myosin XVI                            | Myo16 | 192253 | 1,56 | up   |
| 6446187 | 7153875 | 1259796 | myosin XVI                            | Myo16 | 192253 | 1,55 | up   |
| 6739091 | 7153875 | 1259802 | myosin XVI                            | Myo16 | 192253 | 1,54 | up   |
| 5623713 | 7153875 | 1259792 | myosin XVI                            | Myo16 | 192253 | 1,52 | up   |
| 6192688 | 7153875 | 1259775 | myosin XVI                            | Myo16 | 192253 | 1,50 | down |
| 6633210 | 7153875 | 1259796 | myosin XVI                            | Myo16 | 192253 | 1,49 | up   |
| 6656394 | 7153875 | 1259804 | myosin XVI                            | Myo16 | 192253 | 1,45 | up   |
| 5965477 | 7153875 | 1259795 | myosin XVI                            | Myo16 | 192253 | 1,41 | up   |
| 6525290 | 7153875 | 1259806 | myosin XVI                            | Myo16 | 192253 | 1,38 | up   |
| 6292671 | 7153875 | 1259793 | myosin XVI                            | Myo16 | 192253 | 1,36 | up   |
| 6144837 | 7153875 | 1259805 | myosin XVI                            | Myo16 | 192253 | 1,34 | down |
| 5739100 | 7153875 | 1259776 | myosin XVI                            | Myo16 | 192253 | 1,34 | up   |
| 6292817 | 7153875 | 1259778 | myosin XVI                            | Myo16 | 192253 | 1,32 | down |
| 6556426 | 7153875 | 1259794 | myosin XVI                            | Myo16 | 192253 | 1,32 | up   |
| 6300779 | 7153875 | 1259789 | myosin XVI                            | Myo16 | 192253 | 1,28 | up   |
| 6447165 | 7153875 | 1259785 | myosin XVI                            | Myo16 | 192253 | 1,26 | up   |
| 6215582 | 7153875 | 1259772 | myosin XVI                            | Myo16 | 192253 | 1,24 | up   |
| 5655722 | 7153875 | 1259787 | myosin XVI                            | Myo16 | 192253 | 1,21 | down |
| 6191981 | 7153875 | 1259801 | myosin XVI                            | Myo16 | 192253 | 1,18 | up   |
| 5746886 | 7153875 | 1259799 | myosin XVI                            | Myo16 | 192253 | 1,16 | up   |
| 6129532 | 7153875 | 1259771 | myosin XVI                            | Myo16 | 192253 | 1,13 | down |
| 6447082 | 7153875 | 1259786 | myosin XVI                            | Myo16 | 192253 | 1,07 | up   |
| 6409700 | 7153875 | 1259775 | myosin XVI                            | Myo16 | 192253 | 1,07 | up   |
| 5638656 | 7153875 | 1259788 | myosin XVI                            | Myo16 | 192253 | 1,03 | down |
| 6145417 | 7153875 | 1259807 | myosin XVI                            | Myo16 | 192253 | 1,03 | up   |
| 6725003 | 7153875 | 1259775 | myosin XVI                            | Myo16 | 192253 | 1,02 | up   |
| 6653197 | 7064468 | 1042340 | myosin, heavy chain 11, smooth muscle | Myh11 | 24582  | 2,87 | up   |
| 5798434 | 7064468 | 1042347 | myosin, heavy chain 11, smooth muscle | Myh11 | 24582  | 1,73 | down |
| 6270886 | 7064468 | 1042333 | myosin, heavy chain 11, smooth muscle | Myh11 | 24582  | 1,55 | up   |
| 6746057 | 7064468 | 1042375 | myosin, heavy chain 11, smooth muscle | Myh11 | 24582  | 1,53 | up   |
| 6061410 | 7064468 | 1042335 | myosin, heavy chain 11, smooth muscle | Myh11 | 24582  | 1,53 | down |
| 6314524 | 7064468 | 1042336 | myosin, heavy chain 11, smooth muscle | Myh11 | 24582  | 1,47 | up   |
| 6336265 | 7064468 | 1042356 | myosin, heavy chain 11, smooth muscle | Myh11 | 24582  | 1,40 | up   |
| 5958666 | 7064468 | 1042348 | myosin, heavy chain 11, smooth muscle | Myh11 | 24582  | 1,38 | up   |
| 6413878 | 7064468 | 1042339 | myosin, heavy chain 11, smooth muscle | Myh11 | 24582  | 1,37 | up   |
| 6047053 | 7064468 | 1042338 | myosin, heavy chain 11, smooth muscle | Myh11 | 24582  | 1,36 | up   |
| 5949871 | 7064468 | 1042337 | myosin, heavy chain 11, smooth muscle | Myh11 | 24582  | 1,35 | down |
| 5852558 | 7064468 | 1042346 | myosin, heavy chain 11, smooth muscle | Myh11 | 24582  | 1,34 | up   |
| 5996827 | 7064468 | 1042359 | myosin, heavy chain 11, smooth muscle | Myh11 | 24582  | 1,34 | down |
| 6577307 | 7064468 | 1042353 | myosin, heavy chain 11, smooth muscle | Myh11 | 24582  | 1,32 | down |

|         |         |         |                                                       |        |        |      |      |
|---------|---------|---------|-------------------------------------------------------|--------|--------|------|------|
| 6731705 | 7064468 | 1042341 | myosin, heavy chain 11, smooth muscle                 | Myh11  | 24582  | 1,31 | down |
| 5742541 | 7064468 | 1042351 | myosin, heavy chain 11, smooth muscle                 | Myh11  | 24582  | 1,25 | down |
| 6625160 | 7064468 | 1042345 | myosin, heavy chain 11, smooth muscle                 | Myh11  | 24582  | 1,25 | up   |
| 6720390 | 7064468 | 1042355 | myosin, heavy chain 11, smooth muscle                 | Myh11  | 24582  | 1,22 | down |
| 5985381 | 7064468 | 1042360 | myosin, heavy chain 11, smooth muscle                 | Myh11  | 24582  | 1,15 | down |
| 6262359 | 7064468 | 1042350 | myosin, heavy chain 11, smooth muscle                 | Myh11  | 24582  | 1,15 | down |
| 5997561 | 7064468 | 1042357 | myosin, heavy chain 11, smooth muscle                 | Myh11  | 24582  | 1,09 | down |
| 6280724 | 7064468 | 1042361 | myosin, heavy chain 11, smooth muscle                 | Myh11  | 24582  | 1,07 | up   |
| 6247741 | 7064468 | 1042342 | myosin, heavy chain 11, smooth muscle                 | Myh11  | 24582  | 1,05 | up   |
| 6013757 | 7064468 | 1042352 | myosin, heavy chain 11, smooth muscle                 | Myh11  | 24582  | 1,02 | up   |
| 5684806 | 7064468 | 1042343 | myosin, heavy chain 11, smooth muscle                 | Myh11  | 24582  | 1,02 | up   |
| 6453717 | 7064468 | 1042362 | myosin, heavy chain 11, smooth muscle                 | Myh11  | 24582  | 1,01 | up   |
| 6713591 | 7064468 | 1042344 | myosin, heavy chain 11, smooth muscle                 | Myh11  | 24582  | 1,00 | up   |
| 5962893 | 7138120 | 1221401 | myosin, heavy chain 6, cardiac muscle, alpha          | Myh6   | 29556  | 2,05 | up   |
| 6703908 | 7138120 | 1221421 | myosin, heavy chain 6, cardiac muscle, alpha          | Myh6   | 29556  | 2,01 | up   |
| 5621226 | 7138120 | 1221398 | myosin, heavy chain 6, cardiac muscle, alpha          | Myh6   | 29556  | 1,87 | up   |
| 5831224 | 7138120 | 1221423 | myosin, heavy chain 6, cardiac muscle, alpha          | Myh6   | 29556  | 1,65 | up   |
| 6498672 | 7138120 | 1221402 | myosin, heavy chain 6, cardiac muscle, alpha          | Myh6   | 29556  | 1,49 | down |
| 6034163 | 7138120 | 1221399 | myosin, heavy chain 6, cardiac muscle, alpha          | Myh6   | 29556  | 1,44 | down |
| 6692782 | 7138120 | 1221414 | myosin, heavy chain 6, cardiac muscle, alpha          | Myh6   | 29556  | 1,42 | down |
| 5914494 | 7138120 | 1221431 | myosin, heavy chain 6, cardiac muscle, alpha          | Myh6   | 29556  | 1,31 | down |
| 5926496 | 7138120 | 1221428 | myosin, heavy chain 6, cardiac muscle, alpha          | Myh6   | 29556  | 1,30 | up   |
| 6271786 | 7138120 | 1221427 | myosin, heavy chain 6, cardiac muscle, alpha          | Myh6   | 29556  | 1,28 | down |
| 5740219 | 7138120 | 1221404 | myosin, heavy chain 6, cardiac muscle, alpha          | Myh6   | 29556  | 1,27 | down |
| 5653180 | 7138120 | 1221400 | myosin, heavy chain 6, cardiac muscle, alpha          | Myh6   | 29556  | 1,27 | down |
| 6172283 | 7138120 | 1221413 | myosin, heavy chain 6, cardiac muscle, alpha          | Myh6   | 29556  | 1,23 | down |
| 5657539 | 7138120 | 1221417 | myosin, heavy chain 6, cardiac muscle, alpha          | Myh6   | 29556  | 1,22 | up   |
| 6120008 | 7138120 | 1221412 | myosin, heavy chain 6, cardiac muscle, alpha          | Myh6   | 29556  | 1,22 | down |
| 5864937 | 7138120 | 1221429 | myosin, heavy chain 6, cardiac muscle, alpha          | Myh6   | 29556  | 1,17 | up   |
| 5864982 | 7138120 | 1221426 | myosin, heavy chain 6, cardiac muscle, alpha          | Myh6   | 29556  | 1,16 | down |
| 6223973 | 7138120 | 1221433 | myosin, heavy chain 6, cardiac muscle, alpha          | Myh6   | 29556  | 1,16 | down |
| 5867264 | 7138120 | 1221432 | myosin, heavy chain 6, cardiac muscle, alpha          | Myh6   | 29556  | 1,15 | down |
| 6263428 | 7138120 | 1221407 | myosin, heavy chain 6, cardiac muscle, alpha          | Myh6   | 29556  | 1,14 | up   |
| 6466448 | 7138120 | 1221424 | myosin, heavy chain 6, cardiac muscle, alpha          | Myh6   | 29556  | 1,10 | up   |
| 5866994 | 7138120 | 1221411 | myosin, heavy chain 6, cardiac muscle, alpha          | Myh6   | 29556  | 1,10 | up   |
| 5850100 | 7138120 | 1221408 | myosin, heavy chain 6, cardiac muscle, alpha          | Myh6   | 29556  | 1,08 | up   |
| 5821346 | 7138120 | 1221400 | myosin, heavy chain 6, cardiac muscle, alpha          | Myh6   | 29556  | 1,07 | up   |
| 6594441 | 7138120 | 1221397 | myosin, heavy chain 6, cardiac muscle, alpha          | Myh6   | 29556  | 1,06 | up   |
| 6118701 | 7138120 | 1221409 | myosin, heavy chain 6, cardiac muscle, alpha          | Myh6   | 29556  | 1,05 | down |
| 5778776 | 7138120 | 1221416 | myosin, heavy chain 6, cardiac muscle, alpha          | Myh6   | 29556  | 1,05 | down |
| 5761778 | 7138120 | 1221406 | myosin, heavy chain 6, cardiac muscle, alpha          | Myh6   | 29556  | 1,04 | down |
| 6526220 | 7138120 | 1221405 | myosin, heavy chain 6, cardiac muscle, alpha          | Myh6   | 29556  | 1,04 | down |
| 6326032 | 7138120 | 1221422 | myosin, heavy chain 6, cardiac muscle, alpha          | Myh6   | 29556  | 1,03 | down |
| 5667624 | 7138120 | 1221410 | myosin, heavy chain 6, cardiac muscle, alpha          | Myh6   | 29556  | 1,03 | up   |
| 6468802 | 7138120 | 1221418 | myosin, heavy chain 6, cardiac muscle, alpha          | Myh6   | 29556  | 1,02 | up   |
| 6215322 | 7138120 | 1221403 | myosin, heavy chain 6, cardiac muscle, alpha          | Myh6   | 29556  | 1,01 | up   |
| 6537512 | 7138120 | 1221430 | myosin, heavy chain 6, cardiac muscle, alpha          | Myh6   | 29556  | 1,01 | up   |
| 6472824 | 7138120 | 1221419 | myosin, heavy chain 6, cardiac muscle, alpha          | Myh6   | 29556  | 1,01 | up   |
| 6257053 | 7138120 | 1221425 | myosin, heavy chain 6, cardiac muscle, alpha          | Myh6   | 29556  | 1,01 | down |
| 5667646 | 7138120 | 1221415 | myosin, heavy chain 6, cardiac muscle, alpha          | Myh6   | 29556  | 1,01 | up   |
| 6038599 | 7138120 | 1221420 | myosin, heavy chain 6, cardiac muscle, alpha          | Myh6   | 29556  | 1,00 | up   |
| 5811136 | 7234529 | 1459640 | myosin, light chain 9, regulatory                     | Myl9   | 296313 | 2,02 | down |
| 5737109 | 7234529 | 1459639 | myosin, light chain 9, regulatory                     | Myl9   | 296313 | 1,28 | up   |
| 5821165 | 7234529 | 1459641 | myosin, light chain 9, regulatory                     | Myl9   | 296313 | 1,08 | up   |
| 6712745 | 7234529 | 1459642 | myosin, light chain 9, regulatory                     | Myl9   | 296313 | 1,08 | up   |
| 6507004 | 7234529 | 1459638 | myosin, light chain 9, regulatory                     | Myl9   | 296313 | 1,03 | down |
| 6588782 | 7223633 | 1431501 | myristoylated alanine rich protein kinase C substrate | Marcks | 25603  | 3,40 | up   |



|         |         |         |                                                       |        |        |      |      |
|---------|---------|---------|-------------------------------------------------------|--------|--------|------|------|
| 6616128 | 7223633 | 1431501 | myristoylated alanine rich protein kinase C substrate | Marcks | 25603  | 1,84 | up   |
| 6489676 | 7223633 | 1431501 | myristoylated alanine rich protein kinase C substrate | Marcks | 25603  | 1,50 | up   |
| 6739956 | 7223633 | 1431501 | myristoylated alanine rich protein kinase C substrate | Marcks | 25603  | 1,46 | up   |
| 6508397 | 7223633 | 1431501 | myristoylated alanine rich protein kinase C substrate | Marcks | 25603  | 1,37 | up   |
| 5899464 | 7223633 | 1431501 | myristoylated alanine rich protein kinase C substrate | Marcks | 25603  | 1,06 | down |
| 5799205 | 7223633 | 1431501 | myristoylated alanine rich protein kinase C substrate | Marcks | 25603  | 1,03 | up   |
| 5868007 | 7223633 | 1431502 | myristoylated alanine rich protein kinase C substrate | Marcks | 25603  | 1,02 | up   |
| 5861353 | 7092176 | 1108318 | myxovirus (influenza virus) resistance 1              | Mx1    | 24575  | 2,43 | up   |
| 6341613 | 7092176 | 1108319 | myxovirus (influenza virus) resistance 1              | Mx1    | 24575  | 1,97 | down |
| 6099951 | 7092176 | 1108317 | myxovirus (influenza virus) resistance 1              | Mx1    | 24575  | 1,79 | up   |
| 6004228 | 7092176 | 1108323 | myxovirus (influenza virus) resistance 1              | Mx1    | 24575  | 1,60 | down |
| 6468573 | 7092176 | 1108323 | myxovirus (influenza virus) resistance 1              | Mx1    | 24575  | 1,50 | down |
| 6337819 | 7092176 | 1108313 | myxovirus (influenza virus) resistance 1              | Mx1    | 24575  | 1,43 | down |
| 6124690 | 7092176 | 1108311 | myxovirus (influenza virus) resistance 1              | Mx1    | 24575  | 1,43 | down |
| 6197122 | 7092176 | 1108320 | myxovirus (influenza virus) resistance 1              | Mx1    | 24575  | 1,37 | up   |
| 6452334 | 7092176 | 1108314 | myxovirus (influenza virus) resistance 1              | Mx1    | 24575  | 1,36 | up   |
| 6002822 | 7092176 | 1108310 | myxovirus (influenza virus) resistance 1              | Mx1    | 24575  | 1,34 | down |
| 5897638 | 7092176 | 1108321 | myxovirus (influenza virus) resistance 1              | Mx1    | 24575  | 1,27 | down |
| 6262990 | 7092176 | 1108316 | myxovirus (influenza virus) resistance 1              | Mx1    | 24575  | 1,22 | down |
| 6009201 | 7092176 | 1108315 | myxovirus (influenza virus) resistance 1              | Mx1    | 24575  | 1,21 | up   |
| 5921892 | 7092176 | 1108312 | myxovirus (influenza virus) resistance 1              | Mx1    | 24575  | 1,18 | down |
| 6023507 | 7092176 | 1108322 | myxovirus (influenza virus) resistance 1              | Mx1    | 24575  | 1,18 | up   |
| 5868485 | 7092176 | 1108316 | myxovirus (influenza virus) resistance 1              | Mx1    | 24575  | 1,00 | down |
| 6438386 | 7087207 | 1095975 | myxovirus (influenza virus) resistance 2              | Mx2    | 286918 | 2,94 | up   |
| 5645006 | 7087207 | 1095966 | myxovirus (influenza virus) resistance 2              | Mx2    | 286918 | 2,78 | down |
| 5627139 | 7087207 | 1095967 | myxovirus (influenza virus) resistance 2              | Mx2    | 286918 | 2,71 | down |
| 5942659 | 7087207 | 1095977 | myxovirus (influenza virus) resistance 2              | Mx2    | 286918 | 2,30 | down |
| 6690333 | 7087207 | 1095974 | myxovirus (influenza virus) resistance 2              | Mx2    | 286918 | 2,19 | up   |
| 5641766 | 7087207 | 1095973 | myxovirus (influenza virus) resistance 2              | Mx2    | 286918 | 1,70 | up   |
| 5901301 | 7087207 | 1095972 | myxovirus (influenza virus) resistance 2              | Mx2    | 286918 | 1,68 | down |
| 5675888 | 7087207 | 1095973 | myxovirus (influenza virus) resistance 2              | Mx2    | 286918 | 1,31 | up   |
| 6223794 | 7087207 | 1095971 | myxovirus (influenza virus) resistance 2              | Mx2    | 286918 | 1,30 | up   |
| 6579518 | 7087207 | 1095969 | myxovirus (influenza virus) resistance 2              | Mx2    | 286918 | 1,29 | down |
| 5740960 | 7087207 | 1095976 | myxovirus (influenza virus) resistance 2              | Mx2    | 286918 | 1,23 | down |
| 5636952 | 7087207 | 1095970 | myxovirus (influenza virus) resistance 2              | Mx2    | 286918 | 1,21 | down |
| 6427645 | 7087207 | 1095968 | myxovirus (influenza virus) resistance 2              | Mx2    | 286918 | 1,09 | down |
| 6126461 | 7255510 | 1511331 | N-acetylglucosamine kinase                            | Nagk   | 297393 | 2,01 | down |
| 5711325 | 7255510 | 1511321 | N-acetylglucosamine kinase                            | Nagk   | 297393 | 1,45 | up   |
| 6033773 | 7255510 | 1511324 | N-acetylglucosamine kinase                            | Nagk   | 297393 | 1,30 | up   |
| 6697348 | 7255510 | 1511325 | N-acetylglucosamine kinase                            | Nagk   | 297393 | 1,25 | up   |
| 6415819 | 7255510 | 1511320 | N-acetylglucosamine kinase                            | Nagk   | 297393 | 1,20 | down |
| 6492936 | 7255510 | 1511327 | N-acetylglucosamine kinase                            | Nagk   | 297393 | 1,16 | down |
| 6178678 | 7255510 | 1511330 | N-acetylglucosamine kinase                            | Nagk   | 297393 | 1,06 | up   |
| 6201202 | 7255510 | 1511329 | N-acetylglucosamine kinase                            | Nagk   | 297393 | 1,05 | down |
| 5984421 | 7255510 | 1511328 | N-acetylglucosamine kinase                            | Nagk   | 297393 | 1,03 | down |
| 6422915 | 7255510 | 1511322 | N-acetylglucosamine kinase                            | Nagk   | 297393 | 1,03 | down |
| 5720270 | 7255510 | 1511323 | N-acetylglucosamine kinase                            | Nagk   | 297393 | 1,02 | down |
| 6569739 | 7060085 | 1031724 | N-acetyltransferase 11                                | Nat11  | 361718 | 2,20 | down |
| 5842234 | 7060085 | 1031720 | N-acetyltransferase 11                                | Nat11  | 361718 | 2,08 | down |
| 6733810 | 7060085 | 1031720 | N-acetyltransferase 11                                | Nat11  | 361718 | 1,78 | down |
| 5701004 | 7060085 | 1031719 | N-acetyltransferase 11                                | Nat11  | 361718 | 1,29 | down |
| 6675051 | 7060085 | 1031721 | N-acetyltransferase 11                                | Nat11  | 361718 | 1,28 | down |
| 6451413 | 7060085 | 1031718 | N-acetyltransferase 11                                | Nat11  | 361718 | 1,24 | up   |
| 5822759 | 7060085 | 1031718 | N-acetyltransferase 11                                | Nat11  | 361718 | 1,21 | up   |
| 6441156 | 7060085 | 1031717 | N-acetyltransferase 11                                | Nat11  | 361718 | 1,21 | up   |
| 6576520 | 7060085 | 1031717 | N-acetyltransferase 11                                | Nat11  | 361718 | 1,19 | up   |
| 6337499 | 7060085 | 1031717 | N-acetyltransferase 11                                | Nat11  | 361718 | 1,11 | down |

|         |         |         |                                                                  |            |        |      |      |
|---------|---------|---------|------------------------------------------------------------------|------------|--------|------|------|
| 5786938 | 7060085 | 1031717 | N-acetyltransferase 11                                           | Nat11      | 361718 | 1,11 | down |
| 5821642 | 7060085 | 1031717 | N-acetyltransferase 11                                           | Nat11      | 361718 | 1,10 | up   |
| 6569853 | 7060085 | 1031726 | N-acetyltransferase 11                                           | Nat11      | 361718 | 1,10 | down |
| 6354952 | 7060085 | 1031730 | N-acetyltransferase 11                                           | Nat11      | 361718 | 1,06 | up   |
| 6254592 | 7093264 | 1110790 | N-acetyltransferase 13                                           | Nat13      | 288108 | 2,03 | down |
| 6265214 | 7093264 | 1110796 | N-acetyltransferase 13                                           | Nat13      | 288108 | 1,37 | down |
| 6015501 | 7093264 | 1110790 | N-acetyltransferase 13                                           | Nat13      | 288108 | 1,28 | down |
| 5933396 | 7093264 | 1110790 | N-acetyltransferase 13                                           | Nat13      | 288108 | 1,24 | down |
| 6182319 | 7093264 | 1110791 | N-acetyltransferase 13                                           | Nat13      | 288108 | 1,14 | up   |
| 5876336 | 7093264 | 1110793 | N-acetyltransferase 13                                           | Nat13      | 288108 | 1,11 | up   |
| 6143728 | 7093264 | 1110796 | N-acetyltransferase 13                                           | Nat13      | 288108 | 1,10 | down |
| 6186061 | 7093264 | 1110794 | N-acetyltransferase 13                                           | Nat13      | 288108 | 1,08 | down |
| 5990357 | 7093264 | 1110793 | N-acetyltransferase 13                                           | Nat13      | 288108 | 1,07 | down |
| 5898444 | 7093264 | 1110796 | N-acetyltransferase 13                                           | Nat13      | 288108 | 1,06 | up   |
| 6476310 | 7093264 | 1110791 | N-acetyltransferase 13                                           | Nat13      | 288108 | 1,05 | down |
| 5948028 | 7093264 | 1110792 | N-acetyltransferase 13                                           | Nat13      | 288108 | 1,04 | down |
| 5709299 | 7266798 | 1538880 | N-acetyltransferase 8B                                           | Nat8b      | 171084 | 3,70 | up   |
| 6416209 | 7266798 | 1538881 | N-acetyltransferase 8B                                           | Nat8b      | 171084 | 1,41 | down |
| 6469570 | 7266798 | 1538880 | N-acetyltransferase 8B                                           | Nat8b      | 171084 | 1,17 | down |
| 5906394 | 7266798 | 1538879 | N-acetyltransferase 8B                                           | Nat8b      | 171084 | 1,15 | up   |
| 5829787 | 7266798 | 1538880 | N-acetyltransferase 8B                                           | Nat8b      | 171084 | 1,10 | up   |
| 6274852 | 7028326 | 957434  | NACHT, leucine rich repeat and PYD containing 12                 | Nalp12     | 292541 | 1,06 | down |
| 5836535 | 7144389 | 1236778 | NADH dehydrogenase (ubiquinone) 1 alpha subcomplex 13 pseudogene | Ndufa13-ps | 290671 | 1,02 | down |
| 6366998 | 7075388 | 1069183 | NADH dehydrogenase (ubiquinone) 1 beta subcomplex, 10            | Ndufb10    | 681418 | 2,15 | up   |
| 6412015 | 7075388 | 1069185 | NADH dehydrogenase (ubiquinone) 1 beta subcomplex, 10            | Ndufb10    | 681418 | 1,54 | down |
| 6474734 | 7075388 | 1069182 | NADH dehydrogenase (ubiquinone) 1 beta subcomplex, 10            | Ndufb10    | 681418 | 1,06 | up   |
| 5801299 | 7075388 | 1069184 | NADH dehydrogenase (ubiquinone) 1 beta subcomplex, 10            | Ndufb10    | 681418 | 1,03 | up   |
| 5804625 | 7252777 | 1504491 | NADH dehydrogenase (ubiquinone) 1 beta subcomplex, 2             | Ndufb2     | 362344 | 2,27 | down |
| 5637029 | 7252777 | 1504494 | NADH dehydrogenase (ubiquinone) 1 beta subcomplex, 2             | Ndufb2     | 362344 | 1,74 | down |
| 6260942 | 7252777 | 1504492 | NADH dehydrogenase (ubiquinone) 1 beta subcomplex, 2             | Ndufb2     | 362344 | 1,49 | up   |
| 6103952 | 7252777 | 1504492 | NADH dehydrogenase (ubiquinone) 1 beta subcomplex, 2             | Ndufb2     | 362344 | 1,29 | up   |
| 6488767 | 7252777 | 1504492 | NADH dehydrogenase (ubiquinone) 1 beta subcomplex, 2             | Ndufb2     | 362344 | 1,28 | down |
| 6378634 | 7252777 | 1504493 | NADH dehydrogenase (ubiquinone) 1 beta subcomplex, 2             | Ndufb2     | 362344 | 1,02 | down |
| 5773237 | 7034343 | 972107  | NADH dehydrogenase (ubiquinone) 1, subcomplex unknown, 2         | Ndufc2     | 293130 | 2,15 | down |
| 6446455 | 7034343 | 972107  | NADH dehydrogenase (ubiquinone) 1, subcomplex unknown, 2         | Ndufc2     | 293130 | 1,36 | down |
| 6505753 | 7034343 | 972104  | NADH dehydrogenase (ubiquinone) 1, subcomplex unknown, 2         | Ndufc2     | 293130 | 1,23 | up   |
| 6300932 | 7034343 | 972107  | NADH dehydrogenase (ubiquinone) 1, subcomplex unknown, 2         | Ndufc2     | 293130 | 1,20 | up   |
| 5764674 | 7034343 | 972106  | NADH dehydrogenase (ubiquinone) 1, subcomplex unknown, 2         | Ndufc2     | 293130 | 1,12 | up   |
| 6288470 | 7034343 | 972105  | NADH dehydrogenase (ubiquinone) 1, subcomplex unknown, 2         | Ndufc2     | 293130 | 1,09 | up   |
| 6626544 | 7322250 | 1677050 | NADH dehydrogenase (ubiquinone) Fe-S protein 7                   | Ndufs7     | 362837 | 2,09 | down |
| 5974797 | 7322250 | 1677051 | NADH dehydrogenase (ubiquinone) Fe-S protein 7                   | Ndufs7     | 362837 | 1,44 | down |
| 6475101 | 7322250 | 1677052 | NADH dehydrogenase (ubiquinone) Fe-S protein 7                   | Ndufs7     | 362837 | 1,31 | up   |
| 5876977 | 7322250 | 1677048 | NADH dehydrogenase (ubiquinone) Fe-S protein 7                   | Ndufs7     | 362837 | 1,31 | down |
| 6744512 | 7322250 | 1677045 | NADH dehydrogenase (ubiquinone) Fe-S protein 7                   | Ndufs7     | 362837 | 1,28 | up   |
| 6720189 | 7322250 | 1677047 | NADH dehydrogenase (ubiquinone) Fe-S protein 7                   | Ndufs7     | 362837 | 1,19 | down |
| 6694318 | 7322250 | 1677050 | NADH dehydrogenase (ubiquinone) Fe-S protein 7                   | Ndufs7     | 362837 | 1,16 | up   |
| 6135180 | 7322250 | 1677046 | NADH dehydrogenase (ubiquinone) Fe-S protein 7                   | Ndufs7     | 362837 | 1,07 | up   |
| 6182173 | 7322250 | 1677049 | NADH dehydrogenase (ubiquinone) Fe-S protein 7                   | Ndufs7     | 362837 | 1,02 | down |
| 5937208 | 7059412 | 1030189 | NADH dehydrogenase (ubiquinone) Fe-S protein 8                   | Ndufs8     | 293652 | 2,65 | up   |
| 6401764 | 7059412 | 1030187 | NADH dehydrogenase (ubiquinone) Fe-S protein 8                   | Ndufs8     | 293652 | 1,83 | down |
| 5818041 | 7059412 | 1030184 | NADH dehydrogenase (ubiquinone) Fe-S protein 8                   | Ndufs8     | 293652 | 1,25 | down |
| 6542304 | 7059412 | 1030186 | NADH dehydrogenase (ubiquinone) Fe-S protein 8                   | Ndufs8     | 293652 | 1,22 | up   |
| 6119254 | 7059412 | 1030182 | NADH dehydrogenase (ubiquinone) Fe-S protein 8                   | Ndufs8     | 293652 | 1,09 | up   |
| 5711043 | 7059412 | 1030181 | NADH dehydrogenase (ubiquinone) Fe-S protein 8                   | Ndufs8     | 293652 | 1,06 | down |
| 5897840 | 7059412 | 1030185 | NADH dehydrogenase (ubiquinone) Fe-S protein 8                   | Ndufs8     | 293652 | 1,03 | down |
| 5908683 | 7059412 | 1030183 | NADH dehydrogenase (ubiquinone) Fe-S protein 8                   | Ndufs8     | 293652 | 1,00 | down |
| 6278538 | 7321204 | 1675159 | NCK associated protein 1 like                                    | Nckap11    | 315348 | 2,30 | up   |

|         |         |         |                               |         |        |      |      |
|---------|---------|---------|-------------------------------|---------|--------|------|------|
| 6009483 | 7321204 | 1675157 | NCK associated protein 1 like | Nckap11 | 315348 | 2,01 | down |
| 5682535 | 7321204 | 1675163 | NCK associated protein 1 like | Nckap11 | 315348 | 1,46 | down |
| 6178886 | 7321204 | 1675178 | NCK associated protein 1 like | Nckap11 | 315348 | 1,42 | up   |
| 5763329 | 7321204 | 1675173 | NCK associated protein 1 like | Nckap11 | 315348 | 1,34 | down |
| 5689210 | 7321204 | 1675164 | NCK associated protein 1 like | Nckap11 | 315348 | 1,30 | down |
| 6376586 | 7321204 | 1675158 | NCK associated protein 1 like | Nckap11 | 315348 | 1,28 | up   |
| 6661530 | 7321204 | 1675184 | NCK associated protein 1 like | Nckap11 | 315348 | 1,28 | down |
| 5732974 | 7321204 | 1675154 | NCK associated protein 1 like | Nckap11 | 315348 | 1,27 | down |
| 6380649 | 7321204 | 1675170 | NCK associated protein 1 like | Nckap11 | 315348 | 1,25 | down |
| 5809438 | 7321204 | 1675151 | NCK associated protein 1 like | Nckap11 | 315348 | 1,21 | up   |
| 5674026 | 7321204 | 1675165 | NCK associated protein 1 like | Nckap11 | 315348 | 1,21 | down |
| 6407805 | 7321204 | 1675167 | NCK associated protein 1 like | Nckap11 | 315348 | 1,16 | up   |
| 6440129 | 7321204 | 1675162 | NCK associated protein 1 like | Nckap11 | 315348 | 1,16 | up   |
| 5887195 | 7321204 | 1675160 | NCK associated protein 1 like | Nckap11 | 315348 | 1,16 | down |
| 6705187 | 7321204 | 1675163 | NCK associated protein 1 like | Nckap11 | 315348 | 1,13 | up   |
| 5628672 | 7321204 | 1675176 | NCK associated protein 1 like | Nckap11 | 315348 | 1,12 | down |
| 5839388 | 7321204 | 1675157 | NCK associated protein 1 like | Nckap11 | 315348 | 1,11 | down |
| 6003530 | 7321204 | 1675169 | NCK associated protein 1 like | Nckap11 | 315348 | 1,10 | up   |
| 5620348 | 7321204 | 1675184 | NCK associated protein 1 like | Nckap11 | 315348 | 1,10 | up   |
| 6193392 | 7321204 | 1675166 | NCK associated protein 1 like | Nckap11 | 315348 | 1,10 | down |
| 6199065 | 7321204 | 1675153 | NCK associated protein 1 like | Nckap11 | 315348 | 1,08 | up   |
| 6731107 | 7321204 | 1675177 | NCK associated protein 1 like | Nckap11 | 315348 | 1,08 | down |
| 6049344 | 7321204 | 1675183 | NCK associated protein 1 like | Nckap11 | 315348 | 1,07 | down |
| 5768236 | 7321204 | 1675162 | NCK associated protein 1 like | Nckap11 | 315348 | 1,07 | down |
| 5846909 | 7321204 | 1675180 | NCK associated protein 1 like | Nckap11 | 315348 | 1,06 | down |
| 5903910 | 7321204 | 1675182 | NCK associated protein 1 like | Nckap11 | 315348 | 1,06 | down |
| 6217196 | 7321204 | 1675182 | NCK associated protein 1 like | Nckap11 | 315348 | 1,04 | down |
| 5860092 | 7321204 | 1675174 | NCK associated protein 1 like | Nckap11 | 315348 | 1,02 | down |
| 6672008 | 7321204 | 1675168 | NCK associated protein 1 like | Nckap11 | 315348 | 1,02 | down |
| 6255880 | 7321204 | 1675171 | NCK associated protein 1 like | Nckap11 | 315348 | 1,01 | down |
| 5929349 | 7321204 | 1675152 | NCK associated protein 1 like | Nckap11 | 315348 | 1,01 | up   |
| 6249404 | 7321204 | 1675155 | NCK associated protein 1 like | Nckap11 | 315348 | 1,01 | up   |
| 6625658 | 7321204 | 1675181 | NCK associated protein 1 like | Nckap11 | 315348 | 1,01 | down |
| 6642668 | 7321204 | 1675161 | NCK associated protein 1 like | Nckap11 | 315348 | 1,00 | up   |
| 6375612 | 7238845 | 1470562 | nebulin                       | Neb     | 311029 | 2,88 | down |
| 6725470 | 7238845 | 1470665 | nebulin                       | Neb     | 311029 | 2,26 | down |
| 6706052 | 7238845 | 1470615 | nebulin                       | Neb     | 311029 | 2,11 | down |
| 6684869 | 7238845 | 1470621 | nebulin                       | Neb     | 311029 | 1,92 | down |
| 5982310 | 7238845 | 1470668 | nebulin                       | Neb     | 311029 | 1,89 | down |
| 5651914 | 7238845 | 1470738 | nebulin                       | Neb     | 311029 | 1,89 | down |
| 6285152 | 7238845 | 1470629 | nebulin                       | Neb     | 311029 | 1,85 | down |
| 6131465 | 7238845 | 1470579 | nebulin                       | Neb     | 311029 | 1,78 | down |
| 6401674 | 7238845 | 1470582 | nebulin                       | Neb     | 311029 | 1,71 | down |
| 5895017 | 7238845 | 1470640 | nebulin                       | Neb     | 311029 | 1,66 | down |
| 6666005 | 7238845 | 1470609 | nebulin                       | Neb     | 311029 | 1,57 | up   |
| 6025702 | 7238845 | 1470741 | nebulin                       | Neb     | 311029 | 1,55 | up   |
| 5642821 | 7238845 | 1470616 | nebulin                       | Neb     | 311029 | 1,55 | up   |
| 5698620 | 7238845 | 1470674 | nebulin                       | Neb     | 311029 | 1,54 | down |
| 5701482 | 7238845 | 1470671 | nebulin                       | Neb     | 311029 | 1,54 | down |
| 6286751 | 7238845 | 1470564 | nebulin                       | Neb     | 311029 | 1,53 | down |
| 6260248 | 7238845 | 1470613 | nebulin                       | Neb     | 311029 | 1,51 | down |
| 5759290 | 7238845 | 1470663 | nebulin                       | Neb     | 311029 | 1,50 | down |
| 5840466 | 7238845 | 1470585 | nebulin                       | Neb     | 311029 | 1,49 | up   |
| 6618123 | 7238845 | 1470661 | nebulin                       | Neb     | 311029 | 1,48 | down |
| 5968619 | 7238845 | 1470641 | nebulin                       | Neb     | 311029 | 1,44 | up   |
| 5768722 | 7238845 | 1470704 | nebulin                       | Neb     | 311029 | 1,44 | down |
| 6437730 | 7238845 | 1470697 | nebulin                       | Neb     | 311029 | 1,41 | up   |

|         |         |         |         |     |        |      |      |
|---------|---------|---------|---------|-----|--------|------|------|
| 6226155 | 7238845 | 1470645 | nebulin | Neb | 311029 | 1,38 | down |
| 6379578 | 7238845 | 1470590 | nebulin | Neb | 311029 | 1,37 | down |
| 5904856 | 7238845 | 1470614 | nebulin | Neb | 311029 | 1,36 | down |
| 6119939 | 7238845 | 1470596 | nebulin | Neb | 311029 | 1,35 | up   |
| 6421103 | 7238845 | 1470723 | nebulin | Neb | 311029 | 1,35 | down |
| 5792616 | 7238845 | 1470716 | nebulin | Neb | 311029 | 1,34 | up   |
| 6123670 | 7238845 | 1470657 | nebulin | Neb | 311029 | 1,34 | up   |
| 6425126 | 7238845 | 1470622 | nebulin | Neb | 311029 | 1,33 | down |
| 6524101 | 7238845 | 1470690 | nebulin | Neb | 311029 | 1,33 | down |
| 6644519 | 7238845 | 1470570 | nebulin | Neb | 311029 | 1,32 | down |
| 6527697 | 7238845 | 1470687 | nebulin | Neb | 311029 | 1,31 | down |
| 5672109 | 7238845 | 1470588 | nebulin | Neb | 311029 | 1,30 | up   |
| 6057931 | 7238845 | 1470729 | nebulin | Neb | 311029 | 1,30 | down |
| 5961171 | 7238845 | 1470660 | nebulin | Neb | 311029 | 1,30 | up   |
| 5859904 | 7238845 | 1470631 | nebulin | Neb | 311029 | 1,29 | up   |
| 6401823 | 7238845 | 1470619 | nebulin | Neb | 311029 | 1,29 | down |
| 6221323 | 7238845 | 1470709 | nebulin | Neb | 311029 | 1,27 | down |
| 5930123 | 7238845 | 1470707 | nebulin | Neb | 311029 | 1,25 | down |
| 6192350 | 7238845 | 1470718 | nebulin | Neb | 311029 | 1,25 | down |
| 6000448 | 7238845 | 1470606 | nebulin | Neb | 311029 | 1,25 | down |
| 6512219 | 7238845 | 1470626 | nebulin | Neb | 311029 | 1,24 | up   |
| 6579803 | 7238845 | 1470699 | nebulin | Neb | 311029 | 1,24 | down |
| 6378378 | 7238845 | 1470605 | nebulin | Neb | 311029 | 1,23 | down |
| 6593318 | 7238845 | 1470686 | nebulin | Neb | 311029 | 1,23 | up   |
| 6413436 | 7238845 | 1470594 | nebulin | Neb | 311029 | 1,22 | down |
| 6094652 | 7238845 | 1470681 | nebulin | Neb | 311029 | 1,21 | down |
| 6241045 | 7238845 | 1470624 | nebulin | Neb | 311029 | 1,19 | down |
| 6029542 | 7238845 | 1470561 | nebulin | Neb | 311029 | 1,19 | down |
| 5954911 | 7238845 | 1470664 | nebulin | Neb | 311029 | 1,19 | up   |
| 5793618 | 7238845 | 1470649 | nebulin | Neb | 311029 | 1,18 | down |
| 6119845 | 7238845 | 1470705 | nebulin | Neb | 311029 | 1,18 | up   |
| 6672370 | 7238845 | 1470698 | nebulin | Neb | 311029 | 1,18 | down |
| 6300652 | 7238845 | 1470710 | nebulin | Neb | 311029 | 1,18 | down |
| 6175202 | 7238845 | 1470560 | nebulin | Neb | 311029 | 1,17 | up   |
| 6166786 | 7238845 | 1470564 | nebulin | Neb | 311029 | 1,17 | up   |
| 5847729 | 7238845 | 1470703 | nebulin | Neb | 311029 | 1,16 | up   |
| 6009017 | 7238845 | 1470612 | nebulin | Neb | 311029 | 1,16 | down |
| 6627284 | 7238845 | 1470732 | nebulin | Neb | 311029 | 1,16 | down |
| 6027613 | 7238845 | 1470666 | nebulin | Neb | 311029 | 1,16 | down |
| 6279498 | 7238845 | 1470647 | nebulin | Neb | 311029 | 1,15 | down |
| 5735976 | 7238845 | 1470727 | nebulin | Neb | 311029 | 1,14 | down |
| 6337450 | 7238845 | 1470722 | nebulin | Neb | 311029 | 1,14 | down |
| 6618078 | 7238845 | 1470638 | nebulin | Neb | 311029 | 1,14 | up   |
| 6415605 | 7238845 | 1470682 | nebulin | Neb | 311029 | 1,14 | down |
| 6473118 | 7238845 | 1470678 | nebulin | Neb | 311029 | 1,14 | up   |
| 6396328 | 7238845 | 1470608 | nebulin | Neb | 311029 | 1,14 | up   |
| 6621391 | 7238845 | 1470667 | nebulin | Neb | 311029 | 1,13 | up   |
| 6685723 | 7238845 | 1470737 | nebulin | Neb | 311029 | 1,13 | up   |
| 6306446 | 7238845 | 1470728 | nebulin | Neb | 311029 | 1,13 | up   |
| 6567341 | 7238845 | 1470689 | nebulin | Neb | 311029 | 1,13 | up   |
| 6710451 | 7238845 | 1470561 | nebulin | Neb | 311029 | 1,13 | down |
| 5702775 | 7238845 | 1470711 | nebulin | Neb | 311029 | 1,12 | up   |
| 6004277 | 7238845 | 1470644 | nebulin | Neb | 311029 | 1,12 | up   |
| 5751980 | 7238845 | 1470742 | nebulin | Neb | 311029 | 1,12 | down |
| 6354379 | 7238845 | 1470646 | nebulin | Neb | 311029 | 1,11 | up   |
| 6480532 | 7238845 | 1470607 | nebulin | Neb | 311029 | 1,10 | up   |
| 5867759 | 7238845 | 1470620 | nebulin | Neb | 311029 | 1,10 | down |

|         |         |         |         |     |        |      |      |
|---------|---------|---------|---------|-----|--------|------|------|
| 6193119 | 7238845 | 1470654 | nebulin | Neb | 311029 | 1,10 | down |
| 6015644 | 7238845 | 1470659 | nebulin | Neb | 311029 | 1,09 | down |
| 6623392 | 7238845 | 1470587 | nebulin | Neb | 311029 | 1,09 | down |
| 5845091 | 7238845 | 1470672 | nebulin | Neb | 311029 | 1,09 | up   |
| 6037224 | 7238845 | 1470586 | nebulin | Neb | 311029 | 1,09 | up   |
| 6485369 | 7238845 | 1470602 | nebulin | Neb | 311029 | 1,09 | up   |
| 5935843 | 7238845 | 1470636 | nebulin | Neb | 311029 | 1,09 | up   |
| 6556237 | 7238845 | 1470679 | nebulin | Neb | 311029 | 1,09 | down |
| 6586458 | 7238845 | 1470694 | nebulin | Neb | 311029 | 1,08 | up   |
| 6556876 | 7238845 | 1470639 | nebulin | Neb | 311029 | 1,08 | down |
| 5636756 | 7238845 | 1470569 | nebulin | Neb | 311029 | 1,08 | down |
| 6579193 | 7238845 | 1470719 | nebulin | Neb | 311029 | 1,08 | up   |
| 5735286 | 7238845 | 1470658 | nebulin | Neb | 311029 | 1,08 | up   |
| 6137916 | 7238845 | 1470739 | nebulin | Neb | 311029 | 1,08 | down |
| 5824324 | 7238845 | 1470567 | nebulin | Neb | 311029 | 1,07 | down |
| 5794194 | 7238845 | 1470675 | nebulin | Neb | 311029 | 1,07 | up   |
| 6507705 | 7238845 | 1470712 | nebulin | Neb | 311029 | 1,07 | down |
| 6538712 | 7238845 | 1470726 | nebulin | Neb | 311029 | 1,06 | up   |
| 6128809 | 7238845 | 1470600 | nebulin | Neb | 311029 | 1,06 | up   |
| 6655621 | 7238845 | 1470597 | nebulin | Neb | 311029 | 1,06 | up   |
| 6490908 | 7238845 | 1470559 | nebulin | Neb | 311029 | 1,06 | up   |
| 5953010 | 7238845 | 1470655 | nebulin | Neb | 311029 | 1,06 | up   |
| 6136665 | 7238845 | 1470637 | nebulin | Neb | 311029 | 1,06 | up   |
| 6233799 | 7238845 | 1470724 | nebulin | Neb | 311029 | 1,06 | up   |
| 6711163 | 7238845 | 1470735 | nebulin | Neb | 311029 | 1,06 | down |
| 6312072 | 7238845 | 1470618 | nebulin | Neb | 311029 | 1,05 | down |
| 6283340 | 7238845 | 1470648 | nebulin | Neb | 311029 | 1,05 | down |
| 5714084 | 7238845 | 1470701 | nebulin | Neb | 311029 | 1,05 | down |
| 5706486 | 7238845 | 1470676 | nebulin | Neb | 311029 | 1,05 | up   |
| 6248822 | 7238845 | 1470706 | nebulin | Neb | 311029 | 1,05 | down |
| 5898404 | 7238845 | 1470680 | nebulin | Neb | 311029 | 1,05 | up   |
| 6396734 | 7238845 | 1470632 | nebulin | Neb | 311029 | 1,04 | down |
| 6675005 | 7238845 | 1470736 | nebulin | Neb | 311029 | 1,04 | up   |
| 6139517 | 7238845 | 1470623 | nebulin | Neb | 311029 | 1,04 | up   |
| 6423081 | 7238845 | 1470580 | nebulin | Neb | 311029 | 1,04 | down |
| 5721379 | 7238845 | 1470628 | nebulin | Neb | 311029 | 1,04 | down |
| 5906649 | 7238845 | 1470734 | nebulin | Neb | 311029 | 1,04 | down |
| 6125530 | 7238845 | 1470700 | nebulin | Neb | 311029 | 1,04 | up   |
| 5667111 | 7238845 | 1470627 | nebulin | Neb | 311029 | 1,04 | up   |
| 6719148 | 7238845 | 1470696 | nebulin | Neb | 311029 | 1,03 | up   |
| 5677216 | 7238845 | 1470583 | nebulin | Neb | 311029 | 1,03 | down |
| 6680090 | 7238845 | 1470695 | nebulin | Neb | 311029 | 1,03 | up   |
| 6466561 | 7238845 | 1470683 | nebulin | Neb | 311029 | 1,03 | up   |
| 6695615 | 7238845 | 1470649 | nebulin | Neb | 311029 | 1,03 | up   |
| 6167540 | 7238845 | 1470652 | nebulin | Neb | 311029 | 1,03 | up   |
| 6409068 | 7238845 | 1470677 | nebulin | Neb | 311029 | 1,03 | up   |
| 6464880 | 7238845 | 1470730 | nebulin | Neb | 311029 | 1,03 | up   |
| 5839997 | 7238845 | 1470592 | nebulin | Neb | 311029 | 1,02 | up   |
| 6725344 | 7238845 | 1470656 | nebulin | Neb | 311029 | 1,02 | down |
| 6078516 | 7238845 | 1470593 | nebulin | Neb | 311029 | 1,02 | down |
| 5923635 | 7238845 | 1470651 | nebulin | Neb | 311029 | 1,02 | up   |
| 6589085 | 7238845 | 1470693 | nebulin | Neb | 311029 | 1,02 | down |
| 6236779 | 7238845 | 1470731 | nebulin | Neb | 311029 | 1,02 | up   |
| 6598431 | 7238845 | 1470599 | nebulin | Neb | 311029 | 1,02 | up   |
| 6322278 | 7238845 | 1470634 | nebulin | Neb | 311029 | 1,02 | up   |
| 6247175 | 7238845 | 1470589 | nebulin | Neb | 311029 | 1,02 | down |
| 5801517 | 7238845 | 1470713 | nebulin | Neb | 311029 | 1,02 | up   |

|         |         |         |                                   |      |        |      |      |
|---------|---------|---------|-----------------------------------|------|--------|------|------|
| 6207935 | 7238845 | 1470684 | nebulin                           | Neb  | 311029 | 1,01 | up   |
| 6057197 | 7238845 | 1470643 | nebulin                           | Neb  | 311029 | 1,01 | down |
| 6440169 | 7238845 | 1470725 | nebulin                           | Neb  | 311029 | 1,01 | up   |
| 5897279 | 7238845 | 1470617 | nebulin                           | Neb  | 311029 | 1,01 | up   |
| 6147364 | 7238845 | 1470633 | nebulin                           | Neb  | 311029 | 1,01 | up   |
| 6193332 | 7238845 | 1470568 | nebulin                           | Neb  | 311029 | 1,01 | up   |
| 5889687 | 7238845 | 1470630 | nebulin                           | Neb  | 311029 | 1,01 | up   |
| 5970211 | 7238845 | 1470714 | nebulin                           | Neb  | 311029 | 1,01 | up   |
| 6085974 | 7238845 | 1470653 | nebulin                           | Neb  | 311029 | 1,01 | up   |
| 6553036 | 7238845 | 1470565 | nebulin                           | Neb  | 311029 | 1,01 | down |
| 5648245 | 7238845 | 1470715 | nebulin                           | Neb  | 311029 | 1,01 | up   |
| 6625676 | 7238845 | 1470584 | nebulin                           | Neb  | 311029 | 1,00 | down |
| 5812443 | 7238845 | 1470567 | nebulin                           | Neb  | 311029 | 1,00 | down |
| 5799839 | 7238845 | 1470688 | nebulin                           | Neb  | 311029 | 1,00 | down |
| 5779827 | 7238845 | 1470650 | nebulin                           | Neb  | 311029 | 1,00 | up   |
| 6008375 | 7238845 | 1470635 | nebulin                           | Neb  | 311029 | 1,00 | down |
| 5867601 | 7238845 | 1470591 | nebulin                           | Neb  | 311029 | 1,00 | down |
| 6181867 | 7238845 | 1470566 | nebulin                           | Neb  | 311029 | 1,00 | down |
| 5654320 | 7238845 | 1470595 | nebulin                           | Neb  | 311029 | 1,00 | up   |
| 5825264 | 7238845 | 1470598 | nebulin                           | Neb  | 311029 | 1,00 | up   |
| 5939014 | 7238845 | 1470601 | nebulin                           | Neb  | 311029 | 1,00 | up   |
| 6050659 | 7238845 | 1470692 | nebulin                           | Neb  | 311029 | 1,00 | up   |
| 6064895 | 7238845 | 1470625 | nebulin                           | Neb  | 311029 | 1,00 | up   |
| 6148878 | 7238845 | 1470611 | nebulin                           | Neb  | 311029 | 1,00 | up   |
| 6198676 | 7238845 | 1470720 | nebulin                           | Neb  | 311029 | 1,00 | up   |
| 6063517 | 7064054 | 1041233 | nebulin-related anchoring protein | Nrap | 307982 | 2,08 | up   |
| 5740159 | 7064054 | 1041267 | nebulin-related anchoring protein | Nrap | 307982 | 1,89 | up   |
| 6204509 | 7064054 | 1041240 | nebulin-related anchoring protein | Nrap | 307982 | 1,87 | up   |
| 6278010 | 7064054 | 1041257 | nebulin-related anchoring protein | Nrap | 307982 | 1,76 | up   |
| 5774452 | 7064054 | 1041247 | nebulin-related anchoring protein | Nrap | 307982 | 1,64 | up   |
| 6382214 | 7064054 | 1041235 | nebulin-related anchoring protein | Nrap | 307982 | 1,57 | down |
| 6291912 | 7064054 | 1041231 | nebulin-related anchoring protein | Nrap | 307982 | 1,45 | up   |
| 5740546 | 7064054 | 1041243 | nebulin-related anchoring protein | Nrap | 307982 | 1,44 | up   |
| 5792775 | 7064054 | 1041230 | nebulin-related anchoring protein | Nrap | 307982 | 1,39 | down |
| 6075814 | 7064054 | 1041236 | nebulin-related anchoring protein | Nrap | 307982 | 1,39 | down |
| 5937002 | 7064054 | 1041249 | nebulin-related anchoring protein | Nrap | 307982 | 1,36 | up   |
| 6052169 | 7064054 | 1041264 | nebulin-related anchoring protein | Nrap | 307982 | 1,36 | down |
| 6722716 | 7064054 | 1041226 | nebulin-related anchoring protein | Nrap | 307982 | 1,31 | up   |
| 6263497 | 7064054 | 1041244 | nebulin-related anchoring protein | Nrap | 307982 | 1,31 | up   |
| 6114779 | 7064054 | 1041225 | nebulin-related anchoring protein | Nrap | 307982 | 1,30 | down |
| 6231191 | 7064054 | 1041221 | nebulin-related anchoring protein | Nrap | 307982 | 1,28 | up   |
| 6042062 | 7064054 | 1041242 | nebulin-related anchoring protein | Nrap | 307982 | 1,22 | down |
| 6308198 | 7064054 | 1041232 | nebulin-related anchoring protein | Nrap | 307982 | 1,21 | down |
| 6287902 | 7064054 | 1041224 | nebulin-related anchoring protein | Nrap | 307982 | 1,16 | down |
| 5875508 | 7064054 | 1041237 | nebulin-related anchoring protein | Nrap | 307982 | 1,16 | up   |
| 6020634 | 7064054 | 1041228 | nebulin-related anchoring protein | Nrap | 307982 | 1,14 | down |
| 6271067 | 7064054 | 1041217 | nebulin-related anchoring protein | Nrap | 307982 | 1,13 | down |
| 6319151 | 7064054 | 1041261 | nebulin-related anchoring protein | Nrap | 307982 | 1,12 | down |
| 6525498 | 7064054 | 1041217 | nebulin-related anchoring protein | Nrap | 307982 | 1,11 | up   |
| 6692571 | 7064054 | 1041234 | nebulin-related anchoring protein | Nrap | 307982 | 1,10 | down |
| 5755019 | 7064054 | 1041255 | nebulin-related anchoring protein | Nrap | 307982 | 1,10 | up   |
| 5728261 | 7064054 | 1041256 | nebulin-related anchoring protein | Nrap | 307982 | 1,10 | down |
| 6525841 | 7064054 | 1041238 | nebulin-related anchoring protein | Nrap | 307982 | 1,09 | up   |
| 6081034 | 7064054 | 1041229 | nebulin-related anchoring protein | Nrap | 307982 | 1,09 | down |
| 6662954 | 7064054 | 1041255 | nebulin-related anchoring protein | Nrap | 307982 | 1,08 | up   |
| 6267400 | 7064054 | 1041262 | nebulin-related anchoring protein | Nrap | 307982 | 1,06 | down |
| 5705261 | 7064054 | 1041220 | nebulin-related anchoring protein | Nrap | 307982 | 1,06 | up   |

|         |         |         |                                                 |        |        |      |      |
|---------|---------|---------|-------------------------------------------------|--------|--------|------|------|
| 6626422 | 7064054 | 1041246 | nebulin-related anchoring protein               | Nrap   | 307982 | 1,04 | down |
| 6598719 | 7064054 | 1041223 | nebulin-related anchoring protein               | Nrap   | 307982 | 1,04 | down |
| 6174129 | 7064054 | 1041266 | nebulin-related anchoring protein               | Nrap   | 307982 | 1,04 | up   |
| 6140035 | 7064054 | 1041259 | nebulin-related anchoring protein               | Nrap   | 307982 | 1,04 | up   |
| 6091431 | 7064054 | 1041227 | nebulin-related anchoring protein               | Nrap   | 307982 | 1,03 | up   |
| 6040317 | 7064054 | 1041258 | nebulin-related anchoring protein               | Nrap   | 307982 | 1,03 | up   |
| 6152563 | 7064054 | 1041267 | nebulin-related anchoring protein               | Nrap   | 307982 | 1,03 | down |
| 6305609 | 7064054 | 1041254 | nebulin-related anchoring protein               | Nrap   | 307982 | 1,02 | down |
| 5999468 | 7064054 | 1041219 | nebulin-related anchoring protein               | Nrap   | 307982 | 1,02 | down |
| 6415876 | 7064054 | 1041265 | nebulin-related anchoring protein               | Nrap   | 307982 | 1,02 | down |
| 6049188 | 7064054 | 1041268 | nebulin-related anchoring protein               | Nrap   | 307982 | 1,01 | down |
| 5723646 | 7064054 | 1041268 | nebulin-related anchoring protein               | Nrap   | 307982 | 1,01 | down |
| 6741367 | 7064054 | 1041260 | nebulin-related anchoring protein               | Nrap   | 307982 | 1,01 | down |
| 6107251 | 7064054 | 1041248 | nebulin-related anchoring protein               | Nrap   | 307982 | 1,00 | down |
| 6618350 | 7292520 | 1602572 | NECAP endocytosis associated 2                  | Necap2 | 298598 | 3,01 | down |
| 5701350 | 7292520 | 1602567 | NECAP endocytosis associated 2                  | Necap2 | 298598 | 1,77 | up   |
| 6244665 | 7292520 | 1602564 | NECAP endocytosis associated 2                  | Necap2 | 298598 | 1,42 | down |
| 5800205 | 7292520 | 1602568 | NECAP endocytosis associated 2                  | Necap2 | 298598 | 1,38 | down |
| 5758166 | 7292520 | 1602566 | NECAP endocytosis associated 2                  | Necap2 | 298598 | 1,36 | up   |
| 5715541 | 7292520 | 1602569 | NECAP endocytosis associated 2                  | Necap2 | 298598 | 1,14 | up   |
| 5635754 | 7292520 | 1602564 | NECAP endocytosis associated 2                  | Necap2 | 298598 | 1,14 | down |
| 5951624 | 7292520 | 1602572 | NECAP endocytosis associated 2                  | Necap2 | 298598 | 1,12 | up   |
| 6526809 | 7292520 | 1602570 | NECAP endocytosis associated 2                  | Necap2 | 298598 | 1,11 | up   |
| 6542906 | 7292520 | 1602565 | NECAP endocytosis associated 2                  | Necap2 | 298598 | 1,10 | down |
| 6014601 | 7292520 | 1602571 | NECAP endocytosis associated 2                  | Necap2 | 298598 | 1,05 | down |
| 6215238 | 7052331 | 1014598 | necdin-like 2                                   | Ndn12  | 309259 | 1,37 | up   |
| 5892182 | 7052331 | 1014598 | necdin-like 2                                   | Ndn12  | 309259 | 1,05 | up   |
| 5718109 | 7052331 | 1014598 | necdin-like 2                                   | Ndn12  | 309259 | 1,00 | down |
| 5951235 | 7077170 | 1073572 | Nedd4 binding protein 3                         | N4bp3  | 303112 | 1,93 | up   |
| 6372493 | 7077170 | 1073569 | Nedd4 binding protein 3                         | N4bp3  | 303112 | 1,03 | down |
| 6326354 | 7077170 | 1073570 | Nedd4 binding protein 3                         | N4bp3  | 303112 | 1,02 | up   |
| 6516271 | 7077170 | 1073569 | Nedd4 binding protein 3                         | N4bp3  | 303112 | 1,01 | up   |
| 6692700 | 7077170 | 1073571 | Nedd4 binding protein 3                         | N4bp3  | 303112 | 1,01 | up   |
| 6296517 | 7260461 | 1523858 | negative regulator of ubiquitin-like proteins 1 | Nub1   | 296731 | 2,32 | down |
| 6665781 | 7260461 | 1523870 | negative regulator of ubiquitin-like proteins 1 | Nub1   | 296731 | 2,22 | down |
| 6532248 | 7260461 | 1523866 | negative regulator of ubiquitin-like proteins 1 | Nub1   | 296731 | 1,86 | down |
| 6376523 | 7260461 | 1523868 | negative regulator of ubiquitin-like proteins 1 | Nub1   | 296731 | 1,42 | up   |
| 6127826 | 7260461 | 1523867 | negative regulator of ubiquitin-like proteins 1 | Nub1   | 296731 | 1,26 | up   |
| 6672396 | 7260461 | 1523857 | negative regulator of ubiquitin-like proteins 1 | Nub1   | 296731 | 1,14 | up   |
| 6242317 | 7260461 | 1523865 | negative regulator of ubiquitin-like proteins 1 | Nub1   | 296731 | 1,14 | up   |
| 6375503 | 7260461 | 1523855 | negative regulator of ubiquitin-like proteins 1 | Nub1   | 296731 | 1,12 | up   |
| 5902992 | 7260461 | 1523862 | negative regulator of ubiquitin-like proteins 1 | Nub1   | 296731 | 1,10 | down |
| 6000277 | 7260461 | 1523858 | negative regulator of ubiquitin-like proteins 1 | Nub1   | 296731 | 1,10 | up   |
| 6605105 | 7260461 | 1523869 | negative regulator of ubiquitin-like proteins 1 | Nub1   | 296731 | 1,09 | up   |
| 6100930 | 7260461 | 1523863 | negative regulator of ubiquitin-like proteins 1 | Nub1   | 296731 | 1,08 | up   |
| 6216897 | 7260461 | 1523859 | negative regulator of ubiquitin-like proteins 1 | Nub1   | 296731 | 1,07 | down |
| 6533036 | 7260461 | 1523856 | negative regulator of ubiquitin-like proteins 1 | Nub1   | 296731 | 1,07 | up   |
| 6463706 | 7260461 | 1523864 | negative regulator of ubiquitin-like proteins 1 | Nub1   | 296731 | 1,04 | down |
| 6409741 | 7260461 | 1523860 | negative regulator of ubiquitin-like proteins 1 | Nub1   | 296731 | 1,02 | down |
| 5963667 | 7260461 | 1523861 | negative regulator of ubiquitin-like proteins 1 | Nub1   | 296731 | 1,00 | down |
| 6353723 | 7072332 | 1061648 | neighbor of Brca1 gene 1                        | Nbr1   | 303554 | 1,85 | down |
| 6319615 | 7072332 | 1061641 | neighbor of Brca1 gene 1                        | Nbr1   | 303554 | 1,63 | down |
| 6342695 | 7072332 | 1061641 | neighbor of Brca1 gene 1                        | Nbr1   | 303554 | 1,47 | down |
| 6221846 | 7072332 | 1061650 | neighbor of Brca1 gene 1                        | Nbr1   | 303554 | 1,23 | up   |
| 6100253 | 7072332 | 1061652 | neighbor of Brca1 gene 1                        | Nbr1   | 303554 | 1,21 | down |
| 6470596 | 7072332 | 1061646 | neighbor of Brca1 gene 1                        | Nbr1   | 303554 | 1,19 | up   |
| 5658703 | 7072332 | 1061651 | neighbor of Brca1 gene 1                        | Nbr1   | 303554 | 1,17 | up   |

|         |         |         |                                               |       |        |      |      |
|---------|---------|---------|-----------------------------------------------|-------|--------|------|------|
| 6477279 | 7072332 | 1061665 | neighbor of Brca1 gene 1                      | Nbr1  | 303554 | 1,15 | down |
| 5881839 | 7072332 | 1061664 | neighbor of Brca1 gene 1                      | Nbr1  | 303554 | 1,14 | down |
| 6719967 | 7072332 | 1061657 | neighbor of Brca1 gene 1                      | Nbr1  | 303554 | 1,11 | down |
| 5860710 | 7072332 | 1061659 | neighbor of Brca1 gene 1                      | Nbr1  | 303554 | 1,11 | down |
| 6511093 | 7072332 | 1061660 | neighbor of Brca1 gene 1                      | Nbr1  | 303554 | 1,10 | up   |
| 6140193 | 7072332 | 1061646 | neighbor of Brca1 gene 1                      | Nbr1  | 303554 | 1,09 | up   |
| 6734928 | 7072332 | 1061642 | neighbor of Brca1 gene 1                      | Nbr1  | 303554 | 1,09 | up   |
| 6292785 | 7072332 | 1061663 | neighbor of Brca1 gene 1                      | Nbr1  | 303554 | 1,09 | down |
| 6011618 | 7072332 | 1061654 | neighbor of Brca1 gene 1                      | Nbr1  | 303554 | 1,08 | up   |
| 6063062 | 7072332 | 1061645 | neighbor of Brca1 gene 1                      | Nbr1  | 303554 | 1,08 | down |
| 6428847 | 7072332 | 1061653 | neighbor of Brca1 gene 1                      | Nbr1  | 303554 | 1,07 | down |
| 6645428 | 7072332 | 1061662 | neighbor of Brca1 gene 1                      | Nbr1  | 303554 | 1,04 | down |
| 5869425 | 7072332 | 1061658 | neighbor of Brca1 gene 1                      | Nbr1  | 303554 | 1,03 | up   |
| 5704138 | 7072332 | 1061666 | neighbor of Brca1 gene 1                      | Nbr1  | 303554 | 1,03 | down |
| 6238890 | 7072332 | 1061655 | neighbor of Brca1 gene 1                      | Nbr1  | 303554 | 1,02 | up   |
| 6153821 | 7072332 | 1061656 | neighbor of Brca1 gene 1                      | Nbr1  | 303554 | 1,02 | up   |
| 6329014 | 7072332 | 1061649 | neighbor of Brca1 gene 1                      | Nbr1  | 303554 | 1,02 | up   |
| 6233929 | 7072332 | 1061661 | neighbor of Brca1 gene 1                      | Nbr1  | 303554 | 1,00 | down |
| 6487156 | 7072332 | 1061649 | neighbor of Brca1 gene 1                      | Nbr1  | 303554 | 1,00 | up   |
| 6189865 | 7244602 | 1484769 | nephronophthisis 1 (juvenile) homolog (human) | Nphp1 | 296136 | 2,44 | up   |
| 6380836 | 7244602 | 1484778 | nephronophthisis 1 (juvenile) homolog (human) | Nphp1 | 296136 | 1,58 | down |
| 6548683 | 7244602 | 1484785 | nephronophthisis 1 (juvenile) homolog (human) | Nphp1 | 296136 | 1,56 | down |
| 6576375 | 7244602 | 1484758 | nephronophthisis 1 (juvenile) homolog (human) | Nphp1 | 296136 | 1,54 | up   |
| 6370618 | 7244602 | 1484781 | nephronophthisis 1 (juvenile) homolog (human) | Nphp1 | 296136 | 1,41 | up   |
| 5916041 | 7244602 | 1484773 | nephronophthisis 1 (juvenile) homolog (human) | Nphp1 | 296136 | 1,37 | up   |
| 6027014 | 7244602 | 1484776 | nephronophthisis 1 (juvenile) homolog (human) | Nphp1 | 296136 | 1,36 | up   |
| 6505337 | 7244602 | 1484758 | nephronophthisis 1 (juvenile) homolog (human) | Nphp1 | 296136 | 1,34 | down |
| 6086117 | 7244602 | 1484783 | nephronophthisis 1 (juvenile) homolog (human) | Nphp1 | 296136 | 1,34 | up   |
| 6418796 | 7244602 | 1484779 | nephronophthisis 1 (juvenile) homolog (human) | Nphp1 | 296136 | 1,23 | down |
| 6196270 | 7244602 | 1484784 | nephronophthisis 1 (juvenile) homolog (human) | Nphp1 | 296136 | 1,22 | down |
| 5724035 | 7244602 | 1484782 | nephronophthisis 1 (juvenile) homolog (human) | Nphp1 | 296136 | 1,20 | down |
| 5676480 | 7244602 | 1484769 | nephronophthisis 1 (juvenile) homolog (human) | Nphp1 | 296136 | 1,19 | down |
| 6572582 | 7244602 | 1484768 | nephronophthisis 1 (juvenile) homolog (human) | Nphp1 | 296136 | 1,19 | down |
| 5963560 | 7244602 | 1484763 | nephronophthisis 1 (juvenile) homolog (human) | Nphp1 | 296136 | 1,17 | down |
| 6053042 | 7244602 | 1484767 | nephronophthisis 1 (juvenile) homolog (human) | Nphp1 | 296136 | 1,16 | up   |
| 5698374 | 7244602 | 1484775 | nephronophthisis 1 (juvenile) homolog (human) | Nphp1 | 296136 | 1,13 | up   |
| 5685694 | 7244602 | 1484766 | nephronophthisis 1 (juvenile) homolog (human) | Nphp1 | 296136 | 1,13 | down |
| 6664437 | 7244602 | 1484774 | nephronophthisis 1 (juvenile) homolog (human) | Nphp1 | 296136 | 1,11 | up   |
| 5917955 | 7244602 | 1484773 | nephronophthisis 1 (juvenile) homolog (human) | Nphp1 | 296136 | 1,10 | up   |
| 5784837 | 7244602 | 1484758 | nephronophthisis 1 (juvenile) homolog (human) | Nphp1 | 296136 | 1,10 | up   |
| 5906558 | 7244602 | 1484759 | nephronophthisis 1 (juvenile) homolog (human) | Nphp1 | 296136 | 1,09 | up   |
| 6484173 | 7244602 | 1484786 | nephronophthisis 1 (juvenile) homolog (human) | Nphp1 | 296136 | 1,08 | down |
| 5943412 | 7244602 | 1484765 | nephronophthisis 1 (juvenile) homolog (human) | Nphp1 | 296136 | 1,05 | down |
| 6243784 | 7244602 | 1484772 | nephronophthisis 1 (juvenile) homolog (human) | Nphp1 | 296136 | 1,04 | up   |
| 6297900 | 7244602 | 1484777 | nephronophthisis 1 (juvenile) homolog (human) | Nphp1 | 296136 | 1,01 | down |
| 5822794 | 7244602 | 1484787 | nephronophthisis 1 (juvenile) homolog (human) | Nphp1 | 296136 | 1,01 | up   |
| 5986665 | 7030456 | 961574  | nephrosis 1 homolog, nephrin (human)          | Nphs1 | 64563  | 2,30 | up   |
| 6470357 | 7030456 | 961586  | nephrosis 1 homolog, nephrin (human)          | Nphs1 | 64563  | 1,83 | down |
| 6484692 | 7030456 | 961581  | nephrosis 1 homolog, nephrin (human)          | Nphs1 | 64563  | 1,69 | down |
| 6179737 | 7030456 | 961563  | nephrosis 1 homolog, nephrin (human)          | Nphs1 | 64563  | 1,58 | down |
| 5721648 | 7030456 | 961577  | nephrosis 1 homolog, nephrin (human)          | Nphs1 | 64563  | 1,55 | up   |
| 6746148 | 7030456 | 961584  | nephrosis 1 homolog, nephrin (human)          | Nphs1 | 64563  | 1,48 | up   |
| 5952192 | 7030456 | 961571  | nephrosis 1 homolog, nephrin (human)          | Nphs1 | 64563  | 1,47 | down |
| 6065067 | 7030456 | 961557  | nephrosis 1 homolog, nephrin (human)          | Nphs1 | 64563  | 1,45 | up   |
| 6133188 | 7030456 | 961566  | nephrosis 1 homolog, nephrin (human)          | Nphs1 | 64563  | 1,42 | down |
| 5850655 | 7030456 | 961580  | nephrosis 1 homolog, nephrin (human)          | Nphs1 | 64563  | 1,40 | down |
| 5664685 | 7030456 | 961579  | nephrosis 1 homolog, nephrin (human)          | Nphs1 | 64563  | 1,38 | up   |



|         |         |         |                                                                        |        |        |      |      |
|---------|---------|---------|------------------------------------------------------------------------|--------|--------|------|------|
| 6641092 | 7030456 | 961558  | nephrosis 1 homolog, nephrin (human)                                   | Nphs1  | 64563  | 1,37 | up   |
| 6013600 | 7030456 | 961578  | nephrosis 1 homolog, nephrin (human)                                   | Nphs1  | 64563  | 1,33 | down |
| 6609925 | 7030456 | 961582  | nephrosis 1 homolog, nephrin (human)                                   | Nphs1  | 64563  | 1,23 | up   |
| 6611873 | 7030456 | 961557  | nephrosis 1 homolog, nephrin (human)                                   | Nphs1  | 64563  | 1,21 | up   |
| 5732175 | 7030456 | 961585  | nephrosis 1 homolog, nephrin (human)                                   | Nphs1  | 64563  | 1,18 | up   |
| 6347188 | 7030456 | 961569  | nephrosis 1 homolog, nephrin (human)                                   | Nphs1  | 64563  | 1,17 | down |
| 6614050 | 7030456 | 961587  | nephrosis 1 homolog, nephrin (human)                                   | Nphs1  | 64563  | 1,14 | down |
| 6329602 | 7030456 | 961575  | nephrosis 1 homolog, nephrin (human)                                   | Nphs1  | 64563  | 1,13 | down |
| 6026401 | 7030456 | 961567  | nephrosis 1 homolog, nephrin (human)                                   | Nphs1  | 64563  | 1,13 | down |
| 5797391 | 7030456 | 961580  | nephrosis 1 homolog, nephrin (human)                                   | Nphs1  | 64563  | 1,12 | down |
| 6356790 | 7030456 | 961572  | nephrosis 1 homolog, nephrin (human)                                   | Nphs1  | 64563  | 1,12 | down |
| 6676547 | 7030456 | 961576  | nephrosis 1 homolog, nephrin (human)                                   | Nphs1  | 64563  | 1,11 | up   |
| 5638759 | 7030456 | 961565  | nephrosis 1 homolog, nephrin (human)                                   | Nphs1  | 64563  | 1,10 | up   |
| 6706833 | 7030456 | 961561  | nephrosis 1 homolog, nephrin (human)                                   | Nphs1  | 64563  | 1,09 | up   |
| 5879780 | 7030456 | 961557  | nephrosis 1 homolog, nephrin (human)                                   | Nphs1  | 64563  | 1,08 | up   |
| 5860405 | 7030456 | 961560  | nephrosis 1 homolog, nephrin (human)                                   | Nphs1  | 64563  | 1,07 | up   |
| 5770507 | 7030456 | 961573  | nephrosis 1 homolog, nephrin (human)                                   | Nphs1  | 64563  | 1,06 | up   |
| 5695740 | 7030456 | 961578  | nephrosis 1 homolog, nephrin (human)                                   | Nphs1  | 64563  | 1,05 | up   |
| 5726353 | 7030456 | 961564  | nephrosis 1 homolog, nephrin (human)                                   | Nphs1  | 64563  | 1,04 | up   |
| 6282738 | 7030456 | 961562  | nephrosis 1 homolog, nephrin (human)                                   | Nphs1  | 64563  | 1,03 | up   |
| 6502864 | 7030456 | 961583  | nephrosis 1 homolog, nephrin (human)                                   | Nphs1  | 64563  | 1,03 | down |
| 6559139 | 7030456 | 961583  | nephrosis 1 homolog, nephrin (human)                                   | Nphs1  | 64563  | 1,01 | up   |
| 5679587 | 7030456 | 961570  | nephrosis 1 homolog, nephrin (human)                                   | Nphs1  | 64563  | 1,01 | down |
| 5773590 | 7030456 | 961559  | nephrosis 1 homolog, nephrin (human)                                   | Nphs1  | 64563  | 1,01 | up   |
| 6161948 | 7030456 | 961568  | nephrosis 1 homolog, nephrin (human)                                   | Nphs1  | 64563  | 1,00 | up   |
| 6364837 | 7196006 | 1365566 | nestin                                                                 | Nes    | 25491  | 2,18 | up   |
| 6047145 | 7196006 | 1365569 | nestin                                                                 | Nes    | 25491  | 1,78 | down |
| 6312113 | 7196006 | 1365566 | nestin                                                                 | Nes    | 25491  | 1,75 | up   |
| 5956734 | 7196006 | 1365569 | nestin                                                                 | Nes    | 25491  | 1,52 | down |
| 6377100 | 7196006 | 1365569 | nestin                                                                 | Nes    | 25491  | 1,41 | up   |
| 6236365 | 7196006 | 1365569 | nestin                                                                 | Nes    | 25491  | 1,35 | down |
| 6330786 | 7196006 | 1365569 | nestin                                                                 | Nes    | 25491  | 1,22 | down |
| 6455124 | 7196006 | 1365570 | nestin                                                                 | Nes    | 25491  | 1,17 | down |
| 5663061 | 7196006 | 1365566 | nestin                                                                 | Nes    | 25491  | 1,17 | down |
| 6680307 | 7196006 | 1365567 | nestin                                                                 | Nes    | 25491  | 1,09 | down |
| 6365437 | 7196006 | 1365569 | nestin                                                                 | Nes    | 25491  | 1,07 | up   |
| 6493758 | 7196006 | 1365569 | nestin                                                                 | Nes    | 25491  | 1,05 | up   |
| 5779339 | 7196006 | 1365568 | nestin                                                                 | Nes    | 25491  | 1,04 | up   |
| 5719420 | 7237346 | 1466578 | netrin G2                                                              | Ntng2  | 311836 | 1,69 | down |
| 6416645 | 7237346 | 1466586 | netrin G2                                                              | Ntng2  | 311836 | 1,60 | up   |
| 6424430 | 7237346 | 1466582 | netrin G2                                                              | Ntng2  | 311836 | 1,58 | up   |
| 6231067 | 7237346 | 1466590 | netrin G2                                                              | Ntng2  | 311836 | 1,43 | down |
| 6252197 | 7237346 | 1466579 | netrin G2                                                              | Ntng2  | 311836 | 1,42 | down |
| 5627159 | 7237346 | 1466579 | netrin G2                                                              | Ntng2  | 311836 | 1,27 | up   |
| 5766476 | 7237346 | 1466576 | netrin G2                                                              | Ntng2  | 311836 | 1,09 | up   |
| 5768765 | 7237346 | 1466577 | netrin G2                                                              | Ntng2  | 311836 | 1,05 | down |
| 5860200 | 7237346 | 1466576 | netrin G2                                                              | Ntng2  | 311836 | 1,04 | up   |
| 6086841 | 7237346 | 1466583 | netrin G2                                                              | Ntng2  | 311836 | 1,01 | down |
| 6101469 | 7237346 | 1466590 | netrin G2                                                              | Ntng2  | 311836 | 1,00 | up   |
| 5674212 | 7237346 | 1466590 | netrin G2                                                              | Ntng2  | 311836 | 1,00 | up   |
| 5741766 | 7337872 | 1714427 | neural precursor cell expressed, developmentally down-regulated gene 4 | Neddd4 | 25489  | 1,68 | up   |
| 5971717 | 7337872 | 1714451 | neural precursor cell expressed, developmentally down-regulated gene 4 | Neddd4 | 25489  | 1,46 | down |
| 5706696 | 7337872 | 1714462 | neural precursor cell expressed, developmentally down-regulated gene 4 | Neddd4 | 25489  | 1,35 | down |
| 6122982 | 7337872 | 1714454 | neural precursor cell expressed, developmentally down-regulated gene 4 | Neddd4 | 25489  | 1,32 | up   |
| 6493995 | 7337872 | 1714461 | neural precursor cell expressed, developmentally down-regulated gene 4 | Neddd4 | 25489  | 1,31 | up   |
| 5619101 | 7337872 | 1714440 | neural precursor cell expressed, developmentally down-regulated gene 4 | Neddd4 | 25489  | 1,31 | down |
| 6487822 | 7337872 | 1714445 | neural precursor cell expressed, developmentally down-regulated gene 4 | Neddd4 | 25489  | 1,28 | down |

|         |         |         |                                                                        |        |        |      |      |
|---------|---------|---------|------------------------------------------------------------------------|--------|--------|------|------|
| 5648182 | 7337872 | 1714459 | neural precursor cell expressed, developmentally down-regulated gene 4 | Neddd4 | 25489  | 1,25 | up   |
| 6626151 | 7337872 | 1714432 | neural precursor cell expressed, developmentally down-regulated gene 4 | Neddd4 | 25489  | 1,22 | down |
| 6554683 | 7337872 | 1714438 | neural precursor cell expressed, developmentally down-regulated gene 4 | Neddd4 | 25489  | 1,17 | down |
| 6176253 | 7337872 | 1714452 | neural precursor cell expressed, developmentally down-regulated gene 4 | Neddd4 | 25489  | 1,15 | down |
| 5889503 | 7337872 | 1714441 | neural precursor cell expressed, developmentally down-regulated gene 4 | Neddd4 | 25489  | 1,13 | up   |
| 6315423 | 7337872 | 1714429 | neural precursor cell expressed, developmentally down-regulated gene 4 | Neddd4 | 25489  | 1,13 | up   |
| 5738020 | 7337872 | 1714449 | neural precursor cell expressed, developmentally down-regulated gene 4 | Neddd4 | 25489  | 1,13 | down |
| 6715796 | 7337872 | 1714444 | neural precursor cell expressed, developmentally down-regulated gene 4 | Neddd4 | 25489  | 1,13 | down |
| 5956049 | 7337872 | 1714460 | neural precursor cell expressed, developmentally down-regulated gene 4 | Neddd4 | 25489  | 1,12 | down |
| 5705193 | 7337872 | 1714442 | neural precursor cell expressed, developmentally down-regulated gene 4 | Neddd4 | 25489  | 1,10 | up   |
| 6443541 | 7337872 | 1714456 | neural precursor cell expressed, developmentally down-regulated gene 4 | Neddd4 | 25489  | 1,10 | down |
| 6100123 | 7337872 | 1714428 | neural precursor cell expressed, developmentally down-regulated gene 4 | Neddd4 | 25489  | 1,09 | up   |
| 6625501 | 7337872 | 1714455 | neural precursor cell expressed, developmentally down-regulated gene 4 | Neddd4 | 25489  | 1,09 | down |
| 5736592 | 7337872 | 1714441 | neural precursor cell expressed, developmentally down-regulated gene 4 | Neddd4 | 25489  | 1,08 | down |
| 6340032 | 7337872 | 1714463 | neural precursor cell expressed, developmentally down-regulated gene 4 | Neddd4 | 25489  | 1,06 | down |
| 6430425 | 7337872 | 1714442 | neural precursor cell expressed, developmentally down-regulated gene 4 | Neddd4 | 25489  | 1,06 | up   |
| 6309577 | 7337872 | 1714457 | neural precursor cell expressed, developmentally down-regulated gene 4 | Neddd4 | 25489  | 1,05 | down |
| 6355821 | 7337872 | 1714427 | neural precursor cell expressed, developmentally down-regulated gene 4 | Neddd4 | 25489  | 1,05 | down |
| 5689306 | 7337872 | 1714450 | neural precursor cell expressed, developmentally down-regulated gene 4 | Neddd4 | 25489  | 1,05 | down |
| 5994402 | 7337872 | 1714431 | neural precursor cell expressed, developmentally down-regulated gene 4 | Neddd4 | 25489  | 1,04 | up   |
| 5994146 | 7337872 | 1714463 | neural precursor cell expressed, developmentally down-regulated gene 4 | Neddd4 | 25489  | 1,04 | down |
| 5629630 | 7337872 | 1714442 | neural precursor cell expressed, developmentally down-regulated gene 4 | Neddd4 | 25489  | 1,04 | up   |
| 6332679 | 7337872 | 1714453 | neural precursor cell expressed, developmentally down-regulated gene 4 | Neddd4 | 25489  | 1,04 | up   |
| 5795409 | 7337872 | 1714439 | neural precursor cell expressed, developmentally down-regulated gene 4 | Neddd4 | 25489  | 1,03 | down |
| 6215210 | 7337872 | 1714448 | neural precursor cell expressed, developmentally down-regulated gene 4 | Neddd4 | 25489  | 1,02 | up   |
| 6007038 | 7337872 | 1714435 | neural precursor cell expressed, developmentally down-regulated gene 4 | Neddd4 | 25489  | 1,02 | up   |
| 6507558 | 7138220 | 1221616 | neural retina leucine zipper                                           | Nrl    | 290221 | 2,17 | down |
| 5683232 | 7138220 | 1221616 | neural retina leucine zipper                                           | Nrl    | 290221 | 1,06 | down |
| 6423508 | 7138220 | 1221618 | neural retina leucine zipper                                           | Nrl    | 290221 | 1,05 | down |
| 5918140 | 7138220 | 1221618 | neural retina leucine zipper                                           | Nrl    | 290221 | 1,03 | up   |
| 6430161 | 7146425 | 1241892 | neuregulin 1                                                           | Nrg1   | 112400 | 2,36 | up   |
| 6490295 | 7146425 | 1241882 | neuregulin 1                                                           | Nrg1   | 112400 | 2,19 | down |
| 5847150 | 7146425 | 1241892 | neuregulin 1                                                           | Nrg1   | 112400 | 2,07 | up   |
| 5654185 | 7146425 | 1241881 | neuregulin 1                                                           | Nrg1   | 112400 | 1,76 | down |
| 6569919 | 7146425 | 1241893 | neuregulin 1                                                           | Nrg1   | 112400 | 1,67 | down |
| 5937835 | 7146425 | 1241884 | neuregulin 1                                                           | Nrg1   | 112400 | 1,48 | down |
| 6374875 | 7146425 | 1241899 | neuregulin 1                                                           | Nrg1   | 112400 | 1,33 | up   |
| 5922168 | 7146425 | 1241885 | neuregulin 1                                                           | Nrg1   | 112400 | 1,20 | up   |
| 5778471 | 7146425 | 1241898 | neuregulin 1                                                           | Nrg1   | 112400 | 1,19 | up   |
| 6391989 | 7146425 | 1241894 | neuregulin 1                                                           | Nrg1   | 112400 | 1,18 | up   |
| 6114786 | 7146425 | 1241896 | neuregulin 1                                                           | Nrg1   | 112400 | 1,17 | down |
| 5803395 | 7146425 | 1241889 | neuregulin 1                                                           | Nrg1   | 112400 | 1,15 | down |
| 6415971 | 7146425 | 1241898 | neuregulin 1                                                           | Nrg1   | 112400 | 1,12 | down |
| 5972095 | 7146425 | 1241881 | neuregulin 1                                                           | Nrg1   | 112400 | 1,07 | down |
| 5974229 | 7146425 | 1241897 | neuregulin 1                                                           | Nrg1   | 112400 | 1,03 | down |
| 6309875 | 7146425 | 1241883 | neuregulin 1                                                           | Nrg1   | 112400 | 1,03 | down |
| 6051471 | 7146425 | 1241890 | neuregulin 1                                                           | Nrg1   | 112400 | 1,03 | up   |
| 6199684 | 7146425 | 1241899 | neuregulin 1                                                           | Nrg1   | 112400 | 1,02 | down |
| 6267329 | 7146425 | 1241895 | neuregulin 1                                                           | Nrg1   | 112400 | 1,01 | down |
| 5884524 | 7146425 | 1241888 | neuregulin 1                                                           | Nrg1   | 112400 | 1,01 | down |
| 5683863 | 7039308 | 983906  | neurexin 2                                                             | Nrxn2  | 116595 | 2,27 | down |
| 6373502 | 7039308 | 983920  | neurexin 2                                                             | Nrxn2  | 116595 | 2,13 | up   |
| 6400400 | 7039308 | 983906  | neurexin 2                                                             | Nrxn2  | 116595 | 1,86 | down |
| 5753281 | 7039308 | 983911  | neurexin 2                                                             | Nrxn2  | 116595 | 1,61 | up   |
| 5887349 | 7039308 | 983913  | neurexin 2                                                             | Nrxn2  | 116595 | 1,59 | up   |
| 6098082 | 7039308 | 983926  | neurexin 2                                                             | Nrxn2  | 116595 | 1,57 | down |
| 5915146 | 7039308 | 983924  | neurexin 2                                                             | Nrxn2  | 116595 | 1,39 | down |

|         |         |         |                     |        |        |      |      |
|---------|---------|---------|---------------------|--------|--------|------|------|
| 5977815 | 7039308 | 983928  | neurexin 2          | Nrxn2  | 116595 | 1,37 | up   |
| 5842951 | 7039308 | 983925  | neurexin 2          | Nrxn2  | 116595 | 1,35 | down |
| 6114478 | 7039308 | 983928  | neurexin 2          | Nrxn2  | 116595 | 1,30 | up   |
| 6389200 | 7039308 | 983928  | neurexin 2          | Nrxn2  | 116595 | 1,27 | down |
| 6284522 | 7039308 | 983910  | neurexin 2          | Nrxn2  | 116595 | 1,15 | up   |
| 5833435 | 7039308 | 983907  | neurexin 2          | Nrxn2  | 116595 | 1,13 | up   |
| 6643495 | 7039308 | 983929  | neurexin 2          | Nrxn2  | 116595 | 1,12 | down |
| 5893049 | 7039308 | 983928  | neurexin 2          | Nrxn2  | 116595 | 1,09 | down |
| 6347817 | 7039308 | 983918  | neurexin 2          | Nrxn2  | 116595 | 1,08 | down |
| 5909568 | 7039308 | 983916  | neurexin 2          | Nrxn2  | 116595 | 1,07 | up   |
| 6190897 | 7039308 | 983915  | neurexin 2          | Nrxn2  | 116595 | 1,07 | up   |
| 6742992 | 7039308 | 983914  | neurexin 2          | Nrxn2  | 116595 | 1,06 | down |
| 6001471 | 7039308 | 983923  | neurexin 2          | Nrxn2  | 116595 | 1,03 | up   |
| 6005125 | 7039308 | 983925  | neurexin 2          | Nrxn2  | 116595 | 1,03 | up   |
| 5895829 | 7039308 | 983922  | neurexin 2          | Nrxn2  | 116595 | 1,02 | up   |
| 6413816 | 7039308 | 983906  | neurexin 2          | Nrxn2  | 116595 | 1,02 | down |
| 6651694 | 7039308 | 983917  | neurexin 2          | Nrxn2  | 116595 | 1,01 | down |
| 6518974 | 7039308 | 983909  | neurexin 2          | Nrxn2  | 116595 | 1,01 | down |
| 5821209 | 7039308 | 983912  | neurexin 2          | Nrxn2  | 116595 | 1,01 | up   |
| 5929515 | 7039308 | 983927  | neurexin 2          | Nrxn2  | 116595 | 1,01 | up   |
| 5666098 | 7039308 | 983919  | neurexin 2          | Nrxn2  | 116595 | 1,00 | down |
| 6659659 | 7350237 | 1745525 | neurobeachin-like 2 | Nbeal2 | 316014 | 3,69 | up   |
| 5899439 | 7350237 | 1745508 | neurobeachin-like 2 | Nbeal2 | 316014 | 2,14 | up   |
| 6318566 | 7350237 | 1745525 | neurobeachin-like 2 | Nbeal2 | 316014 | 2,11 | up   |
| 6226204 | 7350237 | 1745506 | neurobeachin-like 2 | Nbeal2 | 316014 | 1,87 | up   |
| 5713625 | 7350237 | 1745515 | neurobeachin-like 2 | Nbeal2 | 316014 | 1,61 | down |
| 6363350 | 7350237 | 1745470 | neurobeachin-like 2 | Nbeal2 | 316014 | 1,57 | up   |
| 6525995 | 7350237 | 1745521 | neurobeachin-like 2 | Nbeal2 | 316014 | 1,44 | up   |
| 6249637 | 7350237 | 1745518 | neurobeachin-like 2 | Nbeal2 | 316014 | 1,41 | down |
| 6026793 | 7350237 | 1745508 | neurobeachin-like 2 | Nbeal2 | 316014 | 1,41 | up   |
| 5735714 | 7350237 | 1745508 | neurobeachin-like 2 | Nbeal2 | 316014 | 1,41 | down |
| 6059649 | 7350237 | 1745510 | neurobeachin-like 2 | Nbeal2 | 316014 | 1,38 | down |
| 5759539 | 7350237 | 1745522 | neurobeachin-like 2 | Nbeal2 | 316014 | 1,36 | up   |
| 6555888 | 7350237 | 1745525 | neurobeachin-like 2 | Nbeal2 | 316014 | 1,32 | up   |
| 6657139 | 7350237 | 1745500 | neurobeachin-like 2 | Nbeal2 | 316014 | 1,26 | down |
| 6745495 | 7350237 | 1745519 | neurobeachin-like 2 | Nbeal2 | 316014 | 1,26 | down |
| 5650855 | 7350237 | 1745501 | neurobeachin-like 2 | Nbeal2 | 316014 | 1,22 | down |
| 6354583 | 7350237 | 1745517 | neurobeachin-like 2 | Nbeal2 | 316014 | 1,20 | down |
| 5995368 | 7350237 | 1745514 | neurobeachin-like 2 | Nbeal2 | 316014 | 1,16 | down |
| 5651495 | 7350237 | 1745513 | neurobeachin-like 2 | Nbeal2 | 316014 | 1,16 | down |
| 5871841 | 7350237 | 1745507 | neurobeachin-like 2 | Nbeal2 | 316014 | 1,10 | down |
| 5816434 | 7350237 | 1745501 | neurobeachin-like 2 | Nbeal2 | 316014 | 1,08 | up   |
| 6217778 | 7350237 | 1745511 | neurobeachin-like 2 | Nbeal2 | 316014 | 1,07 | down |
| 6663364 | 7350237 | 1745509 | neurobeachin-like 2 | Nbeal2 | 316014 | 1,07 | down |
| 6434643 | 7350237 | 1745503 | neurobeachin-like 2 | Nbeal2 | 316014 | 1,06 | down |
| 6599189 | 7350237 | 1745520 | neurobeachin-like 2 | Nbeal2 | 316014 | 1,06 | up   |
| 5620525 | 7350237 | 1745502 | neurobeachin-like 2 | Nbeal2 | 316014 | 1,05 | up   |
| 5872857 | 7350237 | 1745499 | neurobeachin-like 2 | Nbeal2 | 316014 | 1,04 | down |
| 5884913 | 7350237 | 1745505 | neurobeachin-like 2 | Nbeal2 | 316014 | 1,04 | down |
| 6578679 | 7350237 | 1745504 | neurobeachin-like 2 | Nbeal2 | 316014 | 1,04 | down |
| 6500400 | 7350237 | 1745512 | neurobeachin-like 2 | Nbeal2 | 316014 | 1,03 | up   |
| 5759784 | 7350237 | 1745502 | neurobeachin-like 2 | Nbeal2 | 316014 | 1,02 | up   |
| 6613491 | 7350237 | 1745516 | neurobeachin-like 2 | Nbeal2 | 316014 | 1,00 | down |
| 6048660 | 7144354 | 1236686 | neurocan            | Ncan   | 58982  | 2,78 | down |
| 5774494 | 7144354 | 1236686 | neurocan            | Ncan   | 58982  | 1,83 | up   |
| 5861065 | 7144354 | 1236692 | neurocan            | Ncan   | 58982  | 1,75 | down |
| 6361272 | 7144354 | 1236693 | neurocan            | Ncan   | 58982  | 1,63 | up   |

|         |         |         |                                    |         |        |      |      |
|---------|---------|---------|------------------------------------|---------|--------|------|------|
| 6026246 | 7144354 | 1236685 | neurocan                           | Ncan    | 58982  | 1,45 | down |
| 6632955 | 7144354 | 1236683 | neurocan                           | Ncan    | 58982  | 1,37 | up   |
| 6736001 | 7144354 | 1236693 | neurocan                           | Ncan    | 58982  | 1,30 | down |
| 6093055 | 7144354 | 1236685 | neurocan                           | Ncan    | 58982  | 1,28 | down |
| 6234283 | 7144354 | 1236688 | neurocan                           | Ncan    | 58982  | 1,28 | down |
| 6281674 | 7144354 | 1236686 | neurocan                           | Ncan    | 58982  | 1,24 | down |
| 6691893 | 7144354 | 1236694 | neurocan                           | Ncan    | 58982  | 1,24 | up   |
| 5910599 | 7144354 | 1236687 | neurocan                           | Ncan    | 58982  | 1,23 | up   |
| 6304069 | 7144354 | 1236684 | neurocan                           | Ncan    | 58982  | 1,23 | up   |
| 6073007 | 7144354 | 1236681 | neurocan                           | Ncan    | 58982  | 1,21 | down |
| 6305152 | 7144354 | 1236682 | neurocan                           | Ncan    | 58982  | 1,20 | down |
| 6221391 | 7144354 | 1236686 | neurocan                           | Ncan    | 58982  | 1,18 | up   |
| 6188723 | 7144354 | 1236686 | neurocan                           | Ncan    | 58982  | 1,17 | down |
| 6118315 | 7144354 | 1236692 | neurocan                           | Ncan    | 58982  | 1,10 | down |
| 6641118 | 7144354 | 1236686 | neurocan                           | Ncan    | 58982  | 1,10 | down |
| 6285916 | 7144354 | 1236694 | neurocan                           | Ncan    | 58982  | 1,10 | down |
| 5624594 | 7144354 | 1236685 | neurocan                           | Ncan    | 58982  | 1,07 | down |
| 5838133 | 7144354 | 1236691 | neurocan                           | Ncan    | 58982  | 1,07 | down |
| 6299637 | 7144354 | 1236686 | neurocan                           | Ncan    | 58982  | 1,07 | up   |
| 6513028 | 7144354 | 1236683 | neurocan                           | Ncan    | 58982  | 1,07 | down |
| 6081148 | 7144354 | 1236689 | neurocan                           | Ncan    | 58982  | 1,06 | down |
| 5672186 | 7144354 | 1236686 | neurocan                           | Ncan    | 58982  | 1,05 | up   |
| 6303760 | 7144354 | 1236680 | neurocan                           | Ncan    | 58982  | 1,03 | down |
| 6742167 | 7144354 | 1236690 | neurocan                           | Ncan    | 58982  | 1,01 | down |
| 6030032 | 7144354 | 1236679 | neurocan                           | Ncan    | 58982  | 1,00 | up   |
| 6194392 | 7127790 | 1195840 | neurofilament, heavy polypeptide   | Nefh    | 24587  | 3,37 | up   |
| 6044690 | 7127790 | 1195836 | neurofilament, heavy polypeptide   | Nefh    | 24587  | 1,87 | up   |
| 6297390 | 7127790 | 1195838 | neurofilament, heavy polypeptide   | Nefh    | 24587  | 1,53 | down |
| 5800738 | 7127790 | 1195839 | neurofilament, heavy polypeptide   | Nefh    | 24587  | 1,41 | up   |
| 6153629 | 7127790 | 1195835 | neurofilament, heavy polypeptide   | Nefh    | 24587  | 1,29 | up   |
| 6169805 | 7127790 | 1195835 | neurofilament, heavy polypeptide   | Nefh    | 24587  | 1,18 | down |
| 6740507 | 7127790 | 1195835 | neurofilament, heavy polypeptide   | Nefh    | 24587  | 1,09 | down |
| 6648925 | 7127790 | 1195837 | neurofilament, heavy polypeptide   | Nefh    | 24587  | 1,02 | up   |
| 5891930 | 7127790 | 1195836 | neurofilament, heavy polypeptide   | Nefh    | 24587  | 1,00 | down |
| 6574241 | 7321746 | 1676233 | neurogenic differentiation 4       | Neurod4 | 288821 | 2,10 | down |
| 5767980 | 7321746 | 1676233 | neurogenic differentiation 4       | Neurod4 | 288821 | 2,00 | down |
| 6538285 | 7321746 | 1676233 | neurogenic differentiation 4       | Neurod4 | 288821 | 1,96 | up   |
| 6667065 | 7321746 | 1676232 | neurogenic differentiation 4       | Neurod4 | 288821 | 1,57 | down |
| 5700847 | 7321746 | 1676234 | neurogenic differentiation 4       | Neurod4 | 288821 | 1,50 | up   |
| 5997406 | 7321746 | 1676233 | neurogenic differentiation 4       | Neurod4 | 288821 | 1,33 | down |
| 5884186 | 7344200 | 1730665 | neurogranin                        | Nrgn    | 64356  | 3,18 | down |
| 5940077 | 7344200 | 1730664 | neurogranin                        | Nrgn    | 64356  | 1,70 | up   |
| 5754267 | 7344200 | 1730664 | neurogranin                        | Nrgn    | 64356  | 1,14 | down |
| 6678265 | 7344200 | 1730665 | neurogranin                        | Nrgn    | 64356  | 1,11 | up   |
| 6093968 | 7344200 | 1730663 | neurogranin                        | Nrgn    | 64356  | 1,07 | up   |
| 5797660 | 7344200 | 1730663 | neurogranin                        | Nrgn    | 64356  | 1,01 | up   |
| 6501527 | 7131805 | 1205913 | neuroguidin, EIF4E binding protein | Ngdn    | 305887 | 2,23 | up   |
| 5852251 | 7131805 | 1205912 | neuroguidin, EIF4E binding protein | Ngdn    | 305887 | 1,53 | up   |
| 5993645 | 7131805 | 1205910 | neuroguidin, EIF4E binding protein | Ngdn    | 305887 | 1,53 | up   |
| 6497508 | 7131805 | 1205917 | neuroguidin, EIF4E binding protein | Ngdn    | 305887 | 1,32 | up   |
| 6744150 | 7131805 | 1205916 | neuroguidin, EIF4E binding protein | Ngdn    | 305887 | 1,30 | down |
| 6114613 | 7131805 | 1205918 | neuroguidin, EIF4E binding protein | Ngdn    | 305887 | 1,22 | down |
| 6183669 | 7131805 | 1205911 | neuroguidin, EIF4E binding protein | Ngdn    | 305887 | 1,16 | up   |
| 5852286 | 7131805 | 1205913 | neuroguidin, EIF4E binding protein | Ngdn    | 305887 | 1,13 | up   |
| 6365255 | 7131805 | 1205906 | neuroguidin, EIF4E binding protein | Ngdn    | 305887 | 1,10 | down |
| 6587773 | 7131805 | 1205915 | neuroguidin, EIF4E binding protein | Ngdn    | 305887 | 1,06 | up   |
| 6069179 | 7131805 | 1205909 | neuroguidin, EIF4E binding protein | Ngdn    | 305887 | 1,03 | down |

|         |         |         |                                             |       |        |      |      |
|---------|---------|---------|---------------------------------------------|-------|--------|------|------|
| 5668317 | 7131805 | 1205914 | neuroguidin, EIF4E binding protein          | Ngdn  | 305887 | 1,02 | up   |
| 5682099 | 7203364 | 1383462 | neurolysin (metallopeptidase M3 family)     | Nln   | 117041 | 2,26 | down |
| 6038044 | 7203364 | 1383455 | neurolysin (metallopeptidase M3 family)     | Nln   | 117041 | 1,89 | up   |
| 5922520 | 7203364 | 1383457 | neurolysin (metallopeptidase M3 family)     | Nln   | 117041 | 1,73 | down |
| 6313033 | 7203364 | 1383458 | neurolysin (metallopeptidase M3 family)     | Nln   | 117041 | 1,41 | up   |
| 5974291 | 7203364 | 1383461 | neurolysin (metallopeptidase M3 family)     | Nln   | 117041 | 1,40 | down |
| 5788268 | 7203364 | 1383462 | neurolysin (metallopeptidase M3 family)     | Nln   | 117041 | 1,31 | down |
| 5726550 | 7203364 | 1383456 | neurolysin (metallopeptidase M3 family)     | Nln   | 117041 | 1,20 | up   |
| 6551616 | 7203364 | 1383452 | neurolysin (metallopeptidase M3 family)     | Nln   | 117041 | 1,18 | up   |
| 5938242 | 7203364 | 1383454 | neurolysin (metallopeptidase M3 family)     | Nln   | 117041 | 1,17 | down |
| 6704564 | 7203364 | 1383453 | neurolysin (metallopeptidase M3 family)     | Nln   | 117041 | 1,11 | down |
| 6116142 | 7203364 | 1383451 | neurolysin (metallopeptidase M3 family)     | Nln   | 117041 | 1,07 | down |
| 6617148 | 7203364 | 1383460 | neurolysin (metallopeptidase M3 family)     | Nln   | 117041 | 1,04 | down |
| 6113110 | 7203364 | 1383459 | neurolysin (metallopeptidase M3 family)     | Nln   | 117041 | 1,01 | up   |
| 6069020 | 7203364 | 1383463 | neurolysin (metallopeptidase M3 family)     | Nln   | 117041 | 1,00 | down |
| 5756287 | 7031774 | 964724  | neuron navigator 2                          | Nav2  | 171563 | 1,91 | up   |
| 5915771 | 7031774 | 964724  | neuron navigator 2                          | Nav2  | 171563 | 1,76 | up   |
| 6228146 | 7031774 | 964724  | neuron navigator 2                          | Nav2  | 171563 | 1,56 | up   |
| 6305953 | 7364948 | 1781225 | neuronal guanine nucleotide exchange factor | Ngef  | 246217 | 2,37 | down |
| 6433308 | 7364948 | 1781205 | neuronal guanine nucleotide exchange factor | Ngef  | 246217 | 1,84 | down |
| 6610007 | 7364948 | 1781209 | neuronal guanine nucleotide exchange factor | Ngef  | 246217 | 1,64 | up   |
| 6566085 | 7364948 | 1781216 | neuronal guanine nucleotide exchange factor | Ngef  | 246217 | 1,45 | up   |
| 6292634 | 7364948 | 1781221 | neuronal guanine nucleotide exchange factor | Ngef  | 246217 | 1,40 | up   |
| 5845481 | 7364948 | 1781206 | neuronal guanine nucleotide exchange factor | Ngef  | 246217 | 1,39 | up   |
| 6609621 | 7364948 | 1781205 | neuronal guanine nucleotide exchange factor | Ngef  | 246217 | 1,39 | down |
| 5673974 | 7364948 | 1781221 | neuronal guanine nucleotide exchange factor | Ngef  | 246217 | 1,15 | down |
| 6101674 | 7364948 | 1781213 | neuronal guanine nucleotide exchange factor | Ngef  | 246217 | 1,13 | down |
| 5859724 | 7364948 | 1781218 | neuronal guanine nucleotide exchange factor | Ngef  | 246217 | 1,12 | down |
| 6242944 | 7364948 | 1781212 | neuronal guanine nucleotide exchange factor | Ngef  | 246217 | 1,12 | up   |
| 6199974 | 7364948 | 1781210 | neuronal guanine nucleotide exchange factor | Ngef  | 246217 | 1,11 | down |
| 5744954 | 7364948 | 1781220 | neuronal guanine nucleotide exchange factor | Ngef  | 246217 | 1,11 | up   |
| 5984633 | 7364948 | 1781211 | neuronal guanine nucleotide exchange factor | Ngef  | 246217 | 1,10 | up   |
| 6262831 | 7364948 | 1781208 | neuronal guanine nucleotide exchange factor | Ngef  | 246217 | 1,08 | up   |
| 5781426 | 7364948 | 1781223 | neuronal guanine nucleotide exchange factor | Ngef  | 246217 | 1,07 | up   |
| 5873523 | 7364948 | 1781221 | neuronal guanine nucleotide exchange factor | Ngef  | 246217 | 1,04 | up   |
| 6240738 | 7364948 | 1781205 | neuronal guanine nucleotide exchange factor | Ngef  | 246217 | 1,03 | down |
| 6467571 | 7364948 | 1781205 | neuronal guanine nucleotide exchange factor | Ngef  | 246217 | 1,03 | down |
| 5801553 | 7298101 | 1617050 | neuronal PAS domain protein 3               | Npas3 | 299016 | 1,23 | down |
| 5807250 | 7306229 | 1638265 | neuro-oncological ventral antigen 1         | Nova1 | 298992 | 1,36 | up   |
| 6475056 | 7306229 | 1638246 | neuro-oncological ventral antigen 1         | Nova1 | 298992 | 1,23 | up   |
| 6187856 | 7306229 | 1638246 | neuro-oncological ventral antigen 1         | Nova1 | 298992 | 1,13 | up   |
| 5633323 | 7306229 | 1638262 | neuro-oncological ventral antigen 1         | Nova1 | 298992 | 1,12 | down |
| 6165514 | 7306229 | 1638252 | neuro-oncological ventral antigen 1         | Nova1 | 298992 | 1,10 | down |
| 6490223 | 7182255 | 1331278 | neuropilin 1                                | Nrp1  | 246331 | 2,03 | up   |
| 6606379 | 7182255 | 1331282 | neuropilin 1                                | Nrp1  | 246331 | 1,96 | down |
| 5826522 | 7182255 | 1331274 | neuropilin 1                                | Nrp1  | 246331 | 1,81 | up   |
| 6621167 | 7182255 | 1331276 | neuropilin 1                                | Nrp1  | 246331 | 1,70 | up   |
| 6253449 | 7182255 | 1331280 | neuropilin 1                                | Nrp1  | 246331 | 1,35 | up   |
| 6590605 | 7182255 | 1331279 | neuropilin 1                                | Nrp1  | 246331 | 1,30 | up   |
| 6004935 | 7182255 | 1331285 | neuropilin 1                                | Nrp1  | 246331 | 1,26 | down |
| 5703112 | 7182255 | 1331275 | neuropilin 1                                | Nrp1  | 246331 | 1,24 | down |
| 6134348 | 7182255 | 1331272 | neuropilin 1                                | Nrp1  | 246331 | 1,23 | down |
| 5695831 | 7182255 | 1331281 | neuropilin 1                                | Nrp1  | 246331 | 1,22 | up   |
| 6027269 | 7182255 | 1331273 | neuropilin 1                                | Nrp1  | 246331 | 1,22 | up   |
| 5942697 | 7182255 | 1331272 | neuropilin 1                                | Nrp1  | 246331 | 1,19 | down |
| 5885957 | 7182255 | 1331280 | neuropilin 1                                | Nrp1  | 246331 | 1,17 | down |
| 5945717 | 7182255 | 1331285 | neuropilin 1                                | Nrp1  | 246331 | 1,16 | down |

|         |         |         |                                                                 |       |        |      |      |
|---------|---------|---------|-----------------------------------------------------------------|-------|--------|------|------|
| 6248968 | 7182255 | 1331272 | neuropilin 1                                                    | Nrp1  | 246331 | 1,14 | up   |
| 5785290 | 7182255 | 1331288 | neuropilin 1                                                    | Nrp1  | 246331 | 1,13 | down |
| 5961865 | 7182255 | 1331272 | neuropilin 1                                                    | Nrp1  | 246331 | 1,12 | up   |
| 6260469 | 7182255 | 1331286 | neuropilin 1                                                    | Nrp1  | 246331 | 1,12 | down |
| 5809136 | 7182255 | 1331280 | neuropilin 1                                                    | Nrp1  | 246331 | 1,11 | up   |
| 5787201 | 7182255 | 1331272 | neuropilin 1                                                    | Nrp1  | 246331 | 1,07 | up   |
| 6671527 | 7182255 | 1331284 | neuropilin 1                                                    | Nrp1  | 246331 | 1,06 | down |
| 6114657 | 7182255 | 1331283 | neuropilin 1                                                    | Nrp1  | 246331 | 1,06 | down |
| 6077621 | 7182255 | 1331287 | neuropilin 1                                                    | Nrp1  | 246331 | 1,05 | up   |
| 5642889 | 7182255 | 1331271 | neuropilin 1                                                    | Nrp1  | 246331 | 1,04 | up   |
| 6523691 | 7182255 | 1331285 | neuropilin 1                                                    | Nrp1  | 246331 | 1,02 | down |
| 6734080 | 7182255 | 1331285 | neuropilin 1                                                    | Nrp1  | 246331 | 1,01 | down |
| 6689106 | 7182255 | 1331277 | neuropilin 1                                                    | Nrp1  | 246331 | 1,01 | down |
| 6624627 | 7343532 | 1728935 | neurotrimin                                                     | Hnt   | 50864  | 3,55 | up   |
| 6117753 | 7343532 | 1728930 | neurotrimin                                                     | Hnt   | 50864  | 3,21 | down |
| 5704521 | 7343532 | 1728936 | neurotrimin                                                     | Hnt   | 50864  | 2,39 | up   |
| 5839759 | 7343532 | 1728937 | neurotrimin                                                     | Hnt   | 50864  | 2,15 | up   |
| 5768217 | 7343532 | 1728933 | neurotrimin                                                     | Hnt   | 50864  | 2,00 | down |
| 6732385 | 7343532 | 1728932 | neurotrimin                                                     | Hnt   | 50864  | 1,41 | down |
| 6149758 | 7343532 | 1728931 | neurotrimin                                                     | Hnt   | 50864  | 1,34 | down |
| 6645692 | 7343532 | 1728934 | neurotrimin                                                     | Hnt   | 50864  | 1,05 | up   |
| 5863461 | 7161672 | 1279505 | neurotrophic tyrosine kinase, receptor, type 2                  | Ntrk2 | 25054  | 2,73 | up   |
| 6260069 | 7161672 | 1279506 | neurotrophic tyrosine kinase, receptor, type 2                  | Ntrk2 | 25054  | 2,28 | up   |
| 5829200 | 7161672 | 1279504 | neurotrophic tyrosine kinase, receptor, type 2                  | Ntrk2 | 25054  | 2,18 | up   |
| 5711686 | 7161672 | 1279502 | neurotrophic tyrosine kinase, receptor, type 2                  | Ntrk2 | 25054  | 2,01 | up   |
| 6267171 | 7161672 | 1279501 | neurotrophic tyrosine kinase, receptor, type 2                  | Ntrk2 | 25054  | 1,94 | up   |
| 6338793 | 7161672 | 1279510 | neurotrophic tyrosine kinase, receptor, type 2                  | Ntrk2 | 25054  | 1,71 | up   |
| 5846086 | 7161672 | 1279511 | neurotrophic tyrosine kinase, receptor, type 2                  | Ntrk2 | 25054  | 1,66 | down |
| 6090229 | 7161672 | 1279519 | neurotrophic tyrosine kinase, receptor, type 2                  | Ntrk2 | 25054  | 1,59 | down |
| 6721814 | 7161672 | 1279508 | neurotrophic tyrosine kinase, receptor, type 2                  | Ntrk2 | 25054  | 1,51 | up   |
| 6355013 | 7161672 | 1279517 | neurotrophic tyrosine kinase, receptor, type 2                  | Ntrk2 | 25054  | 1,50 | down |
| 6287989 | 7161672 | 1279508 | neurotrophic tyrosine kinase, receptor, type 2                  | Ntrk2 | 25054  | 1,47 | down |
| 5869251 | 7161672 | 1279520 | neurotrophic tyrosine kinase, receptor, type 2                  | Ntrk2 | 25054  | 1,43 | down |
| 6243425 | 7161672 | 1279509 | neurotrophic tyrosine kinase, receptor, type 2                  | Ntrk2 | 25054  | 1,43 | up   |
| 5850348 | 7161672 | 1279513 | neurotrophic tyrosine kinase, receptor, type 2                  | Ntrk2 | 25054  | 1,42 | down |
| 6464986 | 7161672 | 1279514 | neurotrophic tyrosine kinase, receptor, type 2                  | Ntrk2 | 25054  | 1,38 | down |
| 6211984 | 7161672 | 1279518 | neurotrophic tyrosine kinase, receptor, type 2                  | Ntrk2 | 25054  | 1,38 | down |
| 6434715 | 7161672 | 1279520 | neurotrophic tyrosine kinase, receptor, type 2                  | Ntrk2 | 25054  | 1,38 | down |
| 6444403 | 7161672 | 1279507 | neurotrophic tyrosine kinase, receptor, type 2                  | Ntrk2 | 25054  | 1,37 | up   |
| 5678017 | 7161672 | 1279510 | neurotrophic tyrosine kinase, receptor, type 2                  | Ntrk2 | 25054  | 1,22 | up   |
| 6144805 | 7161672 | 1279510 | neurotrophic tyrosine kinase, receptor, type 2                  | Ntrk2 | 25054  | 1,22 | down |
| 6633271 | 7161672 | 1279509 | neurotrophic tyrosine kinase, receptor, type 2                  | Ntrk2 | 25054  | 1,21 | up   |
| 5645197 | 7161672 | 1279515 | neurotrophic tyrosine kinase, receptor, type 2                  | Ntrk2 | 25054  | 1,12 | down |
| 6344940 | 7161672 | 1279503 | neurotrophic tyrosine kinase, receptor, type 2                  | Ntrk2 | 25054  | 1,09 | up   |
| 6467051 | 7161672 | 1279509 | neurotrophic tyrosine kinase, receptor, type 2                  | Ntrk2 | 25054  | 1,08 | up   |
| 5621324 | 7161672 | 1279521 | neurotrophic tyrosine kinase, receptor, type 2                  | Ntrk2 | 25054  | 1,04 | down |
| 5863436 | 7161672 | 1279516 | neurotrophic tyrosine kinase, receptor, type 2                  | Ntrk2 | 25054  | 1,03 | up   |
| 6212815 | 7161672 | 1279509 | neurotrophic tyrosine kinase, receptor, type 2                  | Ntrk2 | 25054  | 1,02 | up   |
| 6116897 | 7161672 | 1279512 | neurotrophic tyrosine kinase, receptor, type 2                  | Ntrk2 | 25054  | 1,01 | down |
| 6248362 | 7283429 | 1581211 | neutral sphingomyelinase (N-SMase) activation associated factor | Nsmaf | 353233 | 2,28 | down |
| 6256059 | 7283429 | 1581212 | neutral sphingomyelinase (N-SMase) activation associated factor | Nsmaf | 353233 | 1,86 | down |
| 5720427 | 7283429 | 1581220 | neutral sphingomyelinase (N-SMase) activation associated factor | Nsmaf | 353233 | 1,59 | up   |
| 5775309 | 7283429 | 1581206 | neutral sphingomyelinase (N-SMase) activation associated factor | Nsmaf | 353233 | 1,56 | up   |
| 6525917 | 7283429 | 1581233 | neutral sphingomyelinase (N-SMase) activation associated factor | Nsmaf | 353233 | 1,28 | down |
| 5716714 | 7283429 | 1581216 | neutral sphingomyelinase (N-SMase) activation associated factor | Nsmaf | 353233 | 1,27 | down |
| 6239308 | 7283429 | 1581229 | neutral sphingomyelinase (N-SMase) activation associated factor | Nsmaf | 353233 | 1,27 | down |
| 6570102 | 7283429 | 1581210 | neutral sphingomyelinase (N-SMase) activation associated factor | Nsmaf | 353233 | 1,21 | down |

|         |         |         |                                                                 |       |        |      |      |
|---------|---------|---------|-----------------------------------------------------------------|-------|--------|------|------|
| 6240000 | 7283429 | 1581231 | neutral sphingomyelinase (N-SMase) activation associated factor | Nsmaf | 353233 | 1,21 | up   |
| 6313960 | 7283429 | 1581221 | neutral sphingomyelinase (N-SMase) activation associated factor | Nsmaf | 353233 | 1,20 | up   |
| 5623499 | 7283429 | 1581209 | neutral sphingomyelinase (N-SMase) activation associated factor | Nsmaf | 353233 | 1,19 | down |
| 6057854 | 7283429 | 1581223 | neutral sphingomyelinase (N-SMase) activation associated factor | Nsmaf | 353233 | 1,18 | down |
| 6515753 | 7283429 | 1581215 | neutral sphingomyelinase (N-SMase) activation associated factor | Nsmaf | 353233 | 1,18 | up   |
| 6403988 | 7283429 | 1581207 | neutral sphingomyelinase (N-SMase) activation associated factor | Nsmaf | 353233 | 1,17 | up   |
| 6431060 | 7283429 | 1581218 | neutral sphingomyelinase (N-SMase) activation associated factor | Nsmaf | 353233 | 1,17 | up   |
| 5941594 | 7283429 | 1581214 | neutral sphingomyelinase (N-SMase) activation associated factor | Nsmaf | 353233 | 1,16 | up   |
| 6242339 | 7283429 | 1581210 | neutral sphingomyelinase (N-SMase) activation associated factor | Nsmaf | 353233 | 1,16 | up   |
| 6164176 | 7283429 | 1581222 | neutral sphingomyelinase (N-SMase) activation associated factor | Nsmaf | 353233 | 1,14 | up   |
| 6341931 | 7283429 | 1581217 | neutral sphingomyelinase (N-SMase) activation associated factor | Nsmaf | 353233 | 1,11 | down |
| 6220966 | 7283429 | 1581234 | neutral sphingomyelinase (N-SMase) activation associated factor | Nsmaf | 353233 | 1,10 | up   |
| 6268947 | 7283429 | 1581208 | neutral sphingomyelinase (N-SMase) activation associated factor | Nsmaf | 353233 | 1,07 | down |
| 6335563 | 7283429 | 1581228 | neutral sphingomyelinase (N-SMase) activation associated factor | Nsmaf | 353233 | 1,07 | up   |
| 6168294 | 7283429 | 1581205 | neutral sphingomyelinase (N-SMase) activation associated factor | Nsmaf | 353233 | 1,06 | up   |
| 5991529 | 7283429 | 1581226 | neutral sphingomyelinase (N-SMase) activation associated factor | Nsmaf | 353233 | 1,06 | up   |
| 5911749 | 7283429 | 1581213 | neutral sphingomyelinase (N-SMase) activation associated factor | Nsmaf | 353233 | 1,06 | down |
| 5867968 | 7283429 | 1581230 | neutral sphingomyelinase (N-SMase) activation associated factor | Nsmaf | 353233 | 1,03 | down |
| 6596159 | 7283429 | 1581224 | neutral sphingomyelinase (N-SMase) activation associated factor | Nsmaf | 353233 | 1,03 | up   |
| 6090791 | 7283429 | 1581227 | neutral sphingomyelinase (N-SMase) activation associated factor | Nsmaf | 353233 | 1,02 | up   |
| 6730165 | 7283429 | 1581225 | neutral sphingomyelinase (N-SMase) activation associated factor | Nsmaf | 353233 | 1,02 | up   |
| 6485692 | 7283429 | 1581232 | neutral sphingomyelinase (N-SMase) activation associated factor | Nsmaf | 353233 | 1,01 | up   |
| 5886071 | 7283429 | 1581226 | neutral sphingomyelinase (N-SMase) activation associated factor | Nsmaf | 353233 | 1,00 | down |
| 5621586 | 7330181 | 1695706 | NFAT activating protein with ITAM motif 1                       | Nfam1 | 362966 | 2,73 | down |
| 6744163 | 7330181 | 1695706 | NFAT activating protein with ITAM motif 1                       | Nfam1 | 362966 | 1,25 | up   |
| 6418123 | 7330181 | 1695703 | NFAT activating protein with ITAM motif 1                       | Nfam1 | 362966 | 1,16 | up   |
| 6150081 | 7330181 | 1695705 | NFAT activating protein with ITAM motif 1                       | Nfam1 | 362966 | 1,06 | up   |
| 6244553 | 7330181 | 1695697 | NFAT activating protein with ITAM motif 1                       | Nfam1 | 362966 | 1,00 | down |
| 6154399 | 7273022 | 1555424 | nibrin                                                          | Nbn   | 85482  | 2,52 | up   |
| 6681304 | 7273022 | 1555422 | nibrin                                                          | Nbn   | 85482  | 1,50 | down |
| 6615817 | 7273022 | 1555416 | nibrin                                                          | Nbn   | 85482  | 1,44 | up   |
| 6479668 | 7273022 | 1555428 | nibrin                                                          | Nbn   | 85482  | 1,43 | up   |
| 5829857 | 7273022 | 1555426 | nibrin                                                          | Nbn   | 85482  | 1,24 | up   |
| 5755466 | 7273022 | 1555414 | nibrin                                                          | Nbn   | 85482  | 1,24 | up   |
| 6300153 | 7273022 | 1555425 | nibrin                                                          | Nbn   | 85482  | 1,23 | down |
| 6554762 | 7273022 | 1555427 | nibrin                                                          | Nbn   | 85482  | 1,21 | down |
| 5762658 | 7273022 | 1555429 | nibrin                                                          | Nbn   | 85482  | 1,20 | down |
| 5684394 | 7273022 | 1555429 | nibrin                                                          | Nbn   | 85482  | 1,18 | down |
| 5827214 | 7273022 | 1555413 | nibrin                                                          | Nbn   | 85482  | 1,18 | down |
| 5665202 | 7273022 | 1555429 | nibrin                                                          | Nbn   | 85482  | 1,17 | down |
| 6547220 | 7273022 | 1555421 | nibrin                                                          | Nbn   | 85482  | 1,10 | up   |
| 6217964 | 7273022 | 1555418 | nibrin                                                          | Nbn   | 85482  | 1,09 | down |
| 6340735 | 7273022 | 1555415 | nibrin                                                          | Nbn   | 85482  | 1,08 | down |
| 6088238 | 7273022 | 1555419 | nibrin                                                          | Nbn   | 85482  | 1,05 | down |
| 6612081 | 7273022 | 1555422 | nibrin                                                          | Nbn   | 85482  | 1,05 | up   |
| 6735257 | 7273022 | 1555420 | nibrin                                                          | Nbn   | 85482  | 1,03 | up   |
| 5934876 | 7273022 | 1555423 | nibrin                                                          | Nbn   | 85482  | 1,03 | up   |
| 6694383 | 7273022 | 1555417 | nibrin                                                          | Nbn   | 85482  | 1,02 | down |
| 6075100 | 7114149 | 1162537 | nicastrin                                                       | Ncstn | 289231 | 2,78 | up   |
| 6113387 | 7114149 | 1162539 | nicastrin                                                       | Ncstn | 289231 | 2,22 | up   |
| 6267750 | 7114149 | 1162521 | nicastrin                                                       | Ncstn | 289231 | 1,49 | up   |
| 6025543 | 7114149 | 1162532 | nicastrin                                                       | Ncstn | 289231 | 1,30 | down |
| 6078723 | 7114149 | 1162538 | nicastrin                                                       | Ncstn | 289231 | 1,20 | down |
| 6458065 | 7114149 | 1162534 | nicastrin                                                       | Ncstn | 289231 | 1,18 | up   |
| 6511010 | 7114149 | 1162527 | nicastrin                                                       | Ncstn | 289231 | 1,16 | down |
| 6441554 | 7114149 | 1162539 | nicastrin                                                       | Ncstn | 289231 | 1,16 | down |
| 5627250 | 7114149 | 1162535 | nicastrin                                                       | Ncstn | 289231 | 1,14 | down |

|         |         |         |                                                          |        |        |      |      |
|---------|---------|---------|----------------------------------------------------------|--------|--------|------|------|
| 5999460 | 7114149 | 1162536 | nicastrin                                                | Ncstn  | 289231 | 1,14 | up   |
| 5765182 | 7114149 | 1162526 | nicastrin                                                | Ncstn  | 289231 | 1,12 | up   |
| 6376266 | 7114149 | 1162523 | nicastrin                                                | Ncstn  | 289231 | 1,12 | down |
| 6193214 | 7114149 | 1162533 | nicastrin                                                | Ncstn  | 289231 | 1,11 | up   |
| 5992365 | 7114149 | 1162536 | nicastrin                                                | Ncstn  | 289231 | 1,09 | up   |
| 6219691 | 7114149 | 1162524 | nicastrin                                                | Ncstn  | 289231 | 1,07 | up   |
| 5992458 | 7114149 | 1162522 | nicastrin                                                | Ncstn  | 289231 | 1,05 | up   |
| 6391342 | 7114149 | 1162521 | nicastrin                                                | Ncstn  | 289231 | 1,04 | down |
| 6138012 | 7114149 | 1162531 | nicastrin                                                | Ncstn  | 289231 | 1,03 | up   |
| 6658752 | 7114149 | 1162530 | nicastrin                                                | Ncstn  | 289231 | 1,03 | up   |
| 6683551 | 7114149 | 1162524 | nicastrin                                                | Ncstn  | 289231 | 1,02 | up   |
| 5969722 | 7114149 | 1162529 | nicastrin                                                | Ncstn  | 289231 | 1,01 | down |
| 6101367 | 7114149 | 1162525 | nicastrin                                                | Ncstn  | 289231 | 1,00 | up   |
| 6056433 | 7114149 | 1162528 | nicastrin                                                | Ncstn  | 289231 | 1,00 | down |
| 5995047 | 7329027 | 1693293 | nicotinate phosphoribosyltransferase domain containing 1 | Naprt1 | 315085 | 2,43 | up   |
| 5667549 | 7329027 | 1693292 | nicotinate phosphoribosyltransferase domain containing 1 | Naprt1 | 315085 | 1,92 | up   |
| 6468393 | 7329027 | 1693299 | nicotinate phosphoribosyltransferase domain containing 1 | Naprt1 | 315085 | 1,85 | up   |
| 6129604 | 7329027 | 1693299 | nicotinate phosphoribosyltransferase domain containing 1 | Naprt1 | 315085 | 1,53 | down |
| 6707397 | 7329027 | 1693301 | nicotinate phosphoribosyltransferase domain containing 1 | Naprt1 | 315085 | 1,36 | up   |
| 6538683 | 7329027 | 1693302 | nicotinate phosphoribosyltransferase domain containing 1 | Naprt1 | 315085 | 1,34 | down |
| 5902277 | 7329027 | 1693289 | nicotinate phosphoribosyltransferase domain containing 1 | Naprt1 | 315085 | 1,28 | down |
| 6247267 | 7329027 | 1693298 | nicotinate phosphoribosyltransferase domain containing 1 | Naprt1 | 315085 | 1,24 | down |
| 6077377 | 7329027 | 1693295 | nicotinate phosphoribosyltransferase domain containing 1 | Naprt1 | 315085 | 1,24 | down |
| 5755551 | 7329027 | 1693302 | nicotinate phosphoribosyltransferase domain containing 1 | Naprt1 | 315085 | 1,21 | down |
| 6107747 | 7329027 | 1693296 | nicotinate phosphoribosyltransferase domain containing 1 | Naprt1 | 315085 | 1,15 | up   |
| 6067817 | 7329027 | 1693290 | nicotinate phosphoribosyltransferase domain containing 1 | Naprt1 | 315085 | 1,15 | up   |
| 6692707 | 7329027 | 1693297 | nicotinate phosphoribosyltransferase domain containing 1 | Naprt1 | 315085 | 1,09 | up   |
| 6656570 | 7329027 | 1693291 | nicotinate phosphoribosyltransferase domain containing 1 | Naprt1 | 315085 | 1,07 | down |
| 6052770 | 7329027 | 1693294 | nicotinate phosphoribosyltransferase domain containing 1 | Naprt1 | 315085 | 1,07 | up   |
| 6562359 | 7329027 | 1693301 | nicotinate phosphoribosyltransferase domain containing 1 | Naprt1 | 315085 | 1,05 | up   |
| 5652310 | 7329027 | 1693300 | nicotinate phosphoribosyltransferase domain containing 1 | Naprt1 | 315085 | 1,05 | up   |
| 6374387 | 7329027 | 1693298 | nicotinate phosphoribosyltransferase domain containing 1 | Naprt1 | 315085 | 1,03 | down |
| 5840981 | 7354896 | 1756999 | NIF3 NGG1 interacting factor 3-like 1 (S. pombe)         | Nif311 | 301431 | 1,40 | up   |
| 5828612 | 7354896 | 1756997 | NIF3 NGG1 interacting factor 3-like 1 (S. pombe)         | Nif311 | 301431 | 1,38 | up   |
| 6158695 | 7354896 | 1756995 | NIF3 NGG1 interacting factor 3-like 1 (S. pombe)         | Nif311 | 301431 | 1,25 | up   |
| 5885714 | 7354896 | 1757003 | NIF3 NGG1 interacting factor 3-like 1 (S. pombe)         | Nif311 | 301431 | 1,24 | up   |
| 6142149 | 7354896 | 1756996 | NIF3 NGG1 interacting factor 3-like 1 (S. pombe)         | Nif311 | 301431 | 1,15 | up   |
| 6336784 | 7354896 | 1757003 | NIF3 NGG1 interacting factor 3-like 1 (S. pombe)         | Nif311 | 301431 | 1,12 | up   |
| 5648682 | 7354896 | 1756996 | NIF3 NGG1 interacting factor 3-like 1 (S. pombe)         | Nif311 | 301431 | 1,10 | up   |
| 6349558 | 7354896 | 1757001 | NIF3 NGG1 interacting factor 3-like 1 (S. pombe)         | Nif311 | 301431 | 1,05 | up   |
| 5825088 | 7354896 | 1756996 | NIF3 NGG1 interacting factor 3-like 1 (S. pombe)         | Nif311 | 301431 | 1,03 | up   |
| 6118289 | 7354896 | 1756998 | NIF3 NGG1 interacting factor 3-like 1 (S. pombe)         | Nif311 | 301431 | 1,03 | up   |
| 5629095 | 7349643 | 1744172 | NIMA (never in mitosis gene a)- related kinase 11        | Nek11  | 315978 | 2,04 | down |
| 6111666 | 7349643 | 1744167 | NIMA (never in mitosis gene a)- related kinase 11        | Nek11  | 315978 | 1,87 | down |
| 6166137 | 7349643 | 1744183 | NIMA (never in mitosis gene a)- related kinase 11        | Nek11  | 315978 | 1,81 | down |
| 6313330 | 7349643 | 1744173 | NIMA (never in mitosis gene a)- related kinase 11        | Nek11  | 315978 | 1,79 | down |
| 6024355 | 7349643 | 1744194 | NIMA (never in mitosis gene a)- related kinase 11        | Nek11  | 315978 | 1,75 | down |
| 6533593 | 7349643 | 1744191 | NIMA (never in mitosis gene a)- related kinase 11        | Nek11  | 315978 | 1,70 | down |
| 5728952 | 7349643 | 1744179 | NIMA (never in mitosis gene a)- related kinase 11        | Nek11  | 315978 | 1,68 | down |
| 6631845 | 7349643 | 1744164 | NIMA (never in mitosis gene a)- related kinase 11        | Nek11  | 315978 | 1,64 | down |
| 6300847 | 7349643 | 1744155 | NIMA (never in mitosis gene a)- related kinase 11        | Nek11  | 315978 | 1,55 | down |
| 5925157 | 7349643 | 1744155 | NIMA (never in mitosis gene a)- related kinase 11        | Nek11  | 315978 | 1,54 | up   |
| 6163319 | 7349643 | 1744171 | NIMA (never in mitosis gene a)- related kinase 11        | Nek11  | 315978 | 1,44 | down |
| 6131103 | 7349643 | 1744169 | NIMA (never in mitosis gene a)- related kinase 11        | Nek11  | 315978 | 1,32 | up   |
| 6471335 | 7349643 | 1744175 | NIMA (never in mitosis gene a)- related kinase 11        | Nek11  | 315978 | 1,23 | up   |
| 6645941 | 7349643 | 1744168 | NIMA (never in mitosis gene a)- related kinase 11        | Nek11  | 315978 | 1,10 | up   |
| 5713276 | 7349643 | 1744183 | NIMA (never in mitosis gene a)- related kinase 11        | Nek11  | 315978 | 1,08 | up   |



|         |         |         |                                                   |       |        |      |      |
|---------|---------|---------|---------------------------------------------------|-------|--------|------|------|
| 6640378 | 7349643 | 1744155 | NIMA (never in mitosis gene a)- related kinase 11 | Nek11 | 315978 | 1,06 | up   |
| 6338480 | 7349643 | 1744193 | NIMA (never in mitosis gene a)- related kinase 11 | Nek11 | 315978 | 1,03 | down |
| 5957275 | 7246548 | 1489166 | ninein-like                                       | Nlp   | 311529 | 2,18 | down |
| 6000205 | 7246548 | 1489164 | ninein-like                                       | Nlp   | 311529 | 1,81 | up   |
| 5881311 | 7246548 | 1489160 | ninein-like                                       | Nlp   | 311529 | 1,77 | down |
| 5923938 | 7246548 | 1489165 | ninein-like                                       | Nlp   | 311529 | 1,66 | up   |
| 6702024 | 7246548 | 1489146 | ninein-like                                       | Nlp   | 311529 | 1,51 | down |
| 6169090 | 7246548 | 1489160 | ninein-like                                       | Nlp   | 311529 | 1,50 | up   |
| 6386995 | 7246548 | 1489154 | ninein-like                                       | Nlp   | 311529 | 1,45 | down |
| 6425414 | 7246548 | 1489163 | ninein-like                                       | Nlp   | 311529 | 1,38 | down |
| 5818018 | 7246548 | 1489137 | ninein-like                                       | Nlp   | 311529 | 1,31 | down |
| 6514724 | 7246548 | 1489152 | ninein-like                                       | Nlp   | 311529 | 1,26 | up   |
| 6139314 | 7246548 | 1489136 | ninein-like                                       | Nlp   | 311529 | 1,26 | down |
| 5655681 | 7246548 | 1489155 | ninein-like                                       | Nlp   | 311529 | 1,23 | up   |
| 5811562 | 7246548 | 1489159 | ninein-like                                       | Nlp   | 311529 | 1,18 | up   |
| 6426970 | 7246548 | 1489162 | ninein-like                                       | Nlp   | 311529 | 1,17 | up   |
| 6185473 | 7246548 | 1489147 | ninein-like                                       | Nlp   | 311529 | 1,15 | down |
| 5648251 | 7246548 | 1489156 | ninein-like                                       | Nlp   | 311529 | 1,15 | down |
| 6008010 | 7246548 | 1489169 | ninein-like                                       | Nlp   | 311529 | 1,13 | down |
| 6618471 | 7246548 | 1489145 | ninein-like                                       | Nlp   | 311529 | 1,13 | up   |
| 6718983 | 7246548 | 1489136 | ninein-like                                       | Nlp   | 311529 | 1,11 | up   |
| 6723728 | 7246548 | 1489151 | ninein-like                                       | Nlp   | 311529 | 1,09 | down |
| 6702962 | 7246548 | 1489137 | ninein-like                                       | Nlp   | 311529 | 1,07 | down |
| 6257042 | 7246548 | 1489141 | ninein-like                                       | Nlp   | 311529 | 1,04 | down |
| 6174020 | 7246548 | 1489136 | ninein-like                                       | Nlp   | 311529 | 1,04 | up   |
| 5801489 | 7246548 | 1489150 | ninein-like                                       | Nlp   | 311529 | 1,03 | up   |
| 5956708 | 7246548 | 1489139 | ninein-like                                       | Nlp   | 311529 | 1,03 | up   |
| 6512301 | 7246548 | 1489142 | ninein-like                                       | Nlp   | 311529 | 1,03 | down |
| 6246759 | 7246548 | 1489143 | ninein-like                                       | Nlp   | 311529 | 1,02 | up   |
| 6675716 | 7246548 | 1489140 | ninein-like                                       | Nlp   | 311529 | 1,02 | up   |
| 6141294 | 7246548 | 1489149 | ninein-like                                       | Nlp   | 311529 | 1,01 | up   |
| 6316341 | 7246548 | 1489138 | ninein-like                                       | Nlp   | 311529 | 1,01 | up   |
| 5818146 | 7069999 | 1056024 | nitric oxide synthase 2, inducible                | Nos2  | 24599  | 8,48 | down |
| 6169334 | 7069999 | 1056028 | nitric oxide synthase 2, inducible                | Nos2  | 24599  | 5,71 | down |
| 5810222 | 7069999 | 1056023 | nitric oxide synthase 2, inducible                | Nos2  | 24599  | 3,18 | up   |
| 5952010 | 7069999 | 1056011 | nitric oxide synthase 2, inducible                | Nos2  | 24599  | 3,05 | up   |
| 6644809 | 7069999 | 1056016 | nitric oxide synthase 2, inducible                | Nos2  | 24599  | 2,13 | up   |
| 5883984 | 7069999 | 1056008 | nitric oxide synthase 2, inducible                | Nos2  | 24599  | 2,09 | down |
| 5693047 | 7069999 | 1056020 | nitric oxide synthase 2, inducible                | Nos2  | 24599  | 1,84 | down |
| 6215948 | 7069999 | 1056009 | nitric oxide synthase 2, inducible                | Nos2  | 24599  | 1,83 | down |
| 6480842 | 7069999 | 1056026 | nitric oxide synthase 2, inducible                | Nos2  | 24599  | 1,81 | up   |
| 5730360 | 7069999 | 1056002 | nitric oxide synthase 2, inducible                | Nos2  | 24599  | 1,76 | down |
| 6502156 | 7069999 | 1056006 | nitric oxide synthase 2, inducible                | Nos2  | 24599  | 1,69 | down |
| 5664760 | 7069999 | 1056012 | nitric oxide synthase 2, inducible                | Nos2  | 24599  | 1,61 | down |
| 5758064 | 7069999 | 1056001 | nitric oxide synthase 2, inducible                | Nos2  | 24599  | 1,59 | up   |
| 6407461 | 7069999 | 1056005 | nitric oxide synthase 2, inducible                | Nos2  | 24599  | 1,56 | down |
| 6730318 | 7069999 | 1056018 | nitric oxide synthase 2, inducible                | Nos2  | 24599  | 1,46 | up   |
| 6019263 | 7069999 | 1056015 | nitric oxide synthase 2, inducible                | Nos2  | 24599  | 1,36 | down |
| 5683180 | 7069999 | 1056004 | nitric oxide synthase 2, inducible                | Nos2  | 24599  | 1,34 | down |
| 6639973 | 7069999 | 1056025 | nitric oxide synthase 2, inducible                | Nos2  | 24599  | 1,34 | down |
| 6663617 | 7069999 | 1056021 | nitric oxide synthase 2, inducible                | Nos2  | 24599  | 1,31 | down |
| 5897082 | 7069999 | 1056014 | nitric oxide synthase 2, inducible                | Nos2  | 24599  | 1,29 | down |
| 6131270 | 7069999 | 1056007 | nitric oxide synthase 2, inducible                | Nos2  | 24599  | 1,27 | up   |
| 6239444 | 7069999 | 1056013 | nitric oxide synthase 2, inducible                | Nos2  | 24599  | 1,24 | up   |
| 6179967 | 7069999 | 1056027 | nitric oxide synthase 2, inducible                | Nos2  | 24599  | 1,20 | up   |
| 6499390 | 7069999 | 1056008 | nitric oxide synthase 2, inducible                | Nos2  | 24599  | 1,16 | down |
| 6207601 | 7069999 | 1056010 | nitric oxide synthase 2, inducible                | Nos2  | 24599  | 1,15 | up   |

|         |         |         |                                           |         |        |      |      |
|---------|---------|---------|-------------------------------------------|---------|--------|------|------|
| 5917327 | 7069999 | 1056017 | nitric oxide synthase 2, inducible        | Nos2    | 24599  | 1,13 | up   |
| 6070066 | 7069999 | 1056019 | nitric oxide synthase 2, inducible        | Nos2    | 24599  | 1,11 | up   |
| 5877268 | 7069999 | 1056002 | nitric oxide synthase 2, inducible        | Nos2    | 24599  | 1,09 | down |
| 5924664 | 7069999 | 1056003 | nitric oxide synthase 2, inducible        | Nos2    | 24599  | 1,04 | down |
| 6436308 | 7069999 | 1056022 | nitric oxide synthase 2, inducible        | Nos2    | 24599  | 1,02 | up   |
| 6260981 | 7260541 | 1524055 | nitric oxide synthase 3, endothelial cell | Nos3    | 24600  | 2,59 | up   |
| 6119663 | 7260541 | 1524073 | nitric oxide synthase 3, endothelial cell | Nos3    | 24600  | 2,04 | up   |
| 6369996 | 7260541 | 1524060 | nitric oxide synthase 3, endothelial cell | Nos3    | 24600  | 1,53 | up   |
| 5990812 | 7260541 | 1524057 | nitric oxide synthase 3, endothelial cell | Nos3    | 24600  | 1,46 | down |
| 6566242 | 7260541 | 1524056 | nitric oxide synthase 3, endothelial cell | Nos3    | 24600  | 1,39 | down |
| 6521928 | 7260541 | 1524067 | nitric oxide synthase 3, endothelial cell | Nos3    | 24600  | 1,34 | up   |
| 6490921 | 7260541 | 1524059 | nitric oxide synthase 3, endothelial cell | Nos3    | 24600  | 1,34 | down |
| 6094937 | 7260541 | 1524070 | nitric oxide synthase 3, endothelial cell | Nos3    | 24600  | 1,33 | up   |
| 6547826 | 7260541 | 1524076 | nitric oxide synthase 3, endothelial cell | Nos3    | 24600  | 1,32 | down |
| 5845427 | 7260541 | 1524056 | nitric oxide synthase 3, endothelial cell | Nos3    | 24600  | 1,31 | down |
| 5945701 | 7260541 | 1524070 | nitric oxide synthase 3, endothelial cell | Nos3    | 24600  | 1,24 | up   |
| 5655546 | 7260541 | 1524071 | nitric oxide synthase 3, endothelial cell | Nos3    | 24600  | 1,21 | up   |
| 6475692 | 7260541 | 1524065 | nitric oxide synthase 3, endothelial cell | Nos3    | 24600  | 1,10 | up   |
| 6108616 | 7260541 | 1524061 | nitric oxide synthase 3, endothelial cell | Nos3    | 24600  | 1,09 | down |
| 5919757 | 7260541 | 1524069 | nitric oxide synthase 3, endothelial cell | Nos3    | 24600  | 1,09 | up   |
| 6463828 | 7260541 | 1524052 | nitric oxide synthase 3, endothelial cell | Nos3    | 24600  | 1,08 | up   |
| 6461147 | 7260541 | 1524075 | nitric oxide synthase 3, endothelial cell | Nos3    | 24600  | 1,08 | up   |
| 6151651 | 7260541 | 1524050 | nitric oxide synthase 3, endothelial cell | Nos3    | 24600  | 1,07 | down |
| 5919656 | 7260541 | 1524053 | nitric oxide synthase 3, endothelial cell | Nos3    | 24600  | 1,06 | down |
| 6702350 | 7260541 | 1524054 | nitric oxide synthase 3, endothelial cell | Nos3    | 24600  | 1,05 | down |
| 6266456 | 7260541 | 1524063 | nitric oxide synthase 3, endothelial cell | Nos3    | 24600  | 1,05 | up   |
| 6092759 | 7260541 | 1524055 | nitric oxide synthase 3, endothelial cell | Nos3    | 24600  | 1,04 | down |
| 5777081 | 7260541 | 1524051 | nitric oxide synthase 3, endothelial cell | Nos3    | 24600  | 1,04 | up   |
| 6218683 | 7260541 | 1524058 | nitric oxide synthase 3, endothelial cell | Nos3    | 24600  | 1,04 | down |
| 6534172 | 7260541 | 1524062 | nitric oxide synthase 3, endothelial cell | Nos3    | 24600  | 1,03 | down |
| 6286688 | 7260541 | 1524066 | nitric oxide synthase 3, endothelial cell | Nos3    | 24600  | 1,03 | down |
| 5956500 | 7260541 | 1524074 | nitric oxide synthase 3, endothelial cell | Nos3    | 24600  | 1,03 | down |
| 6413779 | 7260541 | 1524049 | nitric oxide synthase 3, endothelial cell | Nos3    | 24600  | 1,03 | up   |
| 5657692 | 7260541 | 1524072 | nitric oxide synthase 3, endothelial cell | Nos3    | 24600  | 1,02 | down |
| 6044471 | 7260541 | 1524068 | nitric oxide synthase 3, endothelial cell | Nos3    | 24600  | 1,01 | up   |
| 6160094 | 7260541 | 1524064 | nitric oxide synthase 3, endothelial cell | Nos3    | 24600  | 1,00 | down |
| 6123673 | 7228390 | 1443501 | nitric oxide synthase trafficker          | Nostrin | 311111 | 3,34 | down |
| 5671464 | 7228390 | 1443504 | nitric oxide synthase trafficker          | Nostrin | 311111 | 1,38 | up   |
| 6009453 | 7228390 | 1443515 | nitric oxide synthase trafficker          | Nostrin | 311111 | 1,31 | down |
| 6458865 | 7228390 | 1443512 | nitric oxide synthase trafficker          | Nostrin | 311111 | 1,19 | up   |
| 6137721 | 7228390 | 1443513 | nitric oxide synthase trafficker          | Nostrin | 311111 | 1,15 | up   |
| 6459491 | 7228390 | 1443511 | nitric oxide synthase trafficker          | Nostrin | 311111 | 1,14 | up   |
| 5618060 | 7228390 | 1443505 | nitric oxide synthase trafficker          | Nostrin | 311111 | 1,14 | up   |
| 6174763 | 7228390 | 1443506 | nitric oxide synthase trafficker          | Nostrin | 311111 | 1,10 | down |
| 6106644 | 7228390 | 1443502 | nitric oxide synthase trafficker          | Nostrin | 311111 | 1,08 | up   |
| 6603536 | 7228390 | 1443508 | nitric oxide synthase trafficker          | Nostrin | 311111 | 1,08 | up   |
| 6641234 | 7228390 | 1443509 | nitric oxide synthase trafficker          | Nostrin | 311111 | 1,07 | up   |
| 5845633 | 7228390 | 1443516 | nitric oxide synthase trafficker          | Nostrin | 311111 | 1,05 | down |
| 6383977 | 7228390 | 1443514 | nitric oxide synthase trafficker          | Nostrin | 311111 | 1,03 | down |
| 5944347 | 7228390 | 1443510 | nitric oxide synthase trafficker          | Nostrin | 311111 | 1,02 | down |
| 6165293 | 7228390 | 1443502 | nitric oxide synthase trafficker          | Nostrin | 311111 | 1,02 | up   |
| 6394758 | 7228390 | 1443507 | nitric oxide synthase trafficker          | Nostrin | 311111 | 1,01 | down |
| 6641520 | 7228390 | 1443503 | nitric oxide synthase trafficker          | Nostrin | 311111 | 1,01 | down |
| 5809068 | 7228390 | 1443504 | nitric oxide synthase trafficker          | Nostrin | 311111 | 1,01 | up   |
| 5821791 | 7087500 | 1096726 | nitrilase family, member 2                | Nit2    | 288174 | 1,50 | up   |
| 6705873 | 7087500 | 1096722 | nitrilase family, member 2                | Nit2    | 288174 | 1,38 | down |
| 6202342 | 7087500 | 1096728 | nitrilase family, member 2                | Nit2    | 288174 | 1,36 | down |

|         |         |         |                                       |        |        |      |      |
|---------|---------|---------|---------------------------------------|--------|--------|------|------|
| 5790080 | 7087500 | 1096726 | nitrilase family, member 2            | Nit2   | 288174 | 1,35 | down |
| 6636519 | 7087500 | 1096726 | nitrilase family, member 2            | Nit2   | 288174 | 1,32 | down |
| 5731494 | 7087500 | 1096729 | nitrilase family, member 2            | Nit2   | 288174 | 1,23 | down |
| 6185983 | 7087500 | 1096729 | nitrilase family, member 2            | Nit2   | 288174 | 1,17 | down |
| 6641792 | 7087500 | 1096727 | nitrilase family, member 2            | Nit2   | 288174 | 1,11 | up   |
| 5876504 | 7087500 | 1096724 | nitrilase family, member 2            | Nit2   | 288174 | 1,06 | down |
| 6661227 | 7087500 | 1096721 | nitrilase family, member 2            | Nit2   | 288174 | 1,03 | down |
| 6616769 | 7087500 | 1096723 | nitrilase family, member 2            | Nit2   | 288174 | 1,02 | up   |
| 5768018 | 7087500 | 1096720 | nitrilase family, member 2            | Nit2   | 288174 | 1,01 | down |
| 6118633 | 7116374 | 1168272 | NK6 homeobox 1                        | Nkx6-1 | 65193  | 3,44 | down |
| 6495793 | 7116374 | 1168272 | NK6 homeobox 1                        | Nkx6-1 | 65193  | 1,37 | up   |
| 6124040 | 7116374 | 1168275 | NK6 homeobox 1                        | Nkx6-1 | 65193  | 1,28 | down |
| 6279934 | 7116374 | 1168271 | NK6 homeobox 1                        | Nkx6-1 | 65193  | 1,26 | down |
| 5687476 | 7116374 | 1168270 | NK6 homeobox 1                        | Nkx6-1 | 65193  | 1,13 | up   |
| 5712923 | 7116374 | 1168270 | NK6 homeobox 1                        | Nkx6-1 | 65193  | 1,12 | down |
| 5906139 | 7116374 | 1168273 | NK6 homeobox 1                        | Nkx6-1 | 65193  | 1,07 | down |
| 5681806 | 7116374 | 1168274 | NK6 homeobox 1                        | Nkx6-1 | 65193  | 1,03 | down |
| 6616772 | 7193914 | 1360429 | NMDA receptor regulated 1             | Narg1  | 310399 | 2,70 | down |
| 5798228 | 7193914 | 1360425 | NMDA receptor regulated 1             | Narg1  | 310399 | 1,91 | down |
| 6090610 | 7193914 | 1360444 | NMDA receptor regulated 1             | Narg1  | 310399 | 1,70 | down |
| 6742249 | 7193914 | 1360439 | NMDA receptor regulated 1             | Narg1  | 310399 | 1,69 | down |
| 5692503 | 7193914 | 1360423 | NMDA receptor regulated 1             | Narg1  | 310399 | 1,51 | down |
| 5779282 | 7193914 | 1360423 | NMDA receptor regulated 1             | Narg1  | 310399 | 1,47 | down |
| 6526979 | 7193914 | 1360427 | NMDA receptor regulated 1             | Narg1  | 310399 | 1,37 | up   |
| 6036067 | 7193914 | 1360443 | NMDA receptor regulated 1             | Narg1  | 310399 | 1,36 | up   |
| 6206140 | 7193914 | 1360434 | NMDA receptor regulated 1             | Narg1  | 310399 | 1,35 | up   |
| 6212005 | 7193914 | 1360429 | NMDA receptor regulated 1             | Narg1  | 310399 | 1,34 | up   |
| 6041420 | 7193914 | 1360444 | NMDA receptor regulated 1             | Narg1  | 310399 | 1,33 | up   |
| 5642342 | 7193914 | 1360439 | NMDA receptor regulated 1             | Narg1  | 310399 | 1,28 | down |
| 5679935 | 7193914 | 1360435 | NMDA receptor regulated 1             | Narg1  | 310399 | 1,20 | up   |
| 5919531 | 7193914 | 1360426 | NMDA receptor regulated 1             | Narg1  | 310399 | 1,18 | up   |
| 6082534 | 7193914 | 1360442 | NMDA receptor regulated 1             | Narg1  | 310399 | 1,16 | down |
| 6571249 | 7193914 | 1360430 | NMDA receptor regulated 1             | Narg1  | 310399 | 1,16 | up   |
| 6664443 | 7193914 | 1360444 | NMDA receptor regulated 1             | Narg1  | 310399 | 1,14 | down |
| 6306764 | 7193914 | 1360426 | NMDA receptor regulated 1             | Narg1  | 310399 | 1,11 | down |
| 5919464 | 7193914 | 1360432 | NMDA receptor regulated 1             | Narg1  | 310399 | 1,10 | up   |
| 5691693 | 7193914 | 1360437 | NMDA receptor regulated 1             | Narg1  | 310399 | 1,09 | up   |
| 6124090 | 7193914 | 1360433 | NMDA receptor regulated 1             | Narg1  | 310399 | 1,08 | down |
| 5838380 | 7193914 | 1360441 | NMDA receptor regulated 1             | Narg1  | 310399 | 1,08 | up   |
| 5927213 | 7193914 | 1360427 | NMDA receptor regulated 1             | Narg1  | 310399 | 1,08 | up   |
| 5766775 | 7193914 | 1360431 | NMDA receptor regulated 1             | Narg1  | 310399 | 1,03 | down |
| 6692587 | 7193914 | 1360436 | NMDA receptor regulated 1             | Narg1  | 310399 | 1,02 | up   |
| 6575636 | 7193914 | 1360440 | NMDA receptor regulated 1             | Narg1  | 310399 | 1,01 | down |
| 5913135 | 7193914 | 1360428 | NMDA receptor regulated 1             | Narg1  | 310399 | 1,01 | up   |
| 6648835 | 7167160 | 1292198 | NOL1/NOP2/Sun domain family, member 6 | Nsun6  | 307148 | 2,13 | down |
| 6160689 | 7167160 | 1292203 | NOL1/NOP2/Sun domain family, member 6 | Nsun6  | 307148 | 1,78 | up   |
| 6094430 | 7167160 | 1292212 | NOL1/NOP2/Sun domain family, member 6 | Nsun6  | 307148 | 1,71 | up   |
| 6013237 | 7167160 | 1292218 | NOL1/NOP2/Sun domain family, member 6 | Nsun6  | 307148 | 1,60 | up   |
| 5647048 | 7167160 | 1292214 | NOL1/NOP2/Sun domain family, member 6 | Nsun6  | 307148 | 1,44 | down |
| 5830440 | 7167160 | 1292217 | NOL1/NOP2/Sun domain family, member 6 | Nsun6  | 307148 | 1,38 | up   |
| 6430126 | 7167160 | 1292218 | NOL1/NOP2/Sun domain family, member 6 | Nsun6  | 307148 | 1,33 | down |
| 6572681 | 7167160 | 1292198 | NOL1/NOP2/Sun domain family, member 6 | Nsun6  | 307148 | 1,28 | down |
| 6308416 | 7167160 | 1292218 | NOL1/NOP2/Sun domain family, member 6 | Nsun6  | 307148 | 1,26 | up   |
| 6131068 | 7167160 | 1292199 | NOL1/NOP2/Sun domain family, member 6 | Nsun6  | 307148 | 1,18 | down |
| 6296594 | 7167160 | 1292206 | NOL1/NOP2/Sun domain family, member 6 | Nsun6  | 307148 | 1,17 | up   |
| 6688283 | 7167160 | 1292209 | NOL1/NOP2/Sun domain family, member 6 | Nsun6  | 307148 | 1,12 | up   |
| 5738185 | 7167160 | 1292209 | NOL1/NOP2/Sun domain family, member 6 | Nsun6  | 307148 | 1,07 | down |

|         |         |         |                                                  |        |        |      |      |
|---------|---------|---------|--------------------------------------------------|--------|--------|------|------|
| 5699798 | 7167160 | 1292201 | NOL1/NOP2/Sun domain family, member 6            | Nsun6  | 307148 | 1,07 | up   |
| 6370066 | 7167160 | 1292197 | NOL1/NOP2/Sun domain family, member 6            | Nsun6  | 307148 | 1,06 | down |
| 6096406 | 7167160 | 1292211 | NOL1/NOP2/Sun domain family, member 6            | Nsun6  | 307148 | 1,05 | up   |
| 6526290 | 7317318 | 1665796 | non-SMC element 2, MMS21 homolog (S. cerevisiae) | Nsmce2 | 299957 | 1,62 | up   |
| 6615104 | 7317318 | 1665841 | non-SMC element 2, MMS21 homolog (S. cerevisiae) | Nsmce2 | 299957 | 1,56 | down |
| 6110820 | 7317318 | 1665812 | non-SMC element 2, MMS21 homolog (S. cerevisiae) | Nsmce2 | 299957 | 1,32 | up   |
| 5979513 | 7317318 | 1665838 | non-SMC element 2, MMS21 homolog (S. cerevisiae) | Nsmce2 | 299957 | 1,24 | up   |
| 5923718 | 7317318 | 1665837 | non-SMC element 2, MMS21 homolog (S. cerevisiae) | Nsmce2 | 299957 | 1,12 | down |
| 5958345 | 7317318 | 1665799 | non-SMC element 2, MMS21 homolog (S. cerevisiae) | Nsmce2 | 299957 | 1,07 | up   |
| 5843983 | 7317318 | 1665840 | non-SMC element 2, MMS21 homolog (S. cerevisiae) | Nsmce2 | 299957 | 1,06 | down |
| 6461281 | 7317318 | 1665804 | non-SMC element 2, MMS21 homolog (S. cerevisiae) | Nsmce2 | 299957 | 1,03 | up   |
| 6193518 | 7197253 | 1368314 | Notch homolog 2 (Drosophila)                     | Notch2 | 29492  | 4,21 | down |
| 6190403 | 7197253 | 1368326 | Notch homolog 2 (Drosophila)                     | Notch2 | 29492  | 2,66 | up   |
| 6588966 | 7197253 | 1368315 | Notch homolog 2 (Drosophila)                     | Notch2 | 29492  | 2,53 | up   |
| 6702759 | 7197253 | 1368331 | Notch homolog 2 (Drosophila)                     | Notch2 | 29492  | 2,34 | down |
| 5948332 | 7197253 | 1368338 | Notch homolog 2 (Drosophila)                     | Notch2 | 29492  | 2,18 | down |
| 5679724 | 7197253 | 1368319 | Notch homolog 2 (Drosophila)                     | Notch2 | 29492  | 2,00 | up   |
| 6238091 | 7197253 | 1368344 | Notch homolog 2 (Drosophila)                     | Notch2 | 29492  | 1,76 | down |
| 5805793 | 7197253 | 1368327 | Notch homolog 2 (Drosophila)                     | Notch2 | 29492  | 1,73 | up   |
| 6719724 | 7197253 | 1368343 | Notch homolog 2 (Drosophila)                     | Notch2 | 29492  | 1,71 | up   |
| 5725806 | 7197253 | 1368333 | Notch homolog 2 (Drosophila)                     | Notch2 | 29492  | 1,61 | down |
| 6528349 | 7197253 | 1368331 | Notch homolog 2 (Drosophila)                     | Notch2 | 29492  | 1,52 | down |
| 6363888 | 7197253 | 1368316 | Notch homolog 2 (Drosophila)                     | Notch2 | 29492  | 1,52 | up   |
| 5825737 | 7197253 | 1368335 | Notch homolog 2 (Drosophila)                     | Notch2 | 29492  | 1,47 | down |
| 6666058 | 7197253 | 1368340 | Notch homolog 2 (Drosophila)                     | Notch2 | 29492  | 1,41 | down |
| 6319951 | 7197253 | 1368329 | Notch homolog 2 (Drosophila)                     | Notch2 | 29492  | 1,40 | up   |
| 5671114 | 7197253 | 1368339 | Notch homolog 2 (Drosophila)                     | Notch2 | 29492  | 1,37 | down |
| 6314797 | 7197253 | 1368337 | Notch homolog 2 (Drosophila)                     | Notch2 | 29492  | 1,32 | down |
| 6132046 | 7197253 | 1368342 | Notch homolog 2 (Drosophila)                     | Notch2 | 29492  | 1,32 | up   |
| 6424370 | 7197253 | 1368346 | Notch homolog 2 (Drosophila)                     | Notch2 | 29492  | 1,31 | down |
| 6599121 | 7197253 | 1368322 | Notch homolog 2 (Drosophila)                     | Notch2 | 29492  | 1,31 | up   |
| 6184209 | 7197253 | 1368334 | Notch homolog 2 (Drosophila)                     | Notch2 | 29492  | 1,25 | up   |
| 6623545 | 7197253 | 1368330 | Notch homolog 2 (Drosophila)                     | Notch2 | 29492  | 1,23 | up   |
| 5988307 | 7197253 | 1368328 | Notch homolog 2 (Drosophila)                     | Notch2 | 29492  | 1,21 | down |
| 5667368 | 7197253 | 1368325 | Notch homolog 2 (Drosophila)                     | Notch2 | 29492  | 1,19 | down |
| 6266753 | 7197253 | 1368318 | Notch homolog 2 (Drosophila)                     | Notch2 | 29492  | 1,18 | down |
| 6113621 | 7197253 | 1368323 | Notch homolog 2 (Drosophila)                     | Notch2 | 29492  | 1,13 | up   |
| 5763010 | 7197253 | 1368341 | Notch homolog 2 (Drosophila)                     | Notch2 | 29492  | 1,10 | up   |
| 6743761 | 7197253 | 1368332 | Notch homolog 2 (Drosophila)                     | Notch2 | 29492  | 1,08 | down |
| 6213029 | 7197253 | 1368347 | Notch homolog 2 (Drosophila)                     | Notch2 | 29492  | 1,07 | up   |
| 6125194 | 7197253 | 1368321 | Notch homolog 2 (Drosophila)                     | Notch2 | 29492  | 1,05 | down |
| 6153490 | 7197253 | 1368336 | Notch homolog 2 (Drosophila)                     | Notch2 | 29492  | 1,05 | down |
| 6541065 | 7197253 | 1368324 | Notch homolog 2 (Drosophila)                     | Notch2 | 29492  | 1,05 | down |
| 6672910 | 7197253 | 1368345 | Notch homolog 2 (Drosophila)                     | Notch2 | 29492  | 1,04 | up   |
| 6191710 | 7197253 | 1368320 | Notch homolog 2 (Drosophila)                     | Notch2 | 29492  | 1,04 | down |
| 5620983 | 7197253 | 1368317 | Notch homolog 2 (Drosophila)                     | Notch2 | 29492  | 1,03 | down |
| 5944273 | 7220810 | 1424856 | Notch homolog 4 (Drosophila)                     | Notch4 | 406162 | 2,02 | down |
| 6296603 | 7220810 | 1424856 | Notch homolog 4 (Drosophila)                     | Notch4 | 406162 | 1,81 | down |
| 5986904 | 7220810 | 1424858 | Notch homolog 4 (Drosophila)                     | Notch4 | 406162 | 1,57 | up   |
| 6465854 | 7220810 | 1424871 | Notch homolog 4 (Drosophila)                     | Notch4 | 406162 | 1,53 | up   |
| 6039503 | 7220810 | 1424885 | Notch homolog 4 (Drosophila)                     | Notch4 | 406162 | 1,51 | up   |
| 6550125 | 7220810 | 1424872 | Notch homolog 4 (Drosophila)                     | Notch4 | 406162 | 1,48 | up   |
| 6454827 | 7220810 | 1424884 | Notch homolog 4 (Drosophila)                     | Notch4 | 406162 | 1,46 | up   |
| 6182801 | 7220810 | 1424861 | Notch homolog 4 (Drosophila)                     | Notch4 | 406162 | 1,46 | up   |
| 6598036 | 7220810 | 1424875 | Notch homolog 4 (Drosophila)                     | Notch4 | 406162 | 1,44 | down |
| 6658242 | 7220810 | 1424876 | Notch homolog 4 (Drosophila)                     | Notch4 | 406162 | 1,41 | up   |
| 5899310 | 7220810 | 1424877 | Notch homolog 4 (Drosophila)                     | Notch4 | 406162 | 1,39 | up   |

|         |         |         |                                                         |        |        |      |      |
|---------|---------|---------|---------------------------------------------------------|--------|--------|------|------|
| 5779305 | 7220810 | 1424865 | Notch homolog 4 (Drosophila)                            | Notch4 | 406162 | 1,34 | up   |
| 5634958 | 7220810 | 1424878 | Notch homolog 4 (Drosophila)                            | Notch4 | 406162 | 1,33 | down |
| 5973660 | 7220810 | 1424881 | Notch homolog 4 (Drosophila)                            | Notch4 | 406162 | 1,24 | up   |
| 5886320 | 7220810 | 1424880 | Notch homolog 4 (Drosophila)                            | Notch4 | 406162 | 1,21 | down |
| 6070743 | 7220810 | 1424883 | Notch homolog 4 (Drosophila)                            | Notch4 | 406162 | 1,18 | up   |
| 6742820 | 7220810 | 1424859 | Notch homolog 4 (Drosophila)                            | Notch4 | 406162 | 1,16 | down |
| 6480482 | 7220810 | 1424869 | Notch homolog 4 (Drosophila)                            | Notch4 | 406162 | 1,13 | up   |
| 6542977 | 7220810 | 1424869 | Notch homolog 4 (Drosophila)                            | Notch4 | 406162 | 1,12 | down |
| 5634871 | 7220810 | 1424860 | Notch homolog 4 (Drosophila)                            | Notch4 | 406162 | 1,12 | down |
| 6301718 | 7220810 | 1424882 | Notch homolog 4 (Drosophila)                            | Notch4 | 406162 | 1,12 | up   |
| 6121031 | 7220810 | 1424874 | Notch homolog 4 (Drosophila)                            | Notch4 | 406162 | 1,12 | down |
| 6318289 | 7220810 | 1424867 | Notch homolog 4 (Drosophila)                            | Notch4 | 406162 | 1,10 | up   |
| 6156558 | 7220810 | 1424865 | Notch homolog 4 (Drosophila)                            | Notch4 | 406162 | 1,10 | up   |
| 6356213 | 7220810 | 1424857 | Notch homolog 4 (Drosophila)                            | Notch4 | 406162 | 1,10 | up   |
| 6559739 | 7220810 | 1424862 | Notch homolog 4 (Drosophila)                            | Notch4 | 406162 | 1,10 | up   |
| 6647682 | 7220810 | 1424879 | Notch homolog 4 (Drosophila)                            | Notch4 | 406162 | 1,10 | down |
| 6408536 | 7220810 | 1424865 | Notch homolog 4 (Drosophila)                            | Notch4 | 406162 | 1,09 | up   |
| 5833792 | 7220810 | 1424866 | Notch homolog 4 (Drosophila)                            | Notch4 | 406162 | 1,08 | up   |
| 5663538 | 7220810 | 1424870 | Notch homolog 4 (Drosophila)                            | Notch4 | 406162 | 1,08 | up   |
| 6656367 | 7220810 | 1424885 | Notch homolog 4 (Drosophila)                            | Notch4 | 406162 | 1,07 | up   |
| 6683202 | 7220810 | 1424873 | Notch homolog 4 (Drosophila)                            | Notch4 | 406162 | 1,06 | down |
| 6725970 | 7220810 | 1424864 | Notch homolog 4 (Drosophila)                            | Notch4 | 406162 | 1,05 | down |
| 6026319 | 7220810 | 1424863 | Notch homolog 4 (Drosophila)                            | Notch4 | 406162 | 1,05 | down |
| 5883543 | 7220810 | 1424882 | Notch homolog 4 (Drosophila)                            | Notch4 | 406162 | 1,04 | down |
| 6480636 | 7220810 | 1424873 | Notch homolog 4 (Drosophila)                            | Notch4 | 406162 | 1,03 | down |
| 5754676 | 7220810 | 1424862 | Notch homolog 4 (Drosophila)                            | Notch4 | 406162 | 1,03 | up   |
| 5735756 | 7220810 | 1424868 | Notch homolog 4 (Drosophila)                            | Notch4 | 406162 | 1,00 | down |
| 5989577 | 7233853 | 1458005 | NSFL1 (p97) cofactor (p47)                              | Nsfl1c | 83809  | 2,61 | down |
| 5960447 | 7233853 | 1458006 | NSFL1 (p97) cofactor (p47)                              | Nsfl1c | 83809  | 1,54 | up   |
| 6522568 | 7233853 | 1458009 | NSFL1 (p97) cofactor (p47)                              | Nsfl1c | 83809  | 1,24 | down |
| 6653933 | 7233853 | 1458008 | NSFL1 (p97) cofactor (p47)                              | Nsfl1c | 83809  | 1,18 | down |
| 6248090 | 7233853 | 1458014 | NSFL1 (p97) cofactor (p47)                              | Nsfl1c | 83809  | 1,09 | down |
| 6227615 | 7233853 | 1458012 | NSFL1 (p97) cofactor (p47)                              | Nsfl1c | 83809  | 1,09 | up   |
| 5761977 | 7233853 | 1458005 | NSFL1 (p97) cofactor (p47)                              | Nsfl1c | 83809  | 1,07 | up   |
| 6197882 | 7233853 | 1458010 | NSFL1 (p97) cofactor (p47)                              | Nsfl1c | 83809  | 1,06 | down |
| 5938598 | 7233853 | 1458005 | NSFL1 (p97) cofactor (p47)                              | Nsfl1c | 83809  | 1,05 | up   |
| 6597991 | 7233853 | 1458013 | NSFL1 (p97) cofactor (p47)                              | Nsfl1c | 83809  | 1,03 | down |
| 5991486 | 7233853 | 1458011 | NSFL1 (p97) cofactor (p47)                              | Nsfl1c | 83809  | 1,02 | down |
| 6712529 | 7233853 | 1458007 | NSFL1 (p97) cofactor (p47)                              | Nsfl1c | 83809  | 1,01 | up   |
| 6192295 | 7064557 | 1042552 | N-terminal asparagine amidase                           | Ntan1  | 360462 | 2,12 | down |
| 6613434 | 7064557 | 1042549 | N-terminal asparagine amidase                           | Ntan1  | 360462 | 1,80 | down |
| 6453065 | 7064557 | 1042550 | N-terminal asparagine amidase                           | Ntan1  | 360462 | 1,49 | up   |
| 5848416 | 7064557 | 1042548 | N-terminal asparagine amidase                           | Ntan1  | 360462 | 1,45 | up   |
| 6341234 | 7064557 | 1042551 | N-terminal asparagine amidase                           | Ntan1  | 360462 | 1,37 | down |
| 6332535 | 7064557 | 1042556 | N-terminal asparagine amidase                           | Ntan1  | 360462 | 1,20 | up   |
| 5819938 | 7064557 | 1042557 | N-terminal asparagine amidase                           | Ntan1  | 360462 | 1,12 | up   |
| 5883368 | 7064557 | 1042554 | N-terminal asparagine amidase                           | Ntan1  | 360462 | 1,08 | down |
| 6043867 | 7064557 | 1042553 | N-terminal asparagine amidase                           | Ntan1  | 360462 | 1,06 | down |
| 5818731 | 7064557 | 1042555 | N-terminal asparagine amidase                           | Ntan1  | 360462 | 1,00 | down |
| 6526060 | 7064557 | 1042555 | N-terminal asparagine amidase                           | Ntan1  | 360462 | 1,00 | up   |
| 6042662 | 7313222 | 1654912 | NUAK family, SNF1-like kinase, 1                        | Nuak1  | 299694 | 2,04 | down |
| 6351376 | 7313222 | 1654917 | NUAK family, SNF1-like kinase, 1                        | Nuak1  | 299694 | 1,80 | up   |
| 6697042 | 7313222 | 1654906 | NUAK family, SNF1-like kinase, 1                        | Nuak1  | 299694 | 1,59 | down |
| 5812542 | 7313222 | 1654906 | NUAK family, SNF1-like kinase, 1                        | Nuak1  | 299694 | 1,34 | down |
| 6411248 | 7313222 | 1654906 | NUAK family, SNF1-like kinase, 1                        | Nuak1  | 299694 | 1,07 | up   |
| 6071631 | 7179785 | 1324496 | nuclear factor I/X (CCAAT-binding transcription factor) | Nfix   | 81524  | 2,80 | up   |
| 6265223 | 7179785 | 1324447 | nuclear factor I/X (CCAAT-binding transcription factor) | Nfix   | 81524  | 2,70 | down |

|         |         |         |                                                                                |        |        |      |      |
|---------|---------|---------|--------------------------------------------------------------------------------|--------|--------|------|------|
| 6618462 | 7179785 | 1324488 | nuclear factor I/X (CCAAT-binding transcription factor)                        | Nfix   | 81524  | 2,31 | up   |
| 6294993 | 7179785 | 1324486 | nuclear factor I/X (CCAAT-binding transcription factor)                        | Nfix   | 81524  | 1,85 | up   |
| 6709887 | 7179785 | 1324492 | nuclear factor I/X (CCAAT-binding transcription factor)                        | Nfix   | 81524  | 1,69 | up   |
| 6181866 | 7179785 | 1324489 | nuclear factor I/X (CCAAT-binding transcription factor)                        | Nfix   | 81524  | 1,61 | up   |
| 5904981 | 7179785 | 1324462 | nuclear factor I/X (CCAAT-binding transcription factor)                        | Nfix   | 81524  | 1,40 | up   |
| 6500614 | 7179785 | 1324487 | nuclear factor I/X (CCAAT-binding transcription factor)                        | Nfix   | 81524  | 1,29 | up   |
| 6604005 | 7179785 | 1324498 | nuclear factor I/X (CCAAT-binding transcription factor)                        | Nfix   | 81524  | 1,21 | down |
| 6577658 | 7179785 | 1324447 | nuclear factor I/X (CCAAT-binding transcription factor)                        | Nfix   | 81524  | 1,07 | down |
| 6716496 | 7179785 | 1324491 | nuclear factor I/X (CCAAT-binding transcription factor)                        | Nfix   | 81524  | 1,02 | down |
| 6241776 | 7132020 | 1206315 | nuclear factor of activated T-cells, cytoplasmic, calcineurin-dependent 4      | Nfatc4 | 305897 | 2,88 | down |
| 6723353 | 7132020 | 1206305 | nuclear factor of activated T-cells, cytoplasmic, calcineurin-dependent 4      | Nfatc4 | 305897 | 2,55 | up   |
| 6415092 | 7132020 | 1206312 | nuclear factor of activated T-cells, cytoplasmic, calcineurin-dependent 4      | Nfatc4 | 305897 | 2,53 | up   |
| 6402953 | 7132020 | 1206305 | nuclear factor of activated T-cells, cytoplasmic, calcineurin-dependent 4      | Nfatc4 | 305897 | 1,80 | down |
| 5724959 | 7132020 | 1206310 | nuclear factor of activated T-cells, cytoplasmic, calcineurin-dependent 4      | Nfatc4 | 305897 | 1,58 | up   |
| 5759157 | 7132020 | 1206315 | nuclear factor of activated T-cells, cytoplasmic, calcineurin-dependent 4      | Nfatc4 | 305897 | 1,52 | down |
| 6046788 | 7132020 | 1206307 | nuclear factor of activated T-cells, cytoplasmic, calcineurin-dependent 4      | Nfatc4 | 305897 | 1,39 | up   |
| 6501413 | 7132020 | 1206307 | nuclear factor of activated T-cells, cytoplasmic, calcineurin-dependent 4      | Nfatc4 | 305897 | 1,29 | down |
| 6506139 | 7132020 | 1206313 | nuclear factor of activated T-cells, cytoplasmic, calcineurin-dependent 4      | Nfatc4 | 305897 | 1,25 | down |
| 6284040 | 7132020 | 1206311 | nuclear factor of activated T-cells, cytoplasmic, calcineurin-dependent 4      | Nfatc4 | 305897 | 1,14 | up   |
| 5898759 | 7132020 | 1206314 | nuclear factor of activated T-cells, cytoplasmic, calcineurin-dependent 4      | Nfatc4 | 305897 | 1,12 | up   |
| 6419161 | 7132020 | 1206309 | nuclear factor of activated T-cells, cytoplasmic, calcineurin-dependent 4      | Nfatc4 | 305897 | 1,10 | down |
| 6009350 | 7132020 | 1206315 | nuclear factor of activated T-cells, cytoplasmic, calcineurin-dependent 4      | Nfatc4 | 305897 | 1,06 | up   |
| 6635060 | 7132020 | 1206307 | nuclear factor of activated T-cells, cytoplasmic, calcineurin-dependent 4      | Nfatc4 | 305897 | 1,04 | down |
| 6519923 | 7132020 | 1206308 | nuclear factor of activated T-cells, cytoplasmic, calcineurin-dependent 4      | Nfatc4 | 305897 | 1,01 | down |
| 6661295 | 7214605 | 1409351 | nuclear factor of kappa light polypeptide gene enhancer in B-cells 1           | Nfkb1  | 81736  | 2,55 | up   |
| 5906117 | 7214605 | 1409351 | nuclear factor of kappa light polypeptide gene enhancer in B-cells 1           | Nfkb1  | 81736  | 1,71 | up   |
| 6465679 | 7214605 | 1409361 | nuclear factor of kappa light polypeptide gene enhancer in B-cells 1           | Nfkb1  | 81736  | 1,69 | up   |
| 5619706 | 7214605 | 1409357 | nuclear factor of kappa light polypeptide gene enhancer in B-cells 1           | Nfkb1  | 81736  | 1,55 | up   |
| 6683751 | 7214605 | 1409353 | nuclear factor of kappa light polypeptide gene enhancer in B-cells 1           | Nfkb1  | 81736  | 1,49 | up   |
| 6724975 | 7214605 | 1409355 | nuclear factor of kappa light polypeptide gene enhancer in B-cells 1           | Nfkb1  | 81736  | 1,48 | up   |
| 5671374 | 7214605 | 1409362 | nuclear factor of kappa light polypeptide gene enhancer in B-cells 1           | Nfkb1  | 81736  | 1,42 | down |
| 6039362 | 7214605 | 1409360 | nuclear factor of kappa light polypeptide gene enhancer in B-cells 1           | Nfkb1  | 81736  | 1,31 | up   |
| 6222253 | 7214605 | 1409358 | nuclear factor of kappa light polypeptide gene enhancer in B-cells 1           | Nfkb1  | 81736  | 1,24 | down |
| 5644871 | 7214605 | 1409354 | nuclear factor of kappa light polypeptide gene enhancer in B-cells 1           | Nfkb1  | 81736  | 1,24 | up   |
| 6051303 | 7214605 | 1409363 | nuclear factor of kappa light polypeptide gene enhancer in B-cells 1           | Nfkb1  | 81736  | 1,21 | up   |
| 6486798 | 7214605 | 1409352 | nuclear factor of kappa light polypeptide gene enhancer in B-cells 1           | Nfkb1  | 81736  | 1,14 | up   |
| 6505225 | 7042559 | 991722  | nuclear factor of kappa light polypeptide gene enhancer in B-cells 2, p49/p100 | Nfkb2  | 309452 | 4,79 | down |
| 5922737 | 7042559 | 991719  | nuclear factor of kappa light polypeptide gene enhancer in B-cells 2, p49/p100 | Nfkb2  | 309452 | 1,94 | down |
| 6130506 | 7042559 | 991705  | nuclear factor of kappa light polypeptide gene enhancer in B-cells 2, p49/p100 | Nfkb2  | 309452 | 1,93 | up   |
| 5684871 | 7042559 | 991711  | nuclear factor of kappa light polypeptide gene enhancer in B-cells 2, p49/p100 | Nfkb2  | 309452 | 1,74 | down |
| 6645463 | 7042559 | 991712  | nuclear factor of kappa light polypeptide gene enhancer in B-cells 2, p49/p100 | Nfkb2  | 309452 | 1,63 | down |
| 6581337 | 7042559 | 991710  | nuclear factor of kappa light polypeptide gene enhancer in B-cells 2, p49/p100 | Nfkb2  | 309452 | 1,58 | down |
| 6063623 | 7042559 | 991721  | nuclear factor of kappa light polypeptide gene enhancer in B-cells 2, p49/p100 | Nfkb2  | 309452 | 1,50 | down |
| 5916136 | 7042559 | 991714  | nuclear factor of kappa light polypeptide gene enhancer in B-cells 2, p49/p100 | Nfkb2  | 309452 | 1,45 | down |
| 6258109 | 7042559 | 991717  | nuclear factor of kappa light polypeptide gene enhancer in B-cells 2, p49/p100 | Nfkb2  | 309452 | 1,43 | up   |
| 6649603 | 7042559 | 991706  | nuclear factor of kappa light polypeptide gene enhancer in B-cells 2, p49/p100 | Nfkb2  | 309452 | 1,41 | up   |
| 6271070 | 7042559 | 991703  | nuclear factor of kappa light polypeptide gene enhancer in B-cells 2, p49/p100 | Nfkb2  | 309452 | 1,39 | up   |
| 6090148 | 7042559 | 991715  | nuclear factor of kappa light polypeptide gene enhancer in B-cells 2, p49/p100 | Nfkb2  | 309452 | 1,30 | down |
| 5776258 | 7042559 | 991708  | nuclear factor of kappa light polypeptide gene enhancer in B-cells 2, p49/p100 | Nfkb2  | 309452 | 1,30 | up   |
| 6027051 | 7042559 | 991716  | nuclear factor of kappa light polypeptide gene enhancer in B-cells 2, p49/p100 | Nfkb2  | 309452 | 1,28 | up   |
| 6572336 | 7042559 | 991707  | nuclear factor of kappa light polypeptide gene enhancer in B-cells 2, p49/p100 | Nfkb2  | 309452 | 1,23 | up   |
| 5736603 | 7042559 | 991709  | nuclear factor of kappa light polypeptide gene enhancer in B-cells 2, p49/p100 | Nfkb2  | 309452 | 1,19 | down |
| 6510523 | 7042559 | 991713  | nuclear factor of kappa light polypeptide gene enhancer in B-cells 2, p49/p100 | Nfkb2  | 309452 | 1,18 | up   |
| 6501307 | 7042559 | 991700  | nuclear factor of kappa light polypeptide gene enhancer in B-cells 2, p49/p100 | Nfkb2  | 309452 | 1,16 | up   |
| 5962018 | 7042559 | 991701  | nuclear factor of kappa light polypeptide gene enhancer in B-cells 2, p49/p100 | Nfkb2  | 309452 | 1,15 | down |
| 6035649 | 7042559 | 991720  | nuclear factor of kappa light polypeptide gene enhancer in B-cells 2, p49/p100 | Nfkb2  | 309452 | 1,12 | down |
| 6178644 | 7042559 | 991702  | nuclear factor of kappa light polypeptide gene enhancer in B-cells 2, p49/p100 | Nfkb2  | 309452 | 1,08 | up   |

|         |         |         |                                                                                     |         |        |      |      |
|---------|---------|---------|-------------------------------------------------------------------------------------|---------|--------|------|------|
| 5890464 | 7042559 | 991704  | nuclear factor of kappa light polypeptide gene enhancer in B-cells 2, p49/p100      | Nfkb2   | 309452 | 1,02 | down |
| 6578492 | 7042559 | 991718  | nuclear factor of kappa light polypeptide gene enhancer in B-cells 2, p49/p100      | Nfkb2   | 309452 | 1,00 | up   |
| 5973372 | 7049352 | 1008220 | nuclear factor of kappa light polypeptide gene enhancer in B-cells inhibitor, beta  | Nfkbib  | 81525  | 2,23 | down |
| 6299518 | 7049352 | 1008224 | nuclear factor of kappa light polypeptide gene enhancer in B-cells inhibitor, beta  | Nfkbib  | 81525  | 1,91 | up   |
| 5891222 | 7049352 | 1008226 | nuclear factor of kappa light polypeptide gene enhancer in B-cells inhibitor, beta  | Nfkbib  | 81525  | 1,87 | down |
| 5712101 | 7049352 | 1008224 | nuclear factor of kappa light polypeptide gene enhancer in B-cells inhibitor, beta  | Nfkbib  | 81525  | 1,46 | down |
| 5717509 | 7049352 | 1008221 | nuclear factor of kappa light polypeptide gene enhancer in B-cells inhibitor, beta  | Nfkbib  | 81525  | 1,32 | up   |
| 6086334 | 7049352 | 1008223 | nuclear factor of kappa light polypeptide gene enhancer in B-cells inhibitor, beta  | Nfkbib  | 81525  | 1,30 | down |
| 6434233 | 7049352 | 1008226 | nuclear factor of kappa light polypeptide gene enhancer in B-cells inhibitor, beta  | Nfkbib  | 81525  | 1,22 | up   |
| 6500480 | 7049352 | 1008222 | nuclear factor of kappa light polypeptide gene enhancer in B-cells inhibitor, beta  | Nfkbib  | 81525  | 1,19 | down |
| 6498560 | 7049352 | 1008224 | nuclear factor of kappa light polypeptide gene enhancer in B-cells inhibitor, beta  | Nfkbib  | 81525  | 1,17 | up   |
| 6024930 | 7049352 | 1008225 | nuclear factor of kappa light polypeptide gene enhancer in B-cells inhibitor, beta  | Nfkbib  | 81525  | 1,14 | up   |
| 6458087 | 7049352 | 1008224 | nuclear factor of kappa light polypeptide gene enhancer in B-cells inhibitor, beta  | Nfkbib  | 81525  | 1,07 | up   |
| 6354198 | 7030454 | 961548  | nuclear factor of kappa light polypeptide gene enhancer in B-cells inhibitor, delta | Nfkbid  | 308496 | 2,27 | up   |
| 6353661 | 7030454 | 961555  | nuclear factor of kappa light polypeptide gene enhancer in B-cells inhibitor, delta | Nfkbid  | 308496 | 1,87 | up   |
| 6466099 | 7030454 | 961545  | nuclear factor of kappa light polypeptide gene enhancer in B-cells inhibitor, delta | Nfkbid  | 308496 | 1,54 | down |
| 6207795 | 7030454 | 961548  | nuclear factor of kappa light polypeptide gene enhancer in B-cells inhibitor, delta | Nfkbid  | 308496 | 1,18 | down |
| 5966474 | 7030454 | 961547  | nuclear factor of kappa light polypeptide gene enhancer in B-cells inhibitor, delta | Nfkbid  | 308496 | 1,09 | down |
| 5925774 | 7030454 | 961546  | nuclear factor of kappa light polypeptide gene enhancer in B-cells inhibitor, delta | Nfkbid  | 308496 | 1,06 | down |
| 6215632 | 7030454 | 961547  | nuclear factor of kappa light polypeptide gene enhancer in B-cells inhibitor, delta | Nfkbid  | 308496 | 1,06 | up   |
| 6685369 | 7030454 | 961548  | nuclear factor of kappa light polypeptide gene enhancer in B-cells inhibitor, delta | Nfkbid  | 308496 | 1,02 | down |
| 6403950 | 7030454 | 961545  | nuclear factor of kappa light polypeptide gene enhancer in B-cells inhibitor, delta | Nfkbid  | 308496 | 1,01 | up   |
| 6580469 | 7329341 | 1693882 | nuclear factor of kappa light polypeptide gene enhancer in B-cells inhibitor-like 2 | Nfkbil2 | 366953 | 2,58 | up   |
| 6013282 | 7329341 | 1693885 | nuclear factor of kappa light polypeptide gene enhancer in B-cells inhibitor-like 2 | Nfkbil2 | 366953 | 1,81 | down |
| 6180553 | 7329341 | 1693881 | nuclear factor of kappa light polypeptide gene enhancer in B-cells inhibitor-like 2 | Nfkbil2 | 366953 | 1,80 | down |
| 5829062 | 7329341 | 1693892 | nuclear factor of kappa light polypeptide gene enhancer in B-cells inhibitor-like 2 | Nfkbil2 | 366953 | 1,75 | up   |
| 5687199 | 7329341 | 1693901 | nuclear factor of kappa light polypeptide gene enhancer in B-cells inhibitor-like 2 | Nfkbil2 | 366953 | 1,69 | up   |
| 6375050 | 7329341 | 1693883 | nuclear factor of kappa light polypeptide gene enhancer in B-cells inhibitor-like 2 | Nfkbil2 | 366953 | 1,67 | down |
| 5984884 | 7329341 | 1693878 | nuclear factor of kappa light polypeptide gene enhancer in B-cells inhibitor-like 2 | Nfkbil2 | 366953 | 1,66 | down |
| 6015389 | 7329341 | 1693883 | nuclear factor of kappa light polypeptide gene enhancer in B-cells inhibitor-like 2 | Nfkbil2 | 366953 | 1,56 | up   |
| 6457709 | 7329341 | 1693885 | nuclear factor of kappa light polypeptide gene enhancer in B-cells inhibitor-like 2 | Nfkbil2 | 366953 | 1,53 | up   |
| 6570989 | 7329341 | 1693884 | nuclear factor of kappa light polypeptide gene enhancer in B-cells inhibitor-like 2 | Nfkbil2 | 366953 | 1,50 | up   |
| 5687335 | 7329341 | 1693876 | nuclear factor of kappa light polypeptide gene enhancer in B-cells inhibitor-like 2 | Nfkbil2 | 366953 | 1,42 | down |
| 5631712 | 7329341 | 1693883 | nuclear factor of kappa light polypeptide gene enhancer in B-cells inhibitor-like 2 | Nfkbil2 | 366953 | 1,32 | up   |
| 6390179 | 7329341 | 1693897 | nuclear factor of kappa light polypeptide gene enhancer in B-cells inhibitor-like 2 | Nfkbil2 | 366953 | 1,20 | down |
| 6427859 | 7329341 | 1693879 | nuclear factor of kappa light polypeptide gene enhancer in B-cells inhibitor-like 2 | Nfkbil2 | 366953 | 1,19 | down |
| 6513620 | 7329341 | 1693876 | nuclear factor of kappa light polypeptide gene enhancer in B-cells inhibitor-like 2 | Nfkbil2 | 366953 | 1,18 | up   |
| 6167915 | 7329341 | 1693889 | nuclear factor of kappa light polypeptide gene enhancer in B-cells inhibitor-like 2 | Nfkbil2 | 366953 | 1,15 | up   |
| 6528105 | 7329341 | 1693894 | nuclear factor of kappa light polypeptide gene enhancer in B-cells inhibitor-like 2 | Nfkbil2 | 366953 | 1,14 | down |
| 6013585 | 7329341 | 1693886 | nuclear factor of kappa light polypeptide gene enhancer in B-cells inhibitor-like 2 | Nfkbil2 | 366953 | 1,14 | up   |
| 5752878 | 7329341 | 1693893 | nuclear factor of kappa light polypeptide gene enhancer in B-cells inhibitor-like 2 | Nfkbil2 | 366953 | 1,13 | up   |
| 6155616 | 7329341 | 1693899 | nuclear factor of kappa light polypeptide gene enhancer in B-cells inhibitor-like 2 | Nfkbil2 | 366953 | 1,12 | up   |
| 5637023 | 7329341 | 1693891 | nuclear factor of kappa light polypeptide gene enhancer in B-cells inhibitor-like 2 | Nfkbil2 | 366953 | 1,11 | down |
| 6589272 | 7329341 | 1693882 | nuclear factor of kappa light polypeptide gene enhancer in B-cells inhibitor-like 2 | Nfkbil2 | 366953 | 1,11 | down |
| 6421520 | 7329341 | 1693895 | nuclear factor of kappa light polypeptide gene enhancer in B-cells inhibitor-like 2 | Nfkbil2 | 366953 | 1,11 | up   |
| 6550215 | 7329341 | 1693898 | nuclear factor of kappa light polypeptide gene enhancer in B-cells inhibitor-like 2 | Nfkbil2 | 366953 | 1,09 | up   |
| 6002618 | 7329341 | 1693901 | nuclear factor of kappa light polypeptide gene enhancer in B-cells inhibitor-like 2 | Nfkbil2 | 366953 | 1,08 | down |
| 5844561 | 7329341 | 1693877 | nuclear factor of kappa light polypeptide gene enhancer in B-cells inhibitor-like 2 | Nfkbil2 | 366953 | 1,06 | down |
| 6056986 | 7329341 | 1693880 | nuclear factor of kappa light polypeptide gene enhancer in B-cells inhibitor-like 2 | Nfkbil2 | 366953 | 1,04 | down |
| 6225338 | 7329341 | 1693887 | nuclear factor of kappa light polypeptide gene enhancer in B-cells inhibitor-like 2 | Nfkbil2 | 366953 | 1,03 | down |
| 5835972 | 7329341 | 1693891 | nuclear factor of kappa light polypeptide gene enhancer in B-cells inhibitor-like 2 | Nfkbil2 | 366953 | 1,01 | up   |
| 6018585 | 7329341 | 1693900 | nuclear factor of kappa light polypeptide gene enhancer in B-cells inhibitor-like 2 | Nfkbil2 | 366953 | 1,01 | up   |
| 5807637 | 7329341 | 1693896 | nuclear factor of kappa light polypeptide gene enhancer in B-cells inhibitor-like 2 | Nfkbil2 | 366953 | 1,01 | up   |
| 6405578 | 7329341 | 1693886 | nuclear factor of kappa light polypeptide gene enhancer in B-cells inhibitor-like 2 | Nfkbil2 | 366953 | 1,00 | up   |
| 6235095 | 7098077 | 1122797 | nuclear receptor co-repressor 2                                                     | Ncor2   | 360801 | 3,02 | down |
| 5804201 | 7098077 | 1122769 | nuclear receptor co-repressor 2                                                     | Ncor2   | 360801 | 1,66 | up   |
| 6725487 | 7098077 | 1122782 | nuclear receptor co-repressor 2                                                     | Ncor2   | 360801 | 1,60 | down |

|         |         |         |                                                 |       |        |      |      |
|---------|---------|---------|-------------------------------------------------|-------|--------|------|------|
| 6239496 | 7098077 | 1122748 | nuclear receptor co-repressor 2                 | Ncor2 | 360801 | 1,60 | down |
| 6637600 | 7098077 | 1122776 | nuclear receptor co-repressor 2                 | Ncor2 | 360801 | 1,59 | up   |
| 6181644 | 7098077 | 1122793 | nuclear receptor co-repressor 2                 | Ncor2 | 360801 | 1,54 | up   |
| 6153224 | 7098077 | 1122762 | nuclear receptor co-repressor 2                 | Ncor2 | 360801 | 1,51 | down |
| 5857419 | 7098077 | 1122783 | nuclear receptor co-repressor 2                 | Ncor2 | 360801 | 1,44 | up   |
| 6541490 | 7098077 | 1122806 | nuclear receptor co-repressor 2                 | Ncor2 | 360801 | 1,40 | up   |
| 6275532 | 7098077 | 1122799 | nuclear receptor co-repressor 2                 | Ncor2 | 360801 | 1,39 | down |
| 6080095 | 7098077 | 1122754 | nuclear receptor co-repressor 2                 | Ncor2 | 360801 | 1,39 | up   |
| 6096997 | 7098077 | 1122808 | nuclear receptor co-repressor 2                 | Ncor2 | 360801 | 1,38 | up   |
| 6452209 | 7098077 | 1122804 | nuclear receptor co-repressor 2                 | Ncor2 | 360801 | 1,37 | down |
| 6009782 | 7098077 | 1122741 | nuclear receptor co-repressor 2                 | Ncor2 | 360801 | 1,31 | up   |
| 5944288 | 7098077 | 1122749 | nuclear receptor co-repressor 2                 | Ncor2 | 360801 | 1,30 | down |
| 6474290 | 7098077 | 1122786 | nuclear receptor co-repressor 2                 | Ncor2 | 360801 | 1,28 | up   |
| 5687305 | 7098077 | 1122797 | nuclear receptor co-repressor 2                 | Ncor2 | 360801 | 1,25 | down |
| 6047839 | 7098077 | 1122778 | nuclear receptor co-repressor 2                 | Ncor2 | 360801 | 1,25 | up   |
| 5918392 | 7098077 | 1122792 | nuclear receptor co-repressor 2                 | Ncor2 | 360801 | 1,24 | up   |
| 6445464 | 7098077 | 1122787 | nuclear receptor co-repressor 2                 | Ncor2 | 360801 | 1,24 | down |
| 6061946 | 7098077 | 1122801 | nuclear receptor co-repressor 2                 | Ncor2 | 360801 | 1,23 | down |
| 6324457 | 7098077 | 1122739 | nuclear receptor co-repressor 2                 | Ncor2 | 360801 | 1,22 | down |
| 5797186 | 7098077 | 1122777 | nuclear receptor co-repressor 2                 | Ncor2 | 360801 | 1,22 | up   |
| 6581651 | 7098077 | 1122755 | nuclear receptor co-repressor 2                 | Ncor2 | 360801 | 1,22 | up   |
| 6543455 | 7098077 | 1122788 | nuclear receptor co-repressor 2                 | Ncor2 | 360801 | 1,21 | up   |
| 6337514 | 7098077 | 1122784 | nuclear receptor co-repressor 2                 | Ncor2 | 360801 | 1,21 | up   |
| 6725501 | 7098077 | 1122751 | nuclear receptor co-repressor 2                 | Ncor2 | 360801 | 1,19 | down |
| 6570704 | 7098077 | 1122798 | nuclear receptor co-repressor 2                 | Ncor2 | 360801 | 1,19 | down |
| 6072809 | 7098077 | 1122789 | nuclear receptor co-repressor 2                 | Ncor2 | 360801 | 1,16 | up   |
| 6440854 | 7098077 | 1122744 | nuclear receptor co-repressor 2                 | Ncor2 | 360801 | 1,16 | up   |
| 6563308 | 7098077 | 1122780 | nuclear receptor co-repressor 2                 | Ncor2 | 360801 | 1,14 | up   |
| 5775457 | 7098077 | 1122766 | nuclear receptor co-repressor 2                 | Ncor2 | 360801 | 1,13 | up   |
| 6210024 | 7098077 | 1122757 | nuclear receptor co-repressor 2                 | Ncor2 | 360801 | 1,12 | down |
| 6417349 | 7098077 | 1122794 | nuclear receptor co-repressor 2                 | Ncor2 | 360801 | 1,10 | down |
| 5668728 | 7098077 | 1122770 | nuclear receptor co-repressor 2                 | Ncor2 | 360801 | 1,08 | down |
| 5856485 | 7098077 | 1122739 | nuclear receptor co-repressor 2                 | Ncor2 | 360801 | 1,08 | up   |
| 6319372 | 7098077 | 1122782 | nuclear receptor co-repressor 2                 | Ncor2 | 360801 | 1,08 | down |
| 6488712 | 7098077 | 1122808 | nuclear receptor co-repressor 2                 | Ncor2 | 360801 | 1,06 | down |
| 5837050 | 7098077 | 1122778 | nuclear receptor co-repressor 2                 | Ncor2 | 360801 | 1,06 | down |
| 6343907 | 7098077 | 1122797 | nuclear receptor co-repressor 2                 | Ncor2 | 360801 | 1,06 | down |
| 6606655 | 7098077 | 1122746 | nuclear receptor co-repressor 2                 | Ncor2 | 360801 | 1,05 | up   |
| 6519278 | 7098077 | 1122802 | nuclear receptor co-repressor 2                 | Ncor2 | 360801 | 1,04 | up   |
| 6041603 | 7098077 | 1122739 | nuclear receptor co-repressor 2                 | Ncor2 | 360801 | 1,04 | down |
| 6487325 | 7098077 | 1122795 | nuclear receptor co-repressor 2                 | Ncor2 | 360801 | 1,03 | down |
| 6036506 | 7098077 | 1122796 | nuclear receptor co-repressor 2                 | Ncor2 | 360801 | 1,03 | up   |
| 5978572 | 7098077 | 1122774 | nuclear receptor co-repressor 2                 | Ncor2 | 360801 | 1,03 | up   |
| 5790690 | 7098077 | 1122779 | nuclear receptor co-repressor 2                 | Ncor2 | 360801 | 1,02 | up   |
| 5850741 | 7098077 | 1122803 | nuclear receptor co-repressor 2                 | Ncor2 | 360801 | 1,02 | down |
| 6073980 | 7098077 | 1122806 | nuclear receptor co-repressor 2                 | Ncor2 | 360801 | 1,02 | up   |
| 6273081 | 7098077 | 1122742 | nuclear receptor co-repressor 2                 | Ncor2 | 360801 | 1,01 | up   |
| 6168790 | 7098077 | 1122797 | nuclear receptor co-repressor 2                 | Ncor2 | 360801 | 1,01 | up   |
| 6608227 | 7098077 | 1122727 | nuclear receptor co-repressor 2                 | Ncor2 | 360801 | 1,01 | up   |
| 5874321 | 7098077 | 1122759 | nuclear receptor co-repressor 2                 | Ncor2 | 360801 | 1,01 | up   |
| 6623986 | 7098077 | 1122807 | nuclear receptor co-repressor 2                 | Ncor2 | 360801 | 1,01 | down |
| 6664094 | 7098077 | 1122800 | nuclear receptor co-repressor 2                 | Ncor2 | 360801 | 1,00 | up   |
| 6048483 | 7082318 | 1084597 | nuclear receptor subfamily 1, group D, member 1 | Nr1d1 | 252917 | 2,60 | down |
| 6693453 | 7082318 | 1084596 | nuclear receptor subfamily 1, group D, member 1 | Nr1d1 | 252917 | 1,72 | up   |
| 6517957 | 7082318 | 1084595 | nuclear receptor subfamily 1, group D, member 1 | Nr1d1 | 252917 | 1,32 | up   |
| 6467664 | 7082318 | 1084596 | nuclear receptor subfamily 1, group D, member 1 | Nr1d1 | 252917 | 1,20 | down |
| 5886218 | 7082318 | 1084593 | nuclear receptor subfamily 1, group D, member 1 | Nr1d1 | 252917 | 1,16 | up   |



|         |         |         |                                                 |       |        |      |      |
|---------|---------|---------|-------------------------------------------------|-------|--------|------|------|
| 6566030 | 7082318 | 1084590 | nuclear receptor subfamily 1, group D, member 1 | Nr1d1 | 252917 | 1,12 | down |
| 6013855 | 7082318 | 1084594 | nuclear receptor subfamily 1, group D, member 1 | Nr1d1 | 252917 | 1,10 | up   |
| 5941021 | 7082318 | 1084592 | nuclear receptor subfamily 1, group D, member 1 | Nr1d1 | 252917 | 1,09 | down |
| 6080374 | 7082318 | 1084598 | nuclear receptor subfamily 1, group D, member 1 | Nr1d1 | 252917 | 1,06 | down |
| 5880411 | 7082318 | 1084591 | nuclear receptor subfamily 1, group D, member 1 | Nr1d1 | 252917 | 1,05 | up   |
| 5759408 | 7323604 | 1680154 | nuclear receptor subfamily 1, group H, member 4 | Nr1h4 | 60351  | 2,46 | up   |
| 6038459 | 7323604 | 1680146 | nuclear receptor subfamily 1, group H, member 4 | Nr1h4 | 60351  | 1,89 | down |
| 5793040 | 7323604 | 1680154 | nuclear receptor subfamily 1, group H, member 4 | Nr1h4 | 60351  | 1,75 | up   |
| 6345867 | 7323604 | 1680150 | nuclear receptor subfamily 1, group H, member 4 | Nr1h4 | 60351  | 1,48 | down |
| 5728896 | 7323604 | 1680147 | nuclear receptor subfamily 1, group H, member 4 | Nr1h4 | 60351  | 1,43 | down |
| 6334350 | 7323604 | 1680152 | nuclear receptor subfamily 1, group H, member 4 | Nr1h4 | 60351  | 1,36 | up   |
| 6134561 | 7323604 | 1680148 | nuclear receptor subfamily 1, group H, member 4 | Nr1h4 | 60351  | 1,20 | down |
| 6180897 | 7323604 | 1680145 | nuclear receptor subfamily 1, group H, member 4 | Nr1h4 | 60351  | 1,19 | down |
| 6182614 | 7323604 | 1680144 | nuclear receptor subfamily 1, group H, member 4 | Nr1h4 | 60351  | 1,08 | down |
| 6488617 | 7323604 | 1680149 | nuclear receptor subfamily 1, group H, member 4 | Nr1h4 | 60351  | 1,03 | down |
| 5645896 | 7323604 | 1680148 | nuclear receptor subfamily 1, group H, member 4 | Nr1h4 | 60351  | 1,02 | down |
| 6423523 | 7323604 | 1680151 | nuclear receptor subfamily 1, group H, member 4 | Nr1h4 | 60351  | 1,01 | down |
| 5986455 | 7313850 | 1656742 | nuclear receptor subfamily 2, group C, member 1 | Nr2c1 | 252924 | 3,55 | up   |
| 6610305 | 7313850 | 1656753 | nuclear receptor subfamily 2, group C, member 1 | Nr2c1 | 252924 | 1,92 | down |
| 6185254 | 7313850 | 1656744 | nuclear receptor subfamily 2, group C, member 1 | Nr2c1 | 252924 | 1,41 | up   |
| 6395379 | 7313850 | 1656747 | nuclear receptor subfamily 2, group C, member 1 | Nr2c1 | 252924 | 1,39 | down |
| 6157667 | 7313850 | 1656746 | nuclear receptor subfamily 2, group C, member 1 | Nr2c1 | 252924 | 1,32 | up   |
| 5680235 | 7313850 | 1656754 | nuclear receptor subfamily 2, group C, member 1 | Nr2c1 | 252924 | 1,30 | down |
| 6085358 | 7313850 | 1656749 | nuclear receptor subfamily 2, group C, member 1 | Nr2c1 | 252924 | 1,30 | down |
| 6132977 | 7313850 | 1656743 | nuclear receptor subfamily 2, group C, member 1 | Nr2c1 | 252924 | 1,27 | up   |
| 6316885 | 7313850 | 1656742 | nuclear receptor subfamily 2, group C, member 1 | Nr2c1 | 252924 | 1,24 | down |
| 5824799 | 7313850 | 1656745 | nuclear receptor subfamily 2, group C, member 1 | Nr2c1 | 252924 | 1,17 | up   |
| 6414210 | 7313850 | 1656752 | nuclear receptor subfamily 2, group C, member 1 | Nr2c1 | 252924 | 1,16 | down |
| 6114211 | 7313850 | 1656758 | nuclear receptor subfamily 2, group C, member 1 | Nr2c1 | 252924 | 1,14 | up   |
| 6706727 | 7313850 | 1656751 | nuclear receptor subfamily 2, group C, member 1 | Nr2c1 | 252924 | 1,12 | up   |
| 6196350 | 7313850 | 1656755 | nuclear receptor subfamily 2, group C, member 1 | Nr2c1 | 252924 | 1,11 | down |
| 5633650 | 7313850 | 1656748 | nuclear receptor subfamily 2, group C, member 1 | Nr2c1 | 252924 | 1,10 | down |
| 6276479 | 7313850 | 1656753 | nuclear receptor subfamily 2, group C, member 1 | Nr2c1 | 252924 | 1,07 | up   |
| 6207969 | 7313850 | 1656750 | nuclear receptor subfamily 2, group C, member 1 | Nr2c1 | 252924 | 1,06 | down |
| 6585415 | 7313850 | 1656757 | nuclear receptor subfamily 2, group C, member 1 | Nr2c1 | 252924 | 1,06 | up   |
| 6432544 | 7313850 | 1656757 | nuclear receptor subfamily 2, group C, member 1 | Nr2c1 | 252924 | 1,02 | up   |
| 5788346 | 7313850 | 1656756 | nuclear receptor subfamily 2, group C, member 1 | Nr2c1 | 252924 | 1,02 | down |
| 6116190 | 7201540 | 1379430 | nuclear receptor subfamily 2, group F, member 1 | Nr2f1 | 81808  | 2,22 | down |
| 6493600 | 7201540 | 1379432 | nuclear receptor subfamily 2, group F, member 1 | Nr2f1 | 81808  | 1,32 | down |
| 6524866 | 7201540 | 1379431 | nuclear receptor subfamily 2, group F, member 1 | Nr2f1 | 81808  | 1,26 | up   |
| 6042693 | 7201540 | 1379434 | nuclear receptor subfamily 2, group F, member 1 | Nr2f1 | 81808  | 1,21 | down |
| 5714976 | 7201540 | 1379430 | nuclear receptor subfamily 2, group F, member 1 | Nr2f1 | 81808  | 1,12 | down |
| 6099301 | 7201540 | 1379434 | nuclear receptor subfamily 2, group F, member 1 | Nr2f1 | 81808  | 1,08 | up   |
| 5825758 | 7201540 | 1379434 | nuclear receptor subfamily 2, group F, member 1 | Nr2f1 | 81808  | 1,05 | up   |
| 6396874 | 7201540 | 1379433 | nuclear receptor subfamily 2, group F, member 1 | Nr2f1 | 81808  | 1,05 | down |
| 6312852 | 7201540 | 1379434 | nuclear receptor subfamily 2, group F, member 1 | Nr2f1 | 81808  | 1,00 | up   |
| 6041455 | 7052670 | 1015539 | nuclear receptor subfamily 2, group F, member 2 | Nr2f2 | 113984 | 5,26 | down |
| 5906094 | 7052670 | 1015539 | nuclear receptor subfamily 2, group F, member 2 | Nr2f2 | 113984 | 3,47 | down |
| 5768192 | 7052670 | 1015537 | nuclear receptor subfamily 2, group F, member 2 | Nr2f2 | 113984 | 1,84 | up   |
| 6275058 | 7052670 | 1015539 | nuclear receptor subfamily 2, group F, member 2 | Nr2f2 | 113984 | 1,16 | down |
| 6053632 | 7052670 | 1015539 | nuclear receptor subfamily 2, group F, member 2 | Nr2f2 | 113984 | 1,15 | down |
| 6428919 | 7052670 | 1015539 | nuclear receptor subfamily 2, group F, member 2 | Nr2f2 | 113984 | 1,03 | up   |
| 5869249 | 7052670 | 1015538 | nuclear receptor subfamily 2, group F, member 2 | Nr2f2 | 113984 | 1,01 | down |
| 6200966 | 7274931 | 1559712 | nuclear receptor subfamily 4, group A, member 3 | Nr4a3 | 58853  | 2,15 | down |
| 5898798 | 7274931 | 1559714 | nuclear receptor subfamily 4, group A, member 3 | Nr4a3 | 58853  | 1,67 | down |
| 5857592 | 7274931 | 1559714 | nuclear receptor subfamily 4, group A, member 3 | Nr4a3 | 58853  | 1,63 | down |
| 6002331 | 7274931 | 1559720 | nuclear receptor subfamily 4, group A, member 3 | Nr4a3 | 58853  | 1,62 | up   |

|         |         |         |                                                 |       |        |      |      |
|---------|---------|---------|-------------------------------------------------|-------|--------|------|------|
| 6357381 | 7274931 | 1559717 | nuclear receptor subfamily 4, group A, member 3 | Nr4a3 | 58853  | 1,61 | up   |
| 6706035 | 7274931 | 1559711 | nuclear receptor subfamily 4, group A, member 3 | Nr4a3 | 58853  | 1,29 | up   |
| 5995865 | 7274931 | 1559711 | nuclear receptor subfamily 4, group A, member 3 | Nr4a3 | 58853  | 1,29 | down |
| 5860683 | 7274931 | 1559715 | nuclear receptor subfamily 4, group A, member 3 | Nr4a3 | 58853  | 1,23 | down |
| 6361117 | 7274931 | 1559717 | nuclear receptor subfamily 4, group A, member 3 | Nr4a3 | 58853  | 1,22 | down |
| 5854145 | 7274931 | 1559721 | nuclear receptor subfamily 4, group A, member 3 | Nr4a3 | 58853  | 1,22 | down |
| 6263326 | 7274931 | 1559717 | nuclear receptor subfamily 4, group A, member 3 | Nr4a3 | 58853  | 1,16 | up   |
| 5650109 | 7274931 | 1559718 | nuclear receptor subfamily 4, group A, member 3 | Nr4a3 | 58853  | 1,15 | down |
| 6404664 | 7274931 | 1559717 | nuclear receptor subfamily 4, group A, member 3 | Nr4a3 | 58853  | 1,12 | down |
| 6746188 | 7274931 | 1559713 | nuclear receptor subfamily 4, group A, member 3 | Nr4a3 | 58853  | 1,10 | up   |
| 6053681 | 7274931 | 1559711 | nuclear receptor subfamily 4, group A, member 3 | Nr4a3 | 58853  | 1,09 | down |
| 5817700 | 7274931 | 1559715 | nuclear receptor subfamily 4, group A, member 3 | Nr4a3 | 58853  | 1,04 | down |
| 5810306 | 7274931 | 1559719 | nuclear receptor subfamily 4, group A, member 3 | Nr4a3 | 58853  | 1,04 | up   |
| 6173481 | 7274931 | 1559716 | nuclear receptor subfamily 4, group A, member 3 | Nr4a3 | 58853  | 1,03 | up   |
| 5817424 | 7274931 | 1559712 | nuclear receptor subfamily 4, group A, member 3 | Nr4a3 | 58853  | 1,03 | down |
| 5835001 | 7274931 | 1559714 | nuclear receptor subfamily 4, group A, member 3 | Nr4a3 | 58853  | 1,01 | up   |
| 6207410 | 7238153 | 1468838 | nuclear receptor subfamily 5, group A, member 1 | Nr5a1 | 83826  | 2,09 | down |
| 6525632 | 7238153 | 1468823 | nuclear receptor subfamily 5, group A, member 1 | Nr5a1 | 83826  | 1,48 | up   |
| 6112349 | 7238153 | 1468837 | nuclear receptor subfamily 5, group A, member 1 | Nr5a1 | 83826  | 1,08 | up   |
| 6557736 | 7111638 | 1156216 | nuclear receptor subfamily 5, group A, member 2 | Nr5a2 | 60349  | 2,37 | down |
| 5851404 | 7111638 | 1156217 | nuclear receptor subfamily 5, group A, member 2 | Nr5a2 | 60349  | 1,47 | down |
| 5725331 | 7111638 | 1156211 | nuclear receptor subfamily 5, group A, member 2 | Nr5a2 | 60349  | 1,46 | down |
| 5723972 | 7111638 | 1156216 | nuclear receptor subfamily 5, group A, member 2 | Nr5a2 | 60349  | 1,38 | up   |
| 5901463 | 7111638 | 1156218 | nuclear receptor subfamily 5, group A, member 2 | Nr5a2 | 60349  | 1,33 | down |
| 5825460 | 7111638 | 1156214 | nuclear receptor subfamily 5, group A, member 2 | Nr5a2 | 60349  | 1,25 | up   |
| 5821640 | 7111638 | 1156215 | nuclear receptor subfamily 5, group A, member 2 | Nr5a2 | 60349  | 1,07 | down |
| 6379913 | 7111638 | 1156212 | nuclear receptor subfamily 5, group A, member 2 | Nr5a2 | 60349  | 1,06 | up   |
| 5978184 | 7111638 | 1156210 | nuclear receptor subfamily 5, group A, member 2 | Nr5a2 | 60349  | 1,03 | up   |
| 6301069 | 7111638 | 1156213 | nuclear receptor subfamily 5, group A, member 2 | Nr5a2 | 60349  | 1,03 | up   |
| 5741453 | 7120195 | 1177878 | nucleolar protein 14                            | Nol14 | 289724 | 1,79 | down |
| 6245980 | 7120195 | 1177870 | nucleolar protein 14                            | Nol14 | 289724 | 1,44 | up   |
| 6094909 | 7120195 | 1177876 | nucleolar protein 14                            | Nol14 | 289724 | 1,24 | up   |
| 5791163 | 7120195 | 1177862 | nucleolar protein 14                            | Nol14 | 289724 | 1,22 | down |
| 5624856 | 7120195 | 1177873 | nucleolar protein 14                            | Nol14 | 289724 | 1,20 | up   |
| 6215619 | 7120195 | 1177878 | nucleolar protein 14                            | Nol14 | 289724 | 1,20 | down |
| 6135975 | 7120195 | 1177863 | nucleolar protein 14                            | Nol14 | 289724 | 1,18 | up   |
| 6199864 | 7120195 | 1177866 | nucleolar protein 14                            | Nol14 | 289724 | 1,16 | up   |
| 6524298 | 7120195 | 1177861 | nucleolar protein 14                            | Nol14 | 289724 | 1,14 | down |
| 5872625 | 7120195 | 1177877 | nucleolar protein 14                            | Nol14 | 289724 | 1,13 | down |
| 6687763 | 7120195 | 1177869 | nucleolar protein 14                            | Nol14 | 289724 | 1,12 | up   |
| 6220465 | 7120195 | 1177872 | nucleolar protein 14                            | Nol14 | 289724 | 1,11 | up   |
| 6545800 | 7120195 | 1177875 | nucleolar protein 14                            | Nol14 | 289724 | 1,07 | down |
| 6007108 | 7120195 | 1177867 | nucleolar protein 14                            | Nol14 | 289724 | 1,06 | up   |
| 5967832 | 7120195 | 1177865 | nucleolar protein 14                            | Nol14 | 289724 | 1,05 | down |
| 5862242 | 7120195 | 1177871 | nucleolar protein 14                            | Nol14 | 289724 | 1,05 | up   |
| 6681927 | 7120195 | 1177868 | nucleolar protein 14                            | Nol14 | 289724 | 1,02 | up   |
| 6729810 | 7120195 | 1177873 | nucleolar protein 14                            | Nol14 | 289724 | 1,01 | down |
| 6192704 | 7120195 | 1177864 | nucleolar protein 14                            | Nol14 | 289724 | 1,01 | down |
| 6563878 | 7173706 | 1309240 | nucleolar protein 4                             | Nol4  | 307553 | 1,94 | up   |
| 5759018 | 7173706 | 1309299 | nucleolar protein 4                             | Nol4  | 307553 | 1,87 | down |
| 5850255 | 7173706 | 1309283 | nucleolar protein 4                             | Nol4  | 307553 | 1,82 | down |
| 5840147 | 7173706 | 1309299 | nucleolar protein 4                             | Nol4  | 307553 | 1,77 | down |
| 6520239 | 7173706 | 1309241 | nucleolar protein 4                             | Nol4  | 307553 | 1,61 | up   |
| 6565345 | 7173706 | 1309284 | nucleolar protein 4                             | Nol4  | 307553 | 1,58 | down |
| 6069412 | 7173706 | 1309284 | nucleolar protein 4                             | Nol4  | 307553 | 1,51 | down |
| 6023051 | 7173706 | 1309260 | nucleolar protein 4                             | Nol4  | 307553 | 1,50 | up   |
| 6498529 | 7173706 | 1309241 | nucleolar protein 4                             | Nol4  | 307553 | 1,49 | up   |

|         |         |         |                     |        |        |      |      |
|---------|---------|---------|---------------------|--------|--------|------|------|
| 6110140 | 7173706 | 1309255 | nucleolar protein 4 | No14   | 307553 | 1,40 | down |
| 6194988 | 7173706 | 1309299 | nucleolar protein 4 | No14   | 307553 | 1,40 | down |
| 6018588 | 7173706 | 1309300 | nucleolar protein 4 | No14   | 307553 | 1,36 | up   |
| 6003124 | 7173706 | 1309241 | nucleolar protein 4 | No14   | 307553 | 1,33 | down |
| 6590872 | 7173706 | 1309291 | nucleolar protein 4 | No14   | 307553 | 1,29 | down |
| 6452830 | 7173706 | 1309255 | nucleolar protein 4 | No14   | 307553 | 1,25 | down |
| 6353323 | 7173706 | 1309300 | nucleolar protein 4 | No14   | 307553 | 1,23 | down |
| 5801361 | 7173706 | 1309250 | nucleolar protein 4 | No14   | 307553 | 1,22 | up   |
| 6632551 | 7173706 | 1309241 | nucleolar protein 4 | No14   | 307553 | 1,18 | up   |
| 5772332 | 7173706 | 1309268 | nucleolar protein 4 | No14   | 307553 | 1,16 | up   |
| 5926310 | 7173706 | 1309299 | nucleolar protein 4 | No14   | 307553 | 1,15 | down |
| 6730934 | 7173706 | 1309285 | nucleolar protein 4 | No14   | 307553 | 1,12 | down |
| 6514780 | 7173706 | 1309284 | nucleolar protein 4 | No14   | 307553 | 1,12 | up   |
| 5914483 | 7173706 | 1309300 | nucleolar protein 4 | No14   | 307553 | 1,02 | down |
| 5832669 | 7173706 | 1309299 | nucleolar protein 4 | No14   | 307553 | 1,01 | up   |
| 6497262 | 7281877 | 1577535 | nucleolar protein 9 | No19   | 313744 | 1,58 | up   |
| 5876092 | 7281877 | 1577536 | nucleolar protein 9 | No19   | 313744 | 1,44 | up   |
| 6669656 | 7281877 | 1577537 | nucleolar protein 9 | No19   | 313744 | 1,29 | up   |
| 6598567 | 7281877 | 1577539 | nucleolar protein 9 | No19   | 313744 | 1,17 | up   |
| 5819049 | 7281877 | 1577540 | nucleolar protein 9 | No19   | 313744 | 1,16 | down |
| 6624374 | 7281877 | 1577540 | nucleolar protein 9 | No19   | 313744 | 1,12 | up   |
| 6537901 | 7281877 | 1577534 | nucleolar protein 9 | No19   | 313744 | 1,10 | up   |
| 6410382 | 7281877 | 1577540 | nucleolar protein 9 | No19   | 313744 | 1,06 | down |
| 6058241 | 7229856 | 1447105 | nucleoporin 160     | Nup160 | 311182 | 2,72 | down |
| 5808027 | 7229856 | 1447102 | nucleoporin 160     | Nup160 | 311182 | 2,25 | up   |
| 6559290 | 7229856 | 1447097 | nucleoporin 160     | Nup160 | 311182 | 1,76 | down |
| 6477971 | 7229856 | 1447069 | nucleoporin 160     | Nup160 | 311182 | 1,71 | up   |
| 5710016 | 7229856 | 1447099 | nucleoporin 160     | Nup160 | 311182 | 1,45 | down |
| 5679825 | 7229856 | 1447101 | nucleoporin 160     | Nup160 | 311182 | 1,42 | up   |
| 6618101 | 7229856 | 1447071 | nucleoporin 160     | Nup160 | 311182 | 1,34 | down |
| 6628407 | 7229856 | 1447098 | nucleoporin 160     | Nup160 | 311182 | 1,32 | up   |
| 6511888 | 7229856 | 1447068 | nucleoporin 160     | Nup160 | 311182 | 1,31 | down |
| 6241529 | 7229856 | 1447093 | nucleoporin 160     | Nup160 | 311182 | 1,31 | down |
| 6417777 | 7229856 | 1447103 | nucleoporin 160     | Nup160 | 311182 | 1,26 | up   |
| 6067090 | 7229856 | 1447088 | nucleoporin 160     | Nup160 | 311182 | 1,26 | up   |
| 6279556 | 7229856 | 1447095 | nucleoporin 160     | Nup160 | 311182 | 1,25 | up   |
| 6161604 | 7229856 | 1447076 | nucleoporin 160     | Nup160 | 311182 | 1,23 | down |
| 5985475 | 7229856 | 1447083 | nucleoporin 160     | Nup160 | 311182 | 1,20 | up   |
| 6237251 | 7229856 | 1447082 | nucleoporin 160     | Nup160 | 311182 | 1,18 | up   |
| 6458107 | 7229856 | 1447094 | nucleoporin 160     | Nup160 | 311182 | 1,17 | down |
| 6149177 | 7229856 | 1447087 | nucleoporin 160     | Nup160 | 311182 | 1,16 | up   |
| 6664645 | 7229856 | 1447100 | nucleoporin 160     | Nup160 | 311182 | 1,15 | up   |
| 6436368 | 7229856 | 1447095 | nucleoporin 160     | Nup160 | 311182 | 1,10 | down |
| 6051077 | 7229856 | 1447085 | nucleoporin 160     | Nup160 | 311182 | 1,10 | up   |
| 6419866 | 7229856 | 1447081 | nucleoporin 160     | Nup160 | 311182 | 1,10 | up   |
| 6380152 | 7229856 | 1447106 | nucleoporin 160     | Nup160 | 311182 | 1,09 | up   |
| 5810128 | 7229856 | 1447108 | nucleoporin 160     | Nup160 | 311182 | 1,09 | up   |
| 6642082 | 7229856 | 1447091 | nucleoporin 160     | Nup160 | 311182 | 1,08 | down |
| 6103863 | 7229856 | 1447075 | nucleoporin 160     | Nup160 | 311182 | 1,08 | up   |
| 5752883 | 7229856 | 1447089 | nucleoporin 160     | Nup160 | 311182 | 1,07 | down |
| 5657228 | 7229856 | 1447096 | nucleoporin 160     | Nup160 | 311182 | 1,07 | up   |
| 6584865 | 7229856 | 1447090 | nucleoporin 160     | Nup160 | 311182 | 1,06 | up   |
| 6483171 | 7229856 | 1447109 | nucleoporin 160     | Nup160 | 311182 | 1,06 | up   |
| 6585657 | 7229856 | 1447069 | nucleoporin 160     | Nup160 | 311182 | 1,05 | up   |
| 5665171 | 7229856 | 1447109 | nucleoporin 160     | Nup160 | 311182 | 1,05 | down |
| 6186118 | 7229856 | 1447107 | nucleoporin 160     | Nup160 | 311182 | 1,04 | up   |
| 6456992 | 7229856 | 1447104 | nucleoporin 160     | Nup160 | 311182 | 1,04 | down |

|         |         |         |                                      |        |        |      |      |
|---------|---------|---------|--------------------------------------|--------|--------|------|------|
| 6138523 | 7229856 | 1447086 | nucleoporin 160                      | Nup160 | 311182 | 1,04 | up   |
| 6254302 | 7229856 | 1447092 | nucleoporin 160                      | Nup160 | 311182 | 1,04 | up   |
| 6282613 | 7229856 | 1447074 | nucleoporin 160                      | Nup160 | 311182 | 1,04 | down |
| 6114252 | 7229856 | 1447077 | nucleoporin 160                      | Nup160 | 311182 | 1,01 | down |
| 5804787 | 7116912 | 1169489 | nucleoporin 54                       | Nup54  | 53372  | 2,96 | down |
| 5679153 | 7116912 | 1169502 | nucleoporin 54                       | Nup54  | 53372  | 1,76 | down |
| 6630831 | 7116912 | 1169494 | nucleoporin 54                       | Nup54  | 53372  | 1,39 | down |
| 6301246 | 7116912 | 1169501 | nucleoporin 54                       | Nup54  | 53372  | 1,38 | down |
| 6492285 | 7116912 | 1169491 | nucleoporin 54                       | Nup54  | 53372  | 1,31 | up   |
| 5654036 | 7116912 | 1169500 | nucleoporin 54                       | Nup54  | 53372  | 1,25 | down |
| 5994441 | 7116912 | 1169493 | nucleoporin 54                       | Nup54  | 53372  | 1,24 | down |
| 6463960 | 7116912 | 1169489 | nucleoporin 54                       | Nup54  | 53372  | 1,24 | down |
| 6196760 | 7116912 | 1169498 | nucleoporin 54                       | Nup54  | 53372  | 1,22 | up   |
| 6206302 | 7116912 | 1169491 | nucleoporin 54                       | Nup54  | 53372  | 1,21 | up   |
| 6669410 | 7116912 | 1169495 | nucleoporin 54                       | Nup54  | 53372  | 1,15 | up   |
| 6154436 | 7116912 | 1169490 | nucleoporin 54                       | Nup54  | 53372  | 1,13 | up   |
| 5917827 | 7116912 | 1169502 | nucleoporin 54                       | Nup54  | 53372  | 1,12 | up   |
| 6511858 | 7116912 | 1169497 | nucleoporin 54                       | Nup54  | 53372  | 1,11 | down |
| 6740698 | 7116912 | 1169499 | nucleoporin 54                       | Nup54  | 53372  | 1,11 | down |
| 6303936 | 7116912 | 1169496 | nucleoporin 54                       | Nup54  | 53372  | 1,06 | up   |
| 6549956 | 7116912 | 1169492 | nucleoporin 54                       | Nup54  | 53372  | 1,05 | up   |
| 6221995 | 7260553 | 1524108 | nucleoporin like 2                   | Nup12  | 499974 | 1,51 | down |
| 5678268 | 7260553 | 1524114 | nucleoporin like 2                   | Nup12  | 499974 | 1,47 | down |
| 6053103 | 7260553 | 1524115 | nucleoporin like 2                   | Nup12  | 499974 | 1,36 | down |
| 6186893 | 7260553 | 1524108 | nucleoporin like 2                   | Nup12  | 499974 | 1,21 | up   |
| 6525737 | 7260553 | 1524111 | nucleoporin like 2                   | Nup12  | 499974 | 1,20 | up   |
| 5657933 | 7260553 | 1524110 | nucleoporin like 2                   | Nup12  | 499974 | 1,20 | up   |
| 6042770 | 7260553 | 1524112 | nucleoporin like 2                   | Nup12  | 499974 | 1,12 | up   |
| 6700220 | 7260553 | 1524115 | nucleoporin like 2                   | Nup12  | 499974 | 1,10 | down |
| 5795794 | 7260553 | 1524109 | nucleoporin like 2                   | Nup12  | 499974 | 1,06 | down |
| 5753095 | 7260553 | 1524107 | nucleoporin like 2                   | Nup12  | 499974 | 1,03 | down |
| 6087525 | 7260553 | 1524108 | nucleoporin like 2                   | Nup12  | 499974 | 1,02 | up   |
| 6224543 | 7265254 | 1535429 | nucleosome assembly protein 1-like 5 | Nap115 | 688843 | 2,24 | up   |
| 6206412 | 7265254 | 1535428 | nucleosome assembly protein 1-like 5 | Nap115 | 688843 | 1,87 | up   |
| 5948682 | 7265254 | 1535428 | nucleosome assembly protein 1-like 5 | Nap115 | 688843 | 1,87 | down |
| 5876164 | 7265254 | 1535428 | nucleosome assembly protein 1-like 5 | Nap115 | 688843 | 1,74 | down |
| 6500865 | 7265254 | 1535429 | nucleosome assembly protein 1-like 5 | Nap115 | 688843 | 1,36 | up   |
| 5733198 | 7265254 | 1535428 | nucleosome assembly protein 1-like 5 | Nap115 | 688843 | 1,23 | down |
| 6444906 | 7265254 | 1535428 | nucleosome assembly protein 1-like 5 | Nap115 | 688843 | 1,16 | down |
| 5902514 | 7265254 | 1535429 | nucleosome assembly protein 1-like 5 | Nap115 | 688843 | 1,05 | down |
| 6394541 | 7265254 | 1535429 | nucleosome assembly protein 1-like 5 | Nap115 | 688843 | 1,04 | down |
| 6151138 | 7265254 | 1535428 | nucleosome assembly protein 1-like 5 | Nap115 | 688843 | 1,04 | up   |
| 6141675 | 7265254 | 1535429 | nucleosome assembly protein 1-like 5 | Nap115 | 688843 | 1,02 | up   |
| 6502619 | 7379492 | 1819689 | nyctalopin                           | Nyx    | 302516 | 2,78 | down |
| 6175063 | 7379492 | 1819689 | nyctalopin                           | Nyx    | 302516 | 2,09 | up   |
| 5631849 | 7379492 | 1819698 | nyctalopin                           | Nyx    | 302516 | 1,11 | up   |
| 5791391 | 7379492 | 1819688 | nyctalopin                           | Nyx    | 302516 | 1,01 | down |
| 6269140 | 7379492 | 1819689 | nyctalopin                           | Nyx    | 302516 | 1,00 | down |
| 6663895 | 7377457 | 1815101 | oculocerebrorenal syndrome of Lowe   | Ocrl   | 317576 | 2,49 | up   |
| 6293095 | 7377457 | 1815085 | oculocerebrorenal syndrome of Lowe   | Ocrl   | 317576 | 1,68 | down |
| 5750338 | 7377457 | 1815100 | oculocerebrorenal syndrome of Lowe   | Ocrl   | 317576 | 1,51 | down |
| 5866109 | 7377457 | 1815080 | oculocerebrorenal syndrome of Lowe   | Ocrl   | 317576 | 1,49 | up   |
| 6237165 | 7377457 | 1815091 | oculocerebrorenal syndrome of Lowe   | Ocrl   | 317576 | 1,48 | down |
| 6126268 | 7377457 | 1815079 | oculocerebrorenal syndrome of Lowe   | Ocrl   | 317576 | 1,41 | up   |
| 6065211 | 7377457 | 1815101 | oculocerebrorenal syndrome of Lowe   | Ocrl   | 317576 | 1,40 | up   |
| 6669038 | 7377457 | 1815071 | oculocerebrorenal syndrome of Lowe   | Ocrl   | 317576 | 1,39 | up   |
| 6722331 | 7377457 | 1815083 | oculocerebrorenal syndrome of Lowe   | Ocrl   | 317576 | 1,38 | up   |

|         |         |         |                                          |       |        |      |      |
|---------|---------|---------|------------------------------------------|-------|--------|------|------|
| 5792673 | 7377457 | 1815087 | oculocerebrorenal syndrome of Lowe       | Ocrl  | 317576 | 1,36 | down |
| 6644782 | 7377457 | 1815101 | oculocerebrorenal syndrome of Lowe       | Ocrl  | 317576 | 1,36 | down |
| 6457435 | 7377457 | 1815088 | oculocerebrorenal syndrome of Lowe       | Ocrl  | 317576 | 1,35 | down |
| 6580160 | 7377457 | 1815099 | oculocerebrorenal syndrome of Lowe       | Ocrl  | 317576 | 1,33 | down |
| 6640043 | 7377457 | 1815074 | oculocerebrorenal syndrome of Lowe       | Ocrl  | 317576 | 1,30 | up   |
| 5730481 | 7377457 | 1815100 | oculocerebrorenal syndrome of Lowe       | Ocrl  | 317576 | 1,29 | down |
| 6553487 | 7377457 | 1815081 | oculocerebrorenal syndrome of Lowe       | Ocrl  | 317576 | 1,25 | down |
| 5734889 | 7377457 | 1815096 | oculocerebrorenal syndrome of Lowe       | Ocrl  | 317576 | 1,21 | up   |
| 6303953 | 7377457 | 1815082 | oculocerebrorenal syndrome of Lowe       | Ocrl  | 317576 | 1,21 | up   |
| 6146106 | 7377457 | 1815078 | oculocerebrorenal syndrome of Lowe       | Ocrl  | 317576 | 1,18 | down |
| 5872687 | 7377457 | 1815073 | oculocerebrorenal syndrome of Lowe       | Ocrl  | 317576 | 1,17 | down |
| 6113739 | 7377457 | 1815086 | oculocerebrorenal syndrome of Lowe       | Ocrl  | 317576 | 1,15 | down |
| 5634283 | 7377457 | 1815077 | oculocerebrorenal syndrome of Lowe       | Ocrl  | 317576 | 1,13 | up   |
| 6716378 | 7377457 | 1815097 | oculocerebrorenal syndrome of Lowe       | Ocrl  | 317576 | 1,08 | up   |
| 5705512 | 7377457 | 1815084 | oculocerebrorenal syndrome of Lowe       | Ocrl  | 317576 | 1,08 | down |
| 5621316 | 7377457 | 1815090 | oculocerebrorenal syndrome of Lowe       | Ocrl  | 317576 | 1,05 | up   |
| 6303312 | 7225328 | 1435390 | odorant binding protein 2B               | Obp2b | 286933 | 2,53 | down |
| 6720174 | 7225328 | 1435394 | odorant binding protein 2B               | Obp2b | 286933 | 1,56 | down |
| 6559653 | 7225328 | 1435395 | odorant binding protein 2B               | Obp2b | 286933 | 1,40 | down |
| 5783287 | 7225328 | 1435392 | odorant binding protein 2B               | Obp2b | 286933 | 1,26 | up   |
| 5743918 | 7225328 | 1435393 | odorant binding protein 2B               | Obp2b | 286933 | 1,24 | up   |
| 6379838 | 7225328 | 1435396 | odorant binding protein 2B               | Obp2b | 286933 | 1,20 | up   |
| 6643282 | 7225328 | 1435390 | odorant binding protein 2B               | Obp2b | 286933 | 1,13 | up   |
| 5638701 | 7225328 | 1435391 | odorant binding protein 2B               | Obp2b | 286933 | 1,05 | up   |
| 6052737 | 7076246 | 1071436 | odz, odd Oz/ten-m homolog 2 (Drosophila) | Odz2  | 117242 | 2,45 | down |
| 6626175 | 7076246 | 1071450 | odz, odd Oz/ten-m homolog 2 (Drosophila) | Odz2  | 117242 | 1,92 | down |
| 5951502 | 7076246 | 1071452 | odz, odd Oz/ten-m homolog 2 (Drosophila) | Odz2  | 117242 | 1,83 | up   |
| 5983564 | 7076246 | 1071434 | odz, odd Oz/ten-m homolog 2 (Drosophila) | Odz2  | 117242 | 1,77 | down |
| 6192990 | 7076246 | 1071444 | odz, odd Oz/ten-m homolog 2 (Drosophila) | Odz2  | 117242 | 1,69 | down |
| 6116044 | 7076246 | 1071426 | odz, odd Oz/ten-m homolog 2 (Drosophila) | Odz2  | 117242 | 1,59 | down |
| 6560729 | 7076246 | 1071449 | odz, odd Oz/ten-m homolog 2 (Drosophila) | Odz2  | 117242 | 1,54 | down |
| 6455390 | 7076246 | 1071451 | odz, odd Oz/ten-m homolog 2 (Drosophila) | Odz2  | 117242 | 1,51 | up   |
| 6648116 | 7076246 | 1071433 | odz, odd Oz/ten-m homolog 2 (Drosophila) | Odz2  | 117242 | 1,48 | down |
| 6341142 | 7076246 | 1071435 | odz, odd Oz/ten-m homolog 2 (Drosophila) | Odz2  | 117242 | 1,46 | down |
| 5730838 | 7076246 | 1071452 | odz, odd Oz/ten-m homolog 2 (Drosophila) | Odz2  | 117242 | 1,41 | up   |
| 6239361 | 7076246 | 1071431 | odz, odd Oz/ten-m homolog 2 (Drosophila) | Odz2  | 117242 | 1,41 | down |
| 6179377 | 7076246 | 1071451 | odz, odd Oz/ten-m homolog 2 (Drosophila) | Odz2  | 117242 | 1,39 | up   |
| 6448088 | 7076246 | 1071443 | odz, odd Oz/ten-m homolog 2 (Drosophila) | Odz2  | 117242 | 1,37 | up   |
| 5658897 | 7076246 | 1071429 | odz, odd Oz/ten-m homolog 2 (Drosophila) | Odz2  | 117242 | 1,37 | up   |
| 6141640 | 7076246 | 1071437 | odz, odd Oz/ten-m homolog 2 (Drosophila) | Odz2  | 117242 | 1,35 | down |
| 6471735 | 7076246 | 1071446 | odz, odd Oz/ten-m homolog 2 (Drosophila) | Odz2  | 117242 | 1,34 | up   |
| 6506889 | 7076246 | 1071438 | odz, odd Oz/ten-m homolog 2 (Drosophila) | Odz2  | 117242 | 1,32 | down |
| 6549700 | 7076246 | 1071425 | odz, odd Oz/ten-m homolog 2 (Drosophila) | Odz2  | 117242 | 1,32 | up   |
| 6258137 | 7076246 | 1071445 | odz, odd Oz/ten-m homolog 2 (Drosophila) | Odz2  | 117242 | 1,28 | up   |
| 6309209 | 7076246 | 1071439 | odz, odd Oz/ten-m homolog 2 (Drosophila) | Odz2  | 117242 | 1,28 | up   |
| 6200360 | 7076246 | 1071427 | odz, odd Oz/ten-m homolog 2 (Drosophila) | Odz2  | 117242 | 1,28 | up   |
| 6119699 | 7076246 | 1071443 | odz, odd Oz/ten-m homolog 2 (Drosophila) | Odz2  | 117242 | 1,26 | up   |
| 5950333 | 7076246 | 1071432 | odz, odd Oz/ten-m homolog 2 (Drosophila) | Odz2  | 117242 | 1,24 | up   |
| 6572286 | 7076246 | 1071428 | odz, odd Oz/ten-m homolog 2 (Drosophila) | Odz2  | 117242 | 1,23 | down |
| 6247979 | 7076246 | 1071428 | odz, odd Oz/ten-m homolog 2 (Drosophila) | Odz2  | 117242 | 1,21 | down |
| 5638577 | 7076246 | 1071441 | odz, odd Oz/ten-m homolog 2 (Drosophila) | Odz2  | 117242 | 1,21 | down |
| 6470106 | 7076246 | 1071442 | odz, odd Oz/ten-m homolog 2 (Drosophila) | Odz2  | 117242 | 1,19 | down |
| 5878867 | 7076246 | 1071447 | odz, odd Oz/ten-m homolog 2 (Drosophila) | Odz2  | 117242 | 1,08 | down |
| 6548977 | 7076246 | 1071430 | odz, odd Oz/ten-m homolog 2 (Drosophila) | Odz2  | 117242 | 1,08 | down |
| 5740653 | 7076246 | 1071440 | odz, odd Oz/ten-m homolog 2 (Drosophila) | Odz2  | 117242 | 1,06 | down |
| 6607829 | 7076246 | 1071448 | odz, odd Oz/ten-m homolog 2 (Drosophila) | Odz2  | 117242 | 1,05 | down |
| 6089495 | 7076246 | 1071452 | odz, odd Oz/ten-m homolog 2 (Drosophila) | Odz2  | 117242 | 1,00 | down |

|         |         |         |                                                                                                            |                                           |        |      |      |
|---------|---------|---------|------------------------------------------------------------------------------------------------------------|-------------------------------------------|--------|------|------|
| 6023558 | 7034293 | 971819  | odz, odd Oz/ten-m homolog 4 (Drosophila)                                                                   | Odz4                                      | 308831 | 1,44 | down |
| 6306097 | 7034293 | 971831  | odz, odd Oz/ten-m homolog 4 (Drosophila)                                                                   | Odz4                                      | 308831 | 1,32 | down |
| 5920167 | 7034293 | 971996  | odz, odd Oz/ten-m homolog 4 (Drosophila)                                                                   | Odz4                                      | 308831 | 1,13 | up   |
| 6228668 | 7312121 | 1652374 | olfactory receptor 1052 /// olfactory receptor 936 /// olfactory receptor 932                              | 052 /// Olr936 /// Ol38 /// 288869 /// 36 |        | 2,11 | up   |
| 6277829 | 7312121 | 1652374 | olfactory receptor 1052 /// olfactory receptor 936 /// olfactory receptor 932                              | 052 /// Olr936 /// Ol38 /// 288869 /// 36 |        | 1,06 | up   |
| 6245593 | 7334987 | 1707175 | olfactory receptor 1259                                                                                    | Olr1259                                   | 300581 | 2,60 | up   |
| 6429882 | 7334987 | 1707175 | olfactory receptor 1259                                                                                    | Olr1259                                   | 300581 | 1,24 | down |
| 6431261 | 7334987 | 1707175 | olfactory receptor 1259                                                                                    | Olr1259                                   | 300581 | 1,07 | up   |
| 5811110 | 7334987 | 1707175 | olfactory receptor 1259                                                                                    | Olr1259                                   | 300581 | 1,04 | down |
| 6359820 | 7335013 | 1707208 | olfactory receptor 1271                                                                                    | Olr1271                                   | 286959 | 6,91 | up   |
| 6053052 | 7335013 | 1707207 | olfactory receptor 1271                                                                                    | Olr1271                                   | 286959 | 1,76 | up   |
| 5783807 | 7335013 | 1707207 | olfactory receptor 1271                                                                                    | Olr1271                                   | 286959 | 1,28 | up   |
| 6598462 | 7335013 | 1707206 | olfactory receptor 1271                                                                                    | Olr1271                                   | 286959 | 1,21 | down |
| 6672063 | 7335013 | 1707209 | olfactory receptor 1271                                                                                    | Olr1271                                   | 286959 | 1,15 | down |
| 5767927 | 7220274 | 1423722 | olfactory receptor 1733                                                                                    | Olr1733                                   | 309583 | 1,22 | down |
| 6684340 | 7220274 | 1423722 | olfactory receptor 1733                                                                                    | Olr1733                                   | 309583 | 1,12 | down |
| 5704624 | 7220274 | 1423721 | olfactory receptor 1733 /// olfactory receptor 1739                                                        | Olr1733 /// Olr1739 309583 /// 405202     |        | 1,28 | down |
| 6096355 | 7220274 | 1423720 | olfactory receptor 1733 /// olfactory receptor 1742                                                        | Olr1733 /// Olr1742 309583 /// 294196     |        | 1,46 | up   |
| 5954910 | 7220274 | 1423722 | olfactory receptor 1733 /// olfactory receptor 1742 /// olfactory receptor 1720 /// olfactory receptor 170 | Olr1742 /// Olr1720 294196 /// 406015     |        | 2,17 | up   |
| 6688601 | 7220274 | 1423720 | olfactory receptor 1733 /// olfactory receptor 1742 /// olfactory receptor 1739                            | 33 /// Olr1742 /// Ol38 /// 294196 /// 40 |        | 1,24 | up   |
| 6334613 | 7216309 | 1413742 | olfactory receptor 1748                                                                                    | Olr1748                                   | 405199 | 3,95 | up   |
| 5733473 | 7216309 | 1413743 | olfactory receptor 1748                                                                                    | Olr1748                                   | 405199 | 1,56 | down |
| 6291398 | 7204770 | 1386678 | oncostatin M receptor                                                                                      | Osmr                                      | 310132 | 3,06 | down |
| 6373654 | 7204770 | 1386672 | oncostatin M receptor                                                                                      | Osmr                                      | 310132 | 2,00 | down |
| 6522120 | 7204770 | 1386664 | oncostatin M receptor                                                                                      | Osmr                                      | 310132 | 1,94 | up   |
| 5947126 | 7204770 | 1386671 | oncostatin M receptor                                                                                      | Osmr                                      | 310132 | 1,88 | down |
| 6331396 | 7204770 | 1386667 | oncostatin M receptor                                                                                      | Osmr                                      | 310132 | 1,50 | up   |
| 6040049 | 7204770 | 1386663 | oncostatin M receptor                                                                                      | Osmr                                      | 310132 | 1,45 | up   |
| 5822375 | 7204770 | 1386668 | oncostatin M receptor                                                                                      | Osmr                                      | 310132 | 1,44 | up   |
| 5988755 | 7204770 | 1386666 | oncostatin M receptor                                                                                      | Osmr                                      | 310132 | 1,35 | up   |
| 6586488 | 7204770 | 1386669 | oncostatin M receptor                                                                                      | Osmr                                      | 310132 | 1,33 | down |
| 6614613 | 7204770 | 1386676 | oncostatin M receptor                                                                                      | Osmr                                      | 310132 | 1,31 | down |
| 5942700 | 7204770 | 1386665 | oncostatin M receptor                                                                                      | Osmr                                      | 310132 | 1,20 | up   |
| 5869296 | 7204770 | 1386670 | oncostatin M receptor                                                                                      | Osmr                                      | 310132 | 1,20 | down |
| 6531518 | 7204770 | 1386668 | oncostatin M receptor                                                                                      | Osmr                                      | 310132 | 1,20 | down |
| 6115102 | 7204770 | 1386675 | oncostatin M receptor                                                                                      | Osmr                                      | 310132 | 1,18 | down |
| 5637083 | 7204770 | 1386677 | oncostatin M receptor                                                                                      | Osmr                                      | 310132 | 1,16 | down |
| 6457305 | 7204770 | 1386662 | oncostatin M receptor                                                                                      | Osmr                                      | 310132 | 1,16 | up   |
| 6607922 | 7204770 | 1386677 | oncostatin M receptor                                                                                      | Osmr                                      | 310132 | 1,03 | up   |
| 6496371 | 7204770 | 1386674 | oncostatin M receptor                                                                                      | Osmr                                      | 310132 | 1,02 | down |
| 6672221 | 7204770 | 1386673 | oncostatin M receptor                                                                                      | Osmr                                      | 310132 | 1,01 | up   |
| 6003899 | 7236485 | 1464517 | opiate receptor-like 1                                                                                     | Oprl1                                     | 29256  | 1,59 | up   |
| 5659149 | 7236485 | 1464517 | opiate receptor-like 1                                                                                     | Oprl1                                     | 29256  | 1,43 | down |
| 5629675 | 7236485 | 1464520 | opiate receptor-like 1                                                                                     | Oprl1                                     | 29256  | 1,26 | down |
| 6697602 | 7236485 | 1464517 | opiate receptor-like 1                                                                                     | Oprl1                                     | 29256  | 1,23 | up   |
| 5931418 | 7236485 | 1464519 | opiate receptor-like 1                                                                                     | Oprl1                                     | 29256  | 1,15 | up   |
| 6519086 | 7236485 | 1464517 | opiate receptor-like 1                                                                                     | Oprl1                                     | 29256  | 1,13 | down |
| 5841709 | 7236485 | 1464517 | opiate receptor-like 1                                                                                     | Oprl1                                     | 29256  | 1,04 | down |
| 6670755 | 7279499 | 1571837 | organic solute carrier protein 1                                                                           | Oscp1                                     | 362595 | 1,78 | up   |
| 5960716 | 7279499 | 1571832 | organic solute carrier protein 1                                                                           | Oscp1                                     | 362595 | 1,42 | up   |
| 6658800 | 7279499 | 1571818 | organic solute carrier protein 1                                                                           | Oscp1                                     | 362595 | 1,41 | up   |
| 6298264 | 7279499 | 1571818 | organic solute carrier protein 1                                                                           | Oscp1                                     | 362595 | 1,40 | up   |
| 6250444 | 7279499 | 1571830 | organic solute carrier protein 1                                                                           | Oscp1                                     | 362595 | 1,24 | down |
| 6637536 | 7279499 | 1571835 | organic solute carrier protein 1                                                                           | Oscp1                                     | 362595 | 1,19 | up   |
| 6463739 | 7279499 | 1571824 | organic solute carrier protein 1                                                                           | Oscp1                                     | 362595 | 1,17 | down |
| 5877279 | 7279499 | 1571836 | organic solute carrier protein 1                                                                           | Oscp1                                     | 362595 | 1,16 | down |
| 6345500 | 7279499 | 1571834 | organic solute carrier protein 1                                                                           | Oscp1                                     | 362595 | 1,14 | up   |

|         |         |         |                                  |       |        |      |      |
|---------|---------|---------|----------------------------------|-------|--------|------|------|
| 6360349 | 7279499 | 1571827 | organic solute carrier protein 1 | Oscp1 | 362595 | 1,11 | down |
| 6691472 | 7279499 | 1571834 | organic solute carrier protein 1 | Oscp1 | 362595 | 1,10 | up   |
| 6367228 | 7279499 | 1571831 | organic solute carrier protein 1 | Oscp1 | 362595 | 1,09 | up   |
| 5997386 | 7279499 | 1571826 | organic solute carrier protein 1 | Oscp1 | 362595 | 1,00 | up   |
| 5655946 | 7295652 | 1610308 | otoferlin                        | Otof  | 84573  | 1,66 | down |
| 5638930 | 7295652 | 1610307 | otoferlin                        | Otof  | 84573  | 1,50 | up   |
| 6563224 | 7295652 | 1610312 | otoferlin                        | Otof  | 84573  | 1,14 | up   |
| 6149847 | 7295652 | 1610306 | otoferlin                        | Otof  | 84573  | 1,13 | down |
| 6416016 | 7295652 | 1610310 | otoferlin                        | Otof  | 84573  | 1,08 | down |
| 5680754 | 7295652 | 1610309 | otoferlin                        | Otof  | 84573  | 1,07 | down |
| 5787493 | 7031662 | 964332  | otogelin                         | Otog  | 292918 | 4,43 | down |
| 6120010 | 7031662 | 964330  | otogelin                         | Otog  | 292918 | 1,93 | down |
| 6499694 | 7031662 | 964373  | otogelin                         | Otog  | 292918 | 1,85 | down |
| 6265937 | 7031662 | 964370  | otogelin                         | Otog  | 292918 | 1,75 | up   |
| 5868719 | 7031662 | 964358  | otogelin                         | Otog  | 292918 | 1,66 | down |
| 6461239 | 7031662 | 964334  | otogelin                         | Otog  | 292918 | 1,57 | up   |
| 6519139 | 7031662 | 964367  | otogelin                         | Otog  | 292918 | 1,55 | up   |
| 6299241 | 7031662 | 964323  | otogelin                         | Otog  | 292918 | 1,53 | down |
| 5986452 | 7031662 | 964386  | otogelin                         | Otog  | 292918 | 1,52 | down |
| 6371365 | 7031662 | 964359  | otogelin                         | Otog  | 292918 | 1,50 | up   |
| 6113001 | 7031662 | 964385  | otogelin                         | Otog  | 292918 | 1,47 | up   |
| 5621101 | 7031662 | 964331  | otogelin                         | Otog  | 292918 | 1,46 | up   |
| 6084328 | 7031662 | 964363  | otogelin                         | Otog  | 292918 | 1,46 | up   |
| 5771374 | 7031662 | 964332  | otogelin                         | Otog  | 292918 | 1,45 | down |
| 6414122 | 7031662 | 964360  | otogelin                         | Otog  | 292918 | 1,43 | up   |
| 6165187 | 7031662 | 964329  | otogelin                         | Otog  | 292918 | 1,39 | down |
| 6660796 | 7031662 | 964328  | otogelin                         | Otog  | 292918 | 1,38 | down |
| 6668183 | 7031662 | 964369  | otogelin                         | Otog  | 292918 | 1,37 | up   |
| 6032895 | 7031662 | 964351  | otogelin                         | Otog  | 292918 | 1,35 | up   |
| 6007042 | 7031662 | 964322  | otogelin                         | Otog  | 292918 | 1,33 | up   |
| 6441998 | 7031662 | 964333  | otogelin                         | Otog  | 292918 | 1,31 | up   |
| 5992215 | 7031662 | 964362  | otogelin                         | Otog  | 292918 | 1,30 | up   |
| 5774143 | 7031662 | 964357  | otogelin                         | Otog  | 292918 | 1,28 | up   |
| 6581088 | 7031662 | 964380  | otogelin                         | Otog  | 292918 | 1,25 | down |
| 6407220 | 7031662 | 964383  | otogelin                         | Otog  | 292918 | 1,24 | down |
| 6610207 | 7031662 | 964376  | otogelin                         | Otog  | 292918 | 1,24 | up   |
| 6114413 | 7031662 | 964345  | otogelin                         | Otog  | 292918 | 1,23 | up   |
| 5654591 | 7031662 | 964379  | otogelin                         | Otog  | 292918 | 1,20 | up   |
| 6595290 | 7031662 | 964366  | otogelin                         | Otog  | 292918 | 1,20 | up   |
| 6054807 | 7031662 | 964346  | otogelin                         | Otog  | 292918 | 1,19 | up   |
| 6211395 | 7031662 | 964321  | otogelin                         | Otog  | 292918 | 1,18 | up   |
| 6228395 | 7031662 | 964372  | otogelin                         | Otog  | 292918 | 1,18 | up   |
| 6462645 | 7031662 | 964324  | otogelin                         | Otog  | 292918 | 1,17 | down |
| 5866614 | 7031662 | 964348  | otogelin                         | Otog  | 292918 | 1,17 | down |
| 6089349 | 7031662 | 964337  | otogelin                         | Otog  | 292918 | 1,17 | up   |
| 6380518 | 7031662 | 964350  | otogelin                         | Otog  | 292918 | 1,17 | down |
| 6155543 | 7031662 | 964381  | otogelin                         | Otog  | 292918 | 1,16 | down |
| 6199855 | 7031662 | 964326  | otogelin                         | Otog  | 292918 | 1,15 | down |
| 6349096 | 7031662 | 964327  | otogelin                         | Otog  | 292918 | 1,15 | up   |
| 6494320 | 7031662 | 964360  | otogelin                         | Otog  | 292918 | 1,15 | up   |
| 6067507 | 7031662 | 964360  | otogelin                         | Otog  | 292918 | 1,14 | up   |
| 6718137 | 7031662 | 964320  | otogelin                         | Otog  | 292918 | 1,14 | down |
| 5766918 | 7031662 | 964347  | otogelin                         | Otog  | 292918 | 1,14 | down |
| 5743178 | 7031662 | 964339  | otogelin                         | Otog  | 292918 | 1,13 | down |
| 6140556 | 7031662 | 964342  | otogelin                         | Otog  | 292918 | 1,13 | down |
| 6501711 | 7031662 | 964373  | otogelin                         | Otog  | 292918 | 1,12 | down |
| 6195789 | 7031662 | 964365  | otogelin                         | Otog  | 292918 | 1,09 | up   |

|         |         |         |                          |        |        |      |      |
|---------|---------|---------|--------------------------|--------|--------|------|------|
| 5697408 | 7031662 | 964384  | otogelin                 | Otog   | 292918 | 1,08 | up   |
| 5818175 | 7031662 | 964368  | otogelin                 | Otog   | 292918 | 1,08 | down |
| 6482426 | 7031662 | 964360  | otogelin                 | Otog   | 292918 | 1,07 | up   |
| 5661815 | 7031662 | 964343  | otogelin                 | Otog   | 292918 | 1,07 | up   |
| 6396594 | 7031662 | 964354  | otogelin                 | Otog   | 292918 | 1,07 | up   |
| 6745205 | 7031662 | 964338  | otogelin                 | Otog   | 292918 | 1,06 | up   |
| 6370948 | 7031662 | 964340  | otogelin                 | Otog   | 292918 | 1,06 | up   |
| 6295212 | 7031662 | 964360  | otogelin                 | Otog   | 292918 | 1,06 | down |
| 5795219 | 7031662 | 964360  | otogelin                 | Otog   | 292918 | 1,06 | up   |
| 5849449 | 7031662 | 964371  | otogelin                 | Otog   | 292918 | 1,06 | down |
| 6066461 | 7031662 | 964341  | otogelin                 | Otog   | 292918 | 1,06 | up   |
| 6081183 | 7031662 | 964360  | otogelin                 | Otog   | 292918 | 1,05 | up   |
| 5659619 | 7031662 | 964331  | otogelin                 | Otog   | 292918 | 1,05 | up   |
| 5861832 | 7031662 | 964349  | otogelin                 | Otog   | 292918 | 1,04 | up   |
| 6230756 | 7031662 | 964320  | otogelin                 | Otog   | 292918 | 1,04 | down |
| 6469653 | 7031662 | 964353  | otogelin                 | Otog   | 292918 | 1,04 | down |
| 6401057 | 7031662 | 964361  | otogelin                 | Otog   | 292918 | 1,03 | up   |
| 6330332 | 7031662 | 964325  | otogelin                 | Otog   | 292918 | 1,03 | up   |
| 6579418 | 7031662 | 964378  | otogelin                 | Otog   | 292918 | 1,02 | up   |
| 6009178 | 7031662 | 964356  | otogelin                 | Otog   | 292918 | 1,02 | up   |
| 6578959 | 7031662 | 964384  | otogelin                 | Otog   | 292918 | 1,01 | up   |
| 5870172 | 7031662 | 964377  | otogelin                 | Otog   | 292918 | 1,01 | up   |
| 6602422 | 7073624 | 1064919 | otopetrin 2              | Otop2  | 287820 | 2,14 | down |
| 6654909 | 7073624 | 1064925 | otopetrin 2              | Otop2  | 287820 | 1,41 | down |
| 5654089 | 7073624 | 1064924 | otopetrin 2              | Otop2  | 287820 | 1,38 | up   |
| 5741876 | 7073624 | 1064924 | otopetrin 2              | Otop2  | 287820 | 1,32 | up   |
| 6104418 | 7073624 | 1064923 | otopetrin 2              | Otop2  | 287820 | 1,30 | down |
| 6535912 | 7073624 | 1064920 | otopetrin 2              | Otop2  | 287820 | 1,27 | up   |
| 6704748 | 7073624 | 1064924 | otopetrin 2              | Otop2  | 287820 | 1,27 | down |
| 5991538 | 7073624 | 1064922 | otopetrin 2              | Otop2  | 287820 | 1,25 | up   |
| 6491297 | 7073624 | 1064918 | otopetrin 2              | Otop2  | 287820 | 1,10 | up   |
| 6299881 | 7073624 | 1064925 | otopetrin 2              | Otop2  | 287820 | 1,02 | up   |
| 5989425 | 7032395 | 966627  | OTU domain containing 7A | Otud7a | 309252 | 3,11 | down |
| 6180470 | 7032395 | 966613  | OTU domain containing 7A | Otud7a | 309252 | 1,83 | up   |
| 5654071 | 7032395 | 966595  | OTU domain containing 7A | Otud7a | 309252 | 1,63 | down |
| 5923174 | 7032395 | 966593  | OTU domain containing 7A | Otud7a | 309252 | 1,49 | down |
| 6259806 | 7032395 | 966587  | OTU domain containing 7A | Otud7a | 309252 | 1,43 | up   |
| 5924827 | 7032395 | 966611  | OTU domain containing 7A | Otud7a | 309252 | 1,37 | up   |
| 6092428 | 7032395 | 966629  | OTU domain containing 7A | Otud7a | 309252 | 1,23 | up   |
| 6135108 | 7032395 | 966627  | OTU domain containing 7A | Otud7a | 309252 | 1,16 | down |
| 5896022 | 7032395 | 966628  | OTU domain containing 7A | Otud7a | 309252 | 1,15 | down |
| 5969552 | 7032395 | 966626  | OTU domain containing 7A | Otud7a | 309252 | 1,13 | down |
| 6479557 | 7032395 | 966615  | OTU domain containing 7A | Otud7a | 309252 | 1,12 | up   |
| 6223275 | 7032395 | 966602  | OTU domain containing 7A | Otud7a | 309252 | 1,08 | up   |
| 6109437 | 7032395 | 966601  | OTU domain containing 7A | Otud7a | 309252 | 1,08 | down |
| 6580316 | 7032395 | 966626  | OTU domain containing 7A | Otud7a | 309252 | 1,07 | down |
| 5723493 | 7032395 | 966612  | OTU domain containing 7A | Otud7a | 309252 | 1,06 | up   |
| 6031099 | 7032395 | 966622  | OTU domain containing 7A | Otud7a | 309252 | 1,06 | down |
| 6569546 | 7032395 | 966626  | OTU domain containing 7A | Otud7a | 309252 | 1,05 | up   |
| 6506786 | 7032395 | 966626  | OTU domain containing 7A | Otud7a | 309252 | 1,04 | down |
| 6600136 | 7032395 | 966621  | OTU domain containing 7A | Otud7a | 309252 | 1,04 | up   |
| 5827419 | 7032395 | 966627  | OTU domain containing 7A | Otud7a | 309252 | 1,03 | up   |
| 6519715 | 7032395 | 966608  | OTU domain containing 7A | Otud7a | 309252 | 1,01 | down |
| 6106040 | 7032395 | 966587  | OTU domain containing 7A | Otud7a | 309252 | 1,00 | down |
| 5651323 | 7197048 | 1367816 | OTU domain containing 7B | Otud7b | 310677 | 2,11 | up   |
| 5803663 | 7197048 | 1367814 | OTU domain containing 7B | Otud7b | 310677 | 2,07 | up   |
| 5744160 | 7197048 | 1367824 | OTU domain containing 7B | Otud7b | 310677 | 1,37 | down |



|         |         |         |                                             |         |        |      |      |
|---------|---------|---------|---------------------------------------------|---------|--------|------|------|
| 6154031 | 7197048 | 1367824 | OTU domain containing 7B                    | Otud7b  | 310677 | 1,33 | down |
| 5957250 | 7197048 | 1367824 | OTU domain containing 7B                    | Otud7b  | 310677 | 1,25 | down |
| 5778924 | 7197048 | 1367804 | OTU domain containing 7B                    | Otud7b  | 310677 | 1,24 | down |
| 5771458 | 7197048 | 1367820 | OTU domain containing 7B                    | Otud7b  | 310677 | 1,23 | up   |
| 6469695 | 7197048 | 1367822 | OTU domain containing 7B                    | Otud7b  | 310677 | 1,22 | down |
| 6525392 | 7197048 | 1367819 | OTU domain containing 7B                    | Otud7b  | 310677 | 1,13 | up   |
| 6216225 | 7197048 | 1367824 | OTU domain containing 7B                    | Otud7b  | 310677 | 1,12 | down |
| 5778027 | 7197048 | 1367815 | OTU domain containing 7B                    | Otud7b  | 310677 | 1,09 | up   |
| 5735349 | 7197048 | 1367813 | OTU domain containing 7B                    | Otud7b  | 310677 | 1,09 | up   |
| 6577139 | 7197048 | 1367804 | OTU domain containing 7B                    | Otud7b  | 310677 | 1,07 | up   |
| 6062953 | 7197048 | 1367813 | OTU domain containing 7B                    | Otud7b  | 310677 | 1,06 | up   |
| 5756163 | 7197048 | 1367821 | OTU domain containing 7B                    | Otud7b  | 310677 | 1,01 | down |
| 6112517 | 7197048 | 1367823 | OTU domain containing 7B                    | Otud7b  | 310677 | 1,01 | down |
| 5659902 | 7197048 | 1367817 | OTU domain containing 7B                    | Otud7b  | 310677 | 1,01 | down |
| 6448003 | 7200313 | 1376464 | outer dense fiber of sperm tails 2-like     | Odf2l   | 685425 | 1,83 | up   |
| 6535144 | 7200313 | 1376462 | outer dense fiber of sperm tails 2-like     | Odf2l   | 685425 | 1,67 | down |
| 6424713 | 7200313 | 1376459 | outer dense fiber of sperm tails 2-like     | Odf2l   | 685425 | 1,56 | down |
| 6292958 | 7200313 | 1376457 | outer dense fiber of sperm tails 2-like     | Odf2l   | 685425 | 1,51 | down |
| 6087390 | 7200313 | 1376469 | outer dense fiber of sperm tails 2-like     | Odf2l   | 685425 | 1,50 | up   |
| 6304907 | 7200313 | 1376466 | outer dense fiber of sperm tails 2-like     | Odf2l   | 685425 | 1,47 | up   |
| 6519193 | 7200313 | 1376451 | outer dense fiber of sperm tails 2-like     | Odf2l   | 685425 | 1,36 | down |
| 6122518 | 7200313 | 1376467 | outer dense fiber of sperm tails 2-like     | Odf2l   | 685425 | 1,32 | down |
| 5719520 | 7200313 | 1376450 | outer dense fiber of sperm tails 2-like     | Odf2l   | 685425 | 1,24 | down |
| 5836762 | 7200313 | 1376463 | outer dense fiber of sperm tails 2-like     | Odf2l   | 685425 | 1,23 | down |
| 5741813 | 7200313 | 1376456 | outer dense fiber of sperm tails 2-like     | Odf2l   | 685425 | 1,22 | down |
| 6434470 | 7200313 | 1376464 | outer dense fiber of sperm tails 2-like     | Odf2l   | 685425 | 1,16 | down |
| 6450585 | 7200313 | 1376446 | outer dense fiber of sperm tails 2-like     | Odf2l   | 685425 | 1,15 | down |
| 6026214 | 7200313 | 1376457 | outer dense fiber of sperm tails 2-like     | Odf2l   | 685425 | 1,05 | up   |
| 6724094 | 7200313 | 1376455 | outer dense fiber of sperm tails 2-like     | Odf2l   | 685425 | 1,05 | down |
| 6252245 | 7200313 | 1376472 | outer dense fiber of sperm tails 2-like     | Odf2l   | 685425 | 1,04 | up   |
| 5653732 | 7200313 | 1376461 | outer dense fiber of sperm tails 2-like     | Odf2l   | 685425 | 1,04 | up   |
| 6712778 | 7200313 | 1376452 | outer dense fiber of sperm tails 2-like     | Odf2l   | 685425 | 1,04 | down |
| 6370661 | 7200313 | 1376472 | outer dense fiber of sperm tails 2-like     | Odf2l   | 685425 | 1,03 | up   |
| 6227459 | 7131718 | 1205750 | oxidase assembly 1-like                     | Oxa1l   | 691393 | 1,09 | up   |
| 5966536 | 7181560 | 1329369 | oxidative stress induced growth inhibitor 1 | Osgin1  | 171493 | 2,37 | up   |
| 6280423 | 7181560 | 1329365 | oxidative stress induced growth inhibitor 1 | Osgin1  | 171493 | 2,03 | down |
| 5956849 | 7181560 | 1329368 | oxidative stress induced growth inhibitor 1 | Osgin1  | 171493 | 1,75 | up   |
| 5874114 | 7181560 | 1329362 | oxidative stress induced growth inhibitor 1 | Osgin1  | 171493 | 1,68 | down |
| 6024874 | 7181560 | 1329361 | oxidative stress induced growth inhibitor 1 | Osgin1  | 171493 | 1,47 | down |
| 6123099 | 7181560 | 1329366 | oxidative stress induced growth inhibitor 1 | Osgin1  | 171493 | 1,38 | up   |
| 6242887 | 7181560 | 1329365 | oxidative stress induced growth inhibitor 1 | Osgin1  | 171493 | 1,32 | up   |
| 6731299 | 7181560 | 1329367 | oxidative stress induced growth inhibitor 1 | Osgin1  | 171493 | 1,29 | down |
| 6573327 | 7181560 | 1329364 | oxidative stress induced growth inhibitor 1 | Osgin1  | 171493 | 1,16 | down |
| 6206239 | 7181560 | 1329370 | oxidative stress induced growth inhibitor 1 | Osgin1  | 171493 | 1,14 | up   |
| 5763924 | 7341038 | 1722633 | oxysterol binding protein-like 10           | Osbp110 | 316039 | 1,84 | down |
| 6044944 | 7341038 | 1722690 | oxysterol binding protein-like 10           | Osbp110 | 316039 | 1,33 | down |
| 6295825 | 7341038 | 1722633 | oxysterol binding protein-like 10           | Osbp110 | 316039 | 1,04 | up   |
| 6004242 | 7341038 | 1722650 | oxysterol binding protein-like 10           | Osbp110 | 316039 | 1,02 | up   |
| 5870427 | 7341038 | 1722651 | oxysterol binding protein-like 10           | Osbp110 | 316039 | 1,00 | down |
| 5753311 | 7264653 | 1534064 | oxysterol binding protein-like 3            | Osbp13  | 362360 | 2,22 | up   |
| 5765874 | 7264653 | 1534025 | oxysterol binding protein-like 3            | Osbp13  | 362360 | 1,62 | up   |
| 6367687 | 7264653 | 1534060 | oxysterol binding protein-like 3            | Osbp13  | 362360 | 1,34 | down |
| 6110397 | 7264653 | 1534034 | oxysterol binding protein-like 3            | Osbp13  | 362360 | 1,20 | down |
| 6228310 | 7264653 | 1534065 | oxysterol binding protein-like 3            | Osbp13  | 362360 | 1,14 | up   |
| 5973603 | 7264653 | 1534026 | oxysterol binding protein-like 3            | Osbp13  | 362360 | 1,13 | down |
| 5827700 | 7264653 | 1534027 | oxysterol binding protein-like 3            | Osbp13  | 362360 | 1,04 | up   |
| 6612908 | 7229061 | 1445315 | oxysterol binding protein-like 6            | Osbp16  | 311129 | 2,07 | down |

|         |         |         |                                  |        |        |      |      |
|---------|---------|---------|----------------------------------|--------|--------|------|------|
| 6278968 | 7229061 | 1445322 | oxysterol binding protein-like 6 | Osbpl6 | 311129 | 1,69 | down |
| 6064723 | 7229061 | 1445312 | oxysterol binding protein-like 6 | Osbpl6 | 311129 | 1,68 | down |
| 6131886 | 7229061 | 1445308 | oxysterol binding protein-like 6 | Osbpl6 | 311129 | 1,64 | up   |
| 6328710 | 7229061 | 1445311 | oxysterol binding protein-like 6 | Osbpl6 | 311129 | 1,54 | up   |
| 6258928 | 7229061 | 1445282 | oxysterol binding protein-like 6 | Osbpl6 | 311129 | 1,51 | up   |
| 6171706 | 7229061 | 1445313 | oxysterol binding protein-like 6 | Osbpl6 | 311129 | 1,51 | down |
| 5703607 | 7229061 | 1445320 | oxysterol binding protein-like 6 | Osbpl6 | 311129 | 1,44 | down |
| 6159753 | 7229061 | 1445319 | oxysterol binding protein-like 6 | Osbpl6 | 311129 | 1,37 | down |
| 6212858 | 7229061 | 1445323 | oxysterol binding protein-like 6 | Osbpl6 | 311129 | 1,36 | down |
| 6059319 | 7229061 | 1445283 | oxysterol binding protein-like 6 | Osbpl6 | 311129 | 1,30 | up   |
| 6436369 | 7229061 | 1445299 | oxysterol binding protein-like 6 | Osbpl6 | 311129 | 1,26 | up   |
| 6209872 | 7229061 | 1445317 | oxysterol binding protein-like 6 | Osbpl6 | 311129 | 1,20 | down |
| 6504302 | 7229061 | 1445280 | oxysterol binding protein-like 6 | Osbpl6 | 311129 | 1,17 | down |
| 5669599 | 7229061 | 1445295 | oxysterol binding protein-like 6 | Osbpl6 | 311129 | 1,15 | up   |
| 5828883 | 7229061 | 1445316 | oxysterol binding protein-like 6 | Osbpl6 | 311129 | 1,14 | up   |
| 6266403 | 7229061 | 1445303 | oxysterol binding protein-like 6 | Osbpl6 | 311129 | 1,14 | up   |
| 5807341 | 7229061 | 1445309 | oxysterol binding protein-like 6 | Osbpl6 | 311129 | 1,13 | up   |
| 6095787 | 7229061 | 1445289 | oxysterol binding protein-like 6 | Osbpl6 | 311129 | 1,12 | up   |
| 5700672 | 7229061 | 1445310 | oxysterol binding protein-like 6 | Osbpl6 | 311129 | 1,11 | up   |
| 5816365 | 7229061 | 1445295 | oxysterol binding protein-like 6 | Osbpl6 | 311129 | 1,09 | up   |
| 6355225 | 7229061 | 1445293 | oxysterol binding protein-like 6 | Osbpl6 | 311129 | 1,08 | up   |
| 6118573 | 7229061 | 1445298 | oxysterol binding protein-like 6 | Osbpl6 | 311129 | 1,07 | up   |
| 5667380 | 7229061 | 1445301 | oxysterol binding protein-like 6 | Osbpl6 | 311129 | 1,06 | down |
| 5982207 | 7229061 | 1445297 | oxysterol binding protein-like 6 | Osbpl6 | 311129 | 1,05 | up   |
| 6517839 | 7229061 | 1445294 | oxysterol binding protein-like 6 | Osbpl6 | 311129 | 1,05 | up   |
| 6178393 | 7229061 | 1445295 | oxysterol binding protein-like 6 | Osbpl6 | 311129 | 1,01 | up   |
| 6220889 | 7289879 | 1596411 | oxysterol binding protein-like 9 | Osbpl9 | 298369 | 2,66 | up   |
| 6572779 | 7289879 | 1596434 | oxysterol binding protein-like 9 | Osbpl9 | 298369 | 1,59 | down |
| 6186333 | 7289879 | 1596424 | oxysterol binding protein-like 9 | Osbpl9 | 298369 | 1,42 | up   |
| 5635852 | 7289879 | 1596410 | oxysterol binding protein-like 9 | Osbpl9 | 298369 | 1,36 | up   |
| 6135689 | 7289879 | 1596412 | oxysterol binding protein-like 9 | Osbpl9 | 298369 | 1,34 | up   |
| 6422961 | 7289879 | 1596413 | oxysterol binding protein-like 9 | Osbpl9 | 298369 | 1,31 | up   |
| 6647935 | 7289879 | 1596422 | oxysterol binding protein-like 9 | Osbpl9 | 298369 | 1,31 | up   |
| 5733092 | 7289879 | 1596444 | oxysterol binding protein-like 9 | Osbpl9 | 298369 | 1,24 | down |
| 6103292 | 7289879 | 1596425 | oxysterol binding protein-like 9 | Osbpl9 | 298369 | 1,20 | up   |
| 6064293 | 7289879 | 1596409 | oxysterol binding protein-like 9 | Osbpl9 | 298369 | 1,16 | up   |
| 5642345 | 7289879 | 1596431 | oxysterol binding protein-like 9 | Osbpl9 | 298369 | 1,14 | down |
| 6302601 | 7289879 | 1596405 | oxysterol binding protein-like 9 | Osbpl9 | 298369 | 1,13 | down |
| 6208454 | 7289879 | 1596402 | oxysterol binding protein-like 9 | Osbpl9 | 298369 | 1,09 | up   |
| 6419478 | 7289879 | 1596419 | oxysterol binding protein-like 9 | Osbpl9 | 298369 | 1,08 | down |
| 6509596 | 7289879 | 1596401 | oxysterol binding protein-like 9 | Osbpl9 | 298369 | 1,08 | down |
| 6126012 | 7289879 | 1596400 | oxysterol binding protein-like 9 | Osbpl9 | 298369 | 1,07 | down |
| 6049748 | 7289879 | 1596404 | oxysterol binding protein-like 9 | Osbpl9 | 298369 | 1,07 | down |
| 6370135 | 7289879 | 1596408 | oxysterol binding protein-like 9 | Osbpl9 | 298369 | 1,06 | up   |
| 5976318 | 7289879 | 1596418 | oxysterol binding protein-like 9 | Osbpl9 | 298369 | 1,06 | up   |
| 5756276 | 7289879 | 1596441 | oxysterol binding protein-like 9 | Osbpl9 | 298369 | 1,05 | down |
| 6109059 | 7289879 | 1596406 | oxysterol binding protein-like 9 | Osbpl9 | 298369 | 1,04 | up   |
| 6204935 | 7289879 | 1596404 | oxysterol binding protein-like 9 | Osbpl9 | 298369 | 1,03 | up   |
| 6197094 | 7289879 | 1596439 | oxysterol binding protein-like 9 | Osbpl9 | 298369 | 1,03 | down |
| 5647086 | 7289879 | 1596434 | oxysterol binding protein-like 9 | Osbpl9 | 298369 | 1,03 | down |
| 6652303 | 7289879 | 1596417 | oxysterol binding protein-like 9 | Osbpl9 | 298369 | 1,02 | up   |
| 5665217 | 7289879 | 1596400 | oxysterol binding protein-like 9 | Osbpl9 | 298369 | 1,02 | down |
| 6201048 | 7289879 | 1596410 | oxysterol binding protein-like 9 | Osbpl9 | 298369 | 1,00 | up   |
| 6121094 | 7232615 | 1454354 | oxytocin, prepropeptide          | Oxt    | 25504  | 2,51 | down |
| 5961033 | 7232615 | 1454355 | oxytocin, prepropeptide          | Oxt    | 25504  | 1,73 | up   |
| 6146920 | 7232615 | 1454352 | oxytocin, prepropeptide          | Oxt    | 25504  | 1,03 | up   |
| 6106587 | 7232615 | 1454353 | oxytocin, prepropeptide          | Oxt    | 25504  | 1,01 | up   |

|         |         |         |                                        |        |        |      |      |
|---------|---------|---------|----------------------------------------|--------|--------|------|------|
| 5770558 | 7380381 | 1821554 | p21 (CDKN1A)-activated kinase 3        | Pak3   | 29433  | 3,69 | up   |
| 6394776 | 7380381 | 1821546 | p21 (CDKN1A)-activated kinase 3        | Pak3   | 29433  | 2,66 | up   |
| 5937484 | 7380381 | 1821549 | p21 (CDKN1A)-activated kinase 3        | Pak3   | 29433  | 2,28 | up   |
| 6263558 | 7380381 | 1821550 | p21 (CDKN1A)-activated kinase 3        | Pak3   | 29433  | 2,13 | up   |
| 5692938 | 7380381 | 1821554 | p21 (CDKN1A)-activated kinase 3        | Pak3   | 29433  | 1,69 | up   |
| 5936640 | 7380381 | 1821543 | p21 (CDKN1A)-activated kinase 3        | Pak3   | 29433  | 1,60 | down |
| 5918893 | 7380381 | 1821548 | p21 (CDKN1A)-activated kinase 3        | Pak3   | 29433  | 1,55 | up   |
| 5706820 | 7380381 | 1821545 | p21 (CDKN1A)-activated kinase 3        | Pak3   | 29433  | 1,55 | down |
| 5760596 | 7380381 | 1821544 | p21 (CDKN1A)-activated kinase 3        | Pak3   | 29433  | 1,55 | down |
| 5735272 | 7380381 | 1821547 | p21 (CDKN1A)-activated kinase 3        | Pak3   | 29433  | 1,31 | down |
| 6596304 | 7380381 | 1821553 | p21 (CDKN1A)-activated kinase 3        | Pak3   | 29433  | 1,23 | down |
| 5926553 | 7380381 | 1821540 | p21 (CDKN1A)-activated kinase 3        | Pak3   | 29433  | 1,12 | down |
| 6269970 | 7380381 | 1821544 | p21 (CDKN1A)-activated kinase 3        | Pak3   | 29433  | 1,10 | up   |
| 6551649 | 7380381 | 1821541 | p21 (CDKN1A)-activated kinase 3        | Pak3   | 29433  | 1,08 | down |
| 6495247 | 7380381 | 1821542 | p21 (CDKN1A)-activated kinase 3        | Pak3   | 29433  | 1,07 | up   |
| 6312625 | 7380381 | 1821552 | p21 (CDKN1A)-activated kinase 3        | Pak3   | 29433  | 1,02 | down |
| 6117542 | 7380381 | 1821551 | p21 (CDKN1A)-activated kinase 3        | Pak3   | 29433  | 1,00 | down |
| 6336193 | 7233524 | 1457224 | paired box 1                           | Pax1   | 311505 | 1,75 | up   |
| 6709233 | 7233524 | 1457216 | paired box 1                           | Pax1   | 311505 | 1,41 | up   |
| 6459506 | 7233524 | 1457220 | paired box 1                           | Pax1   | 311505 | 1,31 | down |
| 6497304 | 7233524 | 1457221 | paired box 1                           | Pax1   | 311505 | 1,28 | down |
| 6092490 | 7233524 | 1457222 | paired box 1                           | Pax1   | 311505 | 1,20 | up   |
| 5644133 | 7233524 | 1457222 | paired box 1                           | Pax1   | 311505 | 1,20 | down |
| 6075252 | 7233524 | 1457224 | paired box 1                           | Pax1   | 311505 | 1,15 | up   |
| 6697044 | 7233524 | 1457224 | paired box 1                           | Pax1   | 311505 | 1,15 | up   |
| 6606727 | 7233524 | 1457216 | paired box 1                           | Pax1   | 311505 | 1,11 | up   |
| 6240502 | 7143387 | 1234510 | paired related homeobox protein-like 1 | Prrxl1 | 252880 | 2,17 | down |
| 5828549 | 7143387 | 1234511 | paired related homeobox protein-like 1 | Prrxl1 | 252880 | 1,91 | up   |
| 6580135 | 7143387 | 1234506 | paired related homeobox protein-like 1 | Prrxl1 | 252880 | 1,47 | down |
| 6198599 | 7143387 | 1234507 | paired related homeobox protein-like 1 | Prrxl1 | 252880 | 1,43 | up   |
| 5643203 | 7143387 | 1234505 | paired related homeobox protein-like 1 | Prrxl1 | 252880 | 1,35 | down |
| 6277440 | 7143387 | 1234512 | paired related homeobox protein-like 1 | Prrxl1 | 252880 | 1,35 | down |
| 5626840 | 7143387 | 1234506 | paired related homeobox protein-like 1 | Prrxl1 | 252880 | 1,35 | down |
| 6160588 | 7143387 | 1234512 | paired related homeobox protein-like 1 | Prrxl1 | 252880 | 1,29 | up   |
| 6050671 | 7143387 | 1234509 | paired related homeobox protein-like 1 | Prrxl1 | 252880 | 1,23 | up   |
| 6351978 | 7143387 | 1234505 | paired related homeobox protein-like 1 | Prrxl1 | 252880 | 1,17 | up   |
| 6458435 | 7143387 | 1234512 | paired related homeobox protein-like 1 | Prrxl1 | 252880 | 1,16 | up   |
| 5662396 | 7143387 | 1234511 | paired related homeobox protein-like 1 | Prrxl1 | 252880 | 1,11 | down |
| 5716041 | 7143387 | 1234508 | paired related homeobox protein-like 1 | Prrxl1 | 252880 | 1,10 | up   |
| 6670687 | 7143387 | 1234511 | paired related homeobox protein-like 1 | Prrxl1 | 252880 | 1,07 | up   |
| 5811898 | 7034743 | 973177  | paired-like homeobox 2a                | Phox2a | 116648 | 2,23 | down |
| 5815782 | 7034743 | 973180  | paired-like homeobox 2a                | Phox2a | 116648 | 1,48 | down |
| 6064638 | 7034743 | 973180  | paired-like homeobox 2a                | Phox2a | 116648 | 1,48 | up   |
| 5790337 | 7034743 | 973179  | paired-like homeobox 2a                | Phox2a | 116648 | 1,24 | up   |
| 6620564 | 7034743 | 973179  | paired-like homeobox 2a                | Phox2a | 116648 | 1,20 | down |
| 6537812 | 7034743 | 973177  | paired-like homeobox 2a                | Phox2a | 116648 | 1,20 | up   |
| 6379647 | 7034743 | 973180  | paired-like homeobox 2a                | Phox2a | 116648 | 1,14 | up   |
| 6272870 | 7034743 | 973178  | paired-like homeobox 2a                | Phox2a | 116648 | 1,04 | down |
| 6289895 | 7155441 | 1264357 | paired-like homeodomain 1              | Pitx1  | 113983 | 2,65 | up   |
| 6347903 | 7155441 | 1264354 | paired-like homeodomain 1              | Pitx1  | 113983 | 1,50 | up   |
| 6731097 | 7155441 | 1264356 | paired-like homeodomain 1              | Pitx1  | 113983 | 1,15 | down |
| 6002627 | 7155441 | 1264355 | paired-like homeodomain 1              | Pitx1  | 113983 | 1,13 | down |
| 5780885 | 7155441 | 1264357 | paired-like homeodomain 1              | Pitx1  | 113983 | 1,09 | down |
| 6238909 | 7213294 | 1406092 | palmdelphin                            | Palmd  | 310811 | 2,19 | up   |
| 6602141 | 7213294 | 1406096 | palmdelphin                            | Palmd  | 310811 | 1,58 | down |
| 6173807 | 7213294 | 1406103 | palmdelphin                            | Palmd  | 310811 | 1,50 | up   |
| 6730806 | 7213294 | 1406108 | palmdelphin                            | Palmd  | 310811 | 1,49 | down |

|         |         |         |                                                     |        |        |      |      |
|---------|---------|---------|-----------------------------------------------------|--------|--------|------|------|
| 6283414 | 7213294 | 1406108 | palmdelphin                                         | Palmd  | 310811 | 1,21 | down |
| 5628352 | 7213294 | 1406097 | palmdelphin                                         | Palmd  | 310811 | 1,11 | down |
| 6703727 | 7213294 | 1406108 | palmdelphin                                         | Palmd  | 310811 | 1,07 | up   |
| 6391293 | 7213294 | 1406095 | palmdelphin                                         | Palmd  | 310811 | 1,07 | up   |
| 5756211 | 7213294 | 1406094 | palmdelphin                                         | Palmd  | 310811 | 1,04 | up   |
| 6255307 | 7213294 | 1406108 | palmdelphin                                         | Palmd  | 310811 | 1,02 | up   |
| 5688396 | 7213294 | 1406105 | palmdelphin                                         | Palmd  | 310811 | 1,00 | up   |
| 5913085 | 7160706 | 1277078 | pancreas specific transcription factor, 1a          | Ptf1a  | 117034 | 2,64 | down |
| 5797692 | 7160706 | 1277081 | pancreas specific transcription factor, 1a          | Ptf1a  | 117034 | 1,26 | up   |
| 6070458 | 7160706 | 1277079 | pancreas specific transcription factor, 1a          | Ptf1a  | 117034 | 1,17 | down |
| 6221850 | 7160706 | 1277081 | pancreas specific transcription factor, 1a          | Ptf1a  | 117034 | 1,15 | down |
| 5893181 | 7160706 | 1277078 | pancreas specific transcription factor, 1a          | Ptf1a  | 117034 | 1,14 | up   |
| 6518426 | 7160706 | 1277078 | pancreas specific transcription factor, 1a          | Ptf1a  | 117034 | 1,08 | up   |
| 6188884 | 7160706 | 1277082 | pancreas specific transcription factor, 1a          | Ptf1a  | 117034 | 1,05 | up   |
| 6133294 | 7160706 | 1277080 | pancreas specific transcription factor, 1a          | Ptf1a  | 117034 | 1,02 | down |
| 6190247 | 7043626 | 994314  | pancreatic lipase                                   | Pnlip  | 25702  | 2,12 | up   |
| 6031090 | 7043626 | 994313  | pancreatic lipase                                   | Pnlip  | 25702  | 1,87 | down |
| 5727815 | 7043626 | 994312  | pancreatic lipase                                   | Pnlip  | 25702  | 1,34 | down |
| 6160911 | 7043626 | 994313  | pancreatic lipase                                   | Pnlip  | 25702  | 1,25 | down |
| 6054173 | 7043626 | 994311  | pancreatic lipase                                   | Pnlip  | 25702  | 1,22 | down |
| 6717746 | 7043626 | 994318  | pancreatic lipase                                   | Pnlip  | 25702  | 1,14 | up   |
| 6239032 | 7043626 | 994319  | pancreatic lipase                                   | Pnlip  | 25702  | 1,13 | down |
| 5873636 | 7043626 | 994316  | pancreatic lipase                                   | Pnlip  | 25702  | 1,11 | up   |
| 5846402 | 7043626 | 994310  | pancreatic lipase                                   | Pnlip  | 25702  | 1,07 | up   |
| 5751526 | 7043626 | 994309  | pancreatic lipase                                   | Pnlip  | 25702  | 1,07 | up   |
| 6534000 | 7043626 | 994319  | pancreatic lipase                                   | Pnlip  | 25702  | 1,05 | up   |
| 6188237 | 7043626 | 994317  | pancreatic lipase                                   | Pnlip  | 25702  | 1,05 | down |
| 5956735 | 7043626 | 994314  | pancreatic lipase                                   | Pnlip  | 25702  | 1,04 | down |
| 6165484 | 7043626 | 994315  | pancreatic lipase                                   | Pnlip  | 25702  | 1,03 | down |
| 6395259 | 7043626 | 994308  | pancreatic lipase                                   | Pnlip  | 25702  | 1,02 | down |
| 5934323 | 7043626 | 994320  | pancreatic lipase                                   | Pnlip  | 25702  | 1,01 | up   |
| 6714277 | 7342396 | 1726028 | Pannexin 1                                          | Panx1  | 315435 | 2,79 | up   |
| 5864294 | 7342396 | 1726032 | Pannexin 1                                          | Panx1  | 315435 | 2,08 | down |
| 6140956 | 7342396 | 1726033 | Pannexin 1                                          | Panx1  | 315435 | 1,78 | down |
| 6385664 | 7342396 | 1726030 | Pannexin 1                                          | Panx1  | 315435 | 1,45 | up   |
| 6294106 | 7342396 | 1726033 | Pannexin 1                                          | Panx1  | 315435 | 1,15 | up   |
| 5963518 | 7342396 | 1726033 | Pannexin 1                                          | Panx1  | 315435 | 1,13 | down |
| 6208362 | 7342396 | 1726029 | Pannexin 1                                          | Panx1  | 315435 | 1,13 | up   |
| 5767787 | 7342396 | 1726027 | Pannexin 1                                          | Panx1  | 315435 | 1,08 | down |
| 6038356 | 7342396 | 1726031 | Pannexin 1                                          | Panx1  | 315435 | 1,06 | down |
| 6023120 | 7232709 | 1454531 | pantothenate kinase 2 (Hallervorden-Spatz syndrome) | Pank2  | 296167 | 1,41 | down |
| 5651710 | 7232709 | 1454531 | pantothenate kinase 2 (Hallervorden-Spatz syndrome) | Pank2  | 296167 | 1,32 | up   |
| 6555507 | 7232709 | 1454538 | pantothenate kinase 2 (Hallervorden-Spatz syndrome) | Pank2  | 296167 | 1,20 | down |
| 5761079 | 7232709 | 1454533 | pantothenate kinase 2 (Hallervorden-Spatz syndrome) | Pank2  | 296167 | 1,15 | up   |
| 6299620 | 7232709 | 1454539 | pantothenate kinase 2 (Hallervorden-Spatz syndrome) | Pank2  | 296167 | 1,14 | down |
| 5627503 | 7232709 | 1454526 | pantothenate kinase 2 (Hallervorden-Spatz syndrome) | Pank2  | 296167 | 1,14 | down |
| 5905736 | 7232709 | 1454532 | pantothenate kinase 2 (Hallervorden-Spatz syndrome) | Pank2  | 296167 | 1,13 | down |
| 6230414 | 7232709 | 1454533 | pantothenate kinase 2 (Hallervorden-Spatz syndrome) | Pank2  | 296167 | 1,10 | up   |
| 6165943 | 7232709 | 1454526 | pantothenate kinase 2 (Hallervorden-Spatz syndrome) | Pank2  | 296167 | 1,05 | down |
| 6223268 | 7232709 | 1454526 | pantothenate kinase 2 (Hallervorden-Spatz syndrome) | Pank2  | 296167 | 1,04 | up   |
| 6197164 | 7232709 | 1454531 | pantothenate kinase 2 (Hallervorden-Spatz syndrome) | Pank2  | 296167 | 1,03 | down |
| 5777571 | 7232709 | 1454535 | pantothenate kinase 2 (Hallervorden-Spatz syndrome) | Pank2  | 296167 | 1,01 | up   |
| 6083759 | 7126400 | 1192534 | PARK2 co-regulated-like                             | Pacrgl | 360947 | 2,26 | down |
| 5931503 | 7126400 | 1192524 | PARK2 co-regulated-like                             | Pacrgl | 360947 | 1,72 | up   |
| 6185779 | 7126400 | 1192534 | PARK2 co-regulated-like                             | Pacrgl | 360947 | 1,28 | up   |
| 6484617 | 7126400 | 1192534 | PARK2 co-regulated-like                             | Pacrgl | 360947 | 1,23 | down |
| 6066188 | 7365487 | 1782553 | PAS domain containing serine/threonine kinase       | Pask   | 301617 | 2,20 | down |

|         |         |         |                                                |        |        |      |      |
|---------|---------|---------|------------------------------------------------|--------|--------|------|------|
| 6666138 | 7365487 | 1782556 | PAS domain containing serine/threonine kinase  | Pask   | 301617 | 2,19 | down |
| 5953414 | 7365487 | 1782542 | PAS domain containing serine/threonine kinase  | Pask   | 301617 | 1,70 | up   |
| 6699738 | 7365487 | 1782548 | PAS domain containing serine/threonine kinase  | Pask   | 301617 | 1,63 | up   |
| 6719204 | 7365487 | 1782548 | PAS domain containing serine/threonine kinase  | Pask   | 301617 | 1,39 | down |
| 6490050 | 7365487 | 1782550 | PAS domain containing serine/threonine kinase  | Pask   | 301617 | 1,39 | up   |
| 6236460 | 7365487 | 1782548 | PAS domain containing serine/threonine kinase  | Pask   | 301617 | 1,30 | up   |
| 6720882 | 7365487 | 1782552 | PAS domain containing serine/threonine kinase  | Pask   | 301617 | 1,27 | up   |
| 5701058 | 7365487 | 1782543 | PAS domain containing serine/threonine kinase  | Pask   | 301617 | 1,26 | up   |
| 6412997 | 7365487 | 1782551 | PAS domain containing serine/threonine kinase  | Pask   | 301617 | 1,22 | up   |
| 5740642 | 7365487 | 1782548 | PAS domain containing serine/threonine kinase  | Pask   | 301617 | 1,21 | up   |
| 5625282 | 7365487 | 1782554 | PAS domain containing serine/threonine kinase  | Pask   | 301617 | 1,18 | up   |
| 6205676 | 7365487 | 1782546 | PAS domain containing serine/threonine kinase  | Pask   | 301617 | 1,15 | down |
| 5785260 | 7365487 | 1782555 | PAS domain containing serine/threonine kinase  | Pask   | 301617 | 1,15 | up   |
| 5672291 | 7365487 | 1782541 | PAS domain containing serine/threonine kinase  | Pask   | 301617 | 1,14 | down |
| 6537784 | 7365487 | 1782551 | PAS domain containing serine/threonine kinase  | Pask   | 301617 | 1,13 | down |
| 5999237 | 7365487 | 1782556 | PAS domain containing serine/threonine kinase  | Pask   | 301617 | 1,12 | up   |
| 6647128 | 7365487 | 1782545 | PAS domain containing serine/threonine kinase  | Pask   | 301617 | 1,11 | down |
| 6638740 | 7365487 | 1782540 | PAS domain containing serine/threonine kinase  | Pask   | 301617 | 1,07 | down |
| 5799833 | 7365487 | 1782549 | PAS domain containing serine/threonine kinase  | Pask   | 301617 | 1,05 | down |
| 5663413 | 7365487 | 1782548 | PAS domain containing serine/threonine kinase  | Pask   | 301617 | 1,04 | down |
| 5985715 | 7365487 | 1782547 | PAS domain containing serine/threonine kinase  | Pask   | 301617 | 1,02 | up   |
| 6128588 | 7365487 | 1782544 | PAS domain containing serine/threonine kinase  | Pask   | 301617 | 1,01 | up   |
| 6487971 | 7319398 | 1670678 | patatin-like phospholipase domain containing 3 | Pnpla3 | 362972 | 2,12 | up   |
| 5840877 | 7319398 | 1670685 | patatin-like phospholipase domain containing 3 | Pnpla3 | 362972 | 1,93 | down |
| 5779238 | 7319398 | 1670683 | patatin-like phospholipase domain containing 3 | Pnpla3 | 362972 | 1,52 | down |
| 6240865 | 7319398 | 1670684 | patatin-like phospholipase domain containing 3 | Pnpla3 | 362972 | 1,49 | down |
| 6716284 | 7319398 | 1670682 | patatin-like phospholipase domain containing 3 | Pnpla3 | 362972 | 1,43 | up   |
| 5839989 | 7319398 | 1670679 | patatin-like phospholipase domain containing 3 | Pnpla3 | 362972 | 1,42 | up   |
| 6630525 | 7319398 | 1670687 | patatin-like phospholipase domain containing 3 | Pnpla3 | 362972 | 1,19 | down |
| 6732485 | 7319398 | 1670679 | patatin-like phospholipase domain containing 3 | Pnpla3 | 362972 | 1,17 | up   |
| 6702261 | 7319398 | 1670679 | patatin-like phospholipase domain containing 3 | Pnpla3 | 362972 | 1,15 | down |
| 6120678 | 7319398 | 1670686 | patatin-like phospholipase domain containing 3 | Pnpla3 | 362972 | 1,07 | down |
| 6403967 | 7319398 | 1670679 | patatin-like phospholipase domain containing 3 | Pnpla3 | 362972 | 1,07 | up   |
| 6682980 | 7319398 | 1670680 | patatin-like phospholipase domain containing 3 | Pnpla3 | 362972 | 1,06 | down |
| 6031795 | 7319398 | 1670681 | patatin-like phospholipase domain containing 3 | Pnpla3 | 362972 | 1,04 | down |
| 6491991 | 7319398 | 1670686 | patatin-like phospholipase domain containing 3 | Pnpla3 | 362972 | 1,03 | up   |
| 5832639 | 7330242 | 1695975 | patatin-like phospholipase domain containing 5 | Pnpla5 | 300108 | 2,53 | up   |
| 6444153 | 7330242 | 1695983 | patatin-like phospholipase domain containing 5 | Pnpla5 | 300108 | 1,88 | down |
| 6408402 | 7330242 | 1695977 | patatin-like phospholipase domain containing 5 | Pnpla5 | 300108 | 1,59 | up   |
| 5753406 | 7330242 | 1695980 | patatin-like phospholipase domain containing 5 | Pnpla5 | 300108 | 1,47 | up   |
| 6338887 | 7330242 | 1695977 | patatin-like phospholipase domain containing 5 | Pnpla5 | 300108 | 1,37 | up   |
| 5938754 | 7330242 | 1695975 | patatin-like phospholipase domain containing 5 | Pnpla5 | 300108 | 1,28 | down |
| 6272012 | 7330242 | 1695981 | patatin-like phospholipase domain containing 5 | Pnpla5 | 300108 | 1,19 | down |
| 6448076 | 7330242 | 1695978 | patatin-like phospholipase domain containing 5 | Pnpla5 | 300108 | 1,13 | up   |
| 5849251 | 7330242 | 1695975 | patatin-like phospholipase domain containing 5 | Pnpla5 | 300108 | 1,12 | down |
| 6412308 | 7330242 | 1695979 | patatin-like phospholipase domain containing 5 | Pnpla5 | 300108 | 1,09 | down |
| 6451436 | 7330242 | 1695978 | patatin-like phospholipase domain containing 5 | Pnpla5 | 300108 | 1,07 | down |
| 6621925 | 7330242 | 1695982 | patatin-like phospholipase domain containing 5 | Pnpla5 | 300108 | 1,04 | up   |
| 6365764 | 7330242 | 1695976 | patatin-like phospholipase domain containing 5 | Pnpla5 | 300108 | 1,04 | down |
| 6513719 | 7330242 | 1695983 | patatin-like phospholipase domain containing 5 | Pnpla5 | 300108 | 1,03 | up   |
| 5663801 | 7330242 | 1695975 | patatin-like phospholipase domain containing 5 | Pnpla5 | 300108 | 1,01 | up   |
| 6487618 | 7225443 | 1435668 | patatin-like phospholipase domain containing 7 | Pnpla7 | 246246 | 2,94 | down |
| 6302097 | 7225443 | 1435701 | patatin-like phospholipase domain containing 7 | Pnpla7 | 246246 | 2,09 | down |
| 6201143 | 7225443 | 1435702 | patatin-like phospholipase domain containing 7 | Pnpla7 | 246246 | 1,99 | down |
| 6470469 | 7225443 | 1435669 | patatin-like phospholipase domain containing 7 | Pnpla7 | 246246 | 1,89 | up   |
| 6302538 | 7225443 | 1435703 | patatin-like phospholipase domain containing 7 | Pnpla7 | 246246 | 1,67 | down |
| 6491719 | 7225443 | 1435678 | patatin-like phospholipase domain containing 7 | Pnpla7 | 246246 | 1,66 | up   |

|         |         |         |                                                                  |        |        |      |      |
|---------|---------|---------|------------------------------------------------------------------|--------|--------|------|------|
| 6090254 | 7225443 | 1435685 | patatin-like phospholipase domain containing 7                   | Pnpla7 | 246246 | 1,59 | down |
| 6399388 | 7225443 | 1435679 | patatin-like phospholipase domain containing 7                   | Pnpla7 | 246246 | 1,54 | up   |
| 6231122 | 7225443 | 1435696 | patatin-like phospholipase domain containing 7                   | Pnpla7 | 246246 | 1,48 | down |
| 6139755 | 7225443 | 1435690 | patatin-like phospholipase domain containing 7                   | Pnpla7 | 246246 | 1,43 | down |
| 5755113 | 7225443 | 1435673 | patatin-like phospholipase domain containing 7                   | Pnpla7 | 246246 | 1,39 | up   |
| 6567638 | 7225443 | 1435680 | patatin-like phospholipase domain containing 7                   | Pnpla7 | 246246 | 1,32 | down |
| 6595544 | 7225443 | 1435670 | patatin-like phospholipase domain containing 7                   | Pnpla7 | 246246 | 1,30 | up   |
| 6710771 | 7225443 | 1435688 | patatin-like phospholipase domain containing 7                   | Pnpla7 | 246246 | 1,30 | up   |
| 6746105 | 7225443 | 1435686 | patatin-like phospholipase domain containing 7                   | Pnpla7 | 246246 | 1,27 | up   |
| 5736604 | 7225443 | 1435682 | patatin-like phospholipase domain containing 7                   | Pnpla7 | 246246 | 1,27 | down |
| 6330974 | 7225443 | 1435671 | patatin-like phospholipase domain containing 7                   | Pnpla7 | 246246 | 1,26 | up   |
| 6383462 | 7225443 | 1435675 | patatin-like phospholipase domain containing 7                   | Pnpla7 | 246246 | 1,23 | up   |
| 5859322 | 7225443 | 1435698 | patatin-like phospholipase domain containing 7                   | Pnpla7 | 246246 | 1,22 | down |
| 6739188 | 7225443 | 1435694 | patatin-like phospholipase domain containing 7                   | Pnpla7 | 246246 | 1,22 | down |
| 6410583 | 7225443 | 1435694 | patatin-like phospholipase domain containing 7                   | Pnpla7 | 246246 | 1,20 | up   |
| 5845789 | 7225443 | 1435676 | patatin-like phospholipase domain containing 7                   | Pnpla7 | 246246 | 1,17 | up   |
| 6132411 | 7225443 | 1435698 | patatin-like phospholipase domain containing 7                   | Pnpla7 | 246246 | 1,16 | up   |
| 6418433 | 7225443 | 1435700 | patatin-like phospholipase domain containing 7                   | Pnpla7 | 246246 | 1,15 | up   |
| 5995270 | 7225443 | 1435692 | patatin-like phospholipase domain containing 7                   | Pnpla7 | 246246 | 1,14 | up   |
| 6322155 | 7225443 | 1435702 | patatin-like phospholipase domain containing 7                   | Pnpla7 | 246246 | 1,13 | up   |
| 6498297 | 7225443 | 1435684 | patatin-like phospholipase domain containing 7                   | Pnpla7 | 246246 | 1,09 | up   |
| 6506025 | 7225443 | 1435699 | patatin-like phospholipase domain containing 7                   | Pnpla7 | 246246 | 1,09 | down |
| 5646152 | 7225443 | 1435668 | patatin-like phospholipase domain containing 7                   | Pnpla7 | 246246 | 1,09 | down |
| 5687034 | 7225443 | 1435697 | patatin-like phospholipase domain containing 7                   | Pnpla7 | 246246 | 1,08 | down |
| 6324444 | 7225443 | 1435677 | patatin-like phospholipase domain containing 7                   | Pnpla7 | 246246 | 1,07 | down |
| 6112639 | 7225443 | 1435674 | patatin-like phospholipase domain containing 7                   | Pnpla7 | 246246 | 1,06 | up   |
| 5989274 | 7225443 | 1435695 | patatin-like phospholipase domain containing 7                   | Pnpla7 | 246246 | 1,05 | up   |
| 6575335 | 7225443 | 1435672 | patatin-like phospholipase domain containing 7                   | Pnpla7 | 246246 | 1,04 | down |
| 6711422 | 7225443 | 1435669 | patatin-like phospholipase domain containing 7                   | Pnpla7 | 246246 | 1,04 | up   |
| 6671080 | 7225443 | 1435687 | patatin-like phospholipase domain containing 7                   | Pnpla7 | 246246 | 1,03 | down |
| 5877018 | 7225443 | 1435689 | patatin-like phospholipase domain containing 7                   | Pnpla7 | 246246 | 1,02 | up   |
| 6052422 | 7225443 | 1435681 | patatin-like phospholipase domain containing 7                   | Pnpla7 | 246246 | 1,02 | up   |
| 6221560 | 7225443 | 1435683 | patatin-like phospholipase domain containing 7                   | Pnpla7 | 246246 | 1,02 | up   |
| 5712415 | 7225443 | 1435693 | patatin-like phospholipase domain containing 7                   | Pnpla7 | 246246 | 1,01 | down |
| 5940834 | 7225443 | 1435691 | patatin-like phospholipase domain containing 7                   | Pnpla7 | 246246 | 1,01 | down |
| 6719482 | 7249388 | 1495889 | PAX interacting (with transcription-activation domain) protein 1 | Paxip1 | 311944 | 2,07 | up   |
| 5790955 | 7249388 | 1495907 | PAX interacting (with transcription-activation domain) protein 1 | Paxip1 | 311944 | 1,99 | up   |
| 5769638 | 7249388 | 1495901 | PAX interacting (with transcription-activation domain) protein 1 | Paxip1 | 311944 | 1,61 | down |
| 6603896 | 7249388 | 1495894 | PAX interacting (with transcription-activation domain) protein 1 | Paxip1 | 311944 | 1,58 | up   |
| 6288520 | 7249388 | 1495889 | PAX interacting (with transcription-activation domain) protein 1 | Paxip1 | 311944 | 1,44 | up   |
| 5989007 | 7249388 | 1495883 | PAX interacting (with transcription-activation domain) protein 1 | Paxip1 | 311944 | 1,43 | up   |
| 6450246 | 7249388 | 1495888 | PAX interacting (with transcription-activation domain) protein 1 | Paxip1 | 311944 | 1,42 | down |
| 6007140 | 7249388 | 1495903 | PAX interacting (with transcription-activation domain) protein 1 | Paxip1 | 311944 | 1,42 | up   |
| 6007971 | 7249388 | 1495908 | PAX interacting (with transcription-activation domain) protein 1 | Paxip1 | 311944 | 1,41 | up   |
| 5831703 | 7249388 | 1495893 | PAX interacting (with transcription-activation domain) protein 1 | Paxip1 | 311944 | 1,38 | down |
| 5734906 | 7249388 | 1495907 | PAX interacting (with transcription-activation domain) protein 1 | Paxip1 | 311944 | 1,37 | up   |
| 6738166 | 7249388 | 1495891 | PAX interacting (with transcription-activation domain) protein 1 | Paxip1 | 311944 | 1,32 | down |
| 6141195 | 7249388 | 1495905 | PAX interacting (with transcription-activation domain) protein 1 | Paxip1 | 311944 | 1,25 | down |
| 6368076 | 7249388 | 1495889 | PAX interacting (with transcription-activation domain) protein 1 | Paxip1 | 311944 | 1,24 | up   |
| 5634242 | 7249388 | 1495907 | PAX interacting (with transcription-activation domain) protein 1 | Paxip1 | 311944 | 1,21 | up   |
| 6281294 | 7249388 | 1495900 | PAX interacting (with transcription-activation domain) protein 1 | Paxip1 | 311944 | 1,19 | down |
| 6130208 | 7249388 | 1495891 | PAX interacting (with transcription-activation domain) protein 1 | Paxip1 | 311944 | 1,15 | up   |
| 6686584 | 7249388 | 1495892 | PAX interacting (with transcription-activation domain) protein 1 | Paxip1 | 311944 | 1,11 | down |
| 6171551 | 7249388 | 1495889 | PAX interacting (with transcription-activation domain) protein 1 | Paxip1 | 311944 | 1,10 | down |
| 6160204 | 7249388 | 1495904 | PAX interacting (with transcription-activation domain) protein 1 | Paxip1 | 311944 | 1,10 | up   |
| 6345433 | 7249388 | 1495901 | PAX interacting (with transcription-activation domain) protein 1 | Paxip1 | 311944 | 1,09 | down |
| 5856640 | 7249388 | 1495907 | PAX interacting (with transcription-activation domain) protein 1 | Paxip1 | 311944 | 1,07 | up   |

|         |         |         |                                                                    |        |        |      |      |
|---------|---------|---------|--------------------------------------------------------------------|--------|--------|------|------|
| 6208103 | 7249388 | 1495898 | PAX interacting (with transcription-activation domain) protein 1   | Paxip1 | 311944 | 1,06 | up   |
| 5831597 | 7249388 | 1495889 | PAX interacting (with transcription-activation domain) protein 1   | Paxip1 | 311944 | 1,06 | up   |
| 6485737 | 7249388 | 1495906 | PAX interacting (with transcription-activation domain) protein 1   | Paxip1 | 311944 | 1,06 | up   |
| 6104945 | 7249388 | 1495886 | PAX interacting (with transcription-activation domain) protein 1   | Paxip1 | 311944 | 1,05 | down |
| 6020841 | 7249388 | 1495889 | PAX interacting (with transcription-activation domain) protein 1   | Paxip1 | 311944 | 1,04 | up   |
| 6317784 | 7249388 | 1495896 | PAX interacting (with transcription-activation domain) protein 1   | Paxip1 | 311944 | 1,01 | up   |
| 6325958 | 7249388 | 1495895 | PAX interacting (with transcription-activation domain) protein 1   | Paxip1 | 311944 | 1,01 | up   |
| 5947702 | 7249388 | 1495902 | PAX interacting (with transcription-activation domain) protein 1   | Paxip1 | 311944 | 1,01 | up   |
| 5930958 | 7249388 | 1495891 | PAX interacting (with transcription-activation domain) protein 1   | Paxip1 | 311944 | 1,00 | down |
| 6416325 | 7118503 | 1173549 | PDS5, regulator of cohesion maintenance, homolog A (S. cerevisiae) | Pds5a  | 305343 | 1,74 | up   |
| 5851231 | 7118503 | 1173548 | PDS5, regulator of cohesion maintenance, homolog A (S. cerevisiae) | Pds5a  | 305343 | 1,36 | up   |
| 6083781 | 7118503 | 1173571 | PDS5, regulator of cohesion maintenance, homolog A (S. cerevisiae) | Pds5a  | 305343 | 1,34 | up   |
| 6291613 | 7118503 | 1173565 | PDS5, regulator of cohesion maintenance, homolog A (S. cerevisiae) | Pds5a  | 305343 | 1,29 | down |
| 6328092 | 7118503 | 1173576 | PDS5, regulator of cohesion maintenance, homolog A (S. cerevisiae) | Pds5a  | 305343 | 1,29 | down |
| 6015348 | 7118503 | 1173567 | PDS5, regulator of cohesion maintenance, homolog A (S. cerevisiae) | Pds5a  | 305343 | 1,27 | down |
| 5948662 | 7118503 | 1173560 | PDS5, regulator of cohesion maintenance, homolog A (S. cerevisiae) | Pds5a  | 305343 | 1,20 | up   |
| 6619349 | 7118503 | 1173568 | PDS5, regulator of cohesion maintenance, homolog A (S. cerevisiae) | Pds5a  | 305343 | 1,19 | down |
| 6565795 | 7118503 | 1173570 | PDS5, regulator of cohesion maintenance, homolog A (S. cerevisiae) | Pds5a  | 305343 | 1,19 | up   |
| 5709604 | 7118503 | 1173566 | PDS5, regulator of cohesion maintenance, homolog A (S. cerevisiae) | Pds5a  | 305343 | 1,18 | down |
| 6197296 | 7118503 | 1173553 | PDS5, regulator of cohesion maintenance, homolog A (S. cerevisiae) | Pds5a  | 305343 | 1,17 | up   |
| 5726061 | 7118503 | 1173547 | PDS5, regulator of cohesion maintenance, homolog A (S. cerevisiae) | Pds5a  | 305343 | 1,17 | down |
| 6135939 | 7118503 | 1173561 | PDS5, regulator of cohesion maintenance, homolog A (S. cerevisiae) | Pds5a  | 305343 | 1,16 | up   |
| 5693753 | 7118503 | 1173554 | PDS5, regulator of cohesion maintenance, homolog A (S. cerevisiae) | Pds5a  | 305343 | 1,13 | up   |
| 6414447 | 7118503 | 1173577 | PDS5, regulator of cohesion maintenance, homolog A (S. cerevisiae) | Pds5a  | 305343 | 1,13 | down |
| 6137494 | 7118503 | 1173555 | PDS5, regulator of cohesion maintenance, homolog A (S. cerevisiae) | Pds5a  | 305343 | 1,13 | down |
| 5822472 | 7118503 | 1173552 | PDS5, regulator of cohesion maintenance, homolog A (S. cerevisiae) | Pds5a  | 305343 | 1,12 | down |
| 5882095 | 7118503 | 1173569 | PDS5, regulator of cohesion maintenance, homolog A (S. cerevisiae) | Pds5a  | 305343 | 1,11 | up   |
| 6570265 | 7118503 | 1173575 | PDS5, regulator of cohesion maintenance, homolog A (S. cerevisiae) | Pds5a  | 305343 | 1,10 | up   |
| 6694501 | 7118503 | 1173542 | PDS5, regulator of cohesion maintenance, homolog A (S. cerevisiae) | Pds5a  | 305343 | 1,09 | up   |
| 5758201 | 7118503 | 1173558 | PDS5, regulator of cohesion maintenance, homolog A (S. cerevisiae) | Pds5a  | 305343 | 1,09 | up   |
| 6483105 | 7118503 | 1173576 | PDS5, regulator of cohesion maintenance, homolog A (S. cerevisiae) | Pds5a  | 305343 | 1,08 | down |
| 5820997 | 7118503 | 1173557 | PDS5, regulator of cohesion maintenance, homolog A (S. cerevisiae) | Pds5a  | 305343 | 1,06 | down |
| 5817362 | 7118503 | 1173562 | PDS5, regulator of cohesion maintenance, homolog A (S. cerevisiae) | Pds5a  | 305343 | 1,06 | up   |
| 5998969 | 7118503 | 1173579 | PDS5, regulator of cohesion maintenance, homolog A (S. cerevisiae) | Pds5a  | 305343 | 1,05 | up   |
| 6156568 | 7118503 | 1173571 | PDS5, regulator of cohesion maintenance, homolog A (S. cerevisiae) | Pds5a  | 305343 | 1,04 | down |
| 5681783 | 7118503 | 1173573 | PDS5, regulator of cohesion maintenance, homolog A (S. cerevisiae) | Pds5a  | 305343 | 1,03 | up   |
| 6621338 | 7118503 | 1173556 | PDS5, regulator of cohesion maintenance, homolog A (S. cerevisiae) | Pds5a  | 305343 | 1,02 | down |
| 6114622 | 7118503 | 1173564 | PDS5, regulator of cohesion maintenance, homolog A (S. cerevisiae) | Pds5a  | 305343 | 1,02 | down |
| 6158561 | 7118503 | 1173546 | PDS5, regulator of cohesion maintenance, homolog A (S. cerevisiae) | Pds5a  | 305343 | 1,02 | down |
| 6161249 | 7118503 | 1173550 | PDS5, regulator of cohesion maintenance, homolog A (S. cerevisiae) | Pds5a  | 305343 | 1,02 | down |
| 6350084 | 7118503 | 1173574 | PDS5, regulator of cohesion maintenance, homolog A (S. cerevisiae) | Pds5a  | 305343 | 1,02 | up   |
| 5694509 | 7118503 | 1173559 | PDS5, regulator of cohesion maintenance, homolog A (S. cerevisiae) | Pds5a  | 305343 | 1,00 | down |
| 6441994 | 7118503 | 1173564 | PDS5, regulator of cohesion maintenance, homolog A (S. cerevisiae) | Pds5a  | 305343 | 1,00 | down |
| 5877331 | 7155497 | 1264450 | PDZ and LIM domain 7                                               | Pdlim7 | 286908 | 2,15 | down |
| 6584342 | 7155497 | 1264444 | PDZ and LIM domain 7                                               | Pdlim7 | 286908 | 1,62 | up   |
| 6302807 | 7155497 | 1264449 | PDZ and LIM domain 7                                               | Pdlim7 | 286908 | 1,46 | up   |
| 5650445 | 7155497 | 1264451 | PDZ and LIM domain 7                                               | Pdlim7 | 286908 | 1,26 | down |
| 5897208 | 7155497 | 1264456 | PDZ and LIM domain 7                                               | Pdlim7 | 286908 | 1,18 | down |
| 6714536 | 7155497 | 1264455 | PDZ and LIM domain 7                                               | Pdlim7 | 286908 | 1,17 | down |
| 5809609 | 7155497 | 1264452 | PDZ and LIM domain 7                                               | Pdlim7 | 286908 | 1,16 | up   |
| 6534589 | 7155497 | 1264453 | PDZ and LIM domain 7                                               | Pdlim7 | 286908 | 1,16 | up   |
| 6364715 | 7155497 | 1264451 | PDZ and LIM domain 7                                               | Pdlim7 | 286908 | 1,11 | up   |
| 5831589 | 7155497 | 1264445 | PDZ and LIM domain 7                                               | Pdlim7 | 286908 | 1,09 | down |
| 6292028 | 7155497 | 1264447 | PDZ and LIM domain 7                                               | Pdlim7 | 286908 | 1,08 | down |
| 6069115 | 7155497 | 1264454 | PDZ and LIM domain 7                                               | Pdlim7 | 286908 | 1,03 | up   |
| 6707214 | 7155497 | 1264448 | PDZ and LIM domain 7                                               | Pdlim7 | 286908 | 1,03 | up   |
| 6095958 | 7155497 | 1264446 | PDZ and LIM domain 7                                               | Pdlim7 | 286908 | 1,03 | up   |

|         |         |         |                                      |         |        |      |      |
|---------|---------|---------|--------------------------------------|---------|--------|------|------|
| 6494876 | 7155497 | 1264445 | PDZ and LIM domain 7                 | Pdlim7  | 286908 | 1,00 | up   |
| 6203045 | 7205216 | 1387715 | PDZ domain containing 2              | Pdzd2   | 65034  | 2,19 | up   |
| 6245281 | 7205216 | 1387730 | PDZ domain containing 2              | Pdzd2   | 65034  | 1,66 | up   |
| 6526776 | 7205216 | 1387722 | PDZ domain containing 2              | Pdzd2   | 65034  | 1,43 | down |
| 5855873 | 7205216 | 1387733 | PDZ domain containing 2              | Pdzd2   | 65034  | 1,42 | down |
| 5686329 | 7205216 | 1387725 | PDZ domain containing 2              | Pdzd2   | 65034  | 1,27 | up   |
| 5768497 | 7205216 | 1387720 | PDZ domain containing 2              | Pdzd2   | 65034  | 1,23 | down |
| 6649846 | 7205216 | 1387720 | PDZ domain containing 2              | Pdzd2   | 65034  | 1,21 | up   |
| 5812167 | 7205216 | 1387732 | PDZ domain containing 2              | Pdzd2   | 65034  | 1,21 | down |
| 6095462 | 7205216 | 1387723 | PDZ domain containing 2              | Pdzd2   | 65034  | 1,18 | up   |
| 5747868 | 7205216 | 1387729 | PDZ domain containing 2              | Pdzd2   | 65034  | 1,17 | down |
| 6649124 | 7205216 | 1387724 | PDZ domain containing 2              | Pdzd2   | 65034  | 1,14 | up   |
| 6018492 | 7205216 | 1387736 | PDZ domain containing 2              | Pdzd2   | 65034  | 1,11 | up   |
| 6076570 | 7205216 | 1387719 | PDZ domain containing 2              | Pdzd2   | 65034  | 1,11 | down |
| 5903768 | 7205216 | 1387734 | PDZ domain containing 2              | Pdzd2   | 65034  | 1,11 | up   |
| 6302536 | 7205216 | 1387720 | PDZ domain containing 2              | Pdzd2   | 65034  | 1,11 | down |
| 6580938 | 7205216 | 1387717 | PDZ domain containing 2              | Pdzd2   | 65034  | 1,09 | down |
| 6410204 | 7205216 | 1387722 | PDZ domain containing 2              | Pdzd2   | 65034  | 1,09 | down |
| 6656462 | 7205216 | 1387731 | PDZ domain containing 2              | Pdzd2   | 65034  | 1,08 | up   |
| 6453773 | 7205216 | 1387720 | PDZ domain containing 2              | Pdzd2   | 65034  | 1,06 | up   |
| 6205677 | 7205216 | 1387727 | PDZ domain containing 2              | Pdzd2   | 65034  | 1,05 | up   |
| 6637593 | 7205216 | 1387722 | PDZ domain containing 2              | Pdzd2   | 65034  | 1,05 | up   |
| 6746258 | 7205216 | 1387726 | PDZ domain containing 2              | Pdzd2   | 65034  | 1,04 | up   |
| 5699619 | 7205216 | 1387716 | PDZ domain containing 2              | Pdzd2   | 65034  | 1,03 | up   |
| 6441758 | 7205216 | 1387735 | PDZ domain containing 2              | Pdzd2   | 65034  | 1,03 | down |
| 6341925 | 7205216 | 1387720 | PDZ domain containing 2              | Pdzd2   | 65034  | 1,02 | down |
| 5922145 | 7205216 | 1387728 | PDZ domain containing 2              | Pdzd2   | 65034  | 1,02 | up   |
| 6096748 | 7205216 | 1387736 | PDZ domain containing 2              | Pdzd2   | 65034  | 1,02 | down |
| 6531129 | 7205216 | 1387718 | PDZ domain containing 2              | Pdzd2   | 65034  | 1,02 | up   |
| 5923303 | 7344702 | 1732139 | PDZ domain containing 3              | Pdzd3   | 500986 | 1,11 | up   |
| 5908971 | 7267953 | 1542229 | PDZ domain containing RING finger 3  | Pdzm3   | 312607 | 1,70 | down |
| 5811369 | 7267953 | 1542229 | PDZ domain containing RING finger 3  | Pdzm3   | 312607 | 1,39 | up   |
| 5826075 | 7267953 | 1542264 | PDZ domain containing RING finger 3  | Pdzm3   | 312607 | 1,37 | up   |
| 5759705 | 7267953 | 1542229 | PDZ domain containing RING finger 3  | Pdzm3   | 312607 | 1,08 | up   |
| 5948068 | 7320068 | 1672638 | PDZ domain containing RING finger 4  | Pdzm4   | 315250 | 1,45 | down |
| 6136716 | 7320068 | 1672605 | PDZ domain containing RING finger 4  | Pdzm4   | 315250 | 1,30 | down |
| 5697908 | 7320068 | 1672637 | PDZ domain containing RING finger 4  | Pdzm4   | 315250 | 1,30 | down |
| 5856754 | 7320068 | 1672606 | PDZ domain containing RING finger 4  | Pdzm4   | 315250 | 1,23 | down |
| 6628320 | 7320068 | 1672625 | PDZ domain containing RING finger 4  | Pdzm4   | 315250 | 1,20 | down |
| 5657616 | 7131119 | 1204428 | pellino 2                            | Peli2   | 305835 | 2,49 | down |
| 5652064 | 7131119 | 1204455 | pellino 2                            | Peli2   | 305835 | 1,83 | up   |
| 6575182 | 7131119 | 1204451 | pellino 2                            | Peli2   | 305835 | 1,57 | down |
| 6676085 | 7131119 | 1204454 | pellino 2                            | Peli2   | 305835 | 1,54 | up   |
| 6196689 | 7131119 | 1204455 | pellino 2                            | Peli2   | 305835 | 1,19 | down |
| 5659830 | 7131119 | 1204438 | pellino 2                            | Peli2   | 305835 | 1,18 | up   |
| 6117229 | 7131119 | 1204453 | pellino 2                            | Peli2   | 305835 | 1,13 | up   |
| 5633848 | 7131119 | 1204429 | pellino 2                            | Peli2   | 305835 | 1,07 | down |
| 6076717 | 7029306 | 959286  | peptidoglycan recognition protein 1  | Pglyrp1 | 84387  | 2,23 | down |
| 6620436 | 7029306 | 959282  | peptidoglycan recognition protein 1  | Pglyrp1 | 84387  | 1,24 | up   |
| 6298811 | 7029306 | 959285  | peptidoglycan recognition protein 1  | Pglyrp1 | 84387  | 1,20 | down |
| 6202673 | 7029306 | 959283  | peptidoglycan recognition protein 1  | Pglyrp1 | 84387  | 1,19 | down |
| 5723762 | 7029306 | 959284  | peptidoglycan recognition protein 1  | Pglyrp1 | 84387  | 1,06 | up   |
| 5742273 | 7292488 | 1602434 | peptidyl arginine deiminase, type IV | Padi4   | 29512  | 2,24 | up   |
| 6679323 | 7292488 | 1602430 | peptidyl arginine deiminase, type IV | Padi4   | 29512  | 1,40 | down |
| 6506622 | 7292488 | 1602439 | peptidyl arginine deiminase, type IV | Padi4   | 29512  | 1,40 | down |
| 6217845 | 7292488 | 1602437 | peptidyl arginine deiminase, type IV | Padi4   | 29512  | 1,32 | down |
| 5756324 | 7292488 | 1602442 | peptidyl arginine deiminase, type IV | Padi4   | 29512  | 1,31 | up   |



|         |         |         |                                               |       |        |      |      |
|---------|---------|---------|-----------------------------------------------|-------|--------|------|------|
| 5790488 | 7292488 | 1602441 | peptidyl arginine deiminase, type IV          | Padi4 | 29512  | 1,18 | down |
| 5774145 | 7292488 | 1602431 | peptidyl arginine deiminase, type IV          | Padi4 | 29512  | 1,16 | down |
| 6547647 | 7292488 | 1602433 | peptidyl arginine deiminase, type IV          | Padi4 | 29512  | 1,15 | up   |
| 5727539 | 7292488 | 1602435 | peptidyl arginine deiminase, type IV          | Padi4 | 29512  | 1,13 | down |
| 6732922 | 7292488 | 1602440 | peptidyl arginine deiminase, type IV          | Padi4 | 29512  | 1,13 | down |
| 6089866 | 7292488 | 1602436 | peptidyl arginine deiminase, type IV          | Padi4 | 29512  | 1,09 | down |
| 5873085 | 7292488 | 1602429 | peptidyl arginine deiminase, type IV          | Padi4 | 29512  | 1,08 | up   |
| 5906807 | 7292488 | 1602428 | peptidyl arginine deiminase, type IV          | Padi4 | 29512  | 1,04 | up   |
| 6551620 | 7292488 | 1602427 | peptidyl arginine deiminase, type IV          | Padi4 | 29512  | 1,03 | up   |
| 5707117 | 7292488 | 1602443 | peptidyl arginine deiminase, type IV          | Padi4 | 29512  | 1,03 | down |
| 5824688 | 7292488 | 1602438 | peptidyl arginine deiminase, type IV          | Padi4 | 29512  | 1,02 | up   |
| 6746656 | 7292488 | 1602433 | peptidyl arginine deiminase, type IV          | Padi4 | 29512  | 1,02 | up   |
| 5950256 | 7292488 | 1602432 | peptidyl arginine deiminase, type IV          | Padi4 | 29512  | 1,01 | down |
| 6593911 | 7358041 | 1764727 | peptidylglycine alpha-amidating monooxygenase | Pam   | 25508  | 2,92 | down |
| 6588784 | 7358041 | 1764741 | peptidylglycine alpha-amidating monooxygenase | Pam   | 25508  | 1,76 | down |
| 6661888 | 7358041 | 1764742 | peptidylglycine alpha-amidating monooxygenase | Pam   | 25508  | 1,72 | down |
| 5648250 | 7358041 | 1764743 | peptidylglycine alpha-amidating monooxygenase | Pam   | 25508  | 1,58 | down |
| 5889489 | 7358041 | 1764744 | peptidylglycine alpha-amidating monooxygenase | Pam   | 25508  | 1,55 | up   |
| 6161031 | 7358041 | 1764730 | peptidylglycine alpha-amidating monooxygenase | Pam   | 25508  | 1,46 | up   |
| 6316870 | 7358041 | 1764731 | peptidylglycine alpha-amidating monooxygenase | Pam   | 25508  | 1,45 | up   |
| 6586586 | 7358041 | 1764734 | peptidylglycine alpha-amidating monooxygenase | Pam   | 25508  | 1,40 | up   |
| 5985528 | 7358041 | 1764741 | peptidylglycine alpha-amidating monooxygenase | Pam   | 25508  | 1,38 | down |
| 6273574 | 7358041 | 1764739 | peptidylglycine alpha-amidating monooxygenase | Pam   | 25508  | 1,38 | up   |
| 6738605 | 7358041 | 1764750 | peptidylglycine alpha-amidating monooxygenase | Pam   | 25508  | 1,36 | down |
| 6246681 | 7358041 | 1764740 | peptidylglycine alpha-amidating monooxygenase | Pam   | 25508  | 1,35 | down |
| 6576116 | 7358041 | 1764733 | peptidylglycine alpha-amidating monooxygenase | Pam   | 25508  | 1,33 | up   |
| 6060962 | 7358041 | 1764748 | peptidylglycine alpha-amidating monooxygenase | Pam   | 25508  | 1,33 | down |
| 6300149 | 7358041 | 1764749 | peptidylglycine alpha-amidating monooxygenase | Pam   | 25508  | 1,28 | down |
| 6517883 | 7358041 | 1764751 | peptidylglycine alpha-amidating monooxygenase | Pam   | 25508  | 1,26 | down |
| 5789105 | 7358041 | 1764747 | peptidylglycine alpha-amidating monooxygenase | Pam   | 25508  | 1,24 | up   |
| 6051679 | 7358041 | 1764735 | peptidylglycine alpha-amidating monooxygenase | Pam   | 25508  | 1,22 | up   |
| 6689269 | 7358041 | 1764727 | peptidylglycine alpha-amidating monooxygenase | Pam   | 25508  | 1,21 | down |
| 6274258 | 7358041 | 1764745 | peptidylglycine alpha-amidating monooxygenase | Pam   | 25508  | 1,19 | down |
| 5790925 | 7358041 | 1764732 | peptidylglycine alpha-amidating monooxygenase | Pam   | 25508  | 1,18 | up   |
| 6534087 | 7358041 | 1764746 | peptidylglycine alpha-amidating monooxygenase | Pam   | 25508  | 1,15 | up   |
| 5850792 | 7358041 | 1764737 | peptidylglycine alpha-amidating monooxygenase | Pam   | 25508  | 1,15 | down |
| 6404685 | 7358041 | 1764736 | peptidylglycine alpha-amidating monooxygenase | Pam   | 25508  | 1,12 | up   |
| 6674654 | 7358041 | 1764751 | peptidylglycine alpha-amidating monooxygenase | Pam   | 25508  | 1,09 | up   |
| 6221342 | 7358041 | 1764729 | peptidylglycine alpha-amidating monooxygenase | Pam   | 25508  | 1,07 | up   |
| 6344256 | 7358041 | 1764738 | peptidylglycine alpha-amidating monooxygenase | Pam   | 25508  | 1,05 | up   |
| 5625327 | 7358041 | 1764728 | peptidylglycine alpha-amidating monooxygenase | Pam   | 25508  | 1,03 | down |
| 5997584 | 7290793 | 1598636 | peptidylprolyl isomerase E (cyclophilin E)    | Ppie  | 298508 | 2,28 | up   |
| 5812771 | 7290793 | 1598637 | peptidylprolyl isomerase E (cyclophilin E)    | Ppie  | 298508 | 1,83 | up   |
| 5789469 | 7290793 | 1598635 | peptidylprolyl isomerase E (cyclophilin E)    | Ppie  | 298508 | 1,69 | down |
| 5846550 | 7290793 | 1598628 | peptidylprolyl isomerase E (cyclophilin E)    | Ppie  | 298508 | 1,68 | down |
| 6419659 | 7290793 | 1598639 | peptidylprolyl isomerase E (cyclophilin E)    | Ppie  | 298508 | 1,62 | up   |
| 5674138 | 7290793 | 1598641 | peptidylprolyl isomerase E (cyclophilin E)    | Ppie  | 298508 | 1,58 | down |
| 6021767 | 7290793 | 1598627 | peptidylprolyl isomerase E (cyclophilin E)    | Ppie  | 298508 | 1,40 | down |
| 6114783 | 7290793 | 1598638 | peptidylprolyl isomerase E (cyclophilin E)    | Ppie  | 298508 | 1,14 | up   |
| 6419843 | 7290793 | 1598634 | peptidylprolyl isomerase E (cyclophilin E)    | Ppie  | 298508 | 1,13 | down |
| 5743174 | 7290793 | 1598631 | peptidylprolyl isomerase E (cyclophilin E)    | Ppie  | 298508 | 1,09 | up   |
| 6308406 | 7290793 | 1598640 | peptidylprolyl isomerase E (cyclophilin E)    | Ppie  | 298508 | 1,06 | down |
| 6541888 | 7290793 | 1598633 | peptidylprolyl isomerase E (cyclophilin E)    | Ppie  | 298508 | 1,00 | down |
| 6528524 | 7068987 | 1053598 | period homolog 1 (Drosophila)                 | Per1  | 287422 | 1,66 | up   |
| 6501904 | 7068987 | 1053603 | period homolog 1 (Drosophila)                 | Per1  | 287422 | 1,59 | down |
| 5863315 | 7068987 | 1053608 | period homolog 1 (Drosophila)                 | Per1  | 287422 | 1,44 | up   |
| 6419706 | 7068987 | 1053589 | period homolog 1 (Drosophila)                 | Per1  | 287422 | 1,38 | down |

|         |         |         |                               |       |        |      |      |
|---------|---------|---------|-------------------------------|-------|--------|------|------|
| 6296682 | 7068987 | 1053590 | period homolog 1 (Drosophila) | Per1  | 287422 | 1,35 | down |
| 6430179 | 7068987 | 1053588 | period homolog 1 (Drosophila) | Per1  | 287422 | 1,33 | up   |
| 6045729 | 7068987 | 1053599 | period homolog 1 (Drosophila) | Per1  | 287422 | 1,32 | up   |
| 6715150 | 7068987 | 1053596 | period homolog 1 (Drosophila) | Per1  | 287422 | 1,32 | up   |
| 6040478 | 7068987 | 1053594 | period homolog 1 (Drosophila) | Per1  | 287422 | 1,29 | up   |
| 5794948 | 7068987 | 1053604 | period homolog 1 (Drosophila) | Per1  | 287422 | 1,28 | down |
| 6229343 | 7068987 | 1053608 | period homolog 1 (Drosophila) | Per1  | 287422 | 1,23 | down |
| 6303263 | 7068987 | 1053604 | period homolog 1 (Drosophila) | Per1  | 287422 | 1,22 | down |
| 6728170 | 7068987 | 1053607 | period homolog 1 (Drosophila) | Per1  | 287422 | 1,18 | down |
| 6407126 | 7068987 | 1053603 | period homolog 1 (Drosophila) | Per1  | 287422 | 1,16 | down |
| 5883886 | 7068987 | 1053595 | period homolog 1 (Drosophila) | Per1  | 287422 | 1,15 | up   |
| 6551565 | 7068987 | 1053606 | period homolog 1 (Drosophila) | Per1  | 287422 | 1,14 | up   |
| 6597229 | 7068987 | 1053608 | period homolog 1 (Drosophila) | Per1  | 287422 | 1,14 | up   |
| 6012822 | 7068987 | 1053588 | period homolog 1 (Drosophila) | Per1  | 287422 | 1,13 | up   |
| 5633929 | 7068987 | 1053592 | period homolog 1 (Drosophila) | Per1  | 287422 | 1,13 | up   |
| 6602366 | 7068987 | 1053597 | period homolog 1 (Drosophila) | Per1  | 287422 | 1,13 | up   |
| 5911234 | 7068987 | 1053605 | period homolog 1 (Drosophila) | Per1  | 287422 | 1,13 | down |
| 6446422 | 7068987 | 1053592 | period homolog 1 (Drosophila) | Per1  | 287422 | 1,12 | down |
| 6585118 | 7068987 | 1053591 | period homolog 1 (Drosophila) | Per1  | 287422 | 1,09 | up   |
| 6513012 | 7068987 | 1053601 | period homolog 1 (Drosophila) | Per1  | 287422 | 1,09 | down |
| 6168444 | 7068987 | 1053602 | period homolog 1 (Drosophila) | Per1  | 287422 | 1,07 | up   |
| 6407288 | 7068987 | 1053600 | period homolog 1 (Drosophila) | Per1  | 287422 | 1,02 | up   |
| 5640228 | 7068987 | 1053593 | period homolog 1 (Drosophila) | Per1  | 287422 | 1,01 | down |
| 5931199 | 7293385 | 1604643 | period homolog 3 (Drosophila) | Per3  | 78962  | 2,28 | up   |
| 6295215 | 7293385 | 1604645 | period homolog 3 (Drosophila) | Per3  | 78962  | 1,78 | up   |
| 5741944 | 7293385 | 1604647 | period homolog 3 (Drosophila) | Per3  | 78962  | 1,74 | down |
| 5934652 | 7293385 | 1604644 | period homolog 3 (Drosophila) | Per3  | 78962  | 1,64 | down |
| 5711795 | 7293385 | 1604654 | period homolog 3 (Drosophila) | Per3  | 78962  | 1,55 | down |
| 6163680 | 7293385 | 1604656 | period homolog 3 (Drosophila) | Per3  | 78962  | 1,42 | up   |
| 6704687 | 7293385 | 1604641 | period homolog 3 (Drosophila) | Per3  | 78962  | 1,42 | down |
| 6032121 | 7293385 | 1604650 | period homolog 3 (Drosophila) | Per3  | 78962  | 1,30 | down |
| 5739241 | 7293385 | 1604649 | period homolog 3 (Drosophila) | Per3  | 78962  | 1,28 | up   |
| 6707581 | 7293385 | 1604642 | period homolog 3 (Drosophila) | Per3  | 78962  | 1,27 | down |
| 6272465 | 7293385 | 1604653 | period homolog 3 (Drosophila) | Per3  | 78962  | 1,24 | up   |
| 6288786 | 7293385 | 1604646 | period homolog 3 (Drosophila) | Per3  | 78962  | 1,23 | down |
| 6323758 | 7293385 | 1604657 | period homolog 3 (Drosophila) | Per3  | 78962  | 1,21 | up   |
| 5951808 | 7293385 | 1604640 | period homolog 3 (Drosophila) | Per3  | 78962  | 1,17 | down |
| 6551611 | 7293385 | 1604641 | period homolog 3 (Drosophila) | Per3  | 78962  | 1,16 | down |
| 6494027 | 7293385 | 1604644 | period homolog 3 (Drosophila) | Per3  | 78962  | 1,13 | up   |
| 6430352 | 7293385 | 1604648 | period homolog 3 (Drosophila) | Per3  | 78962  | 1,11 | up   |
| 6480290 | 7293385 | 1604647 | period homolog 3 (Drosophila) | Per3  | 78962  | 1,09 | up   |
| 6743949 | 7293385 | 1604646 | period homolog 3 (Drosophila) | Per3  | 78962  | 1,08 | down |
| 5671251 | 7293385 | 1604644 | period homolog 3 (Drosophila) | Per3  | 78962  | 1,07 | up   |
| 5979038 | 7293385 | 1604652 | period homolog 3 (Drosophila) | Per3  | 78962  | 1,06 | down |
| 6334224 | 7293385 | 1604655 | period homolog 3 (Drosophila) | Per3  | 78962  | 1,04 | up   |
| 6021486 | 7293385 | 1604645 | period homolog 3 (Drosophila) | Per3  | 78962  | 1,03 | up   |
| 5653740 | 7293385 | 1604646 | period homolog 3 (Drosophila) | Per3  | 78962  | 1,03 | up   |
| 6665480 | 7293385 | 1604646 | period homolog 3 (Drosophila) | Per3  | 78962  | 1,03 | up   |
| 6110176 | 7293385 | 1604660 | period homolog 3 (Drosophila) | Per3  | 78962  | 1,03 | down |
| 5866159 | 7293385 | 1604651 | period homolog 3 (Drosophila) | Per3  | 78962  | 1,02 | down |
| 6697550 | 7293385 | 1604658 | period homolog 3 (Drosophila) | Per3  | 78962  | 1,02 | down |
| 5784134 | 7293385 | 1604659 | period homolog 3 (Drosophila) | Per3  | 78962  | 1,01 | up   |
| 5701700 | 7068510 | 1052193 | peripheral myelin protein 22  | Pmp22 | 24660  | 2,37 | down |
| 5819912 | 7068510 | 1052195 | peripheral myelin protein 22  | Pmp22 | 24660  | 1,56 | up   |
| 6336367 | 7068510 | 1052192 | peripheral myelin protein 22  | Pmp22 | 24660  | 1,19 | up   |
| 5799023 | 7068510 | 1052193 | peripheral myelin protein 22  | Pmp22 | 24660  | 1,19 | up   |
| 6344872 | 7068510 | 1052196 | peripheral myelin protein 22  | Pmp22 | 24660  | 1,18 | down |

|         |         |         |                                                                       |           |        |      |      |
|---------|---------|---------|-----------------------------------------------------------------------|-----------|--------|------|------|
| 6216543 | 7068510 | 1052194 | peripheral myelin protein 22                                          | Pmp22     | 24660  | 1,12 | up   |
| 6272129 | 7068510 | 1052197 | peripheral myelin protein 22                                          | Pmp22     | 24660  | 1,10 | down |
| 6233081 | 7280743 | 1574564 | perlecan                                                              | LOC313641 | 313641 | 1,77 | up   |
| 5726039 | 7280743 | 1574566 | perlecan                                                              | LOC313641 | 313641 | 1,27 | down |
| 5963374 | 7280743 | 1574565 | perlecan                                                              | LOC313641 | 313641 | 1,05 | up   |
| 6322934 | 7375047 | 1809507 | peroxiredoxin 4                                                       | Prdx4     | 85274  | 2,76 | down |
| 6656206 | 7375047 | 1809507 | peroxiredoxin 4                                                       | Prdx4     | 85274  | 1,70 | up   |
| 5646503 | 7375047 | 1809509 | peroxiredoxin 4                                                       | Prdx4     | 85274  | 1,62 | down |
| 5965623 | 7375047 | 1809507 | peroxiredoxin 4                                                       | Prdx4     | 85274  | 1,41 | down |
| 6278408 | 7375047 | 1809512 | peroxiredoxin 4                                                       | Prdx4     | 85274  | 1,36 | up   |
| 6025207 | 7375047 | 1809513 | peroxiredoxin 4                                                       | Prdx4     | 85274  | 1,31 | up   |
| 5855265 | 7375047 | 1809507 | peroxiredoxin 4                                                       | Prdx4     | 85274  | 1,20 | down |
| 6159776 | 7375047 | 1809510 | peroxiredoxin 4                                                       | Prdx4     | 85274  | 1,20 | up   |
| 6233199 | 7375047 | 1809508 | peroxiredoxin 4                                                       | Prdx4     | 85274  | 1,05 | up   |
| 6408965 | 7375047 | 1809511 | peroxiredoxin 4                                                       | Prdx4     | 85274  | 1,02 | down |
| 5853430 | 7375047 | 1809513 | peroxiredoxin 4                                                       | Prdx4     | 85274  | 1,01 | up   |
| 6313411 | 7197138 | 1367993 | peroxisomal biogenesis factor 11 beta                                 | Pex11b    | 310682 | 1,83 | down |
| 6097023 | 7197138 | 1367991 | peroxisomal biogenesis factor 11 beta                                 | Pex11b    | 310682 | 1,57 | up   |
| 6301071 | 7197138 | 1367991 | peroxisomal biogenesis factor 11 beta                                 | Pex11b    | 310682 | 1,42 | down |
| 5649537 | 7197138 | 1367995 | peroxisomal biogenesis factor 11 beta                                 | Pex11b    | 310682 | 1,20 | up   |
| 6115362 | 7197138 | 1367996 | peroxisomal biogenesis factor 11 beta                                 | Pex11b    | 310682 | 1,18 | up   |
| 5945665 | 7197138 | 1367992 | peroxisomal biogenesis factor 11 beta                                 | Pex11b    | 310682 | 1,11 | up   |
| 6183356 | 7197138 | 1367994 | peroxisomal biogenesis factor 11 beta                                 | Pex11b    | 310682 | 1,08 | up   |
| 6270920 | 7197138 | 1367994 | peroxisomal biogenesis factor 11 beta                                 | Pex11b    | 310682 | 1,02 | down |
| 6312350 | 7293131 | 1604075 | peroxisomal biogenesis factor 14                                      | Pex14     | 64460  | 3,13 | down |
| 6372397 | 7293131 | 1604079 | peroxisomal biogenesis factor 14                                      | Pex14     | 64460  | 1,34 | up   |
| 5961829 | 7293131 | 1604075 | peroxisomal biogenesis factor 14                                      | Pex14     | 64460  | 1,31 | down |
| 5784365 | 7293131 | 1604075 | peroxisomal biogenesis factor 14                                      | Pex14     | 64460  | 1,27 | down |
| 6109195 | 7293131 | 1604077 | peroxisomal biogenesis factor 14                                      | Pex14     | 64460  | 1,27 | down |
| 6447037 | 7293131 | 1604078 | peroxisomal biogenesis factor 14                                      | Pex14     | 64460  | 1,24 | up   |
| 6509506 | 7293131 | 1604081 | peroxisomal biogenesis factor 14                                      | Pex14     | 64460  | 1,22 | down |
| 6125242 | 7293131 | 1604075 | peroxisomal biogenesis factor 14                                      | Pex14     | 64460  | 1,20 | up   |
| 6558368 | 7293131 | 1604074 | peroxisomal biogenesis factor 14                                      | Pex14     | 64460  | 1,10 | down |
| 6002257 | 7293131 | 1604083 | peroxisomal biogenesis factor 14                                      | Pex14     | 64460  | 1,10 | up   |
| 6672168 | 7293131 | 1604080 | peroxisomal biogenesis factor 14                                      | Pex14     | 64460  | 1,07 | down |
| 6280328 | 7293131 | 1604082 | peroxisomal biogenesis factor 14                                      | Pex14     | 64460  | 1,04 | down |
| 6746171 | 7293131 | 1604074 | peroxisomal biogenesis factor 14                                      | Pex14     | 64460  | 1,02 | down |
| 5773303 | 7293131 | 1604076 | peroxisomal biogenesis factor 14                                      | Pex14     | 64460  | 1,02 | down |
| 6448230 | 7293131 | 1604075 | peroxisomal biogenesis factor 14                                      | Pex14     | 64460  | 1,01 | down |
| 6597785 | 7293131 | 1604074 | peroxisomal biogenesis factor 14                                      | Pex14     | 64460  | 1,01 | up   |
| 6563347 | 7044633 | 997365  | peroxisomal biogenesis factor 7                                       | Pex7      | 308718 | 2,02 | down |
| 5733497 | 7044633 | 997357  | peroxisomal biogenesis factor 7                                       | Pex7      | 308718 | 1,59 | down |
| 5629447 | 7044633 | 997361  | peroxisomal biogenesis factor 7                                       | Pex7      | 308718 | 1,49 | down |
| 6584155 | 7044633 | 997355  | peroxisomal biogenesis factor 7                                       | Pex7      | 308718 | 1,39 | down |
| 6568641 | 7044633 | 997366  | peroxisomal biogenesis factor 7                                       | Pex7      | 308718 | 1,34 | up   |
| 6143360 | 7044633 | 997367  | peroxisomal biogenesis factor 7                                       | Pex7      | 308718 | 1,32 | up   |
| 5726891 | 7044633 | 997358  | peroxisomal biogenesis factor 7                                       | Pex7      | 308718 | 1,25 | down |
| 5857756 | 7044633 | 997352  | peroxisomal biogenesis factor 7                                       | Pex7      | 308718 | 1,20 | down |
| 5936239 | 7044633 | 997353  | peroxisomal biogenesis factor 7                                       | Pex7      | 308718 | 1,12 | down |
| 6651600 | 7044633 | 997362  | peroxisomal biogenesis factor 7                                       | Pex7      | 308718 | 1,04 | down |
| 6085894 | 7044633 | 997352  | peroxisomal biogenesis factor 7                                       | Pex7      | 308718 | 1,04 | up   |
| 6218496 | 7119257 | 1175290 | peroxisome proliferator-activated receptor gamma, coactivator 1 alpha | Ppargc1a  | 83516  | 2,49 | down |
| 5770095 | 7119257 | 1175289 | peroxisome proliferator-activated receptor gamma, coactivator 1 alpha | Ppargc1a  | 83516  | 1,57 | down |
| 6111364 | 7119257 | 1175285 | peroxisome proliferator-activated receptor gamma, coactivator 1 alpha | Ppargc1a  | 83516  | 1,40 | up   |
| 6708738 | 7119257 | 1175287 | peroxisome proliferator-activated receptor gamma, coactivator 1 alpha | Ppargc1a  | 83516  | 1,31 | down |
| 6331503 | 7119257 | 1175291 | peroxisome proliferator-activated receptor gamma, coactivator 1 alpha | Ppargc1a  | 83516  | 1,26 | down |
| 6212728 | 7119257 | 1175286 | peroxisome proliferator-activated receptor gamma, coactivator 1 alpha | Ppargc1a  | 83516  | 1,22 | up   |

|         |         |         |                                                                         |          |        |      |      |
|---------|---------|---------|-------------------------------------------------------------------------|----------|--------|------|------|
| 5637601 | 7119257 | 1175284 | peroxisome proliferator-activated receptor gamma, coactivator 1 alpha   | Ppargc1a | 83516  | 1,20 | up   |
| 6235542 | 7119257 | 1175293 | peroxisome proliferator-activated receptor gamma, coactivator 1 alpha   | Ppargc1a | 83516  | 1,19 | down |
| 6129965 | 7119257 | 1175294 | peroxisome proliferator-activated receptor gamma, coactivator 1 alpha   | Ppargc1a | 83516  | 1,16 | down |
| 6259392 | 7119257 | 1175290 | peroxisome proliferator-activated receptor gamma, coactivator 1 alpha   | Ppargc1a | 83516  | 1,14 | down |
| 6047230 | 7119257 | 1175282 | peroxisome proliferator-activated receptor gamma, coactivator 1 alpha   | Ppargc1a | 83516  | 1,14 | up   |
| 6113826 | 7119257 | 1175283 | peroxisome proliferator-activated receptor gamma, coactivator 1 alpha   | Ppargc1a | 83516  | 1,11 | down |
| 5845674 | 7119257 | 1175292 | peroxisome proliferator-activated receptor gamma, coactivator 1 alpha   | Ppargc1a | 83516  | 1,02 | down |
| 6194391 | 7119257 | 1175288 | peroxisome proliferator-activated receptor gamma, coactivator 1 alpha   | Ppargc1a | 83516  | 1,00 | down |
| 6420830 | 7042529 | 991600  | peroxisome proliferator-activated receptor gamma, coactivator-related 1 | Pprc1    | 294007 | 1,51 | down |
| 5756202 | 7042529 | 991584  | peroxisome proliferator-activated receptor gamma, coactivator-related 1 | Pprc1    | 294007 | 1,36 | up   |
| 6215809 | 7042529 | 991593  | peroxisome proliferator-activated receptor gamma, coactivator-related 1 | Pprc1    | 294007 | 1,35 | up   |
| 6485131 | 7042529 | 991598  | peroxisome proliferator-activated receptor gamma, coactivator-related 1 | Pprc1    | 294007 | 1,35 | down |
| 5639866 | 7042529 | 991597  | peroxisome proliferator-activated receptor gamma, coactivator-related 1 | Pprc1    | 294007 | 1,27 | up   |
| 6693051 | 7042529 | 991588  | peroxisome proliferator-activated receptor gamma, coactivator-related 1 | Pprc1    | 294007 | 1,27 | up   |
| 5692685 | 7042529 | 991588  | peroxisome proliferator-activated receptor gamma, coactivator-related 1 | Pprc1    | 294007 | 1,24 | up   |
| 5701545 | 7042529 | 991590  | peroxisome proliferator-activated receptor gamma, coactivator-related 1 | Pprc1    | 294007 | 1,22 | down |
| 5698918 | 7042529 | 991594  | peroxisome proliferator-activated receptor gamma, coactivator-related 1 | Pprc1    | 294007 | 1,22 | up   |
| 6742755 | 7042529 | 991591  | peroxisome proliferator-activated receptor gamma, coactivator-related 1 | Pprc1    | 294007 | 1,18 | down |
| 6631693 | 7042529 | 991582  | peroxisome proliferator-activated receptor gamma, coactivator-related 1 | Pprc1    | 294007 | 1,17 | up   |
| 5803856 | 7042529 | 991599  | peroxisome proliferator-activated receptor gamma, coactivator-related 1 | Pprc1    | 294007 | 1,17 | up   |
| 6505586 | 7042529 | 991589  | peroxisome proliferator-activated receptor gamma, coactivator-related 1 | Pprc1    | 294007 | 1,16 | up   |
| 6231932 | 7042529 | 991587  | peroxisome proliferator-activated receptor gamma, coactivator-related 1 | Pprc1    | 294007 | 1,13 | down |
| 6503665 | 7042529 | 991585  | peroxisome proliferator-activated receptor gamma, coactivator-related 1 | Pprc1    | 294007 | 1,03 | down |
| 5638231 | 7042529 | 991586  | peroxisome proliferator-activated receptor gamma, coactivator-related 1 | Pprc1    | 294007 | 1,03 | up   |
| 6206304 | 7042529 | 991588  | peroxisome proliferator-activated receptor gamma, coactivator-related 1 | Pprc1    | 294007 | 1,02 | up   |
| 5849066 | 7042529 | 991596  | peroxisome proliferator-activated receptor gamma, coactivator-related 1 | Pprc1    | 294007 | 1,02 | down |
| 6173255 | 7042529 | 991589  | peroxisome proliferator-activated receptor gamma, coactivator-related 1 | Pprc1    | 294007 | 1,02 | down |
| 5946480 | 7042529 | 991592  | peroxisome proliferator-activated receptor gamma, coactivator-related 1 | Pprc1    | 294007 | 1,02 | up   |
| 6376429 | 7042529 | 991589  | peroxisome proliferator-activated receptor gamma, coactivator-related 1 | Pprc1    | 294007 | 1,02 | down |
| 5935103 | 7042529 | 991589  | peroxisome proliferator-activated receptor gamma, coactivator-related 1 | Pprc1    | 294007 | 1,01 | up   |
| 6637057 | 7042529 | 991589  | peroxisome proliferator-activated receptor gamma, coactivator-related 1 | Pprc1    | 294007 | 1,00 | up   |
| 5767272 | 7103829 | 1137192 | PH domain and leucine rich repeat protein phosphatase                   | Phlpp    | 59265  | 4,82 | down |
| 6397146 | 7103829 | 1137192 | PH domain and leucine rich repeat protein phosphatase                   | Phlpp    | 59265  | 4,64 | down |
| 6718892 | 7103829 | 1137192 | PH domain and leucine rich repeat protein phosphatase                   | Phlpp    | 59265  | 2,03 | down |
| 6742819 | 7103829 | 1137192 | PH domain and leucine rich repeat protein phosphatase                   | Phlpp    | 59265  | 1,89 | down |
| 6233725 | 7103829 | 1137192 | PH domain and leucine rich repeat protein phosphatase                   | Phlpp    | 59265  | 1,69 | down |
| 6600396 | 7103829 | 1137193 | PH domain and leucine rich repeat protein phosphatase                   | Phlpp    | 59265  | 1,52 | up   |
| 5760359 | 7103829 | 1137208 | PH domain and leucine rich repeat protein phosphatase                   | Phlpp    | 59265  | 1,36 | down |
| 6155769 | 7103829 | 1137203 | PH domain and leucine rich repeat protein phosphatase                   | Phlpp    | 59265  | 1,31 | up   |
| 6046143 | 7103829 | 1137194 | PH domain and leucine rich repeat protein phosphatase                   | Phlpp    | 59265  | 1,24 | up   |
| 6556856 | 7103829 | 1137192 | PH domain and leucine rich repeat protein phosphatase                   | Phlpp    | 59265  | 1,23 | up   |
| 5761574 | 7103829 | 1137192 | PH domain and leucine rich repeat protein phosphatase                   | Phlpp    | 59265  | 1,18 | down |
| 6451157 | 7103829 | 1137208 | PH domain and leucine rich repeat protein phosphatase                   | Phlpp    | 59265  | 1,16 | down |
| 6596318 | 7103829 | 1137204 | PH domain and leucine rich repeat protein phosphatase                   | Phlpp    | 59265  | 1,16 | down |
| 5839523 | 7103829 | 1137198 | PH domain and leucine rich repeat protein phosphatase                   | Phlpp    | 59265  | 1,16 | up   |
| 5948299 | 7103829 | 1137208 | PH domain and leucine rich repeat protein phosphatase                   | Phlpp    | 59265  | 1,12 | up   |
| 6376837 | 7103829 | 1137199 | PH domain and leucine rich repeat protein phosphatase                   | Phlpp    | 59265  | 1,11 | up   |
| 6372434 | 7103829 | 1137202 | PH domain and leucine rich repeat protein phosphatase                   | Phlpp    | 59265  | 1,10 | down |
| 6211209 | 7103829 | 1137208 | PH domain and leucine rich repeat protein phosphatase                   | Phlpp    | 59265  | 1,09 | down |
| 6670232 | 7103829 | 1137201 | PH domain and leucine rich repeat protein phosphatase                   | Phlpp    | 59265  | 1,06 | up   |
| 6143772 | 7103829 | 1137206 | PH domain and leucine rich repeat protein phosphatase                   | Phlpp    | 59265  | 1,06 | up   |
| 5899958 | 7103829 | 1137195 | PH domain and leucine rich repeat protein phosphatase                   | Phlpp    | 59265  | 1,05 | up   |
| 6139321 | 7103829 | 1137197 | PH domain and leucine rich repeat protein phosphatase                   | Phlpp    | 59265  | 1,05 | up   |
| 6311321 | 7103829 | 1137196 | PH domain and leucine rich repeat protein phosphatase                   | Phlpp    | 59265  | 1,04 | up   |
| 5649130 | 7103829 | 1137208 | PH domain and leucine rich repeat protein phosphatase                   | Phlpp    | 59265  | 1,04 | down |
| 5841825 | 7103829 | 1137200 | PH domain and leucine rich repeat protein phosphatase                   | Phlpp    | 59265  | 1,03 | up   |
| 6326828 | 7103829 | 1137205 | PH domain and leucine rich repeat protein phosphatase                   | Phlpp    | 59265  | 1,02 | down |

|         |         |         |                                                            |                 |                   |      |      |
|---------|---------|---------|------------------------------------------------------------|-----------------|-------------------|------|------|
| 6079068 | 7103829 | 1137207 | PH domain and leucine rich repeat protein phosphatase      | Phlpp           | 59265             | 1,02 | up   |
| 6726168 | 7103829 | 1137204 | PH domain and leucine rich repeat protein phosphatase      | Phlpp           | 59265             | 1,01 | up   |
| 6236088 | 7180949 | 1327477 | PH domain and leucine rich repeat protein phosphatase-like | Phlppi          | 498949            | 2,23 | down |
| 6510572 | 7180949 | 1327489 | PH domain and leucine rich repeat protein phosphatase-like | Phlppi          | 498949            | 1,59 | up   |
| 6266363 | 7180949 | 1327494 | PH domain and leucine rich repeat protein phosphatase-like | Phlppi          | 498949            | 1,50 | up   |
| 6679953 | 7180949 | 1327484 | PH domain and leucine rich repeat protein phosphatase-like | Phlppi          | 498949            | 1,33 | up   |
| 5999354 | 7180949 | 1327480 | PH domain and leucine rich repeat protein phosphatase-like | Phlppi          | 498949            | 1,26 | down |
| 6249957 | 7180949 | 1327496 | PH domain and leucine rich repeat protein phosphatase-like | Phlppi          | 498949            | 1,26 | down |
| 5970904 | 7180949 | 1327497 | PH domain and leucine rich repeat protein phosphatase-like | Phlppi          | 498949            | 1,25 | down |
| 6475997 | 7180949 | 1327477 | PH domain and leucine rich repeat protein phosphatase-like | Phlppi          | 498949            | 1,21 | up   |
| 5848670 | 7180949 | 1327496 | PH domain and leucine rich repeat protein phosphatase-like | Phlppi          | 498949            | 1,20 | up   |
| 5724030 | 7180949 | 1327482 | PH domain and leucine rich repeat protein phosphatase-like | Phlppi          | 498949            | 1,17 | up   |
| 6743202 | 7180949 | 1327492 | PH domain and leucine rich repeat protein phosphatase-like | Phlppi          | 498949            | 1,16 | up   |
| 6075545 | 7180949 | 1327493 | PH domain and leucine rich repeat protein phosphatase-like | Phlppi          | 498949            | 1,15 | up   |
| 6447749 | 7180949 | 1327491 | PH domain and leucine rich repeat protein phosphatase-like | Phlppi          | 498949            | 1,13 | up   |
| 6604474 | 7180949 | 1327485 | PH domain and leucine rich repeat protein phosphatase-like | Phlppi          | 498949            | 1,12 | down |
| 6276210 | 7180949 | 1327479 | PH domain and leucine rich repeat protein phosphatase-like | Phlppi          | 498949            | 1,12 | up   |
| 6720368 | 7180949 | 1327495 | PH domain and leucine rich repeat protein phosphatase-like | Phlppi          | 498949            | 1,08 | up   |
| 6070806 | 7180949 | 1327490 | PH domain and leucine rich repeat protein phosphatase-like | Phlppi          | 498949            | 1,07 | up   |
| 6644000 | 7180949 | 1327481 | PH domain and leucine rich repeat protein phosphatase-like | Phlppi          | 498949            | 1,06 | up   |
| 6084929 | 7180949 | 1327479 | PH domain and leucine rich repeat protein phosphatase-like | Phlppi          | 498949            | 1,03 | up   |
| 6634957 | 7180949 | 1327488 | PH domain and leucine rich repeat protein phosphatase-like | Phlppi          | 498949            | 1,02 | down |
| 5967255 | 7180949 | 1327483 | PH domain and leucine rich repeat protein phosphatase-like | Phlppi          | 498949            | 1,02 | up   |
| 6686525 | 7180949 | 1327475 | PH domain and leucine rich repeat protein phosphatase-like | Phlppi          | 498949            | 1,01 | up   |
| 5643169 | 7138718 | 1222790 | PHD finger protein 11                                      | Phf11           | 361051            | 1,65 | up   |
| 5887174 | 7138718 | 1222789 | PHD finger protein 11                                      | Phf11           | 361051            | 1,62 | down |
| 6294409 | 7138718 | 1222787 | PHD finger protein 11                                      | Phf11           | 361051            | 1,52 | up   |
| 5651540 | 7138718 | 1222788 | PHD finger protein 11                                      | Phf11           | 361051            | 1,31 | down |
| 6543912 | 7138718 | 1222792 | PHD finger protein 11                                      | Phf11           | 361051            | 1,27 | down |
| 6266565 | 7138718 | 1222786 | PHD finger protein 11                                      | Phf11           | 361051            | 1,08 | up   |
| 5989665 | 7138718 | 1222791 | PHD finger protein 11                                      | Phf11           | 361051            | 1,05 | up   |
| 5641305 | 7138718 | 1222794 | PHD finger protein 11                                      | Phf11           | 361051            | 1,02 | up   |
| 5665582 | 7138718 | 1222785 | PHD finger protein 11-like /// PHD finger protein 11       | Phf11 /// Phf11 | 364393 /// 361051 | 3,24 | down |
| 6687308 | 7138718 | 1222788 | PHD finger protein 11-like /// PHD finger protein 11       | Phf11 /// Phf11 | 364393 /// 361051 | 1,60 | down |
| 5844291 | 7138718 | 1222793 | PHD finger protein 11-like /// PHD finger protein 11       | Phf11 /// Phf11 | 364393 /// 361051 | 1,14 | up   |
| 6374846 | 7138718 | 1222785 | PHD finger protein 11-like /// PHD finger protein 11       | Phf11 /// Phf11 | 364393 /// 361051 | 1,11 | up   |
| 5745532 | 7193513 | 1359467 | PHD finger protein 17                                      | Phf17           | 310352            | 1,93 | up   |
| 6565142 | 7193513 | 1359447 | PHD finger protein 17                                      | Phf17           | 310352            | 1,55 | down |
| 6439886 | 7193513 | 1359472 | PHD finger protein 17                                      | Phf17           | 310352            | 1,42 | up   |
| 6337034 | 7193513 | 1359467 | PHD finger protein 17                                      | Phf17           | 310352            | 1,30 | up   |
| 6097345 | 7193513 | 1359471 | PHD finger protein 17                                      | Phf17           | 310352            | 1,25 | down |
| 5629948 | 7193513 | 1359464 | PHD finger protein 17                                      | Phf17           | 310352            | 1,25 | up   |
| 6083200 | 7193513 | 1359458 | PHD finger protein 17                                      | Phf17           | 310352            | 1,23 | down |
| 5957166 | 7193513 | 1359467 | PHD finger protein 17                                      | Phf17           | 310352            | 1,22 | up   |
| 6602907 | 7193513 | 1359471 | PHD finger protein 17                                      | Phf17           | 310352            | 1,12 | down |
| 6677181 | 7193513 | 1359467 | PHD finger protein 17                                      | Phf17           | 310352            | 1,11 | down |
| 6361597 | 7193513 | 1359460 | PHD finger protein 17                                      | Phf17           | 310352            | 1,11 | up   |
| 6217122 | 7193513 | 1359453 | PHD finger protein 17                                      | Phf17           | 310352            | 1,10 | down |
| 5982418 | 7193513 | 1359465 | PHD finger protein 17                                      | Phf17           | 310352            | 1,08 | up   |
| 6399646 | 7193513 | 1359469 | PHD finger protein 17                                      | Phf17           | 310352            | 1,07 | up   |
| 5982397 | 7193513 | 1359463 | PHD finger protein 17                                      | Phf17           | 310352            | 1,04 | down |
| 6412884 | 7193513 | 1359466 | PHD finger protein 17                                      | Phf17           | 310352            | 1,03 | down |
| 6242296 | 7317708 | 1666832 | PHD finger protein 20-like 1                               | Phf2011         | 314964            | 1,82 | up   |
| 5624217 | 7317708 | 1666820 | PHD finger protein 20-like 1                               | Phf2011         | 314964            | 1,54 | down |
| 6368825 | 7317708 | 1666842 | PHD finger protein 20-like 1                               | Phf2011         | 314964            | 1,50 | down |
| 6042894 | 7317708 | 1666825 | PHD finger protein 20-like 1                               | Phf2011         | 314964            | 1,48 | down |
| 5639768 | 7317708 | 1666835 | PHD finger protein 20-like 1                               | Phf2011         | 314964            | 1,43 | down |

|         |         |         |                                                                 |                    |                   |      |      |
|---------|---------|---------|-----------------------------------------------------------------|--------------------|-------------------|------|------|
| 5806690 | 7317708 | 1666831 | PHD finger protein 20-like 1                                    | Phf2011            | 314964            | 1,38 | up   |
| 5774946 | 7317708 | 1666821 | PHD finger protein 20-like 1                                    | Phf2011            | 314964            | 1,37 | down |
| 6494210 | 7317708 | 1666845 | PHD finger protein 20-like 1                                    | Phf2011            | 314964            | 1,37 | down |
| 6291917 | 7317708 | 1666820 | PHD finger protein 20-like 1                                    | Phf2011            | 314964            | 1,33 | down |
| 6101364 | 7317708 | 1666824 | PHD finger protein 20-like 1                                    | Phf2011            | 314964            | 1,25 | down |
| 5702922 | 7317708 | 1666827 | PHD finger protein 20-like 1                                    | Phf2011            | 314964            | 1,25 | down |
| 5941386 | 7317708 | 1666836 | PHD finger protein 20-like 1                                    | Phf2011            | 314964            | 1,20 | up   |
| 6341827 | 7317708 | 1666818 | PHD finger protein 20-like 1                                    | Phf2011            | 314964            | 1,18 | down |
| 6445373 | 7317708 | 1666827 | PHD finger protein 20-like 1                                    | Phf2011            | 314964            | 1,14 | down |
| 6330744 | 7317708 | 1666842 | PHD finger protein 20-like 1                                    | Phf2011            | 314964            | 1,13 | down |
| 6740570 | 7317708 | 1666834 | PHD finger protein 20-like 1                                    | Phf2011            | 314964            | 1,10 | up   |
| 5882961 | 7317708 | 1666832 | PHD finger protein 20-like 1                                    | Phf2011            | 314964            | 1,09 | down |
| 6636750 | 7317708 | 1666839 | PHD finger protein 20-like 1                                    | Phf2011            | 314964            | 1,09 | down |
| 6549155 | 7317708 | 1666845 | PHD finger protein 20-like 1                                    | Phf2011            | 314964            | 1,04 | up   |
| 6699067 | 7317708 | 1666823 | PHD finger protein 20-like 1                                    | Phf2011            | 314964            | 1,04 | up   |
| 6637475 | 7317708 | 1666844 | PHD finger protein 20-like 1                                    | Phf2011            | 314964            | 1,04 | down |
| 5971832 | 7317708 | 1666822 | PHD finger protein 20-like 1                                    | Phf2011            | 314964            | 1,03 | down |
| 5723175 | 7317708 | 1666817 | PHD finger protein 20-like 1 /// hypothetical protein LOC684713 | if2011 /// LOC6847 | 314964 /// 684713 | 1,58 | down |
| 6732634 | 7312658 | 1653542 | phosphatidic acid phosphatase type 2c                           | Ppap2c             | 246115            | 2,18 | down |
| 5632635 | 7312658 | 1653547 | phosphatidic acid phosphatase type 2c                           | Ppap2c             | 246115            | 1,96 | up   |
| 6250193 | 7312658 | 1653545 | phosphatidic acid phosphatase type 2c                           | Ppap2c             | 246115            | 1,61 | down |
| 6476864 | 7312658 | 1653549 | phosphatidic acid phosphatase type 2c                           | Ppap2c             | 246115            | 1,57 | down |
| 6480919 | 7312658 | 1653544 | phosphatidic acid phosphatase type 2c                           | Ppap2c             | 246115            | 1,55 | up   |
| 5738531 | 7312658 | 1653543 | phosphatidic acid phosphatase type 2c                           | Ppap2c             | 246115            | 1,47 | down |
| 5980769 | 7312658 | 1653548 | phosphatidic acid phosphatase type 2c                           | Ppap2c             | 246115            | 1,33 | up   |
| 6443762 | 7312658 | 1653546 | phosphatidic acid phosphatase type 2c                           | Ppap2c             | 246115            | 1,21 | up   |
| 6506570 | 7312658 | 1653548 | phosphatidic acid phosphatase type 2c                           | Ppap2c             | 246115            | 1,05 | up   |
| 6375580 | 7081403 | 1082524 | phosphatidylcholine transfer protein                            | Pctp               | 29510             | 2,59 | down |
| 5967719 | 7081403 | 1082522 | phosphatidylcholine transfer protein                            | Pctp               | 29510             | 1,42 | up   |
| 6429287 | 7081403 | 1082520 | phosphatidylcholine transfer protein                            | Pctp               | 29510             | 1,36 | up   |
| 5846423 | 7081403 | 1082525 | phosphatidylcholine transfer protein                            | Pctp               | 29510             | 1,34 | up   |
| 6646238 | 7081403 | 1082527 | phosphatidylcholine transfer protein                            | Pctp               | 29510             | 1,10 | up   |
| 5623103 | 7081403 | 1082523 | phosphatidylcholine transfer protein                            | Pctp               | 29510             | 1,08 | up   |
| 5987298 | 7081403 | 1082526 | phosphatidylcholine transfer protein                            | Pctp               | 29510             | 1,07 | up   |
| 5880774 | 7081403 | 1082521 | phosphatidylcholine transfer protein                            | Pctp               | 29510             | 1,01 | up   |
| 6154997 | 7081403 | 1082527 | phosphatidylcholine transfer protein                            | Pctp               | 29510             | 1,01 | up   |
| 6196703 | 7293234 | 1604337 | phosphatidylinositol 3-kinase catalytic delta polypeptide       | Pik3cd             | 366508            | 1,96 | up   |
| 6632982 | 7293234 | 1604342 | phosphatidylinositol 3-kinase catalytic delta polypeptide       | Pik3cd             | 366508            | 1,87 | down |
| 6225695 | 7293234 | 1604347 | phosphatidylinositol 3-kinase catalytic delta polypeptide       | Pik3cd             | 366508            | 1,76 | down |
| 6582257 | 7293234 | 1604334 | phosphatidylinositol 3-kinase catalytic delta polypeptide       | Pik3cd             | 366508            | 1,63 | up   |
| 6654854 | 7293234 | 1604335 | phosphatidylinositol 3-kinase catalytic delta polypeptide       | Pik3cd             | 366508            | 1,50 | down |
| 6260484 | 7293234 | 1604346 | phosphatidylinositol 3-kinase catalytic delta polypeptide       | Pik3cd             | 366508            | 1,41 | up   |
| 5775398 | 7293234 | 1604345 | phosphatidylinositol 3-kinase catalytic delta polypeptide       | Pik3cd             | 366508            | 1,37 | down |
| 6122624 | 7293234 | 1604327 | phosphatidylinositol 3-kinase catalytic delta polypeptide       | Pik3cd             | 366508            | 1,35 | up   |
| 5891886 | 7293234 | 1604328 | phosphatidylinositol 3-kinase catalytic delta polypeptide       | Pik3cd             | 366508            | 1,34 | down |
| 6654324 | 7293234 | 1604354 | phosphatidylinositol 3-kinase catalytic delta polypeptide       | Pik3cd             | 366508            | 1,33 | down |
| 6000474 | 7293234 | 1604341 | phosphatidylinositol 3-kinase catalytic delta polypeptide       | Pik3cd             | 366508            | 1,20 | up   |
| 5938306 | 7293234 | 1604324 | phosphatidylinositol 3-kinase catalytic delta polypeptide       | Pik3cd             | 366508            | 1,14 | up   |
| 6448351 | 7293234 | 1604335 | phosphatidylinositol 3-kinase catalytic delta polypeptide       | Pik3cd             | 366508            | 1,13 | up   |
| 5745684 | 7293234 | 1604345 | phosphatidylinositol 3-kinase catalytic delta polypeptide       | Pik3cd             | 366508            | 1,11 | down |
| 6306317 | 7293234 | 1604344 | phosphatidylinositol 3-kinase catalytic delta polypeptide       | Pik3cd             | 366508            | 1,11 | up   |
| 6488100 | 7293234 | 1604335 | phosphatidylinositol 3-kinase catalytic delta polypeptide       | Pik3cd             | 366508            | 1,09 | down |
| 6232806 | 7293234 | 1604331 | phosphatidylinositol 3-kinase catalytic delta polypeptide       | Pik3cd             | 366508            | 1,08 | up   |
| 6310607 | 7293234 | 1604332 | phosphatidylinositol 3-kinase catalytic delta polypeptide       | Pik3cd             | 366508            | 1,08 | down |
| 5696066 | 7293234 | 1604345 | phosphatidylinositol 3-kinase catalytic delta polypeptide       | Pik3cd             | 366508            | 1,08 | up   |
| 6614206 | 7293234 | 1604329 | phosphatidylinositol 3-kinase catalytic delta polypeptide       | Pik3cd             | 366508            | 1,07 | up   |
| 6068552 | 7293234 | 1604339 | phosphatidylinositol 3-kinase catalytic delta polypeptide       | Pik3cd             | 366508            | 1,05 | up   |

|         |         |         |                                                           |        |        |      |      |
|---------|---------|---------|-----------------------------------------------------------|--------|--------|------|------|
| 6201710 | 7293234 | 1604340 | phosphatidylinositol 3-kinase catalytic delta polypeptide | Pik3cd | 366508 | 1,05 | up   |
| 5628724 | 7293234 | 1604343 | phosphatidylinositol 3-kinase catalytic delta polypeptide | Pik3cd | 366508 | 1,04 | up   |
| 5706737 | 7293234 | 1604333 | phosphatidylinositol 3-kinase catalytic delta polypeptide | Pik3cd | 366508 | 1,04 | up   |
| 6645178 | 7293234 | 1604330 | phosphatidylinositol 3-kinase catalytic delta polypeptide | Pik3cd | 366508 | 1,03 | down |
| 5978814 | 7293234 | 1604338 | phosphatidylinositol 3-kinase catalytic delta polypeptide | Pik3cd | 366508 | 1,02 | up   |
| 5984688 | 7293234 | 1604327 | phosphatidylinositol 3-kinase catalytic delta polypeptide | Pik3cd | 366508 | 1,02 | up   |
| 5772144 | 7293234 | 1604325 | phosphatidylinositol 3-kinase catalytic delta polypeptide | Pik3cd | 366508 | 1,01 | down |
| 6139864 | 7293234 | 1604347 | phosphatidylinositol 3-kinase catalytic delta polypeptide | Pik3cd | 366508 | 1,00 | down |
| 5745965 | 7381090 | 1822985 | phosphatidylinositol glycan anchor biosynthesis, class A  | Piga   | 363464 | 2,11 | down |
| 6338673 | 7381090 | 1822979 | phosphatidylinositol glycan anchor biosynthesis, class A  | Piga   | 363464 | 1,52 | down |
| 6235418 | 7381090 | 1822984 | phosphatidylinositol glycan anchor biosynthesis, class A  | Piga   | 363464 | 1,30 | down |
| 5768545 | 7381090 | 1822981 | phosphatidylinositol glycan anchor biosynthesis, class A  | Piga   | 363464 | 1,28 | up   |
| 6525636 | 7381090 | 1822980 | phosphatidylinositol glycan anchor biosynthesis, class A  | Piga   | 363464 | 1,25 | down |
| 6242003 | 7381090 | 1822985 | phosphatidylinositol glycan anchor biosynthesis, class A  | Piga   | 363464 | 1,22 | down |
| 5989429 | 7381090 | 1822984 | phosphatidylinositol glycan anchor biosynthesis, class A  | Piga   | 363464 | 1,17 | down |
| 6210302 | 7381090 | 1822989 | phosphatidylinositol glycan anchor biosynthesis, class A  | Piga   | 363464 | 1,10 | up   |
| 5994222 | 7381090 | 1822983 | phosphatidylinositol glycan anchor biosynthesis, class A  | Piga   | 363464 | 1,03 | up   |
| 6125367 | 7091962 | 1107742 | phosphatidylinositol glycan anchor biosynthesis, class P  | Pigp   | 288238 | 1,74 | up   |
| 6516383 | 7091962 | 1107745 | phosphatidylinositol glycan anchor biosynthesis, class P  | Pigp   | 288238 | 1,53 | down |
| 6098093 | 7091962 | 1107747 | phosphatidylinositol glycan anchor biosynthesis, class P  | Pigp   | 288238 | 1,37 | down |
| 6449436 | 7091962 | 1107748 | phosphatidylinositol glycan anchor biosynthesis, class P  | Pigp   | 288238 | 1,13 | up   |
| 5708544 | 7091962 | 1107749 | phosphatidylinositol glycan anchor biosynthesis, class P  | Pigp   | 288238 | 1,13 | up   |
| 6276899 | 7091962 | 1107742 | phosphatidylinositol glycan anchor biosynthesis, class P  | Pigp   | 288238 | 1,08 | down |
| 6630599 | 7091962 | 1107744 | phosphatidylinositol glycan anchor biosynthesis, class P  | Pigp   | 288238 | 1,04 | up   |
| 6174412 | 7091962 | 1107743 | phosphatidylinositol glycan anchor biosynthesis, class P  | Pigp   | 288238 | 1,02 | down |
| 5781637 | 7079958 | 1079457 | phosphatidylinositol glycan anchor biosynthesis, class S  | Pigs   | 303277 | 2,54 | up   |
| 5732922 | 7079958 | 1079445 | phosphatidylinositol glycan anchor biosynthesis, class S  | Pigs   | 303277 | 1,65 | up   |
| 5697253 | 7079958 | 1079446 | phosphatidylinositol glycan anchor biosynthesis, class S  | Pigs   | 303277 | 1,42 | down |
| 5699960 | 7079958 | 1079445 | phosphatidylinositol glycan anchor biosynthesis, class S  | Pigs   | 303277 | 1,34 | up   |
| 6578335 | 7079958 | 1079451 | phosphatidylinositol glycan anchor biosynthesis, class S  | Pigs   | 303277 | 1,31 | down |
| 6249241 | 7079958 | 1079450 | phosphatidylinositol glycan anchor biosynthesis, class S  | Pigs   | 303277 | 1,18 | down |
| 6178364 | 7079958 | 1079448 | phosphatidylinositol glycan anchor biosynthesis, class S  | Pigs   | 303277 | 1,18 | up   |
| 5831628 | 7079958 | 1079449 | phosphatidylinositol glycan anchor biosynthesis, class S  | Pigs   | 303277 | 1,15 | down |
| 6352199 | 7079958 | 1079447 | phosphatidylinositol glycan anchor biosynthesis, class S  | Pigs   | 303277 | 1,10 | down |
| 5709373 | 7079958 | 1079452 | phosphatidylinositol glycan anchor biosynthesis, class S  | Pigs   | 303277 | 1,08 | up   |
| 6592291 | 7079958 | 1079445 | phosphatidylinositol glycan anchor biosynthesis, class S  | Pigs   | 303277 | 1,08 | up   |
| 6224759 | 7079958 | 1079453 | phosphatidylinositol glycan anchor biosynthesis, class S  | Pigs   | 303277 | 1,07 | down |
| 5837719 | 7079958 | 1079454 | phosphatidylinositol glycan anchor biosynthesis, class S  | Pigs   | 303277 | 1,07 | up   |
| 5951820 | 7079958 | 1079456 | phosphatidylinositol glycan anchor biosynthesis, class S  | Pigs   | 303277 | 1,03 | down |
| 5987319 | 7079958 | 1079446 | phosphatidylinositol glycan anchor biosynthesis, class S  | Pigs   | 303277 | 1,02 | down |
| 5985174 | 7079958 | 1079455 | phosphatidylinositol glycan anchor biosynthesis, class S  | Pigs   | 303277 | 1,02 | down |
| 6573203 | 7280127 | 1573256 | phosphatidylinositol glycan anchor biosynthesis, class V  | Pigv   | 366478 | 2,22 | up   |
| 6232878 | 7280127 | 1573255 | phosphatidylinositol glycan anchor biosynthesis, class V  | Pigv   | 366478 | 1,36 | down |
| 5639854 | 7280127 | 1573259 | phosphatidylinositol glycan anchor biosynthesis, class V  | Pigv   | 366478 | 1,36 | down |
| 5639045 | 7280127 | 1573257 | phosphatidylinositol glycan anchor biosynthesis, class V  | Pigv   | 366478 | 1,27 | down |
| 6016882 | 7280127 | 1573256 | phosphatidylinositol glycan anchor biosynthesis, class V  | Pigv   | 366478 | 1,25 | down |
| 5787698 | 7280127 | 1573258 | phosphatidylinositol glycan anchor biosynthesis, class V  | Pigv   | 366478 | 1,11 | up   |
| 5730753 | 7280127 | 1573258 | phosphatidylinositol glycan anchor biosynthesis, class V  | Pigv   | 366478 | 1,10 | up   |
| 6472605 | 7280127 | 1573255 | phosphatidylinositol glycan anchor biosynthesis, class V  | Pigv   | 366478 | 1,01 | up   |
| 6201629 | 7109730 | 1151723 | phosphatidylinositol glycan, class N                      | Pign   | 309051 | 2,16 | up   |
| 6035396 | 7109730 | 1151746 | phosphatidylinositol glycan, class N                      | Pign   | 309051 | 1,69 | down |
| 6094307 | 7109730 | 1151700 | phosphatidylinositol glycan, class N                      | Pign   | 309051 | 1,51 | down |
| 6302545 | 7109730 | 1151720 | phosphatidylinositol glycan, class N                      | Pign   | 309051 | 1,49 | down |
| 5690814 | 7109730 | 1151699 | phosphatidylinositol glycan, class N                      | Pign   | 309051 | 1,42 | down |
| 5922458 | 7109730 | 1151716 | phosphatidylinositol glycan, class N                      | Pign   | 309051 | 1,41 | up   |
| 5624121 | 7109730 | 1151748 | phosphatidylinositol glycan, class N                      | Pign   | 309051 | 1,39 | down |
| 5998951 | 7109730 | 1151723 | phosphatidylinositol glycan, class N                      | Pign   | 309051 | 1,36 | up   |

|         |         |         |                                                                      |         |        |      |      |
|---------|---------|---------|----------------------------------------------------------------------|---------|--------|------|------|
| 6048587 | 7109730 | 1151741 | phosphatidylinositol glycan, class N                                 | Pign    | 309051 | 1,34 | down |
| 6740726 | 7109730 | 1151705 | phosphatidylinositol glycan, class N                                 | Pign    | 309051 | 1,34 | up   |
| 6715431 | 7109730 | 1151715 | phosphatidylinositol glycan, class N                                 | Pign    | 309051 | 1,33 | up   |
| 6419298 | 7109730 | 1151722 | phosphatidylinositol glycan, class N                                 | Pign    | 309051 | 1,32 | down |
| 6549609 | 7109730 | 1151712 | phosphatidylinositol glycan, class N                                 | Pign    | 309051 | 1,26 | up   |
| 6542252 | 7109730 | 1151718 | phosphatidylinositol glycan, class N                                 | Pign    | 309051 | 1,24 | down |
| 6440891 | 7109730 | 1151724 | phosphatidylinositol glycan, class N                                 | Pign    | 309051 | 1,22 | up   |
| 5752075 | 7109730 | 1151709 | phosphatidylinositol glycan, class N                                 | Pign    | 309051 | 1,20 | up   |
| 6206091 | 7109730 | 1151711 | phosphatidylinositol glycan, class N                                 | Pign    | 309051 | 1,19 | up   |
| 5665076 | 7109730 | 1151735 | phosphatidylinositol glycan, class N                                 | Pign    | 309051 | 1,19 | down |
| 5944310 | 7109730 | 1151740 | phosphatidylinositol glycan, class N                                 | Pign    | 309051 | 1,19 | up   |
| 5801914 | 7109730 | 1151708 | phosphatidylinositol glycan, class N                                 | Pign    | 309051 | 1,18 | down |
| 6650695 | 7109730 | 1151739 | phosphatidylinositol glycan, class N                                 | Pign    | 309051 | 1,14 | down |
| 6519703 | 7109730 | 1151744 | phosphatidylinositol glycan, class N                                 | Pign    | 309051 | 1,13 | up   |
| 5641846 | 7109730 | 1151747 | phosphatidylinositol glycan, class N                                 | Pign    | 309051 | 1,13 | up   |
| 5734830 | 7109730 | 1151720 | phosphatidylinositol glycan, class N                                 | Pign    | 309051 | 1,12 | up   |
| 6536277 | 7109730 | 1151744 | phosphatidylinositol glycan, class N                                 | Pign    | 309051 | 1,12 | down |
| 5973665 | 7109730 | 1151736 | phosphatidylinositol glycan, class N                                 | Pign    | 309051 | 1,10 | down |
| 6374327 | 7109730 | 1151734 | phosphatidylinositol glycan, class N                                 | Pign    | 309051 | 1,09 | down |
| 5821996 | 7109730 | 1151721 | phosphatidylinositol glycan, class N                                 | Pign    | 309051 | 1,08 | up   |
| 5650861 | 7109730 | 1151742 | phosphatidylinositol glycan, class N                                 | Pign    | 309051 | 1,08 | down |
| 6496861 | 7109730 | 1151725 | phosphatidylinositol glycan, class N                                 | Pign    | 309051 | 1,08 | down |
| 6568889 | 7109730 | 1151737 | phosphatidylinositol glycan, class N                                 | Pign    | 309051 | 1,05 | down |
| 6215870 | 7109730 | 1151741 | phosphatidylinositol glycan, class N                                 | Pign    | 309051 | 1,00 | down |
| 6178516 | 7109730 | 1151738 | phosphatidylinositol glycan, class N                                 | Pign    | 309051 | 1,00 | up   |
| 5684985 | 7326233 | 1686313 | phosphatidylinositol-5-phosphate 4-kinase, type II, gamma            | Pip4k2c | 140607 | 2,41 | down |
| 6085165 | 7326233 | 1686307 | phosphatidylinositol-5-phosphate 4-kinase, type II, gamma            | Pip4k2c | 140607 | 1,60 | down |
| 6163421 | 7326233 | 1686310 | phosphatidylinositol-5-phosphate 4-kinase, type II, gamma            | Pip4k2c | 140607 | 1,49 | up   |
| 6404419 | 7326233 | 1686308 | phosphatidylinositol-5-phosphate 4-kinase, type II, gamma            | Pip4k2c | 140607 | 1,28 | down |
| 6544611 | 7326233 | 1686309 | phosphatidylinositol-5-phosphate 4-kinase, type II, gamma            | Pip4k2c | 140607 | 1,24 | up   |
| 6673561 | 7326233 | 1686305 | phosphatidylinositol-5-phosphate 4-kinase, type II, gamma            | Pip4k2c | 140607 | 1,22 | up   |
| 5845760 | 7326233 | 1686311 | phosphatidylinositol-5-phosphate 4-kinase, type II, gamma            | Pip4k2c | 140607 | 1,21 | up   |
| 5747979 | 7326233 | 1686303 | phosphatidylinositol-5-phosphate 4-kinase, type II, gamma            | Pip4k2c | 140607 | 1,16 | down |
| 6566753 | 7326233 | 1686313 | phosphatidylinositol-5-phosphate 4-kinase, type II, gamma            | Pip4k2c | 140607 | 1,13 | down |
| 6092756 | 7326233 | 1686304 | phosphatidylinositol-5-phosphate 4-kinase, type II, gamma            | Pip4k2c | 140607 | 1,13 | down |
| 5800851 | 7326233 | 1686306 | phosphatidylinositol-5-phosphate 4-kinase, type II, gamma            | Pip4k2c | 140607 | 1,12 | down |
| 6351009 | 7326233 | 1686312 | phosphatidylinositol-5-phosphate 4-kinase, type II, gamma            | Pip4k2c | 140607 | 1,07 | down |
| 6302338 | 7326233 | 1686313 | phosphatidylinositol-5-phosphate 4-kinase, type II, gamma            | Pip4k2c | 140607 | 1,03 | up   |
| 5906864 | 7087965 | 1098014 | phosphatidylinositol-specific phospholipase C, X domain containing 2 | Plcx2   | 363781 | 4,42 | up   |
| 6578784 | 7087965 | 1098012 | phosphatidylinositol-specific phospholipase C, X domain containing 2 | Plcx2   | 363781 | 3,70 | up   |
| 6639264 | 7087965 | 1098000 | phosphatidylinositol-specific phospholipase C, X domain containing 2 | Plcx2   | 363781 | 3,52 | up   |
| 5884507 | 7087965 | 1098014 | phosphatidylinositol-specific phospholipase C, X domain containing 2 | Plcx2   | 363781 | 2,36 | up   |
| 6053646 | 7087965 | 1098014 | phosphatidylinositol-specific phospholipase C, X domain containing 2 | Plcx2   | 363781 | 2,36 | up   |
| 6294114 | 7046605 | 1002433 | phosphodiesterase 10A                                                | Pde10a  | 63885  | 5,06 | up   |
| 5830701 | 7046605 | 1002434 | phosphodiesterase 10A                                                | Pde10a  | 63885  | 1,88 | up   |
| 5714377 | 7046605 | 1002420 | phosphodiesterase 10A                                                | Pde10a  | 63885  | 1,69 | down |
| 5914502 | 7046605 | 1002410 | phosphodiesterase 10A                                                | Pde10a  | 63885  | 1,46 | down |
| 5903829 | 7046605 | 1002411 | phosphodiesterase 10A                                                | Pde10a  | 63885  | 1,42 | down |
| 6329565 | 7046605 | 1002408 | phosphodiesterase 10A                                                | Pde10a  | 63885  | 1,36 | down |
| 6686013 | 7046605 | 1002425 | phosphodiesterase 10A                                                | Pde10a  | 63885  | 1,34 | down |
| 6732918 | 7046605 | 1002421 | phosphodiesterase 10A                                                | Pde10a  | 63885  | 1,28 | down |
| 5921428 | 7046605 | 1002425 | phosphodiesterase 10A                                                | Pde10a  | 63885  | 1,28 | down |
| 6527930 | 7046605 | 1002428 | phosphodiesterase 10A                                                | Pde10a  | 63885  | 1,24 | up   |
| 6625205 | 7046605 | 1002432 | phosphodiesterase 10A                                                | Pde10a  | 63885  | 1,23 | down |
| 6660615 | 7046605 | 1002427 | phosphodiesterase 10A                                                | Pde10a  | 63885  | 1,21 | up   |
| 6153282 | 7046605 | 1002419 | phosphodiesterase 10A                                                | Pde10a  | 63885  | 1,20 | down |
| 5979487 | 7046605 | 1002415 | phosphodiesterase 10A                                                | Pde10a  | 63885  | 1,18 | up   |



|         |         |         |                                       |        |       |      |      |
|---------|---------|---------|---------------------------------------|--------|-------|------|------|
| 6461699 | 7046605 | 1002424 | phosphodiesterase 10A                 | Pde10a | 63885 | 1,18 | up   |
| 6126348 | 7046605 | 1002426 | phosphodiesterase 10A                 | Pde10a | 63885 | 1,16 | down |
| 6279270 | 7046605 | 1002416 | phosphodiesterase 10A                 | Pde10a | 63885 | 1,13 | down |
| 6300936 | 7046605 | 1002429 | phosphodiesterase 10A                 | Pde10a | 63885 | 1,12 | down |
| 5697356 | 7046605 | 1002423 | phosphodiesterase 10A                 | Pde10a | 63885 | 1,12 | down |
| 6346746 | 7046605 | 1002432 | phosphodiesterase 10A                 | Pde10a | 63885 | 1,11 | up   |
| 6521290 | 7046605 | 1002413 | phosphodiesterase 10A                 | Pde10a | 63885 | 1,10 | up   |
| 5666365 | 7046605 | 1002409 | phosphodiesterase 10A                 | Pde10a | 63885 | 1,09 | down |
| 6476448 | 7046605 | 1002425 | phosphodiesterase 10A                 | Pde10a | 63885 | 1,09 | down |
| 6280030 | 7046605 | 1002422 | phosphodiesterase 10A                 | Pde10a | 63885 | 1,09 | down |
| 5819433 | 7046605 | 1002417 | phosphodiesterase 10A                 | Pde10a | 63885 | 1,09 | up   |
| 5625837 | 7046605 | 1002430 | phosphodiesterase 10A                 | Pde10a | 63885 | 1,08 | up   |
| 5985102 | 7046605 | 1002409 | phosphodiesterase 10A                 | Pde10a | 63885 | 1,05 | down |
| 6382295 | 7046605 | 1002418 | phosphodiesterase 10A                 | Pde10a | 63885 | 1,05 | up   |
| 6615165 | 7046605 | 1002417 | phosphodiesterase 10A                 | Pde10a | 63885 | 1,03 | up   |
| 6736258 | 7046605 | 1002434 | phosphodiesterase 10A                 | Pde10a | 63885 | 1,03 | up   |
| 6296595 | 7046605 | 1002412 | phosphodiesterase 10A                 | Pde10a | 63885 | 1,02 | down |
| 5649380 | 7046605 | 1002434 | phosphodiesterase 10A                 | Pde10a | 63885 | 1,02 | down |
| 5713441 | 7046605 | 1002414 | phosphodiesterase 10A                 | Pde10a | 63885 | 1,00 | down |
| 6621647 | 7034699 | 973073  | phosphodiesterase 2A, cGMP-stimulated | Pde2a  | 81743 | 2,13 | up   |
| 6393671 | 7034699 | 973068  | phosphodiesterase 2A, cGMP-stimulated | Pde2a  | 81743 | 1,82 | down |
| 6013760 | 7034699 | 973083  | phosphodiesterase 2A, cGMP-stimulated | Pde2a  | 81743 | 1,72 | down |
| 5907010 | 7034699 | 973090  | phosphodiesterase 2A, cGMP-stimulated | Pde2a  | 81743 | 1,70 | up   |
| 6423630 | 7034699 | 973093  | phosphodiesterase 2A, cGMP-stimulated | Pde2a  | 81743 | 1,58 | down |
| 6593937 | 7034699 | 973067  | phosphodiesterase 2A, cGMP-stimulated | Pde2a  | 81743 | 1,53 | up   |
| 6295618 | 7034699 | 973078  | phosphodiesterase 2A, cGMP-stimulated | Pde2a  | 81743 | 1,52 | up   |
| 6306226 | 7034699 | 973070  | phosphodiesterase 2A, cGMP-stimulated | Pde2a  | 81743 | 1,48 | down |
| 6590066 | 7034699 | 973071  | phosphodiesterase 2A, cGMP-stimulated | Pde2a  | 81743 | 1,46 | up   |
| 6713965 | 7034699 | 973091  | phosphodiesterase 2A, cGMP-stimulated | Pde2a  | 81743 | 1,42 | up   |
| 5840942 | 7034699 | 973087  | phosphodiesterase 2A, cGMP-stimulated | Pde2a  | 81743 | 1,34 | up   |
| 6037901 | 7034699 | 973077  | phosphodiesterase 2A, cGMP-stimulated | Pde2a  | 81743 | 1,31 | up   |
| 6375331 | 7034699 | 973080  | phosphodiesterase 2A, cGMP-stimulated | Pde2a  | 81743 | 1,30 | down |
| 6452317 | 7034699 | 973075  | phosphodiesterase 2A, cGMP-stimulated | Pde2a  | 81743 | 1,28 | down |
| 6287513 | 7034699 | 973067  | phosphodiesterase 2A, cGMP-stimulated | Pde2a  | 81743 | 1,26 | down |
| 6354095 | 7034699 | 973072  | phosphodiesterase 2A, cGMP-stimulated | Pde2a  | 81743 | 1,23 | up   |
| 6120805 | 7034699 | 973094  | phosphodiesterase 2A, cGMP-stimulated | Pde2a  | 81743 | 1,21 | down |
| 6395289 | 7034699 | 973081  | phosphodiesterase 2A, cGMP-stimulated | Pde2a  | 81743 | 1,21 | down |
| 5747297 | 7034699 | 973096  | phosphodiesterase 2A, cGMP-stimulated | Pde2a  | 81743 | 1,18 | up   |
| 5618309 | 7034699 | 973074  | phosphodiesterase 2A, cGMP-stimulated | Pde2a  | 81743 | 1,18 | up   |
| 5844959 | 7034699 | 973082  | phosphodiesterase 2A, cGMP-stimulated | Pde2a  | 81743 | 1,14 | up   |
| 6457824 | 7034699 | 973076  | phosphodiesterase 2A, cGMP-stimulated | Pde2a  | 81743 | 1,12 | down |
| 6298898 | 7034699 | 973085  | phosphodiesterase 2A, cGMP-stimulated | Pde2a  | 81743 | 1,11 | up   |
| 5893866 | 7034699 | 973095  | phosphodiesterase 2A, cGMP-stimulated | Pde2a  | 81743 | 1,11 | down |
| 6166259 | 7034699 | 973092  | phosphodiesterase 2A, cGMP-stimulated | Pde2a  | 81743 | 1,11 | up   |
| 5871727 | 7034699 | 973084  | phosphodiesterase 2A, cGMP-stimulated | Pde2a  | 81743 | 1,09 | up   |
| 6465204 | 7034699 | 973089  | phosphodiesterase 2A, cGMP-stimulated | Pde2a  | 81743 | 1,06 | up   |
| 5695774 | 7034699 | 973088  | phosphodiesterase 2A, cGMP-stimulated | Pde2a  | 81743 | 1,05 | down |
| 6372120 | 7034699 | 973069  | phosphodiesterase 2A, cGMP-stimulated | Pde2a  | 81743 | 1,04 | up   |
| 5922654 | 7034699 | 973086  | phosphodiesterase 2A, cGMP-stimulated | Pde2a  | 81743 | 1,04 | down |
| 6130762 | 7034699 | 973079  | phosphodiesterase 2A, cGMP-stimulated | Pde2a  | 81743 | 1,04 | up   |
| 5856577 | 7034699 | 973097  | phosphodiesterase 2A, cGMP-stimulated | Pde2a  | 81743 | 1,03 | up   |
| 6443535 | 7259555 | 1521492 | phosphodiesterase 3A, cGMP inhibited  | Pde3a  | 50678 | 2,51 | up   |
| 5646991 | 7259555 | 1521488 | phosphodiesterase 3A, cGMP inhibited  | Pde3a  | 50678 | 1,72 | up   |
| 6523635 | 7259555 | 1521489 | phosphodiesterase 3A, cGMP inhibited  | Pde3a  | 50678 | 1,46 | up   |
| 6293211 | 7259555 | 1521493 | phosphodiesterase 3A, cGMP inhibited  | Pde3a  | 50678 | 1,45 | down |
| 5626743 | 7259555 | 1521482 | phosphodiesterase 3A, cGMP inhibited  | Pde3a  | 50678 | 1,44 | up   |
| 6689285 | 7259555 | 1521481 | phosphodiesterase 3A, cGMP inhibited  | Pde3a  | 50678 | 1,44 | up   |

|         |         |         |                                                                                      |       |       |      |      |
|---------|---------|---------|--------------------------------------------------------------------------------------|-------|-------|------|------|
| 5910407 | 7259555 | 1521491 | phosphodiesterase 3A, cGMP inhibited                                                 | Pde3a | 50678 | 1,32 | up   |
| 6168363 | 7259555 | 1521490 | phosphodiesterase 3A, cGMP inhibited                                                 | Pde3a | 50678 | 1,27 | down |
| 5997053 | 7259555 | 1521486 | phosphodiesterase 3A, cGMP inhibited                                                 | Pde3a | 50678 | 1,26 | up   |
| 6195979 | 7259555 | 1521481 | phosphodiesterase 3A, cGMP inhibited                                                 | Pde3a | 50678 | 1,23 | down |
| 6582228 | 7259555 | 1521483 | phosphodiesterase 3A, cGMP inhibited                                                 | Pde3a | 50678 | 1,22 | down |
| 6555303 | 7259555 | 1521484 | phosphodiesterase 3A, cGMP inhibited                                                 | Pde3a | 50678 | 1,20 | up   |
| 5645651 | 7259555 | 1521494 | phosphodiesterase 3A, cGMP inhibited                                                 | Pde3a | 50678 | 1,20 | down |
| 6117475 | 7259555 | 1521480 | phosphodiesterase 3A, cGMP inhibited                                                 | Pde3a | 50678 | 1,17 | down |
| 6234932 | 7259555 | 1521492 | phosphodiesterase 3A, cGMP inhibited                                                 | Pde3a | 50678 | 1,15 | up   |
| 6236238 | 7259555 | 1521487 | phosphodiesterase 3A, cGMP inhibited                                                 | Pde3a | 50678 | 1,11 | down |
| 6466307 | 7259555 | 1521485 | phosphodiesterase 3A, cGMP inhibited                                                 | Pde3a | 50678 | 1,03 | down |
| 6664806 | 7259555 | 1521479 | phosphodiesterase 3A, cGMP inhibited                                                 | Pde3a | 50678 | 1,02 | down |
| 6562731 | 7259555 | 1521482 | phosphodiesterase 3A, cGMP inhibited                                                 | Pde3a | 50678 | 1,01 | down |
| 6290425 | 7333487 | 1703684 | phosphodiesterase 4A, cAMP-specific (phosphodiesterase E2 dunce homolog, Drosophila) | Pde4a | 25638 | 2,80 | up   |
| 6497646 | 7333487 | 1703678 | phosphodiesterase 4A, cAMP-specific (phosphodiesterase E2 dunce homolog, Drosophila) | Pde4a | 25638 | 1,95 | down |
| 5704413 | 7333487 | 1703691 | phosphodiesterase 4A, cAMP-specific (phosphodiesterase E2 dunce homolog, Drosophila) | Pde4a | 25638 | 1,93 | down |
| 6496108 | 7333487 | 1703692 | phosphodiesterase 4A, cAMP-specific (phosphodiesterase E2 dunce homolog, Drosophila) | Pde4a | 25638 | 1,65 | up   |
| 6532784 | 7333487 | 1703692 | phosphodiesterase 4A, cAMP-specific (phosphodiesterase E2 dunce homolog, Drosophila) | Pde4a | 25638 | 1,60 | down |
| 6424578 | 7333487 | 1703685 | phosphodiesterase 4A, cAMP-specific (phosphodiesterase E2 dunce homolog, Drosophila) | Pde4a | 25638 | 1,54 | down |
| 5930127 | 7333487 | 1703688 | phosphodiesterase 4A, cAMP-specific (phosphodiesterase E2 dunce homolog, Drosophila) | Pde4a | 25638 | 1,51 | down |
| 5778064 | 7333487 | 1703685 | phosphodiesterase 4A, cAMP-specific (phosphodiesterase E2 dunce homolog, Drosophila) | Pde4a | 25638 | 1,45 | up   |
| 5845406 | 7333487 | 1703689 | phosphodiesterase 4A, cAMP-specific (phosphodiesterase E2 dunce homolog, Drosophila) | Pde4a | 25638 | 1,31 | down |
| 6080168 | 7333487 | 1703692 | phosphodiesterase 4A, cAMP-specific (phosphodiesterase E2 dunce homolog, Drosophila) | Pde4a | 25638 | 1,21 | down |
| 6557599 | 7333487 | 1703692 | phosphodiesterase 4A, cAMP-specific (phosphodiesterase E2 dunce homolog, Drosophila) | Pde4a | 25638 | 1,19 | down |
| 5700069 | 7333487 | 1703683 | phosphodiesterase 4A, cAMP-specific (phosphodiesterase E2 dunce homolog, Drosophila) | Pde4a | 25638 | 1,18 | up   |
| 6164558 | 7333487 | 1703685 | phosphodiesterase 4A, cAMP-specific (phosphodiesterase E2 dunce homolog, Drosophila) | Pde4a | 25638 | 1,18 | down |
| 6126920 | 7333487 | 1703679 | phosphodiesterase 4A, cAMP-specific (phosphodiesterase E2 dunce homolog, Drosophila) | Pde4a | 25638 | 1,15 | down |
| 6031486 | 7333487 | 1703681 | phosphodiesterase 4A, cAMP-specific (phosphodiesterase E2 dunce homolog, Drosophila) | Pde4a | 25638 | 1,14 | up   |
| 6701371 | 7333487 | 1703682 | phosphodiesterase 4A, cAMP-specific (phosphodiesterase E2 dunce homolog, Drosophila) | Pde4a | 25638 | 1,13 | down |
| 5834669 | 7333487 | 1703687 | phosphodiesterase 4A, cAMP-specific (phosphodiesterase E2 dunce homolog, Drosophila) | Pde4a | 25638 | 1,13 | down |
| 6136216 | 7333487 | 1703680 | phosphodiesterase 4A, cAMP-specific (phosphodiesterase E2 dunce homolog, Drosophila) | Pde4a | 25638 | 1,04 | up   |
| 6403505 | 7333487 | 1703678 | phosphodiesterase 4A, cAMP-specific (phosphodiesterase E2 dunce homolog, Drosophila) | Pde4a | 25638 | 1,04 | up   |
| 6358190 | 7333487 | 1703686 | phosphodiesterase 4A, cAMP-specific (phosphodiesterase E2 dunce homolog, Drosophila) | Pde4a | 25638 | 1,03 | up   |
| 5933129 | 7333487 | 1703692 | phosphodiesterase 4A, cAMP-specific (phosphodiesterase E2 dunce homolog, Drosophila) | Pde4a | 25638 | 1,01 | down |
| 6675233 | 7333487 | 1703690 | phosphodiesterase 4A, cAMP-specific (phosphodiesterase E2 dunce homolog, Drosophila) | Pde4a | 25638 | 1,00 | up   |
| 6563180 | 7333487 | 1703679 | phosphodiesterase 4A, cAMP-specific (phosphodiesterase E2 dunce homolog, Drosophila) | Pde4a | 25638 | 1,00 | down |
| 6417773 | 7333487 | 1703692 | phosphodiesterase 4A, cAMP-specific (phosphodiesterase E2 dunce homolog, Drosophila) | Pde4a | 25638 | 1,00 | up   |
| 6699410 | 7277759 | 1567292 | phosphodiesterase 4B, cAMP specific                                                  | Pde4b | 24626 | 2,55 | down |
| 5712865 | 7277759 | 1567302 | phosphodiesterase 4B, cAMP specific                                                  | Pde4b | 24626 | 1,85 | up   |
| 6266258 | 7277759 | 1567296 | phosphodiesterase 4B, cAMP specific                                                  | Pde4b | 24626 | 1,77 | up   |
| 6001387 | 7277759 | 1567285 | phosphodiesterase 4B, cAMP specific                                                  | Pde4b | 24626 | 1,75 | up   |
| 6488365 | 7277759 | 1567301 | phosphodiesterase 4B, cAMP specific                                                  | Pde4b | 24626 | 1,70 | up   |
| 6123551 | 7277759 | 1567286 | phosphodiesterase 4B, cAMP specific                                                  | Pde4b | 24626 | 1,66 | down |
| 6111022 | 7277759 | 1567289 | phosphodiesterase 4B, cAMP specific                                                  | Pde4b | 24626 | 1,52 | down |
| 6154821 | 7277759 | 1567291 | phosphodiesterase 4B, cAMP specific                                                  | Pde4b | 24626 | 1,47 | down |
| 5885466 | 7277759 | 1567287 | phosphodiesterase 4B, cAMP specific                                                  | Pde4b | 24626 | 1,41 | down |
| 6467152 | 7277759 | 1567299 | phosphodiesterase 4B, cAMP specific                                                  | Pde4b | 24626 | 1,40 | up   |
| 6460041 | 7277759 | 1567297 | phosphodiesterase 4B, cAMP specific                                                  | Pde4b | 24626 | 1,32 | up   |
| 6270200 | 7277759 | 1567300 | phosphodiesterase 4B, cAMP specific                                                  | Pde4b | 24626 | 1,31 | up   |
| 6085196 | 7277759 | 1567287 | phosphodiesterase 4B, cAMP specific                                                  | Pde4b | 24626 | 1,27 | down |
| 5925936 | 7277759 | 1567289 | phosphodiesterase 4B, cAMP specific                                                  | Pde4b | 24626 | 1,24 | down |
| 6470740 | 7277759 | 1567290 | phosphodiesterase 4B, cAMP specific                                                  | Pde4b | 24626 | 1,23 | down |
| 6402312 | 7277759 | 1567285 | phosphodiesterase 4B, cAMP specific                                                  | Pde4b | 24626 | 1,21 | down |
| 5855624 | 7277759 | 1567302 | phosphodiesterase 4B, cAMP specific                                                  | Pde4b | 24626 | 1,17 | up   |
| 5788829 | 7277759 | 1567288 | phosphodiesterase 4B, cAMP specific                                                  | Pde4b | 24626 | 1,14 | down |
| 6124327 | 7277759 | 1567294 | phosphodiesterase 4B, cAMP specific                                                  | Pde4b | 24626 | 1,09 | down |
| 6548090 | 7277759 | 1567284 | phosphodiesterase 4B, cAMP specific                                                  | Pde4b | 24626 | 1,08 | down |

|         |         |         |                                                                                      |         |        |      |      |
|---------|---------|---------|--------------------------------------------------------------------------------------|---------|--------|------|------|
| 6119476 | 7277759 | 1567295 | phosphodiesterase 4B, cAMP specific                                                  | Pde4b   | 24626  | 1,08 | up   |
| 6434995 | 7277759 | 1567298 | phosphodiesterase 4B, cAMP specific                                                  | Pde4b   | 24626  | 1,05 | down |
| 6114203 | 7277759 | 1567293 | phosphodiesterase 4B, cAMP specific                                                  | Pde4b   | 24626  | 1,05 | up   |
| 5831036 | 7277759 | 1567288 | phosphodiesterase 4B, cAMP specific                                                  | Pde4b   | 24626  | 1,03 | up   |
| 6230974 | 7149817 | 1250311 | phosphodiesterase 4C, cAMP-specific (phosphodiesterase E1 dunce homolog, Drosophila) | Pde4c   | 290646 | 2,76 | down |
| 6744853 | 7149817 | 1250305 | phosphodiesterase 4C, cAMP-specific (phosphodiesterase E1 dunce homolog, Drosophila) | Pde4c   | 290646 | 2,32 | up   |
| 6008344 | 7149817 | 1250307 | phosphodiesterase 4C, cAMP-specific (phosphodiesterase E1 dunce homolog, Drosophila) | Pde4c   | 290646 | 1,97 | up   |
| 6707333 | 7149817 | 1250309 | phosphodiesterase 4C, cAMP-specific (phosphodiesterase E1 dunce homolog, Drosophila) | Pde4c   | 290646 | 1,74 | up   |
| 5818753 | 7149817 | 1250308 | phosphodiesterase 4C, cAMP-specific (phosphodiesterase E1 dunce homolog, Drosophila) | Pde4c   | 290646 | 1,60 | up   |
| 5752152 | 7149817 | 1250306 | phosphodiesterase 4C, cAMP-specific (phosphodiesterase E1 dunce homolog, Drosophila) | Pde4c   | 290646 | 1,59 | up   |
| 6412552 | 7149817 | 1250309 | phosphodiesterase 4C, cAMP-specific (phosphodiesterase E1 dunce homolog, Drosophila) | Pde4c   | 290646 | 1,43 | down |
| 6502661 | 7149817 | 1250307 | phosphodiesterase 4C, cAMP-specific (phosphodiesterase E1 dunce homolog, Drosophila) | Pde4c   | 290646 | 1,31 | down |
| 6066581 | 7149817 | 1250309 | phosphodiesterase 4C, cAMP-specific (phosphodiesterase E1 dunce homolog, Drosophila) | Pde4c   | 290646 | 1,27 | down |
| 6137443 | 7149817 | 1250310 | phosphodiesterase 4C, cAMP-specific (phosphodiesterase E1 dunce homolog, Drosophila) | Pde4c   | 290646 | 1,16 | down |
| 6740920 | 7149817 | 1250312 | phosphodiesterase 4C, cAMP-specific (phosphodiesterase E1 dunce homolog, Drosophila) | Pde4c   | 290646 | 1,15 | up   |
| 5855916 | 7149817 | 1250307 | phosphodiesterase 4C, cAMP-specific (phosphodiesterase E1 dunce homolog, Drosophila) | Pde4c   | 290646 | 1,12 | down |
| 5752199 | 7149817 | 1250313 | phosphodiesterase 4C, cAMP-specific (phosphodiesterase E1 dunce homolog, Drosophila) | Pde4c   | 290646 | 1,11 | down |
| 5716680 | 7149817 | 1250304 | phosphodiesterase 4C, cAMP-specific (phosphodiesterase E1 dunce homolog, Drosophila) | Pde4c   | 290646 | 1,10 | down |
| 5959089 | 7149817 | 1250309 | phosphodiesterase 4C, cAMP-specific (phosphodiesterase E1 dunce homolog, Drosophila) | Pde4c   | 290646 | 1,09 | up   |
| 6675002 | 7149817 | 1250307 | phosphodiesterase 4C, cAMP-specific (phosphodiesterase E1 dunce homolog, Drosophila) | Pde4c   | 290646 | 1,05 | up   |
| 6446699 | 7149817 | 1250310 | phosphodiesterase 4C, cAMP-specific (phosphodiesterase E1 dunce homolog, Drosophila) | Pde4c   | 290646 | 1,04 | up   |
| 6563651 | 7211830 | 1402901 | phosphodiesterase 4D interacting protein                                             | Pde4dip | 64183  | 2,68 | down |
| 6355482 | 7211830 | 1402908 | phosphodiesterase 4D interacting protein                                             | Pde4dip | 64183  | 1,82 | down |
| 6517113 | 7211830 | 1402943 | phosphodiesterase 4D interacting protein                                             | Pde4dip | 64183  | 1,81 | up   |
| 6046486 | 7211830 | 1402915 | phosphodiesterase 4D interacting protein                                             | Pde4dip | 64183  | 1,68 | down |
| 6163054 | 7211830 | 1402904 | phosphodiesterase 4D interacting protein                                             | Pde4dip | 64183  | 1,54 | down |
| 5939051 | 7211830 | 1402941 | phosphodiesterase 4D interacting protein                                             | Pde4dip | 64183  | 1,51 | up   |
| 5833638 | 7211830 | 1402933 | phosphodiesterase 4D interacting protein                                             | Pde4dip | 64183  | 1,48 | down |
| 6316253 | 7211830 | 1402913 | phosphodiesterase 4D interacting protein                                             | Pde4dip | 64183  | 1,47 | up   |
| 6076880 | 7211830 | 1402926 | phosphodiesterase 4D interacting protein                                             | Pde4dip | 64183  | 1,38 | up   |
| 6601650 | 7211830 | 1402927 | phosphodiesterase 4D interacting protein                                             | Pde4dip | 64183  | 1,37 | up   |
| 5933034 | 7211830 | 1402907 | phosphodiesterase 4D interacting protein                                             | Pde4dip | 64183  | 1,28 | up   |
| 6247996 | 7211830 | 1402920 | phosphodiesterase 4D interacting protein                                             | Pde4dip | 64183  | 1,28 | down |
| 5866781 | 7211830 | 1402900 | phosphodiesterase 4D interacting protein                                             | Pde4dip | 64183  | 1,27 | up   |
| 5698631 | 7211830 | 1402919 | phosphodiesterase 4D interacting protein                                             | Pde4dip | 64183  | 1,25 | down |
| 6155378 | 7211830 | 1402906 | phosphodiesterase 4D interacting protein                                             | Pde4dip | 64183  | 1,25 | down |
| 6362171 | 7211830 | 1402935 | phosphodiesterase 4D interacting protein                                             | Pde4dip | 64183  | 1,24 | up   |
| 5756697 | 7211830 | 1402909 | phosphodiesterase 4D interacting protein                                             | Pde4dip | 64183  | 1,24 | up   |
| 6396842 | 7211830 | 1402938 | phosphodiesterase 4D interacting protein                                             | Pde4dip | 64183  | 1,20 | down |
| 5790389 | 7211830 | 1402918 | phosphodiesterase 4D interacting protein                                             | Pde4dip | 64183  | 1,19 | up   |
| 6016032 | 7211830 | 1402928 | phosphodiesterase 4D interacting protein                                             | Pde4dip | 64183  | 1,19 | up   |
| 6543923 | 7211830 | 1402925 | phosphodiesterase 4D interacting protein                                             | Pde4dip | 64183  | 1,17 | down |
| 6019538 | 7211830 | 1402942 | phosphodiesterase 4D interacting protein                                             | Pde4dip | 64183  | 1,17 | down |
| 5748144 | 7211830 | 1402905 | phosphodiesterase 4D interacting protein                                             | Pde4dip | 64183  | 1,15 | down |
| 5717943 | 7211830 | 1402923 | phosphodiesterase 4D interacting protein                                             | Pde4dip | 64183  | 1,14 | down |
| 5929171 | 7211830 | 1402939 | phosphodiesterase 4D interacting protein                                             | Pde4dip | 64183  | 1,14 | up   |
| 6656695 | 7211830 | 1402922 | phosphodiesterase 4D interacting protein                                             | Pde4dip | 64183  | 1,14 | down |
| 5844836 | 7211830 | 1402911 | phosphodiesterase 4D interacting protein                                             | Pde4dip | 64183  | 1,13 | up   |
| 5982387 | 7211830 | 1402931 | phosphodiesterase 4D interacting protein                                             | Pde4dip | 64183  | 1,12 | down |
| 6708289 | 7211830 | 1402921 | phosphodiesterase 4D interacting protein                                             | Pde4dip | 64183  | 1,10 | down |
| 6567655 | 7211830 | 1402940 | phosphodiesterase 4D interacting protein                                             | Pde4dip | 64183  | 1,10 | down |
| 6289931 | 7211830 | 1402930 | phosphodiesterase 4D interacting protein                                             | Pde4dip | 64183  | 1,09 | down |
| 5833450 | 7211830 | 1402937 | phosphodiesterase 4D interacting protein                                             | Pde4dip | 64183  | 1,08 | down |
| 5737276 | 7211830 | 1402914 | phosphodiesterase 4D interacting protein                                             | Pde4dip | 64183  | 1,08 | up   |
| 6093195 | 7211830 | 1402910 | phosphodiesterase 4D interacting protein                                             | Pde4dip | 64183  | 1,07 | up   |
| 6480212 | 7211830 | 1402921 | phosphodiesterase 4D interacting protein                                             | Pde4dip | 64183  | 1,07 | up   |
| 6287075 | 7211830 | 1402932 | phosphodiesterase 4D interacting protein                                             | Pde4dip | 64183  | 1,06 | up   |

|         |         |         |                                                                                      |         |        |      |      |
|---------|---------|---------|--------------------------------------------------------------------------------------|---------|--------|------|------|
| 6044526 | 7211830 | 1402929 | phosphodiesterase 4D interacting protein                                             | Pde4dip | 64183  | 1,06 | up   |
| 5895158 | 7211830 | 1402943 | phosphodiesterase 4D interacting protein                                             | Pde4dip | 64183  | 1,06 | up   |
| 6467722 | 7211830 | 1402902 | phosphodiesterase 4D interacting protein                                             | Pde4dip | 64183  | 1,06 | up   |
| 6016691 | 7211830 | 1402926 | phosphodiesterase 4D interacting protein                                             | Pde4dip | 64183  | 1,04 | up   |
| 6730211 | 7211830 | 1402917 | phosphodiesterase 4D interacting protein                                             | Pde4dip | 64183  | 1,03 | up   |
| 6058474 | 7211830 | 1402903 | phosphodiesterase 4D interacting protein                                             | Pde4dip | 64183  | 1,03 | up   |
| 6216397 | 7211830 | 1402912 | phosphodiesterase 4D interacting protein                                             | Pde4dip | 64183  | 1,03 | up   |
| 5632325 | 7211830 | 1402934 | phosphodiesterase 4D interacting protein                                             | Pde4dip | 64183  | 1,02 | up   |
| 6387259 | 7211830 | 1402936 | phosphodiesterase 4D interacting protein                                             | Pde4dip | 64183  | 1,02 | down |
| 5746365 | 7211830 | 1402929 | phosphodiesterase 4D interacting protein                                             | Pde4dip | 64183  | 1,01 | up   |
| 5717694 | 7211830 | 1402924 | phosphodiesterase 4D interacting protein                                             | Pde4dip | 64183  | 1,00 | up   |
| 6353173 | 7189455 | 1348332 | phosphodiesterase 4D, cAMP-specific (phosphodiesterase E3 dunce homolog, Drosophila) | Pde4d   | 24627  | 2,58 | up   |
| 5924374 | 7189455 | 1348385 | phosphodiesterase 4D, cAMP-specific (phosphodiesterase E3 dunce homolog, Drosophila) | Pde4d   | 24627  | 2,28 | down |
| 5785403 | 7189455 | 1348348 | phosphodiesterase 4D, cAMP-specific (phosphodiesterase E3 dunce homolog, Drosophila) | Pde4d   | 24627  | 1,79 | up   |
| 6615219 | 7189455 | 1348332 | phosphodiesterase 4D, cAMP-specific (phosphodiesterase E3 dunce homolog, Drosophila) | Pde4d   | 24627  | 1,52 | up   |
| 5712108 | 7189455 | 1348381 | phosphodiesterase 4D, cAMP-specific (phosphodiesterase E3 dunce homolog, Drosophila) | Pde4d   | 24627  | 1,46 | up   |
| 6353802 | 7189455 | 1348386 | phosphodiesterase 4D, cAMP-specific (phosphodiesterase E3 dunce homolog, Drosophila) | Pde4d   | 24627  | 1,38 | down |
| 6028695 | 7189455 | 1348381 | phosphodiesterase 4D, cAMP-specific (phosphodiesterase E3 dunce homolog, Drosophila) | Pde4d   | 24627  | 1,35 | down |
| 6115462 | 7189455 | 1348355 | phosphodiesterase 4D, cAMP-specific (phosphodiesterase E3 dunce homolog, Drosophila) | Pde4d   | 24627  | 1,26 | down |
| 6111242 | 7189455 | 1348386 | phosphodiesterase 4D, cAMP-specific (phosphodiesterase E3 dunce homolog, Drosophila) | Pde4d   | 24627  | 1,21 | down |
| 5833486 | 7189455 | 1348364 | phosphodiesterase 4D, cAMP-specific (phosphodiesterase E3 dunce homolog, Drosophila) | Pde4d   | 24627  | 1,14 | up   |
| 6310592 | 7189455 | 1348362 | phosphodiesterase 4D, cAMP-specific (phosphodiesterase E3 dunce homolog, Drosophila) | Pde4d   | 24627  | 1,11 | down |
| 5628658 | 7189455 | 1348381 | phosphodiesterase 4D, cAMP-specific (phosphodiesterase E3 dunce homolog, Drosophila) | Pde4d   | 24627  | 1,08 | up   |
| 6234424 | 7189455 | 1348387 | phosphodiesterase 4D, cAMP-specific (phosphodiesterase E3 dunce homolog, Drosophila) | Pde4d   | 24627  | 1,03 | up   |
| 5633597 | 7189455 | 1348363 | phosphodiesterase 4D, cAMP-specific (phosphodiesterase E3 dunce homolog, Drosophila) | Pde4d   | 24627  | 1,02 | up   |
| 6547213 | 7159327 | 1273663 | phosphofructokinase, platelet                                                        | Pfkip   | 60416  | 2,41 | down |
| 6463655 | 7159327 | 1273669 | phosphofructokinase, platelet                                                        | Pfkip   | 60416  | 1,70 | down |
| 6249589 | 7159327 | 1273663 | phosphofructokinase, platelet                                                        | Pfkip   | 60416  | 1,70 | down |
| 6258641 | 7159327 | 1273685 | phosphofructokinase, platelet                                                        | Pfkip   | 60416  | 1,52 | up   |
| 5947927 | 7159327 | 1273672 | phosphofructokinase, platelet                                                        | Pfkip   | 60416  | 1,49 | down |
| 6126684 | 7159327 | 1273682 | phosphofructokinase, platelet                                                        | Pfkip   | 60416  | 1,37 | down |
| 6149602 | 7159327 | 1273676 | phosphofructokinase, platelet                                                        | Pfkip   | 60416  | 1,30 | up   |
| 6684310 | 7159327 | 1273682 | phosphofructokinase, platelet                                                        | Pfkip   | 60416  | 1,29 | down |
| 6167662 | 7159327 | 1273677 | phosphofructokinase, platelet                                                        | Pfkip   | 60416  | 1,29 | down |
| 6520969 | 7159327 | 1273681 | phosphofructokinase, platelet                                                        | Pfkip   | 60416  | 1,22 | up   |
| 5796808 | 7159327 | 1273668 | phosphofructokinase, platelet                                                        | Pfkip   | 60416  | 1,20 | up   |
| 5966682 | 7159327 | 1273666 | phosphofructokinase, platelet                                                        | Pfkip   | 60416  | 1,14 | up   |
| 5761463 | 7159327 | 1273680 | phosphofructokinase, platelet                                                        | Pfkip   | 60416  | 1,12 | up   |
| 6522486 | 7159327 | 1273686 | phosphofructokinase, platelet                                                        | Pfkip   | 60416  | 1,11 | up   |
| 5809190 | 7159327 | 1273665 | phosphofructokinase, platelet                                                        | Pfkip   | 60416  | 1,11 | up   |
| 5972657 | 7159327 | 1273679 | phosphofructokinase, platelet                                                        | Pfkip   | 60416  | 1,11 | down |
| 5926358 | 7159327 | 1273667 | phosphofructokinase, platelet                                                        | Pfkip   | 60416  | 1,08 | up   |
| 6073134 | 7159327 | 1273671 | phosphofructokinase, platelet                                                        | Pfkip   | 60416  | 1,08 | up   |
| 6648668 | 7159327 | 1273678 | phosphofructokinase, platelet                                                        | Pfkip   | 60416  | 1,06 | up   |
| 6013668 | 7159327 | 1273664 | phosphofructokinase, platelet                                                        | Pfkip   | 60416  | 1,06 | up   |
| 6295804 | 7159327 | 1273670 | phosphofructokinase, platelet                                                        | Pfkip   | 60416  | 1,05 | down |
| 6581130 | 7159327 | 1273683 | phosphofructokinase, platelet                                                        | Pfkip   | 60416  | 1,05 | up   |
| 6351955 | 7159327 | 1273675 | phosphofructokinase, platelet                                                        | Pfkip   | 60416  | 1,05 | up   |
| 6119632 | 7159327 | 1273684 | phosphofructokinase, platelet                                                        | Pfkip   | 60416  | 1,03 | down |
| 6361354 | 7159327 | 1273673 | phosphofructokinase, platelet                                                        | Pfkip   | 60416  | 1,01 | down |
| 6223738 | 7159327 | 1273674 | phosphofructokinase, platelet                                                        | Pfkip   | 60416  | 1,00 | down |
| 6186538 | 7352525 | 1751133 | phosphoglycerate kinase 2                                                            | Pgk2    | 316265 | 2,06 | up   |
| 5844246 | 7352525 | 1751135 | phosphoglycerate kinase 2                                                            | Pgk2    | 316265 | 1,44 | down |
| 5688876 | 7352525 | 1751134 | phosphoglycerate kinase 2                                                            | Pgk2    | 316265 | 1,11 | down |
| 5917970 | 7352525 | 1751135 | phosphoglycerate kinase 2                                                            | Pgk2    | 316265 | 1,00 | down |
| 6446736 | 7352525 | 1751135 | phosphoglycerate kinase 2                                                            | Pgk2    | 316265 | 1,00 | down |
| 5660623 | 7099311 | 1126146 | phosphoglycerate mutase family member 5                                              | Pgam5   | 288731 | 2,40 | down |

|         |         |         |                                                      |         |        |      |      |
|---------|---------|---------|------------------------------------------------------|---------|--------|------|------|
| 6060935 | 7099311 | 1126146 | phosphoglycerate mutase family member 5              | Pgam5   | 288731 | 1,35 | up   |
| 6148851 | 7099311 | 1126148 | phosphoglycerate mutase family member 5              | Pgam5   | 288731 | 1,06 | up   |
| 6740567 | 7099311 | 1126147 | phosphoglycerate mutase family member 5              | Pgam5   | 288731 | 1,05 | down |
| 5868200 | 7099311 | 1126150 | phosphoglycerate mutase family member 5              | Pgam5   | 288731 | 1,05 | down |
| 6126427 | 7099311 | 1126151 | phosphoglycerate mutase family member 5              | Pgam5   | 288731 | 1,04 | down |
| 6564265 | 7099311 | 1126147 | phosphoglycerate mutase family member 5              | Pgam5   | 288731 | 1,04 | down |
| 6163316 | 7099311 | 1126151 | phosphoglycerate mutase family member 5              | Pgam5   | 288731 | 1,03 | down |
| 6240903 | 7099311 | 1126149 | phosphoglycerate mutase family member 5              | Pgam5   | 288731 | 1,02 | up   |
| 6111090 | 7105066 | 1140365 | phosphoinositide-3-kinase, class 2, beta polypeptide | Pik3c2b | 289021 | 2,81 | up   |
| 6640546 | 7105066 | 1140366 | phosphoinositide-3-kinase, class 2, beta polypeptide | Pik3c2b | 289021 | 2,60 | up   |
| 6600200 | 7105066 | 1140361 | phosphoinositide-3-kinase, class 2, beta polypeptide | Pik3c2b | 289021 | 1,96 | down |
| 6078220 | 7105066 | 1140349 | phosphoinositide-3-kinase, class 2, beta polypeptide | Pik3c2b | 289021 | 1,91 | up   |
| 5802252 | 7105066 | 1140343 | phosphoinositide-3-kinase, class 2, beta polypeptide | Pik3c2b | 289021 | 1,87 | up   |
| 6736450 | 7105066 | 1140348 | phosphoinositide-3-kinase, class 2, beta polypeptide | Pik3c2b | 289021 | 1,76 | up   |
| 5846154 | 7105066 | 1140330 | phosphoinositide-3-kinase, class 2, beta polypeptide | Pik3c2b | 289021 | 1,54 | down |
| 5623365 | 7105066 | 1140341 | phosphoinositide-3-kinase, class 2, beta polypeptide | Pik3c2b | 289021 | 1,51 | down |
| 6182560 | 7105066 | 1140354 | phosphoinositide-3-kinase, class 2, beta polypeptide | Pik3c2b | 289021 | 1,44 | up   |
| 5654011 | 7105066 | 1140356 | phosphoinositide-3-kinase, class 2, beta polypeptide | Pik3c2b | 289021 | 1,44 | down |
| 6712801 | 7105066 | 1140346 | phosphoinositide-3-kinase, class 2, beta polypeptide | Pik3c2b | 289021 | 1,37 | down |
| 6521624 | 7105066 | 1140339 | phosphoinositide-3-kinase, class 2, beta polypeptide | Pik3c2b | 289021 | 1,37 | down |
| 6337695 | 7105066 | 1140359 | phosphoinositide-3-kinase, class 2, beta polypeptide | Pik3c2b | 289021 | 1,35 | down |
| 6518347 | 7105066 | 1140360 | phosphoinositide-3-kinase, class 2, beta polypeptide | Pik3c2b | 289021 | 1,33 | down |
| 5695450 | 7105066 | 1140350 | phosphoinositide-3-kinase, class 2, beta polypeptide | Pik3c2b | 289021 | 1,30 | up   |
| 5836429 | 7105066 | 1140330 | phosphoinositide-3-kinase, class 2, beta polypeptide | Pik3c2b | 289021 | 1,30 | up   |
| 6126309 | 7105066 | 1140337 | phosphoinositide-3-kinase, class 2, beta polypeptide | Pik3c2b | 289021 | 1,30 | down |
| 6020722 | 7105066 | 1140338 | phosphoinositide-3-kinase, class 2, beta polypeptide | Pik3c2b | 289021 | 1,29 | down |
| 6068041 | 7105066 | 1140335 | phosphoinositide-3-kinase, class 2, beta polypeptide | Pik3c2b | 289021 | 1,27 | down |
| 5995010 | 7105066 | 1140352 | phosphoinositide-3-kinase, class 2, beta polypeptide | Pik3c2b | 289021 | 1,26 | up   |
| 5903318 | 7105066 | 1140344 | phosphoinositide-3-kinase, class 2, beta polypeptide | Pik3c2b | 289021 | 1,23 | up   |
| 5745120 | 7105066 | 1140362 | phosphoinositide-3-kinase, class 2, beta polypeptide | Pik3c2b | 289021 | 1,19 | down |
| 5762211 | 7105066 | 1140355 | phosphoinositide-3-kinase, class 2, beta polypeptide | Pik3c2b | 289021 | 1,18 | down |
| 5979890 | 7105066 | 1140327 | phosphoinositide-3-kinase, class 2, beta polypeptide | Pik3c2b | 289021 | 1,17 | up   |
| 6695567 | 7105066 | 1140358 | phosphoinositide-3-kinase, class 2, beta polypeptide | Pik3c2b | 289021 | 1,14 | up   |
| 6192569 | 7105066 | 1140336 | phosphoinositide-3-kinase, class 2, beta polypeptide | Pik3c2b | 289021 | 1,12 | up   |
| 6232341 | 7105066 | 1140342 | phosphoinositide-3-kinase, class 2, beta polypeptide | Pik3c2b | 289021 | 1,07 | up   |
| 6547830 | 7105066 | 1140363 | phosphoinositide-3-kinase, class 2, beta polypeptide | Pik3c2b | 289021 | 1,05 | down |
| 6514872 | 7105066 | 1140357 | phosphoinositide-3-kinase, class 2, beta polypeptide | Pik3c2b | 289021 | 1,03 | down |
| 6070905 | 7105066 | 1140333 | phosphoinositide-3-kinase, class 2, beta polypeptide | Pik3c2b | 289021 | 1,03 | up   |
| 6277365 | 7105066 | 1140364 | phosphoinositide-3-kinase, class 2, beta polypeptide | Pik3c2b | 289021 | 1,03 | down |
| 6675703 | 7105066 | 1140351 | phosphoinositide-3-kinase, class 2, beta polypeptide | Pik3c2b | 289021 | 1,01 | down |
| 6183602 | 7105066 | 1140334 | phosphoinositide-3-kinase, class 2, beta polypeptide | Pik3c2b | 289021 | 1,00 | down |
| 5850016 | 7068942 | 1053393 | phosphoinositide-3-kinase, regulatory subunit 5      | Pik3r5  | 497931 | 1,02 | up   |
| 5955960 | 7068942 | 1053393 | phosphoinositide-3-kinase, regulatory subunit 5      | Pik3r5  | 497931 | 1,01 | down |
| 6213125 | 7231655 | 1451913 | phospholipase A2, group IVB (cytosolic)              | Pla2g4b | 311341 | 1,45 | down |
| 5935993 | 7231655 | 1451919 | phospholipase A2, group IVB (cytosolic)              | Pla2g4b | 311341 | 1,42 | up   |
| 6349333 | 7231655 | 1451923 | phospholipase A2, group IVB (cytosolic)              | Pla2g4b | 311341 | 1,38 | down |
| 6250420 | 7231655 | 1451931 | phospholipase A2, group IVB (cytosolic)              | Pla2g4b | 311341 | 1,38 | up   |
| 6581028 | 7231655 | 1451918 | phospholipase A2, group IVB (cytosolic)              | Pla2g4b | 311341 | 1,34 | up   |
| 6273314 | 7231655 | 1451915 | phospholipase A2, group IVB (cytosolic)              | Pla2g4b | 311341 | 1,29 | down |
| 6467004 | 7231655 | 1451920 | phospholipase A2, group IVB (cytosolic)              | Pla2g4b | 311341 | 1,27 | up   |
| 6732884 | 7231655 | 1451926 | phospholipase A2, group IVB (cytosolic)              | Pla2g4b | 311341 | 1,26 | up   |
| 6332200 | 7231655 | 1451920 | phospholipase A2, group IVB (cytosolic)              | Pla2g4b | 311341 | 1,24 | up   |
| 6257434 | 7231655 | 1451914 | phospholipase A2, group IVB (cytosolic)              | Pla2g4b | 311341 | 1,20 | up   |
| 6396025 | 7231655 | 1451921 | phospholipase A2, group IVB (cytosolic)              | Pla2g4b | 311341 | 1,18 | down |
| 5850116 | 7231655 | 1451927 | phospholipase A2, group IVB (cytosolic)              | Pla2g4b | 311341 | 1,18 | up   |
| 6346304 | 7231655 | 1451915 | phospholipase A2, group IVB (cytosolic)              | Pla2g4b | 311341 | 1,15 | up   |
| 6718745 | 7231655 | 1451916 | phospholipase A2, group IVB (cytosolic)              | Pla2g4b | 311341 | 1,12 | up   |

|         |         |         |                                         |         |        |      |      |
|---------|---------|---------|-----------------------------------------|---------|--------|------|------|
| 5625118 | 7231655 | 1451932 | phospholipase A2, group IVB (cytosolic) | Pla2g4b | 311341 | 1,12 | up   |
| 5982165 | 7231655 | 1451928 | phospholipase A2, group IVB (cytosolic) | Pla2g4b | 311341 | 1,11 | up   |
| 6439625 | 7231655 | 1451922 | phospholipase A2, group IVB (cytosolic) | Pla2g4b | 311341 | 1,10 | down |
| 6052009 | 7231655 | 1451917 | phospholipase A2, group IVB (cytosolic) | Pla2g4b | 311341 | 1,09 | up   |
| 6461842 | 7231655 | 1451924 | phospholipase A2, group IVB (cytosolic) | Pla2g4b | 311341 | 1,07 | up   |
| 6605456 | 7231655 | 1451920 | phospholipase A2, group IVB (cytosolic) | Pla2g4b | 311341 | 1,07 | up   |
| 5926676 | 7231655 | 1451931 | phospholipase A2, group IVB (cytosolic) | Pla2g4b | 311341 | 1,05 | down |
| 6727762 | 7231655 | 1451925 | phospholipase A2, group IVB (cytosolic) | Pla2g4b | 311341 | 1,03 | up   |
| 5799278 | 7231655 | 1451932 | phospholipase A2, group IVB (cytosolic) | Pla2g4b | 311341 | 1,02 | up   |
| 5923631 | 7303805 | 1632076 | phospholipase B                         | Phlpb   | 192259 | 2,31 | down |
| 5629184 | 7303805 | 1632105 | phospholipase B                         | Phlpb   | 192259 | 1,98 | down |
| 5740589 | 7303805 | 1632110 | phospholipase B                         | Phlpb   | 192259 | 1,78 | down |
| 5707009 | 7303805 | 1632072 | phospholipase B                         | Phlpb   | 192259 | 1,59 | down |
| 5700128 | 7303805 | 1632068 | phospholipase B                         | Phlpb   | 192259 | 1,56 | down |
| 5915432 | 7303805 | 1632091 | phospholipase B                         | Phlpb   | 192259 | 1,54 | down |
| 6281957 | 7303805 | 1632083 | phospholipase B                         | Phlpb   | 192259 | 1,53 | up   |
| 6269941 | 7303805 | 1632095 | phospholipase B                         | Phlpb   | 192259 | 1,52 | down |
| 5706081 | 7303805 | 1632096 | phospholipase B                         | Phlpb   | 192259 | 1,51 | up   |
| 6520816 | 7303805 | 1632087 | phospholipase B                         | Phlpb   | 192259 | 1,46 | up   |
| 6425650 | 7303805 | 1632071 | phospholipase B                         | Phlpb   | 192259 | 1,41 | up   |
| 6744568 | 7303805 | 1632107 | phospholipase B                         | Phlpb   | 192259 | 1,38 | down |
| 5631713 | 7303805 | 1632097 | phospholipase B                         | Phlpb   | 192259 | 1,36 | up   |
| 5703098 | 7303805 | 1632078 | phospholipase B                         | Phlpb   | 192259 | 1,26 | down |
| 6053904 | 7303805 | 1632080 | phospholipase B                         | Phlpb   | 192259 | 1,25 | down |
| 5793291 | 7303805 | 1632070 | phospholipase B                         | Phlpb   | 192259 | 1,22 | down |
| 6428530 | 7303805 | 1632084 | phospholipase B                         | Phlpb   | 192259 | 1,21 | down |
| 5792817 | 7303805 | 1632089 | phospholipase B                         | Phlpb   | 192259 | 1,20 | up   |
| 5731881 | 7303805 | 1632116 | phospholipase B                         | Phlpb   | 192259 | 1,20 | down |
| 6221666 | 7303805 | 1632106 | phospholipase B                         | Phlpb   | 192259 | 1,19 | down |
| 6703156 | 7303805 | 1632094 | phospholipase B                         | Phlpb   | 192259 | 1,19 | down |
| 6731246 | 7303805 | 1632077 | phospholipase B                         | Phlpb   | 192259 | 1,19 | up   |
| 5922639 | 7303805 | 1632063 | phospholipase B                         | Phlpb   | 192259 | 1,18 | down |
| 6545176 | 7303805 | 1632101 | phospholipase B                         | Phlpb   | 192259 | 1,17 | up   |
| 6137092 | 7303805 | 1632064 | phospholipase B                         | Phlpb   | 192259 | 1,17 | down |
| 6459068 | 7303805 | 1632114 | phospholipase B                         | Phlpb   | 192259 | 1,16 | down |
| 5970961 | 7303805 | 1632085 | phospholipase B                         | Phlpb   | 192259 | 1,15 | up   |
| 5723270 | 7303805 | 1632063 | phospholipase B                         | Phlpb   | 192259 | 1,12 | down |
| 5678278 | 7303805 | 1632103 | phospholipase B                         | Phlpb   | 192259 | 1,12 | up   |
| 6733497 | 7303805 | 1632069 | phospholipase B                         | Phlpb   | 192259 | 1,10 | down |
| 5619910 | 7303805 | 1632088 | phospholipase B                         | Phlpb   | 192259 | 1,10 | up   |
| 6667723 | 7303805 | 1632092 | phospholipase B                         | Phlpb   | 192259 | 1,09 | down |
| 6186302 | 7303805 | 1632075 | phospholipase B                         | Phlpb   | 192259 | 1,08 | up   |
| 6412407 | 7303805 | 1632108 | phospholipase B                         | Phlpb   | 192259 | 1,08 | up   |
| 6651033 | 7303805 | 1632082 | phospholipase B                         | Phlpb   | 192259 | 1,07 | down |
| 6698018 | 7303805 | 1632104 | phospholipase B                         | Phlpb   | 192259 | 1,07 | down |
| 6323458 | 7303805 | 1632100 | phospholipase B                         | Phlpb   | 192259 | 1,06 | down |
| 6210127 | 7303805 | 1632073 | phospholipase B                         | Phlpb   | 192259 | 1,05 | up   |
| 6049671 | 7303805 | 1632081 | phospholipase B                         | Phlpb   | 192259 | 1,05 | down |
| 6061164 | 7303805 | 1632074 | phospholipase B                         | Phlpb   | 192259 | 1,04 | down |
| 6122954 | 7303805 | 1632066 | phospholipase B                         | Phlpb   | 192259 | 1,02 | up   |
| 5694519 | 7303805 | 1632109 | phospholipase B                         | Phlpb   | 192259 | 1,02 | up   |
| 6218325 | 7303805 | 1632102 | phospholipase B                         | Phlpb   | 192259 | 1,02 | down |
| 5949745 | 7303805 | 1632112 | phospholipase B                         | Phlpb   | 192259 | 1,02 | down |
| 5823338 | 7303805 | 1632086 | phospholipase B                         | Phlpb   | 192259 | 1,02 | down |
| 6422625 | 7303805 | 1632065 | phospholipase B                         | Phlpb   | 192259 | 1,01 | up   |
| 6655129 | 7303805 | 1632079 | phospholipase B                         | Phlpb   | 192259 | 1,01 | up   |
| 6146892 | 7303805 | 1632093 | phospholipase B                         | Phlpb   | 192259 | 1,01 | up   |

|         |         |         |                          |       |        |      |      |
|---------|---------|---------|--------------------------|-------|--------|------|------|
| 6253417 | 7303805 | 1632099 | phospholipase B          | Phlpb | 192259 | 1,01 | up   |
| 6431143 | 7303805 | 1632090 | phospholipase B          | Phlpb | 192259 | 1,01 | up   |
| 5942921 | 7303805 | 1632067 | phospholipase B          | Phlpb | 192259 | 1,00 | up   |
| 6013552 | 7303805 | 1632115 | phospholipase B          | Phlpb | 192259 | 1,00 | up   |
| 6496619 | 7303805 | 1632111 | phospholipase B          | Phlpb | 192259 | 1,00 | up   |
| 6448546 | 7303805 | 1632113 | phospholipase B          | Phlpb | 192259 | 1,00 | up   |
| 6115909 | 7232958 | 1455318 | phospholipase C, beta 4  | Plcb4 | 25031  | 2,12 | up   |
| 5748228 | 7232958 | 1455319 | phospholipase C, beta 4  | Plcb4 | 25031  | 2,02 | up   |
| 5985401 | 7232958 | 1455298 | phospholipase C, beta 4  | Plcb4 | 25031  | 1,94 | up   |
| 6559245 | 7232958 | 1455314 | phospholipase C, beta 4  | Plcb4 | 25031  | 1,93 | up   |
| 6573280 | 7232958 | 1455302 | phospholipase C, beta 4  | Plcb4 | 25031  | 1,60 | up   |
| 6512740 | 7232958 | 1455286 | phospholipase C, beta 4  | Plcb4 | 25031  | 1,59 | up   |
| 6385960 | 7232958 | 1455298 | phospholipase C, beta 4  | Plcb4 | 25031  | 1,56 | up   |
| 5852465 | 7232958 | 1455316 | phospholipase C, beta 4  | Plcb4 | 25031  | 1,53 | up   |
| 5888155 | 7232958 | 1455311 | phospholipase C, beta 4  | Plcb4 | 25031  | 1,47 | down |
| 6086039 | 7232958 | 1455299 | phospholipase C, beta 4  | Plcb4 | 25031  | 1,44 | down |
| 6079302 | 7232958 | 1455324 | phospholipase C, beta 4  | Plcb4 | 25031  | 1,42 | down |
| 5779949 | 7232958 | 1455313 | phospholipase C, beta 4  | Plcb4 | 25031  | 1,37 | down |
| 6293009 | 7232958 | 1455310 | phospholipase C, beta 4  | Plcb4 | 25031  | 1,36 | down |
| 6034868 | 7232958 | 1455320 | phospholipase C, beta 4  | Plcb4 | 25031  | 1,32 | up   |
| 6575867 | 7232958 | 1455294 | phospholipase C, beta 4  | Plcb4 | 25031  | 1,30 | down |
| 5863610 | 7232958 | 1455305 | phospholipase C, beta 4  | Plcb4 | 25031  | 1,30 | up   |
| 6588333 | 7232958 | 1455293 | phospholipase C, beta 4  | Plcb4 | 25031  | 1,25 | up   |
| 5935980 | 7232958 | 1455308 | phospholipase C, beta 4  | Plcb4 | 25031  | 1,25 | down |
| 6418647 | 7232958 | 1455312 | phospholipase C, beta 4  | Plcb4 | 25031  | 1,25 | up   |
| 6702831 | 7232958 | 1455295 | phospholipase C, beta 4  | Plcb4 | 25031  | 1,25 | down |
| 6030624 | 7232958 | 1455292 | phospholipase C, beta 4  | Plcb4 | 25031  | 1,24 | down |
| 6112655 | 7232958 | 1455289 | phospholipase C, beta 4  | Plcb4 | 25031  | 1,23 | up   |
| 6213803 | 7232958 | 1455321 | phospholipase C, beta 4  | Plcb4 | 25031  | 1,22 | down |
| 6289313 | 7232958 | 1455319 | phospholipase C, beta 4  | Plcb4 | 25031  | 1,22 | up   |
| 6265578 | 7232958 | 1455288 | phospholipase C, beta 4  | Plcb4 | 25031  | 1,21 | up   |
| 6448124 | 7232958 | 1455317 | phospholipase C, beta 4  | Plcb4 | 25031  | 1,21 | down |
| 6304671 | 7232958 | 1455300 | phospholipase C, beta 4  | Plcb4 | 25031  | 1,15 | up   |
| 5775003 | 7232958 | 1455291 | phospholipase C, beta 4  | Plcb4 | 25031  | 1,15 | up   |
| 6424782 | 7232958 | 1455303 | phospholipase C, beta 4  | Plcb4 | 25031  | 1,15 | down |
| 6546873 | 7232958 | 1455296 | phospholipase C, beta 4  | Plcb4 | 25031  | 1,13 | down |
| 6213855 | 7232958 | 1455297 | phospholipase C, beta 4  | Plcb4 | 25031  | 1,13 | up   |
| 6031727 | 7232958 | 1455315 | phospholipase C, beta 4  | Plcb4 | 25031  | 1,12 | up   |
| 6367307 | 7232958 | 1455325 | phospholipase C, beta 4  | Plcb4 | 25031  | 1,10 | down |
| 6275915 | 7232958 | 1455309 | phospholipase C, beta 4  | Plcb4 | 25031  | 1,09 | down |
| 6009958 | 7232958 | 1455290 | phospholipase C, beta 4  | Plcb4 | 25031  | 1,08 | up   |
| 6297471 | 7232958 | 1455304 | phospholipase C, beta 4  | Plcb4 | 25031  | 1,06 | up   |
| 5942257 | 7232958 | 1455307 | phospholipase C, beta 4  | Plcb4 | 25031  | 1,05 | up   |
| 6406100 | 7232958 | 1455306 | phospholipase C, beta 4  | Plcb4 | 25031  | 1,04 | down |
| 5927267 | 7232958 | 1455323 | phospholipase C, beta 4  | Plcb4 | 25031  | 1,01 | down |
| 6021146 | 7350833 | 1746947 | phospholipase C, delta 1 | Plcd1 | 24655  | 2,37 | up   |
| 6607534 | 7350833 | 1746952 | phospholipase C, delta 1 | Plcd1 | 24655  | 1,43 | down |
| 5899061 | 7350833 | 1746945 | phospholipase C, delta 1 | Plcd1 | 24655  | 1,21 | up   |
| 6355973 | 7350833 | 1746957 | phospholipase C, delta 1 | Plcd1 | 24655  | 1,20 | down |
| 6059567 | 7350833 | 1746957 | phospholipase C, delta 1 | Plcd1 | 24655  | 1,19 | down |
| 6154502 | 7350833 | 1746954 | phospholipase C, delta 1 | Plcd1 | 24655  | 1,17 | up   |
| 6407027 | 7350833 | 1746943 | phospholipase C, delta 1 | Plcd1 | 24655  | 1,14 | up   |
| 5906039 | 7350833 | 1746950 | phospholipase C, delta 1 | Plcd1 | 24655  | 1,14 | up   |
| 6444418 | 7350833 | 1746946 | phospholipase C, delta 1 | Plcd1 | 24655  | 1,11 | up   |
| 6006429 | 7350833 | 1746944 | phospholipase C, delta 1 | Plcd1 | 24655  | 1,11 | up   |
| 6241576 | 7350833 | 1746948 | phospholipase C, delta 1 | Plcd1 | 24655  | 1,07 | down |
| 6086018 | 7350833 | 1746956 | phospholipase C, delta 1 | Plcd1 | 24655  | 1,06 | down |

|         |         |         |                          |       |       |      |      |
|---------|---------|---------|--------------------------|-------|-------|------|------|
| 6053822 | 7350833 | 1746955 | phospholipase C, delta 1 | Plcd1 | 24655 | 1,06 | down |
| 5909302 | 7350833 | 1746951 | phospholipase C, delta 1 | Plcd1 | 24655 | 1,04 | up   |
| 6436629 | 7350833 | 1746953 | phospholipase C, delta 1 | Plcd1 | 24655 | 1,02 | up   |
| 5741202 | 7350833 | 1746949 | phospholipase C, delta 1 | Plcd1 | 24655 | 1,01 | down |
| 6070444 | 7350833 | 1746942 | phospholipase C, delta 1 | Plcd1 | 24655 | 1,00 | up   |
| 5827827 | 7192686 | 1357077 | phospholipase D1         | Pld1  | 25096 | 2,15 | down |
| 6466272 | 7192686 | 1357067 | phospholipase D1         | Pld1  | 25096 | 1,79 | down |
| 6728127 | 7192686 | 1357068 | phospholipase D1         | Pld1  | 25096 | 1,72 | down |
| 6386942 | 7192686 | 1357080 | phospholipase D1         | Pld1  | 25096 | 1,66 | up   |
| 5998127 | 7192686 | 1357056 | phospholipase D1         | Pld1  | 25096 | 1,60 | down |
| 6317333 | 7192686 | 1357067 | phospholipase D1         | Pld1  | 25096 | 1,51 | up   |
| 5661654 | 7192686 | 1357060 | phospholipase D1         | Pld1  | 25096 | 1,46 | down |
| 6110405 | 7192686 | 1357057 | phospholipase D1         | Pld1  | 25096 | 1,42 | down |
| 5800153 | 7192686 | 1357052 | phospholipase D1         | Pld1  | 25096 | 1,41 | up   |
| 6501399 | 7192686 | 1357073 | phospholipase D1         | Pld1  | 25096 | 1,27 | down |
| 5799568 | 7192686 | 1357067 | phospholipase D1         | Pld1  | 25096 | 1,25 | down |
| 6723422 | 7192686 | 1357062 | phospholipase D1         | Pld1  | 25096 | 1,24 | up   |
| 6390091 | 7192686 | 1357068 | phospholipase D1         | Pld1  | 25096 | 1,23 | up   |
| 6457293 | 7192686 | 1357070 | phospholipase D1         | Pld1  | 25096 | 1,22 | up   |
| 5879492 | 7192686 | 1357061 | phospholipase D1         | Pld1  | 25096 | 1,20 | up   |
| 5938019 | 7192686 | 1357053 | phospholipase D1         | Pld1  | 25096 | 1,19 | up   |
| 6375507 | 7192686 | 1357054 | phospholipase D1         | Pld1  | 25096 | 1,18 | up   |
| 5792004 | 7192686 | 1357058 | phospholipase D1         | Pld1  | 25096 | 1,16 | down |
| 6004603 | 7192686 | 1357054 | phospholipase D1         | Pld1  | 25096 | 1,15 | up   |
| 5644603 | 7192686 | 1357075 | phospholipase D1         | Pld1  | 25096 | 1,14 | up   |
| 5644924 | 7192686 | 1357069 | phospholipase D1         | Pld1  | 25096 | 1,12 | up   |
| 6193848 | 7192686 | 1357059 | phospholipase D1         | Pld1  | 25096 | 1,11 | up   |
| 6570708 | 7192686 | 1357055 | phospholipase D1         | Pld1  | 25096 | 1,09 | up   |
| 6189213 | 7192686 | 1357074 | phospholipase D1         | Pld1  | 25096 | 1,09 | up   |
| 6461290 | 7192686 | 1357063 | phospholipase D1         | Pld1  | 25096 | 1,08 | up   |
| 5665870 | 7192686 | 1357053 | phospholipase D1         | Pld1  | 25096 | 1,07 | up   |
| 6166334 | 7192686 | 1357065 | phospholipase D1         | Pld1  | 25096 | 1,06 | down |
| 6195614 | 7192686 | 1357053 | phospholipase D1         | Pld1  | 25096 | 1,06 | up   |
| 6227978 | 7192686 | 1357064 | phospholipase D1         | Pld1  | 25096 | 1,06 | up   |
| 6232032 | 7192686 | 1357071 | phospholipase D1         | Pld1  | 25096 | 1,05 | up   |
| 6200903 | 7192686 | 1357066 | phospholipase D1         | Pld1  | 25096 | 1,03 | down |
| 6701616 | 7192686 | 1357079 | phospholipase D1         | Pld1  | 25096 | 1,03 | up   |
| 5861102 | 7192686 | 1357072 | phospholipase D1         | Pld1  | 25096 | 1,03 | down |
| 6719106 | 7192686 | 1357078 | phospholipase D1         | Pld1  | 25096 | 1,02 | up   |
| 6440657 | 7192686 | 1357053 | phospholipase D1         | Pld1  | 25096 | 1,01 | up   |
| 6244803 | 7192686 | 1357076 | phospholipase D1         | Pld1  | 25096 | 1,01 | up   |
| 5831468 | 7069249 | 1054113 | phospholipase D2         | Pld2  | 25097 | 2,87 | up   |
| 6671586 | 7069249 | 1054120 | phospholipase D2         | Pld2  | 25097 | 2,38 | down |
| 5843529 | 7069249 | 1054137 | phospholipase D2         | Pld2  | 25097 | 1,76 | down |
| 6140230 | 7069249 | 1054124 | phospholipase D2         | Pld2  | 25097 | 1,61 | up   |
| 5946052 | 7069249 | 1054126 | phospholipase D2         | Pld2  | 25097 | 1,58 | up   |
| 6285670 | 7069249 | 1054116 | phospholipase D2         | Pld2  | 25097 | 1,51 | up   |
| 6060815 | 7069249 | 1054122 | phospholipase D2         | Pld2  | 25097 | 1,47 | down |
| 6358363 | 7069249 | 1054133 | phospholipase D2         | Pld2  | 25097 | 1,45 | up   |
| 6554508 | 7069249 | 1054134 | phospholipase D2         | Pld2  | 25097 | 1,38 | down |
| 6138822 | 7069249 | 1054115 | phospholipase D2         | Pld2  | 25097 | 1,34 | down |
| 6093249 | 7069249 | 1054127 | phospholipase D2         | Pld2  | 25097 | 1,31 | up   |
| 5968724 | 7069249 | 1054119 | phospholipase D2         | Pld2  | 25097 | 1,29 | down |
| 6137283 | 7069249 | 1054125 | phospholipase D2         | Pld2  | 25097 | 1,28 | up   |
| 5669761 | 7069249 | 1054132 | phospholipase D2         | Pld2  | 25097 | 1,21 | up   |
| 5865708 | 7069249 | 1054118 | phospholipase D2         | Pld2  | 25097 | 1,20 | up   |
| 6674700 | 7069249 | 1054130 | phospholipase D2         | Pld2  | 25097 | 1,17 | up   |



|         |         |         |                                 |        |        |      |      |
|---------|---------|---------|---------------------------------|--------|--------|------|------|
| 6491313 | 7069249 | 1054117 | phospholipase D2                | Pld2   | 25097  | 1,13 | down |
| 5996236 | 7069249 | 1054114 | phospholipase D2                | Pld2   | 25097  | 1,12 | up   |
| 6451106 | 7069249 | 1054127 | phospholipase D2                | Pld2   | 25097  | 1,12 | up   |
| 5889213 | 7069249 | 1054135 | phospholipase D2                | Pld2   | 25097  | 1,11 | up   |
| 6539879 | 7069249 | 1054129 | phospholipase D2                | Pld2   | 25097  | 1,09 | down |
| 6597561 | 7069249 | 1054113 | phospholipase D2                | Pld2   | 25097  | 1,05 | down |
| 6249994 | 7069249 | 1054121 | phospholipase D2                | Pld2   | 25097  | 1,05 | up   |
| 6407857 | 7069249 | 1054136 | phospholipase D2                | Pld2   | 25097  | 1,05 | down |
| 6603681 | 7069249 | 1054123 | phospholipase D2                | Pld2   | 25097  | 1,05 | up   |
| 6006736 | 7069249 | 1054131 | phospholipase D2                | Pld2   | 25097  | 1,04 | up   |
| 6103436 | 7069249 | 1054128 | phospholipase D2                | Pld2   | 25097  | 1,03 | down |
| 6563995 | 7339147 | 1717721 | phospholipid scramblase 1       | Plscr1 | 117540 | 3,04 | down |
| 6414831 | 7339147 | 1717723 | phospholipid scramblase 1       | Plscr1 | 117540 | 2,15 | up   |
| 5661863 | 7339147 | 1717722 | phospholipid scramblase 1       | Plscr1 | 117540 | 1,92 | down |
| 6170281 | 7339147 | 1717725 | phospholipid scramblase 1       | Plscr1 | 117540 | 1,58 | up   |
| 6246986 | 7339147 | 1717721 | phospholipid scramblase 1       | Plscr1 | 117540 | 1,39 | down |
| 5798699 | 7339147 | 1717726 | phospholipid scramblase 1       | Plscr1 | 117540 | 1,31 | up   |
| 5804092 | 7339147 | 1717720 | phospholipid scramblase 1       | Plscr1 | 117540 | 1,22 | down |
| 6137465 | 7339147 | 1717727 | phospholipid scramblase 1       | Plscr1 | 117540 | 1,11 | down |
| 5788177 | 7339147 | 1717724 | phospholipid scramblase 1       | Plscr1 | 117540 | 1,10 | down |
| 6737906 | 7339147 | 1717719 | phospholipid scramblase 1       | Plscr1 | 117540 | 1,04 | up   |
| 5872732 | 7069088 | 1053803 | phospholipid scramblase 3       | Plscr3 | 360549 | 2,80 | up   |
| 6555002 | 7069088 | 1053797 | phospholipid scramblase 3       | Plscr3 | 360549 | 1,50 | down |
| 5858010 | 7069088 | 1053798 | phospholipid scramblase 3       | Plscr3 | 360549 | 1,41 | down |
| 5765923 | 7069088 | 1053801 | phospholipid scramblase 3       | Plscr3 | 360549 | 1,24 | up   |
| 6173378 | 7069088 | 1053798 | phospholipid scramblase 3       | Plscr3 | 360549 | 1,23 | down |
| 5927011 | 7069088 | 1053799 | phospholipid scramblase 3       | Plscr3 | 360549 | 1,12 | up   |
| 6653128 | 7069088 | 1053803 | phospholipid scramblase 3       | Plscr3 | 360549 | 1,08 | up   |
| 5944206 | 7069088 | 1053800 | phospholipid scramblase 3       | Plscr3 | 360549 | 1,03 | down |
| 6742652 | 7069088 | 1053802 | phospholipid scramblase 3       | Plscr3 | 360549 | 1,00 | up   |
| 6568679 | 7307499 | 1641428 | phosphorylase, glycogen, liver  | Pygl   | 64035  | 2,42 | up   |
| 5630899 | 7307499 | 1641434 | phosphorylase, glycogen, liver  | Pygl   | 64035  | 2,33 | up   |
| 6438137 | 7307499 | 1641431 | phosphorylase, glycogen, liver  | Pygl   | 64035  | 1,63 | up   |
| 5713137 | 7307499 | 1641416 | phosphorylase, glycogen, liver  | Pygl   | 64035  | 1,52 | up   |
| 6268816 | 7307499 | 1641430 | phosphorylase, glycogen, liver  | Pygl   | 64035  | 1,51 | down |
| 6694101 | 7307499 | 1641423 | phosphorylase, glycogen, liver  | Pygl   | 64035  | 1,47 | down |
| 6211168 | 7307499 | 1641425 | phosphorylase, glycogen, liver  | Pygl   | 64035  | 1,43 | down |
| 5951249 | 7307499 | 1641417 | phosphorylase, glycogen, liver  | Pygl   | 64035  | 1,40 | down |
| 5664529 | 7307499 | 1641433 | phosphorylase, glycogen, liver  | Pygl   | 64035  | 1,37 | down |
| 5670906 | 7307499 | 1641420 | phosphorylase, glycogen, liver  | Pygl   | 64035  | 1,33 | up   |
| 5704859 | 7307499 | 1641429 | phosphorylase, glycogen, liver  | Pygl   | 64035  | 1,26 | up   |
| 6490123 | 7307499 | 1641435 | phosphorylase, glycogen, liver  | Pygl   | 64035  | 1,21 | down |
| 5876947 | 7307499 | 1641424 | phosphorylase, glycogen, liver  | Pygl   | 64035  | 1,20 | down |
| 6093310 | 7307499 | 1641415 | phosphorylase, glycogen, liver  | Pygl   | 64035  | 1,20 | down |
| 5640733 | 7307499 | 1641435 | phosphorylase, glycogen, liver  | Pygl   | 64035  | 1,18 | up   |
| 6482279 | 7307499 | 1641433 | phosphorylase, glycogen, liver  | Pygl   | 64035  | 1,16 | up   |
| 5660870 | 7307499 | 1641418 | phosphorylase, glycogen, liver  | Pygl   | 64035  | 1,12 | down |
| 6421641 | 7307499 | 1641426 | phosphorylase, glycogen, liver  | Pygl   | 64035  | 1,07 | up   |
| 5996895 | 7307499 | 1641422 | phosphorylase, glycogen, liver  | Pygl   | 64035  | 1,06 | down |
| 5883188 | 7307499 | 1641432 | phosphorylase, glycogen, liver  | Pygl   | 64035  | 1,05 | down |
| 6538431 | 7307499 | 1641419 | phosphorylase, glycogen, liver  | Pygl   | 64035  | 1,03 | up   |
| 6504251 | 7307499 | 1641421 | phosphorylase, glycogen, liver  | Pygl   | 64035  | 1,01 | down |
| 6575204 | 7307499 | 1641427 | phosphorylase, glycogen, liver  | Pygl   | 64035  | 1,00 | up   |
| 5810218 | 7039302 | 983851  | phosphorylase, glycogen, muscle | Pygm   | 24701  | 2,06 | up   |
| 5658747 | 7039302 | 983844  | phosphorylase, glycogen, muscle | Pygm   | 24701  | 1,90 | down |
| 6386880 | 7039302 | 983846  | phosphorylase, glycogen, muscle | Pygm   | 24701  | 1,54 | up   |
| 6008100 | 7039302 | 983864  | phosphorylase, glycogen, muscle | Pygm   | 24701  | 1,43 | down |

|         |         |         |                                                                  |            |        |      |      |
|---------|---------|---------|------------------------------------------------------------------|------------|--------|------|------|
| 6006671 | 7039302 | 983860  | phosphorylase, glycogen, muscle                                  | Pygm       | 24701  | 1,42 | down |
| 5659420 | 7039302 | 983862  | phosphorylase, glycogen, muscle                                  | Pygm       | 24701  | 1,34 | down |
| 6695982 | 7039302 | 983861  | phosphorylase, glycogen, muscle                                  | Pygm       | 24701  | 1,33 | up   |
| 6569930 | 7039302 | 983856  | phosphorylase, glycogen, muscle                                  | Pygm       | 24701  | 1,32 | up   |
| 6717187 | 7039302 | 983849  | phosphorylase, glycogen, muscle                                  | Pygm       | 24701  | 1,25 | up   |
| 5896997 | 7039302 | 983845  | phosphorylase, glycogen, muscle                                  | Pygm       | 24701  | 1,23 | down |
| 5894647 | 7039302 | 983853  | phosphorylase, glycogen, muscle                                  | Pygm       | 24701  | 1,23 | down |
| 6192951 | 7039302 | 983858  | phosphorylase, glycogen, muscle                                  | Pygm       | 24701  | 1,23 | down |
| 5731408 | 7039302 | 983848  | phosphorylase, glycogen, muscle                                  | Pygm       | 24701  | 1,21 | up   |
| 6185492 | 7039302 | 983859  | phosphorylase, glycogen, muscle                                  | Pygm       | 24701  | 1,20 | up   |
| 5844406 | 7039302 | 983857  | phosphorylase, glycogen, muscle                                  | Pygm       | 24701  | 1,20 | up   |
| 6639084 | 7039302 | 983855  | phosphorylase, glycogen, muscle                                  | Pygm       | 24701  | 1,18 | down |
| 6726278 | 7039302 | 983842  | phosphorylase, glycogen, muscle                                  | Pygm       | 24701  | 1,18 | up   |
| 5904567 | 7039302 | 983852  | phosphorylase, glycogen, muscle                                  | Pygm       | 24701  | 1,16 | down |
| 6618715 | 7039302 | 983847  | phosphorylase, glycogen, muscle                                  | Pygm       | 24701  | 1,08 | up   |
| 6157712 | 7039302 | 983854  | phosphorylase, glycogen, muscle                                  | Pygm       | 24701  | 1,07 | up   |
| 6223682 | 7039302 | 983863  | phosphorylase, glycogen, muscle                                  | Pygm       | 24701  | 1,00 | up   |
| 6479752 | 7060776 | 1033192 | phosphoserine aminotransferase 1                                 | Psat1      | 293820 | 2,01 | up   |
| 5679347 | 7060776 | 1033194 | phosphoserine aminotransferase 1                                 | Psat1      | 293820 | 1,63 | up   |
| 5696120 | 7060776 | 1033190 | phosphoserine aminotransferase 1                                 | Psat1      | 293820 | 1,27 | down |
| 6345777 | 7060776 | 1033195 | phosphoserine aminotransferase 1                                 | Psat1      | 293820 | 1,27 | down |
| 6088033 | 7060776 | 1033191 | phosphoserine aminotransferase 1                                 | Psat1      | 293820 | 1,20 | up   |
| 6082877 | 7060776 | 1033196 | phosphoserine aminotransferase 1                                 | Psat1      | 293820 | 1,19 | down |
| 6357198 | 7060776 | 1033188 | phosphoserine aminotransferase 1                                 | Psat1      | 293820 | 1,16 | up   |
| 6271171 | 7060776 | 1033187 | phosphoserine aminotransferase 1                                 | Psat1      | 293820 | 1,04 | up   |
| 6262201 | 7060776 | 1033193 | phosphoserine aminotransferase 1                                 | Psat1      | 293820 | 1,03 | down |
| 5630591 | 7060776 | 1033189 | phosphoserine aminotransferase 1                                 | Psat1      | 293820 | 1,02 | up   |
| 6740011 | 7042063 | 990689  | Phytn_dehydro and Pyr_redox domain containing protein RGD1303232 | RGD1303232 | 309381 | 2,59 | down |
| 5894853 | 7042063 | 990691  | Phytn_dehydro and Pyr_redox domain containing protein RGD1303232 | RGD1303232 | 309381 | 1,63 | down |
| 6288106 | 7042063 | 990690  | Phytn_dehydro and Pyr_redox domain containing protein RGD1303232 | RGD1303232 | 309381 | 1,43 | up   |
| 5845993 | 7042063 | 990694  | Phytn_dehydro and Pyr_redox domain containing protein RGD1303232 | RGD1303232 | 309381 | 1,42 | down |
| 5945720 | 7042063 | 990699  | Phytn_dehydro and Pyr_redox domain containing protein RGD1303232 | RGD1303232 | 309381 | 1,34 | up   |
| 6084209 | 7042063 | 990687  | Phytn_dehydro and Pyr_redox domain containing protein RGD1303232 | RGD1303232 | 309381 | 1,33 | down |
| 5960815 | 7042063 | 990699  | Phytn_dehydro and Pyr_redox domain containing protein RGD1303232 | RGD1303232 | 309381 | 1,31 | up   |
| 5921741 | 7042063 | 990700  | Phytn_dehydro and Pyr_redox domain containing protein RGD1303232 | RGD1303232 | 309381 | 1,26 | up   |
| 6381466 | 7042063 | 990695  | Phytn_dehydro and Pyr_redox domain containing protein RGD1303232 | RGD1303232 | 309381 | 1,25 | up   |
| 5717337 | 7042063 | 990698  | Phytn_dehydro and Pyr_redox domain containing protein RGD1303232 | RGD1303232 | 309381 | 1,24 | down |
| 5911904 | 7042063 | 990693  | Phytn_dehydro and Pyr_redox domain containing protein RGD1303232 | RGD1303232 | 309381 | 1,19 | down |
| 5741121 | 7042063 | 990694  | Phytn_dehydro and Pyr_redox domain containing protein RGD1303232 | RGD1303232 | 309381 | 1,17 | down |
| 6676905 | 7042063 | 990688  | Phytn_dehydro and Pyr_redox domain containing protein RGD1303232 | RGD1303232 | 309381 | 1,12 | down |
| 6593518 | 7042063 | 990696  | Phytn_dehydro and Pyr_redox domain containing protein RGD1303232 | RGD1303232 | 309381 | 1,12 | down |
| 6150693 | 7042063 | 990692  | Phytn_dehydro and Pyr_redox domain containing protein RGD1303232 | RGD1303232 | 309381 | 1,09 | up   |
| 6297096 | 7042063 | 990697  | Phytn_dehydro and Pyr_redox domain containing protein RGD1303232 | RGD1303232 | 309381 | 1,08 | down |
| 5949166 | 7042063 | 990686  | Phytn_dehydro and Pyr_redox domain containing protein RGD1303232 | RGD1303232 | 309381 | 1,06 | up   |
| 5967512 | 7042063 | 990701  | Phytn_dehydro and Pyr_redox domain containing protein RGD1303232 | RGD1303232 | 309381 | 1,06 | up   |
| 6176505 | 7042063 | 990688  | Phytn_dehydro and Pyr_redox domain containing protein RGD1303232 | RGD1303232 | 309381 | 1,05 | up   |
| 6054737 | 7042063 | 990694  | Phytn_dehydro and Pyr_redox domain containing protein RGD1303232 | RGD1303232 | 309381 | 1,01 | down |
| 6427335 | 7217331 | 1416059 | pim-1 oncogene                                                   | Pim1       | 24649  | 2,09 | down |
| 6659624 | 7217331 | 1416064 | pim-1 oncogene                                                   | Pim1       | 24649  | 1,72 | down |
| 6260666 | 7217331 | 1416062 | pim-1 oncogene                                                   | Pim1       | 24649  | 1,69 | up   |
| 5747389 | 7217331 | 1416063 | pim-1 oncogene                                                   | Pim1       | 24649  | 1,41 | up   |
| 6340394 | 7217331 | 1416061 | pim-1 oncogene                                                   | Pim1       | 24649  | 1,23 | up   |
| 6318041 | 7217331 | 1416060 | pim-1 oncogene                                                   | Pim1       | 24649  | 1,12 | up   |
| 5677104 | 7132715 | 1207963 | PIN2-interacting protein 1                                       | Pinx1      | 305963 | 2,15 | down |
| 5687323 | 7132715 | 1207970 | PIN2-interacting protein 1                                       | Pinx1      | 305963 | 1,82 | up   |
| 6128179 | 7132715 | 1207967 | PIN2-interacting protein 1                                       | Pinx1      | 305963 | 1,61 | up   |
| 6413268 | 7132715 | 1207986 | PIN2-interacting protein 1                                       | Pinx1      | 305963 | 1,56 | down |

|         |         |         |                            |       |        |      |      |
|---------|---------|---------|----------------------------|-------|--------|------|------|
| 6237103 | 7132715 | 1207965 | PIN2-interacting protein 1 | Pinx1 | 305963 | 1,34 | up   |
| 6239898 | 7132715 | 1207968 | PIN2-interacting protein 1 | Pinx1 | 305963 | 1,23 | down |
| 6443149 | 7132715 | 1207986 | PIN2-interacting protein 1 | Pinx1 | 305963 | 1,09 | up   |
| 5996637 | 7132715 | 1207966 | PIN2-interacting protein 1 | Pinx1 | 305963 | 1,07 | up   |
| 6598001 | 7111567 | 1155990 | plakophilin 1              | Pkp1  | 304822 | 2,38 | up   |
| 6390831 | 7111567 | 1155987 | plakophilin 1              | Pkp1  | 304822 | 2,14 | up   |
| 6500767 | 7111567 | 1155995 | plakophilin 1              | Pkp1  | 304822 | 1,99 | down |
| 6294214 | 7111567 | 1155984 | plakophilin 1              | Pkp1  | 304822 | 1,70 | down |
| 6658895 | 7111567 | 1155988 | plakophilin 1              | Pkp1  | 304822 | 1,66 | down |
| 6733030 | 7111567 | 1155989 | plakophilin 1              | Pkp1  | 304822 | 1,56 | down |
| 6432423 | 7111567 | 1155993 | plakophilin 1              | Pkp1  | 304822 | 1,55 | down |
| 5891548 | 7111567 | 1155983 | plakophilin 1              | Pkp1  | 304822 | 1,46 | up   |
| 6390064 | 7111567 | 1156001 | plakophilin 1              | Pkp1  | 304822 | 1,36 | up   |
| 5929407 | 7111567 | 1155992 | plakophilin 1              | Pkp1  | 304822 | 1,34 | down |
| 6605167 | 7111567 | 1155983 | plakophilin 1              | Pkp1  | 304822 | 1,14 | down |
| 5640573 | 7111567 | 1155986 | plakophilin 1              | Pkp1  | 304822 | 1,13 | down |
| 6431577 | 7111567 | 1155994 | plakophilin 1              | Pkp1  | 304822 | 1,13 | down |
| 6453740 | 7111567 | 1155991 | plakophilin 1              | Pkp1  | 304822 | 1,11 | up   |
| 5687123 | 7111567 | 1155985 | plakophilin 1              | Pkp1  | 304822 | 1,09 | down |
| 6359131 | 7111567 | 1155983 | plakophilin 1              | Pkp1  | 304822 | 1,07 | down |
| 6480880 | 7111567 | 1156006 | plakophilin 1              | Pkp1  | 304822 | 1,02 | down |
| 6467115 | 7227775 | 1441850 | plakophilin 4              | Pkp4  | 295625 | 3,64 | down |
| 6133828 | 7227775 | 1441823 | plakophilin 4              | Pkp4  | 295625 | 1,83 | down |
| 6641785 | 7227775 | 1441845 | plakophilin 4              | Pkp4  | 295625 | 1,52 | down |
| 5836104 | 7227775 | 1441816 | plakophilin 4              | Pkp4  | 295625 | 1,50 | down |
| 6651448 | 7227775 | 1441850 | plakophilin 4              | Pkp4  | 295625 | 1,48 | up   |
| 5957398 | 7227775 | 1441844 | plakophilin 4              | Pkp4  | 295625 | 1,35 | up   |
| 6464325 | 7227775 | 1441822 | plakophilin 4              | Pkp4  | 295625 | 1,29 | down |
| 5838897 | 7227775 | 1441851 | plakophilin 4              | Pkp4  | 295625 | 1,22 | up   |
| 6413903 | 7227775 | 1441824 | plakophilin 4              | Pkp4  | 295625 | 1,21 | up   |
| 5971431 | 7227775 | 1441813 | plakophilin 4              | Pkp4  | 295625 | 1,19 | down |
| 5835204 | 7227775 | 1441842 | plakophilin 4              | Pkp4  | 295625 | 1,19 | up   |
| 6650739 | 7227775 | 1441842 | plakophilin 4              | Pkp4  | 295625 | 1,17 | up   |
| 5941395 | 7227775 | 1441838 | plakophilin 4              | Pkp4  | 295625 | 1,17 | up   |
| 6422357 | 7227775 | 1441837 | plakophilin 4              | Pkp4  | 295625 | 1,13 | down |
| 5640217 | 7227775 | 1441851 | plakophilin 4              | Pkp4  | 295625 | 1,11 | down |
| 6013718 | 7227775 | 1441837 | plakophilin 4              | Pkp4  | 295625 | 1,11 | up   |
| 6663179 | 7227775 | 1441817 | plakophilin 4              | Pkp4  | 295625 | 1,10 | up   |
| 6656036 | 7227775 | 1441818 | plakophilin 4              | Pkp4  | 295625 | 1,06 | down |
| 6361779 | 7227775 | 1441806 | plakophilin 4              | Pkp4  | 295625 | 1,06 | down |
| 5699746 | 7227775 | 1441802 | plakophilin 4              | Pkp4  | 295625 | 1,04 | down |
| 5675290 | 7227775 | 1441818 | plakophilin 4              | Pkp4  | 295625 | 1,04 | down |
| 6101331 | 7227775 | 1441841 | plakophilin 4              | Pkp4  | 295625 | 1,03 | down |
| 6196454 | 7227775 | 1441848 | plakophilin 4              | Pkp4  | 295625 | 1,03 | up   |
| 5729923 | 7227775 | 1441839 | plakophilin 4              | Pkp4  | 295625 | 1,03 | down |
| 6428432 | 7227775 | 1441791 | plakophilin 4              | Pkp4  | 295625 | 1,02 | down |
| 5686715 | 7227775 | 1441820 | plakophilin 4              | Pkp4  | 295625 | 1,02 | down |
| 6027516 | 7227775 | 1441840 | plakophilin 4              | Pkp4  | 295625 | 1,00 | down |
| 5778381 | 7227775 | 1441825 | plakophilin 4              | Pkp4  | 295625 | 1,00 | up   |
| 6737274 | 7046410 | 1001728 | plasminogen                | Plg   | 85253  | 2,11 | down |
| 6212981 | 7046410 | 1001725 | plasminogen                | Plg   | 85253  | 1,65 | down |
| 6430510 | 7046410 | 1001735 | plasminogen                | Plg   | 85253  | 1,59 | down |
| 6619299 | 7046410 | 1001723 | plasminogen                | Plg   | 85253  | 1,56 | down |
| 5834931 | 7046410 | 1001730 | plasminogen                | Plg   | 85253  | 1,55 | up   |
| 5930779 | 7046410 | 1001742 | plasminogen                | Plg   | 85253  | 1,34 | down |
| 6598835 | 7046410 | 1001737 | plasminogen                | Plg   | 85253  | 1,29 | up   |
| 6640233 | 7046410 | 1001736 | plasminogen                | Plg   | 85253  | 1,27 | up   |

|         |         |         |                                                                       |          |        |      |      |
|---------|---------|---------|-----------------------------------------------------------------------|----------|--------|------|------|
| 5688784 | 7046410 | 1001738 | plasminogen                                                           | Plg      | 85253  | 1,23 | down |
| 6737034 | 7046410 | 1001740 | plasminogen                                                           | Plg      | 85253  | 1,22 | down |
| 5794333 | 7046410 | 1001726 | plasminogen                                                           | Plg      | 85253  | 1,19 | down |
| 5930918 | 7046410 | 1001734 | plasminogen                                                           | Plg      | 85253  | 1,17 | down |
| 5919218 | 7046410 | 1001724 | plasminogen                                                           | Plg      | 85253  | 1,15 | up   |
| 6675659 | 7046410 | 1001724 | plasminogen                                                           | Plg      | 85253  | 1,13 | down |
| 6077060 | 7046410 | 1001732 | plasminogen                                                           | Plg      | 85253  | 1,10 | down |
| 6308911 | 7046410 | 1001727 | plasminogen                                                           | Plg      | 85253  | 1,06 | down |
| 6521537 | 7046410 | 1001739 | plasminogen                                                           | Plg      | 85253  | 1,04 | up   |
| 6013893 | 7046410 | 1001731 | plasminogen                                                           | Plg      | 85253  | 1,04 | down |
| 6199368 | 7046410 | 1001729 | plasminogen                                                           | Plg      | 85253  | 1,03 | down |
| 5626171 | 7046410 | 1001735 | plasminogen                                                           | Plg      | 85253  | 1,03 | down |
| 6488377 | 7046410 | 1001741 | plasminogen                                                           | Plg      | 85253  | 1,02 | down |
| 5691735 | 7046410 | 1001733 | plasminogen                                                           | Plg      | 85253  | 1,02 | down |
| 6667896 | 7152929 | 1257578 | plasminogen activator, tissue                                         | Plat     | 25692  | 2,30 | down |
| 5969491 | 7152929 | 1257570 | plasminogen activator, tissue                                         | Plat     | 25692  | 1,42 | down |
| 6242442 | 7152929 | 1257565 | plasminogen activator, tissue                                         | Plat     | 25692  | 1,33 | down |
| 6188351 | 7152929 | 1257577 | plasminogen activator, tissue                                         | Plat     | 25692  | 1,29 | down |
| 6088967 | 7152929 | 1257569 | plasminogen activator, tissue                                         | Plat     | 25692  | 1,21 | up   |
| 6220553 | 7152929 | 1257572 | plasminogen activator, tissue                                         | Plat     | 25692  | 1,16 | up   |
| 5852052 | 7152929 | 1257574 | plasminogen activator, tissue                                         | Plat     | 25692  | 1,15 | down |
| 6259448 | 7152929 | 1257573 | plasminogen activator, tissue                                         | Plat     | 25692  | 1,11 | down |
| 6490728 | 7152929 | 1257566 | plasminogen activator, tissue                                         | Plat     | 25692  | 1,10 | up   |
| 5671323 | 7152929 | 1257569 | plasminogen activator, tissue                                         | Plat     | 25692  | 1,07 | down |
| 5778467 | 7152929 | 1257568 | plasminogen activator, tissue                                         | Plat     | 25692  | 1,05 | up   |
| 5869413 | 7152929 | 1257576 | plasminogen activator, tissue                                         | Plat     | 25692  | 1,04 | down |
| 6490482 | 7152929 | 1257575 | plasminogen activator, tissue                                         | Plat     | 25692  | 1,03 | up   |
| 6365572 | 7152929 | 1257567 | plasminogen activator, tissue                                         | Plat     | 25692  | 1,01 | up   |
| 6646232 | 7152929 | 1257571 | plasminogen activator, tissue                                         | Plat     | 25692  | 1,01 | down |
| 5663433 | 7171030 | 1302251 | platelet derived growth factor receptor, beta polypeptide             | Pdgfrb   | 24629  | 2,51 | up   |
| 6702140 | 7171030 | 1302256 | platelet derived growth factor receptor, beta polypeptide             | Pdgfrb   | 24629  | 1,86 | down |
| 6361706 | 7171030 | 1302259 | platelet derived growth factor receptor, beta polypeptide             | Pdgfrb   | 24629  | 1,45 | down |
| 5726846 | 7171030 | 1302261 | platelet derived growth factor receptor, beta polypeptide             | Pdgfrb   | 24629  | 1,41 | up   |
| 6028056 | 7171030 | 1302262 | platelet derived growth factor receptor, beta polypeptide             | Pdgfrb   | 24629  | 1,36 | up   |
| 6352989 | 7171030 | 1302264 | platelet derived growth factor receptor, beta polypeptide             | Pdgfrb   | 24629  | 1,32 | up   |
| 6304407 | 7171030 | 1302246 | platelet derived growth factor receptor, beta polypeptide             | Pdgfrb   | 24629  | 1,25 | down |
| 6408822 | 7171030 | 1302245 | platelet derived growth factor receptor, beta polypeptide             | Pdgfrb   | 24629  | 1,22 | down |
| 5691328 | 7171030 | 1302254 | platelet derived growth factor receptor, beta polypeptide             | Pdgfrb   | 24629  | 1,21 | down |
| 6125031 | 7171030 | 1302257 | platelet derived growth factor receptor, beta polypeptide             | Pdgfrb   | 24629  | 1,18 | up   |
| 6471000 | 7171030 | 1302268 | platelet derived growth factor receptor, beta polypeptide             | Pdgfrb   | 24629  | 1,17 | up   |
| 5646621 | 7171030 | 1302265 | platelet derived growth factor receptor, beta polypeptide             | Pdgfrb   | 24629  | 1,12 | up   |
| 6192188 | 7171030 | 1302253 | platelet derived growth factor receptor, beta polypeptide             | Pdgfrb   | 24629  | 1,12 | up   |
| 5756385 | 7171030 | 1302255 | platelet derived growth factor receptor, beta polypeptide             | Pdgfrb   | 24629  | 1,11 | up   |
| 5829897 | 7171030 | 1302257 | platelet derived growth factor receptor, beta polypeptide             | Pdgfrb   | 24629  | 1,11 | down |
| 5809206 | 7171030 | 1302248 | platelet derived growth factor receptor, beta polypeptide             | Pdgfrb   | 24629  | 1,11 | down |
| 5940499 | 7171030 | 1302263 | platelet derived growth factor receptor, beta polypeptide             | Pdgfrb   | 24629  | 1,09 | up   |
| 6434097 | 7171030 | 1302250 | platelet derived growth factor receptor, beta polypeptide             | Pdgfrb   | 24629  | 1,07 | up   |
| 6640289 | 7171030 | 1302258 | platelet derived growth factor receptor, beta polypeptide             | Pdgfrb   | 24629  | 1,06 | up   |
| 6693421 | 7171030 | 1302252 | platelet derived growth factor receptor, beta polypeptide             | Pdgfrb   | 24629  | 1,06 | up   |
| 5661215 | 7171030 | 1302249 | platelet derived growth factor receptor, beta polypeptide             | Pdgfrb   | 24629  | 1,05 | up   |
| 5744861 | 7171030 | 1302247 | platelet derived growth factor receptor, beta polypeptide             | Pdgfrb   | 24629  | 1,04 | up   |
| 5951807 | 7171030 | 1302260 | platelet derived growth factor receptor, beta polypeptide             | Pdgfrb   | 24629  | 1,03 | up   |
| 6418693 | 7171030 | 1302268 | platelet derived growth factor receptor, beta polypeptide             | Pdgfrb   | 24629  | 1,02 | down |
| 6104690 | 7171030 | 1302266 | platelet derived growth factor receptor, beta polypeptide             | Pdgfrb   | 24629  | 1,00 | down |
| 5772758 | 7171030 | 1302267 | platelet derived growth factor receptor, beta polypeptide             | Pdgfrb   | 24629  | 1,00 | up   |
| 5818566 | 7048947 | 1007418 | platelet-activating factor acetylhydrolase, isoform Ib, gamma subunit | Pafah1b3 | 114113 | 2,01 | down |
| 6226993 | 7048947 | 1007414 | platelet-activating factor acetylhydrolase, isoform Ib, gamma subunit | Pafah1b3 | 114113 | 1,86 | down |

|         |         |         |                                                                               |          |        |      |      |
|---------|---------|---------|-------------------------------------------------------------------------------|----------|--------|------|------|
| 5770703 | 7048947 | 1007413 | platelet-activating factor acetylhydrolase, isoform Ib, gamma subunit         | Pafah1b3 | 114113 | 1,67 | down |
| 6439019 | 7048947 | 1007415 | platelet-activating factor acetylhydrolase, isoform Ib, gamma subunit         | Pafah1b3 | 114113 | 1,52 | up   |
| 6050589 | 7048947 | 1007417 | platelet-activating factor acetylhydrolase, isoform Ib, gamma subunit         | Pafah1b3 | 114113 | 1,41 | up   |
| 6296817 | 7048947 | 1007416 | platelet-activating factor acetylhydrolase, isoform Ib, gamma subunit         | Pafah1b3 | 114113 | 1,19 | up   |
| 6445643 | 7097005 | 1119794 | platelet-derived growth factor alpha polypeptide                              | Pdgfa    | 25266  | 2,25 | down |
| 5780200 | 7097005 | 1119792 | platelet-derived growth factor alpha polypeptide                              | Pdgfa    | 25266  | 1,83 | down |
| 6612334 | 7097005 | 1119793 | platelet-derived growth factor alpha polypeptide                              | Pdgfa    | 25266  | 1,50 | down |
| 5680595 | 7097005 | 1119798 | platelet-derived growth factor alpha polypeptide                              | Pdgfa    | 25266  | 1,39 | up   |
| 5883641 | 7097005 | 1119797 | platelet-derived growth factor alpha polypeptide                              | Pdgfa    | 25266  | 1,23 | up   |
| 6163572 | 7097005 | 1119798 | platelet-derived growth factor alpha polypeptide                              | Pdgfa    | 25266  | 1,20 | down |
| 5654135 | 7097005 | 1119795 | platelet-derived growth factor alpha polypeptide                              | Pdgfa    | 25266  | 1,19 | up   |
| 6034910 | 7097005 | 1119796 | platelet-derived growth factor alpha polypeptide                              | Pdgfa    | 25266  | 1,12 | up   |
| 6695001 | 7063243 | 1039190 | pleckstrin and Sec7 domain containing                                         | Psd      | 171381 | 2,04 | down |
| 6006989 | 7063243 | 1039191 | pleckstrin and Sec7 domain containing                                         | Psd      | 171381 | 1,79 | down |
| 5850685 | 7063243 | 1039191 | pleckstrin and Sec7 domain containing                                         | Psd      | 171381 | 1,30 | down |
| 5971667 | 7063243 | 1039192 | pleckstrin and Sec7 domain containing                                         | Psd      | 171381 | 1,27 | up   |
| 5908201 | 7063243 | 1039188 | pleckstrin and Sec7 domain containing                                         | Psd      | 171381 | 1,25 | down |
| 6277998 | 7063243 | 1039183 | pleckstrin and Sec7 domain containing                                         | Psd      | 171381 | 1,21 | up   |
| 6000855 | 7063243 | 1039179 | pleckstrin and Sec7 domain containing                                         | Psd      | 171381 | 1,19 | up   |
| 6517722 | 7063243 | 1039189 | pleckstrin and Sec7 domain containing                                         | Psd      | 171381 | 1,13 | up   |
| 5815329 | 7063243 | 1039180 | pleckstrin and Sec7 domain containing                                         | Psd      | 171381 | 1,11 | down |
| 6678799 | 7063243 | 1039186 | pleckstrin and Sec7 domain containing                                         | Psd      | 171381 | 1,10 | up   |
| 6150162 | 7063243 | 1039185 | pleckstrin and Sec7 domain containing                                         | Psd      | 171381 | 1,10 | down |
| 6258709 | 7063243 | 1039184 | pleckstrin and Sec7 domain containing                                         | Psd      | 171381 | 1,09 | up   |
| 6369899 | 7063243 | 1039191 | pleckstrin and Sec7 domain containing                                         | Psd      | 171381 | 1,08 | up   |
| 6310821 | 7063243 | 1039181 | pleckstrin and Sec7 domain containing                                         | Psd      | 171381 | 1,06 | up   |
| 5651998 | 7063243 | 1039182 | pleckstrin and Sec7 domain containing                                         | Psd      | 171381 | 1,05 | up   |
| 5635611 | 7063243 | 1039187 | pleckstrin and Sec7 domain containing                                         | Psd      | 171381 | 1,02 | down |
| 6064069 | 7054975 | 1020635 | pleckstrin homology domain containing, family B (evectins) member 1           | Plekhhb1 | 64471  | 2,12 | down |
| 6052423 | 7054975 | 1020638 | pleckstrin homology domain containing, family B (evectins) member 1           | Plekhhb1 | 64471  | 1,64 | up   |
| 6626421 | 7054975 | 1020642 | pleckstrin homology domain containing, family B (evectins) member 1           | Plekhhb1 | 64471  | 1,58 | up   |
| 6732630 | 7054975 | 1020636 | pleckstrin homology domain containing, family B (evectins) member 1           | Plekhhb1 | 64471  | 1,56 | down |
| 6099373 | 7054975 | 1020635 | pleckstrin homology domain containing, family B (evectins) member 1           | Plekhhb1 | 64471  | 1,38 | down |
| 6091140 | 7054975 | 1020643 | pleckstrin homology domain containing, family B (evectins) member 1           | Plekhhb1 | 64471  | 1,19 | up   |
| 6236923 | 7054975 | 1020639 | pleckstrin homology domain containing, family B (evectins) member 1           | Plekhhb1 | 64471  | 1,18 | down |
| 6320489 | 7054975 | 1020641 | pleckstrin homology domain containing, family B (evectins) member 1           | Plekhhb1 | 64471  | 1,07 | up   |
| 5736074 | 7054975 | 1020635 | pleckstrin homology domain containing, family B (evectins) member 1           | Plekhhb1 | 64471  | 1,05 | down |
| 5618874 | 7054975 | 1020637 | pleckstrin homology domain containing, family B (evectins) member 1           | Plekhhb1 | 64471  | 1,05 | down |
| 6587371 | 7054975 | 1020640 | pleckstrin homology domain containing, family B (evectins) member 1           | Plekhhb1 | 64471  | 1,02 | up   |
| 5810927 | 7054975 | 1020636 | pleckstrin homology domain containing, family B (evectins) member 1           | Plekhhb1 | 64471  | 1,02 | up   |
| 6269551 | 7054975 | 1020638 | pleckstrin homology domain containing, family B (evectins) member 1           | Plekhhb1 | 64471  | 1,01 | down |
| 5625680 | 7049308 | 1008123 | pleckstrin homology domain containing, family G (with RhoGef domain) member 2 | Plekhhg2 | 292750 | 2,09 | up   |
| 6328691 | 7049308 | 1008110 | pleckstrin homology domain containing, family G (with RhoGef domain) member 2 | Plekhhg2 | 292750 | 1,58 | up   |
| 6212986 | 7049308 | 1008123 | pleckstrin homology domain containing, family G (with RhoGef domain) member 2 | Plekhhg2 | 292750 | 1,49 | down |
| 6499435 | 7049308 | 1008109 | pleckstrin homology domain containing, family G (with RhoGef domain) member 2 | Plekhhg2 | 292750 | 1,48 | up   |
| 6440475 | 7049308 | 1008109 | pleckstrin homology domain containing, family G (with RhoGef domain) member 2 | Plekhhg2 | 292750 | 1,44 | down |
| 6671643 | 7049308 | 1008127 | pleckstrin homology domain containing, family G (with RhoGef domain) member 2 | Plekhhg2 | 292750 | 1,42 | up   |
| 6311204 | 7049308 | 1008116 | pleckstrin homology domain containing, family G (with RhoGef domain) member 2 | Plekhhg2 | 292750 | 1,35 | up   |
| 6736794 | 7049308 | 1008109 | pleckstrin homology domain containing, family G (with RhoGef domain) member 2 | Plekhhg2 | 292750 | 1,30 | down |
| 5633231 | 7049308 | 1008112 | pleckstrin homology domain containing, family G (with RhoGef domain) member 2 | Plekhhg2 | 292750 | 1,28 | up   |
| 6309061 | 7049308 | 1008110 | pleckstrin homology domain containing, family G (with RhoGef domain) member 2 | Plekhhg2 | 292750 | 1,27 | up   |
| 5753088 | 7049308 | 1008115 | pleckstrin homology domain containing, family G (with RhoGef domain) member 2 | Plekhhg2 | 292750 | 1,22 | up   |
| 6122083 | 7049308 | 1008121 | pleckstrin homology domain containing, family G (with RhoGef domain) member 2 | Plekhhg2 | 292750 | 1,21 | up   |
| 6236666 | 7049308 | 1008112 | pleckstrin homology domain containing, family G (with RhoGef domain) member 2 | Plekhhg2 | 292750 | 1,19 | down |
| 6099496 | 7049308 | 1008125 | pleckstrin homology domain containing, family G (with RhoGef domain) member 2 | Plekhhg2 | 292750 | 1,18 | down |
| 6557370 | 7049308 | 1008122 | pleckstrin homology domain containing, family G (with RhoGef domain) member 2 | Plekhhg2 | 292750 | 1,17 | up   |
| 6422739 | 7049308 | 1008111 | pleckstrin homology domain containing, family G (with RhoGef domain) member 2 | Plekhhg2 | 292750 | 1,15 | up   |

|         |         |         |                                                                               |          |        |      |      |
|---------|---------|---------|-------------------------------------------------------------------------------|----------|--------|------|------|
| 5790196 | 7049308 | 1008110 | pleckstrin homology domain containing, family G (with RhoGef domain) member 2 | Plekhhg2 | 292750 | 1,15 | down |
| 6408707 | 7049308 | 1008119 | pleckstrin homology domain containing, family G (with RhoGef domain) member 2 | Plekhhg2 | 292750 | 1,15 | down |
| 6656362 | 7049308 | 1008113 | pleckstrin homology domain containing, family G (with RhoGef domain) member 2 | Plekhhg2 | 292750 | 1,11 | down |
| 6272341 | 7049308 | 1008114 | pleckstrin homology domain containing, family G (with RhoGef domain) member 2 | Plekhhg2 | 292750 | 1,09 | up   |
| 6444346 | 7049308 | 1008109 | pleckstrin homology domain containing, family G (with RhoGef domain) member 2 | Plekhhg2 | 292750 | 1,08 | down |
| 6181110 | 7049308 | 1008119 | pleckstrin homology domain containing, family G (with RhoGef domain) member 2 | Plekhhg2 | 292750 | 1,08 | up   |
| 6456404 | 7049308 | 1008111 | pleckstrin homology domain containing, family G (with RhoGef domain) member 2 | Plekhhg2 | 292750 | 1,07 | up   |
| 5950843 | 7049308 | 1008109 | pleckstrin homology domain containing, family G (with RhoGef domain) member 2 | Plekhhg2 | 292750 | 1,07 | up   |
| 6221732 | 7049308 | 1008118 | pleckstrin homology domain containing, family G (with RhoGef domain) member 2 | Plekhhg2 | 292750 | 1,07 | up   |
| 5708831 | 7049308 | 1008117 | pleckstrin homology domain containing, family G (with RhoGef domain) member 2 | Plekhhg2 | 292750 | 1,05 | up   |
| 6693774 | 7049308 | 1008111 | pleckstrin homology domain containing, family G (with RhoGef domain) member 2 | Plekhhg2 | 292750 | 1,04 | down |
| 5729152 | 7049308 | 1008123 | pleckstrin homology domain containing, family G (with RhoGef domain) member 2 | Plekhhg2 | 292750 | 1,03 | down |
| 6149625 | 7049308 | 1008120 | pleckstrin homology domain containing, family G (with RhoGef domain) member 2 | Plekhhg2 | 292750 | 1,01 | up   |
| 6725806 | 7180598 | 1326332 | pleckstrin homology domain containing, family G (with RhoGef domain) member 4 | Plekhhg4 | 307796 | 1,86 | down |
| 5651990 | 7180598 | 1326322 | pleckstrin homology domain containing, family G (with RhoGef domain) member 4 | Plekhhg4 | 307796 | 1,58 | up   |
| 6521993 | 7180598 | 1326327 | pleckstrin homology domain containing, family G (with RhoGef domain) member 4 | Plekhhg4 | 307796 | 1,56 | down |
| 6218661 | 7180598 | 1326331 | pleckstrin homology domain containing, family G (with RhoGef domain) member 4 | Plekhhg4 | 307796 | 1,39 | down |
| 5678841 | 7180598 | 1326332 | pleckstrin homology domain containing, family G (with RhoGef domain) member 4 | Plekhhg4 | 307796 | 1,34 | up   |
| 5740571 | 7180598 | 1326323 | pleckstrin homology domain containing, family G (with RhoGef domain) member 4 | Plekhhg4 | 307796 | 1,29 | down |
| 6377656 | 7180598 | 1326320 | pleckstrin homology domain containing, family G (with RhoGef domain) member 4 | Plekhhg4 | 307796 | 1,26 | down |
| 5719306 | 7180598 | 1326330 | pleckstrin homology domain containing, family G (with RhoGef domain) member 4 | Plekhhg4 | 307796 | 1,25 | up   |
| 6581879 | 7180598 | 1326324 | pleckstrin homology domain containing, family G (with RhoGef domain) member 4 | Plekhhg4 | 307796 | 1,24 | up   |
| 6493789 | 7180598 | 1326326 | pleckstrin homology domain containing, family G (with RhoGef domain) member 4 | Plekhhg4 | 307796 | 1,18 | down |
| 5782400 | 7180598 | 1326329 | pleckstrin homology domain containing, family G (with RhoGef domain) member 4 | Plekhhg4 | 307796 | 1,15 | up   |
| 5881091 | 7180598 | 1326332 | pleckstrin homology domain containing, family G (with RhoGef domain) member 4 | Plekhhg4 | 307796 | 1,14 | up   |
| 6329159 | 7180598 | 1326324 | pleckstrin homology domain containing, family G (with RhoGef domain) member 4 | Plekhhg4 | 307796 | 1,12 | up   |
| 6309824 | 7180598 | 1326327 | pleckstrin homology domain containing, family G (with RhoGef domain) member 4 | Plekhhg4 | 307796 | 1,11 | up   |
| 6569138 | 7180598 | 1326333 | pleckstrin homology domain containing, family G (with RhoGef domain) member 4 | Plekhhg4 | 307796 | 1,11 | up   |
| 6655249 | 7180598 | 1326321 | pleckstrin homology domain containing, family G (with RhoGef domain) member 4 | Plekhhg4 | 307796 | 1,10 | up   |
| 6053584 | 7180598 | 1326327 | pleckstrin homology domain containing, family G (with RhoGef domain) member 4 | Plekhhg4 | 307796 | 1,10 | down |
| 6693876 | 7180598 | 1326319 | pleckstrin homology domain containing, family G (with RhoGef domain) member 4 | Plekhhg4 | 307796 | 1,10 | up   |
| 6535795 | 7180598 | 1326325 | pleckstrin homology domain containing, family G (with RhoGef domain) member 4 | Plekhhg4 | 307796 | 1,10 | down |
| 6465570 | 7180598 | 1326326 | pleckstrin homology domain containing, family G (with RhoGef domain) member 4 | Plekhhg4 | 307796 | 1,08 | up   |
| 6393852 | 7180598 | 1326330 | pleckstrin homology domain containing, family G (with RhoGef domain) member 4 | Plekhhg4 | 307796 | 1,05 | up   |
| 5674464 | 7180598 | 1326324 | pleckstrin homology domain containing, family G (with RhoGef domain) member 4 | Plekhhg4 | 307796 | 1,04 | up   |
| 6484976 | 7180598 | 1326326 | pleckstrin homology domain containing, family G (with RhoGef domain) member 4 | Plekhhg4 | 307796 | 1,04 | down |
| 6470868 | 7180598 | 1326327 | pleckstrin homology domain containing, family G (with RhoGef domain) member 4 | Plekhhg4 | 307796 | 1,01 | down |
| 5994532 | 7180598 | 1326330 | pleckstrin homology domain containing, family G (with RhoGef domain) member 4 | Plekhhg4 | 307796 | 1,01 | down |
| 6110935 | 7180598 | 1326328 | pleckstrin homology domain containing, family G (with RhoGef domain) member 4 | Plekhhg4 | 307796 | 1,01 | up   |
| 6382265 | 7281880 | 1577568 | pleckstrin homology domain containing, family G (with RhoGef domain) member 5 | Plekhhg5 | 310999 | 2,30 | up   |
| 6327428 | 7281880 | 1577569 | pleckstrin homology domain containing, family G (with RhoGef domain) member 5 | Plekhhg5 | 310999 | 1,61 | down |
| 6217474 | 7281880 | 1577561 | pleckstrin homology domain containing, family G (with RhoGef domain) member 5 | Plekhhg5 | 310999 | 1,39 | down |
| 5751066 | 7281880 | 1577576 | pleckstrin homology domain containing, family G (with RhoGef domain) member 5 | Plekhhg5 | 310999 | 1,37 | down |
| 5811616 | 7281880 | 1577578 | pleckstrin homology domain containing, family G (with RhoGef domain) member 5 | Plekhhg5 | 310999 | 1,31 | down |
| 6505177 | 7281880 | 1577559 | pleckstrin homology domain containing, family G (with RhoGef domain) member 5 | Plekhhg5 | 310999 | 1,20 | down |
| 6376811 | 7281880 | 1577565 | pleckstrin homology domain containing, family G (with RhoGef domain) member 5 | Plekhhg5 | 310999 | 1,20 | down |
| 6402710 | 7281880 | 1577570 | pleckstrin homology domain containing, family G (with RhoGef domain) member 5 | Plekhhg5 | 310999 | 1,20 | up   |
| 6598198 | 7281880 | 1577562 | pleckstrin homology domain containing, family G (with RhoGef domain) member 5 | Plekhhg5 | 310999 | 1,15 | up   |
| 6092558 | 7281880 | 1577558 | pleckstrin homology domain containing, family G (with RhoGef domain) member 5 | Plekhhg5 | 310999 | 1,13 | up   |
| 6625039 | 7281880 | 1577563 | pleckstrin homology domain containing, family G (with RhoGef domain) member 5 | Plekhhg5 | 310999 | 1,13 | down |
| 6321335 | 7281880 | 1577574 | pleckstrin homology domain containing, family G (with RhoGef domain) member 5 | Plekhhg5 | 310999 | 1,12 | down |
| 6489018 | 7281880 | 1577578 | pleckstrin homology domain containing, family G (with RhoGef domain) member 5 | Plekhhg5 | 310999 | 1,12 | up   |
| 6129084 | 7281880 | 1577560 | pleckstrin homology domain containing, family G (with RhoGef domain) member 5 | Plekhhg5 | 310999 | 1,10 | down |
| 5879773 | 7281880 | 1577575 | pleckstrin homology domain containing, family G (with RhoGef domain) member 5 | Plekhhg5 | 310999 | 1,08 | up   |
| 6407623 | 7281880 | 1577572 | pleckstrin homology domain containing, family G (with RhoGef domain) member 5 | Plekhhg5 | 310999 | 1,05 | down |
| 6044826 | 7281880 | 1577564 | pleckstrin homology domain containing, family G (with RhoGef domain) member 5 | Plekhhg5 | 310999 | 1,04 | up   |
| 5701613 | 7281880 | 1577579 | pleckstrin homology domain containing, family G (with RhoGef domain) member 5 | Plekhhg5 | 310999 | 1,04 | down |

|         |         |         |                                                                               |          |        |      |      |
|---------|---------|---------|-------------------------------------------------------------------------------|----------|--------|------|------|
| 5902692 | 7281880 | 1577567 | pleckstrin homology domain containing, family G (with RhoGef domain) member 5 | Plekhhg5 | 310999 | 1,04 | down |
| 5774451 | 7281880 | 1577573 | pleckstrin homology domain containing, family G (with RhoGef domain) member 5 | Plekhhg5 | 310999 | 1,03 | up   |
| 6174830 | 7281880 | 1577571 | pleckstrin homology domain containing, family G (with RhoGef domain) member 5 | Plekhhg5 | 310999 | 1,03 | up   |
| 6714526 | 7281880 | 1577577 | pleckstrin homology domain containing, family G (with RhoGef domain) member 5 | Plekhhg5 | 310999 | 1,01 | down |
| 6060971 | 7281880 | 1577566 | pleckstrin homology domain containing, family G (with RhoGef domain) member 5 | Plekhhg5 | 310999 | 1,01 | up   |
| 5654432 | 7299650 | 1620947 | pleckstrin homology domain containing, family H (with MyTH4 domain) member 1  | Plekhh1  | 314262 | 2,36 | down |
| 6581355 | 7299650 | 1620942 | pleckstrin homology domain containing, family H (with MyTH4 domain) member 1  | Plekhh1  | 314262 | 1,44 | down |
| 6712586 | 7299650 | 1620927 | pleckstrin homology domain containing, family H (with MyTH4 domain) member 1  | Plekhh1  | 314262 | 1,42 | down |
| 6389720 | 7299650 | 1620947 | pleckstrin homology domain containing, family H (with MyTH4 domain) member 1  | Plekhh1  | 314262 | 1,38 | up   |
| 6745148 | 7299650 | 1620955 | pleckstrin homology domain containing, family H (with MyTH4 domain) member 1  | Plekhh1  | 314262 | 1,36 | down |
| 6694473 | 7299650 | 1620942 | pleckstrin homology domain containing, family H (with MyTH4 domain) member 1  | Plekhh1  | 314262 | 1,32 | down |
| 6384904 | 7299650 | 1620953 | pleckstrin homology domain containing, family H (with MyTH4 domain) member 1  | Plekhh1  | 314262 | 1,30 | down |
| 5677446 | 7299650 | 1620943 | pleckstrin homology domain containing, family H (with MyTH4 domain) member 1  | Plekhh1  | 314262 | 1,29 | down |
| 6035086 | 7299650 | 1620946 | pleckstrin homology domain containing, family H (with MyTH4 domain) member 1  | Plekhh1  | 314262 | 1,27 | up   |
| 5648009 | 7299650 | 1620963 | pleckstrin homology domain containing, family H (with MyTH4 domain) member 1  | Plekhh1  | 314262 | 1,24 | down |
| 5977225 | 7299650 | 1620969 | pleckstrin homology domain containing, family H (with MyTH4 domain) member 1  | Plekhh1  | 314262 | 1,22 | up   |
| 6597321 | 7299650 | 1620950 | pleckstrin homology domain containing, family H (with MyTH4 domain) member 1  | Plekhh1  | 314262 | 1,21 | down |
| 5869037 | 7299650 | 1620954 | pleckstrin homology domain containing, family H (with MyTH4 domain) member 1  | Plekhh1  | 314262 | 1,19 | up   |
| 6365477 | 7299650 | 1620935 | pleckstrin homology domain containing, family H (with MyTH4 domain) member 1  | Plekhh1  | 314262 | 1,19 | down |
| 5952947 | 7299650 | 1620949 | pleckstrin homology domain containing, family H (with MyTH4 domain) member 1  | Plekhh1  | 314262 | 1,19 | up   |
| 6529863 | 7299650 | 1620945 | pleckstrin homology domain containing, family H (with MyTH4 domain) member 1  | Plekhh1  | 314262 | 1,17 | up   |
| 5756274 | 7299650 | 1620936 | pleckstrin homology domain containing, family H (with MyTH4 domain) member 1  | Plekhh1  | 314262 | 1,15 | up   |
| 6292123 | 7299650 | 1620968 | pleckstrin homology domain containing, family H (with MyTH4 domain) member 1  | Plekhh1  | 314262 | 1,12 | down |
| 5911057 | 7299650 | 1620961 | pleckstrin homology domain containing, family H (with MyTH4 domain) member 1  | Plekhh1  | 314262 | 1,10 | up   |
| 6685254 | 7299650 | 1620958 | pleckstrin homology domain containing, family H (with MyTH4 domain) member 1  | Plekhh1  | 314262 | 1,09 | up   |
| 6000920 | 7299650 | 1620942 | pleckstrin homology domain containing, family H (with MyTH4 domain) member 1  | Plekhh1  | 314262 | 1,09 | down |
| 6389328 | 7299650 | 1620952 | pleckstrin homology domain containing, family H (with MyTH4 domain) member 1  | Plekhh1  | 314262 | 1,08 | up   |
| 5661068 | 7299650 | 1620940 | pleckstrin homology domain containing, family H (with MyTH4 domain) member 1  | Plekhh1  | 314262 | 1,06 | up   |
| 6110418 | 7299650 | 1620942 | pleckstrin homology domain containing, family H (with MyTH4 domain) member 1  | Plekhh1  | 314262 | 1,05 | up   |
| 6486019 | 7299650 | 1620944 | pleckstrin homology domain containing, family H (with MyTH4 domain) member 1  | Plekhh1  | 314262 | 1,05 | up   |
| 5845626 | 7299650 | 1620956 | pleckstrin homology domain containing, family H (with MyTH4 domain) member 1  | Plekhh1  | 314262 | 1,03 | up   |
| 6514329 | 7299650 | 1620962 | pleckstrin homology domain containing, family H (with MyTH4 domain) member 1  | Plekhh1  | 314262 | 1,02 | up   |
| 5687033 | 7299650 | 1620932 | pleckstrin homology domain containing, family H (with MyTH4 domain) member 1  | Plekhh1  | 314262 | 1,02 | up   |
| 6678882 | 7299650 | 1620960 | pleckstrin homology domain containing, family H (with MyTH4 domain) member 1  | Plekhh1  | 314262 | 1,01 | down |
| 6600400 | 7299650 | 1620941 | pleckstrin homology domain containing, family H (with MyTH4 domain) member 1  | Plekhh1  | 314262 | 1,00 | down |
| 6530632 | 7363147 | 1777030 | pleckstrin homology domain containing, family M, member 3                     | Plekhhm3 | 316455 | 1,58 | down |
| 6289075 | 7363147 | 1776999 | pleckstrin homology domain containing, family M, member 3                     | Plekhhm3 | 316455 | 1,09 | down |
| 5862063 | 7087965 | 1098061 | pleckstrin homology-like domain, family B, member 2                           | Phldb2   | 685611 | 1,29 | down |
| 6201170 | 7087965 | 1098061 | pleckstrin homology-like domain, family B, member 2                           | Phldb2   | 685611 | 1,25 | down |
| 6114437 | 7087965 | 1098061 | pleckstrin homology-like domain, family B, member 2                           | Phldb2   | 685611 | 1,11 | down |
| 6410585 | 7329136 | 1693510 | plectin 1                                                                     | Plec1    | 64204  | 2,31 | down |
| 6347205 | 7329136 | 1693511 | plectin 1                                                                     | Plec1    | 64204  | 1,81 | up   |
| 5922269 | 7329136 | 1693548 | plectin 1                                                                     | Plec1    | 64204  | 1,80 | down |
| 6654647 | 7329136 | 1693512 | plectin 1                                                                     | Plec1    | 64204  | 1,79 | up   |
| 5787006 | 7329136 | 1693547 | plectin 1                                                                     | Plec1    | 64204  | 1,54 | up   |
| 6691660 | 7329136 | 1693510 | plectin 1                                                                     | Plec1    | 64204  | 1,53 | down |
| 6374292 | 7329136 | 1693516 | plectin 1                                                                     | Plec1    | 64204  | 1,42 | up   |
| 6574194 | 7329136 | 1693530 | plectin 1                                                                     | Plec1    | 64204  | 1,40 | down |
| 6511319 | 7329136 | 1693526 | plectin 1                                                                     | Plec1    | 64204  | 1,37 | up   |
| 6699063 | 7329136 | 1693517 | plectin 1                                                                     | Plec1    | 64204  | 1,36 | up   |
| 6186077 | 7329136 | 1693553 | plectin 1                                                                     | Plec1    | 64204  | 1,34 | down |
| 5728930 | 7329136 | 1693529 | plectin 1                                                                     | Plec1    | 64204  | 1,34 | up   |
| 5634224 | 7329136 | 1693538 | plectin 1                                                                     | Plec1    | 64204  | 1,33 | up   |
| 6157202 | 7329136 | 1693531 | plectin 1                                                                     | Plec1    | 64204  | 1,32 | down |
| 6437533 | 7329136 | 1693510 | plectin 1                                                                     | Plec1    | 64204  | 1,31 | up   |
| 6241080 | 7329136 | 1693519 | plectin 1                                                                     | Plec1    | 64204  | 1,31 | up   |
| 5848516 | 7329136 | 1693508 | plectin 1                                                                     | Plec1    | 64204  | 1,30 | up   |

|         |         |         |           |        |        |      |      |
|---------|---------|---------|-----------|--------|--------|------|------|
| 5674044 | 7329136 | 1693515 | plectin 1 | Plec1  | 64204  | 1,29 | up   |
| 6285121 | 7329136 | 1693537 | plectin 1 | Plec1  | 64204  | 1,29 | down |
| 6540528 | 7329136 | 1693511 | plectin 1 | Plec1  | 64204  | 1,29 | up   |
| 6480355 | 7329136 | 1693536 | plectin 1 | Plec1  | 64204  | 1,28 | up   |
| 5942464 | 7329136 | 1693525 | plectin 1 | Plec1  | 64204  | 1,27 | down |
| 6074024 | 7329136 | 1693539 | plectin 1 | Plec1  | 64204  | 1,23 | up   |
| 6512579 | 7329136 | 1693520 | plectin 1 | Plec1  | 64204  | 1,23 | up   |
| 6144454 | 7329136 | 1693544 | plectin 1 | Plec1  | 64204  | 1,22 | down |
| 6046305 | 7329136 | 1693551 | plectin 1 | Plec1  | 64204  | 1,21 | down |
| 6562764 | 7329136 | 1693524 | plectin 1 | Plec1  | 64204  | 1,19 | up   |
| 6469245 | 7329136 | 1693548 | plectin 1 | Plec1  | 64204  | 1,19 | up   |
| 6361064 | 7329136 | 1693526 | plectin 1 | Plec1  | 64204  | 1,18 | up   |
| 6130649 | 7329136 | 1693509 | plectin 1 | Plec1  | 64204  | 1,18 | down |
| 6689326 | 7329136 | 1693507 | plectin 1 | Plec1  | 64204  | 1,17 | up   |
| 6475537 | 7329136 | 1693532 | plectin 1 | Plec1  | 64204  | 1,16 | down |
| 5894336 | 7329136 | 1693521 | plectin 1 | Plec1  | 64204  | 1,16 | up   |
| 6692293 | 7329136 | 1693540 | plectin 1 | Plec1  | 64204  | 1,14 | up   |
| 6168304 | 7329136 | 1693527 | plectin 1 | Plec1  | 64204  | 1,12 | up   |
| 5944943 | 7329136 | 1693535 | plectin 1 | Plec1  | 64204  | 1,10 | down |
| 5810747 | 7329136 | 1693508 | plectin 1 | Plec1  | 64204  | 1,10 | down |
| 5868635 | 7329136 | 1693518 | plectin 1 | Plec1  | 64204  | 1,09 | up   |
| 6711864 | 7329136 | 1693514 | plectin 1 | Plec1  | 64204  | 1,08 | up   |
| 6457750 | 7329136 | 1693522 | plectin 1 | Plec1  | 64204  | 1,07 | down |
| 6371871 | 7329136 | 1693550 | plectin 1 | Plec1  | 64204  | 1,07 | down |
| 6443514 | 7329136 | 1693510 | plectin 1 | Plec1  | 64204  | 1,07 | down |
| 5705437 | 7329136 | 1693511 | plectin 1 | Plec1  | 64204  | 1,07 | up   |
| 6040426 | 7329136 | 1693513 | plectin 1 | Plec1  | 64204  | 1,07 | down |
| 6220433 | 7329136 | 1693549 | plectin 1 | Plec1  | 64204  | 1,06 | up   |
| 5873190 | 7329136 | 1693507 | plectin 1 | Plec1  | 64204  | 1,06 | down |
| 6494046 | 7329136 | 1693548 | plectin 1 | Plec1  | 64204  | 1,06 | down |
| 6279883 | 7329136 | 1693510 | plectin 1 | Plec1  | 64204  | 1,05 | up   |
| 5666459 | 7329136 | 1693551 | plectin 1 | Plec1  | 64204  | 1,04 | down |
| 5623100 | 7329136 | 1693534 | plectin 1 | Plec1  | 64204  | 1,03 | up   |
| 6112373 | 7329136 | 1693533 | plectin 1 | Plec1  | 64204  | 1,02 | up   |
| 5758610 | 7329136 | 1693508 | plectin 1 | Plec1  | 64204  | 1,02 | up   |
| 6388760 | 7329136 | 1693545 | plectin 1 | Plec1  | 64204  | 1,02 | down |
| 6244369 | 7329136 | 1693518 | plectin 1 | Plec1  | 64204  | 1,02 | up   |
| 5926568 | 7329136 | 1693509 | plectin 1 | Plec1  | 64204  | 1,02 | down |
| 5884406 | 7329136 | 1693510 | plectin 1 | Plec1  | 64204  | 1,01 | up   |
| 6680942 | 7329136 | 1693528 | plectin 1 | Plec1  | 64204  | 1,01 | down |
| 6022213 | 7329136 | 1693523 | plectin 1 | Plec1  | 64204  | 1,01 | down |
| 6530505 | 7329136 | 1693542 | plectin 1 | Plec1  | 64204  | 1,00 | down |
| 6241740 | 7329136 | 1693548 | plectin 1 | Plec1  | 64204  | 1,00 | up   |
| 5913850 | 7378546 | 1817599 | plexin B3 | Plxnb3 | 363517 | 2,29 | up   |
| 5707224 | 7378546 | 1817601 | plexin B3 | Plxnb3 | 363517 | 1,85 | up   |
| 6342640 | 7378546 | 1817609 | plexin B3 | Plxnb3 | 363517 | 1,65 | down |
| 6257453 | 7378546 | 1817602 | plexin B3 | Plxnb3 | 363517 | 1,65 | up   |
| 6013076 | 7378546 | 1817599 | plexin B3 | Plxnb3 | 363517 | 1,47 | up   |
| 6332140 | 7378546 | 1817608 | plexin B3 | Plxnb3 | 363517 | 1,42 | up   |
| 6160917 | 7378546 | 1817580 | plexin B3 | Plxnb3 | 363517 | 1,41 | up   |
| 5682449 | 7378546 | 1817608 | plexin B3 | Plxnb3 | 363517 | 1,38 | down |
| 6323863 | 7378546 | 1817600 | plexin B3 | Plxnb3 | 363517 | 1,33 | up   |
| 6462354 | 7378546 | 1817593 | plexin B3 | Plxnb3 | 363517 | 1,29 | down |
| 5816740 | 7378546 | 1817607 | plexin B3 | Plxnb3 | 363517 | 1,27 | down |
| 6132248 | 7378546 | 1817588 | plexin B3 | Plxnb3 | 363517 | 1,27 | down |
| 5779556 | 7378546 | 1817596 | plexin B3 | Plxnb3 | 363517 | 1,25 | down |
| 5754249 | 7378546 | 1817612 | plexin B3 | Plxnb3 | 363517 | 1,23 | up   |



|         |         |         |           |        |        |      |      |
|---------|---------|---------|-----------|--------|--------|------|------|
| 6515220 | 7378546 | 1817605 | plexin B3 | Plxnb3 | 363517 | 1,21 | down |
| 6128595 | 7378546 | 1817595 | plexin B3 | Plxnb3 | 363517 | 1,16 | up   |
| 6135904 | 7378546 | 1817583 | plexin B3 | Plxnb3 | 363517 | 1,15 | up   |
| 6319424 | 7378546 | 1817592 | plexin B3 | Plxnb3 | 363517 | 1,14 | up   |
| 6668797 | 7378546 | 1817612 | plexin B3 | Plxnb3 | 363517 | 1,12 | down |
| 6090717 | 7378546 | 1817581 | plexin B3 | Plxnb3 | 363517 | 1,12 | up   |
| 6069679 | 7378546 | 1817603 | plexin B3 | Plxnb3 | 363517 | 1,11 | down |
| 6158763 | 7378546 | 1817610 | plexin B3 | Plxnb3 | 363517 | 1,11 | down |
| 6405306 | 7378546 | 1817604 | plexin B3 | Plxnb3 | 363517 | 1,11 | down |
| 5973808 | 7378546 | 1817597 | plexin B3 | Plxnb3 | 363517 | 1,10 | up   |
| 5948449 | 7378546 | 1817587 | plexin B3 | Plxnb3 | 363517 | 1,09 | down |
| 6692254 | 7378546 | 1817611 | plexin B3 | Plxnb3 | 363517 | 1,09 | down |
| 6111731 | 7378546 | 1817599 | plexin B3 | Plxnb3 | 363517 | 1,08 | up   |
| 6745129 | 7378546 | 1817583 | plexin B3 | Plxnb3 | 363517 | 1,08 | down |
| 6122936 | 7378546 | 1817582 | plexin B3 | Plxnb3 | 363517 | 1,08 | down |
| 5621317 | 7378546 | 1817589 | plexin B3 | Plxnb3 | 363517 | 1,06 | down |
| 5697136 | 7378546 | 1817601 | plexin B3 | Plxnb3 | 363517 | 1,05 | up   |
| 5699699 | 7378546 | 1817591 | plexin B3 | Plxnb3 | 363517 | 1,05 | down |
| 6441236 | 7378546 | 1817580 | plexin B3 | Plxnb3 | 363517 | 1,04 | down |
| 6158592 | 7378546 | 1817590 | plexin B3 | Plxnb3 | 363517 | 1,04 | up   |
| 6244179 | 7378546 | 1817609 | plexin B3 | Plxnb3 | 363517 | 1,04 | up   |
| 5720442 | 7378546 | 1817584 | plexin B3 | Plxnb3 | 363517 | 1,03 | down |
| 6159144 | 7378546 | 1817580 | plexin B3 | Plxnb3 | 363517 | 1,03 | up   |
| 6417678 | 7378546 | 1817598 | plexin B3 | Plxnb3 | 363517 | 1,02 | down |
| 6384948 | 7378546 | 1817585 | plexin B3 | Plxnb3 | 363517 | 1,02 | up   |
| 6211890 | 7378546 | 1817601 | plexin B3 | Plxnb3 | 363517 | 1,02 | down |
| 6572449 | 7378546 | 1817586 | plexin B3 | Plxnb3 | 363517 | 1,00 | up   |
| 6389433 | 7324018 | 1681271 | plexin C1 | Plxnc1 | 362873 | 2,70 | up   |
| 5909572 | 7324018 | 1681254 | plexin C1 | Plxnc1 | 362873 | 2,09 | down |
| 6354636 | 7324018 | 1681236 | plexin C1 | Plxnc1 | 362873 | 1,75 | down |
| 6310677 | 7324018 | 1681251 | plexin C1 | Plxnc1 | 362873 | 1,64 | down |
| 5795599 | 7324018 | 1681249 | plexin C1 | Plxnc1 | 362873 | 1,49 | up   |
| 5872780 | 7324018 | 1681246 | plexin C1 | Plxnc1 | 362873 | 1,41 | up   |
| 6265896 | 7324018 | 1681239 | plexin C1 | Plxnc1 | 362873 | 1,37 | down |
| 6726534 | 7324018 | 1681233 | plexin C1 | Plxnc1 | 362873 | 1,30 | down |
| 5682820 | 7324018 | 1681245 | plexin C1 | Plxnc1 | 362873 | 1,27 | down |
| 5903422 | 7324018 | 1681266 | plexin C1 | Plxnc1 | 362873 | 1,26 | down |
| 5659472 | 7324018 | 1681280 | plexin C1 | Plxnc1 | 362873 | 1,26 | up   |
| 5708718 | 7324018 | 1681250 | plexin C1 | Plxnc1 | 362873 | 1,26 | up   |
| 6724909 | 7324018 | 1681253 | plexin C1 | Plxnc1 | 362873 | 1,24 | up   |
| 6094438 | 7324018 | 1681238 | plexin C1 | Plxnc1 | 362873 | 1,22 | down |
| 6023226 | 7324018 | 1681240 | plexin C1 | Plxnc1 | 362873 | 1,22 | up   |
| 5821347 | 7324018 | 1681257 | plexin C1 | Plxnc1 | 362873 | 1,22 | down |
| 6090953 | 7324018 | 1681237 | plexin C1 | Plxnc1 | 362873 | 1,18 | up   |
| 6216602 | 7324018 | 1681258 | plexin C1 | Plxnc1 | 362873 | 1,17 | down |
| 6191706 | 7324018 | 1681260 | plexin C1 | Plxnc1 | 362873 | 1,14 | down |
| 6345686 | 7324018 | 1681267 | plexin C1 | Plxnc1 | 362873 | 1,14 | up   |
| 5903507 | 7324018 | 1681241 | plexin C1 | Plxnc1 | 362873 | 1,13 | up   |
| 6396368 | 7324018 | 1681260 | plexin C1 | Plxnc1 | 362873 | 1,13 | down |
| 6744876 | 7324018 | 1681256 | plexin C1 | Plxnc1 | 362873 | 1,12 | up   |
| 5682767 | 7324018 | 1681253 | plexin C1 | Plxnc1 | 362873 | 1,11 | down |
| 5680165 | 7324018 | 1681233 | plexin C1 | Plxnc1 | 362873 | 1,09 | up   |
| 6060977 | 7324018 | 1681252 | plexin C1 | Plxnc1 | 362873 | 1,09 | up   |
| 6276174 | 7324018 | 1681279 | plexin C1 | Plxnc1 | 362873 | 1,08 | up   |
| 5748763 | 7324018 | 1681235 | plexin C1 | Plxnc1 | 362873 | 1,07 | up   |
| 6372332 | 7324018 | 1681259 | plexin C1 | Plxnc1 | 362873 | 1,06 | down |
| 6322921 | 7324018 | 1681264 | plexin C1 | Plxnc1 | 362873 | 1,04 | up   |

|         |         |         |                               |        |        |      |      |
|---------|---------|---------|-------------------------------|--------|--------|------|------|
| 6203427 | 7324018 | 1681271 | plexin C1                     | Plxnc1 | 362873 | 1,04 | up   |
| 5914101 | 7324018 | 1681272 | plexin C1                     | Plxnc1 | 362873 | 1,03 | down |
| 6429719 | 7324018 | 1681263 | plexin C1                     | Plxnc1 | 362873 | 1,02 | up   |
| 5623372 | 7324018 | 1681270 | plexin C1                     | Plxnc1 | 362873 | 1,02 | down |
| 6246971 | 7324018 | 1681246 | plexin C1                     | Plxnc1 | 362873 | 1,00 | up   |
| 6096097 | 7268693 | 1544204 | plexin D1                     | Plxnd1 | 312652 | 4,44 | up   |
| 6202751 | 7268693 | 1544213 | plexin D1                     | Plxnd1 | 312652 | 3,54 | down |
| 6140371 | 7268693 | 1544194 | plexin D1                     | Plxnd1 | 312652 | 2,60 | up   |
| 5678006 | 7268693 | 1544213 | plexin D1                     | Plxnd1 | 312652 | 2,46 | down |
| 6109977 | 7268693 | 1544182 | plexin D1                     | Plxnd1 | 312652 | 2,31 | down |
| 5666540 | 7268693 | 1544176 | plexin D1                     | Plxnd1 | 312652 | 2,22 | up   |
| 6291343 | 7268693 | 1544187 | plexin D1                     | Plxnd1 | 312652 | 2,18 | down |
| 5676893 | 7268693 | 1544213 | plexin D1                     | Plxnd1 | 312652 | 2,15 | down |
| 6475970 | 7268693 | 1544205 | plexin D1                     | Plxnd1 | 312652 | 2,14 | up   |
| 5673341 | 7268693 | 1544175 | plexin D1                     | Plxnd1 | 312652 | 2,08 | down |
| 6369348 | 7268693 | 1544213 | plexin D1                     | Plxnd1 | 312652 | 2,05 | down |
| 6484511 | 7268693 | 1544213 | plexin D1                     | Plxnd1 | 312652 | 2,04 | up   |
| 5930991 | 7268693 | 1544206 | plexin D1                     | Plxnd1 | 312652 | 1,99 | up   |
| 6576877 | 7268693 | 1544176 | plexin D1                     | Plxnd1 | 312652 | 1,96 | down |
| 6313630 | 7268693 | 1544192 | plexin D1                     | Plxnd1 | 312652 | 1,94 | up   |
| 6057157 | 7268693 | 1544181 | plexin D1                     | Plxnd1 | 312652 | 1,94 | up   |
| 6683620 | 7268693 | 1544195 | plexin D1                     | Plxnd1 | 312652 | 1,88 | up   |
| 5800425 | 7268693 | 1544188 | plexin D1                     | Plxnd1 | 312652 | 1,60 | down |
| 6107855 | 7268693 | 1544183 | plexin D1                     | Plxnd1 | 312652 | 1,53 | down |
| 6452582 | 7268693 | 1544208 | plexin D1                     | Plxnd1 | 312652 | 1,48 | up   |
| 5827615 | 7268693 | 1544198 | plexin D1                     | Plxnd1 | 312652 | 1,48 | down |
| 6264333 | 7268693 | 1544177 | plexin D1                     | Plxnd1 | 312652 | 1,44 | up   |
| 5653139 | 7268693 | 1544193 | plexin D1                     | Plxnd1 | 312652 | 1,42 | up   |
| 5634613 | 7268693 | 1544185 | plexin D1                     | Plxnd1 | 312652 | 1,40 | down |
| 6415373 | 7268693 | 1544203 | plexin D1                     | Plxnd1 | 312652 | 1,39 | up   |
| 6473221 | 7268693 | 1544213 | plexin D1                     | Plxnd1 | 312652 | 1,35 | down |
| 6111284 | 7268693 | 1544180 | plexin D1                     | Plxnd1 | 312652 | 1,30 | up   |
| 6688794 | 7268693 | 1544184 | plexin D1                     | Plxnd1 | 312652 | 1,29 | up   |
| 5728813 | 7268693 | 1544209 | plexin D1                     | Plxnd1 | 312652 | 1,28 | down |
| 6646478 | 7268693 | 1544197 | plexin D1                     | Plxnd1 | 312652 | 1,24 | down |
| 6652019 | 7268693 | 1544184 | plexin D1                     | Plxnd1 | 312652 | 1,22 | up   |
| 6086602 | 7268693 | 1544179 | plexin D1                     | Plxnd1 | 312652 | 1,20 | down |
| 6661961 | 7268693 | 1544207 | plexin D1                     | Plxnd1 | 312652 | 1,17 | down |
| 6694393 | 7268693 | 1544196 | plexin D1                     | Plxnd1 | 312652 | 1,17 | down |
| 6114713 | 7268693 | 1544189 | plexin D1                     | Plxnd1 | 312652 | 1,15 | down |
| 5684983 | 7268693 | 1544200 | plexin D1                     | Plxnd1 | 312652 | 1,15 | up   |
| 6264931 | 7268693 | 1544202 | plexin D1                     | Plxnd1 | 312652 | 1,12 | down |
| 5713900 | 7268693 | 1544201 | plexin D1                     | Plxnd1 | 312652 | 1,10 | up   |
| 6510140 | 7268693 | 1544178 | plexin D1                     | Plxnd1 | 312652 | 1,08 | down |
| 6355862 | 7268693 | 1544199 | plexin D1                     | Plxnd1 | 312652 | 1,05 | down |
| 6086999 | 7268693 | 1544213 | plexin D1                     | Plxnd1 | 312652 | 1,05 | up   |
| 6032333 | 7268693 | 1544191 | plexin D1                     | Plxnd1 | 312652 | 1,05 | down |
| 5957661 | 7268693 | 1544190 | plexin D1                     | Plxnd1 | 312652 | 1,05 | down |
| 6240320 | 7268693 | 1544186 | plexin D1                     | Plxnd1 | 312652 | 1,04 | down |
| 6610563 | 7268693 | 1544175 | plexin D1                     | Plxnd1 | 312652 | 1,00 | down |
| 5776983 | 7107793 | 1146479 | poliovirus receptor-related 4 | Pvrl4  | 498281 | 2,62 | up   |
| 5709037 | 7107793 | 1146487 | poliovirus receptor-related 4 | Pvrl4  | 498281 | 1,55 | up   |
| 6456054 | 7107793 | 1146483 | poliovirus receptor-related 4 | Pvrl4  | 498281 | 1,50 | down |
| 6515921 | 7107793 | 1146479 | poliovirus receptor-related 4 | Pvrl4  | 498281 | 1,36 | down |
| 5810657 | 7107793 | 1146485 | poliovirus receptor-related 4 | Pvrl4  | 498281 | 1,35 | up   |
| 6409416 | 7107793 | 1146484 | poliovirus receptor-related 4 | Pvrl4  | 498281 | 1,30 | down |
| 5646153 | 7107793 | 1146486 | poliovirus receptor-related 4 | Pvrl4  | 498281 | 1,20 | down |

|         |         |         |                                 |       |        |      |      |
|---------|---------|---------|---------------------------------|-------|--------|------|------|
| 5945468 | 7107793 | 1146490 | poliovirus receptor-related 4   | Pvrl4 | 498281 | 1,20 | down |
| 6415139 | 7107793 | 1146489 | poliovirus receptor-related 4   | Pvrl4 | 498281 | 1,12 | up   |
| 6451491 | 7107793 | 1146489 | poliovirus receptor-related 4   | Pvrl4 | 498281 | 1,02 | down |
| 6529431 | 7107793 | 1146482 | poliovirus receptor-related 4   | Pvrl4 | 498281 | 1,02 | up   |
| 6594895 | 7107793 | 1146488 | poliovirus receptor-related 4   | Pvrl4 | 498281 | 1,01 | down |
| 5707670 | 7036458 | 977023  | polo-like kinase 1 (Drosophila) | Plk1  | 25515  | 2,17 | up   |
| 6664981 | 7036458 | 977034  | polo-like kinase 1 (Drosophila) | Plk1  | 25515  | 1,85 | up   |
| 6054703 | 7036458 | 977028  | polo-like kinase 1 (Drosophila) | Plk1  | 25515  | 1,71 | down |
| 6576410 | 7036458 | 977025  | polo-like kinase 1 (Drosophila) | Plk1  | 25515  | 1,60 | down |
| 6395616 | 7036458 | 977027  | polo-like kinase 1 (Drosophila) | Plk1  | 25515  | 1,52 | down |
| 6536873 | 7036458 | 977024  | polo-like kinase 1 (Drosophila) | Plk1  | 25515  | 1,36 | down |
| 6191412 | 7036458 | 977029  | polo-like kinase 1 (Drosophila) | Plk1  | 25515  | 1,24 | up   |
| 6692690 | 7036458 | 977032  | polo-like kinase 1 (Drosophila) | Plk1  | 25515  | 1,24 | up   |
| 6191409 | 7036458 | 977024  | polo-like kinase 1 (Drosophila) | Plk1  | 25515  | 1,22 | down |
| 5676612 | 7036458 | 977033  | polo-like kinase 1 (Drosophila) | Plk1  | 25515  | 1,21 | down |
| 5924890 | 7036458 | 977030  | polo-like kinase 1 (Drosophila) | Plk1  | 25515  | 1,18 | down |
| 5943502 | 7036458 | 977029  | polo-like kinase 1 (Drosophila) | Plk1  | 25515  | 1,13 | up   |
| 5878261 | 7036458 | 977026  | polo-like kinase 1 (Drosophila) | Plk1  | 25515  | 1,13 | down |
| 6193315 | 7036458 | 977031  | polo-like kinase 1 (Drosophila) | Plk1  | 25515  | 1,03 | down |
| 6244353 | 7189518 | 1348510 | polo-like kinase 2 (Drosophila) | Plk2  | 83722  | 2,19 | down |
| 6669663 | 7189518 | 1348516 | polo-like kinase 2 (Drosophila) | Plk2  | 83722  | 1,78 | up   |
| 6466203 | 7189518 | 1348513 | polo-like kinase 2 (Drosophila) | Plk2  | 83722  | 1,78 | up   |
| 6685311 | 7189518 | 1348521 | polo-like kinase 2 (Drosophila) | Plk2  | 83722  | 1,72 | down |
| 6392393 | 7189518 | 1348523 | polo-like kinase 2 (Drosophila) | Plk2  | 83722  | 1,66 | down |
| 6143750 | 7189518 | 1348512 | polo-like kinase 2 (Drosophila) | Plk2  | 83722  | 1,36 | down |
| 6129173 | 7189518 | 1348514 | polo-like kinase 2 (Drosophila) | Plk2  | 83722  | 1,35 | up   |
| 5976210 | 7189518 | 1348524 | polo-like kinase 2 (Drosophila) | Plk2  | 83722  | 1,33 | down |
| 6553856 | 7189518 | 1348518 | polo-like kinase 2 (Drosophila) | Plk2  | 83722  | 1,33 | down |
| 5977933 | 7189518 | 1348511 | polo-like kinase 2 (Drosophila) | Plk2  | 83722  | 1,28 | down |
| 6386456 | 7189518 | 1348519 | polo-like kinase 2 (Drosophila) | Plk2  | 83722  | 1,26 | down |
| 5706208 | 7189518 | 1348517 | polo-like kinase 2 (Drosophila) | Plk2  | 83722  | 1,21 | down |
| 6734185 | 7189518 | 1348520 | polo-like kinase 2 (Drosophila) | Plk2  | 83722  | 1,16 | up   |
| 5782983 | 7189518 | 1348515 | polo-like kinase 2 (Drosophila) | Plk2  | 83722  | 1,09 | up   |
| 5676623 | 7189518 | 1348522 | polo-like kinase 2 (Drosophila) | Plk2  | 83722  | 1,04 | down |
| 6504614 | 7108423 | 1148288 | poly (ADP-ribose) polymerase 1  | Parp1 | 25591  | 2,53 | down |
| 6551318 | 7108423 | 1148286 | poly (ADP-ribose) polymerase 1  | Parp1 | 25591  | 1,62 | up   |
| 6062384 | 7108423 | 1148274 | poly (ADP-ribose) polymerase 1  | Parp1 | 25591  | 1,53 | down |
| 5879717 | 7108423 | 1148276 | poly (ADP-ribose) polymerase 1  | Parp1 | 25591  | 1,44 | up   |
| 6319909 | 7108423 | 1148282 | poly (ADP-ribose) polymerase 1  | Parp1 | 25591  | 1,37 | up   |
| 6443270 | 7108423 | 1148283 | poly (ADP-ribose) polymerase 1  | Parp1 | 25591  | 1,36 | up   |
| 6072584 | 7108423 | 1148267 | poly (ADP-ribose) polymerase 1  | Parp1 | 25591  | 1,34 | down |
| 6381427 | 7108423 | 1148273 | poly (ADP-ribose) polymerase 1  | Parp1 | 25591  | 1,28 | up   |
| 6283938 | 7108423 | 1148270 | poly (ADP-ribose) polymerase 1  | Parp1 | 25591  | 1,27 | down |
| 6433915 | 7108423 | 1148279 | poly (ADP-ribose) polymerase 1  | Parp1 | 25591  | 1,21 | up   |
| 5868844 | 7108423 | 1148280 | poly (ADP-ribose) polymerase 1  | Parp1 | 25591  | 1,20 | up   |
| 6265232 | 7108423 | 1148285 | poly (ADP-ribose) polymerase 1  | Parp1 | 25591  | 1,18 | up   |
| 5735855 | 7108423 | 1148288 | poly (ADP-ribose) polymerase 1  | Parp1 | 25591  | 1,16 | up   |
| 6296963 | 7108423 | 1148266 | poly (ADP-ribose) polymerase 1  | Parp1 | 25591  | 1,15 | down |
| 6432062 | 7108423 | 1148281 | poly (ADP-ribose) polymerase 1  | Parp1 | 25591  | 1,11 | down |
| 6023511 | 7108423 | 1148275 | poly (ADP-ribose) polymerase 1  | Parp1 | 25591  | 1,09 | down |
| 6064649 | 7108423 | 1148288 | poly (ADP-ribose) polymerase 1  | Parp1 | 25591  | 1,07 | down |
| 6206775 | 7108423 | 1148272 | poly (ADP-ribose) polymerase 1  | Parp1 | 25591  | 1,07 | up   |
| 6146465 | 7108423 | 1148277 | poly (ADP-ribose) polymerase 1  | Parp1 | 25591  | 1,07 | up   |
| 6199362 | 7108423 | 1148287 | poly (ADP-ribose) polymerase 1  | Parp1 | 25591  | 1,07 | down |
| 5996373 | 7108423 | 1148284 | poly (ADP-ribose) polymerase 1  | Parp1 | 25591  | 1,06 | down |
| 6604760 | 7108423 | 1148268 | poly (ADP-ribose) polymerase 1  | Parp1 | 25591  | 1,05 | down |
| 6216932 | 7108423 | 1148271 | poly (ADP-ribose) polymerase 1  | Parp1 | 25591  | 1,05 | up   |

|         |         |         |                                               |       |        |      |      |
|---------|---------|---------|-----------------------------------------------|-------|--------|------|------|
| 5752547 | 7108423 | 1148278 | poly (ADP-ribose) polymerase 1                | Parp1 | 25591  | 1,04 | up   |
| 6545125 | 7108423 | 1148269 | poly (ADP-ribose) polymerase 1                | Parp1 | 25591  | 1,01 | down |
| 5879605 | 7349772 | 1744454 | poly (ADP-ribose) polymerase family, member 3 | Parp3 | 300985 | 2,60 | up   |
| 6701415 | 7349772 | 1744446 | poly (ADP-ribose) polymerase family, member 3 | Parp3 | 300985 | 1,90 | down |
| 6424654 | 7349772 | 1744448 | poly (ADP-ribose) polymerase family, member 3 | Parp3 | 300985 | 1,41 | up   |
| 6336567 | 7349772 | 1744455 | poly (ADP-ribose) polymerase family, member 3 | Parp3 | 300985 | 1,22 | up   |
| 6495486 | 7349772 | 1744450 | poly (ADP-ribose) polymerase family, member 3 | Parp3 | 300985 | 1,21 | up   |
| 5737758 | 7349772 | 1744447 | poly (ADP-ribose) polymerase family, member 3 | Parp3 | 300985 | 1,18 | up   |
| 6056876 | 7349772 | 1744452 | poly (ADP-ribose) polymerase family, member 3 | Parp3 | 300985 | 1,14 | up   |
| 6590515 | 7349772 | 1744449 | poly (ADP-ribose) polymerase family, member 3 | Parp3 | 300985 | 1,09 | down |
| 6449820 | 7349772 | 1744453 | poly (ADP-ribose) polymerase family, member 3 | Parp3 | 300985 | 1,09 | down |
| 5813323 | 7349772 | 1744456 | poly (ADP-ribose) polymerase family, member 3 | Parp3 | 300985 | 1,06 | down |
| 6265951 | 7349772 | 1744451 | poly (ADP-ribose) polymerase family, member 3 | Parp3 | 300985 | 1,03 | down |
| 6530078 | 7336837 | 1711635 | poly (ADP-ribose) polymerase family, member 6 | Parp6 | 300759 | 2,10 | down |
| 5762830 | 7336837 | 1711640 | poly (ADP-ribose) polymerase family, member 6 | Parp6 | 300759 | 1,63 | down |
| 6032040 | 7336837 | 1711612 | poly (ADP-ribose) polymerase family, member 6 | Parp6 | 300759 | 1,57 | up   |
| 6690266 | 7336837 | 1711613 | poly (ADP-ribose) polymerase family, member 6 | Parp6 | 300759 | 1,46 | down |
| 6718454 | 7336837 | 1711614 | poly (ADP-ribose) polymerase family, member 6 | Parp6 | 300759 | 1,35 | up   |
| 6357544 | 7336837 | 1711622 | poly (ADP-ribose) polymerase family, member 6 | Parp6 | 300759 | 1,27 | down |
| 5678283 | 7336837 | 1711620 | poly (ADP-ribose) polymerase family, member 6 | Parp6 | 300759 | 1,26 | down |
| 5834358 | 7336837 | 1711621 | poly (ADP-ribose) polymerase family, member 6 | Parp6 | 300759 | 1,23 | down |
| 6639482 | 7336837 | 1711634 | poly (ADP-ribose) polymerase family, member 6 | Parp6 | 300759 | 1,21 | down |
| 6152519 | 7336837 | 1711613 | poly (ADP-ribose) polymerase family, member 6 | Parp6 | 300759 | 1,19 | up   |
| 5963223 | 7336837 | 1711633 | poly (ADP-ribose) polymerase family, member 6 | Parp6 | 300759 | 1,17 | down |
| 6044689 | 7336837 | 1711615 | poly (ADP-ribose) polymerase family, member 6 | Parp6 | 300759 | 1,15 | up   |
| 6209444 | 7336837 | 1711616 | poly (ADP-ribose) polymerase family, member 6 | Parp6 | 300759 | 1,12 | down |
| 6496141 | 7336837 | 1711632 | poly (ADP-ribose) polymerase family, member 6 | Parp6 | 300759 | 1,10 | down |
| 6352136 | 7336837 | 1711627 | poly (ADP-ribose) polymerase family, member 6 | Parp6 | 300759 | 1,10 | up   |
| 6682781 | 7336837 | 1711623 | poly (ADP-ribose) polymerase family, member 6 | Parp6 | 300759 | 1,09 | up   |
| 5670037 | 7336837 | 1711638 | poly (ADP-ribose) polymerase family, member 6 | Parp6 | 300759 | 1,08 | down |
| 6297044 | 7336837 | 1711618 | poly (ADP-ribose) polymerase family, member 6 | Parp6 | 300759 | 1,07 | up   |
| 6058932 | 7336837 | 1711631 | poly (ADP-ribose) polymerase family, member 6 | Parp6 | 300759 | 1,07 | up   |
| 5766063 | 7336837 | 1711637 | poly (ADP-ribose) polymerase family, member 6 | Parp6 | 300759 | 1,07 | up   |
| 6532447 | 7336837 | 1711617 | poly (ADP-ribose) polymerase family, member 6 | Parp6 | 300759 | 1,07 | down |
| 6531450 | 7336837 | 1711626 | poly (ADP-ribose) polymerase family, member 6 | Parp6 | 300759 | 1,06 | down |
| 6611117 | 7336837 | 1711635 | poly (ADP-ribose) polymerase family, member 6 | Parp6 | 300759 | 1,06 | down |
| 6387837 | 7336837 | 1711636 | poly (ADP-ribose) polymerase family, member 6 | Parp6 | 300759 | 1,06 | up   |
| 5832961 | 7336837 | 1711625 | poly (ADP-ribose) polymerase family, member 6 | Parp6 | 300759 | 1,05 | up   |
| 6153185 | 7336837 | 1711624 | poly (ADP-ribose) polymerase family, member 6 | Parp6 | 300759 | 1,02 | down |
| 5738684 | 7336837 | 1711639 | poly (ADP-ribose) polymerase family, member 6 | Parp6 | 300759 | 1,01 | down |
| 6743311 | 7336837 | 1711621 | poly (ADP-ribose) polymerase family, member 6 | Parp6 | 300759 | 1,01 | down |
| 6310225 | 7093806 | 1112147 | poly (ADP-ribose) polymerase family, member 9 | Parp9 | 303905 | 2,62 | down |
| 6366690 | 7093806 | 1112150 | poly (ADP-ribose) polymerase family, member 9 | Parp9 | 303905 | 2,58 | up   |
| 6662237 | 7093806 | 1112157 | poly (ADP-ribose) polymerase family, member 9 | Parp9 | 303905 | 2,29 | up   |
| 5784855 | 7093806 | 1112163 | poly (ADP-ribose) polymerase family, member 9 | Parp9 | 303905 | 2,06 | down |
| 6246953 | 7093806 | 1112160 | poly (ADP-ribose) polymerase family, member 9 | Parp9 | 303905 | 2,01 | up   |
| 5951632 | 7093806 | 1112160 | poly (ADP-ribose) polymerase family, member 9 | Parp9 | 303905 | 1,93 | up   |
| 6168404 | 7093806 | 1112152 | poly (ADP-ribose) polymerase family, member 9 | Parp9 | 303905 | 1,80 | up   |
| 5885645 | 7093806 | 1112158 | poly (ADP-ribose) polymerase family, member 9 | Parp9 | 303905 | 1,71 | up   |
| 6289607 | 7093806 | 1112148 | poly (ADP-ribose) polymerase family, member 9 | Parp9 | 303905 | 1,63 | up   |
| 6207817 | 7093806 | 1112160 | poly (ADP-ribose) polymerase family, member 9 | Parp9 | 303905 | 1,51 | up   |
| 6352468 | 7093806 | 1112148 | poly (ADP-ribose) polymerase family, member 9 | Parp9 | 303905 | 1,46 | up   |
| 5991141 | 7093806 | 1112165 | poly (ADP-ribose) polymerase family, member 9 | Parp9 | 303905 | 1,44 | up   |
| 6165073 | 7093806 | 1112148 | poly (ADP-ribose) polymerase family, member 9 | Parp9 | 303905 | 1,39 | up   |
| 6438646 | 7093806 | 1112164 | poly (ADP-ribose) polymerase family, member 9 | Parp9 | 303905 | 1,37 | up   |
| 5798486 | 7093806 | 1112159 | poly (ADP-ribose) polymerase family, member 9 | Parp9 | 303905 | 1,34 | up   |
| 6004110 | 7093806 | 1112160 | poly (ADP-ribose) polymerase family, member 9 | Parp9 | 303905 | 1,33 | up   |

|         |         |         |                                               |       |        |      |      |
|---------|---------|---------|-----------------------------------------------|-------|--------|------|------|
| 5752835 | 7093806 | 1112155 | poly (ADP-ribose) polymerase family, member 9 | Parp9 | 303905 | 1,27 | up   |
| 6495595 | 7373866 | 1806263 | poly(rC) binding protein 2                    | Pcbp2 | 363005 | 1,47 | down |
| 6592825 | 7373866 | 1806263 | poly(rC) binding protein 2                    | Pcbp2 | 363005 | 1,35 | down |
| 5650804 | 7373866 | 1806262 | poly(rC) binding protein 2                    | Pcbp2 | 363005 | 1,12 | down |
| 6444801 | 7373866 | 1806261 | poly(rC) binding protein 2                    | Pcbp2 | 363005 | 1,07 | down |
| 5730047 | 7360213 | 1770162 | polycystic kidney and hepatic disease 1       | Pkhd1 | 301287 | 2,36 | up   |
| 5937480 | 7360213 | 1770179 | polycystic kidney and hepatic disease 1       | Pkhd1 | 301287 | 2,30 | down |
| 6716232 | 7360213 | 1770190 | polycystic kidney and hepatic disease 1       | Pkhd1 | 301287 | 1,76 | up   |
| 6628372 | 7360213 | 1770161 | polycystic kidney and hepatic disease 1       | Pkhd1 | 301287 | 1,57 | down |
| 6648201 | 7360213 | 1770167 | polycystic kidney and hepatic disease 1       | Pkhd1 | 301287 | 1,23 | down |
| 6644880 | 7360213 | 1770150 | polycystic kidney and hepatic disease 1       | Pkhd1 | 301287 | 1,23 | up   |
| 5699172 | 7360213 | 1770168 | polycystic kidney and hepatic disease 1       | Pkhd1 | 301287 | 1,23 | down |
| 6252616 | 7360213 | 1770168 | polycystic kidney and hepatic disease 1       | Pkhd1 | 301287 | 1,20 | down |
| 5725201 | 7360213 | 1770149 | polycystic kidney and hepatic disease 1       | Pkhd1 | 301287 | 1,19 | down |
| 5901724 | 7360213 | 1770167 | polycystic kidney and hepatic disease 1       | Pkhd1 | 301287 | 1,18 | up   |
| 5870509 | 7360213 | 1770173 | polycystic kidney and hepatic disease 1       | Pkhd1 | 301287 | 1,17 | down |
| 6433624 | 7360213 | 1770151 | polycystic kidney and hepatic disease 1       | Pkhd1 | 301287 | 1,16 | down |
| 6596211 | 7360213 | 1770182 | polycystic kidney and hepatic disease 1       | Pkhd1 | 301287 | 1,15 | down |
| 5961114 | 7360213 | 1770176 | polycystic kidney and hepatic disease 1       | Pkhd1 | 301287 | 1,15 | down |
| 5642717 | 7360213 | 1770162 | polycystic kidney and hepatic disease 1       | Pkhd1 | 301287 | 1,14 | down |
| 6554331 | 7360213 | 1770180 | polycystic kidney and hepatic disease 1       | Pkhd1 | 301287 | 1,13 | up   |
| 5764445 | 7360213 | 1770184 | polycystic kidney and hepatic disease 1       | Pkhd1 | 301287 | 1,11 | up   |
| 6022787 | 7360213 | 1770173 | polycystic kidney and hepatic disease 1       | Pkhd1 | 301287 | 1,10 | up   |
| 6216745 | 7360213 | 1770152 | polycystic kidney and hepatic disease 1       | Pkhd1 | 301287 | 1,08 | up   |
| 5628544 | 7360213 | 1770145 | polycystic kidney and hepatic disease 1       | Pkhd1 | 301287 | 1,06 | down |
| 6237985 | 7360213 | 1770172 | polycystic kidney and hepatic disease 1       | Pkhd1 | 301287 | 1,06 | up   |
| 5926350 | 7360213 | 1770148 | polycystic kidney and hepatic disease 1       | Pkhd1 | 301287 | 1,05 | up   |
| 6516141 | 7360213 | 1770185 | polycystic kidney and hepatic disease 1       | Pkhd1 | 301287 | 1,05 | up   |
| 6195484 | 7360213 | 1770146 | polycystic kidney and hepatic disease 1       | Pkhd1 | 301287 | 1,05 | up   |
| 6118692 | 7360213 | 1770177 | polycystic kidney and hepatic disease 1       | Pkhd1 | 301287 | 1,04 | down |
| 6552029 | 7360213 | 1770146 | polycystic kidney and hepatic disease 1       | Pkhd1 | 301287 | 1,04 | down |
| 6470549 | 7360213 | 1770149 | polycystic kidney and hepatic disease 1       | Pkhd1 | 301287 | 1,04 | up   |
| 6080879 | 7360213 | 1770178 | polycystic kidney and hepatic disease 1       | Pkhd1 | 301287 | 1,02 | up   |
| 6324494 | 7360213 | 1770147 | polycystic kidney and hepatic disease 1       | Pkhd1 | 301287 | 1,01 | up   |
| 6055245 | 7154535 | 1261901 | polymerase (DNA directed) sigma               | Pols  | 306672 | 1,40 | down |
| 6533949 | 7154535 | 1261909 | polymerase (DNA directed) sigma               | Pols  | 306672 | 1,36 | up   |
| 5637382 | 7154535 | 1261919 | polymerase (DNA directed) sigma               | Pols  | 306672 | 1,34 | up   |
| 6482552 | 7154535 | 1261920 | polymerase (DNA directed) sigma               | Pols  | 306672 | 1,28 | down |
| 6692893 | 7154535 | 1261917 | polymerase (DNA directed) sigma               | Pols  | 306672 | 1,23 | up   |
| 5703260 | 7154535 | 1261920 | polymerase (DNA directed) sigma               | Pols  | 306672 | 1,17 | up   |
| 6491520 | 7154535 | 1261910 | polymerase (DNA directed) sigma               | Pols  | 306672 | 1,13 | down |
| 6179858 | 7154535 | 1261911 | polymerase (DNA directed) sigma               | Pols  | 306672 | 1,13 | down |
| 5922025 | 7154535 | 1261908 | polymerase (DNA directed) sigma               | Pols  | 306672 | 1,10 | down |
| 6703544 | 7154535 | 1261916 | polymerase (DNA directed) sigma               | Pols  | 306672 | 1,08 | up   |
| 6472223 | 7154535 | 1261914 | polymerase (DNA directed) sigma               | Pols  | 306672 | 1,08 | down |
| 6298609 | 7154535 | 1261920 | polymerase (DNA directed) sigma               | Pols  | 306672 | 1,07 | up   |
| 6053203 | 7154535 | 1261913 | polymerase (DNA directed) sigma               | Pols  | 306672 | 1,03 | down |
| 5922481 | 7154535 | 1261912 | polymerase (DNA directed) sigma               | Pols  | 306672 | 1,02 | up   |
| 6667008 | 7154535 | 1261918 | polymerase (DNA directed) sigma               | Pols  | 306672 | 1,02 | up   |
| 5982806 | 7154535 | 1261915 | polymerase (DNA directed) sigma               | Pols  | 306672 | 1,02 | down |
| 6167611 | 7053323 | 1017192 | polymerase (DNA directed), gamma              | Polg  | 85472  | 2,06 | up   |
| 6098254 | 7053323 | 1017200 | polymerase (DNA directed), gamma              | Polg  | 85472  | 1,64 | down |
| 6719272 | 7053323 | 1017178 | polymerase (DNA directed), gamma              | Polg  | 85472  | 1,43 | down |
| 5703044 | 7053323 | 1017186 | polymerase (DNA directed), gamma              | Polg  | 85472  | 1,39 | down |
| 6129885 | 7053323 | 1017182 | polymerase (DNA directed), gamma              | Polg  | 85472  | 1,34 | down |
| 6161354 | 7053323 | 1017183 | polymerase (DNA directed), gamma              | Polg  | 85472  | 1,32 | up   |
| 6702617 | 7053323 | 1017187 | polymerase (DNA directed), gamma              | Polg  | 85472  | 1,29 | down |

|         |         |         |                                                         |        |        |      |      |
|---------|---------|---------|---------------------------------------------------------|--------|--------|------|------|
| 6635031 | 7053323 | 1017192 | polymerase (DNA directed), gamma                        | Polg   | 85472  | 1,28 | down |
| 6009372 | 7053323 | 1017185 | polymerase (DNA directed), gamma                        | Polg   | 85472  | 1,17 | down |
| 6038218 | 7053323 | 1017188 | polymerase (DNA directed), gamma                        | Polg   | 85472  | 1,17 | down |
| 6522360 | 7053323 | 1017180 | polymerase (DNA directed), gamma                        | Polg   | 85472  | 1,16 | up   |
| 6631638 | 7053323 | 1017198 | polymerase (DNA directed), gamma                        | Polg   | 85472  | 1,15 | up   |
| 6726484 | 7053323 | 1017179 | polymerase (DNA directed), gamma                        | Polg   | 85472  | 1,15 | down |
| 6151305 | 7053323 | 1017199 | polymerase (DNA directed), gamma                        | Polg   | 85472  | 1,14 | up   |
| 6526798 | 7053323 | 1017181 | polymerase (DNA directed), gamma                        | Polg   | 85472  | 1,11 | down |
| 6379595 | 7053323 | 1017197 | polymerase (DNA directed), gamma                        | Polg   | 85472  | 1,10 | up   |
| 6318953 | 7053323 | 1017191 | polymerase (DNA directed), gamma                        | Polg   | 85472  | 1,08 | up   |
| 5940148 | 7053323 | 1017198 | polymerase (DNA directed), gamma                        | Polg   | 85472  | 1,08 | up   |
| 5930348 | 7053323 | 1017200 | polymerase (DNA directed), gamma                        | Polg   | 85472  | 1,08 | up   |
| 5871852 | 7053323 | 1017195 | polymerase (DNA directed), gamma                        | Polg   | 85472  | 1,07 | up   |
| 6424634 | 7053323 | 1017184 | polymerase (DNA directed), gamma                        | Polg   | 85472  | 1,06 | up   |
| 6372408 | 7053323 | 1017189 | polymerase (DNA directed), gamma                        | Polg   | 85472  | 1,06 | down |
| 6194113 | 7053323 | 1017190 | polymerase (DNA directed), gamma                        | Polg   | 85472  | 1,04 | down |
| 6130822 | 7053323 | 1017196 | polymerase (DNA directed), gamma                        | Polg   | 85472  | 1,04 | up   |
| 6297345 | 7053323 | 1017194 | polymerase (DNA directed), gamma                        | Polg   | 85472  | 1,03 | down |
| 6605138 | 7053323 | 1017197 | polymerase (DNA directed), gamma                        | Polg   | 85472  | 1,01 | up   |
| 5653846 | 7053323 | 1017193 | polymerase (DNA directed), gamma                        | Polg   | 85472  | 1,00 | down |
| 6468984 | 7232482 | 1453960 | polymerase (RNA) I polypeptide B                        | Polr1b | 83582  | 2,27 | up   |
| 6382244 | 7232482 | 1453953 | polymerase (RNA) I polypeptide B                        | Polr1b | 83582  | 1,80 | up   |
| 5802804 | 7232482 | 1453954 | polymerase (RNA) I polypeptide B                        | Polr1b | 83582  | 1,78 | up   |
| 5893491 | 7232482 | 1453963 | polymerase (RNA) I polypeptide B                        | Polr1b | 83582  | 1,63 | up   |
| 5970957 | 7232482 | 1453954 | polymerase (RNA) I polypeptide B                        | Polr1b | 83582  | 1,57 | up   |
| 6301400 | 7232482 | 1453958 | polymerase (RNA) I polypeptide B                        | Polr1b | 83582  | 1,51 | up   |
| 5788480 | 7232482 | 1453950 | polymerase (RNA) I polypeptide B                        | Polr1b | 83582  | 1,51 | down |
| 6012758 | 7232482 | 1453956 | polymerase (RNA) I polypeptide B                        | Polr1b | 83582  | 1,48 | down |
| 6469828 | 7232482 | 1453964 | polymerase (RNA) I polypeptide B                        | Polr1b | 83582  | 1,41 | up   |
| 5822888 | 7232482 | 1453959 | polymerase (RNA) I polypeptide B                        | Polr1b | 83582  | 1,36 | down |
| 5967469 | 7232482 | 1453952 | polymerase (RNA) I polypeptide B                        | Polr1b | 83582  | 1,32 | up   |
| 6300396 | 7232482 | 1453962 | polymerase (RNA) I polypeptide B                        | Polr1b | 83582  | 1,25 | down |
| 6415438 | 7232482 | 1453957 | polymerase (RNA) I polypeptide B                        | Polr1b | 83582  | 1,25 | up   |
| 6433546 | 7232482 | 1453961 | polymerase (RNA) I polypeptide B                        | Polr1b | 83582  | 1,19 | up   |
| 5802346 | 7232482 | 1453955 | polymerase (RNA) I polypeptide B                        | Polr1b | 83582  | 1,18 | down |
| 5665627 | 7232482 | 1453963 | polymerase (RNA) I polypeptide B                        | Polr1b | 83582  | 1,04 | down |
| 6166373 | 7232482 | 1453949 | polymerase (RNA) I polypeptide B                        | Polr1b | 83582  | 1,03 | up   |
| 6528376 | 7232482 | 1453957 | polymerase (RNA) I polypeptide B                        | Polr1b | 83582  | 1,02 | up   |
| 5737487 | 7232482 | 1453951 | polymerase (RNA) I polypeptide B                        | Polr1b | 83582  | 1,01 | down |
| 6099459 | 7312569 | 1653338 | polymerase (RNA) II (DNA directed) polypeptide E, 25kDa | Polr2e | 690966 | 1,37 | down |
| 6736857 | 7312569 | 1653342 | polymerase (RNA) II (DNA directed) polypeptide E, 25kDa | Polr2e | 690966 | 1,35 | down |
| 5957885 | 7312569 | 1653344 | polymerase (RNA) II (DNA directed) polypeptide E, 25kDa | Polr2e | 690966 | 1,35 | up   |
| 5796268 | 7312569 | 1653344 | polymerase (RNA) II (DNA directed) polypeptide E, 25kDa | Polr2e | 690966 | 1,32 | up   |
| 6386997 | 7312569 | 1653346 | polymerase (RNA) II (DNA directed) polypeptide E, 25kDa | Polr2e | 690966 | 1,27 | down |
| 6739255 | 7312569 | 1653338 | polymerase (RNA) II (DNA directed) polypeptide E, 25kDa | Polr2e | 690966 | 1,25 | up   |
| 6347221 | 7312569 | 1653341 | polymerase (RNA) II (DNA directed) polypeptide E, 25kDa | Polr2e | 690966 | 1,14 | up   |
| 6372336 | 7312569 | 1653346 | polymerase (RNA) II (DNA directed) polypeptide E, 25kDa | Polr2e | 690966 | 1,10 | down |
| 6543029 | 7312569 | 1653340 | polymerase (RNA) II (DNA directed) polypeptide E, 25kDa | Polr2e | 690966 | 1,05 | up   |
| 5959656 | 7312569 | 1653346 | polymerase (RNA) II (DNA directed) polypeptide E, 25kDa | Polr2e | 690966 | 1,05 | down |
| 6403388 | 7031393 | 963705  | polynucleotide kinase 3'-phosphatase                    | Pnkp   | 308576 | 2,23 | up   |
| 6139658 | 7031393 | 963709  | polynucleotide kinase 3'-phosphatase                    | Pnkp   | 308576 | 1,84 | up   |
| 6658130 | 7031393 | 963708  | polynucleotide kinase 3'-phosphatase                    | Pnkp   | 308576 | 1,79 | down |
| 6061050 | 7031393 | 963706  | polynucleotide kinase 3'-phosphatase                    | Pnkp   | 308576 | 1,76 | down |
| 6220388 | 7031393 | 963713  | polynucleotide kinase 3'-phosphatase                    | Pnkp   | 308576 | 1,53 | down |
| 6432161 | 7031393 | 963698  | polynucleotide kinase 3'-phosphatase                    | Pnkp   | 308576 | 1,47 | down |
| 6621010 | 7031393 | 963704  | polynucleotide kinase 3'-phosphatase                    | Pnkp   | 308576 | 1,44 | down |
| 5719656 | 7031393 | 963700  | polynucleotide kinase 3'-phosphatase                    | Pnkp   | 308576 | 1,38 | up   |

|         |         |         |                                                       |       |        |      |      |
|---------|---------|---------|-------------------------------------------------------|-------|--------|------|------|
| 6275578 | 7031393 | 963699  | polynucleotide kinase 3'-phosphatase                  | Pnkp  | 308576 | 1,34 | down |
| 6359057 | 7031393 | 963707  | polynucleotide kinase 3'-phosphatase                  | Pnkp  | 308576 | 1,25 | up   |
| 5641029 | 7031393 | 963711  | polynucleotide kinase 3'-phosphatase                  | Pnkp  | 308576 | 1,24 | down |
| 5998335 | 7031393 | 963714  | polynucleotide kinase 3'-phosphatase                  | Pnkp  | 308576 | 1,21 | down |
| 5623907 | 7031393 | 963703  | polynucleotide kinase 3'-phosphatase                  | Pnkp  | 308576 | 1,18 | down |
| 6495194 | 7031393 | 963713  | polynucleotide kinase 3'-phosphatase                  | Pnkp  | 308576 | 1,11 | down |
| 6676983 | 7031393 | 963712  | polynucleotide kinase 3'-phosphatase                  | Pnkp  | 308576 | 1,07 | up   |
| 5648003 | 7031393 | 963710  | polynucleotide kinase 3'-phosphatase                  | Pnkp  | 308576 | 1,02 | down |
| 6473932 | 7031393 | 963701  | polynucleotide kinase 3'-phosphatase                  | Pnkp  | 308576 | 1,01 | up   |
| 6180832 | 7031393 | 963702  | polynucleotide kinase 3'-phosphatase                  | Pnkp  | 308576 | 1,01 | down |
| 5922800 | 7380108 | 1820986 | polypyrimidine tract-binding protein                  | Smptb | 302879 | 2,13 | down |
| 6612462 | 7380108 | 1820988 | polypyrimidine tract-binding protein                  | Smptb | 302879 | 1,38 | down |
| 6103837 | 7380108 | 1820988 | polypyrimidine tract-binding protein                  | Smptb | 302879 | 1,29 | up   |
| 6015066 | 7380108 | 1820988 | polypyrimidine tract-binding protein                  | Smptb | 302879 | 1,25 | up   |
| 5723181 | 7380108 | 1820989 | polypyrimidine tract-binding protein                  | Smptb | 302879 | 1,20 | down |
| 6363178 | 7380108 | 1820989 | polypyrimidine tract-binding protein                  | Smptb | 302879 | 1,14 | up   |
| 6531519 | 7380108 | 1820985 | polypyrimidine tract-binding protein                  | Smptb | 302879 | 1,07 | up   |
| 6523776 | 7380108 | 1820987 | polypyrimidine tract-binding protein                  | Smptb | 302879 | 1,05 | up   |
| 6584788 | 7380108 | 1820988 | polypyrimidine tract-binding protein                  | Smptb | 302879 | 1,04 | down |
| 6097541 | 7380108 | 1820987 | polypyrimidine tract-binding protein                  | Smptb | 302879 | 1,02 | down |
| 6178359 | 7380108 | 1820989 | polypyrimidine tract-binding protein                  | Smptb | 302879 | 1,02 | down |
| 6615222 | 7380108 | 1820989 | polypyrimidine tract-binding protein                  | Smptb | 302879 | 1,00 | down |
| 6589199 | 7373634 | 1805731 | porcupine homolog (Drosophila)                        | Porcn | 317368 | 2,24 | down |
| 6286449 | 7373634 | 1805723 | porcupine homolog (Drosophila)                        | Porcn | 317368 | 1,52 | down |
| 6412675 | 7373634 | 1805726 | porcupine homolog (Drosophila)                        | Porcn | 317368 | 1,50 | down |
| 5744509 | 7373634 | 1805731 | porcupine homolog (Drosophila)                        | Porcn | 317368 | 1,41 | down |
| 5780688 | 7373634 | 1805728 | porcupine homolog (Drosophila)                        | Porcn | 317368 | 1,37 | down |
| 5788828 | 7373634 | 1805727 | porcupine homolog (Drosophila)                        | Porcn | 317368 | 1,28 | up   |
| 6522420 | 7373634 | 1805730 | porcupine homolog (Drosophila)                        | Porcn | 317368 | 1,27 | up   |
| 6126419 | 7373634 | 1805720 | porcupine homolog (Drosophila)                        | Porcn | 317368 | 1,23 | up   |
| 6081624 | 7373634 | 1805731 | porcupine homolog (Drosophila)                        | Porcn | 317368 | 1,18 | down |
| 5863258 | 7373634 | 1805722 | porcupine homolog (Drosophila)                        | Porcn | 317368 | 1,16 | down |
| 6140592 | 7373634 | 1805727 | porcupine homolog (Drosophila)                        | Porcn | 317368 | 1,09 | up   |
| 6692294 | 7373634 | 1805721 | porcupine homolog (Drosophila)                        | Porcn | 317368 | 1,07 | down |
| 6259183 | 7373634 | 1805721 | porcupine homolog (Drosophila)                        | Porcn | 317368 | 1,03 | down |
| 6485175 | 7118288 | 1172982 | potassium channel tetramerisation domain containing 8 | Kctd8 | 364148 | 2,45 | down |
| 6147467 | 7118288 | 1172995 | potassium channel tetramerisation domain containing 8 | Kctd8 | 364148 | 1,57 | up   |
| 5821522 | 7118288 | 1172982 | potassium channel tetramerisation domain containing 8 | Kctd8 | 364148 | 1,51 | down |
| 6059369 | 7118288 | 1172981 | potassium channel tetramerisation domain containing 8 | Kctd8 | 364148 | 1,49 | up   |
| 5726861 | 7118288 | 1172981 | potassium channel tetramerisation domain containing 8 | Kctd8 | 364148 | 1,33 | up   |
| 6530026 | 7118288 | 1172982 | potassium channel tetramerisation domain containing 8 | Kctd8 | 364148 | 1,31 | up   |
| 6290015 | 7118288 | 1172981 | potassium channel tetramerisation domain containing 8 | Kctd8 | 364148 | 1,22 | down |
| 6683307 | 7118288 | 1172982 | potassium channel tetramerisation domain containing 8 | Kctd8 | 364148 | 1,14 | down |
| 6355015 | 7118288 | 1172982 | potassium channel tetramerisation domain containing 8 | Kctd8 | 364148 | 1,08 | down |
| 6089636 | 7118288 | 1172995 | potassium channel tetramerisation domain containing 8 | Kctd8 | 364148 | 1,02 | down |
| 6593367 | 7225339 | 1435431 | potassium channel, subfamily T, member 1              | Kcnt1 | 60444  | 2,02 | down |
| 6660567 | 7225339 | 1435460 | potassium channel, subfamily T, member 1              | Kcnt1 | 60444  | 1,88 | down |
| 6608781 | 7225339 | 1435450 | potassium channel, subfamily T, member 1              | Kcnt1 | 60444  | 1,81 | down |
| 6683977 | 7225339 | 1435435 | potassium channel, subfamily T, member 1              | Kcnt1 | 60444  | 1,78 | up   |
| 6242432 | 7225339 | 1435432 | potassium channel, subfamily T, member 1              | Kcnt1 | 60444  | 1,61 | down |
| 5698554 | 7225339 | 1435437 | potassium channel, subfamily T, member 1              | Kcnt1 | 60444  | 1,51 | up   |
| 6537092 | 7225339 | 1435459 | potassium channel, subfamily T, member 1              | Kcnt1 | 60444  | 1,41 | up   |
| 5940366 | 7225339 | 1435445 | potassium channel, subfamily T, member 1              | Kcnt1 | 60444  | 1,39 | down |
| 6174062 | 7225339 | 1435452 | potassium channel, subfamily T, member 1              | Kcnt1 | 60444  | 1,35 | up   |
| 5628505 | 7225339 | 1435438 | potassium channel, subfamily T, member 1              | Kcnt1 | 60444  | 1,33 | up   |
| 6072304 | 7225339 | 1435451 | potassium channel, subfamily T, member 1              | Kcnt1 | 60444  | 1,31 | down |
| 5644583 | 7225339 | 1435442 | potassium channel, subfamily T, member 1              | Kcnt1 | 60444  | 1,30 | down |

|         |         |         |                                                                                   |        |        |      |      |
|---------|---------|---------|-----------------------------------------------------------------------------------|--------|--------|------|------|
| 5922941 | 7225339 | 1435454 | potassium channel, subfamily T, member 1                                          | Kcnt1  | 60444  | 1,28 | up   |
| 5802117 | 7225339 | 1435446 | potassium channel, subfamily T, member 1                                          | Kcnt1  | 60444  | 1,24 | up   |
| 6151730 | 7225339 | 1435439 | potassium channel, subfamily T, member 1                                          | Kcnt1  | 60444  | 1,23 | up   |
| 6275490 | 7225339 | 1435449 | potassium channel, subfamily T, member 1                                          | Kcnt1  | 60444  | 1,20 | down |
| 6531750 | 7225339 | 1435434 | potassium channel, subfamily T, member 1                                          | Kcnt1  | 60444  | 1,14 | up   |
| 5795840 | 7225339 | 1435441 | potassium channel, subfamily T, member 1                                          | Kcnt1  | 60444  | 1,11 | down |
| 5865267 | 7225339 | 1435433 | potassium channel, subfamily T, member 1                                          | Kcnt1  | 60444  | 1,10 | up   |
| 6311517 | 7225339 | 1435453 | potassium channel, subfamily T, member 1                                          | Kcnt1  | 60444  | 1,10 | down |
| 5927917 | 7225339 | 1435455 | potassium channel, subfamily T, member 1                                          | Kcnt1  | 60444  | 1,09 | down |
| 6723699 | 7225339 | 1435440 | potassium channel, subfamily T, member 1                                          | Kcnt1  | 60444  | 1,08 | up   |
| 5695657 | 7225339 | 1435447 | potassium channel, subfamily T, member 1                                          | Kcnt1  | 60444  | 1,06 | down |
| 6456641 | 7225339 | 1435444 | potassium channel, subfamily T, member 1                                          | Kcnt1  | 60444  | 1,06 | down |
| 6738767 | 7225339 | 1435458 | potassium channel, subfamily T, member 1                                          | Kcnt1  | 60444  | 1,05 | down |
| 6240237 | 7225339 | 1435456 | potassium channel, subfamily T, member 1                                          | Kcnt1  | 60444  | 1,04 | up   |
| 5840194 | 7225339 | 1435443 | potassium channel, subfamily T, member 1                                          | Kcnt1  | 60444  | 1,04 | up   |
| 6478952 | 7225339 | 1435448 | potassium channel, subfamily T, member 1                                          | Kcnt1  | 60444  | 1,03 | up   |
| 5851765 | 7225339 | 1435457 | potassium channel, subfamily T, member 1                                          | Kcnt1  | 60444  | 1,02 | up   |
| 6377926 | 7225339 | 1435461 | potassium channel, subfamily T, member 1                                          | Kcnt1  | 60444  | 1,01 | down |
| 6104081 | 7225339 | 1435436 | potassium channel, subfamily T, member 1                                          | Kcnt1  | 60444  | 1,01 | down |
| 6598541 | 7192858 | 1357624 | potassium large conductance calcium-activated channel, subfamily M, beta member 2 | Kcnmb2 | 294961 | 2,36 | up   |
| 5691067 | 7192858 | 1357624 | potassium large conductance calcium-activated channel, subfamily M, beta member 2 | Kcnmb2 | 294961 | 1,62 | down |
| 5777982 | 7192858 | 1357623 | potassium large conductance calcium-activated channel, subfamily M, beta member 2 | Kcnmb2 | 294961 | 1,29 | down |
| 6672224 | 7192858 | 1357625 | potassium large conductance calcium-activated channel, subfamily M, beta member 2 | Kcnmb2 | 294961 | 1,20 | up   |
| 5977757 | 7192858 | 1357625 | potassium large conductance calcium-activated channel, subfamily M, beta member 2 | Kcnmb2 | 294961 | 1,12 | down |
| 6580867 | 7192858 | 1357624 | potassium large conductance calcium-activated channel, subfamily M, beta member 2 | Kcnmb2 | 294961 | 1,10 | up   |
| 6338904 | 7192858 | 1357622 | potassium large conductance calcium-activated channel, subfamily M, beta member 2 | Kcnmb2 | 294961 | 1,07 | down |
| 5820430 | 7192858 | 1357620 | potassium large conductance calcium-activated channel, subfamily M, beta member 2 | Kcnmb2 | 294961 | 1,06 | up   |
| 6157777 | 7192858 | 1357621 | potassium large conductance calcium-activated channel, subfamily M, beta member 2 | Kcnmb2 | 294961 | 1,03 | up   |
| 6225860 | 7293515 | 1605075 | potassium voltage-gated channel, shaker-related subfamily, beta member 2          | Kcnab2 | 29738  | 2,14 | up   |
| 6101584 | 7293515 | 1605074 | potassium voltage-gated channel, shaker-related subfamily, beta member 2          | Kcnab2 | 29738  | 1,75 | down |
| 6527445 | 7293515 | 1605069 | potassium voltage-gated channel, shaker-related subfamily, beta member 2          | Kcnab2 | 29738  | 1,69 | up   |
| 6332986 | 7293515 | 1605076 | potassium voltage-gated channel, shaker-related subfamily, beta member 2          | Kcnab2 | 29738  | 1,55 | up   |
| 6571380 | 7293515 | 1605072 | potassium voltage-gated channel, shaker-related subfamily, beta member 2          | Kcnab2 | 29738  | 1,52 | up   |
| 6414107 | 7293515 | 1605067 | potassium voltage-gated channel, shaker-related subfamily, beta member 2          | Kcnab2 | 29738  | 1,51 | down |
| 6175869 | 7293515 | 1605068 | potassium voltage-gated channel, shaker-related subfamily, beta member 2          | Kcnab2 | 29738  | 1,41 | down |
| 5761044 | 7293515 | 1605061 | potassium voltage-gated channel, shaker-related subfamily, beta member 2          | Kcnab2 | 29738  | 1,32 | down |
| 6233053 | 7293515 | 1605063 | potassium voltage-gated channel, shaker-related subfamily, beta member 2          | Kcnab2 | 29738  | 1,24 | down |
| 5690215 | 7293515 | 1605076 | potassium voltage-gated channel, shaker-related subfamily, beta member 2          | Kcnab2 | 29738  | 1,20 | down |
| 6510826 | 7293515 | 1605062 | potassium voltage-gated channel, shaker-related subfamily, beta member 2          | Kcnab2 | 29738  | 1,19 | up   |
| 6313077 | 7293515 | 1605071 | potassium voltage-gated channel, shaker-related subfamily, beta member 2          | Kcnab2 | 29738  | 1,17 | up   |
| 6253474 | 7293515 | 1605064 | potassium voltage-gated channel, shaker-related subfamily, beta member 2          | Kcnab2 | 29738  | 1,16 | up   |
| 6548441 | 7293515 | 1605070 | potassium voltage-gated channel, shaker-related subfamily, beta member 2          | Kcnab2 | 29738  | 1,13 | down |
| 5666957 | 7293515 | 1605073 | potassium voltage-gated channel, shaker-related subfamily, beta member 2          | Kcnab2 | 29738  | 1,10 | down |
| 6121075 | 7293515 | 1605066 | potassium voltage-gated channel, shaker-related subfamily, beta member 2          | Kcnab2 | 29738  | 1,07 | down |
| 6493513 | 7293515 | 1605065 | potassium voltage-gated channel, shaker-related subfamily, beta member 2          | Kcnab2 | 29738  | 1,03 | up   |
| 5721730 | 7293515 | 1605075 | potassium voltage-gated channel, shaker-related subfamily, beta member 2          | Kcnab2 | 29738  | 1,00 | down |
| 5785589 | 7320620 | 1673889 | potassium voltage-gated channel, subfamily H (eag-related), member 3              | Kcnh3  | 27150  | 2,81 | up   |
| 6437375 | 7320620 | 1673884 | potassium voltage-gated channel, subfamily H (eag-related), member 3              | Kcnh3  | 27150  | 1,88 | up   |
| 6001266 | 7320620 | 1673885 | potassium voltage-gated channel, subfamily H (eag-related), member 3              | Kcnh3  | 27150  | 1,70 | down |
| 6147106 | 7320620 | 1673897 | potassium voltage-gated channel, subfamily H (eag-related), member 3              | Kcnh3  | 27150  | 1,59 | down |
| 5845843 | 7320620 | 1673897 | potassium voltage-gated channel, subfamily H (eag-related), member 3              | Kcnh3  | 27150  | 1,48 | up   |
| 6113490 | 7320620 | 1673898 | potassium voltage-gated channel, subfamily H (eag-related), member 3              | Kcnh3  | 27150  | 1,42 | up   |
| 6530626 | 7320620 | 1673886 | potassium voltage-gated channel, subfamily H (eag-related), member 3              | Kcnh3  | 27150  | 1,38 | down |
| 6687785 | 7320620 | 1673887 | potassium voltage-gated channel, subfamily H (eag-related), member 3              | Kcnh3  | 27150  | 1,37 | up   |
| 6153946 | 7320620 | 1673890 | potassium voltage-gated channel, subfamily H (eag-related), member 3              | Kcnh3  | 27150  | 1,31 | down |
| 6505191 | 7320620 | 1673894 | potassium voltage-gated channel, subfamily H (eag-related), member 3              | Kcnh3  | 27150  | 1,29 | up   |
| 6532530 | 7320620 | 1673891 | potassium voltage-gated channel, subfamily H (eag-related), member 3              | Kcnh3  | 27150  | 1,26 | down |



|         |         |         |                                                                      |       |        |      |      |
|---------|---------|---------|----------------------------------------------------------------------|-------|--------|------|------|
| 5981434 | 7320620 | 1673892 | potassium voltage-gated channel, subfamily H (eag-related), member 3 | Kcqh3 | 27150  | 1,24 | up   |
| 6409449 | 7320620 | 1673897 | potassium voltage-gated channel, subfamily H (eag-related), member 3 | Kcqh3 | 27150  | 1,22 | down |
| 6268533 | 7320620 | 1673888 | potassium voltage-gated channel, subfamily H (eag-related), member 3 | Kcqh3 | 27150  | 1,21 | up   |
| 6305849 | 7320620 | 1673895 | potassium voltage-gated channel, subfamily H (eag-related), member 3 | Kcqh3 | 27150  | 1,17 | up   |
| 6408283 | 7320620 | 1673896 | potassium voltage-gated channel, subfamily H (eag-related), member 3 | Kcqh3 | 27150  | 1,16 | up   |
| 6028656 | 7320620 | 1673895 | potassium voltage-gated channel, subfamily H (eag-related), member 3 | Kcqh3 | 27150  | 1,15 | up   |
| 6252741 | 7320620 | 1673883 | potassium voltage-gated channel, subfamily H (eag-related), member 3 | Kcqh3 | 27150  | 1,12 | up   |
| 5753596 | 7320620 | 1673897 | potassium voltage-gated channel, subfamily H (eag-related), member 3 | Kcqh3 | 27150  | 1,08 | up   |
| 6289024 | 7320620 | 1673897 | potassium voltage-gated channel, subfamily H (eag-related), member 3 | Kcqh3 | 27150  | 1,03 | up   |
| 6477970 | 7320620 | 1673893 | potassium voltage-gated channel, subfamily H (eag-related), member 3 | Kcqh3 | 27150  | 1,03 | up   |
| 5824231 | 7320620 | 1673894 | potassium voltage-gated channel, subfamily H (eag-related), member 3 | Kcqh3 | 27150  | 1,00 | down |
| 6672746 | 7082741 | 1085561 | potassium voltage-gated channel, subfamily H (eag-related), member 4 | Kcqh4 | 114032 | 2,73 | down |
| 6511680 | 7082741 | 1085567 | potassium voltage-gated channel, subfamily H (eag-related), member 4 | Kcqh4 | 114032 | 2,28 | up   |
| 6645294 | 7082741 | 1085559 | potassium voltage-gated channel, subfamily H (eag-related), member 4 | Kcqh4 | 114032 | 1,57 | up   |
| 6408923 | 7082741 | 1085552 | potassium voltage-gated channel, subfamily H (eag-related), member 4 | Kcqh4 | 114032 | 1,52 | down |
| 5930860 | 7082741 | 1085558 | potassium voltage-gated channel, subfamily H (eag-related), member 4 | Kcqh4 | 114032 | 1,51 | up   |
| 5940448 | 7082741 | 1085553 | potassium voltage-gated channel, subfamily H (eag-related), member 4 | Kcqh4 | 114032 | 1,43 | up   |
| 6472261 | 7082741 | 1085557 | potassium voltage-gated channel, subfamily H (eag-related), member 4 | Kcqh4 | 114032 | 1,32 | up   |
| 5807642 | 7082741 | 1085564 | potassium voltage-gated channel, subfamily H (eag-related), member 4 | Kcqh4 | 114032 | 1,31 | up   |
| 6649164 | 7082741 | 1085563 | potassium voltage-gated channel, subfamily H (eag-related), member 4 | Kcqh4 | 114032 | 1,30 | down |
| 6348417 | 7082741 | 1085551 | potassium voltage-gated channel, subfamily H (eag-related), member 4 | Kcqh4 | 114032 | 1,26 | up   |
| 6351160 | 7082741 | 1085554 | potassium voltage-gated channel, subfamily H (eag-related), member 4 | Kcqh4 | 114032 | 1,21 | down |
| 6470717 | 7082741 | 1085556 | potassium voltage-gated channel, subfamily H (eag-related), member 4 | Kcqh4 | 114032 | 1,20 | up   |
| 6042721 | 7082741 | 1085556 | potassium voltage-gated channel, subfamily H (eag-related), member 4 | Kcqh4 | 114032 | 1,19 | up   |
| 6281865 | 7082741 | 1085556 | potassium voltage-gated channel, subfamily H (eag-related), member 4 | Kcqh4 | 114032 | 1,16 | down |
| 6460721 | 7082741 | 1085553 | potassium voltage-gated channel, subfamily H (eag-related), member 4 | Kcqh4 | 114032 | 1,15 | down |
| 5652238 | 7082741 | 1085555 | potassium voltage-gated channel, subfamily H (eag-related), member 4 | Kcqh4 | 114032 | 1,12 | down |
| 5628277 | 7082741 | 1085562 | potassium voltage-gated channel, subfamily H (eag-related), member 4 | Kcqh4 | 114032 | 1,08 | up   |
| 6502260 | 7082741 | 1085556 | potassium voltage-gated channel, subfamily H (eag-related), member 4 | Kcqh4 | 114032 | 1,06 | down |
| 6362908 | 7082741 | 1085567 | potassium voltage-gated channel, subfamily H (eag-related), member 4 | Kcqh4 | 114032 | 1,06 | up   |
| 5712226 | 7082741 | 1085565 | potassium voltage-gated channel, subfamily H (eag-related), member 4 | Kcqh4 | 114032 | 1,05 | down |
| 6324496 | 7082741 | 1085560 | potassium voltage-gated channel, subfamily H (eag-related), member 4 | Kcqh4 | 114032 | 1,01 | up   |
| 6567629 | 7082741 | 1085566 | potassium voltage-gated channel, subfamily H (eag-related), member 4 | Kcqh4 | 114032 | 1,01 | up   |
| 6223883 | 7072801 | 1062831 | potassium voltage-gated channel, subfamily H (eag-related), member 6 | Kcqh6 | 116745 | 2,31 | up   |
| 6068122 | 7072801 | 1062832 | potassium voltage-gated channel, subfamily H (eag-related), member 6 | Kcqh6 | 116745 | 1,56 | up   |
| 5764769 | 7072801 | 1062819 | potassium voltage-gated channel, subfamily H (eag-related), member 6 | Kcqh6 | 116745 | 1,53 | up   |
| 6585086 | 7072801 | 1062828 | potassium voltage-gated channel, subfamily H (eag-related), member 6 | Kcqh6 | 116745 | 1,43 | up   |
| 5833485 | 7072801 | 1062826 | potassium voltage-gated channel, subfamily H (eag-related), member 6 | Kcqh6 | 116745 | 1,40 | down |
| 6116063 | 7072801 | 1062831 | potassium voltage-gated channel, subfamily H (eag-related), member 6 | Kcqh6 | 116745 | 1,32 | up   |
| 6722029 | 7072801 | 1062821 | potassium voltage-gated channel, subfamily H (eag-related), member 6 | Kcqh6 | 116745 | 1,25 | down |
| 6109443 | 7072801 | 1062820 | potassium voltage-gated channel, subfamily H (eag-related), member 6 | Kcqh6 | 116745 | 1,22 | up   |
| 6432649 | 7072801 | 1062831 | potassium voltage-gated channel, subfamily H (eag-related), member 6 | Kcqh6 | 116745 | 1,18 | down |
| 5752188 | 7072801 | 1062831 | potassium voltage-gated channel, subfamily H (eag-related), member 6 | Kcqh6 | 116745 | 1,15 | up   |
| 6270957 | 7072801 | 1062824 | potassium voltage-gated channel, subfamily H (eag-related), member 6 | Kcqh6 | 116745 | 1,15 | down |
| 5624354 | 7072801 | 1062827 | potassium voltage-gated channel, subfamily H (eag-related), member 6 | Kcqh6 | 116745 | 1,13 | up   |
| 6237271 | 7072801 | 1062825 | potassium voltage-gated channel, subfamily H (eag-related), member 6 | Kcqh6 | 116745 | 1,12 | down |
| 6435374 | 7072801 | 1062822 | potassium voltage-gated channel, subfamily H (eag-related), member 6 | Kcqh6 | 116745 | 1,11 | down |
| 6407181 | 7072801 | 1062831 | potassium voltage-gated channel, subfamily H (eag-related), member 6 | Kcqh6 | 116745 | 1,08 | down |
| 5842337 | 7072801 | 1062829 | potassium voltage-gated channel, subfamily H (eag-related), member 6 | Kcqh6 | 116745 | 1,06 | up   |
| 6291247 | 7072801 | 1062830 | potassium voltage-gated channel, subfamily H (eag-related), member 6 | Kcqh6 | 116745 | 1,06 | up   |
| 6701788 | 7072801 | 1062823 | potassium voltage-gated channel, subfamily H (eag-related), member 6 | Kcqh6 | 116745 | 1,04 | up   |
| 6096079 | 7038687 | 982274  | potassium voltage-gated channel, subfamily Q, member 1               | Kcqh1 | 84020  | 2,92 | up   |
| 6560574 | 7038687 | 982279  | potassium voltage-gated channel, subfamily Q, member 1               | Kcqh1 | 84020  | 1,96 | down |
| 5623033 | 7038687 | 982286  | potassium voltage-gated channel, subfamily Q, member 1               | Kcqh1 | 84020  | 1,85 | up   |
| 6096339 | 7038687 | 982284  | potassium voltage-gated channel, subfamily Q, member 1               | Kcqh1 | 84020  | 1,48 | up   |
| 6033147 | 7038687 | 982280  | potassium voltage-gated channel, subfamily Q, member 1               | Kcqh1 | 84020  | 1,40 | up   |
| 5937585 | 7038687 | 982282  | potassium voltage-gated channel, subfamily Q, member 1               | Kcqh1 | 84020  | 1,31 | down |

|         |         |         |                                                        |       |        |      |      |
|---------|---------|---------|--------------------------------------------------------|-------|--------|------|------|
| 5804817 | 7038687 | 982281  | potassium voltage-gated channel, subfamily Q, member 1 | Kcnq1 | 84020  | 1,23 | down |
| 6661089 | 7038687 | 982273  | potassium voltage-gated channel, subfamily Q, member 1 | Kcnq1 | 84020  | 1,21 | down |
| 5703257 | 7038687 | 982272  | potassium voltage-gated channel, subfamily Q, member 1 | Kcnq1 | 84020  | 1,11 | down |
| 6384742 | 7038687 | 982277  | potassium voltage-gated channel, subfamily Q, member 1 | Kcnq1 | 84020  | 1,09 | up   |
| 6126006 | 7038687 | 982281  | potassium voltage-gated channel, subfamily Q, member 1 | Kcnq1 | 84020  | 1,06 | down |
| 6319593 | 7038687 | 982272  | potassium voltage-gated channel, subfamily Q, member 1 | Kcnq1 | 84020  | 1,04 | down |
| 6002364 | 7038687 | 982287  | potassium voltage-gated channel, subfamily Q, member 1 | Kcnq1 | 84020  | 1,04 | up   |
| 6225121 | 7038687 | 982274  | potassium voltage-gated channel, subfamily Q, member 1 | Kcnq1 | 84020  | 1,04 | down |
| 5766946 | 7038687 | 982283  | potassium voltage-gated channel, subfamily Q, member 1 | Kcnq1 | 84020  | 1,02 | down |
| 5932849 | 7038687 | 982285  | potassium voltage-gated channel, subfamily Q, member 1 | Kcnq1 | 84020  | 1,02 | up   |
| 5972427 | 7038687 | 982276  | potassium voltage-gated channel, subfamily Q, member 1 | Kcnq1 | 84020  | 1,02 | up   |
| 6103780 | 7038687 | 982275  | potassium voltage-gated channel, subfamily Q, member 1 | Kcnq1 | 84020  | 1,01 | down |
| 6502103 | 7038687 | 982278  | potassium voltage-gated channel, subfamily Q, member 1 | Kcnq1 | 84020  | 1,00 | up   |
| 6116941 | 7248936 | 1494842 | potassium voltage-gated channel, subfamily Q, member 2 | Kcnq2 | 170848 | 3,16 | up   |
| 5962770 | 7248936 | 1494849 | potassium voltage-gated channel, subfamily Q, member 2 | Kcnq2 | 170848 | 2,41 | up   |
| 6568471 | 7248936 | 1494859 | potassium voltage-gated channel, subfamily Q, member 2 | Kcnq2 | 170848 | 1,64 | up   |
| 6226007 | 7248936 | 1494852 | potassium voltage-gated channel, subfamily Q, member 2 | Kcnq2 | 170848 | 1,62 | down |
| 6426613 | 7248936 | 1494850 | potassium voltage-gated channel, subfamily Q, member 2 | Kcnq2 | 170848 | 1,58 | up   |
| 5663480 | 7248936 | 1494845 | potassium voltage-gated channel, subfamily Q, member 2 | Kcnq2 | 170848 | 1,52 | up   |
| 6098630 | 7248936 | 1494843 | potassium voltage-gated channel, subfamily Q, member 2 | Kcnq2 | 170848 | 1,52 | up   |
| 5811051 | 7248936 | 1494857 | potassium voltage-gated channel, subfamily Q, member 2 | Kcnq2 | 170848 | 1,46 | down |
| 6339891 | 7248936 | 1494854 | potassium voltage-gated channel, subfamily Q, member 2 | Kcnq2 | 170848 | 1,38 | down |
| 6213884 | 7248936 | 1494846 | potassium voltage-gated channel, subfamily Q, member 2 | Kcnq2 | 170848 | 1,22 | down |
| 6318024 | 7248936 | 1494856 | potassium voltage-gated channel, subfamily Q, member 2 | Kcnq2 | 170848 | 1,22 | down |
| 6242699 | 7248936 | 1494858 | potassium voltage-gated channel, subfamily Q, member 2 | Kcnq2 | 170848 | 1,17 | down |
| 5918109 | 7248936 | 1494848 | potassium voltage-gated channel, subfamily Q, member 2 | Kcnq2 | 170848 | 1,15 | down |
| 5993116 | 7248936 | 1494847 | potassium voltage-gated channel, subfamily Q, member 2 | Kcnq2 | 170848 | 1,14 | down |
| 5970387 | 7248936 | 1494853 | potassium voltage-gated channel, subfamily Q, member 2 | Kcnq2 | 170848 | 1,12 | down |
| 6407778 | 7248936 | 1494848 | potassium voltage-gated channel, subfamily Q, member 2 | Kcnq2 | 170848 | 1,10 | down |
| 6318846 | 7248936 | 1494851 | potassium voltage-gated channel, subfamily Q, member 2 | Kcnq2 | 170848 | 1,09 | up   |
| 6740990 | 7248936 | 1494842 | potassium voltage-gated channel, subfamily Q, member 2 | Kcnq2 | 170848 | 1,08 | up   |
| 6339277 | 7248936 | 1494842 | potassium voltage-gated channel, subfamily Q, member 2 | Kcnq2 | 170848 | 1,07 | down |
| 5919187 | 7248936 | 1494855 | potassium voltage-gated channel, subfamily Q, member 2 | Kcnq2 | 170848 | 1,06 | up   |
| 6503483 | 7248936 | 1494842 | potassium voltage-gated channel, subfamily Q, member 2 | Kcnq2 | 170848 | 1,05 | up   |
| 5674314 | 7248936 | 1494844 | potassium voltage-gated channel, subfamily Q, member 2 | Kcnq2 | 170848 | 1,03 | up   |
| 6421010 | 7248936 | 1494844 | potassium voltage-gated channel, subfamily Q, member 2 | Kcnq2 | 170848 | 1,01 | down |
| 5873064 | 7328457 | 1691510 | potassium voltage-gated channel, subfamily Q, member 3 | Kcnq3 | 29682  | 2,71 | up   |
| 6506360 | 7328457 | 1691508 | potassium voltage-gated channel, subfamily Q, member 3 | Kcnq3 | 29682  | 1,78 | up   |
| 6683433 | 7328457 | 1691503 | potassium voltage-gated channel, subfamily Q, member 3 | Kcnq3 | 29682  | 1,64 | up   |
| 5740656 | 7328457 | 1691512 | potassium voltage-gated channel, subfamily Q, member 3 | Kcnq3 | 29682  | 1,62 | up   |
| 5993248 | 7328457 | 1691500 | potassium voltage-gated channel, subfamily Q, member 3 | Kcnq3 | 29682  | 1,62 | down |
| 6209328 | 7328457 | 1691504 | potassium voltage-gated channel, subfamily Q, member 3 | Kcnq3 | 29682  | 1,60 | down |
| 6270314 | 7328457 | 1691513 | potassium voltage-gated channel, subfamily Q, member 3 | Kcnq3 | 29682  | 1,48 | down |
| 6117878 | 7328457 | 1691515 | potassium voltage-gated channel, subfamily Q, member 3 | Kcnq3 | 29682  | 1,43 | down |
| 6139555 | 7328457 | 1691512 | potassium voltage-gated channel, subfamily Q, member 3 | Kcnq3 | 29682  | 1,41 | down |
| 6506692 | 7328457 | 1691514 | potassium voltage-gated channel, subfamily Q, member 3 | Kcnq3 | 29682  | 1,40 | down |
| 6032274 | 7328457 | 1691498 | potassium voltage-gated channel, subfamily Q, member 3 | Kcnq3 | 29682  | 1,37 | down |
| 6399908 | 7328457 | 1691507 | potassium voltage-gated channel, subfamily Q, member 3 | Kcnq3 | 29682  | 1,32 | up   |
| 6156527 | 7328457 | 1691505 | potassium voltage-gated channel, subfamily Q, member 3 | Kcnq3 | 29682  | 1,30 | down |
| 5648197 | 7328457 | 1691506 | potassium voltage-gated channel, subfamily Q, member 3 | Kcnq3 | 29682  | 1,26 | up   |
| 6084896 | 7328457 | 1691511 | potassium voltage-gated channel, subfamily Q, member 3 | Kcnq3 | 29682  | 1,19 | up   |
| 6330445 | 7328457 | 1691499 | potassium voltage-gated channel, subfamily Q, member 3 | Kcnq3 | 29682  | 1,17 | down |
| 5627778 | 7328457 | 1691498 | potassium voltage-gated channel, subfamily Q, member 3 | Kcnq3 | 29682  | 1,09 | up   |
| 6442434 | 7328457 | 1691509 | potassium voltage-gated channel, subfamily Q, member 3 | Kcnq3 | 29682  | 1,09 | up   |
| 6211257 | 7328457 | 1691498 | potassium voltage-gated channel, subfamily Q, member 3 | Kcnq3 | 29682  | 1,04 | up   |
| 6569339 | 7328457 | 1691501 | potassium voltage-gated channel, subfamily Q, member 3 | Kcnq3 | 29682  | 1,01 | up   |
| 5984777 | 7328457 | 1691502 | potassium voltage-gated channel, subfamily Q, member 3 | Kcnq3 | 29682  | 1,00 | up   |

|         |         |         |                                                             |        |        |      |      |
|---------|---------|---------|-------------------------------------------------------------|--------|--------|------|------|
| 6490227 | 7360325 | 1770519 | potassium voltage-gated channel, subfamily Q, member 5-like | Kcnq51 | 259273 | 1,38 | up   |
| 5834689 | 7360325 | 1770520 | potassium voltage-gated channel, subfamily Q, member 5-like | Kcnq51 | 259273 | 1,05 | up   |
| 6286402 | 7344630 | 1731937 | POU class 2 homeobox 3                                      | Pou2f3 | 116544 | 3,01 | down |
| 6222752 | 7344630 | 1731950 | POU class 2 homeobox 3                                      | Pou2f3 | 116544 | 1,89 | down |
| 5962780 | 7344630 | 1731949 | POU class 2 homeobox 3                                      | Pou2f3 | 116544 | 1,85 | down |
| 6566502 | 7344630 | 1731937 | POU class 2 homeobox 3                                      | Pou2f3 | 116544 | 1,73 | down |
| 5907980 | 7344630 | 1731959 | POU class 2 homeobox 3                                      | Pou2f3 | 116544 | 1,63 | up   |
| 5977773 | 7344630 | 1731937 | POU class 2 homeobox 3                                      | Pou2f3 | 116544 | 1,59 | up   |
| 6112017 | 7344630 | 1731957 | POU class 2 homeobox 3                                      | Pou2f3 | 116544 | 1,52 | up   |
| 6173192 | 7344630 | 1731937 | POU class 2 homeobox 3                                      | Pou2f3 | 116544 | 1,44 | down |
| 6202841 | 7344630 | 1731955 | POU class 2 homeobox 3                                      | Pou2f3 | 116544 | 1,22 | up   |
| 6521125 | 7344630 | 1731945 | POU class 2 homeobox 3                                      | Pou2f3 | 116544 | 1,19 | up   |
| 6283619 | 7344630 | 1731940 | POU class 2 homeobox 3                                      | Pou2f3 | 116544 | 1,11 | down |
| 5949752 | 7344630 | 1731939 | POU class 2 homeobox 3                                      | Pou2f3 | 116544 | 1,10 | down |
| 6334946 | 7344630 | 1731937 | POU class 2 homeobox 3                                      | Pou2f3 | 116544 | 1,08 | down |
| 6488101 | 7344630 | 1731943 | POU class 2 homeobox 3                                      | Pou2f3 | 116544 | 1,07 | down |
| 6618961 | 7344630 | 1731948 | POU class 2 homeobox 3                                      | Pou2f3 | 116544 | 1,06 | up   |
| 6703066 | 7344630 | 1731947 | POU class 2 homeobox 3                                      | Pou2f3 | 116544 | 1,06 | up   |
| 5654494 | 7344630 | 1731948 | POU class 2 homeobox 3                                      | Pou2f3 | 116544 | 1,05 | down |
| 5638769 | 7344630 | 1731937 | POU class 2 homeobox 3                                      | Pou2f3 | 116544 | 1,04 | up   |
| 5817852 | 7344630 | 1731959 | POU class 2 homeobox 3                                      | Pou2f3 | 116544 | 1,04 | up   |
| 5747986 | 7344630 | 1731946 | POU class 2 homeobox 3                                      | Pou2f3 | 116544 | 1,03 | up   |
| 6612234 | 7304938 | 1634833 | PQ loop repeat containing 3                                 | Pqlc3  | 298906 | 2,53 | up   |
| 6344250 | 7304938 | 1634829 | PQ loop repeat containing 3                                 | Pqlc3  | 298906 | 1,60 | up   |
| 5726421 | 7304938 | 1634830 | PQ loop repeat containing 3                                 | Pqlc3  | 298906 | 1,27 | down |
| 6101856 | 7304938 | 1634832 | PQ loop repeat containing 3                                 | Pqlc3  | 298906 | 1,20 | up   |
| 6234298 | 7304938 | 1634835 | PQ loop repeat containing 3                                 | Pqlc3  | 298906 | 1,20 | down |
| 6173774 | 7304938 | 1634835 | PQ loop repeat containing 3                                 | Pqlc3  | 298906 | 1,15 | down |
| 6213048 | 7304938 | 1634831 | PQ loop repeat containing 3                                 | Pqlc3  | 298906 | 1,14 | down |
| 5700457 | 7304938 | 1634831 | PQ loop repeat containing 3                                 | Pqlc3  | 298906 | 1,11 | down |
| 6279735 | 7304938 | 1634836 | PQ loop repeat containing 3                                 | Pqlc3  | 298906 | 1,10 | down |
| 5745814 | 7304938 | 1634834 | PQ loop repeat containing 3                                 | Pqlc3  | 298906 | 1,10 | down |
| 6525005 | 7304938 | 1634831 | PQ loop repeat containing 3                                 | Pqlc3  | 298906 | 1,06 | down |
| 5931376 | 7304938 | 1634831 | PQ loop repeat containing 3                                 | Pqlc3  | 298906 | 1,05 | up   |
| 6042013 | 7304938 | 1634832 | PQ loop repeat containing 3                                 | Pqlc3  | 298906 | 1,04 | up   |
| 6635123 | 7224182 | 1432758 | PR domain containing 1, with ZNF domain                     | Prdm1  | 309871 | 2,43 | up   |
| 5647043 | 7224182 | 1432754 | PR domain containing 1, with ZNF domain                     | Prdm1  | 309871 | 1,39 | up   |
| 5824121 | 7224182 | 1432760 | PR domain containing 1, with ZNF domain                     | Prdm1  | 309871 | 1,23 | up   |
| 5635314 | 7224182 | 1432766 | PR domain containing 1, with ZNF domain                     | Prdm1  | 309871 | 1,23 | down |
| 5865545 | 7224182 | 1432766 | PR domain containing 1, with ZNF domain                     | Prdm1  | 309871 | 1,16 | down |
| 5961719 | 7224182 | 1432757 | PR domain containing 1, with ZNF domain                     | Prdm1  | 309871 | 1,15 | up   |
| 6080498 | 7224182 | 1432755 | PR domain containing 1, with ZNF domain                     | Prdm1  | 309871 | 1,12 | up   |
| 6528000 | 7224182 | 1432755 | PR domain containing 1, with ZNF domain                     | Prdm1  | 309871 | 1,11 | down |
| 5981825 | 7224182 | 1432762 | PR domain containing 1, with ZNF domain                     | Prdm1  | 309871 | 1,09 | up   |
| 6631091 | 7224182 | 1432756 | PR domain containing 1, with ZNF domain                     | Prdm1  | 309871 | 1,04 | down |
| 6692309 | 7275927 | 1562356 | pregnancy-associated plasma protein A                       | Pappa  | 313262 | 3,38 | up   |
| 6496915 | 7275927 | 1562407 | pregnancy-associated plasma protein A                       | Pappa  | 313262 | 2,93 | down |
| 5898423 | 7275927 | 1562348 | pregnancy-associated plasma protein A                       | Pappa  | 313262 | 2,45 | up   |
| 5779676 | 7275927 | 1562348 | pregnancy-associated plasma protein A                       | Pappa  | 313262 | 2,32 | up   |
| 6538250 | 7275927 | 1562355 | pregnancy-associated plasma protein A                       | Pappa  | 313262 | 2,29 | up   |
| 6568710 | 7275927 | 1562388 | pregnancy-associated plasma protein A                       | Pappa  | 313262 | 1,75 | down |
| 6469479 | 7275927 | 1562389 | pregnancy-associated plasma protein A                       | Pappa  | 313262 | 1,73 | down |
| 6209046 | 7275927 | 1562393 | pregnancy-associated plasma protein A                       | Pappa  | 313262 | 1,72 | down |
| 5970229 | 7275927 | 1562387 | pregnancy-associated plasma protein A                       | Pappa  | 313262 | 1,45 | up   |
| 5836632 | 7275927 | 1562384 | pregnancy-associated plasma protein A                       | Pappa  | 313262 | 1,44 | down |
| 6201231 | 7275927 | 1562387 | pregnancy-associated plasma protein A                       | Pappa  | 313262 | 1,44 | down |
| 6222409 | 7275927 | 1562365 | pregnancy-associated plasma protein A                       | Pappa  | 313262 | 1,36 | down |

|         |         |         |                                       |           |        |      |      |
|---------|---------|---------|---------------------------------------|-----------|--------|------|------|
| 6254329 | 7275927 | 1562358 | pregnancy-associated plasma protein A | Pappa     | 313262 | 1,35 | down |
| 6202955 | 7275927 | 1562357 | pregnancy-associated plasma protein A | Pappa     | 313262 | 1,35 | up   |
| 5843974 | 7275927 | 1562406 | pregnancy-associated plasma protein A | Pappa     | 313262 | 1,26 | down |
| 6367016 | 7275927 | 1562401 | pregnancy-associated plasma protein A | Pappa     | 313262 | 1,22 | down |
| 5767339 | 7275927 | 1562409 | pregnancy-associated plasma protein A | Pappa     | 313262 | 1,16 | up   |
| 6698488 | 7275927 | 1562409 | pregnancy-associated plasma protein A | Pappa     | 313262 | 1,15 | down |
| 6063693 | 7275927 | 1562372 | pregnancy-associated plasma protein A | Pappa     | 313262 | 1,14 | down |
| 5753790 | 7275927 | 1562359 | pregnancy-associated plasma protein A | Pappa     | 313262 | 1,11 | down |
| 5801182 | 7275927 | 1562389 | pregnancy-associated plasma protein A | Pappa     | 313262 | 1,10 | down |
| 5729539 | 7275927 | 1562338 | pregnancy-associated plasma protein A | Pappa     | 313262 | 1,10 | up   |
| 6307161 | 7275927 | 1562364 | pregnancy-associated plasma protein A | Pappa     | 313262 | 1,05 | down |
| 5905847 | 7275927 | 1562394 | pregnancy-associated plasma protein A | Pappa     | 313262 | 1,03 | down |
| 5693948 | 7275927 | 1562402 | pregnancy-associated plasma protein A | Pappa     | 313262 | 1,02 | down |
| 6072280 | 7275927 | 1562385 | pregnancy-associated plasma protein A | Pappa     | 313262 | 1,01 | down |
| 6457623 | 7176362 | 1315500 | prenylcysteine oxidase 1 like         | Pcyox11   | 307396 | 2,26 | down |
| 6358173 | 7176362 | 1315500 | prenylcysteine oxidase 1 like         | Pcyox11   | 307396 | 1,65 | up   |
| 6259520 | 7176362 | 1315504 | prenylcysteine oxidase 1 like         | Pcyox11   | 307396 | 1,56 | down |
| 5838409 | 7176362 | 1315505 | prenylcysteine oxidase 1 like         | Pcyox11   | 307396 | 1,43 | down |
| 6663789 | 7176362 | 1315505 | prenylcysteine oxidase 1 like         | Pcyox11   | 307396 | 1,30 | down |
| 6335080 | 7176362 | 1315502 | prenylcysteine oxidase 1 like         | Pcyox11   | 307396 | 1,27 | down |
| 6258198 | 7176362 | 1315503 | prenylcysteine oxidase 1 like         | Pcyox11   | 307396 | 1,22 | up   |
| 5898182 | 7176362 | 1315509 | prenylcysteine oxidase 1 like         | Pcyox11   | 307396 | 1,05 | up   |
| 6406883 | 7139220 | 1223981 | prepronociceptin                      | Pnoc      | 25516  | 2,35 | down |
| 5766982 | 7139220 | 1223982 | prepronociceptin                      | Pnoc      | 25516  | 1,59 | up   |
| 6219957 | 7139220 | 1223980 | prepronociceptin                      | Pnoc      | 25516  | 1,32 | down |
| 6095501 | 7139220 | 1223978 | prepronociceptin                      | Pnoc      | 25516  | 1,14 | down |
| 6682131 | 7139220 | 1223981 | prepronociceptin                      | Pnoc      | 25516  | 1,11 | up   |
| 6209583 | 7139220 | 1223979 | prepronociceptin                      | Pnoc      | 25516  | 1,02 | up   |
| 6418138 | 7139220 | 1223981 | prepronociceptin                      | Pnoc      | 25516  | 1,01 | down |
| 6746569 | 7264158 | 1532884 | preprotrypsinogen IV                  | LOC286960 | 286960 | 2,47 | up   |
| 6001432 | 7264158 | 1532883 | preprotrypsinogen IV                  | LOC286960 | 286960 | 1,62 | down |
| 6620444 | 7264158 | 1532883 | preprotrypsinogen IV                  | LOC286960 | 286960 | 1,56 | up   |
| 6298510 | 7264158 | 1532881 | preprotrypsinogen IV                  | LOC286960 | 286960 | 1,46 | up   |
| 6027503 | 7264158 | 1532882 | preprotrypsinogen IV                  | LOC286960 | 286960 | 1,16 | up   |
| 6190972 | 7264158 | 1532880 | preprotrypsinogen IV                  | LOC286960 | 286960 | 1,02 | up   |
| 6447449 | 7267362 | 1540314 | prickle homolog 2 (Drosophila)        | Prickle2  | 312563 | 1,54 | up   |
| 5684548 | 7267362 | 1540319 | prickle homolog 2 (Drosophila)        | Prickle2  | 312563 | 1,53 | up   |
| 6349855 | 7267362 | 1540314 | prickle homolog 2 (Drosophila)        | Prickle2  | 312563 | 1,42 | up   |
| 6361045 | 7267362 | 1540305 | prickle homolog 2 (Drosophila)        | Prickle2  | 312563 | 1,17 | up   |
| 6474183 | 7267362 | 1540306 | prickle homolog 2 (Drosophila)        | Prickle2  | 312563 | 1,17 | down |
| 5842369 | 7267362 | 1540316 | prickle homolog 2 (Drosophila)        | Prickle2  | 312563 | 1,14 | up   |
| 6310991 | 7267362 | 1540317 | prickle homolog 2 (Drosophila)        | Prickle2  | 312563 | 1,10 | down |
| 6666063 | 7267362 | 1540324 | prickle homolog 2 (Drosophila)        | Prickle2  | 312563 | 1,06 | down |
| 6072576 | 7267362 | 1540315 | prickle homolog 2 (Drosophila)        | Prickle2  | 312563 | 1,05 | up   |
| 6672571 | 7267362 | 1540315 | prickle homolog 2 (Drosophila)        | Prickle2  | 312563 | 1,04 | down |
| 6595749 | 7267362 | 1540318 | prickle homolog 2 (Drosophila)        | Prickle2  | 312563 | 1,02 | up   |
| 5805831 | 7314703 | 1658729 | PRKC, apoptosis, WT1, regulator       | Pawr      | 64513  | 2,16 | up   |
| 5720963 | 7314703 | 1658726 | PRKC, apoptosis, WT1, regulator       | Pawr      | 64513  | 1,92 | down |
| 6166691 | 7314703 | 1658731 | PRKC, apoptosis, WT1, regulator       | Pawr      | 64513  | 1,73 | up   |
| 6409776 | 7314703 | 1658726 | PRKC, apoptosis, WT1, regulator       | Pawr      | 64513  | 1,52 | down |
| 5738279 | 7314703 | 1658727 | PRKC, apoptosis, WT1, regulator       | Pawr      | 64513  | 1,37 | up   |
| 6721712 | 7314703 | 1658726 | PRKC, apoptosis, WT1, regulator       | Pawr      | 64513  | 1,19 | down |
| 6194175 | 7314703 | 1658730 | PRKC, apoptosis, WT1, regulator       | Pawr      | 64513  | 1,16 | up   |
| 5814157 | 7314703 | 1658728 | PRKC, apoptosis, WT1, regulator       | Pawr      | 64513  | 1,15 | up   |
| 6051260 | 7314703 | 1658726 | PRKC, apoptosis, WT1, regulator       | Pawr      | 64513  | 1,14 | down |
| 6166008 | 7314703 | 1658726 | PRKC, apoptosis, WT1, regulator       | Pawr      | 64513  | 1,12 | down |
| 6458232 | 7314703 | 1658732 | PRKC, apoptosis, WT1, regulator       | Pawr      | 64513  | 1,05 | up   |

|         |         |         |                                                                       |         |        |      |      |
|---------|---------|---------|-----------------------------------------------------------------------|---------|--------|------|------|
| 6053916 | 7314703 | 1658726 | PRKC, apoptosis, WT1, regulator                                       | Pawr    | 64513  | 1,01 | up   |
| 5876446 | 7097454 | 1120873 | Prkr interacting protein 1 (IL11 inducible)                           | Prkrip1 | 498171 | 2,84 | down |
| 5724518 | 7097454 | 1120878 | Prkr interacting protein 1 (IL11 inducible)                           | Prkrip1 | 498171 | 1,33 | up   |
| 6546378 | 7097454 | 1120873 | Prkr interacting protein 1 (IL11 inducible)                           | Prkrip1 | 498171 | 1,25 | down |
| 5630308 | 7097454 | 1120875 | Prkr interacting protein 1 (IL11 inducible)                           | Prkrip1 | 498171 | 1,25 | up   |
| 6518015 | 7097454 | 1120879 | Prkr interacting protein 1 (IL11 inducible)                           | Prkrip1 | 498171 | 1,23 | up   |
| 6452133 | 7097454 | 1120874 | Prkr interacting protein 1 (IL11 inducible)                           | Prkrip1 | 498171 | 1,07 | down |
| 5734640 | 7097454 | 1120877 | Prkr interacting protein 1 (IL11 inducible)                           | Prkrip1 | 498171 | 1,05 | up   |
| 6680237 | 7316063 | 1662330 | processing of precursor 1, ribonuclease P/MRP subunit (S. cerevisiae) | Pop1    | 315045 | 2,23 | up   |
| 6411372 | 7316063 | 1662334 | processing of precursor 1, ribonuclease P/MRP subunit (S. cerevisiae) | Pop1    | 315045 | 2,10 | down |
| 6600367 | 7316063 | 1662331 | processing of precursor 1, ribonuclease P/MRP subunit (S. cerevisiae) | Pop1    | 315045 | 1,67 | down |
| 6434107 | 7316063 | 1662341 | processing of precursor 1, ribonuclease P/MRP subunit (S. cerevisiae) | Pop1    | 315045 | 1,53 | down |
| 6526753 | 7316063 | 1662345 | processing of precursor 1, ribonuclease P/MRP subunit (S. cerevisiae) | Pop1    | 315045 | 1,51 | down |
| 5637522 | 7316063 | 1662339 | processing of precursor 1, ribonuclease P/MRP subunit (S. cerevisiae) | Pop1    | 315045 | 1,51 | down |
| 6172921 | 7316063 | 1662345 | processing of precursor 1, ribonuclease P/MRP subunit (S. cerevisiae) | Pop1    | 315045 | 1,47 | up   |
| 5626851 | 7316063 | 1662329 | processing of precursor 1, ribonuclease P/MRP subunit (S. cerevisiae) | Pop1    | 315045 | 1,45 | up   |
| 6033259 | 7316063 | 1662344 | processing of precursor 1, ribonuclease P/MRP subunit (S. cerevisiae) | Pop1    | 315045 | 1,26 | down |
| 6511363 | 7316063 | 1662345 | processing of precursor 1, ribonuclease P/MRP subunit (S. cerevisiae) | Pop1    | 315045 | 1,23 | up   |
| 6468884 | 7316063 | 1662332 | processing of precursor 1, ribonuclease P/MRP subunit (S. cerevisiae) | Pop1    | 315045 | 1,22 | up   |
| 5972747 | 7316063 | 1662328 | processing of precursor 1, ribonuclease P/MRP subunit (S. cerevisiae) | Pop1    | 315045 | 1,21 | up   |
| 6260808 | 7316063 | 1662343 | processing of precursor 1, ribonuclease P/MRP subunit (S. cerevisiae) | Pop1    | 315045 | 1,17 | down |
| 6548491 | 7316063 | 1662326 | processing of precursor 1, ribonuclease P/MRP subunit (S. cerevisiae) | Pop1    | 315045 | 1,17 | up   |
| 6147877 | 7316063 | 1662345 | processing of precursor 1, ribonuclease P/MRP subunit (S. cerevisiae) | Pop1    | 315045 | 1,15 | up   |
| 6131430 | 7316063 | 1662332 | processing of precursor 1, ribonuclease P/MRP subunit (S. cerevisiae) | Pop1    | 315045 | 1,13 | down |
| 6425660 | 7316063 | 1662325 | processing of precursor 1, ribonuclease P/MRP subunit (S. cerevisiae) | Pop1    | 315045 | 1,12 | up   |
| 6461614 | 7316063 | 1662325 | processing of precursor 1, ribonuclease P/MRP subunit (S. cerevisiae) | Pop1    | 315045 | 1,11 | up   |
| 6411194 | 7316063 | 1662323 | processing of precursor 1, ribonuclease P/MRP subunit (S. cerevisiae) | Pop1    | 315045 | 1,11 | up   |
| 6556634 | 7316063 | 1662333 | processing of precursor 1, ribonuclease P/MRP subunit (S. cerevisiae) | Pop1    | 315045 | 1,10 | down |
| 6737401 | 7316063 | 1662345 | processing of precursor 1, ribonuclease P/MRP subunit (S. cerevisiae) | Pop1    | 315045 | 1,08 | up   |
| 6263261 | 7316063 | 1662345 | processing of precursor 1, ribonuclease P/MRP subunit (S. cerevisiae) | Pop1    | 315045 | 1,06 | up   |
| 5854566 | 7316063 | 1662346 | processing of precursor 1, ribonuclease P/MRP subunit (S. cerevisiae) | Pop1    | 315045 | 1,06 | down |
| 6283743 | 7316063 | 1662335 | processing of precursor 1, ribonuclease P/MRP subunit (S. cerevisiae) | Pop1    | 315045 | 1,04 | up   |
| 6549189 | 7316063 | 1662334 | processing of precursor 1, ribonuclease P/MRP subunit (S. cerevisiae) | Pop1    | 315045 | 1,03 | down |
| 6741665 | 7316063 | 1662334 | processing of precursor 1, ribonuclease P/MRP subunit (S. cerevisiae) | Pop1    | 315045 | 1,02 | down |
| 6288399 | 7316063 | 1662327 | processing of precursor 1, ribonuclease P/MRP subunit (S. cerevisiae) | Pop1    | 315045 | 1,01 | up   |
| 5776038 | 7365183 | 1781941 | procollagen, type VI, alpha 3                                         | Col6a3  | 367313 | 1,66 | down |
| 6618950 | 7365183 | 1781923 | procollagen, type VI, alpha 3                                         | Col6a3  | 367313 | 1,62 | up   |
| 6334172 | 7365183 | 1781926 | procollagen, type VI, alpha 3                                         | Col6a3  | 367313 | 1,60 | down |
| 6148756 | 7365183 | 1781933 | procollagen, type VI, alpha 3                                         | Col6a3  | 367313 | 1,49 | down |
| 6362720 | 7365183 | 1781937 | procollagen, type VI, alpha 3                                         | Col6a3  | 367313 | 1,45 | up   |
| 5825017 | 7365183 | 1781936 | procollagen, type VI, alpha 3                                         | Col6a3  | 367313 | 1,44 | down |
| 6048102 | 7365183 | 1781945 | procollagen, type VI, alpha 3                                         | Col6a3  | 367313 | 1,39 | up   |
| 6732985 | 7365183 | 1781940 | procollagen, type VI, alpha 3                                         | Col6a3  | 367313 | 1,32 | down |
| 6023043 | 7365183 | 1781924 | procollagen, type VI, alpha 3                                         | Col6a3  | 367313 | 1,28 | up   |
| 5766354 | 7365183 | 1781927 | procollagen, type VI, alpha 3                                         | Col6a3  | 367313 | 1,27 | down |
| 6608834 | 7365183 | 1781925 | procollagen, type VI, alpha 3                                         | Col6a3  | 367313 | 1,19 | down |
| 5891174 | 7365183 | 1781934 | procollagen, type VI, alpha 3                                         | Col6a3  | 367313 | 1,17 | down |
| 6129551 | 7365183 | 1781922 | procollagen, type VI, alpha 3                                         | Col6a3  | 367313 | 1,17 | up   |
| 6343705 | 7365183 | 1781925 | procollagen, type VI, alpha 3                                         | Col6a3  | 367313 | 1,17 | up   |
| 5738070 | 7365183 | 1781930 | procollagen, type VI, alpha 3                                         | Col6a3  | 367313 | 1,17 | up   |
| 6362543 | 7365183 | 1781932 | procollagen, type VI, alpha 3                                         | Col6a3  | 367313 | 1,15 | up   |
| 6323926 | 7365183 | 1781946 | procollagen, type VI, alpha 3                                         | Col6a3  | 367313 | 1,13 | down |
| 6233004 | 7365183 | 1781944 | procollagen, type VI, alpha 3                                         | Col6a3  | 367313 | 1,11 | down |
| 5996584 | 7365183 | 1781929 | procollagen, type VI, alpha 3                                         | Col6a3  | 367313 | 1,10 | up   |
| 6019851 | 7365183 | 1781938 | procollagen, type VI, alpha 3                                         | Col6a3  | 367313 | 1,09 | up   |
| 5716629 | 7365183 | 1781939 | procollagen, type VI, alpha 3                                         | Col6a3  | 367313 | 1,08 | down |
| 5912960 | 7365183 | 1781922 | procollagen, type VI, alpha 3                                         | Col6a3  | 367313 | 1,07 | up   |

|         |         |         |                                |        |        |      |      |
|---------|---------|---------|--------------------------------|--------|--------|------|------|
| 5977249 | 7365183 | 1781931 | procollagen, type VI, alpha 3  | Col6a3 | 367313 | 1,01 | up   |
| 6643334 | 7365183 | 1781928 | procollagen, type VI, alpha 3  | Col6a3 | 367313 | 1,01 | up   |
| 6323407 | 7365183 | 1781944 | procollagen, type VI, alpha 3  | Col6a3 | 367313 | 1,01 | down |
| 6421568 | 7340506 | 1721329 | procollagen, type VII, alpha 1 | Col7a1 | 301012 | 5,18 | up   |
| 5962949 | 7340506 | 1721315 | procollagen, type VII, alpha 1 | Col7a1 | 301012 | 3,76 | down |
| 5854673 | 7340506 | 1721323 | procollagen, type VII, alpha 1 | Col7a1 | 301012 | 2,55 | up   |
| 6235286 | 7340506 | 1721362 | procollagen, type VII, alpha 1 | Col7a1 | 301012 | 2,35 | up   |
| 5964019 | 7340506 | 1721351 | procollagen, type VII, alpha 1 | Col7a1 | 301012 | 2,22 | up   |
| 5658874 | 7340506 | 1721304 | procollagen, type VII, alpha 1 | Col7a1 | 301012 | 2,11 | up   |
| 6526650 | 7340506 | 1721284 | procollagen, type VII, alpha 1 | Col7a1 | 301012 | 2,09 | down |
| 6151248 | 7340506 | 1721335 | procollagen, type VII, alpha 1 | Col7a1 | 301012 | 1,95 | up   |
| 5731558 | 7340506 | 1721340 | procollagen, type VII, alpha 1 | Col7a1 | 301012 | 1,83 | down |
| 6411702 | 7340506 | 1721342 | procollagen, type VII, alpha 1 | Col7a1 | 301012 | 1,77 | down |
| 5790214 | 7340506 | 1721346 | procollagen, type VII, alpha 1 | Col7a1 | 301012 | 1,75 | up   |
| 6558919 | 7340506 | 1721287 | procollagen, type VII, alpha 1 | Col7a1 | 301012 | 1,70 | down |
| 6127235 | 7340506 | 1721279 | procollagen, type VII, alpha 1 | Col7a1 | 301012 | 1,65 | up   |
| 6730021 | 7340506 | 1721341 | procollagen, type VII, alpha 1 | Col7a1 | 301012 | 1,65 | up   |
| 6167376 | 7340506 | 1721273 | procollagen, type VII, alpha 1 | Col7a1 | 301012 | 1,63 | up   |
| 6378803 | 7340506 | 1721265 | procollagen, type VII, alpha 1 | Col7a1 | 301012 | 1,62 | down |
| 6508366 | 7340506 | 1721309 | procollagen, type VII, alpha 1 | Col7a1 | 301012 | 1,59 | up   |
| 5743896 | 7340506 | 1721307 | procollagen, type VII, alpha 1 | Col7a1 | 301012 | 1,52 | up   |
| 5738931 | 7340506 | 1721266 | procollagen, type VII, alpha 1 | Col7a1 | 301012 | 1,51 | up   |
| 6713298 | 7340506 | 1721332 | procollagen, type VII, alpha 1 | Col7a1 | 301012 | 1,48 | down |
| 6228539 | 7340506 | 1721328 | procollagen, type VII, alpha 1 | Col7a1 | 301012 | 1,45 | down |
| 6318580 | 7340506 | 1721337 | procollagen, type VII, alpha 1 | Col7a1 | 301012 | 1,45 | down |
| 6283956 | 7340506 | 1721317 | procollagen, type VII, alpha 1 | Col7a1 | 301012 | 1,44 | down |
| 6110467 | 7340506 | 1721322 | procollagen, type VII, alpha 1 | Col7a1 | 301012 | 1,44 | up   |
| 6188367 | 7340506 | 1721275 | procollagen, type VII, alpha 1 | Col7a1 | 301012 | 1,43 | up   |
| 5730147 | 7340506 | 1721293 | procollagen, type VII, alpha 1 | Col7a1 | 301012 | 1,43 | down |
| 6313985 | 7340506 | 1721270 | procollagen, type VII, alpha 1 | Col7a1 | 301012 | 1,42 | down |
| 6371023 | 7340506 | 1721264 | procollagen, type VII, alpha 1 | Col7a1 | 301012 | 1,42 | up   |
| 6523273 | 7340506 | 1721306 | procollagen, type VII, alpha 1 | Col7a1 | 301012 | 1,42 | down |
| 6021148 | 7340506 | 1721276 | procollagen, type VII, alpha 1 | Col7a1 | 301012 | 1,41 | up   |
| 5686626 | 7340506 | 1721331 | procollagen, type VII, alpha 1 | Col7a1 | 301012 | 1,40 | up   |
| 5792306 | 7340506 | 1721290 | procollagen, type VII, alpha 1 | Col7a1 | 301012 | 1,39 | up   |
| 6247739 | 7340506 | 1721325 | procollagen, type VII, alpha 1 | Col7a1 | 301012 | 1,39 | down |
| 5959798 | 7340506 | 1721302 | procollagen, type VII, alpha 1 | Col7a1 | 301012 | 1,39 | up   |
| 6228604 | 7340506 | 1721281 | procollagen, type VII, alpha 1 | Col7a1 | 301012 | 1,39 | down |
| 6284418 | 7340506 | 1721259 | procollagen, type VII, alpha 1 | Col7a1 | 301012 | 1,38 | up   |
| 6050693 | 7340506 | 1721363 | procollagen, type VII, alpha 1 | Col7a1 | 301012 | 1,35 | down |
| 6382342 | 7340506 | 1721291 | procollagen, type VII, alpha 1 | Col7a1 | 301012 | 1,34 | down |
| 6575814 | 7340506 | 1721354 | procollagen, type VII, alpha 1 | Col7a1 | 301012 | 1,33 | down |
| 6356041 | 7340506 | 1721276 | procollagen, type VII, alpha 1 | Col7a1 | 301012 | 1,33 | up   |
| 6250676 | 7340506 | 1721336 | procollagen, type VII, alpha 1 | Col7a1 | 301012 | 1,33 | down |
| 6114483 | 7340506 | 1721311 | procollagen, type VII, alpha 1 | Col7a1 | 301012 | 1,32 | up   |
| 5996601 | 7340506 | 1721364 | procollagen, type VII, alpha 1 | Col7a1 | 301012 | 1,31 | up   |
| 6346123 | 7340506 | 1721359 | procollagen, type VII, alpha 1 | Col7a1 | 301012 | 1,30 | up   |
| 6109596 | 7340506 | 1721258 | procollagen, type VII, alpha 1 | Col7a1 | 301012 | 1,29 | down |
| 6275785 | 7340506 | 1721305 | procollagen, type VII, alpha 1 | Col7a1 | 301012 | 1,28 | down |
| 6737117 | 7340506 | 1721283 | procollagen, type VII, alpha 1 | Col7a1 | 301012 | 1,27 | up   |
| 5831339 | 7340506 | 1721320 | procollagen, type VII, alpha 1 | Col7a1 | 301012 | 1,25 | up   |
| 6592369 | 7340506 | 1721262 | procollagen, type VII, alpha 1 | Col7a1 | 301012 | 1,25 | down |
| 5881827 | 7340506 | 1721339 | procollagen, type VII, alpha 1 | Col7a1 | 301012 | 1,25 | up   |
| 6224334 | 7340506 | 1721348 | procollagen, type VII, alpha 1 | Col7a1 | 301012 | 1,25 | up   |
| 6115480 | 7340506 | 1721355 | procollagen, type VII, alpha 1 | Col7a1 | 301012 | 1,24 | down |
| 5734799 | 7340506 | 1721285 | procollagen, type VII, alpha 1 | Col7a1 | 301012 | 1,24 | down |
| 5674418 | 7340506 | 1721363 | procollagen, type VII, alpha 1 | Col7a1 | 301012 | 1,23 | up   |

|         |         |         |                                |        |        |      |      |
|---------|---------|---------|--------------------------------|--------|--------|------|------|
| 6012643 | 7340506 | 1721356 | procollagen, type VII, alpha 1 | Col7a1 | 301012 | 1,22 | up   |
| 5741049 | 7340506 | 1721255 | procollagen, type VII, alpha 1 | Col7a1 | 301012 | 1,22 | up   |
| 5925691 | 7340506 | 1721271 | procollagen, type VII, alpha 1 | Col7a1 | 301012 | 1,22 | up   |
| 6385329 | 7340506 | 1721263 | procollagen, type VII, alpha 1 | Col7a1 | 301012 | 1,22 | up   |
| 5836744 | 7340506 | 1721289 | procollagen, type VII, alpha 1 | Col7a1 | 301012 | 1,22 | down |
| 6091504 | 7340506 | 1721295 | procollagen, type VII, alpha 1 | Col7a1 | 301012 | 1,21 | down |
| 5722383 | 7340506 | 1721278 | procollagen, type VII, alpha 1 | Col7a1 | 301012 | 1,20 | down |
| 5747105 | 7340506 | 1721324 | procollagen, type VII, alpha 1 | Col7a1 | 301012 | 1,19 | down |
| 6298777 | 7340506 | 1721312 | procollagen, type VII, alpha 1 | Col7a1 | 301012 | 1,19 | down |
| 6104009 | 7340506 | 1721268 | procollagen, type VII, alpha 1 | Col7a1 | 301012 | 1,19 | down |
| 5757541 | 7340506 | 1721296 | procollagen, type VII, alpha 1 | Col7a1 | 301012 | 1,19 | down |
| 6403951 | 7340506 | 1721256 | procollagen, type VII, alpha 1 | Col7a1 | 301012 | 1,18 | up   |
| 6091553 | 7340506 | 1721297 | procollagen, type VII, alpha 1 | Col7a1 | 301012 | 1,17 | down |
| 5709301 | 7340506 | 1721336 | procollagen, type VII, alpha 1 | Col7a1 | 301012 | 1,16 | down |
| 6710078 | 7340506 | 1721357 | procollagen, type VII, alpha 1 | Col7a1 | 301012 | 1,15 | down |
| 6555540 | 7340506 | 1721269 | procollagen, type VII, alpha 1 | Col7a1 | 301012 | 1,15 | down |
| 6656230 | 7340506 | 1721294 | procollagen, type VII, alpha 1 | Col7a1 | 301012 | 1,15 | up   |
| 6008032 | 7340506 | 1721267 | procollagen, type VII, alpha 1 | Col7a1 | 301012 | 1,14 | down |
| 6491706 | 7340506 | 1721326 | procollagen, type VII, alpha 1 | Col7a1 | 301012 | 1,14 | down |
| 6677460 | 7340506 | 1721299 | procollagen, type VII, alpha 1 | Col7a1 | 301012 | 1,14 | up   |
| 5982176 | 7340506 | 1721321 | procollagen, type VII, alpha 1 | Col7a1 | 301012 | 1,13 | up   |
| 5833947 | 7340506 | 1721282 | procollagen, type VII, alpha 1 | Col7a1 | 301012 | 1,13 | up   |
| 6504649 | 7340506 | 1721330 | procollagen, type VII, alpha 1 | Col7a1 | 301012 | 1,13 | up   |
| 6593055 | 7340506 | 1721292 | procollagen, type VII, alpha 1 | Col7a1 | 301012 | 1,12 | up   |
| 5884835 | 7340506 | 1721300 | procollagen, type VII, alpha 1 | Col7a1 | 301012 | 1,11 | down |
| 6460397 | 7340506 | 1721331 | procollagen, type VII, alpha 1 | Col7a1 | 301012 | 1,11 | up   |
| 5756117 | 7340506 | 1721286 | procollagen, type VII, alpha 1 | Col7a1 | 301012 | 1,11 | up   |
| 5761292 | 7340506 | 1721316 | procollagen, type VII, alpha 1 | Col7a1 | 301012 | 1,10 | up   |
| 5793884 | 7340506 | 1721257 | procollagen, type VII, alpha 1 | Col7a1 | 301012 | 1,10 | down |
| 6067092 | 7340506 | 1721329 | procollagen, type VII, alpha 1 | Col7a1 | 301012 | 1,09 | down |
| 5935120 | 7340506 | 1721313 | procollagen, type VII, alpha 1 | Col7a1 | 301012 | 1,09 | up   |
| 5873600 | 7340506 | 1721303 | procollagen, type VII, alpha 1 | Col7a1 | 301012 | 1,09 | up   |
| 6186197 | 7340506 | 1721261 | procollagen, type VII, alpha 1 | Col7a1 | 301012 | 1,09 | up   |
| 6219144 | 7340506 | 1721318 | procollagen, type VII, alpha 1 | Col7a1 | 301012 | 1,08 | down |
| 5759667 | 7340506 | 1721280 | procollagen, type VII, alpha 1 | Col7a1 | 301012 | 1,08 | down |
| 5711166 | 7340506 | 1721274 | procollagen, type VII, alpha 1 | Col7a1 | 301012 | 1,08 | up   |
| 6697422 | 7340506 | 1721345 | procollagen, type VII, alpha 1 | Col7a1 | 301012 | 1,08 | up   |
| 6670943 | 7340506 | 1721358 | procollagen, type VII, alpha 1 | Col7a1 | 301012 | 1,07 | up   |
| 5703984 | 7340506 | 1721361 | procollagen, type VII, alpha 1 | Col7a1 | 301012 | 1,07 | down |
| 6187783 | 7340506 | 1721344 | procollagen, type VII, alpha 1 | Col7a1 | 301012 | 1,07 | up   |
| 6002995 | 7340506 | 1721310 | procollagen, type VII, alpha 1 | Col7a1 | 301012 | 1,07 | down |
| 5782297 | 7340506 | 1721298 | procollagen, type VII, alpha 1 | Col7a1 | 301012 | 1,06 | down |
| 5909738 | 7340506 | 1721352 | procollagen, type VII, alpha 1 | Col7a1 | 301012 | 1,06 | down |
| 5958362 | 7340506 | 1721308 | procollagen, type VII, alpha 1 | Col7a1 | 301012 | 1,06 | down |
| 6317946 | 7340506 | 1721278 | procollagen, type VII, alpha 1 | Col7a1 | 301012 | 1,06 | up   |
| 5927701 | 7340506 | 1721277 | procollagen, type VII, alpha 1 | Col7a1 | 301012 | 1,05 | up   |
| 5791675 | 7340506 | 1721350 | procollagen, type VII, alpha 1 | Col7a1 | 301012 | 1,04 | up   |
| 6259904 | 7340506 | 1721360 | procollagen, type VII, alpha 1 | Col7a1 | 301012 | 1,04 | down |
| 5708101 | 7340506 | 1721365 | procollagen, type VII, alpha 1 | Col7a1 | 301012 | 1,03 | down |
| 5992414 | 7340506 | 1721334 | procollagen, type VII, alpha 1 | Col7a1 | 301012 | 1,03 | down |
| 6301162 | 7340506 | 1721272 | procollagen, type VII, alpha 1 | Col7a1 | 301012 | 1,03 | up   |
| 5622503 | 7340506 | 1721347 | procollagen, type VII, alpha 1 | Col7a1 | 301012 | 1,03 | down |
| 6391891 | 7340506 | 1721327 | procollagen, type VII, alpha 1 | Col7a1 | 301012 | 1,02 | up   |
| 5910135 | 7340506 | 1721343 | procollagen, type VII, alpha 1 | Col7a1 | 301012 | 1,02 | down |
| 5645738 | 7340506 | 1721316 | procollagen, type VII, alpha 1 | Col7a1 | 301012 | 1,02 | down |
| 6391232 | 7340506 | 1721301 | procollagen, type VII, alpha 1 | Col7a1 | 301012 | 1,01 | up   |
| 6269954 | 7340506 | 1721260 | procollagen, type VII, alpha 1 | Col7a1 | 301012 | 1,01 | up   |

|         |         |         |                                                                                                |        |        |      |      |
|---------|---------|---------|------------------------------------------------------------------------------------------------|--------|--------|------|------|
| 5752971 | 7340506 | 1721288 | procollagen, type VII, alpha 1                                                                 | Col7a1 | 301012 | 1,01 | down |
| 5903363 | 7340506 | 1721333 | procollagen, type VII, alpha 1                                                                 | Col7a1 | 301012 | 1,01 | up   |
| 6329601 | 7340506 | 1721319 | procollagen, type VII, alpha 1                                                                 | Col7a1 | 301012 | 1,01 | up   |
| 6719254 | 7340506 | 1721349 | procollagen, type VII, alpha 1                                                                 | Col7a1 | 301012 | 1,00 | up   |
| 5997515 | 7340506 | 1721314 | procollagen, type VII, alpha 1                                                                 | Col7a1 | 301012 | 1,00 | up   |
| 6152423 | 7292975 | 1603761 | procollagen-lysine 1, 2-oxoglutarate 5-dioxygenase 1                                           | Plod1  | 116552 | 2,06 | up   |
| 5858715 | 7292975 | 1603758 | procollagen-lysine 1, 2-oxoglutarate 5-dioxygenase 1                                           | Plod1  | 116552 | 1,90 | down |
| 5818847 | 7292975 | 1603760 | procollagen-lysine 1, 2-oxoglutarate 5-dioxygenase 1                                           | Plod1  | 116552 | 1,64 | down |
| 6358547 | 7292975 | 1603759 | procollagen-lysine 1, 2-oxoglutarate 5-dioxygenase 1                                           | Plod1  | 116552 | 1,47 | up   |
| 5793589 | 7292975 | 1603757 | procollagen-lysine 1, 2-oxoglutarate 5-dioxygenase 1                                           | Plod1  | 116552 | 1,28 | down |
| 5840503 | 7292975 | 1603746 | procollagen-lysine 1, 2-oxoglutarate 5-dioxygenase 1                                           | Plod1  | 116552 | 1,24 | up   |
| 5968493 | 7292975 | 1603748 | procollagen-lysine 1, 2-oxoglutarate 5-dioxygenase 1                                           | Plod1  | 116552 | 1,17 | up   |
| 5854969 | 7292975 | 1603755 | procollagen-lysine 1, 2-oxoglutarate 5-dioxygenase 1                                           | Plod1  | 116552 | 1,17 | down |
| 5661885 | 7292975 | 1603753 | procollagen-lysine 1, 2-oxoglutarate 5-dioxygenase 1                                           | Plod1  | 116552 | 1,15 | up   |
| 6184648 | 7292975 | 1603752 | procollagen-lysine 1, 2-oxoglutarate 5-dioxygenase 1                                           | Plod1  | 116552 | 1,13 | up   |
| 6063665 | 7292975 | 1603754 | procollagen-lysine 1, 2-oxoglutarate 5-dioxygenase 1                                           | Plod1  | 116552 | 1,08 | up   |
| 6056858 | 7292975 | 1603751 | procollagen-lysine 1, 2-oxoglutarate 5-dioxygenase 1                                           | Plod1  | 116552 | 1,07 | down |
| 5813076 | 7292975 | 1603750 | procollagen-lysine 1, 2-oxoglutarate 5-dioxygenase 1                                           | Plod1  | 116552 | 1,07 | up   |
| 6191371 | 7292975 | 1603762 | procollagen-lysine 1, 2-oxoglutarate 5-dioxygenase 1                                           | Plod1  | 116552 | 1,06 | down |
| 6274666 | 7292975 | 1603756 | procollagen-lysine 1, 2-oxoglutarate 5-dioxygenase 1                                           | Plod1  | 116552 | 1,05 | up   |
| 6469089 | 7292975 | 1603762 | procollagen-lysine 1, 2-oxoglutarate 5-dioxygenase 1                                           | Plod1  | 116552 | 1,03 | down |
| 5917167 | 7292975 | 1603749 | procollagen-lysine 1, 2-oxoglutarate 5-dioxygenase 1                                           | Plod1  | 116552 | 1,02 | up   |
| 6475502 | 7292975 | 1603747 | procollagen-lysine 1, 2-oxoglutarate 5-dioxygenase 1                                           | Plod1  | 116552 | 1,00 | up   |
| 6174848 | 7370002 | 1795783 | procollagen-proline, 2-oxoglutarate 4-dioxygenase (proline 4-hydroxylase), alpha polypeptide I | P4ha1  | 64475  | 2,08 | up   |
| 5932451 | 7370002 | 1795771 | procollagen-proline, 2-oxoglutarate 4-dioxygenase (proline 4-hydroxylase), alpha polypeptide I | P4ha1  | 64475  | 1,57 | down |
| 5709060 | 7370002 | 1795783 | procollagen-proline, 2-oxoglutarate 4-dioxygenase (proline 4-hydroxylase), alpha polypeptide I | P4ha1  | 64475  | 1,37 | down |
| 5891569 | 7370002 | 1795770 | procollagen-proline, 2-oxoglutarate 4-dioxygenase (proline 4-hydroxylase), alpha polypeptide I | P4ha1  | 64475  | 1,37 | down |
| 5768813 | 7370002 | 1795784 | procollagen-proline, 2-oxoglutarate 4-dioxygenase (proline 4-hydroxylase), alpha polypeptide I | P4ha1  | 64475  | 1,37 | down |
| 6003117 | 7370002 | 1795769 | procollagen-proline, 2-oxoglutarate 4-dioxygenase (proline 4-hydroxylase), alpha polypeptide I | P4ha1  | 64475  | 1,26 | down |
| 6562465 | 7370002 | 1795781 | procollagen-proline, 2-oxoglutarate 4-dioxygenase (proline 4-hydroxylase), alpha polypeptide I | P4ha1  | 64475  | 1,25 | down |
| 6370845 | 7370002 | 1795787 | procollagen-proline, 2-oxoglutarate 4-dioxygenase (proline 4-hydroxylase), alpha polypeptide I | P4ha1  | 64475  | 1,24 | down |
| 6718393 | 7370002 | 1795789 | procollagen-proline, 2-oxoglutarate 4-dioxygenase (proline 4-hydroxylase), alpha polypeptide I | P4ha1  | 64475  | 1,22 | up   |
| 6433722 | 7370002 | 1795768 | procollagen-proline, 2-oxoglutarate 4-dioxygenase (proline 4-hydroxylase), alpha polypeptide I | P4ha1  | 64475  | 1,15 | down |
| 6593244 | 7370002 | 1795786 | procollagen-proline, 2-oxoglutarate 4-dioxygenase (proline 4-hydroxylase), alpha polypeptide I | P4ha1  | 64475  | 1,13 | up   |
| 5879669 | 7370002 | 1795766 | procollagen-proline, 2-oxoglutarate 4-dioxygenase (proline 4-hydroxylase), alpha polypeptide I | P4ha1  | 64475  | 1,11 | up   |
| 5860648 | 7370002 | 1795775 | procollagen-proline, 2-oxoglutarate 4-dioxygenase (proline 4-hydroxylase), alpha polypeptide I | P4ha1  | 64475  | 1,10 | up   |
| 6022515 | 7370002 | 1795785 | procollagen-proline, 2-oxoglutarate 4-dioxygenase (proline 4-hydroxylase), alpha polypeptide I | P4ha1  | 64475  | 1,09 | up   |
| 5699684 | 7370002 | 1795780 | procollagen-proline, 2-oxoglutarate 4-dioxygenase (proline 4-hydroxylase), alpha polypeptide I | P4ha1  | 64475  | 1,09 | down |
| 6514733 | 7370002 | 1795766 | procollagen-proline, 2-oxoglutarate 4-dioxygenase (proline 4-hydroxylase), alpha polypeptide I | P4ha1  | 64475  | 1,04 | down |
| 6620763 | 7370002 | 1795772 | procollagen-proline, 2-oxoglutarate 4-dioxygenase (proline 4-hydroxylase), alpha polypeptide I | P4ha1  | 64475  | 1,02 | down |
| 6222972 | 7370002 | 1795782 | procollagen-proline, 2-oxoglutarate 4-dioxygenase (proline 4-hydroxylase), alpha polypeptide I | P4ha1  | 64475  | 1,00 | up   |
| 6545643 | 7116759 | 1169128 | progesterin and adipoQ receptor family member III                                              | Paqr3  | 305203 | 2,11 | up   |
| 6687512 | 7116759 | 1169127 | progesterin and adipoQ receptor family member III                                              | Paqr3  | 305203 | 1,72 | up   |
| 6362103 | 7116759 | 1169122 | progesterin and adipoQ receptor family member III                                              | Paqr3  | 305203 | 1,48 | up   |
| 5825163 | 7116759 | 1169123 | progesterin and adipoQ receptor family member III                                              | Paqr3  | 305203 | 1,47 | down |
| 5774427 | 7116759 | 1169127 | progesterin and adipoQ receptor family member III                                              | Paqr3  | 305203 | 1,30 | down |
| 6701529 | 7116759 | 1169122 | progesterin and adipoQ receptor family member III                                              | Paqr3  | 305203 | 1,18 | down |
| 5929777 | 7116759 | 1169124 | progesterin and adipoQ receptor family member III                                              | Paqr3  | 305203 | 1,14 | down |
| 5874213 | 7116759 | 1169126 | progesterin and adipoQ receptor family member III                                              | Paqr3  | 305203 | 1,08 | down |
| 6394450 | 7116759 | 1169125 | progesterin and adipoQ receptor family member III                                              | Paqr3  | 305203 | 1,03 | up   |
| 6295555 | 7190623 | 1351514 | prolactin receptor                                                                             | Prlr   | 24684  | 2,86 | up   |
| 6372019 | 7190623 | 1351519 | prolactin receptor                                                                             | Prlr   | 24684  | 2,67 | up   |
| 6288577 | 7190623 | 1351515 | prolactin receptor                                                                             | Prlr   | 24684  | 2,38 | down |
| 5831983 | 7190623 | 1351518 | prolactin receptor                                                                             | Prlr   | 24684  | 2,05 | down |
| 6453213 | 7190623 | 1351517 | prolactin receptor                                                                             | Prlr   | 24684  | 1,46 | up   |
| 6289161 | 7190623 | 1351520 | prolactin receptor                                                                             | Prlr   | 24684  | 1,42 | down |
| 6404831 | 7190623 | 1351522 | prolactin receptor                                                                             | Prlr   | 24684  | 1,32 | up   |



|         |         |         |                    |       |        |      |      |
|---------|---------|---------|--------------------|-------|--------|------|------|
| 6745867 | 7190623 | 1351523 | prolactin receptor | Prlr  | 24684  | 1,29 | up   |
| 6344983 | 7190623 | 1351516 | prolactin receptor | Prlr  | 24684  | 1,29 | up   |
| 5846153 | 7190623 | 1351523 | prolactin receptor | Prlr  | 24684  | 1,23 | down |
| 6579370 | 7190623 | 1351522 | prolactin receptor | Prlr  | 24684  | 1,17 | down |
| 5986190 | 7190623 | 1351517 | prolactin receptor | Prlr  | 24684  | 1,15 | up   |
| 5640564 | 7190623 | 1351519 | prolactin receptor | Prlr  | 24684  | 1,14 | down |
| 6100935 | 7190623 | 1351522 | prolactin receptor | Prlr  | 24684  | 1,13 | up   |
| 5879956 | 7190623 | 1351521 | prolactin receptor | Prlr  | 24684  | 1,10 | down |
| 5911956 | 7190623 | 1351521 | prolactin receptor | Prlr  | 24684  | 1,04 | up   |
| 6637013 | 7119590 | 1176210 | prominin 1         | Prom1 | 60357  | 2,06 | down |
| 6549741 | 7119590 | 1176208 | prominin 1         | Prom1 | 60357  | 1,74 | down |
| 6715419 | 7119590 | 1176219 | prominin 1         | Prom1 | 60357  | 1,48 | up   |
| 6333737 | 7119590 | 1176201 | prominin 1         | Prom1 | 60357  | 1,44 | up   |
| 5744059 | 7119590 | 1176201 | prominin 1         | Prom1 | 60357  | 1,36 | up   |
| 6328241 | 7119590 | 1176205 | prominin 1         | Prom1 | 60357  | 1,35 | up   |
| 5643702 | 7119590 | 1176217 | prominin 1         | Prom1 | 60357  | 1,33 | up   |
| 6049200 | 7119590 | 1176222 | prominin 1         | Prom1 | 60357  | 1,32 | down |
| 6310006 | 7119590 | 1176221 | prominin 1         | Prom1 | 60357  | 1,31 | down |
| 6249498 | 7119590 | 1176212 | prominin 1         | Prom1 | 60357  | 1,28 | up   |
| 6001675 | 7119590 | 1176204 | prominin 1         | Prom1 | 60357  | 1,23 | up   |
| 5650446 | 7119590 | 1176206 | prominin 1         | Prom1 | 60357  | 1,22 | up   |
| 6652482 | 7119590 | 1176203 | prominin 1         | Prom1 | 60357  | 1,21 | up   |
| 5927465 | 7119590 | 1176211 | prominin 1         | Prom1 | 60357  | 1,21 | up   |
| 6242949 | 7119590 | 1176209 | prominin 1         | Prom1 | 60357  | 1,19 | down |
| 6378853 | 7119590 | 1176213 | prominin 1         | Prom1 | 60357  | 1,19 | up   |
| 6267443 | 7119590 | 1176212 | prominin 1         | Prom1 | 60357  | 1,15 | down |
| 5721687 | 7119590 | 1176201 | prominin 1         | Prom1 | 60357  | 1,14 | down |
| 5848612 | 7119590 | 1176216 | prominin 1         | Prom1 | 60357  | 1,13 | down |
| 6395531 | 7119590 | 1176223 | prominin 1         | Prom1 | 60357  | 1,11 | down |
| 6712072 | 7119590 | 1176218 | prominin 1         | Prom1 | 60357  | 1,09 | down |
| 6577488 | 7119590 | 1176214 | prominin 1         | Prom1 | 60357  | 1,08 | up   |
| 6106312 | 7119590 | 1176207 | prominin 1         | Prom1 | 60357  | 1,06 | up   |
| 5967223 | 7119590 | 1176215 | prominin 1         | Prom1 | 60357  | 1,04 | down |
| 6583480 | 7119590 | 1176220 | prominin 1         | Prom1 | 60357  | 1,04 | up   |
| 6179897 | 7119590 | 1176203 | prominin 1         | Prom1 | 60357  | 1,04 | down |
| 6696888 | 7119590 | 1176202 | prominin 1         | Prom1 | 60357  | 1,01 | up   |
| 6314367 | 7244569 | 1484690 | prominin 2         | Prom2 | 192211 | 2,42 | up   |
| 6645507 | 7244569 | 1484690 | prominin 2         | Prom2 | 192211 | 1,74 | down |
| 5917872 | 7244569 | 1484687 | prominin 2         | Prom2 | 192211 | 1,61 | down |
| 5724146 | 7244569 | 1484682 | prominin 2         | Prom2 | 192211 | 1,60 | up   |
| 6643682 | 7244569 | 1484694 | prominin 2         | Prom2 | 192211 | 1,56 | up   |
| 5762112 | 7244569 | 1484671 | prominin 2         | Prom2 | 192211 | 1,32 | down |
| 6528289 | 7244569 | 1484681 | prominin 2         | Prom2 | 192211 | 1,30 | down |
| 6497044 | 7244569 | 1484692 | prominin 2         | Prom2 | 192211 | 1,24 | down |
| 6581810 | 7244569 | 1484674 | prominin 2         | Prom2 | 192211 | 1,20 | up   |
| 6425591 | 7244569 | 1484672 | prominin 2         | Prom2 | 192211 | 1,19 | down |
| 6106327 | 7244569 | 1484680 | prominin 2         | Prom2 | 192211 | 1,18 | up   |
| 6215669 | 7244569 | 1484686 | prominin 2         | Prom2 | 192211 | 1,17 | up   |
| 5806836 | 7244569 | 1484675 | prominin 2         | Prom2 | 192211 | 1,17 | down |
| 6217609 | 7244569 | 1484692 | prominin 2         | Prom2 | 192211 | 1,16 | down |
| 6715669 | 7244569 | 1484689 | prominin 2         | Prom2 | 192211 | 1,16 | down |
| 6684354 | 7244569 | 1484693 | prominin 2         | Prom2 | 192211 | 1,15 | up   |
| 5683734 | 7244569 | 1484677 | prominin 2         | Prom2 | 192211 | 1,13 | down |
| 6712012 | 7244569 | 1484671 | prominin 2         | Prom2 | 192211 | 1,13 | up   |
| 6449836 | 7244569 | 1484673 | prominin 2         | Prom2 | 192211 | 1,12 | up   |
| 6458955 | 7244569 | 1484678 | prominin 2         | Prom2 | 192211 | 1,11 | up   |
| 5886539 | 7244569 | 1484688 | prominin 2         | Prom2 | 192211 | 1,10 | down |

|         |         |         |                                               |       |        |      |      |
|---------|---------|---------|-----------------------------------------------|-------|--------|------|------|
| 6005273 | 7244569 | 1484691 | prominin 2                                    | Prom2 | 192211 | 1,06 | up   |
| 6085656 | 7244569 | 1484685 | prominin 2                                    | Prom2 | 192211 | 1,05 | down |
| 5842112 | 7244569 | 1484684 | prominin 2                                    | Prom2 | 192211 | 1,03 | down |
| 5854971 | 7244569 | 1484683 | prominin 2                                    | Prom2 | 192211 | 1,02 | down |
| 6733133 | 7244569 | 1484679 | prominin 2                                    | Prom2 | 192211 | 1,02 | down |
| 6398986 | 7244569 | 1484676 | prominin 2                                    | Prom2 | 192211 | 1,02 | up   |
| 6262302 | 7060896 | 1033580 | proprotein convertase subtilisin/kexin type 5 | Pcsk5 | 116548 | 1,99 | up   |
| 5832264 | 7060896 | 1033591 | proprotein convertase subtilisin/kexin type 5 | Pcsk5 | 116548 | 1,66 | up   |
| 5814386 | 7060896 | 1033587 | proprotein convertase subtilisin/kexin type 5 | Pcsk5 | 116548 | 1,65 | down |
| 5941147 | 7060896 | 1033602 | proprotein convertase subtilisin/kexin type 5 | Pcsk5 | 116548 | 1,60 | down |
| 6399075 | 7060896 | 1033581 | proprotein convertase subtilisin/kexin type 5 | Pcsk5 | 116548 | 1,53 | down |
| 6105364 | 7060896 | 1033583 | proprotein convertase subtilisin/kexin type 5 | Pcsk5 | 116548 | 1,42 | down |
| 5837935 | 7060896 | 1033630 | proprotein convertase subtilisin/kexin type 5 | Pcsk5 | 116548 | 1,38 | down |
| 6218213 | 7060896 | 1033647 | proprotein convertase subtilisin/kexin type 5 | Pcsk5 | 116548 | 1,35 | up   |
| 5619789 | 7060896 | 1033630 | proprotein convertase subtilisin/kexin type 5 | Pcsk5 | 116548 | 1,31 | down |
| 6491081 | 7060896 | 1033606 | proprotein convertase subtilisin/kexin type 5 | Pcsk5 | 116548 | 1,27 | down |
| 5868628 | 7060896 | 1033643 | proprotein convertase subtilisin/kexin type 5 | Pcsk5 | 116548 | 1,25 | up   |
| 6272942 | 7060896 | 1033609 | proprotein convertase subtilisin/kexin type 5 | Pcsk5 | 116548 | 1,24 | up   |
| 5898346 | 7060896 | 1033647 | proprotein convertase subtilisin/kexin type 5 | Pcsk5 | 116548 | 1,23 | up   |
| 5887450 | 7060896 | 1033634 | proprotein convertase subtilisin/kexin type 5 | Pcsk5 | 116548 | 1,21 | down |
| 6692807 | 7060896 | 1033593 | proprotein convertase subtilisin/kexin type 5 | Pcsk5 | 116548 | 1,20 | down |
| 6608534 | 7060896 | 1033590 | proprotein convertase subtilisin/kexin type 5 | Pcsk5 | 116548 | 1,19 | down |
| 6264668 | 7060896 | 1033584 | proprotein convertase subtilisin/kexin type 5 | Pcsk5 | 116548 | 1,17 | down |
| 6514910 | 7060896 | 1033619 | proprotein convertase subtilisin/kexin type 5 | Pcsk5 | 116548 | 1,17 | down |
| 6255156 | 7060896 | 1033620 | proprotein convertase subtilisin/kexin type 5 | Pcsk5 | 116548 | 1,11 | down |
| 5736651 | 7060896 | 1033589 | proprotein convertase subtilisin/kexin type 5 | Pcsk5 | 116548 | 1,09 | down |
| 5656406 | 7060896 | 1033629 | proprotein convertase subtilisin/kexin type 5 | Pcsk5 | 116548 | 1,08 | down |
| 5706410 | 7060896 | 1033606 | proprotein convertase subtilisin/kexin type 5 | Pcsk5 | 116548 | 1,07 | down |
| 6058059 | 7060896 | 1033585 | proprotein convertase subtilisin/kexin type 5 | Pcsk5 | 116548 | 1,02 | down |
| 5718329 | 7060896 | 1033543 | proprotein convertase subtilisin/kexin type 5 | Pcsk5 | 116548 | 1,02 | up   |
| 6046490 | 7060896 | 1033599 | proprotein convertase subtilisin/kexin type 5 | Pcsk5 | 116548 | 1,02 | up   |
| 5889735 | 7060896 | 1033541 | proprotein convertase subtilisin/kexin type 5 | Pcsk5 | 116548 | 1,01 | down |
| 5957359 | 7060896 | 1033600 | proprotein convertase subtilisin/kexin type 5 | Pcsk5 | 116548 | 1,01 | up   |
| 6528407 | 7032552 | 967035  | proprotein convertase subtilisin/kexin type 6 | Pcsk6 | 25507  | 3,10 | up   |
| 6483285 | 7032552 | 967039  | proprotein convertase subtilisin/kexin type 6 | Pcsk6 | 25507  | 2,33 | down |
| 6726195 | 7032552 | 967036  | proprotein convertase subtilisin/kexin type 6 | Pcsk6 | 25507  | 2,21 | up   |
| 5971025 | 7032552 | 967044  | proprotein convertase subtilisin/kexin type 6 | Pcsk6 | 25507  | 2,12 | down |
| 5880903 | 7032552 | 967045  | proprotein convertase subtilisin/kexin type 6 | Pcsk6 | 25507  | 1,91 | down |
| 6324240 | 7032552 | 967052  | proprotein convertase subtilisin/kexin type 6 | Pcsk6 | 25507  | 1,89 | down |
| 6131312 | 7032552 | 967049  | proprotein convertase subtilisin/kexin type 6 | Pcsk6 | 25507  | 1,86 | up   |
| 5859517 | 7032552 | 967052  | proprotein convertase subtilisin/kexin type 6 | Pcsk6 | 25507  | 1,77 | up   |
| 5804211 | 7032552 | 967052  | proprotein convertase subtilisin/kexin type 6 | Pcsk6 | 25507  | 1,63 | up   |
| 5932412 | 7032552 | 967040  | proprotein convertase subtilisin/kexin type 6 | Pcsk6 | 25507  | 1,62 | down |
| 5743985 | 7032552 | 967038  | proprotein convertase subtilisin/kexin type 6 | Pcsk6 | 25507  | 1,59 | up   |
| 5775274 | 7032552 | 967051  | proprotein convertase subtilisin/kexin type 6 | Pcsk6 | 25507  | 1,49 | up   |
| 6018030 | 7032552 | 967047  | proprotein convertase subtilisin/kexin type 6 | Pcsk6 | 25507  | 1,43 | down |
| 6168695 | 7032552 | 967052  | proprotein convertase subtilisin/kexin type 6 | Pcsk6 | 25507  | 1,30 | down |
| 6675533 | 7032552 | 967037  | proprotein convertase subtilisin/kexin type 6 | Pcsk6 | 25507  | 1,25 | down |
| 5728169 | 7032552 | 967041  | proprotein convertase subtilisin/kexin type 6 | Pcsk6 | 25507  | 1,24 | down |
| 6393346 | 7032552 | 967046  | proprotein convertase subtilisin/kexin type 6 | Pcsk6 | 25507  | 1,24 | down |
| 6068111 | 7032552 | 967034  | proprotein convertase subtilisin/kexin type 6 | Pcsk6 | 25507  | 1,19 | down |
| 6299607 | 7032552 | 967033  | proprotein convertase subtilisin/kexin type 6 | Pcsk6 | 25507  | 1,18 | down |
| 6264946 | 7032552 | 967052  | proprotein convertase subtilisin/kexin type 6 | Pcsk6 | 25507  | 1,17 | down |
| 6439087 | 7032552 | 967052  | proprotein convertase subtilisin/kexin type 6 | Pcsk6 | 25507  | 1,17 | up   |
| 6222218 | 7032552 | 967048  | proprotein convertase subtilisin/kexin type 6 | Pcsk6 | 25507  | 1,14 | up   |
| 6339038 | 7032552 | 967043  | proprotein convertase subtilisin/kexin type 6 | Pcsk6 | 25507  | 1,12 | down |
| 6256151 | 7032552 | 967039  | proprotein convertase subtilisin/kexin type 6 | Pcsk6 | 25507  | 1,04 | down |

|         |         |         |                                               |        |        |      |      |
|---------|---------|---------|-----------------------------------------------|--------|--------|------|------|
| 5819226 | 7032552 | 967042  | proprotein convertase subtilisin/kexin type 6 | Pcsk6  | 25507  | 1,02 | up   |
| 6352262 | 7032552 | 967050  | proprotein convertase subtilisin/kexin type 6 | Pcsk6  | 25507  | 1,01 | down |
| 6021475 | 7335712 | 1708754 | proprotein convertase subtilisin/kexin type 7 | Pcsk7  | 29606  | 2,93 | down |
| 6118112 | 7335712 | 1708749 | proprotein convertase subtilisin/kexin type 7 | Pcsk7  | 29606  | 1,61 | down |
| 6041209 | 7335712 | 1708748 | proprotein convertase subtilisin/kexin type 7 | Pcsk7  | 29606  | 1,50 | down |
| 6382767 | 7335712 | 1708742 | proprotein convertase subtilisin/kexin type 7 | Pcsk7  | 29606  | 1,47 | down |
| 6617045 | 7335712 | 1708744 | proprotein convertase subtilisin/kexin type 7 | Pcsk7  | 29606  | 1,28 | up   |
| 6384389 | 7335712 | 1708742 | proprotein convertase subtilisin/kexin type 7 | Pcsk7  | 29606  | 1,27 | up   |
| 5795343 | 7335712 | 1708742 | proprotein convertase subtilisin/kexin type 7 | Pcsk7  | 29606  | 1,27 | up   |
| 6444116 | 7335712 | 1708740 | proprotein convertase subtilisin/kexin type 7 | Pcsk7  | 29606  | 1,21 | down |
| 5690843 | 7335712 | 1708757 | proprotein convertase subtilisin/kexin type 7 | Pcsk7  | 29606  | 1,20 | down |
| 6351960 | 7335712 | 1708741 | proprotein convertase subtilisin/kexin type 7 | Pcsk7  | 29606  | 1,16 | up   |
| 5724574 | 7335712 | 1708743 | proprotein convertase subtilisin/kexin type 7 | Pcsk7  | 29606  | 1,15 | down |
| 6540096 | 7335712 | 1708747 | proprotein convertase subtilisin/kexin type 7 | Pcsk7  | 29606  | 1,15 | down |
| 5803271 | 7335712 | 1708756 | proprotein convertase subtilisin/kexin type 7 | Pcsk7  | 29606  | 1,12 | up   |
| 6118801 | 7335712 | 1708755 | proprotein convertase subtilisin/kexin type 7 | Pcsk7  | 29606  | 1,12 | down |
| 6642269 | 7335712 | 1708753 | proprotein convertase subtilisin/kexin type 7 | Pcsk7  | 29606  | 1,09 | down |
| 6120890 | 7335712 | 1708750 | proprotein convertase subtilisin/kexin type 7 | Pcsk7  | 29606  | 1,06 | down |
| 5625789 | 7335712 | 1708752 | proprotein convertase subtilisin/kexin type 7 | Pcsk7  | 29606  | 1,05 | up   |
| 5995322 | 7335712 | 1708751 | proprotein convertase subtilisin/kexin type 7 | Pcsk7  | 29606  | 1,04 | down |
| 5969423 | 7335712 | 1708746 | proprotein convertase subtilisin/kexin type 7 | Pcsk7  | 29606  | 1,04 | up   |
| 6459038 | 7335712 | 1708745 | proprotein convertase subtilisin/kexin type 7 | Pcsk7  | 29606  | 1,00 | up   |
| 6061603 | 7289582 | 1595817 | proprotein convertase subtilisin/kexin type 9 | Pcsk9  | 298296 | 2,24 | up   |
| 6670538 | 7289582 | 1595826 | proprotein convertase subtilisin/kexin type 9 | Pcsk9  | 298296 | 2,04 | down |
| 6361269 | 7289582 | 1595821 | proprotein convertase subtilisin/kexin type 9 | Pcsk9  | 298296 | 1,49 | down |
| 6657284 | 7289582 | 1595825 | proprotein convertase subtilisin/kexin type 9 | Pcsk9  | 298296 | 1,42 | down |
| 6490403 | 7289582 | 1595814 | proprotein convertase subtilisin/kexin type 9 | Pcsk9  | 298296 | 1,34 | down |
| 5697214 | 7289582 | 1595820 | proprotein convertase subtilisin/kexin type 9 | Pcsk9  | 298296 | 1,30 | up   |
| 5638693 | 7289582 | 1595816 | proprotein convertase subtilisin/kexin type 9 | Pcsk9  | 298296 | 1,24 | down |
| 5693248 | 7289582 | 1595823 | proprotein convertase subtilisin/kexin type 9 | Pcsk9  | 298296 | 1,23 | up   |
| 6700461 | 7289582 | 1595818 | proprotein convertase subtilisin/kexin type 9 | Pcsk9  | 298296 | 1,18 | down |
| 5683237 | 7289582 | 1595822 | proprotein convertase subtilisin/kexin type 9 | Pcsk9  | 298296 | 1,15 | up   |
| 6475715 | 7289582 | 1595826 | proprotein convertase subtilisin/kexin type 9 | Pcsk9  | 298296 | 1,14 | down |
| 6556243 | 7289582 | 1595815 | proprotein convertase subtilisin/kexin type 9 | Pcsk9  | 298296 | 1,09 | down |
| 6238344 | 7289582 | 1595816 | proprotein convertase subtilisin/kexin type 9 | Pcsk9  | 298296 | 1,07 | up   |
| 6264704 | 7289582 | 1595823 | proprotein convertase subtilisin/kexin type 9 | Pcsk9  | 298296 | 1,06 | down |
| 6014351 | 7289582 | 1595824 | proprotein convertase subtilisin/kexin type 9 | Pcsk9  | 298296 | 1,02 | down |
| 5783974 | 7289582 | 1595819 | proprotein convertase subtilisin/kexin type 9 | Pcsk9  | 298296 | 1,02 | down |
| 6567087 | 7289582 | 1595826 | proprotein convertase subtilisin/kexin type 9 | Pcsk9  | 298296 | 1,01 | down |
| 6402353 | 7226278 | 1437999 | prostaglandin E synthase 2                    | Ptges2 | 311865 | 3,33 | down |
| 5843693 | 7226278 | 1438004 | prostaglandin E synthase 2                    | Ptges2 | 311865 | 1,47 | up   |
| 5860594 | 7226278 | 1438006 | prostaglandin E synthase 2                    | Ptges2 | 311865 | 1,44 | up   |
| 5644454 | 7226278 | 1438003 | prostaglandin E synthase 2                    | Ptges2 | 311865 | 1,34 | up   |
| 6056957 | 7226278 | 1438005 | prostaglandin E synthase 2                    | Ptges2 | 311865 | 1,34 | up   |
| 6065299 | 7226278 | 1438004 | prostaglandin E synthase 2                    | Ptges2 | 311865 | 1,29 | up   |
| 5890939 | 7226278 | 1438000 | prostaglandin E synthase 2                    | Ptges2 | 311865 | 1,02 | up   |
| 6607615 | 7226278 | 1438002 | prostaglandin E synthase 2                    | Ptges2 | 311865 | 1,01 | down |
| 6073606 | 7224724 | 1433962 | prostaglandin F receptor                      | Ptgr1  | 25652  | 2,68 | up   |
| 6677780 | 7224724 | 1433962 | prostaglandin F receptor                      | Ptgr1  | 25652  | 1,19 | down |
| 6247406 | 7224724 | 1433962 | prostaglandin F receptor                      | Ptgr1  | 25652  | 1,11 | up   |
| 6085124 | 7224724 | 1433964 | prostaglandin F receptor                      | Ptgr1  | 25652  | 1,10 | down |
| 6603859 | 7224724 | 1433964 | prostaglandin F receptor                      | Ptgr1  | 25652  | 1,06 | up   |
| 6233449 | 7224724 | 1433964 | prostaglandin F receptor                      | Ptgr1  | 25652  | 1,06 | down |
| 5904126 | 7224724 | 1433962 | prostaglandin F receptor                      | Ptgr1  | 25652  | 1,03 | down |
| 5662535 | 7224724 | 1433965 | prostaglandin F receptor                      | Ptgr1  | 25652  | 1,02 | down |
| 6062637 | 7224724 | 1433963 | prostaglandin F receptor                      | Ptgr1  | 25652  | 1,01 | down |
| 6134728 | 7212112 | 1403508 | prostaglandin F2 receptor negative regulator  | Ptgrfn | 29602  | 2,42 | up   |

|         |         |         |                                                            |        |        |      |      |
|---------|---------|---------|------------------------------------------------------------|--------|--------|------|------|
| 6265265 | 7212112 | 1403513 | prostaglandin F2 receptor negative regulator               | Ptgfrn | 29602  | 2,13 | down |
| 6220127 | 7212112 | 1403507 | prostaglandin F2 receptor negative regulator               | Ptgfrn | 29602  | 1,82 | down |
| 6023091 | 7212112 | 1403510 | prostaglandin F2 receptor negative regulator               | Ptgfrn | 29602  | 1,48 | up   |
| 5802012 | 7212112 | 1403514 | prostaglandin F2 receptor negative regulator               | Ptgfrn | 29602  | 1,46 | down |
| 5717673 | 7212112 | 1403507 | prostaglandin F2 receptor negative regulator               | Ptgfrn | 29602  | 1,38 | down |
| 5906034 | 7212112 | 1403511 | prostaglandin F2 receptor negative regulator               | Ptgfrn | 29602  | 1,32 | up   |
| 6288798 | 7212112 | 1403512 | prostaglandin F2 receptor negative regulator               | Ptgfrn | 29602  | 1,22 | down |
| 5878566 | 7212112 | 1403507 | prostaglandin F2 receptor negative regulator               | Ptgfrn | 29602  | 1,16 | down |
| 6414355 | 7212112 | 1403507 | prostaglandin F2 receptor negative regulator               | Ptgfrn | 29602  | 1,10 | down |
| 5819337 | 7212112 | 1403509 | prostaglandin F2 receptor negative regulator               | Ptgfrn | 29602  | 1,07 | up   |
| 6409541 | 7212112 | 1403515 | prostaglandin F2 receptor negative regulator               | Ptgfrn | 29602  | 1,05 | down |
| 6415591 | 7212112 | 1403507 | prostaglandin F2 receptor negative regulator               | Ptgfrn | 29602  | 1,03 | down |
| 5928468 | 7226581 | 1438844 | prostaglandin-endoperoxide synthase 1                      | Ptgs1  | 24693  | 3,67 | down |
| 5684701 | 7226581 | 1438845 | prostaglandin-endoperoxide synthase 1                      | Ptgs1  | 24693  | 3,10 | up   |
| 5974964 | 7226581 | 1438843 | prostaglandin-endoperoxide synthase 1                      | Ptgs1  | 24693  | 2,52 | down |
| 6636971 | 7226581 | 1438846 | prostaglandin-endoperoxide synthase 1                      | Ptgs1  | 24693  | 2,40 | up   |
| 6633518 | 7226581 | 1438851 | prostaglandin-endoperoxide synthase 1                      | Ptgs1  | 24693  | 2,21 | up   |
| 6408419 | 7226581 | 1438849 | prostaglandin-endoperoxide synthase 1                      | Ptgs1  | 24693  | 2,14 | up   |
| 6401904 | 7226581 | 1438850 | prostaglandin-endoperoxide synthase 1                      | Ptgs1  | 24693  | 2,07 | up   |
| 6707918 | 7226581 | 1438846 | prostaglandin-endoperoxide synthase 1                      | Ptgs1  | 24693  | 1,87 | down |
| 5948929 | 7226581 | 1438842 | prostaglandin-endoperoxide synthase 1                      | Ptgs1  | 24693  | 1,75 | down |
| 6518736 | 7226581 | 1438852 | prostaglandin-endoperoxide synthase 1                      | Ptgs1  | 24693  | 1,42 | up   |
| 6009855 | 7226581 | 1438854 | prostaglandin-endoperoxide synthase 1                      | Ptgs1  | 24693  | 1,41 | down |
| 5922714 | 7226581 | 1438848 | prostaglandin-endoperoxide synthase 1                      | Ptgs1  | 24693  | 1,21 | up   |
| 6253802 | 7226581 | 1438853 | prostaglandin-endoperoxide synthase 1                      | Ptgs1  | 24693  | 1,11 | up   |
| 6743037 | 7226581 | 1438847 | prostaglandin-endoperoxide synthase 1                      | Ptgs1  | 24693  | 1,01 | up   |
| 6211762 | 7065457 | 1044858 | protease, serine 27                                        | Prss27 | 287108 | 2,96 | up   |
| 5998759 | 7065457 | 1044862 | protease, serine 27                                        | Prss27 | 287108 | 1,43 | down |
| 6635044 | 7065457 | 1044862 | protease, serine 27                                        | Prss27 | 287108 | 1,32 | up   |
| 6194952 | 7065457 | 1044862 | protease, serine 27                                        | Prss27 | 287108 | 1,20 | up   |
| 6436630 | 7065457 | 1044860 | protease, serine 27                                        | Prss27 | 287108 | 1,15 | up   |
| 6394587 | 7065457 | 1044859 | protease, serine 27                                        | Prss27 | 287108 | 1,11 | up   |
| 6030173 | 7065457 | 1044863 | protease, serine 27                                        | Prss27 | 287108 | 1,08 | up   |
| 6292069 | 7065457 | 1044857 | protease, serine 27                                        | Prss27 | 287108 | 1,07 | down |
| 6265859 | 7065457 | 1044861 | protease, serine 27                                        | Prss27 | 287108 | 1,05 | up   |
| 6150623 | 7211391 | 1402123 | proteasome (prosome, macropain) 26S subunit, non-ATPase, 4 | Psm4   | 83499  | 2,00 | down |
| 5827491 | 7211391 | 1402126 | proteasome (prosome, macropain) 26S subunit, non-ATPase, 4 | Psm4   | 83499  | 1,71 | up   |
| 6606758 | 7211391 | 1402130 | proteasome (prosome, macropain) 26S subunit, non-ATPase, 4 | Psm4   | 83499  | 1,29 | down |
| 6389524 | 7211391 | 1402132 | proteasome (prosome, macropain) 26S subunit, non-ATPase, 4 | Psm4   | 83499  | 1,22 | down |
| 6050715 | 7211391 | 1402124 | proteasome (prosome, macropain) 26S subunit, non-ATPase, 4 | Psm4   | 83499  | 1,18 | up   |
| 5625294 | 7211391 | 1402127 | proteasome (prosome, macropain) 26S subunit, non-ATPase, 4 | Psm4   | 83499  | 1,14 | up   |
| 6689592 | 7211391 | 1402128 | proteasome (prosome, macropain) 26S subunit, non-ATPase, 4 | Psm4   | 83499  | 1,12 | down |
| 6363597 | 7211391 | 1402129 | proteasome (prosome, macropain) 26S subunit, non-ATPase, 4 | Psm4   | 83499  | 1,09 | up   |
| 6048392 | 7211391 | 1402125 | proteasome (prosome, macropain) 26S subunit, non-ATPase, 4 | Psm4   | 83499  | 1,08 | down |
| 5900995 | 7211391 | 1402131 | proteasome (prosome, macropain) 26S subunit, non-ATPase, 4 | Psm4   | 83499  | 1,05 | up   |
| 6226266 | 7131912 | 1206132 | proteasome (prosome, macropain) activator subunit 1        | Psm1   | 29630  | 5,08 | down |
| 5886221 | 7131912 | 1206134 | proteasome (prosome, macropain) activator subunit 1        | Psm1   | 29630  | 1,80 | up   |
| 5875761 | 7131912 | 1206140 | proteasome (prosome, macropain) activator subunit 1        | Psm1   | 29630  | 1,72 | up   |
| 5779761 | 7131912 | 1206142 | proteasome (prosome, macropain) activator subunit 1        | Psm1   | 29630  | 1,35 | up   |
| 5740134 | 7131912 | 1206132 | proteasome (prosome, macropain) activator subunit 1        | Psm1   | 29630  | 1,27 | down |
| 6707428 | 7131912 | 1206136 | proteasome (prosome, macropain) activator subunit 1        | Psm1   | 29630  | 1,22 | down |
| 6344178 | 7131912 | 1206133 | proteasome (prosome, macropain) activator subunit 1        | Psm1   | 29630  | 1,21 | down |
| 6679861 | 7131912 | 1206135 | proteasome (prosome, macropain) activator subunit 1        | Psm1   | 29630  | 1,16 | up   |
| 6673210 | 7131912 | 1206139 | proteasome (prosome, macropain) activator subunit 1        | Psm1   | 29630  | 1,15 | up   |
| 6439520 | 7131912 | 1206137 | proteasome (prosome, macropain) activator subunit 1        | Psm1   | 29630  | 1,14 | up   |
| 5947534 | 7131912 | 1206141 | proteasome (prosome, macropain) activator subunit 1        | Psm1   | 29630  | 1,12 | down |
| 6428981 | 7131912 | 1206138 | proteasome (prosome, macropain) activator subunit 1        | Psm1   | 29630  | 1,10 | up   |

|         |         |         |                                                                                          |       |       |      |      |
|---------|---------|---------|------------------------------------------------------------------------------------------|-------|-------|------|------|
| 5721049 | 7138231 | 1221638 | proteasome (prosome, macropain) activator subunit 2                                      | Psme2 | 29614 | 6,12 | down |
| 5697176 | 7154573 | 1262092 | proteasome (prosome, macropain) activator subunit 2                                      | Psme2 | 29614 | 2,88 | up   |
| 6117033 | 7138231 | 1221647 | proteasome (prosome, macropain) activator subunit 2                                      | Psme2 | 29614 | 1,59 | down |
| 5627023 | 7138231 | 1221639 | proteasome (prosome, macropain) activator subunit 2                                      | Psme2 | 29614 | 1,42 | up   |
| 6091893 | 7138231 | 1221643 | proteasome (prosome, macropain) activator subunit 2                                      | Psme2 | 29614 | 1,34 | down |
| 6570491 | 7138231 | 1221638 | proteasome (prosome, macropain) activator subunit 2                                      | Psme2 | 29614 | 1,34 | down |
| 5928708 | 7154573 | 1262093 | proteasome (prosome, macropain) activator subunit 2                                      | Psme2 | 29614 | 1,33 | down |
| 6641900 | 7138231 | 1221638 | proteasome (prosome, macropain) activator subunit 2                                      | Psme2 | 29614 | 1,26 | down |
| 6002854 | 7138231 | 1221645 | proteasome (prosome, macropain) activator subunit 2                                      | Psme2 | 29614 | 1,23 | up   |
| 6359541 | 7138231 | 1221640 | proteasome (prosome, macropain) activator subunit 2                                      | Psme2 | 29614 | 1,22 | up   |
| 6082963 | 7138231 | 1221646 | proteasome (prosome, macropain) activator subunit 2                                      | Psme2 | 29614 | 1,18 | up   |
| 5980344 | 7138231 | 1221648 | proteasome (prosome, macropain) activator subunit 2                                      | Psme2 | 29614 | 1,18 | down |
| 6640942 | 7138231 | 1221641 | proteasome (prosome, macropain) activator subunit 2                                      | Psme2 | 29614 | 1,16 | up   |
| 6582658 | 7138231 | 1221644 | proteasome (prosome, macropain) activator subunit 2                                      | Psme2 | 29614 | 1,04 | down |
| 5645294 | 7154573 | 1262092 | proteasome (prosome, macropain) activator subunit 2                                      | Psme2 | 29614 | 1,01 | down |
| 6633681 | 7138231 | 1221642 | proteasome (prosome, macropain) activator subunit 2                                      | Psme2 | 29614 | 1,00 | down |
| 5935144 | 7298286 | 1617416 | proteasome (prosome, macropain) subunit, alpha type 6                                    | Psma6 | 29673 | 2,75 | down |
| 6331048 | 7298286 | 1617410 | proteasome (prosome, macropain) subunit, alpha type 6                                    | Psma6 | 29673 | 1,26 | up   |
| 6022755 | 7298286 | 1617415 | proteasome (prosome, macropain) subunit, alpha type 6                                    | Psma6 | 29673 | 1,24 | down |
| 6403486 | 7298286 | 1617414 | proteasome (prosome, macropain) subunit, alpha type 6                                    | Psma6 | 29673 | 1,11 | up   |
| 6546706 | 7298286 | 1617413 | proteasome (prosome, macropain) subunit, alpha type 6                                    | Psma6 | 29673 | 1,10 | down |
| 5680063 | 7298286 | 1617412 | proteasome (prosome, macropain) subunit, alpha type 6                                    | Psma6 | 29673 | 1,06 | up   |
| 6001843 | 7298286 | 1617409 | proteasome (prosome, macropain) subunit, alpha type 6                                    | Psma6 | 29673 | 1,02 | down |
| 6130412 | 7298286 | 1617411 | proteasome (prosome, macropain) subunit, alpha type 6                                    | Psma6 | 29673 | 1,01 | down |
| 5793565 | 7248774 | 1494454 | proteasome (prosome, macropain) subunit, alpha type 7                                    | Psma7 | 29674 | 2,47 | down |
| 6355458 | 7248774 | 1494454 | proteasome (prosome, macropain) subunit, alpha type 7                                    | Psma7 | 29674 | 2,21 | down |
| 6065153 | 7248774 | 1494448 | proteasome (prosome, macropain) subunit, alpha type 7                                    | Psma7 | 29674 | 1,49 | up   |
| 6243913 | 7248774 | 1494452 | proteasome (prosome, macropain) subunit, alpha type 7                                    | Psma7 | 29674 | 1,43 | up   |
| 6449058 | 7248774 | 1494453 | proteasome (prosome, macropain) subunit, alpha type 7                                    | Psma7 | 29674 | 1,39 | up   |
| 6190608 | 7248774 | 1494450 | proteasome (prosome, macropain) subunit, alpha type 7                                    | Psma7 | 29674 | 1,17 | down |
| 6278532 | 7248774 | 1494448 | proteasome (prosome, macropain) subunit, alpha type 7                                    | Psma7 | 29674 | 1,15 | down |
| 6348633 | 7248774 | 1494449 | proteasome (prosome, macropain) subunit, alpha type 7                                    | Psma7 | 29674 | 1,08 | up   |
| 6514536 | 7248774 | 1494451 | proteasome (prosome, macropain) subunit, alpha type 7                                    | Psma7 | 29674 | 1,01 | up   |
| 6233152 | 7047107 | 1003785 | proteasome (prosome, macropain) subunit, beta type 1                                     | Psmb1 | 94198 | 2,04 | down |
| 5933373 | 7047107 | 1003786 | proteasome (prosome, macropain) subunit, beta type 1                                     | Psmb1 | 94198 | 1,53 | up   |
| 6515479 | 7047107 | 1003790 | proteasome (prosome, macropain) subunit, beta type 1                                     | Psmb1 | 94198 | 1,47 | down |
| 6662333 | 7047107 | 1003788 | proteasome (prosome, macropain) subunit, beta type 1                                     | Psmb1 | 94198 | 1,15 | up   |
| 5666529 | 7047107 | 1003789 | proteasome (prosome, macropain) subunit, beta type 1                                     | Psmb1 | 94198 | 1,07 | down |
| 6170072 | 7047107 | 1003787 | proteasome (prosome, macropain) subunit, beta type 1                                     | Psmb1 | 94198 | 1,05 | up   |
| 5767101 | 7047107 | 1003790 | proteasome (prosome, macropain) subunit, beta type 1                                     | Psmb1 | 94198 | 1,02 | down |
| 6598194 | 7220914 | 1425043 | proteasome (prosome, macropain) subunit, beta type 8 (large multifunctional peptidase 7) | Psmb8 | 24968 | 4,45 | down |
| 6087279 | 7220914 | 1425044 | proteasome (prosome, macropain) subunit, beta type 8 (large multifunctional peptidase 7) | Psmb8 | 24968 | 2,12 | up   |
| 6337981 | 7220914 | 1425046 | proteasome (prosome, macropain) subunit, beta type 8 (large multifunctional peptidase 7) | Psmb8 | 24968 | 2,07 | up   |
| 6379607 | 7220914 | 1425048 | proteasome (prosome, macropain) subunit, beta type 8 (large multifunctional peptidase 7) | Psmb8 | 24968 | 1,44 | down |
| 6003800 | 7220914 | 1425047 | proteasome (prosome, macropain) subunit, beta type 8 (large multifunctional peptidase 7) | Psmb8 | 24968 | 1,39 | up   |
| 6014577 | 7220914 | 1425049 | proteasome (prosome, macropain) subunit, beta type 8 (large multifunctional peptidase 7) | Psmb8 | 24968 | 1,10 | down |
| 6028161 | 7220914 | 1425045 | proteasome (prosome, macropain) subunit, beta type 8 (large multifunctional peptidase 7) | Psmb8 | 24968 | 1,03 | up   |
| 6306253 | 7216935 | 1415060 | proteasome (prosome, macropain) subunit, beta type 9 (large multifunctional peptidase 2) | Psmb9 | 24967 | 3,92 | down |
| 6534180 | 7216935 | 1415060 | proteasome (prosome, macropain) subunit, beta type 9 (large multifunctional peptidase 2) | Psmb9 | 24967 | 3,45 | down |
| 6686483 | 7216935 | 1415065 | proteasome (prosome, macropain) subunit, beta type 9 (large multifunctional peptidase 2) | Psmb9 | 24967 | 2,62 | up   |
| 5768939 | 7216935 | 1415063 | proteasome (prosome, macropain) subunit, beta type 9 (large multifunctional peptidase 2) | Psmb9 | 24967 | 2,62 | up   |
| 6395139 | 7216935 | 1415064 | proteasome (prosome, macropain) subunit, beta type 9 (large multifunctional peptidase 2) | Psmb9 | 24967 | 2,14 | up   |
| 5838426 | 7216935 | 1415061 | proteasome (prosome, macropain) subunit, beta type 9 (large multifunctional peptidase 2) | Psmb9 | 24967 | 1,42 | down |
| 5950106 | 7216935 | 1415066 | proteasome (prosome, macropain) subunit, beta type 9 (large multifunctional peptidase 2) | Psmb9 | 24967 | 1,41 | down |
| 5737244 | 7216935 | 1415062 | proteasome (prosome, macropain) subunit, beta type 9 (large multifunctional peptidase 2) | Psmb9 | 24967 | 1,11 | down |
| 6236803 | 7128313 | 1197169 | protein arginine methyltransferase 1                                                     | Prmt1 | 60421 | 2,05 | up   |
| 6007207 | 7128313 | 1197168 | protein arginine methyltransferase 1                                                     | Prmt1 | 60421 | 1,85 | down |

|         |         |         |                                                            |         |        |      |      |
|---------|---------|---------|------------------------------------------------------------|---------|--------|------|------|
| 6090467 | 7128313 | 1197169 | protein arginine methyltransferase 1                       | Prmt1   | 60421  | 1,80 | down |
| 5881742 | 7128313 | 1197169 | protein arginine methyltransferase 1                       | Prmt1   | 60421  | 1,38 | up   |
| 6435086 | 7128313 | 1197169 | protein arginine methyltransferase 1                       | Prmt1   | 60421  | 1,20 | up   |
| 6423535 | 7128313 | 1197169 | protein arginine methyltransferase 1                       | Prmt1   | 60421  | 1,14 | down |
| 5810731 | 7128313 | 1197169 | protein arginine methyltransferase 1                       | Prmt1   | 60421  | 1,13 | down |
| 5890782 | 7039821 | 985066  | protein associated with topoisomerase II homolog 1 (yeast) | Pat1l   | 361736 | 2,42 | down |
| 5814100 | 7039821 | 985052  | protein associated with topoisomerase II homolog 1 (yeast) | Pat1l   | 361736 | 1,78 | down |
| 6569281 | 7039821 | 985075  | protein associated with topoisomerase II homolog 1 (yeast) | Pat1l   | 361736 | 1,33 | down |
| 6414552 | 7039821 | 985061  | protein associated with topoisomerase II homolog 1 (yeast) | Pat1l   | 361736 | 1,27 | up   |
| 6417102 | 7039821 | 985070  | protein associated with topoisomerase II homolog 1 (yeast) | Pat1l   | 361736 | 1,26 | up   |
| 6057739 | 7039821 | 985075  | protein associated with topoisomerase II homolog 1 (yeast) | Pat1l   | 361736 | 1,22 | up   |
| 6252716 | 7039821 | 985059  | protein associated with topoisomerase II homolog 1 (yeast) | Pat1l   | 361736 | 1,21 | up   |
| 5758269 | 7039821 | 985075  | protein associated with topoisomerase II homolog 1 (yeast) | Pat1l   | 361736 | 1,21 | up   |
| 6014636 | 7039821 | 985056  | protein associated with topoisomerase II homolog 1 (yeast) | Pat1l   | 361736 | 1,17 | up   |
| 6545159 | 7039821 | 985065  | protein associated with topoisomerase II homolog 1 (yeast) | Pat1l   | 361736 | 1,15 | up   |
| 5728795 | 7039821 | 985067  | protein associated with topoisomerase II homolog 1 (yeast) | Pat1l   | 361736 | 1,14 | down |
| 5851321 | 7039821 | 985055  | protein associated with topoisomerase II homolog 1 (yeast) | Pat1l   | 361736 | 1,13 | up   |
| 6440141 | 7039821 | 985074  | protein associated with topoisomerase II homolog 1 (yeast) | Pat1l   | 361736 | 1,12 | up   |
| 6038478 | 7039821 | 985064  | protein associated with topoisomerase II homolog 1 (yeast) | Pat1l   | 361736 | 1,10 | down |
| 6683279 | 7039821 | 985068  | protein associated with topoisomerase II homolog 1 (yeast) | Pat1l   | 361736 | 1,10 | down |
| 6381148 | 7039821 | 985075  | protein associated with topoisomerase II homolog 1 (yeast) | Pat1l   | 361736 | 1,09 | up   |
| 5635651 | 7039821 | 985054  | protein associated with topoisomerase II homolog 1 (yeast) | Pat1l   | 361736 | 1,07 | up   |
| 6451990 | 7039821 | 985062  | protein associated with topoisomerase II homolog 1 (yeast) | Pat1l   | 361736 | 1,07 | down |
| 6269038 | 7039821 | 985057  | protein associated with topoisomerase II homolog 1 (yeast) | Pat1l   | 361736 | 1,05 | up   |
| 6208315 | 7039821 | 985071  | protein associated with topoisomerase II homolog 1 (yeast) | Pat1l   | 361736 | 1,03 | down |
| 6092737 | 7039821 | 985063  | protein associated with topoisomerase II homolog 1 (yeast) | Pat1l   | 361736 | 1,02 | down |
| 6217574 | 7039821 | 985072  | protein associated with topoisomerase II homolog 1 (yeast) | Pat1l   | 361736 | 1,01 | up   |
| 5823048 | 7039821 | 985059  | protein associated with topoisomerase II homolog 1 (yeast) | Pat1l   | 361736 | 1,00 | up   |
| 5720511 | 7174157 | 1310560 | protein C                                                  | Proc    | 25268  | 2,01 | up   |
| 6417288 | 7174157 | 1310561 | protein C                                                  | Proc    | 25268  | 1,43 | down |
| 6159869 | 7174157 | 1310554 | protein C                                                  | Proc    | 25268  | 1,37 | up   |
| 6153873 | 7174157 | 1310558 | protein C                                                  | Proc    | 25268  | 1,29 | down |
| 6561907 | 7174157 | 1310562 | protein C                                                  | Proc    | 25268  | 1,23 | down |
| 6419488 | 7174157 | 1310555 | protein C                                                  | Proc    | 25268  | 1,19 | down |
| 5734194 | 7174157 | 1310556 | protein C                                                  | Proc    | 25268  | 1,18 | up   |
| 5740530 | 7174157 | 1310557 | protein C                                                  | Proc    | 25268  | 1,13 | down |
| 6713862 | 7174157 | 1310555 | protein C                                                  | Proc    | 25268  | 1,09 | up   |
| 6238330 | 7174157 | 1310559 | protein C                                                  | Proc    | 25268  | 1,00 | up   |
| 6465460 | 7075790 | 1069994 | protein disulfide isomerase family A, member 2             | Pdia2   | 287164 | 2,47 | down |
| 6612433 | 7075790 | 1069992 | protein disulfide isomerase family A, member 2             | Pdia2   | 287164 | 1,58 | down |
| 6659536 | 7075790 | 1069998 | protein disulfide isomerase family A, member 2             | Pdia2   | 287164 | 1,54 | down |
| 6442248 | 7075790 | 1069992 | protein disulfide isomerase family A, member 2             | Pdia2   | 287164 | 1,32 | up   |
| 6262204 | 7075790 | 1069990 | protein disulfide isomerase family A, member 2             | Pdia2   | 287164 | 1,24 | up   |
| 5765760 | 7075790 | 1069989 | protein disulfide isomerase family A, member 2             | Pdia2   | 287164 | 1,20 | down |
| 6479721 | 7075790 | 1069995 | protein disulfide isomerase family A, member 2             | Pdia2   | 287164 | 1,12 | up   |
| 6540671 | 7075790 | 1069990 | protein disulfide isomerase family A, member 2             | Pdia2   | 287164 | 1,10 | up   |
| 5690392 | 7075790 | 1069997 | protein disulfide isomerase family A, member 2             | Pdia2   | 287164 | 1,04 | up   |
| 6394841 | 7075790 | 1069989 | protein disulfide isomerase family A, member 2             | Pdia2   | 287164 | 1,04 | up   |
| 5948320 | 7075790 | 1069994 | protein disulfide isomerase family A, member 2             | Pdia2   | 287164 | 1,03 | down |
| 6245943 | 7075790 | 1069991 | protein disulfide isomerase family A, member 2             | Pdia2   | 287164 | 1,02 | down |
| 6473577 | 7247954 | 1492368 | protein kinase C binding protein 1                         | Prkcbp1 | 296374 | 1,75 | down |
| 6580683 | 7247954 | 1492384 | protein kinase C binding protein 1                         | Prkcbp1 | 296374 | 1,58 | up   |
| 6362445 | 7247954 | 1492384 | protein kinase C binding protein 1                         | Prkcbp1 | 296374 | 1,55 | up   |
| 6427246 | 7247954 | 1492374 | protein kinase C binding protein 1                         | Prkcbp1 | 296374 | 1,48 | up   |
| 5838941 | 7247954 | 1492362 | protein kinase C binding protein 1                         | Prkcbp1 | 296374 | 1,31 | up   |
| 6619710 | 7247954 | 1492361 | protein kinase C binding protein 1                         | Prkcbp1 | 296374 | 1,31 | up   |
| 6269385 | 7247954 | 1492364 | protein kinase C binding protein 1                         | Prkcbp1 | 296374 | 1,29 | down |

|         |         |         |                                    |         |        |      |      |
|---------|---------|---------|------------------------------------|---------|--------|------|------|
| 5796088 | 7247954 | 1492386 | protein kinase C binding protein 1 | Prkcbp1 | 296374 | 1,29 | up   |
| 5750401 | 7247954 | 1492375 | protein kinase C binding protein 1 | Prkcbp1 | 296374 | 1,28 | up   |
| 6603360 | 7247954 | 1492359 | protein kinase C binding protein 1 | Prkcbp1 | 296374 | 1,21 | down |
| 5972656 | 7247954 | 1492372 | protein kinase C binding protein 1 | Prkcbp1 | 296374 | 1,18 | up   |
| 6480593 | 7247954 | 1492366 | protein kinase C binding protein 1 | Prkcbp1 | 296374 | 1,17 | down |
| 6713048 | 7247954 | 1492381 | protein kinase C binding protein 1 | Prkcbp1 | 296374 | 1,14 | down |
| 5705074 | 7247954 | 1492380 | protein kinase C binding protein 1 | Prkcbp1 | 296374 | 1,14 | down |
| 6279605 | 7247954 | 1492363 | protein kinase C binding protein 1 | Prkcbp1 | 296374 | 1,13 | down |
| 5758463 | 7247954 | 1492375 | protein kinase C binding protein 1 | Prkcbp1 | 296374 | 1,13 | up   |
| 5654942 | 7247954 | 1492378 | protein kinase C binding protein 1 | Prkcbp1 | 296374 | 1,13 | down |
| 6174755 | 7247954 | 1492379 | protein kinase C binding protein 1 | Prkcbp1 | 296374 | 1,11 | up   |
| 5817854 | 7247954 | 1492371 | protein kinase C binding protein 1 | Prkcbp1 | 296374 | 1,09 | down |
| 5749468 | 7247954 | 1492375 | protein kinase C binding protein 1 | Prkcbp1 | 296374 | 1,09 | down |
| 6391636 | 7247954 | 1492382 | protein kinase C binding protein 1 | Prkcbp1 | 296374 | 1,08 | up   |
| 5777733 | 7247954 | 1492376 | protein kinase C binding protein 1 | Prkcbp1 | 296374 | 1,08 | up   |
| 5970483 | 7247954 | 1492368 | protein kinase C binding protein 1 | Prkcbp1 | 296374 | 1,08 | down |
| 6551773 | 7247954 | 1492357 | protein kinase C binding protein 1 | Prkcbp1 | 296374 | 1,05 | up   |
| 6211220 | 7247954 | 1492395 | protein kinase C binding protein 1 | Prkcbp1 | 296374 | 1,04 | up   |
| 6600834 | 7247954 | 1492370 | protein kinase C binding protein 1 | Prkcbp1 | 296374 | 1,02 | up   |
| 6530376 | 7247954 | 1492372 | protein kinase C binding protein 1 | Prkcbp1 | 296374 | 1,02 | up   |
| 5708050 | 7247954 | 1492368 | protein kinase C binding protein 1 | Prkcbp1 | 296374 | 1,02 | down |
| 6479635 | 7036479 | 977113  | protein kinase C, beta             | Prkcb   | 25023  | 2,29 | up   |
| 5880191 | 7036479 | 977129  | protein kinase C, beta             | Prkcb   | 25023  | 1,50 | up   |
| 6360444 | 7036479 | 977121  | protein kinase C, beta             | Prkcb   | 25023  | 1,47 | up   |
| 6729155 | 7036479 | 977126  | protein kinase C, beta             | Prkcb   | 25023  | 1,42 | down |
| 6049506 | 7036479 | 977131  | protein kinase C, beta             | Prkcb   | 25023  | 1,40 | up   |
| 5750588 | 7036479 | 977125  | protein kinase C, beta             | Prkcb   | 25023  | 1,38 | up   |
| 6195721 | 7036479 | 977120  | protein kinase C, beta             | Prkcb   | 25023  | 1,36 | down |
| 6150132 | 7036479 | 977117  | protein kinase C, beta             | Prkcb   | 25023  | 1,20 | up   |
| 6344699 | 7036479 | 977127  | protein kinase C, beta             | Prkcb   | 25023  | 1,13 | down |
| 5728248 | 7036479 | 977118  | protein kinase C, beta             | Prkcb   | 25023  | 1,11 | down |
| 6394613 | 7036479 | 977116  | protein kinase C, beta             | Prkcb   | 25023  | 1,10 | up   |
| 6392376 | 7036479 | 977115  | protein kinase C, beta             | Prkcb   | 25023  | 1,09 | down |
| 5645761 | 7036479 | 977130  | protein kinase C, beta             | Prkcb   | 25023  | 1,09 | down |
| 5709827 | 7036479 | 977122  | protein kinase C, beta             | Prkcb   | 25023  | 1,09 | up   |
| 5661149 | 7036479 | 977114  | protein kinase C, beta             | Prkcb   | 25023  | 1,06 | down |
| 6431484 | 7036479 | 977119  | protein kinase C, beta             | Prkcb   | 25023  | 1,06 | up   |
| 5909597 | 7036479 | 977123  | protein kinase C, beta             | Prkcb   | 25023  | 1,05 | down |
| 6734923 | 7036479 | 977124  | protein kinase C, beta             | Prkcb   | 25023  | 1,04 | up   |
| 6600342 | 7036479 | 977121  | protein kinase C, beta             | Prkcb   | 25023  | 1,03 | up   |
| 5836864 | 7036479 | 977128  | protein kinase C, beta             | Prkcb   | 25023  | 1,00 | up   |
| 6604913 | 7148661 | 1247670 | protein kinase C, delta            | Prkcd   | 170538 | 2,72 | up   |
| 5988845 | 7148661 | 1247683 | protein kinase C, delta            | Prkcd   | 170538 | 1,83 | down |
| 5905631 | 7148661 | 1247681 | protein kinase C, delta            | Prkcd   | 170538 | 1,82 | down |
| 6081765 | 7148661 | 1247666 | protein kinase C, delta            | Prkcd   | 170538 | 1,80 | up   |
| 6482999 | 7148661 | 1247674 | protein kinase C, delta            | Prkcd   | 170538 | 1,80 | up   |
| 6200098 | 7148661 | 1247673 | protein kinase C, delta            | Prkcd   | 170538 | 1,77 | down |
| 6064478 | 7148661 | 1247682 | protein kinase C, delta            | Prkcd   | 170538 | 1,44 | down |
| 6241087 | 7148661 | 1247672 | protein kinase C, delta            | Prkcd   | 170538 | 1,35 | up   |
| 6559632 | 7148661 | 1247671 | protein kinase C, delta            | Prkcd   | 170538 | 1,30 | up   |
| 6280818 | 7148661 | 1247680 | protein kinase C, delta            | Prkcd   | 170538 | 1,29 | up   |
| 6564496 | 7148661 | 1247668 | protein kinase C, delta            | Prkcd   | 170538 | 1,24 | down |
| 6192260 | 7148661 | 1247667 | protein kinase C, delta            | Prkcd   | 170538 | 1,22 | up   |
| 6636206 | 7148661 | 1247676 | protein kinase C, delta            | Prkcd   | 170538 | 1,20 | up   |
| 5996262 | 7148661 | 1247678 | protein kinase C, delta            | Prkcd   | 170538 | 1,19 | up   |
| 6688884 | 7148661 | 1247668 | protein kinase C, delta            | Prkcd   | 170538 | 1,14 | up   |
| 5805466 | 7148661 | 1247677 | protein kinase C, delta            | Prkcd   | 170538 | 1,05 | up   |

|         |         |         |                                         |         |        |      |      |
|---------|---------|---------|-----------------------------------------|---------|--------|------|------|
| 5899357 | 7148661 | 1247679 | protein kinase C, delta                 | Prkcd   | 170538 | 1,03 | up   |
| 6132750 | 7148661 | 1247675 | protein kinase C, delta                 | Prkcd   | 170538 | 1,02 | down |
| 5878674 | 7148661 | 1247669 | protein kinase C, delta                 | Prkcd   | 170538 | 1,02 | up   |
| 5812517 | 7055418 | 1021497 | protein kinase C, delta binding protein | Prkcdbp | 85332  | 2,86 | down |
| 5851903 | 7055418 | 1021497 | protein kinase C, delta binding protein | Prkcdbp | 85332  | 1,85 | up   |
| 6707852 | 7055418 | 1021498 | protein kinase C, delta binding protein | Prkcdbp | 85332  | 1,18 | up   |
| 6014299 | 7055418 | 1021497 | protein kinase C, delta binding protein | Prkcdbp | 85332  | 1,06 | down |
| 6554746 | 7055418 | 1021497 | protein kinase C, delta binding protein | Prkcdbp | 85332  | 1,04 | down |
| 6528353 | 7055418 | 1021498 | protein kinase C, delta binding protein | Prkcdbp | 85332  | 1,03 | up   |
| 5954376 | 7047561 | 1004742 | protein kinase C, gamma                 | Prkcg   | 24681  | 3,57 | down |
| 6529931 | 7047561 | 1004747 | protein kinase C, gamma                 | Prkcg   | 24681  | 1,74 | up   |
| 5618220 | 7047561 | 1004752 | protein kinase C, gamma                 | Prkcg   | 24681  | 1,67 | down |
| 6627642 | 7047561 | 1004742 | protein kinase C, gamma                 | Prkcg   | 24681  | 1,66 | down |
| 6281919 | 7047561 | 1004740 | protein kinase C, gamma                 | Prkcg   | 24681  | 1,60 | up   |
| 5993397 | 7047561 | 1004752 | protein kinase C, gamma                 | Prkcg   | 24681  | 1,53 | down |
| 6189442 | 7047561 | 1004737 | protein kinase C, gamma                 | Prkcg   | 24681  | 1,36 | up   |
| 6360448 | 7047561 | 1004746 | protein kinase C, gamma                 | Prkcg   | 24681  | 1,32 | up   |
| 5833339 | 7047561 | 1004745 | protein kinase C, gamma                 | Prkcg   | 24681  | 1,26 | up   |
| 6188102 | 7047561 | 1004744 | protein kinase C, gamma                 | Prkcg   | 24681  | 1,25 | up   |
| 6248477 | 7047561 | 1004751 | protein kinase C, gamma                 | Prkcg   | 24681  | 1,22 | down |
| 6145526 | 7047561 | 1004750 | protein kinase C, gamma                 | Prkcg   | 24681  | 1,21 | down |
| 5746081 | 7047561 | 1004751 | protein kinase C, gamma                 | Prkcg   | 24681  | 1,18 | up   |
| 6526536 | 7047561 | 1004739 | protein kinase C, gamma                 | Prkcg   | 24681  | 1,16 | down |
| 6398576 | 7047561 | 1004752 | protein kinase C, gamma                 | Prkcg   | 24681  | 1,14 | down |
| 5902626 | 7047561 | 1004743 | protein kinase C, gamma                 | Prkcg   | 24681  | 1,11 | down |
| 6643891 | 7047561 | 1004749 | protein kinase C, gamma                 | Prkcg   | 24681  | 1,10 | up   |
| 6001725 | 7047561 | 1004738 | protein kinase C, gamma                 | Prkcg   | 24681  | 1,07 | up   |
| 5952793 | 7047561 | 1004735 | protein kinase C, gamma                 | Prkcg   | 24681  | 1,07 | up   |
| 6119241 | 7047561 | 1004736 | protein kinase C, gamma                 | Prkcg   | 24681  | 1,05 | up   |
| 6125412 | 7047561 | 1004748 | protein kinase C, gamma                 | Prkcg   | 24681  | 1,05 | down |
| 5860821 | 7047561 | 1004733 | protein kinase C, gamma                 | Prkcg   | 24681  | 1,05 | up   |
| 6705070 | 7047561 | 1004741 | protein kinase C, gamma                 | Prkcg   | 24681  | 1,05 | down |
| 5636968 | 7047561 | 1004734 | protein kinase C, gamma                 | Prkcg   | 24681  | 1,04 | down |
| 5973050 | 7047561 | 1004752 | protein kinase C, gamma                 | Prkcg   | 24681  | 1,02 | up   |
| 5779861 | 7306330 | 1638508 | protein kinase D1                       | Prkd1   | 85421  | 1,70 | up   |
| 5857024 | 7306330 | 1638512 | protein kinase D1                       | Prkd1   | 85421  | 1,16 | down |
| 6491260 | 7306330 | 1638513 | protein kinase D1                       | Prkd1   | 85421  | 1,05 | down |
| 5859693 | 7306330 | 1638507 | protein kinase D1                       | Prkd1   | 85421  | 1,03 | down |
| 5920407 | 7029123 | 958988  | protein kinase D2                       | Prkd2   | 292658 | 3,21 | up   |
| 6060073 | 7029123 | 958991  | protein kinase D2                       | Prkd2   | 292658 | 1,64 | down |
| 6170474 | 7029123 | 958987  | protein kinase D2                       | Prkd2   | 292658 | 1,54 | down |
| 6105026 | 7029123 | 958987  | protein kinase D2                       | Prkd2   | 292658 | 1,45 | down |
| 6296327 | 7029123 | 959005  | protein kinase D2                       | Prkd2   | 292658 | 1,45 | up   |
| 5909986 | 7029123 | 959001  | protein kinase D2                       | Prkd2   | 292658 | 1,39 | up   |
| 5636243 | 7029123 | 959003  | protein kinase D2                       | Prkd2   | 292658 | 1,35 | down |
| 6474143 | 7029123 | 958991  | protein kinase D2                       | Prkd2   | 292658 | 1,33 | down |
| 6325010 | 7029123 | 958987  | protein kinase D2                       | Prkd2   | 292658 | 1,32 | up   |
| 6648007 | 7029123 | 958997  | protein kinase D2                       | Prkd2   | 292658 | 1,29 | down |
| 6334339 | 7029123 | 958991  | protein kinase D2                       | Prkd2   | 292658 | 1,24 | down |
| 6185841 | 7029123 | 958994  | protein kinase D2                       | Prkd2   | 292658 | 1,22 | down |
| 5848987 | 7029123 | 958998  | protein kinase D2                       | Prkd2   | 292658 | 1,16 | down |
| 6662248 | 7029123 | 959004  | protein kinase D2                       | Prkd2   | 292658 | 1,16 | up   |
| 6700786 | 7029123 | 958999  | protein kinase D2                       | Prkd2   | 292658 | 1,12 | down |
| 6268943 | 7029123 | 958995  | protein kinase D2                       | Prkd2   | 292658 | 1,12 | down |
| 5740478 | 7029123 | 958990  | protein kinase D2                       | Prkd2   | 292658 | 1,09 | up   |
| 6185688 | 7029123 | 958996  | protein kinase D2                       | Prkd2   | 292658 | 1,07 | up   |
| 6242508 | 7029123 | 959000  | protein kinase D2                       | Prkd2   | 292658 | 1,04 | up   |



|         |         |         |                                                                           |          |        |      |      |
|---------|---------|---------|---------------------------------------------------------------------------|----------|--------|------|------|
| 6131879 | 7029123 | 958993  | protein kinase D2                                                         | Prkd2    | 292658 | 1,03 | up   |
| 6005665 | 7029123 | 958993  | protein kinase D2                                                         | Prkd2    | 292658 | 1,03 | down |
| 6313039 | 7029123 | 959002  | protein kinase D2                                                         | Prkd2    | 292658 | 1,03 | up   |
| 6339170 | 7029123 | 958992  | protein kinase D2                                                         | Prkd2    | 292658 | 1,01 | up   |
| 6145020 | 7029123 | 958989  | protein kinase D2                                                         | Prkd2    | 292658 | 1,00 | down |
| 5699723 | 7219186 | 1420912 | protein kinase inhibitor beta, (cAMP-dependent, catalytic) inhibitor beta | Pkib     | 24678  | 2,66 | up   |
| 5826952 | 7219186 | 1420916 | protein kinase inhibitor beta, (cAMP-dependent, catalytic) inhibitor beta | Pkib     | 24678  | 2,14 | up   |
| 6614929 | 7219186 | 1420917 | protein kinase inhibitor beta, (cAMP-dependent, catalytic) inhibitor beta | Pkib     | 24678  | 2,00 | up   |
| 6712267 | 7219186 | 1420914 | protein kinase inhibitor beta, (cAMP-dependent, catalytic) inhibitor beta | Pkib     | 24678  | 1,63 | up   |
| 5953971 | 7219186 | 1420917 | protein kinase inhibitor beta, (cAMP-dependent, catalytic) inhibitor beta | Pkib     | 24678  | 1,29 | down |
| 6146324 | 7219186 | 1420913 | protein kinase inhibitor beta, (cAMP-dependent, catalytic) inhibitor beta | Pkib     | 24678  | 1,19 | up   |
| 5898478 | 7219186 | 1420915 | protein kinase inhibitor beta, (cAMP-dependent, catalytic) inhibitor beta | Pkib     | 24678  | 1,08 | down |
| 6589740 | 7098837 | 1124893 | protein kinase, AMP-activated, beta 1 non-catalytic subunit               | Prkab1   | 83803  | 3,78 | down |
| 6025113 | 7098837 | 1124886 | protein kinase, AMP-activated, beta 1 non-catalytic subunit               | Prkab1   | 83803  | 1,57 | up   |
| 5746863 | 7098837 | 1124885 | protein kinase, AMP-activated, beta 1 non-catalytic subunit               | Prkab1   | 83803  | 1,50 | up   |
| 6648226 | 7098837 | 1124891 | protein kinase, AMP-activated, beta 1 non-catalytic subunit               | Prkab1   | 83803  | 1,28 | up   |
| 6707188 | 7098837 | 1124887 | protein kinase, AMP-activated, beta 1 non-catalytic subunit               | Prkab1   | 83803  | 1,23 | down |
| 6203234 | 7098837 | 1124888 | protein kinase, AMP-activated, beta 1 non-catalytic subunit               | Prkab1   | 83803  | 1,22 | down |
| 6544397 | 7098837 | 1124890 | protein kinase, AMP-activated, beta 1 non-catalytic subunit               | Prkab1   | 83803  | 1,07 | down |
| 6041588 | 7098837 | 1124889 | protein kinase, AMP-activated, beta 1 non-catalytic subunit               | Prkab1   | 83803  | 1,06 | down |
| 6428678 | 7098837 | 1124892 | protein kinase, AMP-activated, beta 1 non-catalytic subunit               | Prkab1   | 83803  | 1,01 | up   |
| 6721271 | 7197221 | 1368223 | protein kinase, AMP-activated, beta 2 non-catalytic subunit               | Prkab2   | 64562  | 2,13 | up   |
| 6382705 | 7197221 | 1368218 | protein kinase, AMP-activated, beta 2 non-catalytic subunit               | Prkab2   | 64562  | 1,95 | down |
| 6057403 | 7197221 | 1368217 | protein kinase, AMP-activated, beta 2 non-catalytic subunit               | Prkab2   | 64562  | 1,79 | down |
| 6403844 | 7197221 | 1368225 | protein kinase, AMP-activated, beta 2 non-catalytic subunit               | Prkab2   | 64562  | 1,64 | down |
| 6081938 | 7197221 | 1368221 | protein kinase, AMP-activated, beta 2 non-catalytic subunit               | Prkab2   | 64562  | 1,43 | up   |
| 6691012 | 7197221 | 1368222 | protein kinase, AMP-activated, beta 2 non-catalytic subunit               | Prkab2   | 64562  | 1,40 | down |
| 6094400 | 7197221 | 1368220 | protein kinase, AMP-activated, beta 2 non-catalytic subunit               | Prkab2   | 64562  | 1,20 | up   |
| 5826961 | 7197221 | 1368219 | protein kinase, AMP-activated, beta 2 non-catalytic subunit               | Prkab2   | 64562  | 1,20 | down |
| 5899938 | 7197221 | 1368218 | protein kinase, AMP-activated, beta 2 non-catalytic subunit               | Prkab2   | 64562  | 1,15 | down |
| 5932161 | 7197221 | 1368224 | protein kinase, AMP-activated, beta 2 non-catalytic subunit               | Prkab2   | 64562  | 1,04 | down |
| 6617123 | 7249535 | 1496333 | protein kinase, AMP-activated, gamma 2 non-catalytic subunit              | Prkag2   | 373545 | 2,17 | down |
| 6136437 | 7249535 | 1496340 | protein kinase, AMP-activated, gamma 2 non-catalytic subunit              | Prkag2   | 373545 | 1,70 | up   |
| 6473300 | 7249535 | 1496333 | protein kinase, AMP-activated, gamma 2 non-catalytic subunit              | Prkag2   | 373545 | 1,46 | down |
| 6618053 | 7249535 | 1496336 | protein kinase, AMP-activated, gamma 2 non-catalytic subunit              | Prkag2   | 373545 | 1,38 | down |
| 5990027 | 7249535 | 1496345 | protein kinase, AMP-activated, gamma 2 non-catalytic subunit              | Prkag2   | 373545 | 1,37 | up   |
| 6468587 | 7249535 | 1496339 | protein kinase, AMP-activated, gamma 2 non-catalytic subunit              | Prkag2   | 373545 | 1,36 | down |
| 6182197 | 7249535 | 1496345 | protein kinase, AMP-activated, gamma 2 non-catalytic subunit              | Prkag2   | 373545 | 1,34 | down |
| 6076289 | 7249535 | 1496342 | protein kinase, AMP-activated, gamma 2 non-catalytic subunit              | Prkag2   | 373545 | 1,31 | down |
| 6407187 | 7249535 | 1496345 | protein kinase, AMP-activated, gamma 2 non-catalytic subunit              | Prkag2   | 373545 | 1,31 | down |
| 5826556 | 7249535 | 1496345 | protein kinase, AMP-activated, gamma 2 non-catalytic subunit              | Prkag2   | 373545 | 1,25 | down |
| 5953364 | 7249535 | 1496333 | protein kinase, AMP-activated, gamma 2 non-catalytic subunit              | Prkag2   | 373545 | 1,24 | up   |
| 6362380 | 7249535 | 1496337 | protein kinase, AMP-activated, gamma 2 non-catalytic subunit              | Prkag2   | 373545 | 1,24 | up   |
| 5716526 | 7249535 | 1496343 | protein kinase, AMP-activated, gamma 2 non-catalytic subunit              | Prkag2   | 373545 | 1,18 | up   |
| 6108196 | 7249535 | 1496345 | protein kinase, AMP-activated, gamma 2 non-catalytic subunit              | Prkag2   | 373545 | 1,18 | down |
| 6129946 | 7249535 | 1496344 | protein kinase, AMP-activated, gamma 2 non-catalytic subunit              | Prkag2   | 373545 | 1,15 | up   |
| 6679403 | 7249535 | 1496341 | protein kinase, AMP-activated, gamma 2 non-catalytic subunit              | Prkag2   | 373545 | 1,15 | up   |
| 6492818 | 7249535 | 1496338 | protein kinase, AMP-activated, gamma 2 non-catalytic subunit              | Prkag2   | 373545 | 1,12 | down |
| 6553286 | 7249535 | 1496335 | protein kinase, AMP-activated, gamma 2 non-catalytic subunit              | Prkag2   | 373545 | 1,08 | up   |
| 6322873 | 7249535 | 1496346 | protein kinase, AMP-activated, gamma 2 non-catalytic subunit              | Prkag2   | 373545 | 1,03 | down |
| 6156840 | 7249535 | 1496334 | protein kinase, AMP-activated, gamma 2 non-catalytic subunit              | Prkag2   | 373545 | 1,01 | down |
| 5660438 | 7111361 | 1155580 | protein phosphatase 1, regulatory (inhibitor) subunit 12B                 | Ppp1r12b | 304813 | 2,30 | down |
| 6535287 | 7111361 | 1155580 | protein phosphatase 1, regulatory (inhibitor) subunit 12B                 | Ppp1r12b | 304813 | 2,18 | down |
| 6153362 | 7111361 | 1155578 | protein phosphatase 1, regulatory (inhibitor) subunit 12B                 | Ppp1r12b | 304813 | 1,90 | up   |
| 6724619 | 7111361 | 1155595 | protein phosphatase 1, regulatory (inhibitor) subunit 12B                 | Ppp1r12b | 304813 | 1,84 | down |
| 6578065 | 7111361 | 1155584 | protein phosphatase 1, regulatory (inhibitor) subunit 12B                 | Ppp1r12b | 304813 | 1,61 | up   |
| 5764617 | 7111361 | 1155610 | protein phosphatase 1, regulatory (inhibitor) subunit 12B                 | Ppp1r12b | 304813 | 1,60 | down |

|         |         |         |                                                           |          |        |      |      |
|---------|---------|---------|-----------------------------------------------------------|----------|--------|------|------|
| 5781289 | 7111361 | 1155596 | protein phosphatase 1, regulatory (inhibitor) subunit 12B | Ppp1r12b | 304813 | 1,59 | up   |
| 5887023 | 7111361 | 1155609 | protein phosphatase 1, regulatory (inhibitor) subunit 12B | Ppp1r12b | 304813 | 1,55 | up   |
| 6210889 | 7111361 | 1155612 | protein phosphatase 1, regulatory (inhibitor) subunit 12B | Ppp1r12b | 304813 | 1,53 | up   |
| 6725796 | 7111361 | 1155594 | protein phosphatase 1, regulatory (inhibitor) subunit 12B | Ppp1r12b | 304813 | 1,51 | up   |
| 5677831 | 7111361 | 1155616 | protein phosphatase 1, regulatory (inhibitor) subunit 12B | Ppp1r12b | 304813 | 1,38 | down |
| 5733093 | 7111361 | 1155583 | protein phosphatase 1, regulatory (inhibitor) subunit 12B | Ppp1r12b | 304813 | 1,38 | down |
| 6179004 | 7111361 | 1155601 | protein phosphatase 1, regulatory (inhibitor) subunit 12B | Ppp1r12b | 304813 | 1,36 | down |
| 5896604 | 7111361 | 1155614 | protein phosphatase 1, regulatory (inhibitor) subunit 12B | Ppp1r12b | 304813 | 1,35 | up   |
| 6667041 | 7111361 | 1155604 | protein phosphatase 1, regulatory (inhibitor) subunit 12B | Ppp1r12b | 304813 | 1,30 | up   |
| 6630993 | 7111361 | 1155605 | protein phosphatase 1, regulatory (inhibitor) subunit 12B | Ppp1r12b | 304813 | 1,28 | down |
| 6086669 | 7111361 | 1155624 | protein phosphatase 1, regulatory (inhibitor) subunit 12B | Ppp1r12b | 304813 | 1,22 | up   |
| 6027839 | 7111361 | 1155598 | protein phosphatase 1, regulatory (inhibitor) subunit 12B | Ppp1r12b | 304813 | 1,20 | up   |
| 5710094 | 7111361 | 1155595 | protein phosphatase 1, regulatory (inhibitor) subunit 12B | Ppp1r12b | 304813 | 1,19 | down |
| 6473723 | 7111361 | 1155608 | protein phosphatase 1, regulatory (inhibitor) subunit 12B | Ppp1r12b | 304813 | 1,17 | down |
| 6499568 | 7111361 | 1155611 | protein phosphatase 1, regulatory (inhibitor) subunit 12B | Ppp1r12b | 304813 | 1,17 | up   |
| 6239772 | 7111361 | 1155593 | protein phosphatase 1, regulatory (inhibitor) subunit 12B | Ppp1r12b | 304813 | 1,12 | down |
| 5618648 | 7111361 | 1155584 | protein phosphatase 1, regulatory (inhibitor) subunit 12B | Ppp1r12b | 304813 | 1,08 | down |
| 5817782 | 7111361 | 1155577 | protein phosphatase 1, regulatory (inhibitor) subunit 12B | Ppp1r12b | 304813 | 1,08 | up   |
| 5684798 | 7111361 | 1155581 | protein phosphatase 1, regulatory (inhibitor) subunit 12B | Ppp1r12b | 304813 | 1,08 | down |
| 6346145 | 7111361 | 1155607 | protein phosphatase 1, regulatory (inhibitor) subunit 12B | Ppp1r12b | 304813 | 1,07 | up   |
| 6225332 | 7111361 | 1155582 | protein phosphatase 1, regulatory (inhibitor) subunit 12B | Ppp1r12b | 304813 | 1,06 | down |
| 6086414 | 7111361 | 1155613 | protein phosphatase 1, regulatory (inhibitor) subunit 12B | Ppp1r12b | 304813 | 1,03 | up   |
| 5694362 | 7111361 | 1155580 | protein phosphatase 1, regulatory (inhibitor) subunit 12B | Ppp1r12b | 304813 | 1,01 | down |
| 6507731 | 7051029 | 1011850 | protein phosphatase 1, regulatory (inhibitor) subunit 15A | Ppp1r15a | 171071 | 4,23 | down |
| 6729981 | 7051029 | 1011850 | protein phosphatase 1, regulatory (inhibitor) subunit 15A | Ppp1r15a | 171071 | 3,99 | down |
| 6602610 | 7051029 | 1011850 | protein phosphatase 1, regulatory (inhibitor) subunit 15A | Ppp1r15a | 171071 | 3,79 | down |
| 5763028 | 7051029 | 1011852 | protein phosphatase 1, regulatory (inhibitor) subunit 15A | Ppp1r15a | 171071 | 1,48 | up   |
| 6402875 | 7051029 | 1011851 | protein phosphatase 1, regulatory (inhibitor) subunit 15A | Ppp1r15a | 171071 | 1,38 | up   |
| 6603886 | 7051029 | 1011852 | protein phosphatase 1, regulatory (inhibitor) subunit 15A | Ppp1r15a | 171071 | 1,36 | up   |
| 6385013 | 7051029 | 1011852 | protein phosphatase 1, regulatory (inhibitor) subunit 15A | Ppp1r15a | 171071 | 1,24 | up   |
| 6717968 | 7051029 | 1011850 | protein phosphatase 1, regulatory (inhibitor) subunit 15A | Ppp1r15a | 171071 | 1,22 | down |
| 6006338 | 7051029 | 1011853 | protein phosphatase 1, regulatory (inhibitor) subunit 15A | Ppp1r15a | 171071 | 1,21 | up   |
| 6017136 | 7332324 | 1701243 | protein phosphatase 1, regulatory (inhibitor) subunit 1A  | Ppp1r1a  | 58977  | 4,71 | up   |
| 6038815 | 7332324 | 1701241 | protein phosphatase 1, regulatory (inhibitor) subunit 1A  | Ppp1r1a  | 58977  | 1,59 | down |
| 6618507 | 7332324 | 1701237 | protein phosphatase 1, regulatory (inhibitor) subunit 1A  | Ppp1r1a  | 58977  | 1,41 | down |
| 6445719 | 7332324 | 1701237 | protein phosphatase 1, regulatory (inhibitor) subunit 1A  | Ppp1r1a  | 58977  | 1,25 | up   |
| 6520030 | 7332324 | 1701238 | protein phosphatase 1, regulatory (inhibitor) subunit 1A  | Ppp1r1a  | 58977  | 1,21 | down |
| 6089240 | 7332324 | 1701239 | protein phosphatase 1, regulatory (inhibitor) subunit 1A  | Ppp1r1a  | 58977  | 1,18 | up   |
| 6642665 | 7332324 | 1701243 | protein phosphatase 1, regulatory (inhibitor) subunit 1A  | Ppp1r1a  | 58977  | 1,16 | down |
| 5678333 | 7332324 | 1701242 | protein phosphatase 1, regulatory (inhibitor) subunit 1A  | Ppp1r1a  | 58977  | 1,11 | up   |
| 5778279 | 7332324 | 1701240 | protein phosphatase 1, regulatory (inhibitor) subunit 1A  | Ppp1r1a  | 58977  | 1,10 | up   |
| 5884137 | 7332324 | 1701237 | protein phosphatase 1, regulatory (inhibitor) subunit 1A  | Ppp1r1a  | 58977  | 1,04 | down |
| 6060683 | 7332324 | 1701237 | protein phosphatase 1, regulatory (inhibitor) subunit 1A  | Ppp1r1a  | 58977  | 1,03 | up   |
| 6507777 | 7220449 | 1424094 | protein phosphatase 1, regulatory subunit 10              | Ppp1r10  | 65045  | 2,02 | down |
| 5642360 | 7220449 | 1424088 | protein phosphatase 1, regulatory subunit 10              | Ppp1r10  | 65045  | 1,99 | up   |
| 5888126 | 7220449 | 1424093 | protein phosphatase 1, regulatory subunit 10              | Ppp1r10  | 65045  | 1,46 | up   |
| 5860577 | 7220449 | 1424091 | protein phosphatase 1, regulatory subunit 10              | Ppp1r10  | 65045  | 1,18 | up   |
| 5812462 | 7220449 | 1424101 | protein phosphatase 1, regulatory subunit 10              | Ppp1r10  | 65045  | 1,17 | up   |
| 6370552 | 7220449 | 1424099 | protein phosphatase 1, regulatory subunit 10              | Ppp1r10  | 65045  | 1,15 | up   |
| 5793661 | 7220449 | 1424103 | protein phosphatase 1, regulatory subunit 10              | Ppp1r10  | 65045  | 1,15 | up   |
| 6430115 | 7220449 | 1424107 | protein phosphatase 1, regulatory subunit 10              | Ppp1r10  | 65045  | 1,11 | down |
| 6437165 | 7220449 | 1424100 | protein phosphatase 1, regulatory subunit 10              | Ppp1r10  | 65045  | 1,11 | up   |
| 6153839 | 7220449 | 1424106 | protein phosphatase 1, regulatory subunit 10              | Ppp1r10  | 65045  | 1,10 | up   |
| 6296710 | 7220449 | 1424097 | protein phosphatase 1, regulatory subunit 10              | Ppp1r10  | 65045  | 1,09 | down |
| 6555409 | 7220449 | 1424108 | protein phosphatase 1, regulatory subunit 10              | Ppp1r10  | 65045  | 1,09 | down |
| 6046241 | 7220449 | 1424089 | protein phosphatase 1, regulatory subunit 10              | Ppp1r10  | 65045  | 1,08 | up   |
| 6187145 | 7220449 | 1424095 | protein phosphatase 1, regulatory subunit 10              | Ppp1r10  | 65045  | 1,07 | up   |

|         |         |         |                                                                                 |         |        |      |      |
|---------|---------|---------|---------------------------------------------------------------------------------|---------|--------|------|------|
| 6176503 | 7220449 | 1424104 | protein phosphatase 1, regulatory subunit 10                                    | Ppp1r10 | 65045  | 1,05 | down |
| 6387799 | 7220449 | 1424096 | protein phosphatase 1, regulatory subunit 10                                    | Ppp1r10 | 65045  | 1,05 | down |
| 5982383 | 7220449 | 1424102 | protein phosphatase 1, regulatory subunit 10                                    | Ppp1r10 | 65045  | 1,05 | down |
| 5672897 | 7220449 | 1424090 | protein phosphatase 1, regulatory subunit 10                                    | Ppp1r10 | 65045  | 1,04 | down |
| 6342530 | 7220449 | 1424105 | protein phosphatase 1, regulatory subunit 10                                    | Ppp1r10 | 65045  | 1,04 | up   |
| 6733492 | 7220449 | 1424098 | protein phosphatase 1, regulatory subunit 10                                    | Ppp1r10 | 65045  | 1,01 | down |
| 6592610 | 7294686 | 1607840 | protein phosphatase 1B, magnesium dependent, beta isoform                       | Ppm1b   | 24667  | 2,40 | down |
| 6380176 | 7294686 | 1607840 | protein phosphatase 1B, magnesium dependent, beta isoform                       | Ppm1b   | 24667  | 1,48 | down |
| 6558920 | 7294686 | 1607843 | protein phosphatase 1B, magnesium dependent, beta isoform                       | Ppm1b   | 24667  | 1,48 | down |
| 6113495 | 7294686 | 1607845 | protein phosphatase 1B, magnesium dependent, beta isoform                       | Ppm1b   | 24667  | 1,46 | up   |
| 6413752 | 7294686 | 1607844 | protein phosphatase 1B, magnesium dependent, beta isoform                       | Ppm1b   | 24667  | 1,38 | down |
| 6574896 | 7294686 | 1607839 | protein phosphatase 1B, magnesium dependent, beta isoform                       | Ppm1b   | 24667  | 1,29 | down |
| 6108582 | 7294686 | 1607843 | protein phosphatase 1B, magnesium dependent, beta isoform                       | Ppm1b   | 24667  | 1,21 | up   |
| 6574009 | 7294686 | 1607842 | protein phosphatase 1B, magnesium dependent, beta isoform                       | Ppm1b   | 24667  | 1,13 | down |
| 6060044 | 7294686 | 1607845 | protein phosphatase 1B, magnesium dependent, beta isoform                       | Ppm1b   | 24667  | 1,13 | up   |
| 5911677 | 7294686 | 1607847 | protein phosphatase 1B, magnesium dependent, beta isoform                       | Ppm1b   | 24667  | 1,10 | down |
| 6250431 | 7294686 | 1607846 | protein phosphatase 1B, magnesium dependent, beta isoform                       | Ppm1b   | 24667  | 1,09 | down |
| 5867988 | 7294686 | 1607841 | protein phosphatase 1B, magnesium dependent, beta isoform                       | Ppm1b   | 24667  | 1,09 | down |
| 6258431 | 7294686 | 1607847 | protein phosphatase 1B, magnesium dependent, beta isoform                       | Ppm1b   | 24667  | 1,00 | up   |
| 6212202 | 7254209 | 1508018 | protein phosphatase 1K (PP2C domain containing)                                 | Ppm1k   | 312381 | 1,44 | down |
| 6193650 | 7254209 | 1508009 | protein phosphatase 1K (PP2C domain containing)                                 | Ppm1k   | 312381 | 1,33 | down |
| 6569056 | 7254209 | 1508004 | protein phosphatase 1K (PP2C domain containing)                                 | Ppm1k   | 312381 | 1,21 | up   |
| 5770373 | 7254209 | 1508010 | protein phosphatase 1K (PP2C domain containing)                                 | Ppm1k   | 312381 | 1,21 | down |
| 6387291 | 7254209 | 1508017 | protein phosphatase 1K (PP2C domain containing)                                 | Ppm1k   | 312381 | 1,20 | down |
| 6256779 | 7254209 | 1508016 | protein phosphatase 1K (PP2C domain containing)                                 | Ppm1k   | 312381 | 1,14 | down |
| 6198132 | 7254209 | 1508018 | protein phosphatase 1K (PP2C domain containing)                                 | Ppm1k   | 312381 | 1,12 | down |
| 5878942 | 7254209 | 1508014 | protein phosphatase 1K (PP2C domain containing)                                 | Ppm1k   | 312381 | 1,12 | down |
| 6361522 | 7254209 | 1508015 | protein phosphatase 1K (PP2C domain containing)                                 | Ppm1k   | 312381 | 1,08 | up   |
| 6509046 | 7254209 | 1508009 | protein phosphatase 1K (PP2C domain containing)                                 | Ppm1k   | 312381 | 1,05 | up   |
| 5801102 | 7254209 | 1508009 | protein phosphatase 1K (PP2C domain containing)                                 | Ppm1k   | 312381 | 1,03 | up   |
| 6746689 | 7336050 | 1709734 | protein phosphatase 2 (formerly 2A), regulatory subunit A (PR 65), beta isoform | Ppp2r1b | 315648 | 1,27 | down |
| 6097890 | 7336050 | 1709740 | protein phosphatase 2 (formerly 2A), regulatory subunit A (PR 65), beta isoform | Ppp2r1b | 315648 | 1,24 | up   |
| 6063410 | 7336050 | 1709733 | protein phosphatase 2 (formerly 2A), regulatory subunit A (PR 65), beta isoform | Ppp2r1b | 315648 | 1,24 | up   |
| 6025979 | 7336050 | 1709731 | protein phosphatase 2 (formerly 2A), regulatory subunit A (PR 65), beta isoform | Ppp2r1b | 315648 | 1,21 | up   |
| 5722903 | 7336050 | 1709737 | protein phosphatase 2 (formerly 2A), regulatory subunit A (PR 65), beta isoform | Ppp2r1b | 315648 | 1,13 | down |
| 6668111 | 7336050 | 1709732 | protein phosphatase 2 (formerly 2A), regulatory subunit A (PR 65), beta isoform | Ppp2r1b | 315648 | 1,12 | down |
| 6023895 | 7336050 | 1709736 | protein phosphatase 2 (formerly 2A), regulatory subunit A (PR 65), beta isoform | Ppp2r1b | 315648 | 1,08 | up   |
| 5946079 | 7336050 | 1709739 | protein phosphatase 2 (formerly 2A), regulatory subunit A (PR 65), beta isoform | Ppp2r1b | 315648 | 1,07 | down |
| 6491174 | 7336050 | 1709738 | protein phosphatase 2 (formerly 2A), regulatory subunit A (PR 65), beta isoform | Ppp2r1b | 315648 | 1,07 | up   |
| 6047518 | 7336050 | 1709735 | protein phosphatase 2 (formerly 2A), regulatory subunit A (PR 65), beta isoform | Ppp2r1b | 315648 | 1,06 | up   |
| 5996542 | 7336050 | 1709748 | protein phosphatase 2 (formerly 2A), regulatory subunit A (PR 65), beta isoform | Ppp2r1b | 315648 | 1,05 | down |
| 6148423 | 7336050 | 1709748 | protein phosphatase 2 (formerly 2A), regulatory subunit A (PR 65), beta isoform | Ppp2r1b | 315648 | 1,05 | down |
| 6115891 | 7336050 | 1709737 | protein phosphatase 2 (formerly 2A), regulatory subunit A (PR 65), beta isoform | Ppp2r1b | 315648 | 1,05 | up   |
| 6294467 | 7336050 | 1709745 | protein phosphatase 2 (formerly 2A), regulatory subunit A (PR 65), beta isoform | Ppp2r1b | 315648 | 1,04 | down |
| 5977337 | 7336050 | 1709747 | protein phosphatase 2 (formerly 2A), regulatory subunit A (PR 65), beta isoform | Ppp2r1b | 315648 | 1,04 | up   |
| 5729983 | 7336050 | 1709746 | protein phosphatase 2 (formerly 2A), regulatory subunit A (PR 65), beta isoform | Ppp2r1b | 315648 | 1,03 | up   |
| 5677350 | 7336050 | 1709742 | protein phosphatase 2 (formerly 2A), regulatory subunit A (PR 65), beta isoform | Ppp2r1b | 315648 | 1,02 | up   |
| 6496362 | 7175086 | 1312683 | protein phosphatase 2 (formerly 2A), regulatory subunit B (PR 52), beta isoform | Ppp2r2b | 60660  | 2,69 | down |
| 5648605 | 7175086 | 1312677 | protein phosphatase 2 (formerly 2A), regulatory subunit B (PR 52), beta isoform | Ppp2r2b | 60660  | 1,66 | up   |
| 6112711 | 7175086 | 1312676 | protein phosphatase 2 (formerly 2A), regulatory subunit B (PR 52), beta isoform | Ppp2r2b | 60660  | 1,53 | up   |
| 6342958 | 7175086 | 1312680 | protein phosphatase 2 (formerly 2A), regulatory subunit B (PR 52), beta isoform | Ppp2r2b | 60660  | 1,49 | down |
| 6323662 | 7175086 | 1312684 | protein phosphatase 2 (formerly 2A), regulatory subunit B (PR 52), beta isoform | Ppp2r2b | 60660  | 1,35 | up   |
| 6445405 | 7175086 | 1312675 | protein phosphatase 2 (formerly 2A), regulatory subunit B (PR 52), beta isoform | Ppp2r2b | 60660  | 1,34 | down |
| 6740648 | 7175086 | 1312683 | protein phosphatase 2 (formerly 2A), regulatory subunit B (PR 52), beta isoform | Ppp2r2b | 60660  | 1,18 | down |
| 5641546 | 7175086 | 1312679 | protein phosphatase 2 (formerly 2A), regulatory subunit B (PR 52), beta isoform | Ppp2r2b | 60660  | 1,16 | down |
| 5682334 | 7175086 | 1312678 | protein phosphatase 2 (formerly 2A), regulatory subunit B (PR 52), beta isoform | Ppp2r2b | 60660  | 1,13 | down |
| 6596272 | 7175086 | 1312681 | protein phosphatase 2 (formerly 2A), regulatory subunit B (PR 52), beta isoform | Ppp2r2b | 60660  | 1,13 | down |

|         |         |         |                                                                                 |         |        |      |      |
|---------|---------|---------|---------------------------------------------------------------------------------|---------|--------|------|------|
| 6125869 | 7175086 | 1312682 | protein phosphatase 2 (formerly 2A), regulatory subunit B (PR 52), beta isoform | Ppp2r2b | 60660  | 1,12 | down |
| 5823988 | 7175086 | 1312686 | protein phosphatase 2 (formerly 2A), regulatory subunit B (PR 52), beta isoform | Ppp2r2b | 60660  | 1,11 | down |
| 6448125 | 7175086 | 1312678 | protein phosphatase 2 (formerly 2A), regulatory subunit B (PR 52), beta isoform | Ppp2r2b | 60660  | 1,09 | down |
| 5643514 | 7175086 | 1312686 | protein phosphatase 2 (formerly 2A), regulatory subunit B (PR 52), beta isoform | Ppp2r2b | 60660  | 1,05 | up   |
| 6009208 | 7175086 | 1312687 | protein phosphatase 2 (formerly 2A), regulatory subunit B (PR 52), beta isoform | Ppp2r2b | 60660  | 1,01 | up   |
| 5786264 | 7175086 | 1312685 | protein phosphatase 2 (formerly 2A), regulatory subunit B (PR 52), beta isoform | Ppp2r2b | 60660  | 1,01 | up   |
| 5848171 | 7175086 | 1312687 | protein phosphatase 2 (formerly 2A), regulatory subunit B (PR 52), beta isoform | Ppp2r2b | 60660  | 1,00 | down |
| 5960880 | 7127022 | 1194057 | protein phosphatase 2 (formerly 2A), regulatory subunit B, gamma isoform        | Ppp2r2c | 117256 | 1,32 | down |
| 5867669 | 7127022 | 1194058 | protein phosphatase 2 (formerly 2A), regulatory subunit B, gamma isoform        | Ppp2r2c | 117256 | 1,29 | down |
| 6471966 | 7127022 | 1194064 | protein phosphatase 2 (formerly 2A), regulatory subunit B, gamma isoform        | Ppp2r2c | 117256 | 1,17 | up   |
| 5721785 | 7127022 | 1194056 | protein phosphatase 2 (formerly 2A), regulatory subunit B, gamma isoform        | Ppp2r2c | 117256 | 1,14 | up   |
| 6145588 | 7127022 | 1194062 | protein phosphatase 2 (formerly 2A), regulatory subunit B, gamma isoform        | Ppp2r2c | 117256 | 1,11 | down |
| 5728807 | 7127022 | 1194060 | protein phosphatase 2 (formerly 2A), regulatory subunit B, gamma isoform        | Ppp2r2c | 117256 | 1,08 | down |
| 6659755 | 7127022 | 1194063 | protein phosphatase 2 (formerly 2A), regulatory subunit B, gamma isoform        | Ppp2r2c | 117256 | 1,05 | down |
| 6620556 | 7127022 | 1194059 | protein phosphatase 2 (formerly 2A), regulatory subunit B, gamma isoform        | Ppp2r2c | 117256 | 1,01 | up   |
| 5805165 | 7127022 | 1194061 | protein phosphatase 2 (formerly 2A), regulatory subunit B, gamma isoform        | Ppp2r2c | 117256 | 1,00 | up   |
| 6236527 | 7301843 | 1626454 | protein phosphatase 2, regulatory subunit B' gamma isoform                      | Ppp2r5c | 691318 | 1,47 | up   |
| 6472744 | 7301843 | 1626490 | protein phosphatase 2, regulatory subunit B' gamma isoform                      | Ppp2r5c | 691318 | 1,12 | up   |
| 5869660 | 7358437 | 1765870 | protein phosphatase 4, regulatory subunit 1                                     | Ppp4r1  | 140943 | 2,02 | down |
| 6593019 | 7358437 | 1765864 | protein phosphatase 4, regulatory subunit 1                                     | Ppp4r1  | 140943 | 1,41 | down |
| 6515575 | 7358437 | 1765853 | protein phosphatase 4, regulatory subunit 1                                     | Ppp4r1  | 140943 | 1,38 | up   |
| 6339115 | 7358437 | 1765866 | protein phosphatase 4, regulatory subunit 1                                     | Ppp4r1  | 140943 | 1,29 | down |
| 6185502 | 7358437 | 1765867 | protein phosphatase 4, regulatory subunit 1                                     | Ppp4r1  | 140943 | 1,29 | up   |
| 6408809 | 7358437 | 1765865 | protein phosphatase 4, regulatory subunit 1                                     | Ppp4r1  | 140943 | 1,23 | down |
| 6705842 | 7358437 | 1765856 | protein phosphatase 4, regulatory subunit 1                                     | Ppp4r1  | 140943 | 1,23 | up   |
| 5641810 | 7358437 | 1765868 | protein phosphatase 4, regulatory subunit 1                                     | Ppp4r1  | 140943 | 1,17 | down |
| 5834016 | 7358437 | 1765852 | protein phosphatase 4, regulatory subunit 1                                     | Ppp4r1  | 140943 | 1,15 | up   |
| 6720820 | 7358437 | 1765854 | protein phosphatase 4, regulatory subunit 1                                     | Ppp4r1  | 140943 | 1,12 | up   |
| 6254496 | 7358437 | 1765869 | protein phosphatase 4, regulatory subunit 1                                     | Ppp4r1  | 140943 | 1,11 | up   |
| 6426860 | 7358437 | 1765855 | protein phosphatase 4, regulatory subunit 1                                     | Ppp4r1  | 140943 | 1,11 | down |
| 5648627 | 7358437 | 1765863 | protein phosphatase 4, regulatory subunit 1                                     | Ppp4r1  | 140943 | 1,11 | down |
| 5995652 | 7358437 | 1765860 | protein phosphatase 4, regulatory subunit 1                                     | Ppp4r1  | 140943 | 1,10 | up   |
| 5913753 | 7358437 | 1765860 | protein phosphatase 4, regulatory subunit 1                                     | Ppp4r1  | 140943 | 1,08 | up   |
| 5729525 | 7358437 | 1765861 | protein phosphatase 4, regulatory subunit 1                                     | Ppp4r1  | 140943 | 1,07 | up   |
| 6131675 | 7358437 | 1765852 | protein phosphatase 4, regulatory subunit 1                                     | Ppp4r1  | 140943 | 1,05 | down |
| 5912948 | 7358437 | 1765859 | protein phosphatase 4, regulatory subunit 1                                     | Ppp4r1  | 140943 | 1,05 | down |
| 5910156 | 7358437 | 1765858 | protein phosphatase 4, regulatory subunit 1                                     | Ppp4r1  | 140943 | 1,01 | up   |
| 6688773 | 7358437 | 1765862 | protein phosphatase 4, regulatory subunit 1                                     | Ppp4r1  | 140943 | 1,01 | up   |
| 6027043 | 7358437 | 1765857 | protein phosphatase 4, regulatory subunit 1                                     | Ppp4r1  | 140943 | 1,00 | up   |
| 6513505 | 7048434 | 1006459 | protein phosphatase 5, catalytic subunit                                        | Ppp5c   | 65179  | 2,04 | up   |
| 6205715 | 7048434 | 1006469 | protein phosphatase 5, catalytic subunit                                        | Ppp5c   | 65179  | 1,42 | down |
| 6359101 | 7048434 | 1006458 | protein phosphatase 5, catalytic subunit                                        | Ppp5c   | 65179  | 1,28 | down |
| 6423898 | 7048434 | 1006463 | protein phosphatase 5, catalytic subunit                                        | Ppp5c   | 65179  | 1,21 | up   |
| 6320743 | 7048434 | 1006466 | protein phosphatase 5, catalytic subunit                                        | Ppp5c   | 65179  | 1,16 | down |
| 6477447 | 7048434 | 1006460 | protein phosphatase 5, catalytic subunit                                        | Ppp5c   | 65179  | 1,15 | up   |
| 6460905 | 7048434 | 1006457 | protein phosphatase 5, catalytic subunit                                        | Ppp5c   | 65179  | 1,13 | down |
| 6462780 | 7048434 | 1006470 | protein phosphatase 5, catalytic subunit                                        | Ppp5c   | 65179  | 1,10 | down |
| 6330971 | 7048434 | 1006464 | protein phosphatase 5, catalytic subunit                                        | Ppp5c   | 65179  | 1,10 | up   |
| 6139003 | 7048434 | 1006468 | protein phosphatase 5, catalytic subunit                                        | Ppp5c   | 65179  | 1,08 | up   |
| 6745483 | 7048434 | 1006467 | protein phosphatase 5, catalytic subunit                                        | Ppp5c   | 65179  | 1,08 | down |
| 5675653 | 7048434 | 1006464 | protein phosphatase 5, catalytic subunit                                        | Ppp5c   | 65179  | 1,04 | down |
| 6349153 | 7048434 | 1006465 | protein phosphatase 5, catalytic subunit                                        | Ppp5c   | 65179  | 1,03 | up   |
| 6224360 | 7048434 | 1006461 | protein phosphatase 5, catalytic subunit                                        | Ppp5c   | 65179  | 1,02 | down |
| 6268537 | 7048434 | 1006462 | protein phosphatase 5, catalytic subunit                                        | Ppp5c   | 65179  | 1,02 | down |
| 5740602 | 7235557 | 1462241 | protein tyrosine phosphatase, non-receptor type 1                               | Ptpn1   | 24697  | 2,12 | up   |
| 6454855 | 7235557 | 1462241 | protein tyrosine phosphatase, non-receptor type 1                               | Ptpn1   | 24697  | 1,30 | up   |
| 6337806 | 7235557 | 1462248 | protein tyrosine phosphatase, non-receptor type 1                               | Ptpn1   | 24697  | 1,26 | down |

|         |         |         |                                                    |        |        |      |      |
|---------|---------|---------|----------------------------------------------------|--------|--------|------|------|
| 5920093 | 7235557 | 1462247 | protein tyrosine phosphatase, non-receptor type 1  | Ptpn1  | 24697  | 1,25 | up   |
| 5619008 | 7235557 | 1462250 | protein tyrosine phosphatase, non-receptor type 1  | Ptpn1  | 24697  | 1,24 | down |
| 5992248 | 7235557 | 1462242 | protein tyrosine phosphatase, non-receptor type 1  | Ptpn1  | 24697  | 1,23 | up   |
| 6151495 | 7235557 | 1462246 | protein tyrosine phosphatase, non-receptor type 1  | Ptpn1  | 24697  | 1,23 | down |
| 6172233 | 7235557 | 1462243 | protein tyrosine phosphatase, non-receptor type 1  | Ptpn1  | 24697  | 1,19 | down |
| 6184997 | 7235557 | 1462245 | protein tyrosine phosphatase, non-receptor type 1  | Ptpn1  | 24697  | 1,15 | up   |
| 5905471 | 7235557 | 1462248 | protein tyrosine phosphatase, non-receptor type 1  | Ptpn1  | 24697  | 1,14 | down |
| 6101654 | 7235557 | 1462244 | protein tyrosine phosphatase, non-receptor type 1  | Ptpn1  | 24697  | 1,14 | down |
| 6528792 | 7235557 | 1462246 | protein tyrosine phosphatase, non-receptor type 1  | Ptpn1  | 24697  | 1,10 | down |
| 6211444 | 7235557 | 1462249 | protein tyrosine phosphatase, non-receptor type 1  | Ptpn1  | 24697  | 1,06 | up   |
| 6023185 | 7249899 | 1497319 | protein tyrosine phosphatase, non-receptor type 12 | Ptpn12 | 117255 | 2,11 | up   |
| 6252958 | 7249899 | 1497317 | protein tyrosine phosphatase, non-receptor type 12 | Ptpn12 | 117255 | 2,02 | up   |
| 5835163 | 7249899 | 1497322 | protein tyrosine phosphatase, non-receptor type 12 | Ptpn12 | 117255 | 1,75 | down |
| 5859856 | 7249899 | 1497321 | protein tyrosine phosphatase, non-receptor type 12 | Ptpn12 | 117255 | 1,44 | up   |
| 6074482 | 7249899 | 1497320 | protein tyrosine phosphatase, non-receptor type 12 | Ptpn12 | 117255 | 1,26 | up   |
| 5889413 | 7249899 | 1497319 | protein tyrosine phosphatase, non-receptor type 12 | Ptpn12 | 117255 | 1,22 | down |
| 6406793 | 7249899 | 1497312 | protein tyrosine phosphatase, non-receptor type 12 | Ptpn12 | 117255 | 1,21 | down |
| 5631624 | 7249899 | 1497312 | protein tyrosine phosphatase, non-receptor type 12 | Ptpn12 | 117255 | 1,20 | up   |
| 6597984 | 7249899 | 1497314 | protein tyrosine phosphatase, non-receptor type 12 | Ptpn12 | 117255 | 1,20 | down |
| 6345148 | 7249899 | 1497313 | protein tyrosine phosphatase, non-receptor type 12 | Ptpn12 | 117255 | 1,19 | down |
| 5897072 | 7249899 | 1497315 | protein tyrosine phosphatase, non-receptor type 12 | Ptpn12 | 117255 | 1,14 | down |
| 5921416 | 7249899 | 1497316 | protein tyrosine phosphatase, non-receptor type 12 | Ptpn12 | 117255 | 1,07 | up   |
| 5878286 | 7249899 | 1497318 | protein tyrosine phosphatase, non-receptor type 12 | Ptpn12 | 117255 | 1,04 | down |
| 5665064 | 7249899 | 1497323 | protein tyrosine phosphatase, non-receptor type 12 | Ptpn12 | 117255 | 1,02 | up   |
| 6576755 | 7176768 | 1316637 | protein tyrosine phosphatase, non-receptor type 2  | Ptpn2  | 117063 | 2,07 | down |
| 5933107 | 7176768 | 1316631 | protein tyrosine phosphatase, non-receptor type 2  | Ptpn2  | 117063 | 2,06 | down |
| 5877862 | 7176768 | 1316637 | protein tyrosine phosphatase, non-receptor type 2  | Ptpn2  | 117063 | 1,83 | up   |
| 6071677 | 7176768 | 1316632 | protein tyrosine phosphatase, non-receptor type 2  | Ptpn2  | 117063 | 1,33 | up   |
| 5753577 | 7176768 | 1316630 | protein tyrosine phosphatase, non-receptor type 2  | Ptpn2  | 117063 | 1,24 | up   |
| 6719425 | 7176768 | 1316636 | protein tyrosine phosphatase, non-receptor type 2  | Ptpn2  | 117063 | 1,18 | up   |
| 6649150 | 7176768 | 1316638 | protein tyrosine phosphatase, non-receptor type 2  | Ptpn2  | 117063 | 1,12 | down |
| 6434417 | 7176768 | 1316633 | protein tyrosine phosphatase, non-receptor type 2  | Ptpn2  | 117063 | 1,07 | down |
| 5733428 | 7176768 | 1316629 | protein tyrosine phosphatase, non-receptor type 2  | Ptpn2  | 117063 | 1,05 | down |
| 5876528 | 7176768 | 1316635 | protein tyrosine phosphatase, non-receptor type 2  | Ptpn2  | 117063 | 1,04 | up   |
| 5983552 | 7176768 | 1316634 | protein tyrosine phosphatase, non-receptor type 2  | Ptpn2  | 117063 | 1,02 | up   |
| 6502819 | 7309604 | 1646359 | protein tyrosine phosphatase, non-receptor type 21 | Ptpn21 | 171070 | 3,17 | down |
| 6406889 | 7309604 | 1646365 | protein tyrosine phosphatase, non-receptor type 21 | Ptpn21 | 171070 | 2,34 | down |
| 5780953 | 7309604 | 1646360 | protein tyrosine phosphatase, non-receptor type 21 | Ptpn21 | 171070 | 1,99 | up   |
| 6009416 | 7309604 | 1646364 | protein tyrosine phosphatase, non-receptor type 21 | Ptpn21 | 171070 | 1,74 | up   |
| 6669784 | 7309604 | 1646355 | protein tyrosine phosphatase, non-receptor type 21 | Ptpn21 | 171070 | 1,62 | down |
| 5712198 | 7309604 | 1646363 | protein tyrosine phosphatase, non-receptor type 21 | Ptpn21 | 171070 | 1,55 | up   |
| 5961191 | 7309604 | 1646369 | protein tyrosine phosphatase, non-receptor type 21 | Ptpn21 | 171070 | 1,52 | up   |
| 5720872 | 7309604 | 1646365 | protein tyrosine phosphatase, non-receptor type 21 | Ptpn21 | 171070 | 1,50 | down |
| 6110799 | 7309604 | 1646366 | protein tyrosine phosphatase, non-receptor type 21 | Ptpn21 | 171070 | 1,46 | down |
| 5864203 | 7309604 | 1646361 | protein tyrosine phosphatase, non-receptor type 21 | Ptpn21 | 171070 | 1,30 | down |
| 6165547 | 7309604 | 1646361 | protein tyrosine phosphatase, non-receptor type 21 | Ptpn21 | 171070 | 1,27 | down |
| 5797324 | 7309604 | 1646367 | protein tyrosine phosphatase, non-receptor type 21 | Ptpn21 | 171070 | 1,23 | up   |
| 6394417 | 7309604 | 1646371 | protein tyrosine phosphatase, non-receptor type 21 | Ptpn21 | 171070 | 1,23 | down |
| 6256852 | 7309604 | 1646356 | protein tyrosine phosphatase, non-receptor type 21 | Ptpn21 | 171070 | 1,22 | down |
| 6231589 | 7309604 | 1646362 | protein tyrosine phosphatase, non-receptor type 21 | Ptpn21 | 171070 | 1,18 | down |
| 5717790 | 7309604 | 1646368 | protein tyrosine phosphatase, non-receptor type 21 | Ptpn21 | 171070 | 1,16 | up   |
| 6574677 | 7309604 | 1646357 | protein tyrosine phosphatase, non-receptor type 21 | Ptpn21 | 171070 | 1,11 | up   |
| 6240123 | 7309604 | 1646358 | protein tyrosine phosphatase, non-receptor type 21 | Ptpn21 | 171070 | 1,09 | down |
| 6026650 | 7309604 | 1646354 | protein tyrosine phosphatase, non-receptor type 21 | Ptpn21 | 171070 | 1,07 | down |
| 6408400 | 7309604 | 1646352 | protein tyrosine phosphatase, non-receptor type 21 | Ptpn21 | 171070 | 1,07 | up   |
| 6068254 | 7309604 | 1646370 | protein tyrosine phosphatase, non-receptor type 21 | Ptpn21 | 171070 | 1,05 | down |
| 6106398 | 7309604 | 1646364 | protein tyrosine phosphatase, non-receptor type 21 | Ptpn21 | 171070 | 1,03 | down |

|         |         |         |                                                    |        |        |      |      |
|---------|---------|---------|----------------------------------------------------|--------|--------|------|------|
| 6660544 | 7309604 | 1646353 | protein tyrosine phosphatase, non-receptor type 21 | Ptpn21 | 171070 | 1,01 | up   |
| 5985625 | 7350181 | 1745380 | protein tyrosine phosphatase, non-receptor type 23 | Ptpn23 | 117552 | 3,37 | down |
| 6461010 | 7350181 | 1745384 | protein tyrosine phosphatase, non-receptor type 23 | Ptpn23 | 117552 | 2,00 | down |
| 6205096 | 7350181 | 1745386 | protein tyrosine phosphatase, non-receptor type 23 | Ptpn23 | 117552 | 1,78 | down |
| 6099508 | 7350181 | 1745396 | protein tyrosine phosphatase, non-receptor type 23 | Ptpn23 | 117552 | 1,68 | up   |
| 6232031 | 7350181 | 1745379 | protein tyrosine phosphatase, non-receptor type 23 | Ptpn23 | 117552 | 1,61 | down |
| 6567855 | 7350181 | 1745386 | protein tyrosine phosphatase, non-receptor type 23 | Ptpn23 | 117552 | 1,61 | down |
| 6139503 | 7350181 | 1745386 | protein tyrosine phosphatase, non-receptor type 23 | Ptpn23 | 117552 | 1,60 | down |
| 5651955 | 7350181 | 1745386 | protein tyrosine phosphatase, non-receptor type 23 | Ptpn23 | 117552 | 1,57 | down |
| 6707304 | 7350181 | 1745395 | protein tyrosine phosphatase, non-receptor type 23 | Ptpn23 | 117552 | 1,40 | up   |
| 5700050 | 7350181 | 1745385 | protein tyrosine phosphatase, non-receptor type 23 | Ptpn23 | 117552 | 1,39 | down |
| 5803262 | 7350181 | 1745397 | protein tyrosine phosphatase, non-receptor type 23 | Ptpn23 | 117552 | 1,39 | up   |
| 5990582 | 7350181 | 1745379 | protein tyrosine phosphatase, non-receptor type 23 | Ptpn23 | 117552 | 1,38 | down |
| 6195223 | 7350181 | 1745383 | protein tyrosine phosphatase, non-receptor type 23 | Ptpn23 | 117552 | 1,37 | up   |
| 6140897 | 7350181 | 1745379 | protein tyrosine phosphatase, non-receptor type 23 | Ptpn23 | 117552 | 1,18 | down |
| 6062669 | 7350181 | 1745393 | protein tyrosine phosphatase, non-receptor type 23 | Ptpn23 | 117552 | 1,14 | up   |
| 6040071 | 7350181 | 1745398 | protein tyrosine phosphatase, non-receptor type 23 | Ptpn23 | 117552 | 1,14 | up   |
| 6624490 | 7350181 | 1745386 | protein tyrosine phosphatase, non-receptor type 23 | Ptpn23 | 117552 | 1,12 | down |
| 6064133 | 7350181 | 1745389 | protein tyrosine phosphatase, non-receptor type 23 | Ptpn23 | 117552 | 1,11 | up   |
| 6013023 | 7350181 | 1745400 | protein tyrosine phosphatase, non-receptor type 23 | Ptpn23 | 117552 | 1,10 | up   |
| 6669234 | 7350181 | 1745392 | protein tyrosine phosphatase, non-receptor type 23 | Ptpn23 | 117552 | 1,09 | down |
| 6353582 | 7350181 | 1745379 | protein tyrosine phosphatase, non-receptor type 23 | Ptpn23 | 117552 | 1,08 | down |
| 6545983 | 7350181 | 1745385 | protein tyrosine phosphatase, non-receptor type 23 | Ptpn23 | 117552 | 1,06 | up   |
| 6628301 | 7350181 | 1745382 | protein tyrosine phosphatase, non-receptor type 23 | Ptpn23 | 117552 | 1,05 | down |
| 5792310 | 7350181 | 1745388 | protein tyrosine phosphatase, non-receptor type 23 | Ptpn23 | 117552 | 1,05 | down |
| 6253824 | 7350181 | 1745380 | protein tyrosine phosphatase, non-receptor type 23 | Ptpn23 | 117552 | 1,04 | up   |
| 6019798 | 7350181 | 1745387 | protein tyrosine phosphatase, non-receptor type 23 | Ptpn23 | 117552 | 1,04 | down |
| 6602071 | 7350181 | 1745394 | protein tyrosine phosphatase, non-receptor type 23 | Ptpn23 | 117552 | 1,03 | up   |
| 6002202 | 7350181 | 1745399 | protein tyrosine phosphatase, non-receptor type 23 | Ptpn23 | 117552 | 1,02 | up   |
| 5992898 | 7350181 | 1745384 | protein tyrosine phosphatase, non-receptor type 23 | Ptpn23 | 117552 | 1,02 | down |
| 6175916 | 7350181 | 1745391 | protein tyrosine phosphatase, non-receptor type 23 | Ptpn23 | 117552 | 1,02 | down |
| 6116435 | 7350181 | 1745381 | protein tyrosine phosphatase, non-receptor type 23 | Ptpn23 | 117552 | 1,01 | up   |
| 5773396 | 7350181 | 1745390 | protein tyrosine phosphatase, non-receptor type 23 | Ptpn23 | 117552 | 1,01 | down |
| 6387962 | 7110401 | 1153064 | protein tyrosine phosphatase, non-receptor type 4  | Ptpn4  | 246116 | 1,34 | down |
| 6159666 | 7110401 | 1153065 | protein tyrosine phosphatase, non-receptor type 4  | Ptpn4  | 246116 | 1,20 | down |
| 6287612 | 7367980 | 1789194 | protein tyrosine phosphatase, receptor type, D     | Ptprd  | 25529  | 2,16 | up   |
| 5862788 | 7367980 | 1789156 | protein tyrosine phosphatase, receptor type, D     | Ptprd  | 25529  | 1,98 | up   |
| 5675651 | 7367980 | 1789178 | protein tyrosine phosphatase, receptor type, D     | Ptprd  | 25529  | 1,75 | down |
| 6654108 | 7367980 | 1789181 | protein tyrosine phosphatase, receptor type, D     | Ptprd  | 25529  | 1,71 | down |
| 6732869 | 7367980 | 1789197 | protein tyrosine phosphatase, receptor type, D     | Ptprd  | 25529  | 1,67 | down |
| 6448807 | 7367980 | 1789182 | protein tyrosine phosphatase, receptor type, D     | Ptprd  | 25529  | 1,65 | down |
| 6604506 | 7367980 | 1789194 | protein tyrosine phosphatase, receptor type, D     | Ptprd  | 25529  | 1,57 | down |
| 6636369 | 7367980 | 1789193 | protein tyrosine phosphatase, receptor type, D     | Ptprd  | 25529  | 1,51 | down |
| 5851847 | 7367980 | 1789198 | protein tyrosine phosphatase, receptor type, D     | Ptprd  | 25529  | 1,51 | down |
| 5746212 | 7367980 | 1789153 | protein tyrosine phosphatase, receptor type, D     | Ptprd  | 25529  | 1,48 | up   |
| 5863161 | 7367980 | 1789157 | protein tyrosine phosphatase, receptor type, D     | Ptprd  | 25529  | 1,45 | up   |
| 6527937 | 7367980 | 1789185 | protein tyrosine phosphatase, receptor type, D     | Ptprd  | 25529  | 1,45 | down |
| 6447545 | 7367980 | 1789191 | protein tyrosine phosphatase, receptor type, D     | Ptprd  | 25529  | 1,44 | down |
| 5938709 | 7367980 | 1789195 | protein tyrosine phosphatase, receptor type, D     | Ptprd  | 25529  | 1,32 | down |
| 6277122 | 7367980 | 1789196 | protein tyrosine phosphatase, receptor type, D     | Ptprd  | 25529  | 1,31 | down |
| 5854413 | 7367980 | 1789192 | protein tyrosine phosphatase, receptor type, D     | Ptprd  | 25529  | 1,30 | down |
| 5841943 | 7367980 | 1789172 | protein tyrosine phosphatase, receptor type, D     | Ptprd  | 25529  | 1,28 | down |
| 5752711 | 7367980 | 1789177 | protein tyrosine phosphatase, receptor type, D     | Ptprd  | 25529  | 1,25 | up   |
| 6386071 | 7367980 | 1789194 | protein tyrosine phosphatase, receptor type, D     | Ptprd  | 25529  | 1,24 | down |
| 6683100 | 7367980 | 1789182 | protein tyrosine phosphatase, receptor type, D     | Ptprd  | 25529  | 1,23 | up   |
| 6092171 | 7367980 | 1789159 | protein tyrosine phosphatase, receptor type, D     | Ptprd  | 25529  | 1,21 | up   |
| 6207727 | 7367980 | 1789199 | protein tyrosine phosphatase, receptor type, D     | Ptprd  | 25529  | 1,20 | down |

|         |         |         |                                                                                                         |        |        |      |      |
|---------|---------|---------|---------------------------------------------------------------------------------------------------------|--------|--------|------|------|
| 6431179 | 7367980 | 1789177 | protein tyrosine phosphatase, receptor type, D                                                          | Ptprd  | 25529  | 1,19 | up   |
| 5621335 | 7367980 | 1789183 | protein tyrosine phosphatase, receptor type, D                                                          | Ptprd  | 25529  | 1,19 | down |
| 5756187 | 7367980 | 1789190 | protein tyrosine phosphatase, receptor type, D                                                          | Ptprd  | 25529  | 1,18 | up   |
| 6208320 | 7367980 | 1789173 | protein tyrosine phosphatase, receptor type, D                                                          | Ptprd  | 25529  | 1,17 | up   |
| 5759181 | 7367980 | 1789163 | protein tyrosine phosphatase, receptor type, D                                                          | Ptprd  | 25529  | 1,16 | up   |
| 6311282 | 7367980 | 1789188 | protein tyrosine phosphatase, receptor type, D                                                          | Ptprd  | 25529  | 1,16 | down |
| 6297784 | 7367980 | 1789172 | protein tyrosine phosphatase, receptor type, D                                                          | Ptprd  | 25529  | 1,15 | up   |
| 6664626 | 7367980 | 1789200 | protein tyrosine phosphatase, receptor type, D                                                          | Ptprd  | 25529  | 1,13 | down |
| 6706385 | 7367980 | 1789160 | protein tyrosine phosphatase, receptor type, D                                                          | Ptprd  | 25529  | 1,10 | up   |
| 6325261 | 7367980 | 1789187 | protein tyrosine phosphatase, receptor type, D                                                          | Ptprd  | 25529  | 1,10 | down |
| 6699842 | 7367980 | 1789184 | protein tyrosine phosphatase, receptor type, D                                                          | Ptprd  | 25529  | 1,10 | down |
| 5785057 | 7367980 | 1789177 | protein tyrosine phosphatase, receptor type, D                                                          | Ptprd  | 25529  | 1,08 | down |
| 5705696 | 7367980 | 1789186 | protein tyrosine phosphatase, receptor type, D                                                          | Ptprd  | 25529  | 1,08 | down |
| 6064063 | 7367980 | 1789177 | protein tyrosine phosphatase, receptor type, D                                                          | Ptprd  | 25529  | 1,06 | down |
| 5699181 | 7367980 | 1789189 | protein tyrosine phosphatase, receptor type, D                                                          | Ptprd  | 25529  | 1,06 | down |
| 5928483 | 7367980 | 1789182 | protein tyrosine phosphatase, receptor type, D                                                          | Ptprd  | 25529  | 1,06 | up   |
| 5740968 | 7367980 | 1789201 | protein tyrosine phosphatase, receptor type, D                                                          | Ptprd  | 25529  | 1,04 | down |
| 6684049 | 7367980 | 1789191 | protein tyrosine phosphatase, receptor type, D                                                          | Ptprd  | 25529  | 1,03 | up   |
| 5734693 | 7367980 | 1789157 | protein tyrosine phosphatase, receptor type, D                                                          | Ptprd  | 25529  | 1,03 | down |
| 5839802 | 7367980 | 1789171 | protein tyrosine phosphatase, receptor type, D                                                          | Ptprd  | 25529  | 1,02 | down |
| 5813935 | 7367980 | 1789167 | protein tyrosine phosphatase, receptor type, D                                                          | Ptprd  | 25529  | 1,02 | up   |
| 5701238 | 7314620 | 1658524 | protein tyrosine phosphatase, receptor type, f polypeptide (PTPRF), interacting protein (liprin), alpha | Ppfia2 | 362876 | 2,19 | down |
| 5824118 | 7314620 | 1658528 | protein tyrosine phosphatase, receptor type, f polypeptide (PTPRF), interacting protein (liprin), alpha | Ppfia2 | 362876 | 2,00 | down |
| 6116510 | 7314620 | 1658536 | protein tyrosine phosphatase, receptor type, f polypeptide (PTPRF), interacting protein (liprin), alpha | Ppfia2 | 362876 | 1,88 | down |
| 5919305 | 7314620 | 1658545 | protein tyrosine phosphatase, receptor type, f polypeptide (PTPRF), interacting protein (liprin), alpha | Ppfia2 | 362876 | 1,73 | down |
| 5991863 | 7314620 | 1658514 | protein tyrosine phosphatase, receptor type, f polypeptide (PTPRF), interacting protein (liprin), alpha | Ppfia2 | 362876 | 1,66 | down |
| 6387080 | 7314620 | 1658504 | protein tyrosine phosphatase, receptor type, f polypeptide (PTPRF), interacting protein (liprin), alpha | Ppfia2 | 362876 | 1,65 | up   |
| 6683576 | 7314620 | 1658531 | protein tyrosine phosphatase, receptor type, f polypeptide (PTPRF), interacting protein (liprin), alpha | Ppfia2 | 362876 | 1,64 | down |
| 6552761 | 7314620 | 1658520 | protein tyrosine phosphatase, receptor type, f polypeptide (PTPRF), interacting protein (liprin), alpha | Ppfia2 | 362876 | 1,61 | down |
| 5988150 | 7314620 | 1658543 | protein tyrosine phosphatase, receptor type, f polypeptide (PTPRF), interacting protein (liprin), alpha | Ppfia2 | 362876 | 1,60 | up   |
| 5754838 | 7314620 | 1658549 | protein tyrosine phosphatase, receptor type, f polypeptide (PTPRF), interacting protein (liprin), alpha | Ppfia2 | 362876 | 1,59 | down |
| 6503948 | 7314620 | 1658553 | protein tyrosine phosphatase, receptor type, f polypeptide (PTPRF), interacting protein (liprin), alpha | Ppfia2 | 362876 | 1,54 | up   |
| 6047993 | 7314620 | 1658542 | protein tyrosine phosphatase, receptor type, f polypeptide (PTPRF), interacting protein (liprin), alpha | Ppfia2 | 362876 | 1,44 | down |
| 6090174 | 7314620 | 1658520 | protein tyrosine phosphatase, receptor type, f polypeptide (PTPRF), interacting protein (liprin), alpha | Ppfia2 | 362876 | 1,43 | down |
| 6734277 | 7314620 | 1658497 | protein tyrosine phosphatase, receptor type, f polypeptide (PTPRF), interacting protein (liprin), alpha | Ppfia2 | 362876 | 1,39 | up   |
| 6206654 | 7314620 | 1658534 | protein tyrosine phosphatase, receptor type, f polypeptide (PTPRF), interacting protein (liprin), alpha | Ppfia2 | 362876 | 1,39 | down |
| 6348814 | 7314620 | 1658495 | protein tyrosine phosphatase, receptor type, f polypeptide (PTPRF), interacting protein (liprin), alpha | Ppfia2 | 362876 | 1,38 | up   |
| 6578938 | 7314620 | 1658533 | protein tyrosine phosphatase, receptor type, f polypeptide (PTPRF), interacting protein (liprin), alpha | Ppfia2 | 362876 | 1,37 | down |
| 5983301 | 7314620 | 1658547 | protein tyrosine phosphatase, receptor type, f polypeptide (PTPRF), interacting protein (liprin), alpha | Ppfia2 | 362876 | 1,35 | up   |
| 5769974 | 7314620 | 1658552 | protein tyrosine phosphatase, receptor type, f polypeptide (PTPRF), interacting protein (liprin), alpha | Ppfia2 | 362876 | 1,33 | down |
| 5980542 | 7314620 | 1658537 | protein tyrosine phosphatase, receptor type, f polypeptide (PTPRF), interacting protein (liprin), alpha | Ppfia2 | 362876 | 1,32 | up   |
| 6211858 | 7314620 | 1658530 | protein tyrosine phosphatase, receptor type, f polypeptide (PTPRF), interacting protein (liprin), alpha | Ppfia2 | 362876 | 1,32 | up   |
| 5984520 | 7314620 | 1658495 | protein tyrosine phosphatase, receptor type, f polypeptide (PTPRF), interacting protein (liprin), alpha | Ppfia2 | 362876 | 1,30 | up   |
| 6628281 | 7314620 | 1658551 | protein tyrosine phosphatase, receptor type, f polypeptide (PTPRF), interacting protein (liprin), alpha | Ppfia2 | 362876 | 1,28 | down |
| 6073997 | 7314620 | 1658550 | protein tyrosine phosphatase, receptor type, f polypeptide (PTPRF), interacting protein (liprin), alpha | Ppfia2 | 362876 | 1,25 | up   |
| 5637423 | 7314620 | 1658541 | protein tyrosine phosphatase, receptor type, f polypeptide (PTPRF), interacting protein (liprin), alpha | Ppfia2 | 362876 | 1,25 | up   |
| 6355684 | 7314620 | 1658510 | protein tyrosine phosphatase, receptor type, f polypeptide (PTPRF), interacting protein (liprin), alpha | Ppfia2 | 362876 | 1,23 | down |
| 5631068 | 7314620 | 1658533 | protein tyrosine phosphatase, receptor type, f polypeptide (PTPRF), interacting protein (liprin), alpha | Ppfia2 | 362876 | 1,23 | up   |
| 5887969 | 7314620 | 1658535 | protein tyrosine phosphatase, receptor type, f polypeptide (PTPRF), interacting protein (liprin), alpha | Ppfia2 | 362876 | 1,17 | up   |
| 5923109 | 7314620 | 1658523 | protein tyrosine phosphatase, receptor type, f polypeptide (PTPRF), interacting protein (liprin), alpha | Ppfia2 | 362876 | 1,17 | up   |
| 5631589 | 7314620 | 1658544 | protein tyrosine phosphatase, receptor type, f polypeptide (PTPRF), interacting protein (liprin), alpha | Ppfia2 | 362876 | 1,15 | up   |
| 6268196 | 7314620 | 1658527 | protein tyrosine phosphatase, receptor type, f polypeptide (PTPRF), interacting protein (liprin), alpha | Ppfia2 | 362876 | 1,14 | up   |
| 6137083 | 7314620 | 1658515 | protein tyrosine phosphatase, receptor type, f polypeptide (PTPRF), interacting protein (liprin), alpha | Ppfia2 | 362876 | 1,13 | down |
| 6210394 | 7314620 | 1658522 | protein tyrosine phosphatase, receptor type, f polypeptide (PTPRF), interacting protein (liprin), alpha | Ppfia2 | 362876 | 1,12 | down |
| 6089864 | 7314620 | 1658532 | protein tyrosine phosphatase, receptor type, f polypeptide (PTPRF), interacting protein (liprin), alpha | Ppfia2 | 362876 | 1,09 | up   |
| 6614178 | 7314620 | 1658514 | protein tyrosine phosphatase, receptor type, f polypeptide (PTPRF), interacting protein (liprin), alpha | Ppfia2 | 362876 | 1,07 | down |
| 5661401 | 7314620 | 1658538 | protein tyrosine phosphatase, receptor type, f polypeptide (PTPRF), interacting protein (liprin), alpha | Ppfia2 | 362876 | 1,01 | up   |

|         |         |         |                                                                              |       |        |      |      |
|---------|---------|---------|------------------------------------------------------------------------------|-------|--------|------|------|
| 6111097 | 7259266 | 1520742 | protein tyrosine phosphatase, receptor type, O                               | Ptpro | 50677  | 2,34 | down |
| 6503821 | 7259266 | 1520734 | protein tyrosine phosphatase, receptor type, O                               | Ptpro | 50677  | 1,70 | up   |
| 5812990 | 7259266 | 1520745 | protein tyrosine phosphatase, receptor type, O                               | Ptpro | 50677  | 1,54 | down |
| 6207177 | 7259266 | 1520739 | protein tyrosine phosphatase, receptor type, O                               | Ptpro | 50677  | 1,35 | up   |
| 6576768 | 7259266 | 1520738 | protein tyrosine phosphatase, receptor type, O                               | Ptpro | 50677  | 1,34 | up   |
| 6287535 | 7259266 | 1520755 | protein tyrosine phosphatase, receptor type, O                               | Ptpro | 50677  | 1,34 | up   |
| 5652819 | 7259266 | 1520750 | protein tyrosine phosphatase, receptor type, O                               | Ptpro | 50677  | 1,34 | up   |
| 6077765 | 7259266 | 1520733 | protein tyrosine phosphatase, receptor type, O                               | Ptpro | 50677  | 1,30 | up   |
| 5809004 | 7259266 | 1520730 | protein tyrosine phosphatase, receptor type, O                               | Ptpro | 50677  | 1,23 | up   |
| 5825929 | 7259266 | 1520729 | protein tyrosine phosphatase, receptor type, O                               | Ptpro | 50677  | 1,22 | down |
| 6435874 | 7259266 | 1520737 | protein tyrosine phosphatase, receptor type, O                               | Ptpro | 50677  | 1,20 | down |
| 5887526 | 7259266 | 1520752 | protein tyrosine phosphatase, receptor type, O                               | Ptpro | 50677  | 1,19 | down |
| 6530648 | 7259266 | 1520746 | protein tyrosine phosphatase, receptor type, O                               | Ptpro | 50677  | 1,19 | down |
| 6241533 | 7259266 | 1520753 | protein tyrosine phosphatase, receptor type, O                               | Ptpro | 50677  | 1,18 | up   |
| 6055000 | 7259266 | 1520732 | protein tyrosine phosphatase, receptor type, O                               | Ptpro | 50677  | 1,17 | down |
| 6434295 | 7259266 | 1520731 | protein tyrosine phosphatase, receptor type, O                               | Ptpro | 50677  | 1,15 | down |
| 5757155 | 7259266 | 1520741 | protein tyrosine phosphatase, receptor type, O                               | Ptpro | 50677  | 1,12 | up   |
| 6369786 | 7259266 | 1520743 | protein tyrosine phosphatase, receptor type, O                               | Ptpro | 50677  | 1,09 | down |
| 5788837 | 7259266 | 1520742 | protein tyrosine phosphatase, receptor type, O                               | Ptpro | 50677  | 1,07 | down |
| 6626399 | 7259266 | 1520741 | protein tyrosine phosphatase, receptor type, O                               | Ptpro | 50677  | 1,07 | down |
| 5685583 | 7259266 | 1520748 | protein tyrosine phosphatase, receptor type, O                               | Ptpro | 50677  | 1,06 | down |
| 5938422 | 7259266 | 1520740 | protein tyrosine phosphatase, receptor type, O                               | Ptpro | 50677  | 1,05 | down |
| 6282619 | 7259266 | 1520749 | protein tyrosine phosphatase, receptor type, O                               | Ptpro | 50677  | 1,04 | up   |
| 6731102 | 7259266 | 1520735 | protein tyrosine phosphatase, receptor type, O                               | Ptpro | 50677  | 1,02 | up   |
| 5802455 | 7259266 | 1520751 | protein tyrosine phosphatase, receptor type, O                               | Ptpro | 50677  | 1,02 | down |
| 5702276 | 7259266 | 1520747 | protein tyrosine phosphatase, receptor type, O                               | Ptpro | 50677  | 1,02 | up   |
| 6197504 | 7259266 | 1520736 | protein tyrosine phosphatase, receptor type, O                               | Ptpro | 50677  | 1,01 | up   |
| 6102981 | 7259266 | 1520744 | protein tyrosine phosphatase, receptor type, O                               | Ptpro | 50677  | 1,01 | up   |
| 6308712 | 7259266 | 1520754 | protein tyrosine phosphatase, receptor type, O                               | Ptpro | 50677  | 1,01 | down |
| 6053585 | 7043913 | 995232  | protein-L-isoaspartate (D-aspartate) O-methyltransferase 1                   | Pcmt1 | 25604  | 2,50 | down |
| 6720351 | 7043913 | 995237  | protein-L-isoaspartate (D-aspartate) O-methyltransferase 1                   | Pcmt1 | 25604  | 1,63 | down |
| 6076175 | 7043913 | 995232  | protein-L-isoaspartate (D-aspartate) O-methyltransferase 1                   | Pcmt1 | 25604  | 1,43 | down |
| 6348208 | 7043913 | 995236  | protein-L-isoaspartate (D-aspartate) O-methyltransferase 1                   | Pcmt1 | 25604  | 1,33 | up   |
| 6602287 | 7043913 | 995238  | protein-L-isoaspartate (D-aspartate) O-methyltransferase 1                   | Pcmt1 | 25604  | 1,32 | down |
| 6207274 | 7043913 | 995232  | protein-L-isoaspartate (D-aspartate) O-methyltransferase 1                   | Pcmt1 | 25604  | 1,28 | down |
| 6636217 | 7043913 | 995233  | protein-L-isoaspartate (D-aspartate) O-methyltransferase 1                   | Pcmt1 | 25604  | 1,22 | up   |
| 6140311 | 7043913 | 995234  | protein-L-isoaspartate (D-aspartate) O-methyltransferase 1                   | Pcmt1 | 25604  | 1,19 | up   |
| 6557957 | 7043913 | 995235  | protein-L-isoaspartate (D-aspartate) O-methyltransferase 1                   | Pcmt1 | 25604  | 1,18 | up   |
| 6276121 | 7043913 | 995235  | protein-L-isoaspartate (D-aspartate) O-methyltransferase 1                   | Pcmt1 | 25604  | 1,18 | up   |
| 5918262 | 7043913 | 995240  | protein-L-isoaspartate (D-aspartate) O-methyltransferase 1                   | Pcmt1 | 25604  | 1,06 | up   |
| 6407975 | 7043913 | 995239  | protein-L-isoaspartate (D-aspartate) O-methyltransferase 1                   | Pcmt1 | 25604  | 1,02 | down |
| 5679850 | 7236492 | 1464579 | protein-L-isoaspartate (D-aspartate) O-methyltransferase domain containing 2 | Pcmt2 | 311726 | 1,69 | up   |
| 5968126 | 7236492 | 1464579 | protein-L-isoaspartate (D-aspartate) O-methyltransferase domain containing 2 | Pcmt2 | 311726 | 1,45 | down |
| 6184607 | 7236492 | 1464578 | protein-L-isoaspartate (D-aspartate) O-methyltransferase domain containing 2 | Pcmt2 | 311726 | 1,25 | down |
| 6339739 | 7236492 | 1464580 | protein-L-isoaspartate (D-aspartate) O-methyltransferase domain containing 2 | Pcmt2 | 311726 | 1,22 | up   |
| 6459925 | 7236492 | 1464579 | protein-L-isoaspartate (D-aspartate) O-methyltransferase domain containing 2 | Pcmt2 | 311726 | 1,15 | up   |
| 6288397 | 7236492 | 1464578 | protein-L-isoaspartate (D-aspartate) O-methyltransferase domain containing 2 | Pcmt2 | 311726 | 1,11 | up   |
| 6734143 | 7236492 | 1464573 | protein-L-isoaspartate (D-aspartate) O-methyltransferase domain containing 2 | Pcmt2 | 311726 | 1,10 | down |
| 5662073 | 7236492 | 1464576 | protein-L-isoaspartate (D-aspartate) O-methyltransferase domain containing 2 | Pcmt2 | 311726 | 1,10 | up   |
| 5821007 | 7236492 | 1464579 | protein-L-isoaspartate (D-aspartate) O-methyltransferase domain containing 2 | Pcmt2 | 311726 | 1,05 | up   |
| 6382987 | 7236492 | 1464575 | protein-L-isoaspartate (D-aspartate) O-methyltransferase domain containing 2 | Pcmt2 | 311726 | 1,05 | down |
| 6449330 | 7236492 | 1464574 | protein-L-isoaspartate (D-aspartate) O-methyltransferase domain containing 2 | Pcmt2 | 311726 | 1,04 | up   |
| 6651428 | 7236492 | 1464580 | protein-L-isoaspartate (D-aspartate) O-methyltransferase domain containing 2 | Pcmt2 | 311726 | 1,03 | up   |
| 5739236 | 7226261 | 1437913 | protein-O-mannosyltransferase 1                                              | Pomt1 | 84430  | 2,00 | down |
| 6466711 | 7226261 | 1437900 | protein-O-mannosyltransferase 1                                              | Pomt1 | 84430  | 1,67 | down |
| 6430416 | 7226261 | 1437911 | protein-O-mannosyltransferase 1                                              | Pomt1 | 84430  | 1,44 | up   |
| 5797696 | 7226261 | 1437918 | protein-O-mannosyltransferase 1                                              | Pomt1 | 84430  | 1,38 | up   |



|         |         |         |                                                                                                                                               |         |        |      |      |
|---------|---------|---------|-----------------------------------------------------------------------------------------------------------------------------------------------|---------|--------|------|------|
| 6498545 | 7226261 | 1437918 | protein-O-mannosyltransferase 1                                                                                                               | Pomt1   | 84430  | 1,34 | up   |
| 6163169 | 7226261 | 1437910 | protein-O-mannosyltransferase 1                                                                                                               | Pomt1   | 84430  | 1,25 | down |
| 5741020 | 7226261 | 1437917 | protein-O-mannosyltransferase 1                                                                                                               | Pomt1   | 84430  | 1,20 | down |
| 6497501 | 7226261 | 1437912 | protein-O-mannosyltransferase 1                                                                                                               | Pomt1   | 84430  | 1,18 | up   |
| 6442132 | 7226261 | 1437918 | protein-O-mannosyltransferase 1                                                                                                               | Pomt1   | 84430  | 1,16 | up   |
| 5830710 | 7226261 | 1437902 | protein-O-mannosyltransferase 1                                                                                                               | Pomt1   | 84430  | 1,16 | up   |
| 6080263 | 7226261 | 1437904 | protein-O-mannosyltransferase 1                                                                                                               | Pomt1   | 84430  | 1,14 | up   |
| 5715076 | 7226261 | 1437916 | protein-O-mannosyltransferase 1                                                                                                               | Pomt1   | 84430  | 1,11 | up   |
| 6195581 | 7226261 | 1437901 | protein-O-mannosyltransferase 1                                                                                                               | Pomt1   | 84430  | 1,09 | up   |
| 5871348 | 7226261 | 1437908 | protein-O-mannosyltransferase 1                                                                                                               | Pomt1   | 84430  | 1,08 | up   |
| 6415306 | 7226261 | 1437919 | protein-O-mannosyltransferase 1                                                                                                               | Pomt1   | 84430  | 1,07 | down |
| 5705389 | 7226261 | 1437915 | protein-O-mannosyltransferase 1                                                                                                               | Pomt1   | 84430  | 1,06 | down |
| 6063198 | 7226261 | 1437907 | protein-O-mannosyltransferase 1                                                                                                               | Pomt1   | 84430  | 1,05 | up   |
| 6728880 | 7226261 | 1437906 | protein-O-mannosyltransferase 1                                                                                                               | Pomt1   | 84430  | 1,04 | up   |
| 6704859 | 7226261 | 1437909 | protein-O-mannosyltransferase 1                                                                                                               | Pomt1   | 84430  | 1,03 | up   |
| 5644630 | 7226261 | 1437903 | protein-O-mannosyltransferase 1                                                                                                               | Pomt1   | 84430  | 1,01 | down |
| 6110308 | 7226261 | 1437918 | protein-O-mannosyltransferase 1                                                                                                               | Pomt1   | 84430  | 1,01 | down |
| 6669315 | 7226261 | 1437905 | protein-O-mannosyltransferase 1                                                                                                               | Pomt1   | 84430  | 1,01 | down |
| 6587441 | 7226261 | 1437914 | protein-O-mannosyltransferase 1                                                                                                               | Pomt1   | 84430  | 1,00 | up   |
| 5738341 | 7373726 | 1805955 | proteolipid protein 2 (colonic epithelium-enriched)                                                                                           | Plp2    | 302562 | 2,13 | down |
| 6626224 | 7373726 | 1805959 | proteolipid protein 2 (colonic epithelium-enriched)                                                                                           | Plp2    | 302562 | 1,84 | down |
| 6061201 | 7373726 | 1805958 | proteolipid protein 2 (colonic epithelium-enriched)                                                                                           | Plp2    | 302562 | 1,18 | up   |
| 6684305 | 7373726 | 1805956 | proteolipid protein 2 (colonic epithelium-enriched)                                                                                           | Plp2    | 302562 | 1,12 | up   |
| 6004974 | 7373726 | 1805959 | proteolipid protein 2 (colonic epithelium-enriched)                                                                                           | Plp2    | 302562 | 1,09 | down |
| 6481872 | 7373726 | 1805959 | proteolipid protein 2 (colonic epithelium-enriched)                                                                                           | Plp2    | 302562 | 1,04 | down |
| 6127637 | 7373726 | 1805955 | proteolipid protein 2 (colonic epithelium-enriched)                                                                                           | Plp2    | 302562 | 1,02 | down |
| 5763989 | 7373726 | 1805957 | proteolipid protein 2 (colonic epithelium-enriched)                                                                                           | Plp2    | 302562 | 1,00 | down |
| 5833010 | 7140465 | 1226965 | protocadherin 8                                                                                                                               | Pcdh8   | 64865  | 2,69 | down |
| 6357251 | 7140465 | 1226963 | protocadherin 8                                                                                                                               | Pcdh8   | 64865  | 1,23 | down |
| 6608128 | 7140465 | 1226966 | protocadherin 8                                                                                                                               | Pcdh8   | 64865  | 1,14 | up   |
| 6515399 | 7140465 | 1226963 | protocadherin 8                                                                                                                               | Pcdh8   | 64865  | 1,12 | up   |
| 5722896 | 7140465 | 1226965 | protocadherin 8                                                                                                                               | Pcdh8   | 64865  | 1,10 | down |
| 6110707 | 7140465 | 1226966 | protocadherin 8                                                                                                                               | Pcdh8   | 64865  | 1,09 | down |
| 6201726 | 7140465 | 1226966 | protocadherin 8                                                                                                                               | Pcdh8   | 64865  | 1,09 | up   |
| 6349393 | 7140465 | 1226964 | protocadherin 8                                                                                                                               | Pcdh8   | 64865  | 1,05 | down |
| 6697844 | 7169492 | 1298252 | protocadherin alpha 1                                                                                                                         | Pcdha1  | 393085 | 1,62 | down |
| 6679515 | 7169492 | 1298252 | protocadherin alpha 1                                                                                                                         | Pcdha1  | 393085 | 1,55 | down |
| 6451214 | 7169492 | 1298252 | protocadherin alpha 1                                                                                                                         | Pcdha1  | 393085 | 1,43 | down |
| 6440252 | 7169492 | 1298252 | protocadherin alpha 1                                                                                                                         | Pcdha1  | 393085 | 1,07 | up   |
| 6398399 | 7169492 | 1298252 | protocadherin alpha 1                                                                                                                         | Pcdha1  | 393085 | 1,07 | down |
| 5833404 | 7169492 | 1298252 | protocadherin alpha 1                                                                                                                         | Pcdha1  | 393085 | 1,02 | up   |
| 6538619 | 7169492 | 1298272 | protocadherin alpha 1 /// protocadherin alpha 2 /// protocadherin alpha 3 /// protocadherin alpha 4 /// Pcdha9 /// Pcdha 81 /// 393090 /// 11 |         |        | 1,72 | down |
| 6601806 | 7169492 | 1298270 | protocadherin alpha 1 /// protocadherin alpha 2 /// protocadherin alpha 3 /// protocadherin alpha 4 /// Pcdha9 /// Pcdha 81 /// 393090 /// 11 |         |        | 1,63 | down |
| 6285755 | 7169492 | 1298273 | protocadherin alpha 1 /// protocadherin alpha 2 /// protocadherin alpha 3 /// protocadherin alpha 4 /// Pcdha9 /// Pcdha 81 /// 393090 /// 11 |         |        | 1,49 | down |
| 5673292 | 7169492 | 1298273 | protocadherin alpha 1 /// protocadherin alpha 2 /// protocadherin alpha 3 /// protocadherin alpha 4 /// Pcdha9 /// Pcdha 81 /// 393090 /// 11 |         |        | 1,29 | up   |
| 6228370 | 7169492 | 1298271 | protocadherin alpha 1 /// protocadherin alpha 2 /// protocadherin alpha 3 /// protocadherin alpha 4 /// Pcdha9 /// Pcdha 81 /// 393090 /// 11 |         |        | 1,24 | down |
| 6265191 | 7169492 | 1298272 | protocadherin alpha 1 /// protocadherin alpha 2 /// protocadherin alpha 3 /// protocadherin alpha 4 /// Pcdha9 /// Pcdha 81 /// 393090 /// 11 |         |        | 1,23 | down |
| 6658449 | 7169492 | 1298272 | protocadherin alpha 1 /// protocadherin alpha 2 /// protocadherin alpha 3 /// protocadherin alpha 4 /// Pcdha9 /// Pcdha 81 /// 393090 /// 11 |         |        | 1,09 | up   |
| 5797950 | 7169492 | 1298272 | protocadherin alpha 1 /// protocadherin alpha 2 /// protocadherin alpha 3 /// protocadherin alpha 4 /// Pcdha9 /// Pcdha 81 /// 393090 /// 11 |         |        | 1,07 | up   |
| 6175629 | 7169492 | 1298273 | protocadherin alpha 1 /// protocadherin alpha 2 /// protocadherin alpha 3 /// protocadherin alpha 4 /// Pcdha9 /// Pcdha 81 /// 393090 /// 11 |         |        | 1,00 | up   |
| 6715194 | 7169492 | 1298263 | protocadherin alpha 10                                                                                                                        | Pcdha10 | 116778 | 2,74 | up   |
| 6633938 | 7169492 | 1298263 | protocadherin alpha 10                                                                                                                        | Pcdha10 | 116778 | 1,33 | up   |
| 6172121 | 7169492 | 1298264 | protocadherin alpha 11                                                                                                                        | Pcdha11 | 394223 | 1,16 | up   |
| 5682149 | 7169492 | 1298264 | protocadherin alpha 11                                                                                                                        | Pcdha11 | 394223 | 1,14 | up   |
| 6256163 | 7169492 | 1298264 | protocadherin alpha 11                                                                                                                        | Pcdha11 | 394223 | 1,02 | up   |
| 6430407 | 7169492 | 1298264 | protocadherin alpha 11                                                                                                                        | Pcdha11 | 394223 | 1,01 | up   |
| 6075594 | 7169492 | 1298265 | protocadherin alpha 12                                                                                                                        | Pcdha12 | 116779 | 1,14 | down |



|         |         |         |                                                             |          |        |      |      |
|---------|---------|---------|-------------------------------------------------------------|----------|--------|------|------|
| 5797431 | 7169599 | 1298461 | protocadherin gamma subfamily A, 12                         | Pcdhga12 | 498850 | 1,67 | down |
| 6265756 | 7169599 | 1298460 | protocadherin gamma subfamily A, 12                         | Pcdhga12 | 498850 | 1,53 | up   |
| 6127122 | 7169599 | 1298461 | protocadherin gamma subfamily A, 12                         | Pcdhga12 | 498850 | 1,34 | up   |
| 5907387 | 7169599 | 1298441 | protocadherin gamma subfamily A, 2                          | Pcdhga2  | 498846 | 3,23 | up   |
| 6306683 | 7169599 | 1298441 | protocadherin gamma subfamily A, 2                          | Pcdhga2  | 498846 | 1,53 | down |
| 6516555 | 7169599 | 1298441 | protocadherin gamma subfamily A, 2                          | Pcdhga2  | 498846 | 1,18 | up   |
| 5966018 | 7169599 | 1298441 | protocadherin gamma subfamily A, 2                          | Pcdhga2  | 498846 | 1,15 | down |
| 6718602 | 7169599 | 1298441 | protocadherin gamma subfamily A, 2                          | Pcdhga2  | 498846 | 1,01 | up   |
| 5942024 | 7169599 | 1298442 | protocadherin gamma subfamily A, 3                          | Pcdhga3  | 498847 | 1,69 | up   |
| 6572348 | 7169599 | 1298442 | protocadherin gamma subfamily A, 3                          | Pcdhga3  | 498847 | 1,48 | down |
| 5868919 | 7169599 | 1298442 | protocadherin gamma subfamily A, 3                          | Pcdhga3  | 498847 | 1,16 | down |
| 6735136 | 7169599 | 1298442 | protocadherin gamma subfamily A, 3                          | Pcdhga3  | 498847 | 1,05 | up   |
| 6346073 | 7169599 | 1298445 | protocadherin gamma subfamily A, 5                          | Pcdhga5  | 291637 | 1,06 | up   |
| 6349093 | 7169599 | 1298445 | protocadherin gamma subfamily A, 5                          | Pcdhga5  | 291637 | 1,02 | up   |
| 6006894 | 7169599 | 1298448 | protocadherin gamma subfamily A, 7                          | Pcdhga7  | 291635 | 1,35 | down |
| 6628982 | 7169599 | 1298448 | protocadherin gamma subfamily A, 7                          | Pcdhga7  | 291635 | 1,04 | down |
| 6035182 | 7169599 | 1298447 | protocadherin gamma subfamily A, 7                          | Pcdhga7  | 291635 | 1,04 | up   |
| 6614314 | 7169599 | 1298450 | protocadherin gamma subfamily A, 8                          | Pcdhga8  | 364843 | 1,05 | down |
| 6314445 | 7169599 | 1298452 | protocadherin gamma subfamily A, 9                          | Pcdhga9  | 252895 | 6,91 | down |
| 5831038 | 7169599 | 1298452 | protocadherin gamma subfamily A, 9                          | Pcdhga9  | 252895 | 1,38 | down |
| 6171922 | 7169599 | 1298452 | protocadherin gamma subfamily A, 9                          | Pcdhga9  | 252895 | 1,22 | up   |
| 6541847 | 7169599 | 1298452 | protocadherin gamma subfamily A, 9                          | Pcdhga9  | 252895 | 1,16 | down |
| 6193999 | 7169599 | 1298452 | protocadherin gamma subfamily A, 9                          | Pcdhga9  | 252895 | 1,10 | down |
| 6491386 | 7169599 | 1298452 | protocadherin gamma subfamily A, 9                          | Pcdhga9  | 252895 | 1,09 | down |
| 5698140 | 7169599 | 1298452 | protocadherin gamma subfamily A, 9                          | Pcdhga9  | 252895 | 1,07 | up   |
| 6024109 | 7169599 | 1298455 | protocadherin gamma subfamily B, 7                          | Pcdhgb7  | 364844 | 1,52 | up   |
| 6362355 | 7169599 | 1298455 | protocadherin gamma subfamily B, 7                          | Pcdhgb7  | 364844 | 1,17 | up   |
| 6478600 | 7169599 | 1298455 | protocadherin gamma subfamily B, 7                          | Pcdhgb7  | 364844 | 1,06 | down |
| 6324815 | 7169599 | 1298455 | protocadherin gamma subfamily B, 7                          | Pcdhgb7  | 364844 | 1,05 | up   |
| 6223229 | 7169599 | 1298458 | protocadherin gamma subfamily B, 8                          | Pcdhgb8  | 364845 | 1,77 | up   |
| 5878478 | 7169599 | 1298459 | protocadherin gamma subfamily B, 8                          | Pcdhgb8  | 364845 | 1,65 | up   |
| 6384280 | 7169599 | 1298459 | protocadherin gamma subfamily B, 8                          | Pcdhgb8  | 364845 | 1,52 | down |
| 5660972 | 7169599 | 1298458 | protocadherin gamma subfamily B, 8                          | Pcdhgb8  | 364845 | 1,48 | up   |
| 6574233 | 7169599 | 1298462 | protocadherin gamma subfamily C, 3                          | Pcdhgc3  | 116782 | 1,23 | down |
| 5695138 | 7160082 | 1275440 | PRP18 pre-mRNA processing factor 18 homolog (S. cerevisiae) | Prpf18   | 171552 | 2,36 | up   |
| 6653598 | 7160082 | 1275444 | PRP18 pre-mRNA processing factor 18 homolog (S. cerevisiae) | Prpf18   | 171552 | 1,54 | down |
| 5892703 | 7160082 | 1275445 | PRP18 pre-mRNA processing factor 18 homolog (S. cerevisiae) | Prpf18   | 171552 | 1,37 | up   |
| 5693173 | 7160082 | 1275442 | PRP18 pre-mRNA processing factor 18 homolog (S. cerevisiae) | Prpf18   | 171552 | 1,34 | down |
| 5741319 | 7160082 | 1275451 | PRP18 pre-mRNA processing factor 18 homolog (S. cerevisiae) | Prpf18   | 171552 | 1,25 | down |
| 6699208 | 7160082 | 1275440 | PRP18 pre-mRNA processing factor 18 homolog (S. cerevisiae) | Prpf18   | 171552 | 1,18 | down |
| 6235639 | 7160082 | 1275449 | PRP18 pre-mRNA processing factor 18 homolog (S. cerevisiae) | Prpf18   | 171552 | 1,18 | down |
| 5875561 | 7160082 | 1275441 | PRP18 pre-mRNA processing factor 18 homolog (S. cerevisiae) | Prpf18   | 171552 | 1,16 | up   |
| 6413937 | 7160082 | 1275448 | PRP18 pre-mRNA processing factor 18 homolog (S. cerevisiae) | Prpf18   | 171552 | 1,13 | down |
| 6087234 | 7160082 | 1275444 | PRP18 pre-mRNA processing factor 18 homolog (S. cerevisiae) | Prpf18   | 171552 | 1,12 | up   |
| 6047529 | 7160082 | 1275446 | PRP18 pre-mRNA processing factor 18 homolog (S. cerevisiae) | Prpf18   | 171552 | 1,06 | down |
| 6617797 | 7160082 | 1275443 | PRP18 pre-mRNA processing factor 18 homolog (S. cerevisiae) | Prpf18   | 171552 | 1,04 | down |
| 5660688 | 7160082 | 1275450 | PRP18 pre-mRNA processing factor 18 homolog (S. cerevisiae) | Prpf18   | 171552 | 1,04 | up   |
| 6525399 | 7160082 | 1275447 | PRP18 pre-mRNA processing factor 18 homolog (S. cerevisiae) | Prpf18   | 171552 | 1,01 | down |
| 6589047 | 7047524 | 1004656 | PRP31 pre-mRNA processing factor 31 homolog (S. cerevisiae) | Prpf31   | 292536 | 2,26 | down |
| 6584266 | 7047524 | 1004654 | PRP31 pre-mRNA processing factor 31 homolog (S. cerevisiae) | Prpf31   | 292536 | 2,13 | up   |
| 5710548 | 7047524 | 1004662 | PRP31 pre-mRNA processing factor 31 homolog (S. cerevisiae) | Prpf31   | 292536 | 2,07 | up   |
| 6414855 | 7047524 | 1004661 | PRP31 pre-mRNA processing factor 31 homolog (S. cerevisiae) | Prpf31   | 292536 | 1,73 | down |
| 6473248 | 7047524 | 1004656 | PRP31 pre-mRNA processing factor 31 homolog (S. cerevisiae) | Prpf31   | 292536 | 1,42 | up   |
| 5806986 | 7047524 | 1004657 | PRP31 pre-mRNA processing factor 31 homolog (S. cerevisiae) | Prpf31   | 292536 | 1,40 | up   |
| 6706712 | 7047524 | 1004666 | PRP31 pre-mRNA processing factor 31 homolog (S. cerevisiae) | Prpf31   | 292536 | 1,39 | down |
| 5633111 | 7047524 | 1004658 | PRP31 pre-mRNA processing factor 31 homolog (S. cerevisiae) | Prpf31   | 292536 | 1,39 | down |
| 6697098 | 7047524 | 1004655 | PRP31 pre-mRNA processing factor 31 homolog (S. cerevisiae) | Prpf31   | 292536 | 1,30 | up   |

|         |         |         |                                                             |        |        |      |      |
|---------|---------|---------|-------------------------------------------------------------|--------|--------|------|------|
| 6611695 | 7047524 | 1004659 | PRP31 pre-mRNA processing factor 31 homolog (S. cerevisiae) | Prpf31 | 292536 | 1,29 | up   |
| 6175785 | 7047524 | 1004663 | PRP31 pre-mRNA processing factor 31 homolog (S. cerevisiae) | Prpf31 | 292536 | 1,23 | up   |
| 6340553 | 7047524 | 1004654 | PRP31 pre-mRNA processing factor 31 homolog (S. cerevisiae) | Prpf31 | 292536 | 1,18 | up   |
| 5841908 | 7047524 | 1004660 | PRP31 pre-mRNA processing factor 31 homolog (S. cerevisiae) | Prpf31 | 292536 | 1,16 | up   |
| 6020680 | 7047524 | 1004664 | PRP31 pre-mRNA processing factor 31 homolog (S. cerevisiae) | Prpf31 | 292536 | 1,15 | up   |
| 6224391 | 7047524 | 1004654 | PRP31 pre-mRNA processing factor 31 homolog (S. cerevisiae) | Prpf31 | 292536 | 1,12 | up   |
| 6461196 | 7047524 | 1004655 | PRP31 pre-mRNA processing factor 31 homolog (S. cerevisiae) | Prpf31 | 292536 | 1,06 | up   |
| 6186156 | 7047524 | 1004653 | PRP31 pre-mRNA processing factor 31 homolog (S. cerevisiae) | Prpf31 | 292536 | 1,03 | up   |
| 5695300 | 7298692 | 1618413 | PRP39 pre-mRNA processing factor 39 homolog (S. cerevisiae) | Prpf39 | 314171 | 2,20 | down |
| 6355360 | 7298692 | 1618403 | PRP39 pre-mRNA processing factor 39 homolog (S. cerevisiae) | Prpf39 | 314171 | 1,52 | up   |
| 5930292 | 7298692 | 1618413 | PRP39 pre-mRNA processing factor 39 homolog (S. cerevisiae) | Prpf39 | 314171 | 1,51 | down |
| 6699583 | 7298692 | 1618407 | PRP39 pre-mRNA processing factor 39 homolog (S. cerevisiae) | Prpf39 | 314171 | 1,43 | up   |
| 6348391 | 7298692 | 1618401 | PRP39 pre-mRNA processing factor 39 homolog (S. cerevisiae) | Prpf39 | 314171 | 1,42 | up   |
| 6666722 | 7298692 | 1618403 | PRP39 pre-mRNA processing factor 39 homolog (S. cerevisiae) | Prpf39 | 314171 | 1,34 | up   |
| 5963326 | 7298692 | 1618403 | PRP39 pre-mRNA processing factor 39 homolog (S. cerevisiae) | Prpf39 | 314171 | 1,27 | down |
| 6260256 | 7298692 | 1618408 | PRP39 pre-mRNA processing factor 39 homolog (S. cerevisiae) | Prpf39 | 314171 | 1,27 | up   |
| 5717379 | 7298692 | 1618403 | PRP39 pre-mRNA processing factor 39 homolog (S. cerevisiae) | Prpf39 | 314171 | 1,22 | down |
| 5723939 | 7298692 | 1618403 | PRP39 pre-mRNA processing factor 39 homolog (S. cerevisiae) | Prpf39 | 314171 | 1,18 | down |
| 6350864 | 7298692 | 1618409 | PRP39 pre-mRNA processing factor 39 homolog (S. cerevisiae) | Prpf39 | 314171 | 1,17 | down |
| 5789577 | 7298692 | 1618409 | PRP39 pre-mRNA processing factor 39 homolog (S. cerevisiae) | Prpf39 | 314171 | 1,17 | up   |
| 6262779 | 7298692 | 1618412 | PRP39 pre-mRNA processing factor 39 homolog (S. cerevisiae) | Prpf39 | 314171 | 1,17 | up   |
| 6328285 | 7298692 | 1618409 | PRP39 pre-mRNA processing factor 39 homolog (S. cerevisiae) | Prpf39 | 314171 | 1,15 | down |
| 6417194 | 7298692 | 1618403 | PRP39 pre-mRNA processing factor 39 homolog (S. cerevisiae) | Prpf39 | 314171 | 1,12 | down |
| 5948325 | 7298692 | 1618410 | PRP39 pre-mRNA processing factor 39 homolog (S. cerevisiae) | Prpf39 | 314171 | 1,09 | up   |
| 6184157 | 7298692 | 1618403 | PRP39 pre-mRNA processing factor 39 homolog (S. cerevisiae) | Prpf39 | 314171 | 1,08 | up   |
| 6323318 | 7298692 | 1618402 | PRP39 pre-mRNA processing factor 39 homolog (S. cerevisiae) | Prpf39 | 314171 | 1,05 | down |
| 6733924 | 7298692 | 1618413 | PRP39 pre-mRNA processing factor 39 homolog (S. cerevisiae) | Prpf39 | 314171 | 1,05 | down |
| 5827025 | 7298692 | 1618403 | PRP39 pre-mRNA processing factor 39 homolog (S. cerevisiae) | Prpf39 | 314171 | 1,05 | up   |
| 6252896 | 7298692 | 1618402 | PRP39 pre-mRNA processing factor 39 homolog (S. cerevisiae) | Prpf39 | 314171 | 1,04 | up   |
| 5861110 | 7298692 | 1618403 | PRP39 pre-mRNA processing factor 39 homolog (S. cerevisiae) | Prpf39 | 314171 | 1,04 | up   |
| 6733266 | 7298692 | 1618411 | PRP39 pre-mRNA processing factor 39 homolog (S. cerevisiae) | Prpf39 | 314171 | 1,04 | down |
| 5723566 | 7298692 | 1618403 | PRP39 pre-mRNA processing factor 39 homolog (S. cerevisiae) | Prpf39 | 314171 | 1,03 | down |
| 5676740 | 7298692 | 1618404 | PRP39 pre-mRNA processing factor 39 homolog (S. cerevisiae) | Prpf39 | 314171 | 1,00 | down |
| 5979467 | 7298692 | 1618403 | PRP39 pre-mRNA processing factor 39 homolog (S. cerevisiae) | Prpf39 | 314171 | 1,00 | up   |
| 6014782 | 7236460 | 1464452 | PRP6 pre-mRNA splicing factor 6 homolog (S. cerevisiae)     | Prpf6  | 366276 | 2,28 | down |
| 6698759 | 7236460 | 1464475 | PRP6 pre-mRNA splicing factor 6 homolog (S. cerevisiae)     | Prpf6  | 366276 | 1,52 | down |
| 5945728 | 7236460 | 1464460 | PRP6 pre-mRNA splicing factor 6 homolog (S. cerevisiae)     | Prpf6  | 366276 | 1,31 | up   |
| 6251579 | 7236460 | 1464454 | PRP6 pre-mRNA splicing factor 6 homolog (S. cerevisiae)     | Prpf6  | 366276 | 1,28 | up   |
| 6301520 | 7236460 | 1464466 | PRP6 pre-mRNA splicing factor 6 homolog (S. cerevisiae)     | Prpf6  | 366276 | 1,28 | up   |
| 6729019 | 7236460 | 1464470 | PRP6 pre-mRNA splicing factor 6 homolog (S. cerevisiae)     | Prpf6  | 366276 | 1,16 | up   |
| 5958992 | 7236460 | 1464472 | PRP6 pre-mRNA splicing factor 6 homolog (S. cerevisiae)     | Prpf6  | 366276 | 1,15 | up   |
| 6177274 | 7236460 | 1464463 | PRP6 pre-mRNA splicing factor 6 homolog (S. cerevisiae)     | Prpf6  | 366276 | 1,14 | down |
| 5859242 | 7236460 | 1464455 | PRP6 pre-mRNA splicing factor 6 homolog (S. cerevisiae)     | Prpf6  | 366276 | 1,13 | down |
| 5903303 | 7236460 | 1464476 | PRP6 pre-mRNA splicing factor 6 homolog (S. cerevisiae)     | Prpf6  | 366276 | 1,13 | up   |
| 5983545 | 7236460 | 1464459 | PRP6 pre-mRNA splicing factor 6 homolog (S. cerevisiae)     | Prpf6  | 366276 | 1,12 | down |
| 6631312 | 7236460 | 1464468 | PRP6 pre-mRNA splicing factor 6 homolog (S. cerevisiae)     | Prpf6  | 366276 | 1,09 | up   |
| 6420420 | 7236460 | 1464456 | PRP6 pre-mRNA splicing factor 6 homolog (S. cerevisiae)     | Prpf6  | 366276 | 1,08 | down |
| 5831152 | 7236460 | 1464467 | PRP6 pre-mRNA splicing factor 6 homolog (S. cerevisiae)     | Prpf6  | 366276 | 1,08 | up   |
| 5634434 | 7236460 | 1464457 | PRP6 pre-mRNA splicing factor 6 homolog (S. cerevisiae)     | Prpf6  | 366276 | 1,07 | down |
| 5678521 | 7236460 | 1464453 | PRP6 pre-mRNA splicing factor 6 homolog (S. cerevisiae)     | Prpf6  | 366276 | 1,05 | down |
| 5839268 | 7236460 | 1464462 | PRP6 pre-mRNA splicing factor 6 homolog (S. cerevisiae)     | Prpf6  | 366276 | 1,05 | down |
| 6280759 | 7236460 | 1464464 | PRP6 pre-mRNA splicing factor 6 homolog (S. cerevisiae)     | Prpf6  | 366276 | 1,05 | up   |
| 6567793 | 7236460 | 1464470 | PRP6 pre-mRNA splicing factor 6 homolog (S. cerevisiae)     | Prpf6  | 366276 | 1,03 | up   |
| 6043127 | 7236460 | 1464465 | PRP6 pre-mRNA splicing factor 6 homolog (S. cerevisiae)     | Prpf6  | 366276 | 1,02 | up   |
| 5971874 | 7236460 | 1464458 | PRP6 pre-mRNA splicing factor 6 homolog (S. cerevisiae)     | Prpf6  | 366276 | 1,01 | up   |
| 6068555 | 7236460 | 1464474 | PRP6 pre-mRNA splicing factor 6 homolog (S. cerevisiae)     | Prpf6  | 366276 | 1,00 | down |
| 5824627 | 7236460 | 1464473 | PRP6 pre-mRNA splicing factor 6 homolog (S. cerevisiae)     | Prpf6  | 366276 | 1,00 | up   |

|         |         |         |                                                              |         |        |      |      |
|---------|---------|---------|--------------------------------------------------------------|---------|--------|------|------|
| 6569308 | 7069721 | 1055318 | PRP8 pre-mRNA processing factor 8 homolog (S. cerevisiae)    | Prpf8   | 287530 | 1,37 | down |
| 6450746 | 7069721 | 1055323 | PRP8 pre-mRNA processing factor 8 homolog (S. cerevisiae)    | Prpf8   | 287530 | 1,34 | up   |
| 5822479 | 7069721 | 1055319 | PRP8 pre-mRNA processing factor 8 homolog (S. cerevisiae)    | Prpf8   | 287530 | 1,33 | down |
| 5786099 | 7069721 | 1055317 | PRP8 pre-mRNA processing factor 8 homolog (S. cerevisiae)    | Prpf8   | 287530 | 1,20 | down |
| 6072199 | 7069721 | 1055323 | PRP8 pre-mRNA processing factor 8 homolog (S. cerevisiae)    | Prpf8   | 287530 | 1,10 | down |
| 6104351 | 7069721 | 1055320 | PRP8 pre-mRNA processing factor 8 homolog (S. cerevisiae)    | Prpf8   | 287530 | 1,09 | up   |
| 5974010 | 7069721 | 1055321 | PRP8 pre-mRNA processing factor 8 homolog (S. cerevisiae)    | Prpf8   | 287530 | 1,06 | up   |
| 6478856 | 7069721 | 1055321 | PRP8 pre-mRNA processing factor 8 homolog (S. cerevisiae)    | Prpf8   | 287530 | 1,05 | up   |
| 6256910 | 7069721 | 1055322 | PRP8 pre-mRNA processing factor 8 homolog (S. cerevisiae)    | Prpf8   | 287530 | 1,02 | down |
| 6679743 | 7334636 | 1706501 | pseudouridylate synthase 3                                   | Pus3    | 315554 | 1,59 | up   |
| 6663923 | 7334636 | 1706502 | pseudouridylate synthase 3                                   | Pus3    | 315554 | 1,32 | up   |
| 6497965 | 7334636 | 1706502 | pseudouridylate synthase 3                                   | Pus3    | 315554 | 1,30 | down |
| 6732475 | 7334636 | 1706502 | pseudouridylate synthase 3                                   | Pus3    | 315554 | 1,09 | down |
| 5788481 | 7259925 | 1522564 | PTPRF interacting protein, binding protein 1 (liprin beta 1) | Ppfibp1 | 312855 | 2,32 | up   |
| 6659000 | 7259925 | 1522568 | PTPRF interacting protein, binding protein 1 (liprin beta 1) | Ppfibp1 | 312855 | 1,93 | up   |
| 5971216 | 7259925 | 1522542 | PTPRF interacting protein, binding protein 1 (liprin beta 1) | Ppfibp1 | 312855 | 1,86 | down |
| 6257720 | 7259925 | 1522554 | PTPRF interacting protein, binding protein 1 (liprin beta 1) | Ppfibp1 | 312855 | 1,41 | up   |
| 6325141 | 7259925 | 1522555 | PTPRF interacting protein, binding protein 1 (liprin beta 1) | Ppfibp1 | 312855 | 1,37 | down |
| 6644619 | 7259925 | 1522569 | PTPRF interacting protein, binding protein 1 (liprin beta 1) | Ppfibp1 | 312855 | 1,36 | up   |
| 6685731 | 7259925 | 1522550 | PTPRF interacting protein, binding protein 1 (liprin beta 1) | Ppfibp1 | 312855 | 1,36 | down |
| 6550003 | 7259925 | 1522561 | PTPRF interacting protein, binding protein 1 (liprin beta 1) | Ppfibp1 | 312855 | 1,36 | down |
| 6216763 | 7259925 | 1522559 | PTPRF interacting protein, binding protein 1 (liprin beta 1) | Ppfibp1 | 312855 | 1,34 | up   |
| 6555138 | 7259925 | 1522563 | PTPRF interacting protein, binding protein 1 (liprin beta 1) | Ppfibp1 | 312855 | 1,34 | up   |
| 6184132 | 7259925 | 1522544 | PTPRF interacting protein, binding protein 1 (liprin beta 1) | Ppfibp1 | 312855 | 1,32 | up   |
| 6151419 | 7259925 | 1522551 | PTPRF interacting protein, binding protein 1 (liprin beta 1) | Ppfibp1 | 312855 | 1,29 | down |
| 6599088 | 7259925 | 1522565 | PTPRF interacting protein, binding protein 1 (liprin beta 1) | Ppfibp1 | 312855 | 1,27 | down |
| 6017138 | 7259925 | 1522548 | PTPRF interacting protein, binding protein 1 (liprin beta 1) | Ppfibp1 | 312855 | 1,26 | up   |
| 6622716 | 7259925 | 1522547 | PTPRF interacting protein, binding protein 1 (liprin beta 1) | Ppfibp1 | 312855 | 1,22 | down |
| 6362435 | 7259925 | 1522542 | PTPRF interacting protein, binding protein 1 (liprin beta 1) | Ppfibp1 | 312855 | 1,21 | down |
| 6124319 | 7259925 | 1522543 | PTPRF interacting protein, binding protein 1 (liprin beta 1) | Ppfibp1 | 312855 | 1,19 | down |
| 6375259 | 7259925 | 1522566 | PTPRF interacting protein, binding protein 1 (liprin beta 1) | Ppfibp1 | 312855 | 1,18 | down |
| 6700700 | 7259925 | 1522560 | PTPRF interacting protein, binding protein 1 (liprin beta 1) | Ppfibp1 | 312855 | 1,12 | up   |
| 6059426 | 7259925 | 1522547 | PTPRF interacting protein, binding protein 1 (liprin beta 1) | Ppfibp1 | 312855 | 1,11 | up   |
| 6161528 | 7259925 | 1522562 | PTPRF interacting protein, binding protein 1 (liprin beta 1) | Ppfibp1 | 312855 | 1,11 | up   |
| 6262469 | 7259925 | 1522567 | PTPRF interacting protein, binding protein 1 (liprin beta 1) | Ppfibp1 | 312855 | 1,09 | up   |
| 6337410 | 7259925 | 1522537 | PTPRF interacting protein, binding protein 1 (liprin beta 1) | Ppfibp1 | 312855 | 1,07 | up   |
| 5972185 | 7259925 | 1522567 | PTPRF interacting protein, binding protein 1 (liprin beta 1) | Ppfibp1 | 312855 | 1,05 | down |
| 6375520 | 7259925 | 1522557 | PTPRF interacting protein, binding protein 1 (liprin beta 1) | Ppfibp1 | 312855 | 1,04 | up   |
| 5846841 | 7259925 | 1522570 | PTPRF interacting protein, binding protein 1 (liprin beta 1) | Ppfibp1 | 312855 | 1,03 | up   |
| 5695020 | 7259925 | 1522546 | PTPRF interacting protein, binding protein 1 (liprin beta 1) | Ppfibp1 | 312855 | 1,01 | down |
| 5721424 | 7099302 | 1126129 | purinergic receptor P2X, ligand-gated ion channel, 2         | P2rx2   | 114115 | 3,16 | up   |
| 6177442 | 7099302 | 1126121 | purinergic receptor P2X, ligand-gated ion channel, 2         | P2rx2   | 114115 | 3,04 | down |
| 6168595 | 7099302 | 1126119 | purinergic receptor P2X, ligand-gated ion channel, 2         | P2rx2   | 114115 | 2,77 | up   |
| 5686694 | 7099302 | 1126130 | purinergic receptor P2X, ligand-gated ion channel, 2         | P2rx2   | 114115 | 1,95 | down |
| 6043767 | 7099302 | 1126127 | purinergic receptor P2X, ligand-gated ion channel, 2         | P2rx2   | 114115 | 1,74 | down |
| 6252206 | 7099302 | 1126129 | purinergic receptor P2X, ligand-gated ion channel, 2         | P2rx2   | 114115 | 1,67 | up   |
| 6002809 | 7099302 | 1126129 | purinergic receptor P2X, ligand-gated ion channel, 2         | P2rx2   | 114115 | 1,62 | up   |
| 6506625 | 7099302 | 1126121 | purinergic receptor P2X, ligand-gated ion channel, 2         | P2rx2   | 114115 | 1,57 | up   |
| 5658152 | 7099302 | 1126122 | purinergic receptor P2X, ligand-gated ion channel, 2         | P2rx2   | 114115 | 1,56 | down |
| 6238617 | 7099302 | 1126126 | purinergic receptor P2X, ligand-gated ion channel, 2         | P2rx2   | 114115 | 1,55 | down |
| 6482706 | 7099302 | 1126123 | purinergic receptor P2X, ligand-gated ion channel, 2         | P2rx2   | 114115 | 1,53 | down |
| 6343423 | 7099302 | 1126129 | purinergic receptor P2X, ligand-gated ion channel, 2         | P2rx2   | 114115 | 1,50 | down |
| 5668247 | 7099302 | 1126129 | purinergic receptor P2X, ligand-gated ion channel, 2         | P2rx2   | 114115 | 1,50 | up   |
| 6107676 | 7099302 | 1126126 | purinergic receptor P2X, ligand-gated ion channel, 2         | P2rx2   | 114115 | 1,43 | up   |
| 6012300 | 7099302 | 1126128 | purinergic receptor P2X, ligand-gated ion channel, 2         | P2rx2   | 114115 | 1,38 | down |
| 6486633 | 7099302 | 1126120 | purinergic receptor P2X, ligand-gated ion channel, 2         | P2rx2   | 114115 | 1,36 | down |
| 6639756 | 7099302 | 1126124 | purinergic receptor P2X, ligand-gated ion channel, 2         | P2rx2   | 114115 | 1,33 | up   |

|         |         |         |                                                        |                 |                    |      |      |
|---------|---------|---------|--------------------------------------------------------|-----------------|--------------------|------|------|
| 6175661 | 7099302 | 1126129 | purinergic receptor P2X, ligand-gated ion channel, 2   | P2rx2           | 114115             | 1,20 | down |
| 6672699 | 7099302 | 1126125 | purinergic receptor P2X, ligand-gated ion channel, 2   | P2rx2           | 114115             | 1,11 | down |
| 6451716 | 7099302 | 1126129 | purinergic receptor P2X, ligand-gated ion channel, 2   | P2rx2           | 114115             | 1,03 | up   |
| 6094883 | 7099302 | 1126119 | purinergic receptor P2X, ligand-gated ion channel, 2   | P2rx2           | 114115             | 1,02 | down |
| 5771600 | 7099302 | 1126131 | purinergic receptor P2X, ligand-gated ion channel, 2   | P2rx2           | 114115             | 1,01 | down |
| 5806633 | 7133360 | 1209597 | purinergic receptor P2Y, G-protein coupled, 5          | P2ry5           | 691774             | 1,51 | up   |
| 6593256 | 7133360 | 1209596 | purinergic receptor P2Y, G-protein coupled, 5          | P2ry5           | 691774             | 1,33 | down |
| 6525319 | 7133360 | 1209596 | purinergic receptor P2Y, G-protein coupled, 5          | P2ry5           | 691774             | 1,08 | down |
| 6229424 | 7249917 | 1497388 | putative homeodomain transcription factor 2            | Phtf2           | 296762             | 1,97 | down |
| 6723614 | 7249917 | 1497405 | putative homeodomain transcription factor 2            | Phtf2           | 296762             | 1,79 | down |
| 6198403 | 7249917 | 1497378 | putative homeodomain transcription factor 2            | Phtf2           | 296762             | 1,73 | up   |
| 6166213 | 7249917 | 1497398 | putative homeodomain transcription factor 2            | Phtf2           | 296762             | 1,72 | up   |
| 6458471 | 7249917 | 1497393 | putative homeodomain transcription factor 2            | Phtf2           | 296762             | 1,58 | down |
| 6646510 | 7249917 | 1497390 | putative homeodomain transcription factor 2            | Phtf2           | 296762             | 1,52 | up   |
| 6396360 | 7249917 | 1497384 | putative homeodomain transcription factor 2            | Phtf2           | 296762             | 1,48 | up   |
| 6687621 | 7249917 | 1497405 | putative homeodomain transcription factor 2            | Phtf2           | 296762             | 1,35 | down |
| 5641722 | 7249917 | 1497401 | putative homeodomain transcription factor 2            | Phtf2           | 296762             | 1,28 | down |
| 6679655 | 7249917 | 1497400 | putative homeodomain transcription factor 2            | Phtf2           | 296762             | 1,23 | down |
| 5645741 | 7249917 | 1497399 | putative homeodomain transcription factor 2            | Phtf2           | 296762             | 1,21 | down |
| 6420039 | 7249917 | 1497388 | putative homeodomain transcription factor 2            | Phtf2           | 296762             | 1,18 | down |
| 6442798 | 7249917 | 1497386 | putative homeodomain transcription factor 2            | Phtf2           | 296762             | 1,15 | down |
| 6295507 | 7249917 | 1497387 | putative homeodomain transcription factor 2            | Phtf2           | 296762             | 1,15 | down |
| 6373262 | 7249917 | 1497393 | putative homeodomain transcription factor 2            | Phtf2           | 296762             | 1,13 | up   |
| 6707389 | 7249917 | 1497403 | putative homeodomain transcription factor 2            | Phtf2           | 296762             | 1,13 | down |
| 6515684 | 7249917 | 1497402 | putative homeodomain transcription factor 2            | Phtf2           | 296762             | 1,12 | down |
| 6560374 | 7249917 | 1497389 | putative homeodomain transcription factor 2            | Phtf2           | 296762             | 1,08 | up   |
| 5848003 | 7249917 | 1497380 | putative homeodomain transcription factor 2            | Phtf2           | 296762             | 1,07 | up   |
| 5924528 | 7249917 | 1497404 | putative homeodomain transcription factor 2            | Phtf2           | 296762             | 1,07 | down |
| 6161677 | 7249917 | 1497396 | putative homeodomain transcription factor 2            | Phtf2           | 296762             | 1,06 | up   |
| 6343194 | 7249917 | 1497388 | putative homeodomain transcription factor 2            | Phtf2           | 296762             | 1,03 | down |
| 6183048 | 7249917 | 1497405 | putative homeodomain transcription factor 2            | Phtf2           | 296762             | 1,02 | up   |
| 6198136 | 7153666 | 1259216 | putative UA20 protein /// ATPase, class VI, type 11A   | Ua20 /// Atp11a | 246251 /// 3066600 | 2,44 | up   |
| 5897589 | 7153666 | 1259216 | putative UA20 protein /// ATPase, class VI, type 11A   | Ua20 /// Atp11a | 246251 /// 3066600 | 1,13 | down |
| 5965389 | 7153666 | 1259216 | putative UA20 protein /// ATPase, class VI, type 11A   | Ua20 /// Atp11a | 246251 /// 3066600 | 1,04 | down |
| 5813953 | 7057636 | 1026159 | PYD and CARD domain containing                         | Pycard          | 282817             | 2,19 | up   |
| 6410580 | 7057636 | 1026160 | PYD and CARD domain containing                         | Pycard          | 282817             | 1,37 | down |
| 5956781 | 7057636 | 1026158 | PYD and CARD domain containing                         | Pycard          | 282817             | 1,17 | down |
| 6493597 | 7259616 | 1521665 | pyridine nucleotide-disulphide oxidoreductase domain 1 | Pyroxd1         | 297708             | 2,50 | down |
| 6258422 | 7259616 | 1521654 | pyridine nucleotide-disulphide oxidoreductase domain 1 | Pyroxd1         | 297708             | 1,68 | up   |
| 6045103 | 7259616 | 1521664 | pyridine nucleotide-disulphide oxidoreductase domain 1 | Pyroxd1         | 297708             | 1,63 | down |
| 6317777 | 7259616 | 1521656 | pyridine nucleotide-disulphide oxidoreductase domain 1 | Pyroxd1         | 297708             | 1,62 | up   |
| 5732739 | 7259616 | 1521653 | pyridine nucleotide-disulphide oxidoreductase domain 1 | Pyroxd1         | 297708             | 1,60 | down |
| 5819578 | 7259616 | 1521653 | pyridine nucleotide-disulphide oxidoreductase domain 1 | Pyroxd1         | 297708             | 1,52 | down |
| 6385660 | 7259616 | 1521655 | pyridine nucleotide-disulphide oxidoreductase domain 1 | Pyroxd1         | 297708             | 1,33 | up   |
| 6388519 | 7259616 | 1521657 | pyridine nucleotide-disulphide oxidoreductase domain 1 | Pyroxd1         | 297708             | 1,28 | down |
| 5826401 | 7259616 | 1521659 | pyridine nucleotide-disulphide oxidoreductase domain 1 | Pyroxd1         | 297708             | 1,27 | down |
| 6444294 | 7259616 | 1521663 | pyridine nucleotide-disulphide oxidoreductase domain 1 | Pyroxd1         | 297708             | 1,22 | down |
| 6742626 | 7259616 | 1521662 | pyridine nucleotide-disulphide oxidoreductase domain 1 | Pyroxd1         | 297708             | 1,18 | up   |
| 6644814 | 7259616 | 1521658 | pyridine nucleotide-disulphide oxidoreductase domain 1 | Pyroxd1         | 297708             | 1,18 | up   |
| 6734957 | 7259616 | 1521660 | pyridine nucleotide-disulphide oxidoreductase domain 1 | Pyroxd1         | 297708             | 1,09 | up   |
| 6294437 | 7259616 | 1521661 | pyridine nucleotide-disulphide oxidoreductase domain 1 | Pyroxd1         | 297708             | 1,05 | down |
| 6033335 | 7217541 | 1416813 | pyridoxal (pyridoxine, vitamin B6) kinase              | Pdxk            | 83578              | 2,12 | up   |
| 5756450 | 7217541 | 1416821 | pyridoxal (pyridoxine, vitamin B6) kinase              | Pdxk            | 83578              | 1,43 | up   |
| 5765660 | 7217541 | 1416814 | pyridoxal (pyridoxine, vitamin B6) kinase              | Pdxk            | 83578              | 1,29 | down |
| 5717885 | 7217541 | 1416816 | pyridoxal (pyridoxine, vitamin B6) kinase              | Pdxk            | 83578              | 1,17 | down |
| 6739107 | 7217541 | 1416822 | pyridoxal (pyridoxine, vitamin B6) kinase              | Pdxk            | 83578              | 1,15 | up   |
| 6162632 | 7217541 | 1416818 | pyridoxal (pyridoxine, vitamin B6) kinase              | Pdxk            | 83578              | 1,15 | down |

|         |         |         |                                                |        |        |      |      |
|---------|---------|---------|------------------------------------------------|--------|--------|------|------|
| 6319311 | 7217541 | 1416819 | pyridoxal (pyridoxine, vitamin B6) kinase      | Pdxk   | 83578  | 1,11 | up   |
| 6187273 | 7217541 | 1416815 | pyridoxal (pyridoxine, vitamin B6) kinase      | Pdxk   | 83578  | 1,11 | down |
| 5677217 | 7217541 | 1416820 | pyridoxal (pyridoxine, vitamin B6) kinase      | Pdxk   | 83578  | 1,06 | up   |
| 6679453 | 7217541 | 1416817 | pyridoxal (pyridoxine, vitamin B6) kinase      | Pdxk   | 83578  | 1,02 | down |
| 5663741 | 7217541 | 1416823 | pyridoxal (pyridoxine, vitamin B6) kinase      | Pdxk   | 83578  | 1,02 | up   |
| 6315067 | 7318651 | 1669092 | pyridoxal (pyridoxine, vitamin B6) phosphatase | Pdyp   | 727679 | 1,41 | up   |
| 6143621 | 7318651 | 1669093 | pyridoxal (pyridoxine, vitamin B6) phosphatase | Pdyp   | 727679 | 1,28 | up   |
| 6134849 | 7318651 | 1669093 | pyridoxal (pyridoxine, vitamin B6) phosphatase | Pdyp   | 727679 | 1,01 | up   |
| 5678626 | 7144206 | 1236436 | pyroglutamyl-peptidase I                       | Pgpep1 | 290648 | 2,41 | down |
| 5992697 | 7144206 | 1236437 | pyroglutamyl-peptidase I                       | Pgpep1 | 290648 | 1,58 | up   |
| 5751748 | 7144206 | 1236438 | pyroglutamyl-peptidase I                       | Pgpep1 | 290648 | 1,12 | down |
| 6009549 | 7144206 | 1236440 | pyroglutamyl-peptidase I                       | Pgpep1 | 290648 | 1,07 | up   |
| 6264216 | 7144206 | 1236439 | pyroglutamyl-peptidase I                       | Pgpep1 | 290648 | 1,06 | up   |
| 6099050 | 7381993 | 1825220 | pyruvate dehydrogenase kinase, isozyme 3       | Pdk3   | 296849 | 1,94 | down |
| 6166014 | 7381993 | 1825216 | pyruvate dehydrogenase kinase, isozyme 3       | Pdk3   | 296849 | 1,79 | down |
| 6381716 | 7381993 | 1825227 | pyruvate dehydrogenase kinase, isozyme 3       | Pdk3   | 296849 | 1,78 | down |
| 6568878 | 7381993 | 1825225 | pyruvate dehydrogenase kinase, isozyme 3       | Pdk3   | 296849 | 1,65 | down |
| 6693717 | 7381993 | 1825228 | pyruvate dehydrogenase kinase, isozyme 3       | Pdk3   | 296849 | 1,63 | up   |
| 6344222 | 7381993 | 1825233 | pyruvate dehydrogenase kinase, isozyme 3       | Pdk3   | 296849 | 1,59 | up   |
| 6618898 | 7381993 | 1825233 | pyruvate dehydrogenase kinase, isozyme 3       | Pdk3   | 296849 | 1,54 | down |
| 6677084 | 7381993 | 1825222 | pyruvate dehydrogenase kinase, isozyme 3       | Pdk3   | 296849 | 1,46 | down |
| 6537727 | 7381993 | 1825219 | pyruvate dehydrogenase kinase, isozyme 3       | Pdk3   | 296849 | 1,32 | down |
| 5714531 | 7381993 | 1825223 | pyruvate dehydrogenase kinase, isozyme 3       | Pdk3   | 296849 | 1,18 | down |
| 6195945 | 7381993 | 1825221 | pyruvate dehydrogenase kinase, isozyme 3       | Pdk3   | 296849 | 1,16 | up   |
| 6193895 | 7381993 | 1825229 | pyruvate dehydrogenase kinase, isozyme 3       | Pdk3   | 296849 | 1,12 | down |
| 5903965 | 7381993 | 1825226 | pyruvate dehydrogenase kinase, isozyme 3       | Pdk3   | 296849 | 1,08 | down |
| 6034219 | 7333533 | 1703805 | queuine tRNA-ribosyltransferase 1              | Qtrt1  | 64016  | 3,23 | down |
| 6628436 | 7333533 | 1703798 | queuine tRNA-ribosyltransferase 1              | Qtrt1  | 64016  | 3,13 | up   |
| 5777121 | 7333533 | 1703801 | queuine tRNA-ribosyltransferase 1              | Qtrt1  | 64016  | 2,32 | up   |
| 6054763 | 7333533 | 1703796 | queuine tRNA-ribosyltransferase 1              | Qtrt1  | 64016  | 1,78 | down |
| 5766628 | 7333533 | 1703802 | queuine tRNA-ribosyltransferase 1              | Qtrt1  | 64016  | 1,53 | up   |
| 6035844 | 7333533 | 1703798 | queuine tRNA-ribosyltransferase 1              | Qtrt1  | 64016  | 1,39 | down |
| 5636905 | 7333533 | 1703803 | queuine tRNA-ribosyltransferase 1              | Qtrt1  | 64016  | 1,25 | up   |
| 6019769 | 7333533 | 1703806 | queuine tRNA-ribosyltransferase 1              | Qtrt1  | 64016  | 1,21 | up   |
| 6312215 | 7333533 | 1703799 | queuine tRNA-ribosyltransferase 1              | Qtrt1  | 64016  | 1,16 | down |
| 5846165 | 7333533 | 1703805 | queuine tRNA-ribosyltransferase 1              | Qtrt1  | 64016  | 1,13 | down |
| 6525558 | 7333533 | 1703799 | queuine tRNA-ribosyltransferase 1              | Qtrt1  | 64016  | 1,09 | down |
| 6375017 | 7333533 | 1703797 | queuine tRNA-ribosyltransferase 1              | Qtrt1  | 64016  | 1,08 | up   |
| 5751081 | 7333533 | 1703804 | queuine tRNA-ribosyltransferase 1              | Qtrt1  | 64016  | 1,04 | down |
| 5758686 | 7333533 | 1703800 | queuine tRNA-ribosyltransferase 1              | Qtrt1  | 64016  | 1,04 | up   |
| 6594863 | 7333533 | 1703796 | queuine tRNA-ribosyltransferase 1              | Qtrt1  | 64016  | 1,01 | down |
| 6497919 | 7112613 | 1158795 | quiescin Q6 sulfhydryl oxidase 1               | Qsox1  | 84491  | 2,33 | down |
| 6231322 | 7112613 | 1158797 | quiescin Q6 sulfhydryl oxidase 1               | Qsox1  | 84491  | 2,16 | down |
| 6655571 | 7112613 | 1158799 | quiescin Q6 sulfhydryl oxidase 1               | Qsox1  | 84491  | 2,03 | up   |
| 6486127 | 7112613 | 1158807 | quiescin Q6 sulfhydryl oxidase 1               | Qsox1  | 84491  | 1,85 | up   |
| 6079567 | 7112613 | 1158798 | quiescin Q6 sulfhydryl oxidase 1               | Qsox1  | 84491  | 1,56 | up   |
| 5958758 | 7112613 | 1158797 | quiescin Q6 sulfhydryl oxidase 1               | Qsox1  | 84491  | 1,47 | down |
| 6703048 | 7112613 | 1158801 | quiescin Q6 sulfhydryl oxidase 1               | Qsox1  | 84491  | 1,41 | up   |
| 6329575 | 7112613 | 1158804 | quiescin Q6 sulfhydryl oxidase 1               | Qsox1  | 84491  | 1,18 | down |
| 6505877 | 7112613 | 1158808 | quiescin Q6 sulfhydryl oxidase 1               | Qsox1  | 84491  | 1,14 | down |
| 6634663 | 7112613 | 1158806 | quiescin Q6 sulfhydryl oxidase 1               | Qsox1  | 84491  | 1,14 | up   |
| 6306952 | 7112613 | 1158805 | quiescin Q6 sulfhydryl oxidase 1               | Qsox1  | 84491  | 1,13 | up   |
| 6081772 | 7112613 | 1158808 | quiescin Q6 sulfhydryl oxidase 1               | Qsox1  | 84491  | 1,12 | down |
| 6593088 | 7112613 | 1158800 | quiescin Q6 sulfhydryl oxidase 1               | Qsox1  | 84491  | 1,09 | up   |
| 6149947 | 7112613 | 1158803 | quiescin Q6 sulfhydryl oxidase 1               | Qsox1  | 84491  | 1,07 | up   |
| 6743495 | 7112613 | 1158796 | quiescin Q6 sulfhydryl oxidase 1               | Qsox1  | 84491  | 1,03 | down |
| 5904925 | 7112613 | 1158802 | quiescin Q6 sulfhydryl oxidase 1               | Qsox1  | 84491  | 1,01 | down |

|         |         |         |                                       |        |        |      |      |
|---------|---------|---------|---------------------------------------|--------|--------|------|------|
| 6071222 | 7048859 | 1007242 | Rab acceptor 1 (prenylated)           | Rabac1 | 83583  | 2,30 | up   |
| 5770643 | 7048859 | 1007245 | Rab acceptor 1 (prenylated)           | Rabac1 | 83583  | 1,28 | up   |
| 6734959 | 7048859 | 1007246 | Rab acceptor 1 (prenylated)           | Rabac1 | 83583  | 1,25 | down |
| 6459846 | 7048859 | 1007247 | Rab acceptor 1 (prenylated)           | Rabac1 | 83583  | 1,12 | down |
| 6483488 | 7048859 | 1007244 | Rab acceptor 1 (prenylated)           | Rabac1 | 83583  | 1,11 | down |
| 6630028 | 7048859 | 1007243 | Rab acceptor 1 (prenylated)           | Rabac1 | 83583  | 1,05 | up   |
| 6089236 | 7048859 | 1007247 | Rab acceptor 1 (prenylated)           | Rabac1 | 83583  | 1,03 | up   |
| 5628780 | 7346776 | 1737122 | RAB11a, member RAS oncogene family    | Rab11a | 81830  | 2,38 | down |
| 6689658 | 7346776 | 1737117 | RAB11a, member RAS oncogene family    | Rab11a | 81830  | 1,47 | down |
| 5954832 | 7346776 | 1737117 | RAB11a, member RAS oncogene family    | Rab11a | 81830  | 1,41 | down |
| 6263070 | 7346776 | 1737117 | RAB11a, member RAS oncogene family    | Rab11a | 81830  | 1,30 | down |
| 5876254 | 7346776 | 1737119 | RAB11a, member RAS oncogene family    | Rab11a | 81830  | 1,26 | up   |
| 6461755 | 7346776 | 1737120 | RAB11a, member RAS oncogene family    | Rab11a | 81830  | 1,19 | up   |
| 5816709 | 7346776 | 1737117 | RAB11a, member RAS oncogene family    | Rab11a | 81830  | 1,14 | up   |
| 6366501 | 7346776 | 1737122 | RAB11a, member RAS oncogene family    | Rab11a | 81830  | 1,09 | down |
| 6148924 | 7346776 | 1737118 | RAB11a, member RAS oncogene family    | Rab11a | 81830  | 1,05 | up   |
| 6620551 | 7346776 | 1737121 | RAB11a, member RAS oncogene family    | Rab11a | 81830  | 1,03 | up   |
| 5623017 | 7353224 | 1752663 | RAB23, member RAS oncogene family     | Rab23  | 367242 | 1,56 | up   |
| 5670434 | 7353224 | 1752666 | RAB23, member RAS oncogene family     | Rab23  | 367242 | 1,31 | down |
| 5756540 | 7353224 | 1752676 | RAB23, member RAS oncogene family     | Rab23  | 367242 | 1,29 | down |
| 5724078 | 7353224 | 1752665 | RAB23, member RAS oncogene family     | Rab23  | 367242 | 1,27 | down |
| 5639522 | 7353224 | 1752672 | RAB23, member RAS oncogene family     | Rab23  | 367242 | 1,24 | up   |
| 5968553 | 7353224 | 1752676 | RAB23, member RAS oncogene family     | Rab23  | 367242 | 1,22 | down |
| 6644641 | 7353224 | 1752673 | RAB23, member RAS oncogene family     | Rab23  | 367242 | 1,18 | down |
| 6553066 | 7353224 | 1752674 | RAB23, member RAS oncogene family     | Rab23  | 367242 | 1,15 | up   |
| 5777107 | 7353224 | 1752676 | RAB23, member RAS oncogene family     | Rab23  | 367242 | 1,11 | up   |
| 5826562 | 7353224 | 1752668 | RAB23, member RAS oncogene family     | Rab23  | 367242 | 1,11 | down |
| 6007811 | 7353224 | 1752664 | RAB23, member RAS oncogene family     | Rab23  | 367242 | 1,11 | up   |
| 5732232 | 7353224 | 1752672 | RAB23, member RAS oncogene family     | Rab23  | 367242 | 1,07 | up   |
| 6172017 | 7075338 | 1069036 | RAB26, member RAS oncogene family     | Rab26  | 171111 | 2,01 | down |
| 5800208 | 7075338 | 1069033 | RAB26, member RAS oncogene family     | Rab26  | 171111 | 1,99 | up   |
| 5925819 | 7075338 | 1069042 | RAB26, member RAS oncogene family     | Rab26  | 171111 | 1,86 | down |
| 6408689 | 7075338 | 1069040 | RAB26, member RAS oncogene family     | Rab26  | 171111 | 1,58 | down |
| 5842508 | 7075338 | 1069035 | RAB26, member RAS oncogene family     | Rab26  | 171111 | 1,55 | down |
| 6406463 | 7075338 | 1069037 | RAB26, member RAS oncogene family     | Rab26  | 171111 | 1,45 | up   |
| 6414493 | 7075338 | 1069039 | RAB26, member RAS oncogene family     | Rab26  | 171111 | 1,33 | down |
| 6341000 | 7075338 | 1069038 | RAB26, member RAS oncogene family     | Rab26  | 171111 | 1,31 | down |
| 5745722 | 7075338 | 1069034 | RAB26, member RAS oncogene family     | Rab26  | 171111 | 1,17 | up   |
| 6031264 | 7075338 | 1069042 | RAB26, member RAS oncogene family     | Rab26  | 171111 | 1,08 | up   |
| 6594671 | 7075338 | 1069041 | RAB26, member RAS oncogene family     | Rab26  | 171111 | 1,06 | up   |
| 6360883 | 7193916 | 1360453 | RAB33B, member of RAS oncogene family | Rab33b | 365793 | 1,84 | down |
| 6064709 | 7193916 | 1360453 | RAB33B, member of RAS oncogene family | Rab33b | 365793 | 1,69 | down |
| 6501612 | 7193916 | 1360447 | RAB33B, member of RAS oncogene family | Rab33b | 365793 | 1,52 | down |
| 6234533 | 7193916 | 1360447 | RAB33B, member of RAS oncogene family | Rab33b | 365793 | 1,27 | up   |
| 6356449 | 7193916 | 1360453 | RAB33B, member of RAS oncogene family | Rab33b | 365793 | 1,12 | down |
| 5845606 | 7193916 | 1360447 | RAB33B, member of RAS oncogene family | Rab33b | 365793 | 1,09 | up   |
| 6426498 | 7193916 | 1360452 | RAB33B, member of RAS oncogene family | Rab33b | 365793 | 1,09 | up   |
| 5724760 | 7267000 | 1539309 | RAB43, member RAS oncogene family     | Rab43  | 500249 | 2,73 | down |
| 6426777 | 7267000 | 1539303 | RAB43, member RAS oncogene family     | Rab43  | 500249 | 1,50 | up   |
| 5989860 | 7267000 | 1539310 | RAB43, member RAS oncogene family     | Rab43  | 500249 | 1,35 | down |
| 6074390 | 7267000 | 1539305 | RAB43, member RAS oncogene family     | Rab43  | 500249 | 1,16 | up   |
| 5764226 | 7267000 | 1539303 | RAB43, member RAS oncogene family     | Rab43  | 500249 | 1,02 | up   |
| 6310034 | 7098535 | 1123955 | rabphilin 3A                          | Rph3a  | 171039 | 2,75 | down |
| 6718767 | 7098535 | 1123965 | rabphilin 3A                          | Rph3a  | 171039 | 1,84 | down |
| 6703418 | 7098535 | 1123958 | rabphilin 3A                          | Rph3a  | 171039 | 1,63 | down |
| 6163583 | 7098535 | 1123953 | rabphilin 3A                          | Rph3a  | 171039 | 1,36 | down |
| 5841137 | 7098535 | 1123961 | rabphilin 3A                          | Rph3a  | 171039 | 1,35 | up   |



|         |         |         |                            |          |        |      |      |
|---------|---------|---------|----------------------------|----------|--------|------|------|
| 6235055 | 7098535 | 1123966 | rabphilin 3A               | Rph3a    | 171039 | 1,35 | down |
| 6613679 | 7098535 | 1123964 | rabphilin 3A               | Rph3a    | 171039 | 1,28 | up   |
| 6228141 | 7098535 | 1123956 | rabphilin 3A               | Rph3a    | 171039 | 1,27 | up   |
| 6526409 | 7098535 | 1123950 | rabphilin 3A               | Rph3a    | 171039 | 1,26 | up   |
| 6510283 | 7098535 | 1123969 | rabphilin 3A               | Rph3a    | 171039 | 1,24 | down |
| 6572645 | 7098535 | 1123957 | rabphilin 3A               | Rph3a    | 171039 | 1,13 | down |
| 5669712 | 7098535 | 1123955 | rabphilin 3A               | Rph3a    | 171039 | 1,12 | down |
| 6657078 | 7098535 | 1123960 | rabphilin 3A               | Rph3a    | 171039 | 1,11 | up   |
| 5913503 | 7098535 | 1123968 | rabphilin 3A               | Rph3a    | 171039 | 1,10 | down |
| 6479823 | 7098535 | 1123967 | rabphilin 3A               | Rph3a    | 171039 | 1,10 | up   |
| 6395188 | 7098535 | 1123959 | rabphilin 3A               | Rph3a    | 171039 | 1,10 | up   |
| 6531652 | 7098535 | 1123957 | rabphilin 3A               | Rph3a    | 171039 | 1,09 | down |
| 5690862 | 7098535 | 1123954 | rabphilin 3A               | Rph3a    | 171039 | 1,08 | down |
| 6481724 | 7098535 | 1123951 | rabphilin 3A               | Rph3a    | 171039 | 1,04 | down |
| 6694179 | 7098535 | 1123963 | rabphilin 3A               | Rph3a    | 171039 | 1,03 | up   |
| 6042218 | 7098535 | 1123962 | rabphilin 3A               | Rph3a    | 171039 | 1,03 | up   |
| 6277109 | 7098535 | 1123952 | rabphilin 3A               | Rph3a    | 171039 | 1,00 | up   |
| 5964258 | 7203041 | 1382731 | RAD17 homolog (S. pombe)   | Rad17    | 310034 | 1,49 | down |
| 6318087 | 7203041 | 1382728 | RAD17 homolog (S. pombe)   | Rad17    | 310034 | 1,38 | up   |
| 6121718 | 7203041 | 1382725 | RAD17 homolog (S. pombe)   | Rad17    | 310034 | 1,32 | up   |
| 5899468 | 7203041 | 1382724 | RAD17 homolog (S. pombe)   | Rad17    | 310034 | 1,26 | down |
| 6254158 | 7203041 | 1382716 | RAD17 homolog (S. pombe)   | Rad17    | 310034 | 1,22 | down |
| 6711746 | 7203041 | 1382711 | RAD17 homolog (S. pombe)   | Rad17    | 310034 | 1,22 | down |
| 6388539 | 7203041 | 1382713 | RAD17 homolog (S. pombe)   | Rad17    | 310034 | 1,20 | up   |
| 5922401 | 7203041 | 1382714 | RAD17 homolog (S. pombe)   | Rad17    | 310034 | 1,15 | down |
| 5739098 | 7203041 | 1382719 | RAD17 homolog (S. pombe)   | Rad17    | 310034 | 1,11 | up   |
| 5784643 | 7203041 | 1382718 | RAD17 homolog (S. pombe)   | Rad17    | 310034 | 1,11 | down |
| 6189700 | 7203041 | 1382720 | RAD17 homolog (S. pombe)   | Rad17    | 310034 | 1,09 | up   |
| 5776503 | 7203041 | 1382712 | RAD17 homolog (S. pombe)   | Rad17    | 310034 | 1,09 | up   |
| 6215266 | 7203041 | 1382723 | RAD17 homolog (S. pombe)   | Rad17    | 310034 | 1,07 | down |
| 6059855 | 7203041 | 1382715 | RAD17 homolog (S. pombe)   | Rad17    | 310034 | 1,06 | up   |
| 5699791 | 7203041 | 1382723 | RAD17 homolog (S. pombe)   | Rad17    | 310034 | 1,06 | down |
| 6124310 | 7203041 | 1382726 | RAD17 homolog (S. pombe)   | Rad17    | 310034 | 1,04 | up   |
| 6561398 | 7203041 | 1382722 | RAD17 homolog (S. pombe)   | Rad17    | 310034 | 1,04 | up   |
| 6236409 | 7203041 | 1382714 | RAD17 homolog (S. pombe)   | Rad17    | 310034 | 1,03 | up   |
| 6181963 | 7203041 | 1382717 | RAD17 homolog (S. pombe)   | Rad17    | 310034 | 1,02 | down |
| 5767176 | 7203041 | 1382721 | RAD17 homolog (S. pombe)   | Rad17    | 310034 | 1,02 | down |
| 6564082 | 7269763 | 1546532 | RAD51 associated protein 1 | Rad51ap1 | 689055 | 2,24 | down |
| 6171503 | 7269763 | 1546531 | RAD51 associated protein 1 | Rad51ap1 | 689055 | 1,37 | up   |
| 6663276 | 7269763 | 1546531 | RAD51 associated protein 1 | Rad51ap1 | 689055 | 1,20 | down |
| 6374746 | 7269763 | 1546538 | RAD51 associated protein 1 | Rad51ap1 | 689055 | 1,14 | up   |
| 6386855 | 7269763 | 1546535 | RAD51 associated protein 1 | Rad51ap1 | 689055 | 1,11 | up   |
| 5980397 | 7269763 | 1546539 | RAD51 associated protein 1 | Rad51ap1 | 689055 | 1,10 | down |
| 6219454 | 7269763 | 1546537 | RAD51 associated protein 1 | Rad51ap1 | 689055 | 1,08 | up   |
| 5738266 | 7269763 | 1546541 | RAD51 associated protein 1 | Rad51ap1 | 689055 | 1,06 | up   |
| 5779161 | 7269763 | 1546530 | RAD51 associated protein 1 | Rad51ap1 | 689055 | 1,06 | down |
| 5637889 | 7269763 | 1546540 | RAD51 associated protein 1 | Rad51ap1 | 689055 | 1,04 | up   |
| 5871541 | 7269763 | 1546534 | RAD51 associated protein 1 | Rad51ap1 | 689055 | 1,00 | up   |
| 6270215 | 7029380 | 959378  | radial spokehead-like 1    | Rsh11    | 292684 | 2,36 | up   |
| 6536751 | 7029380 | 959381  | radial spokehead-like 1    | Rsh11    | 292684 | 1,28 | up   |
| 5828001 | 7029380 | 959382  | radial spokehead-like 1    | Rsh11    | 292684 | 1,23 | down |
| 5821901 | 7029380 | 959374  | radial spokehead-like 1    | Rsh11    | 292684 | 1,21 | up   |
| 6580371 | 7029380 | 959373  | radial spokehead-like 1    | Rsh11    | 292684 | 1,14 | down |
| 6446884 | 7029380 | 959378  | radial spokehead-like 1    | Rsh11    | 292684 | 1,09 | down |
| 6540984 | 7029380 | 959381  | radial spokehead-like 1    | Rsh11    | 292684 | 1,07 | up   |
| 6317269 | 7029380 | 959378  | radial spokehead-like 1    | Rsh11    | 292684 | 1,06 | up   |
| 6501830 | 7029380 | 959382  | radial spokehead-like 1    | Rsh11    | 292684 | 1,05 | down |

|         |         |         |                                                        |         |        |      |      |
|---------|---------|---------|--------------------------------------------------------|---------|--------|------|------|
| 5872149 | 7029380 | 959373  | radial spokehead-like 1                                | Rshl1   | 292684 | 1,05 | up   |
| 6055772 | 7029380 | 959380  | radial spokehead-like 1                                | Rshl1   | 292684 | 1,02 | up   |
| 6142093 | 7305174 | 1635457 | radical S-adenosyl methionine domain containing 2      | Rsad2   | 65190  | 4,14 | down |
| 5654600 | 7305174 | 1635451 | radical S-adenosyl methionine domain containing 2      | Rsad2   | 65190  | 2,90 | down |
| 6318232 | 7305174 | 1635451 | radical S-adenosyl methionine domain containing 2      | Rsad2   | 65190  | 2,09 | up   |
| 6253424 | 7305174 | 1635451 | radical S-adenosyl methionine domain containing 2      | Rsad2   | 65190  | 1,74 | down |
| 6460507 | 7305174 | 1635451 | radical S-adenosyl methionine domain containing 2      | Rsad2   | 65190  | 1,61 | up   |
| 6306839 | 7305174 | 1635454 | radical S-adenosyl methionine domain containing 2      | Rsad2   | 65190  | 1,52 | up   |
| 6358603 | 7305174 | 1635453 | radical S-adenosyl methionine domain containing 2      | Rsad2   | 65190  | 1,47 | down |
| 6119722 | 7305174 | 1635451 | radical S-adenosyl methionine domain containing 2      | Rsad2   | 65190  | 1,32 | up   |
| 6611263 | 7305174 | 1635455 | radical S-adenosyl methionine domain containing 2      | Rsad2   | 65190  | 1,13 | up   |
| 6560848 | 7305174 | 1635456 | radical S-adenosyl methionine domain containing 2      | Rsad2   | 65190  | 1,09 | up   |
| 6265562 | 7305174 | 1635452 | radical S-adenosyl methionine domain containing 2      | Rsad2   | 65190  | 1,06 | up   |
| 6267735 | 7112350 | 1158020 | ral guanine nucleotide dissociation stimulator,-like 1 | Rgl1    | 289080 | 2,22 | up   |
| 6496180 | 7112350 | 1158022 | ral guanine nucleotide dissociation stimulator,-like 1 | Rgl1    | 289080 | 2,17 | up   |
| 6115022 | 7112350 | 1158007 | ral guanine nucleotide dissociation stimulator,-like 1 | Rgl1    | 289080 | 1,90 | up   |
| 6176598 | 7112350 | 1158019 | ral guanine nucleotide dissociation stimulator,-like 1 | Rgl1    | 289080 | 1,66 | down |
| 6354367 | 7112350 | 1158046 | ral guanine nucleotide dissociation stimulator,-like 1 | Rgl1    | 289080 | 1,59 | down |
| 6659979 | 7112350 | 1158039 | ral guanine nucleotide dissociation stimulator,-like 1 | Rgl1    | 289080 | 1,59 | up   |
| 5773700 | 7112350 | 1158012 | ral guanine nucleotide dissociation stimulator,-like 1 | Rgl1    | 289080 | 1,58 | down |
| 5864765 | 7112350 | 1158013 | ral guanine nucleotide dissociation stimulator,-like 1 | Rgl1    | 289080 | 1,55 | up   |
| 6514299 | 7112350 | 1158011 | ral guanine nucleotide dissociation stimulator,-like 1 | Rgl1    | 289080 | 1,43 | down |
| 6019110 | 7112350 | 1158021 | ral guanine nucleotide dissociation stimulator,-like 1 | Rgl1    | 289080 | 1,37 | down |
| 6020530 | 7112350 | 1158014 | ral guanine nucleotide dissociation stimulator,-like 1 | Rgl1    | 289080 | 1,36 | up   |
| 6499303 | 7112350 | 1158016 | ral guanine nucleotide dissociation stimulator,-like 1 | Rgl1    | 289080 | 1,26 | up   |
| 6175289 | 7112350 | 1158007 | ral guanine nucleotide dissociation stimulator,-like 1 | Rgl1    | 289080 | 1,23 | down |
| 6011317 | 7112350 | 1158011 | ral guanine nucleotide dissociation stimulator,-like 1 | Rgl1    | 289080 | 1,22 | down |
| 6464407 | 7112350 | 1158018 | ral guanine nucleotide dissociation stimulator,-like 1 | Rgl1    | 289080 | 1,19 | up   |
| 6457878 | 7112350 | 1158010 | ral guanine nucleotide dissociation stimulator,-like 1 | Rgl1    | 289080 | 1,08 | up   |
| 5821579 | 7112350 | 1158015 | ral guanine nucleotide dissociation stimulator,-like 1 | Rgl1    | 289080 | 1,05 | up   |
| 6154146 | 7112350 | 1158008 | ral guanine nucleotide dissociation stimulator,-like 1 | Rgl1    | 289080 | 1,05 | down |
| 5989333 | 7112350 | 1158055 | ral guanine nucleotide dissociation stimulator,-like 1 | Rgl1    | 289080 | 1,05 | up   |
| 6207346 | 7112350 | 1158027 | ral guanine nucleotide dissociation stimulator,-like 1 | Rgl1    | 289080 | 1,05 | up   |
| 6637857 | 7112350 | 1158017 | ral guanine nucleotide dissociation stimulator,-like 1 | Rgl1    | 289080 | 1,02 | up   |
| 6514298 | 7112350 | 1158007 | ral guanine nucleotide dissociation stimulator,-like 1 | Rgl1    | 289080 | 1,02 | up   |
| 6719006 | 7221019 | 1425315 | ral guanine nucleotide dissociation stimulator-like 2  | Rgl2    | 294283 | 1,90 | up   |
| 5703023 | 7221019 | 1425318 | ral guanine nucleotide dissociation stimulator-like 2  | Rgl2    | 294283 | 1,73 | down |
| 6576029 | 7221019 | 1425316 | ral guanine nucleotide dissociation stimulator-like 2  | Rgl2    | 294283 | 1,66 | down |
| 6545652 | 7221019 | 1425311 | ral guanine nucleotide dissociation stimulator-like 2  | Rgl2    | 294283 | 1,30 | up   |
| 6196980 | 7221019 | 1425322 | ral guanine nucleotide dissociation stimulator-like 2  | Rgl2    | 294283 | 1,27 | down |
| 6509648 | 7221019 | 1425321 | ral guanine nucleotide dissociation stimulator-like 2  | Rgl2    | 294283 | 1,22 | up   |
| 5959183 | 7221019 | 1425314 | ral guanine nucleotide dissociation stimulator-like 2  | Rgl2    | 294283 | 1,22 | down |
| 6441081 | 7221019 | 1425323 | ral guanine nucleotide dissociation stimulator-like 2  | Rgl2    | 294283 | 1,21 | down |
| 6296369 | 7221019 | 1425324 | ral guanine nucleotide dissociation stimulator-like 2  | Rgl2    | 294283 | 1,20 | down |
| 6019039 | 7221019 | 1425312 | ral guanine nucleotide dissociation stimulator-like 2  | Rgl2    | 294283 | 1,19 | up   |
| 6007148 | 7221019 | 1425309 | ral guanine nucleotide dissociation stimulator-like 2  | Rgl2    | 294283 | 1,18 | down |
| 5981046 | 7221019 | 1425325 | ral guanine nucleotide dissociation stimulator-like 2  | Rgl2    | 294283 | 1,10 | down |
| 6179929 | 7221019 | 1425317 | ral guanine nucleotide dissociation stimulator-like 2  | Rgl2    | 294283 | 1,09 | down |
| 6166579 | 7221019 | 1425313 | ral guanine nucleotide dissociation stimulator-like 2  | Rgl2    | 294283 | 1,07 | up   |
| 5874182 | 7221019 | 1425326 | ral guanine nucleotide dissociation stimulator-like 2  | Rgl2    | 294283 | 1,04 | up   |
| 6384729 | 7221019 | 1425319 | ral guanine nucleotide dissociation stimulator-like 2  | Rgl2    | 294283 | 1,03 | up   |
| 5796897 | 7221019 | 1425326 | ral guanine nucleotide dissociation stimulator-like 2  | Rgl2    | 294283 | 1,03 | down |
| 6051693 | 7221019 | 1425320 | ral guanine nucleotide dissociation stimulator-like 2  | Rgl2    | 294283 | 1,02 | up   |
| 6716761 | 7221019 | 1425310 | ral guanine nucleotide dissociation stimulator-like 2  | Rgl2    | 294283 | 1,02 | up   |
| 6059718 | 7221019 | 1425312 | ral guanine nucleotide dissociation stimulator-like 2  | Rgl2    | 294283 | 1,01 | down |
| 6556605 | 7076099 | 1070642 | RAN binding protein 17                                 | Ranbp17 | 303029 | 1,68 | up   |
| 5818306 | 7076099 | 1070690 | RAN binding protein 17                                 | Ranbp17 | 303029 | 1,66 | down |

|         |         |         |                                                |         |        |      |      |
|---------|---------|---------|------------------------------------------------|---------|--------|------|------|
| 6211736 | 7076099 | 1070653 | RAN binding protein 17                         | Ranbp17 | 303029 | 1,61 | up   |
| 6647216 | 7076099 | 1070646 | RAN binding protein 17                         | Ranbp17 | 303029 | 1,59 | up   |
| 6730037 | 7076099 | 1070631 | RAN binding protein 17                         | Ranbp17 | 303029 | 1,42 | up   |
| 6367691 | 7076099 | 1070659 | RAN binding protein 17                         | Ranbp17 | 303029 | 1,42 | down |
| 6229263 | 7076099 | 1070682 | RAN binding protein 17                         | Ranbp17 | 303029 | 1,40 | down |
| 5713912 | 7076099 | 1070680 | RAN binding protein 17                         | Ranbp17 | 303029 | 1,39 | up   |
| 5645874 | 7076099 | 1070685 | RAN binding protein 17                         | Ranbp17 | 303029 | 1,39 | down |
| 6164580 | 7076099 | 1070689 | RAN binding protein 17                         | Ranbp17 | 303029 | 1,38 | up   |
| 5994031 | 7076099 | 1070687 | RAN binding protein 17                         | Ranbp17 | 303029 | 1,32 | down |
| 6541106 | 7076099 | 1070686 | RAN binding protein 17                         | Ranbp17 | 303029 | 1,30 | down |
| 5874801 | 7076099 | 1070683 | RAN binding protein 17                         | Ranbp17 | 303029 | 1,19 | down |
| 6200625 | 7076099 | 1070688 | RAN binding protein 17                         | Ranbp17 | 303029 | 1,19 | down |
| 6118538 | 7076099 | 1070642 | RAN binding protein 17                         | Ranbp17 | 303029 | 1,17 | up   |
| 6241455 | 7076099 | 1070639 | RAN binding protein 17                         | Ranbp17 | 303029 | 1,14 | down |
| 6273185 | 7076099 | 1070688 | RAN binding protein 17                         | Ranbp17 | 303029 | 1,13 | down |
| 5885881 | 7076099 | 1070654 | RAN binding protein 17                         | Ranbp17 | 303029 | 1,12 | down |
| 5663056 | 7076099 | 1070630 | RAN binding protein 17                         | Ranbp17 | 303029 | 1,12 | up   |
| 6517117 | 7076099 | 1070681 | RAN binding protein 17                         | Ranbp17 | 303029 | 1,12 | down |
| 6731575 | 7076099 | 1070646 | RAN binding protein 17                         | Ranbp17 | 303029 | 1,08 | up   |
| 5793812 | 7076099 | 1070674 | RAN binding protein 17                         | Ranbp17 | 303029 | 1,08 | down |
| 5925391 | 7076099 | 1070690 | RAN binding protein 17                         | Ranbp17 | 303029 | 1,06 | up   |
| 6144520 | 7076099 | 1070632 | RAN binding protein 17                         | Ranbp17 | 303029 | 1,06 | down |
| 5993267 | 7076099 | 1070645 | RAN binding protein 17                         | Ranbp17 | 303029 | 1,05 | down |
| 6278227 | 7076099 | 1070630 | RAN binding protein 17                         | Ranbp17 | 303029 | 1,05 | up   |
| 6640227 | 7076099 | 1070651 | RAN binding protein 17                         | Ranbp17 | 303029 | 1,04 | up   |
| 6669516 | 7076099 | 1070677 | RAN binding protein 17                         | Ranbp17 | 303029 | 1,04 | down |
| 6658864 | 7076099 | 1070658 | RAN binding protein 17                         | Ranbp17 | 303029 | 1,04 | up   |
| 5833448 | 7076099 | 1070685 | RAN binding protein 17                         | Ranbp17 | 303029 | 1,03 | up   |
| 6568031 | 7076099 | 1070641 | RAN binding protein 17                         | Ranbp17 | 303029 | 1,01 | up   |
| 6295572 | 7076099 | 1070642 | RAN binding protein 17                         | Ranbp17 | 303029 | 1,01 | down |
| 6161683 | 7076099 | 1070679 | RAN binding protein 17                         | Ranbp17 | 303029 | 1,00 | up   |
| 6025288 | 7331416 | 1699160 | Rap guanine nucleotide exchange factor (GEF) 3 | Rapgef3 | 59326  | 2,54 | up   |
| 6705829 | 7331416 | 1699147 | Rap guanine nucleotide exchange factor (GEF) 3 | Rapgef3 | 59326  | 2,53 | up   |
| 5769806 | 7331416 | 1699168 | Rap guanine nucleotide exchange factor (GEF) 3 | Rapgef3 | 59326  | 2,22 | down |
| 6045229 | 7331416 | 1699158 | Rap guanine nucleotide exchange factor (GEF) 3 | Rapgef3 | 59326  | 1,96 | up   |
| 5923242 | 7331416 | 1699154 | Rap guanine nucleotide exchange factor (GEF) 3 | Rapgef3 | 59326  | 1,85 | down |
| 5740888 | 7331416 | 1699169 | Rap guanine nucleotide exchange factor (GEF) 3 | Rapgef3 | 59326  | 1,74 | down |
| 6554480 | 7331416 | 1699145 | Rap guanine nucleotide exchange factor (GEF) 3 | Rapgef3 | 59326  | 1,73 | down |
| 6169025 | 7331416 | 1699149 | Rap guanine nucleotide exchange factor (GEF) 3 | Rapgef3 | 59326  | 1,65 | up   |
| 6161171 | 7331416 | 1699151 | Rap guanine nucleotide exchange factor (GEF) 3 | Rapgef3 | 59326  | 1,52 | down |
| 6541283 | 7331416 | 1699160 | Rap guanine nucleotide exchange factor (GEF) 3 | Rapgef3 | 59326  | 1,49 | down |
| 5655397 | 7331416 | 1699164 | Rap guanine nucleotide exchange factor (GEF) 3 | Rapgef3 | 59326  | 1,48 | up   |
| 6714548 | 7331416 | 1699152 | Rap guanine nucleotide exchange factor (GEF) 3 | Rapgef3 | 59326  | 1,44 | up   |
| 6398464 | 7331416 | 1699163 | Rap guanine nucleotide exchange factor (GEF) 3 | Rapgef3 | 59326  | 1,40 | up   |
| 5826332 | 7331416 | 1699150 | Rap guanine nucleotide exchange factor (GEF) 3 | Rapgef3 | 59326  | 1,40 | up   |
| 6144041 | 7331416 | 1699155 | Rap guanine nucleotide exchange factor (GEF) 3 | Rapgef3 | 59326  | 1,40 | up   |
| 6292977 | 7331416 | 1699146 | Rap guanine nucleotide exchange factor (GEF) 3 | Rapgef3 | 59326  | 1,39 | down |
| 6270271 | 7331416 | 1699162 | Rap guanine nucleotide exchange factor (GEF) 3 | Rapgef3 | 59326  | 1,30 | up   |
| 6285762 | 7331416 | 1699144 | Rap guanine nucleotide exchange factor (GEF) 3 | Rapgef3 | 59326  | 1,28 | down |
| 5910345 | 7331416 | 1699159 | Rap guanine nucleotide exchange factor (GEF) 3 | Rapgef3 | 59326  | 1,27 | up   |
| 5706514 | 7331416 | 1699169 | Rap guanine nucleotide exchange factor (GEF) 3 | Rapgef3 | 59326  | 1,25 | down |
| 6474285 | 7331416 | 1699157 | Rap guanine nucleotide exchange factor (GEF) 3 | Rapgef3 | 59326  | 1,23 | down |
| 5921545 | 7331416 | 1699143 | Rap guanine nucleotide exchange factor (GEF) 3 | Rapgef3 | 59326  | 1,22 | down |
| 6277508 | 7331416 | 1699166 | Rap guanine nucleotide exchange factor (GEF) 3 | Rapgef3 | 59326  | 1,20 | down |
| 6470284 | 7331416 | 1699153 | Rap guanine nucleotide exchange factor (GEF) 3 | Rapgef3 | 59326  | 1,18 | up   |
| 5992200 | 7331416 | 1699156 | Rap guanine nucleotide exchange factor (GEF) 3 | Rapgef3 | 59326  | 1,15 | up   |
| 5918268 | 7331416 | 1699161 | Rap guanine nucleotide exchange factor (GEF) 3 | Rapgef3 | 59326  | 1,14 | down |

|         |         |         |                                                                                  |                 |                   |      |      |
|---------|---------|---------|----------------------------------------------------------------------------------|-----------------|-------------------|------|------|
| 6385069 | 7331416 | 1699148 | Rap guanine nucleotide exchange factor (GEF) 3                                   | Rapgef3         | 59326             | 1,14 | up   |
| 6552796 | 7331416 | 1699169 | Rap guanine nucleotide exchange factor (GEF) 3                                   | Rapgef3         | 59326             | 1,11 | up   |
| 5793013 | 7331416 | 1699165 | Rap guanine nucleotide exchange factor (GEF) 3                                   | Rapgef3         | 59326             | 1,05 | down |
| 6546988 | 7331416 | 1699167 | Rap guanine nucleotide exchange factor (GEF) 3                                   | Rapgef3         | 59326             | 1,05 | down |
| 5849460 | 7067670 | 1050341 | Rap guanine nucleotide exchange factor (GEF) 6                                   | Rapgef6         | 303141            | 1,77 | down |
| 5853874 | 7067670 | 1050372 | Rap guanine nucleotide exchange factor (GEF) 6                                   | Rapgef6         | 303141            | 1,69 | down |
| 6616117 | 7067670 | 1050335 | Rap guanine nucleotide exchange factor (GEF) 6                                   | Rapgef6         | 303141            | 1,61 | down |
| 5654313 | 7067670 | 1050367 | Rap guanine nucleotide exchange factor (GEF) 6                                   | Rapgef6         | 303141            | 1,58 | down |
| 6688975 | 7067670 | 1050370 | Rap guanine nucleotide exchange factor (GEF) 6                                   | Rapgef6         | 303141            | 1,51 | down |
| 6121556 | 7067670 | 1050350 | Rap guanine nucleotide exchange factor (GEF) 6                                   | Rapgef6         | 303141            | 1,46 | down |
| 5709972 | 7067670 | 1050352 | Rap guanine nucleotide exchange factor (GEF) 6                                   | Rapgef6         | 303141            | 1,45 | down |
| 6743830 | 7067670 | 1050332 | Rap guanine nucleotide exchange factor (GEF) 6                                   | Rapgef6         | 303141            | 1,45 | down |
| 6099656 | 7067670 | 1050347 | Rap guanine nucleotide exchange factor (GEF) 6                                   | Rapgef6         | 303141            | 1,45 | down |
| 6586349 | 7067670 | 1050353 | Rap guanine nucleotide exchange factor (GEF) 6                                   | Rapgef6         | 303141            | 1,39 | down |
| 6238793 | 7067670 | 1050359 | Rap guanine nucleotide exchange factor (GEF) 6                                   | Rapgef6         | 303141            | 1,38 | down |
| 6190213 | 7067670 | 1050339 | Rap guanine nucleotide exchange factor (GEF) 6                                   | Rapgef6         | 303141            | 1,37 | down |
| 6061193 | 7067670 | 1050354 | Rap guanine nucleotide exchange factor (GEF) 6                                   | Rapgef6         | 303141            | 1,36 | down |
| 6575854 | 7067670 | 1050340 | Rap guanine nucleotide exchange factor (GEF) 6                                   | Rapgef6         | 303141            | 1,32 | down |
| 6474781 | 7067670 | 1050336 | Rap guanine nucleotide exchange factor (GEF) 6                                   | Rapgef6         | 303141            | 1,31 | down |
| 6155608 | 7067670 | 1050356 | Rap guanine nucleotide exchange factor (GEF) 6                                   | Rapgef6         | 303141            | 1,30 | down |
| 6506956 | 7067670 | 1050331 | Rap guanine nucleotide exchange factor (GEF) 6                                   | Rapgef6         | 303141            | 1,27 | down |
| 6035905 | 7067670 | 1050327 | Rap guanine nucleotide exchange factor (GEF) 6                                   | Rapgef6         | 303141            | 1,27 | down |
| 5954192 | 7067670 | 1050326 | Rap guanine nucleotide exchange factor (GEF) 6                                   | Rapgef6         | 303141            | 1,25 | down |
| 6549191 | 7067670 | 1050369 | Rap guanine nucleotide exchange factor (GEF) 6                                   | Rapgef6         | 303141            | 1,24 | down |
| 6705661 | 7067670 | 1050348 | Rap guanine nucleotide exchange factor (GEF) 6                                   | Rapgef6         | 303141            | 1,24 | down |
| 6000044 | 7067670 | 1050329 | Rap guanine nucleotide exchange factor (GEF) 6                                   | Rapgef6         | 303141            | 1,23 | down |
| 5739533 | 7067670 | 1050348 | Rap guanine nucleotide exchange factor (GEF) 6                                   | Rapgef6         | 303141            | 1,23 | down |
| 6255902 | 7067670 | 1050353 | Rap guanine nucleotide exchange factor (GEF) 6                                   | Rapgef6         | 303141            | 1,21 | down |
| 6738397 | 7067670 | 1050372 | Rap guanine nucleotide exchange factor (GEF) 6                                   | Rapgef6         | 303141            | 1,18 | down |
| 6535368 | 7067670 | 1050350 | Rap guanine nucleotide exchange factor (GEF) 6                                   | Rapgef6         | 303141            | 1,17 | down |
| 6375865 | 7067670 | 1050338 | Rap guanine nucleotide exchange factor (GEF) 6                                   | Rapgef6         | 303141            | 1,16 | down |
| 6050518 | 7067670 | 1050342 | Rap guanine nucleotide exchange factor (GEF) 6                                   | Rapgef6         | 303141            | 1,14 | down |
| 5762597 | 7067670 | 1050337 | Rap guanine nucleotide exchange factor (GEF) 6                                   | Rapgef6         | 303141            | 1,14 | down |
| 6710322 | 7067670 | 1050328 | Rap guanine nucleotide exchange factor (GEF) 6                                   | Rapgef6         | 303141            | 1,13 | down |
| 6365768 | 7067670 | 1050360 | Rap guanine nucleotide exchange factor (GEF) 6                                   | Rapgef6         | 303141            | 1,06 | down |
| 5813100 | 7067670 | 1050371 | Rap guanine nucleotide exchange factor (GEF) 6                                   | Rapgef6         | 303141            | 1,03 | down |
| 6070907 | 7067670 | 1050358 | Rap guanine nucleotide exchange factor (GEF) 6                                   | Rapgef6         | 303141            | 1,03 | down |
| 5898419 | 7227433 | 1440994 | RAP1 interacting factor homolog (yeast)                                          | Rif1            | 295602            | 1,11 | up   |
| 6053612 | 7337522 | 1713641 | RAR-related orphan receptor alpha                                                | Rora            | 300807            | 1,77 | up   |
| 5918130 | 7337522 | 1713641 | RAR-related orphan receptor alpha                                                | Rora            | 300807            | 1,76 | up   |
| 5806656 | 7337522 | 1713636 | RAR-related orphan receptor alpha                                                | Rora            | 300807            | 1,74 | up   |
| 6048578 | 7337522 | 1713637 | RAR-related orphan receptor alpha                                                | Rora            | 300807            | 1,65 | up   |
| 5789380 | 7337522 | 1713638 | RAR-related orphan receptor alpha                                                | Rora            | 300807            | 1,64 | up   |
| 6590492 | 7337522 | 1713615 | RAR-related orphan receptor alpha                                                | Rora            | 300807            | 1,62 | down |
| 6165070 | 7337522 | 1713632 | RAR-related orphan receptor alpha                                                | Rora            | 300807            | 1,54 | up   |
| 5668827 | 7337522 | 1713633 | RAR-related orphan receptor alpha                                                | Rora            | 300807            | 1,42 | up   |
| 5716188 | 7337522 | 1713640 | RAR-related orphan receptor alpha                                                | Rora            | 300807            | 1,40 | up   |
| 6447604 | 7337522 | 1713629 | RAR-related orphan receptor alpha                                                | Rora            | 300807            | 1,33 | up   |
| 5746130 | 7337522 | 1713632 | RAR-related orphan receptor alpha                                                | Rora            | 300807            | 1,31 | up   |
| 6358143 | 7337522 | 1713642 | RAR-related orphan receptor alpha                                                | Rora            | 300807            | 1,23 | up   |
| 6243402 | 7337522 | 1713590 | RAR-related orphan receptor alpha                                                | Rora            | 300807            | 1,16 | down |
| 6295135 | 7337522 | 1713590 | RAR-related orphan receptor alpha                                                | Rora            | 300807            | 1,13 | down |
| 5868276 | 7196769 | 1367259 | RAR-related orphan receptor C                                                    | Rorc            | 368158            | 2,26 | down |
| 6593608 | 7196769 | 1367272 | RAR-related orphan receptor C                                                    | Rorc            | 368158            | 1,50 | up   |
| 6413423 | 7196769 | 1367259 | RAR-related orphan receptor C                                                    | Rorc            | 368158            | 1,06 | up   |
| 5939100 | 7196769 | 1367275 | RAR-related orphan receptor C /// leucine rich repeat and Ig domain containing 4 | Rorc /// Lingo4 | 368158 /// 499668 | 1,23 | up   |
| 5918027 | 7196769 | 1367270 | RAR-related orphan receptor C /// leucine rich repeat and Ig domain containing 4 | Rorc /// Lingo4 | 368158 /// 499668 | 1,21 | up   |

|         |         |         |                                                                                  |                 |                   |      |      |
|---------|---------|---------|----------------------------------------------------------------------------------|-----------------|-------------------|------|------|
| 5807922 | 7196769 | 1367274 | RAR-related orphan receptor C /// leucine rich repeat and Ig domain containing 4 | Rorc /// Lingo4 | 368158 /// 499668 | 1,16 | up   |
| 6029492 | 7196769 | 1367273 | RAR-related orphan receptor C /// leucine rich repeat and Ig domain containing 4 | Rorc /// Lingo4 | 368158 /// 499668 | 1,13 | down |
| 5821544 | 7196769 | 1367271 | RAR-related orphan receptor C /// leucine rich repeat and Ig domain containing 4 | Rorc /// Lingo4 | 368158 /// 499668 | 1,04 | up   |
| 6363104 | 7131742 | 1205802 | RAS (RAD and GEM) like GTP binding 2                                             | Rem2            | 64626             | 4,06 | up   |
| 6550033 | 7131742 | 1205800 | RAS (RAD and GEM) like GTP binding 2                                             | Rem2            | 64626             | 1,66 | up   |
| 5628933 | 7131742 | 1205798 | RAS (RAD and GEM) like GTP binding 2                                             | Rem2            | 64626             | 1,33 | down |
| 6061036 | 7131742 | 1205801 | RAS (RAD and GEM) like GTP binding 2                                             | Rem2            | 64626             | 1,20 | down |
| 5648472 | 7131742 | 1205799 | RAS (RAD and GEM) like GTP binding 2                                             | Rem2            | 64626             | 1,15 | up   |
| 5719349 | 7131742 | 1205799 | RAS (RAD and GEM) like GTP binding 2                                             | Rem2            | 64626             | 1,15 | up   |
| 6249494 | 7131742 | 1205802 | RAS (RAD and GEM) like GTP binding 2                                             | Rem2            | 64626             | 1,04 | up   |
| 5632800 | 7233970 | 1458271 | RAS (RAD and GEM)-like GTP-binding 1                                             | Rem1            | 366232            | 1,60 | down |
| 5886564 | 7233970 | 1458271 | RAS (RAD and GEM)-like GTP-binding 1                                             | Rem1            | 366232            | 1,46 | down |
| 5917193 | 7233970 | 1458271 | RAS (RAD and GEM)-like GTP-binding 1                                             | Rem1            | 366232            | 1,37 | down |
| 5999231 | 7233970 | 1458271 | RAS (RAD and GEM)-like GTP-binding 1                                             | Rem1            | 366232            | 1,22 | up   |
| 5726896 | 7233970 | 1458274 | RAS (RAD and GEM)-like GTP-binding 1                                             | Rem1            | 366232            | 1,14 | down |
| 6192666 | 7233970 | 1458269 | RAS (RAD and GEM)-like GTP-binding 1                                             | Rem1            | 366232            | 1,10 | down |
| 6683517 | 7233970 | 1458275 | RAS (RAD and GEM)-like GTP-binding 1                                             | Rem1            | 366232            | 1,08 | up   |
| 6620087 | 7233970 | 1458272 | RAS (RAD and GEM)-like GTP-binding 1                                             | Rem1            | 366232            | 1,06 | up   |
| 6349582 | 7233970 | 1458271 | RAS (RAD and GEM)-like GTP-binding 1                                             | Rem1            | 366232            | 1,03 | up   |
| 5862972 | 7233970 | 1458275 | RAS (RAD and GEM)-like GTP-binding 1                                             | Rem1            | 366232            | 1,01 | up   |
| 5928459 | 7039108 | 983344  | Ras and Rab interactor 1                                                         | Rin1            | 207119            | 2,02 | up   |
| 6596677 | 7039108 | 983338  | Ras and Rab interactor 1                                                         | Rin1            | 207119            | 1,95 | down |
| 6744926 | 7039108 | 983340  | Ras and Rab interactor 1                                                         | Rin1            | 207119            | 1,94 | down |
| 6152055 | 7039108 | 983336  | Ras and Rab interactor 1                                                         | Rin1            | 207119            | 1,58 | up   |
| 6303150 | 7039108 | 983343  | Ras and Rab interactor 1                                                         | Rin1            | 207119            | 1,54 | up   |
| 6551553 | 7039108 | 983341  | Ras and Rab interactor 1                                                         | Rin1            | 207119            | 1,46 | up   |
| 5796187 | 7039108 | 983336  | Ras and Rab interactor 1                                                         | Rin1            | 207119            | 1,42 | down |
| 6099919 | 7039108 | 983345  | Ras and Rab interactor 1                                                         | Rin1            | 207119            | 1,41 | down |
| 6155917 | 7039108 | 983339  | Ras and Rab interactor 1                                                         | Rin1            | 207119            | 1,35 | down |
| 6361716 | 7039108 | 983342  | Ras and Rab interactor 1                                                         | Rin1            | 207119            | 1,33 | down |
| 6016984 | 7039108 | 983342  | Ras and Rab interactor 1                                                         | Rin1            | 207119            | 1,32 | up   |
| 6726005 | 7039108 | 983336  | Ras and Rab interactor 1                                                         | Rin1            | 207119            | 1,06 | up   |
| 6235677 | 7039108 | 983337  | Ras and Rab interactor 1                                                         | Rin1            | 207119            | 1,04 | up   |
| 6310883 | 7039108 | 983345  | Ras and Rab interactor 1                                                         | Rin1            | 207119            | 1,02 | down |
| 6342893 | 7110960 | 1154693 | Ras association (RalGDS/AF-6) domain family member 5                             | Rassf5          | 54355             | 2,33 | down |
| 6398562 | 7110960 | 1154690 | Ras association (RalGDS/AF-6) domain family member 5                             | Rassf5          | 54355             | 1,17 | up   |
| 6136997 | 7110960 | 1154692 | Ras association (RalGDS/AF-6) domain family member 5                             | Rassf5          | 54355             | 1,17 | up   |
| 6035058 | 7110960 | 1154693 | Ras association (RalGDS/AF-6) domain family member 5                             | Rassf5          | 54355             | 1,17 | down |
| 6517068 | 7110960 | 1154686 | Ras association (RalGDS/AF-6) domain family member 5                             | Rassf5          | 54355             | 1,16 | down |
| 6632297 | 7110960 | 1154689 | Ras association (RalGDS/AF-6) domain family member 5                             | Rassf5          | 54355             | 1,16 | up   |
| 6080626 | 7110960 | 1154693 | Ras association (RalGDS/AF-6) domain family member 5                             | Rassf5          | 54355             | 1,14 | down |
| 6418677 | 7110960 | 1154687 | Ras association (RalGDS/AF-6) domain family member 5                             | Rassf5          | 54355             | 1,09 | up   |
| 6038719 | 7110960 | 1154691 | Ras association (RalGDS/AF-6) domain family member 5                             | Rassf5          | 54355             | 1,08 | down |
| 6267707 | 7110960 | 1154688 | Ras association (RalGDS/AF-6) domain family member 5                             | Rassf5          | 54355             | 1,04 | down |
| 6116376 | 7110960 | 1154688 | Ras association (RalGDS/AF-6) domain family member 5                             | Rassf5          | 54355             | 1,03 | up   |
| 5636564 | 7039303 | 983877  | RAS guanyl releasing protein 2 (calcium and DAG-regulated)                       | Rasgrp2         | 361714            | 2,14 | down |
| 5966348 | 7039303 | 983870  | RAS guanyl releasing protein 2 (calcium and DAG-regulated)                       | Rasgrp2         | 361714            | 2,01 | up   |
| 5872034 | 7039303 | 983876  | RAS guanyl releasing protein 2 (calcium and DAG-regulated)                       | Rasgrp2         | 361714            | 1,74 | down |
| 5772899 | 7039303 | 983874  | RAS guanyl releasing protein 2 (calcium and DAG-regulated)                       | Rasgrp2         | 361714            | 1,41 | down |
| 5729378 | 7039303 | 983878  | RAS guanyl releasing protein 2 (calcium and DAG-regulated)                       | Rasgrp2         | 361714            | 1,40 | up   |
| 6740004 | 7039303 | 983885  | RAS guanyl releasing protein 2 (calcium and DAG-regulated)                       | Rasgrp2         | 361714            | 1,39 | up   |
| 6053273 | 7039303 | 983882  | RAS guanyl releasing protein 2 (calcium and DAG-regulated)                       | Rasgrp2         | 361714            | 1,28 | down |
| 6233415 | 7039303 | 983884  | RAS guanyl releasing protein 2 (calcium and DAG-regulated)                       | Rasgrp2         | 361714            | 1,28 | up   |
| 6174985 | 7039303 | 983880  | RAS guanyl releasing protein 2 (calcium and DAG-regulated)                       | Rasgrp2         | 361714            | 1,27 | down |
| 5866303 | 7039303 | 983881  | RAS guanyl releasing protein 2 (calcium and DAG-regulated)                       | Rasgrp2         | 361714            | 1,21 | up   |
| 5751834 | 7039303 | 983879  | RAS guanyl releasing protein 2 (calcium and DAG-regulated)                       | Rasgrp2         | 361714            | 1,19 | up   |
| 6364150 | 7039303 | 983872  | RAS guanyl releasing protein 2 (calcium and DAG-regulated)                       | Rasgrp2         | 361714            | 1,18 | down |

|         |         |         |                                                            |          |        |      |      |
|---------|---------|---------|------------------------------------------------------------|----------|--------|------|------|
| 6498903 | 7039303 | 983886  | RAS guanyl releasing protein 2 (calcium and DAG-regulated) | Rasgrp2  | 361714 | 1,03 | up   |
| 6444973 | 7039303 | 983870  | RAS guanyl releasing protein 2 (calcium and DAG-regulated) | Rasgrp2  | 361714 | 1,03 | down |
| 6523615 | 7039303 | 983873  | RAS guanyl releasing protein 2 (calcium and DAG-regulated) | Rasgrp2  | 361714 | 1,03 | up   |
| 6321076 | 7039303 | 983883  | RAS guanyl releasing protein 2 (calcium and DAG-regulated) | Rasgrp2  | 361714 | 1,01 | up   |
| 5872744 | 7039303 | 983868  | RAS guanyl releasing protein 2 (calcium and DAG-regulated) | Rasgrp2  | 361714 | 1,01 | down |
| 6389651 | 7039303 | 983884  | RAS guanyl releasing protein 2 (calcium and DAG-regulated) | Rasgrp2  | 361714 | 1,00 | up   |
| 6476683 | 7167063 | 1291900 | Ras suppressor protein 1                                   | Rsu1     | 680419 | 3,14 | down |
| 5984071 | 7167063 | 1291900 | Ras suppressor protein 1                                   | Rsu1     | 680419 | 1,47 | down |
| 6266320 | 7167063 | 1291900 | Ras suppressor protein 1                                   | Rsu1     | 680419 | 1,41 | up   |
| 6174842 | 7167063 | 1291869 | Ras suppressor protein 1                                   | Rsu1     | 680419 | 1,25 | up   |
| 5659841 | 7167063 | 1291873 | Ras suppressor protein 1                                   | Rsu1     | 680419 | 1,22 | up   |
| 6210455 | 7167063 | 1291869 | Ras suppressor protein 1                                   | Rsu1     | 680419 | 1,21 | up   |
| 5833705 | 7167063 | 1291885 | Ras suppressor protein 1                                   | Rsu1     | 680419 | 1,19 | down |
| 6338709 | 7167063 | 1291896 | Ras suppressor protein 1                                   | Rsu1     | 680419 | 1,18 | up   |
| 6321349 | 7167063 | 1291885 | Ras suppressor protein 1                                   | Rsu1     | 680419 | 1,11 | up   |
| 6065380 | 7167063 | 1291888 | Ras suppressor protein 1                                   | Rsu1     | 680419 | 1,09 | up   |
| 6067630 | 7167063 | 1291891 | Ras suppressor protein 1                                   | Rsu1     | 680419 | 1,08 | down |
| 6632977 | 7167063 | 1291887 | Ras suppressor protein 1                                   | Rsu1     | 680419 | 1,07 | down |
| 5887402 | 7178979 | 1322369 | RASD family, member 2                                      | Rasd2    | 171099 | 5,10 | down |
| 5979301 | 7178979 | 1322366 | RASD family, member 2                                      | Rasd2    | 171099 | 4,11 | up   |
| 5783219 | 7178979 | 1322366 | RASD family, member 2                                      | Rasd2    | 171099 | 2,98 | down |
| 5687446 | 7178979 | 1322366 | RASD family, member 2                                      | Rasd2    | 171099 | 2,57 | down |
| 6215296 | 7178979 | 1322365 | RASD family, member 2                                      | Rasd2    | 171099 | 2,37 | down |
| 6596264 | 7178979 | 1322369 | RASD family, member 2                                      | Rasd2    | 171099 | 2,23 | up   |
| 6246887 | 7178979 | 1322364 | RASD family, member 2                                      | Rasd2    | 171099 | 2,10 | down |
| 5730374 | 7178979 | 1322367 | RASD family, member 2                                      | Rasd2    | 171099 | 1,77 | up   |
| 6518983 | 7178979 | 1322369 | RASD family, member 2                                      | Rasd2    | 171099 | 1,72 | down |
| 6586578 | 7178979 | 1322368 | RASD family, member 2                                      | Rasd2    | 171099 | 1,67 | up   |
| 6164694 | 7067212 | 1049218 | RasGEF domain family, member 1C                            | Rasgef1c | 360519 | 2,21 | down |
| 6413529 | 7067212 | 1049228 | RasGEF domain family, member 1C                            | Rasgef1c | 360519 | 2,00 | up   |
| 5934545 | 7067212 | 1049217 | RasGEF domain family, member 1C                            | Rasgef1c | 360519 | 2,00 | down |
| 6220293 | 7067212 | 1049225 | RasGEF domain family, member 1C                            | Rasgef1c | 360519 | 1,88 | up   |
| 5875160 | 7067212 | 1049226 | RasGEF domain family, member 1C                            | Rasgef1c | 360519 | 1,60 | up   |
| 5779699 | 7067212 | 1049215 | RasGEF domain family, member 1C                            | Rasgef1c | 360519 | 1,58 | down |
| 6665814 | 7067212 | 1049222 | RasGEF domain family, member 1C                            | Rasgef1c | 360519 | 1,32 | down |
| 6122569 | 7067212 | 1049199 | RasGEF domain family, member 1C                            | Rasgef1c | 360519 | 1,27 | up   |
| 6577227 | 7067212 | 1049216 | RasGEF domain family, member 1C                            | Rasgef1c | 360519 | 1,23 | down |
| 6303687 | 7067212 | 1049223 | RasGEF domain family, member 1C                            | Rasgef1c | 360519 | 1,22 | down |
| 6712887 | 7067212 | 1049227 | RasGEF domain family, member 1C                            | Rasgef1c | 360519 | 1,19 | up   |
| 6590015 | 7067212 | 1049220 | RasGEF domain family, member 1C                            | Rasgef1c | 360519 | 1,16 | down |
| 6498632 | 7067212 | 1049219 | RasGEF domain family, member 1C                            | Rasgef1c | 360519 | 1,15 | down |
| 6550785 | 7067212 | 1049224 | RasGEF domain family, member 1C                            | Rasgef1c | 360519 | 1,14 | down |
| 6724139 | 7067212 | 1049222 | RasGEF domain family, member 1C                            | Rasgef1c | 360519 | 1,01 | up   |
| 6153610 | 7174098 | 1310346 | Ras-like without CAAX 2                                    | Rit2     | 291713 | 2,11 | down |
| 6310655 | 7174098 | 1310347 | Ras-like without CAAX 2                                    | Rit2     | 291713 | 1,66 | down |
| 5843089 | 7174098 | 1310345 | Ras-like without CAAX 2                                    | Rit2     | 291713 | 1,63 | down |
| 6028755 | 7174098 | 1310350 | Ras-like without CAAX 2                                    | Rit2     | 291713 | 1,45 | up   |
| 6451457 | 7174098 | 1310348 | Ras-like without CAAX 2                                    | Rit2     | 291713 | 1,31 | up   |
| 6417458 | 7174098 | 1310350 | Ras-like without CAAX 2                                    | Rit2     | 291713 | 1,30 | up   |
| 6456964 | 7174098 | 1310349 | Ras-like without CAAX 2                                    | Rit2     | 291713 | 1,09 | down |
| 6277516 | 7380548 | 1821987 | Ras-related GTP binding B                                  | RragB    | 117043 | 2,95 | up   |
| 6117272 | 7380548 | 1821982 | Ras-related GTP binding B                                  | RragB    | 117043 | 1,68 | down |
| 6535139 | 7380548 | 1821987 | Ras-related GTP binding B                                  | RragB    | 117043 | 1,44 | up   |
| 6529864 | 7380548 | 1821986 | Ras-related GTP binding B                                  | RragB    | 117043 | 1,41 | down |
| 5623374 | 7380548 | 1821977 | Ras-related GTP binding B                                  | RragB    | 117043 | 1,26 | down |
| 6696506 | 7380548 | 1821983 | Ras-related GTP binding B                                  | RragB    | 117043 | 1,19 | down |
| 5671546 | 7380548 | 1821978 | Ras-related GTP binding B                                  | RragB    | 117043 | 1,18 | down |

|         |         |         |                                                                 |       |        |      |      |
|---------|---------|---------|-----------------------------------------------------------------|-------|--------|------|------|
| 6490592 | 7380548 | 1821980 | Ras-related GTP binding B                                       | RragB | 117043 | 1,13 | down |
| 5786798 | 7380548 | 1821984 | Ras-related GTP binding B                                       | RragB | 117043 | 1,07 | down |
| 6093714 | 7380548 | 1821981 | Ras-related GTP binding B                                       | RragB | 117043 | 1,05 | up   |
| 5810142 | 7380548 | 1821985 | Ras-related GTP binding B                                       | RragB | 117043 | 1,03 | up   |
| 6214149 | 7380548 | 1821979 | Ras-related GTP binding B                                       | RragB | 117043 | 1,02 | down |
| 6087042 | 7279303 | 1571218 | Ras-related GTP binding C                                       | Rragc | 298514 | 2,09 | up   |
| 6689577 | 7279303 | 1571216 | Ras-related GTP binding C                                       | Rragc | 298514 | 2,04 | up   |
| 5640511 | 7279303 | 1571218 | Ras-related GTP binding C                                       | Rragc | 298514 | 1,79 | up   |
| 5867807 | 7279303 | 1571215 | Ras-related GTP binding C                                       | Rragc | 298514 | 1,70 | up   |
| 6405068 | 7279303 | 1571217 | Ras-related GTP binding C                                       | Rragc | 298514 | 1,61 | up   |
| 5692121 | 7279303 | 1571209 | Ras-related GTP binding C                                       | Rragc | 298514 | 1,60 | up   |
| 6312125 | 7279303 | 1571218 | Ras-related GTP binding C                                       | Rragc | 298514 | 1,50 | up   |
| 6292097 | 7279303 | 1571218 | Ras-related GTP binding C                                       | Rragc | 298514 | 1,44 | up   |
| 6550334 | 7279303 | 1571211 | Ras-related GTP binding C                                       | Rragc | 298514 | 1,40 | up   |
| 6041540 | 7279303 | 1571214 | Ras-related GTP binding C                                       | Rragc | 298514 | 1,40 | up   |
| 5856509 | 7279303 | 1571213 | Ras-related GTP binding C                                       | Rragc | 298514 | 1,30 | up   |
| 5782950 | 7059584 | 1030542 | RCE1 homolog, prenyl protein peptidase ( <i>S. cerevisiae</i> ) | Rce1  | 309153 | 2,04 | up   |
| 6002591 | 7059584 | 1030546 | RCE1 homolog, prenyl protein peptidase ( <i>S. cerevisiae</i> ) | Rce1  | 309153 | 1,75 | up   |
| 6090935 | 7059584 | 1030545 | RCE1 homolog, prenyl protein peptidase ( <i>S. cerevisiae</i> ) | Rce1  | 309153 | 1,75 | up   |
| 5967938 | 7059584 | 1030543 | RCE1 homolog, prenyl protein peptidase ( <i>S. cerevisiae</i> ) | Rce1  | 309153 | 1,49 | up   |
| 6367945 | 7059584 | 1030542 | RCE1 homolog, prenyl protein peptidase ( <i>S. cerevisiae</i> ) | Rce1  | 309153 | 1,35 | up   |
| 6073745 | 7059584 | 1030544 | RCE1 homolog, prenyl protein peptidase ( <i>S. cerevisiae</i> ) | Rce1  | 309153 | 1,35 | up   |
| 6180978 | 7059584 | 1030543 | RCE1 homolog, prenyl protein peptidase ( <i>S. cerevisiae</i> ) | Rce1  | 309153 | 1,25 | down |
| 6578463 | 7059584 | 1030546 | RCE1 homolog, prenyl protein peptidase ( <i>S. cerevisiae</i> ) | Rce1  | 309153 | 1,18 | up   |
| 6704144 | 7059584 | 1030546 | RCE1 homolog, prenyl protein peptidase ( <i>S. cerevisiae</i> ) | Rce1  | 309153 | 1,16 | up   |
| 5985690 | 7059584 | 1030542 | RCE1 homolog, prenyl protein peptidase ( <i>S. cerevisiae</i> ) | Rce1  | 309153 | 1,08 | down |
| 6006886 | 7059584 | 1030542 | RCE1 homolog, prenyl protein peptidase ( <i>S. cerevisiae</i> ) | Rce1  | 309153 | 1,06 | down |
| 6625133 | 7094771 | 1114512 | receptor (chemosensory) transporter protein 4                   | Rtp4  | 360733 | 3,59 | up   |
| 6590933 | 7094771 | 1114512 | receptor (chemosensory) transporter protein 4                   | Rtp4  | 360733 | 2,60 | up   |
| 6262832 | 7094771 | 1114510 | receptor (chemosensory) transporter protein 4                   | Rtp4  | 360733 | 2,05 | down |
| 5734132 | 7094771 | 1114515 | receptor (chemosensory) transporter protein 4                   | Rtp4  | 360733 | 1,96 | down |
| 6210979 | 7094771 | 1114514 | receptor (chemosensory) transporter protein 4                   | Rtp4  | 360733 | 1,28 | down |
| 6105976 | 7094771 | 1114511 | receptor (chemosensory) transporter protein 4                   | Rtp4  | 360733 | 1,18 | down |
| 6152991 | 7094771 | 1114511 | receptor (chemosensory) transporter protein 4                   | Rtp4  | 360733 | 1,01 | up   |
| 6368931 | 7229909 | 1447251 | receptor-associated protein of the synapse                      | Rapsn | 362161 | 1,66 | up   |
| 6135223 | 7229909 | 1447245 | receptor-associated protein of the synapse                      | Rapsn | 362161 | 1,39 | down |
| 6005716 | 7229909 | 1447249 | receptor-associated protein of the synapse                      | Rapsn | 362161 | 1,28 | down |
| 6476225 | 7229909 | 1447246 | receptor-associated protein of the synapse                      | Rapsn | 362161 | 1,20 | up   |
| 6037328 | 7229909 | 1447253 | receptor-associated protein of the synapse                      | Rapsn | 362161 | 1,16 | down |
| 5783638 | 7229909 | 1447250 | receptor-associated protein of the synapse                      | Rapsn | 362161 | 1,12 | up   |
| 6036733 | 7229909 | 1447254 | receptor-associated protein of the synapse                      | Rapsn | 362161 | 1,09 | down |
| 6652613 | 7229909 | 1447252 | receptor-associated protein of the synapse                      | Rapsn | 362161 | 1,06 | down |
| 5840244 | 7284153 | 1583006 | receptor-interacting serine-threonine kinase 2                  | Ripk2 | 362491 | 2,07 | down |
| 5688986 | 7284153 | 1583006 | receptor-interacting serine-threonine kinase 2                  | Ripk2 | 362491 | 1,62 | up   |
| 6493593 | 7284153 | 1583010 | receptor-interacting serine-threonine kinase 2                  | Ripk2 | 362491 | 1,57 | up   |
| 6531710 | 7284153 | 1583012 | receptor-interacting serine-threonine kinase 2                  | Ripk2 | 362491 | 1,56 | down |
| 6633117 | 7284153 | 1583004 | receptor-interacting serine-threonine kinase 2                  | Ripk2 | 362491 | 1,50 | down |
| 6553907 | 7284153 | 1583013 | receptor-interacting serine-threonine kinase 2                  | Ripk2 | 362491 | 1,49 | up   |
| 6142471 | 7284153 | 1583016 | receptor-interacting serine-threonine kinase 2                  | Ripk2 | 362491 | 1,25 | down |
| 6705683 | 7284153 | 1583008 | receptor-interacting serine-threonine kinase 2                  | Ripk2 | 362491 | 1,23 | up   |
| 6488027 | 7284153 | 1583005 | receptor-interacting serine-threonine kinase 2                  | Ripk2 | 362491 | 1,15 | down |
| 6028851 | 7284153 | 1583015 | receptor-interacting serine-threonine kinase 2                  | Ripk2 | 362491 | 1,10 | up   |
| 6526828 | 7284153 | 1583003 | receptor-interacting serine-threonine kinase 2                  | Ripk2 | 362491 | 1,07 | down |
| 6213985 | 7138335 | 1221896 | receptor-interacting serine-threonine kinase 3                  | Ripk3 | 246240 | 2,15 | up   |
| 5643873 | 7138335 | 1221894 | receptor-interacting serine-threonine kinase 3                  | Ripk3 | 246240 | 1,77 | down |
| 5652287 | 7138335 | 1221900 | receptor-interacting serine-threonine kinase 3                  | Ripk3 | 246240 | 1,59 | up   |
| 6221106 | 7138335 | 1221899 | receptor-interacting serine-threonine kinase 3                  | Ripk3 | 246240 | 1,58 | up   |

|         |         |         |                                                |        |        |      |      |
|---------|---------|---------|------------------------------------------------|--------|--------|------|------|
| 5943705 | 7138335 | 1221898 | receptor-interacting serine-threonine kinase 3 | Ripk3  | 246240 | 1,48 | down |
| 6087844 | 7138335 | 1221891 | receptor-interacting serine-threonine kinase 3 | Ripk3  | 246240 | 1,44 | down |
| 5723603 | 7138335 | 1221901 | receptor-interacting serine-threonine kinase 3 | Ripk3  | 246240 | 1,34 | down |
| 5837533 | 7138335 | 1221892 | receptor-interacting serine-threonine kinase 3 | Ripk3  | 246240 | 1,15 | up   |
| 6701698 | 7138335 | 1221897 | receptor-interacting serine-threonine kinase 3 | Ripk3  | 246240 | 1,14 | up   |
| 5798410 | 7138335 | 1221898 | receptor-interacting serine-threonine kinase 3 | Ripk3  | 246240 | 1,11 | down |
| 6596306 | 7138335 | 1221896 | receptor-interacting serine-threonine kinase 3 | Ripk3  | 246240 | 1,10 | up   |
| 6557784 | 7138335 | 1221893 | receptor-interacting serine-threonine kinase 3 | Ripk3  | 246240 | 1,10 | up   |
| 5920237 | 7138335 | 1221890 | receptor-interacting serine-threonine kinase 3 | Ripk3  | 246240 | 1,04 | down |
| 6400903 | 7138335 | 1221892 | receptor-interacting serine-threonine kinase 3 | Ripk3  | 246240 | 1,02 | down |
| 6618063 | 7084500 | 1089695 | RecQ protein-like 5                            | Recq15 | 287834 | 2,11 | down |
| 5873907 | 7084500 | 1089698 | RecQ protein-like 5                            | Recq15 | 287834 | 1,95 | down |
| 6086136 | 7084500 | 1089701 | RecQ protein-like 5                            | Recq15 | 287834 | 1,84 | up   |
| 6069150 | 7084500 | 1089693 | RecQ protein-like 5                            | Recq15 | 287834 | 1,57 | down |
| 5974243 | 7084500 | 1089703 | RecQ protein-like 5                            | Recq15 | 287834 | 1,54 | up   |
| 6499456 | 7084500 | 1089693 | RecQ protein-like 5                            | Recq15 | 287834 | 1,46 | down |
| 6709596 | 7084500 | 1089696 | RecQ protein-like 5                            | Recq15 | 287834 | 1,41 | down |
| 5889136 | 7084500 | 1089718 | RecQ protein-like 5                            | Recq15 | 287834 | 1,40 | up   |
| 6291661 | 7084500 | 1089716 | RecQ protein-like 5                            | Recq15 | 287834 | 1,29 | up   |
| 6668556 | 7084500 | 1089694 | RecQ protein-like 5                            | Recq15 | 287834 | 1,28 | down |
| 5846729 | 7084500 | 1089695 | RecQ protein-like 5                            | Recq15 | 287834 | 1,26 | down |
| 6622967 | 7084500 | 1089713 | RecQ protein-like 5                            | Recq15 | 287834 | 1,21 | down |
| 6484008 | 7084500 | 1089720 | RecQ protein-like 5                            | Recq15 | 287834 | 1,20 | down |
| 5890355 | 7084500 | 1089696 | RecQ protein-like 5                            | Recq15 | 287834 | 1,19 | up   |
| 5957079 | 7084500 | 1089703 | RecQ protein-like 5                            | Recq15 | 287834 | 1,13 | up   |
| 6087124 | 7084500 | 1089702 | RecQ protein-like 5                            | Recq15 | 287834 | 1,13 | up   |
| 6077342 | 7084500 | 1089696 | RecQ protein-like 5                            | Recq15 | 287834 | 1,08 | down |
| 6365131 | 7084500 | 1089719 | RecQ protein-like 5                            | Recq15 | 287834 | 1,08 | down |
| 6746915 | 7084500 | 1089697 | RecQ protein-like 5                            | Recq15 | 287834 | 1,07 | up   |
| 5637530 | 7084500 | 1089714 | RecQ protein-like 5                            | Recq15 | 287834 | 1,06 | down |
| 6598060 | 7084500 | 1089715 | RecQ protein-like 5                            | Recq15 | 287834 | 1,06 | down |
| 5639443 | 7084500 | 1089700 | RecQ protein-like 5                            | Recq15 | 287834 | 1,02 | down |
| 5779136 | 7084500 | 1089699 | RecQ protein-like 5                            | Recq15 | 287834 | 1,02 | up   |
| 5903496 | 7249809 | 1496982 | reelin                                         | Reln   | 24718  | 2,41 | down |
| 5890509 | 7249809 | 1496980 | reelin                                         | Reln   | 24718  | 2,21 | up   |
| 6689398 | 7249809 | 1497000 | reelin                                         | Reln   | 24718  | 2,11 | down |
| 6622674 | 7249809 | 1496969 | reelin                                         | Reln   | 24718  | 1,97 | up   |
| 6199406 | 7249809 | 1496967 | reelin                                         | Reln   | 24718  | 1,96 | up   |
| 5641440 | 7249809 | 1496959 | reelin                                         | Reln   | 24718  | 1,92 | down |
| 6145094 | 7249809 | 1496943 | reelin                                         | Reln   | 24718  | 1,88 | down |
| 6615915 | 7249809 | 1496986 | reelin                                         | Reln   | 24718  | 1,84 | down |
| 6087110 | 7249809 | 1496993 | reelin                                         | Reln   | 24718  | 1,83 | up   |
| 6251259 | 7249809 | 1496944 | reelin                                         | Reln   | 24718  | 1,81 | up   |
| 5931727 | 7249809 | 1496980 | reelin                                         | Reln   | 24718  | 1,61 | up   |
| 5925148 | 7249809 | 1497003 | reelin                                         | Reln   | 24718  | 1,60 | down |
| 5660998 | 7249809 | 1496939 | reelin                                         | Reln   | 24718  | 1,57 | down |
| 5933541 | 7249809 | 1496960 | reelin                                         | Reln   | 24718  | 1,54 | up   |
| 6076563 | 7249809 | 1496970 | reelin                                         | Reln   | 24718  | 1,53 | up   |
| 6589548 | 7249809 | 1496985 | reelin                                         | Reln   | 24718  | 1,52 | up   |
| 5768208 | 7249809 | 1496963 | reelin                                         | Reln   | 24718  | 1,52 | up   |
| 6331759 | 7249809 | 1496986 | reelin                                         | Reln   | 24718  | 1,50 | down |
| 6010295 | 7249809 | 1496956 | reelin                                         | Reln   | 24718  | 1,49 | down |
| 5960529 | 7249809 | 1496966 | reelin                                         | Reln   | 24718  | 1,32 | down |
| 6575241 | 7249809 | 1496992 | reelin                                         | Reln   | 24718  | 1,30 | up   |
| 6056099 | 7249809 | 1496979 | reelin                                         | Reln   | 24718  | 1,30 | down |
| 6713020 | 7249809 | 1496964 | reelin                                         | Reln   | 24718  | 1,26 | up   |
| 5808022 | 7249809 | 1496976 | reelin                                         | Reln   | 24718  | 1,25 | down |



|         |         |         |                                           |       |        |      |      |
|---------|---------|---------|-------------------------------------------|-------|--------|------|------|
| 5722712 | 7249809 | 1497002 | reelin                                    | Reln  | 24718  | 1,25 | up   |
| 5865889 | 7249809 | 1496994 | reelin                                    | Reln  | 24718  | 1,23 | down |
| 6187925 | 7249809 | 1496972 | reelin                                    | Reln  | 24718  | 1,22 | down |
| 6708985 | 7249809 | 1496974 | reelin                                    | Reln  | 24718  | 1,21 | up   |
| 5839128 | 7249809 | 1496949 | reelin                                    | Reln  | 24718  | 1,21 | down |
| 6095144 | 7249809 | 1496953 | reelin                                    | Reln  | 24718  | 1,20 | down |
| 6246548 | 7249809 | 1496987 | reelin                                    | Reln  | 24718  | 1,19 | up   |
| 6232313 | 7249809 | 1496993 | reelin                                    | Reln  | 24718  | 1,19 | up   |
| 6133053 | 7249809 | 1496946 | reelin                                    | Reln  | 24718  | 1,19 | up   |
| 6625691 | 7249809 | 1496939 | reelin                                    | Reln  | 24718  | 1,19 | down |
| 5830318 | 7249809 | 1497002 | reelin                                    | Reln  | 24718  | 1,18 | up   |
| 5662449 | 7249809 | 1496952 | reelin                                    | Reln  | 24718  | 1,17 | up   |
| 5937132 | 7249809 | 1496955 | reelin                                    | Reln  | 24718  | 1,17 | up   |
| 6095446 | 7249809 | 1496982 | reelin                                    | Reln  | 24718  | 1,17 | down |
| 6251819 | 7249809 | 1496979 | reelin                                    | Reln  | 24718  | 1,16 | up   |
| 5854721 | 7249809 | 1496981 | reelin                                    | Reln  | 24718  | 1,16 | down |
| 5985792 | 7249809 | 1496999 | reelin                                    | Reln  | 24718  | 1,16 | up   |
| 5715684 | 7249809 | 1496954 | reelin                                    | Reln  | 24718  | 1,15 | up   |
| 6542794 | 7249809 | 1496961 | reelin                                    | Reln  | 24718  | 1,13 | up   |
| 5924134 | 7249809 | 1496984 | reelin                                    | Reln  | 24718  | 1,13 | down |
| 5882016 | 7249809 | 1496999 | reelin                                    | Reln  | 24718  | 1,12 | up   |
| 6670766 | 7249809 | 1496942 | reelin                                    | Reln  | 24718  | 1,12 | down |
| 5728186 | 7249809 | 1496957 | reelin                                    | Reln  | 24718  | 1,12 | up   |
| 6363850 | 7249809 | 1496994 | reelin                                    | Reln  | 24718  | 1,12 | down |
| 6674619 | 7249809 | 1496968 | reelin                                    | Reln  | 24718  | 1,10 | up   |
| 5903542 | 7249809 | 1497001 | reelin                                    | Reln  | 24718  | 1,10 | down |
| 5695739 | 7249809 | 1496998 | reelin                                    | Reln  | 24718  | 1,10 | up   |
| 6247154 | 7249809 | 1496940 | reelin                                    | Reln  | 24718  | 1,10 | up   |
| 5691379 | 7249809 | 1496977 | reelin                                    | Reln  | 24718  | 1,09 | down |
| 5773029 | 7249809 | 1496996 | reelin                                    | Reln  | 24718  | 1,09 | down |
| 6666353 | 7249809 | 1496990 | reelin                                    | Reln  | 24718  | 1,09 | down |
| 5713336 | 7249809 | 1496978 | reelin                                    | Reln  | 24718  | 1,09 | up   |
| 5633478 | 7249809 | 1496959 | reelin                                    | Reln  | 24718  | 1,09 | down |
| 6577830 | 7249809 | 1496971 | reelin                                    | Reln  | 24718  | 1,07 | up   |
| 5972594 | 7249809 | 1496947 | reelin                                    | Reln  | 24718  | 1,06 | down |
| 6650291 | 7249809 | 1496950 | reelin                                    | Reln  | 24718  | 1,06 | down |
| 6129687 | 7249809 | 1496975 | reelin                                    | Reln  | 24718  | 1,06 | up   |
| 5870545 | 7249809 | 1496958 | reelin                                    | Reln  | 24718  | 1,06 | up   |
| 6605274 | 7249809 | 1496995 | reelin                                    | Reln  | 24718  | 1,06 | down |
| 6042852 | 7249809 | 1496965 | reelin                                    | Reln  | 24718  | 1,06 | up   |
| 6468968 | 7249809 | 1496941 | reelin                                    | Reln  | 24718  | 1,06 | up   |
| 6569798 | 7249809 | 1496991 | reelin                                    | Reln  | 24718  | 1,05 | down |
| 6022027 | 7249809 | 1497004 | reelin                                    | Reln  | 24718  | 1,05 | up   |
| 5935409 | 7249809 | 1496988 | reelin                                    | Reln  | 24718  | 1,05 | up   |
| 6124072 | 7249809 | 1496948 | reelin                                    | Reln  | 24718  | 1,05 | up   |
| 6408940 | 7249809 | 1496956 | reelin                                    | Reln  | 24718  | 1,04 | up   |
| 5756531 | 7249809 | 1496976 | reelin                                    | Reln  | 24718  | 1,03 | down |
| 6110320 | 7249809 | 1496973 | reelin                                    | Reln  | 24718  | 1,02 | up   |
| 5774298 | 7249809 | 1496983 | reelin                                    | Reln  | 24718  | 1,02 | up   |
| 5884450 | 7249809 | 1496992 | reelin                                    | Reln  | 24718  | 1,02 | up   |
| 6671444 | 7249809 | 1496997 | reelin                                    | Reln  | 24718  | 1,01 | down |
| 6468918 | 7249809 | 1496962 | reelin                                    | Reln  | 24718  | 1,01 | up   |
| 5704036 | 7249809 | 1496989 | reelin                                    | Reln  | 24718  | 1,01 | up   |
| 6335116 | 7249809 | 1496945 | reelin                                    | Reln  | 24718  | 1,00 | down |
| 5873401 | 7249809 | 1496951 | reelin                                    | Reln  | 24718  | 1,00 | up   |
| 6047153 | 7247668 | 1491734 | regulating synaptic membrane exocytosis 4 | Rims4 | 266976 | 2,26 | up   |
| 5682558 | 7247668 | 1491733 | regulating synaptic membrane exocytosis 4 | Rims4 | 266976 | 1,40 | down |

|         |         |         |                                                                                       |        |        |      |      |
|---------|---------|---------|---------------------------------------------------------------------------------------|--------|--------|------|------|
| 5764220 | 7247668 | 1491736 | regulating synaptic membrane exocytosis 4                                             | Rims4  | 266976 | 1,15 | up   |
| 5705840 | 7247668 | 1491735 | regulating synaptic membrane exocytosis 4                                             | Rims4  | 266976 | 1,12 | up   |
| 6555134 | 7247668 | 1491735 | regulating synaptic membrane exocytosis 4                                             | Rims4  | 266976 | 1,12 | down |
| 5823716 | 7247668 | 1491731 | regulating synaptic membrane exocytosis 4                                             | Rims4  | 266976 | 1,11 | down |
| 5912984 | 7247668 | 1491734 | regulating synaptic membrane exocytosis 4                                             | Rims4  | 266976 | 1,10 | down |
| 5932481 | 7247668 | 1491732 | regulating synaptic membrane exocytosis 4                                             | Rims4  | 266976 | 1,10 | up   |
| 5974481 | 7359874 | 1769350 | regulator of calcineurin 2                                                            | Rcan2  | 140666 | 3,57 | up   |
| 6709062 | 7359874 | 1769344 | regulator of calcineurin 2                                                            | Rcan2  | 140666 | 1,67 | up   |
| 5933795 | 7359874 | 1769349 | regulator of calcineurin 2                                                            | Rcan2  | 140666 | 1,18 | down |
| 5763504 | 7359874 | 1769345 | regulator of calcineurin 2                                                            | Rcan2  | 140666 | 1,16 | up   |
| 6330213 | 7359874 | 1769346 | regulator of calcineurin 2                                                            | Rcan2  | 140666 | 1,12 | down |
| 6541459 | 7359874 | 1769347 | regulator of calcineurin 2                                                            | Rcan2  | 140666 | 1,09 | up   |
| 5942952 | 7133349 | 1209571 | regulator of chromosome condensation (RCC1) and BTB (POZ) domain containing protein 2 | Rcbtb2 | 290363 | 2,10 | up   |
| 5885216 | 7133349 | 1209565 | regulator of chromosome condensation (RCC1) and BTB (POZ) domain containing protein 2 | Rcbtb2 | 290363 | 1,64 | up   |
| 6075574 | 7133349 | 1209566 | regulator of chromosome condensation (RCC1) and BTB (POZ) domain containing protein 2 | Rcbtb2 | 290363 | 1,38 | up   |
| 6267247 | 7133349 | 1209569 | regulator of chromosome condensation (RCC1) and BTB (POZ) domain containing protein 2 | Rcbtb2 | 290363 | 1,36 | up   |
| 5752963 | 7133349 | 1209576 | regulator of chromosome condensation (RCC1) and BTB (POZ) domain containing protein 2 | Rcbtb2 | 290363 | 1,35 | down |
| 5820918 | 7133349 | 1209564 | regulator of chromosome condensation (RCC1) and BTB (POZ) domain containing protein 2 | Rcbtb2 | 290363 | 1,33 | down |
| 6314137 | 7133349 | 1209568 | regulator of chromosome condensation (RCC1) and BTB (POZ) domain containing protein 2 | Rcbtb2 | 290363 | 1,23 | up   |
| 6573449 | 7133349 | 1209577 | regulator of chromosome condensation (RCC1) and BTB (POZ) domain containing protein 2 | Rcbtb2 | 290363 | 1,16 | down |
| 6281947 | 7133349 | 1209575 | regulator of chromosome condensation (RCC1) and BTB (POZ) domain containing protein 2 | Rcbtb2 | 290363 | 1,11 | down |
| 6020989 | 7133349 | 1209567 | regulator of chromosome condensation (RCC1) and BTB (POZ) domain containing protein 2 | Rcbtb2 | 290363 | 1,09 | up   |
| 6693966 | 7133349 | 1209574 | regulator of chromosome condensation (RCC1) and BTB (POZ) domain containing protein 2 | Rcbtb2 | 290363 | 1,09 | down |
| 5645356 | 7133349 | 1209572 | regulator of chromosome condensation (RCC1) and BTB (POZ) domain containing protein 2 | Rcbtb2 | 290363 | 1,07 | up   |
| 6281518 | 7133349 | 1209570 | regulator of chromosome condensation (RCC1) and BTB (POZ) domain containing protein 2 | Rcbtb2 | 290363 | 1,06 | up   |
| 6005995 | 7133349 | 1209567 | regulator of chromosome condensation (RCC1) and BTB (POZ) domain containing protein 2 | Rcbtb2 | 290363 | 1,06 | down |
| 5661287 | 7133349 | 1209573 | regulator of chromosome condensation (RCC1) and BTB (POZ) domain containing protein 2 | Rcbtb2 | 290363 | 1,05 | up   |
| 5837071 | 7065860 | 1045807 | regulator of G-protein signaling 11                                                   | Rgs11  | 54291  | 1,97 | down |
| 6429896 | 7065860 | 1045806 | regulator of G-protein signaling 11                                                   | Rgs11  | 54291  | 1,02 | up   |
| 6067996 | 7127205 | 1194602 | regulator of G-protein signaling 12                                                   | Rgs12  | 54292  | 2,19 | down |
| 5734733 | 7127205 | 1194610 | regulator of G-protein signaling 12                                                   | Rgs12  | 54292  | 1,74 | down |
| 5776035 | 7127205 | 1194612 | regulator of G-protein signaling 12                                                   | Rgs12  | 54292  | 1,64 | down |
| 5679996 | 7127205 | 1194613 | regulator of G-protein signaling 12                                                   | Rgs12  | 54292  | 1,54 | down |
| 6044849 | 7127205 | 1194601 | regulator of G-protein signaling 12                                                   | Rgs12  | 54292  | 1,52 | up   |
| 6199622 | 7127205 | 1194611 | regulator of G-protein signaling 12                                                   | Rgs12  | 54292  | 1,37 | up   |
| 6391650 | 7127205 | 1194605 | regulator of G-protein signaling 12                                                   | Rgs12  | 54292  | 1,34 | down |
| 6229534 | 7127205 | 1194614 | regulator of G-protein signaling 12                                                   | Rgs12  | 54292  | 1,31 | up   |
| 6712200 | 7127205 | 1194606 | regulator of G-protein signaling 12                                                   | Rgs12  | 54292  | 1,23 | up   |
| 6412479 | 7127205 | 1194613 | regulator of G-protein signaling 12                                                   | Rgs12  | 54292  | 1,22 | up   |
| 5794033 | 7127205 | 1194604 | regulator of G-protein signaling 12                                                   | Rgs12  | 54292  | 1,19 | down |
| 6646141 | 7127205 | 1194608 | regulator of G-protein signaling 12                                                   | Rgs12  | 54292  | 1,19 | up   |
| 6715592 | 7127205 | 1194609 | regulator of G-protein signaling 12                                                   | Rgs12  | 54292  | 1,19 | down |
| 6573866 | 7127205 | 1194598 | regulator of G-protein signaling 12                                                   | Rgs12  | 54292  | 1,19 | up   |
| 5797920 | 7127205 | 1194600 | regulator of G-protein signaling 12                                                   | Rgs12  | 54292  | 1,18 | up   |
| 6452987 | 7127205 | 1194598 | regulator of G-protein signaling 12                                                   | Rgs12  | 54292  | 1,17 | down |
| 6197370 | 7127205 | 1194598 | regulator of G-protein signaling 12                                                   | Rgs12  | 54292  | 1,13 | down |
| 6370028 | 7127205 | 1194597 | regulator of G-protein signaling 12                                                   | Rgs12  | 54292  | 1,11 | up   |
| 5915512 | 7127205 | 1194611 | regulator of G-protein signaling 12                                                   | Rgs12  | 54292  | 1,09 | up   |
| 5669004 | 7127205 | 1194604 | regulator of G-protein signaling 12                                                   | Rgs12  | 54292  | 1,06 | down |
| 6427090 | 7127205 | 1194613 | regulator of G-protein signaling 12                                                   | Rgs12  | 54292  | 1,05 | down |
| 6022481 | 7127205 | 1194603 | regulator of G-protein signaling 12                                                   | Rgs12  | 54292  | 1,02 | up   |
| 5989191 | 7127205 | 1194599 | regulator of G-protein signaling 12                                                   | Rgs12  | 54292  | 1,01 | down |
| 6204479 | 7127205 | 1194607 | regulator of G-protein signaling 12                                                   | Rgs12  | 54292  | 1,00 | up   |
| 5669604 | 7106414 | 1143197 | regulator of G-protein signaling 16                                                   | Rgs16  | 360857 | 1,37 | down |
| 6506011 | 7106414 | 1143196 | regulator of G-protein signaling 16                                                   | Rgs16  | 360857 | 1,26 | down |
| 5920927 | 7106414 | 1143194 | regulator of G-protein signaling 16                                                   | Rgs16  | 360857 | 1,06 | down |
| 5826834 | 7106414 | 1143195 | regulator of G-protein signaling 16                                                   | Rgs16  | 360857 | 1,01 | up   |

|         |         |         |                                                             |       |        |      |      |
|---------|---------|---------|-------------------------------------------------------------|-------|--------|------|------|
| 6356367 | 7249028 | 1495098 | regulator of G-protein signaling 19                         | Rgs19 | 59293  | 3,21 | down |
| 6538008 | 7249028 | 1495097 | regulator of G-protein signaling 19                         | Rgs19 | 59293  | 1,46 | down |
| 5712511 | 7249028 | 1495099 | regulator of G-protein signaling 19                         | Rgs19 | 59293  | 1,46 | down |
| 5935110 | 7249028 | 1495100 | regulator of G-protein signaling 19                         | Rgs19 | 59293  | 1,43 | up   |
| 5731720 | 7249028 | 1495094 | regulator of G-protein signaling 19                         | Rgs19 | 59293  | 1,42 | up   |
| 6201256 | 7249028 | 1495099 | regulator of G-protein signaling 19                         | Rgs19 | 59293  | 1,21 | down |
| 6427277 | 7249028 | 1495096 | regulator of G-protein signaling 19                         | Rgs19 | 59293  | 1,16 | down |
| 5923984 | 7249028 | 1495095 | regulator of G-protein signaling 19                         | Rgs19 | 59293  | 1,01 | down |
| 6362765 | 7275761 | 1561888 | regulator of G-protein signaling 3                          | Rgs3  | 54293  | 2,86 | up   |
| 6447194 | 7275761 | 1561881 | regulator of G-protein signaling 3                          | Rgs3  | 54293  | 2,03 | down |
| 6191443 | 7275761 | 1561888 | regulator of G-protein signaling 3                          | Rgs3  | 54293  | 2,02 | up   |
| 6105035 | 7275761 | 1561891 | regulator of G-protein signaling 3                          | Rgs3  | 54293  | 1,95 | down |
| 5683944 | 7275761 | 1561893 | regulator of G-protein signaling 3                          | Rgs3  | 54293  | 1,90 | down |
| 6289427 | 7275761 | 1561875 | regulator of G-protein signaling 3                          | Rgs3  | 54293  | 1,90 | up   |
| 6057119 | 7275761 | 1561888 | regulator of G-protein signaling 3                          | Rgs3  | 54293  | 1,72 | up   |
| 6291474 | 7275761 | 1561886 | regulator of G-protein signaling 3                          | Rgs3  | 54293  | 1,71 | up   |
| 6522651 | 7275761 | 1561879 | regulator of G-protein signaling 3                          | Rgs3  | 54293  | 1,70 | down |
| 5849142 | 7275761 | 1561887 | regulator of G-protein signaling 3                          | Rgs3  | 54293  | 1,69 | up   |
| 6379795 | 7275761 | 1561884 | regulator of G-protein signaling 3                          | Rgs3  | 54293  | 1,60 | down |
| 6729281 | 7275761 | 1561888 | regulator of G-protein signaling 3                          | Rgs3  | 54293  | 1,56 | up   |
| 6188673 | 7275761 | 1561877 | regulator of G-protein signaling 3                          | Rgs3  | 54293  | 1,50 | down |
| 6203049 | 7275761 | 1561888 | regulator of G-protein signaling 3                          | Rgs3  | 54293  | 1,49 | up   |
| 6419024 | 7275761 | 1561890 | regulator of G-protein signaling 3                          | Rgs3  | 54293  | 1,44 | up   |
| 6520275 | 7275761 | 1561889 | regulator of G-protein signaling 3                          | Rgs3  | 54293  | 1,31 | up   |
| 6276111 | 7275761 | 1561888 | regulator of G-protein signaling 3                          | Rgs3  | 54293  | 1,30 | up   |
| 6328354 | 7275761 | 1561892 | regulator of G-protein signaling 3                          | Rgs3  | 54293  | 1,29 | down |
| 6591916 | 7275761 | 1561875 | regulator of G-protein signaling 3                          | Rgs3  | 54293  | 1,26 | down |
| 5703597 | 7275761 | 1561888 | regulator of G-protein signaling 3                          | Rgs3  | 54293  | 1,23 | up   |
| 6013919 | 7275761 | 1561886 | regulator of G-protein signaling 3                          | Rgs3  | 54293  | 1,21 | up   |
| 5731877 | 7275761 | 1561894 | regulator of G-protein signaling 3                          | Rgs3  | 54293  | 1,15 | down |
| 6170589 | 7275761 | 1561878 | regulator of G-protein signaling 3                          | Rgs3  | 54293  | 1,13 | down |
| 6708403 | 7275761 | 1561876 | regulator of G-protein signaling 3                          | Rgs3  | 54293  | 1,13 | down |
| 6282025 | 7275761 | 1561884 | regulator of G-protein signaling 3                          | Rgs3  | 54293  | 1,12 | up   |
| 6101203 | 7275761 | 1561880 | regulator of G-protein signaling 3                          | Rgs3  | 54293  | 1,09 | down |
| 6041174 | 7275761 | 1561882 | regulator of G-protein signaling 3                          | Rgs3  | 54293  | 1,08 | down |
| 6102795 | 7275761 | 1561888 | regulator of G-protein signaling 3                          | Rgs3  | 54293  | 1,05 | down |
| 6235942 | 7275761 | 1561888 | regulator of G-protein signaling 3                          | Rgs3  | 54293  | 1,04 | up   |
| 6455098 | 7275761 | 1561883 | regulator of G-protein signaling 3                          | Rgs3  | 54293  | 1,00 | up   |
| 6093703 | 7184151 | 1335956 | regulatory factor X, 1 (influences HLA class II expression) | Rfx1  | 288906 | 2,13 | up   |
| 5728008 | 7184151 | 1335969 | regulatory factor X, 1 (influences HLA class II expression) | Rfx1  | 288906 | 1,82 | down |
| 5928007 | 7184151 | 1335954 | regulatory factor X, 1 (influences HLA class II expression) | Rfx1  | 288906 | 1,72 | down |
| 5996848 | 7184151 | 1335958 | regulatory factor X, 1 (influences HLA class II expression) | Rfx1  | 288906 | 1,59 | up   |
| 6566308 | 7184151 | 1335950 | regulatory factor X, 1 (influences HLA class II expression) | Rfx1  | 288906 | 1,52 | up   |
| 6331968 | 7184151 | 1335959 | regulatory factor X, 1 (influences HLA class II expression) | Rfx1  | 288906 | 1,44 | down |
| 6407775 | 7184151 | 1335947 | regulatory factor X, 1 (influences HLA class II expression) | Rfx1  | 288906 | 1,38 | up   |
| 5986170 | 7184151 | 1335976 | regulatory factor X, 1 (influences HLA class II expression) | Rfx1  | 288906 | 1,36 | down |
| 5979700 | 7184151 | 1335947 | regulatory factor X, 1 (influences HLA class II expression) | Rfx1  | 288906 | 1,35 | up   |
| 5681945 | 7184151 | 1335970 | regulatory factor X, 1 (influences HLA class II expression) | Rfx1  | 288906 | 1,29 | down |
| 6578347 | 7184151 | 1335947 | regulatory factor X, 1 (influences HLA class II expression) | Rfx1  | 288906 | 1,26 | down |
| 6331875 | 7184151 | 1335948 | regulatory factor X, 1 (influences HLA class II expression) | Rfx1  | 288906 | 1,21 | up   |
| 6075685 | 7184151 | 1335949 | regulatory factor X, 1 (influences HLA class II expression) | Rfx1  | 288906 | 1,20 | up   |
| 5650103 | 7184151 | 1335947 | regulatory factor X, 1 (influences HLA class II expression) | Rfx1  | 288906 | 1,18 | up   |
| 5690373 | 7184151 | 1335965 | regulatory factor X, 1 (influences HLA class II expression) | Rfx1  | 288906 | 1,18 | up   |
| 6312574 | 7184151 | 1335981 | regulatory factor X, 1 (influences HLA class II expression) | Rfx1  | 288906 | 1,17 | up   |
| 6367488 | 7184151 | 1335976 | regulatory factor X, 1 (influences HLA class II expression) | Rfx1  | 288906 | 1,16 | down |
| 6193637 | 7184151 | 1335963 | regulatory factor X, 1 (influences HLA class II expression) | Rfx1  | 288906 | 1,16 | down |
| 6432542 | 7184151 | 1335957 | regulatory factor X, 1 (influences HLA class II expression) | Rfx1  | 288906 | 1,15 | up   |

|         |         |         |                                                                   |         |        |      |      |
|---------|---------|---------|-------------------------------------------------------------------|---------|--------|------|------|
| 5735275 | 7184151 | 1335961 | regulatory factor X, 1 (influences HLA class II expression)       | Rfx1    | 288906 | 1,15 | up   |
| 6059234 | 7184151 | 1335961 | regulatory factor X, 1 (influences HLA class II expression)       | Rfx1    | 288906 | 1,13 | up   |
| 6473937 | 7184151 | 1335968 | regulatory factor X, 1 (influences HLA class II expression)       | Rfx1    | 288906 | 1,13 | down |
| 6459683 | 7184151 | 1335971 | regulatory factor X, 1 (influences HLA class II expression)       | Rfx1    | 288906 | 1,12 | down |
| 6356428 | 7184151 | 1335962 | regulatory factor X, 1 (influences HLA class II expression)       | Rfx1    | 288906 | 1,10 | up   |
| 5989522 | 7184151 | 1335968 | regulatory factor X, 1 (influences HLA class II expression)       | Rfx1    | 288906 | 1,08 | down |
| 6562341 | 7184151 | 1335955 | regulatory factor X, 1 (influences HLA class II expression)       | Rfx1    | 288906 | 1,04 | up   |
| 5679545 | 7184151 | 1335955 | regulatory factor X, 1 (influences HLA class II expression)       | Rfx1    | 288906 | 1,03 | down |
| 6697873 | 7184151 | 1335951 | regulatory factor X, 1 (influences HLA class II expression)       | Rfx1    | 288906 | 1,01 | up   |
| 5779552 | 7056205 | 1023169 | related RAS viral (r-ras) oncogene homolog 2                      | Rras2   | 365355 | 2,67 | down |
| 6273015 | 7056205 | 1023172 | related RAS viral (r-ras) oncogene homolog 2                      | Rras2   | 365355 | 2,53 | down |
| 5954222 | 7056205 | 1023172 | related RAS viral (r-ras) oncogene homolog 2                      | Rras2   | 365355 | 2,22 | down |
| 6391473 | 7056205 | 1023171 | related RAS viral (r-ras) oncogene homolog 2                      | Rras2   | 365355 | 1,37 | up   |
| 6631053 | 7056205 | 1023167 | related RAS viral (r-ras) oncogene homolog 2                      | Rras2   | 365355 | 1,36 | up   |
| 6163945 | 7056205 | 1023168 | related RAS viral (r-ras) oncogene homolog 2                      | Rras2   | 365355 | 1,33 | up   |
| 5977250 | 7056205 | 1023166 | related RAS viral (r-ras) oncogene homolog 2                      | Rras2   | 365355 | 1,09 | up   |
| 6619929 | 7056205 | 1023170 | related RAS viral (r-ras) oncogene homolog 2                      | Rras2   | 365355 | 1,08 | up   |
| 5878803 | 7034356 | 972176  | remodeling and spacing factor 1                                   | Rsf1    | 308839 | 1,16 | up   |
| 6699119 | 7034356 | 972176  | remodeling and spacing factor 1                                   | Rsf1    | 308839 | 1,10 | down |
| 6545938 | 7384985 | 1831796 | renin binding protein                                             | Renbp   | 81759  | 2,16 | down |
| 5954295 | 7384985 | 1831799 | renin binding protein                                             | Renbp   | 81759  | 2,06 | down |
| 6482631 | 7384985 | 1831796 | renin binding protein                                             | Renbp   | 81759  | 1,97 | down |
| 5796123 | 7384985 | 1831803 | renin binding protein                                             | Renbp   | 81759  | 1,78 | up   |
| 6249976 | 7384985 | 1831797 | renin binding protein                                             | Renbp   | 81759  | 1,77 | up   |
| 6164097 | 7384985 | 1831802 | renin binding protein                                             | Renbp   | 81759  | 1,62 | up   |
| 5997295 | 7384985 | 1831805 | renin binding protein                                             | Renbp   | 81759  | 1,49 | up   |
| 6078741 | 7384985 | 1831797 | renin binding protein                                             | Renbp   | 81759  | 1,49 | down |
| 5958006 | 7384985 | 1831804 | renin binding protein                                             | Renbp   | 81759  | 1,26 | down |
| 6208225 | 7384985 | 1831802 | renin binding protein                                             | Renbp   | 81759  | 1,24 | down |
| 6348878 | 7384985 | 1831798 | renin binding protein                                             | Renbp   | 81759  | 1,23 | down |
| 6466173 | 7384985 | 1831800 | renin binding protein                                             | Renbp   | 81759  | 1,10 | up   |
| 6566633 | 7384985 | 1831801 | renin binding protein                                             | Renbp   | 81759  | 1,03 | down |
| 6280955 | 7384985 | 1831804 | renin binding protein                                             | Renbp   | 81759  | 1,01 | up   |
| 6182053 | 7055687 | 1022021 | resistance to inhibitors of cholinesterase 3 homolog (C. elegans) | Ric3    | 687147 | 1,33 | down |
| 6210071 | 7055687 | 1022019 | resistance to inhibitors of cholinesterase 3 homolog (C. elegans) | Ric3    | 687147 | 1,21 | up   |
| 6232355 | 7055687 | 1022016 | resistance to inhibitors of cholinesterase 3 homolog (C. elegans) | Ric3    | 687147 | 1,14 | up   |
| 6711118 | 7055687 | 1022017 | resistance to inhibitors of cholinesterase 3 homolog (C. elegans) | Ric3    | 687147 | 1,13 | down |
| 5637176 | 7055687 | 1022019 | resistance to inhibitors of cholinesterase 3 homolog (C. elegans) | Ric3    | 687147 | 1,09 | down |
| 6062485 | 7055687 | 1022018 | resistance to inhibitors of cholinesterase 3 homolog (C. elegans) | Ric3    | 687147 | 1,03 | down |
| 6231657 | 7039366 | 984069  | REST corepressor 2                                                | Rcor2   | 305811 | 2,12 | down |
| 6634493 | 7039366 | 984060  | REST corepressor 2                                                | Rcor2   | 305811 | 1,77 | up   |
| 6568288 | 7039366 | 984059  | REST corepressor 2                                                | Rcor2   | 305811 | 1,66 | down |
| 6008305 | 7039366 | 984068  | REST corepressor 2                                                | Rcor2   | 305811 | 1,58 | down |
| 6316049 | 7039366 | 984067  | REST corepressor 2                                                | Rcor2   | 305811 | 1,45 | down |
| 6064051 | 7039366 | 984065  | REST corepressor 2                                                | Rcor2   | 305811 | 1,38 | up   |
| 6706913 | 7039366 | 984069  | REST corepressor 2                                                | Rcor2   | 305811 | 1,27 | down |
| 6395958 | 7039366 | 984069  | REST corepressor 2                                                | Rcor2   | 305811 | 1,24 | up   |
| 6313535 | 7039366 | 984066  | REST corepressor 2                                                | Rcor2   | 305811 | 1,21 | down |
| 5944315 | 7039366 | 984062  | REST corepressor 2                                                | Rcor2   | 305811 | 1,10 | up   |
| 5947604 | 7039366 | 984064  | REST corepressor 2                                                | Rcor2   | 305811 | 1,10 | up   |
| 5706883 | 7039366 | 984069  | REST corepressor 2                                                | Rcor2   | 305811 | 1,05 | up   |
| 6285688 | 7039366 | 984058  | REST corepressor 2                                                | Rcor2   | 305811 | 1,05 | up   |
| 5877375 | 7039366 | 984061  | REST corepressor 2                                                | Rcor2   | 305811 | 1,02 | up   |
| 5819497 | 7039366 | 984063  | REST corepressor 2                                                | Rcor2   | 305811 | 1,01 | down |
| 5690770 | 7039366 | 984069  | REST corepressor 2                                                | Rcor2   | 305811 | 1,00 | down |
| 5906561 | 7219885 | 1422784 | reticulin 4 interacting protein 1                                 | Rtn4ip1 | 309912 | 2,11 | up   |
| 5645819 | 7219885 | 1422778 | reticulin 4 interacting protein 1                                 | Rtn4ip1 | 309912 | 1,58 | up   |

|         |         |         |                                                             |         |        |      |      |
|---------|---------|---------|-------------------------------------------------------------|---------|--------|------|------|
| 5640311 | 7219885 | 1422782 | reticulon 4 interacting protein 1                           | Rtn4ip1 | 309912 | 1,27 | down |
| 6346043 | 7219885 | 1422774 | reticulon 4 interacting protein 1                           | Rtn4ip1 | 309912 | 1,21 | down |
| 6004497 | 7219885 | 1422784 | reticulon 4 interacting protein 1                           | Rtn4ip1 | 309912 | 1,21 | up   |
| 6693674 | 7219885 | 1422774 | reticulon 4 interacting protein 1                           | Rtn4ip1 | 309912 | 1,20 | down |
| 6520447 | 7219885 | 1422777 | reticulon 4 interacting protein 1                           | Rtn4ip1 | 309912 | 1,20 | up   |
| 6593200 | 7219885 | 1422774 | reticulon 4 interacting protein 1                           | Rtn4ip1 | 309912 | 1,12 | down |
| 6624909 | 7219885 | 1422781 | reticulon 4 interacting protein 1                           | Rtn4ip1 | 309912 | 1,10 | up   |
| 6511817 | 7219885 | 1422790 | reticulon 4 interacting protein 1                           | Rtn4ip1 | 309912 | 1,08 | up   |
| 6519956 | 7219885 | 1422775 | reticulon 4 interacting protein 1                           | Rtn4ip1 | 309912 | 1,05 | up   |
| 6435382 | 7219885 | 1422790 | reticulon 4 interacting protein 1                           | Rtn4ip1 | 309912 | 1,03 | up   |
| 6230076 | 7219885 | 1422776 | reticulon 4 interacting protein 1                           | Rtn4ip1 | 309912 | 1,01 | up   |
| 6199101 | 7131372 | 1205046 | retinitis pigmentosa GTPase regulator interacting protein 1 | Rpgrip1 | 305850 | 2,19 | up   |
| 6581751 | 7131372 | 1205054 | retinitis pigmentosa GTPase regulator interacting protein 1 | Rpgrip1 | 305850 | 1,96 | up   |
| 5756864 | 7131372 | 1205019 | retinitis pigmentosa GTPase regulator interacting protein 1 | Rpgrip1 | 305850 | 1,66 | up   |
| 5781000 | 7131372 | 1205048 | retinitis pigmentosa GTPase regulator interacting protein 1 | Rpgrip1 | 305850 | 1,65 | up   |
| 5724208 | 7131372 | 1205054 | retinitis pigmentosa GTPase regulator interacting protein 1 | Rpgrip1 | 305850 | 1,42 | up   |
| 6742162 | 7131372 | 1205024 | retinitis pigmentosa GTPase regulator interacting protein 1 | Rpgrip1 | 305850 | 1,32 | up   |
| 6376370 | 7131372 | 1205053 | retinitis pigmentosa GTPase regulator interacting protein 1 | Rpgrip1 | 305850 | 1,27 | up   |
| 5778576 | 7131372 | 1205033 | retinitis pigmentosa GTPase regulator interacting protein 1 | Rpgrip1 | 305850 | 1,24 | down |
| 6172349 | 7131372 | 1205054 | retinitis pigmentosa GTPase regulator interacting protein 1 | Rpgrip1 | 305850 | 1,22 | down |
| 6046642 | 7131372 | 1205054 | retinitis pigmentosa GTPase regulator interacting protein 1 | Rpgrip1 | 305850 | 1,18 | up   |
| 6581032 | 7131372 | 1205042 | retinitis pigmentosa GTPase regulator interacting protein 1 | Rpgrip1 | 305850 | 1,18 | down |
| 6434310 | 7131372 | 1205045 | retinitis pigmentosa GTPase regulator interacting protein 1 | Rpgrip1 | 305850 | 1,17 | up   |
| 5701210 | 7131372 | 1205047 | retinitis pigmentosa GTPase regulator interacting protein 1 | Rpgrip1 | 305850 | 1,17 | up   |
| 6714250 | 7131372 | 1205050 | retinitis pigmentosa GTPase regulator interacting protein 1 | Rpgrip1 | 305850 | 1,16 | up   |
| 6361479 | 7131372 | 1205036 | retinitis pigmentosa GTPase regulator interacting protein 1 | Rpgrip1 | 305850 | 1,14 | down |
| 6530384 | 7131372 | 1205037 | retinitis pigmentosa GTPase regulator interacting protein 1 | Rpgrip1 | 305850 | 1,13 | down |
| 6031552 | 7131372 | 1205020 | retinitis pigmentosa GTPase regulator interacting protein 1 | Rpgrip1 | 305850 | 1,12 | up   |
| 6605555 | 7131372 | 1205052 | retinitis pigmentosa GTPase regulator interacting protein 1 | Rpgrip1 | 305850 | 1,11 | up   |
| 6130961 | 7131372 | 1205023 | retinitis pigmentosa GTPase regulator interacting protein 1 | Rpgrip1 | 305850 | 1,11 | up   |
| 6052262 | 7131372 | 1205034 | retinitis pigmentosa GTPase regulator interacting protein 1 | Rpgrip1 | 305850 | 1,10 | down |
| 6213756 | 7131372 | 1205030 | retinitis pigmentosa GTPase regulator interacting protein 1 | Rpgrip1 | 305850 | 1,10 | up   |
| 6198318 | 7131372 | 1205022 | retinitis pigmentosa GTPase regulator interacting protein 1 | Rpgrip1 | 305850 | 1,09 | down |
| 6018861 | 7131372 | 1205054 | retinitis pigmentosa GTPase regulator interacting protein 1 | Rpgrip1 | 305850 | 1,08 | up   |
| 6191865 | 7131372 | 1205051 | retinitis pigmentosa GTPase regulator interacting protein 1 | Rpgrip1 | 305850 | 1,07 | down |
| 6484761 | 7131372 | 1205037 | retinitis pigmentosa GTPase regulator interacting protein 1 | Rpgrip1 | 305850 | 1,05 | up   |
| 5770143 | 7131372 | 1205047 | retinitis pigmentosa GTPase regulator interacting protein 1 | Rpgrip1 | 305850 | 1,04 | down |
| 5807909 | 7131372 | 1205045 | retinitis pigmentosa GTPase regulator interacting protein 1 | Rpgrip1 | 305850 | 1,03 | up   |
| 6181985 | 7131372 | 1205043 | retinitis pigmentosa GTPase regulator interacting protein 1 | Rpgrip1 | 305850 | 1,02 | down |
| 6313830 | 7131372 | 1205018 | retinitis pigmentosa GTPase regulator interacting protein 1 | Rpgrip1 | 305850 | 1,02 | up   |
| 6102146 | 7131372 | 1205041 | retinitis pigmentosa GTPase regulator interacting protein 1 | Rpgrip1 | 305850 | 1,02 | up   |
| 6684367 | 7131372 | 1205032 | retinitis pigmentosa GTPase regulator interacting protein 1 | Rpgrip1 | 305850 | 1,01 | down |
| 6585818 | 7131372 | 1205031 | retinitis pigmentosa GTPase regulator interacting protein 1 | Rpgrip1 | 305850 | 1,00 | down |
| 5789222 | 7167872 | 1294038 | retinoblastoma binding protein 8                            | Rbbp8   | 291787 | 2,39 | down |
| 6049184 | 7167872 | 1294039 | retinoblastoma binding protein 8                            | Rbbp8   | 291787 | 2,19 | down |
| 5658815 | 7167872 | 1294034 | retinoblastoma binding protein 8                            | Rbbp8   | 291787 | 1,74 | down |
| 6539778 | 7167872 | 1294022 | retinoblastoma binding protein 8                            | Rbbp8   | 291787 | 1,73 | up   |
| 6620406 | 7167872 | 1294025 | retinoblastoma binding protein 8                            | Rbbp8   | 291787 | 1,37 | up   |
| 6676006 | 7167872 | 1294035 | retinoblastoma binding protein 8                            | Rbbp8   | 291787 | 1,35 | up   |
| 6578714 | 7167872 | 1294019 | retinoblastoma binding protein 8                            | Rbbp8   | 291787 | 1,35 | up   |
| 5949364 | 7167872 | 1294032 | retinoblastoma binding protein 8                            | Rbbp8   | 291787 | 1,33 | up   |
| 5691538 | 7167872 | 1294028 | retinoblastoma binding protein 8                            | Rbbp8   | 291787 | 1,29 | down |
| 6674045 | 7167872 | 1294023 | retinoblastoma binding protein 8                            | Rbbp8   | 291787 | 1,27 | down |
| 6566550 | 7167872 | 1294021 | retinoblastoma binding protein 8                            | Rbbp8   | 291787 | 1,26 | down |
| 5682416 | 7167872 | 1294030 | retinoblastoma binding protein 8                            | Rbbp8   | 291787 | 1,25 | down |
| 5850120 | 7167872 | 1294026 | retinoblastoma binding protein 8                            | Rbbp8   | 291787 | 1,17 | up   |
| 6123685 | 7167872 | 1294031 | retinoblastoma binding protein 8                            | Rbbp8   | 291787 | 1,15 | up   |

|         |         |         |                                  |       |        |      |      |
|---------|---------|---------|----------------------------------|-------|--------|------|------|
| 5672854 | 7167872 | 1294024 | retinoblastoma binding protein 8 | Rbbp8 | 291787 | 1,15 | up   |
| 6385556 | 7167872 | 1294020 | retinoblastoma binding protein 8 | Rbbp8 | 291787 | 1,13 | down |
| 5659916 | 7167872 | 1294029 | retinoblastoma binding protein 8 | Rbbp8 | 291787 | 1,06 | up   |
| 6355509 | 7167872 | 1294033 | retinoblastoma binding protein 8 | Rbbp8 | 291787 | 1,06 | up   |
| 5920424 | 7167872 | 1294029 | retinoblastoma binding protein 8 | Rbbp8 | 291787 | 1,02 | down |
| 6251013 | 7183304 | 1334000 | retinoblastoma-like 2            | Rbl2  | 81758  | 2,25 | up   |
| 6336409 | 7183304 | 1333999 | retinoblastoma-like 2            | Rbl2  | 81758  | 2,01 | up   |
| 5847840 | 7183304 | 1334013 | retinoblastoma-like 2            | Rbl2  | 81758  | 1,78 | up   |
| 6101806 | 7183304 | 1334011 | retinoblastoma-like 2            | Rbl2  | 81758  | 1,74 | up   |
| 6295897 | 7183304 | 1334018 | retinoblastoma-like 2            | Rbl2  | 81758  | 1,70 | up   |
| 6390309 | 7183304 | 1334021 | retinoblastoma-like 2            | Rbl2  | 81758  | 1,60 | up   |
| 6240106 | 7183304 | 1334015 | retinoblastoma-like 2            | Rbl2  | 81758  | 1,59 | up   |
| 6678380 | 7183304 | 1334010 | retinoblastoma-like 2            | Rbl2  | 81758  | 1,55 | up   |
| 5844375 | 7183304 | 1334012 | retinoblastoma-like 2            | Rbl2  | 81758  | 1,47 | down |
| 6711880 | 7183304 | 1334020 | retinoblastoma-like 2            | Rbl2  | 81758  | 1,47 | up   |
| 6510323 | 7183304 | 1334021 | retinoblastoma-like 2            | Rbl2  | 81758  | 1,29 | up   |
| 6511735 | 7183304 | 1334005 | retinoblastoma-like 2            | Rbl2  | 81758  | 1,26 | down |
| 6513227 | 7183304 | 1334012 | retinoblastoma-like 2            | Rbl2  | 81758  | 1,24 | down |
| 6746053 | 7183304 | 1334002 | retinoblastoma-like 2            | Rbl2  | 81758  | 1,24 | down |
| 6097597 | 7183304 | 1334006 | retinoblastoma-like 2            | Rbl2  | 81758  | 1,22 | down |
| 6012824 | 7183304 | 1334009 | retinoblastoma-like 2            | Rbl2  | 81758  | 1,20 | down |
| 6604438 | 7183304 | 1333998 | retinoblastoma-like 2            | Rbl2  | 81758  | 1,19 | up   |
| 6089860 | 7183304 | 1334001 | retinoblastoma-like 2            | Rbl2  | 81758  | 1,19 | down |
| 6556675 | 7183304 | 1334019 | retinoblastoma-like 2            | Rbl2  | 81758  | 1,16 | up   |
| 6587455 | 7183304 | 1334001 | retinoblastoma-like 2            | Rbl2  | 81758  | 1,14 | up   |
| 6360304 | 7183304 | 1334011 | retinoblastoma-like 2            | Rbl2  | 81758  | 1,13 | down |
| 6664234 | 7183304 | 1334014 | retinoblastoma-like 2            | Rbl2  | 81758  | 1,13 | up   |
| 6128321 | 7183304 | 1334016 | retinoblastoma-like 2            | Rbl2  | 81758  | 1,13 | down |
| 6428957 | 7183304 | 1334008 | retinoblastoma-like 2            | Rbl2  | 81758  | 1,11 | down |
| 6733164 | 7183304 | 1334007 | retinoblastoma-like 2            | Rbl2  | 81758  | 1,08 | down |
| 6357103 | 7183304 | 1334017 | retinoblastoma-like 2            | Rbl2  | 81758  | 1,05 | up   |
| 6358695 | 7183304 | 1334003 | retinoblastoma-like 2            | Rbl2  | 81758  | 1,03 | up   |
| 6067456 | 7183304 | 1334004 | retinoblastoma-like 2            | Rbl2  | 81758  | 1,02 | up   |
| 6245833 | 7205006 | 1387358 | retinoic acid induced 14         | Rai14 | 294804 | 2,19 | up   |
| 5684512 | 7205006 | 1387352 | retinoic acid induced 14         | Rai14 | 294804 | 2,12 | down |
| 6341818 | 7205006 | 1387348 | retinoic acid induced 14         | Rai14 | 294804 | 1,65 | down |
| 6030427 | 7205006 | 1387355 | retinoic acid induced 14         | Rai14 | 294804 | 1,57 | up   |
| 6519477 | 7205006 | 1387357 | retinoic acid induced 14         | Rai14 | 294804 | 1,55 | up   |
| 6122471 | 7205006 | 1387351 | retinoic acid induced 14         | Rai14 | 294804 | 1,52 | up   |
| 6427621 | 7205006 | 1387360 | retinoic acid induced 14         | Rai14 | 294804 | 1,51 | down |
| 5668713 | 7205006 | 1387347 | retinoic acid induced 14         | Rai14 | 294804 | 1,48 | down |
| 6679124 | 7205006 | 1387353 | retinoic acid induced 14         | Rai14 | 294804 | 1,40 | up   |
| 5704026 | 7205006 | 1387354 | retinoic acid induced 14         | Rai14 | 294804 | 1,33 | up   |
| 6059889 | 7205006 | 1387344 | retinoic acid induced 14         | Rai14 | 294804 | 1,19 | up   |
| 6289763 | 7205006 | 1387356 | retinoic acid induced 14         | Rai14 | 294804 | 1,16 | up   |
| 6060351 | 7205006 | 1387346 | retinoic acid induced 14         | Rai14 | 294804 | 1,07 | down |
| 5811570 | 7205006 | 1387350 | retinoic acid induced 14         | Rai14 | 294804 | 1,04 | down |
| 6401517 | 7205006 | 1387349 | retinoic acid induced 14         | Rai14 | 294804 | 1,02 | up   |
| 6074275 | 7205006 | 1387359 | retinoic acid induced 14         | Rai14 | 294804 | 1,02 | down |
| 6439942 | 7205006 | 1387361 | retinoic acid induced 14         | Rai14 | 294804 | 1,02 | up   |
| 6537493 | 7205006 | 1387360 | retinoic acid induced 14         | Rai14 | 294804 | 1,01 | down |
| 6139932 | 7205006 | 1387345 | retinoic acid induced 14         | Rai14 | 294804 | 1,01 | up   |
| 6690634 | 7332128 | 1700852 | retinoic acid receptor, gamma    | Rarg  | 685072 | 2,44 | up   |
| 6000322 | 7332128 | 1700851 | retinoic acid receptor, gamma    | Rarg  | 685072 | 1,79 | down |
| 6198339 | 7332128 | 1700844 | retinoic acid receptor, gamma    | Rarg  | 685072 | 1,59 | down |
| 5845057 | 7332128 | 1700852 | retinoic acid receptor, gamma    | Rarg  | 685072 | 1,47 | up   |
| 6355944 | 7332128 | 1700845 | retinoic acid receptor, gamma    | Rarg  | 685072 | 1,36 | down |

|         |         |         |                                                             |       |        |      |      |
|---------|---------|---------|-------------------------------------------------------------|-------|--------|------|------|
| 6529423 | 7332128 | 1700842 | retinoic acid receptor, gamma                               | Rarg  | 685072 | 1,35 | up   |
| 6290148 | 7332128 | 1700855 | retinoic acid receptor, gamma                               | Rarg  | 685072 | 1,35 | up   |
| 5935057 | 7332128 | 1700847 | retinoic acid receptor, gamma                               | Rarg  | 685072 | 1,22 | up   |
| 5804866 | 7332128 | 1700845 | retinoic acid receptor, gamma                               | Rarg  | 685072 | 1,22 | up   |
| 6388430 | 7332128 | 1700842 | retinoic acid receptor, gamma                               | Rarg  | 685072 | 1,21 | up   |
| 6323174 | 7332128 | 1700852 | retinoic acid receptor, gamma                               | Rarg  | 685072 | 1,21 | down |
| 6582615 | 7332128 | 1700843 | retinoic acid receptor, gamma                               | Rarg  | 685072 | 1,11 | down |
| 5695251 | 7332128 | 1700848 | retinoic acid receptor, gamma                               | Rarg  | 685072 | 1,10 | up   |
| 6356947 | 7332128 | 1700845 | retinoic acid receptor, gamma                               | Rarg  | 685072 | 1,09 | up   |
| 6526387 | 7332128 | 1700842 | retinoic acid receptor, gamma                               | Rarg  | 685072 | 1,08 | down |
| 6180666 | 7332128 | 1700854 | retinoic acid receptor, gamma                               | Rarg  | 685072 | 1,05 | up   |
| 5744734 | 7332128 | 1700852 | retinoic acid receptor, gamma                               | Rarg  | 685072 | 1,04 | down |
| 5834623 | 7332128 | 1700846 | retinoic acid receptor, gamma                               | Rarg  | 685072 | 1,04 | up   |
| 6477790 | 7332128 | 1700855 | retinoic acid receptor, gamma                               | Rarg  | 685072 | 1,03 | down |
| 6158828 | 7315935 | 1661991 | retinol dehydrogenase 2                                     | Rdh2  | 299511 | 2,23 | up   |
| 6118065 | 7315935 | 1661996 | retinol dehydrogenase 2                                     | Rdh2  | 299511 | 1,71 | up   |
| 6002769 | 7315935 | 1661991 | retinol dehydrogenase 2                                     | Rdh2  | 299511 | 1,63 | up   |
| 6229072 | 7315935 | 1661991 | retinol dehydrogenase 2                                     | Rdh2  | 299511 | 1,52 | down |
| 5785457 | 7315935 | 1661993 | retinol dehydrogenase 2                                     | Rdh2  | 299511 | 1,32 | down |
| 5700339 | 7315935 | 1661995 | retinol dehydrogenase 2                                     | Rdh2  | 299511 | 1,20 | down |
| 6586059 | 7315935 | 1661994 | retinol dehydrogenase 2                                     | Rdh2  | 299511 | 1,15 | up   |
| 6671973 | 7315935 | 1661991 | retinol dehydrogenase 2                                     | Rdh2  | 299511 | 1,03 | down |
| 5697540 | 7326322 | 1686612 | retinol dehydrogenase 7                                     | Rdh7  | 360420 | 4,98 | down |
| 6358764 | 7326322 | 1686609 | retinol dehydrogenase 7                                     | Rdh7  | 360420 | 1,97 | down |
| 6045396 | 7326322 | 1686613 | retinol dehydrogenase 7                                     | Rdh7  | 360420 | 1,86 | down |
| 6745623 | 7326322 | 1686610 | retinol dehydrogenase 7                                     | Rdh7  | 360420 | 1,68 | up   |
| 5798478 | 7326322 | 1686609 | retinol dehydrogenase 7                                     | Rdh7  | 360420 | 1,57 | up   |
| 5862623 | 7326322 | 1686608 | retinol dehydrogenase 7                                     | Rdh7  | 360420 | 1,55 | up   |
| 6221213 | 7326322 | 1686608 | retinol dehydrogenase 7                                     | Rdh7  | 360420 | 1,54 | up   |
| 5680856 | 7326322 | 1686613 | retinol dehydrogenase 7                                     | Rdh7  | 360420 | 1,53 | down |
| 6224637 | 7326322 | 1686608 | retinol dehydrogenase 7                                     | Rdh7  | 360420 | 1,47 | up   |
| 6306431 | 7326322 | 1686609 | retinol dehydrogenase 7                                     | Rdh7  | 360420 | 1,35 | up   |
| 6514641 | 7326322 | 1686611 | retinol dehydrogenase 7                                     | Rdh7  | 360420 | 1,04 | up   |
| 6576579 | 7219624 | 1422136 | REV3-like, catalytic subunit of DNA polymerase zeta (yeast) | Rev3l | 309812 | 1,75 | down |
| 5798323 | 7219624 | 1422122 | REV3-like, catalytic subunit of DNA polymerase zeta (yeast) | Rev3l | 309812 | 1,43 | down |
| 6572094 | 7219624 | 1422140 | REV3-like, catalytic subunit of DNA polymerase zeta (yeast) | Rev3l | 309812 | 1,43 | up   |
| 6519368 | 7219624 | 1422110 | REV3-like, catalytic subunit of DNA polymerase zeta (yeast) | Rev3l | 309812 | 1,42 | up   |
| 6410668 | 7219624 | 1422131 | REV3-like, catalytic subunit of DNA polymerase zeta (yeast) | Rev3l | 309812 | 1,42 | down |
| 6261514 | 7219624 | 1422115 | REV3-like, catalytic subunit of DNA polymerase zeta (yeast) | Rev3l | 309812 | 1,39 | up   |
| 5987324 | 7219624 | 1422111 | REV3-like, catalytic subunit of DNA polymerase zeta (yeast) | Rev3l | 309812 | 1,38 | down |
| 6521473 | 7219624 | 1422123 | REV3-like, catalytic subunit of DNA polymerase zeta (yeast) | Rev3l | 309812 | 1,36 | down |
| 6392351 | 7219624 | 1422122 | REV3-like, catalytic subunit of DNA polymerase zeta (yeast) | Rev3l | 309812 | 1,31 | up   |
| 6404502 | 7219624 | 1422114 | REV3-like, catalytic subunit of DNA polymerase zeta (yeast) | Rev3l | 309812 | 1,28 | down |
| 6013686 | 7219624 | 1422118 | REV3-like, catalytic subunit of DNA polymerase zeta (yeast) | Rev3l | 309812 | 1,27 | up   |
| 5777995 | 7219624 | 1422133 | REV3-like, catalytic subunit of DNA polymerase zeta (yeast) | Rev3l | 309812 | 1,26 | up   |
| 5813324 | 7219624 | 1422122 | REV3-like, catalytic subunit of DNA polymerase zeta (yeast) | Rev3l | 309812 | 1,24 | up   |
| 6720492 | 7219624 | 1422132 | REV3-like, catalytic subunit of DNA polymerase zeta (yeast) | Rev3l | 309812 | 1,24 | down |
| 5645646 | 7219624 | 1422121 | REV3-like, catalytic subunit of DNA polymerase zeta (yeast) | Rev3l | 309812 | 1,22 | up   |
| 6471707 | 7219624 | 1422108 | REV3-like, catalytic subunit of DNA polymerase zeta (yeast) | Rev3l | 309812 | 1,21 | down |
| 5800721 | 7219624 | 1422129 | REV3-like, catalytic subunit of DNA polymerase zeta (yeast) | Rev3l | 309812 | 1,21 | up   |
| 6210984 | 7219624 | 1422122 | REV3-like, catalytic subunit of DNA polymerase zeta (yeast) | Rev3l | 309812 | 1,20 | down |
| 5981799 | 7219624 | 1422100 | REV3-like, catalytic subunit of DNA polymerase zeta (yeast) | Rev3l | 309812 | 1,19 | up   |
| 5822550 | 7219624 | 1422143 | REV3-like, catalytic subunit of DNA polymerase zeta (yeast) | Rev3l | 309812 | 1,18 | down |
| 6152686 | 7219624 | 1422112 | REV3-like, catalytic subunit of DNA polymerase zeta (yeast) | Rev3l | 309812 | 1,18 | up   |
| 6018702 | 7219624 | 1422135 | REV3-like, catalytic subunit of DNA polymerase zeta (yeast) | Rev3l | 309812 | 1,18 | down |
| 6490834 | 7219624 | 1422120 | REV3-like, catalytic subunit of DNA polymerase zeta (yeast) | Rev3l | 309812 | 1,15 | down |
| 6653413 | 7219624 | 1422116 | REV3-like, catalytic subunit of DNA polymerase zeta (yeast) | Rev3l | 309812 | 1,15 | up   |

|         |         |         |                                                             |            |        |      |      |
|---------|---------|---------|-------------------------------------------------------------|------------|--------|------|------|
| 5969673 | 7219624 | 1422127 | REV3-like, catalytic subunit of DNA polymerase zeta (yeast) | Rev3l      | 309812 | 1,13 | down |
| 5781827 | 7219624 | 1422139 | REV3-like, catalytic subunit of DNA polymerase zeta (yeast) | Rev3l      | 309812 | 1,13 | up   |
| 6488890 | 7219624 | 1422138 | REV3-like, catalytic subunit of DNA polymerase zeta (yeast) | Rev3l      | 309812 | 1,10 | down |
| 6125016 | 7219624 | 1422119 | REV3-like, catalytic subunit of DNA polymerase zeta (yeast) | Rev3l      | 309812 | 1,08 | down |
| 6655705 | 7219624 | 1422122 | REV3-like, catalytic subunit of DNA polymerase zeta (yeast) | Rev3l      | 309812 | 1,07 | down |
| 6441150 | 7219624 | 1422116 | REV3-like, catalytic subunit of DNA polymerase zeta (yeast) | Rev3l      | 309812 | 1,07 | up   |
| 5744029 | 7219624 | 1422122 | REV3-like, catalytic subunit of DNA polymerase zeta (yeast) | Rev3l      | 309812 | 1,06 | up   |
| 6236973 | 7219624 | 1422124 | REV3-like, catalytic subunit of DNA polymerase zeta (yeast) | Rev3l      | 309812 | 1,05 | up   |
| 5979710 | 7219624 | 1422113 | REV3-like, catalytic subunit of DNA polymerase zeta (yeast) | Rev3l      | 309812 | 1,04 | down |
| 6347119 | 7219624 | 1422126 | REV3-like, catalytic subunit of DNA polymerase zeta (yeast) | Rev3l      | 309812 | 1,04 | up   |
| 6487738 | 7219624 | 1422130 | REV3-like, catalytic subunit of DNA polymerase zeta (yeast) | Rev3l      | 309812 | 1,03 | down |
| 6340049 | 7219624 | 1422140 | REV3-like, catalytic subunit of DNA polymerase zeta (yeast) | Rev3l      | 309812 | 1,02 | up   |
| 5943971 | 7219624 | 1422143 | REV3-like, catalytic subunit of DNA polymerase zeta (yeast) | Rev3l      | 309812 | 1,00 | up   |
| 5697093 | 7219624 | 1422141 | REV3-like, catalytic subunit of DNA polymerase zeta (yeast) | Rev3l      | 309812 | 1,00 | up   |
| 6282320 | 7219624 | 1422125 | REV3-like, catalytic subunit of DNA polymerase zeta (yeast) | Rev3l      | 309812 | 1,00 | down |
| 6175764 | 7274585 | 1558778 | reversion-inducing-cysteine-rich protein with kazal motifs  | Reck       | 313488 | 2,21 | up   |
| 6211303 | 7274585 | 1558763 | reversion-inducing-cysteine-rich protein with kazal motifs  | Reck       | 313488 | 1,63 | down |
| 6581468 | 7274585 | 1558796 | reversion-inducing-cysteine-rich protein with kazal motifs  | Reck       | 313488 | 1,60 | down |
| 5816464 | 7274585 | 1558783 | reversion-inducing-cysteine-rich protein with kazal motifs  | Reck       | 313488 | 1,46 | up   |
| 5860755 | 7274585 | 1558786 | reversion-inducing-cysteine-rich protein with kazal motifs  | Reck       | 313488 | 1,43 | down |
| 5723584 | 7274585 | 1558794 | reversion-inducing-cysteine-rich protein with kazal motifs  | Reck       | 313488 | 1,42 | down |
| 5769676 | 7274585 | 1558771 | reversion-inducing-cysteine-rich protein with kazal motifs  | Reck       | 313488 | 1,34 | down |
| 6592301 | 7274585 | 1558797 | reversion-inducing-cysteine-rich protein with kazal motifs  | Reck       | 313488 | 1,23 | up   |
| 5651450 | 7274585 | 1558781 | reversion-inducing-cysteine-rich protein with kazal motifs  | Reck       | 313488 | 1,23 | down |
| 6711928 | 7274585 | 1558776 | reversion-inducing-cysteine-rich protein with kazal motifs  | Reck       | 313488 | 1,21 | up   |
| 6439590 | 7274585 | 1558785 | reversion-inducing-cysteine-rich protein with kazal motifs  | Reck       | 313488 | 1,20 | down |
| 6708113 | 7274585 | 1558791 | reversion-inducing-cysteine-rich protein with kazal motifs  | Reck       | 313488 | 1,20 | up   |
| 6280205 | 7274585 | 1558793 | reversion-inducing-cysteine-rich protein with kazal motifs  | Reck       | 313488 | 1,18 | up   |
| 6357452 | 7274585 | 1558768 | reversion-inducing-cysteine-rich protein with kazal motifs  | Reck       | 313488 | 1,17 | up   |
| 5846257 | 7274585 | 1558788 | reversion-inducing-cysteine-rich protein with kazal motifs  | Reck       | 313488 | 1,16 | up   |
| 6104432 | 7274585 | 1558782 | reversion-inducing-cysteine-rich protein with kazal motifs  | Reck       | 313488 | 1,13 | up   |
| 6047062 | 7274585 | 1558787 | reversion-inducing-cysteine-rich protein with kazal motifs  | Reck       | 313488 | 1,10 | up   |
| 5702115 | 7274585 | 1558782 | reversion-inducing-cysteine-rich protein with kazal motifs  | Reck       | 313488 | 1,08 | down |
| 6204305 | 7274585 | 1558774 | reversion-inducing-cysteine-rich protein with kazal motifs  | Reck       | 313488 | 1,06 | down |
| 6221250 | 7274585 | 1558792 | reversion-inducing-cysteine-rich protein with kazal motifs  | Reck       | 313488 | 1,06 | down |
| 6631399 | 7274585 | 1558784 | reversion-inducing-cysteine-rich protein with kazal motifs  | Reck       | 313488 | 1,04 | down |
| 6665913 | 7274585 | 1558797 | reversion-inducing-cysteine-rich protein with kazal motifs  | Reck       | 313488 | 1,04 | down |
| 6582768 | 7274585 | 1558772 | reversion-inducing-cysteine-rich protein with kazal motifs  | Reck       | 313488 | 1,01 | up   |
| 6159369 | 7274585 | 1558797 | reversion-inducing-cysteine-rich protein with kazal motifs  | Reck       | 313488 | 1,01 | up   |
| 6445008 | 7313064 | 1654511 | RGD1561305                                                  | RGD1561305 | 500808 | 2,21 | up   |
| 6038454 | 7315571 | 1660969 | RGD1561648                                                  | RGD1561648 | 500841 | 2,47 | down |
| 6550404 | 7315571 | 1661009 | RGD1561648                                                  | RGD1561648 | 500841 | 2,30 | up   |
| 6539160 | 7315571 | 1661009 | RGD1561648                                                  | RGD1561648 | 500841 | 2,29 | up   |
| 5671926 | 7315571 | 1661006 | RGD1561648                                                  | RGD1561648 | 500841 | 2,11 | up   |
| 6553350 | 7315571 | 1660973 | RGD1561648                                                  | RGD1561648 | 500841 | 2,08 | down |
| 6318127 | 7315571 | 1660999 | RGD1561648                                                  | RGD1561648 | 500841 | 1,67 | down |
| 6221077 | 7315571 | 1660974 | RGD1561648                                                  | RGD1561648 | 500841 | 1,63 | down |
| 6628056 | 7315571 | 1660974 | RGD1561648                                                  | RGD1561648 | 500841 | 1,61 | down |
| 5744566 | 7315571 | 1660974 | RGD1561648                                                  | RGD1561648 | 500841 | 1,49 | down |
| 5957243 | 7315571 | 1661008 | RGD1561648                                                  | RGD1561648 | 500841 | 1,45 | up   |
| 6277016 | 7315571 | 1661002 | RGD1561648                                                  | RGD1561648 | 500841 | 1,44 | down |
| 5822454 | 7315571 | 1661004 | RGD1561648                                                  | RGD1561648 | 500841 | 1,40 | down |
| 6519934 | 7315571 | 1660967 | RGD1561648                                                  | RGD1561648 | 500841 | 1,32 | up   |
| 6583701 | 7315571 | 1661001 | RGD1561648                                                  | RGD1561648 | 500841 | 1,22 | down |
| 5738746 | 7315571 | 1660997 | RGD1561648                                                  | RGD1561648 | 500841 | 1,21 | down |
| 6283641 | 7315571 | 1661007 | RGD1561648                                                  | RGD1561648 | 500841 | 1,18 | down |
| 5636843 | 7065273 | 1044605 | RGD1561796                                                  | RGD1561796 | 360483 | 2,24 | down |



|         |         |         |                     |            |        |      |      |
|---------|---------|---------|---------------------|------------|--------|------|------|
| 5747156 | 7065273 | 1044603 | RGD1561796          | RGD1561796 | 360483 | 1,10 | up   |
| 6368434 | 7065273 | 1044607 | RGD1561796          | RGD1561796 | 360483 | 1,04 | down |
| 6214823 | 7065273 | 1044605 | RGD1561796          | RGD1561796 | 360483 | 1,03 | down |
| 6505113 | 7065273 | 1044605 | RGD1561796          | RGD1561796 | 360483 | 1,03 | up   |
| 6746406 | 7065273 | 1044606 | RGD1561796          | RGD1561796 | 360483 | 1,03 | down |
| 6113176 | 7156114 | 1266049 | RGD1562097          | RGD1562097 | 498718 | 1,49 | down |
| 5644349 | 7156114 | 1266045 | RGD1562097          | RGD1562097 | 498718 | 1,37 | up   |
| 5620823 | 7156114 | 1266048 | RGD1562097          | RGD1562097 | 498718 | 1,02 | down |
| 6058193 | 7156114 | 1266048 | RGD1562097          | RGD1562097 | 498718 | 1,01 | up   |
| 6026957 | 7279073 | 1570685 | RGD1563049          | RGD1563049 | 298493 | 1,70 | up   |
| 5813090 | 7279073 | 1570686 | RGD1563049          | RGD1563049 | 298493 | 1,15 | down |
| 6727401 | 7279073 | 1570687 | RGD1563049          | RGD1563049 | 298493 | 1,08 | up   |
| 6171778 | 7341646 | 1724201 | RGD1563398          | RGD1563398 | 301075 | 1,68 | down |
| 5720223 | 7341646 | 1724196 | RGD1563398          | RGD1563398 | 301075 | 1,58 | down |
| 5990661 | 7341646 | 1724194 | RGD1563398          | RGD1563398 | 301075 | 1,51 | down |
| 5751319 | 7341646 | 1724199 | RGD1563398          | RGD1563398 | 301075 | 1,48 | up   |
| 5755296 | 7341646 | 1724214 | RGD1563398          | RGD1563398 | 301075 | 1,36 | up   |
| 6617441 | 7341646 | 1724213 | RGD1563398          | RGD1563398 | 301075 | 1,30 | up   |
| 6021436 | 7341646 | 1724192 | RGD1563398          | RGD1563398 | 301075 | 1,30 | up   |
| 5960648 | 7341646 | 1724205 | RGD1563398          | RGD1563398 | 301075 | 1,28 | up   |
| 6127248 | 7341646 | 1724203 | RGD1563398          | RGD1563398 | 301075 | 1,25 | down |
| 5723037 | 7341646 | 1724195 | RGD1563398          | RGD1563398 | 301075 | 1,19 | down |
| 5755547 | 7341646 | 1724209 | RGD1563398          | RGD1563398 | 301075 | 1,14 | up   |
| 5672211 | 7341646 | 1724212 | RGD1563398          | RGD1563398 | 301075 | 1,14 | down |
| 6474954 | 7341646 | 1724215 | RGD1563398          | RGD1563398 | 301075 | 1,13 | up   |
| 6032766 | 7341646 | 1724194 | RGD1563398          | RGD1563398 | 301075 | 1,12 | up   |
| 5785689 | 7341646 | 1724213 | RGD1563398          | RGD1563398 | 301075 | 1,09 | down |
| 6098312 | 7341646 | 1724193 | RGD1563398          | RGD1563398 | 301075 | 1,06 | down |
| 5962320 | 7341646 | 1724200 | RGD1563398          | RGD1563398 | 301075 | 1,05 | up   |
| 6083013 | 7341646 | 1724215 | RGD1563398          | RGD1563398 | 301075 | 1,04 | down |
| 5662137 | 7341646 | 1724208 | RGD1563398          | RGD1563398 | 301075 | 1,02 | up   |
| 6021198 | 7341646 | 1724204 | RGD1563398          | RGD1563398 | 301075 | 1,02 | up   |
| 5770364 | 7341646 | 1724215 | RGD1563398          | RGD1563398 | 301075 | 1,02 | down |
| 6729631 | 7341646 | 1724214 | RGD1563398          | RGD1563398 | 301075 | 1,01 | up   |
| 6493215 | 7341646 | 1724207 | RGD1563398          | RGD1563398 | 301075 | 1,01 | down |
| 6345170 | 7341646 | 1724212 | RGD1563398          | RGD1563398 | 301075 | 1,00 | down |
| 5968178 | 7211690 | 1402646 | RGD1565469          | RGD1565469 | 502584 | 2,31 | down |
| 6244722 | 7211690 | 1402643 | RGD1565469          | RGD1565469 | 502584 | 1,54 | up   |
| 5833069 | 7211690 | 1402642 | RGD1565469          | RGD1565469 | 502584 | 1,26 | down |
| 6061165 | 7211690 | 1402645 | RGD1565469          | RGD1565469 | 502584 | 1,07 | up   |
| 5795011 | 7211690 | 1402644 | RGD1565469          | RGD1565469 | 502584 | 1,07 | up   |
| 5645355 | 7211690 | 1402642 | RGD1565469          | RGD1565469 | 502584 | 1,02 | up   |
| 6217219 | 7211690 | 1402642 | RGD1565469          | RGD1565469 | 502584 | 1,01 | up   |
| 6480035 | 7211690 | 1402642 | RGD1565469          | RGD1565469 | 502584 | 1,01 | up   |
| 6572604 | 7211690 | 1402643 | RGD1565469          | RGD1565469 | 502584 | 1,01 | up   |
| 6297735 | 7216807 | 1414701 | RGD1566118          | RGD1566118 | 361797 | 2,42 | up   |
| 5748377 | 7216807 | 1414702 | RGD1566118          | RGD1566118 | 361797 | 1,18 | down |
| 6373017 | 7216807 | 1414696 | RGD1566118          | RGD1566118 | 361797 | 1,17 | down |
| 6638966 | 7216807 | 1414697 | RGD1566118          | RGD1566118 | 361797 | 1,15 | up   |
| 6127418 | 7216807 | 1414695 | RGD1566118          | RGD1566118 | 361797 | 1,08 | down |
| 6688053 | 7216807 | 1414698 | RGD1566118          | RGD1566118 | 361797 | 1,07 | up   |
| 6643788 | 7072329 | 1061632 | Rho family GTPase 2 | Rnd2       | 303553 | 2,39 | down |
| 5693629 | 7072329 | 1061634 | Rho family GTPase 2 | Rnd2       | 303553 | 2,29 | down |
| 6050590 | 7072329 | 1061637 | Rho family GTPase 2 | Rnd2       | 303553 | 1,21 | up   |
| 6082009 | 7072329 | 1061632 | Rho family GTPase 2 | Rnd2       | 303553 | 1,15 | down |
| 6334223 | 7072329 | 1061633 | Rho family GTPase 2 | Rnd2       | 303553 | 1,12 | down |
| 5722334 | 7072329 | 1061635 | Rho family GTPase 2 | Rnd2       | 303553 | 1,05 | up   |

|         |         |         |                                            |          |        |      |      |
|---------|---------|---------|--------------------------------------------|----------|--------|------|------|
| 5881416 | 7072329 | 1061636 | Rho family GTPase 2                        | Rnd2     | 303553 | 1,02 | down |
| 6745497 | 7075791 | 1069999 | Rho GDP dissociation inhibitor (GDI) gamma | Arhgdig  | 360500 | 2,10 | down |
| 6006772 | 7075791 | 1070004 | Rho GDP dissociation inhibitor (GDI) gamma | Arhgdig  | 360500 | 1,68 | up   |
| 5746119 | 7075791 | 1070002 | Rho GDP dissociation inhibitor (GDI) gamma | Arhgdig  | 360500 | 1,26 | up   |
| 6052708 | 7075791 | 1070001 | Rho GDP dissociation inhibitor (GDI) gamma | Arhgdig  | 360500 | 1,16 | down |
| 6241384 | 7075791 | 1070000 | Rho GDP dissociation inhibitor (GDI) gamma | Arhgdig  | 360500 | 1,16 | down |
| 5814728 | 7075791 | 1070005 | Rho GDP dissociation inhibitor (GDI) gamma | Arhgdig  | 360500 | 1,11 | up   |
| 5969845 | 7075791 | 1070000 | Rho GDP dissociation inhibitor (GDI) gamma | Arhgdig  | 360500 | 1,09 | down |
| 5672503 | 7075791 | 1070003 | Rho GDP dissociation inhibitor (GDI) gamma | Arhgdig  | 360500 | 1,05 | up   |
| 6044734 | 7158517 | 1271597 | Rho GTPase activating protein 12           | Arhgap12 | 307016 | 1,50 | up   |
| 6061530 | 7158517 | 1271570 | Rho GTPase activating protein 12           | Arhgap12 | 307016 | 1,47 | down |
| 5933555 | 7158517 | 1271588 | Rho GTPase activating protein 12           | Arhgap12 | 307016 | 1,36 | up   |
| 5626002 | 7158517 | 1271576 | Rho GTPase activating protein 12           | Arhgap12 | 307016 | 1,34 | up   |
| 6085808 | 7158517 | 1271577 | Rho GTPase activating protein 12           | Arhgap12 | 307016 | 1,29 | up   |
| 6242419 | 7158517 | 1271595 | Rho GTPase activating protein 12           | Arhgap12 | 307016 | 1,25 | down |
| 6179532 | 7158517 | 1271590 | Rho GTPase activating protein 12           | Arhgap12 | 307016 | 1,24 | down |
| 6106855 | 7158517 | 1271577 | Rho GTPase activating protein 12           | Arhgap12 | 307016 | 1,24 | up   |
| 5695279 | 7158517 | 1271584 | Rho GTPase activating protein 12           | Arhgap12 | 307016 | 1,23 | down |
| 5861247 | 7158517 | 1271577 | Rho GTPase activating protein 12           | Arhgap12 | 307016 | 1,17 | down |
| 6640695 | 7158517 | 1271571 | Rho GTPase activating protein 12           | Arhgap12 | 307016 | 1,15 | down |
| 5727074 | 7158517 | 1271591 | Rho GTPase activating protein 12           | Arhgap12 | 307016 | 1,15 | up   |
| 6141869 | 7158517 | 1271594 | Rho GTPase activating protein 12           | Arhgap12 | 307016 | 1,13 | up   |
| 5919232 | 7158517 | 1271569 | Rho GTPase activating protein 12           | Arhgap12 | 307016 | 1,12 | down |
| 6123349 | 7158517 | 1271578 | Rho GTPase activating protein 12           | Arhgap12 | 307016 | 1,11 | down |
| 5688142 | 7158517 | 1271587 | Rho GTPase activating protein 12           | Arhgap12 | 307016 | 1,10 | down |
| 6001674 | 7158517 | 1271581 | Rho GTPase activating protein 12           | Arhgap12 | 307016 | 1,09 | down |
| 6677231 | 7158517 | 1271571 | Rho GTPase activating protein 12           | Arhgap12 | 307016 | 1,09 | down |
| 6340675 | 7158517 | 1271597 | Rho GTPase activating protein 12           | Arhgap12 | 307016 | 1,07 | down |
| 6147783 | 7158517 | 1271582 | Rho GTPase activating protein 12           | Arhgap12 | 307016 | 1,06 | up   |
| 5649803 | 7158517 | 1271579 | Rho GTPase activating protein 12           | Arhgap12 | 307016 | 1,05 | up   |
| 6223271 | 7158517 | 1271594 | Rho GTPase activating protein 12           | Arhgap12 | 307016 | 1,04 | up   |
| 6268336 | 7158517 | 1271575 | Rho GTPase activating protein 12           | Arhgap12 | 307016 | 1,03 | up   |
| 6657335 | 7158517 | 1271589 | Rho GTPase activating protein 12           | Arhgap12 | 307016 | 1,02 | down |
| 5798209 | 7158517 | 1271598 | Rho GTPase activating protein 12           | Arhgap12 | 307016 | 1,01 | down |
| 6466358 | 7056985 | 1024889 | Rho GTPase activating protein 17           | Arhgap17 | 63994  | 2,16 | up   |
| 5659217 | 7056985 | 1024876 | Rho GTPase activating protein 17           | Arhgap17 | 63994  | 1,64 | down |
| 5843733 | 7056985 | 1024887 | Rho GTPase activating protein 17           | Arhgap17 | 63994  | 1,63 | down |
| 5664856 | 7056985 | 1024878 | Rho GTPase activating protein 17           | Arhgap17 | 63994  | 1,38 | down |
| 5651926 | 7056985 | 1024886 | Rho GTPase activating protein 17           | Arhgap17 | 63994  | 1,30 | up   |
| 6534990 | 7056985 | 1024892 | Rho GTPase activating protein 17           | Arhgap17 | 63994  | 1,28 | up   |
| 6465718 | 7056985 | 1024881 | Rho GTPase activating protein 17           | Arhgap17 | 63994  | 1,24 | up   |
| 5836337 | 7056985 | 1024893 | Rho GTPase activating protein 17           | Arhgap17 | 63994  | 1,23 | down |
| 6562801 | 7056985 | 1024890 | Rho GTPase activating protein 17           | Arhgap17 | 63994  | 1,21 | up   |
| 6138545 | 7056985 | 1024880 | Rho GTPase activating protein 17           | Arhgap17 | 63994  | 1,17 | up   |
| 6671752 | 7056985 | 1024884 | Rho GTPase activating protein 17           | Arhgap17 | 63994  | 1,16 | up   |
| 6623276 | 7056985 | 1024891 | Rho GTPase activating protein 17           | Arhgap17 | 63994  | 1,14 | up   |
| 5887748 | 7056985 | 1024885 | Rho GTPase activating protein 17           | Arhgap17 | 63994  | 1,11 | up   |
| 6405817 | 7056985 | 1024879 | Rho GTPase activating protein 17           | Arhgap17 | 63994  | 1,09 | up   |
| 6012346 | 7056985 | 1024883 | Rho GTPase activating protein 17           | Arhgap17 | 63994  | 1,08 | up   |
| 6695306 | 7056985 | 1024894 | Rho GTPase activating protein 17           | Arhgap17 | 63994  | 1,07 | down |
| 5791785 | 7056985 | 1024882 | Rho GTPase activating protein 17           | Arhgap17 | 63994  | 1,06 | down |
| 6192716 | 7056985 | 1024875 | Rho GTPase activating protein 17           | Arhgap17 | 63994  | 1,06 | up   |
| 6615672 | 7056985 | 1024874 | Rho GTPase activating protein 17           | Arhgap17 | 63994  | 1,04 | down |
| 6326889 | 7056985 | 1024877 | Rho GTPase activating protein 17           | Arhgap17 | 63994  | 1,01 | down |
| 6497004 | 7056985 | 1024888 | Rho GTPase activating protein 17           | Arhgap17 | 63994  | 1,00 | up   |
| 6662172 | 7336118 | 1709921 | Rho GTPase activating protein 20           | Arhgap20 | 367085 | 2,49 | down |
| 6569389 | 7336118 | 1709930 | Rho GTPase activating protein 20           | Arhgap20 | 367085 | 1,88 | up   |

|         |         |         |                                  |          |        |      |      |
|---------|---------|---------|----------------------------------|----------|--------|------|------|
| 6726394 | 7336118 | 1709929 | Rho GTPase activating protein 20 | Arhgap20 | 367085 | 1,58 | up   |
| 5947338 | 7336118 | 1709922 | Rho GTPase activating protein 20 | Arhgap20 | 367085 | 1,56 | down |
| 6278701 | 7336118 | 1709935 | Rho GTPase activating protein 20 | Arhgap20 | 367085 | 1,55 | up   |
| 5652001 | 7336118 | 1709935 | Rho GTPase activating protein 20 | Arhgap20 | 367085 | 1,40 | up   |
| 5716269 | 7336118 | 1709935 | Rho GTPase activating protein 20 | Arhgap20 | 367085 | 1,30 | down |
| 6740473 | 7336118 | 1709921 | Rho GTPase activating protein 20 | Arhgap20 | 367085 | 1,16 | up   |
| 5777387 | 7336118 | 1709925 | Rho GTPase activating protein 20 | Arhgap20 | 367085 | 1,13 | down |
| 6480999 | 7336118 | 1709933 | Rho GTPase activating protein 20 | Arhgap20 | 367085 | 1,12 | up   |
| 6078352 | 7336118 | 1709927 | Rho GTPase activating protein 20 | Arhgap20 | 367085 | 1,10 | down |
| 5630352 | 7336118 | 1709926 | Rho GTPase activating protein 20 | Arhgap20 | 367085 | 1,09 | down |
| 6196684 | 7336118 | 1709932 | Rho GTPase activating protein 20 | Arhgap20 | 367085 | 1,07 | up   |
| 5695707 | 7336118 | 1709923 | Rho GTPase activating protein 20 | Arhgap20 | 367085 | 1,06 | up   |
| 6301296 | 7336118 | 1709931 | Rho GTPase activating protein 20 | Arhgap20 | 367085 | 1,05 | up   |
| 6570437 | 7336118 | 1709935 | Rho GTPase activating protein 20 | Arhgap20 | 367085 | 1,05 | up   |
| 6001216 | 7336118 | 1709935 | Rho GTPase activating protein 20 | Arhgap20 | 367085 | 1,04 | up   |
| 6539925 | 7336118 | 1709928 | Rho GTPase activating protein 20 | Arhgap20 | 367085 | 1,03 | up   |
| 6390174 | 7336118 | 1709935 | Rho GTPase activating protein 20 | Arhgap20 | 367085 | 1,03 | down |
| 5765219 | 7336118 | 1709924 | Rho GTPase activating protein 20 | Arhgap20 | 367085 | 1,02 | up   |
| 6674624 | 7336118 | 1709934 | Rho GTPase activating protein 20 | Arhgap20 | 367085 | 1,02 | up   |
| 5813691 | 7123023 | 1184799 | Rho GTPase activating protein 24 | Arhgap24 | 305156 | 2,37 | up   |
| 6429567 | 7123023 | 1184802 | Rho GTPase activating protein 24 | Arhgap24 | 305156 | 1,52 | down |
| 6418972 | 7123023 | 1184801 | Rho GTPase activating protein 24 | Arhgap24 | 305156 | 1,51 | down |
| 6163629 | 7123023 | 1184797 | Rho GTPase activating protein 24 | Arhgap24 | 305156 | 1,39 | up   |
| 5862318 | 7123023 | 1184803 | Rho GTPase activating protein 24 | Arhgap24 | 305156 | 1,23 | down |
| 6627925 | 7123023 | 1184800 | Rho GTPase activating protein 24 | Arhgap24 | 305156 | 1,21 | down |
| 5944954 | 7123023 | 1184798 | Rho GTPase activating protein 24 | Arhgap24 | 305156 | 1,19 | down |
| 5781764 | 7123023 | 1184804 | Rho GTPase activating protein 24 | Arhgap24 | 305156 | 1,09 | down |
| 5785055 | 7123023 | 1184803 | Rho GTPase activating protein 24 | Arhgap24 | 305156 | 1,07 | up   |
| 6673381 | 7169732 | 1298757 | Rho GTPase activating protein 26 | Arhgap26 | 307459 | 1,58 | up   |
| 6163632 | 7169732 | 1298771 | Rho GTPase activating protein 26 | Arhgap26 | 307459 | 1,32 | up   |
| 5752700 | 7169732 | 1298736 | Rho GTPase activating protein 26 | Arhgap26 | 307459 | 1,31 | up   |
| 6573293 | 7169732 | 1298722 | Rho GTPase activating protein 26 | Arhgap26 | 307459 | 1,28 | down |
| 5817587 | 7169732 | 1298698 | Rho GTPase activating protein 26 | Arhgap26 | 307459 | 1,27 | up   |
| 6508783 | 7169732 | 1298750 | Rho GTPase activating protein 26 | Arhgap26 | 307459 | 1,25 | up   |
| 6419885 | 7169732 | 1298733 | Rho GTPase activating protein 26 | Arhgap26 | 307459 | 1,18 | up   |
| 6469917 | 7169732 | 1298757 | Rho GTPase activating protein 26 | Arhgap26 | 307459 | 1,17 | up   |
| 6373406 | 7169732 | 1298700 | Rho GTPase activating protein 26 | Arhgap26 | 307459 | 1,13 | down |
| 6590088 | 7169732 | 1298734 | Rho GTPase activating protein 26 | Arhgap26 | 307459 | 1,11 | down |
| 6369871 | 7169732 | 1298779 | Rho GTPase activating protein 26 | Arhgap26 | 307459 | 1,11 | down |
| 5776927 | 7169732 | 1298710 | Rho GTPase activating protein 26 | Arhgap26 | 307459 | 1,09 | up   |
| 6502727 | 7169732 | 1298708 | Rho GTPase activating protein 26 | Arhgap26 | 307459 | 1,08 | down |
| 6689568 | 7169732 | 1298748 | Rho GTPase activating protein 26 | Arhgap26 | 307459 | 1,07 | down |
| 6565593 | 7169732 | 1298707 | Rho GTPase activating protein 26 | Arhgap26 | 307459 | 1,06 | down |
| 6683270 | 7169732 | 1298706 | Rho GTPase activating protein 26 | Arhgap26 | 307459 | 1,06 | down |
| 5620072 | 7169732 | 1298728 | Rho GTPase activating protein 26 | Arhgap26 | 307459 | 1,06 | down |
| 6487099 | 7169732 | 1298686 | Rho GTPase activating protein 26 | Arhgap26 | 307459 | 1,05 | up   |
| 5781881 | 7169732 | 1298704 | Rho GTPase activating protein 26 | Arhgap26 | 307459 | 1,03 | up   |
| 5648053 | 7169732 | 1298705 | Rho GTPase activating protein 26 | Arhgap26 | 307459 | 1,03 | up   |
| 6118016 | 7169732 | 1298713 | Rho GTPase activating protein 26 | Arhgap26 | 307459 | 1,02 | up   |
| 5833344 | 7169732 | 1298703 | Rho GTPase activating protein 26 | Arhgap26 | 307459 | 1,02 | up   |
| 5864313 | 7169732 | 1298729 | Rho GTPase activating protein 26 | Arhgap26 | 307459 | 1,01 | down |
| 5820729 | 7169732 | 1298771 | Rho GTPase activating protein 26 | Arhgap26 | 307459 | 1,01 | down |
| 5677751 | 7169732 | 1298775 | Rho GTPase activating protein 26 | Arhgap26 | 307459 | 1,01 | down |
| 6553250 | 7083177 | 1086593 | Rho GTPase activating protein 27 | Arhgap27 | 303583 | 2,06 | up   |
| 6245640 | 7083177 | 1086595 | Rho GTPase activating protein 27 | Arhgap27 | 303583 | 1,76 | up   |
| 6198869 | 7083177 | 1086601 | Rho GTPase activating protein 27 | Arhgap27 | 303583 | 1,54 | down |
| 5995274 | 7083177 | 1086592 | Rho GTPase activating protein 27 | Arhgap27 | 303583 | 1,35 | down |

|         |         |         |                                                |          |        |      |      |
|---------|---------|---------|------------------------------------------------|----------|--------|------|------|
| 6688533 | 7083177 | 1086600 | Rho GTPase activating protein 27               | Arhgap27 | 303583 | 1,32 | down |
| 6367326 | 7083177 | 1086589 | Rho GTPase activating protein 27               | Arhgap27 | 303583 | 1,30 | up   |
| 6515960 | 7083177 | 1086596 | Rho GTPase activating protein 27               | Arhgap27 | 303583 | 1,29 | down |
| 5851922 | 7083177 | 1086594 | Rho GTPase activating protein 27               | Arhgap27 | 303583 | 1,21 | up   |
| 6507934 | 7083177 | 1086586 | Rho GTPase activating protein 27               | Arhgap27 | 303583 | 1,21 | up   |
| 6726521 | 7083177 | 1086592 | Rho GTPase activating protein 27               | Arhgap27 | 303583 | 1,19 | down |
| 5863672 | 7083177 | 1086597 | Rho GTPase activating protein 27               | Arhgap27 | 303583 | 1,17 | up   |
| 6014613 | 7083177 | 1086593 | Rho GTPase activating protein 27               | Arhgap27 | 303583 | 1,14 | down |
| 5857432 | 7083177 | 1086588 | Rho GTPase activating protein 27               | Arhgap27 | 303583 | 1,09 | up   |
| 6001430 | 7083177 | 1086602 | Rho GTPase activating protein 27               | Arhgap27 | 303583 | 1,09 | up   |
| 6700222 | 7083177 | 1086587 | Rho GTPase activating protein 27               | Arhgap27 | 303583 | 1,08 | up   |
| 6258136 | 7083177 | 1086590 | Rho GTPase activating protein 27               | Arhgap27 | 303583 | 1,04 | up   |
| 6078569 | 7083177 | 1086598 | Rho GTPase activating protein 27               | Arhgap27 | 303583 | 1,03 | up   |
| 5868396 | 7083177 | 1086591 | Rho GTPase activating protein 27               | Arhgap27 | 303583 | 1,02 | down |
| 5942205 | 7083177 | 1086593 | Rho GTPase activating protein 27               | Arhgap27 | 303583 | 1,00 | down |
| 5797702 | 7083177 | 1086599 | Rho GTPase activating protein 27               | Arhgap27 | 303583 | 1,00 | down |
| 6680331 | 7198627 | 1372239 | Rho GTPase activating protein 29               | Arhgap29 | 310833 | 2,07 | up   |
| 6607723 | 7198627 | 1372238 | Rho GTPase activating protein 29               | Arhgap29 | 310833 | 1,82 | down |
| 6560365 | 7198627 | 1372232 | Rho GTPase activating protein 29               | Arhgap29 | 310833 | 1,77 | up   |
| 6432507 | 7198627 | 1372228 | Rho GTPase activating protein 29               | Arhgap29 | 310833 | 1,66 | down |
| 5741357 | 7198627 | 1372243 | Rho GTPase activating protein 29               | Arhgap29 | 310833 | 1,64 | up   |
| 6044467 | 7198627 | 1372250 | Rho GTPase activating protein 29               | Arhgap29 | 310833 | 1,61 | up   |
| 6229839 | 7198627 | 1372242 | Rho GTPase activating protein 29               | Arhgap29 | 310833 | 1,60 | up   |
| 6704381 | 7198627 | 1372245 | Rho GTPase activating protein 29               | Arhgap29 | 310833 | 1,58 | up   |
| 5656650 | 7198627 | 1372231 | Rho GTPase activating protein 29               | Arhgap29 | 310833 | 1,50 | down |
| 6647189 | 7198627 | 1372228 | Rho GTPase activating protein 29               | Arhgap29 | 310833 | 1,46 | down |
| 5829081 | 7198627 | 1372241 | Rho GTPase activating protein 29               | Arhgap29 | 310833 | 1,43 | up   |
| 6323252 | 7198627 | 1372229 | Rho GTPase activating protein 29               | Arhgap29 | 310833 | 1,42 | up   |
| 6487056 | 7198627 | 1372248 | Rho GTPase activating protein 29               | Arhgap29 | 310833 | 1,39 | down |
| 6428479 | 7198627 | 1372234 | Rho GTPase activating protein 29               | Arhgap29 | 310833 | 1,28 | up   |
| 6140139 | 7198627 | 1372236 | Rho GTPase activating protein 29               | Arhgap29 | 310833 | 1,20 | up   |
| 6028521 | 7198627 | 1372244 | Rho GTPase activating protein 29               | Arhgap29 | 310833 | 1,19 | down |
| 5806334 | 7198627 | 1372240 | Rho GTPase activating protein 29               | Arhgap29 | 310833 | 1,18 | up   |
| 6718019 | 7198627 | 1372228 | Rho GTPase activating protein 29               | Arhgap29 | 310833 | 1,15 | up   |
| 6639606 | 7198627 | 1372237 | Rho GTPase activating protein 29               | Arhgap29 | 310833 | 1,09 | up   |
| 5925331 | 7198627 | 1372233 | Rho GTPase activating protein 29               | Arhgap29 | 310833 | 1,07 | down |
| 6188478 | 7198627 | 1372249 | Rho GTPase activating protein 29               | Arhgap29 | 310833 | 1,07 | up   |
| 6681774 | 7198627 | 1372230 | Rho GTPase activating protein 29               | Arhgap29 | 310833 | 1,06 | down |
| 6265842 | 7198627 | 1372235 | Rho GTPase activating protein 29               | Arhgap29 | 310833 | 1,04 | up   |
| 5741383 | 7198627 | 1372247 | Rho GTPase activating protein 29               | Arhgap29 | 310833 | 1,02 | down |
| 6220256 | 7198627 | 1372246 | Rho GTPase activating protein 29               | Arhgap29 | 310833 | 1,00 | up   |
| 6746004 | 7198627 | 1372230 | Rho GTPase activating protein 29               | Arhgap29 | 310833 | 1,00 | down |
| 5714608 | 7319458 | 1670856 | Rho GTPase activating protein 8                | Arhgap8  | 300115 | 2,18 | down |
| 6001492 | 7319458 | 1670855 | Rho GTPase activating protein 8                | Arhgap8  | 300115 | 1,60 | down |
| 6585717 | 7319458 | 1670865 | Rho GTPase activating protein 8                | Arhgap8  | 300115 | 1,25 | down |
| 6017195 | 7319458 | 1670861 | Rho GTPase activating protein 8                | Arhgap8  | 300115 | 1,15 | up   |
| 6366290 | 7319458 | 1670860 | Rho GTPase activating protein 8                | Arhgap8  | 300115 | 1,11 | up   |
| 6470528 | 7319458 | 1670859 | Rho GTPase activating protein 8                | Arhgap8  | 300115 | 1,10 | up   |
| 6618244 | 7319458 | 1670862 | Rho GTPase activating protein 8                | Arhgap8  | 300115 | 1,09 | down |
| 6652056 | 7319458 | 1670858 | Rho GTPase activating protein 8                | Arhgap8  | 300115 | 1,07 | down |
| 5702822 | 7319458 | 1670866 | Rho GTPase activating protein 8                | Arhgap8  | 300115 | 1,07 | up   |
| 6267383 | 7319458 | 1670866 | Rho GTPase activating protein 8                | Arhgap8  | 300115 | 1,05 | up   |
| 6327508 | 7319458 | 1670857 | Rho GTPase activating protein 8                | Arhgap8  | 300115 | 1,03 | up   |
| 6133870 | 7319458 | 1670856 | Rho GTPase activating protein 8                | Arhgap8  | 300115 | 1,03 | up   |
| 5831366 | 7319458 | 1670864 | Rho GTPase activating protein 8                | Arhgap8  | 300115 | 1,00 | up   |
| 5644498 | 7319458 | 1670863 | Rho GTPase activating protein 8                | Arhgap8  | 300115 | 1,00 | down |
| 6228666 | 7142915 | 1233144 | Rho guanine nucleotide exchange factor (GEF) 3 | Arhgef3  | 290541 | 2,16 | down |

|         |         |         |                                                        |         |        |      |      |
|---------|---------|---------|--------------------------------------------------------|---------|--------|------|------|
| 6619218 | 7142915 | 1233149 | Rho guanine nucleotide exchange factor (GEF) 3         | Arhgef3 | 290541 | 1,85 | up   |
| 6257217 | 7142915 | 1233142 | Rho guanine nucleotide exchange factor (GEF) 3         | Arhgef3 | 290541 | 1,43 | down |
| 6471933 | 7142915 | 1233149 | Rho guanine nucleotide exchange factor (GEF) 3         | Arhgef3 | 290541 | 1,40 | down |
| 5679812 | 7142915 | 1233129 | Rho guanine nucleotide exchange factor (GEF) 3         | Arhgef3 | 290541 | 1,36 | down |
| 6109452 | 7142915 | 1233147 | Rho guanine nucleotide exchange factor (GEF) 3         | Arhgef3 | 290541 | 1,19 | down |
| 6729696 | 7142915 | 1233141 | Rho guanine nucleotide exchange factor (GEF) 3         | Arhgef3 | 290541 | 1,14 | down |
| 6585006 | 7142915 | 1233150 | Rho guanine nucleotide exchange factor (GEF) 3         | Arhgef3 | 290541 | 1,13 | down |
| 6072961 | 7142915 | 1233150 | Rho guanine nucleotide exchange factor (GEF) 3         | Arhgef3 | 290541 | 1,12 | up   |
| 6018683 | 7142915 | 1233148 | Rho guanine nucleotide exchange factor (GEF) 3         | Arhgef3 | 290541 | 1,08 | up   |
| 6071817 | 7142915 | 1233139 | Rho guanine nucleotide exchange factor (GEF) 3         | Arhgef3 | 290541 | 1,04 | up   |
| 5937814 | 7142915 | 1233119 | Rho guanine nucleotide exchange factor (GEF) 3         | Arhgef3 | 290541 | 1,03 | up   |
| 5622298 | 7142915 | 1233140 | Rho guanine nucleotide exchange factor (GEF) 3         | Arhgef3 | 290541 | 1,00 | up   |
| 6134028 | 7353287 | 1753034 | Rho guanine nucleotide exchange factor (GEF) 4         | Arhgef4 | 301334 | 2,34 | up   |
| 6134600 | 7253215 | 1505374 | Rho guanine nucleotide exchange factor (GEF) 5         | Arhgef5 | 140898 | 1,51 | up   |
| 6553612 | 7253215 | 1505373 | Rho guanine nucleotide exchange factor (GEF) 5         | Arhgef5 | 140898 | 1,44 | up   |
| 6027950 | 7253215 | 1505376 | Rho guanine nucleotide exchange factor (GEF) 5         | Arhgef5 | 140898 | 1,42 | down |
| 6167828 | 7253215 | 1505375 | Rho guanine nucleotide exchange factor (GEF) 5         | Arhgef5 | 140898 | 1,11 | up   |
| 6006141 | 7196120 | 1365857 | rho/rac guanine nucleotide exchange factor (GEF) 2     | Arhgef2 | 310635 | 6,33 | down |
| 6107045 | 7196120 | 1365873 | rho/rac guanine nucleotide exchange factor (GEF) 2     | Arhgef2 | 310635 | 1,94 | down |
| 5684989 | 7196120 | 1365870 | rho/rac guanine nucleotide exchange factor (GEF) 2     | Arhgef2 | 310635 | 1,79 | up   |
| 6596514 | 7196120 | 1365868 | rho/rac guanine nucleotide exchange factor (GEF) 2     | Arhgef2 | 310635 | 1,70 | up   |
| 6613583 | 7196120 | 1365857 | rho/rac guanine nucleotide exchange factor (GEF) 2     | Arhgef2 | 310635 | 1,52 | down |
| 5731254 | 7196120 | 1365867 | rho/rac guanine nucleotide exchange factor (GEF) 2     | Arhgef2 | 310635 | 1,40 | down |
| 5671444 | 7196120 | 1365859 | rho/rac guanine nucleotide exchange factor (GEF) 2     | Arhgef2 | 310635 | 1,37 | down |
| 6131755 | 7196120 | 1365875 | rho/rac guanine nucleotide exchange factor (GEF) 2     | Arhgef2 | 310635 | 1,35 | down |
| 5748307 | 7196120 | 1365878 | rho/rac guanine nucleotide exchange factor (GEF) 2     | Arhgef2 | 310635 | 1,34 | up   |
| 6098851 | 7196120 | 1365861 | rho/rac guanine nucleotide exchange factor (GEF) 2     | Arhgef2 | 310635 | 1,34 | down |
| 6019969 | 7196120 | 1365879 | rho/rac guanine nucleotide exchange factor (GEF) 2     | Arhgef2 | 310635 | 1,32 | down |
| 6597098 | 7196120 | 1365863 | rho/rac guanine nucleotide exchange factor (GEF) 2     | Arhgef2 | 310635 | 1,30 | up   |
| 6139761 | 7196120 | 1365865 | rho/rac guanine nucleotide exchange factor (GEF) 2     | Arhgef2 | 310635 | 1,21 | up   |
| 6351247 | 7196120 | 1365866 | rho/rac guanine nucleotide exchange factor (GEF) 2     | Arhgef2 | 310635 | 1,21 | down |
| 6278858 | 7196120 | 1365871 | rho/rac guanine nucleotide exchange factor (GEF) 2     | Arhgef2 | 310635 | 1,20 | up   |
| 6006614 | 7196120 | 1365869 | rho/rac guanine nucleotide exchange factor (GEF) 2     | Arhgef2 | 310635 | 1,18 | up   |
| 6564754 | 7196120 | 1365858 | rho/rac guanine nucleotide exchange factor (GEF) 2     | Arhgef2 | 310635 | 1,15 | up   |
| 5825629 | 7196120 | 1365877 | rho/rac guanine nucleotide exchange factor (GEF) 2     | Arhgef2 | 310635 | 1,13 | up   |
| 6497439 | 7196120 | 1365864 | rho/rac guanine nucleotide exchange factor (GEF) 2     | Arhgef2 | 310635 | 1,12 | down |
| 6238998 | 7196120 | 1365876 | rho/rac guanine nucleotide exchange factor (GEF) 2     | Arhgef2 | 310635 | 1,06 | up   |
| 6374787 | 7196120 | 1365860 | rho/rac guanine nucleotide exchange factor (GEF) 2     | Arhgef2 | 310635 | 1,06 | up   |
| 6180796 | 7196120 | 1365862 | rho/rac guanine nucleotide exchange factor (GEF) 2     | Arhgef2 | 310635 | 1,02 | down |
| 6108047 | 7196120 | 1365872 | rho/rac guanine nucleotide exchange factor (GEF) 2     | Arhgef2 | 310635 | 1,02 | down |
| 6136220 | 7196120 | 1365874 | rho/rac guanine nucleotide exchange factor (GEF) 2     | Arhgef2 | 310635 | 1,02 | up   |
| 5820230 | 7173094 | 1307568 | Rho-associated coiled-coil containing protein kinase 1 | Rock1   | 81762  | 2,42 | down |
| 6216075 | 7173094 | 1307536 | Rho-associated coiled-coil containing protein kinase 1 | Rock1   | 81762  | 1,85 | down |
| 6467154 | 7173094 | 1307551 | Rho-associated coiled-coil containing protein kinase 1 | Rock1   | 81762  | 1,66 | down |
| 6139054 | 7173094 | 1307535 | Rho-associated coiled-coil containing protein kinase 1 | Rock1   | 81762  | 1,45 | up   |
| 5641200 | 7173094 | 1307565 | Rho-associated coiled-coil containing protein kinase 1 | Rock1   | 81762  | 1,33 | down |
| 5784910 | 7173094 | 1307540 | Rho-associated coiled-coil containing protein kinase 1 | Rock1   | 81762  | 1,32 | down |
| 6291864 | 7173094 | 1307546 | Rho-associated coiled-coil containing protein kinase 1 | Rock1   | 81762  | 1,29 | up   |
| 5978710 | 7173094 | 1307550 | Rho-associated coiled-coil containing protein kinase 1 | Rock1   | 81762  | 1,26 | up   |
| 6675974 | 7173094 | 1307556 | Rho-associated coiled-coil containing protein kinase 1 | Rock1   | 81762  | 1,25 | down |
| 6290902 | 7173094 | 1307552 | Rho-associated coiled-coil containing protein kinase 1 | Rock1   | 81762  | 1,24 | down |
| 5857769 | 7173094 | 1307538 | Rho-associated coiled-coil containing protein kinase 1 | Rock1   | 81762  | 1,24 | down |
| 5770324 | 7173094 | 1307547 | Rho-associated coiled-coil containing protein kinase 1 | Rock1   | 81762  | 1,23 | down |
| 5973586 | 7173094 | 1307536 | Rho-associated coiled-coil containing protein kinase 1 | Rock1   | 81762  | 1,21 | up   |
| 5970475 | 7173094 | 1307543 | Rho-associated coiled-coil containing protein kinase 1 | Rock1   | 81762  | 1,19 | down |
| 5860142 | 7173094 | 1307567 | Rho-associated coiled-coil containing protein kinase 1 | Rock1   | 81762  | 1,15 | up   |
| 6010118 | 7173094 | 1307539 | Rho-associated coiled-coil containing protein kinase 1 | Rock1   | 81762  | 1,15 | up   |

|         |         |         |                                                        |       |        |      |      |
|---------|---------|---------|--------------------------------------------------------|-------|--------|------|------|
| 6571995 | 7173094 | 1307537 | Rho-associated coiled-coil containing protein kinase 1 | Rock1 | 81762  | 1,14 | up   |
| 6298334 | 7173094 | 1307557 | Rho-associated coiled-coil containing protein kinase 1 | Rock1 | 81762  | 1,13 | up   |
| 6559887 | 7173094 | 1307544 | Rho-associated coiled-coil containing protein kinase 1 | Rock1 | 81762  | 1,13 | down |
| 6564005 | 7173094 | 1307558 | Rho-associated coiled-coil containing protein kinase 1 | Rock1 | 81762  | 1,12 | up   |
| 6451498 | 7173094 | 1307568 | Rho-associated coiled-coil containing protein kinase 1 | Rock1 | 81762  | 1,11 | up   |
| 6744804 | 7173094 | 1307559 | Rho-associated coiled-coil containing protein kinase 1 | Rock1 | 81762  | 1,10 | down |
| 6457620 | 7173094 | 1307542 | Rho-associated coiled-coil containing protein kinase 1 | Rock1 | 81762  | 1,09 | down |
| 5811312 | 7173094 | 1307564 | Rho-associated coiled-coil containing protein kinase 1 | Rock1 | 81762  | 1,09 | down |
| 5665957 | 7173094 | 1307561 | Rho-associated coiled-coil containing protein kinase 1 | Rock1 | 81762  | 1,09 | down |
| 6329125 | 7173094 | 1307541 | Rho-associated coiled-coil containing protein kinase 1 | Rock1 | 81762  | 1,08 | up   |
| 6093314 | 7173094 | 1307566 | Rho-associated coiled-coil containing protein kinase 1 | Rock1 | 81762  | 1,06 | down |
| 6114198 | 7173094 | 1307553 | Rho-associated coiled-coil containing protein kinase 1 | Rock1 | 81762  | 1,06 | down |
| 5688509 | 7173094 | 1307545 | Rho-associated coiled-coil containing protein kinase 1 | Rock1 | 81762  | 1,06 | up   |
| 6691592 | 7173094 | 1307549 | Rho-associated coiled-coil containing protein kinase 1 | Rock1 | 81762  | 1,05 | up   |
| 5965015 | 7173094 | 1307568 | Rho-associated coiled-coil containing protein kinase 1 | Rock1 | 81762  | 1,04 | down |
| 6587132 | 7173094 | 1307560 | Rho-associated coiled-coil containing protein kinase 1 | Rock1 | 81762  | 1,03 | up   |
| 5892432 | 7173094 | 1307562 | Rho-associated coiled-coil containing protein kinase 1 | Rock1 | 81762  | 1,03 | up   |
| 6628457 | 7173094 | 1307548 | Rho-associated coiled-coil containing protein kinase 1 | Rock1 | 81762  | 1,01 | up   |
| 6566352 | 7173094 | 1307554 | Rho-associated coiled-coil containing protein kinase 1 | Rock1 | 81762  | 1,01 | up   |
| 6270105 | 7173094 | 1307555 | Rho-associated coiled-coil containing protein kinase 1 | Rock1 | 81762  | 1,01 | up   |
| 5650215 | 7173094 | 1307563 | Rho-associated coiled-coil containing protein kinase 1 | Rock1 | 81762  | 1,01 | up   |
| 5758358 | 7173094 | 1307555 | Rho-associated coiled-coil containing protein kinase 1 | Rock1 | 81762  | 1,00 | up   |
| 5898297 | 7202749 | 1382054 | Rho-guanine nucleotide exchange factor                 | Rgnef | 361882 | 2,76 | down |
| 6262758 | 7202749 | 1382055 | Rho-guanine nucleotide exchange factor                 | Rgnef | 361882 | 2,17 | down |
| 6162674 | 7202749 | 1382111 | Rho-guanine nucleotide exchange factor                 | Rgnef | 361882 | 1,70 | up   |
| 6005663 | 7202749 | 1382069 | Rho-guanine nucleotide exchange factor                 | Rgnef | 361882 | 1,69 | down |
| 6090775 | 7202749 | 1382051 | Rho-guanine nucleotide exchange factor                 | Rgnef | 361882 | 1,65 | up   |
| 5874039 | 7202749 | 1382102 | Rho-guanine nucleotide exchange factor                 | Rgnef | 361882 | 1,46 | down |
| 5895325 | 7202749 | 1382062 | Rho-guanine nucleotide exchange factor                 | Rgnef | 361882 | 1,40 | down |
| 6570220 | 7202749 | 1382100 | Rho-guanine nucleotide exchange factor                 | Rgnef | 361882 | 1,38 | down |
| 5927368 | 7202749 | 1382087 | Rho-guanine nucleotide exchange factor                 | Rgnef | 361882 | 1,34 | up   |
| 6415800 | 7202749 | 1382088 | Rho-guanine nucleotide exchange factor                 | Rgnef | 361882 | 1,32 | down |
| 6530592 | 7202749 | 1382123 | Rho-guanine nucleotide exchange factor                 | Rgnef | 361882 | 1,31 | down |
| 6429601 | 7202749 | 1382111 | Rho-guanine nucleotide exchange factor                 | Rgnef | 361882 | 1,30 | up   |
| 5932086 | 7202749 | 1382107 | Rho-guanine nucleotide exchange factor                 | Rgnef | 361882 | 1,26 | up   |
| 6393590 | 7202749 | 1382083 | Rho-guanine nucleotide exchange factor                 | Rgnef | 361882 | 1,25 | down |
| 6528094 | 7202749 | 1382077 | Rho-guanine nucleotide exchange factor                 | Rgnef | 361882 | 1,25 | down |
| 5887631 | 7202749 | 1382089 | Rho-guanine nucleotide exchange factor                 | Rgnef | 361882 | 1,22 | down |
| 5966840 | 7202749 | 1382069 | Rho-guanine nucleotide exchange factor                 | Rgnef | 361882 | 1,22 | down |
| 6669730 | 7202749 | 1382078 | Rho-guanine nucleotide exchange factor                 | Rgnef | 361882 | 1,21 | down |
| 6004076 | 7202749 | 1382064 | Rho-guanine nucleotide exchange factor                 | Rgnef | 361882 | 1,21 | up   |
| 6519855 | 7202749 | 1382051 | Rho-guanine nucleotide exchange factor                 | Rgnef | 361882 | 1,21 | up   |
| 5888449 | 7202749 | 1382063 | Rho-guanine nucleotide exchange factor                 | Rgnef | 361882 | 1,19 | down |
| 6716522 | 7202749 | 1382054 | Rho-guanine nucleotide exchange factor                 | Rgnef | 361882 | 1,13 | down |
| 5875928 | 7202749 | 1382073 | Rho-guanine nucleotide exchange factor                 | Rgnef | 361882 | 1,13 | down |
| 5781276 | 7202749 | 1382090 | Rho-guanine nucleotide exchange factor                 | Rgnef | 361882 | 1,10 | up   |
| 6705813 | 7202749 | 1382068 | Rho-guanine nucleotide exchange factor                 | Rgnef | 361882 | 1,09 | up   |
| 5870414 | 7202749 | 1382054 | Rho-guanine nucleotide exchange factor                 | Rgnef | 361882 | 1,09 | down |
| 5738288 | 7202749 | 1382074 | Rho-guanine nucleotide exchange factor                 | Rgnef | 361882 | 1,09 | up   |
| 5805181 | 7202749 | 1382065 | Rho-guanine nucleotide exchange factor                 | Rgnef | 361882 | 1,08 | up   |
| 6471338 | 7202749 | 1382071 | Rho-guanine nucleotide exchange factor                 | Rgnef | 361882 | 1,07 | down |
| 5624272 | 7202749 | 1382067 | Rho-guanine nucleotide exchange factor                 | Rgnef | 361882 | 1,07 | down |
| 6573113 | 7202749 | 1382105 | Rho-guanine nucleotide exchange factor                 | Rgnef | 361882 | 1,06 | down |
| 6624011 | 7202749 | 1382060 | Rho-guanine nucleotide exchange factor                 | Rgnef | 361882 | 1,06 | down |
| 6256304 | 7202749 | 1382112 | Rho-guanine nucleotide exchange factor                 | Rgnef | 361882 | 1,05 | down |
| 6290711 | 7202749 | 1382059 | Rho-guanine nucleotide exchange factor                 | Rgnef | 361882 | 1,05 | down |
| 6591807 | 7202749 | 1382084 | Rho-guanine nucleotide exchange factor                 | Rgnef | 361882 | 1,03 | up   |

|         |         |         |                                         |       |        |      |      |
|---------|---------|---------|-----------------------------------------|-------|--------|------|------|
| 6107247 | 7202749 | 1382070 | Rho-guanine nucleotide exchange factor  | Rgnef | 361882 | 1,03 | down |
| 6300718 | 7202749 | 1382082 | Rho-guanine nucleotide exchange factor  | Rgnef | 361882 | 1,03 | down |
| 5663949 | 7202749 | 1382122 | Rho-guanine nucleotide exchange factor  | Rgnef | 361882 | 1,02 | up   |
| 6227945 | 7202749 | 1382050 | Rho-guanine nucleotide exchange factor  | Rgnef | 361882 | 1,01 | up   |
| 6504390 | 7202749 | 1382072 | Rho-guanine nucleotide exchange factor  | Rgnef | 361882 | 1,01 | down |
| 6647324 | 7202749 | 1382058 | Rho-guanine nucleotide exchange factor  | Rgnef | 361882 | 1,00 | down |
| 5637128 | 7202749 | 1382106 | Rho-guanine nucleotide exchange factor  | Rgnef | 361882 | 1,00 | up   |
| 6531959 | 7084716 | 1090128 | rhomboid 5 homolog 2 (Drosophila)       | Rhbd2 | 303690 | 3,01 | down |
| 6108174 | 7084716 | 1090121 | rhomboid 5 homolog 2 (Drosophila)       | Rhbd2 | 303690 | 2,44 | down |
| 5712293 | 7084716 | 1090116 | rhomboid 5 homolog 2 (Drosophila)       | Rhbd2 | 303690 | 2,33 | up   |
| 6499766 | 7084716 | 1090121 | rhomboid 5 homolog 2 (Drosophila)       | Rhbd2 | 303690 | 2,28 | down |
| 6204291 | 7084716 | 1090122 | rhomboid 5 homolog 2 (Drosophila)       | Rhbd2 | 303690 | 2,06 | down |
| 6411770 | 7084716 | 1090123 | rhomboid 5 homolog 2 (Drosophila)       | Rhbd2 | 303690 | 2,02 | down |
| 6308851 | 7084716 | 1090115 | rhomboid 5 homolog 2 (Drosophila)       | Rhbd2 | 303690 | 1,94 | up   |
| 6470896 | 7084716 | 1090118 | rhomboid 5 homolog 2 (Drosophila)       | Rhbd2 | 303690 | 1,89 | up   |
| 6483405 | 7084716 | 1090110 | rhomboid 5 homolog 2 (Drosophila)       | Rhbd2 | 303690 | 1,84 | up   |
| 5879515 | 7084716 | 1090109 | rhomboid 5 homolog 2 (Drosophila)       | Rhbd2 | 303690 | 1,78 | up   |
| 5748928 | 7084716 | 1090122 | rhomboid 5 homolog 2 (Drosophila)       | Rhbd2 | 303690 | 1,77 | down |
| 5715478 | 7084716 | 1090114 | rhomboid 5 homolog 2 (Drosophila)       | Rhbd2 | 303690 | 1,62 | down |
| 5738828 | 7084716 | 1090111 | rhomboid 5 homolog 2 (Drosophila)       | Rhbd2 | 303690 | 1,59 | up   |
| 6498656 | 7084716 | 1090117 | rhomboid 5 homolog 2 (Drosophila)       | Rhbd2 | 303690 | 1,56 | up   |
| 6019655 | 7084716 | 1090112 | rhomboid 5 homolog 2 (Drosophila)       | Rhbd2 | 303690 | 1,56 | down |
| 6157786 | 7084716 | 1090110 | rhomboid 5 homolog 2 (Drosophila)       | Rhbd2 | 303690 | 1,52 | up   |
| 6321842 | 7084716 | 1090118 | rhomboid 5 homolog 2 (Drosophila)       | Rhbd2 | 303690 | 1,49 | down |
| 6424020 | 7084716 | 1090108 | rhomboid 5 homolog 2 (Drosophila)       | Rhbd2 | 303690 | 1,36 | up   |
| 6189134 | 7084716 | 1090120 | rhomboid 5 homolog 2 (Drosophila)       | Rhbd2 | 303690 | 1,24 | down |
| 6302844 | 7084716 | 1090118 | rhomboid 5 homolog 2 (Drosophila)       | Rhbd2 | 303690 | 1,14 | up   |
| 6596483 | 7084716 | 1090119 | rhomboid 5 homolog 2 (Drosophila)       | Rhbd2 | 303690 | 1,12 | up   |
| 6128106 | 7084716 | 1090113 | rhomboid 5 homolog 2 (Drosophila)       | Rhbd2 | 303690 | 1,06 | up   |
| 6374276 | 7084716 | 1090123 | rhomboid 5 homolog 2 (Drosophila)       | Rhbd2 | 303690 | 1,05 | up   |
| 6428853 | 7084716 | 1090108 | rhomboid 5 homolog 2 (Drosophila)       | Rhbd2 | 303690 | 1,00 | up   |
| 6376813 | 7318139 | 1668074 | rhophilin, Rho GTPase binding protein 1 | Rhpn1 | 300030 | 1,26 | up   |
| 6001708 | 7318139 | 1668076 | rhophilin, Rho GTPase binding protein 1 | Rhpn1 | 300030 | 1,03 | up   |
| 6513584 | 7139682 | 1225007 | Rho-related BTB domain containing 2     | Rhob2 | 306004 | 2,41 | up   |
| 6591893 | 7139682 | 1225015 | Rho-related BTB domain containing 2     | Rhob2 | 306004 | 1,18 | up   |
| 5784476 | 7139682 | 1225007 | Rho-related BTB domain containing 2     | Rhob2 | 306004 | 1,16 | down |
| 6000676 | 7139682 | 1225010 | Rho-related BTB domain containing 2     | Rhob2 | 306004 | 1,15 | up   |
| 5630014 | 7139682 | 1225009 | Rho-related BTB domain containing 2     | Rhob2 | 306004 | 1,15 | down |
| 5787460 | 7139682 | 1225011 | Rho-related BTB domain containing 2     | Rhob2 | 306004 | 1,11 | down |
| 5739024 | 7139682 | 1225012 | Rho-related BTB domain containing 2     | Rhob2 | 306004 | 1,08 | down |
| 5916459 | 7139682 | 1225016 | Rho-related BTB domain containing 2     | Rhob2 | 306004 | 1,07 | up   |
| 6506794 | 7139682 | 1225013 | Rho-related BTB domain containing 2     | Rhob2 | 306004 | 1,04 | down |
| 6450272 | 7139682 | 1225008 | Rho-related BTB domain containing 2     | Rhob2 | 306004 | 1,02 | up   |
| 6657907 | 7139682 | 1225014 | Rho-related BTB domain containing 2     | Rhob2 | 306004 | 1,01 | up   |
| 5718430 | 7201422 | 1379176 | Rho-related BTB domain containing 3     | Rhob3 | 309922 | 1,92 | down |
| 5734555 | 7201422 | 1379191 | Rho-related BTB domain containing 3     | Rhob3 | 309922 | 1,91 | up   |
| 6720673 | 7201422 | 1379173 | Rho-related BTB domain containing 3     | Rhob3 | 309922 | 1,79 | down |
| 6303434 | 7201422 | 1379180 | Rho-related BTB domain containing 3     | Rhob3 | 309922 | 1,79 | down |
| 5930333 | 7201422 | 1379191 | Rho-related BTB domain containing 3     | Rhob3 | 309922 | 1,78 | up   |
| 5841863 | 7201422 | 1379191 | Rho-related BTB domain containing 3     | Rhob3 | 309922 | 1,63 | up   |
| 6587724 | 7201422 | 1379170 | Rho-related BTB domain containing 3     | Rhob3 | 309922 | 1,48 | down |
| 5646004 | 7201422 | 1379190 | Rho-related BTB domain containing 3     | Rhob3 | 309922 | 1,44 | down |
| 6680360 | 7201422 | 1379181 | Rho-related BTB domain containing 3     | Rhob3 | 309922 | 1,29 | down |
| 6330468 | 7201422 | 1379189 | Rho-related BTB domain containing 3     | Rhob3 | 309922 | 1,21 | down |
| 6488414 | 7201422 | 1379169 | Rho-related BTB domain containing 3     | Rhob3 | 309922 | 1,18 | down |
| 5897044 | 7201422 | 1379185 | Rho-related BTB domain containing 3     | Rhob3 | 309922 | 1,18 | down |
| 6026360 | 7201422 | 1379189 | Rho-related BTB domain containing 3     | Rhob3 | 309922 | 1,14 | down |

|         |         |         |                                     |         |        |      |      |
|---------|---------|---------|-------------------------------------|---------|--------|------|------|
| 5702101 | 7201422 | 1379188 | Rho-related BTB domain containing 3 | Rhobtb3 | 309922 | 1,14 | down |
| 5812512 | 7201422 | 1379192 | Rho-related BTB domain containing 3 | Rhobtb3 | 309922 | 1,07 | up   |
| 5674676 | 7201422 | 1379174 | Rho-related BTB domain containing 3 | Rhobtb3 | 309922 | 1,07 | up   |
| 6182798 | 7201422 | 1379170 | Rho-related BTB domain containing 3 | Rhobtb3 | 309922 | 1,06 | up   |
| 6728836 | 7201422 | 1379191 | Rho-related BTB domain containing 3 | Rhobtb3 | 309922 | 1,04 | down |
| 6461839 | 7255436 | 1511085 | rhotekin                            | Rtkn    | 297383 | 2,01 | down |
| 6411423 | 7255436 | 1511087 | rhotekin                            | Rtkn    | 297383 | 1,43 | down |
| 6577526 | 7255436 | 1511096 | rhotekin                            | Rtkn    | 297383 | 1,36 | down |
| 6455514 | 7255436 | 1511085 | rhotekin                            | Rtkn    | 297383 | 1,31 | up   |
| 6176206 | 7255436 | 1511089 | rhotekin                            | Rtkn    | 297383 | 1,29 | down |
| 5707541 | 7255436 | 1511097 | rhotekin                            | Rtkn    | 297383 | 1,27 | down |
| 5862456 | 7255436 | 1511094 | rhotekin                            | Rtkn    | 297383 | 1,27 | up   |
| 6378964 | 7255436 | 1511088 | rhotekin                            | Rtkn    | 297383 | 1,22 | down |
| 6065645 | 7255436 | 1511095 | rhotekin                            | Rtkn    | 297383 | 1,21 | up   |
| 6567198 | 7255436 | 1511094 | rhotekin                            | Rtkn    | 297383 | 1,21 | up   |
| 6643777 | 7255436 | 1511093 | rhotekin                            | Rtkn    | 297383 | 1,17 | up   |
| 5722711 | 7255436 | 1511096 | rhotekin                            | Rtkn    | 297383 | 1,15 | down |
| 5799742 | 7255436 | 1511086 | rhotekin                            | Rtkn    | 297383 | 1,14 | up   |
| 5963204 | 7255436 | 1511091 | rhotekin                            | Rtkn    | 297383 | 1,13 | up   |
| 6023711 | 7255436 | 1511085 | rhotekin                            | Rtkn    | 297383 | 1,11 | up   |
| 5718039 | 7255436 | 1511085 | rhotekin                            | Rtkn    | 297383 | 1,08 | down |
| 6652976 | 7255436 | 1511084 | rhotekin                            | Rtkn    | 297383 | 1,06 | down |
| 5777998 | 7255436 | 1511090 | rhotekin                            | Rtkn    | 297383 | 1,03 | down |
| 5866963 | 7255436 | 1511089 | rhotekin                            | Rtkn    | 297383 | 1,02 | down |
| 5999011 | 7255436 | 1511092 | rhotekin                            | Rtkn    | 297383 | 1,02 | down |
| 6650025 | 7040165 | 985823  | riboflavin kinase                   | Rfk     | 499328 | 2,31 | down |
| 6357152 | 7040165 | 985826  | riboflavin kinase                   | Rfk     | 499328 | 1,56 | up   |
| 6504958 | 7040165 | 985824  | riboflavin kinase                   | Rfk     | 499328 | 1,32 | up   |
| 5969431 | 7040165 | 985825  | riboflavin kinase                   | Rfk     | 499328 | 1,29 | up   |
| 5789142 | 7040165 | 985823  | riboflavin kinase                   | Rfk     | 499328 | 1,16 | down |
| 6043780 | 7040165 | 985823  | riboflavin kinase                   | Rfk     | 499328 | 1,13 | up   |
| 6129011 | 7040165 | 985827  | riboflavin kinase                   | Rfk     | 499328 | 1,12 | up   |
| 6220181 | 7040165 | 985823  | riboflavin kinase                   | Rfk     | 499328 | 1,07 | up   |
| 6103545 | 7040165 | 985824  | riboflavin kinase                   | Rfk     | 499328 | 1,06 | down |
| 5894200 | 7040165 | 985823  | riboflavin kinase                   | Rfk     | 499328 | 1,05 | down |
| 6015791 | 7040165 | 985827  | riboflavin kinase                   | Rfk     | 499328 | 1,03 | up   |
| 5716215 | 7040165 | 985823  | riboflavin kinase                   | Rfk     | 499328 | 1,00 | down |
| 6183721 | 7190844 | 1352151 | ribonuclease type III, nuclear      | Rnasen  | 310159 | 2,23 | down |
| 6478543 | 7190844 | 1352129 | ribonuclease type III, nuclear      | Rnasen  | 310159 | 2,06 | up   |
| 5999055 | 7190844 | 1352111 | ribonuclease type III, nuclear      | Rnasen  | 310159 | 1,67 | down |
| 6353348 | 7190844 | 1352167 | ribonuclease type III, nuclear      | Rnasen  | 310159 | 1,54 | down |
| 6417948 | 7190844 | 1352121 | ribonuclease type III, nuclear      | Rnasen  | 310159 | 1,47 | down |
| 5770790 | 7190844 | 1352160 | ribonuclease type III, nuclear      | Rnasen  | 310159 | 1,46 | down |
| 6188079 | 7190844 | 1352166 | ribonuclease type III, nuclear      | Rnasen  | 310159 | 1,45 | down |
| 6381948 | 7190844 | 1352108 | ribonuclease type III, nuclear      | Rnasen  | 310159 | 1,38 | up   |
| 5664593 | 7190844 | 1352151 | ribonuclease type III, nuclear      | Rnasen  | 310159 | 1,34 | down |
| 5918745 | 7190844 | 1352114 | ribonuclease type III, nuclear      | Rnasen  | 310159 | 1,31 | down |
| 6648360 | 7190844 | 1352115 | ribonuclease type III, nuclear      | Rnasen  | 310159 | 1,29 | up   |
| 6211077 | 7190844 | 1352162 | ribonuclease type III, nuclear      | Rnasen  | 310159 | 1,27 | down |
| 6518309 | 7190844 | 1352169 | ribonuclease type III, nuclear      | Rnasen  | 310159 | 1,19 | down |
| 6191468 | 7190844 | 1352166 | ribonuclease type III, nuclear      | Rnasen  | 310159 | 1,19 | down |
| 5839283 | 7190844 | 1352111 | ribonuclease type III, nuclear      | Rnasen  | 310159 | 1,17 | up   |
| 5785932 | 7190844 | 1352170 | ribonuclease type III, nuclear      | Rnasen  | 310159 | 1,16 | up   |
| 5780870 | 7190844 | 1352116 | ribonuclease type III, nuclear      | Rnasen  | 310159 | 1,15 | up   |
| 5731407 | 7190844 | 1352110 | ribonuclease type III, nuclear      | Rnasen  | 310159 | 1,15 | up   |
| 6028727 | 7190844 | 1352111 | ribonuclease type III, nuclear      | Rnasen  | 310159 | 1,14 | up   |
| 6672182 | 7190844 | 1352117 | ribonuclease type III, nuclear      | Rnasen  | 310159 | 1,13 | down |



|         |         |         |                                                                                          |                    |                  |      |      |
|---------|---------|---------|------------------------------------------------------------------------------------------|--------------------|------------------|------|------|
| 6384581 | 7190844 | 1352165 | ribonuclease type III, nuclear                                                           | Rnasen             | 310159           | 1,09 | down |
| 6686746 | 7190844 | 1352170 | ribonuclease type III, nuclear                                                           | Rnasen             | 310159           | 1,09 | down |
| 6729936 | 7190844 | 1352127 | ribonuclease type III, nuclear                                                           | Rnasen             | 310159           | 1,08 | down |
| 6671167 | 7190844 | 1352106 | ribonuclease type III, nuclear                                                           | Rnasen             | 310159           | 1,08 | down |
| 5992237 | 7190844 | 1352158 | ribonuclease type III, nuclear                                                           | Rnasen             | 310159           | 1,06 | down |
| 6194586 | 7190844 | 1352128 | ribonuclease type III, nuclear                                                           | Rnasen             | 310159           | 1,06 | up   |
| 5721139 | 7190844 | 1352132 | ribonuclease type III, nuclear                                                           | Rnasen             | 310159           | 1,06 | down |
| 6154389 | 7190844 | 1352155 | ribonuclease type III, nuclear                                                           | Rnasen             | 310159           | 1,05 | up   |
| 6256271 | 7190844 | 1352131 | ribonuclease type III, nuclear                                                           | Rnasen             | 310159           | 1,05 | up   |
| 6245135 | 7190844 | 1352168 | ribonuclease type III, nuclear                                                           | Rnasen             | 310159           | 1,04 | up   |
| 6168686 | 7190844 | 1352111 | ribonuclease type III, nuclear                                                           | Rnasen             | 310159           | 1,01 | down |
| 6192315 | 7190844 | 1352113 | ribonuclease type III, nuclear                                                           | Rnasen             | 310159           | 1,01 | down |
| 5663807 | 7190844 | 1352150 | ribonuclease type III, nuclear                                                           | Rnasen             | 310159           | 1,01 | up   |
| 5799227 | 7190844 | 1352115 | ribonuclease type III, nuclear                                                           | Rnasen             | 310159           | 1,01 | up   |
| 6344657 | 7079326 | 1077973 | ribonuclease, RNase K                                                                    | Rnasek             | 287453           | 1,73 | down |
| 6301318 | 7079326 | 1077974 | ribonuclease, RNase K                                                                    | Rnasek             | 287453           | 1,59 | down |
| 6678352 | 7079326 | 1077973 | ribonuclease, RNase K                                                                    | Rnasek             | 287453           | 1,50 | down |
| 6342984 | 7079326 | 1077975 | ribonuclease, RNase K                                                                    | Rnasek             | 287453           | 1,49 | down |
| 6165660 | 7079326 | 1077976 | ribonuclease, RNase K                                                                    | Rnasek             | 287453           | 1,37 | down |
| 5861493 | 7277719 | 1567095 | ribonucleoprotein, PTB-binding 2                                                         | Raver2             | 362551           | 1,58 | up   |
| 5726932 | 7277719 | 1567095 | ribonucleoprotein, PTB-binding 2                                                         | Raver2             | 362551           | 1,46 | down |
| 6552869 | 7277719 | 1567095 | ribonucleoprotein, PTB-binding 2                                                         | Raver2             | 362551           | 1,05 | up   |
| 5667244 | 7298409 | 1617722 | ribose-phosphate pyrophosphokinase I -like                                               | LOC314140          | 314140           | 3,15 | down |
| 5979363 | 7298409 | 1617723 | ribose-phosphate pyrophosphokinase I -like                                               | LOC314140          | 314140           | 1,27 | up   |
| 6544632 | 7298409 | 1617725 | ribose-phosphate pyrophosphokinase I -like                                               | LOC314140          | 314140           | 1,05 | up   |
| 6406644 | 7298409 | 1617724 | ribose-phosphate pyrophosphokinase I -like                                               | LOC314140          | 314140           | 1,00 | up   |
| 5931555 | 7298409 | 1617724 | ribose-phosphate pyrophosphokinase I -like /// phosphoribosyl pyrophosphate synthetase 1 | .OC314140 /// Prps | 314140 /// 29562 | 1,14 | down |
| 6148046 | 7298409 | 1617724 | ribose-phosphate pyrophosphokinase I -like /// phosphoribosyl pyrophosphate synthetase 1 | .OC314140 /// Prps | 314140 /// 29562 | 1,07 | down |
| 5793658 | 7050878 | 1011545 | ribosomal protein L13A                                                                   | Rpl13a             | 317646           | 2,22 | up   |
| 6168206 | 7050878 | 1011538 | ribosomal protein L13A                                                                   | Rpl13a             | 317646           | 1,27 | down |
| 6491606 | 7050878 | 1011539 | ribosomal protein L13A                                                                   | Rpl13a             | 317646           | 1,15 | up   |
| 6071669 | 7050878 | 1011544 | ribosomal protein L13A                                                                   | Rpl13a             | 317646           | 1,10 | up   |
| 6659905 | 7050878 | 1011542 | ribosomal protein L13A                                                                   | Rpl13a             | 317646           | 1,08 | down |
| 6312499 | 7050878 | 1011541 | ribosomal protein L13A                                                                   | Rpl13a             | 317646           | 1,07 | up   |
| 6256973 | 7050878 | 1011540 | ribosomal protein L13A                                                                   | Rpl13a             | 317646           | 1,06 | down |
| 6716048 | 7050878 | 1011543 | ribosomal protein L13A                                                                   | Rpl13a             | 317646           | 1,06 | down |
| 5991003 | 7030144 | 960896  | ribosomal protein S16                                                                    | Rps16              | 140655           | 1,36 | up   |
| 5885999 | 7030144 | 960894  | ribosomal protein S16                                                                    | Rps16              | 140655           | 1,26 | down |
| 5719772 | 7030144 | 960894  | ribosomal protein S16                                                                    | Rps16              | 140655           | 1,17 | up   |
| 6698767 | 7030144 | 960897  | ribosomal protein S16                                                                    | Rps16              | 140655           | 1,08 | up   |
| 5807108 | 7030144 | 960897  | ribosomal protein S16                                                                    | Rps16              | 140655           | 1,07 | down |
| 6488135 | 7030144 | 960893  | ribosomal protein S16                                                                    | Rps16              | 140655           | 1,03 | down |
| 6256648 | 7030144 | 960895  | ribosomal protein S16                                                                    | Rps16              | 140655           | 1,02 | up   |
| 6718753 | 7030144 | 960893  | ribosomal protein S16                                                                    | Rps16              | 140655           | 1,00 | down |
| 5870714 | 7065575 | 1045105 | ribosomal protein S2                                                                     | Rps2               | 83789            | 1,47 | down |
| 6344503 | 7065575 | 1045105 | ribosomal protein S2                                                                     | Rps2               | 83789            | 1,42 | down |
| 6162495 | 7065575 | 1045105 | ribosomal protein S2                                                                     | Rps2               | 83789            | 1,22 | up   |
| 5653346 | 7065575 | 1045110 | ribosomal protein S2                                                                     | Rps2               | 83789            | 1,22 | down |
| 6495794 | 7065575 | 1045106 | ribosomal protein S2                                                                     | Rps2               | 83789            | 1,03 | down |
| 6659859 | 7065575 | 1045109 | ribosomal protein S2                                                                     | Rps2               | 83789            | 1,02 | down |
| 5883544 | 7065575 | 1045107 | ribosomal protein S2                                                                     | Rps2               | 83789            | 1,02 | down |
| 6500668 | 7065575 | 1045111 | ribosomal protein S2                                                                     | Rps2               | 83789            | 1,01 | up   |
| 5989093 | 7283260 | 1580860 | ribosomal protein S20                                                                    | Rps20              | 122772           | 3,54 | down |
| 6216584 | 7281300 | 1576018 | ribosomal protein S20                                                                    | Rps20              | 122772           | 3,40 | down |
| 6019399 | 7283260 | 1580862 | ribosomal protein S20                                                                    | Rps20              | 122772           | 1,19 | up   |
| 5623294 | 7283260 | 1580864 | ribosomal protein S20                                                                    | Rps20              | 122772           | 1,16 | down |
| 6023562 | 7281300 | 1576017 | ribosomal protein S20                                                                    | Rps20              | 122772           | 1,13 | up   |

|         |         |         |                                           |         |        |      |      |
|---------|---------|---------|-------------------------------------------|---------|--------|------|------|
| 6507201 | 7283260 | 1580864 | ribosomal protein S20                     | Rps20   | 122772 | 1,10 | up   |
| 6584334 | 7281300 | 1576017 | ribosomal protein S20                     | Rps20   | 122772 | 1,09 | up   |
| 5713670 | 7283260 | 1580861 | ribosomal protein S20                     | Rps20   | 122772 | 1,06 | down |
| 6393613 | 7283260 | 1580863 | ribosomal protein S20                     | Rps20   | 122772 | 1,02 | down |
| 6716867 | 7281300 | 1576017 | ribosomal protein S20                     | Rps20   | 122772 | 1,00 | down |
| 5820687 | 7027386 | 955021  | ribosomal protein S6 kinase polypeptide 2 | Rps6ka2 | 117269 | 2,43 | down |
| 6493467 | 7027386 | 955018  | ribosomal protein S6 kinase polypeptide 2 | Rps6ka2 | 117269 | 1,27 | down |
| 6680278 | 7027386 | 955029  | ribosomal protein S6 kinase polypeptide 2 | Rps6ka2 | 117269 | 1,23 | up   |
| 5644979 | 7027386 | 955080  | ribosomal protein S6 kinase polypeptide 2 | Rps6ka2 | 117269 | 1,16 | up   |
| 6327324 | 7027386 | 955029  | ribosomal protein S6 kinase polypeptide 2 | Rps6ka2 | 117269 | 1,16 | down |
| 5742452 | 7027386 | 955078  | ribosomal protein S6 kinase polypeptide 2 | Rps6ka2 | 117269 | 1,13 | up   |
| 6055917 | 7027386 | 955083  | ribosomal protein S6 kinase polypeptide 2 | Rps6ka2 | 117269 | 1,11 | down |
| 6402389 | 7027386 | 955079  | ribosomal protein S6 kinase polypeptide 2 | Rps6ka2 | 117269 | 1,07 | up   |
| 6732116 | 7027386 | 955075  | ribosomal protein S6 kinase polypeptide 2 | Rps6ka2 | 117269 | 1,07 | up   |
| 5938001 | 7027386 | 955081  | ribosomal protein S6 kinase polypeptide 2 | Rps6ka2 | 117269 | 1,05 | up   |
| 6553774 | 7027386 | 955029  | ribosomal protein S6 kinase polypeptide 2 | Rps6ka2 | 117269 | 1,00 | up   |
| 6023513 | 7383102 | 1827378 | ribosomal protein S6 kinase polypeptide 6 | Rps6ka6 | 317203 | 1,05 | up   |
| 6656351 | 7245921 | 1487691 | ribosome binding protein 1                | Rrbp1   | 311483 | 1,48 | up   |
| 6620477 | 7245921 | 1487671 | ribosome binding protein 1                | Rrbp1   | 311483 | 1,40 | up   |
| 5998183 | 7245921 | 1487700 | ribosome binding protein 1                | Rrbp1   | 311483 | 1,40 | up   |
| 6580480 | 7245921 | 1487681 | ribosome binding protein 1                | Rrbp1   | 311483 | 1,39 | up   |
| 6698185 | 7245921 | 1487671 | ribosome binding protein 1                | Rrbp1   | 311483 | 1,35 | down |
| 5798450 | 7245921 | 1487671 | ribosome binding protein 1                | Rrbp1   | 311483 | 1,28 | up   |
| 6744880 | 7245921 | 1487673 | ribosome binding protein 1                | Rrbp1   | 311483 | 1,28 | up   |
| 6214167 | 7245921 | 1487671 | ribosome binding protein 1                | Rrbp1   | 311483 | 1,27 | up   |
| 6526504 | 7245921 | 1487686 | ribosome binding protein 1                | Rrbp1   | 311483 | 1,26 | up   |
| 5962894 | 7245921 | 1487709 | ribosome binding protein 1                | Rrbp1   | 311483 | 1,26 | down |
| 6734115 | 7245921 | 1487684 | ribosome binding protein 1                | Rrbp1   | 311483 | 1,21 | up   |
| 6348495 | 7245921 | 1487682 | ribosome binding protein 1                | Rrbp1   | 311483 | 1,18 | up   |
| 5977705 | 7245921 | 1487680 | ribosome binding protein 1                | Rrbp1   | 311483 | 1,17 | up   |
| 6293747 | 7245921 | 1487687 | ribosome binding protein 1                | Rrbp1   | 311483 | 1,16 | up   |
| 6472392 | 7245921 | 1487678 | ribosome binding protein 1                | Rrbp1   | 311483 | 1,15 | up   |
| 6488741 | 7245921 | 1487679 | ribosome binding protein 1                | Rrbp1   | 311483 | 1,13 | down |
| 5909588 | 7245921 | 1487671 | ribosome binding protein 1                | Rrbp1   | 311483 | 1,12 | up   |
| 6377121 | 7245921 | 1487677 | ribosome binding protein 1                | Rrbp1   | 311483 | 1,11 | up   |
| 6234754 | 7245921 | 1487696 | ribosome binding protein 1                | Rrbp1   | 311483 | 1,10 | up   |
| 6434570 | 7245921 | 1487691 | ribosome binding protein 1                | Rrbp1   | 311483 | 1,09 | up   |
| 5880730 | 7245921 | 1487701 | ribosome binding protein 1                | Rrbp1   | 311483 | 1,06 | up   |
| 5795105 | 7245921 | 1487672 | ribosome binding protein 1                | Rrbp1   | 311483 | 1,04 | up   |
| 5893070 | 7245921 | 1487709 | ribosome binding protein 1                | Rrbp1   | 311483 | 1,03 | up   |
| 6393974 | 7245921 | 1487698 | ribosome binding protein 1                | Rrbp1   | 311483 | 1,03 | down |
| 5910305 | 7245921 | 1487674 | ribosome binding protein 1                | Rrbp1   | 311483 | 1,03 | up   |
| 5640790 | 7245921 | 1487694 | ribosome binding protein 1                | Rrbp1   | 311483 | 1,02 | down |
| 6438240 | 7245921 | 1487683 | ribosome binding protein 1                | Rrbp1   | 311483 | 1,01 | up   |
| 6329129 | 7245921 | 1487692 | ribosome binding protein 1                | Rrbp1   | 311483 | 1,01 | down |
| 5687501 | 7245921 | 1487693 | ribosome binding protein 1                | Rrbp1   | 311483 | 1,01 | down |
| 6130739 | 7168309 | 1295354 | ring finger protein 125                   | Rnf125  | 361296 | 3,90 | up   |
| 6670858 | 7168309 | 1295358 | ring finger protein 125                   | Rnf125  | 361296 | 1,58 | up   |
| 6270096 | 7168309 | 1295359 | ring finger protein 125                   | Rnf125  | 361296 | 1,49 | up   |
| 5627900 | 7168309 | 1295359 | ring finger protein 125                   | Rnf125  | 361296 | 1,36 | down |
| 5773734 | 7168309 | 1295356 | ring finger protein 125                   | Rnf125  | 361296 | 1,33 | up   |
| 6653900 | 7168309 | 1295359 | ring finger protein 125                   | Rnf125  | 361296 | 1,30 | up   |
| 6058118 | 7168309 | 1295355 | ring finger protein 125                   | Rnf125  | 361296 | 1,29 | up   |
| 6601733 | 7168309 | 1295357 | ring finger protein 125                   | Rnf125  | 361296 | 1,18 | down |
| 6323389 | 7177428 | 1318368 | ring finger protein 165                   | Rnf165  | 307251 | 2,42 | up   |
| 6082331 | 7177428 | 1318367 | ring finger protein 165                   | Rnf165  | 307251 | 2,02 | up   |
| 5858962 | 7177428 | 1318369 | ring finger protein 165                   | Rnf165  | 307251 | 1,38 | down |

|         |         |         |                         |        |        |      |      |
|---------|---------|---------|-------------------------|--------|--------|------|------|
| 6192639 | 7177428 | 1318372 | ring finger protein 165 | Rnf165 | 307251 | 1,26 | down |
| 5750792 | 7177428 | 1318370 | ring finger protein 165 | Rnf165 | 307251 | 1,14 | down |
| 6534663 | 7177428 | 1318366 | ring finger protein 165 | Rnf165 | 307251 | 1,11 | up   |
| 6049982 | 7177428 | 1318366 | ring finger protein 165 | Rnf165 | 307251 | 1,11 | down |
| 6130491 | 7177428 | 1318397 | ring finger protein 165 | Rnf165 | 307251 | 1,05 | up   |
| 6518859 | 7177428 | 1318372 | ring finger protein 165 | Rnf165 | 307251 | 1,04 | down |
| 5889475 | 7177428 | 1318372 | ring finger protein 165 | Rnf165 | 307251 | 1,03 | up   |
| 6468116 | 7177428 | 1318371 | ring finger protein 165 | Rnf165 | 307251 | 1,01 | up   |
| 6003857 | 7132125 | 1206597 | ring finger protein 17  | Rnf17  | 305908 | 1,69 | up   |
| 5623496 | 7132125 | 1206642 | ring finger protein 17  | Rnf17  | 305908 | 1,04 | down |
| 6488840 | 7265990 | 1537109 | ring finger protein 181 | Rnf181 | 297337 | 2,41 | down |
| 6259384 | 7265990 | 1537109 | ring finger protein 181 | Rnf181 | 297337 | 1,28 | down |
| 6249805 | 7265990 | 1537109 | ring finger protein 181 | Rnf181 | 297337 | 1,28 | up   |
| 5808001 | 7265990 | 1537107 | ring finger protein 181 | Rnf181 | 297337 | 1,25 | down |
| 6017565 | 7265990 | 1537109 | ring finger protein 181 | Rnf181 | 297337 | 1,21 | down |
| 6511345 | 7265990 | 1537104 | ring finger protein 181 | Rnf181 | 297337 | 1,16 | up   |
| 5688862 | 7265990 | 1537109 | ring finger protein 181 | Rnf181 | 297337 | 1,14 | down |
| 5899286 | 7265990 | 1537107 | ring finger protein 181 | Rnf181 | 297337 | 1,14 | up   |
| 5885288 | 7265990 | 1537105 | ring finger protein 181 | Rnf181 | 297337 | 1,14 | down |
| 6274713 | 7265990 | 1537109 | ring finger protein 181 | Rnf181 | 297337 | 1,12 | up   |
| 6184293 | 7265990 | 1537108 | ring finger protein 181 | Rnf181 | 297337 | 1,08 | down |
| 6075912 | 7265990 | 1537108 | ring finger protein 181 | Rnf181 | 297337 | 1,02 | up   |
| 5849358 | 7265990 | 1537106 | ring finger protein 181 | Rnf181 | 297337 | 1,00 | down |
| 6027413 | 7279793 | 1572540 | ring finger protein 19B | Rnf19b | 313806 | 3,64 | down |
| 5951610 | 7279793 | 1572540 | ring finger protein 19B | Rnf19b | 313806 | 2,81 | down |
| 6632127 | 7279793 | 1572535 | ring finger protein 19B | Rnf19b | 313806 | 1,39 | up   |
| 6154882 | 7279793 | 1572531 | ring finger protein 19B | Rnf19b | 313806 | 1,10 | down |
| 5805622 | 7279793 | 1572538 | ring finger protein 19B | Rnf19b | 313806 | 1,08 | down |
| 6548718 | 7279793 | 1572534 | ring finger protein 19B | Rnf19b | 313806 | 1,06 | up   |
| 6292590 | 7279793 | 1572536 | ring finger protein 19B | Rnf19b | 313806 | 1,04 | up   |
| 6322077 | 7279793 | 1572533 | ring finger protein 19B | Rnf19b | 313806 | 1,03 | up   |
| 6442032 | 7279793 | 1572537 | ring finger protein 19B | Rnf19b | 313806 | 1,03 | up   |
| 6541198 | 7275023 | 1559993 | ring finger protein 20  | Rnf20  | 313216 | 2,30 | down |
| 6702550 | 7275023 | 1559993 | ring finger protein 20  | Rnf20  | 313216 | 1,39 | up   |
| 5673817 | 7275023 | 1559999 | ring finger protein 20  | Rnf20  | 313216 | 1,35 | down |
| 6152891 | 7275023 | 1560020 | ring finger protein 20  | Rnf20  | 313216 | 1,34 | down |
| 6108872 | 7275023 | 1560010 | ring finger protein 20  | Rnf20  | 313216 | 1,30 | up   |
| 5869322 | 7275023 | 1560011 | ring finger protein 20  | Rnf20  | 313216 | 1,29 | up   |
| 6621439 | 7275023 | 1560009 | ring finger protein 20  | Rnf20  | 313216 | 1,29 | up   |
| 5692716 | 7275023 | 1559998 | ring finger protein 20  | Rnf20  | 313216 | 1,28 | up   |
| 6062241 | 7275023 | 1560015 | ring finger protein 20  | Rnf20  | 313216 | 1,26 | down |
| 6216237 | 7275023 | 1560013 | ring finger protein 20  | Rnf20  | 313216 | 1,24 | down |
| 6530460 | 7275023 | 1560021 | ring finger protein 20  | Rnf20  | 313216 | 1,20 | down |
| 5912059 | 7275023 | 1560021 | ring finger protein 20  | Rnf20  | 313216 | 1,20 | down |
| 6435616 | 7275023 | 1560006 | ring finger protein 20  | Rnf20  | 313216 | 1,19 | up   |
| 6444571 | 7275023 | 1560003 | ring finger protein 20  | Rnf20  | 313216 | 1,17 | up   |
| 6685234 | 7275023 | 1560010 | ring finger protein 20  | Rnf20  | 313216 | 1,17 | down |
| 5923121 | 7275023 | 1560004 | ring finger protein 20  | Rnf20  | 313216 | 1,15 | up   |
| 6617260 | 7275023 | 1559994 | ring finger protein 20  | Rnf20  | 313216 | 1,15 | down |
| 6125200 | 7275023 | 1560001 | ring finger protein 20  | Rnf20  | 313216 | 1,10 | up   |
| 6062209 | 7275023 | 1559994 | ring finger protein 20  | Rnf20  | 313216 | 1,09 | up   |
| 6207464 | 7275023 | 1560008 | ring finger protein 20  | Rnf20  | 313216 | 1,09 | up   |
| 6062063 | 7275023 | 1560012 | ring finger protein 20  | Rnf20  | 313216 | 1,07 | down |
| 5739133 | 7275023 | 1560014 | ring finger protein 20  | Rnf20  | 313216 | 1,07 | up   |
| 6515847 | 7275023 | 1559993 | ring finger protein 20  | Rnf20  | 313216 | 1,07 | down |
| 6150114 | 7275023 | 1560001 | ring finger protein 20  | Rnf20  | 313216 | 1,06 | up   |
| 6107678 | 7275023 | 1560007 | ring finger protein 20  | Rnf20  | 313216 | 1,06 | up   |

|         |         |         |                                                        |         |        |      |      |
|---------|---------|---------|--------------------------------------------------------|---------|--------|------|------|
| 6294159 | 7275023 | 1560002 | ring finger protein 20                                 | Rnf20   | 313216 | 1,02 | down |
| 6274342 | 7275023 | 1560005 | ring finger protein 20                                 | Rnf20   | 313216 | 1,01 | up   |
| 6294754 | 7275023 | 1559998 | ring finger protein 20                                 | Rnf20   | 313216 | 1,01 | up   |
| 5790351 | 7073898 | 1065732 | ring finger protein 213                                | Rnf213  | 303735 | 2,82 | up   |
| 6507075 | 7073928 | 1065777 | ring finger protein 213                                | Rnf213  | 303735 | 1,65 | down |
| 6099918 | 7073928 | 1065773 | ring finger protein 213                                | Rnf213  | 303735 | 1,32 | down |
| 5838626 | 7073928 | 1065775 | ring finger protein 213                                | Rnf213  | 303735 | 1,26 | down |
| 6005255 | 7073898 | 1065737 | ring finger protein 213                                | Rnf213  | 303735 | 1,10 | up   |
| 5634104 | 7073928 | 1065778 | ring finger protein 213                                | Rnf213  | 303735 | 1,09 | up   |
| 6002302 | 7073928 | 1065774 | ring finger protein 213                                | Rnf213  | 303735 | 1,03 | down |
| 5843572 | 7073928 | 1065776 | ring finger protein 213                                | Rnf213  | 303735 | 1,01 | up   |
| 6268971 | 7363768 | 1778598 | ring finger protein 25                                 | Rnf25   | 301515 | 1,69 | down |
| 5999179 | 7363768 | 1778595 | ring finger protein 25                                 | Rnf25   | 301515 | 1,55 | up   |
| 6710573 | 7363768 | 1778596 | ring finger protein 25                                 | Rnf25   | 301515 | 1,43 | up   |
| 6384244 | 7363768 | 1778597 | ring finger protein 25                                 | Rnf25   | 301515 | 1,40 | up   |
| 6390688 | 7363768 | 1778600 | ring finger protein 25                                 | Rnf25   | 301515 | 1,38 | up   |
| 6656575 | 7363768 | 1778599 | ring finger protein 25                                 | Rnf25   | 301515 | 1,25 | down |
| 5856087 | 7363768 | 1778601 | ring finger protein 25                                 | Rnf25   | 301515 | 1,25 | down |
| 5684099 | 7363768 | 1778595 | ring finger protein 25                                 | Rnf25   | 301515 | 1,19 | down |
| 6521842 | 7363768 | 1778602 | ring finger protein 25                                 | Rnf25   | 301515 | 1,15 | up   |
| 6559821 | 7363768 | 1778601 | ring finger protein 25                                 | Rnf25   | 301515 | 1,06 | down |
| 6465785 | 7363768 | 1778604 | ring finger protein 25                                 | Rnf25   | 301515 | 1,04 | up   |
| 6614141 | 7260183 | 1523099 | ring finger protein 32                                 | Rnf32   | 311936 | 2,24 | down |
| 6063152 | 7260183 | 1523103 | ring finger protein 32                                 | Rnf32   | 311936 | 2,16 | down |
| 6084424 | 7260183 | 1523100 | ring finger protein 32                                 | Rnf32   | 311936 | 1,75 | down |
| 6066607 | 7260183 | 1523105 | ring finger protein 32                                 | Rnf32   | 311936 | 1,60 | down |
| 6271404 | 7260183 | 1523101 | ring finger protein 32                                 | Rnf32   | 311936 | 1,57 | up   |
| 6409662 | 7260183 | 1523104 | ring finger protein 32                                 | Rnf32   | 311936 | 1,54 | down |
| 6022867 | 7260183 | 1523096 | ring finger protein 32                                 | Rnf32   | 311936 | 1,48 | up   |
| 6672779 | 7260183 | 1523103 | ring finger protein 32                                 | Rnf32   | 311936 | 1,47 | down |
| 6251457 | 7260183 | 1523098 | ring finger protein 32                                 | Rnf32   | 311936 | 1,45 | up   |
| 6491917 | 7260183 | 1523096 | ring finger protein 32                                 | Rnf32   | 311936 | 1,38 | up   |
| 6460651 | 7260183 | 1523099 | ring finger protein 32                                 | Rnf32   | 311936 | 1,29 | up   |
| 5785482 | 7260183 | 1523098 | ring finger protein 32                                 | Rnf32   | 311936 | 1,14 | up   |
| 6272293 | 7260183 | 1523104 | ring finger protein 32                                 | Rnf32   | 311936 | 1,10 | up   |
| 6130200 | 7260183 | 1523106 | ring finger protein 32                                 | Rnf32   | 311936 | 1,07 | down |
| 6335633 | 7260183 | 1523098 | ring finger protein 32                                 | Rnf32   | 311936 | 1,04 | up   |
| 5804348 | 7260183 | 1523102 | ring finger protein 32                                 | Rnf32   | 311936 | 1,02 | down |
| 6465378 | 7260183 | 1523097 | ring finger protein 32                                 | Rnf32   | 311936 | 1,01 | down |
| 5999430 | 7167883 | 1294098 | RIO kinase 3 (yeast)                                   | Riok3   | 361293 | 2,45 | down |
| 6182523 | 7167883 | 1294099 | RIO kinase 3 (yeast)                                   | Riok3   | 361293 | 1,47 | up   |
| 6226216 | 7167883 | 1294108 | RIO kinase 3 (yeast)                                   | Riok3   | 361293 | 1,30 | up   |
| 6326369 | 7167883 | 1294108 | RIO kinase 3 (yeast)                                   | Riok3   | 361293 | 1,23 | down |
| 6411742 | 7167883 | 1294101 | RIO kinase 3 (yeast)                                   | Riok3   | 361293 | 1,21 | up   |
| 6007063 | 7167883 | 1294105 | RIO kinase 3 (yeast)                                   | Riok3   | 361293 | 1,14 | down |
| 6605391 | 7167883 | 1294104 | RIO kinase 3 (yeast)                                   | Riok3   | 361293 | 1,10 | down |
| 6715990 | 7167883 | 1294112 | RIO kinase 3 (yeast)                                   | Riok3   | 361293 | 1,10 | down |
| 6612086 | 7167883 | 1294107 | RIO kinase 3 (yeast)                                   | Riok3   | 361293 | 1,08 | up   |
| 5875746 | 7167883 | 1294111 | RIO kinase 3 (yeast)                                   | Riok3   | 361293 | 1,08 | up   |
| 6426418 | 7167883 | 1294103 | RIO kinase 3 (yeast)                                   | Riok3   | 361293 | 1,07 | up   |
| 6431988 | 7167883 | 1294102 | RIO kinase 3 (yeast)                                   | Riok3   | 361293 | 1,06 | down |
| 5999153 | 7167883 | 1294106 | RIO kinase 3 (yeast)                                   | Riok3   | 361293 | 1,04 | up   |
| 6339360 | 7167883 | 1294101 | RIO kinase 3 (yeast)                                   | Riok3   | 361293 | 1,03 | up   |
| 6630100 | 7167883 | 1294098 | RIO kinase 3 (yeast)                                   | Riok3   | 361293 | 1,02 | down |
| 5619947 | 7167883 | 1294112 | RIO kinase 3 (yeast)                                   | Riok3   | 361293 | 1,02 | down |
| 6247240 | 7167883 | 1294109 | RIO kinase 3 (yeast)                                   | Riok3   | 361293 | 1,01 | down |
| 6179450 | 7199743 | 1375181 | RNA (guanine-9-) methyltransferase domain containing 2 | Rg9mtd2 | 295496 | 2,64 | down |

|         |         |         |                                                        |         |        |      |      |
|---------|---------|---------|--------------------------------------------------------|---------|--------|------|------|
| 6414079 | 7199743 | 1375183 | RNA (guanine-9-) methyltransferase domain containing 2 | Rg9mtd2 | 295496 | 1,34 | up   |
| 6182855 | 7199743 | 1375187 | RNA (guanine-9-) methyltransferase domain containing 2 | Rg9mtd2 | 295496 | 1,19 | up   |
| 6024748 | 7199743 | 1375191 | RNA (guanine-9-) methyltransferase domain containing 2 | Rg9mtd2 | 295496 | 1,16 | down |
| 6036210 | 7199743 | 1375190 | RNA (guanine-9-) methyltransferase domain containing 2 | Rg9mtd2 | 295496 | 1,15 | up   |
| 5759592 | 7199743 | 1375192 | RNA (guanine-9-) methyltransferase domain containing 2 | Rg9mtd2 | 295496 | 1,12 | up   |
| 5984311 | 7199743 | 1375189 | RNA (guanine-9-) methyltransferase domain containing 2 | Rg9mtd2 | 295496 | 1,10 | up   |
| 5736455 | 7199743 | 1375185 | RNA (guanine-9-) methyltransferase domain containing 2 | Rg9mtd2 | 295496 | 1,09 | up   |
| 6734821 | 7199743 | 1375184 | RNA (guanine-9-) methyltransferase domain containing 2 | Rg9mtd2 | 295496 | 1,07 | down |
| 5741326 | 7159652 | 1274262 | RNA binding motif protein 17                           | Rbm17   | 291295 | 4,49 | down |
| 5875140 | 7159652 | 1274271 | RNA binding motif protein 17                           | Rbm17   | 291295 | 1,59 | down |
| 5759969 | 7159652 | 1274262 | RNA binding motif protein 17                           | Rbm17   | 291295 | 1,52 | up   |
| 6452021 | 7159652 | 1274272 | RNA binding motif protein 17                           | Rbm17   | 291295 | 1,34 | up   |
| 6713282 | 7159652 | 1274270 | RNA binding motif protein 17                           | Rbm17   | 291295 | 1,27 | down |
| 5638675 | 7159652 | 1274264 | RNA binding motif protein 17                           | Rbm17   | 291295 | 1,22 | up   |
| 5715354 | 7159652 | 1274266 | RNA binding motif protein 17                           | Rbm17   | 291295 | 1,21 | down |
| 6576697 | 7159652 | 1274273 | RNA binding motif protein 17                           | Rbm17   | 291295 | 1,15 | up   |
| 6348177 | 7159652 | 1274268 | RNA binding motif protein 17                           | Rbm17   | 291295 | 1,13 | up   |
| 6081743 | 7159652 | 1274267 | RNA binding motif protein 17                           | Rbm17   | 291295 | 1,13 | up   |
| 5633631 | 7159652 | 1274265 | RNA binding motif protein 17                           | Rbm17   | 291295 | 1,08 | down |
| 5919346 | 7159652 | 1274263 | RNA binding motif protein 17                           | Rbm17   | 291295 | 1,04 | up   |
| 6412576 | 7159652 | 1274269 | RNA binding motif protein 17                           | Rbm17   | 291295 | 1,01 | up   |
| 6023981 | 7237992 | 1468284 | RNA binding motif protein 18                           | Rbm18   | 311902 | 2,43 | down |
| 6695505 | 7237992 | 1468284 | RNA binding motif protein 18                           | Rbm18   | 311902 | 1,32 | down |
| 6295456 | 7237992 | 1468281 | RNA binding motif protein 18                           | Rbm18   | 311902 | 1,21 | down |
| 6024792 | 7237992 | 1468289 | RNA binding motif protein 18                           | Rbm18   | 311902 | 1,21 | down |
| 6352861 | 7237992 | 1468290 | RNA binding motif protein 18                           | Rbm18   | 311902 | 1,20 | up   |
| 6544988 | 7237992 | 1468290 | RNA binding motif protein 18                           | Rbm18   | 311902 | 1,18 | down |
| 5780927 | 7237992 | 1468283 | RNA binding motif protein 18                           | Rbm18   | 311902 | 1,12 | up   |
| 5698594 | 7237992 | 1468289 | RNA binding motif protein 18                           | Rbm18   | 311902 | 1,10 | up   |
| 6741736 | 7237992 | 1468282 | RNA binding motif protein 18                           | Rbm18   | 311902 | 1,03 | down |
| 6177940 | 7237992 | 1468290 | RNA binding motif protein 18                           | Rbm18   | 311902 | 1,02 | up   |
| 5765391 | 7237992 | 1468281 | RNA binding motif protein 18                           | Rbm18   | 311902 | 1,01 | up   |
| 6321402 | 7102510 | 1133880 | RNA binding motif protein 19                           | Rbm19   | 304512 | 2,15 | up   |
| 5803706 | 7102510 | 1133879 | RNA binding motif protein 19                           | Rbm19   | 304512 | 1,99 | down |
| 6618594 | 7102510 | 1133868 | RNA binding motif protein 19                           | Rbm19   | 304512 | 1,76 | down |
| 6569216 | 7102510 | 1133873 | RNA binding motif protein 19                           | Rbm19   | 304512 | 1,65 | up   |
| 5861367 | 7102510 | 1133867 | RNA binding motif protein 19                           | Rbm19   | 304512 | 1,63 | down |
| 6344863 | 7102510 | 1133840 | RNA binding motif protein 19                           | Rbm19   | 304512 | 1,35 | up   |
| 6139484 | 7102510 | 1133884 | RNA binding motif protein 19                           | Rbm19   | 304512 | 1,33 | up   |
| 6696736 | 7102510 | 1133878 | RNA binding motif protein 19                           | Rbm19   | 304512 | 1,32 | up   |
| 6513149 | 7102510 | 1133839 | RNA binding motif protein 19                           | Rbm19   | 304512 | 1,31 | down |
| 5915230 | 7102510 | 1133887 | RNA binding motif protein 19                           | Rbm19   | 304512 | 1,26 | up   |
| 6531125 | 7102510 | 1133871 | RNA binding motif protein 19                           | Rbm19   | 304512 | 1,18 | up   |
| 6166001 | 7102510 | 1133886 | RNA binding motif protein 19                           | Rbm19   | 304512 | 1,15 | up   |
| 6061959 | 7102510 | 1133883 | RNA binding motif protein 19                           | Rbm19   | 304512 | 1,13 | down |
| 5935299 | 7102510 | 1133887 | RNA binding motif protein 19                           | Rbm19   | 304512 | 1,13 | up   |
| 6314121 | 7102510 | 1133882 | RNA binding motif protein 19                           | Rbm19   | 304512 | 1,11 | down |
| 5827560 | 7102510 | 1133868 | RNA binding motif protein 19                           | Rbm19   | 304512 | 1,11 | down |
| 6688048 | 7102510 | 1133877 | RNA binding motif protein 19                           | Rbm19   | 304512 | 1,11 | up   |
| 6229959 | 7102510 | 1133849 | RNA binding motif protein 19                           | Rbm19   | 304512 | 1,09 | down |
| 6546536 | 7102510 | 1133865 | RNA binding motif protein 19                           | Rbm19   | 304512 | 1,07 | up   |
| 5642966 | 7102510 | 1133844 | RNA binding motif protein 19                           | Rbm19   | 304512 | 1,06 | down |
| 5937402 | 7102510 | 1133872 | RNA binding motif protein 19                           | Rbm19   | 304512 | 1,05 | down |
| 6198481 | 7102510 | 1133885 | RNA binding motif protein 19                           | Rbm19   | 304512 | 1,03 | up   |
| 6039142 | 7102510 | 1133864 | RNA binding motif protein 19                           | Rbm19   | 304512 | 1,03 | down |
| 6580462 | 7102510 | 1133866 | RNA binding motif protein 19                           | Rbm19   | 304512 | 1,02 | down |
| 6123859 | 7102510 | 1133882 | RNA binding motif protein 19                           | Rbm19   | 304512 | 1,02 | up   |

|         |         |         |                                                          |       |        |      |      |
|---------|---------|---------|----------------------------------------------------------|-------|--------|------|------|
| 6604492 | 7300027 | 1621888 | RNA binding motif protein 25                             | Rbm25 | 366693 | 1,58 | down |
| 5623289 | 7300027 | 1621892 | RNA binding motif protein 25                             | Rbm25 | 366693 | 1,42 | down |
| 6532382 | 7300027 | 1621889 | RNA binding motif protein 25                             | Rbm25 | 366693 | 1,28 | down |
| 5692081 | 7300027 | 1621888 | RNA binding motif protein 25                             | Rbm25 | 366693 | 1,22 | down |
| 6431164 | 7300027 | 1621888 | RNA binding motif protein 25                             | Rbm25 | 366693 | 1,17 | down |
| 5756899 | 7300027 | 1621892 | RNA binding motif protein 25                             | Rbm25 | 366693 | 1,08 | down |
| 6298804 | 7300027 | 1621887 | RNA binding motif protein 25                             | Rbm25 | 366693 | 1,05 | down |
| 6689580 | 7300027 | 1621890 | RNA binding motif protein 25                             | Rbm25 | 366693 | 1,04 | up   |
| 6432824 | 7300027 | 1621886 | RNA binding motif protein 25                             | Rbm25 | 366693 | 1,01 | down |
| 5888164 | 7049812 | 1009057 | RNA binding motif protein 42                             | Rbm42 | 361545 | 2,16 | up   |
| 6518992 | 7049812 | 1009053 | RNA binding motif protein 42                             | Rbm42 | 361545 | 1,45 | down |
| 6086809 | 7049812 | 1009048 | RNA binding motif protein 42                             | Rbm42 | 361545 | 1,33 | up   |
| 6061741 | 7049812 | 1009055 | RNA binding motif protein 42                             | Rbm42 | 361545 | 1,33 | up   |
| 5700014 | 7049812 | 1009056 | RNA binding motif protein 42                             | Rbm42 | 361545 | 1,19 | down |
| 6680708 | 7049812 | 1009054 | RNA binding motif protein 42                             | Rbm42 | 361545 | 1,17 | down |
| 6408854 | 7049812 | 1009056 | RNA binding motif protein 42                             | Rbm42 | 361545 | 1,16 | down |
| 6065060 | 7049812 | 1009052 | RNA binding motif protein 42                             | Rbm42 | 361545 | 1,08 | down |
| 6449718 | 7049812 | 1009057 | RNA binding motif protein 42                             | Rbm42 | 361545 | 1,05 | up   |
| 6734745 | 7049812 | 1009051 | RNA binding motif protein 42                             | Rbm42 | 361545 | 1,04 | down |
| 5915974 | 7049812 | 1009047 | RNA binding motif protein 42                             | Rbm42 | 361545 | 1,03 | down |
| 6729006 | 7049812 | 1009049 | RNA binding motif protein 42                             | Rbm42 | 361545 | 1,03 | down |
| 5916402 | 7049812 | 1009050 | RNA binding motif protein 42                             | Rbm42 | 361545 | 1,02 | up   |
| 5651892 | 7049812 | 1009052 | RNA binding motif protein 42                             | Rbm42 | 361545 | 1,01 | down |
| 6410141 | 7238826 | 1470530 | RNA binding motif protein 43                             | Rbm43 | 311020 | 2,16 | up   |
| 5860056 | 7238826 | 1470531 | RNA binding motif protein 43                             | Rbm43 | 311020 | 1,89 | up   |
| 6461772 | 7238826 | 1470537 | RNA binding motif protein 43                             | Rbm43 | 311020 | 1,55 | up   |
| 5633768 | 7238826 | 1470535 | RNA binding motif protein 43                             | Rbm43 | 311020 | 1,49 | down |
| 5848601 | 7238826 | 1470531 | RNA binding motif protein 43                             | Rbm43 | 311020 | 1,33 | up   |
| 6154089 | 7238826 | 1470531 | RNA binding motif protein 43                             | Rbm43 | 311020 | 1,28 | down |
| 5626912 | 7238826 | 1470535 | RNA binding motif protein 43                             | Rbm43 | 311020 | 1,15 | up   |
| 6062887 | 7239391 | 1472257 | RNA binding motif, single stranded interacting protein 1 | Rbms1 | 362138 | 3,21 | down |
| 5722592 | 7239391 | 1472256 | RNA binding motif, single stranded interacting protein 1 | Rbms1 | 362138 | 1,91 | down |
| 5985969 | 7239391 | 1472258 | RNA binding motif, single stranded interacting protein 1 | Rbms1 | 362138 | 1,38 | up   |
| 6276797 | 7239391 | 1472254 | RNA binding motif, single stranded interacting protein 1 | Rbms1 | 362138 | 1,36 | up   |
| 6593875 | 7239391 | 1472251 | RNA binding motif, single stranded interacting protein 1 | Rbms1 | 362138 | 1,35 | up   |
| 6141977 | 7239391 | 1472244 | RNA binding motif, single stranded interacting protein 1 | Rbms1 | 362138 | 1,29 | down |
| 6351147 | 7239391 | 1472253 | RNA binding motif, single stranded interacting protein 1 | Rbms1 | 362138 | 1,26 | down |
| 6229650 | 7239391 | 1472244 | RNA binding motif, single stranded interacting protein 1 | Rbms1 | 362138 | 1,19 | down |
| 6673532 | 7239391 | 1472249 | RNA binding motif, single stranded interacting protein 1 | Rbms1 | 362138 | 1,16 | up   |
| 5977826 | 7239391 | 1472256 | RNA binding motif, single stranded interacting protein 1 | Rbms1 | 362138 | 1,16 | down |
| 6021182 | 7239391 | 1472255 | RNA binding motif, single stranded interacting protein 1 | Rbms1 | 362138 | 1,16 | up   |
| 6722358 | 7239391 | 1472252 | RNA binding motif, single stranded interacting protein 1 | Rbms1 | 362138 | 1,15 | down |
| 5770536 | 7239391 | 1472250 | RNA binding motif, single stranded interacting protein 1 | Rbms1 | 362138 | 1,14 | up   |
| 6307046 | 7239391 | 1472245 | RNA binding motif, single stranded interacting protein 1 | Rbms1 | 362138 | 1,06 | up   |
| 6137946 | 7239391 | 1472247 | RNA binding motif, single stranded interacting protein 1 | Rbms1 | 362138 | 1,05 | down |
| 5958131 | 7239391 | 1472253 | RNA binding motif, single stranded interacting protein 1 | Rbms1 | 362138 | 1,04 | up   |
| 5762798 | 7239391 | 1472248 | RNA binding motif, single stranded interacting protein 1 | Rbms1 | 362138 | 1,03 | up   |
| 6054368 | 7239391 | 1472246 | RNA binding motif, single stranded interacting protein 1 | Rbms1 | 362138 | 1,02 | up   |
| 6088466 | 7243628 | 1482375 | RNA polymerase II associated protein 1                   | Rpap1 | 311338 | 1,78 | down |
| 6677929 | 7243628 | 1482388 | RNA polymerase II associated protein 1                   | Rpap1 | 311338 | 1,68 | down |
| 6570394 | 7243628 | 1482383 | RNA polymerase II associated protein 1                   | Rpap1 | 311338 | 1,53 | up   |
| 6182194 | 7243628 | 1482364 | RNA polymerase II associated protein 1                   | Rpap1 | 311338 | 1,48 | down |
| 6663711 | 7243628 | 1482370 | RNA polymerase II associated protein 1                   | Rpap1 | 311338 | 1,48 | down |
| 5859430 | 7243628 | 1482374 | RNA polymerase II associated protein 1                   | Rpap1 | 311338 | 1,41 | down |
| 6476109 | 7243628 | 1482368 | RNA polymerase II associated protein 1                   | Rpap1 | 311338 | 1,40 | up   |
| 6727492 | 7243628 | 1482364 | RNA polymerase II associated protein 1                   | Rpap1 | 311338 | 1,38 | down |
| 5884089 | 7243628 | 1482369 | RNA polymerase II associated protein 1                   | Rpap1 | 311338 | 1,35 | down |

|         |         |         |                                        |       |        |      |      |
|---------|---------|---------|----------------------------------------|-------|--------|------|------|
| 6717757 | 7243628 | 1482387 | RNA polymerase II associated protein 1 | Rpap1 | 311338 | 1,28 | down |
| 5796770 | 7243628 | 1482380 | RNA polymerase II associated protein 1 | Rpap1 | 311338 | 1,26 | up   |
| 6502135 | 7243628 | 1482373 | RNA polymerase II associated protein 1 | Rpap1 | 311338 | 1,26 | down |
| 6254383 | 7243628 | 1482369 | RNA polymerase II associated protein 1 | Rpap1 | 311338 | 1,25 | down |
| 6371071 | 7243628 | 1482379 | RNA polymerase II associated protein 1 | Rpap1 | 311338 | 1,23 | down |
| 6639725 | 7243628 | 1482377 | RNA polymerase II associated protein 1 | Rpap1 | 311338 | 1,21 | up   |
| 5624945 | 7243628 | 1482390 | RNA polymerase II associated protein 1 | Rpap1 | 311338 | 1,21 | up   |
| 6357185 | 7243628 | 1482372 | RNA polymerase II associated protein 1 | Rpap1 | 311338 | 1,16 | up   |
| 6259910 | 7243628 | 1482376 | RNA polymerase II associated protein 1 | Rpap1 | 311338 | 1,16 | up   |
| 5791392 | 7243628 | 1482390 | RNA polymerase II associated protein 1 | Rpap1 | 311338 | 1,14 | up   |
| 6680731 | 7243628 | 1482371 | RNA polymerase II associated protein 1 | Rpap1 | 311338 | 1,14 | down |
| 6343239 | 7243628 | 1482389 | RNA polymerase II associated protein 1 | Rpap1 | 311338 | 1,13 | up   |
| 6172423 | 7243628 | 1482378 | RNA polymerase II associated protein 1 | Rpap1 | 311338 | 1,10 | down |
| 6743496 | 7243628 | 1482389 | RNA polymerase II associated protein 1 | Rpap1 | 311338 | 1,09 | up   |
| 5778189 | 7243628 | 1482363 | RNA polymerase II associated protein 1 | Rpap1 | 311338 | 1,08 | up   |
| 6534893 | 7243628 | 1482385 | RNA polymerase II associated protein 1 | Rpap1 | 311338 | 1,06 | up   |
| 6449191 | 7243628 | 1482385 | RNA polymerase II associated protein 1 | Rpap1 | 311338 | 1,03 | up   |
| 5870371 | 7243628 | 1482386 | RNA polymerase II associated protein 1 | Rpap1 | 311338 | 1,03 | down |
| 6533442 | 7243628 | 1482383 | RNA polymerase II associated protein 1 | Rpap1 | 311338 | 1,03 | up   |
| 6469732 | 7243628 | 1482367 | RNA polymerase II associated protein 1 | Rpap1 | 311338 | 1,02 | up   |
| 5873028 | 7243628 | 1482381 | RNA polymerase II associated protein 1 | Rpap1 | 311338 | 1,02 | up   |
| 6540449 | 7243628 | 1482389 | RNA polymerase II associated protein 1 | Rpap1 | 311338 | 1,01 | up   |
| 5992194 | 7243628 | 1482363 | RNA polymerase II associated protein 1 | Rpap1 | 311338 | 1,00 | down |
| 6552034 | 7172988 | 1307280 | rotatin                                | Rtttn | 291377 | 2,36 | up   |
| 6617259 | 7172988 | 1307328 | rotatin                                | Rtttn | 291377 | 2,07 | down |
| 6035921 | 7172988 | 1307291 | rotatin                                | Rtttn | 291377 | 1,89 | up   |
| 6306241 | 7172988 | 1307312 | rotatin                                | Rtttn | 291377 | 1,81 | down |
| 5690555 | 7172988 | 1307333 | rotatin                                | Rtttn | 291377 | 1,78 | down |
| 6555624 | 7172988 | 1307319 | rotatin                                | Rtttn | 291377 | 1,67 | down |
| 6028412 | 7172988 | 1307297 | rotatin                                | Rtttn | 291377 | 1,62 | down |
| 6165309 | 7172988 | 1307285 | rotatin                                | Rtttn | 291377 | 1,62 | up   |
| 6384491 | 7172988 | 1307339 | rotatin                                | Rtttn | 291377 | 1,48 | down |
| 6390383 | 7172988 | 1307334 | rotatin                                | Rtttn | 291377 | 1,44 | down |
| 6109845 | 7172988 | 1307307 | rotatin                                | Rtttn | 291377 | 1,43 | up   |
| 6549127 | 7172988 | 1307327 | rotatin                                | Rtttn | 291377 | 1,39 | down |
| 5915613 | 7172988 | 1307293 | rotatin                                | Rtttn | 291377 | 1,37 | up   |
| 6418981 | 7172988 | 1307298 | rotatin                                | Rtttn | 291377 | 1,37 | down |
| 6452559 | 7172988 | 1307284 | rotatin                                | Rtttn | 291377 | 1,36 | up   |
| 5824398 | 7172988 | 1307288 | rotatin                                | Rtttn | 291377 | 1,34 | up   |
| 6219945 | 7172988 | 1307307 | rotatin                                | Rtttn | 291377 | 1,34 | down |
| 5919418 | 7172988 | 1307305 | rotatin                                | Rtttn | 291377 | 1,32 | up   |
| 6313708 | 7172988 | 1307316 | rotatin                                | Rtttn | 291377 | 1,31 | down |
| 6299041 | 7172988 | 1307323 | rotatin                                | Rtttn | 291377 | 1,31 | up   |
| 5618203 | 7172988 | 1307286 | rotatin                                | Rtttn | 291377 | 1,30 | up   |
| 6207907 | 7172988 | 1307327 | rotatin                                | Rtttn | 291377 | 1,30 | up   |
| 6025050 | 7172988 | 1307314 | rotatin                                | Rtttn | 291377 | 1,29 | down |
| 6088457 | 7172988 | 1307311 | rotatin                                | Rtttn | 291377 | 1,29 | down |
| 6206461 | 7172988 | 1307304 | rotatin                                | Rtttn | 291377 | 1,28 | up   |
| 6340697 | 7172988 | 1307313 | rotatin                                | Rtttn | 291377 | 1,26 | up   |
| 5620658 | 7172988 | 1307296 | rotatin                                | Rtttn | 291377 | 1,25 | up   |
| 5888267 | 7172988 | 1307297 | rotatin                                | Rtttn | 291377 | 1,24 | down |
| 5753601 | 7172988 | 1307308 | rotatin                                | Rtttn | 291377 | 1,22 | down |
| 5968992 | 7172988 | 1307309 | rotatin                                | Rtttn | 291377 | 1,22 | down |
| 5703872 | 7172988 | 1307339 | rotatin                                | Rtttn | 291377 | 1,22 | up   |
| 6491202 | 7172988 | 1307333 | rotatin                                | Rtttn | 291377 | 1,21 | up   |
| 6372865 | 7172988 | 1307332 | rotatin                                | Rtttn | 291377 | 1,19 | up   |
| 6451738 | 7172988 | 1307306 | rotatin                                | Rtttn | 291377 | 1,19 | up   |

|         |         |         |                                                            |          |        |      |      |
|---------|---------|---------|------------------------------------------------------------|----------|--------|------|------|
| 5944446 | 7172988 | 1307281 | rotatin                                                    | Rttm     | 291377 | 1,18 | up   |
| 5820217 | 7172988 | 1307295 | rotatin                                                    | Rttm     | 291377 | 1,18 | down |
| 5631239 | 7172988 | 1307300 | rotatin                                                    | Rttm     | 291377 | 1,18 | down |
| 5721923 | 7172988 | 1307338 | rotatin                                                    | Rttm     | 291377 | 1,18 | down |
| 6704981 | 7172988 | 1307322 | rotatin                                                    | Rttm     | 291377 | 1,18 | up   |
| 6119504 | 7172988 | 1307323 | rotatin                                                    | Rttm     | 291377 | 1,15 | up   |
| 6314831 | 7172988 | 1307320 | rotatin                                                    | Rttm     | 291377 | 1,15 | down |
| 6694872 | 7172988 | 1307329 | rotatin                                                    | Rttm     | 291377 | 1,12 | up   |
| 6401481 | 7172988 | 1307309 | rotatin                                                    | Rttm     | 291377 | 1,12 | up   |
| 5716185 | 7172988 | 1307286 | rotatin                                                    | Rttm     | 291377 | 1,11 | down |
| 5677197 | 7172988 | 1307299 | rotatin                                                    | Rttm     | 291377 | 1,11 | up   |
| 6159693 | 7172988 | 1307283 | rotatin                                                    | Rttm     | 291377 | 1,11 | down |
| 6473318 | 7172988 | 1307339 | rotatin                                                    | Rttm     | 291377 | 1,11 | down |
| 6394422 | 7172988 | 1307310 | rotatin                                                    | Rttm     | 291377 | 1,10 | up   |
| 5631632 | 7172988 | 1307320 | rotatin                                                    | Rttm     | 291377 | 1,08 | up   |
| 6459229 | 7172988 | 1307293 | rotatin                                                    | Rttm     | 291377 | 1,07 | up   |
| 6401014 | 7172988 | 1307339 | rotatin                                                    | Rttm     | 291377 | 1,06 | down |
| 6361743 | 7172988 | 1307279 | rotatin                                                    | Rttm     | 291377 | 1,06 | up   |
| 6177745 | 7172988 | 1307302 | rotatin                                                    | Rttm     | 291377 | 1,05 | down |
| 6596814 | 7172988 | 1307326 | rotatin                                                    | Rttm     | 291377 | 1,04 | up   |
| 6599752 | 7172988 | 1307337 | rotatin                                                    | Rttm     | 291377 | 1,04 | down |
| 6083177 | 7172988 | 1307301 | rotatin                                                    | Rttm     | 291377 | 1,02 | up   |
| 6329517 | 7172988 | 1307334 | rotatin                                                    | Rttm     | 291377 | 1,02 | down |
| 6737861 | 7172988 | 1307330 | rotatin                                                    | Rttm     | 291377 | 1,01 | down |
| 5750036 | 7172988 | 1307287 | rotatin                                                    | Rttm     | 291377 | 1,00 | down |
| 6561900 | 7172988 | 1307326 | rotatin                                                    | Rttm     | 291377 | 1,00 | down |
| 6305761 | 7172988 | 1307317 | rotatin                                                    | Rttm     | 291377 | 1,00 | up   |
| 6225856 | 7090581 | 1104783 | roundabout, axon guidance receptor, homolog 2 (Drosophila) | Robo2    | 84409  | 1,71 | up   |
| 5952347 | 7090581 | 1104771 | roundabout, axon guidance receptor, homolog 2 (Drosophila) | Robo2    | 84409  | 1,43 | down |
| 5825836 | 7090581 | 1104748 | roundabout, axon guidance receptor, homolog 2 (Drosophila) | Robo2    | 84409  | 1,39 | down |
| 6608705 | 7090581 | 1104770 | roundabout, axon guidance receptor, homolog 2 (Drosophila) | Robo2    | 84409  | 1,24 | down |
| 6531816 | 7090581 | 1104764 | roundabout, axon guidance receptor, homolog 2 (Drosophila) | Robo2    | 84409  | 1,22 | down |
| 6069559 | 7090581 | 1104754 | roundabout, axon guidance receptor, homolog 2 (Drosophila) | Robo2    | 84409  | 1,21 | up   |
| 6092733 | 7090581 | 1104753 | roundabout, axon guidance receptor, homolog 2 (Drosophila) | Robo2    | 84409  | 1,16 | up   |
| 6703762 | 7090581 | 1104783 | roundabout, axon guidance receptor, homolog 2 (Drosophila) | Robo2    | 84409  | 1,15 | up   |
| 6711767 | 7090581 | 1104779 | roundabout, axon guidance receptor, homolog 2 (Drosophila) | Robo2    | 84409  | 1,15 | down |
| 6189203 | 7090581 | 1104817 | roundabout, axon guidance receptor, homolog 2 (Drosophila) | Robo2    | 84409  | 1,14 | up   |
| 6100332 | 7090581 | 1104761 | roundabout, axon guidance receptor, homolog 2 (Drosophila) | Robo2    | 84409  | 1,13 | down |
| 6394260 | 7090581 | 1104762 | roundabout, axon guidance receptor, homolog 2 (Drosophila) | Robo2    | 84409  | 1,13 | up   |
| 5862512 | 7090581 | 1104773 | roundabout, axon guidance receptor, homolog 2 (Drosophila) | Robo2    | 84409  | 1,11 | down |
| 6127851 | 7090581 | 1104769 | roundabout, axon guidance receptor, homolog 2 (Drosophila) | Robo2    | 84409  | 1,10 | down |
| 5699123 | 7090581 | 1104763 | roundabout, axon guidance receptor, homolog 2 (Drosophila) | Robo2    | 84409  | 1,09 | down |
| 5682332 | 7090581 | 1104747 | roundabout, axon guidance receptor, homolog 2 (Drosophila) | Robo2    | 84409  | 1,08 | down |
| 6379487 | 7090581 | 1104785 | roundabout, axon guidance receptor, homolog 2 (Drosophila) | Robo2    | 84409  | 1,07 | down |
| 6440938 | 7090581 | 1104769 | roundabout, axon guidance receptor, homolog 2 (Drosophila) | Robo2    | 84409  | 1,06 | down |
| 6471127 | 7090581 | 1104759 | roundabout, axon guidance receptor, homolog 2 (Drosophila) | Robo2    | 84409  | 1,03 | up   |
| 6242371 | 7090581 | 1104772 | roundabout, axon guidance receptor, homolog 2 (Drosophila) | Robo2    | 84409  | 1,02 | up   |
| 6510799 | 7090581 | 1104817 | roundabout, axon guidance receptor, homolog 2 (Drosophila) | Robo2    | 84409  | 1,02 | up   |
| 6518847 | 7090581 | 1104806 | roundabout, axon guidance receptor, homolog 2 (Drosophila) | Robo2    | 84409  | 1,01 | up   |
| 6290837 | 7090581 | 1104780 | roundabout, axon guidance receptor, homolog 2 (Drosophila) | Robo2    | 84409  | 1,01 | down |
| 6437738 | 7090581 | 1104756 | roundabout, axon guidance receptor, homolog 2 (Drosophila) | Robo2    | 84409  | 1,00 | down |
| 5722970 | 7090581 | 1104766 | roundabout, axon guidance receptor, homolog 2 (Drosophila) | Robo2    | 84409  | 1,00 | up   |
| 5726258 | 7179176 | 1322899 | Rpgrip1-like                                               | Rpgrip11 | 307724 | 2,24 | up   |
| 6701594 | 7179176 | 1322910 | Rpgrip1-like                                               | Rpgrip11 | 307724 | 1,91 | up   |
| 6114664 | 7179176 | 1322935 | Rpgrip1-like                                               | Rpgrip11 | 307724 | 1,88 | down |
| 5693456 | 7179176 | 1322919 | Rpgrip1-like                                               | Rpgrip11 | 307724 | 1,75 | up   |
| 6046113 | 7179176 | 1322921 | Rpgrip1-like                                               | Rpgrip11 | 307724 | 1,69 | up   |



|         |         |         |                                                                                                   |                                       |        |      |      |
|---------|---------|---------|---------------------------------------------------------------------------------------------------|---------------------------------------|--------|------|------|
| 6570949 | 7179176 | 1322902 | Rpgrip1-like                                                                                      | Rpgrip1l                              | 307724 | 1,68 | up   |
| 6519283 | 7179176 | 1322901 | Rpgrip1-like                                                                                      | Rpgrip1l                              | 307724 | 1,54 | down |
| 5864677 | 7179176 | 1322937 | Rpgrip1-like                                                                                      | Rpgrip1l                              | 307724 | 1,47 | down |
| 5954307 | 7179176 | 1322924 | Rpgrip1-like                                                                                      | Rpgrip1l                              | 307724 | 1,41 | up   |
| 5766042 | 7179176 | 1322922 | Rpgrip1-like                                                                                      | Rpgrip1l                              | 307724 | 1,38 | up   |
| 6500852 | 7179176 | 1322925 | Rpgrip1-like                                                                                      | Rpgrip1l                              | 307724 | 1,37 | up   |
| 6102345 | 7179176 | 1322904 | Rpgrip1-like                                                                                      | Rpgrip1l                              | 307724 | 1,33 | up   |
| 6331534 | 7179176 | 1322928 | Rpgrip1-like                                                                                      | Rpgrip1l                              | 307724 | 1,27 | down |
| 5859446 | 7179176 | 1322914 | Rpgrip1-like                                                                                      | Rpgrip1l                              | 307724 | 1,25 | up   |
| 6257047 | 7179176 | 1322920 | Rpgrip1-like                                                                                      | Rpgrip1l                              | 307724 | 1,22 | down |
| 5929726 | 7179176 | 1322916 | Rpgrip1-like                                                                                      | Rpgrip1l                              | 307724 | 1,19 | down |
| 5960361 | 7179176 | 1322923 | Rpgrip1-like                                                                                      | Rpgrip1l                              | 307724 | 1,19 | up   |
| 6627731 | 7179176 | 1322913 | Rpgrip1-like                                                                                      | Rpgrip1l                              | 307724 | 1,17 | down |
| 6287537 | 7179176 | 1322907 | Rpgrip1-like                                                                                      | Rpgrip1l                              | 307724 | 1,16 | down |
| 6568632 | 7179176 | 1322932 | Rpgrip1-like                                                                                      | Rpgrip1l                              | 307724 | 1,15 | down |
| 5963729 | 7179176 | 1322935 | Rpgrip1-like                                                                                      | Rpgrip1l                              | 307724 | 1,14 | up   |
| 5619414 | 7179176 | 1322910 | Rpgrip1-like                                                                                      | Rpgrip1l                              | 307724 | 1,14 | up   |
| 6575172 | 7179176 | 1322938 | Rpgrip1-like                                                                                      | Rpgrip1l                              | 307724 | 1,12 | down |
| 5935416 | 7179176 | 1322917 | Rpgrip1-like                                                                                      | Rpgrip1l                              | 307724 | 1,09 | up   |
| 6150850 | 7179176 | 1322912 | Rpgrip1-like                                                                                      | Rpgrip1l                              | 307724 | 1,08 | up   |
| 6089431 | 7179176 | 1322906 | Rpgrip1-like                                                                                      | Rpgrip1l                              | 307724 | 1,08 | down |
| 5645038 | 7179176 | 1322906 | Rpgrip1-like                                                                                      | Rpgrip1l                              | 307724 | 1,05 | down |
| 6719921 | 7179176 | 1322938 | Rpgrip1-like                                                                                      | Rpgrip1l                              | 307724 | 1,03 | up   |
| 5928505 | 7179176 | 1322926 | Rpgrip1-like                                                                                      | Rpgrip1l                              | 307724 | 1,01 | up   |
| 6376531 | 7179176 | 1322918 | Rpgrip1-like                                                                                      | Rpgrip1l                              | 307724 | 1,01 | down |
| 6161737 | 7216994 | 1415180 | RT1 class I, A3                                                                                   | RT1-A3                                | 309627 | 2,32 | down |
| 6107740 | 7216994 | 1415182 | RT1 class I, A3                                                                                   | RT1-A3                                | 309627 | 1,18 | down |
| 6164431 | 7216994 | 1415184 | RT1 class I, A3                                                                                   | RT1-A3                                | 309627 | 1,07 | up   |
| 5749895 | 7216994 | 1415183 | RT1 class I, A3                                                                                   | RT1-A3                                | 309627 | 1,01 | up   |
| 6592279 | 7216994 | 1415199 | RT1 class I, A3 /// RT1 class Ia, locus A1                                                        | RT1-A3 /// RT1-A1 309627 /// 24973    |        | 2,54 | down |
| 6359319 | 7216994 | 1415200 | RT1 class I, A3 /// RT1 class Ib, locus Aw2 /// RT1 class Ia, locus A1 /// RT1 class Ia, locus A2 | RT1-A3 /// RT1-A1 309627 /// 24973 /  |        | 1,16 | up   |
| 6390118 | 7216994 | 1415203 | RT1 class I, A3 /// RT1 class Ib, locus Aw2 /// RT1 class Ia, locus A1 /// RT1 class Ia, locus A2 | RT1-A3 /// RT1-A1 309627 /// 24973 /  |        | 1,07 | up   |
| 6558486 | 7220575 | 1424341 | RT1 class I, CE1                                                                                  | RT1-CE1                               | 309603 | 1,36 | up   |
| 5810863 | 7216676 | 1414430 | RT1 class I, CE10                                                                                 | RT1-CE10                              | 414792 | 1,76 | down |
| 5757365 | 7216676 | 1414431 | RT1 class I, CE10                                                                                 | RT1-CE10                              | 414792 | 1,62 | up   |
| 5683833 | 7216676 | 1414436 | RT1 class I, CE10                                                                                 | RT1-CE10                              | 414792 | 1,22 | down |
| 6021180 | 7216676 | 1414431 | RT1 class I, CE10                                                                                 | RT1-CE10                              | 414792 | 1,21 | up   |
| 6392290 | 7216676 | 1414432 | RT1 class I, CE10                                                                                 | RT1-CE10                              | 414792 | 1,15 | up   |
| 6193899 | 7216676 | 1414435 | RT1 class I, CE10                                                                                 | RT1-CE10                              | 414792 | 1,14 | down |
| 6535134 | 7216676 | 1414438 | RT1 class I, CE10                                                                                 | RT1-CE10                              | 414792 | 1,13 | up   |
| 6484766 | 7216676 | 1414434 | RT1 class I, CE10                                                                                 | RT1-CE10                              | 414792 | 1,10 | down |
| 5997498 | 7216676 | 1414433 | RT1 class I, CE10                                                                                 | RT1-CE10                              | 414792 | 1,01 | down |
| 5760457 | 7216676 | 1414437 | RT1 class I, CE10                                                                                 | RT1-CE10                              | 414792 | 1,00 | up   |
| 6501547 | 7224452 | 1433368 | RT1 class I, CE11                                                                                 | RT1-CE11                              | 414791 | 2,79 | down |
| 6306632 | 7224452 | 1433363 | RT1 class I, CE11                                                                                 | RT1-CE11                              | 414791 | 2,36 | down |
| 6418391 | 7224452 | 1433366 | RT1 class I, CE11                                                                                 | RT1-CE11                              | 414791 | 1,99 | up   |
| 5791018 | 7224452 | 1433365 | RT1 class I, CE11                                                                                 | RT1-CE11                              | 414791 | 1,02 | up   |
| 5951170 | 7224452 | 1433364 | RT1 class I, CE11 /// RT1 class I, CE7                                                            | RT1-CE11 /// RT1-CI 414791 /// 368153 |        | 4,19 | up   |
| 6611280 | 7216676 | 1414421 | RT1 class I, CE11 /// RT1 class I, CE7                                                            | RT1-CE11 /// RT1-CI 414791 /// 368153 |        | 2,40 | down |
| 5655738 | 7224452 | 1433362 | RT1 class I, CE11 /// RT1 class I, CE7                                                            | RT1-CE11 /// RT1-CI 414791 /// 368153 |        | 2,13 | down |
| 6366394 | 7216676 | 1414423 | RT1 class I, CE11 /// RT1 class I, CE7                                                            | RT1-CE11 /// RT1-CI 414791 /// 368153 |        | 1,84 | up   |
| 5744477 | 7216676 | 1414422 | RT1 class I, CE11 /// RT1 class I, CE7                                                            | RT1-CE11 /// RT1-CI 414791 /// 368153 |        | 1,25 | up   |
| 5812397 | 7224458 | 1433374 | RT1 class I, CE12 /// RT1 class I, CE1                                                            | RT1-CE12 /// RT1-CI 309600 /// 309603 |        | 4,90 | down |
| 5947647 | 7220575 | 1424346 | RT1 class I, CE12 /// RT1 class I, CE1                                                            | RT1-CE12 /// RT1-CI 309600 /// 309603 |        | 3,74 | down |
| 5631415 | 7220575 | 1424342 | RT1 class I, CE12 /// RT1 class I, CE1                                                            | RT1-CE12 /// RT1-CI 309600 /// 309603 |        | 1,95 | down |
| 5739283 | 7224458 | 1433377 | RT1 class I, CE12 /// RT1 class I, CE1                                                            | RT1-CE12 /// RT1-CI 309600 /// 309603 |        | 1,68 | down |
| 6631219 | 7224458 | 1433376 | RT1 class I, CE12 /// RT1 class I, CE1                                                            | RT1-CE12 /// RT1-CI 309600 /// 309603 |        | 1,48 | up   |

|         |         |         |                                               |                                                 |      |      |
|---------|---------|---------|-----------------------------------------------|-------------------------------------------------|------|------|
| 6677804 | 7220575 | 1424343 | RT1 class I, CE12 /// RT1 class I, CE1        | Γ1-CE12 /// RT1-CI 309600 /// 309603            | 1,39 | up   |
| 6077361 | 7220575 | 1424345 | RT1 class I, CE12 /// RT1 class I, CE1        | Γ1-CE12 /// RT1-CI 309600 /// 309603            | 1,23 | down |
| 6191641 | 7220575 | 1424340 | RT1 class I, CE12 /// RT1 class I, CE1        | Γ1-CE12 /// RT1-CI 309600 /// 309603            | 1,22 | up   |
| 5694781 | 7224458 | 1433375 | RT1 class I, CE12 /// RT1 class I, CE1        | Γ1-CE12 /// RT1-CI 309600 /// 309603            | 1,17 | up   |
| 6567436 | 7220575 | 1424344 | RT1 class I, CE12 /// RT1 class I, CE1        | Γ1-CE12 /// RT1-CI 309600 /// 309603            | 1,15 | down |
| 6449932 | 7224458 | 1433378 | RT1 class I, CE12 /// RT1 class I, CE1        | Γ1-CE12 /// RT1-CI 309600 /// 309603            | 1,13 | down |
| 6503026 | 7224458 | 1433379 | RT1 class I, CE12 /// RT1 class I, CE1        | Γ1-CE12 /// RT1-CI 309600 /// 309603            | 1,04 | up   |
| 5726291 | 7224429 | 1433327 | RT1 class I, CE13                             | RT1-CE13 414790                                 | 3,84 | down |
| 6433164 | 7224429 | 1433332 | RT1 class I, CE13                             | RT1-CE13 414790                                 | 2,29 | down |
| 6530313 | 7224429 | 1433330 | RT1 class I, CE13                             | RT1-CE13 414790                                 | 2,16 | up   |
| 5974309 | 7224429 | 1433329 | RT1 class I, CE13                             | RT1-CE13 414790                                 | 1,42 | down |
| 6480762 | 7224429 | 1433326 | RT1 class I, CE13                             | RT1-CE13 414790                                 | 1,39 | down |
| 6512034 | 7224429 | 1433329 | RT1 class I, CE13                             | RT1-CE13 414790                                 | 1,20 | up   |
| 6095052 | 7224429 | 1433331 | RT1 class I, CE13                             | RT1-CE13 414790                                 | 1,15 | down |
| 6154595 | 7224429 | 1433328 | RT1 class I, CE13                             | RT1-CE13 414790                                 | 1,10 | up   |
| 5875739 | 7224429 | 1433337 | RT1 class I, CE14                             | RT1-CE14 414270                                 | 2,55 | up   |
| 6728037 | 7224429 | 1433335 | RT1 class I, CE14                             | RT1-CE14 414270                                 | 2,37 | down |
| 6645381 | 7224429 | 1433333 | RT1 class I, CE14                             | RT1-CE14 414270                                 | 2,03 | up   |
| 5840800 | 7224429 | 1433334 | RT1 class I, CE14                             | RT1-CE14 414270                                 | 1,76 | down |
| 6309097 | 7224429 | 1433333 | RT1 class I, CE14                             | RT1-CE14 414270                                 | 1,56 | up   |
| 6703942 | 7224429 | 1433335 | RT1 class I, CE14                             | RT1-CE14 414270                                 | 1,35 | up   |
| 5627628 | 7224429 | 1433336 | RT1 class I, CE14                             | RT1-CE14 414270                                 | 1,27 | up   |
| 6715287 | 7224511 | 1433493 | RT1 class I, CE15                             | RT1-CE15 414789                                 | 4,51 | down |
| 6183578 | 7224511 | 1433488 | RT1 class I, CE15                             | RT1-CE15 414789                                 | 3,02 | up   |
| 6149192 | 7224511 | 1433494 | RT1 class I, CE15                             | RT1-CE15 414789                                 | 2,16 | down |
| 5883384 | 7224511 | 1433492 | RT1 class I, CE15                             | RT1-CE15 414789                                 | 1,57 | up   |
| 6423532 | 7224511 | 1433491 | RT1 class I, CE15                             | RT1-CE15 414789                                 | 1,37 | down |
| 5886649 | 7224511 | 1433489 | RT1 class I, CE15                             | RT1-CE15 414789                                 | 1,36 | down |
| 5967519 | 7224511 | 1433490 | RT1 class I, CE15                             | RT1-CE15 414789                                 | 1,28 | down |
| 5816043 | 7220541 | 1424280 | RT1 class I, CE15 /// RT1 class I, CE4        | Γ1-CE15 /// RT1-CI 414789 /// 414783            | 2,66 | up   |
| 5984837 | 7220541 | 1424282 | RT1 class I, CE15 /// RT1 class I, CE4        | Γ1-CE15 /// RT1-CI 414789 /// 414783            | 1,23 | up   |
| 6555679 | 7224499 | 1433475 | RT1 class I, CE16                             | RT1-CE16 414819                                 | 3,87 | down |
| 6411112 | 7224499 | 1433475 | RT1 class I, CE16                             | RT1-CE16 414819                                 | 2,72 | down |
| 6649632 | 7224499 | 1433475 | RT1 class I, CE16                             | RT1-CE16 414819                                 | 1,85 | down |
| 5738295 | 7224499 | 1433472 | RT1 class I, CE16                             | RT1-CE16 414819                                 | 1,83 | up   |
| 6363272 | 7224499 | 1433471 | RT1 class I, CE16                             | RT1-CE16 414819                                 | 1,73 | down |
| 5807453 | 7224499 | 1433475 | RT1 class I, CE16                             | RT1-CE16 414819                                 | 1,57 | down |
| 6404629 | 7224499 | 1433469 | RT1 class I, CE16                             | RT1-CE16 414819                                 | 1,51 | up   |
| 5634031 | 7224499 | 1433474 | RT1 class I, CE16                             | RT1-CE16 414819                                 | 1,29 | up   |
| 5744921 | 7224499 | 1433476 | RT1 class I, CE16                             | RT1-CE16 414819                                 | 1,01 | down |
| 6634328 | 7224499 | 1433470 | RT1 class I, CE16 /// RT1 class Ib, locus Aw2 | Γ1-CE16 /// RT1-A <sub>v</sub> 414819 /// 24737 | 1,73 | up   |
| 6643385 | 7224499 | 1433473 | RT1 class I, CE16 /// RT1 class Ib, locus Aw2 | Γ1-CE16 /// RT1-A <sub>v</sub> 414819 /// 24737 | 1,19 | up   |
| 5838823 | 7220569 | 1424332 | RT1 class I, CE2                              | RT1-CE2 414779                                  | 2,80 | down |
| 6514838 | 7220569 | 1424333 | RT1 class I, CE2                              | RT1-CE2 414779                                  | 2,37 | down |
| 6620468 | 7220569 | 1424334 | RT1 class I, CE2                              | RT1-CE2 414779                                  | 1,60 | down |
| 5688505 | 7220569 | 1424331 | RT1 class I, CE2                              | RT1-CE2 414779                                  | 1,60 | up   |
| 6333024 | 7220569 | 1424330 | RT1 class I, CE2                              | RT1-CE2 414779                                  | 1,47 | up   |
| 5966774 | 7220569 | 1424329 | RT1 class I, CE2                              | RT1-CE2 414779                                  | 1,42 | up   |
| 5712333 | 7220557 | 1424313 | RT1 class I, CE3                              | RT1-CE3 414793                                  | 2,78 | down |
| 6164285 | 7220557 | 1424309 | RT1 class I, CE3                              | RT1-CE3 414793                                  | 2,46 | down |
| 6080207 | 7220557 | 1424313 | RT1 class I, CE3                              | RT1-CE3 414793                                  | 2,41 | up   |
| 5662898 | 7220557 | 1424312 | RT1 class I, CE3                              | RT1-CE3 414793                                  | 1,95 | down |
| 6049840 | 7220557 | 1424311 | RT1 class I, CE3                              | RT1-CE3 414793                                  | 1,59 | up   |
| 5985707 | 7220557 | 1424314 | RT1 class I, CE3                              | RT1-CE3 414793                                  | 1,30 | up   |
| 6486976 | 7220557 | 1424310 | RT1 class I, CE3                              | RT1-CE3 414793                                  | 1,20 | down |
| 6594645 | 7220541 | 1424286 | RT1 class I, CE4                              | RT1-CE4 414783                                  | 4,07 | down |
| 6124998 | 7220541 | 1424284 | RT1 class I, CE4                              | RT1-CE4 414783                                  | 2,41 | up   |

|         |         |         |                                                                                                          |                                      |                   |      |      |
|---------|---------|---------|----------------------------------------------------------------------------------------------------------|--------------------------------------|-------------------|------|------|
| 5824526 | 7220541 | 1424282 | RT1 class I, CE4                                                                                         | RT1-CE4                              | 414783            | 2,38 | down |
| 5717103 | 7220541 | 1424285 | RT1 class I, CE4                                                                                         | RT1-CE4                              | 414783            | 1,86 | down |
| 5781096 | 7220541 | 1424283 | RT1 class I, CE4                                                                                         | RT1-CE4                              | 414783            | 1,15 | up   |
| 6476362 | 7220541 | 1424281 | RT1 class I, CE4                                                                                         | RT1-CE4                              | 414783            | 1,15 | down |
| 6169067 | 7220541 | 1424279 | RT1 class I, CE5                                                                                         | RT1-CE5                              | 309607            | 1,52 | down |
| 5817745 | 7220541 | 1424278 | RT1 class I, CE5                                                                                         | RT1-CE5                              | 309607            | 1,49 | up   |
| 6379175 | 7220541 | 1424275 | RT1 class I, CE5                                                                                         | RT1-CE5                              | 309607            | 1,30 | up   |
| 6495343 | 7220541 | 1424277 | RT1 class I, CE5                                                                                         | RT1-CE5                              | 309607            | 1,28 | up   |
| 6639078 | 7220541 | 1424275 | RT1 class I, CE5                                                                                         | RT1-CE5                              | 309607            | 1,25 | up   |
| 6167766 | 7220541 | 1424278 | RT1 class I, CE5                                                                                         | RT1-CE5                              | 309607            | 1,23 | up   |
| 6343495 | 7220541 | 1424276 | RT1 class I, CE5                                                                                         | RT1-CE5                              | 309607            | 1,23 | down |
| 5681011 | 7220541 | 1424274 | RT1 class I, CE5                                                                                         | RT1-CE5                              | 309607            | 1,11 | down |
| 6026371 | 7220541 | 1424272 | RT1 class I, CE5 /// MHC class I RT1.Aa alpha-chain                                                      | RT1-CE5 /// Rt1.aa09607 /// 10018893 |                   | 1,45 | down |
| 6179965 | 7216676 | 1414425 | RT1 class I, CE7                                                                                         | RT1-CE7                              | 368153            | 3,81 | up   |
| 5980405 | 7216676 | 1414427 | RT1 class I, CE7                                                                                         | RT1-CE7                              | 368153            | 1,79 | down |
| 6222885 | 7216676 | 1414424 | RT1 class I, CE7                                                                                         | RT1-CE7                              | 368153            | 1,40 | down |
| 6680965 | 7216676 | 1414426 | RT1 class I, CE7                                                                                         | RT1-CE7                              | 368153            | 1,15 | up   |
| 6291131 | 7216345 | 1413805 | RT1 class I, M6, gene 1                                                                                  | RT1-M6-1                             | 414785            | 1,31 | down |
| 6150825 | 7216345 | 1413804 | RT1 class I, M6, gene 1                                                                                  | RT1-M6-1                             | 414785            | 1,05 | down |
| 6533026 | 7216347 | 1413813 | RT1 class I, M6, gene 2                                                                                  | RT1-M6-2                             | 365527            | 2,00 | up   |
| 6538351 | 7216347 | 1413813 | RT1 class I, M6, gene 2                                                                                  | RT1-M6-2                             | 365527            | 1,99 | up   |
| 5895484 | 7216347 | 1413814 | RT1 class I, M6, gene 2                                                                                  | RT1-M6-2                             | 365527            | 1,58 | down |
| 6336185 | 7216347 | 1413812 | RT1 class I, M6, gene 2                                                                                  | RT1-M6-2                             | 365527            | 1,21 | up   |
| 6379848 | 7216347 | 1413811 | RT1 class I, M6, gene 2                                                                                  | RT1-M6-2                             | 365527            | 1,11 | down |
| 6691676 | 7216347 | 1413811 | RT1 class I, M6, gene 2                                                                                  | RT1-M6-2                             | 365527            | 1,09 | down |
| 5950815 | 7216347 | 1413810 | RT1 class I, M6, gene 2                                                                                  | RT1-M6-2                             | 365527            | 1,03 | down |
| 5830104 | 7216345 | 1413806 | RT1 class I, M6, gene 2 /// RT1 class I, M6, gene 1                                                      | RT1-M6-2 /// RT1-M6-1                | 365527 /// 414785 | 2,18 | up   |
| 5834956 | 7216347 | 1413810 | RT1 class I, M6, gene 2 /// RT1 class I, M6, gene 1                                                      | RT1-M6-2 /// RT1-M6-1                | 365527 /// 414785 | 1,68 | down |
| 6387428 | 7216345 | 1413803 | RT1 class I, M6, gene 2 /// RT1 class I, M6, gene 1                                                      | RT1-M6-2 /// RT1-M6-1                | 365527 /// 414785 | 1,55 | up   |
| 5707528 | 7216345 | 1413808 | RT1 class I, M6, gene 2 /// RT1 class I, M6, gene 1                                                      | RT1-M6-2 /// RT1-M6-1                | 365527 /// 414785 | 1,29 | down |
| 6463583 | 7216347 | 1413815 | RT1 class I, M6, gene 2 /// RT1 class I, M6, gene 1                                                      | RT1-M6-2 /// RT1-M6-1                | 365527 /// 414785 | 1,06 | down |
| 6247217 | 7216345 | 1413807 | RT1 class I, M6, gene 2 /// RT1 class I, M6, gene 1                                                      | RT1-M6-2 /// RT1-M6-1                | 365527 /// 414785 | 1,02 | up   |
| 6130573 | 7216994 | 1415197 | RT1 class Ia, locus A1                                                                                   | RT1-A1                               | 24973             | 2,63 | down |
| 6700370 | 7216994 | 1415198 | RT1 class Ia, locus A1                                                                                   | RT1-A1                               | 24973             | 1,20 | up   |
| 6651777 | 7216994 | 1415181 | RT1 class Ia, locus A1 /// RT1 class I, A3                                                               | RT1-A1 /// RT1-A3                    | 24973 /// 309627  | 1,43 | up   |
| 5877298 | 7216994 | 1415188 | RT1 class Ia, locus A2                                                                                   | RT1-A2                               | 24974             | 3,37 | down |
| 6373267 | 7216994 | 1415189 | RT1 class Ia, locus A2                                                                                   | RT1-A2                               | 24974             | 1,37 | down |
| 5680755 | 7216994 | 1415190 | RT1 class Ia, locus A2                                                                                   | RT1-A2                               | 24974             | 1,19 | down |
| 6430464 | 7216994 | 1415191 | RT1 class Ia, locus A2                                                                                   | RT1-A2                               | 24974             | 1,15 | down |
| 6671509 | 7216994 | 1415192 | RT1 class Ia, locus A2 /// MHC class I RT1.Aa alpha-chain /// RT1 class I, A3 /// RT1 class Ib, locus A3 | RT1-A2 /// RT1-A3                    | 24974 /// 309627  | 1,15 | up   |
| 5715677 | 7216994 | 1415196 | RT1 class Ia, locus A2 /// RT1 class I, A3                                                               | RT1-A2 /// RT1-A3                    | 24974 /// 309627  | 3,21 | down |
| 6255552 | 7216994 | 1415194 | RT1 class Ia, locus A2 /// RT1 class I, A3                                                               | RT1-A2 /// RT1-A3                    | 24974 /// 309627  | 1,52 | up   |
| 6659124 | 7216994 | 1415193 | RT1 class Ia, locus A2 /// RT1 class I, A3                                                               | RT1-A2 /// RT1-A3                    | 24974 /// 309627  | 1,10 | down |
| 5875968 | 7216994 | 1415196 | RT1 class Ia, locus A2 /// RT1 class I, A3 /// RT1 class Ib, locus Aw2 /// RT1 class Ia, locus A1        | RT1-A2 /// RT1-A3                    | 24974 /// 309627  | 1,31 | up   |
| 5749495 | 7216994 | 1415195 | RT1 class Ia, locus A2 /// RT1 class I, A3 /// RT1 class Ib, locus Aw2 /// RT1 class Ia, locus A1        | RT1-A2 /// RT1-A3                    | 24974 /// 309627  | 1,16 | up   |
| 6468280 | 7216519 | 1414135 | RT1 class Ib gene, H2-TL-like, grc region (N3)                                                           | RT1-N3                               | 24750             | 1,78 | up   |
| 6095429 | 7216519 | 1414141 | RT1 class Ib gene, H2-TL-like, grc region (N3)                                                           | RT1-N3                               | 24750             | 1,46 | down |
| 6357891 | 7216519 | 1414141 | RT1 class Ib gene, H2-TL-like, grc region (N3)                                                           | RT1-N3                               | 24750             | 1,33 | down |
| 5985060 | 7216519 | 1414138 | RT1 class Ib gene, H2-TL-like, grc region (N3)                                                           | RT1-N3                               | 24750             | 1,31 | down |
| 6494761 | 7216519 | 1414134 | RT1 class Ib gene, H2-TL-like, grc region (N3)                                                           | RT1-N3                               | 24750             | 1,28 | up   |
| 5710457 | 7216519 | 1414134 | RT1 class Ib gene, H2-TL-like, grc region (N3)                                                           | RT1-N3                               | 24750             | 1,14 | up   |
| 6333672 | 7216519 | 1414140 | RT1 class Ib gene, H2-TL-like, grc region (N3)                                                           | RT1-N3                               | 24750             | 1,03 | up   |
| 5942958 | 7216519 | 1414139 | RT1 class Ib gene, H2-TL-like, grc region (N3) /// RT1 class Ib gene, H2-TL-like, grc region (N1)        | RT1-N3 /// RT1-N1                    | 24750 /// 24748   | 1,05 | down |
| 6325929 | 7216519 | 1414136 | RT1 class Ib gene, H2-TL-like, grc region (N3) /// RT1 class Ib gene, H2-TL-like, grc region (N2) /// N3 | RT1-N3 /// RT1-N2                    | 24750 /// 360323  | 2,35 | up   |
| 6339954 | 7216519 | 1414137 | RT1 class Ib gene, H2-TL-like, grc region (N3) /// RT1 class Ib gene, H2-TL-like, grc region (N2) /// N3 | RT1-N3 /// RT1-N2                    | 24750 /// 360323  | 1,37 | up   |
| 5710613 | 7216519 | 1414136 | RT1 class Ib gene, H2-TL-like, grc region (N3) /// RT1 class Ib gene, H2-TL-like, grc region (N2) /// N3 | RT1-N3 /// RT1-N2                    | 24750 /// 360323  | 1,06 | up   |
| 6396165 | 7220557 | 1424308 | RT1 class Ib, locus Aw2 /// RT1 class I, A3 /// RT1 class I, CE3                                         | RT1-Aw2 /// RT1-A3                   | 309627 /// 414785 | 1,73 | up   |

|         |         |         |                                                                                   |                                    |      |      |
|---------|---------|---------|-----------------------------------------------------------------------------------|------------------------------------|------|------|
| 6077325 | 7224452 | 1433367 | RT1 class Ib, locus Aw2 /// RT1 class I, CE11                                     | Γ1-Aw2 /// RT1-CE 24737 /// 414791 | 1,14 | up   |
| 6663729 | 7220541 | 1424273 | RT1 class Ib, locus Aw2 /// RT1 class I, CE5                                      | T1-Aw2 /// RT1-CE 24737 /// 309607 | 1,11 | up   |
| 6434473 | 7216994 | 1415202 | RT1 class Ib, locus Aw2 /// RT1 class Ia, locus A1                                | †T1-Aw2 /// RT1-A 24737 /// 24973  | 1,90 | up   |
| 6724248 | 7216994 | 1415201 | RT1 class Ib, locus Aw2 /// RT1 class Ia, locus A1                                | ‡T1-Aw2 /// RT1-A 24737 /// 24973  | 1,45 | up   |
| 6736861 | 7216508 | 1414116 | RT1 class Ib, locus H2-Q-like, grc region /// RT1 class Ib, locus H2-TL-like (S2) | RT1-O /// RT1-S2 24751 /// 24994   | 1,52 | up   |
| 6394076 | 7216508 | 1414116 | RT1 class Ib, locus H2-Q-like, grc region /// RT1 class Ib, locus H2-TL-like (S2) | RT1-O /// RT1-S2 24751 /// 24994   | 1,09 | down |
| 6624083 | 7216508 | 1414118 | RT1 class Ib, locus H2-Q-like, grc region /// RT1 class Ib, locus H2-TL-like (S2) | RT1-O /// RT1-S2 24751 /// 24994   | 1,08 | up   |
| 6111134 | 7216508 | 1414119 | RT1 class Ib, locus H2-TL-like (S2)                                               | RT1-S2 24994                       | 2,09 | down |
| 5757699 | 7216508 | 1414115 | RT1 class Ib, locus H2-TL-like (S2)                                               | RT1-S2 24994                       | 1,25 | down |
| 6614552 | 7216508 | 1414117 | RT1 class Ib, locus H2-TL-like (S2)                                               | RT1-S2 24994                       | 1,15 | down |
| 6352043 | 7220882 | 1424994 | RT1 class II, locus Bb                                                            | RT1-Bb 309622                      | 4,94 | down |
| 6703260 | 7220882 | 1424990 | RT1 class II, locus Bb                                                            | RT1-Bb 309622                      | 1,53 | up   |
| 6602804 | 7220882 | 1424995 | RT1 class II, locus Bb                                                            | RT1-Bb 309622                      | 1,42 | down |
| 6636314 | 7220882 | 1424994 | RT1 class II, locus Bb                                                            | RT1-Bb 309622                      | 1,21 | down |
| 6678801 | 7220882 | 1424993 | RT1 class II, locus Bb                                                            | RT1-Bb 309622                      | 1,17 | down |
| 6218459 | 7124152 | 1187340 | RUN and FYVE domain containing 3                                                  | Rufy3 360921                       | 2,21 | up   |
| 6183218 | 7124152 | 1187337 | RUN and FYVE domain containing 3                                                  | Rufy3 360921                       | 1,71 | down |
| 6321490 | 7124152 | 1187350 | RUN and FYVE domain containing 3                                                  | Rufy3 360921                       | 1,30 | down |
| 6007576 | 7124152 | 1187338 | RUN and FYVE domain containing 3                                                  | Rufy3 360921                       | 1,27 | up   |
| 6115691 | 7124152 | 1187344 | RUN and FYVE domain containing 3                                                  | Rufy3 360921                       | 1,26 | up   |
| 5820017 | 7124152 | 1187349 | RUN and FYVE domain containing 3                                                  | Rufy3 360921                       | 1,24 | down |
| 6179248 | 7124152 | 1187349 | RUN and FYVE domain containing 3                                                  | Rufy3 360921                       | 1,23 | down |
| 5673220 | 7124152 | 1187346 | RUN and FYVE domain containing 3                                                  | Rufy3 360921                       | 1,16 | up   |
| 6548103 | 7124152 | 1187343 | RUN and FYVE domain containing 3                                                  | Rufy3 360921                       | 1,13 | up   |
| 5825966 | 7124152 | 1187347 | RUN and FYVE domain containing 3                                                  | Rufy3 360921                       | 1,13 | down |
| 6088776 | 7124152 | 1187339 | RUN and FYVE domain containing 3                                                  | Rufy3 360921                       | 1,12 | up   |
| 6569550 | 7124152 | 1187348 | RUN and FYVE domain containing 3                                                  | Rufy3 360921                       | 1,07 | down |
| 6154153 | 7124152 | 1187341 | RUN and FYVE domain containing 3                                                  | Rufy3 360921                       | 1,06 | down |
| 6612413 | 7124152 | 1187342 | RUN and FYVE domain containing 3                                                  | Rufy3 360921                       | 1,01 | up   |
| 6521713 | 7124152 | 1187345 | RUN and FYVE domain containing 3                                                  | Rufy3 360921                       | 1,01 | down |
| 5693104 | 7091840 | 1107445 | runt related transcription factor 1                                               | Runx1 50662                        | 2,02 | up   |
| 6078366 | 7091840 | 1107444 | runt related transcription factor 1                                               | Runx1 50662                        | 1,94 | down |
| 5787151 | 7091840 | 1107443 | runt related transcription factor 1                                               | Runx1 50662                        | 1,79 | up   |
| 6682291 | 7091840 | 1107442 | runt related transcription factor 1                                               | Runx1 50662                        | 1,73 | up   |
| 5627566 | 7091840 | 1107441 | runt related transcription factor 1                                               | Runx1 50662                        | 1,54 | down |
| 5769943 | 7091840 | 1107439 | runt related transcription factor 1                                               | Runx1 50662                        | 1,27 | down |
| 5775231 | 7091840 | 1107440 | runt related transcription factor 1                                               | Runx1 50662                        | 1,06 | down |
| 6420235 | 7255986 | 1512361 | RuvB-like 1 (E. coli)                                                             | Ruvbl1 65137                       | 2,17 | up   |
| 5641214 | 7255986 | 1512354 | RuvB-like 1 (E. coli)                                                             | Ruvbl1 65137                       | 1,79 | down |
| 6420245 | 7255986 | 1512363 | RuvB-like 1 (E. coli)                                                             | Ruvbl1 65137                       | 1,68 | down |
| 6669555 | 7255986 | 1512360 | RuvB-like 1 (E. coli)                                                             | Ruvbl1 65137                       | 1,51 | up   |
| 5742025 | 7255986 | 1512355 | RuvB-like 1 (E. coli)                                                             | Ruvbl1 65137                       | 1,35 | up   |
| 6302574 | 7255986 | 1512358 | RuvB-like 1 (E. coli)                                                             | Ruvbl1 65137                       | 1,24 | up   |
| 5889192 | 7255986 | 1512357 | RuvB-like 1 (E. coli)                                                             | Ruvbl1 65137                       | 1,17 | up   |
| 5887086 | 7255986 | 1512362 | RuvB-like 1 (E. coli)                                                             | Ruvbl1 65137                       | 1,14 | down |
| 5678120 | 7255986 | 1512356 | RuvB-like 1 (E. coli)                                                             | Ruvbl1 65137                       | 1,09 | down |
| 6164445 | 7255986 | 1512353 | RuvB-like 1 (E. coli)                                                             | Ruvbl1 65137                       | 1,05 | down |
| 6485705 | 7255986 | 1512352 | RuvB-like 1 (E. coli)                                                             | Ruvbl1 65137                       | 1,01 | down |
| 6012501 | 7255986 | 1512359 | RuvB-like 1 (E. coli)                                                             | Ruvbl1 65137                       | 1,01 | down |
| 6679144 | 7159036 | 1272868 | ryanodine receptor 2, cardiac                                                     | Ryr2 689560                        | 2,54 | up   |
| 5655286 | 7159036 | 1272881 | ryanodine receptor 2, cardiac                                                     | Ryr2 689560                        | 2,02 | down |
| 6178329 | 7159036 | 1272938 | ryanodine receptor 2, cardiac                                                     | Ryr2 689560                        | 2,01 | down |
| 6612419 | 7159036 | 1272917 | ryanodine receptor 2, cardiac                                                     | Ryr2 689560                        | 1,98 | up   |
| 6125721 | 7159036 | 1272854 | ryanodine receptor 2, cardiac                                                     | Ryr2 689560                        | 1,85 | down |
| 6190212 | 7159036 | 1272891 | ryanodine receptor 2, cardiac                                                     | Ryr2 689560                        | 1,84 | down |
| 5792795 | 7159036 | 1272876 | ryanodine receptor 2, cardiac                                                     | Ryr2 689560                        | 1,74 | up   |
| 6570560 | 7159036 | 1272905 | ryanodine receptor 2, cardiac                                                     | Ryr2 689560                        | 1,73 | down |

|         |         |         |                               |      |        |      |      |
|---------|---------|---------|-------------------------------|------|--------|------|------|
| 6115602 | 7159036 | 1272930 | ryanodine receptor 2, cardiac | Ryr2 | 689560 | 1,66 | up   |
| 5918277 | 7159036 | 1272918 | ryanodine receptor 2, cardiac | Ryr2 | 689560 | 1,52 | up   |
| 6202779 | 7159036 | 1272901 | ryanodine receptor 2, cardiac | Ryr2 | 689560 | 1,52 | down |
| 5897452 | 7159036 | 1272873 | ryanodine receptor 2, cardiac | Ryr2 | 689560 | 1,51 | down |
| 6174369 | 7159036 | 1272887 | ryanodine receptor 2, cardiac | Ryr2 | 689560 | 1,50 | down |
| 6527299 | 7159036 | 1272888 | ryanodine receptor 2, cardiac | Ryr2 | 689560 | 1,49 | down |
| 6663218 | 7159036 | 1272910 | ryanodine receptor 2, cardiac | Ryr2 | 689560 | 1,46 | down |
| 6277971 | 7159036 | 1272930 | ryanodine receptor 2, cardiac | Ryr2 | 689560 | 1,45 | up   |
| 6511780 | 7159036 | 1272832 | ryanodine receptor 2, cardiac | Ryr2 | 689560 | 1,44 | down |
| 6158697 | 7159036 | 1272893 | ryanodine receptor 2, cardiac | Ryr2 | 689560 | 1,44 | down |
| 6039882 | 7159036 | 1272915 | ryanodine receptor 2, cardiac | Ryr2 | 689560 | 1,43 | up   |
| 6032480 | 7159036 | 1272864 | ryanodine receptor 2, cardiac | Ryr2 | 689560 | 1,43 | up   |
| 5632943 | 7159036 | 1272928 | ryanodine receptor 2, cardiac | Ryr2 | 689560 | 1,41 | up   |
| 6316451 | 7159036 | 1272886 | ryanodine receptor 2, cardiac | Ryr2 | 689560 | 1,41 | down |
| 5663894 | 7159036 | 1272952 | ryanodine receptor 2, cardiac | Ryr2 | 689560 | 1,41 | up   |
| 6328370 | 7159036 | 1272849 | ryanodine receptor 2, cardiac | Ryr2 | 689560 | 1,39 | up   |
| 6235702 | 7159036 | 1272900 | ryanodine receptor 2, cardiac | Ryr2 | 689560 | 1,37 | up   |
| 5817121 | 7159036 | 1272925 | ryanodine receptor 2, cardiac | Ryr2 | 689560 | 1,36 | down |
| 6645022 | 7159036 | 1272920 | ryanodine receptor 2, cardiac | Ryr2 | 689560 | 1,36 | up   |
| 6492325 | 7159036 | 1272831 | ryanodine receptor 2, cardiac | Ryr2 | 689560 | 1,31 | up   |
| 6708151 | 7159036 | 1272940 | ryanodine receptor 2, cardiac | Ryr2 | 689560 | 1,31 | down |
| 6675983 | 7159036 | 1272861 | ryanodine receptor 2, cardiac | Ryr2 | 689560 | 1,30 | down |
| 6046470 | 7159036 | 1272908 | ryanodine receptor 2, cardiac | Ryr2 | 689560 | 1,29 | down |
| 6679202 | 7159036 | 1272959 | ryanodine receptor 2, cardiac | Ryr2 | 689560 | 1,29 | up   |
| 6667470 | 7159036 | 1272946 | ryanodine receptor 2, cardiac | Ryr2 | 689560 | 1,26 | down |
| 5998126 | 7159036 | 1272896 | ryanodine receptor 2, cardiac | Ryr2 | 689560 | 1,26 | down |
| 5626854 | 7159036 | 1272844 | ryanodine receptor 2, cardiac | Ryr2 | 689560 | 1,25 | up   |
| 5680237 | 7159036 | 1272899 | ryanodine receptor 2, cardiac | Ryr2 | 689560 | 1,24 | down |
| 6517425 | 7159036 | 1272850 | ryanodine receptor 2, cardiac | Ryr2 | 689560 | 1,24 | down |
| 6100508 | 7159036 | 1272931 | ryanodine receptor 2, cardiac | Ryr2 | 689560 | 1,24 | up   |
| 6387416 | 7159036 | 1272829 | ryanodine receptor 2, cardiac | Ryr2 | 689560 | 1,24 | down |
| 5760312 | 7159036 | 1272857 | ryanodine receptor 2, cardiac | Ryr2 | 689560 | 1,21 | up   |
| 6155678 | 7159036 | 1272874 | ryanodine receptor 2, cardiac | Ryr2 | 689560 | 1,21 | up   |
| 6664195 | 7159036 | 1272882 | ryanodine receptor 2, cardiac | Ryr2 | 689560 | 1,20 | down |
| 5933313 | 7159036 | 1272960 | ryanodine receptor 2, cardiac | Ryr2 | 689560 | 1,19 | up   |
| 5980869 | 7159036 | 1272906 | ryanodine receptor 2, cardiac | Ryr2 | 689560 | 1,17 | down |
| 6648432 | 7159036 | 1272875 | ryanodine receptor 2, cardiac | Ryr2 | 689560 | 1,16 | down |
| 6531330 | 7159036 | 1272895 | ryanodine receptor 2, cardiac | Ryr2 | 689560 | 1,16 | down |
| 6704188 | 7159036 | 1272870 | ryanodine receptor 2, cardiac | Ryr2 | 689560 | 1,16 | down |
| 6324210 | 7159036 | 1272912 | ryanodine receptor 2, cardiac | Ryr2 | 689560 | 1,16 | down |
| 6678589 | 7159036 | 1272834 | ryanodine receptor 2, cardiac | Ryr2 | 689560 | 1,15 | up   |
| 6037821 | 7159036 | 1272848 | ryanodine receptor 2, cardiac | Ryr2 | 689560 | 1,15 | up   |
| 6213046 | 7159036 | 1272950 | ryanodine receptor 2, cardiac | Ryr2 | 689560 | 1,15 | up   |
| 6574857 | 7159036 | 1272959 | ryanodine receptor 2, cardiac | Ryr2 | 689560 | 1,15 | up   |
| 6142949 | 7159036 | 1272879 | ryanodine receptor 2, cardiac | Ryr2 | 689560 | 1,14 | up   |
| 6587082 | 7159036 | 1272919 | ryanodine receptor 2, cardiac | Ryr2 | 689560 | 1,14 | up   |
| 6133232 | 7159036 | 1272859 | ryanodine receptor 2, cardiac | Ryr2 | 689560 | 1,14 | up   |
| 5974989 | 7159036 | 1272841 | ryanodine receptor 2, cardiac | Ryr2 | 689560 | 1,13 | down |
| 6239513 | 7159036 | 1272944 | ryanodine receptor 2, cardiac | Ryr2 | 689560 | 1,13 | up   |
| 6362911 | 7159036 | 1272897 | ryanodine receptor 2, cardiac | Ryr2 | 689560 | 1,13 | down |
| 5809861 | 7159036 | 1272926 | ryanodine receptor 2, cardiac | Ryr2 | 689560 | 1,12 | up   |
| 6571054 | 7159036 | 1272880 | ryanodine receptor 2, cardiac | Ryr2 | 689560 | 1,12 | down |
| 6383100 | 7159036 | 1272846 | ryanodine receptor 2, cardiac | Ryr2 | 689560 | 1,12 | down |
| 6577990 | 7159036 | 1272885 | ryanodine receptor 2, cardiac | Ryr2 | 689560 | 1,12 | down |
| 5962929 | 7159036 | 1272951 | ryanodine receptor 2, cardiac | Ryr2 | 689560 | 1,12 | up   |
| 6420753 | 7159036 | 1272894 | ryanodine receptor 2, cardiac | Ryr2 | 689560 | 1,11 | up   |
| 5970935 | 7159036 | 1272884 | ryanodine receptor 2, cardiac | Ryr2 | 689560 | 1,11 | up   |

|         |         |         |                               |       |        |      |      |
|---------|---------|---------|-------------------------------|-------|--------|------|------|
| 5895094 | 7159036 | 1272863 | ryanodine receptor 2, cardiac | Ryr2  | 689560 | 1,11 | up   |
| 6574916 | 7159036 | 1272892 | ryanodine receptor 2, cardiac | Ryr2  | 689560 | 1,11 | down |
| 6374258 | 7159036 | 1272903 | ryanodine receptor 2, cardiac | Ryr2  | 689560 | 1,11 | down |
| 6276147 | 7159036 | 1272868 | ryanodine receptor 2, cardiac | Ryr2  | 689560 | 1,10 | up   |
| 6436789 | 7159036 | 1272822 | ryanodine receptor 2, cardiac | Ryr2  | 689560 | 1,09 | down |
| 6045636 | 7159036 | 1272902 | ryanodine receptor 2, cardiac | Ryr2  | 689560 | 1,09 | up   |
| 5834338 | 7159036 | 1272851 | ryanodine receptor 2, cardiac | Ryr2  | 689560 | 1,09 | up   |
| 6425704 | 7159036 | 1272916 | ryanodine receptor 2, cardiac | Ryr2  | 689560 | 1,09 | up   |
| 6088439 | 7159036 | 1272924 | ryanodine receptor 2, cardiac | Ryr2  | 689560 | 1,09 | up   |
| 6745157 | 7159036 | 1272845 | ryanodine receptor 2, cardiac | Ryr2  | 689560 | 1,08 | down |
| 6237289 | 7159036 | 1272874 | ryanodine receptor 2, cardiac | Ryr2  | 689560 | 1,08 | down |
| 5870401 | 7159036 | 1272869 | ryanodine receptor 2, cardiac | Ryr2  | 689560 | 1,08 | up   |
| 5762180 | 7159036 | 1272879 | ryanodine receptor 2, cardiac | Ryr2  | 689560 | 1,07 | down |
| 6666938 | 7159036 | 1272939 | ryanodine receptor 2, cardiac | Ryr2  | 689560 | 1,07 | down |
| 5748587 | 7159036 | 1272923 | ryanodine receptor 2, cardiac | Ryr2  | 689560 | 1,07 | up   |
| 6594534 | 7159036 | 1272856 | ryanodine receptor 2, cardiac | Ryr2  | 689560 | 1,06 | up   |
| 6427436 | 7159036 | 1272871 | ryanodine receptor 2, cardiac | Ryr2  | 689560 | 1,06 | down |
| 6158682 | 7159036 | 1272809 | ryanodine receptor 2, cardiac | Ryr2  | 689560 | 1,06 | up   |
| 5856494 | 7159036 | 1272964 | ryanodine receptor 2, cardiac | Ryr2  | 689560 | 1,06 | down |
| 6075726 | 7159036 | 1272878 | ryanodine receptor 2, cardiac | Ryr2  | 689560 | 1,06 | down |
| 5666084 | 7159036 | 1272968 | ryanodine receptor 2, cardiac | Ryr2  | 689560 | 1,06 | up   |
| 6365816 | 7159036 | 1272968 | ryanodine receptor 2, cardiac | Ryr2  | 689560 | 1,05 | up   |
| 5922565 | 7159036 | 1272877 | ryanodine receptor 2, cardiac | Ryr2  | 689560 | 1,05 | up   |
| 6216987 | 7159036 | 1272967 | ryanodine receptor 2, cardiac | Ryr2  | 689560 | 1,05 | up   |
| 5717967 | 7159036 | 1272914 | ryanodine receptor 2, cardiac | Ryr2  | 689560 | 1,04 | up   |
| 6265808 | 7159036 | 1272945 | ryanodine receptor 2, cardiac | Ryr2  | 689560 | 1,04 | down |
| 6211506 | 7159036 | 1272862 | ryanodine receptor 2, cardiac | Ryr2  | 689560 | 1,04 | up   |
| 6654096 | 7159036 | 1272911 | ryanodine receptor 2, cardiac | Ryr2  | 689560 | 1,03 | down |
| 5663251 | 7159036 | 1272934 | ryanodine receptor 2, cardiac | Ryr2  | 689560 | 1,03 | up   |
| 6513513 | 7159036 | 1272942 | ryanodine receptor 2, cardiac | Ryr2  | 689560 | 1,02 | up   |
| 5862096 | 7159036 | 1272889 | ryanodine receptor 2, cardiac | Ryr2  | 689560 | 1,02 | up   |
| 5787593 | 7159036 | 1272883 | ryanodine receptor 2, cardiac | Ryr2  | 689560 | 1,02 | up   |
| 6228502 | 7159036 | 1272966 | ryanodine receptor 2, cardiac | Ryr2  | 689560 | 1,02 | up   |
| 6565605 | 7159036 | 1272949 | ryanodine receptor 2, cardiac | Ryr2  | 689560 | 1,02 | up   |
| 5687873 | 7159036 | 1272898 | ryanodine receptor 2, cardiac | Ryr2  | 689560 | 1,02 | up   |
| 6181511 | 7159036 | 1272953 | ryanodine receptor 2, cardiac | Ryr2  | 689560 | 1,02 | up   |
| 5930001 | 7159036 | 1272954 | ryanodine receptor 2, cardiac | Ryr2  | 689560 | 1,02 | up   |
| 6194065 | 7159036 | 1272913 | ryanodine receptor 2, cardiac | Ryr2  | 689560 | 1,01 | down |
| 5719745 | 7159036 | 1272890 | ryanodine receptor 2, cardiac | Ryr2  | 689560 | 1,01 | up   |
| 6363399 | 7159036 | 1272840 | ryanodine receptor 2, cardiac | Ryr2  | 689560 | 1,01 | down |
| 6439347 | 7159036 | 1272865 | ryanodine receptor 2, cardiac | Ryr2  | 689560 | 1,01 | down |
| 5793875 | 7159036 | 1272933 | ryanodine receptor 2, cardiac | Ryr2  | 689560 | 1,00 | down |
| 6468287 | 7137751 | 1220589 | sal-like 2 (Drosophila)       | Sall2 | 305854 | 2,26 | up   |
| 6651075 | 7137751 | 1220580 | sal-like 2 (Drosophila)       | Sall2 | 305854 | 1,80 | up   |
| 6012332 | 7137751 | 1220584 | sal-like 2 (Drosophila)       | Sall2 | 305854 | 1,50 | down |
| 6529539 | 7137751 | 1220581 | sal-like 2 (Drosophila)       | Sall2 | 305854 | 1,48 | up   |
| 6332916 | 7137751 | 1220584 | sal-like 2 (Drosophila)       | Sall2 | 305854 | 1,30 | down |
| 5720623 | 7137751 | 1220584 | sal-like 2 (Drosophila)       | Sall2 | 305854 | 1,28 | up   |
| 6702694 | 7137751 | 1220584 | sal-like 2 (Drosophila)       | Sall2 | 305854 | 1,22 | down |
| 5697457 | 7137751 | 1220583 | sal-like 2 (Drosophila)       | Sall2 | 305854 | 1,22 | down |
| 5934482 | 7137751 | 1220582 | sal-like 2 (Drosophila)       | Sall2 | 305854 | 1,21 | down |
| 6456854 | 7137751 | 1220584 | sal-like 2 (Drosophila)       | Sall2 | 305854 | 1,12 | down |
| 6012130 | 7137751 | 1220582 | sal-like 2 (Drosophila)       | Sall2 | 305854 | 1,08 | up   |
| 6238190 | 7137751 | 1220584 | sal-like 2 (Drosophila)       | Sall2 | 305854 | 1,06 | down |
| 6707420 | 7319773 | 1671880 | SAPS domain family, member 2  | Saps2 | 300146 | 2,23 | up   |
| 5987450 | 7319773 | 1671860 | SAPS domain family, member 2  | Saps2 | 300146 | 1,81 | down |
| 6314357 | 7319773 | 1671851 | SAPS domain family, member 2  | Saps2 | 300146 | 1,61 | down |

|         |         |         |                              |           |        |      |      |
|---------|---------|---------|------------------------------|-----------|--------|------|------|
| 5833309 | 7319773 | 1671859 | SAPS domain family, member 2 | Saps2     | 300146 | 1,37 | down |
| 6711764 | 7319773 | 1671879 | SAPS domain family, member 2 | Saps2     | 300146 | 1,33 | up   |
| 6417543 | 7319773 | 1671858 | SAPS domain family, member 2 | Saps2     | 300146 | 1,32 | up   |
| 6006669 | 7319773 | 1671849 | SAPS domain family, member 2 | Saps2     | 300146 | 1,31 | up   |
| 6681010 | 7319773 | 1671876 | SAPS domain family, member 2 | Saps2     | 300146 | 1,29 | down |
| 6404082 | 7319773 | 1671874 | SAPS domain family, member 2 | Saps2     | 300146 | 1,29 | up   |
| 5926047 | 7319773 | 1671867 | SAPS domain family, member 2 | Saps2     | 300146 | 1,28 | down |
| 6661688 | 7319773 | 1671874 | SAPS domain family, member 2 | Saps2     | 300146 | 1,25 | up   |
| 6731636 | 7319773 | 1671854 | SAPS domain family, member 2 | Saps2     | 300146 | 1,24 | up   |
| 6102934 | 7319773 | 1671877 | SAPS domain family, member 2 | Saps2     | 300146 | 1,20 | up   |
| 6462165 | 7319773 | 1671876 | SAPS domain family, member 2 | Saps2     | 300146 | 1,19 | up   |
| 6583392 | 7319773 | 1671865 | SAPS domain family, member 2 | Saps2     | 300146 | 1,17 | down |
| 6276144 | 7319773 | 1671875 | SAPS domain family, member 2 | Saps2     | 300146 | 1,17 | up   |
| 5767427 | 7319773 | 1671858 | SAPS domain family, member 2 | Saps2     | 300146 | 1,15 | down |
| 6627102 | 7319773 | 1671853 | SAPS domain family, member 2 | Saps2     | 300146 | 1,14 | down |
| 6025633 | 7319773 | 1671862 | SAPS domain family, member 2 | Saps2     | 300146 | 1,12 | down |
| 5893885 | 7319773 | 1671881 | SAPS domain family, member 2 | Saps2     | 300146 | 1,11 | up   |
| 5638146 | 7319773 | 1671871 | SAPS domain family, member 2 | Saps2     | 300146 | 1,08 | up   |
| 5936175 | 7319773 | 1671863 | SAPS domain family, member 2 | Saps2     | 300146 | 1,06 | down |
| 6502728 | 7319773 | 1671852 | SAPS domain family, member 2 | Saps2     | 300146 | 1,05 | down |
| 6111713 | 7319773 | 1671869 | SAPS domain family, member 2 | Saps2     | 300146 | 1,05 | up   |
| 6482375 | 7319773 | 1671864 | SAPS domain family, member 2 | Saps2     | 300146 | 1,05 | up   |
| 5647723 | 7319773 | 1671868 | SAPS domain family, member 2 | Saps2     | 300146 | 1,04 | up   |
| 6086856 | 7319773 | 1671866 | SAPS domain family, member 2 | Saps2     | 300146 | 1,04 | up   |
| 6557524 | 7319773 | 1671878 | SAPS domain family, member 2 | Saps2     | 300146 | 1,03 | up   |
| 5764437 | 7319773 | 1671873 | SAPS domain family, member 2 | Saps2     | 300146 | 1,02 | down |
| 6552116 | 7319773 | 1671872 | SAPS domain family, member 2 | Saps2     | 300146 | 1,00 | down |
| 5925242 | 7146082 | 1240838 | sarcoglycan zeta             | Sgcz      | 364605 | 1,62 | up   |
| 5754825 | 7146082 | 1240843 | sarcoglycan zeta             | Sgcz      | 364605 | 1,50 | up   |
| 5899297 | 7146082 | 1240851 | sarcoglycan zeta             | Sgcz      | 364605 | 1,47 | up   |
| 6258149 | 7146082 | 1240847 | sarcoglycan zeta             | Sgcz      | 364605 | 1,19 | down |
| 5957339 | 7146082 | 1240828 | sarcoglycan zeta             | Sgcz      | 364605 | 1,18 | up   |
| 5681804 | 7146082 | 1240852 | sarcoglycan zeta             | Sgcz      | 364605 | 1,16 | down |
| 6068629 | 7146082 | 1240851 | sarcoglycan zeta             | Sgcz      | 364605 | 1,10 | down |
| 6456028 | 7146082 | 1240849 | sarcoglycan zeta             | Sgcz      | 364605 | 1,04 | down |
| 5757913 | 7146082 | 1240838 | sarcoglycan zeta             | Sgcz      | 364605 | 1,02 | down |
| 5887018 | 7146082 | 1240834 | sarcoglycan zeta             | Sgcz      | 364605 | 1,02 | down |
| 6197136 | 7146082 | 1240803 | sarcoglycan zeta             | Sgcz      | 364605 | 1,00 | up   |
| 5808140 | 7149614 | 1249979 | sarcoma antigen NY-SAR-48    | Ny-sar-48 | 290626 | 2,58 | up   |
| 5728100 | 7149614 | 1249970 | sarcoma antigen NY-SAR-48    | Ny-sar-48 | 290626 | 1,68 | up   |
| 6359488 | 7149614 | 1249978 | sarcoma antigen NY-SAR-48    | Ny-sar-48 | 290626 | 1,24 | up   |
| 5945137 | 7149614 | 1249976 | sarcoma antigen NY-SAR-48    | Ny-sar-48 | 290626 | 1,23 | down |
| 5772568 | 7149614 | 1249975 | sarcoma antigen NY-SAR-48    | Ny-sar-48 | 290626 | 1,12 | up   |
| 6626965 | 7149614 | 1249971 | sarcoma antigen NY-SAR-48    | Ny-sar-48 | 290626 | 1,10 | down |
| 6297874 | 7149614 | 1249979 | sarcoma antigen NY-SAR-48    | Ny-sar-48 | 290626 | 1,09 | down |
| 5780362 | 7149614 | 1249971 | sarcoma antigen NY-SAR-48    | Ny-sar-48 | 290626 | 1,09 | down |
| 5991302 | 7149614 | 1249969 | sarcoma antigen NY-SAR-48    | Ny-sar-48 | 290626 | 1,07 | up   |
| 6563067 | 7149614 | 1249977 | sarcoma antigen NY-SAR-48    | Ny-sar-48 | 290626 | 1,04 | down |
| 5857299 | 7149614 | 1249972 | sarcoma antigen NY-SAR-48    | Ny-sar-48 | 290626 | 1,03 | up   |
| 6480099 | 7149614 | 1249974 | sarcoma antigen NY-SAR-48    | Ny-sar-48 | 290626 | 1,02 | up   |
| 6172589 | 7149614 | 1249973 | sarcoma antigen NY-SAR-48    | Ny-sar-48 | 290626 | 1,02 | up   |
| 5809365 | 7351515 | 1748601 | SATB homeobox 1              | Satb1     | 316164 | 2,20 | up   |
| 6001696 | 7351515 | 1748592 | SATB homeobox 1              | Satb1     | 316164 | 2,15 | up   |
| 5901930 | 7351515 | 1748591 | SATB homeobox 1              | Satb1     | 316164 | 1,84 | up   |
| 6647660 | 7351515 | 1748592 | SATB homeobox 1              | Satb1     | 316164 | 1,66 | up   |
| 6174382 | 7351515 | 1748601 | SATB homeobox 1              | Satb1     | 316164 | 1,55 | up   |
| 5676044 | 7351515 | 1748595 | SATB homeobox 1              | Satb1     | 316164 | 1,43 | down |

|         |         |         |                                                                         |          |        |      |      |
|---------|---------|---------|-------------------------------------------------------------------------|----------|--------|------|------|
| 5661827 | 7351515 | 1748596 | SATB homeobox 1                                                         | Satb1    | 316164 | 1,33 | down |
| 5776977 | 7351515 | 1748600 | SATB homeobox 1                                                         | Satb1    | 316164 | 1,29 | down |
| 5759843 | 7351515 | 1748594 | SATB homeobox 1                                                         | Satb1    | 316164 | 1,17 | down |
| 6302607 | 7351515 | 1748597 | SATB homeobox 1                                                         | Satb1    | 316164 | 1,17 | down |
| 6390645 | 7351515 | 1748598 | SATB homeobox 1                                                         | Satb1    | 316164 | 1,17 | down |
| 5732633 | 7351515 | 1748596 | SATB homeobox 1                                                         | Satb1    | 316164 | 1,14 | down |
| 6042670 | 7351515 | 1748602 | SATB homeobox 1                                                         | Satb1    | 316164 | 1,12 | down |
| 5855876 | 7351515 | 1748593 | SATB homeobox 1                                                         | Satb1    | 316164 | 1,07 | up   |
| 5693912 | 7351515 | 1748599 | SATB homeobox 1                                                         | Satb1    | 316164 | 1,06 | up   |
| 5777098 | 7351515 | 1748592 | SATB homeobox 1                                                         | Satb1    | 316164 | 1,04 | down |
| 6668022 | 7351515 | 1748592 | SATB homeobox 1                                                         | Satb1    | 316164 | 1,02 | up   |
| 5815080 | 7351515 | 1748597 | SATB homeobox 1                                                         | Satb1    | 316164 | 1,01 | down |
| 6726230 | 7069724 | 1055341 | scavenger receptor class F, member 1                                    | Scarf1   | 303313 | 2,11 | up   |
| 5861888 | 7069724 | 1055335 | scavenger receptor class F, member 1                                    | Scarf1   | 303313 | 1,50 | down |
| 6338512 | 7069724 | 1055338 | scavenger receptor class F, member 1                                    | Scarf1   | 303313 | 1,43 | up   |
| 6442689 | 7069724 | 1055340 | scavenger receptor class F, member 1                                    | Scarf1   | 303313 | 1,25 | down |
| 6030797 | 7069724 | 1055340 | scavenger receptor class F, member 1                                    | Scarf1   | 303313 | 1,20 | down |
| 6735517 | 7069724 | 1055341 | scavenger receptor class F, member 1                                    | Scarf1   | 303313 | 1,19 | down |
| 6042050 | 7069724 | 1055336 | scavenger receptor class F, member 1                                    | Scarf1   | 303313 | 1,16 | up   |
| 6356619 | 7069724 | 1055334 | scavenger receptor class F, member 1                                    | Scarf1   | 303313 | 1,16 | up   |
| 6542940 | 7069724 | 1055342 | scavenger receptor class F, member 1                                    | Scarf1   | 303313 | 1,13 | up   |
| 5728958 | 7069724 | 1055343 | scavenger receptor class F, member 1                                    | Scarf1   | 303313 | 1,11 | up   |
| 6129881 | 7069724 | 1055343 | scavenger receptor class F, member 1                                    | Scarf1   | 303313 | 1,10 | down |
| 6270032 | 7069724 | 1055336 | scavenger receptor class F, member 1                                    | Scarf1   | 303313 | 1,09 | down |
| 5884726 | 7069724 | 1055339 | scavenger receptor class F, member 1                                    | Scarf1   | 303313 | 1,08 | down |
| 5822971 | 7069724 | 1055336 | scavenger receptor class F, member 1                                    | Scarf1   | 303313 | 1,07 | up   |
| 6635766 | 7069724 | 1055336 | scavenger receptor class F, member 1                                    | Scarf1   | 303313 | 1,03 | up   |
| 6021537 | 7069724 | 1055340 | scavenger receptor class F, member 1                                    | Scarf1   | 303313 | 1,03 | up   |
| 6054612 | 7069724 | 1055338 | scavenger receptor class F, member 1                                    | Scarf1   | 303313 | 1,02 | down |
| 6204220 | 7069724 | 1055333 | scavenger receptor class F, member 1                                    | Scarf1   | 303313 | 1,01 | down |
| 6134537 | 7069724 | 1055333 | scavenger receptor class F, member 1                                    | Scarf1   | 303313 | 1,01 | up   |
| 5623125 | 7097485 | 1120950 | scavenger receptor cysteine rich domain containing, group B (4 domains) | Srcrib4d | 304401 | 1,13 | up   |
| 6388472 | 7097485 | 1120946 | scavenger receptor cysteine rich domain containing, group B (4 domains) | Srcrib4d | 304401 | 1,00 | down |
| 6167797 | 7143144 | 1233901 | Scm-like with four mbt domains 1                                        | Sfmbt1   | 58967  | 2,14 | down |
| 5657996 | 7143144 | 1233916 | Scm-like with four mbt domains 1                                        | Sfmbt1   | 58967  | 1,62 | down |
| 6457630 | 7143144 | 1233913 | Scm-like with four mbt domains 1                                        | Sfmbt1   | 58967  | 1,55 | down |
| 6607956 | 7143144 | 1233896 | Scm-like with four mbt domains 1                                        | Sfmbt1   | 58967  | 1,50 | down |
| 6043874 | 7143144 | 1233905 | Scm-like with four mbt domains 1                                        | Sfmbt1   | 58967  | 1,46 | up   |
| 5753974 | 7143144 | 1233912 | Scm-like with four mbt domains 1                                        | Sfmbt1   | 58967  | 1,36 | up   |
| 5939839 | 7143144 | 1233908 | Scm-like with four mbt domains 1                                        | Sfmbt1   | 58967  | 1,32 | up   |
| 5710232 | 7143144 | 1233903 | Scm-like with four mbt domains 1                                        | Sfmbt1   | 58967  | 1,30 | down |
| 6145721 | 7143144 | 1233902 | Scm-like with four mbt domains 1                                        | Sfmbt1   | 58967  | 1,27 | down |
| 6620230 | 7143144 | 1233911 | Scm-like with four mbt domains 1                                        | Sfmbt1   | 58967  | 1,26 | up   |
| 6583176 | 7143144 | 1233900 | Scm-like with four mbt domains 1                                        | Sfmbt1   | 58967  | 1,24 | up   |
| 6581037 | 7143144 | 1233913 | Scm-like with four mbt domains 1                                        | Sfmbt1   | 58967  | 1,23 | up   |
| 6728358 | 7143144 | 1233913 | Scm-like with four mbt domains 1                                        | Sfmbt1   | 58967  | 1,21 | up   |
| 6405557 | 7143144 | 1233915 | Scm-like with four mbt domains 1                                        | Sfmbt1   | 58967  | 1,17 | down |
| 6007285 | 7143144 | 1233904 | Scm-like with four mbt domains 1                                        | Sfmbt1   | 58967  | 1,14 | down |
| 6535117 | 7143144 | 1233910 | Scm-like with four mbt domains 1                                        | Sfmbt1   | 58967  | 1,14 | up   |
| 6434591 | 7143144 | 1233897 | Scm-like with four mbt domains 1                                        | Sfmbt1   | 58967  | 1,12 | up   |
| 6475037 | 7143144 | 1233907 | Scm-like with four mbt domains 1                                        | Sfmbt1   | 58967  | 1,09 | up   |
| 6411417 | 7143144 | 1233899 | Scm-like with four mbt domains 1                                        | Sfmbt1   | 58967  | 1,08 | up   |
| 6589551 | 7143144 | 1233896 | Scm-like with four mbt domains 1                                        | Sfmbt1   | 58967  | 1,07 | up   |
| 6605770 | 7143144 | 1233909 | Scm-like with four mbt domains 1                                        | Sfmbt1   | 58967  | 1,06 | up   |
| 6734129 | 7143144 | 1233906 | Scm-like with four mbt domains 1                                        | Sfmbt1   | 58967  | 1,04 | up   |
| 5735759 | 7143144 | 1233914 | Scm-like with four mbt domains 1                                        | Sfmbt1   | 58967  | 1,03 | down |
| 5643620 | 7143144 | 1233902 | Scm-like with four mbt domains 1                                        | Sfmbt1   | 58967  | 1,03 | up   |



|         |         |         |                                  |        |        |      |      |
|---------|---------|---------|----------------------------------|--------|--------|------|------|
| 5735915 | 7143144 | 1233898 | Scm-like with four mbt domains 1 | Sfmbt1 | 58967  | 1,00 | down |
| 6314150 | 7253414 | 1506089 | SCO-spondin                      | Sspo   | 474348 | 2,62 | up   |
| 6350519 | 7253414 | 1506028 | SCO-spondin                      | Sspo   | 474348 | 2,61 | up   |
| 6589850 | 7253414 | 1506049 | SCO-spondin                      | Sspo   | 474348 | 2,29 | up   |
| 5844352 | 7253414 | 1506048 | SCO-spondin                      | Sspo   | 474348 | 2,18 | up   |
| 6176318 | 7253414 | 1506060 | SCO-spondin                      | Sspo   | 474348 | 2,09 | up   |
| 6123339 | 7253414 | 1505999 | SCO-spondin                      | Sspo   | 474348 | 2,08 | down |
| 5916620 | 7253414 | 1506055 | SCO-spondin                      | Sspo   | 474348 | 2,08 | up   |
| 5769129 | 7253414 | 1506002 | SCO-spondin                      | Sspo   | 474348 | 2,08 | up   |
| 6406578 | 7253414 | 1506034 | SCO-spondin                      | Sspo   | 474348 | 1,99 | down |
| 5784441 | 7253414 | 1506088 | SCO-spondin                      | Sspo   | 474348 | 1,91 | up   |
| 6482607 | 7253414 | 1506047 | SCO-spondin                      | Sspo   | 474348 | 1,75 | down |
| 6368873 | 7253414 | 1506013 | SCO-spondin                      | Sspo   | 474348 | 1,70 | down |
| 5620719 | 7253414 | 1506007 | SCO-spondin                      | Sspo   | 474348 | 1,61 | down |
| 5865317 | 7253414 | 1506081 | SCO-spondin                      | Sspo   | 474348 | 1,59 | down |
| 5878392 | 7253414 | 1506039 | SCO-spondin                      | Sspo   | 474348 | 1,54 | up   |
| 6614156 | 7253414 | 1506000 | SCO-spondin                      | Sspo   | 474348 | 1,51 | down |
| 6413476 | 7253414 | 1506008 | SCO-spondin                      | Sspo   | 474348 | 1,51 | up   |
| 6446802 | 7253414 | 1506058 | SCO-spondin                      | Sspo   | 474348 | 1,50 | up   |
| 6106407 | 7253414 | 1505995 | SCO-spondin                      | Sspo   | 474348 | 1,49 | up   |
| 5910386 | 7253414 | 1505986 | SCO-spondin                      | Sspo   | 474348 | 1,48 | down |
| 6094488 | 7253414 | 1506064 | SCO-spondin                      | Sspo   | 474348 | 1,48 | down |
| 6018216 | 7253414 | 1506032 | SCO-spondin                      | Sspo   | 474348 | 1,47 | down |
| 6402741 | 7253414 | 1506046 | SCO-spondin                      | Sspo   | 474348 | 1,45 | up   |
| 5998348 | 7253414 | 1505989 | SCO-spondin                      | Sspo   | 474348 | 1,45 | down |
| 6540817 | 7253414 | 1505988 | SCO-spondin                      | Sspo   | 474348 | 1,43 | down |
| 5867876 | 7253414 | 1506073 | SCO-spondin                      | Sspo   | 474348 | 1,43 | down |
| 6543171 | 7253414 | 1506084 | SCO-spondin                      | Sspo   | 474348 | 1,41 | up   |
| 6726465 | 7253414 | 1505989 | SCO-spondin                      | Sspo   | 474348 | 1,40 | down |
| 6263077 | 7253414 | 1505996 | SCO-spondin                      | Sspo   | 474348 | 1,39 | down |
| 5804169 | 7253414 | 1505993 | SCO-spondin                      | Sspo   | 474348 | 1,39 | up   |
| 5805419 | 7253414 | 1506069 | SCO-spondin                      | Sspo   | 474348 | 1,38 | up   |
| 6125469 | 7253414 | 1506044 | SCO-spondin                      | Sspo   | 474348 | 1,38 | up   |
| 5943934 | 7253414 | 1506061 | SCO-spondin                      | Sspo   | 474348 | 1,37 | up   |
| 6492820 | 7253414 | 1506018 | SCO-spondin                      | Sspo   | 474348 | 1,36 | up   |
| 6269326 | 7253414 | 1506004 | SCO-spondin                      | Sspo   | 474348 | 1,34 | up   |
| 5786545 | 7253414 | 1506065 | SCO-spondin                      | Sspo   | 474348 | 1,34 | down |
| 5775665 | 7253414 | 1506068 | SCO-spondin                      | Sspo   | 474348 | 1,33 | down |
| 6061920 | 7253414 | 1506082 | SCO-spondin                      | Sspo   | 474348 | 1,33 | up   |
| 6597196 | 7253414 | 1506009 | SCO-spondin                      | Sspo   | 474348 | 1,32 | down |
| 6419269 | 7253414 | 1506047 | SCO-spondin                      | Sspo   | 474348 | 1,32 | down |
| 6401147 | 7253414 | 1506071 | SCO-spondin                      | Sspo   | 474348 | 1,32 | down |
| 6745655 | 7253414 | 1505987 | SCO-spondin                      | Sspo   | 474348 | 1,31 | up   |
| 5891656 | 7253414 | 1506078 | SCO-spondin                      | Sspo   | 474348 | 1,31 | down |
| 6440693 | 7253414 | 1506042 | SCO-spondin                      | Sspo   | 474348 | 1,31 | down |
| 6494904 | 7253414 | 1506026 | SCO-spondin                      | Sspo   | 474348 | 1,30 | down |
| 5718003 | 7253414 | 1506014 | SCO-spondin                      | Sspo   | 474348 | 1,29 | up   |
| 5814726 | 7253414 | 1506074 | SCO-spondin                      | Sspo   | 474348 | 1,29 | up   |
| 6291745 | 7253414 | 1506015 | SCO-spondin                      | Sspo   | 474348 | 1,28 | down |
| 6202548 | 7253414 | 1506063 | SCO-spondin                      | Sspo   | 474348 | 1,27 | up   |
| 5801121 | 7253414 | 1505997 | SCO-spondin                      | Sspo   | 474348 | 1,25 | up   |
| 5828423 | 7253414 | 1506010 | SCO-spondin                      | Sspo   | 474348 | 1,24 | up   |
| 6363837 | 7253414 | 1506077 | SCO-spondin                      | Sspo   | 474348 | 1,24 | down |
| 6297574 | 7253414 | 1506020 | SCO-spondin                      | Sspo   | 474348 | 1,22 | up   |
| 5971261 | 7253414 | 1506016 | SCO-spondin                      | Sspo   | 474348 | 1,22 | down |
| 6314126 | 7253414 | 1506069 | SCO-spondin                      | Sspo   | 474348 | 1,22 | up   |
| 6360414 | 7253414 | 1506037 | SCO-spondin                      | Sspo   | 474348 | 1,22 | up   |

|         |         |         |             |      |        |      |      |
|---------|---------|---------|-------------|------|--------|------|------|
| 6133564 | 7253414 | 1506017 | SCO-spondin | Sspo | 474348 | 1,20 | down |
| 6588528 | 7253414 | 1506040 | SCO-spondin | Sspo | 474348 | 1,20 | up   |
| 6242144 | 7253414 | 1506049 | SCO-spondin | Sspo | 474348 | 1,18 | down |
| 6728080 | 7253414 | 1506041 | SCO-spondin | Sspo | 474348 | 1,18 | down |
| 6618057 | 7253414 | 1506033 | SCO-spondin | Sspo | 474348 | 1,18 | up   |
| 6484235 | 7253414 | 1506022 | SCO-spondin | Sspo | 474348 | 1,17 | up   |
| 5746407 | 7253414 | 1506060 | SCO-spondin | Sspo | 474348 | 1,17 | down |
| 5886646 | 7253414 | 1506029 | SCO-spondin | Sspo | 474348 | 1,17 | down |
| 5644775 | 7253414 | 1506024 | SCO-spondin | Sspo | 474348 | 1,16 | up   |
| 6302962 | 7253414 | 1506006 | SCO-spondin | Sspo | 474348 | 1,16 | up   |
| 6152111 | 7253414 | 1506021 | SCO-spondin | Sspo | 474348 | 1,16 | down |
| 6388599 | 7253414 | 1506003 | SCO-spondin | Sspo | 474348 | 1,16 | up   |
| 6729376 | 7253414 | 1506066 | SCO-spondin | Sspo | 474348 | 1,15 | up   |
| 6403855 | 7253414 | 1506036 | SCO-spondin | Sspo | 474348 | 1,15 | down |
| 5774102 | 7253414 | 1506042 | SCO-spondin | Sspo | 474348 | 1,15 | up   |
| 6733461 | 7253414 | 1506051 | SCO-spondin | Sspo | 474348 | 1,15 | up   |
| 6720460 | 7253414 | 1506090 | SCO-spondin | Sspo | 474348 | 1,15 | down |
| 6299981 | 7253414 | 1506067 | SCO-spondin | Sspo | 474348 | 1,15 | down |
| 6123409 | 7253414 | 1506032 | SCO-spondin | Sspo | 474348 | 1,14 | down |
| 6432208 | 7253414 | 1506066 | SCO-spondin | Sspo | 474348 | 1,14 | down |
| 6528654 | 7253414 | 1506076 | SCO-spondin | Sspo | 474348 | 1,14 | down |
| 6359320 | 7253414 | 1506066 | SCO-spondin | Sspo | 474348 | 1,13 | down |
| 5883162 | 7253414 | 1505991 | SCO-spondin | Sspo | 474348 | 1,13 | up   |
| 6067840 | 7253414 | 1506039 | SCO-spondin | Sspo | 474348 | 1,13 | up   |
| 6573675 | 7253414 | 1506070 | SCO-spondin | Sspo | 474348 | 1,13 | down |
| 6311983 | 7253414 | 1506023 | SCO-spondin | Sspo | 474348 | 1,13 | down |
| 6117911 | 7253414 | 1506052 | SCO-spondin | Sspo | 474348 | 1,13 | down |
| 5729777 | 7253414 | 1506072 | SCO-spondin | Sspo | 474348 | 1,13 | up   |
| 5868754 | 7253414 | 1506062 | SCO-spondin | Sspo | 474348 | 1,13 | down |
| 5745631 | 7253414 | 1506001 | SCO-spondin | Sspo | 474348 | 1,13 | up   |
| 6356462 | 7253414 | 1506034 | SCO-spondin | Sspo | 474348 | 1,12 | down |
| 6224915 | 7253414 | 1506027 | SCO-spondin | Sspo | 474348 | 1,12 | up   |
| 6353248 | 7253414 | 1506054 | SCO-spondin | Sspo | 474348 | 1,11 | down |
| 6229572 | 7253414 | 1506081 | SCO-spondin | Sspo | 474348 | 1,11 | down |
| 6110185 | 7253414 | 1506045 | SCO-spondin | Sspo | 474348 | 1,11 | down |
| 5794998 | 7253414 | 1506059 | SCO-spondin | Sspo | 474348 | 1,10 | up   |
| 5798856 | 7253414 | 1506079 | SCO-spondin | Sspo | 474348 | 1,10 | down |
| 6065637 | 7253414 | 1506051 | SCO-spondin | Sspo | 474348 | 1,10 | down |
| 5679563 | 7253414 | 1506087 | SCO-spondin | Sspo | 474348 | 1,09 | up   |
| 6196112 | 7253414 | 1506077 | SCO-spondin | Sspo | 474348 | 1,09 | down |
| 5857274 | 7253414 | 1506019 | SCO-spondin | Sspo | 474348 | 1,09 | up   |
| 6667164 | 7253414 | 1505992 | SCO-spondin | Sspo | 474348 | 1,08 | up   |
| 6486337 | 7253414 | 1506025 | SCO-spondin | Sspo | 474348 | 1,08 | down |
| 5757459 | 7253414 | 1505998 | SCO-spondin | Sspo | 474348 | 1,08 | down |
| 5626174 | 7253414 | 1506031 | SCO-spondin | Sspo | 474348 | 1,07 | up   |
| 6332173 | 7253414 | 1506043 | SCO-spondin | Sspo | 474348 | 1,07 | down |
| 5946233 | 7253414 | 1505996 | SCO-spondin | Sspo | 474348 | 1,07 | up   |
| 6055202 | 7253414 | 1506056 | SCO-spondin | Sspo | 474348 | 1,07 | up   |
| 6385744 | 7253414 | 1506082 | SCO-spondin | Sspo | 474348 | 1,07 | up   |
| 6513085 | 7253414 | 1506089 | SCO-spondin | Sspo | 474348 | 1,06 | up   |
| 5886629 | 7253414 | 1506053 | SCO-spondin | Sspo | 474348 | 1,06 | up   |
| 5834010 | 7253414 | 1505990 | SCO-spondin | Sspo | 474348 | 1,06 | up   |
| 6436474 | 7253414 | 1506088 | SCO-spondin | Sspo | 474348 | 1,05 | up   |
| 6488511 | 7253414 | 1506085 | SCO-spondin | Sspo | 474348 | 1,05 | up   |
| 6449472 | 7253414 | 1505994 | SCO-spondin | Sspo | 474348 | 1,05 | up   |
| 6341127 | 7253414 | 1506038 | SCO-spondin | Sspo | 474348 | 1,05 | up   |
| 6381099 | 7253414 | 1506077 | SCO-spondin | Sspo | 474348 | 1,05 | down |

|         |         |         |                                                 |        |        |      |      |
|---------|---------|---------|-------------------------------------------------|--------|--------|------|------|
| 6498369 | 7253414 | 1506083 | SCO-spondin                                     | Sspo   | 474348 | 1,04 | up   |
| 6432273 | 7253414 | 1506057 | SCO-spondin                                     | Sspo   | 474348 | 1,04 | up   |
| 6042580 | 7253414 | 1506050 | SCO-spondin                                     | Sspo   | 474348 | 1,04 | up   |
| 5751246 | 7253414 | 1506020 | SCO-spondin                                     | Sspo   | 474348 | 1,04 | up   |
| 6161773 | 7253414 | 1506005 | SCO-spondin                                     | Sspo   | 474348 | 1,04 | up   |
| 6626255 | 7253414 | 1506075 | SCO-spondin                                     | Sspo   | 474348 | 1,03 | up   |
| 6456880 | 7253414 | 1506086 | SCO-spondin                                     | Sspo   | 474348 | 1,03 | down |
| 6394868 | 7253414 | 1506063 | SCO-spondin                                     | Sspo   | 474348 | 1,03 | up   |
| 6717576 | 7253414 | 1506011 | SCO-spondin                                     | Sspo   | 474348 | 1,03 | down |
| 6334629 | 7253414 | 1506012 | SCO-spondin                                     | Sspo   | 474348 | 1,03 | up   |
| 6387105 | 7253414 | 1506080 | SCO-spondin                                     | Sspo   | 474348 | 1,03 | up   |
| 6184309 | 7253414 | 1506030 | SCO-spondin                                     | Sspo   | 474348 | 1,03 | down |
| 6456804 | 7253414 | 1506072 | SCO-spondin                                     | Sspo   | 474348 | 1,02 | down |
| 6582869 | 7253414 | 1506077 | SCO-spondin                                     | Sspo   | 474348 | 1,02 | down |
| 6131982 | 7253414 | 1506021 | SCO-spondin                                     | Sspo   | 474348 | 1,01 | down |
| 6697377 | 7253414 | 1506033 | SCO-spondin                                     | Sspo   | 474348 | 1,01 | up   |
| 5896876 | 7253414 | 1506000 | SCO-spondin                                     | Sspo   | 474348 | 1,01 | down |
| 5662034 | 7253414 | 1506003 | SCO-spondin                                     | Sspo   | 474348 | 1,01 | up   |
| 6131809 | 7253414 | 1506025 | SCO-spondin                                     | Sspo   | 474348 | 1,00 | down |
| 6085056 | 7253414 | 1506029 | SCO-spondin                                     | Sspo   | 474348 | 1,00 | up   |
| 5806457 | 7253414 | 1506035 | SCO-spondin                                     | Sspo   | 474348 | 1,00 | up   |
| 6636676 | 7198730 | 1372637 | SEC24 family, member D ( <i>S. cerevisiae</i> ) | Sec24d | 310843 | 1,60 | down |
| 6624346 | 7198730 | 1372673 | SEC24 family, member D ( <i>S. cerevisiae</i> ) | Sec24d | 310843 | 1,33 | up   |
| 6629835 | 7198730 | 1372676 | SEC24 family, member D ( <i>S. cerevisiae</i> ) | Sec24d | 310843 | 1,31 | up   |
| 5896977 | 7198730 | 1372652 | SEC24 family, member D ( <i>S. cerevisiae</i> ) | Sec24d | 310843 | 1,28 | up   |
| 6449316 | 7198730 | 1372664 | SEC24 family, member D ( <i>S. cerevisiae</i> ) | Sec24d | 310843 | 1,27 | down |
| 5960714 | 7198730 | 1372648 | SEC24 family, member D ( <i>S. cerevisiae</i> ) | Sec24d | 310843 | 1,25 | down |
| 6695956 | 7198730 | 1372661 | SEC24 family, member D ( <i>S. cerevisiae</i> ) | Sec24d | 310843 | 1,23 | down |
| 5831555 | 7198730 | 1372670 | SEC24 family, member D ( <i>S. cerevisiae</i> ) | Sec24d | 310843 | 1,21 | down |
| 5801682 | 7198730 | 1372647 | SEC24 family, member D ( <i>S. cerevisiae</i> ) | Sec24d | 310843 | 1,19 | down |
| 6365728 | 7198730 | 1372672 | SEC24 family, member D ( <i>S. cerevisiae</i> ) | Sec24d | 310843 | 1,14 | up   |
| 5781906 | 7198730 | 1372673 | SEC24 family, member D ( <i>S. cerevisiae</i> ) | Sec24d | 310843 | 1,14 | down |
| 5829950 | 7198730 | 1372678 | SEC24 family, member D ( <i>S. cerevisiae</i> ) | Sec24d | 310843 | 1,11 | up   |
| 5821452 | 7198730 | 1372657 | SEC24 family, member D ( <i>S. cerevisiae</i> ) | Sec24d | 310843 | 1,11 | down |
| 6188228 | 7198730 | 1372649 | SEC24 family, member D ( <i>S. cerevisiae</i> ) | Sec24d | 310843 | 1,10 | down |
| 5795269 | 7198730 | 1372678 | SEC24 family, member D ( <i>S. cerevisiae</i> ) | Sec24d | 310843 | 1,09 | down |
| 6716617 | 7198730 | 1372643 | SEC24 family, member D ( <i>S. cerevisiae</i> ) | Sec24d | 310843 | 1,08 | up   |
| 6567372 | 7198730 | 1372659 | SEC24 family, member D ( <i>S. cerevisiae</i> ) | Sec24d | 310843 | 1,07 | down |
| 5830815 | 7198730 | 1372669 | SEC24 family, member D ( <i>S. cerevisiae</i> ) | Sec24d | 310843 | 1,07 | up   |
| 6684375 | 7198730 | 1372662 | SEC24 family, member D ( <i>S. cerevisiae</i> ) | Sec24d | 310843 | 1,06 | up   |
| 5999836 | 7198730 | 1372673 | SEC24 family, member D ( <i>S. cerevisiae</i> ) | Sec24d | 310843 | 1,06 | down |
| 5695436 | 7198730 | 1372665 | SEC24 family, member D ( <i>S. cerevisiae</i> ) | Sec24d | 310843 | 1,04 | down |
| 6519027 | 7198730 | 1372667 | SEC24 family, member D ( <i>S. cerevisiae</i> ) | Sec24d | 310843 | 1,02 | up   |
| 5914474 | 7198730 | 1372660 | SEC24 family, member D ( <i>S. cerevisiae</i> ) | Sec24d | 310843 | 1,01 | up   |
| 5647734 | 7198730 | 1372666 | SEC24 family, member D ( <i>S. cerevisiae</i> ) | Sec24d | 310843 | 1,01 | down |
| 6135282 | 7198730 | 1372653 | SEC24 family, member D ( <i>S. cerevisiae</i> ) | Sec24d | 310843 | 1,01 | down |
| 6291370 | 7207292 | 1392633 | SEC62 homolog ( <i>S. cerevisiae</i> )          | Sec62  | 294912 | 2,38 | up   |
| 6250199 | 7207292 | 1392635 | SEC62 homolog ( <i>S. cerevisiae</i> )          | Sec62  | 294912 | 2,08 | up   |
| 6005537 | 7207292 | 1392625 | SEC62 homolog ( <i>S. cerevisiae</i> )          | Sec62  | 294912 | 1,25 | up   |
| 5845764 | 7207292 | 1392626 | SEC62 homolog ( <i>S. cerevisiae</i> )          | Sec62  | 294912 | 1,22 | down |
| 5696489 | 7207292 | 1392633 | SEC62 homolog ( <i>S. cerevisiae</i> )          | Sec62  | 294912 | 1,22 | down |
| 5700797 | 7207292 | 1392630 | SEC62 homolog ( <i>S. cerevisiae</i> )          | Sec62  | 294912 | 1,21 | down |
| 6016623 | 7207292 | 1392629 | SEC62 homolog ( <i>S. cerevisiae</i> )          | Sec62  | 294912 | 1,17 | up   |
| 6222197 | 7207292 | 1392622 | SEC62 homolog ( <i>S. cerevisiae</i> )          | Sec62  | 294912 | 1,14 | up   |
| 6665915 | 7207292 | 1392636 | SEC62 homolog ( <i>S. cerevisiae</i> )          | Sec62  | 294912 | 1,14 | down |
| 5710586 | 7207292 | 1392622 | SEC62 homolog ( <i>S. cerevisiae</i> )          | Sec62  | 294912 | 1,13 | down |
| 6740463 | 7207292 | 1392623 | SEC62 homolog ( <i>S. cerevisiae</i> )          | Sec62  | 294912 | 1,10 | down |

|         |         |         |                                                       |        |        |      |      |
|---------|---------|---------|-------------------------------------------------------|--------|--------|------|------|
| 5730507 | 7207292 | 1392634 | SEC62 homolog (S. cerevisiae)                         | Sec62  | 294912 | 1,10 | down |
| 5834910 | 7207292 | 1392624 | SEC62 homolog (S. cerevisiae)                         | Sec62  | 294912 | 1,01 | down |
| 5823983 | 7207292 | 1392633 | SEC62 homolog (S. cerevisiae)                         | Sec62  | 294912 | 1,01 | down |
| 5815573 | 7077597 | 1074405 | secreted protein, acidic, cysteine-rich (osteonectin) | Sparc  | 24791  | 2,31 | down |
| 6130322 | 7077597 | 1074407 | secreted protein, acidic, cysteine-rich (osteonectin) | Sparc  | 24791  | 1,57 | up   |
| 5643631 | 7077597 | 1074406 | secreted protein, acidic, cysteine-rich (osteonectin) | Sparc  | 24791  | 1,41 | up   |
| 5997008 | 7077597 | 1074401 | secreted protein, acidic, cysteine-rich (osteonectin) | Sparc  | 24791  | 1,22 | down |
| 6120130 | 7077597 | 1074404 | secreted protein, acidic, cysteine-rich (osteonectin) | Sparc  | 24791  | 1,18 | up   |
| 5759748 | 7077597 | 1074402 | secreted protein, acidic, cysteine-rich (osteonectin) | Sparc  | 24791  | 1,07 | down |
| 6603903 | 7077597 | 1074399 | secreted protein, acidic, cysteine-rich (osteonectin) | Sparc  | 24791  | 1,05 | up   |
| 5974112 | 7077597 | 1074403 | secreted protein, acidic, cysteine-rich (osteonectin) | Sparc  | 24791  | 1,05 | up   |
| 6551254 | 7077597 | 1074400 | secreted protein, acidic, cysteine-rich (osteonectin) | Sparc  | 24791  | 1,04 | up   |
| 6226702 | 7077597 | 1074398 | secreted protein, acidic, cysteine-rich (osteonectin) | Sparc  | 24791  | 1,03 | down |
| 6744667 | 7336639 | 1711132 | secretory carrier membrane protein 2                  | Scamp2 | 65168  | 2,16 | down |
| 6280039 | 7336639 | 1711130 | secretory carrier membrane protein 2                  | Scamp2 | 65168  | 1,53 | down |
| 5818995 | 7336639 | 1711134 | secretory carrier membrane protein 2                  | Scamp2 | 65168  | 1,40 | down |
| 6292808 | 7336639 | 1711139 | secretory carrier membrane protein 2                  | Scamp2 | 65168  | 1,38 | up   |
| 5857835 | 7336639 | 1711130 | secretory carrier membrane protein 2                  | Scamp2 | 65168  | 1,16 | down |
| 5881333 | 7336639 | 1711137 | secretory carrier membrane protein 2                  | Scamp2 | 65168  | 1,16 | up   |
| 5867473 | 7336639 | 1711133 | secretory carrier membrane protein 2                  | Scamp2 | 65168  | 1,15 | down |
| 6614569 | 7336639 | 1711139 | secretory carrier membrane protein 2                  | Scamp2 | 65168  | 1,14 | up   |
| 6167292 | 7336639 | 1711136 | secretory carrier membrane protein 2                  | Scamp2 | 65168  | 1,14 | up   |
| 6484958 | 7336639 | 1711138 | secretory carrier membrane protein 2                  | Scamp2 | 65168  | 1,13 | down |
| 6396160 | 7336639 | 1711132 | secretory carrier membrane protein 2                  | Scamp2 | 65168  | 1,10 | up   |
| 6691809 | 7336639 | 1711135 | secretory carrier membrane protein 2                  | Scamp2 | 65168  | 1,08 | down |
| 6117950 | 7336639 | 1711138 | secretory carrier membrane protein 2                  | Scamp2 | 65168  | 1,06 | down |
| 5964466 | 7336639 | 1711134 | secretory carrier membrane protein 2                  | Scamp2 | 65168  | 1,05 | up   |
| 5776741 | 7336639 | 1711131 | secretory carrier membrane protein 2                  | Scamp2 | 65168  | 1,02 | up   |
| 6417685 | 7357672 | 1763717 | selenocysteine lyase                                  | Scly   | 363285 | 2,37 | down |
| 6354762 | 7357672 | 1763723 | selenocysteine lyase                                  | Scly   | 363285 | 2,03 | up   |
| 6047673 | 7357672 | 1763727 | selenocysteine lyase                                  | Scly   | 363285 | 1,42 | up   |
| 6377179 | 7357672 | 1763721 | selenocysteine lyase                                  | Scly   | 363285 | 1,28 | up   |
| 5814257 | 7357672 | 1763728 | selenocysteine lyase                                  | Scly   | 363285 | 1,26 | down |
| 6411892 | 7357672 | 1763719 | selenocysteine lyase                                  | Scly   | 363285 | 1,26 | down |
| 6564437 | 7357672 | 1763725 | selenocysteine lyase                                  | Scly   | 363285 | 1,23 | up   |
| 6737440 | 7357672 | 1763720 | selenocysteine lyase                                  | Scly   | 363285 | 1,21 | down |
| 6148690 | 7357672 | 1763724 | selenocysteine lyase                                  | Scly   | 363285 | 1,13 | down |
| 6618725 | 7357672 | 1763722 | selenocysteine lyase                                  | Scly   | 363285 | 1,13 | up   |
| 6298828 | 7357672 | 1763729 | selenocysteine lyase                                  | Scly   | 363285 | 1,06 | down |
| 6346016 | 7357672 | 1763718 | selenocysteine lyase                                  | Scly   | 363285 | 1,05 | up   |
| 5677774 | 7357672 | 1763726 | selenocysteine lyase                                  | Scly   | 363285 | 1,00 | up   |
| 6183128 | 7190182 | 1350180 | selenoprotein P, plasma, 1                            | Sepp1  | 29360  | 2,78 | down |
| 6685886 | 7190182 | 1350182 | selenoprotein P, plasma, 1                            | Sepp1  | 29360  | 2,29 | up   |
| 6610814 | 7190182 | 1350178 | selenoprotein P, plasma, 1                            | Sepp1  | 29360  | 2,08 | up   |
| 6468368 | 7190182 | 1350181 | selenoprotein P, plasma, 1                            | Sepp1  | 29360  | 2,04 | down |
| 6143650 | 7190182 | 1350177 | selenoprotein P, plasma, 1                            | Sepp1  | 29360  | 1,98 | up   |
| 6542605 | 7190182 | 1350182 | selenoprotein P, plasma, 1                            | Sepp1  | 29360  | 1,75 | up   |
| 6157465 | 7190182 | 1350181 | selenoprotein P, plasma, 1                            | Sepp1  | 29360  | 1,70 | down |
| 6321169 | 7190182 | 1350181 | selenoprotein P, plasma, 1                            | Sepp1  | 29360  | 1,35 | up   |
| 6436620 | 7190182 | 1350179 | selenoprotein P, plasma, 1                            | Sepp1  | 29360  | 1,24 | up   |
| 6385863 | 7190182 | 1350181 | selenoprotein P, plasma, 1                            | Sepp1  | 29360  | 1,12 | down |
| 5823619 | 7048315 | 1006232 | selenoprotein W, 1                                    | Sepw1  | 25545  | 2,28 | down |
| 6548550 | 7048315 | 1006237 | selenoprotein W, 1                                    | Sepw1  | 25545  | 1,92 | up   |
| 6200412 | 7048315 | 1006234 | selenoprotein W, 1                                    | Sepw1  | 25545  | 1,63 | up   |
| 6024956 | 7048315 | 1006235 | selenoprotein W, 1                                    | Sepw1  | 25545  | 1,14 | down |
| 6177683 | 7048315 | 1006237 | selenoprotein W, 1                                    | Sepw1  | 25545  | 1,06 | up   |
| 5632966 | 7048315 | 1006236 | selenoprotein W, 1                                    | Sepw1  | 25545  | 1,05 | down |

|         |         |         |                                                                                         |        |        |      |      |
|---------|---------|---------|-----------------------------------------------------------------------------------------|--------|--------|------|------|
| 5800855 | 7048315 | 1006233 | selenoprotein W, 1                                                                      | Sepw1  | 25545  | 1,03 | up   |
| 6081086 | 7048315 | 1006232 | selenoprotein W, 1                                                                      | Sepw1  | 25545  | 1,02 | up   |
| 6036324 | 7349944 | 1744924 | sema domain, immunoglobulin domain (Ig), short basic domain, secreted, (semaphorin) 3 F | Sema3f | 315996 | 2,81 | up   |
| 5699702 | 7349944 | 1744902 | sema domain, immunoglobulin domain (Ig), short basic domain, secreted, (semaphorin) 3 F | Sema3f | 315996 | 1,84 | down |
| 6445152 | 7349944 | 1744904 | sema domain, immunoglobulin domain (Ig), short basic domain, secreted, (semaphorin) 3 F | Sema3f | 315996 | 1,67 | up   |
| 6418768 | 7349944 | 1744922 | sema domain, immunoglobulin domain (Ig), short basic domain, secreted, (semaphorin) 3 F | Sema3f | 315996 | 1,41 | down |
| 5945307 | 7349944 | 1744924 | sema domain, immunoglobulin domain (Ig), short basic domain, secreted, (semaphorin) 3 F | Sema3f | 315996 | 1,34 | down |
| 6665290 | 7349944 | 1744922 | sema domain, immunoglobulin domain (Ig), short basic domain, secreted, (semaphorin) 3 F | Sema3f | 315996 | 1,29 | down |
| 6237747 | 7349944 | 1744900 | sema domain, immunoglobulin domain (Ig), short basic domain, secreted, (semaphorin) 3 F | Sema3f | 315996 | 1,27 | up   |
| 6244219 | 7349944 | 1744901 | sema domain, immunoglobulin domain (Ig), short basic domain, secreted, (semaphorin) 3 F | Sema3f | 315996 | 1,22 | up   |
| 5909496 | 7349944 | 1744911 | sema domain, immunoglobulin domain (Ig), short basic domain, secreted, (semaphorin) 3 F | Sema3f | 315996 | 1,17 | up   |
| 6703208 | 7349944 | 1744903 | sema domain, immunoglobulin domain (Ig), short basic domain, secreted, (semaphorin) 3 F | Sema3f | 315996 | 1,16 | down |
| 6488093 | 7349944 | 1744918 | sema domain, immunoglobulin domain (Ig), short basic domain, secreted, (semaphorin) 3 F | Sema3f | 315996 | 1,12 | down |
| 6693098 | 7349944 | 1744905 | sema domain, immunoglobulin domain (Ig), short basic domain, secreted, (semaphorin) 3 F | Sema3f | 315996 | 1,12 | down |
| 6597510 | 7349944 | 1744907 | sema domain, immunoglobulin domain (Ig), short basic domain, secreted, (semaphorin) 3 F | Sema3f | 315996 | 1,11 | down |
| 5846989 | 7349944 | 1744909 | sema domain, immunoglobulin domain (Ig), short basic domain, secreted, (semaphorin) 3 F | Sema3f | 315996 | 1,11 | down |
| 5967504 | 7349944 | 1744917 | sema domain, immunoglobulin domain (Ig), short basic domain, secreted, (semaphorin) 3 F | Sema3f | 315996 | 1,10 | up   |
| 5793251 | 7349944 | 1744908 | sema domain, immunoglobulin domain (Ig), short basic domain, secreted, (semaphorin) 3 F | Sema3f | 315996 | 1,10 | down |
| 6426845 | 7349944 | 1744915 | sema domain, immunoglobulin domain (Ig), short basic domain, secreted, (semaphorin) 3 F | Sema3f | 315996 | 1,07 | down |
| 5832953 | 7349944 | 1744900 | sema domain, immunoglobulin domain (Ig), short basic domain, secreted, (semaphorin) 3 F | Sema3f | 315996 | 1,07 | up   |
| 6426660 | 7349944 | 1744916 | sema domain, immunoglobulin domain (Ig), short basic domain, secreted, (semaphorin) 3 F | Sema3f | 315996 | 1,07 | down |
| 6408081 | 7349944 | 1744906 | sema domain, immunoglobulin domain (Ig), short basic domain, secreted, (semaphorin) 3 F | Sema3f | 315996 | 1,05 | down |
| 6702587 | 7349944 | 1744912 | sema domain, immunoglobulin domain (Ig), short basic domain, secreted, (semaphorin) 3 F | Sema3f | 315996 | 1,04 | up   |
| 5922482 | 7349944 | 1744910 | sema domain, immunoglobulin domain (Ig), short basic domain, secreted, (semaphorin) 3 F | Sema3f | 315996 | 1,01 | up   |
| 6083071 | 7261019 | 1525243 | sema domain, immunoglobulin domain (Ig), short basic domain, secreted, (semaphorin) 3C  | Sema3c | 296787 | 1,82 | down |
| 5894898 | 7261019 | 1525262 | sema domain, immunoglobulin domain (Ig), short basic domain, secreted, (semaphorin) 3C  | Sema3c | 296787 | 1,71 | up   |
| 6638555 | 7261019 | 1525260 | sema domain, immunoglobulin domain (Ig), short basic domain, secreted, (semaphorin) 3C  | Sema3c | 296787 | 1,65 | up   |
| 6467855 | 7261019 | 1525257 | sema domain, immunoglobulin domain (Ig), short basic domain, secreted, (semaphorin) 3C  | Sema3c | 296787 | 1,50 | up   |
| 6386776 | 7261019 | 1525261 | sema domain, immunoglobulin domain (Ig), short basic domain, secreted, (semaphorin) 3C  | Sema3c | 296787 | 1,49 | up   |
| 5960762 | 7261019 | 1525256 | sema domain, immunoglobulin domain (Ig), short basic domain, secreted, (semaphorin) 3C  | Sema3c | 296787 | 1,48 | up   |
| 6102928 | 7261019 | 1525249 | sema domain, immunoglobulin domain (Ig), short basic domain, secreted, (semaphorin) 3C  | Sema3c | 296787 | 1,43 | down |
| 6124896 | 7261019 | 1525264 | sema domain, immunoglobulin domain (Ig), short basic domain, secreted, (semaphorin) 3C  | Sema3c | 296787 | 1,41 | up   |
| 6539931 | 7261019 | 1525279 | sema domain, immunoglobulin domain (Ig), short basic domain, secreted, (semaphorin) 3C  | Sema3c | 296787 | 1,35 | up   |
| 6113360 | 7261019 | 1525258 | sema domain, immunoglobulin domain (Ig), short basic domain, secreted, (semaphorin) 3C  | Sema3c | 296787 | 1,17 | down |
| 6544099 | 7261019 | 1525256 | sema domain, immunoglobulin domain (Ig), short basic domain, secreted, (semaphorin) 3C  | Sema3c | 296787 | 1,15 | up   |
| 5688720 | 7261019 | 1525252 | sema domain, immunoglobulin domain (Ig), short basic domain, secreted, (semaphorin) 3C  | Sema3c | 296787 | 1,12 | down |
| 6541733 | 7261019 | 1525265 | sema domain, immunoglobulin domain (Ig), short basic domain, secreted, (semaphorin) 3C  | Sema3c | 296787 | 1,12 | up   |
| 5663388 | 7261019 | 1525246 | sema domain, immunoglobulin domain (Ig), short basic domain, secreted, (semaphorin) 3C  | Sema3c | 296787 | 1,12 | down |
| 5833581 | 7261019 | 1525242 | sema domain, immunoglobulin domain (Ig), short basic domain, secreted, (semaphorin) 3C  | Sema3c | 296787 | 1,12 | up   |
| 5873519 | 7261019 | 1525259 | sema domain, immunoglobulin domain (Ig), short basic domain, secreted, (semaphorin) 3C  | Sema3c | 296787 | 1,09 | up   |
| 6238778 | 7261019 | 1525248 | sema domain, immunoglobulin domain (Ig), short basic domain, secreted, (semaphorin) 3C  | Sema3c | 296787 | 1,09 | up   |
| 6238152 | 7261019 | 1525250 | sema domain, immunoglobulin domain (Ig), short basic domain, secreted, (semaphorin) 3C  | Sema3c | 296787 | 1,08 | down |
| 5914191 | 7261019 | 1525243 | sema domain, immunoglobulin domain (Ig), short basic domain, secreted, (semaphorin) 3C  | Sema3c | 296787 | 1,06 | down |
| 5973191 | 7261019 | 1525242 | sema domain, immunoglobulin domain (Ig), short basic domain, secreted, (semaphorin) 3C  | Sema3c | 296787 | 1,04 | up   |
| 5856000 | 7261147 | 1525683 | sema domain, immunoglobulin domain (Ig), short basic domain, secreted, (semaphorin) 3E  | Sema3e | 296789 | 2,79 | up   |
| 6574527 | 7261147 | 1525670 | sema domain, immunoglobulin domain (Ig), short basic domain, secreted, (semaphorin) 3E  | Sema3e | 296789 | 2,27 | down |
| 5784665 | 7261147 | 1525674 | sema domain, immunoglobulin domain (Ig), short basic domain, secreted, (semaphorin) 3E  | Sema3e | 296789 | 1,75 | down |
| 5902231 | 7261147 | 1525697 | sema domain, immunoglobulin domain (Ig), short basic domain, secreted, (semaphorin) 3E  | Sema3e | 296789 | 1,63 | up   |
| 5775211 | 7261147 | 1525686 | sema domain, immunoglobulin domain (Ig), short basic domain, secreted, (semaphorin) 3E  | Sema3e | 296789 | 1,63 | up   |
| 6376939 | 7261147 | 1525673 | sema domain, immunoglobulin domain (Ig), short basic domain, secreted, (semaphorin) 3E  | Sema3e | 296789 | 1,58 | down |
| 5724815 | 7261147 | 1525710 | sema domain, immunoglobulin domain (Ig), short basic domain, secreted, (semaphorin) 3E  | Sema3e | 296789 | 1,52 | up   |
| 6710563 | 7261147 | 1525670 | sema domain, immunoglobulin domain (Ig), short basic domain, secreted, (semaphorin) 3E  | Sema3e | 296789 | 1,51 | up   |
| 6362270 | 7261147 | 1525681 | sema domain, immunoglobulin domain (Ig), short basic domain, secreted, (semaphorin) 3E  | Sema3e | 296789 | 1,48 | up   |
| 6163728 | 7261147 | 1525676 | sema domain, immunoglobulin domain (Ig), short basic domain, secreted, (semaphorin) 3E  | Sema3e | 296789 | 1,45 | down |
| 6588478 | 7261147 | 1525701 | sema domain, immunoglobulin domain (Ig), short basic domain, secreted, (semaphorin) 3E  | Sema3e | 296789 | 1,44 | up   |
| 6684160 | 7261147 | 1525700 | sema domain, immunoglobulin domain (Ig), short basic domain, secreted, (semaphorin) 3E  | Sema3e | 296789 | 1,26 | down |
| 6294744 | 7261147 | 1525675 | sema domain, immunoglobulin domain (Ig), short basic domain, secreted, (semaphorin) 3E  | Sema3e | 296789 | 1,26 | down |

|         |         |         |                                                                                              |        |        |      |      |
|---------|---------|---------|----------------------------------------------------------------------------------------------|--------|--------|------|------|
| 6731255 | 7261147 | 1525677 | sema domain, immunoglobulin domain (Ig), short basic domain, secreted, (semaphorin) 3E       | Sema3e | 296789 | 1,19 | up   |
| 6093426 | 7261147 | 1525669 | sema domain, immunoglobulin domain (Ig), short basic domain, secreted, (semaphorin) 3E       | Sema3e | 296789 | 1,18 | down |
| 6195650 | 7261147 | 1525682 | sema domain, immunoglobulin domain (Ig), short basic domain, secreted, (semaphorin) 3E       | Sema3e | 296789 | 1,14 | up   |
| 6361418 | 7261147 | 1525678 | sema domain, immunoglobulin domain (Ig), short basic domain, secreted, (semaphorin) 3E       | Sema3e | 296789 | 1,08 | down |
| 6384868 | 7261147 | 1525685 | sema domain, immunoglobulin domain (Ig), short basic domain, secreted, (semaphorin) 3E       | Sema3e | 296789 | 1,06 | up   |
| 5671807 | 7261147 | 1525689 | sema domain, immunoglobulin domain (Ig), short basic domain, secreted, (semaphorin) 3E       | Sema3e | 296789 | 1,04 | down |
| 6091343 | 7261147 | 1525701 | sema domain, immunoglobulin domain (Ig), short basic domain, secreted, (semaphorin) 3E       | Sema3e | 296789 | 1,04 | up   |
| 5873144 | 7361075 | 1772349 | sema domain, immunoglobulin domain (Ig), transmembrane domain (TM) and short cytoplasmic don | Sema4c | 301346 | 2,09 | up   |
| 5631749 | 7361075 | 1772331 | sema domain, immunoglobulin domain (Ig), transmembrane domain (TM) and short cytoplasmic don | Sema4c | 301346 | 1,74 | up   |
| 6556377 | 7361075 | 1772337 | sema domain, immunoglobulin domain (Ig), transmembrane domain (TM) and short cytoplasmic don | Sema4c | 301346 | 1,59 | up   |
| 6398684 | 7361075 | 1772341 | sema domain, immunoglobulin domain (Ig), transmembrane domain (TM) and short cytoplasmic don | Sema4c | 301346 | 1,52 | down |
| 6548517 | 7361075 | 1772342 | sema domain, immunoglobulin domain (Ig), transmembrane domain (TM) and short cytoplasmic don | Sema4c | 301346 | 1,45 | up   |
| 6180877 | 7361075 | 1772338 | sema domain, immunoglobulin domain (Ig), transmembrane domain (TM) and short cytoplasmic don | Sema4c | 301346 | 1,44 | up   |
| 6375137 | 7361075 | 1772339 | sema domain, immunoglobulin domain (Ig), transmembrane domain (TM) and short cytoplasmic don | Sema4c | 301346 | 1,34 | down |
| 6658633 | 7361075 | 1772346 | sema domain, immunoglobulin domain (Ig), transmembrane domain (TM) and short cytoplasmic don | Sema4c | 301346 | 1,26 | down |
| 6262760 | 7361075 | 1772340 | sema domain, immunoglobulin domain (Ig), transmembrane domain (TM) and short cytoplasmic don | Sema4c | 301346 | 1,22 | down |
| 5968565 | 7361075 | 1772334 | sema domain, immunoglobulin domain (Ig), transmembrane domain (TM) and short cytoplasmic don | Sema4c | 301346 | 1,07 | down |
| 5869226 | 7361075 | 1772333 | sema domain, immunoglobulin domain (Ig), transmembrane domain (TM) and short cytoplasmic don | Sema4c | 301346 | 1,07 | down |
| 6351449 | 7361075 | 1772332 | sema domain, immunoglobulin domain (Ig), transmembrane domain (TM) and short cytoplasmic don | Sema4c | 301346 | 1,06 | up   |
| 6546090 | 7361075 | 1772332 | sema domain, immunoglobulin domain (Ig), transmembrane domain (TM) and short cytoplasmic don | Sema4c | 301346 | 1,05 | up   |
| 6554063 | 7361075 | 1772335 | sema domain, immunoglobulin domain (Ig), transmembrane domain (TM) and short cytoplasmic don | Sema4c | 301346 | 1,04 | down |
| 6167944 | 7361075 | 1772338 | sema domain, immunoglobulin domain (Ig), transmembrane domain (TM) and short cytoplasmic don | Sema4c | 301346 | 1,04 | up   |
| 6357155 | 7361075 | 1772336 | sema domain, immunoglobulin domain (Ig), transmembrane domain (TM) and short cytoplasmic don | Sema4c | 301346 | 1,03 | down |
| 6299465 | 7361075 | 1772343 | sema domain, immunoglobulin domain (Ig), transmembrane domain (TM) and short cytoplasmic don | Sema4c | 301346 | 1,01 | up   |
| 5927105 | 7266506 | 1538221 | sema domain, immunoglobulin domain (Ig), transmembrane domain (TM) and short cytoplasmic don | Sema4f | 29745  | 2,25 | up   |
| 6412697 | 7266506 | 1538225 | sema domain, immunoglobulin domain (Ig), transmembrane domain (TM) and short cytoplasmic don | Sema4f | 29745  | 1,84 | down |
| 6216062 | 7266506 | 1538233 | sema domain, immunoglobulin domain (Ig), transmembrane domain (TM) and short cytoplasmic don | Sema4f | 29745  | 1,75 | down |
| 5905672 | 7266506 | 1538229 | sema domain, immunoglobulin domain (Ig), transmembrane domain (TM) and short cytoplasmic don | Sema4f | 29745  | 1,44 | down |
| 5834854 | 7266506 | 1538230 | sema domain, immunoglobulin domain (Ig), transmembrane domain (TM) and short cytoplasmic don | Sema4f | 29745  | 1,42 | down |
| 6347834 | 7266506 | 1538223 | sema domain, immunoglobulin domain (Ig), transmembrane domain (TM) and short cytoplasmic don | Sema4f | 29745  | 1,41 | up   |
| 6120930 | 7266506 | 1538228 | sema domain, immunoglobulin domain (Ig), transmembrane domain (TM) and short cytoplasmic don | Sema4f | 29745  | 1,27 | up   |
| 6485140 | 7266506 | 1538226 | sema domain, immunoglobulin domain (Ig), transmembrane domain (TM) and short cytoplasmic don | Sema4f | 29745  | 1,24 | down |
| 6189963 | 7266506 | 1538227 | sema domain, immunoglobulin domain (Ig), transmembrane domain (TM) and short cytoplasmic don | Sema4f | 29745  | 1,24 | down |
| 5790513 | 7266506 | 1538231 | sema domain, immunoglobulin domain (Ig), transmembrane domain (TM) and short cytoplasmic don | Sema4f | 29745  | 1,22 | up   |
| 6232246 | 7266506 | 1538224 | sema domain, immunoglobulin domain (Ig), transmembrane domain (TM) and short cytoplasmic don | Sema4f | 29745  | 1,21 | down |
| 6648457 | 7266506 | 1538233 | sema domain, immunoglobulin domain (Ig), transmembrane domain (TM) and short cytoplasmic don | Sema4f | 29745  | 1,13 | up   |
| 6273186 | 7266506 | 1538222 | sema domain, immunoglobulin domain (Ig), transmembrane domain (TM) and short cytoplasmic don | Sema4f | 29745  | 1,12 | up   |
| 6168009 | 7266506 | 1538220 | sema domain, immunoglobulin domain (Ig), transmembrane domain (TM) and short cytoplasmic don | Sema4f | 29745  | 1,10 | down |
| 6471929 | 7266506 | 1538221 | sema domain, immunoglobulin domain (Ig), transmembrane domain (TM) and short cytoplasmic don | Sema4f | 29745  | 1,10 | down |
| 5648022 | 7266506 | 1538234 | sema domain, immunoglobulin domain (Ig), transmembrane domain (TM) and short cytoplasmic don | Sema4f | 29745  | 1,07 | up   |
| 6436675 | 7266506 | 1538227 | sema domain, immunoglobulin domain (Ig), transmembrane domain (TM) and short cytoplasmic don | Sema4f | 29745  | 1,07 | up   |
| 6439362 | 7266506 | 1538232 | sema domain, immunoglobulin domain (Ig), transmembrane domain (TM) and short cytoplasmic don | Sema4f | 29745  | 1,04 | up   |
| 6364506 | 7266506 | 1538234 | sema domain, immunoglobulin domain (Ig), transmembrane domain (TM) and short cytoplasmic don | Sema4f | 29745  | 1,02 | down |
| 5779112 | 7042382 | 991301  | sema domain, immunoglobulin domain (Ig), transmembrane domain (TM) and short cytoplasmic don | Sema4g | 361764 | 1,64 | up   |
| 6052299 | 7042382 | 991295  | sema domain, immunoglobulin domain (Ig), transmembrane domain (TM) and short cytoplasmic don | Sema4g | 361764 | 1,62 | down |
| 6437159 | 7042382 | 991291  | sema domain, immunoglobulin domain (Ig), transmembrane domain (TM) and short cytoplasmic don | Sema4g | 361764 | 1,52 | down |
| 6474165 | 7042382 | 991289  | sema domain, immunoglobulin domain (Ig), transmembrane domain (TM) and short cytoplasmic don | Sema4g | 361764 | 1,50 | up   |
| 6187947 | 7042382 | 991294  | sema domain, immunoglobulin domain (Ig), transmembrane domain (TM) and short cytoplasmic don | Sema4g | 361764 | 1,50 | down |
| 6199147 | 7042382 | 991301  | sema domain, immunoglobulin domain (Ig), transmembrane domain (TM) and short cytoplasmic don | Sema4g | 361764 | 1,40 | down |
| 5690512 | 7042382 | 991301  | sema domain, immunoglobulin domain (Ig), transmembrane domain (TM) and short cytoplasmic don | Sema4g | 361764 | 1,34 | down |
| 6262529 | 7042382 | 991301  | sema domain, immunoglobulin domain (Ig), transmembrane domain (TM) and short cytoplasmic don | Sema4g | 361764 | 1,31 | down |
| 6414356 | 7042382 | 991299  | sema domain, immunoglobulin domain (Ig), transmembrane domain (TM) and short cytoplasmic don | Sema4g | 361764 | 1,27 | down |
| 6711592 | 7042382 | 991300  | sema domain, immunoglobulin domain (Ig), transmembrane domain (TM) and short cytoplasmic don | Sema4g | 361764 | 1,25 | down |
| 5731300 | 7042382 | 991298  | sema domain, immunoglobulin domain (Ig), transmembrane domain (TM) and short cytoplasmic don | Sema4g | 361764 | 1,25 | down |
| 5945183 | 7042382 | 991295  | sema domain, immunoglobulin domain (Ig), transmembrane domain (TM) and short cytoplasmic don | Sema4g | 361764 | 1,20 | down |
| 6274019 | 7042382 | 991289  | sema domain, immunoglobulin domain (Ig), transmembrane domain (TM) and short cytoplasmic don | Sema4g | 361764 | 1,18 | down |
| 6692531 | 7042382 | 991296  | sema domain, immunoglobulin domain (Ig), transmembrane domain (TM) and short cytoplasmic don | Sema4g | 361764 | 1,17 | down |



|         |         |         |                                                                                                 |           |        |      |      |
|---------|---------|---------|-------------------------------------------------------------------------------------------------|-----------|--------|------|------|
| 6471350 | 7093835 | 1112246 | sema domain, seven thrombospondin repeats (type 1 and type 1-like), transmembrane domain (TM) a | Sema5b    | 303901 | 1,07 | down |
| 5713847 | 7093835 | 1112223 | sema domain, seven thrombospondin repeats (type 1 and type 1-like), transmembrane domain (TM) a | Sema5b    | 303901 | 1,06 | down |
| 6120479 | 7093835 | 1112225 | sema domain, seven thrombospondin repeats (type 1 and type 1-like), transmembrane domain (TM) a | Sema5b    | 303901 | 1,06 | up   |
| 6571307 | 7093835 | 1112225 | sema domain, seven thrombospondin repeats (type 1 and type 1-like), transmembrane domain (TM) a | Sema5b    | 303901 | 1,04 | up   |
| 6437309 | 7093835 | 1112221 | sema domain, seven thrombospondin repeats (type 1 and type 1-like), transmembrane domain (TM) a | Sema5b    | 303901 | 1,04 | up   |
| 6490016 | 7093835 | 1112247 | sema domain, seven thrombospondin repeats (type 1 and type 1-like), transmembrane domain (TM) a | Sema5b    | 303901 | 1,04 | up   |
| 5902967 | 7093835 | 1112237 | sema domain, seven thrombospondin repeats (type 1 and type 1-like), transmembrane domain (TM) a | Sema5b    | 303901 | 1,02 | up   |
| 6562067 | 7093835 | 1112227 | sema domain, seven thrombospondin repeats (type 1 and type 1-like), transmembrane domain (TM) a | Sema5b    | 303901 | 1,01 | up   |
| 6693694 | 7093835 | 1112219 | sema domain, seven thrombospondin repeats (type 1 and type 1-like), transmembrane domain (TM) a | Sema5b    | 303901 | 1,01 | up   |
| 5728939 | 7093835 | 1112236 | sema domain, seven thrombospondin repeats (type 1 and type 1-like), transmembrane domain (TM) a | Sema5b    | 303901 | 1,01 | down |
| 5987158 | 7368000 | 1789303 | sema domain, transmembrane domain (TM), and cytoplasmic domain, (semaphorin) 6B                 | Sema6b    | 84609  | 2,01 | down |
| 5741871 | 7368000 | 1789306 | sema domain, transmembrane domain (TM), and cytoplasmic domain, (semaphorin) 6B                 | Sema6b    | 84609  | 1,86 | down |
| 5759072 | 7368000 | 1789311 | sema domain, transmembrane domain (TM), and cytoplasmic domain, (semaphorin) 6B                 | Sema6b    | 84609  | 1,69 | up   |
| 5664250 | 7368000 | 1789295 | sema domain, transmembrane domain (TM), and cytoplasmic domain, (semaphorin) 6B                 | Sema6b    | 84609  | 1,67 | down |
| 5864361 | 7368000 | 1789295 | sema domain, transmembrane domain (TM), and cytoplasmic domain, (semaphorin) 6B                 | Sema6b    | 84609  | 1,67 | up   |
| 6607152 | 7368000 | 1789311 | sema domain, transmembrane domain (TM), and cytoplasmic domain, (semaphorin) 6B                 | Sema6b    | 84609  | 1,35 | up   |
| 6424153 | 7368000 | 1789300 | sema domain, transmembrane domain (TM), and cytoplasmic domain, (semaphorin) 6B                 | Sema6b    | 84609  | 1,27 | down |
| 6334346 | 7368000 | 1789311 | sema domain, transmembrane domain (TM), and cytoplasmic domain, (semaphorin) 6B                 | Sema6b    | 84609  | 1,26 | up   |
| 6374770 | 7368000 | 1789310 | sema domain, transmembrane domain (TM), and cytoplasmic domain, (semaphorin) 6B                 | Sema6b    | 84609  | 1,25 | up   |
| 6271452 | 7368000 | 1789309 | sema domain, transmembrane domain (TM), and cytoplasmic domain, (semaphorin) 6B                 | Sema6b    | 84609  | 1,22 | up   |
| 6484066 | 7368000 | 1789296 | sema domain, transmembrane domain (TM), and cytoplasmic domain, (semaphorin) 6B                 | Sema6b    | 84609  | 1,17 | up   |
| 5857718 | 7368000 | 1789301 | sema domain, transmembrane domain (TM), and cytoplasmic domain, (semaphorin) 6B                 | Sema6b    | 84609  | 1,16 | up   |
| 6248267 | 7368000 | 1789307 | sema domain, transmembrane domain (TM), and cytoplasmic domain, (semaphorin) 6B                 | Sema6b    | 84609  | 1,15 | up   |
| 5830486 | 7368000 | 1789303 | sema domain, transmembrane domain (TM), and cytoplasmic domain, (semaphorin) 6B                 | Sema6b    | 84609  | 1,11 | down |
| 6411330 | 7368000 | 1789297 | sema domain, transmembrane domain (TM), and cytoplasmic domain, (semaphorin) 6B                 | Sema6b    | 84609  | 1,11 | up   |
| 5657406 | 7368000 | 1789305 | sema domain, transmembrane domain (TM), and cytoplasmic domain, (semaphorin) 6B                 | Sema6b    | 84609  | 1,10 | up   |
| 6512257 | 7368000 | 1789302 | sema domain, transmembrane domain (TM), and cytoplasmic domain, (semaphorin) 6B                 | Sema6b    | 84609  | 1,09 | down |
| 6717334 | 7368000 | 1789295 | sema domain, transmembrane domain (TM), and cytoplasmic domain, (semaphorin) 6B                 | Sema6b    | 84609  | 1,08 | down |
| 6630259 | 7368000 | 1789308 | sema domain, transmembrane domain (TM), and cytoplasmic domain, (semaphorin) 6B                 | Sema6b    | 84609  | 1,06 | down |
| 6100169 | 7368000 | 1789311 | sema domain, transmembrane domain (TM), and cytoplasmic domain, (semaphorin) 6B                 | Sema6b    | 84609  | 1,01 | down |
| 5907364 | 7368000 | 1789299 | sema domain, transmembrane domain (TM), and cytoplasmic domain, (semaphorin) 6B                 | Sema6b    | 84609  | 1,01 | up   |
| 5862402 | 7368000 | 1789298 | sema domain, transmembrane domain (TM), and cytoplasmic domain, (semaphorin) 6B                 | Sema6b    | 84609  | 1,00 | up   |
| 5905671 | 7073828 | 1065536 | septin 9                                                                                        | sept-09   | 83788  | 2,22 | up   |
| 6305394 | 7073828 | 1065535 | septin 9                                                                                        | sept-09   | 83788  | 1,71 | up   |
| 6072222 | 7073828 | 1065542 | septin 9                                                                                        | sept-09   | 83788  | 1,23 | down |
| 6250423 | 7073828 | 1065543 | septin 9                                                                                        | sept-09   | 83788  | 1,18 | up   |
| 5812784 | 7073828 | 1065548 | septin 9                                                                                        | sept-09   | 83788  | 1,16 | down |
| 6734209 | 7073828 | 1065545 | septin 9                                                                                        | sept-09   | 83788  | 1,15 | down |
| 6132480 | 7073828 | 1065539 | septin 9                                                                                        | sept-09   | 83788  | 1,12 | down |
| 5929198 | 7073828 | 1065544 | septin 9                                                                                        | sept-09   | 83788  | 1,12 | down |
| 6734138 | 7073828 | 1065546 | septin 9                                                                                        | sept-09   | 83788  | 1,10 | up   |
| 5655018 | 7073828 | 1065538 | septin 9                                                                                        | sept-09   | 83788  | 1,10 | down |
| 6577763 | 7073828 | 1065540 | septin 9                                                                                        | sept-09   | 83788  | 1,08 | down |
| 5943241 | 7073828 | 1065540 | septin 9                                                                                        | sept-09   | 83788  | 1,08 | up   |
| 6072509 | 7073828 | 1065549 | septin 9                                                                                        | sept-09   | 83788  | 1,07 | up   |
| 5765175 | 7073828 | 1065547 | septin 9                                                                                        | sept-09   | 83788  | 1,07 | down |
| 6411432 | 7073828 | 1065538 | septin 9                                                                                        | sept-09   | 83788  | 1,07 | down |
| 6229095 | 7073828 | 1065537 | septin 9                                                                                        | sept-09   | 83788  | 1,04 | down |
| 6568325 | 7073828 | 1065538 | septin 9                                                                                        | sept-09   | 83788  | 1,02 | down |
| 6562094 | 7073828 | 1065536 | septin 9                                                                                        | sept-09   | 83788  | 1,00 | up   |
| 6419642 | 7073828 | 1065541 | septin 9                                                                                        | sept-09   | 83788  | 1,00 | down |
| 6714361 | 7301301 | 1625019 | serine (or cysteine) peptidase inhibitor, clade A, member 3N                                    | Serpina3n | 24795  | 2,35 | up   |
| 6180459 | 7301301 | 1625018 | serine (or cysteine) peptidase inhibitor, clade A, member 3N                                    | Serpina3n | 24795  | 1,86 | up   |
| 6664316 | 7301301 | 1625016 | serine (or cysteine) peptidase inhibitor, clade A, member 3N                                    | Serpina3n | 24795  | 1,68 | down |
| 6391678 | 7301301 | 1625020 | serine (or cysteine) peptidase inhibitor, clade A, member 3N                                    | Serpina3n | 24795  | 1,61 | up   |
| 6151483 | 7301301 | 1625021 | serine (or cysteine) peptidase inhibitor, clade A, member 3N                                    | Serpina3n | 24795  | 1,57 | down |
| 6080376 | 7301301 | 1625017 | serine (or cysteine) peptidase inhibitor, clade A, member 3N                                    | Serpina3n | 24795  | 1,50 | down |



|         |         |         |                                                              |           |        |      |      |
|---------|---------|---------|--------------------------------------------------------------|-----------|--------|------|------|
| 5979445 | 7301301 | 1625021 | serine (or cysteine) peptidase inhibitor, clade A, member 3N | Serpina3n | 24795  | 1,45 | up   |
| 6025940 | 7301301 | 1625017 | serine (or cysteine) peptidase inhibitor, clade A, member 3N | Serpina3n | 24795  | 1,23 | down |
| 6645936 | 7301301 | 1625017 | serine (or cysteine) peptidase inhibitor, clade A, member 3N | Serpina3n | 24795  | 1,23 | down |
| 6179245 | 7301301 | 1625017 | serine (or cysteine) peptidase inhibitor, clade A, member 3N | Serpina3n | 24795  | 1,18 | up   |
| 6513241 | 7301301 | 1625017 | serine (or cysteine) peptidase inhibitor, clade A, member 3N | Serpina3n | 24795  | 1,02 | up   |
| 5645392 | 7163946 | 1284282 | serine (or cysteine) peptidase inhibitor, clade B, member 9  | Serpib9   | 361241 | 2,45 | up   |
| 6631420 | 7163946 | 1284289 | serine (or cysteine) peptidase inhibitor, clade B, member 9  | Serpib9   | 361241 | 1,69 | down |
| 6026440 | 7163946 | 1284283 | serine (or cysteine) peptidase inhibitor, clade B, member 9  | Serpib9   | 361241 | 1,66 | up   |
| 6123316 | 7163946 | 1284285 | serine (or cysteine) peptidase inhibitor, clade B, member 9  | Serpib9   | 361241 | 1,43 | up   |
| 6404688 | 7163946 | 1284287 | serine (or cysteine) peptidase inhibitor, clade B, member 9  | Serpib9   | 361241 | 1,42 | down |
| 6232788 | 7163946 | 1284289 | serine (or cysteine) peptidase inhibitor, clade B, member 9  | Serpib9   | 361241 | 1,20 | down |
| 5965874 | 7163946 | 1284284 | serine (or cysteine) peptidase inhibitor, clade B, member 9  | Serpib9   | 361241 | 1,19 | up   |
| 5958331 | 7163946 | 1284286 | serine (or cysteine) peptidase inhibitor, clade B, member 9  | Serpib9   | 361241 | 1,08 | down |
| 6506470 | 7163946 | 1284288 | serine (or cysteine) peptidase inhibitor, clade B, member 9  | Serpib9   | 361241 | 1,01 | down |
| 6710711 | 7241130 | 1476714 | serine (or cysteine) peptidase inhibitor, clade G, member 1  | Serpig1   | 295703 | 2,47 | down |
| 6286391 | 7241130 | 1476707 | serine (or cysteine) peptidase inhibitor, clade G, member 1  | Serpig1   | 295703 | 1,39 | down |
| 5779501 | 7241130 | 1476713 | serine (or cysteine) peptidase inhibitor, clade G, member 1  | Serpig1   | 295703 | 1,29 | up   |
| 6558928 | 7241130 | 1476711 | serine (or cysteine) peptidase inhibitor, clade G, member 1  | Serpig1   | 295703 | 1,19 | up   |
| 6722232 | 7241130 | 1476708 | serine (or cysteine) peptidase inhibitor, clade G, member 1  | Serpig1   | 295703 | 1,13 | down |
| 6094286 | 7241130 | 1476712 | serine (or cysteine) peptidase inhibitor, clade G, member 1  | Serpig1   | 295703 | 1,10 | down |
| 5778451 | 7241130 | 1476708 | serine (or cysteine) peptidase inhibitor, clade G, member 1  | Serpig1   | 295703 | 1,09 | up   |
| 5648312 | 7241130 | 1476708 | serine (or cysteine) peptidase inhibitor, clade G, member 1  | Serpig1   | 295703 | 1,09 | up   |
| 5925737 | 7241130 | 1476708 | serine (or cysteine) peptidase inhibitor, clade G, member 1  | Serpig1   | 295703 | 1,07 | up   |
| 6141348 | 7241130 | 1476713 | serine (or cysteine) peptidase inhibitor, clade G, member 1  | Serpig1   | 295703 | 1,04 | up   |
| 6122375 | 7241130 | 1476709 | serine (or cysteine) peptidase inhibitor, clade G, member 1  | Serpig1   | 295703 | 1,04 | up   |
| 5656049 | 7241130 | 1476710 | serine (or cysteine) peptidase inhibitor, clade G, member 1  | Serpig1   | 295703 | 1,01 | up   |
| 6053540 | 7326261 | 1686432 | serine hydroxymethyltransferase 2 (mitochondrial)            | Shmt2     | 299857 | 2,01 | up   |
| 5922428 | 7326261 | 1686434 | serine hydroxymethyltransferase 2 (mitochondrial)            | Shmt2     | 299857 | 1,69 | down |
| 6400977 | 7326261 | 1686431 | serine hydroxymethyltransferase 2 (mitochondrial)            | Shmt2     | 299857 | 1,35 | up   |
| 6738852 | 7326261 | 1686433 | serine hydroxymethyltransferase 2 (mitochondrial)            | Shmt2     | 299857 | 1,28 | up   |
| 5912096 | 7326261 | 1686439 | serine hydroxymethyltransferase 2 (mitochondrial)            | Shmt2     | 299857 | 1,26 | down |
| 6594978 | 7326261 | 1686440 | serine hydroxymethyltransferase 2 (mitochondrial)            | Shmt2     | 299857 | 1,23 | down |
| 5760297 | 7326261 | 1686441 | serine hydroxymethyltransferase 2 (mitochondrial)            | Shmt2     | 299857 | 1,23 | down |
| 5730450 | 7326261 | 1686436 | serine hydroxymethyltransferase 2 (mitochondrial)            | Shmt2     | 299857 | 1,16 | down |
| 6542039 | 7326261 | 1686435 | serine hydroxymethyltransferase 2 (mitochondrial)            | Shmt2     | 299857 | 1,13 | up   |
| 5839723 | 7326261 | 1686430 | serine hydroxymethyltransferase 2 (mitochondrial)            | Shmt2     | 299857 | 1,13 | down |
| 6537252 | 7326261 | 1686438 | serine hydroxymethyltransferase 2 (mitochondrial)            | Shmt2     | 299857 | 1,11 | up   |
| 6607804 | 7326261 | 1686429 | serine hydroxymethyltransferase 2 (mitochondrial)            | Shmt2     | 299857 | 1,06 | down |
| 6503931 | 7326261 | 1686437 | serine hydroxymethyltransferase 2 (mitochondrial)            | Shmt2     | 299857 | 1,01 | up   |
| 6620877 | 7155765 | 1265060 | serine palmitoyltransferase, long chain base subunit 1       | Sptlc1    | 361213 | 2,02 | down |
| 5720513 | 7155765 | 1265044 | serine palmitoyltransferase, long chain base subunit 1       | Sptlc1    | 361213 | 1,68 | up   |
| 6270799 | 7155765 | 1265048 | serine palmitoyltransferase, long chain base subunit 1       | Sptlc1    | 361213 | 1,58 | down |
| 6530144 | 7155765 | 1265059 | serine palmitoyltransferase, long chain base subunit 1       | Sptlc1    | 361213 | 1,32 | up   |
| 6519190 | 7155765 | 1265060 | serine palmitoyltransferase, long chain base subunit 1       | Sptlc1    | 361213 | 1,21 | up   |
| 5636182 | 7155765 | 1265052 | serine palmitoyltransferase, long chain base subunit 1       | Sptlc1    | 361213 | 1,17 | down |
| 6182492 | 7155765 | 1265060 | serine palmitoyltransferase, long chain base subunit 1       | Sptlc1    | 361213 | 1,17 | up   |
| 6127054 | 7155765 | 1265055 | serine palmitoyltransferase, long chain base subunit 1       | Sptlc1    | 361213 | 1,15 | up   |
| 6091667 | 7155765 | 1265057 | serine palmitoyltransferase, long chain base subunit 1       | Sptlc1    | 361213 | 1,13 | down |
| 5916396 | 7155765 | 1265051 | serine palmitoyltransferase, long chain base subunit 1       | Sptlc1    | 361213 | 1,12 | up   |
| 6308838 | 7155765 | 1265058 | serine palmitoyltransferase, long chain base subunit 1       | Sptlc1    | 361213 | 1,12 | down |
| 5748967 | 7155765 | 1265060 | serine palmitoyltransferase, long chain base subunit 1       | Sptlc1    | 361213 | 1,07 | down |
| 5889919 | 7155765 | 1265049 | serine palmitoyltransferase, long chain base subunit 1       | Sptlc1    | 361213 | 1,06 | down |
| 5895316 | 7155765 | 1265043 | serine palmitoyltransferase, long chain base subunit 1       | Sptlc1    | 361213 | 1,06 | down |
| 6358442 | 7155765 | 1265045 | serine palmitoyltransferase, long chain base subunit 1       | Sptlc1    | 361213 | 1,05 | up   |
| 6373980 | 7155765 | 1265060 | serine palmitoyltransferase, long chain base subunit 1       | Sptlc1    | 361213 | 1,04 | up   |
| 6130901 | 7155765 | 1265054 | serine palmitoyltransferase, long chain base subunit 1       | Sptlc1    | 361213 | 1,02 | up   |
| 6255119 | 7155765 | 1265056 | serine palmitoyltransferase, long chain base subunit 1       | Sptlc1    | 361213 | 1,02 | up   |

|         |         |         |                                                        |           |        |      |      |
|---------|---------|---------|--------------------------------------------------------|-----------|--------|------|------|
| 6514552 | 7155765 | 1265050 | serine palmitoyltransferase, long chain base subunit 1 | Sptlc1    | 361213 | 1,00 | down |
| 6408165 | 7301296 | 1625004 | Serine protease inhibitor                              | LOC299282 | 299282 | 2,93 | up   |
| 6448068 | 7301296 | 1625004 | Serine protease inhibitor                              | LOC299282 | 299282 | 1,54 | up   |
| 6337382 | 7301296 | 1625007 | Serine protease inhibitor                              | LOC299282 | 299282 | 1,48 | down |
| 5965022 | 7301296 | 1624999 | Serine protease inhibitor                              | LOC299282 | 299282 | 1,23 | up   |
| 5860272 | 7301296 | 1625007 | Serine protease inhibitor                              | LOC299282 | 299282 | 1,23 | down |
| 6461086 | 7301296 | 1625005 | Serine protease inhibitor                              | LOC299282 | 299282 | 1,22 | up   |
| 6181530 | 7301296 | 1625001 | Serine protease inhibitor                              | LOC299282 | 299282 | 1,19 | down |
| 5660743 | 7301296 | 1625000 | Serine protease inhibitor                              | LOC299282 | 299282 | 1,14 | down |
| 6111921 | 7301296 | 1625005 | Serine protease inhibitor                              | LOC299282 | 299282 | 1,13 | down |
| 6520531 | 7301296 | 1625006 | Serine protease inhibitor                              | LOC299282 | 299282 | 1,12 | up   |
| 6202402 | 7301296 | 1625008 | Serine protease inhibitor                              | LOC299282 | 299282 | 1,10 | down |
| 6305138 | 7301296 | 1625006 | Serine protease inhibitor                              | LOC299282 | 299282 | 1,09 | down |
| 6535873 | 7301296 | 1625002 | Serine protease inhibitor                              | LOC299282 | 299282 | 1,03 | up   |
| 6585352 | 7301296 | 1625008 | Serine protease inhibitor                              | LOC299282 | 299282 | 1,01 | up   |
| 6170528 | 7356333 | 1760506 | serine/threonine kinase 11 interacting protein         | Stk11ip   | 301535 | 2,45 | up   |
| 6191544 | 7356333 | 1760486 | serine/threonine kinase 11 interacting protein         | Stk11ip   | 301535 | 2,13 | up   |
| 6535738 | 7356333 | 1760487 | serine/threonine kinase 11 interacting protein         | Stk11ip   | 301535 | 1,69 | up   |
| 6560644 | 7356333 | 1760495 | serine/threonine kinase 11 interacting protein         | Stk11ip   | 301535 | 1,66 | up   |
| 6594273 | 7356333 | 1760488 | serine/threonine kinase 11 interacting protein         | Stk11ip   | 301535 | 1,62 | up   |
| 6609152 | 7356333 | 1760484 | serine/threonine kinase 11 interacting protein         | Stk11ip   | 301535 | 1,48 | down |
| 6418438 | 7356333 | 1760483 | serine/threonine kinase 11 interacting protein         | Stk11ip   | 301535 | 1,45 | up   |
| 6486369 | 7356333 | 1760485 | serine/threonine kinase 11 interacting protein         | Stk11ip   | 301535 | 1,44 | up   |
| 5768993 | 7356333 | 1760497 | serine/threonine kinase 11 interacting protein         | Stk11ip   | 301535 | 1,40 | up   |
| 6273519 | 7356333 | 1760502 | serine/threonine kinase 11 interacting protein         | Stk11ip   | 301535 | 1,38 | down |
| 6264703 | 7356333 | 1760501 | serine/threonine kinase 11 interacting protein         | Stk11ip   | 301535 | 1,38 | up   |
| 6449950 | 7356333 | 1760482 | serine/threonine kinase 11 interacting protein         | Stk11ip   | 301535 | 1,33 | down |
| 6629352 | 7356333 | 1760493 | serine/threonine kinase 11 interacting protein         | Stk11ip   | 301535 | 1,29 | down |
| 6070161 | 7356333 | 1760505 | serine/threonine kinase 11 interacting protein         | Stk11ip   | 301535 | 1,27 | up   |
| 6353710 | 7356333 | 1760503 | serine/threonine kinase 11 interacting protein         | Stk11ip   | 301535 | 1,20 | up   |
| 6104953 | 7356333 | 1760506 | serine/threonine kinase 11 interacting protein         | Stk11ip   | 301535 | 1,19 | up   |
| 6066413 | 7356333 | 1760489 | serine/threonine kinase 11 interacting protein         | Stk11ip   | 301535 | 1,18 | down |
| 6188782 | 7356333 | 1760492 | serine/threonine kinase 11 interacting protein         | Stk11ip   | 301535 | 1,16 | down |
| 6125518 | 7356333 | 1760507 | serine/threonine kinase 11 interacting protein         | Stk11ip   | 301535 | 1,15 | down |
| 6569623 | 7356333 | 1760498 | serine/threonine kinase 11 interacting protein         | Stk11ip   | 301535 | 1,15 | up   |
| 5738866 | 7356333 | 1760504 | serine/threonine kinase 11 interacting protein         | Stk11ip   | 301535 | 1,13 | up   |
| 6323805 | 7356333 | 1760498 | serine/threonine kinase 11 interacting protein         | Stk11ip   | 301535 | 1,12 | down |
| 6584963 | 7356333 | 1760495 | serine/threonine kinase 11 interacting protein         | Stk11ip   | 301535 | 1,08 | down |
| 5714579 | 7356333 | 1760490 | serine/threonine kinase 11 interacting protein         | Stk11ip   | 301535 | 1,07 | down |
| 5844855 | 7356333 | 1760496 | serine/threonine kinase 11 interacting protein         | Stk11ip   | 301535 | 1,07 | up   |
| 6039494 | 7356333 | 1760498 | serine/threonine kinase 11 interacting protein         | Stk11ip   | 301535 | 1,05 | up   |
| 6552560 | 7356333 | 1760506 | serine/threonine kinase 11 interacting protein         | Stk11ip   | 301535 | 1,04 | down |
| 5740441 | 7356333 | 1760491 | serine/threonine kinase 11 interacting protein         | Stk11ip   | 301535 | 1,02 | up   |
| 5668121 | 7356333 | 1760496 | serine/threonine kinase 11 interacting protein         | Stk11ip   | 301535 | 1,02 | up   |
| 6150445 | 7326472 | 1686902 | serine/threonine kinase 3 (STE20 homolog, yeast)       | Stk3      | 65189  | 2,32 | down |
| 6411909 | 7326472 | 1686897 | serine/threonine kinase 3 (STE20 homolog, yeast)       | Stk3      | 65189  | 1,68 | down |
| 6609380 | 7326472 | 1686895 | serine/threonine kinase 3 (STE20 homolog, yeast)       | Stk3      | 65189  | 1,63 | up   |
| 6066153 | 7326472 | 1686901 | serine/threonine kinase 3 (STE20 homolog, yeast)       | Stk3      | 65189  | 1,22 | down |
| 5724607 | 7326472 | 1686905 | serine/threonine kinase 3 (STE20 homolog, yeast)       | Stk3      | 65189  | 1,19 | down |
| 5998295 | 7326472 | 1686904 | serine/threonine kinase 3 (STE20 homolog, yeast)       | Stk3      | 65189  | 1,18 | up   |
| 5631402 | 7326472 | 1686899 | serine/threonine kinase 3 (STE20 homolog, yeast)       | Stk3      | 65189  | 1,18 | up   |
| 5989316 | 7326472 | 1686896 | serine/threonine kinase 3 (STE20 homolog, yeast)       | Stk3      | 65189  | 1,14 | up   |
| 5941302 | 7326472 | 1686898 | serine/threonine kinase 3 (STE20 homolog, yeast)       | Stk3      | 65189  | 1,13 | up   |
| 6110245 | 7326472 | 1686906 | serine/threonine kinase 3 (STE20 homolog, yeast)       | Stk3      | 65189  | 1,08 | down |
| 5897644 | 7326472 | 1686900 | serine/threonine kinase 3 (STE20 homolog, yeast)       | Stk3      | 65189  | 1,07 | down |
| 6740731 | 7326472 | 1686897 | serine/threonine kinase 3 (STE20 homolog, yeast)       | Stk3      | 65189  | 1,07 | down |
| 6616603 | 7326472 | 1686903 | serine/threonine kinase 3 (STE20 homolog, yeast)       | Stk3      | 65189  | 1,07 | up   |

|         |         |         |                                                                                   |          |        |      |      |
|---------|---------|---------|-----------------------------------------------------------------------------------|----------|--------|------|------|
| 6058161 | 7326472 | 1686901 | serine/threonine kinase 3 (STE20 homolog, yeast)                                  | Stk3     | 65189  | 1,04 | down |
| 6688779 | 7259303 | 1520825 | serine/threonine kinase receptor associated protein                               | Strap    | 297699 | 2,24 | down |
| 5794168 | 7259303 | 1520825 | serine/threonine kinase receptor associated protein                               | Strap    | 297699 | 1,63 | down |
| 6318347 | 7259303 | 1520826 | serine/threonine kinase receptor associated protein                               | Strap    | 297699 | 1,43 | down |
| 6495108 | 7259303 | 1520829 | serine/threonine kinase receptor associated protein                               | Strap    | 297699 | 1,39 | down |
| 5821605 | 7259303 | 1520834 | serine/threonine kinase receptor associated protein                               | Strap    | 297699 | 1,35 | up   |
| 6462601 | 7259303 | 1520834 | serine/threonine kinase receptor associated protein                               | Strap    | 297699 | 1,25 | up   |
| 5835224 | 7259303 | 1520829 | serine/threonine kinase receptor associated protein                               | Strap    | 297699 | 1,20 | up   |
| 6427816 | 7259303 | 1520828 | serine/threonine kinase receptor associated protein                               | Strap    | 297699 | 1,20 | down |
| 6363573 | 7259303 | 1520833 | serine/threonine kinase receptor associated protein                               | Strap    | 297699 | 1,15 | down |
| 6038059 | 7259303 | 1520831 | serine/threonine kinase receptor associated protein                               | Strap    | 297699 | 1,12 | up   |
| 6369852 | 7259303 | 1520832 | serine/threonine kinase receptor associated protein                               | Strap    | 297699 | 1,10 | down |
| 6647828 | 7259303 | 1520834 | serine/threonine kinase receptor associated protein                               | Strap    | 297699 | 1,09 | up   |
| 6367824 | 7259303 | 1520830 | serine/threonine kinase receptor associated protein                               | Strap    | 297699 | 1,06 | up   |
| 6132235 | 7259303 | 1520827 | serine/threonine kinase receptor associated protein                               | Strap    | 297699 | 1,06 | up   |
| 6004437 | 7259303 | 1520834 | serine/threonine kinase receptor associated protein                               | Strap    | 297699 | 1,05 | down |
| 6544153 | 7259303 | 1520825 | serine/threonine kinase receptor associated protein                               | Strap    | 297699 | 1,00 | up   |
| 6490944 | 7377583 | 1815445 | serine/threonine protein kinase MST4                                              | Mst4     | 317589 | 2,43 | up   |
| 6209518 | 7377583 | 1815445 | serine/threonine protein kinase MST4                                              | Mst4     | 317589 | 1,68 | up   |
| 5978580 | 7377583 | 1815446 | serine/threonine protein kinase MST4                                              | Mst4     | 317589 | 1,42 | up   |
| 6370086 | 7377583 | 1815445 | serine/threonine protein kinase MST4                                              | Mst4     | 317589 | 1,29 | up   |
| 6391069 | 7377583 | 1815463 | serine/threonine protein kinase MST4                                              | Mst4     | 317589 | 1,17 | up   |
| 5952977 | 7130917 | 1203914 | serine/threonine/tyrosine interacting protein                                     | Styx     | 689246 | 1,15 | down |
| 5765995 | 7203403 | 1383604 | serologically defined colon cancer antigen 10                                     | Sdccag10 | 361887 | 2,36 | down |
| 5715091 | 7203403 | 1383605 | serologically defined colon cancer antigen 10                                     | Sdccag10 | 361887 | 1,52 | up   |
| 5968569 | 7203403 | 1383601 | serologically defined colon cancer antigen 10                                     | Sdccag10 | 361887 | 1,42 | up   |
| 5904385 | 7203403 | 1383596 | serologically defined colon cancer antigen 10                                     | Sdccag10 | 361887 | 1,40 | down |
| 5890616 | 7203403 | 1383600 | serologically defined colon cancer antigen 10                                     | Sdccag10 | 361887 | 1,32 | down |
| 5656632 | 7203403 | 1383595 | serologically defined colon cancer antigen 10                                     | Sdccag10 | 361887 | 1,30 | down |
| 6573602 | 7203403 | 1383597 | serologically defined colon cancer antigen 10                                     | Sdccag10 | 361887 | 1,28 | up   |
| 6648934 | 7203403 | 1383609 | serologically defined colon cancer antigen 10                                     | Sdccag10 | 361887 | 1,26 | up   |
| 5706729 | 7203403 | 1383607 | serologically defined colon cancer antigen 10                                     | Sdccag10 | 361887 | 1,25 | down |
| 6703664 | 7203403 | 1383598 | serologically defined colon cancer antigen 10                                     | Sdccag10 | 361887 | 1,17 | down |
| 6605172 | 7203403 | 1383608 | serologically defined colon cancer antigen 10                                     | Sdccag10 | 361887 | 1,15 | up   |
| 5639273 | 7203403 | 1383596 | serologically defined colon cancer antigen 10                                     | Sdccag10 | 361887 | 1,15 | up   |
| 6020291 | 7203403 | 1383597 | serologically defined colon cancer antigen 10                                     | Sdccag10 | 361887 | 1,13 | down |
| 5828662 | 7203403 | 1383599 | serologically defined colon cancer antigen 10                                     | Sdccag10 | 361887 | 1,07 | up   |
| 6717564 | 7203403 | 1383602 | serologically defined colon cancer antigen 10                                     | Sdccag10 | 361887 | 1,06 | up   |
| 6666930 | 7203403 | 1383606 | serologically defined colon cancer antigen 10                                     | Sdccag10 | 361887 | 1,02 | up   |
| 5880936 | 7203403 | 1383603 | serologically defined colon cancer antigen 10                                     | Sdccag10 | 361887 | 1,00 | up   |
| 6008665 | 7351949 | 1749804 | serum response factor (c-fos serum response element-binding transcription factor) | Srf      | 501099 | 3,03 | down |
| 5933489 | 7351949 | 1749804 | serum response factor (c-fos serum response element-binding transcription factor) | Srf      | 501099 | 1,65 | down |
| 5802820 | 7351949 | 1749805 | serum response factor (c-fos serum response element-binding transcription factor) | Srf      | 501099 | 1,64 | up   |
| 6554065 | 7351949 | 1749806 | serum response factor (c-fos serum response element-binding transcription factor) | Srf      | 501099 | 1,53 | up   |
| 6129257 | 7351949 | 1749810 | serum response factor (c-fos serum response element-binding transcription factor) | Srf      | 501099 | 1,52 | up   |
| 6426466 | 7351949 | 1749809 | serum response factor (c-fos serum response element-binding transcription factor) | Srf      | 501099 | 1,24 | up   |
| 5702396 | 7351949 | 1749811 | serum response factor (c-fos serum response element-binding transcription factor) | Srf      | 501099 | 1,19 | up   |
| 6616889 | 7351949 | 1749808 | serum response factor (c-fos serum response element-binding transcription factor) | Srf      | 501099 | 1,18 | up   |
| 5811999 | 7351949 | 1749805 | serum response factor (c-fos serum response element-binding transcription factor) | Srf      | 501099 | 1,08 | down |
| 6404261 | 7351949 | 1749811 | serum response factor (c-fos serum response element-binding transcription factor) | Srf      | 501099 | 1,06 | up   |
| 6631699 | 7351949 | 1749809 | serum response factor (c-fos serum response element-binding transcription factor) | Srf      | 501099 | 1,03 | up   |
| 6377426 | 7351949 | 1749807 | serum response factor (c-fos serum response element-binding transcription factor) | Srf      | 501099 | 1,01 | down |
| 6432240 | 7235074 | 1461009 | serum/glucocorticoid regulated kinase 2                                           | Sgk2     | 171497 | 1,83 | down |
| 6275255 | 7235074 | 1461011 | serum/glucocorticoid regulated kinase 2                                           | Sgk2     | 171497 | 1,64 | down |
| 6157673 | 7235074 | 1461003 | serum/glucocorticoid regulated kinase 2                                           | Sgk2     | 171497 | 1,62 | up   |
| 6044206 | 7235074 | 1461016 | serum/glucocorticoid regulated kinase 2                                           | Sgk2     | 171497 | 1,52 | down |
| 5728109 | 7235074 | 1461001 | serum/glucocorticoid regulated kinase 2                                           | Sgk2     | 171497 | 1,52 | down |

|         |         |         |                                           |        |        |      |      |
|---------|---------|---------|-------------------------------------------|--------|--------|------|------|
| 6350765 | 7235074 | 1461017 | serum/glucocorticoid regulated kinase 2   | Sgk2   | 171497 | 1,24 | down |
| 6364847 | 7235074 | 1461013 | serum/glucocorticoid regulated kinase 2   | Sgk2   | 171497 | 1,15 | up   |
| 6597184 | 7235074 | 1461007 | serum/glucocorticoid regulated kinase 2   | Sgk2   | 171497 | 1,10 | up   |
| 5967475 | 7235074 | 1461016 | serum/glucocorticoid regulated kinase 2   | Sgk2   | 171497 | 1,10 | up   |
| 6472265 | 7235074 | 1461016 | serum/glucocorticoid regulated kinase 2   | Sgk2   | 171497 | 1,10 | up   |
| 6712564 | 7235074 | 1461012 | serum/glucocorticoid regulated kinase 2   | Sgk2   | 171497 | 1,08 | up   |
| 6320171 | 7235074 | 1461010 | serum/glucocorticoid regulated kinase 2   | Sgk2   | 171497 | 1,06 | down |
| 6125399 | 7235074 | 1461015 | serum/glucocorticoid regulated kinase 2   | Sgk2   | 171497 | 1,05 | up   |
| 6535320 | 7235074 | 1461008 | serum/glucocorticoid regulated kinase 2   | Sgk2   | 171497 | 1,04 | up   |
| 6589832 | 7235074 | 1461014 | serum/glucocorticoid regulated kinase 2   | Sgk2   | 171497 | 1,04 | down |
| 6238213 | 7235074 | 1461005 | serum/glucocorticoid regulated kinase 2   | Sgk2   | 171497 | 1,04 | up   |
| 5856985 | 7333027 | 1702673 | sestrin 3                                 | Sesn3  | 315427 | 2,04 | up   |
| 6467200 | 7333027 | 1702687 | sestrin 3                                 | Sesn3  | 315427 | 1,70 | down |
| 6324411 | 7333027 | 1702680 | sestrin 3                                 | Sesn3  | 315427 | 1,42 | down |
| 5710507 | 7333027 | 1702685 | sestrin 3                                 | Sesn3  | 315427 | 1,39 | down |
| 6445597 | 7333027 | 1702682 | sestrin 3                                 | Sesn3  | 315427 | 1,37 | up   |
| 6445302 | 7333027 | 1702687 | sestrin 3                                 | Sesn3  | 315427 | 1,27 | up   |
| 6446530 | 7333027 | 1702681 | sestrin 3                                 | Sesn3  | 315427 | 1,23 | down |
| 6674676 | 7333027 | 1702674 | sestrin 3                                 | Sesn3  | 315427 | 1,18 | up   |
| 5978795 | 7333027 | 1702682 | sestrin 3                                 | Sesn3  | 315427 | 1,14 | up   |
| 6534156 | 7333027 | 1702683 | sestrin 3                                 | Sesn3  | 315427 | 1,09 | down |
| 6022262 | 7333027 | 1702688 | sestrin 3                                 | Sesn3  | 315427 | 1,08 | down |
| 5833970 | 7333027 | 1702686 | sestrin 3                                 | Sesn3  | 315427 | 1,07 | down |
| 6148563 | 7333027 | 1702684 | sestrin 3                                 | Sesn3  | 315427 | 1,03 | down |
| 6317621 | 7333027 | 1702678 | sestrin 3                                 | Sesn3  | 315427 | 1,00 | up   |
| 6661132 | 7330731 | 1697208 | SET binding factor 1                      | Sbf1   | 300147 | 3,43 | down |
| 6359516 | 7330731 | 1697175 | SET binding factor 1                      | Sbf1   | 300147 | 1,04 | down |
| 6717376 | 7177520 | 1318660 | SET binding protein 1                     | Setbp1 | 291423 | 1,36 | down |
| 5853553 | 7177520 | 1318660 | SET binding protein 1                     | Setbp1 | 291423 | 1,16 | down |
| 6351301 | 7177520 | 1318660 | SET binding protein 1                     | Setbp1 | 291423 | 1,15 | down |
| 6670307 | 7177520 | 1318660 | SET binding protein 1                     | Setbp1 | 291423 | 1,13 | down |
| 5804909 | 7177520 | 1318660 | SET binding protein 1                     | Setbp1 | 291423 | 1,11 | down |
| 6464892 | 7091900 | 1107636 | SET domain containing 4                   | Setd4  | 245975 | 2,13 | up   |
| 6616177 | 7091900 | 1107632 | SET domain containing 4                   | Setd4  | 245975 | 1,46 | down |
| 6169118 | 7091900 | 1107626 | SET domain containing 4                   | Setd4  | 245975 | 1,19 | up   |
| 6130443 | 7091900 | 1107636 | SET domain containing 4                   | Setd4  | 245975 | 1,18 | up   |
| 6341265 | 7091900 | 1107638 | SET domain containing 4                   | Setd4  | 245975 | 1,16 | up   |
| 6500019 | 7091900 | 1107627 | SET domain containing 4                   | Setd4  | 245975 | 1,15 | up   |
| 5845268 | 7091900 | 1107631 | SET domain containing 4                   | Setd4  | 245975 | 1,15 | up   |
| 6193723 | 7091900 | 1107629 | SET domain containing 4                   | Setd4  | 245975 | 1,13 | up   |
| 6061337 | 7091900 | 1107634 | SET domain containing 4                   | Setd4  | 245975 | 1,06 | down |
| 5983905 | 7091900 | 1107635 | SET domain containing 4                   | Setd4  | 245975 | 1,03 | up   |
| 6309945 | 7091900 | 1107629 | SET domain containing 4                   | Setd4  | 245975 | 1,02 | down |
| 5622485 | 7091900 | 1107628 | SET domain containing 4                   | Setd4  | 245975 | 1,01 | up   |
| 6517318 | 7091900 | 1107629 | SET domain containing 4                   | Setd4  | 245975 | 1,01 | down |
| 6045269 | 7091900 | 1107631 | SET domain containing 4                   | Setd4  | 245975 | 1,01 | up   |
| 6508778 | 7279103 | 1570845 | sex comb on midleg homolog 1 (Drosophila) | Scmh1  | 362581 | 2,11 | down |
| 5634797 | 7279103 | 1570839 | sex comb on midleg homolog 1 (Drosophila) | Scmh1  | 362581 | 1,42 | up   |
| 6467159 | 7279103 | 1570844 | sex comb on midleg homolog 1 (Drosophila) | Scmh1  | 362581 | 1,40 | up   |
| 5683367 | 7279103 | 1570850 | sex comb on midleg homolog 1 (Drosophila) | Scmh1  | 362581 | 1,37 | up   |
| 6356269 | 7279103 | 1570829 | sex comb on midleg homolog 1 (Drosophila) | Scmh1  | 362581 | 1,35 | up   |
| 5787797 | 7279103 | 1570830 | sex comb on midleg homolog 1 (Drosophila) | Scmh1  | 362581 | 1,32 | up   |
| 5780563 | 7279103 | 1570835 | sex comb on midleg homolog 1 (Drosophila) | Scmh1  | 362581 | 1,28 | up   |
| 6041643 | 7279103 | 1570824 | sex comb on midleg homolog 1 (Drosophila) | Scmh1  | 362581 | 1,26 | up   |
| 5973641 | 7279103 | 1570840 | sex comb on midleg homolog 1 (Drosophila) | Scmh1  | 362581 | 1,26 | down |
| 5790685 | 7279103 | 1570849 | sex comb on midleg homolog 1 (Drosophila) | Scmh1  | 362581 | 1,24 | down |
| 5735933 | 7279103 | 1570833 | sex comb on midleg homolog 1 (Drosophila) | Scmh1  | 362581 | 1,23 | up   |

|         |         |         |                                                                |        |        |      |      |
|---------|---------|---------|----------------------------------------------------------------|--------|--------|------|------|
| 6646289 | 7279103 | 1570819 | sex comb on midleg homolog 1 ( <i>Drosophila</i> )             | Scmh1  | 362581 | 1,15 | up   |
| 6110989 | 7279103 | 1570848 | sex comb on midleg homolog 1 ( <i>Drosophila</i> )             | Scmh1  | 362581 | 1,14 | up   |
| 5916532 | 7279103 | 1570850 | sex comb on midleg homolog 1 ( <i>Drosophila</i> )             | Scmh1  | 362581 | 1,08 | down |
| 5723199 | 7279103 | 1570841 | sex comb on midleg homolog 1 ( <i>Drosophila</i> )             | Scmh1  | 362581 | 1,06 | up   |
| 6348658 | 7279103 | 1570842 | sex comb on midleg homolog 1 ( <i>Drosophila</i> )             | Scmh1  | 362581 | 1,06 | up   |
| 5754414 | 7279103 | 1570832 | sex comb on midleg homolog 1 ( <i>Drosophila</i> )             | Scmh1  | 362581 | 1,06 | down |
| 5989040 | 7279103 | 1570829 | sex comb on midleg homolog 1 ( <i>Drosophila</i> )             | Scmh1  | 362581 | 1,03 | down |
| 6429322 | 7046634 | 1002583 | SFT2 domain containing 1                                       | Sft2d1 | 292305 | 2,18 | down |
| 5876575 | 7046634 | 1002576 | SFT2 domain containing 1                                       | Sft2d1 | 292305 | 1,64 | up   |
| 6510769 | 7046634 | 1002578 | SFT2 domain containing 1                                       | Sft2d1 | 292305 | 1,46 | up   |
| 6478525 | 7046634 | 1002577 | SFT2 domain containing 1                                       | Sft2d1 | 292305 | 1,26 | up   |
| 6096302 | 7046634 | 1002580 | SFT2 domain containing 1                                       | Sft2d1 | 292305 | 1,25 | up   |
| 6546325 | 7046634 | 1002579 | SFT2 domain containing 1                                       | Sft2d1 | 292305 | 1,15 | down |
| 5813553 | 7046634 | 1002576 | SFT2 domain containing 1                                       | Sft2d1 | 292305 | 1,12 | down |
| 5729012 | 7046634 | 1002582 | SFT2 domain containing 1                                       | Sft2d1 | 292305 | 1,07 | down |
| 6586213 | 7046634 | 1002581 | SFT2 domain containing 1                                       | Sft2d1 | 292305 | 1,04 | up   |
| 6207660 | 7133749 | 1210801 | SGT1, suppressor of G2 allele of SKP1 ( <i>S. cerevisiae</i> ) | Sugt1  | 290408 | 2,10 | down |
| 6606065 | 7133749 | 1210805 | SGT1, suppressor of G2 allele of SKP1 ( <i>S. cerevisiae</i> ) | Sugt1  | 290408 | 2,04 | up   |
| 5673183 | 7133749 | 1210800 | SGT1, suppressor of G2 allele of SKP1 ( <i>S. cerevisiae</i> ) | Sugt1  | 290408 | 1,47 | up   |
| 6230602 | 7133749 | 1210818 | SGT1, suppressor of G2 allele of SKP1 ( <i>S. cerevisiae</i> ) | Sugt1  | 290408 | 1,44 | down |
| 6079869 | 7133749 | 1210816 | SGT1, suppressor of G2 allele of SKP1 ( <i>S. cerevisiae</i> ) | Sugt1  | 290408 | 1,37 | up   |
| 6014464 | 7133749 | 1210806 | SGT1, suppressor of G2 allele of SKP1 ( <i>S. cerevisiae</i> ) | Sugt1  | 290408 | 1,31 | up   |
| 6082296 | 7133749 | 1210818 | SGT1, suppressor of G2 allele of SKP1 ( <i>S. cerevisiae</i> ) | Sugt1  | 290408 | 1,30 | up   |
| 5864001 | 7133749 | 1210818 | SGT1, suppressor of G2 allele of SKP1 ( <i>S. cerevisiae</i> ) | Sugt1  | 290408 | 1,21 | down |
| 5834989 | 7133749 | 1210816 | SGT1, suppressor of G2 allele of SKP1 ( <i>S. cerevisiae</i> ) | Sugt1  | 290408 | 1,20 | up   |
| 6042517 | 7133749 | 1210814 | SGT1, suppressor of G2 allele of SKP1 ( <i>S. cerevisiae</i> ) | Sugt1  | 290408 | 1,17 | up   |
| 6208992 | 7133749 | 1210812 | SGT1, suppressor of G2 allele of SKP1 ( <i>S. cerevisiae</i> ) | Sugt1  | 290408 | 1,11 | up   |
| 6529156 | 7133749 | 1210800 | SGT1, suppressor of G2 allele of SKP1 ( <i>S. cerevisiae</i> ) | Sugt1  | 290408 | 1,10 | down |
| 6580842 | 7133749 | 1210802 | SGT1, suppressor of G2 allele of SKP1 ( <i>S. cerevisiae</i> ) | Sugt1  | 290408 | 1,09 | up   |
| 5886377 | 7133749 | 1210809 | SGT1, suppressor of G2 allele of SKP1 ( <i>S. cerevisiae</i> ) | Sugt1  | 290408 | 1,09 | up   |
| 6388110 | 7133749 | 1210811 | SGT1, suppressor of G2 allele of SKP1 ( <i>S. cerevisiae</i> ) | Sugt1  | 290408 | 1,05 | down |
| 6671988 | 7133749 | 1210803 | SGT1, suppressor of G2 allele of SKP1 ( <i>S. cerevisiae</i> ) | Sugt1  | 290408 | 1,03 | up   |
| 6417842 | 7098424 | 1123754 | SH2B adaptor protein 3                                         | Sh2b3  | 58838  | 2,19 | down |
| 6543160 | 7098424 | 1123754 | SH2B adaptor protein 3                                         | Sh2b3  | 58838  | 1,80 | down |
| 6540942 | 7098424 | 1123755 | SH2B adaptor protein 3                                         | Sh2b3  | 58838  | 1,67 | down |
| 6696808 | 7098424 | 1123756 | SH2B adaptor protein 3                                         | Sh2b3  | 58838  | 1,50 | up   |
| 6108583 | 7098424 | 1123754 | SH2B adaptor protein 3                                         | Sh2b3  | 58838  | 1,48 | down |
| 5779773 | 7098424 | 1123754 | SH2B adaptor protein 3                                         | Sh2b3  | 58838  | 1,45 | down |
| 5954649 | 7098424 | 1123754 | SH2B adaptor protein 3                                         | Sh2b3  | 58838  | 1,25 | down |
| 6544203 | 7098424 | 1123756 | SH2B adaptor protein 3                                         | Sh2b3  | 58838  | 1,20 | up   |
| 6167092 | 7098424 | 1123754 | SH2B adaptor protein 3                                         | Sh2b3  | 58838  | 1,18 | down |
| 6080748 | 7098424 | 1123756 | SH2B adaptor protein 3                                         | Sh2b3  | 58838  | 1,16 | up   |
| 5718708 | 7098424 | 1123754 | SH2B adaptor protein 3                                         | Sh2b3  | 58838  | 1,14 | up   |
| 6290952 | 7098424 | 1123754 | SH2B adaptor protein 3                                         | Sh2b3  | 58838  | 1,12 | up   |
| 6602748 | 7098424 | 1123756 | SH2B adaptor protein 3                                         | Sh2b3  | 58838  | 1,10 | up   |
| 6399553 | 7098424 | 1123754 | SH2B adaptor protein 3                                         | Sh2b3  | 58838  | 1,05 | up   |
| 6062017 | 7098424 | 1123756 | SH2B adaptor protein 3                                         | Sh2b3  | 58838  | 1,03 | up   |
| 6506518 | 7098424 | 1123754 | SH2B adaptor protein 3                                         | Sh2b3  | 58838  | 1,03 | up   |
| 6151975 | 7098424 | 1123757 | SH2B adaptor protein 3                                         | Sh2b3  | 58838  | 1,02 | down |
| 5897645 | 7098424 | 1123754 | SH2B adaptor protein 3                                         | Sh2b3  | 58838  | 1,02 | up   |
| 6517052 | 7031280 | 963458  | SH3 and multiple ankyrin repeat domains 1                      | Shank1 | 78957  | 2,56 | down |
| 5920126 | 7031280 | 963479  | SH3 and multiple ankyrin repeat domains 1                      | Shank1 | 78957  | 2,18 | down |
| 5691190 | 7031280 | 963466  | SH3 and multiple ankyrin repeat domains 1                      | Shank1 | 78957  | 1,67 | down |
| 6071090 | 7031280 | 963457  | SH3 and multiple ankyrin repeat domains 1                      | Shank1 | 78957  | 1,66 | down |
| 6275013 | 7031280 | 963481  | SH3 and multiple ankyrin repeat domains 1                      | Shank1 | 78957  | 1,62 | up   |
| 6732459 | 7031280 | 963482  | SH3 and multiple ankyrin repeat domains 1                      | Shank1 | 78957  | 1,61 | down |
| 6383433 | 7031280 | 963468  | SH3 and multiple ankyrin repeat domains 1                      | Shank1 | 78957  | 1,48 | up   |

|         |         |        |                                           |        |        |      |      |
|---------|---------|--------|-------------------------------------------|--------|--------|------|------|
| 5709263 | 7031280 | 963479 | SH3 and multiple ankyrin repeat domains 1 | Shank1 | 78957  | 1,45 | down |
| 6043179 | 7031280 | 963480 | SH3 and multiple ankyrin repeat domains 1 | Shank1 | 78957  | 1,45 | down |
| 6427720 | 7031280 | 963462 | SH3 and multiple ankyrin repeat domains 1 | Shank1 | 78957  | 1,41 | up   |
| 6666705 | 7031280 | 963467 | SH3 and multiple ankyrin repeat domains 1 | Shank1 | 78957  | 1,25 | up   |
| 5791059 | 7031280 | 963458 | SH3 and multiple ankyrin repeat domains 1 | Shank1 | 78957  | 1,23 | up   |
| 5855336 | 7031280 | 963469 | SH3 and multiple ankyrin repeat domains 1 | Shank1 | 78957  | 1,23 | down |
| 6704579 | 7031280 | 963476 | SH3 and multiple ankyrin repeat domains 1 | Shank1 | 78957  | 1,20 | up   |
| 5877410 | 7031280 | 963460 | SH3 and multiple ankyrin repeat domains 1 | Shank1 | 78957  | 1,19 | up   |
| 6578572 | 7031280 | 963463 | SH3 and multiple ankyrin repeat domains 1 | Shank1 | 78957  | 1,17 | up   |
| 5675674 | 7031280 | 963478 | SH3 and multiple ankyrin repeat domains 1 | Shank1 | 78957  | 1,17 | down |
| 6475803 | 7031280 | 963465 | SH3 and multiple ankyrin repeat domains 1 | Shank1 | 78957  | 1,17 | down |
| 5859183 | 7031280 | 963458 | SH3 and multiple ankyrin repeat domains 1 | Shank1 | 78957  | 1,15 | up   |
| 6504403 | 7031280 | 963480 | SH3 and multiple ankyrin repeat domains 1 | Shank1 | 78957  | 1,13 | down |
| 6451034 | 7031280 | 963480 | SH3 and multiple ankyrin repeat domains 1 | Shank1 | 78957  | 1,11 | up   |
| 6068253 | 7031280 | 963459 | SH3 and multiple ankyrin repeat domains 1 | Shank1 | 78957  | 1,07 | down |
| 6586938 | 7031280 | 963480 | SH3 and multiple ankyrin repeat domains 1 | Shank1 | 78957  | 1,06 | down |
| 5764536 | 7031280 | 963473 | SH3 and multiple ankyrin repeat domains 1 | Shank1 | 78957  | 1,06 | down |
| 5700816 | 7031280 | 963470 | SH3 and multiple ankyrin repeat domains 1 | Shank1 | 78957  | 1,05 | up   |
| 6297666 | 7031280 | 963461 | SH3 and multiple ankyrin repeat domains 1 | Shank1 | 78957  | 1,05 | up   |
| 5906571 | 7031280 | 963480 | SH3 and multiple ankyrin repeat domains 1 | Shank1 | 78957  | 1,03 | up   |
| 6437065 | 7031280 | 963472 | SH3 and multiple ankyrin repeat domains 1 | Shank1 | 78957  | 1,03 | down |
| 6059275 | 7031280 | 963464 | SH3 and multiple ankyrin repeat domains 1 | Shank1 | 78957  | 1,02 | up   |
| 6196809 | 7031280 | 963480 | SH3 and multiple ankyrin repeat domains 1 | Shank1 | 78957  | 1,02 | up   |
| 6516442 | 7031280 | 963481 | SH3 and multiple ankyrin repeat domains 1 | Shank1 | 78957  | 1,02 | up   |
| 5983866 | 7031280 | 963480 | SH3 and multiple ankyrin repeat domains 1 | Shank1 | 78957  | 1,02 | up   |
| 5629919 | 7031280 | 963474 | SH3 and multiple ankyrin repeat domains 1 | Shank1 | 78957  | 1,01 | down |
| 6306858 | 7031280 | 963471 | SH3 and multiple ankyrin repeat domains 1 | Shank1 | 78957  | 1,01 | down |
| 5681641 | 7031280 | 963475 | SH3 and multiple ankyrin repeat domains 1 | Shank1 | 78957  | 1,01 | down |
| 6332088 | 7031280 | 963468 | SH3 and multiple ankyrin repeat domains 1 | Shank1 | 78957  | 1,01 | down |
| 5624639 | 7031280 | 963477 | SH3 and multiple ankyrin repeat domains 1 | Shank1 | 78957  | 1,01 | up   |
| 6261933 | 7038746 | 982525 | SH3 and multiple ankyrin repeat domains 2 | Shank2 | 171093 | 2,75 | up   |
| 6251076 | 7038746 | 982524 | SH3 and multiple ankyrin repeat domains 2 | Shank2 | 171093 | 2,47 | up   |
| 6520443 | 7038746 | 982528 | SH3 and multiple ankyrin repeat domains 2 | Shank2 | 171093 | 2,36 | down |
| 5966618 | 7038746 | 982523 | SH3 and multiple ankyrin repeat domains 2 | Shank2 | 171093 | 2,35 | down |
| 6573299 | 7038746 | 982522 | SH3 and multiple ankyrin repeat domains 2 | Shank2 | 171093 | 2,34 | up   |
| 6198374 | 7038746 | 982528 | SH3 and multiple ankyrin repeat domains 2 | Shank2 | 171093 | 2,23 | down |
| 5865065 | 7038746 | 982518 | SH3 and multiple ankyrin repeat domains 2 | Shank2 | 171093 | 2,21 | up   |
| 6134246 | 7038746 | 982517 | SH3 and multiple ankyrin repeat domains 2 | Shank2 | 171093 | 2,05 | up   |
| 6474327 | 7038746 | 982523 | SH3 and multiple ankyrin repeat domains 2 | Shank2 | 171093 | 1,97 | down |
| 6237814 | 7038746 | 982535 | SH3 and multiple ankyrin repeat domains 2 | Shank2 | 171093 | 1,82 | down |
| 6004920 | 7038746 | 982526 | SH3 and multiple ankyrin repeat domains 2 | Shank2 | 171093 | 1,82 | down |
| 6648994 | 7038746 | 982515 | SH3 and multiple ankyrin repeat domains 2 | Shank2 | 171093 | 1,75 | up   |
| 6361923 | 7038746 | 982524 | SH3 and multiple ankyrin repeat domains 2 | Shank2 | 171093 | 1,74 | down |
| 6550457 | 7038746 | 982529 | SH3 and multiple ankyrin repeat domains 2 | Shank2 | 171093 | 1,68 | down |
| 6054667 | 7038746 | 982532 | SH3 and multiple ankyrin repeat domains 2 | Shank2 | 171093 | 1,63 | down |
| 5753746 | 7038746 | 982536 | SH3 and multiple ankyrin repeat domains 2 | Shank2 | 171093 | 1,45 | down |
| 5644332 | 7038746 | 982533 | SH3 and multiple ankyrin repeat domains 2 | Shank2 | 171093 | 1,42 | up   |
| 6229716 | 7038746 | 982520 | SH3 and multiple ankyrin repeat domains 2 | Shank2 | 171093 | 1,39 | up   |
| 6257886 | 7038746 | 982516 | SH3 and multiple ankyrin repeat domains 2 | Shank2 | 171093 | 1,28 | up   |
| 6433242 | 7038746 | 982521 | SH3 and multiple ankyrin repeat domains 2 | Shank2 | 171093 | 1,28 | up   |
| 5976638 | 7038746 | 982533 | SH3 and multiple ankyrin repeat domains 2 | Shank2 | 171093 | 1,27 | up   |
| 6420823 | 7038746 | 982530 | SH3 and multiple ankyrin repeat domains 2 | Shank2 | 171093 | 1,25 | down |
| 6130839 | 7038746 | 982531 | SH3 and multiple ankyrin repeat domains 2 | Shank2 | 171093 | 1,19 | down |
| 5760013 | 7038746 | 982528 | SH3 and multiple ankyrin repeat domains 2 | Shank2 | 171093 | 1,17 | down |
| 6512547 | 7038746 | 982527 | SH3 and multiple ankyrin repeat domains 2 | Shank2 | 171093 | 1,15 | up   |
| 5731858 | 7038746 | 982521 | SH3 and multiple ankyrin repeat domains 2 | Shank2 | 171093 | 1,15 | up   |
| 6385546 | 7038746 | 982534 | SH3 and multiple ankyrin repeat domains 2 | Shank2 | 171093 | 1,13 | up   |

|         |         |         |                                            |        |        |      |      |
|---------|---------|---------|--------------------------------------------|--------|--------|------|------|
| 6358693 | 7038746 | 982524  | SH3 and multiple ankyrin repeat domains 2  | Shank2 | 171093 | 1,13 | down |
| 5943273 | 7038746 | 982519  | SH3 and multiple ankyrin repeat domains 2  | Shank2 | 171093 | 1,09 | up   |
| 6227162 | 7319807 | 1671982 | SH3 and multiple ankyrin repeat domains 3  | Shank3 | 59312  | 3,00 | down |
| 5907632 | 7319807 | 1671968 | SH3 and multiple ankyrin repeat domains 3  | Shank3 | 59312  | 1,97 | up   |
| 5708429 | 7319807 | 1671972 | SH3 and multiple ankyrin repeat domains 3  | Shank3 | 59312  | 1,91 | up   |
| 6303761 | 7319807 | 1671990 | SH3 and multiple ankyrin repeat domains 3  | Shank3 | 59312  | 1,89 | down |
| 6583400 | 7319807 | 1671986 | SH3 and multiple ankyrin repeat domains 3  | Shank3 | 59312  | 1,86 | down |
| 6271481 | 7319807 | 1671981 | SH3 and multiple ankyrin repeat domains 3  | Shank3 | 59312  | 1,58 | down |
| 5976703 | 7319807 | 1671967 | SH3 and multiple ankyrin repeat domains 3  | Shank3 | 59312  | 1,45 | up   |
| 5692471 | 7319807 | 1671987 | SH3 and multiple ankyrin repeat domains 3  | Shank3 | 59312  | 1,38 | down |
| 5816673 | 7319807 | 1671984 | SH3 and multiple ankyrin repeat domains 3  | Shank3 | 59312  | 1,38 | down |
| 6680023 | 7319807 | 1671976 | SH3 and multiple ankyrin repeat domains 3  | Shank3 | 59312  | 1,34 | down |
| 6326952 | 7319807 | 1671966 | SH3 and multiple ankyrin repeat domains 3  | Shank3 | 59312  | 1,34 | down |
| 5977518 | 7319807 | 1671975 | SH3 and multiple ankyrin repeat domains 3  | Shank3 | 59312  | 1,31 | down |
| 6118011 | 7319807 | 1671971 | SH3 and multiple ankyrin repeat domains 3  | Shank3 | 59312  | 1,24 | up   |
| 5900862 | 7319807 | 1671990 | SH3 and multiple ankyrin repeat domains 3  | Shank3 | 59312  | 1,23 | up   |
| 6458077 | 7319807 | 1671989 | SH3 and multiple ankyrin repeat domains 3  | Shank3 | 59312  | 1,22 | up   |
| 6289695 | 7319807 | 1671985 | SH3 and multiple ankyrin repeat domains 3  | Shank3 | 59312  | 1,20 | up   |
| 6737415 | 7319807 | 1671974 | SH3 and multiple ankyrin repeat domains 3  | Shank3 | 59312  | 1,20 | up   |
| 6401271 | 7319807 | 1671989 | SH3 and multiple ankyrin repeat domains 3  | Shank3 | 59312  | 1,20 | down |
| 6303967 | 7319807 | 1671986 | SH3 and multiple ankyrin repeat domains 3  | Shank3 | 59312  | 1,18 | down |
| 6363847 | 7319807 | 1671970 | SH3 and multiple ankyrin repeat domains 3  | Shank3 | 59312  | 1,18 | down |
| 6193146 | 7319807 | 1671977 | SH3 and multiple ankyrin repeat domains 3  | Shank3 | 59312  | 1,16 | up   |
| 6723749 | 7319807 | 1671979 | SH3 and multiple ankyrin repeat domains 3  | Shank3 | 59312  | 1,16 | up   |
| 6158632 | 7319807 | 1671966 | SH3 and multiple ankyrin repeat domains 3  | Shank3 | 59312  | 1,15 | up   |
| 6403791 | 7319807 | 1671975 | SH3 and multiple ankyrin repeat domains 3  | Shank3 | 59312  | 1,15 | up   |
| 6226831 | 7319807 | 1671985 | SH3 and multiple ankyrin repeat domains 3  | Shank3 | 59312  | 1,15 | up   |
| 6738153 | 7319807 | 1671969 | SH3 and multiple ankyrin repeat domains 3  | Shank3 | 59312  | 1,15 | down |
| 6691204 | 7319807 | 1671976 | SH3 and multiple ankyrin repeat domains 3  | Shank3 | 59312  | 1,14 | up   |
| 6025117 | 7319807 | 1671973 | SH3 and multiple ankyrin repeat domains 3  | Shank3 | 59312  | 1,14 | down |
| 6743150 | 7319807 | 1671980 | SH3 and multiple ankyrin repeat domains 3  | Shank3 | 59312  | 1,13 | up   |
| 6436944 | 7319807 | 1671978 | SH3 and multiple ankyrin repeat domains 3  | Shank3 | 59312  | 1,12 | down |
| 6530907 | 7319807 | 1671988 | SH3 and multiple ankyrin repeat domains 3  | Shank3 | 59312  | 1,07 | up   |
| 6514351 | 7319807 | 1671991 | SH3 and multiple ankyrin repeat domains 3  | Shank3 | 59312  | 1,05 | down |
| 6220969 | 7319807 | 1671990 | SH3 and multiple ankyrin repeat domains 3  | Shank3 | 59312  | 1,05 | up   |
| 6719968 | 7319807 | 1671983 | SH3 and multiple ankyrin repeat domains 3  | Shank3 | 59312  | 1,04 | down |
| 5955507 | 7319807 | 1671990 | SH3 and multiple ankyrin repeat domains 3  | Shank3 | 59312  | 1,02 | up   |
| 6734333 | 7171091 | 1302466 | SH3 domain and tetratricopeptide repeats 2 | Sh3tc2 | 307393 | 1,11 | up   |
| 6388507 | 7171091 | 1302463 | SH3 domain and tetratricopeptide repeats 2 | Sh3tc2 | 307393 | 1,10 | up   |
| 6636103 | 7171091 | 1302465 | SH3 domain and tetratricopeptide repeats 2 | Sh3tc2 | 307393 | 1,10 | down |
| 5766068 | 7171091 | 1302466 | SH3 domain and tetratricopeptide repeats 2 | Sh3tc2 | 307393 | 1,03 | up   |
| 6120304 | 7150616 | 1252118 | SH3 domain containing ring finger 1        | Sh3rf1 | 306417 | 2,14 | up   |
| 6038043 | 7150616 | 1252115 | SH3 domain containing ring finger 1        | Sh3rf1 | 306417 | 1,91 | down |
| 5631800 | 7150616 | 1252109 | SH3 domain containing ring finger 1        | Sh3rf1 | 306417 | 1,55 | down |
| 6211568 | 7150616 | 1252112 | SH3 domain containing ring finger 1        | Sh3rf1 | 306417 | 1,47 | down |
| 5748189 | 7150616 | 1252117 | SH3 domain containing ring finger 1        | Sh3rf1 | 306417 | 1,39 | up   |
| 6712518 | 7150616 | 1252113 | SH3 domain containing ring finger 1        | Sh3rf1 | 306417 | 1,37 | up   |
| 6533342 | 7150616 | 1252116 | SH3 domain containing ring finger 1        | Sh3rf1 | 306417 | 1,32 | up   |
| 6228844 | 7150616 | 1252114 | SH3 domain containing ring finger 1        | Sh3rf1 | 306417 | 1,25 | up   |
| 6471876 | 7150616 | 1252112 | SH3 domain containing ring finger 1        | Sh3rf1 | 306417 | 1,24 | up   |
| 6687761 | 7150616 | 1252111 | SH3 domain containing ring finger 1        | Sh3rf1 | 306417 | 1,18 | down |
| 6695554 | 7150616 | 1252119 | SH3 domain containing ring finger 1        | Sh3rf1 | 306417 | 1,15 | up   |
| 6272649 | 7150616 | 1252114 | SH3 domain containing ring finger 1        | Sh3rf1 | 306417 | 1,08 | up   |
| 6735031 | 7150616 | 1252109 | SH3 domain containing ring finger 1        | Sh3rf1 | 306417 | 1,06 | down |
| 5724594 | 7150616 | 1252110 | SH3 domain containing ring finger 1        | Sh3rf1 | 306417 | 1,04 | down |
| 6705410 | 7150616 | 1252112 | SH3 domain containing ring finger 1        | Sh3rf1 | 306417 | 1,01 | down |
| 6675738 | 7318651 | 1669080 | SH3-domain binding protein 1               | Sh3bp1 | 300067 | 1,74 | down |

|         |         |         |                                                               |         |        |      |      |
|---------|---------|---------|---------------------------------------------------------------|---------|--------|------|------|
| 5916750 | 7318651 | 1669083 | SH3-domain binding protein 1                                  | Sh3bp1  | 300067 | 1,67 | up   |
| 6063984 | 7318651 | 1669090 | SH3-domain binding protein 1                                  | Sh3bp1  | 300067 | 1,63 | up   |
| 5923780 | 7318651 | 1669087 | SH3-domain binding protein 1                                  | Sh3bp1  | 300067 | 1,62 | down |
| 6458186 | 7318651 | 1669078 | SH3-domain binding protein 1                                  | Sh3bp1  | 300067 | 1,62 | down |
| 6209375 | 7318651 | 1669073 | SH3-domain binding protein 1                                  | Sh3bp1  | 300067 | 1,49 | up   |
| 6132722 | 7318651 | 1669072 | SH3-domain binding protein 1                                  | Sh3bp1  | 300067 | 1,46 | up   |
| 5966807 | 7318651 | 1669081 | SH3-domain binding protein 1                                  | Sh3bp1  | 300067 | 1,42 | down |
| 6667009 | 7318651 | 1669079 | SH3-domain binding protein 1                                  | Sh3bp1  | 300067 | 1,33 | down |
| 6572569 | 7318651 | 1669074 | SH3-domain binding protein 1                                  | Sh3bp1  | 300067 | 1,29 | down |
| 6687678 | 7318651 | 1669076 | SH3-domain binding protein 1                                  | Sh3bp1  | 300067 | 1,16 | up   |
| 6319090 | 7318651 | 1669084 | SH3-domain binding protein 1                                  | Sh3bp1  | 300067 | 1,16 | up   |
| 6479985 | 7318651 | 1669076 | SH3-domain binding protein 1                                  | Sh3bp1  | 300067 | 1,15 | down |
| 6373145 | 7318651 | 1669075 | SH3-domain binding protein 1                                  | Sh3bp1  | 300067 | 1,14 | down |
| 6103905 | 7318651 | 1669086 | SH3-domain binding protein 1                                  | Sh3bp1  | 300067 | 1,13 | down |
| 6284126 | 7318651 | 1669085 | SH3-domain binding protein 1                                  | Sh3bp1  | 300067 | 1,01 | up   |
| 6033982 | 7318651 | 1669089 | SH3-domain binding protein 1                                  | Sh3bp1  | 300067 | 1,01 | down |
| 6738476 | 7318651 | 1669077 | SH3-domain binding protein 1                                  | Sh3bp1  | 300067 | 1,01 | up   |
| 6675180 | 7318651 | 1669082 | SH3-domain binding protein 1                                  | Sh3bp1  | 300067 | 1,00 | down |
| 6154842 | 7127257 | 1194797 | SH3-domain binding protein 2                                  | Sh3bp2  | 305450 | 1,71 | down |
| 6564505 | 7127257 | 1194821 | SH3-domain binding protein 2                                  | Sh3bp2  | 305450 | 1,56 | down |
| 6218710 | 7127257 | 1194798 | SH3-domain binding protein 2                                  | Sh3bp2  | 305450 | 1,52 | up   |
| 5892082 | 7127257 | 1194799 | SH3-domain binding protein 2                                  | Sh3bp2  | 305450 | 1,26 | up   |
| 6745659 | 7148818 | 1248071 | SH3-domain binding protein 5 (BTK-associated)                 | Sh3bp5  | 117186 | 2,41 | down |
| 6728098 | 7148818 | 1248065 | SH3-domain binding protein 5 (BTK-associated)                 | Sh3bp5  | 117186 | 1,72 | down |
| 6086586 | 7148818 | 1248070 | SH3-domain binding protein 5 (BTK-associated)                 | Sh3bp5  | 117186 | 1,68 | up   |
| 6669788 | 7148818 | 1248066 | SH3-domain binding protein 5 (BTK-associated)                 | Sh3bp5  | 117186 | 1,57 | down |
| 6555721 | 7148818 | 1248069 | SH3-domain binding protein 5 (BTK-associated)                 | Sh3bp5  | 117186 | 1,49 | up   |
| 5637890 | 7148818 | 1248075 | SH3-domain binding protein 5 (BTK-associated)                 | Sh3bp5  | 117186 | 1,44 | up   |
| 5743984 | 7148818 | 1248073 | SH3-domain binding protein 5 (BTK-associated)                 | Sh3bp5  | 117186 | 1,31 | down |
| 5817645 | 7148818 | 1248072 | SH3-domain binding protein 5 (BTK-associated)                 | Sh3bp5  | 117186 | 1,28 | down |
| 6410515 | 7148818 | 1248068 | SH3-domain binding protein 5 (BTK-associated)                 | Sh3bp5  | 117186 | 1,28 | down |
| 6285115 | 7148818 | 1248075 | SH3-domain binding protein 5 (BTK-associated)                 | Sh3bp5  | 117186 | 1,28 | up   |
| 5628638 | 7148818 | 1248067 | SH3-domain binding protein 5 (BTK-associated)                 | Sh3bp5  | 117186 | 1,18 | down |
| 6120040 | 7148818 | 1248074 | SH3-domain binding protein 5 (BTK-associated)                 | Sh3bp5  | 117186 | 1,04 | down |
| 5633353 | 7277783 | 1567420 | SH3-domain GRB2-like (endophilin) interacting protein 1       | Sgip1   | 313413 | 2,38 | down |
| 6711035 | 7215239 | 1410966 | SH3-domain GRB2-like endophilin B1                            | Sh3glb1 | 292156 | 3,59 | down |
| 6453791 | 7215239 | 1410966 | SH3-domain GRB2-like endophilin B1                            | Sh3glb1 | 292156 | 2,10 | down |
| 6350009 | 7215239 | 1410965 | SH3-domain GRB2-like endophilin B1                            | Sh3glb1 | 292156 | 1,40 | up   |
| 6076742 | 7215239 | 1410959 | SH3-domain GRB2-like endophilin B1                            | Sh3glb1 | 292156 | 1,27 | down |
| 6371011 | 7215239 | 1410960 | SH3-domain GRB2-like endophilin B1                            | Sh3glb1 | 292156 | 1,18 | down |
| 6501061 | 7215239 | 1410964 | SH3-domain GRB2-like endophilin B1                            | Sh3glb1 | 292156 | 1,17 | up   |
| 5989567 | 7215239 | 1410958 | SH3-domain GRB2-like endophilin B1                            | Sh3glb1 | 292156 | 1,13 | up   |
| 6258179 | 7215239 | 1410956 | SH3-domain GRB2-like endophilin B1                            | Sh3glb1 | 292156 | 1,12 | up   |
| 5719791 | 7215239 | 1410958 | SH3-domain GRB2-like endophilin B1                            | Sh3glb1 | 292156 | 1,10 | up   |
| 6578774 | 7215239 | 1410963 | SH3-domain GRB2-like endophilin B1                            | Sh3glb1 | 292156 | 1,08 | up   |
| 6689110 | 7215239 | 1410961 | SH3-domain GRB2-like endophilin B1                            | Sh3glb1 | 292156 | 1,07 | down |
| 6541885 | 7215239 | 1410957 | SH3-domain GRB2-like endophilin B1                            | Sh3glb1 | 292156 | 1,05 | down |
| 5852861 | 7215239 | 1410957 | SH3-domain GRB2-like endophilin B1                            | Sh3glb1 | 292156 | 1,02 | down |
| 6084236 | 7215239 | 1410962 | SH3-domain GRB2-like endophilin B1                            | Sh3glb1 | 292156 | 1,00 | up   |
| 6547323 | 7244288 | 1484135 | SHC (Src homology 2 domain containing) family, member 4       | Shc4    | 679845 | 2,06 | down |
| 5712938 | 7244288 | 1484135 | SHC (Src homology 2 domain containing) family, member 4       | Shc4    | 679845 | 1,24 | down |
| 5980003 | 7312627 | 1653482 | SHC (Src homology 2 domain containing) transforming protein 2 | Shc2    | 314612 | 1,80 | up   |
| 5630404 | 7312627 | 1653487 | SHC (Src homology 2 domain containing) transforming protein 2 | Shc2    | 314612 | 1,36 | up   |
| 6602457 | 7312627 | 1653476 | SHC (Src homology 2 domain containing) transforming protein 2 | Shc2    | 314612 | 1,34 | down |
| 5800344 | 7312627 | 1653491 | SHC (Src homology 2 domain containing) transforming protein 2 | Shc2    | 314612 | 1,27 | up   |
| 5872599 | 7312627 | 1653481 | SHC (Src homology 2 domain containing) transforming protein 2 | Shc2    | 314612 | 1,24 | up   |
| 5781665 | 7312627 | 1653472 | SHC (Src homology 2 domain containing) transforming protein 2 | Shc2    | 314612 | 1,24 | down |



|         |         |         |                                                               |       |        |      |      |
|---------|---------|---------|---------------------------------------------------------------|-------|--------|------|------|
| 6188203 | 7312627 | 1653484 | SHC (Src homology 2 domain containing) transforming protein 2 | Shc2  | 314612 | 1,20 | up   |
| 6361030 | 7312627 | 1653483 | SHC (Src homology 2 domain containing) transforming protein 2 | Shc2  | 314612 | 1,16 | down |
| 6140747 | 7312627 | 1653487 | SHC (Src homology 2 domain containing) transforming protein 2 | Shc2  | 314612 | 1,15 | down |
| 6147674 | 7312627 | 1653479 | SHC (Src homology 2 domain containing) transforming protein 2 | Shc2  | 314612 | 1,11 | up   |
| 6671458 | 7312627 | 1653477 | SHC (Src homology 2 domain containing) transforming protein 2 | Shc2  | 314612 | 1,10 | up   |
| 6714209 | 7312627 | 1653480 | SHC (Src homology 2 domain containing) transforming protein 2 | Shc2  | 314612 | 1,07 | down |
| 6615200 | 7312627 | 1653478 | SHC (Src homology 2 domain containing) transforming protein 2 | Shc2  | 314612 | 1,06 | down |
| 6125565 | 7312627 | 1653492 | SHC (Src homology 2 domain containing) transforming protein 2 | Shc2  | 314612 | 1,03 | down |
| 6207432 | 7312627 | 1653472 | SHC (Src homology 2 domain containing) transforming protein 2 | Shc2  | 314612 | 1,01 | up   |
| 5846223 | 7312627 | 1653472 | SHC (Src homology 2 domain containing) transforming protein 2 | Shc2  | 314612 | 1,00 | down |
| 5795918 | 7155882 | 1265361 | SHC (Src homology 2 domain containing) transforming protein 3 | Shc3  | 114858 | 2,70 | up   |
| 6365710 | 7155882 | 1265361 | SHC (Src homology 2 domain containing) transforming protein 3 | Shc3  | 114858 | 2,49 | up   |
| 6732561 | 7155882 | 1265380 | SHC (Src homology 2 domain containing) transforming protein 3 | Shc3  | 114858 | 1,44 | down |
| 6578493 | 7155882 | 1265371 | SHC (Src homology 2 domain containing) transforming protein 3 | Shc3  | 114858 | 1,32 | up   |
| 6687642 | 7155882 | 1265361 | SHC (Src homology 2 domain containing) transforming protein 3 | Shc3  | 114858 | 1,23 | down |
| 5948920 | 7155882 | 1265378 | SHC (Src homology 2 domain containing) transforming protein 3 | Shc3  | 114858 | 1,21 | down |
| 6697177 | 7155882 | 1265373 | SHC (Src homology 2 domain containing) transforming protein 3 | Shc3  | 114858 | 1,21 | down |
| 5890880 | 7155882 | 1265382 | SHC (Src homology 2 domain containing) transforming protein 3 | Shc3  | 114858 | 1,20 | down |
| 6363190 | 7155882 | 1265374 | SHC (Src homology 2 domain containing) transforming protein 3 | Shc3  | 114858 | 1,19 | down |
| 6518920 | 7155882 | 1265382 | SHC (Src homology 2 domain containing) transforming protein 3 | Shc3  | 114858 | 1,16 | down |
| 6742135 | 7155882 | 1265368 | SHC (Src homology 2 domain containing) transforming protein 3 | Shc3  | 114858 | 1,15 | down |
| 6629014 | 7155882 | 1265375 | SHC (Src homology 2 domain containing) transforming protein 3 | Shc3  | 114858 | 1,14 | down |
| 6544456 | 7155882 | 1265361 | SHC (Src homology 2 domain containing) transforming protein 3 | Shc3  | 114858 | 1,13 | down |
| 5872695 | 7155882 | 1265379 | SHC (Src homology 2 domain containing) transforming protein 3 | Shc3  | 114858 | 1,04 | up   |
| 5650238 | 7155882 | 1265383 | SHC (Src homology 2 domain containing) transforming protein 3 | Shc3  | 114858 | 1,03 | down |
| 6582121 | 7155882 | 1265372 | SHC (Src homology 2 domain containing) transforming protein 3 | Shc3  | 114858 | 1,02 | down |
| 6401000 | 7155882 | 1265377 | SHC (Src homology 2 domain containing) transforming protein 3 | Shc3  | 114858 | 1,02 | up   |
| 6447491 | 7334855 | 1706951 | sialic acid acetyltransferase                                 | Siae  | 363045 | 2,12 | up   |
| 5683736 | 7334855 | 1706955 | sialic acid acetyltransferase                                 | Siae  | 363045 | 1,81 | down |
| 6147572 | 7334855 | 1706954 | sialic acid acetyltransferase                                 | Siae  | 363045 | 1,79 | down |
| 6379435 | 7334855 | 1706949 | sialic acid acetyltransferase                                 | Siae  | 363045 | 1,78 | down |
| 6448055 | 7334855 | 1706956 | sialic acid acetyltransferase                                 | Siae  | 363045 | 1,58 | up   |
| 6138940 | 7334855 | 1706951 | sialic acid acetyltransferase                                 | Siae  | 363045 | 1,46 | down |
| 6432495 | 7334855 | 1706948 | sialic acid acetyltransferase                                 | Siae  | 363045 | 1,40 | down |
| 6372482 | 7334855 | 1706957 | sialic acid acetyltransferase                                 | Siae  | 363045 | 1,22 | up   |
| 5661089 | 7334855 | 1706949 | sialic acid acetyltransferase                                 | Siae  | 363045 | 1,20 | down |
| 6534199 | 7334855 | 1706943 | sialic acid acetyltransferase                                 | Siae  | 363045 | 1,20 | up   |
| 6583292 | 7334855 | 1706956 | sialic acid acetyltransferase                                 | Siae  | 363045 | 1,12 | up   |
| 6660962 | 7334855 | 1706950 | sialic acid acetyltransferase                                 | Siae  | 363045 | 1,07 | down |
| 5944795 | 7334855 | 1706944 | sialic acid acetyltransferase                                 | Siae  | 363045 | 1,05 | up   |
| 5671082 | 7334855 | 1706945 | sialic acid acetyltransferase                                 | Siae  | 363045 | 1,03 | down |
| 6575206 | 7088135 | 1098395 | SID1 transmembrane family, member 1                           | Sidt1 | 288109 | 2,53 | up   |
| 6709709 | 7088135 | 1098401 | SID1 transmembrane family, member 1                           | Sidt1 | 288109 | 2,05 | up   |
| 5825925 | 7088135 | 1098419 | SID1 transmembrane family, member 1                           | Sidt1 | 288109 | 1,86 | down |
| 5779151 | 7088135 | 1098409 | SID1 transmembrane family, member 1                           | Sidt1 | 288109 | 1,66 | up   |
| 6443855 | 7088135 | 1098392 | SID1 transmembrane family, member 1                           | Sidt1 | 288109 | 1,51 | up   |
| 5811696 | 7088135 | 1098416 | SID1 transmembrane family, member 1                           | Sidt1 | 288109 | 1,51 | up   |
| 5948615 | 7088135 | 1098408 | SID1 transmembrane family, member 1                           | Sidt1 | 288109 | 1,50 | down |
| 5691069 | 7088135 | 1098406 | SID1 transmembrane family, member 1                           | Sidt1 | 288109 | 1,37 | up   |
| 5916520 | 7088135 | 1098384 | SID1 transmembrane family, member 1                           | Sidt1 | 288109 | 1,34 | down |
| 6427850 | 7088135 | 1098399 | SID1 transmembrane family, member 1                           | Sidt1 | 288109 | 1,32 | down |
| 6445376 | 7088135 | 1098414 | SID1 transmembrane family, member 1                           | Sidt1 | 288109 | 1,28 | up   |
| 6046245 | 7088135 | 1098396 | SID1 transmembrane family, member 1                           | Sidt1 | 288109 | 1,28 | up   |
| 6220259 | 7088135 | 1098411 | SID1 transmembrane family, member 1                           | Sidt1 | 288109 | 1,21 | up   |
| 6741178 | 7088135 | 1098405 | SID1 transmembrane family, member 1                           | Sidt1 | 288109 | 1,20 | up   |
| 6044978 | 7088135 | 1098391 | SID1 transmembrane family, member 1                           | Sidt1 | 288109 | 1,18 | down |
| 6227817 | 7088135 | 1098417 | SID1 transmembrane family, member 1                           | Sidt1 | 288109 | 1,17 | down |

|         |         |         |                                     |       |        |      |      |
|---------|---------|---------|-------------------------------------|-------|--------|------|------|
| 6412756 | 7088135 | 1098404 | SID1 transmembrane family, member 1 | Sidt1 | 288109 | 1,12 | up   |
| 5735427 | 7088135 | 1098415 | SID1 transmembrane family, member 1 | Sidt1 | 288109 | 1,12 | up   |
| 6575211 | 7088135 | 1098398 | SID1 transmembrane family, member 1 | Sidt1 | 288109 | 1,08 | up   |
| 6125115 | 7088135 | 1098410 | SID1 transmembrane family, member 1 | Sidt1 | 288109 | 1,08 | down |
| 5685926 | 7088135 | 1098394 | SID1 transmembrane family, member 1 | Sidt1 | 288109 | 1,08 | up   |
| 6147959 | 7088135 | 1098413 | SID1 transmembrane family, member 1 | Sidt1 | 288109 | 1,05 | down |
| 5717720 | 7088135 | 1098397 | SID1 transmembrane family, member 1 | Sidt1 | 288109 | 1,04 | down |
| 6397598 | 7088135 | 1098407 | SID1 transmembrane family, member 1 | Sidt1 | 288109 | 1,04 | down |
| 5894330 | 7084193 | 1089113 | sidekick homolog 2 (chicken)        | Sdk2  | 360652 | 2,16 | down |
| 6292806 | 7084193 | 1089064 | sidekick homolog 2 (chicken)        | Sdk2  | 360652 | 2,02 | down |
| 6535760 | 7084193 | 1089090 | sidekick homolog 2 (chicken)        | Sdk2  | 360652 | 1,99 | down |
| 6429762 | 7084193 | 1089117 | sidekick homolog 2 (chicken)        | Sdk2  | 360652 | 1,84 | down |
| 6240056 | 7084193 | 1089097 | sidekick homolog 2 (chicken)        | Sdk2  | 360652 | 1,82 | up   |
| 5625151 | 7084193 | 1089055 | sidekick homolog 2 (chicken)        | Sdk2  | 360652 | 1,73 | down |
| 5980142 | 7084193 | 1089085 | sidekick homolog 2 (chicken)        | Sdk2  | 360652 | 1,71 | down |
| 5787745 | 7084193 | 1089078 | sidekick homolog 2 (chicken)        | Sdk2  | 360652 | 1,68 | down |
| 6111846 | 7084193 | 1089091 | sidekick homolog 2 (chicken)        | Sdk2  | 360652 | 1,65 | down |
| 6617478 | 7084193 | 1089049 | sidekick homolog 2 (chicken)        | Sdk2  | 360652 | 1,61 | up   |
| 6743549 | 7084193 | 1089084 | sidekick homolog 2 (chicken)        | Sdk2  | 360652 | 1,59 | down |
| 5657980 | 7084193 | 1089056 | sidekick homolog 2 (chicken)        | Sdk2  | 360652 | 1,58 | up   |
| 5784001 | 7084193 | 1089155 | sidekick homolog 2 (chicken)        | Sdk2  | 360652 | 1,52 | down |
| 5871972 | 7084193 | 1089049 | sidekick homolog 2 (chicken)        | Sdk2  | 360652 | 1,47 | down |
| 6164420 | 7084193 | 1089074 | sidekick homolog 2 (chicken)        | Sdk2  | 360652 | 1,47 | down |
| 6194957 | 7084193 | 1089069 | sidekick homolog 2 (chicken)        | Sdk2  | 360652 | 1,42 | down |
| 5661719 | 7084193 | 1089068 | sidekick homolog 2 (chicken)        | Sdk2  | 360652 | 1,41 | down |
| 5833279 | 7084193 | 1089154 | sidekick homolog 2 (chicken)        | Sdk2  | 360652 | 1,41 | down |
| 6536011 | 7084193 | 1089102 | sidekick homolog 2 (chicken)        | Sdk2  | 360652 | 1,41 | down |
| 5738867 | 7084193 | 1089061 | sidekick homolog 2 (chicken)        | Sdk2  | 360652 | 1,38 | up   |
| 6153348 | 7084193 | 1089089 | sidekick homolog 2 (chicken)        | Sdk2  | 360652 | 1,36 | up   |
| 6044701 | 7084193 | 1089074 | sidekick homolog 2 (chicken)        | Sdk2  | 360652 | 1,33 | up   |
| 6329613 | 7084193 | 1089080 | sidekick homolog 2 (chicken)        | Sdk2  | 360652 | 1,30 | up   |
| 6741188 | 7084193 | 1089098 | sidekick homolog 2 (chicken)        | Sdk2  | 360652 | 1,29 | up   |
| 5917109 | 7084193 | 1089103 | sidekick homolog 2 (chicken)        | Sdk2  | 360652 | 1,28 | up   |
| 6229428 | 7084193 | 1089055 | sidekick homolog 2 (chicken)        | Sdk2  | 360652 | 1,25 | down |
| 6116310 | 7084193 | 1089065 | sidekick homolog 2 (chicken)        | Sdk2  | 360652 | 1,24 | up   |
| 6500099 | 7084193 | 1089075 | sidekick homolog 2 (chicken)        | Sdk2  | 360652 | 1,24 | up   |
| 5827723 | 7084193 | 1089087 | sidekick homolog 2 (chicken)        | Sdk2  | 360652 | 1,24 | down |
| 6474889 | 7084193 | 1089073 | sidekick homolog 2 (chicken)        | Sdk2  | 360652 | 1,24 | down |
| 6427045 | 7084193 | 1089072 | sidekick homolog 2 (chicken)        | Sdk2  | 360652 | 1,23 | up   |
| 5895234 | 7084193 | 1089100 | sidekick homolog 2 (chicken)        | Sdk2  | 360652 | 1,22 | down |
| 5627490 | 7084193 | 1089054 | sidekick homolog 2 (chicken)        | Sdk2  | 360652 | 1,21 | up   |
| 6030525 | 7084193 | 1089092 | sidekick homolog 2 (chicken)        | Sdk2  | 360652 | 1,20 | up   |
| 6238698 | 7084193 | 1089082 | sidekick homolog 2 (chicken)        | Sdk2  | 360652 | 1,19 | down |
| 6664861 | 7084193 | 1089098 | sidekick homolog 2 (chicken)        | Sdk2  | 360652 | 1,18 | down |
| 6661862 | 7084193 | 1089071 | sidekick homolog 2 (chicken)        | Sdk2  | 360652 | 1,18 | down |
| 6486987 | 7084193 | 1089086 | sidekick homolog 2 (chicken)        | Sdk2  | 360652 | 1,17 | up   |
| 6322618 | 7084193 | 1089079 | sidekick homolog 2 (chicken)        | Sdk2  | 360652 | 1,15 | down |
| 5741430 | 7084193 | 1089104 | sidekick homolog 2 (chicken)        | Sdk2  | 360652 | 1,14 | up   |
| 6615980 | 7084193 | 1089108 | sidekick homolog 2 (chicken)        | Sdk2  | 360652 | 1,12 | up   |
| 6144137 | 7084193 | 1089083 | sidekick homolog 2 (chicken)        | Sdk2  | 360652 | 1,11 | up   |
| 5822362 | 7084193 | 1089101 | sidekick homolog 2 (chicken)        | Sdk2  | 360652 | 1,10 | up   |
| 6267685 | 7084193 | 1089093 | sidekick homolog 2 (chicken)        | Sdk2  | 360652 | 1,08 | down |
| 6541625 | 7084193 | 1089076 | sidekick homolog 2 (chicken)        | Sdk2  | 360652 | 1,07 | up   |
| 6569975 | 7084193 | 1089066 | sidekick homolog 2 (chicken)        | Sdk2  | 360652 | 1,05 | down |
| 6389832 | 7084193 | 1089094 | sidekick homolog 2 (chicken)        | Sdk2  | 360652 | 1,04 | up   |
| 6145942 | 7084193 | 1089126 | sidekick homolog 2 (chicken)        | Sdk2  | 360652 | 1,01 | down |
| 5947555 | 7042417 | 991349  | sideroflexin 3                      | Sfxn3 | 65042  | 2,10 | up   |

|         |         |         |                                                    |        |        |      |      |
|---------|---------|---------|----------------------------------------------------|--------|--------|------|------|
| 6164780 | 7042417 | 991353  | sideroflexin 3                                     | Sfxn3  | 65042  | 1,96 | down |
| 5691555 | 7042417 | 991343  | sideroflexin 3                                     | Sfxn3  | 65042  | 1,76 | down |
| 6522189 | 7042417 | 991353  | sideroflexin 3                                     | Sfxn3  | 65042  | 1,64 | down |
| 6372441 | 7042417 | 991346  | sideroflexin 3                                     | Sfxn3  | 65042  | 1,62 | up   |
| 6179987 | 7042417 | 991352  | sideroflexin 3                                     | Sfxn3  | 65042  | 1,43 | up   |
| 5908318 | 7042417 | 991348  | sideroflexin 3                                     | Sfxn3  | 65042  | 1,26 | up   |
| 5815067 | 7042417 | 991350  | sideroflexin 3                                     | Sfxn3  | 65042  | 1,15 | up   |
| 5733435 | 7042417 | 991351  | sideroflexin 3                                     | Sfxn3  | 65042  | 1,14 | down |
| 5863749 | 7042417 | 991342  | sideroflexin 3                                     | Sfxn3  | 65042  | 1,08 | down |
| 5959961 | 7042417 | 991344  | sideroflexin 3                                     | Sfxn3  | 65042  | 1,08 | down |
| 5894087 | 7042417 | 991353  | sideroflexin 3                                     | Sfxn3  | 65042  | 1,07 | down |
| 5691310 | 7042417 | 991345  | sideroflexin 3                                     | Sfxn3  | 65042  | 1,03 | down |
| 6201038 | 7042417 | 991347  | sideroflexin 3                                     | Sfxn3  | 65042  | 1,01 | up   |
| 6358601 | 7064372 | 1042165 | sideroflexin 4                                     | Sfxn4  | 361778 | 3,44 | down |
| 5643264 | 7064372 | 1042178 | sideroflexin 4                                     | Sfxn4  | 361778 | 1,97 | up   |
| 6584197 | 7064372 | 1042171 | sideroflexin 4                                     | Sfxn4  | 361778 | 1,53 | up   |
| 6290708 | 7064372 | 1042175 | sideroflexin 4                                     | Sfxn4  | 361778 | 1,33 | up   |
| 6522790 | 7064372 | 1042162 | sideroflexin 4                                     | Sfxn4  | 361778 | 1,32 | down |
| 6251630 | 7064372 | 1042164 | sideroflexin 4                                     | Sfxn4  | 361778 | 1,31 | up   |
| 6549749 | 7064372 | 1042174 | sideroflexin 4                                     | Sfxn4  | 361778 | 1,30 | up   |
| 6450589 | 7064372 | 1042162 | sideroflexin 4                                     | Sfxn4  | 361778 | 1,27 | up   |
| 6604538 | 7064372 | 1042163 | sideroflexin 4                                     | Sfxn4  | 361778 | 1,13 | down |
| 5894577 | 7064372 | 1042167 | sideroflexin 4                                     | Sfxn4  | 361778 | 1,09 | down |
| 6072186 | 7064372 | 1042169 | sideroflexin 4                                     | Sfxn4  | 361778 | 1,09 | up   |
| 5851405 | 7064372 | 1042170 | sideroflexin 4                                     | Sfxn4  | 361778 | 1,08 | up   |
| 6615062 | 7064372 | 1042162 | sideroflexin 4                                     | Sfxn4  | 361778 | 1,06 | down |
| 5637450 | 7064372 | 1042165 | sideroflexin 4                                     | Sfxn4  | 361778 | 1,06 | down |
| 6710567 | 7064372 | 1042173 | sideroflexin 4                                     | Sfxn4  | 361778 | 1,06 | up   |
| 5883140 | 7064372 | 1042172 | sideroflexin 4                                     | Sfxn4  | 361778 | 1,05 | down |
| 6455398 | 7064372 | 1042168 | sideroflexin 4                                     | Sfxn4  | 361778 | 1,04 | up   |
| 6398245 | 7064372 | 1042162 | sideroflexin 4                                     | Sfxn4  | 361778 | 1,00 | down |
| 6670655 | 7330223 | 1695851 | signal peptide, CUB domain, EGF-like 1             | Scube1 | 315174 | 2,23 | up   |
| 5624246 | 7330223 | 1695847 | signal peptide, CUB domain, EGF-like 1             | Scube1 | 315174 | 1,93 | down |
| 5985165 | 7330223 | 1695869 | signal peptide, CUB domain, EGF-like 1             | Scube1 | 315174 | 1,78 | up   |
| 5631350 | 7330223 | 1695844 | signal peptide, CUB domain, EGF-like 1             | Scube1 | 315174 | 1,42 | up   |
| 6168169 | 7330223 | 1695837 | signal peptide, CUB domain, EGF-like 1             | Scube1 | 315174 | 1,31 | down |
| 6329209 | 7330223 | 1695852 | signal peptide, CUB domain, EGF-like 1             | Scube1 | 315174 | 1,29 | up   |
| 5998838 | 7330223 | 1695854 | signal peptide, CUB domain, EGF-like 1             | Scube1 | 315174 | 1,25 | up   |
| 6536762 | 7330223 | 1695848 | signal peptide, CUB domain, EGF-like 1             | Scube1 | 315174 | 1,23 | down |
| 6514248 | 7330223 | 1695850 | signal peptide, CUB domain, EGF-like 1             | Scube1 | 315174 | 1,18 | up   |
| 5617871 | 7330223 | 1695836 | signal peptide, CUB domain, EGF-like 1             | Scube1 | 315174 | 1,17 | down |
| 5911764 | 7330223 | 1695886 | signal peptide, CUB domain, EGF-like 1             | Scube1 | 315174 | 1,15 | down |
| 6709655 | 7330223 | 1695842 | signal peptide, CUB domain, EGF-like 1             | Scube1 | 315174 | 1,13 | down |
| 6255102 | 7330223 | 1695833 | signal peptide, CUB domain, EGF-like 1             | Scube1 | 315174 | 1,13 | down |
| 5874776 | 7330223 | 1695869 | signal peptide, CUB domain, EGF-like 1             | Scube1 | 315174 | 1,13 | down |
| 5636916 | 7330223 | 1695895 | signal peptide, CUB domain, EGF-like 1             | Scube1 | 315174 | 1,11 | down |
| 6032384 | 7330223 | 1695835 | signal peptide, CUB domain, EGF-like 1             | Scube1 | 315174 | 1,10 | down |
| 6338484 | 7330223 | 1695843 | signal peptide, CUB domain, EGF-like 1             | Scube1 | 315174 | 1,08 | down |
| 6653196 | 7330223 | 1695835 | signal peptide, CUB domain, EGF-like 1             | Scube1 | 315174 | 1,07 | down |
| 6500389 | 7330223 | 1695875 | signal peptide, CUB domain, EGF-like 1             | Scube1 | 315174 | 1,07 | down |
| 6638311 | 7330223 | 1695845 | signal peptide, CUB domain, EGF-like 1             | Scube1 | 315174 | 1,05 | up   |
| 6466891 | 7330223 | 1695866 | signal peptide, CUB domain, EGF-like 1             | Scube1 | 315174 | 1,04 | up   |
| 6130691 | 7330223 | 1695897 | signal peptide, CUB domain, EGF-like 1             | Scube1 | 315174 | 1,03 | down |
| 6142880 | 7330223 | 1695834 | signal peptide, CUB domain, EGF-like 1             | Scube1 | 315174 | 1,03 | up   |
| 6375986 | 7330223 | 1695839 | signal peptide, CUB domain, EGF-like 1             | Scube1 | 315174 | 1,03 | up   |
| 5926950 | 7330223 | 1695863 | signal peptide, CUB domain, EGF-like 1             | Scube1 | 315174 | 1,00 | down |
| 6065734 | 7311784 | 1651668 | signal transducer and activator of transcription 2 | Stat2  | 288774 | 2,29 | down |

|         |         |         |                                                             |            |        |      |      |
|---------|---------|---------|-------------------------------------------------------------|------------|--------|------|------|
| 6371930 | 7311784 | 1651676 | signal transducer and activator of transcription 2          | Stat2      | 288774 | 1,96 | down |
| 6204435 | 7311784 | 1651669 | signal transducer and activator of transcription 2          | Stat2      | 288774 | 1,69 | up   |
| 6077938 | 7311784 | 1651680 | signal transducer and activator of transcription 2          | Stat2      | 288774 | 1,65 | up   |
| 5643283 | 7311784 | 1651686 | signal transducer and activator of transcription 2          | Stat2      | 288774 | 1,61 | down |
| 6450110 | 7311784 | 1651667 | signal transducer and activator of transcription 2          | Stat2      | 288774 | 1,47 | up   |
| 6473479 | 7311784 | 1651685 | signal transducer and activator of transcription 2          | Stat2      | 288774 | 1,43 | down |
| 6273787 | 7311784 | 1651673 | signal transducer and activator of transcription 2          | Stat2      | 288774 | 1,38 | down |
| 6568266 | 7311784 | 1651666 | signal transducer and activator of transcription 2          | Stat2      | 288774 | 1,32 | up   |
| 6427593 | 7311784 | 1651677 | signal transducer and activator of transcription 2          | Stat2      | 288774 | 1,29 | up   |
| 5881934 | 7311784 | 1651674 | signal transducer and activator of transcription 2          | Stat2      | 288774 | 1,21 | up   |
| 6549303 | 7311784 | 1651671 | signal transducer and activator of transcription 2          | Stat2      | 288774 | 1,20 | down |
| 5764603 | 7311784 | 1651687 | signal transducer and activator of transcription 2          | Stat2      | 288774 | 1,20 | up   |
| 6106429 | 7311784 | 1651678 | signal transducer and activator of transcription 2          | Stat2      | 288774 | 1,20 | up   |
| 5677859 | 7311784 | 1651670 | signal transducer and activator of transcription 2          | Stat2      | 288774 | 1,19 | down |
| 6745539 | 7311784 | 1651684 | signal transducer and activator of transcription 2          | Stat2      | 288774 | 1,18 | down |
| 5847482 | 7311784 | 1651683 | signal transducer and activator of transcription 2          | Stat2      | 288774 | 1,14 | up   |
| 6414474 | 7311784 | 1651681 | signal transducer and activator of transcription 2          | Stat2      | 288774 | 1,11 | up   |
| 5912161 | 7311784 | 1651672 | signal transducer and activator of transcription 2          | Stat2      | 288774 | 1,10 | up   |
| 5919286 | 7311784 | 1651682 | signal transducer and activator of transcription 2          | Stat2      | 288774 | 1,08 | up   |
| 6137926 | 7311784 | 1651665 | signal transducer and activator of transcription 2          | Stat2      | 288774 | 1,06 | up   |
| 6075010 | 7311784 | 1651679 | signal transducer and activator of transcription 2          | Stat2      | 288774 | 1,04 | up   |
| 6072783 | 7311784 | 1651664 | signal transducer and activator of transcription 2          | Stat2      | 288774 | 1,02 | down |
| 6061091 | 7311784 | 1651675 | signal transducer and activator of transcription 2          | Stat2      | 288774 | 1,00 | down |
| 6556067 | 7362023 | 1774245 | signal transducer and activator of transcription 4          | Stat4      | 367264 | 2,49 | up   |
| 6578730 | 7362023 | 1774244 | signal transducer and activator of transcription 4          | Stat4      | 367264 | 1,66 | up   |
| 5836871 | 7362023 | 1774243 | signal transducer and activator of transcription 4          | Stat4      | 367264 | 1,59 | down |
| 5721510 | 7362023 | 1774247 | signal transducer and activator of transcription 4          | Stat4      | 367264 | 1,49 | down |
| 6218416 | 7362023 | 1774250 | signal transducer and activator of transcription 4          | Stat4      | 367264 | 1,44 | down |
| 6569468 | 7362023 | 1774265 | signal transducer and activator of transcription 4          | Stat4      | 367264 | 1,34 | up   |
| 6102952 | 7362023 | 1774262 | signal transducer and activator of transcription 4          | Stat4      | 367264 | 1,22 | up   |
| 6193725 | 7362023 | 1774248 | signal transducer and activator of transcription 4          | Stat4      | 367264 | 1,21 | down |
| 6023615 | 7362023 | 1774257 | signal transducer and activator of transcription 4          | Stat4      | 367264 | 1,19 | up   |
| 6609833 | 7362023 | 1774261 | signal transducer and activator of transcription 4          | Stat4      | 367264 | 1,17 | down |
| 6553097 | 7362023 | 1774249 | signal transducer and activator of transcription 4          | Stat4      | 367264 | 1,17 | up   |
| 5886181 | 7362023 | 1774251 | signal transducer and activator of transcription 4          | Stat4      | 367264 | 1,15 | up   |
| 6521225 | 7362023 | 1774259 | signal transducer and activator of transcription 4          | Stat4      | 367264 | 1,13 | down |
| 6483341 | 7362023 | 1774264 | signal transducer and activator of transcription 4          | Stat4      | 367264 | 1,11 | down |
| 5796406 | 7362023 | 1774253 | signal transducer and activator of transcription 4          | Stat4      | 367264 | 1,10 | up   |
| 6638624 | 7362023 | 1774260 | signal transducer and activator of transcription 4          | Stat4      | 367264 | 1,09 | up   |
| 5841406 | 7362023 | 1774255 | signal transducer and activator of transcription 4          | Stat4      | 367264 | 1,08 | up   |
| 6206194 | 7362023 | 1774252 | signal transducer and activator of transcription 4          | Stat4      | 367264 | 1,08 | up   |
| 6228248 | 7362023 | 1774243 | signal transducer and activator of transcription 4          | Stat4      | 367264 | 1,07 | down |
| 6369751 | 7362023 | 1774257 | signal transducer and activator of transcription 4          | Stat4      | 367264 | 1,06 | up   |
| 6398228 | 7362023 | 1774258 | signal transducer and activator of transcription 4          | Stat4      | 367264 | 1,05 | up   |
| 5673455 | 7362023 | 1774265 | signal transducer and activator of transcription 4          | Stat4      | 367264 | 1,04 | down |
| 5690033 | 7362023 | 1774254 | signal transducer and activator of transcription 4          | Stat4      | 367264 | 1,04 | down |
| 6092203 | 7362023 | 1774257 | signal transducer and activator of transcription 4          | Stat4      | 367264 | 1,01 | down |
| 5817426 | 7362023 | 1774263 | signal transducer and activator of transcription 4          | Stat4      | 367264 | 1,00 | up   |
| 6498634 | 7362023 | 1774246 | signal transducer and activator of transcription 4          | Stat4      | 367264 | 1,00 | up   |
| 6740330 | 7362023 | 1774256 | signal transducer and activator of transcription 4          | Stat4      | 367264 | 1,00 | up   |
| 5668215 | 7341546 | 1723979 | similar to 106 kDa O-GlcNAc transferase-interacting protein | RGD1307844 | 316085 | 1,56 | down |
| 6343272 | 7341546 | 1723979 | similar to 106 kDa O-GlcNAc transferase-interacting protein | RGD1307844 | 316085 | 1,34 | up   |
| 5739300 | 7341546 | 1723973 | similar to 106 kDa O-GlcNAc transferase-interacting protein | RGD1307844 | 316085 | 1,30 | up   |
| 6503878 | 7341546 | 1723979 | similar to 106 kDa O-GlcNAc transferase-interacting protein | RGD1307844 | 316085 | 1,22 | down |
| 6225195 | 7341546 | 1723978 | similar to 106 kDa O-GlcNAc transferase-interacting protein | RGD1307844 | 316085 | 1,21 | down |
| 5844348 | 7341546 | 1723963 | similar to 106 kDa O-GlcNAc transferase-interacting protein | RGD1307844 | 316085 | 1,17 | up   |
| 5625930 | 7341546 | 1723958 | similar to 106 kDa O-GlcNAc transferase-interacting protein | RGD1307844 | 316085 | 1,17 | up   |

|         |         |         |                                                                                   |            |        |      |      |
|---------|---------|---------|-----------------------------------------------------------------------------------|------------|--------|------|------|
| 6507339 | 7341546 | 1723969 | similar to 106 kDa O-GlcNAc transferase-interacting protein                       | RGD1307844 | 316085 | 1,16 | up   |
| 6526013 | 7341546 | 1723947 | similar to 106 kDa O-GlcNAc transferase-interacting protein                       | RGD1307844 | 316085 | 1,13 | up   |
| 6162686 | 7341546 | 1723972 | similar to 106 kDa O-GlcNAc transferase-interacting protein                       | RGD1307844 | 316085 | 1,13 | up   |
| 5966991 | 7341546 | 1723968 | similar to 106 kDa O-GlcNAc transferase-interacting protein                       | RGD1307844 | 316085 | 1,12 | up   |
| 5624574 | 7341546 | 1723958 | similar to 106 kDa O-GlcNAc transferase-interacting protein                       | RGD1307844 | 316085 | 1,11 | up   |
| 6249227 | 7341546 | 1723979 | similar to 106 kDa O-GlcNAc transferase-interacting protein                       | RGD1307844 | 316085 | 1,09 | up   |
| 6619372 | 7341546 | 1723979 | similar to 106 kDa O-GlcNAc transferase-interacting protein                       | RGD1307844 | 316085 | 1,09 | up   |
| 5940304 | 7341546 | 1723978 | similar to 106 kDa O-GlcNAc transferase-interacting protein                       | RGD1307844 | 316085 | 1,09 | up   |
| 6723106 | 7341546 | 1723967 | similar to 106 kDa O-GlcNAc transferase-interacting protein                       | RGD1307844 | 316085 | 1,08 | up   |
| 5740117 | 7341546 | 1723977 | similar to 106 kDa O-GlcNAc transferase-interacting protein                       | RGD1307844 | 316085 | 1,05 | down |
| 5840928 | 7341546 | 1723978 | similar to 106 kDa O-GlcNAc transferase-interacting protein                       | RGD1307844 | 316085 | 1,05 | down |
| 6217319 | 7341546 | 1723971 | similar to 106 kDa O-GlcNAc transferase-interacting protein                       | RGD1307844 | 316085 | 1,04 | up   |
| 6166034 | 7341546 | 1723964 | similar to 106 kDa O-GlcNAc transferase-interacting protein                       | RGD1307844 | 316085 | 1,04 | up   |
| 6225824 | 7341546 | 1723975 | similar to 106 kDa O-GlcNAc transferase-interacting protein                       | RGD1307844 | 316085 | 1,04 | down |
| 6106338 | 7341546 | 1723961 | similar to 106 kDa O-GlcNAc transferase-interacting protein                       | RGD1307844 | 316085 | 1,02 | down |
| 5907578 | 7341546 | 1723965 | similar to 106 kDa O-GlcNAc transferase-interacting protein                       | RGD1307844 | 316085 | 1,02 | up   |
| 6244908 | 7337242 | 1712711 | similar to 2010321M09Rik protein                                                  | RGD1359616 | 300782 | 2,10 | up   |
| 6078186 | 7337242 | 1712709 | similar to 2010321M09Rik protein                                                  | RGD1359616 | 300782 | 1,41 | down |
| 6240932 | 7337242 | 1712701 | similar to 2010321M09Rik protein                                                  | RGD1359616 | 300782 | 1,23 | down |
| 6328899 | 7337242 | 1712712 | similar to 2010321M09Rik protein                                                  | RGD1359616 | 300782 | 1,19 | down |
| 5731191 | 7337242 | 1712703 | similar to 2010321M09Rik protein                                                  | RGD1359616 | 300782 | 1,16 | down |
| 5927736 | 7337242 | 1712702 | similar to 2010321M09Rik protein                                                  | RGD1359616 | 300782 | 1,15 | up   |
| 6538184 | 7337242 | 1712704 | similar to 2010321M09Rik protein                                                  | RGD1359616 | 300782 | 1,11 | down |
| 5773931 | 7337242 | 1712705 | similar to 2010321M09Rik protein                                                  | RGD1359616 | 300782 | 1,10 | up   |
| 6730432 | 7337242 | 1712710 | similar to 2010321M09Rik protein                                                  | RGD1359616 | 300782 | 1,04 | up   |
| 5976338 | 7337242 | 1712701 | similar to 2010321M09Rik protein                                                  | RGD1359616 | 300782 | 1,04 | down |
| 6409931 | 7337242 | 1712706 | similar to 2010321M09Rik protein                                                  | RGD1359616 | 300782 | 1,04 | down |
| 5968538 | 7337242 | 1712707 | similar to 2010321M09Rik protein                                                  | RGD1359616 | 300782 | 1,04 | up   |
| 6002500 | 7337242 | 1712700 | similar to 2010321M09Rik protein                                                  | RGD1359616 | 300782 | 1,04 | up   |
| 5737692 | 7337242 | 1712708 | similar to 2010321M09Rik protein                                                  | RGD1359616 | 300782 | 1,00 | up   |
| 6455454 | 7139708 | 1225051 | similar to 2610301G19Rik protein                                                  | RGD1309922 | 306007 | 1,55 | up   |
| 6269327 | 7139708 | 1225051 | similar to 2610301G19Rik protein                                                  | RGD1309922 | 306007 | 1,33 | down |
| 5714098 | 7139708 | 1225051 | similar to 2610301G19Rik protein                                                  | RGD1309922 | 306007 | 1,23 | up   |
| 6371277 | 7139708 | 1225053 | similar to 2610301G19Rik protein                                                  | RGD1309922 | 306007 | 1,20 | up   |
| 6045016 | 7139708 | 1225051 | similar to 2610301G19Rik protein                                                  | RGD1309922 | 306007 | 1,16 | down |
| 6160902 | 7139708 | 1225051 | similar to 2610301G19Rik protein                                                  | RGD1309922 | 306007 | 1,13 | up   |
| 6506578 | 7139708 | 1225051 | similar to 2610301G19Rik protein                                                  | RGD1309922 | 306007 | 1,12 | down |
| 5679235 | 7139708 | 1225051 | similar to 2610301G19Rik protein                                                  | RGD1309922 | 306007 | 1,04 | down |
| 6477183 | 7350837 | 1746979 | similar to 3-ketoacyl-CoA thiolase B, peroxisomal precursor (Beta-ketothiolase B) | RGD1562373 | 501072 | 2,22 | down |
| 6602105 | 7350837 | 1746978 | similar to 3-ketoacyl-CoA thiolase B, peroxisomal precursor (Beta-ketothiolase B) | RGD1562373 | 501072 | 1,87 | up   |
| 6103450 | 7350837 | 1746974 | similar to 3-ketoacyl-CoA thiolase B, peroxisomal precursor (Beta-ketothiolase B) | RGD1562373 | 501072 | 1,40 | down |
| 6378487 | 7350837 | 1746980 | similar to 3-ketoacyl-CoA thiolase B, peroxisomal precursor (Beta-ketothiolase B) | RGD1562373 | 501072 | 1,36 | up   |
| 6246125 | 7350837 | 1746972 | similar to 3-ketoacyl-CoA thiolase B, peroxisomal precursor (Beta-ketothiolase B) | RGD1562373 | 501072 | 1,36 | down |
| 5831939 | 7350837 | 1746975 | similar to 3-ketoacyl-CoA thiolase B, peroxisomal precursor (Beta-ketothiolase B) | RGD1562373 | 501072 | 1,35 | up   |
| 6002164 | 7350837 | 1746981 | similar to 3-ketoacyl-CoA thiolase B, peroxisomal precursor (Beta-ketothiolase B) | RGD1562373 | 501072 | 1,24 | up   |
| 6156704 | 7350837 | 1746977 | similar to 3-ketoacyl-CoA thiolase B, peroxisomal precursor (Beta-ketothiolase B) | RGD1562373 | 501072 | 1,19 | down |
| 5702184 | 7350837 | 1746973 | similar to 3-ketoacyl-CoA thiolase B, peroxisomal precursor (Beta-ketothiolase B) | RGD1562373 | 501072 | 1,18 | down |
| 6329594 | 7350837 | 1746969 | similar to 3-ketoacyl-CoA thiolase B, peroxisomal precursor (Beta-ketothiolase B) | RGD1562373 | 501072 | 1,07 | down |
| 6174563 | 7350837 | 1746976 | similar to 3-ketoacyl-CoA thiolase B, peroxisomal precursor (Beta-ketothiolase B) | RGD1562373 | 501072 | 1,06 | down |
| 6427122 | 7350837 | 1746970 | similar to 3-ketoacyl-CoA thiolase B, peroxisomal precursor (Beta-ketothiolase B) | RGD1562373 | 501072 | 1,06 | up   |
| 5984833 | 7350837 | 1746971 | similar to 3-ketoacyl-CoA thiolase B, peroxisomal precursor (Beta-ketothiolase B) | RGD1562373 | 501072 | 1,00 | down |
| 6468680 | 7031618 | 964191  | similar to 5E5 antigen                                                            | LOC691056  | 691056 | 2,08 | down |
| 6082314 | 7031618 | 964197  | similar to 5E5 antigen                                                            | LOC691056  | 691056 | 1,74 | up   |
| 6352102 | 7031618 | 964188  | similar to 5E5 antigen                                                            | LOC691056  | 691056 | 1,68 | down |
| 6237579 | 7031618 | 964194  | similar to 5E5 antigen                                                            | LOC691056  | 691056 | 1,65 | down |
| 6546934 | 7031618 | 964197  | similar to 5E5 antigen                                                            | LOC691056  | 691056 | 1,45 | down |
| 6743332 | 7031618 | 964192  | similar to 5E5 antigen                                                            | LOC691056  | 691056 | 1,45 | down |

|         |         |         |                                                                                                |            |        |      |      |
|---------|---------|---------|------------------------------------------------------------------------------------------------|------------|--------|------|------|
| 5746762 | 7031618 | 964197  | similar to 5E5 antigen                                                                         | LOC691056  | 691056 | 1,43 | down |
| 5743827 | 7031618 | 964195  | similar to 5E5 antigen                                                                         | LOC691056  | 691056 | 1,40 | down |
| 6395869 | 7031618 | 964197  | similar to 5E5 antigen                                                                         | LOC691056  | 691056 | 1,37 | down |
| 6425508 | 7031618 | 964193  | similar to 5E5 antigen                                                                         | LOC691056  | 691056 | 1,30 | down |
| 6701149 | 7031618 | 964197  | similar to 5E5 antigen                                                                         | LOC691056  | 691056 | 1,30 | up   |
| 5737788 | 7031618 | 964198  | similar to 5E5 antigen                                                                         | LOC691056  | 691056 | 1,30 | up   |
| 5889202 | 7031618 | 964196  | similar to 5E5 antigen                                                                         | LOC691056  | 691056 | 1,25 | down |
| 6663919 | 7031618 | 964191  | similar to 5E5 antigen                                                                         | LOC691056  | 691056 | 1,18 | up   |
| 5989569 | 7031618 | 964189  | similar to 5E5 antigen                                                                         | LOC691056  | 691056 | 1,16 | up   |
| 5908204 | 7031618 | 964197  | similar to 5E5 antigen                                                                         | LOC691056  | 691056 | 1,09 | up   |
| 6067525 | 7031618 | 964190  | similar to 5E5 antigen                                                                         | LOC691056  | 691056 | 1,01 | down |
| 6289017 | 7152007 | 1255325 | similar to 6430573F11Rik protein                                                               | RGD1304810 | 306504 | 2,28 | down |
| 6584901 | 7152007 | 1255302 | similar to 6430573F11Rik protein                                                               | RGD1304810 | 306504 | 1,46 | down |
| 5925676 | 7152007 | 1255312 | similar to 6430573F11Rik protein                                                               | RGD1304810 | 306504 | 1,40 | up   |
| 5730766 | 7152007 | 1255302 | similar to 6430573F11Rik protein                                                               | RGD1304810 | 306504 | 1,34 | down |
| 6632670 | 7152007 | 1255326 | similar to 6430573F11Rik protein                                                               | RGD1304810 | 306504 | 1,34 | down |
| 6070613 | 7152007 | 1255307 | similar to 6430573F11Rik protein                                                               | RGD1304810 | 306504 | 1,27 | down |
| 5695239 | 7152007 | 1255326 | similar to 6430573F11Rik protein                                                               | RGD1304810 | 306504 | 1,27 | up   |
| 6102105 | 7152007 | 1255302 | similar to 6430573F11Rik protein                                                               | RGD1304810 | 306504 | 1,25 | down |
| 6266307 | 7152007 | 1255314 | similar to 6430573F11Rik protein                                                               | RGD1304810 | 306504 | 1,10 | down |
| 6061374 | 7152007 | 1255326 | similar to 6430573F11Rik protein                                                               | RGD1304810 | 306504 | 1,10 | up   |
| 6497802 | 7152007 | 1255325 | similar to 6430573F11Rik protein                                                               | RGD1304810 | 306504 | 1,08 | down |
| 5885300 | 7152007 | 1255314 | similar to 6430573F11Rik protein                                                               | RGD1304810 | 306504 | 1,07 | up   |
| 6328050 | 7152007 | 1255302 | similar to 6430573F11Rik protein                                                               | RGD1304810 | 306504 | 1,07 | up   |
| 6585677 | 7152007 | 1255302 | similar to 6430573F11Rik protein                                                               | RGD1304810 | 306504 | 1,05 | down |
| 6046334 | 7152007 | 1255302 | similar to 6430573F11Rik protein                                                               | RGD1304810 | 306504 | 1,03 | down |
| 6093046 | 7152007 | 1255307 | similar to 6430573F11Rik protein                                                               | RGD1304810 | 306504 | 1,02 | up   |
| 6184448 | 7092549 | 1109117 | similar to ABI gene family, member 3 (NESH) binding protein                                    | RGD1562717 | 363767 | 1,62 | up   |
| 6701491 | 7092549 | 1109117 | similar to ABI gene family, member 3 (NESH) binding protein                                    | RGD1562717 | 363767 | 1,19 | down |
| 6263162 | 7092549 | 1109117 | similar to ABI gene family, member 3 (NESH) binding protein                                    | RGD1562717 | 363767 | 1,02 | down |
| 6687211 | 7092549 | 1109117 | similar to ABI gene family, member 3 (NESH) binding protein                                    | RGD1562717 | 363767 | 1,01 | up   |
| 6133670 | 7115771 | 1166590 | similar to actin, gamma 2, smooth muscle, enteric                                              | LOC360902  | 360902 | 2,50 | up   |
| 5985909 | 7115771 | 1166590 | similar to actin, gamma 2, smooth muscle, enteric                                              | LOC360902  | 360902 | 1,64 | up   |
| 6392974 | 7115771 | 1166590 | similar to actin, gamma 2, smooth muscle, enteric                                              | LOC360902  | 360902 | 1,52 | down |
| 6102664 | 7115771 | 1166591 | similar to actin, gamma 2, smooth muscle, enteric                                              | LOC360902  | 360902 | 1,10 | up   |
| 5702351 | 7351333 | 1748156 | similar to Acyl-CoA dehydrogenase family member 8, mitochondrial precursor (ACAD-8) (Isobutyry | LOC367196  | 367196 | 2,09 | up   |
| 5947875 | 7351333 | 1748156 | similar to Acyl-CoA dehydrogenase family member 8, mitochondrial precursor (ACAD-8) (Isobutyry | LOC367196  | 367196 | 1,39 | up   |
| 5635317 | 7351333 | 1748159 | similar to Acyl-CoA dehydrogenase family member 8, mitochondrial precursor (ACAD-8) (Isobutyry | LOC367196  | 367196 | 1,22 | down |
| 6197210 | 7351333 | 1748158 | similar to Acyl-CoA dehydrogenase family member 8, mitochondrial precursor (ACAD-8) (Isobutyry | LOC367196  | 367196 | 1,15 | down |
| 6115638 | 7351333 | 1748160 | similar to Acyl-CoA dehydrogenase family member 8, mitochondrial precursor (ACAD-8) (Isobutyry | LOC367196  | 367196 | 1,09 | down |
| 6656863 | 7351333 | 1748158 | similar to Acyl-CoA dehydrogenase family member 8, mitochondrial precursor (ACAD-8) (Isobutyry | LOC367196  | 367196 | 1,08 | down |
| 6400050 | 7351333 | 1748157 | similar to Acyl-CoA dehydrogenase family member 8, mitochondrial precursor (ACAD-8) (Isobutyry | LOC367196  | 367196 | 1,00 | down |
| 5785836 | 7039589 | 984518  | similar to AHNAK nucleoprotein isoform 2                                                       | LOC686579  | 686579 | 1,65 | down |
| 5974046 | 7039589 | 984521  | similar to AHNAK nucleoprotein isoform 2                                                       | LOC686579  | 686579 | 1,45 | down |
| 6636321 | 7039589 | 984511  | similar to AHNAK nucleoprotein isoform 2                                                       | LOC686579  | 686579 | 1,38 | up   |
| 5664795 | 7039589 | 984515  | similar to AHNAK nucleoprotein isoform 2                                                       | LOC686579  | 686579 | 1,30 | up   |
| 6067316 | 7359453 | 1768449 | similar to AI661453 protein                                                                    | RGD1561662 | 301232 | 1,57 | up   |
| 5823584 | 7359453 | 1768453 | similar to AI661453 protein                                                                    | RGD1561662 | 301232 | 1,33 | up   |
| 6060141 | 7359453 | 1768460 | similar to AI661453 protein                                                                    | RGD1561662 | 301232 | 1,19 | up   |
| 6302830 | 7374090 | 1806828 | similar to AMME syndrome candidate gene 1 protein homolog                                      | RGD1561004 | 501539 | 2,26 | down |
| 6134582 | 7374090 | 1806832 | similar to AMME syndrome candidate gene 1 protein homolog                                      | RGD1561004 | 501539 | 1,54 | down |
| 6126390 | 7374090 | 1806832 | similar to AMME syndrome candidate gene 1 protein homolog                                      | RGD1561004 | 501539 | 1,42 | up   |
| 6184760 | 7374090 | 1806832 | similar to AMME syndrome candidate gene 1 protein homolog                                      | RGD1561004 | 501539 | 1,40 | down |
| 6202432 | 7374090 | 1806829 | similar to AMME syndrome candidate gene 1 protein homolog                                      | RGD1561004 | 501539 | 1,33 | up   |
| 6174178 | 7374090 | 1806832 | similar to AMME syndrome candidate gene 1 protein homolog                                      | RGD1561004 | 501539 | 1,33 | down |
| 6099038 | 7374090 | 1806828 | similar to AMME syndrome candidate gene 1 protein homolog                                      | RGD1561004 | 501539 | 1,33 | up   |
| 6009183 | 7374090 | 1806823 | similar to AMME syndrome candidate gene 1 protein homolog                                      | RGD1561004 | 501539 | 1,30 | up   |

|         |         |         |                                                                                                 |            |        |      |      |
|---------|---------|---------|-------------------------------------------------------------------------------------------------|------------|--------|------|------|
| 5704844 | 7374090 | 1806832 | similar to AMME syndrome candidate gene 1 protein homolog                                       | RGD1561004 | 501539 | 1,27 | down |
| 6508552 | 7374090 | 1806833 | similar to AMME syndrome candidate gene 1 protein homolog                                       | RGD1561004 | 501539 | 1,17 | up   |
| 5792715 | 7374090 | 1806816 | similar to AMME syndrome candidate gene 1 protein homolog                                       | RGD1561004 | 501539 | 1,06 | up   |
| 6044226 | 7374090 | 1806830 | similar to AMME syndrome candidate gene 1 protein homolog                                       | RGD1561004 | 501539 | 1,02 | up   |
| 5922642 | 7355138 | 1757684 | similar to amyotrophic lateral sclerosis 2 (juvenile) chromosome region, candidate 19 isoform b | LOC301455  | 301455 | 1,20 | up   |
| 5721715 | 7181442 | 1328887 | similar to ATM/ATR-Substrate Chk2-Interacting Zn2+-finger protein                               | LOC499230  | 499230 | 1,07 | up   |
| 6118926 | 7253976 | 1507430 | similar to B230212L03Rik protein                                                                | MGC95152   | 297109 | 2,35 | up   |
| 6542322 | 7253976 | 1507431 | similar to B230212L03Rik protein                                                                | MGC95152   | 297109 | 2,02 | up   |
| 6052643 | 7253976 | 1507433 | similar to B230212L03Rik protein                                                                | MGC95152   | 297109 | 1,88 | down |
| 6076336 | 7253976 | 1507430 | similar to B230212L03Rik protein                                                                | MGC95152   | 297109 | 1,28 | down |
| 6371573 | 7253976 | 1507432 | similar to B230212L03Rik protein                                                                | MGC95152   | 297109 | 1,03 | up   |
| 5914640 | 7075460 | 1069417 | similar to BAI1-associated protein 3 (BAP3)                                                     | LOC682192  | 682192 | 3,02 | up   |
| 6631961 | 7075460 | 1069396 | similar to BAI1-associated protein 3 (BAP3)                                                     | LOC682192  | 682192 | 1,53 | down |
| 5719457 | 7075460 | 1069383 | similar to BAI1-associated protein 3 (BAP3)                                                     | LOC682192  | 682192 | 1,43 | up   |
| 6470044 | 7144088 | 1236189 | similar to B-cell novel protein 1                                                               | LOC498604  | 498604 | 2,73 | down |
| 5771977 | 7144088 | 1236178 | similar to B-cell novel protein 1                                                               | LOC498604  | 498604 | 2,58 | down |
| 6291098 | 7144088 | 1236175 | similar to B-cell novel protein 1                                                               | LOC498604  | 498604 | 1,79 | up   |
| 6349887 | 7144088 | 1236179 | similar to B-cell novel protein 1                                                               | LOC498604  | 498604 | 1,73 | down |
| 6114467 | 7144088 | 1236182 | similar to B-cell novel protein 1                                                               | LOC498604  | 498604 | 1,49 | up   |
| 6160110 | 7144088 | 1236188 | similar to B-cell novel protein 1                                                               | LOC498604  | 498604 | 1,45 | down |
| 6577355 | 7144088 | 1236178 | similar to B-cell novel protein 1                                                               | LOC498604  | 498604 | 1,26 | down |
| 6714625 | 7144088 | 1236176 | similar to B-cell novel protein 1                                                               | LOC498604  | 498604 | 1,23 | up   |
| 5912802 | 7144088 | 1236181 | similar to B-cell novel protein 1                                                               | LOC498604  | 498604 | 1,22 | down |
| 6573790 | 7144088 | 1236182 | similar to B-cell novel protein 1                                                               | LOC498604  | 498604 | 1,20 | up   |
| 5727356 | 7144088 | 1236184 | similar to B-cell novel protein 1                                                               | LOC498604  | 498604 | 1,19 | down |
| 6298849 | 7144088 | 1236187 | similar to B-cell novel protein 1                                                               | LOC498604  | 498604 | 1,16 | up   |
| 6310851 | 7144088 | 1236183 | similar to B-cell novel protein 1                                                               | LOC498604  | 498604 | 1,13 | down |
| 6387452 | 7144088 | 1236190 | similar to B-cell novel protein 1                                                               | LOC498604  | 498604 | 1,11 | up   |
| 6307605 | 7144088 | 1236180 | similar to B-cell novel protein 1                                                               | LOC498604  | 498604 | 1,08 | up   |
| 5864640 | 7144088 | 1236186 | similar to B-cell novel protein 1                                                               | LOC498604  | 498604 | 1,02 | down |
| 6042611 | 7144088 | 1236181 | similar to B-cell novel protein 1                                                               | LOC498604  | 498604 | 1,01 | up   |
| 6156585 | 7273744 | 1557040 | similar to BTB and CNC homology 1, basic leucine zipper transcription factor 2                  | RGD1562865 | 313125 | 1,61 | up   |
| 6362028 | 7273744 | 1557040 | similar to BTB and CNC homology 1, basic leucine zipper transcription factor 2                  | RGD1562865 | 313125 | 1,54 | up   |
| 6099593 | 7273744 | 1557040 | similar to BTB and CNC homology 1, basic leucine zipper transcription factor 2                  | RGD1562865 | 313125 | 1,50 | up   |
| 6099667 | 7273744 | 1557040 | similar to BTB and CNC homology 1, basic leucine zipper transcription factor 2                  | RGD1562865 | 313125 | 1,48 | down |
| 6211493 | 7273744 | 1557022 | similar to BTB and CNC homology 1, basic leucine zipper transcription factor 2                  | RGD1562865 | 313125 | 1,41 | up   |
| 5708208 | 7273744 | 1557040 | similar to BTB and CNC homology 1, basic leucine zipper transcription factor 2                  | RGD1562865 | 313125 | 1,40 | up   |
| 6110966 | 7273744 | 1557031 | similar to BTB and CNC homology 1, basic leucine zipper transcription factor 2                  | RGD1562865 | 313125 | 1,35 | up   |
| 6552576 | 7273744 | 1557043 | similar to BTB and CNC homology 1, basic leucine zipper transcription factor 2                  | RGD1562865 | 313125 | 1,29 | down |
| 6302631 | 7273744 | 1557042 | similar to BTB and CNC homology 1, basic leucine zipper transcription factor 2                  | RGD1562865 | 313125 | 1,20 | down |
| 6587296 | 7273744 | 1556995 | similar to BTB and CNC homology 1, basic leucine zipper transcription factor 2                  | RGD1562865 | 313125 | 1,08 | down |
| 6381737 | 7236131 | 1463792 | similar to cadherin 4                                                                           | LOC311710  | 311710 | 1,09 | down |
| 5822480 | 7293402 | 1604729 | similar to calmodulin-binding transcription activator 1                                         | LOC500591  | 500591 | 2,61 | down |
| 6735469 | 7293402 | 1604694 | similar to calmodulin-binding transcription activator 1                                         | LOC500591  | 500591 | 2,17 | down |
| 5863223 | 7293402 | 1604722 | similar to calmodulin-binding transcription activator 1                                         | LOC500591  | 500591 | 1,70 | up   |
| 5866798 | 7293402 | 1604695 | similar to calmodulin-binding transcription activator 1                                         | LOC500591  | 500591 | 1,62 | down |
| 6341243 | 7293402 | 1604728 | similar to calmodulin-binding transcription activator 1                                         | LOC500591  | 500591 | 1,53 | up   |
| 6113703 | 7293402 | 1604719 | similar to calmodulin-binding transcription activator 1                                         | LOC500591  | 500591 | 1,51 | down |
| 5963796 | 7293402 | 1604700 | similar to calmodulin-binding transcription activator 1                                         | LOC500591  | 500591 | 1,50 | down |
| 6195462 | 7293402 | 1604723 | similar to calmodulin-binding transcription activator 1                                         | LOC500591  | 500591 | 1,49 | down |
| 6237565 | 7293402 | 1604722 | similar to calmodulin-binding transcription activator 1                                         | LOC500591  | 500591 | 1,49 | down |
| 6091119 | 7293402 | 1604690 | similar to calmodulin-binding transcription activator 1                                         | LOC500591  | 500591 | 1,48 | down |
| 5971476 | 7293402 | 1604717 | similar to calmodulin-binding transcription activator 1                                         | LOC500591  | 500591 | 1,44 | down |
| 5691295 | 7293402 | 1604702 | similar to calmodulin-binding transcription activator 1                                         | LOC500591  | 500591 | 1,35 | down |
| 6366939 | 7293402 | 1604723 | similar to calmodulin-binding transcription activator 1                                         | LOC500591  | 500591 | 1,34 | up   |
| 6061502 | 7293402 | 1604722 | similar to calmodulin-binding transcription activator 1                                         | LOC500591  | 500591 | 1,31 | down |
| 6592993 | 7293402 | 1604689 | similar to calmodulin-binding transcription activator 1                                         | LOC500591  | 500591 | 1,30 | up   |

|         |         |         |                                                                                   |                                        |        |      |      |
|---------|---------|---------|-----------------------------------------------------------------------------------|----------------------------------------|--------|------|------|
| 6389903 | 7293402 | 1604690 | similar to calmodulin-binding transcription activator 1                           | LOC500591                              | 500591 | 1,29 | up   |
| 5693568 | 7293402 | 1604703 | similar to calmodulin-binding transcription activator 1                           | LOC500591                              | 500591 | 1,29 | up   |
| 6097267 | 7293402 | 1604736 | similar to calmodulin-binding transcription activator 1                           | LOC500591                              | 500591 | 1,29 | down |
| 6197946 | 7293402 | 1604705 | similar to calmodulin-binding transcription activator 1                           | LOC500591                              | 500591 | 1,28 | up   |
| 6629585 | 7293402 | 1604689 | similar to calmodulin-binding transcription activator 1                           | LOC500591                              | 500591 | 1,26 | down |
| 6016492 | 7293402 | 1604698 | similar to calmodulin-binding transcription activator 1                           | LOC500591                              | 500591 | 1,26 | up   |
| 6404836 | 7293402 | 1604722 | similar to calmodulin-binding transcription activator 1                           | LOC500591                              | 500591 | 1,25 | down |
| 6262139 | 7293402 | 1604723 | similar to calmodulin-binding transcription activator 1                           | LOC500591                              | 500591 | 1,24 | down |
| 5989360 | 7293402 | 1604760 | similar to calmodulin-binding transcription activator 1                           | LOC500591                              | 500591 | 1,24 | up   |
| 6026202 | 7293402 | 1604728 | similar to calmodulin-binding transcription activator 1                           | LOC500591                              | 500591 | 1,23 | down |
| 6121008 | 7293402 | 1604799 | similar to calmodulin-binding transcription activator 1                           | LOC500591                              | 500591 | 1,23 | down |
| 6224235 | 7293402 | 1604689 | similar to calmodulin-binding transcription activator 1                           | LOC500591                              | 500591 | 1,21 | down |
| 5997675 | 7293402 | 1604831 | similar to calmodulin-binding transcription activator 1                           | LOC500591                              | 500591 | 1,19 | down |
| 5759583 | 7293402 | 1604722 | similar to calmodulin-binding transcription activator 1                           | LOC500591                              | 500591 | 1,14 | down |
| 6276034 | 7293402 | 1604723 | similar to calmodulin-binding transcription activator 1                           | LOC500591                              | 500591 | 1,13 | up   |
| 6185094 | 7293402 | 1604729 | similar to calmodulin-binding transcription activator 1                           | LOC500591                              | 500591 | 1,11 | up   |
| 6569962 | 7293402 | 1604700 | similar to calmodulin-binding transcription activator 1                           | LOC500591                              | 500591 | 1,08 | up   |
| 5709047 | 7293402 | 1604700 | similar to calmodulin-binding transcription activator 1                           | LOC500591                              | 500591 | 1,06 | up   |
| 6269014 | 7293402 | 1604701 | similar to calmodulin-binding transcription activator 1                           | LOC500591                              | 500591 | 1,05 | up   |
| 5995477 | 7293402 | 1604690 | similar to calmodulin-binding transcription activator 1                           | LOC500591                              | 500591 | 1,05 | down |
| 6662031 | 7293402 | 1604697 | similar to calmodulin-binding transcription activator 1                           | LOC500591                              | 500591 | 1,05 | up   |
| 6175179 | 7293402 | 1604690 | similar to calmodulin-binding transcription activator 1                           | LOC500591                              | 500591 | 1,03 | up   |
| 5787569 | 7293402 | 1604696 | similar to calmodulin-binding transcription activator 1                           | LOC500591                              | 500591 | 1,01 | down |
| 5819009 | 7266778 | 1538854 | similar to Camello-like 2                                                         | LOC681227                              | 681227 | 1,72 | up   |
| 6371160 | 7266778 | 1538854 | similar to Camello-like 2 /// similar to RIKEN cDNA 1700019G17                    | 681227 /// RGD156 681227 /// 500238    |        | 1,44 | down |
| 6270502 | 7266778 | 1538854 | similar to Camello-like 2 /// similar to RIKEN cDNA 1700019G17 /// camello-like 2 | :27 /// RGD156350:27 /// 500238 /// 50 |        | 1,18 | up   |
| 5692021 | 7158269 | 1271075 | similar to cDNA sequence AF397014                                                 | RGD1308114                             | 361253 | 2,26 | up   |
| 6076627 | 7158269 | 1271070 | similar to cDNA sequence AF397014                                                 | RGD1308114                             | 361253 | 1,94 | down |
| 6339655 | 7158269 | 1271074 | similar to cDNA sequence AF397014                                                 | RGD1308114                             | 361253 | 1,76 | up   |
| 6311860 | 7158269 | 1271071 | similar to cDNA sequence AF397014                                                 | RGD1308114                             | 361253 | 1,76 | down |
| 6699593 | 7158269 | 1271068 | similar to cDNA sequence AF397014                                                 | RGD1308114                             | 361253 | 1,55 | up   |
| 5946472 | 7158269 | 1271077 | similar to cDNA sequence AF397014                                                 | RGD1308114                             | 361253 | 1,34 | up   |
| 5657547 | 7158269 | 1271078 | similar to cDNA sequence AF397014                                                 | RGD1308114                             | 361253 | 1,33 | up   |
| 6453000 | 7158269 | 1271076 | similar to cDNA sequence AF397014                                                 | RGD1308114                             | 361253 | 1,33 | down |
| 5888432 | 7158269 | 1271080 | similar to cDNA sequence AF397014                                                 | RGD1308114                             | 361253 | 1,31 | up   |
| 6594230 | 7158269 | 1271072 | similar to cDNA sequence AF397014                                                 | RGD1308114                             | 361253 | 1,22 | down |
| 6072441 | 7158269 | 1271081 | similar to cDNA sequence AF397014                                                 | RGD1308114                             | 361253 | 1,16 | up   |
| 5925973 | 7158269 | 1271073 | similar to cDNA sequence AF397014                                                 | RGD1308114                             | 361253 | 1,14 | down |
| 6102828 | 7158269 | 1271079 | similar to cDNA sequence AF397014                                                 | RGD1308114                             | 361253 | 1,08 | up   |
| 6260457 | 7158269 | 1271074 | similar to cDNA sequence AF397014                                                 | RGD1308114                             | 361253 | 1,06 | down |
| 6701223 | 7158269 | 1271070 | similar to cDNA sequence AF397014                                                 | RGD1308114                             | 361253 | 1,06 | down |
| 6225013 | 7158269 | 1271069 | similar to cDNA sequence AF397014                                                 | RGD1308114                             | 361253 | 1,05 | down |
| 6650759 | 7093201 | 1110640 | similar to cDNA sequence BC027231; hypothetical protein MGC27931                  | RGD1311458                             | 303948 | 2,32 | down |
| 6466642 | 7093201 | 1110636 | similar to cDNA sequence BC027231; hypothetical protein MGC27931                  | RGD1311458                             | 303948 | 1,50 | up   |
| 5727116 | 7093201 | 1110635 | similar to cDNA sequence BC027231; hypothetical protein MGC27931                  | RGD1311458                             | 303948 | 1,49 | up   |
| 6260470 | 7093201 | 1110631 | similar to cDNA sequence BC027231; hypothetical protein MGC27931                  | RGD1311458                             | 303948 | 1,48 | down |
| 6497671 | 7093201 | 1110632 | similar to cDNA sequence BC027231; hypothetical protein MGC27931                  | RGD1311458                             | 303948 | 1,43 | down |
| 5696449 | 7093201 | 1110634 | similar to cDNA sequence BC027231; hypothetical protein MGC27931                  | RGD1311458                             | 303948 | 1,22 | up   |
| 6125638 | 7093201 | 1110639 | similar to cDNA sequence BC027231; hypothetical protein MGC27931                  | RGD1311458                             | 303948 | 1,19 | down |
| 6071877 | 7093201 | 1110638 | similar to cDNA sequence BC027231; hypothetical protein MGC27931                  | RGD1311458                             | 303948 | 1,08 | down |
| 6447583 | 7093201 | 1110633 | similar to cDNA sequence BC027231; hypothetical protein MGC27931                  | RGD1311458                             | 303948 | 1,02 | up   |
| 5952268 | 7093201 | 1110637 | similar to cDNA sequence BC027231; hypothetical protein MGC27931                  | RGD1311458                             | 303948 | 1,01 | up   |
| 6502291 | 7349546 | 1743794 | similar to CDV-3B                                                                 | LOC315970                              | 315970 | 2,41 | down |
| 5649947 | 7349546 | 1743794 | similar to CDV-3B                                                                 | LOC315970                              | 315970 | 1,45 | down |
| 5905216 | 7349546 | 1743791 | similar to CDV-3B                                                                 | LOC315970                              | 315970 | 1,43 | down |
| 6064717 | 7349546 | 1743792 | similar to CDV-3B                                                                 | LOC315970                              | 315970 | 1,12 | up   |
| 6165843 | 7349546 | 1743790 | similar to CDV-3B                                                                 | LOC315970                              | 315970 | 1,10 | up   |



|         |         |         |                       |            |        |      |      |
|---------|---------|---------|-----------------------|------------|--------|------|------|
| 5794460 | 7349546 | 1743791 | similar to CDV-3B     | LOC315970  | 315970 | 1,05 | up   |
| 6022619 | 7349546 | 1743792 | similar to CDV-3B     | LOC315970  | 315970 | 1,04 | down |
| 6227483 | 7349546 | 1743793 | similar to CDV-3B     | LOC315970  | 315970 | 1,02 | down |
| 6331615 | 7141456 | 1229591 | similar to CG10084-PA | RGD1308297 | 306137 | 1,73 | up   |
| 6719373 | 7141456 | 1229599 | similar to CG10084-PA | RGD1308297 | 306137 | 1,54 | down |
| 5776153 | 7141456 | 1229604 | similar to CG10084-PA | RGD1308297 | 306137 | 1,42 | down |
| 6310137 | 7141456 | 1229608 | similar to CG10084-PA | RGD1308297 | 306137 | 1,42 | down |
| 5803543 | 7141456 | 1229591 | similar to CG10084-PA | RGD1308297 | 306137 | 1,34 | down |
| 5696632 | 7141456 | 1229595 | similar to CG10084-PA | RGD1308297 | 306137 | 1,33 | up   |
| 6635796 | 7141456 | 1229612 | similar to CG10084-PA | RGD1308297 | 306137 | 1,30 | down |
| 5998704 | 7141456 | 1229613 | similar to CG10084-PA | RGD1308297 | 306137 | 1,28 | down |
| 6314840 | 7141456 | 1229616 | similar to CG10084-PA | RGD1308297 | 306137 | 1,24 | down |
| 5647180 | 7141456 | 1229611 | similar to CG10084-PA | RGD1308297 | 306137 | 1,24 | down |
| 6210120 | 7141456 | 1229591 | similar to CG10084-PA | RGD1308297 | 306137 | 1,18 | down |
| 6625665 | 7141456 | 1229605 | similar to CG10084-PA | RGD1308297 | 306137 | 1,17 | down |
| 6356380 | 7141456 | 1229603 | similar to CG10084-PA | RGD1308297 | 306137 | 1,15 | up   |
| 6300898 | 7141456 | 1229606 | similar to CG10084-PA | RGD1308297 | 306137 | 1,12 | down |
| 5718027 | 7141456 | 1229589 | similar to CG10084-PA | RGD1308297 | 306137 | 1,11 | up   |
| 6279086 | 7141456 | 1229592 | similar to CG10084-PA | RGD1308297 | 306137 | 1,11 | down |
| 6705393 | 7141456 | 1229591 | similar to CG10084-PA | RGD1308297 | 306137 | 1,11 | up   |
| 6168891 | 7141456 | 1229614 | similar to CG10084-PA | RGD1308297 | 306137 | 1,09 | down |
| 5895890 | 7141456 | 1229609 | similar to CG10084-PA | RGD1308297 | 306137 | 1,08 | down |
| 6052003 | 7141456 | 1229597 | similar to CG10084-PA | RGD1308297 | 306137 | 1,08 | down |
| 5666499 | 7141456 | 1229598 | similar to CG10084-PA | RGD1308297 | 306137 | 1,08 | up   |
| 6578867 | 7141456 | 1229611 | similar to CG10084-PA | RGD1308297 | 306137 | 1,07 | down |
| 5776425 | 7141456 | 1229607 | similar to CG10084-PA | RGD1308297 | 306137 | 1,07 | up   |
| 6673442 | 7141456 | 1229596 | similar to CG10084-PA | RGD1308297 | 306137 | 1,06 | up   |
| 6299862 | 7141456 | 1229607 | similar to CG10084-PA | RGD1308297 | 306137 | 1,03 | up   |
| 5787983 | 7141456 | 1229600 | similar to CG10084-PA | RGD1308297 | 306137 | 1,02 | up   |
| 6004484 | 7141456 | 1229602 | similar to CG10084-PA | RGD1308297 | 306137 | 1,02 | up   |
| 6319646 | 7050167 | 1009803 | similar to CG11133-PA | LOC689639  | 689639 | 2,13 | down |
| 6102040 | 7050167 | 1009806 | similar to CG11133-PA | LOC689639  | 689639 | 1,48 | down |
| 6014200 | 7050167 | 1009812 | similar to CG11133-PA | LOC689639  | 689639 | 1,26 | down |
| 6128083 | 7050167 | 1009804 | similar to CG11133-PA | LOC689639  | 689639 | 1,24 | up   |
| 6222681 | 7050167 | 1009807 | similar to CG11133-PA | LOC689639  | 689639 | 1,16 | up   |
| 6444522 | 7050167 | 1009813 | similar to CG11133-PA | LOC689639  | 689639 | 1,13 | down |
| 6536904 | 7050167 | 1009808 | similar to CG11133-PA | LOC689639  | 689639 | 1,12 | down |
| 6687920 | 7050167 | 1009805 | similar to CG11133-PA | LOC689639  | 689639 | 1,11 | up   |
| 5651429 | 7050167 | 1009809 | similar to CG11133-PA | LOC689639  | 689639 | 1,04 | up   |
| 6033954 | 7050167 | 1009801 | similar to CG11133-PA | LOC689639  | 689639 | 1,03 | up   |
| 6507930 | 7050167 | 1009810 | similar to CG11133-PA | LOC689639  | 689639 | 1,02 | down |
| 6482680 | 7050167 | 1009802 | similar to CG11133-PA | LOC689639  | 689639 | 1,01 | up   |
| 6115213 | 7050167 | 1009811 | similar to CG11133-PA | LOC689639  | 689639 | 1,00 | down |
| 6447327 | 7050167 | 1009811 | similar to CG11133-PA | LOC689639  | 689639 | 1,00 | up   |
| 6547513 | 7318714 | 1669224 | similar to CG11259-PA | RGD1305415 | 362958 | 2,90 | down |
| 6317913 | 7033337 | 969509  | similar to CG13745-PA | LOC683179  | 683179 | 2,09 | down |
| 6083474 | 7033337 | 969502  | similar to CG13745-PA | LOC683179  | 683179 | 1,67 | up   |
| 5970892 | 7033337 | 969502  | similar to CG13745-PA | LOC683179  | 683179 | 1,51 | down |
| 5959458 | 7033337 | 969516  | similar to CG13745-PA | LOC683179  | 683179 | 1,43 | down |
| 6086941 | 7033337 | 969514  | similar to CG13745-PA | LOC683179  | 683179 | 1,23 | up   |
| 5982972 | 7033337 | 969477  | similar to CG13745-PA | LOC683179  | 683179 | 1,18 | down |
| 6036319 | 7033337 | 969503  | similar to CG13745-PA | LOC683179  | 683179 | 1,16 | down |
| 5793087 | 7033337 | 969481  | similar to CG13745-PA | LOC683179  | 683179 | 1,13 | down |
| 6645792 | 7033337 | 969513  | similar to CG13745-PA | LOC683179  | 683179 | 1,12 | down |
| 5986489 | 7033337 | 969478  | similar to CG13745-PA | LOC683179  | 683179 | 1,11 | up   |
| 6028443 | 7033337 | 969508  | similar to CG13745-PA | LOC683179  | 683179 | 1,09 | up   |
| 5951698 | 7033337 | 969476  | similar to CG13745-PA | LOC683179  | 683179 | 1,05 | up   |

|         |         |         |                                                 |                                     |        |      |      |
|---------|---------|---------|-------------------------------------------------|-------------------------------------|--------|------|------|
| 6680527 | 7033337 | 969512  | similar to CG13745-PA                           | LOC683179                           | 683179 | 1,05 | down |
| 5791383 | 7033337 | 969511  | similar to CG13745-PA                           | LOC683179                           | 683179 | 1,04 | up   |
| 5772200 | 7033337 | 969505  | similar to CG13745-PA                           | LOC683179                           | 683179 | 1,03 | down |
| 6527247 | 7033337 | 969515  | similar to CG13745-PA                           | LOC683179                           | 683179 | 1,02 | up   |
| 6250144 | 7033337 | 969510  | similar to CG13745-PA                           | LOC683179                           | 683179 | 1,01 | up   |
| 6237741 | 7033337 | 969516  | similar to CG13745-PA                           | LOC683179                           | 683179 | 1,00 | down |
| 6737163 | 7237674 | 1467321 | similar to CG17122-PA                           | LOC499781                           | 499781 | 2,20 | down |
| 6326003 | 7237674 | 1467317 | similar to CG17122-PA                           | LOC499781                           | 499781 | 1,56 | up   |
| 5688373 | 7237674 | 1467318 | similar to CG17122-PA                           | LOC499781                           | 499781 | 1,35 | up   |
| 6055133 | 7237674 | 1467320 | similar to CG17122-PA                           | LOC499781                           | 499781 | 1,25 | down |
| 5708035 | 7237674 | 1467312 | similar to CG17122-PA                           | LOC499781                           | 499781 | 1,23 | up   |
| 6281085 | 7237674 | 1467319 | similar to CG17122-PA                           | LOC499781                           | 499781 | 1,12 | up   |
| 6156960 | 7237674 | 1467322 | similar to CG17122-PA                           | LOC499781                           | 499781 | 1,08 | down |
| 5761190 | 7237674 | 1467313 | similar to CG17122-PA                           | LOC499781                           | 499781 | 1,08 | down |
| 6331744 | 7237674 | 1467311 | similar to CG17122-PA                           | LOC499781                           | 499781 | 1,07 | up   |
| 5870055 | 7237674 | 1467314 | similar to CG17122-PA                           | LOC499781                           | 499781 | 1,06 | up   |
| 5703233 | 7237674 | 1467312 | similar to CG17122-PA                           | LOC499781                           | 499781 | 1,01 | down |
| 5738346 | 7355580 | 1758873 | similar to CG18437-PA                           | LOC689998                           | 689998 | 2,52 | up   |
| 5879149 | 7355580 | 1758846 | similar to CG18437-PA                           | LOC689991                           | 689991 | 1,30 | up   |
| 6207275 | 7355580 | 1758847 | similar to CG18437-PA                           | LOC689991                           | 689991 | 1,16 | up   |
| 6630646 | 7355580 | 1758875 | similar to CG18437-PA                           | LOC689998                           | 689998 | 1,13 | down |
| 6170621 | 7355580 | 1758873 | similar to CG18437-PA                           | LOC689998                           | 689998 | 1,13 | up   |
| 6571710 | 7355580 | 1758873 | similar to CG18437-PA                           | LOC689998                           | 689998 | 1,09 | up   |
| 5873272 | 7355580 | 1758868 | similar to CG18437-PA                           | LOC689991                           | 689991 | 1,09 | up   |
| 6068001 | 7355580 | 1758850 | similar to CG18437-PA /// similar to CG18437-PA | 689991 /// LOC31c 689991 /// 316460 |        | 2,16 | up   |
| 6295653 | 7355580 | 1758844 | similar to CG18437-PA /// similar to CG18437-PA | 689991 /// LOC31c 689991 /// 316460 |        | 1,51 | down |
| 6106103 | 7355580 | 1758838 | similar to CG18437-PA /// similar to CG18437-PA | 689991 /// LOC31c 689991 /// 316460 |        | 1,49 | down |
| 5769786 | 7355580 | 1758850 | similar to CG18437-PA /// similar to CG18437-PA | 689991 /// LOC31c 689991 /// 316460 |        | 1,34 | down |
| 5636541 | 7355580 | 1758891 | similar to CG18437-PA /// similar to CG18437-PA | 689998 /// LOC31c 689998 /// 316460 |        | 1,31 | up   |
| 5935156 | 7355580 | 1758833 | similar to CG18437-PA /// similar to CG18437-PA | 689991 /// LOC31c 689991 /// 316460 |        | 1,30 | up   |
| 6722115 | 7355580 | 1758843 | similar to CG18437-PA /// similar to CG18437-PA | 689991 /// LOC31c 689991 /// 316460 |        | 1,27 | down |
| 6148428 | 7355580 | 1758895 | similar to CG18437-PA /// similar to CG18437-PA | 689998 /// LOC31c 689998 /// 316460 |        | 1,26 | up   |
| 6471213 | 7355580 | 1758830 | similar to CG18437-PA /// similar to CG18437-PA | 689991 /// LOC31c 689991 /// 316460 |        | 1,23 | down |
| 6161489 | 7355580 | 1758884 | similar to CG18437-PA /// similar to CG18437-PA | 689998 /// LOC31c 689998 /// 316460 |        | 1,21 | up   |
| 6490679 | 7355580 | 1758829 | similar to CG18437-PA /// similar to CG18437-PA | 689991 /// LOC31c 689991 /// 316460 |        | 1,21 | down |
| 6355958 | 7355580 | 1758882 | similar to CG18437-PA /// similar to CG18437-PA | 689998 /// LOC31c 689998 /// 316460 |        | 1,17 | up   |
| 6140767 | 7355580 | 1758836 | similar to CG18437-PA /// similar to CG18437-PA | 689991 /// LOC31c 689991 /// 316460 |        | 1,16 | down |
| 6292207 | 7355580 | 1758840 | similar to CG18437-PA /// similar to CG18437-PA | 689991 /// LOC31c 689991 /// 316460 |        | 1,15 | down |
| 5845544 | 7355580 | 1758845 | similar to CG18437-PA /// similar to CG18437-PA | 689991 /// LOC31c 689991 /// 316460 |        | 1,15 | down |
| 5913416 | 7355580 | 1758854 | similar to CG18437-PA /// similar to CG18437-PA | 689991 /// LOC31c 689991 /// 316460 |        | 1,12 | down |
| 6188447 | 7355580 | 1758853 | similar to CG18437-PA /// similar to CG18437-PA | 689991 /// LOC31c 689991 /// 316460 |        | 1,12 | up   |
| 6594133 | 7355580 | 1758837 | similar to CG18437-PA /// similar to CG18437-PA | 689991 /// LOC31c 689991 /// 316460 |        | 1,11 | down |
| 6071178 | 7355580 | 1758848 | similar to CG18437-PA /// similar to CG18437-PA | 689991 /// LOC31c 689991 /// 316460 |        | 1,11 | up   |
| 6197611 | 7355580 | 1758855 | similar to CG18437-PA /// similar to CG18437-PA | 689991 /// LOC31c 689991 /// 316460 |        | 1,11 | up   |
| 6112587 | 7355580 | 1758865 | similar to CG18437-PA /// similar to CG18437-PA | 689991 /// LOC31c 689991 /// 316460 |        | 1,11 | up   |
| 6340606 | 7355580 | 1758866 | similar to CG18437-PA /// similar to CG18437-PA | 689991 /// LOC31c 689991 /// 316460 |        | 1,11 | up   |
| 6618174 | 7355580 | 1758893 | similar to CG18437-PA /// similar to CG18437-PA | 689998 /// LOC31c 689998 /// 316460 |        | 1,10 | down |
| 5959251 | 7355580 | 1758894 | similar to CG18437-PA /// similar to CG18437-PA | 689998 /// LOC31c 689998 /// 316460 |        | 1,09 | down |
| 6664242 | 7355580 | 1758865 | similar to CG18437-PA /// similar to CG18437-PA | 689991 /// LOC31c 689991 /// 316460 |        | 1,09 | down |
| 5961960 | 7355580 | 1758862 | similar to CG18437-PA /// similar to CG18437-PA | 689991 /// LOC31c 689991 /// 316460 |        | 1,09 | down |
| 5785205 | 7355580 | 1758849 | similar to CG18437-PA /// similar to CG18437-PA | 689991 /// LOC31c 689991 /// 316460 |        | 1,08 | down |
| 5656927 | 7355580 | 1758871 | similar to CG18437-PA /// similar to CG18437-PA | 689991 /// LOC31c 689991 /// 316460 |        | 1,08 | down |
| 6076450 | 7355580 | 1758859 | similar to CG18437-PA /// similar to CG18437-PA | 689991 /// LOC31c 689991 /// 316460 |        | 1,08 | down |
| 6442701 | 7355580 | 1758850 | similar to CG18437-PA /// similar to CG18437-PA | 689991 /// LOC31c 689991 /// 316460 |        | 1,08 | down |
| 5751511 | 7355580 | 1758884 | similar to CG18437-PA /// similar to CG18437-PA | 689998 /// LOC31c 689998 /// 316460 |        | 1,08 | down |
| 5877038 | 7355580 | 1758889 | similar to CG18437-PA /// similar to CG18437-PA | 689998 /// LOC31c 689998 /// 316460 |        | 1,07 | up   |
| 6518913 | 7355580 | 1758866 | similar to CG18437-PA /// similar to CG18437-PA | 689991 /// LOC31c 689991 /// 316460 |        | 1,07 | down |

|         |         |         |                                                 |                                     |        |      |      |
|---------|---------|---------|-------------------------------------------------|-------------------------------------|--------|------|------|
| 5942590 | 7355580 | 1758856 | similar to CG18437-PA /// similar to CG18437-PA | 7689991 /// LOC316689991 /// 316460 | 1,07   | down |      |
| 6185211 | 7355580 | 1758863 | similar to CG18437-PA /// similar to CG18437-PA | 7689991 /// LOC316689991 /// 316460 | 1,07   | up   |      |
| 6567486 | 7355580 | 1758857 | similar to CG18437-PA /// similar to CG18437-PA | 7689991 /// LOC316689991 /// 316460 | 1,07   | down |      |
| 5974519 | 7355580 | 1758834 | similar to CG18437-PA /// similar to CG18437-PA | 7689991 /// LOC316689991 /// 316460 | 1,07   | up   |      |
| 6104333 | 7355580 | 1758837 | similar to CG18437-PA /// similar to CG18437-PA | 7689991 /// LOC316689991 /// 316460 | 1,05   | down |      |
| 6256301 | 7355580 | 1758832 | similar to CG18437-PA /// similar to CG18437-PA | 7689991 /// LOC316689991 /// 316460 | 1,05   | down |      |
| 6721571 | 7355580 | 1758839 | similar to CG18437-PA /// similar to CG18437-PA | 7689991 /// LOC316689991 /// 316460 | 1,05   | down |      |
| 5834711 | 7355580 | 1758835 | similar to CG18437-PA /// similar to CG18437-PA | 7689991 /// LOC316689991 /// 316460 | 1,04   | down |      |
| 5817187 | 7355580 | 1758851 | similar to CG18437-PA /// similar to CG18437-PA | 7689991 /// LOC316689991 /// 316460 | 1,04   | up   |      |
| 5978989 | 7355580 | 1758844 | similar to CG18437-PA /// similar to CG18437-PA | 7689991 /// LOC316689991 /// 316460 | 1,03   | down |      |
| 6413595 | 7355580 | 1758852 | similar to CG18437-PA /// similar to CG18437-PA | 7689991 /// LOC316689991 /// 316460 | 1,03   | up   |      |
| 5905623 | 7355580 | 1758870 | similar to CG18437-PA /// similar to CG18437-PA | 7689991 /// LOC316689991 /// 316460 | 1,03   | down |      |
| 6295390 | 7355580 | 1758883 | similar to CG18437-PA /// similar to CG18437-PA | 7689998 /// LOC316689998 /// 316460 | 1,02   | down |      |
| 6656004 | 7355580 | 1758881 | similar to CG18437-PA /// similar to CG18437-PA | 7689998 /// LOC316689998 /// 316460 | 1,02   | down |      |
| 5652478 | 7355580 | 1758841 | similar to CG18437-PA /// similar to CG18437-PA | 7689991 /// LOC316689991 /// 316460 | 1,01   | down |      |
| 6105853 | 7355580 | 1758869 | similar to CG18437-PA /// similar to CG18437-PA | 7689991 /// LOC316689991 /// 316460 | 1,01   | up   |      |
| 5858723 | 7355580 | 1758880 | similar to CG18437-PA /// similar to CG18437-PA | 7689998 /// LOC316689998 /// 316460 | 1,00   | up   |      |
| 5919281 | 7290474 | 1597973 | similar to CG4329-PA, isoform A                 | LOC679620                           | 679620 | 1,21 | up   |
| 5972549 | 7290474 | 1597970 | similar to CG4329-PA, isoform A                 | LOC679620                           | 679620 | 1,14 | up   |
| 6532024 | 7290474 | 1597974 | similar to CG4329-PA, isoform A                 | LOC679620                           | 679620 | 1,10 | up   |
| 5931962 | 7290474 | 1597972 | similar to CG4329-PA, isoform A                 | LOC679620                           | 679620 | 1,08 | down |
| 5883290 | 7176456 | 1315800 | similar to CG8486-PA, isoform A                 | LOC682889                           | 682889 | 2,28 | down |
| 5652729 | 7176456 | 1315806 | similar to CG8486-PA, isoform A                 | LOC682889                           | 682889 | 1,87 | down |
| 6025413 | 7176456 | 1315809 | similar to CG8486-PA, isoform A                 | LOC682889                           | 682889 | 1,69 | up   |
| 6194504 | 7176456 | 1315813 | similar to CG8486-PA, isoform A                 | LOC682889                           | 682889 | 1,60 | up   |
| 6311297 | 7176456 | 1315873 | similar to CG8486-PA, isoform A                 | LOC682889                           | 682889 | 1,58 | up   |
| 5828535 | 7176456 | 1315805 | similar to CG8486-PA, isoform A                 | LOC682889                           | 682889 | 1,56 | up   |
| 6665883 | 7176456 | 1315808 | similar to CG8486-PA, isoform A                 | LOC682889                           | 682889 | 1,36 | down |
| 6259826 | 7176456 | 1315817 | similar to CG8486-PA, isoform A                 | LOC682889                           | 682889 | 1,29 | up   |
| 5940186 | 7176456 | 1315804 | similar to CG8486-PA, isoform A                 | LOC682889                           | 682889 | 1,23 | up   |
| 5694306 | 7176456 | 1315827 | similar to CG8486-PA, isoform A                 | LOC682889                           | 682889 | 1,22 | down |
| 6481811 | 7176456 | 1315827 | similar to CG8486-PA, isoform A                 | LOC682889                           | 682889 | 1,21 | up   |
| 6570350 | 7176456 | 1315811 | similar to CG8486-PA, isoform A                 | LOC682889                           | 682889 | 1,20 | down |
| 6415377 | 7176456 | 1315824 | similar to CG8486-PA, isoform A                 | LOC682889                           | 682889 | 1,16 | down |
| 6395982 | 7176456 | 1315813 | similar to CG8486-PA, isoform A                 | LOC682889                           | 682889 | 1,15 | down |
| 5991201 | 7176456 | 1315826 | similar to CG8486-PA, isoform A                 | LOC682889                           | 682889 | 1,11 | down |
| 5628514 | 7176456 | 1315826 | similar to CG8486-PA, isoform A                 | LOC682889                           | 682889 | 1,06 | up   |
| 6100260 | 7176456 | 1315799 | similar to CG8486-PA, isoform A                 | LOC682889                           | 682889 | 1,06 | up   |
| 6080784 | 7176456 | 1315819 | similar to CG8486-PA, isoform A                 | LOC682889                           | 682889 | 1,04 | down |
| 5987380 | 7176456 | 1315796 | similar to CG8486-PA, isoform A                 | LOC682889                           | 682889 | 1,04 | down |
| 6145891 | 7176456 | 1315863 | similar to CG8486-PA, isoform A                 | LOC682889                           | 682889 | 1,03 | up   |
| 5946619 | 7176456 | 1315801 | similar to CG8486-PA, isoform A                 | LOC682889                           | 682889 | 1,03 | up   |
| 6097255 | 7176456 | 1315884 | similar to CG8486-PA, isoform A                 | LOC682889                           | 682889 | 1,02 | up   |
| 6520638 | 7176456 | 1315810 | similar to CG8486-PA, isoform A                 | LOC682889                           | 682889 | 1,01 | down |
| 6497132 | 7176456 | 1315819 | similar to CG8486-PA, isoform A                 | LOC682889                           | 682889 | 1,00 | up   |
| 6363982 | 7176456 | 1315812 | similar to CG8486-PA, isoform A                 | LOC682889                           | 682889 | 1,00 | down |
| 6329082 | 7330314 | 1696131 | similar to CG9646-PA                            | RGD1304694                          | 362974 | 1,28 | down |
| 6471992 | 7330314 | 1696129 | similar to CG9646-PA                            | RGD1304694                          | 362974 | 1,17 | down |
| 6668224 | 7330314 | 1696133 | similar to CG9646-PA                            | RGD1304694                          | 362974 | 1,16 | down |
| 5779410 | 7330314 | 1696128 | similar to CG9646-PA                            | RGD1304694                          | 362974 | 1,11 | down |
| 6115371 | 7330314 | 1696128 | similar to CG9646-PA                            | RGD1304694                          | 362974 | 1,10 | down |
| 6155740 | 7330314 | 1696130 | similar to CG9646-PA                            | RGD1304694                          | 362974 | 1,08 | up   |
| 5626830 | 7210568 | 1400450 | similar to CGI-41 protein                       | RGD1311265                          | 361976 | 2,07 | down |
| 6607999 | 7210568 | 1400453 | similar to CGI-41 protein                       | RGD1311265                          | 361976 | 1,75 | up   |
| 6134991 | 7210568 | 1400446 | similar to CGI-41 protein                       | RGD1311265                          | 361976 | 1,65 | up   |
| 6476085 | 7210568 | 1400453 | similar to CGI-41 protein                       | RGD1311265                          | 361976 | 1,60 | up   |
| 6179610 | 7210568 | 1400452 | similar to CGI-41 protein                       | RGD1311265                          | 361976 | 1,35 | up   |

|         |         |         |                                                 |            |        |      |      |
|---------|---------|---------|-------------------------------------------------|------------|--------|------|------|
| 6316458 | 7210568 | 1400449 | similar to CGI-41 protein                       | RGD1311265 | 361976 | 1,34 | up   |
| 5800300 | 7210568 | 1400448 | similar to CGI-41 protein                       | RGD1311265 | 361976 | 1,28 | down |
| 5889601 | 7210568 | 1400445 | similar to CGI-41 protein                       | RGD1311265 | 361976 | 1,22 | down |
| 6531852 | 7210568 | 1400445 | similar to CGI-41 protein                       | RGD1311265 | 361976 | 1,18 | down |
| 6149138 | 7210568 | 1400447 | similar to CGI-41 protein                       | RGD1311265 | 361976 | 1,08 | up   |
| 6715332 | 7210568 | 1400450 | similar to CGI-41 protein                       | RGD1311265 | 361976 | 1,07 | down |
| 5839675 | 7210568 | 1400451 | similar to CGI-41 protein                       | RGD1311265 | 361976 | 1,01 | up   |
| 5640910 | 7196233 | 1366104 | similar to chromosome 1 open reading frame 2    | RGD1306107 | 310640 | 1,84 | down |
| 6050231 | 7196233 | 1366104 | similar to chromosome 1 open reading frame 2    | RGD1306107 | 310640 | 1,66 | up   |
| 5813175 | 7196233 | 1366096 | similar to chromosome 1 open reading frame 2    | RGD1306107 | 310640 | 1,57 | down |
| 6044395 | 7196233 | 1366098 | similar to chromosome 1 open reading frame 2    | RGD1306107 | 310640 | 1,55 | down |
| 6390028 | 7196233 | 1366099 | similar to chromosome 1 open reading frame 2    | RGD1306107 | 310640 | 1,50 | down |
| 6559829 | 7196233 | 1366097 | similar to chromosome 1 open reading frame 2    | RGD1306107 | 310640 | 1,44 | down |
| 5773717 | 7196233 | 1366095 | similar to chromosome 1 open reading frame 2    | RGD1306107 | 310640 | 1,40 | down |
| 6528797 | 7196233 | 1366100 | similar to chromosome 1 open reading frame 2    | RGD1306107 | 310640 | 1,39 | down |
| 5901186 | 7196233 | 1366105 | similar to chromosome 1 open reading frame 2    | RGD1306107 | 310640 | 1,32 | down |
| 6131027 | 7196233 | 1366098 | similar to chromosome 1 open reading frame 2    | RGD1306107 | 310640 | 1,26 | down |
| 5971663 | 7196233 | 1366100 | similar to chromosome 1 open reading frame 2    | RGD1306107 | 310640 | 1,23 | down |
| 5675596 | 7196233 | 1366104 | similar to chromosome 1 open reading frame 2    | RGD1306107 | 310640 | 1,20 | up   |
| 6348217 | 7196233 | 1366101 | similar to chromosome 1 open reading frame 2    | RGD1306107 | 310640 | 1,16 | up   |
| 6052097 | 7196233 | 1366102 | similar to chromosome 1 open reading frame 2    | RGD1306107 | 310640 | 1,16 | down |
| 6106916 | 7196233 | 1366098 | similar to chromosome 1 open reading frame 2    | RGD1306107 | 310640 | 1,06 | up   |
| 6235651 | 7196233 | 1366105 | similar to chromosome 1 open reading frame 2    | RGD1306107 | 310640 | 1,05 | up   |
| 6034211 | 7196233 | 1366103 | similar to chromosome 1 open reading frame 2    | RGD1306107 | 310640 | 1,00 | up   |
| 6658067 | 7148978 | 1248516 | similar to chromosome 10 open reading frame 64  | RGD1564142 | 498582 | 1,46 | down |
| 6611522 | 7148978 | 1248520 | similar to chromosome 10 open reading frame 64  | RGD1564142 | 498582 | 1,19 | down |
| 5667710 | 7148978 | 1248513 | similar to chromosome 10 open reading frame 64  | RGD1564142 | 498582 | 1,15 | up   |
| 5745091 | 7148978 | 1248449 | similar to chromosome 10 open reading frame 64  | RGD1564142 | 498582 | 1,12 | down |
| 6672115 | 7148978 | 1248519 | similar to chromosome 10 open reading frame 64  | RGD1564142 | 498582 | 1,11 | up   |
| 5705503 | 7148978 | 1248485 | similar to chromosome 10 open reading frame 64  | RGD1564142 | 498582 | 1,11 | down |
| 6515905 | 7148978 | 1248518 | similar to chromosome 10 open reading frame 64  | RGD1564142 | 498582 | 1,10 | up   |
| 6389498 | 7148978 | 1248517 | similar to chromosome 10 open reading frame 64  | RGD1564142 | 498582 | 1,09 | up   |
| 6119093 | 7148978 | 1248510 | similar to chromosome 10 open reading frame 64  | RGD1564142 | 498582 | 1,08 | down |
| 6683120 | 7148978 | 1248512 | similar to chromosome 10 open reading frame 64  | RGD1564142 | 498582 | 1,07 | up   |
| 6419928 | 7148978 | 1248504 | similar to chromosome 10 open reading frame 64  | RGD1564142 | 498582 | 1,06 | up   |
| 6120673 | 7058507 | 1028325 | similar to chromosome 10 open reading frame 92  | RGD1559985 | 499282 | 1,03 | up   |
| 6658604 | 7307424 | 1641136 | similar to chromosome 14 open reading frame 138 | RGD1306228 | 362748 | 1,56 | down |
| 6266691 | 7073928 | 1065793 | similar to chromosome 17 open reading frame 27  | LOC688296  | 688296 | 3,07 | down |
| 6071339 | 7073928 | 1065793 | similar to chromosome 17 open reading frame 27  | LOC688296  | 688296 | 3,06 | down |
| 5852355 | 7073928 | 1065802 | similar to chromosome 17 open reading frame 27  | LOC688296  | 688296 | 1,94 | up   |
| 6338438 | 7073928 | 1065810 | similar to chromosome 17 open reading frame 27  | LOC688296  | 688296 | 1,86 | down |
| 6221838 | 7073928 | 1065814 | similar to chromosome 17 open reading frame 27  | LOC688296  | 688296 | 1,85 | down |
| 6380485 | 7073928 | 1065790 | similar to chromosome 17 open reading frame 27  | LOC688296  | 688296 | 1,80 | up   |
| 6111329 | 7073928 | 1065806 | similar to chromosome 17 open reading frame 27  | LOC688296  | 688296 | 1,58 | down |
| 6065417 | 7073928 | 1065803 | similar to chromosome 17 open reading frame 27  | LOC688296  | 688296 | 1,57 | down |
| 6730743 | 7073928 | 1065788 | similar to chromosome 17 open reading frame 27  | LOC688296  | 688296 | 1,51 | up   |
| 6716406 | 7073928 | 1065796 | similar to chromosome 17 open reading frame 27  | LOC688296  | 688296 | 1,44 | up   |
| 5901154 | 7073928 | 1065784 | similar to chromosome 17 open reading frame 27  | LOC688296  | 688296 | 1,39 | up   |
| 6063581 | 7073928 | 1065794 | similar to chromosome 17 open reading frame 27  | LOC688296  | 688296 | 1,34 | down |
| 6481678 | 7073928 | 1065801 | similar to chromosome 17 open reading frame 27  | LOC688296  | 688296 | 1,34 | up   |
| 6213322 | 7073928 | 1065811 | similar to chromosome 17 open reading frame 27  | LOC688296  | 688296 | 1,33 | up   |
| 6475186 | 7073928 | 1065791 | similar to chromosome 17 open reading frame 27  | LOC688296  | 688296 | 1,32 | up   |
| 6599099 | 7073928 | 1065797 | similar to chromosome 17 open reading frame 27  | LOC688296  | 688296 | 1,26 | up   |
| 5669571 | 7073928 | 1065800 | similar to chromosome 17 open reading frame 27  | LOC688296  | 688296 | 1,26 | up   |
| 5655432 | 7073928 | 1065795 | similar to chromosome 17 open reading frame 27  | LOC688296  | 688296 | 1,24 | up   |
| 6096532 | 7073928 | 1065782 | similar to chromosome 17 open reading frame 27  | LOC688296  | 688296 | 1,22 | up   |
| 6276880 | 7073928 | 1065808 | similar to chromosome 17 open reading frame 27  | LOC688296  | 688296 | 1,19 | up   |

|         |         |         |                                                                                |                                     |        |      |      |
|---------|---------|---------|--------------------------------------------------------------------------------|-------------------------------------|--------|------|------|
| 5648836 | 7073928 | 1065787 | similar to chromosome 17 open reading frame 27                                 | LOC688296                           | 688296 | 1,18 | up   |
| 6493534 | 7073928 | 1065785 | similar to chromosome 17 open reading frame 27                                 | LOC688296                           | 688296 | 1,16 | up   |
| 5936882 | 7073928 | 1065813 | similar to chromosome 17 open reading frame 27                                 | LOC688296                           | 688296 | 1,09 | down |
| 6187219 | 7073928 | 1065783 | similar to chromosome 17 open reading frame 27                                 | LOC688296                           | 688296 | 1,06 | up   |
| 6679786 | 7073928 | 1065807 | similar to chromosome 17 open reading frame 27                                 | LOC688296                           | 688296 | 1,06 | up   |
| 6330482 | 7073928 | 1065786 | similar to chromosome 17 open reading frame 27                                 | LOC688296                           | 688296 | 1,03 | down |
| 5912792 | 7073928 | 1065792 | similar to chromosome 17 open reading frame 27                                 | LOC688296                           | 688296 | 1,02 | down |
| 6538161 | 7073928 | 1065809 | similar to chromosome 17 open reading frame 27                                 | LOC688296                           | 688296 | 1,02 | up   |
| 6363965 | 7073928 | 1065815 | similar to chromosome 17 open reading frame 27                                 | LOC688296                           | 688296 | 1,02 | up   |
| 6700923 | 7073928 | 1065798 | similar to chromosome 17 open reading frame 27                                 | LOC688296                           | 688296 | 1,01 | up   |
| 5882783 | 7073928 | 1065812 | similar to chromosome 17 open reading frame 27                                 | LOC688296                           | 688296 | 1,01 | up   |
| 6719888 | 7225543 | 1435943 | similar to chromosome 9 open reading frame 7                                   | RGD1311501                          | 296599 | 1,82 | up   |
| 6027816 | 7225543 | 1435941 | similar to chromosome 9 open reading frame 7                                   | RGD1311501                          | 296599 | 1,21 | up   |
| 5874899 | 7225543 | 1435943 | similar to chromosome 9 open reading frame 7                                   | RGD1311501                          | 296599 | 1,20 | down |
| 6410411 | 7225543 | 1435942 | similar to chromosome 9 open reading frame 7                                   | RGD1311501                          | 296599 | 1,07 | up   |
| 6506129 | 7225543 | 1435944 | similar to chromosome 9 open reading frame 7                                   | RGD1311501                          | 296599 | 1,07 | up   |
| 6456438 | 7381352 | 1823755 | similar to chromosome X open reading frame 23                                  | RGD1562161                          | 501559 | 3,89 | up   |
| 6239885 | 7381352 | 1823745 | similar to chromosome X open reading frame 23                                  | RGD1562161                          | 501559 | 1,66 | up   |
| 6193538 | 7381352 | 1823751 | similar to chromosome X open reading frame 23                                  | RGD1562161                          | 501559 | 1,64 | down |
| 6181832 | 7381352 | 1823747 | similar to chromosome X open reading frame 23                                  | RGD1562161                          | 501559 | 1,63 | down |
| 5972252 | 7381352 | 1823752 | similar to chromosome X open reading frame 23                                  | RGD1562161                          | 501559 | 1,44 | up   |
| 6348865 | 7381352 | 1823749 | similar to chromosome X open reading frame 23                                  | RGD1562161                          | 501559 | 1,39 | up   |
| 6586304 | 7381352 | 1823742 | similar to chromosome X open reading frame 23                                  | RGD1562161                          | 501559 | 1,36 | down |
| 6358489 | 7381352 | 1823755 | similar to chromosome X open reading frame 23                                  | RGD1562161                          | 501559 | 1,34 | up   |
| 5892300 | 7381352 | 1823754 | similar to chromosome X open reading frame 23                                  | RGD1562161                          | 501559 | 1,30 | up   |
| 6293332 | 7381352 | 1823747 | similar to chromosome X open reading frame 23                                  | RGD1562161                          | 501559 | 1,28 | down |
| 5777615 | 7381352 | 1823759 | similar to chromosome X open reading frame 23                                  | RGD1562161                          | 501559 | 1,19 | up   |
| 5830348 | 7381352 | 1823755 | similar to chromosome X open reading frame 23                                  | RGD1562161                          | 501559 | 1,13 | down |
| 6006172 | 7381352 | 1823753 | similar to chromosome X open reading frame 23                                  | RGD1562161                          | 501559 | 1,09 | up   |
| 6488773 | 7381352 | 1823742 | similar to chromosome X open reading frame 23                                  | RGD1562161                          | 501559 | 1,08 | down |
| 6592587 | 7381352 | 1823756 | similar to chromosome X open reading frame 23                                  | RGD1562161                          | 501559 | 1,07 | down |
| 5824789 | 7381352 | 1823755 | similar to chromosome X open reading frame 23                                  | RGD1562161                          | 501559 | 1,04 | up   |
| 6510050 | 7381352 | 1823746 | similar to chromosome X open reading frame 23                                  | RGD1562161                          | 501559 | 1,03 | up   |
| 6520944 | 7222236 | 1428113 | similar to coiled-coil domain containing 6 /// coiled-coil domain containing 6 | OC687820 /// Ccdc 687820 /// 691155 |        | 1,08 | down |
| 6109180 | 7029181 | 959075  | similar to coiled-coil domain containing 8                                     | MGC72567                            | 494320 | 3,85 | up   |
| 6102704 | 7029181 | 959074  | similar to coiled-coil domain containing 8                                     | MGC72567                            | 494320 | 1,53 | up   |
| 5620722 | 7029181 | 959078  | similar to coiled-coil domain containing 8                                     | MGC72567                            | 494320 | 1,51 | up   |
| 6001445 | 7029181 | 959075  | similar to coiled-coil domain containing 8                                     | MGC72567                            | 494320 | 1,29 | down |
| 6210013 | 7029181 | 959075  | similar to coiled-coil domain containing 8                                     | MGC72567                            | 494320 | 1,27 | up   |
| 6405956 | 7029181 | 959078  | similar to coiled-coil domain containing 8                                     | MGC72567                            | 494320 | 1,20 | up   |
| 6688669 | 7029181 | 959078  | similar to coiled-coil domain containing 8                                     | MGC72567                            | 494320 | 1,17 | down |
| 5632044 | 7029181 | 959075  | similar to coiled-coil domain containing 8                                     | MGC72567                            | 494320 | 1,15 | down |
| 5740875 | 7029181 | 959075  | similar to coiled-coil domain containing 8                                     | MGC72567                            | 494320 | 1,14 | up   |
| 6636070 | 7029181 | 959078  | similar to coiled-coil domain containing 8                                     | MGC72567                            | 494320 | 1,10 | up   |
| 5667148 | 7029181 | 959076  | similar to coiled-coil domain containing 8                                     | MGC72567                            | 494320 | 1,09 | up   |
| 5842079 | 7029181 | 959075  | similar to coiled-coil domain containing 8                                     | MGC72567                            | 494320 | 1,08 | down |
| 6346299 | 7029181 | 959078  | similar to coiled-coil domain containing 8                                     | MGC72567                            | 494320 | 1,04 | down |
| 6720035 | 7029181 | 959078  | similar to coiled-coil domain containing 8                                     | MGC72567                            | 494320 | 1,04 | down |
| 5897422 | 7029181 | 959077  | similar to coiled-coil domain containing 8                                     | MGC72567                            | 494320 | 1,03 | up   |
| 5846129 | 7029181 | 959075  | similar to coiled-coil domain containing 8                                     | MGC72567                            | 494320 | 1,02 | up   |
| 6686976 | 7106776 | 1144113 | similar to constitutive photomorphogenic protein 1                             | RGD1304773                          | 360860 | 1,13 | up   |
| 5946378 | 7253272 | 1505698 | similar to contactin associated protein-like 2 isoform a                       | LOC500105                           | 500105 | 2,39 | down |
| 6038996 | 7253272 | 1505586 | similar to contactin associated protein-like 2 isoform a                       | LOC500105                           | 500105 | 1,59 | up   |
| 6313029 | 7253272 | 1505644 | similar to contactin associated protein-like 2 isoform a                       | LOC500105                           | 500105 | 1,34 | down |
| 5910443 | 7253272 | 1505695 | similar to contactin associated protein-like 2 isoform a                       | LOC500105                           | 500105 | 1,33 | down |
| 6647294 | 7253272 | 1505604 | similar to contactin associated protein-like 2 isoform a                       | LOC500105                           | 500105 | 1,29 | down |
| 6073582 | 7253272 | 1505662 | similar to contactin associated protein-like 2 isoform a                       | LOC500105                           | 500105 | 1,27 | down |

|         |         |         |                                                          |           |        |      |      |
|---------|---------|---------|----------------------------------------------------------|-----------|--------|------|------|
| 5920229 | 7253272 | 1505699 | similar to contactin associated protein-like 2 isoform a | LOC500105 | 500105 | 1,25 | down |
| 5806434 | 7253272 | 1505676 | similar to contactin associated protein-like 2 isoform a | LOC500105 | 500105 | 1,21 | down |
| 6618875 | 7253272 | 1505664 | similar to contactin associated protein-like 2 isoform a | LOC500105 | 500105 | 1,17 | down |
| 6619159 | 7253272 | 1505685 | similar to contactin associated protein-like 2 isoform a | LOC500105 | 500105 | 1,14 | down |
| 6027370 | 7253272 | 1505593 | similar to contactin associated protein-like 2 isoform a | LOC500105 | 500105 | 1,06 | down |
| 5715751 | 7253272 | 1505624 | similar to contactin associated protein-like 2 isoform a | LOC500105 | 500105 | 1,04 | down |
| 5814503 | 7253272 | 1505636 | similar to contactin associated protein-like 2 isoform a | LOC500105 | 500105 | 1,01 | down |
| 6518260 | 7253272 | 1505678 | similar to contactin associated protein-like 2 isoform a | LOC500105 | 500105 | 1,01 | down |
| 6640438 | 7327249 | 1688573 | similar to CUB and Sushi multiple domains 3 isoform 1    | LOC314942 | 314942 | 2,29 | down |
| 6312373 | 7327249 | 1688580 | similar to CUB and Sushi multiple domains 3 isoform 1    | LOC314942 | 314942 | 1,73 | down |
| 5998971 | 7327249 | 1688646 | similar to CUB and Sushi multiple domains 3 isoform 1    | LOC314942 | 314942 | 1,62 | up   |
| 6194245 | 7327249 | 1688581 | similar to CUB and Sushi multiple domains 3 isoform 1    | LOC314942 | 314942 | 1,59 | up   |
| 6047056 | 7327249 | 1688584 | similar to CUB and Sushi multiple domains 3 isoform 1    | LOC314942 | 314942 | 1,50 | up   |
| 6018713 | 7327249 | 1688620 | similar to CUB and Sushi multiple domains 3 isoform 1    | LOC314942 | 314942 | 1,49 | up   |
| 5829461 | 7327249 | 1688597 | similar to CUB and Sushi multiple domains 3 isoform 1    | LOC314942 | 314942 | 1,48 | down |
| 6009877 | 7327249 | 1688616 | similar to CUB and Sushi multiple domains 3 isoform 1    | LOC314942 | 314942 | 1,46 | down |
| 6208704 | 7327249 | 1688630 | similar to CUB and Sushi multiple domains 3 isoform 1    | LOC314942 | 314942 | 1,46 | up   |
| 5699404 | 7327249 | 1688591 | similar to CUB and Sushi multiple domains 3 isoform 1    | LOC314942 | 314942 | 1,45 | up   |
| 6319662 | 7327249 | 1688715 | similar to CUB and Sushi multiple domains 3 isoform 1    | LOC314942 | 314942 | 1,43 | down |
| 6008133 | 7327249 | 1688604 | similar to CUB and Sushi multiple domains 3 isoform 1    | LOC314942 | 314942 | 1,42 | up   |
| 6399199 | 7327249 | 1688573 | similar to CUB and Sushi multiple domains 3 isoform 1    | LOC314942 | 314942 | 1,39 | up   |
| 6687733 | 7327249 | 1688573 | similar to CUB and Sushi multiple domains 3 isoform 1    | LOC314942 | 314942 | 1,36 | down |
| 6670254 | 7327249 | 1688611 | similar to CUB and Sushi multiple domains 3 isoform 1    | LOC314942 | 314942 | 1,36 | up   |
| 6497410 | 7327249 | 1688661 | similar to CUB and Sushi multiple domains 3 isoform 1    | LOC314942 | 314942 | 1,35 | down |
| 6296435 | 7327249 | 1688604 | similar to CUB and Sushi multiple domains 3 isoform 1    | LOC314942 | 314942 | 1,33 | down |
| 5861159 | 7327249 | 1688634 | similar to CUB and Sushi multiple domains 3 isoform 1    | LOC314942 | 314942 | 1,32 | up   |
| 6422967 | 7327249 | 1688603 | similar to CUB and Sushi multiple domains 3 isoform 1    | LOC314942 | 314942 | 1,28 | up   |
| 6305234 | 7327249 | 1688676 | similar to CUB and Sushi multiple domains 3 isoform 1    | LOC314942 | 314942 | 1,28 | up   |
| 6422157 | 7327249 | 1688602 | similar to CUB and Sushi multiple domains 3 isoform 1    | LOC314942 | 314942 | 1,28 | down |
| 6479583 | 7327249 | 1688574 | similar to CUB and Sushi multiple domains 3 isoform 1    | LOC314942 | 314942 | 1,28 | down |
| 5977746 | 7327249 | 1688650 | similar to CUB and Sushi multiple domains 3 isoform 1    | LOC314942 | 314942 | 1,27 | down |
| 6231042 | 7327249 | 1688577 | similar to CUB and Sushi multiple domains 3 isoform 1    | LOC314942 | 314942 | 1,26 | up   |
| 6705338 | 7327249 | 1688649 | similar to CUB and Sushi multiple domains 3 isoform 1    | LOC314942 | 314942 | 1,25 | down |
| 6331465 | 7327249 | 1688680 | similar to CUB and Sushi multiple domains 3 isoform 1    | LOC314942 | 314942 | 1,24 | down |
| 5994908 | 7327249 | 1688622 | similar to CUB and Sushi multiple domains 3 isoform 1    | LOC314942 | 314942 | 1,23 | down |
| 6692715 | 7327249 | 1688638 | similar to CUB and Sushi multiple domains 3 isoform 1    | LOC314942 | 314942 | 1,21 | up   |
| 5797603 | 7327249 | 1688593 | similar to CUB and Sushi multiple domains 3 isoform 1    | LOC314942 | 314942 | 1,21 | down |
| 6245387 | 7327249 | 1688702 | similar to CUB and Sushi multiple domains 3 isoform 1    | LOC314942 | 314942 | 1,20 | down |
| 6523545 | 7327249 | 1688715 | similar to CUB and Sushi multiple domains 3 isoform 1    | LOC314942 | 314942 | 1,20 | down |
| 5714258 | 7327249 | 1688573 | similar to CUB and Sushi multiple domains 3 isoform 1    | LOC314942 | 314942 | 1,19 | down |
| 6077387 | 7327249 | 1688587 | similar to CUB and Sushi multiple domains 3 isoform 1    | LOC314942 | 314942 | 1,18 | up   |
| 6349679 | 7327249 | 1688594 | similar to CUB and Sushi multiple domains 3 isoform 1    | LOC314942 | 314942 | 1,17 | down |
| 6677712 | 7327249 | 1688701 | similar to CUB and Sushi multiple domains 3 isoform 1    | LOC314942 | 314942 | 1,17 | down |
| 6238716 | 7327249 | 1688665 | similar to CUB and Sushi multiple domains 3 isoform 1    | LOC314942 | 314942 | 1,17 | down |
| 6047654 | 7327249 | 1688653 | similar to CUB and Sushi multiple domains 3 isoform 1    | LOC314942 | 314942 | 1,16 | up   |
| 6145151 | 7327249 | 1688634 | similar to CUB and Sushi multiple domains 3 isoform 1    | LOC314942 | 314942 | 1,16 | down |
| 5800600 | 7327249 | 1688590 | similar to CUB and Sushi multiple domains 3 isoform 1    | LOC314942 | 314942 | 1,15 | up   |
| 5683428 | 7327249 | 1688636 | similar to CUB and Sushi multiple domains 3 isoform 1    | LOC314942 | 314942 | 1,15 | up   |
| 5633827 | 7327249 | 1688591 | similar to CUB and Sushi multiple domains 3 isoform 1    | LOC314942 | 314942 | 1,14 | up   |
| 5821516 | 7327249 | 1688687 | similar to CUB and Sushi multiple domains 3 isoform 1    | LOC314942 | 314942 | 1,14 | down |
| 6348966 | 7327249 | 1688606 | similar to CUB and Sushi multiple domains 3 isoform 1    | LOC314942 | 314942 | 1,13 | down |
| 6507727 | 7327249 | 1688621 | similar to CUB and Sushi multiple domains 3 isoform 1    | LOC314942 | 314942 | 1,11 | down |
| 5762855 | 7327249 | 1688596 | similar to CUB and Sushi multiple domains 3 isoform 1    | LOC314942 | 314942 | 1,11 | down |
| 6139912 | 7327249 | 1688586 | similar to CUB and Sushi multiple domains 3 isoform 1    | LOC314942 | 314942 | 1,10 | down |
| 5717276 | 7327249 | 1688575 | similar to CUB and Sushi multiple domains 3 isoform 1    | LOC314942 | 314942 | 1,10 | down |
| 5857909 | 7327249 | 1688676 | similar to CUB and Sushi multiple domains 3 isoform 1    | LOC314942 | 314942 | 1,10 | up   |
| 6218006 | 7327249 | 1688715 | similar to CUB and Sushi multiple domains 3 isoform 1    | LOC314942 | 314942 | 1,10 | up   |

|         |         |         |                                                       |            |        |      |      |
|---------|---------|---------|-------------------------------------------------------|------------|--------|------|------|
| 6006477 | 7327249 | 1688661 | similar to CUB and Sushi multiple domains 3 isoform 1 | LOC314942  | 314942 | 1,09 | down |
| 5821039 | 7327249 | 1688601 | similar to CUB and Sushi multiple domains 3 isoform 1 | LOC314942  | 314942 | 1,08 | down |
| 5697160 | 7327249 | 1688645 | similar to CUB and Sushi multiple domains 3 isoform 1 | LOC314942  | 314942 | 1,08 | down |
| 6679324 | 7327249 | 1688578 | similar to CUB and Sushi multiple domains 3 isoform 1 | LOC314942  | 314942 | 1,07 | down |
| 5668842 | 7327249 | 1688588 | similar to CUB and Sushi multiple domains 3 isoform 1 | LOC314942  | 314942 | 1,06 | down |
| 5893968 | 7327249 | 1688637 | similar to CUB and Sushi multiple domains 3 isoform 1 | LOC314942  | 314942 | 1,06 | up   |
| 6422584 | 7327249 | 1688630 | similar to CUB and Sushi multiple domains 3 isoform 1 | LOC314942  | 314942 | 1,06 | down |
| 6345452 | 7327249 | 1688640 | similar to CUB and Sushi multiple domains 3 isoform 1 | LOC314942  | 314942 | 1,06 | down |
| 5747284 | 7327249 | 1688613 | similar to CUB and Sushi multiple domains 3 isoform 1 | LOC314942  | 314942 | 1,05 | down |
| 5936597 | 7327249 | 1688695 | similar to CUB and Sushi multiple domains 3 isoform 1 | LOC314942  | 314942 | 1,05 | up   |
| 6073543 | 7327249 | 1688599 | similar to CUB and Sushi multiple domains 3 isoform 1 | LOC314942  | 314942 | 1,05 | up   |
| 6189492 | 7327249 | 1688573 | similar to CUB and Sushi multiple domains 3 isoform 1 | LOC314942  | 314942 | 1,05 | up   |
| 5859763 | 7327249 | 1688647 | similar to CUB and Sushi multiple domains 3 isoform 1 | LOC314942  | 314942 | 1,04 | down |
| 5749674 | 7327249 | 1688648 | similar to CUB and Sushi multiple domains 3 isoform 1 | LOC314942  | 314942 | 1,04 | down |
| 5956013 | 7327249 | 1688579 | similar to CUB and Sushi multiple domains 3 isoform 1 | LOC314942  | 314942 | 1,04 | down |
| 6164027 | 7327249 | 1688631 | similar to CUB and Sushi multiple domains 3 isoform 1 | LOC314942  | 314942 | 1,03 | up   |
| 5703585 | 7327249 | 1688583 | similar to CUB and Sushi multiple domains 3 isoform 1 | LOC314942  | 314942 | 1,03 | up   |
| 6463993 | 7327249 | 1688605 | similar to CUB and Sushi multiple domains 3 isoform 1 | LOC314942  | 314942 | 1,03 | down |
| 5678471 | 7327249 | 1688655 | similar to CUB and Sushi multiple domains 3 isoform 1 | LOC314942  | 314942 | 1,02 | up   |
| 5709369 | 7327249 | 1688633 | similar to CUB and Sushi multiple domains 3 isoform 1 | LOC314942  | 314942 | 1,02 | up   |
| 5901102 | 7327249 | 1688663 | similar to CUB and Sushi multiple domains 3 isoform 1 | LOC314942  | 314942 | 1,02 | up   |
| 6544463 | 7327249 | 1688592 | similar to CUB and Sushi multiple domains 3 isoform 1 | LOC314942  | 314942 | 1,02 | up   |
| 6660961 | 7327249 | 1688654 | similar to CUB and Sushi multiple domains 3 isoform 1 | LOC314942  | 314942 | 1,02 | up   |
| 6118380 | 7327249 | 1688589 | similar to CUB and Sushi multiple domains 3 isoform 1 | LOC314942  | 314942 | 1,02 | down |
| 6198255 | 7327249 | 1688674 | similar to CUB and Sushi multiple domains 3 isoform 1 | LOC314942  | 314942 | 1,01 | down |
| 6095830 | 7327249 | 1688573 | similar to CUB and Sushi multiple domains 3 isoform 1 | LOC314942  | 314942 | 1,01 | up   |
| 5795010 | 7327249 | 1688585 | similar to CUB and Sushi multiple domains 3 isoform 1 | LOC314942  | 314942 | 1,01 | up   |
| 6158892 | 7327249 | 1688595 | similar to CUB and Sushi multiple domains 3 isoform 1 | LOC314942  | 314942 | 1,01 | up   |
| 5768777 | 7327249 | 1688607 | similar to CUB and Sushi multiple domains 3 isoform 1 | LOC314942  | 314942 | 1,00 | down |
| 6405157 | 7327249 | 1688650 | similar to CUB and Sushi multiple domains 3 isoform 1 | LOC314942  | 314942 | 1,00 | up   |
| 6396235 | 7327249 | 1688630 | similar to CUB and Sushi multiple domains 3 isoform 1 | LOC314942  | 314942 | 1,00 | down |
| 5890231 | 7327249 | 1688672 | similar to CUB and Sushi multiple domains 3 isoform 1 | LOC314942  | 314942 | 1,00 | up   |
| 6206185 | 7327249 | 1688641 | similar to CUB and Sushi multiple domains 3 isoform 1 | LOC314942  | 314942 | 1,00 | up   |
| 6367634 | 7327249 | 1688627 | similar to CUB and Sushi multiple domains 3 isoform 1 | LOC314942  | 314942 | 1,00 | up   |
| 6545668 | 7327249 | 1688582 | similar to CUB and Sushi multiple domains 3 isoform 1 | LOC314942  | 314942 | 1,00 | up   |
| 6553449 | 7374790 | 1808774 | similar to CXORF15                                    | LOC302680  | 302680 | 3,10 | up   |
| 6483884 | 7374790 | 1808771 | similar to CXORF15                                    | LOC302680  | 302680 | 1,85 | up   |
| 6024574 | 7374790 | 1808773 | similar to CXORF15                                    | LOC302680  | 302680 | 1,60 | down |
| 5628187 | 7374790 | 1808772 | similar to CXORF15                                    | LOC302680  | 302680 | 1,46 | down |
| 5819511 | 7374790 | 1808770 | similar to CXORF15                                    | LOC302680  | 302680 | 1,30 | up   |
| 6504659 | 7374790 | 1808772 | similar to CXORF15                                    | LOC302680  | 302680 | 1,19 | up   |
| 6739964 | 7374790 | 1808775 | similar to CXORF15                                    | LOC302680  | 302680 | 1,16 | down |
| 6229013 | 7374790 | 1808776 | similar to CXORF15                                    | LOC302680  | 302680 | 1,15 | up   |
| 5842420 | 7374790 | 1808769 | similar to CXORF15                                    | LOC302680  | 302680 | 1,13 | up   |
| 6095498 | 7374790 | 1808769 | similar to CXORF15                                    | LOC302680  | 302680 | 1,11 | up   |
| 5714237 | 7374790 | 1808769 | similar to CXORF15                                    | LOC302680  | 302680 | 1,06 | up   |
| 5712887 | 7358053 | 1764843 | similar to D1Ert622e protein                          | RGD1562136 | 501195 | 3,11 | up   |
| 5838548 | 7358053 | 1764835 | similar to D1Ert622e protein                          | RGD1562136 | 501195 | 1,86 | down |
| 5866647 | 7358053 | 1764844 | similar to D1Ert622e protein                          | RGD1562136 | 501195 | 1,75 | up   |
| 6644009 | 7358053 | 1764835 | similar to D1Ert622e protein                          | RGD1562136 | 501195 | 1,50 | down |
| 6270420 | 7358053 | 1764843 | similar to D1Ert622e protein                          | RGD1562136 | 501195 | 1,45 | up   |
| 6425320 | 7358053 | 1764838 | similar to D1Ert622e protein                          | RGD1562136 | 501195 | 1,12 | up   |
| 6319859 | 7358048 | 1764819 | similar to D330021B20 protein                         | RGD1308143 | 316685 | 1,34 | up   |
| 6042530 | 7358048 | 1764821 | similar to D330021B20 protein                         | RGD1308143 | 316685 | 1,11 | up   |
| 6649730 | 7358048 | 1764821 | similar to D330021B20 protein                         | RGD1308143 | 316685 | 1,06 | down |
| 5989140 | 7358048 | 1764818 | similar to D330021B20 protein                         | RGD1308143 | 316685 | 1,05 | down |
| 5934406 | 7358048 | 1764810 | similar to D330021B20 protein                         | RGD1308143 | 316685 | 1,02 | down |

|         |         |         |                                                                                                                                                       |            |        |      |      |
|---------|---------|---------|-------------------------------------------------------------------------------------------------------------------------------------------------------|------------|--------|------|------|
| 6052241 | 7358048 | 1764814 | similar to D330021B20 protein                                                                                                                         | RGD1308143 | 316685 | 1,02 | down |
| 6499817 | 7140946 | 1228284 | similar to Dachshund homolog 1 (Dach1)                                                                                                                | LOC306096  | 306096 | 2,19 | up   |
| 6667090 | 7140946 | 1228299 | similar to Dachshund homolog 1 (Dach1)                                                                                                                | LOC306096  | 306096 | 1,99 | down |
| 6623448 | 7140946 | 1228345 | similar to Dachshund homolog 1 (Dach1)                                                                                                                | LOC306096  | 306096 | 1,65 | up   |
| 5730657 | 7140946 | 1228285 | similar to Dachshund homolog 1 (Dach1)                                                                                                                | LOC306096  | 306096 | 1,43 | up   |
| 6603972 | 7140946 | 1228300 | similar to Dachshund homolog 1 (Dach1)                                                                                                                | LOC306096  | 306096 | 1,39 | down |
| 6134618 | 7140946 | 1228322 | similar to Dachshund homolog 1 (Dach1)                                                                                                                | LOC306096  | 306096 | 1,37 | down |
| 5763344 | 7140946 | 1228298 | similar to Dachshund homolog 1 (Dach1)                                                                                                                | LOC306096  | 306096 | 1,31 | down |
| 5628825 | 7140946 | 1228311 | similar to Dachshund homolog 1 (Dach1)                                                                                                                | LOC306096  | 306096 | 1,25 | down |
| 6333179 | 7140946 | 1228345 | similar to Dachshund homolog 1 (Dach1)                                                                                                                | LOC306096  | 306096 | 1,14 | down |
| 6696299 | 7140946 | 1228279 | similar to Dachshund homolog 1 (Dach1)                                                                                                                | LOC306096  | 306096 | 1,14 | up   |
| 6655201 | 7140946 | 1228288 | similar to Dachshund homolog 1 (Dach1)                                                                                                                | LOC306096  | 306096 | 1,10 | down |
| 6267950 | 7140946 | 1228279 | similar to Dachshund homolog 1 (Dach1)                                                                                                                | LOC306096  | 306096 | 1,07 | up   |
| 5675867 | 7140946 | 1228286 | similar to Dachshund homolog 1 (Dach1)                                                                                                                | LOC306096  | 306096 | 1,06 | down |
| 5835623 | 7140946 | 1228301 | similar to Dachshund homolog 1 (Dach1)                                                                                                                | LOC306096  | 306096 | 1,05 | up   |
| 5654658 | 7140946 | 1228279 | similar to Dachshund homolog 1 (Dach1)                                                                                                                | LOC306096  | 306096 | 1,02 | down |
| 5901400 | 7037495 | 979340  | similar to deleted in malignant brain tumors 1 isoform a precursor /// similar to deleted in malignant $\epsilon$ 678798 /// LOC69: 678798 /// 691970 |            |        | 2,26 | up   |
| 6255166 | 7037495 | 979327  | similar to deleted in malignant brain tumors 1 isoform a precursor /// similar to deleted in malignant $\epsilon$ 678798 /// LOC69: 678798 /// 691970 |            |        | 2,21 | down |
| 6085160 | 7037495 | 979330  | similar to deleted in malignant brain tumors 1 isoform a precursor /// similar to deleted in malignant $\epsilon$ 678798 /// LOC69: 678798 /// 691970 |            |        | 1,78 | down |
| 5743857 | 7037495 | 979333  | similar to deleted in malignant brain tumors 1 isoform a precursor /// similar to deleted in malignant $\epsilon$ 678798 /// LOC69: 678798 /// 691970 |            |        | 1,44 | up   |
| 6209415 | 7037495 | 979338  | similar to deleted in malignant brain tumors 1 isoform a precursor /// similar to deleted in malignant $\epsilon$ 678798 /// LOC69: 678798 /// 691970 |            |        | 1,33 | down |
| 6651538 | 7037495 | 979338  | similar to deleted in malignant brain tumors 1 isoform a precursor /// similar to deleted in malignant $\epsilon$ 678798 /// LOC69: 678798 /// 691970 |            |        | 1,30 | down |
| 6327389 | 7037495 | 979329  | similar to deleted in malignant brain tumors 1 isoform a precursor /// similar to deleted in malignant $\epsilon$ 678798 /// LOC69: 678798 /// 691970 |            |        | 1,27 | up   |
| 5649519 | 7037495 | 979334  | similar to deleted in malignant brain tumors 1 isoform a precursor /// similar to deleted in malignant $\epsilon$ 678798 /// LOC69: 678798 /// 691970 |            |        | 1,12 | up   |
| 6354873 | 7037495 | 979331  | similar to deleted in malignant brain tumors 1 isoform a precursor /// similar to deleted in malignant $\epsilon$ 678798 /// LOC69: 678798 /// 691970 |            |        | 1,11 | up   |
| 6013970 | 7037495 | 979344  | similar to deleted in malignant brain tumors 1 isoform a precursor /// similar to deleted in malignant $\epsilon$ 678798 /// LOC69: 678798 /// 691970 |            |        | 1,09 | up   |
| 6464645 | 7037495 | 979339  | similar to deleted in malignant brain tumors 1 isoform a precursor /// similar to deleted in malignant $\epsilon$ 678798 /// LOC69: 678798 /// 691970 |            |        | 1,09 | down |
| 6105091 | 7037495 | 979335  | similar to deleted in malignant brain tumors 1 isoform a precursor /// similar to deleted in malignant $\epsilon$ 678798 /// LOC69: 678798 /// 691970 |            |        | 1,07 | down |
| 5893799 | 7037495 | 979343  | similar to deleted in malignant brain tumors 1 isoform a precursor /// similar to deleted in malignant $\epsilon$ 678798 /// LOC69: 678798 /// 691970 |            |        | 1,05 | up   |
| 6435415 | 7037495 | 979331  | similar to deleted in malignant brain tumors 1 isoform a precursor /// similar to deleted in malignant $\epsilon$ 678798 /// LOC69: 678798 /// 691970 |            |        | 1,03 | down |
| 5768876 | 7037495 | 979343  | similar to deleted in malignant brain tumors 1 isoform a precursor /// similar to deleted in malignant $\epsilon$ 678798 /// LOC69: 678798 /// 691970 |            |        | 1,03 | up   |
| 5954050 | 7037495 | 979341  | similar to deleted in malignant brain tumors 1 isoform a precursor /// similar to deleted in malignant $\epsilon$ 678798 /// LOC69: 678798 /// 691970 |            |        | 1,02 | down |
| 5694354 | 7037495 | 979342  | similar to deleted in malignant brain tumors 1 isoform a precursor /// similar to deleted in malignant $\epsilon$ 678798 /// LOC69: 678798 /// 691970 |            |        | 1,02 | up   |
| 5749737 | 7037495 | 979320  | similar to deleted in malignant brain tumors 1 isoform a precursor /// similar to deleted in malignant $\epsilon$ 678798 /// LOC69: 678798 /// 691970 |            |        | 1,02 | down |
| 6493447 | 7037495 | 979328  | similar to deleted in malignant brain tumors 1 isoform a precursor /// similar to deleted in malignant $\epsilon$ 678798 /// LOC69: 678798 /// 691970 |            |        | 1,00 | down |
| 6363863 | 7037495 | 979332  | similar to deleted in malignant brain tumors 1 isoform a precursor /// similar to deleted in malignant $\epsilon$ 678798 /// LOC69: 678798 /// 691970 |            |        | 1,00 | up   |
| 5849204 | 7037495 | 979315  | similar to deleted in malignant brain tumors 1 isoform c precursor                                                                                    | LOC691970  | 691970 | 1,24 | up   |
| 5716849 | 7079475 | 1078283 | similar to Der1-like domain family, member 2                                                                                                          | LOC687738  | 687738 | 1,21 | down |
| 6289500 | 7079475 | 1078282 | similar to Der1-like domain family, member 2                                                                                                          | LOC687738  | 687738 | 1,14 | down |
| 6696712 | 7079475 | 1078283 | similar to Der1-like domain family, member 2                                                                                                          | LOC687738  | 687738 | 1,13 | up   |
| 6597772 | 7079475 | 1078283 | similar to Der1-like domain family, member 2                                                                                                          | LOC687738  | 687738 | 1,09 | down |
| 6648719 | 7079475 | 1078283 | similar to Der1-like domain family, member 2                                                                                                          | LOC687738  | 687738 | 1,04 | down |
| 5711118 | 7079475 | 1078283 | similar to Der1-like domain family, member 2                                                                                                          | LOC687738  | 687738 | 1,01 | down |
| 5716565 | 7188138 | 1345043 | similar to developmental endothelial locus-1 isoform b                                                                                                | LOC681994  | 681994 | 2,46 | down |
| 5675038 | 7188138 | 1345061 | similar to developmental endothelial locus-1 isoform b                                                                                                | LOC681994  | 681994 | 2,40 | down |
| 6269426 | 7188138 | 1345066 | similar to developmental endothelial locus-1 isoform b                                                                                                | LOC681994  | 681994 | 2,02 | down |
| 6513815 | 7188138 | 1345013 | similar to developmental endothelial locus-1 isoform b                                                                                                | LOC681994  | 681994 | 1,87 | up   |
| 5951569 | 7188138 | 1345026 | similar to developmental endothelial locus-1 isoform b                                                                                                | LOC681994  | 681994 | 1,82 | up   |
| 6687640 | 7188138 | 1345046 | similar to developmental endothelial locus-1 isoform b                                                                                                | LOC681994  | 681994 | 1,72 | down |
| 6489484 | 7188138 | 1345044 | similar to developmental endothelial locus-1 isoform b                                                                                                | LOC681994  | 681994 | 1,61 | down |
| 6103755 | 7188138 | 1345016 | similar to developmental endothelial locus-1 isoform b                                                                                                | LOC681994  | 681994 | 1,36 | up   |
| 6223890 | 7188138 | 1344996 | similar to developmental endothelial locus-1 isoform b                                                                                                | LOC681994  | 681994 | 1,25 | down |
| 6078118 | 7188138 | 1345032 | similar to developmental endothelial locus-1 isoform b                                                                                                | LOC681994  | 681994 | 1,22 | up   |
| 6043077 | 7188138 | 1344996 | similar to developmental endothelial locus-1 isoform b                                                                                                | LOC681994  | 681994 | 1,05 | down |
| 6555994 | 7140365 | 1226806 | similar to diacylglycerol kinase eta                                                                                                                  | RGD1561955 | 361076 | 1,33 | down |
| 6660629 | 7370131 | 1796179 | similar to Discs large homolog 5 (Placenta and prostate DLG) (Discs large protein P-dlg)                                                              | LOC682811  | 682811 | 2,55 | up   |
| 6691448 | 7368565 | 1791288 | similar to Discs large homolog 5 (Placenta and prostate DLG) (Discs large protein P-dlg)                                                              | LOC685908  | 685908 | 2,07 | up   |



|         |         |         |                                                                                                                                             |            |        |      |      |
|---------|---------|---------|---------------------------------------------------------------------------------------------------------------------------------------------|------------|--------|------|------|
| 5683299 | 7368555 | 1791236 | similar to Discs large homolog 5 (Placenta and prostate DLG) (Discs large protein P-dlg) /// hypothet:301193 /// LOC68( 301193 /// 686784   |            | 1,16   | down |      |
| 6721612 | 7368555 | 1791228 | similar to Discs large homolog 5 (Placenta and prostate DLG) (Discs large protein P-dlg) /// hypothet:691414 /// LOC68: 691414 /// 685769   |            | 1,14   | up   |      |
| 6371167 | 7369938 | 1795528 | similar to Discs large homolog 5 (Placenta and prostate DLG) (Discs large protein P-dlg) /// similar tc:501089 /// LOC36: 501089 /// 363320 |            | 1,80   | down |      |
| 5686133 | 7233178 | 1455892 | similar to dJ842G6.1.1 (novel protein)                                                                                                      | RGD1309829 | 296190 | 1,32 | down |
| 5647921 | 7233178 | 1455887 | similar to dJ842G6.1.1 (novel protein)                                                                                                      | RGD1309829 | 296190 | 1,28 | up   |
| 6568167 | 7233178 | 1455902 | similar to dJ842G6.1.1 (novel protein)                                                                                                      | RGD1309829 | 296190 | 1,20 | up   |
| 5922936 | 7233178 | 1455899 | similar to dJ842G6.1.1 (novel protein)                                                                                                      | RGD1309829 | 296190 | 1,18 | down |
| 5787496 | 7233178 | 1455895 | similar to dJ842G6.1.1 (novel protein)                                                                                                      | RGD1309829 | 296190 | 1,16 | up   |
| 5903943 | 7233178 | 1455891 | similar to dJ842G6.1.1 (novel protein)                                                                                                      | RGD1309829 | 296190 | 1,13 | up   |
| 6581363 | 7233178 | 1455887 | similar to dJ842G6.1.1 (novel protein)                                                                                                      | RGD1309829 | 296190 | 1,11 | up   |
| 6020282 | 7233178 | 1455896 | similar to dJ842G6.1.1 (novel protein)                                                                                                      | RGD1309829 | 296190 | 1,10 | down |
| 6419311 | 7233178 | 1455889 | similar to dJ842G6.1.1 (novel protein)                                                                                                      | RGD1309829 | 296190 | 1,06 | up   |
| 6363643 | 7233178 | 1455888 | similar to dJ842G6.1.1 (novel protein)                                                                                                      | RGD1309829 | 296190 | 1,04 | down |
| 5770848 | 7233178 | 1455901 | similar to dJ842G6.1.1 (novel protein)                                                                                                      | RGD1309829 | 296190 | 1,04 | up   |
| 5651175 | 7233178 | 1455890 | similar to dJ842G6.1.1 (novel protein)                                                                                                      | RGD1309829 | 296190 | 1,02 | up   |
| 5767618 | 7121074 | 1179919 | similar to DNA-binding protein Ikaros form 1 - mouse                                                                                        | RGD1562979 | 305501 | 2,87 | up   |
| 6566156 | 7121074 | 1179919 | similar to DNA-binding protein Ikaros form 1 - mouse                                                                                        | RGD1562979 | 305501 | 1,49 | down |
| 6339320 | 7121074 | 1179920 | similar to DNA-binding protein Ikaros form 1 - mouse                                                                                        | RGD1562979 | 305501 | 1,28 | down |
| 5679295 | 7121074 | 1179885 | similar to DNA-binding protein Ikaros form 1 - mouse                                                                                        | RGD1562979 | 305501 | 1,26 | up   |
| 5919911 | 7121074 | 1179915 | similar to DNA-binding protein Ikaros form 1 - mouse                                                                                        | RGD1562979 | 305501 | 1,21 | up   |
| 5992782 | 7121074 | 1179912 | similar to DNA-binding protein Ikaros form 1 - mouse                                                                                        | RGD1562979 | 305501 | 1,17 | down |
| 5706745 | 7121074 | 1179916 | similar to DNA-binding protein Ikaros form 1 - mouse                                                                                        | RGD1562979 | 305501 | 1,13 | down |
| 5755788 | 7121074 | 1179890 | similar to DNA-binding protein Ikaros form 1 - mouse                                                                                        | RGD1562979 | 305501 | 1,09 | down |
| 6104588 | 7329135 | 1693485 | similar to Epiplakin                                                                                                                        | LOC686567  | 686567 | 1,78 | up   |
| 5646848 | 7329135 | 1693485 | similar to Epiplakin                                                                                                                        | LOC686567  | 686567 | 1,67 | up   |
| 6582453 | 7329135 | 1693485 | similar to Epiplakin                                                                                                                        | LOC686567  | 686567 | 1,65 | up   |
| 6126694 | 7329135 | 1693484 | similar to Epiplakin                                                                                                                        | LOC686567  | 686567 | 1,34 | up   |
| 6449151 | 7329135 | 1693484 | similar to Epiplakin                                                                                                                        | LOC686567  | 686567 | 1,33 | up   |
| 6193469 | 7329135 | 1693485 | similar to Epiplakin                                                                                                                        | LOC686567  | 686567 | 1,31 | up   |
| 6322781 | 7329135 | 1693484 | similar to Epiplakin                                                                                                                        | LOC686567  | 686567 | 1,07 | down |
| 5905188 | 7329135 | 1693485 | similar to Epiplakin                                                                                                                        | LOC686567  | 686567 | 1,06 | up   |
| 6313342 | 7329135 | 1693485 | similar to Epiplakin                                                                                                                        | LOC686567  | 686567 | 1,06 | up   |
| 6354489 | 7329135 | 1693485 | similar to Epiplakin                                                                                                                        | LOC686567  | 686567 | 1,02 | up   |
| 5883210 | 7371677 | 1800754 | similar to eukaryotic translation initiation factor 4 gamma, 2                                                                              | LOC678831  | 678831 | 1,20 | down |
| 5889942 | 7371677 | 1800754 | similar to eukaryotic translation initiation factor 4 gamma, 2                                                                              | LOC678831  | 678831 | 1,13 | down |
| 6470909 | 7371677 | 1800755 | similar to eukaryotic translation initiation factor 4 gamma, 2                                                                              | LOC678831  | 678831 | 1,11 | up   |
| 6538460 | 7371677 | 1800755 | similar to eukaryotic translation initiation factor 4 gamma, 2                                                                              | LOC678831  | 678831 | 1,09 | down |
| 6377580 | 7336449 | 1710615 | similar to expressed sequence AI118078                                                                                                      | RGD1562084 | 501002 | 2,13 | down |
| 6407754 | 7336449 | 1710611 | similar to expressed sequence AI118078                                                                                                      | RGD1562084 | 501002 | 1,89 | down |
| 6464096 | 7336449 | 1710632 | similar to expressed sequence AI118078                                                                                                      | RGD1562084 | 501002 | 1,45 | down |
| 5678981 | 7336449 | 1710611 | similar to expressed sequence AI118078                                                                                                      | RGD1562084 | 501002 | 1,45 | down |
| 5939291 | 7336449 | 1710628 | similar to expressed sequence AI118078                                                                                                      | RGD1562084 | 501002 | 1,36 | down |
| 5915676 | 7336449 | 1710619 | similar to expressed sequence AI118078                                                                                                      | RGD1562084 | 501002 | 1,24 | down |
| 5833563 | 7336449 | 1710632 | similar to expressed sequence AI118078                                                                                                      | RGD1562084 | 501002 | 1,24 | down |
| 5737910 | 7336449 | 1710631 | similar to expressed sequence AI118078                                                                                                      | RGD1562084 | 501002 | 1,22 | down |
| 6040447 | 7336449 | 1710605 | similar to expressed sequence AI118078                                                                                                      | RGD1562084 | 501002 | 1,21 | up   |
| 5968441 | 7336449 | 1710618 | similar to expressed sequence AI118078                                                                                                      | RGD1562084 | 501002 | 1,20 | down |
| 5998123 | 7336449 | 1710620 | similar to expressed sequence AI118078                                                                                                      | RGD1562084 | 501002 | 1,17 | down |
| 5937757 | 7336449 | 1710619 | similar to expressed sequence AI118078                                                                                                      | RGD1562084 | 501002 | 1,16 | down |
| 6707466 | 7336449 | 1710602 | similar to expressed sequence AI118078                                                                                                      | RGD1562084 | 501002 | 1,03 | up   |
| 6040089 | 7336449 | 1710632 | similar to expressed sequence AI118078                                                                                                      | RGD1562084 | 501002 | 1,01 | up   |
| 6542574 | 7370977 | 1798761 | similar to Fatty acid-binding protein, epidermal (E-FABP) (Cutaneous fatty acid-binding protein) (C-                                        | LOC503340  | 503340 | 1,32 | up   |
| 5704752 | 7370977 | 1798761 | similar to Fatty acid-binding protein, epidermal (E-FABP) (Cutaneous fatty acid-binding protein) (C-                                        | LOC503340  | 503340 | 1,03 | up   |
| 5709580 | 7030172 | 960965  | similar to F-box only protein 27                                                                                                            | RGD1563982 | 499114 | 2,19 | up   |
| 6620247 | 7030172 | 960964  | similar to F-box only protein 27                                                                                                            | RGD1563982 | 499114 | 2,18 | down |
| 6188844 | 7030172 | 960964  | similar to F-box only protein 27                                                                                                            | RGD1563982 | 499114 | 1,66 | down |
| 5891536 | 7030172 | 960963  | similar to F-box only protein 27                                                                                                            | RGD1563982 | 499114 | 1,46 | down |

|         |         |         |                                                                       |            |        |      |      |
|---------|---------|---------|-----------------------------------------------------------------------|------------|--------|------|------|
| 6443355 | 7030172 | 960967  | similar to F-box only protein 27                                      | RGD1563982 | 499114 | 1,28 | up   |
| 5629845 | 7030172 | 960967  | similar to F-box only protein 27                                      | RGD1563982 | 499114 | 1,26 | down |
| 6645648 | 7030172 | 960967  | similar to F-box only protein 27                                      | RGD1563982 | 499114 | 1,19 | up   |
| 5724389 | 7030172 | 960965  | similar to F-box only protein 27                                      | RGD1563982 | 499114 | 1,15 | up   |
| 5723039 | 7030172 | 960966  | similar to F-box only protein 27                                      | RGD1563982 | 499114 | 1,14 | up   |
| 6000744 | 7030172 | 960965  | similar to F-box only protein 27                                      | RGD1563982 | 499114 | 1,08 | up   |
| 6627281 | 7030172 | 960964  | similar to F-box only protein 27                                      | RGD1563982 | 499114 | 1,06 | down |
| 5793742 | 7049334 | 1008179 | similar to F-box only protein 6 (F-box/G-domain protein 2)            | RGD1305932 | 292755 | 2,04 | up   |
| 6715153 | 7049334 | 1008182 | similar to F-box only protein 6 (F-box/G-domain protein 2)            | RGD1305932 | 292755 | 1,57 | down |
| 6058121 | 7049334 | 1008180 | similar to F-box only protein 6 (F-box/G-domain protein 2)            | RGD1305932 | 292755 | 1,45 | up   |
| 5976503 | 7049334 | 1008184 | similar to F-box only protein 6 (F-box/G-domain protein 2)            | RGD1305932 | 292755 | 1,31 | down |
| 6693367 | 7049334 | 1008183 | similar to F-box only protein 6 (F-box/G-domain protein 2)            | RGD1305932 | 292755 | 1,18 | up   |
| 5743195 | 7049334 | 1008180 | similar to F-box only protein 6 (F-box/G-domain protein 2)            | RGD1305932 | 292755 | 1,08 | up   |
| 5810033 | 7049334 | 1008181 | similar to F-box only protein 6 (F-box/G-domain protein 2)            | RGD1305932 | 292755 | 1,03 | down |
| 6746607 | 7030087 | 960803  | similar to Fc fragment of IgG binding protein; IgG Fc binding protein | RGD1311906 | 292746 | 2,09 | down |
| 6113541 | 7030087 | 960803  | similar to Fc fragment of IgG binding protein; IgG Fc binding protein | RGD1311906 | 292746 | 2,06 | down |
| 6437169 | 7030087 | 960804  | similar to Fc fragment of IgG binding protein; IgG Fc binding protein | RGD1311906 | 292746 | 1,48 | down |
| 5843109 | 7030087 | 960801  | similar to Fc fragment of IgG binding protein; IgG Fc binding protein | RGD1311906 | 292746 | 1,45 | up   |
| 6643552 | 7030087 | 960805  | similar to Fc fragment of IgG binding protein; IgG Fc binding protein | RGD1311906 | 292746 | 1,37 | down |
| 6268239 | 7030087 | 960799  | similar to Fc fragment of IgG binding protein; IgG Fc binding protein | RGD1311906 | 292746 | 1,36 | up   |
| 5851926 | 7030087 | 960796  | similar to Fc fragment of IgG binding protein; IgG Fc binding protein | RGD1311906 | 292746 | 1,36 | up   |
| 5681810 | 7030087 | 960802  | similar to Fc fragment of IgG binding protein; IgG Fc binding protein | RGD1311906 | 292746 | 1,21 | down |
| 5790251 | 7030087 | 960795  | similar to Fc fragment of IgG binding protein; IgG Fc binding protein | RGD1311906 | 292746 | 1,20 | up   |
| 6229291 | 7030087 | 960797  | similar to Fc fragment of IgG binding protein; IgG Fc binding protein | RGD1311906 | 292746 | 1,17 | down |
| 6126837 | 7030087 | 960794  | similar to Fc fragment of IgG binding protein; IgG Fc binding protein | RGD1311906 | 292746 | 1,11 | up   |
| 6000826 | 7030087 | 960798  | similar to Fc fragment of IgG binding protein; IgG Fc binding protein | RGD1311906 | 292746 | 1,08 | down |
| 5671034 | 7030087 | 960804  | similar to Fc fragment of IgG binding protein; IgG Fc binding protein | RGD1311906 | 292746 | 1,07 | up   |
| 6352577 | 7030087 | 960800  | similar to Fc fragment of IgG binding protein; IgG Fc binding protein | RGD1311906 | 292746 | 1,05 | down |
| 5832329 | 7059971 | 1031476 | similar to FLJ00354 protein                                           | RGD1311475 | 293698 | 1,42 | up   |
| 6106900 | 7059971 | 1031477 | similar to FLJ00354 protein                                           | RGD1311475 | 293698 | 1,28 | down |
| 5629455 | 7059971 | 1031476 | similar to FLJ00354 protein                                           | RGD1311475 | 293698 | 1,26 | up   |
| 5939732 | 7059971 | 1031480 | similar to FLJ00354 protein                                           | RGD1311475 | 293698 | 1,15 | down |
| 5791604 | 7059971 | 1031479 | similar to FLJ00354 protein                                           | RGD1311475 | 293698 | 1,15 | down |
| 5820568 | 7059971 | 1031481 | similar to FLJ00354 protein                                           | RGD1311475 | 293698 | 1,08 | up   |
| 5817663 | 7059971 | 1031478 | similar to FLJ00354 protein                                           | RGD1311475 | 293698 | 1,07 | up   |
| 6061062 | 7059971 | 1031475 | similar to FLJ00354 protein                                           | RGD1311475 | 293698 | 1,02 | down |
| 5628014 | 7059971 | 1031482 | similar to FLJ00354 protein                                           | RGD1311475 | 293698 | 1,01 | up   |
| 6124927 | 7059971 | 1031474 | similar to FLJ00354 protein                                           | RGD1311475 | 293698 | 1,00 | down |
| 5881939 | 7328833 | 1692805 | similar to FLJ43860 protein                                           | RGD1559695 | 500889 | 2,02 | down |
| 6611536 | 7328833 | 1692794 | similar to FLJ43860 protein                                           | RGD1559695 | 500889 | 1,74 | up   |
| 6243025 | 7328833 | 1692782 | similar to FLJ43860 protein                                           | RGD1559695 | 500889 | 1,53 | down |
| 5893165 | 7328833 | 1692776 | similar to FLJ43860 protein                                           | RGD1559695 | 500889 | 1,41 | down |
| 6417580 | 7328833 | 1692805 | similar to FLJ43860 protein                                           | RGD1559695 | 500889 | 1,39 | down |
| 5818495 | 7328833 | 1692777 | similar to FLJ43860 protein                                           | RGD1559695 | 500889 | 1,38 | down |
| 5873980 | 7328833 | 1692780 | similar to FLJ43860 protein                                           | RGD1559695 | 500889 | 1,37 | down |
| 6362864 | 7328833 | 1692788 | similar to FLJ43860 protein                                           | RGD1559695 | 500889 | 1,35 | down |
| 6317888 | 7328833 | 1692792 | similar to FLJ43860 protein                                           | RGD1559695 | 500889 | 1,34 | up   |
| 6602446 | 7328833 | 1692810 | similar to FLJ43860 protein                                           | RGD1559695 | 500889 | 1,25 | down |
| 5782151 | 7328833 | 1692789 | similar to FLJ43860 protein                                           | RGD1559695 | 500889 | 1,25 | down |
| 6211645 | 7328833 | 1692813 | similar to FLJ43860 protein                                           | RGD1559695 | 500889 | 1,23 | down |
| 5786190 | 7328833 | 1692791 | similar to FLJ43860 protein                                           | RGD1559695 | 500889 | 1,23 | up   |
| 6508616 | 7328833 | 1692801 | similar to FLJ43860 protein                                           | RGD1559695 | 500889 | 1,22 | up   |
| 5716397 | 7328833 | 1692800 | similar to FLJ43860 protein                                           | RGD1559695 | 500889 | 1,20 | up   |
| 6125330 | 7328833 | 1692781 | similar to FLJ43860 protein                                           | RGD1559695 | 500889 | 1,18 | up   |
| 6733250 | 7328833 | 1692802 | similar to FLJ43860 protein                                           | RGD1559695 | 500889 | 1,15 | up   |
| 5816379 | 7328833 | 1692796 | similar to FLJ43860 protein                                           | RGD1559695 | 500889 | 1,15 | up   |
| 6302217 | 7328833 | 1692808 | similar to FLJ43860 protein                                           | RGD1559695 | 500889 | 1,15 | down |

|         |         |         |                                                                |                                     |        |      |      |
|---------|---------|---------|----------------------------------------------------------------|-------------------------------------|--------|------|------|
| 6588125 | 7328833 | 1692798 | similar to FLJ43860 protein                                    | RGD1559695                          | 500889 | 1,10 | up   |
| 6300859 | 7328833 | 1692790 | similar to FLJ43860 protein                                    | RGD1559695                          | 500889 | 1,09 | up   |
| 5803884 | 7328833 | 1692778 | similar to FLJ43860 protein                                    | RGD1559695                          | 500889 | 1,08 | down |
| 6684200 | 7328833 | 1692799 | similar to FLJ43860 protein                                    | RGD1559695                          | 500889 | 1,07 | up   |
| 5628667 | 7328833 | 1692810 | similar to FLJ43860 protein                                    | RGD1559695                          | 500889 | 1,06 | up   |
| 6468626 | 7328833 | 1692773 | similar to FLJ43860 protein                                    | RGD1559695                          | 500889 | 1,06 | up   |
| 5906576 | 7328833 | 1692809 | similar to FLJ43860 protein                                    | RGD1559695                          | 500889 | 1,06 | up   |
| 6076748 | 7328833 | 1692787 | similar to FLJ43860 protein                                    | RGD1559695                          | 500889 | 1,06 | up   |
| 6565445 | 7328833 | 1692774 | similar to FLJ43860 protein                                    | RGD1559695                          | 500889 | 1,06 | down |
| 5969306 | 7328833 | 1692797 | similar to FLJ43860 protein                                    | RGD1559695                          | 500889 | 1,05 | down |
| 6135842 | 7328833 | 1692775 | similar to FLJ43860 protein                                    | RGD1559695                          | 500889 | 1,05 | down |
| 5687481 | 7328833 | 1692788 | similar to FLJ43860 protein                                    | RGD1559695                          | 500889 | 1,04 | down |
| 6224458 | 7328833 | 1692786 | similar to FLJ43860 protein                                    | RGD1559695                          | 500889 | 1,02 | up   |
| 6392063 | 7328833 | 1692783 | similar to FLJ43860 protein                                    | RGD1559695                          | 500889 | 1,02 | down |
| 5631458 | 7328833 | 1692803 | similar to FLJ43860 protein                                    | RGD1559695                          | 500889 | 1,01 | up   |
| 6526937 | 7323869 | 1680890 | similar to FLJ44112 protein                                    | RGD1565866                          | 314740 | 1,39 | down |
| 6181384 | 7323869 | 1680869 | similar to FLJ44112 protein /// hypothetical protein LOC687814 | 1565866 /// LOC68 314740 /// 687814 |        | 1,76 | up   |
| 5914366 | 7323869 | 1680883 | similar to FLJ44112 protein /// hypothetical protein LOC687814 | 1565866 /// LOC68 314740 /// 687814 |        | 1,61 | down |
| 6309011 | 7323869 | 1680897 | similar to FLJ44112 protein /// hypothetical protein LOC687814 | 1565866 /// LOC68 314740 /// 687814 |        | 1,47 | up   |
| 5927912 | 7323869 | 1680893 | similar to FLJ44112 protein /// hypothetical protein LOC687814 | 1565866 /// LOC68 314740 /// 687814 |        | 1,35 | up   |
| 6105917 | 7323869 | 1680896 | similar to FLJ44112 protein /// hypothetical protein LOC687814 | 1565866 /// LOC68 314740 /// 687814 |        | 1,32 | down |
| 6232601 | 7323869 | 1680907 | similar to FLJ44112 protein /// hypothetical protein LOC687814 | 1565866 /// LOC68 314740 /// 687814 |        | 1,31 | down |
| 5962679 | 7323869 | 1680908 | similar to FLJ44112 protein /// hypothetical protein LOC687814 | 1565866 /// LOC68 314740 /// 687814 |        | 1,30 | up   |
| 6692588 | 7323869 | 1680877 | similar to FLJ44112 protein /// hypothetical protein LOC687814 | 1565866 /// LOC68 314740 /// 687814 |        | 1,18 | down |
| 6408511 | 7323869 | 1680871 | similar to FLJ44112 protein /// hypothetical protein LOC687814 | 1565866 /// LOC68 314740 /// 687814 |        | 1,16 | down |
| 6463670 | 7323869 | 1680894 | similar to FLJ44112 protein /// hypothetical protein LOC687814 | 1565866 /// LOC68 314740 /// 687814 |        | 1,14 | down |
| 6450239 | 7323869 | 1680885 | similar to FLJ44112 protein /// hypothetical protein LOC687814 | 1565866 /// LOC68 314740 /// 687814 |        | 1,11 | up   |
| 6414636 | 7323869 | 1680906 | similar to FLJ44112 protein /// hypothetical protein LOC687814 | 1565866 /// LOC68 314740 /// 687814 |        | 1,11 | down |
| 6644433 | 7323869 | 1680908 | similar to FLJ44112 protein /// hypothetical protein LOC687814 | 1565866 /// LOC68 314740 /// 687814 |        | 1,11 | up   |
| 5701394 | 7323869 | 1680892 | similar to FLJ44112 protein /// hypothetical protein LOC687814 | 1565866 /// LOC68 314740 /// 687814 |        | 1,10 | down |
| 5695834 | 7323869 | 1680878 | similar to FLJ44112 protein /// hypothetical protein LOC687814 | 1565866 /// LOC68 314740 /// 687814 |        | 1,10 | up   |
| 5782019 | 7323869 | 1680905 | similar to FLJ44112 protein /// hypothetical protein LOC687814 | 1565866 /// LOC68 314740 /// 687814 |        | 1,10 | down |
| 5681105 | 7323869 | 1680872 | similar to FLJ44112 protein /// hypothetical protein LOC687814 | 1565866 /// LOC68 314740 /// 687814 |        | 1,07 | down |
| 5642406 | 7323869 | 1680868 | similar to FLJ44112 protein /// hypothetical protein LOC687814 | 1565866 /// LOC68 314740 /// 687814 |        | 1,06 | up   |
| 6551071 | 7323869 | 1680875 | similar to FLJ44112 protein /// hypothetical protein LOC687814 | 1565866 /// LOC68 314740 /// 687814 |        | 1,05 | down |
| 6553696 | 7323869 | 1680876 | similar to FLJ44112 protein /// hypothetical protein LOC687814 | 1565866 /// LOC68 314740 /// 687814 |        | 1,04 | down |
| 6045215 | 7323869 | 1680870 | similar to FLJ44112 protein /// hypothetical protein LOC687814 | 1565866 /// LOC68 314740 /// 687814 |        | 1,03 | down |
| 6461769 | 7323869 | 1680900 | similar to FLJ44112 protein /// hypothetical protein LOC687814 | 1565866 /// LOC68 314740 /// 687814 |        | 1,02 | down |
| 6115822 | 7323869 | 1680884 | similar to FLJ44112 protein /// hypothetical protein LOC687814 | 1565866 /// LOC68 314740 /// 687814 |        | 1,01 | up   |
| 6606361 | 7323869 | 1680886 | similar to FLJ44112 protein /// hypothetical protein LOC687814 | 1565866 /// LOC68 314740 /// 687814 |        | 1,01 | up   |
| 6239387 | 7323869 | 1680909 | similar to FLJ44112 protein /// hypothetical protein LOC687814 | 1565866 /// LOC68 314740 /// 687814 |        | 1,00 | down |
| 5672949 | 7323869 | 1680871 | similar to FLJ44112 protein /// hypothetical protein LOC687814 | 1565866 /// LOC68 314740 /// 687814 |        | 1,00 | up   |
| 5850068 | 7323869 | 1680868 | similar to FLJ44112 protein /// hypothetical protein LOC687814 | 1565866 /// LOC68 314740 /// 687814 |        | 1,00 | up   |
| 5692693 | 7323869 | 1680874 | similar to FLJ44112 protein /// hypothetical protein LOC687814 | 1565866 /// LOC68 314740 /// 687814 |        | 1,00 | down |
| 6499591 | 7268357 | 1543391 | similar to Fls485 protein                                      | RGD1562010                          | 500286 | 1,07 | down |
| 6186278 | 7268357 | 1543391 | similar to Fls485 protein                                      | RGD1562010                          | 500286 | 1,01 | up   |
| 6036250 | 7227474 | 1441164 | similar to formin-like 2 isoform B                             | RGD1560248                          | 499797 | 1,98 | down |
| 6715039 | 7227474 | 1441150 | similar to formin-like 2 isoform B                             | RGD1560248                          | 499797 | 1,66 | down |
| 6393237 | 7227474 | 1441164 | similar to formin-like 2 isoform B                             | RGD1560248                          | 499797 | 1,62 | down |
| 6486194 | 7227474 | 1441167 | similar to formin-like 2 isoform B                             | RGD1560248                          | 499797 | 1,03 | down |
| 6369289 | 7101684 | 1131711 | similar to G protein-coupled receptor 133                      | LOC689257                           | 689257 | 2,47 | up   |
| 5987429 | 7101684 | 1131710 | similar to G protein-coupled receptor 133                      | LOC689257                           | 689257 | 1,35 | down |
| 5625925 | 7226812 | 1439359 | similar to G protein-coupled receptor 144                      | RGD1564139                          | 366034 | 2,72 | up   |
| 6051790 | 7226812 | 1439354 | similar to G protein-coupled receptor 144                      | RGD1564139                          | 366034 | 1,19 | up   |
| 6251462 | 7226812 | 1439359 | similar to G protein-coupled receptor 144                      | RGD1564139                          | 366034 | 1,15 | down |
| 6383622 | 7226812 | 1439356 | similar to G protein-coupled receptor 144                      | RGD1564139                          | 366034 | 1,15 | down |
| 5967750 | 7226812 | 1439355 | similar to G protein-coupled receptor 144                      | RGD1564139                          | 366034 | 1,11 | down |

|         |         |         |                                                                                                 |                                      |        |      |      |
|---------|---------|---------|-------------------------------------------------------------------------------------------------|--------------------------------------|--------|------|------|
| 6697166 | 7226812 | 1439351 | similar to G protein-coupled receptor 144                                                       | RGD1564139                           | 366034 | 1,11 | down |
| 5998175 | 7226812 | 1439353 | similar to G protein-coupled receptor 144                                                       | RGD1564139                           | 366034 | 1,10 | down |
| 6633568 | 7226812 | 1439357 | similar to G protein-coupled receptor 144                                                       | RGD1564139                           | 366034 | 1,05 | up   |
| 5871239 | 7107321 | 1145322 | similar to G protein-coupled receptor 161                                                       | RGD1563245                           | 289180 | 3,26 | down |
| 5701856 | 7107321 | 1145327 | similar to G protein-coupled receptor 161                                                       | RGD1563245                           | 289180 | 2,23 | up   |
| 6567263 | 7107321 | 1145327 | similar to G protein-coupled receptor 161                                                       | RGD1563245                           | 289180 | 1,66 | up   |
| 6283450 | 7107321 | 1145325 | similar to G protein-coupled receptor 161                                                       | RGD1563245                           | 289180 | 1,53 | down |
| 6263459 | 7107321 | 1145325 | similar to G protein-coupled receptor 161                                                       | RGD1563245                           | 289180 | 1,38 | up   |
| 5712239 | 7107321 | 1145322 | similar to G protein-coupled receptor 161                                                       | RGD1563245                           | 289180 | 1,16 | down |
| 6274657 | 7107321 | 1145326 | similar to G protein-coupled receptor 161                                                       | RGD1563245                           | 289180 | 1,05 | up   |
| 6016248 | 7030519 | 961695  | similar to Gene model 1082                                                                      | RGD1560986                           | 292786 | 2,12 | down |
| 5675670 | 7030519 | 961694  | similar to Gene model 1082                                                                      | RGD1560986                           | 292786 | 1,55 | up   |
| 6135655 | 7030519 | 961699  | similar to Gene model 1082                                                                      | RGD1560986                           | 292786 | 1,51 | down |
| 6523016 | 7030519 | 961689  | similar to Gene model 1082                                                                      | RGD1560986                           | 292786 | 1,24 | up   |
| 6456245 | 7030519 | 961694  | similar to Gene model 1082                                                                      | RGD1560986                           | 292786 | 1,19 | up   |
| 6119980 | 7030519 | 961698  | similar to Gene model 1082                                                                      | RGD1560986                           | 292786 | 1,15 | down |
| 6571644 | 7030519 | 961693  | similar to Gene model 1082                                                                      | RGD1560986                           | 292786 | 1,14 | down |
| 5664253 | 7030519 | 961692  | similar to Gene model 1082                                                                      | RGD1560986                           | 292786 | 1,12 | up   |
| 6677232 | 7030519 | 961702  | similar to Gene model 1082                                                                      | RGD1560986                           | 292786 | 1,11 | down |
| 5797017 | 7030519 | 961702  | similar to Gene model 1082                                                                      | RGD1560986                           | 292786 | 1,07 | up   |
| 6290138 | 7030519 | 961702  | similar to Gene model 1082                                                                      | RGD1560986                           | 292786 | 1,06 | up   |
| 6130094 | 7030519 | 961696  | similar to Gene model 1082                                                                      | RGD1560986                           | 292786 | 1,05 | up   |
| 5795780 | 7030519 | 961696  | similar to Gene model 1082                                                                      | RGD1560986                           | 292786 | 1,01 | down |
| 5784008 | 7368912 | 1792635 | similar to glutaredoxin 1 (thioltransferase); glutaredoxin                                      | LOC305806                            | 305806 | 1,46 | up   |
| 6420302 | 7368912 | 1792635 | similar to glutaredoxin 1 (thioltransferase); glutaredoxin                                      | LOC305806                            | 305806 | 1,37 | down |
| 5959041 | 7368912 | 1792635 | similar to glutaredoxin 1 (thioltransferase); glutaredoxin /// similar to RIKEN cDNA 1700001F09 | :305806 /// LOC29( 305806 /// 290508 |        | 5,22 | down |
| 5969872 | 7371539 | 1800299 | similar to glutaredoxin 1 (thioltransferase); glutaredoxin /// similar to RIKEN cDNA 1700001F09 | :305806 /// LOC29( 305806 /// 290508 |        | 4,98 | down |
| 6117571 | 7368912 | 1792635 | similar to glutaredoxin 1 (thioltransferase); glutaredoxin /// similar to RIKEN cDNA 1700001F09 | :305806 /// LOC29( 305806 /// 290508 |        | 4,96 | down |
| 6020950 | 7371539 | 1800299 | similar to glutaredoxin 1 (thioltransferase); glutaredoxin /// similar to RIKEN cDNA 1700001F09 | :305806 /// LOC29( 305806 /// 290508 |        | 1,68 | up   |
| 6356241 | 7371539 | 1800299 | similar to glutaredoxin 1 (thioltransferase); glutaredoxin /// similar to RIKEN cDNA 1700001F09 | :305806 /// LOC29( 305806 /// 290508 |        | 1,67 | up   |
| 5680259 | 7368912 | 1792635 | similar to glutaredoxin 1 (thioltransferase); glutaredoxin /// similar to RIKEN cDNA 1700001F09 | :305806 /// LOC29( 305806 /// 290508 |        | 1,37 | up   |
| 6176124 | 7368912 | 1792634 | similar to glutaredoxin 1 (thioltransferase); glutaredoxin /// similar to RIKEN cDNA 1700001F09 | :305806 /// LOC29( 305806 /// 290508 |        | 1,14 | up   |
| 5919161 | 7371539 | 1800299 | similar to glutaredoxin 1 (thioltransferase); glutaredoxin /// similar to RIKEN cDNA 1700001F09 | :305806 /// LOC29( 305806 /// 290508 |        | 1,08 | up   |
| 5984377 | 7368912 | 1792635 | similar to glutaredoxin 1 (thioltransferase); glutaredoxin /// similar to RIKEN cDNA 1700001F09 | :305806 /// LOC29( 305806 /// 290508 |        | 1,08 | up   |
| 6630461 | 7371539 | 1800299 | similar to glutaredoxin 1 (thioltransferase); glutaredoxin /// similar to RIKEN cDNA 1700001F09 | :305806 /// LOC29( 305806 /// 290508 |        | 1,07 | up   |
| 6203880 | 7371539 | 1800300 | similar to glutaredoxin 1 (thioltransferase); glutaredoxin /// similar to RIKEN cDNA 1700001F09 | :305806 /// LOC29( 305806 /// 290508 |        | 1,05 | down |
| 6541266 | 7368912 | 1792633 | similar to glutaredoxin 1 (thioltransferase); glutaredoxin /// similar to RIKEN cDNA 1700001F09 | :305806 /// LOC29( 305806 /// 290508 |        | 1,01 | up   |
| 6725398 | 7370412 | 1796832 | similar to gonadotropin-regulated long chain acyl-CoA synthetase                                | LOC316124                            | 316124 | 2,06 | down |
| 6606380 | 7370412 | 1796837 | similar to gonadotropin-regulated long chain acyl-CoA synthetase                                | LOC316124                            | 316124 | 1,72 | down |
| 6104489 | 7370412 | 1796830 | similar to gonadotropin-regulated long chain acyl-CoA synthetase                                | LOC316124                            | 316124 | 1,49 | down |
| 6447325 | 7370412 | 1796826 | similar to gonadotropin-regulated long chain acyl-CoA synthetase                                | LOC316124                            | 316124 | 1,45 | up   |
| 6233835 | 7370412 | 1796839 | similar to gonadotropin-regulated long chain acyl-CoA synthetase                                | LOC316124                            | 316124 | 1,39 | down |
| 5865919 | 7370412 | 1796827 | similar to gonadotropin-regulated long chain acyl-CoA synthetase                                | LOC316124                            | 316124 | 1,35 | up   |
| 6518184 | 7370412 | 1796824 | similar to gonadotropin-regulated long chain acyl-CoA synthetase                                | LOC316124                            | 316124 | 1,24 | down |
| 6600827 | 7370412 | 1796824 | similar to gonadotropin-regulated long chain acyl-CoA synthetase                                | LOC316124                            | 316124 | 1,19 | up   |
| 6021394 | 7370412 | 1796831 | similar to gonadotropin-regulated long chain acyl-CoA synthetase                                | LOC316124                            | 316124 | 1,13 | up   |
| 6108580 | 7370412 | 1796829 | similar to gonadotropin-regulated long chain acyl-CoA synthetase                                | LOC316124                            | 316124 | 1,12 | up   |
| 5622867 | 7370412 | 1796825 | similar to gonadotropin-regulated long chain acyl-CoA synthetase                                | LOC316124                            | 316124 | 1,11 | down |
| 6352528 | 7370412 | 1796834 | similar to gonadotropin-regulated long chain acyl-CoA synthetase                                | LOC316124                            | 316124 | 1,10 | down |
| 6563606 | 7370412 | 1796823 | similar to gonadotropin-regulated long chain acyl-CoA synthetase                                | LOC316124                            | 316124 | 1,05 | up   |
| 6690331 | 7370412 | 1796829 | similar to gonadotropin-regulated long chain acyl-CoA synthetase                                | LOC316124                            | 316124 | 1,04 | up   |
| 6208547 | 7370412 | 1796822 | similar to gonadotropin-regulated long chain acyl-CoA synthetase                                | LOC316124                            | 316124 | 1,01 | up   |
| 6678659 | 7370412 | 1796836 | similar to gonadotropin-regulated long chain acyl-CoA synthetase                                | LOC316124                            | 316124 | 1,00 | up   |
| 6157735 | 7237711 | 1467443 | similar to GTPase activating RANGAP domain-like 3                                               | RGD1564019                           | 499783 | 2,73 | up   |
| 5812129 | 7237711 | 1467427 | similar to GTPase activating RANGAP domain-like 3                                               | RGD1564019                           | 499783 | 2,63 | down |
| 5708488 | 7237711 | 1467449 | similar to GTPase activating RANGAP domain-like 3                                               | RGD1564019                           | 499783 | 2,30 | up   |
| 5848598 | 7237711 | 1467449 | similar to GTPase activating RANGAP domain-like 3                                               | RGD1564019                           | 499783 | 1,95 | up   |

|         |         |         |                                                                     |            |        |      |      |
|---------|---------|---------|---------------------------------------------------------------------|------------|--------|------|------|
| 6693479 | 7237711 | 1467445 | similar to GTPase activating RANGAP domain-like 3                   | RGD1564019 | 499783 | 1,89 | up   |
| 6574499 | 7237711 | 1467450 | similar to GTPase activating RANGAP domain-like 3                   | RGD1564019 | 499783 | 1,67 | up   |
| 6018448 | 7237711 | 1467448 | similar to GTPase activating RANGAP domain-like 3                   | RGD1564019 | 499783 | 1,59 | down |
| 6043380 | 7237711 | 1467425 | similar to GTPase activating RANGAP domain-like 3                   | RGD1564019 | 499783 | 1,57 | up   |
| 6461022 | 7237711 | 1467429 | similar to GTPase activating RANGAP domain-like 3                   | RGD1564019 | 499783 | 1,47 | down |
| 5800986 | 7237711 | 1467437 | similar to GTPase activating RANGAP domain-like 3                   | RGD1564019 | 499783 | 1,45 | up   |
| 5892801 | 7237711 | 1467458 | similar to GTPase activating RANGAP domain-like 3                   | RGD1564019 | 499783 | 1,45 | up   |
| 5917659 | 7237711 | 1467435 | similar to GTPase activating RANGAP domain-like 3                   | RGD1564019 | 499783 | 1,41 | up   |
| 6397645 | 7237711 | 1467464 | similar to GTPase activating RANGAP domain-like 3                   | RGD1564019 | 499783 | 1,38 | down |
| 6552513 | 7237711 | 1467431 | similar to GTPase activating RANGAP domain-like 3                   | RGD1564019 | 499783 | 1,37 | up   |
| 5645929 | 7237711 | 1467423 | similar to GTPase activating RANGAP domain-like 3                   | RGD1564019 | 499783 | 1,35 | up   |
| 6422652 | 7237711 | 1467426 | similar to GTPase activating RANGAP domain-like 3                   | RGD1564019 | 499783 | 1,35 | up   |
| 6021919 | 7237711 | 1467457 | similar to GTPase activating RANGAP domain-like 3                   | RGD1564019 | 499783 | 1,32 | up   |
| 6012658 | 7237711 | 1467428 | similar to GTPase activating RANGAP domain-like 3                   | RGD1564019 | 499783 | 1,27 | up   |
| 6317594 | 7237711 | 1467442 | similar to GTPase activating RANGAP domain-like 3                   | RGD1564019 | 499783 | 1,25 | up   |
| 6284010 | 7237711 | 1467463 | similar to GTPase activating RANGAP domain-like 3                   | RGD1564019 | 499783 | 1,24 | down |
| 6310624 | 7237711 | 1467446 | similar to GTPase activating RANGAP domain-like 3                   | RGD1564019 | 499783 | 1,22 | up   |
| 5653961 | 7237711 | 1467451 | similar to GTPase activating RANGAP domain-like 3                   | RGD1564019 | 499783 | 1,20 | down |
| 5843042 | 7237711 | 1467442 | similar to GTPase activating RANGAP domain-like 3                   | RGD1564019 | 499783 | 1,20 | down |
| 5791366 | 7237711 | 1467434 | similar to GTPase activating RANGAP domain-like 3                   | RGD1564019 | 499783 | 1,15 | down |
| 6372103 | 7237711 | 1467424 | similar to GTPase activating RANGAP domain-like 3                   | RGD1564019 | 499783 | 1,14 | down |
| 5875156 | 7237711 | 1467423 | similar to GTPase activating RANGAP domain-like 3                   | RGD1564019 | 499783 | 1,13 | down |
| 5996069 | 7237711 | 1467455 | similar to GTPase activating RANGAP domain-like 3                   | RGD1564019 | 499783 | 1,12 | down |
| 5788107 | 7237711 | 1467423 | similar to GTPase activating RANGAP domain-like 3                   | RGD1564019 | 499783 | 1,07 | down |
| 6036993 | 7237711 | 1467433 | similar to GTPase activating RANGAP domain-like 3                   | RGD1564019 | 499783 | 1,02 | down |
| 5668926 | 7237711 | 1467452 | similar to GTPase activating RANGAP domain-like 3                   | RGD1564019 | 499783 | 1,02 | down |
| 6162221 | 7200129 | 1375993 | similar to guanylate binding protein 1, interferon-inducible, 67kDa | RGD1561239 | 304267 | 2,25 | up   |
| 6277229 | 7200129 | 1375991 | similar to guanylate binding protein 1, interferon-inducible, 67kDa | RGD1561239 | 304267 | 1,42 | down |
| 5658775 | 7200129 | 1375992 | similar to guanylate binding protein 1, interferon-inducible, 67kDa | RGD1561239 | 304267 | 1,16 | down |
| 6531355 | 7122585 | 1183684 | similar to H43E16.1                                                 | LOC689994  | 689994 | 1,20 | down |
| 5757837 | 7122585 | 1183691 | similar to H43E16.1                                                 | LOC689994  | 689994 | 1,19 | up   |
| 6354293 | 7122585 | 1183684 | similar to H43E16.1                                                 | LOC689994  | 689994 | 1,05 | down |
| 6226889 | 7138349 | 1221926 | similar to HCDI protein                                             | RGD1309307 | 361044 | 2,26 | down |
| 6409883 | 7138349 | 1221923 | similar to HCDI protein                                             | RGD1309307 | 361044 | 1,67 | down |
| 5994984 | 7138349 | 1221926 | similar to HCDI protein                                             | RGD1309307 | 361044 | 1,21 | up   |
| 5776055 | 7138349 | 1221925 | similar to HCDI protein                                             | RGD1309307 | 361044 | 1,19 | up   |
| 5992166 | 7138349 | 1221925 | similar to HCDI protein                                             | RGD1309307 | 361044 | 1,10 | down |
| 5643704 | 7138349 | 1221925 | similar to HCDI protein                                             | RGD1309307 | 361044 | 1,08 | down |
| 5697503 | 7138349 | 1221923 | similar to HCDI protein                                             | RGD1309307 | 361044 | 1,04 | down |
| 6744722 | 7138349 | 1221925 | similar to HCDI protein                                             | RGD1309307 | 361044 | 1,03 | down |
| 5814055 | 7138349 | 1221923 | similar to HCDI protein                                             | RGD1309307 | 361044 | 1,01 | up   |
| 6453104 | 7158419 | 1271387 | similar to HECT type E3 ubiquitin ligase                            | RGD1561038 | 291209 | 1,84 | down |
| 5989030 | 7158419 | 1271410 | similar to HECT type E3 ubiquitin ligase                            | RGD1561038 | 291209 | 1,35 | down |
| 6380546 | 7158419 | 1271401 | similar to HECT type E3 ubiquitin ligase                            | RGD1561038 | 291209 | 1,34 | up   |
| 6685225 | 7158419 | 1271402 | similar to HECT type E3 ubiquitin ligase                            | RGD1561038 | 291209 | 1,19 | down |
| 6599283 | 7158419 | 1271429 | similar to HECT type E3 ubiquitin ligase                            | RGD1561038 | 291209 | 1,19 | down |
| 5782775 | 7158419 | 1271425 | similar to HECT type E3 ubiquitin ligase                            | RGD1561038 | 291209 | 1,17 | up   |
| 6615127 | 7158419 | 1271392 | similar to HECT type E3 ubiquitin ligase                            | RGD1561038 | 291209 | 1,17 | down |
| 5759282 | 7158419 | 1271402 | similar to HECT type E3 ubiquitin ligase                            | RGD1561038 | 291209 | 1,16 | up   |
| 6644176 | 7158419 | 1271414 | similar to HECT type E3 ubiquitin ligase                            | RGD1561038 | 291209 | 1,15 | up   |
| 5624256 | 7158419 | 1271430 | similar to HECT type E3 ubiquitin ligase                            | RGD1561038 | 291209 | 1,14 | down |
| 6546530 | 7158419 | 1271376 | similar to HECT type E3 ubiquitin ligase                            | RGD1561038 | 291209 | 1,13 | up   |
| 6707966 | 7158419 | 1271423 | similar to HECT type E3 ubiquitin ligase                            | RGD1561038 | 291209 | 1,13 | up   |
| 6057163 | 7158419 | 1271413 | similar to HECT type E3 ubiquitin ligase                            | RGD1561038 | 291209 | 1,11 | down |
| 6558872 | 7158419 | 1271397 | similar to HECT type E3 ubiquitin ligase                            | RGD1561038 | 291209 | 1,10 | up   |
| 6296569 | 7158419 | 1271404 | similar to HECT type E3 ubiquitin ligase                            | RGD1561038 | 291209 | 1,08 | down |
| 6698291 | 7158419 | 1271428 | similar to HECT type E3 ubiquitin ligase                            | RGD1561038 | 291209 | 1,08 | down |

|         |         |         |                                                     |            |        |      |      |
|---------|---------|---------|-----------------------------------------------------|------------|--------|------|------|
| 6224480 | 7158419 | 1271409 | similar to HECT type E3 ubiquitin ligase            | RGD1561038 | 291209 | 1,06 | up   |
| 6203467 | 7158419 | 1271407 | similar to HECT type E3 ubiquitin ligase            | RGD1561038 | 291209 | 1,05 | up   |
| 6079354 | 7158419 | 1271390 | similar to HECT type E3 ubiquitin ligase            | RGD1561038 | 291209 | 1,04 | up   |
| 6470921 | 7158419 | 1271412 | similar to HECT type E3 ubiquitin ligase            | RGD1561038 | 291209 | 1,04 | up   |
| 5640990 | 7158419 | 1271406 | similar to HECT type E3 ubiquitin ligase            | RGD1561038 | 291209 | 1,04 | down |
| 5764380 | 7158419 | 1271411 | similar to HECT type E3 ubiquitin ligase            | RGD1561038 | 291209 | 1,03 | down |
| 6490112 | 7158419 | 1271408 | similar to HECT type E3 ubiquitin ligase            | RGD1561038 | 291209 | 1,03 | down |
| 6371765 | 7158419 | 1271424 | similar to HECT type E3 ubiquitin ligase            | RGD1561038 | 291209 | 1,03 | up   |
| 6632216 | 7158419 | 1271402 | similar to HECT type E3 ubiquitin ligase            | RGD1561038 | 291209 | 1,03 | up   |
| 6611886 | 7158419 | 1271393 | similar to HECT type E3 ubiquitin ligase            | RGD1561038 | 291209 | 1,02 | down |
| 6734904 | 7158419 | 1271403 | similar to HECT type E3 ubiquitin ligase            | RGD1561038 | 291209 | 1,02 | up   |
| 5747674 | 7158419 | 1271391 | similar to HECT type E3 ubiquitin ligase            | RGD1561038 | 291209 | 1,02 | down |
| 6639314 | 7158419 | 1271415 | similar to HECT type E3 ubiquitin ligase            | RGD1561038 | 291209 | 1,02 | up   |
| 6585096 | 7158419 | 1271405 | similar to HECT type E3 ubiquitin ligase            | RGD1561038 | 291209 | 1,01 | down |
| 6142932 | 7197076 | 1367887 | similar to histone protein Hist2h3c1                | RGD1563516 | 690148 | 2,09 | down |
| 6150049 | 7197076 | 1367888 | similar to histone protein Hist2h3c1                | RGD1563516 | 690148 | 1,65 | up   |
| 5827770 | 7197076 | 1367887 | similar to histone protein Hist2h3c1                | RGD1563516 | 690148 | 1,01 | up   |
| 5628431 | 7264797 | 1534438 | similar to homeobox-containing transcription factor | RGD1561431 | 500125 | 2,15 | down |
| 6048108 | 7136746 | 1217962 | similar to HT021                                    | RGD1306063 | 289928 | 1,68 | down |
| 6676839 | 7136746 | 1217969 | similar to HT021                                    | RGD1306063 | 289928 | 1,39 | up   |
| 6392155 | 7136746 | 1217962 | similar to HT021                                    | RGD1306063 | 289928 | 1,37 | down |
| 5981951 | 7136746 | 1217968 | similar to HT021                                    | RGD1306063 | 289928 | 1,35 | up   |
| 5663205 | 7136746 | 1217962 | similar to HT021                                    | RGD1306063 | 289928 | 1,20 | up   |
| 6340917 | 7136746 | 1217962 | similar to HT021                                    | RGD1306063 | 289928 | 1,19 | down |
| 6351072 | 7136746 | 1217969 | similar to HT021                                    | RGD1306063 | 289928 | 1,12 | down |
| 6335858 | 7136746 | 1217963 | similar to HT021                                    | RGD1306063 | 289928 | 1,06 | up   |
| 5844285 | 7136746 | 1217962 | similar to HT021                                    | RGD1306063 | 289928 | 1,06 | down |
| 5694182 | 7336039 | 1709684 | similar to hypothetical gene supported by AK085276  | RGD1562252 | 315646 | 1,54 | down |
| 6407002 | 7336039 | 1709685 | similar to hypothetical gene supported by AK085276  | RGD1562252 | 315646 | 1,45 | up   |
| 6366912 | 7336039 | 1709683 | similar to hypothetical gene supported by AK085276  | RGD1562252 | 315646 | 1,27 | up   |
| 5826765 | 7336039 | 1709683 | similar to hypothetical gene supported by AK085276  | RGD1562252 | 315646 | 1,24 | up   |
| 6390958 | 7336039 | 1709685 | similar to hypothetical gene supported by AK085276  | RGD1562252 | 315646 | 1,16 | up   |
| 5715214 | 7336039 | 1709684 | similar to hypothetical gene supported by AK085276  | RGD1562252 | 315646 | 1,11 | down |
| 5967694 | 7336039 | 1709686 | similar to hypothetical gene supported by AK085276  | RGD1562252 | 315646 | 1,08 | down |
| 5790573 | 7336039 | 1709685 | similar to hypothetical gene supported by AK085276  | RGD1562252 | 315646 | 1,06 | down |
| 6216978 | 7304045 | 1632660 | similar to hypothetical protein                     | MGC94915   | 362712 | 2,36 | up   |
| 6584655 | 7304045 | 1632666 | similar to hypothetical protein                     | MGC94915   | 362712 | 2,34 | up   |
| 6126549 | 7254040 | 1507613 | similar to hypothetical protein                     | RGD1562590 | 312365 | 2,23 | down |
| 6074504 | 7282831 | 1579751 | similar to hypothetical protein                     | RGD1564053 | 500390 | 2,16 | down |
| 5920609 | 7093219 | 1110687 | similar to hypothetical protein                     | RGD1559942 | 363782 | 2,13 | up   |
| 6292139 | 7130889 | 1203870 | similar to hypothetical protein                     | RGD1563070 | 305812 | 2,04 | down |
| 5741891 | 7284901 | 1584805 | similar to hypothetical protein                     | RGD1310641 | 366347 | 2,03 | up   |
| 6040799 | 7276650 | 1564109 | similar to hypothetical protein                     | RGD1309931 | 362538 | 1,94 | up   |
| 5660169 | 7093219 | 1110693 | similar to hypothetical protein                     | RGD1559942 | 363782 | 1,82 | down |
| 5771101 | 7093219 | 1110695 | similar to hypothetical protein                     | RGD1559942 | 363782 | 1,74 | up   |
| 5816645 | 7093219 | 1110692 | similar to hypothetical protein                     | RGD1559942 | 363782 | 1,70 | down |
| 6435943 | 7254040 | 1507575 | similar to hypothetical protein                     | RGD1562590 | 312365 | 1,67 | down |
| 5912171 | 7093219 | 1110683 | similar to hypothetical protein                     | RGD1559942 | 363782 | 1,57 | down |
| 5683385 | 7282831 | 1579762 | similar to hypothetical protein                     | RGD1564053 | 500390 | 1,56 | down |
| 6141531 | 7093219 | 1110693 | similar to hypothetical protein                     | RGD1559942 | 363782 | 1,53 | down |
| 5905004 | 7276650 | 1564162 | similar to hypothetical protein                     | RGD1309931 | 362538 | 1,50 | down |
| 6532904 | 7093219 | 1110686 | similar to hypothetical protein                     | RGD1559942 | 363782 | 1,50 | down |
| 5899458 | 7088489 | 1099530 | similar to hypothetical protein                     | RGD1305539 | 303920 | 1,49 | down |
| 5795878 | 7304045 | 1632673 | similar to hypothetical protein                     | MGC94915   | 362712 | 1,48 | up   |
| 5985830 | 7304045 | 1632668 | similar to hypothetical protein                     | MGC94915   | 362712 | 1,44 | up   |
| 5619460 | 7304045 | 1632675 | similar to hypothetical protein                     | MGC94915   | 362712 | 1,42 | down |
| 5796453 | 7284901 | 1584805 | similar to hypothetical protein                     | RGD1310641 | 366347 | 1,38 | down |

|         |         |         |                                 |            |        |      |      |
|---------|---------|---------|---------------------------------|------------|--------|------|------|
| 5801365 | 7304045 | 1632663 | similar to hypothetical protein | MGC94915   | 362712 | 1,38 | down |
| 6365908 | 7093219 | 1110684 | similar to hypothetical protein | RGD1559942 | 363782 | 1,37 | up   |
| 5958596 | 7282831 | 1579791 | similar to hypothetical protein | RGD1564053 | 500390 | 1,37 | up   |
| 5874155 | 7304045 | 1632664 | similar to hypothetical protein | MGC94915   | 362712 | 1,36 | up   |
| 6549560 | 7093219 | 1110691 | similar to hypothetical protein | RGD1559942 | 363782 | 1,35 | up   |
| 6731725 | 7304045 | 1632671 | similar to hypothetical protein | MGC94915   | 362712 | 1,34 | down |
| 6385473 | 7304045 | 1632675 | similar to hypothetical protein | MGC94915   | 362712 | 1,32 | up   |
| 5818591 | 7093219 | 1110697 | similar to hypothetical protein | RGD1559942 | 363782 | 1,31 | down |
| 6006759 | 7093219 | 1110694 | similar to hypothetical protein | RGD1559942 | 363782 | 1,30 | up   |
| 6698943 | 7130889 | 1203880 | similar to hypothetical protein | RGD1563070 | 305812 | 1,30 | down |
| 6733503 | 7093219 | 1110685 | similar to hypothetical protein | RGD1559942 | 363782 | 1,28 | up   |
| 6280803 | 7282831 | 1579739 | similar to hypothetical protein | RGD1564053 | 500390 | 1,28 | up   |
| 5922822 | 7088489 | 1099530 | similar to hypothetical protein | RGD1305539 | 303920 | 1,26 | up   |
| 5706199 | 7282831 | 1579737 | similar to hypothetical protein | RGD1564053 | 500390 | 1,24 | up   |
| 5971947 | 7093219 | 1110700 | similar to hypothetical protein | RGD1559942 | 363782 | 1,23 | down |
| 6205644 | 7284901 | 1584805 | similar to hypothetical protein | RGD1310641 | 366347 | 1,22 | down |
| 5910776 | 7282831 | 1579790 | similar to hypothetical protein | RGD1564053 | 500390 | 1,22 | down |
| 6546524 | 7284901 | 1584816 | similar to hypothetical protein | RGD1310641 | 366347 | 1,22 | up   |
| 6703039 | 7093219 | 1110694 | similar to hypothetical protein | RGD1559942 | 363782 | 1,20 | down |
| 6172566 | 7284901 | 1584810 | similar to hypothetical protein | RGD1310641 | 366347 | 1,20 | down |
| 6586085 | 7304045 | 1632669 | similar to hypothetical protein | MGC94915   | 362712 | 1,18 | up   |
| 6036407 | 7130889 | 1203865 | similar to hypothetical protein | RGD1563070 | 305812 | 1,18 | down |
| 6237921 | 7304045 | 1632667 | similar to hypothetical protein | MGC94915   | 362712 | 1,17 | down |
| 6296423 | 7304045 | 1632662 | similar to hypothetical protein | MGC94915   | 362712 | 1,16 | up   |
| 6563737 | 7130889 | 1203879 | similar to hypothetical protein | RGD1563070 | 305812 | 1,16 | down |
| 5851062 | 7276650 | 1564155 | similar to hypothetical protein | RGD1309931 | 362538 | 1,16 | down |
| 6574274 | 7254040 | 1507575 | similar to hypothetical protein | RGD1562590 | 312365 | 1,16 | down |
| 6500789 | 7304045 | 1632670 | similar to hypothetical protein | MGC94915   | 362712 | 1,16 | down |
| 6413982 | 7130889 | 1203864 | similar to hypothetical protein | RGD1563070 | 305812 | 1,14 | up   |
| 5746136 | 7284901 | 1584817 | similar to hypothetical protein | RGD1310641 | 366347 | 1,14 | down |
| 5671521 | 7304045 | 1632662 | similar to hypothetical protein | MGC94915   | 362712 | 1,14 | down |
| 6519750 | 7304045 | 1632663 | similar to hypothetical protein | MGC94915   | 362712 | 1,13 | up   |
| 6684298 | 7304045 | 1632674 | similar to hypothetical protein | MGC94915   | 362712 | 1,11 | up   |
| 6108672 | 7093219 | 1110696 | similar to hypothetical protein | RGD1559942 | 363782 | 1,10 | down |
| 6322048 | 7130889 | 1203881 | similar to hypothetical protein | RGD1563070 | 305812 | 1,10 | down |
| 6433860 | 7304045 | 1632668 | similar to hypothetical protein | MGC94915   | 362712 | 1,10 | down |
| 5792723 | 7282831 | 1579738 | similar to hypothetical protein | RGD1564053 | 500390 | 1,09 | down |
| 5684179 | 7284901 | 1584812 | similar to hypothetical protein | RGD1310641 | 366347 | 1,09 | down |
| 6547659 | 7282831 | 1579772 | similar to hypothetical protein | RGD1564053 | 500390 | 1,08 | down |
| 6598394 | 7282831 | 1579741 | similar to hypothetical protein | RGD1564053 | 500390 | 1,08 | up   |
| 6672867 | 7284901 | 1584814 | similar to hypothetical protein | RGD1310641 | 366347 | 1,08 | down |
| 5698983 | 7130889 | 1203878 | similar to hypothetical protein | RGD1563070 | 305812 | 1,07 | up   |
| 6106185 | 7304045 | 1632672 | similar to hypothetical protein | MGC94915   | 362712 | 1,07 | up   |
| 6578616 | 7284901 | 1584819 | similar to hypothetical protein | RGD1310641 | 366347 | 1,07 | down |
| 6465312 | 7130889 | 1203869 | similar to hypothetical protein | RGD1563070 | 305812 | 1,07 | down |
| 6110331 | 7282831 | 1579736 | similar to hypothetical protein | RGD1564053 | 500390 | 1,06 | up   |
| 5895754 | 7282831 | 1579781 | similar to hypothetical protein | RGD1564053 | 500390 | 1,06 | up   |
| 5959001 | 7282831 | 1579752 | similar to hypothetical protein | RGD1564053 | 500390 | 1,06 | up   |
| 6391673 | 7304045 | 1632672 | similar to hypothetical protein | MGC94915   | 362712 | 1,06 | up   |
| 5965367 | 7093219 | 1110681 | similar to hypothetical protein | RGD1559942 | 363782 | 1,06 | up   |
| 5722691 | 7304045 | 1632658 | similar to hypothetical protein | MGC94915   | 362712 | 1,05 | up   |
| 6625549 | 7282831 | 1579786 | similar to hypothetical protein | RGD1564053 | 500390 | 1,05 | up   |
| 5706556 | 7284901 | 1584813 | similar to hypothetical protein | RGD1310641 | 366347 | 1,05 | up   |
| 6052750 | 7304045 | 1632659 | similar to hypothetical protein | MGC94915   | 362712 | 1,05 | down |
| 6019873 | 7093219 | 1110693 | similar to hypothetical protein | RGD1559942 | 363782 | 1,04 | down |
| 5910191 | 7282831 | 1579742 | similar to hypothetical protein | RGD1564053 | 500390 | 1,04 | up   |
| 6640638 | 7284901 | 1584808 | similar to hypothetical protein | RGD1310641 | 366347 | 1,03 | down |

|         |         |         |                                            |            |        |      |      |
|---------|---------|---------|--------------------------------------------|------------|--------|------|------|
| 6357075 | 7284901 | 1584818 | similar to hypothetical protein            | RGD1310641 | 366347 | 1,03 | down |
| 6328298 | 7130889 | 1203881 | similar to hypothetical protein            | RGD1563070 | 305812 | 1,02 | up   |
| 6596970 | 7304045 | 1632665 | similar to hypothetical protein            | MGC94915   | 362712 | 1,02 | down |
| 6185729 | 7284901 | 1584811 | similar to hypothetical protein            | RGD1310641 | 366347 | 1,02 | up   |
| 5913110 | 7284901 | 1584806 | similar to hypothetical protein            | RGD1310641 | 366347 | 1,02 | down |
| 6703543 | 7093219 | 1110698 | similar to hypothetical protein            | RGD1559942 | 363782 | 1,02 | up   |
| 6639530 | 7282831 | 1579799 | similar to hypothetical protein            | RGD1564053 | 500390 | 1,02 | down |
| 6663662 | 7093219 | 1110688 | similar to hypothetical protein            | RGD1559942 | 363782 | 1,02 | down |
| 6244667 | 7282831 | 1579751 | similar to hypothetical protein            | RGD1564053 | 500390 | 1,02 | up   |
| 6709227 | 7093219 | 1110693 | similar to hypothetical protein            | RGD1559942 | 363782 | 1,01 | down |
| 6496287 | 7304045 | 1632661 | similar to hypothetical protein            | MGC94915   | 362712 | 1,01 | up   |
| 6436482 | 7093219 | 1110681 | similar to hypothetical protein            | RGD1559942 | 363782 | 1,01 | down |
| 6728439 | 7282831 | 1579738 | similar to hypothetical protein            | RGD1564053 | 500390 | 1,01 | down |
| 5720333 | 7093219 | 1110699 | similar to hypothetical protein            | RGD1559942 | 363782 | 1,01 | down |
| 5937980 | 7284901 | 1584804 | similar to hypothetical protein            | RGD1310641 | 366347 | 1,01 | down |
| 6452846 | 7284901 | 1584815 | similar to hypothetical protein            | RGD1310641 | 366347 | 1,00 | down |
| 6579669 | 7093219 | 1110693 | similar to hypothetical protein            | RGD1559942 | 363782 | 1,00 | up   |
| 6110957 | 7282831 | 1579774 | similar to hypothetical protein            | RGD1564053 | 500390 | 1,00 | down |
| 6312645 | 7313064 | 1654514 | similar to hypothetical protein 4930509O22 | LOC300308  | 300308 | 1,66 | up   |
| 6614681 | 7313064 | 1654508 | similar to hypothetical protein 4930509O22 | LOC300308  | 300308 | 1,54 | up   |
| 6157456 | 7313064 | 1654509 | similar to hypothetical protein 4930509O22 | LOC300308  | 300308 | 1,51 | up   |
| 6584413 | 7313064 | 1654508 | similar to hypothetical protein 4930509O22 | LOC300308  | 300308 | 1,47 | down |
| 6449458 | 7313064 | 1654509 | similar to hypothetical protein 4930509O22 | LOC300308  | 300308 | 1,37 | up   |
| 5768202 | 7313064 | 1654510 | similar to hypothetical protein 4930509O22 | LOC300308  | 300308 | 1,33 | up   |
| 6126297 | 7313064 | 1654519 | similar to hypothetical protein 4930509O22 | LOC300308  | 300308 | 1,25 | down |
| 6356488 | 7313064 | 1654512 | similar to hypothetical protein 4930509O22 | LOC300308  | 300308 | 1,20 | up   |
| 5805115 | 7313064 | 1654519 | similar to hypothetical protein 4930509O22 | LOC300308  | 300308 | 1,19 | down |
| 6738690 | 7313064 | 1654517 | similar to hypothetical protein 4930509O22 | LOC300308  | 300308 | 1,19 | down |
| 5733467 | 7313064 | 1654518 | similar to hypothetical protein 4930509O22 | LOC300308  | 300308 | 1,15 | down |
| 5834091 | 7313064 | 1654507 | similar to hypothetical protein 4930509O22 | LOC300308  | 300308 | 1,14 | down |
| 6696754 | 7313064 | 1654513 | similar to hypothetical protein 4930509O22 | LOC300308  | 300308 | 1,13 | up   |
| 5696094 | 7313064 | 1654515 | similar to hypothetical protein 4930509O22 | LOC300308  | 300308 | 1,06 | up   |
| 5806784 | 7313064 | 1654518 | similar to hypothetical protein 4930509O22 | LOC300308  | 300308 | 1,05 | down |
| 5804039 | 7313064 | 1654516 | similar to hypothetical protein 4930509O22 | LOC300308  | 300308 | 1,04 | up   |
| 6262816 | 7313064 | 1654515 | similar to hypothetical protein 4930509O22 | LOC300308  | 300308 | 1,03 | up   |
| 5643843 | 7313064 | 1654515 | similar to hypothetical protein 4930509O22 | LOC300308  | 300308 | 1,02 | down |
| 5878508 | 7313064 | 1654520 | similar to hypothetical protein 4930509O22 | LOC300308  | 300308 | 1,02 | up   |
| 6025047 | 7236968 | 1465660 | similar to hypothetical protein 4932418E24 | RGD1565512 | 499759 | 2,24 | up   |
| 6019891 | 7236968 | 1465651 | similar to hypothetical protein 4932418E24 | RGD1565512 | 499759 | 2,16 | up   |
| 6474752 | 7236968 | 1465653 | similar to hypothetical protein 4932418E24 | RGD1565512 | 499759 | 1,86 | down |
| 6343311 | 7236968 | 1465657 | similar to hypothetical protein 4932418E24 | RGD1565512 | 499759 | 1,74 | down |
| 6731234 | 7236968 | 1465652 | similar to hypothetical protein 4932418E24 | RGD1565512 | 499759 | 1,54 | down |
| 5877438 | 7236968 | 1465651 | similar to hypothetical protein 4932418E24 | RGD1565512 | 499759 | 1,48 | up   |
| 6082957 | 7236968 | 1465653 | similar to hypothetical protein 4932418E24 | RGD1565512 | 499759 | 1,42 | down |
| 5894161 | 7236968 | 1465659 | similar to hypothetical protein 4932418E24 | RGD1565512 | 499759 | 1,42 | down |
| 6081305 | 7236968 | 1465653 | similar to hypothetical protein 4932418E24 | RGD1565512 | 499759 | 1,39 | up   |
| 6344150 | 7236968 | 1465660 | similar to hypothetical protein 4932418E24 | RGD1565512 | 499759 | 1,38 | up   |
| 5924060 | 7236968 | 1465651 | similar to hypothetical protein 4932418E24 | RGD1565512 | 499759 | 1,33 | up   |
| 6557868 | 7236968 | 1465652 | similar to hypothetical protein 4932418E24 | RGD1565512 | 499759 | 1,26 | down |
| 5896990 | 7236968 | 1465659 | similar to hypothetical protein 4932418E24 | RGD1565512 | 499759 | 1,25 | up   |
| 6659022 | 7236968 | 1465658 | similar to hypothetical protein 4932418E24 | RGD1565512 | 499759 | 1,22 | down |
| 6159206 | 7236968 | 1465652 | similar to hypothetical protein 4932418E24 | RGD1565512 | 499759 | 1,18 | up   |
| 6155990 | 7236968 | 1465655 | similar to hypothetical protein 4932418E24 | RGD1565512 | 499759 | 1,11 | down |
| 5852724 | 7236968 | 1465659 | similar to hypothetical protein 4932418E24 | RGD1565512 | 499759 | 1,09 | down |
| 5698045 | 7236968 | 1465655 | similar to hypothetical protein 4932418E24 | RGD1565512 | 499759 | 1,06 | down |
| 5927869 | 7236968 | 1465654 | similar to hypothetical protein 4932418E24 | RGD1565512 | 499759 | 1,02 | down |
| 6272859 | 7275741 | 1561829 | similar to hypothetical protein 4933430I17 | LOC500475  | 500475 | 2,24 | up   |



|         |         |         |                                               |            |        |      |      |
|---------|---------|---------|-----------------------------------------------|------------|--------|------|------|
| 5626591 | 7275741 | 1561820 | similar to hypothetical protein 4933430I17    | LOC500475  | 500475 | 1,86 | down |
| 5891735 | 7275741 | 1561834 | similar to hypothetical protein 4933430I17    | LOC500475  | 500475 | 1,76 | up   |
| 6290884 | 7275741 | 1561825 | similar to hypothetical protein 4933430I17    | LOC500475  | 500475 | 1,64 | down |
| 5626515 | 7275741 | 1561826 | similar to hypothetical protein 4933430I17    | LOC500475  | 500475 | 1,25 | down |
| 6642272 | 7275741 | 1561827 | similar to hypothetical protein 4933430I17    | LOC500475  | 500475 | 1,25 | down |
| 6249242 | 7275741 | 1561828 | similar to hypothetical protein 4933430I17    | LOC500475  | 500475 | 1,20 | up   |
| 6670964 | 7275741 | 1561824 | similar to hypothetical protein 4933430I17    | LOC500475  | 500475 | 1,17 | down |
| 6456164 | 7275741 | 1561821 | similar to hypothetical protein 4933430I17    | LOC500475  | 500475 | 1,16 | down |
| 5666274 | 7275741 | 1561833 | similar to hypothetical protein 4933430I17    | LOC500475  | 500475 | 1,15 | up   |
| 5939900 | 7275741 | 1561823 | similar to hypothetical protein 4933430I17    | LOC500475  | 500475 | 1,08 | up   |
| 5925727 | 7275741 | 1561822 | similar to hypothetical protein 4933430I17    | LOC500475  | 500475 | 1,05 | up   |
| 5675264 | 7275741 | 1561831 | similar to hypothetical protein 4933430I17    | LOC500475  | 500475 | 1,04 | up   |
| 5975539 | 7275741 | 1561826 | similar to hypothetical protein 4933430I17    | LOC500475  | 500475 | 1,03 | up   |
| 6055902 | 7275741 | 1561832 | similar to hypothetical protein 4933430I17    | LOC500475  | 500475 | 1,03 | down |
| 6188223 | 7275741 | 1561820 | similar to hypothetical protein 4933430I17    | LOC500475  | 500475 | 1,03 | down |
| 5745394 | 7275741 | 1561830 | similar to hypothetical protein 4933430I17    | LOC500475  | 500475 | 1,01 | down |
| 6337029 | 7350993 | 1747489 | similar to hypothetical protein A730098P15    | RGD1565726 | 363167 | 1,16 | up   |
| 5687333 | 7350993 | 1747480 | similar to hypothetical protein A730098P15    | RGD1565726 | 363167 | 1,11 | up   |
| 6297628 | 7350993 | 1747481 | similar to hypothetical protein A730098P15    | RGD1565726 | 363167 | 1,02 | up   |
| 6039793 | 7259131 | 1520410 | similar to hypothetical protein DKFZp761D0211 | RGD1306151 | 362455 | 2,06 | down |
| 6734929 | 7259131 | 1520418 | similar to hypothetical protein DKFZp761D0211 | RGD1306151 | 362455 | 1,60 | up   |
| 5848301 | 7259131 | 1520405 | similar to hypothetical protein DKFZp761D0211 | RGD1306151 | 362455 | 1,46 | down |
| 6550512 | 7259131 | 1520418 | similar to hypothetical protein DKFZp761D0211 | RGD1306151 | 362455 | 1,46 | up   |
| 6010928 | 7259131 | 1520401 | similar to hypothetical protein DKFZp761D0211 | RGD1306151 | 362455 | 1,37 | up   |
| 5945881 | 7259131 | 1520417 | similar to hypothetical protein DKFZp761D0211 | RGD1306151 | 362455 | 1,34 | up   |
| 6590334 | 7259131 | 1520418 | similar to hypothetical protein DKFZp761D0211 | RGD1306151 | 362455 | 1,33 | up   |
| 6049329 | 7259131 | 1520402 | similar to hypothetical protein DKFZp761D0211 | RGD1306151 | 362455 | 1,28 | up   |
| 5769392 | 7259131 | 1520418 | similar to hypothetical protein DKFZp761D0211 | RGD1306151 | 362455 | 1,27 | down |
| 6235965 | 7259131 | 1520404 | similar to hypothetical protein DKFZp761D0211 | RGD1306151 | 362455 | 1,16 | down |
| 6601242 | 7259131 | 1520411 | similar to hypothetical protein DKFZp761D0211 | RGD1306151 | 362455 | 1,15 | up   |
| 5774839 | 7259131 | 1520416 | similar to hypothetical protein DKFZp761D0211 | RGD1306151 | 362455 | 1,12 | up   |
| 5905505 | 7259131 | 1520418 | similar to hypothetical protein DKFZp761D0211 | RGD1306151 | 362455 | 1,10 | up   |
| 6152426 | 7259131 | 1520418 | similar to hypothetical protein DKFZp761D0211 | RGD1306151 | 362455 | 1,07 | down |
| 6192736 | 7259131 | 1520415 | similar to hypothetical protein DKFZp761D0211 | RGD1306151 | 362455 | 1,05 | down |
| 6465447 | 7259131 | 1520409 | similar to hypothetical protein DKFZp761D0211 | RGD1306151 | 362455 | 1,04 | up   |
| 5941901 | 7259131 | 1520408 | similar to hypothetical protein DKFZp761D0211 | RGD1306151 | 362455 | 1,03 | up   |
| 6422539 | 7259131 | 1520403 | similar to hypothetical protein DKFZp761D0211 | RGD1306151 | 362455 | 1,03 | down |
| 5858926 | 7259131 | 1520407 | similar to hypothetical protein DKFZp761D0211 | RGD1306151 | 362455 | 1,01 | up   |
| 6044222 | 7147979 | 1245991 | similar to hypothetical protein FLJ10154      | RGD1310061 | 290912 | 2,01 | down |
| 5997402 | 7147979 | 1245988 | similar to hypothetical protein FLJ10154      | RGD1310061 | 290912 | 1,85 | up   |
| 6641126 | 7147979 | 1245988 | similar to hypothetical protein FLJ10154      | RGD1310061 | 290912 | 1,23 | up   |
| 6141845 | 7147979 | 1245990 | similar to hypothetical protein FLJ10154      | RGD1310061 | 290912 | 1,16 | up   |
| 6031518 | 7147979 | 1245988 | similar to hypothetical protein FLJ10154      | RGD1310061 | 290912 | 1,13 | up   |
| 5623799 | 7147979 | 1245989 | similar to hypothetical protein FLJ10154      | RGD1310061 | 290912 | 1,02 | up   |
| 6091475 | 7147979 | 1245992 | similar to hypothetical protein FLJ10154      | RGD1310061 | 290912 | 1,01 | up   |
| 6688451 | 7113339 | 1160715 | similar to hypothetical protein FLJ10706      | LOC498265  | 498265 | 2,45 | up   |
| 5973022 | 7113339 | 1160721 | similar to hypothetical protein FLJ10706      | LOC498265  | 498265 | 1,78 | up   |
| 6135900 | 7113339 | 1160722 | similar to hypothetical protein FLJ10706      | LOC498265  | 498265 | 1,66 | up   |
| 6670438 | 7113339 | 1160723 | similar to hypothetical protein FLJ10706      | LOC498265  | 498265 | 1,65 | down |
| 6629952 | 7113339 | 1160718 | similar to hypothetical protein FLJ10706      | LOC498265  | 498265 | 1,58 | up   |
| 5874583 | 7113339 | 1160713 | similar to hypothetical protein FLJ10706      | LOC498265  | 498265 | 1,58 | down |
| 6068643 | 7113339 | 1160708 | similar to hypothetical protein FLJ10706      | LOC498265  | 498265 | 1,53 | down |
| 6354401 | 7113339 | 1160731 | similar to hypothetical protein FLJ10706      | LOC498265  | 498265 | 1,34 | down |
| 6136049 | 7113339 | 1160725 | similar to hypothetical protein FLJ10706      | LOC498265  | 498265 | 1,28 | up   |
| 6318895 | 7113339 | 1160717 | similar to hypothetical protein FLJ10706      | LOC498265  | 498265 | 1,26 | up   |
| 6194263 | 7113339 | 1160721 | similar to hypothetical protein FLJ10706      | LOC498265  | 498265 | 1,19 | down |
| 6283753 | 7113339 | 1160727 | similar to hypothetical protein FLJ10706      | LOC498265  | 498265 | 1,17 | down |

|         |         |         |                                          |            |        |      |      |
|---------|---------|---------|------------------------------------------|------------|--------|------|------|
| 6701120 | 7113339 | 1160709 | similar to hypothetical protein FLJ10706 | LOC498265  | 498265 | 1,16 | down |
| 6493146 | 7113339 | 1160724 | similar to hypothetical protein FLJ10706 | LOC498265  | 498265 | 1,16 | up   |
| 6017291 | 7113339 | 1160715 | similar to hypothetical protein FLJ10706 | LOC498265  | 498265 | 1,16 | down |
| 5618916 | 7113339 | 1160719 | similar to hypothetical protein FLJ10706 | LOC498265  | 498265 | 1,16 | up   |
| 6531892 | 7113339 | 1160726 | similar to hypothetical protein FLJ10706 | LOC498265  | 498265 | 1,15 | down |
| 6441347 | 7113339 | 1160716 | similar to hypothetical protein FLJ10706 | LOC498265  | 498265 | 1,13 | down |
| 6314788 | 7113339 | 1160713 | similar to hypothetical protein FLJ10706 | LOC498265  | 498265 | 1,10 | down |
| 6566855 | 7113339 | 1160729 | similar to hypothetical protein FLJ10706 | LOC498265  | 498265 | 1,09 | up   |
| 6688901 | 7113339 | 1160712 | similar to hypothetical protein FLJ10706 | LOC498265  | 498265 | 1,08 | down |
| 5836736 | 7113339 | 1160728 | similar to hypothetical protein FLJ10706 | LOC498265  | 498265 | 1,07 | up   |
| 6717048 | 7113339 | 1160714 | similar to hypothetical protein FLJ10706 | LOC498265  | 498265 | 1,07 | down |
| 6147552 | 7113339 | 1160720 | similar to hypothetical protein FLJ10706 | LOC498265  | 498265 | 1,07 | down |
| 6015435 | 7113339 | 1160731 | similar to hypothetical protein FLJ10706 | LOC498265  | 498265 | 1,04 | down |
| 5676051 | 7113339 | 1160710 | similar to hypothetical protein FLJ10706 | LOC498265  | 498265 | 1,04 | down |
| 5674147 | 7113339 | 1160711 | similar to hypothetical protein FLJ10706 | LOC498265  | 498265 | 1,03 | up   |
| 6520899 | 7113339 | 1160730 | similar to hypothetical protein FLJ10706 | LOC498265  | 498265 | 1,03 | up   |
| 6498954 | 7318596 | 1668936 | similar to hypothetical protein FLJ12242 | RGD1311154 | 300317 | 1,83 | down |
| 5906390 | 7318596 | 1668926 | similar to hypothetical protein FLJ12242 | RGD1311154 | 300317 | 1,45 | down |
| 5765769 | 7318596 | 1668925 | similar to hypothetical protein FLJ12242 | RGD1311154 | 300317 | 1,43 | up   |
| 6214316 | 7318596 | 1668936 | similar to hypothetical protein FLJ12242 | RGD1311154 | 300317 | 1,38 | up   |
| 6656054 | 7318596 | 1668928 | similar to hypothetical protein FLJ12242 | RGD1311154 | 300317 | 1,38 | down |
| 6436539 | 7318596 | 1668929 | similar to hypothetical protein FLJ12242 | RGD1311154 | 300317 | 1,24 | down |
| 6166024 | 7318596 | 1668931 | similar to hypothetical protein FLJ12242 | RGD1311154 | 300317 | 1,22 | down |
| 6687367 | 7318596 | 1668938 | similar to hypothetical protein FLJ12242 | RGD1311154 | 300317 | 1,00 | up   |
| 6444120 | 7190534 | 1351233 | similar to hypothetical protein FLJ13231 | RGD1310081 | 310137 | 2,04 | up   |
| 6541943 | 7190534 | 1351239 | similar to hypothetical protein FLJ13231 | RGD1310081 | 310137 | 1,87 | down |
| 6228188 | 7190534 | 1351215 | similar to hypothetical protein FLJ13231 | RGD1310081 | 310137 | 1,80 | down |
| 5796179 | 7190534 | 1351241 | similar to hypothetical protein FLJ13231 | RGD1310081 | 310137 | 1,42 | down |
| 6320827 | 7190534 | 1351219 | similar to hypothetical protein FLJ13231 | RGD1310081 | 310137 | 1,35 | up   |
| 6154049 | 7190534 | 1351237 | similar to hypothetical protein FLJ13231 | RGD1310081 | 310137 | 1,33 | up   |
| 6328857 | 7190534 | 1351229 | similar to hypothetical protein FLJ13231 | RGD1310081 | 310137 | 1,31 | up   |
| 6375241 | 7190534 | 1351226 | similar to hypothetical protein FLJ13231 | RGD1310081 | 310137 | 1,28 | up   |
| 6691828 | 7190534 | 1351226 | similar to hypothetical protein FLJ13231 | RGD1310081 | 310137 | 1,26 | up   |
| 6516958 | 7190534 | 1351231 | similar to hypothetical protein FLJ13231 | RGD1310081 | 310137 | 1,24 | down |
| 5679940 | 7190534 | 1351209 | similar to hypothetical protein FLJ13231 | RGD1310081 | 310137 | 1,23 | up   |
| 6120386 | 7190534 | 1351235 | similar to hypothetical protein FLJ13231 | RGD1310081 | 310137 | 1,22 | down |
| 5751686 | 7190534 | 1351216 | similar to hypothetical protein FLJ13231 | RGD1310081 | 310137 | 1,19 | up   |
| 6106126 | 7190534 | 1351237 | similar to hypothetical protein FLJ13231 | RGD1310081 | 310137 | 1,18 | down |
| 6455710 | 7190534 | 1351239 | similar to hypothetical protein FLJ13231 | RGD1310081 | 310137 | 1,16 | up   |
| 6100110 | 7190534 | 1351214 | similar to hypothetical protein FLJ13231 | RGD1310081 | 310137 | 1,16 | up   |
| 5897087 | 7190534 | 1351234 | similar to hypothetical protein FLJ13231 | RGD1310081 | 310137 | 1,14 | down |
| 6721292 | 7190534 | 1351240 | similar to hypothetical protein FLJ13231 | RGD1310081 | 310137 | 1,13 | down |
| 5994909 | 7190534 | 1351220 | similar to hypothetical protein FLJ13231 | RGD1310081 | 310137 | 1,10 | down |
| 5976527 | 7190534 | 1351217 | similar to hypothetical protein FLJ13231 | RGD1310081 | 310137 | 1,09 | up   |
| 6448327 | 7190534 | 1351218 | similar to hypothetical protein FLJ13231 | RGD1310081 | 310137 | 1,09 | down |
| 6699115 | 7190534 | 1351227 | similar to hypothetical protein FLJ13231 | RGD1310081 | 310137 | 1,08 | up   |
| 6437019 | 7190534 | 1351213 | similar to hypothetical protein FLJ13231 | RGD1310081 | 310137 | 1,07 | down |
| 6444031 | 7190534 | 1351211 | similar to hypothetical protein FLJ13231 | RGD1310081 | 310137 | 1,05 | up   |
| 6659921 | 7190534 | 1351212 | similar to hypothetical protein FLJ13231 | RGD1310081 | 310137 | 1,05 | up   |
| 6095254 | 7190534 | 1351208 | similar to hypothetical protein FLJ13231 | RGD1310081 | 310137 | 1,02 | down |
| 6410533 | 7190534 | 1351223 | similar to hypothetical protein FLJ13231 | RGD1310081 | 310137 | 1,02 | up   |
| 5836398 | 7190534 | 1351224 | similar to hypothetical protein FLJ13231 | RGD1310081 | 310137 | 1,02 | up   |
| 6221841 | 7190534 | 1351210 | similar to hypothetical protein FLJ13231 | RGD1310081 | 310137 | 1,01 | up   |
| 6394901 | 7190534 | 1351236 | similar to hypothetical protein FLJ13231 | RGD1310081 | 310137 | 1,01 | down |
| 6554589 | 7285563 | 1586043 | similar to hypothetical protein FLJ14642 | RGD1310376 | 298404 | 1,82 | up   |
| 6076725 | 7285563 | 1586043 | similar to hypothetical protein FLJ14642 | RGD1310376 | 298404 | 1,28 | up   |
| 5631554 | 7285563 | 1586041 | similar to hypothetical protein FLJ14642 | RGD1310376 | 298404 | 1,25 | up   |

|         |         |         |                                                    |            |        |      |      |
|---------|---------|---------|----------------------------------------------------|------------|--------|------|------|
| 6033644 | 7285563 | 1586043 | similar to hypothetical protein FLJ14642           | RGD1310376 | 298404 | 1,21 | down |
| 6589527 | 7285563 | 1586042 | similar to hypothetical protein FLJ14642           | RGD1310376 | 298404 | 1,09 | up   |
| 6269324 | 7285563 | 1586039 | similar to hypothetical protein FLJ14642           | RGD1310376 | 298404 | 1,08 | up   |
| 6193789 | 7285563 | 1586042 | similar to hypothetical protein FLJ14642           | RGD1310376 | 298404 | 1,07 | down |
| 6222873 | 7282927 | 1579973 | similar to hypothetical protein FLJ22490           | RGD1307055 | 362472 | 1,32 | down |
| 5880224 | 7282927 | 1580009 | similar to hypothetical protein FLJ22490           | RGD1307055 | 362472 | 1,25 | down |
| 6573377 | 7282927 | 1580010 | similar to hypothetical protein FLJ22490           | RGD1307055 | 362472 | 1,15 | down |
| 5982282 | 7365147 | 1781745 | similar to hypothetical protein FLJ22527           | RGD1305311 | 316616 | 1,21 | down |
| 6588547 | 7059584 | 1030561 | similar to hypothetical protein FLJ22531           | RGD1563323 | 361702 | 1,29 | up   |
| 6015337 | 7059584 | 1030560 | similar to hypothetical protein FLJ22531           | RGD1563323 | 361702 | 1,15 | up   |
| 6007577 | 7059584 | 1030563 | similar to hypothetical protein FLJ22531           | RGD1563323 | 361702 | 1,10 | up   |
| 6742927 | 7059584 | 1030562 | similar to hypothetical protein FLJ22531           | RGD1563323 | 361702 | 1,10 | down |
| 6697200 | 7143412 | 1234588 | similar to hypothetical protein FLJ31737           | RGD1310423 | 361112 | 2,09 | up   |
| 6726618 | 7143412 | 1234592 | similar to hypothetical protein FLJ31737           | RGD1310423 | 361112 | 1,45 | down |
| 6053594 | 7143412 | 1234602 | similar to hypothetical protein FLJ31737           | RGD1310423 | 361112 | 1,20 | up   |
| 5663502 | 7143412 | 1234593 | similar to hypothetical protein FLJ31737           | RGD1310423 | 361112 | 1,15 | up   |
| 6136435 | 7143412 | 1234609 | similar to hypothetical protein FLJ31737           | RGD1310423 | 361112 | 1,14 | down |
| 5744847 | 7143412 | 1234597 | similar to hypothetical protein FLJ31737           | RGD1310423 | 361112 | 1,10 | up   |
| 5812730 | 7143412 | 1234604 | similar to hypothetical protein FLJ31737           | RGD1310423 | 361112 | 1,06 | down |
| 6038390 | 7143412 | 1234584 | similar to hypothetical protein FLJ31737           | RGD1310423 | 361112 | 1,02 | down |
| 6257550 | 7143412 | 1234609 | similar to hypothetical protein FLJ31737           | RGD1310423 | 361112 | 1,01 | up   |
| 5627519 | 7223395 | 1431089 | similar to hypothetical protein FLJ32745           | RGD1566050 | 499442 | 1,73 | up   |
| 6088817 | 7223395 | 1431090 | similar to hypothetical protein FLJ32745           | RGD1566050 | 499442 | 1,41 | down |
| 6575418 | 7223395 | 1431087 | similar to hypothetical protein FLJ32745           | RGD1566050 | 499442 | 1,26 | up   |
| 6032418 | 7223395 | 1431071 | similar to hypothetical protein FLJ32745           | RGD1566050 | 499442 | 1,09 | down |
| 5718199 | 7223395 | 1431085 | similar to hypothetical protein FLJ32745           | RGD1566050 | 499442 | 1,08 | down |
| 5672628 | 7223395 | 1431091 | similar to hypothetical protein FLJ32745           | RGD1566050 | 499442 | 1,00 | down |
| 6388749 | 7112672 | 1158987 | similar to hypothetical protein FLJ32940 isoform 1 | RGD1566124 | 501861 | 2,18 | up   |
| 5693084 | 7112672 | 1158997 | similar to hypothetical protein FLJ32940 isoform 1 | RGD1566124 | 501861 | 1,99 | up   |
| 6195040 | 7112672 | 1158983 | similar to hypothetical protein FLJ32940 isoform 1 | RGD1566124 | 501861 | 1,89 | down |
| 6582473 | 7112672 | 1159006 | similar to hypothetical protein FLJ32940 isoform 1 | RGD1566124 | 501861 | 1,86 | down |
| 6091430 | 7112672 | 1158985 | similar to hypothetical protein FLJ32940 isoform 1 | RGD1566124 | 501861 | 1,63 | up   |
| 5698454 | 7112672 | 1158985 | similar to hypothetical protein FLJ32940 isoform 1 | RGD1566124 | 501861 | 1,56 | up   |
| 6657708 | 7112672 | 1158993 | similar to hypothetical protein FLJ32940 isoform 1 | RGD1566124 | 501861 | 1,49 | down |
| 5906582 | 7112672 | 1158979 | similar to hypothetical protein FLJ32940 isoform 1 | RGD1566124 | 501861 | 1,39 | up   |
| 6611991 | 7112672 | 1158992 | similar to hypothetical protein FLJ32940 isoform 1 | RGD1566124 | 501861 | 1,36 | down |
| 6067327 | 7112672 | 1159004 | similar to hypothetical protein FLJ32940 isoform 1 | RGD1566124 | 501861 | 1,36 | down |
| 6138218 | 7112672 | 1158998 | similar to hypothetical protein FLJ32940 isoform 1 | RGD1566124 | 501861 | 1,36 | up   |
| 6369887 | 7112672 | 1159005 | similar to hypothetical protein FLJ32940 isoform 1 | RGD1566124 | 501861 | 1,33 | up   |
| 6599332 | 7112672 | 1158994 | similar to hypothetical protein FLJ32940 isoform 1 | RGD1566124 | 501861 | 1,32 | up   |
| 5819098 | 7112672 | 1158981 | similar to hypothetical protein FLJ32940 isoform 1 | RGD1566124 | 501861 | 1,27 | down |
| 6538013 | 7112672 | 1159005 | similar to hypothetical protein FLJ32940 isoform 1 | RGD1566124 | 501861 | 1,27 | down |
| 6561177 | 7112672 | 1158982 | similar to hypothetical protein FLJ32940 isoform 1 | RGD1566124 | 501861 | 1,18 | up   |
| 6536910 | 7112672 | 1158990 | similar to hypothetical protein FLJ32940 isoform 1 | RGD1566124 | 501861 | 1,17 | down |
| 6583904 | 7112672 | 1158990 | similar to hypothetical protein FLJ32940 isoform 1 | RGD1566124 | 501861 | 1,13 | down |
| 6430305 | 7112672 | 1159001 | similar to hypothetical protein FLJ32940 isoform 1 | RGD1566124 | 501861 | 1,13 | down |
| 6471101 | 7112672 | 1158984 | similar to hypothetical protein FLJ32940 isoform 1 | RGD1566124 | 501861 | 1,12 | up   |
| 5857703 | 7112672 | 1158991 | similar to hypothetical protein FLJ32940 isoform 1 | RGD1566124 | 501861 | 1,10 | down |
| 6585092 | 7112672 | 1159000 | similar to hypothetical protein FLJ32940 isoform 1 | RGD1566124 | 501861 | 1,05 | up   |
| 5854346 | 7112672 | 1158989 | similar to hypothetical protein FLJ32940 isoform 1 | RGD1566124 | 501861 | 1,02 | up   |
| 6667436 | 7112672 | 1158996 | similar to hypothetical protein FLJ32940 isoform 1 | RGD1566124 | 501861 | 1,01 | down |
| 6168375 | 7093255 | 1110761 | similar to hypothetical protein KIAA2018           | RGD1560175 | 303946 | 1,34 | down |
| 6136273 | 7099543 | 1126630 | similar to hypothetical protein LOC199675          | RGD1565374 | 498128 | 2,29 | up   |
| 5978730 | 7099543 | 1126632 | similar to hypothetical protein LOC199675          | RGD1565374 | 498128 | 1,38 | down |
| 5685186 | 7099543 | 1126633 | similar to hypothetical protein LOC199675          | RGD1565374 | 498128 | 1,23 | down |
| 6674114 | 7099543 | 1126635 | similar to hypothetical protein LOC199675          | RGD1565374 | 498128 | 1,16 | up   |
| 6012370 | 7099543 | 1126628 | similar to hypothetical protein LOC199675          | RGD1565374 | 498128 | 1,13 | down |

|         |         |         |                                                                                                        |            |        |       |      |
|---------|---------|---------|--------------------------------------------------------------------------------------------------------|------------|--------|-------|------|
| 5825985 | 7099543 | 1126631 | similar to hypothetical protein LOC199675                                                              | RGD1565374 | 498128 | 1,07  | down |
| 6415085 | 7099543 | 1126634 | similar to hypothetical protein LOC199675                                                              | RGD1565374 | 498128 | 1,06  | down |
| 5972896 | 7099543 | 1126629 | similar to hypothetical protein LOC199675                                                              | RGD1565374 | 498128 | 1,04  | down |
| 6148810 | 7099543 | 1126635 | similar to hypothetical protein LOC199675                                                              | RGD1565374 | 498128 | 1,00  | down |
| 6144858 | 7255755 | 1511921 | similar to Hypothetical protein MGC25529                                                               | RGD1306746 | 312511 | 2,30  | down |
| 5688072 | 7255755 | 1511914 | similar to Hypothetical protein MGC25529                                                               | RGD1306746 | 312511 | 1,64  | down |
| 5724763 | 7255755 | 1511923 | similar to Hypothetical protein MGC25529                                                               | RGD1306746 | 312511 | 1,54  | up   |
| 6101548 | 7255755 | 1511920 | similar to Hypothetical protein MGC25529                                                               | RGD1306746 | 312511 | 1,23  | up   |
| 6305644 | 7255755 | 1511923 | similar to Hypothetical protein MGC25529                                                               | RGD1306746 | 312511 | 1,16  | down |
| 5853244 | 7255755 | 1511917 | similar to Hypothetical protein MGC25529                                                               | RGD1306746 | 312511 | 1,15  | up   |
| 6110081 | 7255755 | 1511918 | similar to Hypothetical protein MGC25529                                                               | RGD1306746 | 312511 | 1,15  | down |
| 5735807 | 7255755 | 1511916 | similar to Hypothetical protein MGC25529                                                               | RGD1306746 | 312511 | 1,07  | down |
| 6517273 | 7255755 | 1511915 | similar to Hypothetical protein MGC25529                                                               | RGD1306746 | 312511 | 1,05  | down |
| 6495130 | 7255755 | 1511919 | similar to Hypothetical protein MGC25529                                                               | RGD1306746 | 312511 | 1,02  | down |
| 5825055 | 7255755 | 1511924 | similar to Hypothetical protein MGC25529                                                               | RGD1306746 | 312511 | 1,02  | down |
| 6638194 | 7272616 | 1554414 | similar to hypothetical protein MGC34646                                                               | RGD1564200 | 366311 | 1,99  | up   |
| 5857875 | 7272616 | 1554383 | similar to hypothetical protein MGC34646                                                               | RGD1564200 | 366311 | 1,48  | up   |
| 6686267 | 7272616 | 1554396 | similar to hypothetical protein MGC34646                                                               | RGD1564200 | 366311 | 1,35  | down |
| 5975267 | 7272616 | 1554414 | similar to hypothetical protein MGC34646                                                               | RGD1564200 | 366311 | 1,30  | up   |
| 6495846 | 7272616 | 1554416 | similar to hypothetical protein MGC34646                                                               | RGD1564200 | 366311 | 1,30  | up   |
| 6392460 | 7272616 | 1554416 | similar to hypothetical protein MGC34646                                                               | RGD1564200 | 366311 | 1,17  | down |
| 6711995 | 7272616 | 1554416 | similar to hypothetical protein MGC34646                                                               | RGD1564200 | 366311 | 1,16  | down |
| 5700193 | 7272616 | 1554416 | similar to hypothetical protein MGC34646                                                               | RGD1564200 | 366311 | 1,09  | down |
| 5868356 | 7272616 | 1554413 | similar to hypothetical protein MGC34646                                                               | RGD1564200 | 366311 | 1,05  | up   |
| 5958588 | 7272616 | 1554387 | similar to hypothetical protein MGC34646                                                               | RGD1564200 | 366311 | 1,03  | down |
| 6223947 | 7272616 | 1554387 | similar to hypothetical protein MGC34646                                                               | RGD1564200 | 366311 | 1,00  | up   |
| 6357081 | 7059429 | 1030241 | similar to hypothetical protein MGC37914                                                               | RGD1307603 | 293656 | 2,04  | down |
| 6305313 | 7059429 | 1030242 | similar to hypothetical protein MGC37914                                                               | RGD1307603 | 293656 | 1,95  | up   |
| 6221442 | 7059429 | 1030249 | similar to hypothetical protein MGC37914                                                               | RGD1307603 | 293656 | 1,21  | down |
| 6625804 | 7059429 | 1030245 | similar to hypothetical protein MGC37914                                                               | RGD1307603 | 293656 | 1,09  | up   |
| 5965910 | 7059429 | 1030247 | similar to hypothetical protein MGC37914                                                               | RGD1307603 | 293656 | 1,08  | up   |
| 5829998 | 7059429 | 1030246 | similar to hypothetical protein MGC37914                                                               | RGD1307603 | 293656 | 1,03  | up   |
| 6049941 | 7059429 | 1030244 | similar to hypothetical protein MGC37914                                                               | RGD1307603 | 293656 | 1,02  | up   |
| 6690340 | 7293922 | 1605959 | similar to hypothetical protein MGC45873                                                               | RGD1310271 | 313778 | 1,51  | down |
| 5793369 | 7293922 | 1605958 | similar to hypothetical protein MGC45873                                                               | RGD1310271 | 313778 | 1,03  | up   |
| 5969943 | 7289597 | 1595869 | similar to Hypothetical protein MGC58608                                                               | RGD1559493 | 500516 | 2,40  | up   |
| 6117966 | 7289597 | 1595877 | similar to Hypothetical protein MGC58608                                                               | RGD1559493 | 500516 | 2,05  | down |
| 6519383 | 7289597 | 1595873 | similar to Hypothetical protein MGC58608                                                               | RGD1559493 | 500516 | 1,72  | up   |
| 5641104 | 7289597 | 1595867 | similar to Hypothetical protein MGC58608                                                               | RGD1559493 | 500516 | 1,47  | up   |
| 6028805 | 7289597 | 1595875 | similar to Hypothetical protein MGC58608                                                               | RGD1559493 | 500516 | 1,38  | up   |
| 5711161 | 7289597 | 1595870 | similar to Hypothetical protein MGC58608                                                               | RGD1559493 | 500516 | 1,29  | down |
| 6731359 | 7289597 | 1595875 | similar to Hypothetical protein MGC58608                                                               | RGD1559493 | 500516 | 1,27  | down |
| 5998000 | 7289597 | 1595876 | similar to Hypothetical protein MGC58608                                                               | RGD1559493 | 500516 | 1,17  | up   |
| 6262269 | 7289597 | 1595871 | similar to Hypothetical protein MGC58608                                                               | RGD1559493 | 500516 | 1,14  | up   |
| 6183353 | 7289597 | 1595874 | similar to Hypothetical protein MGC58608                                                               | RGD1559493 | 500516 | 1,09  | down |
| 6187440 | 7289597 | 1595872 | similar to Hypothetical protein MGC58608                                                               | RGD1559493 | 500516 | 1,03  | up   |
| 6600981 | 7289597 | 1595877 | similar to Hypothetical protein MGC58608                                                               | RGD1559493 | 500516 | 1,01  | down |
| 6423785 | 7083030 | 1086272 | similar to Integrin alpha-IIb precursor (Platelet membrane glycoprotein IIb) (GPalpha IIb) (GPIIb) (CI | LOC685269  | 685269 | 1,33  | up   |
| 6702097 | 7083030 | 1086243 | similar to Integrin alpha-IIb precursor (Platelet membrane glycoprotein IIb) (GPalpha IIb) (GPIIb) (CI | LOC685269  | 685269 | 1,05  | up   |
| 6395448 | 7170909 | 1302053 | similar to interferon-inducible GTPase                                                                 | MGC108823  | 307414 | 10,61 | up   |
| 6496597 | 7170909 | 1302053 | similar to interferon-inducible GTPase                                                                 | MGC108823  | 307414 | 7,69  | up   |
| 6634436 | 7170909 | 1302053 | similar to interferon-inducible GTPase                                                                 | MGC108823  | 307414 | 6,03  | up   |
| 6641304 | 7170909 | 1302053 | similar to interferon-inducible GTPase                                                                 | MGC108823  | 307414 | 2,18  | down |
| 6553314 | 7170909 | 1302054 | similar to interferon-inducible GTPase                                                                 | MGC108823  | 307414 | 1,45  | down |
| 6458418 | 7170909 | 1302052 | similar to interferon-inducible GTPase                                                                 | MGC108823  | 307414 | 1,27  | down |
| 6665677 | 7170909 | 1302053 | similar to interferon-inducible GTPase                                                                 | MGC108823  | 307414 | 1,07  | up   |
| 6128080 | 7370446 | 1797001 | similar to jumonji domain containing 2B                                                                | LOC301128  | 301128 | 2,67  | down |

|         |         |         |                                               |            |        |      |      |
|---------|---------|---------|-----------------------------------------------|------------|--------|------|------|
| 6175677 | 7370446 | 1796996 | similar to jumonji domain containing 2B       | LOC301128  | 301128 | 1,77 | up   |
| 6579566 | 7370446 | 1796996 | similar to jumonji domain containing 2B       | LOC301128  | 301128 | 1,61 | down |
| 5965891 | 7370446 | 1796996 | similar to jumonji domain containing 2B       | LOC301128  | 301128 | 1,36 | up   |
| 6353129 | 7370446 | 1797002 | similar to jumonji domain containing 2B       | LOC301128  | 301128 | 1,32 | down |
| 6215605 | 7370446 | 1796998 | similar to jumonji domain containing 2B       | LOC301128  | 301128 | 1,30 | down |
| 6624238 | 7370446 | 1796990 | similar to jumonji domain containing 2B       | LOC301128  | 301128 | 1,26 | down |
| 6442505 | 7370446 | 1796998 | similar to jumonji domain containing 2B       | LOC301128  | 301128 | 1,24 | down |
| 6434731 | 7370446 | 1796989 | similar to jumonji domain containing 2B       | LOC301128  | 301128 | 1,24 | down |
| 6155518 | 7370446 | 1796988 | similar to jumonji domain containing 2B       | LOC301128  | 301128 | 1,23 | down |
| 5703218 | 7370446 | 1796991 | similar to jumonji domain containing 2B       | LOC301128  | 301128 | 1,18 | up   |
| 6486789 | 7370446 | 1796995 | similar to jumonji domain containing 2B       | LOC301128  | 301128 | 1,17 | up   |
| 6632655 | 7370446 | 1797017 | similar to jumonji domain containing 2B       | LOC301128  | 301128 | 1,14 | down |
| 6324028 | 7370446 | 1797020 | similar to jumonji domain containing 2B       | LOC301128  | 301128 | 1,14 | up   |
| 6295395 | 7370446 | 1797001 | similar to jumonji domain containing 2B       | LOC301128  | 301128 | 1,14 | up   |
| 6650398 | 7370446 | 1797018 | similar to jumonji domain containing 2B       | LOC301128  | 301128 | 1,13 | up   |
| 6003147 | 7370446 | 1797010 | similar to jumonji domain containing 2B       | LOC301128  | 301128 | 1,12 | down |
| 6438485 | 7370446 | 1797017 | similar to jumonji domain containing 2B       | LOC301128  | 301128 | 1,12 | up   |
| 5792615 | 7370446 | 1796996 | similar to jumonji domain containing 2B       | LOC301128  | 301128 | 1,11 | up   |
| 5629195 | 7370446 | 1796988 | similar to jumonji domain containing 2B       | LOC301128  | 301128 | 1,11 | up   |
| 5886097 | 7370446 | 1796995 | similar to jumonji domain containing 2B       | LOC301128  | 301128 | 1,08 | up   |
| 5784411 | 7370446 | 1797015 | similar to jumonji domain containing 2B       | LOC301128  | 301128 | 1,08 | down |
| 6019061 | 7370446 | 1797003 | similar to jumonji domain containing 2B       | LOC301128  | 301128 | 1,07 | up   |
| 5965738 | 7370446 | 1797011 | similar to jumonji domain containing 2B       | LOC301128  | 301128 | 1,07 | up   |
| 5742711 | 7370446 | 1796999 | similar to jumonji domain containing 2B       | LOC301128  | 301128 | 1,07 | up   |
| 6441920 | 7370446 | 1797005 | similar to jumonji domain containing 2B       | LOC301128  | 301128 | 1,07 | up   |
| 6409265 | 7370446 | 1796992 | similar to jumonji domain containing 2B       | LOC301128  | 301128 | 1,05 | up   |
| 6221395 | 7370446 | 1797012 | similar to jumonji domain containing 2B       | LOC301128  | 301128 | 1,04 | down |
| 5707303 | 7370446 | 1796993 | similar to jumonji domain containing 2B       | LOC301128  | 301128 | 1,04 | up   |
| 5771204 | 7370446 | 1796996 | similar to jumonji domain containing 2B       | LOC301128  | 301128 | 1,03 | down |
| 6712780 | 7370446 | 1797016 | similar to jumonji domain containing 2B       | LOC301128  | 301128 | 1,02 | up   |
| 6205661 | 7370446 | 1796997 | similar to jumonji domain containing 2B       | LOC301128  | 301128 | 1,01 | up   |
| 5652241 | 7370446 | 1797017 | similar to jumonji domain containing 2B       | LOC301128  | 301128 | 1,01 | down |
| 6513553 | 7191382 | 1353515 | similar to keratin complex 1, acidic, gene 18 | LOC683212  | 683212 | 5,92 | down |
| 6636863 | 7191382 | 1353518 | similar to keratin complex 1, acidic, gene 18 | LOC683212  | 683212 | 1,47 | down |
| 6654067 | 7280982 | 1575132 | similar to KIAA0090 protein                   | RGD1310427 | 362643 | 1,98 | up   |
| 6487464 | 7280982 | 1575155 | similar to KIAA0090 protein                   | RGD1310427 | 362643 | 1,84 | up   |
| 6509015 | 7280982 | 1575140 | similar to KIAA0090 protein                   | RGD1310427 | 362643 | 1,55 | up   |
| 6025963 | 7280982 | 1575146 | similar to KIAA0090 protein                   | RGD1310427 | 362643 | 1,39 | up   |
| 6165308 | 7280982 | 1575138 | similar to KIAA0090 protein                   | RGD1310427 | 362643 | 1,37 | up   |
| 6154140 | 7280982 | 1575134 | similar to KIAA0090 protein                   | RGD1310427 | 362643 | 1,32 | up   |
| 6187791 | 7280982 | 1575144 | similar to KIAA0090 protein                   | RGD1310427 | 362643 | 1,29 | up   |
| 6718311 | 7280982 | 1575145 | similar to KIAA0090 protein                   | RGD1310427 | 362643 | 1,26 | up   |
| 5713282 | 7280982 | 1575139 | similar to KIAA0090 protein                   | RGD1310427 | 362643 | 1,24 | up   |
| 6306980 | 7280982 | 1575137 | similar to KIAA0090 protein                   | RGD1310427 | 362643 | 1,23 | up   |
| 5886287 | 7280982 | 1575148 | similar to KIAA0090 protein                   | RGD1310427 | 362643 | 1,22 | up   |
| 6236928 | 7280982 | 1575136 | similar to KIAA0090 protein                   | RGD1310427 | 362643 | 1,20 | up   |
| 6586740 | 7280982 | 1575153 | similar to KIAA0090 protein                   | RGD1310427 | 362643 | 1,19 | up   |
| 6358427 | 7280982 | 1575141 | similar to KIAA0090 protein                   | RGD1310427 | 362643 | 1,17 | up   |
| 6374218 | 7280982 | 1575154 | similar to KIAA0090 protein                   | RGD1310427 | 362643 | 1,16 | up   |
| 5735577 | 7280982 | 1575143 | similar to KIAA0090 protein                   | RGD1310427 | 362643 | 1,15 | up   |
| 5823170 | 7280982 | 1575135 | similar to KIAA0090 protein                   | RGD1310427 | 362643 | 1,12 | up   |
| 6216206 | 7280982 | 1575154 | similar to KIAA0090 protein                   | RGD1310427 | 362643 | 1,10 | down |
| 5821488 | 7280982 | 1575133 | similar to KIAA0090 protein                   | RGD1310427 | 362643 | 1,10 | up   |
| 6050313 | 7280982 | 1575152 | similar to KIAA0090 protein                   | RGD1310427 | 362643 | 1,10 | down |
| 6733808 | 7280982 | 1575154 | similar to KIAA0090 protein                   | RGD1310427 | 362643 | 1,09 | up   |
| 6387638 | 7280982 | 1575149 | similar to KIAA0090 protein                   | RGD1310427 | 362643 | 1,09 | up   |
| 6410009 | 7280982 | 1575151 | similar to KIAA0090 protein                   | RGD1310427 | 362643 | 1,07 | down |

|         |         |         |                             |            |        |      |      |
|---------|---------|---------|-----------------------------|------------|--------|------|------|
| 6113378 | 7280982 | 1575147 | similar to KIAA0090 protein | RGD1310427 | 362643 | 1,07 | down |
| 6276862 | 7280982 | 1575150 | similar to KIAA0090 protein | RGD1310427 | 362643 | 1,06 | down |
| 6615199 | 7280982 | 1575136 | similar to KIAA0090 protein | RGD1310427 | 362643 | 1,05 | up   |
| 6548285 | 7280982 | 1575142 | similar to KIAA0090 protein | RGD1310427 | 362643 | 1,05 | up   |
| 6241499 | 7102416 | 1133520 | similar to KIAA0614 protein | RGD1309762 | 304503 | 1,81 | down |
| 6221086 | 7102416 | 1133514 | similar to KIAA0614 protein | RGD1309762 | 304503 | 1,62 | down |
| 5994231 | 7102416 | 1133492 | similar to KIAA0614 protein | RGD1309762 | 304503 | 1,44 | down |
| 6473109 | 7102416 | 1133534 | similar to KIAA0614 protein | RGD1309762 | 304503 | 1,40 | up   |
| 6618644 | 7102416 | 1133506 | similar to KIAA0614 protein | RGD1309762 | 304503 | 1,35 | down |
| 5854831 | 7102416 | 1133540 | similar to KIAA0614 protein | RGD1309762 | 304503 | 1,35 | up   |
| 6573943 | 7102416 | 1133509 | similar to KIAA0614 protein | RGD1309762 | 304503 | 1,34 | down |
| 5877563 | 7102416 | 1133533 | similar to KIAA0614 protein | RGD1309762 | 304503 | 1,31 | up   |
| 5956085 | 7102416 | 1133532 | similar to KIAA0614 protein | RGD1309762 | 304503 | 1,29 | up   |
| 6289777 | 7102416 | 1133544 | similar to KIAA0614 protein | RGD1309762 | 304503 | 1,25 | up   |
| 6583092 | 7102416 | 1133491 | similar to KIAA0614 protein | RGD1309762 | 304503 | 1,24 | down |
| 6625467 | 7102416 | 1133493 | similar to KIAA0614 protein | RGD1309762 | 304503 | 1,24 | down |
| 6398970 | 7102416 | 1133538 | similar to KIAA0614 protein | RGD1309762 | 304503 | 1,22 | up   |
| 5960519 | 7102416 | 1133537 | similar to KIAA0614 protein | RGD1309762 | 304503 | 1,22 | down |
| 6285811 | 7102416 | 1133519 | similar to KIAA0614 protein | RGD1309762 | 304503 | 1,21 | down |
| 5982481 | 7102416 | 1133498 | similar to KIAA0614 protein | RGD1309762 | 304503 | 1,21 | up   |
| 5926771 | 7102416 | 1133517 | similar to KIAA0614 protein | RGD1309762 | 304503 | 1,21 | down |
| 5721878 | 7102416 | 1133507 | similar to KIAA0614 protein | RGD1309762 | 304503 | 1,20 | down |
| 6502765 | 7102416 | 1133531 | similar to KIAA0614 protein | RGD1309762 | 304503 | 1,19 | down |
| 5809995 | 7102416 | 1133523 | similar to KIAA0614 protein | RGD1309762 | 304503 | 1,18 | up   |
| 5986156 | 7102416 | 1133500 | similar to KIAA0614 protein | RGD1309762 | 304503 | 1,13 | down |
| 6499966 | 7102416 | 1133550 | similar to KIAA0614 protein | RGD1309762 | 304503 | 1,13 | up   |
| 6450512 | 7102416 | 1133513 | similar to KIAA0614 protein | RGD1309762 | 304503 | 1,13 | up   |
| 5995086 | 7102416 | 1133491 | similar to KIAA0614 protein | RGD1309762 | 304503 | 1,12 | down |
| 5650525 | 7102416 | 1133494 | similar to KIAA0614 protein | RGD1309762 | 304503 | 1,12 | down |
| 6302578 | 7102416 | 1133495 | similar to KIAA0614 protein | RGD1309762 | 304503 | 1,12 | down |
| 6552818 | 7102416 | 1133504 | similar to KIAA0614 protein | RGD1309762 | 304503 | 1,12 | down |
| 5939135 | 7102416 | 1133502 | similar to KIAA0614 protein | RGD1309762 | 304503 | 1,12 | up   |
| 6645253 | 7102416 | 1133509 | similar to KIAA0614 protein | RGD1309762 | 304503 | 1,11 | down |
| 6225773 | 7102416 | 1133521 | similar to KIAA0614 protein | RGD1309762 | 304503 | 1,11 | up   |
| 6397144 | 7102416 | 1133546 | similar to KIAA0614 protein | RGD1309762 | 304503 | 1,10 | up   |
| 5982006 | 7102416 | 1133522 | similar to KIAA0614 protein | RGD1309762 | 304503 | 1,10 | down |
| 6478165 | 7102416 | 1133528 | similar to KIAA0614 protein | RGD1309762 | 304503 | 1,09 | up   |
| 5843471 | 7102416 | 1133509 | similar to KIAA0614 protein | RGD1309762 | 304503 | 1,09 | down |
| 5704224 | 7102416 | 1133503 | similar to KIAA0614 protein | RGD1309762 | 304503 | 1,09 | up   |
| 6201758 | 7102416 | 1133496 | similar to KIAA0614 protein | RGD1309762 | 304503 | 1,09 | down |
| 6209094 | 7102416 | 1133516 | similar to KIAA0614 protein | RGD1309762 | 304503 | 1,08 | down |
| 6181182 | 7102416 | 1133526 | similar to KIAA0614 protein | RGD1309762 | 304503 | 1,08 | down |
| 6678968 | 7102416 | 1133535 | similar to KIAA0614 protein | RGD1309762 | 304503 | 1,08 | down |
| 6524979 | 7102416 | 1133515 | similar to KIAA0614 protein | RGD1309762 | 304503 | 1,07 | up   |
| 6460012 | 7102416 | 1133536 | similar to KIAA0614 protein | RGD1309762 | 304503 | 1,07 | down |
| 6668403 | 7102416 | 1133512 | similar to KIAA0614 protein | RGD1309762 | 304503 | 1,06 | down |
| 6264735 | 7102416 | 1133529 | similar to KIAA0614 protein | RGD1309762 | 304503 | 1,06 | up   |
| 5975852 | 7102416 | 1133545 | similar to KIAA0614 protein | RGD1309762 | 304503 | 1,06 | down |
| 6095230 | 7102416 | 1133535 | similar to KIAA0614 protein | RGD1309762 | 304503 | 1,06 | down |
| 6341060 | 7102416 | 1133497 | similar to KIAA0614 protein | RGD1309762 | 304503 | 1,06 | down |
| 5742074 | 7102416 | 1133509 | similar to KIAA0614 protein | RGD1309762 | 304503 | 1,05 | up   |
| 6333582 | 7102416 | 1133542 | similar to KIAA0614 protein | RGD1309762 | 304503 | 1,05 | down |
| 6184591 | 7102416 | 1133527 | similar to KIAA0614 protein | RGD1309762 | 304503 | 1,04 | down |
| 6453255 | 7102416 | 1133505 | similar to KIAA0614 protein | RGD1309762 | 304503 | 1,03 | down |
| 5943247 | 7102416 | 1133543 | similar to KIAA0614 protein | RGD1309762 | 304503 | 1,03 | down |
| 5651258 | 7102416 | 1133501 | similar to KIAA0614 protein | RGD1309762 | 304503 | 1,03 | up   |
| 5988326 | 7102416 | 1133499 | similar to KIAA0614 protein | RGD1309762 | 304503 | 1,02 | down |

|         |         |         |                             |            |        |      |      |
|---------|---------|---------|-----------------------------|------------|--------|------|------|
| 6558808 | 7102416 | 1133547 | similar to KIAA0614 protein | RGD1309762 | 304503 | 1,02 | down |
| 6245472 | 7102416 | 1133549 | similar to KIAA0614 protein | RGD1309762 | 304503 | 1,02 | down |
| 6225202 | 7102416 | 1133532 | similar to KIAA0614 protein | RGD1309762 | 304503 | 1,01 | down |
| 6639137 | 7102416 | 1133539 | similar to KIAA0614 protein | RGD1309762 | 304503 | 1,00 | up   |
| 5628017 | 7293402 | 1604862 | similar to KIAA0833 protein | LOC362665  | 362665 | 1,24 | up   |
| 6437525 | 7293402 | 1604869 | similar to KIAA0833 protein | LOC362665  | 362665 | 1,15 | down |
| 6649914 | 7293402 | 1604861 | similar to KIAA0833 protein | LOC362665  | 362665 | 1,10 | up   |
| 6636344 | 7293402 | 1604869 | similar to KIAA0833 protein | LOC362665  | 362665 | 1,02 | down |
| 6083588 | 7322020 | 1676634 | similar to KIAA1086 protein | RGD1304737 | 314639 | 2,11 | down |
| 6373942 | 7322020 | 1676650 | similar to KIAA1086 protein | RGD1304737 | 314639 | 1,89 | down |
| 6365030 | 7322020 | 1676634 | similar to KIAA1086 protein | RGD1304737 | 314639 | 1,85 | down |
| 6126208 | 7322020 | 1676652 | similar to KIAA1086 protein | RGD1304737 | 314639 | 1,63 | down |
| 6521408 | 7322020 | 1676635 | similar to KIAA1086 protein | RGD1304737 | 314639 | 1,48 | down |
| 5808717 | 7322020 | 1676645 | similar to KIAA1086 protein | RGD1304737 | 314639 | 1,48 | up   |
| 6146208 | 7322020 | 1676634 | similar to KIAA1086 protein | RGD1304737 | 314639 | 1,46 | down |
| 6672888 | 7322020 | 1676634 | similar to KIAA1086 protein | RGD1304737 | 314639 | 1,34 | down |
| 6564054 | 7322020 | 1676642 | similar to KIAA1086 protein | RGD1304737 | 314639 | 1,26 | up   |
| 6623606 | 7322020 | 1676638 | similar to KIAA1086 protein | RGD1304737 | 314639 | 1,17 | down |
| 5657792 | 7322020 | 1676639 | similar to KIAA1086 protein | RGD1304737 | 314639 | 1,16 | down |
| 6318661 | 7322020 | 1676648 | similar to KIAA1086 protein | RGD1304737 | 314639 | 1,14 | up   |
| 5755196 | 7322020 | 1676637 | similar to KIAA1086 protein | RGD1304737 | 314639 | 1,14 | down |
| 5935839 | 7322020 | 1676640 | similar to KIAA1086 protein | RGD1304737 | 314639 | 1,13 | up   |
| 6092551 | 7322020 | 1676644 | similar to KIAA1086 protein | RGD1304737 | 314639 | 1,12 | up   |
| 6216728 | 7322020 | 1676647 | similar to KIAA1086 protein | RGD1304737 | 314639 | 1,10 | up   |
| 6535281 | 7322020 | 1676643 | similar to KIAA1086 protein | RGD1304737 | 314639 | 1,06 | down |
| 5939223 | 7322020 | 1676649 | similar to KIAA1086 protein | RGD1304737 | 314639 | 1,06 | down |
| 5826589 | 7322020 | 1676638 | similar to KIAA1086 protein | RGD1304737 | 314639 | 1,03 | down |
| 5695094 | 7322020 | 1676648 | similar to KIAA1086 protein | RGD1304737 | 314639 | 1,02 | up   |
| 6625296 | 7322020 | 1676636 | similar to KIAA1086 protein | RGD1304737 | 314639 | 1,02 | down |
| 6305273 | 7322020 | 1676641 | similar to KIAA1086 protein | RGD1304737 | 314639 | 1,01 | up   |
| 5936894 | 7083355 | 1086916 | similar to KIAA1267 protein | RGD1311429 | 360642 | 1,38 | up   |
| 5671185 | 7083355 | 1086924 | similar to KIAA1267 protein | RGD1311429 | 360642 | 1,26 | down |
| 6620295 | 7083355 | 1086906 | similar to KIAA1267 protein | RGD1311429 | 360642 | 1,19 | up   |
| 6132371 | 7083355 | 1086908 | similar to KIAA1267 protein | RGD1311429 | 360642 | 1,17 | up   |
| 6428151 | 7083355 | 1086904 | similar to KIAA1267 protein | RGD1311429 | 360642 | 1,15 | up   |
| 6740496 | 7083355 | 1086905 | similar to KIAA1267 protein | RGD1311429 | 360642 | 1,14 | up   |
| 5655339 | 7083355 | 1086904 | similar to KIAA1267 protein | RGD1311429 | 360642 | 1,13 | up   |
| 6050942 | 7083355 | 1086919 | similar to KIAA1267 protein | RGD1311429 | 360642 | 1,09 | down |
| 6695202 | 7083355 | 1086911 | similar to KIAA1267 protein | RGD1311429 | 360642 | 1,08 | up   |
| 5978471 | 7083355 | 1086919 | similar to KIAA1267 protein | RGD1311429 | 360642 | 1,08 | up   |
| 6430341 | 7083355 | 1086915 | similar to KIAA1267 protein | RGD1311429 | 360642 | 1,05 | down |
| 6172847 | 7083355 | 1086910 | similar to KIAA1267 protein | RGD1311429 | 360642 | 1,05 | down |
| 6587870 | 7083355 | 1086903 | similar to KIAA1267 protein | RGD1311429 | 360642 | 1,04 | down |
| 6282994 | 7083355 | 1086909 | similar to KIAA1267 protein | RGD1311429 | 360642 | 1,02 | up   |
| 5664701 | 7083355 | 1086909 | similar to KIAA1267 protein | RGD1311429 | 360642 | 1,02 | down |
| 6068827 | 7083355 | 1086914 | similar to KIAA1267 protein | RGD1311429 | 360642 | 1,02 | down |
| 5726432 | 7083355 | 1086923 | similar to KIAA1267 protein | RGD1311429 | 360642 | 1,01 | up   |
| 6557148 | 7083355 | 1086903 | similar to KIAA1267 protein | RGD1311429 | 360642 | 1,01 | down |
| 6714986 | 7083355 | 1086913 | similar to KIAA1267 protein | RGD1311429 | 360642 | 1,00 | up   |
| 5619132 | 7083355 | 1086913 | similar to KIAA1267 protein | RGD1311429 | 360642 | 1,00 | up   |
| 5691941 | 7212735 | 1405034 | similar to KIAA1324 protein | RGD1310209 | 362019 | 2,43 | up   |
| 5643313 | 7212735 | 1405016 | similar to KIAA1324 protein | RGD1310209 | 362019 | 1,46 | up   |
| 6333431 | 7212735 | 1405005 | similar to KIAA1324 protein | RGD1310209 | 362019 | 1,40 | up   |
| 6138465 | 7212735 | 1405010 | similar to KIAA1324 protein | RGD1310209 | 362019 | 1,39 | down |
| 6172525 | 7212735 | 1405023 | similar to KIAA1324 protein | RGD1310209 | 362019 | 1,31 | down |
| 6666945 | 7212735 | 1405014 | similar to KIAA1324 protein | RGD1310209 | 362019 | 1,27 | up   |
| 6532480 | 7212735 | 1405034 | similar to KIAA1324 protein | RGD1310209 | 362019 | 1,27 | up   |

|         |         |         |                             |            |        |      |      |
|---------|---------|---------|-----------------------------|------------|--------|------|------|
| 5775493 | 7212735 | 1405013 | similar to KIAA1324 protein | RGD1310209 | 362019 | 1,19 | up   |
| 5757081 | 7212735 | 1405018 | similar to KIAA1324 protein | RGD1310209 | 362019 | 1,18 | down |
| 6282303 | 7212735 | 1405019 | similar to KIAA1324 protein | RGD1310209 | 362019 | 1,16 | down |
| 6699982 | 7212735 | 1405007 | similar to KIAA1324 protein | RGD1310209 | 362019 | 1,16 | up   |
| 6448901 | 7212735 | 1405009 | similar to KIAA1324 protein | RGD1310209 | 362019 | 1,12 | down |
| 5723812 | 7212735 | 1405008 | similar to KIAA1324 protein | RGD1310209 | 362019 | 1,12 | up   |
| 6488019 | 7212735 | 1405003 | similar to KIAA1324 protein | RGD1310209 | 362019 | 1,11 | up   |
| 6410691 | 7212735 | 1405011 | similar to KIAA1324 protein | RGD1310209 | 362019 | 1,08 | up   |
| 6479653 | 7212735 | 1405004 | similar to KIAA1324 protein | RGD1310209 | 362019 | 1,08 | up   |
| 6376977 | 7212735 | 1405020 | similar to KIAA1324 protein | RGD1310209 | 362019 | 1,07 | up   |
| 6336951 | 7212735 | 1405017 | similar to KIAA1324 protein | RGD1310209 | 362019 | 1,07 | down |
| 5766219 | 7212735 | 1405033 | similar to KIAA1324 protein | RGD1310209 | 362019 | 1,06 | down |
| 6294927 | 7212735 | 1405015 | similar to KIAA1324 protein | RGD1310209 | 362019 | 1,01 | up   |
| 6621380 | 7212735 | 1405012 | similar to KIAA1324 protein | RGD1310209 | 362019 | 1,00 | down |
| 6490111 | 7025310 | 949247  | similar to KIAA1357 protein | RGD1308124 | 308631 | 2,34 | up   |
| 6130857 | 7025310 | 949265  | similar to KIAA1357 protein | RGD1308124 | 308631 | 1,85 | up   |
| 5999673 | 7025310 | 949267  | similar to KIAA1357 protein | RGD1308124 | 308631 | 1,63 | up   |
| 5783401 | 7025310 | 949267  | similar to KIAA1357 protein | RGD1308124 | 308631 | 1,62 | up   |
| 5995742 | 7025310 | 949269  | similar to KIAA1357 protein | RGD1308124 | 308631 | 1,41 | up   |
| 5620199 | 7025310 | 949267  | similar to KIAA1357 protein | RGD1308124 | 308631 | 1,27 | up   |
| 5671782 | 7025310 | 949267  | similar to KIAA1357 protein | RGD1308124 | 308631 | 1,09 | up   |
| 6648921 | 7025310 | 949268  | similar to KIAA1357 protein | RGD1308124 | 308631 | 1,07 | down |
| 6046853 | 7025310 | 949260  | similar to KIAA1357 protein | RGD1308124 | 308631 | 1,06 | down |
| 5901659 | 7025310 | 949270  | similar to KIAA1357 protein | RGD1308124 | 308631 | 1,06 | down |
| 6665932 | 7025310 | 949269  | similar to KIAA1357 protein | RGD1308124 | 308631 | 1,03 | down |
| 6723542 | 7025310 | 949267  | similar to KIAA1357 protein | RGD1308124 | 308631 | 1,01 | up   |
| 6065911 | 7301198 | 1624814 | similar to KIAA1409 protein | RGD1311117 | 314401 | 3,21 | up   |
| 5834866 | 7301198 | 1624789 | similar to KIAA1409 protein | RGD1311117 | 314401 | 1,99 | up   |
| 6619957 | 7301198 | 1624814 | similar to KIAA1409 protein | RGD1311117 | 314401 | 1,84 | up   |
| 6091774 | 7301198 | 1624762 | similar to KIAA1409 protein | RGD1311117 | 314401 | 1,65 | down |
| 5879656 | 7301198 | 1624770 | similar to KIAA1409 protein | RGD1311117 | 314401 | 1,62 | up   |
| 6158007 | 7301198 | 1624760 | similar to KIAA1409 protein | RGD1311117 | 314401 | 1,52 | up   |
| 6630469 | 7301198 | 1624799 | similar to KIAA1409 protein | RGD1311117 | 314401 | 1,38 | down |
| 6464299 | 7301198 | 1624781 | similar to KIAA1409 protein | RGD1311117 | 314401 | 1,38 | up   |
| 5891905 | 7301198 | 1624815 | similar to KIAA1409 protein | RGD1311117 | 314401 | 1,34 | up   |
| 6066408 | 7301198 | 1624791 | similar to KIAA1409 protein | RGD1311117 | 314401 | 1,29 | up   |
| 6237121 | 7301198 | 1624793 | similar to KIAA1409 protein | RGD1311117 | 314401 | 1,26 | up   |
| 6193348 | 7301198 | 1624813 | similar to KIAA1409 protein | RGD1311117 | 314401 | 1,26 | down |
| 6318449 | 7301198 | 1624768 | similar to KIAA1409 protein | RGD1311117 | 314401 | 1,25 | down |
| 6151572 | 7301198 | 1624800 | similar to KIAA1409 protein | RGD1311117 | 314401 | 1,24 | down |
| 6289715 | 7301198 | 1624760 | similar to KIAA1409 protein | RGD1311117 | 314401 | 1,23 | down |
| 6588256 | 7301198 | 1624776 | similar to KIAA1409 protein | RGD1311117 | 314401 | 1,22 | up   |
| 6285468 | 7301198 | 1624758 | similar to KIAA1409 protein | RGD1311117 | 314401 | 1,22 | down |
| 6101961 | 7301198 | 1624764 | similar to KIAA1409 protein | RGD1311117 | 314401 | 1,21 | down |
| 5877540 | 7301198 | 1624761 | similar to KIAA1409 protein | RGD1311117 | 314401 | 1,19 | down |
| 5635845 | 7301198 | 1624808 | similar to KIAA1409 protein | RGD1311117 | 314401 | 1,19 | down |
| 6631754 | 7301198 | 1624790 | similar to KIAA1409 protein | RGD1311117 | 314401 | 1,18 | up   |
| 6369731 | 7301198 | 1624757 | similar to KIAA1409 protein | RGD1311117 | 314401 | 1,17 | down |
| 6376626 | 7301198 | 1624773 | similar to KIAA1409 protein | RGD1311117 | 314401 | 1,16 | up   |
| 5654646 | 7301198 | 1624782 | similar to KIAA1409 protein | RGD1311117 | 314401 | 1,16 | down |
| 6141776 | 7301198 | 1624797 | similar to KIAA1409 protein | RGD1311117 | 314401 | 1,16 | up   |
| 6598806 | 7301198 | 1624783 | similar to KIAA1409 protein | RGD1311117 | 314401 | 1,15 | up   |
| 5791864 | 7301198 | 1624796 | similar to KIAA1409 protein | RGD1311117 | 314401 | 1,13 | up   |
| 5975898 | 7301198 | 1624807 | similar to KIAA1409 protein | RGD1311117 | 314401 | 1,13 | up   |
| 6229459 | 7301198 | 1624772 | similar to KIAA1409 protein | RGD1311117 | 314401 | 1,13 | down |
| 6684242 | 7301198 | 1624763 | similar to KIAA1409 protein | RGD1311117 | 314401 | 1,11 | down |
| 6674946 | 7301198 | 1624769 | similar to KIAA1409 protein | RGD1311117 | 314401 | 1,11 | up   |



|         |         |         |                             |            |        |      |      |
|---------|---------|---------|-----------------------------|------------|--------|------|------|
| 6682717 | 7301198 | 1624760 | similar to KIAA1409 protein | RGD1311117 | 314401 | 1,11 | down |
| 6178897 | 7301198 | 1624782 | similar to KIAA1409 protein | RGD1311117 | 314401 | 1,11 | up   |
| 6313349 | 7301198 | 1624809 | similar to KIAA1409 protein | RGD1311117 | 314401 | 1,11 | up   |
| 5671023 | 7301198 | 1624777 | similar to KIAA1409 protein | RGD1311117 | 314401 | 1,10 | up   |
| 6256305 | 7301198 | 1624749 | similar to KIAA1409 protein | RGD1311117 | 314401 | 1,10 | up   |
| 6471280 | 7301198 | 1624792 | similar to KIAA1409 protein | RGD1311117 | 314401 | 1,09 | up   |
| 6531158 | 7301198 | 1624743 | similar to KIAA1409 protein | RGD1311117 | 314401 | 1,08 | up   |
| 6562088 | 7301198 | 1624752 | similar to KIAA1409 protein | RGD1311117 | 314401 | 1,08 | down |
| 5807881 | 7301198 | 1624747 | similar to KIAA1409 protein | RGD1311117 | 314401 | 1,07 | up   |
| 6625535 | 7301198 | 1624759 | similar to KIAA1409 protein | RGD1311117 | 314401 | 1,07 | up   |
| 5837672 | 7301198 | 1624766 | similar to KIAA1409 protein | RGD1311117 | 314401 | 1,06 | down |
| 6511044 | 7301198 | 1624802 | similar to KIAA1409 protein | RGD1311117 | 314401 | 1,06 | down |
| 5942646 | 7301198 | 1624787 | similar to KIAA1409 protein | RGD1311117 | 314401 | 1,06 | down |
| 6416922 | 7301198 | 1624805 | similar to KIAA1409 protein | RGD1311117 | 314401 | 1,04 | up   |
| 6312676 | 7301198 | 1624774 | similar to KIAA1409 protein | RGD1311117 | 314401 | 1,04 | down |
| 6600221 | 7301198 | 1624811 | similar to KIAA1409 protein | RGD1311117 | 314401 | 1,03 | up   |
| 6688895 | 7301198 | 1624810 | similar to KIAA1409 protein | RGD1311117 | 314401 | 1,03 | down |
| 6174644 | 7301198 | 1624775 | similar to KIAA1409 protein | RGD1311117 | 314401 | 1,03 | up   |
| 6213654 | 7301198 | 1624798 | similar to KIAA1409 protein | RGD1311117 | 314401 | 1,03 | up   |
| 6320101 | 7301198 | 1624750 | similar to KIAA1409 protein | RGD1311117 | 314401 | 1,02 | down |
| 6567951 | 7301198 | 1624785 | similar to KIAA1409 protein | RGD1311117 | 314401 | 1,01 | down |
| 6085668 | 7263805 | 1532203 | similar to KIAA1549 protein | RGD1306271 | 312246 | 1,50 | down |
| 5870972 | 7263805 | 1532201 | similar to KIAA1549 protein | RGD1306271 | 312246 | 1,34 | up   |
| 5722397 | 7263805 | 1532221 | similar to KIAA1549 protein | RGD1306271 | 312246 | 1,33 | down |
| 6137863 | 7263805 | 1532225 | similar to KIAA1549 protein | RGD1306271 | 312246 | 1,33 | up   |
| 5781186 | 7263805 | 1532216 | similar to KIAA1549 protein | RGD1306271 | 312246 | 1,31 | down |
| 6730524 | 7263805 | 1532214 | similar to KIAA1549 protein | RGD1306271 | 312246 | 1,30 | down |
| 6121388 | 7263805 | 1532225 | similar to KIAA1549 protein | RGD1306271 | 312246 | 1,27 | up   |
| 5646506 | 7263805 | 1532206 | similar to KIAA1549 protein | RGD1306271 | 312246 | 1,25 | down |
| 6110544 | 7263805 | 1532220 | similar to KIAA1549 protein | RGD1306271 | 312246 | 1,21 | down |
| 6086512 | 7263805 | 1532225 | similar to KIAA1549 protein | RGD1306271 | 312246 | 1,20 | up   |
| 6163933 | 7263805 | 1532206 | similar to KIAA1549 protein | RGD1306271 | 312246 | 1,19 | down |
| 6192655 | 7263805 | 1532202 | similar to KIAA1549 protein | RGD1306271 | 312246 | 1,18 | down |
| 6215370 | 7263805 | 1532223 | similar to KIAA1549 protein | RGD1306271 | 312246 | 1,17 | down |
| 5940295 | 7263805 | 1532203 | similar to KIAA1549 protein | RGD1306271 | 312246 | 1,17 | down |
| 6558241 | 7263805 | 1532225 | similar to KIAA1549 protein | RGD1306271 | 312246 | 1,15 | down |
| 6564753 | 7263805 | 1532225 | similar to KIAA1549 protein | RGD1306271 | 312246 | 1,14 | up   |
| 5624769 | 7263805 | 1532224 | similar to KIAA1549 protein | RGD1306271 | 312246 | 1,13 | down |
| 5958177 | 7263805 | 1532207 | similar to KIAA1549 protein | RGD1306271 | 312246 | 1,12 | up   |
| 6405819 | 7263805 | 1532225 | similar to KIAA1549 protein | RGD1306271 | 312246 | 1,12 | down |
| 5869576 | 7263805 | 1532201 | similar to KIAA1549 protein | RGD1306271 | 312246 | 1,10 | up   |
| 6678671 | 7263805 | 1532209 | similar to KIAA1549 protein | RGD1306271 | 312246 | 1,10 | down |
| 6619043 | 7263805 | 1532218 | similar to KIAA1549 protein | RGD1306271 | 312246 | 1,08 | up   |
| 6320647 | 7263805 | 1532225 | similar to KIAA1549 protein | RGD1306271 | 312246 | 1,08 | up   |
| 6016003 | 7263805 | 1532219 | similar to KIAA1549 protein | RGD1306271 | 312246 | 1,07 | down |
| 6596901 | 7263805 | 1532217 | similar to KIAA1549 protein | RGD1306271 | 312246 | 1,07 | up   |
| 6101545 | 7263805 | 1532204 | similar to KIAA1549 protein | RGD1306271 | 312246 | 1,06 | down |
| 5733514 | 7263805 | 1532212 | similar to KIAA1549 protein | RGD1306271 | 312246 | 1,03 | down |
| 6291077 | 7263805 | 1532208 | similar to KIAA1549 protein | RGD1306271 | 312246 | 1,01 | down |
| 6668836 | 7072765 | 1062711 | similar to KIAA1636 protein | RGD1309285 | 303599 | 1,59 | up   |
| 5942904 | 7072765 | 1062709 | similar to KIAA1636 protein | RGD1309285 | 303599 | 1,38 | up   |
| 6436345 | 7072765 | 1062719 | similar to KIAA1636 protein | RGD1309285 | 303599 | 1,37 | down |
| 5698297 | 7072765 | 1062727 | similar to KIAA1636 protein | RGD1309285 | 303599 | 1,31 | up   |
| 5738970 | 7072765 | 1062720 | similar to KIAA1636 protein | RGD1309285 | 303599 | 1,15 | down |
| 6258488 | 7072765 | 1062725 | similar to KIAA1636 protein | RGD1309285 | 303599 | 1,15 | up   |
| 5973384 | 7072765 | 1062727 | similar to KIAA1636 protein | RGD1309285 | 303599 | 1,08 | up   |
| 6526382 | 7072765 | 1062730 | similar to KIAA1636 protein | RGD1309285 | 303599 | 1,07 | up   |

|         |         |         |                                                                |                                     |        |      |      |
|---------|---------|---------|----------------------------------------------------------------|-------------------------------------|--------|------|------|
| 5933239 | 7072765 | 1062728 | similar to KIAA1636 protein                                    | RGD1309285                          | 303599 | 1,04 | down |
| 6144399 | 7072765 | 1062724 | similar to KIAA1636 protein                                    | RGD1309285                          | 303599 | 1,01 | up   |
| 5816922 | 7072765 | 1062707 | similar to KIAA1636 protein /// hypothetical protein LOC688431 | 1309285 /// LOC68 303599 /// 688431 |        | 1,54 | up   |
| 6046200 | 7072765 | 1062707 | similar to KIAA1636 protein /// hypothetical protein LOC688431 | 1309285 /// LOC68 303599 /// 688431 |        | 1,32 | up   |
| 6446598 | 7072765 | 1062707 | similar to KIAA1636 protein /// hypothetical protein LOC688431 | 1309285 /// LOC68 303599 /// 688431 |        | 1,01 | down |
| 6593058 | 7168403 | 1295560 | similar to KIAA1713 protein                                    | RGD1305869                          | 307555 | 3,01 | up   |
| 5911600 | 7168403 | 1295583 | similar to KIAA1713 protein                                    | RGD1305869                          | 307555 | 1,66 | down |
| 6222449 | 7168403 | 1295554 | similar to KIAA1713 protein                                    | RGD1305869                          | 307555 | 1,33 | up   |
| 6123569 | 7168403 | 1295583 | similar to KIAA1713 protein                                    | RGD1305869                          | 307555 | 1,32 | down |
| 6118779 | 7168403 | 1295567 | similar to KIAA1713 protein                                    | RGD1305869                          | 307555 | 1,31 | up   |
| 5746414 | 7168403 | 1295582 | similar to KIAA1713 protein                                    | RGD1305869                          | 307555 | 1,30 | up   |
| 6603288 | 7168403 | 1295554 | similar to KIAA1713 protein                                    | RGD1305869                          | 307555 | 1,27 | down |
| 6182644 | 7168403 | 1295583 | similar to KIAA1713 protein                                    | RGD1305869                          | 307555 | 1,24 | up   |
| 6741651 | 7168403 | 1295564 | similar to KIAA1713 protein                                    | RGD1305869                          | 307555 | 1,22 | down |
| 5685304 | 7168403 | 1295559 | similar to KIAA1713 protein                                    | RGD1305869                          | 307555 | 1,19 | down |
| 6729968 | 7168403 | 1295579 | similar to KIAA1713 protein                                    | RGD1305869                          | 307555 | 1,19 | down |
| 6691224 | 7168403 | 1295554 | similar to KIAA1713 protein                                    | RGD1305869                          | 307555 | 1,18 | down |
| 5913621 | 7168403 | 1295583 | similar to KIAA1713 protein                                    | RGD1305869                          | 307555 | 1,13 | up   |
| 5915494 | 7168403 | 1295583 | similar to KIAA1713 protein                                    | RGD1305869                          | 307555 | 1,10 | up   |
| 6682056 | 7168403 | 1295581 | similar to KIAA1713 protein                                    | RGD1305869                          | 307555 | 1,09 | up   |
| 6070311 | 7168403 | 1295583 | similar to KIAA1713 protein                                    | RGD1305869                          | 307555 | 1,09 | up   |
| 6706068 | 7168403 | 1295584 | similar to KIAA1713 protein                                    | RGD1305869                          | 307555 | 1,08 | up   |
| 6488502 | 7168403 | 1295583 | similar to KIAA1713 protein                                    | RGD1305869                          | 307555 | 1,06 | up   |
| 6696455 | 7168403 | 1295583 | similar to KIAA1713 protein                                    | RGD1305869                          | 307555 | 1,06 | up   |
| 6371622 | 7168403 | 1295579 | similar to KIAA1713 protein                                    | RGD1305869                          | 307555 | 1,05 | down |
| 6081311 | 7168403 | 1295570 | similar to KIAA1713 protein                                    | RGD1305869                          | 307555 | 1,04 | down |
| 5803374 | 7168403 | 1295548 | similar to KIAA1713 protein                                    | RGD1305869                          | 307555 | 1,04 | up   |
| 6743585 | 7168403 | 1295570 | similar to KIAA1713 protein                                    | RGD1305869                          | 307555 | 1,03 | down |
| 5669583 | 7168403 | 1295566 | similar to KIAA1713 protein                                    | RGD1305869                          | 307555 | 1,02 | down |
| 6210482 | 7168403 | 1295583 | similar to KIAA1713 protein                                    | RGD1305869                          | 307555 | 1,00 | up   |
| 6536078 | 7168403 | 1295545 | similar to KIAA1713 protein                                    | RGD1305869                          | 307555 | 1,00 | up   |
| 6112591 | 7342430 | 1726151 | similar to KIAA1731 protein                                    | RGD1311723                          | 363018 | 3,21 | up   |
| 6269793 | 7342430 | 1726149 | similar to KIAA1731 protein                                    | RGD1311723                          | 363018 | 2,95 | up   |
| 5798685 | 7342430 | 1726128 | similar to KIAA1731 protein                                    | RGD1311723                          | 363018 | 2,03 | down |
| 5979007 | 7342430 | 1726145 | similar to KIAA1731 protein                                    | RGD1311723                          | 363018 | 1,67 | up   |
| 6600983 | 7342430 | 1726127 | similar to KIAA1731 protein                                    | RGD1311723                          | 363018 | 1,59 | down |
| 5924016 | 7342430 | 1726140 | similar to KIAA1731 protein                                    | RGD1311723                          | 363018 | 1,53 | up   |
| 5769774 | 7342430 | 1726147 | similar to KIAA1731 protein                                    | RGD1311723                          | 363018 | 1,42 | up   |
| 6326887 | 7342430 | 1726148 | similar to KIAA1731 protein                                    | RGD1311723                          | 363018 | 1,32 | up   |
| 5909220 | 7342430 | 1726129 | similar to KIAA1731 protein                                    | RGD1311723                          | 363018 | 1,30 | down |
| 5842991 | 7342430 | 1726127 | similar to KIAA1731 protein                                    | RGD1311723                          | 363018 | 1,28 | up   |
| 5658983 | 7342430 | 1726133 | similar to KIAA1731 protein                                    | RGD1311723                          | 363018 | 1,25 | up   |
| 5710089 | 7342430 | 1726132 | similar to KIAA1731 protein                                    | RGD1311723                          | 363018 | 1,21 | up   |
| 5750159 | 7342430 | 1726146 | similar to KIAA1731 protein                                    | RGD1311723                          | 363018 | 1,20 | down |
| 6691252 | 7342430 | 1726127 | similar to KIAA1731 protein                                    | RGD1311723                          | 363018 | 1,19 | down |
| 6029739 | 7342430 | 1726130 | similar to KIAA1731 protein                                    | RGD1311723                          | 363018 | 1,18 | up   |
| 5828708 | 7342430 | 1726127 | similar to KIAA1731 protein                                    | RGD1311723                          | 363018 | 1,16 | down |
| 6115246 | 7342430 | 1726141 | similar to KIAA1731 protein                                    | RGD1311723                          | 363018 | 1,14 | up   |
| 6545146 | 7342430 | 1726135 | similar to KIAA1731 protein                                    | RGD1311723                          | 363018 | 1,12 | down |
| 6737913 | 7342430 | 1726127 | similar to KIAA1731 protein                                    | RGD1311723                          | 363018 | 1,12 | down |
| 5633004 | 7342430 | 1726142 | similar to KIAA1731 protein                                    | RGD1311723                          | 363018 | 1,11 | down |
| 6026475 | 7342430 | 1726141 | similar to KIAA1731 protein                                    | RGD1311723                          | 363018 | 1,09 | down |
| 6534210 | 7342430 | 1726149 | similar to KIAA1731 protein                                    | RGD1311723                          | 363018 | 1,06 | up   |
| 6093181 | 7342430 | 1726131 | similar to KIAA1731 protein                                    | RGD1311723                          | 363018 | 1,06 | up   |
| 6537432 | 7342430 | 1726137 | similar to KIAA1731 protein                                    | RGD1311723                          | 363018 | 1,03 | down |
| 5872774 | 7342430 | 1726136 | similar to KIAA1731 protein                                    | RGD1311723                          | 363018 | 1,03 | up   |
| 5620420 | 7342430 | 1726143 | similar to KIAA1731 protein                                    | RGD1311723                          | 363018 | 1,02 | down |

|         |         |         |                             |            |        |      |      |
|---------|---------|---------|-----------------------------|------------|--------|------|------|
| 6239846 | 7342430 | 1726139 | similar to KIAA1731 protein | RGD1311723 | 363018 | 1,02 | up   |
| 6258236 | 7342430 | 1726134 | similar to KIAA1731 protein | RGD1311723 | 363018 | 1,02 | up   |
| 5843763 | 7342430 | 1726145 | similar to KIAA1731 protein | RGD1311723 | 363018 | 1,01 | down |
| 5790047 | 7128921 | 1198538 | similar to KIAA1841 protein | RGD1305110 | 305579 | 2,35 | down |
| 6281106 | 7128921 | 1198532 | similar to KIAA1841 protein | RGD1305110 | 305579 | 1,78 | down |
| 6644346 | 7128921 | 1198516 | similar to KIAA1841 protein | RGD1305110 | 305579 | 1,62 | down |
| 6103084 | 7128921 | 1198519 | similar to KIAA1841 protein | RGD1305110 | 305579 | 1,54 | up   |
| 5848503 | 7128921 | 1198530 | similar to KIAA1841 protein | RGD1305110 | 305579 | 1,53 | down |
| 5975238 | 7128921 | 1198513 | similar to KIAA1841 protein | RGD1305110 | 305579 | 1,53 | up   |
| 6671879 | 7128921 | 1198529 | similar to KIAA1841 protein | RGD1305110 | 305579 | 1,34 | down |
| 6554074 | 7128921 | 1198525 | similar to KIAA1841 protein | RGD1305110 | 305579 | 1,29 | down |
| 6302692 | 7128921 | 1198531 | similar to KIAA1841 protein | RGD1305110 | 305579 | 1,27 | up   |
| 6448256 | 7128921 | 1198532 | similar to KIAA1841 protein | RGD1305110 | 305579 | 1,26 | down |
| 6441436 | 7128921 | 1198512 | similar to KIAA1841 protein | RGD1305110 | 305579 | 1,25 | up   |
| 6610765 | 7128921 | 1198523 | similar to KIAA1841 protein | RGD1305110 | 305579 | 1,19 | up   |
| 5962810 | 7128921 | 1198529 | similar to KIAA1841 protein | RGD1305110 | 305579 | 1,19 | down |
| 6305608 | 7128921 | 1198520 | similar to KIAA1841 protein | RGD1305110 | 305579 | 1,19 | down |
| 6369735 | 7128921 | 1198533 | similar to KIAA1841 protein | RGD1305110 | 305579 | 1,19 | down |
| 5840085 | 7128921 | 1198517 | similar to KIAA1841 protein | RGD1305110 | 305579 | 1,18 | up   |
| 6317981 | 7128921 | 1198527 | similar to KIAA1841 protein | RGD1305110 | 305579 | 1,13 | down |
| 5675181 | 7128921 | 1198521 | similar to KIAA1841 protein | RGD1305110 | 305579 | 1,10 | up   |
| 6677019 | 7128921 | 1198515 | similar to KIAA1841 protein | RGD1305110 | 305579 | 1,07 | down |
| 6118929 | 7128921 | 1198526 | similar to KIAA1841 protein | RGD1305110 | 305579 | 1,06 | up   |
| 6686602 | 7128921 | 1198528 | similar to KIAA1841 protein | RGD1305110 | 305579 | 1,05 | down |
| 6403272 | 7128921 | 1198527 | similar to KIAA1841 protein | RGD1305110 | 305579 | 1,03 | down |
| 5642553 | 7128921 | 1198511 | similar to KIAA1841 protein | RGD1305110 | 305579 | 1,03 | up   |
| 6689463 | 7128921 | 1198518 | similar to KIAA1841 protein | RGD1305110 | 305579 | 1,02 | up   |
| 6745211 | 7318286 | 1668335 | similar to KIAA1875 protein | RGD1562063 | 500896 | 1,75 | down |
| 5617910 | 7318286 | 1668333 | similar to KIAA1875 protein | RGD1562063 | 500896 | 1,74 | up   |
| 6034305 | 7318286 | 1668329 | similar to KIAA1875 protein | RGD1562063 | 500896 | 1,65 | down |
| 6371663 | 7318286 | 1668325 | similar to KIAA1875 protein | RGD1562063 | 500896 | 1,53 | down |
| 6719930 | 7318286 | 1668328 | similar to KIAA1875 protein | RGD1562063 | 500896 | 1,50 | up   |
| 5725111 | 7318286 | 1668329 | similar to KIAA1875 protein | RGD1562063 | 500896 | 1,47 | up   |
| 6496084 | 7318286 | 1668335 | similar to KIAA1875 protein | RGD1562063 | 500896 | 1,45 | up   |
| 6149528 | 7318286 | 1668332 | similar to KIAA1875 protein | RGD1562063 | 500896 | 1,40 | down |
| 6143146 | 7318286 | 1668325 | similar to KIAA1875 protein | RGD1562063 | 500896 | 1,35 | down |
| 5645834 | 7318286 | 1668329 | similar to KIAA1875 protein | RGD1562063 | 500896 | 1,31 | down |
| 5926312 | 7318286 | 1668330 | similar to KIAA1875 protein | RGD1562063 | 500896 | 1,29 | down |
| 6384088 | 7318286 | 1668328 | similar to KIAA1875 protein | RGD1562063 | 500896 | 1,26 | up   |
| 5761427 | 7318286 | 1668331 | similar to KIAA1875 protein | RGD1562063 | 500896 | 1,26 | up   |
| 5684292 | 7318286 | 1668324 | similar to KIAA1875 protein | RGD1562063 | 500896 | 1,23 | up   |
| 5736948 | 7318286 | 1668328 | similar to KIAA1875 protein | RGD1562063 | 500896 | 1,22 | down |
| 6283634 | 7318286 | 1668325 | similar to KIAA1875 protein | RGD1562063 | 500896 | 1,22 | up   |
| 6672463 | 7318286 | 1668323 | similar to KIAA1875 protein | RGD1562063 | 500896 | 1,21 | down |
| 6128028 | 7318286 | 1668325 | similar to KIAA1875 protein | RGD1562063 | 500896 | 1,17 | down |
| 6048834 | 7318286 | 1668327 | similar to KIAA1875 protein | RGD1562063 | 500896 | 1,15 | up   |
| 5944290 | 7318286 | 1668324 | similar to KIAA1875 protein | RGD1562063 | 500896 | 1,15 | down |
| 5951776 | 7318286 | 1668327 | similar to KIAA1875 protein | RGD1562063 | 500896 | 1,13 | down |
| 6728112 | 7318286 | 1668323 | similar to KIAA1875 protein | RGD1562063 | 500896 | 1,13 | up   |
| 6585354 | 7318286 | 1668327 | similar to KIAA1875 protein | RGD1562063 | 500896 | 1,12 | up   |
| 6339852 | 7318286 | 1668325 | similar to KIAA1875 protein | RGD1562063 | 500896 | 1,12 | up   |
| 5755131 | 7318286 | 1668329 | similar to KIAA1875 protein | RGD1562063 | 500896 | 1,08 | down |
| 6529985 | 7318286 | 1668328 | similar to KIAA1875 protein | RGD1562063 | 500896 | 1,07 | down |
| 6520744 | 7318286 | 1668327 | similar to KIAA1875 protein | RGD1562063 | 500896 | 1,06 | up   |
| 6472021 | 7318286 | 1668327 | similar to KIAA1875 protein | RGD1562063 | 500896 | 1,05 | down |
| 6375471 | 7318286 | 1668333 | similar to KIAA1875 protein | RGD1562063 | 500896 | 1,05 | up   |
| 6025982 | 7318286 | 1668335 | similar to KIAA1875 protein | RGD1562063 | 500896 | 1,04 | down |

|         |         |         |                                                                        |            |        |      |      |
|---------|---------|---------|------------------------------------------------------------------------|------------|--------|------|------|
| 6614079 | 7318286 | 1668325 | similar to KIAA1875 protein                                            | RGD1562063 | 500896 | 1,03 | down |
| 5753530 | 7318286 | 1668334 | similar to KIAA1875 protein                                            | RGD1562063 | 500896 | 1,03 | up   |
| 5634319 | 7318286 | 1668326 | similar to KIAA1875 protein                                            | RGD1562063 | 500896 | 1,02 | up   |
| 5917888 | 7102723 | 1134392 | similar to kinase suppressor of ras 2                                  | RGD1562674 | 288691 | 2,15 | up   |
| 5912100 | 7102723 | 1134399 | similar to kinase suppressor of ras 2                                  | RGD1562674 | 288691 | 1,65 | up   |
| 6145970 | 7102723 | 1134394 | similar to kinase suppressor of ras 2                                  | RGD1562674 | 288691 | 1,44 | down |
| 5959660 | 7102723 | 1134373 | similar to kinase suppressor of ras 2                                  | RGD1562674 | 288691 | 1,35 | down |
| 6721739 | 7102723 | 1134375 | similar to kinase suppressor of ras 2                                  | RGD1562674 | 288691 | 1,24 | down |
| 5673641 | 7102723 | 1134419 | similar to kinase suppressor of ras 2                                  | RGD1562674 | 288691 | 1,17 | down |
| 6481201 | 7102723 | 1134409 | similar to kinase suppressor of ras 2                                  | RGD1562674 | 288691 | 1,17 | down |
| 6166237 | 7102723 | 1134390 | similar to kinase suppressor of ras 2                                  | RGD1562674 | 288691 | 1,15 | up   |
| 6056287 | 7102723 | 1134374 | similar to kinase suppressor of ras 2                                  | RGD1562674 | 288691 | 1,14 | up   |
| 5832922 | 7102723 | 1134401 | similar to kinase suppressor of ras 2                                  | RGD1562674 | 288691 | 1,12 | down |
| 6032988 | 7102723 | 1134399 | similar to kinase suppressor of ras 2                                  | RGD1562674 | 288691 | 1,10 | down |
| 5882872 | 7102723 | 1134376 | similar to kinase suppressor of ras 2                                  | RGD1562674 | 288691 | 1,09 | down |
| 6621016 | 7102723 | 1134377 | similar to kinase suppressor of ras 2                                  | RGD1562674 | 288691 | 1,07 | up   |
| 6382154 | 7102723 | 1134393 | similar to kinase suppressor of ras 2                                  | RGD1562674 | 288691 | 1,05 | up   |
| 5716173 | 7102723 | 1134405 | similar to kinase suppressor of ras 2                                  | RGD1562674 | 288691 | 1,05 | up   |
| 5831383 | 7102723 | 1134400 | similar to kinase suppressor of ras 2                                  | RGD1562674 | 288691 | 1,03 | up   |
| 6018324 | 7102723 | 1134437 | similar to kinase suppressor of ras 2                                  | RGD1562674 | 288691 | 1,02 | down |
| 6090390 | 7102723 | 1134427 | similar to kinase suppressor of ras 2                                  | RGD1562674 | 288691 | 1,00 | down |
| 5729999 | 7237438 | 1466789 | similar to LOC495800 protein                                           | LOC499770  | 499770 | 2,09 | up   |
| 6132704 | 7237438 | 1466791 | similar to LOC495800 protein                                           | LOC499770  | 499770 | 1,26 | up   |
| 6319746 | 7237438 | 1466784 | similar to LOC495800 protein                                           | LOC499770  | 499770 | 1,19 | down |
| 5984667 | 7237438 | 1466788 | similar to LOC495800 protein                                           | LOC499770  | 499770 | 1,15 | up   |
| 6431041 | 7237438 | 1466785 | similar to LOC495800 protein                                           | LOC499770  | 499770 | 1,10 | up   |
| 6544941 | 7237438 | 1466783 | similar to LOC495800 protein                                           | LOC499770  | 499770 | 1,09 | up   |
| 6290474 | 7237438 | 1466790 | similar to LOC495800 protein                                           | LOC499770  | 499770 | 1,08 | up   |
| 6360181 | 7237438 | 1466782 | similar to LOC495800 protein                                           | LOC499770  | 499770 | 1,03 | up   |
| 6509469 | 7237438 | 1466780 | similar to LOC495800 protein                                           | LOC499770  | 499770 | 1,02 | up   |
| 6386798 | 7185483 | 1338937 | similar to mannose receptor precursor-like isoform 4                   | RGD1559899 | 307851 | 1,75 | down |
| 6269033 | 7185483 | 1338939 | similar to mannose receptor precursor-like isoform 4                   | RGD1559899 | 307851 | 1,71 | down |
| 6108659 | 7185483 | 1338924 | similar to mannose receptor precursor-like isoform 4                   | RGD1559899 | 307851 | 1,45 | up   |
| 5901222 | 7185483 | 1338938 | similar to mannose receptor precursor-like isoform 4                   | RGD1559899 | 307851 | 1,21 | down |
| 6020370 | 7185483 | 1338940 | similar to mannose receptor precursor-like isoform 4                   | RGD1559899 | 307851 | 1,18 | down |
| 6555014 | 7185483 | 1338935 | similar to mannose receptor precursor-like isoform 4                   | RGD1559899 | 307851 | 1,14 | up   |
| 6197251 | 7185483 | 1338932 | similar to mannose receptor precursor-like isoform 4                   | RGD1559899 | 307851 | 1,13 | up   |
| 5870715 | 7185483 | 1338939 | similar to mannose receptor precursor-like isoform 4                   | RGD1559899 | 307851 | 1,08 | up   |
| 6574753 | 7185483 | 1338934 | similar to mannose receptor precursor-like isoform 4                   | RGD1559899 | 307851 | 1,08 | up   |
| 6166139 | 7185483 | 1338936 | similar to mannose receptor precursor-like isoform 4                   | RGD1559899 | 307851 | 1,07 | up   |
| 5983680 | 7185483 | 1338941 | similar to mannose receptor precursor-like isoform 4                   | RGD1559899 | 307851 | 1,06 | up   |
| 6448354 | 7185483 | 1338933 | similar to mannose receptor precursor-like isoform 4                   | RGD1559899 | 307851 | 1,06 | up   |
| 6169510 | 7185483 | 1338931 | similar to mannose receptor precursor-like isoform 4                   | RGD1559899 | 307851 | 1,03 | up   |
| 6467796 | 7185483 | 1338930 | similar to mannose receptor precursor-like isoform 4                   | RGD1559899 | 307851 | 1,02 | up   |
| 6480337 | 7185483 | 1338925 | similar to mannose receptor precursor-like isoform 4                   | RGD1559899 | 307851 | 1,01 | up   |
| 6615881 | 7069253 | 1054176 | similar to Map4k6-pending protein                                      | LOC303259  | 303259 | 1,85 | down |
| 5748095 | 7069253 | 1054173 | similar to Map4k6-pending protein                                      | LOC303259  | 303259 | 1,13 | down |
| 5956706 | 7069253 | 1054176 | similar to Map4k6-pending protein                                      | LOC303259  | 303259 | 1,12 | up   |
| 6361373 | 7069253 | 1054175 | similar to Map4k6-pending protein                                      | LOC303259  | 303259 | 1,12 | up   |
| 5771042 | 7069253 | 1054176 | similar to Map4k6-pending protein                                      | LOC303259  | 303259 | 1,10 | down |
| 6235422 | 7069253 | 1054175 | similar to Map4k6-pending protein                                      | LOC303259  | 303259 | 1,08 | up   |
| 6170908 | 7069253 | 1054174 | similar to Map4k6-pending protein                                      | LOC303259  | 303259 | 1,06 | down |
| 6533174 | 7069253 | 1054176 | similar to Map4k6-pending protein                                      | LOC303259  | 303259 | 1,06 | up   |
| 6201792 | 7069253 | 1054172 | similar to Map4k6-pending protein                                      | LOC303259  | 303259 | 1,06 | down |
| 6665217 | 7069253 | 1054175 | similar to Map4k6-pending protein                                      | LOC303259  | 303259 | 1,04 | down |
| 6098549 | 7069253 | 1054172 | similar to Map4k6-pending protein                                      | LOC303259  | 303259 | 1,00 | down |
| 6574888 | 7185355 | 1338690 | similar to MARVEL (membrane-associating) domain containing 3 isoform a | RGD1562056 | 498950 | 2,16 | up   |

|         |         |         |                                                                                                 |                                     |        |      |      |
|---------|---------|---------|-------------------------------------------------------------------------------------------------|-------------------------------------|--------|------|------|
| 6465263 | 7185355 | 1338691 | similar to MARVEL (membrane-associating) domain containing 3 isoform a                          | RGD1562056                          | 498950 | 1,95 | up   |
| 6190657 | 7185355 | 1338691 | similar to MARVEL (membrane-associating) domain containing 3 isoform a                          | RGD1562056                          | 498950 | 1,38 | down |
| 6226759 | 7185355 | 1338698 | similar to MARVEL (membrane-associating) domain containing 3 isoform a                          | RGD1562056                          | 498950 | 1,18 | down |
| 6696246 | 7185355 | 1338696 | similar to MARVEL (membrane-associating) domain containing 3 isoform a                          | RGD1562056                          | 498950 | 1,17 | down |
| 6571981 | 7194400 | 1361727 | similar to mediator of RNA polymerase II transcription, subunit 12 homolog (S. cerevisiae)-like | LOC690752                           | 690752 | 1,26 | down |
| 6225437 | 7194400 | 1361720 | similar to mediator of RNA polymerase II transcription, subunit 12 homolog (S. cerevisiae)-like | LOC690752                           | 690752 | 1,17 | down |
| 5755871 | 7194400 | 1361716 | similar to mediator of RNA polymerase II transcription, subunit 12 homolog (S. cerevisiae)-like | LOC690752                           | 690752 | 1,11 | up   |
| 6031624 | 7194400 | 1361721 | similar to mediator of RNA polymerase II transcription, subunit 12 homolog (S. cerevisiae)-like | LOC690752                           | 690752 | 1,10 | down |
| 6033367 | 7194400 | 1361717 | similar to mediator of RNA polymerase II transcription, subunit 12 homolog (S. cerevisiae)-like | LOC690752                           | 690752 | 1,07 | up   |
| 5911820 | 7194400 | 1361718 | similar to mediator of RNA polymerase II transcription, subunit 12 homolog (S. cerevisiae)-like | LOC690752                           | 690752 | 1,06 | up   |
| 6022830 | 7194400 | 1361726 | similar to mediator of RNA polymerase II transcription, subunit 12 homolog (S. cerevisiae)-like | LOC690752                           | 690752 | 1,04 | down |
| 6593076 | 7194400 | 1361726 | similar to mediator of RNA polymerase II transcription, subunit 12 homolog (S. cerevisiae)-like | LOC690752                           | 690752 | 1,03 | up   |
| 6197761 | 7194400 | 1361728 | similar to mediator of RNA polymerase II transcription, subunit 12 homolog (S. cerevisiae)-like | LOC690752                           | 690752 | 1,03 | down |
| 6267442 | 7069810 | 1055548 | similar to membrane protein expressed in epithelial-like lung adenocarcinoma                    | RGD1307493                          | 303317 | 2,68 | up   |
| 6576337 | 7069810 | 1055550 | similar to membrane protein expressed in epithelial-like lung adenocarcinoma                    | RGD1307493                          | 303317 | 1,32 | down |
| 6374427 | 7069810 | 1055554 | similar to membrane protein expressed in epithelial-like lung adenocarcinoma                    | RGD1307493                          | 303317 | 1,32 | up   |
| 6591557 | 7069810 | 1055553 | similar to membrane protein expressed in epithelial-like lung adenocarcinoma                    | RGD1307493                          | 303317 | 1,28 | down |
| 6360974 | 7069810 | 1055555 | similar to membrane protein expressed in epithelial-like lung adenocarcinoma                    | RGD1307493                          | 303317 | 1,11 | up   |
| 6684928 | 7069810 | 1055555 | similar to membrane protein expressed in epithelial-like lung adenocarcinoma                    | RGD1307493                          | 303317 | 1,05 | up   |
| 5865088 | 7368954 | 1792787 | similar to MIC2 like 1                                                                          | LOC680643                           | 680643 | 2,08 | down |
| 6409975 | 7368804 | 1792264 | similar to MIC2 like 1                                                                          | LOC681166                           | 681166 | 1,08 | down |
| 6378525 | 7368804 | 1792262 | similar to MIC2 like 1 /// similar to MIC2 like 1                                               | 363413 /// LOC681363413 /// 681166  |        | 1,46 | down |
| 5711236 | 7368804 | 1792257 | similar to MIC2 like 1 /// similar to MIC2 like 1                                               | 681166 /// LOC36: 681166 /// 363413 |        | 1,37 | down |
| 5882913 | 7368804 | 1792263 | similar to MIC2 like 1 /// similar to nidogen 2 /// similar to nidogen 2                        | LOC316873 /// 66 /// 316873 /// 36  |        | 1,00 | up   |
| 6460737 | 7182133 | 1330839 | similar to Mixed lineage kinase 4                                                               | RGD1306091                          | 307950 | 2,27 | down |
| 5781080 | 7182133 | 1330839 | similar to Mixed lineage kinase 4                                                               | RGD1306091                          | 307950 | 1,38 | up   |
| 6104597 | 7182133 | 1330834 | similar to Mixed lineage kinase 4                                                               | RGD1306091                          | 307950 | 1,26 | up   |
| 6238354 | 7182133 | 1330838 | similar to Mixed lineage kinase 4                                                               | RGD1306091                          | 307950 | 1,19 | down |
| 5680274 | 7182133 | 1330829 | similar to Mixed lineage kinase 4                                                               | RGD1306091                          | 307950 | 1,18 | up   |
| 6735478 | 7182133 | 1330842 | similar to Mixed lineage kinase 4                                                               | RGD1306091                          | 307950 | 1,17 | up   |
| 6177708 | 7182133 | 1330841 | similar to Mixed lineage kinase 4                                                               | RGD1306091                          | 307950 | 1,17 | up   |
| 5879270 | 7182133 | 1330840 | similar to Mixed lineage kinase 4                                                               | RGD1306091                          | 307950 | 1,11 | up   |
| 6438319 | 7182133 | 1330832 | similar to Mixed lineage kinase 4                                                               | RGD1306091                          | 307950 | 1,10 | down |
| 6251618 | 7182133 | 1330830 | similar to Mixed lineage kinase 4                                                               | RGD1306091                          | 307950 | 1,09 | down |
| 5722358 | 7182133 | 1330836 | similar to Mixed lineage kinase 4                                                               | RGD1306091                          | 307950 | 1,09 | up   |
| 5873708 | 7182133 | 1330841 | similar to Mixed lineage kinase 4                                                               | RGD1306091                          | 307950 | 1,07 | down |
| 6194801 | 7182133 | 1330835 | similar to Mixed lineage kinase 4                                                               | RGD1306091                          | 307950 | 1,06 | down |
| 5765095 | 7244290 | 1484169 | similar to mKIAA0256 protein                                                                    | RGD1559930                          | 296115 | 1,27 | down |
| 6242074 | 7244290 | 1484145 | similar to mKIAA0256 protein                                                                    | RGD1559930                          | 296115 | 1,10 | up   |
| 6558283 | 7132024 | 1206336 | similar to mKIAA0323 protein                                                                    | RGD1565688                          | 498517 | 1,51 | down |
| 6114435 | 7069603 | 1055032 | similar to mKIAA0664 protein                                                                    | RGD1307222                          | 303300 | 1,27 | up   |
| 5701042 | 7069603 | 1055031 | similar to mKIAA0664 protein                                                                    | RGD1307222                          | 303300 | 1,17 | down |
| 6147711 | 7069603 | 1055037 | similar to mKIAA0664 protein                                                                    | RGD1307222                          | 303300 | 1,14 | down |
| 6461738 | 7069603 | 1055059 | similar to mKIAA0664 protein                                                                    | RGD1307222                          | 303300 | 1,10 | up   |
| 5993926 | 7374317 | 1807417 | similar to mKIAA1111 protein                                                                    | RGD1561065                          | 317425 | 2,10 | down |
| 6231158 | 7374317 | 1807405 | similar to mKIAA1111 protein                                                                    | RGD1561065                          | 317425 | 1,70 | down |
| 6161850 | 7374317 | 1807400 | similar to mKIAA1111 protein                                                                    | RGD1561065                          | 317425 | 1,56 | down |
| 6022572 | 7374317 | 1807404 | similar to mKIAA1111 protein                                                                    | RGD1561065                          | 317425 | 1,55 | down |
| 6385763 | 7374317 | 1807410 | similar to mKIAA1111 protein                                                                    | RGD1561065                          | 317425 | 1,47 | down |
| 5786800 | 7374317 | 1807412 | similar to mKIAA1111 protein                                                                    | RGD1561065                          | 317425 | 1,33 | up   |
| 5631711 | 7374317 | 1807402 | similar to mKIAA1111 protein                                                                    | RGD1561065                          | 317425 | 1,33 | down |
| 6005806 | 7374317 | 1807414 | similar to mKIAA1111 protein                                                                    | RGD1561065                          | 317425 | 1,20 | up   |
| 6422758 | 7374317 | 1807413 | similar to mKIAA1111 protein                                                                    | RGD1561065                          | 317425 | 1,15 | down |
| 6286607 | 7374317 | 1807405 | similar to mKIAA1111 protein                                                                    | RGD1561065                          | 317425 | 1,15 | down |
| 6075348 | 7374317 | 1807401 | similar to mKIAA1111 protein                                                                    | RGD1561065                          | 317425 | 1,14 | up   |
| 5923354 | 7374317 | 1807411 | similar to mKIAA1111 protein                                                                    | RGD1561065                          | 317425 | 1,11 | up   |
| 6556245 | 7374317 | 1807397 | similar to mKIAA1111 protein                                                                    | RGD1561065                          | 317425 | 1,11 | up   |

|         |         |         |                                                        |            |        |      |      |
|---------|---------|---------|--------------------------------------------------------|------------|--------|------|------|
| 6186974 | 7374317 | 1807415 | similar to mKIAA1111 protein                           | RGD1561065 | 317425 | 1,10 | down |
| 6073305 | 7374317 | 1807416 | similar to mKIAA1111 protein                           | RGD1561065 | 317425 | 1,10 | up   |
| 6697776 | 7374317 | 1807403 | similar to mKIAA1111 protein                           | RGD1561065 | 317425 | 1,09 | up   |
| 6360954 | 7374317 | 1807407 | similar to mKIAA1111 protein                           | RGD1561065 | 317425 | 1,08 | down |
| 6355617 | 7374317 | 1807408 | similar to mKIAA1111 protein                           | RGD1561065 | 317425 | 1,06 | up   |
| 6633195 | 7374317 | 1807417 | similar to mKIAA1111 protein                           | RGD1561065 | 317425 | 1,06 | up   |
| 6373269 | 7374317 | 1807409 | similar to mKIAA1111 protein                           | RGD1561065 | 317425 | 1,03 | down |
| 6259625 | 7374317 | 1807396 | similar to mKIAA1111 protein                           | RGD1561065 | 317425 | 1,02 | down |
| 6002919 | 7374317 | 1807398 | similar to mKIAA1111 protein                           | RGD1561065 | 317425 | 1,02 | down |
| 5751764 | 7374317 | 1807399 | similar to mKIAA1111 protein                           | RGD1561065 | 317425 | 1,02 | up   |
| 5796284 | 7209927 | 1398950 | similar to mKIAA1450 protein                           | RGD1562174 | 310538 | 3,31 | down |
| 6312026 | 7209927 | 1398916 | similar to mKIAA1450 protein                           | RGD1562174 | 310538 | 1,47 | down |
| 5837634 | 7209927 | 1398916 | similar to mKIAA1450 protein                           | RGD1562174 | 310538 | 1,41 | down |
| 6640774 | 7209927 | 1398916 | similar to mKIAA1450 protein                           | RGD1562174 | 310538 | 1,26 | down |
| 6066258 | 7209927 | 1398944 | similar to mKIAA1450 protein                           | RGD1562174 | 310538 | 1,24 | up   |
| 6531501 | 7266725 | 1538780 | similar to mKIAA1940 protein                           | RGD1566130 | 312504 | 2,06 | down |
| 5741907 | 7266725 | 1538792 | similar to mKIAA1940 protein                           | RGD1566130 | 312504 | 1,55 | up   |
| 6105729 | 7266725 | 1538786 | similar to mKIAA1940 protein                           | RGD1566130 | 312504 | 1,53 | up   |
| 6161446 | 7266725 | 1538779 | similar to mKIAA1940 protein                           | RGD1566130 | 312504 | 1,32 | down |
| 6348720 | 7266725 | 1538790 | similar to mKIAA1940 protein                           | RGD1566130 | 312504 | 1,30 | up   |
| 5910723 | 7266725 | 1538791 | similar to mKIAA1940 protein                           | RGD1566130 | 312504 | 1,23 | up   |
| 5680727 | 7266725 | 1538789 | similar to mKIAA1940 protein                           | RGD1566130 | 312504 | 1,22 | down |
| 5937077 | 7266725 | 1538788 | similar to mKIAA1940 protein                           | RGD1566130 | 312504 | 1,15 | down |
| 5816729 | 7266725 | 1538786 | similar to mKIAA1940 protein                           | RGD1566130 | 312504 | 1,13 | up   |
| 6670491 | 7266725 | 1538787 | similar to mKIAA1940 protein                           | RGD1566130 | 312504 | 1,13 | up   |
| 5748202 | 7266725 | 1538783 | similar to mKIAA1940 protein                           | RGD1566130 | 312504 | 1,12 | up   |
| 6194260 | 7266725 | 1538780 | similar to mKIAA1940 protein                           | RGD1566130 | 312504 | 1,11 | down |
| 6388548 | 7266725 | 1538790 | similar to mKIAA1940 protein                           | RGD1566130 | 312504 | 1,08 | up   |
| 5859983 | 7266725 | 1538788 | similar to mKIAA1940 protein                           | RGD1566130 | 312504 | 1,07 | down |
| 5986626 | 7266725 | 1538781 | similar to mKIAA1940 protein                           | RGD1566130 | 312504 | 1,04 | down |
| 5880199 | 7266725 | 1538782 | similar to mKIAA1940 protein                           | RGD1566130 | 312504 | 1,01 | down |
| 6187559 | 7337714 | 1714054 | similar to modulator of estrogen induced transcription | RGD1307526 | 315792 | 2,05 | down |
| 6075699 | 7337714 | 1714054 | similar to modulator of estrogen induced transcription | RGD1307526 | 315792 | 1,91 | down |
| 6386496 | 7337714 | 1714054 | similar to modulator of estrogen induced transcription | RGD1307526 | 315792 | 1,52 | up   |
| 6263276 | 7337714 | 1714052 | similar to modulator of estrogen induced transcription | RGD1307526 | 315792 | 1,44 | down |
| 6145470 | 7337714 | 1714054 | similar to modulator of estrogen induced transcription | RGD1307526 | 315792 | 1,25 | up   |
| 5674197 | 7337714 | 1714050 | similar to modulator of estrogen induced transcription | RGD1307526 | 315792 | 1,04 | up   |
| 5648976 | 7337714 | 1714051 | similar to modulator of estrogen induced transcription | RGD1307526 | 315792 | 1,04 | down |
| 5730689 | 7337714 | 1714053 | similar to modulator of estrogen induced transcription | RGD1307526 | 315792 | 1,01 | down |
| 6277288 | 7191888 | 1354948 | similar to Myelin P2 protein                           | RGD1565000 | 499570 | 1,54 | up   |
| 6089052 | 7191888 | 1354947 | similar to Myelin P2 protein                           | RGD1565000 | 499570 | 1,38 | down |
| 5627047 | 7191888 | 1354939 | similar to Myelin P2 protein                           | RGD1565000 | 499570 | 1,33 | down |
| 6189900 | 7191888 | 1354946 | similar to Myelin P2 protein                           | RGD1565000 | 499570 | 1,09 | down |
| 5971989 | 7228530 | 1443837 | similar to myosin IIIB                                 | RGD1560313 | 366069 | 2,32 | down |
| 6235720 | 7228530 | 1443852 | similar to myosin IIIB                                 | RGD1560313 | 366069 | 2,26 | down |
| 6153238 | 7228530 | 1443827 | similar to myosin IIIB                                 | RGD1560313 | 366069 | 1,90 | down |
| 5654656 | 7228530 | 1443843 | similar to myosin IIIB                                 | RGD1560313 | 366069 | 1,82 | down |
| 5935940 | 7228530 | 1443831 | similar to myosin IIIB                                 | RGD1560313 | 366069 | 1,60 | down |
| 6319405 | 7228530 | 1443883 | similar to myosin IIIB                                 | RGD1560313 | 366069 | 1,60 | down |
| 6443882 | 7228530 | 1443790 | similar to myosin IIIB                                 | RGD1560313 | 366069 | 1,51 | up   |
| 6257953 | 7228530 | 1443845 | similar to myosin IIIB                                 | RGD1560313 | 366069 | 1,51 | down |
| 6167395 | 7228530 | 1443836 | similar to myosin IIIB                                 | RGD1560313 | 366069 | 1,47 | down |
| 5666998 | 7228530 | 1443862 | similar to myosin IIIB                                 | RGD1560313 | 366069 | 1,42 | down |
| 6494680 | 7228530 | 1443850 | similar to myosin IIIB                                 | RGD1560313 | 366069 | 1,41 | down |
| 5915824 | 7228530 | 1443838 | similar to myosin IIIB                                 | RGD1560313 | 366069 | 1,35 | down |
| 6419051 | 7228530 | 1443859 | similar to myosin IIIB                                 | RGD1560313 | 366069 | 1,35 | up   |
| 5856900 | 7228530 | 1443842 | similar to myosin IIIB                                 | RGD1560313 | 366069 | 1,31 | up   |

|         |         |         |                                                                                    |            |        |      |      |
|---------|---------|---------|------------------------------------------------------------------------------------|------------|--------|------|------|
| 5784543 | 7228530 | 1443861 | similar to myosin IIIB                                                             | RGD1560313 | 366069 | 1,26 | up   |
| 5627032 | 7228530 | 1443849 | similar to myosin IIIB                                                             | RGD1560313 | 366069 | 1,26 | up   |
| 6389021 | 7228530 | 1443881 | similar to myosin IIIB                                                             | RGD1560313 | 366069 | 1,23 | down |
| 5750818 | 7228530 | 1443840 | similar to myosin IIIB                                                             | RGD1560313 | 366069 | 1,21 | down |
| 6440850 | 7228530 | 1443809 | similar to myosin IIIB                                                             | RGD1560313 | 366069 | 1,17 | up   |
| 5964261 | 7228530 | 1443839 | similar to myosin IIIB                                                             | RGD1560313 | 366069 | 1,16 | up   |
| 6640168 | 7228530 | 1443790 | similar to myosin IIIB                                                             | RGD1560313 | 366069 | 1,15 | up   |
| 6498536 | 7228530 | 1443795 | similar to myosin IIIB                                                             | RGD1560313 | 366069 | 1,14 | up   |
| 6242648 | 7228530 | 1443794 | similar to myosin IIIB                                                             | RGD1560313 | 366069 | 1,13 | up   |
| 6360824 | 7228530 | 1443791 | similar to myosin IIIB                                                             | RGD1560313 | 366069 | 1,12 | up   |
| 6359066 | 7228530 | 1443868 | similar to myosin IIIB                                                             | RGD1560313 | 366069 | 1,07 | up   |
| 6487742 | 7228530 | 1443867 | similar to myosin IIIB                                                             | RGD1560313 | 366069 | 1,07 | down |
| 6586789 | 7228530 | 1443847 | similar to myosin IIIB                                                             | RGD1560313 | 366069 | 1,07 | down |
| 6063262 | 7228530 | 1443851 | similar to myosin IIIB                                                             | RGD1560313 | 366069 | 1,06 | up   |
| 6417175 | 7228530 | 1443870 | similar to myosin IIIB                                                             | RGD1560313 | 366069 | 1,04 | down |
| 6142890 | 7228530 | 1443798 | similar to myosin IIIB                                                             | RGD1560313 | 366069 | 1,03 | up   |
| 6362719 | 7366728 | 1785427 | similar to Myosin regulatory light chain 2-A, smooth muscle isoform (Myosin RLC-A) | RGD1309537 | 501203 | 2,44 | up   |
| 6524232 | 7366728 | 1785430 | similar to Myosin regulatory light chain 2-A, smooth muscle isoform (Myosin RLC-A) | RGD1309537 | 501203 | 1,45 | up   |
| 5622909 | 7366728 | 1785431 | similar to Myosin regulatory light chain 2-A, smooth muscle isoform (Myosin RLC-A) | RGD1309537 | 501203 | 1,36 | up   |
| 6478918 | 7366728 | 1785428 | similar to Myosin regulatory light chain 2-A, smooth muscle isoform (Myosin RLC-A) | RGD1309537 | 501203 | 1,07 | up   |
| 6153363 | 7366728 | 1785429 | similar to Myosin regulatory light chain 2-A, smooth muscle isoform (Myosin RLC-A) | RGD1309537 | 501203 | 1,06 | down |
| 6652890 | 7069830 | 1055586 | similar to myosin XVIIIa                                                           | LOC360570  | 360570 | 3,05 | down |
| 6037797 | 7069830 | 1055663 | similar to myosin XVIIIa                                                           | LOC360570  | 360570 | 1,45 | up   |
| 5933822 | 7069830 | 1055663 | similar to myosin XVIIIa                                                           | LOC360570  | 360570 | 1,18 | down |
| 6015243 | 7069830 | 1055652 | similar to myosin XVIIIa                                                           | LOC360570  | 360570 | 1,13 | up   |
| 6523137 | 7069830 | 1055653 | similar to myosin XVIIIa                                                           | LOC360570  | 360570 | 1,11 | down |
| 5792043 | 7069830 | 1055595 | similar to myosin XVIIIa                                                           | LOC360570  | 360570 | 1,05 | down |
| 6544610 | 7069830 | 1055651 | similar to myosin XVIIIa                                                           | LOC360570  | 360570 | 1,03 | up   |
| 6430178 | 7069830 | 1055650 | similar to myosin XVIIIa                                                           | LOC360570  | 360570 | 1,03 | down |
| 6384988 | 7069830 | 1055663 | similar to myosin XVIIIa                                                           | LOC360570  | 360570 | 1,03 | down |
| 5918849 | 7069830 | 1055663 | similar to myosin XVIIIa                                                           | LOC360570  | 360570 | 1,02 | down |
| 6732161 | 7069830 | 1055660 | similar to myosin XVIIIa                                                           | LOC360570  | 360570 | 1,00 | up   |
| 6404421 | 7073677 | 1065138 | similar to Myosin-15 (Myosin XV) (Unconventional myosin-15)                        | LOC688264  | 688264 | 2,77 | up   |
| 6145271 | 7073677 | 1065124 | similar to Myosin-15 (Myosin XV) (Unconventional myosin-15)                        | LOC688264  | 688264 | 2,72 | up   |
| 5863850 | 7073677 | 1065133 | similar to Myosin-15 (Myosin XV) (Unconventional myosin-15)                        | LOC688264  | 688264 | 2,64 | up   |
| 6728035 | 7073677 | 1065130 | similar to Myosin-15 (Myosin XV) (Unconventional myosin-15)                        | LOC688264  | 688264 | 2,56 | up   |
| 5963793 | 7073677 | 1065143 | similar to Myosin-15 (Myosin XV) (Unconventional myosin-15)                        | LOC688264  | 688264 | 2,54 | up   |
| 5620131 | 7073677 | 1065136 | similar to Myosin-15 (Myosin XV) (Unconventional myosin-15)                        | LOC688264  | 688264 | 2,10 | up   |
| 6195125 | 7073677 | 1065124 | similar to Myosin-15 (Myosin XV) (Unconventional myosin-15)                        | LOC688264  | 688264 | 2,08 | up   |
| 5990210 | 7073677 | 1065127 | similar to Myosin-15 (Myosin XV) (Unconventional myosin-15)                        | LOC688264  | 688264 | 2,03 | up   |
| 5796265 | 7073677 | 1065124 | similar to Myosin-15 (Myosin XV) (Unconventional myosin-15)                        | LOC688264  | 688264 | 2,00 | up   |
| 6244520 | 7073677 | 1065131 | similar to Myosin-15 (Myosin XV) (Unconventional myosin-15)                        | LOC688264  | 688264 | 1,99 | up   |
| 5948388 | 7073677 | 1065132 | similar to Myosin-15 (Myosin XV) (Unconventional myosin-15)                        | LOC688264  | 688264 | 1,91 | up   |
| 5958010 | 7073677 | 1065140 | similar to Myosin-15 (Myosin XV) (Unconventional myosin-15)                        | LOC688264  | 688264 | 1,89 | up   |
| 5877276 | 7073677 | 1065128 | similar to Myosin-15 (Myosin XV) (Unconventional myosin-15)                        | LOC688264  | 688264 | 1,89 | up   |
| 6035373 | 7073677 | 1065182 | similar to Myosin-15 (Myosin XV) (Unconventional myosin-15)                        | LOC690323  | 690323 | 1,88 | up   |
| 6176786 | 7073677 | 1065139 | similar to Myosin-15 (Myosin XV) (Unconventional myosin-15)                        | LOC688264  | 688264 | 1,86 | up   |
| 6592524 | 7073677 | 1065129 | similar to Myosin-15 (Myosin XV) (Unconventional myosin-15)                        | LOC688264  | 688264 | 1,77 | up   |
| 5823214 | 7073677 | 1065126 | similar to Myosin-15 (Myosin XV) (Unconventional myosin-15)                        | LOC688264  | 688264 | 1,73 | up   |
| 5866706 | 7073677 | 1065141 | similar to Myosin-15 (Myosin XV) (Unconventional myosin-15)                        | LOC688264  | 688264 | 1,71 | up   |
| 6190372 | 7073677 | 1065146 | similar to Myosin-15 (Myosin XV) (Unconventional myosin-15)                        | LOC688264  | 688264 | 1,70 | down |
| 5755087 | 7073677 | 1065148 | similar to Myosin-15 (Myosin XV) (Unconventional myosin-15)                        | LOC688264  | 688264 | 1,63 | down |
| 5835301 | 7073677 | 1065137 | similar to Myosin-15 (Myosin XV) (Unconventional myosin-15)                        | LOC688264  | 688264 | 1,62 | up   |
| 6553305 | 7073677 | 1065123 | similar to Myosin-15 (Myosin XV) (Unconventional myosin-15)                        | LOC688264  | 688264 | 1,60 | up   |
| 6086714 | 7073677 | 1065179 | similar to Myosin-15 (Myosin XV) (Unconventional myosin-15)                        | LOC690323  | 690323 | 1,59 | down |
| 5796663 | 7073677 | 1065142 | similar to Myosin-15 (Myosin XV) (Unconventional myosin-15)                        | LOC688264  | 688264 | 1,54 | up   |
| 6291604 | 7073677 | 1065171 | similar to Myosin-15 (Myosin XV) (Unconventional myosin-15)                        | LOC688264  | 688264 | 1,52 | down |

|         |         |         |                                                                              |            |        |      |      |
|---------|---------|---------|------------------------------------------------------------------------------|------------|--------|------|------|
| 5644844 | 7073677 | 1065135 | similar to Myosin-15 (Myosin XV) (Unconventional myosin-15)                  | LOC688264  | 688264 | 1,48 | up   |
| 5775884 | 7073677 | 1065178 | similar to Myosin-15 (Myosin XV) (Unconventional myosin-15)                  | LOC690323  | 690323 | 1,43 | down |
| 5857206 | 7073677 | 1065176 | similar to Myosin-15 (Myosin XV) (Unconventional myosin-15)                  | LOC690323  | 690323 | 1,43 | down |
| 5693235 | 7073677 | 1065147 | similar to Myosin-15 (Myosin XV) (Unconventional myosin-15)                  | LOC688264  | 688264 | 1,41 | down |
| 6165124 | 7073677 | 1065184 | similar to Myosin-15 (Myosin XV) (Unconventional myosin-15)                  | LOC690323  | 690323 | 1,40 | down |
| 6183808 | 7073677 | 1065174 | similar to Myosin-15 (Myosin XV) (Unconventional myosin-15)                  | LOC690323  | 690323 | 1,36 | down |
| 5900040 | 7073677 | 1065124 | similar to Myosin-15 (Myosin XV) (Unconventional myosin-15)                  | LOC688264  | 688264 | 1,36 | up   |
| 6424323 | 7073677 | 1065185 | similar to Myosin-15 (Myosin XV) (Unconventional myosin-15)                  | LOC690323  | 690323 | 1,35 | down |
| 6338212 | 7073677 | 1065173 | similar to Myosin-15 (Myosin XV) (Unconventional myosin-15)                  | LOC690323  | 690323 | 1,34 | down |
| 6510444 | 7073677 | 1065145 | similar to Myosin-15 (Myosin XV) (Unconventional myosin-15)                  | LOC688264  | 688264 | 1,25 | down |
| 5628872 | 7073677 | 1065126 | similar to Myosin-15 (Myosin XV) (Unconventional myosin-15)                  | LOC688264  | 688264 | 1,22 | up   |
| 6286705 | 7073677 | 1065177 | similar to Myosin-15 (Myosin XV) (Unconventional myosin-15)                  | LOC690323  | 690323 | 1,20 | down |
| 6573606 | 7073677 | 1065134 | similar to Myosin-15 (Myosin XV) (Unconventional myosin-15)                  | LOC688264  | 688264 | 1,18 | up   |
| 6525494 | 7073677 | 1065180 | similar to Myosin-15 (Myosin XV) (Unconventional myosin-15)                  | LOC690323  | 690323 | 1,17 | down |
| 6236240 | 7073677 | 1065183 | similar to Myosin-15 (Myosin XV) (Unconventional myosin-15)                  | LOC690323  | 690323 | 1,17 | up   |
| 5746003 | 7073677 | 1065172 | similar to Myosin-15 (Myosin XV) (Unconventional myosin-15)                  | LOC690323  | 690323 | 1,15 | up   |
| 6639678 | 7073677 | 1065175 | similar to Myosin-15 (Myosin XV) (Unconventional myosin-15)                  | LOC690323  | 690323 | 1,08 | down |
| 6357132 | 7073677 | 1065181 | similar to Myosin-15 (Myosin XV) (Unconventional myosin-15)                  | LOC690323  | 690323 | 1,08 | down |
| 6447223 | 7073677 | 1065185 | similar to Myosin-15 (Myosin XV) (Unconventional myosin-15)                  | LOC690323  | 690323 | 1,05 | down |
| 5860726 | 7073677 | 1065182 | similar to Myosin-15 (Myosin XV) (Unconventional myosin-15)                  | LOC690323  | 690323 | 1,02 | up   |
| 5881975 | 7223633 | 1431500 | similar to Myristoylated alanine-rich C-kinase substrate (MARCKS) (ACAMP-81) | LOC294446  | 294446 | 1,73 | down |
| 6038688 | 7223633 | 1431500 | similar to Myristoylated alanine-rich C-kinase substrate (MARCKS) (ACAMP-81) | LOC294446  | 294446 | 1,37 | down |
| 6046471 | 7223633 | 1431502 | similar to Myristoylated alanine-rich C-kinase substrate (MARCKS) (ACAMP-81) | LOC294446  | 294446 | 1,17 | down |
| 5787162 | 7208784 | 1396074 | similar to neurobeachin                                                      | RGD1562629 | 361948 | 2,02 | up   |
| 6089696 | 7208784 | 1396162 | similar to neurobeachin                                                      | RGD1562629 | 361948 | 1,58 | down |
| 6591079 | 7208784 | 1396064 | similar to neurobeachin                                                      | RGD1562629 | 361948 | 1,55 | up   |
| 5999543 | 7208784 | 1396170 | similar to neurobeachin                                                      | RGD1562629 | 361948 | 1,33 | up   |
| 6338636 | 7208784 | 1396166 | similar to neurobeachin                                                      | RGD1562629 | 361948 | 1,32 | up   |
| 6193369 | 7208784 | 1396169 | similar to neurobeachin                                                      | RGD1562629 | 361948 | 1,31 | up   |
| 6312808 | 7208784 | 1396186 | similar to neurobeachin                                                      | RGD1562629 | 361948 | 1,31 | up   |
| 6061353 | 7208784 | 1396165 | similar to neurobeachin                                                      | RGD1562629 | 361948 | 1,31 | down |
| 5909054 | 7208784 | 1396172 | similar to neurobeachin                                                      | RGD1562629 | 361948 | 1,26 | up   |
| 5959320 | 7208784 | 1396072 | similar to neurobeachin                                                      | RGD1562629 | 361948 | 1,24 | up   |
| 5705814 | 7208784 | 1396162 | similar to neurobeachin                                                      | RGD1562629 | 361948 | 1,22 | down |
| 6202992 | 7208784 | 1396173 | similar to neurobeachin                                                      | RGD1562629 | 361948 | 1,21 | down |
| 6337705 | 7208784 | 1396185 | similar to neurobeachin                                                      | RGD1562629 | 361948 | 1,19 | up   |
| 6006390 | 7208784 | 1396063 | similar to neurobeachin                                                      | RGD1562629 | 361948 | 1,19 | up   |
| 6264994 | 7208784 | 1396063 | similar to neurobeachin                                                      | RGD1562629 | 361948 | 1,19 | up   |
| 6670794 | 7208784 | 1396187 | similar to neurobeachin                                                      | RGD1562629 | 361948 | 1,17 | up   |
| 6058164 | 7208784 | 1396066 | similar to neurobeachin                                                      | RGD1562629 | 361948 | 1,16 | up   |
| 5767444 | 7208784 | 1396184 | similar to neurobeachin                                                      | RGD1562629 | 361948 | 1,15 | up   |
| 6306086 | 7208784 | 1396167 | similar to neurobeachin                                                      | RGD1562629 | 361948 | 1,15 | down |
| 6174027 | 7208784 | 1396073 | similar to neurobeachin                                                      | RGD1562629 | 361948 | 1,14 | down |
| 5988030 | 7208784 | 1396162 | similar to neurobeachin                                                      | RGD1562629 | 361948 | 1,13 | down |
| 6291811 | 7208784 | 1396182 | similar to neurobeachin                                                      | RGD1562629 | 361948 | 1,13 | down |
| 5732028 | 7208784 | 1396163 | similar to neurobeachin                                                      | RGD1562629 | 361948 | 1,12 | down |
| 6331039 | 7208784 | 1396075 | similar to neurobeachin                                                      | RGD1562629 | 361948 | 1,12 | up   |
| 5972201 | 7208784 | 1396067 | similar to neurobeachin                                                      | RGD1562629 | 361948 | 1,10 | down |
| 6343568 | 7208784 | 1396171 | similar to neurobeachin                                                      | RGD1562629 | 361948 | 1,10 | down |
| 6295545 | 7208784 | 1396164 | similar to neurobeachin                                                      | RGD1562629 | 361948 | 1,09 | up   |
| 5861368 | 7208784 | 1396181 | similar to neurobeachin                                                      | RGD1562629 | 361948 | 1,08 | up   |
| 5737460 | 7208784 | 1396080 | similar to neurobeachin                                                      | RGD1562629 | 361948 | 1,06 | up   |
| 6097824 | 7208784 | 1396177 | similar to neurobeachin                                                      | RGD1562629 | 361948 | 1,06 | up   |
| 6456999 | 7208784 | 1396076 | similar to neurobeachin                                                      | RGD1562629 | 361948 | 1,05 | up   |
| 6439427 | 7208784 | 1396178 | similar to neurobeachin                                                      | RGD1562629 | 361948 | 1,05 | up   |
| 5783169 | 7208784 | 1396192 | similar to neurobeachin                                                      | RGD1562629 | 361948 | 1,05 | down |
| 6281385 | 7208784 | 1396065 | similar to neurobeachin                                                      | RGD1562629 | 361948 | 1,05 | up   |



|         |         |         |                                                                                                                                                      |                                     |        |      |      |
|---------|---------|---------|------------------------------------------------------------------------------------------------------------------------------------------------------|-------------------------------------|--------|------|------|
| 6339048 | 7208784 | 1396183 | similar to neurobeachin                                                                                                                              | RGD1562629                          | 361948 | 1,04 | down |
| 6284555 | 7208784 | 1396168 | similar to neurobeachin                                                                                                                              | RGD1562629                          | 361948 | 1,04 | down |
| 6386728 | 7208784 | 1396173 | similar to neurobeachin                                                                                                                              | RGD1562629                          | 361948 | 1,02 | down |
| 6161789 | 7208784 | 1396082 | similar to neurobeachin                                                                                                                              | RGD1562629                          | 361948 | 1,02 | up   |
| 5697771 | 7208784 | 1396063 | similar to neurobeachin                                                                                                                              | RGD1562629                          | 361948 | 1,01 | down |
| 6020644 | 7040238 | 985988  | similar to Nicotinamide riboside kinase 1                                                                                                            | LOC499330                           | 499330 | 2,01 | down |
| 6017130 | 7040238 | 985992  | similar to Nicotinamide riboside kinase 1                                                                                                            | LOC499330                           | 499330 | 1,50 | up   |
| 5846468 | 7040238 | 985990  | similar to Nicotinamide riboside kinase 1                                                                                                            | LOC499330                           | 499330 | 1,39 | down |
| 6071510 | 7040238 | 985993  | similar to Nicotinamide riboside kinase 1                                                                                                            | LOC499330                           | 499330 | 1,34 | up   |
| 5784473 | 7040238 | 985995  | similar to Nicotinamide riboside kinase 1                                                                                                            | LOC499330                           | 499330 | 1,11 | down |
| 6586298 | 7040238 | 985994  | similar to Nicotinamide riboside kinase 1                                                                                                            | LOC499330                           | 499330 | 1,07 | down |
| 6089416 | 7040238 | 985989  | similar to Nicotinamide riboside kinase 1                                                                                                            | LOC499330                           | 499330 | 1,06 | down |
| 5672191 | 7040238 | 985991  | similar to Nicotinamide riboside kinase 1                                                                                                            | LOC499330                           | 499330 | 1,04 | up   |
| 5623886 | 7040238 | 985995  | similar to Nicotinamide riboside kinase 1                                                                                                            | LOC499330                           | 499330 | 1,02 | down |
| 6327948 | 7040238 | 985988  | similar to Nicotinamide riboside kinase 1                                                                                                            | LOC499330                           | 499330 | 1,00 | up   |
| 6067129 | 7368804 | 1792251 | similar to nidogen 2                                                                                                                                 | LOC503361                           | 503361 | 4,45 | up   |
| 6410320 | 7369166 | 1793380 | similar to nidogen 2                                                                                                                                 | LOC305771                           | 305771 | 1,70 | down |
| 5869275 | 7368804 | 1792226 | similar to nidogen 2                                                                                                                                 | LOC365085                           | 365085 | 1,07 | up   |
| 6672687 | 7369141 | 1793315 | similar to nidogen 2                                                                                                                                 | LOC305771                           | 305771 | 1,04 | up   |
| 6253006 | 7368804 | 1792251 | similar to nidogen 2 /// similar to nidogen 2                                                                                                        | 680933 /// LOC50: 680933 /// 503361 |        | 3,24 | up   |
| 5793264 | 7369141 | 1793315 | similar to nidogen 2 /// similar to nidogen 2                                                                                                        | 501230 /// LOC30: 501230 /// 305771 |        | 1,60 | up   |
| 6234938 | 7369141 | 1793316 | similar to nidogen 2 /// similar to nidogen 2                                                                                                        | 501230 /// LOC30: 501230 /// 305771 |        | 1,56 | up   |
| 5926408 | 7368804 | 1792251 | similar to nidogen 2 /// similar to nidogen 2                                                                                                        | 680933 /// LOC50: 680933 /// 503361 |        | 1,10 | down |
| 6545566 | 7368804 | 1792226 | similar to nidogen 2 /// similar to nidogen 2 /// similar to nidogen 2 protein /// similar to nidogen 2                                              | 316873 /// RGD156 316873 /// 498627 |        | 1,65 | up   |
| 6069623 | 7369166 | 1793379 | similar to nidogen 2 /// similar to nidogen 2 protein /// similar to nidogen 2 /// similar to nidogen 2 /// 5 /// LOC503391 /// 27 /// 503391 /// 30 |                                     |        | 1,42 | up   |
| 6241816 | 7369129 | 1793271 | similar to nidogen 2 protein                                                                                                                         | LOC367622                           | 367622 | 4,41 | up   |
| 6312202 | 7368986 | 1792861 | similar to nidogen 2 protein                                                                                                                         | LOC302022                           | 302022 | 2,15 | up   |
| 6267603 | 7368986 | 1792861 | similar to nidogen 2 protein                                                                                                                         | LOC302022                           | 302022 | 1,81 | up   |
| 5688653 | 7369129 | 1793271 | similar to nidogen 2 protein                                                                                                                         | LOC367622                           | 367622 | 1,57 | down |
| 6351415 | 7368986 | 1792857 | similar to nidogen 2 protein                                                                                                                         | LOC302022                           | 302022 | 1,32 | up   |
| 6298090 | 7368986 | 1792855 | similar to nidogen 2 protein                                                                                                                         | LOC302022                           | 302022 | 1,04 | up   |
| 6204535 | 7147213 | 1243819 | similar to NIMA (never in mitosis gene a)-related expressed kinase 5                                                                                 | LOC686318                           | 686318 | 2,13 | up   |
| 6029642 | 7147213 | 1243824 | similar to NIMA (never in mitosis gene a)-related expressed kinase 5                                                                                 | LOC686318                           | 686318 | 1,35 | up   |
| 6408006 | 7147213 | 1243828 | similar to NIMA (never in mitosis gene a)-related expressed kinase 5                                                                                 | LOC686318                           | 686318 | 1,25 | up   |
| 5680212 | 7147213 | 1243823 | similar to NIMA (never in mitosis gene a)-related expressed kinase 5                                                                                 | LOC686318                           | 686318 | 1,22 | down |
| 6695778 | 7147213 | 1243817 | similar to NIMA (never in mitosis gene a)-related expressed kinase 5                                                                                 | LOC686318                           | 686318 | 1,20 | down |
| 6641626 | 7147213 | 1243821 | similar to NIMA (never in mitosis gene a)-related expressed kinase 5                                                                                 | LOC686318                           | 686318 | 1,18 | down |
| 6562007 | 7147213 | 1243822 | similar to NIMA (never in mitosis gene a)-related expressed kinase 5                                                                                 | LOC686318                           | 686318 | 1,16 | down |
| 6127729 | 7147213 | 1243835 | similar to NIMA (never in mitosis gene a)-related expressed kinase 5                                                                                 | LOC686318                           | 686318 | 1,14 | up   |
| 6482636 | 7147213 | 1243832 | similar to NIMA (never in mitosis gene a)-related expressed kinase 5                                                                                 | LOC686318                           | 686318 | 1,12 | down |
| 5977397 | 7147213 | 1243837 | similar to NIMA (never in mitosis gene a)-related expressed kinase 5                                                                                 | LOC686318                           | 686318 | 1,10 | down |
| 5878992 | 7147213 | 1243831 | similar to NIMA (never in mitosis gene a)-related expressed kinase 5                                                                                 | LOC686318                           | 686318 | 1,08 | up   |
| 6700245 | 7147213 | 1243818 | similar to NIMA (never in mitosis gene a)-related expressed kinase 5                                                                                 | LOC686318                           | 686318 | 1,06 | up   |
| 5704964 | 7147213 | 1243825 | similar to NIMA (never in mitosis gene a)-related expressed kinase 5                                                                                 | LOC686318                           | 686318 | 1,05 | up   |
| 5906706 | 7147213 | 1243833 | similar to NIMA (never in mitosis gene a)-related expressed kinase 5                                                                                 | LOC686318                           | 686318 | 1,05 | up   |
| 5837924 | 7147213 | 1243827 | similar to NIMA (never in mitosis gene a)-related expressed kinase 5                                                                                 | LOC686318                           | 686318 | 1,05 | down |
| 6059903 | 7147213 | 1243823 | similar to NIMA (never in mitosis gene a)-related expressed kinase 5                                                                                 | LOC686318                           | 686318 | 1,04 | down |
| 6493786 | 7147213 | 1243836 | similar to NIMA (never in mitosis gene a)-related expressed kinase 5                                                                                 | LOC686318                           | 686318 | 1,04 | up   |
| 5951949 | 7147213 | 1243835 | similar to NIMA (never in mitosis gene a)-related expressed kinase 5                                                                                 | LOC686318                           | 686318 | 1,01 | up   |
| 6500159 | 7355804 | 1759432 | similar to Nol5a_predicted protein                                                                                                                   | RGD1563521                          | 501161 | 1,62 | down |
| 6233428 | 7301905 | 1626767 | similar to novel protein                                                                                                                             | RGD1560608                          | 500724 | 2,04 | down |
| 6613816 | 7301905 | 1626772 | similar to novel protein                                                                                                                             | RGD1560608                          | 500724 | 1,52 | up   |
| 5851351 | 7127540 | 1195302 | similar to novel protein                                                                                                                             | RGD1560636                          | 305467 | 1,37 | down |
| 6092898 | 7301905 | 1626770 | similar to novel protein                                                                                                                             | RGD1560608                          | 500724 | 1,33 | up   |
| 6130584 | 7301905 | 1626772 | similar to novel protein                                                                                                                             | RGD1560608                          | 500724 | 1,19 | down |
| 6624844 | 7301905 | 1626771 | similar to novel protein                                                                                                                             | RGD1560608                          | 500724 | 1,05 | down |
| 5870209 | 7128112 | 1196550 | similar to novel protein similar to Tensin Tns                                                                                                       | RGD1564174                          | 360980 | 1,38 | up   |

|         |         |         |                                                                                  |            |        |      |      |
|---------|---------|---------|----------------------------------------------------------------------------------|------------|--------|------|------|
| 5818190 | 7128112 | 1196562 | similar to novel protein similar to Tensin Tns                                   | RGD1564174 | 360980 | 1,34 | up   |
| 5629811 | 7128112 | 1196559 | similar to novel protein similar to Tensin Tns                                   | RGD1564174 | 360980 | 1,26 | up   |
| 5935539 | 7128112 | 1196578 | similar to novel protein similar to Tensin Tns                                   | RGD1564174 | 360980 | 1,25 | up   |
| 6072580 | 7128112 | 1196548 | similar to novel protein similar to Tensin Tns                                   | RGD1564174 | 360980 | 1,18 | down |
| 6077620 | 7128112 | 1196522 | similar to novel protein similar to Tensin Tns                                   | RGD1564174 | 360980 | 1,18 | down |
| 5720148 | 7128112 | 1196566 | similar to novel protein similar to Tensin Tns                                   | RGD1564174 | 360980 | 1,18 | down |
| 5745925 | 7128112 | 1196570 | similar to novel protein similar to Tensin Tns                                   | RGD1564174 | 360980 | 1,18 | up   |
| 6441707 | 7128112 | 1196563 | similar to novel protein similar to Tensin Tns                                   | RGD1564174 | 360980 | 1,17 | up   |
| 6627032 | 7128112 | 1196558 | similar to novel protein similar to Tensin Tns                                   | RGD1564174 | 360980 | 1,17 | up   |
| 6448289 | 7128112 | 1196561 | similar to novel protein similar to Tensin Tns                                   | RGD1564174 | 360980 | 1,11 | down |
| 6719299 | 7128112 | 1196568 | similar to novel protein similar to Tensin Tns                                   | RGD1564174 | 360980 | 1,03 | down |
| 6453878 | 7128112 | 1196560 | similar to novel protein similar to Tensin Tns                                   | RGD1564174 | 360980 | 1,02 | down |
| 5663408 | 7128112 | 1196549 | similar to novel protein similar to Tensin Tns                                   | RGD1564174 | 360980 | 1,02 | up   |
| 6662700 | 7128112 | 1196568 | similar to novel protein similar to Tensin Tns                                   | RGD1564174 | 360980 | 1,02 | down |
| 6662705 | 7336931 | 1711844 | similar to Nuclear membrane binding protein NUCLING                              | RGD1560011 | 315732 | 1,49 | up   |
| 6614091 | 7336931 | 1711844 | similar to Nuclear membrane binding protein NUCLING                              | RGD1560011 | 315732 | 1,11 | up   |
| 6139778 | 7336931 | 1711897 | similar to Nuclear membrane binding protein NUCLING                              | RGD1560011 | 315732 | 1,03 | up   |
| 5765666 | 7258784 | 1519668 | similar to nuclear receptor interacting protein 2                                | LOC689619  | 689619 | 1,42 | down |
| 6697009 | 7377116 | 1814067 | similar to nuclear RNA export factor 2                                           | LOC680025  | 680025 | 2,31 | down |
| 5904166 | 7377116 | 1814067 | similar to nuclear RNA export factor 2                                           | LOC680025  | 680025 | 1,30 | down |
| 6593721 | 7073950 | 1065942 | similar to p150 target of rapamycin (TOR)-scaffold protein containing WD-repeats | RGD1311784 | 287871 | 1,56 | down |
| 6052395 | 7073950 | 1065934 | similar to p150 target of rapamycin (TOR)-scaffold protein containing WD-repeats | RGD1311784 | 287871 | 1,49 | down |
| 6332958 | 7073950 | 1065931 | similar to p150 target of rapamycin (TOR)-scaffold protein containing WD-repeats | RGD1311784 | 287871 | 1,47 | down |
| 6713475 | 7073950 | 1065924 | similar to p150 target of rapamycin (TOR)-scaffold protein containing WD-repeats | RGD1311784 | 287871 | 1,43 | down |
| 5901919 | 7073950 | 1065880 | similar to p150 target of rapamycin (TOR)-scaffold protein containing WD-repeats | RGD1311784 | 287871 | 1,35 | up   |
| 5709090 | 7073950 | 1065942 | similar to p150 target of rapamycin (TOR)-scaffold protein containing WD-repeats | RGD1311784 | 287871 | 1,34 | up   |
| 6156404 | 7073950 | 1065926 | similar to p150 target of rapamycin (TOR)-scaffold protein containing WD-repeats | RGD1311784 | 287871 | 1,33 | down |
| 6257721 | 7073950 | 1065940 | similar to p150 target of rapamycin (TOR)-scaffold protein containing WD-repeats | RGD1311784 | 287871 | 1,28 | up   |
| 5804373 | 7073950 | 1065869 | similar to p150 target of rapamycin (TOR)-scaffold protein containing WD-repeats | RGD1311784 | 287871 | 1,27 | up   |
| 6276324 | 7073950 | 1065923 | similar to p150 target of rapamycin (TOR)-scaffold protein containing WD-repeats | RGD1311784 | 287871 | 1,27 | down |
| 6087409 | 7073950 | 1065859 | similar to p150 target of rapamycin (TOR)-scaffold protein containing WD-repeats | RGD1311784 | 287871 | 1,25 | down |
| 6513787 | 7073950 | 1065868 | similar to p150 target of rapamycin (TOR)-scaffold protein containing WD-repeats | RGD1311784 | 287871 | 1,25 | up   |
| 6136527 | 7073950 | 1065935 | similar to p150 target of rapamycin (TOR)-scaffold protein containing WD-repeats | RGD1311784 | 287871 | 1,24 | down |
| 6727379 | 7073950 | 1065930 | similar to p150 target of rapamycin (TOR)-scaffold protein containing WD-repeats | RGD1311784 | 287871 | 1,23 | down |
| 6234052 | 7073950 | 1065919 | similar to p150 target of rapamycin (TOR)-scaffold protein containing WD-repeats | RGD1311784 | 287871 | 1,23 | down |
| 6034361 | 7073950 | 1065910 | similar to p150 target of rapamycin (TOR)-scaffold protein containing WD-repeats | RGD1311784 | 287871 | 1,22 | up   |
| 6222995 | 7073950 | 1065921 | similar to p150 target of rapamycin (TOR)-scaffold protein containing WD-repeats | RGD1311784 | 287871 | 1,16 | down |
| 6314912 | 7073950 | 1065912 | similar to p150 target of rapamycin (TOR)-scaffold protein containing WD-repeats | RGD1311784 | 287871 | 1,16 | down |
| 6128465 | 7073950 | 1065928 | similar to p150 target of rapamycin (TOR)-scaffold protein containing WD-repeats | RGD1311784 | 287871 | 1,14 | up   |
| 6462729 | 7073950 | 1065883 | similar to p150 target of rapamycin (TOR)-scaffold protein containing WD-repeats | RGD1311784 | 287871 | 1,13 | up   |
| 6044187 | 7073950 | 1065908 | similar to p150 target of rapamycin (TOR)-scaffold protein containing WD-repeats | RGD1311784 | 287871 | 1,13 | down |
| 6208150 | 7073950 | 1065922 | similar to p150 target of rapamycin (TOR)-scaffold protein containing WD-repeats | RGD1311784 | 287871 | 1,13 | down |
| 6610116 | 7073950 | 1065918 | similar to p150 target of rapamycin (TOR)-scaffold protein containing WD-repeats | RGD1311784 | 287871 | 1,12 | down |
| 5935683 | 7073950 | 1065911 | similar to p150 target of rapamycin (TOR)-scaffold protein containing WD-repeats | RGD1311784 | 287871 | 1,12 | down |
| 6274928 | 7073950 | 1065942 | similar to p150 target of rapamycin (TOR)-scaffold protein containing WD-repeats | RGD1311784 | 287871 | 1,10 | up   |
| 6706686 | 7073950 | 1065939 | similar to p150 target of rapamycin (TOR)-scaffold protein containing WD-repeats | RGD1311784 | 287871 | 1,09 | down |
| 6311837 | 7073950 | 1065933 | similar to p150 target of rapamycin (TOR)-scaffold protein containing WD-repeats | RGD1311784 | 287871 | 1,09 | up   |
| 6506304 | 7073950 | 1065941 | similar to p150 target of rapamycin (TOR)-scaffold protein containing WD-repeats | RGD1311784 | 287871 | 1,09 | down |
| 5962002 | 7073950 | 1065905 | similar to p150 target of rapamycin (TOR)-scaffold protein containing WD-repeats | RGD1311784 | 287871 | 1,09 | down |
| 6421073 | 7073950 | 1065904 | similar to p150 target of rapamycin (TOR)-scaffold protein containing WD-repeats | RGD1311784 | 287871 | 1,09 | down |
| 6448715 | 7073950 | 1065938 | similar to p150 target of rapamycin (TOR)-scaffold protein containing WD-repeats | RGD1311784 | 287871 | 1,08 | down |
| 6459402 | 7073950 | 1065936 | similar to p150 target of rapamycin (TOR)-scaffold protein containing WD-repeats | RGD1311784 | 287871 | 1,08 | up   |
| 5731767 | 7073950 | 1065920 | similar to p150 target of rapamycin (TOR)-scaffold protein containing WD-repeats | RGD1311784 | 287871 | 1,06 | down |
| 6557420 | 7073950 | 1065938 | similar to p150 target of rapamycin (TOR)-scaffold protein containing WD-repeats | RGD1311784 | 287871 | 1,06 | down |
| 6026146 | 7073950 | 1065887 | similar to p150 target of rapamycin (TOR)-scaffold protein containing WD-repeats | RGD1311784 | 287871 | 1,05 | up   |
| 6149640 | 7073950 | 1065932 | similar to p150 target of rapamycin (TOR)-scaffold protein containing WD-repeats | RGD1311784 | 287871 | 1,02 | down |
| 6067154 | 7073950 | 1065897 | similar to p150 target of rapamycin (TOR)-scaffold protein containing WD-repeats | RGD1311784 | 287871 | 1,02 | down |

|         |         |         |                                                          |            |        |      |      |
|---------|---------|---------|----------------------------------------------------------|------------|--------|------|------|
| 6463099 | 7219729 | 1422382 | similar to peptidylprolyl isomerase (cyclophilin)-like 6 | LOC684245  | 684245 | 2,48 | up   |
| 5923733 | 7219729 | 1422385 | similar to peptidylprolyl isomerase (cyclophilin)-like 6 | LOC684245  | 684245 | 1,94 | up   |
| 5746246 | 7219729 | 1422381 | similar to peptidylprolyl isomerase (cyclophilin)-like 6 | LOC684245  | 684245 | 1,60 | down |
| 6186051 | 7219729 | 1422383 | similar to peptidylprolyl isomerase (cyclophilin)-like 6 | LOC684245  | 684245 | 1,49 | up   |
| 6336883 | 7219729 | 1422381 | similar to peptidylprolyl isomerase (cyclophilin)-like 6 | LOC684245  | 684245 | 1,42 | down |
| 6239503 | 7219729 | 1422382 | similar to peptidylprolyl isomerase (cyclophilin)-like 6 | LOC684245  | 684245 | 1,34 | down |
| 5678784 | 7219729 | 1422386 | similar to peptidylprolyl isomerase (cyclophilin)-like 6 | LOC684245  | 684245 | 1,12 | down |
| 6307265 | 7219729 | 1422380 | similar to peptidylprolyl isomerase (cyclophilin)-like 6 | LOC684245  | 684245 | 1,11 | up   |
| 6045468 | 7219729 | 1422390 | similar to peptidylprolyl isomerase (cyclophilin)-like 6 | LOC684245  | 684245 | 1,02 | up   |
| 6119057 | 7120468 | 1178511 | similar to PES1 protein                                  | LOC289740  | 289740 | 1,98 | down |
| 6736787 | 7120468 | 1178511 | similar to PES1 protein                                  | LOC289740  | 289740 | 1,51 | down |
| 5845891 | 7120468 | 1178504 | similar to PES1 protein                                  | LOC289740  | 289740 | 1,46 | up   |
| 6664356 | 7120468 | 1178505 | similar to PES1 protein                                  | LOC289740  | 289740 | 1,39 | up   |
| 6565021 | 7120468 | 1178512 | similar to PES1 protein                                  | LOC289740  | 289740 | 1,37 | down |
| 5868732 | 7120468 | 1178507 | similar to PES1 protein                                  | LOC289740  | 289740 | 1,34 | up   |
| 6046455 | 7120468 | 1178501 | similar to PES1 protein                                  | LOC289740  | 289740 | 1,30 | up   |
| 6421850 | 7120468 | 1178502 | similar to PES1 protein                                  | LOC289740  | 289740 | 1,29 | up   |
| 5852914 | 7120468 | 1178506 | similar to PES1 protein                                  | LOC289740  | 289740 | 1,19 | up   |
| 6081658 | 7120468 | 1178510 | similar to PES1 protein                                  | LOC289740  | 289740 | 1,16 | down |
| 6678581 | 7120468 | 1178503 | similar to PES1 protein                                  | LOC289740  | 289740 | 1,15 | up   |
| 6351027 | 7120468 | 1178510 | similar to PES1 protein                                  | LOC289740  | 289740 | 1,14 | up   |
| 5664137 | 7120468 | 1178508 | similar to PES1 protein                                  | LOC289740  | 289740 | 1,13 | up   |
| 5809014 | 7120468 | 1178500 | similar to PES1 protein                                  | LOC289740  | 289740 | 1,06 | up   |
| 6193965 | 7120468 | 1178504 | similar to PES1 protein                                  | LOC289740  | 289740 | 1,04 | up   |
| 6262135 | 7299785 | 1621347 | similar to pleckstrin homology domain protein (5V327)    | RGD1566112 | 500685 | 2,25 | down |
| 6603388 | 7299785 | 1621344 | similar to pleckstrin homology domain protein (5V327)    | RGD1566112 | 500685 | 1,84 | down |
| 6016700 | 7299785 | 1621350 | similar to pleckstrin homology domain protein (5V327)    | RGD1566112 | 500685 | 1,56 | up   |
| 5656662 | 7299785 | 1621354 | similar to pleckstrin homology domain protein (5V327)    | RGD1566112 | 500685 | 1,43 | up   |
| 5861489 | 7299785 | 1621349 | similar to pleckstrin homology domain protein (5V327)    | RGD1566112 | 500685 | 1,42 | up   |
| 5642875 | 7299785 | 1621335 | similar to pleckstrin homology domain protein (5V327)    | RGD1566112 | 500685 | 1,31 | down |
| 6507334 | 7299785 | 1621342 | similar to pleckstrin homology domain protein (5V327)    | RGD1566112 | 500685 | 1,23 | down |
| 6170290 | 7299785 | 1621336 | similar to pleckstrin homology domain protein (5V327)    | RGD1566112 | 500685 | 1,12 | down |
| 6421490 | 7299785 | 1621341 | similar to pleckstrin homology domain protein (5V327)    | RGD1566112 | 500685 | 1,12 | down |
| 5857965 | 7299785 | 1621353 | similar to pleckstrin homology domain protein (5V327)    | RGD1566112 | 500685 | 1,11 | up   |
| 6040731 | 7299785 | 1621355 | similar to pleckstrin homology domain protein (5V327)    | RGD1566112 | 500685 | 1,10 | up   |
| 5865111 | 7299785 | 1621340 | similar to pleckstrin homology domain protein (5V327)    | RGD1566112 | 500685 | 1,10 | down |
| 5929669 | 7299785 | 1621343 | similar to pleckstrin homology domain protein (5V327)    | RGD1566112 | 500685 | 1,10 | down |
| 5959374 | 7299785 | 1621351 | similar to pleckstrin homology domain protein (5V327)    | RGD1566112 | 500685 | 1,09 | up   |
| 5620662 | 7299785 | 1621348 | similar to pleckstrin homology domain protein (5V327)    | RGD1566112 | 500685 | 1,01 | up   |
| 6696460 | 7373866 | 1806264 | similar to poly(rC) binding protein 2                    | LOC680369  | 680369 | 2,07 | up   |
| 5859243 | 7373866 | 1806262 | similar to poly(rC) binding protein 2                    | LOC680369  | 680369 | 2,04 | up   |
| 6281517 | 7373866 | 1806262 | similar to poly(rC) binding protein 2                    | LOC680369  | 680369 | 1,24 | down |
| 5981390 | 7373866 | 1806262 | similar to poly(rC) binding protein 2                    | LOC680369  | 680369 | 1,20 | down |
| 6539366 | 7373866 | 1806262 | similar to poly(rC) binding protein 2                    | LOC680369  | 680369 | 1,09 | down |
| 5927427 | 7373866 | 1806262 | similar to poly(rC) binding protein 2                    | LOC680369  | 680369 | 1,07 | up   |
| 5676237 | 7373866 | 1806262 | similar to poly(rC) binding protein 2                    | LOC680369  | 680369 | 1,05 | up   |
| 5774428 | 7238202 | 1468958 | similar to Protein C9orf126 homolog                      | LOC690538  | 690538 | 1,40 | up   |
| 5802890 | 7238202 | 1468938 | similar to Protein C9orf126 homolog                      | LOC690538  | 690538 | 1,14 | up   |
| 6395864 | 7238202 | 1468959 | similar to Protein C9orf126 homolog                      | LOC690538  | 690538 | 1,04 | up   |
| 6393728 | 7052331 | 1014572 | similar to Protein KIAA0574                              | LOC680344  | 680344 | 1,68 | up   |
| 5869621 | 7052331 | 1014590 | similar to Protein KIAA0574                              | LOC680344  | 680344 | 1,30 | down |
| 6215776 | 7052331 | 1014578 | similar to Protein KIAA0574                              | LOC680344  | 680344 | 1,30 | down |
| 5757182 | 7052331 | 1014574 | similar to Protein KIAA0574                              | LOC680344  | 680344 | 1,08 | down |
| 6677122 | 7052331 | 1014581 | similar to Protein KIAA0574                              | LOC680344  | 680344 | 1,05 | down |
| 6311044 | 7052331 | 1014577 | similar to Protein KIAA0574                              | LOC680344  | 680344 | 1,04 | up   |
| 6642100 | 7052331 | 1014578 | similar to Protein KIAA0574                              | LOC680344  | 680344 | 1,04 | down |
| 5823360 | 7299083 | 1619264 | similar to Protein KIAA0586                              | LOC690035  | 690035 | 2,12 | up   |

|         |         |         |                                                                                       |            |        |      |      |
|---------|---------|---------|---------------------------------------------------------------------------------------|------------|--------|------|------|
| 6152385 | 7299083 | 1619255 | similar to Protein KIAA0586                                                           | LOC690035  | 690035 | 1,83 | down |
| 6421236 | 7299083 | 1619232 | similar to Protein KIAA0586                                                           | LOC690035  | 690035 | 1,81 | up   |
| 5835106 | 7299083 | 1619253 | similar to Protein KIAA0586                                                           | LOC690035  | 690035 | 1,78 | down |
| 6223190 | 7299083 | 1619233 | similar to Protein KIAA0586                                                           | LOC690035  | 690035 | 1,77 | down |
| 5936142 | 7299083 | 1619254 | similar to Protein KIAA0586                                                           | LOC690035  | 690035 | 1,69 | up   |
| 6462311 | 7299083 | 1619243 | similar to Protein KIAA0586                                                           | LOC690035  | 690035 | 1,63 | up   |
| 6423749 | 7299083 | 1619245 | similar to Protein KIAA0586                                                           | LOC690035  | 690035 | 1,50 | down |
| 6194376 | 7299083 | 1619243 | similar to Protein KIAA0586                                                           | LOC690035  | 690035 | 1,46 | down |
| 6136705 | 7299083 | 1619240 | similar to Protein KIAA0586                                                           | LOC690035  | 690035 | 1,36 | down |
| 5981189 | 7299083 | 1619264 | similar to Protein KIAA0586                                                           | LOC690035  | 690035 | 1,35 | up   |
| 6069061 | 7299083 | 1619234 | similar to Protein KIAA0586                                                           | LOC690035  | 690035 | 1,33 | up   |
| 6147437 | 7299083 | 1619258 | similar to Protein KIAA0586                                                           | LOC690035  | 690035 | 1,33 | up   |
| 6406353 | 7299083 | 1619239 | similar to Protein KIAA0586                                                           | LOC690035  | 690035 | 1,32 | down |
| 5876086 | 7299083 | 1619256 | similar to Protein KIAA0586                                                           | LOC690035  | 690035 | 1,31 | up   |
| 5895625 | 7299083 | 1619249 | similar to Protein KIAA0586                                                           | LOC690035  | 690035 | 1,29 | down |
| 6222177 | 7299083 | 1619241 | similar to Protein KIAA0586                                                           | LOC690035  | 690035 | 1,25 | down |
| 5769924 | 7299083 | 1619235 | similar to Protein KIAA0586                                                           | LOC690035  | 690035 | 1,24 | down |
| 6361549 | 7299083 | 1619237 | similar to Protein KIAA0586                                                           | LOC690035  | 690035 | 1,23 | down |
| 6736477 | 7299083 | 1619238 | similar to Protein KIAA0586                                                           | LOC690035  | 690035 | 1,21 | down |
| 6415418 | 7299083 | 1619251 | similar to Protein KIAA0586                                                           | LOC690035  | 690035 | 1,20 | down |
| 6283837 | 7299083 | 1619257 | similar to Protein KIAA0586                                                           | LOC690035  | 690035 | 1,18 | up   |
| 6253617 | 7299083 | 1619231 | similar to Protein KIAA0586                                                           | LOC690035  | 690035 | 1,15 | down |
| 6219494 | 7299083 | 1619243 | similar to Protein KIAA0586                                                           | LOC690035  | 690035 | 1,15 | down |
| 6190418 | 7299083 | 1619255 | similar to Protein KIAA0586                                                           | LOC690035  | 690035 | 1,15 | down |
| 6453549 | 7299083 | 1619238 | similar to Protein KIAA0586                                                           | LOC690035  | 690035 | 1,12 | down |
| 6177371 | 7299083 | 1619248 | similar to Protein KIAA0586                                                           | LOC690035  | 690035 | 1,09 | down |
| 6408708 | 7299083 | 1619240 | similar to Protein KIAA0586                                                           | LOC690035  | 690035 | 1,08 | up   |
| 6335696 | 7299083 | 1619247 | similar to Protein KIAA0586                                                           | LOC690035  | 690035 | 1,06 | down |
| 6257990 | 7299083 | 1619229 | similar to Protein KIAA0586                                                           | LOC690035  | 690035 | 1,06 | down |
| 6722488 | 7299083 | 1619242 | similar to Protein KIAA0586                                                           | LOC690035  | 690035 | 1,03 | up   |
| 6598402 | 7299083 | 1619236 | similar to Protein KIAA0586                                                           | LOC690035  | 690035 | 1,03 | down |
| 6742161 | 7299083 | 1619228 | similar to Protein KIAA0586                                                           | LOC690035  | 690035 | 1,03 | down |
| 6683628 | 7299083 | 1619252 | similar to Protein KIAA0586                                                           | LOC690035  | 690035 | 1,02 | down |
| 5777080 | 7299083 | 1619251 | similar to Protein KIAA0586                                                           | LOC690035  | 690035 | 1,01 | down |
| 5684617 | 7299083 | 1619244 | similar to Protein KIAA0586                                                           | LOC690035  | 690035 | 1,01 | up   |
| 6522485 | 7156052 | 1265780 | similar to protein kinase, lysine deficient 1; kinase deficient protein               | RGD1307284 | 306811 | 1,95 | down |
| 6119078 | 7156052 | 1265789 | similar to protein kinase, lysine deficient 1; kinase deficient protein               | RGD1307284 | 306811 | 1,49 | up   |
| 6224612 | 7156052 | 1265789 | similar to protein kinase, lysine deficient 1; kinase deficient protein               | RGD1307284 | 306811 | 1,34 | down |
| 6403584 | 7156052 | 1265778 | similar to protein kinase, lysine deficient 1; kinase deficient protein               | RGD1307284 | 306811 | 1,24 | up   |
| 6201552 | 7156052 | 1265786 | similar to protein kinase, lysine deficient 1; kinase deficient protein               | RGD1307284 | 306811 | 1,20 | down |
| 5965963 | 7355755 | 1759335 | similar to PSST739 protein                                                            | RGD1565501 | 501160 | 2,06 | down |
| 6022396 | 7355755 | 1759317 | similar to PSST739 protein                                                            | RGD1565501 | 501160 | 2,00 | down |
| 6092223 | 7355755 | 1759323 | similar to PSST739 protein                                                            | RGD1565501 | 501160 | 1,38 | up   |
| 6689143 | 7355755 | 1759317 | similar to PSST739 protein                                                            | RGD1565501 | 501160 | 1,35 | up   |
| 6485987 | 7355755 | 1759318 | similar to PSST739 protein                                                            | RGD1565501 | 501160 | 1,22 | down |
| 6625273 | 7355755 | 1759318 | similar to PSST739 protein                                                            | RGD1565501 | 501160 | 1,05 | up   |
| 6369980 | 7355755 | 1759334 | similar to PSST739 protein                                                            | RGD1565501 | 501160 | 1,02 | up   |
| 6707154 | 7355755 | 1759318 | similar to PSST739 protein                                                            | RGD1565501 | 501160 | 1,00 | up   |
| 5763071 | 7091609 | 1107063 | similar to Putative protein C21orf62 homolog                                          | RGD1562726 | 498060 | 3,17 | down |
| 6395078 | 7091609 | 1107060 | similar to Putative protein C21orf62 homolog                                          | RGD1562726 | 498060 | 1,27 | up   |
| 6685140 | 7091609 | 1107060 | similar to Putative protein C21orf62 homolog                                          | RGD1562726 | 498060 | 1,21 | down |
| 5980716 | 7091609 | 1107062 | similar to Putative protein C21orf62 homolog                                          | RGD1562726 | 498060 | 1,19 | up   |
| 6701308 | 7101258 | 1130582 | similar to Rasa4 protein                                                              | RGD1565457 | 288589 | 3,51 | down |
| 6509429 | 7101258 | 1130556 | similar to Rasa4 protein                                                              | RGD1565457 | 288589 | 1,94 | down |
| 6505761 | 7142917 | 1233183 | similar to retinoblastoma-associated protein 140                                      | LOC679469  | 679469 | 1,90 | down |
| 6056888 | 7142917 | 1233184 | similar to retinoblastoma-associated protein 140                                      | LOC679469  | 679469 | 1,38 | down |
| 5685471 | 7180630 | 1326441 | similar to RGD, leucine-rich repeat, tropomodulin and proline-rich containing protein | RGD1562390 | 307797 | 2,00 | down |

|         |         |         |                                                                                       |                                       |        |      |      |
|---------|---------|---------|---------------------------------------------------------------------------------------|---------------------------------------|--------|------|------|
| 5943602 | 7180630 | 1326435 | similar to RGD, leucine-rich repeat, tropomodulin and proline-rich containing protein | RGD1562390                            | 307797 | 1,96 | down |
| 5796490 | 7180630 | 1326440 | similar to RGD, leucine-rich repeat, tropomodulin and proline-rich containing protein | RGD1562390                            | 307797 | 1,90 | up   |
| 6491530 | 7180630 | 1326432 | similar to RGD, leucine-rich repeat, tropomodulin and proline-rich containing protein | RGD1562390                            | 307797 | 1,76 | up   |
| 5723789 | 7180630 | 1326455 | similar to RGD, leucine-rich repeat, tropomodulin and proline-rich containing protein | RGD1562390                            | 307797 | 1,60 | down |
| 6667117 | 7180630 | 1326452 | similar to RGD, leucine-rich repeat, tropomodulin and proline-rich containing protein | RGD1562390                            | 307797 | 1,57 | down |
| 6563803 | 7180630 | 1326456 | similar to RGD, leucine-rich repeat, tropomodulin and proline-rich containing protein | RGD1562390                            | 307797 | 1,52 | down |
| 6598972 | 7180630 | 1326438 | similar to RGD, leucine-rich repeat, tropomodulin and proline-rich containing protein | RGD1562390                            | 307797 | 1,49 | down |
| 6638409 | 7180630 | 1326456 | similar to RGD, leucine-rich repeat, tropomodulin and proline-rich containing protein | RGD1562390                            | 307797 | 1,32 | up   |
| 5953673 | 7180630 | 1326436 | similar to RGD, leucine-rich repeat, tropomodulin and proline-rich containing protein | RGD1562390                            | 307797 | 1,31 | up   |
| 5918663 | 7180630 | 1326435 | similar to RGD, leucine-rich repeat, tropomodulin and proline-rich containing protein | RGD1562390                            | 307797 | 1,30 | up   |
| 6703699 | 7180630 | 1326428 | similar to RGD, leucine-rich repeat, tropomodulin and proline-rich containing protein | RGD1562390                            | 307797 | 1,29 | down |
| 6269879 | 7180630 | 1326444 | similar to RGD, leucine-rich repeat, tropomodulin and proline-rich containing protein | RGD1562390                            | 307797 | 1,28 | up   |
| 6393403 | 7180630 | 1326447 | similar to RGD, leucine-rich repeat, tropomodulin and proline-rich containing protein | RGD1562390                            | 307797 | 1,28 | up   |
| 5750844 | 7180630 | 1326431 | similar to RGD, leucine-rich repeat, tropomodulin and proline-rich containing protein | RGD1562390                            | 307797 | 1,27 | up   |
| 6099750 | 7180630 | 1326435 | similar to RGD, leucine-rich repeat, tropomodulin and proline-rich containing protein | RGD1562390                            | 307797 | 1,25 | up   |
| 5761056 | 7180630 | 1326442 | similar to RGD, leucine-rich repeat, tropomodulin and proline-rich containing protein | RGD1562390                            | 307797 | 1,22 | up   |
| 6073590 | 7180630 | 1326443 | similar to RGD, leucine-rich repeat, tropomodulin and proline-rich containing protein | RGD1562390                            | 307797 | 1,21 | down |
| 5626737 | 7180630 | 1326431 | similar to RGD, leucine-rich repeat, tropomodulin and proline-rich containing protein | RGD1562390                            | 307797 | 1,20 | up   |
| 6619048 | 7180630 | 1326445 | similar to RGD, leucine-rich repeat, tropomodulin and proline-rich containing protein | RGD1562390                            | 307797 | 1,18 | down |
| 6409308 | 7180630 | 1326429 | similar to RGD, leucine-rich repeat, tropomodulin and proline-rich containing protein | RGD1562390                            | 307797 | 1,17 | down |
| 5705443 | 7180630 | 1326434 | similar to RGD, leucine-rich repeat, tropomodulin and proline-rich containing protein | RGD1562390                            | 307797 | 1,16 | up   |
| 6326125 | 7180630 | 1326439 | similar to RGD, leucine-rich repeat, tropomodulin and proline-rich containing protein | RGD1562390                            | 307797 | 1,15 | down |
| 6122065 | 7180630 | 1326448 | similar to RGD, leucine-rich repeat, tropomodulin and proline-rich containing protein | RGD1562390                            | 307797 | 1,13 | down |
| 5916472 | 7180630 | 1326450 | similar to RGD, leucine-rich repeat, tropomodulin and proline-rich containing protein | RGD1562390                            | 307797 | 1,12 | down |
| 5795359 | 7180630 | 1326455 | similar to RGD, leucine-rich repeat, tropomodulin and proline-rich containing protein | RGD1562390                            | 307797 | 1,11 | up   |
| 6135924 | 7180630 | 1326426 | similar to RGD, leucine-rich repeat, tropomodulin and proline-rich containing protein | RGD1562390                            | 307797 | 1,11 | up   |
| 6051933 | 7180630 | 1326433 | similar to RGD, leucine-rich repeat, tropomodulin and proline-rich containing protein | RGD1562390                            | 307797 | 1,11 | down |
| 6293773 | 7180630 | 1326437 | similar to RGD, leucine-rich repeat, tropomodulin and proline-rich containing protein | RGD1562390                            | 307797 | 1,10 | down |
| 6400915 | 7180630 | 1326426 | similar to RGD, leucine-rich repeat, tropomodulin and proline-rich containing protein | RGD1562390                            | 307797 | 1,09 | down |
| 6330775 | 7180630 | 1326425 | similar to RGD, leucine-rich repeat, tropomodulin and proline-rich containing protein | RGD1562390                            | 307797 | 1,09 | up   |
| 6139841 | 7180630 | 1326433 | similar to RGD, leucine-rich repeat, tropomodulin and proline-rich containing protein | RGD1562390                            | 307797 | 1,08 | down |
| 6445588 | 7180630 | 1326449 | similar to RGD, leucine-rich repeat, tropomodulin and proline-rich containing protein | RGD1562390                            | 307797 | 1,07 | down |
| 6447836 | 7180630 | 1326455 | similar to RGD, leucine-rich repeat, tropomodulin and proline-rich containing protein | RGD1562390                            | 307797 | 1,06 | down |
| 5644010 | 7180630 | 1326427 | similar to RGD, leucine-rich repeat, tropomodulin and proline-rich containing protein | RGD1562390                            | 307797 | 1,05 | up   |
| 6377532 | 7180630 | 1326451 | similar to RGD, leucine-rich repeat, tropomodulin and proline-rich containing protein | RGD1562390                            | 307797 | 1,04 | down |
| 5914236 | 7180630 | 1326430 | similar to RGD, leucine-rich repeat, tropomodulin and proline-rich containing protein | RGD1562390                            | 307797 | 1,03 | up   |
| 6539076 | 7180630 | 1326446 | similar to RGD, leucine-rich repeat, tropomodulin and proline-rich containing protein | RGD1562390                            | 307797 | 1,03 | down |
| 6226854 | 7180630 | 1326454 | similar to RGD, leucine-rich repeat, tropomodulin and proline-rich containing protein | RGD1562390                            | 307797 | 1,02 | down |
| 6449890 | 7180630 | 1326455 | similar to RGD, leucine-rich repeat, tropomodulin and proline-rich containing protein | RGD1562390                            | 307797 | 1,02 | down |
| 6209475 | 7180630 | 1326453 | similar to RGD, leucine-rich repeat, tropomodulin and proline-rich containing protein | RGD1562390                            | 307797 | 1,00 | down |
| 6709846 | 7373633 | 1805710 | similar to ribosomal protein L31                                                      | LOC679519                             | 679519 | 1,98 | down |
| 6298447 | 7091576 | 1106967 | similar to RIKEN cDNA 1110004E09                                                      | RGD1306954                            | 288269 | 2,66 | down |
| 5711482 | 7091576 | 1106964 | similar to RIKEN cDNA 1110004E09                                                      | RGD1306954                            | 288269 | 1,78 | up   |
| 6148157 | 7091576 | 1106961 | similar to RIKEN cDNA 1110004E09                                                      | RGD1306954                            | 288269 | 1,47 | down |
| 6731880 | 7091576 | 1106963 | similar to RIKEN cDNA 1110004E09                                                      | RGD1306954                            | 288269 | 1,41 | down |
| 5703556 | 7091576 | 1106962 | similar to RIKEN cDNA 1110004E09                                                      | RGD1306954                            | 288269 | 1,28 | up   |
| 5641793 | 7091576 | 1106965 | similar to RIKEN cDNA 1110004E09                                                      | RGD1306954                            | 288269 | 1,23 | up   |
| 6290678 | 7091576 | 1106966 | similar to RIKEN cDNA 1110004E09                                                      | RGD1306954                            | 288269 | 1,11 | up   |
| 6195185 | 7091576 | 1106967 | similar to RIKEN cDNA 1110004E09                                                      | RGD1306954                            | 288269 | 1,02 | down |
| 6344056 | 7156047 | 1265734 | similar to RIKEN cDNA 1110007C09                                                      | RGD1306058                            | 361224 | 1,79 | up   |
| 5950716 | 7156047 | 1265733 | similar to RIKEN cDNA 1110007C09                                                      | RGD1306058                            | 361224 | 1,27 | up   |
| 6724016 | 7156047 | 1265731 | similar to RIKEN cDNA 1110007C09                                                      | RGD1306058                            | 361224 | 1,23 | down |
| 5852137 | 7156047 | 1265728 | similar to RIKEN cDNA 1110007C09                                                      | RGD1306058                            | 361224 | 1,15 | down |
| 6304154 | 7156047 | 1265730 | similar to RIKEN cDNA 1110007C09                                                      | RGD1306058                            | 361224 | 1,09 | down |
| 6139983 | 7156047 | 1265734 | similar to RIKEN cDNA 1110007C09                                                      | RGD1306058                            | 361224 | 1,04 | down |
| 6619925 | 7079326 | 1077973 | similar to RIKEN cDNA 1110020A23 /// ribonuclease, RNase K                            | JD1308134 /// Rnas: 287452 /// 287453 |        | 2,70 | up   |
| 5932309 | 7079326 | 1077973 | similar to RIKEN cDNA 1110020A23 /// ribonuclease, RNase K                            | JD1308134 /// Rnas: 287452 /// 287453 |        | 2,11 | up   |

|         |         |         |                                                                                   |                                          |      |      |
|---------|---------|---------|-----------------------------------------------------------------------------------|------------------------------------------|------|------|
| 5998164 | 7079326 | 1077973 | similar to RIKEN cDNA 1110020A23 /// ribonuclease, RNase K                        | JD1308134 /// Rnas 287452 /// 287453     | 1,62 | up   |
| 6188143 | 7079326 | 1077973 | similar to RIKEN cDNA 1110020A23 /// ribonuclease, RNase K                        | JD1308134 /// Rnas 287452 /// 287453     | 1,44 | up   |
| 6359567 | 7079326 | 1077973 | similar to RIKEN cDNA 1110020A23 /// ribonuclease, RNase K                        | JD1308134 /// Rnas 287452 /// 287453     | 1,27 | down |
| 5679233 | 7079326 | 1077972 | similar to RIKEN cDNA 1110020A23 /// ribonuclease, RNase K                        | JD1308134 /// Rnas 287452 /// 287453     | 1,12 | down |
| 6039140 | 7301904 | 1626758 | similar to RIKEN cDNA 1600013K19                                                  | RGD1307749 299338                        | 1,85 | down |
| 6428359 | 7301904 | 1626766 | similar to RIKEN cDNA 1600013K19                                                  | RGD1307749 299338                        | 1,33 | up   |
| 6305541 | 7301904 | 1626754 | similar to RIKEN cDNA 1600013K19                                                  | RGD1307749 299338                        | 1,26 | down |
| 6429655 | 7301904 | 1626760 | similar to RIKEN cDNA 1600013K19                                                  | RGD1307749 299338                        | 1,20 | up   |
| 5941241 | 7301904 | 1626763 | similar to RIKEN cDNA 1600013K19                                                  | RGD1307749 299338                        | 1,11 | up   |
| 6172783 | 7301904 | 1626761 | similar to RIKEN cDNA 1600013K19                                                  | RGD1307749 299338                        | 1,11 | down |
| 6655569 | 7301904 | 1626765 | similar to RIKEN cDNA 1600013K19                                                  | RGD1307749 299338                        | 1,09 | down |
| 5710704 | 7301904 | 1626762 | similar to RIKEN cDNA 1600013K19                                                  | RGD1307749 299338                        | 1,04 | down |
| 6305718 | 7301904 | 1626761 | similar to RIKEN cDNA 1600013K19                                                  | RGD1307749 299338                        | 1,03 | down |
| 6515085 | 7301904 | 1626761 | similar to RIKEN cDNA 1600013K19                                                  | RGD1307749 299338                        | 1,02 | up   |
| 6500842 | 7301904 | 1626759 | similar to RIKEN cDNA 1600013K19                                                  | RGD1307749 299338                        | 1,02 | down |
| 6546654 | 7301904 | 1626764 | similar to RIKEN cDNA 1600013K19                                                  | RGD1307749 299338                        | 1,00 | up   |
| 5923578 | 7368565 | 1791291 | similar to RIKEN cDNA 1700001E04                                                  | LOC363181 363181                         | 1,30 | up   |
| 6405561 | 7368565 | 1791289 | similar to RIKEN cDNA 1700001E04                                                  | LOC363181 363181                         | 1,29 | up   |
| 6630820 | 7368565 | 1791291 | similar to RIKEN cDNA 1700001E04                                                  | LOC363181 363181                         | 1,14 | down |
| 6371714 | 7369938 | 1795526 | similar to RIKEN cDNA 1700001E04                                                  | LOC363181 363181                         | 1,14 | up   |
| 6316524 | 7371539 | 1800299 | similar to RIKEN cDNA 1700001F09                                                  | LOC290508 290508                         | 1,60 | up   |
| 6111705 | 7371539 | 1800299 | similar to RIKEN cDNA 1700001F09                                                  | LOC290508 290508                         | 1,01 | down |
| 6541063 | 7371539 | 1800299 | similar to RIKEN cDNA 1700001F09                                                  | LOC290508 290508                         | 1,00 | down |
| 6338004 | 7266778 | 1538855 | similar to RIKEN cDNA 1700019G17                                                  | RGD1563507 500238                        | 1,49 | down |
| 5707572 | 7266778 | 1538857 | similar to RIKEN cDNA 1700019G17                                                  | RGD1563507 500238                        | 1,41 | down |
| 6008331 | 7266778 | 1538856 | similar to RIKEN cDNA 1700019G17                                                  | RGD1563507 500238                        | 1,03 | down |
| 6386253 | 7266778 | 1538854 | similar to RIKEN cDNA 1700019G17 /// camello-like 2 /// similar to Camello-like 2 | 3507 /// Cml2 /// LC38 /// 500237 /// 68 | 1,00 | up   |
| 5720557 | 7218241 | 1418699 | similar to RIKEN cDNA 1700040L02                                                  | RGD1306739 361834                        | 2,23 | up   |
| 5816592 | 7218241 | 1418719 | similar to RIKEN cDNA 1700040L02                                                  | RGD1306739 361834                        | 1,73 | down |
| 5777534 | 7218241 | 1418698 | similar to RIKEN cDNA 1700040L02                                                  | RGD1306739 361834                        | 1,53 | down |
| 6007568 | 7218241 | 1418692 | similar to RIKEN cDNA 1700040L02                                                  | RGD1306739 361834                        | 1,39 | up   |
| 6623354 | 7218241 | 1418698 | similar to RIKEN cDNA 1700040L02                                                  | RGD1306739 361834                        | 1,37 | up   |
| 6587615 | 7218241 | 1418700 | similar to RIKEN cDNA 1700040L02                                                  | RGD1306739 361834                        | 1,31 | up   |
| 5965144 | 7218241 | 1418695 | similar to RIKEN cDNA 1700040L02                                                  | RGD1306739 361834                        | 1,19 | down |
| 5851771 | 7218241 | 1418714 | similar to RIKEN cDNA 1700040L02                                                  | RGD1306739 361834                        | 1,18 | down |
| 6007199 | 7218241 | 1418713 | similar to RIKEN cDNA 1700040L02                                                  | RGD1306739 361834                        | 1,18 | down |
| 5926070 | 7218241 | 1418718 | similar to RIKEN cDNA 1700040L02                                                  | RGD1306739 361834                        | 1,09 | up   |
| 6688328 | 7218241 | 1418713 | similar to RIKEN cDNA 1700040L02                                                  | RGD1306739 361834                        | 1,07 | down |
| 6137525 | 7373420 | 1805132 | similar to RIKEN cDNA 1810030O07                                                  | RGD1565685 317344                        | 1,84 | up   |
| 6657609 | 7373420 | 1805129 | similar to RIKEN cDNA 1810030O07                                                  | RGD1565685 317344                        | 1,16 | down |
| 5962880 | 7373420 | 1805130 | similar to RIKEN cDNA 1810030O07                                                  | RGD1565685 317344                        | 1,13 | up   |
| 6362986 | 7373420 | 1805129 | similar to RIKEN cDNA 1810030O07                                                  | RGD1565685 317344                        | 1,05 | up   |
| 6245416 | 7373420 | 1805136 | similar to RIKEN cDNA 1810030O07                                                  | RGD1565685 317344                        | 1,05 | down |
| 6054155 | 7373420 | 1805134 | similar to RIKEN cDNA 1810030O07                                                  | RGD1565685 317344                        | 1,04 | down |
| 5939539 | 7373420 | 1805131 | similar to RIKEN cDNA 1810030O07                                                  | RGD1565685 317344                        | 1,03 | down |
| 6592968 | 7373420 | 1805133 | similar to RIKEN cDNA 1810030O07                                                  | RGD1565685 317344                        | 1,02 | up   |
| 6527513 | 7246518 | 1489041 | similar to RIKEN cDNA 2310001A20                                                  | RGD1308874 366227                        | 1,30 | down |
| 6054778 | 7246518 | 1489046 | similar to RIKEN cDNA 2310001A20                                                  | RGD1308874 366227                        | 1,23 | down |
| 5972751 | 7246518 | 1489052 | similar to RIKEN cDNA 2310001A20                                                  | RGD1308874 366227                        | 1,23 | up   |
| 6374827 | 7246518 | 1489049 | similar to RIKEN cDNA 2310001A20                                                  | RGD1308874 366227                        | 1,20 | down |
| 5984650 | 7246518 | 1489041 | similar to RIKEN cDNA 2310001A20                                                  | RGD1308874 366227                        | 1,20 | up   |
| 6250740 | 7246518 | 1489042 | similar to RIKEN cDNA 2310001A20                                                  | RGD1308874 366227                        | 1,11 | up   |
| 6255748 | 7246518 | 1489052 | similar to RIKEN cDNA 2310001A20                                                  | RGD1308874 366227                        | 1,08 | up   |
| 6182062 | 7246518 | 1489043 | similar to RIKEN cDNA 2310001A20                                                  | RGD1308874 366227                        | 1,08 | down |
| 5761746 | 7246518 | 1489045 | similar to RIKEN cDNA 2310001A20                                                  | RGD1308874 366227                        | 1,05 | down |
| 6541136 | 7246518 | 1489047 | similar to RIKEN cDNA 2310001A20                                                  | RGD1308874 366227                        | 1,04 | up   |
| 5794805 | 7246518 | 1489045 | similar to RIKEN cDNA 2310001A20                                                  | RGD1308874 366227                        | 1,03 | up   |

|         |         |         |                                  |            |        |      |      |
|---------|---------|---------|----------------------------------|------------|--------|------|------|
| 5874769 | 7186528 | 1341560 | similar to RIKEN cDNA 2310022B05 | RGD1559896 | 498967 | 2,18 | down |
| 6275325 | 7186528 | 1341553 | similar to RIKEN cDNA 2310022B05 | RGD1559896 | 498967 | 1,88 | down |
| 6160191 | 7186528 | 1341560 | similar to RIKEN cDNA 2310022B05 | RGD1559896 | 498967 | 1,80 | up   |
| 6665954 | 7186528 | 1341553 | similar to RIKEN cDNA 2310022B05 | RGD1559896 | 498967 | 1,36 | down |
| 6358688 | 7186528 | 1341551 | similar to RIKEN cDNA 2310022B05 | RGD1559896 | 498967 | 1,31 | up   |
| 6103642 | 7186528 | 1341551 | similar to RIKEN cDNA 2310022B05 | RGD1559896 | 498967 | 1,31 | down |
| 6012580 | 7186528 | 1341551 | similar to RIKEN cDNA 2310022B05 | RGD1559896 | 498967 | 1,28 | up   |
| 5947370 | 7186528 | 1341551 | similar to RIKEN cDNA 2310022B05 | RGD1559896 | 498967 | 1,28 | down |
| 6719397 | 7186528 | 1341551 | similar to RIKEN cDNA 2310022B05 | RGD1559896 | 498967 | 1,21 | up   |
| 6714642 | 7186528 | 1341560 | similar to RIKEN cDNA 2310022B05 | RGD1559896 | 498967 | 1,11 | up   |
| 6631190 | 7186528 | 1341554 | similar to RIKEN cDNA 2310022B05 | RGD1559896 | 498967 | 1,09 | down |
| 6127041 | 7186528 | 1341551 | similar to RIKEN cDNA 2310022B05 | RGD1559896 | 498967 | 1,06 | down |
| 6495488 | 7186528 | 1341551 | similar to RIKEN cDNA 2310022B05 | RGD1559896 | 498967 | 1,06 | down |
| 6326337 | 7186528 | 1341560 | similar to RIKEN cDNA 2310022B05 | RGD1559896 | 498967 | 1,05 | down |
| 6107198 | 7186528 | 1341551 | similar to RIKEN cDNA 2310022B05 | RGD1559896 | 498967 | 1,05 | down |
| 6340941 | 7186528 | 1341552 | similar to RIKEN cDNA 2310022B05 | RGD1559896 | 498967 | 1,03 | down |
| 6388406 | 7186528 | 1341553 | similar to RIKEN cDNA 2310022B05 | RGD1559896 | 498967 | 1,01 | down |
| 6073748 | 7119179 | 1174999 | similar to RIKEN cDNA 2310045A20 | RGD1562860 | 360945 | 2,25 | down |
| 6185515 | 7119179 | 1175007 | similar to RIKEN cDNA 2310045A20 | RGD1562860 | 360945 | 1,90 | up   |
| 5977534 | 7119179 | 1174991 | similar to RIKEN cDNA 2310045A20 | RGD1562860 | 360945 | 1,76 | up   |
| 6669513 | 7119179 | 1174987 | similar to RIKEN cDNA 2310045A20 | RGD1562860 | 360945 | 1,73 | down |
| 6628458 | 7119179 | 1175008 | similar to RIKEN cDNA 2310045A20 | RGD1562860 | 360945 | 1,60 | up   |
| 5827120 | 7119179 | 1174983 | similar to RIKEN cDNA 2310045A20 | RGD1562860 | 360945 | 1,55 | up   |
| 6140999 | 7119179 | 1174966 | similar to RIKEN cDNA 2310045A20 | RGD1562860 | 360945 | 1,55 | up   |
| 6097863 | 7119179 | 1175001 | similar to RIKEN cDNA 2310045A20 | RGD1562860 | 360945 | 1,51 | down |
| 6249938 | 7119179 | 1174971 | similar to RIKEN cDNA 2310045A20 | RGD1562860 | 360945 | 1,44 | down |
| 5749371 | 7119179 | 1174997 | similar to RIKEN cDNA 2310045A20 | RGD1562860 | 360945 | 1,40 | down |
| 5935497 | 7119179 | 1174982 | similar to RIKEN cDNA 2310045A20 | RGD1562860 | 360945 | 1,38 | up   |
| 6155328 | 7119179 | 1174983 | similar to RIKEN cDNA 2310045A20 | RGD1562860 | 360945 | 1,31 | up   |
| 6338596 | 7119179 | 1174967 | similar to RIKEN cDNA 2310045A20 | RGD1562860 | 360945 | 1,30 | down |
| 6476123 | 7119179 | 1175007 | similar to RIKEN cDNA 2310045A20 | RGD1562860 | 360945 | 1,29 | down |
| 6410936 | 7119179 | 1175002 | similar to RIKEN cDNA 2310045A20 | RGD1562860 | 360945 | 1,27 | up   |
| 5904623 | 7119179 | 1174989 | similar to RIKEN cDNA 2310045A20 | RGD1562860 | 360945 | 1,27 | up   |
| 6376379 | 7119179 | 1174976 | similar to RIKEN cDNA 2310045A20 | RGD1562860 | 360945 | 1,24 | down |
| 5705537 | 7119179 | 1175006 | similar to RIKEN cDNA 2310045A20 | RGD1562860 | 360945 | 1,24 | up   |
| 6342559 | 7119179 | 1174977 | similar to RIKEN cDNA 2310045A20 | RGD1562860 | 360945 | 1,16 | up   |
| 6556816 | 7119179 | 1174980 | similar to RIKEN cDNA 2310045A20 | RGD1562860 | 360945 | 1,15 | up   |
| 6242257 | 7119179 | 1174994 | similar to RIKEN cDNA 2310045A20 | RGD1562860 | 360945 | 1,15 | up   |
| 6363549 | 7119179 | 1174990 | similar to RIKEN cDNA 2310045A20 | RGD1562860 | 360945 | 1,15 | down |
| 6296995 | 7119179 | 1174992 | similar to RIKEN cDNA 2310045A20 | RGD1562860 | 360945 | 1,12 | down |
| 6001246 | 7119179 | 1174978 | similar to RIKEN cDNA 2310045A20 | RGD1562860 | 360945 | 1,11 | up   |
| 6695596 | 7119179 | 1174981 | similar to RIKEN cDNA 2310045A20 | RGD1562860 | 360945 | 1,09 | up   |
| 6245726 | 7119179 | 1175003 | similar to RIKEN cDNA 2310045A20 | RGD1562860 | 360945 | 1,09 | up   |
| 6558073 | 7119179 | 1174986 | similar to RIKEN cDNA 2310045A20 | RGD1562860 | 360945 | 1,08 | down |
| 6417582 | 7119179 | 1174971 | similar to RIKEN cDNA 2310045A20 | RGD1562860 | 360945 | 1,06 | down |
| 6191881 | 7119179 | 1174993 | similar to RIKEN cDNA 2310045A20 | RGD1562860 | 360945 | 1,04 | up   |
| 5898724 | 7119179 | 1175007 | similar to RIKEN cDNA 2310045A20 | RGD1562860 | 360945 | 1,02 | up   |
| 6576777 | 7119179 | 1174998 | similar to RIKEN cDNA 2310045A20 | RGD1562860 | 360945 | 1,01 | up   |
| 6485034 | 7059917 | 1031329 | similar to RIKEN cDNA 2410004C24 | RGD1308049 | 293690 | 1,29 | up   |
| 5975861 | 7099294 | 1126108 | similar to RIKEN cDNA 2410025L10 | RGD1563342 | 304572 | 2,62 | down |
| 6689931 | 7099294 | 1126075 | similar to RIKEN cDNA 2410025L10 | RGD1563342 | 304572 | 2,34 | down |
| 6098366 | 7099294 | 1126108 | similar to RIKEN cDNA 2410025L10 | RGD1563342 | 304572 | 1,56 | up   |
| 5677425 | 7099294 | 1126075 | similar to RIKEN cDNA 2410025L10 | RGD1563342 | 304572 | 1,51 | up   |
| 6324215 | 7099294 | 1126108 | similar to RIKEN cDNA 2410025L10 | RGD1563342 | 304572 | 1,48 | up   |
| 5948207 | 7099294 | 1126108 | similar to RIKEN cDNA 2410025L10 | RGD1563342 | 304572 | 1,45 | up   |
| 5764306 | 7099294 | 1126094 | similar to RIKEN cDNA 2410025L10 | RGD1563342 | 304572 | 1,41 | up   |
| 6457074 | 7099294 | 1126079 | similar to RIKEN cDNA 2410025L10 | RGD1563342 | 304572 | 1,40 | down |

|         |         |         |                                                                       |                                    |        |      |      |
|---------|---------|---------|-----------------------------------------------------------------------|------------------------------------|--------|------|------|
| 5717204 | 7099294 | 1126108 | similar to RIKEN cDNA 2410025L10                                      | RGD1563342                         | 304572 | 1,38 | down |
| 5860520 | 7099294 | 1126096 | similar to RIKEN cDNA 2410025L10                                      | RGD1563342                         | 304572 | 1,35 | up   |
| 6577197 | 7099294 | 1126107 | similar to RIKEN cDNA 2410025L10                                      | RGD1563342                         | 304572 | 1,34 | up   |
| 5673990 | 7099294 | 1126106 | similar to RIKEN cDNA 2410025L10                                      | RGD1563342                         | 304572 | 1,29 | up   |
| 6559909 | 7099294 | 1126095 | similar to RIKEN cDNA 2410025L10                                      | RGD1563342                         | 304572 | 1,28 | down |
| 6004655 | 7099294 | 1126109 | similar to RIKEN cDNA 2410025L10                                      | RGD1563342                         | 304572 | 1,28 | up   |
| 6272900 | 7099294 | 1126102 | similar to RIKEN cDNA 2410025L10                                      | RGD1563342                         | 304572 | 1,23 | down |
| 6070925 | 7099294 | 1126108 | similar to RIKEN cDNA 2410025L10                                      | RGD1563342                         | 304572 | 1,22 | down |
| 5663339 | 7099294 | 1126086 | similar to RIKEN cDNA 2410025L10                                      | RGD1563342                         | 304572 | 1,22 | down |
| 6394317 | 7099294 | 1126087 | similar to RIKEN cDNA 2410025L10                                      | RGD1563342                         | 304572 | 1,21 | down |
| 6129277 | 7099294 | 1126098 | similar to RIKEN cDNA 2410025L10                                      | RGD1563342                         | 304572 | 1,20 | up   |
| 6231703 | 7099294 | 1126097 | similar to RIKEN cDNA 2410025L10                                      | RGD1563342                         | 304572 | 1,19 | down |
| 5832763 | 7099294 | 1126104 | similar to RIKEN cDNA 2410025L10                                      | RGD1563342                         | 304572 | 1,18 | down |
| 5979829 | 7099294 | 1126108 | similar to RIKEN cDNA 2410025L10                                      | RGD1563342                         | 304572 | 1,16 | up   |
| 6232531 | 7099294 | 1126099 | similar to RIKEN cDNA 2410025L10                                      | RGD1563342                         | 304572 | 1,15 | down |
| 6611219 | 7099294 | 1126096 | similar to RIKEN cDNA 2410025L10                                      | RGD1563342                         | 304572 | 1,15 | down |
| 6484169 | 7099294 | 1126074 | similar to RIKEN cDNA 2410025L10                                      | RGD1563342                         | 304572 | 1,12 | down |
| 6446680 | 7099294 | 1126098 | similar to RIKEN cDNA 2410025L10                                      | RGD1563342                         | 304572 | 1,11 | down |
| 5742815 | 7099294 | 1126102 | similar to RIKEN cDNA 2410025L10                                      | RGD1563342                         | 304572 | 1,10 | down |
| 6534062 | 7099294 | 1126098 | similar to RIKEN cDNA 2410025L10                                      | RGD1563342                         | 304572 | 1,07 | up   |
| 5849134 | 7099294 | 1126105 | similar to RIKEN cDNA 2410025L10                                      | RGD1563342                         | 304572 | 1,04 | down |
| 6587931 | 7099294 | 1126096 | similar to RIKEN cDNA 2410025L10                                      | RGD1563342                         | 304572 | 1,03 | up   |
| 6297803 | 7099294 | 1126108 | similar to RIKEN cDNA 2410025L10                                      | RGD1563342                         | 304572 | 1,02 | down |
| 5996378 | 7099294 | 1126103 | similar to RIKEN cDNA 2410025L10                                      | RGD1563342                         | 304572 | 1,02 | down |
| 6450212 | 7099294 | 1126097 | similar to RIKEN cDNA 2410025L10                                      | RGD1563342                         | 304572 | 1,02 | down |
| 6190504 | 7099294 | 1126076 | similar to RIKEN cDNA 2410025L10                                      | RGD1563342                         | 304572 | 1,00 | down |
| 6091718 | 7369939 | 1795591 | similar to RIKEN cDNA 2610042L04 /// similar to RIKEN cDNA 4930555G01 | 501224 /// LOC367501224 /// 367381 |        | 1,18 | up   |
| 6495423 | 7369939 | 1795610 | similar to RIKEN cDNA 2610042L04 /// similar to RIKEN cDNA 4930555G01 | 501224 /// LOC367501224 /// 367381 |        | 1,14 | down |
| 6465898 | 7087456 | 1096617 | similar to RIKEN cDNA 2610528E23                                      | RGD1309437                         | 288176 | 2,72 | down |
| 5798077 | 7087456 | 1096616 | similar to RIKEN cDNA 2610528E23                                      | RGD1309437                         | 288176 | 1,50 | down |
| 6195741 | 7087456 | 1096618 | similar to RIKEN cDNA 2610528E23                                      | RGD1309437                         | 288176 | 1,47 | up   |
| 5800157 | 7087456 | 1096624 | similar to RIKEN cDNA 2610528E23                                      | RGD1309437                         | 288176 | 1,22 | down |
| 5618961 | 7087456 | 1096623 | similar to RIKEN cDNA 2610528E23                                      | RGD1309437                         | 288176 | 1,21 | down |
| 6572266 | 7087456 | 1096625 | similar to RIKEN cDNA 2610528E23                                      | RGD1309437                         | 288176 | 1,17 | up   |
| 5921830 | 7087456 | 1096620 | similar to RIKEN cDNA 2610528E23                                      | RGD1309437                         | 288176 | 1,14 | up   |
| 5662431 | 7087456 | 1096622 | similar to RIKEN cDNA 2610528E23                                      | RGD1309437                         | 288176 | 1,12 | up   |
| 6007590 | 7087456 | 1096619 | similar to RIKEN cDNA 2610528E23                                      | RGD1309437                         | 288176 | 1,11 | down |
| 5937780 | 7087456 | 1096621 | similar to RIKEN cDNA 2610528E23                                      | RGD1309437                         | 288176 | 1,07 | up   |
| 6487955 | 7087456 | 1096615 | similar to RIKEN cDNA 2610528E23                                      | RGD1309437                         | 288176 | 1,07 | up   |
| 5966821 | 7087456 | 1096615 | similar to RIKEN cDNA 2610528E23                                      | RGD1309437                         | 288176 | 1,01 | up   |
| 5954571 | 7039380 | 984098  | similar to RIKEN cDNA 2700081O15                                      | RGD1560108                         | 499309 | 2,11 | up   |
| 6400649 | 7039380 | 984101  | similar to RIKEN cDNA 2700081O15                                      | RGD1560108                         | 499309 | 1,97 | down |
| 5914554 | 7039380 | 984101  | similar to RIKEN cDNA 2700081O15                                      | RGD1560108                         | 499309 | 1,56 | down |
| 6531724 | 7039380 | 984096  | similar to RIKEN cDNA 2700081O15                                      | RGD1560108                         | 499309 | 1,39 | down |
| 6614120 | 7039380 | 984100  | similar to RIKEN cDNA 2700081O15                                      | RGD1560108                         | 499309 | 1,34 | down |
| 5714870 | 7039380 | 984098  | similar to RIKEN cDNA 2700081O15                                      | RGD1560108                         | 499309 | 1,24 | up   |
| 6410631 | 7039380 | 984096  | similar to RIKEN cDNA 2700081O15                                      | RGD1560108                         | 499309 | 1,21 | up   |
| 6498390 | 7039380 | 984101  | similar to RIKEN cDNA 2700081O15                                      | RGD1560108                         | 499309 | 1,20 | up   |
| 5770206 | 7039380 | 984099  | similar to RIKEN cDNA 2700081O15                                      | RGD1560108                         | 499309 | 1,18 | down |
| 6558024 | 7039380 | 984101  | similar to RIKEN cDNA 2700081O15                                      | RGD1560108                         | 499309 | 1,16 | down |
| 6293448 | 7039380 | 984101  | similar to RIKEN cDNA 2700081O15                                      | RGD1560108                         | 499309 | 1,15 | up   |
| 6487221 | 7039380 | 984098  | similar to RIKEN cDNA 2700081O15                                      | RGD1560108                         | 499309 | 1,12 | up   |
| 5851386 | 7039380 | 984100  | similar to RIKEN cDNA 2700081O15                                      | RGD1560108                         | 499309 | 1,11 | down |
| 6069906 | 7039380 | 984097  | similar to RIKEN cDNA 2700081O15                                      | RGD1560108                         | 499309 | 1,11 | up   |
| 6464264 | 7039380 | 984101  | similar to RIKEN cDNA 2700081O15                                      | RGD1560108                         | 499309 | 1,04 | down |
| 6368309 | 7039380 | 984101  | similar to RIKEN cDNA 2700081O15                                      | RGD1560108                         | 499309 | 1,03 | down |
| 6310073 | 7039380 | 984096  | similar to RIKEN cDNA 2700081O15                                      | RGD1560108                         | 499309 | 1,02 | up   |



|         |         |         |                                  |            |        |      |      |
|---------|---------|---------|----------------------------------|------------|--------|------|------|
| 6149493 | 7039380 | 984101  | similar to RIKEN cDNA 2700081O15 | RGD1560108 | 499309 | 1,01 | up   |
| 5986042 | 7039380 | 984099  | similar to RIKEN cDNA 2700081O15 | RGD1560108 | 499309 | 1,01 | down |
| 5893865 | 7306680 | 1639575 | similar to RIKEN cDNA 2700097O09 | RGD1304624 | 314128 | 2,27 | up   |
| 6719907 | 7306680 | 1639574 | similar to RIKEN cDNA 2700097O09 | RGD1304624 | 314128 | 1,61 | down |
| 5876226 | 7306680 | 1639574 | similar to RIKEN cDNA 2700097O09 | RGD1304624 | 314128 | 1,51 | down |
| 6512936 | 7306680 | 1639574 | similar to RIKEN cDNA 2700097O09 | RGD1304624 | 314128 | 1,43 | down |
| 5645155 | 7306680 | 1639576 | similar to RIKEN cDNA 2700097O09 | RGD1304624 | 314128 | 1,23 | up   |
| 5824343 | 7306680 | 1639573 | similar to RIKEN cDNA 2700097O09 | RGD1304624 | 314128 | 1,22 | up   |
| 6042765 | 7306680 | 1639569 | similar to RIKEN cDNA 2700097O09 | RGD1304624 | 314128 | 1,11 | up   |
| 6481098 | 7306680 | 1639571 | similar to RIKEN cDNA 2700097O09 | RGD1304624 | 314128 | 1,11 | down |
| 5915081 | 7306680 | 1639570 | similar to RIKEN cDNA 2700097O09 | RGD1304624 | 314128 | 1,08 | down |
| 6497850 | 7306680 | 1639572 | similar to RIKEN cDNA 2700097O09 | RGD1304624 | 314128 | 1,04 | up   |
| 6276708 | 7292701 | 1602927 | similar to RIKEN cDNA 2900090M10 | RGD1563444 | 500577 | 1,61 | up   |
| 6706008 | 7292701 | 1602924 | similar to RIKEN cDNA 2900090M10 | RGD1563444 | 500577 | 1,49 | up   |
| 6561804 | 7292701 | 1602923 | similar to RIKEN cDNA 2900090M10 | RGD1563444 | 500577 | 1,46 | down |
| 5921113 | 7292701 | 1602952 | similar to RIKEN cDNA 2900090M10 | RGD1563444 | 500577 | 1,42 | down |
| 6285229 | 7292701 | 1602949 | similar to RIKEN cDNA 2900090M10 | RGD1563444 | 500577 | 1,41 | up   |
| 5930738 | 7292701 | 1602933 | similar to RIKEN cDNA 2900090M10 | RGD1563444 | 500577 | 1,38 | up   |
| 6687939 | 7292701 | 1602935 | similar to RIKEN cDNA 2900090M10 | RGD1563444 | 500577 | 1,33 | up   |
| 6013629 | 7292701 | 1602945 | similar to RIKEN cDNA 2900090M10 | RGD1563444 | 500577 | 1,31 | up   |
| 6070255 | 7292701 | 1602937 | similar to RIKEN cDNA 2900090M10 | RGD1563444 | 500577 | 1,22 | up   |
| 6340225 | 7292701 | 1602936 | similar to RIKEN cDNA 2900090M10 | RGD1563444 | 500577 | 1,20 | down |
| 6110203 | 7292701 | 1602925 | similar to RIKEN cDNA 2900090M10 | RGD1563444 | 500577 | 1,14 | down |
| 6114367 | 7292701 | 1602928 | similar to RIKEN cDNA 2900090M10 | RGD1563444 | 500577 | 1,14 | up   |
| 6648842 | 7292701 | 1602931 | similar to RIKEN cDNA 2900090M10 | RGD1563444 | 500577 | 1,12 | down |
| 5983431 | 7292701 | 1602932 | similar to RIKEN cDNA 2900090M10 | RGD1563444 | 500577 | 1,07 | down |
| 6694900 | 7292701 | 1602944 | similar to RIKEN cDNA 2900090M10 | RGD1563444 | 500577 | 1,07 | down |
| 5797280 | 7292701 | 1602941 | similar to RIKEN cDNA 2900090M10 | RGD1563444 | 500577 | 1,04 | down |
| 6567691 | 7292701 | 1602934 | similar to RIKEN cDNA 2900090M10 | RGD1563444 | 500577 | 1,04 | up   |
| 6463755 | 7292701 | 1602938 | similar to RIKEN cDNA 2900090M10 | RGD1563444 | 500577 | 1,03 | down |
| 6024043 | 7292701 | 1602930 | similar to RIKEN cDNA 2900090M10 | RGD1563444 | 500577 | 1,03 | down |
| 6254191 | 7292701 | 1602953 | similar to RIKEN cDNA 2900090M10 | RGD1563444 | 500577 | 1,02 | down |
| 6150443 | 7292701 | 1602926 | similar to RIKEN cDNA 2900090M10 | RGD1563444 | 500577 | 1,02 | up   |
| 5862508 | 7292701 | 1602939 | similar to RIKEN cDNA 2900090M10 | RGD1563444 | 500577 | 1,01 | up   |
| 6301103 | 7292701 | 1602951 | similar to RIKEN cDNA 2900090M10 | RGD1563444 | 500577 | 1,00 | up   |
| 6717413 | 7034747 | 973188  | similar to RIKEN cDNA 3200002M19 | RGD1311634 | 293155 | 2,54 | down |
| 6501298 | 7034747 | 973193  | similar to RIKEN cDNA 3200002M19 | RGD1311634 | 293155 | 1,70 | up   |
| 5728165 | 7034747 | 973188  | similar to RIKEN cDNA 3200002M19 | RGD1311634 | 293155 | 1,44 | up   |
| 6568846 | 7361042 | 1772269 | similar to RIKEN cDNA 4632411B12 | RGD1309220 | 316328 | 1,63 | up   |
| 6415315 | 7361042 | 1772261 | similar to RIKEN cDNA 4632411B12 | RGD1309220 | 316328 | 1,47 | down |
| 6100290 | 7361042 | 1772277 | similar to RIKEN cDNA 4632411B12 | RGD1309220 | 316328 | 1,46 | up   |
| 6040687 | 7361042 | 1772270 | similar to RIKEN cDNA 4632411B12 | RGD1309220 | 316328 | 1,41 | up   |
| 6692344 | 7361042 | 1772274 | similar to RIKEN cDNA 4632411B12 | RGD1309220 | 316328 | 1,31 | up   |
| 6372721 | 7361042 | 1772270 | similar to RIKEN cDNA 4632411B12 | RGD1309220 | 316328 | 1,25 | down |
| 6542367 | 7361042 | 1772257 | similar to RIKEN cDNA 4632411B12 | RGD1309220 | 316328 | 1,18 | down |
| 5999756 | 7361042 | 1772266 | similar to RIKEN cDNA 4632411B12 | RGD1309220 | 316328 | 1,17 | up   |
| 5990536 | 7361042 | 1772262 | similar to RIKEN cDNA 4632411B12 | RGD1309220 | 316328 | 1,17 | up   |
| 6705409 | 7361042 | 1772256 | similar to RIKEN cDNA 4632411B12 | RGD1309220 | 316328 | 1,17 | up   |
| 6557501 | 7361042 | 1772257 | similar to RIKEN cDNA 4632411B12 | RGD1309220 | 316328 | 1,17 | down |
| 6569357 | 7361042 | 1772260 | similar to RIKEN cDNA 4632411B12 | RGD1309220 | 316328 | 1,12 | up   |
| 6110725 | 7361042 | 1772259 | similar to RIKEN cDNA 4632411B12 | RGD1309220 | 316328 | 1,08 | down |
| 5621407 | 7361042 | 1772258 | similar to RIKEN cDNA 4632411B12 | RGD1309220 | 316328 | 1,06 | up   |
| 5911633 | 7361042 | 1772268 | similar to RIKEN cDNA 4632411B12 | RGD1309220 | 316328 | 1,05 | down |
| 5651867 | 7361042 | 1772275 | similar to RIKEN cDNA 4632411B12 | RGD1309220 | 316328 | 1,03 | down |
| 6493668 | 7361042 | 1772278 | similar to RIKEN cDNA 4632411B12 | RGD1309220 | 316328 | 1,02 | up   |
| 6304711 | 7361042 | 1772267 | similar to RIKEN cDNA 4632411B12 | RGD1309220 | 316328 | 1,02 | up   |
| 6729114 | 7361042 | 1772271 | similar to RIKEN cDNA 4632411B12 | RGD1309220 | 316328 | 1,01 | up   |

|         |         |         |                                       |            |        |      |      |
|---------|---------|---------|---------------------------------------|------------|--------|------|------|
| 5955222 | 7361042 | 1772272 | similar to RIKEN cDNA 4632411B12      | RGD1309220 | 316328 | 1,00 | down |
| 6398631 | 7361042 | 1772265 | similar to RIKEN cDNA 4632411B12      | RGD1309220 | 316328 | 1,00 | down |
| 6368493 | 7278597 | 1569627 | similar to RIKEN cDNA 4732418C07      | RGD1310351 | 298425 | 1,91 | up   |
| 6465225 | 7278597 | 1569644 | similar to RIKEN cDNA 4732418C07      | RGD1310351 | 298425 | 1,80 | down |
| 6723024 | 7278597 | 1569644 | similar to RIKEN cDNA 4732418C07      | RGD1310351 | 298425 | 1,29 | down |
| 5731137 | 7278597 | 1569629 | similar to RIKEN cDNA 4732418C07      | RGD1310351 | 298425 | 1,22 | up   |
| 6452245 | 7278597 | 1569644 | similar to RIKEN cDNA 4732418C07      | RGD1310351 | 298425 | 1,20 | up   |
| 5669145 | 7278597 | 1569643 | similar to RIKEN cDNA 4732418C07      | RGD1310351 | 298425 | 1,20 | down |
| 5717778 | 7278597 | 1569627 | similar to RIKEN cDNA 4732418C07      | RGD1310351 | 298425 | 1,18 | down |
| 6375254 | 7278597 | 1569640 | similar to RIKEN cDNA 4732418C07      | RGD1310351 | 298425 | 1,17 | down |
| 6281240 | 7278597 | 1569633 | similar to RIKEN cDNA 4732418C07      | RGD1310351 | 298425 | 1,13 | up   |
| 6516819 | 7278597 | 1569628 | similar to RIKEN cDNA 4732418C07      | RGD1310351 | 298425 | 1,13 | down |
| 6005147 | 7278597 | 1569630 | similar to RIKEN cDNA 4732418C07      | RGD1310351 | 298425 | 1,12 | up   |
| 6437797 | 7278597 | 1569642 | similar to RIKEN cDNA 4732418C07      | RGD1310351 | 298425 | 1,12 | down |
| 6528527 | 7278597 | 1569635 | similar to RIKEN cDNA 4732418C07      | RGD1310351 | 298425 | 1,10 | up   |
| 5653836 | 7278597 | 1569637 | similar to RIKEN cDNA 4732418C07      | RGD1310351 | 298425 | 1,09 | down |
| 6248632 | 7278597 | 1569639 | similar to RIKEN cDNA 4732418C07      | RGD1310351 | 298425 | 1,08 | up   |
| 6123743 | 7278597 | 1569636 | similar to RIKEN cDNA 4732418C07      | RGD1310351 | 298425 | 1,07 | down |
| 6318403 | 7278597 | 1569634 | similar to RIKEN cDNA 4732418C07      | RGD1310351 | 298425 | 1,05 | up   |
| 6575276 | 7278597 | 1569638 | similar to RIKEN cDNA 4732418C07      | RGD1310351 | 298425 | 1,04 | up   |
| 5737348 | 7278597 | 1569627 | similar to RIKEN cDNA 4732418C07      | RGD1310351 | 298425 | 1,03 | down |
| 6050283 | 7146807 | 1242809 | similar to RIKEN cDNA 4930444A02      | RGD1310810 | 306549 | 1,42 | down |
| 5887363 | 7146807 | 1242810 | similar to RIKEN cDNA 4930444A02      | RGD1310810 | 306549 | 1,36 | down |
| 6371179 | 7146807 | 1242814 | similar to RIKEN cDNA 4930444A02      | RGD1310810 | 306549 | 1,17 | down |
| 6040345 | 7146807 | 1242809 | similar to RIKEN cDNA 4930444A02      | RGD1310810 | 306549 | 1,15 | down |
| 5719166 | 7146807 | 1242811 | similar to RIKEN cDNA 4930444A02      | RGD1310810 | 306549 | 1,08 | up   |
| 6634200 | 7146807 | 1242813 | similar to RIKEN cDNA 4930444A02      | RGD1310810 | 306549 | 1,08 | down |
| 6486223 | 7146807 | 1242813 | similar to RIKEN cDNA 4930444A02      | RGD1310810 | 306549 | 1,07 | down |
| 6060966 | 7368567 | 1791333 | similar to RIKEN cDNA 4930555G01      | LOC367381  | 367381 | 2,06 | down |
| 6555536 | 7369939 | 1795607 | similar to RIKEN cDNA 4930555G01      | LOC367381  | 367381 | 1,78 | up   |
| 5670601 | 7368567 | 1791335 | similar to RIKEN cDNA 4930555G01      | LOC367381  | 367381 | 1,63 | down |
| 5770255 | 7366749 | 1785477 | similar to RIKEN cDNA 4931400A14      | RGD1307234 | 316732 | 1,52 | down |
| 6207866 | 7366749 | 1785477 | similar to RIKEN cDNA 4931400A14      | RGD1307234 | 316732 | 1,38 | down |
| 6126018 | 7061703 | 1035734 | similar to RIKEN cDNA 5033414D02      | RGD1306839 | 293888 | 2,20 | up   |
| 6597929 | 7061703 | 1035729 | similar to RIKEN cDNA 5033414D02      | RGD1306839 | 293888 | 1,71 | up   |
| 5911386 | 7061703 | 1035738 | similar to RIKEN cDNA 5033414D02      | RGD1306839 | 293888 | 1,51 | down |
| 6637726 | 7061703 | 1035726 | similar to RIKEN cDNA 5033414D02      | RGD1306839 | 293888 | 1,44 | up   |
| 5659589 | 7061703 | 1035727 | similar to RIKEN cDNA 5033414D02      | RGD1306839 | 293888 | 1,22 | down |
| 6038835 | 7061703 | 1035728 | similar to RIKEN cDNA 5033414D02      | RGD1306839 | 293888 | 1,15 | up   |
| 5967889 | 7061703 | 1035739 | similar to RIKEN cDNA 5033414D02      | RGD1306839 | 293888 | 1,12 | down |
| 5736046 | 7126658 | 1193153 | similar to RIKEN cDNA 5730509K17 gene | RGD1561042 | 498386 | 3,16 | up   |
| 5627955 | 7126658 | 1193131 | similar to RIKEN cDNA 5730509K17 gene | RGD1561042 | 498386 | 2,42 | up   |
| 5795928 | 7126658 | 1193173 | similar to RIKEN cDNA 5730509K17 gene | RGD1561042 | 498386 | 2,10 | down |
| 5971390 | 7126658 | 1193168 | similar to RIKEN cDNA 5730509K17 gene | RGD1561042 | 498386 | 2,05 | down |
| 6252883 | 7126658 | 1193136 | similar to RIKEN cDNA 5730509K17 gene | RGD1561042 | 498386 | 1,92 | up   |
| 5676236 | 7126658 | 1193167 | similar to RIKEN cDNA 5730509K17 gene | RGD1561042 | 498386 | 1,89 | up   |
| 6544705 | 7126658 | 1193141 | similar to RIKEN cDNA 5730509K17 gene | RGD1561042 | 498386 | 1,88 | down |
| 6634874 | 7126658 | 1193157 | similar to RIKEN cDNA 5730509K17 gene | RGD1561042 | 498386 | 1,87 | up   |
| 6554181 | 7126658 | 1193131 | similar to RIKEN cDNA 5730509K17 gene | RGD1561042 | 498386 | 1,77 | up   |
| 6668671 | 7126658 | 1193129 | similar to RIKEN cDNA 5730509K17 gene | RGD1561042 | 498386 | 1,75 | up   |
| 5633903 | 7126658 | 1193143 | similar to RIKEN cDNA 5730509K17 gene | RGD1561042 | 498386 | 1,71 | down |
| 5878234 | 7126658 | 1193152 | similar to RIKEN cDNA 5730509K17 gene | RGD1561042 | 498386 | 1,71 | down |
| 5658090 | 7126658 | 1193131 | similar to RIKEN cDNA 5730509K17 gene | RGD1561042 | 498386 | 1,60 | up   |
| 5840337 | 7126658 | 1193144 | similar to RIKEN cDNA 5730509K17 gene | RGD1561042 | 498386 | 1,59 | down |
| 6660383 | 7126658 | 1193133 | similar to RIKEN cDNA 5730509K17 gene | RGD1561042 | 498386 | 1,56 | down |
| 6192989 | 7126658 | 1193146 | similar to RIKEN cDNA 5730509K17 gene | RGD1561042 | 498386 | 1,46 | down |
| 5629960 | 7126658 | 1193139 | similar to RIKEN cDNA 5730509K17 gene | RGD1561042 | 498386 | 1,43 | down |

|         |         |         |                                       |            |        |      |      |
|---------|---------|---------|---------------------------------------|------------|--------|------|------|
| 6587128 | 7126658 | 1193165 | similar to RIKEN cDNA 5730509K17 gene | RGD1561042 | 498386 | 1,36 | up   |
| 6581029 | 7126658 | 1193147 | similar to RIKEN cDNA 5730509K17 gene | RGD1561042 | 498386 | 1,35 | down |
| 5670032 | 7126658 | 1193169 | similar to RIKEN cDNA 5730509K17 gene | RGD1561042 | 498386 | 1,34 | up   |
| 6592909 | 7126658 | 1193134 | similar to RIKEN cDNA 5730509K17 gene | RGD1561042 | 498386 | 1,32 | down |
| 6099120 | 7126658 | 1193132 | similar to RIKEN cDNA 5730509K17 gene | RGD1561042 | 498386 | 1,28 | up   |
| 6549950 | 7126658 | 1193174 | similar to RIKEN cDNA 5730509K17 gene | RGD1561042 | 498386 | 1,28 | up   |
| 6271152 | 7126658 | 1193155 | similar to RIKEN cDNA 5730509K17 gene | RGD1561042 | 498386 | 1,27 | down |
| 5948318 | 7126658 | 1193145 | similar to RIKEN cDNA 5730509K17 gene | RGD1561042 | 498386 | 1,25 | down |
| 5816635 | 7126658 | 1193159 | similar to RIKEN cDNA 5730509K17 gene | RGD1561042 | 498386 | 1,24 | up   |
| 6508109 | 7126658 | 1193158 | similar to RIKEN cDNA 5730509K17 gene | RGD1561042 | 498386 | 1,24 | up   |
| 6500100 | 7126658 | 1193142 | similar to RIKEN cDNA 5730509K17 gene | RGD1561042 | 498386 | 1,19 | up   |
| 6005970 | 7126658 | 1193163 | similar to RIKEN cDNA 5730509K17 gene | RGD1561042 | 498386 | 1,16 | down |
| 5939670 | 7126658 | 1193160 | similar to RIKEN cDNA 5730509K17 gene | RGD1561042 | 498386 | 1,13 | up   |
| 6314201 | 7126658 | 1193130 | similar to RIKEN cDNA 5730509K17 gene | RGD1561042 | 498386 | 1,12 | down |
| 6415116 | 7126658 | 1193140 | similar to RIKEN cDNA 5730509K17 gene | RGD1561042 | 498386 | 1,07 | down |
| 6443135 | 7126658 | 1193166 | similar to RIKEN cDNA 5730509K17 gene | RGD1561042 | 498386 | 1,07 | up   |
| 6262225 | 7126658 | 1193171 | similar to RIKEN cDNA 5730509K17 gene | RGD1561042 | 498386 | 1,05 | down |
| 6510787 | 7126658 | 1193172 | similar to RIKEN cDNA 5730509K17 gene | RGD1561042 | 498386 | 1,05 | up   |
| 6725687 | 7126658 | 1193137 | similar to RIKEN cDNA 5730509K17 gene | RGD1561042 | 498386 | 1,05 | down |
| 6233631 | 7126658 | 1193162 | similar to RIKEN cDNA 5730509K17 gene | RGD1561042 | 498386 | 1,03 | down |
| 6064099 | 7126658 | 1193138 | similar to RIKEN cDNA 5730509K17 gene | RGD1561042 | 498386 | 1,01 | up   |
| 5849130 | 7126658 | 1193136 | similar to RIKEN cDNA 5730509K17 gene | RGD1561042 | 498386 | 1,00 | down |
| 5929869 | 7344380 | 1731115 | similar to RIKEN cDNA 5830475I06      | RGD1311744 | 300608 | 1,03 | down |
| 6171858 | 7275879 | 1562188 | similar to RIKEN cDNA 6330416G13 gene | RGD1304595 | 298104 | 2,36 | down |
| 6137334 | 7275879 | 1562200 | similar to RIKEN cDNA 6330416G13 gene | RGD1304595 | 298104 | 2,15 | up   |
| 5717019 | 7275879 | 1562203 | similar to RIKEN cDNA 6330416G13 gene | RGD1304595 | 298104 | 1,97 | down |
| 5809007 | 7275879 | 1562199 | similar to RIKEN cDNA 6330416G13 gene | RGD1304595 | 298104 | 1,93 | up   |
| 6629616 | 7275879 | 1562196 | similar to RIKEN cDNA 6330416G13 gene | RGD1304595 | 298104 | 1,88 | up   |
| 5661952 | 7275879 | 1562203 | similar to RIKEN cDNA 6330416G13 gene | RGD1304595 | 298104 | 1,49 | up   |
| 6043354 | 7275879 | 1562198 | similar to RIKEN cDNA 6330416G13 gene | RGD1304595 | 298104 | 1,44 | up   |
| 6653833 | 7275879 | 1562204 | similar to RIKEN cDNA 6330416G13 gene | RGD1304595 | 298104 | 1,38 | up   |
| 6393936 | 7275879 | 1562190 | similar to RIKEN cDNA 6330416G13 gene | RGD1304595 | 298104 | 1,34 | up   |
| 6077423 | 7275879 | 1562197 | similar to RIKEN cDNA 6330416G13 gene | RGD1304595 | 298104 | 1,28 | up   |
| 6195896 | 7275879 | 1562204 | similar to RIKEN cDNA 6330416G13 gene | RGD1304595 | 298104 | 1,26 | down |
| 6651401 | 7275879 | 1562204 | similar to RIKEN cDNA 6330416G13 gene | RGD1304595 | 298104 | 1,21 | up   |
| 5808910 | 7275879 | 1562202 | similar to RIKEN cDNA 6330416G13 gene | RGD1304595 | 298104 | 1,20 | down |
| 6654241 | 7275879 | 1562189 | similar to RIKEN cDNA 6330416G13 gene | RGD1304595 | 298104 | 1,20 | down |
| 6327702 | 7275879 | 1562204 | similar to RIKEN cDNA 6330416G13 gene | RGD1304595 | 298104 | 1,10 | down |
| 5806295 | 7275879 | 1562203 | similar to RIKEN cDNA 6330416G13 gene | RGD1304595 | 298104 | 1,10 | down |
| 6051699 | 7275879 | 1562203 | similar to RIKEN cDNA 6330416G13 gene | RGD1304595 | 298104 | 1,09 | up   |
| 6618034 | 7275879 | 1562193 | similar to RIKEN cDNA 6330416G13 gene | RGD1304595 | 298104 | 1,08 | down |
| 6055660 | 7275879 | 1562204 | similar to RIKEN cDNA 6330416G13 gene | RGD1304595 | 298104 | 1,05 | up   |
| 5845231 | 7275879 | 1562204 | similar to RIKEN cDNA 6330416G13 gene | RGD1304595 | 298104 | 1,03 | down |
| 6507341 | 7282393 | 1578795 | similar to RIKEN cDNA 9430015G10      | RGD1311517 | 313775 | 2,38 | down |
| 6673686 | 7282393 | 1578793 | similar to RIKEN cDNA 9430015G10      | RGD1311517 | 313775 | 1,99 | down |
| 5753304 | 7282393 | 1578792 | similar to RIKEN cDNA 9430015G10      | RGD1311517 | 313775 | 1,85 | up   |
| 5997509 | 7282393 | 1578794 | similar to RIKEN cDNA 9430015G10      | RGD1311517 | 313775 | 1,66 | down |
| 5638392 | 7282393 | 1578789 | similar to RIKEN cDNA 9430015G10      | RGD1311517 | 313775 | 1,46 | up   |
| 5860115 | 7282393 | 1578793 | similar to RIKEN cDNA 9430015G10      | RGD1311517 | 313775 | 1,39 | up   |
| 6240584 | 7282393 | 1578790 | similar to RIKEN cDNA 9430015G10      | RGD1311517 | 313775 | 1,36 | down |
| 5820923 | 7282393 | 1578796 | similar to RIKEN cDNA 9430015G10      | RGD1311517 | 313775 | 1,36 | up   |
| 5905313 | 7282393 | 1578791 | similar to RIKEN cDNA 9430015G10      | RGD1311517 | 313775 | 1,12 | up   |
| 6248779 | 7282393 | 1578787 | similar to RIKEN cDNA 9430015G10      | RGD1311517 | 313775 | 1,11 | down |
| 6018100 | 7282393 | 1578788 | similar to RIKEN cDNA 9430015G10      | RGD1311517 | 313775 | 1,07 | up   |
| 6627349 | 7282393 | 1578796 | similar to RIKEN cDNA 9430015G10      | RGD1311517 | 313775 | 1,00 | down |
| 6007397 | 7356619 | 1761332 | similar to RIKEN cDNA 9430031J16      | RGD1305560 | 301561 | 3,13 | down |
| 6086031 | 7356619 | 1761333 | similar to RIKEN cDNA 9430031J16      | RGD1305560 | 301561 | 2,32 | down |

|         |         |         |                                       |            |        |      |      |
|---------|---------|---------|---------------------------------------|------------|--------|------|------|
| 5705242 | 7356619 | 1761341 | similar to RIKEN cDNA 9430031J16      | RGD1305560 | 301561 | 1,49 | up   |
| 5621563 | 7356619 | 1761353 | similar to RIKEN cDNA 9430031J16      | RGD1305560 | 301561 | 1,15 | up   |
| 6290385 | 7356619 | 1761330 | similar to RIKEN cDNA 9430031J16      | RGD1305560 | 301561 | 1,14 | down |
| 6139132 | 7356619 | 1761353 | similar to RIKEN cDNA 9430031J16      | RGD1305560 | 301561 | 1,11 | up   |
| 6071992 | 7068695 | 1052733 | similar to RIKEN cDNA A530088H08 gene | RGD1565284 | 497929 | 1,09 | up   |
| 6588572 | 7068695 | 1052737 | similar to RIKEN cDNA A530088H08 gene | RGD1565284 | 497929 | 1,07 | down |
| 6076541 | 7199341 | 1374125 | similar to RIKEN cDNA A630047E20      | RGD1307816 | 295446 | 2,06 | down |
| 6175094 | 7199341 | 1374143 | similar to RIKEN cDNA A630047E20      | RGD1307816 | 295446 | 2,02 | up   |
| 5848349 | 7199341 | 1374180 | similar to RIKEN cDNA A630047E20      | RGD1307816 | 295446 | 1,69 | up   |
| 5620785 | 7199341 | 1374137 | similar to RIKEN cDNA A630047E20      | RGD1307816 | 295446 | 1,51 | up   |
| 6563007 | 7199341 | 1374123 | similar to RIKEN cDNA A630047E20      | RGD1307816 | 295446 | 1,50 | up   |
| 6561857 | 7199341 | 1374125 | similar to RIKEN cDNA A630047E20      | RGD1307816 | 295446 | 1,39 | down |
| 6190298 | 7199341 | 1374152 | similar to RIKEN cDNA A630047E20      | RGD1307816 | 295446 | 1,35 | down |
| 6583077 | 7199341 | 1374179 | similar to RIKEN cDNA A630047E20      | RGD1307816 | 295446 | 1,32 | up   |
| 5686510 | 7199341 | 1374147 | similar to RIKEN cDNA A630047E20      | RGD1307816 | 295446 | 1,32 | up   |
| 6611240 | 7199341 | 1374180 | similar to RIKEN cDNA A630047E20      | RGD1307816 | 295446 | 1,31 | down |
| 6193005 | 7199341 | 1374146 | similar to RIKEN cDNA A630047E20      | RGD1307816 | 295446 | 1,31 | up   |
| 5679461 | 7199341 | 1374144 | similar to RIKEN cDNA A630047E20      | RGD1307816 | 295446 | 1,30 | down |
| 6406632 | 7199341 | 1374148 | similar to RIKEN cDNA A630047E20      | RGD1307816 | 295446 | 1,28 | down |
| 6485084 | 7199341 | 1374145 | similar to RIKEN cDNA A630047E20      | RGD1307816 | 295446 | 1,28 | up   |
| 6481512 | 7199341 | 1374175 | similar to RIKEN cDNA A630047E20      | RGD1307816 | 295446 | 1,27 | up   |
| 5639640 | 7199341 | 1374131 | similar to RIKEN cDNA A630047E20      | RGD1307816 | 295446 | 1,27 | down |
| 5624521 | 7199341 | 1374180 | similar to RIKEN cDNA A630047E20      | RGD1307816 | 295446 | 1,25 | up   |
| 6132129 | 7199341 | 1374128 | similar to RIKEN cDNA A630047E20      | RGD1307816 | 295446 | 1,22 | up   |
| 5753290 | 7199341 | 1374180 | similar to RIKEN cDNA A630047E20      | RGD1307816 | 295446 | 1,20 | down |
| 5892247 | 7199341 | 1374135 | similar to RIKEN cDNA A630047E20      | RGD1307816 | 295446 | 1,18 | up   |
| 6702026 | 7199341 | 1374141 | similar to RIKEN cDNA A630047E20      | RGD1307816 | 295446 | 1,17 | down |
| 6122660 | 7199341 | 1374179 | similar to RIKEN cDNA A630047E20      | RGD1307816 | 295446 | 1,15 | down |
| 6372113 | 7199341 | 1374159 | similar to RIKEN cDNA A630047E20      | RGD1307816 | 295446 | 1,14 | down |
| 6377925 | 7199341 | 1374136 | similar to RIKEN cDNA A630047E20      | RGD1307816 | 295446 | 1,14 | up   |
| 6102135 | 7199341 | 1374134 | similar to RIKEN cDNA A630047E20      | RGD1307816 | 295446 | 1,11 | up   |
| 6213282 | 7199341 | 1374139 | similar to RIKEN cDNA A630047E20      | RGD1307816 | 295446 | 1,08 | down |
| 6388463 | 7199341 | 1374142 | similar to RIKEN cDNA A630047E20      | RGD1307816 | 295446 | 1,08 | down |
| 5801699 | 7199341 | 1374179 | similar to RIKEN cDNA A630047E20      | RGD1307816 | 295446 | 1,06 | down |
| 6349182 | 7199341 | 1374138 | similar to RIKEN cDNA A630047E20      | RGD1307816 | 295446 | 1,05 | up   |
| 6570876 | 7199341 | 1374169 | similar to RIKEN cDNA A630047E20      | RGD1307816 | 295446 | 1,05 | up   |
| 6540303 | 7199341 | 1374151 | similar to RIKEN cDNA A630047E20      | RGD1307816 | 295446 | 1,04 | down |
| 5686336 | 7199341 | 1374132 | similar to RIKEN cDNA A630047E20      | RGD1307816 | 295446 | 1,03 | down |
| 6277385 | 7190242 | 1350304 | similar to RIKEN cDNA B130016O10 gene | RGD1308448 | 310358 | 1,47 | down |
| 6585562 | 7190242 | 1350322 | similar to RIKEN cDNA B130016O10 gene | RGD1308448 | 310358 | 1,35 | down |
| 5952428 | 7190242 | 1350321 | similar to RIKEN cDNA B130016O10 gene | RGD1308448 | 310358 | 1,19 | down |
| 5711636 | 7190242 | 1350294 | similar to RIKEN cDNA B130016O10 gene | RGD1308448 | 310358 | 1,04 | up   |
| 6225408 | 7180538 | 1326187 | similar to RIKEN cDNA D230025D16Rik   | RGD621098  | 207123 | 2,13 | down |
| 6039544 | 7180538 | 1326201 | similar to RIKEN cDNA D230025D16Rik   | RGD621098  | 207123 | 1,73 | down |
| 5667803 | 7180538 | 1326192 | similar to RIKEN cDNA D230025D16Rik   | RGD621098  | 207123 | 1,50 | down |
| 6311644 | 7180538 | 1326187 | similar to RIKEN cDNA D230025D16Rik   | RGD621098  | 207123 | 1,30 | up   |
| 6409091 | 7180538 | 1326193 | similar to RIKEN cDNA D230025D16Rik   | RGD621098  | 207123 | 1,30 | up   |
| 6017115 | 7180538 | 1326202 | similar to RIKEN cDNA D230025D16Rik   | RGD621098  | 207123 | 1,27 | up   |
| 6281268 | 7180538 | 1326196 | similar to RIKEN cDNA D230025D16Rik   | RGD621098  | 207123 | 1,24 | up   |
| 5675159 | 7180538 | 1326197 | similar to RIKEN cDNA D230025D16Rik   | RGD621098  | 207123 | 1,19 | up   |
| 6423387 | 7180538 | 1326187 | similar to RIKEN cDNA D230025D16Rik   | RGD621098  | 207123 | 1,17 | down |
| 6519836 | 7180538 | 1326194 | similar to RIKEN cDNA D230025D16Rik   | RGD621098  | 207123 | 1,15 | up   |
| 6338254 | 7180538 | 1326187 | similar to RIKEN cDNA D230025D16Rik   | RGD621098  | 207123 | 1,11 | down |
| 6493368 | 7180538 | 1326200 | similar to RIKEN cDNA D230025D16Rik   | RGD621098  | 207123 | 1,09 | down |
| 5834509 | 7180538 | 1326191 | similar to RIKEN cDNA D230025D16Rik   | RGD621098  | 207123 | 1,08 | down |
| 6306322 | 7180538 | 1326199 | similar to RIKEN cDNA D230025D16Rik   | RGD621098  | 207123 | 1,07 | up   |
| 6098990 | 7180538 | 1326195 | similar to RIKEN cDNA D230025D16Rik   | RGD621098  | 207123 | 1,03 | up   |

|         |         |         |                                                                                                                                           |            |        |      |      |
|---------|---------|---------|-------------------------------------------------------------------------------------------------------------------------------------------|------------|--------|------|------|
| 6446327 | 7180538 | 1326198 | similar to RIKEN cDNA D230025D16Rik                                                                                                       | RGD621098  | 207123 | 1,03 | up   |
| 6302349 | 7180538 | 1326188 | similar to RIKEN cDNA D230025D16Rik                                                                                                       | RGD621098  | 207123 | 1,02 | up   |
| 6046403 | 7180538 | 1326189 | similar to RIKEN cDNA D230025D16Rik                                                                                                       | RGD621098  | 207123 | 1,01 | down |
| 6435248 | 7180538 | 1326190 | similar to RIKEN cDNA D230025D16Rik                                                                                                       | RGD621098  | 207123 | 1,01 | up   |
| 6006304 | 7340304 | 1720865 | similar to RIKEN cDNA D330022A01 gene                                                                                                     | RGD1306603 | 363144 | 2,47 | down |
| 5890959 | 7340304 | 1720867 | similar to RIKEN cDNA D330022A01 gene                                                                                                     | RGD1306603 | 363144 | 2,36 | down |
| 5721436 | 7340304 | 1720867 | similar to RIKEN cDNA D330022A01 gene                                                                                                     | RGD1306603 | 363144 | 1,26 | down |
| 6574108 | 7340304 | 1720868 | similar to RIKEN cDNA D330022A01 gene                                                                                                     | RGD1306603 | 363144 | 1,21 | down |
| 6391869 | 7162959 | 1282089 | similar to RNA binding motif protein 24                                                                                                   | LOC690139  | 690139 | 2,40 | down |
| 5752899 | 7162959 | 1282082 | similar to RNA binding motif protein 24                                                                                                   | LOC690139  | 690139 | 1,74 | down |
| 6452130 | 7162959 | 1282082 | similar to RNA binding motif protein 24                                                                                                   | LOC690139  | 690139 | 1,40 | up   |
| 5795807 | 7162959 | 1282082 | similar to RNA binding motif protein 24                                                                                                   | LOC690139  | 690139 | 1,22 | up   |
| 6064632 | 7162959 | 1282086 | similar to RNA binding motif protein 24                                                                                                   | LOC690139  | 690139 | 1,11 | up   |
| 6113187 | 7162959 | 1282082 | similar to RNA binding motif protein 24                                                                                                   | LOC690139  | 690139 | 1,08 | down |
| 5926726 | 7162959 | 1282082 | similar to RNA binding motif protein 24                                                                                                   | LOC690139  | 690139 | 1,06 | up   |
| 5970445 | 7162959 | 1282082 | similar to RNA binding motif protein 24                                                                                                   | LOC690139  | 690139 | 1,05 | down |
| 5914540 | 7162959 | 1282089 | similar to RNA binding motif protein 24                                                                                                   | LOC690139  | 690139 | 1,03 | up   |
| 6178115 | 7162959 | 1282087 | similar to RNA binding motif protein 24                                                                                                   | LOC690139  | 690139 | 1,02 | down |
| 5989293 | 7351953 | 1749880 | similar to RP3-330M21.4                                                                                                                   | RGD1559518 | 316229 | 1,89 | down |
| 6505921 | 7351953 | 1749864 | similar to RP3-330M21.4                                                                                                                   | RGD1559518 | 316229 | 1,79 | down |
| 6298343 | 7351953 | 1749869 | similar to RP3-330M21.4                                                                                                                   | RGD1559518 | 316229 | 1,41 | up   |
| 6153585 | 7351953 | 1749879 | similar to RP3-330M21.4                                                                                                                   | RGD1559518 | 316229 | 1,39 | up   |
| 6610414 | 7351953 | 1749879 | similar to RP3-330M21.4                                                                                                                   | RGD1559518 | 316229 | 1,39 | down |
| 6674795 | 7351953 | 1749871 | similar to RP3-330M21.4                                                                                                                   | RGD1559518 | 316229 | 1,35 | up   |
| 5866423 | 7351953 | 1749865 | similar to RP3-330M21.4                                                                                                                   | RGD1559518 | 316229 | 1,31 | up   |
| 6274948 | 7351953 | 1749879 | similar to RP3-330M21.4                                                                                                                   | RGD1559518 | 316229 | 1,30 | up   |
| 6528755 | 7351953 | 1749879 | similar to RP3-330M21.4                                                                                                                   | RGD1559518 | 316229 | 1,26 | down |
| 6469184 | 7351953 | 1749870 | similar to RP3-330M21.4                                                                                                                   | RGD1559518 | 316229 | 1,19 | up   |
| 6302487 | 7351953 | 1749872 | similar to RP3-330M21.4                                                                                                                   | RGD1559518 | 316229 | 1,11 | down |
| 6508790 | 7351953 | 1749874 | similar to RP3-330M21.4                                                                                                                   | RGD1559518 | 316229 | 1,10 | down |
| 6301972 | 7351953 | 1749867 | similar to RP3-330M21.4                                                                                                                   | RGD1559518 | 316229 | 1,10 | down |
| 5692810 | 7351953 | 1749880 | similar to RP3-330M21.4                                                                                                                   | RGD1559518 | 316229 | 1,09 | down |
| 6121412 | 7351953 | 1749866 | similar to RP3-330M21.4                                                                                                                   | RGD1559518 | 316229 | 1,09 | down |
| 5661159 | 7351953 | 1749860 | similar to RP3-330M21.4                                                                                                                   | RGD1559518 | 316229 | 1,07 | up   |
| 6396536 | 7351953 | 1749873 | similar to RP3-330M21.4                                                                                                                   | RGD1559518 | 316229 | 1,03 | down |
| 6434188 | 7351953 | 1749879 | similar to RP3-330M21.4                                                                                                                   | RGD1559518 | 316229 | 1,02 | down |
| 6577417 | 7351953 | 1749868 | similar to RP3-330M21.4                                                                                                                   | RGD1559518 | 316229 | 1,01 | down |
| 6296892 | 7351953 | 1749874 | similar to RP3-330M21.4                                                                                                                   | RGD1559518 | 316229 | 1,00 | up   |
| 6021572 | 7220882 | 1424991 | similar to RT1 class II histocompatibility antigen, B-1 beta chain precursor (RT1.B-beta(1)) /// RT1 cC688090 /// RT1-I 688090 /// 309622 |            |        | 2,48 | up   |
| 6254811 | 7220882 | 1424992 | similar to RT1 class II histocompatibility antigen, B-1 beta chain precursor (RT1.B-beta(1)) /// RT1 cC688090 /// RT1-I 688090 /// 309622 |            |        | 1,02 | up   |
| 5680558 | 7038179 | 981267  | similar to scavenger receptor cysteine-rich type 1 protein M160 precursor                                                                 | LOC680907  | 680907 | 1,47 | down |
| 6586091 | 7038179 | 981262  | similar to scavenger receptor cysteine-rich type 1 protein M160 precursor                                                                 | LOC680907  | 680907 | 1,38 | up   |
| 5972890 | 7038179 | 981265  | similar to scavenger receptor cysteine-rich type 1 protein M160 precursor                                                                 | LOC680907  | 680907 | 1,23 | up   |
| 6266909 | 7038179 | 981264  | similar to scavenger receptor cysteine-rich type 1 protein M160 precursor                                                                 | LOC680907  | 680907 | 1,22 | up   |
| 5669056 | 7038179 | 981266  | similar to scavenger receptor cysteine-rich type 1 protein M160 precursor                                                                 | LOC680907  | 680907 | 1,15 | down |
| 5929730 | 7038179 | 981264  | similar to scavenger receptor cysteine-rich type 1 protein M160 precursor                                                                 | LOC680907  | 680907 | 1,14 | up   |
| 5809030 | 7038179 | 981268  | similar to scavenger receptor cysteine-rich type 1 protein M160 precursor                                                                 | LOC680907  | 680907 | 1,12 | up   |
| 5880897 | 7038179 | 981266  | similar to scavenger receptor cysteine-rich type 1 protein M160 precursor                                                                 | LOC680907  | 680907 | 1,08 | up   |
| 5896178 | 7038179 | 981261  | similar to scavenger receptor cysteine-rich type 1 protein M160 precursor                                                                 | LOC680907  | 680907 | 1,03 | up   |
| 5791338 | 7038179 | 981265  | similar to scavenger receptor cysteine-rich type 1 protein M160 precursor                                                                 | LOC680907  | 680907 | 1,02 | down |
| 6663964 | 7038179 | 981264  | similar to scavenger receptor cysteine-rich type 1 protein M160 precursor                                                                 | LOC680907  | 680907 | 1,01 | down |
| 5744818 | 7038179 | 981262  | similar to scavenger receptor cysteine-rich type 1 protein M160 precursor                                                                 | LOC680907  | 680907 | 1,01 | down |
| 5986359 | 7038179 | 981253  | similar to scavenger receptor protein family member                                                                                       | LOC682120  | 682120 | 1,31 | up   |
| 6176251 | 7038179 | 981254  | similar to scavenger receptor protein family member                                                                                       | LOC682120  | 682120 | 1,08 | up   |
| 6533098 | 7136142 | 1216425 | similar to SEC24 related gene family, member C                                                                                            | LOC685144  | 685144 | 1,53 | up   |
| 6423551 | 7136142 | 1216436 | similar to SEC24 related gene family, member C                                                                                            | LOC685144  | 685144 | 1,33 | down |
| 5915938 | 7136142 | 1216432 | similar to SEC24 related gene family, member C                                                                                            | LOC685144  | 685144 | 1,27 | down |

|         |         |         |                                                |            |        |      |      |
|---------|---------|---------|------------------------------------------------|------------|--------|------|------|
| 5935757 | 7136142 | 1216421 | similar to SEC24 related gene family, member C | LOC685144  | 685144 | 1,26 | up   |
| 6738236 | 7136142 | 1216423 | similar to SEC24 related gene family, member C | LOC685144  | 685144 | 1,26 | up   |
| 5681691 | 7136142 | 1216414 | similar to SEC24 related gene family, member C | LOC685144  | 685144 | 1,20 | down |
| 6048314 | 7136142 | 1216429 | similar to SEC24 related gene family, member C | LOC685144  | 685144 | 1,19 | down |
| 6432521 | 7136142 | 1216432 | similar to SEC24 related gene family, member C | LOC685144  | 685144 | 1,19 | down |
| 5767871 | 7136142 | 1216426 | similar to SEC24 related gene family, member C | LOC685144  | 685144 | 1,15 | up   |
| 5857119 | 7136142 | 1216431 | similar to SEC24 related gene family, member C | LOC685144  | 685144 | 1,13 | up   |
| 6670750 | 7136142 | 1216435 | similar to SEC24 related gene family, member C | LOC685144  | 685144 | 1,12 | down |
| 6179327 | 7136142 | 1216428 | similar to SEC24 related gene family, member C | LOC685144  | 685144 | 1,12 | up   |
| 6178972 | 7136142 | 1216415 | similar to SEC24 related gene family, member C | LOC685144  | 685144 | 1,09 | down |
| 6050800 | 7136142 | 1216419 | similar to SEC24 related gene family, member C | LOC685144  | 685144 | 1,09 | up   |
| 6727363 | 7136142 | 1216419 | similar to SEC24 related gene family, member C | LOC685144  | 685144 | 1,08 | down |
| 6541575 | 7136142 | 1216415 | similar to SEC24 related gene family, member C | LOC685144  | 685144 | 1,08 | down |
| 5678338 | 7136142 | 1216414 | similar to SEC24 related gene family, member C | LOC685144  | 685144 | 1,06 | down |
| 5906528 | 7136142 | 1216424 | similar to SEC24 related gene family, member C | LOC685144  | 685144 | 1,05 | up   |
| 6339273 | 7136142 | 1216433 | similar to SEC24 related gene family, member C | LOC685144  | 685144 | 1,05 | down |
| 6666903 | 7136142 | 1216432 | similar to SEC24 related gene family, member C | LOC685144  | 685144 | 1,03 | down |
| 6086570 | 7136142 | 1216418 | similar to SEC24 related gene family, member C | LOC685144  | 685144 | 1,03 | up   |
| 6658473 | 7136142 | 1216427 | similar to SEC24 related gene family, member C | LOC685144  | 685144 | 1,03 | down |
| 5973462 | 7136142 | 1216420 | similar to SEC24 related gene family, member C | LOC685144  | 685144 | 1,02 | up   |
| 6007216 | 7136142 | 1216417 | similar to SEC24 related gene family, member C | LOC685144  | 685144 | 1,02 | down |
| 6630251 | 7136142 | 1216422 | similar to SEC24 related gene family, member C | LOC685144  | 685144 | 1,02 | down |
| 5716373 | 7136142 | 1216414 | similar to SEC24 related gene family, member C | LOC685144  | 685144 | 1,01 | down |
| 5849261 | 7136142 | 1216433 | similar to SEC24 related gene family, member C | LOC685144  | 685144 | 1,00 | down |
| 6617941 | 7055876 | 1022460 | similar to SET binding factor 2                | LOC691036  | 691036 | 1,65 | down |
| 6098912 | 7055876 | 1022512 | similar to SET binding factor 2                | RGD1559442 | 308934 | 1,54 | up   |
| 5623322 | 7055876 | 1022458 | similar to SET binding factor 2                | LOC691036  | 691036 | 1,53 | down |
| 6746918 | 7055876 | 1022521 | similar to SET binding factor 2                | LOC691036  | 691036 | 1,51 | down |
| 6087757 | 7055876 | 1022462 | similar to SET binding factor 2                | LOC691036  | 691036 | 1,42 | up   |
| 6567767 | 7055876 | 1022457 | similar to SET binding factor 2                | LOC691036  | 691036 | 1,40 | down |
| 6077287 | 7055876 | 1022460 | similar to SET binding factor 2                | LOC691036  | 691036 | 1,38 | down |
| 6291492 | 7055876 | 1022484 | similar to SET binding factor 2                | LOC691036  | 691036 | 1,30 | down |
| 5877262 | 7055876 | 1022468 | similar to SET binding factor 2                | LOC691036  | 691036 | 1,28 | down |
| 5826017 | 7055876 | 1022521 | similar to SET binding factor 2                | LOC691036  | 691036 | 1,27 | down |
| 6064219 | 7055876 | 1022495 | similar to SET binding factor 2                | LOC691036  | 691036 | 1,25 | down |
| 5888270 | 7055876 | 1022492 | similar to SET binding factor 2                | LOC691036  | 691036 | 1,25 | up   |
| 5941712 | 7055876 | 1022478 | similar to SET binding factor 2                | LOC691036  | 691036 | 1,24 | down |
| 6538639 | 7055876 | 1022501 | similar to SET binding factor 2                | LOC691036  | 691036 | 1,23 | up   |
| 6689255 | 7055876 | 1022503 | similar to SET binding factor 2                | LOC691036  | 691036 | 1,21 | down |
| 6091359 | 7055876 | 1022499 | similar to SET binding factor 2                | LOC691036  | 691036 | 1,19 | up   |
| 6688525 | 7055876 | 1022506 | similar to SET binding factor 2                | LOC691036  | 691036 | 1,18 | up   |
| 6109531 | 7055876 | 1022503 | similar to SET binding factor 2                | LOC691036  | 691036 | 1,18 | up   |
| 6243774 | 7055876 | 1022476 | similar to SET binding factor 2                | LOC691036  | 691036 | 1,17 | up   |
| 5936562 | 7055876 | 1022483 | similar to SET binding factor 2                | LOC691036  | 691036 | 1,16 | up   |
| 5786165 | 7055876 | 1022502 | similar to SET binding factor 2                | LOC691036  | 691036 | 1,15 | up   |
| 6721407 | 7055876 | 1022474 | similar to SET binding factor 2                | LOC691036  | 691036 | 1,15 | down |
| 5893895 | 7055876 | 1022483 | similar to SET binding factor 2                | LOC691036  | 691036 | 1,14 | up   |
| 5637175 | 7055876 | 1022457 | similar to SET binding factor 2                | LOC691036  | 691036 | 1,14 | down |
| 6088981 | 7055876 | 1022504 | similar to SET binding factor 2                | LOC691036  | 691036 | 1,13 | up   |
| 5668276 | 7055876 | 1022496 | similar to SET binding factor 2                | LOC691036  | 691036 | 1,12 | down |
| 6518927 | 7055876 | 1022507 | similar to SET binding factor 2                | LOC691036  | 691036 | 1,10 | up   |
| 5743164 | 7055876 | 1022479 | similar to SET binding factor 2                | LOC691036  | 691036 | 1,10 | down |
| 5653879 | 7055876 | 1022466 | similar to SET binding factor 2                | LOC691036  | 691036 | 1,10 | up   |
| 5876223 | 7055876 | 1022466 | similar to SET binding factor 2                | LOC691036  | 691036 | 1,10 | up   |
| 6490698 | 7055876 | 1022500 | similar to SET binding factor 2                | LOC691036  | 691036 | 1,09 | down |
| 6080304 | 7055876 | 1022465 | similar to SET binding factor 2                | LOC691036  | 691036 | 1,09 | up   |
| 5946527 | 7055876 | 1022497 | similar to SET binding factor 2                | LOC691036  | 691036 | 1,07 | down |

|         |         |         |                                                                                                       |            |              |         |      |      |
|---------|---------|---------|-------------------------------------------------------------------------------------------------------|------------|--------------|---------|------|------|
| 6254497 | 7055876 | 1022480 | similar to SET binding factor 2                                                                       | LOC691036  | 691036       | 1,06    | up   |      |
| 6434122 | 7055876 | 1022477 | similar to SET binding factor 2                                                                       | LOC691036  | 691036       | 1,05    | down |      |
| 6349902 | 7055876 | 1022463 | similar to SET binding factor 2                                                                       | LOC691036  | 691036       | 1,05    | down |      |
| 5987989 | 7055876 | 1022467 | similar to SET binding factor 2                                                                       | LOC691036  | 691036       | 1,04    | down |      |
| 5696648 | 7055876 | 1022461 | similar to SET binding factor 2                                                                       | LOC691036  | 691036       | 1,04    | down |      |
| 6677464 | 7055876 | 1022488 | similar to SET binding factor 2                                                                       | LOC691036  | 691036       | 1,04    | up   |      |
| 5973328 | 7055876 | 1022482 | similar to SET binding factor 2                                                                       | LOC691036  | 691036       | 1,02    | up   |      |
| 5812429 | 7055876 | 1022464 | similar to SET binding factor 2                                                                       | LOC691036  | 691036       | 1,02    | up   |      |
| 6235571 | 7055876 | 1022467 | similar to SET binding factor 2                                                                       | LOC691036  | 691036       | 1,02    | down |      |
| 6685509 | 7055876 | 1022481 | similar to SET binding factor 2                                                                       | LOC691036  | 691036       | 1,02    | down |      |
| 6400402 | 7055876 | 1022508 | similar to SET binding factor 2                                                                       | LOC691036  | 691036       | 1,02    | down |      |
| 5702056 | 7055876 | 1022469 | similar to SET binding factor 2                                                                       | LOC691036  | 691036       | 1,01    | down |      |
| 5934001 | 7055876 | 1022515 | similar to SET binding factor 2                                                                       | LOC691036  | 691036       | 1,01    | down |      |
| 6421933 | 7055876 | 1022498 | similar to SET binding factor 2                                                                       | LOC691036  | 691036       | 1,01    | up   |      |
| 6533977 | 7102040 | 1132631 | similar to SET domain-containing protein                                                              | LOC689820  | 689820       | 1,42    | down |      |
| 6390393 | 7102040 | 1132632 | similar to SET domain-containing protein /// SET domain containing (lysine methyltransferase) 8       | LOC687538  | 687538       | 2,27    | down |      |
| 5875307 | 7102040 | 1132627 | similar to SET domain-containing protein /// similar to SET domain-containing protein /// SET doma820 | LOC687538  | 687538       | 1,37    | up   |      |
| 5980303 | 7102040 | 1132629 | similar to SET domain-containing protein /// similar to SET domain-containing protein /// SET doma820 | LOC687538  | 687538       | 1,36    | up   |      |
| 6246111 | 7102040 | 1132622 | similar to SET domain-containing protein /// similar to SET domain-containing protein /// SET doma820 | LOC687538  | 687538       | 1,12    | down |      |
| 6168314 | 7102040 | 1132626 | similar to SET domain-containing protein /// similar to SET domain-containing protein /// SET doma820 | LOC687538  | 687538       | 1,09    | up   |      |
| 6127290 | 7102040 | 1132628 | similar to SET domain-containing protein /// similar to SET domain-containing protein /// SET doma820 | LOC687538  | 687538       | 1,09    | up   |      |
| 5904319 | 7102040 | 1132623 | similar to SET domain-containing protein /// similar to SET domain-containing protein /// SET doma820 | LOC687538  | 687538       | 1,08    | up   |      |
| 6183055 | 7102040 | 1132625 | similar to SET domain-containing protein /// similar to SET domain-containing protein /// SET doma820 | LOC687538  | 687538       | 1,01    | down |      |
| 5994444 | 7102040 | 1132621 | similar to SET domain-containing protein /// similar to SET domain-containing protein /// SET doma820 | LOC687538  | 687538       | 1,01    | down |      |
| 6132065 | 7100523 | 1128953 | similar to sidekick 1                                                                                 | RGD1560686 | 304297       | 1,38    | up   |      |
| 5724848 | 7100523 | 1128841 | similar to sidekick 1                                                                                 | RGD1560686 | 304297       | 1,33    | up   |      |
| 5740285 | 7100523 | 1128935 | similar to sidekick 1                                                                                 | RGD1560686 | 304297       | 1,32    | up   |      |
| 5710794 | 7100523 | 1128949 | similar to sidekick 1                                                                                 | RGD1560686 | 304297       | 1,29    | up   |      |
| 5788599 | 7100523 | 1128953 | similar to sidekick 1                                                                                 | RGD1560686 | 304297       | 1,21    | down |      |
| 6639676 | 7100523 | 1128948 | similar to sidekick 1                                                                                 | RGD1560686 | 304297       | 1,20    | up   |      |
| 5645213 | 7310851 | 1649623 | similar to single chain Fv antibody fragment scFv 7-10A /// immunoglobulin heavy chain 6              | LOC314509  | Igh-t 314509 | 2,99357 | 1,43 | up   |
| 6675013 | 7310851 | 1649621 | similar to single chain Fv antibody fragment scFv 7-10A /// immunoglobulin heavy chain 6              | LOC314509  | Igh-t 314509 | 2,99357 | 1,26 | up   |
| 6559344 | 7310851 | 1649624 | similar to single chain Fv antibody fragment scFv 7-10A /// immunoglobulin heavy chain 6              | LOC314509  | Igh-t 314509 | 2,99357 | 1,23 | up   |
| 5743795 | 7310851 | 1649622 | similar to single chain Fv antibody fragment scFv 7-10A /// immunoglobulin heavy chain 6              | LOC314509  | Igh-t 314509 | 2,99357 | 1,06 | down |
| 5672912 | 7310851 | 1649619 | similar to single chain Fv antibody fragment scFv 7-10A /// immunoglobulin heavy chain 6              | LOC314509  | Igh-t 314509 | 2,99357 | 1,04 | down |
| 5629028 | 7310851 | 1649620 | similar to single chain Fv antibody fragment scFv 7-10A /// immunoglobulin heavy chain 6              | LOC314509  | Igh-t 314509 | 2,99357 | 1,02 | down |
| 6276769 | 7310851 | 1649622 | similar to single chain Fv antibody fragment scFv 7-10A /// immunoglobulin heavy chain 6              | LOC314509  | Igh-t 314509 | 2,99357 | 1,02 | up   |
| 6449812 | 7206144 | 1390016 | similar to solute carrier family 7 (cationic amino acid transporter, y+ system), member 12            | LOC361914  | 361914       | 1,58    | up   |      |
| 6120422 | 7206144 | 1390016 | similar to solute carrier family 7 (cationic amino acid transporter, y+ system), member 12            | LOC361914  | 361914       | 1,23    | down |      |
| 6276419 | 7206144 | 1390014 | similar to solute carrier family 7 (cationic amino acid transporter, y+ system), member 12            | LOC361914  | 361914       | 1,07    | up   |      |
| 6073707 | 7206144 | 1390015 | similar to solute carrier family 7 (cationic amino acid transporter, y+ system), member 12            | LOC361914  | 361914       | 1,02    | up   |      |
| 6740636 | 7206144 | 1390013 | similar to solute carrier family 7 (cationic amino acid transporter, y+ system), member 12            | LOC361914  | 361914       | 1,02    | down |      |
| 6159564 | 7339286 | 1718071 | similar to solute carrier family 9 (sodium/hydrogen exchanger), isoform 9                             | RGD1560736 | 363115       | 1,57    | down |      |
| 6590266 | 7339286 | 1718076 | similar to solute carrier family 9 (sodium/hydrogen exchanger), isoform 9                             | RGD1560736 | 363115       | 1,46    | down |      |
| 6293647 | 7339286 | 1718028 | similar to solute carrier family 9 (sodium/hydrogen exchanger), isoform 9                             | RGD1560736 | 363115       | 1,46    | up   |      |
| 6363228 | 7339286 | 1718113 | similar to solute carrier family 9 (sodium/hydrogen exchanger), isoform 9                             | RGD1560736 | 363115       | 1,44    | down |      |
| 5632969 | 7339286 | 1718073 | similar to solute carrier family 9 (sodium/hydrogen exchanger), isoform 9                             | RGD1560736 | 363115       | 1,42    | down |      |
| 6036485 | 7339286 | 1718036 | similar to solute carrier family 9 (sodium/hydrogen exchanger), isoform 9                             | RGD1560736 | 363115       | 1,35    | down |      |
| 6380233 | 7339286 | 1718116 | similar to solute carrier family 9 (sodium/hydrogen exchanger), isoform 9                             | RGD1560736 | 363115       | 1,30    | down |      |
| 6066477 | 7339286 | 1718028 | similar to solute carrier family 9 (sodium/hydrogen exchanger), isoform 9                             | RGD1560736 | 363115       | 1,22    | up   |      |
| 5705605 | 7339286 | 1718110 | similar to solute carrier family 9 (sodium/hydrogen exchanger), isoform 9                             | RGD1560736 | 363115       | 1,20    | down |      |
| 6230043 | 7339286 | 1718084 | similar to solute carrier family 9 (sodium/hydrogen exchanger), isoform 9                             | RGD1560736 | 363115       | 1,16    | down |      |
| 6205911 | 7339286 | 1718055 | similar to solute carrier family 9 (sodium/hydrogen exchanger), isoform 9                             | RGD1560736 | 363115       | 1,14    | down |      |
| 6567724 | 7339286 | 1718116 | similar to solute carrier family 9 (sodium/hydrogen exchanger), isoform 9                             | RGD1560736 | 363115       | 1,13    | up   |      |
| 6063812 | 7339286 | 1718077 | similar to solute carrier family 9 (sodium/hydrogen exchanger), isoform 9                             | RGD1560736 | 363115       | 1,12    | up   |      |
| 6078033 | 7339286 | 1718033 | similar to solute carrier family 9 (sodium/hydrogen exchanger), isoform 9                             | RGD1560736 | 363115       | 1,12    | up   |      |
| 5756412 | 7339286 | 1718028 | similar to solute carrier family 9 (sodium/hydrogen exchanger), isoform 9                             | RGD1560736 | 363115       | 1,09    | up   |      |

|         |         |         |                                                                                                                                             |            |        |      |      |
|---------|---------|---------|---------------------------------------------------------------------------------------------------------------------------------------------|------------|--------|------|------|
| 5673002 | 7339286 | 1718113 | similar to solute carrier family 9 (sodium/hydrogen exchanger), isoform 9                                                                   | RGD1560736 | 363115 | 1,07 | up   |
| 6449170 | 7339286 | 1718106 | similar to solute carrier family 9 (sodium/hydrogen exchanger), isoform 9                                                                   | RGD1560736 | 363115 | 1,07 | down |
| 6422448 | 7339286 | 1718115 | similar to solute carrier family 9 (sodium/hydrogen exchanger), isoform 9                                                                   | RGD1560736 | 363115 | 1,05 | down |
| 6066759 | 7339286 | 1718035 | similar to solute carrier family 9 (sodium/hydrogen exchanger), isoform 9                                                                   | RGD1560736 | 363115 | 1,04 | up   |
| 5881258 | 7339286 | 1718116 | similar to solute carrier family 9 (sodium/hydrogen exchanger), isoform 9                                                                   | RGD1560736 | 363115 | 1,01 | down |
| 6559956 | 7218728 | 1419929 | similar to spatial-delta                                                                                                                    | RGD1561665 | 499429 | 1,35 | up   |
| 6325878 | 7218728 | 1419914 | similar to spatial-delta                                                                                                                    | RGD1561665 | 499429 | 1,03 | down |
| 5971936 | 7096680 | 1118808 | similar to speedy B isoform                                                                                                                 | MGC125213  | 498146 | 1,50 | up   |
| 6399930 | 7096680 | 1118810 | similar to speedy B isoform                                                                                                                 | MGC125213  | 498146 | 1,38 | up   |
| 5710950 | 7096680 | 1118813 | similar to speedy B isoform                                                                                                                 | MGC125213  | 498146 | 1,25 | down |
| 5963743 | 7096680 | 1118814 | similar to speedy B isoform                                                                                                                 | MGC125213  | 498146 | 1,15 | up   |
| 6353023 | 7096680 | 1118808 | similar to speedy B isoform                                                                                                                 | MGC125213  | 498146 | 1,12 | down |
| 5860996 | 7096680 | 1118814 | similar to speedy B isoform                                                                                                                 | MGC125213  | 498146 | 1,10 | up   |
| 6341748 | 7096680 | 1118815 | similar to speedy B isoform                                                                                                                 | MGC125213  | 498146 | 1,09 | up   |
| 5892379 | 7096680 | 1118815 | similar to speedy B isoform                                                                                                                 | MGC125213  | 498146 | 1,08 | up   |
| 6585707 | 7096680 | 1118812 | similar to speedy B isoform                                                                                                                 | MGC125213  | 498146 | 1,02 | up   |
| 6452473 | 7096680 | 1118811 | similar to speedy B isoform                                                                                                                 | MGC125213  | 498146 | 1,02 | down |
| 5702504 | 7370763 | 1798112 | similar to spermatogenesis associated glutamate (E)-rich protein 4d                                                                         | LOC501307  | 501307 | 2,68 | up   |
| 6595703 | 7370763 | 1798112 | similar to spermatogenesis associated glutamate (E)-rich protein 4d                                                                         | LOC501307  | 501307 | 2,08 | down |
| 5858070 | 7370763 | 1798116 | similar to spermatogenesis associated glutamate (E)-rich protein 4d                                                                         | LOC501307  | 501307 | 1,59 | up   |
| 5891010 | 7370763 | 1798114 | similar to spermatogenesis associated glutamate (E)-rich protein 4d                                                                         | LOC501307  | 501307 | 1,56 | down |
| 6416780 | 7370763 | 1798112 | similar to spermatogenesis associated glutamate (E)-rich protein 4d                                                                         | LOC501307  | 501307 | 1,55 | down |
| 5879025 | 7370763 | 1798114 | similar to spermatogenesis associated glutamate (E)-rich protein 4d                                                                         | LOC501307  | 501307 | 1,52 | down |
| 6450321 | 7370763 | 1798113 | similar to spermatogenesis associated glutamate (E)-rich protein 4d                                                                         | LOC501307  | 501307 | 1,11 | up   |
| 5779195 | 7370853 | 1798409 | similar to spermatogenesis associated glutamate (E)-rich protein 4d                                                                         | LOC691712  | 691712 | 1,09 | down |
| 6252612 | 7370763 | 1798112 | similar to spermatogenesis associated glutamate (E)-rich protein 4d                                                                         | LOC501307  | 501307 | 1,06 | down |
| 6528895 | 7370763 | 1798112 | similar to spermatogenesis associated glutamate (E)-rich protein 4d                                                                         | LOC501307  | 501307 | 1,05 | down |
| 5764271 | 7370763 | 1798112 | similar to spermatogenesis associated glutamate (E)-rich protein 4d                                                                         | LOC501307  | 501307 | 1,01 | down |
| 6238874 | 7370853 | 1798416 | similar to spermatogenesis associated glutamate (E)-rich protein 4d /// hypothetical protein LOC6917 /// LOC501317 /// 95 /// 501317 /// 68 | LOC501307  | 501307 | 1,19 | up   |
| 6187037 | 7370853 | 1798408 | similar to spermatogenesis associated glutamate (E)-rich protein 4d /// similar to spermatogenesis ass:691712 /// LOC68: 691712 /// 685018  | LOC501307  | 501307 | 1,00 | down |
| 5965826 | 7337845 | 1714357 | similar to suppressor of hairy wing homolog 4 isoform 1                                                                                     | RGD1560796 | 315798 | 1,75 | up   |
| 6150534 | 7337845 | 1714354 | similar to suppressor of hairy wing homolog 4 isoform 1                                                                                     | RGD1560796 | 315798 | 1,43 | down |
| 6177725 | 7337845 | 1714356 | similar to suppressor of hairy wing homolog 4 isoform 1                                                                                     | RGD1560796 | 315798 | 1,34 | down |
| 5725202 | 7337845 | 1714357 | similar to suppressor of hairy wing homolog 4 isoform 1                                                                                     | RGD1560796 | 315798 | 1,33 | up   |
| 5936997 | 7337845 | 1714347 | similar to suppressor of hairy wing homolog 4 isoform 1                                                                                     | RGD1560796 | 315798 | 1,26 | down |
| 6377287 | 7337845 | 1714352 | similar to suppressor of hairy wing homolog 4 isoform 1                                                                                     | RGD1560796 | 315798 | 1,19 | up   |
| 5870948 | 7337845 | 1714349 | similar to suppressor of hairy wing homolog 4 isoform 1                                                                                     | RGD1560796 | 315798 | 1,19 | up   |
| 6233057 | 7337845 | 1714350 | similar to suppressor of hairy wing homolog 4 isoform 1                                                                                     | RGD1560796 | 315798 | 1,06 | up   |
| 6699376 | 7337845 | 1714348 | similar to suppressor of hairy wing homolog 4 isoform 1                                                                                     | RGD1560796 | 315798 | 1,03 | up   |
| 6631122 | 7337845 | 1714352 | similar to suppressor of hairy wing homolog 4 isoform 1                                                                                     | RGD1560796 | 315798 | 1,00 | down |
| 5643415 | 7200996 | 1378134 | similar to T06D8.1a                                                                                                                         | LOC295528  | 295528 | 2,52 | up   |
| 6448215 | 7200996 | 1378140 | similar to T06D8.1a                                                                                                                         | LOC295528  | 295528 | 1,60 | down |
| 5869389 | 7200996 | 1378134 | similar to T06D8.1a                                                                                                                         | LOC295528  | 295528 | 1,58 | up   |
| 6103195 | 7200996 | 1378146 | similar to T06D8.1a                                                                                                                         | LOC295528  | 295528 | 1,23 | down |
| 5622584 | 7200996 | 1378149 | similar to T06D8.1a                                                                                                                         | LOC295528  | 295528 | 1,22 | down |
| 6358324 | 7200996 | 1378147 | similar to T06D8.1a                                                                                                                         | LOC295528  | 295528 | 1,21 | down |
| 6655670 | 7200996 | 1378141 | similar to T06D8.1a                                                                                                                         | LOC295528  | 295528 | 1,21 | down |
| 6547613 | 7131550 | 1205564 | similar to T-cell receptor alpha chain precursor V and C regions (TRA29)                                                                    | RGD1359684 | 290071 | 2,32 | up   |
| 6122086 | 7131550 | 1205561 | similar to T-cell receptor alpha chain precursor V and C regions (TRA29)                                                                    | RGD1359684 | 290071 | 1,78 | down |
| 5833289 | 7131550 | 1205560 | similar to T-cell receptor alpha chain precursor V and C regions (TRA29)                                                                    | RGD1359684 | 290071 | 1,70 | up   |
| 6188778 | 7131550 | 1205569 | similar to T-cell receptor alpha chain precursor V and C regions (TRA29)                                                                    | RGD1359684 | 290071 | 1,30 | down |
| 6338149 | 7131550 | 1205570 | similar to T-cell receptor alpha chain precursor V and C regions (TRA29)                                                                    | RGD1359684 | 290071 | 1,09 | up   |
| 6138153 | 7131550 | 1205568 | similar to T-cell receptor alpha chain precursor V and C regions (TRA29)                                                                    | RGD1359684 | 290071 | 1,08 | up   |
| 5819768 | 7131550 | 1205566 | similar to T-cell receptor alpha chain precursor V and C regions (TRA29)                                                                    | RGD1359684 | 290071 | 1,06 | up   |
| 5682574 | 7131550 | 1205561 | similar to T-cell receptor alpha chain precursor V and C regions (TRA29)                                                                    | RGD1359684 | 290071 | 1,06 | up   |
| 5934451 | 7131550 | 1205561 | similar to T-cell receptor alpha chain precursor V and C regions (TRA29)                                                                    | RGD1359684 | 290071 | 1,02 | up   |
| 5826730 | 7315352 | 1660333 | similar to TIF alpha protein                                                                                                                | RGD1561292 | 500836 | 2,04 | down |



|         |         |         |                                                                                                          |            |        |      |      |
|---------|---------|---------|----------------------------------------------------------------------------------------------------------|------------|--------|------|------|
| 5804560 | 7315352 | 1660331 | similar to TIF alpha protein                                                                             | RGD1561292 | 500836 | 1,35 | down |
| 5858683 | 7315352 | 1660333 | similar to TIF alpha protein                                                                             | RGD1561292 | 500836 | 1,21 | up   |
| 6588436 | 7315352 | 1660330 | similar to TIF alpha protein                                                                             | RGD1561292 | 500836 | 1,19 | up   |
| 6673403 | 7315352 | 1660329 | similar to TIF alpha protein                                                                             | RGD1561292 | 500836 | 1,11 | up   |
| 6661639 | 7315352 | 1660332 | similar to TIF alpha protein                                                                             | RGD1561292 | 500836 | 1,10 | down |
| 6270019 | 7315352 | 1660334 | similar to TIF alpha protein                                                                             | RGD1561292 | 500836 | 1,09 | up   |
| 6072803 | 7149994 | 1250634 | similar to TR4 orphan receptor associated protein TRA16                                                  | LOC361128  | 361128 | 2,67 | up   |
| 6728565 | 7149994 | 1250638 | similar to TR4 orphan receptor associated protein TRA16                                                  | LOC361128  | 361128 | 1,45 | up   |
| 5623085 | 7149994 | 1250637 | similar to TR4 orphan receptor associated protein TRA16                                                  | LOC361128  | 361128 | 1,30 | down |
| 6316613 | 7149994 | 1250640 | similar to TR4 orphan receptor associated protein TRA16                                                  | LOC361128  | 361128 | 1,15 | down |
| 6334030 | 7149994 | 1250639 | similar to TR4 orphan receptor associated protein TRA16                                                  | LOC361128  | 361128 | 1,12 | up   |
| 5704268 | 7149994 | 1250636 | similar to TR4 orphan receptor associated protein TRA16                                                  | LOC361128  | 361128 | 1,10 | down |
| 6632664 | 7149994 | 1250635 | similar to TR4 orphan receptor associated protein TRA16                                                  | LOC361128  | 361128 | 1,05 | up   |
| 6517072 | 7043379 | 993602  | similar to Transcription factor 7-like 2 (HMG box transcription factor 4) (T-cell-specific transcription | LOC683733  | 683733 | 2,70 | up   |
| 5676886 | 7043379 | 993654  | similar to Transcription factor 7-like 2 (HMG box transcription factor 4) (T-cell-specific transcription | LOC683733  | 683733 | 1,48 | up   |
| 6364269 | 7043379 | 993654  | similar to Transcription factor 7-like 2 (HMG box transcription factor 4) (T-cell-specific transcription | LOC683733  | 683733 | 1,30 | up   |
| 5858212 | 7043379 | 993650  | similar to Transcription factor 7-like 2 (HMG box transcription factor 4) (T-cell-specific transcription | LOC683733  | 683733 | 1,15 | down |
| 6040232 | 7043379 | 993650  | similar to Transcription factor 7-like 2 (HMG box transcription factor 4) (T-cell-specific transcription | LOC683733  | 683733 | 1,15 | down |
| 6149014 | 7043379 | 993651  | similar to Transcription factor 7-like 2 (HMG box transcription factor 4) (T-cell-specific transcription | LOC683733  | 683733 | 1,08 | up   |
| 6467423 | 7258546 | 1518986 | similar to Transmembrane protein 16B                                                                     | LOC683001  | 683001 | 2,06 | down |
| 6276051 | 7258546 | 1519009 | similar to Transmembrane protein 16B                                                                     | LOC683001  | 683001 | 1,64 | up   |
| 6264981 | 7258546 | 1518935 | similar to Transmembrane protein 16B                                                                     | LOC683001  | 683001 | 1,61 | down |
| 5829705 | 7258546 | 1519011 | similar to Transmembrane protein 16B                                                                     | LOC683001  | 683001 | 1,56 | down |
| 6266804 | 7258546 | 1519002 | similar to Transmembrane protein 16B                                                                     | LOC683001  | 683001 | 1,51 | up   |
| 5618993 | 7258546 | 1518950 | similar to Transmembrane protein 16B                                                                     | LOC683001  | 683001 | 1,33 | down |
| 6410918 | 7258546 | 1518949 | similar to Transmembrane protein 16B                                                                     | LOC683001  | 683001 | 1,27 | up   |
| 5979242 | 7258546 | 1519011 | similar to Transmembrane protein 16B                                                                     | LOC683001  | 683001 | 1,24 | up   |
| 6374396 | 7258546 | 1519011 | similar to Transmembrane protein 16B                                                                     | LOC683001  | 683001 | 1,18 | down |
| 5821330 | 7258546 | 1518969 | similar to Transmembrane protein 16B                                                                     | LOC683001  | 683001 | 1,17 | up   |
| 6259724 | 7258546 | 1518952 | similar to Transmembrane protein 16B                                                                     | LOC683001  | 683001 | 1,14 | down |
| 6331940 | 7258546 | 1518966 | similar to Transmembrane protein 16B                                                                     | LOC683001  | 683001 | 1,13 | down |
| 5707673 | 7258546 | 1518965 | similar to Transmembrane protein 16B                                                                     | LOC683001  | 683001 | 1,10 | up   |
| 6643210 | 7258546 | 1518958 | similar to Transmembrane protein 16B                                                                     | LOC683001  | 683001 | 1,08 | up   |
| 6488958 | 7258546 | 1518984 | similar to Transmembrane protein 16B                                                                     | LOC683001  | 683001 | 1,08 | down |
| 6581510 | 7258546 | 1518954 | similar to Transmembrane protein 16B                                                                     | LOC683001  | 683001 | 1,06 | down |
| 6190855 | 7258546 | 1519005 | similar to Transmembrane protein 16B                                                                     | LOC683001  | 683001 | 1,06 | down |
| 6572122 | 7258546 | 1518953 | similar to Transmembrane protein 16B                                                                     | LOC683001  | 683001 | 1,05 | down |
| 6383372 | 7258546 | 1519011 | similar to Transmembrane protein 16B                                                                     | LOC683001  | 683001 | 1,05 | down |
| 6353992 | 7258546 | 1519004 | similar to Transmembrane protein 16B                                                                     | LOC683001  | 683001 | 1,04 | up   |
| 6331919 | 7258546 | 1518945 | similar to Transmembrane protein 16B                                                                     | LOC683001  | 683001 | 1,03 | up   |
| 5953127 | 7258546 | 1518934 | similar to Transmembrane protein 16B                                                                     | LOC683001  | 683001 | 1,01 | up   |
| 5927970 | 7258546 | 1518938 | similar to Transmembrane protein 16B                                                                     | LOC683001  | 683001 | 1,01 | down |
| 6256067 | 7258546 | 1518971 | similar to Transmembrane protein 16B                                                                     | LOC683001  | 683001 | 1,01 | up   |
| 5908094 | 7258546 | 1519006 | similar to Transmembrane protein 16B                                                                     | LOC683001  | 683001 | 1,00 | up   |
| 5848088 | 7173640 | 1308957 | similar to TRS85 homolog                                                                                 | RGD1309102 | 291750 | 2,05 | down |
| 5654868 | 7173640 | 1308978 | similar to TRS85 homolog                                                                                 | RGD1309102 | 291750 | 1,53 | up   |
| 6505472 | 7173640 | 1308982 | similar to TRS85 homolog                                                                                 | RGD1309102 | 291750 | 1,48 | down |
| 5991399 | 7173640 | 1308983 | similar to TRS85 homolog                                                                                 | RGD1309102 | 291750 | 1,47 | down |
| 6220928 | 7173640 | 1308984 | similar to TRS85 homolog                                                                                 | RGD1309102 | 291750 | 1,44 | down |
| 6531341 | 7173640 | 1308963 | similar to TRS85 homolog                                                                                 | RGD1309102 | 291750 | 1,37 | down |
| 5931232 | 7173640 | 1308968 | similar to TRS85 homolog                                                                                 | RGD1309102 | 291750 | 1,34 | up   |
| 6505988 | 7173640 | 1308955 | similar to TRS85 homolog                                                                                 | RGD1309102 | 291750 | 1,30 | down |
| 5984211 | 7173640 | 1308979 | similar to TRS85 homolog                                                                                 | RGD1309102 | 291750 | 1,29 | up   |
| 6437752 | 7173640 | 1308982 | similar to TRS85 homolog                                                                                 | RGD1309102 | 291750 | 1,25 | down |
| 5896241 | 7173640 | 1308948 | similar to TRS85 homolog                                                                                 | RGD1309102 | 291750 | 1,24 | up   |
| 6202164 | 7173640 | 1308947 | similar to TRS85 homolog                                                                                 | RGD1309102 | 291750 | 1,24 | up   |
| 5632653 | 7173640 | 1308956 | similar to TRS85 homolog                                                                                 | RGD1309102 | 291750 | 1,23 | up   |

|         |         |         |                                                           |            |        |      |      |
|---------|---------|---------|-----------------------------------------------------------|------------|--------|------|------|
| 6070457 | 7173640 | 1308986 | similar to TRS85 homolog                                  | RGD1309102 | 291750 | 1,20 | down |
| 5719409 | 7173640 | 1308945 | similar to TRS85 homolog                                  | RGD1309102 | 291750 | 1,18 | down |
| 5978788 | 7173640 | 1308985 | similar to TRS85 homolog                                  | RGD1309102 | 291750 | 1,18 | down |
| 6736840 | 7173640 | 1308944 | similar to TRS85 homolog                                  | RGD1309102 | 291750 | 1,17 | up   |
| 5683485 | 7173640 | 1308961 | similar to TRS85 homolog                                  | RGD1309102 | 291750 | 1,17 | down |
| 6028084 | 7173640 | 1308953 | similar to TRS85 homolog                                  | RGD1309102 | 291750 | 1,16 | down |
| 6429946 | 7173640 | 1308962 | similar to TRS85 homolog                                  | RGD1309102 | 291750 | 1,11 | down |
| 5964979 | 7173640 | 1308974 | similar to TRS85 homolog                                  | RGD1309102 | 291750 | 1,09 | up   |
| 5684522 | 7173640 | 1308977 | similar to TRS85 homolog                                  | RGD1309102 | 291750 | 1,08 | up   |
| 6310616 | 7173640 | 1308961 | similar to TRS85 homolog                                  | RGD1309102 | 291750 | 1,08 | up   |
| 6110674 | 7173640 | 1308975 | similar to TRS85 homolog                                  | RGD1309102 | 291750 | 1,07 | up   |
| 6341972 | 7173640 | 1308980 | similar to TRS85 homolog                                  | RGD1309102 | 291750 | 1,04 | up   |
| 5716368 | 7173640 | 1308954 | similar to TRS85 homolog                                  | RGD1309102 | 291750 | 1,03 | down |
| 6293306 | 7173640 | 1308966 | similar to TRS85 homolog                                  | RGD1309102 | 291750 | 1,03 | down |
| 6104949 | 7173640 | 1308959 | similar to TRS85 homolog                                  | RGD1309102 | 291750 | 1,03 | down |
| 5639385 | 7173640 | 1308957 | similar to TRS85 homolog                                  | RGD1309102 | 291750 | 1,01 | down |
| 6021283 | 7173640 | 1308944 | similar to TRS85 homolog                                  | RGD1309102 | 291750 | 1,01 | down |
| 6596291 | 7173640 | 1308952 | similar to TRS85 homolog                                  | RGD1309102 | 291750 | 1,01 | up   |
| 6292313 | 7173640 | 1308960 | similar to TRS85 homolog                                  | RGD1309102 | 291750 | 1,00 | up   |
| 5686194 | 7173640 | 1308945 | similar to TRS85 homolog                                  | RGD1309102 | 291750 | 1,00 | down |
| 5780948 | 7269911 | 1546905 | similar to Tubby-related protein 3 (Tubby-like protein 3) | LOC688749  | 688749 | 1,13 | up   |
| 5847012 | 7269911 | 1546905 | similar to Tubby-related protein 3 (Tubby-like protein 3) | LOC688749  | 688749 | 1,03 | down |
| 6216368 | 7058713 | 1028672 | similar to Tumor protein p53 inducible protein 5          | RGD1560565 | 499287 | 1,79 | up   |
| 6386886 | 7058713 | 1028671 | similar to Tumor protein p53 inducible protein 5          | RGD1560565 | 499287 | 1,18 | up   |
| 6477086 | 7058713 | 1028673 | similar to Tumor protein p53 inducible protein 5          | RGD1560565 | 499287 | 1,07 | down |
| 5727836 | 7121849 | 1181741 | similar to ubiquitin specific protease 34                 | LOC360990  | 360990 | 1,45 | down |
| 5662591 | 7121849 | 1181729 | similar to ubiquitin specific protease 34                 | LOC360990  | 360990 | 1,26 | up   |
| 6180873 | 7121849 | 1181827 | similar to ubiquitin specific protease 34                 | LOC360990  | 360990 | 1,26 | down |
| 5927226 | 7121849 | 1181823 | similar to ubiquitin specific protease 34                 | LOC360990  | 360990 | 1,25 | down |
| 6359529 | 7121849 | 1181732 | similar to ubiquitin specific protease 34                 | LOC360990  | 360990 | 1,22 | up   |
| 6211800 | 7121849 | 1181729 | similar to ubiquitin specific protease 34                 | LOC360990  | 360990 | 1,21 | down |
| 5745729 | 7121849 | 1181822 | similar to ubiquitin specific protease 34                 | LOC360990  | 360990 | 1,20 | down |
| 5907329 | 7121849 | 1181828 | similar to ubiquitin specific protease 34                 | LOC360990  | 360990 | 1,20 | down |
| 6202049 | 7121849 | 1181740 | similar to ubiquitin specific protease 34                 | LOC360990  | 360990 | 1,20 | down |
| 6651472 | 7121849 | 1181750 | similar to ubiquitin specific protease 34                 | LOC360990  | 360990 | 1,20 | down |
| 6365474 | 7121849 | 1181752 | similar to ubiquitin specific protease 34                 | LOC360990  | 360990 | 1,19 | up   |
| 6139940 | 7121849 | 1181828 | similar to ubiquitin specific protease 34                 | LOC360990  | 360990 | 1,17 | down |
| 6687878 | 7121849 | 1181745 | similar to ubiquitin specific protease 34                 | LOC360990  | 360990 | 1,15 | up   |
| 6453853 | 7121849 | 1181743 | similar to ubiquitin specific protease 34                 | LOC360990  | 360990 | 1,15 | up   |
| 6342242 | 7121849 | 1181752 | similar to ubiquitin specific protease 34                 | LOC360990  | 360990 | 1,13 | down |
| 5823419 | 7121849 | 1181743 | similar to ubiquitin specific protease 34                 | LOC360990  | 360990 | 1,12 | up   |
| 6449219 | 7121849 | 1181744 | similar to ubiquitin specific protease 34                 | LOC360990  | 360990 | 1,12 | up   |
| 6209829 | 7121849 | 1181749 | similar to ubiquitin specific protease 34                 | LOC360990  | 360990 | 1,12 | down |
| 5871341 | 7121849 | 1181734 | similar to ubiquitin specific protease 34                 | LOC360990  | 360990 | 1,09 | up   |
| 6366241 | 7121849 | 1181751 | similar to ubiquitin specific protease 34                 | LOC360990  | 360990 | 1,06 | up   |
| 5942202 | 7121849 | 1181829 | similar to ubiquitin specific protease 34                 | LOC360990  | 360990 | 1,06 | up   |
| 6625297 | 7121849 | 1181747 | similar to ubiquitin specific protease 34                 | LOC360990  | 360990 | 1,05 | down |
| 6166914 | 7121849 | 1181826 | similar to ubiquitin specific protease 34                 | LOC360990  | 360990 | 1,05 | down |
| 5960558 | 7121849 | 1181825 | similar to ubiquitin specific protease 34                 | LOC360990  | 360990 | 1,04 | down |
| 5924407 | 7121849 | 1181829 | similar to ubiquitin specific protease 34                 | LOC360990  | 360990 | 1,04 | up   |
| 6217831 | 7121849 | 1181746 | similar to ubiquitin specific protease 34                 | LOC360990  | 360990 | 1,04 | down |
| 6432067 | 7121849 | 1181829 | similar to ubiquitin specific protease 34                 | LOC360990  | 360990 | 1,03 | down |
| 6682792 | 7121849 | 1181748 | similar to ubiquitin specific protease 34                 | LOC360990  | 360990 | 1,01 | up   |
| 5866605 | 7337314 | 1712899 | similar to ubiquitin-associated protein 1                 | LOC691574  | 691574 | 1,17 | down |
| 6243338 | 7337314 | 1712900 | similar to ubiquitin-associated protein 1                 | LOC691574  | 691574 | 1,10 | up   |
| 6590338 | 7337314 | 1712898 | similar to ubiquitin-associated protein 1                 | LOC691574  | 691574 | 1,01 | up   |
| 5975314 | 7154655 | 1262317 | similar to UPF0308 protein C9orf21                        | LOC498685  | 498685 | 1,69 | up   |

|         |         |         |                                                              |            |        |      |      |
|---------|---------|---------|--------------------------------------------------------------|------------|--------|------|------|
| 5829452 | 7154655 | 1262309 | similar to UPF0308 protein C9orf21                           | LOC498685  | 498685 | 1,18 | up   |
| 6355124 | 7154655 | 1262310 | similar to UPF0308 protein C9orf21                           | LOC498685  | 498685 | 1,17 | up   |
| 6313523 | 7154655 | 1262312 | similar to UPF0308 protein C9orf21                           | LOC498685  | 498685 | 1,16 | down |
| 6462734 | 7154655 | 1262311 | similar to UPF0308 protein C9orf21                           | LOC498685  | 498685 | 1,13 | up   |
| 6091588 | 7029081 | 958910  | similar to Zinc finger CCCH-type domain containing protein 6 | LOC678741  | 678741 | 2,05 | up   |
| 5805338 | 7029081 | 958910  | similar to Zinc finger CCCH-type domain containing protein 6 | LOC678741  | 678741 | 1,70 | up   |
| 6563214 | 7029081 | 958893  | similar to Zinc finger CCCH-type domain containing protein 6 | LOC678741  | 678741 | 1,55 | down |
| 5701650 | 7029081 | 958904  | similar to Zinc finger CCCH-type domain containing protein 6 | LOC678741  | 678741 | 1,48 | down |
| 6408917 | 7029081 | 958911  | similar to Zinc finger CCCH-type domain containing protein 6 | LOC678741  | 678741 | 1,33 | down |
| 5886301 | 7029081 | 958888  | similar to Zinc finger CCCH-type domain containing protein 6 | LOC678741  | 678741 | 1,32 | up   |
| 6275705 | 7029081 | 958895  | similar to Zinc finger CCCH-type domain containing protein 6 | LOC678741  | 678741 | 1,32 | down |
| 5947181 | 7029081 | 958897  | similar to Zinc finger CCCH-type domain containing protein 6 | LOC678741  | 678741 | 1,29 | up   |
| 6720742 | 7029081 | 958899  | similar to Zinc finger CCCH-type domain containing protein 6 | LOC678741  | 678741 | 1,24 | down |
| 5887728 | 7029081 | 958905  | similar to Zinc finger CCCH-type domain containing protein 6 | LOC678741  | 678741 | 1,21 | up   |
| 6280346 | 7029081 | 958909  | similar to Zinc finger CCCH-type domain containing protein 6 | LOC678741  | 678741 | 1,15 | down |
| 6001591 | 7029081 | 958904  | similar to Zinc finger CCCH-type domain containing protein 6 | LOC678741  | 678741 | 1,15 | up   |
| 5745337 | 7029081 | 958912  | similar to Zinc finger CCCH-type domain containing protein 6 | LOC678741  | 678741 | 1,10 | up   |
| 6635621 | 7029081 | 958898  | similar to Zinc finger CCCH-type domain containing protein 6 | LOC678741  | 678741 | 1,09 | down |
| 5785961 | 7029081 | 958907  | similar to Zinc finger CCCH-type domain containing protein 6 | LOC678741  | 678741 | 1,08 | up   |
| 6242619 | 7029081 | 958900  | similar to Zinc finger CCCH-type domain containing protein 6 | LOC678741  | 678741 | 1,07 | down |
| 5689295 | 7029081 | 958908  | similar to Zinc finger CCCH-type domain containing protein 6 | LOC678741  | 678741 | 1,07 | up   |
| 5991905 | 7029081 | 958908  | similar to Zinc finger CCCH-type domain containing protein 6 | LOC678741  | 678741 | 1,05 | down |
| 5839458 | 7029081 | 958911  | similar to Zinc finger CCCH-type domain containing protein 6 | LOC678741  | 678741 | 1,01 | up   |
| 6245961 | 7029081 | 958902  | similar to Zinc finger CCCH-type domain containing protein 6 | LOC678741  | 678741 | 1,01 | up   |
| 6336553 | 7029081 | 958894  | similar to Zinc finger CCCH-type domain containing protein 6 | LOC678741  | 678741 | 1,01 | down |
| 6548528 | 7029081 | 958903  | similar to Zinc finger CCCH-type domain containing protein 6 | LOC678741  | 678741 | 1,00 | up   |
| 5926083 | 7228520 | 1443765 | similar to zinc finger protein 650                           | RGD1565257 | 311115 | 2,17 | down |
| 6295115 | 7228520 | 1443755 | similar to zinc finger protein 650                           | RGD1565257 | 311115 | 2,13 | up   |
| 6133001 | 7228520 | 1443766 | similar to zinc finger protein 650                           | RGD1565257 | 311115 | 2,06 | down |
| 6202993 | 7228520 | 1443764 | similar to zinc finger protein 650                           | RGD1565257 | 311115 | 1,97 | down |
| 6157650 | 7228520 | 1443762 | similar to zinc finger protein 650                           | RGD1565257 | 311115 | 1,85 | down |
| 5941058 | 7228520 | 1443769 | similar to zinc finger protein 650                           | RGD1565257 | 311115 | 1,75 | down |
| 5839274 | 7228520 | 1443767 | similar to zinc finger protein 650                           | RGD1565257 | 311115 | 1,73 | down |
| 6502579 | 7228520 | 1443754 | similar to zinc finger protein 650                           | RGD1565257 | 311115 | 1,71 | up   |
| 6535099 | 7228520 | 1443748 | similar to zinc finger protein 650                           | RGD1565257 | 311115 | 1,64 | up   |
| 5711872 | 7228520 | 1443763 | similar to zinc finger protein 650                           | RGD1565257 | 311115 | 1,60 | down |
| 6384381 | 7228520 | 1443766 | similar to zinc finger protein 650                           | RGD1565257 | 311115 | 1,53 | down |
| 6583979 | 7228520 | 1443768 | similar to zinc finger protein 650                           | RGD1565257 | 311115 | 1,53 | down |
| 5626692 | 7228520 | 1443753 | similar to zinc finger protein 650                           | RGD1565257 | 311115 | 1,50 | up   |
| 6598334 | 7228520 | 1443749 | similar to zinc finger protein 650                           | RGD1565257 | 311115 | 1,48 | up   |
| 6261369 | 7228520 | 1443747 | similar to zinc finger protein 650                           | RGD1565257 | 311115 | 1,48 | up   |
| 6122642 | 7228520 | 1443761 | similar to zinc finger protein 650                           | RGD1565257 | 311115 | 1,48 | down |
| 5621346 | 7228520 | 1443743 | similar to zinc finger protein 650                           | RGD1565257 | 311115 | 1,44 | up   |
| 6197245 | 7228520 | 1443752 | similar to zinc finger protein 650                           | RGD1565257 | 311115 | 1,42 | up   |
| 6559348 | 7228520 | 1443751 | similar to zinc finger protein 650                           | RGD1565257 | 311115 | 1,39 | up   |
| 5842706 | 7228520 | 1443748 | similar to zinc finger protein 650                           | RGD1565257 | 311115 | 1,25 | up   |
| 6087815 | 7228520 | 1443747 | similar to zinc finger protein 650                           | RGD1565257 | 311115 | 1,23 | up   |
| 5837746 | 7228520 | 1443760 | similar to zinc finger protein 650                           | RGD1565257 | 311115 | 1,23 | up   |
| 6156621 | 7228520 | 1443750 | similar to zinc finger protein 650                           | RGD1565257 | 311115 | 1,20 | up   |
| 5999400 | 7333333 | 1703403 | similar to zinc finger protein 75                            | RGD1565419 | 500950 | 1,95 | down |
| 5960413 | 7333333 | 1703403 | similar to zinc finger protein 75                            | RGD1565419 | 500950 | 1,84 | down |
| 6254452 | 7333333 | 1703401 | similar to zinc finger protein 75                            | RGD1565419 | 500950 | 1,43 | up   |
| 5772260 | 7333333 | 1703388 | similar to zinc finger protein 75                            | RGD1565419 | 500950 | 1,40 | down |
| 6312043 | 7333333 | 1703397 | similar to zinc finger protein 75                            | RGD1565419 | 500950 | 1,27 | down |
| 5828470 | 7333333 | 1703390 | similar to zinc finger protein 75                            | RGD1565419 | 500950 | 1,25 | down |
| 5865614 | 7333333 | 1703399 | similar to zinc finger protein 75                            | RGD1565419 | 500950 | 1,13 | up   |
| 6288753 | 7333333 | 1703400 | similar to zinc finger protein 75                            | RGD1565419 | 500950 | 1,10 | up   |

|         |         |         |                                                 |            |        |      |      |
|---------|---------|---------|-------------------------------------------------|------------|--------|------|------|
| 6162467 | 7333333 | 1703403 | similar to zinc finger protein 75               | RGD1565419 | 500950 | 1,10 | down |
| 6414093 | 7333333 | 1703391 | similar to zinc finger protein 75               | RGD1565419 | 500950 | 1,07 | up   |
| 5859354 | 7333333 | 1703403 | similar to zinc finger protein 75               | RGD1565419 | 500950 | 1,07 | up   |
| 6038419 | 7333333 | 1703400 | similar to zinc finger protein 75               | RGD1565419 | 500950 | 1,07 | down |
| 6334003 | 7333333 | 1703403 | similar to zinc finger protein 75               | RGD1565419 | 500950 | 1,07 | down |
| 6689049 | 7333333 | 1703398 | similar to zinc finger protein 75               | RGD1565419 | 500950 | 1,07 | down |
| 6155843 | 7333333 | 1703403 | similar to zinc finger protein 75               | RGD1565419 | 500950 | 1,05 | down |
| 5624651 | 7333333 | 1703393 | similar to zinc finger protein 75               | RGD1565419 | 500950 | 1,01 | down |
| 6712646 | 7383586 | 1828434 | similar to zinc finger, matrin type 1           | RGD1565344 | 308654 | 2,13 | down |
| 6400944 | 7383586 | 1828426 | similar to zinc finger, matrin type 1           | RGD1565344 | 308654 | 1,82 | down |
| 6087953 | 7383586 | 1828426 | similar to zinc finger, matrin type 1           | RGD1565344 | 308654 | 1,72 | down |
| 6430073 | 7383586 | 1828431 | similar to zinc finger, matrin type 1           | RGD1565344 | 308654 | 1,61 | down |
| 6492434 | 7383586 | 1828425 | similar to zinc finger, matrin type 1           | RGD1565344 | 308654 | 1,52 | up   |
| 5729790 | 7383586 | 1828425 | similar to zinc finger, matrin type 1           | RGD1565344 | 308654 | 1,49 | down |
| 5701286 | 7383586 | 1828436 | similar to zinc finger, matrin type 1           | RGD1565344 | 308654 | 1,20 | up   |
| 6670305 | 7383586 | 1828433 | similar to zinc finger, matrin type 1           | RGD1565344 | 308654 | 1,19 | down |
| 5889927 | 7383586 | 1828425 | similar to zinc finger, matrin type 1           | RGD1565344 | 308654 | 1,14 | down |
| 6028962 | 7383586 | 1828432 | similar to zinc finger, matrin type 1           | RGD1565344 | 308654 | 1,01 | up   |
| 5849892 | 7224789 | 1434071 | similar to zinc finger, ZZ domain containing 3  | LOC310958  | 310958 | 2,17 | down |
| 6360578 | 7224789 | 1434069 | similar to zinc finger, ZZ domain containing 3  | LOC310958  | 310958 | 1,53 | up   |
| 5621388 | 7224789 | 1434068 | similar to zinc finger, ZZ domain containing 3  | LOC310958  | 310958 | 1,18 | up   |
| 5899582 | 7224789 | 1434067 | similar to zinc finger, ZZ domain containing 3  | LOC310958  | 310958 | 1,07 | up   |
| 6663741 | 7224789 | 1434072 | similar to zinc finger, ZZ domain containing 3  | LOC310958  | 310958 | 1,05 | up   |
| 6052702 | 7224789 | 1434074 | similar to zinc finger, ZZ domain containing 3  | LOC310958  | 310958 | 1,04 | down |
| 6727373 | 7224789 | 1434073 | similar to zinc finger, ZZ domain containing 3  | LOC310958  | 310958 | 1,01 | up   |
| 6130907 | 7336579 | 1710984 | SIN3 homolog A, transcription regulator (yeast) | Sin3a      | 363067 | 2,49 | down |
| 6630452 | 7336579 | 1710990 | SIN3 homolog A, transcription regulator (yeast) | Sin3a      | 363067 | 1,75 | down |
| 6541992 | 7336579 | 1710997 | SIN3 homolog A, transcription regulator (yeast) | Sin3a      | 363067 | 1,64 | up   |
| 6272389 | 7336579 | 1711007 | SIN3 homolog A, transcription regulator (yeast) | Sin3a      | 363067 | 1,44 | up   |
| 5722144 | 7336579 | 1711007 | SIN3 homolog A, transcription regulator (yeast) | Sin3a      | 363067 | 1,41 | down |
| 6537349 | 7336579 | 1710992 | SIN3 homolog A, transcription regulator (yeast) | Sin3a      | 363067 | 1,40 | down |
| 6609423 | 7336579 | 1710992 | SIN3 homolog A, transcription regulator (yeast) | Sin3a      | 363067 | 1,39 | down |
| 6510967 | 7336579 | 1710987 | SIN3 homolog A, transcription regulator (yeast) | Sin3a      | 363067 | 1,37 | down |
| 6288389 | 7336579 | 1710999 | SIN3 homolog A, transcription regulator (yeast) | Sin3a      | 363067 | 1,37 | down |
| 6011405 | 7336579 | 1711000 | SIN3 homolog A, transcription regulator (yeast) | Sin3a      | 363067 | 1,34 | up   |
| 6517364 | 7336579 | 1710993 | SIN3 homolog A, transcription regulator (yeast) | Sin3a      | 363067 | 1,30 | up   |
| 6248836 | 7336579 | 1710986 | SIN3 homolog A, transcription regulator (yeast) | Sin3a      | 363067 | 1,29 | down |
| 6511558 | 7336579 | 1710995 | SIN3 homolog A, transcription regulator (yeast) | Sin3a      | 363067 | 1,25 | up   |
| 6376071 | 7336579 | 1711005 | SIN3 homolog A, transcription regulator (yeast) | Sin3a      | 363067 | 1,23 | up   |
| 6022597 | 7336579 | 1711001 | SIN3 homolog A, transcription regulator (yeast) | Sin3a      | 363067 | 1,21 | up   |
| 6436263 | 7336579 | 1710992 | SIN3 homolog A, transcription regulator (yeast) | Sin3a      | 363067 | 1,19 | up   |
| 5965278 | 7336579 | 1710994 | SIN3 homolog A, transcription regulator (yeast) | Sin3a      | 363067 | 1,18 | up   |
| 6307788 | 7336579 | 1711002 | SIN3 homolog A, transcription regulator (yeast) | Sin3a      | 363067 | 1,16 | up   |
| 5670918 | 7336579 | 1710996 | SIN3 homolog A, transcription regulator (yeast) | Sin3a      | 363067 | 1,15 | up   |
| 6175404 | 7336579 | 1711003 | SIN3 homolog A, transcription regulator (yeast) | Sin3a      | 363067 | 1,15 | up   |
| 6467934 | 7336579 | 1711004 | SIN3 homolog A, transcription regulator (yeast) | Sin3a      | 363067 | 1,14 | down |
| 5825196 | 7336579 | 1710990 | SIN3 homolog A, transcription regulator (yeast) | Sin3a      | 363067 | 1,12 | up   |
| 6064295 | 7336579 | 1710992 | SIN3 homolog A, transcription regulator (yeast) | Sin3a      | 363067 | 1,09 | up   |
| 6617837 | 7336579 | 1710998 | SIN3 homolog A, transcription regulator (yeast) | Sin3a      | 363067 | 1,06 | down |
| 6390655 | 7336579 | 1710985 | SIN3 homolog A, transcription regulator (yeast) | Sin3a      | 363067 | 1,05 | down |
| 5927366 | 7336579 | 1710988 | SIN3 homolog A, transcription regulator (yeast) | Sin3a      | 363067 | 1,03 | up   |
| 5786701 | 7336579 | 1710994 | SIN3 homolog A, transcription regulator (yeast) | Sin3a      | 363067 | 1,03 | down |
| 6219540 | 7336579 | 1710989 | SIN3 homolog A, transcription regulator (yeast) | Sin3a      | 363067 | 1,01 | down |
| 6646434 | 7278050 | 1568234 | single stranded DNA binding protein 3           | Ssbp3      | 84354  | 2,35 | up   |
| 6640384 | 7278050 | 1568236 | single stranded DNA binding protein 3           | Ssbp3      | 84354  | 1,39 | down |
| 5735595 | 7278050 | 1568231 | single stranded DNA binding protein 3           | Ssbp3      | 84354  | 1,35 | down |
| 6006485 | 7278050 | 1568243 | single stranded DNA binding protein 3           | Ssbp3      | 84354  | 1,31 | up   |

|         |         |         |                                                        |        |        |      |      |
|---------|---------|---------|--------------------------------------------------------|--------|--------|------|------|
| 5986858 | 7278050 | 1568235 | single stranded DNA binding protein 3                  | Ssbp3  | 84354  | 1,28 | down |
| 5700411 | 7278050 | 1568237 | single stranded DNA binding protein 3                  | Ssbp3  | 84354  | 1,27 | down |
| 6250766 | 7278050 | 1568230 | single stranded DNA binding protein 3                  | Ssbp3  | 84354  | 1,19 | up   |
| 6286161 | 7278050 | 1568227 | single stranded DNA binding protein 3                  | Ssbp3  | 84354  | 1,16 | up   |
| 6446180 | 7278050 | 1568240 | single stranded DNA binding protein 3                  | Ssbp3  | 84354  | 1,15 | up   |
| 5786884 | 7278050 | 1568241 | single stranded DNA binding protein 3                  | Ssbp3  | 84354  | 1,12 | down |
| 6597100 | 7278050 | 1568228 | single stranded DNA binding protein 3                  | Ssbp3  | 84354  | 1,12 | up   |
| 6558008 | 7278050 | 1568238 | single stranded DNA binding protein 3                  | Ssbp3  | 84354  | 1,11 | down |
| 6443292 | 7278050 | 1568242 | single stranded DNA binding protein 3                  | Ssbp3  | 84354  | 1,11 | down |
| 6295548 | 7278050 | 1568227 | single stranded DNA binding protein 3                  | Ssbp3  | 84354  | 1,06 | up   |
| 6461679 | 7278050 | 1568233 | single stranded DNA binding protein 3                  | Ssbp3  | 84354  | 1,04 | down |
| 6745163 | 7278050 | 1568227 | single stranded DNA binding protein 3                  | Ssbp3  | 84354  | 1,03 | up   |
| 6151906 | 7278050 | 1568239 | single stranded DNA binding protein 3                  | Ssbp3  | 84354  | 1,02 | down |
| 6641507 | 7278050 | 1568229 | single stranded DNA binding protein 3                  | Ssbp3  | 84354  | 1,01 | up   |
| 6330885 | 7278050 | 1568232 | single stranded DNA binding protein 3                  | Ssbp3  | 84354  | 1,00 | down |
| 5775044 | 7294738 | 1608000 | SIX homeobox 3                                         | Six3   | 78974  | 1,34 | up   |
| 6204061 | 7294738 | 1607999 | SIX homeobox 3                                         | Six3   | 78974  | 1,15 | down |
| 6504811 | 7307733 | 1642051 | SIX homeobox 4                                         | Six4   | 299138 | 1,20 | down |
| 6636075 | 7307733 | 1642051 | SIX homeobox 4                                         | Six4   | 299138 | 1,17 | down |
| 6613842 | 7307733 | 1642048 | SIX homeobox 4                                         | Six4   | 299138 | 1,13 | up   |
| 6233129 | 7307733 | 1642049 | SIX homeobox 4                                         | Six4   | 299138 | 1,08 | down |
| 5984835 | 7307733 | 1642048 | SIX homeobox 4                                         | Six4   | 299138 | 1,07 | down |
| 6611267 | 7307733 | 1642052 | SIX homeobox 4                                         | Six4   | 299138 | 1,02 | down |
| 6308751 | 7029386 | 959410  | SIX homeobox 5                                         | Six5   | 308406 | 2,37 | down |
| 6181296 | 7029386 | 959412  | SIX homeobox 5                                         | Six5   | 308406 | 1,45 | down |
| 5916772 | 7029386 | 959410  | SIX homeobox 5                                         | Six5   | 308406 | 1,28 | down |
| 5701797 | 7029386 | 959412  | SIX homeobox 5                                         | Six5   | 308406 | 1,27 | down |
| 6696124 | 7029386 | 959413  | SIX homeobox 5                                         | Six5   | 308406 | 1,23 | down |
| 6696619 | 7029386 | 959410  | SIX homeobox 5                                         | Six5   | 308406 | 1,11 | down |
| 6213342 | 7029386 | 959411  | SIX homeobox 5                                         | Six5   | 308406 | 1,11 | up   |
| 6206805 | 7029386 | 959411  | SIX homeobox 5                                         | Six5   | 308406 | 1,06 | up   |
| 5786113 | 7029386 | 959413  | SIX homeobox 5                                         | Six5   | 308406 | 1,06 | up   |
| 5847698 | 7029386 | 959413  | SIX homeobox 5                                         | Six5   | 308406 | 1,03 | down |
| 6298846 | 7029386 | 959412  | SIX homeobox 5                                         | Six5   | 308406 | 1,00 | down |
| 6681587 | 7250511 | 1498637 | six transmembrane epithelial antigen of the prostate 2 | Steap2 | 312052 | 2,81 | down |
| 6108724 | 7250511 | 1498631 | six transmembrane epithelial antigen of the prostate 2 | Steap2 | 312052 | 1,95 | down |
| 6310205 | 7250511 | 1498638 | six transmembrane epithelial antigen of the prostate 2 | Steap2 | 312052 | 1,95 | down |
| 6574157 | 7250511 | 1498643 | six transmembrane epithelial antigen of the prostate 2 | Steap2 | 312052 | 1,70 | down |
| 6080540 | 7250511 | 1498639 | six transmembrane epithelial antigen of the prostate 2 | Steap2 | 312052 | 1,66 | down |
| 6518795 | 7250511 | 1498642 | six transmembrane epithelial antigen of the prostate 2 | Steap2 | 312052 | 1,61 | down |
| 5681306 | 7250511 | 1498643 | six transmembrane epithelial antigen of the prostate 2 | Steap2 | 312052 | 1,33 | up   |
| 5700710 | 7250511 | 1498644 | six transmembrane epithelial antigen of the prostate 2 | Steap2 | 312052 | 1,23 | down |
| 6336124 | 7250511 | 1498643 | six transmembrane epithelial antigen of the prostate 2 | Steap2 | 312052 | 1,19 | up   |
| 6238262 | 7250511 | 1498642 | six transmembrane epithelial antigen of the prostate 2 | Steap2 | 312052 | 1,11 | down |
| 6381541 | 7250511 | 1498631 | six transmembrane epithelial antigen of the prostate 2 | Steap2 | 312052 | 1,08 | up   |
| 5669673 | 7250511 | 1498638 | six transmembrane epithelial antigen of the prostate 2 | Steap2 | 312052 | 1,06 | down |
| 6551096 | 7062628 | 1038080 | slit homolog 1 (Drosophila)                            | Slit1  | 65047  | 2,80 | up   |
| 6577349 | 7062628 | 1038079 | slit homolog 1 (Drosophila)                            | Slit1  | 65047  | 2,71 | up   |
| 6691778 | 7062628 | 1038080 | slit homolog 1 (Drosophila)                            | Slit1  | 65047  | 2,15 | up   |
| 6321697 | 7062628 | 1038103 | slit homolog 1 (Drosophila)                            | Slit1  | 65047  | 1,97 | down |
| 5653068 | 7062628 | 1038081 | slit homolog 1 (Drosophila)                            | Slit1  | 65047  | 1,88 | up   |
| 5839232 | 7062628 | 1038092 | slit homolog 1 (Drosophila)                            | Slit1  | 65047  | 1,87 | up   |
| 6682386 | 7062628 | 1038100 | slit homolog 1 (Drosophila)                            | Slit1  | 65047  | 1,75 | down |
| 6413193 | 7062628 | 1038111 | slit homolog 1 (Drosophila)                            | Slit1  | 65047  | 1,74 | up   |
| 6674373 | 7062628 | 1038095 | slit homolog 1 (Drosophila)                            | Slit1  | 65047  | 1,73 | up   |
| 5807274 | 7062628 | 1038098 | slit homolog 1 (Drosophila)                            | Slit1  | 65047  | 1,71 | down |
| 6599994 | 7062628 | 1038102 | slit homolog 1 (Drosophila)                            | Slit1  | 65047  | 1,70 | down |

|         |         |         |                                           |        |        |      |      |
|---------|---------|---------|-------------------------------------------|--------|--------|------|------|
| 5941958 | 7062628 | 1038085 | slit homolog 1 (Drosophila)               | Slit1  | 65047  | 1,56 | up   |
| 5685253 | 7062628 | 1038086 | slit homolog 1 (Drosophila)               | Slit1  | 65047  | 1,53 | up   |
| 6302731 | 7062628 | 1038105 | slit homolog 1 (Drosophila)               | Slit1  | 65047  | 1,50 | down |
| 6129985 | 7062628 | 1038093 | slit homolog 1 (Drosophila)               | Slit1  | 65047  | 1,47 | down |
| 6333878 | 7062628 | 1038083 | slit homolog 1 (Drosophila)               | Slit1  | 65047  | 1,46 | up   |
| 5777527 | 7062628 | 1038107 | slit homolog 1 (Drosophila)               | Slit1  | 65047  | 1,46 | down |
| 6581993 | 7062628 | 1038104 | slit homolog 1 (Drosophila)               | Slit1  | 65047  | 1,45 | down |
| 5932574 | 7062628 | 1038106 | slit homolog 1 (Drosophila)               | Slit1  | 65047  | 1,41 | down |
| 6654266 | 7062628 | 1038082 | slit homolog 1 (Drosophila)               | Slit1  | 65047  | 1,39 | down |
| 6485781 | 7062628 | 1038091 | slit homolog 1 (Drosophila)               | Slit1  | 65047  | 1,38 | up   |
| 6612543 | 7062628 | 1038096 | slit homolog 1 (Drosophila)               | Slit1  | 65047  | 1,37 | up   |
| 5937549 | 7062628 | 1038089 | slit homolog 1 (Drosophila)               | Slit1  | 65047  | 1,30 | up   |
| 6462561 | 7062628 | 1038108 | slit homolog 1 (Drosophila)               | Slit1  | 65047  | 1,30 | up   |
| 5656728 | 7062628 | 1038080 | slit homolog 1 (Drosophila)               | Slit1  | 65047  | 1,28 | up   |
| 5727905 | 7062628 | 1038087 | slit homolog 1 (Drosophila)               | Slit1  | 65047  | 1,27 | down |
| 6675367 | 7062628 | 1038107 | slit homolog 1 (Drosophila)               | Slit1  | 65047  | 1,26 | down |
| 5764765 | 7062628 | 1038088 | slit homolog 1 (Drosophila)               | Slit1  | 65047  | 1,24 | down |
| 6428077 | 7062628 | 1038101 | slit homolog 1 (Drosophila)               | Slit1  | 65047  | 1,23 | down |
| 5621481 | 7062628 | 1038081 | slit homolog 1 (Drosophila)               | Slit1  | 65047  | 1,22 | up   |
| 6507017 | 7062628 | 1038094 | slit homolog 1 (Drosophila)               | Slit1  | 65047  | 1,20 | down |
| 6061998 | 7062628 | 1038099 | slit homolog 1 (Drosophila)               | Slit1  | 65047  | 1,19 | down |
| 5638152 | 7062628 | 1038097 | slit homolog 1 (Drosophila)               | Slit1  | 65047  | 1,19 | up   |
| 6660296 | 7062628 | 1038112 | slit homolog 1 (Drosophila)               | Slit1  | 65047  | 1,17 | down |
| 5796880 | 7062628 | 1038085 | slit homolog 1 (Drosophila)               | Slit1  | 65047  | 1,14 | up   |
| 5937518 | 7062628 | 1038090 | slit homolog 1 (Drosophila)               | Slit1  | 65047  | 1,12 | up   |
| 6306693 | 7062628 | 1038110 | slit homolog 1 (Drosophila)               | Slit1  | 65047  | 1,11 | up   |
| 6162870 | 7062628 | 1038084 | slit homolog 1 (Drosophila)               | Slit1  | 65047  | 1,04 | down |
| 5625302 | 7062628 | 1038109 | slit homolog 1 (Drosophila)               | Slit1  | 65047  | 1,03 | down |
| 6499972 | 7110999 | 1154789 | SLIT-ROBO Rho GTPase activating protein 2 | Srgap2 | 360840 | 1,90 | up   |
| 6169647 | 7110999 | 1154764 | SLIT-ROBO Rho GTPase activating protein 2 | Srgap2 | 360840 | 1,51 | down |
| 6367614 | 7110999 | 1154779 | SLIT-ROBO Rho GTPase activating protein 2 | Srgap2 | 360840 | 1,51 | up   |
| 6247013 | 7110999 | 1154791 | SLIT-ROBO Rho GTPase activating protein 2 | Srgap2 | 360840 | 1,48 | up   |
| 6108607 | 7110999 | 1154788 | SLIT-ROBO Rho GTPase activating protein 2 | Srgap2 | 360840 | 1,47 | up   |
| 5669857 | 7110999 | 1154783 | SLIT-ROBO Rho GTPase activating protein 2 | Srgap2 | 360840 | 1,46 | down |
| 6478339 | 7110999 | 1154763 | SLIT-ROBO Rho GTPase activating protein 2 | Srgap2 | 360840 | 1,43 | up   |
| 6312320 | 7110999 | 1154766 | SLIT-ROBO Rho GTPase activating protein 2 | Srgap2 | 360840 | 1,40 | up   |
| 6211256 | 7110999 | 1154763 | SLIT-ROBO Rho GTPase activating protein 2 | Srgap2 | 360840 | 1,39 | up   |
| 6583934 | 7110999 | 1154762 | SLIT-ROBO Rho GTPase activating protein 2 | Srgap2 | 360840 | 1,34 | down |
| 6332281 | 7110999 | 1154792 | SLIT-ROBO Rho GTPase activating protein 2 | Srgap2 | 360840 | 1,31 | up   |
| 5621779 | 7110999 | 1154762 | SLIT-ROBO Rho GTPase activating protein 2 | Srgap2 | 360840 | 1,30 | down |
| 6281713 | 7110999 | 1154765 | SLIT-ROBO Rho GTPase activating protein 2 | Srgap2 | 360840 | 1,28 | down |
| 5948795 | 7110999 | 1154797 | SLIT-ROBO Rho GTPase activating protein 2 | Srgap2 | 360840 | 1,28 | up   |
| 5662933 | 7110999 | 1154793 | SLIT-ROBO Rho GTPase activating protein 2 | Srgap2 | 360840 | 1,27 | down |
| 5752680 | 7110999 | 1154813 | SLIT-ROBO Rho GTPase activating protein 2 | Srgap2 | 360840 | 1,24 | down |
| 5979950 | 7110999 | 1154802 | SLIT-ROBO Rho GTPase activating protein 2 | Srgap2 | 360840 | 1,20 | up   |
| 6694770 | 7110999 | 1154785 | SLIT-ROBO Rho GTPase activating protein 2 | Srgap2 | 360840 | 1,20 | down |
| 6519378 | 7110999 | 1154774 | SLIT-ROBO Rho GTPase activating protein 2 | Srgap2 | 360840 | 1,16 | up   |
| 6229274 | 7110999 | 1154776 | SLIT-ROBO Rho GTPase activating protein 2 | Srgap2 | 360840 | 1,14 | up   |
| 6362345 | 7110999 | 1154777 | SLIT-ROBO Rho GTPase activating protein 2 | Srgap2 | 360840 | 1,07 | down |
| 6460605 | 7110999 | 1154813 | SLIT-ROBO Rho GTPase activating protein 2 | Srgap2 | 360840 | 1,05 | up   |
| 6004742 | 7110999 | 1154787 | SLIT-ROBO Rho GTPase activating protein 2 | Srgap2 | 360840 | 1,03 | down |
| 6390035 | 7180236 | 1325491 | SMAD family member 1                      | Smad1  | 25671  | 2,49 | down |
| 6608722 | 7180236 | 1325495 | SMAD family member 1                      | Smad1  | 25671  | 1,52 | up   |
| 6344606 | 7180236 | 1325490 | SMAD family member 1                      | Smad1  | 25671  | 1,34 | down |
| 6663352 | 7180236 | 1325494 | SMAD family member 1                      | Smad1  | 25671  | 1,31 | up   |
| 6609547 | 7180236 | 1325489 | SMAD family member 1                      | Smad1  | 25671  | 1,25 | down |
| 6277058 | 7180236 | 1325492 | SMAD family member 1                      | Smad1  | 25671  | 1,20 | up   |

|         |         |         |                                                |        |        |      |      |
|---------|---------|---------|------------------------------------------------|--------|--------|------|------|
| 5771498 | 7180236 | 1325489 | SMAD family member 1                           | Smad1  | 25671  | 1,19 | down |
| 5675555 | 7180236 | 1325493 | SMAD family member 1                           | Smad1  | 25671  | 1,18 | down |
| 5791966 | 7180236 | 1325491 | SMAD family member 1                           | Smad1  | 25671  | 1,16 | up   |
| 6400230 | 7180236 | 1325490 | SMAD family member 1                           | Smad1  | 25671  | 1,16 | up   |
| 6274910 | 7180236 | 1325489 | SMAD family member 1                           | Smad1  | 25671  | 1,05 | down |
| 5651645 | 7346711 | 1736856 | SMAD family member 3                           | Smad3  | 25631  | 2,30 | down |
| 6511307 | 7346711 | 1736867 | SMAD family member 3                           | Smad3  | 25631  | 1,80 | up   |
| 5924083 | 7346711 | 1736869 | SMAD family member 3                           | Smad3  | 25631  | 1,77 | up   |
| 6672587 | 7346711 | 1736860 | SMAD family member 3                           | Smad3  | 25631  | 1,67 | up   |
| 6669833 | 7346711 | 1736870 | SMAD family member 3                           | Smad3  | 25631  | 1,60 | down |
| 6143418 | 7346711 | 1736856 | SMAD family member 3                           | Smad3  | 25631  | 1,48 | up   |
| 6133269 | 7346711 | 1736870 | SMAD family member 3                           | Smad3  | 25631  | 1,36 | up   |
| 5892278 | 7346711 | 1736868 | SMAD family member 3                           | Smad3  | 25631  | 1,33 | up   |
| 5733832 | 7346711 | 1736859 | SMAD family member 3                           | Smad3  | 25631  | 1,32 | up   |
| 6036693 | 7346711 | 1736862 | SMAD family member 3                           | Smad3  | 25631  | 1,28 | up   |
| 6141641 | 7346711 | 1736866 | SMAD family member 3                           | Smad3  | 25631  | 1,26 | down |
| 5645953 | 7346711 | 1736855 | SMAD family member 3                           | Smad3  | 25631  | 1,24 | down |
| 6515797 | 7346711 | 1736855 | SMAD family member 3                           | Smad3  | 25631  | 1,20 | down |
| 6266112 | 7346711 | 1736865 | SMAD family member 3                           | Smad3  | 25631  | 1,19 | up   |
| 6720065 | 7346711 | 1736857 | SMAD family member 3                           | Smad3  | 25631  | 1,16 | down |
| 6746921 | 7346711 | 1736860 | SMAD family member 3                           | Smad3  | 25631  | 1,16 | up   |
| 6106795 | 7346711 | 1736857 | SMAD family member 3                           | Smad3  | 25631  | 1,14 | up   |
| 5993401 | 7346711 | 1736863 | SMAD family member 3                           | Smad3  | 25631  | 1,14 | up   |
| 5933537 | 7346711 | 1736861 | SMAD family member 3                           | Smad3  | 25631  | 1,13 | down |
| 6359733 | 7346711 | 1736864 | SMAD family member 3                           | Smad3  | 25631  | 1,12 | up   |
| 5900495 | 7346711 | 1736855 | SMAD family member 3                           | Smad3  | 25631  | 1,08 | down |
| 5643881 | 7346711 | 1736855 | SMAD family member 3                           | Smad3  | 25631  | 1,06 | down |
| 6295939 | 7346711 | 1736856 | SMAD family member 3                           | Smad3  | 25631  | 1,06 | down |
| 6421015 | 7346711 | 1736858 | SMAD family member 3                           | Smad3  | 25631  | 1,05 | up   |
| 6652449 | 7346711 | 1736862 | SMAD family member 3                           | Smad3  | 25631  | 1,02 | up   |
| 5703443 | 7172144 | 1305043 | SMAD family member 7                           | Smad7  | 81516  | 2,72 | up   |
| 6681516 | 7172144 | 1305044 | SMAD family member 7                           | Smad7  | 81516  | 2,14 | down |
| 6352200 | 7172144 | 1305042 | SMAD family member 7                           | Smad7  | 81516  | 1,86 | up   |
| 6507297 | 7172144 | 1305046 | SMAD family member 7                           | Smad7  | 81516  | 1,82 | up   |
| 5802350 | 7172144 | 1305043 | SMAD family member 7                           | Smad7  | 81516  | 1,49 | down |
| 6070373 | 7172144 | 1305044 | SMAD family member 7                           | Smad7  | 81516  | 1,47 | down |
| 6242631 | 7172144 | 1305043 | SMAD family member 7                           | Smad7  | 81516  | 1,35 | up   |
| 6171589 | 7172144 | 1305043 | SMAD family member 7                           | Smad7  | 81516  | 1,34 | down |
| 6482456 | 7172144 | 1305043 | SMAD family member 7                           | Smad7  | 81516  | 1,28 | up   |
| 6444695 | 7172144 | 1305043 | SMAD family member 7                           | Smad7  | 81516  | 1,22 | down |
| 6051275 | 7172144 | 1305043 | SMAD family member 7                           | Smad7  | 81516  | 1,19 | down |
| 5684272 | 7172144 | 1305045 | SMAD family member 7                           | Smad7  | 81516  | 1,17 | up   |
| 6673274 | 7172144 | 1305042 | SMAD family member 7                           | Smad7  | 81516  | 1,02 | up   |
| 6124035 | 7172144 | 1305047 | SMAD family member 7                           | Smad7  | 81516  | 1,01 | up   |
| 6443452 | 7194141 | 1361089 | SMAD family member 9                           | Smad9  | 85435  | 2,68 | up   |
| 6450812 | 7194141 | 1361093 | SMAD family member 9                           | Smad9  | 85435  | 2,14 | up   |
| 6285854 | 7194141 | 1361089 | SMAD family member 9                           | Smad9  | 85435  | 1,99 | down |
| 5940372 | 7194141 | 1361090 | SMAD family member 9                           | Smad9  | 85435  | 1,82 | down |
| 6249304 | 7194141 | 1361093 | SMAD family member 9                           | Smad9  | 85435  | 1,66 | up   |
| 6588958 | 7194141 | 1361092 | SMAD family member 9                           | Smad9  | 85435  | 1,57 | down |
| 6189848 | 7194141 | 1361091 | SMAD family member 9                           | Smad9  | 85435  | 1,01 | up   |
| 6478382 | 7231834 | 1452269 | small EDRK-rich factor 2                       | Serf2  | 502663 | 1,47 | up   |
| 5859617 | 7231834 | 1452271 | small EDRK-rich factor 2                       | Serf2  | 502663 | 1,35 | down |
| 5931765 | 7231834 | 1452271 | small EDRK-rich factor 2                       | Serf2  | 502663 | 1,13 | down |
| 6194333 | 7231834 | 1452272 | small EDRK-rich factor 2                       | Serf2  | 502663 | 1,06 | down |
| 5932457 | 7233298 | 1456277 | small nuclear ribonucleoprotein polypeptide B" | Snrpb2 | 362223 | 2,34 | up   |
| 6467249 | 7233298 | 1456280 | small nuclear ribonucleoprotein polypeptide B" | Snrpb2 | 362223 | 1,35 | down |

|         |         |         |                                                                 |        |        |      |      |
|---------|---------|---------|-----------------------------------------------------------------|--------|--------|------|------|
| 6609158 | 7233298 | 1456278 | small nuclear ribonucleoprotein polypeptide B"                  | Snrpb2 | 362223 | 1,24 | up   |
| 6562615 | 7233298 | 1456275 | small nuclear ribonucleoprotein polypeptide B"                  | Snrpb2 | 362223 | 1,14 | up   |
| 6489074 | 7233298 | 1456281 | small nuclear ribonucleoprotein polypeptide B"                  | Snrpb2 | 362223 | 1,10 | up   |
| 6372165 | 7233298 | 1456276 | small nuclear ribonucleoprotein polypeptide B"                  | Snrpb2 | 362223 | 1,08 | down |
| 5634824 | 7233298 | 1456281 | small nuclear ribonucleoprotein polypeptide B"                  | Snrpb2 | 362223 | 1,04 | down |
| 6636731 | 7309738 | 1646963 | SMEK homolog 1, suppressor of mek1 (Dictyostelium)              | Smek1  | 314388 | 1,46 | up   |
| 5918285 | 7309738 | 1646963 | SMEK homolog 1, suppressor of mek1 (Dictyostelium)              | Smek1  | 314388 | 1,27 | up   |
| 6160274 | 7309738 | 1646961 | SMEK homolog 1, suppressor of mek1 (Dictyostelium)              | Smek1  | 314388 | 1,19 | up   |
| 6089482 | 7309738 | 1646962 | SMEK homolog 1, suppressor of mek1 (Dictyostelium)              | Smek1  | 314388 | 1,16 | up   |
| 6728313 | 7309738 | 1646965 | SMEK homolog 1, suppressor of mek1 (Dictyostelium)              | Smek1  | 314388 | 1,12 | down |
| 6731003 | 7309738 | 1646964 | SMEK homolog 1, suppressor of mek1 (Dictyostelium)              | Smek1  | 314388 | 1,06 | up   |
| 6065640 | 7309738 | 1646967 | SMEK homolog 1, suppressor of mek1 (Dictyostelium)              | Smek1  | 314388 | 1,06 | down |
| 6462756 | 7309738 | 1646963 | SMEK homolog 1, suppressor of mek1 (Dictyostelium)              | Smek1  | 314388 | 1,05 | down |
| 6483372 | 7309738 | 1646963 | SMEK homolog 1, suppressor of mek1 (Dictyostelium)              | Smek1  | 314388 | 1,03 | up   |
| 6158605 | 7122131 | 1182667 | SMEK homolog 2, suppressor of mek1 (Dictyostelium)              | Smek2  | 360993 | 2,67 | down |
| 5982224 | 7122131 | 1182681 | SMEK homolog 2, suppressor of mek1 (Dictyostelium)              | Smek2  | 360993 | 1,43 | down |
| 5739867 | 7122131 | 1182676 | SMEK homolog 2, suppressor of mek1 (Dictyostelium)              | Smek2  | 360993 | 1,34 | down |
| 5912628 | 7122131 | 1182685 | SMEK homolog 2, suppressor of mek1 (Dictyostelium)              | Smek2  | 360993 | 1,25 | up   |
| 6500070 | 7122131 | 1182688 | SMEK homolog 2, suppressor of mek1 (Dictyostelium)              | Smek2  | 360993 | 1,21 | up   |
| 6252717 | 7122131 | 1182674 | SMEK homolog 2, suppressor of mek1 (Dictyostelium)              | Smek2  | 360993 | 1,18 | up   |
| 6454831 | 7122131 | 1182687 | SMEK homolog 2, suppressor of mek1 (Dictyostelium)              | Smek2  | 360993 | 1,18 | up   |
| 5702698 | 7122131 | 1182673 | SMEK homolog 2, suppressor of mek1 (Dictyostelium)              | Smek2  | 360993 | 1,17 | up   |
| 6083665 | 7122131 | 1182686 | SMEK homolog 2, suppressor of mek1 (Dictyostelium)              | Smek2  | 360993 | 1,15 | down |
| 5902907 | 7122131 | 1182679 | SMEK homolog 2, suppressor of mek1 (Dictyostelium)              | Smek2  | 360993 | 1,12 | up   |
| 6379073 | 7122131 | 1182688 | SMEK homolog 2, suppressor of mek1 (Dictyostelium)              | Smek2  | 360993 | 1,11 | up   |
| 5802188 | 7122131 | 1182678 | SMEK homolog 2, suppressor of mek1 (Dictyostelium)              | Smek2  | 360993 | 1,07 | down |
| 6156479 | 7122131 | 1182683 | SMEK homolog 2, suppressor of mek1 (Dictyostelium)              | Smek2  | 360993 | 1,06 | down |
| 6472746 | 7122131 | 1182682 | SMEK homolog 2, suppressor of mek1 (Dictyostelium)              | Smek2  | 360993 | 1,02 | down |
| 6588466 | 7122131 | 1182675 | SMEK homolog 2, suppressor of mek1 (Dictyostelium)              | Smek2  | 360993 | 1,01 | up   |
| 6493431 | 7122131 | 1182677 | SMEK homolog 2, suppressor of mek1 (Dictyostelium)              | Smek2  | 360993 | 1,01 | up   |
| 5779830 | 7122131 | 1182667 | SMEK homolog 2, suppressor of mek1 (Dictyostelium)              | Smek2  | 360993 | 1,01 | down |
| 6043290 | 7112355 | 1158090 | Smg-7 homolog, nonsense mediated mRNA decay factor (C. elegans) | Smg7   | 360855 | 1,26 | down |
| 6356048 | 7079600 | 1078625 | smoothelin-like 2                                               | Smtnl2 | 679629 | 1,02 | up   |
| 6420977 | 7083533 | 1087310 | sodium channel, voltage-gated, type 4, alpha subunit            | Scn4a  | 25722  | 2,78 | up   |
| 5705498 | 7083533 | 1087329 | sodium channel, voltage-gated, type 4, alpha subunit            | Scn4a  | 25722  | 1,91 | down |
| 6270909 | 7083533 | 1087306 | sodium channel, voltage-gated, type 4, alpha subunit            | Scn4a  | 25722  | 1,71 | up   |
| 6711891 | 7083533 | 1087306 | sodium channel, voltage-gated, type 4, alpha subunit            | Scn4a  | 25722  | 1,52 | down |
| 5700904 | 7083533 | 1087314 | sodium channel, voltage-gated, type 4, alpha subunit            | Scn4a  | 25722  | 1,48 | up   |
| 6034639 | 7083533 | 1087329 | sodium channel, voltage-gated, type 4, alpha subunit            | Scn4a  | 25722  | 1,37 | up   |
| 6690942 | 7083533 | 1087330 | sodium channel, voltage-gated, type 4, alpha subunit            | Scn4a  | 25722  | 1,32 | down |
| 6092877 | 7083533 | 1087329 | sodium channel, voltage-gated, type 4, alpha subunit            | Scn4a  | 25722  | 1,30 | down |
| 6043001 | 7083533 | 1087327 | sodium channel, voltage-gated, type 4, alpha subunit            | Scn4a  | 25722  | 1,27 | down |
| 5698200 | 7083533 | 1087317 | sodium channel, voltage-gated, type 4, alpha subunit            | Scn4a  | 25722  | 1,22 | up   |
| 5760074 | 7083533 | 1087307 | sodium channel, voltage-gated, type 4, alpha subunit            | Scn4a  | 25722  | 1,21 | down |
| 6737315 | 7083533 | 1087326 | sodium channel, voltage-gated, type 4, alpha subunit            | Scn4a  | 25722  | 1,21 | up   |
| 5650643 | 7083533 | 1087306 | sodium channel, voltage-gated, type 4, alpha subunit            | Scn4a  | 25722  | 1,17 | down |
| 5955904 | 7083533 | 1087309 | sodium channel, voltage-gated, type 4, alpha subunit            | Scn4a  | 25722  | 1,15 | up   |
| 6697792 | 7083533 | 1087312 | sodium channel, voltage-gated, type 4, alpha subunit            | Scn4a  | 25722  | 1,15 | up   |
| 6647230 | 7083533 | 1087328 | sodium channel, voltage-gated, type 4, alpha subunit            | Scn4a  | 25722  | 1,12 | down |
| 6109687 | 7083533 | 1087324 | sodium channel, voltage-gated, type 4, alpha subunit            | Scn4a  | 25722  | 1,11 | up   |
| 5636745 | 7083533 | 1087313 | sodium channel, voltage-gated, type 4, alpha subunit            | Scn4a  | 25722  | 1,10 | up   |
| 5782513 | 7083533 | 1087315 | sodium channel, voltage-gated, type 4, alpha subunit            | Scn4a  | 25722  | 1,09 | up   |
| 6462692 | 7083533 | 1087318 | sodium channel, voltage-gated, type 4, alpha subunit            | Scn4a  | 25722  | 1,07 | down |
| 5830130 | 7083533 | 1087320 | sodium channel, voltage-gated, type 4, alpha subunit            | Scn4a  | 25722  | 1,06 | down |
| 6090597 | 7083533 | 1087323 | sodium channel, voltage-gated, type 4, alpha subunit            | Scn4a  | 25722  | 1,04 | down |
| 5746104 | 7083533 | 1087306 | sodium channel, voltage-gated, type 4, alpha subunit            | Scn4a  | 25722  | 1,04 | up   |
| 6435933 | 7083533 | 1087311 | sodium channel, voltage-gated, type 4, alpha subunit            | Scn4a  | 25722  | 1,03 | up   |



|         |         |         |                                                      |       |       |      |      |
|---------|---------|---------|------------------------------------------------------|-------|-------|------|------|
| 5878331 | 7083533 | 1087325 | sodium channel, voltage-gated, type 4, alpha subunit | Scn4a | 25722 | 1,03 | down |
| 5877740 | 7083533 | 1087321 | sodium channel, voltage-gated, type 4, alpha subunit | Scn4a | 25722 | 1,02 | up   |
| 6232854 | 7083533 | 1087319 | sodium channel, voltage-gated, type 4, alpha subunit | Scn4a | 25722 | 1,01 | up   |
| 5640743 | 7083533 | 1087306 | sodium channel, voltage-gated, type 4, alpha subunit | Scn4a | 25722 | 1,01 | up   |
| 6175453 | 7083533 | 1087322 | sodium channel, voltage-gated, type 4, alpha subunit | Scn4a | 25722 | 1,00 | up   |
| 6467496 | 7083533 | 1087316 | sodium channel, voltage-gated, type 4, alpha subunit | Scn4a | 25722 | 1,00 | down |
| 6696601 | 7350886 | 1747140 | sodium channel, voltage-gated, type 5, alpha subunit | Scn5a | 25665 | 2,29 | up   |
| 6573453 | 7350886 | 1747144 | sodium channel, voltage-gated, type 5, alpha subunit | Scn5a | 25665 | 1,54 | down |
| 5799617 | 7350886 | 1747138 | sodium channel, voltage-gated, type 5, alpha subunit | Scn5a | 25665 | 1,52 | down |
| 6410781 | 7350886 | 1747157 | sodium channel, voltage-gated, type 5, alpha subunit | Scn5a | 25665 | 1,48 | down |
| 6296805 | 7350886 | 1747155 | sodium channel, voltage-gated, type 5, alpha subunit | Scn5a | 25665 | 1,43 | up   |
| 6183604 | 7350886 | 1747142 | sodium channel, voltage-gated, type 5, alpha subunit | Scn5a | 25665 | 1,41 | down |
| 6598591 | 7350886 | 1747132 | sodium channel, voltage-gated, type 5, alpha subunit | Scn5a | 25665 | 1,37 | up   |
| 6688315 | 7350886 | 1747143 | sodium channel, voltage-gated, type 5, alpha subunit | Scn5a | 25665 | 1,34 | up   |
| 5884590 | 7350886 | 1747146 | sodium channel, voltage-gated, type 5, alpha subunit | Scn5a | 25665 | 1,34 | up   |
| 6116360 | 7350886 | 1747147 | sodium channel, voltage-gated, type 5, alpha subunit | Scn5a | 25665 | 1,24 | down |
| 6120506 | 7350886 | 1747152 | sodium channel, voltage-gated, type 5, alpha subunit | Scn5a | 25665 | 1,24 | up   |
| 6024601 | 7350886 | 1747145 | sodium channel, voltage-gated, type 5, alpha subunit | Scn5a | 25665 | 1,24 | down |
| 6252046 | 7350886 | 1747150 | sodium channel, voltage-gated, type 5, alpha subunit | Scn5a | 25665 | 1,22 | down |
| 6160092 | 7350886 | 1747137 | sodium channel, voltage-gated, type 5, alpha subunit | Scn5a | 25665 | 1,20 | up   |
| 6288286 | 7350886 | 1747131 | sodium channel, voltage-gated, type 5, alpha subunit | Scn5a | 25665 | 1,18 | down |
| 6711046 | 7350886 | 1747134 | sodium channel, voltage-gated, type 5, alpha subunit | Scn5a | 25665 | 1,15 | down |
| 6173637 | 7350886 | 1747135 | sodium channel, voltage-gated, type 5, alpha subunit | Scn5a | 25665 | 1,15 | down |
| 6331223 | 7350886 | 1747136 | sodium channel, voltage-gated, type 5, alpha subunit | Scn5a | 25665 | 1,15 | up   |
| 6083347 | 7350886 | 1747148 | sodium channel, voltage-gated, type 5, alpha subunit | Scn5a | 25665 | 1,12 | down |
| 6176532 | 7350886 | 1747151 | sodium channel, voltage-gated, type 5, alpha subunit | Scn5a | 25665 | 1,07 | up   |
| 6291110 | 7350886 | 1747141 | sodium channel, voltage-gated, type 5, alpha subunit | Scn5a | 25665 | 1,05 | up   |
| 5978640 | 7350886 | 1747139 | sodium channel, voltage-gated, type 5, alpha subunit | Scn5a | 25665 | 1,05 | up   |
| 5852994 | 7350886 | 1747133 | sodium channel, voltage-gated, type 5, alpha subunit | Scn5a | 25665 | 1,04 | up   |
| 6355507 | 7350886 | 1747157 | sodium channel, voltage-gated, type 5, alpha subunit | Scn5a | 25665 | 1,04 | up   |
| 6745121 | 7350886 | 1747154 | sodium channel, voltage-gated, type 5, alpha subunit | Scn5a | 25665 | 1,04 | up   |
| 6070622 | 7350886 | 1747149 | sodium channel, voltage-gated, type 5, alpha subunit | Scn5a | 25665 | 1,03 | up   |
| 5788201 | 7350886 | 1747156 | sodium channel, voltage-gated, type 5, alpha subunit | Scn5a | 25665 | 1,03 | up   |
| 6546595 | 7350886 | 1747139 | sodium channel, voltage-gated, type 5, alpha subunit | Scn5a | 25665 | 1,02 | down |
| 6537059 | 7350886 | 1747153 | sodium channel, voltage-gated, type 5, alpha subunit | Scn5a | 25665 | 1,02 | down |
| 5973263 | 7350886 | 1747156 | sodium channel, voltage-gated, type 5, alpha subunit | Scn5a | 25665 | 1,00 | up   |
| 6291091 | 7350886 | 1747158 | sodium channel, voltage-gated, type 5, alpha subunit | Scn5a | 25665 | 1,00 | up   |
| 6356521 | 7350886 | 1747131 | sodium channel, voltage-gated, type 5, alpha subunit | Scn5a | 25665 | 1,00 | up   |
| 6719842 | 7320850 | 1674393 | sodium channel, voltage-gated, type 8, alpha subunit | Scn8a | 29710 | 2,07 | down |
| 6051592 | 7320850 | 1674413 | sodium channel, voltage-gated, type 8, alpha subunit | Scn8a | 29710 | 1,53 | up   |
| 5960248 | 7320850 | 1674392 | sodium channel, voltage-gated, type 8, alpha subunit | Scn8a | 29710 | 1,49 | down |
| 5820998 | 7320850 | 1674419 | sodium channel, voltage-gated, type 8, alpha subunit | Scn8a | 29710 | 1,44 | down |
| 6555833 | 7320850 | 1674406 | sodium channel, voltage-gated, type 8, alpha subunit | Scn8a | 29710 | 1,44 | down |
| 6504951 | 7320850 | 1674403 | sodium channel, voltage-gated, type 8, alpha subunit | Scn8a | 29710 | 1,38 | up   |
| 5825755 | 7320850 | 1674412 | sodium channel, voltage-gated, type 8, alpha subunit | Scn8a | 29710 | 1,29 | down |
| 6472163 | 7320850 | 1674419 | sodium channel, voltage-gated, type 8, alpha subunit | Scn8a | 29710 | 1,26 | up   |
| 6089383 | 7320850 | 1674407 | sodium channel, voltage-gated, type 8, alpha subunit | Scn8a | 29710 | 1,22 | down |
| 5651835 | 7320850 | 1674419 | sodium channel, voltage-gated, type 8, alpha subunit | Scn8a | 29710 | 1,21 | up   |
| 5745852 | 7320850 | 1674416 | sodium channel, voltage-gated, type 8, alpha subunit | Scn8a | 29710 | 1,21 | up   |
| 6614121 | 7320850 | 1674401 | sodium channel, voltage-gated, type 8, alpha subunit | Scn8a | 29710 | 1,19 | down |
| 6573417 | 7320850 | 1674415 | sodium channel, voltage-gated, type 8, alpha subunit | Scn8a | 29710 | 1,15 | up   |
| 6265290 | 7320850 | 1674402 | sodium channel, voltage-gated, type 8, alpha subunit | Scn8a | 29710 | 1,12 | down |
| 6415427 | 7320850 | 1674411 | sodium channel, voltage-gated, type 8, alpha subunit | Scn8a | 29710 | 1,12 | up   |
| 6486047 | 7320850 | 1674398 | sodium channel, voltage-gated, type 8, alpha subunit | Scn8a | 29710 | 1,12 | down |
| 5940416 | 7320850 | 1674408 | sodium channel, voltage-gated, type 8, alpha subunit | Scn8a | 29710 | 1,10 | down |
| 5792857 | 7320850 | 1674405 | sodium channel, voltage-gated, type 8, alpha subunit | Scn8a | 29710 | 1,09 | down |
| 6570454 | 7320850 | 1674400 | sodium channel, voltage-gated, type 8, alpha subunit | Scn8a | 29710 | 1,09 | up   |

|         |         |         |                                                                                                 |                 |                  |      |      |
|---------|---------|---------|-------------------------------------------------------------------------------------------------|-----------------|------------------|------|------|
| 6169362 | 7320850 | 1674408 | sodium channel, voltage-gated, type 8, alpha subunit                                            | Scn8a           | 29710            | 1,09 | up   |
| 6562085 | 7320850 | 1674404 | sodium channel, voltage-gated, type 8, alpha subunit                                            | Scn8a           | 29710            | 1,06 | up   |
| 5915914 | 7320850 | 1674399 | sodium channel, voltage-gated, type 8, alpha subunit                                            | Scn8a           | 29710            | 1,05 | up   |
| 6565880 | 7320850 | 1674397 | sodium channel, voltage-gated, type 8, alpha subunit                                            | Scn8a           | 29710            | 1,03 | down |
| 6024274 | 7320850 | 1674395 | sodium channel, voltage-gated, type 8, alpha subunit                                            | Scn8a           | 29710            | 1,03 | down |
| 5958645 | 7320850 | 1674418 | sodium channel, voltage-gated, type 8, alpha subunit                                            | Scn8a           | 29710            | 1,03 | up   |
| 6533596 | 7320850 | 1674417 | sodium channel, voltage-gated, type 8, alpha subunit                                            | Scn8a           | 29710            | 1,02 | down |
| 6735738 | 7320850 | 1674396 | sodium channel, voltage-gated, type 8, alpha subunit                                            | Scn8a           | 29710            | 1,02 | down |
| 6626303 | 7320850 | 1674394 | sodium channel, voltage-gated, type 8, alpha subunit                                            | Scn8a           | 29710            | 1,01 | down |
| 6565086 | 7320850 | 1674414 | sodium channel, voltage-gated, type 8, alpha subunit                                            | Scn8a           | 29710            | 1,01 | up   |
| 6062548 | 7320850 | 1674409 | sodium channel, voltage-gated, type 8, alpha subunit                                            | Scn8a           | 29710            | 1,00 | down |
| 5837293 | 7320850 | 1674410 | sodium channel, voltage-gated, type 8, alpha subunit                                            | Scn8a           | 29710            | 1,00 | up   |
| 6418547 | 7239756 | 1473218 | sodium channel, voltage-gated, type I, alpha                                                    | Scn1a           | 81574            | 2,80 | up   |
| 5797851 | 7239756 | 1473222 | sodium channel, voltage-gated, type I, alpha                                                    | Scn1a           | 81574            | 1,50 | down |
| 6134626 | 7239756 | 1473218 | sodium channel, voltage-gated, type I, alpha                                                    | Scn1a           | 81574            | 1,43 | down |
| 6013119 | 7239756 | 1473215 | sodium channel, voltage-gated, type I, alpha                                                    | Scn1a           | 81574            | 1,42 | up   |
| 5966608 | 7239756 | 1473225 | sodium channel, voltage-gated, type I, alpha                                                    | Scn1a           | 81574            | 1,40 | down |
| 6048350 | 7239756 | 1473207 | sodium channel, voltage-gated, type I, alpha                                                    | Scn1a           | 81574            | 1,40 | up   |
| 6722073 | 7239756 | 1473227 | sodium channel, voltage-gated, type I, alpha                                                    | Scn1a           | 81574            | 1,38 | down |
| 6084103 | 7239756 | 1473225 | sodium channel, voltage-gated, type I, alpha                                                    | Scn1a           | 81574            | 1,36 | down |
| 6568359 | 7239756 | 1473221 | sodium channel, voltage-gated, type I, alpha                                                    | Scn1a           | 81574            | 1,30 | down |
| 6040709 | 7239756 | 1473202 | sodium channel, voltage-gated, type I, alpha                                                    | Scn1a           | 81574            | 1,27 | down |
| 6476475 | 7239756 | 1473219 | sodium channel, voltage-gated, type I, alpha                                                    | Scn1a           | 81574            | 1,18 | down |
| 6128128 | 7239756 | 1473229 | sodium channel, voltage-gated, type I, alpha                                                    | Scn1a           | 81574            | 1,18 | up   |
| 6585600 | 7239756 | 1473204 | sodium channel, voltage-gated, type I, alpha                                                    | Scn1a           | 81574            | 1,17 | up   |
| 6626783 | 7239756 | 1473227 | sodium channel, voltage-gated, type I, alpha                                                    | Scn1a           | 81574            | 1,16 | down |
| 6572563 | 7239756 | 1473205 | sodium channel, voltage-gated, type I, alpha                                                    | Scn1a           | 81574            | 1,16 | up   |
| 5981889 | 7239756 | 1473226 | sodium channel, voltage-gated, type I, alpha                                                    | Scn1a           | 81574            | 1,13 | up   |
| 5644748 | 7239756 | 1473217 | sodium channel, voltage-gated, type I, alpha                                                    | Scn1a           | 81574            | 1,13 | down |
| 6507689 | 7239756 | 1473216 | sodium channel, voltage-gated, type I, alpha                                                    | Scn1a           | 81574            | 1,10 | up   |
| 6716109 | 7239756 | 1473212 | sodium channel, voltage-gated, type I, alpha                                                    | Scn1a           | 81574            | 1,09 | down |
| 6046753 | 7239756 | 1473228 | sodium channel, voltage-gated, type I, alpha                                                    | Scn1a           | 81574            | 1,09 | down |
| 5901183 | 7239756 | 1473228 | sodium channel, voltage-gated, type I, alpha                                                    | Scn1a           | 81574            | 1,09 | up   |
| 6635431 | 7239756 | 1473216 | sodium channel, voltage-gated, type I, alpha                                                    | Scn1a           | 81574            | 1,08 | down |
| 6442643 | 7239756 | 1473210 | sodium channel, voltage-gated, type I, alpha                                                    | Scn1a           | 81574            | 1,08 | down |
| 6058327 | 7239756 | 1473211 | sodium channel, voltage-gated, type I, alpha                                                    | Scn1a           | 81574            | 1,08 | down |
| 5892142 | 7239756 | 1473214 | sodium channel, voltage-gated, type I, alpha                                                    | Scn1a           | 81574            | 1,06 | down |
| 6252712 | 7239756 | 1473220 | sodium channel, voltage-gated, type I, alpha                                                    | Scn1a           | 81574            | 1,06 | up   |
| 6308188 | 7239756 | 1473213 | sodium channel, voltage-gated, type I, alpha                                                    | Scn1a           | 81574            | 1,06 | up   |
| 6396749 | 7239756 | 1473217 | sodium channel, voltage-gated, type I, alpha                                                    | Scn1a           | 81574            | 1,03 | up   |
| 6309226 | 7239756 | 1473203 | sodium channel, voltage-gated, type I, alpha                                                    | Scn1a           | 81574            | 1,02 | up   |
| 6720101 | 7239756 | 1473206 | sodium channel, voltage-gated, type I, alpha                                                    | Scn1a           | 81574            | 1,02 | up   |
| 6233477 | 7239756 | 1473223 | sodium channel, voltage-gated, type I, alpha                                                    | Scn1a           | 81574            | 1,01 | down |
| 6026513 | 7239756 | 1473226 | sodium channel, voltage-gated, type I, alpha                                                    | Scn1a           | 81574            | 1,00 | up   |
| 6400083 | 7239756 | 1473209 | sodium channel, voltage-gated, type I, alpha                                                    | Scn1a           | 81574            | 1,00 | up   |
| 6670949 | 7239756 | 1473208 | sodium channel, voltage-gated, type I, alpha                                                    | Scn1a           | 81574            | 1,00 | up   |
| 5955168 | 7239756 | 1473214 | sodium channel, voltage-gated, type I, alpha /// sodium channel, voltage-gated, type III, alpha | Scn1a /// Scn3a | 81574 /// 497770 | 1,79 | down |
| 5662097 | 7239756 | 1473220 | sodium channel, voltage-gated, type I, alpha /// sodium channel, voltage-gated, type III, alpha | Scn1a /// Scn3a | 81574 /// 497770 | 1,50 | down |
| 5684008 | 7239756 | 1473224 | sodium channel, voltage-gated, type I, alpha /// sodium channel, voltage-gated, type III, alpha | Scn1a /// Scn3a | 81574 /// 497770 | 1,09 | up   |
| 5984280 | 7228160 | 1442872 | sodium channel, voltage-gated, type II, alpha I                                                 | Scn2a1          | 24766            | 2,05 | down |
| 6203092 | 7228160 | 1442861 | sodium channel, voltage-gated, type II, alpha I                                                 | Scn2a1          | 24766            | 1,80 | up   |
| 6664722 | 7228160 | 1442863 | sodium channel, voltage-gated, type II, alpha I                                                 | Scn2a1          | 24766            | 1,75 | up   |
| 6358735 | 7228160 | 1442858 | sodium channel, voltage-gated, type II, alpha I                                                 | Scn2a1          | 24766            | 1,60 | up   |
| 5804570 | 7228160 | 1442864 | sodium channel, voltage-gated, type II, alpha I                                                 | Scn2a1          | 24766            | 1,56 | up   |
| 6718868 | 7228160 | 1442848 | sodium channel, voltage-gated, type II, alpha I                                                 | Scn2a1          | 24766            | 1,55 | down |
| 6178583 | 7228160 | 1442858 | sodium channel, voltage-gated, type II, alpha I                                                 | Scn2a1          | 24766            | 1,40 | down |
| 5955445 | 7228160 | 1442874 | sodium channel, voltage-gated, type II, alpha I                                                 | Scn2a1          | 24766            | 1,39 | down |

|         |         |         |                                                                                                    |                  |                  |      |      |
|---------|---------|---------|----------------------------------------------------------------------------------------------------|------------------|------------------|------|------|
| 5913237 | 7228160 | 1442869 | sodium channel, voltage-gated, type II, alpha 1                                                    | Scn2a1           | 24766            | 1,34 | up   |
| 6357608 | 7228160 | 1442875 | sodium channel, voltage-gated, type II, alpha 1                                                    | Scn2a1           | 24766            | 1,34 | up   |
| 6349426 | 7228160 | 1442849 | sodium channel, voltage-gated, type II, alpha 1                                                    | Scn2a1           | 24766            | 1,33 | up   |
| 6570082 | 7228160 | 1442875 | sodium channel, voltage-gated, type II, alpha 1                                                    | Scn2a1           | 24766            | 1,29 | up   |
| 5817317 | 7228160 | 1442873 | sodium channel, voltage-gated, type II, alpha 1                                                    | Scn2a1           | 24766            | 1,28 | up   |
| 5995824 | 7228160 | 1442856 | sodium channel, voltage-gated, type II, alpha 1                                                    | Scn2a1           | 24766            | 1,26 | up   |
| 5907729 | 7228160 | 1442875 | sodium channel, voltage-gated, type II, alpha 1                                                    | Scn2a1           | 24766            | 1,26 | down |
| 6576638 | 7228160 | 1442875 | sodium channel, voltage-gated, type II, alpha 1                                                    | Scn2a1           | 24766            | 1,26 | down |
| 6713204 | 7228160 | 1442860 | sodium channel, voltage-gated, type II, alpha 1                                                    | Scn2a1           | 24766            | 1,24 | up   |
| 5840955 | 7228160 | 1442848 | sodium channel, voltage-gated, type II, alpha 1                                                    | Scn2a1           | 24766            | 1,23 | down |
| 5693809 | 7228160 | 1442875 | sodium channel, voltage-gated, type II, alpha 1                                                    | Scn2a1           | 24766            | 1,22 | up   |
| 6090413 | 7228160 | 1442866 | sodium channel, voltage-gated, type II, alpha 1                                                    | Scn2a1           | 24766            | 1,22 | down |
| 6121362 | 7228160 | 1442848 | sodium channel, voltage-gated, type II, alpha 1                                                    | Scn2a1           | 24766            | 1,20 | down |
| 6059801 | 7228160 | 1442850 | sodium channel, voltage-gated, type II, alpha 1                                                    | Scn2a1           | 24766            | 1,20 | down |
| 5773914 | 7228160 | 1442875 | sodium channel, voltage-gated, type II, alpha 1                                                    | Scn2a1           | 24766            | 1,20 | down |
| 5674136 | 7228160 | 1442851 | sodium channel, voltage-gated, type II, alpha 1                                                    | Scn2a1           | 24766            | 1,19 | down |
| 5932769 | 7228160 | 1442868 | sodium channel, voltage-gated, type II, alpha 1                                                    | Scn2a1           | 24766            | 1,17 | down |
| 6576008 | 7228160 | 1442850 | sodium channel, voltage-gated, type II, alpha 1                                                    | Scn2a1           | 24766            | 1,16 | down |
| 6030204 | 7228160 | 1442852 | sodium channel, voltage-gated, type II, alpha 1                                                    | Scn2a1           | 24766            | 1,14 | up   |
| 6399720 | 7228160 | 1442859 | sodium channel, voltage-gated, type II, alpha 1                                                    | Scn2a1           | 24766            | 1,14 | up   |
| 6050790 | 7228160 | 1442862 | sodium channel, voltage-gated, type II, alpha 1                                                    | Scn2a1           | 24766            | 1,12 | down |
| 6036947 | 7228160 | 1442867 | sodium channel, voltage-gated, type II, alpha 1                                                    | Scn2a1           | 24766            | 1,12 | up   |
| 6166385 | 7228160 | 1442855 | sodium channel, voltage-gated, type II, alpha 1                                                    | Scn2a1           | 24766            | 1,10 | up   |
| 6139237 | 7228160 | 1442875 | sodium channel, voltage-gated, type II, alpha 1                                                    | Scn2a1           | 24766            | 1,09 | down |
| 5722089 | 7228160 | 1442854 | sodium channel, voltage-gated, type II, alpha 1                                                    | Scn2a1           | 24766            | 1,09 | down |
| 6347684 | 7228160 | 1442875 | sodium channel, voltage-gated, type II, alpha 1                                                    | Scn2a1           | 24766            | 1,07 | up   |
| 5652330 | 7228160 | 1442857 | sodium channel, voltage-gated, type II, alpha 1                                                    | Scn2a1           | 24766            | 1,07 | up   |
| 5910836 | 7228160 | 1442875 | sodium channel, voltage-gated, type II, alpha 1                                                    | Scn2a1           | 24766            | 1,07 | up   |
| 6720744 | 7228160 | 1442859 | sodium channel, voltage-gated, type II, alpha 1                                                    | Scn2a1           | 24766            | 1,03 | up   |
| 6097823 | 7228160 | 1442871 | sodium channel, voltage-gated, type II, alpha 1                                                    | Scn2a1           | 24766            | 1,02 | up   |
| 6106939 | 7228160 | 1442870 | sodium channel, voltage-gated, type II, alpha 1                                                    | Scn2a1           | 24766            | 1,01 | up   |
| 6331863 | 7228160 | 1442865 | sodium channel, voltage-gated, type II, alpha 1                                                    | Scn2a1           | 24766            | 1,01 | up   |
| 5626210 | 7228160 | 1442853 | sodium channel, voltage-gated, type II, alpha 1 /// sodium channel, voltage-gated, type III, alpha | Scn2a1 /// Scn3a | 24766 /// 497770 | 1,16 | up   |
| 6500469 | 7228160 | 1442874 | sodium channel, voltage-gated, type III, alpha /// sodium channel, voltage-gated, type II, alpha 1 | Scn3a /// Scn2a1 | 497770 /// 24766 | 1,91 | down |
| 6650217 | 7228160 | 1442862 | sodium channel, voltage-gated, type III, alpha /// sodium channel, voltage-gated, type II, alpha 1 | Scn3a /// Scn2a1 | 497770 /// 24766 | 1,59 | down |
| 6350683 | 7228160 | 1442874 | sodium channel, voltage-gated, type III, alpha /// sodium channel, voltage-gated, type II, alpha 1 | Scn3a /// Scn2a1 | 497770 /// 24766 | 1,01 | up   |
| 6091053 | 7239774 | 1473313 | sodium channel, voltage-gated, type VII, alpha                                                     | Scn7a            | 64155            | 2,53 | up   |
| 6272367 | 7239774 | 1473315 | sodium channel, voltage-gated, type VII, alpha                                                     | Scn7a            | 64155            | 2,44 | down |
| 5847584 | 7239774 | 1473319 | sodium channel, voltage-gated, type VII, alpha                                                     | Scn7a            | 64155            | 2,25 | down |
| 5818296 | 7239774 | 1473320 | sodium channel, voltage-gated, type VII, alpha                                                     | Scn7a            | 64155            | 2,24 | down |
| 6479684 | 7239774 | 1473307 | sodium channel, voltage-gated, type VII, alpha                                                     | Scn7a            | 64155            | 1,98 | up   |
| 6244319 | 7239774 | 1473311 | sodium channel, voltage-gated, type VII, alpha                                                     | Scn7a            | 64155            | 1,86 | up   |
| 6028500 | 7239774 | 1473297 | sodium channel, voltage-gated, type VII, alpha                                                     | Scn7a            | 64155            | 1,78 | up   |
| 6263953 | 7239774 | 1473305 | sodium channel, voltage-gated, type VII, alpha                                                     | Scn7a            | 64155            | 1,69 | down |
| 6252160 | 7239774 | 1473314 | sodium channel, voltage-gated, type VII, alpha                                                     | Scn7a            | 64155            | 1,64 | down |
| 5934625 | 7239774 | 1473310 | sodium channel, voltage-gated, type VII, alpha                                                     | Scn7a            | 64155            | 1,59 | up   |
| 6328973 | 7239774 | 1473303 | sodium channel, voltage-gated, type VII, alpha                                                     | Scn7a            | 64155            | 1,59 | down |
| 5899113 | 7239774 | 1473317 | sodium channel, voltage-gated, type VII, alpha                                                     | Scn7a            | 64155            | 1,56 | up   |
| 5674200 | 7239774 | 1473301 | sodium channel, voltage-gated, type VII, alpha                                                     | Scn7a            | 64155            | 1,39 | up   |
| 6033055 | 7239774 | 1473308 | sodium channel, voltage-gated, type VII, alpha                                                     | Scn7a            | 64155            | 1,36 | up   |
| 6287761 | 7239774 | 1473302 | sodium channel, voltage-gated, type VII, alpha                                                     | Scn7a            | 64155            | 1,28 | down |
| 6550800 | 7239774 | 1473300 | sodium channel, voltage-gated, type VII, alpha                                                     | Scn7a            | 64155            | 1,26 | up   |
| 6011802 | 7239774 | 1473317 | sodium channel, voltage-gated, type VII, alpha                                                     | Scn7a            | 64155            | 1,24 | down |
| 5810756 | 7239774 | 1473311 | sodium channel, voltage-gated, type VII, alpha                                                     | Scn7a            | 64155            | 1,24 | up   |
| 6093429 | 7239774 | 1473312 | sodium channel, voltage-gated, type VII, alpha                                                     | Scn7a            | 64155            | 1,22 | down |
| 6019808 | 7239774 | 1473322 | sodium channel, voltage-gated, type VII, alpha                                                     | Scn7a            | 64155            | 1,19 | down |
| 6357438 | 7239774 | 1473309 | sodium channel, voltage-gated, type VII, alpha                                                     | Scn7a            | 64155            | 1,18 | down |

|         |         |         |                                                      |        |        |      |      |
|---------|---------|---------|------------------------------------------------------|--------|--------|------|------|
| 6248739 | 7239774 | 1473304 | sodium channel, voltage-gated, type VII, alpha       | Scn7a  | 64155  | 1,15 | up   |
| 6549745 | 7239774 | 1473306 | sodium channel, voltage-gated, type VII, alpha       | Scn7a  | 64155  | 1,15 | up   |
| 5899941 | 7239774 | 1473318 | sodium channel, voltage-gated, type VII, alpha       | Scn7a  | 64155  | 1,13 | down |
| 6559857 | 7239774 | 1473321 | sodium channel, voltage-gated, type VII, alpha       | Scn7a  | 64155  | 1,12 | down |
| 6523562 | 7239774 | 1473298 | sodium channel, voltage-gated, type VII, alpha       | Scn7a  | 64155  | 1,12 | up   |
| 6138572 | 7239774 | 1473299 | sodium channel, voltage-gated, type VII, alpha       | Scn7a  | 64155  | 1,07 | down |
| 6586440 | 7239774 | 1473309 | sodium channel, voltage-gated, type VII, alpha       | Scn7a  | 64155  | 1,07 | up   |
| 6556185 | 7239774 | 1473316 | sodium channel, voltage-gated, type VII, alpha       | Scn7a  | 64155  | 1,07 | down |
| 5954590 | 7350894 | 1747171 | sodium channel, voltage-gated, type X, alpha subunit | Scn10a | 29571  | 2,41 | down |
| 6646439 | 7350894 | 1747179 | sodium channel, voltage-gated, type X, alpha subunit | Scn10a | 29571  | 1,74 | down |
| 5809739 | 7350894 | 1747189 | sodium channel, voltage-gated, type X, alpha subunit | Scn10a | 29571  | 1,54 | up   |
| 5873677 | 7350894 | 1747166 | sodium channel, voltage-gated, type X, alpha subunit | Scn10a | 29571  | 1,31 | up   |
| 6077757 | 7350894 | 1747193 | sodium channel, voltage-gated, type X, alpha subunit | Scn10a | 29571  | 1,28 | down |
| 6348769 | 7350894 | 1747192 | sodium channel, voltage-gated, type X, alpha subunit | Scn10a | 29571  | 1,20 | up   |
| 6084663 | 7350894 | 1747167 | sodium channel, voltage-gated, type X, alpha subunit | Scn10a | 29571  | 1,19 | up   |
| 6101143 | 7350894 | 1747188 | sodium channel, voltage-gated, type X, alpha subunit | Scn10a | 29571  | 1,18 | down |
| 6119997 | 7350894 | 1747184 | sodium channel, voltage-gated, type X, alpha subunit | Scn10a | 29571  | 1,17 | up   |
| 6608359 | 7350894 | 1747176 | sodium channel, voltage-gated, type X, alpha subunit | Scn10a | 29571  | 1,17 | up   |
| 6373295 | 7350894 | 1747178 | sodium channel, voltage-gated, type X, alpha subunit | Scn10a | 29571  | 1,17 | up   |
| 6472334 | 7350894 | 1747187 | sodium channel, voltage-gated, type X, alpha subunit | Scn10a | 29571  | 1,16 | up   |
| 6687524 | 7350894 | 1747180 | sodium channel, voltage-gated, type X, alpha subunit | Scn10a | 29571  | 1,14 | down |
| 6337110 | 7350894 | 1747186 | sodium channel, voltage-gated, type X, alpha subunit | Scn10a | 29571  | 1,14 | up   |
| 5696873 | 7350894 | 1747183 | sodium channel, voltage-gated, type X, alpha subunit | Scn10a | 29571  | 1,13 | down |
| 6433809 | 7350894 | 1747191 | sodium channel, voltage-gated, type X, alpha subunit | Scn10a | 29571  | 1,08 | down |
| 6660338 | 7350894 | 1747194 | sodium channel, voltage-gated, type X, alpha subunit | Scn10a | 29571  | 1,08 | down |
| 5866359 | 7350894 | 1747182 | sodium channel, voltage-gated, type X, alpha subunit | Scn10a | 29571  | 1,07 | up   |
| 6563039 | 7350894 | 1747168 | sodium channel, voltage-gated, type X, alpha subunit | Scn10a | 29571  | 1,06 | down |
| 5758462 | 7350894 | 1747181 | sodium channel, voltage-gated, type X, alpha subunit | Scn10a | 29571  | 1,06 | down |
| 6255129 | 7350894 | 1747177 | sodium channel, voltage-gated, type X, alpha subunit | Scn10a | 29571  | 1,06 | down |
| 6240139 | 7350894 | 1747175 | sodium channel, voltage-gated, type X, alpha subunit | Scn10a | 29571  | 1,04 | down |
| 6337277 | 7350894 | 1747190 | sodium channel, voltage-gated, type X, alpha subunit | Scn10a | 29571  | 1,03 | down |
| 5949101 | 7350894 | 1747174 | sodium channel, voltage-gated, type X, alpha subunit | Scn10a | 29571  | 1,03 | up   |
| 5700084 | 7350894 | 1747170 | sodium channel, voltage-gated, type X, alpha subunit | Scn10a | 29571  | 1,03 | down |
| 6203915 | 7350894 | 1747173 | sodium channel, voltage-gated, type X, alpha subunit | Scn10a | 29571  | 1,02 | up   |
| 5656260 | 7350894 | 1747183 | sodium channel, voltage-gated, type X, alpha subunit | Scn10a | 29571  | 1,02 | down |
| 6438886 | 7350894 | 1747169 | sodium channel, voltage-gated, type X, alpha subunit | Scn10a | 29571  | 1,02 | up   |
| 5956678 | 7350894 | 1747172 | sodium channel, voltage-gated, type X, alpha subunit | Scn10a | 29571  | 1,01 | up   |
| 6718030 | 7350894 | 1747185 | sodium channel, voltage-gated, type X, alpha subunit | Scn10a | 29571  | 1,01 | down |
| 6469185 | 7350894 | 1747193 | sodium channel, voltage-gated, type X, alpha subunit | Scn10a | 29571  | 1,00 | up   |
| 6167495 | 7142431 | 1231856 | sodium leak channel, non-selective                   | Nalcn  | 266760 | 2,21 | down |
| 5700337 | 7142431 | 1231877 | sodium leak channel, non-selective                   | Nalcn  | 266760 | 1,67 | down |
| 6371439 | 7142431 | 1231868 | sodium leak channel, non-selective                   | Nalcn  | 266760 | 1,56 | down |
| 5866945 | 7142431 | 1231859 | sodium leak channel, non-selective                   | Nalcn  | 266760 | 1,51 | down |
| 5960535 | 7142431 | 1231849 | sodium leak channel, non-selective                   | Nalcn  | 266760 | 1,50 | down |
| 6210435 | 7142431 | 1231867 | sodium leak channel, non-selective                   | Nalcn  | 266760 | 1,34 | down |
| 5860957 | 7142431 | 1231853 | sodium leak channel, non-selective                   | Nalcn  | 266760 | 1,29 | up   |
| 5961695 | 7142431 | 1231847 | sodium leak channel, non-selective                   | Nalcn  | 266760 | 1,28 | up   |
| 6472523 | 7142431 | 1231863 | sodium leak channel, non-selective                   | Nalcn  | 266760 | 1,27 | down |
| 6120152 | 7142431 | 1231862 | sodium leak channel, non-selective                   | Nalcn  | 266760 | 1,25 | up   |
| 6088028 | 7142431 | 1231858 | sodium leak channel, non-selective                   | Nalcn  | 266760 | 1,22 | up   |
| 5789239 | 7142431 | 1231871 | sodium leak channel, non-selective                   | Nalcn  | 266760 | 1,22 | down |
| 6201529 | 7142431 | 1231881 | sodium leak channel, non-selective                   | Nalcn  | 266760 | 1,22 | down |
| 6101481 | 7142431 | 1231869 | sodium leak channel, non-selective                   | Nalcn  | 266760 | 1,21 | down |
| 6396124 | 7142431 | 1231866 | sodium leak channel, non-selective                   | Nalcn  | 266760 | 1,20 | down |
| 6102965 | 7142431 | 1231879 | sodium leak channel, non-selective                   | Nalcn  | 266760 | 1,20 | up   |
| 6665717 | 7142431 | 1231854 | sodium leak channel, non-selective                   | Nalcn  | 266760 | 1,18 | down |
| 6442182 | 7142431 | 1231864 | sodium leak channel, non-selective                   | Nalcn  | 266760 | 1,17 | up   |

|         |         |         |                                                                                     |         |        |      |      |
|---------|---------|---------|-------------------------------------------------------------------------------------|---------|--------|------|------|
| 6512650 | 7142431 | 1231860 | sodium leak channel, non-selective                                                  | Nalcn   | 266760 | 1,13 | up   |
| 6357553 | 7142431 | 1231846 | sodium leak channel, non-selective                                                  | Nalcn   | 266760 | 1,13 | down |
| 5782035 | 7142431 | 1231870 | sodium leak channel, non-selective                                                  | Nalcn   | 266760 | 1,12 | down |
| 5908233 | 7142431 | 1231865 | sodium leak channel, non-selective                                                  | Nalcn   | 266760 | 1,11 | up   |
| 6439730 | 7142431 | 1231851 | sodium leak channel, non-selective                                                  | Nalcn   | 266760 | 1,11 | down |
| 6258301 | 7142431 | 1231875 | sodium leak channel, non-selective                                                  | Nalcn   | 266760 | 1,11 | up   |
| 6219483 | 7142431 | 1231873 | sodium leak channel, non-selective                                                  | Nalcn   | 266760 | 1,11 | down |
| 6235760 | 7142431 | 1231848 | sodium leak channel, non-selective                                                  | Nalcn   | 266760 | 1,11 | up   |
| 6086352 | 7142431 | 1231876 | sodium leak channel, non-selective                                                  | Nalcn   | 266760 | 1,10 | down |
| 6473662 | 7142431 | 1231880 | sodium leak channel, non-selective                                                  | Nalcn   | 266760 | 1,09 | up   |
| 6299316 | 7142431 | 1231852 | sodium leak channel, non-selective                                                  | Nalcn   | 266760 | 1,06 | down |
| 5968836 | 7142431 | 1231857 | sodium leak channel, non-selective                                                  | Nalcn   | 266760 | 1,04 | up   |
| 6612405 | 7142431 | 1231861 | sodium leak channel, non-selective                                                  | Nalcn   | 266760 | 1,03 | up   |
| 6049397 | 7142431 | 1231872 | sodium leak channel, non-selective                                                  | Nalcn   | 266760 | 1,02 | up   |
| 5979788 | 7142431 | 1231855 | sodium leak channel, non-selective                                                  | Nalcn   | 266760 | 1,02 | up   |
| 6491689 | 7142431 | 1231878 | sodium leak channel, non-selective                                                  | Nalcn   | 266760 | 1,01 | up   |
| 6608416 | 7142431 | 1231850 | sodium leak channel, non-selective                                                  | Nalcn   | 266760 | 1,01 | down |
| 6644356 | 7142431 | 1231874 | sodium leak channel, non-selective                                                  | Nalcn   | 266760 | 1,00 | up   |
| 6147280 | 7230622 | 1448848 | solute carrier family 1 (glial high affinity glutamate transporter), member 2       | Slc1a2  | 29482  | 2,06 | down |
| 5937853 | 7230622 | 1448852 | solute carrier family 1 (glial high affinity glutamate transporter), member 2       | Slc1a2  | 29482  | 1,40 | up   |
| 6506386 | 7230622 | 1448857 | solute carrier family 1 (glial high affinity glutamate transporter), member 2       | Slc1a2  | 29482  | 1,23 | down |
| 6077484 | 7230622 | 1448850 | solute carrier family 1 (glial high affinity glutamate transporter), member 2       | Slc1a2  | 29482  | 1,22 | up   |
| 6510033 | 7230622 | 1448853 | solute carrier family 1 (glial high affinity glutamate transporter), member 2       | Slc1a2  | 29482  | 1,19 | up   |
| 6309103 | 7230622 | 1448858 | solute carrier family 1 (glial high affinity glutamate transporter), member 2       | Slc1a2  | 29482  | 1,18 | up   |
| 5900129 | 7230622 | 1448854 | solute carrier family 1 (glial high affinity glutamate transporter), member 2       | Slc1a2  | 29482  | 1,18 | up   |
| 6296851 | 7230622 | 1448851 | solute carrier family 1 (glial high affinity glutamate transporter), member 2       | Slc1a2  | 29482  | 1,12 | down |
| 6262057 | 7230622 | 1448856 | solute carrier family 1 (glial high affinity glutamate transporter), member 2       | Slc1a2  | 29482  | 1,11 | down |
| 6326185 | 7230622 | 1448855 | solute carrier family 1 (glial high affinity glutamate transporter), member 2       | Slc1a2  | 29482  | 1,08 | down |
| 6656981 | 7230622 | 1448856 | solute carrier family 1 (glial high affinity glutamate transporter), member 2       | Slc1a2  | 29482  | 1,08 | down |
| 6547761 | 7230622 | 1448849 | solute carrier family 1 (glial high affinity glutamate transporter), member 2       | Slc1a2  | 29482  | 1,06 | up   |
| 6543412 | 7331795 | 1700116 | solute carrier family 11 (proton-coupled divalent metal ion transporters), member 2 | Slc11a2 | 25715  | 2,45 | down |
| 6602821 | 7331795 | 1700099 | solute carrier family 11 (proton-coupled divalent metal ion transporters), member 2 | Slc11a2 | 25715  | 2,07 | down |
| 6672753 | 7331795 | 1700100 | solute carrier family 11 (proton-coupled divalent metal ion transporters), member 2 | Slc11a2 | 25715  | 1,94 | up   |
| 5971709 | 7331795 | 1700099 | solute carrier family 11 (proton-coupled divalent metal ion transporters), member 2 | Slc11a2 | 25715  | 1,49 | up   |
| 6350720 | 7331795 | 1700115 | solute carrier family 11 (proton-coupled divalent metal ion transporters), member 2 | Slc11a2 | 25715  | 1,41 | up   |
| 5905286 | 7331795 | 1700101 | solute carrier family 11 (proton-coupled divalent metal ion transporters), member 2 | Slc11a2 | 25715  | 1,36 | up   |
| 5702243 | 7331795 | 1700108 | solute carrier family 11 (proton-coupled divalent metal ion transporters), member 2 | Slc11a2 | 25715  | 1,30 | up   |
| 6337637 | 7331795 | 1700106 | solute carrier family 11 (proton-coupled divalent metal ion transporters), member 2 | Slc11a2 | 25715  | 1,28 | down |
| 6085410 | 7331795 | 1700109 | solute carrier family 11 (proton-coupled divalent metal ion transporters), member 2 | Slc11a2 | 25715  | 1,25 | up   |
| 5765806 | 7331795 | 1700102 | solute carrier family 11 (proton-coupled divalent metal ion transporters), member 2 | Slc11a2 | 25715  | 1,24 | down |
| 6558487 | 7331795 | 1700104 | solute carrier family 11 (proton-coupled divalent metal ion transporters), member 2 | Slc11a2 | 25715  | 1,22 | up   |
| 6687494 | 7331795 | 1700112 | solute carrier family 11 (proton-coupled divalent metal ion transporters), member 2 | Slc11a2 | 25715  | 1,21 | down |
| 6399306 | 7331795 | 1700113 | solute carrier family 11 (proton-coupled divalent metal ion transporters), member 2 | Slc11a2 | 25715  | 1,08 | up   |
| 6113641 | 7331795 | 1700114 | solute carrier family 11 (proton-coupled divalent metal ion transporters), member 2 | Slc11a2 | 25715  | 1,07 | down |
| 6247572 | 7331795 | 1700103 | solute carrier family 11 (proton-coupled divalent metal ion transporters), member 2 | Slc11a2 | 25715  | 1,06 | up   |
| 6395716 | 7331795 | 1700099 | solute carrier family 11 (proton-coupled divalent metal ion transporters), member 2 | Slc11a2 | 25715  | 1,05 | down |
| 6584301 | 7331795 | 1700107 | solute carrier family 11 (proton-coupled divalent metal ion transporters), member 2 | Slc11a2 | 25715  | 1,04 | down |
| 6486039 | 7331795 | 1700100 | solute carrier family 11 (proton-coupled divalent metal ion transporters), member 2 | Slc11a2 | 25715  | 1,04 | down |
| 6120542 | 7331795 | 1700115 | solute carrier family 11 (proton-coupled divalent metal ion transporters), member 2 | Slc11a2 | 25715  | 1,04 | down |
| 6327549 | 7331795 | 1700110 | solute carrier family 11 (proton-coupled divalent metal ion transporters), member 2 | Slc11a2 | 25715  | 1,03 | up   |
| 6369550 | 7331795 | 1700111 | solute carrier family 11 (proton-coupled divalent metal ion transporters), member 2 | Slc11a2 | 25715  | 1,01 | down |
| 6089969 | 7331795 | 1700105 | solute carrier family 11 (proton-coupled divalent metal ion transporters), member 2 | Slc11a2 | 25715  | 1,00 | up   |
| 5833612 | 7185012 | 1337906 | solute carrier family 12 (potassium/chloride transporters), member 4                | Slc12a4 | 29501  | 2,73 | down |
| 6208382 | 7185012 | 1337918 | solute carrier family 12 (potassium/chloride transporters), member 4                | Slc12a4 | 29501  | 2,55 | up   |
| 5803283 | 7185012 | 1337904 | solute carrier family 12 (potassium/chloride transporters), member 4                | Slc12a4 | 29501  | 1,75 | up   |
| 5909802 | 7185012 | 1337911 | solute carrier family 12 (potassium/chloride transporters), member 4                | Slc12a4 | 29501  | 1,60 | down |
| 5831361 | 7185012 | 1337900 | solute carrier family 12 (potassium/chloride transporters), member 4                | Slc12a4 | 29501  | 1,59 | down |

|         |         |         |                                                                      |         |        |      |      |
|---------|---------|---------|----------------------------------------------------------------------|---------|--------|------|------|
| 6522137 | 7185012 | 1337916 | solute carrier family 12 (potassium/chloride transporters), member 4 | Slc12a4 | 29501  | 1,51 | down |
| 5709382 | 7185012 | 1337901 | solute carrier family 12 (potassium/chloride transporters), member 4 | Slc12a4 | 29501  | 1,45 | down |
| 6606891 | 7185012 | 1337919 | solute carrier family 12 (potassium/chloride transporters), member 4 | Slc12a4 | 29501  | 1,44 | down |
| 5804968 | 7185012 | 1337900 | solute carrier family 12 (potassium/chloride transporters), member 4 | Slc12a4 | 29501  | 1,44 | up   |
| 6552922 | 7185012 | 1337917 | solute carrier family 12 (potassium/chloride transporters), member 4 | Slc12a4 | 29501  | 1,38 | up   |
| 6249808 | 7185012 | 1337910 | solute carrier family 12 (potassium/chloride transporters), member 4 | Slc12a4 | 29501  | 1,34 | up   |
| 5690886 | 7185012 | 1337920 | solute carrier family 12 (potassium/chloride transporters), member 4 | Slc12a4 | 29501  | 1,33 | down |
| 6535302 | 7185012 | 1337905 | solute carrier family 12 (potassium/chloride transporters), member 4 | Slc12a4 | 29501  | 1,33 | up   |
| 5925572 | 7185012 | 1337914 | solute carrier family 12 (potassium/chloride transporters), member 4 | Slc12a4 | 29501  | 1,31 | down |
| 6311404 | 7185012 | 1337912 | solute carrier family 12 (potassium/chloride transporters), member 4 | Slc12a4 | 29501  | 1,28 | up   |
| 6126239 | 7185012 | 1337909 | solute carrier family 12 (potassium/chloride transporters), member 4 | Slc12a4 | 29501  | 1,27 | up   |
| 6110173 | 7185012 | 1337918 | solute carrier family 12 (potassium/chloride transporters), member 4 | Slc12a4 | 29501  | 1,25 | up   |
| 6147458 | 7185012 | 1337907 | solute carrier family 12 (potassium/chloride transporters), member 4 | Slc12a4 | 29501  | 1,23 | up   |
| 6480112 | 7185012 | 1337908 | solute carrier family 12 (potassium/chloride transporters), member 4 | Slc12a4 | 29501  | 1,18 | up   |
| 5898047 | 7185012 | 1337906 | solute carrier family 12 (potassium/chloride transporters), member 4 | Slc12a4 | 29501  | 1,15 | down |
| 5678170 | 7185012 | 1337921 | solute carrier family 12 (potassium/chloride transporters), member 4 | Slc12a4 | 29501  | 1,12 | down |
| 6459505 | 7185012 | 1337913 | solute carrier family 12 (potassium/chloride transporters), member 4 | Slc12a4 | 29501  | 1,11 | up   |
| 6245911 | 7185012 | 1337900 | solute carrier family 12 (potassium/chloride transporters), member 4 | Slc12a4 | 29501  | 1,11 | up   |
| 5624011 | 7185012 | 1337902 | solute carrier family 12 (potassium/chloride transporters), member 4 | Slc12a4 | 29501  | 1,08 | down |
| 5863563 | 7185012 | 1337903 | solute carrier family 12 (potassium/chloride transporters), member 4 | Slc12a4 | 29501  | 1,05 | down |
| 6709491 | 7185012 | 1337922 | solute carrier family 12 (potassium/chloride transporters), member 4 | Slc12a4 | 29501  | 1,05 | up   |
| 6254109 | 7185012 | 1337910 | solute carrier family 12 (potassium/chloride transporters), member 4 | Slc12a4 | 29501  | 1,03 | up   |
| 6289839 | 7185012 | 1337915 | solute carrier family 12 (potassium/chloride transporters), member 4 | Slc12a4 | 29501  | 1,03 | up   |
| 5935509 | 7185012 | 1337923 | solute carrier family 12 (potassium/chloride transporters), member 4 | Slc12a4 | 29501  | 1,01 | down |
| 5656604 | 7231152 | 1450259 | solute carrier family 12, member 6                                   | Slc12a6 | 691209 | 1,70 | down |
| 5759681 | 7231152 | 1450246 | solute carrier family 12, member 6                                   | Slc12a6 | 691209 | 1,55 | down |
| 6398368 | 7231152 | 1450245 | solute carrier family 12, member 6                                   | Slc12a6 | 691209 | 1,54 | down |
| 6624395 | 7231152 | 1450248 | solute carrier family 12, member 6                                   | Slc12a6 | 691209 | 1,49 | down |
| 6180644 | 7231152 | 1450253 | solute carrier family 12, member 6                                   | Slc12a6 | 691209 | 1,49 | down |
| 5795097 | 7231152 | 1450251 | solute carrier family 12, member 6                                   | Slc12a6 | 691209 | 1,45 | down |
| 6518985 | 7231152 | 1450258 | solute carrier family 12, member 6                                   | Slc12a6 | 691209 | 1,44 | down |
| 6065891 | 7231152 | 1450240 | solute carrier family 12, member 6                                   | Slc12a6 | 691209 | 1,43 | down |
| 6026180 | 7231152 | 1450249 | solute carrier family 12, member 6                                   | Slc12a6 | 691209 | 1,43 | down |
| 6096607 | 7231152 | 1450238 | solute carrier family 12, member 6                                   | Slc12a6 | 691209 | 1,41 | up   |
| 5811046 | 7231152 | 1450228 | solute carrier family 12, member 6                                   | Slc12a6 | 691209 | 1,36 | down |
| 5693148 | 7231152 | 1450242 | solute carrier family 12, member 6                                   | Slc12a6 | 691209 | 1,32 | down |
| 6211872 | 7231152 | 1450245 | solute carrier family 12, member 6                                   | Slc12a6 | 691209 | 1,31 | down |
| 6416351 | 7231152 | 1450255 | solute carrier family 12, member 6                                   | Slc12a6 | 691209 | 1,27 | down |
| 5957862 | 7231152 | 1450260 | solute carrier family 12, member 6                                   | Slc12a6 | 691209 | 1,27 | down |
| 5917115 | 7231152 | 1450241 | solute carrier family 12, member 6                                   | Slc12a6 | 691209 | 1,25 | down |
| 5831342 | 7231152 | 1450247 | solute carrier family 12, member 6                                   | Slc12a6 | 691209 | 1,24 | down |
| 6572220 | 7231152 | 1450243 | solute carrier family 12, member 6                                   | Slc12a6 | 691209 | 1,23 | down |
| 6685894 | 7231152 | 1450252 | solute carrier family 12, member 6                                   | Slc12a6 | 691209 | 1,20 | down |
| 6695104 | 7231152 | 1450254 | solute carrier family 12, member 6                                   | Slc12a6 | 691209 | 1,20 | up   |
| 5850327 | 7231152 | 1450256 | solute carrier family 12, member 6                                   | Slc12a6 | 691209 | 1,20 | down |
| 6670508 | 7231152 | 1450257 | solute carrier family 12, member 6                                   | Slc12a6 | 691209 | 1,19 | down |
| 6405995 | 7231152 | 1450239 | solute carrier family 12, member 6                                   | Slc12a6 | 691209 | 1,19 | down |
| 5621656 | 7231152 | 1450228 | solute carrier family 12, member 6                                   | Slc12a6 | 691209 | 1,16 | down |
| 6593065 | 7231152 | 1450249 | solute carrier family 12, member 6                                   | Slc12a6 | 691209 | 1,15 | down |
| 6052675 | 7231152 | 1450261 | solute carrier family 12, member 6                                   | Slc12a6 | 691209 | 1,13 | down |
| 6720071 | 7231152 | 1450258 | solute carrier family 12, member 6                                   | Slc12a6 | 691209 | 1,11 | down |
| 6123549 | 7231152 | 1450244 | solute carrier family 12, member 6                                   | Slc12a6 | 691209 | 1,07 | up   |
| 6640753 | 7221577 | 1426696 | solute carrier family 19 (folate transporter), member 1              | Slc19a1 | 29723  | 2,42 | down |
| 5712987 | 7221577 | 1426698 | solute carrier family 19 (folate transporter), member 1              | Slc19a1 | 29723  | 1,63 | down |
| 6176738 | 7221577 | 1426699 | solute carrier family 19 (folate transporter), member 1              | Slc19a1 | 29723  | 1,35 | up   |
| 5680307 | 7221577 | 1426698 | solute carrier family 19 (folate transporter), member 1              | Slc19a1 | 29723  | 1,34 | up   |
| 5988020 | 7221577 | 1426698 | solute carrier family 19 (folate transporter), member 1              | Slc19a1 | 29723  | 1,32 | up   |

|         |         |         |                                                                     |          |        |      |      |
|---------|---------|---------|---------------------------------------------------------------------|----------|--------|------|------|
| 6490062 | 7221577 | 1426702 | solute carrier family 19 (folate transporter), member 1             | Slc19a1  | 29723  | 1,20 | up   |
| 5981805 | 7221577 | 1426697 | solute carrier family 19 (folate transporter), member 1             | Slc19a1  | 29723  | 1,19 | down |
| 6131314 | 7221577 | 1426696 | solute carrier family 19 (folate transporter), member 1             | Slc19a1  | 29723  | 1,15 | down |
| 6381144 | 7221577 | 1426698 | solute carrier family 19 (folate transporter), member 1             | Slc19a1  | 29723  | 1,12 | up   |
| 6539219 | 7221577 | 1426700 | solute carrier family 19 (folate transporter), member 1             | Slc19a1  | 29723  | 1,08 | up   |
| 5899649 | 7221577 | 1426698 | solute carrier family 19 (folate transporter), member 1             | Slc19a1  | 29723  | 1,06 | up   |
| 6545457 | 7221577 | 1426698 | solute carrier family 19 (folate transporter), member 1             | Slc19a1  | 29723  | 1,05 | down |
| 6219417 | 7221577 | 1426700 | solute carrier family 19 (folate transporter), member 1             | Slc19a1  | 29723  | 1,05 | down |
| 5967303 | 7221577 | 1426701 | solute carrier family 19 (folate transporter), member 1             | Slc19a1  | 29723  | 1,04 | down |
| 5681431 | 7221577 | 1426698 | solute carrier family 19 (folate transporter), member 1             | Slc19a1  | 29723  | 1,04 | down |
| 6015595 | 7221577 | 1426696 | solute carrier family 19 (folate transporter), member 1             | Slc19a1  | 29723  | 1,01 | down |
| 6356727 | 7279020 | 1570524 | solute carrier family 2 (facilitated glucose transporter), member 1 | Slc2a1   | 24778  | 9,69 | down |
| 5630671 | 7279020 | 1570524 | solute carrier family 2 (facilitated glucose transporter), member 1 | Slc2a1   | 24778  | 2,35 | up   |
| 6007677 | 7279020 | 1570529 | solute carrier family 2 (facilitated glucose transporter), member 1 | Slc2a1   | 24778  | 1,49 | down |
| 6594222 | 7279020 | 1570532 | solute carrier family 2 (facilitated glucose transporter), member 1 | Slc2a1   | 24778  | 1,26 | up   |
| 5752585 | 7279020 | 1570526 | solute carrier family 2 (facilitated glucose transporter), member 1 | Slc2a1   | 24778  | 1,22 | up   |
| 5834936 | 7279020 | 1570524 | solute carrier family 2 (facilitated glucose transporter), member 1 | Slc2a1   | 24778  | 1,18 | down |
| 5839359 | 7279020 | 1570527 | solute carrier family 2 (facilitated glucose transporter), member 1 | Slc2a1   | 24778  | 1,17 | up   |
| 6622915 | 7279020 | 1570526 | solute carrier family 2 (facilitated glucose transporter), member 1 | Slc2a1   | 24778  | 1,15 | down |
| 5679473 | 7279020 | 1570528 | solute carrier family 2 (facilitated glucose transporter), member 1 | Slc2a1   | 24778  | 1,13 | up   |
| 5904241 | 7279020 | 1570531 | solute carrier family 2 (facilitated glucose transporter), member 1 | Slc2a1   | 24778  | 1,13 | down |
| 6533472 | 7279020 | 1570525 | solute carrier family 2 (facilitated glucose transporter), member 1 | Slc2a1   | 24778  | 1,13 | up   |
| 6027800 | 7279020 | 1570534 | solute carrier family 2 (facilitated glucose transporter), member 1 | Slc2a1   | 24778  | 1,10 | down |
| 5641095 | 7279020 | 1570530 | solute carrier family 2 (facilitated glucose transporter), member 1 | Slc2a1   | 24778  | 1,05 | down |
| 6077109 | 7279020 | 1570533 | solute carrier family 2 (facilitated glucose transporter), member 1 | Slc2a1   | 24778  | 1,04 | down |
| 5797048 | 7192700 | 1357197 | solute carrier family 2 (facilitated glucose transporter), member 2 | Slc2a2   | 25351  | 2,81 | up   |
| 6745050 | 7192700 | 1357189 | solute carrier family 2 (facilitated glucose transporter), member 2 | Slc2a2   | 25351  | 2,26 | down |
| 5982753 | 7192700 | 1357190 | solute carrier family 2 (facilitated glucose transporter), member 2 | Slc2a2   | 25351  | 1,70 | down |
| 6409080 | 7192700 | 1357197 | solute carrier family 2 (facilitated glucose transporter), member 2 | Slc2a2   | 25351  | 1,61 | up   |
| 6433153 | 7192700 | 1357191 | solute carrier family 2 (facilitated glucose transporter), member 2 | Slc2a2   | 25351  | 1,30 | down |
| 6211450 | 7192700 | 1357193 | solute carrier family 2 (facilitated glucose transporter), member 2 | Slc2a2   | 25351  | 1,28 | up   |
| 6177400 | 7192700 | 1357198 | solute carrier family 2 (facilitated glucose transporter), member 2 | Slc2a2   | 25351  | 1,18 | up   |
| 5789368 | 7192700 | 1357195 | solute carrier family 2 (facilitated glucose transporter), member 2 | Slc2a2   | 25351  | 1,17 | down |
| 5861619 | 7192700 | 1357200 | solute carrier family 2 (facilitated glucose transporter), member 2 | Slc2a2   | 25351  | 1,16 | down |
| 6350948 | 7192700 | 1357194 | solute carrier family 2 (facilitated glucose transporter), member 2 | Slc2a2   | 25351  | 1,14 | up   |
| 5674169 | 7192700 | 1357199 | solute carrier family 2 (facilitated glucose transporter), member 2 | Slc2a2   | 25351  | 1,12 | up   |
| 6070558 | 7192700 | 1357196 | solute carrier family 2 (facilitated glucose transporter), member 2 | Slc2a2   | 25351  | 1,10 | down |
| 6489641 | 7192700 | 1357192 | solute carrier family 2 (facilitated glucose transporter), member 2 | Slc2a2   | 25351  | 1,10 | up   |
| 6512384 | 7039417 | 984179  | solute carrier family 22 (organic anion transporter), member 8      | Slc22a8  | 83500  | 2,03 | up   |
| 5646007 | 7039417 | 984177  | solute carrier family 22 (organic anion transporter), member 8      | Slc22a8  | 83500  | 1,68 | up   |
| 5777974 | 7039417 | 984173  | solute carrier family 22 (organic anion transporter), member 8      | Slc22a8  | 83500  | 1,57 | down |
| 5852034 | 7039417 | 984171  | solute carrier family 22 (organic anion transporter), member 8      | Slc22a8  | 83500  | 1,46 | down |
| 6293637 | 7039417 | 984175  | solute carrier family 22 (organic anion transporter), member 8      | Slc22a8  | 83500  | 1,34 | down |
| 6272502 | 7039417 | 984181  | solute carrier family 22 (organic anion transporter), member 8      | Slc22a8  | 83500  | 1,28 | down |
| 5739924 | 7039417 | 984178  | solute carrier family 22 (organic anion transporter), member 8      | Slc22a8  | 83500  | 1,21 | up   |
| 5971099 | 7039417 | 984172  | solute carrier family 22 (organic anion transporter), member 8      | Slc22a8  | 83500  | 1,16 | up   |
| 5791309 | 7039417 | 984182  | solute carrier family 22 (organic anion transporter), member 8      | Slc22a8  | 83500  | 1,07 | down |
| 6540367 | 7039417 | 984180  | solute carrier family 22 (organic anion transporter), member 8      | Slc22a8  | 83500  | 1,05 | up   |
| 6047802 | 7039417 | 984174  | solute carrier family 22 (organic anion transporter), member 8      | Slc22a8  | 83500  | 1,04 | up   |
| 5796310 | 7039417 | 984176  | solute carrier family 22 (organic anion transporter), member 8      | Slc22a8  | 83500  | 1,00 | up   |
| 5942565 | 7138103 | 1221373 | solute carrier family 22, member 17                                 | Slc22a17 | 305886 | 2,32 | up   |
| 6083716 | 7138103 | 1221372 | solute carrier family 22, member 17                                 | Slc22a17 | 305886 | 2,09 | up   |
| 6430554 | 7138103 | 1221363 | solute carrier family 22, member 17                                 | Slc22a17 | 305886 | 2,08 | up   |
| 6722075 | 7138103 | 1221372 | solute carrier family 22, member 17                                 | Slc22a17 | 305886 | 1,66 | up   |
| 6110900 | 7138103 | 1221367 | solute carrier family 22, member 17                                 | Slc22a17 | 305886 | 1,58 | down |
| 6358100 | 7138103 | 1221369 | solute carrier family 22, member 17                                 | Slc22a17 | 305886 | 1,49 | up   |
| 6447814 | 7138103 | 1221373 | solute carrier family 22, member 17                                 | Slc22a17 | 305886 | 1,40 | up   |

|         |         |         |                                                                                |          |        |      |      |
|---------|---------|---------|--------------------------------------------------------------------------------|----------|--------|------|------|
| 6559993 | 7138103 | 1221365 | solute carrier family 22, member 17                                            | Slc22a17 | 305886 | 1,37 | down |
| 6107834 | 7138103 | 1221364 | solute carrier family 22, member 17                                            | Slc22a17 | 305886 | 1,29 | down |
| 6718961 | 7138103 | 1221366 | solute carrier family 22, member 17                                            | Slc22a17 | 305886 | 1,19 | down |
| 5917581 | 7138103 | 1221371 | solute carrier family 22, member 17                                            | Slc22a17 | 305886 | 1,18 | up   |
| 6254752 | 7138103 | 1221368 | solute carrier family 22, member 17                                            | Slc22a17 | 305886 | 1,15 | down |
| 5836134 | 7138103 | 1221366 | solute carrier family 22, member 17                                            | Slc22a17 | 305886 | 1,13 | down |
| 5962095 | 7138103 | 1221370 | solute carrier family 22, member 17                                            | Slc22a17 | 305886 | 1,06 | down |
| 5767249 | 7138103 | 1221372 | solute carrier family 22, member 17                                            | Slc22a17 | 305886 | 1,06 | up   |
| 6136764 | 7138103 | 1221364 | solute carrier family 22, member 17                                            | Slc22a17 | 305886 | 1,06 | down |
| 5662526 | 7102483 | 1133769 | solute carrier family 24 (sodium/potassium/calcium exchanger), member 6        | Slc24a6  | 498185 | 2,07 | down |
| 5752477 | 7102483 | 1133763 | solute carrier family 24 (sodium/potassium/calcium exchanger), member 6        | Slc24a6  | 498185 | 1,59 | up   |
| 6732516 | 7102483 | 1133755 | solute carrier family 24 (sodium/potassium/calcium exchanger), member 6        | Slc24a6  | 498185 | 1,57 | down |
| 5714442 | 7102483 | 1133757 | solute carrier family 24 (sodium/potassium/calcium exchanger), member 6        | Slc24a6  | 498185 | 1,55 | up   |
| 6596623 | 7102483 | 1133761 | solute carrier family 24 (sodium/potassium/calcium exchanger), member 6        | Slc24a6  | 498185 | 1,50 | up   |
| 5647858 | 7102483 | 1133769 | solute carrier family 24 (sodium/potassium/calcium exchanger), member 6        | Slc24a6  | 498185 | 1,46 | up   |
| 6512197 | 7102483 | 1133755 | solute carrier family 24 (sodium/potassium/calcium exchanger), member 6        | Slc24a6  | 498185 | 1,33 | down |
| 5835991 | 7102483 | 1133764 | solute carrier family 24 (sodium/potassium/calcium exchanger), member 6        | Slc24a6  | 498185 | 1,22 | down |
| 6479303 | 7102483 | 1133766 | solute carrier family 24 (sodium/potassium/calcium exchanger), member 6        | Slc24a6  | 498185 | 1,22 | up   |
| 6053796 | 7102483 | 1133756 | solute carrier family 24 (sodium/potassium/calcium exchanger), member 6        | Slc24a6  | 498185 | 1,21 | down |
| 6018214 | 7102483 | 1133765 | solute carrier family 24 (sodium/potassium/calcium exchanger), member 6        | Slc24a6  | 498185 | 1,14 | down |
| 6532559 | 7102483 | 1133768 | solute carrier family 24 (sodium/potassium/calcium exchanger), member 6        | Slc24a6  | 498185 | 1,13 | down |
| 6253745 | 7102483 | 1133760 | solute carrier family 24 (sodium/potassium/calcium exchanger), member 6        | Slc24a6  | 498185 | 1,11 | up   |
| 6111508 | 7102483 | 1133759 | solute carrier family 24 (sodium/potassium/calcium exchanger), member 6        | Slc24a6  | 498185 | 1,10 | down |
| 6107220 | 7102483 | 1133765 | solute carrier family 24 (sodium/potassium/calcium exchanger), member 6        | Slc24a6  | 498185 | 1,09 | up   |
| 6712330 | 7102483 | 1133762 | solute carrier family 24 (sodium/potassium/calcium exchanger), member 6        | Slc24a6  | 498185 | 1,07 | down |
| 5620100 | 7102483 | 1133758 | solute carrier family 24 (sodium/potassium/calcium exchanger), member 6        | Slc24a6  | 498185 | 1,06 | down |
| 5894677 | 7102483 | 1133767 | solute carrier family 24 (sodium/potassium/calcium exchanger), member 6        | Slc24a6  | 498185 | 1,06 | down |
| 6591037 | 7232069 | 1452949 | solute carrier family 24, member 5                                             | Slc24a5  | 311387 | 2,40 | up   |
| 5793976 | 7232069 | 1452947 | solute carrier family 24, member 5                                             | Slc24a5  | 311387 | 2,30 | down |
| 6009778 | 7232069 | 1452945 | solute carrier family 24, member 5                                             | Slc24a5  | 311387 | 1,44 | down |
| 6288770 | 7232069 | 1452940 | solute carrier family 24, member 5                                             | Slc24a5  | 311387 | 1,37 | down |
| 5891725 | 7232069 | 1452954 | solute carrier family 24, member 5                                             | Slc24a5  | 311387 | 1,19 | down |
| 6559045 | 7232069 | 1452953 | solute carrier family 24, member 5                                             | Slc24a5  | 311387 | 1,14 | down |
| 5951826 | 7232069 | 1452951 | solute carrier family 24, member 5                                             | Slc24a5  | 311387 | 1,10 | up   |
| 6421288 | 7232069 | 1452946 | solute carrier family 24, member 5                                             | Slc24a5  | 311387 | 1,04 | up   |
| 5813242 | 7232069 | 1452945 | solute carrier family 24, member 5                                             | Slc24a5  | 311387 | 1,00 | up   |
| 6568672 | 7198069 | 1370614 | solute carrier family 25 (mitochondrial carrier, phosphate carrier), member 24 | Slc25a24 | 310791 | 2,03 | down |
| 6680170 | 7198069 | 1370610 | solute carrier family 25 (mitochondrial carrier, phosphate carrier), member 24 | Slc25a24 | 310791 | 1,82 | up   |
| 5938563 | 7198069 | 1370617 | solute carrier family 25 (mitochondrial carrier, phosphate carrier), member 24 | Slc25a24 | 310791 | 1,58 | up   |
| 6668329 | 7198069 | 1370609 | solute carrier family 25 (mitochondrial carrier, phosphate carrier), member 24 | Slc25a24 | 310791 | 1,37 | up   |
| 5774532 | 7198069 | 1370613 | solute carrier family 25 (mitochondrial carrier, phosphate carrier), member 24 | Slc25a24 | 310791 | 1,33 | up   |
| 5723990 | 7198069 | 1370618 | solute carrier family 25 (mitochondrial carrier, phosphate carrier), member 24 | Slc25a24 | 310791 | 1,26 | down |
| 6128140 | 7198069 | 1370612 | solute carrier family 25 (mitochondrial carrier, phosphate carrier), member 24 | Slc25a24 | 310791 | 1,24 | down |
| 6014820 | 7198069 | 1370616 | solute carrier family 25 (mitochondrial carrier, phosphate carrier), member 24 | Slc25a24 | 310791 | 1,22 | down |
| 6054052 | 7198069 | 1370619 | solute carrier family 25 (mitochondrial carrier, phosphate carrier), member 24 | Slc25a24 | 310791 | 1,14 | down |
| 6074985 | 7198069 | 1370615 | solute carrier family 25 (mitochondrial carrier, phosphate carrier), member 24 | Slc25a24 | 310791 | 1,13 | down |
| 5651224 | 7237652 | 1467258 | solute carrier family 25 (mitochondrial carrier, phosphate carrier), member 25 | Slc25a25 | 246771 | 2,00 | down |
| 6565929 | 7237652 | 1467253 | solute carrier family 25 (mitochondrial carrier, phosphate carrier), member 25 | Slc25a25 | 246771 | 1,34 | up   |
| 6605565 | 7237652 | 1467258 | solute carrier family 25 (mitochondrial carrier, phosphate carrier), member 25 | Slc25a25 | 246771 | 1,33 | up   |
| 6305500 | 7237652 | 1467257 | solute carrier family 25 (mitochondrial carrier, phosphate carrier), member 25 | Slc25a25 | 246771 | 1,24 | down |
| 6484468 | 7237652 | 1467256 | solute carrier family 25 (mitochondrial carrier, phosphate carrier), member 25 | Slc25a25 | 246771 | 1,19 | up   |
| 6160454 | 7237652 | 1467249 | solute carrier family 25 (mitochondrial carrier, phosphate carrier), member 25 | Slc25a25 | 246771 | 1,16 | up   |
| 5830534 | 7237652 | 1467255 | solute carrier family 25 (mitochondrial carrier, phosphate carrier), member 25 | Slc25a25 | 246771 | 1,14 | down |
| 6350039 | 7237652 | 1467248 | solute carrier family 25 (mitochondrial carrier, phosphate carrier), member 25 | Slc25a25 | 246771 | 1,11 | up   |
| 6667764 | 7237652 | 1467252 | solute carrier family 25 (mitochondrial carrier, phosphate carrier), member 25 | Slc25a25 | 246771 | 1,08 | down |
| 5819898 | 7237652 | 1467254 | solute carrier family 25 (mitochondrial carrier, phosphate carrier), member 25 | Slc25a25 | 246771 | 1,03 | down |
| 6089518 | 7237652 | 1467250 | solute carrier family 25 (mitochondrial carrier, phosphate carrier), member 25 | Slc25a25 | 246771 | 1,02 | up   |



|         |         |         |                                                                                   |          |        |      |      |
|---------|---------|---------|-----------------------------------------------------------------------------------|----------|--------|------|------|
| 6486041 | 7237652 | 1467251 | solute carrier family 25 (mitochondrial carrier, phosphate carrier), member 25    | Slc25a25 | 246771 | 1,02 | down |
| 5618815 | 7147204 | 1243777 | solute carrier family 25 (mitochondrial carrier; ornithine transporter) member 15 | Slc25a15 | 306574 | 1,44 | up   |
| 6354049 | 7147204 | 1243775 | solute carrier family 25 (mitochondrial carrier; ornithine transporter) member 15 | Slc25a15 | 306574 | 1,40 | down |
| 5830129 | 7147204 | 1243774 | solute carrier family 25 (mitochondrial carrier; ornithine transporter) member 15 | Slc25a15 | 306574 | 1,31 | up   |
| 5830503 | 7147204 | 1243778 | solute carrier family 25 (mitochondrial carrier; ornithine transporter) member 15 | Slc25a15 | 306574 | 1,29 | down |
| 6019907 | 7147204 | 1243775 | solute carrier family 25 (mitochondrial carrier; ornithine transporter) member 15 | Slc25a15 | 306574 | 1,24 | down |
| 6360211 | 7147204 | 1243772 | solute carrier family 25 (mitochondrial carrier; ornithine transporter) member 15 | Slc25a15 | 306574 | 1,21 | down |
| 6040419 | 7147204 | 1243773 | solute carrier family 25 (mitochondrial carrier; ornithine transporter) member 15 | Slc25a15 | 306574 | 1,15 | up   |
| 6620962 | 7147204 | 1243775 | solute carrier family 25 (mitochondrial carrier; ornithine transporter) member 15 | Slc25a15 | 306574 | 1,12 | down |
| 6669208 | 7147204 | 1243776 | solute carrier family 25 (mitochondrial carrier; ornithine transporter) member 15 | Slc25a15 | 306574 | 1,08 | down |
| 6438585 | 7367943 | 1788912 | solute carrier family 25 (mitochondrial carrier; phosphate carrier), member 23    | Slc25a23 | 301113 | 2,44 | up   |
| 6014926 | 7367943 | 1788916 | solute carrier family 25 (mitochondrial carrier; phosphate carrier), member 23    | Slc25a23 | 301113 | 1,86 | down |
| 5899812 | 7367943 | 1788931 | solute carrier family 25 (mitochondrial carrier; phosphate carrier), member 23    | Slc25a23 | 301113 | 1,80 | up   |
| 5935449 | 7367943 | 1788913 | solute carrier family 25 (mitochondrial carrier; phosphate carrier), member 23    | Slc25a23 | 301113 | 1,32 | down |
| 5673816 | 7367943 | 1788921 | solute carrier family 25 (mitochondrial carrier; phosphate carrier), member 23    | Slc25a23 | 301113 | 1,31 | down |
| 5974058 | 7367943 | 1788917 | solute carrier family 25 (mitochondrial carrier; phosphate carrier), member 23    | Slc25a23 | 301113 | 1,24 | up   |
| 6728633 | 7367943 | 1788924 | solute carrier family 25 (mitochondrial carrier; phosphate carrier), member 23    | Slc25a23 | 301113 | 1,22 | down |
| 6377344 | 7367943 | 1788915 | solute carrier family 25 (mitochondrial carrier; phosphate carrier), member 23    | Slc25a23 | 301113 | 1,18 | up   |
| 6413270 | 7367943 | 1788920 | solute carrier family 25 (mitochondrial carrier; phosphate carrier), member 23    | Slc25a23 | 301113 | 1,18 | down |
| 6655381 | 7367943 | 1788929 | solute carrier family 25 (mitochondrial carrier; phosphate carrier), member 23    | Slc25a23 | 301113 | 1,17 | down |
| 5646088 | 7367943 | 1788931 | solute carrier family 25 (mitochondrial carrier; phosphate carrier), member 23    | Slc25a23 | 301113 | 1,14 | up   |
| 6175534 | 7367943 | 1788923 | solute carrier family 25 (mitochondrial carrier; phosphate carrier), member 23    | Slc25a23 | 301113 | 1,05 | down |
| 5632684 | 7367943 | 1788931 | solute carrier family 25 (mitochondrial carrier; phosphate carrier), member 23    | Slc25a23 | 301113 | 1,01 | down |
| 5823191 | 7367943 | 1788931 | solute carrier family 25 (mitochondrial carrier; phosphate carrier), member 23    | Slc25a23 | 301113 | 1,01 | down |
| 6273481 | 7367943 | 1788922 | solute carrier family 25 (mitochondrial carrier; phosphate carrier), member 23    | Slc25a23 | 301113 | 1,00 | up   |
| 5656939 | 7139658 | 1224907 | solute carrier family 25, member 37                                               | Slc25a37 | 306000 | 2,41 | down |
| 5737631 | 7139658 | 1224906 | solute carrier family 25, member 37                                               | Slc25a37 | 306000 | 2,38 | up   |
| 6388340 | 7139658 | 1224906 | solute carrier family 25, member 37                                               | Slc25a37 | 306000 | 1,50 | up   |
| 5824079 | 7139658 | 1224907 | solute carrier family 25, member 37                                               | Slc25a37 | 306000 | 1,34 | down |
| 6558246 | 7139658 | 1224905 | solute carrier family 25, member 37                                               | Slc25a37 | 306000 | 1,18 | down |
| 5648184 | 7139658 | 1224907 | solute carrier family 25, member 37                                               | Slc25a37 | 306000 | 1,09 | down |
| 5858671 | 7139658 | 1224904 | solute carrier family 25, member 37                                               | Slc25a37 | 306000 | 1,05 | up   |
| 6517679 | 7083021 | 1086216 | solute carrier family 25, member 39                                               | Slc25a39 | 360636 | 2,32 | down |
| 6343022 | 7083021 | 1086208 | solute carrier family 25, member 39                                               | Slc25a39 | 360636 | 1,30 | down |
| 5961285 | 7083021 | 1086210 | solute carrier family 25, member 39                                               | Slc25a39 | 360636 | 1,28 | down |
| 6650265 | 7083021 | 1086217 | solute carrier family 25, member 39                                               | Slc25a39 | 360636 | 1,26 | down |
| 6567952 | 7083021 | 1086211 | solute carrier family 25, member 39                                               | Slc25a39 | 360636 | 1,20 | up   |
| 5618112 | 7083021 | 1086213 | solute carrier family 25, member 39                                               | Slc25a39 | 360636 | 1,18 | down |
| 6588475 | 7083021 | 1086214 | solute carrier family 25, member 39                                               | Slc25a39 | 360636 | 1,10 | down |
| 5947729 | 7083021 | 1086213 | solute carrier family 25, member 39                                               | Slc25a39 | 360636 | 1,09 | down |
| 5700013 | 7083021 | 1086209 | solute carrier family 25, member 39                                               | Slc25a39 | 360636 | 1,08 | down |
| 6340119 | 7083021 | 1086218 | solute carrier family 25, member 39                                               | Slc25a39 | 360636 | 1,08 | up   |
| 5973820 | 7083021 | 1086210 | solute carrier family 25, member 39                                               | Slc25a39 | 360636 | 1,08 | down |
| 6431751 | 7083021 | 1086212 | solute carrier family 25, member 39                                               | Slc25a39 | 360636 | 1,07 | up   |
| 5915664 | 7083021 | 1086215 | solute carrier family 25, member 39                                               | Slc25a39 | 360636 | 1,06 | down |
| 6579050 | 7083021 | 1086221 | solute carrier family 25, member 39                                               | Slc25a39 | 360636 | 1,03 | down |
| 6368049 | 7174114 | 1310431 | solute carrier family 25, member 46                                               | Slc25a46 | 291709 | 2,52 | up   |
| 5817978 | 7174114 | 1310439 | solute carrier family 25, member 46                                               | Slc25a46 | 291709 | 1,52 | down |
| 6061181 | 7174114 | 1310439 | solute carrier family 25, member 46                                               | Slc25a46 | 291709 | 1,27 | up   |
| 5806453 | 7174114 | 1310437 | solute carrier family 25, member 46                                               | Slc25a46 | 291709 | 1,27 | down |
| 6507313 | 7174114 | 1310438 | solute carrier family 25, member 46                                               | Slc25a46 | 291709 | 1,18 | down |
| 6175405 | 7174114 | 1310430 | solute carrier family 25, member 46                                               | Slc25a46 | 291709 | 1,13 | down |
| 5687658 | 7174114 | 1310434 | solute carrier family 25, member 46                                               | Slc25a46 | 291709 | 1,12 | down |
| 6634085 | 7174114 | 1310436 | solute carrier family 25, member 46                                               | Slc25a46 | 291709 | 1,10 | down |
| 6611177 | 7174114 | 1310429 | solute carrier family 25, member 46                                               | Slc25a46 | 291709 | 1,09 | up   |
| 5782236 | 7174114 | 1310439 | solute carrier family 25, member 46                                               | Slc25a46 | 291709 | 1,06 | down |
| 6195961 | 7174114 | 1310429 | solute carrier family 25, member 46                                               | Slc25a46 | 291709 | 1,05 | down |

|         |         |         |                                                                            |         |        |      |      |
|---------|---------|---------|----------------------------------------------------------------------------|---------|--------|------|------|
| 6035155 | 7176282 | 1315372 | solute carrier family 26 (sulfate transporter), member 2                   | Slc26a2 | 117267 | 2,34 | up   |
| 6680189 | 7176282 | 1315369 | solute carrier family 26 (sulfate transporter), member 2                   | Slc26a2 | 117267 | 1,21 | down |
| 6648705 | 7176282 | 1315368 | solute carrier family 26 (sulfate transporter), member 2                   | Slc26a2 | 117267 | 1,17 | up   |
| 6620599 | 7176282 | 1315369 | solute carrier family 26 (sulfate transporter), member 2                   | Slc26a2 | 117267 | 1,12 | down |
| 6458209 | 7176282 | 1315370 | solute carrier family 26 (sulfate transporter), member 2                   | Slc26a2 | 117267 | 1,11 | down |
| 6300218 | 7176282 | 1315368 | solute carrier family 26 (sulfate transporter), member 2                   | Slc26a2 | 117267 | 1,10 | up   |
| 6742906 | 7176282 | 1315369 | solute carrier family 26 (sulfate transporter), member 2                   | Slc26a2 | 117267 | 1,10 | down |
| 6529544 | 7176282 | 1315371 | solute carrier family 26 (sulfate transporter), member 2                   | Slc26a2 | 117267 | 1,09 | down |
| 5760024 | 7104920 | 1140055 | solute carrier family 26, member 9                                         | Slc26a9 | 304784 | 2,29 | down |
| 5757934 | 7104920 | 1140070 | solute carrier family 26, member 9                                         | Slc26a9 | 304784 | 2,14 | up   |
| 5783601 | 7104920 | 1140070 | solute carrier family 26, member 9                                         | Slc26a9 | 304784 | 2,02 | up   |
| 5759924 | 7104920 | 1140042 | solute carrier family 26, member 9                                         | Slc26a9 | 304784 | 1,36 | down |
| 6375653 | 7104920 | 1140060 | solute carrier family 26, member 9                                         | Slc26a9 | 304784 | 1,35 | down |
| 6348390 | 7104920 | 1140069 | solute carrier family 26, member 9                                         | Slc26a9 | 304784 | 1,22 | up   |
| 6475087 | 7104920 | 1140062 | solute carrier family 26, member 9                                         | Slc26a9 | 304784 | 1,22 | down |
| 6554785 | 7104920 | 1140065 | solute carrier family 26, member 9                                         | Slc26a9 | 304784 | 1,22 | up   |
| 6273113 | 7104920 | 1140068 | solute carrier family 26, member 9                                         | Slc26a9 | 304784 | 1,20 | up   |
| 6485108 | 7104920 | 1140070 | solute carrier family 26, member 9                                         | Slc26a9 | 304784 | 1,19 | up   |
| 6623449 | 7104920 | 1140066 | solute carrier family 26, member 9                                         | Slc26a9 | 304784 | 1,17 | down |
| 6617741 | 7104920 | 1140054 | solute carrier family 26, member 9                                         | Slc26a9 | 304784 | 1,16 | down |
| 6301592 | 7104920 | 1140057 | solute carrier family 26, member 9                                         | Slc26a9 | 304784 | 1,15 | down |
| 6746493 | 7104920 | 1140053 | solute carrier family 26, member 9                                         | Slc26a9 | 304784 | 1,14 | up   |
| 6569712 | 7104920 | 1140063 | solute carrier family 26, member 9                                         | Slc26a9 | 304784 | 1,12 | up   |
| 6346936 | 7104920 | 1140070 | solute carrier family 26, member 9                                         | Slc26a9 | 304784 | 1,09 | down |
| 6515415 | 7104920 | 1140048 | solute carrier family 26, member 9                                         | Slc26a9 | 304784 | 1,08 | up   |
| 6077080 | 7104920 | 1140061 | solute carrier family 26, member 9                                         | Slc26a9 | 304784 | 1,08 | down |
| 5893299 | 7104920 | 1140058 | solute carrier family 26, member 9                                         | Slc26a9 | 304784 | 1,08 | down |
| 5642552 | 7104920 | 1140067 | solute carrier family 26, member 9                                         | Slc26a9 | 304784 | 1,05 | up   |
| 6452214 | 7104920 | 1140059 | solute carrier family 26, member 9                                         | Slc26a9 | 304784 | 1,04 | down |
| 6478703 | 7104920 | 1140056 | solute carrier family 26, member 9                                         | Slc26a9 | 304784 | 1,02 | down |
| 6031498 | 7104920 | 1140052 | solute carrier family 26, member 9                                         | Slc26a9 | 304784 | 1,02 | down |
| 6068256 | 7104920 | 1140064 | solute carrier family 26, member 9                                         | Slc26a9 | 304784 | 1,00 | down |
| 6121866 | 7244077 | 1483429 | solute carrier family 28 (sodium-coupled nucleoside transporter), member 2 | Slc28a2 | 60423  | 2,21 | down |
| 5874866 | 7244077 | 1483436 | solute carrier family 28 (sodium-coupled nucleoside transporter), member 2 | Slc28a2 | 60423  | 2,02 | down |
| 6051550 | 7244077 | 1483433 | solute carrier family 28 (sodium-coupled nucleoside transporter), member 2 | Slc28a2 | 60423  | 1,81 | down |
| 6066490 | 7244077 | 1483420 | solute carrier family 28 (sodium-coupled nucleoside transporter), member 2 | Slc28a2 | 60423  | 1,69 | up   |
| 5656011 | 7244077 | 1483435 | solute carrier family 28 (sodium-coupled nucleoside transporter), member 2 | Slc28a2 | 60423  | 1,58 | up   |
| 5793026 | 7244077 | 1483421 | solute carrier family 28 (sodium-coupled nucleoside transporter), member 2 | Slc28a2 | 60423  | 1,55 | up   |
| 6485048 | 7244077 | 1483422 | solute carrier family 28 (sodium-coupled nucleoside transporter), member 2 | Slc28a2 | 60423  | 1,52 | up   |
| 5846732 | 7244077 | 1483425 | solute carrier family 28 (sodium-coupled nucleoside transporter), member 2 | Slc28a2 | 60423  | 1,50 | down |
| 6551301 | 7244077 | 1483432 | solute carrier family 28 (sodium-coupled nucleoside transporter), member 2 | Slc28a2 | 60423  | 1,48 | down |
| 6616112 | 7244077 | 1483427 | solute carrier family 28 (sodium-coupled nucleoside transporter), member 2 | Slc28a2 | 60423  | 1,40 | down |
| 5750548 | 7244077 | 1483434 | solute carrier family 28 (sodium-coupled nucleoside transporter), member 2 | Slc28a2 | 60423  | 1,36 | down |
| 6705619 | 7244077 | 1483424 | solute carrier family 28 (sodium-coupled nucleoside transporter), member 2 | Slc28a2 | 60423  | 1,18 | down |
| 6551800 | 7244077 | 1483437 | solute carrier family 28 (sodium-coupled nucleoside transporter), member 2 | Slc28a2 | 60423  | 1,17 | up   |
| 5978380 | 7244077 | 1483430 | solute carrier family 28 (sodium-coupled nucleoside transporter), member 2 | Slc28a2 | 60423  | 1,15 | down |
| 6522782 | 7244077 | 1483423 | solute carrier family 28 (sodium-coupled nucleoside transporter), member 2 | Slc28a2 | 60423  | 1,15 | up   |
| 6186315 | 7244077 | 1483428 | solute carrier family 28 (sodium-coupled nucleoside transporter), member 2 | Slc28a2 | 60423  | 1,15 | down |
| 5648247 | 7244077 | 1483426 | solute carrier family 28 (sodium-coupled nucleoside transporter), member 2 | Slc28a2 | 60423  | 1,07 | down |
| 5834386 | 7244077 | 1483431 | solute carrier family 28 (sodium-coupled nucleoside transporter), member 2 | Slc28a2 | 60423  | 1,01 | down |
| 5787957 | 7352119 | 1750265 | solute carrier family 29 (nucleoside transporters), member 1               | Slc29a1 | 63997  | 2,02 | down |
| 6580159 | 7352119 | 1750269 | solute carrier family 29 (nucleoside transporters), member 1               | Slc29a1 | 63997  | 1,57 | down |
| 6329794 | 7352119 | 1750276 | solute carrier family 29 (nucleoside transporters), member 1               | Slc29a1 | 63997  | 1,50 | up   |
| 5618715 | 7352119 | 1750264 | solute carrier family 29 (nucleoside transporters), member 1               | Slc29a1 | 63997  | 1,39 | up   |
| 5635525 | 7352119 | 1750277 | solute carrier family 29 (nucleoside transporters), member 1               | Slc29a1 | 63997  | 1,22 | down |
| 6529114 | 7352119 | 1750275 | solute carrier family 29 (nucleoside transporters), member 1               | Slc29a1 | 63997  | 1,21 | down |
| 6513921 | 7352119 | 1750274 | solute carrier family 29 (nucleoside transporters), member 1               | Slc29a1 | 63997  | 1,20 | down |

|         |         |         |                                                                      |         |        |      |      |
|---------|---------|---------|----------------------------------------------------------------------|---------|--------|------|------|
| 6453535 | 7352119 | 1750276 | solute carrier family 29 (nucleoside transporters), member 1         | Slc29a1 | 63997  | 1,19 | down |
| 6583266 | 7352119 | 1750268 | solute carrier family 29 (nucleoside transporters), member 1         | Slc29a1 | 63997  | 1,13 | down |
| 6458753 | 7352119 | 1750268 | solute carrier family 29 (nucleoside transporters), member 1         | Slc29a1 | 63997  | 1,12 | down |
| 5702578 | 7352119 | 1750267 | solute carrier family 29 (nucleoside transporters), member 1         | Slc29a1 | 63997  | 1,11 | up   |
| 6038491 | 7352119 | 1750273 | solute carrier family 29 (nucleoside transporters), member 1         | Slc29a1 | 63997  | 1,10 | up   |
| 5664651 | 7352119 | 1750272 | solute carrier family 29 (nucleoside transporters), member 1         | Slc29a1 | 63997  | 1,08 | up   |
| 6423957 | 7352119 | 1750270 | solute carrier family 29 (nucleoside transporters), member 1         | Slc29a1 | 63997  | 1,05 | down |
| 5693311 | 7352119 | 1750266 | solute carrier family 29 (nucleoside transporters), member 1         | Slc29a1 | 63997  | 1,05 | up   |
| 6609082 | 7352119 | 1750266 | solute carrier family 29 (nucleoside transporters), member 1         | Slc29a1 | 63997  | 1,03 | down |
| 6735167 | 7352119 | 1750278 | solute carrier family 29 (nucleoside transporters), member 1         | Slc29a1 | 63997  | 1,03 | up   |
| 6172780 | 7125348 | 1190086 | solute carrier family 30 (zinc transporter), member 9                | Slc30a9 | 498358 | 1,49 | down |
| 6577143 | 7125348 | 1190089 | solute carrier family 30 (zinc transporter), member 9                | Slc30a9 | 498358 | 1,42 | down |
| 6216309 | 7125348 | 1190077 | solute carrier family 30 (zinc transporter), member 9                | Slc30a9 | 498358 | 1,37 | down |
| 6296646 | 7125348 | 1190076 | solute carrier family 30 (zinc transporter), member 9                | Slc30a9 | 498358 | 1,35 | down |
| 6574552 | 7125348 | 1190092 | solute carrier family 30 (zinc transporter), member 9                | Slc30a9 | 498358 | 1,30 | down |
| 6017068 | 7125348 | 1190100 | solute carrier family 30 (zinc transporter), member 9                | Slc30a9 | 498358 | 1,28 | up   |
| 6295316 | 7125348 | 1190081 | solute carrier family 30 (zinc transporter), member 9                | Slc30a9 | 498358 | 1,25 | down |
| 6304856 | 7125348 | 1190082 | solute carrier family 30 (zinc transporter), member 9                | Slc30a9 | 498358 | 1,25 | down |
| 6541467 | 7125348 | 1190079 | solute carrier family 30 (zinc transporter), member 9                | Slc30a9 | 498358 | 1,21 | down |
| 6044611 | 7125348 | 1190079 | solute carrier family 30 (zinc transporter), member 9                | Slc30a9 | 498358 | 1,20 | down |
| 6577278 | 7125348 | 1190083 | solute carrier family 30 (zinc transporter), member 9                | Slc30a9 | 498358 | 1,19 | up   |
| 6290113 | 7125348 | 1190085 | solute carrier family 30 (zinc transporter), member 9                | Slc30a9 | 498358 | 1,16 | down |
| 5708658 | 7125348 | 1190088 | solute carrier family 30 (zinc transporter), member 9                | Slc30a9 | 498358 | 1,15 | down |
| 6399237 | 7125348 | 1190090 | solute carrier family 30 (zinc transporter), member 9                | Slc30a9 | 498358 | 1,15 | down |
| 5840832 | 7125348 | 1190078 | solute carrier family 30 (zinc transporter), member 9                | Slc30a9 | 498358 | 1,14 | down |
| 5796508 | 7125348 | 1190091 | solute carrier family 30 (zinc transporter), member 9                | Slc30a9 | 498358 | 1,12 | up   |
| 6276550 | 7125348 | 1190100 | solute carrier family 30 (zinc transporter), member 9                | Slc30a9 | 498358 | 1,10 | up   |
| 6309017 | 7125348 | 1190080 | solute carrier family 30 (zinc transporter), member 9                | Slc30a9 | 498358 | 1,06 | down |
| 6297114 | 7125348 | 1190084 | solute carrier family 30 (zinc transporter), member 9                | Slc30a9 | 498358 | 1,05 | up   |
| 5722313 | 7125348 | 1190079 | solute carrier family 30 (zinc transporter), member 9                | Slc30a9 | 498358 | 1,04 | down |
| 6489830 | 7125348 | 1190095 | solute carrier family 30 (zinc transporter), member 9                | Slc30a9 | 498358 | 1,01 | down |
| 6720889 | 7284901 | 1584796 | solute carrier family 35 (CMP-sialic acid transporter), member A1    | Slc35a1 | 313139 | 1,72 | down |
| 5940362 | 7284901 | 1584797 | solute carrier family 35 (CMP-sialic acid transporter), member A1    | Slc35a1 | 313139 | 1,42 | down |
| 6694111 | 7284901 | 1584790 | solute carrier family 35 (CMP-sialic acid transporter), member A1    | Slc35a1 | 313139 | 1,26 | up   |
| 6521383 | 7284901 | 1584795 | solute carrier family 35 (CMP-sialic acid transporter), member A1    | Slc35a1 | 313139 | 1,13 | down |
| 5994071 | 7284901 | 1584791 | solute carrier family 35 (CMP-sialic acid transporter), member A1    | Slc35a1 | 313139 | 1,12 | up   |
| 6156290 | 7284901 | 1584792 | solute carrier family 35 (CMP-sialic acid transporter), member A1    | Slc35a1 | 313139 | 1,09 | down |
| 5717335 | 7284901 | 1584798 | solute carrier family 35 (CMP-sialic acid transporter), member A1    | Slc35a1 | 313139 | 1,09 | up   |
| 6009711 | 7284901 | 1584794 | solute carrier family 35 (CMP-sialic acid transporter), member A1    | Slc35a1 | 313139 | 1,05 | up   |
| 6017682 | 7336288 | 1710271 | solute carrier family 35, member F2                                  | Slc35f2 | 300713 | 1,44 | down |
| 6088636 | 7336288 | 1710258 | solute carrier family 35, member F2                                  | Slc35f2 | 300713 | 1,35 | up   |
| 6716300 | 7336288 | 1710258 | solute carrier family 35, member F2                                  | Slc35f2 | 300713 | 1,28 | up   |
| 6712475 | 7336288 | 1710267 | solute carrier family 35, member F2                                  | Slc35f2 | 300713 | 1,28 | down |
| 6511220 | 7336288 | 1710268 | solute carrier family 35, member F2                                  | Slc35f2 | 300713 | 1,26 | down |
| 6261572 | 7336288 | 1710269 | solute carrier family 35, member F2                                  | Slc35f2 | 300713 | 1,22 | down |
| 6605548 | 7336288 | 1710263 | solute carrier family 35, member F2                                  | Slc35f2 | 300713 | 1,18 | up   |
| 5656405 | 7336288 | 1710262 | solute carrier family 35, member F2                                  | Slc35f2 | 300713 | 1,11 | down |
| 6531231 | 7336288 | 1710269 | solute carrier family 35, member F2                                  | Slc35f2 | 300713 | 1,08 | up   |
| 6492910 | 7336288 | 1710258 | solute carrier family 35, member F2                                  | Slc35f2 | 300713 | 1,06 | down |
| 6721008 | 7335481 | 1708248 | solute carrier family 37 (glucose-6-phosphate transporter), member 4 | Slc37a4 | 29573  | 2,54 | up   |
| 5740128 | 7335481 | 1708239 | solute carrier family 37 (glucose-6-phosphate transporter), member 4 | Slc37a4 | 29573  | 2,19 | up   |
| 5858301 | 7335481 | 1708240 | solute carrier family 37 (glucose-6-phosphate transporter), member 4 | Slc37a4 | 29573  | 1,65 | up   |
| 6608265 | 7335481 | 1708240 | solute carrier family 37 (glucose-6-phosphate transporter), member 4 | Slc37a4 | 29573  | 1,23 | up   |
| 5829918 | 7335481 | 1708243 | solute carrier family 37 (glucose-6-phosphate transporter), member 4 | Slc37a4 | 29573  | 1,12 | up   |
| 6205509 | 7335481 | 1708245 | solute carrier family 37 (glucose-6-phosphate transporter), member 4 | Slc37a4 | 29573  | 1,10 | down |
| 5831404 | 7335481 | 1708246 | solute carrier family 37 (glucose-6-phosphate transporter), member 4 | Slc37a4 | 29573  | 1,10 | up   |
| 6421438 | 7335481 | 1708242 | solute carrier family 37 (glucose-6-phosphate transporter), member 4 | Slc37a4 | 29573  | 1,08 | down |

|         |         |         |                                                                       |         |        |      |      |
|---------|---------|---------|-----------------------------------------------------------------------|---------|--------|------|------|
| 6626207 | 7335481 | 1708241 | solute carrier family 37 (glucose-6-phosphate transporter), member 4  | Slc37a4 | 29573  | 1,05 | down |
| 6473840 | 7335481 | 1708247 | solute carrier family 37 (glucose-6-phosphate transporter), member 4  | Slc37a4 | 29573  | 1,01 | up   |
| 5711600 | 7335481 | 1708244 | solute carrier family 37 (glucose-6-phosphate transporter), member 4  | Slc37a4 | 29573  | 1,00 | down |
| 6489143 | 7217487 | 1416662 | solute carrier family 37 (glycerol-3-phosphate transporter), member 1 | Slc37a1 | 294321 | 2,47 | up   |
| 6520535 | 7217487 | 1416669 | solute carrier family 37 (glycerol-3-phosphate transporter), member 1 | Slc37a1 | 294321 | 1,63 | down |
| 6573042 | 7217487 | 1416669 | solute carrier family 37 (glycerol-3-phosphate transporter), member 1 | Slc37a1 | 294321 | 1,43 | up   |
| 5622947 | 7217487 | 1416656 | solute carrier family 37 (glycerol-3-phosphate transporter), member 1 | Slc37a1 | 294321 | 1,29 | up   |
| 5693209 | 7217487 | 1416660 | solute carrier family 37 (glycerol-3-phosphate transporter), member 1 | Slc37a1 | 294321 | 1,26 | down |
| 5703137 | 7217487 | 1416661 | solute carrier family 37 (glycerol-3-phosphate transporter), member 1 | Slc37a1 | 294321 | 1,25 | down |
| 5783466 | 7217487 | 1416653 | solute carrier family 37 (glycerol-3-phosphate transporter), member 1 | Slc37a1 | 294321 | 1,23 | up   |
| 5674814 | 7217487 | 1416665 | solute carrier family 37 (glycerol-3-phosphate transporter), member 1 | Slc37a1 | 294321 | 1,20 | up   |
| 6551345 | 7217487 | 1416652 | solute carrier family 37 (glycerol-3-phosphate transporter), member 1 | Slc37a1 | 294321 | 1,12 | down |
| 6608893 | 7217487 | 1416664 | solute carrier family 37 (glycerol-3-phosphate transporter), member 1 | Slc37a1 | 294321 | 1,12 | down |
| 6663696 | 7217487 | 1416658 | solute carrier family 37 (glycerol-3-phosphate transporter), member 1 | Slc37a1 | 294321 | 1,09 | down |
| 5661649 | 7217487 | 1416653 | solute carrier family 37 (glycerol-3-phosphate transporter), member 1 | Slc37a1 | 294321 | 1,08 | down |
| 6238450 | 7217487 | 1416659 | solute carrier family 37 (glycerol-3-phosphate transporter), member 1 | Slc37a1 | 294321 | 1,08 | down |
| 5729607 | 7217487 | 1416666 | solute carrier family 37 (glycerol-3-phosphate transporter), member 1 | Slc37a1 | 294321 | 1,06 | up   |
| 6522396 | 7217487 | 1416670 | solute carrier family 37 (glycerol-3-phosphate transporter), member 1 | Slc37a1 | 294321 | 1,05 | down |
| 6330933 | 7217487 | 1416671 | solute carrier family 37 (glycerol-3-phosphate transporter), member 1 | Slc37a1 | 294321 | 1,05 | up   |
| 5854464 | 7217487 | 1416668 | solute carrier family 37 (glycerol-3-phosphate transporter), member 1 | Slc37a1 | 294321 | 1,04 | down |
| 5951902 | 7217487 | 1416655 | solute carrier family 37 (glycerol-3-phosphate transporter), member 1 | Slc37a1 | 294321 | 1,03 | up   |
| 5692547 | 7217487 | 1416657 | solute carrier family 37 (glycerol-3-phosphate transporter), member 1 | Slc37a1 | 294321 | 1,02 | up   |
| 6609967 | 7217487 | 1416654 | solute carrier family 37 (glycerol-3-phosphate transporter), member 1 | Slc37a1 | 294321 | 1,02 | up   |
| 5635671 | 7217487 | 1416667 | solute carrier family 37 (glycerol-3-phosphate transporter), member 1 | Slc37a1 | 294321 | 1,01 | down |
| 6108916 | 7217487 | 1416663 | solute carrier family 37 (glycerol-3-phosphate transporter), member 1 | Slc37a1 | 294321 | 1,00 | up   |
| 6154612 | 7349935 | 1744865 | solute carrier family 38, member 3                                    | Slc38a3 | 252919 | 3,23 | up   |
| 6601227 | 7349935 | 1744879 | solute carrier family 38, member 3                                    | Slc38a3 | 252919 | 2,72 | up   |
| 5719840 | 7349935 | 1744881 | solute carrier family 38, member 3                                    | Slc38a3 | 252919 | 2,23 | up   |
| 5664071 | 7349935 | 1744882 | solute carrier family 38, member 3                                    | Slc38a3 | 252919 | 1,96 | up   |
| 5685296 | 7349935 | 1744880 | solute carrier family 38, member 3                                    | Slc38a3 | 252919 | 1,85 | up   |
| 6223733 | 7349935 | 1744875 | solute carrier family 38, member 3                                    | Slc38a3 | 252919 | 1,61 | down |
| 5885525 | 7349935 | 1744866 | solute carrier family 38, member 3                                    | Slc38a3 | 252919 | 1,52 | up   |
| 6201700 | 7349935 | 1744872 | solute carrier family 38, member 3                                    | Slc38a3 | 252919 | 1,50 | down |
| 6586039 | 7349935 | 1744870 | solute carrier family 38, member 3                                    | Slc38a3 | 252919 | 1,49 | down |
| 6074391 | 7349935 | 1744874 | solute carrier family 38, member 3                                    | Slc38a3 | 252919 | 1,34 | down |
| 6472916 | 7349935 | 1744878 | solute carrier family 38, member 3                                    | Slc38a3 | 252919 | 1,27 | up   |
| 6279209 | 7349935 | 1744876 | solute carrier family 38, member 3                                    | Slc38a3 | 252919 | 1,23 | down |
| 5855558 | 7349935 | 1744871 | solute carrier family 38, member 3                                    | Slc38a3 | 252919 | 1,21 | up   |
| 5965221 | 7349935 | 1744877 | solute carrier family 38, member 3                                    | Slc38a3 | 252919 | 1,14 | down |
| 5767370 | 7349935 | 1744867 | solute carrier family 38, member 3                                    | Slc38a3 | 252919 | 1,10 | down |
| 5791509 | 7349935 | 1744869 | solute carrier family 38, member 3                                    | Slc38a3 | 252919 | 1,08 | down |
| 6679443 | 7349935 | 1744873 | solute carrier family 38, member 3                                    | Slc38a3 | 252919 | 1,08 | down |
| 6522923 | 7349935 | 1744875 | solute carrier family 38, member 3                                    | Slc38a3 | 252919 | 1,07 | up   |
| 6262105 | 7349935 | 1744868 | solute carrier family 38, member 3                                    | Slc38a3 | 252919 | 1,05 | down |
| 6121905 | 7379840 | 1820454 | solute carrier family 38, member 5                                    | Slc38a5 | 192208 | 2,91 | up   |
| 6642797 | 7379840 | 1820452 | solute carrier family 38, member 5                                    | Slc38a5 | 192208 | 1,71 | down |
| 6678957 | 7379840 | 1820453 | solute carrier family 38, member 5                                    | Slc38a5 | 192208 | 1,57 | down |
| 6241788 | 7379840 | 1820448 | solute carrier family 38, member 5                                    | Slc38a5 | 192208 | 1,53 | up   |
| 6290394 | 7379840 | 1820443 | solute carrier family 38, member 5                                    | Slc38a5 | 192208 | 1,43 | up   |
| 5712700 | 7379840 | 1820447 | solute carrier family 38, member 5                                    | Slc38a5 | 192208 | 1,40 | up   |
| 5894701 | 7379840 | 1820449 | solute carrier family 38, member 5                                    | Slc38a5 | 192208 | 1,30 | down |
| 5691662 | 7379840 | 1820445 | solute carrier family 38, member 5                                    | Slc38a5 | 192208 | 1,24 | down |
| 6446744 | 7379840 | 1820444 | solute carrier family 38, member 5                                    | Slc38a5 | 192208 | 1,22 | down |
| 5998426 | 7379840 | 1820446 | solute carrier family 38, member 5                                    | Slc38a5 | 192208 | 1,20 | up   |
| 5976239 | 7379840 | 1820440 | solute carrier family 38, member 5                                    | Slc38a5 | 192208 | 1,19 | down |
| 5987273 | 7379840 | 1820447 | solute carrier family 38, member 5                                    | Slc38a5 | 192208 | 1,18 | down |
| 5797129 | 7379840 | 1820442 | solute carrier family 38, member 5                                    | Slc38a5 | 192208 | 1,15 | down |

|         |         |         |                                                     |         |        |      |      |
|---------|---------|---------|-----------------------------------------------------|---------|--------|------|------|
| 6239074 | 7379840 | 1820439 | solute carrier family 38, member 5                  | Slc38a5 | 192208 | 1,12 | down |
| 5809624 | 7379840 | 1820450 | solute carrier family 38, member 5                  | Slc38a5 | 192208 | 1,11 | up   |
| 6456827 | 7379840 | 1820451 | solute carrier family 38, member 5                  | Slc38a5 | 192208 | 1,07 | down |
| 5893373 | 7379840 | 1820441 | solute carrier family 38, member 5                  | Slc38a5 | 192208 | 1,04 | up   |
| 6741326 | 7379840 | 1820438 | solute carrier family 38, member 5                  | Slc38a5 | 192208 | 1,02 | down |
| 6225040 | 7189669 | 1348965 | solute carrier family 38, member 9                  | Slc38a9 | 310091 | 2,17 | down |
| 6189122 | 7189669 | 1348989 | solute carrier family 38, member 9                  | Slc38a9 | 310091 | 2,01 | up   |
| 6645875 | 7189669 | 1348973 | solute carrier family 38, member 9                  | Slc38a9 | 310091 | 1,69 | up   |
| 6221941 | 7189669 | 1348977 | solute carrier family 38, member 9                  | Slc38a9 | 310091 | 1,50 | down |
| 6475271 | 7189669 | 1348982 | solute carrier family 38, member 9                  | Slc38a9 | 310091 | 1,47 | up   |
| 5922942 | 7189669 | 1348979 | solute carrier family 38, member 9                  | Slc38a9 | 310091 | 1,43 | up   |
| 6396159 | 7189669 | 1348990 | solute carrier family 38, member 9                  | Slc38a9 | 310091 | 1,33 | down |
| 6048261 | 7189669 | 1348984 | solute carrier family 38, member 9                  | Slc38a9 | 310091 | 1,29 | up   |
| 6072665 | 7189669 | 1348992 | solute carrier family 38, member 9                  | Slc38a9 | 310091 | 1,23 | up   |
| 5618628 | 7189669 | 1348975 | solute carrier family 38, member 9                  | Slc38a9 | 310091 | 1,15 | down |
| 5983594 | 7189669 | 1348985 | solute carrier family 38, member 9                  | Slc38a9 | 310091 | 1,15 | down |
| 5872182 | 7189669 | 1348977 | solute carrier family 38, member 9                  | Slc38a9 | 310091 | 1,12 | up   |
| 6338582 | 7189669 | 1348978 | solute carrier family 38, member 9                  | Slc38a9 | 310091 | 1,11 | down |
| 5926578 | 7189669 | 1348976 | solute carrier family 38, member 9                  | Slc38a9 | 310091 | 1,10 | up   |
| 5667073 | 7189669 | 1348982 | solute carrier family 38, member 9                  | Slc38a9 | 310091 | 1,06 | up   |
| 5618385 | 7189669 | 1348991 | solute carrier family 38, member 9                  | Slc38a9 | 310091 | 1,04 | up   |
| 6515839 | 7260501 | 1523972 | solute carrier family 4 (anion exchanger), member 2 | Slc4a2  | 24780  | 2,50 | up   |
| 5834056 | 7260501 | 1523973 | solute carrier family 4 (anion exchanger), member 2 | Slc4a2  | 24780  | 2,33 | up   |
| 6015171 | 7260501 | 1523950 | solute carrier family 4 (anion exchanger), member 2 | Slc4a2  | 24780  | 1,44 | up   |
| 6393568 | 7260501 | 1523970 | solute carrier family 4 (anion exchanger), member 2 | Slc4a2  | 24780  | 1,40 | up   |
| 5868741 | 7260501 | 1523960 | solute carrier family 4 (anion exchanger), member 2 | Slc4a2  | 24780  | 1,38 | up   |
| 6563720 | 7260501 | 1523957 | solute carrier family 4 (anion exchanger), member 2 | Slc4a2  | 24780  | 1,28 | up   |
| 5956324 | 7260501 | 1523962 | solute carrier family 4 (anion exchanger), member 2 | Slc4a2  | 24780  | 1,25 | up   |
| 6573622 | 7260501 | 1523958 | solute carrier family 4 (anion exchanger), member 2 | Slc4a2  | 24780  | 1,19 | down |
| 5852822 | 7260501 | 1523964 | solute carrier family 4 (anion exchanger), member 2 | Slc4a2  | 24780  | 1,15 | up   |
| 5647105 | 7260501 | 1523965 | solute carrier family 4 (anion exchanger), member 2 | Slc4a2  | 24780  | 1,12 | down |
| 6668015 | 7260501 | 1523952 | solute carrier family 4 (anion exchanger), member 2 | Slc4a2  | 24780  | 1,12 | up   |
| 6399749 | 7260501 | 1523961 | solute carrier family 4 (anion exchanger), member 2 | Slc4a2  | 24780  | 1,08 | up   |
| 6674616 | 7260501 | 1523956 | solute carrier family 4 (anion exchanger), member 2 | Slc4a2  | 24780  | 1,07 | down |
| 6067102 | 7260501 | 1523972 | solute carrier family 4 (anion exchanger), member 2 | Slc4a2  | 24780  | 1,07 | up   |
| 6520056 | 7260501 | 1523955 | solute carrier family 4 (anion exchanger), member 2 | Slc4a2  | 24780  | 1,07 | down |
| 6489703 | 7260501 | 1523971 | solute carrier family 4 (anion exchanger), member 2 | Slc4a2  | 24780  | 1,07 | up   |
| 6169116 | 7260501 | 1523959 | solute carrier family 4 (anion exchanger), member 2 | Slc4a2  | 24780  | 1,07 | down |
| 6374998 | 7260501 | 1523951 | solute carrier family 4 (anion exchanger), member 2 | Slc4a2  | 24780  | 1,06 | down |
| 6660579 | 7260501 | 1523969 | solute carrier family 4 (anion exchanger), member 2 | Slc4a2  | 24780  | 1,06 | down |
| 6013393 | 7260501 | 1523968 | solute carrier family 4 (anion exchanger), member 2 | Slc4a2  | 24780  | 1,06 | up   |
| 6714235 | 7260501 | 1523963 | solute carrier family 4 (anion exchanger), member 2 | Slc4a2  | 24780  | 1,06 | down |
| 6181256 | 7260501 | 1523953 | solute carrier family 4 (anion exchanger), member 2 | Slc4a2  | 24780  | 1,04 | up   |
| 6567437 | 7260501 | 1523964 | solute carrier family 4 (anion exchanger), member 2 | Slc4a2  | 24780  | 1,03 | up   |
| 6649665 | 7260501 | 1523954 | solute carrier family 4 (anion exchanger), member 2 | Slc4a2  | 24780  | 1,02 | down |
| 6418612 | 7260501 | 1523966 | solute carrier family 4 (anion exchanger), member 2 | Slc4a2  | 24780  | 1,01 | up   |
| 6077260 | 7260501 | 1523967 | solute carrier family 4 (anion exchanger), member 2 | Slc4a2  | 24780  | 1,00 | down |
| 6522066 | 7320812 | 1674335 | solute carrier family 4 (anion exchanger), member 8 | Slc4a8  | 315311 | 3,00 | down |
| 5980972 | 7320812 | 1674336 | solute carrier family 4 (anion exchanger), member 8 | Slc4a8  | 315311 | 1,61 | up   |
| 5977905 | 7320812 | 1674326 | solute carrier family 4 (anion exchanger), member 8 | Slc4a8  | 315311 | 1,44 | up   |
| 6435566 | 7320812 | 1674343 | solute carrier family 4 (anion exchanger), member 8 | Slc4a8  | 315311 | 1,43 | down |
| 5787414 | 7320812 | 1674339 | solute carrier family 4 (anion exchanger), member 8 | Slc4a8  | 315311 | 1,43 | down |
| 6711225 | 7320812 | 1674330 | solute carrier family 4 (anion exchanger), member 8 | Slc4a8  | 315311 | 1,39 | down |
| 6198411 | 7320812 | 1674342 | solute carrier family 4 (anion exchanger), member 8 | Slc4a8  | 315311 | 1,35 | up   |
| 6576572 | 7320812 | 1674345 | solute carrier family 4 (anion exchanger), member 8 | Slc4a8  | 315311 | 1,32 | up   |
| 6521389 | 7320812 | 1674338 | solute carrier family 4 (anion exchanger), member 8 | Slc4a8  | 315311 | 1,29 | up   |
| 6030369 | 7320812 | 1674337 | solute carrier family 4 (anion exchanger), member 8 | Slc4a8  | 315311 | 1,25 | down |

|         |         |         |                                                                     |        |        |      |      |
|---------|---------|---------|---------------------------------------------------------------------|--------|--------|------|------|
| 5759120 | 7320812 | 1674347 | solute carrier family 4 (anion exchanger), member 8                 | Slc4a8 | 315311 | 1,24 | up   |
| 5656932 | 7320812 | 1674327 | solute carrier family 4 (anion exchanger), member 8                 | Slc4a8 | 315311 | 1,23 | up   |
| 6464659 | 7320812 | 1674329 | solute carrier family 4 (anion exchanger), member 8                 | Slc4a8 | 315311 | 1,23 | up   |
| 5959700 | 7320812 | 1674328 | solute carrier family 4 (anion exchanger), member 8                 | Slc4a8 | 315311 | 1,23 | up   |
| 6627134 | 7320812 | 1674336 | solute carrier family 4 (anion exchanger), member 8                 | Slc4a8 | 315311 | 1,20 | down |
| 6456635 | 7320812 | 1674331 | solute carrier family 4 (anion exchanger), member 8                 | Slc4a8 | 315311 | 1,19 | up   |
| 6315753 | 7320812 | 1674332 | solute carrier family 4 (anion exchanger), member 8                 | Slc4a8 | 315311 | 1,16 | down |
| 6119347 | 7320812 | 1674346 | solute carrier family 4 (anion exchanger), member 8                 | Slc4a8 | 315311 | 1,15 | down |
| 5676888 | 7320812 | 1674340 | solute carrier family 4 (anion exchanger), member 8                 | Slc4a8 | 315311 | 1,13 | down |
| 5821043 | 7320812 | 1674333 | solute carrier family 4 (anion exchanger), member 8                 | Slc4a8 | 315311 | 1,11 | down |
| 5882755 | 7320812 | 1674344 | solute carrier family 4 (anion exchanger), member 8                 | Slc4a8 | 315311 | 1,10 | up   |
| 5892518 | 7320812 | 1674334 | solute carrier family 4 (anion exchanger), member 8                 | Slc4a8 | 315311 | 1,06 | down |
| 5618735 | 7320812 | 1674326 | solute carrier family 4 (anion exchanger), member 8                 | Slc4a8 | 315311 | 1,05 | up   |
| 6659705 | 7320812 | 1674331 | solute carrier family 4 (anion exchanger), member 8                 | Slc4a8 | 315311 | 1,01 | up   |
| 5726123 | 7320812 | 1674341 | solute carrier family 4 (anion exchanger), member 8                 | Slc4a8 | 315311 | 1,00 | down |
| 5765604 | 7255463 | 1511190 | solute carrier family 4, sodium bicarbonate cotransporter, member 5 | Slc4a5 | 297386 | 2,03 | down |
| 5652434 | 7255463 | 1511195 | solute carrier family 4, sodium bicarbonate cotransporter, member 5 | Slc4a5 | 297386 | 2,01 | up   |
| 5775072 | 7255463 | 1511184 | solute carrier family 4, sodium bicarbonate cotransporter, member 5 | Slc4a5 | 297386 | 1,66 | up   |
| 5652135 | 7255463 | 1511202 | solute carrier family 4, sodium bicarbonate cotransporter, member 5 | Slc4a5 | 297386 | 1,65 | down |
| 6062843 | 7255463 | 1511210 | solute carrier family 4, sodium bicarbonate cotransporter, member 5 | Slc4a5 | 297386 | 1,59 | up   |
| 6038803 | 7255463 | 1511186 | solute carrier family 4, sodium bicarbonate cotransporter, member 5 | Slc4a5 | 297386 | 1,49 | down |
| 6569759 | 7255463 | 1511188 | solute carrier family 4, sodium bicarbonate cotransporter, member 5 | Slc4a5 | 297386 | 1,48 | up   |
| 5896682 | 7255463 | 1511196 | solute carrier family 4, sodium bicarbonate cotransporter, member 5 | Slc4a5 | 297386 | 1,46 | up   |
| 5852471 | 7255463 | 1511201 | solute carrier family 4, sodium bicarbonate cotransporter, member 5 | Slc4a5 | 297386 | 1,44 | down |
| 6048788 | 7255463 | 1511197 | solute carrier family 4, sodium bicarbonate cotransporter, member 5 | Slc4a5 | 297386 | 1,40 | up   |
| 6659501 | 7255463 | 1511206 | solute carrier family 4, sodium bicarbonate cotransporter, member 5 | Slc4a5 | 297386 | 1,39 | down |
| 5850127 | 7255463 | 1511199 | solute carrier family 4, sodium bicarbonate cotransporter, member 5 | Slc4a5 | 297386 | 1,34 | down |
| 6476415 | 7255463 | 1511189 | solute carrier family 4, sodium bicarbonate cotransporter, member 5 | Slc4a5 | 297386 | 1,25 | down |
| 6261308 | 7255463 | 1511208 | solute carrier family 4, sodium bicarbonate cotransporter, member 5 | Slc4a5 | 297386 | 1,20 | up   |
| 6148193 | 7255463 | 1511205 | solute carrier family 4, sodium bicarbonate cotransporter, member 5 | Slc4a5 | 297386 | 1,19 | down |
| 6193950 | 7255463 | 1511211 | solute carrier family 4, sodium bicarbonate cotransporter, member 5 | Slc4a5 | 297386 | 1,17 | down |
| 6276957 | 7255463 | 1511195 | solute carrier family 4, sodium bicarbonate cotransporter, member 5 | Slc4a5 | 297386 | 1,16 | up   |
| 6684365 | 7255463 | 1511185 | solute carrier family 4, sodium bicarbonate cotransporter, member 5 | Slc4a5 | 297386 | 1,16 | up   |
| 5885866 | 7255463 | 1511187 | solute carrier family 4, sodium bicarbonate cotransporter, member 5 | Slc4a5 | 297386 | 1,15 | up   |
| 6042378 | 7255463 | 1511211 | solute carrier family 4, sodium bicarbonate cotransporter, member 5 | Slc4a5 | 297386 | 1,10 | up   |
| 6363557 | 7255463 | 1511200 | solute carrier family 4, sodium bicarbonate cotransporter, member 5 | Slc4a5 | 297386 | 1,09 | up   |
| 6627137 | 7255463 | 1511198 | solute carrier family 4, sodium bicarbonate cotransporter, member 5 | Slc4a5 | 297386 | 1,08 | down |
| 6280595 | 7255463 | 1511209 | solute carrier family 4, sodium bicarbonate cotransporter, member 5 | Slc4a5 | 297386 | 1,07 | up   |
| 6472870 | 7255463 | 1511204 | solute carrier family 4, sodium bicarbonate cotransporter, member 5 | Slc4a5 | 297386 | 1,05 | down |
| 6174709 | 7255463 | 1511194 | solute carrier family 4, sodium bicarbonate cotransporter, member 5 | Slc4a5 | 297386 | 1,05 | down |
| 6287652 | 7255463 | 1511195 | solute carrier family 4, sodium bicarbonate cotransporter, member 5 | Slc4a5 | 297386 | 1,05 | down |
| 6558974 | 7255463 | 1511192 | solute carrier family 4, sodium bicarbonate cotransporter, member 5 | Slc4a5 | 297386 | 1,05 | up   |
| 6665706 | 7255463 | 1511193 | solute carrier family 4, sodium bicarbonate cotransporter, member 5 | Slc4a5 | 297386 | 1,03 | down |
| 6119106 | 7255463 | 1511207 | solute carrier family 4, sodium bicarbonate cotransporter, member 5 | Slc4a5 | 297386 | 1,02 | down |
| 6498464 | 7255463 | 1511203 | solute carrier family 4, sodium bicarbonate cotransporter, member 5 | Slc4a5 | 297386 | 1,01 | up   |
| 6433495 | 7255463 | 1511191 | solute carrier family 4, sodium bicarbonate cotransporter, member 5 | Slc4a5 | 297386 | 1,00 | up   |
| 6454966 | 7136592 | 1217580 | solute carrier family 4, sodium bicarbonate cotransporter, member 7 | Slc4a7 | 117955 | 2,38 | up   |
| 6156865 | 7136592 | 1217570 | solute carrier family 4, sodium bicarbonate cotransporter, member 7 | Slc4a7 | 117955 | 1,85 | down |
| 6440183 | 7136592 | 1217575 | solute carrier family 4, sodium bicarbonate cotransporter, member 7 | Slc4a7 | 117955 | 1,70 | down |
| 5634849 | 7136592 | 1217571 | solute carrier family 4, sodium bicarbonate cotransporter, member 7 | Slc4a7 | 117955 | 1,40 | down |
| 6684505 | 7136592 | 1217561 | solute carrier family 4, sodium bicarbonate cotransporter, member 7 | Slc4a7 | 117955 | 1,35 | down |
| 5651229 | 7136592 | 1217568 | solute carrier family 4, sodium bicarbonate cotransporter, member 7 | Slc4a7 | 117955 | 1,29 | down |
| 5761953 | 7136592 | 1217569 | solute carrier family 4, sodium bicarbonate cotransporter, member 7 | Slc4a7 | 117955 | 1,28 | down |
| 6687388 | 7136592 | 1217576 | solute carrier family 4, sodium bicarbonate cotransporter, member 7 | Slc4a7 | 117955 | 1,26 | up   |
| 6156126 | 7136592 | 1217572 | solute carrier family 4, sodium bicarbonate cotransporter, member 7 | Slc4a7 | 117955 | 1,25 | up   |
| 6499099 | 7136592 | 1217570 | solute carrier family 4, sodium bicarbonate cotransporter, member 7 | Slc4a7 | 117955 | 1,19 | down |
| 6602871 | 7136592 | 1217582 | solute carrier family 4, sodium bicarbonate cotransporter, member 7 | Slc4a7 | 117955 | 1,18 | up   |

|         |         |         |                                                                         |         |        |      |      |
|---------|---------|---------|-------------------------------------------------------------------------|---------|--------|------|------|
| 5710748 | 7136592 | 1217574 | solute carrier family 4, sodium bicarbonate cotransporter, member 7     | Slc4a7  | 117955 | 1,16 | up   |
| 6537862 | 7136592 | 1217581 | solute carrier family 4, sodium bicarbonate cotransporter, member 7     | Slc4a7  | 117955 | 1,16 | up   |
| 6515828 | 7136592 | 1217572 | solute carrier family 4, sodium bicarbonate cotransporter, member 7     | Slc4a7  | 117955 | 1,15 | up   |
| 6502083 | 7136592 | 1217575 | solute carrier family 4, sodium bicarbonate cotransporter, member 7     | Slc4a7  | 117955 | 1,15 | up   |
| 5795813 | 7136592 | 1217560 | solute carrier family 4, sodium bicarbonate cotransporter, member 7     | Slc4a7  | 117955 | 1,14 | up   |
| 6057977 | 7136592 | 1217572 | solute carrier family 4, sodium bicarbonate cotransporter, member 7     | Slc4a7  | 117955 | 1,13 | down |
| 6510433 | 7136592 | 1217567 | solute carrier family 4, sodium bicarbonate cotransporter, member 7     | Slc4a7  | 117955 | 1,13 | down |
| 5991056 | 7136592 | 1217566 | solute carrier family 4, sodium bicarbonate cotransporter, member 7     | Slc4a7  | 117955 | 1,13 | up   |
| 6457570 | 7136592 | 1217564 | solute carrier family 4, sodium bicarbonate cotransporter, member 7     | Slc4a7  | 117955 | 1,13 | down |
| 6409131 | 7136592 | 1217577 | solute carrier family 4, sodium bicarbonate cotransporter, member 7     | Slc4a7  | 117955 | 1,11 | up   |
| 6212088 | 7136592 | 1217569 | solute carrier family 4, sodium bicarbonate cotransporter, member 7     | Slc4a7  | 117955 | 1,11 | down |
| 6571841 | 7136592 | 1217579 | solute carrier family 4, sodium bicarbonate cotransporter, member 7     | Slc4a7  | 117955 | 1,11 | up   |
| 5651580 | 7136592 | 1217580 | solute carrier family 4, sodium bicarbonate cotransporter, member 7     | Slc4a7  | 117955 | 1,11 | up   |
| 6110823 | 7136592 | 1217580 | solute carrier family 4, sodium bicarbonate cotransporter, member 7     | Slc4a7  | 117955 | 1,11 | up   |
| 6189601 | 7136592 | 1217584 | solute carrier family 4, sodium bicarbonate cotransporter, member 7     | Slc4a7  | 117955 | 1,09 | down |
| 5658729 | 7136592 | 1217563 | solute carrier family 4, sodium bicarbonate cotransporter, member 7     | Slc4a7  | 117955 | 1,09 | down |
| 6029070 | 7136592 | 1217585 | solute carrier family 4, sodium bicarbonate cotransporter, member 7     | Slc4a7  | 117955 | 1,07 | down |
| 6462944 | 7136592 | 1217583 | solute carrier family 4, sodium bicarbonate cotransporter, member 7     | Slc4a7  | 117955 | 1,06 | down |
| 6261705 | 7136592 | 1217578 | solute carrier family 4, sodium bicarbonate cotransporter, member 7     | Slc4a7  | 117955 | 1,06 | up   |
| 6638329 | 7136592 | 1217573 | solute carrier family 4, sodium bicarbonate cotransporter, member 7     | Slc4a7  | 117955 | 1,05 | down |
| 5959582 | 7136592 | 1217564 | solute carrier family 4, sodium bicarbonate cotransporter, member 7     | Slc4a7  | 117955 | 1,03 | up   |
| 5650831 | 7136592 | 1217581 | solute carrier family 4, sodium bicarbonate cotransporter, member 7     | Slc4a7  | 117955 | 1,02 | down |
| 5858552 | 7136592 | 1217562 | solute carrier family 4, sodium bicarbonate cotransporter, member 7     | Slc4a7  | 117955 | 1,00 | down |
| 5890110 | 7136592 | 1217565 | solute carrier family 4, sodium bicarbonate cotransporter, member 7     | Slc4a7  | 117955 | 1,00 | down |
| 6735096 | 7169367 | 1298055 | solute carrier family 4, sodium bicarbonate cotransporter, member 9     | Slc4a9  | 266612 | 2,09 | up   |
| 6639377 | 7169367 | 1298053 | solute carrier family 4, sodium bicarbonate cotransporter, member 9     | Slc4a9  | 266612 | 2,05 | up   |
| 5889778 | 7169367 | 1298050 | solute carrier family 4, sodium bicarbonate cotransporter, member 9     | Slc4a9  | 266612 | 1,54 | up   |
| 5895373 | 7169367 | 1298046 | solute carrier family 4, sodium bicarbonate cotransporter, member 9     | Slc4a9  | 266612 | 1,54 | down |
| 5693393 | 7169367 | 1298048 | solute carrier family 4, sodium bicarbonate cotransporter, member 9     | Slc4a9  | 266612 | 1,48 | up   |
| 5805980 | 7169367 | 1298064 | solute carrier family 4, sodium bicarbonate cotransporter, member 9     | Slc4a9  | 266612 | 1,40 | down |
| 6385696 | 7169367 | 1298049 | solute carrier family 4, sodium bicarbonate cotransporter, member 9     | Slc4a9  | 266612 | 1,37 | down |
| 6057966 | 7169367 | 1298047 | solute carrier family 4, sodium bicarbonate cotransporter, member 9     | Slc4a9  | 266612 | 1,31 | down |
| 5631268 | 7169367 | 1298051 | solute carrier family 4, sodium bicarbonate cotransporter, member 9     | Slc4a9  | 266612 | 1,21 | down |
| 5747761 | 7169367 | 1298065 | solute carrier family 4, sodium bicarbonate cotransporter, member 9     | Slc4a9  | 266612 | 1,20 | down |
| 6545871 | 7169367 | 1298045 | solute carrier family 4, sodium bicarbonate cotransporter, member 9     | Slc4a9  | 266612 | 1,20 | up   |
| 5803835 | 7169367 | 1298062 | solute carrier family 4, sodium bicarbonate cotransporter, member 9     | Slc4a9  | 266612 | 1,20 | down |
| 6478798 | 7169367 | 1298055 | solute carrier family 4, sodium bicarbonate cotransporter, member 9     | Slc4a9  | 266612 | 1,20 | down |
| 6145068 | 7169367 | 1298054 | solute carrier family 4, sodium bicarbonate cotransporter, member 9     | Slc4a9  | 266612 | 1,19 | up   |
| 6033211 | 7169367 | 1298061 | solute carrier family 4, sodium bicarbonate cotransporter, member 9     | Slc4a9  | 266612 | 1,16 | up   |
| 5792053 | 7169367 | 1298053 | solute carrier family 4, sodium bicarbonate cotransporter, member 9     | Slc4a9  | 266612 | 1,15 | up   |
| 6465248 | 7169367 | 1298060 | solute carrier family 4, sodium bicarbonate cotransporter, member 9     | Slc4a9  | 266612 | 1,12 | up   |
| 6485330 | 7169367 | 1298057 | solute carrier family 4, sodium bicarbonate cotransporter, member 9     | Slc4a9  | 266612 | 1,12 | down |
| 5774729 | 7169367 | 1298053 | solute carrier family 4, sodium bicarbonate cotransporter, member 9     | Slc4a9  | 266612 | 1,09 | down |
| 6330937 | 7169367 | 1298063 | solute carrier family 4, sodium bicarbonate cotransporter, member 9     | Slc4a9  | 266612 | 1,08 | down |
| 6256406 | 7169367 | 1298052 | solute carrier family 4, sodium bicarbonate cotransporter, member 9     | Slc4a9  | 266612 | 1,07 | up   |
| 6567200 | 7169367 | 1298054 | solute carrier family 4, sodium bicarbonate cotransporter, member 9     | Slc4a9  | 266612 | 1,07 | down |
| 5839204 | 7169367 | 1298065 | solute carrier family 4, sodium bicarbonate cotransporter, member 9     | Slc4a9  | 266612 | 1,06 | down |
| 6598853 | 7169367 | 1298046 | solute carrier family 4, sodium bicarbonate cotransporter, member 9     | Slc4a9  | 266612 | 1,04 | down |
| 6431614 | 7169367 | 1298059 | solute carrier family 4, sodium bicarbonate cotransporter, member 9     | Slc4a9  | 266612 | 1,02 | down |
| 5646029 | 7169367 | 1298058 | solute carrier family 4, sodium bicarbonate cotransporter, member 9     | Slc4a9  | 266612 | 1,01 | down |
| 5635711 | 7169367 | 1298056 | solute carrier family 4, sodium bicarbonate cotransporter, member 9     | Slc4a9  | 266612 | 1,01 | down |
| 5922278 | 7227986 | 1442419 | solute carrier family 4, sodium bicarbonate transporter-like, member 10 | Slc4a10 | 295645 | 2,05 | down |
| 5952187 | 7227986 | 1442400 | solute carrier family 4, sodium bicarbonate transporter-like, member 10 | Slc4a10 | 295645 | 2,04 | down |
| 6537466 | 7227986 | 1442404 | solute carrier family 4, sodium bicarbonate transporter-like, member 10 | Slc4a10 | 295645 | 1,85 | down |
| 5733278 | 7227986 | 1442402 | solute carrier family 4, sodium bicarbonate transporter-like, member 10 | Slc4a10 | 295645 | 1,71 | up   |
| 6461641 | 7227986 | 1442400 | solute carrier family 4, sodium bicarbonate transporter-like, member 10 | Slc4a10 | 295645 | 1,69 | down |
| 6506496 | 7227986 | 1442405 | solute carrier family 4, sodium bicarbonate transporter-like, member 10 | Slc4a10 | 295645 | 1,66 | down |

|         |         |         |                                                                         |         |        |      |      |
|---------|---------|---------|-------------------------------------------------------------------------|---------|--------|------|------|
| 5646515 | 7227986 | 1442416 | solute carrier family 4, sodium bicarbonate transporter-like, member 10 | Slc4a10 | 295645 | 1,60 | up   |
| 6731404 | 7227986 | 1442397 | solute carrier family 4, sodium bicarbonate transporter-like, member 10 | Slc4a10 | 295645 | 1,58 | up   |
| 6117807 | 7227986 | 1442410 | solute carrier family 4, sodium bicarbonate transporter-like, member 10 | Slc4a10 | 295645 | 1,46 | up   |
| 6707594 | 7227986 | 1442412 | solute carrier family 4, sodium bicarbonate transporter-like, member 10 | Slc4a10 | 295645 | 1,42 | down |
| 5904705 | 7227986 | 1442418 | solute carrier family 4, sodium bicarbonate transporter-like, member 10 | Slc4a10 | 295645 | 1,37 | down |
| 6054930 | 7227986 | 1442405 | solute carrier family 4, sodium bicarbonate transporter-like, member 10 | Slc4a10 | 295645 | 1,34 | down |
| 5972191 | 7227986 | 1442399 | solute carrier family 4, sodium bicarbonate transporter-like, member 10 | Slc4a10 | 295645 | 1,34 | down |
| 6378886 | 7227986 | 1442393 | solute carrier family 4, sodium bicarbonate transporter-like, member 10 | Slc4a10 | 295645 | 1,27 | down |
| 6552036 | 7227986 | 1442414 | solute carrier family 4, sodium bicarbonate transporter-like, member 10 | Slc4a10 | 295645 | 1,26 | up   |
| 6323340 | 7227986 | 1442407 | solute carrier family 4, sodium bicarbonate transporter-like, member 10 | Slc4a10 | 295645 | 1,25 | up   |
| 6715124 | 7227986 | 1442395 | solute carrier family 4, sodium bicarbonate transporter-like, member 10 | Slc4a10 | 295645 | 1,25 | up   |
| 6582175 | 7227986 | 1442411 | solute carrier family 4, sodium bicarbonate transporter-like, member 10 | Slc4a10 | 295645 | 1,21 | up   |
| 6034358 | 7227986 | 1442417 | solute carrier family 4, sodium bicarbonate transporter-like, member 10 | Slc4a10 | 295645 | 1,21 | down |
| 6349794 | 7227986 | 1442408 | solute carrier family 4, sodium bicarbonate transporter-like, member 10 | Slc4a10 | 295645 | 1,17 | up   |
| 6013443 | 7227986 | 1442413 | solute carrier family 4, sodium bicarbonate transporter-like, member 10 | Slc4a10 | 295645 | 1,17 | down |
| 5717908 | 7227986 | 1442415 | solute carrier family 4, sodium bicarbonate transporter-like, member 10 | Slc4a10 | 295645 | 1,16 | up   |
| 6600283 | 7227986 | 1442396 | solute carrier family 4, sodium bicarbonate transporter-like, member 10 | Slc4a10 | 295645 | 1,16 | down |
| 6570328 | 7227986 | 1442408 | solute carrier family 4, sodium bicarbonate transporter-like, member 10 | Slc4a10 | 295645 | 1,14 | down |
| 6683501 | 7227986 | 1442394 | solute carrier family 4, sodium bicarbonate transporter-like, member 10 | Slc4a10 | 295645 | 1,14 | down |
| 5994112 | 7227986 | 1442401 | solute carrier family 4, sodium bicarbonate transporter-like, member 10 | Slc4a10 | 295645 | 1,11 | up   |
| 6443592 | 7227986 | 1442406 | solute carrier family 4, sodium bicarbonate transporter-like, member 10 | Slc4a10 | 295645 | 1,10 | down |
| 5922132 | 7227986 | 1442403 | solute carrier family 4, sodium bicarbonate transporter-like, member 10 | Slc4a10 | 295645 | 1,08 | up   |
| 6710933 | 7227986 | 1442420 | solute carrier family 4, sodium bicarbonate transporter-like, member 10 | Slc4a10 | 295645 | 1,07 | down |
| 5843305 | 7227986 | 1442410 | solute carrier family 4, sodium bicarbonate transporter-like, member 10 | Slc4a10 | 295645 | 1,03 | up   |
| 6224647 | 7227986 | 1442398 | solute carrier family 4, sodium bicarbonate transporter-like, member 10 | Slc4a10 | 295645 | 1,02 | up   |
| 6012144 | 7227986 | 1442409 | solute carrier family 4, sodium bicarbonate transporter-like, member 10 | Slc4a10 | 295645 | 1,02 | down |
| 6210322 | 7244936 | 1485354 | solute carrier family 4, sodium bicarbonate transporter-like, member 11 | Slc4a11 | 311423 | 2,27 | up   |
| 6054950 | 7244936 | 1485359 | solute carrier family 4, sodium bicarbonate transporter-like, member 11 | Slc4a11 | 311423 | 2,03 | up   |
| 6392795 | 7244936 | 1485354 | solute carrier family 4, sodium bicarbonate transporter-like, member 11 | Slc4a11 | 311423 | 1,98 | up   |
| 6014885 | 7244936 | 1485355 | solute carrier family 4, sodium bicarbonate transporter-like, member 11 | Slc4a11 | 311423 | 1,98 | down |
| 5660510 | 7244936 | 1485363 | solute carrier family 4, sodium bicarbonate transporter-like, member 11 | Slc4a11 | 311423 | 1,86 | up   |
| 6045885 | 7244936 | 1485367 | solute carrier family 4, sodium bicarbonate transporter-like, member 11 | Slc4a11 | 311423 | 1,80 | down |
| 6653803 | 7244936 | 1485361 | solute carrier family 4, sodium bicarbonate transporter-like, member 11 | Slc4a11 | 311423 | 1,68 | up   |
| 6369372 | 7244936 | 1485357 | solute carrier family 4, sodium bicarbonate transporter-like, member 11 | Slc4a11 | 311423 | 1,63 | up   |
| 5713235 | 7244936 | 1485360 | solute carrier family 4, sodium bicarbonate transporter-like, member 11 | Slc4a11 | 311423 | 1,60 | up   |
| 6339850 | 7244936 | 1485365 | solute carrier family 4, sodium bicarbonate transporter-like, member 11 | Slc4a11 | 311423 | 1,59 | up   |
| 5797531 | 7244936 | 1485356 | solute carrier family 4, sodium bicarbonate transporter-like, member 11 | Slc4a11 | 311423 | 1,55 | down |
| 6224665 | 7244936 | 1485353 | solute carrier family 4, sodium bicarbonate transporter-like, member 11 | Slc4a11 | 311423 | 1,21 | up   |
| 5916471 | 7244936 | 1485353 | solute carrier family 4, sodium bicarbonate transporter-like, member 11 | Slc4a11 | 311423 | 1,18 | up   |
| 6308161 | 7244936 | 1485366 | solute carrier family 4, sodium bicarbonate transporter-like, member 11 | Slc4a11 | 311423 | 1,16 | up   |
| 5898458 | 7244936 | 1485357 | solute carrier family 4, sodium bicarbonate transporter-like, member 11 | Slc4a11 | 311423 | 1,04 | up   |
| 6125381 | 7244936 | 1485354 | solute carrier family 4, sodium bicarbonate transporter-like, member 11 | Slc4a11 | 311423 | 1,01 | down |
| 6084834 | 7244936 | 1485359 | solute carrier family 4, sodium bicarbonate transporter-like, member 11 | Slc4a11 | 311423 | 1,00 | down |
| 6240859 | 7069727 | 1055368 | solute carrier family 43, member 2                                      | Slc43a2 | 287532 | 1,66 | down |
| 6507349 | 7069727 | 1055348 | solute carrier family 43, member 2                                      | Slc43a2 | 287532 | 1,41 | up   |
| 6197045 | 7069727 | 1055367 | solute carrier family 43, member 2                                      | Slc43a2 | 287532 | 1,34 | down |
| 5955404 | 7069727 | 1055346 | solute carrier family 43, member 2                                      | Slc43a2 | 287532 | 1,26 | up   |
| 6443860 | 7069727 | 1055367 | solute carrier family 43, member 2                                      | Slc43a2 | 287532 | 1,22 | down |
| 6614004 | 7069727 | 1055358 | solute carrier family 43, member 2                                      | Slc43a2 | 287532 | 1,21 | down |
| 6495099 | 7069727 | 1055368 | solute carrier family 43, member 2                                      | Slc43a2 | 287532 | 1,18 | down |
| 6707816 | 7069727 | 1055351 | solute carrier family 43, member 2                                      | Slc43a2 | 287532 | 1,16 | up   |
| 6369434 | 7069727 | 1055352 | solute carrier family 43, member 2                                      | Slc43a2 | 287532 | 1,13 | up   |
| 5843934 | 7069727 | 1055359 | solute carrier family 43, member 2                                      | Slc43a2 | 287532 | 1,10 | up   |
| 5652365 | 7069727 | 1055354 | solute carrier family 43, member 2                                      | Slc43a2 | 287532 | 1,08 | up   |
| 5977598 | 7069727 | 1055356 | solute carrier family 43, member 2                                      | Slc43a2 | 287532 | 1,07 | down |
| 6641269 | 7069727 | 1055362 | solute carrier family 43, member 2                                      | Slc43a2 | 287532 | 1,06 | down |
| 5699720 | 7069727 | 1055357 | solute carrier family 43, member 2                                      | Slc43a2 | 287532 | 1,05 | up   |



|         |         |         |                                                                                 |         |        |      |      |
|---------|---------|---------|---------------------------------------------------------------------------------|---------|--------|------|------|
| 6541589 | 7069727 | 1055361 | solute carrier family 43, member 2                                              | Slc43a2 | 287532 | 1,05 | down |
| 6485500 | 7069727 | 1055366 | solute carrier family 43, member 2                                              | Slc43a2 | 287532 | 1,04 | down |
| 6184288 | 7069727 | 1055348 | solute carrier family 43, member 2                                              | Slc43a2 | 287532 | 1,01 | down |
| 6151587 | 7213560 | 1406819 | solute carrier family 44, member 3                                              | Slc44a3 | 295417 | 2,04 | down |
| 6427580 | 7213560 | 1406812 | solute carrier family 44, member 3                                              | Slc44a3 | 295417 | 1,51 | up   |
| 6396645 | 7213560 | 1406816 | solute carrier family 44, member 3                                              | Slc44a3 | 295417 | 1,40 | up   |
| 5731155 | 7213560 | 1406810 | solute carrier family 44, member 3                                              | Slc44a3 | 295417 | 1,31 | up   |
| 6637810 | 7213560 | 1406814 | solute carrier family 44, member 3                                              | Slc44a3 | 295417 | 1,28 | up   |
| 6218281 | 7213560 | 1406820 | solute carrier family 44, member 3                                              | Slc44a3 | 295417 | 1,20 | down |
| 5837328 | 7213560 | 1406811 | solute carrier family 44, member 3                                              | Slc44a3 | 295417 | 1,18 | up   |
| 6698888 | 7213560 | 1406823 | solute carrier family 44, member 3                                              | Slc44a3 | 295417 | 1,18 | down |
| 6720006 | 7213560 | 1406819 | solute carrier family 44, member 3                                              | Slc44a3 | 295417 | 1,16 | down |
| 5842248 | 7213560 | 1406817 | solute carrier family 44, member 3                                              | Slc44a3 | 295417 | 1,11 | down |
| 6484130 | 7213560 | 1406822 | solute carrier family 44, member 3                                              | Slc44a3 | 295417 | 1,06 | down |
| 5640819 | 7213560 | 1406821 | solute carrier family 44, member 3                                              | Slc44a3 | 295417 | 1,02 | up   |
| 6188314 | 7213560 | 1406813 | solute carrier family 44, member 3                                              | Slc44a3 | 295417 | 1,01 | up   |
| 6421289 | 7213560 | 1406815 | solute carrier family 44, member 3                                              | Slc44a3 | 295417 | 1,01 | up   |
| 6328222 | 7213560 | 1406818 | solute carrier family 44, member 3                                              | Slc44a3 | 295417 | 1,00 | up   |
| 6007895 | 7220663 | 1424591 | solute carrier family 44, member 4                                              | Slc44a4 | 294255 | 2,46 | down |
| 6415721 | 7220663 | 1424574 | solute carrier family 44, member 4                                              | Slc44a4 | 294255 | 1,95 | down |
| 5823653 | 7220663 | 1424580 | solute carrier family 44, member 4                                              | Slc44a4 | 294255 | 1,58 | up   |
| 5690521 | 7220663 | 1424570 | solute carrier family 44, member 4                                              | Slc44a4 | 294255 | 1,54 | down |
| 5905192 | 7220663 | 1424585 | solute carrier family 44, member 4                                              | Slc44a4 | 294255 | 1,52 | down |
| 6273167 | 7220663 | 1424587 | solute carrier family 44, member 4                                              | Slc44a4 | 294255 | 1,51 | down |
| 6556236 | 7220663 | 1424580 | solute carrier family 44, member 4                                              | Slc44a4 | 294255 | 1,48 | up   |
| 6746476 | 7220663 | 1424573 | solute carrier family 44, member 4                                              | Slc44a4 | 294255 | 1,47 | down |
| 5941704 | 7220663 | 1424576 | solute carrier family 44, member 4                                              | Slc44a4 | 294255 | 1,42 | down |
| 6222094 | 7220663 | 1424584 | solute carrier family 44, member 4                                              | Slc44a4 | 294255 | 1,40 | up   |
| 6436319 | 7220663 | 1424572 | solute carrier family 44, member 4                                              | Slc44a4 | 294255 | 1,37 | down |
| 5713032 | 7220663 | 1424581 | solute carrier family 44, member 4                                              | Slc44a4 | 294255 | 1,35 | up   |
| 6533635 | 7220663 | 1424582 | solute carrier family 44, member 4                                              | Slc44a4 | 294255 | 1,35 | up   |
| 6472999 | 7220663 | 1424579 | solute carrier family 44, member 4                                              | Slc44a4 | 294255 | 1,34 | up   |
| 6672991 | 7220663 | 1424588 | solute carrier family 44, member 4                                              | Slc44a4 | 294255 | 1,24 | up   |
| 6580035 | 7220663 | 1424589 | solute carrier family 44, member 4                                              | Slc44a4 | 294255 | 1,22 | down |
| 6397930 | 7220663 | 1424586 | solute carrier family 44, member 4                                              | Slc44a4 | 294255 | 1,21 | up   |
| 6293290 | 7220663 | 1424571 | solute carrier family 44, member 4                                              | Slc44a4 | 294255 | 1,16 | down |
| 5693497 | 7220663 | 1424590 | solute carrier family 44, member 4                                              | Slc44a4 | 294255 | 1,14 | down |
| 6378927 | 7220663 | 1424578 | solute carrier family 44, member 4                                              | Slc44a4 | 294255 | 1,14 | down |
| 6267026 | 7220663 | 1424577 | solute carrier family 44, member 4                                              | Slc44a4 | 294255 | 1,11 | up   |
| 6163452 | 7220663 | 1424583 | solute carrier family 44, member 4                                              | Slc44a4 | 294255 | 1,08 | down |
| 6469112 | 7220663 | 1424575 | solute carrier family 44, member 4                                              | Slc44a4 | 294255 | 1,05 | up   |
| 5789495 | 7220663 | 1424579 | solute carrier family 44, member 4                                              | Slc44a4 | 294255 | 1,05 | up   |
| 6233802 | 7220663 | 1424578 | solute carrier family 44, member 4                                              | Slc44a4 | 294255 | 1,03 | down |
| 5822270 | 7096380 | 1118029 | solute carrier family 46, member 3                                              | Slc46a3 | 288454 | 2,21 | up   |
| 6458916 | 7096380 | 1118031 | solute carrier family 46, member 3                                              | Slc46a3 | 288454 | 1,76 | up   |
| 5871700 | 7096380 | 1118028 | solute carrier family 46, member 3                                              | Slc46a3 | 288454 | 1,75 | up   |
| 5831425 | 7096380 | 1118027 | solute carrier family 46, member 3                                              | Slc46a3 | 288454 | 1,29 | down |
| 6256294 | 7096380 | 1118031 | solute carrier family 46, member 3                                              | Slc46a3 | 288454 | 1,18 | down |
| 6265469 | 7096380 | 1118025 | solute carrier family 46, member 3                                              | Slc46a3 | 288454 | 1,16 | down |
| 5906674 | 7096380 | 1118026 | solute carrier family 46, member 3                                              | Slc46a3 | 288454 | 1,15 | up   |
| 6524504 | 7096380 | 1118030 | solute carrier family 46, member 3                                              | Slc46a3 | 288454 | 1,15 | up   |
| 6416272 | 7258081 | 1517894 | solute carrier family 6 (neurotransmitter transporter, betaine/GABA), member 12 | Slc6a12 | 50676  | 2,34 | up   |
| 6663472 | 7258081 | 1517901 | solute carrier family 6 (neurotransmitter transporter, betaine/GABA), member 12 | Slc6a12 | 50676  | 1,92 | down |
| 6463963 | 7258081 | 1517898 | solute carrier family 6 (neurotransmitter transporter, betaine/GABA), member 12 | Slc6a12 | 50676  | 1,72 | up   |
| 6055868 | 7258081 | 1517909 | solute carrier family 6 (neurotransmitter transporter, betaine/GABA), member 12 | Slc6a12 | 50676  | 1,41 | down |
| 6125132 | 7258081 | 1517906 | solute carrier family 6 (neurotransmitter transporter, betaine/GABA), member 12 | Slc6a12 | 50676  | 1,41 | up   |
| 5802066 | 7258081 | 1517900 | solute carrier family 6 (neurotransmitter transporter, betaine/GABA), member 12 | Slc6a12 | 50676  | 1,39 | down |

|         |         |         |                                                                                 |         |        |      |      |
|---------|---------|---------|---------------------------------------------------------------------------------|---------|--------|------|------|
| 6356013 | 7258081 | 1517895 | solute carrier family 6 (neurotransmitter transporter, betaine/GABA), member 12 | Slc6a12 | 50676  | 1,39 | down |
| 6580733 | 7258081 | 1517903 | solute carrier family 6 (neurotransmitter transporter, betaine/GABA), member 12 | Slc6a12 | 50676  | 1,28 | up   |
| 6638563 | 7258081 | 1517896 | solute carrier family 6 (neurotransmitter transporter, betaine/GABA), member 12 | Slc6a12 | 50676  | 1,23 | up   |
| 6672305 | 7258081 | 1517902 | solute carrier family 6 (neurotransmitter transporter, betaine/GABA), member 12 | Slc6a12 | 50676  | 1,21 | up   |
| 6349389 | 7258081 | 1517897 | solute carrier family 6 (neurotransmitter transporter, betaine/GABA), member 12 | Slc6a12 | 50676  | 1,16 | down |
| 5740431 | 7258081 | 1517894 | solute carrier family 6 (neurotransmitter transporter, betaine/GABA), member 12 | Slc6a12 | 50676  | 1,06 | down |
| 6358674 | 7258081 | 1517899 | solute carrier family 6 (neurotransmitter transporter, betaine/GABA), member 12 | Slc6a12 | 50676  | 1,06 | down |
| 6321875 | 7258081 | 1517904 | solute carrier family 6 (neurotransmitter transporter, betaine/GABA), member 12 | Slc6a12 | 50676  | 1,03 | down |
| 6312846 | 7258081 | 1517907 | solute carrier family 6 (neurotransmitter transporter, betaine/GABA), member 12 | Slc6a12 | 50676  | 1,02 | up   |
| 5621763 | 7258081 | 1517905 | solute carrier family 6 (neurotransmitter transporter, betaine/GABA), member 12 | Slc6a12 | 50676  | 1,01 | up   |
| 5733594 | 7258081 | 1517908 | solute carrier family 6 (neurotransmitter transporter, betaine/GABA), member 12 | Slc6a12 | 50676  | 1,00 | down |
| 6290778 | 7257482 | 1516414 | solute carrier family 6 (neurotransmitter transporter, GABA), member 11         | Slc6a11 | 79213  | 2,96 | up   |
| 6309542 | 7257482 | 1516424 | solute carrier family 6 (neurotransmitter transporter, GABA), member 11         | Slc6a11 | 79213  | 1,89 | down |
| 5657612 | 7257482 | 1516421 | solute carrier family 6 (neurotransmitter transporter, GABA), member 11         | Slc6a11 | 79213  | 1,63 | up   |
| 5672155 | 7257482 | 1516426 | solute carrier family 6 (neurotransmitter transporter, GABA), member 11         | Slc6a11 | 79213  | 1,59 | up   |
| 5640145 | 7257482 | 1516427 | solute carrier family 6 (neurotransmitter transporter, GABA), member 11         | Slc6a11 | 79213  | 1,33 | down |
| 5770213 | 7257482 | 1516423 | solute carrier family 6 (neurotransmitter transporter, GABA), member 11         | Slc6a11 | 79213  | 1,27 | down |
| 6082468 | 7257482 | 1516414 | solute carrier family 6 (neurotransmitter transporter, GABA), member 11         | Slc6a11 | 79213  | 1,26 | up   |
| 5669863 | 7257482 | 1516415 | solute carrier family 6 (neurotransmitter transporter, GABA), member 11         | Slc6a11 | 79213  | 1,18 | up   |
| 6375172 | 7257482 | 1516427 | solute carrier family 6 (neurotransmitter transporter, GABA), member 11         | Slc6a11 | 79213  | 1,14 | down |
| 6318286 | 7257482 | 1516425 | solute carrier family 6 (neurotransmitter transporter, GABA), member 11         | Slc6a11 | 79213  | 1,09 | down |
| 6156532 | 7257482 | 1516418 | solute carrier family 6 (neurotransmitter transporter, GABA), member 11         | Slc6a11 | 79213  | 1,08 | up   |
| 6151706 | 7257482 | 1516416 | solute carrier family 6 (neurotransmitter transporter, GABA), member 11         | Slc6a11 | 79213  | 1,07 | down |
| 6151994 | 7257482 | 1516417 | solute carrier family 6 (neurotransmitter transporter, GABA), member 11         | Slc6a11 | 79213  | 1,06 | up   |
| 6094473 | 7257482 | 1516422 | solute carrier family 6 (neurotransmitter transporter, GABA), member 11         | Slc6a11 | 79213  | 1,04 | down |
| 5802683 | 7257482 | 1516419 | solute carrier family 6 (neurotransmitter transporter, GABA), member 11         | Slc6a11 | 79213  | 1,01 | down |
| 5899043 | 7257482 | 1516420 | solute carrier family 6 (neurotransmitter transporter, GABA), member 11         | Slc6a11 | 79213  | 1,01 | up   |
| 6618130 | 7031844 | 964958  | solute carrier family 6 (neurotransmitter transporter, glycine), member 5       | Slc6a5  | 171148 | 2,06 | down |
| 5705120 | 7031844 | 964960  | solute carrier family 6 (neurotransmitter transporter, glycine), member 5       | Slc6a5  | 171148 | 1,89 | down |
| 6230615 | 7031844 | 964955  | solute carrier family 6 (neurotransmitter transporter, glycine), member 5       | Slc6a5  | 171148 | 1,71 | up   |
| 6643965 | 7031844 | 964951  | solute carrier family 6 (neurotransmitter transporter, glycine), member 5       | Slc6a5  | 171148 | 1,67 | down |
| 6709384 | 7031844 | 964945  | solute carrier family 6 (neurotransmitter transporter, glycine), member 5       | Slc6a5  | 171148 | 1,64 | down |
| 5708481 | 7031844 | 964949  | solute carrier family 6 (neurotransmitter transporter, glycine), member 5       | Slc6a5  | 171148 | 1,37 | up   |
| 6643416 | 7031844 | 964957  | solute carrier family 6 (neurotransmitter transporter, glycine), member 5       | Slc6a5  | 171148 | 1,27 | up   |
| 6715660 | 7031844 | 964959  | solute carrier family 6 (neurotransmitter transporter, glycine), member 5       | Slc6a5  | 171148 | 1,24 | up   |
| 6403694 | 7031844 | 964952  | solute carrier family 6 (neurotransmitter transporter, glycine), member 5       | Slc6a5  | 171148 | 1,17 | up   |
| 5878601 | 7031844 | 964950  | solute carrier family 6 (neurotransmitter transporter, glycine), member 5       | Slc6a5  | 171148 | 1,17 | up   |
| 6722319 | 7031844 | 964953  | solute carrier family 6 (neurotransmitter transporter, glycine), member 5       | Slc6a5  | 171148 | 1,15 | up   |
| 6549506 | 7031844 | 964946  | solute carrier family 6 (neurotransmitter transporter, glycine), member 5       | Slc6a5  | 171148 | 1,14 | down |
| 5968610 | 7031844 | 964962  | solute carrier family 6 (neurotransmitter transporter, glycine), member 5       | Slc6a5  | 171148 | 1,13 | down |
| 6385466 | 7031844 | 964962  | solute carrier family 6 (neurotransmitter transporter, glycine), member 5       | Slc6a5  | 171148 | 1,13 | up   |
| 6204330 | 7031844 | 964961  | solute carrier family 6 (neurotransmitter transporter, glycine), member 5       | Slc6a5  | 171148 | 1,10 | up   |
| 6240606 | 7031844 | 964954  | solute carrier family 6 (neurotransmitter transporter, glycine), member 5       | Slc6a5  | 171148 | 1,08 | up   |
| 6463596 | 7031844 | 964956  | solute carrier family 6 (neurotransmitter transporter, glycine), member 5       | Slc6a5  | 171148 | 1,07 | up   |
| 5663018 | 7031844 | 964947  | solute carrier family 6 (neurotransmitter transporter, glycine), member 5       | Slc6a5  | 171148 | 1,06 | up   |
| 5785690 | 7031844 | 964962  | solute carrier family 6 (neurotransmitter transporter, glycine), member 5       | Slc6a5  | 171148 | 1,04 | up   |
| 6699178 | 7031844 | 964948  | solute carrier family 6 (neurotransmitter transporter, glycine), member 5       | Slc6a5  | 171148 | 1,00 | down |
| 6160379 | 7278898 | 1570295 | solute carrier family 6 (neurotransmitter transporter, glycine), member 9       | Slc6a9  | 116509 | 2,88 | down |
| 6164813 | 7278898 | 1570295 | solute carrier family 6 (neurotransmitter transporter, glycine), member 9       | Slc6a9  | 116509 | 2,15 | down |
| 6480123 | 7278898 | 1570295 | solute carrier family 6 (neurotransmitter transporter, glycine), member 9       | Slc6a9  | 116509 | 1,71 | down |
| 5686380 | 7278898 | 1570297 | solute carrier family 6 (neurotransmitter transporter, glycine), member 9       | Slc6a9  | 116509 | 1,65 | down |
| 5836225 | 7278898 | 1570305 | solute carrier family 6 (neurotransmitter transporter, glycine), member 9       | Slc6a9  | 116509 | 1,39 | up   |
| 6008589 | 7278898 | 1570306 | solute carrier family 6 (neurotransmitter transporter, glycine), member 9       | Slc6a9  | 116509 | 1,27 | up   |
| 6441315 | 7278898 | 1570300 | solute carrier family 6 (neurotransmitter transporter, glycine), member 9       | Slc6a9  | 116509 | 1,24 | up   |
| 5741278 | 7278898 | 1570300 | solute carrier family 6 (neurotransmitter transporter, glycine), member 9       | Slc6a9  | 116509 | 1,24 | down |
| 6602276 | 7278898 | 1570298 | solute carrier family 6 (neurotransmitter transporter, glycine), member 9       | Slc6a9  | 116509 | 1,21 | down |
| 6190122 | 7278898 | 1570308 | solute carrier family 6 (neurotransmitter transporter, glycine), member 9       | Slc6a9  | 116509 | 1,14 | down |

|         |         |         |                                                                                                                                             |         |        |      |      |
|---------|---------|---------|---------------------------------------------------------------------------------------------------------------------------------------------|---------|--------|------|------|
| 6256574 | 7278898 | 1570301 | solute carrier family 6 (neurotransmitter transporter, glycine), member 9                                                                   | Slc6a9  | 116509 | 1,08 | up   |
| 5858399 | 7278898 | 1570303 | solute carrier family 6 (neurotransmitter transporter, glycine), member 9                                                                   | Slc6a9  | 116509 | 1,06 | up   |
| 6080169 | 7278898 | 1570299 | solute carrier family 6 (neurotransmitter transporter, glycine), member 9                                                                   | Slc6a9  | 116509 | 1,02 | up   |
| 6556364 | 7278898 | 1570304 | solute carrier family 6 (neurotransmitter transporter, glycine), member 9                                                                   | Slc6a9  | 116509 | 1,02 | down |
| 5990376 | 7278898 | 1570302 | solute carrier family 6 (neurotransmitter transporter, glycine), member 9                                                                   | Slc6a9  | 116509 | 1,01 | down |
| 6131288 | 7278898 | 1570307 | solute carrier family 6 (neurotransmitter transporter, glycine), member 9                                                                   | Slc6a9  | 116509 | 1,00 | up   |
| 6652552 | 7080358 | 1080192 | solute carrier family 6 (neurotransmitter transporter, serotonin), member 4                                                                 | Slc6a4  | 25553  | 2,96 | up   |
| 5988306 | 7080358 | 1080191 | solute carrier family 6 (neurotransmitter transporter, serotonin), member 4                                                                 | Slc6a4  | 25553  | 1,55 | down |
| 6371671 | 7080358 | 1080187 | solute carrier family 6 (neurotransmitter transporter, serotonin), member 4                                                                 | Slc6a4  | 25553  | 1,32 | down |
| 6049526 | 7080358 | 1080188 | solute carrier family 6 (neurotransmitter transporter, serotonin), member 4                                                                 | Slc6a4  | 25553  | 1,31 | down |
| 6207732 | 7080358 | 1080195 | solute carrier family 6 (neurotransmitter transporter, serotonin), member 4                                                                 | Slc6a4  | 25553  | 1,29 | up   |
| 6155817 | 7080358 | 1080193 | solute carrier family 6 (neurotransmitter transporter, serotonin), member 4                                                                 | Slc6a4  | 25553  | 1,27 | down |
| 6076955 | 7080358 | 1080199 | solute carrier family 6 (neurotransmitter transporter, serotonin), member 4                                                                 | Slc6a4  | 25553  | 1,27 | down |
| 6469161 | 7080358 | 1080186 | solute carrier family 6 (neurotransmitter transporter, serotonin), member 4                                                                 | Slc6a4  | 25553  | 1,23 | up   |
| 5733123 | 7080358 | 1080198 | solute carrier family 6 (neurotransmitter transporter, serotonin), member 4                                                                 | Slc6a4  | 25553  | 1,20 | up   |
| 6459584 | 7080358 | 1080194 | solute carrier family 6 (neurotransmitter transporter, serotonin), member 4                                                                 | Slc6a4  | 25553  | 1,17 | down |
| 5870387 | 7080358 | 1080185 | solute carrier family 6 (neurotransmitter transporter, serotonin), member 4                                                                 | Slc6a4  | 25553  | 1,15 | down |
| 6552832 | 7080358 | 1080189 | solute carrier family 6 (neurotransmitter transporter, serotonin), member 4                                                                 | Slc6a4  | 25553  | 1,15 | up   |
| 6248646 | 7080358 | 1080193 | solute carrier family 6 (neurotransmitter transporter, serotonin), member 4                                                                 | Slc6a4  | 25553  | 1,14 | down |
| 6255593 | 7080358 | 1080197 | solute carrier family 6 (neurotransmitter transporter, serotonin), member 4                                                                 | Slc6a4  | 25553  | 1,13 | down |
| 5901558 | 7080358 | 1080197 | solute carrier family 6 (neurotransmitter transporter, serotonin), member 4                                                                 | Slc6a4  | 25553  | 1,10 | up   |
| 5798129 | 7080358 | 1080190 | solute carrier family 6 (neurotransmitter transporter, serotonin), member 4                                                                 | Slc6a4  | 25553  | 1,09 | down |
| 6644834 | 7080358 | 1080184 | solute carrier family 6 (neurotransmitter transporter, serotonin), member 4                                                                 | Slc6a4  | 25553  | 1,06 | up   |
| 6172677 | 7080358 | 1080184 | solute carrier family 6 (neurotransmitter transporter, serotonin), member 4                                                                 | Slc6a4  | 25553  | 1,05 | down |
| 6645766 | 7080358 | 1080196 | solute carrier family 6 (neurotransmitter transporter, serotonin), member 4                                                                 | Slc6a4  | 25553  | 1,02 | up   |
| 5987397 | 7026418 | 952189  | solute carrier family 6, member 18                                                                                                          | Slc6a18 | 29323  | 2,59 | down |
| 6328320 | 7026418 | 952190  | solute carrier family 6, member 18                                                                                                          | Slc6a18 | 29323  | 1,75 | down |
| 5948607 | 7026418 | 952182  | solute carrier family 6, member 18                                                                                                          | Slc6a18 | 29323  | 1,52 | down |
| 6181425 | 7026418 | 952180  | solute carrier family 6, member 18                                                                                                          | Slc6a18 | 29323  | 1,51 | up   |
| 6294906 | 7026418 | 952179  | solute carrier family 6, member 18                                                                                                          | Slc6a18 | 29323  | 1,38 | down |
| 5978913 | 7026418 | 952188  | solute carrier family 6, member 18                                                                                                          | Slc6a18 | 29323  | 1,28 | down |
| 6581404 | 7026418 | 952190  | solute carrier family 6, member 18                                                                                                          | Slc6a18 | 29323  | 1,19 | down |
| 6712618 | 7026418 | 952184  | solute carrier family 6, member 18                                                                                                          | Slc6a18 | 29323  | 1,12 | down |
| 6231690 | 7026418 | 952181  | solute carrier family 6, member 18                                                                                                          | Slc6a18 | 29323  | 1,07 | up   |
| 5950939 | 7026418 | 952186  | solute carrier family 6, member 18                                                                                                          | Slc6a18 | 29323  | 1,06 | up   |
| 6097957 | 7026418 | 952187  | solute carrier family 6, member 18                                                                                                          | Slc6a18 | 29323  | 1,06 | down |
| 5835736 | 7026418 | 952185  | solute carrier family 6, member 18                                                                                                          | Slc6a18 | 29323  | 1,06 | up   |
| 6539817 | 7026418 | 952188  | solute carrier family 6, member 18                                                                                                          | Slc6a18 | 29323  | 1,05 | up   |
| 5930262 | 7026418 | 952183  | solute carrier family 6, member 18                                                                                                          | Slc6a18 | 29323  | 1,03 | down |
| 5875524 | 7026418 | 952181  | solute carrier family 6, member 18                                                                                                          | Slc6a18 | 29323  | 1,02 | up   |
| 6465166 | 7026418 | 952187  | solute carrier family 6, member 18                                                                                                          | Slc6a18 | 29323  | 1,02 | down |
| 6724759 | 7026418 | 952189  | solute carrier family 6, member 18                                                                                                          | Slc6a18 | 29323  | 1,02 | up   |
| 6570010 | 7208330 | 1395080 | solute carrier family 7 (cationic amino acid transporter, y+ system), member 11                                                             | Slc7a11 | 310392 | 2,13 | down |
| 6316148 | 7208330 | 1395084 | solute carrier family 7 (cationic amino acid transporter, y+ system), member 11                                                             | Slc7a11 | 310392 | 1,64 | up   |
| 6277772 | 7208330 | 1395092 | solute carrier family 7 (cationic amino acid transporter, y+ system), member 11                                                             | Slc7a11 | 310392 | 1,44 | down |
| 6211296 | 7208330 | 1395096 | solute carrier family 7 (cationic amino acid transporter, y+ system), member 11                                                             | Slc7a11 | 310392 | 1,27 | up   |
| 6440121 | 7208330 | 1395085 | solute carrier family 7 (cationic amino acid transporter, y+ system), member 11                                                             | Slc7a11 | 310392 | 1,20 | up   |
| 5719773 | 7208330 | 1395079 | solute carrier family 7 (cationic amino acid transporter, y+ system), member 11                                                             | Slc7a11 | 310392 | 1,19 | down |
| 6097861 | 7208330 | 1395080 | solute carrier family 7 (cationic amino acid transporter, y+ system), member 11                                                             | Slc7a11 | 310392 | 1,12 | down |
| 6425724 | 7208330 | 1395087 | solute carrier family 7 (cationic amino acid transporter, y+ system), member 11                                                             | Slc7a11 | 310392 | 1,11 | up   |
| 5697029 | 7208330 | 1395093 | solute carrier family 7 (cationic amino acid transporter, y+ system), member 11                                                             | Slc7a11 | 310392 | 1,08 | up   |
| 6587247 | 7208330 | 1395083 | solute carrier family 7 (cationic amino acid transporter, y+ system), member 11                                                             | Slc7a11 | 310392 | 1,08 | down |
| 6237437 | 7208330 | 1395091 | solute carrier family 7 (cationic amino acid transporter, y+ system), member 11                                                             | Slc7a11 | 310392 | 1,04 | up   |
| 6122682 | 7208330 | 1395097 | solute carrier family 7 (cationic amino acid transporter, y+ system), member 11                                                             | Slc7a11 | 310392 | 1,04 | up   |
| 6264640 | 7208330 | 1395098 | solute carrier family 7 (cationic amino acid transporter, y+ system), member 11                                                             | Slc7a11 | 310392 | 1,02 | down |
| 6367515 | 7208330 | 1395086 | solute carrier family 7 (cationic amino acid transporter, y+ system), member 11                                                             | Slc7a11 | 310392 | 1,01 | down |
| 5839445 | 7206144 | 1390013 | solute carrier family 7 (cationic amino acid transporter, y+ system), member 12 /// similar to solute cxc7a12 /// LOC3619 294881 /// 361914 |         |        | 2,79 | up   |

|         |         |         |                                                                                                                                             |        |        |           |
|---------|---------|---------|---------------------------------------------------------------------------------------------------------------------------------------------|--------|--------|-----------|
| 6581809 | 7206144 | 1390016 | solute carrier family 7 (cationic amino acid transporter, y+ system), member 12 /// similar to solute cxc7a12 /// LOC3619 294881 /// 361914 |        | 1,10   | up        |
| 6598440 | 7089952 | 1103318 | solute carrier family 7 (cationic amino acid transporter, y+ system), member 4                                                              | Slc7a4 | 303787 | 1,96 up   |
| 6625764 | 7089952 | 1103318 | solute carrier family 7 (cationic amino acid transporter, y+ system), member 4                                                              | Slc7a4 | 303787 | 1,52 down |
| 6413204 | 7089952 | 1103318 | solute carrier family 7 (cationic amino acid transporter, y+ system), member 4                                                              | Slc7a4 | 303787 | 1,45 down |
| 6458885 | 7089952 | 1103319 | solute carrier family 7 (cationic amino acid transporter, y+ system), member 4                                                              | Slc7a4 | 303787 | 1,42 down |
| 5908807 | 7089952 | 1103317 | solute carrier family 7 (cationic amino acid transporter, y+ system), member 4                                                              | Slc7a4 | 303787 | 1,37 down |
| 5696348 | 7089952 | 1103319 | solute carrier family 7 (cationic amino acid transporter, y+ system), member 4                                                              | Slc7a4 | 303787 | 1,24 up   |
| 6592659 | 7089952 | 1103318 | solute carrier family 7 (cationic amino acid transporter, y+ system), member 4                                                              | Slc7a4 | 303787 | 1,13 down |
| 6420611 | 7180687 | 1326630 | solute carrier family 7 (cationic amino acid transporter, y+ system), member 6                                                              | Slc7a6 | 307811 | 1,92 down |
| 6737289 | 7180687 | 1326632 | solute carrier family 7 (cationic amino acid transporter, y+ system), member 6                                                              | Slc7a6 | 307811 | 1,44 down |
| 5988609 | 7180687 | 1326630 | solute carrier family 7 (cationic amino acid transporter, y+ system), member 6                                                              | Slc7a6 | 307811 | 1,42 up   |
| 6246546 | 7180687 | 1326634 | solute carrier family 7 (cationic amino acid transporter, y+ system), member 6                                                              | Slc7a6 | 307811 | 1,37 up   |
| 5933264 | 7180687 | 1326629 | solute carrier family 7 (cationic amino acid transporter, y+ system), member 6                                                              | Slc7a6 | 307811 | 1,31 down |
| 5948500 | 7180687 | 1326631 | solute carrier family 7 (cationic amino acid transporter, y+ system), member 6                                                              | Slc7a6 | 307811 | 1,28 up   |
| 6713236 | 7180687 | 1326627 | solute carrier family 7 (cationic amino acid transporter, y+ system), member 6                                                              | Slc7a6 | 307811 | 1,13 down |
| 6081632 | 7180687 | 1326630 | solute carrier family 7 (cationic amino acid transporter, y+ system), member 6                                                              | Slc7a6 | 307811 | 1,12 up   |
| 6376957 | 7180687 | 1326634 | solute carrier family 7 (cationic amino acid transporter, y+ system), member 6                                                              | Slc7a6 | 307811 | 1,12 up   |
| 5766891 | 7180687 | 1326630 | solute carrier family 7 (cationic amino acid transporter, y+ system), member 6                                                              | Slc7a6 | 307811 | 1,09 up   |
| 6379762 | 7180687 | 1326627 | solute carrier family 7 (cationic amino acid transporter, y+ system), member 6                                                              | Slc7a6 | 307811 | 1,05 down |
| 6732697 | 7180687 | 1326633 | solute carrier family 7 (cationic amino acid transporter, y+ system), member 6                                                              | Slc7a6 | 307811 | 1,03 down |
| 6569249 | 7180687 | 1326627 | solute carrier family 7 (cationic amino acid transporter, y+ system), member 6                                                              | Slc7a6 | 307811 | 1,03 down |
| 6559810 | 7302914 | 1629276 | solute carrier family 8 (sodium/calcium exchanger), member 1                                                                                | Slc8a1 | 29715  | 2,63 up   |
| 6709012 | 7302914 | 1629278 | solute carrier family 8 (sodium/calcium exchanger), member 1                                                                                | Slc8a1 | 29715  | 2,30 up   |
| 5910982 | 7302914 | 1629271 | solute carrier family 8 (sodium/calcium exchanger), member 1                                                                                | Slc8a1 | 29715  | 1,28 down |
| 6287859 | 7302914 | 1629277 | solute carrier family 8 (sodium/calcium exchanger), member 1                                                                                | Slc8a1 | 29715  | 1,27 up   |
| 6148342 | 7302914 | 1629273 | solute carrier family 8 (sodium/calcium exchanger), member 1                                                                                | Slc8a1 | 29715  | 1,19 up   |
| 5642103 | 7302914 | 1629272 | solute carrier family 8 (sodium/calcium exchanger), member 1                                                                                | Slc8a1 | 29715  | 1,17 up   |
| 6614174 | 7302914 | 1629270 | solute carrier family 8 (sodium/calcium exchanger), member 1                                                                                | Slc8a1 | 29715  | 1,12 down |
| 6135198 | 7302914 | 1629274 | solute carrier family 8 (sodium/calcium exchanger), member 1                                                                                | Slc8a1 | 29715  | 1,08 up   |
| 5804941 | 7302914 | 1629277 | solute carrier family 8 (sodium/calcium exchanger), member 1                                                                                | Slc8a1 | 29715  | 1,06 down |
| 6110819 | 7302914 | 1629275 | solute carrier family 8 (sodium/calcium exchanger), member 1                                                                                | Slc8a1 | 29715  | 1,05 down |
| 6012492 | 7302914 | 1629270 | solute carrier family 8 (sodium/calcium exchanger), member 1                                                                                | Slc8a1 | 29715  | 1,04 down |
| 6469379 | 7302914 | 1629277 | solute carrier family 8 (sodium/calcium exchanger), member 1                                                                                | Slc8a1 | 29715  | 1,00 down |
| 6567520 | 7045415 | 999530  | solute carrier family 9 (sodium/hydrogen exchanger), member 3                                                                               | Slc9a3 | 24784  | 2,19 up   |
| 6181150 | 7045415 | 999514  | solute carrier family 9 (sodium/hydrogen exchanger), member 3                                                                               | Slc9a3 | 24784  | 1,55 down |
| 6528204 | 7045415 | 999527  | solute carrier family 9 (sodium/hydrogen exchanger), member 3                                                                               | Slc9a3 | 24784  | 1,54 down |
| 6733573 | 7045415 | 999530  | solute carrier family 9 (sodium/hydrogen exchanger), member 3                                                                               | Slc9a3 | 24784  | 1,52 up   |
| 6172960 | 7045415 | 999525  | solute carrier family 9 (sodium/hydrogen exchanger), member 3                                                                               | Slc9a3 | 24784  | 1,34 down |
| 6096024 | 7045415 | 999514  | solute carrier family 9 (sodium/hydrogen exchanger), member 3                                                                               | Slc9a3 | 24784  | 1,25 down |
| 6040304 | 7045415 | 999524  | solute carrier family 9 (sodium/hydrogen exchanger), member 3                                                                               | Slc9a3 | 24784  | 1,24 down |
| 5872057 | 7045415 | 999520  | solute carrier family 9 (sodium/hydrogen exchanger), member 3                                                                               | Slc9a3 | 24784  | 1,24 down |
| 5752553 | 7045415 | 999514  | solute carrier family 9 (sodium/hydrogen exchanger), member 3                                                                               | Slc9a3 | 24784  | 1,18 down |
| 5635122 | 7045415 | 999518  | solute carrier family 9 (sodium/hydrogen exchanger), member 3                                                                               | Slc9a3 | 24784  | 1,16 down |
| 6702590 | 7045415 | 999516  | solute carrier family 9 (sodium/hydrogen exchanger), member 3                                                                               | Slc9a3 | 24784  | 1,14 down |
| 6126917 | 7045415 | 999529  | solute carrier family 9 (sodium/hydrogen exchanger), member 3                                                                               | Slc9a3 | 24784  | 1,13 up   |
| 5981710 | 7045415 | 999517  | solute carrier family 9 (sodium/hydrogen exchanger), member 3                                                                               | Slc9a3 | 24784  | 1,13 up   |
| 6008590 | 7045415 | 999514  | solute carrier family 9 (sodium/hydrogen exchanger), member 3                                                                               | Slc9a3 | 24784  | 1,11 down |
| 6456408 | 7045415 | 999514  | solute carrier family 9 (sodium/hydrogen exchanger), member 3                                                                               | Slc9a3 | 24784  | 1,11 down |
| 6740840 | 7045415 | 999528  | solute carrier family 9 (sodium/hydrogen exchanger), member 3                                                                               | Slc9a3 | 24784  | 1,10 up   |
| 5967271 | 7045415 | 999514  | solute carrier family 9 (sodium/hydrogen exchanger), member 3                                                                               | Slc9a3 | 24784  | 1,09 up   |
| 6196150 | 7045415 | 999514  | solute carrier family 9 (sodium/hydrogen exchanger), member 3                                                                               | Slc9a3 | 24784  | 1,07 up   |
| 5792483 | 7045415 | 999514  | solute carrier family 9 (sodium/hydrogen exchanger), member 3                                                                               | Slc9a3 | 24784  | 1,06 down |
| 6546233 | 7045415 | 999519  | solute carrier family 9 (sodium/hydrogen exchanger), member 3                                                                               | Slc9a3 | 24784  | 1,06 up   |
| 6202539 | 7045415 | 999522  | solute carrier family 9 (sodium/hydrogen exchanger), member 3                                                                               | Slc9a3 | 24784  | 1,05 up   |
| 5666121 | 7045415 | 999523  | solute carrier family 9 (sodium/hydrogen exchanger), member 3                                                                               | Slc9a3 | 24784  | 1,05 down |
| 5767286 | 7045415 | 999526  | solute carrier family 9 (sodium/hydrogen exchanger), member 3                                                                               | Slc9a3 | 24784  | 1,05 up   |
| 5736811 | 7045415 | 999521  | solute carrier family 9 (sodium/hydrogen exchanger), member 3                                                                               | Slc9a3 | 24784  | 1,04 up   |

|         |         |         |                                                                                                         |                     |                 |      |      |
|---------|---------|---------|---------------------------------------------------------------------------------------------------------|---------------------|-----------------|------|------|
| 5881562 | 7045415 | 999514  | solute carrier family 9 (sodium/hydrogen exchanger), member 3                                           | Slc9a3              | 24784           | 1,03 | down |
| 5802869 | 7045415 | 999514  | solute carrier family 9 (sodium/hydrogen exchanger), member 3                                           | Slc9a3              | 24784           | 1,03 | up   |
| 6685485 | 7045415 | 999525  | solute carrier family 9 (sodium/hydrogen exchanger), member 3                                           | Slc9a3              | 24784           | 1,03 | up   |
| 6030449 | 7045415 | 999514  | solute carrier family 9 (sodium/hydrogen exchanger), member 3                                           | Slc9a3              | 24784           | 1,02 | up   |
| 6660599 | 7045415 | 999515  | solute carrier family 9 (sodium/hydrogen exchanger), member 3                                           | Slc9a3              | 24784           | 1,01 | down |
| 6495735 | 7045415 | 999514  | solute carrier family 9 (sodium/hydrogen exchanger), member 3                                           | Slc9a3              | 24784           | 1,00 | up   |
| 6416068 | 7073613 | 1064870 | solute carrier family 9 (sodium/hydrogen exchanger), member 3 regulator 1                               | Slc9a3r1            | 59114           | 2,20 | down |
| 6044685 | 7073613 | 1064868 | solute carrier family 9 (sodium/hydrogen exchanger), member 3 regulator 1                               | Slc9a3r1            | 59114           | 1,41 | down |
| 5799566 | 7073613 | 1064872 | solute carrier family 9 (sodium/hydrogen exchanger), member 3 regulator 1                               | Slc9a3r1            | 59114           | 1,40 | up   |
| 6660078 | 7073613 | 1064867 | solute carrier family 9 (sodium/hydrogen exchanger), member 3 regulator 1                               | Slc9a3r1            | 59114           | 1,25 | down |
| 5919009 | 7073613 | 1064869 | solute carrier family 9 (sodium/hydrogen exchanger), member 3 regulator 1                               | Slc9a3r1            | 59114           | 1,21 | up   |
| 6431938 | 7073613 | 1064871 | solute carrier family 9 (sodium/hydrogen exchanger), member 3 regulator 1                               | Slc9a3r1            | 59114           | 1,04 | up   |
| 6443618 | 7270891 | 1549441 | solute carrier organic anion transporter family, member 1a1                                             | Slco1a1             | 50572           | 1,60 | down |
| 6673623 | 7270891 | 1549439 | solute carrier organic anion transporter family, member 1a1                                             | Slco1a1             | 50572           | 1,49 | down |
| 6660493 | 7270891 | 1549442 | solute carrier organic anion transporter family, member 1a1                                             | Slco1a1             | 50572           | 1,35 | up   |
| 6370194 | 7270891 | 1549444 | solute carrier organic anion transporter family, member 1a1                                             | Slco1a1             | 50572           | 1,28 | up   |
| 5662534 | 7270891 | 1549443 | solute carrier organic anion transporter family, member 1a1                                             | Slco1a1             | 50572           | 1,10 | up   |
| 6451008 | 7270891 | 1549438 | solute carrier organic anion transporter family, member 1a1                                             | Slco1a1             | 50572           | 1,08 | down |
| 6115572 | 7270891 | 1549440 | solute carrier organic anion transporter family, member 1a1                                             | Slco1a1             | 50572           | 1,08 | up   |
| 6650644 | 7270891 | 1549436 | solute carrier organic anion transporter family, member 1a1                                             | Slco1a1             | 50572           | 1,04 | down |
| 5742777 | 7270891 | 1549437 | solute carrier organic anion transporter family, member 1a1                                             | Slco1a1             | 50572           | 1,02 | down |
| 6348082 | 7270891 | 1549444 | solute carrier organic anion transporter family, member 1a1                                             | Slco1a1             | 50572           | 1,02 | down |
| 5943130 | 7270891 | 1549447 | solute carrier organic anion transporter family, member 1a5                                             | Slco1a5             | 80900           | 2,85 | up   |
| 6012194 | 7270891 | 1549445 | solute carrier organic anion transporter family, member 1a5                                             | Slco1a5             | 80900           | 2,00 | up   |
| 6130409 | 7270891 | 1549459 | solute carrier organic anion transporter family, member 1a5                                             | Slco1a5             | 80900           | 1,79 | down |
| 6174606 | 7270891 | 1549446 | solute carrier organic anion transporter family, member 1a5                                             | Slco1a5             | 80900           | 1,62 | up   |
| 6340572 | 7270891 | 1549448 | solute carrier organic anion transporter family, member 1a5                                             | Slco1a5             | 80900           | 1,48 | up   |
| 6024980 | 7270891 | 1549458 | solute carrier organic anion transporter family, member 1a5                                             | Slco1a5             | 80900           | 1,36 | up   |
| 6699871 | 7270891 | 1549445 | solute carrier organic anion transporter family, member 1a5                                             | Slco1a5             | 80900           | 1,32 | up   |
| 6408678 | 7270891 | 1549449 | solute carrier organic anion transporter family, member 1a5                                             | Slco1a5             | 80900           | 1,27 | up   |
| 6562829 | 7270891 | 1549450 | solute carrier organic anion transporter family, member 1a5                                             | Slco1a5             | 80900           | 1,26 | up   |
| 6648649 | 7270891 | 1549451 | solute carrier organic anion transporter family, member 1a5                                             | Slco1a5             | 80900           | 1,25 | down |
| 6096451 | 7270891 | 1549459 | solute carrier organic anion transporter family, member 1a5                                             | Slco1a5             | 80900           | 1,19 | up   |
| 6413408 | 7270891 | 1549456 | solute carrier organic anion transporter family, member 1a5                                             | Slco1a5             | 80900           | 1,10 | up   |
| 6576079 | 7270891 | 1549445 | solute carrier organic anion transporter family, member 1a5                                             | Slco1a5             | 80900           | 1,09 | down |
| 5632159 | 7270891 | 1549458 | solute carrier organic anion transporter family, member 1a5                                             | Slco1a5             | 80900           | 1,07 | up   |
| 6078068 | 7270891 | 1549454 | solute carrier organic anion transporter family, member 1a5                                             | Slco1a5             | 80900           | 1,03 | down |
| 5641361 | 7270891 | 1549452 | solute carrier organic anion transporter family, member 1a5                                             | Slco1a5             | 80900           | 1,03 | down |
| 6010555 | 7270891 | 1549457 | solute carrier organic anion transporter family, member 1a5                                             | Slco1a5             | 80900           | 1,02 | up   |
| 5873290 | 7270891 | 1549445 | solute carrier organic anion transporter family, member 1a5                                             | Slco1a5             | 80900           | 1,02 | up   |
| 5927451 | 7270891 | 1549453 | solute carrier organic anion transporter family, member 1a5                                             | Slco1a5             | 80900           | 1,02 | down |
| 6479781 | 7270891 | 1549446 | solute carrier organic anion transporter family, member 1a5                                             | Slco1a5             | 80900           | 1,01 | up   |
| 6027512 | 7270891 | 1549455 | solute carrier organic anion transporter family, member 1a5 /// solute carrier organic anion transporte | Slco1a5 /// Slco1a1 | 80900 /// 50572 | 1,36 | down |
| 6074766 | 7339851 | 1719641 | solute carrier organic anion transporter family, member 2a1                                             | Slco2a1             | 24546           | 2,54 | down |
| 5697782 | 7339851 | 1719646 | solute carrier organic anion transporter family, member 2a1                                             | Slco2a1             | 24546           | 1,96 | down |
| 6478153 | 7339851 | 1719645 | solute carrier organic anion transporter family, member 2a1                                             | Slco2a1             | 24546           | 1,46 | up   |
| 6385207 | 7339851 | 1719648 | solute carrier organic anion transporter family, member 2a1                                             | Slco2a1             | 24546           | 1,42 | up   |
| 5771343 | 7339851 | 1719646 | solute carrier organic anion transporter family, member 2a1                                             | Slco2a1             | 24546           | 1,38 | down |
| 6338794 | 7339851 | 1719640 | solute carrier organic anion transporter family, member 2a1                                             | Slco2a1             | 24546           | 1,37 | down |
| 5789774 | 7339851 | 1719649 | solute carrier organic anion transporter family, member 2a1                                             | Slco2a1             | 24546           | 1,32 | up   |
| 5841445 | 7339851 | 1719638 | solute carrier organic anion transporter family, member 2a1                                             | Slco2a1             | 24546           | 1,27 | down |
| 6114685 | 7339851 | 1719639 | solute carrier organic anion transporter family, member 2a1                                             | Slco2a1             | 24546           | 1,26 | up   |
| 5856676 | 7339851 | 1719646 | solute carrier organic anion transporter family, member 2a1                                             | Slco2a1             | 24546           | 1,21 | up   |
| 6521957 | 7339851 | 1719643 | solute carrier organic anion transporter family, member 2a1                                             | Slco2a1             | 24546           | 1,17 | up   |
| 5818034 | 7339851 | 1719645 | solute carrier organic anion transporter family, member 2a1                                             | Slco2a1             | 24546           | 1,16 | down |
| 5971213 | 7339851 | 1719647 | solute carrier organic anion transporter family, member 2a1                                             | Slco2a1             | 24546           | 1,13 | down |
| 6370338 | 7339851 | 1719639 | solute carrier organic anion transporter family, member 2a1                                             | Slco2a1             | 24546           | 1,13 | down |

|         |         |         |                                                             |         |        |      |      |
|---------|---------|---------|-------------------------------------------------------------|---------|--------|------|------|
| 5655807 | 7339851 | 1719637 | solute carrier organic anion transporter family, member 2a1 | Slco2a1 | 24546  | 1,11 | down |
| 5714559 | 7339851 | 1719639 | solute carrier organic anion transporter family, member 2a1 | Slco2a1 | 24546  | 1,10 | down |
| 5822584 | 7339851 | 1719642 | solute carrier organic anion transporter family, member 2a1 | Slco2a1 | 24546  | 1,08 | up   |
| 6210472 | 7339851 | 1719637 | solute carrier organic anion transporter family, member 2a1 | Slco2a1 | 24546  | 1,08 | up   |
| 6138443 | 7339851 | 1719644 | solute carrier organic anion transporter family, member 2a1 | Slco2a1 | 24546  | 1,05 | down |
| 5952681 | 7339851 | 1719638 | solute carrier organic anion transporter family, member 2a1 | Slco2a1 | 24546  | 1,02 | up   |
| 6631211 | 7073458 | 1064466 | somatostatin receptor 2                                     | Sstr2   | 54305  | 2,76 | up   |
| 6394315 | 7073458 | 1064467 | somatostatin receptor 2                                     | Sstr2   | 54305  | 1,96 | up   |
| 5970158 | 7073458 | 1064467 | somatostatin receptor 2                                     | Sstr2   | 54305  | 1,50 | down |
| 6624644 | 7073458 | 1064465 | somatostatin receptor 2                                     | Sstr2   | 54305  | 1,48 | up   |
| 6009049 | 7073458 | 1064466 | somatostatin receptor 2                                     | Sstr2   | 54305  | 1,45 | down |
| 6381683 | 7073458 | 1064467 | somatostatin receptor 2                                     | Sstr2   | 54305  | 1,39 | up   |
| 5687512 | 7073458 | 1064466 | somatostatin receptor 2                                     | Sstr2   | 54305  | 1,22 | down |
| 6600288 | 7062436 | 1037665 | sorbin and SH3 domain containing 1                          | Sorbs1  | 686098 | 1,69 | up   |
| 5911026 | 7062436 | 1037685 | sorbin and SH3 domain containing 1                          | Sorbs1  | 686098 | 1,57 | up   |
| 6501144 | 7062436 | 1037662 | sorbin and SH3 domain containing 1                          | Sorbs1  | 686098 | 1,56 | down |
| 5768901 | 7062436 | 1037693 | sorbin and SH3 domain containing 1                          | Sorbs1  | 686098 | 1,55 | down |
| 5914411 | 7062436 | 1037652 | sorbin and SH3 domain containing 1                          | Sorbs1  | 686098 | 1,50 | up   |
| 5998173 | 7062436 | 1037687 | sorbin and SH3 domain containing 1                          | Sorbs1  | 686098 | 1,43 | down |
| 6110924 | 7062436 | 1037661 | sorbin and SH3 domain containing 1                          | Sorbs1  | 686098 | 1,41 | down |
| 5996367 | 7062436 | 1037667 | sorbin and SH3 domain containing 1                          | Sorbs1  | 686098 | 1,40 | up   |
| 5934751 | 7062436 | 1037681 | sorbin and SH3 domain containing 1                          | Sorbs1  | 686098 | 1,36 | up   |
| 6489872 | 7062436 | 1037701 | sorbin and SH3 domain containing 1                          | Sorbs1  | 686098 | 1,31 | down |
| 6452579 | 7062436 | 1037687 | sorbin and SH3 domain containing 1                          | Sorbs1  | 686098 | 1,31 | down |
| 5930608 | 7062436 | 1037657 | sorbin and SH3 domain containing 1                          | Sorbs1  | 686098 | 1,29 | up   |
| 6626290 | 7062436 | 1037660 | sorbin and SH3 domain containing 1                          | Sorbs1  | 686098 | 1,28 | down |
| 6655638 | 7062436 | 1037680 | sorbin and SH3 domain containing 1                          | Sorbs1  | 686098 | 1,27 | down |
| 5927228 | 7062436 | 1037657 | sorbin and SH3 domain containing 1                          | Sorbs1  | 686098 | 1,26 | down |
| 5661366 | 7062436 | 1037690 | sorbin and SH3 domain containing 1                          | Sorbs1  | 686098 | 1,24 | down |
| 6739220 | 7062436 | 1037650 | sorbin and SH3 domain containing 1                          | Sorbs1  | 686098 | 1,22 | up   |
| 6272391 | 7062436 | 1037661 | sorbin and SH3 domain containing 1                          | Sorbs1  | 686098 | 1,19 | down |
| 6091761 | 7062436 | 1037663 | sorbin and SH3 domain containing 1                          | Sorbs1  | 686098 | 1,19 | down |
| 6684644 | 7062436 | 1037684 | sorbin and SH3 domain containing 1                          | Sorbs1  | 686098 | 1,18 | up   |
| 5775668 | 7062436 | 1037657 | sorbin and SH3 domain containing 1                          | Sorbs1  | 686098 | 1,16 | up   |
| 6410493 | 7062436 | 1037692 | sorbin and SH3 domain containing 1                          | Sorbs1  | 686098 | 1,15 | up   |
| 5629803 | 7062436 | 1037700 | sorbin and SH3 domain containing 1                          | Sorbs1  | 686098 | 1,13 | up   |
| 5686573 | 7062436 | 1037704 | sorbin and SH3 domain containing 1                          | Sorbs1  | 686098 | 1,11 | down |
| 6119615 | 7062436 | 1037693 | sorbin and SH3 domain containing 1                          | Sorbs1  | 686098 | 1,10 | down |
| 6686505 | 7062436 | 1037649 | sorbin and SH3 domain containing 1                          | Sorbs1  | 686098 | 1,09 | up   |
| 6416695 | 7062436 | 1037675 | sorbin and SH3 domain containing 1                          | Sorbs1  | 686098 | 1,08 | up   |
| 5976361 | 7062436 | 1037672 | sorbin and SH3 domain containing 1                          | Sorbs1  | 686098 | 1,07 | down |
| 5812012 | 7062436 | 1037677 | sorbin and SH3 domain containing 1                          | Sorbs1  | 686098 | 1,06 | down |
| 6157770 | 7062436 | 1037660 | sorbin and SH3 domain containing 1                          | Sorbs1  | 686098 | 1,06 | down |
| 5848668 | 7062436 | 1037679 | sorbin and SH3 domain containing 1                          | Sorbs1  | 686098 | 1,06 | down |
| 6279791 | 7062436 | 1037680 | sorbin and SH3 domain containing 1                          | Sorbs1  | 686098 | 1,04 | up   |
| 6057852 | 7062436 | 1037659 | sorbin and SH3 domain containing 1                          | Sorbs1  | 686098 | 1,04 | down |
| 5965376 | 7062436 | 1037676 | sorbin and SH3 domain containing 1                          | Sorbs1  | 686098 | 1,02 | down |
| 5634952 | 7062436 | 1037686 | sorbin and SH3 domain containing 1                          | Sorbs1  | 686098 | 1,02 | down |
| 6638621 | 7062436 | 1037702 | sorbin and SH3 domain containing 1                          | Sorbs1  | 686098 | 1,02 | down |
| 5697263 | 7062436 | 1037649 | sorbin and SH3 domain containing 1                          | Sorbs1  | 686098 | 1,00 | up   |
| 5690288 | 7198002 | 1370414 | sortilin 1                                                  | Sort1   | 83576  | 2,19 | up   |
| 6111959 | 7198002 | 1370413 | sortilin 1                                                  | Sort1   | 83576  | 1,75 | up   |
| 5992838 | 7198002 | 1370429 | sortilin 1                                                  | Sort1   | 83576  | 1,50 | up   |
| 6211586 | 7198002 | 1370432 | sortilin 1                                                  | Sort1   | 83576  | 1,48 | down |
| 6614776 | 7198002 | 1370438 | sortilin 1                                                  | Sort1   | 83576  | 1,42 | down |
| 6602529 | 7198002 | 1370425 | sortilin 1                                                  | Sort1   | 83576  | 1,35 | down |
| 5843373 | 7198002 | 1370443 | sortilin 1                                                  | Sort1   | 83576  | 1,32 | up   |

|         |         |         |                                                            |        |        |      |      |
|---------|---------|---------|------------------------------------------------------------|--------|--------|------|------|
| 6386073 | 7198002 | 1370439 | sortilin 1                                                 | Sort1  | 83576  | 1,28 | down |
| 6733557 | 7198002 | 1370436 | sortilin 1                                                 | Sort1  | 83576  | 1,26 | down |
| 6529738 | 7198002 | 1370445 | sortilin 1                                                 | Sort1  | 83576  | 1,24 | down |
| 6050720 | 7198002 | 1370415 | sortilin 1                                                 | Sort1  | 83576  | 1,22 | up   |
| 6229853 | 7198002 | 1370442 | sortilin 1                                                 | Sort1  | 83576  | 1,21 | up   |
| 6529350 | 7198002 | 1370430 | sortilin 1                                                 | Sort1  | 83576  | 1,19 | down |
| 6553230 | 7198002 | 1370428 | sortilin 1                                                 | Sort1  | 83576  | 1,19 | down |
| 5940265 | 7198002 | 1370431 | sortilin 1                                                 | Sort1  | 83576  | 1,15 | up   |
| 6132475 | 7198002 | 1370426 | sortilin 1                                                 | Sort1  | 83576  | 1,14 | down |
| 5676744 | 7198002 | 1370445 | sortilin 1                                                 | Sort1  | 83576  | 1,10 | down |
| 6232530 | 7198002 | 1370433 | sortilin 1                                                 | Sort1  | 83576  | 1,08 | up   |
| 6082579 | 7198002 | 1370440 | sortilin 1                                                 | Sort1  | 83576  | 1,08 | down |
| 6669894 | 7198002 | 1370423 | sortilin 1                                                 | Sort1  | 83576  | 1,07 | down |
| 6473551 | 7198002 | 1370437 | sortilin 1                                                 | Sort1  | 83576  | 1,07 | up   |
| 5927195 | 7198002 | 1370427 | sortilin 1                                                 | Sort1  | 83576  | 1,05 | down |
| 6152909 | 7198002 | 1370431 | sortilin 1                                                 | Sort1  | 83576  | 1,04 | up   |
| 5663521 | 7198002 | 1370434 | sortilin 1                                                 | Sort1  | 83576  | 1,03 | down |
| 6696153 | 7344530 | 1731556 | sortilin-related receptor, LDLR class A repeats-containing | Sor11  | 300652 | 1,32 | down |
| 5967472 | 7344530 | 1731557 | sortilin-related receptor, LDLR class A repeats-containing | Sor11  | 300652 | 1,19 | down |
| 5650758 | 7344530 | 1731556 | sortilin-related receptor, LDLR class A repeats-containing | Sor11  | 300652 | 1,07 | up   |
| 6007793 | 7344530 | 1731556 | sortilin-related receptor, LDLR class A repeats-containing | Sor11  | 300652 | 1,03 | down |
| 6529724 | 7063716 | 1040125 | sortilin-related VPS10 domain containing receptor 1        | Sores1 | 309533 | 1,82 | down |
| 6340835 | 7063716 | 1040217 | sortilin-related VPS10 domain containing receptor 1        | Sores1 | 309533 | 1,14 | down |
| 6568229 | 7063716 | 1040126 | sortilin-related VPS10 domain containing receptor 1        | Sores1 | 309533 | 1,09 | down |
| 6261550 | 7063716 | 1040126 | sortilin-related VPS10 domain containing receptor 1        | Sores1 | 309533 | 1,05 | down |
| 6683986 | 7063716 | 1040217 | sortilin-related VPS10 domain containing receptor 1        | Sores1 | 309533 | 1,01 | down |
| 5636711 | 7120039 | 1177534 | sortilin-related VPS10 domain containing receptor 2        | Sores2 | 305438 | 2,01 | up   |
| 5984600 | 7120039 | 1177522 | sortilin-related VPS10 domain containing receptor 2        | Sores2 | 305438 | 1,94 | down |
| 6651912 | 7120039 | 1177547 | sortilin-related VPS10 domain containing receptor 2        | Sores2 | 305438 | 1,55 | down |
| 6744369 | 7120039 | 1177535 | sortilin-related VPS10 domain containing receptor 2        | Sores2 | 305438 | 1,53 | down |
| 5979590 | 7120039 | 1177552 | sortilin-related VPS10 domain containing receptor 2        | Sores2 | 305438 | 1,48 | up   |
| 6649447 | 7120039 | 1177529 | sortilin-related VPS10 domain containing receptor 2        | Sores2 | 305438 | 1,46 | down |
| 6022402 | 7120039 | 1177453 | sortilin-related VPS10 domain containing receptor 2        | Sores2 | 305438 | 1,45 | up   |
| 6010556 | 7120039 | 1177551 | sortilin-related VPS10 domain containing receptor 2        | Sores2 | 305438 | 1,39 | up   |
| 6208600 | 7120039 | 1177552 | sortilin-related VPS10 domain containing receptor 2        | Sores2 | 305438 | 1,37 | down |
| 5894720 | 7120039 | 1177541 | sortilin-related VPS10 domain containing receptor 2        | Sores2 | 305438 | 1,33 | down |
| 6074864 | 7120039 | 1177528 | sortilin-related VPS10 domain containing receptor 2        | Sores2 | 305438 | 1,31 | down |
| 6526410 | 7120039 | 1177488 | sortilin-related VPS10 domain containing receptor 2        | Sores2 | 305438 | 1,23 | down |
| 5971354 | 7120039 | 1177519 | sortilin-related VPS10 domain containing receptor 2        | Sores2 | 305438 | 1,22 | up   |
| 5800001 | 7120039 | 1177531 | sortilin-related VPS10 domain containing receptor 2        | Sores2 | 305438 | 1,22 | down |
| 6196867 | 7120039 | 1177540 | sortilin-related VPS10 domain containing receptor 2        | Sores2 | 305438 | 1,21 | down |
| 5620409 | 7120039 | 1177515 | sortilin-related VPS10 domain containing receptor 2        | Sores2 | 305438 | 1,19 | up   |
| 5808908 | 7120039 | 1177533 | sortilin-related VPS10 domain containing receptor 2        | Sores2 | 305438 | 1,16 | down |
| 6594562 | 7120039 | 1177530 | sortilin-related VPS10 domain containing receptor 2        | Sores2 | 305438 | 1,15 | up   |
| 6449396 | 7120039 | 1177544 | sortilin-related VPS10 domain containing receptor 2        | Sores2 | 305438 | 1,13 | down |
| 6403228 | 7120039 | 1177524 | sortilin-related VPS10 domain containing receptor 2        | Sores2 | 305438 | 1,12 | down |
| 6433128 | 7120039 | 1177521 | sortilin-related VPS10 domain containing receptor 2        | Sores2 | 305438 | 1,11 | down |
| 6065241 | 7120039 | 1177453 | sortilin-related VPS10 domain containing receptor 2        | Sores2 | 305438 | 1,10 | down |
| 6721801 | 7120039 | 1177549 | sortilin-related VPS10 domain containing receptor 2        | Sores2 | 305438 | 1,10 | up   |
| 6575910 | 7120039 | 1177527 | sortilin-related VPS10 domain containing receptor 2        | Sores2 | 305438 | 1,09 | down |
| 6715499 | 7120039 | 1177520 | sortilin-related VPS10 domain containing receptor 2        | Sores2 | 305438 | 1,09 | up   |
| 5689736 | 7120039 | 1177542 | sortilin-related VPS10 domain containing receptor 2        | Sores2 | 305438 | 1,06 | down |
| 6668685 | 7120039 | 1177469 | sortilin-related VPS10 domain containing receptor 2        | Sores2 | 305438 | 1,05 | up   |
| 6664977 | 7120039 | 1177545 | sortilin-related VPS10 domain containing receptor 2        | Sores2 | 305438 | 1,04 | up   |
| 5754536 | 7120039 | 1177543 | sortilin-related VPS10 domain containing receptor 2        | Sores2 | 305438 | 1,04 | up   |
| 5965226 | 7120039 | 1177538 | sortilin-related VPS10 domain containing receptor 2        | Sores2 | 305438 | 1,02 | up   |
| 5963808 | 7120039 | 1177543 | sortilin-related VPS10 domain containing receptor 2        | Sores2 | 305438 | 1,02 | up   |

|         |         |         |                  |       |        |      |      |
|---------|---------|---------|------------------|-------|--------|------|------|
| 6111635 | 7346902 | 1737359 | sorting nexin 1  | Snx1  | 84471  | 2,74 | down |
| 5975237 | 7346902 | 1737367 | sorting nexin 1  | Snx1  | 84471  | 1,86 | down |
| 6633266 | 7346902 | 1737369 | sorting nexin 1  | Snx1  | 84471  | 1,42 | down |
| 6070100 | 7346902 | 1737368 | sorting nexin 1  | Snx1  | 84471  | 1,38 | down |
| 6123841 | 7346902 | 1737359 | sorting nexin 1  | Snx1  | 84471  | 1,30 | up   |
| 6733754 | 7346902 | 1737361 | sorting nexin 1  | Snx1  | 84471  | 1,29 | up   |
| 6417188 | 7346902 | 1737365 | sorting nexin 1  | Snx1  | 84471  | 1,28 | up   |
| 6008984 | 7346902 | 1737366 | sorting nexin 1  | Snx1  | 84471  | 1,23 | up   |
| 5827934 | 7346902 | 1737362 | sorting nexin 1  | Snx1  | 84471  | 1,15 | down |
| 5930408 | 7346902 | 1737364 | sorting nexin 1  | Snx1  | 84471  | 1,15 | up   |
| 6448599 | 7346902 | 1737360 | sorting nexin 1  | Snx1  | 84471  | 1,13 | down |
| 6577097 | 7346902 | 1737372 | sorting nexin 1  | Snx1  | 84471  | 1,06 | down |
| 5814074 | 7346902 | 1737371 | sorting nexin 1  | Snx1  | 84471  | 1,05 | up   |
| 6134010 | 7346902 | 1737370 | sorting nexin 1  | Snx1  | 84471  | 1,04 | down |
| 6427077 | 7346902 | 1737373 | sorting nexin 1  | Snx1  | 84471  | 1,03 | down |
| 5924690 | 7346902 | 1737363 | sorting nexin 1  | Snx1  | 84471  | 1,02 | up   |
| 6682983 | 7253707 | 1506799 | sorting nexin 10 | Snx10 | 297096 | 2,14 | up   |
| 6058334 | 7253707 | 1506797 | sorting nexin 10 | Snx10 | 297096 | 1,81 | down |
| 5926109 | 7253707 | 1506796 | sorting nexin 10 | Snx10 | 297096 | 1,78 | up   |
| 5655765 | 7253707 | 1506795 | sorting nexin 10 | Snx10 | 297096 | 1,53 | down |
| 6322435 | 7253707 | 1506799 | sorting nexin 10 | Snx10 | 297096 | 1,40 | up   |
| 5802907 | 7253707 | 1506798 | sorting nexin 10 | Snx10 | 297096 | 1,38 | up   |
| 6017508 | 7253707 | 1506795 | sorting nexin 10 | Snx10 | 297096 | 1,20 | up   |
| 5818024 | 7253707 | 1506794 | sorting nexin 10 | Snx10 | 297096 | 1,09 | down |
| 6174326 | 7081975 | 1083912 | sorting nexin 11 | Snx11 | 303493 | 2,06 | down |
| 6594870 | 7081975 | 1083906 | sorting nexin 11 | Snx11 | 303493 | 1,61 | up   |
| 6012457 | 7081975 | 1083906 | sorting nexin 11 | Snx11 | 303493 | 1,44 | down |
| 6092859 | 7081975 | 1083910 | sorting nexin 11 | Snx11 | 303493 | 1,25 | up   |
| 5856553 | 7081975 | 1083906 | sorting nexin 11 | Snx11 | 303493 | 1,23 | up   |
| 5656593 | 7081975 | 1083907 | sorting nexin 11 | Snx11 | 303493 | 1,21 | up   |
| 5799340 | 7081975 | 1083906 | sorting nexin 11 | Snx11 | 303493 | 1,13 | up   |
| 6553603 | 7081975 | 1083909 | sorting nexin 11 | Snx11 | 303493 | 1,12 | down |
| 5783582 | 7081975 | 1083908 | sorting nexin 11 | Snx11 | 303493 | 1,10 | up   |
| 5984142 | 7081975 | 1083911 | sorting nexin 11 | Snx11 | 303493 | 1,05 | up   |
| 5916340 | 7081975 | 1083908 | sorting nexin 11 | Snx11 | 303493 | 1,03 | down |
| 6404342 | 7346898 | 1737339 | sorting nexin 22 | Snx22 | 300796 | 2,67 | down |
| 6052177 | 7346898 | 1737338 | sorting nexin 22 | Snx22 | 300796 | 1,80 | down |
| 6212270 | 7346898 | 1737341 | sorting nexin 22 | Snx22 | 300796 | 1,33 | up   |
| 6136071 | 7346898 | 1737343 | sorting nexin 22 | Snx22 | 300796 | 1,25 | up   |
| 5641277 | 7346898 | 1737340 | sorting nexin 22 | Snx22 | 300796 | 1,17 | up   |
| 5767704 | 7346898 | 1737342 | sorting nexin 22 | Snx22 | 300796 | 1,11 | down |
| 6417831 | 7346898 | 1737338 | sorting nexin 22 | Snx22 | 300796 | 1,07 | up   |
| 6337423 | 7049689 | 1008875 | sorting nexin 26 | Snx26 | 361540 | 2,25 | up   |
| 5738768 | 7049689 | 1008891 | sorting nexin 26 | Snx26 | 361540 | 2,13 | down |
| 6652917 | 7049689 | 1008884 | sorting nexin 26 | Snx26 | 361540 | 1,71 | up   |
| 6453396 | 7049689 | 1008893 | sorting nexin 26 | Snx26 | 361540 | 1,68 | down |
| 5779168 | 7049689 | 1008876 | sorting nexin 26 | Snx26 | 361540 | 1,60 | up   |
| 6016019 | 7049689 | 1008876 | sorting nexin 26 | Snx26 | 361540 | 1,59 | up   |
| 6082024 | 7049689 | 1008876 | sorting nexin 26 | Snx26 | 361540 | 1,58 | down |
| 5639611 | 7049689 | 1008876 | sorting nexin 26 | Snx26 | 361540 | 1,54 | up   |
| 5688616 | 7049689 | 1008878 | sorting nexin 26 | Snx26 | 361540 | 1,46 | up   |
| 5883829 | 7049689 | 1008875 | sorting nexin 26 | Snx26 | 361540 | 1,44 | down |
| 5736976 | 7049689 | 1008887 | sorting nexin 26 | Snx26 | 361540 | 1,36 | down |
| 6497160 | 7049689 | 1008888 | sorting nexin 26 | Snx26 | 361540 | 1,31 | up   |
| 5621039 | 7049689 | 1008894 | sorting nexin 26 | Snx26 | 361540 | 1,30 | down |
| 5743637 | 7049689 | 1008895 | sorting nexin 26 | Snx26 | 361540 | 1,22 | down |
| 6717805 | 7049689 | 1008897 | sorting nexin 26 | Snx26 | 361540 | 1,20 | up   |



|         |         |         |                          |       |        |      |      |
|---------|---------|---------|--------------------------|-------|--------|------|------|
| 6079561 | 7049689 | 1008882 | sorting nexin 26         | Snx26 | 361540 | 1,19 | down |
| 5756076 | 7049689 | 1008876 | sorting nexin 26         | Snx26 | 361540 | 1,18 | down |
| 6293092 | 7049689 | 1008873 | sorting nexin 26         | Snx26 | 361540 | 1,17 | up   |
| 6207341 | 7049689 | 1008885 | sorting nexin 26         | Snx26 | 361540 | 1,12 | down |
| 5773751 | 7049689 | 1008896 | sorting nexin 26         | Snx26 | 361540 | 1,10 | up   |
| 6442617 | 7049689 | 1008889 | sorting nexin 26         | Snx26 | 361540 | 1,09 | up   |
| 6179637 | 7049689 | 1008886 | sorting nexin 26         | Snx26 | 361540 | 1,07 | down |
| 5909641 | 7049689 | 1008873 | sorting nexin 26         | Snx26 | 361540 | 1,04 | up   |
| 6496690 | 7049689 | 1008877 | sorting nexin 26         | Snx26 | 361540 | 1,04 | down |
| 6541968 | 7049689 | 1008879 | sorting nexin 26         | Snx26 | 361540 | 1,03 | up   |
| 6481571 | 7049689 | 1008890 | sorting nexin 26         | Snx26 | 361540 | 1,02 | down |
| 6614773 | 7245932 | 1487794 | sorting nexin 5          | Snx5  | 296199 | 3,89 | down |
| 6033191 | 7245932 | 1487782 | sorting nexin 5          | Snx5  | 296199 | 1,77 | down |
| 6118400 | 7245932 | 1487795 | sorting nexin 5          | Snx5  | 296199 | 1,42 | down |
| 6065559 | 7245932 | 1487780 | sorting nexin 5          | Snx5  | 296199 | 1,36 | up   |
| 5715181 | 7245932 | 1487785 | sorting nexin 5          | Snx5  | 296199 | 1,30 | up   |
| 5658820 | 7245932 | 1487786 | sorting nexin 5          | Snx5  | 296199 | 1,17 | down |
| 6606667 | 7245932 | 1487781 | sorting nexin 5          | Snx5  | 296199 | 1,15 | down |
| 6236357 | 7245932 | 1487790 | sorting nexin 5          | Snx5  | 296199 | 1,12 | up   |
| 5995089 | 7245932 | 1487780 | sorting nexin 5          | Snx5  | 296199 | 1,12 | up   |
| 6376281 | 7245932 | 1487784 | sorting nexin 5          | Snx5  | 296199 | 1,10 | down |
| 6185629 | 7245932 | 1487789 | sorting nexin 5          | Snx5  | 296199 | 1,09 | up   |
| 5848972 | 7245932 | 1487780 | sorting nexin 5          | Snx5  | 296199 | 1,08 | down |
| 5968051 | 7245932 | 1487783 | sorting nexin 5          | Snx5  | 296199 | 1,04 | down |
| 5873310 | 7245932 | 1487788 | sorting nexin 5          | Snx5  | 296199 | 1,03 | up   |
| 6407784 | 7245932 | 1487794 | sorting nexin 5          | Snx5  | 296199 | 1,02 | down |
| 5639615 | 7245932 | 1487791 | sorting nexin 5          | Snx5  | 296199 | 1,02 | down |
| 6620508 | 7245932 | 1487795 | sorting nexin 5          | Snx5  | 296199 | 1,02 | up   |
| 5884096 | 7245932 | 1487787 | sorting nexin 5          | Snx5  | 296199 | 1,01 | up   |
| 6602986 | 7213341 | 1406265 | sorting nexin 7          | Snx7  | 310815 | 4,35 | down |
| 6535998 | 7213341 | 1406259 | sorting nexin 7          | Snx7  | 310815 | 2,18 | up   |
| 5679401 | 7213341 | 1406260 | sorting nexin 7          | Snx7  | 310815 | 1,37 | up   |
| 6306475 | 7213341 | 1406257 | sorting nexin 7          | Snx7  | 310815 | 1,36 | down |
| 5926111 | 7213341 | 1406263 | sorting nexin 7          | Snx7  | 310815 | 1,35 | up   |
| 6636024 | 7213341 | 1406264 | sorting nexin 7          | Snx7  | 310815 | 1,14 | up   |
| 6062272 | 7213341 | 1406258 | sorting nexin 7          | Snx7  | 310815 | 1,14 | down |
| 6006907 | 7213341 | 1406262 | sorting nexin 7          | Snx7  | 310815 | 1,13 | down |
| 6732551 | 7213341 | 1406256 | sorting nexin 7          | Snx7  | 310815 | 1,09 | up   |
| 5743681 | 7213341 | 1406261 | sorting nexin 7          | Snx7  | 310815 | 1,03 | down |
| 5670593 | 7096873 | 1119377 | sorting nexin 8          | Snx8  | 288504 | 2,02 | down |
| 6400094 | 7096873 | 1119376 | sorting nexin 8          | Snx8  | 288504 | 1,85 | up   |
| 5798847 | 7096873 | 1119386 | sorting nexin 8          | Snx8  | 288504 | 1,77 | down |
| 6477407 | 7096873 | 1119373 | sorting nexin 8          | Snx8  | 288504 | 1,63 | up   |
| 5965076 | 7096873 | 1119386 | sorting nexin 8          | Snx8  | 288504 | 1,46 | down |
| 6366781 | 7096873 | 1119372 | sorting nexin 8          | Snx8  | 288504 | 1,39 | up   |
| 6253315 | 7096873 | 1119369 | sorting nexin 8          | Snx8  | 288504 | 1,31 | down |
| 5772561 | 7096873 | 1119381 | sorting nexin 8          | Snx8  | 288504 | 1,25 | up   |
| 6419652 | 7096873 | 1119386 | sorting nexin 8          | Snx8  | 288504 | 1,20 | down |
| 5637422 | 7096873 | 1119369 | sorting nexin 8          | Snx8  | 288504 | 1,16 | down |
| 6383650 | 7096873 | 1119374 | sorting nexin 8          | Snx8  | 288504 | 1,13 | up   |
| 6423461 | 7096873 | 1119386 | sorting nexin 8          | Snx8  | 288504 | 1,11 | down |
| 5738120 | 7096873 | 1119383 | sorting nexin 8          | Snx8  | 288504 | 1,07 | down |
| 6448689 | 7096873 | 1119385 | sorting nexin 8          | Snx8  | 288504 | 1,05 | down |
| 6339267 | 7096873 | 1119375 | sorting nexin 8          | Snx8  | 288504 | 1,04 | up   |
| 5629642 | 7096873 | 1119377 | sorting nexin 8          | Snx8  | 288504 | 1,01 | down |
| 5728650 | 7302445 | 1628179 | Sp8 transcription factor | Sp8   | 299499 | 2,01 | down |
| 6182147 | 7302445 | 1628178 | Sp8 transcription factor | Sp8   | 299499 | 1,76 | up   |

|         |         |         |                                                                          |        |        |      |      |
|---------|---------|---------|--------------------------------------------------------------------------|--------|--------|------|------|
| 5932781 | 7302445 | 1628180 | Sp8 transcription factor                                                 | Sp8    | 299499 | 1,10 | down |
| 5858139 | 7302445 | 1628177 | Sp8 transcription factor                                                 | Sp8    | 299499 | 1,07 | up   |
| 6179225 | 7302445 | 1628179 | Sp8 transcription factor                                                 | Sp8    | 299499 | 1,06 | down |
| 6510460 | 7302445 | 1628178 | Sp8 transcription factor                                                 | Sp8    | 299499 | 1,00 | up   |
| 6401239 | 7155286 | 1263840 | sparc/osteonectin, cwcv and kazal-like domains proteoglycan (testican) 1 | Spock1 | 306759 | 2,67 | up   |
| 6047695 | 7155286 | 1263907 | sparc/osteonectin, cwcv and kazal-like domains proteoglycan (testican) 1 | Spock1 | 306759 | 1,29 | up   |
| 6639717 | 7155286 | 1263908 | sparc/osteonectin, cwcv and kazal-like domains proteoglycan (testican) 1 | Spock1 | 306759 | 1,28 | down |
| 5641647 | 7155286 | 1263905 | sparc/osteonectin, cwcv and kazal-like domains proteoglycan (testican) 1 | Spock1 | 306759 | 1,08 | down |
| 6545756 | 7155286 | 1263906 | sparc/osteonectin, cwcv and kazal-like domains proteoglycan (testican) 1 | Spock1 | 306759 | 1,06 | down |
| 5670549 | 7155286 | 1263903 | sparc/osteonectin, cwcv and kazal-like domains proteoglycan (testican) 1 | Spock1 | 306759 | 1,05 | up   |
| 5893043 | 7194172 | 1361155 | spastic paraplegia 20, spartin (Troyer syndrome) homolog (human)         | Spg20  | 295053 | 2,07 | down |
| 6525107 | 7194172 | 1361154 | spastic paraplegia 20, spartin (Troyer syndrome) homolog (human)         | Spg20  | 295053 | 1,99 | down |
| 6234306 | 7194172 | 1361161 | spastic paraplegia 20, spartin (Troyer syndrome) homolog (human)         | Spg20  | 295053 | 1,74 | down |
| 6569294 | 7194172 | 1361169 | spastic paraplegia 20, spartin (Troyer syndrome) homolog (human)         | Spg20  | 295053 | 1,71 | down |
| 6072918 | 7194172 | 1361169 | spastic paraplegia 20, spartin (Troyer syndrome) homolog (human)         | Spg20  | 295053 | 1,69 | down |
| 6581548 | 7194172 | 1361160 | spastic paraplegia 20, spartin (Troyer syndrome) homolog (human)         | Spg20  | 295053 | 1,45 | down |
| 6416923 | 7194172 | 1361162 | spastic paraplegia 20, spartin (Troyer syndrome) homolog (human)         | Spg20  | 295053 | 1,37 | down |
| 6288053 | 7194172 | 1361162 | spastic paraplegia 20, spartin (Troyer syndrome) homolog (human)         | Spg20  | 295053 | 1,36 | down |
| 6015769 | 7194172 | 1361158 | spastic paraplegia 20, spartin (Troyer syndrome) homolog (human)         | Spg20  | 295053 | 1,31 | down |
| 6007706 | 7181836 | 1330070 | spastic paraplegia 7 homolog (human)                                     | Spg7   | 353231 | 2,07 | up   |
| 6687837 | 7181836 | 1330064 | spastic paraplegia 7 homolog (human)                                     | Spg7   | 353231 | 1,63 | up   |
| 5947608 | 7181836 | 1330062 | spastic paraplegia 7 homolog (human)                                     | Spg7   | 353231 | 1,47 | down |
| 6139743 | 7181836 | 1330076 | spastic paraplegia 7 homolog (human)                                     | Spg7   | 353231 | 1,42 | down |
| 6588257 | 7181836 | 1330072 | spastic paraplegia 7 homolog (human)                                     | Spg7   | 353231 | 1,41 | up   |
| 5792107 | 7181836 | 1330077 | spastic paraplegia 7 homolog (human)                                     | Spg7   | 353231 | 1,31 | down |
| 6668201 | 7181836 | 1330074 | spastic paraplegia 7 homolog (human)                                     | Spg7   | 353231 | 1,26 | down |
| 6287955 | 7181836 | 1330068 | spastic paraplegia 7 homolog (human)                                     | Spg7   | 353231 | 1,24 | down |
| 6730949 | 7181836 | 1330069 | spastic paraplegia 7 homolog (human)                                     | Spg7   | 353231 | 1,22 | down |
| 6043201 | 7181836 | 1330073 | spastic paraplegia 7 homolog (human)                                     | Spg7   | 353231 | 1,18 | up   |
| 6313967 | 7181836 | 1330064 | spastic paraplegia 7 homolog (human)                                     | Spg7   | 353231 | 1,18 | up   |
| 6650405 | 7181836 | 1330063 | spastic paraplegia 7 homolog (human)                                     | Spg7   | 353231 | 1,13 | up   |
| 6372131 | 7181836 | 1330066 | spastic paraplegia 7 homolog (human)                                     | Spg7   | 353231 | 1,11 | down |
| 6480602 | 7181836 | 1330062 | spastic paraplegia 7 homolog (human)                                     | Spg7   | 353231 | 1,08 | up   |
| 6738508 | 7181836 | 1330075 | spastic paraplegia 7 homolog (human)                                     | Spg7   | 353231 | 1,07 | up   |
| 6240905 | 7181836 | 1330071 | spastic paraplegia 7 homolog (human)                                     | Spg7   | 353231 | 1,02 | up   |
| 5690822 | 7181836 | 1330065 | spastic paraplegia 7 homolog (human)                                     | Spg7   | 353231 | 1,02 | down |
| 6178045 | 7181836 | 1330067 | spastic paraplegia 7 homolog (human)                                     | Spg7   | 353231 | 1,02 | up   |
| 5992976 | 7303635 | 1631441 | spastin                                                                  | Spast  | 362700 | 2,24 | down |
| 6433317 | 7303635 | 1631444 | spastin                                                                  | Spast  | 362700 | 1,77 | down |
| 6487804 | 7303635 | 1631459 | spastin                                                                  | Spast  | 362700 | 1,42 | down |
| 5663090 | 7303635 | 1631442 | spastin                                                                  | Spast  | 362700 | 1,28 | down |
| 6209698 | 7303635 | 1631447 | spastin                                                                  | Spast  | 362700 | 1,25 | down |
| 6320626 | 7303635 | 1631441 | spastin                                                                  | Spast  | 362700 | 1,23 | down |
| 5931981 | 7303635 | 1631445 | spastin                                                                  | Spast  | 362700 | 1,23 | up   |
| 6702463 | 7303635 | 1631459 | spastin                                                                  | Spast  | 362700 | 1,19 | up   |
| 6235314 | 7303635 | 1631443 | spastin                                                                  | Spast  | 362700 | 1,17 | down |
| 6669531 | 7303635 | 1631446 | spastin                                                                  | Spast  | 362700 | 1,15 | up   |
| 6219537 | 7303635 | 1631457 | spastin                                                                  | Spast  | 362700 | 1,11 | up   |
| 6695736 | 7303635 | 1631454 | spastin                                                                  | Spast  | 362700 | 1,08 | up   |
| 6135884 | 7303635 | 1631459 | spastin                                                                  | Spast  | 362700 | 1,07 | up   |
| 5834155 | 7303635 | 1631454 | spastin                                                                  | Spast  | 362700 | 1,07 | up   |
| 6519371 | 7303635 | 1631450 | spastin                                                                  | Spast  | 362700 | 1,07 | down |
| 6029682 | 7303635 | 1631441 | spastin                                                                  | Spast  | 362700 | 1,06 | up   |
| 6375593 | 7303635 | 1631448 | spastin                                                                  | Spast  | 362700 | 1,06 | up   |
| 5704840 | 7303635 | 1631453 | spastin                                                                  | Spast  | 362700 | 1,04 | up   |
| 6164068 | 7303635 | 1631452 | spastin                                                                  | Spast  | 362700 | 1,03 | down |
| 6416387 | 7303635 | 1631449 | spastin                                                                  | Spast  | 362700 | 1,02 | down |

|         |         |         |                                                |         |        |      |      |
|---------|---------|---------|------------------------------------------------|---------|--------|------|------|
| 6270793 | 7303635 | 1631456 | spastin                                        | Spast   | 362700 | 1,02 | down |
| 5807834 | 7221855 | 1427256 | SPECC1-like                                    | Specc11 | 361828 | 1,57 | down |
| 5824211 | 7221855 | 1427251 | SPECC1-like                                    | Specc11 | 361828 | 1,46 | down |
| 6207316 | 7221855 | 1427234 | SPECC1-like                                    | Specc11 | 361828 | 1,40 | up   |
| 6363580 | 7221855 | 1427232 | SPECC1-like                                    | Specc11 | 361828 | 1,38 | up   |
| 6212106 | 7221855 | 1427242 | SPECC1-like                                    | Specc11 | 361828 | 1,36 | up   |
| 6173566 | 7221855 | 1427223 | SPECC1-like                                    | Specc11 | 361828 | 1,35 | up   |
| 5896707 | 7221855 | 1427236 | SPECC1-like                                    | Specc11 | 361828 | 1,30 | down |
| 6040625 | 7221855 | 1427243 | SPECC1-like                                    | Specc11 | 361828 | 1,26 | up   |
| 5792548 | 7221855 | 1427246 | SPECC1-like                                    | Specc11 | 361828 | 1,20 | down |
| 6100813 | 7221855 | 1427223 | SPECC1-like                                    | Specc11 | 361828 | 1,19 | up   |
| 6653079 | 7221855 | 1427249 | SPECC1-like                                    | Specc11 | 361828 | 1,19 | down |
| 5622599 | 7221855 | 1427225 | SPECC1-like                                    | Specc11 | 361828 | 1,17 | up   |
| 6116127 | 7221855 | 1427244 | SPECC1-like                                    | Specc11 | 361828 | 1,14 | up   |
| 6405473 | 7221855 | 1427250 | SPECC1-like                                    | Specc11 | 361828 | 1,13 | up   |
| 5948609 | 7221855 | 1427250 | SPECC1-like                                    | Specc11 | 361828 | 1,12 | up   |
| 6256571 | 7221855 | 1427224 | SPECC1-like                                    | Specc11 | 361828 | 1,12 | up   |
| 6288415 | 7221855 | 1427250 | SPECC1-like                                    | Specc11 | 361828 | 1,11 | up   |
| 6668420 | 7221855 | 1427236 | SPECC1-like                                    | Specc11 | 361828 | 1,10 | up   |
| 5701468 | 7221855 | 1427252 | SPECC1-like                                    | Specc11 | 361828 | 1,08 | down |
| 6015900 | 7221855 | 1427241 | SPECC1-like                                    | Specc11 | 361828 | 1,06 | down |
| 6351724 | 7045859 | 1000517 | spectrin repeat containing, nuclear envelope 1 | Syne1   | 499010 | 2,44 | up   |
| 5664900 | 7045772 | 1000366 | spectrin repeat containing, nuclear envelope 1 | Syne1   | 499010 | 2,04 | up   |
| 6448522 | 7045772 | 1000350 | spectrin repeat containing, nuclear envelope 1 | Syne1   | 499010 | 1,93 | down |
| 6249935 | 7045772 | 1000345 | spectrin repeat containing, nuclear envelope 1 | Syne1   | 499010 | 1,69 | up   |
| 6212852 | 7045859 | 1000527 | spectrin repeat containing, nuclear envelope 1 | Syne1   | 499010 | 1,62 | down |
| 6077469 | 7045772 | 1000347 | spectrin repeat containing, nuclear envelope 1 | Syne1   | 499010 | 1,62 | up   |
| 6233005 | 7045772 | 1000397 | spectrin repeat containing, nuclear envelope 1 | Syne1   | 499010 | 1,61 | down |
| 6299800 | 7045859 | 1000516 | spectrin repeat containing, nuclear envelope 1 | Syne1   | 499010 | 1,61 | up   |
| 5750611 | 7045772 | 1000383 | spectrin repeat containing, nuclear envelope 1 | Syne1   | 499010 | 1,60 | down |
| 6128418 | 7045859 | 1000517 | spectrin repeat containing, nuclear envelope 1 | Syne1   | 499010 | 1,56 | up   |
| 6348829 | 7045772 | 1000374 | spectrin repeat containing, nuclear envelope 1 | Syne1   | 499010 | 1,55 | down |
| 6205575 | 7045772 | 1000355 | spectrin repeat containing, nuclear envelope 1 | Syne1   | 499010 | 1,54 | up   |
| 6294980 | 7045772 | 1000367 | spectrin repeat containing, nuclear envelope 1 | Syne1   | 499010 | 1,53 | up   |
| 5823147 | 7045772 | 1000359 | spectrin repeat containing, nuclear envelope 1 | Syne1   | 499010 | 1,49 | down |
| 6358819 | 7045859 | 1000516 | spectrin repeat containing, nuclear envelope 1 | Syne1   | 499010 | 1,46 | down |
| 6380979 | 7045772 | 1000399 | spectrin repeat containing, nuclear envelope 1 | Syne1   | 499010 | 1,43 | up   |
| 6129205 | 7045859 | 1000524 | spectrin repeat containing, nuclear envelope 1 | Syne1   | 499010 | 1,42 | up   |
| 6024865 | 7045859 | 1000517 | spectrin repeat containing, nuclear envelope 1 | Syne1   | 499010 | 1,39 | up   |
| 6536895 | 7045772 | 1000348 | spectrin repeat containing, nuclear envelope 1 | Syne1   | 499010 | 1,37 | up   |
| 6529513 | 7045859 | 1000535 | spectrin repeat containing, nuclear envelope 1 | Syne1   | 499010 | 1,37 | down |
| 6658584 | 7045772 | 1000380 | spectrin repeat containing, nuclear envelope 1 | Syne1   | 499010 | 1,37 | up   |
| 5671538 | 7045772 | 1000393 | spectrin repeat containing, nuclear envelope 1 | Syne1   | 499010 | 1,35 | up   |
| 5869457 | 7045772 | 1000357 | spectrin repeat containing, nuclear envelope 1 | Syne1   | 499010 | 1,35 | down |
| 5824009 | 7045772 | 1000384 | spectrin repeat containing, nuclear envelope 1 | Syne1   | 499010 | 1,34 | up   |
| 6206381 | 7045772 | 1000346 | spectrin repeat containing, nuclear envelope 1 | Syne1   | 499010 | 1,32 | up   |
| 6659778 | 7045772 | 1000369 | spectrin repeat containing, nuclear envelope 1 | Syne1   | 499010 | 1,32 | up   |
| 5652002 | 7045772 | 1000372 | spectrin repeat containing, nuclear envelope 1 | Syne1   | 499010 | 1,32 | down |
| 5811983 | 7045772 | 1000350 | spectrin repeat containing, nuclear envelope 1 | Syne1   | 499010 | 1,31 | down |
| 6015811 | 7045772 | 1000398 | spectrin repeat containing, nuclear envelope 1 | Syne1   | 499010 | 1,28 | down |
| 6115703 | 7045859 | 1000530 | spectrin repeat containing, nuclear envelope 1 | Syne1   | 499010 | 1,28 | down |
| 6653295 | 7045859 | 1000537 | spectrin repeat containing, nuclear envelope 1 | Syne1   | 499010 | 1,26 | up   |
| 6234592 | 7045772 | 1000377 | spectrin repeat containing, nuclear envelope 1 | Syne1   | 499010 | 1,23 | down |
| 6423488 | 7045772 | 1000352 | spectrin repeat containing, nuclear envelope 1 | Syne1   | 499010 | 1,23 | down |
| 6668982 | 7045859 | 1000522 | spectrin repeat containing, nuclear envelope 1 | Syne1   | 499010 | 1,22 | up   |
| 5725512 | 7045772 | 1000390 | spectrin repeat containing, nuclear envelope 1 | Syne1   | 499010 | 1,21 | up   |
| 6299198 | 7045772 | 1000389 | spectrin repeat containing, nuclear envelope 1 | Syne1   | 499010 | 1,20 | down |

|         |         |         |                                                |       |        |      |      |
|---------|---------|---------|------------------------------------------------|-------|--------|------|------|
| 6373965 | 7045772 | 1000363 | spectrin repeat containing, nuclear envelope 1 | Syne1 | 499010 | 1,19 | up   |
| 5718255 | 7045772 | 1000370 | spectrin repeat containing, nuclear envelope 1 | Syne1 | 499010 | 1,19 | down |
| 6606086 | 7045772 | 1000371 | spectrin repeat containing, nuclear envelope 1 | Syne1 | 499010 | 1,19 | up   |
| 6398919 | 7045772 | 1000392 | spectrin repeat containing, nuclear envelope 1 | Syne1 | 499010 | 1,18 | down |
| 6709365 | 7045772 | 1000378 | spectrin repeat containing, nuclear envelope 1 | Syne1 | 499010 | 1,18 | up   |
| 6070940 | 7045772 | 1000391 | spectrin repeat containing, nuclear envelope 1 | Syne1 | 499010 | 1,18 | down |
| 6329063 | 7045772 | 1000375 | spectrin repeat containing, nuclear envelope 1 | Syne1 | 499010 | 1,17 | up   |
| 5809902 | 7045772 | 1000366 | spectrin repeat containing, nuclear envelope 1 | Syne1 | 499010 | 1,16 | up   |
| 6230732 | 7045772 | 1000376 | spectrin repeat containing, nuclear envelope 1 | Syne1 | 499010 | 1,16 | up   |
| 6432374 | 7045772 | 1000386 | spectrin repeat containing, nuclear envelope 1 | Syne1 | 499010 | 1,16 | up   |
| 6204770 | 7045859 | 1000521 | spectrin repeat containing, nuclear envelope 1 | Syne1 | 499010 | 1,16 | down |
| 5683587 | 7045772 | 1000348 | spectrin repeat containing, nuclear envelope 1 | Syne1 | 499010 | 1,15 | down |
| 6293423 | 7045772 | 1000365 | spectrin repeat containing, nuclear envelope 1 | Syne1 | 499010 | 1,15 | down |
| 6078626 | 7045772 | 1000387 | spectrin repeat containing, nuclear envelope 1 | Syne1 | 499010 | 1,15 | down |
| 6744113 | 7045859 | 1000523 | spectrin repeat containing, nuclear envelope 1 | Syne1 | 499010 | 1,14 | down |
| 6267055 | 7045772 | 1000368 | spectrin repeat containing, nuclear envelope 1 | Syne1 | 499010 | 1,14 | up   |
| 6565747 | 7045772 | 1000348 | spectrin repeat containing, nuclear envelope 1 | Syne1 | 499010 | 1,14 | down |
| 6238328 | 7045859 | 1000528 | spectrin repeat containing, nuclear envelope 1 | Syne1 | 499010 | 1,13 | down |
| 6050522 | 7045772 | 1000354 | spectrin repeat containing, nuclear envelope 1 | Syne1 | 499010 | 1,13 | down |
| 6200122 | 7045772 | 1000349 | spectrin repeat containing, nuclear envelope 1 | Syne1 | 499010 | 1,13 | up   |
| 6276724 | 7045859 | 1000529 | spectrin repeat containing, nuclear envelope 1 | Syne1 | 499010 | 1,13 | down |
| 6638988 | 7045772 | 1000387 | spectrin repeat containing, nuclear envelope 1 | Syne1 | 499010 | 1,13 | down |
| 6303186 | 7045772 | 1000382 | spectrin repeat containing, nuclear envelope 1 | Syne1 | 499010 | 1,12 | up   |
| 5829635 | 7045772 | 1000346 | spectrin repeat containing, nuclear envelope 1 | Syne1 | 499010 | 1,12 | down |
| 6424302 | 7045772 | 1000364 | spectrin repeat containing, nuclear envelope 1 | Syne1 | 499010 | 1,12 | down |
| 5703682 | 7045772 | 1000379 | spectrin repeat containing, nuclear envelope 1 | Syne1 | 499010 | 1,11 | up   |
| 6382701 | 7045772 | 1000396 | spectrin repeat containing, nuclear envelope 1 | Syne1 | 499010 | 1,11 | up   |
| 6039320 | 7045859 | 1000519 | spectrin repeat containing, nuclear envelope 1 | Syne1 | 499010 | 1,11 | up   |
| 5681742 | 7045859 | 1000520 | spectrin repeat containing, nuclear envelope 1 | Syne1 | 499010 | 1,10 | up   |
| 5866541 | 7045772 | 1000353 | spectrin repeat containing, nuclear envelope 1 | Syne1 | 499010 | 1,10 | up   |
| 6494007 | 7045772 | 1000395 | spectrin repeat containing, nuclear envelope 1 | Syne1 | 499010 | 1,10 | up   |
| 5959238 | 7045772 | 1000361 | spectrin repeat containing, nuclear envelope 1 | Syne1 | 499010 | 1,10 | up   |
| 6524668 | 7045859 | 1000533 | spectrin repeat containing, nuclear envelope 1 | Syne1 | 499010 | 1,09 | down |
| 6022991 | 7045859 | 1000532 | spectrin repeat containing, nuclear envelope 1 | Syne1 | 499010 | 1,09 | down |
| 6114752 | 7045859 | 1000525 | spectrin repeat containing, nuclear envelope 1 | Syne1 | 499010 | 1,08 | up   |
| 6068189 | 7045859 | 1000534 | spectrin repeat containing, nuclear envelope 1 | Syne1 | 499010 | 1,08 | down |
| 5868095 | 7045772 | 1000394 | spectrin repeat containing, nuclear envelope 1 | Syne1 | 499010 | 1,07 | up   |
| 5906305 | 7045772 | 1000351 | spectrin repeat containing, nuclear envelope 1 | Syne1 | 499010 | 1,06 | down |
| 6040064 | 7045772 | 1000373 | spectrin repeat containing, nuclear envelope 1 | Syne1 | 499010 | 1,05 | down |
| 6219767 | 7045772 | 1000358 | spectrin repeat containing, nuclear envelope 1 | Syne1 | 499010 | 1,05 | up   |
| 5797659 | 7045772 | 1000385 | spectrin repeat containing, nuclear envelope 1 | Syne1 | 499010 | 1,04 | down |
| 5696133 | 7045772 | 1000401 | spectrin repeat containing, nuclear envelope 1 | Syne1 | 499010 | 1,03 | down |
| 6313075 | 7045772 | 1000362 | spectrin repeat containing, nuclear envelope 1 | Syne1 | 499010 | 1,03 | up   |
| 5714690 | 7045772 | 1000400 | spectrin repeat containing, nuclear envelope 1 | Syne1 | 499010 | 1,03 | up   |
| 5652006 | 7045772 | 1000400 | spectrin repeat containing, nuclear envelope 1 | Syne1 | 499010 | 1,03 | down |
| 5839858 | 7045772 | 1000361 | spectrin repeat containing, nuclear envelope 1 | Syne1 | 499010 | 1,03 | up   |
| 6437903 | 7045772 | 1000388 | spectrin repeat containing, nuclear envelope 1 | Syne1 | 499010 | 1,02 | up   |
| 5930543 | 7045859 | 1000536 | spectrin repeat containing, nuclear envelope 1 | Syne1 | 499010 | 1,02 | up   |
| 5660928 | 7045772 | 1000381 | spectrin repeat containing, nuclear envelope 1 | Syne1 | 499010 | 1,02 | down |
| 6521677 | 7045859 | 1000518 | spectrin repeat containing, nuclear envelope 1 | Syne1 | 499010 | 1,02 | down |
| 6088148 | 7045859 | 1000526 | spectrin repeat containing, nuclear envelope 1 | Syne1 | 499010 | 1,01 | down |
| 6176339 | 7045859 | 1000531 | spectrin repeat containing, nuclear envelope 1 | Syne1 | 499010 | 1,01 | down |
| 6228124 | 7045772 | 1000356 | spectrin repeat containing, nuclear envelope 1 | Syne1 | 499010 | 1,00 | up   |
| 5725834 | 7045772 | 1000360 | spectrin repeat containing, nuclear envelope 1 | Syne1 | 499010 | 1,00 | up   |
| 5854363 | 7308057 | 1642783 | spectrin, beta, erythrocytic                   | Sptb  | 314251 | 2,40 | down |
| 6107796 | 7308057 | 1642776 | spectrin, beta, erythrocytic                   | Sptb  | 314251 | 2,26 | down |
| 6046414 | 7308057 | 1642763 | spectrin, beta, erythrocytic                   | Sptb  | 314251 | 1,98 | up   |

|         |         |         |                                    |        |        |      |      |
|---------|---------|---------|------------------------------------|--------|--------|------|------|
| 5898158 | 7308057 | 1642765 | spectrin, beta, erythrocytic       | Sptb   | 314251 | 1,79 | up   |
| 6494783 | 7308057 | 1642759 | spectrin, beta, erythrocytic       | Sptb   | 314251 | 1,72 | up   |
| 6184380 | 7308057 | 1642775 | spectrin, beta, erythrocytic       | Sptb   | 314251 | 1,56 | up   |
| 6706983 | 7308057 | 1642756 | spectrin, beta, erythrocytic       | Sptb   | 314251 | 1,54 | up   |
| 6554545 | 7308057 | 1642777 | spectrin, beta, erythrocytic       | Sptb   | 314251 | 1,51 | up   |
| 5892018 | 7308057 | 1642773 | spectrin, beta, erythrocytic       | Sptb   | 314251 | 1,48 | down |
| 5926660 | 7308057 | 1642771 | spectrin, beta, erythrocytic       | Sptb   | 314251 | 1,47 | down |
| 5757252 | 7308057 | 1642781 | spectrin, beta, erythrocytic       | Sptb   | 314251 | 1,46 | up   |
| 6593001 | 7308057 | 1642774 | spectrin, beta, erythrocytic       | Sptb   | 314251 | 1,42 | up   |
| 6730368 | 7308057 | 1642757 | spectrin, beta, erythrocytic       | Sptb   | 314251 | 1,42 | up   |
| 5768781 | 7308057 | 1642780 | spectrin, beta, erythrocytic       | Sptb   | 314251 | 1,42 | down |
| 5636288 | 7308057 | 1642778 | spectrin, beta, erythrocytic       | Sptb   | 314251 | 1,41 | down |
| 6282697 | 7308057 | 1642760 | spectrin, beta, erythrocytic       | Sptb   | 314251 | 1,35 | up   |
| 6648399 | 7308057 | 1642754 | spectrin, beta, erythrocytic       | Sptb   | 314251 | 1,31 | down |
| 6598628 | 7308057 | 1642782 | spectrin, beta, erythrocytic       | Sptb   | 314251 | 1,26 | down |
| 6653530 | 7308057 | 1642766 | spectrin, beta, erythrocytic       | Sptb   | 314251 | 1,23 | down |
| 5973796 | 7308057 | 1642752 | spectrin, beta, erythrocytic       | Sptb   | 314251 | 1,19 | down |
| 6008202 | 7308057 | 1642762 | spectrin, beta, erythrocytic       | Sptb   | 314251 | 1,18 | up   |
| 6641993 | 7308057 | 1642770 | spectrin, beta, erythrocytic       | Sptb   | 314251 | 1,13 | up   |
| 5664934 | 7308057 | 1642753 | spectrin, beta, erythrocytic       | Sptb   | 314251 | 1,11 | down |
| 5625303 | 7308057 | 1642752 | spectrin, beta, erythrocytic       | Sptb   | 314251 | 1,11 | down |
| 5904048 | 7308057 | 1642761 | spectrin, beta, erythrocytic       | Sptb   | 314251 | 1,10 | down |
| 6079881 | 7308057 | 1642755 | spectrin, beta, erythrocytic       | Sptb   | 314251 | 1,07 | down |
| 5830704 | 7308057 | 1642779 | spectrin, beta, erythrocytic       | Sptb   | 314251 | 1,07 | down |
| 6525896 | 7308057 | 1642782 | spectrin, beta, erythrocytic       | Sptb   | 314251 | 1,06 | down |
| 6132441 | 7308057 | 1642758 | spectrin, beta, erythrocytic       | Sptb   | 314251 | 1,06 | up   |
| 6654665 | 7308057 | 1642767 | spectrin, beta, erythrocytic       | Sptb   | 314251 | 1,04 | down |
| 5941067 | 7308057 | 1642768 | spectrin, beta, erythrocytic       | Sptb   | 314251 | 1,04 | down |
| 6174566 | 7308057 | 1642769 | spectrin, beta, erythrocytic       | Sptb   | 314251 | 1,03 | down |
| 6161559 | 7308057 | 1642752 | spectrin, beta, erythrocytic       | Sptb   | 314251 | 1,03 | up   |
| 5733744 | 7308057 | 1642764 | spectrin, beta, erythrocytic       | Sptb   | 314251 | 1,03 | up   |
| 6434404 | 7308057 | 1642772 | spectrin, beta, erythrocytic       | Sptb   | 314251 | 1,02 | down |
| 6010739 | 7039041 | 983181  | spectrin, beta, non-erythrocytic 2 | Sptbn2 | 29211  | 2,44 | up   |
| 6741903 | 7039041 | 983206  | spectrin, beta, non-erythrocytic 2 | Sptbn2 | 29211  | 1,76 | up   |
| 5760005 | 7039041 | 983196  | spectrin, beta, non-erythrocytic 2 | Sptbn2 | 29211  | 1,70 | up   |
| 6379781 | 7039041 | 983212  | spectrin, beta, non-erythrocytic 2 | Sptbn2 | 29211  | 1,68 | up   |
| 6657197 | 7039041 | 983212  | spectrin, beta, non-erythrocytic 2 | Sptbn2 | 29211  | 1,60 | up   |
| 6130474 | 7039041 | 983195  | spectrin, beta, non-erythrocytic 2 | Sptbn2 | 29211  | 1,56 | down |
| 5621333 | 7039041 | 983215  | spectrin, beta, non-erythrocytic 2 | Sptbn2 | 29211  | 1,48 | down |
| 5717472 | 7039041 | 983194  | spectrin, beta, non-erythrocytic 2 | Sptbn2 | 29211  | 1,46 | down |
| 5808587 | 7039041 | 983200  | spectrin, beta, non-erythrocytic 2 | Sptbn2 | 29211  | 1,43 | down |
| 6736921 | 7039041 | 983199  | spectrin, beta, non-erythrocytic 2 | Sptbn2 | 29211  | 1,43 | up   |
| 6305856 | 7039041 | 983211  | spectrin, beta, non-erythrocytic 2 | Sptbn2 | 29211  | 1,37 | up   |
| 5655993 | 7039041 | 983208  | spectrin, beta, non-erythrocytic 2 | Sptbn2 | 29211  | 1,36 | down |
| 6067041 | 7039041 | 983215  | spectrin, beta, non-erythrocytic 2 | Sptbn2 | 29211  | 1,35 | down |
| 6388505 | 7039041 | 983215  | spectrin, beta, non-erythrocytic 2 | Sptbn2 | 29211  | 1,30 | down |
| 6054046 | 7039041 | 983213  | spectrin, beta, non-erythrocytic 2 | Sptbn2 | 29211  | 1,28 | up   |
| 6600250 | 7039041 | 983210  | spectrin, beta, non-erythrocytic 2 | Sptbn2 | 29211  | 1,26 | down |
| 6740554 | 7039041 | 983183  | spectrin, beta, non-erythrocytic 2 | Sptbn2 | 29211  | 1,23 | up   |
| 6679150 | 7039041 | 983185  | spectrin, beta, non-erythrocytic 2 | Sptbn2 | 29211  | 1,23 | down |
| 6036246 | 7039041 | 983187  | spectrin, beta, non-erythrocytic 2 | Sptbn2 | 29211  | 1,22 | up   |
| 6300062 | 7039041 | 983204  | spectrin, beta, non-erythrocytic 2 | Sptbn2 | 29211  | 1,21 | down |
| 6396661 | 7039041 | 983186  | spectrin, beta, non-erythrocytic 2 | Sptbn2 | 29211  | 1,19 | down |
| 6097830 | 7039041 | 983205  | spectrin, beta, non-erythrocytic 2 | Sptbn2 | 29211  | 1,17 | down |
| 5829793 | 7039041 | 983193  | spectrin, beta, non-erythrocytic 2 | Sptbn2 | 29211  | 1,17 | up   |
| 6543590 | 7039041 | 983209  | spectrin, beta, non-erythrocytic 2 | Sptbn2 | 29211  | 1,16 | up   |
| 6367842 | 7039041 | 983214  | spectrin, beta, non-erythrocytic 2 | Sptbn2 | 29211  | 1,15 | down |

|         |         |         |                                                                |        |        |      |      |
|---------|---------|---------|----------------------------------------------------------------|--------|--------|------|------|
| 5954598 | 7039041 | 983189  | spectrin, beta, non-erythrocytic 2                             | Sptbn2 | 29211  | 1,14 | up   |
| 5824740 | 7039041 | 983180  | spectrin, beta, non-erythrocytic 2                             | Sptbn2 | 29211  | 1,13 | down |
| 5771820 | 7039041 | 983201  | spectrin, beta, non-erythrocytic 2                             | Sptbn2 | 29211  | 1,12 | up   |
| 6687664 | 7039041 | 983207  | spectrin, beta, non-erythrocytic 2                             | Sptbn2 | 29211  | 1,11 | down |
| 6458951 | 7039041 | 983184  | spectrin, beta, non-erythrocytic 2                             | Sptbn2 | 29211  | 1,10 | up   |
| 6002595 | 7039041 | 983197  | spectrin, beta, non-erythrocytic 2                             | Sptbn2 | 29211  | 1,09 | up   |
| 5787127 | 7039041 | 983188  | spectrin, beta, non-erythrocytic 2                             | Sptbn2 | 29211  | 1,06 | down |
| 5798389 | 7039041 | 983203  | spectrin, beta, non-erythrocytic 2                             | Sptbn2 | 29211  | 1,05 | up   |
| 6044977 | 7039041 | 983182  | spectrin, beta, non-erythrocytic 2                             | Sptbn2 | 29211  | 1,04 | down |
| 6742938 | 7039041 | 983198  | spectrin, beta, non-erythrocytic 2                             | Sptbn2 | 29211  | 1,04 | down |
| 5671825 | 7039041 | 983192  | spectrin, beta, non-erythrocytic 2                             | Sptbn2 | 29211  | 1,04 | down |
| 5790669 | 7039041 | 983202  | spectrin, beta, non-erythrocytic 2                             | Sptbn2 | 29211  | 1,03 | up   |
| 6711238 | 7039041 | 983215  | spectrin, beta, non-erythrocytic 2                             | Sptbn2 | 29211  | 1,03 | up   |
| 6581131 | 7039041 | 983190  | spectrin, beta, non-erythrocytic 2                             | Sptbn2 | 29211  | 1,01 | up   |
| 5623491 | 7039041 | 983215  | spectrin, beta, non-erythrocytic 2                             | Sptbn2 | 29211  | 1,01 | up   |
| 5756293 | 7039041 | 983191  | spectrin, beta, non-erythrocytic 2                             | Sptbn2 | 29211  | 1,00 | down |
| 6376327 | 7243647 | 1482487 | spectrin, beta, non-erythrocytic 5                             | Sptbn5 | 296090 | 1,12 | down |
| 6073322 | 7068413 | 1051961 | sperm antigen with calponin homology and coiled-coil domains 1 | Specc1 | 303208 | 2,08 | up   |
| 6186530 | 7068413 | 1051955 | sperm antigen with calponin homology and coiled-coil domains 1 | Specc1 | 303208 | 1,44 | up   |
| 6156109 | 7068413 | 1051948 | sperm antigen with calponin homology and coiled-coil domains 1 | Specc1 | 303208 | 1,39 | down |
| 6417899 | 7068413 | 1051960 | sperm antigen with calponin homology and coiled-coil domains 1 | Specc1 | 303208 | 1,39 | up   |
| 6237575 | 7068413 | 1051959 | sperm antigen with calponin homology and coiled-coil domains 1 | Specc1 | 303208 | 1,26 | down |
| 6394264 | 7068413 | 1051962 | sperm antigen with calponin homology and coiled-coil domains 1 | Specc1 | 303208 | 1,26 | down |
| 5968356 | 7068413 | 1051947 | sperm antigen with calponin homology and coiled-coil domains 1 | Specc1 | 303208 | 1,18 | up   |
| 6567142 | 7068413 | 1051958 | sperm antigen with calponin homology and coiled-coil domains 1 | Specc1 | 303208 | 1,02 | down |
| 5859706 | 7316192 | 1662693 | sperm associated antigen 1                                     | Spag1  | 315033 | 2,43 | down |
| 6319623 | 7316192 | 1662694 | sperm associated antigen 1                                     | Spag1  | 315033 | 2,05 | down |
| 6042567 | 7316192 | 1662695 | sperm associated antigen 1                                     | Spag1  | 315033 | 1,92 | down |
| 6250669 | 7316192 | 1662696 | sperm associated antigen 1                                     | Spag1  | 315033 | 1,29 | down |
| 5625560 | 7316192 | 1662685 | sperm associated antigen 1                                     | Spag1  | 315033 | 1,25 | down |
| 6621038 | 7316192 | 1662683 | sperm associated antigen 1                                     | Spag1  | 315033 | 1,24 | down |
| 6154490 | 7316192 | 1662692 | sperm associated antigen 1                                     | Spag1  | 315033 | 1,23 | up   |
| 5949824 | 7316192 | 1662689 | sperm associated antigen 1                                     | Spag1  | 315033 | 1,20 | up   |
| 5956497 | 7316192 | 1662677 | sperm associated antigen 1                                     | Spag1  | 315033 | 1,20 | down |
| 6164102 | 7316192 | 1662686 | sperm associated antigen 1                                     | Spag1  | 315033 | 1,14 | down |
| 5899064 | 7316192 | 1662684 | sperm associated antigen 1                                     | Spag1  | 315033 | 1,14 | down |
| 5827635 | 7316192 | 1662688 | sperm associated antigen 1                                     | Spag1  | 315033 | 1,09 | up   |
| 6704150 | 7316192 | 1662691 | sperm associated antigen 1                                     | Spag1  | 315033 | 1,09 | up   |
| 5831923 | 7316192 | 1662678 | sperm associated antigen 1                                     | Spag1  | 315033 | 1,05 | up   |
| 5948265 | 7316192 | 1662680 | sperm associated antigen 1                                     | Spag1  | 315033 | 1,05 | up   |
| 6479551 | 7316192 | 1662682 | sperm associated antigen 1                                     | Spag1  | 315033 | 1,04 | up   |
| 6663112 | 7316192 | 1662690 | sperm associated antigen 1                                     | Spag1  | 315033 | 1,04 | up   |
| 6419685 | 7316192 | 1662681 | sperm associated antigen 1                                     | Spag1  | 315033 | 1,03 | down |
| 6632774 | 7316192 | 1662679 | sperm associated antigen 1                                     | Spag1  | 315033 | 1,02 | up   |
| 5906624 | 7316192 | 1662687 | sperm associated antigen 1                                     | Spag1  | 315033 | 1,01 | down |
| 6451791 | 7071292 | 1059457 | sperm associated antigen 9                                     | Spag9  | 360600 | 2,31 | up   |
| 6431361 | 7071292 | 1059451 | sperm associated antigen 9                                     | Spag9  | 360600 | 1,65 | up   |
| 6317416 | 7071292 | 1059456 | sperm associated antigen 9                                     | Spag9  | 360600 | 1,41 | up   |
| 6554425 | 7071292 | 1059442 | sperm associated antigen 9                                     | Spag9  | 360600 | 1,41 | down |
| 6623421 | 7071292 | 1059465 | sperm associated antigen 9                                     | Spag9  | 360600 | 1,38 | up   |
| 6678088 | 7071292 | 1059439 | sperm associated antigen 9                                     | Spag9  | 360600 | 1,37 | down |
| 6299769 | 7071292 | 1059460 | sperm associated antigen 9                                     | Spag9  | 360600 | 1,35 | down |
| 5858337 | 7071292 | 1059464 | sperm associated antigen 9                                     | Spag9  | 360600 | 1,29 | down |
| 6156322 | 7071292 | 1059436 | sperm associated antigen 9                                     | Spag9  | 360600 | 1,28 | down |
| 6676789 | 7071292 | 1059456 | sperm associated antigen 9                                     | Spag9  | 360600 | 1,21 | up   |
| 6257899 | 7071292 | 1059441 | sperm associated antigen 9                                     | Spag9  | 360600 | 1,21 | down |
| 5716098 | 7071292 | 1059444 | sperm associated antigen 9                                     | Spag9  | 360600 | 1,18 | down |

|         |         |         |                               |         |        |      |      |
|---------|---------|---------|-------------------------------|---------|--------|------|------|
| 5794692 | 7071292 | 1059437 | sperm associated antigen 9    | Spag9   | 360600 | 1,17 | down |
| 6568527 | 7071292 | 1059455 | sperm associated antigen 9    | Spag9   | 360600 | 1,17 | up   |
| 6426876 | 7071292 | 1059452 | sperm associated antigen 9    | Spag9   | 360600 | 1,16 | up   |
| 5667510 | 7071292 | 1059463 | sperm associated antigen 9    | Spag9   | 360600 | 1,14 | down |
| 5967191 | 7071292 | 1059440 | sperm associated antigen 9    | Spag9   | 360600 | 1,13 | up   |
| 6255711 | 7071292 | 1059462 | sperm associated antigen 9    | Spag9   | 360600 | 1,12 | down |
| 6292121 | 7071292 | 1059435 | sperm associated antigen 9    | Spag9   | 360600 | 1,12 | down |
| 6540249 | 7071292 | 1059458 | sperm associated antigen 9    | Spag9   | 360600 | 1,12 | up   |
| 5978777 | 7071292 | 1059454 | sperm associated antigen 9    | Spag9   | 360600 | 1,10 | down |
| 6260131 | 7071292 | 1059448 | sperm associated antigen 9    | Spag9   | 360600 | 1,10 | down |
| 5643384 | 7071292 | 1059461 | sperm associated antigen 9    | Spag9   | 360600 | 1,09 | up   |
| 6536059 | 7071292 | 1059423 | sperm associated antigen 9    | Spag9   | 360600 | 1,08 | up   |
| 5810347 | 7071292 | 1059451 | sperm associated antigen 9    | Spag9   | 360600 | 1,07 | up   |
| 6641933 | 7071292 | 1059429 | sperm associated antigen 9    | Spag9   | 360600 | 1,05 | up   |
| 6074277 | 7071292 | 1059453 | sperm associated antigen 9    | Spag9   | 360600 | 1,02 | down |
| 6517005 | 7071292 | 1059443 | sperm associated antigen 9    | Spag9   | 360600 | 1,01 | down |
| 6721792 | 7124981 | 1189244 | spermatogenesis associated 18 | Spata18 | 289586 | 2,53 | up   |
| 6027979 | 7124981 | 1189238 | spermatogenesis associated 18 | Spata18 | 289586 | 2,18 | up   |
| 6576503 | 7124981 | 1189244 | spermatogenesis associated 18 | Spata18 | 289586 | 2,14 | up   |
| 6554678 | 7124981 | 1189238 | spermatogenesis associated 18 | Spata18 | 289586 | 1,96 | up   |
| 6211835 | 7124981 | 1189242 | spermatogenesis associated 18 | Spata18 | 289586 | 1,91 | down |
| 6177173 | 7124981 | 1189237 | spermatogenesis associated 18 | Spata18 | 289586 | 1,86 | up   |
| 6629619 | 7124981 | 1189240 | spermatogenesis associated 18 | Spata18 | 289586 | 1,64 | up   |
| 6191116 | 7124981 | 1189241 | spermatogenesis associated 18 | Spata18 | 289586 | 1,62 | down |
| 6475540 | 7124981 | 1189235 | spermatogenesis associated 18 | Spata18 | 289586 | 1,38 | up   |
| 6402061 | 7124981 | 1189233 | spermatogenesis associated 18 | Spata18 | 289586 | 1,38 | down |
| 6071929 | 7124981 | 1189233 | spermatogenesis associated 18 | Spata18 | 289586 | 1,32 | down |
| 5744176 | 7124981 | 1189232 | spermatogenesis associated 18 | Spata18 | 289586 | 1,32 | down |
| 5874023 | 7124981 | 1189234 | spermatogenesis associated 18 | Spata18 | 289586 | 1,31 | down |
| 6741462 | 7124981 | 1189236 | spermatogenesis associated 18 | Spata18 | 289586 | 1,20 | up   |
| 5773869 | 7124981 | 1189243 | spermatogenesis associated 18 | Spata18 | 289586 | 1,15 | up   |
| 5693779 | 7124981 | 1189244 | spermatogenesis associated 18 | Spata18 | 289586 | 1,11 | down |
| 5876654 | 7124981 | 1189237 | spermatogenesis associated 18 | Spata18 | 289586 | 1,04 | down |
| 6530424 | 7124981 | 1189239 | spermatogenesis associated 18 | Spata18 | 289586 | 1,00 | up   |
| 6311370 | 7281086 | 1575592 | spermatogenesis associated 21 | Spata21 | 366491 | 2,56 | down |
| 6330897 | 7281086 | 1575599 | spermatogenesis associated 21 | Spata21 | 366491 | 2,01 | up   |
| 5742582 | 7281086 | 1575595 | spermatogenesis associated 21 | Spata21 | 366491 | 1,49 | up   |
| 6040647 | 7281086 | 1575586 | spermatogenesis associated 21 | Spata21 | 366491 | 1,40 | down |
| 5804122 | 7281086 | 1575598 | spermatogenesis associated 21 | Spata21 | 366491 | 1,39 | up   |
| 6132862 | 7281086 | 1575590 | spermatogenesis associated 21 | Spata21 | 366491 | 1,38 | down |
| 6721469 | 7281086 | 1575591 | spermatogenesis associated 21 | Spata21 | 366491 | 1,35 | up   |
| 5796804 | 7281086 | 1575598 | spermatogenesis associated 21 | Spata21 | 366491 | 1,18 | down |
| 6336722 | 7281086 | 1575585 | spermatogenesis associated 21 | Spata21 | 366491 | 1,17 | up   |
| 6634790 | 7281086 | 1575587 | spermatogenesis associated 21 | Spata21 | 366491 | 1,14 | down |
| 6101676 | 7281086 | 1575599 | spermatogenesis associated 21 | Spata21 | 366491 | 1,13 | down |
| 5805069 | 7281086 | 1575594 | spermatogenesis associated 21 | Spata21 | 366491 | 1,13 | up   |
| 6121645 | 7281086 | 1575593 | spermatogenesis associated 21 | Spata21 | 366491 | 1,12 | up   |
| 6196495 | 7281086 | 1575589 | spermatogenesis associated 21 | Spata21 | 366491 | 1,11 | up   |
| 6494831 | 7281086 | 1575598 | spermatogenesis associated 21 | Spata21 | 366491 | 1,10 | down |
| 6520227 | 7281086 | 1575588 | spermatogenesis associated 21 | Spata21 | 366491 | 1,10 | up   |
| 6251373 | 7281086 | 1575588 | spermatogenesis associated 21 | Spata21 | 366491 | 1,08 | up   |
| 6560339 | 7281086 | 1575589 | spermatogenesis associated 21 | Spata21 | 366491 | 1,08 | down |
| 5663294 | 7281086 | 1575599 | spermatogenesis associated 21 | Spata21 | 366491 | 1,08 | up   |
| 6485714 | 7281086 | 1575592 | spermatogenesis associated 21 | Spata21 | 366491 | 1,06 | down |
| 6316397 | 7281086 | 1575596 | spermatogenesis associated 21 | Spata21 | 366491 | 1,04 | down |
| 5641295 | 7281086 | 1575597 | spermatogenesis associated 21 | Spata21 | 366491 | 1,01 | down |
| 6184158 | 7281086 | 1575592 | spermatogenesis associated 21 | Spata21 | 366491 | 1,00 | up   |

|         |         |         |                                             |        |        |      |      |
|---------|---------|---------|---------------------------------------------|--------|--------|------|------|
| 6011880 | 7357026 | 1762222 | spermatogenesis associated 3                | Spata3 | 363270 | 1,47 | up   |
| 6507641 | 7357026 | 1762221 | spermatogenesis associated 3                | Spata3 | 363270 | 1,11 | up   |
| 6299412 | 7357026 | 1762224 | spermatogenesis associated 3                | Spata3 | 363270 | 1,06 | up   |
| 6183242 | 7357026 | 1762222 | spermatogenesis associated 3                | Spata3 | 363270 | 1,04 | down |
| 5704289 | 7357026 | 1762229 | spermatogenesis associated 3                | Spata3 | 363270 | 1,03 | down |
| 6319107 | 7357026 | 1762224 | spermatogenesis associated 3                | Spata3 | 363270 | 1,03 | up   |
| 5737387 | 7352152 | 1750342 | spermatogenesis associated, serine-rich 1   | Spats1 | 301255 | 1,52 | down |
| 6078624 | 7352152 | 1750337 | spermatogenesis associated, serine-rich 1   | Spats1 | 301255 | 1,23 | down |
| 6660757 | 7352152 | 1750341 | spermatogenesis associated, serine-rich 1   | Spats1 | 301255 | 1,21 | up   |
| 5893453 | 7352152 | 1750340 | spermatogenesis associated, serine-rich 1   | Spats1 | 301255 | 1,18 | down |
| 6429032 | 7352152 | 1750342 | spermatogenesis associated, serine-rich 1   | Spats1 | 301255 | 1,17 | down |
| 5997275 | 7352152 | 1750339 | spermatogenesis associated, serine-rich 1   | Spats1 | 301255 | 1,05 | down |
| 6029778 | 7352152 | 1750337 | spermatogenesis associated, serine-rich 1   | Spats1 | 301255 | 1,05 | up   |
| 6049738 | 7352152 | 1750336 | spermatogenesis associated, serine-rich 1   | Spats1 | 301255 | 1,04 | up   |
| 6046940 | 7352152 | 1750338 | spermatogenesis associated, serine-rich 1   | Spats1 | 301255 | 1,02 | down |
| 5905463 | 7375057 | 1809523 | spermidine/spermine N1-acetyl transferase 1 | Sat1   | 302642 | 2,27 | down |
| 5928129 | 7375057 | 1809523 | spermidine/spermine N1-acetyl transferase 1 | Sat1   | 302642 | 2,27 | up   |
| 5897036 | 7375057 | 1809527 | spermidine/spermine N1-acetyl transferase 1 | Sat1   | 302642 | 1,77 | down |
| 5673765 | 7375057 | 1809524 | spermidine/spermine N1-acetyl transferase 1 | Sat1   | 302642 | 1,52 | down |
| 6575714 | 7375057 | 1809528 | spermidine/spermine N1-acetyl transferase 1 | Sat1   | 302642 | 1,51 | up   |
| 5990690 | 7375057 | 1809526 | spermidine/spermine N1-acetyl transferase 1 | Sat1   | 302642 | 1,44 | up   |
| 6035598 | 7375057 | 1809529 | spermidine/spermine N1-acetyl transferase 1 | Sat1   | 302642 | 1,42 | up   |
| 6533692 | 7375057 | 1809525 | spermidine/spermine N1-acetyl transferase 1 | Sat1   | 302642 | 1,19 | down |
| 5938772 | 7375057 | 1809523 | spermidine/spermine N1-acetyl transferase 1 | Sat1   | 302642 | 1,18 | up   |
| 5682818 | 7232732 | 1454582 | spermine oxidase                            | Smox   | 308652 | 3,31 | up   |
| 6111082 | 7232732 | 1454570 | spermine oxidase                            | Smox   | 308652 | 2,81 | down |
| 5707854 | 7232732 | 1454580 | spermine oxidase                            | Smox   | 308652 | 2,12 | up   |
| 6596831 | 7232732 | 1454585 | spermine oxidase                            | Smox   | 308652 | 1,60 | down |
| 5731065 | 7232732 | 1454582 | spermine oxidase                            | Smox   | 308652 | 1,50 | up   |
| 6250585 | 7232732 | 1454582 | spermine oxidase                            | Smox   | 308652 | 1,50 | up   |
| 5644515 | 7232732 | 1454583 | spermine oxidase                            | Smox   | 308652 | 1,33 | up   |
| 6730500 | 7232732 | 1454582 | spermine oxidase                            | Smox   | 308652 | 1,29 | up   |
| 6702259 | 7232732 | 1454583 | spermine oxidase                            | Smox   | 308652 | 1,25 | up   |
| 6545770 | 7232732 | 1454581 | spermine oxidase                            | Smox   | 308652 | 1,16 | up   |
| 6688339 | 7232732 | 1454585 | spermine oxidase                            | Smox   | 308652 | 1,10 | up   |
| 5930850 | 7232732 | 1454579 | spermine oxidase                            | Smox   | 308652 | 1,07 | down |
| 6034619 | 7204917 | 1387123 | S-phase kinase-associated protein 2 (p45)   | Skp2   | 294790 | 2,86 | down |
| 5965851 | 7204917 | 1387114 | S-phase kinase-associated protein 2 (p45)   | Skp2   | 294790 | 1,46 | down |
| 5696745 | 7204917 | 1387111 | S-phase kinase-associated protein 2 (p45)   | Skp2   | 294790 | 1,41 | down |
| 6314610 | 7204917 | 1387107 | S-phase kinase-associated protein 2 (p45)   | Skp2   | 294790 | 1,39 | up   |
| 6194430 | 7204917 | 1387110 | S-phase kinase-associated protein 2 (p45)   | Skp2   | 294790 | 1,32 | up   |
| 5731805 | 7204917 | 1387115 | S-phase kinase-associated protein 2 (p45)   | Skp2   | 294790 | 1,25 | down |
| 5631558 | 7204917 | 1387123 | S-phase kinase-associated protein 2 (p45)   | Skp2   | 294790 | 1,24 | up   |
| 6225119 | 7204917 | 1387116 | S-phase kinase-associated protein 2 (p45)   | Skp2   | 294790 | 1,18 | down |
| 6067935 | 7204917 | 1387119 | S-phase kinase-associated protein 2 (p45)   | Skp2   | 294790 | 1,14 | down |
| 5776533 | 7204917 | 1387124 | S-phase kinase-associated protein 2 (p45)   | Skp2   | 294790 | 1,04 | up   |
| 5707461 | 7204917 | 1387107 | S-phase kinase-associated protein 2 (p45)   | Skp2   | 294790 | 1,03 | down |
| 6162419 | 7204917 | 1387112 | S-phase kinase-associated protein 2 (p45)   | Skp2   | 294790 | 1,02 | up   |
| 6380511 | 7061894 | 1036286 | sphingomyelin synthase 1                    | Sgms1  | 353229 | 2,11 | up   |
| 6075711 | 7061894 | 1036291 | sphingomyelin synthase 1                    | Sgms1  | 353229 | 1,56 | down |
| 5975716 | 7061894 | 1036287 | sphingomyelin synthase 1                    | Sgms1  | 353229 | 1,43 | up   |
| 5644626 | 7061894 | 1036290 | sphingomyelin synthase 1                    | Sgms1  | 353229 | 1,42 | up   |
| 5934587 | 7061894 | 1036292 | sphingomyelin synthase 1                    | Sgms1  | 353229 | 1,42 | down |
| 6356010 | 7061894 | 1036293 | sphingomyelin synthase 1                    | Sgms1  | 353229 | 1,36 | down |
| 6267582 | 7061894 | 1036287 | sphingomyelin synthase 1                    | Sgms1  | 353229 | 1,34 | up   |
| 6333701 | 7061894 | 1036294 | sphingomyelin synthase 1                    | Sgms1  | 353229 | 1,22 | down |
| 6030014 | 7061894 | 1036284 | sphingomyelin synthase 1                    | Sgms1  | 353229 | 1,21 | up   |



|         |         |         |                                          |        |        |      |      |
|---------|---------|---------|------------------------------------------|--------|--------|------|------|
| 6528432 | 7061894 | 1036282 | sphingomyelin synthase 1                 | Sgms1  | 353229 | 1,19 | down |
| 6284919 | 7061894 | 1036285 | sphingomyelin synthase 1                 | Sgms1  | 353229 | 1,06 | down |
| 6269809 | 7061894 | 1036281 | sphingomyelin synthase 1                 | Sgms1  | 353229 | 1,05 | up   |
| 6418559 | 7061894 | 1036294 | sphingomyelin synthase 1                 | Sgms1  | 353229 | 1,04 | up   |
| 5836096 | 7061894 | 1036288 | sphingomyelin synthase 1                 | Sgms1  | 353229 | 1,02 | up   |
| 5676967 | 7061894 | 1036283 | sphingomyelin synthase 1                 | Sgms1  | 353229 | 1,02 | down |
| 5860643 | 7364582 | 1780525 | SPHK1 interactor, AKAP domain containing | Sphkap | 316561 | 1,59 | down |
| 5940395 | 7364582 | 1780559 | SPHK1 interactor, AKAP domain containing | Sphkap | 316561 | 1,41 | up   |
| 6326167 | 7364582 | 1780527 | SPHK1 interactor, AKAP domain containing | Sphkap | 316561 | 1,35 | down |
| 6393026 | 7364582 | 1780541 | SPHK1 interactor, AKAP domain containing | Sphkap | 316561 | 1,29 | down |
| 6350949 | 7364582 | 1780526 | SPHK1 interactor, AKAP domain containing | Sphkap | 316561 | 1,17 | down |
| 6532352 | 7364582 | 1780529 | SPHK1 interactor, AKAP domain containing | Sphkap | 316561 | 1,14 | up   |
| 6439641 | 7364582 | 1780559 | SPHK1 interactor, AKAP domain containing | Sphkap | 316561 | 1,11 | up   |
| 6188849 | 7364582 | 1780529 | SPHK1 interactor, AKAP domain containing | Sphkap | 316561 | 1,10 | down |
| 5944376 | 7364582 | 1780531 | SPHK1 interactor, AKAP domain containing | Sphkap | 316561 | 1,08 | down |
| 6548508 | 7364582 | 1780529 | SPHK1 interactor, AKAP domain containing | Sphkap | 316561 | 1,08 | down |
| 5976304 | 7364582 | 1780533 | SPHK1 interactor, AKAP domain containing | Sphkap | 316561 | 1,08 | up   |
| 5985685 | 7364582 | 1780559 | SPHK1 interactor, AKAP domain containing | Sphkap | 316561 | 1,04 | up   |
| 6284821 | 7364582 | 1780522 | SPHK1 interactor, AKAP domain containing | Sphkap | 316561 | 1,04 | up   |
| 6711043 | 7364582 | 1780529 | SPHK1 interactor, AKAP domain containing | Sphkap | 316561 | 1,03 | up   |
| 6312905 | 7364582 | 1780524 | SPHK1 interactor, AKAP domain containing | Sphkap | 316561 | 1,02 | down |
| 5854397 | 7364582 | 1780549 | SPHK1 interactor, AKAP domain containing | Sphkap | 316561 | 1,02 | up   |
| 6635437 | 7364582 | 1780553 | SPHK1 interactor, AKAP domain containing | Sphkap | 316561 | 1,02 | up   |
| 6094605 | 7364582 | 1780532 | SPHK1 interactor, AKAP domain containing | Sphkap | 316561 | 1,01 | up   |
| 6134639 | 7198325 | 1371340 | spindle assembly 6 homolog (C. elegans)  | Sass6  | 310807 | 1,61 | down |
| 6265582 | 7198325 | 1371338 | spindle assembly 6 homolog (C. elegans)  | Sass6  | 310807 | 1,59 | down |
| 6438502 | 7198325 | 1371335 | spindle assembly 6 homolog (C. elegans)  | Sass6  | 310807 | 1,39 | up   |
| 5724624 | 7198325 | 1371336 | spindle assembly 6 homolog (C. elegans)  | Sass6  | 310807 | 1,33 | up   |
| 5847823 | 7198325 | 1371342 | spindle assembly 6 homolog (C. elegans)  | Sass6  | 310807 | 1,23 | down |
| 6071319 | 7198325 | 1371339 | spindle assembly 6 homolog (C. elegans)  | Sass6  | 310807 | 1,21 | up   |
| 5928035 | 7198325 | 1371337 | spindle assembly 6 homolog (C. elegans)  | Sass6  | 310807 | 1,20 | up   |
| 6660728 | 7198325 | 1371341 | spindle assembly 6 homolog (C. elegans)  | Sass6  | 310807 | 1,19 | up   |
| 5723719 | 7198325 | 1371343 | spindle assembly 6 homolog (C. elegans)  | Sass6  | 310807 | 1,17 | up   |
| 5666485 | 7198325 | 1371345 | spindle assembly 6 homolog (C. elegans)  | Sass6  | 310807 | 1,17 | up   |
| 6500722 | 7198325 | 1371346 | spindle assembly 6 homolog (C. elegans)  | Sass6  | 310807 | 1,11 | down |
| 6606867 | 7198325 | 1371348 | spindle assembly 6 homolog (C. elegans)  | Sass6  | 310807 | 1,07 | down |
| 5646448 | 7198325 | 1371331 | spindle assembly 6 homolog (C. elegans)  | Sass6  | 310807 | 1,06 | up   |
| 6530431 | 7198325 | 1371349 | spindle assembly 6 homolog (C. elegans)  | Sass6  | 310807 | 1,03 | up   |
| 5666201 | 7198325 | 1371344 | spindle assembly 6 homolog (C. elegans)  | Sass6  | 310807 | 1,01 | down |
| 6229625 | 7079635 | 1078690 | spinster homolog 3 (Drosophila)          | Spns3  | 497946 | 2,05 | down |
| 6388758 | 7079635 | 1078688 | spinster homolog 3 (Drosophila)          | Spns3  | 497946 | 1,36 | down |
| 5895552 | 7079635 | 1078681 | spinster homolog 3 (Drosophila)          | Spns3  | 497946 | 1,35 | down |
| 6153512 | 7079635 | 1078680 | spinster homolog 3 (Drosophila)          | Spns3  | 497946 | 1,34 | down |
| 6575779 | 7079635 | 1078687 | spinster homolog 3 (Drosophila)          | Spns3  | 497946 | 1,21 | down |
| 6113681 | 7079635 | 1078692 | spinster homolog 3 (Drosophila)          | Spns3  | 497946 | 1,20 | down |
| 5691401 | 7079635 | 1078691 | spinster homolog 3 (Drosophila)          | Spns3  | 497946 | 1,16 | up   |
| 5864487 | 7079635 | 1078678 | spinster homolog 3 (Drosophila)          | Spns3  | 497946 | 1,09 | up   |
| 5954741 | 7079635 | 1078689 | spinster homolog 3 (Drosophila)          | Spns3  | 497946 | 1,07 | up   |
| 6491936 | 7079635 | 1078682 | spinster homolog 3 (Drosophila)          | Spns3  | 497946 | 1,06 | up   |
| 6246426 | 7079635 | 1078679 | spinster homolog 3 (Drosophila)          | Spns3  | 497946 | 1,05 | down |
| 5927486 | 7079635 | 1078695 | spinster homolog 3 (Drosophila)          | Spns3  | 497946 | 1,04 | up   |
| 6115686 | 7079635 | 1078695 | spinster homolog 3 (Drosophila)          | Spns3  | 497946 | 1,03 | up   |
| 6720972 | 7181871 | 1330167 | spire homolog 2 (Drosophila)             | Spire2 | 307925 | 2,48 | down |
| 6661299 | 7181871 | 1330174 | spire homolog 2 (Drosophila)             | Spire2 | 307925 | 1,58 | up   |
| 5764556 | 7181871 | 1330179 | spire homolog 2 (Drosophila)             | Spire2 | 307925 | 1,57 | up   |
| 6681637 | 7181871 | 1330177 | spire homolog 2 (Drosophila)             | Spire2 | 307925 | 1,38 | up   |
| 5937644 | 7181871 | 1330167 | spire homolog 2 (Drosophila)             | Spire2 | 307925 | 1,30 | down |

|         |         |         |                                                          |        |        |      |      |
|---------|---------|---------|----------------------------------------------------------|--------|--------|------|------|
| 6452972 | 7181871 | 1330175 | spire homolog 2 (Drosophila)                             | Spire2 | 307925 | 1,28 | down |
| 6347840 | 7181871 | 1330180 | spire homolog 2 (Drosophila)                             | Spire2 | 307925 | 1,24 | up   |
| 6269488 | 7181871 | 1330176 | spire homolog 2 (Drosophila)                             | Spire2 | 307925 | 1,24 | down |
| 6224968 | 7181871 | 1330179 | spire homolog 2 (Drosophila)                             | Spire2 | 307925 | 1,23 | up   |
| 6218705 | 7181871 | 1330183 | spire homolog 2 (Drosophila)                             | Spire2 | 307925 | 1,22 | up   |
| 6617527 | 7181871 | 1330173 | spire homolog 2 (Drosophila)                             | Spire2 | 307925 | 1,16 | up   |
| 6068149 | 7181871 | 1330169 | spire homolog 2 (Drosophila)                             | Spire2 | 307925 | 1,13 | up   |
| 6180407 | 7181871 | 1330186 | spire homolog 2 (Drosophila)                             | Spire2 | 307925 | 1,11 | down |
| 5695165 | 7181871 | 1330182 | spire homolog 2 (Drosophila)                             | Spire2 | 307925 | 1,06 | down |
| 6445527 | 7181871 | 1330186 | spire homolog 2 (Drosophila)                             | Spire2 | 307925 | 1,06 | down |
| 6609010 | 7181871 | 1330167 | spire homolog 2 (Drosophila)                             | Spire2 | 307925 | 1,05 | up   |
| 5808579 | 7181871 | 1330184 | spire homolog 2 (Drosophila)                             | Spire2 | 307925 | 1,05 | up   |
| 6178041 | 7181871 | 1330185 | spire homolog 2 (Drosophila)                             | Spire2 | 307925 | 1,05 | up   |
| 6582541 | 7181871 | 1330177 | spire homolog 2 (Drosophila)                             | Spire2 | 307925 | 1,02 | up   |
| 5803453 | 7181871 | 1330178 | spire homolog 2 (Drosophila)                             | Spire2 | 307925 | 1,00 | down |
| 5757992 | 7065640 | 1045199 | splA/ryanodine receptor domain and SOCS box containing 3 | Spsb3  | 302981 | 2,77 | down |
| 5886322 | 7065640 | 1045211 | splA/ryanodine receptor domain and SOCS box containing 3 | Spsb3  | 302981 | 1,57 | down |
| 6343183 | 7065640 | 1045200 | splA/ryanodine receptor domain and SOCS box containing 3 | Spsb3  | 302981 | 1,51 | down |
| 6195929 | 7065640 | 1045210 | splA/ryanodine receptor domain and SOCS box containing 3 | Spsb3  | 302981 | 1,45 | up   |
| 5836852 | 7065640 | 1045211 | splA/ryanodine receptor domain and SOCS box containing 3 | Spsb3  | 302981 | 1,41 | up   |
| 6484265 | 7065640 | 1045208 | splA/ryanodine receptor domain and SOCS box containing 3 | Spsb3  | 302981 | 1,35 | up   |
| 6245544 | 7065640 | 1045211 | splA/ryanodine receptor domain and SOCS box containing 3 | Spsb3  | 302981 | 1,25 | up   |
| 6086359 | 7065640 | 1045201 | splA/ryanodine receptor domain and SOCS box containing 3 | Spsb3  | 302981 | 1,18 | up   |
| 6221193 | 7065640 | 1045210 | splA/ryanodine receptor domain and SOCS box containing 3 | Spsb3  | 302981 | 1,11 | up   |
| 6290101 | 7065640 | 1045209 | splA/ryanodine receptor domain and SOCS box containing 3 | Spsb3  | 302981 | 1,07 | down |
| 5629714 | 7120486 | 1178583 | splicing factor 3a, subunit 1                            | Sf3a1  | 305479 | 1,65 | up   |
| 6429741 | 7120486 | 1178585 | splicing factor 3a, subunit 1                            | Sf3a1  | 305479 | 1,64 | down |
| 6560624 | 7120486 | 1178587 | splicing factor 3a, subunit 1                            | Sf3a1  | 305479 | 1,50 | down |
| 6525488 | 7120486 | 1178582 | splicing factor 3a, subunit 1                            | Sf3a1  | 305479 | 1,39 | down |
| 5888871 | 7120486 | 1178586 | splicing factor 3a, subunit 1                            | Sf3a1  | 305479 | 1,36 | down |
| 6312495 | 7120486 | 1178582 | splicing factor 3a, subunit 1                            | Sf3a1  | 305479 | 1,32 | up   |
| 6048905 | 7120486 | 1178571 | splicing factor 3a, subunit 1                            | Sf3a1  | 305479 | 1,25 | up   |
| 6151411 | 7120486 | 1178585 | splicing factor 3a, subunit 1                            | Sf3a1  | 305479 | 1,21 | up   |
| 5668644 | 7120486 | 1178576 | splicing factor 3a, subunit 1                            | Sf3a1  | 305479 | 1,15 | up   |
| 5896355 | 7120486 | 1178572 | splicing factor 3a, subunit 1                            | Sf3a1  | 305479 | 1,15 | down |
| 6486460 | 7120486 | 1178582 | splicing factor 3a, subunit 1                            | Sf3a1  | 305479 | 1,14 | down |
| 5621281 | 7120486 | 1178584 | splicing factor 3a, subunit 1                            | Sf3a1  | 305479 | 1,12 | up   |
| 6268649 | 7120486 | 1178575 | splicing factor 3a, subunit 1                            | Sf3a1  | 305479 | 1,12 | up   |
| 5765824 | 7120486 | 1178577 | splicing factor 3a, subunit 1                            | Sf3a1  | 305479 | 1,12 | up   |
| 6234278 | 7120486 | 1178581 | splicing factor 3a, subunit 1                            | Sf3a1  | 305479 | 1,10 | down |
| 6487292 | 7120486 | 1178578 | splicing factor 3a, subunit 1                            | Sf3a1  | 305479 | 1,08 | up   |
| 6566583 | 7120486 | 1178579 | splicing factor 3a, subunit 1                            | Sf3a1  | 305479 | 1,06 | down |
| 6248390 | 7120486 | 1178573 | splicing factor 3a, subunit 1                            | Sf3a1  | 305479 | 1,04 | up   |
| 5967767 | 7120486 | 1178570 | splicing factor 3a, subunit 1                            | Sf3a1  | 305479 | 1,03 | up   |
| 6162633 | 7120486 | 1178588 | splicing factor 3a, subunit 1                            | Sf3a1  | 305479 | 1,03 | down |
| 5857054 | 7120486 | 1178574 | splicing factor 3a, subunit 1                            | Sf3a1  | 305479 | 1,03 | up   |
| 5841921 | 7120486 | 1178580 | splicing factor 3a, subunit 1                            | Sf3a1  | 305479 | 1,02 | up   |
| 6637855 | 7187149 | 1342809 | splicing factor, arginine/serine-rich 16                 | Sfrs16 | 499390 | 2,84 | down |
| 6207509 | 7187149 | 1342792 | splicing factor, arginine/serine-rich 16                 | Sfrs16 | 499390 | 2,00 | up   |
| 6111902 | 7187149 | 1342800 | splicing factor, arginine/serine-rich 16                 | Sfrs16 | 499390 | 1,75 | down |
| 6742013 | 7187149 | 1342805 | splicing factor, arginine/serine-rich 16                 | Sfrs16 | 499390 | 1,60 | up   |
| 6626214 | 7187149 | 1342810 | splicing factor, arginine/serine-rich 16                 | Sfrs16 | 499390 | 1,57 | down |
| 6448609 | 7187149 | 1342798 | splicing factor, arginine/serine-rich 16                 | Sfrs16 | 499390 | 1,55 | up   |
| 6389906 | 7187149 | 1342797 | splicing factor, arginine/serine-rich 16                 | Sfrs16 | 499390 | 1,54 | down |
| 6014551 | 7187149 | 1342793 | splicing factor, arginine/serine-rich 16                 | Sfrs16 | 499390 | 1,50 | up   |
| 6649536 | 7187149 | 1342801 | splicing factor, arginine/serine-rich 16                 | Sfrs16 | 499390 | 1,36 | down |
| 5838077 | 7187149 | 1342801 | splicing factor, arginine/serine-rich 16                 | Sfrs16 | 499390 | 1,33 | up   |

|         |         |         |                                                                       |        |        |      |      |
|---------|---------|---------|-----------------------------------------------------------------------|--------|--------|------|------|
| 5827458 | 7187149 | 1342806 | splicing factor, arginine/serine-rich 16                              | Sfrs16 | 499390 | 1,27 | down |
| 6712409 | 7187149 | 1342804 | splicing factor, arginine/serine-rich 16                              | Sfrs16 | 499390 | 1,22 | up   |
| 6310019 | 7187149 | 1342791 | splicing factor, arginine/serine-rich 16                              | Sfrs16 | 499390 | 1,22 | up   |
| 6480569 | 7187149 | 1342803 | splicing factor, arginine/serine-rich 16                              | Sfrs16 | 499390 | 1,16 | down |
| 6745261 | 7187149 | 1342808 | splicing factor, arginine/serine-rich 16                              | Sfrs16 | 499390 | 1,12 | down |
| 5632616 | 7187149 | 1342795 | splicing factor, arginine/serine-rich 16                              | Sfrs16 | 499390 | 1,11 | up   |
| 6163211 | 7187149 | 1342802 | splicing factor, arginine/serine-rich 16                              | Sfrs16 | 499390 | 1,10 | down |
| 6714823 | 7187149 | 1342794 | splicing factor, arginine/serine-rich 16                              | Sfrs16 | 499390 | 1,08 | down |
| 6553043 | 7187149 | 1342807 | splicing factor, arginine/serine-rich 16                              | Sfrs16 | 499390 | 1,06 | down |
| 6257527 | 7187149 | 1342799 | splicing factor, arginine/serine-rich 16                              | Sfrs16 | 499390 | 1,05 | up   |
| 6381671 | 7187149 | 1342810 | splicing factor, arginine/serine-rich 16                              | Sfrs16 | 499390 | 1,03 | up   |
| 6734566 | 7187149 | 1342791 | splicing factor, arginine/serine-rich 16                              | Sfrs16 | 499390 | 1,03 | down |
| 5856366 | 7187149 | 1342796 | splicing factor, arginine/serine-rich 16                              | Sfrs16 | 499390 | 1,01 | down |
| 6725251 | 7187149 | 1342803 | splicing factor, arginine/serine-rich 16                              | Sfrs16 | 499390 | 1,01 | down |
| 6481350 | 7101643 | 1131595 | splicing factor, arginine/serine-rich 8                               | Sfrs8  | 304431 | 2,06 | down |
| 6233567 | 7101643 | 1131590 | splicing factor, arginine/serine-rich 8                               | Sfrs8  | 304431 | 1,72 | up   |
| 6563623 | 7101643 | 1131580 | splicing factor, arginine/serine-rich 8                               | Sfrs8  | 304431 | 1,56 | up   |
| 6162664 | 7101643 | 1131576 | splicing factor, arginine/serine-rich 8                               | Sfrs8  | 304431 | 1,48 | down |
| 6632648 | 7101643 | 1131595 | splicing factor, arginine/serine-rich 8                               | Sfrs8  | 304431 | 1,43 | down |
| 5928937 | 7101643 | 1131593 | splicing factor, arginine/serine-rich 8                               | Sfrs8  | 304431 | 1,33 | up   |
| 5949465 | 7101643 | 1131594 | splicing factor, arginine/serine-rich 8                               | Sfrs8  | 304431 | 1,33 | up   |
| 6108322 | 7101643 | 1131567 | splicing factor, arginine/serine-rich 8                               | Sfrs8  | 304431 | 1,26 | down |
| 6553704 | 7101643 | 1131566 | splicing factor, arginine/serine-rich 8                               | Sfrs8  | 304431 | 1,25 | up   |
| 6418056 | 7101643 | 1131581 | splicing factor, arginine/serine-rich 8                               | Sfrs8  | 304431 | 1,24 | down |
| 5715000 | 7101643 | 1131565 | splicing factor, arginine/serine-rich 8                               | Sfrs8  | 304431 | 1,22 | down |
| 6030707 | 7101643 | 1131578 | splicing factor, arginine/serine-rich 8                               | Sfrs8  | 304431 | 1,21 | up   |
| 6268344 | 7101643 | 1131582 | splicing factor, arginine/serine-rich 8                               | Sfrs8  | 304431 | 1,20 | up   |
| 6341828 | 7101643 | 1131565 | splicing factor, arginine/serine-rich 8                               | Sfrs8  | 304431 | 1,19 | down |
| 5753706 | 7101643 | 1131573 | splicing factor, arginine/serine-rich 8                               | Sfrs8  | 304431 | 1,19 | down |
| 6091038 | 7101643 | 1131565 | splicing factor, arginine/serine-rich 8                               | Sfrs8  | 304431 | 1,18 | down |
| 6324286 | 7101643 | 1131576 | splicing factor, arginine/serine-rich 8                               | Sfrs8  | 304431 | 1,17 | down |
| 6734665 | 7101643 | 1131565 | splicing factor, arginine/serine-rich 8                               | Sfrs8  | 304431 | 1,17 | down |
| 6201166 | 7101643 | 1131577 | splicing factor, arginine/serine-rich 8                               | Sfrs8  | 304431 | 1,15 | up   |
| 6297254 | 7101643 | 1131595 | splicing factor, arginine/serine-rich 8                               | Sfrs8  | 304431 | 1,15 | down |
| 5989241 | 7101643 | 1131595 | splicing factor, arginine/serine-rich 8                               | Sfrs8  | 304431 | 1,14 | down |
| 6631176 | 7101643 | 1131576 | splicing factor, arginine/serine-rich 8                               | Sfrs8  | 304431 | 1,10 | down |
| 6214326 | 7101643 | 1131565 | splicing factor, arginine/serine-rich 8                               | Sfrs8  | 304431 | 1,05 | up   |
| 6217291 | 7101643 | 1131583 | splicing factor, arginine/serine-rich 8                               | Sfrs8  | 304431 | 1,04 | up   |
| 5800673 | 7101643 | 1131592 | splicing factor, arginine/serine-rich 8                               | Sfrs8  | 304431 | 1,03 | down |
| 6268454 | 7101643 | 1131591 | splicing factor, arginine/serine-rich 8                               | Sfrs8  | 304431 | 1,01 | down |
| 5804918 | 7235840 | 1463003 | SPO11 meiotic protein covalently bound to DSB homolog (S. cerevisiae) | Spo11  | 366261 | 1,72 | down |
| 6294287 | 7235840 | 1462995 | SPO11 meiotic protein covalently bound to DSB homolog (S. cerevisiae) | Spo11  | 366261 | 1,65 | down |
| 6451743 | 7235840 | 1463000 | SPO11 meiotic protein covalently bound to DSB homolog (S. cerevisiae) | Spo11  | 366261 | 1,56 | down |
| 5721301 | 7235840 | 1462992 | SPO11 meiotic protein covalently bound to DSB homolog (S. cerevisiae) | Spo11  | 366261 | 1,42 | down |
| 6079157 | 7235840 | 1462995 | SPO11 meiotic protein covalently bound to DSB homolog (S. cerevisiae) | Spo11  | 366261 | 1,34 | up   |
| 6694667 | 7235840 | 1462993 | SPO11 meiotic protein covalently bound to DSB homolog (S. cerevisiae) | Spo11  | 366261 | 1,27 | down |
| 6102551 | 7235840 | 1462995 | SPO11 meiotic protein covalently bound to DSB homolog (S. cerevisiae) | Spo11  | 366261 | 1,26 | down |
| 6203560 | 7235840 | 1463002 | SPO11 meiotic protein covalently bound to DSB homolog (S. cerevisiae) | Spo11  | 366261 | 1,19 | down |
| 6396398 | 7235840 | 1462994 | SPO11 meiotic protein covalently bound to DSB homolog (S. cerevisiae) | Spo11  | 366261 | 1,10 | up   |
| 5625988 | 7235840 | 1463003 | SPO11 meiotic protein covalently bound to DSB homolog (S. cerevisiae) | Spo11  | 366261 | 1,04 | down |
| 5786283 | 7235840 | 1462998 | SPO11 meiotic protein covalently bound to DSB homolog (S. cerevisiae) | Spo11  | 366261 | 1,02 | down |
| 5860139 | 7235840 | 1463001 | SPO11 meiotic protein covalently bound to DSB homolog (S. cerevisiae) | Spo11  | 366261 | 1,02 | down |
| 6324320 | 7235840 | 1462999 | SPO11 meiotic protein covalently bound to DSB homolog (S. cerevisiae) | Spo11  | 366261 | 1,02 | up   |
| 5654959 | 7235840 | 1462996 | SPO11 meiotic protein covalently bound to DSB homolog (S. cerevisiae) | Spo11  | 366261 | 1,01 | up   |
| 6092696 | 7196331 | 1366390 | Src homology 2 domain containing E                                    | She    | 685088 | 1,07 | down |
| 6690141 | 7056304 | 1023569 | SRY (sex determining region Y)-box 6                                  | Sox6   | 293165 | 2,46 | up   |
| 6073164 | 7056304 | 1023616 | SRY (sex determining region Y)-box 6                                  | Sox6   | 293165 | 1,50 | up   |

|         |         |         |                                                         |         |        |      |      |
|---------|---------|---------|---------------------------------------------------------|---------|--------|------|------|
| 6099122 | 7056304 | 1023582 | SRY (sex determining region Y)-box 6                    | Sox6    | 293165 | 1,40 | down |
| 6745516 | 7056304 | 1023582 | SRY (sex determining region Y)-box 6                    | Sox6    | 293165 | 1,37 | down |
| 5743927 | 7056304 | 1023558 | SRY (sex determining region Y)-box 6                    | Sox6    | 293165 | 1,32 | down |
| 6532329 | 7056304 | 1023521 | SRY (sex determining region Y)-box 6                    | Sox6    | 293165 | 1,27 | up   |
| 6254759 | 7056304 | 1023537 | SRY (sex determining region Y)-box 6                    | Sox6    | 293165 | 1,19 | down |
| 6205229 | 7056304 | 1023597 | SRY (sex determining region Y)-box 6                    | Sox6    | 293165 | 1,18 | up   |
| 6586818 | 7056304 | 1023593 | SRY (sex determining region Y)-box 6                    | Sox6    | 293165 | 1,17 | down |
| 6373754 | 7056304 | 1023549 | SRY (sex determining region Y)-box 6                    | Sox6    | 293165 | 1,17 | down |
| 5908378 | 7056304 | 1023548 | SRY (sex determining region Y)-box 6                    | Sox6    | 293165 | 1,11 | up   |
| 5720030 | 7056304 | 1023558 | SRY (sex determining region Y)-box 6                    | Sox6    | 293165 | 1,09 | down |
| 6651788 | 7056304 | 1023597 | SRY (sex determining region Y)-box 6                    | Sox6    | 293165 | 1,09 | up   |
| 6702226 | 7056304 | 1023548 | SRY (sex determining region Y)-box 6                    | Sox6    | 293165 | 1,08 | up   |
| 6426639 | 7056304 | 1023524 | SRY (sex determining region Y)-box 6                    | Sox6    | 293165 | 1,04 | up   |
| 6078208 | 7056304 | 1023561 | SRY (sex determining region Y)-box 6                    | Sox6    | 293165 | 1,01 | up   |
| 6650452 | 7056304 | 1023550 | SRY (sex determining region Y)-box 6                    | Sox6    | 293165 | 1,01 | down |
| 5878426 | 7056304 | 1023571 | SRY (sex determining region Y)-box 6                    | Sox6    | 293165 | 1,00 | down |
| 6185810 | 7075533 | 1069573 | SRY (sex determining region Y)-box 8                    | Sox8    | 302993 | 3,10 | down |
| 6030264 | 7075533 | 1069573 | SRY (sex determining region Y)-box 8                    | Sox8    | 302993 | 1,76 | down |
| 5934266 | 7075533 | 1069569 | SRY (sex determining region Y)-box 8                    | Sox8    | 302993 | 1,33 | down |
| 6486512 | 7075533 | 1069573 | SRY (sex determining region Y)-box 8                    | Sox8    | 302993 | 1,22 | down |
| 6418959 | 7075533 | 1069573 | SRY (sex determining region Y)-box 8                    | Sox8    | 302993 | 1,18 | up   |
| 5759305 | 7075533 | 1069569 | SRY (sex determining region Y)-box 8                    | Sox8    | 302993 | 1,15 | up   |
| 5671983 | 7075533 | 1069572 | SRY (sex determining region Y)-box 8                    | Sox8    | 302993 | 1,05 | up   |
| 6496896 | 7181026 | 1327842 | ST3 beta-galactoside alpha-2,3-sialyltransferase 2      | St3gal2 | 64442  | 2,52 | down |
| 5749329 | 7181026 | 1327844 | ST3 beta-galactoside alpha-2,3-sialyltransferase 2      | St3gal2 | 64442  | 1,74 | down |
| 6440579 | 7181026 | 1327844 | ST3 beta-galactoside alpha-2,3-sialyltransferase 2      | St3gal2 | 64442  | 1,30 | up   |
| 6367959 | 7181026 | 1327841 | ST3 beta-galactoside alpha-2,3-sialyltransferase 2      | St3gal2 | 64442  | 1,21 | up   |
| 6194760 | 7181026 | 1327839 | ST3 beta-galactoside alpha-2,3-sialyltransferase 2      | St3gal2 | 64442  | 1,03 | down |
| 5969245 | 7181026 | 1327843 | ST3 beta-galactoside alpha-2,3-sialyltransferase 2      | St3gal2 | 64442  | 1,02 | down |
| 6415802 | 7181026 | 1327838 | ST3 beta-galactoside alpha-2,3-sialyltransferase 2      | St3gal2 | 64442  | 1,00 | down |
| 6699870 | 7094780 | 1114562 | ST6 beta-galactosamide alpha-2,6-sialyltransferase 1    | St6gal1 | 25197  | 4,13 | up   |
| 6627447 | 7094780 | 1114558 | ST6 beta-galactosamide alpha-2,6-sialyltransferase 1    | St6gal1 | 25197  | 3,70 | up   |
| 6653624 | 7094780 | 1114548 | ST6 beta-galactosamide alpha-2,6-sialyltransferase 1    | St6gal1 | 25197  | 1,87 | up   |
| 6589376 | 7094780 | 1114554 | ST6 beta-galactosamide alpha-2,6-sialyltransferase 1    | St6gal1 | 25197  | 1,71 | down |
| 6564296 | 7094780 | 1114559 | ST6 beta-galactosamide alpha-2,6-sialyltransferase 1    | St6gal1 | 25197  | 1,69 | up   |
| 5838256 | 7094780 | 1114555 | ST6 beta-galactosamide alpha-2,6-sialyltransferase 1    | St6gal1 | 25197  | 1,58 | down |
| 5659442 | 7094780 | 1114561 | ST6 beta-galactosamide alpha-2,6-sialyltransferase 1    | St6gal1 | 25197  | 1,39 | down |
| 6329008 | 7094780 | 1114561 | ST6 beta-galactosamide alpha-2,6-sialyltransferase 1    | St6gal1 | 25197  | 1,35 | up   |
| 6234293 | 7094780 | 1114561 | ST6 beta-galactosamide alpha-2,6-sialyltransferase 1    | St6gal1 | 25197  | 1,32 | down |
| 6590671 | 7094780 | 1114556 | ST6 beta-galactosamide alpha-2,6-sialyltransferase 1    | St6gal1 | 25197  | 1,25 | down |
| 6403013 | 7094780 | 1114561 | ST6 beta-galactosamide alpha-2,6-sialyltransferase 1    | St6gal1 | 25197  | 1,25 | down |
| 5791672 | 7094780 | 1114557 | ST6 beta-galactosamide alpha-2,6-sialyltransferase 1    | St6gal1 | 25197  | 1,19 | down |
| 6569995 | 7094780 | 1114549 | ST6 beta-galactosamide alpha-2,6-sialyltransferase 1    | St6gal1 | 25197  | 1,18 | down |
| 6175499 | 7094780 | 1114551 | ST6 beta-galactosamide alpha-2,6-sialyltransferase 1    | St6gal1 | 25197  | 1,17 | down |
| 6296460 | 7094780 | 1114550 | ST6 beta-galactosamide alpha-2,6-sialyltransferase 1    | St6gal1 | 25197  | 1,16 | down |
| 6188168 | 7094780 | 1114553 | ST6 beta-galactosamide alpha-2,6-sialyltransferase 1    | St6gal1 | 25197  | 1,16 | down |
| 5948106 | 7094780 | 1114552 | ST6 beta-galactosamide alpha-2,6-sialyltransferase 1    | St6gal1 | 25197  | 1,09 | up   |
| 5799259 | 7094780 | 1114560 | ST6 beta-galactosamide alpha-2,6-sialyltransferase 1    | St6gal1 | 25197  | 1,06 | down |
| 6335196 | 7065980 | 1046080 | stanniocalcin 2                                         | Stc2    | 63878  | 2,00 | up   |
| 5888347 | 7065980 | 1046081 | stanniocalcin 2                                         | Stc2    | 63878  | 1,33 | down |
| 5793355 | 7065980 | 1046079 | stanniocalcin 2                                         | Stc2    | 63878  | 1,31 | down |
| 5917816 | 7065980 | 1046082 | stanniocalcin 2                                         | Stc2    | 63878  | 1,07 | up   |
| 6029131 | 7033673 | 970371  | StAR-related lipid transfer (START) domain containing 5 | Stard5  | 502348 | 2,04 | up   |
| 5747770 | 7033673 | 970380  | StAR-related lipid transfer (START) domain containing 5 | Stard5  | 502348 | 1,04 | up   |
| 6286472 | 7368815 | 1792338 | STEAP family member 3                                   | Steap3  | 170824 | 3,13 | up   |
| 5997922 | 7368815 | 1792337 | STEAP family member 3                                   | Steap3  | 170824 | 2,12 | up   |
| 5922443 | 7368815 | 1792333 | STEAP family member 3                                   | Steap3  | 170824 | 1,84 | up   |

|         |         |         |                                                          |        |        |      |      |
|---------|---------|---------|----------------------------------------------------------|--------|--------|------|------|
| 6299937 | 7368815 | 1792315 | STEAP family member 3                                    | Steap3 | 170824 | 1,81 | down |
| 6614261 | 7368815 | 1792333 | STEAP family member 3                                    | Steap3 | 170824 | 1,36 | up   |
| 6563260 | 7368815 | 1792332 | STEAP family member 3                                    | Steap3 | 170824 | 1,36 | up   |
| 6008016 | 7368815 | 1792334 | STEAP family member 3                                    | Steap3 | 170824 | 1,07 | up   |
| 6612805 | 7243901 | 1483036 | stereocilin                                              | Src    | 691937 | 1,04 | down |
| 6101494 | 7261766 | 1527157 | sterile alpha motif domain containing 9-like             | Samd9l | 500015 | 2,27 | up   |
| 5677783 | 7261766 | 1527156 | sterile alpha motif domain containing 9-like             | Samd9l | 500015 | 1,15 | down |
| 5872845 | 7289791 | 1596237 | sterol carrier protein 2                                 | Scp2   | 25541  | 2,15 | up   |
| 6634523 | 7289791 | 1596222 | sterol carrier protein 2                                 | Scp2   | 25541  | 1,75 | up   |
| 6283024 | 7289791 | 1596232 | sterol carrier protein 2                                 | Scp2   | 25541  | 1,64 | up   |
| 6494953 | 7289791 | 1596228 | sterol carrier protein 2                                 | Scp2   | 25541  | 1,46 | down |
| 5827079 | 7289791 | 1596224 | sterol carrier protein 2                                 | Scp2   | 25541  | 1,35 | up   |
| 5650334 | 7289791 | 1596224 | sterol carrier protein 2                                 | Scp2   | 25541  | 1,31 | up   |
| 6562431 | 7289791 | 1596235 | sterol carrier protein 2                                 | Scp2   | 25541  | 1,31 | down |
| 6135575 | 7289791 | 1596234 | sterol carrier protein 2                                 | Scp2   | 25541  | 1,25 | down |
| 5851172 | 7289791 | 1596225 | sterol carrier protein 2                                 | Scp2   | 25541  | 1,25 | up   |
| 6564443 | 7289791 | 1596231 | sterol carrier protein 2                                 | Scp2   | 25541  | 1,23 | down |
| 6378283 | 7289791 | 1596236 | sterol carrier protein 2                                 | Scp2   | 25541  | 1,20 | up   |
| 5896796 | 7289791 | 1596227 | sterol carrier protein 2                                 | Scp2   | 25541  | 1,20 | down |
| 6480655 | 7289791 | 1596222 | sterol carrier protein 2                                 | Scp2   | 25541  | 1,11 | up   |
| 6325441 | 7289791 | 1596226 | sterol carrier protein 2                                 | Scp2   | 25541  | 1,10 | down |
| 6531254 | 7289791 | 1596230 | sterol carrier protein 2                                 | Scp2   | 25541  | 1,08 | up   |
| 6089480 | 7289791 | 1596229 | sterol carrier protein 2                                 | Scp2   | 25541  | 1,04 | down |
| 5699539 | 7289791 | 1596223 | sterol carrier protein 2                                 | Scp2   | 25541  | 1,04 | up   |
| 6159463 | 7289791 | 1596238 | sterol carrier protein 2                                 | Scp2   | 25541  | 1,01 | up   |
| 6269148 | 7289791 | 1596233 | sterol carrier protein 2                                 | Scp2   | 25541  | 1,01 | up   |
| 6732527 | 7321006 | 1674754 | sterol O-acyltransferase 2                               | Soat2  | 266770 | 2,37 | up   |
| 5997392 | 7321006 | 1674750 | sterol O-acyltransferase 2                               | Soat2  | 266770 | 1,73 | down |
| 5987208 | 7321006 | 1674759 | sterol O-acyltransferase 2                               | Soat2  | 266770 | 1,52 | down |
| 5702538 | 7321006 | 1674750 | sterol O-acyltransferase 2                               | Soat2  | 266770 | 1,49 | down |
| 6202725 | 7321006 | 1674764 | sterol O-acyltransferase 2                               | Soat2  | 266770 | 1,46 | up   |
| 5890290 | 7321006 | 1674763 | sterol O-acyltransferase 2                               | Soat2  | 266770 | 1,44 | down |
| 6659965 | 7321006 | 1674761 | sterol O-acyltransferase 2                               | Soat2  | 266770 | 1,37 | up   |
| 6355925 | 7321006 | 1674756 | sterol O-acyltransferase 2                               | Soat2  | 266770 | 1,29 | down |
| 6713119 | 7321006 | 1674751 | sterol O-acyltransferase 2                               | Soat2  | 266770 | 1,24 | down |
| 5993086 | 7321006 | 1674752 | sterol O-acyltransferase 2                               | Soat2  | 266770 | 1,21 | down |
| 6745282 | 7321006 | 1674764 | sterol O-acyltransferase 2                               | Soat2  | 266770 | 1,15 | down |
| 6185058 | 7321006 | 1674760 | sterol O-acyltransferase 2                               | Soat2  | 266770 | 1,15 | up   |
| 6514296 | 7321006 | 1674763 | sterol O-acyltransferase 2                               | Soat2  | 266770 | 1,09 | up   |
| 6561394 | 7321006 | 1674758 | sterol O-acyltransferase 2                               | Soat2  | 266770 | 1,08 | down |
| 5837624 | 7321006 | 1674755 | sterol O-acyltransferase 2                               | Soat2  | 266770 | 1,04 | down |
| 6238370 | 7321006 | 1674762 | sterol O-acyltransferase 2                               | Soat2  | 266770 | 1,04 | down |
| 6369851 | 7321006 | 1674753 | sterol O-acyltransferase 2                               | Soat2  | 266770 | 1,04 | up   |
| 5834779 | 7321006 | 1674765 | sterol O-acyltransferase 2                               | Soat2  | 266770 | 1,03 | down |
| 6130634 | 7321006 | 1674757 | sterol O-acyltransferase 2                               | Soat2  | 266770 | 1,02 | down |
| 6122557 | 7078143 | 1075446 | sterol regulatory element binding transcription factor 1 | Srebfl | 78968  | 1,58 | up   |
| 6693877 | 7078143 | 1075441 | sterol regulatory element binding transcription factor 1 | Srebfl | 78968  | 1,52 | down |
| 6307122 | 7078143 | 1075441 | sterol regulatory element binding transcription factor 1 | Srebfl | 78968  | 1,35 | up   |
| 5715575 | 7078143 | 1075448 | sterol regulatory element binding transcription factor 1 | Srebfl | 78968  | 1,29 | down |
| 6699736 | 7078143 | 1075449 | sterol regulatory element binding transcription factor 1 | Srebfl | 78968  | 1,21 | up   |
| 6123181 | 7078143 | 1075436 | sterol regulatory element binding transcription factor 1 | Srebfl | 78968  | 1,19 | down |
| 6490736 | 7078143 | 1075438 | sterol regulatory element binding transcription factor 1 | Srebfl | 78968  | 1,17 | down |
| 6430011 | 7078143 | 1075450 | sterol regulatory element binding transcription factor 1 | Srebfl | 78968  | 1,13 | up   |
| 6182904 | 7078143 | 1075451 | sterol regulatory element binding transcription factor 1 | Srebfl | 78968  | 1,12 | down |
| 6089468 | 7078143 | 1075446 | sterol regulatory element binding transcription factor 1 | Srebfl | 78968  | 1,11 | up   |
| 5788497 | 7078143 | 1075445 | sterol regulatory element binding transcription factor 1 | Srebfl | 78968  | 1,11 | down |
| 6400795 | 7078143 | 1075444 | sterol regulatory element binding transcription factor 1 | Srebfl | 78968  | 1,07 | up   |

|         |         |         |                                                          |        |        |      |      |
|---------|---------|---------|----------------------------------------------------------|--------|--------|------|------|
| 5960485 | 7078143 | 1075450 | sterol regulatory element binding transcription factor 1 | Srebfl | 78968  | 1,07 | down |
| 5809553 | 7078143 | 1075444 | sterol regulatory element binding transcription factor 1 | Srebfl | 78968  | 1,05 | up   |
| 5861329 | 7078143 | 1075436 | sterol regulatory element binding transcription factor 1 | Srebfl | 78968  | 1,05 | down |
| 5927573 | 7078143 | 1075451 | sterol regulatory element binding transcription factor 1 | Srebfl | 78968  | 1,04 | down |
| 5917098 | 7078143 | 1075443 | sterol regulatory element binding transcription factor 1 | Srebfl | 78968  | 1,04 | down |
| 6293425 | 7078143 | 1075442 | sterol regulatory element binding transcription factor 1 | Srebfl | 78968  | 1,03 | down |
| 5690583 | 7078143 | 1075439 | sterol regulatory element binding transcription factor 1 | Srebfl | 78968  | 1,02 | up   |
| 5706759 | 7078143 | 1075447 | sterol regulatory element binding transcription factor 1 | Srebfl | 78968  | 1,02 | up   |
| 6085182 | 7078143 | 1075440 | sterol regulatory element binding transcription factor 1 | Srebfl | 78968  | 1,01 | down |
| 6057587 | 7285530 | 1585966 | stomatin (Epb7.2)-like 2                                 | Stoml2 | 298203 | 2,87 | up   |
| 6575381 | 7285530 | 1585964 | stomatin (Epb7.2)-like 2                                 | Stoml2 | 298203 | 1,83 | down |
| 6695759 | 7285530 | 1585970 | stomatin (Epb7.2)-like 2                                 | Stoml2 | 298203 | 1,70 | down |
| 5800832 | 7285530 | 1585969 | stomatin (Epb7.2)-like 2                                 | Stoml2 | 298203 | 1,51 | up   |
| 6060572 | 7285530 | 1585970 | stomatin (Epb7.2)-like 2                                 | Stoml2 | 298203 | 1,34 | up   |
| 6167240 | 7285530 | 1585968 | stomatin (Epb7.2)-like 2                                 | Stoml2 | 298203 | 1,20 | up   |
| 6720899 | 7285530 | 1585965 | stomatin (Epb7.2)-like 2                                 | Stoml2 | 298203 | 1,14 | down |
| 6544553 | 7285530 | 1585970 | stomatin (Epb7.2)-like 2                                 | Stoml2 | 298203 | 1,14 | down |
| 6009341 | 7285530 | 1585967 | stomatin (Epb7.2)-like 2                                 | Stoml2 | 298203 | 1,11 | up   |
| 6425251 | 7285530 | 1585970 | stomatin (Epb7.2)-like 2                                 | Stoml2 | 298203 | 1,06 | down |
| 5725807 | 7285530 | 1585966 | stomatin (Epb7.2)-like 2                                 | Stoml2 | 298203 | 1,02 | up   |
| 5891041 | 7312566 | 1653310 | strawberry notch homolog 2 (Drosophila)                  | Sbno2  | 314619 | 2,06 | up   |
| 6198418 | 7312566 | 1653322 | strawberry notch homolog 2 (Drosophila)                  | Sbno2  | 314619 | 1,96 | up   |
| 6114062 | 7312566 | 1653295 | strawberry notch homolog 2 (Drosophila)                  | Sbno2  | 314619 | 1,89 | down |
| 6235446 | 7312566 | 1653313 | strawberry notch homolog 2 (Drosophila)                  | Sbno2  | 314619 | 1,87 | up   |
| 6113838 | 7312566 | 1653296 | strawberry notch homolog 2 (Drosophila)                  | Sbno2  | 314619 | 1,81 | down |
| 6593711 | 7312566 | 1653335 | strawberry notch homolog 2 (Drosophila)                  | Sbno2  | 314619 | 1,80 | up   |
| 6377254 | 7312566 | 1653304 | strawberry notch homolog 2 (Drosophila)                  | Sbno2  | 314619 | 1,79 | up   |
| 6350894 | 7312566 | 1653335 | strawberry notch homolog 2 (Drosophila)                  | Sbno2  | 314619 | 1,77 | down |
| 6306049 | 7312566 | 1653318 | strawberry notch homolog 2 (Drosophila)                  | Sbno2  | 314619 | 1,76 | up   |
| 6467346 | 7312566 | 1653331 | strawberry notch homolog 2 (Drosophila)                  | Sbno2  | 314619 | 1,74 | up   |
| 5798335 | 7312566 | 1653295 | strawberry notch homolog 2 (Drosophila)                  | Sbno2  | 314619 | 1,64 | down |
| 5947135 | 7312566 | 1653329 | strawberry notch homolog 2 (Drosophila)                  | Sbno2  | 314619 | 1,59 | up   |
| 5712363 | 7312566 | 1653300 | strawberry notch homolog 2 (Drosophila)                  | Sbno2  | 314619 | 1,58 | down |
| 5957517 | 7312566 | 1653309 | strawberry notch homolog 2 (Drosophila)                  | Sbno2  | 314619 | 1,51 | up   |
| 5947347 | 7312566 | 1653317 | strawberry notch homolog 2 (Drosophila)                  | Sbno2  | 314619 | 1,50 | up   |
| 6104689 | 7312566 | 1653297 | strawberry notch homolog 2 (Drosophila)                  | Sbno2  | 314619 | 1,49 | down |
| 6003700 | 7312566 | 1653321 | strawberry notch homolog 2 (Drosophila)                  | Sbno2  | 314619 | 1,38 | up   |
| 6447320 | 7312566 | 1653324 | strawberry notch homolog 2 (Drosophila)                  | Sbno2  | 314619 | 1,34 | down |
| 6502130 | 7312566 | 1653321 | strawberry notch homolog 2 (Drosophila)                  | Sbno2  | 314619 | 1,28 | up   |
| 5695646 | 7312566 | 1653319 | strawberry notch homolog 2 (Drosophila)                  | Sbno2  | 314619 | 1,26 | up   |
| 5895319 | 7312566 | 1653298 | strawberry notch homolog 2 (Drosophila)                  | Sbno2  | 314619 | 1,26 | down |
| 6564903 | 7312566 | 1653334 | strawberry notch homolog 2 (Drosophila)                  | Sbno2  | 314619 | 1,25 | up   |
| 5871476 | 7312566 | 1653325 | strawberry notch homolog 2 (Drosophila)                  | Sbno2  | 314619 | 1,25 | up   |
| 5866709 | 7312566 | 1653332 | strawberry notch homolog 2 (Drosophila)                  | Sbno2  | 314619 | 1,25 | down |
| 5773414 | 7312566 | 1653328 | strawberry notch homolog 2 (Drosophila)                  | Sbno2  | 314619 | 1,24 | up   |
| 6676089 | 7312566 | 1653312 | strawberry notch homolog 2 (Drosophila)                  | Sbno2  | 314619 | 1,20 | up   |
| 6373626 | 7312566 | 1653335 | strawberry notch homolog 2 (Drosophila)                  | Sbno2  | 314619 | 1,17 | up   |
| 6704590 | 7312566 | 1653314 | strawberry notch homolog 2 (Drosophila)                  | Sbno2  | 314619 | 1,14 | up   |
| 5693441 | 7312566 | 1653332 | strawberry notch homolog 2 (Drosophila)                  | Sbno2  | 314619 | 1,14 | down |
| 6511673 | 7312566 | 1653316 | strawberry notch homolog 2 (Drosophila)                  | Sbno2  | 314619 | 1,13 | down |
| 6477252 | 7312566 | 1653333 | strawberry notch homolog 2 (Drosophila)                  | Sbno2  | 314619 | 1,13 | down |
| 6661065 | 7312566 | 1653326 | strawberry notch homolog 2 (Drosophila)                  | Sbno2  | 314619 | 1,13 | up   |
| 5881876 | 7312566 | 1653311 | strawberry notch homolog 2 (Drosophila)                  | Sbno2  | 314619 | 1,12 | up   |
| 6476910 | 7312566 | 1653323 | strawberry notch homolog 2 (Drosophila)                  | Sbno2  | 314619 | 1,06 | up   |
| 6171320 | 7312566 | 1653330 | strawberry notch homolog 2 (Drosophila)                  | Sbno2  | 314619 | 1,05 | up   |
| 6008339 | 7312566 | 1653327 | strawberry notch homolog 2 (Drosophila)                  | Sbno2  | 314619 | 1,04 | down |
| 6735602 | 7312566 | 1653313 | strawberry notch homolog 2 (Drosophila)                  | Sbno2  | 314619 | 1,01 | down |

|         |         |         |                                         |       |        |      |      |
|---------|---------|---------|-----------------------------------------|-------|--------|------|------|
| 6597519 | 7312566 | 1653315 | strawberry notch homolog 2 (Drosophila) | Sbno2 | 314619 | 1,01 | up   |
| 6500597 | 7029119 | 958968  | striatin, calmodulin binding protein 4  | Strn4 | 308392 | 2,10 | down |
| 6160665 | 7029119 | 958968  | striatin, calmodulin binding protein 4  | Strn4 | 308392 | 1,65 | up   |
| 6252090 | 7029119 | 958983  | striatin, calmodulin binding protein 4  | Strn4 | 308392 | 1,41 | down |
| 5660917 | 7029119 | 958983  | striatin, calmodulin binding protein 4  | Strn4 | 308392 | 1,29 | up   |
| 5872388 | 7029119 | 958982  | striatin, calmodulin binding protein 4  | Strn4 | 308392 | 1,26 | down |
| 5988257 | 7029119 | 958982  | striatin, calmodulin binding protein 4  | Strn4 | 308392 | 1,22 | down |
| 6543895 | 7029119 | 958969  | striatin, calmodulin binding protein 4  | Strn4 | 308392 | 1,18 | down |
| 6614474 | 7029119 | 958968  | striatin, calmodulin binding protein 4  | Strn4 | 308392 | 1,18 | down |
| 6697738 | 7029119 | 958978  | striatin, calmodulin binding protein 4  | Strn4 | 308392 | 1,16 | up   |
| 6016956 | 7029119 | 958974  | striatin, calmodulin binding protein 4  | Strn4 | 308392 | 1,16 | up   |
| 6116179 | 7029119 | 958982  | striatin, calmodulin binding protein 4  | Strn4 | 308392 | 1,16 | down |
| 6494112 | 7029119 | 958981  | striatin, calmodulin binding protein 4  | Strn4 | 308392 | 1,15 | down |
| 5740807 | 7029119 | 958977  | striatin, calmodulin binding protein 4  | Strn4 | 308392 | 1,15 | up   |
| 6686699 | 7029119 | 958975  | striatin, calmodulin binding protein 4  | Strn4 | 308392 | 1,14 | down |
| 5659833 | 7029119 | 958973  | striatin, calmodulin binding protein 4  | Strn4 | 308392 | 1,13 | up   |
| 6151049 | 7029119 | 958980  | striatin, calmodulin binding protein 4  | Strn4 | 308392 | 1,10 | down |
| 6388892 | 7029119 | 958971  | striatin, calmodulin binding protein 4  | Strn4 | 308392 | 1,09 | down |
| 6157733 | 7029119 | 958979  | striatin, calmodulin binding protein 4  | Strn4 | 308392 | 1,07 | up   |
| 6692172 | 7029119 | 958983  | striatin, calmodulin binding protein 4  | Strn4 | 308392 | 1,05 | down |
| 5659083 | 7029119 | 958972  | striatin, calmodulin binding protein 4  | Strn4 | 308392 | 1,02 | up   |
| 6009409 | 7029119 | 958970  | striatin, calmodulin binding protein 4  | Strn4 | 308392 | 1,01 | up   |
| 6332312 | 7029119 | 958976  | striatin, calmodulin binding protein 4  | Strn4 | 308392 | 1,01 | up   |
| 5748455 | 7339732 | 1719226 | stromal antigen 1                       | Stag1 | 315958 | 2,40 | up   |
| 6380768 | 7339732 | 1719208 | stromal antigen 1                       | Stag1 | 315958 | 2,02 | down |
| 6654734 | 7339732 | 1719227 | stromal antigen 1                       | Stag1 | 315958 | 1,69 | up   |
| 6348207 | 7339732 | 1719244 | stromal antigen 1                       | Stag1 | 315958 | 1,63 | down |
| 6608575 | 7339732 | 1719243 | stromal antigen 1                       | Stag1 | 315958 | 1,46 | down |
| 6408493 | 7339732 | 1719247 | stromal antigen 1                       | Stag1 | 315958 | 1,42 | up   |
| 6194048 | 7339732 | 1719211 | stromal antigen 1                       | Stag1 | 315958 | 1,41 | up   |
| 6731567 | 7339732 | 1719236 | stromal antigen 1                       | Stag1 | 315958 | 1,38 | up   |
| 5868456 | 7339732 | 1719204 | stromal antigen 1                       | Stag1 | 315958 | 1,37 | up   |
| 5923575 | 7339732 | 1719199 | stromal antigen 1                       | Stag1 | 315958 | 1,34 | up   |
| 5975181 | 7339732 | 1719232 | stromal antigen 1                       | Stag1 | 315958 | 1,33 | up   |
| 6579686 | 7339732 | 1719242 | stromal antigen 1                       | Stag1 | 315958 | 1,24 | down |
| 6281339 | 7339732 | 1719197 | stromal antigen 1                       | Stag1 | 315958 | 1,22 | down |
| 6694845 | 7339732 | 1719216 | stromal antigen 1                       | Stag1 | 315958 | 1,20 | down |
| 5982508 | 7339732 | 1719215 | stromal antigen 1                       | Stag1 | 315958 | 1,20 | up   |
| 6594844 | 7339732 | 1719206 | stromal antigen 1                       | Stag1 | 315958 | 1,19 | up   |
| 5923209 | 7339732 | 1719208 | stromal antigen 1                       | Stag1 | 315958 | 1,18 | down |
| 6535676 | 7339732 | 1719236 | stromal antigen 1                       | Stag1 | 315958 | 1,17 | down |
| 6197641 | 7339732 | 1719228 | stromal antigen 1                       | Stag1 | 315958 | 1,14 | down |
| 6597754 | 7339732 | 1719192 | stromal antigen 1                       | Stag1 | 315958 | 1,12 | up   |
| 6521467 | 7339732 | 1719231 | stromal antigen 1                       | Stag1 | 315958 | 1,12 | up   |
| 6471185 | 7339732 | 1719249 | stromal antigen 1                       | Stag1 | 315958 | 1,12 | up   |
| 5736358 | 7339732 | 1719220 | stromal antigen 1                       | Stag1 | 315958 | 1,11 | up   |
| 6185667 | 7339732 | 1719212 | stromal antigen 1                       | Stag1 | 315958 | 1,10 | down |
| 5673175 | 7339732 | 1719192 | stromal antigen 1                       | Stag1 | 315958 | 1,10 | up   |
| 6598958 | 7339732 | 1719229 | stromal antigen 1                       | Stag1 | 315958 | 1,07 | down |
| 6473945 | 7339732 | 1719201 | stromal antigen 1                       | Stag1 | 315958 | 1,06 | down |
| 6368785 | 7339732 | 1719219 | stromal antigen 1                       | Stag1 | 315958 | 1,03 | up   |
| 5862849 | 7339732 | 1719245 | stromal antigen 1                       | Stag1 | 315958 | 1,02 | down |
| 6363130 | 7339732 | 1719241 | stromal antigen 1                       | Stag1 | 315958 | 1,02 | up   |
| 5645466 | 7339732 | 1719248 | stromal antigen 1                       | Stag1 | 315958 | 1,01 | down |
| 6320234 | 7339732 | 1719246 | stromal antigen 1                       | Stag1 | 315958 | 1,01 | down |
| 6381556 | 7339732 | 1719217 | stromal antigen 1                       | Stag1 | 315958 | 1,01 | up   |
| 6252620 | 7339732 | 1719230 | stromal antigen 1                       | Stag1 | 315958 | 1,00 | up   |

|         |         |         |                                                 |       |        |      |      |
|---------|---------|---------|-------------------------------------------------|-------|--------|------|------|
| 5753711 | 7043235 | 993143  | structural maintenance of chromosomes 3         | Smc3  | 29486  | 2,66 | down |
| 6308867 | 7043235 | 993148  | structural maintenance of chromosomes 3         | Smc3  | 29486  | 2,04 | up   |
| 6324002 | 7043235 | 993144  | structural maintenance of chromosomes 3         | Smc3  | 29486  | 1,69 | up   |
| 5851438 | 7043235 | 993161  | structural maintenance of chromosomes 3         | Smc3  | 29486  | 1,62 | down |
| 6336566 | 7043235 | 993147  | structural maintenance of chromosomes 3         | Smc3  | 29486  | 1,47 | down |
| 5622800 | 7043235 | 993164  | structural maintenance of chromosomes 3         | Smc3  | 29486  | 1,35 | down |
| 6265035 | 7043235 | 993160  | structural maintenance of chromosomes 3         | Smc3  | 29486  | 1,30 | up   |
| 5782170 | 7043235 | 993149  | structural maintenance of chromosomes 3         | Smc3  | 29486  | 1,29 | up   |
| 6390894 | 7043235 | 993159  | structural maintenance of chromosomes 3         | Smc3  | 29486  | 1,24 | up   |
| 6526269 | 7043235 | 993165  | structural maintenance of chromosomes 3         | Smc3  | 29486  | 1,23 | down |
| 6634821 | 7043235 | 993152  | structural maintenance of chromosomes 3         | Smc3  | 29486  | 1,22 | up   |
| 6199603 | 7043235 | 993161  | structural maintenance of chromosomes 3         | Smc3  | 29486  | 1,22 | up   |
| 6499681 | 7043235 | 993154  | structural maintenance of chromosomes 3         | Smc3  | 29486  | 1,21 | down |
| 6448429 | 7043235 | 993146  | structural maintenance of chromosomes 3         | Smc3  | 29486  | 1,20 | down |
| 6104737 | 7043235 | 993168  | structural maintenance of chromosomes 3         | Smc3  | 29486  | 1,15 | up   |
| 5967005 | 7043235 | 993158  | structural maintenance of chromosomes 3         | Smc3  | 29486  | 1,15 | up   |
| 6475016 | 7043235 | 993163  | structural maintenance of chromosomes 3         | Smc3  | 29486  | 1,15 | down |
| 6629756 | 7043235 | 993153  | structural maintenance of chromosomes 3         | Smc3  | 29486  | 1,15 | down |
| 6590188 | 7043235 | 993145  | structural maintenance of chromosomes 3         | Smc3  | 29486  | 1,14 | up   |
| 6276874 | 7043235 | 993169  | structural maintenance of chromosomes 3         | Smc3  | 29486  | 1,14 | up   |
| 6701464 | 7043235 | 993150  | structural maintenance of chromosomes 3         | Smc3  | 29486  | 1,10 | down |
| 6662895 | 7043235 | 993166  | structural maintenance of chromosomes 3         | Smc3  | 29486  | 1,10 | up   |
| 6036243 | 7043235 | 993142  | structural maintenance of chromosomes 3         | Smc3  | 29486  | 1,10 | up   |
| 6234577 | 7043235 | 993155  | structural maintenance of chromosomes 3         | Smc3  | 29486  | 1,09 | down |
| 6314783 | 7043235 | 993162  | structural maintenance of chromosomes 3         | Smc3  | 29486  | 1,08 | up   |
| 5922151 | 7043235 | 993156  | structural maintenance of chromosomes 3         | Smc3  | 29486  | 1,06 | down |
| 6401204 | 7043235 | 993167  | structural maintenance of chromosomes 3         | Smc3  | 29486  | 1,06 | up   |
| 5904037 | 7043235 | 993157  | structural maintenance of chromosomes 3         | Smc3  | 29486  | 1,03 | down |
| 5939465 | 7043235 | 993151  | structural maintenance of chromosomes 3         | Smc3  | 29486  | 1,02 | down |
| 6123746 | 7247976 | 1492433 | sulfatase 2                                     | Sulf2 | 311642 | 2,72 | down |
| 6599361 | 7247976 | 1492434 | sulfatase 2                                     | Sulf2 | 311642 | 1,82 | up   |
| 6419988 | 7247976 | 1492432 | sulfatase 2                                     | Sulf2 | 311642 | 1,56 | down |
| 6026029 | 7247976 | 1492446 | sulfatase 2                                     | Sulf2 | 311642 | 1,52 | up   |
| 5730763 | 7247976 | 1492439 | sulfatase 2                                     | Sulf2 | 311642 | 1,45 | down |
| 6573400 | 7247976 | 1492459 | sulfatase 2                                     | Sulf2 | 311642 | 1,38 | up   |
| 6511328 | 7247976 | 1492440 | sulfatase 2                                     | Sulf2 | 311642 | 1,32 | down |
| 6131617 | 7247976 | 1492459 | sulfatase 2                                     | Sulf2 | 311642 | 1,29 | up   |
| 6170483 | 7247976 | 1492437 | sulfatase 2                                     | Sulf2 | 311642 | 1,26 | down |
| 6516278 | 7247976 | 1492442 | sulfatase 2                                     | Sulf2 | 311642 | 1,24 | up   |
| 6068984 | 7247976 | 1492455 | sulfatase 2                                     | Sulf2 | 311642 | 1,23 | up   |
| 6658468 | 7247976 | 1492438 | sulfatase 2                                     | Sulf2 | 311642 | 1,21 | down |
| 6501702 | 7247976 | 1492445 | sulfatase 2                                     | Sulf2 | 311642 | 1,20 | down |
| 6712555 | 7247976 | 1492448 | sulfatase 2                                     | Sulf2 | 311642 | 1,16 | down |
| 6226439 | 7247976 | 1492450 | sulfatase 2                                     | Sulf2 | 311642 | 1,10 | up   |
| 5705830 | 7247976 | 1492459 | sulfatase 2                                     | Sulf2 | 311642 | 1,09 | down |
| 5765938 | 7247976 | 1492463 | sulfatase 2                                     | Sulf2 | 311642 | 1,08 | down |
| 6478559 | 7247976 | 1492436 | sulfatase 2                                     | Sulf2 | 311642 | 1,07 | up   |
| 5860183 | 7247976 | 1492444 | sulfatase 2                                     | Sulf2 | 311642 | 1,07 | up   |
| 6602933 | 7247976 | 1492459 | sulfatase 2                                     | Sulf2 | 311642 | 1,06 | up   |
| 6661161 | 7247976 | 1492441 | sulfatase 2                                     | Sulf2 | 311642 | 1,03 | down |
| 6413284 | 7247976 | 1492449 | sulfatase 2                                     | Sulf2 | 311642 | 1,02 | down |
| 6248092 | 7247976 | 1492443 | sulfatase 2                                     | Sulf2 | 311642 | 1,01 | up   |
| 6668379 | 7247976 | 1492431 | sulfatase 2                                     | Sulf2 | 311642 | 1,00 | up   |
| 6120458 | 7233921 | 1458154 | sulfiredoxin 1 homolog ( <i>S. cerevisiae</i> ) | Srxn1 | 296271 | 1,72 | up   |
| 5758221 | 7233921 | 1458152 | sulfiredoxin 1 homolog ( <i>S. cerevisiae</i> ) | Srxn1 | 296271 | 1,71 | up   |
| 5672886 | 7233921 | 1458153 | sulfiredoxin 1 homolog ( <i>S. cerevisiae</i> ) | Srxn1 | 296271 | 1,67 | up   |
| 6347095 | 7233921 | 1458151 | sulfiredoxin 1 homolog ( <i>S. cerevisiae</i> ) | Srxn1 | 296271 | 1,62 | up   |



|         |         |         |                                                                      |        |        |      |      |
|---------|---------|---------|----------------------------------------------------------------------|--------|--------|------|------|
| 6308929 | 7233921 | 1458151 | sulfiredoxin 1 homolog ( <i>S. cerevisiae</i> )                      | Srxn1  | 296271 | 1,59 | down |
| 6130489 | 7233921 | 1458151 | sulfiredoxin 1 homolog ( <i>S. cerevisiae</i> )                      | Srxn1  | 296271 | 1,30 | down |
| 6030103 | 7343701 | 1729256 | suppression of tumorigenicity 14 (colon carcinoma)                   | St14   | 114093 | 3,24 | down |
| 5687418 | 7343701 | 1729273 | suppression of tumorigenicity 14 (colon carcinoma)                   | St14   | 114093 | 2,23 | up   |
| 6484334 | 7343701 | 1729269 | suppression of tumorigenicity 14 (colon carcinoma)                   | St14   | 114093 | 2,09 | down |
| 5738422 | 7343701 | 1729264 | suppression of tumorigenicity 14 (colon carcinoma)                   | St14   | 114093 | 2,02 | down |
| 6288004 | 7343701 | 1729259 | suppression of tumorigenicity 14 (colon carcinoma)                   | St14   | 114093 | 1,84 | down |
| 5864430 | 7343701 | 1729260 | suppression of tumorigenicity 14 (colon carcinoma)                   | St14   | 114093 | 1,80 | down |
| 6359697 | 7343701 | 1729271 | suppression of tumorigenicity 14 (colon carcinoma)                   | St14   | 114093 | 1,58 | up   |
| 5964955 | 7343701 | 1729268 | suppression of tumorigenicity 14 (colon carcinoma)                   | St14   | 114093 | 1,58 | up   |
| 6514428 | 7343701 | 1729269 | suppression of tumorigenicity 14 (colon carcinoma)                   | St14   | 114093 | 1,48 | down |
| 5887530 | 7343701 | 1729265 | suppression of tumorigenicity 14 (colon carcinoma)                   | St14   | 114093 | 1,41 | up   |
| 6685417 | 7343701 | 1729258 | suppression of tumorigenicity 14 (colon carcinoma)                   | St14   | 114093 | 1,38 | down |
| 5715628 | 7343701 | 1729274 | suppression of tumorigenicity 14 (colon carcinoma)                   | St14   | 114093 | 1,36 | up   |
| 6246336 | 7343701 | 1729272 | suppression of tumorigenicity 14 (colon carcinoma)                   | St14   | 114093 | 1,30 | up   |
| 6679519 | 7343701 | 1729270 | suppression of tumorigenicity 14 (colon carcinoma)                   | St14   | 114093 | 1,28 | up   |
| 5824931 | 7343701 | 1729262 | suppression of tumorigenicity 14 (colon carcinoma)                   | St14   | 114093 | 1,24 | up   |
| 6038979 | 7343701 | 1729261 | suppression of tumorigenicity 14 (colon carcinoma)                   | St14   | 114093 | 1,20 | up   |
| 5742363 | 7343701 | 1729263 | suppression of tumorigenicity 14 (colon carcinoma)                   | St14   | 114093 | 1,14 | down |
| 5928584 | 7343701 | 1729257 | suppression of tumorigenicity 14 (colon carcinoma)                   | St14   | 114093 | 1,07 | up   |
| 6000773 | 7343701 | 1729257 | suppression of tumorigenicity 14 (colon carcinoma)                   | St14   | 114093 | 1,05 | up   |
| 6209798 | 7343701 | 1729262 | suppression of tumorigenicity 14 (colon carcinoma)                   | St14   | 114093 | 1,05 | down |
| 6611379 | 7343701 | 1729269 | suppression of tumorigenicity 14 (colon carcinoma)                   | St14   | 114093 | 1,04 | down |
| 6016137 | 7343701 | 1729267 | suppression of tumorigenicity 14 (colon carcinoma)                   | St14   | 114093 | 1,01 | down |
| 6515564 | 7343701 | 1729266 | suppression of tumorigenicity 14 (colon carcinoma)                   | St14   | 114093 | 1,01 | up   |
| 6161015 | 7324052 | 1681418 | suppressor of cytokine signaling 2                                   | Socs2  | 84607  | 2,78 | down |
| 6458182 | 7324052 | 1681418 | suppressor of cytokine signaling 2                                   | Socs2  | 84607  | 2,51 | up   |
| 6456316 | 7324052 | 1681418 | suppressor of cytokine signaling 2                                   | Socs2  | 84607  | 1,31 | down |
| 5705324 | 7324052 | 1681418 | suppressor of cytokine signaling 2                                   | Socs2  | 84607  | 1,03 | up   |
| 6193765 | 7324052 | 1681417 | suppressor of cytokine signaling 2                                   | Socs2  | 84607  | 1,01 | up   |
| 6422609 | 7294851 | 1608366 | suppressor of cytokine signaling 5                                   | Socs5  | 500616 | 1,95 | up   |
| 5994170 | 7294851 | 1608366 | suppressor of cytokine signaling 5                                   | Socs5  | 500616 | 1,20 | up   |
| 6193689 | 7294851 | 1608366 | suppressor of cytokine signaling 5                                   | Socs5  | 500616 | 1,14 | up   |
| 5788810 | 7294851 | 1608362 | suppressor of cytokine signaling 5                                   | Socs5  | 500616 | 1,13 | up   |
| 5824410 | 7294851 | 1608365 | suppressor of cytokine signaling 5                                   | Socs5  | 500616 | 1,03 | up   |
| 6505221 | 7294851 | 1608362 | suppressor of cytokine signaling 5                                   | Socs5  | 500616 | 1,02 | up   |
| 5807110 | 7071714 | 1060366 | suppressor of cytokine signaling 7                                   | Socs7  | 287659 | 1,28 | up   |
| 5895929 | 7098810 | 1124659 | suppressor of defective silencing 3 homolog ( <i>S. cerevisiae</i> ) | Suds3  | 360819 | 1,39 | down |
| 6209558 | 7098810 | 1124659 | suppressor of defective silencing 3 homolog ( <i>S. cerevisiae</i> ) | Suds3  | 360819 | 1,25 | up   |
| 6201282 | 7098810 | 1124659 | suppressor of defective silencing 3 homolog ( <i>S. cerevisiae</i> ) | Suds3  | 360819 | 1,12 | down |
| 6350215 | 7098810 | 1124659 | suppressor of defective silencing 3 homolog ( <i>S. cerevisiae</i> ) | Suds3  | 360819 | 1,08 | up   |
| 6274978 | 7098810 | 1124659 | suppressor of defective silencing 3 homolog ( <i>S. cerevisiae</i> ) | Suds3  | 360819 | 1,05 | down |
| 5865315 | 7197549 | 1369235 | suppressor of IKK epsilon                                            | Sike   | 362007 | 2,08 | down |
| 6240412 | 7197549 | 1369236 | suppressor of IKK epsilon                                            | Sike   | 362007 | 1,70 | down |
| 6439664 | 7197549 | 1369231 | suppressor of IKK epsilon                                            | Sike   | 362007 | 1,46 | down |
| 6731077 | 7197549 | 1369233 | suppressor of IKK epsilon                                            | Sike   | 362007 | 1,31 | down |
| 6746903 | 7197549 | 1369235 | suppressor of IKK epsilon                                            | Sike   | 362007 | 1,31 | up   |
| 5884411 | 7197549 | 1369236 | suppressor of IKK epsilon                                            | Sike   | 362007 | 1,22 | up   |
| 6249079 | 7197549 | 1369236 | suppressor of IKK epsilon                                            | Sike   | 362007 | 1,16 | down |
| 6217878 | 7197549 | 1369231 | suppressor of IKK epsilon                                            | Sike   | 362007 | 1,13 | up   |
| 6119529 | 7197549 | 1369236 | suppressor of IKK epsilon                                            | Sike   | 362007 | 1,07 | down |
| 6276255 | 7197549 | 1369232 | suppressor of IKK epsilon                                            | Sike   | 362007 | 1,04 | down |
| 5836273 | 7197549 | 1369234 | suppressor of IKK epsilon                                            | Sike   | 362007 | 1,03 | up   |
| 6524956 | 7197549 | 1369231 | suppressor of IKK epsilon                                            | Sike   | 362007 | 1,02 | down |
| 6097098 | 7359789 | 1769128 | suppressor of Ty 3 homolog ( <i>S. cerevisiae</i> )                  | Supt3h | 685697 | 1,90 | down |
| 6724769 | 7359789 | 1769140 | suppressor of Ty 3 homolog ( <i>S. cerevisiae</i> )                  | Supt3h | 685697 | 1,53 | up   |
| 6481265 | 7359789 | 1769129 | suppressor of Ty 3 homolog ( <i>S. cerevisiae</i> )                  | Supt3h | 685697 | 1,33 | up   |

|         |         |         |                                                        |        |        |      |      |
|---------|---------|---------|--------------------------------------------------------|--------|--------|------|------|
| 5947819 | 7359789 | 1769124 | suppressor of Ty 3 homolog (S. cerevisiae)             | Supt3h | 685697 | 1,31 | down |
| 6715620 | 7359789 | 1769141 | suppressor of Ty 3 homolog (S. cerevisiae)             | Supt3h | 685697 | 1,27 | up   |
| 6256842 | 7359789 | 1769127 | suppressor of Ty 3 homolog (S. cerevisiae)             | Supt3h | 685697 | 1,14 | down |
| 6670938 | 7359789 | 1769139 | suppressor of Ty 3 homolog (S. cerevisiae)             | Supt3h | 685697 | 1,13 | down |
| 5664000 | 7359789 | 1769127 | suppressor of Ty 3 homolog (S. cerevisiae)             | Supt3h | 685697 | 1,13 | up   |
| 5651083 | 7359789 | 1769129 | suppressor of Ty 3 homolog (S. cerevisiae)             | Supt3h | 685697 | 1,08 | up   |
| 5776944 | 7254851 | 1509823 | surfactant protein B                                   | Sftpb  | 192155 | 2,19 | down |
| 6309971 | 7254851 | 1509825 | surfactant protein B                                   | Sftpb  | 192155 | 1,69 | up   |
| 5900009 | 7254851 | 1509822 | surfactant protein B                                   | Sftpb  | 192155 | 1,31 | up   |
| 5642072 | 7254851 | 1509821 | surfactant protein B                                   | Sftpb  | 192155 | 1,27 | up   |
| 5648203 | 7254851 | 1509818 | surfactant protein B                                   | Sftpb  | 192155 | 1,22 | up   |
| 6300434 | 7254851 | 1509817 | surfactant protein B                                   | Sftpb  | 192155 | 1,17 | up   |
| 6598278 | 7254851 | 1509825 | surfactant protein B                                   | Sftpb  | 192155 | 1,16 | down |
| 6089592 | 7254851 | 1509824 | surfactant protein B                                   | Sftpb  | 192155 | 1,16 | down |
| 5637807 | 7254851 | 1509827 | surfactant protein B                                   | Sftpb  | 192155 | 1,14 | down |
| 6445827 | 7254851 | 1509823 | surfactant protein B                                   | Sftpb  | 192155 | 1,14 | up   |
| 6738492 | 7254851 | 1509823 | surfactant protein B                                   | Sftpb  | 192155 | 1,09 | down |
| 5867051 | 7254851 | 1509820 | surfactant protein B                                   | Sftpb  | 192155 | 1,09 | down |
| 5630725 | 7254851 | 1509819 | surfactant protein B                                   | Sftpb  | 192155 | 1,08 | down |
| 6734992 | 7254851 | 1509826 | surfactant protein B                                   | Sftpb  | 192155 | 1,07 | down |
| 6243564 | 7254851 | 1509824 | surfactant protein B                                   | Sftpb  | 192155 | 1,02 | up   |
| 5804057 | 7225506 | 1435860 | surfeit 2                                              | Surf2  | 619345 | 2,07 | down |
| 6418835 | 7225506 | 1435865 | surfeit 2                                              | Surf2  | 619345 | 1,25 | down |
| 6226207 | 7225506 | 1435863 | surfeit 2                                              | Surf2  | 619345 | 1,17 | up   |
| 5764412 | 7225506 | 1435866 | surfeit 2                                              | Surf2  | 619345 | 1,12 | down |
| 6514870 | 7225506 | 1435863 | surfeit 2                                              | Surf2  | 619345 | 1,08 | down |
| 6200497 | 7225506 | 1435862 | surfeit 2                                              | Surf2  | 619345 | 1,04 | down |
| 6502036 | 7225506 | 1435864 | surfeit 2                                              | Surf2  | 619345 | 1,02 | down |
| 6103741 | 7225506 | 1435861 | surfeit 2                                              | Surf2  | 619345 | 1,01 | up   |
| 5648271 | 7188879 | 1346749 | survival motor neuron 1                                | Smn1   | 64301  | 2,54 | down |
| 5646775 | 7188879 | 1346751 | survival motor neuron 1                                | Smn1   | 64301  | 1,52 | up   |
| 6739236 | 7188879 | 1346758 | survival motor neuron 1                                | Smn1   | 64301  | 1,51 | down |
| 6374076 | 7188879 | 1346755 | survival motor neuron 1                                | Smn1   | 64301  | 1,43 | down |
| 6718378 | 7188879 | 1346758 | survival motor neuron 1                                | Smn1   | 64301  | 1,37 | up   |
| 6526633 | 7188879 | 1346754 | survival motor neuron 1                                | Smn1   | 64301  | 1,27 | down |
| 6661043 | 7188879 | 1346753 | survival motor neuron 1                                | Smn1   | 64301  | 1,19 | up   |
| 5769865 | 7188879 | 1346756 | survival motor neuron 1                                | Smn1   | 64301  | 1,19 | up   |
| 5789339 | 7188879 | 1346750 | survival motor neuron 1                                | Smn1   | 64301  | 1,10 | down |
| 5963453 | 7188879 | 1346757 | survival motor neuron 1                                | Smn1   | 64301  | 1,08 | down |
| 6581158 | 7188879 | 1346752 | survival motor neuron 1                                | Smn1   | 64301  | 1,05 | up   |
| 6221715 | 7063873 | 1040645 | survival motor neuron domain containing 1              | Smndc1 | 287768 | 2,37 | up   |
| 6311525 | 7063873 | 1040644 | survival motor neuron domain containing 1              | Smndc1 | 287768 | 1,79 | up   |
| 6186202 | 7063873 | 1040653 | survival motor neuron domain containing 1              | Smndc1 | 287768 | 1,64 | down |
| 6441404 | 7063873 | 1040649 | survival motor neuron domain containing 1              | Smndc1 | 287768 | 1,52 | up   |
| 6045895 | 7063873 | 1040643 | survival motor neuron domain containing 1              | Smndc1 | 287768 | 1,50 | up   |
| 6527328 | 7063873 | 1040642 | survival motor neuron domain containing 1              | Smndc1 | 287768 | 1,36 | up   |
| 5693312 | 7063873 | 1040642 | survival motor neuron domain containing 1              | Smndc1 | 287768 | 1,28 | down |
| 6732361 | 7063873 | 1040642 | survival motor neuron domain containing 1              | Smndc1 | 287768 | 1,27 | down |
| 6647506 | 7063873 | 1040646 | survival motor neuron domain containing 1              | Smndc1 | 287768 | 1,07 | up   |
| 6617154 | 7063873 | 1040642 | survival motor neuron domain containing 1              | Smndc1 | 287768 | 1,02 | up   |
| 6654543 | 7298534 | 1617981 | survival of motor neuron protein interacting protein 1 | Sip1   | 84404  | 2,18 | down |
| 6465092 | 7298534 | 1617983 | survival of motor neuron protein interacting protein 1 | Sip1   | 84404  | 1,44 | up   |
| 5632597 | 7298534 | 1617978 | survival of motor neuron protein interacting protein 1 | Sip1   | 84404  | 1,32 | up   |
| 6271614 | 7298534 | 1617975 | survival of motor neuron protein interacting protein 1 | Sip1   | 84404  | 1,30 | up   |
| 6445600 | 7298534 | 1617976 | survival of motor neuron protein interacting protein 1 | Sip1   | 84404  | 1,22 | down |
| 5883086 | 7298534 | 1617980 | survival of motor neuron protein interacting protein 1 | Sip1   | 84404  | 1,16 | up   |
| 6064081 | 7298534 | 1617983 | survival of motor neuron protein interacting protein 1 | Sip1   | 84404  | 1,15 | up   |

|         |         |         |                                                                                                   |         |        |      |      |
|---------|---------|---------|---------------------------------------------------------------------------------------------------|---------|--------|------|------|
| 6341235 | 7298534 | 1617977 | survival of motor neuron protein interacting protein 1                                            | Sip1    | 84404  | 1,14 | up   |
| 6432715 | 7298534 | 1617982 | survival of motor neuron protein interacting protein 1                                            | Sip1    | 84404  | 1,12 | up   |
| 6578009 | 7298534 | 1617974 | survival of motor neuron protein interacting protein 1                                            | Sip1    | 84404  | 1,00 | down |
| 6247193 | 7099016 | 1125274 | SV2 related protein                                                                               | Svop    | 171442 | 2,28 | up   |
| 6465304 | 7099016 | 1125279 | SV2 related protein                                                                               | Svop    | 171442 | 1,45 | up   |
| 6337553 | 7099016 | 1125275 | SV2 related protein                                                                               | Svop    | 171442 | 1,39 | up   |
| 5693684 | 7099016 | 1125277 | SV2 related protein                                                                               | Svop    | 171442 | 1,38 | down |
| 6523896 | 7099016 | 1125282 | SV2 related protein                                                                               | Svop    | 171442 | 1,30 | up   |
| 6422607 | 7099016 | 1125286 | SV2 related protein                                                                               | Svop    | 171442 | 1,30 | down |
| 6173163 | 7099016 | 1125289 | SV2 related protein                                                                               | Svop    | 171442 | 1,28 | down |
| 6401711 | 7099016 | 1125274 | SV2 related protein                                                                               | Svop    | 171442 | 1,25 | up   |
| 5793072 | 7099016 | 1125284 | SV2 related protein                                                                               | Svop    | 171442 | 1,15 | up   |
| 5832283 | 7099016 | 1125281 | SV2 related protein                                                                               | Svop    | 171442 | 1,14 | down |
| 6720072 | 7099016 | 1125288 | SV2 related protein                                                                               | Svop    | 171442 | 1,14 | up   |
| 5787955 | 7099016 | 1125283 | SV2 related protein                                                                               | Svop    | 171442 | 1,13 | down |
| 6349741 | 7099016 | 1125287 | SV2 related protein                                                                               | Svop    | 171442 | 1,12 | down |
| 5798317 | 7099016 | 1125285 | SV2 related protein                                                                               | Svop    | 171442 | 1,10 | down |
| 6662710 | 7099016 | 1125276 | SV2 related protein                                                                               | Svop    | 171442 | 1,09 | down |
| 6725524 | 7099016 | 1125278 | SV2 related protein                                                                               | Svop    | 171442 | 1,05 | down |
| 6395544 | 7099016 | 1125280 | SV2 related protein                                                                               | Svop    | 171442 | 1,01 | up   |
| 6243286 | 7035414 | 974472  | SWAP-70 protein                                                                                   | Swap70  | 293410 | 1,74 | down |
| 6269025 | 7035414 | 974467  | SWAP-70 protein                                                                                   | Swap70  | 293410 | 1,73 | up   |
| 6197886 | 7035414 | 974463  | SWAP-70 protein                                                                                   | Swap70  | 293410 | 1,57 | down |
| 6193956 | 7035414 | 974465  | SWAP-70 protein                                                                                   | Swap70  | 293410 | 1,53 | down |
| 6304065 | 7035414 | 974469  | SWAP-70 protein                                                                                   | Swap70  | 293410 | 1,43 | up   |
| 6459062 | 7035414 | 974475  | SWAP-70 protein                                                                                   | Swap70  | 293410 | 1,41 | up   |
| 6211812 | 7035414 | 974470  | SWAP-70 protein                                                                                   | Swap70  | 293410 | 1,20 | down |
| 5740215 | 7035414 | 974473  | SWAP-70 protein                                                                                   | Swap70  | 293410 | 1,20 | down |
| 6532372 | 7035414 | 974466  | SWAP-70 protein                                                                                   | Swap70  | 293410 | 1,14 | down |
| 6439789 | 7035414 | 974474  | SWAP-70 protein                                                                                   | Swap70  | 293410 | 1,09 | down |
| 6405054 | 7035414 | 974476  | SWAP-70 protein                                                                                   | Swap70  | 293410 | 1,09 | down |
| 6450595 | 7035414 | 974471  | SWAP-70 protein                                                                                   | Swap70  | 293410 | 1,08 | down |
| 6577156 | 7035414 | 974468  | SWAP-70 protein                                                                                   | Swap70  | 293410 | 1,01 | down |
| 6527570 | 7355865 | 1759586 | Swi/SNF related matrix associated, actin dependent regulator of chromatin, subfamily a-like 1     | Smarc11 | 316477 | 2,23 | down |
| 5945499 | 7355865 | 1759601 | Swi/SNF related matrix associated, actin dependent regulator of chromatin, subfamily a-like 1     | Smarc11 | 316477 | 1,57 | up   |
| 6716460 | 7355865 | 1759583 | Swi/SNF related matrix associated, actin dependent regulator of chromatin, subfamily a-like 1     | Smarc11 | 316477 | 1,48 | up   |
| 6696372 | 7355865 | 1759602 | Swi/SNF related matrix associated, actin dependent regulator of chromatin, subfamily a-like 1     | Smarc11 | 316477 | 1,47 | up   |
| 6735997 | 7355865 | 1759600 | Swi/SNF related matrix associated, actin dependent regulator of chromatin, subfamily a-like 1     | Smarc11 | 316477 | 1,44 | down |
| 6282387 | 7355865 | 1759589 | Swi/SNF related matrix associated, actin dependent regulator of chromatin, subfamily a-like 1     | Smarc11 | 316477 | 1,42 | up   |
| 5805463 | 7355865 | 1759603 | Swi/SNF related matrix associated, actin dependent regulator of chromatin, subfamily a-like 1     | Smarc11 | 316477 | 1,41 | down |
| 5823652 | 7355865 | 1759592 | Swi/SNF related matrix associated, actin dependent regulator of chromatin, subfamily a-like 1     | Smarc11 | 316477 | 1,36 | up   |
| 6293431 | 7355865 | 1759597 | Swi/SNF related matrix associated, actin dependent regulator of chromatin, subfamily a-like 1     | Smarc11 | 316477 | 1,35 | up   |
| 5982924 | 7355865 | 1759595 | Swi/SNF related matrix associated, actin dependent regulator of chromatin, subfamily a-like 1     | Smarc11 | 316477 | 1,24 | up   |
| 6721070 | 7355865 | 1759604 | Swi/SNF related matrix associated, actin dependent regulator of chromatin, subfamily a-like 1     | Smarc11 | 316477 | 1,23 | down |
| 6668058 | 7355865 | 1759581 | Swi/SNF related matrix associated, actin dependent regulator of chromatin, subfamily a-like 1     | Smarc11 | 316477 | 1,23 | down |
| 6549727 | 7355865 | 1759598 | Swi/SNF related matrix associated, actin dependent regulator of chromatin, subfamily a-like 1     | Smarc11 | 316477 | 1,19 | down |
| 6671252 | 7355865 | 1759604 | Swi/SNF related matrix associated, actin dependent regulator of chromatin, subfamily a-like 1     | Smarc11 | 316477 | 1,16 | up   |
| 5827879 | 7355865 | 1759591 | Swi/SNF related matrix associated, actin dependent regulator of chromatin, subfamily a-like 1     | Smarc11 | 316477 | 1,13 | up   |
| 6385378 | 7355865 | 1759582 | Swi/SNF related matrix associated, actin dependent regulator of chromatin, subfamily a-like 1     | Smarc11 | 316477 | 1,12 | up   |
| 6616050 | 7355865 | 1759585 | Swi/SNF related matrix associated, actin dependent regulator of chromatin, subfamily a-like 1     | Smarc11 | 316477 | 1,10 | down |
| 6396327 | 7355865 | 1759584 | Swi/SNF related matrix associated, actin dependent regulator of chromatin, subfamily a-like 1     | Smarc11 | 316477 | 1,08 | down |
| 6667199 | 7355865 | 1759585 | Swi/SNF related matrix associated, actin dependent regulator of chromatin, subfamily a-like 1     | Smarc11 | 316477 | 1,05 | down |
| 5829448 | 7355865 | 1759594 | Swi/SNF related matrix associated, actin dependent regulator of chromatin, subfamily a-like 1     | Smarc11 | 316477 | 1,03 | up   |
| 5783495 | 7217798 | 1417611 | SWI/SNF related, matrix associated, actin dependent regulator of chromatin, subfamily b, member 1 | Smarcb1 | 361825 | 2,09 | up   |
| 5642304 | 7217798 | 1417601 | SWI/SNF related, matrix associated, actin dependent regulator of chromatin, subfamily b, member 1 | Smarcb1 | 361825 | 1,46 | down |
| 6235538 | 7217798 | 1417611 | SWI/SNF related, matrix associated, actin dependent regulator of chromatin, subfamily b, member 1 | Smarcb1 | 361825 | 1,32 | up   |
| 6640487 | 7217798 | 1417611 | SWI/SNF related, matrix associated, actin dependent regulator of chromatin, subfamily b, member 1 | Smarcb1 | 361825 | 1,30 | down |

|         |         |         |                                                                                                   |         |        |      |      |
|---------|---------|---------|---------------------------------------------------------------------------------------------------|---------|--------|------|------|
| 6208986 | 7217798 | 1417606 | SWI/SNF related, matrix associated, actin dependent regulator of chromatin, subfamily b, member 1 | Smarcb1 | 361825 | 1,21 | down |
| 5788162 | 7217798 | 1417604 | SWI/SNF related, matrix associated, actin dependent regulator of chromatin, subfamily b, member 1 | Smarcb1 | 361825 | 1,19 | up   |
| 6626781 | 7217798 | 1417601 | SWI/SNF related, matrix associated, actin dependent regulator of chromatin, subfamily b, member 1 | Smarcb1 | 361825 | 1,15 | down |
| 6680642 | 7217798 | 1417611 | SWI/SNF related, matrix associated, actin dependent regulator of chromatin, subfamily b, member 1 | Smarcb1 | 361825 | 1,09 | down |
| 5950551 | 7217798 | 1417601 | SWI/SNF related, matrix associated, actin dependent regulator of chromatin, subfamily b, member 1 | Smarcb1 | 361825 | 1,07 | down |
| 6090879 | 7217798 | 1417605 | SWI/SNF related, matrix associated, actin dependent regulator of chromatin, subfamily b, member 1 | Smarcb1 | 361825 | 1,06 | up   |
| 6342783 | 7217798 | 1417609 | SWI/SNF related, matrix associated, actin dependent regulator of chromatin, subfamily b, member 1 | Smarcb1 | 361825 | 1,06 | up   |
| 5621363 | 7217798 | 1417611 | SWI/SNF related, matrix associated, actin dependent regulator of chromatin, subfamily b, member 1 | Smarcb1 | 361825 | 1,04 | down |
| 6058697 | 7217798 | 1417607 | SWI/SNF related, matrix associated, actin dependent regulator of chromatin, subfamily b, member 1 | Smarcb1 | 361825 | 1,03 | up   |
| 5799934 | 7217798 | 1417608 | SWI/SNF related, matrix associated, actin dependent regulator of chromatin, subfamily b, member 1 | Smarcb1 | 361825 | 1,03 | up   |
| 5793142 | 7217798 | 1417602 | SWI/SNF related, matrix associated, actin dependent regulator of chromatin, subfamily b, member 1 | Smarcb1 | 361825 | 1,01 | up   |
| 6403148 | 7340646 | 1721613 | SWI/SNF related, matrix associated, actin dependent regulator of chromatin, subfamily c, member 1 | Smarcc1 | 301020 | 2,15 | down |
| 6126046 | 7340646 | 1721606 | SWI/SNF related, matrix associated, actin dependent regulator of chromatin, subfamily c, member 1 | Smarcc1 | 301020 | 2,12 | down |
| 5977008 | 7340646 | 1721608 | SWI/SNF related, matrix associated, actin dependent regulator of chromatin, subfamily c, member 1 | Smarcc1 | 301020 | 1,52 | up   |
| 5899824 | 7340646 | 1721581 | SWI/SNF related, matrix associated, actin dependent regulator of chromatin, subfamily c, member 1 | Smarcc1 | 301020 | 1,52 | down |
| 5860297 | 7340646 | 1721600 | SWI/SNF related, matrix associated, actin dependent regulator of chromatin, subfamily c, member 1 | Smarcc1 | 301020 | 1,46 | up   |
| 6003208 | 7340646 | 1721597 | SWI/SNF related, matrix associated, actin dependent regulator of chromatin, subfamily c, member 1 | Smarcc1 | 301020 | 1,38 | up   |
| 5852168 | 7340646 | 1721612 | SWI/SNF related, matrix associated, actin dependent regulator of chromatin, subfamily c, member 1 | Smarcc1 | 301020 | 1,36 | down |
| 6058766 | 7340646 | 1721591 | SWI/SNF related, matrix associated, actin dependent regulator of chromatin, subfamily c, member 1 | Smarcc1 | 301020 | 1,33 | up   |
| 6703055 | 7340646 | 1721585 | SWI/SNF related, matrix associated, actin dependent regulator of chromatin, subfamily c, member 1 | Smarcc1 | 301020 | 1,30 | up   |
| 6664037 | 7340646 | 1721582 | SWI/SNF related, matrix associated, actin dependent regulator of chromatin, subfamily c, member 1 | Smarcc1 | 301020 | 1,25 | up   |
| 6076995 | 7340646 | 1721587 | SWI/SNF related, matrix associated, actin dependent regulator of chromatin, subfamily c, member 1 | Smarcc1 | 301020 | 1,24 | up   |
| 5695383 | 7340646 | 1721607 | SWI/SNF related, matrix associated, actin dependent regulator of chromatin, subfamily c, member 1 | Smarcc1 | 301020 | 1,22 | down |
| 6317323 | 7340646 | 1721610 | SWI/SNF related, matrix associated, actin dependent regulator of chromatin, subfamily c, member 1 | Smarcc1 | 301020 | 1,19 | up   |
| 5868351 | 7340646 | 1721612 | SWI/SNF related, matrix associated, actin dependent regulator of chromatin, subfamily c, member 1 | Smarcc1 | 301020 | 1,18 | down |
| 6363551 | 7340646 | 1721593 | SWI/SNF related, matrix associated, actin dependent regulator of chromatin, subfamily c, member 1 | Smarcc1 | 301020 | 1,18 | up   |
| 6095828 | 7340646 | 1721584 | SWI/SNF related, matrix associated, actin dependent regulator of chromatin, subfamily c, member 1 | Smarcc1 | 301020 | 1,17 | up   |
| 6473037 | 7340646 | 1721603 | SWI/SNF related, matrix associated, actin dependent regulator of chromatin, subfamily c, member 1 | Smarcc1 | 301020 | 1,17 | down |
| 6043125 | 7340646 | 1721612 | SWI/SNF related, matrix associated, actin dependent regulator of chromatin, subfamily c, member 1 | Smarcc1 | 301020 | 1,17 | up   |
| 6204720 | 7340646 | 1721594 | SWI/SNF related, matrix associated, actin dependent regulator of chromatin, subfamily c, member 1 | Smarcc1 | 301020 | 1,16 | down |
| 6550529 | 7340646 | 1721604 | SWI/SNF related, matrix associated, actin dependent regulator of chromatin, subfamily c, member 1 | Smarcc1 | 301020 | 1,13 | down |
| 6484197 | 7340646 | 1721602 | SWI/SNF related, matrix associated, actin dependent regulator of chromatin, subfamily c, member 1 | Smarcc1 | 301020 | 1,12 | up   |
| 6041453 | 7340646 | 1721599 | SWI/SNF related, matrix associated, actin dependent regulator of chromatin, subfamily c, member 1 | Smarcc1 | 301020 | 1,11 | up   |
| 5980748 | 7340646 | 1721608 | SWI/SNF related, matrix associated, actin dependent regulator of chromatin, subfamily c, member 1 | Smarcc1 | 301020 | 1,11 | down |
| 5762697 | 7340646 | 1721587 | SWI/SNF related, matrix associated, actin dependent regulator of chromatin, subfamily c, member 1 | Smarcc1 | 301020 | 1,09 | up   |
| 6145811 | 7340646 | 1721612 | SWI/SNF related, matrix associated, actin dependent regulator of chromatin, subfamily c, member 1 | Smarcc1 | 301020 | 1,07 | down |
| 6577913 | 7340646 | 1721598 | SWI/SNF related, matrix associated, actin dependent regulator of chromatin, subfamily c, member 1 | Smarcc1 | 301020 | 1,07 | down |
| 6630391 | 7340646 | 1721583 | SWI/SNF related, matrix associated, actin dependent regulator of chromatin, subfamily c, member 1 | Smarcc1 | 301020 | 1,06 | down |
| 6360299 | 7340646 | 1721612 | SWI/SNF related, matrix associated, actin dependent regulator of chromatin, subfamily c, member 1 | Smarcc1 | 301020 | 1,05 | up   |
| 5657806 | 7340646 | 1721591 | SWI/SNF related, matrix associated, actin dependent regulator of chromatin, subfamily c, member 1 | Smarcc1 | 301020 | 1,05 | down |
| 6611324 | 7340646 | 1721609 | SWI/SNF related, matrix associated, actin dependent regulator of chromatin, subfamily c, member 1 | Smarcc1 | 301020 | 1,03 | down |
| 5993802 | 7340646 | 1721610 | SWI/SNF related, matrix associated, actin dependent regulator of chromatin, subfamily c, member 1 | Smarcc1 | 301020 | 1,03 | down |
| 6363370 | 7340646 | 1721605 | SWI/SNF related, matrix associated, actin dependent regulator of chromatin, subfamily c, member 1 | Smarcc1 | 301020 | 1,03 | down |
| 5925599 | 7340646 | 1721595 | SWI/SNF related, matrix associated, actin dependent regulator of chromatin, subfamily c, member 1 | Smarcc1 | 301020 | 1,03 | down |
| 6086043 | 7340646 | 1721592 | SWI/SNF related, matrix associated, actin dependent regulator of chromatin, subfamily c, member 1 | Smarcc1 | 301020 | 1,02 | down |
| 6357115 | 7340646 | 1721586 | SWI/SNF related, matrix associated, actin dependent regulator of chromatin, subfamily c, member 1 | Smarcc1 | 301020 | 1,01 | down |
| 5855671 | 7340646 | 1721590 | SWI/SNF related, matrix associated, actin dependent regulator of chromatin, subfamily c, member 1 | Smarcc1 | 301020 | 1,01 | up   |
| 5653117 | 7312686 | 1653625 | synapse defective 1, Rho GTPase, homolog 1 (C. elegans)                                           | Syde1   | 362842 | 1,04 | down |
| 6163907 | 7026892 | 953659  | synaptojanin 2                                                                                    | Synj2   | 84018  | 2,36 | down |
| 5840049 | 7026892 | 953665  | synaptojanin 2                                                                                    | Synj2   | 84018  | 1,85 | up   |
| 6275401 | 7026892 | 953671  | synaptojanin 2                                                                                    | Synj2   | 84018  | 1,71 | down |
| 6254139 | 7026892 | 953671  | synaptojanin 2                                                                                    | Synj2   | 84018  | 1,64 | up   |
| 6062313 | 7026892 | 953646  | synaptojanin 2                                                                                    | Synj2   | 84018  | 1,60 | up   |
| 5965157 | 7026892 | 953656  | synaptojanin 2                                                                                    | Synj2   | 84018  | 1,53 | down |
| 6219842 | 7026892 | 953649  | synaptojanin 2                                                                                    | Synj2   | 84018  | 1,52 | up   |
| 6495532 | 7026892 | 953657  | synaptojanin 2                                                                                    | Synj2   | 84018  | 1,43 | up   |
| 6199521 | 7026892 | 953672  | synaptojanin 2                                                                                    | Synj2   | 84018  | 1,36 | down |

|         |         |         |                                |       |       |      |      |
|---------|---------|---------|--------------------------------|-------|-------|------|------|
| 6361962 | 7026892 | 953667  | synaptojanin 2                 | Synj2 | 84018 | 1,36 | down |
| 5634785 | 7026892 | 953655  | synaptojanin 2                 | Synj2 | 84018 | 1,30 | up   |
| 6673849 | 7026892 | 953664  | synaptojanin 2                 | Synj2 | 84018 | 1,30 | up   |
| 6142505 | 7026892 | 953653  | synaptojanin 2                 | Synj2 | 84018 | 1,24 | down |
| 6217262 | 7026892 | 953647  | synaptojanin 2                 | Synj2 | 84018 | 1,20 | down |
| 5687822 | 7026892 | 953669  | synaptojanin 2                 | Synj2 | 84018 | 1,19 | down |
| 6390597 | 7026892 | 953672  | synaptojanin 2                 | Synj2 | 84018 | 1,18 | down |
| 6163248 | 7026892 | 953647  | synaptojanin 2                 | Synj2 | 84018 | 1,16 | down |
| 6125043 | 7026892 | 953651  | synaptojanin 2                 | Synj2 | 84018 | 1,15 | up   |
| 5811795 | 7026892 | 953646  | synaptojanin 2                 | Synj2 | 84018 | 1,13 | up   |
| 5960997 | 7026892 | 953670  | synaptojanin 2                 | Synj2 | 84018 | 1,12 | down |
| 5741903 | 7026892 | 953666  | synaptojanin 2                 | Synj2 | 84018 | 1,11 | down |
| 6164127 | 7026892 | 953654  | synaptojanin 2                 | Synj2 | 84018 | 1,10 | up   |
| 5626673 | 7026892 | 953668  | synaptojanin 2                 | Synj2 | 84018 | 1,09 | down |
| 5691977 | 7026892 | 953660  | synaptojanin 2                 | Synj2 | 84018 | 1,08 | down |
| 6344249 | 7026892 | 953661  | synaptojanin 2                 | Synj2 | 84018 | 1,07 | down |
| 6295714 | 7026892 | 953658  | synaptojanin 2                 | Synj2 | 84018 | 1,06 | up   |
| 5838628 | 7026892 | 953672  | synaptojanin 2                 | Synj2 | 84018 | 1,06 | down |
| 6622157 | 7026892 | 953650  | synaptojanin 2                 | Synj2 | 84018 | 1,06 | up   |
| 6649954 | 7026892 | 953650  | synaptojanin 2                 | Synj2 | 84018 | 1,05 | down |
| 6200189 | 7026892 | 953648  | synaptojanin 2                 | Synj2 | 84018 | 1,04 | down |
| 6261024 | 7026892 | 953662  | synaptojanin 2                 | Synj2 | 84018 | 1,04 | up   |
| 5829237 | 7026892 | 953663  | synaptojanin 2                 | Synj2 | 84018 | 1,02 | up   |
| 6519397 | 7026892 | 953652  | synaptojanin 2                 | Synj2 | 84018 | 1,00 | up   |
| 6478443 | 7248683 | 1494116 | synaptonemal complex protein 2 | Sycp2 | 83820 | 2,65 | down |
| 5763938 | 7248683 | 1494135 | synaptonemal complex protein 2 | Sycp2 | 83820 | 2,08 | up   |
| 6744412 | 7248683 | 1494146 | synaptonemal complex protein 2 | Sycp2 | 83820 | 2,02 | down |
| 6459673 | 7248683 | 1494143 | synaptonemal complex protein 2 | Sycp2 | 83820 | 1,97 | down |
| 5834349 | 7248683 | 1494147 | synaptonemal complex protein 2 | Sycp2 | 83820 | 1,96 | up   |
| 6451601 | 7248683 | 1494144 | synaptonemal complex protein 2 | Sycp2 | 83820 | 1,73 | down |
| 5776570 | 7248683 | 1494133 | synaptonemal complex protein 2 | Sycp2 | 83820 | 1,54 | down |
| 5673412 | 7248683 | 1494140 | synaptonemal complex protein 2 | Sycp2 | 83820 | 1,48 | down |
| 6080656 | 7248683 | 1494111 | synaptonemal complex protein 2 | Sycp2 | 83820 | 1,47 | up   |
| 5924699 | 7248683 | 1494110 | synaptonemal complex protein 2 | Sycp2 | 83820 | 1,33 | up   |
| 6632191 | 7248683 | 1494148 | synaptonemal complex protein 2 | Sycp2 | 83820 | 1,29 | up   |
| 6598669 | 7248683 | 1494123 | synaptonemal complex protein 2 | Sycp2 | 83820 | 1,29 | down |
| 5654427 | 7248683 | 1494138 | synaptonemal complex protein 2 | Sycp2 | 83820 | 1,27 | down |
| 5665537 | 7248683 | 1494115 | synaptonemal complex protein 2 | Sycp2 | 83820 | 1,26 | down |
| 6228263 | 7248683 | 1494136 | synaptonemal complex protein 2 | Sycp2 | 83820 | 1,23 | down |
| 6283122 | 7248683 | 1494107 | synaptonemal complex protein 2 | Sycp2 | 83820 | 1,19 | up   |
| 6633720 | 7248683 | 1494114 | synaptonemal complex protein 2 | Sycp2 | 83820 | 1,19 | down |
| 5951883 | 7248683 | 1494120 | synaptonemal complex protein 2 | Sycp2 | 83820 | 1,16 | down |
| 5703407 | 7248683 | 1494130 | synaptonemal complex protein 2 | Sycp2 | 83820 | 1,16 | up   |
| 6714431 | 7248683 | 1494112 | synaptonemal complex protein 2 | Sycp2 | 83820 | 1,14 | up   |
| 6557424 | 7248683 | 1494128 | synaptonemal complex protein 2 | Sycp2 | 83820 | 1,13 | up   |
| 6051506 | 7248683 | 1494108 | synaptonemal complex protein 2 | Sycp2 | 83820 | 1,13 | up   |
| 6035072 | 7248683 | 1494109 | synaptonemal complex protein 2 | Sycp2 | 83820 | 1,12 | up   |
| 6584271 | 7248683 | 1494106 | synaptonemal complex protein 2 | Sycp2 | 83820 | 1,12 | up   |
| 6118008 | 7248683 | 1494117 | synaptonemal complex protein 2 | Sycp2 | 83820 | 1,12 | down |
| 6418997 | 7248683 | 1494137 | synaptonemal complex protein 2 | Sycp2 | 83820 | 1,11 | down |
| 6155978 | 7248683 | 1494106 | synaptonemal complex protein 2 | Sycp2 | 83820 | 1,09 | down |
| 6253799 | 7248683 | 1494124 | synaptonemal complex protein 2 | Sycp2 | 83820 | 1,08 | down |
| 6523921 | 7248683 | 1494129 | synaptonemal complex protein 2 | Sycp2 | 83820 | 1,08 | up   |
| 5659786 | 7248683 | 1494112 | synaptonemal complex protein 2 | Sycp2 | 83820 | 1,08 | down |
| 5831528 | 7248683 | 1494142 | synaptonemal complex protein 2 | Sycp2 | 83820 | 1,07 | up   |
| 6370524 | 7248683 | 1494126 | synaptonemal complex protein 2 | Sycp2 | 83820 | 1,06 | up   |
| 6391561 | 7248683 | 1494125 | synaptonemal complex protein 2 | Sycp2 | 83820 | 1,04 | up   |

|         |         |         |                                     |        |        |      |      |
|---------|---------|---------|-------------------------------------|--------|--------|------|------|
| 5711048 | 7248683 | 1494118 | synaptonemal complex protein 2      | Sycp2  | 83820  | 1,04 | down |
| 5822588 | 7248683 | 1494139 | synaptonemal complex protein 2      | Sycp2  | 83820  | 1,04 | down |
| 5969498 | 7248683 | 1494148 | synaptonemal complex protein 2      | Sycp2  | 83820  | 1,04 | up   |
| 5982495 | 7248683 | 1494132 | synaptonemal complex protein 2      | Sycp2  | 83820  | 1,04 | up   |
| 6703329 | 7248683 | 1494121 | synaptonemal complex protein 2      | Sycp2  | 83820  | 1,04 | up   |
| 6550080 | 7248683 | 1494145 | synaptonemal complex protein 2      | Sycp2  | 83820  | 1,03 | down |
| 5732512 | 7248683 | 1494127 | synaptonemal complex protein 2      | Sycp2  | 83820  | 1,03 | up   |
| 5801630 | 7248683 | 1494119 | synaptonemal complex protein 2      | Sycp2  | 83820  | 1,03 | up   |
| 6184378 | 7248683 | 1494131 | synaptonemal complex protein 2      | Sycp2  | 83820  | 1,02 | up   |
| 6123550 | 7248683 | 1494122 | synaptonemal complex protein 2      | Sycp2  | 83820  | 1,02 | up   |
| 6163152 | 7248683 | 1494113 | synaptonemal complex protein 2      | Sycp2  | 83820  | 1,01 | up   |
| 6370348 | 7248683 | 1494141 | synaptonemal complex protein 2      | Sycp2  | 83820  | 1,00 | up   |
| 6683481 | 7248683 | 1494134 | synaptonemal complex protein 2      | Sycp2  | 83820  | 1,00 | up   |
| 5847182 | 7082667 | 1085385 | synaptonemal complex protein SC65   | Sc65   | 59101  | 2,60 | down |
| 5835255 | 7082667 | 1085383 | synaptonemal complex protein SC65   | Sc65   | 59101  | 1,85 | down |
| 5974134 | 7082667 | 1085380 | synaptonemal complex protein SC65   | Sc65   | 59101  | 1,46 | up   |
| 6669633 | 7082667 | 1085381 | synaptonemal complex protein SC65   | Sc65   | 59101  | 1,20 | down |
| 5781808 | 7082667 | 1085382 | synaptonemal complex protein SC65   | Sc65   | 59101  | 1,20 | down |
| 5881871 | 7082667 | 1085379 | synaptonemal complex protein SC65   | Sc65   | 59101  | 1,12 | up   |
| 6557478 | 7082667 | 1085386 | synaptonemal complex protein SC65   | Sc65   | 59101  | 1,05 | up   |
| 5669920 | 7082667 | 1085384 | synaptonemal complex protein SC65   | Sc65   | 59101  | 1,02 | up   |
| 5643598 | 7078060 | 1075273 | synaptosomal-associated protein, 47 | Snap47 | 303183 | 2,16 | down |
| 5804639 | 7078060 | 1075271 | synaptosomal-associated protein, 47 | Snap47 | 303183 | 1,38 | down |
| 6548394 | 7078060 | 1075272 | synaptosomal-associated protein, 47 | Snap47 | 303183 | 1,12 | up   |
| 6730804 | 7078060 | 1075270 | synaptosomal-associated protein, 47 | Snap47 | 303183 | 1,11 | down |
| 6706114 | 7078060 | 1075274 | synaptosomal-associated protein, 47 | Snap47 | 303183 | 1,10 | up   |
| 6239994 | 7078060 | 1075274 | synaptosomal-associated protein, 47 | Snap47 | 303183 | 1,09 | up   |
| 6331866 | 7078060 | 1075275 | synaptosomal-associated protein, 47 | Snap47 | 303183 | 1,00 | up   |
| 5792944 | 7324760 | 1683054 | synaptotagmin I                     | Syt1   | 25716  | 2,05 | down |
| 6260178 | 7324760 | 1683099 | synaptotagmin I                     | Syt1   | 25716  | 1,64 | down |
| 5757254 | 7324760 | 1683081 | synaptotagmin I                     | Syt1   | 25716  | 1,64 | down |
| 6451288 | 7324760 | 1683070 | synaptotagmin I                     | Syt1   | 25716  | 1,33 | down |
| 6294382 | 7324760 | 1683069 | synaptotagmin I                     | Syt1   | 25716  | 1,27 | up   |
| 5873976 | 7324760 | 1683087 | synaptotagmin I                     | Syt1   | 25716  | 1,22 | down |
| 5845065 | 7324760 | 1683032 | synaptotagmin I                     | Syt1   | 25716  | 1,21 | up   |
| 6229945 | 7324760 | 1683093 | synaptotagmin I                     | Syt1   | 25716  | 1,21 | down |
| 5656998 | 7324760 | 1683035 | synaptotagmin I                     | Syt1   | 25716  | 1,21 | down |
| 6699105 | 7324760 | 1683068 | synaptotagmin I                     | Syt1   | 25716  | 1,11 | down |
| 6432383 | 7324760 | 1683033 | synaptotagmin I                     | Syt1   | 25716  | 1,09 | down |
| 5994826 | 7324760 | 1683099 | synaptotagmin I                     | Syt1   | 25716  | 1,08 | up   |
| 6364909 | 7324760 | 1683032 | synaptotagmin I                     | Syt1   | 25716  | 1,07 | up   |
| 5618059 | 7324760 | 1683071 | synaptotagmin I                     | Syt1   | 25716  | 1,02 | up   |
| 6485830 | 7324760 | 1683033 | synaptotagmin I                     | Syt1   | 25716  | 1,02 | up   |
| 6110424 | 7324760 | 1683035 | synaptotagmin I                     | Syt1   | 25716  | 1,01 | down |
| 6126328 | 7105320 | 1140885 | synaptotagmin II                    | Syt2   | 24805  | 2,20 | down |
| 6017145 | 7105320 | 1140887 | synaptotagmin II                    | Syt2   | 24805  | 1,55 | up   |
| 6057038 | 7105320 | 1140882 | synaptotagmin II                    | Syt2   | 24805  | 1,36 | down |
| 6442671 | 7105320 | 1140888 | synaptotagmin II                    | Syt2   | 24805  | 1,22 | down |
| 6555890 | 7105320 | 1140883 | synaptotagmin II                    | Syt2   | 24805  | 1,22 | down |
| 6094558 | 7105320 | 1140882 | synaptotagmin II                    | Syt2   | 24805  | 1,11 | up   |
| 6448898 | 7105320 | 1140884 | synaptotagmin II                    | Syt2   | 24805  | 1,07 | down |
| 6518176 | 7105320 | 1140880 | synaptotagmin II                    | Syt2   | 24805  | 1,04 | down |
| 6386401 | 7105320 | 1140886 | synaptotagmin II                    | Syt2   | 24805  | 1,04 | up   |
| 6525306 | 7105320 | 1140881 | synaptotagmin II                    | Syt2   | 24805  | 1,03 | up   |
| 6515009 | 7031293 | 963515  | synaptotagmin III                   | Syt3   | 25731  | 2,05 | up   |
| 6075255 | 7031293 | 963510  | synaptotagmin III                   | Syt3   | 25731  | 1,71 | up   |
| 6303841 | 7031293 | 963513  | synaptotagmin III                   | Syt3   | 25731  | 1,71 | up   |

|         |         |         |                                      |        |       |      |      |
|---------|---------|---------|--------------------------------------|--------|-------|------|------|
| 6219356 | 7031293 | 963516  | synaptotagmin III                    | Syt3   | 25731 | 1,71 | down |
| 6422275 | 7031293 | 963519  | synaptotagmin III                    | Syt3   | 25731 | 1,68 | up   |
| 6538110 | 7031293 | 963512  | synaptotagmin III                    | Syt3   | 25731 | 1,49 | down |
| 6230861 | 7031293 | 963518  | synaptotagmin III                    | Syt3   | 25731 | 1,47 | down |
| 5985770 | 7031293 | 963517  | synaptotagmin III                    | Syt3   | 25731 | 1,46 | down |
| 5846194 | 7031293 | 963520  | synaptotagmin III                    | Syt3   | 25731 | 1,44 | down |
| 6206469 | 7031293 | 963513  | synaptotagmin III                    | Syt3   | 25731 | 1,36 | up   |
| 5839214 | 7031293 | 963515  | synaptotagmin III                    | Syt3   | 25731 | 1,31 | down |
| 6701941 | 7031293 | 963514  | synaptotagmin III                    | Syt3   | 25731 | 1,18 | up   |
| 6187260 | 7031293 | 963513  | synaptotagmin III                    | Syt3   | 25731 | 1,17 | up   |
| 6455799 | 7031293 | 963511  | synaptotagmin III                    | Syt3   | 25731 | 1,00 | down |
| 5645585 | 7230224 | 1447825 | synaptotagmin XIII                   | Syt13  | 80977 | 2,48 | up   |
| 6494296 | 7230224 | 1447826 | synaptotagmin XIII                   | Syt13  | 80977 | 1,36 | up   |
| 6333856 | 7230224 | 1447830 | synaptotagmin XIII                   | Syt13  | 80977 | 1,26 | down |
| 5989554 | 7230224 | 1447827 | synaptotagmin XIII                   | Syt13  | 80977 | 1,17 | down |
| 6720520 | 7230224 | 1447829 | synaptotagmin XIII                   | Syt13  | 80977 | 1,14 | down |
| 5871139 | 7230224 | 1447826 | synaptotagmin XIII                   | Syt13  | 80977 | 1,09 | down |
| 5749586 | 7230224 | 1447825 | synaptotagmin XIII                   | Syt13  | 80977 | 1,06 | up   |
| 5757998 | 7230224 | 1447830 | synaptotagmin XIII                   | Syt13  | 80977 | 1,03 | down |
| 5707156 | 7230224 | 1447828 | synaptotagmin XIII                   | Syt13  | 80977 | 1,01 | down |
| 6205695 | 7296103 | 1611393 | syndecan 1                           | Sdc1   | 25216 | 2,12 | down |
| 5850135 | 7296103 | 1611394 | syndecan 1                           | Sdc1   | 25216 | 1,39 | down |
| 6465449 | 7296103 | 1611396 | syndecan 1                           | Sdc1   | 25216 | 1,38 | up   |
| 6373323 | 7296103 | 1611395 | syndecan 1                           | Sdc1   | 25216 | 1,31 | up   |
| 6185733 | 7296103 | 1611396 | syndecan 1                           | Sdc1   | 25216 | 1,29 | up   |
| 6388036 | 7296103 | 1611393 | syndecan 1                           | Sdc1   | 25216 | 1,10 | up   |
| 5787345 | 7296103 | 1611392 | syndecan 1                           | Sdc1   | 25216 | 1,08 | up   |
| 6403516 | 7296103 | 1611391 | syndecan 1                           | Sdc1   | 25216 | 1,08 | up   |
| 6653276 | 7296103 | 1611392 | syndecan 1                           | Sdc1   | 25216 | 1,07 | down |
| 6342733 | 7296103 | 1611396 | syndecan 1                           | Sdc1   | 25216 | 1,02 | down |
| 5772719 | 7057600 | 1026071 | syntaxin 1B                          | Stx1b  | 24923 | 2,24 | down |
| 6394331 | 7057600 | 1026062 | syntaxin 1B                          | Stx1b  | 24923 | 1,91 | up   |
| 6052904 | 7057600 | 1026068 | syntaxin 1B                          | Stx1b  | 24923 | 1,70 | down |
| 6424361 | 7057600 | 1026058 | syntaxin 1B                          | Stx1b  | 24923 | 1,52 | up   |
| 5621383 | 7057600 | 1026060 | syntaxin 1B                          | Stx1b  | 24923 | 1,46 | up   |
| 5806818 | 7057600 | 1026060 | syntaxin 1B                          | Stx1b  | 24923 | 1,43 | up   |
| 6020637 | 7057600 | 1026069 | syntaxin 1B                          | Stx1b  | 24923 | 1,37 | down |
| 6337824 | 7057600 | 1026061 | syntaxin 1B                          | Stx1b  | 24923 | 1,23 | up   |
| 6476612 | 7057600 | 1026070 | syntaxin 1B                          | Stx1b  | 24923 | 1,22 | up   |
| 6421194 | 7057600 | 1026059 | syntaxin 1B                          | Stx1b  | 24923 | 1,19 | up   |
| 5835572 | 7057600 | 1026058 | syntaxin 1B                          | Stx1b  | 24923 | 1,12 | down |
| 6668406 | 7057600 | 1026064 | syntaxin 1B                          | Stx1b  | 24923 | 1,08 | down |
| 5658872 | 7057600 | 1026067 | syntaxin 1B                          | Stx1b  | 24923 | 1,06 | down |
| 6400077 | 7057600 | 1026066 | syntaxin 1B                          | Stx1b  | 24923 | 1,02 | down |
| 6328437 | 7057600 | 1026063 | syntaxin 1B                          | Stx1b  | 24923 | 1,00 | up   |
| 6698824 | 7057600 | 1026065 | syntaxin 1B                          | Stx1b  | 24923 | 1,00 | up   |
| 5684300 | 7044070 | 995764  | syntaxin binding protein 5 (tomosyn) | Stxbp5 | 81022 | 2,97 | up   |
| 6480969 | 7044070 | 995764  | syntaxin binding protein 5 (tomosyn) | Stxbp5 | 81022 | 1,85 | up   |
| 5658993 | 7044070 | 995762  | syntaxin binding protein 5 (tomosyn) | Stxbp5 | 81022 | 1,63 | up   |
| 6553524 | 7044070 | 995764  | syntaxin binding protein 5 (tomosyn) | Stxbp5 | 81022 | 1,52 | up   |
| 5709359 | 7044070 | 995745  | syntaxin binding protein 5 (tomosyn) | Stxbp5 | 81022 | 1,46 | down |
| 6652756 | 7044070 | 995737  | syntaxin binding protein 5 (tomosyn) | Stxbp5 | 81022 | 1,39 | up   |
| 5624458 | 7044070 | 995761  | syntaxin binding protein 5 (tomosyn) | Stxbp5 | 81022 | 1,38 | up   |
| 5668421 | 7044070 | 995740  | syntaxin binding protein 5 (tomosyn) | Stxbp5 | 81022 | 1,37 | up   |
| 5924798 | 7044070 | 995759  | syntaxin binding protein 5 (tomosyn) | Stxbp5 | 81022 | 1,36 | down |
| 5696471 | 7044070 | 995741  | syntaxin binding protein 5 (tomosyn) | Stxbp5 | 81022 | 1,32 | up   |
| 5765927 | 7044070 | 995757  | syntaxin binding protein 5 (tomosyn) | Stxbp5 | 81022 | 1,23 | up   |

|         |         |         |                                                                          |        |        |      |      |
|---------|---------|---------|--------------------------------------------------------------------------|--------|--------|------|------|
| 6352606 | 7044070 | 995751  | syntaxin binding protein 5 (tomosyn)                                     | Stxbp5 | 81022  | 1,21 | up   |
| 6034202 | 7044070 | 995748  | syntaxin binding protein 5 (tomosyn)                                     | Stxbp5 | 81022  | 1,18 | down |
| 6624711 | 7044070 | 995741  | syntaxin binding protein 5 (tomosyn)                                     | Stxbp5 | 81022  | 1,17 | up   |
| 5921443 | 7044070 | 995764  | syntaxin binding protein 5 (tomosyn)                                     | Stxbp5 | 81022  | 1,14 | down |
| 5727567 | 7044070 | 995750  | syntaxin binding protein 5 (tomosyn)                                     | Stxbp5 | 81022  | 1,14 | up   |
| 5950320 | 7044070 | 995764  | syntaxin binding protein 5 (tomosyn)                                     | Stxbp5 | 81022  | 1,14 | down |
| 6401487 | 7044070 | 995743  | syntaxin binding protein 5 (tomosyn)                                     | Stxbp5 | 81022  | 1,14 | down |
| 5931390 | 7044070 | 995741  | syntaxin binding protein 5 (tomosyn)                                     | Stxbp5 | 81022  | 1,13 | down |
| 6444535 | 7044070 | 995738  | syntaxin binding protein 5 (tomosyn)                                     | Stxbp5 | 81022  | 1,12 | up   |
| 6319100 | 7044070 | 995744  | syntaxin binding protein 5 (tomosyn)                                     | Stxbp5 | 81022  | 1,10 | up   |
| 6667157 | 7044070 | 995763  | syntaxin binding protein 5 (tomosyn)                                     | Stxbp5 | 81022  | 1,10 | up   |
| 6410383 | 7044070 | 995739  | syntaxin binding protein 5 (tomosyn)                                     | Stxbp5 | 81022  | 1,10 | up   |
| 6716644 | 7044070 | 995754  | syntaxin binding protein 5 (tomosyn)                                     | Stxbp5 | 81022  | 1,09 | up   |
| 6671574 | 7044070 | 995760  | syntaxin binding protein 5 (tomosyn)                                     | Stxbp5 | 81022  | 1,09 | up   |
| 6421174 | 7044070 | 995749  | syntaxin binding protein 5 (tomosyn)                                     | Stxbp5 | 81022  | 1,08 | down |
| 6675358 | 7044070 | 995742  | syntaxin binding protein 5 (tomosyn)                                     | Stxbp5 | 81022  | 1,08 | up   |
| 6309035 | 7044070 | 995747  | syntaxin binding protein 5 (tomosyn)                                     | Stxbp5 | 81022  | 1,05 | down |
| 5924206 | 7044070 | 995737  | syntaxin binding protein 5 (tomosyn)                                     | Stxbp5 | 81022  | 1,05 | down |
| 5933898 | 7044070 | 995760  | syntaxin binding protein 5 (tomosyn)                                     | Stxbp5 | 81022  | 1,05 | down |
| 6113960 | 7044070 | 995753  | syntaxin binding protein 5 (tomosyn)                                     | Stxbp5 | 81022  | 1,05 | down |
| 6635811 | 7044070 | 995752  | syntaxin binding protein 5 (tomosyn)                                     | Stxbp5 | 81022  | 1,04 | down |
| 5750608 | 7044070 | 995755  | syntaxin binding protein 5 (tomosyn)                                     | Stxbp5 | 81022  | 1,04 | down |
| 6483414 | 7044070 | 995756  | syntaxin binding protein 5 (tomosyn)                                     | Stxbp5 | 81022  | 1,03 | down |
| 6376172 | 7044070 | 995755  | syntaxin binding protein 5 (tomosyn)                                     | Stxbp5 | 81022  | 1,03 | up   |
| 6542672 | 7044070 | 995758  | syntaxin binding protein 5 (tomosyn)                                     | Stxbp5 | 81022  | 1,02 | down |
| 6502823 | 7044070 | 995760  | syntaxin binding protein 5 (tomosyn)                                     | Stxbp5 | 81022  | 1,02 | down |
| 5632724 | 7044070 | 995749  | syntaxin binding protein 5 (tomosyn)                                     | Stxbp5 | 81022  | 1,02 | up   |
| 6116905 | 7044070 | 995746  | syntaxin binding protein 5 (tomosyn)                                     | Stxbp5 | 81022  | 1,00 | up   |
| 6344148 | 7272110 | 1553056 | syntrophin, gamma 1                                                      | Sntg1  | 500394 | 2,13 | down |
| 5632498 | 7272110 | 1553051 | syntrophin, gamma 1                                                      | Sntg1  | 500394 | 1,32 | up   |
| 6711022 | 7272110 | 1553084 | syntrophin, gamma 1                                                      | Sntg1  | 500394 | 1,19 | down |
| 6398323 | 7272110 | 1553063 | syntrophin, gamma 1                                                      | Sntg1  | 500394 | 1,15 | up   |
| 5752533 | 7272110 | 1553084 | syntrophin, gamma 1                                                      | Sntg1  | 500394 | 1,15 | up   |
| 6530098 | 7272110 | 1553084 | syntrophin, gamma 1                                                      | Sntg1  | 500394 | 1,14 | down |
| 6083973 | 7272110 | 1553058 | syntrophin, gamma 1                                                      | Sntg1  | 500394 | 1,08 | down |
| 5641272 | 7272110 | 1553047 | syntrophin, gamma 1                                                      | Sntg1  | 500394 | 1,08 | down |
| 5920232 | 7272110 | 1553051 | syntrophin, gamma 1                                                      | Sntg1  | 500394 | 1,06 | up   |
| 6270383 | 7272110 | 1553057 | syntrophin, gamma 1                                                      | Sntg1  | 500394 | 1,06 | down |
| 6547094 | 7272110 | 1553059 | syntrophin, gamma 1                                                      | Sntg1  | 500394 | 1,05 | down |
| 6351419 | 7265309 | 1535585 | synuclein, alpha (non A4 component of amyloid precursor)                 | Snca   | 29219  | 2,38 | up   |
| 5984868 | 7265309 | 1535588 | synuclein, alpha (non A4 component of amyloid precursor)                 | Snca   | 29219  | 1,56 | down |
| 6451646 | 7265309 | 1535588 | synuclein, alpha (non A4 component of amyloid precursor)                 | Snca   | 29219  | 1,37 | down |
| 6311854 | 7265309 | 1535586 | synuclein, alpha (non A4 component of amyloid precursor)                 | Snca   | 29219  | 1,36 | up   |
| 6081424 | 7265309 | 1535583 | synuclein, alpha (non A4 component of amyloid precursor)                 | Snca   | 29219  | 1,16 | down |
| 5661181 | 7265309 | 1535583 | synuclein, alpha (non A4 component of amyloid precursor)                 | Snca   | 29219  | 1,09 | up   |
| 6653622 | 7265309 | 1535587 | synuclein, alpha (non A4 component of amyloid precursor)                 | Snca   | 29219  | 1,08 | down |
| 6088862 | 7265309 | 1535584 | synuclein, alpha (non A4 component of amyloid precursor)                 | Snca   | 29219  | 1,04 | down |
| 6302395 | 7199454 | 1374484 | tachykinin receptor 3                                                    | Tacr3  | 24808  | 2,02 | down |
| 5737986 | 7199454 | 1374488 | tachykinin receptor 3                                                    | Tacr3  | 24808  | 1,58 | down |
| 6219725 | 7199454 | 1374484 | tachykinin receptor 3                                                    | Tacr3  | 24808  | 1,42 | up   |
| 5882244 | 7199454 | 1374487 | tachykinin receptor 3                                                    | Tacr3  | 24808  | 1,41 | up   |
| 5713029 | 7199454 | 1374487 | tachykinin receptor 3                                                    | Tacr3  | 24808  | 1,37 | up   |
| 5765619 | 7199454 | 1374486 | tachykinin receptor 3                                                    | Tacr3  | 24808  | 1,31 | down |
| 6002131 | 7199454 | 1374483 | tachykinin receptor 3                                                    | Tacr3  | 24808  | 1,29 | up   |
| 6742113 | 7199454 | 1374483 | tachykinin receptor 3                                                    | Tacr3  | 24808  | 1,13 | down |
| 6405506 | 7199454 | 1374485 | tachykinin receptor 3                                                    | Tacr3  | 24808  | 1,04 | up   |
| 6665725 | 7376073 | 1811729 | TAFI RNA polymerase II, TATA box binding protein (TBP)-associated factor | Taf1   | 317256 | 1,69 | up   |



|         |         |         |                                                                                  |       |        |      |      |
|---------|---------|---------|----------------------------------------------------------------------------------|-------|--------|------|------|
| 5889768 | 7070461 | 1057379 | TAF15 RNA polymerase II, TATA box binding protein (TBP)-associated factor        | Taf15 | 287571 | 1,82 | down |
| 6101128 | 7070461 | 1057379 | TAF15 RNA polymerase II, TATA box binding protein (TBP)-associated factor        | Taf15 | 287571 | 1,55 | down |
| 6728988 | 7070461 | 1057372 | TAF15 RNA polymerase II, TATA box binding protein (TBP)-associated factor        | Taf15 | 287571 | 1,48 | down |
| 6687688 | 7070461 | 1057367 | TAF15 RNA polymerase II, TATA box binding protein (TBP)-associated factor        | Taf15 | 287571 | 1,44 | up   |
| 6223920 | 7070461 | 1057375 | TAF15 RNA polymerase II, TATA box binding protein (TBP)-associated factor        | Taf15 | 287571 | 1,34 | down |
| 5807497 | 7070461 | 1057373 | TAF15 RNA polymerase II, TATA box binding protein (TBP)-associated factor        | Taf15 | 287571 | 1,24 | down |
| 6094413 | 7070461 | 1057368 | TAF15 RNA polymerase II, TATA box binding protein (TBP)-associated factor        | Taf15 | 287571 | 1,21 | down |
| 6723004 | 7070461 | 1057366 | TAF15 RNA polymerase II, TATA box binding protein (TBP)-associated factor        | Taf15 | 287571 | 1,20 | up   |
| 6267226 | 7070461 | 1057363 | TAF15 RNA polymerase II, TATA box binding protein (TBP)-associated factor        | Taf15 | 287571 | 1,19 | up   |
| 6630090 | 7070461 | 1057376 | TAF15 RNA polymerase II, TATA box binding protein (TBP)-associated factor        | Taf15 | 287571 | 1,16 | down |
| 6369883 | 7070461 | 1057374 | TAF15 RNA polymerase II, TATA box binding protein (TBP)-associated factor        | Taf15 | 287571 | 1,16 | up   |
| 5688977 | 7070461 | 1057365 | TAF15 RNA polymerase II, TATA box binding protein (TBP)-associated factor        | Taf15 | 287571 | 1,16 | up   |
| 6400422 | 7070461 | 1057370 | TAF15 RNA polymerase II, TATA box binding protein (TBP)-associated factor        | Taf15 | 287571 | 1,14 | up   |
| 6153527 | 7070461 | 1057371 | TAF15 RNA polymerase II, TATA box binding protein (TBP)-associated factor        | Taf15 | 287571 | 1,12 | up   |
| 5642695 | 7070461 | 1057364 | TAF15 RNA polymerase II, TATA box binding protein (TBP)-associated factor        | Taf15 | 287571 | 1,11 | up   |
| 6298027 | 7070461 | 1057378 | TAF15 RNA polymerase II, TATA box binding protein (TBP)-associated factor        | Taf15 | 287571 | 1,09 | down |
| 5827714 | 7070461 | 1057361 | TAF15 RNA polymerase II, TATA box binding protein (TBP)-associated factor        | Taf15 | 287571 | 1,02 | down |
| 6456227 | 7060195 | 1031967 | TAF6-like RNA polymerase II, p300/CBP-associated factor (PCAF)-associated factor | Taf6l | 309194 | 2,81 | up   |
| 5976992 | 7060195 | 1031974 | TAF6-like RNA polymerase II, p300/CBP-associated factor (PCAF)-associated factor | Taf6l | 309194 | 1,90 | down |
| 6708918 | 7060195 | 1031961 | TAF6-like RNA polymerase II, p300/CBP-associated factor (PCAF)-associated factor | Taf6l | 309194 | 1,85 | down |
| 6267510 | 7060195 | 1031969 | TAF6-like RNA polymerase II, p300/CBP-associated factor (PCAF)-associated factor | Taf6l | 309194 | 1,72 | up   |
| 5834253 | 7060195 | 1031964 | TAF6-like RNA polymerase II, p300/CBP-associated factor (PCAF)-associated factor | Taf6l | 309194 | 1,44 | down |
| 6538554 | 7060195 | 1031966 | TAF6-like RNA polymerase II, p300/CBP-associated factor (PCAF)-associated factor | Taf6l | 309194 | 1,30 | up   |
| 5679554 | 7060195 | 1031963 | TAF6-like RNA polymerase II, p300/CBP-associated factor (PCAF)-associated factor | Taf6l | 309194 | 1,23 | up   |
| 6142287 | 7060195 | 1031961 | TAF6-like RNA polymerase II, p300/CBP-associated factor (PCAF)-associated factor | Taf6l | 309194 | 1,20 | down |
| 5955868 | 7060195 | 1031961 | TAF6-like RNA polymerase II, p300/CBP-associated factor (PCAF)-associated factor | Taf6l | 309194 | 1,19 | down |
| 6369199 | 7060195 | 1031970 | TAF6-like RNA polymerase II, p300/CBP-associated factor (PCAF)-associated factor | Taf6l | 309194 | 1,14 | up   |
| 5815983 | 7060195 | 1031971 | TAF6-like RNA polymerase II, p300/CBP-associated factor (PCAF)-associated factor | Taf6l | 309194 | 1,11 | up   |
| 6240223 | 7060195 | 1031968 | TAF6-like RNA polymerase II, p300/CBP-associated factor (PCAF)-associated factor | Taf6l | 309194 | 1,11 | down |
| 5850082 | 7060195 | 1031962 | TAF6-like RNA polymerase II, p300/CBP-associated factor (PCAF)-associated factor | Taf6l | 309194 | 1,03 | down |
| 6052676 | 7060195 | 1031965 | TAF6-like RNA polymerase II, p300/CBP-associated factor (PCAF)-associated factor | Taf6l | 309194 | 1,01 | down |
| 5632161 | 7146245 | 1241337 | tankyrase, TRF1-interacting ankyrin-related ADP-ribose polymerase                | Tnks  | 290794 | 2,16 | down |
| 5870040 | 7146245 | 1241369 | tankyrase, TRF1-interacting ankyrin-related ADP-ribose polymerase                | Tnks  | 290794 | 1,38 | up   |
| 5647188 | 7146245 | 1241341 | tankyrase, TRF1-interacting ankyrin-related ADP-ribose polymerase                | Tnks  | 290794 | 1,38 | up   |
| 6060382 | 7146245 | 1241367 | tankyrase, TRF1-interacting ankyrin-related ADP-ribose polymerase                | Tnks  | 290794 | 1,37 | up   |
| 6352863 | 7146245 | 1241349 | tankyrase, TRF1-interacting ankyrin-related ADP-ribose polymerase                | Tnks  | 290794 | 1,33 | down |
| 6180088 | 7146245 | 1241375 | tankyrase, TRF1-interacting ankyrin-related ADP-ribose polymerase                | Tnks  | 290794 | 1,32 | up   |
| 6687546 | 7146245 | 1241368 | tankyrase, TRF1-interacting ankyrin-related ADP-ribose polymerase                | Tnks  | 290794 | 1,31 | up   |
| 6587068 | 7146245 | 1241359 | tankyrase, TRF1-interacting ankyrin-related ADP-ribose polymerase                | Tnks  | 290794 | 1,25 | up   |
| 5883608 | 7146245 | 1241354 | tankyrase, TRF1-interacting ankyrin-related ADP-ribose polymerase                | Tnks  | 290794 | 1,23 | up   |
| 6053305 | 7146245 | 1241364 | tankyrase, TRF1-interacting ankyrin-related ADP-ribose polymerase                | Tnks  | 290794 | 1,19 | down |
| 6457849 | 7146245 | 1241370 | tankyrase, TRF1-interacting ankyrin-related ADP-ribose polymerase                | Tnks  | 290794 | 1,19 | down |
| 6580025 | 7146245 | 1241338 | tankyrase, TRF1-interacting ankyrin-related ADP-ribose polymerase                | Tnks  | 290794 | 1,18 | up   |
| 6688229 | 7146245 | 1241358 | tankyrase, TRF1-interacting ankyrin-related ADP-ribose polymerase                | Tnks  | 290794 | 1,16 | up   |
| 6556964 | 7146245 | 1241353 | tankyrase, TRF1-interacting ankyrin-related ADP-ribose polymerase                | Tnks  | 290794 | 1,13 | up   |
| 5855453 | 7146245 | 1241365 | tankyrase, TRF1-interacting ankyrin-related ADP-ribose polymerase                | Tnks  | 290794 | 1,11 | down |
| 5735660 | 7146245 | 1241357 | tankyrase, TRF1-interacting ankyrin-related ADP-ribose polymerase                | Tnks  | 290794 | 1,11 | up   |
| 6577335 | 7146245 | 1241343 | tankyrase, TRF1-interacting ankyrin-related ADP-ribose polymerase                | Tnks  | 290794 | 1,11 | down |
| 5847473 | 7146245 | 1241371 | tankyrase, TRF1-interacting ankyrin-related ADP-ribose polymerase                | Tnks  | 290794 | 1,10 | down |
| 5874519 | 7146245 | 1241372 | tankyrase, TRF1-interacting ankyrin-related ADP-ribose polymerase                | Tnks  | 290794 | 1,09 | up   |
| 5763022 | 7146245 | 1241337 | tankyrase, TRF1-interacting ankyrin-related ADP-ribose polymerase                | Tnks  | 290794 | 1,08 | down |
| 5636915 | 7146245 | 1241360 | tankyrase, TRF1-interacting ankyrin-related ADP-ribose polymerase                | Tnks  | 290794 | 1,08 | down |
| 6733512 | 7146245 | 1241356 | tankyrase, TRF1-interacting ankyrin-related ADP-ribose polymerase                | Tnks  | 290794 | 1,07 | down |
| 6029628 | 7146245 | 1241337 | tankyrase, TRF1-interacting ankyrin-related ADP-ribose polymerase                | Tnks  | 290794 | 1,06 | down |
| 6360698 | 7146245 | 1241361 | tankyrase, TRF1-interacting ankyrin-related ADP-ribose polymerase                | Tnks  | 290794 | 1,05 | down |
| 5631388 | 7146245 | 1241376 | tankyrase, TRF1-interacting ankyrin-related ADP-ribose polymerase                | Tnks  | 290794 | 1,05 | up   |
| 6724457 | 7146245 | 1241341 | tankyrase, TRF1-interacting ankyrin-related ADP-ribose polymerase                | Tnks  | 290794 | 1,05 | up   |

|         |         |         |                                                                       |        |        |      |      |
|---------|---------|---------|-----------------------------------------------------------------------|--------|--------|------|------|
| 5809916 | 7146245 | 1241348 | tankyrase, TRF1-interacting ankyrin-related ADP-ribose polymerase     | Tnks   | 290794 | 1,04 | down |
| 6680137 | 7146245 | 1241363 | tankyrase, TRF1-interacting ankyrin-related ADP-ribose polymerase     | Tnks   | 290794 | 1,04 | up   |
| 6255803 | 7146245 | 1241355 | tankyrase, TRF1-interacting ankyrin-related ADP-ribose polymerase     | Tnks   | 290794 | 1,03 | down |
| 5767210 | 7146245 | 1241366 | tankyrase, TRF1-interacting ankyrin-related ADP-ribose polymerase     | Tnks   | 290794 | 1,03 | down |
| 5839017 | 7057365 | 1025710 | TAO kinase 2                                                          | Taok2  | 64666  | 3,09 | up   |
| 6197038 | 7057365 | 1025696 | TAO kinase 2                                                          | Taok2  | 64666  | 2,09 | down |
| 6436259 | 7057365 | 1025696 | TAO kinase 2                                                          | Taok2  | 64666  | 1,44 | down |
| 5703558 | 7057365 | 1025696 | TAO kinase 2                                                          | Taok2  | 64666  | 1,33 | down |
| 6153709 | 7057365 | 1025708 | TAO kinase 2                                                          | Taok2  | 64666  | 1,24 | down |
| 6585674 | 7057365 | 1025711 | TAO kinase 2                                                          | Taok2  | 64666  | 1,19 | down |
| 5675421 | 7057365 | 1025701 | TAO kinase 2                                                          | Taok2  | 64666  | 1,17 | up   |
| 6496229 | 7057365 | 1025703 | TAO kinase 2                                                          | Taok2  | 64666  | 1,17 | down |
| 6292712 | 7057365 | 1025698 | TAO kinase 2                                                          | Taok2  | 64666  | 1,15 | up   |
| 6701597 | 7057365 | 1025696 | TAO kinase 2                                                          | Taok2  | 64666  | 1,11 | down |
| 6096832 | 7057365 | 1025696 | TAO kinase 2                                                          | Taok2  | 64666  | 1,11 | up   |
| 5650489 | 7057365 | 1025710 | TAO kinase 2                                                          | Taok2  | 64666  | 1,10 | up   |
| 6364543 | 7057365 | 1025702 | TAO kinase 2                                                          | Taok2  | 64666  | 1,10 | up   |
| 6520033 | 7057365 | 1025696 | TAO kinase 2                                                          | Taok2  | 64666  | 1,10 | down |
| 6507826 | 7057365 | 1025696 | TAO kinase 2                                                          | Taok2  | 64666  | 1,09 | down |
| 5885815 | 7057365 | 1025696 | TAO kinase 2                                                          | Taok2  | 64666  | 1,08 | up   |
| 6608256 | 7057365 | 1025700 | TAO kinase 2                                                          | Taok2  | 64666  | 1,08 | up   |
| 6426183 | 7057365 | 1025696 | TAO kinase 2                                                          | Taok2  | 64666  | 1,07 | up   |
| 5951514 | 7057365 | 1025696 | TAO kinase 2                                                          | Taok2  | 64666  | 1,05 | down |
| 6024406 | 7057365 | 1025705 | TAO kinase 2                                                          | Taok2  | 64666  | 1,04 | down |
| 6684516 | 7057365 | 1025697 | TAO kinase 2                                                          | Taok2  | 64666  | 1,03 | down |
| 6143908 | 7057365 | 1025704 | TAO kinase 2                                                          | Taok2  | 64666  | 1,02 | down |
| 5717104 | 7057365 | 1025700 | TAO kinase 2                                                          | Taok2  | 64666  | 1,02 | up   |
| 6026280 | 7057365 | 1025706 | TAO kinase 2                                                          | Taok2  | 64666  | 1,02 | up   |
| 6452384 | 7057365 | 1025700 | TAO kinase 2                                                          | Taok2  | 64666  | 1,02 | up   |
| 6262324 | 7057365 | 1025707 | TAO kinase 2                                                          | Taok2  | 64666  | 1,02 | down |
| 6234653 | 7057365 | 1025709 | TAO kinase 2                                                          | Taok2  | 64666  | 1,02 | down |
| 5683009 | 7057365 | 1025696 | TAO kinase 2                                                          | Taok2  | 64666  | 1,01 | down |
| 5819985 | 7057365 | 1025699 | TAO kinase 2                                                          | Taok2  | 64666  | 1,01 | up   |
| 5969037 | 7269637 | 1546244 | TAP binding protein-like                                              | Tapbpl | 297602 | 5,16 | down |
| 6500547 | 7269637 | 1546244 | TAP binding protein-like                                              | Tapbpl | 297602 | 2,99 | down |
| 6627381 | 7269637 | 1546242 | TAP binding protein-like                                              | Tapbpl | 297602 | 2,09 | up   |
| 6396412 | 7269637 | 1546240 | TAP binding protein-like                                              | Tapbpl | 297602 | 1,96 | up   |
| 6638851 | 7269637 | 1546237 | TAP binding protein-like                                              | Tapbpl | 297602 | 1,83 | up   |
| 6291763 | 7269637 | 1546238 | TAP binding protein-like                                              | Tapbpl | 297602 | 1,78 | up   |
| 6738829 | 7269637 | 1546244 | TAP binding protein-like                                              | Tapbpl | 297602 | 1,74 | down |
| 5706447 | 7269637 | 1546241 | TAP binding protein-like                                              | Tapbpl | 297602 | 1,38 | up   |
| 6598106 | 7269637 | 1546239 | TAP binding protein-like                                              | Tapbpl | 297602 | 1,23 | up   |
| 6538593 | 7269637 | 1546237 | TAP binding protein-like                                              | Tapbpl | 297602 | 1,06 | up   |
| 5982239 | 7186130 | 1340572 | TATA box binding protein (Tbp)-associated factor, RNA polymerase I, C | Taf1c  | 361420 | 2,06 | up   |
| 5715079 | 7186130 | 1340560 | TATA box binding protein (Tbp)-associated factor, RNA polymerase I, C | Taf1c  | 361420 | 1,84 | down |
| 6585256 | 7186130 | 1340559 | TATA box binding protein (Tbp)-associated factor, RNA polymerase I, C | Taf1c  | 361420 | 1,50 | down |
| 6379763 | 7186130 | 1340563 | TATA box binding protein (Tbp)-associated factor, RNA polymerase I, C | Taf1c  | 361420 | 1,39 | down |
| 5983443 | 7186130 | 1340573 | TATA box binding protein (Tbp)-associated factor, RNA polymerase I, C | Taf1c  | 361420 | 1,39 | down |
| 5637228 | 7186130 | 1340562 | TATA box binding protein (Tbp)-associated factor, RNA polymerase I, C | Taf1c  | 361420 | 1,35 | up   |
| 6122704 | 7186130 | 1340563 | TATA box binding protein (Tbp)-associated factor, RNA polymerase I, C | Taf1c  | 361420 | 1,34 | up   |
| 5624083 | 7186130 | 1340564 | TATA box binding protein (Tbp)-associated factor, RNA polymerase I, C | Taf1c  | 361420 | 1,24 | up   |
| 5867054 | 7186130 | 1340566 | TATA box binding protein (Tbp)-associated factor, RNA polymerase I, C | Taf1c  | 361420 | 1,22 | up   |
| 5730583 | 7186130 | 1340560 | TATA box binding protein (Tbp)-associated factor, RNA polymerase I, C | Taf1c  | 361420 | 1,21 | down |
| 5621275 | 7186130 | 1340566 | TATA box binding protein (Tbp)-associated factor, RNA polymerase I, C | Taf1c  | 361420 | 1,18 | up   |
| 5672705 | 7186130 | 1340573 | TATA box binding protein (Tbp)-associated factor, RNA polymerase I, C | Taf1c  | 361420 | 1,13 | down |
| 6479137 | 7186130 | 1340569 | TATA box binding protein (Tbp)-associated factor, RNA polymerase I, C | Taf1c  | 361420 | 1,12 | down |
| 6565535 | 7186130 | 1340568 | TATA box binding protein (Tbp)-associated factor, RNA polymerase I, C | Taf1c  | 361420 | 1,09 | down |

|         |         |         |                                                                       |         |        |      |      |
|---------|---------|---------|-----------------------------------------------------------------------|---------|--------|------|------|
| 5899547 | 7186130 | 1340560 | TATA box binding protein (Tbp)-associated factor, RNA polymerase I, C | Taf1c   | 361420 | 1,07 | down |
| 6558739 | 7186130 | 1340567 | TATA box binding protein (Tbp)-associated factor, RNA polymerase I, C | Taf1c   | 361420 | 1,06 | up   |
| 6059625 | 7186130 | 1340565 | TATA box binding protein (Tbp)-associated factor, RNA polymerase I, C | Taf1c   | 361420 | 1,04 | down |
| 5621591 | 7186130 | 1340570 | TATA box binding protein (Tbp)-associated factor, RNA polymerase I, C | Taf1c   | 361420 | 1,04 | up   |
| 5748965 | 7186130 | 1340571 | TATA box binding protein (Tbp)-associated factor, RNA polymerase I, C | Taf1c   | 361420 | 1,04 | down |
| 6364848 | 7186130 | 1340561 | TATA box binding protein (Tbp)-associated factor, RNA polymerase I, C | Taf1c   | 361420 | 1,03 | down |
| 5635014 | 7186130 | 1340573 | TATA box binding protein (Tbp)-associated factor, RNA polymerase I, C | Taf1c   | 361420 | 1,02 | up   |
| 5661115 | 7371253 | 1799592 | TBC1 domain family, member 16                                         | Tbc1d16 | 303734 | 2,38 | down |
| 5831074 | 7371253 | 1799574 | TBC1 domain family, member 16                                         | Tbc1d16 | 303734 | 1,50 | down |
| 6419400 | 7371253 | 1799562 | TBC1 domain family, member 16                                         | Tbc1d16 | 303734 | 1,46 | down |
| 5923786 | 7371253 | 1799567 | TBC1 domain family, member 16                                         | Tbc1d16 | 303734 | 1,37 | up   |
| 5751721 | 7371253 | 1799568 | TBC1 domain family, member 16                                         | Tbc1d16 | 303734 | 1,37 | up   |
| 5696430 | 7371253 | 1799570 | TBC1 domain family, member 16                                         | Tbc1d16 | 303734 | 1,36 | up   |
| 6587670 | 7371253 | 1799571 | TBC1 domain family, member 16                                         | Tbc1d16 | 303734 | 1,17 | down |
| 5934100 | 7371253 | 1799572 | TBC1 domain family, member 16                                         | Tbc1d16 | 303734 | 1,11 | down |
| 6228417 | 7371253 | 1799593 | TBC1 domain family, member 16                                         | Tbc1d16 | 303734 | 1,05 | up   |
| 5893527 | 7371253 | 1799594 | TBC1 domain family, member 16                                         | Tbc1d16 | 303734 | 1,03 | down |
| 6330199 | 7371253 | 1799575 | TBC1 domain family, member 16                                         | Tbc1d16 | 303734 | 1,01 | down |
| 6452059 | 7371253 | 1799564 | TBC1 domain family, member 16                                         | Tbc1d16 | 303734 | 1,00 | down |
| 6603268 | 7351568 | 1748847 | TBC1 domain family, member 5                                          | Tbc1d5  | 501088 | 2,50 | up   |
| 6317607 | 7351568 | 1748776 | TBC1 domain family, member 5                                          | Tbc1d5  | 501088 | 1,65 | down |
| 6244826 | 7351568 | 1748797 | TBC1 domain family, member 5                                          | Tbc1d5  | 501088 | 1,29 | down |
| 6022613 | 7351568 | 1748773 | TBC1 domain family, member 5                                          | Tbc1d5  | 501088 | 1,28 | down |
| 5984556 | 7351568 | 1748812 | TBC1 domain family, member 5                                          | Tbc1d5  | 501088 | 1,24 | up   |
| 5761983 | 7351568 | 1748836 | TBC1 domain family, member 5                                          | Tbc1d5  | 501088 | 1,17 | down |
| 6103108 | 7351568 | 1748843 | TBC1 domain family, member 5                                          | Tbc1d5  | 501088 | 1,15 | down |
| 5901936 | 7351568 | 1748809 | TBC1 domain family, member 5                                          | Tbc1d5  | 501088 | 1,14 | up   |
| 5901318 | 7351568 | 1748799 | TBC1 domain family, member 5                                          | Tbc1d5  | 501088 | 1,14 | down |
| 6008512 | 7351568 | 1748837 | TBC1 domain family, member 5                                          | Tbc1d5  | 501088 | 1,13 | up   |
| 6086932 | 7351568 | 1748800 | TBC1 domain family, member 5                                          | Tbc1d5  | 501088 | 1,13 | down |
| 6407774 | 7351568 | 1748853 | TBC1 domain family, member 5                                          | Tbc1d5  | 501088 | 1,12 | up   |
| 5981019 | 7351568 | 1748823 | TBC1 domain family, member 5                                          | Tbc1d5  | 501088 | 1,12 | up   |
| 6490646 | 7351568 | 1748812 | TBC1 domain family, member 5                                          | Tbc1d5  | 501088 | 1,11 | up   |
| 6540260 | 7351568 | 1748798 | TBC1 domain family, member 5                                          | Tbc1d5  | 501088 | 1,11 | down |
| 5956994 | 7351568 | 1748790 | TBC1 domain family, member 5                                          | Tbc1d5  | 501088 | 1,10 | down |
| 6038946 | 7351568 | 1748852 | TBC1 domain family, member 5                                          | Tbc1d5  | 501088 | 1,09 | up   |
| 6666112 | 7351568 | 1748854 | TBC1 domain family, member 5                                          | Tbc1d5  | 501088 | 1,09 | down |
| 6600206 | 7351568 | 1748855 | TBC1 domain family, member 5                                          | Tbc1d5  | 501088 | 1,09 | up   |
| 6409067 | 7351568 | 1748796 | TBC1 domain family, member 5                                          | Tbc1d5  | 501088 | 1,09 | down |
| 6560511 | 7351568 | 1748810 | TBC1 domain family, member 5                                          | Tbc1d5  | 501088 | 1,08 | down |
| 6134825 | 7351568 | 1748827 | TBC1 domain family, member 5                                          | Tbc1d5  | 501088 | 1,08 | up   |
| 5897013 | 7351568 | 1748807 | TBC1 domain family, member 5                                          | Tbc1d5  | 501088 | 1,03 | down |
| 6061774 | 7351568 | 1748811 | TBC1 domain family, member 5                                          | Tbc1d5  | 501088 | 1,01 | up   |
| 6732584 | 7082041 | 1084019 | TBK1 binding protein 1                                                | Tbkbp1  | 266764 | 2,77 | down |
| 6245821 | 7082041 | 1084018 | TBK1 binding protein 1                                                | Tbkbp1  | 266764 | 2,61 | down |
| 5843980 | 7082041 | 1084009 | TBK1 binding protein 1                                                | Tbkbp1  | 266764 | 2,59 | down |
| 6212298 | 7082041 | 1084017 | TBK1 binding protein 1                                                | Tbkbp1  | 266764 | 2,50 | up   |
| 6262768 | 7082041 | 1084018 | TBK1 binding protein 1                                                | Tbkbp1  | 266764 | 2,31 | down |
| 6026099 | 7082041 | 1084017 | TBK1 binding protein 1                                                | Tbkbp1  | 266764 | 2,07 | up   |
| 6421691 | 7082041 | 1084016 | TBK1 binding protein 1                                                | Tbkbp1  | 266764 | 1,94 | up   |
| 6449577 | 7082041 | 1084010 | TBK1 binding protein 1                                                | Tbkbp1  | 266764 | 1,93 | up   |
| 5649319 | 7082041 | 1084011 | TBK1 binding protein 1                                                | Tbkbp1  | 266764 | 1,53 | down |
| 5950676 | 7082041 | 1084015 | TBK1 binding protein 1                                                | Tbkbp1  | 266764 | 1,51 | up   |
| 6036870 | 7082041 | 1084018 | TBK1 binding protein 1                                                | Tbkbp1  | 266764 | 1,49 | down |
| 6228764 | 7082041 | 1084013 | TBK1 binding protein 1                                                | Tbkbp1  | 266764 | 1,49 | up   |
| 5905817 | 7082041 | 1084014 | TBK1 binding protein 1                                                | Tbkbp1  | 266764 | 1,31 | up   |
| 5739030 | 7082041 | 1084009 | TBK1 binding protein 1                                                | Tbkbp1  | 266764 | 1,27 | up   |

|         |         |         |                        |        |        |      |      |
|---------|---------|---------|------------------------|--------|--------|------|------|
| 6592498 | 7082041 | 1084012 | TBK1 binding protein 1 | Tbkbp1 | 266764 | 1,10 | down |
| 6205606 | 7082041 | 1084011 | TBK1 binding protein 1 | Tbkbp1 | 266764 | 1,01 | down |
| 6442442 | 7089762 | 1102988 | T-box 1                | Tbx1   | 360737 | 3,47 | down |
| 6273576 | 7089762 | 1102995 | T-box 1                | Tbx1   | 360737 | 1,66 | down |
| 6011060 | 7089762 | 1102984 | T-box 1                | Tbx1   | 360737 | 1,63 | up   |
| 6737739 | 7089762 | 1102990 | T-box 1                | Tbx1   | 360737 | 1,45 | up   |
| 6229933 | 7089762 | 1102994 | T-box 1                | Tbx1   | 360737 | 1,43 | down |
| 6100655 | 7089762 | 1102993 | T-box 1                | Tbx1   | 360737 | 1,40 | up   |
| 6303127 | 7089762 | 1102989 | T-box 1                | Tbx1   | 360737 | 1,31 | down |
| 6410151 | 7089762 | 1102992 | T-box 1                | Tbx1   | 360737 | 1,20 | down |
| 5706999 | 7089762 | 1102996 | T-box 1                | Tbx1   | 360737 | 1,06 | up   |
| 6418681 | 7089762 | 1102986 | T-box 1                | Tbx1   | 360737 | 1,05 | up   |
| 5717285 | 7089762 | 1102988 | T-box 1                | Tbx1   | 360737 | 1,00 | up   |
| 6451407 | 7089762 | 1102996 | T-box 1                | Tbx1   | 360737 | 1,00 | up   |
| 6421004 | 7343279 | 1728124 | T-box 20               | Tbx20  | 315497 | 2,30 | down |
| 5638075 | 7343279 | 1728127 | T-box 20               | Tbx20  | 315497 | 1,37 | up   |
| 5848487 | 7343279 | 1728127 | T-box 20               | Tbx20  | 315497 | 1,22 | up   |
| 5641115 | 7343279 | 1728116 | T-box 20               | Tbx20  | 315497 | 1,13 | down |
| 6428754 | 7343279 | 1728122 | T-box 20               | Tbx20  | 315497 | 1,11 | up   |
| 6477277 | 7343279 | 1728120 | T-box 20               | Tbx20  | 315497 | 1,10 | down |
| 6351121 | 7343279 | 1728116 | T-box 20               | Tbx20  | 315497 | 1,09 | up   |
| 5718734 | 7343279 | 1728127 | T-box 20               | Tbx20  | 315497 | 1,05 | down |
| 6667570 | 7343279 | 1728121 | T-box 20               | Tbx20  | 315497 | 1,03 | down |
| 6442129 | 7343279 | 1728117 | T-box 20               | Tbx20  | 315497 | 1,03 | down |
| 6742470 | 7376398 | 1812487 | T-box 22               | Tbx22  | 302369 | 2,03 | down |
| 6330998 | 7376398 | 1812494 | T-box 22               | Tbx22  | 302369 | 1,44 | up   |
| 6726558 | 7376398 | 1812492 | T-box 22               | Tbx22  | 302369 | 1,31 | down |
| 6082217 | 7376398 | 1812493 | T-box 22               | Tbx22  | 302369 | 1,29 | down |
| 6401032 | 7376398 | 1812496 | T-box 22               | Tbx22  | 302369 | 1,21 | down |
| 6640792 | 7376398 | 1812497 | T-box 22               | Tbx22  | 302369 | 1,13 | up   |
| 6190500 | 7376398 | 1812497 | T-box 22               | Tbx22  | 302369 | 1,11 | down |
| 6439572 | 7376398 | 1812489 | T-box 22               | Tbx22  | 302369 | 1,10 | down |
| 6172339 | 7376398 | 1812488 | T-box 22               | Tbx22  | 302369 | 1,10 | down |
| 5900126 | 7376398 | 1812495 | T-box 22               | Tbx22  | 302369 | 1,04 | down |
| 6693380 | 7376398 | 1812497 | T-box 22               | Tbx22  | 302369 | 1,03 | down |
| 6667106 | 7376398 | 1812496 | T-box 22               | Tbx22  | 302369 | 1,01 | down |
| 5944880 | 7376398 | 1812496 | T-box 22               | Tbx22  | 302369 | 1,00 | up   |
| 6092561 | 7036871 | 977873  | T-box 6                | Tbx6   | 365371 | 2,09 | up   |
| 5749180 | 7036871 | 977874  | T-box 6                | Tbx6   | 365371 | 1,98 | down |
| 6211375 | 7036871 | 977877  | T-box 6                | Tbx6   | 365371 | 1,61 | down |
| 5692482 | 7036871 | 977877  | T-box 6                | Tbx6   | 365371 | 1,24 | down |
| 6441894 | 7036871 | 977875  | T-box 6                | Tbx6   | 365371 | 1,21 | up   |
| 6528168 | 7036871 | 977880  | T-box 6                | Tbx6   | 365371 | 1,17 | down |
| 6460937 | 7036871 | 977873  | T-box 6                | Tbx6   | 365371 | 1,13 | up   |
| 5702767 | 7036871 | 977879  | T-box 6                | Tbx6   | 365371 | 1,08 | down |
| 5618535 | 7036871 | 977876  | T-box 6                | Tbx6   | 365371 | 1,04 | up   |
| 6070508 | 7036871 | 977873  | T-box 6                | Tbx6   | 365371 | 1,04 | down |
| 6368360 | 7036871 | 977878  | T-box 6                | Tbx6   | 365371 | 1,02 | up   |
| 6162602 | 7348487 | 1741271 | T-box18                | Tbx18  | 315870 | 2,19 | down |
| 6097845 | 7348487 | 1741271 | T-box18                | Tbx18  | 315870 | 1,55 | down |
| 6524087 | 7348487 | 1741272 | T-box18                | Tbx18  | 315870 | 1,49 | down |
| 6415659 | 7348487 | 1741259 | T-box18                | Tbx18  | 315870 | 1,46 | up   |
| 6186026 | 7348487 | 1741259 | T-box18                | Tbx18  | 315870 | 1,44 | up   |
| 6573331 | 7348487 | 1741263 | T-box18                | Tbx18  | 315870 | 1,44 | down |
| 6144613 | 7348487 | 1741269 | T-box18                | Tbx18  | 315870 | 1,30 | up   |
| 6702996 | 7348487 | 1741269 | T-box18                | Tbx18  | 315870 | 1,27 | up   |
| 6529367 | 7348487 | 1741271 | T-box18                | Tbx18  | 315870 | 1,16 | down |

|         |         |         |                                           |       |        |      |      |
|---------|---------|---------|-------------------------------------------|-------|--------|------|------|
| 5653894 | 7348487 | 1741269 | T-box18                                   | Tbx18 | 315870 | 1,12 | down |
| 6142422 | 7348487 | 1741261 | T-box18                                   | Tbx18 | 315870 | 1,10 | up   |
| 6220265 | 7348487 | 1741264 | T-box18                                   | Tbx18 | 315870 | 1,08 | up   |
| 6611408 | 7348487 | 1741259 | T-box18                                   | Tbx18 | 315870 | 1,05 | up   |
| 6239315 | 7348487 | 1741266 | T-box18                                   | Tbx18 | 315870 | 1,04 | up   |
| 6067415 | 7348487 | 1741259 | T-box18                                   | Tbx18 | 315870 | 1,02 | up   |
| 6278572 | 7348487 | 1741265 | T-box18                                   | Tbx18 | 315870 | 1,01 | up   |
| 6647963 | 7348487 | 1741272 | T-box18                                   | Tbx18 | 315870 | 1,01 | down |
| 6253298 | 7278575 | 1569562 | T-cell acute lymphocytic leukemia 1       | Tal1  | 313507 | 3,97 | up   |
| 6452738 | 7278575 | 1569558 | T-cell acute lymphocytic leukemia 1       | Tal1  | 313507 | 1,79 | down |
| 6183145 | 7278575 | 1569557 | T-cell acute lymphocytic leukemia 1       | Tal1  | 313507 | 1,77 | up   |
| 6256322 | 7278575 | 1569562 | T-cell acute lymphocytic leukemia 1       | Tal1  | 313507 | 1,67 | down |
| 6073193 | 7278575 | 1569562 | T-cell acute lymphocytic leukemia 1       | Tal1  | 313507 | 1,35 | down |
| 6619390 | 7278575 | 1569562 | T-cell acute lymphocytic leukemia 1       | Tal1  | 313507 | 1,30 | down |
| 5782733 | 7278575 | 1569561 | T-cell acute lymphocytic leukemia 1       | Tal1  | 313507 | 1,23 | down |
| 5891062 | 7278575 | 1569557 | T-cell acute lymphocytic leukemia 1       | Tal1  | 313507 | 1,23 | up   |
| 6421301 | 7278575 | 1569563 | T-cell acute lymphocytic leukemia 1       | Tal1  | 313507 | 1,20 | up   |
| 6745582 | 7278575 | 1569562 | T-cell acute lymphocytic leukemia 1       | Tal1  | 313507 | 1,10 | up   |
| 6710652 | 7278575 | 1569562 | T-cell acute lymphocytic leukemia 1       | Tal1  | 313507 | 1,09 | up   |
| 6481510 | 7278575 | 1569555 | T-cell acute lymphocytic leukemia 1       | Tal1  | 313507 | 1,08 | down |
| 6037856 | 7278575 | 1569559 | T-cell acute lymphocytic leukemia 1       | Tal1  | 313507 | 1,05 | down |
| 5694379 | 7278575 | 1569563 | T-cell acute lymphocytic leukemia 1       | Tal1  | 313507 | 1,01 | up   |
| 5786975 | 7278575 | 1569562 | T-cell acute lymphocytic leukemia 1       | Tal1  | 313507 | 1,01 | up   |
| 6739465 | 7086672 | 1094395 | T-cell lymphoma invasion and metastasis 1 | Tiam1 | 304109 | 1,40 | down |
| 6522367 | 7086672 | 1094395 | T-cell lymphoma invasion and metastasis 1 | Tiam1 | 304109 | 1,37 | down |
| 5929652 | 7086672 | 1094371 | T-cell lymphoma invasion and metastasis 1 | Tiam1 | 304109 | 1,36 | up   |
| 6470812 | 7086672 | 1094383 | T-cell lymphoma invasion and metastasis 1 | Tiam1 | 304109 | 1,33 | up   |
| 6456788 | 7086672 | 1094394 | T-cell lymphoma invasion and metastasis 1 | Tiam1 | 304109 | 1,32 | down |
| 6465526 | 7086672 | 1094364 | T-cell lymphoma invasion and metastasis 1 | Tiam1 | 304109 | 1,32 | up   |
| 5698441 | 7086672 | 1094350 | T-cell lymphoma invasion and metastasis 1 | Tiam1 | 304109 | 1,29 | up   |
| 6207467 | 7086672 | 1094373 | T-cell lymphoma invasion and metastasis 1 | Tiam1 | 304109 | 1,28 | up   |
| 5981873 | 7086672 | 1094358 | T-cell lymphoma invasion and metastasis 1 | Tiam1 | 304109 | 1,26 | up   |
| 5723784 | 7086672 | 1094388 | T-cell lymphoma invasion and metastasis 1 | Tiam1 | 304109 | 1,25 | down |
| 6273040 | 7086672 | 1094362 | T-cell lymphoma invasion and metastasis 1 | Tiam1 | 304109 | 1,25 | down |
| 5786833 | 7086672 | 1094355 | T-cell lymphoma invasion and metastasis 1 | Tiam1 | 304109 | 1,22 | up   |
| 6569628 | 7086672 | 1094392 | T-cell lymphoma invasion and metastasis 1 | Tiam1 | 304109 | 1,20 | down |
| 5671955 | 7086672 | 1094369 | T-cell lymphoma invasion and metastasis 1 | Tiam1 | 304109 | 1,16 | up   |
| 6258811 | 7086672 | 1094350 | T-cell lymphoma invasion and metastasis 1 | Tiam1 | 304109 | 1,16 | up   |
| 6238402 | 7086672 | 1094382 | T-cell lymphoma invasion and metastasis 1 | Tiam1 | 304109 | 1,09 | up   |
| 6600525 | 7086672 | 1094361 | T-cell lymphoma invasion and metastasis 1 | Tiam1 | 304109 | 1,08 | up   |
| 6152717 | 7086672 | 1094366 | T-cell lymphoma invasion and metastasis 1 | Tiam1 | 304109 | 1,08 | down |
| 6317850 | 7086672 | 1094385 | T-cell lymphoma invasion and metastasis 1 | Tiam1 | 304109 | 1,07 | down |
| 6064372 | 7086672 | 1094376 | T-cell lymphoma invasion and metastasis 1 | Tiam1 | 304109 | 1,07 | down |
| 5858745 | 7086672 | 1094390 | T-cell lymphoma invasion and metastasis 1 | Tiam1 | 304109 | 1,06 | down |
| 6218355 | 7086672 | 1094381 | T-cell lymphoma invasion and metastasis 1 | Tiam1 | 304109 | 1,05 | down |
| 6410130 | 7086672 | 1094389 | T-cell lymphoma invasion and metastasis 1 | Tiam1 | 304109 | 1,05 | down |
| 6050972 | 7086672 | 1094356 | T-cell lymphoma invasion and metastasis 1 | Tiam1 | 304109 | 1,05 | up   |
| 6398208 | 7086672 | 1094380 | T-cell lymphoma invasion and metastasis 1 | Tiam1 | 304109 | 1,02 | down |
| 6086530 | 7086672 | 1094384 | T-cell lymphoma invasion and metastasis 1 | Tiam1 | 304109 | 1,02 | down |
| 5640301 | 7086672 | 1094368 | T-cell lymphoma invasion and metastasis 1 | Tiam1 | 304109 | 1,00 | up   |
| 5898969 | 7031473 | 963873  | TEA domain family member 2                | Tead2 | 308582 | 2,32 | up   |
| 6619187 | 7031473 | 963876  | TEA domain family member 2                | Tead2 | 308582 | 1,68 | up   |
| 6539340 | 7031473 | 963865  | TEA domain family member 2                | Tead2 | 308582 | 1,45 | down |
| 6676914 | 7031473 | 963874  | TEA domain family member 2                | Tead2 | 308582 | 1,42 | up   |
| 6182191 | 7031473 | 963864  | TEA domain family member 2                | Tead2 | 308582 | 1,30 | up   |
| 5841890 | 7031473 | 963877  | TEA domain family member 2                | Tead2 | 308582 | 1,27 | down |
| 6016279 | 7031473 | 963875  | TEA domain family member 2                | Tead2 | 308582 | 1,24 | down |

|         |         |         |                             |       |        |      |      |
|---------|---------|---------|-----------------------------|-------|--------|------|------|
| 5877653 | 7031473 | 963866  | TEA domain family member 2  | Tead2 | 308582 | 1,24 | up   |
| 5672611 | 7031473 | 963868  | TEA domain family member 2  | Tead2 | 308582 | 1,22 | up   |
| 5681737 | 7031473 | 963872  | TEA domain family member 2  | Tead2 | 308582 | 1,21 | up   |
| 6314786 | 7031473 | 963869  | TEA domain family member 2  | Tead2 | 308582 | 1,13 | up   |
| 5831705 | 7031473 | 963877  | TEA domain family member 2  | Tead2 | 308582 | 1,12 | down |
| 6044022 | 7031473 | 963867  | TEA domain family member 2  | Tead2 | 308582 | 1,08 | down |
| 6096937 | 7031473 | 963873  | TEA domain family member 2  | Tead2 | 308582 | 1,03 | down |
| 6369418 | 7031473 | 963870  | TEA domain family member 2  | Tead2 | 308582 | 1,02 | down |
| 6349841 | 7118157 | 1172510 | tec protein tyrosine kinase | Tec   | 84492  | 2,79 | down |
| 6109897 | 7118157 | 1172518 | tec protein tyrosine kinase | Tec   | 84492  | 2,59 | up   |
| 6139440 | 7118157 | 1172508 | tec protein tyrosine kinase | Tec   | 84492  | 2,17 | up   |
| 6172707 | 7118157 | 1172517 | tec protein tyrosine kinase | Tec   | 84492  | 1,70 | up   |
| 6023225 | 7118157 | 1172506 | tec protein tyrosine kinase | Tec   | 84492  | 1,67 | up   |
| 6231114 | 7118157 | 1172521 | tec protein tyrosine kinase | Tec   | 84492  | 1,61 | up   |
| 5729850 | 7118157 | 1172520 | tec protein tyrosine kinase | Tec   | 84492  | 1,42 | up   |
| 6012146 | 7118157 | 1172525 | tec protein tyrosine kinase | Tec   | 84492  | 1,40 | down |
| 6346234 | 7118157 | 1172497 | tec protein tyrosine kinase | Tec   | 84492  | 1,35 | down |
| 6320358 | 7118157 | 1172522 | tec protein tyrosine kinase | Tec   | 84492  | 1,33 | up   |
| 5797172 | 7118157 | 1172499 | tec protein tyrosine kinase | Tec   | 84492  | 1,28 | up   |
| 6529975 | 7118157 | 1172516 | tec protein tyrosine kinase | Tec   | 84492  | 1,26 | down |
| 6165349 | 7118157 | 1172496 | tec protein tyrosine kinase | Tec   | 84492  | 1,25 | down |
| 6240841 | 7118157 | 1172524 | tec protein tyrosine kinase | Tec   | 84492  | 1,23 | up   |
| 5713048 | 7118157 | 1172510 | tec protein tyrosine kinase | Tec   | 84492  | 1,21 | up   |
| 6088361 | 7118157 | 1172507 | tec protein tyrosine kinase | Tec   | 84492  | 1,20 | up   |
| 5892219 | 7118157 | 1172514 | tec protein tyrosine kinase | Tec   | 84492  | 1,14 | down |
| 6492723 | 7118157 | 1172515 | tec protein tyrosine kinase | Tec   | 84492  | 1,13 | up   |
| 6158993 | 7118157 | 1172511 | tec protein tyrosine kinase | Tec   | 84492  | 1,11 | down |
| 6555497 | 7118157 | 1172505 | tec protein tyrosine kinase | Tec   | 84492  | 1,07 | down |
| 5647660 | 7118157 | 1172513 | tec protein tyrosine kinase | Tec   | 84492  | 1,02 | down |
| 5799636 | 7106824 | 1144281 | tenascin R                  | Tnr   | 25567  | 2,39 | up   |
| 6322901 | 7106824 | 1144271 | tenascin R                  | Tnr   | 25567  | 1,99 | down |
| 6511356 | 7106824 | 1144291 | tenascin R                  | Tnr   | 25567  | 1,71 | up   |
| 5943007 | 7106824 | 1144287 | tenascin R                  | Tnr   | 25567  | 1,71 | down |
| 5779153 | 7106824 | 1144279 | tenascin R                  | Tnr   | 25567  | 1,69 | up   |
| 6021249 | 7106824 | 1144290 | tenascin R                  | Tnr   | 25567  | 1,67 | down |
| 5951623 | 7106824 | 1144292 | tenascin R                  | Tnr   | 25567  | 1,52 | down |
| 6340318 | 7106824 | 1144271 | tenascin R                  | Tnr   | 25567  | 1,47 | up   |
| 6001298 | 7106824 | 1144284 | tenascin R                  | Tnr   | 25567  | 1,44 | down |
| 5687030 | 7106824 | 1144274 | tenascin R                  | Tnr   | 25567  | 1,39 | down |
| 6341309 | 7106824 | 1144278 | tenascin R                  | Tnr   | 25567  | 1,35 | down |
| 5812885 | 7106824 | 1144278 | tenascin R                  | Tnr   | 25567  | 1,33 | down |
| 6317705 | 7106824 | 1144271 | tenascin R                  | Tnr   | 25567  | 1,31 | down |
| 6669443 | 7106824 | 1144273 | tenascin R                  | Tnr   | 25567  | 1,30 | down |
| 5801212 | 7106824 | 1144286 | tenascin R                  | Tnr   | 25567  | 1,30 | up   |
| 6592021 | 7106824 | 1144272 | tenascin R                  | Tnr   | 25567  | 1,29 | down |
| 6382206 | 7106824 | 1144285 | tenascin R                  | Tnr   | 25567  | 1,18 | down |
| 6740058 | 7106824 | 1144288 | tenascin R                  | Tnr   | 25567  | 1,13 | down |
| 6638405 | 7106824 | 1144283 | tenascin R                  | Tnr   | 25567  | 1,12 | up   |
| 6270522 | 7106824 | 1144293 | tenascin R                  | Tnr   | 25567  | 1,11 | up   |
| 6217821 | 7106824 | 1144282 | tenascin R                  | Tnr   | 25567  | 1,08 | down |
| 6348083 | 7106824 | 1144275 | tenascin R                  | Tnr   | 25567  | 1,08 | up   |
| 5660142 | 7106824 | 1144280 | tenascin R                  | Tnr   | 25567  | 1,08 | up   |
| 6238673 | 7106824 | 1144287 | tenascin R                  | Tnr   | 25567  | 1,06 | up   |
| 5780385 | 7106824 | 1144276 | tenascin R                  | Tnr   | 25567  | 1,04 | down |
| 6534711 | 7106824 | 1144289 | tenascin R                  | Tnr   | 25567  | 1,03 | up   |
| 6274136 | 7106824 | 1144277 | tenascin R                  | Tnr   | 25567  | 1,03 | up   |
| 5913746 | 7363674 | 1778397 | tensin 1                    | Tns1  | 301509 | 1,88 | down |

|         |         |         |                                                         |       |        |      |      |
|---------|---------|---------|---------------------------------------------------------|-------|--------|------|------|
| 5695518 | 7363674 | 1778397 | tensin 1                                                | Tns1  | 301509 | 1,63 | up   |
| 5636090 | 7363674 | 1778439 | tensin 1                                                | Tns1  | 301509 | 1,59 | down |
| 5932876 | 7363674 | 1778399 | tensin 1                                                | Tns1  | 301509 | 1,56 | down |
| 6578664 | 7363674 | 1778445 | tensin 1                                                | Tns1  | 301509 | 1,34 | down |
| 5758769 | 7363674 | 1778397 | tensin 1                                                | Tns1  | 301509 | 1,32 | down |
| 6667742 | 7363674 | 1778397 | tensin 1                                                | Tns1  | 301509 | 1,23 | up   |
| 6063462 | 7363674 | 1778400 | tensin 1                                                | Tns1  | 301509 | 1,23 | up   |
| 6418430 | 7363674 | 1778398 | tensin 1                                                | Tns1  | 301509 | 1,19 | down |
| 6321077 | 7363674 | 1778397 | tensin 1                                                | Tns1  | 301509 | 1,17 | down |
| 6550782 | 7363674 | 1778446 | tensin 1                                                | Tns1  | 301509 | 1,10 | up   |
| 5669326 | 7363674 | 1778397 | tensin 1                                                | Tns1  | 301509 | 1,08 | down |
| 6388767 | 7363674 | 1778402 | tensin 1                                                | Tns1  | 301509 | 1,08 | down |
| 6263473 | 7363674 | 1778399 | tensin 1                                                | Tns1  | 301509 | 1,07 | down |
| 6228983 | 7363674 | 1778397 | tensin 1                                                | Tns1  | 301509 | 1,06 | down |
| 6054723 | 7363674 | 1778401 | tensin 1                                                | Tns1  | 301509 | 1,05 | up   |
| 6476217 | 7320998 | 1674724 | tensin like C1 domain containing phosphatase (tensin 2) | Tenc1 | 315326 | 1,74 | up   |
| 6054123 | 7320998 | 1674721 | tensin like C1 domain containing phosphatase (tensin 2) | Tenc1 | 315326 | 1,65 | up   |
| 5797699 | 7320998 | 1674716 | tensin like C1 domain containing phosphatase (tensin 2) | Tenc1 | 315326 | 1,59 | down |
| 5927501 | 7320998 | 1674718 | tensin like C1 domain containing phosphatase (tensin 2) | Tenc1 | 315326 | 1,54 | up   |
| 6528502 | 7320998 | 1674738 | tensin like C1 domain containing phosphatase (tensin 2) | Tenc1 | 315326 | 1,50 | down |
| 6025377 | 7320998 | 1674729 | tensin like C1 domain containing phosphatase (tensin 2) | Tenc1 | 315326 | 1,46 | down |
| 5996644 | 7320998 | 1674727 | tensin like C1 domain containing phosphatase (tensin 2) | Tenc1 | 315326 | 1,42 | up   |
| 5866242 | 7320998 | 1674733 | tensin like C1 domain containing phosphatase (tensin 2) | Tenc1 | 315326 | 1,42 | up   |
| 6350029 | 7320998 | 1674738 | tensin like C1 domain containing phosphatase (tensin 2) | Tenc1 | 315326 | 1,38 | up   |
| 5661470 | 7320998 | 1674715 | tensin like C1 domain containing phosphatase (tensin 2) | Tenc1 | 315326 | 1,37 | up   |
| 6362618 | 7320998 | 1674712 | tensin like C1 domain containing phosphatase (tensin 2) | Tenc1 | 315326 | 1,36 | down |
| 5979098 | 7320998 | 1674719 | tensin like C1 domain containing phosphatase (tensin 2) | Tenc1 | 315326 | 1,36 | up   |
| 6347469 | 7320998 | 1674736 | tensin like C1 domain containing phosphatase (tensin 2) | Tenc1 | 315326 | 1,34 | up   |
| 5911015 | 7320998 | 1674726 | tensin like C1 domain containing phosphatase (tensin 2) | Tenc1 | 315326 | 1,33 | up   |
| 6546368 | 7320998 | 1674734 | tensin like C1 domain containing phosphatase (tensin 2) | Tenc1 | 315326 | 1,31 | up   |
| 6603036 | 7320998 | 1674720 | tensin like C1 domain containing phosphatase (tensin 2) | Tenc1 | 315326 | 1,29 | up   |
| 5671078 | 7320998 | 1674725 | tensin like C1 domain containing phosphatase (tensin 2) | Tenc1 | 315326 | 1,29 | up   |
| 6746211 | 7320998 | 1674733 | tensin like C1 domain containing phosphatase (tensin 2) | Tenc1 | 315326 | 1,27 | up   |
| 6370740 | 7320998 | 1674735 | tensin like C1 domain containing phosphatase (tensin 2) | Tenc1 | 315326 | 1,26 | down |
| 5963432 | 7320998 | 1674714 | tensin like C1 domain containing phosphatase (tensin 2) | Tenc1 | 315326 | 1,25 | down |
| 5891369 | 7320998 | 1674737 | tensin like C1 domain containing phosphatase (tensin 2) | Tenc1 | 315326 | 1,24 | up   |
| 6401640 | 7320998 | 1674735 | tensin like C1 domain containing phosphatase (tensin 2) | Tenc1 | 315326 | 1,22 | up   |
| 6486953 | 7320998 | 1674728 | tensin like C1 domain containing phosphatase (tensin 2) | Tenc1 | 315326 | 1,17 | up   |
| 6578879 | 7320998 | 1674713 | tensin like C1 domain containing phosphatase (tensin 2) | Tenc1 | 315326 | 1,15 | up   |
| 5638147 | 7320998 | 1674732 | tensin like C1 domain containing phosphatase (tensin 2) | Tenc1 | 315326 | 1,10 | up   |
| 6614844 | 7320998 | 1674717 | tensin like C1 domain containing phosphatase (tensin 2) | Tenc1 | 315326 | 1,09 | down |
| 6532954 | 7320998 | 1674723 | tensin like C1 domain containing phosphatase (tensin 2) | Tenc1 | 315326 | 1,08 | down |
| 6561101 | 7320998 | 1674731 | tensin like C1 domain containing phosphatase (tensin 2) | Tenc1 | 315326 | 1,07 | up   |
| 5821663 | 7320998 | 1674729 | tensin like C1 domain containing phosphatase (tensin 2) | Tenc1 | 315326 | 1,04 | down |
| 6180625 | 7320998 | 1674730 | tensin like C1 domain containing phosphatase (tensin 2) | Tenc1 | 315326 | 1,04 | down |
| 5729494 | 7138263 | 1221733 | TERF1 (TRF1)-interacting nuclear factor 2               | Tinf2 | 290232 | 2,02 | up   |
| 5689883 | 7138263 | 1221730 | TERF1 (TRF1)-interacting nuclear factor 2               | Tinf2 | 290232 | 1,72 | up   |
| 6707039 | 7138263 | 1221729 | TERF1 (TRF1)-interacting nuclear factor 2               | Tinf2 | 290232 | 1,70 | up   |
| 5773165 | 7138263 | 1221725 | TERF1 (TRF1)-interacting nuclear factor 2               | Tinf2 | 290232 | 1,39 | up   |
| 6642800 | 7138263 | 1221724 | TERF1 (TRF1)-interacting nuclear factor 2               | Tinf2 | 290232 | 1,38 | down |
| 5932581 | 7138263 | 1221728 | TERF1 (TRF1)-interacting nuclear factor 2               | Tinf2 | 290232 | 1,26 | down |
| 6156103 | 7138263 | 1221729 | TERF1 (TRF1)-interacting nuclear factor 2               | Tinf2 | 290232 | 1,25 | up   |
| 5679201 | 7138263 | 1221731 | TERF1 (TRF1)-interacting nuclear factor 2               | Tinf2 | 290232 | 1,10 | down |
| 5987463 | 7138263 | 1221732 | TERF1 (TRF1)-interacting nuclear factor 2               | Tinf2 | 290232 | 1,10 | up   |
| 6728648 | 7138263 | 1221727 | TERF1 (TRF1)-interacting nuclear factor 2               | Tinf2 | 290232 | 1,08 | down |
| 6108925 | 7138263 | 1221726 | TERF1 (TRF1)-interacting nuclear factor 2               | Tinf2 | 290232 | 1,05 | down |
| 5885655 | 7138263 | 1221725 | TERF1 (TRF1)-interacting nuclear factor 2               | Tinf2 | 290232 | 1,02 | up   |

|         |         |         |                                                                 |                    |                   |      |      |
|---------|---------|---------|-----------------------------------------------------------------|--------------------|-------------------|------|------|
| 5632916 | 7138263 | 1221727 | TERF1 (TRF1)-interacting nuclear factor 2                       | Tinf2              | 290232            | 1,00 | up   |
| 5873822 | 7070836 | 1058322 | testis expressed 14                                             | Tex14              | 287603            | 1,25 | down |
| 5937496 | 7349791 | 1744517 | testis expressed 264                                            | Tex264             | 300988            | 3,10 | down |
| 5907948 | 7349791 | 1744511 | testis expressed 264                                            | Tex264             | 300988            | 1,89 | down |
| 6010126 | 7349791 | 1744515 | testis expressed 264                                            | Tex264             | 300988            | 1,46 | up   |
| 6626547 | 7349791 | 1744513 | testis expressed 264                                            | Tex264             | 300988            | 1,29 | up   |
| 6073401 | 7349791 | 1744514 | testis expressed 264                                            | Tex264             | 300988            | 1,28 | up   |
| 6568238 | 7349791 | 1744515 | testis expressed 264                                            | Tex264             | 300988            | 1,10 | down |
| 6515381 | 7349791 | 1744516 | testis expressed 264                                            | Tex264             | 300988            | 1,07 | up   |
| 6406621 | 7349791 | 1744511 | testis expressed 264                                            | Tex264             | 300988            | 1,03 | down |
| 5619808 | 7349791 | 1744512 | testis expressed 264                                            | Tex264             | 300988            | 1,01 | down |
| 6161909 | 7347427 | 1738682 | testis expressed gene 9                                         | Tex9               | 300822            | 2,19 | down |
| 5708314 | 7347427 | 1738684 | testis expressed gene 9                                         | Tex9               | 300822            | 1,56 | down |
| 5810196 | 7347427 | 1738671 | testis expressed gene 9                                         | Tex9               | 300822            | 1,43 | down |
| 5912911 | 7347427 | 1738686 | testis expressed gene 9                                         | Tex9               | 300822            | 1,36 | up   |
| 6658965 | 7347427 | 1738672 | testis expressed gene 9                                         | Tex9               | 300822            | 1,31 | up   |
| 6652969 | 7347427 | 1738678 | testis expressed gene 9                                         | Tex9               | 300822            | 1,29 | up   |
| 6480057 | 7347427 | 1738686 | testis expressed gene 9                                         | Tex9               | 300822            | 1,23 | up   |
| 6693854 | 7347427 | 1738679 | testis expressed gene 9                                         | Tex9               | 300822            | 1,19 | down |
| 6620665 | 7347427 | 1738686 | testis expressed gene 9                                         | Tex9               | 300822            | 1,17 | up   |
| 6540966 | 7347427 | 1738676 | testis expressed gene 9                                         | Tex9               | 300822            | 1,12 | down |
| 5641611 | 7347427 | 1738686 | testis expressed gene 9                                         | Tex9               | 300822            | 1,08 | down |
| 6482542 | 7347427 | 1738671 | testis expressed gene 9                                         | Tex9               | 300822            | 1,02 | up   |
| 5657307 | 7347427 | 1738683 | testis expressed gene 9                                         | Tex9               | 300822            | 1,02 | down |
| 6346850 | 7347427 | 1738677 | testis expressed gene 9                                         | Tex9               | 300822            | 1,01 | down |
| 6594612 | 7263248 | 1530611 | testis specific, 14                                             | Tsga14             | 500069            | 2,33 | down |
| 6002160 | 7263248 | 1530608 | testis specific, 14                                             | Tsga14             | 500069            | 1,95 | down |
| 6048657 | 7263248 | 1530603 | testis specific, 14                                             | Tsga14             | 500069            | 1,90 | down |
| 6271522 | 7263248 | 1530602 | testis specific, 14                                             | Tsga14             | 500069            | 1,71 | up   |
| 6743439 | 7263248 | 1530606 | testis specific, 14                                             | Tsga14             | 500069            | 1,63 | down |
| 6365683 | 7263248 | 1530612 | testis specific, 14                                             | Tsga14             | 500069            | 1,54 | up   |
| 6237384 | 7263248 | 1530604 | testis specific, 14                                             | Tsga14             | 500069            | 1,50 | down |
| 6595078 | 7263248 | 1530613 | testis specific, 14                                             | Tsga14             | 500069            | 1,49 | up   |
| 5620727 | 7263248 | 1530602 | testis specific, 14                                             | Tsga14             | 500069            | 1,37 | up   |
| 5927903 | 7263248 | 1530602 | testis specific, 14                                             | Tsga14             | 500069            | 1,22 | down |
| 6481515 | 7263248 | 1530602 | testis specific, 14                                             | Tsga14             | 500069            | 1,12 | up   |
| 5769181 | 7263248 | 1530608 | testis specific, 14                                             | Tsga14             | 500069            | 1,09 | down |
| 6547164 | 7263248 | 1530602 | testis specific, 14                                             | Tsga14             | 500069            | 1,06 | down |
| 6241054 | 7263248 | 1530609 | testis specific, 14                                             | Tsga14             | 500069            | 1,02 | down |
| 5840520 | 7263248 | 1530602 | testis specific, 14                                             | Tsga14             | 500069            | 1,02 | down |
| 6675697 | 7266544 | 1538334 | tet oncogene family member 3                                    | Tet3               | 680576            | 1,19 | down |
| 5771273 | 7266544 | 1538339 | tet oncogene family member 3                                    | Tet3               | 680576            | 1,14 | up   |
| 5945467 | 7266544 | 1538340 | tet oncogene family member 3                                    | Tet3               | 680576            | 1,12 | down |
| 6161226 | 7266544 | 1538342 | tet oncogene family member 3                                    | Tet3               | 680576            | 1,07 | down |
| 6124840 | 7266544 | 1538350 | tet oncogene family member 3 /// hypothetical protein LOC680588 | Tet3 /// LOC680588 | 680576 /// 680588 | 1,63 | up   |
| 6338463 | 7266544 | 1538351 | tet oncogene family member 3 /// hypothetical protein LOC680588 | Tet3 /// LOC680588 | 680576 /// 680588 | 1,20 | down |
| 5946597 | 7266544 | 1538346 | tet oncogene family member 3 /// hypothetical protein LOC680588 | Tet3 /// LOC680588 | 680576 /// 680588 | 1,07 | up   |
| 6211511 | 7197536 | 1369203 | tetraspanin 2                                                   | Tspan2             | 64521             | 2,93 | up   |
| 5952140 | 7197536 | 1369206 | tetraspanin 2                                                   | Tspan2             | 64521             | 2,35 | up   |
| 5660620 | 7197536 | 1369209 | tetraspanin 2                                                   | Tspan2             | 64521             | 2,22 | down |
| 5842228 | 7197536 | 1369208 | tetraspanin 2                                                   | Tspan2             | 64521             | 1,68 | down |
| 5827188 | 7197536 | 1369201 | tetraspanin 2                                                   | Tspan2             | 64521             | 1,45 | down |
| 6726350 | 7197536 | 1369200 | tetraspanin 2                                                   | Tspan2             | 64521             | 1,30 | down |
| 5731310 | 7197536 | 1369207 | tetraspanin 2                                                   | Tspan2             | 64521             | 1,30 | up   |
| 6245983 | 7197536 | 1369204 | tetraspanin 2                                                   | Tspan2             | 64521             | 1,16 | up   |
| 6497581 | 7197536 | 1369209 | tetraspanin 2                                                   | Tspan2             | 64521             | 1,13 | down |
| 6123970 | 7197536 | 1369202 | tetraspanin 2                                                   | Tspan2             | 64521             | 1,10 | up   |



|         |         |         |                                     |        |        |      |      |
|---------|---------|---------|-------------------------------------|--------|--------|------|------|
| 6379630 | 7197536 | 1369205 | tetraspanin 2                       | Tspan2 | 64521  | 1,04 | down |
| 5932653 | 7383501 | 1828205 | tetraspanin 6                       | Tspan6 | 302313 | 1,46 | down |
| 6077890 | 7383501 | 1828200 | tetraspanin 6                       | Tspan6 | 302313 | 1,36 | up   |
| 6103700 | 7383501 | 1828204 | tetraspanin 6                       | Tspan6 | 302313 | 1,12 | down |
| 6135162 | 7383501 | 1828202 | tetraspanin 6                       | Tspan6 | 302313 | 1,10 | down |
| 6232563 | 7383501 | 1828203 | tetraspanin 6                       | Tspan6 | 302313 | 1,09 | down |
| 5891249 | 7383501 | 1828201 | tetraspanin 6                       | Tspan6 | 302313 | 1,09 | down |
| 6468235 | 7383501 | 1828207 | tetraspanin 6                       | Tspan6 | 302313 | 1,06 | down |
| 6393114 | 7383501 | 1828206 | tetraspanin 6                       | Tspan6 | 302313 | 1,04 | up   |
| 6426317 | 7076581 | 1072206 | tetratricopeptide repeat domain 1   | Ttc1   | 287208 | 2,10 | down |
| 6440466 | 7076581 | 1072204 | tetratricopeptide repeat domain 1   | Ttc1   | 287208 | 1,64 | up   |
| 6527924 | 7076581 | 1072201 | tetratricopeptide repeat domain 1   | Ttc1   | 287208 | 1,41 | down |
| 6448577 | 7076581 | 1072199 | tetratricopeptide repeat domain 1   | Ttc1   | 287208 | 1,32 | up   |
| 5628804 | 7076581 | 1072203 | tetratricopeptide repeat domain 1   | Ttc1   | 287208 | 1,21 | down |
| 6024196 | 7076581 | 1072206 | tetratricopeptide repeat domain 1   | Ttc1   | 287208 | 1,17 | down |
| 6062440 | 7076581 | 1072205 | tetratricopeptide repeat domain 1   | Ttc1   | 287208 | 1,14 | down |
| 6279152 | 7076581 | 1072202 | tetratricopeptide repeat domain 1   | Ttc1   | 287208 | 1,11 | up   |
| 6306902 | 7076581 | 1072200 | tetratricopeptide repeat domain 1   | Ttc1   | 287208 | 1,03 | up   |
| 6004943 | 7239752 | 1473198 | tetratricopeptide repeat domain 21B | Ttc21b | 295654 | 1,73 | up   |
| 6617691 | 7239752 | 1473154 | tetratricopeptide repeat domain 21B | Ttc21b | 295654 | 1,02 | up   |
| 6006320 | 7032618 | 967309  | tetratricopeptide repeat domain 23  | Ttc23  | 308708 | 2,18 | down |
| 6407691 | 7032618 | 967332  | tetratricopeptide repeat domain 23  | Ttc23  | 308708 | 1,38 | up   |
| 6698700 | 7032618 | 967306  | tetratricopeptide repeat domain 23  | Ttc23  | 308708 | 1,31 | up   |
| 6557713 | 7032618 | 967326  | tetratricopeptide repeat domain 23  | Ttc23  | 308708 | 1,24 | down |
| 5839689 | 7032618 | 967331  | tetratricopeptide repeat domain 23  | Ttc23  | 308708 | 1,22 | down |
| 6216512 | 7032618 | 967314  | tetratricopeptide repeat domain 23  | Ttc23  | 308708 | 1,17 | down |
| 5853520 | 7032618 | 967311  | tetratricopeptide repeat domain 23  | Ttc23  | 308708 | 1,17 | up   |
| 6059635 | 7032618 | 967319  | tetratricopeptide repeat domain 23  | Ttc23  | 308708 | 1,13 | down |
| 6285489 | 7032618 | 967308  | tetratricopeptide repeat domain 23  | Ttc23  | 308708 | 1,10 | up   |
| 6333298 | 7032618 | 967323  | tetratricopeptide repeat domain 23  | Ttc23  | 308708 | 1,09 | down |
| 6668232 | 7032618 | 967306  | tetratricopeptide repeat domain 23  | Ttc23  | 308708 | 1,09 | up   |
| 6597763 | 7032618 | 967314  | tetratricopeptide repeat domain 23  | Ttc23  | 308708 | 1,03 | down |
| 5665369 | 7032618 | 967310  | tetratricopeptide repeat domain 23  | Ttc23  | 308708 | 1,02 | down |
| 6527412 | 7032618 | 967332  | tetratricopeptide repeat domain 23  | Ttc23  | 308708 | 1,02 | up   |
| 6009764 | 7303612 | 1631281 | tetratricopeptide repeat domain 27  | Ttc27  | 298782 | 2,23 | down |
| 6166865 | 7303612 | 1631262 | tetratricopeptide repeat domain 27  | Ttc27  | 298782 | 2,10 | up   |
| 6187214 | 7303612 | 1631298 | tetratricopeptide repeat domain 27  | Ttc27  | 298782 | 1,60 | up   |
| 6343295 | 7303612 | 1631278 | tetratricopeptide repeat domain 27  | Ttc27  | 298782 | 1,51 | down |
| 6317834 | 7303612 | 1631265 | tetratricopeptide repeat domain 27  | Ttc27  | 298782 | 1,45 | up   |
| 6660627 | 7303612 | 1631277 | tetratricopeptide repeat domain 27  | Ttc27  | 298782 | 1,45 | up   |
| 6570762 | 7303612 | 1631300 | tetratricopeptide repeat domain 27  | Ttc27  | 298782 | 1,39 | down |
| 6583912 | 7303612 | 1631268 | tetratricopeptide repeat domain 27  | Ttc27  | 298782 | 1,38 | up   |
| 6432471 | 7303612 | 1631301 | tetratricopeptide repeat domain 27  | Ttc27  | 298782 | 1,26 | up   |
| 5976915 | 7303612 | 1631269 | tetratricopeptide repeat domain 27  | Ttc27  | 298782 | 1,25 | down |
| 5795204 | 7303612 | 1631299 | tetratricopeptide repeat domain 27  | Ttc27  | 298782 | 1,20 | up   |
| 5945877 | 7303612 | 1631297 | tetratricopeptide repeat domain 27  | Ttc27  | 298782 | 1,17 | down |
| 5893260 | 7303612 | 1631302 | tetratricopeptide repeat domain 27  | Ttc27  | 298782 | 1,15 | up   |
| 5809920 | 7303612 | 1631289 | tetratricopeptide repeat domain 27  | Ttc27  | 298782 | 1,14 | down |
| 6264258 | 7303612 | 1631276 | tetratricopeptide repeat domain 27  | Ttc27  | 298782 | 1,13 | up   |
| 6466906 | 7303612 | 1631288 | tetratricopeptide repeat domain 27  | Ttc27  | 298782 | 1,13 | down |
| 6165724 | 7303612 | 1631287 | tetratricopeptide repeat domain 27  | Ttc27  | 298782 | 1,11 | down |
| 5962990 | 7303612 | 1631300 | tetratricopeptide repeat domain 27  | Ttc27  | 298782 | 1,09 | down |
| 5755246 | 7303612 | 1631269 | tetratricopeptide repeat domain 27  | Ttc27  | 298782 | 1,09 | up   |
| 6106944 | 7303612 | 1631304 | tetratricopeptide repeat domain 27  | Ttc27  | 298782 | 1,08 | down |
| 6359943 | 7303612 | 1631296 | tetratricopeptide repeat domain 27  | Ttc27  | 298782 | 1,03 | down |
| 6350260 | 7303612 | 1631303 | tetratricopeptide repeat domain 27  | Ttc27  | 298782 | 1,02 | up   |
| 6272879 | 7303612 | 1631262 | tetratricopeptide repeat domain 27  | Ttc27  | 298782 | 1,02 | down |

|         |         |         |                                     |        |        |      |      |
|---------|---------|---------|-------------------------------------|--------|--------|------|------|
| 5962868 | 7190317 | 1350503 | tetratricopeptide repeat domain 33  | Ttc33  | 294774 | 1,49 | up   |
| 5941279 | 7190317 | 1350512 | tetratricopeptide repeat domain 33  | Ttc33  | 294774 | 1,37 | down |
| 6046244 | 7190317 | 1350511 | tetratricopeptide repeat domain 33  | Ttc33  | 294774 | 1,30 | up   |
| 6592760 | 7190317 | 1350503 | tetratricopeptide repeat domain 33  | Ttc33  | 294774 | 1,26 | down |
| 6159746 | 7190317 | 1350508 | tetratricopeptide repeat domain 33  | Ttc33  | 294774 | 1,13 | down |
| 6531378 | 7190317 | 1350512 | tetratricopeptide repeat domain 33  | Ttc33  | 294774 | 1,08 | down |
| 6466485 | 7190317 | 1350505 | tetratricopeptide repeat domain 33  | Ttc33  | 294774 | 1,07 | up   |
| 6741757 | 7316589 | 1663890 | tetratricopeptide repeat domain 35  | Ttc35  | 362905 | 1,32 | down |
| 5741779 | 7316589 | 1663879 | tetratricopeptide repeat domain 35  | Ttc35  | 362905 | 1,31 | up   |
| 6097836 | 7316589 | 1663889 | tetratricopeptide repeat domain 35  | Ttc35  | 362905 | 1,30 | up   |
| 6472616 | 7316589 | 1663878 | tetratricopeptide repeat domain 35  | Ttc35  | 362905 | 1,27 | up   |
| 6066220 | 7316589 | 1663880 | tetratricopeptide repeat domain 35  | Ttc35  | 362905 | 1,17 | up   |
| 5921278 | 7316589 | 1663883 | tetratricopeptide repeat domain 35  | Ttc35  | 362905 | 1,11 | up   |
| 6021114 | 7316589 | 1663886 | tetratricopeptide repeat domain 35  | Ttc35  | 362905 | 1,08 | down |
| 6604028 | 7316589 | 1663881 | tetratricopeptide repeat domain 35  | Ttc35  | 362905 | 1,07 | down |
| 6487761 | 7316589 | 1663884 | tetratricopeptide repeat domain 35  | Ttc35  | 362905 | 1,07 | up   |
| 6667706 | 7316589 | 1663876 | tetratricopeptide repeat domain 35  | Ttc35  | 362905 | 1,06 | up   |
| 6274317 | 7316589 | 1663882 | tetratricopeptide repeat domain 35  | Ttc35  | 362905 | 1,00 | up   |
| 5876351 | 7316589 | 1663885 | tetratricopeptide repeat domain 35  | Ttc35  | 362905 | 1,00 | down |
| 5720366 | 7344837 | 1732415 | tetratricopeptide repeat domain 36  | Ttc36  | 300676 | 2,92 | down |
| 5978833 | 7344837 | 1732412 | tetratricopeptide repeat domain 36  | Ttc36  | 300676 | 1,52 | up   |
| 6397823 | 7344837 | 1732415 | tetratricopeptide repeat domain 36  | Ttc36  | 300676 | 1,46 | down |
| 6180693 | 7344837 | 1732414 | tetratricopeptide repeat domain 36  | Ttc36  | 300676 | 1,19 | down |
| 6310428 | 7344837 | 1732413 | tetratricopeptide repeat domain 36  | Ttc36  | 300676 | 1,14 | down |
| 6131605 | 7278314 | 1568897 | tetratricopeptide repeat domain 39A | Ttc39a | 298366 | 2,05 | up   |
| 6122015 | 7278314 | 1568893 | tetratricopeptide repeat domain 39A | Ttc39a | 298366 | 1,70 | down |
| 6209717 | 7278314 | 1568909 | tetratricopeptide repeat domain 39A | Ttc39a | 298366 | 1,37 | down |
| 6324180 | 7278314 | 1568903 | tetratricopeptide repeat domain 39A | Ttc39a | 298366 | 1,37 | up   |
| 6187563 | 7278314 | 1568894 | tetratricopeptide repeat domain 39A | Ttc39a | 298366 | 1,36 | up   |
| 5913007 | 7278314 | 1568900 | tetratricopeptide repeat domain 39A | Ttc39a | 298366 | 1,34 | up   |
| 6186886 | 7278314 | 1568895 | tetratricopeptide repeat domain 39A | Ttc39a | 298366 | 1,33 | down |
| 6044681 | 7278314 | 1568893 | tetratricopeptide repeat domain 39A | Ttc39a | 298366 | 1,24 | up   |
| 6347612 | 7278314 | 1568911 | tetratricopeptide repeat domain 39A | Ttc39a | 298366 | 1,20 | down |
| 6483504 | 7278314 | 1568914 | tetratricopeptide repeat domain 39A | Ttc39a | 298366 | 1,19 | up   |
| 6103699 | 7278314 | 1568898 | tetratricopeptide repeat domain 39A | Ttc39a | 298366 | 1,16 | down |
| 5871047 | 7278314 | 1568896 | tetratricopeptide repeat domain 39A | Ttc39a | 298366 | 1,16 | down |
| 6193002 | 7278314 | 1568910 | tetratricopeptide repeat domain 39A | Ttc39a | 298366 | 1,16 | down |
| 6508060 | 7278314 | 1568906 | tetratricopeptide repeat domain 39A | Ttc39a | 298366 | 1,14 | up   |
| 6414465 | 7278314 | 1568904 | tetratricopeptide repeat domain 39A | Ttc39a | 298366 | 1,13 | up   |
| 6584180 | 7278314 | 1568912 | tetratricopeptide repeat domain 39A | Ttc39a | 298366 | 1,10 | up   |
| 6126743 | 7278314 | 1568913 | tetratricopeptide repeat domain 39A | Ttc39a | 298366 | 1,09 | down |
| 6631234 | 7278314 | 1568891 | tetratricopeptide repeat domain 39A | Ttc39a | 298366 | 1,09 | down |
| 6367973 | 7278314 | 1568902 | tetratricopeptide repeat domain 39A | Ttc39a | 298366 | 1,06 | up   |
| 6220331 | 7278314 | 1568914 | tetratricopeptide repeat domain 39A | Ttc39a | 298366 | 1,04 | up   |
| 6632591 | 7278314 | 1568905 | tetratricopeptide repeat domain 39A | Ttc39a | 298366 | 1,02 | down |
| 6096713 | 7288095 | 1592091 | tetratricopeptide repeat domain 39B | Ttc39b | 298186 | 2,29 | down |
| 6003460 | 7288095 | 1592082 | tetratricopeptide repeat domain 39B | Ttc39b | 298186 | 1,75 | up   |
| 5852797 | 7288095 | 1592047 | tetratricopeptide repeat domain 39B | Ttc39b | 298186 | 1,31 | up   |
| 5636809 | 7288095 | 1592058 | tetratricopeptide repeat domain 39B | Ttc39b | 298186 | 1,25 | down |
| 6036445 | 7288095 | 1592055 | tetratricopeptide repeat domain 39B | Ttc39b | 298186 | 1,23 | up   |
| 5815871 | 7288095 | 1592064 | tetratricopeptide repeat domain 39B | Ttc39b | 298186 | 1,20 | up   |
| 5767907 | 7288095 | 1592054 | tetratricopeptide repeat domain 39B | Ttc39b | 298186 | 1,20 | up   |
| 6041789 | 7288095 | 1592059 | tetratricopeptide repeat domain 39B | Ttc39b | 298186 | 1,18 | down |
| 6737205 | 7288095 | 1592044 | tetratricopeptide repeat domain 39B | Ttc39b | 298186 | 1,17 | up   |
| 5726020 | 7288095 | 1592044 | tetratricopeptide repeat domain 39B | Ttc39b | 298186 | 1,16 | up   |
| 6164935 | 7288095 | 1592091 | tetratricopeptide repeat domain 39B | Ttc39b | 298186 | 1,16 | down |
| 5955703 | 7288095 | 1592056 | tetratricopeptide repeat domain 39B | Ttc39b | 298186 | 1,15 | up   |

|         |         |         |                                                                       |        |        |      |      |
|---------|---------|---------|-----------------------------------------------------------------------|--------|--------|------|------|
| 6459218 | 7288095 | 1592053 | tetratricopeptide repeat domain 39B                                   | Ttc39b | 298186 | 1,15 | up   |
| 6075527 | 7288095 | 1592057 | tetratricopeptide repeat domain 39B                                   | Ttc39b | 298186 | 1,12 | up   |
| 6485046 | 7288095 | 1592050 | tetratricopeptide repeat domain 39B                                   | Ttc39b | 298186 | 1,08 | up   |
| 6220899 | 7288095 | 1592068 | tetratricopeptide repeat domain 39B                                   | Ttc39b | 298186 | 1,07 | down |
| 6410538 | 7288095 | 1592065 | tetratricopeptide repeat domain 39B                                   | Ttc39b | 298186 | 1,06 | up   |
| 6732548 | 7288095 | 1592049 | tetratricopeptide repeat domain 39B                                   | Ttc39b | 298186 | 1,06 | down |
| 5865183 | 7288095 | 1592060 | tetratricopeptide repeat domain 39B                                   | Ttc39b | 298186 | 1,06 | up   |
| 6590272 | 7288095 | 1592051 | tetratricopeptide repeat domain 39B                                   | Ttc39b | 298186 | 1,04 | up   |
| 6223022 | 7288095 | 1592063 | tetratricopeptide repeat domain 39B                                   | Ttc39b | 298186 | 1,03 | down |
| 6619451 | 7288095 | 1592046 | tetratricopeptide repeat domain 39B                                   | Ttc39b | 298186 | 1,03 | up   |
| 5646640 | 7288095 | 1592052 | tetratricopeptide repeat domain 39B                                   | Ttc39b | 298186 | 1,01 | down |
| 6426585 | 7300906 | 1624052 | tetratricopeptide repeat domain 8                                     | Ttc8   | 299246 | 2,90 | up   |
| 5671049 | 7300906 | 1624056 | tetratricopeptide repeat domain 8                                     | Ttc8   | 299246 | 1,92 | down |
| 5762222 | 7300906 | 1624045 | tetratricopeptide repeat domain 8                                     | Ttc8   | 299246 | 1,92 | up   |
| 6371253 | 7300906 | 1624045 | tetratricopeptide repeat domain 8                                     | Ttc8   | 299246 | 1,75 | up   |
| 6410876 | 7300906 | 1624061 | tetratricopeptide repeat domain 8                                     | Ttc8   | 299246 | 1,41 | down |
| 6518817 | 7300906 | 1624064 | tetratricopeptide repeat domain 8                                     | Ttc8   | 299246 | 1,40 | up   |
| 6368547 | 7300906 | 1624055 | tetratricopeptide repeat domain 8                                     | Ttc8   | 299246 | 1,32 | down |
| 6746100 | 7300906 | 1624050 | tetratricopeptide repeat domain 8                                     | Ttc8   | 299246 | 1,30 | up   |
| 6249953 | 7300906 | 1624062 | tetratricopeptide repeat domain 8                                     | Ttc8   | 299246 | 1,29 | down |
| 6549070 | 7300906 | 1624060 | tetratricopeptide repeat domain 8                                     | Ttc8   | 299246 | 1,23 | up   |
| 6088844 | 7300906 | 1624052 | tetratricopeptide repeat domain 8                                     | Ttc8   | 299246 | 1,21 | up   |
| 6096946 | 7300906 | 1624053 | tetratricopeptide repeat domain 8                                     | Ttc8   | 299246 | 1,20 | down |
| 6428939 | 7300906 | 1624064 | tetratricopeptide repeat domain 8                                     | Ttc8   | 299246 | 1,19 | down |
| 6563710 | 7300906 | 1624057 | tetratricopeptide repeat domain 8                                     | Ttc8   | 299246 | 1,18 | down |
| 5968527 | 7300906 | 1624051 | tetratricopeptide repeat domain 8                                     | Ttc8   | 299246 | 1,16 | up   |
| 6321385 | 7300906 | 1624063 | tetratricopeptide repeat domain 8                                     | Ttc8   | 299246 | 1,11 | down |
| 6471963 | 7300906 | 1624050 | tetratricopeptide repeat domain 8                                     | Ttc8   | 299246 | 1,02 | down |
| 5853335 | 7300906 | 1624054 | tetratricopeptide repeat domain 8                                     | Ttc8   | 299246 | 1,00 | up   |
| 5720823 | 7227811 | 1441994 | tetratricopeptide repeat, ankyrin repeat and coiled-coil containing 1 | Tanc1  | 311055 | 2,23 | down |
| 6111559 | 7227811 | 1441999 | tetratricopeptide repeat, ankyrin repeat and coiled-coil containing 1 | Tanc1  | 311055 | 2,19 | down |
| 5782473 | 7227811 | 1442009 | tetratricopeptide repeat, ankyrin repeat and coiled-coil containing 1 | Tanc1  | 311055 | 2,13 | down |
| 6327563 | 7227811 | 1442007 | tetratricopeptide repeat, ankyrin repeat and coiled-coil containing 1 | Tanc1  | 311055 | 1,64 | down |
| 6595357 | 7227811 | 1442000 | tetratricopeptide repeat, ankyrin repeat and coiled-coil containing 1 | Tanc1  | 311055 | 1,55 | up   |
| 6177356 | 7227811 | 1442001 | tetratricopeptide repeat, ankyrin repeat and coiled-coil containing 1 | Tanc1  | 311055 | 1,47 | down |
| 6253061 | 7227811 | 1442013 | tetratricopeptide repeat, ankyrin repeat and coiled-coil containing 1 | Tanc1  | 311055 | 1,46 | up   |
| 5841808 | 7227811 | 1442004 | tetratricopeptide repeat, ankyrin repeat and coiled-coil containing 1 | Tanc1  | 311055 | 1,43 | down |
| 5974867 | 7227811 | 1441995 | tetratricopeptide repeat, ankyrin repeat and coiled-coil containing 1 | Tanc1  | 311055 | 1,43 | up   |
| 6637132 | 7227811 | 1441998 | tetratricopeptide repeat, ankyrin repeat and coiled-coil containing 1 | Tanc1  | 311055 | 1,40 | down |
| 5637668 | 7227811 | 1442006 | tetratricopeptide repeat, ankyrin repeat and coiled-coil containing 1 | Tanc1  | 311055 | 1,37 | up   |
| 6658167 | 7227811 | 1442008 | tetratricopeptide repeat, ankyrin repeat and coiled-coil containing 1 | Tanc1  | 311055 | 1,35 | down |
| 6534986 | 7227811 | 1441997 | tetratricopeptide repeat, ankyrin repeat and coiled-coil containing 1 | Tanc1  | 311055 | 1,27 | up   |
| 5803772 | 7227811 | 1442012 | tetratricopeptide repeat, ankyrin repeat and coiled-coil containing 1 | Tanc1  | 311055 | 1,26 | up   |
| 6236824 | 7227811 | 1442014 | tetratricopeptide repeat, ankyrin repeat and coiled-coil containing 1 | Tanc1  | 311055 | 1,21 | down |
| 5783906 | 7227811 | 1441993 | tetratricopeptide repeat, ankyrin repeat and coiled-coil containing 1 | Tanc1  | 311055 | 1,20 | down |
| 6245647 | 7227811 | 1442009 | tetratricopeptide repeat, ankyrin repeat and coiled-coil containing 1 | Tanc1  | 311055 | 1,17 | down |
| 6505909 | 7227811 | 1442010 | tetratricopeptide repeat, ankyrin repeat and coiled-coil containing 1 | Tanc1  | 311055 | 1,16 | up   |
| 6374351 | 7227811 | 1442015 | tetratricopeptide repeat, ankyrin repeat and coiled-coil containing 1 | Tanc1  | 311055 | 1,16 | down |
| 6226959 | 7227811 | 1442002 | tetratricopeptide repeat, ankyrin repeat and coiled-coil containing 1 | Tanc1  | 311055 | 1,16 | up   |
| 5979116 | 7227811 | 1441999 | tetratricopeptide repeat, ankyrin repeat and coiled-coil containing 1 | Tanc1  | 311055 | 1,15 | up   |
| 6112304 | 7227811 | 1441996 | tetratricopeptide repeat, ankyrin repeat and coiled-coil containing 1 | Tanc1  | 311055 | 1,14 | up   |
| 5994358 | 7227811 | 1441991 | tetratricopeptide repeat, ankyrin repeat and coiled-coil containing 1 | Tanc1  | 311055 | 1,10 | down |
| 5732286 | 7227811 | 1442016 | tetratricopeptide repeat, ankyrin repeat and coiled-coil containing 1 | Tanc1  | 311055 | 1,09 | down |
| 5670967 | 7227811 | 1442003 | tetratricopeptide repeat, ankyrin repeat and coiled-coil containing 1 | Tanc1  | 311055 | 1,07 | down |
| 6352435 | 7227811 | 1441993 | tetratricopeptide repeat, ankyrin repeat and coiled-coil containing 1 | Tanc1  | 311055 | 1,07 | up   |
| 5954641 | 7227811 | 1442011 | tetratricopeptide repeat, ankyrin repeat and coiled-coil containing 1 | Tanc1  | 311055 | 1,06 | down |
| 6201599 | 7227811 | 1442005 | tetratricopeptide repeat, ankyrin repeat and coiled-coil containing 1 | Tanc1  | 311055 | 1,04 | down |

|         |         |         |                                                                       |        |        |      |      |
|---------|---------|---------|-----------------------------------------------------------------------|--------|--------|------|------|
| 6654260 | 7227811 | 1442006 | tetratricopeptide repeat, ankyrin repeat and coiled-coil containing 1 | Tanc1  | 311055 | 1,03 | down |
| 5795857 | 7227811 | 1442016 | tetratricopeptide repeat, ankyrin repeat and coiled-coil containing 1 | Tanc1  | 311055 | 1,03 | down |
| 6013966 | 7227811 | 1441992 | tetratricopeptide repeat, ankyrin repeat and coiled-coil containing 1 | Tanc1  | 311055 | 1,01 | down |
| 5879595 | 7227811 | 1442013 | tetratricopeptide repeat, ankyrin repeat and coiled-coil containing 1 | Tanc1  | 311055 | 1,01 | down |
| 5745533 | 7366702 | 1785386 | TGFB-induced factor homeobox 1                                        | Tgif1  | 316742 | 2,09 | down |
| 5994835 | 7366702 | 1785385 | TGFB-induced factor homeobox 1                                        | Tgif1  | 316742 | 1,70 | up   |
| 6350427 | 7366702 | 1785383 | TGFB-induced factor homeobox 1                                        | Tgif1  | 316742 | 1,21 | up   |
| 5675819 | 7366702 | 1785384 | TGFB-induced factor homeobox 1                                        | Tgif1  | 316742 | 1,16 | down |
| 5797168 | 7365561 | 1782704 | THAP domain containing 4                                              | Thap4  | 363291 | 2,36 | down |
| 6138783 | 7365561 | 1782706 | THAP domain containing 4                                              | Thap4  | 363291 | 1,49 | up   |
| 6553679 | 7365561 | 1782705 | THAP domain containing 4                                              | Thap4  | 363291 | 1,35 | up   |
| 6216862 | 7365561 | 1782701 | THAP domain containing 4                                              | Thap4  | 363291 | 1,14 | down |
| 6468462 | 7365561 | 1782700 | THAP domain containing 4                                              | Thap4  | 363291 | 1,12 | up   |
| 6272143 | 7365561 | 1782702 | THAP domain containing 4                                              | Thap4  | 363291 | 1,02 | up   |
| 6493313 | 7365561 | 1782703 | THAP domain containing 4                                              | Thap4  | 363291 | 1,01 | down |
| 5850057 | 7323355 | 1679380 | thioredoxin reductase 1                                               | Txnrd1 | 58819  | 2,03 | down |
| 6711514 | 7323355 | 1679375 | thioredoxin reductase 1                                               | Txnrd1 | 58819  | 1,41 | up   |
| 6160122 | 7323355 | 1679377 | thioredoxin reductase 1                                               | Txnrd1 | 58819  | 1,37 | up   |
| 5855695 | 7323355 | 1679374 | thioredoxin reductase 1                                               | Txnrd1 | 58819  | 1,34 | up   |
| 6282443 | 7323355 | 1679376 | thioredoxin reductase 1                                               | Txnrd1 | 58819  | 1,28 | down |
| 5669942 | 7323355 | 1679369 | thioredoxin reductase 1                                               | Txnrd1 | 58819  | 1,25 | up   |
| 5747914 | 7323355 | 1679379 | thioredoxin reductase 1                                               | Txnrd1 | 58819  | 1,22 | down |
| 6081873 | 7323355 | 1679368 | thioredoxin reductase 1                                               | Txnrd1 | 58819  | 1,19 | up   |
| 6500677 | 7323355 | 1679372 | thioredoxin reductase 1                                               | Txnrd1 | 58819  | 1,16 | up   |
| 6006286 | 7323355 | 1679364 | thioredoxin reductase 1                                               | Txnrd1 | 58819  | 1,11 | up   |
| 5798513 | 7323355 | 1679366 | thioredoxin reductase 1                                               | Txnrd1 | 58819  | 1,11 | down |
| 6238742 | 7323355 | 1679367 | thioredoxin reductase 1                                               | Txnrd1 | 58819  | 1,10 | down |
| 6124299 | 7323355 | 1679370 | thioredoxin reductase 1                                               | Txnrd1 | 58819  | 1,09 | down |
| 6008865 | 7323355 | 1679373 | thioredoxin reductase 1                                               | Txnrd1 | 58819  | 1,08 | down |
| 5930984 | 7323355 | 1679371 | thioredoxin reductase 1                                               | Txnrd1 | 58819  | 1,05 | down |
| 5650098 | 7323355 | 1679365 | thioredoxin reductase 1                                               | Txnrd1 | 58819  | 1,05 | up   |
| 5959043 | 7323355 | 1679378 | thioredoxin reductase 1                                               | Txnrd1 | 58819  | 1,04 | up   |
| 6010763 | 7323355 | 1679377 | thioredoxin reductase 1                                               | Txnrd1 | 58819  | 1,03 | down |
| 6404128 | 7075083 | 1068542 | THO complex 6 homolog (Drosophila)                                    | Thoc6  | 79227  | 2,44 | down |
| 6223225 | 7075083 | 1068533 | THO complex 6 homolog (Drosophila)                                    | Thoc6  | 79227  | 1,45 | down |
| 5995864 | 7075083 | 1068537 | THO complex 6 homolog (Drosophila)                                    | Thoc6  | 79227  | 1,45 | up   |
| 6366610 | 7075083 | 1068539 | THO complex 6 homolog (Drosophila)                                    | Thoc6  | 79227  | 1,39 | down |
| 5727668 | 7075083 | 1068545 | THO complex 6 homolog (Drosophila)                                    | Thoc6  | 79227  | 1,37 | up   |
| 5672066 | 7075083 | 1068545 | THO complex 6 homolog (Drosophila)                                    | Thoc6  | 79227  | 1,32 | up   |
| 6493440 | 7075083 | 1068546 | THO complex 6 homolog (Drosophila)                                    | Thoc6  | 79227  | 1,21 | down |
| 5908072 | 7075083 | 1068546 | THO complex 6 homolog (Drosophila)                                    | Thoc6  | 79227  | 1,20 | up   |
| 6441197 | 7075083 | 1068544 | THO complex 6 homolog (Drosophila)                                    | Thoc6  | 79227  | 1,17 | up   |
| 5848157 | 7075083 | 1068541 | THO complex 6 homolog (Drosophila)                                    | Thoc6  | 79227  | 1,16 | up   |
| 6328044 | 7075083 | 1068543 | THO complex 6 homolog (Drosophila)                                    | Thoc6  | 79227  | 1,15 | up   |
| 6034194 | 7075083 | 1068540 | THO complex 6 homolog (Drosophila)                                    | Thoc6  | 79227  | 1,13 | up   |
| 5670445 | 7075083 | 1068534 | THO complex 6 homolog (Drosophila)                                    | Thoc6  | 79227  | 1,10 | down |
| 6740343 | 7075083 | 1068535 | THO complex 6 homolog (Drosophila)                                    | Thoc6  | 79227  | 1,07 | down |
| 6745105 | 7075083 | 1068536 | THO complex 6 homolog (Drosophila)                                    | Thoc6  | 79227  | 1,02 | up   |
| 5874911 | 7075083 | 1068538 | THO complex 6 homolog (Drosophila)                                    | Thoc6  | 79227  | 1,00 | down |
| 6392078 | 7384904 | 1831595 | three prime repair exonuclease 2                                      | Trex2  | 309275 | 2,44 | down |
| 5934851 | 7384904 | 1831594 | three prime repair exonuclease 2                                      | Trex2  | 309275 | 1,51 | up   |
| 5888123 | 7384904 | 1831594 | three prime repair exonuclease 2                                      | Trex2  | 309275 | 1,26 | down |
| 5910026 | 7384904 | 1831594 | three prime repair exonuclease 2                                      | Trex2  | 309275 | 1,24 | down |
| 6737899 | 7384904 | 1831593 | three prime repair exonuclease 2                                      | Trex2  | 309275 | 1,10 | up   |
| 5837558 | 7032513 | 966959  | threonyl-tRNA synthetase-like 2                                       | Tarsl2 | 308701 | 2,57 | up   |
| 5635834 | 7032513 | 966959  | threonyl-tRNA synthetase-like 2                                       | Tarsl2 | 308701 | 1,77 | up   |
| 5989013 | 7032513 | 966947  | threonyl-tRNA synthetase-like 2                                       | Tarsl2 | 308701 | 1,49 | up   |

|         |         |         |                                             |         |        |      |      |
|---------|---------|---------|---------------------------------------------|---------|--------|------|------|
| 6439267 | 7032513 | 966947  | threonyl-tRNA synthetase-like 2             | Tarsl2  | 308701 | 1,45 | up   |
| 5819190 | 7032513 | 966950  | threonyl-tRNA synthetase-like 2             | Tarsl2  | 308701 | 1,44 | down |
| 6341627 | 7032513 | 966949  | threonyl-tRNA synthetase-like 2             | Tarsl2  | 308701 | 1,33 | down |
| 6242556 | 7032513 | 966947  | threonyl-tRNA synthetase-like 2             | Tarsl2  | 308701 | 1,30 | up   |
| 6046793 | 7032513 | 966952  | threonyl-tRNA synthetase-like 2             | Tarsl2  | 308701 | 1,22 | down |
| 5966614 | 7032513 | 966954  | threonyl-tRNA synthetase-like 2             | Tarsl2  | 308701 | 1,17 | up   |
| 6466631 | 7032513 | 966955  | threonyl-tRNA synthetase-like 2             | Tarsl2  | 308701 | 1,14 | up   |
| 5751367 | 7032513 | 966949  | threonyl-tRNA synthetase-like 2             | Tarsl2  | 308701 | 1,12 | up   |
| 6375656 | 7032513 | 966953  | threonyl-tRNA synthetase-like 2             | Tarsl2  | 308701 | 1,05 | down |
| 5745700 | 7032513 | 966951  | threonyl-tRNA synthetase-like 2             | Tarsl2  | 308701 | 1,05 | down |
| 6639955 | 7032513 | 966948  | threonyl-tRNA synthetase-like 2             | Tarsl2  | 308701 | 1,04 | down |
| 6370487 | 7032513 | 966958  | threonyl-tRNA synthetase-like 2             | Tarsl2  | 308701 | 1,02 | down |
| 5666949 | 7032513 | 966956  | threonyl-tRNA synthetase-like 2             | Tarsl2  | 308701 | 1,01 | up   |
| 6120350 | 7032513 | 966957  | threonyl-tRNA synthetase-like 2             | Tarsl2  | 308701 | 1,00 | down |
| 6463484 | 7152981 | 1257716 | thrombospondin, type I, domain containing 1 | Thsd1   | 364630 | 2,29 | down |
| 5797652 | 7152981 | 1257714 | thrombospondin, type I, domain containing 1 | Thsd1   | 364630 | 2,16 | up   |
| 6565567 | 7152981 | 1257714 | thrombospondin, type I, domain containing 1 | Thsd1   | 364630 | 1,43 | up   |
| 5683310 | 7152981 | 1257710 | thrombospondin, type I, domain containing 1 | Thsd1   | 364630 | 1,31 | up   |
| 6695017 | 7152981 | 1257712 | thrombospondin, type I, domain containing 1 | Thsd1   | 364630 | 1,29 | down |
| 6086484 | 7152981 | 1257709 | thrombospondin, type I, domain containing 1 | Thsd1   | 364630 | 1,28 | down |
| 6564266 | 7152981 | 1257710 | thrombospondin, type I, domain containing 1 | Thsd1   | 364630 | 1,21 | up   |
| 6585090 | 7152981 | 1257715 | thrombospondin, type I, domain containing 1 | Thsd1   | 364630 | 1,15 | up   |
| 5786266 | 7152981 | 1257710 | thrombospondin, type I, domain containing 1 | Thsd1   | 364630 | 1,09 | down |
| 5770161 | 7152981 | 1257711 | thrombospondin, type I, domain containing 1 | Thsd1   | 364630 | 1,09 | down |
| 5986165 | 7321965 | 1676529 | thromboxane A2 receptor                     | Tbxa2r  | 24816  | 2,16 | down |
| 5883739 | 7321965 | 1676528 | thromboxane A2 receptor                     | Tbxa2r  | 24816  | 1,13 | up   |
| 6300301 | 7321965 | 1676528 | thromboxane A2 receptor                     | Tbxa2r  | 24816  | 1,11 | down |
| 5903886 | 7321965 | 1676530 | thromboxane A2 receptor                     | Tbxa2r  | 24816  | 1,04 | up   |
| 6162096 | 7321965 | 1676529 | thromboxane A2 receptor                     | Tbxa2r  | 24816  | 1,03 | up   |
| 6243101 | 7321965 | 1676530 | thromboxane A2 receptor                     | Tbxa2r  | 24816  | 1,02 | up   |
| 6245279 | 7321965 | 1676531 | thromboxane A2 receptor                     | Tbxa2r  | 24816  | 1,01 | down |
| 6670456 | 7302887 | 1629163 | THUMP domain containing 2                   | Thumpd2 | 313851 | 2,68 | up   |
| 5623086 | 7302887 | 1629160 | THUMP domain containing 2                   | Thumpd2 | 313851 | 2,61 | down |
| 5719197 | 7302887 | 1629158 | THUMP domain containing 2                   | Thumpd2 | 313851 | 1,36 | up   |
| 6014904 | 7302887 | 1629162 | THUMP domain containing 2                   | Thumpd2 | 313851 | 1,35 | down |
| 5747672 | 7302887 | 1629155 | THUMP domain containing 2                   | Thumpd2 | 313851 | 1,32 | up   |
| 6363550 | 7302887 | 1629161 | THUMP domain containing 2                   | Thumpd2 | 313851 | 1,25 | up   |
| 5653530 | 7302887 | 1629155 | THUMP domain containing 2                   | Thumpd2 | 313851 | 1,24 | up   |
| 6629714 | 7302887 | 1629155 | THUMP domain containing 2                   | Thumpd2 | 313851 | 1,18 | up   |
| 5710322 | 7302887 | 1629159 | THUMP domain containing 2                   | Thumpd2 | 313851 | 1,12 | down |
| 6118683 | 7302887 | 1629156 | THUMP domain containing 2                   | Thumpd2 | 313851 | 1,06 | up   |
| 6703079 | 7302887 | 1629157 | THUMP domain containing 2                   | Thumpd2 | 313851 | 1,03 | down |
| 5666951 | 7302887 | 1629156 | THUMP domain containing 2                   | Thumpd2 | 313851 | 1,02 | up   |
| 5906056 | 7302887 | 1629163 | THUMP domain containing 2                   | Thumpd2 | 313851 | 1,01 | up   |
| 6668782 | 7302887 | 1629155 | THUMP domain containing 2                   | Thumpd2 | 313851 | 1,00 | down |
| 6508312 | 7257337 | 1515979 | THUMP domain containing 3                   | Thumpd3 | 500288 | 1,66 | up   |
| 5640325 | 7257337 | 1515982 | THUMP domain containing 3                   | Thumpd3 | 500288 | 1,56 | up   |
| 5919162 | 7257337 | 1515981 | THUMP domain containing 3                   | Thumpd3 | 500288 | 1,54 | up   |
| 6141111 | 7257337 | 1515982 | THUMP domain containing 3                   | Thumpd3 | 500288 | 1,36 | up   |
| 6048474 | 7257337 | 1515978 | THUMP domain containing 3                   | Thumpd3 | 500288 | 1,33 | up   |
| 6391970 | 7257337 | 1515973 | THUMP domain containing 3                   | Thumpd3 | 500288 | 1,33 | up   |
| 6645871 | 7257337 | 1515981 | THUMP domain containing 3                   | Thumpd3 | 500288 | 1,32 | up   |
| 6116796 | 7257337 | 1515973 | THUMP domain containing 3                   | Thumpd3 | 500288 | 1,30 | down |
| 6386338 | 7257337 | 1515974 | THUMP domain containing 3                   | Thumpd3 | 500288 | 1,29 | down |
| 5861731 | 7257337 | 1515980 | THUMP domain containing 3                   | Thumpd3 | 500288 | 1,18 | down |
| 5983831 | 7257337 | 1515975 | THUMP domain containing 3                   | Thumpd3 | 500288 | 1,11 | up   |
| 6445810 | 7257337 | 1515973 | THUMP domain containing 3                   | Thumpd3 | 500288 | 1,06 | up   |

|         |         |         |                                        |         |        |      |      |
|---------|---------|---------|----------------------------------------|---------|--------|------|------|
| 5764518 | 7257337 | 1515976 | THUMP domain containing 3              | Thumpd3 | 500288 | 1,06 | down |
| 6526603 | 7369031 | 1793018 | thyroid hormone receptor interactor 10 | Trip10  | 116717 | 2,36 | down |
| 6546826 | 7369031 | 1793005 | thyroid hormone receptor interactor 10 | Trip10  | 116717 | 2,31 | up   |
| 6163714 | 7369031 | 1793015 | thyroid hormone receptor interactor 10 | Trip10  | 116717 | 2,27 | up   |
| 5873778 | 7369031 | 1793010 | thyroid hormone receptor interactor 10 | Trip10  | 116717 | 2,01 | up   |
| 5854212 | 7369031 | 1793008 | thyroid hormone receptor interactor 10 | Trip10  | 116717 | 1,98 | down |
| 6399559 | 7369031 | 1793014 | thyroid hormone receptor interactor 10 | Trip10  | 116717 | 1,80 | up   |
| 6483409 | 7369031 | 1793009 | thyroid hormone receptor interactor 10 | Trip10  | 116717 | 1,56 | up   |
| 6508763 | 7369031 | 1793006 | thyroid hormone receptor interactor 10 | Trip10  | 116717 | 1,31 | up   |
| 6116346 | 7369031 | 1793003 | thyroid hormone receptor interactor 10 | Trip10  | 116717 | 1,24 | down |
| 5984121 | 7369031 | 1793016 | thyroid hormone receptor interactor 10 | Trip10  | 116717 | 1,21 | up   |
| 6439168 | 7369031 | 1793017 | thyroid hormone receptor interactor 10 | Trip10  | 116717 | 1,13 | down |
| 6303605 | 7369031 | 1793018 | thyroid hormone receptor interactor 10 | Trip10  | 116717 | 1,11 | down |
| 6048375 | 7369031 | 1793018 | thyroid hormone receptor interactor 10 | Trip10  | 116717 | 1,11 | down |
| 5776778 | 7369031 | 1793007 | thyroid hormone receptor interactor 10 | Trip10  | 116717 | 1,07 | up   |
| 6465206 | 7369031 | 1793012 | thyroid hormone receptor interactor 10 | Trip10  | 116717 | 1,06 | down |
| 5765108 | 7346885 | 1737319 | thyroid hormone receptor interactor 4  | Trip4   | 315769 | 2,14 | down |
| 6524945 | 7346885 | 1737313 | thyroid hormone receptor interactor 4  | Trip4   | 315769 | 1,68 | up   |
| 6267753 | 7346885 | 1737312 | thyroid hormone receptor interactor 4  | Trip4   | 315769 | 1,49 | up   |
| 6292913 | 7346885 | 1737318 | thyroid hormone receptor interactor 4  | Trip4   | 315769 | 1,39 | down |
| 6458637 | 7346885 | 1737302 | thyroid hormone receptor interactor 4  | Trip4   | 315769 | 1,31 | down |
| 6292770 | 7346885 | 1737318 | thyroid hormone receptor interactor 4  | Trip4   | 315769 | 1,29 | up   |
| 5692458 | 7346885 | 1737301 | thyroid hormone receptor interactor 4  | Trip4   | 315769 | 1,29 | up   |
| 6200426 | 7346885 | 1737310 | thyroid hormone receptor interactor 4  | Trip4   | 315769 | 1,23 | up   |
| 6594990 | 7346885 | 1737322 | thyroid hormone receptor interactor 4  | Trip4   | 315769 | 1,22 | up   |
| 6634647 | 7346885 | 1737315 | thyroid hormone receptor interactor 4  | Trip4   | 315769 | 1,20 | up   |
| 6690181 | 7346885 | 1737320 | thyroid hormone receptor interactor 4  | Trip4   | 315769 | 1,20 | down |
| 6455347 | 7346885 | 1737311 | thyroid hormone receptor interactor 4  | Trip4   | 315769 | 1,18 | down |
| 6567119 | 7346885 | 1737321 | thyroid hormone receptor interactor 4  | Trip4   | 315769 | 1,17 | up   |
| 6710241 | 7346885 | 1737316 | thyroid hormone receptor interactor 4  | Trip4   | 315769 | 1,17 | down |
| 6613947 | 7346885 | 1737314 | thyroid hormone receptor interactor 4  | Trip4   | 315769 | 1,15 | up   |
| 6714697 | 7346885 | 1737323 | thyroid hormone receptor interactor 4  | Trip4   | 315769 | 1,09 | up   |
| 5821585 | 7346885 | 1737306 | thyroid hormone receptor interactor 4  | Trip4   | 315769 | 1,09 | up   |
| 5726107 | 7346885 | 1737315 | thyroid hormone receptor interactor 4  | Trip4   | 315769 | 1,08 | up   |
| 6623296 | 7346885 | 1737301 | thyroid hormone receptor interactor 4  | Trip4   | 315769 | 1,07 | down |
| 5674831 | 7346885 | 1737317 | thyroid hormone receptor interactor 4  | Trip4   | 315769 | 1,00 | up   |
| 5993958 | 7346885 | 1737308 | thyroid hormone receptor interactor 4  | Trip4   | 315769 | 1,00 | up   |
| 5989263 | 7300596 | 1623395 | thyroid stimulating hormone receptor   | Tshr    | 25360  | 2,11 | down |
| 6438551 | 7300596 | 1623401 | thyroid stimulating hormone receptor   | Tshr    | 25360  | 1,31 | down |
| 6173596 | 7300596 | 1623393 | thyroid stimulating hormone receptor   | Tshr    | 25360  | 1,23 | up   |
| 6207665 | 7300596 | 1623393 | thyroid stimulating hormone receptor   | Tshr    | 25360  | 1,19 | down |
| 6237362 | 7300596 | 1623399 | thyroid stimulating hormone receptor   | Tshr    | 25360  | 1,12 | up   |
| 6550090 | 7300596 | 1623398 | thyroid stimulating hormone receptor   | Tshr    | 25360  | 1,12 | up   |
| 6030775 | 7300596 | 1623400 | thyroid stimulating hormone receptor   | Tshr    | 25360  | 1,10 | up   |
| 6718765 | 7300596 | 1623394 | thyroid stimulating hormone receptor   | Tshr    | 25360  | 1,03 | down |
| 6151137 | 7300596 | 1623396 | thyroid stimulating hormone receptor   | Tshr    | 25360  | 1,02 | down |
| 5985938 | 7300596 | 1623402 | thyroid stimulating hormone receptor   | Tshr    | 25360  | 1,01 | up   |
| 5802036 | 7300596 | 1623397 | thyroid stimulating hormone receptor   | Tshr    | 25360  | 1,01 | down |
| 6429276 | 7300596 | 1623403 | thyroid stimulating hormone receptor   | Tshr    | 25360  | 1,01 | down |
| 5760579 | 7352046 | 1750028 | tight junction associated protein 1    | Tjap1   | 316233 | 1,76 | down |
| 5898022 | 7352046 | 1750035 | tight junction associated protein 1    | Tjap1   | 316233 | 1,46 | down |
| 6024569 | 7352046 | 1750028 | tight junction associated protein 1    | Tjap1   | 316233 | 1,39 | down |
| 5685171 | 7352046 | 1750044 | tight junction associated protein 1    | Tjap1   | 316233 | 1,37 | up   |
| 6651703 | 7352046 | 1750044 | tight junction associated protein 1    | Tjap1   | 316233 | 1,35 | up   |
| 5780713 | 7352046 | 1750031 | tight junction associated protein 1    | Tjap1   | 316233 | 1,33 | down |
| 5682320 | 7352046 | 1750038 | tight junction associated protein 1    | Tjap1   | 316233 | 1,26 | up   |
| 5961630 | 7352046 | 1750034 | tight junction associated protein 1    | Tjap1   | 316233 | 1,24 | up   |

|         |         |         |                                     |       |        |      |      |
|---------|---------|---------|-------------------------------------|-------|--------|------|------|
| 5825377 | 7352046 | 1750044 | tight junction associated protein 1 | Tjap1 | 316233 | 1,20 | down |
| 6262909 | 7352046 | 1750043 | tight junction associated protein 1 | Tjap1 | 316233 | 1,20 | down |
| 5906549 | 7352046 | 1750044 | tight junction associated protein 1 | Tjap1 | 316233 | 1,19 | up   |
| 6014048 | 7352046 | 1750041 | tight junction associated protein 1 | Tjap1 | 316233 | 1,15 | down |
| 6417323 | 7352046 | 1750042 | tight junction associated protein 1 | Tjap1 | 316233 | 1,14 | down |
| 6040406 | 7352046 | 1750037 | tight junction associated protein 1 | Tjap1 | 316233 | 1,12 | down |
| 5843654 | 7352046 | 1750040 | tight junction associated protein 1 | Tjap1 | 316233 | 1,11 | up   |
| 5646220 | 7052338 | 1014650 | tight junction protein 1            | Tjp1  | 292994 | 1,46 | up   |
| 6632030 | 7052338 | 1014648 | tight junction protein 1            | Tjp1  | 292994 | 1,38 | up   |
| 5855928 | 7052338 | 1014652 | tight junction protein 1            | Tjp1  | 292994 | 1,35 | up   |
| 5819784 | 7052338 | 1014651 | tight junction protein 1            | Tjp1  | 292994 | 1,28 | up   |
| 5716826 | 7052338 | 1014655 | tight junction protein 1            | Tjp1  | 292994 | 1,28 | up   |
| 5779601 | 7052338 | 1014640 | tight junction protein 1            | Tjp1  | 292994 | 1,27 | down |
| 6186444 | 7052338 | 1014656 | tight junction protein 1            | Tjp1  | 292994 | 1,27 | up   |
| 5638816 | 7052338 | 1014654 | tight junction protein 1            | Tjp1  | 292994 | 1,25 | up   |
| 6354325 | 7052338 | 1014644 | tight junction protein 1            | Tjp1  | 292994 | 1,23 | up   |
| 6408378 | 7052338 | 1014638 | tight junction protein 1            | Tjp1  | 292994 | 1,23 | down |
| 6136892 | 7052338 | 1014633 | tight junction protein 1            | Tjp1  | 292994 | 1,22 | up   |
| 5890897 | 7052338 | 1014642 | tight junction protein 1            | Tjp1  | 292994 | 1,20 | up   |
| 5752491 | 7052338 | 1014629 | tight junction protein 1            | Tjp1  | 292994 | 1,19 | down |
| 5629818 | 7052338 | 1014646 | tight junction protein 1            | Tjp1  | 292994 | 1,18 | down |
| 5991569 | 7052338 | 1014642 | tight junction protein 1            | Tjp1  | 292994 | 1,17 | up   |
| 6287041 | 7052338 | 1014645 | tight junction protein 1            | Tjp1  | 292994 | 1,17 | up   |
| 5639643 | 7052338 | 1014658 | tight junction protein 1            | Tjp1  | 292994 | 1,13 | up   |
| 6662803 | 7052338 | 1014661 | tight junction protein 1            | Tjp1  | 292994 | 1,12 | down |
| 6268221 | 7052338 | 1014639 | tight junction protein 1            | Tjp1  | 292994 | 1,11 | down |
| 6330902 | 7052338 | 1014660 | tight junction protein 1            | Tjp1  | 292994 | 1,10 | down |
| 5689123 | 7052338 | 1014647 | tight junction protein 1            | Tjp1  | 292994 | 1,09 | up   |
| 5624154 | 7052338 | 1014636 | tight junction protein 1            | Tjp1  | 292994 | 1,09 | down |
| 6695930 | 7052338 | 1014650 | tight junction protein 1            | Tjp1  | 292994 | 1,09 | up   |
| 6575786 | 7052338 | 1014634 | tight junction protein 1            | Tjp1  | 292994 | 1,08 | up   |
| 5695299 | 7052338 | 1014658 | tight junction protein 1            | Tjp1  | 292994 | 1,07 | up   |
| 6593637 | 7052338 | 1014635 | tight junction protein 1            | Tjp1  | 292994 | 1,07 | down |
| 5628500 | 7052338 | 1014659 | tight junction protein 1            | Tjp1  | 292994 | 1,06 | down |
| 6315196 | 7052338 | 1014636 | tight junction protein 1            | Tjp1  | 292994 | 1,05 | down |
| 5910605 | 7052338 | 1014641 | tight junction protein 1            | Tjp1  | 292994 | 1,05 | up   |
| 6704426 | 7052338 | 1014653 | tight junction protein 1            | Tjp1  | 292994 | 1,05 | up   |
| 5650820 | 7052338 | 1014630 | tight junction protein 1            | Tjp1  | 292994 | 1,04 | down |
| 6700000 | 7052338 | 1014643 | tight junction protein 1            | Tjp1  | 292994 | 1,03 | down |
| 6726102 | 7052338 | 1014642 | tight junction protein 1            | Tjp1  | 292994 | 1,01 | down |
| 6625086 | 7312338 | 1652787 | tight junction protein 3            | Tjp3  | 314640 | 4,06 | down |
| 5815074 | 7312338 | 1652767 | tight junction protein 3            | Tjp3  | 314640 | 2,64 | down |
| 5632277 | 7312338 | 1652786 | tight junction protein 3            | Tjp3  | 314640 | 2,27 | down |
| 6633768 | 7312338 | 1652774 | tight junction protein 3            | Tjp3  | 314640 | 1,88 | up   |
| 6629346 | 7312338 | 1652784 | tight junction protein 3            | Tjp3  | 314640 | 1,64 | down |
| 6318792 | 7312338 | 1652770 | tight junction protein 3            | Tjp3  | 314640 | 1,58 | up   |
| 6091241 | 7312338 | 1652778 | tight junction protein 3            | Tjp3  | 314640 | 1,54 | up   |
| 5795516 | 7312338 | 1652768 | tight junction protein 3            | Tjp3  | 314640 | 1,53 | down |
| 6396142 | 7312338 | 1652785 | tight junction protein 3            | Tjp3  | 314640 | 1,49 | down |
| 6511882 | 7312338 | 1652771 | tight junction protein 3            | Tjp3  | 314640 | 1,38 | up   |
| 5781638 | 7312338 | 1652782 | tight junction protein 3            | Tjp3  | 314640 | 1,33 | up   |
| 6521168 | 7312338 | 1652773 | tight junction protein 3            | Tjp3  | 314640 | 1,29 | up   |
| 6041431 | 7312338 | 1652777 | tight junction protein 3            | Tjp3  | 314640 | 1,28 | down |
| 6181707 | 7312338 | 1652777 | tight junction protein 3            | Tjp3  | 314640 | 1,26 | up   |
| 6289615 | 7312338 | 1652776 | tight junction protein 3            | Tjp3  | 314640 | 1,25 | down |
| 6047931 | 7312338 | 1652780 | tight junction protein 3            | Tjp3  | 314640 | 1,24 | down |
| 6403398 | 7312338 | 1652783 | tight junction protein 3            | Tjp3  | 314640 | 1,16 | up   |

|         |         |         |                                    |          |        |      |      |
|---------|---------|---------|------------------------------------|----------|--------|------|------|
| 6189499 | 7312338 | 1652775 | tight junction protein 3           | Tjp3     | 314640 | 1,16 | up   |
| 6247807 | 7312338 | 1652771 | tight junction protein 3           | Tjp3     | 314640 | 1,15 | down |
| 5697605 | 7312338 | 1652781 | tight junction protein 3           | Tjp3     | 314640 | 1,12 | up   |
| 6557028 | 7312338 | 1652769 | tight junction protein 3           | Tjp3     | 314640 | 1,07 | down |
| 6423656 | 7312338 | 1652779 | tight junction protein 3           | Tjp3     | 314640 | 1,06 | down |
| 6126103 | 7311776 | 1651639 | timeless homolog (Drosophila)      | Timeless | 83508  | 2,04 | down |
| 6582326 | 7311776 | 1651644 | timeless homolog (Drosophila)      | Timeless | 83508  | 1,53 | down |
| 6696463 | 7311776 | 1651627 | timeless homolog (Drosophila)      | Timeless | 83508  | 1,50 | up   |
| 5950752 | 7311776 | 1651627 | timeless homolog (Drosophila)      | Timeless | 83508  | 1,44 | down |
| 5695399 | 7311776 | 1651650 | timeless homolog (Drosophila)      | Timeless | 83508  | 1,44 | down |
| 6616640 | 7311776 | 1651632 | timeless homolog (Drosophila)      | Timeless | 83508  | 1,43 | down |
| 5799190 | 7311776 | 1651646 | timeless homolog (Drosophila)      | Timeless | 83508  | 1,31 | down |
| 6011983 | 7311776 | 1651648 | timeless homolog (Drosophila)      | Timeless | 83508  | 1,30 | down |
| 5802743 | 7311776 | 1651645 | timeless homolog (Drosophila)      | Timeless | 83508  | 1,28 | up   |
| 6030301 | 7311776 | 1651628 | timeless homolog (Drosophila)      | Timeless | 83508  | 1,25 | down |
| 5805025 | 7311776 | 1651633 | timeless homolog (Drosophila)      | Timeless | 83508  | 1,23 | up   |
| 6148682 | 7311776 | 1651641 | timeless homolog (Drosophila)      | Timeless | 83508  | 1,22 | down |
| 6335794 | 7311776 | 1651646 | timeless homolog (Drosophila)      | Timeless | 83508  | 1,18 | up   |
| 6061028 | 7311776 | 1651629 | timeless homolog (Drosophila)      | Timeless | 83508  | 1,16 | down |
| 6131178 | 7311776 | 1651647 | timeless homolog (Drosophila)      | Timeless | 83508  | 1,15 | down |
| 6603578 | 7311776 | 1651634 | timeless homolog (Drosophila)      | Timeless | 83508  | 1,14 | up   |
| 5719813 | 7311776 | 1651638 | timeless homolog (Drosophila)      | Timeless | 83508  | 1,12 | up   |
| 5934335 | 7311776 | 1651630 | timeless homolog (Drosophila)      | Timeless | 83508  | 1,11 | down |
| 6232562 | 7311776 | 1651643 | timeless homolog (Drosophila)      | Timeless | 83508  | 1,10 | up   |
| 5620336 | 7311776 | 1651642 | timeless homolog (Drosophila)      | Timeless | 83508  | 1,08 | down |
| 5740555 | 7311776 | 1651640 | timeless homolog (Drosophila)      | Timeless | 83508  | 1,08 | up   |
| 6474801 | 7311776 | 1651636 | timeless homolog (Drosophila)      | Timeless | 83508  | 1,08 | down |
| 6650895 | 7311776 | 1651644 | timeless homolog (Drosophila)      | Timeless | 83508  | 1,07 | up   |
| 6379999 | 7311776 | 1651642 | timeless homolog (Drosophila)      | Timeless | 83508  | 1,05 | down |
| 5772883 | 7311776 | 1651645 | timeless homolog (Drosophila)      | Timeless | 83508  | 1,05 | up   |
| 5977413 | 7311776 | 1651650 | timeless homolog (Drosophila)      | Timeless | 83508  | 1,05 | up   |
| 5929178 | 7311776 | 1651637 | timeless homolog (Drosophila)      | Timeless | 83508  | 1,04 | up   |
| 6064741 | 7311776 | 1651635 | timeless homolog (Drosophila)      | Timeless | 83508  | 1,04 | down |
| 6165802 | 7311776 | 1651631 | timeless homolog (Drosophila)      | Timeless | 83508  | 1,03 | down |
| 6000874 | 7311776 | 1651649 | timeless homolog (Drosophila)      | Timeless | 83508  | 1,01 | down |
| 5878975 | 7311776 | 1651626 | timeless homolog (Drosophila)      | Timeless | 83508  | 1,01 | down |
| 6164744 | 7379138 | 1818924 | TIMP metalloproteinase inhibitor 1 | Timp1    | 116510 | 5,16 | down |
| 6395478 | 7379138 | 1818925 | TIMP metalloproteinase inhibitor 1 | Timp1    | 116510 | 1,32 | up   |
| 6315878 | 7379138 | 1818927 | TIMP metalloproteinase inhibitor 1 | Timp1    | 116510 | 1,26 | up   |
| 5716973 | 7379138 | 1818928 | TIMP metalloproteinase inhibitor 1 | Timp1    | 116510 | 1,24 | down |
| 6144215 | 7379138 | 1818929 | TIMP metalloproteinase inhibitor 1 | Timp1    | 116510 | 1,23 | up   |
| 5739506 | 7379138 | 1818929 | TIMP metalloproteinase inhibitor 1 | Timp1    | 116510 | 1,19 | down |
| 6742490 | 7379138 | 1818926 | TIMP metalloproteinase inhibitor 1 | Timp1    | 116510 | 1,19 | up   |
| 6157429 | 7240569 | 1475305 | titin                              | Ttn      | 84015  | 1,65 | up   |
| 6574069 | 7240569 | 1475423 | titin                              | Ttn      | 84015  | 1,64 | down |
| 6162425 | 7240569 | 1475442 | titin                              | Ttn      | 84015  | 1,55 | down |
| 6309845 | 7240569 | 1475307 | titin                              | Ttn      | 84015  | 1,52 | down |
| 6463813 | 7240569 | 1475426 | titin                              | Ttn      | 84015  | 1,51 | up   |
| 6072039 | 7240569 | 1475467 | titin                              | Ttn      | 84015  | 1,50 | down |
| 6731225 | 7240569 | 1475412 | titin                              | Ttn      | 84015  | 1,49 | down |
| 6061335 | 7240569 | 1475477 | titin                              | Ttn      | 84015  | 1,47 | up   |
| 5757974 | 7240569 | 1475306 | titin                              | Ttn      | 84015  | 1,45 | up   |
| 6451737 | 7240569 | 1475398 | titin                              | Ttn      | 84015  | 1,45 | down |
| 5637734 | 7240569 | 1475441 | titin                              | Ttn      | 84015  | 1,42 | down |
| 6546184 | 7240569 | 1475422 | titin                              | Ttn      | 84015  | 1,42 | up   |
| 6118324 | 7240569 | 1475431 | titin                              | Ttn      | 84015  | 1,40 | down |
| 6073009 | 7240569 | 1475391 | titin                              | Ttn      | 84015  | 1,38 | up   |



|         |         |         |                          |        |        |      |      |
|---------|---------|---------|--------------------------|--------|--------|------|------|
| 6730367 | 7240569 | 1475436 | titin                    | Ttn    | 84015  | 1,37 | up   |
| 6269475 | 7240569 | 1475410 | titin                    | Ttn    | 84015  | 1,35 | down |
| 6645369 | 7240569 | 1475308 | titin                    | Ttn    | 84015  | 1,34 | down |
| 6095602 | 7240569 | 1475425 | titin                    | Ttn    | 84015  | 1,31 | down |
| 6236639 | 7240569 | 1475431 | titin                    | Ttn    | 84015  | 1,29 | down |
| 5723280 | 7240569 | 1475408 | titin                    | Ttn    | 84015  | 1,28 | up   |
| 6632703 | 7240569 | 1475475 | titin                    | Ttn    | 84015  | 1,24 | up   |
| 6043164 | 7240569 | 1475435 | titin                    | Ttn    | 84015  | 1,24 | up   |
| 6693152 | 7240569 | 1475465 | titin                    | Ttn    | 84015  | 1,23 | down |
| 6155294 | 7240569 | 1475340 | titin                    | Ttn    | 84015  | 1,22 | down |
| 6738689 | 7240569 | 1475418 | titin                    | Ttn    | 84015  | 1,21 | up   |
| 5883593 | 7240569 | 1475417 | titin                    | Ttn    | 84015  | 1,21 | up   |
| 6271050 | 7240569 | 1475427 | titin                    | Ttn    | 84015  | 1,21 | down |
| 5831786 | 7240569 | 1475309 | titin                    | Ttn    | 84015  | 1,19 | down |
| 6101607 | 7240569 | 1475432 | titin                    | Ttn    | 84015  | 1,19 | up   |
| 6406930 | 7240569 | 1475422 | titin                    | Ttn    | 84015  | 1,16 | up   |
| 6438825 | 7240569 | 1475465 | titin                    | Ttn    | 84015  | 1,15 | down |
| 5671996 | 7240569 | 1475428 | titin                    | Ttn    | 84015  | 1,14 | up   |
| 6187035 | 7240569 | 1475421 | titin                    | Ttn    | 84015  | 1,14 | up   |
| 5976243 | 7240569 | 1475406 | titin                    | Ttn    | 84015  | 1,14 | up   |
| 6718484 | 7240569 | 1475467 | titin                    | Ttn    | 84015  | 1,14 | up   |
| 6206245 | 7240569 | 1475439 | titin                    | Ttn    | 84015  | 1,11 | up   |
| 5963114 | 7240569 | 1475434 | titin                    | Ttn    | 84015  | 1,11 | down |
| 5769298 | 7240569 | 1475414 | titin                    | Ttn    | 84015  | 1,10 | down |
| 6534420 | 7240569 | 1475304 | titin                    | Ttn    | 84015  | 1,10 | up   |
| 6013623 | 7240569 | 1475415 | titin                    | Ttn    | 84015  | 1,10 | up   |
| 6621625 | 7240569 | 1475429 | titin                    | Ttn    | 84015  | 1,09 | down |
| 5852833 | 7240569 | 1475409 | titin                    | Ttn    | 84015  | 1,08 | up   |
| 6187370 | 7240569 | 1475411 | titin                    | Ttn    | 84015  | 1,08 | down |
| 6284581 | 7240569 | 1475436 | titin                    | Ttn    | 84015  | 1,08 | down |
| 6700074 | 7240569 | 1475407 | titin                    | Ttn    | 84015  | 1,07 | up   |
| 6269080 | 7240569 | 1475426 | titin                    | Ttn    | 84015  | 1,07 | down |
| 5834926 | 7240569 | 1475424 | titin                    | Ttn    | 84015  | 1,07 | up   |
| 5773398 | 7240569 | 1475413 | titin                    | Ttn    | 84015  | 1,07 | down |
| 6566338 | 7240569 | 1475430 | titin                    | Ttn    | 84015  | 1,07 | up   |
| 5642040 | 7240569 | 1475428 | titin                    | Ttn    | 84015  | 1,06 | down |
| 5883814 | 7240569 | 1475416 | titin                    | Ttn    | 84015  | 1,06 | down |
| 5788584 | 7240569 | 1475392 | titin                    | Ttn    | 84015  | 1,06 | up   |
| 6639810 | 7240569 | 1475438 | titin                    | Ttn    | 84015  | 1,05 | up   |
| 6010526 | 7240569 | 1475426 | titin                    | Ttn    | 84015  | 1,05 | down |
| 6372851 | 7240569 | 1475433 | titin                    | Ttn    | 84015  | 1,05 | down |
| 6645344 | 7240569 | 1475430 | titin                    | Ttn    | 84015  | 1,04 | up   |
| 5952371 | 7240569 | 1475419 | titin                    | Ttn    | 84015  | 1,03 | down |
| 6168060 | 7240569 | 1475373 | titin                    | Ttn    | 84015  | 1,03 | down |
| 6223146 | 7240569 | 1475374 | titin                    | Ttn    | 84015  | 1,02 | down |
| 6431157 | 7240569 | 1475437 | titin                    | Ttn    | 84015  | 1,01 | down |
| 6425827 | 7240569 | 1475440 | titin                    | Ttn    | 84015  | 1,01 | down |
| 5810768 | 7240569 | 1475310 | titin                    | Ttn    | 84015  | 1,00 | down |
| 6476522 | 7080069 | 1079627 | TLC domain containing 1  | Tlcd1  | 287472 | 2,00 | down |
| 6709894 | 7080069 | 1079623 | TLC domain containing 1  | Tlcd1  | 287472 | 1,26 | down |
| 6611068 | 7080069 | 1079627 | TLC domain containing 1  | Tlcd1  | 287472 | 1,22 | up   |
| 6427123 | 7080069 | 1079625 | TLC domain containing 1  | Tlcd1  | 287472 | 1,16 | up   |
| 6169322 | 7080069 | 1079626 | TLC domain containing 1  | Tlcd1  | 287472 | 1,12 | up   |
| 5802821 | 7080069 | 1079624 | TLC domain containing 1  | Tlcd1  | 287472 | 1,04 | down |
| 6576581 | 7215947 | 1412919 | TNNI3 interacting kinase | Tnni3k | 295531 | 2,45 | down |
| 6589226 | 7215947 | 1412917 | TNNI3 interacting kinase | Tnni3k | 295531 | 1,69 | down |
| 6022234 | 7215947 | 1412922 | TNNI3 interacting kinase | Tnni3k | 295531 | 1,67 | up   |

|         |         |         |                                       |        |        |      |      |
|---------|---------|---------|---------------------------------------|--------|--------|------|------|
| 6314383 | 7215947 | 1412931 | TNNI3 interacting kinase              | Tnni3k | 295531 | 1,39 | up   |
| 5847305 | 7215947 | 1412937 | TNNI3 interacting kinase              | Tnni3k | 295531 | 1,29 | up   |
| 6442594 | 7215947 | 1412932 | TNNI3 interacting kinase              | Tnni3k | 295531 | 1,26 | down |
| 6214541 | 7215947 | 1412933 | TNNI3 interacting kinase              | Tnni3k | 295531 | 1,23 | down |
| 5628235 | 7215947 | 1412925 | TNNI3 interacting kinase              | Tnni3k | 295531 | 1,18 | up   |
| 6454791 | 7215947 | 1412929 | TNNI3 interacting kinase              | Tnni3k | 295531 | 1,18 | down |
| 5742455 | 7215947 | 1412920 | TNNI3 interacting kinase              | Tnni3k | 295531 | 1,13 | down |
| 5679115 | 7215947 | 1412934 | TNNI3 interacting kinase              | Tnni3k | 295531 | 1,13 | down |
| 5859608 | 7215947 | 1412923 | TNNI3 interacting kinase              | Tnni3k | 295531 | 1,12 | up   |
| 6181850 | 7215947 | 1412927 | TNNI3 interacting kinase              | Tnni3k | 295531 | 1,10 | up   |
| 5884890 | 7215947 | 1412924 | TNNI3 interacting kinase              | Tnni3k | 295531 | 1,10 | down |
| 6105674 | 7215947 | 1412921 | TNNI3 interacting kinase              | Tnni3k | 295531 | 1,09 | up   |
| 6433829 | 7215947 | 1412928 | TNNI3 interacting kinase              | Tnni3k | 295531 | 1,09 | up   |
| 6521681 | 7215947 | 1412918 | TNNI3 interacting kinase              | Tnni3k | 295531 | 1,09 | down |
| 6241496 | 7215947 | 1412936 | TNNI3 interacting kinase              | Tnni3k | 295531 | 1,08 | down |
| 6081617 | 7215947 | 1412930 | TNNI3 interacting kinase              | Tnni3k | 295531 | 1,04 | up   |
| 6254664 | 7215947 | 1412935 | TNNI3 interacting kinase              | Tnni3k | 295531 | 1,04 | up   |
| 6325267 | 7215947 | 1412926 | TNNI3 interacting kinase              | Tnni3k | 295531 | 1,03 | up   |
| 5910904 | 7118598 | 1173761 | toll-like receptor 6                  | Tlr6   | 305353 | 2,10 | up   |
| 5690222 | 7118598 | 1173761 | toll-like receptor 6                  | Tlr6   | 305353 | 1,14 | down |
| 6544847 | 7118598 | 1173761 | toll-like receptor 6                  | Tlr6   | 305353 | 1,11 | down |
| 5779130 | 7118598 | 1173761 | toll-like receptor 6                  | Tlr6   | 305353 | 1,01 | up   |
| 6468804 | 7175355 | 1313236 | toll-like receptor adaptor molecule 2 | Ticam2 | 364867 | 2,61 | up   |
| 5796353 | 7175355 | 1313233 | toll-like receptor adaptor molecule 2 | Ticam2 | 364867 | 2,49 | up   |
| 5935704 | 7175355 | 1313232 | toll-like receptor adaptor molecule 2 | Ticam2 | 364867 | 1,66 | up   |
| 5972960 | 7175355 | 1313231 | toll-like receptor adaptor molecule 2 | Ticam2 | 364867 | 1,60 | up   |
| 5908134 | 7175355 | 1313230 | toll-like receptor adaptor molecule 2 | Ticam2 | 364867 | 1,55 | up   |
| 6203080 | 7175355 | 1313237 | toll-like receptor adaptor molecule 2 | Ticam2 | 364867 | 1,54 | up   |
| 6555498 | 7175355 | 1313237 | toll-like receptor adaptor molecule 2 | Ticam2 | 364867 | 1,41 | up   |
| 5679118 | 7144782 | 1237791 | tolloid-like 1                        | Tll1   | 678743 | 2,76 | up   |
| 6313109 | 7144782 | 1237790 | tolloid-like 1                        | Tll1   | 678743 | 1,94 | up   |
| 6056566 | 7144782 | 1237779 | tolloid-like 1                        | Tll1   | 678743 | 1,58 | up   |
| 6174014 | 7144782 | 1237785 | tolloid-like 1                        | Tll1   | 678743 | 1,54 | up   |
| 6376101 | 7144782 | 1237792 | tolloid-like 1                        | Tll1   | 678743 | 1,53 | up   |
| 6237148 | 7144782 | 1237781 | tolloid-like 1                        | Tll1   | 678743 | 1,44 | up   |
| 6384390 | 7144782 | 1237795 | tolloid-like 1                        | Tll1   | 678743 | 1,39 | up   |
| 5891689 | 7144782 | 1237795 | tolloid-like 1                        | Tll1   | 678743 | 1,38 | down |
| 6355764 | 7144782 | 1237794 | tolloid-like 1                        | Tll1   | 678743 | 1,37 | up   |
| 6058071 | 7144782 | 1237770 | tolloid-like 1                        | Tll1   | 678743 | 1,36 | down |
| 6576934 | 7144782 | 1237785 | tolloid-like 1                        | Tll1   | 678743 | 1,35 | down |
| 6003931 | 7144782 | 1237769 | tolloid-like 1                        | Tll1   | 678743 | 1,26 | up   |
| 6579588 | 7144782 | 1237793 | tolloid-like 1                        | Tll1   | 678743 | 1,25 | up   |
| 6159184 | 7144782 | 1237786 | tolloid-like 1                        | Tll1   | 678743 | 1,24 | down |
| 6325793 | 7144782 | 1237772 | tolloid-like 1                        | Tll1   | 678743 | 1,22 | up   |
| 6165470 | 7144782 | 1237782 | tolloid-like 1                        | Tll1   | 678743 | 1,21 | up   |
| 5710689 | 7144782 | 1237759 | tolloid-like 1                        | Tll1   | 678743 | 1,20 | up   |
| 6539848 | 7144782 | 1237768 | tolloid-like 1                        | Tll1   | 678743 | 1,20 | up   |
| 6541596 | 7144782 | 1237781 | tolloid-like 1                        | Tll1   | 678743 | 1,18 | up   |
| 5617725 | 7144782 | 1237771 | tolloid-like 1                        | Tll1   | 678743 | 1,14 | down |
| 5763985 | 7144782 | 1237773 | tolloid-like 1                        | Tll1   | 678743 | 1,08 | down |
| 6092073 | 7144782 | 1237779 | tolloid-like 1                        | Tll1   | 678743 | 1,08 | down |
| 6720716 | 7144782 | 1237775 | tolloid-like 1                        | Tll1   | 678743 | 1,07 | up   |
| 6729010 | 7144782 | 1237776 | tolloid-like 1                        | Tll1   | 678743 | 1,03 | down |
| 6126580 | 7144782 | 1237788 | tolloid-like 1                        | Tll1   | 678743 | 1,02 | down |
| 6097360 | 7144782 | 1237785 | tolloid-like 1                        | Tll1   | 678743 | 1,01 | down |
| 6230616 | 7050641 | 1010962 | tonin                                 | Ton    | 24841  | 2,06 | down |
| 5938627 | 7050641 | 1010960 | tonin                                 | Ton    | 24841  | 1,40 | up   |

|         |         |         |                                                                                 |                 |                   |      |      |
|---------|---------|---------|---------------------------------------------------------------------------------|-----------------|-------------------|------|------|
| 5866231 | 7050641 | 1010958 | tonin                                                                           | Ton             | 24841             | 1,30 | down |
| 6020894 | 7050641 | 1010958 | tonin                                                                           | Ton             | 24841             | 1,22 | down |
| 6699917 | 7050641 | 1010959 | tonin                                                                           | Ton             | 24841             | 1,20 | up   |
| 5894341 | 7050641 | 1010962 | tonin                                                                           | Ton             | 24841             | 1,09 | up   |
| 5864607 | 7050641 | 1010957 | tonin                                                                           | Ton             | 24841             | 1,04 | down |
| 6656038 | 7328991 | 1693200 | topoisomerase (DNA) I, mitochondrial                                            | Top1mt          | 300029            | 2,21 | up   |
| 6481374 | 7328991 | 1693201 | topoisomerase (DNA) I, mitochondrial                                            | Top1mt          | 300029            | 1,67 | up   |
| 6115349 | 7328991 | 1693209 | topoisomerase (DNA) I, mitochondrial                                            | Top1mt          | 300029            | 1,63 | down |
| 5725860 | 7328991 | 1693197 | topoisomerase (DNA) I, mitochondrial                                            | Top1mt          | 300029            | 1,46 | down |
| 5649296 | 7328991 | 1693195 | topoisomerase (DNA) I, mitochondrial                                            | Top1mt          | 300029            | 1,44 | down |
| 6356410 | 7328991 | 1693199 | topoisomerase (DNA) I, mitochondrial                                            | Top1mt          | 300029            | 1,43 | up   |
| 6586888 | 7328991 | 1693202 | topoisomerase (DNA) I, mitochondrial                                            | Top1mt          | 300029            | 1,33 | down |
| 6045424 | 7328991 | 1693205 | topoisomerase (DNA) I, mitochondrial                                            | Top1mt          | 300029            | 1,32 | up   |
| 5833216 | 7328991 | 1693196 | topoisomerase (DNA) I, mitochondrial                                            | Top1mt          | 300029            | 1,22 | up   |
| 6536461 | 7328991 | 1693203 | topoisomerase (DNA) I, mitochondrial                                            | Top1mt          | 300029            | 1,19 | down |
| 6377065 | 7328991 | 1693198 | topoisomerase (DNA) I, mitochondrial                                            | Top1mt          | 300029            | 1,14 | up   |
| 6378733 | 7328991 | 1693207 | topoisomerase (DNA) I, mitochondrial                                            | Top1mt          | 300029            | 1,10 | down |
| 5778025 | 7328991 | 1693205 | topoisomerase (DNA) I, mitochondrial                                            | Top1mt          | 300029            | 1,07 | down |
| 6453440 | 7328991 | 1693206 | topoisomerase (DNA) I, mitochondrial                                            | Top1mt          | 300029            | 1,07 | down |
| 5865256 | 7328991 | 1693208 | topoisomerase (DNA) I, mitochondrial                                            | Top1mt          | 300029            | 1,06 | up   |
| 6360364 | 7328991 | 1693204 | topoisomerase (DNA) I, mitochondrial                                            | Top1mt          | 300029            | 1,03 | down |
| 6387258 | 7226288 | 1438046 | torsin family 2, member A                                                       | Tor2a           | 362112            | 1,51 | down |
| 6406762 | 7226288 | 1438045 | torsin family 2, member A                                                       | Tor2a           | 362112            | 1,13 | up   |
| 6310125 | 7226288 | 1438044 | torsin family 2, member A                                                       | Tor2a           | 362112            | 1,08 | down |
| 6690140 | 7226288 | 1438043 | torsin family 2, member A                                                       | Tor2a           | 362112            | 1,08 | up   |
| 5899108 | 7226288 | 1438042 | torsin family 2, member A /// peptidyl-tRNA hydrolase 1 homolog (S. cerevisiae) | Tor2a /// Ptrh1 | 362112 /// 362113 | 2,03 | up   |
| 5946258 | 7226288 | 1438040 | torsin family 2, member A /// peptidyl-tRNA hydrolase 1 homolog (S. cerevisiae) | Tor2a /// Ptrh1 | 362112 /// 362113 | 1,26 | down |
| 6352292 | 7226288 | 1438041 | torsin family 2, member A /// peptidyl-tRNA hydrolase 1 homolog (S. cerevisiae) | Tor2a /// Ptrh1 | 362112 /// 362113 | 1,20 | up   |
| 6493661 | 7219605 | 1422078 | Traf3 interacting protein 2                                                     | Traf3ip2        | 361857            | 2,53 | down |
| 5742321 | 7219605 | 1422073 | Traf3 interacting protein 2                                                     | Traf3ip2        | 361857            | 2,44 | up   |
| 6008345 | 7219605 | 1422063 | Traf3 interacting protein 2                                                     | Traf3ip2        | 361857            | 1,88 | up   |
| 6203094 | 7219605 | 1422078 | Traf3 interacting protein 2                                                     | Traf3ip2        | 361857            | 1,80 | down |
| 6251332 | 7219605 | 1422070 | Traf3 interacting protein 2                                                     | Traf3ip2        | 361857            | 1,59 | up   |
| 5635424 | 7219605 | 1422063 | Traf3 interacting protein 2                                                     | Traf3ip2        | 361857            | 1,57 | up   |
| 6216119 | 7219605 | 1422077 | Traf3 interacting protein 2                                                     | Traf3ip2        | 361857            | 1,34 | down |
| 6672019 | 7219605 | 1422069 | Traf3 interacting protein 2                                                     | Traf3ip2        | 361857            | 1,25 | up   |
| 6414727 | 7219605 | 1422053 | Traf3 interacting protein 2                                                     | Traf3ip2        | 361857            | 1,20 | down |
| 5864016 | 7219605 | 1422073 | Traf3 interacting protein 2                                                     | Traf3ip2        | 361857            | 1,17 | down |
| 5981350 | 7219605 | 1422057 | Traf3 interacting protein 2                                                     | Traf3ip2        | 361857            | 1,12 | up   |
| 5757840 | 7219605 | 1422057 | Traf3 interacting protein 2                                                     | Traf3ip2        | 361857            | 1,05 | up   |
| 6121859 | 7219605 | 1422066 | Traf3 interacting protein 2                                                     | Traf3ip2        | 361857            | 1,03 | down |
| 6038423 | 7219605 | 1422062 | Traf3 interacting protein 2                                                     | Traf3ip2        | 361857            | 1,01 | down |
| 6684023 | 7344745 | 1732280 | trafficking protein particle complex 4                                          | Trappc4         | 367073            | 2,93 | down |
| 6361780 | 7344745 | 1732280 | trafficking protein particle complex 4                                          | Trappc4         | 367073            | 1,63 | down |
| 6637580 | 7344745 | 1732279 | trafficking protein particle complex 4                                          | Trappc4         | 367073            | 1,50 | up   |
| 6301956 | 7344745 | 1732280 | trafficking protein particle complex 4                                          | Trappc4         | 367073            | 1,18 | up   |
| 6642706 | 7344745 | 1732277 | trafficking protein particle complex 4                                          | Trappc4         | 367073            | 1,06 | up   |
| 6707269 | 7344745 | 1732278 | trafficking protein particle complex 4                                          | Trappc4         | 367073            | 1,03 | down |
| 6456221 | 7344745 | 1732276 | trafficking protein particle complex 4                                          | Trappc4         | 367073            | 1,03 | up   |
| 5799676 | 7344745 | 1732275 | trafficking protein particle complex 4                                          | Trappc4         | 367073            | 1,00 | up   |
| 6504756 | 7029442 | 959559  | trafficking protein particle complex 6A                                         | Trappc6a        | 680465            | 2,06 | up   |
| 6451807 | 7029442 | 959555  | trafficking protein particle complex 6A                                         | Trappc6a        | 680465            | 1,89 | down |
| 6256237 | 7029442 | 959557  | trafficking protein particle complex 6A                                         | Trappc6a        | 680465            | 1,48 | down |
| 6073540 | 7029442 | 959558  | trafficking protein particle complex 6A                                         | Trappc6a        | 680465            | 1,28 | up   |
| 6336816 | 7029442 | 959559  | trafficking protein particle complex 6A                                         | Trappc6a        | 680465            | 1,13 | down |
| 6245002 | 7029442 | 959554  | trafficking protein particle complex 6A                                         | Trappc6a        | 680465            | 1,08 | up   |
| 6039077 | 7029442 | 959556  | trafficking protein particle complex 6A                                         | Trappc6a        | 680465            | 1,07 | down |

|         |         |         |                                           |         |        |      |      |
|---------|---------|---------|-------------------------------------------|---------|--------|------|------|
| 6017212 | 7362580 | 1775774 | trafficking protein, kinesin binding 2    | Trak2   | 171086 | 2,08 | up   |
| 5620093 | 7362580 | 1775786 | trafficking protein, kinesin binding 2    | Trak2   | 171086 | 1,69 | up   |
| 6480101 | 7362580 | 1775788 | trafficking protein, kinesin binding 2    | Trak2   | 171086 | 1,68 | down |
| 6416982 | 7362580 | 1775776 | trafficking protein, kinesin binding 2    | Trak2   | 171086 | 1,58 | down |
| 6206735 | 7362580 | 1775781 | trafficking protein, kinesin binding 2    | Trak2   | 171086 | 1,54 | down |
| 6502809 | 7362580 | 1775778 | trafficking protein, kinesin binding 2    | Trak2   | 171086 | 1,34 | down |
| 5726939 | 7362580 | 1775771 | trafficking protein, kinesin binding 2    | Trak2   | 171086 | 1,34 | down |
| 6299613 | 7362580 | 1775789 | trafficking protein, kinesin binding 2    | Trak2   | 171086 | 1,28 | up   |
| 6438159 | 7362580 | 1775785 | trafficking protein, kinesin binding 2    | Trak2   | 171086 | 1,25 | down |
| 5881538 | 7362580 | 1775780 | trafficking protein, kinesin binding 2    | Trak2   | 171086 | 1,25 | up   |
| 5861428 | 7362580 | 1775783 | trafficking protein, kinesin binding 2    | Trak2   | 171086 | 1,22 | up   |
| 6714589 | 7362580 | 1775779 | trafficking protein, kinesin binding 2    | Trak2   | 171086 | 1,18 | down |
| 6010675 | 7362580 | 1775774 | trafficking protein, kinesin binding 2    | Trak2   | 171086 | 1,17 | down |
| 6189334 | 7362580 | 1775776 | trafficking protein, kinesin binding 2    | Trak2   | 171086 | 1,15 | up   |
| 5889706 | 7362580 | 1775777 | trafficking protein, kinesin binding 2    | Trak2   | 171086 | 1,14 | down |
| 5956913 | 7362580 | 1775771 | trafficking protein, kinesin binding 2    | Trak2   | 171086 | 1,11 | up   |
| 5912395 | 7362580 | 1775787 | trafficking protein, kinesin binding 2    | Trak2   | 171086 | 1,09 | up   |
| 6416411 | 7362580 | 1775772 | trafficking protein, kinesin binding 2    | Trak2   | 171086 | 1,08 | down |
| 5769445 | 7362580 | 1775782 | trafficking protein, kinesin binding 2    | Trak2   | 171086 | 1,04 | down |
| 6262819 | 7362580 | 1775773 | trafficking protein, kinesin binding 2    | Trak2   | 171086 | 1,04 | down |
| 5695038 | 7362580 | 1775775 | trafficking protein, kinesin binding 2    | Trak2   | 171086 | 1,03 | down |
| 5772514 | 7362580 | 1775784 | trafficking protein, kinesin binding 2    | Trak2   | 171086 | 1,01 | up   |
| 6241203 | 7283156 | 1580624 | transcription elongation factor A (SII) 1 | Tcea1   | 362479 | 1,57 | up   |
| 6217389 | 7283156 | 1580615 | transcription elongation factor A (SII) 1 | Tcea1   | 362479 | 1,56 | down |
| 6424384 | 7283156 | 1580618 | transcription elongation factor A (SII) 1 | Tcea1   | 362479 | 1,52 | up   |
| 5742995 | 7283156 | 1580617 | transcription elongation factor A (SII) 1 | Tcea1   | 362479 | 1,32 | up   |
| 5746987 | 7283156 | 1580625 | transcription elongation factor A (SII) 1 | Tcea1   | 362479 | 1,23 | down |
| 6659566 | 7283156 | 1580626 | transcription elongation factor A (SII) 1 | Tcea1   | 362479 | 1,19 | down |
| 5718853 | 7283156 | 1580614 | transcription elongation factor A (SII) 1 | Tcea1   | 362479 | 1,12 | down |
| 6729913 | 7283156 | 1580623 | transcription elongation factor A (SII) 1 | Tcea1   | 362479 | 1,08 | up   |
| 6683103 | 7283156 | 1580626 | transcription elongation factor A (SII) 1 | Tcea1   | 362479 | 1,05 | up   |
| 6418579 | 7283156 | 1580620 | transcription elongation factor A (SII) 1 | Tcea1   | 362479 | 1,05 | up   |
| 6638537 | 7283156 | 1580621 | transcription elongation factor A (SII) 1 | Tcea1   | 362479 | 1,00 | up   |
| 6741052 | 7283156 | 1580616 | transcription elongation factor A (SII) 1 | Tcea1   | 362479 | 1,00 | down |
| 5956537 | 7235808 | 1462947 | transcription factor AP-2, gamma          | Tcfap2c | 362280 | 2,05 | up   |
| 6225641 | 7235808 | 1462949 | transcription factor AP-2, gamma          | Tcfap2c | 362280 | 1,84 | down |
| 6319586 | 7235808 | 1462951 | transcription factor AP-2, gamma          | Tcfap2c | 362280 | 1,27 | up   |
| 6360511 | 7235808 | 1462950 | transcription factor AP-2, gamma          | Tcfap2c | 362280 | 1,13 | up   |
| 6493731 | 7235808 | 1462947 | transcription factor AP-2, gamma          | Tcfap2c | 362280 | 1,10 | down |
| 5939207 | 7235808 | 1462952 | transcription factor AP-2, gamma          | Tcfap2c | 362280 | 1,08 | down |
| 5880311 | 7235808 | 1462947 | transcription factor AP-2, gamma          | Tcfap2c | 362280 | 1,04 | down |
| 5741636 | 7235808 | 1462949 | transcription factor AP-2, gamma          | Tcfap2c | 362280 | 1,00 | up   |
| 6083645 | 7235808 | 1462948 | transcription factor AP-2, gamma          | Tcfap2c | 362280 | 1,00 | up   |
| 6409592 | 7235808 | 1462946 | transcription factor AP-2, gamma          | Tcfap2c | 362280 | 1,00 | up   |
| 6164770 | 7359426 | 1768353 | transcription factor EB                   | Tfeb    | 316214 | 2,00 | down |
| 6231486 | 7359426 | 1768355 | transcription factor EB                   | Tfeb    | 316214 | 1,78 | up   |
| 6560960 | 7359426 | 1768359 | transcription factor EB                   | Tfeb    | 316214 | 1,42 | up   |
| 5731961 | 7359426 | 1768353 | transcription factor EB                   | Tfeb    | 316214 | 1,39 | up   |
| 5882265 | 7359426 | 1768358 | transcription factor EB                   | Tfeb    | 316214 | 1,38 | up   |
| 6286960 | 7359426 | 1768355 | transcription factor EB                   | Tfeb    | 316214 | 1,33 | up   |
| 6137715 | 7359426 | 1768362 | transcription factor EB                   | Tfeb    | 316214 | 1,30 | down |
| 6476467 | 7359426 | 1768360 | transcription factor EB                   | Tfeb    | 316214 | 1,21 | up   |
| 6424206 | 7359426 | 1768363 | transcription factor EB                   | Tfeb    | 316214 | 1,19 | down |
| 6395428 | 7359426 | 1768364 | transcription factor EB                   | Tfeb    | 316214 | 1,15 | down |
| 6218975 | 7359426 | 1768357 | transcription factor EB                   | Tfeb    | 316214 | 1,06 | down |
| 5740464 | 7359426 | 1768362 | transcription factor EB                   | Tfeb    | 316214 | 1,06 | down |
| 6350131 | 7359426 | 1768353 | transcription factor EB                   | Tfeb    | 316214 | 1,04 | down |

|         |         |         |                                                      |        |        |      |      |
|---------|---------|---------|------------------------------------------------------|--------|--------|------|------|
| 6031972 | 7359426 | 1768353 | transcription factor EB                              | Tfeb   | 316214 | 1,03 | up   |
| 5980634 | 7359426 | 1768361 | transcription factor EB                              | Tfeb   | 316214 | 1,01 | up   |
| 6176798 | 7359426 | 1768362 | transcription factor EB                              | Tfeb   | 316214 | 1,00 | down |
| 6652741 | 7080793 | 1081110 | transcriptional adaptor 2 (ADA2 homolog, yeast)-like | Tada2l | 360581 | 2,86 | down |
| 6707434 | 7080793 | 1081114 | transcriptional adaptor 2 (ADA2 homolog, yeast)-like | Tada2l | 360581 | 1,94 | down |
| 5979244 | 7080793 | 1081113 | transcriptional adaptor 2 (ADA2 homolog, yeast)-like | Tada2l | 360581 | 1,66 | down |
| 5908942 | 7080793 | 1081111 | transcriptional adaptor 2 (ADA2 homolog, yeast)-like | Tada2l | 360581 | 1,49 | down |
| 6477452 | 7080793 | 1081112 | transcriptional adaptor 2 (ADA2 homolog, yeast)-like | Tada2l | 360581 | 1,47 | up   |
| 5690094 | 7080793 | 1081118 | transcriptional adaptor 2 (ADA2 homolog, yeast)-like | Tada2l | 360581 | 1,37 | down |
| 6458765 | 7080793 | 1081116 | transcriptional adaptor 2 (ADA2 homolog, yeast)-like | Tada2l | 360581 | 1,36 | up   |
| 6549299 | 7080793 | 1081122 | transcriptional adaptor 2 (ADA2 homolog, yeast)-like | Tada2l | 360581 | 1,31 | up   |
| 6272377 | 7080793 | 1081108 | transcriptional adaptor 2 (ADA2 homolog, yeast)-like | Tada2l | 360581 | 1,31 | down |
| 6459118 | 7080793 | 1081115 | transcriptional adaptor 2 (ADA2 homolog, yeast)-like | Tada2l | 360581 | 1,27 | up   |
| 5649159 | 7080793 | 1081124 | transcriptional adaptor 2 (ADA2 homolog, yeast)-like | Tada2l | 360581 | 1,21 | down |
| 6338681 | 7080793 | 1081117 | transcriptional adaptor 2 (ADA2 homolog, yeast)-like | Tada2l | 360581 | 1,15 | down |
| 6296704 | 7080793 | 1081109 | transcriptional adaptor 2 (ADA2 homolog, yeast)-like | Tada2l | 360581 | 1,12 | up   |
| 6562687 | 7080793 | 1081123 | transcriptional adaptor 2 (ADA2 homolog, yeast)-like | Tada2l | 360581 | 1,09 | down |
| 5872590 | 7080793 | 1081112 | transcriptional adaptor 2 (ADA2 homolog, yeast)-like | Tada2l | 360581 | 1,08 | up   |
| 5671823 | 7080793 | 1081120 | transcriptional adaptor 2 (ADA2 homolog, yeast)-like | Tada2l | 360581 | 1,06 | down |
| 6134373 | 7080793 | 1081119 | transcriptional adaptor 2 (ADA2 homolog, yeast)-like | Tada2l | 360581 | 1,05 | down |
| 6701710 | 7080793 | 1081121 | transcriptional adaptor 2 (ADA2 homolog, yeast)-like | Tada2l | 360581 | 1,04 | down |
| 6539264 | 7080793 | 1081120 | transcriptional adaptor 2 (ADA2 homolog, yeast)-like | Tada2l | 360581 | 1,03 | up   |
| 6262138 | 7094158 | 1112984 | transferrin receptor                                 | Tfrc   | 64678  | 3,07 | down |
| 6067776 | 7094158 | 1112983 | transferrin receptor                                 | Tfrc   | 64678  | 1,58 | up   |
| 6245662 | 7094158 | 1112980 | transferrin receptor                                 | Tfrc   | 64678  | 1,28 | up   |
| 6143381 | 7094158 | 1112976 | transferrin receptor                                 | Tfrc   | 64678  | 1,19 | up   |
| 6345050 | 7094158 | 1112976 | transferrin receptor                                 | Tfrc   | 64678  | 1,16 | down |
| 5787004 | 7094158 | 1112967 | transferrin receptor                                 | Tfrc   | 64678  | 1,16 | down |
| 6487838 | 7094158 | 1112966 | transferrin receptor                                 | Tfrc   | 64678  | 1,14 | up   |
| 5750427 | 7094158 | 1112977 | transferrin receptor                                 | Tfrc   | 64678  | 1,14 | down |
| 6592763 | 7094158 | 1112979 | transferrin receptor                                 | Tfrc   | 64678  | 1,13 | down |
| 6687990 | 7094158 | 1112978 | transferrin receptor                                 | Tfrc   | 64678  | 1,11 | down |
| 5709075 | 7094158 | 1112965 | transferrin receptor                                 | Tfrc   | 64678  | 1,06 | up   |
| 6197333 | 7094158 | 1112969 | transferrin receptor                                 | Tfrc   | 64678  | 1,06 | up   |
| 5826456 | 7094158 | 1112965 | transferrin receptor                                 | Tfrc   | 64678  | 1,06 | down |
| 6285408 | 7094158 | 1112968 | transferrin receptor                                 | Tfrc   | 64678  | 1,05 | up   |
| 6432117 | 7094158 | 1112971 | transferrin receptor                                 | Tfrc   | 64678  | 1,04 | up   |
| 6371980 | 7094158 | 1112972 | transferrin receptor                                 | Tfrc   | 64678  | 1,03 | down |
| 6073866 | 7094158 | 1112975 | transferrin receptor                                 | Tfrc   | 64678  | 1,02 | up   |
| 6709269 | 7094158 | 1112973 | transferrin receptor                                 | Tfrc   | 64678  | 1,02 | down |
| 6681836 | 7094158 | 1112974 | transferrin receptor                                 | Tfrc   | 64678  | 1,01 | down |
| 5708094 | 7097240 | 1120364 | transferrin receptor 2                               | Tfr2   | 288562 | 2,33 | up   |
| 5651491 | 7097240 | 1120364 | transferrin receptor 2                               | Tfr2   | 288562 | 1,63 | up   |
| 5991339 | 7097240 | 1120363 | transferrin receptor 2                               | Tfr2   | 288562 | 1,62 | down |
| 6516888 | 7097240 | 1120356 | transferrin receptor 2                               | Tfr2   | 288562 | 1,59 | down |
| 6468965 | 7097240 | 1120365 | transferrin receptor 2                               | Tfr2   | 288562 | 1,53 | down |
| 5830208 | 7097240 | 1120368 | transferrin receptor 2                               | Tfr2   | 288562 | 1,42 | up   |
| 5831829 | 7097240 | 1120359 | transferrin receptor 2                               | Tfr2   | 288562 | 1,29 | up   |
| 5681004 | 7097240 | 1120364 | transferrin receptor 2                               | Tfr2   | 288562 | 1,28 | up   |
| 5659917 | 7097240 | 1120357 | transferrin receptor 2                               | Tfr2   | 288562 | 1,19 | down |
| 6120774 | 7097240 | 1120367 | transferrin receptor 2                               | Tfr2   | 288562 | 1,13 | down |
| 6080884 | 7097240 | 1120361 | transferrin receptor 2                               | Tfr2   | 288562 | 1,10 | down |
| 6694904 | 7097240 | 1120371 | transferrin receptor 2                               | Tfr2   | 288562 | 1,10 | down |
| 5825016 | 7097240 | 1120369 | transferrin receptor 2                               | Tfr2   | 288562 | 1,09 | up   |
| 6301274 | 7097240 | 1120358 | transferrin receptor 2                               | Tfr2   | 288562 | 1,09 | down |
| 5631259 | 7097240 | 1120370 | transferrin receptor 2                               | Tfr2   | 288562 | 1,08 | up   |
| 5661000 | 7097240 | 1120355 | transferrin receptor 2                               | Tfr2   | 288562 | 1,06 | down |

|         |         |         |                                                        |         |        |      |      |
|---------|---------|---------|--------------------------------------------------------|---------|--------|------|------|
| 5686507 | 7097240 | 1120368 | transferrin receptor 2                                 | Tfr2    | 288562 | 1,05 | up   |
| 6185655 | 7097240 | 1120371 | transferrin receptor 2                                 | Tfr2    | 288562 | 1,04 | down |
| 6344380 | 7097240 | 1120360 | transferrin receptor 2                                 | Tfr2    | 288562 | 1,02 | up   |
| 5964610 | 7097240 | 1120365 | transferrin receptor 2                                 | Tfr2    | 288562 | 1,02 | up   |
| 6104951 | 7097240 | 1120362 | transferrin receptor 2                                 | Tfr2    | 288562 | 1,02 | down |
| 6646859 | 7037235 | 978579  | transforming growth factor beta 1 induced transcript 1 | Tgfb1i1 | 84574  | 1,74 | down |
| 6062968 | 7037235 | 978577  | transforming growth factor beta 1 induced transcript 1 | Tgfb1i1 | 84574  | 1,55 | up   |
| 6316958 | 7037235 | 978582  | transforming growth factor beta 1 induced transcript 1 | Tgfb1i1 | 84574  | 1,49 | up   |
| 5694983 | 7037235 | 978578  | transforming growth factor beta 1 induced transcript 1 | Tgfb1i1 | 84574  | 1,28 | down |
| 5687677 | 7037235 | 978578  | transforming growth factor beta 1 induced transcript 1 | Tgfb1i1 | 84574  | 1,24 | down |
| 6315619 | 7037235 | 978580  | transforming growth factor beta 1 induced transcript 1 | Tgfb1i1 | 84574  | 1,15 | down |
| 6328914 | 7037235 | 978581  | transforming growth factor beta 1 induced transcript 1 | Tgfb1i1 | 84574  | 1,07 | up   |
| 5923647 | 7115195 | 1165151 | transforming growth factor, beta 2                     | Tgfb2   | 81809  | 2,62 | down |
| 6253792 | 7115195 | 1165150 | transforming growth factor, beta 2                     | Tgfb2   | 81809  | 1,66 | down |
| 6111596 | 7115195 | 1165145 | transforming growth factor, beta 2                     | Tgfb2   | 81809  | 1,54 | down |
| 6104289 | 7115195 | 1165150 | transforming growth factor, beta 2                     | Tgfb2   | 81809  | 1,53 | down |
| 5955561 | 7115195 | 1165145 | transforming growth factor, beta 2                     | Tgfb2   | 81809  | 1,41 | up   |
| 6350412 | 7115195 | 1165147 | transforming growth factor, beta 2                     | Tgfb2   | 81809  | 1,37 | up   |
| 6697051 | 7115195 | 1165146 | transforming growth factor, beta 2                     | Tgfb2   | 81809  | 1,25 | up   |
| 6742922 | 7115195 | 1165152 | transforming growth factor, beta 2                     | Tgfb2   | 81809  | 1,24 | up   |
| 5770630 | 7115195 | 1165149 | transforming growth factor, beta 2                     | Tgfb2   | 81809  | 1,07 | up   |
| 6700234 | 7115195 | 1165148 | transforming growth factor, beta 2                     | Tgfb2   | 81809  | 1,06 | down |
| 5816133 | 7146933 | 1243047 | transforming, acidic coiled-coil containing protein 1  | Tacc1   | 306562 | 2,41 | down |
| 6302021 | 7146933 | 1243047 | transforming, acidic coiled-coil containing protein 1  | Tacc1   | 306562 | 1,41 | up   |
| 5756549 | 7146933 | 1243058 | transforming, acidic coiled-coil containing protein 1  | Tacc1   | 306562 | 1,37 | down |
| 6319942 | 7146933 | 1243047 | transforming, acidic coiled-coil containing protein 1  | Tacc1   | 306562 | 1,36 | up   |
| 5655778 | 7146933 | 1243057 | transforming, acidic coiled-coil containing protein 1  | Tacc1   | 306562 | 1,35 | down |
| 6315627 | 7146933 | 1243047 | transforming, acidic coiled-coil containing protein 1  | Tacc1   | 306562 | 1,31 | down |
| 6498908 | 7146933 | 1243053 | transforming, acidic coiled-coil containing protein 1  | Tacc1   | 306562 | 1,29 | down |
| 5864212 | 7146933 | 1243056 | transforming, acidic coiled-coil containing protein 1  | Tacc1   | 306562 | 1,27 | up   |
| 6517600 | 7146933 | 1243046 | transforming, acidic coiled-coil containing protein 1  | Tacc1   | 306562 | 1,26 | up   |
| 6371164 | 7146933 | 1243051 | transforming, acidic coiled-coil containing protein 1  | Tacc1   | 306562 | 1,22 | down |
| 6557655 | 7146933 | 1243047 | transforming, acidic coiled-coil containing protein 1  | Tacc1   | 306562 | 1,22 | up   |
| 5776339 | 7146933 | 1243054 | transforming, acidic coiled-coil containing protein 1  | Tacc1   | 306562 | 1,21 | up   |
| 6591786 | 7146933 | 1243052 | transforming, acidic coiled-coil containing protein 1  | Tacc1   | 306562 | 1,20 | down |
| 6139879 | 7146933 | 1243048 | transforming, acidic coiled-coil containing protein 1  | Tacc1   | 306562 | 1,17 | down |
| 5907223 | 7146933 | 1243050 | transforming, acidic coiled-coil containing protein 1  | Tacc1   | 306562 | 1,17 | up   |
| 6660173 | 7146933 | 1243045 | transforming, acidic coiled-coil containing protein 1  | Tacc1   | 306562 | 1,16 | up   |
| 5974888 | 7146933 | 1243059 | transforming, acidic coiled-coil containing protein 1  | Tacc1   | 306562 | 1,16 | up   |
| 6489035 | 7146933 | 1243047 | transforming, acidic coiled-coil containing protein 1  | Tacc1   | 306562 | 1,15 | up   |
| 6263612 | 7146933 | 1243055 | transforming, acidic coiled-coil containing protein 1  | Tacc1   | 306562 | 1,12 | up   |
| 6674692 | 7146933 | 1243044 | transforming, acidic coiled-coil containing protein 1  | Tacc1   | 306562 | 1,10 | down |
| 6674175 | 7146933 | 1243045 | transforming, acidic coiled-coil containing protein 1  | Tacc1   | 306562 | 1,09 | down |
| 6325763 | 7146933 | 1243049 | transforming, acidic coiled-coil containing protein 1  | Tacc1   | 306562 | 1,06 | up   |
| 6313755 | 7146933 | 1243047 | transforming, acidic coiled-coil containing protein 1  | Tacc1   | 306562 | 1,02 | up   |
| 5822347 | 7087986 | 1098090 | transgelin 3                                           | Tagln3  | 63837  | 2,13 | up   |
| 6122377 | 7087986 | 1098094 | transgelin 3                                           | Tagln3  | 63837  | 1,69 | down |
| 5674059 | 7087986 | 1098095 | transgelin 3                                           | Tagln3  | 63837  | 1,23 | down |
| 6192444 | 7087986 | 1098092 | transgelin 3                                           | Tagln3  | 63837  | 1,22 | down |
| 6538925 | 7087986 | 1098093 | transgelin 3                                           | Tagln3  | 63837  | 1,22 | up   |
| 6297376 | 7087986 | 1098094 | transgelin 3                                           | Tagln3  | 63837  | 1,10 | up   |
| 5819346 | 7087986 | 1098091 | transgelin 3                                           | Tagln3  | 63837  | 1,06 | down |
| 6597787 | 7247301 | 1490758 | transglutaminase 2, C polypeptide                      | Tgm2    | 56083  | 2,33 | up   |
| 6378490 | 7247301 | 1490749 | transglutaminase 2, C polypeptide                      | Tgm2    | 56083  | 1,80 | up   |
| 6274199 | 7247301 | 1490757 | transglutaminase 2, C polypeptide                      | Tgm2    | 56083  | 1,31 | up   |
| 6669585 | 7247301 | 1490755 | transglutaminase 2, C polypeptide                      | Tgm2    | 56083  | 1,30 | down |
| 6425997 | 7247301 | 1490756 | transglutaminase 2, C polypeptide                      | Tgm2    | 56083  | 1,24 | down |

|         |         |         |                                                                    |       |        |      |      |
|---------|---------|---------|--------------------------------------------------------------------|-------|--------|------|------|
| 6439068 | 7247301 | 1490760 | transglutaminase 2, C polypeptide                                  | Tgm2  | 56083  | 1,23 | down |
| 6638561 | 7247301 | 1490751 | transglutaminase 2, C polypeptide                                  | Tgm2  | 56083  | 1,23 | down |
| 5621433 | 7247301 | 1490750 | transglutaminase 2, C polypeptide                                  | Tgm2  | 56083  | 1,17 | up   |
| 6257274 | 7247301 | 1490754 | transglutaminase 2, C polypeptide                                  | Tgm2  | 56083  | 1,16 | up   |
| 6005725 | 7247301 | 1490753 | transglutaminase 2, C polypeptide                                  | Tgm2  | 56083  | 1,10 | down |
| 6089904 | 7247301 | 1490752 | transglutaminase 2, C polypeptide                                  | Tgm2  | 56083  | 1,09 | down |
| 6026742 | 7247301 | 1490761 | transglutaminase 2, C polypeptide                                  | Tgm2  | 56083  | 1,09 | up   |
| 5687047 | 7247301 | 1490759 | transglutaminase 2, C polypeptide                                  | Tgm2  | 56083  | 1,07 | down |
| 6041281 | 7232534 | 1454140 | transglutaminase 3, E polypeptide                                  | Tgm3  | 366189 | 2,10 | down |
| 6471779 | 7232534 | 1454134 | transglutaminase 3, E polypeptide                                  | Tgm3  | 366189 | 1,34 | down |
| 6307694 | 7232534 | 1454131 | transglutaminase 3, E polypeptide                                  | Tgm3  | 366189 | 1,33 | up   |
| 5865455 | 7232534 | 1454137 | transglutaminase 3, E polypeptide                                  | Tgm3  | 366189 | 1,32 | down |
| 6547555 | 7232534 | 1454132 | transglutaminase 3, E polypeptide                                  | Tgm3  | 366189 | 1,20 | down |
| 5847301 | 7232534 | 1454138 | transglutaminase 3, E polypeptide                                  | Tgm3  | 366189 | 1,19 | down |
| 6363019 | 7232534 | 1454133 | transglutaminase 3, E polypeptide                                  | Tgm3  | 366189 | 1,18 | up   |
| 6340730 | 7232534 | 1454129 | transglutaminase 3, E polypeptide                                  | Tgm3  | 366189 | 1,12 | up   |
| 6484283 | 7232534 | 1454140 | transglutaminase 3, E polypeptide                                  | Tgm3  | 366189 | 1,06 | up   |
| 5704308 | 7232534 | 1454127 | transglutaminase 3, E polypeptide                                  | Tgm3  | 366189 | 1,04 | up   |
| 6049239 | 7232534 | 1454139 | transglutaminase 3, E polypeptide                                  | Tgm3  | 366189 | 1,04 | up   |
| 6425206 | 7232534 | 1454134 | transglutaminase 3, E polypeptide                                  | Tgm3  | 366189 | 1,03 | down |
| 6560540 | 7232534 | 1454136 | transglutaminase 3, E polypeptide                                  | Tgm3  | 366189 | 1,00 | up   |
| 6080533 | 7232534 | 1454135 | transglutaminase 3, E polypeptide                                  | Tgm3  | 366189 | 1,00 | up   |
| 5618433 | 7232534 | 1454130 | transglutaminase 3, E polypeptide                                  | Tgm3  | 366189 | 1,00 | up   |
| 6224660 | 7271760 | 1552030 | transient receptor potential cation channel, subfamily A, member 1 | Trpa1 | 312896 | 2,36 | up   |
| 5641651 | 7271760 | 1552039 | transient receptor potential cation channel, subfamily A, member 1 | Trpa1 | 312896 | 2,16 | down |
| 6142153 | 7271760 | 1552044 | transient receptor potential cation channel, subfamily A, member 1 | Trpa1 | 312896 | 1,79 | down |
| 6309115 | 7271760 | 1552032 | transient receptor potential cation channel, subfamily A, member 1 | Trpa1 | 312896 | 1,65 | up   |
| 6031322 | 7271760 | 1552040 | transient receptor potential cation channel, subfamily A, member 1 | Trpa1 | 312896 | 1,55 | down |
| 6108951 | 7271760 | 1552042 | transient receptor potential cation channel, subfamily A, member 1 | Trpa1 | 312896 | 1,55 | up   |
| 6186134 | 7271760 | 1552040 | transient receptor potential cation channel, subfamily A, member 1 | Trpa1 | 312896 | 1,55 | up   |
| 5822383 | 7271760 | 1552037 | transient receptor potential cation channel, subfamily A, member 1 | Trpa1 | 312896 | 1,46 | down |
| 6025220 | 7271760 | 1552054 | transient receptor potential cation channel, subfamily A, member 1 | Trpa1 | 312896 | 1,44 | up   |
| 5805217 | 7271760 | 1552053 | transient receptor potential cation channel, subfamily A, member 1 | Trpa1 | 312896 | 1,37 | up   |
| 6079450 | 7271760 | 1552056 | transient receptor potential cation channel, subfamily A, member 1 | Trpa1 | 312896 | 1,37 | up   |
| 6501847 | 7271760 | 1552056 | transient receptor potential cation channel, subfamily A, member 1 | Trpa1 | 312896 | 1,33 | down |
| 5759370 | 7271760 | 1552034 | transient receptor potential cation channel, subfamily A, member 1 | Trpa1 | 312896 | 1,31 | down |
| 6426082 | 7271760 | 1552036 | transient receptor potential cation channel, subfamily A, member 1 | Trpa1 | 312896 | 1,28 | down |
| 6308300 | 7271760 | 1552036 | transient receptor potential cation channel, subfamily A, member 1 | Trpa1 | 312896 | 1,27 | up   |
| 5788086 | 7271760 | 1552048 | transient receptor potential cation channel, subfamily A, member 1 | Trpa1 | 312896 | 1,27 | up   |
| 6711854 | 7271760 | 1552043 | transient receptor potential cation channel, subfamily A, member 1 | Trpa1 | 312896 | 1,26 | up   |
| 6404689 | 7271760 | 1552052 | transient receptor potential cation channel, subfamily A, member 1 | Trpa1 | 312896 | 1,26 | down |
| 6318124 | 7271760 | 1552035 | transient receptor potential cation channel, subfamily A, member 1 | Trpa1 | 312896 | 1,26 | up   |
| 6051695 | 7271760 | 1552031 | transient receptor potential cation channel, subfamily A, member 1 | Trpa1 | 312896 | 1,25 | down |
| 6025887 | 7271760 | 1552047 | transient receptor potential cation channel, subfamily A, member 1 | Trpa1 | 312896 | 1,18 | up   |
| 5807836 | 7271760 | 1552046 | transient receptor potential cation channel, subfamily A, member 1 | Trpa1 | 312896 | 1,17 | up   |
| 6598816 | 7271760 | 1552051 | transient receptor potential cation channel, subfamily A, member 1 | Trpa1 | 312896 | 1,17 | down |
| 6707152 | 7271760 | 1552038 | transient receptor potential cation channel, subfamily A, member 1 | Trpa1 | 312896 | 1,16 | down |
| 6384457 | 7271760 | 1552045 | transient receptor potential cation channel, subfamily A, member 1 | Trpa1 | 312896 | 1,10 | up   |
| 6383862 | 7271760 | 1552048 | transient receptor potential cation channel, subfamily A, member 1 | Trpa1 | 312896 | 1,09 | down |
| 6605349 | 7271760 | 1552049 | transient receptor potential cation channel, subfamily A, member 1 | Trpa1 | 312896 | 1,09 | down |
| 5658255 | 7271760 | 1552041 | transient receptor potential cation channel, subfamily A, member 1 | Trpa1 | 312896 | 1,08 | down |
| 6436420 | 7271760 | 1552050 | transient receptor potential cation channel, subfamily A, member 1 | Trpa1 | 312896 | 1,06 | down |
| 6607635 | 7271760 | 1552033 | transient receptor potential cation channel, subfamily A, member 1 | Trpa1 | 312896 | 1,06 | up   |
| 6104936 | 7271760 | 1552055 | transient receptor potential cation channel, subfamily A, member 1 | Trpa1 | 312896 | 1,00 | down |
| 6622118 | 7332774 | 1702141 | transient receptor potential cation channel, subfamily C, member 6 | Trpc6 | 89823  | 2,03 | down |
| 6191263 | 7332774 | 1702147 | transient receptor potential cation channel, subfamily C, member 6 | Trpc6 | 89823  | 1,45 | up   |
| 6383962 | 7332774 | 1702149 | transient receptor potential cation channel, subfamily C, member 6 | Trpc6 | 89823  | 1,33 | down |

|         |         |         |                                                                    |       |        |      |      |
|---------|---------|---------|--------------------------------------------------------------------|-------|--------|------|------|
| 6522346 | 7332774 | 1702142 | transient receptor potential cation channel, subfamily C, member 6 | Trpc6 | 89823  | 1,27 | up   |
| 5721298 | 7332774 | 1702152 | transient receptor potential cation channel, subfamily C, member 6 | Trpc6 | 89823  | 1,26 | up   |
| 5696558 | 7332774 | 1702144 | transient receptor potential cation channel, subfamily C, member 6 | Trpc6 | 89823  | 1,22 | down |
| 6726535 | 7332774 | 1702143 | transient receptor potential cation channel, subfamily C, member 6 | Trpc6 | 89823  | 1,19 | down |
| 6144320 | 7332774 | 1702145 | transient receptor potential cation channel, subfamily C, member 6 | Trpc6 | 89823  | 1,16 | up   |
| 5703960 | 7332774 | 1702148 | transient receptor potential cation channel, subfamily C, member 6 | Trpc6 | 89823  | 1,13 | up   |
| 5707921 | 7332774 | 1702146 | transient receptor potential cation channel, subfamily C, member 6 | Trpc6 | 89823  | 1,10 | down |
| 6641859 | 7332774 | 1702151 | transient receptor potential cation channel, subfamily C, member 6 | Trpc6 | 89823  | 1,06 | up   |
| 5957088 | 7332774 | 1702153 | transient receptor potential cation channel, subfamily C, member 6 | Trpc6 | 89823  | 1,01 | up   |
| 5753831 | 7332774 | 1702150 | transient receptor potential cation channel, subfamily C, member 6 | Trpc6 | 89823  | 1,00 | down |
| 6321669 | 7217594 | 1417025 | transient receptor potential cation channel, subfamily M, member 2 | Trpm2 | 294329 | 2,41 | down |
| 6163241 | 7217594 | 1417044 | transient receptor potential cation channel, subfamily M, member 2 | Trpm2 | 294329 | 2,24 | down |
| 5952423 | 7217594 | 1417035 | transient receptor potential cation channel, subfamily M, member 2 | Trpm2 | 294329 | 1,59 | up   |
| 6006852 | 7217594 | 1417022 | transient receptor potential cation channel, subfamily M, member 2 | Trpm2 | 294329 | 1,54 | up   |
| 6305254 | 7217594 | 1417036 | transient receptor potential cation channel, subfamily M, member 2 | Trpm2 | 294329 | 1,53 | down |
| 5681561 | 7217594 | 1417013 | transient receptor potential cation channel, subfamily M, member 2 | Trpm2 | 294329 | 1,52 | up   |
| 5802246 | 7217594 | 1417015 | transient receptor potential cation channel, subfamily M, member 2 | Trpm2 | 294329 | 1,46 | down |
| 5921179 | 7217594 | 1417020 | transient receptor potential cation channel, subfamily M, member 2 | Trpm2 | 294329 | 1,44 | up   |
| 6062512 | 7217594 | 1417019 | transient receptor potential cation channel, subfamily M, member 2 | Trpm2 | 294329 | 1,34 | up   |
| 6039863 | 7217594 | 1417017 | transient receptor potential cation channel, subfamily M, member 2 | Trpm2 | 294329 | 1,30 | down |
| 6287047 | 7217594 | 1417032 | transient receptor potential cation channel, subfamily M, member 2 | Trpm2 | 294329 | 1,29 | up   |
| 6256079 | 7217594 | 1417040 | transient receptor potential cation channel, subfamily M, member 2 | Trpm2 | 294329 | 1,28 | down |
| 5882988 | 7217594 | 1417043 | transient receptor potential cation channel, subfamily M, member 2 | Trpm2 | 294329 | 1,27 | up   |
| 6154811 | 7217594 | 1417023 | transient receptor potential cation channel, subfamily M, member 2 | Trpm2 | 294329 | 1,26 | down |
| 5832945 | 7217594 | 1417018 | transient receptor potential cation channel, subfamily M, member 2 | Trpm2 | 294329 | 1,24 | up   |
| 5776448 | 7217594 | 1417016 | transient receptor potential cation channel, subfamily M, member 2 | Trpm2 | 294329 | 1,22 | up   |
| 5687583 | 7217594 | 1417037 | transient receptor potential cation channel, subfamily M, member 2 | Trpm2 | 294329 | 1,18 | up   |
| 6333232 | 7217594 | 1417021 | transient receptor potential cation channel, subfamily M, member 2 | Trpm2 | 294329 | 1,15 | down |
| 6065250 | 7217594 | 1417026 | transient receptor potential cation channel, subfamily M, member 2 | Trpm2 | 294329 | 1,13 | up   |
| 6102884 | 7217594 | 1417041 | transient receptor potential cation channel, subfamily M, member 2 | Trpm2 | 294329 | 1,11 | down |
| 6424785 | 7217594 | 1417039 | transient receptor potential cation channel, subfamily M, member 2 | Trpm2 | 294329 | 1,10 | down |
| 6389351 | 7217594 | 1417029 | transient receptor potential cation channel, subfamily M, member 2 | Trpm2 | 294329 | 1,07 | up   |
| 6582129 | 7217594 | 1417030 | transient receptor potential cation channel, subfamily M, member 2 | Trpm2 | 294329 | 1,07 | down |
| 6209128 | 7217594 | 1417027 | transient receptor potential cation channel, subfamily M, member 2 | Trpm2 | 294329 | 1,06 | up   |
| 6172665 | 7217594 | 1417031 | transient receptor potential cation channel, subfamily M, member 2 | Trpm2 | 294329 | 1,06 | down |
| 5872922 | 7217594 | 1417034 | transient receptor potential cation channel, subfamily M, member 2 | Trpm2 | 294329 | 1,05 | up   |
| 6179093 | 7217594 | 1417038 | transient receptor potential cation channel, subfamily M, member 2 | Trpm2 | 294329 | 1,04 | up   |
| 6616507 | 7217594 | 1417033 | transient receptor potential cation channel, subfamily M, member 2 | Trpm2 | 294329 | 1,02 | down |
| 6671717 | 7217594 | 1417024 | transient receptor potential cation channel, subfamily M, member 2 | Trpm2 | 294329 | 1,01 | down |
| 6191146 | 7217594 | 1417042 | transient receptor potential cation channel, subfamily M, member 2 | Trpm2 | 294329 | 1,01 | down |
| 6622950 | 7217594 | 1417044 | transient receptor potential cation channel, subfamily M, member 2 | Trpm2 | 294329 | 1,01 | up   |
| 6101313 | 7217594 | 1417028 | transient receptor potential cation channel, subfamily M, member 2 | Trpm2 | 294329 | 1,01 | up   |
| 6382703 | 7217594 | 1417014 | transient receptor potential cation channel, subfamily M, member 2 | Trpm2 | 294329 | 1,00 | down |
| 5804894 | 7050943 | 1011672 | transient receptor potential cation channel, subfamily M, member 4 | Trpm4 | 171143 | 2,34 | up   |
| 5740401 | 7050943 | 1011673 | transient receptor potential cation channel, subfamily M, member 4 | Trpm4 | 171143 | 1,51 | down |
| 6322837 | 7050943 | 1011671 | transient receptor potential cation channel, subfamily M, member 4 | Trpm4 | 171143 | 1,48 | up   |
| 6660605 | 7050943 | 1011667 | transient receptor potential cation channel, subfamily M, member 4 | Trpm4 | 171143 | 1,47 | up   |
| 6418442 | 7050943 | 1011666 | transient receptor potential cation channel, subfamily M, member 4 | Trpm4 | 171143 | 1,44 | up   |
| 5797641 | 7050943 | 1011665 | transient receptor potential cation channel, subfamily M, member 4 | Trpm4 | 171143 | 1,26 | down |
| 6516521 | 7050943 | 1011668 | transient receptor potential cation channel, subfamily M, member 4 | Trpm4 | 171143 | 1,25 | up   |
| 6141163 | 7050943 | 1011665 | transient receptor potential cation channel, subfamily M, member 4 | Trpm4 | 171143 | 1,16 | up   |
| 5746061 | 7050943 | 1011668 | transient receptor potential cation channel, subfamily M, member 4 | Trpm4 | 171143 | 1,08 | down |
| 6322074 | 7050943 | 1011669 | transient receptor potential cation channel, subfamily M, member 4 | Trpm4 | 171143 | 1,06 | up   |
| 6182238 | 7050943 | 1011670 | transient receptor potential cation channel, subfamily M, member 4 | Trpm4 | 171143 | 1,01 | up   |
| 6686433 | 7050943 | 1011664 | transient receptor potential cation channel, subfamily M, member 4 | Trpm4 | 171143 | 1,00 | down |
| 6596634 | 7378602 | 1817714 | transketolase-like 1                                               | Tktl1 | 689374 | 2,03 | down |
| 6465192 | 7378602 | 1817715 | transketolase-like 1                                               | Tktl1 | 689374 | 1,69 | up   |



|         |         |         |                                                                  |         |        |      |      |
|---------|---------|---------|------------------------------------------------------------------|---------|--------|------|------|
| 5827462 | 7378602 | 1817722 | transketolase-like 1                                             | Tkt1l   | 689374 | 1,44 | up   |
| 6123548 | 7378602 | 1817712 | transketolase-like 1                                             | Tkt1l   | 689374 | 1,27 | up   |
| 5717439 | 7378602 | 1817713 | transketolase-like 1                                             | Tkt1l   | 689374 | 1,22 | up   |
| 6006031 | 7378602 | 1817721 | transketolase-like 1                                             | Tkt1l   | 689374 | 1,20 | up   |
| 6129939 | 7378602 | 1817711 | transketolase-like 1                                             | Tkt1l   | 689374 | 1,20 | up   |
| 6103320 | 7378602 | 1817709 | transketolase-like 1                                             | Tkt1l   | 689374 | 1,10 | up   |
| 6635195 | 7378602 | 1817718 | transketolase-like 1                                             | Tkt1l   | 689374 | 1,05 | down |
| 5830917 | 7378602 | 1817722 | transketolase-like 1                                             | Tkt1l   | 689374 | 1,04 | down |
| 5773223 | 7378602 | 1817720 | transketolase-like 1                                             | Tkt1l   | 689374 | 1,04 | up   |
| 5972891 | 7378602 | 1817708 | transketolase-like 1                                             | Tkt1l   | 689374 | 1,03 | down |
| 6121108 | 7378602 | 1817717 | transketolase-like 1                                             | Tkt1l   | 689374 | 1,02 | up   |
| 6346147 | 7378602 | 1817710 | transketolase-like 1                                             | Tkt1l   | 689374 | 1,01 | up   |
| 6304538 | 7378602 | 1817722 | transketolase-like 1                                             | Tkt1l   | 689374 | 1,01 | up   |
| 6476553 | 7378602 | 1817719 | transketolase-like 1                                             | Tkt1l   | 689374 | 1,01 | up   |
| 6015609 | 7111442 | 1155805 | translocase of inner mitochondrial membrane 17 homolog A (yeast) | Timm17a | 54311  | 2,52 | up   |
| 5903292 | 7111442 | 1155804 | translocase of inner mitochondrial membrane 17 homolog A (yeast) | Timm17a | 54311  | 1,80 | down |
| 6687994 | 7111442 | 1155803 | translocase of inner mitochondrial membrane 17 homolog A (yeast) | Timm17a | 54311  | 1,60 | down |
| 5869243 | 7111442 | 1155801 | translocase of inner mitochondrial membrane 17 homolog A (yeast) | Timm17a | 54311  | 1,29 | down |
| 5802080 | 7111442 | 1155806 | translocase of inner mitochondrial membrane 17 homolog A (yeast) | Timm17a | 54311  | 1,13 | up   |
| 6739399 | 7111442 | 1155802 | translocase of inner mitochondrial membrane 17 homolog A (yeast) | Timm17a | 54311  | 1,12 | up   |
| 6689217 | 7111442 | 1155804 | translocase of inner mitochondrial membrane 17 homolog A (yeast) | Timm17a | 54311  | 1,11 | down |
| 6505130 | 7111442 | 1155800 | translocase of inner mitochondrial membrane 17 homolog A (yeast) | Timm17a | 54311  | 1,07 | up   |
| 6396053 | 7111442 | 1155803 | translocase of inner mitochondrial membrane 17 homolog A (yeast) | Timm17a | 54311  | 1,06 | up   |
| 6121741 | 7111442 | 1155804 | translocase of inner mitochondrial membrane 17 homolog A (yeast) | Timm17a | 54311  | 1,05 | up   |
| 6247095 | 7247672 | 1491751 | translocase of outer mitochondrial membrane 34                   | Tomm34  | 311621 | 2,72 | up   |
| 6492722 | 7247672 | 1491753 | translocase of outer mitochondrial membrane 34                   | Tomm34  | 311621 | 1,55 | down |
| 6116580 | 7247672 | 1491752 | translocase of outer mitochondrial membrane 34                   | Tomm34  | 311621 | 1,53 | down |
| 6663791 | 7247672 | 1491755 | translocase of outer mitochondrial membrane 34                   | Tomm34  | 311621 | 1,18 | up   |
| 6549049 | 7247672 | 1491754 | translocase of outer mitochondrial membrane 34                   | Tomm34  | 311621 | 1,17 | up   |
| 6455992 | 7247672 | 1491750 | translocase of outer mitochondrial membrane 34                   | Tomm34  | 311621 | 1,10 | up   |
| 6622128 | 7247672 | 1491750 | translocase of outer mitochondrial membrane 34                   | Tomm34  | 311621 | 1,10 | down |
| 6512816 | 7247672 | 1491756 | translocase of outer mitochondrial membrane 34                   | Tomm34  | 311621 | 1,07 | up   |
| 6577545 | 7113985 | 1162238 | translocase of outer mitochondrial membrane 40 homolog B (yeast) | Tomm40b | 304971 | 1,73 | down |
| 5699533 | 7113985 | 1162233 | translocase of outer mitochondrial membrane 40 homolog B (yeast) | Tomm40b | 304971 | 1,57 | down |
| 6681108 | 7113985 | 1162236 | translocase of outer mitochondrial membrane 40 homolog B (yeast) | Tomm40b | 304971 | 1,35 | down |
| 6258354 | 7113985 | 1162234 | translocase of outer mitochondrial membrane 40 homolog B (yeast) | Tomm40b | 304971 | 1,30 | down |
| 6362172 | 7113985 | 1162239 | translocase of outer mitochondrial membrane 40 homolog B (yeast) | Tomm40b | 304971 | 1,24 | up   |
| 6325333 | 7113985 | 1162237 | translocase of outer mitochondrial membrane 40 homolog B (yeast) | Tomm40b | 304971 | 1,18 | down |
| 6513473 | 7113985 | 1162232 | translocase of outer mitochondrial membrane 40 homolog B (yeast) | Tomm40b | 304971 | 1,05 | down |
| 5923297 | 7113985 | 1162235 | translocase of outer mitochondrial membrane 40 homolog B (yeast) | Tomm40b | 304971 | 1,03 | up   |
| 6404218 | 7113985 | 1162240 | translocase of outer mitochondrial membrane 40 homolog B (yeast) | Tomm40b | 304971 | 1,01 | up   |
| 6698420 | 7194285 | 1361471 | transmembrane 4 L six family member 4                            | Tm4sf4  | 116467 | 2,92 | up   |
| 6191950 | 7194285 | 1361468 | transmembrane 4 L six family member 4                            | Tm4sf4  | 116467 | 1,28 | up   |
| 5728771 | 7194285 | 1361467 | transmembrane 4 L six family member 4                            | Tm4sf4  | 116467 | 1,26 | down |
| 6674707 | 7194285 | 1361469 | transmembrane 4 L six family member 4                            | Tm4sf4  | 116467 | 1,11 | down |
| 6337432 | 7194285 | 1361471 | transmembrane 4 L six family member 4                            | Tm4sf4  | 116467 | 1,08 | down |
| 5888323 | 7194285 | 1361470 | transmembrane 4 L six family member 4                            | Tm4sf4  | 116467 | 1,04 | down |
| 6017996 | 7234040 | 1458482 | transmembrane 9 superfamily protein member 4                     | Tm9sf4  | 296279 | 1,51 | up   |
| 6116582 | 7234040 | 1458505 | transmembrane 9 superfamily protein member 4                     | Tm9sf4  | 296279 | 1,41 | down |
| 6230682 | 7234040 | 1458485 | transmembrane 9 superfamily protein member 4                     | Tm9sf4  | 296279 | 1,39 | up   |
| 6524370 | 7234040 | 1458482 | transmembrane 9 superfamily protein member 4                     | Tm9sf4  | 296279 | 1,36 | up   |
| 6528496 | 7234040 | 1458500 | transmembrane 9 superfamily protein member 4                     | Tm9sf4  | 296279 | 1,18 | down |
| 6094262 | 7234040 | 1458488 | transmembrane 9 superfamily protein member 4                     | Tm9sf4  | 296279 | 1,16 | down |
| 5952302 | 7234040 | 1458485 | transmembrane 9 superfamily protein member 4                     | Tm9sf4  | 296279 | 1,16 | down |
| 5783589 | 7234040 | 1458491 | transmembrane 9 superfamily protein member 4                     | Tm9sf4  | 296279 | 1,15 | up   |
| 6450833 | 7234040 | 1458493 | transmembrane 9 superfamily protein member 4                     | Tm9sf4  | 296279 | 1,15 | up   |
| 6471703 | 7234040 | 1458487 | transmembrane 9 superfamily protein member 4                     | Tm9sf4  | 296279 | 1,14 | up   |

|         |         |         |                                               |        |        |      |      |
|---------|---------|---------|-----------------------------------------------|--------|--------|------|------|
| 6002380 | 7234040 | 1458489 | transmembrane 9 superfamily protein member 4  | Tm9sf4 | 296279 | 1,13 | down |
| 6191963 | 7234040 | 1458495 | transmembrane 9 superfamily protein member 4  | Tm9sf4 | 296279 | 1,13 | down |
| 6730344 | 7234040 | 1458504 | transmembrane 9 superfamily protein member 4  | Tm9sf4 | 296279 | 1,10 | down |
| 6543748 | 7234040 | 1458503 | transmembrane 9 superfamily protein member 4  | Tm9sf4 | 296279 | 1,08 | up   |
| 5991743 | 7234040 | 1458492 | transmembrane 9 superfamily protein member 4  | Tm9sf4 | 296279 | 1,07 | up   |
| 6663249 | 7234040 | 1458500 | transmembrane 9 superfamily protein member 4  | Tm9sf4 | 296279 | 1,07 | down |
| 6505971 | 7234040 | 1458502 | transmembrane 9 superfamily protein member 4  | Tm9sf4 | 296279 | 1,06 | down |
| 5726734 | 7234040 | 1458505 | transmembrane 9 superfamily protein member 4  | Tm9sf4 | 296279 | 1,05 | down |
| 6170597 | 7234040 | 1458494 | transmembrane 9 superfamily protein member 4  | Tm9sf4 | 296279 | 1,04 | up   |
| 5799415 | 7234040 | 1458496 | transmembrane 9 superfamily protein member 4  | Tm9sf4 | 296279 | 1,03 | down |
| 6609863 | 7234040 | 1458486 | transmembrane 9 superfamily protein member 4  | Tm9sf4 | 296279 | 1,03 | up   |
| 6143653 | 7234040 | 1458497 | transmembrane 9 superfamily protein member 4  | Tm9sf4 | 296279 | 1,01 | down |
| 6075938 | 7268694 | 1544224 | transmembrane and coiled-coil domain family 1 | Tmcc1  | 312654 | 1,15 | down |
| 5894791 | 7268694 | 1544223 | transmembrane and coiled-coil domain family 1 | Tmcc1  | 312654 | 1,12 | down |
| 6545476 | 7313905 | 1656861 | transmembrane and coiled-coil domain family 3 | Tmcc3  | 314751 | 1,65 | up   |
| 6505845 | 7313905 | 1656838 | transmembrane and coiled-coil domain family 3 | Tmcc3  | 314751 | 1,48 | down |
| 6049931 | 7313905 | 1656858 | transmembrane and coiled-coil domain family 3 | Tmcc3  | 314751 | 1,41 | up   |
| 5947085 | 7313905 | 1656861 | transmembrane and coiled-coil domain family 3 | Tmcc3  | 314751 | 1,33 | down |
| 5808546 | 7313905 | 1656861 | transmembrane and coiled-coil domain family 3 | Tmcc3  | 314751 | 1,27 | up   |
| 6326752 | 7313905 | 1656861 | transmembrane and coiled-coil domain family 3 | Tmcc3  | 314751 | 1,19 | up   |
| 6368808 | 7313905 | 1656861 | transmembrane and coiled-coil domain family 3 | Tmcc3  | 314751 | 1,14 | up   |
| 5992204 | 7313905 | 1656861 | transmembrane and coiled-coil domain family 3 | Tmcc3  | 314751 | 1,09 | up   |
| 6194461 | 7313905 | 1656861 | transmembrane and coiled-coil domain family 3 | Tmcc3  | 314751 | 1,04 | down |
| 5787350 | 7313905 | 1656856 | transmembrane and coiled-coil domain family 3 | Tmcc3  | 314751 | 1,03 | up   |
| 5940057 | 7313905 | 1656861 | transmembrane and coiled-coil domain family 3 | Tmcc3  | 314751 | 1,03 | down |
| 6168795 | 7313905 | 1656858 | transmembrane and coiled-coil domain family 3 | Tmcc3  | 314751 | 1,00 | up   |
| 5883350 | 7153571 | 1259019 | transmembrane and coiled-coil domains 3       | Tmco3  | 306607 | 3,25 | up   |
| 6287672 | 7153571 | 1259019 | transmembrane and coiled-coil domains 3       | Tmco3  | 306607 | 2,71 | up   |
| 5932562 | 7153571 | 1259031 | transmembrane and coiled-coil domains 3       | Tmco3  | 306607 | 1,48 | down |
| 5801022 | 7153571 | 1259034 | transmembrane and coiled-coil domains 3       | Tmco3  | 306607 | 1,42 | down |
| 6673540 | 7153571 | 1259030 | transmembrane and coiled-coil domains 3       | Tmco3  | 306607 | 1,41 | down |
| 5999265 | 7153571 | 1259019 | transmembrane and coiled-coil domains 3       | Tmco3  | 306607 | 1,38 | up   |
| 5823327 | 7153571 | 1259028 | transmembrane and coiled-coil domains 3       | Tmco3  | 306607 | 1,36 | down |
| 5683337 | 7153571 | 1259037 | transmembrane and coiled-coil domains 3       | Tmco3  | 306607 | 1,32 | down |
| 5763550 | 7153571 | 1259037 | transmembrane and coiled-coil domains 3       | Tmco3  | 306607 | 1,32 | down |
| 6559768 | 7153571 | 1259027 | transmembrane and coiled-coil domains 3       | Tmco3  | 306607 | 1,23 | down |
| 6143549 | 7153571 | 1259021 | transmembrane and coiled-coil domains 3       | Tmco3  | 306607 | 1,22 | up   |
| 5666598 | 7153571 | 1259019 | transmembrane and coiled-coil domains 3       | Tmco3  | 306607 | 1,18 | up   |
| 6257704 | 7153571 | 1259037 | transmembrane and coiled-coil domains 3       | Tmco3  | 306607 | 1,14 | down |
| 6365707 | 7153571 | 1259035 | transmembrane and coiled-coil domains 3       | Tmco3  | 306607 | 1,13 | down |
| 6196177 | 7153571 | 1259023 | transmembrane and coiled-coil domains 3       | Tmco3  | 306607 | 1,11 | down |
| 6216350 | 7153571 | 1259029 | transmembrane and coiled-coil domains 3       | Tmco3  | 306607 | 1,10 | up   |
| 6278880 | 7153571 | 1259021 | transmembrane and coiled-coil domains 3       | Tmco3  | 306607 | 1,09 | up   |
| 6433534 | 7153571 | 1259034 | transmembrane and coiled-coil domains 3       | Tmco3  | 306607 | 1,04 | down |
| 6395858 | 7153571 | 1259036 | transmembrane and coiled-coil domains 3       | Tmco3  | 306607 | 1,03 | up   |
| 6371474 | 7280959 | 1575052 | transmembrane and coiled-coil domains 4       | Tmco4  | 500573 | 3,00 | up   |
| 5628908 | 7280959 | 1575044 | transmembrane and coiled-coil domains 4       | Tmco4  | 500573 | 2,36 | up   |
| 6433548 | 7280959 | 1575047 | transmembrane and coiled-coil domains 4       | Tmco4  | 500573 | 1,96 | up   |
| 5795031 | 7280959 | 1575048 | transmembrane and coiled-coil domains 4       | Tmco4  | 500573 | 1,50 | down |
| 5979771 | 7280959 | 1575045 | transmembrane and coiled-coil domains 4       | Tmco4  | 500573 | 1,37 | up   |
| 6114856 | 7280959 | 1575042 | transmembrane and coiled-coil domains 4       | Tmco4  | 500573 | 1,28 | down |
| 6341887 | 7280959 | 1575043 | transmembrane and coiled-coil domains 4       | Tmco4  | 500573 | 1,24 | up   |
| 5951754 | 7280959 | 1575051 | transmembrane and coiled-coil domains 4       | Tmco4  | 500573 | 1,24 | down |
| 5620667 | 7280959 | 1575049 | transmembrane and coiled-coil domains 4       | Tmco4  | 500573 | 1,18 | up   |
| 6636900 | 7280959 | 1575052 | transmembrane and coiled-coil domains 4       | Tmco4  | 500573 | 1,13 | up   |
| 5820917 | 7280959 | 1575053 | transmembrane and coiled-coil domains 4       | Tmco4  | 500573 | 1,11 | up   |
| 6034469 | 7280959 | 1575050 | transmembrane and coiled-coil domains 4       | Tmco4  | 500573 | 1,09 | down |

|         |         |         |                                                           |           |        |      |      |
|---------|---------|---------|-----------------------------------------------------------|-----------|--------|------|------|
| 6153262 | 7280959 | 1575040 | transmembrane and coiled-coil domains 4                   | Tmco4     | 500573 | 1,02 | down |
| 6546798 | 7142416 | 1231819 | transmembrane and tetratricopeptide repeat containing 4   | Tmtc4     | 290501 | 3,46 | up   |
| 5925113 | 7142416 | 1231792 | transmembrane and tetratricopeptide repeat containing 4   | Tmtc4     | 290501 | 2,98 | up   |
| 6062459 | 7142416 | 1231795 | transmembrane and tetratricopeptide repeat containing 4   | Tmtc4     | 290501 | 2,24 | down |
| 6563175 | 7142416 | 1231798 | transmembrane and tetratricopeptide repeat containing 4   | Tmtc4     | 290501 | 1,84 | down |
| 6041586 | 7142416 | 1231813 | transmembrane and tetratricopeptide repeat containing 4   | Tmtc4     | 290501 | 1,60 | down |
| 6175573 | 7142416 | 1231794 | transmembrane and tetratricopeptide repeat containing 4   | Tmtc4     | 290501 | 1,59 | down |
| 5928275 | 7142416 | 1231811 | transmembrane and tetratricopeptide repeat containing 4   | Tmtc4     | 290501 | 1,52 | down |
| 5883320 | 7142416 | 1231802 | transmembrane and tetratricopeptide repeat containing 4   | Tmtc4     | 290501 | 1,51 | down |
| 6199014 | 7142416 | 1231813 | transmembrane and tetratricopeptide repeat containing 4   | Tmtc4     | 290501 | 1,48 | up   |
| 6122791 | 7142416 | 1231797 | transmembrane and tetratricopeptide repeat containing 4   | Tmtc4     | 290501 | 1,47 | down |
| 6561099 | 7142416 | 1231796 | transmembrane and tetratricopeptide repeat containing 4   | Tmtc4     | 290501 | 1,45 | down |
| 5983145 | 7142416 | 1231809 | transmembrane and tetratricopeptide repeat containing 4   | Tmtc4     | 290501 | 1,40 | down |
| 6102273 | 7142416 | 1231792 | transmembrane and tetratricopeptide repeat containing 4   | Tmtc4     | 290501 | 1,38 | down |
| 6555028 | 7142416 | 1231790 | transmembrane and tetratricopeptide repeat containing 4   | Tmtc4     | 290501 | 1,37 | down |
| 6287648 | 7142416 | 1231786 | transmembrane and tetratricopeptide repeat containing 4   | Tmtc4     | 290501 | 1,31 | down |
| 6052180 | 7142416 | 1231786 | transmembrane and tetratricopeptide repeat containing 4   | Tmtc4     | 290501 | 1,26 | down |
| 6478393 | 7142416 | 1231791 | transmembrane and tetratricopeptide repeat containing 4   | Tmtc4     | 290501 | 1,26 | down |
| 6045861 | 7142416 | 1231793 | transmembrane and tetratricopeptide repeat containing 4   | Tmtc4     | 290501 | 1,22 | up   |
| 5652886 | 7142416 | 1231786 | transmembrane and tetratricopeptide repeat containing 4   | Tmtc4     | 290501 | 1,14 | down |
| 5626832 | 7142416 | 1231810 | transmembrane and tetratricopeptide repeat containing 4   | Tmtc4     | 290501 | 1,14 | down |
| 5905198 | 7142416 | 1231800 | transmembrane and tetratricopeptide repeat containing 4   | Tmtc4     | 290501 | 1,11 | down |
| 6331004 | 7142416 | 1231787 | transmembrane and tetratricopeptide repeat containing 4   | Tmtc4     | 290501 | 1,04 | up   |
| 6589439 | 7363718 | 1778530 | transmembrane BAX inhibitor motif containing 1            | Tmbim1    | 316516 | 4,28 | down |
| 6408046 | 7363718 | 1778530 | transmembrane BAX inhibitor motif containing 1            | Tmbim1    | 316516 | 3,36 | down |
| 6057698 | 7363718 | 1778529 | transmembrane BAX inhibitor motif containing 1            | Tmbim1    | 316516 | 3,03 | down |
| 5811030 | 7363718 | 1778519 | transmembrane BAX inhibitor motif containing 1            | Tmbim1    | 316516 | 2,30 | down |
| 5852888 | 7363718 | 1778528 | transmembrane BAX inhibitor motif containing 1            | Tmbim1    | 316516 | 1,59 | down |
| 5986376 | 7363718 | 1778520 | transmembrane BAX inhibitor motif containing 1            | Tmbim1    | 316516 | 1,55 | down |
| 6214631 | 7363718 | 1778524 | transmembrane BAX inhibitor motif containing 1            | Tmbim1    | 316516 | 1,37 | up   |
| 6028721 | 7363718 | 1778522 | transmembrane BAX inhibitor motif containing 1            | Tmbim1    | 316516 | 1,26 | up   |
| 5825247 | 7363718 | 1778527 | transmembrane BAX inhibitor motif containing 1            | Tmbim1    | 316516 | 1,22 | up   |
| 5639650 | 7363718 | 1778525 | transmembrane BAX inhibitor motif containing 1            | Tmbim1    | 316516 | 1,16 | up   |
| 6405140 | 7363718 | 1778526 | transmembrane BAX inhibitor motif containing 1            | Tmbim1    | 316516 | 1,15 | up   |
| 6559553 | 7363718 | 1778523 | transmembrane BAX inhibitor motif containing 1            | Tmbim1    | 316516 | 1,07 | up   |
| 6672638 | 7363718 | 1778521 | transmembrane BAX inhibitor motif containing 1            | Tmbim1    | 316516 | 1,01 | up   |
| 5895043 | 7315441 | 1660626 | transmembrane BAX inhibitor motif containing 4            | Tmbim4    | 362884 | 2,28 | down |
| 5855357 | 7315441 | 1660633 | transmembrane BAX inhibitor motif containing 4            | Tmbim4    | 362884 | 1,91 | down |
| 5748621 | 7315441 | 1660631 | transmembrane BAX inhibitor motif containing 4            | Tmbim4    | 362884 | 1,38 | up   |
| 6209102 | 7315441 | 1660629 | transmembrane BAX inhibitor motif containing 4            | Tmbim4    | 362884 | 1,30 | down |
| 6577900 | 7315441 | 1660630 | transmembrane BAX inhibitor motif containing 4            | Tmbim4    | 362884 | 1,29 | up   |
| 5854595 | 7315441 | 1660632 | transmembrane BAX inhibitor motif containing 4            | Tmbim4    | 362884 | 1,27 | up   |
| 6419524 | 7315441 | 1660627 | transmembrane BAX inhibitor motif containing 4            | Tmbim4    | 362884 | 1,24 | up   |
| 6570420 | 7315441 | 1660628 | transmembrane BAX inhibitor motif containing 4            | Tmbim4    | 362884 | 1,22 | up   |
| 6134528 | 7315441 | 1660626 | transmembrane BAX inhibitor motif containing 4            | Tmbim4    | 362884 | 1,11 | down |
| 6262150 | 7175355 | 1313241 | transmembrane emp24 protein transport domain containing 7 | Tmed7     | 252889 | 1,66 | down |
| 5991993 | 7175355 | 1313240 | transmembrane emp24 protein transport domain containing 7 | Tmed7     | 252889 | 1,55 | down |
| 6614908 | 7175355 | 1313240 | transmembrane emp24 protein transport domain containing 7 | Tmed7     | 252889 | 1,45 | down |
| 6522373 | 7175355 | 1313244 | transmembrane emp24 protein transport domain containing 7 | Tmed7     | 252889 | 1,31 | down |
| 5960996 | 7175355 | 1313243 | transmembrane emp24 protein transport domain containing 7 | Tmed7     | 252889 | 1,29 | down |
| 6377215 | 7175355 | 1313244 | transmembrane emp24 protein transport domain containing 7 | Tmed7     | 252889 | 1,21 | down |
| 5622465 | 7175355 | 1313243 | transmembrane emp24 protein transport domain containing 7 | Tmed7     | 252889 | 1,19 | down |
| 6390336 | 7175355 | 1313244 | transmembrane emp24 protein transport domain containing 7 | Tmed7     | 252889 | 1,18 | down |
| 6722274 | 7175355 | 1313244 | transmembrane emp24 protein transport domain containing 7 | Tmed7     | 252889 | 1,12 | down |
| 6557265 | 7175355 | 1313239 | transmembrane emp24 protein transport domain containing 7 | Tmed7     | 252889 | 1,05 | down |
| 5806680 | 7117416 | 1170685 | transmembrane protease, serine 11b                        | Tmprss11b | 365265 | 3,65 | down |
| 6303852 | 7117416 | 1170686 | transmembrane protease, serine 11b                        | Tmprss11b | 365265 | 1,25 | down |

|         |         |         |                                    |           |        |      |      |
|---------|---------|---------|------------------------------------|-----------|--------|------|------|
| 6236495 | 7117416 | 1170691 | transmembrane protease, serine 11b | Tmprss11b | 365265 | 1,21 | up   |
| 6452079 | 7117416 | 1170693 | transmembrane protease, serine 11b | Tmprss11b | 365265 | 1,19 | up   |
| 6473813 | 7117416 | 1170690 | transmembrane protease, serine 11b | Tmprss11b | 365265 | 1,18 | down |
| 5665100 | 7117416 | 1170692 | transmembrane protease, serine 11b | Tmprss11b | 365265 | 1,08 | down |
| 6289946 | 7117416 | 1170689 | transmembrane protease, serine 11b | Tmprss11b | 365265 | 1,08 | down |
| 6252523 | 7117416 | 1170687 | transmembrane protease, serine 11b | Tmprss11b | 365265 | 1,02 | down |
| 6527641 | 7117416 | 1170694 | transmembrane protease, serine 11b | Tmprss11b | 365265 | 1,01 | up   |
| 6146375 | 7117416 | 1170688 | transmembrane protease, serine 11b | Tmprss11b | 365265 | 1,00 | up   |
| 5761645 | 7092195 | 1108365 | transmembrane protease, serine 2   | Tmprss2   | 156435 | 2,61 | up   |
| 5848329 | 7092195 | 1108359 | transmembrane protease, serine 2   | Tmprss2   | 156435 | 1,32 | down |
| 5732243 | 7092195 | 1108353 | transmembrane protease, serine 2   | Tmprss2   | 156435 | 1,28 | down |
| 5879067 | 7092195 | 1108357 | transmembrane protease, serine 2   | Tmprss2   | 156435 | 1,27 | up   |
| 6671181 | 7092195 | 1108353 | transmembrane protease, serine 2   | Tmprss2   | 156435 | 1,26 | up   |
| 6398895 | 7092195 | 1108353 | transmembrane protease, serine 2   | Tmprss2   | 156435 | 1,24 | down |
| 5914291 | 7092195 | 1108364 | transmembrane protease, serine 2   | Tmprss2   | 156435 | 1,22 | up   |
| 6507385 | 7092195 | 1108362 | transmembrane protease, serine 2   | Tmprss2   | 156435 | 1,22 | up   |
| 6113535 | 7092195 | 1108356 | transmembrane protease, serine 2   | Tmprss2   | 156435 | 1,22 | down |
| 6336065 | 7092195 | 1108361 | transmembrane protease, serine 2   | Tmprss2   | 156435 | 1,19 | down |
| 6538033 | 7092195 | 1108354 | transmembrane protease, serine 2   | Tmprss2   | 156435 | 1,12 | up   |
| 6591818 | 7092195 | 1108358 | transmembrane protease, serine 2   | Tmprss2   | 156435 | 1,09 | down |
| 5760181 | 7092195 | 1108352 | transmembrane protease, serine 2   | Tmprss2   | 156435 | 1,08 | up   |
| 6164656 | 7092195 | 1108365 | transmembrane protease, serine 2   | Tmprss2   | 156435 | 1,06 | down |
| 5682961 | 7092195 | 1108363 | transmembrane protease, serine 2   | Tmprss2   | 156435 | 1,03 | up   |
| 6386978 | 7092195 | 1108358 | transmembrane protease, serine 2   | Tmprss2   | 156435 | 1,03 | down |
| 5650871 | 7092195 | 1108355 | transmembrane protease, serine 2   | Tmprss2   | 156435 | 1,01 | up   |
| 6316974 | 7092195 | 1108360 | transmembrane protease, serine 2   | Tmprss2   | 156435 | 1,01 | down |
| 6322683 | 7221420 | 1426260 | transmembrane protease, serine 3   | Tmprss3   | 309665 | 3,26 | up   |
| 6288494 | 7221420 | 1426255 | transmembrane protease, serine 3   | Tmprss3   | 309665 | 1,71 | up   |
| 6670543 | 7221420 | 1426248 | transmembrane protease, serine 3   | Tmprss3   | 309665 | 1,69 | down |
| 5767198 | 7221420 | 1426254 | transmembrane protease, serine 3   | Tmprss3   | 309665 | 1,53 | down |
| 5812230 | 7221420 | 1426259 | transmembrane protease, serine 3   | Tmprss3   | 309665 | 1,52 | up   |
| 6277946 | 7221420 | 1426244 | transmembrane protease, serine 3   | Tmprss3   | 309665 | 1,47 | down |
| 6287384 | 7221420 | 1426256 | transmembrane protease, serine 3   | Tmprss3   | 309665 | 1,39 | up   |
| 5978820 | 7221420 | 1426250 | transmembrane protease, serine 3   | Tmprss3   | 309665 | 1,36 | down |
| 6112991 | 7221420 | 1426243 | transmembrane protease, serine 3   | Tmprss3   | 309665 | 1,22 | up   |
| 5799582 | 7221420 | 1426252 | transmembrane protease, serine 3   | Tmprss3   | 309665 | 1,22 | up   |
| 6038279 | 7221420 | 1426245 | transmembrane protease, serine 3   | Tmprss3   | 309665 | 1,17 | down |
| 6128890 | 7221420 | 1426258 | transmembrane protease, serine 3   | Tmprss3   | 309665 | 1,11 | down |
| 6541661 | 7221420 | 1426246 | transmembrane protease, serine 3   | Tmprss3   | 309665 | 1,11 | down |
| 5879590 | 7221420 | 1426245 | transmembrane protease, serine 3   | Tmprss3   | 309665 | 1,11 | down |
| 6382187 | 7221420 | 1426261 | transmembrane protease, serine 3   | Tmprss3   | 309665 | 1,08 | up   |
| 6242902 | 7221420 | 1426253 | transmembrane protease, serine 3   | Tmprss3   | 309665 | 1,05 | down |
| 6374453 | 7335930 | 1709339 | transmembrane protease, serine 5   | Tmprss5   | 266681 | 2,47 | down |
| 6102984 | 7335930 | 1709338 | transmembrane protease, serine 5   | Tmprss5   | 266681 | 2,03 | up   |
| 5831132 | 7335930 | 1709332 | transmembrane protease, serine 5   | Tmprss5   | 266681 | 1,88 | up   |
| 6544369 | 7335930 | 1709341 | transmembrane protease, serine 5   | Tmprss5   | 266681 | 1,76 | down |
| 6683421 | 7335930 | 1709336 | transmembrane protease, serine 5   | Tmprss5   | 266681 | 1,18 | up   |
| 6540576 | 7335930 | 1709342 | transmembrane protease, serine 5   | Tmprss5   | 266681 | 1,16 | up   |
| 6546046 | 7335930 | 1709340 | transmembrane protease, serine 5   | Tmprss5   | 266681 | 1,14 | down |
| 5938017 | 7335930 | 1709333 | transmembrane protease, serine 5   | Tmprss5   | 266681 | 1,10 | down |
| 5786403 | 7335930 | 1709335 | transmembrane protease, serine 5   | Tmprss5   | 266681 | 1,08 | up   |
| 6372603 | 7335930 | 1709337 | transmembrane protease, serine 5   | Tmprss5   | 266681 | 1,05 | up   |
| 6176712 | 7335930 | 1709334 | transmembrane protease, serine 5   | Tmprss5   | 266681 | 1,04 | up   |
| 5642292 | 7335930 | 1709343 | transmembrane protease, serine 5   | Tmprss5   | 266681 | 1,03 | down |
| 6533958 | 7335930 | 1709332 | transmembrane protease, serine 5   | Tmprss5   | 266681 | 1,03 | up   |
| 5817364 | 7335930 | 1709331 | transmembrane protease, serine 5   | Tmprss5   | 266681 | 1,02 | up   |
| 5916754 | 7072336 | 1061670 | transmembrane protein 106A         | Tmem106a  | 287722 | 2,40 | down |

|         |         |         |                            |          |        |      |      |
|---------|---------|---------|----------------------------|----------|--------|------|------|
| 5799871 | 7072336 | 1061675 | transmembrane protein 106A | Tmem106a | 287722 | 1,74 | up   |
| 5762339 | 7072336 | 1061670 | transmembrane protein 106A | Tmem106a | 287722 | 1,60 | down |
| 5872983 | 7072336 | 1061676 | transmembrane protein 106A | Tmem106a | 287722 | 1,55 | up   |
| 5956341 | 7072336 | 1061672 | transmembrane protein 106A | Tmem106a | 287722 | 1,47 | up   |
| 6529970 | 7072336 | 1061677 | transmembrane protein 106A | Tmem106a | 287722 | 1,25 | up   |
| 6027341 | 7072336 | 1061671 | transmembrane protein 106A | Tmem106a | 287722 | 1,20 | down |
| 6722501 | 7072336 | 1061673 | transmembrane protein 106A | Tmem106a | 287722 | 1,19 | up   |
| 6633924 | 7072336 | 1061678 | transmembrane protein 106A | Tmem106a | 287722 | 1,17 | down |
| 5859839 | 7072336 | 1061674 | transmembrane protein 106A | Tmem106a | 287722 | 1,05 | down |
| 5742281 | 7072336 | 1061678 | transmembrane protein 106A | Tmem106a | 287722 | 1,04 | up   |
| 6568073 | 7262292 | 1528381 | transmembrane protein 106B | Tmem106b | 312132 | 2,17 | down |
| 5680453 | 7262292 | 1528387 | transmembrane protein 106B | Tmem106b | 312132 | 1,22 | down |
| 5678664 | 7262292 | 1528386 | transmembrane protein 106B | Tmem106b | 312132 | 1,18 | up   |
| 6573391 | 7262292 | 1528383 | transmembrane protein 106B | Tmem106b | 312132 | 1,15 | up   |
| 6736593 | 7262292 | 1528389 | transmembrane protein 106B | Tmem106b | 312132 | 1,10 | up   |
| 6267573 | 7262292 | 1528385 | transmembrane protein 106B | Tmem106b | 312132 | 1,08 | up   |
| 5644198 | 7262292 | 1528388 | transmembrane protein 106B | Tmem106b | 312132 | 1,07 | down |
| 5650681 | 7262292 | 1528389 | transmembrane protein 106B | Tmem106b | 312132 | 1,06 | up   |
| 5626036 | 7262292 | 1528382 | transmembrane protein 106B | Tmem106b | 312132 | 1,04 | down |
| 5953776 | 7262292 | 1528384 | transmembrane protein 106B | Tmem106b | 312132 | 1,03 | up   |
| 6280208 | 7143155 | 1233934 | transmembrane protein 110  | Tmem110  | 361110 | 2,60 | up   |
| 5829576 | 7143155 | 1233932 | transmembrane protein 110  | Tmem110  | 361110 | 1,64 | up   |
| 5871960 | 7143155 | 1233929 | transmembrane protein 110  | Tmem110  | 361110 | 1,31 | up   |
| 5811700 | 7143155 | 1233933 | transmembrane protein 110  | Tmem110  | 361110 | 1,31 | down |
| 6697667 | 7143155 | 1233931 | transmembrane protein 110  | Tmem110  | 361110 | 1,26 | up   |
| 6702748 | 7143155 | 1233930 | transmembrane protein 110  | Tmem110  | 361110 | 1,17 | up   |
| 6276561 | 7143155 | 1233927 | transmembrane protein 110  | Tmem110  | 361110 | 1,15 | down |
| 5685880 | 7143155 | 1233928 | transmembrane protein 110  | Tmem110  | 361110 | 1,13 | down |
| 5896973 | 7143155 | 1233927 | transmembrane protein 110  | Tmem110  | 361110 | 1,12 | down |
| 5872806 | 7143155 | 1233930 | transmembrane protein 110  | Tmem110  | 361110 | 1,05 | down |
| 6162977 | 7102369 | 1133430 | transmembrane protein 116  | Tmem116  | 690442 | 2,14 | up   |
| 5717855 | 7102369 | 1133429 | transmembrane protein 116  | Tmem116  | 690442 | 1,84 | down |
| 6418283 | 7102369 | 1133421 | transmembrane protein 116  | Tmem116  | 690442 | 1,36 | up   |
| 6363197 | 7102369 | 1133416 | transmembrane protein 116  | Tmem116  | 690442 | 1,32 | up   |
| 5627755 | 7102369 | 1133416 | transmembrane protein 116  | Tmem116  | 690442 | 1,25 | up   |
| 6220305 | 7102369 | 1133418 | transmembrane protein 116  | Tmem116  | 690442 | 1,12 | down |
| 6460621 | 7102369 | 1133423 | transmembrane protein 116  | Tmem116  | 690442 | 1,12 | up   |
| 6600870 | 7102369 | 1133420 | transmembrane protein 116  | Tmem116  | 690442 | 1,02 | down |
| 6559258 | 7102369 | 1133432 | transmembrane protein 116  | Tmem116  | 690442 | 1,02 | down |
| 6489539 | 7102369 | 1133417 | transmembrane protein 116  | Tmem116  | 690442 | 1,01 | down |
| 6643809 | 7102369 | 1133425 | transmembrane protein 116  | Tmem116  | 690442 | 1,01 | up   |
| 6614257 | 7097504 | 1121003 | transmembrane protein 120A | Tmem120a | 288591 | 2,70 | down |
| 6081310 | 7097504 | 1120991 | transmembrane protein 120A | Tmem120a | 288591 | 2,03 | down |
| 6550849 | 7097504 | 1120991 | transmembrane protein 120A | Tmem120a | 288591 | 1,63 | down |
| 6138697 | 7097504 | 1121000 | transmembrane protein 120A | Tmem120a | 288591 | 1,36 | up   |
| 5942899 | 7097504 | 1120998 | transmembrane protein 120A | Tmem120a | 288591 | 1,36 | up   |
| 6236906 | 7097504 | 1120996 | transmembrane protein 120A | Tmem120a | 288591 | 1,29 | up   |
| 6316693 | 7097504 | 1120999 | transmembrane protein 120A | Tmem120a | 288591 | 1,22 | up   |
| 6583328 | 7097504 | 1120993 | transmembrane protein 120A | Tmem120a | 288591 | 1,19 | up   |
| 6074915 | 7097504 | 1120992 | transmembrane protein 120A | Tmem120a | 288591 | 1,16 | up   |
| 6466198 | 7097504 | 1120995 | transmembrane protein 120A | Tmem120a | 288591 | 1,14 | up   |
| 6163817 | 7097504 | 1121001 | transmembrane protein 120A | Tmem120a | 288591 | 1,08 | up   |
| 5694924 | 7097504 | 1120994 | transmembrane protein 120A | Tmem120a | 288591 | 1,07 | up   |
| 5630961 | 7097504 | 1120991 | transmembrane protein 120A | Tmem120a | 288591 | 1,07 | down |
| 6009306 | 7097504 | 1120991 | transmembrane protein 120A | Tmem120a | 288591 | 1,07 | up   |
| 6292897 | 7097504 | 1120997 | transmembrane protein 120A | Tmem120a | 288591 | 1,07 | down |
| 5924151 | 7097504 | 1121002 | transmembrane protein 120A | Tmem120a | 288591 | 1,04 | down |

|         |         |         |                            |          |        |      |      |
|---------|---------|---------|----------------------------|----------|--------|------|------|
| 5918428 | 7059702 | 1030772 | transmembrane protein 151A | Tmem151a | 309158 | 4,11 | up   |
| 5912969 | 7059702 | 1030773 | transmembrane protein 151A | Tmem151a | 309158 | 2,52 | up   |
| 5793794 | 7059702 | 1030772 | transmembrane protein 151A | Tmem151a | 309158 | 1,02 | down |
| 5933316 | 7195673 | 1364854 | transmembrane protein 154  | Tmem154  | 361972 | 2,19 | up   |
| 6627011 | 7195673 | 1364851 | transmembrane protein 154  | Tmem154  | 361972 | 1,89 | up   |
| 6381317 | 7195673 | 1364847 | transmembrane protein 154  | Tmem154  | 361972 | 1,18 | down |
| 5900078 | 7195673 | 1364853 | transmembrane protein 154  | Tmem154  | 361972 | 1,09 | down |
| 6676053 | 7195673 | 1364852 | transmembrane protein 154  | Tmem154  | 361972 | 1,09 | down |
| 6316156 | 7195673 | 1364843 | transmembrane protein 154  | Tmem154  | 361972 | 1,05 | up   |
| 6523202 | 7195673 | 1364843 | transmembrane protein 154  | Tmem154  | 361972 | 1,05 | down |
| 6570680 | 7195673 | 1364847 | transmembrane protein 154  | Tmem154  | 361972 | 1,00 | down |
| 6093655 | 7380452 | 1821679 | transmembrane protein 164  | Tmem164  | 367763 | 1,37 | up   |
| 6170173 | 7380452 | 1821680 | transmembrane protein 164  | Tmem164  | 367763 | 1,26 | up   |
| 6473244 | 7380452 | 1821679 | transmembrane protein 164  | Tmem164  | 367763 | 1,19 | up   |
| 6470055 | 7380452 | 1821685 | transmembrane protein 164  | Tmem164  | 367763 | 1,17 | down |
| 6528362 | 7380452 | 1821702 | transmembrane protein 164  | Tmem164  | 367763 | 1,16 | down |
| 6450885 | 7380452 | 1821679 | transmembrane protein 164  | Tmem164  | 367763 | 1,16 | up   |
| 5870128 | 7380452 | 1821679 | transmembrane protein 164  | Tmem164  | 367763 | 1,08 | up   |
| 5885811 | 7380452 | 1821692 | transmembrane protein 164  | Tmem164  | 367763 | 1,03 | down |
| 6595498 | 7380452 | 1821688 | transmembrane protein 164  | Tmem164  | 367763 | 1,02 | down |
| 6736737 | 7124803 | 1188796 | transmembrane protein 165  | Tmem165  | 364137 | 1,49 | up   |
| 6201646 | 7124803 | 1188793 | transmembrane protein 165  | Tmem165  | 364137 | 1,31 | down |
| 5807808 | 7124803 | 1188794 | transmembrane protein 165  | Tmem165  | 364137 | 1,15 | up   |
| 6209241 | 7124803 | 1188795 | transmembrane protein 165  | Tmem165  | 364137 | 1,14 | down |
| 6548830 | 7124803 | 1188790 | transmembrane protein 165  | Tmem165  | 364137 | 1,11 | up   |
| 6588596 | 7124803 | 1188796 | transmembrane protein 165  | Tmem165  | 364137 | 1,07 | up   |
| 6142198 | 7124803 | 1188791 | transmembrane protein 165  | Tmem165  | 364137 | 1,01 | up   |
| 6717487 | 7262334 | 1528465 | transmembrane protein 168  | Tmem168  | 312135 | 2,37 | down |
| 5680945 | 7262334 | 1528464 | transmembrane protein 168  | Tmem168  | 312135 | 1,65 | up   |
| 6485461 | 7262334 | 1528462 | transmembrane protein 168  | Tmem168  | 312135 | 1,49 | up   |
| 6312980 | 7262334 | 1528462 | transmembrane protein 168  | Tmem168  | 312135 | 1,31 | down |
| 6741142 | 7262334 | 1528460 | transmembrane protein 168  | Tmem168  | 312135 | 1,12 | up   |
| 6417478 | 7262334 | 1528464 | transmembrane protein 168  | Tmem168  | 312135 | 1,12 | up   |
| 6131739 | 7262334 | 1528461 | transmembrane protein 168  | Tmem168  | 312135 | 1,07 | down |
| 6479875 | 7262334 | 1528464 | transmembrane protein 168  | Tmem168  | 312135 | 1,03 | up   |
| 6516568 | 7262334 | 1528463 | transmembrane protein 168  | Tmem168  | 312135 | 1,03 | up   |
| 6043412 | 7121718 | 1181480 | transmembrane protein 17   | Tmem17   | 360985 | 2,13 | up   |
| 6304926 | 7121718 | 1181476 | transmembrane protein 17   | Tmem17   | 360985 | 1,92 | down |
| 6228115 | 7121718 | 1181476 | transmembrane protein 17   | Tmem17   | 360985 | 1,81 | down |
| 6015865 | 7121718 | 1181477 | transmembrane protein 17   | Tmem17   | 360985 | 1,42 | down |
| 6606419 | 7121718 | 1181481 | transmembrane protein 17   | Tmem17   | 360985 | 1,14 | up   |
| 5756095 | 7121718 | 1181479 | transmembrane protein 17   | Tmem17   | 360985 | 1,13 | up   |
| 6126626 | 7121718 | 1181478 | transmembrane protein 17   | Tmem17   | 360985 | 1,05 | down |
| 6601327 | 7060195 | 1031959 | transmembrane protein 179B | Tmem179b | 690263 | 1,48 | down |
| 5978889 | 7060195 | 1031960 | transmembrane protein 179B | Tmem179b | 690263 | 1,31 | down |
| 5672288 | 7060195 | 1031959 | transmembrane protein 179B | Tmem179b | 690263 | 1,24 | down |
| 6381449 | 7060195 | 1031961 | transmembrane protein 179B | Tmem179b | 690263 | 1,08 | up   |
| 5951412 | 7180346 | 1325764 | transmembrane protein 184C | Tmem184c | 291946 | 2,40 | up   |
| 6346781 | 7180346 | 1325763 | transmembrane protein 184C | Tmem184c | 291946 | 2,32 | up   |
| 6395482 | 7180346 | 1325772 | transmembrane protein 184C | Tmem184c | 291946 | 2,19 | down |
| 6308211 | 7180346 | 1325774 | transmembrane protein 184C | Tmem184c | 291946 | 1,59 | up   |
| 6177014 | 7180346 | 1325766 | transmembrane protein 184C | Tmem184c | 291946 | 1,50 | down |
| 6428400 | 7180346 | 1325764 | transmembrane protein 184C | Tmem184c | 291946 | 1,48 | up   |
| 6576918 | 7180346 | 1325763 | transmembrane protein 184C | Tmem184c | 291946 | 1,44 | up   |
| 6130241 | 7180346 | 1325774 | transmembrane protein 184C | Tmem184c | 291946 | 1,42 | up   |
| 6119764 | 7180346 | 1325767 | transmembrane protein 184C | Tmem184c | 291946 | 1,34 | up   |
| 6619778 | 7180346 | 1325774 | transmembrane protein 184C | Tmem184c | 291946 | 1,33 | down |

|         |         |         |                            |          |        |      |      |
|---------|---------|---------|----------------------------|----------|--------|------|------|
| 5757239 | 7180346 | 1325765 | transmembrane protein 184C | Tmem184c | 291946 | 1,21 | down |
| 5960675 | 7180346 | 1325773 | transmembrane protein 184C | Tmem184c | 291946 | 1,19 | down |
| 5687184 | 7180346 | 1325770 | transmembrane protein 184C | Tmem184c | 291946 | 1,19 | down |
| 6354128 | 7180346 | 1325769 | transmembrane protein 184C | Tmem184c | 291946 | 1,13 | up   |
| 5719484 | 7180346 | 1325768 | transmembrane protein 184C | Tmem184c | 291946 | 1,12 | down |
| 6617247 | 7180346 | 1325771 | transmembrane protein 184C | Tmem184c | 291946 | 1,03 | down |
| 6548922 | 7180346 | 1325765 | transmembrane protein 184C | Tmem184c | 291946 | 1,02 | down |
| 5944306 | 7263238 | 1530591 | transmembrane protein 209  | Tmem209  | 312200 | 2,04 | down |
| 6021617 | 7263238 | 1530583 | transmembrane protein 209  | Tmem209  | 312200 | 1,62 | down |
| 5861840 | 7263238 | 1530587 | transmembrane protein 209  | Tmem209  | 312200 | 1,45 | up   |
| 5838600 | 7263238 | 1530582 | transmembrane protein 209  | Tmem209  | 312200 | 1,42 | up   |
| 5803745 | 7263238 | 1530585 | transmembrane protein 209  | Tmem209  | 312200 | 1,41 | up   |
| 6378988 | 7263238 | 1530580 | transmembrane protein 209  | Tmem209  | 312200 | 1,38 | down |
| 5784225 | 7263238 | 1530578 | transmembrane protein 209  | Tmem209  | 312200 | 1,30 | up   |
| 6496219 | 7263238 | 1530579 | transmembrane protein 209  | Tmem209  | 312200 | 1,25 | up   |
| 5785006 | 7263238 | 1530587 | transmembrane protein 209  | Tmem209  | 312200 | 1,25 | down |
| 5649768 | 7263238 | 1530578 | transmembrane protein 209  | Tmem209  | 312200 | 1,24 | down |
| 5763701 | 7263238 | 1530584 | transmembrane protein 209  | Tmem209  | 312200 | 1,23 | up   |
| 5621524 | 7263238 | 1530586 | transmembrane protein 209  | Tmem209  | 312200 | 1,20 | down |
| 6511456 | 7263238 | 1530590 | transmembrane protein 209  | Tmem209  | 312200 | 1,19 | up   |
| 6088318 | 7263238 | 1530588 | transmembrane protein 209  | Tmem209  | 312200 | 1,05 | up   |
| 6332517 | 7263238 | 1530582 | transmembrane protein 209  | Tmem209  | 312200 | 1,03 | down |
| 6124201 | 7263238 | 1530589 | transmembrane protein 209  | Tmem209  | 312200 | 1,03 | down |
| 6140380 | 7263238 | 1530588 | transmembrane protein 209  | Tmem209  | 312200 | 1,03 | up   |
| 6655675 | 7263238 | 1530581 | transmembrane protein 209  | Tmem209  | 312200 | 1,00 | up   |
| 6402086 | 7344836 | 1732409 | transmembrane protein 25   | Tmem25   | 689172 | 2,02 | down |
| 5974178 | 7344836 | 1732409 | transmembrane protein 25   | Tmem25   | 689172 | 1,79 | down |
| 6026321 | 7344836 | 1732407 | transmembrane protein 25   | Tmem25   | 689172 | 1,51 | down |
| 6303689 | 7344836 | 1732408 | transmembrane protein 25   | Tmem25   | 689172 | 1,50 | down |
| 6194705 | 7344836 | 1732409 | transmembrane protein 25   | Tmem25   | 689172 | 1,43 | down |
| 6220459 | 7344836 | 1732408 | transmembrane protein 25   | Tmem25   | 689172 | 1,33 | down |
| 6261432 | 7344836 | 1732411 | transmembrane protein 25   | Tmem25   | 689172 | 1,32 | down |
| 5753917 | 7344836 | 1732409 | transmembrane protein 25   | Tmem25   | 689172 | 1,15 | up   |
| 6262456 | 7344836 | 1732411 | transmembrane protein 25   | Tmem25   | 689172 | 1,13 | up   |
| 5800685 | 7344836 | 1732409 | transmembrane protein 25   | Tmem25   | 689172 | 1,09 | up   |
| 5641248 | 7344836 | 1732411 | transmembrane protein 25   | Tmem25   | 689172 | 1,07 | down |
| 6327437 | 7344836 | 1732411 | transmembrane protein 25   | Tmem25   | 689172 | 1,02 | down |
| 6083624 | 7376962 | 1813712 | transmembrane protein 35   | Tmem35   | 308134 | 2,52 | down |
| 5638197 | 7376962 | 1813711 | transmembrane protein 35   | Tmem35   | 308134 | 2,10 | down |
| 6308356 | 7376962 | 1813710 | transmembrane protein 35   | Tmem35   | 308134 | 1,53 | up   |
| 6323937 | 7376962 | 1813710 | transmembrane protein 35   | Tmem35   | 308134 | 1,37 | up   |
| 5818510 | 7376962 | 1813710 | transmembrane protein 35   | Tmem35   | 308134 | 1,16 | up   |
| 6393900 | 7376962 | 1813710 | transmembrane protein 35   | Tmem35   | 308134 | 1,10 | up   |
| 6700144 | 7376962 | 1813710 | transmembrane protein 35   | Tmem35   | 308134 | 1,06 | up   |
| 6346161 | 7149498 | 1249779 | transmembrane protein 38a  | Tmem38a  | 306327 | 1,30 | down |
| 5812870 | 7149498 | 1249783 | transmembrane protein 38a  | Tmem38a  | 306327 | 1,24 | up   |
| 6081704 | 7149498 | 1249776 | transmembrane protein 38a  | Tmem38a  | 306327 | 1,22 | up   |
| 6701647 | 7149498 | 1249781 | transmembrane protein 38a  | Tmem38a  | 306327 | 1,15 | down |
| 6194257 | 7149498 | 1249777 | transmembrane protein 38a  | Tmem38a  | 306327 | 1,09 | down |
| 5925361 | 7149498 | 1249780 | transmembrane protein 38a  | Tmem38a  | 306327 | 1,01 | down |
| 5780973 | 7149498 | 1249776 | transmembrane protein 38a  | Tmem38a  | 306327 | 1,00 | up   |
| 5693569 | 7278112 | 1568356 | transmembrane protein 48   | Tmem48   | 362557 | 2,17 | up   |
| 5642935 | 7278112 | 1568355 | transmembrane protein 48   | Tmem48   | 362557 | 1,93 | down |
| 6107367 | 7278112 | 1568358 | transmembrane protein 48   | Tmem48   | 362557 | 1,70 | up   |
| 6407304 | 7278112 | 1568355 | transmembrane protein 48   | Tmem48   | 362557 | 1,59 | down |
| 6254731 | 7278112 | 1568365 | transmembrane protein 48   | Tmem48   | 362557 | 1,58 | up   |
| 5793073 | 7278112 | 1568355 | transmembrane protein 48   | Tmem48   | 362557 | 1,57 | down |

|         |         |         |                                                                        |        |        |      |      |
|---------|---------|---------|------------------------------------------------------------------------|--------|--------|------|------|
| 6292944 | 7278112 | 1568366 | transmembrane protein 48                                               | Tmem48 | 362557 | 1,50 | down |
| 6371937 | 7278112 | 1568357 | transmembrane protein 48                                               | Tmem48 | 362557 | 1,44 | down |
| 5819613 | 7278112 | 1568367 | transmembrane protein 48                                               | Tmem48 | 362557 | 1,30 | up   |
| 5726233 | 7278112 | 1568362 | transmembrane protein 48                                               | Tmem48 | 362557 | 1,29 | down |
| 6121290 | 7278112 | 1568363 | transmembrane protein 48                                               | Tmem48 | 362557 | 1,26 | down |
| 6661414 | 7278112 | 1568361 | transmembrane protein 48                                               | Tmem48 | 362557 | 1,25 | up   |
| 6612205 | 7278112 | 1568355 | transmembrane protein 48                                               | Tmem48 | 362557 | 1,24 | down |
| 6743406 | 7278112 | 1568368 | transmembrane protein 48                                               | Tmem48 | 362557 | 1,22 | up   |
| 6437872 | 7278112 | 1568369 | transmembrane protein 48                                               | Tmem48 | 362557 | 1,22 | down |
| 6223493 | 7278112 | 1568359 | transmembrane protein 48                                               | Tmem48 | 362557 | 1,18 | up   |
| 5894022 | 7278112 | 1568356 | transmembrane protein 48                                               | Tmem48 | 362557 | 1,17 | up   |
| 5664932 | 7278112 | 1568360 | transmembrane protein 48                                               | Tmem48 | 362557 | 1,14 | up   |
| 6439341 | 7278112 | 1568366 | transmembrane protein 48                                               | Tmem48 | 362557 | 1,13 | down |
| 6307344 | 7278112 | 1568355 | transmembrane protein 48                                               | Tmem48 | 362557 | 1,09 | up   |
| 6689998 | 7278112 | 1568364 | transmembrane protein 48                                               | Tmem48 | 362557 | 1,06 | down |
| 6377571 | 7278112 | 1568370 | transmembrane protein 48                                               | Tmem48 | 362557 | 1,00 | up   |
| 5949936 | 7231775 | 1452121 | transmembrane protein 62                                               | Tmem62 | 311350 | 2,07 | down |
| 6460052 | 7274964 | 1559837 | transmembrane protein with EGF-like and two follistatin-like domains 1 | Tmeff1 | 63845  | 4,10 | up   |
| 5959106 | 7274964 | 1559841 | transmembrane protein with EGF-like and two follistatin-like domains 1 | Tmeff1 | 63845  | 1,56 | up   |
| 6304105 | 7274964 | 1559839 | transmembrane protein with EGF-like and two follistatin-like domains 1 | Tmeff1 | 63845  | 1,46 | down |
| 6139351 | 7274964 | 1559838 | transmembrane protein with EGF-like and two follistatin-like domains 1 | Tmeff1 | 63845  | 1,41 | down |
| 6321554 | 7274964 | 1559842 | transmembrane protein with EGF-like and two follistatin-like domains 1 | Tmeff1 | 63845  | 1,40 | up   |
| 5775743 | 7274964 | 1559840 | transmembrane protein with EGF-like and two follistatin-like domains 1 | Tmeff1 | 63845  | 1,27 | down |
| 5846842 | 7274964 | 1559835 | transmembrane protein with EGF-like and two follistatin-like domains 1 | Tmeff1 | 63845  | 1,09 | down |
| 6259438 | 7274964 | 1559844 | transmembrane protein with EGF-like and two follistatin-like domains 1 | Tmeff1 | 63845  | 1,06 | down |
| 5673071 | 7274964 | 1559843 | transmembrane protein with EGF-like and two follistatin-like domains 1 | Tmeff1 | 63845  | 1,06 | up   |
| 6344758 | 7274964 | 1559836 | transmembrane protein with EGF-like and two follistatin-like domains 1 | Tmeff1 | 63845  | 1,02 | up   |
| 6277959 | 7220923 | 1425058 | transporter 1, ATP-binding cassette, sub-family B (MDR/TAP)            | Tap1   | 24811  | 3,14 | down |
| 6146251 | 7220923 | 1425058 | transporter 1, ATP-binding cassette, sub-family B (MDR/TAP)            | Tap1   | 24811  | 2,03 | down |
| 6232105 | 7220923 | 1425068 | transporter 1, ATP-binding cassette, sub-family B (MDR/TAP)            | Tap1   | 24811  | 1,92 | up   |
| 6170893 | 7220923 | 1425059 | transporter 1, ATP-binding cassette, sub-family B (MDR/TAP)            | Tap1   | 24811  | 1,33 | down |
| 5878895 | 7220923 | 1425067 | transporter 1, ATP-binding cassette, sub-family B (MDR/TAP)            | Tap1   | 24811  | 1,32 | down |
| 5636449 | 7220923 | 1425065 | transporter 1, ATP-binding cassette, sub-family B (MDR/TAP)            | Tap1   | 24811  | 1,31 | up   |
| 6504909 | 7220923 | 1425062 | transporter 1, ATP-binding cassette, sub-family B (MDR/TAP)            | Tap1   | 24811  | 1,25 | up   |
| 6023947 | 7220923 | 1425060 | transporter 1, ATP-binding cassette, sub-family B (MDR/TAP)            | Tap1   | 24811  | 1,19 | up   |
| 6556769 | 7220923 | 1425066 | transporter 1, ATP-binding cassette, sub-family B (MDR/TAP)            | Tap1   | 24811  | 1,10 | up   |
| 6474899 | 7220923 | 1425063 | transporter 1, ATP-binding cassette, sub-family B (MDR/TAP)            | Tap1   | 24811  | 1,10 | up   |
| 5758490 | 7220923 | 1425064 | transporter 1, ATP-binding cassette, sub-family B (MDR/TAP)            | Tap1   | 24811  | 1,05 | up   |
| 6377398 | 7220923 | 1425061 | transporter 1, ATP-binding cassette, sub-family B (MDR/TAP)            | Tap1   | 24811  | 1,02 | down |
| 6352081 | 7220903 | 1425025 | transporter 2, ATP-binding cassette, sub-family B (MDR/TAP)            | Tap2   | 24812  | 4,12 | down |
| 6608000 | 7220903 | 1425021 | transporter 2, ATP-binding cassette, sub-family B (MDR/TAP)            | Tap2   | 24812  | 3,10 | down |
| 6102439 | 7220903 | 1425028 | transporter 2, ATP-binding cassette, sub-family B (MDR/TAP)            | Tap2   | 24812  | 2,89 | down |
| 6021014 | 7220903 | 1425022 | transporter 2, ATP-binding cassette, sub-family B (MDR/TAP)            | Tap2   | 24812  | 2,85 | down |
| 6644934 | 7220903 | 1425030 | transporter 2, ATP-binding cassette, sub-family B (MDR/TAP)            | Tap2   | 24812  | 2,76 | up   |
| 6249575 | 7220903 | 1425031 | transporter 2, ATP-binding cassette, sub-family B (MDR/TAP)            | Tap2   | 24812  | 2,11 | up   |
| 6112189 | 7220903 | 1425031 | transporter 2, ATP-binding cassette, sub-family B (MDR/TAP)            | Tap2   | 24812  | 2,02 | up   |
| 6022555 | 7220903 | 1425023 | transporter 2, ATP-binding cassette, sub-family B (MDR/TAP)            | Tap2   | 24812  | 1,86 | down |
| 6591426 | 7220903 | 1425030 | transporter 2, ATP-binding cassette, sub-family B (MDR/TAP)            | Tap2   | 24812  | 1,51 | up   |
| 5847536 | 7220903 | 1425024 | transporter 2, ATP-binding cassette, sub-family B (MDR/TAP)            | Tap2   | 24812  | 1,48 | down |
| 6432766 | 7220903 | 1425029 | transporter 2, ATP-binding cassette, sub-family B (MDR/TAP)            | Tap2   | 24812  | 1,46 | up   |
| 5794466 | 7220903 | 1425026 | transporter 2, ATP-binding cassette, sub-family B (MDR/TAP)            | Tap2   | 24812  | 1,39 | up   |
| 6147728 | 7220903 | 1425032 | transporter 2, ATP-binding cassette, sub-family B (MDR/TAP)            | Tap2   | 24812  | 1,26 | up   |
| 5713592 | 7220903 | 1425027 | transporter 2, ATP-binding cassette, sub-family B (MDR/TAP)            | Tap2   | 24812  | 1,01 | up   |
| 5670221 | 7202837 | 1382283 | transportin 1                                                          | Tnpo1  | 309126 | 1,52 | down |
| 6283754 | 7202837 | 1382298 | transportin 1                                                          | Tnpo1  | 309126 | 1,23 | down |
| 5718050 | 7202837 | 1382290 | transportin 1                                                          | Tnpo1  | 309126 | 1,21 | down |
| 6737449 | 7202837 | 1382300 | transportin 1                                                          | Tnpo1  | 309126 | 1,17 | up   |



|         |         |         |                                                    |       |        |      |      |
|---------|---------|---------|----------------------------------------------------|-------|--------|------|------|
| 6142729 | 7202837 | 1382299 | transportin 1                                      | Tnpo1 | 309126 | 1,14 | up   |
| 6328338 | 7202837 | 1382282 | transportin 1                                      | Tnpo1 | 309126 | 1,14 | down |
| 5647429 | 7202837 | 1382284 | transportin 1                                      | Tnpo1 | 309126 | 1,14 | down |
| 6350814 | 7202837 | 1382292 | transportin 1                                      | Tnpo1 | 309126 | 1,11 | up   |
| 6648508 | 7202837 | 1382289 | transportin 1                                      | Tnpo1 | 309126 | 1,11 | up   |
| 6066520 | 7202837 | 1382286 | transportin 1                                      | Tnpo1 | 309126 | 1,10 | up   |
| 6529591 | 7202837 | 1382281 | transportin 1                                      | Tnpo1 | 309126 | 1,09 | down |
| 6416715 | 7202837 | 1382302 | transportin 1                                      | Tnpo1 | 309126 | 1,08 | down |
| 6675505 | 7202837 | 1382285 | transportin 1                                      | Tnpo1 | 309126 | 1,08 | down |
| 5729156 | 7202837 | 1382281 | transportin 1                                      | Tnpo1 | 309126 | 1,07 | down |
| 6056519 | 7202837 | 1382294 | transportin 1                                      | Tnpo1 | 309126 | 1,07 | down |
| 6424462 | 7202837 | 1382293 | transportin 1                                      | Tnpo1 | 309126 | 1,07 | up   |
| 6654252 | 7202837 | 1382301 | transportin 1                                      | Tnpo1 | 309126 | 1,06 | down |
| 6339860 | 7202837 | 1382303 | transportin 1                                      | Tnpo1 | 309126 | 1,06 | up   |
| 6078234 | 7202837 | 1382304 | transportin 1                                      | Tnpo1 | 309126 | 1,05 | up   |
| 6053708 | 7202837 | 1382296 | transportin 1                                      | Tnpo1 | 309126 | 1,03 | up   |
| 6171501 | 7202837 | 1382291 | transportin 1                                      | Tnpo1 | 309126 | 1,01 | down |
| 6740969 | 7202837 | 1382297 | transportin 1                                      | Tnpo1 | 309126 | 1,01 | up   |
| 5876668 | 7202837 | 1382298 | transportin 1                                      | Tnpo1 | 309126 | 1,01 | up   |
| 6218392 | 7202837 | 1382295 | transportin 1                                      | Tnpo1 | 309126 | 1,00 | down |
| 6348167 | 7176235 | 1315253 | Treacher Collins Franceschetti syndrome 1, homolog | Tcof1 | 291571 | 2,66 | down |
| 6587262 | 7176235 | 1315257 | Treacher Collins Franceschetti syndrome 1, homolog | Tcof1 | 291571 | 2,45 | up   |
| 6525907 | 7176235 | 1315238 | Treacher Collins Franceschetti syndrome 1, homolog | Tcof1 | 291571 | 2,27 | up   |
| 6418756 | 7176235 | 1315244 | Treacher Collins Franceschetti syndrome 1, homolog | Tcof1 | 291571 | 2,08 | up   |
| 6512429 | 7176235 | 1315243 | Treacher Collins Franceschetti syndrome 1, homolog | Tcof1 | 291571 | 2,07 | up   |
| 6201904 | 7176235 | 1315238 | Treacher Collins Franceschetti syndrome 1, homolog | Tcof1 | 291571 | 1,68 | up   |
| 6252055 | 7176235 | 1315253 | Treacher Collins Franceschetti syndrome 1, homolog | Tcof1 | 291571 | 1,56 | down |
| 5685752 | 7176235 | 1315251 | Treacher Collins Franceschetti syndrome 1, homolog | Tcof1 | 291571 | 1,56 | down |
| 5773376 | 7176235 | 1315263 | Treacher Collins Franceschetti syndrome 1, homolog | Tcof1 | 291571 | 1,51 | up   |
| 5815718 | 7176235 | 1315261 | Treacher Collins Franceschetti syndrome 1, homolog | Tcof1 | 291571 | 1,46 | up   |
| 6304421 | 7176235 | 1315253 | Treacher Collins Franceschetti syndrome 1, homolog | Tcof1 | 291571 | 1,44 | up   |
| 6645856 | 7176235 | 1315237 | Treacher Collins Franceschetti syndrome 1, homolog | Tcof1 | 291571 | 1,44 | down |
| 6135866 | 7176235 | 1315240 | Treacher Collins Franceschetti syndrome 1, homolog | Tcof1 | 291571 | 1,43 | down |
| 5728989 | 7176235 | 1315234 | Treacher Collins Franceschetti syndrome 1, homolog | Tcof1 | 291571 | 1,41 | down |
| 6049442 | 7176235 | 1315251 | Treacher Collins Franceschetti syndrome 1, homolog | Tcof1 | 291571 | 1,38 | down |
| 6536355 | 7176235 | 1315255 | Treacher Collins Franceschetti syndrome 1, homolog | Tcof1 | 291571 | 1,33 | down |
| 6366110 | 7176235 | 1315235 | Treacher Collins Franceschetti syndrome 1, homolog | Tcof1 | 291571 | 1,30 | down |
| 5657146 | 7176235 | 1315234 | Treacher Collins Franceschetti syndrome 1, homolog | Tcof1 | 291571 | 1,28 | down |
| 6462545 | 7176235 | 1315246 | Treacher Collins Franceschetti syndrome 1, homolog | Tcof1 | 291571 | 1,27 | down |
| 5849156 | 7176235 | 1315259 | Treacher Collins Franceschetti syndrome 1, homolog | Tcof1 | 291571 | 1,27 | up   |
| 5970612 | 7176235 | 1315247 | Treacher Collins Franceschetti syndrome 1, homolog | Tcof1 | 291571 | 1,21 | down |
| 6488217 | 7176235 | 1315249 | Treacher Collins Franceschetti syndrome 1, homolog | Tcof1 | 291571 | 1,21 | up   |
| 5718546 | 7176235 | 1315265 | Treacher Collins Franceschetti syndrome 1, homolog | Tcof1 | 291571 | 1,17 | up   |
| 6306068 | 7176235 | 1315245 | Treacher Collins Franceschetti syndrome 1, homolog | Tcof1 | 291571 | 1,16 | down |
| 6597871 | 7176235 | 1315240 | Treacher Collins Franceschetti syndrome 1, homolog | Tcof1 | 291571 | 1,14 | up   |
| 5999875 | 7176235 | 1315239 | Treacher Collins Franceschetti syndrome 1, homolog | Tcof1 | 291571 | 1,10 | up   |
| 5970434 | 7176235 | 1315248 | Treacher Collins Franceschetti syndrome 1, homolog | Tcof1 | 291571 | 1,09 | down |
| 6244212 | 7176235 | 1315237 | Treacher Collins Franceschetti syndrome 1, homolog | Tcof1 | 291571 | 1,05 | down |
| 6176320 | 7176235 | 1315234 | Treacher Collins Franceschetti syndrome 1, homolog | Tcof1 | 291571 | 1,04 | up   |
| 6651982 | 7176235 | 1315250 | Treacher Collins Franceschetti syndrome 1, homolog | Tcof1 | 291571 | 1,03 | up   |
| 6208537 | 7176235 | 1315258 | Treacher Collins Franceschetti syndrome 1, homolog | Tcof1 | 291571 | 1,01 | down |
| 5651864 | 7176235 | 1315254 | Treacher Collins Franceschetti syndrome 1, homolog | Tcof1 | 291571 | 1,01 | up   |
| 5782962 | 7221412 | 1426233 | trefoil factor 2                                   | Tff2  | 116592 | 2,13 | down |
| 6285472 | 7221412 | 1426231 | trefoil factor 2                                   | Tff2  | 116592 | 1,44 | down |
| 5838544 | 7221412 | 1426232 | trefoil factor 2                                   | Tff2  | 116592 | 1,35 | up   |
| 6341305 | 7221412 | 1426233 | trefoil factor 2                                   | Tff2  | 116592 | 1,11 | up   |
| 6132995 | 7221412 | 1426230 | trefoil factor 2                                   | Tff2  | 116592 | 1,04 | down |

|         |         |         |                                                     |        |        |      |      |
|---------|---------|---------|-----------------------------------------------------|--------|--------|------|------|
| 6635767 | 7103017 | 1135171 | trichoplein, keratin filament binding               | Tchp   | 304547 | 2,65 | down |
| 5799836 | 7103017 | 1135173 | trichoplein, keratin filament binding               | Tchp   | 304547 | 2,12 | down |
| 6067260 | 7103017 | 1135157 | trichoplein, keratin filament binding               | Tchp   | 304547 | 1,93 | down |
| 5673283 | 7103017 | 1135160 | trichoplein, keratin filament binding               | Tchp   | 304547 | 1,80 | down |
| 6438881 | 7103017 | 1135172 | trichoplein, keratin filament binding               | Tchp   | 304547 | 1,59 | down |
| 5879172 | 7103017 | 1135168 | trichoplein, keratin filament binding               | Tchp   | 304547 | 1,56 | up   |
| 6530598 | 7103017 | 1135171 | trichoplein, keratin filament binding               | Tchp   | 304547 | 1,52 | up   |
| 6137166 | 7103017 | 1135167 | trichoplein, keratin filament binding               | Tchp   | 304547 | 1,43 | down |
| 6495651 | 7103017 | 1135170 | trichoplein, keratin filament binding               | Tchp   | 304547 | 1,36 | down |
| 6128432 | 7103017 | 1135157 | trichoplein, keratin filament binding               | Tchp   | 304547 | 1,29 | down |
| 6267022 | 7103017 | 1135164 | trichoplein, keratin filament binding               | Tchp   | 304547 | 1,27 | up   |
| 6051128 | 7103017 | 1135159 | trichoplein, keratin filament binding               | Tchp   | 304547 | 1,16 | down |
| 5775080 | 7103017 | 1135162 | trichoplein, keratin filament binding               | Tchp   | 304547 | 1,08 | up   |
| 6482831 | 7103017 | 1135163 | trichoplein, keratin filament binding               | Tchp   | 304547 | 1,08 | down |
| 5768575 | 7103017 | 1135161 | trichoplein, keratin filament binding               | Tchp   | 304547 | 1,03 | down |
| 6152487 | 7272299 | 1553564 | trimethylguanosine synthase homolog (S. cerevisiae) | Tgs1   | 312947 | 1,41 | up   |
| 5747283 | 7272299 | 1553571 | trimethylguanosine synthase homolog (S. cerevisiae) | Tgs1   | 312947 | 1,35 | down |
| 6057064 | 7272299 | 1553560 | trimethylguanosine synthase homolog (S. cerevisiae) | Tgs1   | 312947 | 1,33 | down |
| 5989699 | 7272299 | 1553569 | trimethylguanosine synthase homolog (S. cerevisiae) | Tgs1   | 312947 | 1,29 | up   |
| 5827619 | 7272299 | 1553573 | trimethylguanosine synthase homolog (S. cerevisiae) | Tgs1   | 312947 | 1,25 | down |
| 5649381 | 7272299 | 1553558 | trimethylguanosine synthase homolog (S. cerevisiae) | Tgs1   | 312947 | 1,25 | down |
| 5729163 | 7272299 | 1553565 | trimethylguanosine synthase homolog (S. cerevisiae) | Tgs1   | 312947 | 1,16 | up   |
| 5975212 | 7272299 | 1553566 | trimethylguanosine synthase homolog (S. cerevisiae) | Tgs1   | 312947 | 1,11 | up   |
| 6619536 | 7272299 | 1553573 | trimethylguanosine synthase homolog (S. cerevisiae) | Tgs1   | 312947 | 1,11 | down |
| 5862109 | 7272299 | 1553568 | trimethylguanosine synthase homolog (S. cerevisiae) | Tgs1   | 312947 | 1,11 | down |
| 6204188 | 7272299 | 1553558 | trimethylguanosine synthase homolog (S. cerevisiae) | Tgs1   | 312947 | 1,06 | up   |
| 6383580 | 7272299 | 1553570 | trimethylguanosine synthase homolog (S. cerevisiae) | Tgs1   | 312947 | 1,05 | up   |
| 5679152 | 7272299 | 1553562 | trimethylguanosine synthase homolog (S. cerevisiae) | Tgs1   | 312947 | 1,04 | down |
| 6254446 | 7272299 | 1553563 | trimethylguanosine synthase homolog (S. cerevisiae) | Tgs1   | 312947 | 1,01 | up   |
| 6186263 | 7272299 | 1553561 | trimethylguanosine synthase homolog (S. cerevisiae) | Tgs1   | 312947 | 1,00 | down |
| 6435388 | 7272299 | 1553568 | trimethylguanosine synthase homolog (S. cerevisiae) | Tgs1   | 312947 | 1,00 | up   |
| 6715579 | 7196803 | 1367328 | trinucleotide repeat containing 4                   | Tnrc4  | 499669 | 5,88 | up   |
| 6416532 | 7196803 | 1367340 | trinucleotide repeat containing 4                   | Tnrc4  | 499669 | 1,29 | down |
| 6730988 | 7196803 | 1367338 | trinucleotide repeat containing 4                   | Tnrc4  | 499669 | 1,23 | down |
| 5627015 | 7196803 | 1367339 | trinucleotide repeat containing 4                   | Tnrc4  | 499669 | 1,22 | down |
| 5978364 | 7196803 | 1367328 | trinucleotide repeat containing 4                   | Tnrc4  | 499669 | 1,20 | down |
| 6695509 | 7196803 | 1367329 | trinucleotide repeat containing 4                   | Tnrc4  | 499669 | 1,19 | down |
| 5647947 | 7196803 | 1367335 | trinucleotide repeat containing 4                   | Tnrc4  | 499669 | 1,18 | down |
| 6106186 | 7196803 | 1367337 | trinucleotide repeat containing 4                   | Tnrc4  | 499669 | 1,18 | down |
| 6302647 | 7196803 | 1367340 | trinucleotide repeat containing 4                   | Tnrc4  | 499669 | 1,14 | down |
| 6623865 | 7196803 | 1367341 | trinucleotide repeat containing 4                   | Tnrc4  | 499669 | 1,12 | down |
| 5794572 | 7196803 | 1367338 | trinucleotide repeat containing 4                   | Tnrc4  | 499669 | 1,09 | up   |
| 6506792 | 7196803 | 1367336 | trinucleotide repeat containing 4                   | Tnrc4  | 499669 | 1,05 | up   |
| 6010408 | 7196803 | 1367333 | trinucleotide repeat containing 4                   | Tnrc4  | 499669 | 1,03 | up   |
| 5706193 | 7196803 | 1367344 | trinucleotide repeat containing 4                   | Tnrc4  | 499669 | 1,02 | up   |
| 6199845 | 7196803 | 1367328 | trinucleotide repeat containing 4                   | Tnrc4  | 499669 | 1,01 | down |
| 6469936 | 7196803 | 1367328 | trinucleotide repeat containing 4                   | Tnrc4  | 499669 | 1,00 | down |
| 6585127 | 7318691 | 1669168 | TRIO and F-actin binding protein                    | Triobp | 362956 | 2,18 | down |
| 6169004 | 7318691 | 1669166 | TRIO and F-actin binding protein                    | Triobp | 362956 | 1,93 | up   |
| 5787884 | 7318691 | 1669168 | TRIO and F-actin binding protein                    | Triobp | 362956 | 1,78 | down |
| 6480900 | 7318691 | 1669165 | TRIO and F-actin binding protein                    | Triobp | 362956 | 1,74 | up   |
| 5927187 | 7318691 | 1669162 | TRIO and F-actin binding protein                    | Triobp | 362956 | 1,28 | up   |
| 5668856 | 7318691 | 1669161 | TRIO and F-actin binding protein                    | Triobp | 362956 | 1,27 | down |
| 5813702 | 7318691 | 1669167 | TRIO and F-actin binding protein                    | Triobp | 362956 | 1,19 | up   |
| 6344798 | 7318691 | 1669164 | TRIO and F-actin binding protein                    | Triobp | 362956 | 1,17 | up   |
| 5922179 | 7318691 | 1669163 | TRIO and F-actin binding protein                    | Triobp | 362956 | 1,14 | up   |
| 6462082 | 7210263 | 1399733 | tripartite motif protein 2                          | Trim2  | 361970 | 1,77 | down |

|         |         |         |                                |        |        |      |      |
|---------|---------|---------|--------------------------------|--------|--------|------|------|
| 5789546 | 7210263 | 1399745 | tripartite motif protein 2     | Trim2  | 361970 | 1,71 | up   |
| 5749568 | 7210263 | 1399734 | tripartite motif protein 2     | Trim2  | 361970 | 1,62 | up   |
| 6693550 | 7210263 | 1399759 | tripartite motif protein 2     | Trim2  | 361970 | 1,53 | down |
| 6157531 | 7210263 | 1399733 | tripartite motif protein 2     | Trim2  | 361970 | 1,42 | down |
| 6568633 | 7210263 | 1399745 | tripartite motif protein 2     | Trim2  | 361970 | 1,40 | up   |
| 5679470 | 7210263 | 1399754 | tripartite motif protein 2     | Trim2  | 361970 | 1,34 | down |
| 6387969 | 7210263 | 1399740 | tripartite motif protein 2     | Trim2  | 361970 | 1,27 | down |
| 5861243 | 7210263 | 1399737 | tripartite motif protein 2     | Trim2  | 361970 | 1,24 | down |
| 6061872 | 7210263 | 1399744 | tripartite motif protein 2     | Trim2  | 361970 | 1,17 | down |
| 6362487 | 7210263 | 1399754 | tripartite motif protein 2     | Trim2  | 361970 | 1,14 | up   |
| 6616720 | 7210263 | 1399741 | tripartite motif protein 2     | Trim2  | 361970 | 1,11 | up   |
| 6521849 | 7210263 | 1399751 | tripartite motif protein 2     | Trim2  | 361970 | 1,10 | down |
| 6529071 | 7210263 | 1399740 | tripartite motif protein 2     | Trim2  | 361970 | 1,06 | up   |
| 5618135 | 7210263 | 1399744 | tripartite motif protein 2     | Trim2  | 361970 | 1,03 | down |
| 5931652 | 7210263 | 1399736 | tripartite motif protein 2     | Trim2  | 361970 | 1,02 | up   |
| 6587101 | 7220358 | 1423886 | tripartite motif-containing 26 | Trim26 | 309586 | 3,29 | down |
| 6256596 | 7220358 | 1423886 | tripartite motif-containing 26 | Trim26 | 309586 | 1,70 | down |
| 5868318 | 7220358 | 1423885 | tripartite motif-containing 26 | Trim26 | 309586 | 1,66 | up   |
| 6620147 | 7220358 | 1423883 | tripartite motif-containing 26 | Trim26 | 309586 | 1,28 | down |
| 5697414 | 7220358 | 1423884 | tripartite motif-containing 26 | Trim26 | 309586 | 1,25 | up   |
| 6678695 | 7220358 | 1423888 | tripartite motif-containing 26 | Trim26 | 309586 | 1,21 | up   |
| 6340273 | 7220358 | 1423883 | tripartite motif-containing 26 | Trim26 | 309586 | 1,16 | up   |
| 5862367 | 7220358 | 1423887 | tripartite motif-containing 26 | Trim26 | 309586 | 1,10 | down |
| 6159888 | 7220358 | 1423889 | tripartite motif-containing 26 | Trim26 | 309586 | 1,08 | up   |
| 6086507 | 7220358 | 1423882 | tripartite motif-containing 26 | Trim26 | 309586 | 1,03 | down |
| 6438136 | 7055438 | 1021563 | tripartite motif-containing 3  | Trim3  | 83616  | 4,79 | down |
| 5939993 | 7055438 | 1021556 | tripartite motif-containing 3  | Trim3  | 83616  | 1,45 | up   |
| 6309274 | 7055438 | 1021555 | tripartite motif-containing 3  | Trim3  | 83616  | 1,33 | up   |
| 6261868 | 7055438 | 1021560 | tripartite motif-containing 3  | Trim3  | 83616  | 1,32 | down |
| 6144785 | 7055438 | 1021563 | tripartite motif-containing 3  | Trim3  | 83616  | 1,30 | down |
| 5937756 | 7055438 | 1021553 | tripartite motif-containing 3  | Trim3  | 83616  | 1,26 | up   |
| 6651144 | 7055438 | 1021561 | tripartite motif-containing 3  | Trim3  | 83616  | 1,24 | down |
| 6162909 | 7055438 | 1021551 | tripartite motif-containing 3  | Trim3  | 83616  | 1,16 | down |
| 5753195 | 7055438 | 1021562 | tripartite motif-containing 3  | Trim3  | 83616  | 1,09 | up   |
| 6255990 | 7055438 | 1021552 | tripartite motif-containing 3  | Trim3  | 83616  | 1,04 | up   |
| 6638263 | 7055438 | 1021562 | tripartite motif-containing 3  | Trim3  | 83616  | 1,04 | up   |
| 5851650 | 7055438 | 1021554 | tripartite motif-containing 3  | Trim3  | 83616  | 1,04 | down |
| 6529526 | 7055438 | 1021557 | tripartite motif-containing 3  | Trim3  | 83616  | 1,03 | up   |
| 6744035 | 7055438 | 1021559 | tripartite motif-containing 3  | Trim3  | 83616  | 1,02 | down |
| 6010888 | 7055438 | 1021558 | tripartite motif-containing 3  | Trim3  | 83616  | 1,02 | down |
| 6745705 | 7303939 | 1632346 | tripartite motif-containing 54 | Trim54 | 362708 | 2,33 | down |
| 6513549 | 7303939 | 1632341 | tripartite motif-containing 54 | Trim54 | 362708 | 1,47 | down |
| 5773547 | 7303939 | 1632340 | tripartite motif-containing 54 | Trim54 | 362708 | 1,39 | up   |
| 5992911 | 7303939 | 1632346 | tripartite motif-containing 54 | Trim54 | 362708 | 1,27 | up   |
| 6298484 | 7303939 | 1632342 | tripartite motif-containing 54 | Trim54 | 362708 | 1,26 | down |
| 5748665 | 7303939 | 1632344 | tripartite motif-containing 54 | Trim54 | 362708 | 1,24 | up   |
| 6447238 | 7303939 | 1632345 | tripartite motif-containing 54 | Trim54 | 362708 | 1,12 | up   |
| 6208703 | 7303939 | 1632346 | tripartite motif-containing 54 | Trim54 | 362708 | 1,04 | down |
| 6535201 | 7303939 | 1632343 | tripartite motif-containing 54 | Trim54 | 362708 | 1,04 | up   |
| 6616962 | 7303939 | 1632339 | tripartite motif-containing 54 | Trim54 | 362708 | 1,02 | down |
| 6629633 | 7182056 | 1330577 | tripartite motif-containing 67 | Trim67 | 307938 | 1,60 | up   |
| 6182060 | 7182056 | 1330578 | tripartite motif-containing 67 | Trim67 | 307938 | 1,56 | down |
| 6742158 | 7182056 | 1330590 | tripartite motif-containing 67 | Trim67 | 307938 | 1,44 | up   |
| 6214365 | 7182056 | 1330588 | tripartite motif-containing 67 | Trim67 | 307938 | 1,39 | up   |
| 6063616 | 7182056 | 1330578 | tripartite motif-containing 67 | Trim67 | 307938 | 1,32 | down |
| 5672333 | 7182056 | 1330591 | tripartite motif-containing 67 | Trim67 | 307938 | 1,21 | up   |
| 5715022 | 7182056 | 1330592 | tripartite motif-containing 67 | Trim67 | 307938 | 1,20 | down |

|         |         |         |                                              |        |        |      |      |
|---------|---------|---------|----------------------------------------------|--------|--------|------|------|
| 6632098 | 7182056 | 1330584 | tripartite motif-containing 67               | Trim67 | 307938 | 1,19 | up   |
| 5819820 | 7182056 | 1330589 | tripartite motif-containing 67               | Trim67 | 307938 | 1,17 | down |
| 6744687 | 7182056 | 1330587 | tripartite motif-containing 67               | Trim67 | 307938 | 1,05 | down |
| 6486776 | 7182056 | 1330578 | tripartite motif-containing 67               | Trim67 | 307938 | 1,05 | down |
| 6445940 | 7182056 | 1330578 | tripartite motif-containing 67               | Trim67 | 307938 | 1,03 | down |
| 5638056 | 7182056 | 1330576 | tripartite motif-containing 67               | Trim67 | 307938 | 1,03 | down |
| 6280606 | 7182056 | 1330583 | tripartite motif-containing 67               | Trim67 | 307938 | 1,02 | down |
| 6100482 | 7182056 | 1330579 | tripartite motif-containing 67               | Trim67 | 307938 | 1,01 | down |
| 6619670 | 7182056 | 1330586 | tripartite motif-containing 67               | Trim67 | 307938 | 1,00 | down |
| 6190587 | 7205750 | 1389000 | triple functional domain (PTPRF interacting) | Trio   | 310192 | 1,88 | down |
| 6405748 | 7205750 | 1388978 | triple functional domain (PTPRF interacting) | Trio   | 310192 | 1,87 | up   |
| 6458102 | 7205750 | 1388951 | triple functional domain (PTPRF interacting) | Trio   | 310192 | 1,86 | down |
| 6352956 | 7205750 | 1388947 | triple functional domain (PTPRF interacting) | Trio   | 310192 | 1,72 | down |
| 6661553 | 7205750 | 1389026 | triple functional domain (PTPRF interacting) | Trio   | 310192 | 1,71 | up   |
| 5649691 | 7205750 | 1388987 | triple functional domain (PTPRF interacting) | Trio   | 310192 | 1,54 | up   |
| 5652773 | 7205750 | 1389031 | triple functional domain (PTPRF interacting) | Trio   | 310192 | 1,47 | up   |
| 6353186 | 7205750 | 1388972 | triple functional domain (PTPRF interacting) | Trio   | 310192 | 1,47 | up   |
| 6739659 | 7205750 | 1388977 | triple functional domain (PTPRF interacting) | Trio   | 310192 | 1,45 | up   |
| 6444747 | 7205750 | 1388971 | triple functional domain (PTPRF interacting) | Trio   | 310192 | 1,42 | up   |
| 6141287 | 7205750 | 1388990 | triple functional domain (PTPRF interacting) | Trio   | 310192 | 1,41 | up   |
| 5627171 | 7205750 | 1388915 | triple functional domain (PTPRF interacting) | Trio   | 310192 | 1,38 | up   |
| 5629825 | 7205750 | 1388923 | triple functional domain (PTPRF interacting) | Trio   | 310192 | 1,33 | up   |
| 6188224 | 7205750 | 1388989 | triple functional domain (PTPRF interacting) | Trio   | 310192 | 1,33 | up   |
| 6134505 | 7205750 | 1388926 | triple functional domain (PTPRF interacting) | Trio   | 310192 | 1,32 | down |
| 5839471 | 7205750 | 1389020 | triple functional domain (PTPRF interacting) | Trio   | 310192 | 1,32 | up   |
| 5795030 | 7205750 | 1388992 | triple functional domain (PTPRF interacting) | Trio   | 310192 | 1,30 | up   |
| 5841416 | 7205750 | 1388993 | triple functional domain (PTPRF interacting) | Trio   | 310192 | 1,30 | up   |
| 6156769 | 7205750 | 1389030 | triple functional domain (PTPRF interacting) | Trio   | 310192 | 1,29 | up   |
| 6661027 | 7205750 | 1388999 | triple functional domain (PTPRF interacting) | Trio   | 310192 | 1,28 | up   |
| 5744781 | 7205750 | 1389014 | triple functional domain (PTPRF interacting) | Trio   | 310192 | 1,27 | up   |
| 5870608 | 7205750 | 1388938 | triple functional domain (PTPRF interacting) | Trio   | 310192 | 1,26 | up   |
| 5649257 | 7205750 | 1388953 | triple functional domain (PTPRF interacting) | Trio   | 310192 | 1,26 | down |
| 6673622 | 7205750 | 1388939 | triple functional domain (PTPRF interacting) | Trio   | 310192 | 1,25 | down |
| 6074342 | 7205750 | 1389022 | triple functional domain (PTPRF interacting) | Trio   | 310192 | 1,24 | up   |
| 6694296 | 7205750 | 1388936 | triple functional domain (PTPRF interacting) | Trio   | 310192 | 1,21 | down |
| 6206599 | 7205750 | 1388970 | triple functional domain (PTPRF interacting) | Trio   | 310192 | 1,20 | up   |
| 5866616 | 7205750 | 1388946 | triple functional domain (PTPRF interacting) | Trio   | 310192 | 1,19 | down |
| 6258245 | 7205750 | 1388969 | triple functional domain (PTPRF interacting) | Trio   | 310192 | 1,18 | up   |
| 6155749 | 7205750 | 1388914 | triple functional domain (PTPRF interacting) | Trio   | 310192 | 1,16 | up   |
| 6474679 | 7205750 | 1388916 | triple functional domain (PTPRF interacting) | Trio   | 310192 | 1,16 | down |
| 5652097 | 7205750 | 1389029 | triple functional domain (PTPRF interacting) | Trio   | 310192 | 1,15 | up   |
| 6043569 | 7205750 | 1388917 | triple functional domain (PTPRF interacting) | Trio   | 310192 | 1,15 | up   |
| 5779722 | 7205750 | 1388927 | triple functional domain (PTPRF interacting) | Trio   | 310192 | 1,12 | down |
| 5945146 | 7205750 | 1388963 | triple functional domain (PTPRF interacting) | Trio   | 310192 | 1,10 | up   |
| 6695585 | 7205750 | 1388984 | triple functional domain (PTPRF interacting) | Trio   | 310192 | 1,08 | up   |
| 6570284 | 7205750 | 1388968 | triple functional domain (PTPRF interacting) | Trio   | 310192 | 1,07 | up   |
| 5683510 | 7205750 | 1388986 | triple functional domain (PTPRF interacting) | Trio   | 310192 | 1,07 | down |
| 6347562 | 7205750 | 1388980 | triple functional domain (PTPRF interacting) | Trio   | 310192 | 1,07 | up   |
| 5930760 | 7205750 | 1389034 | triple functional domain (PTPRF interacting) | Trio   | 310192 | 1,05 | down |
| 6562214 | 7205750 | 1388934 | triple functional domain (PTPRF interacting) | Trio   | 310192 | 1,04 | up   |
| 5954700 | 7205750 | 1388951 | triple functional domain (PTPRF interacting) | Trio   | 310192 | 1,04 | down |
| 5919176 | 7205750 | 1388934 | triple functional domain (PTPRF interacting) | Trio   | 310192 | 1,03 | up   |
| 5898389 | 7205750 | 1388945 | triple functional domain (PTPRF interacting) | Trio   | 310192 | 1,02 | up   |
| 5810352 | 7205750 | 1389009 | triple functional domain (PTPRF interacting) | Trio   | 310192 | 1,02 | down |
| 6125911 | 7205750 | 1389035 | triple functional domain (PTPRF interacting) | Trio   | 310192 | 1,01 | down |
| 6543351 | 7205750 | 1388979 | triple functional domain (PTPRF interacting) | Trio   | 310192 | 1,01 | down |
| 5848975 | 7205750 | 1388918 | triple functional domain (PTPRF interacting) | Trio   | 310192 | 1,01 | down |

|         |         |         |                                                            |        |        |      |      |
|---------|---------|---------|------------------------------------------------------------|--------|--------|------|------|
| 5856928 | 7184050 | 1335719 | TRM1 tRNA methyltransferase 1 homolog (S. cerevisiae)      | Trmt1  | 288914 | 2,89 | down |
| 6377480 | 7184050 | 1335713 | TRM1 tRNA methyltransferase 1 homolog (S. cerevisiae)      | Trmt1  | 288914 | 2,01 | down |
| 6559525 | 7184050 | 1335718 | TRM1 tRNA methyltransferase 1 homolog (S. cerevisiae)      | Trmt1  | 288914 | 1,79 | down |
| 5769791 | 7184050 | 1335712 | TRM1 tRNA methyltransferase 1 homolog (S. cerevisiae)      | Trmt1  | 288914 | 1,59 | down |
| 5835448 | 7184050 | 1335717 | TRM1 tRNA methyltransferase 1 homolog (S. cerevisiae)      | Trmt1  | 288914 | 1,45 | down |
| 6161314 | 7184050 | 1335728 | TRM1 tRNA methyltransferase 1 homolog (S. cerevisiae)      | Trmt1  | 288914 | 1,35 | down |
| 6660456 | 7184050 | 1335712 | TRM1 tRNA methyltransferase 1 homolog (S. cerevisiae)      | Trmt1  | 288914 | 1,32 | down |
| 6215761 | 7184050 | 1335726 | TRM1 tRNA methyltransferase 1 homolog (S. cerevisiae)      | Trmt1  | 288914 | 1,29 | up   |
| 6496212 | 7184050 | 1335725 | TRM1 tRNA methyltransferase 1 homolog (S. cerevisiae)      | Trmt1  | 288914 | 1,27 | up   |
| 6538786 | 7184050 | 1335714 | TRM1 tRNA methyltransferase 1 homolog (S. cerevisiae)      | Trmt1  | 288914 | 1,26 | up   |
| 6084182 | 7184050 | 1335727 | TRM1 tRNA methyltransferase 1 homolog (S. cerevisiae)      | Trmt1  | 288914 | 1,16 | down |
| 6388523 | 7184050 | 1335721 | TRM1 tRNA methyltransferase 1 homolog (S. cerevisiae)      | Trmt1  | 288914 | 1,14 | down |
| 6142938 | 7184050 | 1335724 | TRM1 tRNA methyltransferase 1 homolog (S. cerevisiae)      | Trmt1  | 288914 | 1,13 | up   |
| 6380346 | 7184050 | 1335723 | TRM1 tRNA methyltransferase 1 homolog (S. cerevisiae)      | Trmt1  | 288914 | 1,11 | up   |
| 6654086 | 7184050 | 1335715 | TRM1 tRNA methyltransferase 1 homolog (S. cerevisiae)      | Trmt1  | 288914 | 1,11 | up   |
| 6254952 | 7184050 | 1335720 | TRM1 tRNA methyltransferase 1 homolog (S. cerevisiae)      | Trmt1  | 288914 | 1,05 | down |
| 5704834 | 7184050 | 1335722 | TRM1 tRNA methyltransferase 1 homolog (S. cerevisiae)      | Trmt1  | 288914 | 1,05 | up   |
| 5735050 | 7184050 | 1335716 | TRM1 tRNA methyltransferase 1 homolog (S. cerevisiae)      | Trmt1  | 288914 | 1,03 | down |
| 6567971 | 7184050 | 1335716 | TRM1 tRNA methyltransferase 1 homolog (S. cerevisiae)      | Trmt1  | 288914 | 1,02 | down |
| 5791627 | 7184050 | 1335716 | TRM1 tRNA methyltransferase 1 homolog (S. cerevisiae)      | Trmt1  | 288914 | 1,01 | up   |
| 6371853 | 7319609 | 1671200 | tRNA 5-methylaminomethyl-2-thiouridylate methyltransferase | Trmu   | 362976 | 2,12 | up   |
| 5775449 | 7319609 | 1671207 | tRNA 5-methylaminomethyl-2-thiouridylate methyltransferase | Trmu   | 362976 | 1,59 | up   |
| 6498668 | 7319609 | 1671204 | tRNA 5-methylaminomethyl-2-thiouridylate methyltransferase | Trmu   | 362976 | 1,52 | up   |
| 5718167 | 7319609 | 1671204 | tRNA 5-methylaminomethyl-2-thiouridylate methyltransferase | Trmu   | 362976 | 1,28 | down |
| 5790467 | 7319609 | 1671208 | tRNA 5-methylaminomethyl-2-thiouridylate methyltransferase | Trmu   | 362976 | 1,18 | down |
| 6735763 | 7319609 | 1671197 | tRNA 5-methylaminomethyl-2-thiouridylate methyltransferase | Trmu   | 362976 | 1,18 | down |
| 6566613 | 7319609 | 1671208 | tRNA 5-methylaminomethyl-2-thiouridylate methyltransferase | Trmu   | 362976 | 1,17 | down |
| 6670885 | 7319609 | 1671201 | tRNA 5-methylaminomethyl-2-thiouridylate methyltransferase | Trmu   | 362976 | 1,15 | up   |
| 5636588 | 7319609 | 1671199 | tRNA 5-methylaminomethyl-2-thiouridylate methyltransferase | Trmu   | 362976 | 1,07 | up   |
| 6001656 | 7319609 | 1671198 | tRNA 5-methylaminomethyl-2-thiouridylate methyltransferase | Trmu   | 362976 | 1,05 | up   |
| 6386969 | 7319609 | 1671209 | tRNA 5-methylaminomethyl-2-thiouridylate methyltransferase | Trmu   | 362976 | 1,05 | up   |
| 6562324 | 7319609 | 1671197 | tRNA 5-methylaminomethyl-2-thiouridylate methyltransferase | Trmu   | 362976 | 1,03 | up   |
| 6234980 | 7319609 | 1671206 | tRNA 5-methylaminomethyl-2-thiouridylate methyltransferase | Trmu   | 362976 | 1,01 | up   |
| 6492865 | 7317274 | 1665627 | tRNA methyltransferase 12 homolog (S. cerevisiae)          | Trmt12 | 314999 | 2,23 | down |
| 6017081 | 7317274 | 1665627 | tRNA methyltransferase 12 homolog (S. cerevisiae)          | Trmt12 | 314999 | 1,01 | down |
| 6063489 | 7073673 | 1065082 | tRNA splicing endonuclease 54 homolog (S. cerevisiae)      | Tsen54 | 690308 | 2,65 | down |
| 6103970 | 7073673 | 1065088 | tRNA splicing endonuclease 54 homolog (S. cerevisiae)      | Tsen54 | 690308 | 1,80 | up   |
| 5831626 | 7073673 | 1065091 | tRNA splicing endonuclease 54 homolog (S. cerevisiae)      | Tsen54 | 690308 | 1,58 | down |
| 6599291 | 7073673 | 1065089 | tRNA splicing endonuclease 54 homolog (S. cerevisiae)      | Tsen54 | 690308 | 1,41 | up   |
| 6294180 | 7073673 | 1065084 | tRNA splicing endonuclease 54 homolog (S. cerevisiae)      | Tsen54 | 690308 | 1,41 | up   |
| 5639476 | 7073673 | 1065091 | tRNA splicing endonuclease 54 homolog (S. cerevisiae)      | Tsen54 | 690308 | 1,37 | down |
| 6409352 | 7073673 | 1065089 | tRNA splicing endonuclease 54 homolog (S. cerevisiae)      | Tsen54 | 690308 | 1,36 | down |
| 5631739 | 7073673 | 1065086 | tRNA splicing endonuclease 54 homolog (S. cerevisiae)      | Tsen54 | 690308 | 1,32 | up   |
| 5673726 | 7073673 | 1065083 | tRNA splicing endonuclease 54 homolog (S. cerevisiae)      | Tsen54 | 690308 | 1,29 | down |
| 6079521 | 7073673 | 1065088 | tRNA splicing endonuclease 54 homolog (S. cerevisiae)      | Tsen54 | 690308 | 1,20 | up   |
| 5784970 | 7073673 | 1065087 | tRNA splicing endonuclease 54 homolog (S. cerevisiae)      | Tsen54 | 690308 | 1,20 | up   |
| 5637894 | 7073673 | 1065085 | tRNA splicing endonuclease 54 homolog (S. cerevisiae)      | Tsen54 | 690308 | 1,05 | up   |
| 6336869 | 7073673 | 1065090 | tRNA splicing endonuclease 54 homolog (S. cerevisiae)      | Tsen54 | 690308 | 1,05 | up   |
| 5788574 | 7073673 | 1065091 | tRNA splicing endonuclease 54 homolog (S. cerevisiae)      | Tsen54 | 690308 | 1,04 | up   |
| 6000543 | 7101553 | 1131338 | tRNA-yW synthesizing protein 1 homolog (S. cerevisiae)     | Tyw1   | 304423 | 2,23 | up   |
| 5980789 | 7101553 | 1131327 | tRNA-yW synthesizing protein 1 homolog (S. cerevisiae)     | Tyw1   | 304423 | 2,06 | up   |
| 5912561 | 7101553 | 1131341 | tRNA-yW synthesizing protein 1 homolog (S. cerevisiae)     | Tyw1   | 304423 | 1,66 | up   |
| 6017743 | 7101553 | 1131338 | tRNA-yW synthesizing protein 1 homolog (S. cerevisiae)     | Tyw1   | 304423 | 1,44 | up   |
| 5752830 | 7101553 | 1131329 | tRNA-yW synthesizing protein 1 homolog (S. cerevisiae)     | Tyw1   | 304423 | 1,44 | down |
| 6721309 | 7101553 | 1131320 | tRNA-yW synthesizing protein 1 homolog (S. cerevisiae)     | Tyw1   | 304423 | 1,38 | down |
| 6255828 | 7101553 | 1131344 | tRNA-yW synthesizing protein 1 homolog (S. cerevisiae)     | Tyw1   | 304423 | 1,34 | down |
| 6225865 | 7101553 | 1131330 | tRNA-yW synthesizing protein 1 homolog (S. cerevisiae)     | Tyw1   | 304423 | 1,25 | up   |

|         |         |         |                                                        |       |        |      |      |
|---------|---------|---------|--------------------------------------------------------|-------|--------|------|------|
| 6018743 | 7101553 | 1131338 | tRNA-yW synthesizing protein 1 homolog (S. cerevisiae) | Tyw1  | 304423 | 1,19 | up   |
| 5652655 | 7101553 | 1131346 | tRNA-yW synthesizing protein 1 homolog (S. cerevisiae) | Tyw1  | 304423 | 1,18 | up   |
| 6251181 | 7101553 | 1131322 | tRNA-yW synthesizing protein 1 homolog (S. cerevisiae) | Tyw1  | 304423 | 1,12 | down |
| 6446532 | 7101553 | 1131340 | tRNA-yW synthesizing protein 1 homolog (S. cerevisiae) | Tyw1  | 304423 | 1,10 | down |
| 5635490 | 7101553 | 1131336 | tRNA-yW synthesizing protein 1 homolog (S. cerevisiae) | Tyw1  | 304423 | 1,07 | down |
| 6504707 | 7101553 | 1131339 | tRNA-yW synthesizing protein 1 homolog (S. cerevisiae) | Tyw1  | 304423 | 1,05 | down |
| 6209418 | 7101553 | 1131326 | tRNA-yW synthesizing protein 1 homolog (S. cerevisiae) | Tyw1  | 304423 | 1,05 | down |
| 6259382 | 7101553 | 1131332 | tRNA-yW synthesizing protein 1 homolog (S. cerevisiae) | Tyw1  | 304423 | 1,04 | down |
| 6617682 | 7101553 | 1131321 | tRNA-yW synthesizing protein 1 homolog (S. cerevisiae) | Tyw1  | 304423 | 1,03 | down |
| 5723556 | 7101553 | 1131320 | tRNA-yW synthesizing protein 1 homolog (S. cerevisiae) | Tyw1  | 304423 | 1,03 | up   |
| 6143983 | 7101553 | 1131320 | tRNA-yW synthesizing protein 1 homolog (S. cerevisiae) | Tyw1  | 304423 | 1,03 | down |
| 6607691 | 7101553 | 1131335 | tRNA-yW synthesizing protein 1 homolog (S. cerevisiae) | Tyw1  | 304423 | 1,02 | down |
| 6007725 | 7101553 | 1131341 | tRNA-yW synthesizing protein 1 homolog (S. cerevisiae) | Tyw1  | 304423 | 1,01 | down |
| 5705561 | 7101553 | 1131345 | tRNA-yW synthesizing protein 1 homolog (S. cerevisiae) | Tyw1  | 304423 | 1,01 | up   |
| 6091055 | 7338762 | 1716707 | trophoblast glycoprotein                               | Tpbg  | 83684  | 3,37 | up   |
| 6563854 | 7338762 | 1716707 | trophoblast glycoprotein                               | Tpbg  | 83684  | 1,50 | down |
| 6598444 | 7338762 | 1716706 | trophoblast glycoprotein                               | Tpbg  | 83684  | 1,30 | down |
| 6653620 | 7338762 | 1716706 | trophoblast glycoprotein                               | Tpbg  | 83684  | 1,19 | down |
| 5831811 | 7338762 | 1716706 | trophoblast glycoprotein                               | Tpbg  | 83684  | 1,19 | up   |
| 6383373 | 7338762 | 1716707 | trophoblast glycoprotein                               | Tpbg  | 83684  | 1,05 | down |
| 5626855 | 7346991 | 1737553 | tropomyosin 1, alpha                                   | Tpm1  | 24851  | 2,35 | down |
| 5765851 | 7346991 | 1737551 | tropomyosin 1, alpha                                   | Tpm1  | 24851  | 1,87 | down |
| 6456859 | 7346991 | 1737552 | tropomyosin 1, alpha                                   | Tpm1  | 24851  | 1,87 | down |
| 5970162 | 7346991 | 1737540 | tropomyosin 1, alpha                                   | Tpm1  | 24851  | 1,62 | down |
| 6431196 | 7346991 | 1737547 | tropomyosin 1, alpha                                   | Tpm1  | 24851  | 1,43 | up   |
| 6290492 | 7346991 | 1737539 | tropomyosin 1, alpha                                   | Tpm1  | 24851  | 1,41 | up   |
| 6441836 | 7346991 | 1737541 | tropomyosin 1, alpha                                   | Tpm1  | 24851  | 1,36 | down |
| 6606554 | 7346991 | 1737550 | tropomyosin 1, alpha                                   | Tpm1  | 24851  | 1,34 | down |
| 5886362 | 7346991 | 1737543 | tropomyosin 1, alpha                                   | Tpm1  | 24851  | 1,31 | up   |
| 5852778 | 7346991 | 1737541 | tropomyosin 1, alpha                                   | Tpm1  | 24851  | 1,27 | down |
| 6105695 | 7346991 | 1737550 | tropomyosin 1, alpha                                   | Tpm1  | 24851  | 1,25 | up   |
| 6032871 | 7346991 | 1737549 | tropomyosin 1, alpha                                   | Tpm1  | 24851  | 1,23 | up   |
| 6485754 | 7346991 | 1737546 | tropomyosin 1, alpha                                   | Tpm1  | 24851  | 1,18 | down |
| 6343884 | 7346991 | 1737548 | tropomyosin 1, alpha                                   | Tpm1  | 24851  | 1,16 | up   |
| 5956247 | 7346991 | 1737538 | tropomyosin 1, alpha                                   | Tpm1  | 24851  | 1,10 | up   |
| 6468003 | 7346991 | 1737545 | tropomyosin 1, alpha                                   | Tpm1  | 24851  | 1,06 | down |
| 6632718 | 7346991 | 1737544 | tropomyosin 1, alpha                                   | Tpm1  | 24851  | 1,06 | up   |
| 6410500 | 7346991 | 1737542 | tropomyosin 1, alpha                                   | Tpm1  | 24851  | 1,03 | up   |
| 6588435 | 7196361 | 1366436 | tropomyosin 3, gamma                                   | Tpm3  | 117557 | 2,03 | up   |
| 6420686 | 7196361 | 1366442 | tropomyosin 3, gamma                                   | Tpm3  | 117557 | 1,64 | down |
| 6186235 | 7196361 | 1366445 | tropomyosin 3, gamma                                   | Tpm3  | 117557 | 1,62 | up   |
| 6702652 | 7196361 | 1366444 | tropomyosin 3, gamma                                   | Tpm3  | 117557 | 1,53 | down |
| 5780217 | 7196361 | 1366437 | tropomyosin 3, gamma                                   | Tpm3  | 117557 | 1,43 | down |
| 5671480 | 7196361 | 1366440 | tropomyosin 3, gamma                                   | Tpm3  | 117557 | 1,28 | up   |
| 5848541 | 7196361 | 1366446 | tropomyosin 3, gamma                                   | Tpm3  | 117557 | 1,08 | up   |
| 6448688 | 7196361 | 1366439 | tropomyosin 3, gamma                                   | Tpm3  | 117557 | 1,08 | up   |
| 5867743 | 7196361 | 1366438 | tropomyosin 3, gamma                                   | Tpm3  | 117557 | 1,04 | down |
| 6008122 | 7196361 | 1366437 | tropomyosin 3, gamma                                   | Tpm3  | 117557 | 1,04 | down |
| 6112649 | 7196361 | 1366444 | tropomyosin 3, gamma                                   | Tpm3  | 117557 | 1,04 | up   |
| 6341586 | 7196361 | 1366443 | tropomyosin 3, gamma                                   | Tpm3  | 117557 | 1,03 | up   |
| 6203554 | 7196361 | 1366441 | tropomyosin 3, gamma                                   | Tpm3  | 117557 | 1,02 | down |
| 6682243 | 7105453 | 1141144 | troponin T type 2 (cardiac)                            | Tnnt2 | 24837  | 2,53 | down |
| 5701693 | 7105453 | 1141145 | troponin T type 2 (cardiac)                            | Tnnt2 | 24837  | 1,73 | up   |
| 6149353 | 7105453 | 1141146 | troponin T type 2 (cardiac)                            | Tnnt2 | 24837  | 1,52 | down |
| 6574562 | 7105453 | 1141153 | troponin T type 2 (cardiac)                            | Tnnt2 | 24837  | 1,50 | up   |
| 6444192 | 7105453 | 1141147 | troponin T type 2 (cardiac)                            | Tnnt2 | 24837  | 1,19 | down |
| 6275433 | 7105453 | 1141148 | troponin T type 2 (cardiac)                            | Tnnt2 | 24837  | 1,12 | up   |

|         |         |         |                                    |        |        |      |      |
|---------|---------|---------|------------------------------------|--------|--------|------|------|
| 6250784 | 7105453 | 1141150 | troponin T type 2 (cardiac)        | Tnnt2  | 24837  | 1,12 | up   |
| 5902964 | 7105453 | 1141143 | troponin T type 2 (cardiac)        | Tnnt2  | 24837  | 1,12 | up   |
| 5705178 | 7105453 | 1141142 | troponin T type 2 (cardiac)        | Tnnt2  | 24837  | 1,11 | up   |
| 6258334 | 7105453 | 1141152 | troponin T type 2 (cardiac)        | Tnnt2  | 24837  | 1,07 | up   |
| 6358491 | 7105453 | 1141149 | troponin T type 2 (cardiac)        | Tnnt2  | 24837  | 1,06 | up   |
| 6155408 | 7105453 | 1141154 | troponin T type 2 (cardiac)        | Tnnt2  | 24837  | 1,06 | down |
| 6125575 | 7105453 | 1141155 | troponin T type 2 (cardiac)        | Tnnt2  | 24837  | 1,05 | down |
| 6620785 | 7105453 | 1141151 | troponin T type 2 (cardiac)        | Tnnt2  | 24837  | 1,02 | down |
| 5826607 | 7038618 | 982106  | troponin T type 3 (skeletal, fast) | Tnnt3  | 24838  | 2,02 | up   |
| 6732517 | 7038618 | 982110  | troponin T type 3 (skeletal, fast) | Tnnt3  | 24838  | 1,43 | down |
| 5955400 | 7038618 | 982103  | troponin T type 3 (skeletal, fast) | Tnnt3  | 24838  | 1,29 | up   |
| 6517271 | 7038618 | 982107  | troponin T type 3 (skeletal, fast) | Tnnt3  | 24838  | 1,22 | up   |
| 6579175 | 7038618 | 982108  | troponin T type 3 (skeletal, fast) | Tnnt3  | 24838  | 1,12 | down |
| 5691514 | 7038618 | 982104  | troponin T type 3 (skeletal, fast) | Tnnt3  | 24838  | 1,04 | up   |
| 6132181 | 7038618 | 982105  | troponin T type 3 (skeletal, fast) | Tnnt3  | 24838  | 1,03 | down |
| 5848921 | 7038618 | 982109  | troponin T type 3 (skeletal, fast) | Tnnt3  | 24838  | 1,02 | down |
| 5846344 | 7310471 | 1648605 | tryptophanyl-tRNA synthetase       | Wars   | 314442 | 2,52 | down |
| 6600835 | 7310471 | 1648614 | tryptophanyl-tRNA synthetase       | Wars   | 314442 | 1,98 | down |
| 6208158 | 7310471 | 1648610 | tryptophanyl-tRNA synthetase       | Wars   | 314442 | 1,28 | up   |
| 5794729 | 7310471 | 1648609 | tryptophanyl-tRNA synthetase       | Wars   | 314442 | 1,25 | down |
| 6418357 | 7310471 | 1648615 | tryptophanyl-tRNA synthetase       | Wars   | 314442 | 1,20 | up   |
| 5909556 | 7310471 | 1648615 | tryptophanyl-tRNA synthetase       | Wars   | 314442 | 1,16 | up   |
| 5644389 | 7310471 | 1648615 | tryptophanyl-tRNA synthetase       | Wars   | 314442 | 1,15 | down |
| 6264683 | 7310471 | 1648608 | tryptophanyl-tRNA synthetase       | Wars   | 314442 | 1,09 | up   |
| 6184263 | 7310471 | 1648611 | tryptophanyl-tRNA synthetase       | Wars   | 314442 | 1,09 | up   |
| 6005564 | 7310471 | 1648612 | tryptophanyl-tRNA synthetase       | Wars   | 314442 | 1,07 | up   |
| 6700053 | 7310471 | 1648613 | tryptophanyl-tRNA synthetase       | Wars   | 314442 | 1,06 | up   |
| 6275237 | 7310471 | 1648607 | tryptophanyl-tRNA synthetase       | Wars   | 314442 | 1,06 | down |
| 5756648 | 7310471 | 1648607 | tryptophanyl-tRNA synthetase       | Wars   | 314442 | 1,04 | up   |
| 6530870 | 7310471 | 1648606 | tryptophanyl-tRNA synthetase       | Wars   | 314442 | 1,04 | up   |
| 5815790 | 7219301 | 1421262 | TSPY-like 4                        | Tspyl4 | 309828 | 3,96 | up   |
| 5742759 | 7219301 | 1421263 | TSPY-like 4                        | Tspyl4 | 309828 | 1,53 | down |
| 5946680 | 7219301 | 1421262 | TSPY-like 4                        | Tspyl4 | 309828 | 1,38 | down |
| 6277283 | 7219301 | 1421262 | TSPY-like 4                        | Tspyl4 | 309828 | 1,29 | up   |
| 6566380 | 7219301 | 1421262 | TSPY-like 4                        | Tspyl4 | 309828 | 1,07 | up   |
| 5745950 | 7221168 | 1425635 | tubby like protein 1               | Tulp1  | 309900 | 2,48 | down |
| 5624429 | 7221168 | 1425631 | tubby like protein 1               | Tulp1  | 309900 | 1,77 | down |
| 6172823 | 7221168 | 1425622 | tubby like protein 1               | Tulp1  | 309900 | 1,75 | up   |
| 6061354 | 7221168 | 1425621 | tubby like protein 1               | Tulp1  | 309900 | 1,63 | up   |
| 6597846 | 7221168 | 1425629 | tubby like protein 1               | Tulp1  | 309900 | 1,42 | up   |
| 6148169 | 7221168 | 1425631 | tubby like protein 1               | Tulp1  | 309900 | 1,12 | down |
| 5747711 | 7221168 | 1425634 | tubby like protein 1               | Tulp1  | 309900 | 1,11 | down |
| 6031251 | 7221168 | 1425636 | tubby like protein 1               | Tulp1  | 309900 | 1,10 | up   |
| 6471749 | 7221168 | 1425626 | tubby like protein 1               | Tulp1  | 309900 | 1,08 | down |
| 6248205 | 7221168 | 1425621 | tubby like protein 1               | Tulp1  | 309900 | 1,07 | down |
| 5942269 | 7221168 | 1425630 | tubby like protein 1               | Tulp1  | 309900 | 1,04 | up   |
| 5820059 | 7221168 | 1425624 | tubby like protein 1               | Tulp1  | 309900 | 1,02 | up   |
| 5892045 | 7221168 | 1425633 | tubby like protein 1               | Tulp1  | 309900 | 1,02 | down |
| 6530572 | 7221168 | 1425623 | tubby like protein 1               | Tulp1  | 309900 | 1,01 | up   |
| 6743923 | 7221168 | 1425627 | tubby like protein 1               | Tulp1  | 309900 | 1,00 | down |
| 6618559 | 7158452 | 1271482 | tubulin folding cofactor E         | Tbce   | 361255 | 2,09 | down |
| 5676262 | 7158452 | 1271492 | tubulin folding cofactor E         | Tbce   | 361255 | 1,88 | down |
| 6005680 | 7158452 | 1271488 | tubulin folding cofactor E         | Tbce   | 361255 | 1,57 | up   |
| 5687662 | 7158452 | 1271490 | tubulin folding cofactor E         | Tbce   | 361255 | 1,49 | down |
| 6705931 | 7158452 | 1271486 | tubulin folding cofactor E         | Tbce   | 361255 | 1,37 | up   |
| 5634416 | 7158452 | 1271476 | tubulin folding cofactor E         | Tbce   | 361255 | 1,30 | up   |
| 6192391 | 7158452 | 1271477 | tubulin folding cofactor E         | Tbce   | 361255 | 1,24 | down |

|         |         |         |                                                |                   |                   |      |      |
|---------|---------|---------|------------------------------------------------|-------------------|-------------------|------|------|
| 5966660 | 7158452 | 1271484 | tubulin folding cofactor E                     | Tbce              | 361255            | 1,21 | down |
| 6086329 | 7158452 | 1271479 | tubulin folding cofactor E                     | Tbce              | 361255            | 1,18 | down |
| 6726481 | 7158452 | 1271485 | tubulin folding cofactor E                     | Tbce              | 361255            | 1,15 | up   |
| 5623696 | 7158452 | 1271487 | tubulin folding cofactor E                     | Tbce              | 361255            | 1,13 | up   |
| 6563043 | 7158452 | 1271491 | tubulin folding cofactor E                     | Tbce              | 361255            | 1,13 | up   |
| 6018271 | 7158452 | 1271479 | tubulin folding cofactor E                     | Tbce              | 361255            | 1,11 | down |
| 6235807 | 7158452 | 1271483 | tubulin folding cofactor E                     | Tbce              | 361255            | 1,09 | down |
| 5724434 | 7158452 | 1271481 | tubulin folding cofactor E                     | Tbce              | 361255            | 1,06 | up   |
| 6398879 | 7158452 | 1271489 | tubulin folding cofactor E                     | Tbce              | 361255            | 1,06 | up   |
| 5747062 | 7158452 | 1271476 | tubulin folding cofactor E                     | Tbce              | 361255            | 1,04 | down |
| 6457811 | 7158452 | 1271487 | tubulin folding cofactor E                     | Tbce              | 361255            | 1,04 | up   |
| 6667882 | 7158452 | 1271480 | tubulin folding cofactor E                     | Tbce              | 361255            | 1,03 | down |
| 6179900 | 7158452 | 1271478 | tubulin folding cofactor E                     | Tbce              | 361255            | 1,03 | up   |
| 6413397 | 7158452 | 1271482 | tubulin folding cofactor E                     | Tbce              | 361255            | 1,02 | up   |
| 5926959 | 7232474 | 1453935 | tubulin tyrosine ligase                        | Ttl               | 171572            | 2,47 | up   |
| 5729463 | 7232474 | 1453935 | tubulin tyrosine ligase                        | Ttl               | 171572            | 1,54 | down |
| 6593500 | 7232474 | 1453936 | tubulin tyrosine ligase                        | Ttl               | 171572            | 1,29 | down |
| 5717125 | 7232474 | 1453941 | tubulin tyrosine ligase                        | Ttl               | 171572            | 1,09 | up   |
| 6737525 | 7232474 | 1453938 | tubulin tyrosine ligase                        | Ttl               | 171572            | 1,03 | down |
| 5764481 | 7232474 | 1453940 | tubulin tyrosine ligase                        | Ttl               | 171572            | 1,03 | down |
| 5755656 | 7232474 | 1453937 | tubulin tyrosine ligase                        | Ttl               | 171572            | 1,03 | down |
| 5881456 | 7232474 | 1453939 | tubulin tyrosine ligase                        | Ttl               | 171572            | 1,02 | up   |
| 5695842 | 7237940 | 1468140 | tubulin tyrosine ligase-like family, member 11 | Ttll11            | 689746            | 2,02 | down |
| 6071349 | 7237940 | 1468178 | tubulin tyrosine ligase-like family, member 11 | Ttll11            | 689746            | 1,89 | up   |
| 6041876 | 7237940 | 1468197 | tubulin tyrosine ligase-like family, member 11 | Ttll11            | 689746            | 1,71 | down |
| 6548391 | 7237940 | 1468140 | tubulin tyrosine ligase-like family, member 11 | Ttll11            | 689746            | 1,66 | up   |
| 6507117 | 7237940 | 1468152 | tubulin tyrosine ligase-like family, member 11 | Ttll11            | 689746            | 1,54 | down |
| 6360245 | 7237940 | 1468183 | tubulin tyrosine ligase-like family, member 11 | Ttll11            | 689746            | 1,38 | up   |
| 5782280 | 7237940 | 1468179 | tubulin tyrosine ligase-like family, member 11 | Ttll11            | 689746            | 1,35 | down |
| 6476499 | 7237940 | 1468140 | tubulin tyrosine ligase-like family, member 11 | Ttll11            | 689746            | 1,30 | up   |
| 5653556 | 7237940 | 1468197 | tubulin tyrosine ligase-like family, member 11 | Ttll11            | 689746            | 1,30 | down |
| 5778319 | 7237940 | 1468191 | tubulin tyrosine ligase-like family, member 11 | Ttll11            | 689746            | 1,28 | up   |
| 6246476 | 7237940 | 1468159 | tubulin tyrosine ligase-like family, member 11 | Ttll11            | 689746            | 1,18 | up   |
| 6525962 | 7237940 | 1468197 | tubulin tyrosine ligase-like family, member 11 | Ttll11            | 689746            | 1,13 | up   |
| 6527137 | 7237940 | 1468197 | tubulin tyrosine ligase-like family, member 11 | Ttll11            | 689746            | 1,08 | up   |
| 6673797 | 7237940 | 1468141 | tubulin tyrosine ligase-like family, member 11 | Ttll11            | 689746            | 1,05 | down |
| 6633502 | 7237940 | 1468189 | tubulin tyrosine ligase-like family, member 11 | Ttll11            | 689746            | 1,01 | up   |
| 6216475 | 7356115 | 1760135 | tubulin tyrosine ligase-like family, member 4  | Ttl4              | 690512            | 1,81 | down |
| 5778388 | 7200545 | 1376936 | tubulin tyrosine ligase-like family, member 7  | Ttl7              | 310982            | 2,23 | down |
| 5874200 | 7200545 | 1376936 | tubulin tyrosine ligase-like family, member 7  | Ttl7              | 310982            | 2,00 | down |
| 6740025 | 7200545 | 1376887 | tubulin tyrosine ligase-like family, member 7  | Ttl7              | 310982            | 1,99 | up   |
| 5811139 | 7200545 | 1376919 | tubulin tyrosine ligase-like family, member 7  | Ttl7              | 310982            | 1,58 | down |
| 6681175 | 7200545 | 1376893 | tubulin tyrosine ligase-like family, member 7  | Ttl7              | 310982            | 1,30 | down |
| 6306509 | 7200545 | 1376896 | tubulin tyrosine ligase-like family, member 7  | Ttl7              | 310982            | 1,28 | up   |
| 6093533 | 7200545 | 1376918 | tubulin tyrosine ligase-like family, member 7  | Ttl7              | 310982            | 1,20 | down |
| 5988004 | 7200545 | 1376892 | tubulin tyrosine ligase-like family, member 7  | Ttl7              | 310982            | 1,12 | down |
| 6166512 | 7200545 | 1376930 | tubulin tyrosine ligase-like family, member 7  | Ttl7              | 310982            | 1,10 | down |
| 6124421 | 7200545 | 1376895 | tubulin tyrosine ligase-like family, member 7  | Ttl7              | 310982            | 1,09 | up   |
| 6241152 | 7200545 | 1376889 | tubulin tyrosine ligase-like family, member 7  | Ttl7              | 310982            | 1,08 | down |
| 5625501 | 7200545 | 1376893 | tubulin tyrosine ligase-like family, member 7  | Ttl7              | 310982            | 1,08 | up   |
| 6486107 | 7200545 | 1376926 | tubulin tyrosine ligase-like family, member 7  | Ttl7              | 310982            | 1,01 | down |
| 6419714 | 7259835 | 1522356 | tubulin, alpha 3A /// tubulin, alpha 3B        | Tuba3a /// Tuba3b | 500319 /// 500363 | 1,53 | up   |
| 6697661 | 7259835 | 1522354 | tubulin, alpha 3A /// tubulin, alpha 3B        | Tuba3a /// Tuba3b | 500319 /// 500363 | 1,20 | up   |
| 6137291 | 7259835 | 1522357 | tubulin, alpha 3A /// tubulin, alpha 3B        | Tuba3a /// Tuba3b | 500319 /// 500363 | 1,14 | up   |
| 6746786 | 7259835 | 1522356 | tubulin, alpha 3A /// tubulin, alpha 3B        | Tuba3a /// Tuba3b | 500319 /// 500363 | 1,05 | up   |
| 6275400 | 7259835 | 1522354 | tubulin, alpha 3B                              | Tuba3b            | 500363            | 2,17 | down |
| 6570372 | 7259835 | 1522356 | tubulin, alpha 3B                              | Tuba3b            | 500363            | 1,19 | up   |



|         |         |         |                                             |         |        |      |      |
|---------|---------|---------|---------------------------------------------|---------|--------|------|------|
| 6677897 | 7259835 | 1522358 | tubulin, alpha 3B                           | Tuba3b  | 500363 | 1,12 | down |
| 6215401 | 7259835 | 1522355 | tubulin, alpha 3B                           | Tuba3b  | 500363 | 1,10 | down |
| 6686573 | 7259835 | 1522357 | tubulin, alpha 3B                           | Tuba3b  | 500363 | 1,04 | up   |
| 6108391 | 7171549 | 1303546 | tubulin, beta 6                             | Tubb6   | 307351 | 2,78 | up   |
| 6094664 | 7171549 | 1303544 | tubulin, beta 6                             | Tubb6   | 307351 | 2,31 | up   |
| 6217058 | 7171549 | 1303550 | tubulin, beta 6                             | Tubb6   | 307351 | 1,83 | up   |
| 5803570 | 7171549 | 1303550 | tubulin, beta 6                             | Tubb6   | 307351 | 1,62 | up   |
| 6458498 | 7171549 | 1303549 | tubulin, beta 6                             | Tubb6   | 307351 | 1,34 | down |
| 6642881 | 7171549 | 1303544 | tubulin, beta 6                             | Tubb6   | 307351 | 1,25 | down |
| 5640660 | 7147720 | 1245213 | tubulin, gamma complex associated protein 3 | Tubgcp3 | 306599 | 2,08 | down |
| 5965880 | 7147720 | 1245222 | tubulin, gamma complex associated protein 3 | Tubgcp3 | 306599 | 1,64 | down |
| 5949380 | 7147720 | 1245217 | tubulin, gamma complex associated protein 3 | Tubgcp3 | 306599 | 1,59 | down |
| 6529347 | 7147720 | 1245202 | tubulin, gamma complex associated protein 3 | Tubgcp3 | 306599 | 1,44 | down |
| 6113645 | 7147720 | 1245219 | tubulin, gamma complex associated protein 3 | Tubgcp3 | 306599 | 1,41 | up   |
| 6148883 | 7147720 | 1245214 | tubulin, gamma complex associated protein 3 | Tubgcp3 | 306599 | 1,41 | down |
| 6675409 | 7147720 | 1245204 | tubulin, gamma complex associated protein 3 | Tubgcp3 | 306599 | 1,39 | up   |
| 6709443 | 7147720 | 1245236 | tubulin, gamma complex associated protein 3 | Tubgcp3 | 306599 | 1,34 | down |
| 5756683 | 7147720 | 1245210 | tubulin, gamma complex associated protein 3 | Tubgcp3 | 306599 | 1,32 | down |
| 6469107 | 7147720 | 1245202 | tubulin, gamma complex associated protein 3 | Tubgcp3 | 306599 | 1,30 | down |
| 5964782 | 7147720 | 1245206 | tubulin, gamma complex associated protein 3 | Tubgcp3 | 306599 | 1,25 | up   |
| 6320980 | 7147720 | 1245224 | tubulin, gamma complex associated protein 3 | Tubgcp3 | 306599 | 1,23 | up   |
| 6264528 | 7147720 | 1245221 | tubulin, gamma complex associated protein 3 | Tubgcp3 | 306599 | 1,20 | up   |
| 6186792 | 7147720 | 1245209 | tubulin, gamma complex associated protein 3 | Tubgcp3 | 306599 | 1,20 | down |
| 5796674 | 7147720 | 1245233 | tubulin, gamma complex associated protein 3 | Tubgcp3 | 306599 | 1,20 | up   |
| 5911171 | 7147720 | 1245237 | tubulin, gamma complex associated protein 3 | Tubgcp3 | 306599 | 1,15 | down |
| 6435937 | 7147720 | 1245238 | tubulin, gamma complex associated protein 3 | Tubgcp3 | 306599 | 1,15 | up   |
| 6307662 | 7147720 | 1245233 | tubulin, gamma complex associated protein 3 | Tubgcp3 | 306599 | 1,09 | up   |
| 5757390 | 7147720 | 1245215 | tubulin, gamma complex associated protein 3 | Tubgcp3 | 306599 | 1,07 | up   |
| 5808843 | 7147720 | 1245228 | tubulin, gamma complex associated protein 3 | Tubgcp3 | 306599 | 1,07 | down |
| 6528947 | 7147720 | 1245234 | tubulin, gamma complex associated protein 3 | Tubgcp3 | 306599 | 1,07 | down |
| 6738434 | 7147720 | 1245226 | tubulin, gamma complex associated protein 3 | Tubgcp3 | 306599 | 1,06 | up   |
| 6404658 | 7147720 | 1245216 | tubulin, gamma complex associated protein 3 | Tubgcp3 | 306599 | 1,03 | down |
| 6108930 | 7147720 | 1245210 | tubulin, gamma complex associated protein 3 | Tubgcp3 | 306599 | 1,01 | up   |
| 6002720 | 7147720 | 1245237 | tubulin, gamma complex associated protein 3 | Tubgcp3 | 306599 | 1,00 | up   |
| 6544771 | 7369712 | 1794817 | tubulin-specific chaperone d                | Tbcd    | 360683 | 2,11 | up   |
| 5920456 | 7369712 | 1794846 | tubulin-specific chaperone d                | Tbcd    | 360683 | 1,53 | down |
| 6530352 | 7369712 | 1794824 | tubulin-specific chaperone d                | Tbcd    | 360683 | 1,39 | down |
| 6299880 | 7369712 | 1794844 | tubulin-specific chaperone d                | Tbcd    | 360683 | 1,37 | down |
| 5770152 | 7369712 | 1794821 | tubulin-specific chaperone d                | Tbcd    | 360683 | 1,34 | down |
| 6302331 | 7369712 | 1794822 | tubulin-specific chaperone d                | Tbcd    | 360683 | 1,29 | up   |
| 6072363 | 7369712 | 1794819 | tubulin-specific chaperone d                | Tbcd    | 360683 | 1,25 | up   |
| 5883697 | 7369712 | 1794837 | tubulin-specific chaperone d                | Tbcd    | 360683 | 1,25 | down |
| 5793817 | 7369712 | 1794836 | tubulin-specific chaperone d                | Tbcd    | 360683 | 1,21 | down |
| 5842790 | 7369712 | 1794849 | tubulin-specific chaperone d                | Tbcd    | 360683 | 1,18 | down |
| 6056054 | 7369712 | 1794827 | tubulin-specific chaperone d                | Tbcd    | 360683 | 1,18 | down |
| 6172375 | 7369712 | 1794840 | tubulin-specific chaperone d                | Tbcd    | 360683 | 1,14 | up   |
| 6097007 | 7369712 | 1794842 | tubulin-specific chaperone d                | Tbcd    | 360683 | 1,13 | down |
| 6300729 | 7369712 | 1794820 | tubulin-specific chaperone d                | Tbcd    | 360683 | 1,12 | up   |
| 5824699 | 7369712 | 1794839 | tubulin-specific chaperone d                | Tbcd    | 360683 | 1,11 | down |
| 6273348 | 7369712 | 1794823 | tubulin-specific chaperone d                | Tbcd    | 360683 | 1,11 | down |
| 6263029 | 7369712 | 1794826 | tubulin-specific chaperone d                | Tbcd    | 360683 | 1,09 | down |
| 6330312 | 7369712 | 1794825 | tubulin-specific chaperone d                | Tbcd    | 360683 | 1,06 | down |
| 5780176 | 7369712 | 1794850 | tubulin-specific chaperone d                | Tbcd    | 360683 | 1,04 | down |
| 6644162 | 7369712 | 1794847 | tubulin-specific chaperone d                | Tbcd    | 360683 | 1,02 | up   |
| 6415245 | 7369712 | 1794849 | tubulin-specific chaperone d                | Tbcd    | 360683 | 1,01 | down |
| 5921791 | 7291393 | 1600085 | tubulointerstitial nephritis antigen-like 1 | Tinagl1 | 94174  | 2,03 | down |
| 5707764 | 7291393 | 1600091 | tubulointerstitial nephritis antigen-like 1 | Tinagl1 | 94174  | 1,72 | down |

|         |         |         |                                             |         |        |      |      |
|---------|---------|---------|---------------------------------------------|---------|--------|------|------|
| 5924433 | 7291393 | 1600080 | tubulointerstitial nephritis antigen-like 1 | Tinagl1 | 94174  | 1,51 | up   |
| 6074376 | 7291393 | 1600079 | tubulointerstitial nephritis antigen-like 1 | Tinagl1 | 94174  | 1,32 | up   |
| 5993218 | 7291393 | 1600084 | tubulointerstitial nephritis antigen-like 1 | Tinagl1 | 94174  | 1,29 | up   |
| 5725802 | 7291393 | 1600088 | tubulointerstitial nephritis antigen-like 1 | Tinagl1 | 94174  | 1,27 | down |
| 6117039 | 7291393 | 1600081 | tubulointerstitial nephritis antigen-like 1 | Tinagl1 | 94174  | 1,22 | down |
| 6635471 | 7291393 | 1600091 | tubulointerstitial nephritis antigen-like 1 | Tinagl1 | 94174  | 1,17 | up   |
| 6172338 | 7291393 | 1600083 | tubulointerstitial nephritis antigen-like 1 | Tinagl1 | 94174  | 1,15 | down |
| 6369826 | 7291393 | 1600087 | tubulointerstitial nephritis antigen-like 1 | Tinagl1 | 94174  | 1,13 | up   |
| 6590448 | 7291393 | 1600086 | tubulointerstitial nephritis antigen-like 1 | Tinagl1 | 94174  | 1,12 | up   |
| 6685997 | 7291393 | 1600089 | tubulointerstitial nephritis antigen-like 1 | Tinagl1 | 94174  | 1,08 | up   |
| 5952775 | 7291393 | 1600086 | tubulointerstitial nephritis antigen-like 1 | Tinagl1 | 94174  | 1,08 | up   |
| 5628653 | 7291393 | 1600079 | tubulointerstitial nephritis antigen-like 1 | Tinagl1 | 94174  | 1,08 | down |
| 6132376 | 7291393 | 1600083 | tubulointerstitial nephritis antigen-like 1 | Tinagl1 | 94174  | 1,07 | up   |
| 6677061 | 7291393 | 1600091 | tubulointerstitial nephritis antigen-like 1 | Tinagl1 | 94174  | 1,07 | up   |
| 5653746 | 7291393 | 1600082 | tubulointerstitial nephritis antigen-like 1 | Tinagl1 | 94174  | 1,07 | up   |
| 5716756 | 7291393 | 1600090 | tubulointerstitial nephritis antigen-like 1 | Tinagl1 | 94174  | 1,03 | up   |
| 6739870 | 7050167 | 1009829 | tudor domain containing 12                  | Tdrd12  | 292813 | 1,09 | down |
| 5657835 | 7134056 | 1211483 | tudor domain containing 3                   | Tdrd3   | 306066 | 2,22 | down |
| 6180993 | 7134056 | 1211483 | tudor domain containing 3                   | Tdrd3   | 306066 | 1,65 | down |
| 6183116 | 7134056 | 1211489 | tudor domain containing 3                   | Tdrd3   | 306066 | 1,58 | up   |
| 5794671 | 7134056 | 1211495 | tudor domain containing 3                   | Tdrd3   | 306066 | 1,40 | up   |
| 5857839 | 7134056 | 1211496 | tudor domain containing 3                   | Tdrd3   | 306066 | 1,34 | up   |
| 5737467 | 7134056 | 1211486 | tudor domain containing 3                   | Tdrd3   | 306066 | 1,23 | up   |
| 5971357 | 7134056 | 1211493 | tudor domain containing 3                   | Tdrd3   | 306066 | 1,23 | down |
| 6439173 | 7134056 | 1211490 | tudor domain containing 3                   | Tdrd3   | 306066 | 1,22 | up   |
| 6483064 | 7134056 | 1211488 | tudor domain containing 3                   | Tdrd3   | 306066 | 1,14 | down |
| 5738022 | 7134056 | 1211494 | tudor domain containing 3                   | Tdrd3   | 306066 | 1,07 | down |
| 6456598 | 7134056 | 1211484 | tudor domain containing 3                   | Tdrd3   | 306066 | 1,04 | up   |
| 5815069 | 7134056 | 1211486 | tudor domain containing 3                   | Tdrd3   | 306066 | 1,04 | down |
| 5732491 | 7134056 | 1211485 | tudor domain containing 3                   | Tdrd3   | 306066 | 1,04 | up   |
| 6736069 | 7134056 | 1211491 | tudor domain containing 3                   | Tdrd3   | 306066 | 1,02 | up   |
| 6012586 | 7134056 | 1211492 | tudor domain containing 3                   | Tdrd3   | 306066 | 1,01 | down |
| 6388214 | 7134056 | 1211487 | tudor domain containing 3                   | Tdrd3   | 306066 | 1,01 | up   |
| 6729097 | 7112671 | 1158970 | tudor domain containing 5                   | Tdrd5   | 289129 | 2,16 | down |
| 6385541 | 7112671 | 1158969 | tudor domain containing 5                   | Tdrd5   | 289129 | 1,57 | down |
| 6325130 | 7112671 | 1158968 | tudor domain containing 5                   | Tdrd5   | 289129 | 1,47 | down |
| 6161807 | 7112671 | 1158972 | tudor domain containing 5                   | Tdrd5   | 289129 | 1,39 | down |
| 6474722 | 7112671 | 1158973 | tudor domain containing 5                   | Tdrd5   | 289129 | 1,39 | down |
| 5886902 | 7112671 | 1158958 | tudor domain containing 5                   | Tdrd5   | 289129 | 1,36 | down |
| 6407684 | 7112671 | 1158956 | tudor domain containing 5                   | Tdrd5   | 289129 | 1,34 | up   |
| 5719748 | 7112671 | 1158961 | tudor domain containing 5                   | Tdrd5   | 289129 | 1,28 | down |
| 6435036 | 7112671 | 1158968 | tudor domain containing 5                   | Tdrd5   | 289129 | 1,27 | down |
| 6088366 | 7112671 | 1158967 | tudor domain containing 5                   | Tdrd5   | 289129 | 1,24 | down |
| 5859053 | 7112671 | 1158971 | tudor domain containing 5                   | Tdrd5   | 289129 | 1,19 | up   |
| 6699432 | 7112671 | 1158965 | tudor domain containing 5                   | Tdrd5   | 289129 | 1,18 | up   |
| 5747067 | 7112671 | 1158957 | tudor domain containing 5                   | Tdrd5   | 289129 | 1,12 | down |
| 6139467 | 7112671 | 1158966 | tudor domain containing 5                   | Tdrd5   | 289129 | 1,08 | down |
| 6627173 | 7112671 | 1158959 | tudor domain containing 5                   | Tdrd5   | 289129 | 1,08 | up   |
| 5788872 | 7112671 | 1158972 | tudor domain containing 5                   | Tdrd5   | 289129 | 1,07 | down |
| 6450947 | 7112671 | 1158963 | tudor domain containing 5                   | Tdrd5   | 289129 | 1,06 | up   |
| 5936808 | 7112671 | 1158960 | tudor domain containing 5                   | Tdrd5   | 289129 | 1,04 | up   |
| 6080235 | 7112671 | 1158974 | tudor domain containing 5                   | Tdrd5   | 289129 | 1,04 | up   |
| 5886450 | 7112671 | 1158966 | tudor domain containing 5                   | Tdrd5   | 289129 | 1,04 | down |
| 6522071 | 7112671 | 1158961 | tudor domain containing 5                   | Tdrd5   | 289129 | 1,03 | down |
| 5709207 | 7112671 | 1158956 | tudor domain containing 5                   | Tdrd5   | 289129 | 1,01 | down |
| 6075245 | 7302018 | 1626979 | tudor domain containing 9                   | Tdrd9   | 299343 | 2,41 | up   |
| 6005567 | 7302018 | 1626982 | tudor domain containing 9                   | Tdrd9   | 299343 | 1,92 | down |

|         |         |         |                                                        |          |        |      |      |
|---------|---------|---------|--------------------------------------------------------|----------|--------|------|------|
| 5782843 | 7302018 | 1626985 | tudor domain containing 9                              | Tdrd9    | 299343 | 1,55 | down |
| 6595520 | 7302018 | 1626970 | tudor domain containing 9                              | Tdrd9    | 299343 | 1,54 | up   |
| 6547581 | 7302018 | 1626993 | tudor domain containing 9                              | Tdrd9    | 299343 | 1,51 | down |
| 5624946 | 7302018 | 1626971 | tudor domain containing 9                              | Tdrd9    | 299343 | 1,44 | up   |
| 6646438 | 7302018 | 1626978 | tudor domain containing 9                              | Tdrd9    | 299343 | 1,41 | up   |
| 6572301 | 7302018 | 1626976 | tudor domain containing 9                              | Tdrd9    | 299343 | 1,39 | down |
| 6694553 | 7302018 | 1626994 | tudor domain containing 9                              | Tdrd9    | 299343 | 1,35 | up   |
| 6261155 | 7302018 | 1626975 | tudor domain containing 9                              | Tdrd9    | 299343 | 1,29 | up   |
| 6390626 | 7302018 | 1626992 | tudor domain containing 9                              | Tdrd9    | 299343 | 1,25 | up   |
| 5995995 | 7302018 | 1626983 | tudor domain containing 9                              | Tdrd9    | 299343 | 1,24 | up   |
| 6202323 | 7302018 | 1626988 | tudor domain containing 9                              | Tdrd9    | 299343 | 1,23 | down |
| 6365309 | 7302018 | 1626977 | tudor domain containing 9                              | Tdrd9    | 299343 | 1,23 | down |
| 5824550 | 7302018 | 1626995 | tudor domain containing 9                              | Tdrd9    | 299343 | 1,21 | down |
| 6301140 | 7302018 | 1626986 | tudor domain containing 9                              | Tdrd9    | 299343 | 1,18 | down |
| 5878629 | 7302018 | 1626995 | tudor domain containing 9                              | Tdrd9    | 299343 | 1,15 | down |
| 6451337 | 7302018 | 1626976 | tudor domain containing 9                              | Tdrd9    | 299343 | 1,15 | up   |
| 6129252 | 7302018 | 1626968 | tudor domain containing 9                              | Tdrd9    | 299343 | 1,14 | down |
| 6136993 | 7302018 | 1626982 | tudor domain containing 9                              | Tdrd9    | 299343 | 1,13 | down |
| 6446573 | 7302018 | 1626991 | tudor domain containing 9                              | Tdrd9    | 299343 | 1,13 | up   |
| 6037364 | 7302018 | 1626976 | tudor domain containing 9                              | Tdrd9    | 299343 | 1,12 | down |
| 6366733 | 7302018 | 1626982 | tudor domain containing 9                              | Tdrd9    | 299343 | 1,09 | up   |
| 6574364 | 7302018 | 1626982 | tudor domain containing 9                              | Tdrd9    | 299343 | 1,08 | up   |
| 5635793 | 7302018 | 1626966 | tudor domain containing 9                              | Tdrd9    | 299343 | 1,07 | down |
| 6745730 | 7302018 | 1626987 | tudor domain containing 9                              | Tdrd9    | 299343 | 1,07 | down |
| 6434211 | 7302018 | 1626981 | tudor domain containing 9                              | Tdrd9    | 299343 | 1,06 | down |
| 6448190 | 7302018 | 1626980 | tudor domain containing 9                              | Tdrd9    | 299343 | 1,06 | down |
| 6177487 | 7302018 | 1626969 | tudor domain containing 9                              | Tdrd9    | 299343 | 1,04 | up   |
| 6678353 | 7302018 | 1626982 | tudor domain containing 9                              | Tdrd9    | 299343 | 1,04 | up   |
| 6202668 | 7302018 | 1626974 | tudor domain containing 9                              | Tdrd9    | 299343 | 1,03 | down |
| 6146060 | 7302018 | 1626990 | tudor domain containing 9                              | Tdrd9    | 299343 | 1,03 | up   |
| 5810784 | 7302018 | 1626965 | tudor domain containing 9                              | Tdrd9    | 299343 | 1,01 | down |
| 5774882 | 7302018 | 1626989 | tudor domain containing 9                              | Tdrd9    | 299343 | 1,01 | up   |
| 5889448 | 7079135 | 1077630 | tumor necrosis factor (ligand) superfamily, member 13  | Tnfsf13  | 287437 | 2,23 | up   |
| 6688697 | 7079135 | 1077624 | tumor necrosis factor (ligand) superfamily, member 13  | Tnfsf13  | 287437 | 1,49 | up   |
| 5747075 | 7079135 | 1077625 | tumor necrosis factor (ligand) superfamily, member 13  | Tnfsf13  | 287437 | 1,47 | up   |
| 6166135 | 7079135 | 1077627 | tumor necrosis factor (ligand) superfamily, member 13  | Tnfsf13  | 287437 | 1,33 | down |
| 5906147 | 7079135 | 1077626 | tumor necrosis factor (ligand) superfamily, member 13  | Tnfsf13  | 287437 | 1,13 | down |
| 6073542 | 7079135 | 1077629 | tumor necrosis factor (ligand) superfamily, member 13  | Tnfsf13  | 287437 | 1,12 | up   |
| 5758386 | 7079135 | 1077631 | tumor necrosis factor (ligand) superfamily, member 13  | Tnfsf13  | 287437 | 1,07 | up   |
| 6332232 | 7079135 | 1077628 | tumor necrosis factor (ligand) superfamily, member 13  | Tnfsf13  | 287437 | 1,02 | down |
| 6021551 | 7153895 | 1259920 | tumor necrosis factor (ligand) superfamily, member 13b | Tnfsf13b | 498666 | 1,35 | down |
| 6195858 | 7153895 | 1259918 | tumor necrosis factor (ligand) superfamily, member 13b | Tnfsf13b | 498666 | 1,08 | down |
| 6413503 | 7153895 | 1259923 | tumor necrosis factor (ligand) superfamily, member 13b | Tnfsf13b | 498666 | 1,08 | down |
| 5992345 | 7153895 | 1259921 | tumor necrosis factor (ligand) superfamily, member 13b | Tnfsf13b | 498666 | 1,06 | up   |
| 6507667 | 7153895 | 1259924 | tumor necrosis factor (ligand) superfamily, member 13b | Tnfsf13b | 498666 | 1,01 | up   |
| 6742635 | 7287386 | 1590135 | tumor necrosis factor (ligand) superfamily, member 15  | Tnfsf15  | 252878 | 2,10 | down |
| 5919760 | 7287386 | 1590133 | tumor necrosis factor (ligand) superfamily, member 15  | Tnfsf15  | 252878 | 1,39 | up   |
| 6571779 | 7287386 | 1590135 | tumor necrosis factor (ligand) superfamily, member 15  | Tnfsf15  | 252878 | 1,31 | down |
| 5765467 | 7287386 | 1590132 | tumor necrosis factor (ligand) superfamily, member 15  | Tnfsf15  | 252878 | 1,07 | down |
| 6020877 | 7287386 | 1590134 | tumor necrosis factor (ligand) superfamily, member 15  | Tnfsf15  | 252878 | 1,07 | up   |
| 5813383 | 7287386 | 1590132 | tumor necrosis factor (ligand) superfamily, member 15  | Tnfsf15  | 252878 | 1,03 | up   |
| 6002680 | 7292877 | 1603512 | tumor necrosis factor receptor superfamily, member 1b  | Tnfrsf1b | 156767 | 2,23 | down |
| 6152522 | 7292877 | 1603518 | tumor necrosis factor receptor superfamily, member 1b  | Tnfrsf1b | 156767 | 1,90 | up   |
| 6472250 | 7292877 | 1603514 | tumor necrosis factor receptor superfamily, member 1b  | Tnfrsf1b | 156767 | 1,81 | down |
| 5827190 | 7292877 | 1603519 | tumor necrosis factor receptor superfamily, member 1b  | Tnfrsf1b | 156767 | 1,58 | up   |
| 6656104 | 7292877 | 1603515 | tumor necrosis factor receptor superfamily, member 1b  | Tnfrsf1b | 156767 | 1,57 | up   |
| 5906009 | 7292877 | 1603513 | tumor necrosis factor receptor superfamily, member 1b  | Tnfrsf1b | 156767 | 1,33 | up   |

|         |         |         |                                                       |          |        |      |      |
|---------|---------|---------|-------------------------------------------------------|----------|--------|------|------|
| 6041007 | 7292877 | 1603521 | tumor necrosis factor receptor superfamily, member 1b | Tnfrsf1b | 156767 | 1,24 | down |
| 6321715 | 7292877 | 1603512 | tumor necrosis factor receptor superfamily, member 1b | Tnfrsf1b | 156767 | 1,20 | down |
| 6599834 | 7292877 | 1603512 | tumor necrosis factor receptor superfamily, member 1b | Tnfrsf1b | 156767 | 1,15 | down |
| 6102649 | 7292877 | 1603512 | tumor necrosis factor receptor superfamily, member 1b | Tnfrsf1b | 156767 | 1,12 | up   |
| 5801072 | 7292877 | 1603520 | tumor necrosis factor receptor superfamily, member 1b | Tnfrsf1b | 156767 | 1,12 | down |
| 6015617 | 7292877 | 1603522 | tumor necrosis factor receptor superfamily, member 1b | Tnfrsf1b | 156767 | 1,11 | down |
| 5718733 | 7292877 | 1603516 | tumor necrosis factor receptor superfamily, member 1b | Tnfrsf1b | 156767 | 1,11 | up   |
| 6093010 | 7292877 | 1603517 | tumor necrosis factor receptor superfamily, member 1b | Tnfrsf1b | 156767 | 1,09 | up   |
| 6434114 | 7292877 | 1603513 | tumor necrosis factor receptor superfamily, member 1b | Tnfrsf1b | 156767 | 1,05 | down |
| 5932505 | 7191983 | 1355173 | tumor protein D52                                     | Tpd52    | 294900 | 1,31 | up   |
| 6325826 | 7191983 | 1355164 | tumor protein D52                                     | Tpd52    | 294900 | 1,27 | down |
| 6715811 | 7191983 | 1355168 | tumor protein D52                                     | Tpd52    | 294900 | 1,22 | down |
| 5874649 | 7191983 | 1355175 | tumor protein D52                                     | Tpd52    | 294900 | 1,12 | down |
| 5728043 | 7191983 | 1355175 | tumor protein D52                                     | Tpd52    | 294900 | 1,08 | down |
| 6398008 | 7191983 | 1355175 | tumor protein D52                                     | Tpd52    | 294900 | 1,07 | down |
| 6645823 | 7191983 | 1355164 | tumor protein D52                                     | Tpd52    | 294900 | 1,03 | up   |
| 6621794 | 7191983 | 1355161 | tumor protein D52                                     | Tpd52    | 294900 | 1,03 | down |
| 6679473 | 7191983 | 1355166 | tumor protein D52                                     | Tpd52    | 294900 | 1,01 | up   |
| 6226002 | 7243894 | 1482991 | tumor protein p53 binding protein 1                   | Tp53bp1  | 296099 | 1,57 | up   |
| 6087466 | 7243894 | 1482960 | tumor protein p53 binding protein 1                   | Tp53bp1  | 296099 | 1,57 | up   |
| 5807789 | 7243894 | 1482959 | tumor protein p53 binding protein 1                   | Tp53bp1  | 296099 | 1,51 | up   |
| 5653198 | 7243894 | 1482974 | tumor protein p53 binding protein 1                   | Tp53bp1  | 296099 | 1,45 | down |
| 6723660 | 7243894 | 1482984 | tumor protein p53 binding protein 1                   | Tp53bp1  | 296099 | 1,30 | down |
| 5687911 | 7243894 | 1482976 | tumor protein p53 binding protein 1                   | Tp53bp1  | 296099 | 1,29 | down |
| 5825886 | 7243894 | 1482951 | tumor protein p53 binding protein 1                   | Tp53bp1  | 296099 | 1,27 | down |
| 6334522 | 7243894 | 1482989 | tumor protein p53 binding protein 1                   | Tp53bp1  | 296099 | 1,26 | down |
| 6570520 | 7243894 | 1482977 | tumor protein p53 binding protein 1                   | Tp53bp1  | 296099 | 1,23 | up   |
| 6224934 | 7243894 | 1482988 | tumor protein p53 binding protein 1                   | Tp53bp1  | 296099 | 1,23 | down |
| 6247476 | 7243894 | 1482955 | tumor protein p53 binding protein 1                   | Tp53bp1  | 296099 | 1,22 | down |
| 5867787 | 7243894 | 1482978 | tumor protein p53 binding protein 1                   | Tp53bp1  | 296099 | 1,21 | down |
| 5863007 | 7243894 | 1482956 | tumor protein p53 binding protein 1                   | Tp53bp1  | 296099 | 1,17 | down |
| 6042755 | 7243894 | 1482958 | tumor protein p53 binding protein 1                   | Tp53bp1  | 296099 | 1,16 | up   |
| 6325384 | 7243894 | 1482978 | tumor protein p53 binding protein 1                   | Tp53bp1  | 296099 | 1,15 | down |
| 5659213 | 7243894 | 1482963 | tumor protein p53 binding protein 1                   | Tp53bp1  | 296099 | 1,14 | up   |
| 6452074 | 7243894 | 1482985 | tumor protein p53 binding protein 1                   | Tp53bp1  | 296099 | 1,13 | up   |
| 6264339 | 7243894 | 1482982 | tumor protein p53 binding protein 1                   | Tp53bp1  | 296099 | 1,13 | down |
| 6348581 | 7243894 | 1482965 | tumor protein p53 binding protein 1                   | Tp53bp1  | 296099 | 1,12 | down |
| 6333966 | 7243894 | 1482966 | tumor protein p53 binding protein 1                   | Tp53bp1  | 296099 | 1,12 | down |
| 5722866 | 7243894 | 1482964 | tumor protein p53 binding protein 1                   | Tp53bp1  | 296099 | 1,11 | down |
| 6159858 | 7243894 | 1482969 | tumor protein p53 binding protein 1                   | Tp53bp1  | 296099 | 1,09 | up   |
| 6558791 | 7243894 | 1482968 | tumor protein p53 binding protein 1                   | Tp53bp1  | 296099 | 1,08 | down |
| 5825075 | 7243894 | 1482981 | tumor protein p53 binding protein 1                   | Tp53bp1  | 296099 | 1,07 | down |
| 5834231 | 7243894 | 1482961 | tumor protein p53 binding protein 1                   | Tp53bp1  | 296099 | 1,07 | up   |
| 6292673 | 7243894 | 1482976 | tumor protein p53 binding protein 1                   | Tp53bp1  | 296099 | 1,03 | up   |
| 6702564 | 7243894 | 1482977 | tumor protein p53 binding protein 1                   | Tp53bp1  | 296099 | 1,03 | down |
| 6048704 | 7243894 | 1482957 | tumor protein p53 binding protein 1                   | Tp53bp1  | 296099 | 1,03 | down |
| 6505772 | 7243894 | 1482972 | tumor protein p53 binding protein 1                   | Tp53bp1  | 296099 | 1,01 | up   |
| 5938852 | 7323387 | 1679455 | tumor rejection antigen gp96                          | Tra1     | 362862 | 2,40 | up   |
| 6412135 | 7323387 | 1679455 | tumor rejection antigen gp96                          | Tra1     | 362862 | 2,21 | up   |
| 6208142 | 7323387 | 1679464 | tumor rejection antigen gp96                          | Tra1     | 362862 | 1,26 | down |
| 6236466 | 7323387 | 1679451 | tumor rejection antigen gp96                          | Tra1     | 362862 | 1,16 | up   |
| 6508981 | 7323387 | 1679462 | tumor rejection antigen gp96                          | Tra1     | 362862 | 1,15 | down |
| 6442326 | 7323387 | 1679465 | tumor rejection antigen gp96                          | Tra1     | 362862 | 1,14 | down |
| 5733418 | 7323387 | 1679457 | tumor rejection antigen gp96                          | Tra1     | 362862 | 1,10 | down |
| 6213015 | 7323387 | 1679460 | tumor rejection antigen gp96                          | Tra1     | 362862 | 1,10 | up   |
| 6247294 | 7323387 | 1679458 | tumor rejection antigen gp96                          | Tra1     | 362862 | 1,09 | up   |
| 5715255 | 7323387 | 1679461 | tumor rejection antigen gp96                          | Tra1     | 362862 | 1,08 | down |

|         |         |         |                              |         |        |      |      |
|---------|---------|---------|------------------------------|---------|--------|------|------|
| 6629531 | 7323387 | 1679467 | tumor rejection antigen gp96 | Tra1    | 362862 | 1,07 | up   |
| 5904178 | 7323387 | 1679456 | tumor rejection antigen gp96 | Tra1    | 362862 | 1,06 | up   |
| 6207220 | 7323387 | 1679453 | tumor rejection antigen gp96 | Tra1    | 362862 | 1,06 | down |
| 6664313 | 7323387 | 1679455 | tumor rejection antigen gp96 | Tra1    | 362862 | 1,03 | up   |
| 5757391 | 7323387 | 1679459 | tumor rejection antigen gp96 | Tra1    | 362862 | 1,03 | down |
| 5994018 | 7323387 | 1679454 | tumor rejection antigen gp96 | Tra1    | 362862 | 1,02 | down |
| 6452904 | 7323387 | 1679463 | tumor rejection antigen gp96 | Tra1    | 362862 | 1,02 | up   |
| 6188727 | 7323387 | 1679466 | tumor rejection antigen gp96 | Tra1    | 362862 | 1,01 | down |
| 6291588 | 7323387 | 1679455 | tumor rejection antigen gp96 | Tra1    | 362862 | 1,01 | up   |
| 5744611 | 7323387 | 1679452 | tumor rejection antigen gp96 | Tra1    | 362862 | 1,01 | down |
| 6588231 | 7297292 | 1614690 | TWIST neighbor               | Twistnb | 362728 | 2,46 | down |
| 6221009 | 7297292 | 1614693 | TWIST neighbor               | Twistnb | 362728 | 1,54 | up   |
| 6109250 | 7297292 | 1614693 | TWIST neighbor               | Twistnb | 362728 | 1,37 | down |
| 5729074 | 7297292 | 1614693 | TWIST neighbor               | Twistnb | 362728 | 1,30 | up   |
| 6646044 | 7297292 | 1614693 | TWIST neighbor               | Twistnb | 362728 | 1,26 | up   |
| 6680336 | 7297292 | 1614692 | TWIST neighbor               | Twistnb | 362728 | 1,20 | up   |
| 6661480 | 7297292 | 1614693 | TWIST neighbor               | Twistnb | 362728 | 1,08 | down |
| 6565380 | 7297292 | 1614691 | TWIST neighbor               | Twistnb | 362728 | 1,03 | up   |
| 6273443 | 7059309 | 1029915 | two pore segment channel 2   | Tpcn2   | 309139 | 2,26 | down |
| 6097268 | 7059309 | 1029947 | two pore segment channel 2   | Tpcn2   | 309139 | 1,98 | down |
| 6524228 | 7059309 | 1029915 | two pore segment channel 2   | Tpcn2   | 309139 | 1,76 | up   |
| 6200180 | 7059309 | 1029921 | two pore segment channel 2   | Tpcn2   | 309139 | 1,69 | up   |
| 6525588 | 7059309 | 1029936 | two pore segment channel 2   | Tpcn2   | 309139 | 1,47 | down |
| 6451255 | 7059309 | 1029945 | two pore segment channel 2   | Tpcn2   | 309139 | 1,40 | down |
| 6106665 | 7059309 | 1029920 | two pore segment channel 2   | Tpcn2   | 309139 | 1,38 | down |
| 6454044 | 7059309 | 1029944 | two pore segment channel 2   | Tpcn2   | 309139 | 1,36 | up   |
| 5944733 | 7059309 | 1029922 | two pore segment channel 2   | Tpcn2   | 309139 | 1,34 | up   |
| 6242308 | 7059309 | 1029946 | two pore segment channel 2   | Tpcn2   | 309139 | 1,33 | down |
| 6619628 | 7059309 | 1029924 | two pore segment channel 2   | Tpcn2   | 309139 | 1,33 | up   |
| 5930464 | 7059309 | 1029926 | two pore segment channel 2   | Tpcn2   | 309139 | 1,31 | up   |
| 6590491 | 7059309 | 1029927 | two pore segment channel 2   | Tpcn2   | 309139 | 1,26 | up   |
| 6700444 | 7059309 | 1029917 | two pore segment channel 2   | Tpcn2   | 309139 | 1,22 | up   |
| 5970011 | 7059309 | 1029923 | two pore segment channel 2   | Tpcn2   | 309139 | 1,21 | up   |
| 6374082 | 7059309 | 1029919 | two pore segment channel 2   | Tpcn2   | 309139 | 1,19 | down |
| 6508862 | 7059309 | 1029933 | two pore segment channel 2   | Tpcn2   | 309139 | 1,18 | down |
| 5988732 | 7059309 | 1029943 | two pore segment channel 2   | Tpcn2   | 309139 | 1,18 | up   |
| 6484842 | 7059309 | 1029931 | two pore segment channel 2   | Tpcn2   | 309139 | 1,10 | up   |
| 6348069 | 7059309 | 1029941 | two pore segment channel 2   | Tpcn2   | 309139 | 1,08 | down |
| 5810557 | 7059309 | 1029929 | two pore segment channel 2   | Tpcn2   | 309139 | 1,05 | up   |
| 5867250 | 7059309 | 1029939 | two pore segment channel 2   | Tpcn2   | 309139 | 1,05 | up   |
| 6030353 | 7059309 | 1029941 | two pore segment channel 2   | Tpcn2   | 309139 | 1,04 | up   |
| 6338235 | 7059309 | 1029934 | two pore segment channel 2   | Tpcn2   | 309139 | 1,04 | down |
| 5628368 | 7059309 | 1029938 | two pore segment channel 2   | Tpcn2   | 309139 | 1,04 | down |
| 6271122 | 7059309 | 1029937 | two pore segment channel 2   | Tpcn2   | 309139 | 1,04 | down |
| 6186196 | 7059309 | 1029916 | two pore segment channel 2   | Tpcn2   | 309139 | 1,03 | down |
| 6671986 | 7059309 | 1029940 | two pore segment channel 2   | Tpcn2   | 309139 | 1,03 | up   |
| 5743938 | 7331954 | 1700449 | type II keratin Kb23         | Kb23    | 407759 | 2,46 | up   |
| 5932727 | 7331954 | 1700443 | type II keratin Kb23         | Kb23    | 407759 | 1,43 | down |
| 6657430 | 7331954 | 1700441 | type II keratin Kb23         | Kb23    | 407759 | 1,40 | down |
| 6006257 | 7331954 | 1700450 | type II keratin Kb23         | Kb23    | 407759 | 1,39 | up   |
| 6280884 | 7331954 | 1700441 | type II keratin Kb23         | Kb23    | 407759 | 1,21 | down |
| 5782653 | 7331954 | 1700447 | type II keratin Kb23         | Kb23    | 407759 | 1,17 | down |
| 5925150 | 7331954 | 1700446 | type II keratin Kb23         | Kb23    | 407759 | 1,14 | up   |
| 6456352 | 7331954 | 1700450 | type II keratin Kb23         | Kb23    | 407759 | 1,10 | up   |
| 6117155 | 7331954 | 1700441 | type II keratin Kb23         | Kb23    | 407759 | 1,07 | down |
| 5883849 | 7331954 | 1700448 | type II keratin Kb23         | Kb23    | 407759 | 1,03 | up   |
| 5747459 | 7331954 | 1700445 | type II keratin Kb23         | Kb23    | 407759 | 1,01 | down |

|         |         |         |                                                                 |        |        |      |      |
|---------|---------|---------|-----------------------------------------------------------------|--------|--------|------|------|
| 6388471 | 7331954 | 1700442 | type II keratin Kb23                                            | Kb23   | 407759 | 1,01 | down |
| 6553569 | 7331954 | 1700444 | type II keratin Kb23                                            | Kb23   | 407759 | 1,00 | down |
| 6689524 | 7030451 | 961535  | Tyro protein tyrosine kinase binding protein                    | Tyrobp | 361537 | 3,43 | up   |
| 6159131 | 7030451 | 961536  | Tyro protein tyrosine kinase binding protein                    | Tyrobp | 361537 | 1,72 | down |
| 6124796 | 7030451 | 961538  | Tyro protein tyrosine kinase binding protein                    | Tyrobp | 361537 | 1,14 | up   |
| 5913437 | 7030451 | 961539  | Tyro protein tyrosine kinase binding protein                    | Tyrobp | 361537 | 1,14 | up   |
| 6247021 | 7030451 | 961537  | Tyro protein tyrosine kinase binding protein                    | Tyrobp | 361537 | 1,13 | down |
| 6010063 | 7030451 | 961539  | Tyro protein tyrosine kinase binding protein                    | Tyrobp | 361537 | 1,11 | up   |
| 6502641 | 7290463 | 1597950 | tyrosine kinase with immunoglobulin-like and EGF-like domains 1 | Tiel   | 89806  | 2,20 | down |
| 6013233 | 7290463 | 1597949 | tyrosine kinase with immunoglobulin-like and EGF-like domains 1 | Tiel   | 89806  | 1,87 | up   |
| 6704244 | 7290463 | 1597945 | tyrosine kinase with immunoglobulin-like and EGF-like domains 1 | Tiel   | 89806  | 1,67 | up   |
| 6215872 | 7290463 | 1597955 | tyrosine kinase with immunoglobulin-like and EGF-like domains 1 | Tiel   | 89806  | 1,39 | down |
| 6202928 | 7290463 | 1597936 | tyrosine kinase with immunoglobulin-like and EGF-like domains 1 | Tiel   | 89806  | 1,37 | down |
| 6196299 | 7290463 | 1597952 | tyrosine kinase with immunoglobulin-like and EGF-like domains 1 | Tiel   | 89806  | 1,34 | up   |
| 6740674 | 7290463 | 1597951 | tyrosine kinase with immunoglobulin-like and EGF-like domains 1 | Tiel   | 89806  | 1,33 | down |
| 6675218 | 7290463 | 1597951 | tyrosine kinase with immunoglobulin-like and EGF-like domains 1 | Tiel   | 89806  | 1,26 | up   |
| 5978243 | 7290463 | 1597938 | tyrosine kinase with immunoglobulin-like and EGF-like domains 1 | Tiel   | 89806  | 1,22 | down |
| 6566831 | 7290463 | 1597942 | tyrosine kinase with immunoglobulin-like and EGF-like domains 1 | Tiel   | 89806  | 1,22 | down |
| 5735162 | 7290463 | 1597948 | tyrosine kinase with immunoglobulin-like and EGF-like domains 1 | Tiel   | 89806  | 1,21 | up   |
| 5681043 | 7290463 | 1597941 | tyrosine kinase with immunoglobulin-like and EGF-like domains 1 | Tiel   | 89806  | 1,20 | up   |
| 6644431 | 7290463 | 1597943 | tyrosine kinase with immunoglobulin-like and EGF-like domains 1 | Tiel   | 89806  | 1,19 | up   |
| 6316371 | 7290463 | 1597933 | tyrosine kinase with immunoglobulin-like and EGF-like domains 1 | Tiel   | 89806  | 1,17 | down |
| 6665200 | 7290463 | 1597937 | tyrosine kinase with immunoglobulin-like and EGF-like domains 1 | Tiel   | 89806  | 1,15 | down |
| 6498736 | 7290463 | 1597954 | tyrosine kinase with immunoglobulin-like and EGF-like domains 1 | Tiel   | 89806  | 1,14 | down |
| 6672414 | 7290463 | 1597946 | tyrosine kinase with immunoglobulin-like and EGF-like domains 1 | Tiel   | 89806  | 1,13 | down |
| 6261440 | 7290463 | 1597956 | tyrosine kinase with immunoglobulin-like and EGF-like domains 1 | Tiel   | 89806  | 1,12 | up   |
| 6097790 | 7290463 | 1597935 | tyrosine kinase with immunoglobulin-like and EGF-like domains 1 | Tiel   | 89806  | 1,11 | down |
| 6334964 | 7290463 | 1597945 | tyrosine kinase with immunoglobulin-like and EGF-like domains 1 | Tiel   | 89806  | 1,08 | up   |
| 6348820 | 7290463 | 1597945 | tyrosine kinase with immunoglobulin-like and EGF-like domains 1 | Tiel   | 89806  | 1,06 | down |
| 5736993 | 7290463 | 1597945 | tyrosine kinase with immunoglobulin-like and EGF-like domains 1 | Tiel   | 89806  | 1,05 | up   |
| 6165243 | 7290463 | 1597934 | tyrosine kinase with immunoglobulin-like and EGF-like domains 1 | Tiel   | 89806  | 1,05 | down |
| 6121207 | 7290463 | 1597941 | tyrosine kinase with immunoglobulin-like and EGF-like domains 1 | Tiel   | 89806  | 1,03 | up   |
| 6006515 | 7290463 | 1597944 | tyrosine kinase with immunoglobulin-like and EGF-like domains 1 | Tiel   | 89806  | 1,01 | down |
| 6676056 | 7290463 | 1597933 | tyrosine kinase with immunoglobulin-like and EGF-like domains 1 | Tiel   | 89806  | 1,01 | down |
| 6155061 | 7079236 | 1077789 | tyrosine kinase, non-receptor, 1                                | Tnk1   | 303247 | 2,15 | up   |
| 6356983 | 7079236 | 1077788 | tyrosine kinase, non-receptor, 1                                | Tnk1   | 303247 | 1,55 | down |
| 6358011 | 7079236 | 1077786 | tyrosine kinase, non-receptor, 1                                | Tnk1   | 303247 | 1,25 | up   |
| 6712394 | 7079236 | 1077783 | tyrosine kinase, non-receptor, 1                                | Tnk1   | 303247 | 1,22 | down |
| 6218414 | 7079236 | 1077782 | tyrosine kinase, non-receptor, 1                                | Tnk1   | 303247 | 1,20 | up   |
| 6459018 | 7079236 | 1077787 | tyrosine kinase, non-receptor, 1                                | Tnk1   | 303247 | 1,17 | up   |
| 5899686 | 7079236 | 1077784 | tyrosine kinase, non-receptor, 1                                | Tnk1   | 303247 | 1,15 | down |
| 5943648 | 7079236 | 1077785 | tyrosine kinase, non-receptor, 1                                | Tnk1   | 303247 | 1,14 | down |
| 6102109 | 7079236 | 1077781 | tyrosine kinase, non-receptor, 1                                | Tnk1   | 303247 | 1,13 | up   |
| 5652643 | 7079236 | 1077782 | tyrosine kinase, non-receptor, 1                                | Tnk1   | 303247 | 1,12 | up   |
| 6237212 | 7079236 | 1077790 | tyrosine kinase, non-receptor, 1                                | Tnk1   | 303247 | 1,10 | down |
| 5767072 | 7079236 | 1077791 | tyrosine kinase, non-receptor, 1                                | Tnk1   | 303247 | 1,10 | down |
| 6419294 | 7079236 | 1077787 | tyrosine kinase, non-receptor, 1                                | Tnk1   | 303247 | 1,10 | up   |
| 5889043 | 7079236 | 1077780 | tyrosine kinase, non-receptor, 1                                | Tnk1   | 303247 | 1,07 | up   |
| 5973485 | 7079236 | 1077782 | tyrosine kinase, non-receptor, 1                                | Tnk1   | 303247 | 1,06 | up   |
| 6609540 | 7079236 | 1077782 | tyrosine kinase, non-receptor, 1                                | Tnk1   | 303247 | 1,00 | up   |
| 6141975 | 7279810 | 1572574 | tyrosyl-tRNA synthetase                                         | Yars   | 313047 | 1,59 | down |
| 6061860 | 7279810 | 1572575 | tyrosyl-tRNA synthetase                                         | Yars   | 313047 | 1,34 | up   |
| 6745750 | 7279810 | 1572580 | tyrosyl-tRNA synthetase                                         | Yars   | 313047 | 1,16 | up   |
| 6493366 | 7279810 | 1572583 | tyrosyl-tRNA synthetase                                         | Yars   | 313047 | 1,12 | down |
| 6053412 | 7279810 | 1572589 | tyrosyl-tRNA synthetase                                         | Yars   | 313047 | 1,12 | up   |
| 5692089 | 7279810 | 1572586 | tyrosyl-tRNA synthetase                                         | Yars   | 313047 | 1,11 | up   |
| 6251309 | 7279810 | 1572577 | tyrosyl-tRNA synthetase                                         | Yars   | 313047 | 1,08 | up   |

|         |         |         |                                 |       |        |      |      |
|---------|---------|---------|---------------------------------|-------|--------|------|------|
| 6250164 | 7279810 | 1572591 | tyrosyl-tRNA synthetase         | Yars  | 313047 | 1,08 | up   |
| 6412917 | 7279810 | 1572591 | tyrosyl-tRNA synthetase         | Yars  | 313047 | 1,08 | down |
| 6278087 | 7279810 | 1572582 | tyrosyl-tRNA synthetase         | Yars  | 313047 | 1,06 | down |
| 6245243 | 7279810 | 1572584 | tyrosyl-tRNA synthetase         | Yars  | 313047 | 1,03 | down |
| 5726359 | 7279810 | 1572576 | tyrosyl-tRNA synthetase         | Yars  | 313047 | 1,01 | down |
| 6065573 | 7279810 | 1572590 | tyrosyl-tRNA synthetase         | Yars  | 313047 | 1,01 | down |
| 6271384 | 7279810 | 1572581 | tyrosyl-tRNA synthetase         | Yars  | 313047 | 1,00 | up   |
| 6004528 | 7096461 | 1118253 | ubiquitin specific peptidase 12 | Usp12 | 360763 | 1,16 | up   |
| 5876795 | 7096461 | 1118254 | ubiquitin specific peptidase 12 | Usp12 | 360763 | 1,06 | down |
| 6577891 | 7226109 | 1437358 | ubiquitin specific peptidase 20 | Usp20 | 311856 | 2,26 | down |
| 6044050 | 7226109 | 1437355 | ubiquitin specific peptidase 20 | Usp20 | 311856 | 1,27 | down |
| 6634310 | 7226109 | 1437384 | ubiquitin specific peptidase 20 | Usp20 | 311856 | 1,25 | up   |
| 6363485 | 7226109 | 1437376 | ubiquitin specific peptidase 20 | Usp20 | 311856 | 1,25 | up   |
| 5994943 | 7226109 | 1437370 | ubiquitin specific peptidase 20 | Usp20 | 311856 | 1,24 | down |
| 6449645 | 7226109 | 1437373 | ubiquitin specific peptidase 20 | Usp20 | 311856 | 1,22 | up   |
| 6039696 | 7226109 | 1437372 | ubiquitin specific peptidase 20 | Usp20 | 311856 | 1,22 | down |
| 5753599 | 7226109 | 1437359 | ubiquitin specific peptidase 20 | Usp20 | 311856 | 1,19 | up   |
| 6221292 | 7226109 | 1437384 | ubiquitin specific peptidase 20 | Usp20 | 311856 | 1,19 | down |
| 5735116 | 7226109 | 1437366 | ubiquitin specific peptidase 20 | Usp20 | 311856 | 1,18 | down |
| 6002841 | 7226109 | 1437363 | ubiquitin specific peptidase 20 | Usp20 | 311856 | 1,16 | up   |
| 5726596 | 7226109 | 1437364 | ubiquitin specific peptidase 20 | Usp20 | 311856 | 1,16 | up   |
| 6520110 | 7226109 | 1437371 | ubiquitin specific peptidase 20 | Usp20 | 311856 | 1,15 | up   |
| 5626085 | 7226109 | 1437375 | ubiquitin specific peptidase 20 | Usp20 | 311856 | 1,14 | down |
| 6116365 | 7226109 | 1437380 | ubiquitin specific peptidase 20 | Usp20 | 311856 | 1,10 | down |
| 5650908 | 7226109 | 1437365 | ubiquitin specific peptidase 20 | Usp20 | 311856 | 1,10 | down |
| 6404312 | 7226109 | 1437379 | ubiquitin specific peptidase 20 | Usp20 | 311856 | 1,08 | up   |
| 5711135 | 7226109 | 1437364 | ubiquitin specific peptidase 20 | Usp20 | 311856 | 1,06 | up   |
| 6002107 | 7226109 | 1437382 | ubiquitin specific peptidase 20 | Usp20 | 311856 | 1,05 | up   |
| 6415542 | 7226109 | 1437377 | ubiquitin specific peptidase 20 | Usp20 | 311856 | 1,04 | down |
| 6187701 | 7226109 | 1437369 | ubiquitin specific peptidase 20 | Usp20 | 311856 | 1,04 | up   |
| 5837543 | 7226109 | 1437383 | ubiquitin specific peptidase 20 | Usp20 | 311856 | 1,03 | up   |
| 6065453 | 7226109 | 1437381 | ubiquitin specific peptidase 20 | Usp20 | 311856 | 1,02 | up   |
| 6276971 | 7226109 | 1437360 | ubiquitin specific peptidase 20 | Usp20 | 311856 | 1,02 | up   |
| 6006975 | 7226109 | 1437368 | ubiquitin specific peptidase 20 | Usp20 | 311856 | 1,02 | down |
| 6295151 | 7226109 | 1437378 | ubiquitin specific peptidase 20 | Usp20 | 311856 | 1,01 | down |
| 6010935 | 7226109 | 1437362 | ubiquitin specific peptidase 20 | Usp20 | 311856 | 1,01 | down |
| 5701893 | 7086044 | 1092909 | ubiquitin specific peptidase 25 | Usp25 | 304150 | 1,91 | down |
| 5963834 | 7086044 | 1092917 | ubiquitin specific peptidase 25 | Usp25 | 304150 | 1,73 | up   |
| 6730551 | 7086044 | 1092950 | ubiquitin specific peptidase 25 | Usp25 | 304150 | 1,68 | down |
| 5730935 | 7086044 | 1092947 | ubiquitin specific peptidase 25 | Usp25 | 304150 | 1,67 | up   |
| 6130909 | 7086044 | 1092933 | ubiquitin specific peptidase 25 | Usp25 | 304150 | 1,64 | up   |
| 5866959 | 7086044 | 1092948 | ubiquitin specific peptidase 25 | Usp25 | 304150 | 1,60 | up   |
| 5694944 | 7086044 | 1092928 | ubiquitin specific peptidase 25 | Usp25 | 304150 | 1,51 | up   |
| 6064182 | 7086044 | 1092934 | ubiquitin specific peptidase 25 | Usp25 | 304150 | 1,47 | up   |
| 6497954 | 7086044 | 1092944 | ubiquitin specific peptidase 25 | Usp25 | 304150 | 1,46 | down |
| 6412257 | 7086044 | 1092915 | ubiquitin specific peptidase 25 | Usp25 | 304150 | 1,43 | down |
| 5720205 | 7086044 | 1092925 | ubiquitin specific peptidase 25 | Usp25 | 304150 | 1,40 | down |
| 5733128 | 7086044 | 1092943 | ubiquitin specific peptidase 25 | Usp25 | 304150 | 1,30 | down |
| 5878857 | 7086044 | 1092918 | ubiquitin specific peptidase 25 | Usp25 | 304150 | 1,30 | up   |
| 6122600 | 7086044 | 1092914 | ubiquitin specific peptidase 25 | Usp25 | 304150 | 1,28 | up   |
| 6035362 | 7086044 | 1092921 | ubiquitin specific peptidase 25 | Usp25 | 304150 | 1,23 | up   |
| 6347585 | 7086044 | 1092932 | ubiquitin specific peptidase 25 | Usp25 | 304150 | 1,21 | up   |
| 6414547 | 7086044 | 1092942 | ubiquitin specific peptidase 25 | Usp25 | 304150 | 1,15 | up   |
| 6400264 | 7086044 | 1092931 | ubiquitin specific peptidase 25 | Usp25 | 304150 | 1,13 | up   |
| 6314125 | 7086044 | 1092936 | ubiquitin specific peptidase 25 | Usp25 | 304150 | 1,13 | down |
| 6583374 | 7086044 | 1092931 | ubiquitin specific peptidase 25 | Usp25 | 304150 | 1,13 | up   |
| 5737319 | 7086044 | 1092949 | ubiquitin specific peptidase 25 | Usp25 | 304150 | 1,12 | up   |

|         |         |         |                                     |       |        |      |      |
|---------|---------|---------|-------------------------------------|-------|--------|------|------|
| 6099736 | 7086044 | 1092922 | ubiquitin specific peptidase 25     | Usp25 | 304150 | 1,10 | down |
| 5833989 | 7086044 | 1092929 | ubiquitin specific peptidase 25     | Usp25 | 304150 | 1,09 | up   |
| 6724324 | 7086044 | 1092949 | ubiquitin specific peptidase 25     | Usp25 | 304150 | 1,09 | down |
| 5890075 | 7086044 | 1092930 | ubiquitin specific peptidase 25     | Usp25 | 304150 | 1,08 | down |
| 6278970 | 7086044 | 1092928 | ubiquitin specific peptidase 25     | Usp25 | 304150 | 1,07 | up   |
| 6509990 | 7086044 | 1092935 | ubiquitin specific peptidase 25     | Usp25 | 304150 | 1,02 | down |
| 6558953 | 7086044 | 1092920 | ubiquitin specific peptidase 25     | Usp25 | 304150 | 1,02 | up   |
| 6319560 | 7335903 | 1709276 | ubiquitin specific peptidase 28     | Usp28 | 315639 | 1,88 | up   |
| 6169356 | 7335903 | 1709280 | ubiquitin specific peptidase 28     | Usp28 | 315639 | 1,67 | down |
| 6560917 | 7335903 | 1709295 | ubiquitin specific peptidase 28     | Usp28 | 315639 | 1,58 | up   |
| 5736084 | 7335903 | 1709294 | ubiquitin specific peptidase 28     | Usp28 | 315639 | 1,50 | up   |
| 6715743 | 7335903 | 1709292 | ubiquitin specific peptidase 28     | Usp28 | 315639 | 1,47 | up   |
| 6261473 | 7335903 | 1709288 | ubiquitin specific peptidase 28     | Usp28 | 315639 | 1,47 | down |
| 6143335 | 7335903 | 1709270 | ubiquitin specific peptidase 28     | Usp28 | 315639 | 1,40 | down |
| 6150501 | 7335903 | 1709285 | ubiquitin specific peptidase 28     | Usp28 | 315639 | 1,40 | down |
| 6199091 | 7335903 | 1709281 | ubiquitin specific peptidase 28     | Usp28 | 315639 | 1,32 | up   |
| 5904138 | 7335903 | 1709290 | ubiquitin specific peptidase 28     | Usp28 | 315639 | 1,31 | up   |
| 6302594 | 7335903 | 1709277 | ubiquitin specific peptidase 28     | Usp28 | 315639 | 1,31 | down |
| 5750051 | 7335903 | 1709295 | ubiquitin specific peptidase 28     | Usp28 | 315639 | 1,29 | down |
| 5944186 | 7335903 | 1709274 | ubiquitin specific peptidase 28     | Usp28 | 315639 | 1,28 | up   |
| 5956933 | 7335903 | 1709282 | ubiquitin specific peptidase 28     | Usp28 | 315639 | 1,27 | down |
| 5639562 | 7335903 | 1709284 | ubiquitin specific peptidase 28     | Usp28 | 315639 | 1,25 | down |
| 6612397 | 7335903 | 1709293 | ubiquitin specific peptidase 28     | Usp28 | 315639 | 1,20 | up   |
| 6635276 | 7335903 | 1709275 | ubiquitin specific peptidase 28     | Usp28 | 315639 | 1,19 | up   |
| 5913960 | 7335903 | 1709285 | ubiquitin specific peptidase 28     | Usp28 | 315639 | 1,19 | down |
| 6518977 | 7335903 | 1709282 | ubiquitin specific peptidase 28     | Usp28 | 315639 | 1,18 | down |
| 6396636 | 7335903 | 1709272 | ubiquitin specific peptidase 28     | Usp28 | 315639 | 1,18 | down |
| 5762936 | 7335903 | 1709283 | ubiquitin specific peptidase 28     | Usp28 | 315639 | 1,14 | up   |
| 6495909 | 7335903 | 1709277 | ubiquitin specific peptidase 28     | Usp28 | 315639 | 1,14 | up   |
| 6377163 | 7335903 | 1709278 | ubiquitin specific peptidase 28     | Usp28 | 315639 | 1,11 | up   |
| 5837606 | 7335903 | 1709269 | ubiquitin specific peptidase 28     | Usp28 | 315639 | 1,08 | up   |
| 6297493 | 7335903 | 1709279 | ubiquitin specific peptidase 28     | Usp28 | 315639 | 1,06 | up   |
| 6010889 | 7335903 | 1709286 | ubiquitin specific peptidase 28     | Usp28 | 315639 | 1,03 | up   |
| 6664733 | 7335903 | 1709291 | ubiquitin specific peptidase 28     | Usp28 | 315639 | 1,03 | down |
| 6314839 | 7335903 | 1709273 | ubiquitin specific peptidase 28     | Usp28 | 315639 | 1,02 | down |
| 6275816 | 7180151 | 1325192 | ubiquitin specific peptidase 38     | Usp38 | 307764 | 2,05 | up   |
| 6375971 | 7180151 | 1325198 | ubiquitin specific peptidase 38     | Usp38 | 307764 | 1,44 | up   |
| 6141185 | 7180151 | 1325203 | ubiquitin specific peptidase 38     | Usp38 | 307764 | 1,31 | down |
| 5877517 | 7180151 | 1325195 | ubiquitin specific peptidase 38     | Usp38 | 307764 | 1,31 | up   |
| 5961757 | 7180151 | 1325203 | ubiquitin specific peptidase 38     | Usp38 | 307764 | 1,14 | up   |
| 6509220 | 7180151 | 1325192 | ubiquitin specific peptidase 38     | Usp38 | 307764 | 1,12 | down |
| 6533385 | 7180151 | 1325193 | ubiquitin specific peptidase 38     | Usp38 | 307764 | 1,10 | up   |
| 5948060 | 7180151 | 1325203 | ubiquitin specific peptidase 38     | Usp38 | 307764 | 1,09 | down |
| 6526566 | 7180151 | 1325196 | ubiquitin specific peptidase 38     | Usp38 | 307764 | 1,07 | down |
| 5763747 | 7180151 | 1325192 | ubiquitin specific peptidase 38     | Usp38 | 307764 | 1,06 | down |
| 6458662 | 7180151 | 1325194 | ubiquitin specific peptidase 38     | Usp38 | 307764 | 1,06 | up   |
| 6309196 | 7180151 | 1325197 | ubiquitin specific peptidase 38     | Usp38 | 307764 | 1,02 | down |
| 6414619 | 7180151 | 1325200 | ubiquitin specific peptidase 38     | Usp38 | 307764 | 1,01 | up   |
| 5904084 | 7099973 | 1127543 | ubiquitin specific peptidase like 1 | Usp11 | 288447 | 2,00 | up   |
| 5805323 | 7099973 | 1127534 | ubiquitin specific peptidase like 1 | Usp11 | 288447 | 1,43 | down |
| 6293075 | 7099973 | 1127542 | ubiquitin specific peptidase like 1 | Usp11 | 288447 | 1,42 | down |
| 6575869 | 7099973 | 1127540 | ubiquitin specific peptidase like 1 | Usp11 | 288447 | 1,28 | up   |
| 6502857 | 7099973 | 1127537 | ubiquitin specific peptidase like 1 | Usp11 | 288447 | 1,27 | up   |
| 6012274 | 7099973 | 1127535 | ubiquitin specific peptidase like 1 | Usp11 | 288447 | 1,19 | down |
| 6020137 | 7099973 | 1127541 | ubiquitin specific peptidase like 1 | Usp11 | 288447 | 1,16 | up   |
| 6502364 | 7099973 | 1127535 | ubiquitin specific peptidase like 1 | Usp11 | 288447 | 1,10 | down |
| 5677400 | 7099973 | 1127538 | ubiquitin specific peptidase like 1 | Usp11 | 288447 | 1,09 | down |



|         |         |         |                                                                |           |           |      |      |
|---------|---------|---------|----------------------------------------------------------------|-----------|-----------|------|------|
| 5826192 | 7099973 | 1127536 | ubiquitin specific peptidase like 1                            | Usp11     | 288447    | 1,08 | up   |
| 6642904 | 7099973 | 1127540 | ubiquitin specific peptidase like 1                            | Usp11     | 288447    | 1,08 | up   |
| 6383661 | 7099973 | 1127539 | ubiquitin specific peptidase like 1                            | Usp11     | 288447    | 1,07 | down |
| 5666162 | 7099973 | 1127535 | ubiquitin specific peptidase like 1                            | Usp11     | 288447    | 1,02 | down |
| 6596992 | 7192914 | 1357829 | ubiquitin specific protease 13 (isopeptidase T-3)              | Usp13     | 310306    | 1,63 | up   |
| 5827503 | 7192914 | 1357829 | ubiquitin specific protease 13 (isopeptidase T-3)              | Usp13     | 310306    | 1,55 | down |
| 6205407 | 7192914 | 1357821 | ubiquitin specific protease 13 (isopeptidase T-3)              | Usp13     | 310306    | 1,41 | up   |
| 5838796 | 7192914 | 1357801 | ubiquitin specific protease 13 (isopeptidase T-3)              | Usp13     | 310306    | 1,31 | down |
| 5705411 | 7192914 | 1357823 | ubiquitin specific protease 13 (isopeptidase T-3)              | Usp13     | 310306    | 1,28 | up   |
| 5664548 | 7192914 | 1357794 | ubiquitin specific protease 13 (isopeptidase T-3)              | Usp13     | 310306    | 1,28 | down |
| 5647643 | 7192914 | 1357815 | ubiquitin specific protease 13 (isopeptidase T-3)              | Usp13     | 310306    | 1,26 | up   |
| 6144521 | 7192914 | 1357829 | ubiquitin specific protease 13 (isopeptidase T-3)              | Usp13     | 310306    | 1,24 | up   |
| 5976487 | 7192914 | 1357830 | ubiquitin specific protease 13 (isopeptidase T-3)              | Usp13     | 310306    | 1,23 | up   |
| 5654490 | 7192914 | 1357809 | ubiquitin specific protease 13 (isopeptidase T-3)              | Usp13     | 310306    | 1,22 | down |
| 5902906 | 7192914 | 1357793 | ubiquitin specific protease 13 (isopeptidase T-3)              | Usp13     | 310306    | 1,20 | down |
| 5623864 | 7192914 | 1357813 | ubiquitin specific protease 13 (isopeptidase T-3)              | Usp13     | 310306    | 1,20 | down |
| 6162617 | 7192914 | 1357820 | ubiquitin specific protease 13 (isopeptidase T-3)              | Usp13     | 310306    | 1,20 | up   |
| 6001306 | 7192914 | 1357786 | ubiquitin specific protease 13 (isopeptidase T-3)              | Usp13     | 310306    | 1,14 | down |
| 6626115 | 7192914 | 1357827 | ubiquitin specific protease 13 (isopeptidase T-3)              | Usp13     | 310306    | 1,13 | up   |
| 5706881 | 7192914 | 1357806 | ubiquitin specific protease 13 (isopeptidase T-3)              | Usp13     | 310306    | 1,12 | up   |
| 5812484 | 7192914 | 1357802 | ubiquitin specific protease 13 (isopeptidase T-3)              | Usp13     | 310306    | 1,12 | up   |
| 5982819 | 7192914 | 1357785 | ubiquitin specific protease 13 (isopeptidase T-3)              | Usp13     | 310306    | 1,10 | up   |
| 6181700 | 7192914 | 1357828 | ubiquitin specific protease 13 (isopeptidase T-3)              | Usp13     | 310306    | 1,09 | down |
| 5981054 | 7192914 | 1357810 | ubiquitin specific protease 13 (isopeptidase T-3)              | Usp13     | 310306    | 1,08 | down |
| 6652288 | 7192914 | 1357811 | ubiquitin specific protease 13 (isopeptidase T-3)              | Usp13     | 310306    | 1,08 | down |
| 6662234 | 7192914 | 1357814 | ubiquitin specific protease 13 (isopeptidase T-3)              | Usp13     | 310306    | 1,07 | down |
| 6042968 | 7192914 | 1357797 | ubiquitin specific protease 13 (isopeptidase T-3)              | Usp13     | 310306    | 1,05 | down |
| 5669121 | 7192914 | 1357826 | ubiquitin specific protease 13 (isopeptidase T-3)              | Usp13     | 310306    | 1,04 | down |
| 6368787 | 7192914 | 1357809 | ubiquitin specific protease 13 (isopeptidase T-3)              | Usp13     | 310306    | 1,03 | down |
| 6320957 | 7192914 | 1357824 | ubiquitin specific protease 13 (isopeptidase T-3)              | Usp13     | 310306    | 1,01 | down |
| 6371117 | 7078815 | 1076997 | ubiquitin specific protease 43                                 | rCG_32844 | 100147704 | 2,01 | down |
| 5738103 | 7078815 | 1076977 | ubiquitin specific protease 43                                 | rCG_32844 | 100147704 | 2,00 | up   |
| 6164271 | 7078815 | 1076977 | ubiquitin specific protease 43                                 | rCG_32844 | 100147704 | 1,58 | up   |
| 5658868 | 7078815 | 1076996 | ubiquitin specific protease 43                                 | rCG_32844 | 100147704 | 1,52 | up   |
| 6299826 | 7078815 | 1076975 | ubiquitin specific protease 43                                 | rCG_32844 | 100147704 | 1,51 | up   |
| 5617971 | 7078815 | 1076991 | ubiquitin specific protease 43                                 | rCG_32844 | 100147704 | 1,48 | up   |
| 6307404 | 7078815 | 1076988 | ubiquitin specific protease 43                                 | rCG_32844 | 100147704 | 1,42 | down |
| 6044777 | 7078815 | 1076985 | ubiquitin specific protease 43                                 | rCG_32844 | 100147704 | 1,33 | down |
| 6523596 | 7078815 | 1076976 | ubiquitin specific protease 43                                 | rCG_32844 | 100147704 | 1,27 | up   |
| 5645829 | 7078815 | 1076991 | ubiquitin specific protease 43                                 | rCG_32844 | 100147704 | 1,22 | down |
| 5697623 | 7078815 | 1076977 | ubiquitin specific protease 43                                 | rCG_32844 | 100147704 | 1,20 | up   |
| 6496872 | 7078815 | 1076989 | ubiquitin specific protease 43                                 | rCG_32844 | 100147704 | 1,13 | up   |
| 6348534 | 7078815 | 1076992 | ubiquitin specific protease 43                                 | rCG_32844 | 100147704 | 1,13 | up   |
| 5746177 | 7078815 | 1076988 | ubiquitin specific protease 43                                 | rCG_32844 | 100147704 | 1,11 | up   |
| 5850287 | 7078815 | 1076983 | ubiquitin specific protease 43                                 | rCG_32844 | 100147704 | 1,10 | down |
| 5933183 | 7078815 | 1076997 | ubiquitin specific protease 43                                 | rCG_32844 | 100147704 | 1,09 | down |
| 5794669 | 7078815 | 1076979 | ubiquitin specific protease 43                                 | rCG_32844 | 100147704 | 1,08 | down |
| 6682139 | 7078815 | 1076990 | ubiquitin specific protease 43                                 | rCG_32844 | 100147704 | 1,06 | up   |
| 6560202 | 7078815 | 1076984 | ubiquitin specific protease 43                                 | rCG_32844 | 100147704 | 1,06 | up   |
| 6366509 | 7078815 | 1076977 | ubiquitin specific protease 43                                 | rCG_32844 | 100147704 | 1,06 | down |
| 6054392 | 7078815 | 1076995 | ubiquitin specific protease 43                                 | rCG_32844 | 100147704 | 1,04 | down |
| 5840713 | 7078815 | 1076986 | ubiquitin specific protease 43                                 | rCG_32844 | 100147704 | 1,03 | down |
| 6393090 | 7078815 | 1076980 | ubiquitin specific protease 43                                 | rCG_32844 | 100147704 | 1,03 | down |
| 6140811 | 7078815 | 1076993 | ubiquitin specific protease 43                                 | rCG_32844 | 100147704 | 1,02 | up   |
| 6300256 | 7078815 | 1076983 | ubiquitin specific protease 43                                 | rCG_32844 | 100147704 | 1,01 | down |
| 6133750 | 7378941 | 1818453 | ubiquitin-conjugating enzyme E2A, RAD6 homolog (S. cerevisiae) | Ube2a     | 298317    | 2,31 | down |
| 6366583 | 7378941 | 1818455 | ubiquitin-conjugating enzyme E2A, RAD6 homolog (S. cerevisiae) | Ube2a     | 298317    | 1,64 | up   |

|         |         |         |                                                                |        |        |      |      |
|---------|---------|---------|----------------------------------------------------------------|--------|--------|------|------|
| 6504877 | 7378941 | 1818452 | ubiquitin-conjugating enzyme E2A, RAD6 homolog (S. cerevisiae) | Ube2a  | 298317 | 1,42 | up   |
| 6272102 | 7378941 | 1818448 | ubiquitin-conjugating enzyme E2A, RAD6 homolog (S. cerevisiae) | Ube2a  | 298317 | 1,16 | up   |
| 6119878 | 7378941 | 1818451 | ubiquitin-conjugating enzyme E2A, RAD6 homolog (S. cerevisiae) | Ube2a  | 298317 | 1,15 | down |
| 5886537 | 7378941 | 1818450 | ubiquitin-conjugating enzyme E2A, RAD6 homolog (S. cerevisiae) | Ube2a  | 298317 | 1,14 | up   |
| 6252549 | 7378941 | 1818454 | ubiquitin-conjugating enzyme E2A, RAD6 homolog (S. cerevisiae) | Ube2a  | 298317 | 1,12 | down |
| 5835365 | 7378941 | 1818449 | ubiquitin-conjugating enzyme E2A, RAD6 homolog (S. cerevisiae) | Ube2a  | 298317 | 1,04 | up   |
| 6092259 | 7235323 | 1461551 | ubiquitin-conjugating enzyme E2C                               | Ube2c  | 296368 | 3,64 | up   |
| 6440845 | 7235323 | 1461556 | ubiquitin-conjugating enzyme E2C                               | Ube2c  | 296368 | 1,78 | up   |
| 5913641 | 7235323 | 1461555 | ubiquitin-conjugating enzyme E2C                               | Ube2c  | 296368 | 1,38 | down |
| 5934090 | 7235323 | 1461551 | ubiquitin-conjugating enzyme E2C                               | Ube2c  | 296368 | 1,30 | down |
| 6095663 | 7235323 | 1461553 | ubiquitin-conjugating enzyme E2C                               | Ube2c  | 296368 | 1,10 | down |
| 6047393 | 7235323 | 1461552 | ubiquitin-conjugating enzyme E2C                               | Ube2c  | 296368 | 1,06 | down |
| 6431367 | 7076631 | 1072326 | ubiquitin-like domain containing CTD phosphatase 1             | Ublcp1 | 360514 | 2,22 | down |
| 6315925 | 7076631 | 1072323 | ubiquitin-like domain containing CTD phosphatase 1             | Ublcp1 | 360514 | 1,95 | up   |
| 6425432 | 7076631 | 1072327 | ubiquitin-like domain containing CTD phosphatase 1             | Ublcp1 | 360514 | 1,64 | up   |
| 6248216 | 7076631 | 1072325 | ubiquitin-like domain containing CTD phosphatase 1             | Ublcp1 | 360514 | 1,60 | up   |
| 6090099 | 7076631 | 1072327 | ubiquitin-like domain containing CTD phosphatase 1             | Ublcp1 | 360514 | 1,29 | down |
| 5717484 | 7076631 | 1072318 | ubiquitin-like domain containing CTD phosphatase 1             | Ublcp1 | 360514 | 1,27 | up   |
| 6450768 | 7076631 | 1072324 | ubiquitin-like domain containing CTD phosphatase 1             | Ublcp1 | 360514 | 1,23 | down |
| 5920116 | 7076631 | 1072318 | ubiquitin-like domain containing CTD phosphatase 1             | Ublcp1 | 360514 | 1,21 | down |
| 5969850 | 7076631 | 1072327 | ubiquitin-like domain containing CTD phosphatase 1             | Ublcp1 | 360514 | 1,20 | down |
| 6339555 | 7076631 | 1072320 | ubiquitin-like domain containing CTD phosphatase 1             | Ublcp1 | 360514 | 1,14 | down |
| 6116220 | 7076631 | 1072322 | ubiquitin-like domain containing CTD phosphatase 1             | Ublcp1 | 360514 | 1,12 | down |
| 5660587 | 7076631 | 1072324 | ubiquitin-like domain containing CTD phosphatase 1             | Ublcp1 | 360514 | 1,09 | down |
| 5778009 | 7076631 | 1072319 | ubiquitin-like domain containing CTD phosphatase 1             | Ublcp1 | 360514 | 1,05 | down |
| 6605114 | 7076631 | 1072321 | ubiquitin-like domain containing CTD phosphatase 1             | Ublcp1 | 360514 | 1,02 | down |
| 5932463 | 7267685 | 1541310 | ubiquitin-like modifier activating enzyme 3                    | Uba3   | 117553 | 2,53 | down |
| 5984080 | 7267685 | 1541312 | ubiquitin-like modifier activating enzyme 3                    | Uba3   | 117553 | 1,42 | up   |
| 6299650 | 7267685 | 1541321 | ubiquitin-like modifier activating enzyme 3                    | Uba3   | 117553 | 1,36 | down |
| 6746354 | 7267685 | 1541308 | ubiquitin-like modifier activating enzyme 3                    | Uba3   | 117553 | 1,35 | up   |
| 6239487 | 7267685 | 1541319 | ubiquitin-like modifier activating enzyme 3                    | Uba3   | 117553 | 1,33 | down |
| 6042970 | 7267685 | 1541316 | ubiquitin-like modifier activating enzyme 3                    | Uba3   | 117553 | 1,27 | up   |
| 6233139 | 7267685 | 1541318 | ubiquitin-like modifier activating enzyme 3                    | Uba3   | 117553 | 1,21 | down |
| 5788343 | 7267685 | 1541311 | ubiquitin-like modifier activating enzyme 3                    | Uba3   | 117553 | 1,21 | up   |
| 6635842 | 7267685 | 1541309 | ubiquitin-like modifier activating enzyme 3                    | Uba3   | 117553 | 1,20 | down |
| 5937027 | 7267685 | 1541315 | ubiquitin-like modifier activating enzyme 3                    | Uba3   | 117553 | 1,20 | down |
| 5761435 | 7267685 | 1541307 | ubiquitin-like modifier activating enzyme 3                    | Uba3   | 117553 | 1,19 | down |
| 6028724 | 7267685 | 1541320 | ubiquitin-like modifier activating enzyme 3                    | Uba3   | 117553 | 1,09 | up   |
| 5804184 | 7267685 | 1541306 | ubiquitin-like modifier activating enzyme 3                    | Uba3   | 117553 | 1,09 | down |
| 6113319 | 7267685 | 1541313 | ubiquitin-like modifier activating enzyme 3                    | Uba3   | 117553 | 1,09 | down |
| 6050531 | 7267685 | 1541305 | ubiquitin-like modifier activating enzyme 3                    | Uba3   | 117553 | 1,05 | down |
| 5639646 | 7267685 | 1541317 | ubiquitin-like modifier activating enzyme 3                    | Uba3   | 117553 | 1,04 | up   |
| 6696857 | 7267685 | 1541314 | ubiquitin-like modifier activating enzyme 3                    | Uba3   | 117553 | 1,02 | up   |
| 6309114 | 7267685 | 1541305 | ubiquitin-like modifier activating enzyme 3                    | Uba3   | 117553 | 1,02 | down |
| 6367212 | 7267685 | 1541322 | ubiquitin-like modifier activating enzyme 3                    | Uba3   | 117553 | 1,01 | down |
| 6666535 | 7340304 | 1720848 | ubiquitin-like modifier activating enzyme 7                    | Uba7   | 301000 | 3,36 | up   |
| 5762888 | 7340304 | 1720844 | ubiquitin-like modifier activating enzyme 7                    | Uba7   | 301000 | 3,07 | up   |
| 5741493 | 7340304 | 1720851 | ubiquitin-like modifier activating enzyme 7                    | Uba7   | 301000 | 2,86 | up   |
| 6321353 | 7340304 | 1720843 | ubiquitin-like modifier activating enzyme 7                    | Uba7   | 301000 | 2,75 | up   |
| 6476537 | 7340304 | 1720845 | ubiquitin-like modifier activating enzyme 7                    | Uba7   | 301000 | 2,72 | up   |
| 6490556 | 7340304 | 1720850 | ubiquitin-like modifier activating enzyme 7                    | Uba7   | 301000 | 2,56 | up   |
| 6449810 | 7340304 | 1720847 | ubiquitin-like modifier activating enzyme 7                    | Uba7   | 301000 | 2,46 | up   |
| 6361677 | 7340304 | 1720852 | ubiquitin-like modifier activating enzyme 7                    | Uba7   | 301000 | 2,08 | up   |
| 5771507 | 7340304 | 1720851 | ubiquitin-like modifier activating enzyme 7                    | Uba7   | 301000 | 1,93 | up   |
| 6570080 | 7340304 | 1720851 | ubiquitin-like modifier activating enzyme 7                    | Uba7   | 301000 | 1,91 | up   |
| 5775485 | 7340304 | 1720853 | ubiquitin-like modifier activating enzyme 7                    | Uba7   | 301000 | 1,85 | up   |
| 6587227 | 7340304 | 1720842 | ubiquitin-like modifier activating enzyme 7                    | Uba7   | 301000 | 1,84 | up   |

|         |         |         |                                                   |       |        |      |      |
|---------|---------|---------|---------------------------------------------------|-------|--------|------|------|
| 5764792 | 7340304 | 1720840 | ubiquitin-like modifier activating enzyme 7       | Uba7  | 301000 | 1,83 | down |
| 6373978 | 7340304 | 1720841 | ubiquitin-like modifier activating enzyme 7       | Uba7  | 301000 | 1,62 | up   |
| 6093628 | 7340304 | 1720857 | ubiquitin-like modifier activating enzyme 7       | Uba7  | 301000 | 1,54 | down |
| 5880274 | 7340304 | 1720840 | ubiquitin-like modifier activating enzyme 7       | Uba7  | 301000 | 1,53 | down |
| 6177392 | 7340304 | 1720853 | ubiquitin-like modifier activating enzyme 7       | Uba7  | 301000 | 1,44 | up   |
| 6722789 | 7340304 | 1720854 | ubiquitin-like modifier activating enzyme 7       | Uba7  | 301000 | 1,35 | up   |
| 6092880 | 7340304 | 1720855 | ubiquitin-like modifier activating enzyme 7       | Uba7  | 301000 | 1,27 | up   |
| 6031571 | 7340304 | 1720849 | ubiquitin-like modifier activating enzyme 7       | Uba7  | 301000 | 1,09 | up   |
| 5678623 | 7340304 | 1720856 | ubiquitin-like modifier activating enzyme 7       | Uba7  | 301000 | 1,05 | down |
| 5718772 | 7340304 | 1720858 | ubiquitin-like modifier activating enzyme 7       | Uba7  | 301000 | 1,05 | up   |
| 6463325 | 7340304 | 1720840 | ubiquitin-like modifier activating enzyme 7       | Uba7  | 301000 | 1,04 | up   |
| 5685950 | 7340304 | 1720859 | ubiquitin-like modifier activating enzyme 7       | Uba7  | 301000 | 1,04 | down |
| 5797751 | 7340304 | 1720841 | ubiquitin-like modifier activating enzyme 7       | Uba7  | 301000 | 1,02 | up   |
| 5776649 | 7370448 | 1797037 | ubiquitin-like with PHD and ring finger domains 1 | Uhrf1 | 316129 | 2,14 | down |
| 5747292 | 7370448 | 1797034 | ubiquitin-like with PHD and ring finger domains 1 | Uhrf1 | 316129 | 1,73 | up   |
| 6490782 | 7370448 | 1797026 | ubiquitin-like with PHD and ring finger domains 1 | Uhrf1 | 316129 | 1,41 | up   |
| 6735548 | 7370448 | 1797031 | ubiquitin-like with PHD and ring finger domains 1 | Uhrf1 | 316129 | 1,33 | down |
| 6384074 | 7370448 | 1797032 | ubiquitin-like with PHD and ring finger domains 1 | Uhrf1 | 316129 | 1,32 | up   |
| 6501621 | 7370448 | 1797042 | ubiquitin-like with PHD and ring finger domains 1 | Uhrf1 | 316129 | 1,32 | down |
| 6265228 | 7370448 | 1797035 | ubiquitin-like with PHD and ring finger domains 1 | Uhrf1 | 316129 | 1,32 | down |
| 6151753 | 7370448 | 1797023 | ubiquitin-like with PHD and ring finger domains 1 | Uhrf1 | 316129 | 1,27 | down |
| 6438867 | 7370448 | 1797025 | ubiquitin-like with PHD and ring finger domains 1 | Uhrf1 | 316129 | 1,27 | down |
| 6729550 | 7370448 | 1797024 | ubiquitin-like with PHD and ring finger domains 1 | Uhrf1 | 316129 | 1,24 | down |
| 6588581 | 7370448 | 1797028 | ubiquitin-like with PHD and ring finger domains 1 | Uhrf1 | 316129 | 1,24 | up   |
| 5957425 | 7370448 | 1797033 | ubiquitin-like with PHD and ring finger domains 1 | Uhrf1 | 316129 | 1,23 | up   |
| 5658590 | 7370448 | 1797027 | ubiquitin-like with PHD and ring finger domains 1 | Uhrf1 | 316129 | 1,23 | down |
| 6487584 | 7370448 | 1797044 | ubiquitin-like with PHD and ring finger domains 1 | Uhrf1 | 316129 | 1,22 | up   |
| 6121275 | 7370448 | 1797036 | ubiquitin-like with PHD and ring finger domains 1 | Uhrf1 | 316129 | 1,18 | down |
| 5769919 | 7370448 | 1797029 | ubiquitin-like with PHD and ring finger domains 1 | Uhrf1 | 316129 | 1,14 | down |
| 6368820 | 7370448 | 1797030 | ubiquitin-like with PHD and ring finger domains 1 | Uhrf1 | 316129 | 1,10 | down |
| 5669651 | 7370448 | 1797023 | ubiquitin-like with PHD and ring finger domains 1 | Uhrf1 | 316129 | 1,07 | up   |
| 5863013 | 7370448 | 1797041 | ubiquitin-like with PHD and ring finger domains 1 | Uhrf1 | 316129 | 1,03 | down |
| 6624961 | 7041140 | 988273  | ubiquitin-like with PHD and ring finger domains 2 | Uhrf2 | 309331 | 1,47 | down |
| 6211374 | 7041140 | 988290  | ubiquitin-like with PHD and ring finger domains 2 | Uhrf2 | 309331 | 1,31 | down |
| 6535903 | 7041140 | 988294  | ubiquitin-like with PHD and ring finger domains 2 | Uhrf2 | 309331 | 1,26 | up   |
| 6534498 | 7041140 | 988286  | ubiquitin-like with PHD and ring finger domains 2 | Uhrf2 | 309331 | 1,13 | down |
| 6181994 | 7041140 | 988266  | ubiquitin-like with PHD and ring finger domains 2 | Uhrf2 | 309331 | 1,11 | down |
| 6280262 | 7041140 | 988288  | ubiquitin-like with PHD and ring finger domains 2 | Uhrf2 | 309331 | 1,11 | down |
| 6737893 | 7041140 | 988271  | ubiquitin-like with PHD and ring finger domains 2 | Uhrf2 | 309331 | 1,09 | up   |
| 6370255 | 7041140 | 988287  | ubiquitin-like with PHD and ring finger domains 2 | Uhrf2 | 309331 | 1,08 | down |
| 5874380 | 7041140 | 988276  | ubiquitin-like with PHD and ring finger domains 2 | Uhrf2 | 309331 | 1,07 | up   |
| 5790944 | 7041140 | 988281  | ubiquitin-like with PHD and ring finger domains 2 | Uhrf2 | 309331 | 1,07 | down |
| 6228230 | 7041140 | 988267  | ubiquitin-like with PHD and ring finger domains 2 | Uhrf2 | 309331 | 1,05 | down |
| 5751981 | 7041140 | 988266  | ubiquitin-like with PHD and ring finger domains 2 | Uhrf2 | 309331 | 1,05 | up   |
| 5751064 | 7041140 | 988275  | ubiquitin-like with PHD and ring finger domains 2 | Uhrf2 | 309331 | 1,05 | up   |
| 6280042 | 7041140 | 988294  | ubiquitin-like with PHD and ring finger domains 2 | Uhrf2 | 309331 | 1,05 | down |
| 5636220 | 7041140 | 988274  | ubiquitin-like with PHD and ring finger domains 2 | Uhrf2 | 309331 | 1,04 | up   |
| 6499202 | 7041140 | 988272  | ubiquitin-like with PHD and ring finger domains 2 | Uhrf2 | 309331 | 1,03 | up   |
| 6732658 | 7041140 | 988292  | ubiquitin-like with PHD and ring finger domains 2 | Uhrf2 | 309331 | 1,03 | up   |
| 6115961 | 7041140 | 988286  | ubiquitin-like with PHD and ring finger domains 2 | Uhrf2 | 309331 | 1,03 | down |
| 6121335 | 7041140 | 988287  | ubiquitin-like with PHD and ring finger domains 2 | Uhrf2 | 309331 | 1,02 | down |
| 6639094 | 7041140 | 988271  | ubiquitin-like with PHD and ring finger domains 2 | Uhrf2 | 309331 | 1,02 | up   |
| 6646764 | 7041140 | 988268  | ubiquitin-like with PHD and ring finger domains 2 | Uhrf2 | 309331 | 1,00 | up   |
| 5764713 | 7292372 | 1602162 | UBX domain containing 3                           | Ubx3  | 298577 | 2,31 | down |
| 6206228 | 7292372 | 1602162 | UBX domain containing 3                           | Ubx3  | 298577 | 1,60 | up   |
| 5783541 | 7292372 | 1602162 | UBX domain containing 3                           | Ubx3  | 298577 | 1,35 | up   |
| 5882222 | 7292372 | 1602162 | UBX domain containing 3                           | Ubx3  | 298577 | 1,24 | up   |

|         |         |         |                                                      |         |        |      |      |
|---------|---------|---------|------------------------------------------------------|---------|--------|------|------|
| 6351465 | 7292372 | 1602162 | UBX domain containing 3                              | Ubx3    | 298577 | 1,08 | down |
| 6507524 | 7280362 | 1573675 | UBX domain protein 11                                | Ubx11   | 192207 | 2,67 | up   |
| 6140236 | 7280362 | 1573674 | UBX domain protein 11                                | Ubx11   | 192207 | 1,59 | up   |
| 5947333 | 7280362 | 1573686 | UBX domain protein 11                                | Ubx11   | 192207 | 1,55 | up   |
| 6168172 | 7280362 | 1573673 | UBX domain protein 11                                | Ubx11   | 192207 | 1,40 | down |
| 6176502 | 7280362 | 1573680 | UBX domain protein 11                                | Ubx11   | 192207 | 1,37 | down |
| 6197195 | 7280362 | 1573683 | UBX domain protein 11                                | Ubx11   | 192207 | 1,36 | up   |
| 6070207 | 7280362 | 1573681 | UBX domain protein 11                                | Ubx11   | 192207 | 1,35 | down |
| 6180098 | 7280362 | 1573682 | UBX domain protein 11                                | Ubx11   | 192207 | 1,19 | down |
| 5802178 | 7280362 | 1573676 | UBX domain protein 11                                | Ubx11   | 192207 | 1,19 | down |
| 6351259 | 7280362 | 1573672 | UBX domain protein 11                                | Ubx11   | 192207 | 1,15 | down |
| 6725758 | 7280362 | 1573673 | UBX domain protein 11                                | Ubx11   | 192207 | 1,15 | down |
| 6427706 | 7280362 | 1573679 | UBX domain protein 11                                | Ubx11   | 192207 | 1,14 | up   |
| 6040154 | 7280362 | 1573685 | UBX domain protein 11                                | Ubx11   | 192207 | 1,12 | down |
| 6391116 | 7280362 | 1573677 | UBX domain protein 11                                | Ubx11   | 192207 | 1,09 | up   |
| 6663742 | 7280362 | 1573684 | UBX domain protein 11                                | Ubx11   | 192207 | 1,07 | up   |
| 6148515 | 7280362 | 1573678 | UBX domain protein 11                                | Ubx11   | 192207 | 1,05 | down |
| 6726627 | 7280362 | 1573673 | UBX domain protein 11                                | Ubx11   | 192207 | 1,05 | up   |
| 6295705 | 7272431 | 1553897 | UBX domain protein 2B                                | Ubx2b   | 312965 | 2,00 | down |
| 6249329 | 7272431 | 1553896 | UBX domain protein 2B                                | Ubx2b   | 312965 | 1,46 | up   |
| 6607464 | 7272431 | 1553890 | UBX domain protein 2B                                | Ubx2b   | 312965 | 1,35 | up   |
| 6264452 | 7272431 | 1553894 | UBX domain protein 2B                                | Ubx2b   | 312965 | 1,26 | up   |
| 6463349 | 7272431 | 1553900 | UBX domain protein 2B                                | Ubx2b   | 312965 | 1,24 | down |
| 6633325 | 7272431 | 1553898 | UBX domain protein 2B                                | Ubx2b   | 312965 | 1,21 | up   |
| 6175717 | 7272431 | 1553900 | UBX domain protein 2B                                | Ubx2b   | 312965 | 1,11 | down |
| 5759062 | 7272431 | 1553899 | UBX domain protein 2B                                | Ubx2b   | 312965 | 1,04 | up   |
| 5967111 | 7272431 | 1553895 | UBX domain protein 2B                                | Ubx2b   | 312965 | 1,00 | up   |
| 5628239 | 7368005 | 1789338 | UBX domain protein 6                                 | Ubx6    | 363332 | 3,07 | down |
| 5696179 | 7368005 | 1789344 | UBX domain protein 6                                 | Ubx6    | 363332 | 2,25 | up   |
| 6314174 | 7368005 | 1789338 | UBX domain protein 6                                 | Ubx6    | 363332 | 1,54 | down |
| 6097914 | 7368005 | 1789342 | UBX domain protein 6                                 | Ubx6    | 363332 | 1,24 | up   |
| 6281723 | 7368005 | 1789343 | UBX domain protein 6                                 | Ubx6    | 363332 | 1,17 | down |
| 5906758 | 7368005 | 1789340 | UBX domain protein 6                                 | Ubx6    | 363332 | 1,16 | up   |
| 6613139 | 7368005 | 1789342 | UBX domain protein 6                                 | Ubx6    | 363332 | 1,10 | down |
| 6468601 | 7368005 | 1789342 | UBX domain protein 6                                 | Ubx6    | 363332 | 1,09 | up   |
| 6735288 | 7368005 | 1789344 | UBX domain protein 6                                 | Ubx6    | 363332 | 1,07 | up   |
| 6312450 | 7368005 | 1789342 | UBX domain protein 6                                 | Ubx6    | 363332 | 1,06 | up   |
| 6560907 | 7368005 | 1789343 | UBX domain protein 6                                 | Ubx6    | 363332 | 1,06 | down |
| 6297281 | 7368005 | 1789337 | UBX domain protein 6                                 | Ubx6    | 363332 | 1,03 | down |
| 6479313 | 7384904 | 1831597 | UCHL5 interacting protein                            | Uchl5ip | 293844 | 1,96 | down |
| 6656600 | 7384904 | 1831599 | UCHL5 interacting protein                            | Uchl5ip | 293844 | 1,84 | down |
| 6522205 | 7384904 | 1831596 | UCHL5 interacting protein                            | Uchl5ip | 293844 | 1,66 | up   |
| 6335668 | 7384904 | 1831600 | UCHL5 interacting protein                            | Uchl5ip | 293844 | 1,56 | down |
| 6638181 | 7384904 | 1831602 | UCHL5 interacting protein                            | Uchl5ip | 293844 | 1,53 | up   |
| 6263344 | 7384904 | 1831601 | UCHL5 interacting protein                            | Uchl5ip | 293844 | 1,52 | down |
| 5948237 | 7384904 | 1831604 | UCHL5 interacting protein                            | Uchl5ip | 293844 | 1,49 | up   |
| 6340090 | 7384904 | 1831599 | UCHL5 interacting protein                            | Uchl5ip | 293844 | 1,41 | up   |
| 5844587 | 7384904 | 1831596 | UCHL5 interacting protein                            | Uchl5ip | 293844 | 1,27 | up   |
| 6247412 | 7384904 | 1831606 | UCHL5 interacting protein                            | Uchl5ip | 293844 | 1,11 | down |
| 6110791 | 7384904 | 1831605 | UCHL5 interacting protein                            | Uchl5ip | 293844 | 1,10 | up   |
| 6608393 | 7384904 | 1831600 | UCHL5 interacting protein                            | Uchl5ip | 293844 | 1,09 | down |
| 6362254 | 7384904 | 1831608 | UCHL5 interacting protein                            | Uchl5ip | 293844 | 1,08 | down |
| 5955009 | 7384904 | 1831600 | UCHL5 interacting protein                            | Uchl5ip | 293844 | 1,07 | down |
| 6521748 | 7384904 | 1831608 | UCHL5 interacting protein                            | Uchl5ip | 293844 | 1,06 | down |
| 5872701 | 7357340 | 1762946 | UDP glucuronosyltransferase 1 family, polypeptide A1 | Ugt1a1  | 24861  | 1,13 | up   |
| 6542604 | 7357340 | 1762945 | UDP glucuronosyltransferase 1 family, polypeptide A2 | Ugt1a2  | 396527 | 2,26 | up   |
| 6712589 | 7357340 | 1762943 | UDP glucuronosyltransferase 1 family, polypeptide A5 | Ugt1a5  | 574523 | 1,87 | up   |

|         |         |         |                                                                                                    |                                      |        |      |      |
|---------|---------|---------|----------------------------------------------------------------------------------------------------|--------------------------------------|--------|------|------|
| 6164896 | 7357340 | 1762943 | UDP glucuronosyltransferase 1 family, polypeptide A5                                               | Ugt1a5                               | 574523 | 1,20 | up   |
| 6443473 | 7357340 | 1762940 | UDP glucuronosyltransferase 1 family, polypeptide A6                                               | Ugt1a6                               | 113992 | 2,02 | up   |
| 6355532 | 7357340 | 1762942 | UDP glucuronosyltransferase 1 family, polypeptide A6                                               | Ugt1a6                               | 113992 | 1,31 | up   |
| 6043693 | 7357340 | 1762941 | UDP glucuronosyltransferase 1 family, polypeptide A6                                               | Ugt1a6                               | 113992 | 1,05 | up   |
| 6347739 | 7357340 | 1762939 | UDP glucuronosyltransferase 1 family, polypeptide A7C                                              | Ugt1a7c                              | 154516 | 1,29 | down |
| 6098319 | 7357340 | 1762939 | UDP glucuronosyltransferase 1 family, polypeptide A7C                                              | Ugt1a7c                              | 154516 | 1,24 | down |
| 6616404 | 7357340 | 1762939 | UDP glucuronosyltransferase 1 family, polypeptide A7C                                              | Ugt1a7c                              | 154516 | 1,09 | down |
| 5984785 | 7357340 | 1762938 | UDP glucuronosyltransferase 1 family, polypeptide A7C                                              | Ugt1a7c                              | 154516 | 1,01 | up   |
| 5784510 | 7357340 | 1762949 | UDP glucuronosyltransferase 1 family, polypeptide A7C /// UDP glucuronosyltransferase 1 family, p/ | Ugt1a2 /// Ugt1a3396527 /// 396551 / |        | 1,55 | down |
| 6199925 | 7357340 | 1762949 | UDP glucuronosyltransferase 1 family, polypeptide A7C /// UDP glucuronosyltransferase 1 family, p/ | Ugt1a2 /// Ugt1a3396527 /// 396551 / |        | 1,24 | down |
| 5705105 | 7357340 | 1762951 | UDP glucuronosyltransferase 1 family, polypeptide A7C /// UDP glucuronosyltransferase 1 family, p/ | Ugt1a2 /// Ugt1a3396527 /// 396551 / |        | 1,24 | up   |
| 6612719 | 7357340 | 1762947 | UDP glucuronosyltransferase 1 family, polypeptide A7C /// UDP glucuronosyltransferase 1 family, p/ | Ugt1a2 /// Ugt1a3396527 /// 396551 / |        | 1,06 | down |
| 6087960 | 7357340 | 1762950 | UDP glucuronosyltransferase 1 family, polypeptide A7C /// UDP glucuronosyltransferase 1 family, p/ | Ugt1a2 /// Ugt1a3396527 /// 396551 / |        | 1,06 | up   |
| 6354227 | 7357340 | 1762950 | UDP glucuronosyltransferase 1 family, polypeptide A7C /// UDP glucuronosyltransferase 1 family, p/ | Ugt1a2 /// Ugt1a3396527 /// 396551 / |        | 1,05 | down |
| 6113549 | 7357340 | 1762948 | UDP glucuronosyltransferase 1 family, polypeptide A7C /// UDP glucuronosyltransferase 1 family, p/ | Ugt1a2 /// Ugt1a3396527 /// 396551 / |        | 1,02 | up   |
| 6556831 | 7357340 | 1762936 | UDP glucuronosyltransferase 1 family, polypeptide A9                                               | Ugt1a9                               | 396552 | 1,41 | down |
| 5842001 | 7357340 | 1762936 | UDP glucuronosyltransferase 1 family, polypeptide A9                                               | Ugt1a9                               | 396552 | 1,07 | up   |
| 6727683 | 7357340 | 1762944 | UDP glycosyltransferase 1 family polypeptide A3                                                    | Ugt1a3                               | 396551 | 1,61 | up   |
| 5760100 | 7357340 | 1762944 | UDP glycosyltransferase 1 family polypeptide A3                                                    | Ugt1a3                               | 396551 | 1,33 | up   |
| 6123011 | 7357340 | 1762944 | UDP glycosyltransferase 1 family polypeptide A3                                                    | Ugt1a3                               | 396551 | 1,24 | up   |
| 6252226 | 7357340 | 1762944 | UDP glycosyltransferase 1 family polypeptide A3                                                    | Ugt1a3                               | 396551 | 1,14 | down |
| 6143895 | 7357340 | 1762944 | UDP glycosyltransferase 1 family polypeptide A3                                                    | Ugt1a3                               | 396551 | 1,10 | up   |
| 5954273 | 7357340 | 1762937 | UDP glycosyltransferase 1 family, polypeptide A8                                                   | Ugt1a8                               | 301595 | 1,45 | down |
| 5643634 | 7357340 | 1762937 | UDP glycosyltransferase 1 family, polypeptide A8                                                   | Ugt1a8                               | 301595 | 1,38 | down |
| 6216910 | 7357340 | 1762937 | UDP glycosyltransferase 1 family, polypeptide A8                                                   | Ugt1a8                               | 301595 | 1,12 | down |
| 6388271 | 7357340 | 1762937 | UDP glycosyltransferase 1 family, polypeptide A8                                                   | Ugt1a8                               | 301595 | 1,05 | down |
| 6559949 | 7357340 | 1762937 | UDP glycosyltransferase 1 family, polypeptide A8                                                   | Ugt1a8                               | 301595 | 1,02 | down |
| 6091468 | 7105894 | 1142036 | UDP-Gal:betaGlcNAc beta 1,3-galactosyltransferase, polypeptide 2                                   | B3galt2                              | 686081 | 4,62 | up   |
| 5768759 | 7105894 | 1142035 | UDP-Gal:betaGlcNAc beta 1,3-galactosyltransferase, polypeptide 2                                   | B3galt2                              | 686081 | 1,55 | up   |
| 6169942 | 7105894 | 1142034 | UDP-Gal:betaGlcNAc beta 1,3-galactosyltransferase, polypeptide 2                                   | B3galt2                              | 686081 | 1,53 | down |
| 5970748 | 7105894 | 1142033 | UDP-Gal:betaGlcNAc beta 1,3-galactosyltransferase, polypeptide 2                                   | B3galt2                              | 686081 | 1,16 | down |
| 6308290 | 7105894 | 1142034 | UDP-Gal:betaGlcNAc beta 1,3-galactosyltransferase, polypeptide 2                                   | B3galt2                              | 686081 | 1,10 | down |
| 6165967 | 7217032 | 1415247 | UDP-Gal:betaGlcNAc beta 1,3-galactosyltransferase, polypeptide 4                                   | B3galt4                              | 171079 | 2,66 | down |
| 6213561 | 7217032 | 1415247 | UDP-Gal:betaGlcNAc beta 1,3-galactosyltransferase, polypeptide 4                                   | B3galt4                              | 171079 | 1,59 | up   |
| 6035002 | 7217032 | 1415247 | UDP-Gal:betaGlcNAc beta 1,3-galactosyltransferase, polypeptide 4                                   | B3galt4                              | 171079 | 1,46 | down |
| 6098502 | 7217032 | 1415247 | UDP-Gal:betaGlcNAc beta 1,3-galactosyltransferase, polypeptide 4                                   | B3galt4                              | 171079 | 1,26 | up   |
| 6527398 | 7217032 | 1415248 | UDP-Gal:betaGlcNAc beta 1,3-galactosyltransferase, polypeptide 4                                   | B3galt4                              | 171079 | 1,15 | up   |
| 6361017 | 7217032 | 1415247 | UDP-Gal:betaGlcNAc beta 1,3-galactosyltransferase, polypeptide 4                                   | B3galt4                              | 171079 | 1,06 | down |
| 5764040 | 7217032 | 1415248 | UDP-Gal:betaGlcNAc beta 1,3-galactosyltransferase, polypeptide 4                                   | B3galt4                              | 171079 | 1,00 | up   |
| 6070418 | 7285239 | 1585496 | UDP-Gal:betaGlcNAc beta 1,4- galactosyltransferase, polypeptide 1                                  | B4galt1                              | 24390  | 2,10 | down |
| 6390971 | 7285239 | 1585479 | UDP-Gal:betaGlcNAc beta 1,4- galactosyltransferase, polypeptide 1                                  | B4galt1                              | 24390  | 2,04 | up   |
| 6228494 | 7285239 | 1585496 | UDP-Gal:betaGlcNAc beta 1,4- galactosyltransferase, polypeptide 1                                  | B4galt1                              | 24390  | 2,03 | down |
| 5773265 | 7285239 | 1585496 | UDP-Gal:betaGlcNAc beta 1,4- galactosyltransferase, polypeptide 1                                  | B4galt1                              | 24390  | 1,76 | down |
| 6139872 | 7285239 | 1585496 | UDP-Gal:betaGlcNAc beta 1,4- galactosyltransferase, polypeptide 1                                  | B4galt1                              | 24390  | 1,52 | down |
| 5765881 | 7285239 | 1585496 | UDP-Gal:betaGlcNAc beta 1,4- galactosyltransferase, polypeptide 1                                  | B4galt1                              | 24390  | 1,52 | down |
| 6563495 | 7285239 | 1585485 | UDP-Gal:betaGlcNAc beta 1,4- galactosyltransferase, polypeptide 1                                  | B4galt1                              | 24390  | 1,45 | down |
| 5745930 | 7285239 | 1585479 | UDP-Gal:betaGlcNAc beta 1,4- galactosyltransferase, polypeptide 1                                  | B4galt1                              | 24390  | 1,39 | up   |
| 5721847 | 7285239 | 1585487 | UDP-Gal:betaGlcNAc beta 1,4- galactosyltransferase, polypeptide 1                                  | B4galt1                              | 24390  | 1,31 | up   |
| 5651374 | 7285239 | 1585485 | UDP-Gal:betaGlcNAc beta 1,4- galactosyltransferase, polypeptide 1                                  | B4galt1                              | 24390  | 1,26 | up   |
| 6056699 | 7285239 | 1585479 | UDP-Gal:betaGlcNAc beta 1,4- galactosyltransferase, polypeptide 1                                  | B4galt1                              | 24390  | 1,23 | up   |
| 6293463 | 7285239 | 1585481 | UDP-Gal:betaGlcNAc beta 1,4- galactosyltransferase, polypeptide 1                                  | B4galt1                              | 24390  | 1,15 | up   |
| 5735907 | 7285239 | 1585483 | UDP-Gal:betaGlcNAc beta 1,4- galactosyltransferase, polypeptide 1                                  | B4galt1                              | 24390  | 1,09 | down |
| 6573681 | 7285239 | 1585495 | UDP-Gal:betaGlcNAc beta 1,4- galactosyltransferase, polypeptide 1                                  | B4galt1                              | 24390  | 1,03 | down |
| 5948832 | 7285239 | 1585479 | UDP-Gal:betaGlcNAc beta 1,4- galactosyltransferase, polypeptide 1                                  | B4galt1                              | 24390  | 1,02 | up   |
| 6428464 | 7370484 | 1797179 | UDP-glucuronate decarboxylase 1                                                                    | Uxs1                                 | 246232 | 2,96 | up   |
| 6091180 | 7370484 | 1797169 | UDP-glucuronate decarboxylase 1                                                                    | Uxs1                                 | 246232 | 1,52 | down |
| 6631690 | 7370484 | 1797163 | UDP-glucuronate decarboxylase 1                                                                    | Uxs1                                 | 246232 | 1,40 | up   |

|         |         |         |                                                                                              |         |        |      |      |
|---------|---------|---------|----------------------------------------------------------------------------------------------|---------|--------|------|------|
| 5957985 | 7370484 | 1797160 | UDP-glucuronate decarboxylase 1                                                              | Uxs1    | 246232 | 1,40 | up   |
| 6669070 | 7370484 | 1797166 | UDP-glucuronate decarboxylase 1                                                              | Uxs1    | 246232 | 1,36 | up   |
| 6738982 | 7370484 | 1797171 | UDP-glucuronate decarboxylase 1                                                              | Uxs1    | 246232 | 1,19 | down |
| 6377954 | 7370484 | 1797173 | UDP-glucuronate decarboxylase 1                                                              | Uxs1    | 246232 | 1,15 | down |
| 6274130 | 7370484 | 1797179 | UDP-glucuronate decarboxylase 1                                                              | Uxs1    | 246232 | 1,14 | down |
| 6050989 | 7370484 | 1797160 | UDP-glucuronate decarboxylase 1                                                              | Uxs1    | 246232 | 1,14 | up   |
| 6006124 | 7370484 | 1797168 | UDP-glucuronate decarboxylase 1                                                              | Uxs1    | 246232 | 1,13 | down |
| 6113820 | 7370484 | 1797161 | UDP-glucuronate decarboxylase 1                                                              | Uxs1    | 246232 | 1,10 | up   |
| 5677972 | 7370484 | 1797162 | UDP-glucuronate decarboxylase 1                                                              | Uxs1    | 246232 | 1,05 | down |
| 6567284 | 7370484 | 1797167 | UDP-glucuronate decarboxylase 1                                                              | Uxs1    | 246232 | 1,04 | down |
| 5932143 | 7370484 | 1797170 | UDP-glucuronate decarboxylase 1                                                              | Uxs1    | 246232 | 1,03 | down |
| 5718376 | 7370484 | 1797164 | UDP-glucuronate decarboxylase 1                                                              | Uxs1    | 246232 | 1,03 | up   |
| 6182817 | 7370484 | 1797172 | UDP-glucuronate decarboxylase 1                                                              | Uxs1    | 246232 | 1,02 | up   |
| 6158982 | 7227517 | 1441295 | UDP-N-acetyl-alpha-D-galactosamine:polypeptide N-acetylglucosaminyltransferase 13 (GalNAc-T  | Galnt13 | 311039 | 2,65 | down |
| 5956694 | 7227517 | 1441297 | UDP-N-acetyl-alpha-D-galactosamine:polypeptide N-acetylglucosaminyltransferase 13 (GalNAc-T  | Galnt13 | 311039 | 1,62 | up   |
| 6733574 | 7227517 | 1441298 | UDP-N-acetyl-alpha-D-galactosamine:polypeptide N-acetylglucosaminyltransferase 13 (GalNAc-T  | Galnt13 | 311039 | 1,61 | down |
| 6308439 | 7227517 | 1441290 | UDP-N-acetyl-alpha-D-galactosamine:polypeptide N-acetylglucosaminyltransferase 13 (GalNAc-T  | Galnt13 | 311039 | 1,36 | up   |
| 5985085 | 7227517 | 1441294 | UDP-N-acetyl-alpha-D-galactosamine:polypeptide N-acetylglucosaminyltransferase 13 (GalNAc-T  | Galnt13 | 311039 | 1,32 | down |
| 5949093 | 7227517 | 1441300 | UDP-N-acetyl-alpha-D-galactosamine:polypeptide N-acetylglucosaminyltransferase 13 (GalNAc-T  | Galnt13 | 311039 | 1,28 | up   |
| 6246054 | 7227517 | 1441289 | UDP-N-acetyl-alpha-D-galactosamine:polypeptide N-acetylglucosaminyltransferase 13 (GalNAc-T  | Galnt13 | 311039 | 1,27 | up   |
| 6160948 | 7227517 | 1441297 | UDP-N-acetyl-alpha-D-galactosamine:polypeptide N-acetylglucosaminyltransferase 13 (GalNAc-T  | Galnt13 | 311039 | 1,26 | up   |
| 6547129 | 7227517 | 1441291 | UDP-N-acetyl-alpha-D-galactosamine:polypeptide N-acetylglucosaminyltransferase 13 (GalNAc-T  | Galnt13 | 311039 | 1,14 | down |
| 5979734 | 7227517 | 1441296 | UDP-N-acetyl-alpha-D-galactosamine:polypeptide N-acetylglucosaminyltransferase 13 (GalNAc-T  | Galnt13 | 311039 | 1,12 | up   |
| 6474995 | 7227517 | 1441292 | UDP-N-acetyl-alpha-D-galactosamine:polypeptide N-acetylglucosaminyltransferase 13 (GalNAc-T  | Galnt13 | 311039 | 1,10 | up   |
| 5841530 | 7227517 | 1441293 | UDP-N-acetyl-alpha-D-galactosamine:polypeptide N-acetylglucosaminyltransferase 13 (GalNAc-T  | Galnt13 | 311039 | 1,08 | down |
| 5720232 | 7227517 | 1441299 | UDP-N-acetyl-alpha-D-galactosamine:polypeptide N-acetylglucosaminyltransferase 13 (GalNAc-T  | Galnt13 | 311039 | 1,06 | down |
| 5689290 | 7227517 | 1441289 | UDP-N-acetyl-alpha-D-galactosamine:polypeptide N-acetylglucosaminyltransferase 13 (GalNAc-T  | Galnt13 | 311039 | 1,03 | down |
| 6467086 | 7295359 | 1609508 | UDP-N-acetyl-alpha-D-galactosamine:polypeptide N-acetylglucosaminyltransferase 14 (GalNAc-T  | Galnt14 | 313878 | 2,04 | down |
| 6683778 | 7295359 | 1609511 | UDP-N-acetyl-alpha-D-galactosamine:polypeptide N-acetylglucosaminyltransferase 14 (GalNAc-T  | Galnt14 | 313878 | 1,63 | up   |
| 5633470 | 7295359 | 1609507 | UDP-N-acetyl-alpha-D-galactosamine:polypeptide N-acetylglucosaminyltransferase 14 (GalNAc-T  | Galnt14 | 313878 | 1,60 | down |
| 6538334 | 7295359 | 1609510 | UDP-N-acetyl-alpha-D-galactosamine:polypeptide N-acetylglucosaminyltransferase 14 (GalNAc-T  | Galnt14 | 313878 | 1,57 | up   |
| 6523179 | 7295359 | 1609498 | UDP-N-acetyl-alpha-D-galactosamine:polypeptide N-acetylglucosaminyltransferase 14 (GalNAc-T  | Galnt14 | 313878 | 1,51 | down |
| 5951180 | 7295359 | 1609497 | UDP-N-acetyl-alpha-D-galactosamine:polypeptide N-acetylglucosaminyltransferase 14 (GalNAc-T  | Galnt14 | 313878 | 1,50 | down |
| 6055773 | 7295359 | 1609503 | UDP-N-acetyl-alpha-D-galactosamine:polypeptide N-acetylglucosaminyltransferase 14 (GalNAc-T  | Galnt14 | 313878 | 1,34 | down |
| 6332665 | 7295359 | 1609509 | UDP-N-acetyl-alpha-D-galactosamine:polypeptide N-acetylglucosaminyltransferase 14 (GalNAc-T  | Galnt14 | 313878 | 1,31 | up   |
| 6738092 | 7295359 | 1609505 | UDP-N-acetyl-alpha-D-galactosamine:polypeptide N-acetylglucosaminyltransferase 14 (GalNAc-T  | Galnt14 | 313878 | 1,28 | up   |
| 5985089 | 7295359 | 1609496 | UDP-N-acetyl-alpha-D-galactosamine:polypeptide N-acetylglucosaminyltransferase 14 (GalNAc-T  | Galnt14 | 313878 | 1,26 | up   |
| 5766424 | 7295359 | 1609496 | UDP-N-acetyl-alpha-D-galactosamine:polypeptide N-acetylglucosaminyltransferase 14 (GalNAc-T  | Galnt14 | 313878 | 1,26 | up   |
| 6127887 | 7295359 | 1609506 | UDP-N-acetyl-alpha-D-galactosamine:polypeptide N-acetylglucosaminyltransferase 14 (GalNAc-T  | Galnt14 | 313878 | 1,23 | down |
| 5985000 | 7295359 | 1609502 | UDP-N-acetyl-alpha-D-galactosamine:polypeptide N-acetylglucosaminyltransferase 14 (GalNAc-T  | Galnt14 | 313878 | 1,19 | down |
| 6431820 | 7295359 | 1609510 | UDP-N-acetyl-alpha-D-galactosamine:polypeptide N-acetylglucosaminyltransferase 14 (GalNAc-T  | Galnt14 | 313878 | 1,17 | up   |
| 6118018 | 7295359 | 1609504 | UDP-N-acetyl-alpha-D-galactosamine:polypeptide N-acetylglucosaminyltransferase 14 (GalNAc-T  | Galnt14 | 313878 | 1,11 | down |
| 6473964 | 7295359 | 1609511 | UDP-N-acetyl-alpha-D-galactosamine:polypeptide N-acetylglucosaminyltransferase 14 (GalNAc-T  | Galnt14 | 313878 | 1,11 | down |
| 5672181 | 7295359 | 1609501 | UDP-N-acetyl-alpha-D-galactosamine:polypeptide N-acetylglucosaminyltransferase 14 (GalNAc-T  | Galnt14 | 313878 | 1,11 | up   |
| 6409525 | 7295359 | 1609511 | UDP-N-acetyl-alpha-D-galactosamine:polypeptide N-acetylglucosaminyltransferase 14 (GalNAc-T  | Galnt14 | 313878 | 1,04 | down |
| 5700789 | 7295359 | 1609499 | UDP-N-acetyl-alpha-D-galactosamine:polypeptide N-acetylglucosaminyltransferase 14 (GalNAc-T  | Galnt14 | 313878 | 1,02 | up   |
| 6638160 | 7295359 | 1609500 | UDP-N-acetyl-alpha-D-galactosamine:polypeptide N-acetylglucosaminyltransferase 14 (GalNAc-T  | Galnt14 | 313878 | 1,00 | down |
| 6343756 | 7182000 | 1330450 | UDP-N-acetyl-alpha-D-galactosamine:polypeptide N-acetylglucosaminyltransferase 2 (GalNAc-T2, | Galnt2  | 292090 | 2,04 | up   |
| 6615911 | 7182000 | 1330433 | UDP-N-acetyl-alpha-D-galactosamine:polypeptide N-acetylglucosaminyltransferase 2 (GalNAc-T2, | Galnt2  | 292090 | 1,38 | down |
| 6443157 | 7182000 | 1330432 | UDP-N-acetyl-alpha-D-galactosamine:polypeptide N-acetylglucosaminyltransferase 2 (GalNAc-T2, | Galnt2  | 292090 | 1,33 | up   |
| 5971496 | 7182000 | 1330447 | UDP-N-acetyl-alpha-D-galactosamine:polypeptide N-acetylglucosaminyltransferase 2 (GalNAc-T2, | Galnt2  | 292090 | 1,25 | down |
| 5803357 | 7182000 | 1330445 | UDP-N-acetyl-alpha-D-galactosamine:polypeptide N-acetylglucosaminyltransferase 2 (GalNAc-T2, | Galnt2  | 292090 | 1,25 | up   |
| 6133081 | 7182000 | 1330434 | UDP-N-acetyl-alpha-D-galactosamine:polypeptide N-acetylglucosaminyltransferase 2 (GalNAc-T2, | Galnt2  | 292090 | 1,23 | down |
| 5867621 | 7182000 | 1330420 | UDP-N-acetyl-alpha-D-galactosamine:polypeptide N-acetylglucosaminyltransferase 2 (GalNAc-T2, | Galnt2  | 292090 | 1,18 | down |
| 6081533 | 7182000 | 1330441 | UDP-N-acetyl-alpha-D-galactosamine:polypeptide N-acetylglucosaminyltransferase 2 (GalNAc-T2, | Galnt2  | 292090 | 1,14 | down |
| 6096248 | 7182000 | 1330450 | UDP-N-acetyl-alpha-D-galactosamine:polypeptide N-acetylglucosaminyltransferase 2 (GalNAc-T2, | Galnt2  | 292090 | 1,12 | up   |
| 6653065 | 7182000 | 1330443 | UDP-N-acetyl-alpha-D-galactosamine:polypeptide N-acetylglucosaminyltransferase 2 (GalNAc-T2, | Galnt2  | 292090 | 1,12 | up   |

|         |         |         |                                                                                              |         |        |      |      |
|---------|---------|---------|----------------------------------------------------------------------------------------------|---------|--------|------|------|
| 5708571 | 7182000 | 1330449 | UDP-N-acetyl-alpha-D-galactosamine:polypeptide N-acetylglucosaminyltransferase 2 (GalNAc-T2) | Galnt2  | 292090 | 1,11 | up   |
| 6211446 | 7182000 | 1330444 | UDP-N-acetyl-alpha-D-galactosamine:polypeptide N-acetylglucosaminyltransferase 2 (GalNAc-T2) | Galnt2  | 292090 | 1,10 | up   |
| 5636938 | 7182000 | 1330448 | UDP-N-acetyl-alpha-D-galactosamine:polypeptide N-acetylglucosaminyltransferase 2 (GalNAc-T2) | Galnt2  | 292090 | 1,09 | down |
| 6365296 | 7182000 | 1330449 | UDP-N-acetyl-alpha-D-galactosamine:polypeptide N-acetylglucosaminyltransferase 2 (GalNAc-T2) | Galnt2  | 292090 | 1,06 | down |
| 6051123 | 7182000 | 1330439 | UDP-N-acetyl-alpha-D-galactosamine:polypeptide N-acetylglucosaminyltransferase 2 (GalNAc-T2) | Galnt2  | 292090 | 1,04 | up   |
| 6513409 | 7182000 | 1330442 | UDP-N-acetyl-alpha-D-galactosamine:polypeptide N-acetylglucosaminyltransferase 2 (GalNAc-T2) | Galnt2  | 292090 | 1,04 | down |
| 5835724 | 7182000 | 1330440 | UDP-N-acetyl-alpha-D-galactosamine:polypeptide N-acetylglucosaminyltransferase 2 (GalNAc-T2) | Galnt2  | 292090 | 1,03 | down |
| 6130224 | 7182000 | 1330449 | UDP-N-acetyl-alpha-D-galactosamine:polypeptide N-acetylglucosaminyltransferase 2 (GalNAc-T2) | Galnt2  | 292090 | 1,02 | up   |
| 6482248 | 7182000 | 1330424 | UDP-N-acetyl-alpha-D-galactosamine:polypeptide N-acetylglucosaminyltransferase 2 (GalNAc-T2) | Galnt2  | 292090 | 1,00 | up   |
| 5816905 | 7227688 | 1441606 | UDP-N-acetyl-alpha-D-galactosamine:polypeptide N-acetylglucosaminyltransferase 5 (GalNAc-T5) | Galnt5  | 83627  | 2,89 | up   |
| 6040931 | 7227688 | 1441610 | UDP-N-acetyl-alpha-D-galactosamine:polypeptide N-acetylglucosaminyltransferase 5 (GalNAc-T5) | Galnt5  | 83627  | 2,06 | down |
| 6246424 | 7227688 | 1441608 | UDP-N-acetyl-alpha-D-galactosamine:polypeptide N-acetylglucosaminyltransferase 5 (GalNAc-T5) | Galnt5  | 83627  | 1,64 | down |
| 6628273 | 7227688 | 1441605 | UDP-N-acetyl-alpha-D-galactosamine:polypeptide N-acetylglucosaminyltransferase 5 (GalNAc-T5) | Galnt5  | 83627  | 1,59 | up   |
| 6030905 | 7227688 | 1441608 | UDP-N-acetyl-alpha-D-galactosamine:polypeptide N-acetylglucosaminyltransferase 5 (GalNAc-T5) | Galnt5  | 83627  | 1,49 | down |
| 6080081 | 7227688 | 1441604 | UDP-N-acetyl-alpha-D-galactosamine:polypeptide N-acetylglucosaminyltransferase 5 (GalNAc-T5) | Galnt5  | 83627  | 1,47 | up   |
| 6324431 | 7227688 | 1441602 | UDP-N-acetyl-alpha-D-galactosamine:polypeptide N-acetylglucosaminyltransferase 5 (GalNAc-T5) | Galnt5  | 83627  | 1,33 | down |
| 5989622 | 7227688 | 1441607 | UDP-N-acetyl-alpha-D-galactosamine:polypeptide N-acetylglucosaminyltransferase 5 (GalNAc-T5) | Galnt5  | 83627  | 1,33 | up   |
| 6480665 | 7227688 | 1441611 | UDP-N-acetyl-alpha-D-galactosamine:polypeptide N-acetylglucosaminyltransferase 5 (GalNAc-T5) | Galnt5  | 83627  | 1,24 | down |
| 6328661 | 7227688 | 1441602 | UDP-N-acetyl-alpha-D-galactosamine:polypeptide N-acetylglucosaminyltransferase 5 (GalNAc-T5) | Galnt5  | 83627  | 1,22 | up   |
| 5949780 | 7227688 | 1441609 | UDP-N-acetyl-alpha-D-galactosamine:polypeptide N-acetylglucosaminyltransferase 5 (GalNAc-T5) | Galnt5  | 83627  | 1,20 | down |
| 5853091 | 7227688 | 1441603 | UDP-N-acetyl-alpha-D-galactosamine:polypeptide N-acetylglucosaminyltransferase 5 (GalNAc-T5) | Galnt5  | 83627  | 1,17 | up   |
| 6486174 | 7227688 | 1441612 | UDP-N-acetyl-alpha-D-galactosamine:polypeptide N-acetylglucosaminyltransferase 5 (GalNAc-T5) | Galnt5  | 83627  | 1,06 | up   |
| 5851628 | 7103310 | 1135892 | UDP-N-acetyl-alpha-D-galactosamine:polypeptide N-acetylglucosaminyltransferase 9             | Galnt9  | 304571 | 3,58 | down |
| 6451010 | 7103310 | 1135866 | UDP-N-acetyl-alpha-D-galactosamine:polypeptide N-acetylglucosaminyltransferase 9             | Galnt9  | 304571 | 1,52 | down |
| 6202953 | 7103310 | 1135880 | UDP-N-acetyl-alpha-D-galactosamine:polypeptide N-acetylglucosaminyltransferase 9             | Galnt9  | 304571 | 1,41 | down |
| 6496177 | 7103310 | 1135875 | UDP-N-acetyl-alpha-D-galactosamine:polypeptide N-acetylglucosaminyltransferase 9             | Galnt9  | 304571 | 1,38 | up   |
| 5983246 | 7103310 | 1135869 | UDP-N-acetyl-alpha-D-galactosamine:polypeptide N-acetylglucosaminyltransferase 9             | Galnt9  | 304571 | 1,29 | up   |
| 5734577 | 7103310 | 1135877 | UDP-N-acetyl-alpha-D-galactosamine:polypeptide N-acetylglucosaminyltransferase 9             | Galnt9  | 304571 | 1,26 | down |
| 6633600 | 7103310 | 1135865 | UDP-N-acetyl-alpha-D-galactosamine:polypeptide N-acetylglucosaminyltransferase 9             | Galnt9  | 304571 | 1,21 | down |
| 6000416 | 7103310 | 1135892 | UDP-N-acetyl-alpha-D-galactosamine:polypeptide N-acetylglucosaminyltransferase 9             | Galnt9  | 304571 | 1,18 | down |
| 6105163 | 7103310 | 1135892 | UDP-N-acetyl-alpha-D-galactosamine:polypeptide N-acetylglucosaminyltransferase 9             | Galnt9  | 304571 | 1,18 | down |
| 5719410 | 7103310 | 1135879 | UDP-N-acetyl-alpha-D-galactosamine:polypeptide N-acetylglucosaminyltransferase 9             | Galnt9  | 304571 | 1,12 | down |
| 5785631 | 7103310 | 1135864 | UDP-N-acetyl-alpha-D-galactosamine:polypeptide N-acetylglucosaminyltransferase 9             | Galnt9  | 304571 | 1,09 | up   |
| 5903646 | 7103310 | 1135865 | UDP-N-acetyl-alpha-D-galactosamine:polypeptide N-acetylglucosaminyltransferase 9             | Galnt9  | 304571 | 1,05 | down |
| 5860192 | 7103310 | 1135870 | UDP-N-acetyl-alpha-D-galactosamine:polypeptide N-acetylglucosaminyltransferase 9             | Galnt9  | 304571 | 1,03 | up   |
| 6675494 | 7103310 | 1135867 | UDP-N-acetyl-alpha-D-galactosamine:polypeptide N-acetylglucosaminyltransferase 9             | Galnt9  | 304571 | 1,03 | up   |
| 5896531 | 7103310 | 1135884 | UDP-N-acetyl-alpha-D-galactosamine:polypeptide N-acetylglucosaminyltransferase 9             | Galnt9  | 304571 | 1,02 | down |
| 5681834 | 7103310 | 1135892 | UDP-N-acetyl-alpha-D-galactosamine:polypeptide N-acetylglucosaminyltransferase 9             | Galnt9  | 304571 | 1,01 | down |
| 5972271 | 7056025 | 1022769 | UDP-N-acetyl-alpha-D-galactosamine:polypeptide N-acetylglucosaminyltransferase-like 4        | Galntl4 | 293181 | 2,19 | up   |
| 6674767 | 7056025 | 1022767 | UDP-N-acetyl-alpha-D-galactosamine:polypeptide N-acetylglucosaminyltransferase-like 4        | Galntl4 | 293181 | 1,98 | up   |
| 6260313 | 7056025 | 1022801 | UDP-N-acetyl-alpha-D-galactosamine:polypeptide N-acetylglucosaminyltransferase-like 4        | Galntl4 | 293181 | 1,75 | up   |
| 5968598 | 7056025 | 1022768 | UDP-N-acetyl-alpha-D-galactosamine:polypeptide N-acetylglucosaminyltransferase-like 4        | Galntl4 | 293181 | 1,68 | up   |
| 6699575 | 7056025 | 1022756 | UDP-N-acetyl-alpha-D-galactosamine:polypeptide N-acetylglucosaminyltransferase-like 4        | Galntl4 | 293181 | 1,59 | down |
| 6027952 | 7056025 | 1022763 | UDP-N-acetyl-alpha-D-galactosamine:polypeptide N-acetylglucosaminyltransferase-like 4        | Galntl4 | 293181 | 1,38 | down |
| 5619865 | 7056025 | 1022750 | UDP-N-acetyl-alpha-D-galactosamine:polypeptide N-acetylglucosaminyltransferase-like 4        | Galntl4 | 293181 | 1,27 | down |
| 6663457 | 7056025 | 1022782 | UDP-N-acetyl-alpha-D-galactosamine:polypeptide N-acetylglucosaminyltransferase-like 4        | Galntl4 | 293181 | 1,20 | up   |
| 5918689 | 7056025 | 1022762 | UDP-N-acetyl-alpha-D-galactosamine:polypeptide N-acetylglucosaminyltransferase-like 4        | Galntl4 | 293181 | 1,17 | down |
| 5808946 | 7056025 | 1022761 | UDP-N-acetyl-alpha-D-galactosamine:polypeptide N-acetylglucosaminyltransferase-like 4        | Galntl4 | 293181 | 1,11 | down |
| 5792931 | 7056025 | 1022763 | UDP-N-acetyl-alpha-D-galactosamine:polypeptide N-acetylglucosaminyltransferase-like 4        | Galntl4 | 293181 | 1,11 | down |
| 6711354 | 7056025 | 1022761 | UDP-N-acetyl-alpha-D-galactosamine:polypeptide N-acetylglucosaminyltransferase-like 4        | Galntl4 | 293181 | 1,09 | up   |
| 6044189 | 7056025 | 1022750 | UDP-N-acetyl-alpha-D-galactosamine:polypeptide N-acetylglucosaminyltransferase-like 4        | Galntl4 | 293181 | 1,05 | up   |
| 6684252 | 7056025 | 1022787 | UDP-N-acetyl-alpha-D-galactosamine:polypeptide N-acetylglucosaminyltransferase-like 4        | Galntl4 | 293181 | 1,04 | up   |
| 5828849 | 7056025 | 1022782 | UDP-N-acetyl-alpha-D-galactosamine:polypeptide N-acetylglucosaminyltransferase-like 4        | Galntl4 | 293181 | 1,04 | down |
| 5978369 | 7056025 | 1022801 | UDP-N-acetyl-alpha-D-galactosamine:polypeptide N-acetylglucosaminyltransferase-like 4        | Galntl4 | 293181 | 1,03 | up   |
| 5695853 | 7274462 | 1558522 | unc-13 homolog B (C. elegans)                                                                | Unc13b  | 64830  | 3,53 | up   |
| 6207631 | 7274462 | 1558554 | unc-13 homolog B (C. elegans)                                                                | Unc13b  | 64830  | 2,07 | down |
| 5829814 | 7274462 | 1558527 | unc-13 homolog B (C. elegans)                                                                | Unc13b  | 64830  | 1,91 | down |

|         |         |         |                               |        |        |      |      |
|---------|---------|---------|-------------------------------|--------|--------|------|------|
| 6634084 | 7274462 | 1558523 | unc-13 homolog B (C. elegans) | Unc13b | 64830  | 1,62 | up   |
| 5795564 | 7274462 | 1558556 | unc-13 homolog B (C. elegans) | Unc13b | 64830  | 1,59 | down |
| 6278211 | 7274462 | 1558527 | unc-13 homolog B (C. elegans) | Unc13b | 64830  | 1,58 | down |
| 6454285 | 7274462 | 1558518 | unc-13 homolog B (C. elegans) | Unc13b | 64830  | 1,57 | up   |
| 6650552 | 7274462 | 1558519 | unc-13 homolog B (C. elegans) | Unc13b | 64830  | 1,55 | up   |
| 5758270 | 7274462 | 1558524 | unc-13 homolog B (C. elegans) | Unc13b | 64830  | 1,55 | up   |
| 6065282 | 7274462 | 1558520 | unc-13 homolog B (C. elegans) | Unc13b | 64830  | 1,53 | up   |
| 6307332 | 7274462 | 1558521 | unc-13 homolog B (C. elegans) | Unc13b | 64830  | 1,50 | up   |
| 6009791 | 7274462 | 1558545 | unc-13 homolog B (C. elegans) | Unc13b | 64830  | 1,47 | down |
| 5939402 | 7274462 | 1558517 | unc-13 homolog B (C. elegans) | Unc13b | 64830  | 1,46 | up   |
| 6117563 | 7274462 | 1558551 | unc-13 homolog B (C. elegans) | Unc13b | 64830  | 1,41 | up   |
| 6258331 | 7274462 | 1558530 | unc-13 homolog B (C. elegans) | Unc13b | 64830  | 1,40 | down |
| 5844017 | 7274462 | 1558536 | unc-13 homolog B (C. elegans) | Unc13b | 64830  | 1,38 | down |
| 6385148 | 7274462 | 1558526 | unc-13 homolog B (C. elegans) | Unc13b | 64830  | 1,38 | down |
| 6057271 | 7274462 | 1558527 | unc-13 homolog B (C. elegans) | Unc13b | 64830  | 1,37 | down |
| 6246841 | 7274462 | 1558550 | unc-13 homolog B (C. elegans) | Unc13b | 64830  | 1,35 | up   |
| 5796345 | 7274462 | 1558527 | unc-13 homolog B (C. elegans) | Unc13b | 64830  | 1,29 | down |
| 6604915 | 7274462 | 1558542 | unc-13 homolog B (C. elegans) | Unc13b | 64830  | 1,28 | down |
| 6680180 | 7274462 | 1558543 | unc-13 homolog B (C. elegans) | Unc13b | 64830  | 1,27 | up   |
| 5698376 | 7274462 | 1558525 | unc-13 homolog B (C. elegans) | Unc13b | 64830  | 1,26 | up   |
| 5671586 | 7274462 | 1558534 | unc-13 homolog B (C. elegans) | Unc13b | 64830  | 1,26 | down |
| 6202046 | 7274462 | 1558524 | unc-13 homolog B (C. elegans) | Unc13b | 64830  | 1,25 | up   |
| 6548995 | 7274462 | 1558531 | unc-13 homolog B (C. elegans) | Unc13b | 64830  | 1,24 | down |
| 6135462 | 7274462 | 1558555 | unc-13 homolog B (C. elegans) | Unc13b | 64830  | 1,24 | down |
| 6076960 | 7274462 | 1558537 | unc-13 homolog B (C. elegans) | Unc13b | 64830  | 1,23 | down |
| 5782548 | 7274462 | 1558527 | unc-13 homolog B (C. elegans) | Unc13b | 64830  | 1,22 | down |
| 6044299 | 7274462 | 1558540 | unc-13 homolog B (C. elegans) | Unc13b | 64830  | 1,20 | up   |
| 6008719 | 7274462 | 1558533 | unc-13 homolog B (C. elegans) | Unc13b | 64830  | 1,19 | down |
| 6253159 | 7274462 | 1558535 | unc-13 homolog B (C. elegans) | Unc13b | 64830  | 1,18 | up   |
| 5937743 | 7274462 | 1558539 | unc-13 homolog B (C. elegans) | Unc13b | 64830  | 1,17 | up   |
| 6620797 | 7274462 | 1558532 | unc-13 homolog B (C. elegans) | Unc13b | 64830  | 1,17 | down |
| 6098548 | 7274462 | 1558541 | unc-13 homolog B (C. elegans) | Unc13b | 64830  | 1,17 | down |
| 6504940 | 7274462 | 1558552 | unc-13 homolog B (C. elegans) | Unc13b | 64830  | 1,16 | down |
| 6677612 | 7274462 | 1558553 | unc-13 homolog B (C. elegans) | Unc13b | 64830  | 1,16 | up   |
| 6075170 | 7274462 | 1558549 | unc-13 homolog B (C. elegans) | Unc13b | 64830  | 1,14 | down |
| 6509511 | 7274462 | 1558528 | unc-13 homolog B (C. elegans) | Unc13b | 64830  | 1,14 | down |
| 6003226 | 7274462 | 1558527 | unc-13 homolog B (C. elegans) | Unc13b | 64830  | 1,13 | down |
| 6401398 | 7274462 | 1558529 | unc-13 homolog B (C. elegans) | Unc13b | 64830  | 1,12 | down |
| 6242112 | 7274462 | 1558546 | unc-13 homolog B (C. elegans) | Unc13b | 64830  | 1,09 | up   |
| 5860253 | 7274462 | 1558537 | unc-13 homolog B (C. elegans) | Unc13b | 64830  | 1,07 | down |
| 6666106 | 7274462 | 1558548 | unc-13 homolog B (C. elegans) | Unc13b | 64830  | 1,07 | up   |
| 6411781 | 7274462 | 1558557 | unc-13 homolog B (C. elegans) | Unc13b | 64830  | 1,04 | down |
| 6244159 | 7274462 | 1558544 | unc-13 homolog B (C. elegans) | Unc13b | 64830  | 1,03 | up   |
| 6216673 | 7274462 | 1558535 | unc-13 homolog B (C. elegans) | Unc13b | 64830  | 1,03 | up   |
| 6696920 | 7274462 | 1558538 | unc-13 homolog B (C. elegans) | Unc13b | 64830  | 1,01 | up   |
| 5716635 | 7274462 | 1558527 | unc-13 homolog B (C. elegans) | Unc13b | 64830  | 1,01 | down |
| 6336696 | 7274462 | 1558547 | unc-13 homolog B (C. elegans) | Unc13b | 64830  | 1,01 | up   |
| 6389137 | 7274462 | 1558516 | unc-13 homolog B (C. elegans) | Unc13b | 64830  | 1,00 | down |
| 6047480 | 7084520 | 1089779 | unc-13 homolog D (C. elegans) | Unc13d | 192177 | 2,54 | up   |
| 6276418 | 7084520 | 1089774 | unc-13 homolog D (C. elegans) | Unc13d | 192177 | 1,92 | up   |
| 6096812 | 7084520 | 1089768 | unc-13 homolog D (C. elegans) | Unc13d | 192177 | 1,58 | up   |
| 6166076 | 7084520 | 1089773 | unc-13 homolog D (C. elegans) | Unc13d | 192177 | 1,48 | up   |
| 5789237 | 7084520 | 1089786 | unc-13 homolog D (C. elegans) | Unc13d | 192177 | 1,43 | up   |
| 6049484 | 7084520 | 1089764 | unc-13 homolog D (C. elegans) | Unc13d | 192177 | 1,39 | down |
| 5966764 | 7084520 | 1089771 | unc-13 homolog D (C. elegans) | Unc13d | 192177 | 1,39 | up   |
| 5740948 | 7084520 | 1089778 | unc-13 homolog D (C. elegans) | Unc13d | 192177 | 1,35 | down |
| 6011189 | 7084520 | 1089781 | unc-13 homolog D (C. elegans) | Unc13d | 192177 | 1,34 | down |



|         |         |         |                                     |        |        |      |      |
|---------|---------|---------|-------------------------------------|--------|--------|------|------|
| 5935469 | 7084520 | 1089787 | unc-13 homolog D (C. elegans)       | Unc13d | 192177 | 1,34 | up   |
| 6375349 | 7084520 | 1089760 | unc-13 homolog D (C. elegans)       | Unc13d | 192177 | 1,33 | down |
| 6615081 | 7084520 | 1089767 | unc-13 homolog D (C. elegans)       | Unc13d | 192177 | 1,30 | down |
| 6707064 | 7084520 | 1089785 | unc-13 homolog D (C. elegans)       | Unc13d | 192177 | 1,27 | down |
| 6529960 | 7084520 | 1089785 | unc-13 homolog D (C. elegans)       | Unc13d | 192177 | 1,23 | down |
| 5876063 | 7084520 | 1089782 | unc-13 homolog D (C. elegans)       | Unc13d | 192177 | 1,23 | up   |
| 6214884 | 7084520 | 1089783 | unc-13 homolog D (C. elegans)       | Unc13d | 192177 | 1,23 | up   |
| 6672311 | 7084520 | 1089770 | unc-13 homolog D (C. elegans)       | Unc13d | 192177 | 1,21 | down |
| 5870896 | 7084520 | 1089789 | unc-13 homolog D (C. elegans)       | Unc13d | 192177 | 1,21 | up   |
| 5809387 | 7084520 | 1089758 | unc-13 homolog D (C. elegans)       | Unc13d | 192177 | 1,21 | down |
| 6448990 | 7084520 | 1089777 | unc-13 homolog D (C. elegans)       | Unc13d | 192177 | 1,20 | down |
| 5643747 | 7084520 | 1089765 | unc-13 homolog D (C. elegans)       | Unc13d | 192177 | 1,19 | down |
| 6648427 | 7084520 | 1089762 | unc-13 homolog D (C. elegans)       | Unc13d | 192177 | 1,18 | up   |
| 5952233 | 7084520 | 1089769 | unc-13 homolog D (C. elegans)       | Unc13d | 192177 | 1,16 | up   |
| 5977295 | 7084520 | 1089766 | unc-13 homolog D (C. elegans)       | Unc13d | 192177 | 1,14 | up   |
| 5987294 | 7084520 | 1089761 | unc-13 homolog D (C. elegans)       | Unc13d | 192177 | 1,13 | down |
| 6674612 | 7084520 | 1089775 | unc-13 homolog D (C. elegans)       | Unc13d | 192177 | 1,13 | down |
| 6583150 | 7084520 | 1089763 | unc-13 homolog D (C. elegans)       | Unc13d | 192177 | 1,12 | up   |
| 6288210 | 7084520 | 1089788 | unc-13 homolog D (C. elegans)       | Unc13d | 192177 | 1,12 | up   |
| 5687118 | 7084520 | 1089784 | unc-13 homolog D (C. elegans)       | Unc13d | 192177 | 1,11 | down |
| 6499779 | 7084520 | 1089760 | unc-13 homolog D (C. elegans)       | Unc13d | 192177 | 1,09 | down |
| 6441702 | 7084520 | 1089790 | unc-13 homolog D (C. elegans)       | Unc13d | 192177 | 1,07 | down |
| 6492140 | 7084520 | 1089759 | unc-13 homolog D (C. elegans)       | Unc13d | 192177 | 1,07 | down |
| 5820824 | 7084520 | 1089772 | unc-13 homolog D (C. elegans)       | Unc13d | 192177 | 1,06 | up   |
| 6201791 | 7084520 | 1089771 | unc-13 homolog D (C. elegans)       | Unc13d | 192177 | 1,05 | up   |
| 6467352 | 7084520 | 1089776 | unc-13 homolog D (C. elegans)       | Unc13d | 192177 | 1,05 | down |
| 6724100 | 7084520 | 1089780 | unc-13 homolog D (C. elegans)       | Unc13d | 192177 | 1,01 | down |
| 5730155 | 7084520 | 1089790 | unc-13 homolog D (C. elegans)       | Unc13d | 192177 | 1,00 | down |
| 5877777 | 7222806 | 1429648 | unc-5 homolog B (C. elegans)        | Unc5b  | 60630  | 2,92 | up   |
| 6724767 | 7222806 | 1429653 | unc-5 homolog B (C. elegans)        | Unc5b  | 60630  | 2,06 | up   |
| 5816850 | 7222806 | 1429636 | unc-5 homolog B (C. elegans)        | Unc5b  | 60630  | 1,95 | down |
| 6076252 | 7222806 | 1429646 | unc-5 homolog B (C. elegans)        | Unc5b  | 60630  | 1,89 | up   |
| 5679243 | 7222806 | 1429641 | unc-5 homolog B (C. elegans)        | Unc5b  | 60630  | 1,64 | up   |
| 6471762 | 7222806 | 1429652 | unc-5 homolog B (C. elegans)        | Unc5b  | 60630  | 1,62 | down |
| 6537850 | 7222806 | 1429648 | unc-5 homolog B (C. elegans)        | Unc5b  | 60630  | 1,48 | up   |
| 6610624 | 7222806 | 1429647 | unc-5 homolog B (C. elegans)        | Unc5b  | 60630  | 1,48 | down |
| 6159016 | 7222806 | 1429639 | unc-5 homolog B (C. elegans)        | Unc5b  | 60630  | 1,27 | down |
| 6685728 | 7222806 | 1429644 | unc-5 homolog B (C. elegans)        | Unc5b  | 60630  | 1,25 | up   |
| 6292679 | 7222806 | 1429648 | unc-5 homolog B (C. elegans)        | Unc5b  | 60630  | 1,25 | up   |
| 6205257 | 7222806 | 1429643 | unc-5 homolog B (C. elegans)        | Unc5b  | 60630  | 1,23 | down |
| 6390171 | 7222806 | 1429636 | unc-5 homolog B (C. elegans)        | Unc5b  | 60630  | 1,21 | down |
| 6359479 | 7222806 | 1429643 | unc-5 homolog B (C. elegans)        | Unc5b  | 60630  | 1,20 | down |
| 5971208 | 7222806 | 1429651 | unc-5 homolog B (C. elegans)        | Unc5b  | 60630  | 1,17 | up   |
| 5883918 | 7222806 | 1429642 | unc-5 homolog B (C. elegans)        | Unc5b  | 60630  | 1,16 | down |
| 6033298 | 7222806 | 1429638 | unc-5 homolog B (C. elegans)        | Unc5b  | 60630  | 1,16 | down |
| 5764100 | 7222806 | 1429637 | unc-5 homolog B (C. elegans)        | Unc5b  | 60630  | 1,08 | down |
| 5652966 | 7222806 | 1429640 | unc-5 homolog B (C. elegans)        | Unc5b  | 60630  | 1,06 | down |
| 6460175 | 7222806 | 1429645 | unc-5 homolog B (C. elegans)        | Unc5b  | 60630  | 1,06 | up   |
| 5872828 | 7222806 | 1429649 | unc-5 homolog B (C. elegans)        | Unc5b  | 60630  | 1,04 | up   |
| 6510404 | 7222806 | 1429650 | unc-5 homolog B (C. elegans)        | Unc5b  | 60630  | 1,01 | down |
| 6112434 | 7329846 | 1695003 | unc-84 homolog B (C. elegans)       | Unc84b | 315135 | 2,54 | down |
| 6027928 | 7329846 | 1695006 | unc-84 homolog B (C. elegans)       | Unc84b | 315135 | 1,66 | down |
| 6438865 | 7329846 | 1694987 | unc-84 homolog B (C. elegans)       | Unc84b | 315135 | 1,60 | up   |
| 6456752 | 7329846 | 1694987 | unc-84 homolog B (C. elegans)       | Unc84b | 315135 | 1,44 | up   |
| 5854586 | 7329846 | 1694987 | unc-84 homolog B (C. elegans)       | Unc84b | 315135 | 1,07 | up   |
| 6035534 | 7340990 | 1722518 | upstream binding protein 1 (LBP-1a) | Ubp1   | 301038 | 1,22 | down |
| 6397910 | 7340990 | 1722500 | upstream binding protein 1 (LBP-1a) | Ubp1   | 301038 | 1,15 | down |

|         |         |         |                                  |       |        |      |      |
|---------|---------|---------|----------------------------------|-------|--------|------|------|
| 5678670 | 7049931 | 1009236 | upstream transcription factor 2  | Usf2  | 81817  | 2,06 | down |
| 6264362 | 7049931 | 1009232 | upstream transcription factor 2  | Usf2  | 81817  | 1,78 | up   |
| 5853394 | 7049931 | 1009234 | upstream transcription factor 2  | Usf2  | 81817  | 1,26 | down |
| 5932384 | 7049931 | 1009226 | upstream transcription factor 2  | Usf2  | 81817  | 1,18 | up   |
| 5900228 | 7049931 | 1009230 | upstream transcription factor 2  | Usf2  | 81817  | 1,13 | up   |
| 6220202 | 7049931 | 1009237 | upstream transcription factor 2  | Usf2  | 81817  | 1,12 | down |
| 6135656 | 7049931 | 1009228 | upstream transcription factor 2  | Usf2  | 81817  | 1,11 | down |
| 6622049 | 7049931 | 1009227 | upstream transcription factor 2  | Usf2  | 81817  | 1,10 | down |
| 6103947 | 7049931 | 1009235 | upstream transcription factor 2  | Usf2  | 81817  | 1,09 | down |
| 6205431 | 7049931 | 1009229 | upstream transcription factor 2  | Usf2  | 81817  | 1,08 | up   |
| 6367784 | 7049931 | 1009231 | upstream transcription factor 2  | Usf2  | 81817  | 1,07 | down |
| 6587706 | 7049931 | 1009233 | upstream transcription factor 2  | Usf2  | 81817  | 1,01 | up   |
| 6018848 | 7049931 | 1009233 | upstream transcription factor 2  | Usf2  | 81817  | 1,00 | up   |
| 6695056 | 7103033 | 1135263 | uracil-DNA glycosylase           | Ung   | 304577 | 2,00 | down |
| 6627257 | 7103033 | 1135262 | uracil-DNA glycosylase           | Ung   | 304577 | 1,60 | up   |
| 6520021 | 7103033 | 1135257 | uracil-DNA glycosylase           | Ung   | 304577 | 1,44 | down |
| 6382461 | 7103033 | 1135263 | uracil-DNA glycosylase           | Ung   | 304577 | 1,35 | down |
| 6015195 | 7103033 | 1135263 | uracil-DNA glycosylase           | Ung   | 304577 | 1,35 | down |
| 6320086 | 7103033 | 1135258 | uracil-DNA glycosylase           | Ung   | 304577 | 1,12 | down |
| 5742953 | 7103033 | 1135260 | uracil-DNA glycosylase           | Ung   | 304577 | 1,12 | up   |
| 6558363 | 7103033 | 1135261 | uracil-DNA glycosylase           | Ung   | 304577 | 1,11 | up   |
| 6086977 | 7103033 | 1135259 | uracil-DNA glycosylase           | Ung   | 304577 | 1,10 | up   |
| 6424486 | 7221839 | 1427194 | ureidopropionase, beta           | Uppb1 | 116593 | 2,56 | up   |
| 6388585 | 7221839 | 1427189 | ureidopropionase, beta           | Uppb1 | 116593 | 1,79 | up   |
| 6572971 | 7221839 | 1427193 | ureidopropionase, beta           | Uppb1 | 116593 | 1,39 | down |
| 6160984 | 7221839 | 1427187 | ureidopropionase, beta           | Uppb1 | 116593 | 1,38 | down |
| 5666847 | 7221839 | 1427191 | ureidopropionase, beta           | Uppb1 | 116593 | 1,30 | down |
| 6656655 | 7221839 | 1427188 | ureidopropionase, beta           | Uppb1 | 116593 | 1,17 | up   |
| 5687632 | 7221839 | 1427192 | ureidopropionase, beta           | Uppb1 | 116593 | 1,17 | down |
| 6555962 | 7221839 | 1427195 | ureidopropionase, beta           | Uppb1 | 116593 | 1,13 | up   |
| 5800065 | 7221839 | 1427190 | ureidopropionase, beta           | Uppb1 | 116593 | 1,13 | down |
| 5898955 | 7221839 | 1427186 | ureidopropionase, beta           | Uppb1 | 116593 | 1,05 | up   |
| 6370710 | 7249015 | 1495051 | uridine-cytidine kinase 1-like 1 | Uckl1 | 499956 | 1,86 | up   |
| 6312265 | 7249015 | 1495051 | uridine-cytidine kinase 1-like 1 | Uckl1 | 499956 | 1,84 | up   |
| 5745441 | 7249015 | 1495051 | uridine-cytidine kinase 1-like 1 | Uckl1 | 499956 | 1,31 | down |
| 6548876 | 7249015 | 1495048 | uridine-cytidine kinase 1-like 1 | Uckl1 | 499956 | 1,29 | down |
| 5661615 | 7249015 | 1495052 | uridine-cytidine kinase 1-like 1 | Uckl1 | 499956 | 1,26 | down |
| 6573027 | 7249015 | 1495062 | uridine-cytidine kinase 1-like 1 | Uckl1 | 499956 | 1,24 | down |
| 5927148 | 7249015 | 1495054 | uridine-cytidine kinase 1-like 1 | Uckl1 | 499956 | 1,18 | down |
| 6309175 | 7249015 | 1495051 | uridine-cytidine kinase 1-like 1 | Uckl1 | 499956 | 1,12 | up   |
| 5922327 | 7249015 | 1495049 | uridine-cytidine kinase 1-like 1 | Uckl1 | 499956 | 1,11 | down |
| 6256566 | 7249015 | 1495050 | uridine-cytidine kinase 1-like 1 | Uckl1 | 499956 | 1,10 | down |
| 6092755 | 7249015 | 1495050 | uridine-cytidine kinase 1-like 1 | Uckl1 | 499956 | 1,08 | up   |
| 6486835 | 7249015 | 1495055 | uridine-cytidine kinase 1-like 1 | Uckl1 | 499956 | 1,07 | down |
| 6379369 | 7249015 | 1495053 | uridine-cytidine kinase 1-like 1 | Uckl1 | 499956 | 1,06 | down |
| 6659907 | 7249015 | 1495057 | uridine-cytidine kinase 1-like 1 | Uckl1 | 499956 | 1,03 | up   |
| 5686269 | 7249015 | 1495056 | uridine-cytidine kinase 1-like 1 | Uckl1 | 499956 | 1,02 | up   |
| 5833491 | 7249015 | 1495050 | uridine-cytidine kinase 1-like 1 | Uckl1 | 499956 | 1,01 | up   |
| 6193105 | 7113627 | 1161349 | uridine-cytidine kinase 2        | Uck2  | 304944 | 2,06 | down |
| 5952206 | 7113627 | 1161349 | uridine-cytidine kinase 2        | Uck2  | 304944 | 1,73 | down |
| 5779581 | 7113627 | 1161331 | uridine-cytidine kinase 2        | Uck2  | 304944 | 1,46 | up   |
| 6709725 | 7113627 | 1161329 | uridine-cytidine kinase 2        | Uck2  | 304944 | 1,13 | up   |
| 6320949 | 7113627 | 1161349 | uridine-cytidine kinase 2        | Uck2  | 304944 | 1,12 | down |
| 5859337 | 7113627 | 1161328 | uridine-cytidine kinase 2        | Uck2  | 304944 | 1,07 | down |
| 6650812 | 7113627 | 1161326 | uridine-cytidine kinase 2        | Uck2  | 304944 | 1,05 | up   |
| 5644256 | 7113627 | 1161326 | uridine-cytidine kinase 2        | Uck2  | 304944 | 1,02 | up   |
| 6015298 | 7113627 | 1161330 | uridine-cytidine kinase 2        | Uck2  | 304944 | 1,01 | up   |

|         |         |         |                                   |       |        |      |      |
|---------|---------|---------|-----------------------------------|-------|--------|------|------|
| 5783396 | 7058121 | 1027217 | uroporphyrinogen III synthase     | Uros  | 309070 | 2,53 | up   |
| 6217957 | 7058121 | 1027212 | uroporphyrinogen III synthase     | Uros  | 309070 | 2,50 | down |
| 5774343 | 7058121 | 1027217 | uroporphyrinogen III synthase     | Uros  | 309070 | 1,71 | up   |
| 6396494 | 7058121 | 1027215 | uroporphyrinogen III synthase     | Uros  | 309070 | 1,22 | down |
| 5708906 | 7058121 | 1027214 | uroporphyrinogen III synthase     | Uros  | 309070 | 1,19 | down |
| 6378479 | 7058121 | 1027216 | uroporphyrinogen III synthase     | Uros  | 309070 | 1,16 | down |
| 6056758 | 7058121 | 1027210 | uroporphyrinogen III synthase     | Uros  | 309070 | 1,16 | up   |
| 6134494 | 7058121 | 1027209 | uroporphyrinogen III synthase     | Uros  | 309070 | 1,13 | up   |
| 5969858 | 7058121 | 1027211 | uroporphyrinogen III synthase     | Uros  | 309070 | 1,09 | down |
| 6353950 | 7058121 | 1027213 | uroporphyrinogen III synthase     | Uros  | 309070 | 1,08 | up   |
| 6117524 | 7058121 | 1027208 | uroporphyrinogen III synthase     | Uros  | 309070 | 1,03 | down |
| 5671320 | 7108974 | 1149805 | Usher syndrome 2A homolog (human) | Ush2a | 266765 | 2,27 | up   |
| 5955209 | 7108974 | 1149804 | Usher syndrome 2A homolog (human) | Ush2a | 266765 | 1,74 | up   |
| 6226981 | 7108974 | 1149795 | Usher syndrome 2A homolog (human) | Ush2a | 266765 | 1,62 | down |
| 5829263 | 7108974 | 1149794 | Usher syndrome 2A homolog (human) | Ush2a | 266765 | 1,54 | down |
| 6361388 | 7108974 | 1149799 | Usher syndrome 2A homolog (human) | Ush2a | 266765 | 1,48 | down |
| 6733910 | 7108974 | 1149802 | Usher syndrome 2A homolog (human) | Ush2a | 266765 | 1,38 | up   |
| 5712125 | 7108974 | 1149805 | Usher syndrome 2A homolog (human) | Ush2a | 266765 | 1,33 | up   |
| 5632819 | 7108974 | 1149806 | Usher syndrome 2A homolog (human) | Ush2a | 266765 | 1,32 | up   |
| 6493195 | 7108974 | 1149793 | Usher syndrome 2A homolog (human) | Ush2a | 266765 | 1,30 | up   |
| 6030891 | 7108974 | 1149795 | Usher syndrome 2A homolog (human) | Ush2a | 266765 | 1,25 | up   |
| 6170387 | 7108974 | 1149805 | Usher syndrome 2A homolog (human) | Ush2a | 266765 | 1,22 | up   |
| 6284944 | 7108974 | 1149800 | Usher syndrome 2A homolog (human) | Ush2a | 266765 | 1,17 | down |
| 6457695 | 7108974 | 1149797 | Usher syndrome 2A homolog (human) | Ush2a | 266765 | 1,14 | down |
| 6112001 | 7108974 | 1149803 | Usher syndrome 2A homolog (human) | Ush2a | 266765 | 1,12 | up   |
| 5770644 | 7108974 | 1149803 | Usher syndrome 2A homolog (human) | Ush2a | 266765 | 1,11 | down |
| 5718768 | 7108974 | 1149799 | Usher syndrome 2A homolog (human) | Ush2a | 266765 | 1,10 | up   |
| 5800679 | 7108974 | 1149805 | Usher syndrome 2A homolog (human) | Ush2a | 266765 | 1,09 | down |
| 6744743 | 7108974 | 1149791 | Usher syndrome 2A homolog (human) | Ush2a | 266765 | 1,09 | down |
| 5720665 | 7108974 | 1149802 | Usher syndrome 2A homolog (human) | Ush2a | 266765 | 1,09 | down |
| 5884730 | 7108974 | 1149798 | Usher syndrome 2A homolog (human) | Ush2a | 266765 | 1,06 | up   |
| 6443732 | 7108974 | 1149801 | Usher syndrome 2A homolog (human) | Ush2a | 266765 | 1,05 | up   |
| 5696963 | 7108974 | 1149792 | Usher syndrome 2A homolog (human) | Ush2a | 266765 | 1,04 | down |
| 6259899 | 7108974 | 1149796 | Usher syndrome 2A homolog (human) | Ush2a | 266765 | 1,04 | down |
| 6725422 | 7108974 | 1149804 | Usher syndrome 2A homolog (human) | Ush2a | 266765 | 1,01 | up   |
| 6422905 | 7044211 | 996293  | utrophin                          | Utrn  | 25600  | 3,28 | up   |
| 6702574 | 7044211 | 996293  | utrophin                          | Utrn  | 25600  | 2,69 | up   |
| 6185849 | 7044211 | 996283  | utrophin                          | Utrn  | 25600  | 1,45 | down |
| 5675236 | 7044211 | 996287  | utrophin                          | Utrn  | 25600  | 1,42 | up   |
| 6040657 | 7044211 | 996263  | utrophin                          | Utrn  | 25600  | 1,41 | up   |
| 5780946 | 7044211 | 996292  | utrophin                          | Utrn  | 25600  | 1,40 | down |
| 6542184 | 7044211 | 996230  | utrophin                          | Utrn  | 25600  | 1,40 | down |
| 6014465 | 7044211 | 996226  | utrophin                          | Utrn  | 25600  | 1,37 | down |
| 6048684 | 7044211 | 996287  | utrophin                          | Utrn  | 25600  | 1,36 | down |
| 5928204 | 7044211 | 996253  | utrophin                          | Utrn  | 25600  | 1,34 | up   |
| 5964977 | 7044211 | 996229  | utrophin                          | Utrn  | 25600  | 1,34 | down |
| 6431981 | 7044211 | 996278  | utrophin                          | Utrn  | 25600  | 1,29 | down |
| 6290335 | 7044211 | 996247  | utrophin                          | Utrn  | 25600  | 1,29 | up   |
| 6308312 | 7044211 | 996255  | utrophin                          | Utrn  | 25600  | 1,27 | down |
| 6638534 | 7044211 | 996248  | utrophin                          | Utrn  | 25600  | 1,26 | up   |
| 6225845 | 7044211 | 996224  | utrophin                          | Utrn  | 25600  | 1,26 | down |
| 5742344 | 7044211 | 996238  | utrophin                          | Utrn  | 25600  | 1,24 | down |
| 6672677 | 7044211 | 996291  | utrophin                          | Utrn  | 25600  | 1,24 | down |
| 6231702 | 7044211 | 996274  | utrophin                          | Utrn  | 25600  | 1,23 | up   |
| 5800798 | 7044211 | 996221  | utrophin                          | Utrn  | 25600  | 1,23 | down |
| 6526227 | 7044211 | 996280  | utrophin                          | Utrn  | 25600  | 1,22 | down |
| 6110950 | 7044211 | 996244  | utrophin                          | Utrn  | 25600  | 1,21 | down |

|         |         |         |                                      |        |        |      |      |
|---------|---------|---------|--------------------------------------|--------|--------|------|------|
| 5717161 | 7044211 | 996227  | utrophin                             | Utrn   | 25600  | 1,19 | down |
| 5952377 | 7044211 | 996250  | utrophin                             | Utrn   | 25600  | 1,18 | down |
| 6158685 | 7044211 | 996254  | utrophin                             | Utrn   | 25600  | 1,17 | up   |
| 6267309 | 7044211 | 996235  | utrophin                             | Utrn   | 25600  | 1,16 | down |
| 6620559 | 7044211 | 996236  | utrophin                             | Utrn   | 25600  | 1,15 | down |
| 6183139 | 7044211 | 996242  | utrophin                             | Utrn   | 25600  | 1,15 | up   |
| 6634064 | 7044211 | 996279  | utrophin                             | Utrn   | 25600  | 1,14 | up   |
| 6056804 | 7044211 | 996223  | utrophin                             | Utrn   | 25600  | 1,14 | down |
| 6263234 | 7044211 | 996233  | utrophin                             | Utrn   | 25600  | 1,14 | up   |
| 6289728 | 7044211 | 996245  | utrophin                             | Utrn   | 25600  | 1,13 | up   |
| 6087225 | 7044211 | 996252  | utrophin                             | Utrn   | 25600  | 1,13 | up   |
| 5873031 | 7044211 | 996282  | utrophin                             | Utrn   | 25600  | 1,13 | down |
| 6150756 | 7044211 | 996260  | utrophin                             | Utrn   | 25600  | 1,13 | down |
| 6493848 | 7044211 | 996277  | utrophin                             | Utrn   | 25600  | 1,12 | up   |
| 6674248 | 7044211 | 996284  | utrophin                             | Utrn   | 25600  | 1,12 | up   |
| 6222490 | 7044211 | 996259  | utrophin                             | Utrn   | 25600  | 1,11 | down |
| 6323129 | 7044211 | 996266  | utrophin                             | Utrn   | 25600  | 1,11 | up   |
| 6497826 | 7044211 | 996272  | utrophin                             | Utrn   | 25600  | 1,11 | down |
| 6727428 | 7044211 | 996261  | utrophin                             | Utrn   | 25600  | 1,10 | down |
| 5979168 | 7044211 | 996251  | utrophin                             | Utrn   | 25600  | 1,10 | down |
| 6464178 | 7044211 | 996240  | utrophin                             | Utrn   | 25600  | 1,09 | up   |
| 5897943 | 7044211 | 996289  | utrophin                             | Utrn   | 25600  | 1,09 | up   |
| 6323184 | 7044211 | 996232  | utrophin                             | Utrn   | 25600  | 1,08 | up   |
| 6233460 | 7044211 | 996269  | utrophin                             | Utrn   | 25600  | 1,08 | up   |
| 6374390 | 7044211 | 996267  | utrophin                             | Utrn   | 25600  | 1,07 | down |
| 6156096 | 7044211 | 996228  | utrophin                             | Utrn   | 25600  | 1,07 | down |
| 6288458 | 7044211 | 996246  | utrophin                             | Utrn   | 25600  | 1,07 | down |
| 5880293 | 7044211 | 996264  | utrophin                             | Utrn   | 25600  | 1,07 | up   |
| 6101235 | 7044211 | 996258  | utrophin                             | Utrn   | 25600  | 1,06 | down |
| 6724911 | 7044211 | 996257  | utrophin                             | Utrn   | 25600  | 1,06 | down |
| 6027062 | 7044211 | 996273  | utrophin                             | Utrn   | 25600  | 1,05 | up   |
| 6486714 | 7044211 | 996276  | utrophin                             | Utrn   | 25600  | 1,04 | down |
| 5650797 | 7044211 | 996290  | utrophin                             | Utrn   | 25600  | 1,04 | up   |
| 6146549 | 7044211 | 996239  | utrophin                             | Utrn   | 25600  | 1,04 | down |
| 6312751 | 7044211 | 996249  | utrophin                             | Utrn   | 25600  | 1,04 | up   |
| 6405460 | 7044211 | 996262  | utrophin                             | Utrn   | 25600  | 1,04 | up   |
| 6538878 | 7044211 | 996234  | utrophin                             | Utrn   | 25600  | 1,04 | up   |
| 6292680 | 7044211 | 996275  | utrophin                             | Utrn   | 25600  | 1,04 | up   |
| 6582441 | 7044211 | 996277  | utrophin                             | Utrn   | 25600  | 1,04 | down |
| 6571665 | 7044211 | 996241  | utrophin                             | Utrn   | 25600  | 1,03 | down |
| 6707300 | 7044211 | 996283  | utrophin                             | Utrn   | 25600  | 1,03 | up   |
| 6241522 | 7044211 | 996243  | utrophin                             | Utrn   | 25600  | 1,03 | down |
| 6525121 | 7044211 | 996288  | utrophin                             | Utrn   | 25600  | 1,03 | down |
| 6365541 | 7044211 | 996270  | utrophin                             | Utrn   | 25600  | 1,02 | down |
| 6211745 | 7044211 | 996231  | utrophin                             | Utrn   | 25600  | 1,02 | down |
| 5749075 | 7044211 | 996285  | utrophin                             | Utrn   | 25600  | 1,02 | up   |
| 6338931 | 7044211 | 996256  | utrophin                             | Utrn   | 25600  | 1,02 | down |
| 5627805 | 7044211 | 996265  | utrophin                             | Utrn   | 25600  | 1,02 | up   |
| 6219333 | 7044211 | 996223  | utrophin                             | Utrn   | 25600  | 1,02 | down |
| 6106484 | 7044211 | 996222  | utrophin                             | Utrn   | 25600  | 1,02 | down |
| 6336632 | 7044211 | 996286  | utrophin                             | Utrn   | 25600  | 1,01 | up   |
| 6213856 | 7044211 | 996268  | utrophin                             | Utrn   | 25600  | 1,00 | up   |
| 5626402 | 7044211 | 996281  | utrophin                             | Utrn   | 25600  | 1,00 | up   |
| 6199319 | 7044211 | 996225  | utrophin                             | Utrn   | 25600  | 1,00 | up   |
| 6215741 | 7044211 | 996237  | utrophin                             | Utrn   | 25600  | 1,00 | down |
| 5783325 | 7044211 | 996271  | utrophin                             | Utrn   | 25600  | 1,00 | down |
| 6525892 | 7292869 | 1603433 | vacuolar protein sorting 13D (yeast) | Vps13d | 313825 | 1,95 | down |

|         |         |         |                                      |        |        |      |      |
|---------|---------|---------|--------------------------------------|--------|--------|------|------|
| 6436928 | 7292869 | 1603476 | vacuolar protein sorting 13D (yeast) | Vps13d | 313825 | 1,92 | down |
| 6527879 | 7292869 | 1603424 | vacuolar protein sorting 13D (yeast) | Vps13d | 313825 | 1,49 | down |
| 6414854 | 7292869 | 1603438 | vacuolar protein sorting 13D (yeast) | Vps13d | 313825 | 1,46 | up   |
| 6574180 | 7292869 | 1603486 | vacuolar protein sorting 13D (yeast) | Vps13d | 313825 | 1,44 | down |
| 6449884 | 7292869 | 1603497 | vacuolar protein sorting 13D (yeast) | Vps13d | 313825 | 1,43 | down |
| 5991739 | 7292869 | 1603373 | vacuolar protein sorting 13D (yeast) | Vps13d | 313825 | 1,41 | down |
| 6732930 | 7292869 | 1603420 | vacuolar protein sorting 13D (yeast) | Vps13d | 313825 | 1,39 | down |
| 6073935 | 7292869 | 1603477 | vacuolar protein sorting 13D (yeast) | Vps13d | 313825 | 1,38 | down |
| 5808950 | 7292869 | 1603444 | vacuolar protein sorting 13D (yeast) | Vps13d | 313825 | 1,36 | down |
| 5955329 | 7292869 | 1603426 | vacuolar protein sorting 13D (yeast) | Vps13d | 313825 | 1,35 | down |
| 5967567 | 7292869 | 1603480 | vacuolar protein sorting 13D (yeast) | Vps13d | 313825 | 1,33 | up   |
| 6717688 | 7292869 | 1603478 | vacuolar protein sorting 13D (yeast) | Vps13d | 313825 | 1,33 | down |
| 6580423 | 7292869 | 1603431 | vacuolar protein sorting 13D (yeast) | Vps13d | 313825 | 1,32 | down |
| 6446090 | 7292869 | 1603470 | vacuolar protein sorting 13D (yeast) | Vps13d | 313825 | 1,29 | down |
| 5758534 | 7292869 | 1603436 | vacuolar protein sorting 13D (yeast) | Vps13d | 313825 | 1,29 | down |
| 6025181 | 7292869 | 1603439 | vacuolar protein sorting 13D (yeast) | Vps13d | 313825 | 1,29 | down |
| 5759437 | 7292869 | 1603456 | vacuolar protein sorting 13D (yeast) | Vps13d | 313825 | 1,27 | up   |
| 6091750 | 7292869 | 1603494 | vacuolar protein sorting 13D (yeast) | Vps13d | 313825 | 1,27 | up   |
| 6486095 | 7292869 | 1603487 | vacuolar protein sorting 13D (yeast) | Vps13d | 313825 | 1,27 | up   |
| 5944940 | 7292869 | 1603443 | vacuolar protein sorting 13D (yeast) | Vps13d | 313825 | 1,25 | down |
| 6398808 | 7292869 | 1603397 | vacuolar protein sorting 13D (yeast) | Vps13d | 313825 | 1,25 | up   |
| 5838652 | 7292869 | 1603437 | vacuolar protein sorting 13D (yeast) | Vps13d | 313825 | 1,25 | up   |
| 5985907 | 7292869 | 1603432 | vacuolar protein sorting 13D (yeast) | Vps13d | 313825 | 1,24 | down |
| 6562941 | 7292869 | 1603483 | vacuolar protein sorting 13D (yeast) | Vps13d | 313825 | 1,23 | up   |
| 6015032 | 7292869 | 1603444 | vacuolar protein sorting 13D (yeast) | Vps13d | 313825 | 1,22 | down |
| 6218963 | 7292869 | 1603441 | vacuolar protein sorting 13D (yeast) | Vps13d | 313825 | 1,21 | down |
| 6731723 | 7292869 | 1603461 | vacuolar protein sorting 13D (yeast) | Vps13d | 313825 | 1,19 | up   |
| 6382322 | 7292869 | 1603372 | vacuolar protein sorting 13D (yeast) | Vps13d | 313825 | 1,19 | down |
| 6735927 | 7292869 | 1603460 | vacuolar protein sorting 13D (yeast) | Vps13d | 313825 | 1,19 | up   |
| 6051330 | 7292869 | 1603419 | vacuolar protein sorting 13D (yeast) | Vps13d | 313825 | 1,18 | up   |
| 6445674 | 7292869 | 1603492 | vacuolar protein sorting 13D (yeast) | Vps13d | 313825 | 1,18 | up   |
| 6071103 | 7292869 | 1603482 | vacuolar protein sorting 13D (yeast) | Vps13d | 313825 | 1,18 | up   |
| 6017789 | 7292869 | 1603440 | vacuolar protein sorting 13D (yeast) | Vps13d | 313825 | 1,17 | down |
| 6058336 | 7292869 | 1603429 | vacuolar protein sorting 13D (yeast) | Vps13d | 313825 | 1,17 | down |
| 6508196 | 7292869 | 1603442 | vacuolar protein sorting 13D (yeast) | Vps13d | 313825 | 1,17 | up   |
| 5638346 | 7292869 | 1603488 | vacuolar protein sorting 13D (yeast) | Vps13d | 313825 | 1,15 | down |
| 5779506 | 7292869 | 1603467 | vacuolar protein sorting 13D (yeast) | Vps13d | 313825 | 1,15 | up   |
| 6283888 | 7292869 | 1603470 | vacuolar protein sorting 13D (yeast) | Vps13d | 313825 | 1,14 | down |
| 5951780 | 7292869 | 1603484 | vacuolar protein sorting 13D (yeast) | Vps13d | 313825 | 1,14 | up   |
| 5811806 | 7292869 | 1603485 | vacuolar protein sorting 13D (yeast) | Vps13d | 313825 | 1,14 | up   |
| 6338635 | 7292869 | 1603448 | vacuolar protein sorting 13D (yeast) | Vps13d | 313825 | 1,14 | up   |
| 6590904 | 7292869 | 1603375 | vacuolar protein sorting 13D (yeast) | Vps13d | 313825 | 1,14 | down |
| 6537553 | 7292869 | 1603468 | vacuolar protein sorting 13D (yeast) | Vps13d | 313825 | 1,14 | up   |
| 6401202 | 7292869 | 1603428 | vacuolar protein sorting 13D (yeast) | Vps13d | 313825 | 1,13 | down |
| 6610520 | 7292869 | 1603371 | vacuolar protein sorting 13D (yeast) | Vps13d | 313825 | 1,13 | down |
| 5668821 | 7292869 | 1603462 | vacuolar protein sorting 13D (yeast) | Vps13d | 313825 | 1,12 | up   |
| 5765557 | 7292869 | 1603458 | vacuolar protein sorting 13D (yeast) | Vps13d | 313825 | 1,11 | up   |
| 5794302 | 7292869 | 1603490 | vacuolar protein sorting 13D (yeast) | Vps13d | 313825 | 1,10 | down |
| 5846924 | 7292869 | 1603453 | vacuolar protein sorting 13D (yeast) | Vps13d | 313825 | 1,10 | up   |
| 6281885 | 7292869 | 1603502 | vacuolar protein sorting 13D (yeast) | Vps13d | 313825 | 1,09 | up   |
| 6699429 | 7292869 | 1603447 | vacuolar protein sorting 13D (yeast) | Vps13d | 313825 | 1,08 | up   |
| 6001247 | 7292869 | 1603491 | vacuolar protein sorting 13D (yeast) | Vps13d | 313825 | 1,08 | up   |
| 5823645 | 7292869 | 1603400 | vacuolar protein sorting 13D (yeast) | Vps13d | 313825 | 1,08 | down |
| 6210619 | 7292869 | 1603474 | vacuolar protein sorting 13D (yeast) | Vps13d | 313825 | 1,07 | up   |
| 5959549 | 7292869 | 1603466 | vacuolar protein sorting 13D (yeast) | Vps13d | 313825 | 1,06 | up   |
| 5768604 | 7292869 | 1603455 | vacuolar protein sorting 13D (yeast) | Vps13d | 313825 | 1,06 | down |
| 5932040 | 7292869 | 1603465 | vacuolar protein sorting 13D (yeast) | Vps13d | 313825 | 1,06 | down |

|         |         |         |                                                       |        |        |      |      |
|---------|---------|---------|-------------------------------------------------------|--------|--------|------|------|
| 6186586 | 7292869 | 1603480 | vacuolar protein sorting 13D (yeast)                  | Vps13d | 313825 | 1,06 | down |
| 6039011 | 7292869 | 1603463 | vacuolar protein sorting 13D (yeast)                  | Vps13d | 313825 | 1,06 | down |
| 5841088 | 7292869 | 1603495 | vacuolar protein sorting 13D (yeast)                  | Vps13d | 313825 | 1,05 | up   |
| 6648040 | 7292869 | 1603493 | vacuolar protein sorting 13D (yeast)                  | Vps13d | 313825 | 1,05 | up   |
| 6518046 | 7292869 | 1603449 | vacuolar protein sorting 13D (yeast)                  | Vps13d | 313825 | 1,04 | down |
| 6048984 | 7292869 | 1603430 | vacuolar protein sorting 13D (yeast)                  | Vps13d | 313825 | 1,03 | down |
| 6336331 | 7292869 | 1603472 | vacuolar protein sorting 13D (yeast)                  | Vps13d | 313825 | 1,03 | down |
| 6425225 | 7292869 | 1603489 | vacuolar protein sorting 13D (yeast)                  | Vps13d | 313825 | 1,03 | down |
| 6285665 | 7292869 | 1603496 | vacuolar protein sorting 13D (yeast)                  | Vps13d | 313825 | 1,03 | up   |
| 6359796 | 7292869 | 1603435 | vacuolar protein sorting 13D (yeast)                  | Vps13d | 313825 | 1,02 | up   |
| 5793188 | 7292869 | 1603427 | vacuolar protein sorting 13D (yeast)                  | Vps13d | 313825 | 1,02 | up   |
| 6067419 | 7292869 | 1603457 | vacuolar protein sorting 13D (yeast)                  | Vps13d | 313825 | 1,02 | up   |
| 6490607 | 7292869 | 1603470 | vacuolar protein sorting 13D (yeast)                  | Vps13d | 313825 | 1,01 | down |
| 6720527 | 7292869 | 1603479 | vacuolar protein sorting 13D (yeast)                  | Vps13d | 313825 | 1,01 | up   |
| 6745864 | 7292869 | 1603464 | vacuolar protein sorting 13D (yeast)                  | Vps13d | 313825 | 1,00 | up   |
| 5665216 | 7039728 | 984846  | vacuolar protein sorting 37 homolog C (S. cerevisiae) | Vps37c | 308178 | 1,61 | up   |
| 5783390 | 7039728 | 984848  | vacuolar protein sorting 37 homolog C (S. cerevisiae) | Vps37c | 308178 | 1,52 | down |
| 5695800 | 7039728 | 984846  | vacuolar protein sorting 37 homolog C (S. cerevisiae) | Vps37c | 308178 | 1,30 | down |
| 5710786 | 7039728 | 984848  | vacuolar protein sorting 37 homolog C (S. cerevisiae) | Vps37c | 308178 | 1,26 | up   |
| 5620214 | 7039728 | 984844  | vacuolar protein sorting 37 homolog C (S. cerevisiae) | Vps37c | 308178 | 1,23 | up   |
| 6659757 | 7039728 | 984838  | vacuolar protein sorting 37 homolog C (S. cerevisiae) | Vps37c | 308178 | 1,23 | down |
| 6081092 | 7039728 | 984846  | vacuolar protein sorting 37 homolog C (S. cerevisiae) | Vps37c | 308178 | 1,18 | down |
| 6715596 | 7039728 | 984843  | vacuolar protein sorting 37 homolog C (S. cerevisiae) | Vps37c | 308178 | 1,18 | up   |
| 6732262 | 7039728 | 984846  | vacuolar protein sorting 37 homolog C (S. cerevisiae) | Vps37c | 308178 | 1,15 | up   |
| 6100186 | 7039728 | 984846  | vacuolar protein sorting 37 homolog C (S. cerevisiae) | Vps37c | 308178 | 1,10 | up   |
| 6231952 | 7039728 | 984846  | vacuolar protein sorting 37 homolog C (S. cerevisiae) | Vps37c | 308178 | 1,07 | down |
| 6318410 | 7039728 | 984846  | vacuolar protein sorting 37 homolog C (S. cerevisiae) | Vps37c | 308178 | 1,07 | up   |
| 6470856 | 7039728 | 984848  | vacuolar protein sorting 37 homolog C (S. cerevisiae) | Vps37c | 308178 | 1,02 | up   |
| 6333095 | 7039728 | 984847  | vacuolar protein sorting 37 homolog C (S. cerevisiae) | Vps37c | 308178 | 1,02 | up   |
| 6194913 | 7039728 | 984845  | vacuolar protein sorting 37 homolog C (S. cerevisiae) | Vps37c | 308178 | 1,01 | up   |
| 5886743 | 7220650 | 1424522 | valyl-tRNA synthetase                                 | Vars   | 25009  | 2,53 | down |
| 6291988 | 7220650 | 1424526 | valyl-tRNA synthetase                                 | Vars   | 25009  | 1,96 | up   |
| 6011417 | 7220650 | 1424547 | valyl-tRNA synthetase                                 | Vars   | 25009  | 1,94 | down |
| 6675702 | 7220650 | 1424552 | valyl-tRNA synthetase                                 | Vars   | 25009  | 1,67 | down |
| 6317268 | 7220650 | 1424523 | valyl-tRNA synthetase                                 | Vars   | 25009  | 1,47 | down |
| 6460317 | 7220650 | 1424534 | valyl-tRNA synthetase                                 | Vars   | 25009  | 1,31 | up   |
| 6373357 | 7220650 | 1424548 | valyl-tRNA synthetase                                 | Vars   | 25009  | 1,27 | down |
| 5843045 | 7220650 | 1424532 | valyl-tRNA synthetase                                 | Vars   | 25009  | 1,25 | down |
| 6261025 | 7220650 | 1424540 | valyl-tRNA synthetase                                 | Vars   | 25009  | 1,22 | up   |
| 6695684 | 7220650 | 1424542 | valyl-tRNA synthetase                                 | Vars   | 25009  | 1,19 | down |
| 6038727 | 7220650 | 1424551 | valyl-tRNA synthetase                                 | Vars   | 25009  | 1,19 | up   |
| 5633686 | 7220650 | 1424545 | valyl-tRNA synthetase                                 | Vars   | 25009  | 1,17 | up   |
| 5759004 | 7220650 | 1424536 | valyl-tRNA synthetase                                 | Vars   | 25009  | 1,16 | up   |
| 5988454 | 7220650 | 1424530 | valyl-tRNA synthetase                                 | Vars   | 25009  | 1,16 | down |
| 6349647 | 7220650 | 1424541 | valyl-tRNA synthetase                                 | Vars   | 25009  | 1,13 | up   |
| 5756316 | 7220650 | 1424549 | valyl-tRNA synthetase                                 | Vars   | 25009  | 1,11 | down |
| 6626318 | 7220650 | 1424522 | valyl-tRNA synthetase                                 | Vars   | 25009  | 1,07 | up   |
| 6209227 | 7220650 | 1424531 | valyl-tRNA synthetase                                 | Vars   | 25009  | 1,07 | up   |
| 6505667 | 7220650 | 1424550 | valyl-tRNA synthetase                                 | Vars   | 25009  | 1,06 | down |
| 6497023 | 7220650 | 1424529 | valyl-tRNA synthetase                                 | Vars   | 25009  | 1,06 | up   |
| 5678869 | 7220650 | 1424528 | valyl-tRNA synthetase                                 | Vars   | 25009  | 1,06 | up   |
| 5618624 | 7220650 | 1424546 | valyl-tRNA synthetase                                 | Vars   | 25009  | 1,05 | up   |
| 6721700 | 7220650 | 1424525 | valyl-tRNA synthetase                                 | Vars   | 25009  | 1,05 | up   |
| 5806910 | 7220650 | 1424538 | valyl-tRNA synthetase                                 | Vars   | 25009  | 1,05 | down |
| 6422729 | 7220650 | 1424539 | valyl-tRNA synthetase                                 | Vars   | 25009  | 1,05 | down |
| 5658512 | 7220650 | 1424537 | valyl-tRNA synthetase                                 | Vars   | 25009  | 1,03 | up   |
| 5757955 | 7220650 | 1424533 | valyl-tRNA synthetase                                 | Vars   | 25009  | 1,03 | down |

|         |         |         |                                          |       |        |      |      |
|---------|---------|---------|------------------------------------------|-------|--------|------|------|
| 6539668 | 7220650 | 1424523 | valyl-tRNA synthetase                    | Vars  | 25009  | 1,03 | down |
| 6009245 | 7220650 | 1424529 | valyl-tRNA synthetase                    | Vars  | 25009  | 1,02 | up   |
| 6647990 | 7220650 | 1424524 | valyl-tRNA synthetase                    | Vars  | 25009  | 1,01 | down |
| 6273510 | 7220650 | 1424527 | valyl-tRNA synthetase                    | Vars  | 25009  | 1,01 | up   |
| 6513498 | 7220650 | 1424535 | valyl-tRNA synthetase                    | Vars  | 25009  | 1,00 | down |
| 6351318 | 7302307 | 1627591 | vasoactive intestinal peptide receptor 2 | Vipr2 | 29555  | 2,84 | up   |
| 5653970 | 7302307 | 1627591 | vasoactive intestinal peptide receptor 2 | Vipr2 | 29555  | 2,09 | up   |
| 6746922 | 7302307 | 1627603 | vasoactive intestinal peptide receptor 2 | Vipr2 | 29555  | 1,77 | down |
| 5953233 | 7302307 | 1627604 | vasoactive intestinal peptide receptor 2 | Vipr2 | 29555  | 1,61 | up   |
| 6146329 | 7302307 | 1627597 | vasoactive intestinal peptide receptor 2 | Vipr2 | 29555  | 1,54 | down |
| 6581187 | 7302307 | 1627599 | vasoactive intestinal peptide receptor 2 | Vipr2 | 29555  | 1,47 | up   |
| 6328935 | 7302307 | 1627594 | vasoactive intestinal peptide receptor 2 | Vipr2 | 29555  | 1,39 | down |
| 6651199 | 7302307 | 1627596 | vasoactive intestinal peptide receptor 2 | Vipr2 | 29555  | 1,38 | up   |
| 5851905 | 7302307 | 1627602 | vasoactive intestinal peptide receptor 2 | Vipr2 | 29555  | 1,37 | down |
| 5746294 | 7302307 | 1627593 | vasoactive intestinal peptide receptor 2 | Vipr2 | 29555  | 1,36 | up   |
| 6354589 | 7302307 | 1627604 | vasoactive intestinal peptide receptor 2 | Vipr2 | 29555  | 1,30 | down |
| 5733794 | 7302307 | 1627600 | vasoactive intestinal peptide receptor 2 | Vipr2 | 29555  | 1,14 | down |
| 6024849 | 7302307 | 1627592 | vasoactive intestinal peptide receptor 2 | Vipr2 | 29555  | 1,12 | down |
| 5928465 | 7302307 | 1627598 | vasoactive intestinal peptide receptor 2 | Vipr2 | 29555  | 1,10 | down |
| 5921472 | 7302307 | 1627597 | vasoactive intestinal peptide receptor 2 | Vipr2 | 29555  | 1,10 | down |
| 6035874 | 7302307 | 1627595 | vasoactive intestinal peptide receptor 2 | Vipr2 | 29555  | 1,09 | down |
| 6323852 | 7302307 | 1627601 | vasoactive intestinal peptide receptor 2 | Vipr2 | 29555  | 1,04 | up   |
| 6571320 | 7302307 | 1627604 | vasoactive intestinal peptide receptor 2 | Vipr2 | 29555  | 1,04 | up   |
| 6395152 | 7300392 | 1622750 | vasohibin 1                              | Vash1 | 503052 | 1,60 | down |
| 5936470 | 7300392 | 1622759 | vasohibin 1                              | Vash1 | 503052 | 1,50 | down |
| 6308088 | 7300392 | 1622750 | vasohibin 1                              | Vash1 | 503052 | 1,33 | down |
| 6676511 | 7300392 | 1622750 | vasohibin 1                              | Vash1 | 503052 | 1,32 | up   |
| 6322028 | 7237132 | 1466105 | vav 2 guanine nucleotide exchange factor | Vav2  | 296603 | 2,33 | up   |
| 6456380 | 7237132 | 1466108 | vav 2 guanine nucleotide exchange factor | Vav2  | 296603 | 2,18 | up   |
| 5640333 | 7237132 | 1466130 | vav 2 guanine nucleotide exchange factor | Vav2  | 296603 | 1,60 | up   |
| 6611096 | 7237132 | 1466187 | vav 2 guanine nucleotide exchange factor | Vav2  | 296603 | 1,53 | up   |
| 6518333 | 7237132 | 1466112 | vav 2 guanine nucleotide exchange factor | Vav2  | 296603 | 1,39 | down |
| 6113932 | 7237132 | 1466105 | vav 2 guanine nucleotide exchange factor | Vav2  | 296603 | 1,39 | down |
| 5971664 | 7237132 | 1466105 | vav 2 guanine nucleotide exchange factor | Vav2  | 296603 | 1,38 | up   |
| 6156588 | 7237132 | 1466171 | vav 2 guanine nucleotide exchange factor | Vav2  | 296603 | 1,34 | down |
| 6099207 | 7237132 | 1466128 | vav 2 guanine nucleotide exchange factor | Vav2  | 296603 | 1,29 | up   |
| 6290614 | 7237132 | 1466116 | vav 2 guanine nucleotide exchange factor | Vav2  | 296603 | 1,27 | down |
| 6185843 | 7237132 | 1466121 | vav 2 guanine nucleotide exchange factor | Vav2  | 296603 | 1,26 | up   |
| 6543422 | 7237132 | 1466126 | vav 2 guanine nucleotide exchange factor | Vav2  | 296603 | 1,26 | down |
| 6702360 | 7237132 | 1466110 | vav 2 guanine nucleotide exchange factor | Vav2  | 296603 | 1,23 | up   |
| 5874270 | 7237132 | 1466105 | vav 2 guanine nucleotide exchange factor | Vav2  | 296603 | 1,21 | up   |
| 6247651 | 7237132 | 1466151 | vav 2 guanine nucleotide exchange factor | Vav2  | 296603 | 1,20 | down |
| 6262640 | 7237132 | 1466122 | vav 2 guanine nucleotide exchange factor | Vav2  | 296603 | 1,19 | down |
| 6578420 | 7237132 | 1466125 | vav 2 guanine nucleotide exchange factor | Vav2  | 296603 | 1,18 | down |
| 6503403 | 7237132 | 1466127 | vav 2 guanine nucleotide exchange factor | Vav2  | 296603 | 1,17 | down |
| 5626801 | 7237132 | 1466107 | vav 2 guanine nucleotide exchange factor | Vav2  | 296603 | 1,17 | up   |
| 6388799 | 7237132 | 1466137 | vav 2 guanine nucleotide exchange factor | Vav2  | 296603 | 1,15 | up   |
| 6647360 | 7237132 | 1466114 | vav 2 guanine nucleotide exchange factor | Vav2  | 296603 | 1,15 | up   |
| 6136833 | 7237132 | 1466105 | vav 2 guanine nucleotide exchange factor | Vav2  | 296603 | 1,14 | up   |
| 6106127 | 7237132 | 1466118 | vav 2 guanine nucleotide exchange factor | Vav2  | 296603 | 1,12 | down |
| 5896299 | 7237132 | 1466105 | vav 2 guanine nucleotide exchange factor | Vav2  | 296603 | 1,11 | up   |
| 5736773 | 7237132 | 1466131 | vav 2 guanine nucleotide exchange factor | Vav2  | 296603 | 1,11 | down |
| 5765420 | 7237132 | 1466124 | vav 2 guanine nucleotide exchange factor | Vav2  | 296603 | 1,08 | up   |
| 5813317 | 7237132 | 1466119 | vav 2 guanine nucleotide exchange factor | Vav2  | 296603 | 1,06 | up   |
| 6331070 | 7237132 | 1466135 | vav 2 guanine nucleotide exchange factor | Vav2  | 296603 | 1,05 | up   |
| 6148168 | 7237132 | 1466140 | vav 2 guanine nucleotide exchange factor | Vav2  | 296603 | 1,04 | down |
| 6317692 | 7237132 | 1466186 | vav 2 guanine nucleotide exchange factor | Vav2  | 296603 | 1,03 | down |

|         |         |         |                                                                    |       |        |      |      |
|---------|---------|---------|--------------------------------------------------------------------|-------|--------|------|------|
| 5720421 | 7237132 | 1466132 | vav 2 guanine nucleotide exchange factor                           | Vav2  | 296603 | 1,03 | down |
| 6592677 | 7237132 | 1466129 | vav 2 guanine nucleotide exchange factor                           | Vav2  | 296603 | 1,00 | up   |
| 6524148 | 7198087 | 1370726 | vav 3 guanine nucleotide exchange factor                           | Vav3  | 295378 | 1,15 | down |
| 5971386 | 7064228 | 1041814 | ventral anterior homeobox 1                                        | Vax1  | 64571  | 3,96 | down |
| 6564537 | 7064228 | 1041814 | ventral anterior homeobox 1                                        | Vax1  | 64571  | 1,53 | up   |
| 6240441 | 7064228 | 1041814 | ventral anterior homeobox 1                                        | Vax1  | 64571  | 1,44 | down |
| 5657901 | 7064228 | 1041814 | ventral anterior homeobox 1                                        | Vax1  | 64571  | 1,31 | down |
| 5662887 | 7064228 | 1041816 | ventral anterior homeobox 1                                        | Vax1  | 64571  | 1,31 | up   |
| 5878363 | 7064228 | 1041814 | ventral anterior homeobox 1                                        | Vax1  | 64571  | 1,17 | down |
| 5724416 | 7064228 | 1041814 | ventral anterior homeobox 1                                        | Vax1  | 64571  | 1,13 | down |
| 6596563 | 7064228 | 1041814 | ventral anterior homeobox 1                                        | Vax1  | 64571  | 1,13 | up   |
| 5791795 | 7064228 | 1041815 | ventral anterior homeobox 1                                        | Vax1  | 64571  | 1,05 | up   |
| 6053398 | 7321394 | 1675581 | v-erb-b2 erythroblastic leukemia viral oncogene homolog 3 (avian)  | ErbB3 | 29496  | 2,25 | down |
| 5804980 | 7321394 | 1675592 | v-erb-b2 erythroblastic leukemia viral oncogene homolog 3 (avian)  | ErbB3 | 29496  | 1,84 | down |
| 6196002 | 7321394 | 1675574 | v-erb-b2 erythroblastic leukemia viral oncogene homolog 3 (avian)  | ErbB3 | 29496  | 1,67 | down |
| 5755658 | 7321394 | 1675572 | v-erb-b2 erythroblastic leukemia viral oncogene homolog 3 (avian)  | ErbB3 | 29496  | 1,58 | down |
| 6699479 | 7321394 | 1675594 | v-erb-b2 erythroblastic leukemia viral oncogene homolog 3 (avian)  | ErbB3 | 29496  | 1,57 | up   |
| 6253605 | 7321394 | 1675585 | v-erb-b2 erythroblastic leukemia viral oncogene homolog 3 (avian)  | ErbB3 | 29496  | 1,46 | up   |
| 6733394 | 7321394 | 1675591 | v-erb-b2 erythroblastic leukemia viral oncogene homolog 3 (avian)  | ErbB3 | 29496  | 1,45 | up   |
| 6209899 | 7321394 | 1675582 | v-erb-b2 erythroblastic leukemia viral oncogene homolog 3 (avian)  | ErbB3 | 29496  | 1,40 | up   |
| 6526764 | 7321394 | 1675572 | v-erb-b2 erythroblastic leukemia viral oncogene homolog 3 (avian)  | ErbB3 | 29496  | 1,39 | down |
| 5785789 | 7321394 | 1675589 | v-erb-b2 erythroblastic leukemia viral oncogene homolog 3 (avian)  | ErbB3 | 29496  | 1,34 | down |
| 6188701 | 7321394 | 1675586 | v-erb-b2 erythroblastic leukemia viral oncogene homolog 3 (avian)  | ErbB3 | 29496  | 1,23 | up   |
| 6179139 | 7321394 | 1675577 | v-erb-b2 erythroblastic leukemia viral oncogene homolog 3 (avian)  | ErbB3 | 29496  | 1,21 | up   |
| 5824991 | 7321394 | 1675572 | v-erb-b2 erythroblastic leukemia viral oncogene homolog 3 (avian)  | ErbB3 | 29496  | 1,21 | up   |
| 6356033 | 7321394 | 1675579 | v-erb-b2 erythroblastic leukemia viral oncogene homolog 3 (avian)  | ErbB3 | 29496  | 1,17 | up   |
| 6265945 | 7321394 | 1675595 | v-erb-b2 erythroblastic leukemia viral oncogene homolog 3 (avian)  | ErbB3 | 29496  | 1,14 | up   |
| 6205913 | 7321394 | 1675591 | v-erb-b2 erythroblastic leukemia viral oncogene homolog 3 (avian)  | ErbB3 | 29496  | 1,13 | up   |
| 5631233 | 7321394 | 1675597 | v-erb-b2 erythroblastic leukemia viral oncogene homolog 3 (avian)  | ErbB3 | 29496  | 1,10 | down |
| 5646436 | 7321394 | 1675583 | v-erb-b2 erythroblastic leukemia viral oncogene homolog 3 (avian)  | ErbB3 | 29496  | 1,07 | down |
| 6473445 | 7321394 | 1675596 | v-erb-b2 erythroblastic leukemia viral oncogene homolog 3 (avian)  | ErbB3 | 29496  | 1,07 | down |
| 6127166 | 7321394 | 1675584 | v-erb-b2 erythroblastic leukemia viral oncogene homolog 3 (avian)  | ErbB3 | 29496  | 1,07 | down |
| 6410262 | 7321394 | 1675598 | v-erb-b2 erythroblastic leukemia viral oncogene homolog 3 (avian)  | ErbB3 | 29496  | 1,06 | down |
| 6583254 | 7321394 | 1675588 | v-erb-b2 erythroblastic leukemia viral oncogene homolog 3 (avian)  | ErbB3 | 29496  | 1,05 | down |
| 6076920 | 7321394 | 1675587 | v-erb-b2 erythroblastic leukemia viral oncogene homolog 3 (avian)  | ErbB3 | 29496  | 1,04 | up   |
| 6723896 | 7321394 | 1675593 | v-erb-b2 erythroblastic leukemia viral oncogene homolog 3 (avian)  | ErbB3 | 29496  | 1,03 | down |
| 6506640 | 7321394 | 1675571 | v-erb-b2 erythroblastic leukemia viral oncogene homolog 3 (avian)  | ErbB3 | 29496  | 1,02 | down |
| 6261969 | 7321394 | 1675574 | v-erb-b2 erythroblastic leukemia viral oncogene homolog 3 (avian)  | ErbB3 | 29496  | 1,02 | down |
| 5705649 | 7321394 | 1675576 | v-erb-b2 erythroblastic leukemia viral oncogene homolog 3 (avian)  | ErbB3 | 29496  | 1,01 | down |
| 5925004 | 7321394 | 1675573 | v-erb-b2 erythroblastic leukemia viral oncogene homolog 3 (avian)  | ErbB3 | 29496  | 1,01 | down |
| 6328355 | 7321394 | 1675578 | v-erb-b2 erythroblastic leukemia viral oncogene homolog 3 (avian)  | ErbB3 | 29496  | 1,01 | down |
| 6212671 | 7321394 | 1675580 | v-erb-b2 erythroblastic leukemia viral oncogene homolog 3 (avian)  | ErbB3 | 29496  | 1,00 | down |
| 6089042 | 7321394 | 1675575 | v-erb-b2 erythroblastic leukemia viral oncogene homolog 3 (avian)  | ErbB3 | 29496  | 1,00 | up   |
| 6141159 | 7321394 | 1675571 | v-erb-b2 erythroblastic leukemia viral oncogene homolog 3 (avian)  | ErbB3 | 29496  | 1,00 | up   |
| 6142682 | 7321394 | 1675590 | v-erb-b2 erythroblastic leukemia viral oncogene homolog 3 (avian)  | ErbB3 | 29496  | 1,00 | up   |
| 6228493 | 7367959 | 1789071 | vimentin-type intermediate filament associated coiled-coil protein | Vmac  | 363327 | 2,10 | up   |
| 6263966 | 7367959 | 1789073 | vimentin-type intermediate filament associated coiled-coil protein | Vmac  | 363327 | 1,23 | down |
| 6499302 | 7136062 | 1216272 | vinculin                                                           | Vcl   | 305679 | 1,81 | up   |
| 5701685 | 7136062 | 1216277 | vinculin                                                           | Vcl   | 305679 | 1,37 | down |
| 5632276 | 7136062 | 1216285 | vinculin                                                           | Vcl   | 305679 | 1,30 | down |
| 5841484 | 7136062 | 1216300 | vinculin                                                           | Vcl   | 305679 | 1,28 | down |
| 5672878 | 7136062 | 1216273 | vinculin                                                           | Vcl   | 305679 | 1,27 | down |
| 6681930 | 7136062 | 1216280 | vinculin                                                           | Vcl   | 305679 | 1,21 | down |
| 6291460 | 7136062 | 1216275 | vinculin                                                           | Vcl   | 305679 | 1,21 | down |
| 5760786 | 7136062 | 1216296 | vinculin                                                           | Vcl   | 305679 | 1,19 | up   |
| 5880899 | 7136062 | 1216281 | vinculin                                                           | Vcl   | 305679 | 1,18 | down |
| 6722277 | 7136062 | 1216298 | vinculin                                                           | Vcl   | 305679 | 1,18 | up   |



|         |         |         |                                                                  |        |        |      |      |
|---------|---------|---------|------------------------------------------------------------------|--------|--------|------|------|
| 6569537 | 7136062 | 1216295 | vinculin                                                         | Vcl    | 305679 | 1,17 | down |
| 6407135 | 7136062 | 1216277 | vinculin                                                         | Vcl    | 305679 | 1,17 | up   |
| 6725921 | 7136062 | 1216272 | vinculin                                                         | Vcl    | 305679 | 1,16 | down |
| 6178330 | 7136062 | 1216298 | vinculin                                                         | Vcl    | 305679 | 1,14 | up   |
| 6273710 | 7136062 | 1216288 | vinculin                                                         | Vcl    | 305679 | 1,13 | down |
| 6426766 | 7136062 | 1216297 | vinculin                                                         | Vcl    | 305679 | 1,12 | up   |
| 6237861 | 7136062 | 1216284 | vinculin                                                         | Vcl    | 305679 | 1,11 | down |
| 6569797 | 7136062 | 1216289 | vinculin                                                         | Vcl    | 305679 | 1,10 | down |
| 6242791 | 7136062 | 1216278 | vinculin                                                         | Vcl    | 305679 | 1,08 | down |
| 5702190 | 7136062 | 1216274 | vinculin                                                         | Vcl    | 305679 | 1,08 | down |
| 6544790 | 7136062 | 1216282 | vinculin                                                         | Vcl    | 305679 | 1,07 | up   |
| 6722047 | 7136062 | 1216287 | vinculin                                                         | Vcl    | 305679 | 1,03 | down |
| 5697152 | 7136062 | 1216286 | vinculin                                                         | Vcl    | 305679 | 1,03 | down |
| 6200218 | 7136062 | 1216272 | vinculin                                                         | Vcl    | 305679 | 1,02 | down |
| 6323545 | 7136062 | 1216305 | vinculin                                                         | Vcl    | 305679 | 1,02 | down |
| 5785094 | 7136062 | 1216279 | vinculin                                                         | Vcl    | 305679 | 1,01 | down |
| 6098044 | 7318753 | 1669318 | v-maf musculoaponeurotic fibrosarcoma oncogene homolog F (avian) | Maff   | 366960 | 2,25 | down |
| 5941414 | 7318753 | 1669317 | v-maf musculoaponeurotic fibrosarcoma oncogene homolog F (avian) | Maff   | 366960 | 1,39 | up   |
| 6317472 | 7318753 | 1669318 | v-maf musculoaponeurotic fibrosarcoma oncogene homolog F (avian) | Maff   | 366960 | 1,35 | up   |
| 6084334 | 7334980 | 1707167 | von Willebrand factor A domain containing 5A                     | Vwa5a  | 301097 | 8,50 | down |
| 5861458 | 7334980 | 1707168 | von Willebrand factor A domain containing 5A                     | Vwa5a  | 301097 | 4,37 | down |
| 5939209 | 7334980 | 1707161 | von Willebrand factor A domain containing 5A                     | Vwa5a  | 301097 | 2,00 | down |
| 5897716 | 7334980 | 1707166 | von Willebrand factor A domain containing 5A                     | Vwa5a  | 301097 | 1,90 | down |
| 6620053 | 7334980 | 1707152 | von Willebrand factor A domain containing 5A                     | Vwa5a  | 301097 | 1,38 | up   |
| 6457562 | 7334980 | 1707150 | von Willebrand factor A domain containing 5A                     | Vwa5a  | 301097 | 1,29 | down |
| 5905300 | 7334980 | 1707151 | von Willebrand factor A domain containing 5A                     | Vwa5a  | 301097 | 1,29 | down |
| 6581747 | 7334980 | 1707159 | von Willebrand factor A domain containing 5A                     | Vwa5a  | 301097 | 1,28 | down |
| 6567289 | 7334980 | 1707166 | von Willebrand factor A domain containing 5A                     | Vwa5a  | 301097 | 1,23 | down |
| 5854962 | 7334980 | 1707158 | von Willebrand factor A domain containing 5A                     | Vwa5a  | 301097 | 1,20 | down |
| 5763232 | 7334980 | 1707163 | von Willebrand factor A domain containing 5A                     | Vwa5a  | 301097 | 1,18 | up   |
| 6318659 | 7334980 | 1707154 | von Willebrand factor A domain containing 5A                     | Vwa5a  | 301097 | 1,17 | up   |
| 6598585 | 7334980 | 1707156 | von Willebrand factor A domain containing 5A                     | Vwa5a  | 301097 | 1,16 | up   |
| 5711445 | 7334980 | 1707165 | von Willebrand factor A domain containing 5A                     | Vwa5a  | 301097 | 1,14 | up   |
| 5733294 | 7334980 | 1707166 | von Willebrand factor A domain containing 5A                     | Vwa5a  | 301097 | 1,14 | down |
| 5687369 | 7334980 | 1707157 | von Willebrand factor A domain containing 5A                     | Vwa5a  | 301097 | 1,12 | down |
| 6459146 | 7334980 | 1707166 | von Willebrand factor A domain containing 5A                     | Vwa5a  | 301097 | 1,11 | up   |
| 6084946 | 7334980 | 1707162 | von Willebrand factor A domain containing 5A                     | Vwa5a  | 301097 | 1,10 | up   |
| 6432831 | 7334980 | 1707164 | von Willebrand factor A domain containing 5A                     | Vwa5a  | 301097 | 1,05 | down |
| 5791549 | 7334980 | 1707155 | von Willebrand factor A domain containing 5A                     | Vwa5a  | 301097 | 1,05 | up   |
| 6544400 | 7334980 | 1707153 | von Willebrand factor A domain containing 5A                     | Vwa5a  | 301097 | 1,03 | down |
| 5784076 | 7334980 | 1707160 | von Willebrand factor A domain containing 5A                     | Vwa5a  | 301097 | 1,01 | down |
| 6441040 | 7292364 | 1602114 | von Willebrand factor A domain containing 5B1                    | Vwa5b1 | 313653 | 2,34 | down |
| 6482714 | 7292364 | 1602108 | von Willebrand factor A domain containing 5B1                    | Vwa5b1 | 313653 | 2,33 | down |
| 5863298 | 7292364 | 1602101 | von Willebrand factor A domain containing 5B1                    | Vwa5b1 | 313653 | 2,06 | down |
| 6692777 | 7292364 | 1602123 | von Willebrand factor A domain containing 5B1                    | Vwa5b1 | 313653 | 1,76 | down |
| 6208208 | 7292364 | 1602117 | von Willebrand factor A domain containing 5B1                    | Vwa5b1 | 313653 | 1,61 | down |
| 6388776 | 7292364 | 1602122 | von Willebrand factor A domain containing 5B1                    | Vwa5b1 | 313653 | 1,60 | down |
| 6024716 | 7292364 | 1602115 | von Willebrand factor A domain containing 5B1                    | Vwa5b1 | 313653 | 1,46 | down |
| 6745706 | 7292364 | 1602107 | von Willebrand factor A domain containing 5B1                    | Vwa5b1 | 313653 | 1,43 | down |
| 6604337 | 7292364 | 1602121 | von Willebrand factor A domain containing 5B1                    | Vwa5b1 | 313653 | 1,40 | down |
| 6199589 | 7292364 | 1602111 | von Willebrand factor A domain containing 5B1                    | Vwa5b1 | 313653 | 1,39 | down |
| 5774123 | 7292364 | 1602109 | von Willebrand factor A domain containing 5B1                    | Vwa5b1 | 313653 | 1,39 | down |
| 6447694 | 7292364 | 1602103 | von Willebrand factor A domain containing 5B1                    | Vwa5b1 | 313653 | 1,35 | up   |
| 6158038 | 7292364 | 1602113 | von Willebrand factor A domain containing 5B1                    | Vwa5b1 | 313653 | 1,30 | up   |
| 6547033 | 7292364 | 1602125 | von Willebrand factor A domain containing 5B1                    | Vwa5b1 | 313653 | 1,28 | up   |
| 6694590 | 7292364 | 1602130 | von Willebrand factor A domain containing 5B1                    | Vwa5b1 | 313653 | 1,27 | up   |
| 6018646 | 7292364 | 1602123 | von Willebrand factor A domain containing 5B1                    | Vwa5b1 | 313653 | 1,15 | up   |

|         |         |         |                                                              |        |        |      |      |
|---------|---------|---------|--------------------------------------------------------------|--------|--------|------|------|
| 6138866 | 7292364 | 1602102 | von Willebrand factor A domain containing 5B1                | Vwa5b1 | 313653 | 1,15 | up   |
| 6145203 | 7292364 | 1602106 | von Willebrand factor A domain containing 5B1                | Vwa5b1 | 313653 | 1,13 | up   |
| 5641893 | 7292364 | 1602105 | von Willebrand factor A domain containing 5B1                | Vwa5b1 | 313653 | 1,12 | up   |
| 6217882 | 7292364 | 1602126 | von Willebrand factor A domain containing 5B1                | Vwa5b1 | 313653 | 1,10 | up   |
| 5992660 | 7292364 | 1602100 | von Willebrand factor A domain containing 5B1                | Vwa5b1 | 313653 | 1,08 | up   |
| 6463413 | 7292364 | 1602120 | von Willebrand factor A domain containing 5B1                | Vwa5b1 | 313653 | 1,07 | down |
| 5810506 | 7292364 | 1602112 | von Willebrand factor A domain containing 5B1                | Vwa5b1 | 313653 | 1,05 | up   |
| 5961930 | 7292364 | 1602108 | von Willebrand factor A domain containing 5B1                | Vwa5b1 | 313653 | 1,03 | down |
| 6256111 | 7292364 | 1602125 | von Willebrand factor A domain containing 5B1                | Vwa5b1 | 313653 | 1,03 | up   |
| 6164534 | 7095066 | 1115290 | von Willebrand factor A domain containing 5B2                | Vwa5b2 | 303812 | 2,30 | up   |
| 6554483 | 7095066 | 1115268 | von Willebrand factor A domain containing 5B2                | Vwa5b2 | 303812 | 1,49 | down |
| 6472738 | 7095066 | 1115276 | von Willebrand factor A domain containing 5B2                | Vwa5b2 | 303812 | 1,39 | down |
| 6255202 | 7095066 | 1115280 | von Willebrand factor A domain containing 5B2                | Vwa5b2 | 303812 | 1,38 | down |
| 5775247 | 7095066 | 1115285 | von Willebrand factor A domain containing 5B2                | Vwa5b2 | 303812 | 1,37 | down |
| 6292681 | 7095066 | 1115269 | von Willebrand factor A domain containing 5B2                | Vwa5b2 | 303812 | 1,35 | down |
| 6520955 | 7095066 | 1115277 | von Willebrand factor A domain containing 5B2                | Vwa5b2 | 303812 | 1,34 | up   |
| 5717964 | 7095066 | 1115275 | von Willebrand factor A domain containing 5B2                | Vwa5b2 | 303812 | 1,31 | up   |
| 5700038 | 7095066 | 1115279 | von Willebrand factor A domain containing 5B2                | Vwa5b2 | 303812 | 1,30 | down |
| 6572271 | 7095066 | 1115287 | von Willebrand factor A domain containing 5B2                | Vwa5b2 | 303812 | 1,26 | up   |
| 6388425 | 7095066 | 1115267 | von Willebrand factor A domain containing 5B2                | Vwa5b2 | 303812 | 1,22 | down |
| 6205351 | 7095066 | 1115288 | von Willebrand factor A domain containing 5B2                | Vwa5b2 | 303812 | 1,22 | up   |
| 5682935 | 7095066 | 1115268 | von Willebrand factor A domain containing 5B2                | Vwa5b2 | 303812 | 1,17 | down |
| 6224382 | 7095066 | 1115284 | von Willebrand factor A domain containing 5B2                | Vwa5b2 | 303812 | 1,16 | down |
| 6132284 | 7095066 | 1115288 | von Willebrand factor A domain containing 5B2                | Vwa5b2 | 303812 | 1,16 | down |
| 6445082 | 7095066 | 1115282 | von Willebrand factor A domain containing 5B2                | Vwa5b2 | 303812 | 1,10 | up   |
| 5997483 | 7095066 | 1115281 | von Willebrand factor A domain containing 5B2                | Vwa5b2 | 303812 | 1,08 | down |
| 6595649 | 7095066 | 1115289 | von Willebrand factor A domain containing 5B2                | Vwa5b2 | 303812 | 1,08 | down |
| 6248227 | 7095066 | 1115274 | von Willebrand factor A domain containing 5B2                | Vwa5b2 | 303812 | 1,05 | down |
| 6638095 | 7095066 | 1115269 | von Willebrand factor A domain containing 5B2                | Vwa5b2 | 303812 | 1,02 | down |
| 6718322 | 7095066 | 1115286 | von Willebrand factor A domain containing 5B2                | Vwa5b2 | 303812 | 1,02 | up   |
| 5619812 | 7095066 | 1115287 | von Willebrand factor A domain containing 5B2                | Vwa5b2 | 303812 | 1,01 | up   |
| 6055458 | 7039725 | 984833  | von Willebrand factor C and EGF domains                      | Vwce   | 309209 | 2,14 | up   |
| 5849551 | 7039725 | 984832  | von Willebrand factor C and EGF domains                      | Vwce   | 309209 | 1,06 | down |
| 6087334 | 7039213 | 983511  | v-rel reticuloendotheliosis viral oncogene homolog A (avian) | Rela   | 309165 | 2,11 | down |
| 5793655 | 7039213 | 983521  | v-rel reticuloendotheliosis viral oncogene homolog A (avian) | Rela   | 309165 | 1,84 | up   |
| 5721992 | 7039213 | 983519  | v-rel reticuloendotheliosis viral oncogene homolog A (avian) | Rela   | 309165 | 1,42 | down |
| 6379834 | 7039213 | 983518  | v-rel reticuloendotheliosis viral oncogene homolog A (avian) | Rela   | 309165 | 1,37 | up   |
| 6273603 | 7039213 | 983520  | v-rel reticuloendotheliosis viral oncogene homolog A (avian) | Rela   | 309165 | 1,37 | up   |
| 5899044 | 7039213 | 983520  | v-rel reticuloendotheliosis viral oncogene homolog A (avian) | Rela   | 309165 | 1,25 | down |
| 6634763 | 7039213 | 983517  | v-rel reticuloendotheliosis viral oncogene homolog A (avian) | Rela   | 309165 | 1,16 | up   |
| 6222467 | 7039213 | 983515  | v-rel reticuloendotheliosis viral oncogene homolog A (avian) | Rela   | 309165 | 1,16 | down |
| 6039050 | 7039213 | 983520  | v-rel reticuloendotheliosis viral oncogene homolog A (avian) | Rela   | 309165 | 1,14 | down |
| 6172633 | 7039213 | 983520  | v-rel reticuloendotheliosis viral oncogene homolog A (avian) | Rela   | 309165 | 1,11 | up   |
| 5666864 | 7039213 | 983514  | v-rel reticuloendotheliosis viral oncogene homolog A (avian) | Rela   | 309165 | 1,05 | down |
| 5675332 | 7039213 | 983512  | v-rel reticuloendotheliosis viral oncogene homolog A (avian) | Rela   | 309165 | 1,04 | up   |
| 5866822 | 7039213 | 983513  | v-rel reticuloendotheliosis viral oncogene homolog A (avian) | Rela   | 309165 | 1,04 | down |
| 6201432 | 7039213 | 983516  | v-rel reticuloendotheliosis viral oncogene homolog A (avian) | Rela   | 309165 | 1,04 | down |
| 5868154 | 7033541 | 969974  | WAS protein homology region 2 domain containing 1            | Whdc1  | 293057 | 3,25 | down |
| 6063848 | 7033541 | 969974  | WAS protein homology region 2 domain containing 1            | Whdc1  | 293057 | 2,65 | down |
| 5843076 | 7033541 | 969975  | WAS protein homology region 2 domain containing 1            | Whdc1  | 293057 | 2,30 | down |
| 6126236 | 7033541 | 969974  | WAS protein homology region 2 domain containing 1            | Whdc1  | 293057 | 1,73 | down |
| 5723481 | 7033541 | 969986  | WAS protein homology region 2 domain containing 1            | Whdc1  | 293057 | 1,47 | down |
| 6688054 | 7033541 | 969976  | WAS protein homology region 2 domain containing 1            | Whdc1  | 293057 | 1,47 | down |
| 5628136 | 7033541 | 969975  | WAS protein homology region 2 domain containing 1            | Whdc1  | 293057 | 1,39 | down |
| 5899073 | 7033541 | 969985  | WAS protein homology region 2 domain containing 1            | Whdc1  | 293057 | 1,38 | up   |
| 6514931 | 7033541 | 969986  | WAS protein homology region 2 domain containing 1            | Whdc1  | 293057 | 1,31 | up   |
| 6723202 | 7033541 | 969979  | WAS protein homology region 2 domain containing 1            | Whdc1  | 293057 | 1,28 | up   |

|         |         |         |                                                   |       |        |      |      |
|---------|---------|---------|---------------------------------------------------|-------|--------|------|------|
| 6673055 | 7033541 | 969982  | WAS protein homology region 2 domain containing 1 | Whdc1 | 293057 | 1,27 | down |
| 6100171 | 7033541 | 969980  | WAS protein homology region 2 domain containing 1 | Whdc1 | 293057 | 1,24 | up   |
| 6281623 | 7033541 | 969984  | WAS protein homology region 2 domain containing 1 | Whdc1 | 293057 | 1,19 | up   |
| 5619744 | 7033541 | 969980  | WAS protein homology region 2 domain containing 1 | Whdc1 | 293057 | 1,19 | up   |
| 5776208 | 7033541 | 969985  | WAS protein homology region 2 domain containing 1 | Whdc1 | 293057 | 1,17 | up   |
| 5884136 | 7033541 | 969978  | WAS protein homology region 2 domain containing 1 | Whdc1 | 293057 | 1,15 | down |
| 6033171 | 7033541 | 969986  | WAS protein homology region 2 domain containing 1 | Whdc1 | 293057 | 1,13 | up   |
| 5714076 | 7033541 | 969987  | WAS protein homology region 2 domain containing 1 | Whdc1 | 293057 | 1,09 | down |
| 6111102 | 7033541 | 969981  | WAS protein homology region 2 domain containing 1 | Whdc1 | 293057 | 1,07 | up   |
| 6443472 | 7033541 | 969985  | WAS protein homology region 2 domain containing 1 | Whdc1 | 293057 | 1,04 | down |
| 5639112 | 7033541 | 969983  | WAS protein homology region 2 domain containing 1 | Whdc1 | 293057 | 1,02 | down |
| 6657158 | 7071969 | 1060902 | WAS/WASL interacting protein family, member 2     | Wipf2 | 360620 | 1,24 | up   |
| 6292311 | 7362759 | 1776143 | WD repeat domain 12                               | Wdr12 | 363237 | 2,76 | up   |
| 6132439 | 7362759 | 1776142 | WD repeat domain 12                               | Wdr12 | 363237 | 1,83 | up   |
| 6039606 | 7362759 | 1776132 | WD repeat domain 12                               | Wdr12 | 363237 | 1,74 | down |
| 6292082 | 7362759 | 1776138 | WD repeat domain 12                               | Wdr12 | 363237 | 1,73 | up   |
| 6329090 | 7362759 | 1776137 | WD repeat domain 12                               | Wdr12 | 363237 | 1,72 | down |
| 5845712 | 7362759 | 1776139 | WD repeat domain 12                               | Wdr12 | 363237 | 1,51 | up   |
| 6630967 | 7362759 | 1776134 | WD repeat domain 12                               | Wdr12 | 363237 | 1,47 | down |
| 5819096 | 7362759 | 1776133 | WD repeat domain 12                               | Wdr12 | 363237 | 1,40 | up   |
| 5818528 | 7362759 | 1776140 | WD repeat domain 12                               | Wdr12 | 363237 | 1,37 | up   |
| 6657652 | 7362759 | 1776144 | WD repeat domain 12                               | Wdr12 | 363237 | 1,22 | down |
| 6694907 | 7362759 | 1776136 | WD repeat domain 12                               | Wdr12 | 363237 | 1,14 | up   |
| 6366719 | 7362759 | 1776141 | WD repeat domain 12                               | Wdr12 | 363237 | 1,14 | down |
| 5700721 | 7362759 | 1776134 | WD repeat domain 12                               | Wdr12 | 363237 | 1,05 | down |
| 6703643 | 7362759 | 1776135 | WD repeat domain 12                               | Wdr12 | 363237 | 1,02 | down |
| 5852798 | 7322388 | 1677328 | WD repeat domain 18                               | Wdr18 | 314617 | 2,19 | up   |
| 5938187 | 7322388 | 1677324 | WD repeat domain 18                               | Wdr18 | 314617 | 1,56 | up   |
| 6697997 | 7322388 | 1677321 | WD repeat domain 18                               | Wdr18 | 314617 | 1,28 | up   |
| 6721550 | 7322388 | 1677322 | WD repeat domain 18                               | Wdr18 | 314617 | 1,15 | up   |
| 6481630 | 7322388 | 1677327 | WD repeat domain 18                               | Wdr18 | 314617 | 1,14 | down |
| 6058760 | 7322388 | 1677320 | WD repeat domain 18                               | Wdr18 | 314617 | 1,12 | up   |
| 6027490 | 7322388 | 1677323 | WD repeat domain 18                               | Wdr18 | 314617 | 1,05 | up   |
| 5653656 | 7322388 | 1677328 | WD repeat domain 18                               | Wdr18 | 314617 | 1,05 | up   |
| 6172010 | 7322388 | 1677326 | WD repeat domain 18                               | Wdr18 | 314617 | 1,02 | down |
| 5954667 | 7065810 | 1045688 | WD repeat domain 24                               | Wdr24 | 360497 | 1,46 | up   |
| 6364341 | 7065810 | 1045685 | WD repeat domain 24                               | Wdr24 | 360497 | 1,40 | up   |
| 5888517 | 7065810 | 1045686 | WD repeat domain 24                               | Wdr24 | 360497 | 1,21 | down |
| 5777884 | 7065810 | 1045680 | WD repeat domain 24                               | Wdr24 | 360497 | 1,19 | down |
| 5785759 | 7065810 | 1045684 | WD repeat domain 24                               | Wdr24 | 360497 | 1,17 | up   |
| 6648249 | 7065810 | 1045684 | WD repeat domain 24                               | Wdr24 | 360497 | 1,16 | down |
| 6385446 | 7065810 | 1045688 | WD repeat domain 24                               | Wdr24 | 360497 | 1,09 | up   |
| 6608937 | 7065810 | 1045688 | WD repeat domain 24                               | Wdr24 | 360497 | 1,06 | down |
| 6176562 | 7065810 | 1045688 | WD repeat domain 24                               | Wdr24 | 360497 | 1,03 | up   |
| 6297660 | 7065810 | 1045687 | WD repeat domain 24                               | Wdr24 | 360497 | 1,01 | down |
| 6634626 | 7274737 | 1559116 | WD repeat domain 32                               | Wdr32 | 313242 | 2,87 | down |
| 6492248 | 7274737 | 1559116 | WD repeat domain 32                               | Wdr32 | 313242 | 1,67 | down |
| 5850046 | 7274737 | 1559121 | WD repeat domain 32                               | Wdr32 | 313242 | 1,38 | up   |
| 6127212 | 7274737 | 1559121 | WD repeat domain 32                               | Wdr32 | 313242 | 1,30 | up   |
| 6413864 | 7274737 | 1559120 | WD repeat domain 32                               | Wdr32 | 313242 | 1,28 | down |
| 5859438 | 7274737 | 1559122 | WD repeat domain 32                               | Wdr32 | 313242 | 1,26 | down |
| 6408298 | 7274737 | 1559123 | WD repeat domain 32                               | Wdr32 | 313242 | 1,15 | up   |
| 5880194 | 7274737 | 1559117 | WD repeat domain 32                               | Wdr32 | 313242 | 1,10 | down |
| 6285708 | 7274737 | 1559119 | WD repeat domain 32                               | Wdr32 | 313242 | 1,10 | up   |
| 5676601 | 7274737 | 1559120 | WD repeat domain 32                               | Wdr32 | 313242 | 1,09 | up   |
| 5959247 | 7274737 | 1559123 | WD repeat domain 32                               | Wdr32 | 313242 | 1,08 | up   |
| 5994713 | 7274737 | 1559116 | WD repeat domain 32                               | Wdr32 | 313242 | 1,01 | up   |

|         |         |         |                          |        |        |      |      |
|---------|---------|---------|--------------------------|--------|--------|------|------|
| 6401575 | 7296131 | 1611484 | WD repeat domain 35-like | Wdr351 | 503018 | 1,74 | up   |
| 5627612 | 7296131 | 1611501 | WD repeat domain 35-like | Wdr351 | 503018 | 1,73 | down |
| 6205427 | 7296131 | 1611479 | WD repeat domain 35-like | Wdr351 | 503018 | 1,71 | up   |
| 6268987 | 7296131 | 1611482 | WD repeat domain 35-like | Wdr351 | 503018 | 1,54 | up   |
| 5696075 | 7296131 | 1611480 | WD repeat domain 35-like | Wdr351 | 503018 | 1,46 | up   |
| 5901095 | 7296131 | 1611502 | WD repeat domain 35-like | Wdr351 | 503018 | 1,39 | down |
| 6286090 | 7296131 | 1611503 | WD repeat domain 35-like | Wdr351 | 503018 | 1,39 | down |
| 6394671 | 7296131 | 1611498 | WD repeat domain 35-like | Wdr351 | 503018 | 1,37 | up   |
| 5813251 | 7296131 | 1611494 | WD repeat domain 35-like | Wdr351 | 503018 | 1,33 | down |
| 6335771 | 7296131 | 1611490 | WD repeat domain 35-like | Wdr351 | 503018 | 1,33 | down |
| 6510885 | 7296131 | 1611497 | WD repeat domain 35-like | Wdr351 | 503018 | 1,28 | down |
| 6571040 | 7296131 | 1611485 | WD repeat domain 35-like | Wdr351 | 503018 | 1,25 | up   |
| 6349462 | 7296131 | 1611499 | WD repeat domain 35-like | Wdr351 | 503018 | 1,15 | down |
| 5850699 | 7296131 | 1611483 | WD repeat domain 35-like | Wdr351 | 503018 | 1,15 | up   |
| 6672894 | 7296131 | 1611495 | WD repeat domain 35-like | Wdr351 | 503018 | 1,14 | down |
| 6320128 | 7296131 | 1611496 | WD repeat domain 35-like | Wdr351 | 503018 | 1,14 | up   |
| 5731982 | 7296131 | 1611503 | WD repeat domain 35-like | Wdr351 | 503018 | 1,08 | down |
| 6233609 | 7296131 | 1611486 | WD repeat domain 35-like | Wdr351 | 503018 | 1,06 | down |
| 6453736 | 7296131 | 1611493 | WD repeat domain 35-like | Wdr351 | 503018 | 1,04 | down |
| 5795291 | 7296131 | 1611500 | WD repeat domain 35-like | Wdr351 | 503018 | 1,03 | up   |
| 6356323 | 7296131 | 1611488 | WD repeat domain 35-like | Wdr351 | 503018 | 1,02 | up   |
| 6139627 | 7296131 | 1611487 | WD repeat domain 35-like | Wdr351 | 503018 | 1,01 | down |
| 6103588 | 7168979 | 1297201 | WD repeat domain 36      | Wdr36  | 361305 | 1,36 | up   |
| 6690139 | 7266532 | 1538299 | WD repeat domain 54      | Wdr54  | 500226 | 1,99 | up   |
| 6553525 | 7266532 | 1538298 | WD repeat domain 54      | Wdr54  | 500226 | 1,55 | up   |
| 6125413 | 7266532 | 1538297 | WD repeat domain 54      | Wdr54  | 500226 | 1,51 | up   |
| 6422092 | 7266532 | 1538301 | WD repeat domain 54      | Wdr54  | 500226 | 1,34 | down |
| 6619515 | 7266532 | 1538302 | WD repeat domain 54      | Wdr54  | 500226 | 1,28 | up   |
| 5904261 | 7266532 | 1538294 | WD repeat domain 54      | Wdr54  | 500226 | 1,24 | down |
| 5822239 | 7266532 | 1538296 | WD repeat domain 54      | Wdr54  | 500226 | 1,23 | up   |
| 6394473 | 7266532 | 1538300 | WD repeat domain 54      | Wdr54  | 500226 | 1,16 | down |
| 6658279 | 7266532 | 1538291 | WD repeat domain 54      | Wdr54  | 500226 | 1,14 | down |
| 6231453 | 7266532 | 1538293 | WD repeat domain 54      | Wdr54  | 500226 | 1,11 | down |
| 6211389 | 7266532 | 1538293 | WD repeat domain 54      | Wdr54  | 500226 | 1,10 | up   |
| 6596041 | 7266532 | 1538302 | WD repeat domain 54      | Wdr54  | 500226 | 1,09 | down |
| 5871889 | 7266532 | 1538292 | WD repeat domain 54      | Wdr54  | 500226 | 1,09 | down |
| 6464668 | 7266532 | 1538295 | WD repeat domain 54      | Wdr54  | 500226 | 1,08 | up   |
| 6328429 | 7350032 | 1745149 | WD repeat domain 6       | Wdr6   | 301007 | 4,54 | up   |
| 6295331 | 7350032 | 1745147 | WD repeat domain 6       | Wdr6   | 301007 | 1,28 | down |
| 6634621 | 7350032 | 1745148 | WD repeat domain 6       | Wdr6   | 301007 | 1,04 | down |
| 6413114 | 7317204 | 1665382 | WD repeat domain 67      | Wdr67  | 299949 | 2,07 | up   |
| 5869972 | 7317204 | 1665371 | WD repeat domain 67      | Wdr67  | 299949 | 1,61 | up   |
| 5875707 | 7317204 | 1665384 | WD repeat domain 67      | Wdr67  | 299949 | 1,58 | up   |
| 6692788 | 7317204 | 1665372 | WD repeat domain 67      | Wdr67  | 299949 | 1,41 | up   |
| 5889468 | 7317204 | 1665400 | WD repeat domain 67      | Wdr67  | 299949 | 1,33 | down |
| 6088948 | 7317204 | 1665389 | WD repeat domain 67      | Wdr67  | 299949 | 1,29 | down |
| 5739456 | 7317204 | 1665375 | WD repeat domain 67      | Wdr67  | 299949 | 1,28 | up   |
| 6186433 | 7317204 | 1665399 | WD repeat domain 67      | Wdr67  | 299949 | 1,28 | down |
| 5686836 | 7317204 | 1665389 | WD repeat domain 67      | Wdr67  | 299949 | 1,28 | down |
| 6540594 | 7317204 | 1665396 | WD repeat domain 67      | Wdr67  | 299949 | 1,24 | down |
| 6613345 | 7317204 | 1665386 | WD repeat domain 67      | Wdr67  | 299949 | 1,19 | up   |
| 5708806 | 7317204 | 1665387 | WD repeat domain 67      | Wdr67  | 299949 | 1,18 | down |
| 5947193 | 7317204 | 1665378 | WD repeat domain 67      | Wdr67  | 299949 | 1,14 | down |
| 6260272 | 7317204 | 1665404 | WD repeat domain 67      | Wdr67  | 299949 | 1,14 | down |
| 6019024 | 7317204 | 1665389 | WD repeat domain 67      | Wdr67  | 299949 | 1,13 | down |
| 5655763 | 7317204 | 1665390 | WD repeat domain 67      | Wdr67  | 299949 | 1,12 | down |
| 6421803 | 7317204 | 1665397 | WD repeat domain 67      | Wdr67  | 299949 | 1,10 | down |

|         |         |         |                          |       |        |      |      |
|---------|---------|---------|--------------------------|-------|--------|------|------|
| 6669729 | 7317204 | 1665401 | WD repeat domain 67      | Wdr67 | 299949 | 1,07 | down |
| 6290435 | 7317204 | 1665380 | WD repeat domain 67      | Wdr67 | 299949 | 1,07 | up   |
| 6453441 | 7317204 | 1665407 | WD repeat domain 67      | Wdr67 | 299949 | 1,05 | down |
| 6059175 | 7317204 | 1665385 | WD repeat domain 67      | Wdr67 | 299949 | 1,04 | down |
| 5649093 | 7317204 | 1665379 | WD repeat domain 67      | Wdr67 | 299949 | 1,03 | up   |
| 5924771 | 7317204 | 1665376 | WD repeat domain 67      | Wdr67 | 299949 | 1,03 | up   |
| 5963362 | 7317204 | 1665406 | WD repeat domain 67      | Wdr67 | 299949 | 1,02 | down |
| 5922949 | 7317204 | 1665383 | WD repeat domain 67      | Wdr67 | 299949 | 1,01 | up   |
| 6129382 | 7053620 | 1017790 | WD repeat domain 73      | Wdr73 | 308751 | 2,22 | up   |
| 5866069 | 7053620 | 1017786 | WD repeat domain 73      | Wdr73 | 308751 | 1,95 | up   |
| 5827716 | 7053620 | 1017789 | WD repeat domain 73      | Wdr73 | 308751 | 1,64 | down |
| 6280752 | 7053620 | 1017791 | WD repeat domain 73      | Wdr73 | 308751 | 1,48 | up   |
| 5949489 | 7053620 | 1017793 | WD repeat domain 73      | Wdr73 | 308751 | 1,44 | up   |
| 6529081 | 7053620 | 1017792 | WD repeat domain 73      | Wdr73 | 308751 | 1,39 | up   |
| 5739487 | 7053620 | 1017789 | WD repeat domain 73      | Wdr73 | 308751 | 1,21 | up   |
| 6458720 | 7053620 | 1017787 | WD repeat domain 73      | Wdr73 | 308751 | 1,21 | down |
| 5691115 | 7053620 | 1017794 | WD repeat domain 73      | Wdr73 | 308751 | 1,14 | down |
| 5654948 | 7053620 | 1017786 | WD repeat domain 73      | Wdr73 | 308751 | 1,03 | down |
| 6487450 | 7039463 | 984253  | WD repeat domain 74      | Wdr74 | 690229 | 1,89 | up   |
| 6005701 | 7039463 | 984251  | WD repeat domain 74      | Wdr74 | 690229 | 1,46 | up   |
| 6388923 | 7039463 | 984249  | WD repeat domain 74      | Wdr74 | 690229 | 1,39 | up   |
| 6378729 | 7039463 | 984243  | WD repeat domain 74      | Wdr74 | 690229 | 1,37 | down |
| 5903189 | 7039463 | 984248  | WD repeat domain 74      | Wdr74 | 690229 | 1,36 | up   |
| 6035198 | 7039463 | 984245  | WD repeat domain 74      | Wdr74 | 690229 | 1,30 | down |
| 6304624 | 7039463 | 984247  | WD repeat domain 74      | Wdr74 | 690229 | 1,28 | up   |
| 5761100 | 7039463 | 984252  | WD repeat domain 74      | Wdr74 | 690229 | 1,21 | up   |
| 6312875 | 7039463 | 984254  | WD repeat domain 74      | Wdr74 | 690229 | 1,10 | down |
| 6708648 | 7039463 | 984254  | WD repeat domain 74      | Wdr74 | 690229 | 1,09 | up   |
| 6418282 | 7039463 | 984244  | WD repeat domain 74      | Wdr74 | 690229 | 1,06 | up   |
| 5903520 | 7039463 | 984252  | WD repeat domain 74      | Wdr74 | 690229 | 1,01 | up   |
| 6695524 | 7289382 | 1595188 | WD repeat domain 78      | Wdr78 | 313417 | 2,02 | down |
| 6143807 | 7289382 | 1595205 | WD repeat domain 78      | Wdr78 | 313417 | 1,61 | up   |
| 5981440 | 7289382 | 1595207 | WD repeat domain 78      | Wdr78 | 313417 | 1,48 | down |
| 6688619 | 7289382 | 1595191 | WD repeat domain 78      | Wdr78 | 313417 | 1,45 | down |
| 5775761 | 7289382 | 1595186 | WD repeat domain 78      | Wdr78 | 313417 | 1,44 | down |
| 6523334 | 7289382 | 1595189 | WD repeat domain 78      | Wdr78 | 313417 | 1,31 | up   |
| 6655774 | 7289382 | 1595188 | WD repeat domain 78      | Wdr78 | 313417 | 1,24 | down |
| 6657696 | 7289382 | 1595201 | WD repeat domain 78      | Wdr78 | 313417 | 1,14 | down |
| 5877307 | 7289382 | 1595203 | WD repeat domain 78      | Wdr78 | 313417 | 1,14 | up   |
| 6125213 | 7289382 | 1595194 | WD repeat domain 78      | Wdr78 | 313417 | 1,13 | down |
| 5757813 | 7289382 | 1595195 | WD repeat domain 78      | Wdr78 | 313417 | 1,11 | up   |
| 5956473 | 7289382 | 1595184 | WD repeat domain 78      | Wdr78 | 313417 | 1,09 | down |
| 5671504 | 7289382 | 1595192 | WD repeat domain 78      | Wdr78 | 313417 | 1,08 | up   |
| 5659439 | 7289382 | 1595195 | WD repeat domain 78      | Wdr78 | 313417 | 1,08 | up   |
| 6111530 | 7289382 | 1595190 | WD repeat domain 78      | Wdr78 | 313417 | 1,06 | up   |
| 6181539 | 7289382 | 1595208 | WD repeat domain 78      | Wdr78 | 313417 | 1,03 | up   |
| 6622956 | 7289382 | 1595203 | WD repeat domain 78      | Wdr78 | 313417 | 1,02 | up   |
| 6142033 | 7289382 | 1595202 | WD repeat domain 78      | Wdr78 | 313417 | 1,02 | up   |
| 6319197 | 7289382 | 1595204 | WD repeat domain 78      | Wdr78 | 313417 | 1,02 | up   |
| 5875317 | 7289382 | 1595197 | WD repeat domain 78      | Wdr78 | 313417 | 1,02 | up   |
| 6723972 | 7289382 | 1595212 | WD repeat domain 78      | Wdr78 | 313417 | 1,01 | down |
| 5898484 | 7035407 | 974445  | wee 1 homolog (S. pombe) | Wee1  | 308937 | 2,25 | down |
| 6461212 | 7035407 | 974454  | wee 1 homolog (S. pombe) | Wee1  | 308937 | 2,16 | up   |
| 5960532 | 7035407 | 974447  | wee 1 homolog (S. pombe) | Wee1  | 308937 | 1,77 | down |
| 6640086 | 7035407 | 974445  | wee 1 homolog (S. pombe) | Wee1  | 308937 | 1,75 | down |
| 6286860 | 7035407 | 974445  | wee 1 homolog (S. pombe) | Wee1  | 308937 | 1,61 | down |
| 5915094 | 7035407 | 974455  | wee 1 homolog (S. pombe) | Wee1  | 308937 | 1,32 | up   |

|         |         |         |                                                       |         |        |      |      |
|---------|---------|---------|-------------------------------------------------------|---------|--------|------|------|
| 6147725 | 7035407 | 974456  | wee 1 homolog (S. pombe)                              | Wee1    | 308937 | 1,18 | down |
| 6475386 | 7035407 | 974450  | wee 1 homolog (S. pombe)                              | Wee1    | 308937 | 1,15 | down |
| 6471218 | 7035407 | 974455  | wee 1 homolog (S. pombe)                              | Wee1    | 308937 | 1,14 | down |
| 5677837 | 7035407 | 974452  | wee 1 homolog (S. pombe)                              | Wee1    | 308937 | 1,11 | up   |
| 6208829 | 7035407 | 974456  | wee 1 homolog (S. pombe)                              | Wee1    | 308937 | 1,10 | up   |
| 6487108 | 7035407 | 974449  | wee 1 homolog (S. pombe)                              | Wee1    | 308937 | 1,10 | down |
| 5741912 | 7035407 | 974448  | wee 1 homolog (S. pombe)                              | Wee1    | 308937 | 1,08 | up   |
| 6454363 | 7035407 | 974456  | wee 1 homolog (S. pombe)                              | Wee1    | 308937 | 1,07 | down |
| 6682727 | 7035407 | 974446  | wee 1 homolog (S. pombe)                              | Wee1    | 308937 | 1,06 | down |
| 5923024 | 7035407 | 974451  | wee 1 homolog (S. pombe)                              | Wee1    | 308937 | 1,03 | up   |
| 6149902 | 7035407 | 974453  | wee 1 homolog (S. pombe)                              | Wee1    | 308937 | 1,03 | down |
| 5632131 | 7035407 | 974445  | wee 1 homolog (S. pombe)                              | Wee1    | 308937 | 1,02 | up   |
| 5995232 | 7035407 | 974445  | wee 1 homolog (S. pombe)                              | Wee1    | 308937 | 1,01 | up   |
| 5973131 | 7103420 | 1136170 | Williams Beuren syndrome chromosome region 22         | Wbscr22 | 368084 | 1,70 | up   |
| 5717825 | 7103420 | 1136175 | Williams Beuren syndrome chromosome region 22         | Wbscr22 | 368084 | 1,49 | up   |
| 6565361 | 7103420 | 1136179 | Williams Beuren syndrome chromosome region 22         | Wbscr22 | 368084 | 1,30 | down |
| 6196161 | 7103420 | 1136174 | Williams Beuren syndrome chromosome region 22         | Wbscr22 | 368084 | 1,13 | up   |
| 6379322 | 7103420 | 1136173 | Williams Beuren syndrome chromosome region 22         | Wbscr22 | 368084 | 1,11 | down |
| 6387598 | 7103420 | 1136178 | Williams Beuren syndrome chromosome region 22         | Wbscr22 | 368084 | 1,10 | down |
| 6180313 | 7103420 | 1136176 | Williams Beuren syndrome chromosome region 22         | Wbscr22 | 368084 | 1,09 | up   |
| 6168902 | 7103420 | 1136170 | Williams Beuren syndrome chromosome region 22         | Wbscr22 | 368084 | 1,07 | down |
| 5874146 | 7103420 | 1136171 | Williams Beuren syndrome chromosome region 22         | Wbscr22 | 368084 | 1,03 | down |
| 5755298 | 7103420 | 1136172 | Williams Beuren syndrome chromosome region 22         | Wbscr22 | 368084 | 1,03 | down |
| 6347082 | 7103420 | 1136177 | Williams Beuren syndrome chromosome region 22         | Wbscr22 | 368084 | 1,00 | up   |
| 6679057 | 7101362 | 1130823 | Williams Beuren syndrome chromosome region 27         | Wbscr27 | 688407 | 2,70 | up   |
| 5932580 | 7101362 | 1130821 | Williams Beuren syndrome chromosome region 27         | Wbscr27 | 688407 | 1,95 | up   |
| 6351156 | 7101362 | 1130825 | Williams Beuren syndrome chromosome region 27         | Wbscr27 | 688407 | 1,71 | up   |
| 5950519 | 7101362 | 1130819 | Williams Beuren syndrome chromosome region 27         | Wbscr27 | 688407 | 1,61 | up   |
| 5862522 | 7101362 | 1130824 | Williams Beuren syndrome chromosome region 27         | Wbscr27 | 688407 | 1,50 | down |
| 5885115 | 7101362 | 1130819 | Williams Beuren syndrome chromosome region 27         | Wbscr27 | 688407 | 1,35 | down |
| 6109496 | 7101362 | 1130819 | Williams Beuren syndrome chromosome region 27         | Wbscr27 | 688407 | 1,22 | down |
| 6405775 | 7101362 | 1130826 | Williams Beuren syndrome chromosome region 27         | Wbscr27 | 688407 | 1,13 | down |
| 6010221 | 7101362 | 1130821 | Williams Beuren syndrome chromosome region 27         | Wbscr27 | 688407 | 1,12 | down |
| 5770539 | 7101362 | 1130820 | Williams Beuren syndrome chromosome region 27         | Wbscr27 | 688407 | 1,10 | up   |
| 6746432 | 7101362 | 1130821 | Williams Beuren syndrome chromosome region 27         | Wbscr27 | 688407 | 1,06 | up   |
| 6408193 | 7101362 | 1130818 | Williams Beuren syndrome chromosome region 27         | Wbscr27 | 688407 | 1,05 | down |
| 5762480 | 7097536 | 1121126 | Williams-Beuren syndrome chromosome region 28 (human) | Wbscr28 | 288604 | 2,31 | up   |
| 6369685 | 7230801 | 1449267 | Wilms tumor 1                                         | Wt1     | 24883  | 2,21 | up   |
| 6472337 | 7230801 | 1449275 | Wilms tumor 1                                         | Wt1     | 24883  | 1,95 | down |
| 5867810 | 7230801 | 1449273 | Wilms tumor 1                                         | Wt1     | 24883  | 1,48 | up   |
| 6649156 | 7230801 | 1449270 | Wilms tumor 1                                         | Wt1     | 24883  | 1,38 | down |
| 6522357 | 7230801 | 1449266 | Wilms tumor 1                                         | Wt1     | 24883  | 1,23 | up   |
| 6290775 | 7230801 | 1449274 | Wilms tumor 1                                         | Wt1     | 24883  | 1,16 | down |
| 5779468 | 7230801 | 1449272 | Wilms tumor 1                                         | Wt1     | 24883  | 1,16 | down |
| 6565175 | 7230801 | 1449268 | Wilms tumor 1                                         | Wt1     | 24883  | 1,14 | down |
| 5757948 | 7230801 | 1449266 | Wilms tumor 1                                         | Wt1     | 24883  | 1,10 | down |
| 6402850 | 7230801 | 1449266 | Wilms tumor 1                                         | Wt1     | 24883  | 1,07 | up   |
| 6136573 | 7230801 | 1449271 | Wilms tumor 1                                         | Wt1     | 24883  | 1,03 | down |
| 6396775 | 7230801 | 1449269 | Wilms tumor 1                                         | Wt1     | 24883  | 1,02 | down |
| 6327008 | 7230801 | 1449266 | Wilms tumor 1                                         | Wt1     | 24883  | 1,00 | down |
| 6197288 | 7262570 | 1528992 | wingless-type MMTV integration site family member 2   | Wnt2    | 114487 | 1,14 | down |
| 6259809 | 7262570 | 1528990 | wingless-type MMTV integration site family member 2   | Wnt2    | 114487 | 1,04 | up   |
| 6478769 | 7262570 | 1528992 | wingless-type MMTV integration site family member 2   | Wnt2    | 114487 | 1,02 | up   |
| 6187534 | 7320544 | 1673752 | wingless-type MMTV integration site family, member 1  | Wnt1    | 24881  | 2,12 | up   |
| 6252895 | 7320544 | 1673754 | wingless-type MMTV integration site family, member 1  | Wnt1    | 24881  | 1,81 | down |
| 6604509 | 7320544 | 1673755 | wingless-type MMTV integration site family, member 1  | Wnt1    | 24881  | 1,54 | down |
| 6368420 | 7320544 | 1673753 | wingless-type MMTV integration site family, member 1  | Wnt1    | 24881  | 1,18 | up   |

|         |         |         |                                                      |       |        |      |      |
|---------|---------|---------|------------------------------------------------------|-------|--------|------|------|
| 6239247 | 7320544 | 1673755 | wingless-type MMTV integration site family, member 1 | Wnt1  | 24881  | 1,13 | up   |
| 6344427 | 7072578 | 1062206 | wingless-type MMTV integration site family, member 3 | Wnt3  | 24882  | 2,05 | up   |
| 6272783 | 7072578 | 1062206 | wingless-type MMTV integration site family, member 3 | Wnt3  | 24882  | 1,26 | up   |
| 6542969 | 7072578 | 1062209 | wingless-type MMTV integration site family, member 3 | Wnt3  | 24882  | 1,25 | down |
| 6280939 | 7072578 | 1062211 | wingless-type MMTV integration site family, member 3 | Wnt3  | 24882  | 1,08 | down |
| 6433831 | 7072578 | 1062208 | wingless-type MMTV integration site family, member 3 | Wnt3  | 24882  | 1,02 | down |
| 6160675 | 7072578 | 1062211 | wingless-type MMTV integration site family, member 3 | Wnt3  | 24882  | 1,01 | down |
| 6552833 | 7072269 | 1061526 | WNK lysine deficient protein kinase 4                | Wnk4  | 287715 | 2,49 | up   |
| 6254165 | 7072269 | 1061517 | WNK lysine deficient protein kinase 4                | Wnk4  | 287715 | 2,32 | down |
| 5619252 | 7072269 | 1061523 | WNK lysine deficient protein kinase 4                | Wnk4  | 287715 | 1,95 | up   |
| 6096702 | 7072269 | 1061529 | WNK lysine deficient protein kinase 4                | Wnk4  | 287715 | 1,93 | down |
| 6097393 | 7072269 | 1061532 | WNK lysine deficient protein kinase 4                | Wnk4  | 287715 | 1,88 | up   |
| 6535321 | 7072269 | 1061521 | WNK lysine deficient protein kinase 4                | Wnk4  | 287715 | 1,43 | down |
| 6481193 | 7072269 | 1061513 | WNK lysine deficient protein kinase 4                | Wnk4  | 287715 | 1,38 | down |
| 5974372 | 7072269 | 1061514 | WNK lysine deficient protein kinase 4                | Wnk4  | 287715 | 1,26 | up   |
| 5881282 | 7072269 | 1061530 | WNK lysine deficient protein kinase 4                | Wnk4  | 287715 | 1,21 | up   |
| 6077265 | 7072269 | 1061513 | WNK lysine deficient protein kinase 4                | Wnk4  | 287715 | 1,20 | up   |
| 6736329 | 7072269 | 1061528 | WNK lysine deficient protein kinase 4                | Wnk4  | 287715 | 1,19 | up   |
| 5636191 | 7072269 | 1061522 | WNK lysine deficient protein kinase 4                | Wnk4  | 287715 | 1,16 | down |
| 6170010 | 7072269 | 1061520 | WNK lysine deficient protein kinase 4                | Wnk4  | 287715 | 1,15 | up   |
| 6175524 | 7072269 | 1061524 | WNK lysine deficient protein kinase 4                | Wnk4  | 287715 | 1,15 | down |
| 6294248 | 7072269 | 1061516 | WNK lysine deficient protein kinase 4                | Wnk4  | 287715 | 1,14 | down |
| 6263839 | 7072269 | 1061519 | WNK lysine deficient protein kinase 4                | Wnk4  | 287715 | 1,12 | down |
| 6575196 | 7072269 | 1061527 | WNK lysine deficient protein kinase 4                | Wnk4  | 287715 | 1,12 | up   |
| 6558963 | 7072269 | 1061531 | WNK lysine deficient protein kinase 4                | Wnk4  | 287715 | 1,11 | up   |
| 6335148 | 7072269 | 1061526 | WNK lysine deficient protein kinase 4                | Wnk4  | 287715 | 1,10 | down |
| 5669079 | 7072269 | 1061515 | WNK lysine deficient protein kinase 4                | Wnk4  | 287715 | 1,08 | down |
| 5683100 | 7072269 | 1061525 | WNK lysine deficient protein kinase 4                | Wnk4  | 287715 | 1,06 | up   |
| 6341618 | 7072269 | 1061518 | WNK lysine deficient protein kinase 4                | Wnk4  | 287715 | 1,05 | down |
| 5821692 | 7072269 | 1061527 | WNK lysine deficient protein kinase 4                | Wnk4  | 287715 | 1,03 | up   |
| 6053521 | 7072269 | 1061532 | WNK lysine deficient protein kinase 4                | Wnk4  | 287715 | 1,00 | down |
| 6548309 | 7266530 | 1538282 | WW domain binding protein 1                          | Wbp1  | 297381 | 2,10 | up   |
| 6127541 | 7266530 | 1538283 | WW domain binding protein 1                          | Wbp1  | 297381 | 1,44 | down |
| 6243498 | 7266530 | 1538282 | WW domain binding protein 1                          | Wbp1  | 297381 | 1,41 | down |
| 6294674 | 7266530 | 1538280 | WW domain binding protein 1                          | Wbp1  | 297381 | 1,27 | down |
| 5936499 | 7266530 | 1538281 | WW domain binding protein 1                          | Wbp1  | 297381 | 1,26 | down |
| 6492907 | 7266530 | 1538280 | WW domain binding protein 1                          | Wbp1  | 297381 | 1,22 | up   |
| 5964916 | 7266530 | 1538280 | WW domain binding protein 1                          | Wbp1  | 297381 | 1,20 | down |
| 5674494 | 7266530 | 1538279 | WW domain binding protein 1                          | Wbp1  | 297381 | 1,16 | down |
| 6251688 | 7266530 | 1538284 | WW domain binding protein 1                          | Wbp1  | 297381 | 1,14 | up   |
| 6641415 | 7266530 | 1538282 | WW domain binding protein 1                          | Wbp1  | 297381 | 1,06 | up   |
| 6732275 | 7270558 | 1548510 | WW domain binding protein 11                         | Wbp11 | 297695 | 2,73 | down |
| 5749380 | 7270558 | 1548503 | WW domain binding protein 11                         | Wbp11 | 297695 | 1,52 | down |
| 5820373 | 7270558 | 1548501 | WW domain binding protein 11                         | Wbp11 | 297695 | 1,46 | down |
| 6002094 | 7270558 | 1548500 | WW domain binding protein 11                         | Wbp11 | 297695 | 1,38 | up   |
| 6649592 | 7270558 | 1548510 | WW domain binding protein 11                         | Wbp11 | 297695 | 1,26 | up   |
| 6251485 | 7270558 | 1548501 | WW domain binding protein 11                         | Wbp11 | 297695 | 1,26 | down |
| 6280758 | 7270558 | 1548506 | WW domain binding protein 11                         | Wbp11 | 297695 | 1,21 | down |
| 6106392 | 7270558 | 1548505 | WW domain binding protein 11                         | Wbp11 | 297695 | 1,19 | up   |
| 6068167 | 7270558 | 1548504 | WW domain binding protein 11                         | Wbp11 | 297695 | 1,07 | up   |
| 6590082 | 7270558 | 1548508 | WW domain binding protein 11                         | Wbp11 | 297695 | 1,04 | up   |
| 6259723 | 7270558 | 1548507 | WW domain binding protein 11                         | Wbp11 | 297695 | 1,04 | down |
| 5867961 | 7270558 | 1548506 | WW domain binding protein 11                         | Wbp11 | 297695 | 1,03 | down |
| 5866411 | 7270558 | 1548502 | WW domain binding protein 11                         | Wbp11 | 297695 | 1,02 | up   |
| 6317656 | 7270558 | 1548509 | WW domain binding protein 11                         | Wbp11 | 297695 | 1,01 | down |
| 5651774 | 7270558 | 1548507 | WW domain binding protein 11                         | Wbp11 | 297695 | 1,00 | up   |
| 6462762 | 7180804 | 1326998 | WW domain containing E3 ubiquitin protein ligase 2   | Wwp2  | 291999 | 4,57 | down |

|         |         |         |                                                    |       |        |      |      |
|---------|---------|---------|----------------------------------------------------|-------|--------|------|------|
| 5772201 | 7180804 | 1326994 | WW domain containing E3 ubiquitin protein ligase 2 | Wwp2  | 291999 | 1,98 | up   |
| 5819708 | 7180804 | 1326973 | WW domain containing E3 ubiquitin protein ligase 2 | Wwp2  | 291999 | 1,76 | down |
| 6484960 | 7180804 | 1327006 | WW domain containing E3 ubiquitin protein ligase 2 | Wwp2  | 291999 | 1,62 | up   |
| 6695574 | 7180804 | 1327008 | WW domain containing E3 ubiquitin protein ligase 2 | Wwp2  | 291999 | 1,58 | up   |
| 6744172 | 7180804 | 1326971 | WW domain containing E3 ubiquitin protein ligase 2 | Wwp2  | 291999 | 1,50 | up   |
| 6733778 | 7180804 | 1327014 | WW domain containing E3 ubiquitin protein ligase 2 | Wwp2  | 291999 | 1,50 | up   |
| 5626424 | 7180804 | 1327000 | WW domain containing E3 ubiquitin protein ligase 2 | Wwp2  | 291999 | 1,49 | up   |
| 6488825 | 7180804 | 1327013 | WW domain containing E3 ubiquitin protein ligase 2 | Wwp2  | 291999 | 1,34 | down |
| 6582744 | 7180804 | 1326983 | WW domain containing E3 ubiquitin protein ligase 2 | Wwp2  | 291999 | 1,31 | up   |
| 6139865 | 7180804 | 1327003 | WW domain containing E3 ubiquitin protein ligase 2 | Wwp2  | 291999 | 1,29 | up   |
| 6482006 | 7180804 | 1327010 | WW domain containing E3 ubiquitin protein ligase 2 | Wwp2  | 291999 | 1,21 | up   |
| 6732314 | 7180804 | 1327004 | WW domain containing E3 ubiquitin protein ligase 2 | Wwp2  | 291999 | 1,20 | up   |
| 6582697 | 7180804 | 1326990 | WW domain containing E3 ubiquitin protein ligase 2 | Wwp2  | 291999 | 1,19 | up   |
| 5907187 | 7180804 | 1326999 | WW domain containing E3 ubiquitin protein ligase 2 | Wwp2  | 291999 | 1,15 | down |
| 6372594 | 7180804 | 1326992 | WW domain containing E3 ubiquitin protein ligase 2 | Wwp2  | 291999 | 1,15 | up   |
| 6062183 | 7180804 | 1327012 | WW domain containing E3 ubiquitin protein ligase 2 | Wwp2  | 291999 | 1,13 | down |
| 5955533 | 7180804 | 1327009 | WW domain containing E3 ubiquitin protein ligase 2 | Wwp2  | 291999 | 1,13 | up   |
| 5663979 | 7180804 | 1326991 | WW domain containing E3 ubiquitin protein ligase 2 | Wwp2  | 291999 | 1,09 | down |
| 6190932 | 7180804 | 1326970 | WW domain containing E3 ubiquitin protein ligase 2 | Wwp2  | 291999 | 1,08 | up   |
| 6486341 | 7180804 | 1326974 | WW domain containing E3 ubiquitin protein ligase 2 | Wwp2  | 291999 | 1,06 | up   |
| 6399955 | 7180804 | 1327001 | WW domain containing E3 ubiquitin protein ligase 2 | Wwp2  | 291999 | 1,06 | down |
| 6072409 | 7180804 | 1327011 | WW domain containing E3 ubiquitin protein ligase 2 | Wwp2  | 291999 | 1,03 | down |
| 6140992 | 7180804 | 1326985 | WW domain containing E3 ubiquitin protein ligase 2 | Wwp2  | 291999 | 1,01 | down |
| 6465862 | 7208847 | 1396324 | WW domain containing transcription regulator 1     | Wwtr1 | 295062 | 2,38 | down |
| 5765502 | 7208847 | 1396320 | WW domain containing transcription regulator 1     | Wwtr1 | 295062 | 1,48 | up   |
| 5866749 | 7208847 | 1396340 | WW domain containing transcription regulator 1     | Wwtr1 | 295062 | 1,36 | up   |
| 6097029 | 7208847 | 1396319 | WW domain containing transcription regulator 1     | Wwtr1 | 295062 | 1,19 | up   |
| 5864156 | 7208847 | 1396340 | WW domain containing transcription regulator 1     | Wwtr1 | 295062 | 1,13 | down |
| 6704926 | 7208847 | 1396341 | WW domain containing transcription regulator 1     | Wwtr1 | 295062 | 1,13 | up   |
| 5739167 | 7208847 | 1396327 | WW domain containing transcription regulator 1     | Wwtr1 | 295062 | 1,12 | down |
| 5647862 | 7208847 | 1396318 | WW domain containing transcription regulator 1     | Wwtr1 | 295062 | 1,12 | down |
| 6090896 | 7208847 | 1396320 | WW domain containing transcription regulator 1     | Wwtr1 | 295062 | 1,10 | up   |
| 6617355 | 7208847 | 1396318 | WW domain containing transcription regulator 1     | Wwtr1 | 295062 | 1,04 | up   |
| 6191597 | 7208847 | 1396324 | WW domain containing transcription regulator 1     | Wwtr1 | 295062 | 1,00 | up   |
| 6651225 | 7181286 | 1328456 | WW domain-containing oxidoreductase                | Wwox  | 292041 | 1,59 | down |
| 6293625 | 7181286 | 1328453 | WW domain-containing oxidoreductase                | Wwox  | 292041 | 1,30 | down |
| 6268848 | 7181286 | 1328455 | WW domain-containing oxidoreductase                | Wwox  | 292041 | 1,23 | down |
| 6132082 | 7181286 | 1328457 | WW domain-containing oxidoreductase                | Wwox  | 292041 | 1,08 | down |
| 6645239 | 7181286 | 1328474 | WW domain-containing oxidoreductase                | Wwox  | 292041 | 1,05 | up   |
| 6449486 | 7350922 | 1747316 | xin actin-binding repeat containing 1              | Xirp1 | 316071 | 1,67 | up   |
| 5679516 | 7350922 | 1747316 | xin actin-binding repeat containing 1              | Xirp1 | 316071 | 1,43 | up   |
| 5731637 | 7350922 | 1747316 | xin actin-binding repeat containing 1              | Xirp1 | 316071 | 1,34 | down |
| 6287593 | 7350922 | 1747316 | xin actin-binding repeat containing 1              | Xirp1 | 316071 | 1,33 | up   |
| 6403998 | 7350922 | 1747316 | xin actin-binding repeat containing 1              | Xirp1 | 316071 | 1,32 | down |
| 5950079 | 7350922 | 1747316 | xin actin-binding repeat containing 1              | Xirp1 | 316071 | 1,20 | up   |
| 5773743 | 7350922 | 1747315 | xin actin-binding repeat containing 1              | Xirp1 | 316071 | 1,18 | down |
| 6234867 | 7350922 | 1747314 | xin actin-binding repeat containing 1              | Xirp1 | 316071 | 1,09 | down |
| 5972629 | 7350922 | 1747316 | xin actin-binding repeat containing 1              | Xirp1 | 316071 | 1,06 | up   |
| 5633854 | 7350922 | 1747316 | xin actin-binding repeat containing 1              | Xirp1 | 316071 | 1,00 | down |
| 6042048 | 7378809 | 1818110 | X-linked inhibitor of apoptosis                    | Xiap  | 63879  | 2,17 | down |
| 6414066 | 7378809 | 1818113 | X-linked inhibitor of apoptosis                    | Xiap  | 63879  | 1,58 | up   |
| 6382377 | 7378809 | 1818114 | X-linked inhibitor of apoptosis                    | Xiap  | 63879  | 1,45 | down |
| 6127328 | 7378809 | 1818111 | X-linked inhibitor of apoptosis                    | Xiap  | 63879  | 1,36 | down |
| 5776019 | 7378809 | 1818113 | X-linked inhibitor of apoptosis                    | Xiap  | 63879  | 1,26 | up   |
| 5695252 | 7378809 | 1818112 | X-linked inhibitor of apoptosis                    | Xiap  | 63879  | 1,20 | down |
| 5802183 | 7378809 | 1818115 | X-linked inhibitor of apoptosis                    | Xiap  | 63879  | 1,05 | up   |
| 6570212 | 7378809 | 1818109 | X-linked inhibitor of apoptosis                    | Xiap  | 63879  | 1,04 | up   |



|         |         |         |                                                                        |       |        |      |      |
|---------|---------|---------|------------------------------------------------------------------------|-------|--------|------|------|
| 6184973 | 7378809 | 1818108 | X-linked inhibitor of apoptosis                                        | Xiap  | 63879  | 1,02 | down |
| 6205627 | 7029638 | 959872  | X-ray repair complementing defective repair in Chinese hamster cells 1 | Xrcc1 | 84495  | 2,28 | down |
| 6219828 | 7029638 | 959880  | X-ray repair complementing defective repair in Chinese hamster cells 1 | Xrcc1 | 84495  | 1,75 | up   |
| 5871440 | 7029638 | 959886  | X-ray repair complementing defective repair in Chinese hamster cells 1 | Xrcc1 | 84495  | 1,50 | down |
| 6141262 | 7029638 | 959885  | X-ray repair complementing defective repair in Chinese hamster cells 1 | Xrcc1 | 84495  | 1,33 | up   |
| 5811212 | 7029638 | 959884  | X-ray repair complementing defective repair in Chinese hamster cells 1 | Xrcc1 | 84495  | 1,33 | up   |
| 6234499 | 7029638 | 959883  | X-ray repair complementing defective repair in Chinese hamster cells 1 | Xrcc1 | 84495  | 1,26 | up   |
| 6143230 | 7029638 | 959881  | X-ray repair complementing defective repair in Chinese hamster cells 1 | Xrcc1 | 84495  | 1,25 | up   |
| 6692006 | 7029638 | 959882  | X-ray repair complementing defective repair in Chinese hamster cells 1 | Xrcc1 | 84495  | 1,24 | up   |
| 6369154 | 7029638 | 959888  | X-ray repair complementing defective repair in Chinese hamster cells 1 | Xrcc1 | 84495  | 1,20 | up   |
| 6299470 | 7029638 | 959889  | X-ray repair complementing defective repair in Chinese hamster cells 1 | Xrcc1 | 84495  | 1,20 | up   |
| 6156981 | 7029638 | 959873  | X-ray repair complementing defective repair in Chinese hamster cells 1 | Xrcc1 | 84495  | 1,17 | up   |
| 6592111 | 7029638 | 959876  | X-ray repair complementing defective repair in Chinese hamster cells 1 | Xrcc1 | 84495  | 1,15 | up   |
| 6503519 | 7029638 | 959874  | X-ray repair complementing defective repair in Chinese hamster cells 1 | Xrcc1 | 84495  | 1,14 | up   |
| 5718365 | 7029638 | 959880  | X-ray repair complementing defective repair in Chinese hamster cells 1 | Xrcc1 | 84495  | 1,13 | down |
| 6589027 | 7029638 | 959879  | X-ray repair complementing defective repair in Chinese hamster cells 1 | Xrcc1 | 84495  | 1,04 | down |
| 6295397 | 7029638 | 959878  | X-ray repair complementing defective repair in Chinese hamster cells 1 | Xrcc1 | 84495  | 1,04 | up   |
| 6627158 | 7029638 | 959875  | X-ray repair complementing defective repair in Chinese hamster cells 1 | Xrcc1 | 84495  | 1,03 | up   |
| 6110047 | 7029638 | 959887  | X-ray repair complementing defective repair in Chinese hamster cells 1 | Xrcc1 | 84495  | 1,02 | up   |
| 6684039 | 7029638 | 959877  | X-ray repair complementing defective repair in Chinese hamster cells 1 | Xrcc1 | 84495  | 1,01 | up   |
| 6326852 | 7069142 | 1053881 | Y box binding protein 2                                                | Ybx2  | 303250 | 1,12 | up   |
| 6557845 | 7069142 | 1053881 | Y box binding protein 2                                                | Ybx2  | 303250 | 1,11 | up   |
| 6713144 | 7069142 | 1053881 | Y box binding protein 2                                                | Ybx2  | 303250 | 1,00 | up   |
| 6135055 | 7303722 | 1631712 | yippee-like 5 (Drosophila)                                             | Ypel5 | 298792 | 2,29 | down |
| 6183191 | 7303722 | 1631712 | yippee-like 5 (Drosophila)                                             | Ypel5 | 298792 | 1,70 | up   |
| 5758787 | 7303722 | 1631712 | yippee-like 5 (Drosophila)                                             | Ypel5 | 298792 | 1,45 | down |
| 5635542 | 7303722 | 1631712 | yippee-like 5 (Drosophila)                                             | Ypel5 | 298792 | 1,30 | up   |
| 5757363 | 7303722 | 1631713 | yippee-like 5 (Drosophila)                                             | Ypel5 | 298792 | 1,20 | up   |
| 6210207 | 7303722 | 1631712 | yippee-like 5 (Drosophila)                                             | Ypel5 | 298792 | 1,12 | down |
| 5783148 | 7303722 | 1631712 | yippee-like 5 (Drosophila)                                             | Ypel5 | 298792 | 1,02 | down |
| 5636433 | 7303722 | 1631722 | yippee-like 5 (Drosophila)                                             | Ypel5 | 298792 | 1,00 | down |
| 5764204 | 7301653 | 1626016 | YY1 transcription factor                                               | Yy1   | 24919  | 2,07 | down |
| 5918691 | 7301653 | 1626021 | YY1 transcription factor                                               | Yy1   | 24919  | 1,81 | up   |
| 5848245 | 7301653 | 1626016 | YY1 transcription factor                                               | Yy1   | 24919  | 1,49 | down |
| 5679135 | 7301653 | 1626017 | YY1 transcription factor                                               | Yy1   | 24919  | 1,31 | down |
| 6496093 | 7301653 | 1626015 | YY1 transcription factor                                               | Yy1   | 24919  | 1,21 | down |
| 6665339 | 7301653 | 1626018 | YY1 transcription factor                                               | Yy1   | 24919  | 1,16 | up   |
| 6366511 | 7301653 | 1626019 | YY1 transcription factor                                               | Yy1   | 24919  | 1,14 | up   |
| 6316502 | 7301653 | 1626016 | YY1 transcription factor                                               | Yy1   | 24919  | 1,12 | down |
| 6244973 | 7301653 | 1626020 | YY1 transcription factor                                               | Yy1   | 24919  | 1,09 | up   |
| 6099610 | 7301653 | 1626022 | YY1 transcription factor                                               | Yy1   | 24919  | 1,07 | down |
| 5980249 | 7301653 | 1626016 | YY1 transcription factor                                               | Yy1   | 24919  | 1,02 | down |
| 6252912 | 7353455 | 1753384 | zeta-chain (TCR) associated protein kinase                             | Zap70 | 301348 | 2,16 | down |
| 5745867 | 7353455 | 1753387 | zeta-chain (TCR) associated protein kinase                             | Zap70 | 301348 | 1,76 | down |
| 6553874 | 7353455 | 1753381 | zeta-chain (TCR) associated protein kinase                             | Zap70 | 301348 | 1,62 | up   |
| 6103828 | 7353455 | 1753391 | zeta-chain (TCR) associated protein kinase                             | Zap70 | 301348 | 1,36 | up   |
| 5972730 | 7353455 | 1753382 | zeta-chain (TCR) associated protein kinase                             | Zap70 | 301348 | 1,29 | down |
| 6047021 | 7353455 | 1753390 | zeta-chain (TCR) associated protein kinase                             | Zap70 | 301348 | 1,24 | up   |
| 5969134 | 7353455 | 1753388 | zeta-chain (TCR) associated protein kinase                             | Zap70 | 301348 | 1,20 | up   |
| 6317600 | 7353455 | 1753385 | zeta-chain (TCR) associated protein kinase                             | Zap70 | 301348 | 1,19 | up   |
| 6025569 | 7353455 | 1753392 | zeta-chain (TCR) associated protein kinase                             | Zap70 | 301348 | 1,12 | up   |
| 5788468 | 7353455 | 1753383 | zeta-chain (TCR) associated protein kinase                             | Zap70 | 301348 | 1,09 | down |
| 5746316 | 7353455 | 1753386 | zeta-chain (TCR) associated protein kinase                             | Zap70 | 301348 | 1,07 | down |
| 5639368 | 7353455 | 1753380 | zeta-chain (TCR) associated protein kinase                             | Zap70 | 301348 | 1,05 | up   |
| 6499800 | 7353455 | 1753389 | zeta-chain (TCR) associated protein kinase                             | Zap70 | 301348 | 1,02 | down |
| 5649718 | 7374740 | 1808633 | zinc finger (CCCH type), RNA binding motif and serine/arginine rich 2  | Zrsr2 | 302670 | 1,95 | down |
| 6637505 | 7374740 | 1808621 | zinc finger (CCCH type), RNA binding motif and serine/arginine rich 2  | Zrsr2 | 302670 | 1,74 | up   |

|         |         |         |                                                                       |        |        |      |      |
|---------|---------|---------|-----------------------------------------------------------------------|--------|--------|------|------|
| 6018419 | 7374740 | 1808635 | zinc finger (CCCH type), RNA binding motif and serine/arginine rich 2 | Zrsr2  | 302670 | 1,56 | down |
| 6430212 | 7374740 | 1808632 | zinc finger (CCCH type), RNA binding motif and serine/arginine rich 2 | Zrsr2  | 302670 | 1,44 | down |
| 5865572 | 7374740 | 1808624 | zinc finger (CCCH type), RNA binding motif and serine/arginine rich 2 | Zrsr2  | 302670 | 1,36 | down |
| 6312327 | 7374740 | 1808626 | zinc finger (CCCH type), RNA binding motif and serine/arginine rich 2 | Zrsr2  | 302670 | 1,30 | up   |
| 5718302 | 7374740 | 1808625 | zinc finger (CCCH type), RNA binding motif and serine/arginine rich 2 | Zrsr2  | 302670 | 1,24 | up   |
| 6432159 | 7374740 | 1808631 | zinc finger (CCCH type), RNA binding motif and serine/arginine rich 2 | Zrsr2  | 302670 | 1,24 | up   |
| 6520435 | 7374740 | 1808629 | zinc finger (CCCH type), RNA binding motif and serine/arginine rich 2 | Zrsr2  | 302670 | 1,21 | down |
| 6205719 | 7374740 | 1808630 | zinc finger (CCCH type), RNA binding motif and serine/arginine rich 2 | Zrsr2  | 302670 | 1,18 | down |
| 5643823 | 7374740 | 1808620 | zinc finger (CCCH type), RNA binding motif and serine/arginine rich 2 | Zrsr2  | 302670 | 1,16 | down |
| 6571872 | 7374740 | 1808623 | zinc finger (CCCH type), RNA binding motif and serine/arginine rich 2 | Zrsr2  | 302670 | 1,15 | up   |
| 6512590 | 7374740 | 1808635 | zinc finger (CCCH type), RNA binding motif and serine/arginine rich 2 | Zrsr2  | 302670 | 1,13 | down |
| 5870014 | 7374740 | 1808623 | zinc finger (CCCH type), RNA binding motif and serine/arginine rich 2 | Zrsr2  | 302670 | 1,06 | down |
| 6031959 | 7206349 | 1390453 | zinc finger and BTB domain containing 10                              | Zbtb10 | 80338  | 2,58 | down |
| 6597112 | 7206349 | 1390454 | zinc finger and BTB domain containing 10                              | Zbtb10 | 80338  | 1,54 | down |
| 6487212 | 7206349 | 1390448 | zinc finger and BTB domain containing 10                              | Zbtb10 | 80338  | 1,27 | up   |
| 6353474 | 7206349 | 1390453 | zinc finger and BTB domain containing 10                              | Zbtb10 | 80338  | 1,27 | up   |
| 6316284 | 7206349 | 1390452 | zinc finger and BTB domain containing 10                              | Zbtb10 | 80338  | 1,25 | down |
| 5769426 | 7206349 | 1390447 | zinc finger and BTB domain containing 10                              | Zbtb10 | 80338  | 1,22 | down |
| 6240912 | 7206349 | 1390447 | zinc finger and BTB domain containing 10                              | Zbtb10 | 80338  | 1,19 | up   |
| 5917184 | 7206349 | 1390454 | zinc finger and BTB domain containing 10                              | Zbtb10 | 80338  | 1,15 | down |
| 6003532 | 7206349 | 1390449 | zinc finger and BTB domain containing 10                              | Zbtb10 | 80338  | 1,14 | down |
| 6426566 | 7206349 | 1390446 | zinc finger and BTB domain containing 10                              | Zbtb10 | 80338  | 1,13 | down |
| 6724466 | 7206349 | 1390450 | zinc finger and BTB domain containing 10                              | Zbtb10 | 80338  | 1,11 | up   |
| 6041637 | 7206349 | 1390451 | zinc finger and BTB domain containing 10                              | Zbtb10 | 80338  | 1,09 | up   |
| 5677605 | 7206349 | 1390446 | zinc finger and BTB domain containing 10                              | Zbtb10 | 80338  | 1,06 | up   |
| 6537255 | 7093296 | 1110982 | zinc finger and BTB domain containing 20                              | Zbtb20 | 288105 | 1,61 | down |
| 6505677 | 7093296 | 1110912 | zinc finger and BTB domain containing 20                              | Zbtb20 | 288105 | 1,58 | up   |
| 6577970 | 7093296 | 1110962 | zinc finger and BTB domain containing 20                              | Zbtb20 | 288105 | 1,57 | down |
| 5649233 | 7093296 | 1110913 | zinc finger and BTB domain containing 20                              | Zbtb20 | 288105 | 1,50 | down |
| 6372496 | 7093296 | 1110908 | zinc finger and BTB domain containing 20                              | Zbtb20 | 288105 | 1,42 | down |
| 5731878 | 7093296 | 1110926 | zinc finger and BTB domain containing 20                              | Zbtb20 | 288105 | 1,34 | down |
| 6036562 | 7093296 | 1110971 | zinc finger and BTB domain containing 20                              | Zbtb20 | 288105 | 1,24 | down |
| 6424128 | 7093296 | 1110894 | zinc finger and BTB domain containing 20                              | Zbtb20 | 288105 | 1,21 | down |
| 6710445 | 7093296 | 1110963 | zinc finger and BTB domain containing 20                              | Zbtb20 | 288105 | 1,19 | up   |
| 5874152 | 7093296 | 1110894 | zinc finger and BTB domain containing 20                              | Zbtb20 | 288105 | 1,17 | down |
| 5715748 | 7093296 | 1110939 | zinc finger and BTB domain containing 20                              | Zbtb20 | 288105 | 1,06 | down |
| 5921513 | 7093296 | 1110896 | zinc finger and BTB domain containing 20                              | Zbtb20 | 288105 | 1,04 | down |
| 6060714 | 7093296 | 1110969 | zinc finger and BTB domain containing 20                              | Zbtb20 | 288105 | 1,04 | up   |
| 6704172 | 7093296 | 1110907 | zinc finger and BTB domain containing 20                              | Zbtb20 | 288105 | 1,02 | up   |
| 6356081 | 7221031 | 1425348 | zinc finger and BTB domain containing 22                              | Zbtb22 | 309630 | 2,26 | down |
| 5844912 | 7221031 | 1425346 | zinc finger and BTB domain containing 22                              | Zbtb22 | 309630 | 1,28 | down |
| 5625949 | 7221031 | 1425347 | zinc finger and BTB domain containing 22                              | Zbtb22 | 309630 | 1,26 | up   |
| 6402056 | 7221031 | 1425347 | zinc finger and BTB domain containing 22                              | Zbtb22 | 309630 | 1,14 | down |
| 6118487 | 7221031 | 1425347 | zinc finger and BTB domain containing 22                              | Zbtb22 | 309630 | 1,02 | down |
| 6443679 | 7221031 | 1425347 | zinc finger and BTB domain containing 22                              | Zbtb22 | 309630 | 1,00 | down |
| 5725310 | 7049793 | 1009015 | zinc finger and BTB domain containing 32                              | Zbtb32 | 688845 | 2,12 | down |
| 5788579 | 7049793 | 1009011 | zinc finger and BTB domain containing 32                              | Zbtb32 | 688845 | 1,82 | down |
| 5797015 | 7049793 | 1009011 | zinc finger and BTB domain containing 32                              | Zbtb32 | 688845 | 1,52 | up   |
| 6261138 | 7049793 | 1009015 | zinc finger and BTB domain containing 32                              | Zbtb32 | 688845 | 1,45 | up   |
| 6469864 | 7049793 | 1009012 | zinc finger and BTB domain containing 32                              | Zbtb32 | 688845 | 1,38 | up   |
| 6675847 | 7049793 | 1009014 | zinc finger and BTB domain containing 32                              | Zbtb32 | 688845 | 1,30 | up   |
| 6698682 | 7049793 | 1009011 | zinc finger and BTB domain containing 32                              | Zbtb32 | 688845 | 1,25 | up   |
| 6584779 | 7049793 | 1009011 | zinc finger and BTB domain containing 32                              | Zbtb32 | 688845 | 1,21 | up   |
| 5885689 | 7049793 | 1009015 | zinc finger and BTB domain containing 32                              | Zbtb32 | 688845 | 1,16 | down |
| 6419416 | 7049793 | 1009015 | zinc finger and BTB domain containing 32                              | Zbtb32 | 688845 | 1,12 | down |
| 6403715 | 7049793 | 1009015 | zinc finger and BTB domain containing 32                              | Zbtb32 | 688845 | 1,10 | down |
| 6648136 | 7049793 | 1009012 | zinc finger and BTB domain containing 32                              | Zbtb32 | 688845 | 1,08 | up   |

|         |         |         |                                          |         |        |      |      |
|---------|---------|---------|------------------------------------------|---------|--------|------|------|
| 6233963 | 7049793 | 1009013 | zinc finger and BTB domain containing 32 | Zbtb32  | 688845 | 1,07 | up   |
| 5635962 | 7049793 | 1009010 | zinc finger and BTB domain containing 32 | Zbtb32  | 688845 | 1,05 | up   |
| 6347970 | 7315934 | 1661989 | zinc finger and BTB domain containing 39 | Zbtb39  | 299510 | 1,42 | up   |
| 6522765 | 7315934 | 1661989 | zinc finger and BTB domain containing 39 | Zbtb39  | 299510 | 1,03 | down |
| 6047989 | 7315934 | 1661990 | zinc finger and BTB domain containing 39 | Zbtb39  | 299510 | 1,02 | up   |
| 6346895 | 7291309 | 1599933 | zinc finger and BTB domain containing 8a | Zbtb8a  | 313049 | 1,58 | down |
| 5795257 | 7291309 | 1599937 | zinc finger and BTB domain containing 8a | Zbtb8a  | 313049 | 1,30 | down |
| 6403285 | 7291309 | 1599932 | zinc finger and BTB domain containing 8a | Zbtb8a  | 313049 | 1,21 | up   |
| 5965752 | 7291309 | 1599933 | zinc finger and BTB domain containing 8a | Zbtb8a  | 313049 | 1,19 | up   |
| 6455197 | 7291309 | 1599931 | zinc finger and BTB domain containing 8a | Zbtb8a  | 313049 | 1,13 | up   |
| 5773454 | 7291309 | 1599931 | zinc finger and BTB domain containing 8a | Zbtb8a  | 313049 | 1,05 | up   |
| 5771776 | 7291309 | 1599937 | zinc finger and BTB domain containing 8a | Zbtb8a  | 313049 | 1,02 | down |
| 6655374 | 7291309 | 1599931 | zinc finger and BTB domain containing 8a | Zbtb8a  | 313049 | 1,01 | down |
| 6585212 | 7291309 | 1599939 | zinc finger and BTB domain containing 8a | Zbtb8a  | 313049 | 1,00 | up   |
| 6202877 | 7291309 | 1599943 | zinc finger and BTB domain containing 8b | Zbtb8b  | 500553 | 3,49 | down |
| 6293253 | 7291309 | 1599946 | zinc finger and BTB domain containing 8b | Zbtb8b  | 500553 | 1,49 | down |
| 6181826 | 7291309 | 1599945 | zinc finger and BTB domain containing 8b | Zbtb8b  | 500553 | 1,33 | down |
| 6651845 | 7291309 | 1599944 | zinc finger and BTB domain containing 8b | Zbtb8b  | 500553 | 1,19 | up   |
| 6454884 | 7291309 | 1599945 | zinc finger and BTB domain containing 8b | Zbtb8b  | 500553 | 1,18 | down |
| 6612774 | 7291309 | 1599946 | zinc finger and BTB domain containing 8b | Zbtb8b  | 500553 | 1,15 | down |
| 6498940 | 7291309 | 1599945 | zinc finger and BTB domain containing 8b | Zbtb8b  | 500553 | 1,14 | down |
| 6295220 | 7291309 | 1599946 | zinc finger and BTB domain containing 8b | Zbtb8b  | 500553 | 1,14 | down |
| 6395335 | 7291309 | 1599943 | zinc finger and BTB domain containing 8b | Zbtb8b  | 500553 | 1,01 | up   |
| 6032991 | 7290942 | 1599131 | zinc finger CCCH type containing 12A     | Zc3h12a | 313587 | 3,49 | down |
| 5663051 | 7290942 | 1599134 | zinc finger CCCH type containing 12A     | Zc3h12a | 313587 | 3,37 | up   |
| 5905331 | 7290942 | 1599131 | zinc finger CCCH type containing 12A     | Zc3h12a | 313587 | 1,84 | down |
| 6351883 | 7290942 | 1599138 | zinc finger CCCH type containing 12A     | Zc3h12a | 313587 | 1,82 | up   |
| 6230308 | 7290942 | 1599133 | zinc finger CCCH type containing 12A     | Zc3h12a | 313587 | 1,54 | up   |
| 5853885 | 7290942 | 1599138 | zinc finger CCCH type containing 12A     | Zc3h12a | 313587 | 1,48 | up   |
| 6028004 | 7290942 | 1599132 | zinc finger CCCH type containing 12A     | Zc3h12a | 313587 | 1,46 | up   |
| 5804068 | 7290942 | 1599135 | zinc finger CCCH type containing 12A     | Zc3h12a | 313587 | 1,17 | up   |
| 5807863 | 7133484 | 1209928 | zinc finger CCCH type containing 13      | Zc3h13  | 305955 | 2,87 | down |
| 6040686 | 7133484 | 1209929 | zinc finger CCCH type containing 13      | Zc3h13  | 305955 | 2,23 | down |
| 6091914 | 7133484 | 1209931 | zinc finger CCCH type containing 13      | Zc3h13  | 305955 | 1,50 | down |
| 6547988 | 7133484 | 1209934 | zinc finger CCCH type containing 13      | Zc3h13  | 305955 | 1,29 | down |
| 6680587 | 7133484 | 1209924 | zinc finger CCCH type containing 13      | Zc3h13  | 305955 | 1,27 | down |
| 5715707 | 7133484 | 1209926 | zinc finger CCCH type containing 13      | Zc3h13  | 305955 | 1,06 | down |
| 6658962 | 7133484 | 1209932 | zinc finger CCCH type containing 13      | Zc3h13  | 305955 | 1,05 | down |
| 5793940 | 7133484 | 1209927 | zinc finger CCCH type containing 13      | Zc3h13  | 305955 | 1,04 | down |
| 5943499 | 7064732 | 1042915 | zinc finger CCCH type containing 7 A     | Zc3h7a  | 360466 | 1,61 | up   |
| 6616429 | 7064732 | 1042923 | zinc finger CCCH type containing 7 A     | Zc3h7a  | 360466 | 1,31 | up   |
| 6260083 | 7064732 | 1042934 | zinc finger CCCH type containing 7 A     | Zc3h7a  | 360466 | 1,27 | up   |
| 5830804 | 7064732 | 1042936 | zinc finger CCCH type containing 7 A     | Zc3h7a  | 360466 | 1,26 | up   |
| 6350431 | 7064732 | 1042935 | zinc finger CCCH type containing 7 A     | Zc3h7a  | 360466 | 1,25 | down |
| 6573656 | 7064732 | 1042928 | zinc finger CCCH type containing 7 A     | Zc3h7a  | 360466 | 1,21 | up   |
| 6062139 | 7064732 | 1042920 | zinc finger CCCH type containing 7 A     | Zc3h7a  | 360466 | 1,21 | up   |
| 6737456 | 7064732 | 1042912 | zinc finger CCCH type containing 7 A     | Zc3h7a  | 360466 | 1,21 | down |
| 6545671 | 7064732 | 1042919 | zinc finger CCCH type containing 7 A     | Zc3h7a  | 360466 | 1,20 | up   |
| 6371471 | 7064732 | 1042918 | zinc finger CCCH type containing 7 A     | Zc3h7a  | 360466 | 1,15 | down |
| 6119092 | 7064732 | 1042926 | zinc finger CCCH type containing 7 A     | Zc3h7a  | 360466 | 1,15 | down |
| 5677154 | 7064732 | 1042921 | zinc finger CCCH type containing 7 A     | Zc3h7a  | 360466 | 1,12 | up   |
| 6521018 | 7064732 | 1042925 | zinc finger CCCH type containing 7 A     | Zc3h7a  | 360466 | 1,12 | up   |
| 5657773 | 7064732 | 1042932 | zinc finger CCCH type containing 7 A     | Zc3h7a  | 360466 | 1,12 | up   |
| 5678857 | 7064732 | 1042911 | zinc finger CCCH type containing 7 A     | Zc3h7a  | 360466 | 1,12 | up   |
| 5817771 | 7064732 | 1042916 | zinc finger CCCH type containing 7 A     | Zc3h7a  | 360466 | 1,09 | down |
| 6283778 | 7064732 | 1042927 | zinc finger CCCH type containing 7 A     | Zc3h7a  | 360466 | 1,08 | up   |
| 6015462 | 7064732 | 1042913 | zinc finger CCCH type containing 7 A     | Zc3h7a  | 360466 | 1,07 | up   |

|         |         |         |                                      |        |        |      |      |
|---------|---------|---------|--------------------------------------|--------|--------|------|------|
| 6695414 | 7064732 | 1042917 | zinc finger CCCH type containing 7 A | Zc3h7a | 360466 | 1,06 | up   |
| 5645113 | 7064732 | 1042932 | zinc finger CCCH type containing 7 A | Zc3h7a | 360466 | 1,05 | up   |
| 5673460 | 7064732 | 1042924 | zinc finger CCCH type containing 7 A | Zc3h7a | 360466 | 1,04 | up   |
| 6632164 | 7064732 | 1042933 | zinc finger CCCH type containing 7 A | Zc3h7a | 360466 | 1,04 | down |
| 6350619 | 7064732 | 1042914 | zinc finger CCCH type containing 7 A | Zc3h7a | 360466 | 1,01 | up   |
| 6719832 | 7064732 | 1042922 | zinc finger CCCH type containing 7 A | Zc3h7a | 360466 | 1,00 | down |
| 6360112 | 7064732 | 1042922 | zinc finger CCCH type containing 7 A | Zc3h7a | 360466 | 1,00 | down |
| 6737875 | 7229382 | 1446261 | zinc finger CCCH-type containing 15  | Zc3h15 | 362154 | 5,30 | down |
| 6566077 | 7229382 | 1446262 | zinc finger CCCH-type containing 15  | Zc3h15 | 362154 | 2,11 | down |
| 6628350 | 7229382 | 1446263 | zinc finger CCCH-type containing 15  | Zc3h15 | 362154 | 1,52 | down |
| 5962765 | 7229382 | 1446266 | zinc finger CCCH-type containing 15  | Zc3h15 | 362154 | 1,42 | down |
| 6177284 | 7229382 | 1446271 | zinc finger CCCH-type containing 15  | Zc3h15 | 362154 | 1,37 | down |
| 6414720 | 7229382 | 1446264 | zinc finger CCCH-type containing 15  | Zc3h15 | 362154 | 1,23 | down |
| 6392879 | 7229382 | 1446267 | zinc finger CCCH-type containing 15  | Zc3h15 | 362154 | 1,22 | up   |
| 6472378 | 7229382 | 1446269 | zinc finger CCCH-type containing 15  | Zc3h15 | 362154 | 1,19 | up   |
| 5772082 | 7229382 | 1446271 | zinc finger CCCH-type containing 15  | Zc3h15 | 362154 | 1,16 | up   |
| 6728669 | 7229382 | 1446268 | zinc finger CCCH-type containing 15  | Zc3h15 | 362154 | 1,15 | up   |
| 6364548 | 7229382 | 1446271 | zinc finger CCCH-type containing 15  | Zc3h15 | 362154 | 1,12 | up   |
| 6489732 | 7229382 | 1446261 | zinc finger CCCH-type containing 15  | Zc3h15 | 362154 | 1,09 | down |
| 6686879 | 7229382 | 1446270 | zinc finger CCCH-type containing 15  | Zc3h15 | 362154 | 1,06 | up   |
| 6316344 | 7229382 | 1446265 | zinc finger CCCH-type containing 15  | Zc3h15 | 362154 | 1,05 | up   |
| 6432559 | 7319151 | 1670116 | zinc finger CCCH-type containing 7B  | Zc3h7b | 315158 | 1,75 | down |
| 6188341 | 7319151 | 1670117 | zinc finger CCCH-type containing 7B  | Zc3h7b | 315158 | 1,35 | down |
| 6207249 | 7319151 | 1670124 | zinc finger CCCH-type containing 7B  | Zc3h7b | 315158 | 1,34 | up   |
| 6115782 | 7319151 | 1670122 | zinc finger CCCH-type containing 7B  | Zc3h7b | 315158 | 1,31 | up   |
| 6492066 | 7319151 | 1670139 | zinc finger CCCH-type containing 7B  | Zc3h7b | 315158 | 1,23 | up   |
| 6579453 | 7319151 | 1670126 | zinc finger CCCH-type containing 7B  | Zc3h7b | 315158 | 1,21 | up   |
| 5952359 | 7319151 | 1670118 | zinc finger CCCH-type containing 7B  | Zc3h7b | 315158 | 1,19 | up   |
| 5689368 | 7319151 | 1670138 | zinc finger CCCH-type containing 7B  | Zc3h7b | 315158 | 1,17 | down |
| 6086088 | 7319151 | 1670127 | zinc finger CCCH-type containing 7B  | Zc3h7b | 315158 | 1,14 | up   |
| 6479824 | 7319151 | 1670115 | zinc finger CCCH-type containing 7B  | Zc3h7b | 315158 | 1,11 | down |
| 5708942 | 7319151 | 1670134 | zinc finger CCCH-type containing 7B  | Zc3h7b | 315158 | 1,10 | down |
| 6329366 | 7319151 | 1670125 | zinc finger CCCH-type containing 7B  | Zc3h7b | 315158 | 1,10 | down |
| 5776151 | 7319151 | 1670121 | zinc finger CCCH-type containing 7B  | Zc3h7b | 315158 | 1,10 | up   |
| 6296269 | 7319151 | 1670128 | zinc finger CCCH-type containing 7B  | Zc3h7b | 315158 | 1,09 | down |
| 5890610 | 7319151 | 1670123 | zinc finger CCCH-type containing 7B  | Zc3h7b | 315158 | 1,07 | down |
| 5844151 | 7319151 | 1670140 | zinc finger CCCH-type containing 7B  | Zc3h7b | 315158 | 1,06 | down |
| 6393002 | 7319151 | 1670119 | zinc finger CCCH-type containing 7B  | Zc3h7b | 315158 | 1,06 | down |
| 6673575 | 7319151 | 1670136 | zinc finger CCCH-type containing 7B  | Zc3h7b | 315158 | 1,04 | up   |
| 6334360 | 7319151 | 1670130 | zinc finger CCCH-type containing 7B  | Zc3h7b | 315158 | 1,04 | up   |
| 6313844 | 7319151 | 1670137 | zinc finger CCCH-type containing 7B  | Zc3h7b | 315158 | 1,03 | up   |
| 6373190 | 7319151 | 1670129 | zinc finger CCCH-type containing 7B  | Zc3h7b | 315158 | 1,03 | down |
| 6277125 | 7319151 | 1670131 | zinc finger CCCH-type containing 7B  | Zc3h7b | 315158 | 1,02 | down |
| 6541543 | 7319151 | 1670135 | zinc finger CCCH-type containing 7B  | Zc3h7b | 315158 | 1,00 | up   |
| 6687173 | 7048757 | 1007017 | zinc finger protein 111              | Zfp111 | 170849 | 2,26 | down |
| 6400661 | 7048757 | 1007017 | zinc finger protein 111              | Zfp111 | 170849 | 1,58 | up   |
| 5681918 | 7048757 | 1007020 | zinc finger protein 111              | Zfp111 | 170849 | 1,57 | up   |
| 6522901 | 7048757 | 1007017 | zinc finger protein 111              | Zfp111 | 170849 | 1,43 | up   |
| 5796157 | 7048757 | 1007017 | zinc finger protein 111              | Zfp111 | 170849 | 1,26 | down |
| 6468144 | 7048757 | 1007017 | zinc finger protein 111              | Zfp111 | 170849 | 1,26 | down |
| 6298615 | 7048757 | 1007017 | zinc finger protein 111              | Zfp111 | 170849 | 1,24 | up   |
| 5769081 | 7048757 | 1007017 | zinc finger protein 111              | Zfp111 | 170849 | 1,20 | down |
| 6062676 | 7048757 | 1007018 | zinc finger protein 111              | Zfp111 | 170849 | 1,19 | down |
| 6417937 | 7048757 | 1007020 | zinc finger protein 111              | Zfp111 | 170849 | 1,18 | up   |
| 5873564 | 7048757 | 1007019 | zinc finger protein 111              | Zfp111 | 170849 | 1,16 | down |
| 5701281 | 7048757 | 1007017 | zinc finger protein 111              | Zfp111 | 170849 | 1,13 | up   |
| 5778899 | 7048757 | 1007017 | zinc finger protein 111              | Zfp111 | 170849 | 1,07 | up   |

|         |         |         |                         |        |        |      |      |
|---------|---------|---------|-------------------------|--------|--------|------|------|
| 5988826 | 7048757 | 1007017 | zinc finger protein 111 | Zfp111 | 170849 | 1,01 | up   |
| 6601087 | 7100408 | 1128644 | zinc finger protein 12  | Zfp12  | 288486 | 1,18 | down |
| 6550420 | 7204442 | 1386079 | zinc finger protein 131 | Zfp131 | 310375 | 1,59 | up   |
| 6182884 | 7204442 | 1386081 | zinc finger protein 131 | Zfp131 | 310375 | 1,36 | up   |
| 5956759 | 7204442 | 1386077 | zinc finger protein 131 | Zfp131 | 310375 | 1,30 | down |
| 6384814 | 7204442 | 1386079 | zinc finger protein 131 | Zfp131 | 310375 | 1,27 | down |
| 6449668 | 7204442 | 1386080 | zinc finger protein 131 | Zfp131 | 310375 | 1,25 | up   |
| 6233560 | 7204442 | 1386078 | zinc finger protein 131 | Zfp131 | 310375 | 1,19 | up   |
| 6402315 | 7204442 | 1386077 | zinc finger protein 131 | Zfp131 | 310375 | 1,11 | down |
| 5978523 | 7204442 | 1386079 | zinc finger protein 131 | Zfp131 | 310375 | 1,06 | up   |
| 6180005 | 7204442 | 1386082 | zinc finger protein 131 | Zfp131 | 310375 | 1,04 | up   |
| 5909667 | 7035403 | 974430  | zinc finger protein 143 | Zfp143 | 361627 | 2,20 | down |
| 6039081 | 7035403 | 974431  | zinc finger protein 143 | Zfp143 | 361627 | 1,78 | down |
| 6259117 | 7035403 | 974421  | zinc finger protein 143 | Zfp143 | 361627 | 1,77 | down |
| 5989159 | 7035403 | 974433  | zinc finger protein 143 | Zfp143 | 361627 | 1,77 | up   |
| 6356255 | 7035403 | 974421  | zinc finger protein 143 | Zfp143 | 361627 | 1,75 | up   |
| 6124659 | 7035403 | 974425  | zinc finger protein 143 | Zfp143 | 361627 | 1,58 | up   |
| 6723418 | 7035403 | 974428  | zinc finger protein 143 | Zfp143 | 361627 | 1,39 | down |
| 6020592 | 7035403 | 974427  | zinc finger protein 143 | Zfp143 | 361627 | 1,31 | down |
| 5835336 | 7035403 | 974422  | zinc finger protein 143 | Zfp143 | 361627 | 1,28 | up   |
| 6118217 | 7035403 | 974423  | zinc finger protein 143 | Zfp143 | 361627 | 1,27 | up   |
| 6624706 | 7035403 | 974434  | zinc finger protein 143 | Zfp143 | 361627 | 1,20 | up   |
| 5812384 | 7035403 | 974429  | zinc finger protein 143 | Zfp143 | 361627 | 1,20 | down |
| 6413494 | 7035403 | 974432  | zinc finger protein 143 | Zfp143 | 361627 | 1,15 | down |
| 6113330 | 7035403 | 974424  | zinc finger protein 143 | Zfp143 | 361627 | 1,10 | down |
| 6675684 | 7035403 | 974436  | zinc finger protein 143 | Zfp143 | 361627 | 1,09 | down |
| 6303635 | 7035403 | 974426  | zinc finger protein 143 | Zfp143 | 361627 | 1,09 | up   |
| 6273611 | 7035403 | 974435  | zinc finger protein 143 | Zfp143 | 361627 | 1,08 | down |
| 6329856 | 7120379 | 1178329 | zinc finger protein 278 | Zfp278 | 305471 | 2,50 | down |
| 6213130 | 7120379 | 1178334 | zinc finger protein 278 | Zfp278 | 305471 | 1,61 | up   |
| 5963639 | 7120379 | 1178334 | zinc finger protein 278 | Zfp278 | 305471 | 1,40 | down |
| 6028987 | 7120379 | 1178335 | zinc finger protein 278 | Zfp278 | 305471 | 1,39 | up   |
| 6679683 | 7120379 | 1178335 | zinc finger protein 278 | Zfp278 | 305471 | 1,35 | up   |
| 6083686 | 7120379 | 1178331 | zinc finger protein 278 | Zfp278 | 305471 | 1,28 | down |
| 6375758 | 7120379 | 1178334 | zinc finger protein 278 | Zfp278 | 305471 | 1,26 | up   |
| 6236520 | 7120379 | 1178329 | zinc finger protein 278 | Zfp278 | 305471 | 1,18 | up   |
| 6622384 | 7120379 | 1178331 | zinc finger protein 278 | Zfp278 | 305471 | 1,14 | up   |
| 5665091 | 7120379 | 1178329 | zinc finger protein 278 | Zfp278 | 305471 | 1,09 | up   |
| 5905053 | 7120379 | 1178329 | zinc finger protein 278 | Zfp278 | 305471 | 1,09 | down |
| 5692780 | 7120379 | 1178335 | zinc finger protein 278 | Zfp278 | 305471 | 1,05 | down |
| 6271079 | 7120379 | 1178329 | zinc finger protein 278 | Zfp278 | 305471 | 1,03 | down |
| 6531676 | 7284912 | 1584857 | zinc finger protein 292 | Znf292 | 50552  | 2,04 | down |
| 6088941 | 7284912 | 1584858 | zinc finger protein 292 | Znf292 | 50552  | 1,41 | up   |
| 6453184 | 7284912 | 1584857 | zinc finger protein 292 | Znf292 | 50552  | 1,34 | down |
| 6526146 | 7284912 | 1584857 | zinc finger protein 292 | Znf292 | 50552  | 1,22 | up   |
| 6661084 | 7284912 | 1584857 | zinc finger protein 292 | Znf292 | 50552  | 1,15 | down |
| 6598845 | 7284912 | 1584858 | zinc finger protein 292 | Znf292 | 50552  | 1,14 | up   |
| 6664979 | 7284912 | 1584857 | zinc finger protein 292 | Znf292 | 50552  | 1,08 | down |
| 6427180 | 7284912 | 1584857 | zinc finger protein 292 | Znf292 | 50552  | 1,07 | down |
| 6534650 | 7284912 | 1584858 | zinc finger protein 292 | Znf292 | 50552  | 1,07 | up   |
| 6637134 | 7284912 | 1584857 | zinc finger protein 292 | Znf292 | 50552  | 1,05 | up   |
| 6633786 | 7284912 | 1584858 | zinc finger protein 292 | Znf292 | 50552  | 1,01 | up   |
| 6286359 | 7284912 | 1584857 | zinc finger protein 292 | Znf292 | 50552  | 1,00 | down |
| 6226857 | 7247848 | 1492045 | zinc finger protein 335 | Zfp335 | 259270 | 2,98 | down |
| 6013859 | 7247848 | 1492052 | zinc finger protein 335 | Zfp335 | 259270 | 1,41 | up   |
| 6373986 | 7247848 | 1492046 | zinc finger protein 335 | Zfp335 | 259270 | 1,27 | down |
| 5851093 | 7247848 | 1492049 | zinc finger protein 335 | Zfp335 | 259270 | 1,27 | down |

|         |         |         |                          |         |        |      |      |
|---------|---------|---------|--------------------------|---------|--------|------|------|
| 6596551 | 7247848 | 1492060 | zinc finger protein 335  | Zfp335  | 259270 | 1,22 | down |
| 6027544 | 7247848 | 1492051 | zinc finger protein 335  | Zfp335  | 259270 | 1,19 | up   |
| 5984059 | 7247848 | 1492053 | zinc finger protein 335  | Zfp335  | 259270 | 1,18 | down |
| 6252548 | 7247848 | 1492057 | zinc finger protein 335  | Zfp335  | 259270 | 1,16 | up   |
| 5988610 | 7247848 | 1492056 | zinc finger protein 335  | Zfp335  | 259270 | 1,13 | down |
| 6250517 | 7247848 | 1492050 | zinc finger protein 335  | Zfp335  | 259270 | 1,12 | up   |
| 6455602 | 7247848 | 1492072 | zinc finger protein 335  | Zfp335  | 259270 | 1,12 | down |
| 6501024 | 7247848 | 1492052 | zinc finger protein 335  | Zfp335  | 259270 | 1,12 | down |
| 6318114 | 7247848 | 1492047 | zinc finger protein 335  | Zfp335  | 259270 | 1,10 | down |
| 5980315 | 7247848 | 1492049 | zinc finger protein 335  | Zfp335  | 259270 | 1,10 | up   |
| 6035090 | 7247848 | 1492055 | zinc finger protein 335  | Zfp335  | 259270 | 1,10 | up   |
| 6568686 | 7247848 | 1492059 | zinc finger protein 335  | Zfp335  | 259270 | 1,10 | up   |
| 6605188 | 7247848 | 1492062 | zinc finger protein 335  | Zfp335  | 259270 | 1,06 | up   |
| 5867650 | 7247848 | 1492058 | zinc finger protein 335  | Zfp335  | 259270 | 1,06 | down |
| 5767905 | 7247848 | 1492054 | zinc finger protein 335  | Zfp335  | 259270 | 1,04 | down |
| 6336863 | 7247848 | 1492048 | zinc finger protein 335  | Zfp335  | 259270 | 1,04 | up   |
| 6316082 | 7247848 | 1492060 | zinc finger protein 335  | Zfp335  | 259270 | 1,03 | down |
| 6403141 | 7162102 | 1280359 | zinc finger protein 346  | Zfp346  | 306765 | 2,51 | up   |
| 6711906 | 7162102 | 1280362 | zinc finger protein 346  | Zfp346  | 306765 | 1,85 | down |
| 5866480 | 7162102 | 1280359 | zinc finger protein 346  | Zfp346  | 306765 | 1,71 | up   |
| 6423170 | 7162102 | 1280361 | zinc finger protein 346  | Zfp346  | 306765 | 1,31 | up   |
| 6131752 | 7162102 | 1280360 | zinc finger protein 346  | Zfp346  | 306765 | 1,14 | down |
| 6295528 | 7162102 | 1280360 | zinc finger protein 346  | Zfp346  | 306765 | 1,13 | down |
| 5638715 | 7162102 | 1280359 | zinc finger protein 346  | Zfp346  | 306765 | 1,09 | down |
| 5661555 | 7162102 | 1280359 | zinc finger protein 346  | Zfp346  | 306765 | 1,08 | up   |
| 5906982 | 7162102 | 1280359 | zinc finger protein 346  | Zfp346  | 306765 | 1,07 | down |
| 5837416 | 7162102 | 1280359 | zinc finger protein 346  | Zfp346  | 306765 | 1,07 | up   |
| 5799993 | 7162102 | 1280365 | zinc finger protein 346  | Zfp346  | 306765 | 1,06 | down |
| 6214866 | 7162102 | 1280366 | zinc finger protein 346  | Zfp346  | 306765 | 1,05 | down |
| 5897497 | 7162102 | 1280358 | zinc finger protein 346  | Zfp346  | 306765 | 1,04 | up   |
| 5792504 | 7162102 | 1280359 | zinc finger protein 346  | Zfp346  | 306765 | 1,02 | down |
| 6576431 | 7162102 | 1280359 | zinc finger protein 346  | Zfp346  | 306765 | 1,02 | down |
| 5943314 | 7240641 | 1475713 | zinc finger protein 385B | Zfp385b | 311137 | 2,01 | down |
| 6522453 | 7240641 | 1475714 | zinc finger protein 385B | Zfp385b | 311137 | 1,47 | up   |
| 5712794 | 7240641 | 1475711 | zinc finger protein 385B | Zfp385b | 311137 | 1,45 | up   |
| 6225343 | 7240641 | 1475712 | zinc finger protein 385B | Zfp385b | 311137 | 1,44 | down |
| 6556852 | 7240641 | 1475731 | zinc finger protein 385B | Zfp385b | 311137 | 1,34 | up   |
| 5698032 | 7240641 | 1475764 | zinc finger protein 385B | Zfp385b | 311137 | 1,31 | up   |
| 6544378 | 7240641 | 1475712 | zinc finger protein 385B | Zfp385b | 311137 | 1,30 | down |
| 6128845 | 7240641 | 1475739 | zinc finger protein 385B | Zfp385b | 311137 | 1,21 | up   |
| 6077058 | 7240641 | 1475764 | zinc finger protein 385B | Zfp385b | 311137 | 1,19 | down |
| 6048564 | 7240641 | 1475714 | zinc finger protein 385B | Zfp385b | 311137 | 1,09 | up   |
| 5728129 | 7240641 | 1475715 | zinc finger protein 385B | Zfp385b | 311137 | 1,07 | down |
| 6366864 | 7240641 | 1475725 | zinc finger protein 385B | Zfp385b | 311137 | 1,02 | down |
| 6429155 | 7253358 | 1505841 | zinc finger protein 398  | Zfp398  | 500108 | 2,28 | down |
| 6586175 | 7253358 | 1505830 | zinc finger protein 398  | Zfp398  | 500108 | 1,42 | up   |
| 5731264 | 7253358 | 1505840 | zinc finger protein 398  | Zfp398  | 500108 | 1,34 | down |
| 6066929 | 7253358 | 1505830 | zinc finger protein 398  | Zfp398  | 500108 | 1,19 | up   |
| 6599705 | 7253358 | 1505830 | zinc finger protein 398  | Zfp398  | 500108 | 1,19 | up   |
| 5802563 | 7253358 | 1505828 | zinc finger protein 398  | Zfp398  | 500108 | 1,17 | down |
| 5640352 | 7253358 | 1505839 | zinc finger protein 398  | Zfp398  | 500108 | 1,12 | down |
| 6405765 | 7253358 | 1505838 | zinc finger protein 398  | Zfp398  | 500108 | 1,05 | up   |
| 6589982 | 7253358 | 1505837 | zinc finger protein 398  | Zfp398  | 500108 | 1,01 | down |
| 5974173 | 7177834 | 1319597 | zinc finger protein 407  | Zfp407  | 307213 | 1,10 | up   |
| 6746398 | 7179467 | 1323671 | zinc finger protein 423  | Zfp423  | 94188  | 2,47 | down |
| 6310463 | 7179467 | 1323670 | zinc finger protein 423  | Zfp423  | 94188  | 1,82 | up   |
| 6690093 | 7179467 | 1323672 | zinc finger protein 423  | Zfp423  | 94188  | 1,39 | down |

|         |         |         |                         |        |        |      |      |
|---------|---------|---------|-------------------------|--------|--------|------|------|
| 6393123 | 7179467 | 1323674 | zinc finger protein 423 | Zfp423 | 94188  | 1,18 | up   |
| 6519029 | 7179467 | 1323676 | zinc finger protein 423 | Zfp423 | 94188  | 1,14 | down |
| 6398830 | 7179467 | 1323677 | zinc finger protein 423 | Zfp423 | 94188  | 1,10 | down |
| 6070838 | 7179467 | 1323678 | zinc finger protein 423 | Zfp423 | 94188  | 1,10 | up   |
| 6069467 | 7179467 | 1323671 | zinc finger protein 423 | Zfp423 | 94188  | 1,09 | down |
| 6391939 | 7179467 | 1323671 | zinc finger protein 423 | Zfp423 | 94188  | 1,08 | up   |
| 5980902 | 7179467 | 1323672 | zinc finger protein 423 | Zfp423 | 94188  | 1,06 | up   |
| 6403697 | 7179467 | 1323673 | zinc finger protein 423 | Zfp423 | 94188  | 1,04 | down |
| 6699304 | 7179467 | 1323678 | zinc finger protein 423 | Zfp423 | 94188  | 1,01 | down |
| 5619433 | 7179467 | 1323675 | zinc finger protein 423 | Zfp423 | 94188  | 1,01 | down |
| 6375084 | 7275546 | 1561448 | zinc finger protein 483 | Znf483 | 170955 | 2,86 | up   |
| 6330475 | 7275546 | 1561451 | zinc finger protein 483 | Znf483 | 170955 | 2,01 | up   |
| 5676019 | 7275546 | 1561453 | zinc finger protein 483 | Znf483 | 170955 | 1,96 | up   |
| 5797529 | 7275546 | 1561448 | zinc finger protein 483 | Znf483 | 170955 | 1,69 | down |
| 5642487 | 7275546 | 1561449 | zinc finger protein 483 | Znf483 | 170955 | 1,51 | up   |
| 5972983 | 7275546 | 1561451 | zinc finger protein 483 | Znf483 | 170955 | 1,22 | down |
| 6371728 | 7275546 | 1561452 | zinc finger protein 483 | Znf483 | 170955 | 1,20 | down |
| 6608779 | 7275546 | 1561448 | zinc finger protein 483 | Znf483 | 170955 | 1,16 | up   |
| 6307934 | 7275546 | 1561452 | zinc finger protein 483 | Znf483 | 170955 | 1,13 | down |
| 6716768 | 7275546 | 1561453 | zinc finger protein 483 | Znf483 | 170955 | 1,11 | down |
| 6266860 | 7275546 | 1561452 | zinc finger protein 483 | Znf483 | 170955 | 1,08 | down |
| 5991901 | 7275546 | 1561450 | zinc finger protein 483 | Znf483 | 170955 | 1,06 | up   |
| 5782705 | 7275546 | 1561453 | zinc finger protein 483 | Znf483 | 170955 | 1,02 | up   |
| 6075957 | 7275546 | 1561453 | zinc finger protein 483 | Znf483 | 170955 | 1,00 | up   |
| 6515980 | 7172691 | 1306437 | zinc finger protein 516 | Znf516 | 291406 | 1,19 | up   |
| 6559914 | 7171417 | 1303185 | zinc finger protein 532 | Znf532 | 307362 | 2,05 | up   |
| 5844824 | 7171417 | 1303185 | zinc finger protein 532 | Znf532 | 307362 | 1,43 | down |
| 5877758 | 7171417 | 1303162 | zinc finger protein 532 | Znf532 | 307362 | 1,41 | down |
| 6029744 | 7171417 | 1303167 | zinc finger protein 532 | Znf532 | 307362 | 1,34 | up   |
| 6158484 | 7171417 | 1303183 | zinc finger protein 532 | Znf532 | 307362 | 1,33 | up   |
| 5637288 | 7171417 | 1303172 | zinc finger protein 532 | Znf532 | 307362 | 1,26 | down |
| 6467465 | 7171417 | 1303157 | zinc finger protein 532 | Znf532 | 307362 | 1,21 | down |
| 5773894 | 7171417 | 1303163 | zinc finger protein 532 | Znf532 | 307362 | 1,20 | up   |
| 6052666 | 7171417 | 1303184 | zinc finger protein 532 | Znf532 | 307362 | 1,19 | up   |
| 6154387 | 7171417 | 1303155 | zinc finger protein 532 | Znf532 | 307362 | 1,08 | down |
| 6359309 | 7171417 | 1303155 | zinc finger protein 532 | Znf532 | 307362 | 1,04 | up   |
| 6620613 | 7171417 | 1303170 | zinc finger protein 532 | Znf532 | 307362 | 1,03 | down |
| 6709009 | 7036967 | 978014  | zinc finger protein 553 | Znf553 | 308991 | 2,36 | down |
| 6232858 | 7036967 | 978017  | zinc finger protein 553 | Znf553 | 308991 | 1,65 | down |
| 6170377 | 7036967 | 978014  | zinc finger protein 553 | Znf553 | 308991 | 1,58 | up   |
| 6546677 | 7036967 | 978014  | zinc finger protein 553 | Znf553 | 308991 | 1,32 | down |
| 6058475 | 7036967 | 978016  | zinc finger protein 553 | Znf553 | 308991 | 1,19 | up   |
| 5918808 | 7036967 | 978017  | zinc finger protein 553 | Znf553 | 308991 | 1,13 | up   |
| 6181971 | 7036967 | 978016  | zinc finger protein 553 | Znf553 | 308991 | 1,01 | down |
| 6725356 | 7065570 | 1045091 | zinc finger protein 598 | Znf598 | 287119 | 2,25 | down |
| 6533223 | 7065570 | 1045091 | zinc finger protein 598 | Znf598 | 287119 | 1,74 | down |
| 6727896 | 7065570 | 1045088 | zinc finger protein 598 | Znf598 | 287119 | 1,42 | down |
| 5927397 | 7065570 | 1045086 | zinc finger protein 598 | Znf598 | 287119 | 1,34 | up   |
| 5750497 | 7065570 | 1045086 | zinc finger protein 598 | Znf598 | 287119 | 1,32 | up   |
| 6154147 | 7065570 | 1045091 | zinc finger protein 598 | Znf598 | 287119 | 1,30 | up   |
| 6507790 | 7065570 | 1045085 | zinc finger protein 598 | Znf598 | 287119 | 1,24 | up   |
| 6614168 | 7065570 | 1045093 | zinc finger protein 598 | Znf598 | 287119 | 1,23 | up   |
| 6672077 | 7065570 | 1045093 | zinc finger protein 598 | Znf598 | 287119 | 1,22 | up   |
| 5667427 | 7065570 | 1045090 | zinc finger protein 598 | Znf598 | 287119 | 1,10 | up   |
| 6613083 | 7065570 | 1045087 | zinc finger protein 598 | Znf598 | 287119 | 1,09 | up   |
| 6033782 | 7065570 | 1045086 | zinc finger protein 598 | Znf598 | 287119 | 1,07 | up   |
| 6675683 | 7065570 | 1045092 | zinc finger protein 598 | Znf598 | 287119 | 1,06 | down |

|         |         |         |                                              |         |        |      |      |
|---------|---------|---------|----------------------------------------------|---------|--------|------|------|
| 6156366 | 7065570 | 1045091 | zinc finger protein 598                      | Znf598  | 287119 | 1,05 | up   |
| 6121320 | 7065570 | 1045093 | zinc finger protein 598                      | Znf598  | 287119 | 1,04 | down |
| 6703605 | 7065570 | 1045091 | zinc finger protein 598                      | Znf598  | 287119 | 1,02 | up   |
| 6311622 | 7065570 | 1045089 | zinc finger protein 598                      | Znf598  | 287119 | 1,00 | down |
| 6306760 | 7331508 | 1699463 | zinc finger protein 641                      | Znf641  | 300197 | 2,23 | up   |
| 6498059 | 7331508 | 1699460 | zinc finger protein 641                      | Znf641  | 300197 | 1,61 | up   |
| 5834296 | 7331508 | 1699462 | zinc finger protein 641                      | Znf641  | 300197 | 1,56 | down |
| 5743053 | 7331508 | 1699457 | zinc finger protein 641                      | Znf641  | 300197 | 1,36 | down |
| 6302443 | 7331508 | 1699459 | zinc finger protein 641                      | Znf641  | 300197 | 1,34 | up   |
| 5782844 | 7331508 | 1699460 | zinc finger protein 641                      | Znf641  | 300197 | 1,25 | up   |
| 6399804 | 7331508 | 1699461 | zinc finger protein 641                      | Znf641  | 300197 | 1,14 | up   |
| 6278650 | 7331508 | 1699459 | zinc finger protein 641                      | Znf641  | 300197 | 1,11 | down |
| 6406559 | 7331508 | 1699459 | zinc finger protein 641                      | Znf641  | 300197 | 1,06 | up   |
| 5898630 | 7331508 | 1699458 | zinc finger protein 641                      | Znf641  | 300197 | 1,04 | up   |
| 5786773 | 7331508 | 1699462 | zinc finger protein 641                      | Znf641  | 300197 | 1,03 | up   |
| 6371145 | 7116023 | 1167299 | zinc finger protein 644                      | Znf644  | 305127 | 2,21 | up   |
| 6407589 | 7217192 | 1415704 | zinc finger protein 76 (expressed in testis) | Znf76   | 361809 | 2,58 | up   |
| 6221176 | 7217192 | 1415697 | zinc finger protein 76 (expressed in testis) | Znf76   | 361809 | 2,28 | down |
| 5892583 | 7217192 | 1415704 | zinc finger protein 76 (expressed in testis) | Znf76   | 361809 | 1,60 | up   |
| 5772051 | 7217192 | 1415694 | zinc finger protein 76 (expressed in testis) | Znf76   | 361809 | 1,58 | up   |
| 6232451 | 7217192 | 1415702 | zinc finger protein 76 (expressed in testis) | Znf76   | 361809 | 1,57 | down |
| 5939384 | 7217192 | 1415696 | zinc finger protein 76 (expressed in testis) | Znf76   | 361809 | 1,57 | down |
| 6434558 | 7217192 | 1415701 | zinc finger protein 76 (expressed in testis) | Znf76   | 361809 | 1,46 | up   |
| 6243730 | 7217192 | 1415700 | zinc finger protein 76 (expressed in testis) | Znf76   | 361809 | 1,39 | up   |
| 6301601 | 7217192 | 1415695 | zinc finger protein 76 (expressed in testis) | Znf76   | 361809 | 1,31 | down |
| 6535111 | 7217192 | 1415692 | zinc finger protein 76 (expressed in testis) | Znf76   | 361809 | 1,23 | up   |
| 5705106 | 7217192 | 1415698 | zinc finger protein 76 (expressed in testis) | Znf76   | 361809 | 1,21 | down |
| 6343206 | 7217192 | 1415703 | zinc finger protein 76 (expressed in testis) | Znf76   | 361809 | 1,20 | up   |
| 5690945 | 7217192 | 1415693 | zinc finger protein 76 (expressed in testis) | Znf76   | 361809 | 1,14 | up   |
| 6170300 | 7217192 | 1415691 | zinc finger protein 76 (expressed in testis) | Znf76   | 361809 | 1,09 | down |
| 6565044 | 7217192 | 1415691 | zinc finger protein 76 (expressed in testis) | Znf76   | 361809 | 1,06 | down |
| 6087238 | 7180721 | 1326698 | zinc finger protein 90                       | Zfp90   | 498945 | 2,46 | down |
| 6042054 | 7180721 | 1326695 | zinc finger protein 90                       | Zfp90   | 498945 | 1,37 | down |
| 6193465 | 7180721 | 1326697 | zinc finger protein 90                       | Zfp90   | 498945 | 1,25 | down |
| 6418058 | 7180721 | 1326696 | zinc finger protein 90                       | Zfp90   | 498945 | 1,14 | up   |
| 6636023 | 7180721 | 1326695 | zinc finger protein 90                       | Zfp90   | 498945 | 1,14 | down |
| 6529421 | 7180721 | 1326698 | zinc finger protein 90                       | Zfp90   | 498945 | 1,05 | down |
| 5986965 | 7097084 | 1119949 | zinc finger with KRAB and SCAN domains 1     | Zkscan1 | 498160 | 1,57 | up   |
| 6074496 | 7097084 | 1119952 | zinc finger with KRAB and SCAN domains 1     | Zkscan1 | 498160 | 1,27 | down |
| 6514080 | 7097084 | 1119956 | zinc finger with KRAB and SCAN domains 1     | Zkscan1 | 498160 | 1,20 | down |
| 5786114 | 7097084 | 1119954 | zinc finger with KRAB and SCAN domains 1     | Zkscan1 | 498160 | 1,19 | up   |
| 6659632 | 7097084 | 1119950 | zinc finger with KRAB and SCAN domains 1     | Zkscan1 | 498160 | 1,09 | down |
| 6567530 | 7097084 | 1119951 | zinc finger with KRAB and SCAN domains 1     | Zkscan1 | 498160 | 1,08 | down |
| 5673588 | 7097084 | 1119951 | zinc finger with KRAB and SCAN domains 1     | Zkscan1 | 498160 | 1,07 | down |
| 5714930 | 7097084 | 1119955 | zinc finger with KRAB and SCAN domains 1     | Zkscan1 | 498160 | 1,03 | up   |
| 6266734 | 7097084 | 1119957 | zinc finger with KRAB and SCAN domains 1     | Zkscan1 | 498160 | 1,02 | down |
| 6247565 | 7191866 | 1354902 | zinc finger, AN1-type domain 1               | Zfand1  | 361917 | 1,30 | down |
| 5975305 | 7191866 | 1354902 | zinc finger, AN1-type domain 1               | Zfand1  | 361917 | 1,14 | up   |
| 5775043 | 7191866 | 1354902 | zinc finger, AN1-type domain 1               | Zfand1  | 361917 | 1,06 | down |
| 6651078 | 7263222 | 1530536 | zinc finger, C3HC-type containing 1          | Zc3hc1  | 296957 | 2,02 | down |
| 5693783 | 7263222 | 1530545 | zinc finger, C3HC-type containing 1          | Zc3hc1  | 296957 | 1,73 | up   |
| 6724785 | 7263222 | 1530534 | zinc finger, C3HC-type containing 1          | Zc3hc1  | 296957 | 1,54 | up   |
| 6005869 | 7263222 | 1530529 | zinc finger, C3HC-type containing 1          | Zc3hc1  | 296957 | 1,34 | down |
| 5788264 | 7263222 | 1530539 | zinc finger, C3HC-type containing 1          | Zc3hc1  | 296957 | 1,32 | up   |
| 6742375 | 7263222 | 1530541 | zinc finger, C3HC-type containing 1          | Zc3hc1  | 296957 | 1,29 | up   |
| 6264824 | 7263222 | 1530544 | zinc finger, C3HC-type containing 1          | Zc3hc1  | 296957 | 1,26 | up   |
| 5709027 | 7263222 | 1530535 | zinc finger, C3HC-type containing 1          | Zc3hc1  | 296957 | 1,23 | down |



|         |         |         |                                        |         |        |      |      |
|---------|---------|---------|----------------------------------------|---------|--------|------|------|
| 6344639 | 7263222 | 1530536 | zinc finger, C3HC-type containing 1    | Zc3hc1  | 296957 | 1,22 | up   |
| 5642838 | 7263222 | 1530529 | zinc finger, C3HC-type containing 1    | Zc3hc1  | 296957 | 1,16 | down |
| 5968579 | 7263222 | 1530536 | zinc finger, C3HC-type containing 1    | Zc3hc1  | 296957 | 1,13 | down |
| 5821926 | 7263222 | 1530542 | zinc finger, C3HC-type containing 1    | Zc3hc1  | 296957 | 1,09 | up   |
| 6397300 | 7263222 | 1530529 | zinc finger, C3HC-type containing 1    | Zc3hc1  | 296957 | 1,05 | up   |
| 6314181 | 7263222 | 1530536 | zinc finger, C3HC-type containing 1    | Zc3hc1  | 296957 | 1,04 | up   |
| 6465810 | 7263222 | 1530538 | zinc finger, C3HC-type containing 1    | Zc3hc1  | 296957 | 1,03 | up   |
| 6427983 | 7186240 | 1340819 | zinc finger, CCHC domain containing 14 | Zcchc14 | 365018 | 1,59 | down |
| 5736280 | 7186240 | 1340819 | zinc finger, CCHC domain containing 14 | Zcchc14 | 365018 | 1,05 | down |
| 6381636 | 7355244 | 1758147 | zinc finger, DBF-type containing 2     | Zdbf2   | 501153 | 1,44 | down |
| 6597292 | 7355244 | 1758147 | zinc finger, DBF-type containing 2     | Zdbf2   | 501153 | 1,31 | down |
| 5734550 | 7355244 | 1758147 | zinc finger, DBF-type containing 2     | Zdbf2   | 501153 | 1,23 | down |
| 6704586 | 7355244 | 1758147 | zinc finger, DBF-type containing 2     | Zdbf2   | 501153 | 1,18 | down |
| 6703339 | 7355244 | 1758144 | zinc finger, DBF-type containing 2     | Zdbf2   | 501153 | 1,17 | down |
| 6610285 | 7355244 | 1758147 | zinc finger, DBF-type containing 2     | Zdbf2   | 501153 | 1,16 | up   |
| 6625326 | 7355244 | 1758145 | zinc finger, DBF-type containing 2     | Zdbf2   | 501153 | 1,11 | down |
| 6551980 | 7355244 | 1758142 | zinc finger, DBF-type containing 2     | Zdbf2   | 501153 | 1,08 | up   |
| 6029294 | 7355244 | 1758146 | zinc finger, DBF-type containing 2     | Zdbf2   | 501153 | 1,01 | down |
| 6460805 | 7355244 | 1758146 | zinc finger, DBF-type containing 2     | Zdbf2   | 501153 | 1,00 | up   |
| 6175275 | 7184931 | 1337705 | zinc finger, DHHC-type containing 1    | Zdhhc1  | 291967 | 2,11 | down |
| 6147442 | 7184931 | 1337711 | zinc finger, DHHC-type containing 1    | Zdhhc1  | 291967 | 1,57 | down |
| 6128414 | 7184931 | 1337710 | zinc finger, DHHC-type containing 1    | Zdhhc1  | 291967 | 1,47 | down |
| 5887328 | 7184931 | 1337704 | zinc finger, DHHC-type containing 1    | Zdhhc1  | 291967 | 1,34 | down |
| 6343050 | 7184931 | 1337720 | zinc finger, DHHC-type containing 1    | Zdhhc1  | 291967 | 1,33 | down |
| 6082005 | 7184931 | 1337710 | zinc finger, DHHC-type containing 1    | Zdhhc1  | 291967 | 1,32 | up   |
| 5753804 | 7184931 | 1337723 | zinc finger, DHHC-type containing 1    | Zdhhc1  | 291967 | 1,28 | down |
| 5655703 | 7184931 | 1337711 | zinc finger, DHHC-type containing 1    | Zdhhc1  | 291967 | 1,26 | down |
| 6633706 | 7184931 | 1337706 | zinc finger, DHHC-type containing 1    | Zdhhc1  | 291967 | 1,22 | up   |
| 6623018 | 7184931 | 1337706 | zinc finger, DHHC-type containing 1    | Zdhhc1  | 291967 | 1,22 | down |
| 5619228 | 7184931 | 1337708 | zinc finger, DHHC-type containing 1    | Zdhhc1  | 291967 | 1,18 | up   |
| 5878805 | 7184931 | 1337709 | zinc finger, DHHC-type containing 1    | Zdhhc1  | 291967 | 1,15 | down |
| 5869304 | 7184931 | 1337705 | zinc finger, DHHC-type containing 1    | Zdhhc1  | 291967 | 1,13 | up   |
| 5774691 | 7184931 | 1337713 | zinc finger, DHHC-type containing 1    | Zdhhc1  | 291967 | 1,11 | up   |
| 6212926 | 7184931 | 1337713 | zinc finger, DHHC-type containing 1    | Zdhhc1  | 291967 | 1,10 | down |
| 6125617 | 7184931 | 1337722 | zinc finger, DHHC-type containing 1    | Zdhhc1  | 291967 | 1,04 | up   |
| 6311023 | 7184931 | 1337720 | zinc finger, DHHC-type containing 1    | Zdhhc1  | 291967 | 1,02 | up   |
| 6350430 | 7184931 | 1337707 | zinc finger, DHHC-type containing 1    | Zdhhc1  | 291967 | 1,00 | down |
| 6445295 | 7184931 | 1337705 | zinc finger, DHHC-type containing 1    | Zdhhc1  | 291967 | 1,00 | up   |
| 6032327 | 7151857 | 1254937 | zinc finger, DHHC-type containing 2    | Zdhhc2  | 246326 | 2,00 | down |
| 6536020 | 7151857 | 1254928 | zinc finger, DHHC-type containing 2    | Zdhhc2  | 246326 | 1,79 | down |
| 6724890 | 7151857 | 1254931 | zinc finger, DHHC-type containing 2    | Zdhhc2  | 246326 | 1,37 | down |
| 6239601 | 7151857 | 1254938 | zinc finger, DHHC-type containing 2    | Zdhhc2  | 246326 | 1,29 | up   |
| 5827336 | 7151857 | 1254934 | zinc finger, DHHC-type containing 2    | Zdhhc2  | 246326 | 1,27 | up   |
| 6354504 | 7151857 | 1254927 | zinc finger, DHHC-type containing 2    | Zdhhc2  | 246326 | 1,26 | up   |
| 6632233 | 7151857 | 1254938 | zinc finger, DHHC-type containing 2    | Zdhhc2  | 246326 | 1,23 | up   |
| 6383351 | 7151857 | 1254938 | zinc finger, DHHC-type containing 2    | Zdhhc2  | 246326 | 1,22 | up   |
| 6633469 | 7151857 | 1254937 | zinc finger, DHHC-type containing 2    | Zdhhc2  | 246326 | 1,20 | up   |
| 6202924 | 7151857 | 1254930 | zinc finger, DHHC-type containing 2    | Zdhhc2  | 246326 | 1,19 | down |
| 6005522 | 7151857 | 1254932 | zinc finger, DHHC-type containing 2    | Zdhhc2  | 246326 | 1,11 | down |
| 6334556 | 7151857 | 1254933 | zinc finger, DHHC-type containing 2    | Zdhhc2  | 246326 | 1,08 | down |
| 6163874 | 7151857 | 1254936 | zinc finger, DHHC-type containing 2    | Zdhhc2  | 246326 | 1,06 | down |
| 5707103 | 7151857 | 1254928 | zinc finger, DHHC-type containing 2    | Zdhhc2  | 246326 | 1,05 | up   |
| 6586412 | 7151857 | 1254935 | zinc finger, DHHC-type containing 2    | Zdhhc2  | 246326 | 1,04 | down |
| 6067064 | 7151857 | 1254929 | zinc finger, DHHC-type containing 2    | Zdhhc2  | 246326 | 1,03 | down |
| 6647515 | 7151857 | 1254931 | zinc finger, DHHC-type containing 2    | Zdhhc2  | 246326 | 1,02 | down |
| 5848295 | 7088167 | 1098498 | zinc finger, DHHC-type containing 23   | Zdhhc23 | 363783 | 2,21 | up   |
| 6688036 | 7088167 | 1098497 | zinc finger, DHHC-type containing 23   | Zdhhc23 | 363783 | 1,89 | down |

|         |         |         |                                        |         |        |      |      |
|---------|---------|---------|----------------------------------------|---------|--------|------|------|
| 6641384 | 7088167 | 1098499 | zinc finger, DHHC-type containing 23   | Zdhhc23 | 363783 | 1,65 | up   |
| 5935934 | 7088167 | 1098498 | zinc finger, DHHC-type containing 23   | Zdhhc23 | 363783 | 1,53 | up   |
| 5804349 | 7088167 | 1098497 | zinc finger, DHHC-type containing 23   | Zdhhc23 | 363783 | 1,30 | down |
| 6205088 | 7088167 | 1098500 | zinc finger, DHHC-type containing 23   | Zdhhc23 | 363783 | 1,19 | down |
| 6193307 | 7088167 | 1098501 | zinc finger, DHHC-type containing 23   | Zdhhc23 | 363783 | 1,17 | down |
| 5718283 | 7088167 | 1098497 | zinc finger, DHHC-type containing 23   | Zdhhc23 | 363783 | 1,07 | down |
| 6697172 | 7308262 | 1643213 | zinc finger, FYVE domain containing 26 | Zfyve26 | 314265 | 1,61 | up   |
| 6677760 | 7308262 | 1643209 | zinc finger, FYVE domain containing 26 | Zfyve26 | 314265 | 1,49 | up   |
| 6557686 | 7308262 | 1643227 | zinc finger, FYVE domain containing 26 | Zfyve26 | 314265 | 1,49 | up   |
| 6204769 | 7308262 | 1643197 | zinc finger, FYVE domain containing 26 | Zfyve26 | 314265 | 1,45 | down |
| 5711533 | 7308262 | 1643212 | zinc finger, FYVE domain containing 26 | Zfyve26 | 314265 | 1,42 | up   |
| 6705220 | 7308262 | 1643224 | zinc finger, FYVE domain containing 26 | Zfyve26 | 314265 | 1,40 | up   |
| 5964583 | 7308262 | 1643183 | zinc finger, FYVE domain containing 26 | Zfyve26 | 314265 | 1,40 | down |
| 6551424 | 7308262 | 1643219 | zinc finger, FYVE domain containing 26 | Zfyve26 | 314265 | 1,36 | down |
| 6491961 | 7308262 | 1643201 | zinc finger, FYVE domain containing 26 | Zfyve26 | 314265 | 1,32 | down |
| 6356724 | 7308262 | 1643220 | zinc finger, FYVE domain containing 26 | Zfyve26 | 314265 | 1,31 | down |
| 6344343 | 7308262 | 1643196 | zinc finger, FYVE domain containing 26 | Zfyve26 | 314265 | 1,31 | up   |
| 5709681 | 7308262 | 1643195 | zinc finger, FYVE domain containing 26 | Zfyve26 | 314265 | 1,31 | down |
| 6179545 | 7308262 | 1643230 | zinc finger, FYVE domain containing 26 | Zfyve26 | 314265 | 1,30 | up   |
| 6423735 | 7308262 | 1643207 | zinc finger, FYVE domain containing 26 | Zfyve26 | 314265 | 1,28 | up   |
| 6120327 | 7308262 | 1643230 | zinc finger, FYVE domain containing 26 | Zfyve26 | 314265 | 1,27 | up   |
| 6009808 | 7308262 | 1643192 | zinc finger, FYVE domain containing 26 | Zfyve26 | 314265 | 1,26 | down |
| 6502900 | 7308262 | 1643184 | zinc finger, FYVE domain containing 26 | Zfyve26 | 314265 | 1,25 | down |
| 6602540 | 7308262 | 1643229 | zinc finger, FYVE domain containing 26 | Zfyve26 | 314265 | 1,24 | up   |
| 5861024 | 7308262 | 1643221 | zinc finger, FYVE domain containing 26 | Zfyve26 | 314265 | 1,23 | up   |
| 5887817 | 7308262 | 1643187 | zinc finger, FYVE domain containing 26 | Zfyve26 | 314265 | 1,23 | up   |
| 6152170 | 7308262 | 1643214 | zinc finger, FYVE domain containing 26 | Zfyve26 | 314265 | 1,20 | up   |
| 5923864 | 7308262 | 1643185 | zinc finger, FYVE domain containing 26 | Zfyve26 | 314265 | 1,19 | down |
| 6550523 | 7308262 | 1643218 | zinc finger, FYVE domain containing 26 | Zfyve26 | 314265 | 1,19 | up   |
| 6235414 | 7308262 | 1643181 | zinc finger, FYVE domain containing 26 | Zfyve26 | 314265 | 1,17 | down |
| 6673130 | 7308262 | 1643193 | zinc finger, FYVE domain containing 26 | Zfyve26 | 314265 | 1,15 | down |
| 6731253 | 7308262 | 1643182 | zinc finger, FYVE domain containing 26 | Zfyve26 | 314265 | 1,15 | down |
| 5984234 | 7308262 | 1643190 | zinc finger, FYVE domain containing 26 | Zfyve26 | 314265 | 1,14 | up   |
| 5948665 | 7308262 | 1643225 | zinc finger, FYVE domain containing 26 | Zfyve26 | 314265 | 1,13 | up   |
| 6499444 | 7308262 | 1643177 | zinc finger, FYVE domain containing 26 | Zfyve26 | 314265 | 1,12 | up   |
| 6438304 | 7308262 | 1643226 | zinc finger, FYVE domain containing 26 | Zfyve26 | 314265 | 1,11 | up   |
| 6157562 | 7308262 | 1643223 | zinc finger, FYVE domain containing 26 | Zfyve26 | 314265 | 1,10 | up   |
| 5914781 | 7308262 | 1643203 | zinc finger, FYVE domain containing 26 | Zfyve26 | 314265 | 1,09 | up   |
| 5700867 | 7308262 | 1643208 | zinc finger, FYVE domain containing 26 | Zfyve26 | 314265 | 1,08 | up   |
| 5729562 | 7308262 | 1643209 | zinc finger, FYVE domain containing 26 | Zfyve26 | 314265 | 1,07 | up   |
| 5677941 | 7308262 | 1643217 | zinc finger, FYVE domain containing 26 | Zfyve26 | 314265 | 1,06 | up   |
| 5741610 | 7308262 | 1643215 | zinc finger, FYVE domain containing 26 | Zfyve26 | 314265 | 1,05 | up   |
| 5709511 | 7308262 | 1643186 | zinc finger, FYVE domain containing 26 | Zfyve26 | 314265 | 1,04 | up   |
| 6591854 | 7308262 | 1643217 | zinc finger, FYVE domain containing 26 | Zfyve26 | 314265 | 1,04 | down |
| 6032319 | 7308262 | 1643211 | zinc finger, FYVE domain containing 26 | Zfyve26 | 314265 | 1,04 | up   |
| 6016974 | 7308262 | 1643191 | zinc finger, FYVE domain containing 26 | Zfyve26 | 314265 | 1,02 | up   |
| 6089537 | 7308262 | 1643204 | zinc finger, FYVE domain containing 26 | Zfyve26 | 314265 | 1,02 | up   |
| 5760973 | 7308262 | 1643199 | zinc finger, FYVE domain containing 26 | Zfyve26 | 314265 | 1,02 | down |
| 5868320 | 7308262 | 1643222 | zinc finger, FYVE domain containing 26 | Zfyve26 | 314265 | 1,02 | up   |
| 6613609 | 7308262 | 1643205 | zinc finger, FYVE domain containing 26 | Zfyve26 | 314265 | 1,02 | up   |
| 6252569 | 7308262 | 1643202 | zinc finger, FYVE domain containing 26 | Zfyve26 | 314265 | 1,01 | up   |
| 6158094 | 7062809 | 1038445 | zinc finger, FYVE domain containing 27 | Zfyve27 | 309376 | 1,80 | down |
| 6610560 | 7062809 | 1038441 | zinc finger, FYVE domain containing 27 | Zfyve27 | 309376 | 1,66 | down |
| 5731983 | 7062809 | 1038444 | zinc finger, FYVE domain containing 27 | Zfyve27 | 309376 | 1,29 | up   |
| 6334666 | 7062809 | 1038441 | zinc finger, FYVE domain containing 27 | Zfyve27 | 309376 | 1,28 | down |
| 6003369 | 7062809 | 1038443 | zinc finger, FYVE domain containing 27 | Zfyve27 | 309376 | 1,26 | up   |
| 5681147 | 7062809 | 1038449 | zinc finger, FYVE domain containing 27 | Zfyve27 | 309376 | 1,15 | down |

|         |         |         |                                        |         |        |      |      |
|---------|---------|---------|----------------------------------------|---------|--------|------|------|
| 6365191 | 7062809 | 1038448 | zinc finger, FYVE domain containing 27 | Zfyve27 | 309376 | 1,15 | down |
| 6018878 | 7062809 | 1038452 | zinc finger, FYVE domain containing 27 | Zfyve27 | 309376 | 1,14 | down |
| 5706842 | 7062809 | 1038450 | zinc finger, FYVE domain containing 27 | Zfyve27 | 309376 | 1,10 | down |
| 5707678 | 7062809 | 1038451 | zinc finger, FYVE domain containing 27 | Zfyve27 | 309376 | 1,10 | up   |
| 6314718 | 7062809 | 1038441 | zinc finger, FYVE domain containing 27 | Zfyve27 | 309376 | 1,06 | down |
| 6373230 | 7062809 | 1038447 | zinc finger, FYVE domain containing 27 | Zfyve27 | 309376 | 1,04 | down |
| 6273798 | 7062809 | 1038442 | zinc finger, FYVE domain containing 27 | Zfyve27 | 309376 | 1,04 | up   |
| 6049167 | 7062809 | 1038452 | zinc finger, FYVE domain containing 27 | Zfyve27 | 309376 | 1,03 | up   |
| 6234023 | 7062809 | 1038452 | zinc finger, FYVE domain containing 27 | Zfyve27 | 309376 | 1,00 | down |
| 6594568 | 7062809 | 1038446 | zinc finger, FYVE domain containing 27 | Zfyve27 | 309376 | 1,00 | down |
| 6582730 | 7062809 | 1038441 | zinc finger, FYVE domain containing 27 | Zfyve27 | 309376 | 1,00 | down |
| 5692653 | 7120235 | 1177950 | zinc finger, FYVE domain containing 28 | Zfyve28 | 305454 | 2,39 | down |
| 6242332 | 7120235 | 1177946 | zinc finger, FYVE domain containing 28 | Zfyve28 | 305454 | 1,44 | up   |
| 5954380 | 7120235 | 1177964 | zinc finger, FYVE domain containing 28 | Zfyve28 | 305454 | 1,42 | up   |
| 5751989 | 7120235 | 1177955 | zinc finger, FYVE domain containing 28 | Zfyve28 | 305454 | 1,28 | up   |
| 6034986 | 7120235 | 1177965 | zinc finger, FYVE domain containing 28 | Zfyve28 | 305454 | 1,25 | up   |
| 5666780 | 7120235 | 1177966 | zinc finger, FYVE domain containing 28 | Zfyve28 | 305454 | 1,21 | up   |
| 6691380 | 7120235 | 1177963 | zinc finger, FYVE domain containing 28 | Zfyve28 | 305454 | 1,20 | down |
| 5708471 | 7120235 | 1177947 | zinc finger, FYVE domain containing 28 | Zfyve28 | 305454 | 1,19 | up   |
| 5818796 | 7120235 | 1177968 | zinc finger, FYVE domain containing 28 | Zfyve28 | 305454 | 1,15 | up   |
| 6588873 | 7120235 | 1177939 | zinc finger, FYVE domain containing 28 | Zfyve28 | 305454 | 1,11 | down |
| 5717843 | 7120235 | 1177968 | zinc finger, FYVE domain containing 28 | Zfyve28 | 305454 | 1,11 | up   |
| 6003160 | 7120235 | 1177954 | zinc finger, FYVE domain containing 28 | Zfyve28 | 305454 | 1,08 | up   |
| 6012897 | 7120235 | 1177962 | zinc finger, FYVE domain containing 28 | Zfyve28 | 305454 | 1,07 | up   |
| 5860732 | 7120235 | 1177969 | zinc finger, FYVE domain containing 28 | Zfyve28 | 305454 | 1,05 | down |
| 6183058 | 7120235 | 1177948 | zinc finger, FYVE domain containing 28 | Zfyve28 | 305454 | 1,04 | down |
| 6103247 | 7120235 | 1177949 | zinc finger, FYVE domain containing 28 | Zfyve28 | 305454 | 1,04 | down |
| 5645569 | 7101206 | 1130460 | zinc finger, HIT domain containing 1   | Znhit1  | 360784 | 1,95 | up   |
| 6567657 | 7101206 | 1130460 | zinc finger, HIT domain containing 1   | Znhit1  | 360784 | 1,10 | down |
| 6180561 | 7101206 | 1130460 | zinc finger, HIT domain containing 1   | Znhit1  | 360784 | 1,03 | down |
| 6255111 | 7152889 | 1257331 | zinc finger, matrin type 4             | Zmat4   | 684961 | 1,23 | down |
| 6383144 | 7152889 | 1257377 | zinc finger, matrin type 4             | Zmat4   | 684961 | 1,15 | up   |
| 6175850 | 7152889 | 1257352 | zinc finger, matrin type 4             | Zmat4   | 684961 | 1,13 | down |
| 6372826 | 7152889 | 1257352 | zinc finger, matrin type 4             | Zmat4   | 684961 | 1,11 | up   |
| 6686382 | 7152889 | 1257360 | zinc finger, matrin type 4             | Zmat4   | 684961 | 1,06 | down |
| 5688200 | 7152889 | 1257370 | zinc finger, matrin type 4             | Zmat4   | 684961 | 1,03 | up   |
| 5980893 | 7152889 | 1257333 | zinc finger, matrin type 4             | Zmat4   | 684961 | 1,03 | up   |
| 6631392 | 7255517 | 1511355 | zinc finger, matrin-like               | Zfml    | 312491 | 1,84 | down |
| 5723910 | 7255517 | 1511370 | zinc finger, matrin-like               | Zfml    | 312491 | 1,47 | up   |
| 5941488 | 7255517 | 1511364 | zinc finger, matrin-like               | Zfml    | 312491 | 1,46 | down |
| 5893663 | 7255517 | 1511358 | zinc finger, matrin-like               | Zfml    | 312491 | 1,44 | down |
| 6532338 | 7255517 | 1511342 | zinc finger, matrin-like               | Zfml    | 312491 | 1,42 | down |
| 6521010 | 7255517 | 1511362 | zinc finger, matrin-like               | Zfml    | 312491 | 1,41 | up   |
| 6473782 | 7255517 | 1511365 | zinc finger, matrin-like               | Zfml    | 312491 | 1,36 | down |
| 6681811 | 7255517 | 1511357 | zinc finger, matrin-like               | Zfml    | 312491 | 1,36 | down |
| 5702893 | 7255517 | 1511352 | zinc finger, matrin-like               | Zfml    | 312491 | 1,31 | up   |
| 6688622 | 7255517 | 1511366 | zinc finger, matrin-like               | Zfml    | 312491 | 1,30 | up   |
| 5663429 | 7255517 | 1511350 | zinc finger, matrin-like               | Zfml    | 312491 | 1,30 | down |
| 5766071 | 7255517 | 1511360 | zinc finger, matrin-like               | Zfml    | 312491 | 1,27 | up   |
| 5874871 | 7255517 | 1511351 | zinc finger, matrin-like               | Zfml    | 312491 | 1,26 | up   |
| 6060890 | 7255517 | 1511363 | zinc finger, matrin-like               | Zfml    | 312491 | 1,25 | up   |
| 6622855 | 7255517 | 1511359 | zinc finger, matrin-like               | Zfml    | 312491 | 1,25 | down |
| 5857085 | 7255517 | 1511342 | zinc finger, matrin-like               | Zfml    | 312491 | 1,25 | down |
| 6537931 | 7255517 | 1511346 | zinc finger, matrin-like               | Zfml    | 312491 | 1,22 | up   |
| 5769075 | 7255517 | 1511342 | zinc finger, matrin-like               | Zfml    | 312491 | 1,20 | down |
| 6109050 | 7255517 | 1511339 | zinc finger, matrin-like               | Zfml    | 312491 | 1,18 | up   |
| 6239049 | 7255517 | 1511356 | zinc finger, matrin-like               | Zfml    | 312491 | 1,17 | up   |

|         |         |         |                                    |       |        |      |      |
|---------|---------|---------|------------------------------------|-------|--------|------|------|
| 5963855 | 7255517 | 1511349 | zinc finger, matrin-like           | Zfml  | 312491 | 1,15 | down |
| 6395282 | 7255517 | 1511367 | zinc finger, matrin-like           | Zfml  | 312491 | 1,15 | up   |
| 6606176 | 7255517 | 1511348 | zinc finger, matrin-like           | Zfml  | 312491 | 1,11 | down |
| 6005957 | 7255517 | 1511342 | zinc finger, matrin-like           | Zfml  | 312491 | 1,11 | down |
| 5665417 | 7255517 | 1511361 | zinc finger, matrin-like           | Zfml  | 312491 | 1,08 | down |
| 6623600 | 7255517 | 1511360 | zinc finger, matrin-like           | Zfml  | 312491 | 1,08 | up   |
| 5824823 | 7255517 | 1511354 | zinc finger, matrin-like           | Zfml  | 312491 | 1,08 | down |
| 6189939 | 7255517 | 1511347 | zinc finger, matrin-like           | Zfml  | 312491 | 1,07 | up   |
| 5895340 | 7255517 | 1511342 | zinc finger, matrin-like           | Zfml  | 312491 | 1,06 | down |
| 5876602 | 7255517 | 1511342 | zinc finger, matrin-like           | Zfml  | 312491 | 1,06 | down |
| 5741672 | 7255517 | 1511358 | zinc finger, matrin-like           | Zfml  | 312491 | 1,05 | down |
| 6028753 | 7255517 | 1511353 | zinc finger, matrin-like           | Zfml  | 312491 | 1,04 | down |
| 5960321 | 7255517 | 1511370 | zinc finger, matrin-like           | Zfml  | 312491 | 1,04 | up   |
| 5924365 | 7255517 | 1511369 | zinc finger, matrin-like           | Zfml  | 312491 | 1,04 | down |
| 5663135 | 7255517 | 1511372 | zinc finger, matrin-like           | Zfml  | 312491 | 1,02 | up   |
| 6141160 | 7255517 | 1511347 | zinc finger, matrin-like           | Zfml  | 312491 | 1,02 | down |
| 6740566 | 7255517 | 1511344 | zinc finger, matrin-like           | Zfml  | 312491 | 1,01 | up   |
| 5825074 | 7142770 | 1232661 | zinc finger, MIZ-type containing 1 | Zmiz1 | 361103 | 2,39 | down |
| 6099949 | 7142770 | 1232683 | zinc finger, MIZ-type containing 1 | Zmiz1 | 361103 | 1,51 | up   |
| 5969125 | 7142770 | 1232691 | zinc finger, MIZ-type containing 1 | Zmiz1 | 361103 | 1,46 | up   |
| 5647617 | 7142770 | 1232734 | zinc finger, MIZ-type containing 1 | Zmiz1 | 361103 | 1,41 | down |
| 6594331 | 7142770 | 1232690 | zinc finger, MIZ-type containing 1 | Zmiz1 | 361103 | 1,36 | up   |
| 6088320 | 7142770 | 1232735 | zinc finger, MIZ-type containing 1 | Zmiz1 | 361103 | 1,31 | up   |
| 6739778 | 7142770 | 1232724 | zinc finger, MIZ-type containing 1 | Zmiz1 | 361103 | 1,29 | up   |
| 5802426 | 7142770 | 1232695 | zinc finger, MIZ-type containing 1 | Zmiz1 | 361103 | 1,25 | up   |
| 6699239 | 7142770 | 1232711 | zinc finger, MIZ-type containing 1 | Zmiz1 | 361103 | 1,18 | up   |
| 6633339 | 7142770 | 1232725 | zinc finger, MIZ-type containing 1 | Zmiz1 | 361103 | 1,16 | down |
| 5958767 | 7142770 | 1232724 | zinc finger, MIZ-type containing 1 | Zmiz1 | 361103 | 1,15 | down |
| 6690568 | 7142770 | 1232722 | zinc finger, MIZ-type containing 1 | Zmiz1 | 361103 | 1,14 | down |
| 6304051 | 7142770 | 1232671 | zinc finger, MIZ-type containing 1 | Zmiz1 | 361103 | 1,13 | up   |
| 6727439 | 7142770 | 1232721 | zinc finger, MIZ-type containing 1 | Zmiz1 | 361103 | 1,13 | down |
| 6189208 | 7142770 | 1232719 | zinc finger, MIZ-type containing 1 | Zmiz1 | 361103 | 1,13 | up   |
| 6036884 | 7142770 | 1232727 | zinc finger, MIZ-type containing 1 | Zmiz1 | 361103 | 1,13 | down |
| 6541333 | 7142770 | 1232728 | zinc finger, MIZ-type containing 1 | Zmiz1 | 361103 | 1,12 | down |
| 6363700 | 7142770 | 1232717 | zinc finger, MIZ-type containing 1 | Zmiz1 | 361103 | 1,10 | up   |
| 6645192 | 7142770 | 1232661 | zinc finger, MIZ-type containing 1 | Zmiz1 | 361103 | 1,09 | down |
| 5925097 | 7142770 | 1232715 | zinc finger, MIZ-type containing 1 | Zmiz1 | 361103 | 1,09 | up   |
| 6657184 | 7142770 | 1232736 | zinc finger, MIZ-type containing 1 | Zmiz1 | 361103 | 1,09 | down |
| 6267271 | 7142770 | 1232717 | zinc finger, MIZ-type containing 1 | Zmiz1 | 361103 | 1,09 | down |
| 6212059 | 7142770 | 1232731 | zinc finger, MIZ-type containing 1 | Zmiz1 | 361103 | 1,08 | down |
| 6504618 | 7142770 | 1232732 | zinc finger, MIZ-type containing 1 | Zmiz1 | 361103 | 1,08 | up   |
| 5822957 | 7142770 | 1232726 | zinc finger, MIZ-type containing 1 | Zmiz1 | 361103 | 1,07 | up   |
| 5907504 | 7142770 | 1232737 | zinc finger, MIZ-type containing 1 | Zmiz1 | 361103 | 1,05 | down |
| 6218372 | 7142770 | 1232714 | zinc finger, MIZ-type containing 1 | Zmiz1 | 361103 | 1,04 | down |
| 6698451 | 7142770 | 1232729 | zinc finger, MIZ-type containing 1 | Zmiz1 | 361103 | 1,02 | up   |
| 6594035 | 7142770 | 1232719 | zinc finger, MIZ-type containing 1 | Zmiz1 | 361103 | 1,02 | down |
| 6128570 | 7142770 | 1232736 | zinc finger, MIZ-type containing 1 | Zmiz1 | 361103 | 1,02 | up   |
| 6598231 | 7142770 | 1232730 | zinc finger, MIZ-type containing 1 | Zmiz1 | 361103 | 1,01 | down |
| 5925966 | 7142770 | 1232735 | zinc finger, MIZ-type containing 1 | Zmiz1 | 361103 | 1,01 | down |
| 6689923 | 7279593 | 1572105 | zinc finger, MYM-type 6            | Zmym6 | 362602 | 2,12 | down |
| 6440108 | 7279593 | 1572106 | zinc finger, MYM-type 6            | Zmym6 | 362602 | 1,64 | down |
| 6423989 | 7279593 | 1572086 | zinc finger, MYM-type 6            | Zmym6 | 362602 | 1,59 | up   |
| 6249556 | 7279593 | 1572100 | zinc finger, MYM-type 6            | Zmym6 | 362602 | 1,53 | down |
| 6447484 | 7279593 | 1572104 | zinc finger, MYM-type 6            | Zmym6 | 362602 | 1,52 | down |
| 6189211 | 7279593 | 1572101 | zinc finger, MYM-type 6            | Zmym6 | 362602 | 1,50 | down |
| 6491518 | 7279593 | 1572100 | zinc finger, MYM-type 6            | Zmym6 | 362602 | 1,48 | down |
| 6371624 | 7279593 | 1572105 | zinc finger, MYM-type 6            | Zmym6 | 362602 | 1,45 | down |

|         |         |         |                                        |         |        |      |      |
|---------|---------|---------|----------------------------------------|---------|--------|------|------|
| 5993984 | 7279593 | 1572094 | zinc finger, MYM-type 6                | Zmym6   | 362602 | 1,32 | up   |
| 6174292 | 7279593 | 1572087 | zinc finger, MYM-type 6                | Zmym6   | 362602 | 1,31 | up   |
| 5737962 | 7279593 | 1572100 | zinc finger, MYM-type 6                | Zmym6   | 362602 | 1,28 | down |
| 6196489 | 7279593 | 1572100 | zinc finger, MYM-type 6                | Zmym6   | 362602 | 1,26 | up   |
| 5626721 | 7279593 | 1572088 | zinc finger, MYM-type 6                | Zmym6   | 362602 | 1,24 | up   |
| 6325137 | 7279593 | 1572096 | zinc finger, MYM-type 6                | Zmym6   | 362602 | 1,21 | down |
| 6118688 | 7279593 | 1572090 | zinc finger, MYM-type 6                | Zmym6   | 362602 | 1,18 | up   |
| 5682532 | 7279593 | 1572100 | zinc finger, MYM-type 6                | Zmym6   | 362602 | 1,17 | up   |
| 5922118 | 7279593 | 1572097 | zinc finger, MYM-type 6                | Zmym6   | 362602 | 1,14 | down |
| 5922853 | 7279593 | 1572095 | zinc finger, MYM-type 6                | Zmym6   | 362602 | 1,14 | up   |
| 5658550 | 7279593 | 1572100 | zinc finger, MYM-type 6                | Zmym6   | 362602 | 1,13 | down |
| 6114045 | 7279593 | 1572092 | zinc finger, MYM-type 6                | Zmym6   | 362602 | 1,10 | up   |
| 6734915 | 7279593 | 1572096 | zinc finger, MYM-type 6                | Zmym6   | 362602 | 1,08 | up   |
| 6002208 | 7279593 | 1572093 | zinc finger, MYM-type 6                | Zmym6   | 362602 | 1,08 | up   |
| 5851224 | 7279593 | 1572100 | zinc finger, MYM-type 6                | Zmym6   | 362602 | 1,05 | down |
| 6281274 | 7279593 | 1572091 | zinc finger, MYM-type 6                | Zmym6   | 362602 | 1,04 | up   |
| 6584295 | 7279593 | 1572099 | zinc finger, MYM-type 6                | Zmym6   | 362602 | 1,04 | up   |
| 6127918 | 7279593 | 1572085 | zinc finger, MYM-type 6                | Zmym6   | 362602 | 1,03 | up   |
| 5728383 | 7279593 | 1572100 | zinc finger, MYM-type 6                | Zmym6   | 362602 | 1,02 | up   |
| 5885092 | 7279593 | 1572096 | zinc finger, MYM-type 6                | Zmym6   | 362602 | 1,02 | up   |
| 5765540 | 7279593 | 1572085 | zinc finger, MYM-type 6                | Zmym6   | 362602 | 1,01 | down |
| 5675017 | 7279593 | 1572100 | zinc finger, MYM-type 6                | Zmym6   | 362602 | 1,00 | up   |
| 6413966 | 7069239 | 1054088 | zinc finger, MYND domain containing 15 | Zmynd15 | 287457 | 2,48 | up   |
| 6703629 | 7069239 | 1054085 | zinc finger, MYND domain containing 15 | Zmynd15 | 287457 | 1,97 | up   |
| 6237923 | 7069239 | 1054087 | zinc finger, MYND domain containing 15 | Zmynd15 | 287457 | 1,89 | up   |
| 6724150 | 7069239 | 1054090 | zinc finger, MYND domain containing 15 | Zmynd15 | 287457 | 1,75 | up   |
| 6183974 | 7069239 | 1054086 | zinc finger, MYND domain containing 15 | Zmynd15 | 287457 | 1,70 | down |
| 6074128 | 7069239 | 1054092 | zinc finger, MYND domain containing 15 | Zmynd15 | 287457 | 1,67 | down |
| 5997259 | 7069239 | 1054082 | zinc finger, MYND domain containing 15 | Zmynd15 | 287457 | 1,66 | down |
| 5764055 | 7069239 | 1054078 | zinc finger, MYND domain containing 15 | Zmynd15 | 287457 | 1,57 | up   |
| 6524753 | 7069239 | 1054082 | zinc finger, MYND domain containing 15 | Zmynd15 | 287457 | 1,43 | up   |
| 6051961 | 7069239 | 1054091 | zinc finger, MYND domain containing 15 | Zmynd15 | 287457 | 1,36 | up   |
| 6180567 | 7069239 | 1054091 | zinc finger, MYND domain containing 15 | Zmynd15 | 287457 | 1,35 | up   |
| 6520786 | 7069239 | 1054080 | zinc finger, MYND domain containing 15 | Zmynd15 | 287457 | 1,34 | down |
| 5849275 | 7069239 | 1054079 | zinc finger, MYND domain containing 15 | Zmynd15 | 287457 | 1,32 | down |
| 5974108 | 7069239 | 1054084 | zinc finger, MYND domain containing 15 | Zmynd15 | 287457 | 1,25 | up   |
| 6323086 | 7069239 | 1054083 | zinc finger, MYND domain containing 15 | Zmynd15 | 287457 | 1,24 | up   |
| 6084531 | 7069239 | 1054089 | zinc finger, MYND domain containing 15 | Zmynd15 | 287457 | 1,21 | down |
| 5683637 | 7069239 | 1054082 | zinc finger, MYND domain containing 15 | Zmynd15 | 287457 | 1,16 | up   |
| 5765434 | 7069239 | 1054081 | zinc finger, MYND domain containing 15 | Zmynd15 | 287457 | 1,06 | down |
| 5919675 | 7069239 | 1054081 | zinc finger, MYND domain containing 15 | Zmynd15 | 287457 | 1,06 | down |
| 5973965 | 7225419 | 1435639 | zinc finger, MYND-type containing 19   | Zmynd19 | 311791 | 2,21 | down |
| 5745439 | 7225419 | 1435643 | zinc finger, MYND-type containing 19   | Zmynd19 | 311791 | 1,47 | up   |
| 6696113 | 7225419 | 1435644 | zinc finger, MYND-type containing 19   | Zmynd19 | 311791 | 1,41 | up   |
| 6725620 | 7225419 | 1435642 | zinc finger, MYND-type containing 19   | Zmynd19 | 311791 | 1,35 | up   |
| 6560772 | 7225419 | 1435639 | zinc finger, MYND-type containing 19   | Zmynd19 | 311791 | 1,23 | down |
| 6377276 | 7225419 | 1435640 | zinc finger, MYND-type containing 19   | Zmynd19 | 311791 | 1,02 | down |
| 6496091 | 7225419 | 1435641 | zinc finger, MYND-type containing 19   | Zmynd19 | 311791 | 1,01 | down |
| 6075657 | 7278794 | 1570061 | zinc finger, SWIM domain containing 5  | Zswim5  | 313524 | 2,59 | down |
| 6407667 | 7278794 | 1570066 | zinc finger, SWIM domain containing 5  | Zswim5  | 313524 | 1,42 | up   |
| 6348171 | 7278794 | 1570069 | zinc finger, SWIM domain containing 5  | Zswim5  | 313524 | 1,23 | down |
| 6469670 | 7278794 | 1570067 | zinc finger, SWIM domain containing 5  | Zswim5  | 313524 | 1,23 | up   |
| 5911534 | 7278794 | 1570060 | zinc finger, SWIM domain containing 5  | Zswim5  | 313524 | 1,20 | down |
| 5867249 | 7278794 | 1570065 | zinc finger, SWIM domain containing 5  | Zswim5  | 313524 | 1,17 | up   |
| 6382444 | 7278794 | 1570068 | zinc finger, SWIM domain containing 5  | Zswim5  | 313524 | 1,15 | up   |
| 6731290 | 7278794 | 1570061 | zinc finger, SWIM domain containing 5  | Zswim5  | 313524 | 1,15 | up   |
| 6265936 | 7278794 | 1570062 | zinc finger, SWIM domain containing 5  | Zswim5  | 313524 | 1,13 | down |

|         |         |         |                                            |        |        |      |      |
|---------|---------|---------|--------------------------------------------|--------|--------|------|------|
| 6426107 | 7278794 | 1570058 | zinc finger, SWIM domain containing 5      | Zswim5 | 313524 | 1,11 | up   |
| 5993460 | 7278794 | 1570064 | zinc finger, SWIM domain containing 5      | Zswim5 | 313524 | 1,10 | up   |
| 6377214 | 7278794 | 1570067 | zinc finger, SWIM domain containing 5      | Zswim5 | 313524 | 1,09 | up   |
| 5772654 | 7278794 | 1570063 | zinc finger, SWIM domain containing 5      | Zswim5 | 313524 | 1,06 | up   |
| 6488757 | 7278794 | 1570070 | zinc finger, SWIM domain containing 5      | Zswim5 | 313524 | 1,04 | up   |
| 6393460 | 7278794 | 1570059 | zinc finger, SWIM domain containing 5      | Zswim5 | 313524 | 1,04 | down |
| 6635207 | 7179859 | 1324604 | zinc finger, SWIM-type containing 4        | Zswim4 | 304655 | 2,97 | down |
| 6593485 | 7179859 | 1324608 | zinc finger, SWIM-type containing 4        | Zswim4 | 304655 | 2,21 | down |
| 6229663 | 7179859 | 1324611 | zinc finger, SWIM-type containing 4        | Zswim4 | 304655 | 2,05 | down |
| 6447557 | 7179859 | 1324611 | zinc finger, SWIM-type containing 4        | Zswim4 | 304655 | 1,84 | down |
| 6663316 | 7179859 | 1324617 | zinc finger, SWIM-type containing 4        | Zswim4 | 304655 | 1,69 | up   |
| 6148513 | 7179859 | 1324609 | zinc finger, SWIM-type containing 4        | Zswim4 | 304655 | 1,69 | up   |
| 5621785 | 7179859 | 1324615 | zinc finger, SWIM-type containing 4        | Zswim4 | 304655 | 1,66 | up   |
| 5879844 | 7179859 | 1324607 | zinc finger, SWIM-type containing 4        | Zswim4 | 304655 | 1,61 | up   |
| 6645767 | 7179859 | 1324612 | zinc finger, SWIM-type containing 4        | Zswim4 | 304655 | 1,41 | up   |
| 6079091 | 7179859 | 1324614 | zinc finger, SWIM-type containing 4        | Zswim4 | 304655 | 1,33 | up   |
| 6466339 | 7179859 | 1324605 | zinc finger, SWIM-type containing 4        | Zswim4 | 304655 | 1,30 | up   |
| 6095844 | 7179859 | 1324613 | zinc finger, SWIM-type containing 4        | Zswim4 | 304655 | 1,25 | down |
| 5733962 | 7179859 | 1324618 | zinc finger, SWIM-type containing 4        | Zswim4 | 304655 | 1,18 | up   |
| 5976754 | 7179859 | 1324618 | zinc finger, SWIM-type containing 4        | Zswim4 | 304655 | 1,16 | up   |
| 5996820 | 7179859 | 1324611 | zinc finger, SWIM-type containing 4        | Zswim4 | 304655 | 1,12 | down |
| 6531981 | 7179859 | 1324618 | zinc finger, SWIM-type containing 4        | Zswim4 | 304655 | 1,08 | down |
| 6434800 | 7179859 | 1324616 | zinc finger, SWIM-type containing 4        | Zswim4 | 304655 | 1,07 | up   |
| 5772520 | 7179859 | 1324610 | zinc finger, SWIM-type containing 4        | Zswim4 | 304655 | 1,03 | up   |
| 6289383 | 7069464 | 1054626 | zinc finger, ZZ-type with EF hand domain 1 | Zzef1  | 287476 | 1,63 | up   |
| 5906904 | 7069464 | 1054675 | zinc finger, ZZ-type with EF hand domain 1 | Zzef1  | 287476 | 1,61 | down |
| 6608587 | 7069464 | 1054658 | zinc finger, ZZ-type with EF hand domain 1 | Zzef1  | 287476 | 1,57 | down |
| 6478027 | 7069464 | 1054637 | zinc finger, ZZ-type with EF hand domain 1 | Zzef1  | 287476 | 1,56 | down |
| 6529505 | 7069464 | 1054674 | zinc finger, ZZ-type with EF hand domain 1 | Zzef1  | 287476 | 1,37 | down |
| 6567789 | 7069464 | 1054615 | zinc finger, ZZ-type with EF hand domain 1 | Zzef1  | 287476 | 1,35 | up   |
| 5671815 | 7069464 | 1054618 | zinc finger, ZZ-type with EF hand domain 1 | Zzef1  | 287476 | 1,34 | up   |
| 6272315 | 7069464 | 1054659 | zinc finger, ZZ-type with EF hand domain 1 | Zzef1  | 287476 | 1,32 | down |
| 6024891 | 7069464 | 1054667 | zinc finger, ZZ-type with EF hand domain 1 | Zzef1  | 287476 | 1,31 | down |
| 6607304 | 7069464 | 1054644 | zinc finger, ZZ-type with EF hand domain 1 | Zzef1  | 287476 | 1,30 | up   |
| 5956117 | 7069464 | 1054610 | zinc finger, ZZ-type with EF hand domain 1 | Zzef1  | 287476 | 1,25 | down |
| 6741920 | 7069464 | 1054643 | zinc finger, ZZ-type with EF hand domain 1 | Zzef1  | 287476 | 1,24 | down |
| 6721349 | 7069464 | 1054632 | zinc finger, ZZ-type with EF hand domain 1 | Zzef1  | 287476 | 1,24 | up   |
| 5904884 | 7069464 | 1054619 | zinc finger, ZZ-type with EF hand domain 1 | Zzef1  | 287476 | 1,24 | up   |
| 6633644 | 7069464 | 1054655 | zinc finger, ZZ-type with EF hand domain 1 | Zzef1  | 287476 | 1,23 | down |
| 5926574 | 7069464 | 1054657 | zinc finger, ZZ-type with EF hand domain 1 | Zzef1  | 287476 | 1,23 | up   |
| 6416556 | 7069464 | 1054661 | zinc finger, ZZ-type with EF hand domain 1 | Zzef1  | 287476 | 1,20 | down |
| 6338946 | 7069464 | 1054660 | zinc finger, ZZ-type with EF hand domain 1 | Zzef1  | 287476 | 1,20 | down |
| 5894730 | 7069464 | 1054656 | zinc finger, ZZ-type with EF hand domain 1 | Zzef1  | 287476 | 1,19 | up   |
| 6109711 | 7069464 | 1054620 | zinc finger, ZZ-type with EF hand domain 1 | Zzef1  | 287476 | 1,16 | up   |
| 5690569 | 7069464 | 1054633 | zinc finger, ZZ-type with EF hand domain 1 | Zzef1  | 287476 | 1,15 | up   |
| 6093256 | 7069464 | 1054641 | zinc finger, ZZ-type with EF hand domain 1 | Zzef1  | 287476 | 1,13 | up   |
| 6327564 | 7069464 | 1054656 | zinc finger, ZZ-type with EF hand domain 1 | Zzef1  | 287476 | 1,13 | down |
| 5932060 | 7069464 | 1054662 | zinc finger, ZZ-type with EF hand domain 1 | Zzef1  | 287476 | 1,13 | down |
| 6249516 | 7069464 | 1054623 | zinc finger, ZZ-type with EF hand domain 1 | Zzef1  | 287476 | 1,12 | down |
| 6541845 | 7069464 | 1054616 | zinc finger, ZZ-type with EF hand domain 1 | Zzef1  | 287476 | 1,12 | up   |
| 6339849 | 7069464 | 1054669 | zinc finger, ZZ-type with EF hand domain 1 | Zzef1  | 287476 | 1,12 | up   |
| 6123030 | 7069464 | 1054676 | zinc finger, ZZ-type with EF hand domain 1 | Zzef1  | 287476 | 1,12 | down |
| 6441397 | 7069464 | 1054633 | zinc finger, ZZ-type with EF hand domain 1 | Zzef1  | 287476 | 1,12 | down |
| 6269960 | 7069464 | 1054650 | zinc finger, ZZ-type with EF hand domain 1 | Zzef1  | 287476 | 1,11 | up   |
| 6059786 | 7069464 | 1054637 | zinc finger, ZZ-type with EF hand domain 1 | Zzef1  | 287476 | 1,11 | down |
| 6545449 | 7069464 | 1054642 | zinc finger, ZZ-type with EF hand domain 1 | Zzef1  | 287476 | 1,10 | up   |
| 5935180 | 7069464 | 1054664 | zinc finger, ZZ-type with EF hand domain 1 | Zzef1  | 287476 | 1,09 | down |

|         |         |         |                                            |         |        |      |      |
|---------|---------|---------|--------------------------------------------|---------|--------|------|------|
| 6267742 | 7069464 | 1054619 | zinc finger, ZZ-type with EF hand domain 1 | Zzef1   | 287476 | 1,09 | up   |
| 6116128 | 7069464 | 1054630 | zinc finger, ZZ-type with EF hand domain 1 | Zzef1   | 287476 | 1,07 | up   |
| 6358623 | 7069464 | 1054635 | zinc finger, ZZ-type with EF hand domain 1 | Zzef1   | 287476 | 1,06 | up   |
| 6559989 | 7069464 | 1054617 | zinc finger, ZZ-type with EF hand domain 1 | Zzef1   | 287476 | 1,06 | up   |
| 5994784 | 7069464 | 1054621 | zinc finger, ZZ-type with EF hand domain 1 | Zzef1   | 287476 | 1,06 | down |
| 5936139 | 7069464 | 1054659 | zinc finger, ZZ-type with EF hand domain 1 | Zzef1   | 287476 | 1,06 | up   |
| 6053764 | 7069464 | 1054668 | zinc finger, ZZ-type with EF hand domain 1 | Zzef1   | 287476 | 1,06 | down |
| 5686466 | 7069464 | 1054618 | zinc finger, ZZ-type with EF hand domain 1 | Zzef1   | 287476 | 1,06 | down |
| 5677041 | 7069464 | 1054614 | zinc finger, ZZ-type with EF hand domain 1 | Zzef1   | 287476 | 1,05 | down |
| 6150817 | 7069464 | 1054639 | zinc finger, ZZ-type with EF hand domain 1 | Zzef1   | 287476 | 1,05 | down |
| 5944481 | 7069464 | 1054614 | zinc finger, ZZ-type with EF hand domain 1 | Zzef1   | 287476 | 1,05 | up   |
| 6004135 | 7069464 | 1054663 | zinc finger, ZZ-type with EF hand domain 1 | Zzef1   | 287476 | 1,05 | up   |
| 6347790 | 7069464 | 1054665 | zinc finger, ZZ-type with EF hand domain 1 | Zzef1   | 287476 | 1,05 | up   |
| 6715548 | 7069464 | 1054648 | zinc finger, ZZ-type with EF hand domain 1 | Zzef1   | 287476 | 1,05 | up   |
| 5746488 | 7069464 | 1054645 | zinc finger, ZZ-type with EF hand domain 1 | Zzef1   | 287476 | 1,05 | down |
| 5936146 | 7069464 | 1054631 | zinc finger, ZZ-type with EF hand domain 1 | Zzef1   | 287476 | 1,05 | up   |
| 5932010 | 7069464 | 1054646 | zinc finger, ZZ-type with EF hand domain 1 | Zzef1   | 287476 | 1,05 | down |
| 5620347 | 7069464 | 1054638 | zinc finger, ZZ-type with EF hand domain 1 | Zzef1   | 287476 | 1,04 | down |
| 5971028 | 7069464 | 1054634 | zinc finger, ZZ-type with EF hand domain 1 | Zzef1   | 287476 | 1,03 | down |
| 6191972 | 7069464 | 1054625 | zinc finger, ZZ-type with EF hand domain 1 | Zzef1   | 287476 | 1,03 | down |
| 6061823 | 7069464 | 1054632 | zinc finger, ZZ-type with EF hand domain 1 | Zzef1   | 287476 | 1,03 | down |
| 6576852 | 7069464 | 1054651 | zinc finger, ZZ-type with EF hand domain 1 | Zzef1   | 287476 | 1,02 | up   |
| 6340446 | 7069464 | 1054636 | zinc finger, ZZ-type with EF hand domain 1 | Zzef1   | 287476 | 1,02 | up   |
| 6294135 | 7069464 | 1054652 | zinc finger, ZZ-type with EF hand domain 1 | Zzef1   | 287476 | 1,02 | down |
| 6540288 | 7069464 | 1054624 | zinc finger, ZZ-type with EF hand domain 1 | Zzef1   | 287476 | 1,02 | down |
| 6400041 | 7069464 | 1054647 | zinc finger, ZZ-type with EF hand domain 1 | Zzef1   | 287476 | 1,01 | down |
| 6706667 | 7069464 | 1054628 | zinc finger, ZZ-type with EF hand domain 1 | Zzef1   | 287476 | 1,01 | down |
| 5666231 | 7069464 | 1054673 | zinc finger, ZZ-type with EF hand domain 1 | Zzef1   | 287476 | 1,01 | down |
| 6741715 | 7069464 | 1054629 | zinc finger, ZZ-type with EF hand domain 1 | Zzef1   | 287476 | 1,01 | down |
| 6515866 | 7069464 | 1054654 | zinc finger, ZZ-type with EF hand domain 1 | Zzef1   | 287476 | 1,01 | up   |
| 6732792 | 7069464 | 1054610 | zinc finger, ZZ-type with EF hand domain 1 | Zzef1   | 287476 | 1,01 | up   |
| 6435079 | 7069464 | 1054653 | zinc finger, ZZ-type with EF hand domain 1 | Zzef1   | 287476 | 1,00 | down |
| 6144663 | 7216356 | 1413831 | zinc ribbon domain containing, 1           | Znrd1   | 361784 | 2,58 | down |
| 6416025 | 7216356 | 1413830 | zinc ribbon domain containing, 1           | Znrd1   | 361784 | 2,49 | up   |
| 6073033 | 7216356 | 1413828 | zinc ribbon domain containing, 1           | Znrd1   | 361784 | 2,39 | down |
| 6465603 | 7216356 | 1413828 | zinc ribbon domain containing, 1           | Znrd1   | 361784 | 1,14 | down |
| 6334841 | 7216356 | 1413829 | zinc ribbon domain containing, 1           | Znrd1   | 361784 | 1,05 | up   |
| 6394513 | 7280982 | 1575166 | ZUBR1                                      | Rbaf600 | 313658 | 1,47 | down |
| 6592931 | 7280982 | 1575232 | ZUBR1                                      | Rbaf600 | 313658 | 1,39 | down |
| 6700421 | 7280982 | 1575168 | ZUBR1                                      | Rbaf600 | 313658 | 1,35 | down |
| 6526436 | 7280982 | 1575267 | ZUBR1                                      | Rbaf600 | 313658 | 1,34 | down |
| 5625127 | 7280982 | 1575192 | ZUBR1                                      | Rbaf600 | 313658 | 1,34 | up   |
| 6736878 | 7280982 | 1575252 | ZUBR1                                      | Rbaf600 | 313658 | 1,32 | down |
| 6277735 | 7280982 | 1575239 | ZUBR1                                      | Rbaf600 | 313658 | 1,29 | up   |
| 6579015 | 7280982 | 1575210 | ZUBR1                                      | Rbaf600 | 313658 | 1,29 | up   |
| 6433862 | 7280982 | 1575159 | ZUBR1                                      | Rbaf600 | 313658 | 1,27 | up   |
| 5826409 | 7280982 | 1575214 | ZUBR1                                      | Rbaf600 | 313658 | 1,27 | down |
| 6118694 | 7280982 | 1575258 | ZUBR1                                      | Rbaf600 | 313658 | 1,27 | down |
| 6742469 | 7280982 | 1575191 | ZUBR1                                      | Rbaf600 | 313658 | 1,27 | up   |
| 6583889 | 7280982 | 1575232 | ZUBR1                                      | Rbaf600 | 313658 | 1,27 | down |
| 5888524 | 7280982 | 1575198 | ZUBR1                                      | Rbaf600 | 313658 | 1,27 | down |
| 5887720 | 7280982 | 1575236 | ZUBR1                                      | Rbaf600 | 313658 | 1,26 | up   |
| 5752541 | 7280982 | 1575157 | ZUBR1                                      | Rbaf600 | 313658 | 1,26 | down |
| 6476781 | 7280982 | 1575182 | ZUBR1                                      | Rbaf600 | 313658 | 1,26 | down |
| 6492631 | 7280982 | 1575170 | ZUBR1                                      | Rbaf600 | 313658 | 1,26 | down |
| 6658277 | 7280982 | 1575263 | ZUBR1                                      | Rbaf600 | 313658 | 1,24 | down |
| 5790506 | 7280982 | 1575176 | ZUBR1                                      | Rbaf600 | 313658 | 1,23 | down |

|         |         |         |       |         |        |      |      |
|---------|---------|---------|-------|---------|--------|------|------|
| 6115488 | 7280982 | 1575250 | ZUBR1 | Rbaf600 | 313658 | 1,22 | down |
| 6234730 | 7280982 | 1575249 | ZUBR1 | Rbaf600 | 313658 | 1,20 | up   |
| 6557991 | 7280982 | 1575246 | ZUBR1 | Rbaf600 | 313658 | 1,20 | down |
| 5872362 | 7280982 | 1575238 | ZUBR1 | Rbaf600 | 313658 | 1,19 | up   |
| 6408089 | 7280982 | 1575164 | ZUBR1 | Rbaf600 | 313658 | 1,19 | down |
| 6419129 | 7280982 | 1575178 | ZUBR1 | Rbaf600 | 313658 | 1,19 | up   |
| 6451501 | 7280982 | 1575197 | ZUBR1 | Rbaf600 | 313658 | 1,19 | down |
| 6324543 | 7280982 | 1575217 | ZUBR1 | Rbaf600 | 313658 | 1,18 | down |
| 5628133 | 7280982 | 1575193 | ZUBR1 | Rbaf600 | 313658 | 1,18 | up   |
| 5801425 | 7280982 | 1575218 | ZUBR1 | Rbaf600 | 313658 | 1,17 | down |
| 6116790 | 7280982 | 1575254 | ZUBR1 | Rbaf600 | 313658 | 1,16 | down |
| 5896334 | 7280982 | 1575262 | ZUBR1 | Rbaf600 | 313658 | 1,16 | down |
| 6220063 | 7280982 | 1575158 | ZUBR1 | Rbaf600 | 313658 | 1,16 | down |
| 6146276 | 7280982 | 1575245 | ZUBR1 | Rbaf600 | 313658 | 1,15 | up   |
| 5798893 | 7280982 | 1575173 | ZUBR1 | Rbaf600 | 313658 | 1,15 | down |
| 6040975 | 7280982 | 1575266 | ZUBR1 | Rbaf600 | 313658 | 1,14 | down |
| 5986227 | 7280982 | 1575171 | ZUBR1 | Rbaf600 | 313658 | 1,14 | up   |
| 6263880 | 7280982 | 1575183 | ZUBR1 | Rbaf600 | 313658 | 1,14 | down |
| 6493027 | 7280982 | 1575177 | ZUBR1 | Rbaf600 | 313658 | 1,14 | down |
| 5769890 | 7280982 | 1575206 | ZUBR1 | Rbaf600 | 313658 | 1,13 | up   |
| 6669412 | 7280982 | 1575242 | ZUBR1 | Rbaf600 | 313658 | 1,13 | down |
| 6392395 | 7280982 | 1575165 | ZUBR1 | Rbaf600 | 313658 | 1,13 | down |
| 5707026 | 7280982 | 1575223 | ZUBR1 | Rbaf600 | 313658 | 1,13 | down |
| 6510358 | 7280982 | 1575233 | ZUBR1 | Rbaf600 | 313658 | 1,12 | up   |
| 6233565 | 7280982 | 1575267 | ZUBR1 | Rbaf600 | 313658 | 1,12 | down |
| 5729649 | 7280982 | 1575259 | ZUBR1 | Rbaf600 | 313658 | 1,12 | up   |
| 5680591 | 7280982 | 1575211 | ZUBR1 | Rbaf600 | 313658 | 1,11 | down |
| 6445396 | 7280982 | 1575185 | ZUBR1 | Rbaf600 | 313658 | 1,11 | down |
| 6318605 | 7280982 | 1575174 | ZUBR1 | Rbaf600 | 313658 | 1,11 | down |
| 5911521 | 7280982 | 1575179 | ZUBR1 | Rbaf600 | 313658 | 1,11 | up   |
| 5727492 | 7280982 | 1575201 | ZUBR1 | Rbaf600 | 313658 | 1,11 | up   |
| 6150569 | 7280982 | 1575264 | ZUBR1 | Rbaf600 | 313658 | 1,11 | up   |
| 5857804 | 7280982 | 1575241 | ZUBR1 | Rbaf600 | 313658 | 1,10 | up   |
| 6597442 | 7280982 | 1575163 | ZUBR1 | Rbaf600 | 313658 | 1,10 | down |
| 5857949 | 7280982 | 1575248 | ZUBR1 | Rbaf600 | 313658 | 1,10 | up   |
| 6156936 | 7280982 | 1575226 | ZUBR1 | Rbaf600 | 313658 | 1,10 | up   |
| 5987003 | 7280982 | 1575199 | ZUBR1 | Rbaf600 | 313658 | 1,10 | up   |
| 5822495 | 7280982 | 1575162 | ZUBR1 | Rbaf600 | 313658 | 1,10 | up   |
| 6293102 | 7280982 | 1575251 | ZUBR1 | Rbaf600 | 313658 | 1,10 | down |
| 6166925 | 7280982 | 1575243 | ZUBR1 | Rbaf600 | 313658 | 1,10 | up   |
| 5819411 | 7280982 | 1575216 | ZUBR1 | Rbaf600 | 313658 | 1,10 | down |
| 6508904 | 7280982 | 1575220 | ZUBR1 | Rbaf600 | 313658 | 1,10 | down |
| 6113477 | 7280982 | 1575237 | ZUBR1 | Rbaf600 | 313658 | 1,10 | up   |
| 5623721 | 7280982 | 1575186 | ZUBR1 | Rbaf600 | 313658 | 1,09 | up   |
| 6402542 | 7280982 | 1575225 | ZUBR1 | Rbaf600 | 313658 | 1,09 | up   |
| 5778626 | 7280982 | 1575160 | ZUBR1 | Rbaf600 | 313658 | 1,09 | down |
| 5905979 | 7280982 | 1575220 | ZUBR1 | Rbaf600 | 313658 | 1,09 | down |
| 6337164 | 7280982 | 1575160 | ZUBR1 | Rbaf600 | 313658 | 1,09 | up   |
| 6637711 | 7280982 | 1575202 | ZUBR1 | Rbaf600 | 313658 | 1,08 | down |
| 6583747 | 7280982 | 1575256 | ZUBR1 | Rbaf600 | 313658 | 1,08 | down |
| 6355358 | 7280982 | 1575265 | ZUBR1 | Rbaf600 | 313658 | 1,08 | up   |
| 5742346 | 7280982 | 1575217 | ZUBR1 | Rbaf600 | 313658 | 1,07 | down |
| 6579558 | 7280982 | 1575235 | ZUBR1 | Rbaf600 | 313658 | 1,07 | up   |
| 6692403 | 7280982 | 1575231 | ZUBR1 | Rbaf600 | 313658 | 1,07 | down |
| 6398931 | 7280982 | 1575167 | ZUBR1 | Rbaf600 | 313658 | 1,07 | down |
| 6085322 | 7280982 | 1575224 | ZUBR1 | Rbaf600 | 313658 | 1,06 | down |
| 6558836 | 7280982 | 1575240 | ZUBR1 | Rbaf600 | 313658 | 1,06 | down |



|         |         |         |                 |         |        |      |      |
|---------|---------|---------|-----------------|---------|--------|------|------|
| 6223383 | 7280982 | 1575222 | ZUBR1           | Rbaf600 | 313658 | 1,06 | down |
| 6088952 | 7280982 | 1575195 | ZUBR1           | Rbaf600 | 313658 | 1,06 | up   |
| 5924079 | 7280982 | 1575230 | ZUBR1           | Rbaf600 | 313658 | 1,06 | down |
| 6470351 | 7280982 | 1575194 | ZUBR1           | Rbaf600 | 313658 | 1,06 | down |
| 5896191 | 7280982 | 1575244 | ZUBR1           | Rbaf600 | 313658 | 1,06 | down |
| 6465267 | 7280982 | 1575208 | ZUBR1           | Rbaf600 | 313658 | 1,05 | down |
| 6028058 | 7280982 | 1575190 | ZUBR1           | Rbaf600 | 313658 | 1,05 | down |
| 6654722 | 7280982 | 1575181 | ZUBR1           | Rbaf600 | 313658 | 1,05 | down |
| 6097542 | 7280982 | 1575196 | ZUBR1           | Rbaf600 | 313658 | 1,05 | down |
| 6677783 | 7280982 | 1575261 | ZUBR1           | Rbaf600 | 313658 | 1,05 | down |
| 6054389 | 7280982 | 1575257 | ZUBR1           | Rbaf600 | 313658 | 1,04 | down |
| 6557946 | 7280982 | 1575229 | ZUBR1           | Rbaf600 | 313658 | 1,04 | up   |
| 6168943 | 7280982 | 1575161 | ZUBR1           | Rbaf600 | 313658 | 1,04 | up   |
| 6394215 | 7280982 | 1575203 | ZUBR1           | Rbaf600 | 313658 | 1,03 | down |
| 6453991 | 7280982 | 1575228 | ZUBR1           | Rbaf600 | 313658 | 1,03 | up   |
| 6357445 | 7280982 | 1575255 | ZUBR1           | Rbaf600 | 313658 | 1,03 | up   |
| 6108309 | 7280982 | 1575189 | ZUBR1           | Rbaf600 | 313658 | 1,03 | down |
| 6496138 | 7280982 | 1575172 | ZUBR1           | Rbaf600 | 313658 | 1,03 | up   |
| 6578878 | 7280982 | 1575219 | ZUBR1           | Rbaf600 | 313658 | 1,02 | up   |
| 6329226 | 7280982 | 1575247 | ZUBR1           | Rbaf600 | 313658 | 1,02 | up   |
| 6581887 | 7280982 | 1575180 | ZUBR1           | Rbaf600 | 313658 | 1,02 | up   |
| 6365188 | 7280982 | 1575234 | ZUBR1           | Rbaf600 | 313658 | 1,02 | up   |
| 5865815 | 7280982 | 1575221 | ZUBR1           | Rbaf600 | 313658 | 1,02 | down |
| 5667436 | 7280982 | 1575188 | ZUBR1           | Rbaf600 | 313658 | 1,02 | down |
| 6251406 | 7280982 | 1575213 | ZUBR1           | Rbaf600 | 313658 | 1,02 | down |
| 5965788 | 7280982 | 1575180 | ZUBR1           | Rbaf600 | 313658 | 1,01 | up   |
| 6073039 | 7280982 | 1575200 | ZUBR1           | Rbaf600 | 313658 | 1,01 | up   |
| 5935807 | 7280982 | 1575187 | ZUBR1           | Rbaf600 | 313658 | 1,01 | down |
| 6613946 | 7280982 | 1575253 | ZUBR1           | Rbaf600 | 313658 | 1,01 | up   |
| 6361505 | 7280982 | 1575169 | ZUBR1           | Rbaf600 | 313658 | 1,01 | down |
| 6446120 | 7280982 | 1575184 | ZUBR1           | Rbaf600 | 313658 | 1,01 | down |
| 5844712 | 7280982 | 1575260 | ZUBR1           | Rbaf600 | 313658 | 1,01 | up   |
| 6428578 | 7280982 | 1575227 | ZUBR1           | Rbaf600 | 313658 | 1,00 | down |
| 5972304 | 7125074 | 1189428 | zygote arrest 1 | Zar1    | 353228 | 3,19 | down |
| 6201799 | 7125074 | 1189427 | zygote arrest 1 | Zar1    | 353228 | 1,64 | up   |
| 6329487 | 7125074 | 1189428 | zygote arrest 1 | Zar1    | 353228 | 1,19 | up   |
| 6350699 | 7125074 | 1189428 | zygote arrest 1 | Zar1    | 353228 | 1,14 | down |
| 6239617 | 7125074 | 1189426 | zygote arrest 1 | Zar1    | 353228 | 1,09 | up   |
| 6482324 | 7125074 | 1189424 | zygote arrest 1 | Zar1    | 353228 | 1,07 | down |
| 5864508 | 7125074 | 1189425 | zygote arrest 1 | Zar1    | 353228 | 1,06 | up   |
| 6168258 | 7125074 | 1189428 | zygote arrest 1 | Zar1    | 353228 | 1,04 | up   |
| 5617904 | 7156372 | 1266708 | ---             | ---     | ---    | 1,01 | up   |
| 5618032 | 7295652 | 1610314 | ---             | ---     | ---    | 1,28 | up   |
| 5618065 | 7277783 | 1567458 | ---             | ---     | ---    | 1,02 | up   |
| 5618098 | 7140834 | 1227987 | ---             | ---     | ---    | 1,08 | up   |
| 5618221 | 7069830 | 1055605 | ---             | ---     | ---    | 1,23 | down |
| 5618339 | 7243901 | 1483052 | ---             | ---     | ---    | 1,00 | up   |
| 5618342 | 7093219 | 1110690 | ---             | ---     | ---    | 1,07 | down |
| 5618404 | 7312903 | 1654098 | ---             | ---     | ---    | 1,06 | up   |
| 5618557 | 7243894 | 1482993 | ---             | ---     | ---    | 1,81 | down |
| 5618561 | 7033504 | 969851  | ---             | ---     | ---    | 1,18 | down |
| 5618568 | 7155286 | 1263908 | ---             | ---     | ---    | 1,32 | down |
| 5618593 | 7319627 | 1671257 | ---             | ---     | ---    | 1,26 | down |
| 5618615 | 7220292 | 1423772 | ---             | ---     | ---    | 1,26 | up   |
| 5618616 | 7194172 | 1361183 | ---             | ---     | ---    | 1,51 | up   |
| 5618647 | 7248790 | 1494514 | ---             | ---     | ---    | 1,40 | up   |
| 5618783 | 7178644 | 1321612 | ---             | ---     | ---    | 1,35 | up   |

|         |         |         |     |     |     |      |      |
|---------|---------|---------|-----|-----|-----|------|------|
| 5618826 | 7032204 | 966153  | --- | --- | --- | 1,98 | up   |
| 5618856 | 7212587 | 1404639 | --- | --- | --- | 1,01 | down |
| 5618955 | 7122140 | 1182729 | --- | --- | --- | 1,36 | up   |
| 5619045 | 7167325 | 1292551 | --- | --- | --- | 2,02 | down |
| 5619086 | 7237346 | 1466594 | --- | --- | --- | 1,08 | down |
| 5619127 | 7288077 | 1591987 | --- | --- | --- | 1,40 | up   |
| 5619128 | 7337872 | 1714429 | --- | --- | --- | 1,28 | up   |
| 5619136 | 7105780 | 1141690 | --- | --- | --- | 1,16 | down |
| 5619216 | 7330396 | 1696351 | --- | --- | --- | 1,03 | up   |
| 5619249 | 7050167 | 1009800 | --- | --- | --- | 1,17 | up   |
| 5619464 | 7069253 | 1054169 | --- | --- | --- | 1,05 | down |
| 5619553 | 7095868 | 1116781 | --- | --- | --- | 1,03 | down |
| 5619577 | 7198210 | 1370983 | --- | --- | --- | 1,05 | down |
| 5619601 | 7189455 | 1348332 | --- | --- | --- | 1,46 | up   |
| 5619625 | 7069603 | 1055050 | --- | --- | --- | 1,06 | down |
| 5619660 | 7080476 | 1080416 | --- | --- | --- | 1,12 | down |
| 5619728 | 7147720 | 1245233 | --- | --- | --- | 1,07 | down |
| 5619757 | 7207093 | 1392121 | --- | --- | --- | 2,98 | down |
| 5619933 | 7114274 | 1162824 | --- | --- | --- | 1,28 | down |
| 5620076 | 7031774 | 964650  | --- | --- | --- | 1,52 | up   |
| 5620087 | 7162144 | 1280508 | --- | --- | --- | 1,14 | down |
| 5620157 | 7216309 | 1413743 | --- | --- | --- | 1,10 | down |
| 5620163 | 7216970 | 1415128 | --- | --- | --- | 1,23 | down |
| 5620234 | 7264085 | 1532719 | --- | --- | --- | 1,31 | up   |
| 5620243 | 7153136 | 1258051 | --- | --- | --- | 1,12 | down |
| 5620329 | 7244287 | 1484072 | --- | --- | --- | 1,06 | up   |
| 5620349 | 7210822 | 1400977 | --- | --- | --- | 1,16 | down |
| 5620367 | 7181193 | 1328288 | --- | --- | --- | 1,21 | up   |
| 5620407 | 7197820 | 1370100 | --- | --- | --- | 1,77 | down |
| 5620500 | 7336931 | 1711859 | --- | --- | --- | 1,62 | down |
| 5620689 | 7341243 | 1723223 | --- | --- | --- | 1,73 | down |
| 5620938 | 7082098 | 1084111 | --- | --- | --- | 1,06 | up   |
| 5621054 | 7344702 | 1732139 | --- | --- | --- | 1,08 | down |
| 5621086 | 7088164 | 1098479 | --- | --- | --- | 1,41 | down |
| 5621094 | 7196331 | 1366380 | --- | --- | --- | 1,33 | up   |
| 5621146 | 7260488 | 1523937 | --- | --- | --- | 1,00 | down |
| 5621234 | 7248790 | 1494521 | --- | --- | --- | 1,09 | down |
| 5621254 | 7373038 | 1804287 | --- | --- | --- | 1,68 | up   |
| 5621376 | 7168979 | 1297175 | --- | --- | --- | 1,55 | down |
| 5621436 | 7025670 | 950422  | --- | --- | --- | 1,00 | down |
| 5621449 | 7274892 | 1559542 | --- | --- | --- | 1,06 | down |
| 5621523 | 7088164 | 1098487 | --- | --- | --- | 1,41 | down |
| 5621588 | 7090581 | 1104741 | --- | --- | --- | 1,32 | up   |
| 5621678 | 7029119 | 958977  | --- | --- | --- | 1,03 | up   |
| 5621695 | 7146093 | 1240914 | --- | --- | --- | 1,06 | up   |
| 5621701 | 7279533 | 1571916 | --- | --- | --- | 1,02 | up   |
| 5621702 | 7274780 | 1559198 | --- | --- | --- | 2,59 | up   |
| 5621728 | 7337425 | 1713177 | --- | --- | --- | 1,01 | down |
| 5621776 | 7144782 | 1237759 | --- | --- | --- | 1,56 | down |
| 5621848 | 7075460 | 1069399 | --- | --- | --- | 1,04 | up   |
| 5621850 | 7156114 | 1266054 | --- | --- | --- | 1,14 | up   |
| 5621902 | 7183927 | 1335497 | --- | --- | --- | 1,22 | down |
| 5621970 | 7121849 | 1181778 | --- | --- | --- | 1,07 | up   |
| 5622073 | 7193056 | 1358258 | --- | --- | --- | 1,17 | up   |
| 5622147 | 7303777 | 1631923 | --- | --- | --- | 1,09 | down |
| 5622358 | 7385253 | 1832225 | --- | --- | --- | 1,00 | down |
| 5622387 | 7070836 | 1058357 | --- | --- | --- | 1,39 | down |

|         |         |         |     |     |     |      |      |
|---------|---------|---------|-----|-----|-----|------|------|
| 5622388 | 7318714 | 1669227 | --- | --- | --- | 1,09 | up   |
| 5622412 | 7344702 | 1732141 | --- | --- | --- | 1,84 | up   |
| 5622661 | 7240569 | 1475456 | --- | --- | --- | 1,41 | up   |
| 5622686 | 7344702 | 1732146 | --- | --- | --- | 1,26 | down |
| 5622831 | 7288077 | 1592009 | --- | --- | --- | 1,02 | up   |
| 5622905 | 7278010 | 1568040 | --- | --- | --- | 1,15 | down |
| 5622940 | 7244290 | 1484168 | --- | --- | --- | 1,03 | up   |
| 5622948 | 7221443 | 1426320 | --- | --- | --- | 1,66 | down |
| 5622974 | 7035407 | 974445  | --- | --- | --- | 1,75 | down |
| 5622979 | 7371001 | 1798849 | --- | --- | --- | 1,82 | down |
| 5622992 | 7146093 | 1240942 | --- | --- | --- | 1,28 | up   |
| 5623063 | 7239752 | 1473157 | --- | --- | --- | 1,22 | up   |
| 5623069 | 7049308 | 1008125 | --- | --- | --- | 1,19 | up   |
| 5623091 | 7292517 | 1602534 | --- | --- | --- | 1,02 | down |
| 5623099 | 7354896 | 1756992 | --- | --- | --- | 2,28 | down |
| 5623135 | 7122140 | 1182720 | --- | --- | --- | 1,56 | down |
| 5623147 | 7326271 | 1686516 | --- | --- | --- | 1,15 | up   |
| 5623217 | 7321029 | 1674832 | --- | --- | --- | 1,28 | down |
| 5623355 | 7090581 | 1104843 | --- | --- | --- | 2,57 | up   |
| 5623560 | 7176368 | 1315573 | --- | --- | --- | 1,11 | up   |
| 5623583 | 7127257 | 1194813 | --- | --- | --- | 1,46 | down |
| 5623641 | 7067518 | 1049957 | --- | --- | --- | 1,08 | up   |
| 5623706 | 7339379 | 1718319 | --- | --- | --- | 1,06 | up   |
| 5623782 | 7043515 | 994012  | --- | --- | --- | 1,42 | up   |
| 5623853 | 7073677 | 1065149 | --- | --- | --- | 1,05 | down |
| 5623871 | 7341243 | 1723217 | --- | --- | --- | 1,53 | down |
| 5623904 | 7030224 | 961115  | --- | --- | --- | 1,61 | up   |
| 5624031 | 7337872 | 1714427 | --- | --- | --- | 1,28 | up   |
| 5624034 | 7071714 | 1060365 | --- | --- | --- | 1,54 | down |
| 5624037 | 7356115 | 1760119 | --- | --- | --- | 1,17 | up   |
| 5624114 | 7359453 | 1768450 | --- | --- | --- | 1,58 | down |
| 5624144 | 7341274 | 1723400 | --- | --- | --- | 1,17 | down |
| 5624314 | 7042529 | 991598  | --- | --- | --- | 2,18 | down |
| 5624328 | 7371253 | 1799562 | --- | --- | --- | 1,02 | up   |
| 5624364 | 7064134 | 1041461 | --- | --- | --- | 1,12 | down |
| 5624388 | 7217434 | 1416354 | --- | --- | --- | 1,11 | up   |
| 5624405 | 7091439 | 1106615 | --- | --- | --- | 1,15 | up   |
| 5624524 | 7190844 | 1352151 | --- | --- | --- | 1,02 | up   |
| 5624570 | 7143455 | 1234717 | --- | --- | --- | 1,12 | up   |
| 5624662 | 7075790 | 1069994 | --- | --- | --- | 1,50 | up   |
| 5624752 | 7264653 | 1534052 | --- | --- | --- | 1,06 | up   |
| 5624758 | 7239752 | 1473194 | --- | --- | --- | 1,24 | down |
| 5624812 | 7142414 | 1231756 | --- | --- | --- | 1,27 | up   |
| 5624866 | 7217679 | 1417300 | --- | --- | --- | 1,19 | down |
| 5624892 | 7061550 | 1035288 | --- | --- | --- | 1,45 | down |
| 5624893 | 7217679 | 1417303 | --- | --- | --- | 1,07 | down |
| 5624921 | 7156052 | 1265744 | --- | --- | --- | 1,27 | up   |
| 5625255 | 7181001 | 1327642 | --- | --- | --- | 1,05 | up   |
| 5625285 | 7139708 | 1225066 | --- | --- | --- | 1,18 | up   |
| 5625297 | 7115259 | 1165352 | --- | --- | --- | 1,01 | down |
| 5625416 | 7339379 | 1718363 | --- | --- | --- | 1,05 | down |
| 5625595 | 7337425 | 1713158 | --- | --- | --- | 1,26 | up   |
| 5625644 | 7078666 | 1076548 | --- | --- | --- | 1,46 | down |
| 5625690 | 7330396 | 1696347 | --- | --- | --- | 1,09 | up   |
| 5625774 | 7294911 | 1608527 | --- | --- | --- | 1,10 | up   |
| 5625844 | 7337425 | 1713152 | --- | --- | --- | 1,18 | down |
| 5625896 | 7263348 | 1530812 | --- | --- | --- | 1,05 | up   |

|         |         |         |     |     |     |      |      |
|---------|---------|---------|-----|-----|-----|------|------|
| 5625935 | 7246518 | 1489054 | --- | --- | --- | 1,20 | down |
| 5626074 | 7257976 | 1517712 | --- | --- | --- | 1,21 | up   |
| 5626080 | 7056333 | 1023678 | --- | --- | --- | 1,16 | up   |
| 5626207 | 7188458 | 1345704 | --- | --- | --- | 1,34 | up   |
| 5626211 | 7341243 | 1723218 | --- | --- | --- | 1,40 | down |
| 5626246 | 7139824 | 1225319 | --- | --- | --- | 1,18 | up   |
| 5626314 | 7333333 | 1703386 | --- | --- | --- | 1,12 | down |
| 5626442 | 7370002 | 1795777 | --- | --- | --- | 1,28 | up   |
| 5626564 | 7208784 | 1396159 | --- | --- | --- | 1,34 | down |
| 5626610 | 7106752 | 1143984 | --- | --- | --- | 1,12 | down |
| 5626626 | 7146872 | 1242903 | --- | --- | --- | 1,23 | down |
| 5626638 | 7091954 | 1107708 | --- | --- | --- | 1,03 | down |
| 5626676 | 7253408 | 1505957 | --- | --- | --- | 1,10 | down |
| 5626703 | 7312575 | 1653359 | --- | --- | --- | 1,40 | down |
| 5626755 | 7118234 | 1172820 | --- | --- | --- | 1,19 | down |
| 5627123 | 7106776 | 1144106 | --- | --- | --- | 1,14 | up   |
| 5627138 | 7168521 | 1295924 | --- | --- | --- | 1,25 | up   |
| 5627189 | 7337425 | 1713135 | --- | --- | --- | 1,10 | up   |
| 5627207 | 7067828 | 1050784 | --- | --- | --- | 1,19 | down |
| 5627272 | 7196029 | 1365612 | --- | --- | --- | 2,09 | down |
| 5627349 | 7089080 | 1101161 | --- | --- | --- | 1,02 | down |
| 5627434 | 7182739 | 1332585 | --- | --- | --- | 1,01 | down |
| 5627449 | 7285530 | 1585971 | --- | --- | --- | 1,19 | down |
| 5627501 | 7235069 | 1460973 | --- | --- | --- | 1,72 | down |
| 5627591 | 7351844 | 1749504 | --- | --- | --- | 1,17 | down |
| 5627623 | 7297589 | 1615687 | --- | --- | --- | 1,07 | down |
| 5627787 | 7233513 | 1457168 | --- | --- | --- | 1,14 | up   |
| 5627788 | 7044906 | 998126  | --- | --- | --- | 2,14 | down |
| 5627867 | 7090581 | 1104749 | --- | --- | --- | 1,22 | down |
| 5627920 | 7252339 | 1503272 | --- | --- | --- | 1,11 | down |
| 5627932 | 7058149 | 1027258 | --- | --- | --- | 1,41 | down |
| 5628025 | 7112566 | 1158641 | --- | --- | --- | 1,42 | up   |
| 5628194 | 7267802 | 1541800 | --- | --- | --- | 1,26 | up   |
| 5628229 | 7050167 | 1009800 | --- | --- | --- | 1,75 | up   |
| 5628343 | 7052385 | 1014770 | --- | --- | --- | 1,36 | up   |
| 5628432 | 7341038 | 1722678 | --- | --- | --- | 1,57 | up   |
| 5628536 | 7240569 | 1475362 | --- | --- | --- | 1,06 | up   |
| 5628542 | 7069603 | 1055050 | --- | --- | --- | 1,04 | up   |
| 5628575 | 7098867 | 1124952 | --- | --- | --- | 1,29 | up   |
| 5628631 | 7356619 | 1761341 | --- | --- | --- | 1,09 | down |
| 5628633 | 7217445 | 1416480 | --- | --- | --- | 1,02 | down |
| 5628662 | 7198210 | 1370993 | --- | --- | --- | 1,13 | up   |
| 5628696 | 7208436 | 1395345 | --- | --- | --- | 1,75 | down |
| 5628703 | 7317204 | 1665398 | --- | --- | --- | 1,85 | up   |
| 5628715 | 7039223 | 983562  | --- | --- | --- | 1,17 | up   |
| 5628750 | 7031774 | 964729  | --- | --- | --- | 1,24 | up   |
| 5628828 | 7108434 | 1148314 | --- | --- | --- | 1,42 | down |
| 5628870 | 7240641 | 1475745 | --- | --- | --- | 1,02 | down |
| 5628894 | 7060896 | 1033576 | --- | --- | --- | 1,38 | down |
| 5629058 | 7217434 | 1416402 | --- | --- | --- | 1,17 | down |
| 5629171 | 7123714 | 1186423 | --- | --- | --- | 1,06 | down |
| 5629209 | 7195680 | 1364870 | --- | --- | --- | 1,89 | down |
| 5629281 | 7380497 | 1821840 | --- | --- | --- | 1,16 | down |
| 5629293 | 7114274 | 1162813 | --- | --- | --- | 2,10 | up   |
| 5629379 | 7204831 | 1386772 | --- | --- | --- | 1,03 | up   |
| 5629400 | 7182056 | 1330595 | --- | --- | --- | 2,18 | down |
| 5629438 | 7167160 | 1292216 | --- | --- | --- | 1,02 | down |

|         |         |         |     |     |     |      |      |
|---------|---------|---------|-----|-----|-----|------|------|
| 5629461 | 7140113 | 1226059 | --- | --- | --- | 1,64 | down |
| 5629475 | 7199536 | 1374707 | --- | --- | --- | 1,89 | up   |
| 5629478 | 7217679 | 1417292 | --- | --- | --- | 1,10 | down |
| 5629484 | 7146082 | 1240853 | --- | --- | --- | 1,82 | up   |
| 5629504 | 7205944 | 1389462 | --- | --- | --- | 1,02 | up   |
| 5629528 | 7146807 | 1242816 | --- | --- | --- | 1,17 | down |
| 5629584 | 7110401 | 1153084 | --- | --- | --- | 1,30 | up   |
| 5629610 | 7311367 | 1650729 | --- | --- | --- | 2,13 | up   |
| 5629618 | 7035414 | 974468  | --- | --- | --- | 2,43 | down |
| 5629648 | 7343250 | 1728034 | --- | --- | --- | 1,57 | down |
| 5629664 | 7221420 | 1426253 | --- | --- | --- | 1,57 | up   |
| 5629679 | 7318286 | 1668338 | --- | --- | --- | 1,62 | up   |
| 5629793 | 7052385 | 1014797 | --- | --- | --- | 1,23 | up   |
| 5629880 | 7350922 | 1747316 | --- | --- | --- | 1,17 | down |
| 5629887 | 7139708 | 1225062 | --- | --- | --- | 1,16 | up   |
| 5629935 | 7148741 | 1247844 | --- | --- | --- | 1,12 | down |
| 5630020 | 7181442 | 1328882 | --- | --- | --- | 2,27 | down |
| 5630101 | 7207093 | 1392092 | --- | --- | --- | 1,06 | up   |
| 5630132 | 7038179 | 981265  | --- | --- | --- | 1,34 | up   |
| 5630200 | 7258455 | 1518725 | --- | --- | --- | 1,13 | down |
| 5630230 | 7376820 | 1813396 | --- | --- | --- | 1,24 | down |
| 5630324 | 7217434 | 1416399 | --- | --- | --- | 1,11 | down |
| 5630365 | 7039725 | 984825  | --- | --- | --- | 1,22 | up   |
| 5630407 | 7279499 | 1571823 | --- | --- | --- | 1,02 | down |
| 5630432 | 7058713 | 1028666 | --- | --- | --- | 1,26 | down |
| 5630499 | 7354896 | 1756993 | --- | --- | --- | 1,29 | down |
| 5630515 | 7168521 | 1295914 | --- | --- | --- | 1,45 | down |
| 5630800 | 7191594 | 1354170 | --- | --- | --- | 2,03 | up   |
| 5630875 | 7381330 | 1823625 | --- | --- | --- | 2,03 | down |
| 5630930 | 7146872 | 1242908 | --- | --- | --- | 1,14 | up   |
| 5631042 | 7267953 | 1542231 | --- | --- | --- | 1,62 | down |
| 5631149 | 7330314 | 1696144 | --- | --- | --- | 1,03 | up   |
| 5631294 | 7326271 | 1686465 | --- | --- | --- | 1,34 | down |
| 5631298 | 7088164 | 1098473 | --- | --- | --- | 1,98 | down |
| 5631410 | 7059766 | 1030973 | --- | --- | --- | 1,09 | up   |
| 5631420 | 7102369 | 1133435 | --- | --- | --- | 1,25 | down |
| 5631460 | 7374324 | 1807524 | --- | --- | --- | 1,30 | up   |
| 5631540 | 7184231 | 1336146 | --- | --- | --- | 2,23 | up   |
| 5631634 | 7173706 | 1309290 | --- | --- | --- | 1,67 | up   |
| 5631644 | 7383586 | 1828428 | --- | --- | --- | 1,39 | down |
| 5631694 | 7258784 | 1519669 | --- | --- | --- | 1,42 | down |
| 5631856 | 7203041 | 1382730 | --- | --- | --- | 1,35 | down |
| 5631873 | 7213908 | 1407645 | --- | --- | --- | 1,71 | down |
| 5631880 | 7367980 | 1789173 | --- | --- | --- | 1,42 | up   |
| 5631889 | 7210387 | 1400039 | --- | --- | --- | 1,26 | down |
| 5631895 | 7253602 | 1506490 | --- | --- | --- | 1,06 | down |
| 5631907 | 7168979 | 1297200 | --- | --- | --- | 1,42 | up   |
| 5631912 | 7381090 | 1822985 | --- | --- | --- | 1,43 | down |
| 5631989 | 7282927 | 1579998 | --- | --- | --- | 1,23 | up   |
| 5632051 | 7149817 | 1250316 | --- | --- | --- | 1,56 | down |
| 5632093 | 7052385 | 1014776 | --- | --- | --- | 1,10 | up   |
| 5632127 | 7368004 | 1789332 | --- | --- | --- | 1,25 | up   |
| 5632132 | 7131876 | 1206052 | --- | --- | --- | 1,13 | down |
| 5632206 | 7168521 | 1295920 | --- | --- | --- | 1,06 | down |
| 5632209 | 7114274 | 1162814 | --- | --- | --- | 1,03 | up   |
| 5632247 | 7169732 | 1298780 | --- | --- | --- | 1,12 | up   |
| 5632265 | 7072748 | 1062586 | --- | --- | --- | 1,03 | down |

|         |         |         |     |     |     |      |      |
|---------|---------|---------|-----|-----|-----|------|------|
| 5632285 | 7198210 | 1370959 | --- | --- | --- | 1,05 | up   |
| 5632305 | 7132125 | 1206623 | --- | --- | --- | 1,02 | up   |
| 5632419 | 7194400 | 1361705 | --- | --- | --- | 1,10 | up   |
| 5632432 | 7068987 | 1053605 | --- | --- | --- | 1,06 | down |
| 5632437 | 7236358 | 1464240 | --- | --- | --- | 1,09 | up   |
| 5632477 | 7289879 | 1596427 | --- | --- | --- | 1,35 | down |
| 5632605 | 7102723 | 1134400 | --- | --- | --- | 1,03 | up   |
| 5632624 | 7318143 | 1668091 | --- | --- | --- | 1,11 | down |
| 5632790 | 7070836 | 1058336 | --- | --- | --- | 1,04 | down |
| 5632816 | 7213228 | 1405992 | --- | --- | --- | 1,60 | up   |
| 5632891 | 7372840 | 1803760 | --- | --- | --- | 1,50 | up   |
| 5632899 | 7120827 | 1179352 | --- | --- | --- | 1,11 | up   |
| 5632905 | 7068942 | 1053393 | --- | --- | --- | 1,45 | down |
| 5632910 | 7127540 | 1195288 | --- | --- | --- | 1,02 | down |
| 5632928 | 7281924 | 1577748 | --- | --- | --- | 1,30 | down |
| 5633030 | 7266544 | 1538344 | --- | --- | --- | 1,05 | down |
| 5633098 | 7183182 | 1333572 | --- | --- | --- | 1,06 | up   |
| 5633105 | 7318139 | 1668067 | --- | --- | --- | 1,75 | down |
| 5633167 | 7062233 | 1037185 | --- | --- | --- | 1,07 | up   |
| 5633289 | 7178644 | 1321610 | --- | --- | --- | 1,41 | up   |
| 5633321 | 7340673 | 1721696 | --- | --- | --- | 1,49 | up   |
| 5633407 | 7274780 | 1559198 | --- | --- | --- | 1,94 | up   |
| 5633537 | 7183927 | 1335504 | --- | --- | --- | 1,17 | down |
| 5633632 | 7211389 | 1402115 | --- | --- | --- | 1,01 | down |
| 5633667 | 7153895 | 1259915 | --- | --- | --- | 1,20 | up   |
| 5633740 | 7031618 | 964204  | --- | --- | --- | 1,34 | up   |
| 5633815 | 7220292 | 1423773 | --- | --- | --- | 1,16 | up   |
| 5633850 | 7246823 | 1489671 | --- | --- | --- | 1,35 | down |
| 5633884 | 7209927 | 1398945 | --- | --- | --- | 1,28 | up   |
| 5633916 | 7247512 | 1491217 | --- | --- | --- | 1,38 | up   |
| 5633965 | 7369141 | 1793316 | --- | --- | --- | 1,59 | down |
| 5633966 | 7382499 | 1826256 | --- | --- | --- | 1,00 | up   |
| 5634078 | 7308679 | 1644253 | --- | --- | --- | 1,08 | down |
| 5634103 | 7330396 | 1696364 | --- | --- | --- | 1,08 | down |
| 5634109 | 7181001 | 1327632 | --- | --- | --- | 1,02 | up   |
| 5634121 | 7328833 | 1692800 | --- | --- | --- | 1,12 | down |
| 5634138 | 7194400 | 1361766 | --- | --- | --- | 1,01 | up   |
| 5634291 | 7315571 | 1661010 | --- | --- | --- | 1,47 | down |
| 5634308 | 7146542 | 1242289 | --- | --- | --- | 1,29 | down |
| 5634353 | 7221443 | 1426314 | --- | --- | --- | 1,13 | down |
| 5634361 | 7089080 | 1101155 | --- | --- | --- | 1,04 | up   |
| 5634476 | 7364346 | 1780031 | --- | --- | --- | 1,14 | down |
| 5634493 | 7070836 | 1058337 | --- | --- | --- | 1,32 | up   |
| 5634503 | 7062436 | 1037680 | --- | --- | --- | 1,08 | up   |
| 5634520 | 7069727 | 1055365 | --- | --- | --- | 1,04 | up   |
| 5634574 | 7196029 | 1365603 | --- | --- | --- | 1,34 | down |
| 5634587 | 7384073 | 1829453 | --- | --- | --- | 2,06 | down |
| 5634627 | 7167872 | 1294018 | --- | --- | --- | 1,18 | down |
| 5634669 | 7143381 | 1234481 | --- | --- | --- | 1,01 | down |
| 5634872 | 7213908 | 1407649 | --- | --- | --- | 1,09 | down |
| 5634882 | 7140365 | 1226792 | --- | --- | --- | 1,61 | down |
| 5634889 | 7170764 | 1301471 | --- | --- | --- | 1,00 | up   |
| 5634891 | 7240569 | 1475470 | --- | --- | --- | 1,09 | down |
| 5635075 | 7180687 | 1326626 | --- | --- | --- | 1,02 | down |
| 5635118 | 7110999 | 1154762 | --- | --- | --- | 1,04 | up   |
| 5635171 | 7286807 | 1588841 | --- | --- | --- | 1,46 | up   |
| 5635249 | 7069603 | 1055055 | --- | --- | --- | 1,01 | up   |

|         |         |         |     |     |     |      |      |
|---------|---------|---------|-----|-----|-----|------|------|
| 5635268 | 7038153 | 981158  | --- | --- | --- | 1,17 | up   |
| 5635345 | 7031618 | 964198  | --- | --- | --- | 1,26 | up   |
| 5635406 | 7194540 | 1362078 | --- | --- | --- | 1,37 | up   |
| 5635420 | 7196029 | 1365629 | --- | --- | --- | 1,07 | up   |
| 5635434 | 7373634 | 1805729 | --- | --- | --- | 1,67 | down |
| 5635436 | 7086966 | 1095237 | --- | --- | --- | 1,09 | down |
| 5635441 | 7038530 | 981879  | --- | --- | --- | 1,30 | up   |
| 5635450 | 7337224 | 1712585 | --- | --- | --- | 1,74 | up   |
| 5635559 | 7341546 | 1723942 | --- | --- | --- | 1,15 | up   |
| 5635756 | 7297589 | 1615622 | --- | --- | --- | 1,44 | down |
| 5635782 | 7252877 | 1504738 | --- | --- | --- | 1,09 | down |
| 5636030 | 7190242 | 1350307 | --- | --- | --- | 2,28 | up   |
| 5636067 | 7033504 | 969867  | --- | --- | --- | 1,39 | up   |
| 5636077 | 7059648 | 1030677 | --- | --- | --- | 1,56 | up   |
| 5636257 | 7162144 | 1280497 | --- | --- | --- | 1,04 | up   |
| 5636279 | 7039223 | 983571  | --- | --- | --- | 1,23 | up   |
| 5636307 | 7040442 | 986578  | --- | --- | --- | 2,07 | down |
| 5636390 | 7217650 | 1417206 | --- | --- | --- | 1,29 | down |
| 5636408 | 7117526 | 1170987 | --- | --- | --- | 1,58 | down |
| 5636534 | 7194400 | 1361701 | --- | --- | --- | 1,00 | up   |
| 5636610 | 7346687 | 1736696 | --- | --- | --- | 1,17 | up   |
| 5636632 | 7036458 | 977022  | --- | --- | --- | 3,45 | up   |
| 5636652 | 7238115 | 1468668 | --- | --- | --- | 1,02 | up   |
| 5636666 | 7118234 | 1172845 | --- | --- | --- | 1,08 | down |
| 5636679 | 7383102 | 1827389 | --- | --- | --- | 1,38 | up   |
| 5636704 | 7076236 | 1071192 | --- | --- | --- | 1,16 | up   |
| 5636714 | 7056736 | 1024415 | --- | --- | --- | 1,87 | up   |
| 5636721 | 7302018 | 1626961 | --- | --- | --- | 1,93 | up   |
| 5636749 | 7067828 | 1050784 | --- | --- | --- | 1,02 | down |
| 5636777 | 7339379 | 1718327 | --- | --- | --- | 2,05 | down |
| 5636802 | 7093752 | 1111996 | --- | --- | --- | 1,12 | down |
| 5636887 | 7125348 | 1190100 | --- | --- | --- | 1,39 | up   |
| 5636910 | 7215722 | 1412268 | --- | --- | --- | 1,59 | up   |
| 5636931 | 7039821 | 985058  | --- | --- | --- | 1,83 | down |
| 5636977 | 7309646 | 1646489 | --- | --- | --- | 1,01 | up   |
| 5636992 | 7140365 | 1226773 | --- | --- | --- | 2,62 | down |
| 5637025 | 7167872 | 1294035 | --- | --- | --- | 1,09 | down |
| 5637126 | 7248790 | 1494503 | --- | --- | --- | 1,00 | down |
| 5637162 | 7207069 | 1392023 | --- | --- | --- | 1,19 | down |
| 5637277 | 7094139 | 1112897 | --- | --- | --- | 1,39 | down |
| 5637312 | 7286807 | 1588777 | --- | --- | --- | 1,17 | down |
| 5637315 | 7337425 | 1713165 | --- | --- | --- | 1,07 | down |
| 5637343 | 7301843 | 1626471 | --- | --- | --- | 1,05 | down |
| 5637360 | 7196331 | 1366380 | --- | --- | --- | 1,03 | down |
| 5637437 | 7147720 | 1245236 | --- | --- | --- | 1,34 | up   |
| 5637442 | 7272431 | 1553902 | --- | --- | --- | 1,19 | down |
| 5637475 | 7137646 | 1220430 | --- | --- | --- | 1,92 | down |
| 5637641 | 7162144 | 1280490 | --- | --- | --- | 1,06 | up   |
| 5637748 | 7106752 | 1144027 | --- | --- | --- | 1,39 | up   |
| 5637824 | 7052813 | 1015927 | --- | --- | --- | 1,02 | down |
| 5637834 | 7307473 | 1641276 | --- | --- | --- | 1,06 | up   |
| 5637885 | 7142917 | 1233166 | --- | --- | --- | 1,01 | up   |
| 5637972 | 7312161 | 1652462 | --- | --- | --- | 1,57 | up   |
| 5638098 | 7075460 | 1069390 | --- | --- | --- | 1,08 | down |
| 5638128 | 7384509 | 1830763 | --- | --- | --- | 3,61 | down |
| 5638145 | 7289075 | 1594440 | --- | --- | --- | 1,63 | up   |
| 5638163 | 7069253 | 1054157 | --- | --- | --- | 1,20 | down |

|         |         |         |     |     |     |      |      |
|---------|---------|---------|-----|-----|-----|------|------|
| 5638165 | 7374313 | 1807379 | --- | --- | --- | 1,10 | down |
| 5638244 | 7282927 | 1580003 | --- | --- | --- | 1,13 | up   |
| 5638386 | 7234040 | 1458505 | --- | --- | --- | 1,16 | down |
| 5638409 | 7100523 | 1128882 | --- | --- | --- | 1,57 | down |
| 5638438 | 7120010 | 1177376 | --- | --- | --- | 1,24 | up   |
| 5638450 | 7330731 | 1697195 | --- | --- | --- | 1,03 | up   |
| 5638468 | 7029985 | 960597  | --- | --- | --- | 1,03 | up   |
| 5638571 | 7091439 | 1106630 | --- | --- | --- | 1,49 | down |
| 5638591 | 7034293 | 971994  | --- | --- | --- | 1,36 | up   |
| 5638689 | 7313538 | 1655742 | --- | --- | --- | 1,40 | down |
| 5638768 | 7058507 | 1028297 | --- | --- | --- | 1,24 | down |
| 5638818 | 7258546 | 1518975 | --- | --- | --- | 1,23 | up   |
| 5638871 | 7180630 | 1326426 | --- | --- | --- | 1,23 | up   |
| 5638876 | 7112355 | 1158076 | --- | --- | --- | 1,22 | up   |
| 5638887 | 7372840 | 1803781 | --- | --- | --- | 1,18 | up   |
| 5639009 | 7146245 | 1241362 | --- | --- | --- | 1,06 | up   |
| 5639046 | 7121074 | 1179916 | --- | --- | --- | 1,05 | down |
| 5639069 | 7186240 | 1340820 | --- | --- | --- | 1,06 | down |
| 5639073 | 7327169 | 1688442 | --- | --- | --- | 1,21 | up   |
| 5639122 | 7274780 | 1559226 | --- | --- | --- | 1,10 | up   |
| 5639232 | 7128112 | 1196525 | --- | --- | --- | 1,17 | down |
| 5639253 | 7086672 | 1094394 | --- | --- | --- | 1,57 | down |
| 5639271 | 7101258 | 1130570 | --- | --- | --- | 1,02 | up   |
| 5639275 | 7254040 | 1507593 | --- | --- | --- | 1,14 | down |
| 5639288 | 7174281 | 1310844 | --- | --- | --- | 2,03 | up   |
| 5639303 | 7227474 | 1441126 | --- | --- | --- | 1,22 | up   |
| 5639409 | 7146093 | 1240983 | --- | --- | --- | 1,54 | down |
| 5639411 | 7207971 | 1394324 | --- | --- | --- | 1,25 | down |
| 5639415 | 7140365 | 1226771 | --- | --- | --- | 1,18 | up   |
| 5639483 | 7247976 | 1492429 | --- | --- | --- | 1,25 | up   |
| 5639492 | 7364948 | 1781218 | --- | --- | --- | 1,26 | up   |
| 5639524 | 7336050 | 1709751 | --- | --- | --- | 1,56 | down |
| 5639721 | 7062233 | 1037228 | --- | --- | --- | 1,12 | down |
| 5639725 | 7306330 | 1638522 | --- | --- | --- | 1,19 | down |
| 5639811 | 7247230 | 1490581 | --- | --- | --- | 1,30 | down |
| 5639869 | 7339452 | 1718595 | --- | --- | --- | 1,06 | up   |
| 5640168 | 7127691 | 1195632 | --- | --- | --- | 1,25 | down |
| 5640248 | 7160687 | 1276995 | --- | --- | --- | 1,17 | up   |
| 5640262 | 7376073 | 1811716 | --- | --- | --- | 1,08 | up   |
| 5640293 | 7374493 | 1807966 | --- | --- | --- | 1,04 | up   |
| 5640343 | 7361042 | 1772264 | --- | --- | --- | 1,04 | down |
| 5640345 | 7166867 | 1291369 | --- | --- | --- | 1,38 | down |
| 5640383 | 7035525 | 974771  | --- | --- | --- | 2,10 | down |
| 5640488 | 7270592 | 1548561 | --- | --- | --- | 1,23 | up   |
| 5640510 | 7358859 | 1767002 | --- | --- | --- | 1,05 | up   |
| 5640515 | 7056304 | 1023627 | --- | --- | --- | 1,71 | up   |
| 5640527 | 7278010 | 1568038 | --- | --- | --- | 1,17 | up   |
| 5640556 | 7179785 | 1324499 | --- | --- | --- | 1,23 | down |
| 5640589 | 7062436 | 1037653 | --- | --- | --- | 1,27 | up   |
| 5640627 | 7220914 | 1425048 | --- | --- | --- | 2,80 | down |
| 5640664 | 7087282 | 1096144 | --- | --- | --- | 1,13 | up   |
| 5640675 | 7209927 | 1398918 | --- | --- | --- | 1,05 | up   |
| 5640727 | 7344713 | 1732177 | --- | --- | --- | 1,56 | up   |
| 5640749 | 7028624 | 958006  | --- | --- | --- | 1,09 | down |
| 5640949 | 7256070 | 1512583 | --- | --- | --- | 1,03 | down |
| 5641070 | 7374493 | 1807958 | --- | --- | --- | 1,24 | up   |
| 5641092 | 7306229 | 1638266 | --- | --- | --- | 1,66 | up   |



|         |         |         |     |     |     |      |      |
|---------|---------|---------|-----|-----|-----|------|------|
| 5641225 | 7371001 | 1798850 | --- | --- | --- | 1,15 | up   |
| 5641230 | 7217434 | 1416343 | --- | --- | --- | 1,04 | up   |
| 5641276 | 7318714 | 1669244 | --- | --- | --- | 1,02 | down |
| 5641279 | 7062233 | 1037205 | --- | --- | --- | 1,01 | down |
| 5641331 | 7212587 | 1404635 | --- | --- | --- | 1,42 | down |
| 5641337 | 7321029 | 1674804 | --- | --- | --- | 1,07 | down |
| 5641339 | 7256070 | 1512599 | --- | --- | --- | 1,65 | up   |
| 5641349 | 7274892 | 1559549 | --- | --- | --- | 2,10 | down |
| 5641430 | 7079238 | 1077811 | --- | --- | --- | 1,02 | up   |
| 5641555 | 7280743 | 1574464 | --- | --- | --- | 1,04 | up   |
| 5641699 | 7359453 | 1768449 | --- | --- | --- | 1,09 | up   |
| 5641772 | 7052813 | 1015931 | --- | --- | --- | 1,43 | down |
| 5641842 | 7281924 | 1577749 | --- | --- | --- | 1,01 | up   |
| 5641856 | 7114934 | 1164531 | --- | --- | --- | 2,14 | down |
| 5641891 | 7380497 | 1821829 | --- | --- | --- | 1,02 | down |
| 5641972 | 7156611 | 1267325 | --- | --- | --- | 1,00 | up   |
| 5641991 | 7240569 | 1475464 | --- | --- | --- | 1,14 | up   |
| 5642012 | 7075460 | 1069395 | --- | --- | --- | 1,04 | up   |
| 5642025 | 7366728 | 1785433 | --- | --- | --- | 1,43 | down |
| 5642064 | 7369939 | 1795635 | --- | --- | --- | 1,99 | down |
| 5642129 | 7112355 | 1158081 | --- | --- | --- | 1,27 | up   |
| 5642443 | 7277742 | 1567166 | --- | --- | --- | 1,78 | up   |
| 5642450 | 7186464 | 1341369 | --- | --- | --- | 1,26 | down |
| 5642493 | 7358048 | 1764805 | --- | --- | --- | 1,03 | down |
| 5642603 | 7356115 | 1760136 | --- | --- | --- | 1,25 | down |
| 5642609 | 7156611 | 1267336 | --- | --- | --- | 1,11 | down |
| 5642820 | 7078982 | 1077311 | --- | --- | --- | 1,16 | up   |
| 5642903 | 7140365 | 1226775 | --- | --- | --- | 1,53 | up   |
| 5642928 | 7073677 | 1065156 | --- | --- | --- | 1,33 | down |
| 5642951 | 7039223 | 983563  | --- | --- | --- | 1,11 | down |
| 5642961 | 7070836 | 1058349 | --- | --- | --- | 1,01 | down |
| 5643092 | 7059584 | 1030542 | --- | --- | --- | 1,41 | up   |
| 5643135 | 7318714 | 1669243 | --- | --- | --- | 1,46 | up   |
| 5643219 | 7365147 | 1781747 | --- | --- | --- | 1,01 | up   |
| 5643266 | 7070668 | 1057911 | --- | --- | --- | 1,34 | up   |
| 5643290 | 7361881 | 1773957 | --- | --- | --- | 1,26 | down |
| 5643302 | 7264797 | 1534427 | --- | --- | --- | 1,04 | up   |
| 5643354 | 7361042 | 1772278 | --- | --- | --- | 2,14 | down |
| 5643428 | 7252877 | 1504751 | --- | --- | --- | 1,37 | up   |
| 5643486 | 7209927 | 1398939 | --- | --- | --- | 1,17 | down |
| 5643581 | 7374324 | 1807501 | --- | --- | --- | 1,22 | down |
| 5643669 | 7128921 | 1198516 | --- | --- | --- | 1,36 | up   |
| 5643771 | 7033337 | 969499  | --- | --- | --- | 1,14 | up   |
| 5643800 | 7100523 | 1128902 | --- | --- | --- | 1,27 | up   |
| 5643818 | 7128539 | 1197666 | --- | --- | --- | 1,07 | up   |
| 5643839 | 7166867 | 1291347 | --- | --- | --- | 1,13 | down |
| 5643906 | 7093296 | 1110886 | --- | --- | --- | 1,62 | up   |
| 5643958 | 7073950 | 1065923 | --- | --- | --- | 1,50 | up   |
| 5644087 | 7189455 | 1348345 | --- | --- | --- | 1,04 | down |
| 5644166 | 7052813 | 1015883 | --- | --- | --- | 1,59 | down |
| 5644186 | 7293402 | 1604804 | --- | --- | --- | 1,08 | up   |
| 5644252 | 7200129 | 1375996 | --- | --- | --- | 1,62 | down |
| 5644334 | 7087282 | 1096240 | --- | --- | --- | 1,04 | down |
| 5644373 | 7079600 | 1078629 | --- | --- | --- | 1,05 | down |
| 5644378 | 7084716 | 1090110 | --- | --- | --- | 2,73 | down |
| 5644588 | 7113085 | 1159998 | --- | --- | --- | 1,36 | up   |
| 5644620 | 7147809 | 1245448 | --- | --- | --- | 1,27 | up   |

|         |         |         |     |     |     |      |      |
|---------|---------|---------|-----|-----|-----|------|------|
| 5644717 | 7340990 | 1722509 | --- | --- | --- | 1,01 | up   |
| 5644825 | 7188829 | 1346662 | --- | --- | --- | 1,14 | down |
| 5644967 | 7107321 | 1145318 | --- | --- | --- | 1,28 | down |
| 5644981 | 7264797 | 1534422 | --- | --- | --- | 1,01 | up   |
| 5644986 | 7156052 | 1265760 | --- | --- | --- | 1,01 | up   |
| 5645024 | 7329135 | 1693498 | --- | --- | --- | 1,11 | up   |
| 5645034 | 7228530 | 1443905 | --- | --- | --- | 1,26 | down |
| 5645046 | 7041609 | 989588  | --- | --- | --- | 1,00 | down |
| 5645085 | 7247005 | 1490120 | --- | --- | --- | 1,01 | down |
| 5645164 | 7355580 | 1758895 | --- | --- | --- | 1,44 | down |
| 5645186 | 7085063 | 1090806 | --- | --- | --- | 2,16 | up   |
| 5645220 | 7257893 | 1517481 | --- | --- | --- | 1,23 | down |
| 5645221 | 7028278 | 957310  | --- | --- | --- | 1,17 | up   |
| 5645251 | 7105780 | 1141705 | --- | --- | --- | 2,04 | down |
| 5645350 | 7240569 | 1475503 | --- | --- | --- | 1,11 | down |
| 5645382 | 7155765 | 1265043 | --- | --- | --- | 1,01 | up   |
| 5645519 | 7084500 | 1089707 | --- | --- | --- | 1,02 | down |
| 5645602 | 7110999 | 1154775 | --- | --- | --- | 1,37 | down |
| 5645603 | 7247848 | 1492049 | --- | --- | --- | 1,11 | up   |
| 5645735 | 7183182 | 1333563 | --- | --- | --- | 1,52 | up   |
| 5645775 | 7073950 | 1065938 | --- | --- | --- | 1,18 | down |
| 5645794 | 7146542 | 1242295 | --- | --- | --- | 1,01 | up   |
| 5645858 | 7320735 | 1674160 | --- | --- | --- | 1,01 | up   |
| 5645868 | 7167883 | 1294099 | --- | --- | --- | 1,05 | up   |
| 5646044 | 7212587 | 1404651 | --- | --- | --- | 1,14 | down |
| 5646099 | 7140113 | 1226087 | --- | --- | --- | 1,67 | down |
| 5646128 | 7142321 | 1231498 | --- | --- | --- | 1,14 | up   |
| 5646144 | 7337314 | 1712898 | --- | --- | --- | 1,15 | up   |
| 5646213 | 7252877 | 1504710 | --- | --- | --- | 1,19 | up   |
| 5646263 | 7072765 | 1062741 | --- | --- | --- | 1,13 | up   |
| 5646334 | 7360486 | 1770960 | --- | --- | --- | 1,02 | up   |
| 5646340 | 7345465 | 1733859 | --- | --- | --- | 1,43 | down |
| 5646383 | 7152974 | 1257659 | --- | --- | --- | 1,27 | up   |
| 5646399 | 7080563 | 1080715 | --- | --- | --- | 1,27 | down |
| 5646527 | 7374324 | 1807504 | --- | --- | --- | 1,47 | up   |
| 5646667 | 7076236 | 1071178 | --- | --- | --- | 1,07 | up   |
| 5646713 | 7279810 | 1572589 | --- | --- | --- | 3,22 | down |
| 5646868 | 7337522 | 1713595 | --- | --- | --- | 2,15 | down |
| 5646946 | 7221443 | 1426312 | --- | --- | --- | 1,07 | down |
| 5646960 | 7378997 | 1818648 | --- | --- | --- | 1,12 | up   |
| 5646972 | 7312686 | 1653623 | --- | --- | --- | 2,03 | up   |
| 5646986 | 7331413 | 1699136 | --- | --- | --- | 1,02 | down |
| 5647018 | 7377304 | 1814599 | --- | --- | --- | 1,15 | up   |
| 5647058 | 7270397 | 1548132 | --- | --- | --- | 1,74 | down |
| 5647147 | 7171091 | 1302470 | --- | --- | --- | 1,13 | up   |
| 5647237 | 7240569 | 1475487 | --- | --- | --- | 1,09 | down |
| 5647250 | 7069721 | 1055283 | --- | --- | --- | 1,12 | down |
| 5647297 | 7217434 | 1416452 | --- | --- | --- | 1,16 | up   |
| 5647346 | 7198087 | 1370679 | --- | --- | --- | 1,11 | up   |
| 5647456 | 7244027 | 1483277 | --- | --- | --- | 1,46 | up   |
| 5647555 | 7100523 | 1128849 | --- | --- | --- | 1,08 | up   |
| 5647671 | 7327169 | 1688440 | --- | --- | --- | 1,42 | up   |
| 5647769 | 7364346 | 1780010 | --- | --- | --- | 1,54 | up   |
| 5647822 | 7337425 | 1713137 | --- | --- | --- | 1,01 | up   |
| 5647927 | 7333462 | 1703643 | --- | --- | --- | 2,23 | down |
| 5647941 | 7311391 | 1650850 | --- | --- | --- | 1,08 | up   |
| 5647979 | 7156052 | 1265744 | --- | --- | --- | 1,08 | down |

|         |         |         |     |     |     |      |      |
|---------|---------|---------|-----|-----|-----|------|------|
| 5648033 | 7056736 | 1024419 | --- | --- | --- | 1,38 | up   |
| 5648043 | 7131876 | 1206045 | --- | --- | --- | 1,23 | down |
| 5648144 | 7216676 | 1414421 | --- | --- | --- | 1,31 | down |
| 5648272 | 7067670 | 1050319 | --- | --- | --- | 2,86 | up   |
| 5648333 | 7378997 | 1818639 | --- | --- | --- | 2,15 | down |
| 5648413 | 7030549 | 961799  | --- | --- | --- | 1,05 | up   |
| 5648469 | 7229856 | 1447078 | --- | --- | --- | 1,15 | up   |
| 5648496 | 7369400 | 1793983 | --- | --- | --- | 1,14 | up   |
| 5648516 | 7260488 | 1523913 | --- | --- | --- | 1,01 | down |
| 5648526 | 7095066 | 1115269 | --- | --- | --- | 1,20 | up   |
| 5648674 | 7352635 | 1751446 | --- | --- | --- | 1,43 | up   |
| 5648684 | 7055793 | 1022322 | --- | --- | --- | 1,21 | up   |
| 5648782 | 7344406 | 1731202 | --- | --- | --- | 1,24 | up   |
| 5648784 | 7303777 | 1631912 | --- | --- | --- | 1,49 | up   |
| 5648786 | 7281924 | 1577734 | --- | --- | --- | 1,10 | up   |
| 5648791 | 7069721 | 1055291 | --- | --- | --- | 1,01 | down |
| 5648803 | 7240641 | 1475780 | --- | --- | --- | 1,15 | down |
| 5648899 | 7341264 | 1723350 | --- | --- | --- | 1,03 | down |
| 5648938 | 7297756 | 1616091 | --- | --- | --- | 1,03 | up   |
| 5649020 | 7031618 | 964201  | --- | --- | --- | 1,13 | up   |
| 5649049 | 7073573 | 1064748 | --- | --- | --- | 2,06 | down |
| 5649051 | 7344838 | 1732458 | --- | --- | --- | 1,69 | down |
| 5649068 | 7094158 | 1112981 | --- | --- | --- | 1,09 | up   |
| 5649288 | 7227474 | 1441113 | --- | --- | --- | 1,16 | down |
| 5649398 | 7247005 | 1490111 | --- | --- | --- | 1,00 | up   |
| 5649421 | 7217192 | 1415699 | --- | --- | --- | 1,05 | down |
| 5649429 | 7122805 | 1184245 | --- | --- | --- | 1,07 | down |
| 5649479 | 7143455 | 1234729 | --- | --- | --- | 1,00 | down |
| 5649492 | 7374493 | 1807965 | --- | --- | --- | 2,29 | down |
| 5649505 | 7168979 | 1297175 | --- | --- | --- | 1,51 | down |
| 5649604 | 7295410 | 1609754 | --- | --- | --- | 1,88 | up   |
| 5649650 | 7059020 | 1029362 | --- | --- | --- | 1,21 | up   |
| 5649656 | 7069830 | 1055642 | --- | --- | --- | 1,12 | down |
| 5649725 | 7217434 | 1416352 | --- | --- | --- | 1,10 | up   |
| 5649744 | 7142770 | 1232693 | --- | --- | --- | 1,15 | down |
| 5649781 | 7363529 | 1777944 | --- | --- | --- | 1,02 | down |
| 5649884 | 7341274 | 1723391 | --- | --- | --- | 1,35 | up   |
| 5649915 | 7106752 | 1144007 | --- | --- | --- | 1,70 | up   |
| 5649934 | 7038659 | 982166  | --- | --- | --- | 1,02 | down |
| 5649950 | 7384073 | 1829452 | --- | --- | --- | 1,11 | up   |
| 5650049 | 7088625 | 1099877 | --- | --- | --- | 4,61 | down |
| 5650213 | 7089952 | 1103318 | --- | --- | --- | 1,83 | up   |
| 5650343 | 7101258 | 1130567 | --- | --- | --- | 1,19 | up   |
| 5650368 | 7297589 | 1615629 | --- | --- | --- | 1,26 | up   |
| 5650452 | 7189184 | 1347596 | --- | --- | --- | 1,22 | down |
| 5650475 | 7158920 | 1272509 | --- | --- | --- | 1,20 | up   |
| 5650597 | 7070869 | 1058492 | --- | --- | --- | 1,20 | up   |
| 5650606 | 7075460 | 1069391 | --- | --- | --- | 1,33 | up   |
| 5650652 | 7247954 | 1492396 | --- | --- | --- | 1,59 | down |
| 5650684 | 7068942 | 1053385 | --- | --- | --- | 1,12 | down |
| 5650730 | 7176362 | 1315506 | --- | --- | --- | 1,32 | up   |
| 5650890 | 7312569 | 1653341 | --- | --- | --- | 1,05 | down |
| 5650935 | 7182739 | 1332583 | --- | --- | --- | 1,38 | up   |
| 5650938 | 7272110 | 1553031 | --- | --- | --- | 1,11 | up   |
| 5650971 | 7181286 | 1328484 | --- | --- | --- | 1,70 | up   |
| 5651002 | 7340673 | 1721712 | --- | --- | --- | 1,23 | down |
| 5651069 | 7341274 | 1723381 | --- | --- | --- | 1,34 | up   |

|         |         |         |     |     |     |      |      |
|---------|---------|---------|-----|-----|-----|------|------|
| 5651104 | 7086966 | 1095253 | --- | --- | --- | 1,03 | down |
| 5651128 | 7079475 | 1078281 | --- | --- | --- | 1,43 | down |
| 5651134 | 7244287 | 1484047 | --- | --- | --- | 1,21 | down |
| 5651140 | 7237814 | 1467841 | --- | --- | --- | 1,07 | down |
| 5651268 | 7205944 | 1389461 | --- | --- | --- | 1,23 | down |
| 5651404 | 7126400 | 1192525 | --- | --- | --- | 1,14 | down |
| 5651478 | 7080476 | 1080400 | --- | --- | --- | 1,24 | down |
| 5651587 | 7273251 | 1555948 | --- | --- | --- | 1,36 | up   |
| 5651593 | 7086966 | 1095236 | --- | --- | --- | 1,94 | up   |
| 5651603 | 7359361 | 1768262 | --- | --- | --- | 1,11 | down |
| 5651613 | 7040442 | 986524  | --- | --- | --- | 1,53 | up   |
| 5651628 | 7321414 | 1675640 | --- | --- | --- | 1,07 | down |
| 5651678 | 7062436 | 1037682 | --- | --- | --- | 1,36 | up   |
| 5651684 | 7094158 | 1112972 | --- | --- | --- | 1,77 | down |
| 5651738 | 7174281 | 1310845 | --- | --- | --- | 2,07 | up   |
| 5651782 | 7180598 | 1326330 | --- | --- | --- | 1,21 | up   |
| 5651886 | 7376820 | 1813442 | --- | --- | --- | 1,36 | down |
| 5651903 | 7222236 | 1428122 | --- | --- | --- | 1,11 | down |
| 5651910 | 7256191 | 1512862 | --- | --- | --- | 1,06 | down |
| 5652024 | 7384509 | 1830731 | --- | --- | --- | 1,25 | down |
| 5652036 | 7368489 | 1791034 | --- | --- | --- | 1,00 | up   |
| 5652079 | 7376073 | 1811700 | --- | --- | --- | 1,00 | up   |
| 5652119 | 7069830 | 1055643 | --- | --- | --- | 1,11 | down |
| 5652266 | 7136062 | 1216294 | --- | --- | --- | 1,31 | up   |
| 5652269 | 7328985 | 1693172 | --- | --- | --- | 1,28 | down |
| 5652276 | 7142917 | 1233175 | --- | --- | --- | 1,05 | down |
| 5652284 | 7355804 | 1759431 | --- | --- | --- | 1,06 | down |
| 5652295 | 7231152 | 1450228 | --- | --- | --- | 1,05 | up   |
| 5652299 | 7165644 | 1288009 | --- | --- | --- | 2,24 | up   |
| 5652337 | 7247907 | 1492242 | --- | --- | --- | 1,00 | up   |
| 5652383 | 7207093 | 1392095 | --- | --- | --- | 1,15 | up   |
| 5652547 | 7064732 | 1042931 | --- | --- | --- | 1,50 | down |
| 5652608 | 7061003 | 1033923 | --- | --- | --- | 1,02 | down |
| 5652620 | 7043515 | 994006  | --- | --- | --- | 2,36 | down |
| 5652625 | 7253358 | 1505834 | --- | --- | --- | 1,39 | up   |
| 5652843 | 7068942 | 1053380 | --- | --- | --- | 1,17 | up   |
| 5652848 | 7252728 | 1504325 | --- | --- | --- | 1,38 | up   |
| 5652962 | 7229061 | 1445300 | --- | --- | --- | 1,87 | up   |
| 5652967 | 7131372 | 1205049 | --- | --- | --- | 1,08 | down |
| 5653052 | 7293922 | 1605958 | --- | --- | --- | 1,16 | up   |
| 5653268 | 7182056 | 1330576 | --- | --- | --- | 1,04 | up   |
| 5653349 | 7217650 | 1417171 | --- | --- | --- | 1,40 | up   |
| 5653379 | 7333462 | 1703641 | --- | --- | --- | 1,20 | up   |
| 5653435 | 7101643 | 1131578 | --- | --- | --- | 1,58 | up   |
| 5653437 | 7029078 | 958875  | --- | --- | --- | 1,28 | up   |
| 5653451 | 7225291 | 1435293 | --- | --- | --- | 1,04 | up   |
| 5653638 | 7313841 | 1656718 | --- | --- | --- | 1,23 | up   |
| 5653657 | 7309738 | 1646947 | --- | --- | --- | 1,00 | up   |
| 5653858 | 7256070 | 1512581 | --- | --- | --- | 1,19 | down |
| 5653890 | 7069830 | 1055639 | --- | --- | --- | 1,24 | up   |
| 5653936 | 7213908 | 1407657 | --- | --- | --- | 1,47 | up   |
| 5653949 | 7279303 | 1571201 | --- | --- | --- | 1,52 | down |
| 5654035 | 7259923 | 1522524 | --- | --- | --- | 1,33 | up   |
| 5654037 | 7339732 | 1719239 | --- | --- | --- | 1,42 | down |
| 5654069 | 7067670 | 1050333 | --- | --- | --- | 1,30 | up   |
| 5654077 | 7039725 | 984817  | --- | --- | --- | 1,19 | up   |
| 5654104 | 7295410 | 1609716 | --- | --- | --- | 1,28 | up   |

|         |         |         |     |     |     |      |      |
|---------|---------|---------|-----|-----|-----|------|------|
| 5654166 | 7361881 | 1773943 | --- | --- | --- | 1,44 | down |
| 5654462 | 7368954 | 1792778 | --- | --- | --- | 2,04 | up   |
| 5654475 | 7281188 | 1575809 | --- | --- | --- | 1,11 | up   |
| 5654481 | 7176235 | 1315234 | --- | --- | --- | 1,20 | down |
| 5654504 | 7083030 | 1086248 | --- | --- | --- | 1,16 | up   |
| 5654526 | 7261580 | 1526806 | --- | --- | --- | 1,15 | down |
| 5654551 | 7041465 | 989108  | --- | --- | --- | 1,04 | down |
| 5654738 | 7097536 | 1121129 | --- | --- | --- | 1,04 | down |
| 5654758 | 7381330 | 1823641 | --- | --- | --- | 1,36 | up   |
| 5654852 | 7041061 | 988081  | --- | --- | --- | 1,50 | up   |
| 5654900 | 7029119 | 958977  | --- | --- | --- | 1,19 | up   |
| 5654988 | 7107926 | 1146838 | --- | --- | --- | 1,32 | down |
| 5654989 | 7087965 | 1098047 | --- | --- | --- | 1,36 | down |
| 5655060 | 7240569 | 1475400 | --- | --- | --- | 1,30 | down |
| 5655084 | 7200545 | 1376912 | --- | --- | --- | 1,10 | down |
| 5655373 | 7058507 | 1028294 | --- | --- | --- | 1,09 | up   |
| 5655394 | 7169599 | 1298444 | --- | --- | --- | 1,14 | up   |
| 5655527 | 7114274 | 1162811 | --- | --- | --- | 1,00 | up   |
| 5655596 | 7354935 | 1757097 | --- | --- | --- | 1,67 | up   |
| 5655636 | 7373633 | 1805697 | --- | --- | --- | 1,04 | up   |
| 5655712 | 7240569 | 1475472 | --- | --- | --- | 1,08 | up   |
| 5655728 | 7069239 | 1054091 | --- | --- | --- | 1,49 | down |
| 5655749 | 7146542 | 1242252 | --- | --- | --- | 1,10 | down |
| 5655774 | 7194400 | 1361783 | --- | --- | --- | 1,41 | up   |
| 5655804 | 7086966 | 1095263 | --- | --- | --- | 1,07 | up   |
| 5655824 | 7147416 | 1244423 | --- | --- | --- | 1,39 | up   |
| 5655840 | 7231557 | 1451566 | --- | --- | --- | 1,21 | down |
| 5655899 | 7318286 | 1668333 | --- | --- | --- | 1,02 | down |
| 5655989 | 7094139 | 1112921 | --- | --- | --- | 1,03 | up   |
| 5656063 | 7247907 | 1492238 | --- | --- | --- | 1,00 | up   |
| 5656097 | 7084500 | 1089703 | --- | --- | --- | 1,31 | up   |
| 5656108 | 7169599 | 1298453 | --- | --- | --- | 1,18 | up   |
| 5656123 | 7073677 | 1065150 | --- | --- | --- | 1,20 | down |
| 5656201 | 7320068 | 1672626 | --- | --- | --- | 1,28 | up   |
| 5656223 | 7274892 | 1559566 | --- | --- | --- | 1,05 | up   |
| 5656303 | 7327169 | 1688460 | --- | --- | --- | 1,23 | up   |
| 5656308 | 7052385 | 1014790 | --- | --- | --- | 1,13 | down |
| 5656390 | 7376073 | 1811691 | --- | --- | --- | 1,13 | up   |
| 5656425 | 7298101 | 1617093 | --- | --- | --- | 1,06 | up   |
| 5656535 | 7039302 | 983840  | --- | --- | --- | 1,33 | down |
| 5656584 | 7099573 | 1126723 | --- | --- | --- | 1,17 | down |
| 5656619 | 7292517 | 1602554 | --- | --- | --- | 1,16 | up   |
| 5656682 | 7328985 | 1693160 | --- | --- | --- | 1,14 | down |
| 5656861 | 7217747 | 1417467 | --- | --- | --- | 1,69 | down |
| 5657054 | 7113483 | 1161021 | --- | --- | --- | 1,26 | down |
| 5657070 | 7105375 | 1140969 | --- | --- | --- | 1,02 | down |
| 5657222 | 7217679 | 1417297 | --- | --- | --- | 1,42 | up   |
| 5657226 | 7297589 | 1615666 | --- | --- | --- | 1,72 | up   |
| 5657241 | 7181193 | 1328299 | --- | --- | --- | 1,21 | down |
| 5657252 | 7035525 | 974772  | --- | --- | --- | 1,56 | down |
| 5657327 | 7247954 | 1492387 | --- | --- | --- | 1,07 | up   |
| 5657471 | 7112350 | 1158029 | --- | --- | --- | 1,14 | down |
| 5657553 | 7229061 | 1445287 | --- | --- | --- | 1,26 | down |
| 5657593 | 7150047 | 1250782 | --- | --- | --- | 1,53 | up   |
| 5657648 | 7312566 | 1653300 | --- | --- | --- | 1,55 | up   |
| 5657652 | 7195680 | 1364883 | --- | --- | --- | 1,48 | up   |
| 5657712 | 7041609 | 989555  | --- | --- | --- | 1,12 | down |

|         |         |         |     |     |     |      |      |
|---------|---------|---------|-----|-----|-----|------|------|
| 5657730 | 7207093 | 1392105 | --- | --- | --- | 1,10 | up   |
| 5657753 | 7297274 | 1614658 | --- | --- | --- | 1,00 | down |
| 5657839 | 7330223 | 1695835 | --- | --- | --- | 2,66 | down |
| 5657853 | 7210387 | 1400046 | --- | --- | --- | 1,54 | down |
| 5657897 | 7368004 | 1789328 | --- | --- | --- | 1,20 | up   |
| 5657916 | 7095021 | 1115139 | --- | --- | --- | 1,70 | up   |
| 5657917 | 7356115 | 1760114 | --- | --- | --- | 1,50 | up   |
| 5657958 | 7088625 | 1099868 | --- | --- | --- | 1,42 | up   |
| 5658002 | 7210822 | 1400969 | --- | --- | --- | 1,15 | down |
| 5658096 | 7067828 | 1050771 | --- | --- | --- | 1,17 | down |
| 5658121 | 7113083 | 1159968 | --- | --- | --- | 1,28 | up   |
| 5658199 | 7280959 | 1575055 | --- | --- | --- | 1,02 | up   |
| 5658241 | 7148741 | 1247838 | --- | --- | --- | 1,10 | up   |
| 5658290 | 7181105 | 1327963 | --- | --- | --- | 1,56 | up   |
| 5658359 | 7143455 | 1234713 | --- | --- | --- | 1,58 | down |
| 5658436 | 7059020 | 1029349 | --- | --- | --- | 1,40 | up   |
| 5658446 | 7236131 | 1463790 | --- | --- | --- | 1,21 | down |
| 5658472 | 7033504 | 969850  | --- | --- | --- | 1,61 | up   |
| 5658478 | 7071264 | 1059285 | --- | --- | --- | 1,58 | down |
| 5658498 | 7083030 | 1086248 | --- | --- | --- | 1,15 | up   |
| 5658507 | 7152974 | 1257657 | --- | --- | --- | 1,01 | up   |
| 5658524 | 7196029 | 1365624 | --- | --- | --- | 1,14 | down |
| 5658739 | 7109730 | 1151745 | --- | --- | --- | 1,25 | down |
| 5658798 | 7110401 | 1153057 | --- | --- | --- | 1,37 | up   |
| 5658853 | 7257893 | 1517456 | --- | --- | --- | 1,14 | up   |
| 5658903 | 7353997 | 1754710 | --- | --- | --- | 1,88 | up   |
| 5658931 | 7301843 | 1626474 | --- | --- | --- | 1,12 | down |
| 5658975 | 7061550 | 1035282 | --- | --- | --- | 1,34 | down |
| 5658995 | 7052176 | 1014219 | --- | --- | --- | 1,29 | up   |
| 5659043 | 7234401 | 1459338 | --- | --- | --- | 1,06 | down |
| 5659174 | 7045955 | 1000746 | --- | --- | --- | 1,03 | up   |
| 5659206 | 7253408 | 1505935 | --- | --- | --- | 1,43 | up   |
| 5659370 | 7264653 | 1534060 | --- | --- | --- | 1,24 | up   |
| 5659382 | 7291828 | 1600925 | --- | --- | --- | 1,60 | down |
| 5659417 | 7052338 | 1014664 | --- | --- | --- | 1,87 | down |
| 5659548 | 7297589 | 1615641 | --- | --- | --- | 1,01 | up   |
| 5659628 | 7162177 | 1280576 | --- | --- | --- | 1,19 | down |
| 5659653 | 7075460 | 1069406 | --- | --- | --- | 1,21 | up   |
| 5659705 | 7212285 | 1403988 | --- | --- | --- | 1,03 | down |
| 5659751 | 7131805 | 1205907 | --- | --- | --- | 1,18 | down |
| 5659872 | 7075445 | 1069353 | --- | --- | --- | 1,29 | up   |
| 5659921 | 7339732 | 1719203 | --- | --- | --- | 1,50 | down |
| 5659928 | 7378997 | 1818646 | --- | --- | --- | 1,19 | down |
| 5659968 | 7313841 | 1656716 | --- | --- | --- | 1,23 | down |
| 5660008 | 7198210 | 1371026 | --- | --- | --- | 1,11 | down |
| 5660070 | 7040442 | 986554  | --- | --- | --- | 1,42 | down |
| 5660134 | 7374790 | 1808783 | --- | --- | --- | 1,12 | up   |
| 5660159 | 7110401 | 1153069 | --- | --- | --- | 1,04 | up   |
| 5660241 | 7240569 | 1475502 | --- | --- | --- | 1,00 | up   |
| 5660259 | 7139708 | 1225067 | --- | --- | --- | 1,14 | up   |
| 5660320 | 7220449 | 1424092 | --- | --- | --- | 2,24 | up   |
| 5660360 | 7293402 | 1604856 | --- | --- | --- | 1,53 | up   |
| 5660419 | 7088625 | 1099880 | --- | --- | --- | 1,34 | up   |
| 5660468 | 7070869 | 1058491 | --- | --- | --- | 1,85 | down |
| 5660476 | 7028624 | 957993  | --- | --- | --- | 1,05 | up   |
| 5660481 | 7355755 | 1759318 | --- | --- | --- | 1,13 | up   |
| 5660517 | 7373038 | 1804289 | --- | --- | --- | 1,40 | down |

|         |         |         |     |     |     |      |      |
|---------|---------|---------|-----|-----|-----|------|------|
| 5660519 | 7207971 | 1394312 | --- | --- | --- | 1,28 | up   |
| 5660588 | 7189669 | 1348970 | --- | --- | --- | 1,07 | up   |
| 5660590 | 7371228 | 1799457 | --- | --- | --- | 1,01 | down |
| 5660627 | 7207069 | 1392028 | --- | --- | --- | 1,32 | down |
| 5660645 | 7337250 | 1712720 | --- | --- | --- | 1,18 | up   |
| 5660652 | 7079475 | 1078288 | --- | --- | --- | 1,39 | up   |
| 5660690 | 7030087 | 960787  | --- | --- | --- | 1,20 | down |
| 5660730 | 7240569 | 1475479 | --- | --- | --- | 1,03 | up   |
| 5660794 | 7309738 | 1646947 | --- | --- | --- | 1,17 | up   |
| 5660813 | 7330314 | 1696144 | --- | --- | --- | 2,36 | up   |
| 5660819 | 7083030 | 1086259 | --- | --- | --- | 1,04 | up   |
| 5660858 | 7088164 | 1098472 | --- | --- | --- | 1,05 | up   |
| 5660939 | 7031618 | 964198  | --- | --- | --- | 1,22 | down |
| 5660942 | 7350489 | 1746106 | --- | --- | --- | 1,00 | down |
| 5661067 | 7184850 | 1337612 | --- | --- | --- | 1,11 | down |
| 5661078 | 7143455 | 1234728 | --- | --- | --- | 1,88 | down |
| 5661102 | 7336931 | 1711872 | --- | --- | --- | 1,52 | up   |
| 5661155 | 7142081 | 1230986 | --- | --- | --- | 1,29 | up   |
| 5661249 | 7191866 | 1354893 | --- | --- | --- | 1,25 | up   |
| 5661255 | 7343279 | 1728117 | --- | --- | --- | 1,35 | up   |
| 5661381 | 7067670 | 1050322 | --- | --- | --- | 2,70 | up   |
| 5661388 | 7148741 | 1247839 | --- | --- | --- | 1,38 | down |
| 5661395 | 7175946 | 1314650 | --- | --- | --- | 1,05 | down |
| 5661483 | 7113083 | 1159966 | --- | --- | --- | 1,12 | up   |
| 5661518 | 7243901 | 1483058 | --- | --- | --- | 1,15 | up   |
| 5661569 | 7366749 | 1785515 | --- | --- | --- | 1,17 | down |
| 5661573 | 7039725 | 984832  | --- | --- | --- | 1,00 | up   |
| 5661601 | 7361223 | 1772620 | --- | --- | --- | 1,05 | down |
| 5661627 | 7309734 | 1646877 | --- | --- | --- | 2,22 | down |
| 5661633 | 7069142 | 1053880 | --- | --- | --- | 1,06 | down |
| 5661700 | 7263248 | 1530601 | --- | --- | --- | 1,31 | up   |
| 5661705 | 7141456 | 1229610 | --- | --- | --- | 1,68 | up   |
| 5661724 | 7181001 | 1327592 | --- | --- | --- | 1,03 | up   |
| 5661738 | 7353224 | 1752671 | --- | --- | --- | 1,04 | up   |
| 5661772 | 7332128 | 1700849 | --- | --- | --- | 1,24 | down |
| 5661833 | 7350993 | 1747497 | --- | --- | --- | 1,06 | down |
| 5661887 | 7138580 | 1222507 | --- | --- | --- | 1,50 | down |
| 5661927 | 7121849 | 1181775 | --- | --- | --- | 1,30 | up   |
| 5661928 | 7157189 | 1268660 | --- | --- | --- | 1,02 | up   |
| 5662016 | 7326245 | 1686391 | --- | --- | --- | 1,04 | up   |
| 5662259 | 7069724 | 1055337 | --- | --- | --- | 1,12 | up   |
| 5662321 | 7239752 | 1473149 | --- | --- | --- | 1,26 | up   |
| 5662378 | 7060896 | 1033619 | --- | --- | --- | 1,54 | up   |
| 5662439 | 7376566 | 1812878 | --- | --- | --- | 2,92 | up   |
| 5662474 | 7168979 | 1297186 | --- | --- | --- | 1,23 | up   |
| 5662522 | 7330396 | 1696370 | --- | --- | --- | 1,37 | up   |
| 5662587 | 7055793 | 1022311 | --- | --- | --- | 1,22 | up   |
| 5662595 | 7083355 | 1086911 | --- | --- | --- | 1,20 | up   |
| 5662645 | 7139708 | 1225051 | --- | --- | --- | 1,31 | up   |
| 5662648 | 7227433 | 1440984 | --- | --- | --- | 2,30 | down |
| 5662710 | 7122131 | 1182680 | --- | --- | --- | 1,01 | up   |
| 5662874 | 7034356 | 972169  | --- | --- | --- | 1,45 | up   |
| 5662877 | 7254040 | 1507592 | --- | --- | --- | 1,21 | up   |
| 5662894 | 7079238 | 1077806 | --- | --- | --- | 1,20 | down |
| 5663058 | 7204917 | 1387118 | --- | --- | --- | 1,50 | down |
| 5663200 | 7148978 | 1248528 | --- | --- | --- | 1,08 | up   |
| 5663223 | 7079475 | 1078286 | --- | --- | --- | 1,53 | up   |

|         |         |         |     |     |     |      |      |
|---------|---------|---------|-----|-----|-----|------|------|
| 5663434 | 7258546 | 1518930 | --- | --- | --- | 1,10 | down |
| 5663449 | 7056736 | 1024416 | --- | --- | --- | 1,34 | up   |
| 5663491 | 7293922 | 1605964 | --- | --- | --- | 2,65 | down |
| 5663615 | 7092549 | 1109167 | --- | --- | --- | 1,19 | down |
| 5663645 | 7174281 | 1310875 | --- | --- | --- | 1,16 | up   |
| 5663670 | 7289382 | 1595205 | --- | --- | --- | 1,19 | down |
| 5663725 | 7102723 | 1134431 | --- | --- | --- | 1,67 | up   |
| 5663748 | 7162144 | 1280514 | --- | --- | --- | 1,27 | up   |
| 5663760 | 7337522 | 1713634 | --- | --- | --- | 1,62 | up   |
| 5663765 | 7180166 | 1325239 | --- | --- | --- | 1,07 | down |
| 5663781 | 7073609 | 1064859 | --- | --- | --- | 1,19 | down |
| 5663927 | 7329846 | 1694996 | --- | --- | --- | 1,41 | up   |
| 5663942 | 7140365 | 1226767 | --- | --- | --- | 2,59 | down |
| 5663960 | 7217434 | 1416424 | --- | --- | --- | 1,90 | down |
| 5664006 | 7194400 | 1361732 | --- | --- | --- | 1,04 | down |
| 5664013 | 7358859 | 1766963 | --- | --- | --- | 1,13 | down |
| 5664021 | 7055876 | 1022469 | --- | --- | --- | 1,06 | down |
| 5664062 | 7344530 | 1731582 | --- | --- | --- | 1,21 | up   |
| 5664167 | 7275879 | 1562186 | --- | --- | --- | 2,06 | down |
| 5664182 | 7288170 | 1592321 | --- | --- | --- | 1,07 | down |
| 5664231 | 7249388 | 1495880 | --- | --- | --- | 1,05 | down |
| 5664259 | 7196029 | 1365625 | --- | --- | --- | 1,08 | up   |
| 5664287 | 7095041 | 1115174 | --- | --- | --- | 1,54 | down |
| 5664345 | 7106752 | 1144058 | --- | --- | --- | 1,00 | up   |
| 5664382 | 7095041 | 1115175 | --- | --- | --- | 1,04 | down |
| 5664483 | 7259923 | 1522530 | --- | --- | --- | 1,25 | down |
| 5664514 | 7363568 | 1778141 | --- | --- | --- | 1,63 | down |
| 5664537 | 7069253 | 1054153 | --- | --- | --- | 1,10 | down |
| 5664641 | 7346505 | 1736285 | --- | --- | --- | 1,52 | down |
| 5664741 | 7213908 | 1407698 | --- | --- | --- | 1,14 | down |
| 5664748 | 7335637 | 1708479 | --- | --- | --- | 1,36 | up   |
| 5664778 | 7123714 | 1186425 | --- | --- | --- | 1,07 | up   |
| 5664807 | 7055793 | 1022308 | --- | --- | --- | 1,07 | up   |
| 5664939 | 7321029 | 1674827 | --- | --- | --- | 1,17 | up   |
| 5664956 | 7092549 | 1109178 | --- | --- | --- | 1,19 | down |
| 5665085 | 7257893 | 1517460 | --- | --- | --- | 1,10 | up   |
| 5665238 | 7211389 | 1402113 | --- | --- | --- | 1,11 | down |
| 5665266 | 7315206 | 1660016 | --- | --- | --- | 1,98 | down |
| 5665293 | 7038153 | 981162  | --- | --- | --- | 1,44 | up   |
| 5665312 | 7098077 | 1122730 | --- | --- | --- | 1,08 | down |
| 5665321 | 7068942 | 1053382 | --- | --- | --- | 1,65 | up   |
| 5665326 | 7200313 | 1376465 | --- | --- | --- | 1,36 | down |
| 5665385 | 7320735 | 1674176 | --- | --- | --- | 1,08 | down |
| 5665389 | 7335637 | 1708463 | --- | --- | --- | 1,17 | up   |
| 5665427 | 7064732 | 1042909 | --- | --- | --- | 2,29 | down |
| 5665485 | 7240569 | 1475403 | --- | --- | --- | 1,03 | down |
| 5665535 | 7355138 | 1757685 | --- | --- | --- | 2,02 | up   |
| 5665555 | 7368489 | 1791034 | --- | --- | --- | 1,03 | down |
| 5665597 | 7350489 | 1746120 | --- | --- | --- | 1,05 | down |
| 5665648 | 7359426 | 1768370 | --- | --- | --- | 1,04 | down |
| 5665653 | 7121849 | 1181790 | --- | --- | --- | 1,29 | down |
| 5665714 | 7115507 | 1165968 | --- | --- | --- | 1,14 | down |
| 5665716 | 7217679 | 1417304 | --- | --- | --- | 1,15 | down |
| 5665723 | 7339286 | 1718038 | --- | --- | --- | 1,01 | down |
| 5665858 | 7259925 | 1522570 | --- | --- | --- | 1,48 | up   |
| 5665909 | 7139708 | 1225060 | --- | --- | --- | 1,07 | up   |
| 5666034 | 7336837 | 1711614 | --- | --- | --- | 1,10 | down |



|         |         |         |     |     |     |      |      |
|---------|---------|---------|-----|-----|-----|------|------|
| 5666066 | 7344836 | 1732411 | --- | --- | --- | 1,09 | up   |
| 5666068 | 7361881 | 1773935 | --- | --- | --- | 1,02 | up   |
| 5666179 | 7166867 | 1291297 | --- | --- | --- | 1,56 | up   |
| 5666198 | 7173706 | 1309297 | --- | --- | --- | 1,20 | up   |
| 5666295 | 7257337 | 1515976 | --- | --- | --- | 2,33 | down |
| 5666333 | 7168521 | 1295909 | --- | --- | --- | 1,19 | down |
| 5666417 | 7289879 | 1596439 | --- | --- | --- | 1,28 | down |
| 5666447 | 7212587 | 1404643 | --- | --- | --- | 1,12 | down |
| 5666636 | 7237711 | 1467430 | --- | --- | --- | 1,54 | down |
| 5666657 | 7279568 | 1572028 | --- | --- | --- | 1,14 | up   |
| 5666670 | 7264653 | 1534025 | --- | --- | --- | 1,54 | down |
| 5666689 | 7231653 | 1451865 | --- | --- | --- | 1,02 | down |
| 5666936 | 7209811 | 1398675 | --- | --- | --- | 1,46 | down |
| 5666993 | 7326612 | 1687204 | --- | --- | --- | 1,94 | down |
| 5667013 | 7330582 | 1696862 | --- | --- | --- | 1,68 | down |
| 5667022 | 7340757 | 1721889 | --- | --- | --- | 1,84 | down |
| 5667062 | 7131372 | 1205030 | --- | --- | --- | 1,22 | down |
| 5667102 | 7276650 | 1564163 | --- | --- | --- | 1,03 | down |
| 5667185 | 7182739 | 1332589 | --- | --- | --- | 1,08 | down |
| 5667192 | 7198087 | 1370637 | --- | --- | --- | 1,89 | up   |
| 5667229 | 7148978 | 1248539 | --- | --- | --- | 1,16 | down |
| 5667335 | 7078143 | 1075437 | --- | --- | --- | 2,14 | up   |
| 5667528 | 7205944 | 1389473 | --- | --- | --- | 1,05 | up   |
| 5667595 | 7196803 | 1367338 | --- | --- | --- | 1,15 | up   |
| 5667711 | 7169573 | 1298391 | --- | --- | --- | 1,07 | down |
| 5667724 | 7131550 | 1205571 | --- | --- | --- | 1,03 | up   |
| 5667743 | 7320998 | 1674733 | --- | --- | --- | 1,22 | down |
| 5667802 | 7123421 | 1185812 | --- | --- | --- | 1,51 | down |
| 5667904 | 7217650 | 1417177 | --- | --- | --- | 1,33 | up   |
| 5667970 | 7033673 | 970377  | --- | --- | --- | 1,17 | down |
| 5667974 | 7132020 | 1206308 | --- | --- | --- | 1,51 | up   |
| 5668127 | 7221443 | 1426319 | --- | --- | --- | 1,46 | down |
| 5668243 | 7373633 | 1805716 | --- | --- | --- | 1,05 | up   |
| 5668244 | 7364948 | 1781228 | --- | --- | --- | 1,00 | down |
| 5668264 | 7216807 | 1414700 | --- | --- | --- | 1,20 | down |
| 5668555 | 7355138 | 1757772 | --- | --- | --- | 1,03 | down |
| 5668626 | 7266544 | 1538342 | --- | --- | --- | 2,01 | down |
| 5668642 | 7282831 | 1579770 | --- | --- | --- | 1,13 | down |
| 5668834 | 7344380 | 1731119 | --- | --- | --- | 1,57 | up   |
| 5668881 | 7300027 | 1621891 | --- | --- | --- | 1,21 | up   |
| 5668950 | 7090581 | 1104745 | --- | --- | --- | 1,61 | up   |
| 5669161 | 7157189 | 1268588 | --- | --- | --- | 1,02 | down |
| 5669174 | 7326612 | 1687192 | --- | --- | --- | 1,08 | up   |
| 5669201 | 7027350 | 954942  | --- | --- | --- | 1,02 | down |
| 5669264 | 7113085 | 1159990 | --- | --- | --- | 1,17 | up   |
| 5669279 | 7378997 | 1818680 | --- | --- | --- | 1,44 | down |
| 5669302 | 7226277 | 1437996 | --- | --- | --- | 1,05 | down |
| 5669315 | 7243647 | 1482481 | --- | --- | --- | 1,18 | down |
| 5669347 | 7031774 | 964788  | --- | --- | --- | 1,52 | down |
| 5669444 | 7031774 | 964777  | --- | --- | --- | 1,24 | down |
| 5669552 | 7180630 | 1326456 | --- | --- | --- | 1,11 | down |
| 5669568 | 7263652 | 1531628 | --- | --- | --- | 1,02 | up   |
| 5669607 | 7188138 | 1345026 | --- | --- | --- | 1,02 | up   |
| 5669788 | 7170764 | 1301476 | --- | --- | --- | 1,27 | up   |
| 5670007 | 7193987 | 1360666 | --- | --- | --- | 2,41 | up   |
| 5670017 | 7049184 | 1007935 | --- | --- | --- | 1,30 | up   |
| 5670087 | 7058507 | 1028306 | --- | --- | --- | 1,21 | down |

|         |         |         |     |     |     |      |      |
|---------|---------|---------|-----|-----|-----|------|------|
| 5670177 | 7377116 | 1814074 | --- | --- | --- | 1,03 | up   |
| 5670213 | 7217679 | 1417318 | --- | --- | --- | 1,53 | down |
| 5670284 | 7374324 | 1807467 | --- | --- | --- | 1,01 | down |
| 5670340 | 7112566 | 1158626 | --- | --- | --- | 1,09 | up   |
| 5670355 | 7193403 | 1359190 | --- | --- | --- | 1,08 | down |
| 5670440 | 7217650 | 1417204 | --- | --- | --- | 1,48 | down |
| 5670453 | 7181193 | 1328293 | --- | --- | --- | 1,26 | down |
| 5670487 | 7198087 | 1370681 | --- | --- | --- | 1,03 | up   |
| 5670503 | 7203018 | 1382643 | --- | --- | --- | 1,09 | up   |
| 5670578 | 7243647 | 1482484 | --- | --- | --- | 1,06 | up   |
| 5670743 | 7127257 | 1194800 | --- | --- | --- | 2,27 | up   |
| 5670785 | 7202837 | 1382316 | --- | --- | --- | 1,10 | up   |
| 5670803 | 7354935 | 1757089 | --- | --- | --- | 1,04 | down |
| 5670909 | 7343250 | 1728036 | --- | --- | --- | 1,90 | down |
| 5671015 | 7121849 | 1181765 | --- | --- | --- | 1,21 | up   |
| 5671064 | 7040674 | 987030  | --- | --- | --- | 1,99 | up   |
| 5671116 | 7247230 | 1490577 | --- | --- | --- | 1,37 | down |
| 5671139 | 7088544 | 1099676 | --- | --- | --- | 1,01 | down |
| 5671164 | 7233970 | 1458274 | --- | --- | --- | 1,08 | up   |
| 5671446 | 7078666 | 1076548 | --- | --- | --- | 1,25 | up   |
| 5671493 | 7217650 | 1417186 | --- | --- | --- | 1,03 | down |
| 5671622 | 7120671 | 1178993 | --- | --- | --- | 1,75 | down |
| 5671669 | 7303805 | 1632098 | --- | --- | --- | 1,05 | down |
| 5672042 | 7220618 | 1424436 | --- | --- | --- | 1,21 | up   |
| 5672057 | 7207292 | 1392621 | --- | --- | --- | 1,08 | up   |
| 5672076 | 7180804 | 1327005 | --- | --- | --- | 1,11 | down |
| 5672172 | 7055793 | 1022318 | --- | --- | --- | 1,10 | down |
| 5672180 | 7227474 | 1441168 | --- | --- | --- | 2,61 | down |
| 5672243 | 7034293 | 971904  | --- | --- | --- | 1,14 | up   |
| 5672332 | 7340304 | 1720867 | --- | --- | --- | 1,32 | down |
| 5672397 | 7181452 | 1328932 | --- | --- | --- | 1,17 | up   |
| 5672416 | 7031774 | 964783  | --- | --- | --- | 1,40 | down |
| 5672422 | 7227474 | 1441128 | --- | --- | --- | 1,19 | up   |
| 5672474 | 7337224 | 1712620 | --- | --- | --- | 1,52 | up   |
| 5672481 | 7116540 | 1168638 | --- | --- | --- | 1,25 | up   |
| 5672486 | 7258784 | 1519674 | --- | --- | --- | 1,04 | up   |
| 5672618 | 7290814 | 1598670 | --- | --- | --- | 2,45 | up   |
| 5672648 | 7371682 | 1800774 | --- | --- | --- | 1,62 | down |
| 5672686 | 7333027 | 1702682 | --- | --- | --- | 1,21 | up   |
| 5672692 | 7208784 | 1396109 | --- | --- | --- | 1,67 | up   |
| 5672932 | 7110999 | 1154772 | --- | --- | --- | 1,61 | down |
| 5672973 | 7330396 | 1696345 | --- | --- | --- | 1,14 | up   |
| 5672997 | 7237672 | 1467305 | --- | --- | --- | 1,48 | up   |
| 5673104 | 7267953 | 1542264 | --- | --- | --- | 1,51 | up   |
| 5673128 | 7341243 | 1723225 | --- | --- | --- | 1,50 | down |
| 5673189 | 7113483 | 1161005 | --- | --- | --- | 1,01 | up   |
| 5673254 | 7041609 | 989575  | --- | --- | --- | 1,12 | up   |
| 5673258 | 7148741 | 1247836 | --- | --- | --- | 1,00 | down |
| 5673275 | 7158517 | 1271595 | --- | --- | --- | 1,06 | up   |
| 5673325 | 7363568 | 1778138 | --- | --- | --- | 1,04 | up   |
| 5673344 | 7095041 | 1115188 | --- | --- | --- | 1,21 | down |
| 5673351 | 7366749 | 1785536 | --- | --- | --- | 2,33 | down |
| 5673352 | 7193056 | 1358257 | --- | --- | --- | 1,03 | up   |
| 5673538 | 7109292 | 1150741 | --- | --- | --- | 1,05 | up   |
| 5673577 | 7122140 | 1182716 | --- | --- | --- | 1,26 | up   |
| 5673684 | 7292869 | 1603408 | --- | --- | --- | 2,36 | down |
| 5673690 | 7380878 | 1822561 | --- | --- | --- | 1,20 | up   |

|         |         |         |     |     |     |      |      |
|---------|---------|---------|-----|-----|-----|------|------|
| 5673806 | 7358788 | 1766856 | --- | --- | --- | 1,04 | up   |
| 5673880 | 7252382 | 1503515 | --- | --- | --- | 1,93 | down |
| 5673942 | 7320735 | 1674177 | --- | --- | --- | 1,29 | down |
| 5673949 | 7175946 | 1314645 | --- | --- | --- | 1,11 | down |
| 5673955 | 7306330 | 1638523 | --- | --- | --- | 1,94 | down |
| 5674089 | 7093255 | 1110765 | --- | --- | --- | 1,39 | up   |
| 5674119 | 7078666 | 1076506 | --- | --- | --- | 1,12 | down |
| 5674128 | 7281877 | 1577537 | --- | --- | --- | 1,42 | down |
| 5674171 | 7217434 | 1416439 | --- | --- | --- | 1,05 | up   |
| 5674257 | 7237992 | 1468282 | --- | --- | --- | 1,04 | up   |
| 5674286 | 7090581 | 1104749 | --- | --- | --- | 1,11 | down |
| 5674330 | 7173706 | 1309270 | --- | --- | --- | 2,09 | up   |
| 5674436 | 7288170 | 1592321 | --- | --- | --- | 1,09 | down |
| 5674515 | 7240569 | 1475388 | --- | --- | --- | 1,12 | down |
| 5674535 | 7243901 | 1483059 | --- | --- | --- | 1,33 | down |
| 5674614 | 7374324 | 1807539 | --- | --- | --- | 1,87 | down |
| 5674687 | 7217747 | 1417508 | --- | --- | --- | 1,14 | down |
| 5674724 | 7286807 | 1588804 | --- | --- | --- | 1,57 | up   |
| 5674862 | 7221256 | 1425884 | --- | --- | --- | 2,13 | up   |
| 5674983 | 7240569 | 1475512 | --- | --- | --- | 1,03 | down |
| 5675047 | 7025670 | 950443  | --- | --- | --- | 1,02 | down |
| 5675061 | 7244287 | 1484068 | --- | --- | --- | 1,21 | down |
| 5675139 | 7231655 | 1451918 | --- | --- | --- | 1,06 | down |
| 5675271 | 7093936 | 1112480 | --- | --- | --- | 1,02 | up   |
| 5675293 | 7323869 | 1680881 | --- | --- | --- | 1,09 | up   |
| 5675486 | 7091439 | 1106616 | --- | --- | --- | 1,06 | down |
| 5675536 | 7031774 | 964765  | --- | --- | --- | 1,24 | down |
| 5675580 | 7279806 | 1572560 | --- | --- | --- | 1,12 | up   |
| 5675582 | 7193056 | 1358267 | --- | --- | --- | 1,17 | down |
| 5675589 | 7165825 | 1288453 | --- | --- | --- | 2,04 | up   |
| 5675606 | 7227474 | 1441162 | --- | --- | --- | 1,22 | down |
| 5675622 | 7273251 | 1555957 | --- | --- | --- | 1,60 | up   |
| 5675953 | 7156052 | 1265776 | --- | --- | --- | 1,53 | down |
| 5676022 | 7288077 | 1591943 | --- | --- | --- | 1,16 | down |
| 5676106 | 7307424 | 1641140 | --- | --- | --- | 1,36 | down |
| 5676227 | 7041609 | 989583  | --- | --- | --- | 1,19 | up   |
| 5676266 | 7237940 | 1468183 | --- | --- | --- | 1,30 | down |
| 5676302 | 7318286 | 1668335 | --- | --- | --- | 1,21 | down |
| 5676560 | 7236358 | 1464255 | --- | --- | --- | 1,10 | down |
| 5676635 | 7309646 | 1646489 | --- | --- | --- | 1,09 | up   |
| 5676649 | 7180943 | 1327442 | --- | --- | --- | 1,50 | up   |
| 5676812 | 7350181 | 1745386 | --- | --- | --- | 1,28 | up   |
| 5676837 | 7039223 | 983566  | --- | --- | --- | 1,20 | down |
| 5676861 | 7361881 | 1773956 | --- | --- | --- | 1,26 | down |
| 5676908 | 7211363 | 1402050 | --- | --- | --- | 1,09 | down |
| 5676956 | 7220618 | 1424434 | --- | --- | --- | 1,06 | up   |
| 5676973 | 7031774 | 964724  | --- | --- | --- | 1,03 | up   |
| 5677050 | 7195680 | 1364902 | --- | --- | --- | 1,03 | up   |
| 5677088 | 7198087 | 1370674 | --- | --- | --- | 1,43 | up   |
| 5677219 | 7370415 | 1796853 | --- | --- | --- | 1,17 | down |
| 5677255 | 7258455 | 1518725 | --- | --- | --- | 1,05 | down |
| 5677349 | 7193056 | 1358259 | --- | --- | --- | 1,01 | up   |
| 5677368 | 7112355 | 1158075 | --- | --- | --- | 1,16 | down |
| 5677380 | 7329135 | 1693483 | --- | --- | --- | 1,43 | up   |
| 5677517 | 7261768 | 1527177 | --- | --- | --- | 2,36 | up   |
| 5677647 | 7072748 | 1062594 | --- | --- | --- | 1,90 | down |
| 5677748 | 7212587 | 1404645 | --- | --- | --- | 1,25 | down |

|         |         |         |     |     |     |      |      |
|---------|---------|---------|-----|-----|-----|------|------|
| 5677754 | 7282927 | 1580022 | --- | --- | --- | 1,05 | down |
| 5677784 | 7109292 | 1150723 | --- | --- | --- | 1,39 | down |
| 5677812 | 7197056 | 1367845 | --- | --- | --- | 1,54 | up   |
| 5677841 | 7198210 | 1371010 | --- | --- | --- | 1,02 | down |
| 5677875 | 7307424 | 1641142 | --- | --- | --- | 1,09 | down |
| 5678072 | 7058507 | 1028296 | --- | --- | --- | 1,35 | up   |
| 5678083 | 7098810 | 1124647 | --- | --- | --- | 1,12 | down |
| 5678127 | 7354896 | 1756992 | --- | --- | --- | 1,72 | up   |
| 5678153 | 7237814 | 1467829 | --- | --- | --- | 1,09 | down |
| 5678176 | 7226277 | 1437986 | --- | --- | --- | 1,35 | down |
| 5678200 | 7049689 | 1008893 | --- | --- | --- | 2,00 | down |
| 5678249 | 7244287 | 1484061 | --- | --- | --- | 1,28 | down |
| 5678323 | 7350530 | 1746235 | --- | --- | --- | 2,04 | down |
| 5678371 | 7180166 | 1325244 | --- | --- | --- | 1,23 | down |
| 5678399 | 7368004 | 1789332 | --- | --- | --- | 1,29 | up   |
| 5678418 | 7256070 | 1512597 | --- | --- | --- | 1,01 | up   |
| 5678468 | 7264653 | 1534037 | --- | --- | --- | 1,32 | up   |
| 5678575 | 7326245 | 1686396 | --- | --- | --- | 1,05 | up   |
| 5678604 | 7377791 | 1816008 | --- | --- | --- | 1,06 | down |
| 5678631 | 7052338 | 1014663 | --- | --- | --- | 2,47 | down |
| 5678662 | 7053874 | 1018328 | --- | --- | --- | 1,11 | up   |
| 5678826 | 7142081 | 1230986 | --- | --- | --- | 1,33 | down |
| 5678837 | 7197056 | 1367840 | --- | --- | --- | 1,06 | down |
| 5678848 | 7030519 | 961691  | --- | --- | --- | 1,31 | down |
| 5678916 | 7337224 | 1712629 | --- | --- | --- | 1,58 | down |
| 5678952 | 7349817 | 1744645 | --- | --- | --- | 1,15 | down |
| 5678987 | 7280743 | 1574534 | --- | --- | --- | 2,33 | up   |
| 5679062 | 7364346 | 1780013 | --- | --- | --- | 1,09 | up   |
| 5679249 | 7091439 | 1106625 | --- | --- | --- | 1,34 | down |
| 5679323 | 7150047 | 1250768 | --- | --- | --- | 1,35 | down |
| 5679358 | 7252513 | 1503834 | --- | --- | --- | 1,93 | down |
| 5679388 | 7049689 | 1008888 | --- | --- | --- | 1,04 | down |
| 5679433 | 7378997 | 1818662 | --- | --- | --- | 1,07 | up   |
| 5679459 | 7374324 | 1807520 | --- | --- | --- | 1,02 | up   |
| 5679534 | 7353287 | 1753029 | --- | --- | --- | 1,06 | down |
| 5679753 | 7317708 | 1666842 | --- | --- | --- | 1,00 | up   |
| 5679795 | 7089080 | 1101141 | --- | --- | --- | 1,17 | down |
| 5679809 | 7132125 | 1206635 | --- | --- | --- | 1,01 | down |
| 5679856 | 7286807 | 1588844 | --- | --- | --- | 2,33 | up   |
| 5679921 | 7338101 | 1715192 | --- | --- | --- | 1,05 | down |
| 5679959 | 7240569 | 1475462 | --- | --- | --- | 1,34 | up   |
| 5680012 | 7169732 | 1298774 | --- | --- | --- | 1,61 | up   |
| 5680120 | 7258546 | 1518984 | --- | --- | --- | 1,14 | down |
| 5680303 | 7337224 | 1712607 | --- | --- | --- | 1,06 | up   |
| 5680368 | 7071714 | 1060351 | --- | --- | --- | 1,29 | down |
| 5680385 | 7374790 | 1808778 | --- | --- | --- | 1,30 | up   |
| 5680674 | 7207069 | 1392020 | --- | --- | --- | 1,47 | down |
| 5680693 | 7033504 | 969858  | --- | --- | --- | 1,29 | up   |
| 5680704 | 7068942 | 1053376 | --- | --- | --- | 1,25 | up   |
| 5680724 | 7330396 | 1696344 | --- | --- | --- | 2,12 | up   |
| 5680783 | 7380878 | 1822560 | --- | --- | --- | 1,15 | down |
| 5680796 | 7374090 | 1806802 | --- | --- | --- | 1,57 | up   |
| 5680818 | 7093835 | 1112225 | --- | --- | --- | 1,80 | down |
| 5680844 | 7032558 | 967064  | --- | --- | --- | 1,13 | down |
| 5680845 | 7321414 | 1675633 | --- | --- | --- | 1,46 | down |
| 5681003 | 7370910 | 1798539 | --- | --- | --- | 1,01 | down |
| 5681054 | 7239752 | 1473189 | --- | --- | --- | 1,22 | up   |

|         |         |         |     |     |     |      |      |
|---------|---------|---------|-----|-----|-----|------|------|
| 5681059 | 7066035 | 1046210 | --- | --- | --- | 1,13 | down |
| 5681214 | 7196331 | 1366390 | --- | --- | --- | 1,24 | down |
| 5681294 | 7255911 | 1512216 | --- | --- | --- | 1,34 | down |
| 5681303 | 7131766 | 1205865 | --- | --- | --- | 1,17 | up   |
| 5681330 | 7091962 | 1107749 | --- | --- | --- | 1,50 | down |
| 5681366 | 7191866 | 1354896 | --- | --- | --- | 1,47 | down |
| 5681403 | 7350237 | 1745495 | --- | --- | --- | 1,19 | down |
| 5681426 | 7142081 | 1230985 | --- | --- | --- | 1,38 | up   |
| 5681451 | 7303191 | 1629962 | --- | --- | --- | 1,13 | down |
| 5681463 | 7118356 | 1173172 | --- | --- | --- | 1,17 | down |
| 5681490 | 7182739 | 1332588 | --- | --- | --- | 1,22 | down |
| 5681517 | 7252877 | 1504693 | --- | --- | --- | 1,42 | down |
| 5681528 | 7079326 | 1077973 | --- | --- | --- | 1,34 | down |
| 5681613 | 7237438 | 1466792 | --- | --- | --- | 1,43 | down |
| 5681618 | 7169599 | 1298443 | --- | --- | --- | 1,20 | down |
| 5681672 | 7374493 | 1807961 | --- | --- | --- | 1,03 | down |
| 5681714 | 7337872 | 1714429 | --- | --- | --- | 1,02 | down |
| 5681716 | 7252877 | 1504695 | --- | --- | --- | 1,03 | down |
| 5681768 | 7309734 | 1646939 | --- | --- | --- | 1,35 | up   |
| 5681840 | 7112355 | 1158066 | --- | --- | --- | 1,01 | up   |
| 5681841 | 7158517 | 1271595 | --- | --- | --- | 1,35 | down |
| 5681885 | 7240569 | 1475524 | --- | --- | --- | 1,05 | down |
| 5681963 | 7056304 | 1023548 | --- | --- | --- | 1,62 | up   |
| 5681987 | 7340990 | 1722516 | --- | --- | --- | 1,18 | up   |
| 5682084 | 7312566 | 1653299 | --- | --- | --- | 1,51 | down |
| 5682163 | 7080476 | 1080413 | --- | --- | --- | 1,24 | up   |
| 5682220 | 7098867 | 1124947 | --- | --- | --- | 1,16 | down |
| 5682260 | 7239939 | 1473794 | --- | --- | --- | 1,06 | down |
| 5682317 | 7336931 | 1711874 | --- | --- | --- | 1,22 | up   |
| 5682355 | 7243894 | 1482966 | --- | --- | --- | 1,26 | up   |
| 5682356 | 7263222 | 1530539 | --- | --- | --- | 1,18 | down |
| 5682400 | 7061003 | 1033923 | --- | --- | --- | 2,13 | down |
| 5682497 | 7060896 | 1033560 | --- | --- | --- | 1,32 | up   |
| 5682529 | 7073854 | 1065631 | --- | --- | --- | 1,03 | down |
| 5682567 | 7122140 | 1182698 | --- | --- | --- | 1,11 | up   |
| 5682622 | 7079326 | 1077973 | --- | --- | --- | 1,24 | up   |
| 5682628 | 7100523 | 1128858 | --- | --- | --- | 1,12 | up   |
| 5682768 | 7093296 | 1110906 | --- | --- | --- | 1,04 | up   |
| 5682783 | 7211363 | 1402037 | --- | --- | --- | 1,22 | up   |
| 5682831 | 7231775 | 1452123 | --- | --- | --- | 1,04 | up   |
| 5682884 | 7156978 | 1268180 | --- | --- | --- | 1,10 | up   |
| 5682885 | 7137646 | 1220430 | --- | --- | --- | 1,47 | down |
| 5683016 | 7067518 | 1049955 | --- | --- | --- | 1,76 | down |
| 5683082 | 7282927 | 1579999 | --- | --- | --- | 1,03 | down |
| 5683240 | 7243253 | 1481232 | --- | --- | --- | 1,16 | up   |
| 5683269 | 7374324 | 1807517 | --- | --- | --- | 1,04 | down |
| 5683325 | 7261580 | 1526795 | --- | --- | --- | 1,05 | down |
| 5683543 | 7355138 | 1757705 | --- | --- | --- | 1,13 | up   |
| 5683597 | 7252339 | 1503272 | --- | --- | --- | 2,04 | down |
| 5683686 | 7261768 | 1527178 | --- | --- | --- | 1,03 | down |
| 5683695 | 7367969 | 1789104 | --- | --- | --- | 2,05 | down |
| 5683752 | 7171417 | 1303154 | --- | --- | --- | 1,18 | up   |
| 5683808 | 7236492 | 1464531 | --- | --- | --- | 2,52 | up   |
| 5683810 | 7033541 | 969985  | --- | --- | --- | 1,38 | up   |
| 5683904 | 7039308 | 983921  | --- | --- | --- | 1,03 | down |
| 5683922 | 7383102 | 1827404 | --- | --- | --- | 1,35 | up   |
| 5683951 | 7199341 | 1374164 | --- | --- | --- | 1,12 | up   |

|         |         |         |     |     |     |      |      |
|---------|---------|---------|-----|-----|-----|------|------|
| 5683996 | 7125494 | 1190398 | --- | --- | --- | 2,28 | down |
| 5684010 | 7175946 | 1314647 | --- | --- | --- | 1,07 | down |
| 5684159 | 7365183 | 1781911 | --- | --- | --- | 1,36 | up   |
| 5684204 | 7170764 | 1301490 | --- | --- | --- | 1,25 | down |
| 5684264 | 7371228 | 1799473 | --- | --- | --- | 1,36 | up   |
| 5684356 | 7367946 | 1788963 | --- | --- | --- | 1,05 | down |
| 5684402 | 7248790 | 1494534 | --- | --- | --- | 1,33 | up   |
| 5684410 | 7088489 | 1099525 | --- | --- | --- | 1,65 | down |
| 5684426 | 7198210 | 1370956 | --- | --- | --- | 1,00 | up   |
| 5684438 | 7210822 | 1400973 | --- | --- | --- | 2,14 | up   |
| 5684467 | 7115963 | 1167080 | --- | --- | --- | 1,03 | up   |
| 5684518 | 7200545 | 1376910 | --- | --- | --- | 3,32 | up   |
| 5684555 | 7194400 | 1361780 | --- | --- | --- | 1,26 | up   |
| 5684632 | 7027350 | 954943  | --- | --- | --- | 1,15 | up   |
| 5684771 | 7207093 | 1392102 | --- | --- | --- | 1,29 | down |
| 5684818 | 7167823 | 1293895 | --- | --- | --- | 1,09 | up   |
| 5684827 | 7258455 | 1518705 | --- | --- | --- | 1,11 | down |
| 5684864 | 7041609 | 989563  | --- | --- | --- | 1,12 | up   |
| 5684986 | 7156047 | 1265726 | --- | --- | --- | 1,08 | down |
| 5684995 | 7031618 | 964198  | --- | --- | --- | 1,42 | up   |
| 5685017 | 7217434 | 1416457 | --- | --- | --- | 1,26 | down |
| 5685053 | 7306330 | 1638514 | --- | --- | --- | 2,02 | up   |
| 5685160 | 7140365 | 1226802 | --- | --- | --- | 1,32 | up   |
| 5685230 | 7067212 | 1049200 | --- | --- | --- | 1,56 | down |
| 5685428 | 7361881 | 1773933 | --- | --- | --- | 1,24 | up   |
| 5685443 | 7117526 | 1171003 | --- | --- | --- | 2,04 | up   |
| 5685458 | 7212587 | 1404639 | --- | --- | --- | 1,12 | up   |
| 5685566 | 7031774 | 964761  | --- | --- | --- | 1,33 | down |
| 5685578 | 7181001 | 1327630 | --- | --- | --- | 1,01 | down |
| 5685686 | 7194400 | 1361777 | --- | --- | --- | 1,35 | down |
| 5685687 | 7359361 | 1768262 | --- | --- | --- | 1,41 | up   |
| 5685704 | 7140113 | 1226047 | --- | --- | --- | 1,54 | down |
| 5685719 | 7084176 | 1089013 | --- | --- | --- | 1,41 | down |
| 5685729 | 7062436 | 1037668 | --- | --- | --- | 1,09 | up   |
| 5685746 | 7093255 | 1110762 | --- | --- | --- | 1,03 | down |
| 5685762 | 7217747 | 1417469 | --- | --- | --- | 1,01 | down |
| 5685831 | 7297274 | 1614569 | --- | --- | --- | 1,31 | down |
| 5685940 | 7169367 | 1298066 | --- | --- | --- | 1,01 | down |
| 5686005 | 7247512 | 1491200 | --- | --- | --- | 2,05 | down |
| 5686084 | 7118503 | 1173569 | --- | --- | --- | 1,27 | down |
| 5686187 | 7049184 | 1007931 | --- | --- | --- | 2,43 | up   |
| 5686213 | 7127540 | 1195285 | --- | --- | --- | 1,30 | down |
| 5686223 | 7360486 | 1770943 | --- | --- | --- | 1,15 | up   |
| 5686282 | 7253215 | 1505369 | --- | --- | --- | 1,78 | up   |
| 5686306 | 7162144 | 1280492 | --- | --- | --- | 1,18 | up   |
| 5686384 | 7292517 | 1602553 | --- | --- | --- | 1,22 | down |
| 5686475 | 7039265 | 983649  | --- | --- | --- | 1,61 | up   |
| 5686511 | 7148741 | 1247866 | --- | --- | --- | 1,28 | down |
| 5686574 | 7302860 | 1629007 | --- | --- | --- | 1,60 | up   |
| 5686593 | 7244287 | 1484091 | --- | --- | --- | 2,33 | up   |
| 5686605 | 7240569 | 1475482 | --- | --- | --- | 2,25 | down |
| 5686674 | 7339379 | 1718361 | --- | --- | --- | 1,60 | down |
| 5686873 | 7031774 | 964781  | --- | --- | --- | 1,15 | down |
| 5686985 | 7240569 | 1475313 | --- | --- | --- | 1,02 | down |
| 5687078 | 7261592 | 1526839 | --- | --- | --- | 1,09 | down |
| 5687188 | 7227474 | 1441136 | --- | --- | --- | 1,27 | up   |
| 5687223 | 7339452 | 1718594 | --- | --- | --- | 1,06 | down |

|         |         |         |     |     |     |      |      |
|---------|---------|---------|-----|-----|-----|------|------|
| 5687311 | 7140365 | 1226779 | --- | --- | --- | 1,27 | down |
| 5687317 | 7285530 | 1585970 | --- | --- | --- | 1,25 | up   |
| 5687338 | 7127540 | 1195290 | --- | --- | --- | 1,18 | up   |
| 5687392 | 7330396 | 1696365 | --- | --- | --- | 1,63 | down |
| 5687424 | 7068995 | 1053628 | --- | --- | --- | 1,03 | down |
| 5687531 | 7298101 | 1617094 | --- | --- | --- | 1,02 | up   |
| 5687574 | 7025310 | 949271  | --- | --- | --- | 1,17 | up   |
| 5687635 | 7067670 | 1050364 | --- | --- | --- | 1,39 | up   |
| 5687748 | 7095041 | 1115183 | --- | --- | --- | 1,17 | down |
| 5687751 | 7092549 | 1109148 | --- | --- | --- | 1,01 | up   |
| 5687932 | 7074911 | 1068172 | --- | --- | --- | 1,06 | up   |
| 5688065 | 7280743 | 1574494 | --- | --- | --- | 1,05 | down |
| 5688380 | 7237346 | 1466580 | --- | --- | --- | 2,09 | down |
| 5688423 | 7096924 | 1119616 | --- | --- | --- | 1,28 | up   |
| 5688503 | 7367980 | 1789167 | --- | --- | --- | 1,02 | down |
| 5688572 | 7281924 | 1577753 | --- | --- | --- | 1,10 | down |
| 5688738 | 7326271 | 1686467 | --- | --- | --- | 1,12 | down |
| 5688767 | 7292517 | 1602527 | --- | --- | --- | 1,04 | down |
| 5688910 | 7052385 | 1014773 | --- | --- | --- | 1,07 | up   |
| 5689023 | 7076160 | 1070930 | --- | --- | --- | 1,11 | down |
| 5689062 | 7207093 | 1392116 | --- | --- | --- | 1,02 | down |
| 5689129 | 7340673 | 1721702 | --- | --- | --- | 1,08 | up   |
| 5689272 | 7052813 | 1015906 | --- | --- | --- | 1,06 | up   |
| 5689417 | 7355044 | 1757453 | --- | --- | --- | 1,96 | down |
| 5689479 | 7034293 | 971951  | --- | --- | --- | 1,02 | down |
| 5689530 | 7127540 | 1195296 | --- | --- | --- | 1,05 | down |
| 5689638 | 7040674 | 987028  | --- | --- | --- | 1,39 | up   |
| 5689854 | 7123421 | 1185811 | --- | --- | --- | 1,04 | down |
| 5689867 | 7186464 | 1341370 | --- | --- | --- | 1,07 | up   |
| 5690106 | 7171091 | 1302467 | --- | --- | --- | 1,18 | up   |
| 5690159 | 7108434 | 1148304 | --- | --- | --- | 1,88 | up   |
| 5690255 | 7093752 | 1112009 | --- | --- | --- | 1,04 | up   |
| 5690461 | 7132125 | 1206625 | --- | --- | --- | 1,07 | down |
| 5690466 | 7180598 | 1326330 | --- | --- | --- | 1,26 | up   |
| 5690517 | 7067670 | 1050365 | --- | --- | --- | 1,21 | down |
| 5690553 | 7070461 | 1057366 | --- | --- | --- | 3,53 | down |
| 5690615 | 7123421 | 1185845 | --- | --- | --- | 1,04 | up   |
| 5690656 | 7149934 | 1250521 | --- | --- | --- | 1,03 | down |
| 5690755 | 7049308 | 1008112 | --- | --- | --- | 1,57 | down |
| 5690911 | 7148978 | 1248473 | --- | --- | --- | 1,42 | up   |
| 5690937 | 7257976 | 1517711 | --- | --- | --- | 1,01 | down |
| 5690962 | 7381330 | 1823630 | --- | --- | --- | 1,03 | up   |
| 5691056 | 7217747 | 1417491 | --- | --- | --- | 1,03 | up   |
| 5691070 | 7292701 | 1602969 | --- | --- | --- | 1,08 | down |
| 5691121 | 7366749 | 1785480 | --- | --- | --- | 1,18 | up   |
| 5691207 | 7376566 | 1812884 | --- | --- | --- | 1,03 | down |
| 5691268 | 7165825 | 1288449 | --- | --- | --- | 1,29 | down |
| 5691301 | 7073609 | 1064851 | --- | --- | --- | 1,33 | up   |
| 5691322 | 7274780 | 1559185 | --- | --- | --- | 1,18 | down |
| 5691330 | 7240569 | 1475394 | --- | --- | --- | 1,91 | up   |
| 5691422 | 7244287 | 1484078 | --- | --- | --- | 2,18 | down |
| 5691431 | 7122140 | 1182712 | --- | --- | --- | 1,35 | up   |
| 5691435 | 7360486 | 1770977 | --- | --- | --- | 1,05 | down |
| 5691437 | 7295652 | 1610316 | --- | --- | --- | 1,08 | up   |
| 5691438 | 7237346 | 1466590 | --- | --- | --- | 1,74 | down |
| 5691450 | 7227474 | 1441151 | --- | --- | --- | 1,49 | up   |
| 5691460 | 7168521 | 1295888 | --- | --- | --- | 1,39 | up   |

|         |         |         |     |     |     |      |      |
|---------|---------|---------|-----|-----|-----|------|------|
| 5691469 | 7096924 | 1119625 | --- | --- | --- | 1,92 | down |
| 5691486 | 7288095 | 1592050 | --- | --- | --- | 1,32 | down |
| 5691511 | 7341038 | 1722683 | --- | --- | --- | 1,57 | down |
| 5691533 | 7232069 | 1452953 | --- | --- | --- | 1,03 | down |
| 5691625 | 7374317 | 1807407 | --- | --- | --- | 1,14 | up   |
| 5691802 | 7361881 | 1773948 | --- | --- | --- | 1,08 | up   |
| 5691867 | 7133484 | 1209951 | --- | --- | --- | 1,50 | up   |
| 5691922 | 7142416 | 1231800 | --- | --- | --- | 1,79 | up   |
| 5691947 | 7102510 | 1133876 | --- | --- | --- | 1,06 | down |
| 5692040 | 7293234 | 1604335 | --- | --- | --- | 1,33 | down |
| 5692115 | 7213908 | 1407652 | --- | --- | --- | 1,17 | down |
| 5692184 | 7219729 | 1422390 | --- | --- | --- | 1,11 | up   |
| 5692307 | 7346898 | 1737337 | --- | --- | --- | 1,49 | up   |
| 5692312 | 7186464 | 1341365 | --- | --- | --- | 1,50 | up   |
| 5692376 | 7303777 | 1631907 | --- | --- | --- | 1,42 | up   |
| 5692462 | 7227775 | 1441841 | --- | --- | --- | 1,16 | down |
| 5692516 | 7248790 | 1494509 | --- | --- | --- | 1,23 | down |
| 5692544 | 7139708 | 1225055 | --- | --- | --- | 1,32 | up   |
| 5692661 | 7128704 | 1198021 | --- | --- | --- | 1,29 | down |
| 5692832 | 7120671 | 1178998 | --- | --- | --- | 1,04 | up   |
| 5692836 | 7243647 | 1482470 | --- | --- | --- | 1,02 | up   |
| 5692854 | 7149008 | 1248599 | --- | --- | --- | 1,34 | down |
| 5692881 | 7088135 | 1098419 | --- | --- | --- | 1,30 | up   |
| 5692885 | 7101258 | 1130577 | --- | --- | --- | 1,47 | up   |
| 5692914 | 7195680 | 1364903 | --- | --- | --- | 1,04 | up   |
| 5692920 | 7330396 | 1696336 | --- | --- | --- | 1,05 | down |
| 5692925 | 7281577 | 1576873 | --- | --- | --- | 1,22 | down |
| 5693128 | 7259925 | 1522536 | --- | --- | --- | 1,80 | down |
| 5693132 | 7317708 | 1666840 | --- | --- | --- | 1,09 | down |
| 5693323 | 7337522 | 1713620 | --- | --- | --- | 1,13 | down |
| 5693438 | 7350489 | 1746116 | --- | --- | --- | 1,34 | down |
| 5693468 | 7142416 | 1231800 | --- | --- | --- | 1,32 | up   |
| 5693489 | 7025310 | 949236  | --- | --- | --- | 1,10 | down |
| 5693490 | 7257893 | 1517459 | --- | --- | --- | 1,60 | up   |
| 5693505 | 7168979 | 1297199 | --- | --- | --- | 1,34 | down |
| 5693553 | 7237672 | 1467307 | --- | --- | --- | 1,15 | up   |
| 5693579 | 7331757 | 1700024 | --- | --- | --- | 2,12 | down |
| 5693751 | 7372840 | 1803770 | --- | --- | --- | 1,02 | down |
| 5693923 | 7034293 | 971996  | --- | --- | --- | 1,18 | down |
| 5693951 | 7289382 | 1595183 | --- | --- | --- | 1,16 | up   |
| 5694065 | 7363147 | 1777017 | --- | --- | --- | 1,31 | up   |
| 5694133 | 7255687 | 1511771 | --- | --- | --- | 1,03 | down |
| 5694350 | 7059020 | 1029340 | --- | --- | --- | 1,06 | down |
| 5694374 | 7346687 | 1736690 | --- | --- | --- | 1,19 | up   |
| 5694431 | 7062233 | 1037197 | --- | --- | --- | 1,19 | up   |
| 5694436 | 7031774 | 964706  | --- | --- | --- | 1,53 | up   |
| 5694516 | 7313841 | 1656733 | --- | --- | --- | 1,08 | down |
| 5694577 | 7146093 | 1240932 | --- | --- | --- | 1,25 | up   |
| 5694735 | 7057462 | 1025859 | --- | --- | --- | 1,08 | down |
| 5694745 | 7216807 | 1414701 | --- | --- | --- | 1,17 | down |
| 5694876 | 7082098 | 1084117 | --- | --- | --- | 1,35 | down |
| 5694935 | 7244290 | 1484159 | --- | --- | --- | 1,08 | up   |
| 5694961 | 7166867 | 1291310 | --- | --- | --- | 1,17 | down |
| 5695042 | 7069721 | 1055298 | --- | --- | --- | 1,02 | down |
| 5695093 | 7302327 | 1627679 | --- | --- | --- | 1,00 | down |
| 5695102 | 7378997 | 1818666 | --- | --- | --- | 1,36 | down |
| 5695133 | 7148978 | 1248533 | --- | --- | --- | 1,56 | down |



|         |         |         |     |     |     |      |      |
|---------|---------|---------|-----|-----|-----|------|------|
| 5695184 | 7353224 | 1752674 | --- | --- | --- | 1,13 | down |
| 5695303 | 7227433 | 1440980 | --- | --- | --- | 1,17 | up   |
| 5695305 | 7188829 | 1346661 | --- | --- | --- | 1,03 | down |
| 5695349 | 7228530 | 1443791 | --- | --- | --- | 1,16 | up   |
| 5695358 | 7178644 | 1321612 | --- | --- | --- | 2,33 | up   |
| 5695391 | 7329135 | 1693495 | --- | --- | --- | 1,52 | up   |
| 5695417 | 7279568 | 1572021 | --- | --- | --- | 1,01 | up   |
| 5695699 | 7059449 | 1030305 | --- | --- | --- | 1,46 | up   |
| 5695700 | 7088544 | 1099661 | --- | --- | --- | 1,23 | down |
| 5695763 | 7249388 | 1495899 | --- | --- | --- | 1,08 | down |
| 5695775 | 7231484 | 1451360 | --- | --- | --- | 1,13 | down |
| 5695954 | 7190844 | 1352153 | --- | --- | --- | 1,22 | up   |
| 5696072 | 7100523 | 1128917 | --- | --- | --- | 1,09 | down |
| 5696105 | 7128539 | 1197669 | --- | --- | --- | 1,28 | down |
| 5696115 | 7257893 | 1517481 | --- | --- | --- | 1,00 | down |
| 5696140 | 7086672 | 1094348 | --- | --- | --- | 1,28 | up   |
| 5696157 | 7337425 | 1713164 | --- | --- | --- | 1,14 | down |
| 5696200 | 7272299 | 1553558 | --- | --- | --- | 2,01 | up   |
| 5696245 | 7217434 | 1416453 | --- | --- | --- | 1,56 | down |
| 5696278 | 7217650 | 1417189 | --- | --- | --- | 1,48 | down |
| 5696298 | 7374324 | 1807489 | --- | --- | --- | 1,10 | down |
| 5696319 | 7217434 | 1416434 | --- | --- | --- | 1,31 | down |
| 5696357 | 7146425 | 1241891 | --- | --- | --- | 1,45 | up   |
| 5696359 | 7040674 | 987067  | --- | --- | --- | 1,91 | up   |
| 5696472 | 7319773 | 1671860 | --- | --- | --- | 1,13 | down |
| 5696551 | 7330731 | 1697172 | --- | --- | --- | 1,04 | down |
| 5696554 | 7239752 | 1473183 | --- | --- | --- | 1,34 | up   |
| 5696594 | 7248790 | 1494543 | --- | --- | --- | 1,22 | down |
| 5696776 | 7243726 | 1482683 | --- | --- | --- | 2,23 | down |
| 5696819 | 7127540 | 1195289 | --- | --- | --- | 1,03 | down |
| 5696870 | 7070668 | 1057929 | --- | --- | --- | 1,02 | up   |
| 5697072 | 7088489 | 1099528 | --- | --- | --- | 1,01 | down |
| 5697157 | 7337425 | 1713139 | --- | --- | --- | 1,12 | down |
| 5697205 | 7084193 | 1089067 | --- | --- | --- | 1,52 | up   |
| 5697220 | 7212718 | 1404941 | --- | --- | --- | 1,00 | down |
| 5697242 | 7221168 | 1425623 | --- | --- | --- | 1,08 | down |
| 5697365 | 7063716 | 1040161 | --- | --- | --- | 1,09 | up   |
| 5697367 | 7053874 | 1018336 | --- | --- | --- | 1,19 | up   |
| 5697418 | 7366749 | 1785477 | --- | --- | --- | 1,06 | down |
| 5697483 | 7081487 | 1082706 | --- | --- | --- | 1,06 | up   |
| 5697611 | 7366749 | 1785479 | --- | --- | --- | 3,26 | down |
| 5697671 | 7341546 | 1723950 | --- | --- | --- | 1,34 | down |
| 5697700 | 7225291 | 1435293 | --- | --- | --- | 1,03 | up   |
| 5697731 | 7218728 | 1419923 | --- | --- | --- | 1,06 | up   |
| 5697768 | 7292657 | 1602839 | --- | --- | --- | 1,10 | down |
| 5697813 | 7146245 | 1241377 | --- | --- | --- | 1,08 | up   |
| 5697840 | 7062233 | 1037184 | --- | --- | --- | 1,02 | up   |
| 5698017 | 7233921 | 1458159 | --- | --- | --- | 2,13 | down |
| 5698088 | 7237346 | 1466593 | --- | --- | --- | 1,08 | down |
| 5698117 | 7252283 | 1503114 | --- | --- | --- | 1,13 | down |
| 5698164 | 7091962 | 1107746 | --- | --- | --- | 2,24 | down |
| 5698190 | 7076099 | 1070650 | --- | --- | --- | 1,64 | down |
| 5698313 | 7083030 | 1086257 | --- | --- | --- | 1,85 | down |
| 5698359 | 7344406 | 1731192 | --- | --- | --- | 1,19 | up   |
| 5698410 | 7141061 | 1228649 | --- | --- | --- | 1,19 | up   |
| 5698433 | 7371001 | 1798838 | --- | --- | --- | 1,12 | down |
| 5698458 | 7117813 | 1171721 | --- | --- | --- | 1,06 | up   |

|         |         |         |     |     |     |      |      |
|---------|---------|---------|-----|-----|-----|------|------|
| 5698604 | 7344836 | 1732409 | --- | --- | --- | 1,13 | up   |
| 5698691 | 7191594 | 1354232 | --- | --- | --- | 2,11 | up   |
| 5698821 | 7084500 | 1089710 | --- | --- | --- | 1,10 | down |
| 5698855 | 7341115 | 1722914 | --- | --- | --- | 1,34 | down |
| 5698863 | 7115507 | 1165970 | --- | --- | --- | 1,29 | up   |
| 5698881 | 7078982 | 1077311 | --- | --- | --- | 3,01 | up   |
| 5698888 | 7038659 | 982167  | --- | --- | --- | 1,48 | up   |
| 5698957 | 7307733 | 1642051 | --- | --- | --- | 2,01 | up   |
| 5698959 | 7083030 | 1086251 | --- | --- | --- | 1,56 | down |
| 5699094 | 7252339 | 1503293 | --- | --- | --- | 2,10 | up   |
| 5699101 | 7239752 | 1473185 | --- | --- | --- | 1,04 | down |
| 5699151 | 7120039 | 1177489 | --- | --- | --- | 1,37 | up   |
| 5699176 | 7148741 | 1247830 | --- | --- | --- | 1,40 | up   |
| 5699185 | 7041140 | 988278  | --- | --- | --- | 1,79 | down |
| 5699268 | 7292657 | 1602839 | --- | --- | --- | 1,38 | down |
| 5699322 | 7381330 | 1823623 | --- | --- | --- | 1,08 | down |
| 5699405 | 7202749 | 1382095 | --- | --- | --- | 1,32 | up   |
| 5699501 | 7121849 | 1181809 | --- | --- | --- | 1,15 | up   |
| 5699522 | 7115507 | 1165982 | --- | --- | --- | 1,03 | up   |
| 5699527 | 7305275 | 1635837 | --- | --- | --- | 1,38 | down |
| 5699570 | 7343250 | 1728036 | --- | --- | --- | 1,14 | up   |
| 5699801 | 7321414 | 1675625 | --- | --- | --- | 1,53 | down |
| 5699810 | 7031774 | 964724  | --- | --- | --- | 1,00 | down |
| 5699875 | 7326271 | 1686459 | --- | --- | --- | 1,14 | up   |
| 5700065 | 7378997 | 1818650 | --- | --- | --- | 1,41 | down |
| 5700088 | 7363529 | 1777955 | --- | --- | --- | 1,00 | up   |
| 5700170 | 7374324 | 1807495 | --- | --- | --- | 1,04 | down |
| 5700188 | 7088164 | 1098482 | --- | --- | --- | 1,42 | up   |
| 5700240 | 7326612 | 1687192 | --- | --- | --- | 1,41 | down |
| 5700331 | 7043379 | 993619  | --- | --- | --- | 1,12 | down |
| 5700333 | 7117951 | 1172081 | --- | --- | --- | 1,05 | up   |
| 5700362 | 7312575 | 1653352 | --- | --- | --- | 1,18 | up   |
| 5700374 | 7060896 | 1033591 | --- | --- | --- | 1,28 | up   |
| 5700421 | 7365183 | 1781904 | --- | --- | --- | 1,59 | down |
| 5700425 | 7121849 | 1181807 | --- | --- | --- | 1,23 | up   |
| 5700434 | 7180804 | 1327015 | --- | --- | --- | 1,20 | down |
| 5700486 | 7373678 | 1805858 | --- | --- | --- | 1,13 | up   |
| 5700524 | 7196331 | 1366387 | --- | --- | --- | 1,04 | down |
| 5700767 | 7350993 | 1747504 | --- | --- | --- | 1,10 | up   |
| 5700784 | 7075445 | 1069341 | --- | --- | --- | 1,07 | down |
| 5700920 | 7144389 | 1236778 | --- | --- | --- | 2,18 | down |
| 5701043 | 7139026 | 1223498 | --- | --- | --- | 1,03 | down |
| 5701048 | 7371001 | 1798863 | --- | --- | --- | 1,33 | down |
| 5701066 | 7281924 | 1577703 | --- | --- | --- | 1,19 | up   |
| 5701188 | 7274593 | 1558817 | --- | --- | --- | 1,19 | up   |
| 5701267 | 7181105 | 1327967 | --- | --- | --- | 1,49 | down |
| 5701305 | 7030037 | 960707  | --- | --- | --- | 1,42 | up   |
| 5701335 | 7279499 | 1571829 | --- | --- | --- | 2,12 | down |
| 5701385 | 7320735 | 1674152 | --- | --- | --- | 1,07 | up   |
| 5701502 | 7238202 | 1468956 | --- | --- | --- | 1,85 | down |
| 5701603 | 7299650 | 1620963 | --- | --- | --- | 1,10 | down |
| 5701659 | 7080563 | 1080722 | --- | --- | --- | 1,11 | down |
| 5701687 | 7377116 | 1814071 | --- | --- | --- | 1,28 | up   |
| 5701701 | 7132024 | 1206342 | --- | --- | --- | 1,02 | down |
| 5701801 | 7038530 | 981873  | --- | --- | --- | 1,01 | down |
| 5701810 | 7309734 | 1646884 | --- | --- | --- | 1,10 | up   |
| 5701818 | 7252339 | 1503301 | --- | --- | --- | 1,13 | up   |

|         |         |         |     |     |     |      |      |
|---------|---------|---------|-----|-----|-----|------|------|
| 5701897 | 7231152 | 1450262 | --- | --- | --- | 2,42 | up   |
| 5701904 | 7098810 | 1124645 | --- | --- | --- | 1,09 | down |
| 5701952 | 7371682 | 1800775 | --- | --- | --- | 1,15 | down |
| 5702066 | 7132024 | 1206337 | --- | --- | --- | 1,16 | up   |
| 5702147 | 7349817 | 1744599 | --- | --- | --- | 1,23 | up   |
| 5702345 | 7126400 | 1192529 | --- | --- | --- | 1,34 | down |
| 5702457 | 7052331 | 1014567 | --- | --- | --- | 1,06 | up   |
| 5702529 | 7353232 | 1752853 | --- | --- | --- | 1,36 | up   |
| 5702532 | 7131372 | 1205040 | --- | --- | --- | 1,01 | up   |
| 5702547 | 7240569 | 1475323 | --- | --- | --- | 1,07 | down |
| 5702579 | 7190524 | 1351184 | --- | --- | --- | 1,07 | down |
| 5702709 | 7274780 | 1559226 | --- | --- | --- | 1,12 | up   |
| 5702750 | 7275927 | 1562389 | --- | --- | --- | 1,42 | down |
| 5702856 | 7345465 | 1733819 | --- | --- | --- | 1,27 | down |
| 5702872 | 7255911 | 1512222 | --- | --- | --- | 1,10 | up   |
| 5703017 | 7360325 | 1770516 | --- | --- | --- | 1,13 | down |
| 5703056 | 7156052 | 1265754 | --- | --- | --- | 1,12 | down |
| 5703067 | 7033616 | 970211  | --- | --- | --- | 1,57 | down |
| 5703120 | 7263652 | 1531626 | --- | --- | --- | 1,38 | up   |
| 5703240 | 7307473 | 1641281 | --- | --- | --- | 1,32 | up   |
| 5703243 | 7375673 | 1810746 | --- | --- | --- | 1,25 | down |
| 5703297 | 7353284 | 1752984 | --- | --- | --- | 1,11 | down |
| 5703310 | 7087965 | 1098050 | --- | --- | --- | 1,06 | up   |
| 5703313 | 7374324 | 1807533 | --- | --- | --- | 1,03 | up   |
| 5703380 | 7148741 | 1247878 | --- | --- | --- | 1,09 | up   |
| 5703395 | 7068259 | 1051631 | --- | --- | --- | 1,33 | down |
| 5703472 | 7305275 | 1635828 | --- | --- | --- | 1,20 | down |
| 5703518 | 7369954 | 1795675 | --- | --- | --- | 1,30 | down |
| 5703534 | 7314620 | 1658526 | --- | --- | --- | 1,24 | up   |
| 5703626 | 7340990 | 1722505 | --- | --- | --- | 1,23 | up   |
| 5703638 | 7088544 | 1099689 | --- | --- | --- | 1,08 | down |
| 5703814 | 7056025 | 1022767 | --- | --- | --- | 1,05 | up   |
| 5703894 | 7383823 | 1828940 | --- | --- | --- | 1,32 | up   |
| 5703910 | 7194540 | 1362113 | --- | --- | --- | 1,36 | down |
| 5703967 | 7324760 | 1683088 | --- | --- | --- | 1,06 | up   |
| 5704065 | 7368986 | 1792855 | --- | --- | --- | 3,90 | down |
| 5704131 | 7321029 | 1674806 | --- | --- | --- | 1,10 | up   |
| 5704135 | 7278794 | 1570049 | --- | --- | --- | 1,16 | up   |
| 5704213 | 7321414 | 1675629 | --- | --- | --- | 1,11 | up   |
| 5704234 | 7260488 | 1523933 | --- | --- | --- | 1,13 | up   |
| 5704325 | 7377304 | 1814594 | --- | --- | --- | 1,09 | up   |
| 5704339 | 7059449 | 1030303 | --- | --- | --- | 1,03 | up   |
| 5704383 | 7033504 | 969848  | --- | --- | --- | 1,27 | up   |
| 5704570 | 7153571 | 1259033 | --- | --- | --- | 2,40 | up   |
| 5704629 | 7059020 | 1029332 | --- | --- | --- | 1,64 | down |
| 5704643 | 7041609 | 989584  | --- | --- | --- | 1,02 | up   |
| 5704749 | 7369781 | 1795035 | --- | --- | --- | 1,23 | up   |
| 5704820 | 7335637 | 1708473 | --- | --- | --- | 1,61 | down |
| 5704866 | 7357026 | 1762223 | --- | --- | --- | 1,01 | down |
| 5704888 | 7370415 | 1796850 | --- | --- | --- | 1,84 | up   |
| 5704898 | 7236358 | 1464246 | --- | --- | --- | 1,04 | down |
| 5704908 | 7179859 | 1324617 | --- | --- | --- | 2,29 | down |
| 5705081 | 7306229 | 1638248 | --- | --- | --- | 1,02 | down |
| 5705158 | 7186240 | 1340831 | --- | --- | --- | 1,13 | up   |
| 5705340 | 7117526 | 1171034 | --- | --- | --- | 1,22 | up   |
| 5705367 | 7088164 | 1098484 | --- | --- | --- | 2,53 | down |
| 5705578 | 7093255 | 1110761 | --- | --- | --- | 1,19 | up   |

|         |         |         |     |     |     |      |      |
|---------|---------|---------|-----|-----|-----|------|------|
| 5705654 | 7297589 | 1615605 | --- | --- | --- | 1,15 | up   |
| 5705663 | 7331795 | 1700098 | --- | --- | --- | 1,32 | down |
| 5705738 | 7196006 | 1365569 | --- | --- | --- | 1,36 | up   |
| 5705926 | 7309734 | 1646890 | --- | --- | --- | 1,09 | down |
| 5705938 | 7068259 | 1051633 | --- | --- | --- | 1,25 | up   |
| 5706120 | 7261580 | 1526813 | --- | --- | --- | 1,31 | up   |
| 5706143 | 7210702 | 1400724 | --- | --- | --- | 1,09 | down |
| 5706169 | 7345465 | 1733851 | --- | --- | --- | 1,74 | down |
| 5706273 | 7076160 | 1070882 | --- | --- | --- | 1,38 | up   |
| 5706319 | 7231775 | 1452122 | --- | --- | --- | 1,01 | up   |
| 5706374 | 7351844 | 1749489 | --- | --- | --- | 1,29 | up   |
| 5706519 | 7196029 | 1365627 | --- | --- | --- | 1,45 | down |
| 5706576 | 7061948 | 1036371 | --- | --- | --- | 1,17 | down |
| 5706592 | 7170764 | 1301477 | --- | --- | --- | 1,23 | up   |
| 5706623 | 7292178 | 1601743 | --- | --- | --- | 1,30 | down |
| 5706758 | 7257893 | 1517468 | --- | --- | --- | 1,10 | up   |
| 5706773 | 7217650 | 1417176 | --- | --- | --- | 1,84 | down |
| 5706780 | 7383102 | 1827380 | --- | --- | --- | 1,11 | down |
| 5706813 | 7373678 | 1805858 | --- | --- | --- | 1,14 | up   |
| 5706839 | 7181026 | 1327845 | --- | --- | --- | 1,51 | down |
| 5706918 | 7188458 | 1345724 | --- | --- | --- | 1,96 | up   |
| 5706945 | 7127540 | 1195291 | --- | --- | --- | 1,51 | up   |
| 5706963 | 7078666 | 1076505 | --- | --- | --- | 1,10 | up   |
| 5706965 | 7171091 | 1302449 | --- | --- | --- | 1,53 | down |
| 5707033 | 7374493 | 1807957 | --- | --- | --- | 1,04 | up   |
| 5707034 | 7168439 | 1295686 | --- | --- | --- | 1,36 | up   |
| 5707035 | 7109292 | 1150747 | --- | --- | --- | 1,13 | down |
| 5707111 | 7039532 | 984433  | --- | --- | --- | 1,67 | up   |
| 5707126 | 7175946 | 1314641 | --- | --- | --- | 1,16 | up   |
| 5707221 | 7252877 | 1504778 | --- | --- | --- | 1,66 | up   |
| 5707247 | 7282927 | 1579978 | --- | --- | --- | 1,07 | down |
| 5707274 | 7267362 | 1540328 | --- | --- | --- | 1,46 | down |
| 5707275 | 7378878 | 1818321 | --- | --- | --- | 1,02 | up   |
| 5707286 | 7162144 | 1280511 | --- | --- | --- | 1,12 | up   |
| 5707305 | 7092549 | 1109132 | --- | --- | --- | 1,01 | up   |
| 5707423 | 7381330 | 1823621 | --- | --- | --- | 1,30 | up   |
| 5707462 | 7143455 | 1234723 | --- | --- | --- | 1,06 | up   |
| 5707516 | 7274780 | 1559221 | --- | --- | --- | 1,34 | down |
| 5707565 | 7344702 | 1732141 | --- | --- | --- | 1,05 | down |
| 5707741 | 7246518 | 1489046 | --- | --- | --- | 1,31 | down |
| 5707810 | 7052331 | 1014567 | --- | --- | --- | 1,77 | down |
| 5707853 | 7240569 | 1475376 | --- | --- | --- | 1,03 | down |
| 5707925 | 7073673 | 1065080 | --- | --- | --- | 1,02 | up   |
| 5707975 | 7120427 | 1178423 | --- | --- | --- | 1,06 | down |
| 5707987 | 7309734 | 1646898 | --- | --- | --- | 1,53 | down |
| 5708031 | 7338101 | 1715191 | --- | --- | --- | 1,16 | down |
| 5708084 | 7345456 | 1733793 | --- | --- | --- | 1,06 | down |
| 5708276 | 7050167 | 1009828 | --- | --- | --- | 1,00 | up   |
| 5708284 | 7153136 | 1258043 | --- | --- | --- | 1,11 | down |
| 5708375 | 7033504 | 969858  | --- | --- | --- | 1,49 | up   |
| 5708380 | 7330181 | 1695695 | --- | --- | --- | 1,05 | down |
| 5708428 | 7297274 | 1614630 | --- | --- | --- | 1,13 | up   |
| 5708508 | 7078605 | 1076351 | --- | --- | --- | 1,09 | up   |
| 5708578 | 7138580 | 1222507 | --- | --- | --- | 1,02 | down |
| 5708586 | 7133484 | 1209935 | --- | --- | --- | 1,11 | up   |
| 5708768 | 7301296 | 1624998 | --- | --- | --- | 1,18 | up   |
| 5708799 | 7350993 | 1747546 | --- | --- | --- | 1,16 | up   |

|         |         |         |     |     |     |      |      |
|---------|---------|---------|-----|-----|-----|------|------|
| 5708953 | 7255522 | 1511384 | --- | --- | --- | 1,20 | down |
| 5709043 | 7095041 | 1115178 | --- | --- | --- | 1,04 | up   |
| 5709061 | 7184151 | 1335954 | --- | --- | --- | 1,10 | up   |
| 5709099 | 7088135 | 1098402 | --- | --- | --- | 1,01 | up   |
| 5709156 | 7380878 | 1822578 | --- | --- | --- | 1,06 | down |
| 5709183 | 7122140 | 1182733 | --- | --- | --- | 1,71 | down |
| 5709208 | 7095041 | 1115186 | --- | --- | --- | 1,13 | up   |
| 5709264 | 7346885 | 1737308 | --- | --- | --- | 1,09 | up   |
| 5709345 | 7059020 | 1029345 | --- | --- | --- | 1,41 | up   |
| 5709431 | 7192307 | 1356003 | --- | --- | --- | 2,54 | down |
| 5709447 | 7167823 | 1293862 | --- | --- | --- | 2,77 | up   |
| 5709468 | 7327169 | 1688467 | --- | --- | --- | 1,12 | down |
| 5709492 | 7340673 | 1721709 | --- | --- | --- | 1,26 | up   |
| 5709781 | 7140365 | 1226791 | --- | --- | --- | 1,02 | down |
| 5709840 | 7063515 | 1039668 | --- | --- | --- | 1,44 | down |
| 5709843 | 7217650 | 1417171 | --- | --- | --- | 1,45 | up   |
| 5709965 | 7029078 | 958875  | --- | --- | --- | 1,14 | up   |
| 5709977 | 7093936 | 1112475 | --- | --- | --- | 1,45 | down |
| 5710002 | 7231533 | 1451508 | --- | --- | --- | 2,01 | up   |
| 5710058 | 7341546 | 1723943 | --- | --- | --- | 1,24 | up   |
| 5710183 | 7359460 | 1768471 | --- | --- | --- | 1,16 | up   |
| 5710211 | 7261580 | 1526793 | --- | --- | --- | 1,05 | down |
| 5710261 | 7281577 | 1576882 | --- | --- | --- | 1,42 | up   |
| 5710308 | 7071969 | 1060894 | --- | --- | --- | 1,01 | down |
| 5710355 | 7181193 | 1328292 | --- | --- | --- | 1,04 | up   |
| 5710418 | 7099573 | 1126738 | --- | --- | --- | 1,18 | down |
| 5710563 | 7027386 | 955084  | --- | --- | --- | 1,04 | up   |
| 5710585 | 7121849 | 1181757 | --- | --- | --- | 1,17 | up   |
| 5710639 | 7278010 | 1568045 | --- | --- | --- | 1,31 | down |
| 5710915 | 7196029 | 1365624 | --- | --- | --- | 1,20 | up   |
| 5710932 | 7280743 | 1574536 | --- | --- | --- | 1,06 | down |
| 5711008 | 7179176 | 1322900 | --- | --- | --- | 1,07 | up   |
| 5711070 | 7073677 | 1065161 | --- | --- | --- | 1,66 | down |
| 5711234 | 7339387 | 1718377 | --- | --- | --- | 1,14 | down |
| 5711238 | 7062233 | 1037233 | --- | --- | --- | 1,28 | up   |
| 5711259 | 7139026 | 1223497 | --- | --- | --- | 1,15 | down |
| 5711282 | 7052813 | 1015920 | --- | --- | --- | 1,20 | up   |
| 5711311 | 7117526 | 1171033 | --- | --- | --- | 1,08 | down |
| 5711318 | 7231152 | 1450258 | --- | --- | --- | 1,23 | up   |
| 5711376 | 7156052 | 1265763 | --- | --- | --- | 1,27 | down |
| 5711391 | 7102416 | 1133513 | --- | --- | --- | 1,17 | up   |
| 5711404 | 7267344 | 1540262 | --- | --- | --- | 1,28 | up   |
| 5711492 | 7064468 | 1042376 | --- | --- | --- | 1,15 | down |
| 5711507 | 7319773 | 1671874 | --- | --- | --- | 1,33 | up   |
| 5711517 | 7217434 | 1416370 | --- | --- | --- | 1,11 | up   |
| 5711611 | 7353382 | 1753221 | --- | --- | --- | 1,01 | up   |
| 5711646 | 7146542 | 1242296 | --- | --- | --- | 1,12 | down |
| 5711818 | 7213228 | 1405992 | --- | --- | --- | 1,01 | up   |
| 5711867 | 7319151 | 1670111 | --- | --- | --- | 3,93 | up   |
| 5711876 | 7194400 | 1361722 | --- | --- | --- | 1,26 | down |
| 5711891 | 7239303 | 1471998 | --- | --- | --- | 1,18 | up   |
| 5711945 | 7162959 | 1282085 | --- | --- | --- | 1,14 | up   |
| 5712033 | 7200545 | 1376913 | --- | --- | --- | 1,47 | up   |
| 5712104 | 7062436 | 1037670 | --- | --- | --- | 1,13 | down |
| 5712299 | 7239303 | 1471941 | --- | --- | --- | 1,15 | up   |
| 5712435 | 7291853 | 1600989 | --- | --- | --- | 1,69 | down |
| 5712443 | 7217143 | 1415616 | --- | --- | --- | 1,82 | down |

|         |         |         |     |     |     |      |      |
|---------|---------|---------|-----|-----|-----|------|------|
| 5712452 | 7274892 | 1559570 | --- | --- | --- | 1,15 | up   |
| 5712562 | 7156052 | 1265784 | --- | --- | --- | 1,51 | up   |
| 5712597 | 7179914 | 1324713 | --- | --- | --- | 1,21 | up   |
| 5712698 | 7083031 | 1086289 | --- | --- | --- | 1,05 | up   |
| 5712802 | 7360486 | 1770988 | --- | --- | --- | 1,04 | down |
| 5712822 | 7211389 | 1402121 | --- | --- | --- | 1,23 | down |
| 5712857 | 7131876 | 1206050 | --- | --- | --- | 1,46 | down |
| 5713135 | 7258455 | 1518739 | --- | --- | --- | 1,02 | down |
| 5713174 | 7293234 | 1604353 | --- | --- | --- | 1,19 | down |
| 5713184 | 7148978 | 1248456 | --- | --- | --- | 2,27 | down |
| 5713200 | 7247230 | 1490581 | --- | --- | --- | 1,46 | down |
| 5713225 | 7205944 | 1389474 | --- | --- | --- | 1,01 | down |
| 5713318 | 7031774 | 964728  | --- | --- | --- | 1,30 | up   |
| 5713377 | 7241163 | 1476824 | --- | --- | --- | 1,73 | down |
| 5713399 | 7088544 | 1099666 | --- | --- | --- | 1,42 | down |
| 5713417 | 7142081 | 1230952 | --- | --- | --- | 1,10 | down |
| 5713424 | 7096924 | 1119603 | --- | --- | --- | 1,09 | down |
| 5713427 | 7033337 | 969497  | --- | --- | --- | 1,12 | down |
| 5713431 | 7288077 | 1591993 | --- | --- | --- | 1,76 | down |
| 5713458 | 7354935 | 1757102 | --- | --- | --- | 1,36 | up   |
| 5713510 | 7213908 | 1407762 | --- | --- | --- | 1,94 | up   |
| 5713544 | 7227433 | 1440986 | --- | --- | --- | 1,11 | down |
| 5713710 | 7286807 | 1588825 | --- | --- | --- | 1,41 | down |
| 5713750 | 7267344 | 1540264 | --- | --- | --- | 1,44 | down |
| 5713773 | 7297589 | 1615687 | --- | --- | --- | 1,08 | down |
| 5713811 | 7244290 | 1484158 | --- | --- | --- | 1,37 | down |
| 5713863 | 7047524 | 1004655 | --- | --- | --- | 1,35 | down |
| 5713906 | 7352152 | 1750335 | --- | --- | --- | 2,47 | up   |
| 5713941 | 7337224 | 1712610 | --- | --- | --- | 1,79 | up   |
| 5713950 | 7158517 | 1271593 | --- | --- | --- | 1,06 | up   |
| 5713994 | 7256191 | 1512879 | --- | --- | --- | 1,98 | up   |
| 5714053 | 7374324 | 1807441 | --- | --- | --- | 1,11 | up   |
| 5714067 | 7330731 | 1697193 | --- | --- | --- | 1,04 | up   |
| 5714344 | 7337845 | 1714331 | --- | --- | --- | 1,37 | down |
| 5714505 | 7382499 | 1826256 | --- | --- | --- | 1,00 | down |
| 5714600 | 7130917 | 1203917 | --- | --- | --- | 1,09 | down |
| 5714683 | 7100523 | 1128899 | --- | --- | --- | 1,33 | down |
| 5714732 | 7330396 | 1696371 | --- | --- | --- | 1,09 | up   |
| 5714801 | 7148978 | 1248463 | --- | --- | --- | 1,07 | down |
| 5714845 | 7063873 | 1040648 | --- | --- | --- | 2,17 | down |
| 5714876 | 7089952 | 1103320 | --- | --- | --- | 1,93 | up   |
| 5714897 | 7306229 | 1638245 | --- | --- | --- | 1,20 | down |
| 5714916 | 7207093 | 1392113 | --- | --- | --- | 1,93 | down |
| 5714944 | 7053874 | 1018312 | --- | --- | --- | 1,81 | up   |
| 5715056 | 7210263 | 1399767 | --- | --- | --- | 1,20 | down |
| 5715070 | 7261668 | 1526982 | --- | --- | --- | 2,08 | down |
| 5715082 | 7337425 | 1713177 | --- | --- | --- | 1,31 | up   |
| 5715089 | 7282831 | 1579774 | --- | --- | --- | 1,60 | down |
| 5715110 | 7069603 | 1055049 | --- | --- | --- | 1,26 | up   |
| 5715202 | 7056025 | 1022800 | --- | --- | --- | 1,03 | up   |
| 5715386 | 7053874 | 1018313 | --- | --- | --- | 1,14 | up   |
| 5715501 | 7254040 | 1507594 | --- | --- | --- | 1,19 | up   |
| 5715521 | 7261592 | 1526856 | --- | --- | --- | 2,46 | up   |
| 5715630 | 7278010 | 1568037 | --- | --- | --- | 1,01 | down |
| 5715679 | 7030037 | 960717  | --- | --- | --- | 1,14 | down |
| 5715735 | 7380497 | 1821865 | --- | --- | --- | 1,07 | up   |
| 5715800 | 7052813 | 1015918 | --- | --- | --- | 1,39 | down |

|         |         |         |     |     |     |      |      |
|---------|---------|---------|-----|-----|-----|------|------|
| 5715820 | 7127540 | 1195284 | --- | --- | --- | 1,36 | down |
| 5715926 | 7239939 | 1473794 | --- | --- | --- | 1,11 | down |
| 5715990 | 7339379 | 1718340 | --- | --- | --- | 1,26 | up   |
| 5716094 | 7091439 | 1106622 | --- | --- | --- | 1,43 | up   |
| 5716115 | 7368986 | 1792880 | --- | --- | --- | 1,73 | down |
| 5716234 | 7318651 | 1669091 | --- | --- | --- | 1,38 | up   |
| 5716264 | 7113483 | 1161006 | --- | --- | --- | 1,00 | down |
| 5716346 | 7217434 | 1416452 | --- | --- | --- | 2,45 | down |
| 5716409 | 7326271 | 1686482 | --- | --- | --- | 1,13 | down |
| 5716453 | 7356027 | 1759977 | --- | --- | --- | 1,38 | up   |
| 5716506 | 7056736 | 1024422 | --- | --- | --- | 1,82 | up   |
| 5716618 | 7280743 | 1574486 | --- | --- | --- | 2,13 | up   |
| 5716641 | 7176275 | 1315334 | --- | --- | --- | 1,06 | down |
| 5716688 | 7363529 | 1777911 | --- | --- | --- | 1,28 | down |
| 5716698 | 7196029 | 1365616 | --- | --- | --- | 1,02 | up   |
| 5716700 | 7123129 | 1185073 | --- | --- | --- | 1,42 | up   |
| 5716701 | 7252877 | 1504692 | --- | --- | --- | 1,11 | down |
| 5716733 | 7261580 | 1526809 | --- | --- | --- | 1,37 | down |
| 5716821 | 7281877 | 1577533 | --- | --- | --- | 1,32 | up   |
| 5716841 | 7240569 | 1475448 | --- | --- | --- | 1,05 | down |
| 5716871 | 7198210 | 1371009 | --- | --- | --- | 1,48 | down |
| 5716888 | 7341546 | 1723973 | --- | --- | --- | 1,08 | down |
| 5716910 | 7331757 | 1700027 | --- | --- | --- | 1,47 | up   |
| 5717002 | 7091900 | 1107637 | --- | --- | --- | 1,38 | up   |
| 5717081 | 7067828 | 1050798 | --- | --- | --- | 1,03 | up   |
| 5717170 | 7096461 | 1118271 | --- | --- | --- | 1,08 | up   |
| 5717237 | 7346687 | 1736696 | --- | --- | --- | 1,16 | down |
| 5717283 | 7047524 | 1004666 | --- | --- | --- | 1,35 | up   |
| 5717413 | 7260066 | 1522890 | --- | --- | --- | 1,02 | up   |
| 5717476 | 7301843 | 1626486 | --- | --- | --- | 1,15 | up   |
| 5717491 | 7230886 | 1449527 | --- | --- | --- | 1,00 | up   |
| 5717523 | 7112566 | 1158635 | --- | --- | --- | 1,09 | up   |
| 5717614 | 7053874 | 1018318 | --- | --- | --- | 1,02 | up   |
| 5717701 | 7236492 | 1464559 | --- | --- | --- | 1,53 | down |
| 5717725 | 7050716 | 1011224 | --- | --- | --- | 1,53 | down |
| 5717765 | 7071264 | 1059296 | --- | --- | --- | 1,31 | up   |
| 5717800 | 7358048 | 1764817 | --- | --- | --- | 1,39 | up   |
| 5718007 | 7032558 | 967058  | --- | --- | --- | 1,35 | up   |
| 5718133 | 7341274 | 1723397 | --- | --- | --- | 1,23 | down |
| 5718204 | 7059020 | 1029331 | --- | --- | --- | 1,55 | down |
| 5718272 | 7105780 | 1141701 | --- | --- | --- | 1,03 | up   |
| 5718296 | 7108974 | 1149795 | --- | --- | --- | 1,06 | down |
| 5718310 | 7148978 | 1248450 | --- | --- | --- | 1,80 | down |
| 5718467 | 7302787 | 1628899 | --- | --- | --- | 1,17 | down |
| 5718503 | 7230886 | 1449578 | --- | --- | --- | 1,10 | up   |
| 5718556 | 7309734 | 1646916 | --- | --- | --- | 1,09 | up   |
| 5718565 | 7290474 | 1597970 | --- | --- | --- | 2,13 | down |
| 5718571 | 7044988 | 998456  | --- | --- | --- | 1,57 | up   |
| 5718619 | 7189669 | 1348982 | --- | --- | --- | 1,24 | down |
| 5718622 | 7040442 | 986471  | --- | --- | --- | 1,64 | up   |
| 5718652 | 7337425 | 1713154 | --- | --- | --- | 1,06 | up   |
| 5718727 | 7197400 | 1368813 | --- | --- | --- | 1,07 | up   |
| 5718749 | 7055793 | 1022320 | --- | --- | --- | 3,11 | up   |
| 5718767 | 7328833 | 1692773 | --- | --- | --- | 1,07 | down |
| 5718798 | 7341038 | 1722688 | --- | --- | --- | 1,05 | down |
| 5718802 | 7140365 | 1226793 | --- | --- | --- | 1,25 | up   |
| 5718893 | 7376073 | 1811689 | --- | --- | --- | 1,23 | up   |

|         |         |         |     |     |     |      |      |
|---------|---------|---------|-----|-----|-----|------|------|
| 5719053 | 7377583 | 1815460 | --- | --- | --- | 1,01 | down |
| 5719059 | 7149934 | 1250519 | --- | --- | --- | 1,22 | up   |
| 5719133 | 7145604 | 1239843 | --- | --- | --- | 1,27 | down |
| 5719185 | 7105066 | 1140367 | --- | --- | --- | 1,02 | down |
| 5719196 | 7227433 | 1440970 | --- | --- | --- | 1,05 | up   |
| 5719247 | 7071741 | 1060440 | --- | --- | --- | 1,26 | down |
| 5719391 | 7202749 | 1382060 | --- | --- | --- | 1,84 | down |
| 5719468 | 7156052 | 1265784 | --- | --- | --- | 1,06 | down |
| 5719503 | 7056304 | 1023602 | --- | --- | --- | 1,25 | down |
| 5719533 | 7332059 | 1700733 | --- | --- | --- | 1,56 | up   |
| 5719570 | 7105449 | 1141123 | --- | --- | --- | 2,62 | down |
| 5719625 | 7059506 | 1030393 | --- | --- | --- | 1,38 | up   |
| 5719650 | 7180732 | 1326726 | --- | --- | --- | 1,29 | up   |
| 5719674 | 7337425 | 1713159 | --- | --- | --- | 1,18 | down |
| 5719742 | 7384509 | 1830731 | --- | --- | --- | 1,58 | up   |
| 5719743 | 7292701 | 1602955 | --- | --- | --- | 1,44 | down |
| 5719780 | 7231557 | 1451558 | --- | --- | --- | 1,05 | down |
| 5719892 | 7067518 | 1049956 | --- | --- | --- | 1,05 | up   |
| 5720132 | 7252283 | 1503115 | --- | --- | --- | 1,98 | down |
| 5720327 | 7146872 | 1242907 | --- | --- | --- | 1,12 | down |
| 5720414 | 7200545 | 1376915 | --- | --- | --- | 1,70 | up   |
| 5720447 | 7142081 | 1230972 | --- | --- | --- | 1,03 | down |
| 5720516 | 7280982 | 1575204 | --- | --- | --- | 1,10 | up   |
| 5720527 | 7205750 | 1388930 | --- | --- | --- | 1,03 | up   |
| 5720723 | 7165644 | 1288009 | --- | --- | --- | 1,13 | down |
| 5720747 | 7098810 | 1124652 | --- | --- | --- | 1,32 | down |
| 5720776 | 7274892 | 1559558 | --- | --- | --- | 1,15 | down |
| 5720801 | 7156978 | 1268174 | --- | --- | --- | 1,01 | up   |
| 5720850 | 7237814 | 1467814 | --- | --- | --- | 1,29 | down |
| 5720888 | 7056106 | 1022980 | --- | --- | --- | 1,02 | up   |
| 5720985 | 7095021 | 1115123 | --- | --- | --- | 1,37 | down |
| 5721081 | 7329802 | 1694916 | --- | --- | --- | 1,26 | down |
| 5721128 | 7162177 | 1280576 | --- | --- | --- | 1,24 | down |
| 5721152 | 7074911 | 1068178 | --- | --- | --- | 1,03 | up   |
| 5721182 | 7101094 | 1130228 | --- | --- | --- | 1,32 | down |
| 5721234 | 7213908 | 1407659 | --- | --- | --- | 1,05 | up   |
| 5721277 | 7238414 | 1469584 | --- | --- | --- | 1,29 | up   |
| 5721317 | 7363568 | 1778131 | --- | --- | --- | 1,84 | down |
| 5721539 | 7060896 | 1033553 | --- | --- | --- | 1,02 | up   |
| 5721588 | 7273251 | 1555948 | --- | --- | --- | 1,37 | up   |
| 5721604 | 7073854 | 1065634 | --- | --- | --- | 2,62 | down |
| 5721653 | 7243647 | 1482453 | --- | --- | --- | 1,16 | up   |
| 5721702 | 7181193 | 1328293 | --- | --- | --- | 1,88 | down |
| 5721853 | 7240569 | 1475387 | --- | --- | --- | 1,08 | down |
| 5722079 | 7341646 | 1724197 | --- | --- | --- | 1,01 | down |
| 5722172 | 7062233 | 1037247 | --- | --- | --- | 1,01 | up   |
| 5722175 | 7321414 | 1675627 | --- | --- | --- | 1,75 | up   |
| 5722192 | 7353232 | 1752748 | --- | --- | --- | 1,19 | up   |
| 5722224 | 7082098 | 1084115 | --- | --- | --- | 1,01 | up   |
| 5722225 | 7113483 | 1161016 | --- | --- | --- | 1,09 | up   |
| 5722254 | 7363529 | 1777932 | --- | --- | --- | 1,00 | up   |
| 5722273 | 7373678 | 1805873 | --- | --- | --- | 1,13 | down |
| 5722305 | 7120671 | 1179003 | --- | --- | --- | 1,20 | down |
| 5722375 | 7363529 | 1777955 | --- | --- | --- | 1,03 | down |
| 5722408 | 7309734 | 1646876 | --- | --- | --- | 1,01 | up   |
| 5722451 | 7139708 | 1225061 | --- | --- | --- | 1,03 | up   |
| 5722474 | 7321414 | 1675632 | --- | --- | --- | 1,01 | up   |



|         |         |         |     |     |     |      |      |
|---------|---------|---------|-----|-----|-----|------|------|
| 5722484 | 7039589 | 984514  | --- | --- | --- | 1,08 | down |
| 5722517 | 7175946 | 1314648 | --- | --- | --- | 1,12 | down |
| 5722519 | 7238202 | 1468953 | --- | --- | --- | 1,21 | down |
| 5722520 | 7093936 | 1112462 | --- | --- | --- | 2,06 | down |
| 5722541 | 7147720 | 1245236 | --- | --- | --- | 1,61 | down |
| 5722556 | 7193403 | 1359201 | --- | --- | --- | 1,31 | up   |
| 5722693 | 7097536 | 1121129 | --- | --- | --- | 1,56 | down |
| 5722840 | 7150348 | 1251434 | --- | --- | --- | 1,20 | down |
| 5722935 | 7093835 | 1112220 | --- | --- | --- | 1,70 | down |
| 5723108 | 7230628 | 1448865 | --- | --- | --- | 1,06 | up   |
| 5723133 | 7029770 | 960158  | --- | --- | --- | 1,37 | up   |
| 5723144 | 7032204 | 966120  | --- | --- | --- | 1,90 | up   |
| 5723185 | 7350237 | 1745480 | --- | --- | --- | 1,06 | up   |
| 5723309 | 7273744 | 1556975 | --- | --- | --- | 1,12 | down |
| 5723342 | 7085063 | 1090803 | --- | --- | --- | 1,24 | down |
| 5723405 | 7115362 | 1165598 | --- | --- | --- | 1,06 | up   |
| 5723542 | 7329135 | 1693495 | --- | --- | --- | 2,14 | down |
| 5723600 | 7292869 | 1603397 | --- | --- | --- | 1,87 | up   |
| 5723636 | 7257893 | 1517459 | --- | --- | --- | 1,84 | down |
| 5723720 | 7096461 | 1118265 | --- | --- | --- | 1,32 | up   |
| 5723731 | 7340506 | 1721336 | --- | --- | --- | 1,52 | up   |
| 5723745 | 7240569 | 1475494 | --- | --- | --- | 1,08 | down |
| 5723954 | 7188829 | 1346668 | --- | --- | --- | 1,47 | down |
| 5724054 | 7203018 | 1382649 | --- | --- | --- | 1,32 | up   |
| 5724087 | 7093936 | 1112465 | --- | --- | --- | 1,57 | down |
| 5724108 | 7069830 | 1055633 | --- | --- | --- | 1,13 | down |
| 5724121 | 7148741 | 1247828 | --- | --- | --- | 1,01 | down |
| 5724144 | 7092406 | 1108781 | --- | --- | --- | 1,60 | down |
| 5724234 | 7297274 | 1614642 | --- | --- | --- | 1,11 | down |
| 5724392 | 7079238 | 1077810 | --- | --- | --- | 1,35 | up   |
| 5724395 | 7195680 | 1364877 | --- | --- | --- | 1,65 | down |
| 5724408 | 7370508 | 1797230 | --- | --- | --- | 2,32 | up   |
| 5724450 | 7093835 | 1112220 | --- | --- | --- | 1,72 | up   |
| 5724559 | 7238202 | 1468940 | --- | --- | --- | 1,03 | down |
| 5724565 | 7031774 | 964707  | --- | --- | --- | 1,34 | up   |
| 5724570 | 7175946 | 1314643 | --- | --- | --- | 1,17 | up   |
| 5724614 | 7373633 | 1805696 | --- | --- | --- | 1,10 | down |
| 5724652 | 7233513 | 1457167 | --- | --- | --- | 1,65 | down |
| 5724664 | 7308262 | 1643195 | --- | --- | --- | 1,01 | up   |
| 5724749 | 7277719 | 1567093 | --- | --- | --- | 1,11 | down |
| 5724776 | 7183927 | 1335497 | --- | --- | --- | 1,35 | down |
| 5724808 | 7088544 | 1099659 | --- | --- | --- | 1,63 | down |
| 5724889 | 7284901 | 1584800 | --- | --- | --- | 1,13 | down |
| 5725012 | 7318286 | 1668335 | --- | --- | --- | 1,05 | up   |
| 5725092 | 7088625 | 1099875 | --- | --- | --- | 1,33 | up   |
| 5725100 | 7257038 | 1515290 | --- | --- | --- | 1,51 | up   |
| 5725203 | 7073673 | 1065088 | --- | --- | --- | 1,14 | down |
| 5725244 | 7243647 | 1482476 | --- | --- | --- | 1,75 | up   |
| 5725345 | 7384509 | 1830741 | --- | --- | --- | 1,39 | down |
| 5725356 | 7167325 | 1292547 | --- | --- | --- | 1,06 | up   |
| 5725393 | 7261668 | 1526983 | --- | --- | --- | 1,03 | down |
| 5725467 | 7361881 | 1773951 | --- | --- | --- | 1,28 | down |
| 5725496 | 7064134 | 1041445 | --- | --- | --- | 1,12 | down |
| 5725508 | 7108434 | 1148311 | --- | --- | --- | 1,58 | down |
| 5725671 | 7368004 | 1789335 | --- | --- | --- | 2,68 | down |
| 5725685 | 7336931 | 1711853 | --- | --- | --- | 1,21 | up   |
| 5725698 | 7055793 | 1022316 | --- | --- | --- | 1,24 | up   |

|         |         |         |     |     |     |      |      |
|---------|---------|---------|-----|-----|-----|------|------|
| 5725811 | 7239303 | 1471952 | --- | --- | --- | 1,11 | up   |
| 5725827 | 7380497 | 1821867 | --- | --- | --- | 1,00 | up   |
| 5725878 | 7068259 | 1051614 | --- | --- | --- | 2,10 | down |
| 5725950 | 7148978 | 1248510 | --- | --- | --- | 1,04 | up   |
| 5725975 | 7375958 | 1811479 | --- | --- | --- | 1,82 | up   |
| 5726007 | 7168519 | 1295878 | --- | --- | --- | 1,44 | down |
| 5726094 | 7108556 | 1148720 | --- | --- | --- | 1,10 | up   |
| 5726229 | 7058507 | 1028309 | --- | --- | --- | 1,02 | up   |
| 5726230 | 7148978 | 1248484 | --- | --- | --- | 1,25 | up   |
| 5726261 | 7364346 | 1780012 | --- | --- | --- | 1,08 | down |
| 5726422 | 7231484 | 1451398 | --- | --- | --- | 1,04 | down |
| 5726438 | 7369712 | 1794830 | --- | --- | --- | 1,24 | up   |
| 5726549 | 7281924 | 1577709 | --- | --- | --- | 1,08 | down |
| 5726607 | 7095041 | 1115173 | --- | --- | --- | 1,01 | down |
| 5726611 | 7279793 | 1572538 | --- | --- | --- | 2,40 | down |
| 5726629 | 7363674 | 1778450 | --- | --- | --- | 2,00 | down |
| 5726721 | 7195680 | 1364883 | --- | --- | --- | 1,56 | down |
| 5726724 | 7028624 | 957992  | --- | --- | --- | 1,03 | down |
| 5726789 | 7105814 | 1141774 | --- | --- | --- | 1,29 | up   |
| 5726805 | 7238826 | 1470532 | --- | --- | --- | 1,89 | down |
| 5726926 | 7272616 | 1554388 | --- | --- | --- | 1,02 | down |
| 5726975 | 7059449 | 1030305 | --- | --- | --- | 1,02 | up   |
| 5726977 | 7297589 | 1615687 | --- | --- | --- | 1,03 | up   |
| 5726985 | 7110401 | 1153090 | --- | --- | --- | 1,30 | up   |
| 5727022 | 7212587 | 1404632 | --- | --- | --- | 1,45 | up   |
| 5727152 | 7109292 | 1150751 | --- | --- | --- | 1,21 | down |
| 5727233 | 7075460 | 1069401 | --- | --- | --- | 1,33 | down |
| 5727250 | 7059971 | 1031464 | --- | --- | --- | 1,18 | down |
| 5727332 | 7140365 | 1226788 | --- | --- | --- | 1,12 | up   |
| 5727334 | 7274780 | 1559225 | --- | --- | --- | 1,55 | up   |
| 5727420 | 7095021 | 1115133 | --- | --- | --- | 1,13 | down |
| 5727436 | 7182739 | 1332581 | --- | --- | --- | 1,59 | up   |
| 5727440 | 7140834 | 1227938 | --- | --- | --- | 1,51 | up   |
| 5727442 | 7370412 | 1796840 | --- | --- | --- | 1,10 | up   |
| 5727454 | 7363576 | 1778195 | --- | --- | --- | 1,22 | down |
| 5727491 | 7238202 | 1468954 | --- | --- | --- | 1,24 | up   |
| 5727504 | 7034747 | 973193  | --- | --- | --- | 1,63 | up   |
| 5727558 | 7311391 | 1650860 | --- | --- | --- | 1,73 | down |
| 5727634 | 7131766 | 1205862 | --- | --- | --- | 1,26 | up   |
| 5727648 | 7039725 | 984822  | --- | --- | --- | 1,63 | down |
| 5727655 | 7123714 | 1186419 | --- | --- | --- | 1,07 | down |
| 5727721 | 7067670 | 1050319 | --- | --- | --- | 1,08 | up   |
| 5727754 | 7162144 | 1280512 | --- | --- | --- | 1,09 | down |
| 5727944 | 7339379 | 1718353 | --- | --- | --- | 1,02 | down |
| 5727975 | 7326271 | 1686460 | --- | --- | --- | 1,00 | down |
| 5728034 | 7132125 | 1206634 | --- | --- | --- | 1,14 | down |
| 5728082 | 7231533 | 1451502 | --- | --- | --- | 1,56 | up   |
| 5728127 | 7330731 | 1697186 | --- | --- | --- | 1,25 | up   |
| 5728271 | 7367990 | 1789220 | --- | --- | --- | 1,08 | down |
| 5728355 | 7314620 | 1658494 | --- | --- | --- | 1,40 | up   |
| 5728448 | 7196803 | 1367334 | --- | --- | --- | 2,38 | up   |
| 5728468 | 7313538 | 1655742 | --- | --- | --- | 1,03 | up   |
| 5728499 | 7028624 | 958002  | --- | --- | --- | 1,35 | down |
| 5728584 | 7322260 | 1677067 | --- | --- | --- | 1,10 | down |
| 5728623 | 7071741 | 1060453 | --- | --- | --- | 1,24 | down |
| 5728638 | 7289879 | 1596420 | --- | --- | --- | 1,08 | up   |
| 5728673 | 7065094 | 1044114 | --- | --- | --- | 1,04 | down |

|         |         |         |     |     |     |      |      |
|---------|---------|---------|-----|-----|-----|------|------|
| 5728680 | 7112355 | 1158086 | --- | --- | --- | 1,05 | up   |
| 5728760 | 7243901 | 1483060 | --- | --- | --- | 1,35 | down |
| 5728844 | 7351568 | 1748855 | --- | --- | --- | 1,05 | up   |
| 5728852 | 7170764 | 1301485 | --- | --- | --- | 1,35 | down |
| 5728927 | 7085063 | 1090806 | --- | --- | --- | 1,34 | down |
| 5729006 | 7244287 | 1484048 | --- | --- | --- | 1,10 | down |
| 5729011 | 7291909 | 1601094 | --- | --- | --- | 2,28 | up   |
| 5729034 | 7297589 | 1615604 | --- | --- | --- | 1,18 | up   |
| 5729053 | 7312532 | 1653222 | --- | --- | --- | 1,37 | down |
| 5729198 | 7341002 | 1722541 | --- | --- | --- | 1,01 | down |
| 5729208 | 7115362 | 1165598 | --- | --- | --- | 1,16 | down |
| 5729312 | 7321029 | 1674805 | --- | --- | --- | 1,15 | up   |
| 5729384 | 7297589 | 1615615 | --- | --- | --- | 1,42 | down |
| 5729505 | 7281924 | 1577743 | --- | --- | --- | 1,31 | up   |
| 5729605 | 7181001 | 1327611 | --- | --- | --- | 1,45 | up   |
| 5729611 | 7248790 | 1494546 | --- | --- | --- | 1,38 | up   |
| 5729614 | 7337522 | 1713595 | --- | --- | --- | 2,13 | down |
| 5729617 | 7237672 | 1467304 | --- | --- | --- | 1,44 | down |
| 5729757 | 7100523 | 1128842 | --- | --- | --- | 1,15 | up   |
| 5729783 | 7374493 | 1807968 | --- | --- | --- | 1,34 | down |
| 5729816 | 7069830 | 1055623 | --- | --- | --- | 1,37 | down |
| 5730110 | 7168979 | 1297191 | --- | --- | --- | 1,28 | down |
| 5730113 | 7273251 | 1555960 | --- | --- | --- | 1,65 | down |
| 5730118 | 7361223 | 1772612 | --- | --- | --- | 1,15 | up   |
| 5730123 | 7279103 | 1570821 | --- | --- | --- | 1,17 | down |
| 5730172 | 7329135 | 1693494 | --- | --- | --- | 1,42 | down |
| 5730206 | 7253088 | 1505112 | --- | --- | --- | 1,11 | up   |
| 5730263 | 7289075 | 1594457 | --- | --- | --- | 1,08 | up   |
| 5730281 | 7253088 | 1505114 | --- | --- | --- | 1,29 | up   |
| 5730446 | 7340673 | 1721689 | --- | --- | --- | 1,14 | down |
| 5730535 | 7356619 | 1761349 | --- | --- | --- | 1,09 | up   |
| 5730661 | 7181001 | 1327628 | --- | --- | --- | 2,02 | up   |
| 5730794 | 7368489 | 1791035 | --- | --- | --- | 1,01 | up   |
| 5730844 | 7221443 | 1426328 | --- | --- | --- | 1,08 | up   |
| 5730894 | 7059020 | 1029351 | --- | --- | --- | 1,11 | up   |
| 5730922 | 7148741 | 1247830 | --- | --- | --- | 1,26 | up   |
| 5730924 | 7059766 | 1030980 | --- | --- | --- | 1,53 | up   |
| 5730929 | 7115362 | 1165598 | --- | --- | --- | 1,55 | down |
| 5730951 | 7211363 | 1402042 | --- | --- | --- | 1,36 | up   |
| 5730965 | 7065640 | 1045211 | --- | --- | --- | 1,30 | down |
| 5731037 | 7176409 | 1315677 | --- | --- | --- | 1,33 | up   |
| 5731038 | 7188138 | 1345000 | --- | --- | --- | 1,37 | up   |
| 5731039 | 7279568 | 1572008 | --- | --- | --- | 1,12 | down |
| 5731164 | 7326612 | 1687200 | --- | --- | --- | 1,02 | down |
| 5731235 | 7138349 | 1221923 | --- | --- | --- | 1,34 | down |
| 5731243 | 7083030 | 1086249 | --- | --- | --- | 1,79 | up   |
| 5731292 | 7359426 | 1768356 | --- | --- | --- | 2,19 | up   |
| 5731346 | 7243628 | 1482390 | --- | --- | --- | 1,07 | up   |
| 5731362 | 7337425 | 1713210 | --- | --- | --- | 1,54 | down |
| 5731555 | 7035525 | 974782  | --- | --- | --- | 1,57 | down |
| 5731565 | 7087965 | 1098058 | --- | --- | --- | 1,42 | down |
| 5731592 | 7376206 | 1811982 | --- | --- | --- | 1,63 | up   |
| 5731594 | 7297589 | 1615666 | --- | --- | --- | 1,11 | down |
| 5731625 | 7207093 | 1392098 | --- | --- | --- | 1,09 | down |
| 5731692 | 7196029 | 1365622 | --- | --- | --- | 1,02 | down |
| 5731740 | 7033616 | 970193  | --- | --- | --- | 1,07 | up   |
| 5731751 | 7374324 | 1807516 | --- | --- | --- | 1,02 | up   |

|         |         |         |     |     |     |      |      |
|---------|---------|---------|-----|-----|-----|------|------|
| 5731839 | 7171091 | 1302458 | --- | --- | --- | 1,22 | up   |
| 5731865 | 7248790 | 1494492 | --- | --- | --- | 1,37 | up   |
| 5731906 | 7237711 | 1467461 | --- | --- | --- | 1,22 | down |
| 5731986 | 7237132 | 1466106 | --- | --- | --- | 1,25 | down |
| 5732055 | 7217650 | 1417178 | --- | --- | --- | 1,14 | down |
| 5732061 | 7356027 | 1759980 | --- | --- | --- | 1,45 | up   |
| 5732094 | 7207069 | 1392026 | --- | --- | --- | 1,04 | down |
| 5732117 | 7374324 | 1807483 | --- | --- | --- | 1,06 | up   |
| 5732152 | 7280743 | 1574559 | --- | --- | --- | 1,36 | up   |
| 5732188 | 7294738 | 1607996 | --- | --- | --- | 1,27 | down |
| 5732222 | 7112355 | 1158074 | --- | --- | --- | 1,06 | down |
| 5732245 | 7246823 | 1489671 | --- | --- | --- | 2,36 | up   |
| 5732255 | 7249019 | 1495085 | --- | --- | --- | 1,45 | up   |
| 5732276 | 7217434 | 1416410 | --- | --- | --- | 1,04 | down |
| 5732334 | 7248790 | 1494520 | --- | --- | --- | 1,11 | up   |
| 5732345 | 7239752 | 1473151 | --- | --- | --- | 1,41 | up   |
| 5732502 | 7193403 | 1359194 | --- | --- | --- | 1,22 | up   |
| 5732527 | 7252877 | 1504782 | --- | --- | --- | 1,09 | up   |
| 5732653 | 7326612 | 1687198 | --- | --- | --- | 1,03 | up   |
| 5732718 | 7330396 | 1696401 | --- | --- | --- | 1,14 | up   |
| 5732728 | 7140365 | 1226776 | --- | --- | --- | 1,34 | up   |
| 5732741 | 7079475 | 1078286 | --- | --- | --- | 1,10 | up   |
| 5732757 | 7168439 | 1295698 | --- | --- | --- | 1,34 | up   |
| 5732798 | 7028624 | 957996  | --- | --- | --- | 1,03 | up   |
| 5732818 | 7116540 | 1168636 | --- | --- | --- | 1,07 | down |
| 5732868 | 7281577 | 1576888 | --- | --- | --- | 1,03 | up   |
| 5732912 | 7346505 | 1736287 | --- | --- | --- | 1,03 | down |
| 5732932 | 7309738 | 1646949 | --- | --- | --- | 1,06 | down |
| 5732940 | 7181871 | 1330172 | --- | --- | --- | 1,09 | up   |
| 5733019 | 7358053 | 1764842 | --- | --- | --- | 2,15 | down |
| 5733089 | 7257893 | 1517461 | --- | --- | --- | 1,71 | up   |
| 5733117 | 7146000 | 1240661 | --- | --- | --- | 1,74 | down |
| 5733154 | 7196803 | 1367328 | --- | --- | --- | 1,51 | up   |
| 5733280 | 7240569 | 1475472 | --- | --- | --- | 2,33 | down |
| 5733290 | 7350530 | 1746237 | --- | --- | --- | 1,72 | down |
| 5733302 | 7301843 | 1626488 | --- | --- | --- | 1,84 | up   |
| 5733379 | 7068259 | 1051593 | --- | --- | --- | 1,44 | down |
| 5733522 | 7281575 | 1576839 | --- | --- | --- | 1,23 | up   |
| 5733635 | 7156611 | 1267365 | --- | --- | --- | 1,29 | down |
| 5733676 | 7162959 | 1282082 | --- | --- | --- | 1,70 | down |
| 5733704 | 7031774 | 964738  | --- | --- | --- | 2,13 | down |
| 5733742 | 7153571 | 1259033 | --- | --- | --- | 2,09 | up   |
| 5733750 | 7227433 | 1440967 | --- | --- | --- | 1,07 | up   |
| 5733769 | 7200313 | 1376462 | --- | --- | --- | 1,03 | up   |
| 5733888 | 7097485 | 1120937 | --- | --- | --- | 2,86 | down |
| 5733947 | 7367980 | 1789191 | --- | --- | --- | 1,45 | up   |
| 5733958 | 7240569 | 1475469 | --- | --- | --- | 1,05 | down |
| 5734124 | 7313222 | 1654906 | --- | --- | --- | 1,69 | up   |
| 5734171 | 7364948 | 1781227 | --- | --- | --- | 1,10 | up   |
| 5734201 | 7128539 | 1197692 | --- | --- | --- | 1,37 | down |
| 5734222 | 7070668 | 1057918 | --- | --- | --- | 1,93 | up   |
| 5734391 | 7232534 | 1454142 | --- | --- | --- | 1,04 | up   |
| 5734481 | 7247230 | 1490589 | --- | --- | --- | 1,49 | down |
| 5734484 | 7248790 | 1494490 | --- | --- | --- | 1,07 | down |
| 5734532 | 7148741 | 1247833 | --- | --- | --- | 1,13 | up   |
| 5734742 | 7330731 | 1697181 | --- | --- | --- | 1,20 | up   |
| 5734923 | 7029119 | 958980  | --- | --- | --- | 1,02 | up   |

|         |         |         |     |     |     |      |      |
|---------|---------|---------|-----|-----|-----|------|------|
| 5734931 | 7067828 | 1050786 | --- | --- | --- | 1,19 | down |
| 5734938 | 7140113 | 1226063 | --- | --- | --- | 1,45 | up   |
| 5734997 | 7059020 | 1029336 | --- | --- | --- | 1,07 | down |
| 5735034 | 7258455 | 1518723 | --- | --- | --- | 1,00 | up   |
| 5735066 | 7207069 | 1392028 | --- | --- | --- | 1,76 | down |
| 5735121 | 7059309 | 1029926 | --- | --- | --- | 1,11 | down |
| 5735135 | 7067670 | 1050330 | --- | --- | --- | 1,28 | down |
| 5735248 | 7351568 | 1748790 | --- | --- | --- | 1,24 | up   |
| 5735259 | 7038530 | 981877  | --- | --- | --- | 1,12 | down |
| 5735294 | 7193056 | 1358272 | --- | --- | --- | 1,01 | up   |
| 5735312 | 7321204 | 1675169 | --- | --- | --- | 1,10 | down |
| 5735432 | 7066035 | 1046205 | --- | --- | --- | 1,08 | down |
| 5735467 | 7296131 | 1611488 | --- | --- | --- | 1,56 | up   |
| 5735548 | 7059584 | 1030546 | --- | --- | --- | 1,48 | down |
| 5735602 | 7119845 | 1176910 | --- | --- | --- | 1,13 | up   |
| 5735644 | 7080476 | 1080420 | --- | --- | --- | 1,03 | up   |
| 5735647 | 7194400 | 1361779 | --- | --- | --- | 1,13 | up   |
| 5735949 | 7049308 | 1008124 | --- | --- | --- | 1,90 | down |
| 5735963 | 7068259 | 1051612 | --- | --- | --- | 2,14 | down |
| 5736087 | 7279533 | 1571916 | --- | --- | --- | 1,00 | down |
| 5736246 | 7092549 | 1109154 | --- | --- | --- | 1,14 | down |
| 5736257 | 7040674 | 987003  | --- | --- | --- | 1,44 | up   |
| 5736309 | 7164949 | 1286358 | --- | --- | --- | 1,74 | down |
| 5736341 | 7067670 | 1050345 | --- | --- | --- | 1,31 | down |
| 5736396 | 7243901 | 1483064 | --- | --- | --- | 1,32 | up   |
| 5736399 | 7222741 | 1429364 | --- | --- | --- | 1,21 | down |
| 5736409 | 7365147 | 1781768 | --- | --- | --- | 1,05 | up   |
| 5736452 | 7177834 | 1319618 | --- | --- | --- | 1,50 | down |
| 5736492 | 7356326 | 1760473 | --- | --- | --- | 1,05 | down |
| 5736532 | 7244287 | 1484087 | --- | --- | --- | 1,05 | up   |
| 5736533 | 7205944 | 1389471 | --- | --- | --- | 1,07 | up   |
| 5736569 | 7196029 | 1365636 | --- | --- | --- | 1,18 | up   |
| 5736588 | 7038530 | 981860  | --- | --- | --- | 1,18 | up   |
| 5736594 | 7177520 | 1318612 | --- | --- | --- | 1,12 | up   |
| 5736599 | 7108434 | 1148309 | --- | --- | --- | 1,05 | down |
| 5736613 | 7336931 | 1711855 | --- | --- | --- | 1,05 | down |
| 5736625 | 7374324 | 1807477 | --- | --- | --- | 1,50 | down |
| 5736631 | 7302787 | 1628882 | --- | --- | --- | 1,13 | down |
| 5736727 | 7066035 | 1046195 | --- | --- | --- | 1,45 | up   |
| 5736738 | 7193056 | 1358279 | --- | --- | --- | 2,49 | up   |
| 5736750 | 7177180 | 1317764 | --- | --- | --- | 1,45 | down |
| 5736752 | 7217434 | 1416342 | --- | --- | --- | 1,12 | down |
| 5736789 | 7114274 | 1162828 | --- | --- | --- | 2,03 | down |
| 5736808 | 7079236 | 1077791 | --- | --- | --- | 1,01 | up   |
| 5736937 | 7065575 | 1045108 | --- | --- | --- | 1,00 | up   |
| 5736952 | 7056106 | 1022979 | --- | --- | --- | 1,02 | down |
| 5736967 | 7039303 | 983874  | --- | --- | --- | 1,21 | up   |
| 5737133 | 7353997 | 1754703 | --- | --- | --- | 1,09 | down |
| 5737150 | 7376566 | 1812846 | --- | --- | --- | 1,38 | up   |
| 5737155 | 7253408 | 1505945 | --- | --- | --- | 1,08 | up   |
| 5737198 | 7059702 | 1030771 | --- | --- | --- | 1,31 | down |
| 5737211 | 7039223 | 983577  | --- | --- | --- | 1,25 | up   |
| 5737228 | 7260579 | 1524191 | --- | --- | --- | 2,11 | down |
| 5737275 | 7069830 | 1055591 | --- | --- | --- | 1,16 | up   |
| 5737278 | 7168519 | 1295873 | --- | --- | --- | 1,06 | up   |
| 5737320 | 7100210 | 1128144 | --- | --- | --- | 1,41 | down |
| 5737391 | 7305275 | 1635846 | --- | --- | --- | 1,16 | up   |

|         |         |         |     |     |     |      |      |
|---------|---------|---------|-----|-----|-----|------|------|
| 5737492 | 7148741 | 1247839 | --- | --- | --- | 1,12 | up   |
| 5737545 | 7092549 | 1109175 | --- | --- | --- | 1,02 | down |
| 5737560 | 7267000 | 1539304 | --- | --- | --- | 1,31 | down |
| 5737561 | 7385253 | 1832223 | --- | --- | --- | 1,05 | down |
| 5737596 | 7041061 | 988075  | --- | --- | --- | 1,09 | down |
| 5737641 | 7115963 | 1167050 | --- | --- | --- | 1,22 | up   |
| 5737653 | 7186464 | 1341380 | --- | --- | --- | 1,07 | down |
| 5737775 | 7180804 | 1326999 | --- | --- | --- | 1,20 | down |
| 5737828 | 7261580 | 1526818 | --- | --- | --- | 1,71 | down |
| 5737844 | 7056333 | 1023686 | --- | --- | --- | 1,03 | down |
| 5737853 | 7039223 | 983561  | --- | --- | --- | 1,12 | down |
| 5737862 | 7247848 | 1492073 | --- | --- | --- | 1,02 | down |
| 5737864 | 7343250 | 1728049 | --- | --- | --- | 1,21 | up   |
| 5737918 | 7374324 | 1807454 | --- | --- | --- | 1,16 | up   |
| 5738025 | 7282343 | 1578686 | --- | --- | --- | 1,29 | up   |
| 5738109 | 7247954 | 1492389 | --- | --- | --- | 1,29 | up   |
| 5738223 | 7049689 | 1008873 | --- | --- | --- | 1,30 | down |
| 5738271 | 7296131 | 1611503 | --- | --- | --- | 2,25 | up   |
| 5738290 | 7099573 | 1126731 | --- | --- | --- | 1,33 | down |
| 5738324 | 7181105 | 1327967 | --- | --- | --- | 1,53 | up   |
| 5738355 | 7330223 | 1695835 | --- | --- | --- | 1,17 | down |
| 5738392 | 7334636 | 1706502 | --- | --- | --- | 1,36 | up   |
| 5738404 | 7030087 | 960785  | --- | --- | --- | 1,16 | up   |
| 5738475 | 7218728 | 1419924 | --- | --- | --- | 1,06 | up   |
| 5738576 | 7131876 | 1206052 | --- | --- | --- | 1,30 | down |
| 5738629 | 7267802 | 1541732 | --- | --- | --- | 1,58 | up   |
| 5738707 | 7165644 | 1288009 | --- | --- | --- | 1,13 | up   |
| 5738818 | 7181105 | 1327966 | --- | --- | --- | 1,09 | down |
| 5738928 | 7043515 | 994015  | --- | --- | --- | 1,22 | up   |
| 5738997 | 7340673 | 1721693 | --- | --- | --- | 1,38 | down |
| 5739143 | 7055793 | 1022312 | --- | --- | --- | 1,44 | up   |
| 5739200 | 7237438 | 1466793 | --- | --- | --- | 1,31 | down |
| 5739238 | 7212735 | 1405006 | --- | --- | --- | 2,27 | up   |
| 5739243 | 7341243 | 1723219 | --- | --- | --- | 1,01 | up   |
| 5739247 | 7068259 | 1051625 | --- | --- | --- | 2,01 | down |
| 5739314 | 7141061 | 1228696 | --- | --- | --- | 1,18 | up   |
| 5739324 | 7292517 | 1602559 | --- | --- | --- | 1,49 | down |
| 5739348 | 7291803 | 1600886 | --- | --- | --- | 1,30 | down |
| 5739365 | 7231834 | 1452268 | --- | --- | --- | 1,21 | down |
| 5739402 | 7105375 | 1140970 | --- | --- | --- | 1,16 | down |
| 5739433 | 7346066 | 1735283 | --- | --- | --- | 1,20 | up   |
| 5739511 | 7340304 | 1720853 | --- | --- | --- | 1,63 | down |
| 5739562 | 7059309 | 1029904 | --- | --- | --- | 1,30 | down |
| 5739690 | 7238153 | 1468835 | --- | --- | --- | 1,42 | down |
| 5739818 | 7180598 | 1326335 | --- | --- | --- | 1,18 | up   |
| 5739820 | 7350237 | 1745492 | --- | --- | --- | 1,36 | up   |
| 5739833 | 7075445 | 1069359 | --- | --- | --- | 1,01 | down |
| 5739887 | 7368815 | 1792312 | --- | --- | --- | 1,30 | down |
| 5739914 | 7069830 | 1055616 | --- | --- | --- | 1,07 | down |
| 5739949 | 7347427 | 1738678 | --- | --- | --- | 1,34 | down |
| 5740047 | 7205944 | 1389481 | --- | --- | --- | 2,51 | up   |
| 5740096 | 7067518 | 1049955 | --- | --- | --- | 1,40 | up   |
| 5740179 | 7125348 | 1190100 | --- | --- | --- | 1,21 | down |
| 5740222 | 7210387 | 1400036 | --- | --- | --- | 1,09 | up   |
| 5740251 | 7361881 | 1773951 | --- | --- | --- | 1,36 | up   |
| 5740321 | 7139825 | 1225355 | --- | --- | --- | 1,10 | up   |
| 5740328 | 7384509 | 1830746 | --- | --- | --- | 1,30 | up   |

|         |         |         |     |     |     |      |      |
|---------|---------|---------|-----|-----|-----|------|------|
| 5740524 | 7252877 | 1504698 | --- | --- | --- | 1,27 | up   |
| 5740557 | 7376206 | 1811975 | --- | --- | --- | 1,05 | up   |
| 5740596 | 7217434 | 1416429 | --- | --- | --- | 1,45 | down |
| 5740700 | 7199743 | 1375182 | --- | --- | --- | 1,08 | up   |
| 5740719 | 7267802 | 1541754 | --- | --- | --- | 1,07 | up   |
| 5740721 | 7255522 | 1511454 | --- | --- | --- | 1,27 | down |
| 5740839 | 7191594 | 1354232 | --- | --- | --- | 1,10 | up   |
| 5740918 | 7146872 | 1242913 | --- | --- | --- | 1,11 | up   |
| 5741066 | 7294911 | 1608533 | --- | --- | --- | 1,13 | down |
| 5741307 | 7256191 | 1512861 | --- | --- | --- | 1,09 | down |
| 5741313 | 7248790 | 1494507 | --- | --- | --- | 1,24 | down |
| 5741352 | 7196029 | 1365618 | --- | --- | --- | 1,25 | up   |
| 5741393 | 7235794 | 1462894 | --- | --- | --- | 1,28 | up   |
| 5741421 | 7179785 | 1324488 | --- | --- | --- | 1,21 | down |
| 5741423 | 7289075 | 1594451 | --- | --- | --- | 1,12 | up   |
| 5741470 | 7108434 | 1148324 | --- | --- | --- | 1,80 | up   |
| 5741472 | 7243901 | 1483052 | --- | --- | --- | 1,07 | up   |
| 5741511 | 7373678 | 1805882 | --- | --- | --- | 1,04 | down |
| 5741565 | 7364346 | 1780009 | --- | --- | --- | 1,25 | up   |
| 5741605 | 7204929 | 1387148 | --- | --- | --- | 2,05 | down |
| 5741645 | 7295410 | 1609777 | --- | --- | --- | 1,48 | up   |
| 5741731 | 7140834 | 1227938 | --- | --- | --- | 1,53 | up   |
| 5741764 | 7093296 | 1110925 | --- | --- | --- | 1,18 | up   |
| 5741816 | 7132125 | 1206619 | --- | --- | --- | 1,20 | up   |
| 5741827 | 7333333 | 1703394 | --- | --- | --- | 1,04 | up   |
| 5742044 | 7080476 | 1080401 | --- | --- | --- | 1,46 | down |
| 5742045 | 7337902 | 1714546 | --- | --- | --- | 1,57 | up   |
| 5742052 | 7221443 | 1426325 | --- | --- | --- | 2,18 | up   |
| 5742138 | 7378878 | 1818320 | --- | --- | --- | 2,21 | down |
| 5742162 | 7236358 | 1464259 | --- | --- | --- | 1,04 | down |
| 5742232 | 7261580 | 1526807 | --- | --- | --- | 1,18 | up   |
| 5742253 | 7295652 | 1610274 | --- | --- | --- | 2,10 | up   |
| 5742312 | 7245932 | 1487792 | --- | --- | --- | 1,17 | up   |
| 5742345 | 7079238 | 1077823 | --- | --- | --- | 1,01 | up   |
| 5742377 | 7076236 | 1071201 | --- | --- | --- | 1,66 | down |
| 5742451 | 7377583 | 1815456 | --- | --- | --- | 1,35 | down |
| 5742526 | 7319609 | 1671206 | --- | --- | --- | 1,06 | down |
| 5742628 | 7039265 | 983654  | --- | --- | --- | 1,09 | down |
| 5742743 | 7307473 | 1641278 | --- | --- | --- | 1,01 | up   |
| 5743029 | 7086044 | 1092909 | --- | --- | --- | 2,40 | down |
| 5743042 | 7078666 | 1076508 | --- | --- | --- | 1,36 | down |
| 5743095 | 7162177 | 1280577 | --- | --- | --- | 1,17 | down |
| 5743149 | 7345465 | 1733859 | --- | --- | --- | 1,39 | down |
| 5743219 | 7303777 | 1631907 | --- | --- | --- | 1,03 | down |
| 5743234 | 7356115 | 1760118 | --- | --- | --- | 1,34 | up   |
| 5743283 | 7240224 | 1474389 | --- | --- | --- | 1,12 | down |
| 5743356 | 7231484 | 1451398 | --- | --- | --- | 1,03 | down |
| 5743370 | 7268357 | 1543389 | --- | --- | --- | 1,47 | down |
| 5743374 | 7095021 | 1115127 | --- | --- | --- | 1,44 | down |
| 5743474 | 7215722 | 1412268 | --- | --- | --- | 2,29 | up   |
| 5743519 | 7050716 | 1011224 | --- | --- | --- | 1,16 | up   |
| 5743521 | 7238115 | 1468570 | --- | --- | --- | 1,10 | up   |
| 5743782 | 7207069 | 1392029 | --- | --- | --- | 1,33 | down |
| 5743845 | 7207069 | 1392017 | --- | --- | --- | 1,00 | down |
| 5743879 | 7349643 | 1744141 | --- | --- | --- | 1,22 | down |
| 5743989 | 7288077 | 1591968 | --- | --- | --- | 1,27 | down |
| 5744060 | 7194400 | 1361778 | --- | --- | --- | 1,03 | up   |

|         |         |         |     |     |     |      |      |
|---------|---------|---------|-----|-----|-----|------|------|
| 5744235 | 7132125 | 1206616 | --- | --- | --- | 1,15 | up   |
| 5744248 | 7243647 | 1482463 | --- | --- | --- | 1,04 | up   |
| 5744292 | 7150348 | 1251418 | --- | --- | --- | 1,38 | down |
| 5744388 | 7109292 | 1150724 | --- | --- | --- | 1,09 | down |
| 5744391 | 7069142 | 1053872 | --- | --- | --- | 1,47 | down |
| 5744500 | 7176368 | 1315588 | --- | --- | --- | 1,01 | down |
| 5744567 | 7056333 | 1023683 | --- | --- | --- | 1,13 | up   |
| 5744595 | 7380497 | 1821855 | --- | --- | --- | 1,38 | down |
| 5744671 | 7252877 | 1504773 | --- | --- | --- | 1,25 | down |
| 5744675 | 7255911 | 1512229 | --- | --- | --- | 1,18 | up   |
| 5744683 | 7217679 | 1417317 | --- | --- | --- | 1,05 | down |
| 5744705 | 7288077 | 1592010 | --- | --- | --- | 1,30 | down |
| 5744763 | 7276650 | 1564149 | --- | --- | --- | 1,42 | up   |
| 5744778 | 7326612 | 1687185 | --- | --- | --- | 1,18 | down |
| 5744846 | 7261580 | 1526770 | --- | --- | --- | 1,24 | up   |
| 5744870 | 7059506 | 1030400 | --- | --- | --- | 1,11 | up   |
| 5744909 | 7367851 | 1788522 | --- | --- | --- | 1,11 | up   |
| 5744931 | 7237814 | 1467836 | --- | --- | --- | 1,85 | up   |
| 5745094 | 7181001 | 1327635 | --- | --- | --- | 1,25 | down |
| 5745125 | 7269911 | 1546906 | --- | --- | --- | 1,02 | up   |
| 5745296 | 7079600 | 1078628 | --- | --- | --- | 1,07 | up   |
| 5745442 | 7089080 | 1101129 | --- | --- | --- | 1,01 | up   |
| 5745474 | 7359453 | 1768450 | --- | --- | --- | 1,15 | down |
| 5745479 | 7369939 | 1795635 | --- | --- | --- | 1,76 | down |
| 5745492 | 7295652 | 1610296 | --- | --- | --- | 1,07 | down |
| 5745522 | 7363576 | 1778194 | --- | --- | --- | 1,08 | down |
| 5745547 | 7252877 | 1504776 | --- | --- | --- | 1,21 | down |
| 5745557 | 7070836 | 1058333 | --- | --- | --- | 1,06 | down |
| 5745572 | 7052933 | 1016219 | --- | --- | --- | 1,13 | down |
| 5745744 | 7196029 | 1365639 | --- | --- | --- | 1,17 | down |
| 5745789 | 7058149 | 1027277 | --- | --- | --- | 1,01 | down |
| 5745790 | 7301616 | 1625900 | --- | --- | --- | 1,21 | down |
| 5745793 | 7196029 | 1365610 | --- | --- | --- | 1,48 | up   |
| 5745862 | 7340673 | 1721699 | --- | --- | --- | 1,03 | up   |
| 5746063 | 7208847 | 1396349 | --- | --- | --- | 1,01 | down |
| 5746101 | 7336931 | 1711872 | --- | --- | --- | 1,26 | up   |
| 5746121 | 7256789 | 1514652 | --- | --- | --- | 1,11 | up   |
| 5746158 | 7092549 | 1109138 | --- | --- | --- | 1,33 | up   |
| 5746226 | 7126658 | 1193169 | --- | --- | --- | 1,92 | up   |
| 5746247 | 7384509 | 1830738 | --- | --- | --- | 1,01 | up   |
| 5746259 | 7052813 | 1015908 | --- | --- | --- | 1,02 | down |
| 5746359 | 7158517 | 1271583 | --- | --- | --- | 1,39 | up   |
| 5746379 | 7312532 | 1653214 | --- | --- | --- | 1,05 | up   |
| 5746436 | 7217434 | 1416401 | --- | --- | --- | 1,03 | down |
| 5746443 | 7152974 | 1257658 | --- | --- | --- | 1,42 | up   |
| 5746446 | 7120827 | 1179351 | --- | --- | --- | 1,06 | down |
| 5746493 | 7142321 | 1231502 | --- | --- | --- | 1,01 | down |
| 5746557 | 7297589 | 1615687 | --- | --- | --- | 1,09 | up   |
| 5746595 | 7336288 | 1710266 | --- | --- | --- | 1,04 | up   |
| 5746611 | 7321414 | 1675642 | --- | --- | --- | 1,56 | up   |
| 5746623 | 7207292 | 1392622 | --- | --- | --- | 1,21 | down |
| 5746634 | 7025310 | 949236  | --- | --- | --- | 1,43 | down |
| 5746700 | 7033337 | 969496  | --- | --- | --- | 1,16 | down |
| 5746789 | 7131876 | 1206052 | --- | --- | --- | 1,06 | up   |
| 5746833 | 7380497 | 1821845 | --- | --- | --- | 1,10 | down |
| 5746859 | 7122585 | 1183684 | --- | --- | --- | 1,51 | down |
| 5746999 | 7281877 | 1577532 | --- | --- | --- | 1,32 | up   |



|         |         |         |     |     |     |      |      |
|---------|---------|---------|-----|-----|-----|------|------|
| 5747070 | 7072225 | 1061405 | --- | --- | --- | 1,10 | down |
| 5747218 | 7065860 | 1045798 | --- | --- | --- | 1,22 | down |
| 5747226 | 7368004 | 1789331 | --- | --- | --- | 1,73 | down |
| 5747246 | 7318596 | 1668936 | --- | --- | --- | 2,35 | up   |
| 5747349 | 7127540 | 1195284 | --- | --- | --- | 1,16 | up   |
| 5747458 | 7280743 | 1574558 | --- | --- | --- | 1,31 | down |
| 5747476 | 7264808 | 1534468 | --- | --- | --- | 1,05 | down |
| 5747510 | 7380497 | 1821862 | --- | --- | --- | 1,00 | up   |
| 5747586 | 7073609 | 1064858 | --- | --- | --- | 1,27 | up   |
| 5747608 | 7213908 | 1407662 | --- | --- | --- | 1,91 | down |
| 5747675 | 7345465 | 1733827 | --- | --- | --- | 1,56 | down |
| 5747727 | 7097583 | 1121276 | --- | --- | --- | 1,33 | down |
| 5747826 | 7293402 | 1604869 | --- | --- | --- | 1,03 | up   |
| 5747837 | 7120039 | 1177491 | --- | --- | --- | 1,43 | up   |
| 5747851 | 7096924 | 1119621 | --- | --- | --- | 1,08 | down |
| 5748187 | 7330396 | 1696338 | --- | --- | --- | 1,46 | up   |
| 5748188 | 7055793 | 1022333 | --- | --- | --- | 1,29 | down |
| 5748201 | 7193959 | 1360602 | --- | --- | --- | 1,13 | up   |
| 5748220 | 7346066 | 1735309 | --- | --- | --- | 1,37 | up   |
| 5748278 | 7343250 | 1728039 | --- | --- | --- | 2,61 | up   |
| 5748295 | 7272110 | 1553073 | --- | --- | --- | 1,37 | up   |
| 5748340 | 7166439 | 1290098 | --- | --- | --- | 2,78 | up   |
| 5748407 | 7100523 | 1128851 | --- | --- | --- | 1,15 | up   |
| 5748427 | 7034747 | 973193  | --- | --- | --- | 1,57 | up   |
| 5748572 | 7252339 | 1503265 | --- | --- | --- | 1,53 | up   |
| 5748592 | 7115362 | 1165607 | --- | --- | --- | 1,10 | up   |
| 5748612 | 7063873 | 1040642 | --- | --- | --- | 1,09 | up   |
| 5748737 | 7261580 | 1526783 | --- | --- | --- | 1,08 | up   |
| 5748766 | 7258455 | 1518711 | --- | --- | --- | 1,04 | up   |
| 5749011 | 7086966 | 1095267 | --- | --- | --- | 1,19 | down |
| 5749039 | 7062233 | 1037188 | --- | --- | --- | 1,05 | up   |
| 5749215 | 7344530 | 1731580 | --- | --- | --- | 1,17 | down |
| 5749220 | 7244287 | 1484070 | --- | --- | --- | 1,03 | down |
| 5749308 | 7039532 | 984441  | --- | --- | --- | 1,40 | down |
| 5749399 | 7237438 | 1466791 | --- | --- | --- | 1,03 | down |
| 5749492 | 7148741 | 1247825 | --- | --- | --- | 1,42 | down |
| 5749505 | 7365183 | 1781916 | --- | --- | --- | 1,46 | down |
| 5749537 | 7071264 | 1059310 | --- | --- | --- | 1,06 | up   |
| 5749625 | 7186464 | 1341364 | --- | --- | --- | 1,42 | up   |
| 5749661 | 7377116 | 1814068 | --- | --- | --- | 1,02 | down |
| 5749670 | 7281877 | 1577531 | --- | --- | --- | 1,15 | down |
| 5749700 | 7123129 | 1185090 | --- | --- | --- | 2,41 | down |
| 5749850 | 7146542 | 1242291 | --- | --- | --- | 1,01 | down |
| 5750090 | 7263222 | 1530532 | --- | --- | --- | 1,08 | up   |
| 5750236 | 7215722 | 1412268 | --- | --- | --- | 2,10 | up   |
| 5750288 | 7258455 | 1518732 | --- | --- | --- | 1,35 | down |
| 5750423 | 7235840 | 1463002 | --- | --- | --- | 1,30 | up   |
| 5750488 | 7165954 | 1288811 | --- | --- | --- | 1,20 | up   |
| 5750558 | 7030087 | 960790  | --- | --- | --- | 1,03 | down |
| 5750575 | 7105057 | 1140311 | --- | --- | --- | 1,10 | down |
| 5750599 | 7320998 | 1674712 | --- | --- | --- | 2,28 | down |
| 5750614 | 7268694 | 1544235 | --- | --- | --- | 1,26 | up   |
| 5750617 | 7367994 | 1789238 | --- | --- | --- | 1,02 | down |
| 5750627 | 7180804 | 1327014 | --- | --- | --- | 1,09 | up   |
| 5750683 | 7274780 | 1559243 | --- | --- | --- | 1,06 | up   |
| 5750698 | 7052385 | 1014786 | --- | --- | --- | 1,17 | down |
| 5750706 | 7252877 | 1504762 | --- | --- | --- | 1,14 | up   |

|         |         |         |     |     |     |      |      |
|---------|---------|---------|-----|-----|-----|------|------|
| 5750931 | 7330731 | 1697174 | --- | --- | --- | 1,02 | down |
| 5751221 | 7364346 | 1780026 | --- | --- | --- | 1,85 | up   |
| 5751240 | 7267802 | 1541816 | --- | --- | --- | 1,07 | up   |
| 5751243 | 7267953 | 1542232 | --- | --- | --- | 1,62 | down |
| 5751252 | 7121849 | 1181758 | --- | --- | --- | 1,04 | up   |
| 5751300 | 7060896 | 1033554 | --- | --- | --- | 1,53 | up   |
| 5751364 | 7279533 | 1571910 | --- | --- | --- | 2,58 | down |
| 5751380 | 7102416 | 1133513 | --- | --- | --- | 1,02 | up   |
| 5751403 | 7341002 | 1722534 | --- | --- | --- | 4,16 | up   |
| 5751416 | 7273251 | 1555949 | --- | --- | --- | 1,41 | up   |
| 5751439 | 7339387 | 1718378 | --- | --- | --- | 1,13 | up   |
| 5751459 | 7193056 | 1358255 | --- | --- | --- | 1,07 | down |
| 5751524 | 7315206 | 1660021 | --- | --- | --- | 1,24 | down |
| 5751536 | 7267802 | 1541816 | --- | --- | --- | 1,62 | down |
| 5751575 | 7062233 | 1037242 | --- | --- | --- | 1,09 | down |
| 5751858 | 7121849 | 1181770 | --- | --- | --- | 1,11 | up   |
| 5751939 | 7121849 | 1181799 | --- | --- | --- | 1,06 | up   |
| 5751972 | 7198210 | 1370958 | --- | --- | --- | 1,04 | up   |
| 5752045 | 7056304 | 1023521 | --- | --- | --- | 2,22 | down |
| 5752095 | 7247954 | 1492397 | --- | --- | --- | 1,10 | down |
| 5752147 | 7289075 | 1594472 | --- | --- | --- | 1,01 | down |
| 5752177 | 7115362 | 1165598 | --- | --- | --- | 1,42 | down |
| 5752282 | 7355041 | 1757403 | --- | --- | --- | 2,40 | up   |
| 5752300 | 7196029 | 1365636 | --- | --- | --- | 1,11 | up   |
| 5752312 | 7205944 | 1389464 | --- | --- | --- | 1,05 | up   |
| 5752377 | 7247512 | 1491205 | --- | --- | --- | 1,91 | up   |
| 5752394 | 7059917 | 1031331 | --- | --- | --- | 1,11 | up   |
| 5752422 | 7046605 | 1002433 | --- | --- | --- | 1,33 | up   |
| 5752503 | 7341646 | 1724194 | --- | --- | --- | 1,09 | up   |
| 5752548 | 7168521 | 1295979 | --- | --- | --- | 1,05 | down |
| 5752556 | 7216970 | 1415120 | --- | --- | --- | 1,22 | up   |
| 5752575 | 7350993 | 1747523 | --- | --- | --- | 1,02 | down |
| 5752775 | 7343250 | 1728045 | --- | --- | --- | 1,18 | up   |
| 5752791 | 7030454 | 961552  | --- | --- | --- | 1,10 | up   |
| 5752842 | 7225291 | 1435296 | --- | --- | --- | 1,46 | up   |
| 5752932 | 7153136 | 1258009 | --- | --- | --- | 1,59 | up   |
| 5753012 | 7214605 | 1409365 | --- | --- | --- | 1,66 | down |
| 5753081 | 7231484 | 1451388 | --- | --- | --- | 1,19 | down |
| 5753101 | 7378997 | 1818657 | --- | --- | --- | 1,67 | up   |
| 5753110 | 7340673 | 1721713 | --- | --- | --- | 1,07 | up   |
| 5753119 | 7060896 | 1033551 | --- | --- | --- | 1,24 | down |
| 5753149 | 7256191 | 1512859 | --- | --- | --- | 1,80 | up   |
| 5753153 | 7071292 | 1059461 | --- | --- | --- | 1,64 | up   |
| 5753204 | 7302787 | 1628889 | --- | --- | --- | 1,00 | down |
| 5753222 | 7213228 | 1405990 | --- | --- | --- | 1,33 | down |
| 5753237 | 7181193 | 1328292 | --- | --- | --- | 1,56 | up   |
| 5753288 | 7092549 | 1109172 | --- | --- | --- | 1,32 | down |
| 5753341 | 7231484 | 1451382 | --- | --- | --- | 1,05 | up   |
| 5753374 | 7329846 | 1694991 | --- | --- | --- | 1,38 | up   |
| 5753399 | 7337425 | 1713160 | --- | --- | --- | 1,32 | up   |
| 5753439 | 7053620 | 1017794 | --- | --- | --- | 1,25 | down |
| 5753527 | 7040442 | 986538  | --- | --- | --- | 1,22 | up   |
| 5753591 | 7128112 | 1196523 | --- | --- | --- | 1,05 | down |
| 5753639 | 7156114 | 1266055 | --- | --- | --- | 1,06 | up   |
| 5753664 | 7212587 | 1404648 | --- | --- | --- | 1,36 | down |
| 5753668 | 7115507 | 1165977 | --- | --- | --- | 1,13 | up   |
| 5753674 | 7229856 | 1447079 | --- | --- | --- | 1,02 | up   |

|         |         |         |     |     |     |      |      |
|---------|---------|---------|-----|-----|-----|------|------|
| 5753687 | 7189455 | 1348369 | --- | --- | --- | 1,02 | down |
| 5753708 | 7095021 | 1115124 | --- | --- | --- | 1,06 | up   |
| 5753736 | 7153136 | 1258047 | --- | --- | --- | 1,21 | down |
| 5753742 | 7268694 | 1544244 | --- | --- | --- | 1,13 | down |
| 5753762 | 7171091 | 1302469 | --- | --- | --- | 1,01 | down |
| 5753852 | 7321414 | 1675637 | --- | --- | --- | 1,84 | up   |
| 5753929 | 7363529 | 1777966 | --- | --- | --- | 1,73 | down |
| 5754000 | 7058507 | 1028306 | --- | --- | --- | 1,38 | up   |
| 5754044 | 7240641 | 1475740 | --- | --- | --- | 1,19 | up   |
| 5754100 | 7068942 | 1053378 | --- | --- | --- | 1,10 | up   |
| 5754121 | 7344380 | 1731114 | --- | --- | --- | 1,00 | up   |
| 5754157 | 7091439 | 1106635 | --- | --- | --- | 1,10 | down |
| 5754263 | 7340057 | 1720325 | --- | --- | --- | 1,85 | up   |
| 5754277 | 7128704 | 1198018 | --- | --- | --- | 1,01 | up   |
| 5754322 | 7360486 | 1770965 | --- | --- | --- | 1,36 | up   |
| 5754497 | 7348924 | 1742182 | --- | --- | --- | 1,02 | down |
| 5754508 | 7041609 | 989567  | --- | --- | --- | 1,37 | up   |
| 5754683 | 7031774 | 964754  | --- | --- | --- | 1,16 | down |
| 5754730 | 7230698 | 1449066 | --- | --- | --- | 1,17 | down |
| 5754784 | 7156611 | 1267343 | --- | --- | --- | 1,05 | up   |
| 5754788 | 7214605 | 1409398 | --- | --- | --- | 1,20 | down |
| 5754831 | 7127540 | 1195300 | --- | --- | --- | 1,27 | up   |
| 5754848 | 7041584 | 989455  | --- | --- | --- | 1,23 | down |
| 5754888 | 7139026 | 1223503 | --- | --- | --- | 1,03 | down |
| 5754915 | 7360486 | 1771015 | --- | --- | --- | 1,37 | down |
| 5755082 | 7340990 | 1722512 | --- | --- | --- | 1,08 | up   |
| 5755142 | 7083031 | 1086285 | --- | --- | --- | 1,26 | up   |
| 5755163 | 7067518 | 1049958 | --- | --- | --- | 1,31 | down |
| 5755230 | 7107321 | 1145322 | --- | --- | --- | 1,21 | up   |
| 5755292 | 7142081 | 1230985 | --- | --- | --- | 1,05 | up   |
| 5755327 | 7300027 | 1621888 | --- | --- | --- | 2,02 | up   |
| 5755516 | 7292701 | 1602966 | --- | --- | --- | 1,20 | down |
| 5755576 | 7083030 | 1086272 | --- | --- | --- | 1,06 | up   |
| 5755639 | 7315206 | 1660037 | --- | --- | --- | 2,14 | down |
| 5755661 | 7258784 | 1519671 | --- | --- | --- | 1,68 | down |
| 5755703 | 7267204 | 1539853 | --- | --- | --- | 1,02 | up   |
| 5755764 | 7238202 | 1468946 | --- | --- | --- | 2,20 | down |
| 5755818 | 7253272 | 1505569 | --- | --- | --- | 1,60 | up   |
| 5755838 | 7042382 | 991296  | --- | --- | --- | 1,79 | up   |
| 5755933 | 7067670 | 1050320 | --- | --- | --- | 2,44 | up   |
| 5755982 | 7366749 | 1785527 | --- | --- | --- | 1,01 | up   |
| 5756098 | 7301843 | 1626490 | --- | --- | --- | 1,57 | up   |
| 5756124 | 7243894 | 1482961 | --- | --- | --- | 1,06 | up   |
| 5756225 | 7063873 | 1040641 | --- | --- | --- | 1,65 | down |
| 5756256 | 7190524 | 1351177 | --- | --- | --- | 1,16 | up   |
| 5756298 | 7252382 | 1503515 | --- | --- | --- | 2,67 | up   |
| 5756302 | 7274892 | 1559576 | --- | --- | --- | 1,45 | up   |
| 5756360 | 7069253 | 1054175 | --- | --- | --- | 1,61 | down |
| 5756497 | 7344380 | 1731116 | --- | --- | --- | 2,10 | up   |
| 5756594 | 7339379 | 1718334 | --- | --- | --- | 1,16 | up   |
| 5756618 | 7166867 | 1291311 | --- | --- | --- | 1,01 | up   |
| 5756701 | 7259221 | 1520633 | --- | --- | --- | 1,11 | up   |
| 5756805 | 7181105 | 1327967 | --- | --- | --- | 1,33 | down |
| 5756841 | 7236968 | 1465656 | --- | --- | --- | 1,55 | down |
| 5756927 | 7171091 | 1302464 | --- | --- | --- | 1,27 | down |
| 5756979 | 7083030 | 1086255 | --- | --- | --- | 1,04 | down |
| 5756990 | 7186464 | 1341385 | --- | --- | --- | 1,42 | down |

|         |         |         |     |     |     |      |      |
|---------|---------|---------|-----|-----|-----|------|------|
| 5757042 | 7128112 | 1196531 | --- | --- | --- | 1,03 | down |
| 5757049 | 7125494 | 1190403 | --- | --- | --- | 1,06 | down |
| 5757124 | 7107926 | 1146838 | --- | --- | --- | 1,18 | down |
| 5757131 | 7297589 | 1615642 | --- | --- | --- | 1,15 | up   |
| 5757329 | 7217434 | 1416369 | --- | --- | --- | 1,04 | up   |
| 5757415 | 7353284 | 1752983 | --- | --- | --- | 1,19 | down |
| 5757463 | 7324760 | 1683093 | --- | --- | --- | 1,36 | down |
| 5757468 | 7172691 | 1306437 | --- | --- | --- | 1,13 | down |
| 5757537 | 7146000 | 1240655 | --- | --- | --- | 4,75 | down |
| 5757571 | 7056304 | 1023556 | --- | --- | --- | 1,26 | down |
| 5757615 | 7227474 | 1441163 | --- | --- | --- | 1,17 | down |
| 5757625 | 7290296 | 1597394 | --- | --- | --- | 1,14 | up   |
| 5757673 | 7052813 | 1015892 | --- | --- | --- | 1,54 | down |
| 5757738 | 7231775 | 1452125 | --- | --- | --- | 1,33 | down |
| 5757985 | 7190242 | 1350309 | --- | --- | --- | 1,26 | down |
| 5758007 | 7170845 | 1301879 | --- | --- | --- | 1,18 | down |
| 5758025 | 7131718 | 1205749 | --- | --- | --- | 2,01 | up   |
| 5758056 | 7240569 | 1475521 | --- | --- | --- | 1,41 | down |
| 5758075 | 7127540 | 1195301 | --- | --- | --- | 1,66 | up   |
| 5758131 | 7279073 | 1570711 | --- | --- | --- | 1,02 | down |
| 5758136 | 7281924 | 1577753 | --- | --- | --- | 1,04 | up   |
| 5758284 | 7182739 | 1332586 | --- | --- | --- | 1,61 | down |
| 5758290 | 7132024 | 1206344 | --- | --- | --- | 1,48 | up   |
| 5758320 | 7365147 | 1781782 | --- | --- | --- | 1,52 | down |
| 5758479 | 7155866 | 1265325 | --- | --- | --- | 1,17 | up   |
| 5758486 | 7303191 | 1629957 | --- | --- | --- | 2,61 | up   |
| 5758530 | 7302327 | 1627678 | --- | --- | --- | 1,57 | up   |
| 5758543 | 7198325 | 1371350 | --- | --- | --- | 1,33 | down |
| 5758595 | 7095960 | 1117069 | --- | --- | --- | 1,09 | down |
| 5758623 | 7289069 | 1594419 | --- | --- | --- | 1,43 | down |
| 5758626 | 7366749 | 1785501 | --- | --- | --- | 1,14 | down |
| 5758670 | 7213908 | 1407757 | --- | --- | --- | 1,25 | up   |
| 5758812 | 7101258 | 1130566 | --- | --- | --- | 1,20 | down |
| 5758855 | 7360486 | 1771025 | --- | --- | --- | 2,16 | down |
| 5758945 | 7279533 | 1571917 | --- | --- | --- | 1,01 | down |
| 5758961 | 7378997 | 1818620 | --- | --- | --- | 1,64 | down |
| 5759036 | 7120671 | 1179004 | --- | --- | --- | 1,29 | up   |
| 5759043 | 7156372 | 1266709 | --- | --- | --- | 1,21 | down |
| 5759081 | 7069239 | 1054092 | --- | --- | --- | 1,16 | down |
| 5759275 | 7041140 | 988269  | --- | --- | --- | 1,09 | up   |
| 5759380 | 7184151 | 1335966 | --- | --- | --- | 1,14 | down |
| 5759438 | 7236131 | 1463755 | --- | --- | --- | 1,10 | up   |
| 5759452 | 7205944 | 1389484 | --- | --- | --- | 1,14 | down |
| 5759454 | 7195680 | 1364899 | --- | --- | --- | 1,14 | down |
| 5759550 | 7053874 | 1018311 | --- | --- | --- | 1,00 | down |
| 5759574 | 7373678 | 1805857 | --- | --- | --- | 1,93 | up   |
| 5759636 | 7136746 | 1217962 | --- | --- | --- | 1,00 | up   |
| 5759682 | 7039223 | 983549  | --- | --- | --- | 1,26 | down |
| 5759905 | 7130917 | 1203928 | --- | --- | --- | 1,11 | down |
| 5759964 | 7190242 | 1350305 | --- | --- | --- | 1,37 | up   |
| 5760157 | 7373678 | 1805881 | --- | --- | --- | 1,06 | up   |
| 5760164 | 7337425 | 1713168 | --- | --- | --- | 1,33 | up   |
| 5760178 | 7069724 | 1055338 | --- | --- | --- | 1,04 | down |
| 5760183 | 7261768 | 1527165 | --- | --- | --- | 2,26 | up   |
| 5760185 | 7128112 | 1196564 | --- | --- | --- | 1,17 | down |
| 5760202 | 7042529 | 991595  | --- | --- | --- | 1,11 | up   |
| 5760203 | 7091439 | 1106638 | --- | --- | --- | 1,08 | up   |

|         |         |         |     |     |     |      |      |
|---------|---------|---------|-----|-----|-----|------|------|
| 5760250 | 7181001 | 1327634 | --- | --- | --- | 1,45 | down |
| 5760278 | 7130917 | 1203930 | --- | --- | --- | 1,18 | down |
| 5760329 | 7341264 | 1723359 | --- | --- | --- | 1,04 | down |
| 5760347 | 7293922 | 1605962 | --- | --- | --- | 1,12 | down |
| 5760383 | 7075460 | 1069412 | --- | --- | --- | 1,20 | down |
| 5760450 | 7181193 | 1328302 | --- | --- | --- | 2,03 | up   |
| 5760553 | 7028326 | 957440  | --- | --- | --- | 1,12 | down |
| 5760591 | 7380878 | 1822584 | --- | --- | --- | 1,10 | up   |
| 5760597 | 7361223 | 1772613 | --- | --- | --- | 1,30 | up   |
| 5760652 | 7191888 | 1354950 | --- | --- | --- | 2,81 | up   |
| 5760690 | 7140365 | 1226789 | --- | --- | --- | 1,37 | up   |
| 5760722 | 7148741 | 1247833 | --- | --- | --- | 1,43 | up   |
| 5760769 | 7147416 | 1244423 | --- | --- | --- | 1,14 | up   |
| 5760860 | 7252777 | 1504494 | --- | --- | --- | 1,18 | up   |
| 5760959 | 7131718 | 1205741 | --- | --- | --- | 1,10 | down |
| 5760977 | 7337425 | 1713206 | --- | --- | --- | 1,09 | down |
| 5761074 | 7069830 | 1055637 | --- | --- | --- | 1,02 | up   |
| 5761084 | 7368815 | 1792348 | --- | --- | --- | 1,04 | up   |
| 5761110 | 7182739 | 1332589 | --- | --- | --- | 1,02 | up   |
| 5761341 | 7330731 | 1697172 | --- | --- | --- | 1,14 | up   |
| 5761350 | 7222741 | 1429364 | --- | --- | --- | 1,49 | down |
| 5761411 | 7066035 | 1046193 | --- | --- | --- | 1,02 | up   |
| 5761503 | 7368555 | 1791242 | --- | --- | --- | 1,27 | down |
| 5761566 | 7031774 | 964688  | --- | --- | --- | 1,92 | up   |
| 5761592 | 7363529 | 1777936 | --- | --- | --- | 2,71 | up   |
| 5761680 | 7193403 | 1359187 | --- | --- | --- | 1,64 | up   |
| 5761737 | 7190534 | 1351229 | --- | --- | --- | 1,09 | down |
| 5761779 | 7121849 | 1181821 | --- | --- | --- | 1,05 | up   |
| 5761836 | 7356333 | 1760489 | --- | --- | --- | 1,40 | down |
| 5761842 | 7341002 | 1722557 | --- | --- | --- | 1,53 | up   |
| 5761851 | 7169732 | 1298758 | --- | --- | --- | 1,05 | down |
| 5761891 | 7384073 | 1829458 | --- | --- | --- | 1,03 | down |
| 5761899 | 7315206 | 1660018 | --- | --- | --- | 1,72 | up   |
| 5761960 | 7312569 | 1653343 | --- | --- | --- | 4,34 | down |
| 5762084 | 7287337 | 1589976 | --- | --- | --- | 1,69 | down |
| 5762155 | 7248790 | 1494495 | --- | --- | --- | 1,03 | down |
| 5762223 | 7294911 | 1608533 | --- | --- | --- | 1,16 | down |
| 5762260 | 7213945 | 1407850 | --- | --- | --- | 1,68 | down |
| 5762296 | 7121849 | 1181753 | --- | --- | --- | 1,22 | down |
| 5762335 | 7333462 | 1703647 | --- | --- | --- | 1,03 | up   |
| 5762396 | 7067670 | 1050304 | --- | --- | --- | 2,27 | up   |
| 5762405 | 7377304 | 1814577 | --- | --- | --- | 1,23 | down |
| 5762458 | 7131718 | 1205741 | --- | --- | --- | 1,04 | down |
| 5762523 | 7249019 | 1495081 | --- | --- | --- | 1,35 | down |
| 5762538 | 7198210 | 1371001 | --- | --- | --- | 1,19 | up   |
| 5762559 | 7339452 | 1718595 | --- | --- | --- | 2,16 | down |
| 5762578 | 7236358 | 1464219 | --- | --- | --- | 1,23 | down |
| 5762608 | 7274593 | 1558805 | --- | --- | --- | 3,23 | down |
| 5762629 | 7028278 | 957312  | --- | --- | --- | 1,08 | up   |
| 5762642 | 7382499 | 1826256 | --- | --- | --- | 1,15 | up   |
| 5762660 | 7344702 | 1732140 | --- | --- | --- | 1,23 | down |
| 5762714 | 7200545 | 1376901 | --- | --- | --- | 1,25 | up   |
| 5762717 | 7194540 | 1362112 | --- | --- | --- | 1,02 | down |
| 5762813 | 7081748 | 1083343 | --- | --- | --- | 1,07 | down |
| 5762837 | 7158920 | 1272510 | --- | --- | --- | 1,29 | down |
| 5762885 | 7364948 | 1781209 | --- | --- | --- | 1,12 | down |
| 5762923 | 7371753 | 1800970 | --- | --- | --- | 1,23 | down |

|         |         |         |     |     |     |      |      |
|---------|---------|---------|-----|-----|-----|------|------|
| 5762988 | 7333462 | 1703641 | --- | --- | --- | 1,11 | up   |
| 5763097 | 7160687 | 1277015 | --- | --- | --- | 1,08 | up   |
| 5763125 | 7196065 | 1365726 | --- | --- | --- | 1,53 | up   |
| 5763337 | 7059020 | 1029348 | --- | --- | --- | 1,03 | up   |
| 5763358 | 7292178 | 1601753 | --- | --- | --- | 1,10 | up   |
| 5763475 | 7383823 | 1828934 | --- | --- | --- | 1,10 | down |
| 5763520 | 7264797 | 1534442 | --- | --- | --- | 1,43 | up   |
| 5763609 | 7341264 | 1723350 | --- | --- | --- | 1,23 | up   |
| 5763614 | 7073854 | 1065623 | --- | --- | --- | 1,86 | down |
| 5763766 | 7273251 | 1555941 | --- | --- | --- | 1,16 | down |
| 5764020 | 7326245 | 1686404 | --- | --- | --- | 4,29 | down |
| 5764041 | 7209927 | 1398941 | --- | --- | --- | 1,01 | down |
| 5764082 | 7358859 | 1767018 | --- | --- | --- | 1,00 | down |
| 5764116 | 7196029 | 1365617 | --- | --- | --- | 1,36 | up   |
| 5764151 | 7340304 | 1720843 | --- | --- | --- | 1,70 | down |
| 5764154 | 7052385 | 1014794 | --- | --- | --- | 1,03 | up   |
| 5764242 | 7369939 | 1795613 | --- | --- | --- | 1,43 | down |
| 5764283 | 7148741 | 1247827 | --- | --- | --- | 1,06 | up   |
| 5764347 | 7143455 | 1234739 | --- | --- | --- | 1,43 | down |
| 5764403 | 7034356 | 972164  | --- | --- | --- | 1,18 | down |
| 5764512 | 7326612 | 1687188 | --- | --- | --- | 1,02 | up   |
| 5764583 | 7088544 | 1099669 | --- | --- | --- | 1,14 | up   |
| 5764585 | 7277783 | 1567420 | --- | --- | --- | 1,52 | up   |
| 5764591 | 7330623 | 1696950 | --- | --- | --- | 1,18 | down |
| 5764647 | 7183182 | 1333571 | --- | --- | --- | 1,18 | down |
| 5764652 | 7302018 | 1626963 | --- | --- | --- | 1,15 | up   |
| 5764707 | 7038659 | 982167  | --- | --- | --- | 1,44 | down |
| 5764735 | 7171417 | 1303149 | --- | --- | --- | 1,56 | up   |
| 5764847 | 7201422 | 1379186 | --- | --- | --- | 1,08 | down |
| 5764898 | 7076099 | 1070662 | --- | --- | --- | 1,20 | up   |
| 5764961 | 7059584 | 1030556 | --- | --- | --- | 1,19 | up   |
| 5765014 | 7099573 | 1126729 | --- | --- | --- | 1,48 | up   |
| 5765023 | 7302860 | 1629005 | --- | --- | --- | 1,02 | down |
| 5765158 | 7289382 | 1595213 | --- | --- | --- | 1,08 | up   |
| 5765178 | 7252877 | 1504707 | --- | --- | --- | 1,09 | down |
| 5765180 | 7360325 | 1770492 | --- | --- | --- | 1,11 | up   |
| 5765204 | 7243363 | 1481627 | --- | --- | --- | 1,12 | down |
| 5765250 | 7067670 | 1050302 | --- | --- | --- | 1,69 | up   |
| 5765283 | 7227433 | 1440983 | --- | --- | --- | 1,04 | up   |
| 5765313 | 7233178 | 1455899 | --- | --- | --- | 1,00 | down |
| 5765464 | 7373633 | 1805698 | --- | --- | --- | 1,02 | up   |
| 5765474 | 7330396 | 1696354 | --- | --- | --- | 1,07 | up   |
| 5765510 | 7072765 | 1062742 | --- | --- | --- | 1,17 | down |
| 5765599 | 7380878 | 1822547 | --- | --- | --- | 1,21 | down |
| 5765748 | 7146000 | 1240656 | --- | --- | --- | 1,36 | up   |
| 5765786 | 7181193 | 1328290 | --- | --- | --- | 1,27 | up   |
| 5765870 | 7374493 | 1807959 | --- | --- | --- | 1,05 | up   |
| 5765872 | 7286807 | 1588792 | --- | --- | --- | 1,00 | down |
| 5765878 | 7349313 | 1743115 | --- | --- | --- | 3,84 | down |
| 5765943 | 7247230 | 1490569 | --- | --- | --- | 1,10 | up   |
| 5765953 | 7369939 | 1795614 | --- | --- | --- | 1,35 | down |
| 5765978 | 7269911 | 1546915 | --- | --- | --- | 1,12 | up   |
| 5765983 | 7305275 | 1635822 | --- | --- | --- | 1,45 | up   |
| 5766014 | 7265259 | 1535447 | --- | --- | --- | 1,02 | down |
| 5766332 | 7279568 | 1572013 | --- | --- | --- | 1,21 | down |
| 5766396 | 7096461 | 1118267 | --- | --- | --- | 1,18 | down |
| 5766507 | 7131550 | 1205562 | --- | --- | --- | 1,07 | up   |

|         |         |         |     |     |     |      |      |
|---------|---------|---------|-----|-----|-----|------|------|
| 5766515 | 7214605 | 1409404 | --- | --- | --- | 3,05 | down |
| 5766521 | 7135736 | 1215403 | --- | --- | --- | 1,71 | up   |
| 5766570 | 7147791 | 1245416 | --- | --- | --- | 2,16 | up   |
| 5766583 | 7052331 | 1014598 | --- | --- | --- | 2,10 | down |
| 5766653 | 7062233 | 1037243 | --- | --- | --- | 1,14 | up   |
| 5766657 | 7302445 | 1628176 | --- | --- | --- | 1,03 | down |
| 5766661 | 7059962 | 1031402 | --- | --- | --- | 1,11 | down |
| 5766737 | 7071264 | 1059363 | --- | --- | --- | 2,94 | up   |
| 5766745 | 7226277 | 1437984 | --- | --- | --- | 1,16 | down |
| 5766746 | 7131718 | 1205747 | --- | --- | --- | 1,07 | up   |
| 5766831 | 7340673 | 1721703 | --- | --- | --- | 1,03 | down |
| 5766887 | 7367994 | 1789256 | --- | --- | --- | 2,70 | up   |
| 5767034 | 7317708 | 1666836 | --- | --- | --- | 1,28 | up   |
| 5767044 | 7168521 | 1295897 | --- | --- | --- | 1,02 | up   |
| 5767093 | 7349817 | 1744588 | --- | --- | --- | 1,63 | down |
| 5767140 | 7110999 | 1154757 | --- | --- | --- | 2,19 | down |
| 5767284 | 7312532 | 1653221 | --- | --- | --- | 1,17 | up   |
| 5767315 | 7212285 | 1403980 | --- | --- | --- | 1,13 | down |
| 5767342 | 7297274 | 1614661 | --- | --- | --- | 1,18 | down |
| 5767401 | 7071659 | 1060225 | --- | --- | --- | 2,06 | up   |
| 5767526 | 7243363 | 1481626 | --- | --- | --- | 1,00 | down |
| 5767730 | 7061003 | 1033921 | --- | --- | --- | 1,09 | down |
| 5767759 | 7339379 | 1718326 | --- | --- | --- | 1,28 | up   |
| 5767802 | 7350489 | 1746126 | --- | --- | --- | 1,07 | down |
| 5767812 | 7350993 | 1747551 | --- | --- | --- | 1,11 | down |
| 5767813 | 7349817 | 1744597 | --- | --- | --- | 1,15 | down |
| 5767821 | 7286807 | 1588833 | --- | --- | --- | 1,42 | down |
| 5767912 | 7066035 | 1046222 | --- | --- | --- | 1,02 | up   |
| 5767936 | 7181193 | 1328289 | --- | --- | --- | 1,02 | up   |
| 5768044 | 7097485 | 1120935 | --- | --- | --- | 1,35 | up   |
| 5768093 | 7344380 | 1731126 | --- | --- | --- | 1,04 | down |
| 5768145 | 7384509 | 1830736 | --- | --- | --- | 1,04 | up   |
| 5768174 | 7030519 | 961700  | --- | --- | --- | 1,41 | up   |
| 5768204 | 7198087 | 1370686 | --- | --- | --- | 1,04 | down |
| 5768214 | 7242451 | 1479338 | --- | --- | --- | 1,78 | up   |
| 5768267 | 7032204 | 966120  | --- | --- | --- | 1,28 | down |
| 5768299 | 7381090 | 1822991 | --- | --- | --- | 1,31 | up   |
| 5768319 | 7363529 | 1777924 | --- | --- | --- | 1,13 | down |
| 5768360 | 7083030 | 1086267 | --- | --- | --- | 1,05 | down |
| 5768404 | 7066035 | 1046221 | --- | --- | --- | 1,25 | down |
| 5768476 | 7198210 | 1370970 | --- | --- | --- | 1,35 | up   |
| 5768479 | 7297589 | 1615603 | --- | --- | --- | 1,20 | up   |
| 5768504 | 7052957 | 1016258 | --- | --- | --- | 1,74 | down |
| 5768675 | 7312686 | 1653621 | --- | --- | --- | 1,06 | down |
| 5768704 | 7287337 | 1589994 | --- | --- | --- | 1,03 | down |
| 5768731 | 7156052 | 1265780 | --- | --- | --- | 1,13 | down |
| 5768745 | 7230886 | 1449526 | --- | --- | --- | 1,01 | up   |
| 5768847 | 7239752 | 1473196 | --- | --- | --- | 1,04 | up   |
| 5769128 | 7083030 | 1086261 | --- | --- | --- | 1,06 | up   |
| 5769184 | 7255687 | 1511771 | --- | --- | --- | 2,25 | down |
| 5769321 | 7093806 | 1112161 | --- | --- | --- | 2,79 | down |
| 5769354 | 7367943 | 1788925 | --- | --- | --- | 1,06 | up   |
| 5769522 | 7194400 | 1361789 | --- | --- | --- | 1,12 | up   |
| 5769885 | 7359361 | 1768264 | --- | --- | --- | 1,03 | up   |
| 5769903 | 7320068 | 1672648 | --- | --- | --- | 2,02 | up   |
| 5769945 | 7029770 | 960158  | --- | --- | --- | 1,53 | up   |
| 5769992 | 7119845 | 1176909 | --- | --- | --- | 1,20 | down |

|         |         |         |     |     |     |      |      |
|---------|---------|---------|-----|-----|-----|------|------|
| 5770025 | 7350993 | 1747532 | --- | --- | --- | 1,50 | up   |
| 5770038 | 7186240 | 1340829 | --- | --- | --- | 1,17 | up   |
| 5770050 | 7356115 | 1760134 | --- | --- | --- | 1,24 | down |
| 5770082 | 7240569 | 1475464 | --- | --- | --- | 1,09 | up   |
| 5770352 | 7274892 | 1559525 | --- | --- | --- | 1,06 | up   |
| 5770427 | 7360486 | 1771015 | --- | --- | --- | 1,38 | up   |
| 5770463 | 7069253 | 1054151 | --- | --- | --- | 1,33 | up   |
| 5770491 | 7075445 | 1069341 | --- | --- | --- | 1,41 | up   |
| 5770725 | 7038659 | 982167  | --- | --- | --- | 1,11 | down |
| 5770729 | 7166855 | 1291255 | --- | --- | --- | 2,59 | down |
| 5770735 | 7295652 | 1610277 | --- | --- | --- | 1,12 | down |
| 5770743 | 7102369 | 1133418 | --- | --- | --- | 1,51 | up   |
| 5770966 | 7122585 | 1183687 | --- | --- | --- | 1,42 | up   |
| 5771000 | 7039265 | 983658  | --- | --- | --- | 1,25 | up   |
| 5771019 | 7140946 | 1228325 | --- | --- | --- | 2,00 | up   |
| 5771049 | 7318139 | 1668076 | --- | --- | --- | 1,26 | up   |
| 5771089 | 7374324 | 1807505 | --- | --- | --- | 1,18 | down |
| 5771116 | 7218728 | 1419919 | --- | --- | --- | 2,24 | up   |
| 5771147 | 7254209 | 1508007 | --- | --- | --- | 1,10 | down |
| 5771320 | 7280743 | 1574523 | --- | --- | --- | 1,00 | down |
| 5771358 | 7205750 | 1388931 | --- | --- | --- | 1,06 | down |
| 5771386 | 7156052 | 1265772 | --- | --- | --- | 1,01 | up   |
| 5771574 | 7181193 | 1328304 | --- | --- | --- | 1,31 | up   |
| 5771593 | 7344406 | 1731192 | --- | --- | --- | 1,12 | up   |
| 5771633 | 7034293 | 971810  | --- | --- | --- | 2,99 | up   |
| 5771699 | 7141456 | 1229595 | --- | --- | --- | 1,54 | up   |
| 5771700 | 7356115 | 1760133 | --- | --- | --- | 1,67 | up   |
| 5771730 | 7261580 | 1526802 | --- | --- | --- | 1,17 | up   |
| 5771762 | 7100210 | 1128143 | --- | --- | --- | 1,02 | down |
| 5771803 | 7243647 | 1482425 | --- | --- | --- | 1,25 | down |
| 5771914 | 7311367 | 1650728 | --- | --- | --- | 1,27 | down |
| 5771981 | 7306629 | 1639457 | --- | --- | --- | 2,16 | up   |
| 5772062 | 7340304 | 1720867 | --- | --- | --- | 2,21 | down |
| 5772103 | 7213908 | 1407712 | --- | --- | --- | 1,20 | down |
| 5772150 | 7372840 | 1803780 | --- | --- | --- | 1,25 | up   |
| 5772162 | 7353224 | 1752673 | --- | --- | --- | 1,08 | down |
| 5772246 | 7238202 | 1468939 | --- | --- | --- | 1,35 | up   |
| 5772258 | 7233106 | 1455668 | --- | --- | --- | 1,26 | down |
| 5772275 | 7040442 | 986503  | --- | --- | --- | 1,06 | down |
| 5772311 | 7198644 | 1372268 | --- | --- | --- | 1,27 | up   |
| 5772360 | 7218728 | 1419929 | --- | --- | --- | 1,02 | up   |
| 5772436 | 7321414 | 1675643 | --- | --- | --- | 1,42 | down |
| 5772526 | 7217747 | 1417506 | --- | --- | --- | 1,90 | up   |
| 5772629 | 7274892 | 1559525 | --- | --- | --- | 1,10 | up   |
| 5772684 | 7069464 | 1054670 | --- | --- | --- | 1,08 | up   |
| 5772710 | 7288077 | 1591952 | --- | --- | --- | 1,32 | up   |
| 5772733 | 7240224 | 1474390 | --- | --- | --- | 1,17 | up   |
| 5772829 | 7086966 | 1095278 | --- | --- | --- | 1,06 | down |
| 5772895 | 7317274 | 1665629 | --- | --- | --- | 1,02 | down |
| 5772940 | 7095868 | 1116780 | --- | --- | --- | 1,17 | down |
| 5772969 | 7112672 | 1158978 | --- | --- | --- | 2,01 | up   |
| 5773161 | 7158419 | 1271376 | --- | --- | --- | 1,21 | up   |
| 5773163 | 7064468 | 1042378 | --- | --- | --- | 1,86 | up   |
| 5773285 | 7058507 | 1028307 | --- | --- | --- | 1,25 | up   |
| 5773338 | 7288095 | 1592061 | --- | --- | --- | 1,02 | up   |
| 5773406 | 7063716 | 1040153 | --- | --- | --- | 1,30 | down |
| 5773569 | 7175946 | 1314638 | --- | --- | --- | 1,14 | down |



|         |         |         |     |     |     |      |      |
|---------|---------|---------|-----|-----|-----|------|------|
| 5773585 | 7337224 | 1712607 | --- | --- | --- | 1,01 | down |
| 5773750 | 7371228 | 1799461 | --- | --- | --- | 1,40 | up   |
| 5773774 | 7252877 | 1504709 | --- | --- | --- | 1,05 | up   |
| 5773797 | 7188829 | 1346669 | --- | --- | --- | 1,40 | down |
| 5773811 | 7196029 | 1365601 | --- | --- | --- | 1,98 | up   |
| 5773884 | 7194540 | 1362080 | --- | --- | --- | 1,68 | up   |
| 5773928 | 7282927 | 1579998 | --- | --- | --- | 1,41 | down |
| 5774024 | 7030224 | 961135  | --- | --- | --- | 1,23 | up   |
| 5774062 | 7180804 | 1327006 | --- | --- | --- | 1,12 | up   |
| 5774090 | 7301843 | 1626478 | --- | --- | --- | 1,05 | up   |
| 5774128 | 7210702 | 1400724 | --- | --- | --- | 1,21 | down |
| 5774163 | 7091954 | 1107721 | --- | --- | --- | 1,20 | down |
| 5774221 | 7147809 | 1245453 | --- | --- | --- | 1,05 | down |
| 5774231 | 7146542 | 1242295 | --- | --- | --- | 1,17 | down |
| 5774297 | 7198210 | 1370968 | --- | --- | --- | 1,08 | down |
| 5774354 | 7374324 | 1807464 | --- | --- | --- | 1,04 | down |
| 5774369 | 7056333 | 1023713 | --- | --- | --- | 1,06 | up   |
| 5774401 | 7096924 | 1119615 | --- | --- | --- | 1,48 | up   |
| 5774453 | 7279103 | 1570826 | --- | --- | --- | 1,33 | down |
| 5774541 | 7361075 | 1772338 | --- | --- | --- | 1,08 | up   |
| 5774594 | 7265259 | 1535438 | --- | --- | --- | 1,03 | up   |
| 5774731 | 7302445 | 1628172 | --- | --- | --- | 1,18 | up   |
| 5774740 | 7244602 | 1484757 | --- | --- | --- | 1,03 | up   |
| 5774815 | 7371228 | 1799468 | --- | --- | --- | 1,03 | down |
| 5774864 | 7158920 | 1272512 | --- | --- | --- | 1,30 | up   |
| 5775002 | 7071292 | 1059434 | --- | --- | --- | 1,56 | down |
| 5775005 | 7231484 | 1451355 | --- | --- | --- | 1,11 | up   |
| 5775034 | 7370977 | 1798760 | --- | --- | --- | 2,09 | down |
| 5775198 | 7292701 | 1602955 | --- | --- | --- | 1,16 | down |
| 5775332 | 7040442 | 986516  | --- | --- | --- | 1,02 | up   |
| 5775340 | 7154893 | 1262910 | --- | --- | --- | 1,10 | down |
| 5775351 | 7350237 | 1745474 | --- | --- | --- | 1,05 | down |
| 5775352 | 7360486 | 1770972 | --- | --- | --- | 1,04 | up   |
| 5775375 | 7052813 | 1015913 | --- | --- | --- | 1,44 | up   |
| 5775379 | 7112355 | 1158077 | --- | --- | --- | 1,16 | up   |
| 5775462 | 7076236 | 1071180 | --- | --- | --- | 1,16 | down |
| 5775463 | 7052933 | 1016215 | --- | --- | --- | 1,10 | up   |
| 5775490 | 7293763 | 1605709 | --- | --- | --- | 1,22 | down |
| 5775523 | 7240641 | 1475771 | --- | --- | --- | 1,13 | up   |
| 5775525 | 7366749 | 1785484 | --- | --- | --- | 1,27 | up   |
| 5775547 | 7132024 | 1206337 | --- | --- | --- | 1,04 | up   |
| 5775576 | 7172691 | 1306451 | --- | --- | --- | 1,08 | up   |
| 5775593 | 7240569 | 1475472 | --- | --- | --- | 1,03 | down |
| 5775778 | 7340304 | 1720865 | --- | --- | --- | 1,53 | down |
| 5775805 | 7360325 | 1770507 | --- | --- | --- | 1,61 | up   |
| 5775819 | 7121849 | 1181804 | --- | --- | --- | 1,07 | up   |
| 5776100 | 7081487 | 1082712 | --- | --- | --- | 1,02 | down |
| 5776119 | 7113261 | 1160480 | --- | --- | --- | 1,01 | up   |
| 5776130 | 7239752 | 1473168 | --- | --- | --- | 1,10 | down |
| 5776195 | 7040674 | 987028  | --- | --- | --- | 2,44 | up   |
| 5776257 | 7027386 | 955069  | --- | --- | --- | 1,11 | up   |
| 5776269 | 7278794 | 1570049 | --- | --- | --- | 1,58 | down |
| 5776353 | 7350993 | 1747553 | --- | --- | --- | 1,12 | up   |
| 5776459 | 7374324 | 1807528 | --- | --- | --- | 1,33 | down |
| 5776474 | 7102889 | 1134852 | --- | --- | --- | 1,29 | down |
| 5776514 | 7277783 | 1567444 | --- | --- | --- | 1,30 | up   |
| 5776567 | 7038153 | 981149  | --- | --- | --- | 1,07 | down |

|         |         |         |     |     |     |      |      |
|---------|---------|---------|-----|-----|-----|------|------|
| 5776633 | 7239752 | 1473169 | --- | --- | --- | 1,47 | down |
| 5776715 | 7321029 | 1674831 | --- | --- | --- | 2,04 | up   |
| 5776739 | 7100523 | 1128841 | --- | --- | --- | 1,11 | up   |
| 5776810 | 7039223 | 983577  | --- | --- | --- | 1,25 | up   |
| 5776812 | 7244287 | 1484049 | --- | --- | --- | 1,18 | down |
| 5776869 | 7166867 | 1291301 | --- | --- | --- | 1,26 | up   |
| 5776877 | 7317274 | 1665628 | --- | --- | --- | 1,21 | up   |
| 5776907 | 7259221 | 1520627 | --- | --- | --- | 1,37 | down |
| 5777017 | 7165825 | 1288461 | --- | --- | --- | 1,22 | down |
| 5777034 | 7269637 | 1546244 | --- | --- | --- | 2,40 | down |
| 5777185 | 7280743 | 1574502 | --- | --- | --- | 1,04 | up   |
| 5777268 | 7225213 | 1435123 | --- | --- | --- | 1,21 | up   |
| 5777343 | 7365147 | 1781776 | --- | --- | --- | 1,00 | down |
| 5777557 | 7217747 | 1417492 | --- | --- | --- | 1,43 | down |
| 5777623 | 7121849 | 1181753 | --- | --- | --- | 1,28 | down |
| 5777641 | 7087500 | 1096725 | --- | --- | --- | 1,11 | up   |
| 5777642 | 7182739 | 1332587 | --- | --- | --- | 1,00 | up   |
| 5777677 | 7241995 | 1478335 | --- | --- | --- | 1,26 | down |
| 5777722 | 7217434 | 1416359 | --- | --- | --- | 1,06 | up   |
| 5777830 | 7264797 | 1534437 | --- | --- | --- | 1,36 | up   |
| 5777868 | 7259807 | 1522245 | --- | --- | --- | 1,19 | up   |
| 5777891 | 7232732 | 1454582 | --- | --- | --- | 1,58 | down |
| 5778104 | 7243647 | 1482487 | --- | --- | --- | 1,08 | up   |
| 5778115 | 7182056 | 1330576 | --- | --- | --- | 1,11 | up   |
| 5778141 | 7346687 | 1736697 | --- | --- | --- | 1,54 | down |
| 5778182 | 7132125 | 1206617 | --- | --- | --- | 1,00 | up   |
| 5778242 | 7068942 | 1053384 | --- | --- | --- | 1,09 | up   |
| 5778251 | 7351844 | 1749498 | --- | --- | --- | 2,61 | down |
| 5778259 | 7383102 | 1827401 | --- | --- | --- | 1,78 | down |
| 5778347 | 7200313 | 1376452 | --- | --- | --- | 1,01 | up   |
| 5778372 | 7153136 | 1258043 | --- | --- | --- | 1,50 | down |
| 5778454 | 7121074 | 1179920 | --- | --- | --- | 1,01 | down |
| 5778465 | 7284663 | 1588466 | --- | --- | --- | 1,60 | down |
| 5778559 | 7243627 | 1482346 | --- | --- | --- | 1,26 | up   |
| 5778571 | 7282927 | 1580004 | --- | --- | --- | 1,05 | up   |
| 5778622 | 7253088 | 1505123 | --- | --- | --- | 1,22 | up   |
| 5778649 | 7181105 | 1327967 | --- | --- | --- | 1,28 | down |
| 5778665 | 7123714 | 1186430 | --- | --- | --- | 1,25 | down |
| 5778670 | 7168309 | 1295348 | --- | --- | --- | 1,49 | down |
| 5778755 | 7333333 | 1703398 | --- | --- | --- | 1,64 | up   |
| 5778898 | 7264653 | 1534024 | --- | --- | --- | 1,42 | down |
| 5778940 | 7207093 | 1392094 | --- | --- | --- | 1,07 | up   |
| 5778944 | 7321029 | 1674808 | --- | --- | --- | 1,82 | down |
| 5778950 | 7056333 | 1023701 | --- | --- | --- | 1,21 | down |
| 5778954 | 7257976 | 1517706 | --- | --- | --- | 1,20 | down |
| 5778976 | 7285530 | 1585970 | --- | --- | --- | 1,10 | down |
| 5779135 | 7351953 | 1749858 | --- | --- | --- | 1,34 | down |
| 5779160 | 7308679 | 1644252 | --- | --- | --- | 1,60 | up   |
| 5779170 | 7091954 | 1107726 | --- | --- | --- | 1,14 | up   |
| 5779188 | 7294911 | 1608528 | --- | --- | --- | 1,18 | up   |
| 5779219 | 7168979 | 1297179 | --- | --- | --- | 1,02 | down |
| 5779234 | 7255687 | 1511772 | --- | --- | --- | 1,35 | up   |
| 5779390 | 7097827 | 1122036 | --- | --- | --- | 1,03 | down |
| 5779398 | 7030144 | 960896  | --- | --- | --- | 1,69 | down |
| 5779557 | 7233513 | 1457171 | --- | --- | --- | 1,01 | down |
| 5779560 | 7105814 | 1141774 | --- | --- | --- | 1,02 | up   |
| 5779585 | 7363674 | 1778440 | --- | --- | --- | 1,06 | down |

|         |         |         |     |     |     |      |      |
|---------|---------|---------|-----|-----|-----|------|------|
| 5779646 | 7330731 | 1697197 | --- | --- | --- | 1,25 | down |
| 5779670 | 7189404 | 1348195 | --- | --- | --- | 1,23 | down |
| 5779728 | 7140365 | 1226790 | --- | --- | --- | 1,06 | up   |
| 5779779 | 7069721 | 1055290 | --- | --- | --- | 1,13 | up   |
| 5779833 | 7156170 | 1266229 | --- | --- | --- | 1,08 | up   |
| 5779877 | 7169550 | 1298364 | --- | --- | --- | 1,51 | down |
| 5779888 | 7367969 | 1789104 | --- | --- | --- | 1,99 | down |
| 5779931 | 7093219 | 1110682 | --- | --- | --- | 1,10 | down |
| 5779967 | 7139708 | 1225056 | --- | --- | --- | 1,40 | up   |
| 5779990 | 7063873 | 1040647 | --- | --- | --- | 1,31 | down |
| 5780009 | 7093806 | 1112166 | --- | --- | --- | 3,24 | down |
| 5780010 | 7148741 | 1247840 | --- | --- | --- | 1,19 | up   |
| 5780020 | 7339387 | 1718394 | --- | --- | --- | 2,83 | down |
| 5780027 | 7288077 | 1591995 | --- | --- | --- | 1,04 | up   |
| 5780196 | 7217747 | 1417490 | --- | --- | --- | 1,13 | down |
| 5780304 | 7298920 | 1618823 | --- | --- | --- | 1,16 | down |
| 5780317 | 7167063 | 1291900 | --- | --- | --- | 1,46 | down |
| 5780507 | 7374790 | 1808777 | --- | --- | --- | 1,50 | down |
| 5780532 | 7155866 | 1265340 | --- | --- | --- | 2,16 | down |
| 5780554 | 7231533 | 1451502 | --- | --- | --- | 1,03 | up   |
| 5780569 | 7192902 | 1357765 | --- | --- | --- | 2,31 | down |
| 5780584 | 7309646 | 1646496 | --- | --- | --- | 1,03 | up   |
| 5780606 | 7308679 | 1644239 | --- | --- | --- | 1,28 | down |
| 5780614 | 7239939 | 1473793 | --- | --- | --- | 1,35 | up   |
| 5780641 | 7217679 | 1417313 | --- | --- | --- | 1,27 | up   |
| 5780680 | 7166867 | 1291287 | --- | --- | --- | 1,49 | up   |
| 5780708 | 7120550 | 1178685 | --- | --- | --- | 1,26 | up   |
| 5780765 | 7238845 | 1470743 | --- | --- | --- | 1,01 | up   |
| 5780779 | 7376073 | 1811709 | --- | --- | --- | 1,35 | up   |
| 5780808 | 7121849 | 1181806 | --- | --- | --- | 1,25 | up   |
| 5780837 | 7180598 | 1326326 | --- | --- | --- | 2,13 | down |
| 5780975 | 7264085 | 1532719 | --- | --- | --- | 3,45 | down |
| 5780994 | 7217434 | 1416375 | --- | --- | --- | 1,12 | up   |
| 5781048 | 7363576 | 1778176 | --- | --- | --- | 1,32 | up   |
| 5781121 | 7340057 | 1720332 | --- | --- | --- | 1,58 | up   |
| 5781376 | 7193403 | 1359197 | --- | --- | --- | 1,07 | down |
| 5781437 | 7330181 | 1695709 | --- | --- | --- | 1,19 | down |
| 5781453 | 7142915 | 1233113 | --- | --- | --- | 1,24 | up   |
| 5781602 | 7114274 | 1162812 | --- | --- | --- | 1,08 | down |
| 5781651 | 7181001 | 1327618 | --- | --- | --- | 1,48 | down |
| 5781711 | 7162389 | 1281188 | --- | --- | --- | 2,98 | up   |
| 5781714 | 7339379 | 1718345 | --- | --- | --- | 1,24 | up   |
| 5781738 | 7319055 | 1669949 | --- | --- | --- | 1,06 | up   |
| 5781746 | 7257038 | 1515289 | --- | --- | --- | 1,49 | up   |
| 5781775 | 7029078 | 958874  | --- | --- | --- | 1,11 | up   |
| 5781783 | 7264808 | 1534467 | --- | --- | --- | 1,08 | up   |
| 5781933 | 7364346 | 1779965 | --- | --- | --- | 1,15 | down |
| 5781960 | 7127540 | 1195292 | --- | --- | --- | 1,33 | down |
| 5782113 | 7156052 | 1265773 | --- | --- | --- | 1,01 | down |
| 5782163 | 7269763 | 1546532 | --- | --- | --- | 1,20 | up   |
| 5782164 | 7172373 | 1305564 | --- | --- | --- | 2,86 | up   |
| 5782285 | 7115507 | 1165978 | --- | --- | --- | 1,01 | up   |
| 5782413 | 7202837 | 1382285 | --- | --- | --- | 1,03 | down |
| 5782486 | 7034293 | 971862  | --- | --- | --- | 1,15 | down |
| 5782504 | 7367994 | 1789255 | --- | --- | --- | 1,35 | down |
| 5782521 | 7034356 | 972161  | --- | --- | --- | 1,49 | up   |
| 5782562 | 7049508 | 1008561 | --- | --- | --- | 2,26 | down |

|         |         |         |     |     |     |      |      |
|---------|---------|---------|-----|-----|-----|------|------|
| 5782638 | 7356115 | 1760115 | --- | --- | --- | 1,12 | down |
| 5782652 | 7132125 | 1206605 | --- | --- | --- | 1,29 | down |
| 5782765 | 7356027 | 1759985 | --- | --- | --- | 1,24 | up   |
| 5782851 | 7158920 | 1272510 | --- | --- | --- | 2,05 | up   |
| 5782877 | 7333333 | 1703398 | --- | --- | --- | 1,16 | down |
| 5782899 | 7315206 | 1660023 | --- | --- | --- | 1,78 | down |
| 5782910 | 7128112 | 1196528 | --- | --- | --- | 1,07 | down |
| 5783062 | 7180630 | 1326454 | --- | --- | --- | 1,18 | up   |
| 5783296 | 7052813 | 1015912 | --- | --- | --- | 1,36 | up   |
| 5783341 | 7352044 | 1750011 | --- | --- | --- | 1,34 | up   |
| 5783444 | 7243894 | 1482954 | --- | --- | --- | 1,36 | down |
| 5783458 | 7267204 | 1539856 | --- | --- | --- | 1,06 | down |
| 5783560 | 7240569 | 1475514 | --- | --- | --- | 1,12 | down |
| 5783661 | 7121849 | 1181811 | --- | --- | --- | 1,04 | up   |
| 5783666 | 7228530 | 1443787 | --- | --- | --- | 1,26 | down |
| 5783942 | 7048014 | 1005632 | --- | --- | --- | 1,40 | up   |
| 5783949 | 7258323 | 1518471 | --- | --- | --- | 3,83 | down |
| 5783966 | 7162144 | 1280506 | --- | --- | --- | 1,28 | down |
| 5783989 | 7108122 | 1147386 | --- | --- | --- | 1,07 | down |
| 5784103 | 7368004 | 1789336 | --- | --- | --- | 1,60 | up   |
| 5784127 | 7190524 | 1351175 | --- | --- | --- | 1,08 | up   |
| 5784145 | 7363674 | 1778414 | --- | --- | --- | 1,06 | down |
| 5784336 | 7217434 | 1416441 | --- | --- | --- | 2,07 | down |
| 5784394 | 7337250 | 1712738 | --- | --- | --- | 1,46 | up   |
| 5784453 | 7253408 | 1505942 | --- | --- | --- | 1,47 | up   |
| 5784488 | 7181286 | 1328469 | --- | --- | --- | 1,47 | up   |
| 5784729 | 7072765 | 1062731 | --- | --- | --- | 1,07 | down |
| 5784757 | 7298920 | 1618820 | --- | --- | --- | 1,19 | down |
| 5784799 | 7071714 | 1060360 | --- | --- | --- | 1,09 | down |
| 5784828 | 7193403 | 1359194 | --- | --- | --- | 1,19 | down |
| 5784886 | 7193056 | 1358269 | --- | --- | --- | 1,03 | down |
| 5784895 | 7133484 | 1209937 | --- | --- | --- | 1,03 | up   |
| 5784964 | 7176456 | 1315828 | --- | --- | --- | 1,03 | up   |
| 5784992 | 7060195 | 1031960 | --- | --- | --- | 1,62 | down |
| 5785033 | 7286807 | 1588846 | --- | --- | --- | 1,26 | down |
| 5785045 | 7120379 | 1178328 | --- | --- | --- | 1,10 | up   |
| 5785080 | 7326245 | 1686394 | --- | --- | --- | 2,14 | up   |
| 5785092 | 7095041 | 1115184 | --- | --- | --- | 1,21 | down |
| 5785391 | 7170764 | 1301466 | --- | --- | --- | 1,27 | up   |
| 5785430 | 7203018 | 1382642 | --- | --- | --- | 1,35 | down |
| 5785450 | 7070393 | 1057217 | --- | --- | --- | 1,09 | down |
| 5785455 | 7079600 | 1078632 | --- | --- | --- | 1,02 | down |
| 5785530 | 7313905 | 1656847 | --- | --- | --- | 1,50 | down |
| 5785638 | 7122140 | 1182704 | --- | --- | --- | 1,14 | down |
| 5785708 | 7281577 | 1576888 | --- | --- | --- | 2,04 | up   |
| 5785769 | 7033616 | 970211  | --- | --- | --- | 2,31 | down |
| 5785770 | 7146000 | 1240659 | --- | --- | --- | 1,05 | up   |
| 5785819 | 7197048 | 1367812 | --- | --- | --- | 1,38 | down |
| 5785865 | 7071969 | 1060902 | --- | --- | --- | 1,34 | down |
| 5785879 | 7231834 | 1452273 | --- | --- | --- | 1,02 | up   |
| 5785937 | 7148741 | 1247873 | --- | --- | --- | 1,03 | down |
| 5785989 | 7243901 | 1483062 | --- | --- | --- | 2,19 | up   |
| 5786004 | 7321204 | 1675168 | --- | --- | --- | 1,06 | down |
| 5786009 | 7091439 | 1106614 | --- | --- | --- | 1,01 | down |
| 5786038 | 7168521 | 1295930 | --- | --- | --- | 1,26 | up   |
| 5786047 | 7070836 | 1058346 | --- | --- | --- | 1,12 | up   |
| 5786049 | 7297589 | 1615680 | --- | --- | --- | 1,19 | up   |

|         |         |         |     |     |     |      |      |
|---------|---------|---------|-----|-----|-----|------|------|
| 5786052 | 7120235 | 1177952 | --- | --- | --- | 1,24 | up   |
| 5786211 | 7127540 | 1195303 | --- | --- | --- | 1,26 | down |
| 5786315 | 7193403 | 1359189 | --- | --- | --- | 1,01 | down |
| 5786325 | 7267802 | 1541733 | --- | --- | --- | 1,07 | up   |
| 5786434 | 7279810 | 1572587 | --- | --- | --- | 1,79 | down |
| 5786496 | 7235076 | 1461028 | --- | --- | --- | 1,48 | down |
| 5786512 | 7148741 | 1247837 | --- | --- | --- | 1,21 | down |
| 5786514 | 7112355 | 1158063 | --- | --- | --- | 1,01 | down |
| 5786650 | 7203018 | 1382649 | --- | --- | --- | 1,00 | up   |
| 5786696 | 7343279 | 1728114 | --- | --- | --- | 1,32 | up   |
| 5786764 | 7363529 | 1777946 | --- | --- | --- | 1,71 | down |
| 5786782 | 7260066 | 1522893 | --- | --- | --- | 1,28 | up   |
| 5786807 | 7317708 | 1666822 | --- | --- | --- | 1,18 | down |
| 5786888 | 7180804 | 1326988 | --- | --- | --- | 1,63 | up   |
| 5786895 | 7360486 | 1770999 | --- | --- | --- | 1,37 | down |
| 5787087 | 7237814 | 1467828 | --- | --- | --- | 1,19 | down |
| 5787179 | 7349643 | 1744165 | --- | --- | --- | 1,02 | down |
| 5787185 | 7115146 | 1164932 | --- | --- | --- | 1,10 | down |
| 5787199 | 7247230 | 1490568 | --- | --- | --- | 1,10 | down |
| 5787217 | 7240569 | 1475515 | --- | --- | --- | 1,11 | up   |
| 5787234 | 7068259 | 1051595 | --- | --- | --- | 1,11 | up   |
| 5787240 | 7305275 | 1635829 | --- | --- | --- | 1,47 | down |
| 5787256 | 7183182 | 1333570 | --- | --- | --- | 1,35 | down |
| 5787288 | 7123714 | 1186418 | --- | --- | --- | 1,07 | down |
| 5787351 | 7102113 | 1132808 | --- | --- | --- | 1,62 | down |
| 5787484 | 7199341 | 1374138 | --- | --- | --- | 1,06 | up   |
| 5787521 | 7148741 | 1247831 | --- | --- | --- | 1,07 | up   |
| 5787541 | 7374317 | 1807405 | --- | --- | --- | 1,28 | down |
| 5787566 | 7073928 | 1065803 | --- | --- | --- | 2,45 | down |
| 5787601 | 7073569 | 1064736 | --- | --- | --- | 1,02 | down |
| 5787627 | 7186464 | 1341369 | --- | --- | --- | 1,77 | down |
| 5787702 | 7360486 | 1770941 | --- | --- | --- | 1,10 | down |
| 5787826 | 7237346 | 1466592 | --- | --- | --- | 1,00 | up   |
| 5787860 | 7192914 | 1357831 | --- | --- | --- | 1,26 | down |
| 5787910 | 7197056 | 1367842 | --- | --- | --- | 1,13 | down |
| 5787946 | 7141061 | 1228644 | --- | --- | --- | 1,08 | down |
| 5787953 | 7244288 | 1484128 | --- | --- | --- | 1,48 | down |
| 5788093 | 7259221 | 1520633 | --- | --- | --- | 1,07 | down |
| 5788113 | 7069253 | 1054155 | --- | --- | --- | 1,11 | up   |
| 5788142 | 7301900 | 1626743 | --- | --- | --- | 1,07 | down |
| 5788143 | 7067670 | 1050324 | --- | --- | --- | 2,94 | up   |
| 5788168 | 7198087 | 1370678 | --- | --- | --- | 1,40 | up   |
| 5788176 | 7118356 | 1173203 | --- | --- | --- | 1,03 | down |
| 5788362 | 7257893 | 1517482 | --- | --- | --- | 1,59 | down |
| 5788372 | 7318286 | 1668328 | --- | --- | --- | 1,22 | up   |
| 5788399 | 7139708 | 1225064 | --- | --- | --- | 1,03 | up   |
| 5788408 | 7238115 | 1468638 | --- | --- | --- | 1,20 | up   |
| 5788623 | 7181442 | 1328882 | --- | --- | --- | 1,82 | down |
| 5788826 | 7181001 | 1327592 | --- | --- | --- | 1,07 | up   |
| 5788879 | 7225543 | 1435913 | --- | --- | --- | 1,01 | down |
| 5788997 | 7059584 | 1030542 | --- | --- | --- | 1,02 | up   |
| 5789015 | 7195680 | 1364898 | --- | --- | --- | 1,04 | down |
| 5789135 | 7041584 | 989452  | --- | --- | --- | 1,05 | down |
| 5789208 | 7127540 | 1195295 | --- | --- | --- | 1,42 | up   |
| 5789216 | 7253358 | 1505835 | --- | --- | --- | 1,62 | down |
| 5789379 | 7097485 | 1120948 | --- | --- | --- | 1,21 | up   |
| 5789434 | 7373633 | 1805707 | --- | --- | --- | 1,32 | up   |

|         |         |         |     |     |     |      |      |
|---------|---------|---------|-----|-----|-----|------|------|
| 5789453 | 7329846 | 1694992 | --- | --- | --- | 1,68 | down |
| 5789482 | 7292701 | 1602957 | --- | --- | --- | 1,10 | down |
| 5789521 | 7038530 | 981859  | --- | --- | --- | 1,06 | down |
| 5789647 | 7058149 | 1027257 | --- | --- | --- | 1,26 | up   |
| 5789666 | 7248790 | 1494538 | --- | --- | --- | 1,06 | up   |
| 5789720 | 7325643 | 1685180 | --- | --- | --- | 1,06 | down |
| 5789740 | 7092549 | 1109136 | --- | --- | --- | 1,10 | down |
| 5789778 | 7316054 | 1662299 | --- | --- | --- | 1,48 | up   |
| 5789999 | 7358859 | 1766965 | --- | --- | --- | 1,70 | up   |
| 5790204 | 7368912 | 1792632 | --- | --- | --- | 1,02 | down |
| 5790226 | 7297589 | 1615620 | --- | --- | --- | 1,09 | down |
| 5790276 | 7252877 | 1504696 | --- | --- | --- | 1,32 | down |
| 5790292 | 7027386 | 955066  | --- | --- | --- | 1,33 | up   |
| 5790628 | 7231152 | 1450271 | --- | --- | --- | 1,80 | up   |
| 5790666 | 7339834 | 1719547 | --- | --- | --- | 1,11 | down |
| 5790718 | 7155882 | 1265361 | --- | --- | --- | 1,09 | down |
| 5790728 | 7146093 | 1240987 | --- | --- | --- | 1,29 | up   |
| 5790738 | 7231152 | 1450258 | --- | --- | --- | 1,26 | up   |
| 5790794 | 7039821 | 985069  | --- | --- | --- | 1,64 | down |
| 5790801 | 7089080 | 1101171 | --- | --- | --- | 1,27 | up   |
| 5790904 | 7185355 | 1338694 | --- | --- | --- | 1,04 | down |
| 5790996 | 7318139 | 1668075 | --- | --- | --- | 1,02 | up   |
| 5791007 | 7265259 | 1535437 | --- | --- | --- | 1,17 | down |
| 5791025 | 7330238 | 1695962 | --- | --- | --- | 1,05 | down |
| 5791039 | 7087282 | 1096169 | --- | --- | --- | 1,06 | up   |
| 5791058 | 7169599 | 1298451 | --- | --- | --- | 1,03 | up   |
| 5791406 | 7117813 | 1171723 | --- | --- | --- | 1,09 | down |
| 5791625 | 7088723 | 1100139 | --- | --- | --- | 1,39 | up   |
| 5791631 | 7092549 | 1109188 | --- | --- | --- | 1,49 | up   |
| 5791705 | 7071292 | 1059447 | --- | --- | --- | 1,11 | down |
| 5791738 | 7274780 | 1559220 | --- | --- | --- | 1,24 | down |
| 5791812 | 7154655 | 1262333 | --- | --- | --- | 1,04 | up   |
| 5791891 | 7289075 | 1594449 | --- | --- | --- | 1,02 | up   |
| 5791938 | 7274780 | 1559234 | --- | --- | --- | 1,13 | down |
| 5791959 | 7031774 | 964772  | --- | --- | --- | 1,09 | up   |
| 5791971 | 7139026 | 1223499 | --- | --- | --- | 1,10 | down |
| 5792000 | 7344380 | 1731115 | --- | --- | --- | 4,06 | up   |
| 5792063 | 7047524 | 1004663 | --- | --- | --- | 1,02 | down |
| 5792071 | 7339379 | 1718359 | --- | --- | --- | 1,21 | down |
| 5792103 | 7133484 | 1209935 | --- | --- | --- | 1,03 | up   |
| 5792134 | 7345456 | 1733793 | --- | --- | --- | 1,06 | up   |
| 5792201 | 7292364 | 1602104 | --- | --- | --- | 1,36 | up   |
| 5792205 | 7071292 | 1059448 | --- | --- | --- | 1,32 | up   |
| 5792278 | 7210387 | 1400038 | --- | --- | --- | 1,01 | down |
| 5792399 | 7317204 | 1665390 | --- | --- | --- | 1,25 | up   |
| 5792492 | 7208784 | 1396108 | --- | --- | --- | 1,18 | down |
| 5792525 | 7181001 | 1327600 | --- | --- | --- | 1,07 | down |
| 5792583 | 7248790 | 1494498 | --- | --- | --- | 1,50 | up   |
| 5792697 | 7069253 | 1054166 | --- | --- | --- | 3,35 | up   |
| 5792753 | 7131876 | 1206046 | --- | --- | --- | 1,53 | up   |
| 5792813 | 7345465 | 1733842 | --- | --- | --- | 1,24 | up   |
| 5793020 | 7376566 | 1812888 | --- | --- | --- | 1,83 | up   |
| 5793029 | 7358859 | 1767017 | --- | --- | --- | 1,14 | down |
| 5793105 | 7292517 | 1602546 | --- | --- | --- | 1,27 | down |
| 5793107 | 7093296 | 1110938 | --- | --- | --- | 1,41 | down |
| 5793160 | 7373038 | 1804283 | --- | --- | --- | 1,70 | down |
| 5793263 | 7374790 | 1808765 | --- | --- | --- | 1,36 | down |

|         |         |         |     |     |     |      |      |
|---------|---------|---------|-----|-----|-----|------|------|
| 5793332 | 7086966 | 1095287 | --- | --- | --- | 1,91 | up   |
| 5793441 | 7282927 | 1579979 | --- | --- | --- | 1,06 | down |
| 5793647 | 7047524 | 1004656 | --- | --- | --- | 1,37 | down |
| 5793688 | 7121849 | 1181784 | --- | --- | --- | 1,24 | down |
| 5793766 | 7093255 | 1110769 | --- | --- | --- | 1,02 | up   |
| 5793801 | 7307473 | 1641293 | --- | --- | --- | 1,04 | down |
| 5793891 | 7143381 | 1234496 | --- | --- | --- | 1,38 | up   |
| 5794000 | 7088135 | 1098419 | --- | --- | --- | 1,04 | down |
| 5794100 | 7210263 | 1399752 | --- | --- | --- | 1,57 | down |
| 5794110 | 7052813 | 1015942 | --- | --- | --- | 1,24 | down |
| 5794161 | 7040442 | 986575  | --- | --- | --- | 1,29 | down |
| 5794181 | 7358859 | 1766976 | --- | --- | --- | 1,01 | down |
| 5794187 | 7246518 | 1489046 | --- | --- | --- | 1,35 | up   |
| 5794311 | 7232615 | 1454352 | --- | --- | --- | 1,31 | up   |
| 5794438 | 7193403 | 1359193 | --- | --- | --- | 1,03 | up   |
| 5794604 | 7132125 | 1206614 | --- | --- | --- | 1,00 | up   |
| 5794605 | 7103782 | 1136947 | --- | --- | --- | 1,06 | up   |
| 5794635 | 7363674 | 1778411 | --- | --- | --- | 1,05 | up   |
| 5794702 | 7191866 | 1354900 | --- | --- | --- | 1,42 | up   |
| 5794745 | 7352635 | 1751445 | --- | --- | --- | 1,05 | down |
| 5794850 | 7243901 | 1483045 | --- | --- | --- | 1,22 | up   |
| 5794958 | 7249019 | 1495082 | --- | --- | --- | 2,03 | up   |
| 5795067 | 7059020 | 1029335 | --- | --- | --- | 1,66 | down |
| 5795279 | 7198210 | 1370964 | --- | --- | --- | 1,04 | up   |
| 5795373 | 7243901 | 1483061 | --- | --- | --- | 1,21 | down |
| 5795428 | 7324071 | 1681459 | --- | --- | --- | 1,42 | down |
| 5795478 | 7122140 | 1182731 | --- | --- | --- | 1,16 | up   |
| 5795531 | 7076236 | 1071214 | --- | --- | --- | 1,03 | up   |
| 5795557 | 7139708 | 1225052 | --- | --- | --- | 2,01 | up   |
| 5795631 | 7043379 | 993594  | --- | --- | --- | 1,04 | up   |
| 5795693 | 7281924 | 1577707 | --- | --- | --- | 1,08 | down |
| 5795697 | 7122140 | 1182718 | --- | --- | --- | 1,13 | down |
| 5795786 | 7231484 | 1451397 | --- | --- | --- | 1,21 | down |
| 5796009 | 7198210 | 1371002 | --- | --- | --- | 1,42 | down |
| 5796028 | 7308679 | 1644246 | --- | --- | --- | 3,16 | down |
| 5796154 | 7153136 | 1258022 | --- | --- | --- | 1,51 | down |
| 5796182 | 7079236 | 1077786 | --- | --- | --- | 1,46 | up   |
| 5796196 | 7034356 | 972174  | --- | --- | --- | 1,05 | down |
| 5796219 | 7331413 | 1699139 | --- | --- | --- | 2,09 | down |
| 5796266 | 7337425 | 1713152 | --- | --- | --- | 1,15 | up   |
| 5796320 | 7039589 | 984514  | --- | --- | --- | 1,32 | up   |
| 5796332 | 7160687 | 1276992 | --- | --- | --- | 1,68 | down |
| 5796346 | 7181286 | 1328485 | --- | --- | --- | 2,73 | up   |
| 5796415 | 7145604 | 1239846 | --- | --- | --- | 1,19 | down |
| 5796428 | 7297589 | 1615603 | --- | --- | --- | 1,36 | up   |
| 5796452 | 7197056 | 1367847 | --- | --- | --- | 1,34 | up   |
| 5796456 | 7350237 | 1745471 | --- | --- | --- | 1,20 | up   |
| 5796458 | 7095041 | 1115190 | --- | --- | --- | 2,38 | up   |
| 5796462 | 7261580 | 1526811 | --- | --- | --- | 1,10 | down |
| 5796477 | 7279593 | 1572089 | --- | --- | --- | 1,11 | down |
| 5796512 | 7340304 | 1720853 | --- | --- | --- | 1,05 | up   |
| 5796558 | 7112355 | 1158073 | --- | --- | --- | 1,76 | down |
| 5796630 | 7093806 | 1112166 | --- | --- | --- | 2,87 | down |
| 5796719 | 7366749 | 1785512 | --- | --- | --- | 1,44 | up   |
| 5796781 | 7070668 | 1057932 | --- | --- | --- | 1,01 | down |
| 5796843 | 7101206 | 1130458 | --- | --- | --- | 1,34 | up   |
| 5796857 | 7071714 | 1060351 | --- | --- | --- | 1,13 | up   |

|         |         |         |     |     |     |      |      |
|---------|---------|---------|-----|-----|-----|------|------|
| 5796903 | 7240569 | 1475461 | --- | --- | --- | 1,11 | down |
| 5797076 | 7263805 | 1532179 | --- | --- | --- | 1,09 | down |
| 5797147 | 7384179 | 1829797 | --- | --- | --- | 1,58 | down |
| 5797182 | 7358048 | 1764796 | --- | --- | --- | 1,13 | down |
| 5797246 | 7253408 | 1505953 | --- | --- | --- | 1,03 | down |
| 5797312 | 7346229 | 1735598 | --- | --- | --- | 1,29 | down |
| 5797360 | 7363529 | 1777893 | --- | --- | --- | 1,45 | up   |
| 5797376 | 7041584 | 989453  | --- | --- | --- | 1,00 | down |
| 5797421 | 7154655 | 1262313 | --- | --- | --- | 1,14 | up   |
| 5797445 | 7211363 | 1402045 | --- | --- | --- | 1,31 | down |
| 5797525 | 7099573 | 1126728 | --- | --- | --- | 1,11 | down |
| 5797595 | 7122140 | 1182703 | --- | --- | --- | 1,23 | up   |
| 5797607 | 7152974 | 1257659 | --- | --- | --- | 1,14 | up   |
| 5797624 | 7339286 | 1718105 | --- | --- | --- | 1,55 | up   |
| 5797628 | 7344406 | 1731239 | --- | --- | --- | 1,21 | up   |
| 5797647 | 7217434 | 1416408 | --- | --- | --- | 1,15 | down |
| 5797810 | 7058713 | 1028670 | --- | --- | --- | 1,03 | up   |
| 5797881 | 7238202 | 1468952 | --- | --- | --- | 1,12 | down |
| 5797986 | 7176275 | 1315333 | --- | --- | --- | 1,18 | down |
| 5798009 | 7280982 | 1575197 | --- | --- | --- | 1,06 | up   |
| 5798265 | 7095041 | 1115164 | --- | --- | --- | 1,09 | up   |
| 5798275 | 7115507 | 1165973 | --- | --- | --- | 1,38 | down |
| 5798287 | 7356115 | 1760137 | --- | --- | --- | 1,76 | down |
| 5798294 | 7046605 | 1002431 | --- | --- | --- | 1,38 | up   |
| 5798303 | 7229856 | 1447074 | --- | --- | --- | 1,02 | down |
| 5798392 | 7236358 | 1464262 | --- | --- | --- | 1,06 | up   |
| 5798426 | 7374313 | 1807385 | --- | --- | --- | 1,03 | down |
| 5798427 | 7235069 | 1460979 | --- | --- | --- | 1,13 | down |
| 5798429 | 7070836 | 1058330 | --- | --- | --- | 1,01 | up   |
| 5798438 | 7217434 | 1416397 | --- | --- | --- | 1,12 | up   |
| 5798528 | 7025670 | 950410  | --- | --- | --- | 1,01 | up   |
| 5798545 | 7278010 | 1568041 | --- | --- | --- | 1,17 | down |
| 5798551 | 7217650 | 1417191 | --- | --- | --- | 1,26 | down |
| 5798573 | 7368555 | 1791238 | --- | --- | --- | 1,45 | down |
| 5798666 | 7231152 | 1450269 | --- | --- | --- | 3,38 | up   |
| 5798673 | 7260553 | 1524109 | --- | --- | --- | 1,35 | down |
| 5798902 | 7146872 | 1242903 | --- | --- | --- | 1,07 | up   |
| 5798909 | 7198210 | 1370961 | --- | --- | --- | 1,08 | down |
| 5799069 | 7143455 | 1234714 | --- | --- | --- | 1,27 | down |
| 5799109 | 7305275 | 1635848 | --- | --- | --- | 1,33 | up   |
| 5799214 | 7198210 | 1370997 | --- | --- | --- | 1,04 | up   |
| 5799244 | 7140365 | 1226782 | --- | --- | --- | 1,02 | down |
| 5799268 | 7213294 | 1406092 | --- | --- | --- | 1,13 | up   |
| 5799270 | 7095021 | 1115129 | --- | --- | --- | 1,46 | up   |
| 5799344 | 7194356 | 1361630 | --- | --- | --- | 1,23 | down |
| 5799358 | 7040442 | 986499  | --- | --- | --- | 2,36 | up   |
| 5799391 | 7350530 | 1746234 | --- | --- | --- | 2,28 | down |
| 5799438 | 7374740 | 1808618 | --- | --- | --- | 1,18 | up   |
| 5799439 | 7307473 | 1641293 | --- | --- | --- | 1,21 | up   |
| 5799472 | 7122805 | 1184247 | --- | --- | --- | 1,98 | up   |
| 5799486 | 7302787 | 1628875 | --- | --- | --- | 1,05 | down |
| 5799501 | 7331757 | 1700017 | --- | --- | --- | 1,19 | up   |
| 5799576 | 7240569 | 1475457 | --- | --- | --- | 1,37 | down |
| 5799584 | 7259923 | 1522531 | --- | --- | --- | 1,05 | up   |
| 5799710 | 7200129 | 1375996 | --- | --- | --- | 1,66 | down |
| 5799719 | 7197056 | 1367844 | --- | --- | --- | 1,34 | up   |
| 5799947 | 7253215 | 1505369 | --- | --- | --- | 1,30 | down |



|         |         |         |     |     |     |      |      |
|---------|---------|---------|-----|-----|-----|------|------|
| 5799977 | 7373633 | 1805708 | --- | --- | --- | 1,15 | up   |
| 5800014 | 7093296 | 1110983 | --- | --- | --- | 3,25 | up   |
| 5800054 | 7207093 | 1392123 | --- | --- | --- | 1,23 | down |
| 5800143 | 7190242 | 1350307 | --- | --- | --- | 1,36 | up   |
| 5800238 | 7173640 | 1308966 | --- | --- | --- | 1,00 | down |
| 5800405 | 7247954 | 1492358 | --- | --- | --- | 1,29 | up   |
| 5800414 | 7358623 | 1766290 | --- | --- | --- | 1,20 | down |
| 5800447 | 7320735 | 1674130 | --- | --- | --- | 1,34 | down |
| 5800463 | 7248790 | 1494501 | --- | --- | --- | 1,39 | down |
| 5800483 | 7108434 | 1148317 | --- | --- | --- | 1,23 | down |
| 5800571 | 7247907 | 1492242 | --- | --- | --- | 1,00 | up   |
| 5800581 | 7120379 | 1178332 | --- | --- | --- | 1,18 | down |
| 5800901 | 7244287 | 1484057 | --- | --- | --- | 1,33 | down |
| 5801115 | 7182056 | 1330597 | --- | --- | --- | 1,19 | down |
| 5801250 | 7356619 | 1761348 | --- | --- | --- | 1,21 | down |
| 5801269 | 7098810 | 1124656 | --- | --- | --- | 1,25 | down |
| 5801294 | 7341243 | 1723231 | --- | --- | --- | 1,28 | down |
| 5801337 | 7086966 | 1095292 | --- | --- | --- | 2,07 | up   |
| 5801359 | 7350489 | 1746112 | --- | --- | --- | 1,21 | down |
| 5801538 | 7341375 | 1723552 | --- | --- | --- | 1,27 | down |
| 5801602 | 7050716 | 1011232 | --- | --- | --- | 1,09 | up   |
| 5801629 | 7331757 | 1700023 | --- | --- | --- | 1,29 | down |
| 5801660 | 7222236 | 1428119 | --- | --- | --- | 1,17 | up   |
| 5801666 | 7374324 | 1807498 | --- | --- | --- | 1,15 | down |
| 5801700 | 7031774 | 964706  | --- | --- | --- | 1,34 | up   |
| 5801729 | 7356115 | 1760134 | --- | --- | --- | 1,00 | down |
| 5801733 | 7228520 | 1443769 | --- | --- | --- | 2,31 | down |
| 5801788 | 7050167 | 1009818 | --- | --- | --- | 1,05 | down |
| 5801819 | 7117526 | 1171002 | --- | --- | --- | 2,10 | up   |
| 5801911 | 7213294 | 1406094 | --- | --- | --- | 1,09 | down |
| 5801913 | 7336449 | 1710627 | --- | --- | --- | 1,25 | up   |
| 5801995 | 7093936 | 1112474 | --- | --- | --- | 1,46 | down |
| 5802041 | 7197400 | 1368814 | --- | --- | --- | 1,20 | up   |
| 5802094 | 7209927 | 1398942 | --- | --- | --- | 1,02 | up   |
| 5802097 | 7148978 | 1248500 | --- | --- | --- | 1,02 | up   |
| 5802098 | 7212587 | 1404647 | --- | --- | --- | 1,17 | down |
| 5802149 | 7147204 | 1243775 | --- | --- | --- | 1,17 | up   |
| 5802189 | 7257976 | 1517705 | --- | --- | --- | 1,31 | up   |
| 5802235 | 7363674 | 1778441 | --- | --- | --- | 1,20 | down |
| 5802273 | 7343250 | 1728042 | --- | --- | --- | 1,32 | down |
| 5802278 | 7092549 | 1109160 | --- | --- | --- | 1,07 | up   |
| 5802288 | 7363529 | 1777945 | --- | --- | --- | 1,07 | down |
| 5802340 | 7344406 | 1731195 | --- | --- | --- | 1,11 | down |
| 5802509 | 7092549 | 1109148 | --- | --- | --- | 1,01 | down |
| 5802657 | 7070836 | 1058360 | --- | --- | --- | 1,04 | up   |
| 5802666 | 7282927 | 1579979 | --- | --- | --- | 1,22 | up   |
| 5802670 | 7084500 | 1089709 | --- | --- | --- | 1,13 | up   |
| 5802711 | 7291032 | 1599338 | --- | --- | --- | 1,07 | down |
| 5802992 | 7171091 | 1302461 | --- | --- | --- | 1,15 | down |
| 5802995 | 7264745 | 1534279 | --- | --- | --- | 1,48 | down |
| 5803046 | 7339379 | 1718317 | --- | --- | --- | 1,13 | up   |
| 5803049 | 7208436 | 1395315 | --- | --- | --- | 1,26 | up   |
| 5803132 | 7106752 | 1144055 | --- | --- | --- | 1,18 | down |
| 5803261 | 7281924 | 1577725 | --- | --- | --- | 1,02 | up   |
| 5803265 | 7247907 | 1492243 | --- | --- | --- | 1,04 | down |
| 5803309 | 7248790 | 1494514 | --- | --- | --- | 1,65 | up   |
| 5803366 | 7185483 | 1338940 | --- | --- | --- | 1,13 | up   |

|         |         |         |     |     |     |      |      |
|---------|---------|---------|-----|-----|-----|------|------|
| 5803370 | 7337250 | 1712739 | --- | --- | --- | 1,17 | up   |
| 5803444 | 7214605 | 1409396 | --- | --- | --- | 1,39 | up   |
| 5803537 | 7131550 | 1205557 | --- | --- | --- | 1,06 | up   |
| 5803713 | 7173640 | 1308964 | --- | --- | --- | 1,09 | up   |
| 5803838 | 7259923 | 1522529 | --- | --- | --- | 1,04 | up   |
| 5803906 | 7060896 | 1033557 | --- | --- | --- | 1,17 | down |
| 5803938 | 7337425 | 1713212 | --- | --- | --- | 1,05 | up   |
| 5804176 | 7267802 | 1541833 | --- | --- | --- | 1,15 | down |
| 5804187 | 7313538 | 1655732 | --- | --- | --- | 1,17 | down |
| 5804250 | 7314270 | 1657740 | --- | --- | --- | 1,21 | down |
| 5804271 | 7350489 | 1746117 | --- | --- | --- | 1,05 | up   |
| 5804371 | 7093255 | 1110764 | --- | --- | --- | 1,02 | up   |
| 5804384 | 7282343 | 1578664 | --- | --- | --- | 1,02 | down |
| 5804415 | 7058507 | 1028324 | --- | --- | --- | 1,12 | down |
| 5804421 | 7301198 | 1624760 | --- | --- | --- | 2,18 | up   |
| 5804446 | 7239939 | 1473796 | --- | --- | --- | 1,28 | up   |
| 5804601 | 7126658 | 1193137 | --- | --- | --- | 2,07 | up   |
| 5804624 | 7186305 | 1341000 | --- | --- | --- | 1,16 | up   |
| 5804778 | 7358859 | 1766985 | --- | --- | --- | 1,07 | down |
| 5804978 | 7247005 | 1490119 | --- | --- | --- | 1,00 | up   |
| 5805015 | 7097240 | 1120364 | --- | --- | --- | 1,18 | down |
| 5805057 | 7040442 | 986501  | --- | --- | --- | 1,34 | down |
| 5805068 | 7337224 | 1712604 | --- | --- | --- | 1,23 | down |
| 5805121 | 7365183 | 1781916 | --- | --- | --- | 1,08 | down |
| 5805138 | 7044988 | 998462  | --- | --- | --- | 1,00 | up   |
| 5805145 | 7075790 | 1069994 | --- | --- | --- | 1,01 | down |
| 5805154 | 7231484 | 1451387 | --- | --- | --- | 1,23 | up   |
| 5805156 | 7341243 | 1723211 | --- | --- | --- | 2,14 | down |
| 5805164 | 7142917 | 1233171 | --- | --- | --- | 1,02 | down |
| 5805287 | 7384179 | 1829774 | --- | --- | --- | 1,09 | up   |
| 5805313 | 7277783 | 1567471 | --- | --- | --- | 2,01 | up   |
| 5805322 | 7052957 | 1016261 | --- | --- | --- | 1,32 | down |
| 5805510 | 7194540 | 1362078 | --- | --- | --- | 1,15 | down |
| 5805520 | 7235069 | 1460968 | --- | --- | --- | 1,19 | down |
| 5805589 | 7212735 | 1405024 | --- | --- | --- | 1,19 | down |
| 5805698 | 7055793 | 1022332 | --- | --- | --- | 1,11 | up   |
| 5805737 | 7127540 | 1195271 | --- | --- | --- | 1,29 | up   |
| 5805769 | 7374324 | 1807483 | --- | --- | --- | 1,07 | down |
| 5805787 | 7064134 | 1041446 | --- | --- | --- | 1,16 | down |
| 5805841 | 7095021 | 1115119 | --- | --- | --- | 1,02 | down |
| 5805857 | 7233178 | 1455897 | --- | --- | --- | 1,61 | down |
| 5805876 | 7148741 | 1247832 | --- | --- | --- | 1,03 | down |
| 5805940 | 7308679 | 1644254 | --- | --- | --- | 2,62 | down |
| 5805952 | 7078143 | 1075436 | --- | --- | --- | 1,27 | down |
| 5806018 | 7156052 | 1265743 | --- | --- | --- | 2,46 | up   |
| 5806026 | 7217434 | 1416403 | --- | --- | --- | 1,03 | up   |
| 5806039 | 7259925 | 1522548 | --- | --- | --- | 1,34 | up   |
| 5806053 | 7031774 | 964751  | --- | --- | --- | 1,29 | down |
| 5806055 | 7274780 | 1559254 | --- | --- | --- | 1,83 | down |
| 5806110 | 7166867 | 1291293 | --- | --- | --- | 1,14 | up   |
| 5806128 | 7186240 | 1340822 | --- | --- | --- | 1,33 | up   |
| 5806133 | 7031774 | 964761  | --- | --- | --- | 1,14 | down |
| 5806145 | 7039223 | 983553  | --- | --- | --- | 1,69 | up   |
| 5806233 | 7346066 | 1735320 | --- | --- | --- | 1,18 | down |
| 5806237 | 7122140 | 1182721 | --- | --- | --- | 1,11 | up   |
| 5806268 | 7303722 | 1631711 | --- | --- | --- | 1,25 | down |
| 5806331 | 7039463 | 984254  | --- | --- | --- | 1,92 | down |

|         |         |         |     |     |     |      |      |
|---------|---------|---------|-----|-----|-----|------|------|
| 5806340 | 7181560 | 1329363 | --- | --- | --- | 1,47 | down |
| 5806377 | 7356115 | 1760127 | --- | --- | --- | 1,00 | up   |
| 5806410 | 7057462 | 1025863 | --- | --- | --- | 1,26 | down |
| 5806420 | 7184981 | 1337850 | --- | --- | --- | 1,06 | down |
| 5806526 | 7309734 | 1646885 | --- | --- | --- | 1,01 | up   |
| 5806551 | 7071648 | 1060192 | --- | --- | --- | 1,08 | up   |
| 5806611 | 7127540 | 1195293 | --- | --- | --- | 1,01 | up   |
| 5806634 | 7062233 | 1037244 | --- | --- | --- | 1,07 | down |
| 5806786 | 7319609 | 1671208 | --- | --- | --- | 2,03 | up   |
| 5806846 | 7247230 | 1490587 | --- | --- | --- | 1,03 | down |
| 5806870 | 7148741 | 1247883 | --- | --- | --- | 1,02 | up   |
| 5806877 | 7158920 | 1272523 | --- | --- | --- | 1,39 | up   |
| 5806899 | 7147809 | 1245456 | --- | --- | --- | 1,19 | up   |
| 5807054 | 7302787 | 1628896 | --- | --- | --- | 1,51 | down |
| 5807111 | 7308262 | 1643179 | --- | --- | --- | 1,26 | down |
| 5807129 | 7292517 | 1602533 | --- | --- | --- | 2,26 | down |
| 5807238 | 7034356 | 972157  | --- | --- | --- | 1,10 | up   |
| 5807251 | 7261580 | 1526788 | --- | --- | --- | 1,46 | down |
| 5807403 | 7087965 | 1098046 | --- | --- | --- | 1,12 | down |
| 5807419 | 7142081 | 1230989 | --- | --- | --- | 1,48 | down |
| 5807459 | 7282927 | 1579983 | --- | --- | --- | 1,40 | up   |
| 5807496 | 7364346 | 1779971 | --- | --- | --- | 1,25 | up   |
| 5807502 | 7099573 | 1126730 | --- | --- | --- | 1,21 | up   |
| 5807573 | 7339379 | 1718350 | --- | --- | --- | 1,56 | down |
| 5807677 | 7028624 | 957997  | --- | --- | --- | 1,30 | up   |
| 5807733 | 7059309 | 1029911 | --- | --- | --- | 1,30 | down |
| 5807751 | 7244287 | 1484088 | --- | --- | --- | 1,67 | up   |
| 5807760 | 7040442 | 986485  | --- | --- | --- | 1,33 | down |
| 5807768 | 7329135 | 1693500 | --- | --- | --- | 1,29 | up   |
| 5807795 | 7056333 | 1023671 | --- | --- | --- | 1,17 | down |
| 5807825 | 7344406 | 1731188 | --- | --- | --- | 1,28 | down |
| 5807879 | 7110401 | 1153090 | --- | --- | --- | 1,40 | down |
| 5807905 | 7225543 | 1435928 | --- | --- | --- | 1,18 | up   |
| 5808005 | 7326245 | 1686397 | --- | --- | --- | 1,05 | down |
| 5808091 | 7318139 | 1668076 | --- | --- | --- | 1,10 | down |
| 5808111 | 7235840 | 1462999 | --- | --- | --- | 1,01 | up   |
| 5808199 | 7267344 | 1540263 | --- | --- | --- | 1,05 | down |
| 5808257 | 7162144 | 1280496 | --- | --- | --- | 1,00 | down |
| 5808290 | 7280743 | 1574540 | --- | --- | --- | 1,65 | up   |
| 5808321 | 7118356 | 1173203 | --- | --- | --- | 1,04 | down |
| 5808463 | 7208784 | 1396110 | --- | --- | --- | 1,47 | up   |
| 5808524 | 7344380 | 1731125 | --- | --- | --- | 1,15 | down |
| 5808540 | 7210263 | 1399752 | --- | --- | --- | 1,98 | up   |
| 5808605 | 7068259 | 1051606 | --- | --- | --- | 1,59 | down |
| 5808636 | 7171091 | 1302466 | --- | --- | --- | 1,26 | up   |
| 5808716 | 7231557 | 1451570 | --- | --- | --- | 1,01 | down |
| 5808823 | 7377116 | 1814073 | --- | --- | --- | 1,12 | up   |
| 5808985 | 7091954 | 1107732 | --- | --- | --- | 1,16 | up   |
| 5808997 | 7148741 | 1247859 | --- | --- | --- | 1,20 | up   |
| 5809036 | 7298101 | 1616977 | --- | --- | --- | 1,32 | down |
| 5809065 | 7353614 | 1753732 | --- | --- | --- | 1,52 | down |
| 5809115 | 7355138 | 1757854 | --- | --- | --- | 1,00 | up   |
| 5809135 | 7373678 | 1805862 | --- | --- | --- | 1,54 | up   |
| 5809142 | 7132125 | 1206619 | --- | --- | --- | 1,11 | down |
| 5809209 | 7068942 | 1053388 | --- | --- | --- | 1,00 | up   |
| 5809218 | 7355044 | 1757451 | --- | --- | --- | 1,52 | up   |
| 5809219 | 7355044 | 1757440 | --- | --- | --- | 1,11 | up   |

|         |         |         |     |     |     |      |      |
|---------|---------|---------|-----|-----|-----|------|------|
| 5809364 | 7350993 | 1747542 | --- | --- | --- | 1,03 | up   |
| 5809445 | 7371753 | 1800976 | --- | --- | --- | 1,05 | up   |
| 5809451 | 7166867 | 1291346 | --- | --- | --- | 1,05 | down |
| 5809588 | 7068259 | 1051654 | --- | --- | --- | 1,23 | up   |
| 5809598 | 7247334 | 1490820 | --- | --- | --- | 1,11 | up   |
| 5809606 | 7279810 | 1572588 | --- | --- | --- | 1,02 | up   |
| 5809662 | 7123714 | 1186419 | --- | --- | --- | 2,30 | up   |
| 5809665 | 7365147 | 1781782 | --- | --- | --- | 2,04 | down |
| 5809672 | 7313841 | 1656714 | --- | --- | --- | 1,24 | up   |
| 5809678 | 7029081 | 958890  | --- | --- | --- | 1,20 | down |
| 5809722 | 7237814 | 1467844 | --- | --- | --- | 1,12 | down |
| 5809805 | 7288077 | 1592015 | --- | --- | --- | 1,44 | up   |
| 5809867 | 7079600 | 1078633 | --- | --- | --- | 1,44 | down |
| 5810040 | 7339387 | 1718381 | --- | --- | --- | 2,02 | up   |
| 5810054 | 7193056 | 1358250 | --- | --- | --- | 1,26 | up   |
| 5810061 | 7092549 | 1109187 | --- | --- | --- | 1,03 | up   |
| 5810072 | 7319151 | 1670133 | --- | --- | --- | 1,01 | down |
| 5810255 | 7108434 | 1148310 | --- | --- | --- | 1,41 | up   |
| 5810274 | 7092549 | 1109171 | --- | --- | --- | 1,22 | down |
| 5810360 | 7358048 | 1764808 | --- | --- | --- | 1,57 | down |
| 5810522 | 7380497 | 1821859 | --- | --- | --- | 1,07 | up   |
| 5810588 | 7361042 | 1772277 | --- | --- | --- | 1,12 | up   |
| 5810624 | 7041609 | 989585  | --- | --- | --- | 1,08 | up   |
| 5810652 | 7061703 | 1035736 | --- | --- | --- | 1,06 | down |
| 5810659 | 7047524 | 1004666 | --- | --- | --- | 1,43 | down |
| 5810698 | 7350993 | 1747536 | --- | --- | --- | 2,13 | up   |
| 5810708 | 7326271 | 1686479 | --- | --- | --- | 1,12 | down |
| 5810728 | 7263805 | 1532197 | --- | --- | --- | 1,22 | up   |
| 5810844 | 7205750 | 1389049 | --- | --- | --- | 1,56 | down |
| 5810857 | 7280743 | 1574536 | --- | --- | --- | 1,53 | up   |
| 5810922 | 7068942 | 1053385 | --- | --- | --- | 1,03 | down |
| 5811004 | 7261580 | 1526767 | --- | --- | --- | 1,25 | down |
| 5811119 | 7203018 | 1382650 | --- | --- | --- | 1,13 | up   |
| 5811194 | 7376206 | 1811981 | --- | --- | --- | 1,21 | down |
| 5811213 | 7339379 | 1718358 | --- | --- | --- | 1,09 | up   |
| 5811301 | 7177834 | 1319633 | --- | --- | --- | 1,28 | down |
| 5811453 | 7308679 | 1644245 | --- | --- | --- | 1,66 | down |
| 5811505 | 7207093 | 1392137 | --- | --- | --- | 1,15 | down |
| 5811518 | 7052331 | 1014575 | --- | --- | --- | 1,19 | up   |
| 5811546 | 7052957 | 1016261 | --- | --- | --- | 1,08 | up   |
| 5811571 | 7377304 | 1814595 | --- | --- | --- | 1,56 | up   |
| 5811597 | 7318286 | 1668329 | --- | --- | --- | 1,71 | up   |
| 5811619 | 7180804 | 1327006 | --- | --- | --- | 1,03 | down |
| 5811677 | 7128112 | 1196541 | --- | --- | --- | 1,18 | up   |
| 5811681 | 7336931 | 1711862 | --- | --- | --- | 1,02 | down |
| 5811687 | 7027386 | 955067  | --- | --- | --- | 1,14 | up   |
| 5811699 | 7086522 | 1093944 | --- | --- | --- | 1,00 | down |
| 5811730 | 7107321 | 1145325 | --- | --- | --- | 1,71 | down |
| 5811761 | 7143455 | 1234735 | --- | --- | --- | 1,01 | down |
| 5811812 | 7315571 | 1661010 | --- | --- | --- | 2,74 | up   |
| 5811925 | 7370415 | 1796849 | --- | --- | --- | 2,72 | down |
| 5811949 | 7142081 | 1230951 | --- | --- | --- | 1,32 | down |
| 5811980 | 7231484 | 1451395 | --- | --- | --- | 1,18 | down |
| 5812030 | 7214605 | 1409392 | --- | --- | --- | 1,91 | down |
| 5812224 | 7355138 | 1757839 | --- | --- | --- | 1,19 | down |
| 5812228 | 7248790 | 1494542 | --- | --- | --- | 1,37 | down |
| 5812232 | 7253358 | 1505836 | --- | --- | --- | 1,12 | up   |

|         |         |         |     |     |     |      |      |
|---------|---------|---------|-----|-----|-----|------|------|
| 5812238 | 7088544 | 1099682 | --- | --- | --- | 1,31 | up   |
| 5812254 | 7170764 | 1301480 | --- | --- | --- | 1,08 | down |
| 5812318 | 7359453 | 1768449 | --- | --- | --- | 1,10 | down |
| 5812342 | 7088625 | 1099874 | --- | --- | --- | 1,00 | down |
| 5812398 | 7282927 | 1580001 | --- | --- | --- | 1,27 | down |
| 5812433 | 7073569 | 1064738 | --- | --- | --- | 1,31 | up   |
| 5812476 | 7070511 | 1057476 | --- | --- | --- | 1,30 | down |
| 5812575 | 7336854 | 1711681 | --- | --- | --- | 1,36 | down |
| 5812616 | 7052957 | 1016259 | --- | --- | --- | 1,26 | down |
| 5812677 | 7217434 | 1416348 | --- | --- | --- | 1,09 | down |
| 5812702 | 7131718 | 1205746 | --- | --- | --- | 1,08 | down |
| 5812740 | 7266778 | 1538854 | --- | --- | --- | 2,39 | down |
| 5812756 | 7081487 | 1082705 | --- | --- | --- | 1,46 | up   |
| 5812783 | 7369939 | 1795615 | --- | --- | --- | 1,34 | down |
| 5812830 | 7336039 | 1709681 | --- | --- | --- | 1,53 | up   |
| 5812865 | 7127540 | 1195301 | --- | --- | --- | 1,30 | up   |
| 5812925 | 7333462 | 1703648 | --- | --- | --- | 1,20 | down |
| 5812954 | 7127257 | 1194804 | --- | --- | --- | 1,62 | down |
| 5812989 | 7155765 | 1265046 | --- | --- | --- | 1,04 | up   |
| 5813066 | 7111361 | 1155607 | --- | --- | --- | 1,29 | up   |
| 5813226 | 7147204 | 1243771 | --- | --- | --- | 2,01 | up   |
| 5813321 | 7196803 | 1367340 | --- | --- | --- | 1,01 | up   |
| 5813366 | 7095041 | 1115181 | --- | --- | --- | 1,00 | down |
| 5813416 | 7309738 | 1646947 | --- | --- | --- | 2,14 | up   |
| 5813435 | 7305275 | 1635839 | --- | --- | --- | 1,01 | up   |
| 5813536 | 7259925 | 1522548 | --- | --- | --- | 1,01 | up   |
| 5813585 | 7351953 | 1749875 | --- | --- | --- | 2,12 | down |
| 5813627 | 7053874 | 1018338 | --- | --- | --- | 1,24 | up   |
| 5813639 | 7329846 | 1694996 | --- | --- | --- | 2,24 | down |
| 5813663 | 7248790 | 1494487 | --- | --- | --- | 1,66 | down |
| 5813687 | 7038530 | 981879  | --- | --- | --- | 1,14 | up   |
| 5813734 | 7091900 | 1107631 | --- | --- | --- | 1,27 | down |
| 5813744 | 7069603 | 1055049 | --- | --- | --- | 1,19 | down |
| 5813753 | 7073950 | 1065939 | --- | --- | --- | 1,02 | down |
| 5813769 | 7146000 | 1240658 | --- | --- | --- | 1,62 | down |
| 5813880 | 7268357 | 1543403 | --- | --- | --- | 1,46 | up   |
| 5813975 | 7064468 | 1042366 | --- | --- | --- | 1,04 | down |
| 5813976 | 7284901 | 1584793 | --- | --- | --- | 1,83 | up   |
| 5814031 | 7033337 | 969489  | --- | --- | --- | 1,08 | down |
| 5814205 | 7344406 | 1731211 | --- | --- | --- | 2,02 | down |
| 5814445 | 7363768 | 1778601 | --- | --- | --- | 1,08 | up   |
| 5814463 | 7039223 | 983561  | --- | --- | --- | 1,05 | up   |
| 5814687 | 7038179 | 981265  | --- | --- | --- | 2,18 | down |
| 5814699 | 7030549 | 961801  | --- | --- | --- | 1,01 | up   |
| 5814735 | 7230886 | 1449547 | --- | --- | --- | 1,04 | down |
| 5814743 | 7229856 | 1447084 | --- | --- | --- | 1,59 | down |
| 5814782 | 7359361 | 1768261 | --- | --- | --- | 1,15 | down |
| 5814793 | 7320735 | 1674185 | --- | --- | --- | 1,45 | down |
| 5814837 | 7155624 | 1264724 | --- | --- | --- | 1,25 | down |
| 5814867 | 7238414 | 1469562 | --- | --- | --- | 2,83 | down |
| 5814874 | 7156372 | 1266713 | --- | --- | --- | 1,05 | up   |
| 5814947 | 7181001 | 1327630 | --- | --- | --- | 1,07 | up   |
| 5814994 | 7240224 | 1474389 | --- | --- | --- | 1,12 | up   |
| 5815020 | 7208710 | 1395899 | --- | --- | --- | 1,12 | up   |
| 5815184 | 7192914 | 1357821 | --- | --- | --- | 1,99 | up   |
| 5815219 | 7040442 | 986524  | --- | --- | --- | 1,98 | down |
| 5815246 | 7384509 | 1830745 | --- | --- | --- | 1,51 | up   |

|         |         |         |     |     |     |      |      |
|---------|---------|---------|-----|-----|-----|------|------|
| 5815260 | 7031774 | 964699  | --- | --- | --- | 1,58 | up   |
| 5815371 | 7108434 | 1148320 | --- | --- | --- | 2,34 | up   |
| 5815384 | 7373634 | 1805724 | --- | --- | --- | 1,56 | up   |
| 5815415 | 7060896 | 1033564 | --- | --- | --- | 1,41 | up   |
| 5815448 | 7072765 | 1062743 | --- | --- | --- | 1,35 | down |
| 5815477 | 7368804 | 1792261 | --- | --- | --- | 1,02 | down |
| 5815484 | 7148741 | 1247850 | --- | --- | --- | 1,01 | up   |
| 5815611 | 7374090 | 1806805 | --- | --- | --- | 1,78 | up   |
| 5815640 | 7279303 | 1571206 | --- | --- | --- | 2,39 | down |
| 5815685 | 7378878 | 1818324 | --- | --- | --- | 1,77 | down |
| 5815751 | 7264274 | 1533172 | --- | --- | --- | 1,05 | up   |
| 5815760 | 7191888 | 1354943 | --- | --- | --- | 1,03 | up   |
| 5815776 | 7162144 | 1280507 | --- | --- | --- | 1,27 | up   |
| 5815875 | 7353232 | 1752770 | --- | --- | --- | 1,10 | down |
| 5815885 | 7374324 | 1807475 | --- | --- | --- | 1,11 | down |
| 5816064 | 7118234 | 1172821 | --- | --- | --- | 1,07 | up   |
| 5816172 | 7294911 | 1608526 | --- | --- | --- | 1,36 | down |
| 5816191 | 7250511 | 1498641 | --- | --- | --- | 1,17 | down |
| 5816267 | 7173640 | 1308961 | --- | --- | --- | 1,13 | up   |
| 5816337 | 7258323 | 1518477 | --- | --- | --- | 5,33 | down |
| 5816373 | 7350489 | 1746123 | --- | --- | --- | 1,04 | down |
| 5816374 | 7366749 | 1785529 | --- | --- | --- | 1,33 | up   |
| 5816468 | 7064468 | 1042370 | --- | --- | --- | 1,06 | down |
| 5816534 | 7193513 | 1359467 | --- | --- | --- | 1,17 | up   |
| 5816587 | 7350993 | 1747544 | --- | --- | --- | 1,70 | down |
| 5816604 | 7030037 | 960717  | --- | --- | --- | 1,11 | down |
| 5816664 | 7068259 | 1051609 | --- | --- | --- | 1,34 | up   |
| 5816747 | 7342430 | 1726155 | --- | --- | --- | 1,26 | down |
| 5816780 | 7350993 | 1747524 | --- | --- | --- | 1,09 | up   |
| 5816804 | 7139824 | 1225319 | --- | --- | --- | 2,11 | down |
| 5816825 | 7180687 | 1326630 | --- | --- | --- | 1,07 | up   |
| 5816894 | 7373633 | 1805707 | --- | --- | --- | 1,14 | up   |
| 5816982 | 7214605 | 1409369 | --- | --- | --- | 1,09 | up   |
| 5817022 | 7075445 | 1069344 | --- | --- | --- | 1,43 | up   |
| 5817056 | 7041140 | 988291  | --- | --- | --- | 1,09 | down |
| 5817084 | 7344380 | 1731117 | --- | --- | --- | 1,82 | up   |
| 5817100 | 7200152 | 1376052 | --- | --- | --- | 1,21 | up   |
| 5817157 | 7198210 | 1370980 | --- | --- | --- | 1,30 | up   |
| 5817291 | 7329846 | 1694991 | --- | --- | --- | 1,39 | up   |
| 5817402 | 7361223 | 1772629 | --- | --- | --- | 1,12 | down |
| 5817458 | 7093255 | 1110763 | --- | --- | --- | 1,28 | down |
| 5817525 | 7332059 | 1700725 | --- | --- | --- | 1,26 | down |
| 5817573 | 7294911 | 1608529 | --- | --- | --- | 1,12 | down |
| 5817929 | 7261580 | 1526805 | --- | --- | --- | 1,01 | up   |
| 5818010 | 7031774 | 964724  | --- | --- | --- | 1,38 | up   |
| 5818128 | 7259221 | 1520627 | --- | --- | --- | 1,32 | up   |
| 5818188 | 7337425 | 1713143 | --- | --- | --- | 1,12 | up   |
| 5818384 | 7059962 | 1031403 | --- | --- | --- | 1,10 | down |
| 5818435 | 7196769 | 1367266 | --- | --- | --- | 1,09 | up   |
| 5818649 | 7353232 | 1752773 | --- | --- | --- | 1,01 | down |
| 5818727 | 7098077 | 1122799 | --- | --- | --- | 1,27 | up   |
| 5818794 | 7032618 | 967333  | --- | --- | --- | 1,08 | up   |
| 5818914 | 7041140 | 988282  | --- | --- | --- | 1,29 | up   |
| 5818931 | 7203041 | 1382719 | --- | --- | --- | 1,55 | down |
| 5818948 | 7181105 | 1327967 | --- | --- | --- | 1,46 | down |
| 5819002 | 7377791 | 1816003 | --- | --- | --- | 1,39 | up   |
| 5819007 | 7072765 | 1062749 | --- | --- | --- | 1,03 | up   |

|         |         |         |     |     |     |      |      |
|---------|---------|---------|-----|-----|-----|------|------|
| 5819021 | 7381330 | 1823645 | --- | --- | --- | 1,38 | up   |
| 5819083 | 7217679 | 1417322 | --- | --- | --- | 1,20 | down |
| 5819229 | 7274892 | 1559578 | --- | --- | --- | 1,24 | down |
| 5819233 | 7034293 | 971996  | --- | --- | --- | 1,03 | up   |
| 5819244 | 7146093 | 1240933 | --- | --- | --- | 1,67 | up   |
| 5819334 | 7337224 | 1712592 | --- | --- | --- | 1,32 | down |
| 5819351 | 7081810 | 1083545 | --- | --- | --- | 1,00 | up   |
| 5819357 | 7164949 | 1286389 | --- | --- | --- | 2,68 | down |
| 5819372 | 7088625 | 1099872 | --- | --- | --- | 1,17 | down |
| 5819397 | 7344702 | 1732140 | --- | --- | --- | 1,01 | up   |
| 5819403 | 7068987 | 1053603 | --- | --- | --- | 1,83 | down |
| 5819432 | 7088489 | 1099530 | --- | --- | --- | 1,32 | down |
| 5819510 | 7253408 | 1505932 | --- | --- | --- | 2,04 | down |
| 5819515 | 7047524 | 1004658 | --- | --- | --- | 1,41 | down |
| 5819532 | 7358859 | 1766975 | --- | --- | --- | 1,12 | down |
| 5819581 | 7070836 | 1058359 | --- | --- | --- | 1,10 | up   |
| 5819681 | 7238115 | 1468633 | --- | --- | --- | 1,70 | down |
| 5819702 | 7045955 | 1000740 | --- | --- | --- | 1,74 | down |
| 5819731 | 7344530 | 1731580 | --- | --- | --- | 1,25 | up   |
| 5819775 | 7302327 | 1627694 | --- | --- | --- | 1,86 | down |
| 5819851 | 7267344 | 1540264 | --- | --- | --- | 1,01 | down |
| 5820082 | 7297274 | 1614662 | --- | --- | --- | 1,73 | down |
| 5820265 | 7037235 | 978574  | --- | --- | --- | 2,91 | up   |
| 5820385 | 7063716 | 1040125 | --- | --- | --- | 1,00 | down |
| 5820457 | 7244290 | 1484146 | --- | --- | --- | 1,30 | down |
| 5820486 | 7198210 | 1370998 | --- | --- | --- | 1,16 | up   |
| 5820501 | 7309734 | 1646899 | --- | --- | --- | 1,06 | up   |
| 5820575 | 7376820 | 1813413 | --- | --- | --- | 1,22 | up   |
| 5820620 | 7087965 | 1098049 | --- | --- | --- | 1,42 | down |
| 5820626 | 7351568 | 1748825 | --- | --- | --- | 1,14 | down |
| 5820701 | 7320735 | 1674156 | --- | --- | --- | 1,28 | down |
| 5820871 | 7210713 | 1400752 | --- | --- | --- | 1,98 | up   |
| 5821015 | 7088164 | 1098476 | --- | --- | --- | 1,38 | up   |
| 5821046 | 7100523 | 1128845 | --- | --- | --- | 1,07 | up   |
| 5821048 | 7197056 | 1367847 | --- | --- | --- | 1,02 | down |
| 5821073 | 7093255 | 1110758 | --- | --- | --- | 1,44 | down |
| 5821132 | 7071659 | 1060234 | --- | --- | --- | 1,11 | down |
| 5821150 | 7318286 | 1668337 | --- | --- | --- | 1,00 | down |
| 5821284 | 7073624 | 1064915 | --- | --- | --- | 1,25 | down |
| 5821309 | 7312575 | 1653361 | --- | --- | --- | 1,16 | up   |
| 5821331 | 7350993 | 1747501 | --- | --- | --- | 1,31 | down |
| 5821440 | 7113483 | 1161014 | --- | --- | --- | 1,49 | up   |
| 5821506 | 7370448 | 1797043 | --- | --- | --- | 1,05 | up   |
| 5821518 | 7063716 | 1040125 | --- | --- | --- | 1,09 | up   |
| 5821531 | 7364346 | 1780019 | --- | --- | --- | 1,04 | up   |
| 5821549 | 7318714 | 1669238 | --- | --- | --- | 1,03 | down |
| 5821559 | 7154584 | 1262108 | --- | --- | --- | 1,27 | down |
| 5821658 | 7378981 | 1818552 | --- | --- | --- | 1,60 | up   |
| 5821748 | 7037235 | 978576  | --- | --- | --- | 1,05 | up   |
| 5821757 | 7122140 | 1182714 | --- | --- | --- | 1,07 | up   |
| 5821816 | 7052338 | 1014632 | --- | --- | --- | 1,14 | down |
| 5821845 | 7202145 | 1380722 | --- | --- | --- | 1,30 | down |
| 5822080 | 7110401 | 1153054 | --- | --- | --- | 1,16 | down |
| 5822092 | 7088544 | 1099677 | --- | --- | --- | 1,12 | down |
| 5822105 | 7086522 | 1093957 | --- | --- | --- | 2,44 | down |
| 5822121 | 7276650 | 1564125 | --- | --- | --- | 2,10 | down |
| 5822123 | 7367943 | 1788927 | --- | --- | --- | 1,05 | up   |

|         |         |         |     |     |     |      |      |
|---------|---------|---------|-----|-----|-----|------|------|
| 5822158 | 7377791 | 1816008 | --- | --- | --- | 1,17 | up   |
| 5822184 | 7069721 | 1055308 | --- | --- | --- | 1,05 | up   |
| 5822392 | 7373678 | 1805866 | --- | --- | --- | 1,02 | down |
| 5822517 | 7194400 | 1361765 | --- | --- | --- | 1,24 | down |
| 5822661 | 7172373 | 1305579 | --- | --- | --- | 1,22 | down |
| 5822771 | 7176368 | 1315575 | --- | --- | --- | 1,04 | down |
| 5822772 | 7073673 | 1065088 | --- | --- | --- | 3,24 | down |
| 5822862 | 7361881 | 1773927 | --- | --- | --- | 2,14 | down |
| 5823054 | 7142915 | 1233093 | --- | --- | --- | 1,29 | up   |
| 5823114 | 7067828 | 1050788 | --- | --- | --- | 1,18 | up   |
| 5823148 | 7221443 | 1426314 | --- | --- | --- | 1,60 | down |
| 5823157 | 7115362 | 1165605 | --- | --- | --- | 1,22 | down |
| 5823220 | 7075460 | 1069396 | --- | --- | --- | 3,38 | up   |
| 5823318 | 7378997 | 1818643 | --- | --- | --- | 1,05 | up   |
| 5823359 | 7179785 | 1324498 | --- | --- | --- | 1,00 | down |
| 5823481 | 7248790 | 1494551 | --- | --- | --- | 1,25 | up   |
| 5823497 | 7233513 | 1457175 | --- | --- | --- | 1,26 | down |
| 5823504 | 7032558 | 967063  | --- | --- | --- | 2,01 | up   |
| 5823571 | 7237814 | 1467833 | --- | --- | --- | 1,10 | down |
| 5823598 | 7166867 | 1291306 | --- | --- | --- | 1,13 | up   |
| 5823672 | 7088164 | 1098459 | --- | --- | --- | 2,02 | up   |
| 5823793 | 7301900 | 1626741 | --- | --- | --- | 1,06 | down |
| 5823832 | 7252339 | 1503298 | --- | --- | --- | 1,35 | down |
| 5823847 | 7363529 | 1777931 | --- | --- | --- | 1,09 | up   |
| 5823863 | 7342430 | 1726127 | --- | --- | --- | 1,08 | up   |
| 5824041 | 7127540 | 1195297 | --- | --- | --- | 1,11 | up   |
| 5824167 | 7121849 | 1181797 | --- | --- | --- | 2,12 | down |
| 5824189 | 7074164 | 1066383 | --- | --- | --- | 2,57 | up   |
| 5824368 | 7110401 | 1153062 | --- | --- | --- | 1,20 | up   |
| 5824415 | 7110999 | 1154770 | --- | --- | --- | 1,20 | down |
| 5824575 | 7084500 | 1089717 | --- | --- | --- | 1,43 | up   |
| 5824583 | 7110999 | 1154758 | --- | --- | --- | 1,37 | down |
| 5824641 | 7340057 | 1720331 | --- | --- | --- | 1,02 | down |
| 5824680 | 7244287 | 1484079 | --- | --- | --- | 1,83 | down |
| 5824737 | 7069830 | 1055588 | --- | --- | --- | 1,00 | up   |
| 5824777 | 7031774 | 964726  | --- | --- | --- | 1,32 | up   |
| 5824840 | 7248790 | 1494510 | --- | --- | --- | 1,40 | up   |
| 5824859 | 7315571 | 1661011 | --- | --- | --- | 2,20 | up   |
| 5825013 | 7238115 | 1468582 | --- | --- | --- | 1,23 | up   |
| 5825023 | 7374324 | 1807488 | --- | --- | --- | 1,23 | down |
| 5825087 | 7225543 | 1435916 | --- | --- | --- | 1,03 | up   |
| 5825108 | 7376820 | 1813398 | --- | --- | --- | 1,59 | up   |
| 5825133 | 7181001 | 1327619 | --- | --- | --- | 1,37 | up   |
| 5825144 | 7122585 | 1183683 | --- | --- | --- | 1,26 | up   |
| 5825149 | 7039223 | 983573  | --- | --- | --- | 1,56 | down |
| 5825217 | 7278575 | 1569560 | --- | --- | --- | 1,07 | down |
| 5825258 | 7225291 | 1435295 | --- | --- | --- | 1,19 | up   |
| 5825332 | 7052385 | 1014793 | --- | --- | --- | 1,03 | up   |
| 5825388 | 7040674 | 987047  | --- | --- | --- | 2,87 | up   |
| 5825399 | 7069464 | 1054660 | --- | --- | --- | 1,63 | down |
| 5825432 | 7286807 | 1588832 | --- | --- | --- | 1,25 | up   |
| 5825510 | 7231484 | 1451371 | --- | --- | --- | 1,34 | down |
| 5825573 | 7209811 | 1398674 | --- | --- | --- | 1,39 | down |
| 5825681 | 7072748 | 1062586 | --- | --- | --- | 1,08 | up   |
| 5825924 | 7258455 | 1518703 | --- | --- | --- | 1,21 | up   |
| 5825971 | 7200545 | 1376920 | --- | --- | --- | 2,32 | up   |
| 5826008 | 7350237 | 1745484 | --- | --- | --- | 1,29 | down |



|         |         |         |     |     |     |      |      |
|---------|---------|---------|-----|-----|-----|------|------|
| 5826013 | 7225543 | 1435918 | --- | --- | --- | 1,25 | down |
| 5826195 | 7131876 | 1206057 | --- | --- | --- | 1,39 | up   |
| 5826285 | 7068504 | 1052169 | --- | --- | --- | 1,16 | down |
| 5826500 | 7091962 | 1107750 | --- | --- | --- | 1,33 | up   |
| 5826816 | 7320735 | 1674147 | --- | --- | --- | 1,16 | down |
| 5826850 | 7098810 | 1124648 | --- | --- | --- | 1,39 | up   |
| 5826857 | 7331413 | 1699137 | --- | --- | --- | 1,08 | up   |
| 5826907 | 7040442 | 986471  | --- | --- | --- | 1,20 | down |
| 5826915 | 7358859 | 1767013 | --- | --- | --- | 1,94 | up   |
| 5826918 | 7202837 | 1382284 | --- | --- | --- | 1,36 | up   |
| 5826921 | 7363529 | 1777979 | --- | --- | --- | 1,20 | down |
| 5827060 | 7146982 | 1243295 | --- | --- | --- | 1,45 | up   |
| 5827100 | 7381352 | 1823744 | --- | --- | --- | 1,29 | down |
| 5827122 | 7340990 | 1722508 | --- | --- | --- | 1,13 | up   |
| 5827129 | 7031662 | 964344  | --- | --- | --- | 1,07 | down |
| 5827143 | 7240569 | 1475393 | --- | --- | --- | 1,30 | down |
| 5827395 | 7371228 | 1799458 | --- | --- | --- | 1,17 | up   |
| 5827426 | 7138243 | 1221686 | --- | --- | --- | 1,37 | down |
| 5827463 | 7204831 | 1386762 | --- | --- | --- | 1,01 | down |
| 5827534 | 7313538 | 1655734 | --- | --- | --- | 1,08 | up   |
| 5827656 | 7360486 | 1771011 | --- | --- | --- | 1,06 | down |
| 5827798 | 7049508 | 1008562 | --- | --- | --- | 1,16 | down |
| 5827833 | 7063716 | 1040125 | --- | --- | --- | 1,11 | down |
| 5827916 | 7113985 | 1162240 | --- | --- | --- | 1,18 | down |
| 5827920 | 7302327 | 1627687 | --- | --- | --- | 1,07 | up   |
| 5828036 | 7158517 | 1271594 | --- | --- | --- | 1,20 | down |
| 5828038 | 7180630 | 1326455 | --- | --- | --- | 1,32 | up   |
| 5828039 | 7330314 | 1696138 | --- | --- | --- | 1,10 | down |
| 5828253 | 7071264 | 1059362 | --- | --- | --- | 1,87 | up   |
| 5828254 | 7326245 | 1686391 | --- | --- | --- | 1,44 | up   |
| 5828273 | 7231137 | 1450206 | --- | --- | --- | 1,21 | down |
| 5828285 | 7281924 | 1577753 | --- | --- | --- | 1,05 | up   |
| 5828304 | 7321029 | 1674832 | --- | --- | --- | 1,68 | up   |
| 5828443 | 7256070 | 1512585 | --- | --- | --- | 1,33 | down |
| 5828499 | 7193056 | 1358271 | --- | --- | --- | 1,12 | up   |
| 5828574 | 7158419 | 1271375 | --- | --- | --- | 1,36 | up   |
| 5828630 | 7041635 | 989639  | --- | --- | --- | 1,40 | down |
| 5828731 | 7067670 | 1050307 | --- | --- | --- | 2,42 | up   |
| 5828776 | 7337425 | 1713175 | --- | --- | --- | 1,22 | down |
| 5828841 | 7035525 | 974776  | --- | --- | --- | 1,01 | up   |
| 5828899 | 7261019 | 1525281 | --- | --- | --- | 2,02 | down |
| 5829021 | 7153136 | 1258051 | --- | --- | --- | 1,02 | up   |
| 5829392 | 7070869 | 1058470 | --- | --- | --- | 1,18 | up   |
| 5829431 | 7204831 | 1386774 | --- | --- | --- | 1,11 | down |
| 5829455 | 7239752 | 1473177 | --- | --- | --- | 1,14 | down |
| 5829510 | 7233524 | 1457220 | --- | --- | --- | 1,13 | up   |
| 5829521 | 7056333 | 1023676 | --- | --- | --- | 1,09 | down |
| 5829524 | 7088544 | 1099699 | --- | --- | --- | 1,02 | up   |
| 5829687 | 7243894 | 1482952 | --- | --- | --- | 1,41 | down |
| 5829880 | 7260066 | 1522899 | --- | --- | --- | 2,18 | down |
| 5829926 | 7227433 | 1440994 | --- | --- | --- | 1,12 | up   |
| 5829936 | 7289879 | 1596420 | --- | --- | --- | 1,05 | down |
| 5829942 | 7081487 | 1082708 | --- | --- | --- | 2,10 | down |
| 5830008 | 7364346 | 1779994 | --- | --- | --- | 1,05 | down |
| 5830271 | 7039589 | 984512  | --- | --- | --- | 1,22 | up   |
| 5830279 | 7168521 | 1295977 | --- | --- | --- | 1,18 | down |
| 5830315 | 7237814 | 1467843 | --- | --- | --- | 1,23 | up   |

|         |         |         |     |     |     |      |      |
|---------|---------|---------|-----|-----|-----|------|------|
| 5830346 | 7069721 | 1055286 | --- | --- | --- | 1,07 | up   |
| 5830573 | 7360486 | 1770967 | --- | --- | --- | 1,02 | up   |
| 5830577 | 7345456 | 1733793 | --- | --- | --- | 2,69 | down |
| 5830787 | 7242451 | 1479338 | --- | --- | --- | 2,17 | down |
| 5830851 | 7158419 | 1271426 | --- | --- | --- | 1,21 | down |
| 5830863 | 7162144 | 1280515 | --- | --- | --- | 1,26 | up   |
| 5830869 | 7336837 | 1711619 | --- | --- | --- | 1,37 | down |
| 5830995 | 7358859 | 1766973 | --- | --- | --- | 1,25 | down |
| 5831118 | 7038530 | 981871  | --- | --- | --- | 1,02 | up   |
| 5831123 | 7248790 | 1494489 | --- | --- | --- | 1,23 | up   |
| 5831221 | 7225543 | 1435917 | --- | --- | --- | 1,01 | down |
| 5831306 | 7376073 | 1811725 | --- | --- | --- | 1,26 | up   |
| 5831355 | 7333462 | 1703638 | --- | --- | --- | 1,04 | down |
| 5831489 | 7041609 | 989574  | --- | --- | --- | 1,18 | down |
| 5831542 | 7122805 | 1184248 | --- | --- | --- | 1,25 | up   |
| 5831572 | 7382499 | 1826256 | --- | --- | --- | 1,05 | up   |
| 5831594 | 7068259 | 1051592 | --- | --- | --- | 1,37 | up   |
| 5831596 | 7032204 | 966120  | --- | --- | --- | 1,03 | down |
| 5831638 | 7073950 | 1065905 | --- | --- | --- | 1,07 | up   |
| 5831707 | 7058149 | 1027259 | --- | --- | --- | 1,18 | up   |
| 5831709 | 7092549 | 1109134 | --- | --- | --- | 1,19 | up   |
| 5831880 | 7053874 | 1018311 | --- | --- | --- | 1,10 | up   |
| 5831954 | 7064468 | 1042334 | --- | --- | --- | 1,25 | down |
| 5831989 | 7159036 | 1272969 | --- | --- | --- | 1,02 | down |
| 5832051 | 7373633 | 1805703 | --- | --- | --- | 1,27 | down |
| 5832114 | 7116103 | 1167596 | --- | --- | --- | 3,52 | up   |
| 5832202 | 7252877 | 1504706 | --- | --- | --- | 1,37 | down |
| 5832205 | 7149994 | 1250637 | --- | --- | --- | 1,14 | down |
| 5832233 | 7240569 | 1475464 | --- | --- | --- | 1,08 | up   |
| 5832281 | 7312465 | 1653049 | --- | --- | --- | 1,30 | up   |
| 5832330 | 7359426 | 1768372 | --- | --- | --- | 1,70 | up   |
| 5832370 | 7079238 | 1077807 | --- | --- | --- | 1,32 | down |
| 5832378 | 7367980 | 1789176 | --- | --- | --- | 1,79 | up   |
| 5832395 | 7089080 | 1101152 | --- | --- | --- | 1,07 | down |
| 5832472 | 7029770 | 960153  | --- | --- | --- | 1,20 | down |
| 5832530 | 7350237 | 1745475 | --- | --- | --- | 1,13 | down |
| 5832615 | 7274780 | 1559245 | --- | --- | --- | 1,39 | down |
| 5832620 | 7281924 | 1577716 | --- | --- | --- | 1,30 | down |
| 5832624 | 7069603 | 1055038 | --- | --- | --- | 1,11 | down |
| 5832630 | 7225543 | 1435920 | --- | --- | --- | 1,47 | down |
| 5832689 | 7144782 | 1237778 | --- | --- | --- | 1,71 | down |
| 5832693 | 7093806 | 1112149 | --- | --- | --- | 2,09 | down |
| 5832708 | 7148741 | 1247861 | --- | --- | --- | 1,02 | down |
| 5832731 | 7095066 | 1115267 | --- | --- | --- | 1,20 | down |
| 5832758 | 7172373 | 1305587 | --- | --- | --- | 1,28 | up   |
| 5833001 | 7229856 | 1447072 | --- | --- | --- | 1,33 | down |
| 5833055 | 7346687 | 1736688 | --- | --- | --- | 1,10 | up   |
| 5833112 | 7094139 | 1112921 | --- | --- | --- | 1,26 | down |
| 5833184 | 7123421 | 1185828 | --- | --- | --- | 1,18 | down |
| 5833304 | 7243647 | 1482418 | --- | --- | --- | 1,36 | down |
| 5833324 | 7320998 | 1674713 | --- | --- | --- | 1,20 | down |
| 5833365 | 7107926 | 1146838 | --- | --- | --- | 1,04 | down |
| 5833520 | 7186688 | 1341848 | --- | --- | --- | 1,33 | down |
| 5833611 | 7337522 | 1713618 | --- | --- | --- | 1,61 | down |
| 5833618 | 7031774 | 964692  | --- | --- | --- | 1,60 | up   |
| 5833720 | 7317708 | 1666824 | --- | --- | --- | 1,15 | up   |
| 5833746 | 7345465 | 1733864 | --- | --- | --- | 2,52 | up   |

|         |         |         |     |     |     |      |      |
|---------|---------|---------|-----|-----|-----|------|------|
| 5833813 | 7217434 | 1416361 | --- | --- | --- | 1,09 | down |
| 5833866 | 7350993 | 1747496 | --- | --- | --- | 1,89 | up   |
| 5833880 | 7320735 | 1674187 | --- | --- | --- | 1,03 | down |
| 5833935 | 7189669 | 1348964 | --- | --- | --- | 1,67 | down |
| 5834028 | 7306330 | 1638516 | --- | --- | --- | 1,04 | up   |
| 5834118 | 7120671 | 1178997 | --- | --- | --- | 1,20 | down |
| 5834307 | 7337522 | 1713593 | --- | --- | --- | 2,07 | down |
| 5834354 | 7217650 | 1417185 | --- | --- | --- | 1,01 | up   |
| 5834368 | 7030037 | 960707  | --- | --- | --- | 1,02 | down |
| 5834465 | 7239752 | 1473190 | --- | --- | --- | 1,46 | down |
| 5834479 | 7245874 | 1487596 | --- | --- | --- | 1,28 | up   |
| 5834514 | 7127691 | 1195631 | --- | --- | --- | 1,57 | down |
| 5834943 | 7264808 | 1534465 | --- | --- | --- | 1,01 | down |
| 5835042 | 7319259 | 1670402 | --- | --- | --- | 1,01 | up   |
| 5835142 | 7227433 | 1440981 | --- | --- | --- | 1,05 | up   |
| 5835158 | 7279194 | 1571005 | --- | --- | --- | 1,14 | up   |
| 5835161 | 7083031 | 1086286 | --- | --- | --- | 1,16 | down |
| 5835162 | 7277783 | 1567457 | --- | --- | --- | 1,69 | up   |
| 5835283 | 7166867 | 1291374 | --- | --- | --- | 1,01 | up   |
| 5835298 | 7240569 | 1475478 | --- | --- | --- | 1,77 | down |
| 5835559 | 7263248 | 1530617 | --- | --- | --- | 1,62 | up   |
| 5835603 | 7177834 | 1319637 | --- | --- | --- | 2,19 | up   |
| 5835618 | 7095041 | 1115166 | --- | --- | --- | 1,34 | up   |
| 5835650 | 7221443 | 1426317 | --- | --- | --- | 1,08 | down |
| 5835653 | 7288170 | 1592378 | --- | --- | --- | 1,04 | down |
| 5835722 | 7059584 | 1030547 | --- | --- | --- | 1,11 | down |
| 5835728 | 7128112 | 1196541 | --- | --- | --- | 1,14 | up   |
| 5835760 | 7236358 | 1464221 | --- | --- | --- | 1,05 | up   |
| 5835774 | 7055793 | 1022300 | --- | --- | --- | 1,10 | up   |
| 5835913 | 7102889 | 1134852 | --- | --- | --- | 1,17 | down |
| 5835915 | 7172988 | 1307278 | --- | --- | --- | 1,25 | up   |
| 5835971 | 7156047 | 1265724 | --- | --- | --- | 1,61 | up   |
| 5835992 | 7243901 | 1483043 | --- | --- | --- | 1,38 | down |
| 5836010 | 7280743 | 1574488 | --- | --- | --- | 2,09 | down |
| 5836046 | 7208436 | 1395315 | --- | --- | --- | 1,21 | down |
| 5836159 | 7351568 | 1748813 | --- | --- | --- | 1,06 | down |
| 5836161 | 7189455 | 1348364 | --- | --- | --- | 1,59 | down |
| 5836192 | 7035525 | 974779  | --- | --- | --- | 1,43 | up   |
| 5836203 | 7030037 | 960708  | --- | --- | --- | 1,83 | up   |
| 5836250 | 7092549 | 1109141 | --- | --- | --- | 1,91 | down |
| 5836338 | 7260488 | 1523922 | --- | --- | --- | 1,16 | down |
| 5836381 | 7040442 | 986572  | --- | --- | --- | 1,78 | up   |
| 5836435 | 7281924 | 1577745 | --- | --- | --- | 1,13 | down |
| 5836488 | 7312566 | 1653299 | --- | --- | --- | 1,46 | down |
| 5836542 | 7082098 | 1084116 | --- | --- | --- | 1,50 | up   |
| 5836704 | 7083021 | 1086216 | --- | --- | --- | 1,08 | down |
| 5836815 | 7252339 | 1503272 | --- | --- | --- | 1,05 | up   |
| 5836998 | 7115259 | 1165353 | --- | --- | --- | 1,41 | down |
| 5837107 | 7384509 | 1830754 | --- | --- | --- | 1,23 | down |
| 5837128 | 7066035 | 1046201 | --- | --- | --- | 1,03 | down |
| 5837151 | 7086966 | 1095249 | --- | --- | --- | 1,15 | down |
| 5837180 | 7259807 | 1522250 | --- | --- | --- | 1,11 | up   |
| 5837298 | 7318286 | 1668329 | --- | --- | --- | 6,05 | up   |
| 5837514 | 7243901 | 1483040 | --- | --- | --- | 1,03 | up   |
| 5837541 | 7217434 | 1416356 | --- | --- | --- | 1,06 | up   |
| 5837574 | 7279303 | 1571206 | --- | --- | --- | 2,20 | down |
| 5837586 | 7056333 | 1023679 | --- | --- | --- | 1,48 | down |

|         |         |         |     |     |     |      |      |
|---------|---------|---------|-----|-----|-----|------|------|
| 5837618 | 7335903 | 1709293 | --- | --- | --- | 1,10 | down |
| 5837630 | 7031774 | 964779  | --- | --- | --- | 1,19 | down |
| 5837659 | 7039589 | 984514  | --- | --- | --- | 2,03 | up   |
| 5837775 | 7307473 | 1641277 | --- | --- | --- | 1,07 | up   |
| 5837800 | 7071292 | 1059427 | --- | --- | --- | 1,07 | up   |
| 5837907 | 7239939 | 1473795 | --- | --- | --- | 1,02 | down |
| 5838021 | 7092549 | 1109209 | --- | --- | --- | 1,33 | up   |
| 5838026 | 7281924 | 1577754 | --- | --- | --- | 1,88 | down |
| 5838087 | 7240641 | 1475773 | --- | --- | --- | 1,00 | up   |
| 5838160 | 7378546 | 1817601 | --- | --- | --- | 1,39 | down |
| 5838287 | 7289075 | 1594460 | --- | --- | --- | 1,45 | up   |
| 5838301 | 7240569 | 1475386 | --- | --- | --- | 1,05 | down |
| 5838402 | 7114274 | 1162813 | --- | --- | --- | 1,14 | up   |
| 5838636 | 7101206 | 1130460 | --- | --- | --- | 1,25 | down |
| 5838642 | 7189184 | 1347597 | --- | --- | --- | 1,13 | down |
| 5838840 | 7294911 | 1608530 | --- | --- | --- | 1,19 | down |
| 5838920 | 7337872 | 1714437 | --- | --- | --- | 1,02 | down |
| 5838950 | 7028624 | 957994  | --- | --- | --- | 1,06 | up   |
| 5838953 | 7368489 | 1791031 | --- | --- | --- | 1,00 | down |
| 5839131 | 7244290 | 1484149 | --- | --- | --- | 1,21 | up   |
| 5839202 | 7260066 | 1522891 | --- | --- | --- | 1,45 | down |
| 5839260 | 7168979 | 1297201 | --- | --- | --- | 1,17 | down |
| 5839342 | 7073854 | 1065627 | --- | --- | --- | 1,24 | up   |
| 5839383 | 7142917 | 1233168 | --- | --- | --- | 1,02 | down |
| 5839440 | 7210822 | 1400981 | --- | --- | --- | 1,21 | up   |
| 5839443 | 7245874 | 1487596 | --- | --- | --- | 1,48 | down |
| 5839467 | 7088544 | 1099658 | --- | --- | --- | 1,02 | up   |
| 5839503 | 7068504 | 1052168 | --- | --- | --- | 1,36 | up   |
| 5839524 | 7321029 | 1674807 | --- | --- | --- | 1,60 | up   |
| 5839547 | 7344406 | 1731199 | --- | --- | --- | 1,17 | up   |
| 5839565 | 7162144 | 1280503 | --- | --- | --- | 1,11 | down |
| 5839581 | 7321414 | 1675637 | --- | --- | --- | 1,04 | up   |
| 5839586 | 7368986 | 1792880 | --- | --- | --- | 1,77 | down |
| 5839609 | 7193056 | 1358273 | --- | --- | --- | 1,21 | up   |
| 5839615 | 7131876 | 1206044 | --- | --- | --- | 1,25 | down |
| 5839620 | 7103017 | 1135160 | --- | --- | --- | 1,57 | up   |
| 5839635 | 7154655 | 1262336 | --- | --- | --- | 1,16 | up   |
| 5839651 | 7083021 | 1086210 | --- | --- | --- | 1,30 | down |
| 5839718 | 7277783 | 1567431 | --- | --- | --- | 1,32 | up   |
| 5839770 | 7200545 | 1376899 | --- | --- | --- | 1,16 | down |
| 5840010 | 7314270 | 1657723 | --- | --- | --- | 1,11 | up   |
| 5840019 | 7166855 | 1291263 | --- | --- | --- | 1,02 | up   |
| 5840083 | 7366749 | 1785521 | --- | --- | --- | 1,77 | down |
| 5840140 | 7378602 | 1817709 | --- | --- | --- | 1,82 | down |
| 5840253 | 7172988 | 1307300 | --- | --- | --- | 1,65 | down |
| 5840298 | 7056736 | 1024418 | --- | --- | --- | 1,22 | up   |
| 5840360 | 7069830 | 1055644 | --- | --- | --- | 1,66 | down |
| 5840362 | 7326245 | 1686403 | --- | --- | --- | 1,04 | down |
| 5840374 | 7369712 | 1794831 | --- | --- | --- | 1,32 | up   |
| 5840493 | 7350993 | 1747556 | --- | --- | --- | 1,01 | up   |
| 5840532 | 7053878 | 1018372 | --- | --- | --- | 1,05 | down |
| 5840660 | 7318714 | 1669224 | --- | --- | --- | 1,53 | down |
| 5840683 | 7059506 | 1030393 | --- | --- | --- | 1,22 | down |
| 5840758 | 7318139 | 1668074 | --- | --- | --- | 1,44 | up   |
| 5840798 | 7256191 | 1512867 | --- | --- | --- | 1,23 | down |
| 5840822 | 7039532 | 984441  | --- | --- | --- | 1,64 | up   |
| 5840886 | 7034293 | 971907  | --- | --- | --- | 1,33 | down |

|         |         |         |     |     |     |      |      |
|---------|---------|---------|-----|-----|-----|------|------|
| 5841013 | 7107503 | 1145800 | --- | --- | --- | 1,61 | up   |
| 5841042 | 7281924 | 1577740 | --- | --- | --- | 1,08 | down |
| 5841057 | 7350993 | 1747502 | --- | --- | --- | 1,10 | up   |
| 5841131 | 7059020 | 1029346 | --- | --- | --- | 1,57 | up   |
| 5841132 | 7298101 | 1617053 | --- | --- | --- | 1,04 | down |
| 5841146 | 7231775 | 1452134 | --- | --- | --- | 1,55 | down |
| 5841156 | 7171091 | 1302448 | --- | --- | --- | 1,31 | down |
| 5841194 | 7363529 | 1777933 | --- | --- | --- | 1,05 | up   |
| 5841199 | 7383102 | 1827391 | --- | --- | --- | 1,42 | up   |
| 5841238 | 7295410 | 1609793 | --- | --- | --- | 1,10 | up   |
| 5841277 | 7146807 | 1242815 | --- | --- | --- | 1,54 | down |
| 5841326 | 7347427 | 1738681 | --- | --- | --- | 1,25 | up   |
| 5841418 | 7384509 | 1830743 | --- | --- | --- | 1,24 | down |
| 5841432 | 7253215 | 1505367 | --- | --- | --- | 1,34 | down |
| 5841542 | 7189455 | 1348337 | --- | --- | --- | 1,24 | up   |
| 5841563 | 7374324 | 1807460 | --- | --- | --- | 1,05 | down |
| 5841662 | 7166867 | 1291312 | --- | --- | --- | 1,27 | up   |
| 5841674 | 7075460 | 1069391 | --- | --- | --- | 5,79 | up   |
| 5841703 | 7337845 | 1714352 | --- | --- | --- | 1,15 | down |
| 5841764 | 7031774 | 964650  | --- | --- | --- | 1,14 | up   |
| 5841828 | 7384179 | 1829771 | --- | --- | --- | 1,05 | up   |
| 5841830 | 7279303 | 1571200 | --- | --- | --- | 1,68 | down |
| 5841961 | 7115963 | 1167057 | --- | --- | --- | 1,18 | up   |
| 5841963 | 7240224 | 1474389 | --- | --- | --- | 1,10 | down |
| 5841965 | 7244027 | 1483285 | --- | --- | --- | 1,04 | down |
| 5842250 | 7117951 | 1172084 | --- | --- | --- | 1,19 | down |
| 5842285 | 7156170 | 1266282 | --- | --- | --- | 1,23 | down |
| 5842389 | 7034356 | 972170  | --- | --- | --- | 1,14 | down |
| 5842502 | 7277719 | 1567087 | --- | --- | --- | 1,04 | up   |
| 5842550 | 7264653 | 1534030 | --- | --- | --- | 1,12 | down |
| 5842680 | 7154535 | 1261901 | --- | --- | --- | 1,25 | down |
| 5842700 | 7231484 | 1451361 | --- | --- | --- | 1,26 | down |
| 5842890 | 7253215 | 1505372 | --- | --- | --- | 1,13 | up   |
| 5842921 | 7093255 | 1110763 | --- | --- | --- | 1,20 | down |
| 5843009 | 7358048 | 1764815 | --- | --- | --- | 1,58 | up   |
| 5843013 | 7264797 | 1534444 | --- | --- | --- | 1,15 | down |
| 5843078 | 7292869 | 1603444 | --- | --- | --- | 1,08 | up   |
| 5843079 | 7158920 | 1272513 | --- | --- | --- | 1,50 | down |
| 5843166 | 7291828 | 1600927 | --- | --- | --- | 1,92 | up   |
| 5843168 | 7146542 | 1242296 | --- | --- | --- | 2,37 | down |
| 5843175 | 7136746 | 1217967 | --- | --- | --- | 1,12 | down |
| 5843176 | 7086966 | 1095287 | --- | --- | --- | 2,78 | down |
| 5843346 | 7038530 | 981885  | --- | --- | --- | 1,11 | down |
| 5843382 | 7039463 | 984254  | --- | --- | --- | 1,36 | down |
| 5843391 | 7256191 | 1512882 | --- | --- | --- | 1,30 | down |
| 5843563 | 7087965 | 1098056 | --- | --- | --- | 2,48 | up   |
| 5843877 | 7268694 | 1544239 | --- | --- | --- | 1,41 | down |
| 5843908 | 7364346 | 1779992 | --- | --- | --- | 1,04 | up   |
| 5843915 | 7330731 | 1697164 | --- | --- | --- | 1,01 | down |
| 5843979 | 7083021 | 1086210 | --- | --- | --- | 1,30 | up   |
| 5843992 | 7286807 | 1588796 | --- | --- | --- | 1,03 | down |
| 5844074 | 7244287 | 1484085 | --- | --- | --- | 1,37 | up   |
| 5844093 | 7340757 | 1721902 | --- | --- | --- | 1,04 | up   |
| 5844115 | 7119845 | 1176877 | --- | --- | --- | 1,03 | down |
| 5844131 | 7179785 | 1324499 | --- | --- | --- | 2,19 | up   |
| 5844140 | 7247512 | 1491191 | --- | --- | --- | 1,10 | up   |
| 5844423 | 7370853 | 1798415 | --- | --- | --- | 1,60 | up   |

|         |         |         |     |     |     |      |      |
|---------|---------|---------|-----|-----|-----|------|------|
| 5844454 | 7317708 | 1666826 | --- | --- | --- | 1,36 | up   |
| 5844487 | 7100523 | 1128866 | --- | --- | --- | 1,37 | up   |
| 5844508 | 7364346 | 1779985 | --- | --- | --- | 1,07 | down |
| 5844591 | 7229061 | 1445291 | --- | --- | --- | 1,23 | up   |
| 5844605 | 7217747 | 1417507 | --- | --- | --- | 1,18 | up   |
| 5844637 | 7366749 | 1785513 | --- | --- | --- | 1,20 | up   |
| 5844641 | 7038971 | 982983  | --- | --- | --- | 2,40 | down |
| 5844942 | 7368986 | 1792880 | --- | --- | --- | 1,77 | down |
| 5844978 | 7116023 | 1167282 | --- | --- | --- | 1,18 | up   |
| 5844984 | 7346066 | 1735323 | --- | --- | --- | 2,32 | down |
| 5845004 | 7360486 | 1771009 | --- | --- | --- | 1,22 | down |
| 5845040 | 7330314 | 1696138 | --- | --- | --- | 1,61 | up   |
| 5845128 | 7212735 | 1405028 | --- | --- | --- | 1,14 | up   |
| 5845129 | 7171549 | 1303546 | --- | --- | --- | 1,67 | down |
| 5845142 | 7371682 | 1800776 | --- | --- | --- | 1,12 | down |
| 5845228 | 7329846 | 1694992 | --- | --- | --- | 1,24 | up   |
| 5845313 | 7028624 | 957998  | --- | --- | --- | 1,40 | down |
| 5845371 | 7288170 | 1592299 | --- | --- | --- | 1,03 | up   |
| 5845376 | 7217143 | 1415592 | --- | --- | --- | 1,85 | down |
| 5845592 | 7288170 | 1592302 | --- | --- | --- | 1,06 | up   |
| 5845604 | 7364346 | 1779968 | --- | --- | --- | 1,47 | down |
| 5845643 | 7376073 | 1811693 | --- | --- | --- | 1,09 | up   |
| 5845752 | 7280743 | 1574516 | --- | --- | --- | 1,39 | down |
| 5845793 | 7319773 | 1671876 | --- | --- | --- | 1,00 | up   |
| 5845879 | 7027386 | 955048  | --- | --- | --- | 1,04 | down |
| 5846002 | 7317204 | 1665397 | --- | --- | --- | 1,13 | down |
| 5846039 | 7380497 | 1821848 | --- | --- | --- | 1,70 | down |
| 5846051 | 7245932 | 1487784 | --- | --- | --- | 1,42 | up   |
| 5846071 | 7337425 | 1713217 | --- | --- | --- | 1,21 | down |
| 5846085 | 7326378 | 1686713 | --- | --- | --- | 1,29 | down |
| 5846199 | 7081487 | 1082715 | --- | --- | --- | 1,89 | up   |
| 5846244 | 7180721 | 1326698 | --- | --- | --- | 1,31 | up   |
| 5846288 | 7069253 | 1054157 | --- | --- | --- | 1,24 | up   |
| 5846371 | 7253358 | 1505833 | --- | --- | --- | 1,09 | up   |
| 5846412 | 7341115 | 1722916 | --- | --- | --- | 1,53 | down |
| 5846455 | 7237346 | 1466590 | --- | --- | --- | 1,46 | down |
| 5846463 | 7246823 | 1489674 | --- | --- | --- | 1,29 | up   |
| 5846690 | 7237672 | 1467297 | --- | --- | --- | 1,13 | down |
| 5846698 | 7253408 | 1505934 | --- | --- | --- | 1,12 | down |
| 5846950 | 7365147 | 1781766 | --- | --- | --- | 1,04 | up   |
| 5846966 | 7303777 | 1631906 | --- | --- | --- | 1,01 | up   |
| 5847032 | 7352046 | 1750038 | --- | --- | --- | 1,27 | up   |
| 5847037 | 7132715 | 1207957 | --- | --- | --- | 1,28 | down |
| 5847058 | 7378997 | 1818654 | --- | --- | --- | 1,17 | down |
| 5847082 | 7217434 | 1416343 | --- | --- | --- | 1,14 | up   |
| 5847264 | 7128921 | 1198506 | --- | --- | --- | 1,11 | down |
| 5847276 | 7358048 | 1764799 | --- | --- | --- | 1,11 | up   |
| 5847287 | 7148978 | 1248452 | --- | --- | --- | 1,64 | up   |
| 5847323 | 7180630 | 1326455 | --- | --- | --- | 1,37 | up   |
| 5847392 | 7176456 | 1315798 | --- | --- | --- | 1,22 | down |
| 5847510 | 7028326 | 957437  | --- | --- | --- | 1,28 | up   |
| 5847582 | 7069464 | 1054665 | --- | --- | --- | 1,23 | up   |
| 5847598 | 7229061 | 1445290 | --- | --- | --- | 1,42 | down |
| 5847602 | 7050716 | 1011221 | --- | --- | --- | 1,18 | up   |
| 5847603 | 7055793 | 1022322 | --- | --- | --- | 1,00 | up   |
| 5847708 | 7339379 | 1718361 | --- | --- | --- | 1,30 | down |
| 5847738 | 7173640 | 1308969 | --- | --- | --- | 1,14 | up   |

|         |         |         |     |     |     |      |      |
|---------|---------|---------|-----|-----|-----|------|------|
| 5847754 | 7308262 | 1643189 | --- | --- | --- | 1,37 | down |
| 5847834 | 7050878 | 1011549 | --- | --- | --- | 1,13 | down |
| 5847845 | 7168521 | 1295963 | --- | --- | --- | 1,30 | down |
| 5847938 | 7170764 | 1301484 | --- | --- | --- | 1,23 | down |
| 5847952 | 7168521 | 1295952 | --- | --- | --- | 1,21 | down |
| 5847978 | 7373633 | 1805711 | --- | --- | --- | 1,02 | up   |
| 5848041 | 7039532 | 984428  | --- | --- | --- | 1,48 | down |
| 5848096 | 7162177 | 1280583 | --- | --- | --- | 1,09 | down |
| 5848179 | 7156052 | 1265752 | --- | --- | --- | 1,17 | up   |
| 5848212 | 7126400 | 1192524 | --- | --- | --- | 1,34 | down |
| 5848359 | 7040674 | 987043  | --- | --- | --- | 1,16 | up   |
| 5848398 | 7281924 | 1577747 | --- | --- | --- | 1,61 | up   |
| 5848564 | 7320735 | 1674189 | --- | --- | --- | 1,07 | up   |
| 5848573 | 7383586 | 1828427 | --- | --- | --- | 1,24 | up   |
| 5848588 | 7090581 | 1104804 | --- | --- | --- | 1,62 | down |
| 5848660 | 7368005 | 1789342 | --- | --- | --- | 1,13 | down |
| 5848667 | 7120827 | 1179299 | --- | --- | --- | 1,84 | down |
| 5848720 | 7198087 | 1370682 | --- | --- | --- | 1,23 | down |
| 5848787 | 7264653 | 1534053 | --- | --- | --- | 1,13 | down |
| 5848811 | 7337522 | 1713620 | --- | --- | --- | 2,22 | up   |
| 5848819 | 7327169 | 1688463 | --- | --- | --- | 1,10 | down |
| 5848954 | 7198087 | 1370699 | --- | --- | --- | 1,19 | up   |
| 5849001 | 7128112 | 1196532 | --- | --- | --- | 1,04 | up   |
| 5849109 | 7301904 | 1626761 | --- | --- | --- | 1,03 | up   |
| 5849179 | 7227775 | 1441842 | --- | --- | --- | 1,29 | down |
| 5849185 | 7072765 | 1062745 | --- | --- | --- | 1,13 | down |
| 5849192 | 7264653 | 1534055 | --- | --- | --- | 1,19 | down |
| 5849260 | 7240569 | 1475499 | --- | --- | --- | 1,01 | down |
| 5849292 | 7149934 | 1250517 | --- | --- | --- | 1,29 | down |
| 5849410 | 7044906 | 998126  | --- | --- | --- | 1,30 | up   |
| 5849480 | 7247672 | 1491756 | --- | --- | --- | 1,12 | up   |
| 5849568 | 7373678 | 1805875 | --- | --- | --- | 1,13 | down |
| 5849603 | 7253272 | 1505575 | --- | --- | --- | 1,14 | down |
| 5849654 | 7245921 | 1487689 | --- | --- | --- | 1,83 | down |
| 5849739 | 7155866 | 1265309 | --- | --- | --- | 1,00 | up   |
| 5849826 | 7314270 | 1657722 | --- | --- | --- | 1,30 | down |
| 5849882 | 7071292 | 1059430 | --- | --- | --- | 1,27 | up   |
| 5849998 | 7375937 | 1811355 | --- | --- | --- | 1,20 | up   |
| 5850012 | 7374324 | 1807508 | --- | --- | --- | 1,16 | down |
| 5850126 | 7148741 | 1247829 | --- | --- | --- | 1,79 | down |
| 5850136 | 7162959 | 1282086 | --- | --- | --- | 1,19 | up   |
| 5850158 | 7238115 | 1468672 | --- | --- | --- | 2,15 | down |
| 5850196 | 7257976 | 1517713 | --- | --- | --- | 1,07 | down |
| 5850228 | 7099573 | 1126737 | --- | --- | --- | 1,02 | down |
| 5850457 | 7363576 | 1778170 | --- | --- | --- | 1,28 | down |
| 5850490 | 7377304 | 1814590 | --- | --- | --- | 1,12 | down |
| 5850580 | 7253358 | 1505832 | --- | --- | --- | 1,07 | up   |
| 5850610 | 7207093 | 1392121 | --- | --- | --- | 1,07 | down |
| 5850659 | 7340990 | 1722516 | --- | --- | --- | 1,74 | down |
| 5850756 | 7315206 | 1660025 | --- | --- | --- | 1,97 | down |
| 5850793 | 7059766 | 1030980 | --- | --- | --- | 1,17 | up   |
| 5850815 | 7339379 | 1718352 | --- | --- | --- | 1,20 | down |
| 5850890 | 7065860 | 1045800 | --- | --- | --- | 1,01 | up   |
| 5850932 | 7377116 | 1814067 | --- | --- | --- | 1,25 | down |
| 5851015 | 7111427 | 1155764 | --- | --- | --- | 2,47 | down |
| 5851086 | 7154655 | 1262329 | --- | --- | --- | 1,25 | up   |
| 5851366 | 7073677 | 1065161 | --- | --- | --- | 1,45 | down |

|         |         |         |     |     |     |      |      |
|---------|---------|---------|-----|-----|-----|------|------|
| 5851413 | 7086966 | 1095275 | --- | --- | --- | 1,21 | down |
| 5851505 | 7335637 | 1708477 | --- | --- | --- | 1,13 | down |
| 5851508 | 7092549 | 1109163 | --- | --- | --- | 1,23 | up   |
| 5851520 | 7376820 | 1813452 | --- | --- | --- | 1,22 | up   |
| 5851606 | 7337425 | 1713182 | --- | --- | --- | 1,17 | down |
| 5851671 | 7297589 | 1615669 | --- | --- | --- | 1,07 | down |
| 5851688 | 7267000 | 1539305 | --- | --- | --- | 1,29 | up   |
| 5851820 | 7121074 | 1179884 | --- | --- | --- | 1,51 | up   |
| 5851910 | 7198087 | 1370720 | --- | --- | --- | 1,23 | up   |
| 5852028 | 7062233 | 1037244 | --- | --- | --- | 1,10 | up   |
| 5852068 | 7231484 | 1451395 | --- | --- | --- | 1,03 | up   |
| 5852094 | 7067518 | 1049945 | --- | --- | --- | 1,03 | down |
| 5852118 | 7073928 | 1065799 | --- | --- | --- | 2,16 | down |
| 5852170 | 7121849 | 1181813 | --- | --- | --- | 1,21 | up   |
| 5852217 | 7376566 | 1812885 | --- | --- | --- | 1,35 | up   |
| 5852222 | 7254040 | 1507605 | --- | --- | --- | 1,02 | up   |
| 5852237 | 7123714 | 1186425 | --- | --- | --- | 1,11 | up   |
| 5852249 | 7219885 | 1422778 | --- | --- | --- | 1,98 | down |
| 5852291 | 7243363 | 1481603 | --- | --- | --- | 1,49 | down |
| 5852430 | 7095021 | 1115135 | --- | --- | --- | 1,35 | up   |
| 5852503 | 7243647 | 1482435 | --- | --- | --- | 1,19 | up   |
| 5852634 | 7034293 | 971945  | --- | --- | --- | 1,23 | down |
| 5852640 | 7172373 | 1305566 | --- | --- | --- | 1,70 | down |
| 5852693 | 7136142 | 1216419 | --- | --- | --- | 1,27 | down |
| 5852723 | 7053874 | 1018317 | --- | --- | --- | 1,63 | down |
| 5852739 | 7312903 | 1654097 | --- | --- | --- | 1,29 | down |
| 5852750 | 7181442 | 1328882 | --- | --- | --- | 2,07 | down |
| 5852761 | 7096461 | 1118271 | --- | --- | --- | 1,05 | down |
| 5852764 | 7329846 | 1695003 | --- | --- | --- | 1,03 | down |
| 5852857 | 7069721 | 1055294 | --- | --- | --- | 1,02 | down |
| 5852885 | 7216970 | 1415120 | --- | --- | --- | 1,75 | down |
| 5853029 | 7146093 | 1240940 | --- | --- | --- | 1,29 | up   |
| 5853053 | 7122585 | 1183691 | --- | --- | --- | 4,00 | up   |
| 5853062 | 7178752 | 1321791 | --- | --- | --- | 1,82 | up   |
| 5853116 | 7240569 | 1475464 | --- | --- | --- | 1,24 | up   |
| 5853282 | 7083030 | 1086271 | --- | --- | --- | 1,03 | up   |
| 5853317 | 7089080 | 1101144 | --- | --- | --- | 1,06 | down |
| 5853399 | 7131550 | 1205559 | --- | --- | --- | 1,26 | up   |
| 5853472 | 7297589 | 1615639 | --- | --- | --- | 1,06 | up   |
| 5853491 | 7245921 | 1487677 | --- | --- | --- | 1,49 | down |
| 5853497 | 7100523 | 1128880 | --- | --- | --- | 1,31 | up   |
| 5853531 | 7106752 | 1144043 | --- | --- | --- | 1,03 | down |
| 5853535 | 7190844 | 1352144 | --- | --- | --- | 1,05 | down |
| 5853584 | 7297756 | 1616090 | --- | --- | --- | 1,03 | up   |
| 5853590 | 7108434 | 1148315 | --- | --- | --- | 1,18 | down |
| 5853617 | 7311391 | 1650857 | --- | --- | --- | 1,02 | up   |
| 5853618 | 7156052 | 1265758 | --- | --- | --- | 1,03 | down |
| 5853622 | 7035525 | 974777  | --- | --- | --- | 1,07 | down |
| 5853682 | 7279593 | 1572084 | --- | --- | --- | 1,45 | down |
| 5853733 | 7059584 | 1030549 | --- | --- | --- | 1,25 | down |
| 5853912 | 7279568 | 1572034 | --- | --- | --- | 1,29 | down |
| 5854054 | 7213945 | 1407837 | --- | --- | --- | 1,17 | up   |
| 5854084 | 7115362 | 1165609 | --- | --- | --- | 1,33 | up   |
| 5854144 | 7073679 | 1065187 | --- | --- | --- | 1,04 | up   |
| 5854146 | 7220454 | 1424128 | --- | --- | --- | 1,06 | down |
| 5854176 | 7363529 | 1777953 | --- | --- | --- | 1,41 | down |
| 5854195 | 7194400 | 1361761 | --- | --- | --- | 1,35 | up   |



|         |         |         |     |     |     |      |      |
|---------|---------|---------|-----|-----|-----|------|------|
| 5854287 | 7378997 | 1818673 | --- | --- | --- | 1,24 | up   |
| 5854333 | 7098411 | 1123703 | --- | --- | --- | 1,07 | up   |
| 5854359 | 7146245 | 1241377 | --- | --- | --- | 1,10 | down |
| 5854386 | 7235393 | 1461705 | --- | --- | --- | 6,44 | down |
| 5854393 | 7115507 | 1165969 | --- | --- | --- | 1,03 | down |
| 5854399 | 7166439 | 1290103 | --- | --- | --- | 1,54 | down |
| 5854412 | 7363529 | 1777899 | --- | --- | --- | 1,38 | up   |
| 5854433 | 7198087 | 1370687 | --- | --- | --- | 1,69 | down |
| 5854448 | 7368954 | 1792772 | --- | --- | --- | 2,04 | down |
| 5854601 | 7214605 | 1409372 | --- | --- | --- | 1,38 | down |
| 5854699 | 7359426 | 1768376 | --- | --- | --- | 1,38 | down |
| 5854739 | 7315206 | 1660028 | --- | --- | --- | 1,16 | up   |
| 5854807 | 7154584 | 1262120 | --- | --- | --- | 1,08 | down |
| 5854880 | 7301198 | 1624784 | --- | --- | --- | 1,16 | up   |
| 5854923 | 7182739 | 1332582 | --- | --- | --- | 1,61 | down |
| 5855064 | 7364346 | 1779969 | --- | --- | --- | 1,20 | down |
| 5855076 | 7110959 | 1154681 | --- | --- | --- | 1,29 | down |
| 5855149 | 7142917 | 1233165 | --- | --- | --- | 1,26 | down |
| 5855193 | 7360486 | 1770952 | --- | --- | --- | 1,64 | down |
| 5855212 | 7244288 | 1484094 | --- | --- | --- | 1,57 | up   |
| 5855485 | 7256191 | 1512869 | --- | --- | --- | 1,11 | up   |
| 5855550 | 7230698 | 1449068 | --- | --- | --- | 1,45 | down |
| 5855562 | 7064468 | 1042379 | --- | --- | --- | 1,11 | up   |
| 5855668 | 7053874 | 1018334 | --- | --- | --- | 1,19 | down |
| 5855834 | 7205944 | 1389459 | --- | --- | --- | 1,08 | down |
| 5856157 | 7252877 | 1504775 | --- | --- | --- | 1,03 | down |
| 5856185 | 7110959 | 1154682 | --- | --- | --- | 1,32 | down |
| 5856259 | 7280743 | 1574529 | --- | --- | --- | 1,45 | down |
| 5856442 | 7064468 | 1042374 | --- | --- | --- | 1,04 | up   |
| 5856535 | 7236358 | 1464243 | --- | --- | --- | 1,40 | up   |
| 5856542 | 7232709 | 1454536 | --- | --- | --- | 1,78 | down |
| 5856576 | 7108556 | 1148718 | --- | --- | --- | 2,53 | down |
| 5856594 | 7084500 | 1089705 | --- | --- | --- | 1,24 | down |
| 5856614 | 7331413 | 1699135 | --- | --- | --- | 1,08 | down |
| 5856696 | 7059020 | 1029346 | --- | --- | --- | 1,16 | up   |
| 5856698 | 7274780 | 1559209 | --- | --- | --- | 1,49 | down |
| 5856699 | 7207093 | 1392143 | --- | --- | --- | 1,11 | down |
| 5856809 | 7383823 | 1828933 | --- | --- | --- | 2,60 | down |
| 5856826 | 7207093 | 1392101 | --- | --- | --- | 1,04 | down |
| 5856941 | 7092549 | 1109185 | --- | --- | --- | 1,01 | up   |
| 5856973 | 7282927 | 1580008 | --- | --- | --- | 1,16 | down |
| 5857012 | 7280743 | 1574518 | --- | --- | --- | 1,16 | up   |
| 5857028 | 7073677 | 1065171 | --- | --- | --- | 1,16 | up   |
| 5857040 | 7326271 | 1686470 | --- | --- | --- | 1,32 | up   |
| 5857062 | 7223395 | 1431080 | --- | --- | --- | 1,06 | down |
| 5857239 | 7344380 | 1731128 | --- | --- | --- | 1,12 | down |
| 5857286 | 7377583 | 1815454 | --- | --- | --- | 1,24 | down |
| 5857337 | 7114274 | 1162811 | --- | --- | --- | 1,01 | up   |
| 5857364 | 7380878 | 1822584 | --- | --- | --- | 1,08 | down |
| 5857376 | 7075460 | 1069394 | --- | --- | --- | 1,95 | up   |
| 5857443 | 7101684 | 1131708 | --- | --- | --- | 1,02 | down |
| 5857464 | 7034356 | 972175  | --- | --- | --- | 1,07 | down |
| 5857537 | 7326378 | 1686713 | --- | --- | --- | 1,23 | down |
| 5857575 | 7274780 | 1559252 | --- | --- | --- | 1,05 | up   |
| 5857610 | 7039463 | 984250  | --- | --- | --- | 1,37 | up   |
| 5857677 | 7247512 | 1491206 | --- | --- | --- | 1,88 | up   |
| 5857729 | 7303722 | 1631710 | --- | --- | --- | 1,52 | down |

|         |         |         |     |     |     |      |      |
|---------|---------|---------|-----|-----|-----|------|------|
| 5857784 | 7363674 | 1778439 | --- | --- | --- | 1,22 | up   |
| 5857810 | 7318139 | 1668072 | --- | --- | --- | 1,66 | up   |
| 5857852 | 7312627 | 1653491 | --- | --- | --- | 1,63 | down |
| 5857925 | 7341038 | 1722667 | --- | --- | --- | 1,06 | up   |
| 5858030 | 7127801 | 1195868 | --- | --- | --- | 1,01 | down |
| 5858055 | 7131372 | 1205032 | --- | --- | --- | 1,48 | down |
| 5858081 | 7041061 | 988072  | --- | --- | --- | 3,74 | down |
| 5858156 | 7127540 | 1195270 | --- | --- | --- | 1,34 | up   |
| 5858238 | 7241995 | 1478326 | --- | --- | --- | 1,29 | up   |
| 5858263 | 7217747 | 1417504 | --- | --- | --- | 1,42 | up   |
| 5858381 | 7384904 | 1831595 | --- | --- | --- | 1,05 | up   |
| 5858397 | 7347427 | 1738665 | --- | --- | --- | 1,10 | up   |
| 5858398 | 7203018 | 1382662 | --- | --- | --- | 1,28 | down |
| 5858566 | 7226278 | 1437998 | --- | --- | --- | 1,10 | down |
| 5858583 | 7121849 | 1181773 | --- | --- | --- | 1,07 | down |
| 5858650 | 7193056 | 1358263 | --- | --- | --- | 1,17 | up   |
| 5858681 | 7065640 | 1045204 | --- | --- | --- | 1,06 | down |
| 5858783 | 7195680 | 1364897 | --- | --- | --- | 1,34 | up   |
| 5859009 | 7142917 | 1233170 | --- | --- | --- | 1,18 | down |
| 5859026 | 7065640 | 1045202 | --- | --- | --- | 1,20 | up   |
| 5859043 | 7375937 | 1811340 | --- | --- | --- | 1,62 | up   |
| 5859111 | 7257893 | 1517483 | --- | --- | --- | 1,05 | down |
| 5859139 | 7210263 | 1399734 | --- | --- | --- | 1,04 | up   |
| 5859250 | 7358048 | 1764791 | --- | --- | --- | 1,15 | down |
| 5859252 | 7193056 | 1358289 | --- | --- | --- | 1,22 | up   |
| 5859327 | 7378997 | 1818688 | --- | --- | --- | 1,05 | up   |
| 5859375 | 7180804 | 1326997 | --- | --- | --- | 1,86 | down |
| 5859393 | 7149817 | 1250308 | --- | --- | --- | 2,18 | up   |
| 5859505 | 7274780 | 1559200 | --- | --- | --- | 2,17 | up   |
| 5859515 | 7347427 | 1738663 | --- | --- | --- | 1,07 | up   |
| 5859670 | 7369031 | 1793011 | --- | --- | --- | 1,32 | down |
| 5859717 | 7033504 | 969858  | --- | --- | --- | 1,43 | down |
| 5859871 | 7091954 | 1107709 | --- | --- | --- | 1,39 | up   |
| 5860176 | 7237814 | 1467816 | --- | --- | --- | 1,60 | down |
| 5860247 | 7258546 | 1519010 | --- | --- | --- | 1,60 | down |
| 5860440 | 7070668 | 1057918 | --- | --- | --- | 1,68 | up   |
| 5860485 | 7339387 | 1718379 | --- | --- | --- | 1,11 | up   |
| 5860576 | 7184151 | 1335968 | --- | --- | --- | 1,13 | up   |
| 5860639 | 7196803 | 1367328 | --- | --- | --- | 1,49 | up   |
| 5860688 | 7142915 | 1233106 | --- | --- | --- | 1,87 | up   |
| 5860762 | 7056304 | 1023619 | --- | --- | --- | 1,55 | up   |
| 5860864 | 7162177 | 1280575 | --- | --- | --- | 2,79 | down |
| 5860937 | 7312161 | 1652463 | --- | --- | --- | 2,57 | down |
| 5860994 | 7383823 | 1828947 | --- | --- | --- | 1,23 | down |
| 5861027 | 7073677 | 1065157 | --- | --- | --- | 1,35 | down |
| 5861202 | 7307473 | 1641256 | --- | --- | --- | 1,35 | down |
| 5861213 | 7146872 | 1242914 | --- | --- | --- | 2,33 | down |
| 5861227 | 7072429 | 1061867 | --- | --- | --- | 1,04 | down |
| 5861271 | 7049508 | 1008558 | --- | --- | --- | 1,77 | up   |
| 5861282 | 7106776 | 1144111 | --- | --- | --- | 1,01 | up   |
| 5861300 | 7336931 | 1711866 | --- | --- | --- | 1,08 | up   |
| 5861313 | 7237672 | 1467302 | --- | --- | --- | 1,91 | down |
| 5861393 | 7039821 | 985073  | --- | --- | --- | 1,61 | down |
| 5861503 | 7355580 | 1758872 | --- | --- | --- | 3,22 | up   |
| 5861507 | 7337224 | 1712609 | --- | --- | --- | 1,30 | down |
| 5861530 | 7279568 | 1572026 | --- | --- | --- | 1,06 | down |
| 5861681 | 7106776 | 1144107 | --- | --- | --- | 1,08 | up   |

|         |         |         |     |     |     |      |      |
|---------|---------|---------|-----|-----|-----|------|------|
| 5861684 | 7172691 | 1306450 | --- | --- | --- | 1,05 | up   |
| 5861693 | 7053878 | 1018359 | --- | --- | --- | 1,09 | down |
| 5861714 | 7066035 | 1046224 | --- | --- | --- | 1,00 | down |
| 5861756 | 7195680 | 1364872 | --- | --- | --- | 1,21 | up   |
| 5861802 | 7217650 | 1417175 | --- | --- | --- | 1,21 | up   |
| 5861927 | 7267802 | 1541816 | --- | --- | --- | 1,92 | down |
| 5861980 | 7112355 | 1158083 | --- | --- | --- | 1,03 | up   |
| 5861988 | 7364948 | 1781217 | --- | --- | --- | 1,14 | down |
| 5862252 | 7297589 | 1615657 | --- | --- | --- | 1,43 | up   |
| 5862279 | 7238202 | 1468947 | --- | --- | --- | 1,18 | down |
| 5862385 | 7337224 | 1712619 | --- | --- | --- | 1,56 | down |
| 5862405 | 7087282 | 1096160 | --- | --- | --- | 1,42 | up   |
| 5862516 | 7063873 | 1040651 | --- | --- | --- | 1,51 | down |
| 5862741 | 7233513 | 1457166 | --- | --- | --- | 3,84 | down |
| 5862912 | 7052957 | 1016259 | --- | --- | --- | 1,41 | down |
| 5862991 | 7042382 | 991289  | --- | --- | --- | 1,13 | up   |
| 5863086 | 7259923 | 1522521 | --- | --- | --- | 1,15 | down |
| 5863129 | 7278010 | 1568043 | --- | --- | --- | 1,51 | down |
| 5863167 | 7120827 | 1179353 | --- | --- | --- | 1,01 | up   |
| 5863229 | 7095021 | 1115131 | --- | --- | --- | 1,66 | down |
| 5863259 | 7196029 | 1365626 | --- | --- | --- | 1,57 | down |
| 5863305 | 7350237 | 1745477 | --- | --- | --- | 1,50 | up   |
| 5863327 | 7193056 | 1358268 | --- | --- | --- | 1,06 | up   |
| 5863397 | 7274780 | 1559231 | --- | --- | --- | 1,08 | down |
| 5863402 | 7240641 | 1475730 | --- | --- | --- | 1,51 | down |
| 5863404 | 7259131 | 1520415 | --- | --- | --- | 1,51 | up   |
| 5863443 | 7337425 | 1713189 | --- | --- | --- | 1,00 | down |
| 5863535 | 7037235 | 978584  | --- | --- | --- | 1,23 | down |
| 5863663 | 7171091 | 1302457 | --- | --- | --- | 1,03 | up   |
| 5863692 | 7384509 | 1830759 | --- | --- | --- | 1,05 | down |
| 5863717 | 7292178 | 1601748 | --- | --- | --- | 1,00 | up   |
| 5863770 | 7196029 | 1365628 | --- | --- | --- | 1,13 | up   |
| 5863803 | 7071969 | 1060901 | --- | --- | --- | 1,40 | up   |
| 5864034 | 7217747 | 1417497 | --- | --- | --- | 1,38 | up   |
| 5864067 | 7231653 | 1451902 | --- | --- | --- | 1,12 | down |
| 5864095 | 7176409 | 1315673 | --- | --- | --- | 1,37 | up   |
| 5864119 | 7078666 | 1076516 | --- | --- | --- | 1,32 | down |
| 5864161 | 7337425 | 1713201 | --- | --- | --- | 1,02 | down |
| 5864207 | 7120468 | 1178499 | --- | --- | --- | 1,37 | down |
| 5864254 | 7220618 | 1424436 | --- | --- | --- | 1,14 | up   |
| 5864292 | 7344406 | 1731197 | --- | --- | --- | 1,31 | up   |
| 5864367 | 7297589 | 1615666 | --- | --- | --- | 1,55 | up   |
| 5864385 | 7181105 | 1327962 | --- | --- | --- | 1,00 | down |
| 5864519 | 7122140 | 1182735 | --- | --- | --- | 1,08 | down |
| 5864535 | 7233012 | 1455403 | --- | --- | --- | 1,10 | down |
| 5864551 | 7146982 | 1243292 | --- | --- | --- | 1,18 | up   |
| 5864582 | 7061003 | 1033923 | --- | --- | --- | 1,00 | down |
| 5864602 | 7239939 | 1473797 | --- | --- | --- | 1,38 | down |
| 5864612 | 7307473 | 1641300 | --- | --- | --- | 1,43 | down |
| 5864691 | 7320735 | 1674165 | --- | --- | --- | 1,03 | down |
| 5864707 | 7243647 | 1482463 | --- | --- | --- | 1,11 | down |
| 5864759 | 7171417 | 1303153 | --- | --- | --- | 1,09 | up   |
| 5864973 | 7200545 | 1376917 | --- | --- | --- | 1,21 | down |
| 5865024 | 7102113 | 1132824 | --- | --- | --- | 1,03 | up   |
| 5865115 | 7263248 | 1530602 | --- | --- | --- | 1,05 | down |
| 5865127 | 7068942 | 1053386 | --- | --- | --- | 1,58 | down |
| 5865128 | 7288077 | 1591955 | --- | --- | --- | 1,21 | down |

|         |         |         |     |     |     |      |      |
|---------|---------|---------|-----|-----|-----|------|------|
| 5865195 | 7312686 | 1653624 | --- | --- | --- | 1,23 | up   |
| 5865200 | 7339286 | 1718108 | --- | --- | --- | 1,35 | up   |
| 5865240 | 7196331 | 1366379 | --- | --- | --- | 1,20 | down |
| 5865246 | 7360486 | 1770954 | --- | --- | --- | 1,02 | up   |
| 5865286 | 7255911 | 1512229 | --- | --- | --- | 1,06 | down |
| 5865388 | 7247848 | 1492047 | --- | --- | --- | 1,40 | down |
| 5865508 | 7330238 | 1695939 | --- | --- | --- | 1,16 | up   |
| 5865512 | 7237814 | 1467836 | --- | --- | --- | 1,03 | up   |
| 5865668 | 7317204 | 1665391 | --- | --- | --- | 1,16 | down |
| 5865673 | 7353224 | 1752667 | --- | --- | --- | 1,71 | up   |
| 5865698 | 7040442 | 986559  | --- | --- | --- | 1,25 | down |
| 5865721 | 7053878 | 1018361 | --- | --- | --- | 1,55 | down |
| 5865751 | 7181442 | 1328882 | --- | --- | --- | 5,03 | down |
| 5865766 | 7128704 | 1198017 | --- | --- | --- | 1,13 | up   |
| 5865808 | 7302787 | 1628903 | --- | --- | --- | 1,23 | up   |
| 5865909 | 7068259 | 1051652 | --- | --- | --- | 1,05 | down |
| 5865932 | 7068259 | 1051637 | --- | --- | --- | 1,02 | up   |
| 5865935 | 7050716 | 1011221 | --- | --- | --- | 1,24 | down |
| 5866038 | 7097454 | 1120880 | --- | --- | --- | 1,22 | down |
| 5866078 | 7318139 | 1668074 | --- | --- | --- | 1,31 | down |
| 5866081 | 7056333 | 1023709 | --- | --- | --- | 1,53 | down |
| 5866171 | 7295410 | 1609782 | --- | --- | --- | 1,23 | down |
| 5866225 | 7282927 | 1580016 | --- | --- | --- | 1,33 | down |
| 5866272 | 7170764 | 1301490 | --- | --- | --- | 1,11 | down |
| 5866314 | 7123421 | 1185833 | --- | --- | --- | 2,41 | down |
| 5866343 | 7336931 | 1711872 | --- | --- | --- | 1,06 | up   |
| 5866368 | 7075445 | 1069339 | --- | --- | --- | 1,46 | down |
| 5866458 | 7358859 | 1767009 | --- | --- | --- | 1,09 | up   |
| 5866518 | 7280743 | 1574500 | --- | --- | --- | 1,24 | down |
| 5866552 | 7237438 | 1466787 | --- | --- | --- | 1,50 | down |
| 5866607 | 7050167 | 1009800 | --- | --- | --- | 1,12 | down |
| 5866615 | 7244288 | 1484094 | --- | --- | --- | 1,24 | up   |
| 5866700 | 7098077 | 1122727 | --- | --- | --- | 1,18 | up   |
| 5866745 | 7194356 | 1361627 | --- | --- | --- | 1,33 | down |
| 5866779 | 7062233 | 1037243 | --- | --- | --- | 1,35 | down |
| 5866801 | 7371001 | 1798869 | --- | --- | --- | 1,09 | down |
| 5866874 | 7328985 | 1693161 | --- | --- | --- | 1,05 | down |
| 5866888 | 7383102 | 1827399 | --- | --- | --- | 1,16 | down |
| 5866927 | 7068504 | 1052167 | --- | --- | --- | 1,05 | up   |
| 5867117 | 7173640 | 1308961 | --- | --- | --- | 1,56 | up   |
| 5867150 | 7201422 | 1379185 | --- | --- | --- | 2,15 | up   |
| 5867201 | 7240569 | 1475329 | --- | --- | --- | 1,17 | up   |
| 5867204 | 7098648 | 1124276 | --- | --- | --- | 2,02 | up   |
| 5867321 | 7040442 | 986512  | --- | --- | --- | 1,44 | up   |
| 5867386 | 7088489 | 1099521 | --- | --- | --- | 1,19 | down |
| 5867569 | 7073677 | 1065153 | --- | --- | --- | 1,56 | up   |
| 5867623 | 7174114 | 1310431 | --- | --- | --- | 1,08 | up   |
| 5867646 | 7231484 | 1451379 | --- | --- | --- | 2,09 | up   |
| 5867689 | 7119845 | 1176886 | --- | --- | --- | 2,03 | down |
| 5867751 | 7166867 | 1291325 | --- | --- | --- | 1,08 | up   |
| 5867756 | 7233012 | 1455410 | --- | --- | --- | 1,21 | up   |
| 5867761 | 7131103 | 1204357 | --- | --- | --- | 1,16 | down |
| 5867792 | 7069253 | 1054160 | --- | --- | --- | 1,24 | down |
| 5867845 | 7248790 | 1494499 | --- | --- | --- | 1,47 | up   |
| 5867877 | 7279568 | 1572035 | --- | --- | --- | 1,04 | down |
| 5867910 | 7269637 | 1546234 | --- | --- | --- | 2,06 | down |
| 5867935 | 7217679 | 1417295 | --- | --- | --- | 1,31 | up   |

|         |         |         |     |     |     |      |      |
|---------|---------|---------|-----|-----|-----|------|------|
| 5868026 | 7133484 | 1209941 | --- | --- | --- | 1,07 | up   |
| 5868102 | 7233524 | 1457219 | --- | --- | --- | 2,57 | down |
| 5868110 | 7348487 | 1741251 | --- | --- | --- | 1,21 | up   |
| 5868120 | 7041486 | 989220  | --- | --- | --- | 1,39 | up   |
| 5868140 | 7280743 | 1574487 | --- | --- | --- | 1,22 | down |
| 5868204 | 7127691 | 1195636 | --- | --- | --- | 1,52 | up   |
| 5868249 | 7072765 | 1062744 | --- | --- | --- | 1,01 | down |
| 5868285 | 7140834 | 1227967 | --- | --- | --- | 1,05 | up   |
| 5868394 | 7355580 | 1758887 | --- | --- | --- | 1,72 | up   |
| 5868698 | 7373678 | 1805852 | --- | --- | --- | 1,39 | down |
| 5868876 | 7132125 | 1206641 | --- | --- | --- | 1,22 | down |
| 5868951 | 7360213 | 1770141 | --- | --- | --- | 1,01 | down |
| 5869090 | 7148741 | 1247828 | --- | --- | --- | 1,52 | up   |
| 5869199 | 7256191 | 1512860 | --- | --- | --- | 1,16 | down |
| 5869215 | 7165954 | 1288767 | --- | --- | --- | 1,62 | down |
| 5869270 | 7273251 | 1555943 | --- | --- | --- | 1,30 | down |
| 5869438 | 7115146 | 1164933 | --- | --- | --- | 2,23 | down |
| 5869581 | 7143455 | 1234734 | --- | --- | --- | 1,17 | up   |
| 5869587 | 7329135 | 1693488 | --- | --- | --- | 1,21 | down |
| 5869631 | 7378997 | 1818647 | --- | --- | --- | 1,28 | up   |
| 5869721 | 7041635 | 989642  | --- | --- | --- | 1,42 | down |
| 5869742 | 7069253 | 1054167 | --- | --- | --- | 1,10 | up   |
| 5869758 | 7181442 | 1328884 | --- | --- | --- | 1,11 | down |
| 5869825 | 7089080 | 1101157 | --- | --- | --- | 1,04 | up   |
| 5869834 | 7370779 | 1798152 | --- | --- | --- | 2,01 | down |
| 5869837 | 7197056 | 1367834 | --- | --- | --- | 1,10 | down |
| 5870107 | 7119845 | 1176858 | --- | --- | --- | 1,02 | down |
| 5870139 | 7279303 | 1571212 | --- | --- | --- | 1,02 | up   |
| 5870153 | 7256070 | 1512584 | --- | --- | --- | 1,30 | down |
| 5870191 | 7059971 | 1031461 | --- | --- | --- | 1,15 | up   |
| 5870243 | 7091439 | 1106615 | --- | --- | --- | 1,12 | up   |
| 5870291 | 7175946 | 1314637 | --- | --- | --- | 1,45 | down |
| 5870440 | 7312686 | 1653625 | --- | --- | --- | 1,04 | down |
| 5870505 | 7039223 | 983558  | --- | --- | --- | 2,23 | up   |
| 5870514 | 7082098 | 1084108 | --- | --- | --- | 1,00 | down |
| 5870518 | 7075460 | 1069394 | --- | --- | --- | 3,66 | up   |
| 5870561 | 7186464 | 1341366 | --- | --- | --- | 1,05 | up   |
| 5870662 | 7288077 | 1591993 | --- | --- | --- | 1,10 | up   |
| 5870666 | 7237814 | 1467831 | --- | --- | --- | 1,15 | up   |
| 5870692 | 7090581 | 1104745 | --- | --- | --- | 1,86 | up   |
| 5870702 | 7191594 | 1354233 | --- | --- | --- | 1,52 | up   |
| 5870707 | 7029985 | 960592  | --- | --- | --- | 1,39 | down |
| 5870781 | 7336931 | 1711867 | --- | --- | --- | 1,01 | up   |
| 5870796 | 7128921 | 1198510 | --- | --- | --- | 1,44 | up   |
| 5870858 | 7257337 | 1515977 | --- | --- | --- | 1,57 | down |
| 5870935 | 7171091 | 1302444 | --- | --- | --- | 1,15 | down |
| 5870971 | 7210822 | 1400978 | --- | --- | --- | 1,10 | up   |
| 5871064 | 7065860 | 1045807 | --- | --- | --- | 1,55 | up   |
| 5871136 | 7059309 | 1029907 | --- | --- | --- | 1,13 | up   |
| 5871289 | 7207069 | 1392034 | --- | --- | --- | 1,18 | down |
| 5871339 | 7374324 | 1807532 | --- | --- | --- | 1,07 | down |
| 5871397 | 7099573 | 1126730 | --- | --- | --- | 1,09 | down |
| 5871414 | 7121849 | 1181819 | --- | --- | --- | 1,02 | up   |
| 5871442 | 7069721 | 1055292 | --- | --- | --- | 1,16 | up   |
| 5871463 | 7318714 | 1669241 | --- | --- | --- | 1,13 | down |
| 5871505 | 7341002 | 1722533 | --- | --- | --- | 1,20 | up   |
| 5871573 | 7080476 | 1080403 | --- | --- | --- | 1,05 | down |

|         |         |         |     |     |     |      |      |
|---------|---------|---------|-----|-----|-----|------|------|
| 5871612 | 7236358 | 1464248 | --- | --- | --- | 1,06 | up   |
| 5871693 | 7075445 | 1069352 | --- | --- | --- | 1,32 | up   |
| 5871701 | 7308262 | 1643209 | --- | --- | --- | 1,33 | down |
| 5871779 | 7071264 | 1059296 | --- | --- | --- | 1,70 | up   |
| 5871784 | 7053620 | 1017791 | --- | --- | --- | 1,45 | down |
| 5871799 | 7148741 | 1247849 | --- | --- | --- | 1,27 | down |
| 5871805 | 7279555 | 1571952 | --- | --- | --- | 1,18 | up   |
| 5871812 | 7337425 | 1713188 | --- | --- | --- | 1,03 | down |
| 5871857 | 7302445 | 1628175 | --- | --- | --- | 1,30 | up   |
| 5871908 | 7136746 | 1217970 | --- | --- | --- | 1,06 | up   |
| 5871913 | 7358859 | 1766999 | --- | --- | --- | 1,36 | down |
| 5872023 | 7136062 | 1216304 | --- | --- | --- | 1,05 | up   |
| 5872056 | 7305275 | 1635845 | --- | --- | --- | 1,06 | down |
| 5872110 | 7165644 | 1288009 | --- | --- | --- | 1,44 | up   |
| 5872230 | 7308679 | 1644244 | --- | --- | --- | 1,31 | up   |
| 5872256 | 7168439 | 1295710 | --- | --- | --- | 1,56 | up   |
| 5872330 | 7080476 | 1080410 | --- | --- | --- | 1,13 | down |
| 5872395 | 7153571 | 1259039 | --- | --- | --- | 1,43 | down |
| 5872541 | 7340057 | 1720333 | --- | --- | --- | 1,02 | down |
| 5872595 | 7068259 | 1051622 | --- | --- | --- | 1,76 | down |
| 5872723 | 7274585 | 1558789 | --- | --- | --- | 1,10 | up   |
| 5872736 | 7374790 | 1808765 | --- | --- | --- | 1,37 | down |
| 5872762 | 7288077 | 1591952 | --- | --- | --- | 1,05 | up   |
| 5872768 | 7288077 | 1591995 | --- | --- | --- | 1,18 | up   |
| 5872777 | 7031774 | 964651  | --- | --- | --- | 1,13 | down |
| 5872808 | 7198210 | 1370982 | --- | --- | --- | 1,22 | down |
| 5872850 | 7068259 | 1051619 | --- | --- | --- | 1,95 | up   |
| 5872876 | 7044988 | 998454  | --- | --- | --- | 1,17 | down |
| 5872904 | 7335903 | 1709287 | --- | --- | --- | 1,39 | up   |
| 5872906 | 7363529 | 1777902 | --- | --- | --- | 2,01 | down |
| 5872991 | 7367959 | 1789071 | --- | --- | --- | 1,45 | up   |
| 5873032 | 7281877 | 1577528 | --- | --- | --- | 1,31 | up   |
| 5873037 | 7381330 | 1823627 | --- | --- | --- | 1,12 | up   |
| 5873139 | 7200996 | 1378158 | --- | --- | --- | 1,50 | up   |
| 5873209 | 7248790 | 1494514 | --- | --- | --- | 1,03 | up   |
| 5873224 | 7074911 | 1068173 | --- | --- | --- | 1,21 | down |
| 5873411 | 7146982 | 1243284 | --- | --- | --- | 1,19 | down |
| 5873622 | 7249015 | 1495062 | --- | --- | --- | 1,29 | down |
| 5873654 | 7068413 | 1051960 | --- | --- | --- | 1,30 | down |
| 5873767 | 7235069 | 1460988 | --- | --- | --- | 1,19 | down |
| 5873854 | 7065570 | 1045091 | --- | --- | --- | 1,10 | up   |
| 5873956 | 7082098 | 1084124 | --- | --- | --- | 1,17 | up   |
| 5874012 | 7209927 | 1398916 | --- | --- | --- | 1,27 | down |
| 5874025 | 7365147 | 1781772 | --- | --- | --- | 1,12 | down |
| 5874143 | 7166855 | 1291249 | --- | --- | --- | 1,59 | down |
| 5874265 | 7113483 | 1160998 | --- | --- | --- | 1,41 | down |
| 5874317 | 7146093 | 1240986 | --- | --- | --- | 1,16 | up   |
| 5874401 | 7240569 | 1475510 | --- | --- | --- | 1,00 | up   |
| 5874466 | 7365147 | 1781778 | --- | --- | --- | 1,19 | up   |
| 5874467 | 7340304 | 1720865 | --- | --- | --- | 1,53 | down |
| 5874515 | 7361881 | 1773943 | --- | --- | --- | 1,16 | down |
| 5874527 | 7230886 | 1449569 | --- | --- | --- | 1,06 | up   |
| 5874546 | 7057462 | 1025863 | --- | --- | --- | 1,13 | up   |
| 5874554 | 7318714 | 1669234 | --- | --- | --- | 1,19 | up   |
| 5874758 | 7285563 | 1586041 | --- | --- | --- | 1,23 | down |
| 5874765 | 7105057 | 1140310 | --- | --- | --- | 2,12 | up   |
| 5874774 | 7073677 | 1065159 | --- | --- | --- | 1,23 | down |

|         |         |         |     |     |     |      |      |
|---------|---------|---------|-----|-----|-----|------|------|
| 5874777 | 7193056 | 1358257 | --- | --- | --- | 1,13 | down |
| 5874867 | 7032395 | 966595  | --- | --- | --- | 1,38 | down |
| 5874878 | 7371228 | 1799455 | --- | --- | --- | 1,33 | up   |
| 5874945 | 7337224 | 1712624 | --- | --- | --- | 1,32 | up   |
| 5875035 | 7062436 | 1037675 | --- | --- | --- | 1,80 | down |
| 5875285 | 7202837 | 1382307 | --- | --- | --- | 1,06 | down |
| 5875329 | 7309734 | 1646898 | --- | --- | --- | 1,62 | down |
| 5875338 | 7376206 | 1811973 | --- | --- | --- | 1,14 | up   |
| 5875343 | 7070836 | 1058361 | --- | --- | --- | 1,14 | down |
| 5875480 | 7059584 | 1030552 | --- | --- | --- | 1,09 | up   |
| 5875493 | 7361881 | 1773944 | --- | --- | --- | 1,58 | up   |
| 5875597 | 7237814 | 1467834 | --- | --- | --- | 1,22 | up   |
| 5875623 | 7102416 | 1133513 | --- | --- | --- | 1,48 | up   |
| 5875703 | 7248790 | 1494550 | --- | --- | --- | 1,12 | up   |
| 5875729 | 7156052 | 1265777 | --- | --- | --- | 1,15 | up   |
| 5875730 | 7092549 | 1109183 | --- | --- | --- | 1,12 | down |
| 5875773 | 7376566 | 1812857 | --- | --- | --- | 2,13 | down |
| 5875827 | 7273251 | 1555948 | --- | --- | --- | 1,55 | up   |
| 5875896 | 7052385 | 1014800 | --- | --- | --- | 1,09 | up   |
| 5875913 | 7289069 | 1594393 | --- | --- | --- | 1,05 | down |
| 5875914 | 7230886 | 1449524 | --- | --- | --- | 1,03 | down |
| 5875933 | 7284901 | 1584807 | --- | --- | --- | 1,10 | down |
| 5875951 | 7239752 | 1473157 | --- | --- | --- | 1,20 | up   |
| 5876009 | 7131718 | 1205742 | --- | --- | --- | 1,26 | down |
| 5876011 | 7062233 | 1037245 | --- | --- | --- | 1,17 | down |
| 5876161 | 7198644 | 1372353 | --- | --- | --- | 1,10 | down |
| 5876168 | 7160846 | 1277348 | --- | --- | --- | 1,03 | up   |
| 5876170 | 7373678 | 1805855 | --- | --- | --- | 1,01 | up   |
| 5876211 | 7040674 | 987027  | --- | --- | --- | 2,13 | up   |
| 5876213 | 7369822 | 1795130 | --- | --- | --- | 1,02 | up   |
| 5876248 | 7193056 | 1358274 | --- | --- | --- | 1,47 | down |
| 5876303 | 7297589 | 1615636 | --- | --- | --- | 1,05 | down |
| 5876387 | 7050716 | 1011230 | --- | --- | --- | 2,10 | down |
| 5876415 | 7286807 | 1588846 | --- | --- | --- | 1,04 | down |
| 5876431 | 7261580 | 1526796 | --- | --- | --- | 1,12 | up   |
| 5876444 | 7197056 | 1367848 | --- | --- | --- | 1,30 | up   |
| 5876501 | 7383655 | 1828573 | --- | --- | --- | 1,36 | down |
| 5876643 | 7358048 | 1764797 | --- | --- | --- | 1,04 | up   |
| 5876677 | 7194172 | 1361162 | --- | --- | --- | 1,38 | up   |
| 5876694 | 7237346 | 1466592 | --- | --- | --- | 1,00 | down |
| 5876706 | 7042382 | 991286  | --- | --- | --- | 1,32 | up   |
| 5876753 | 7343250 | 1728033 | --- | --- | --- | 1,28 | down |
| 5876769 | 7039463 | 984252  | --- | --- | --- | 1,12 | down |
| 5876778 | 7340673 | 1721708 | --- | --- | --- | 1,19 | up   |
| 5876836 | 7298920 | 1618828 | --- | --- | --- | 2,18 | up   |
| 5876932 | 7168439 | 1295712 | --- | --- | --- | 1,50 | up   |
| 5877012 | 7036871 | 977873  | --- | --- | --- | 1,15 | up   |
| 5877076 | 7285530 | 1585966 | --- | --- | --- | 1,15 | down |
| 5877079 | 7257893 | 1517470 | --- | --- | --- | 1,07 | down |
| 5877117 | 7217434 | 1416416 | --- | --- | --- | 1,46 | up   |
| 5877160 | 7207093 | 1392078 | --- | --- | --- | 1,06 | up   |
| 5877162 | 7341002 | 1722535 | --- | --- | --- | 1,51 | up   |
| 5877164 | 7121849 | 1181761 | --- | --- | --- | 1,04 | up   |
| 5877170 | 7369712 | 1794829 | --- | --- | --- | 1,15 | up   |
| 5877368 | 7353997 | 1754703 | --- | --- | --- | 1,17 | down |
| 5877379 | 7040442 | 986577  | --- | --- | --- | 1,46 | down |
| 5877408 | 7108434 | 1148319 | --- | --- | --- | 1,22 | down |

|         |         |         |     |     |     |      |      |
|---------|---------|---------|-----|-----|-----|------|------|
| 5877596 | 7329135 | 1693495 | --- | --- | --- | 1,00 | up   |
| 5877597 | 7341243 | 1723215 | --- | --- | --- | 1,10 | down |
| 5877652 | 7302787 | 1628898 | --- | --- | --- | 1,02 | down |
| 5877716 | 7058713 | 1028663 | --- | --- | --- | 1,56 | down |
| 5877768 | 7341546 | 1723943 | --- | --- | --- | 1,14 | down |
| 5877771 | 7330396 | 1696360 | --- | --- | --- | 1,41 | down |
| 5877805 | 7075460 | 1069395 | --- | --- | --- | 1,17 | down |
| 5877850 | 7162144 | 1280502 | --- | --- | --- | 1,84 | down |
| 5878046 | 7069830 | 1055667 | --- | --- | --- | 2,32 | down |
| 5878080 | 7243628 | 1482384 | --- | --- | --- | 1,51 | down |
| 5878089 | 7363529 | 1777958 | --- | --- | --- | 1,00 | down |
| 5878092 | 7079475 | 1078284 | --- | --- | --- | 1,41 | up   |
| 5878141 | 7239752 | 1473179 | --- | --- | --- | 1,24 | down |
| 5878210 | 7267204 | 1539851 | --- | --- | --- | 2,11 | up   |
| 5878217 | 7170764 | 1301489 | --- | --- | --- | 1,01 | up   |
| 5878291 | 7234040 | 1458505 | --- | --- | --- | 1,54 | up   |
| 5878352 | 7217679 | 1417308 | --- | --- | --- | 1,20 | down |
| 5878357 | 7169599 | 1298444 | --- | --- | --- | 1,22 | down |
| 5878423 | 7290942 | 1599135 | --- | --- | --- | 3,14 | down |
| 5878476 | 7069830 | 1055638 | --- | --- | --- | 1,51 | down |
| 5878486 | 7176275 | 1315343 | --- | --- | --- | 1,19 | down |
| 5878528 | 7376398 | 1812493 | --- | --- | --- | 1,00 | up   |
| 5878536 | 7221855 | 1427254 | --- | --- | --- | 2,06 | down |
| 5878628 | 7235323 | 1461554 | --- | --- | --- | 1,05 | down |
| 5878735 | 7149008 | 1248598 | --- | --- | --- | 1,15 | down |
| 5878811 | 7093296 | 1110929 | --- | --- | --- | 1,02 | up   |
| 5878955 | 7049508 | 1008560 | --- | --- | --- | 1,10 | up   |
| 5879105 | 7073854 | 1065625 | --- | --- | --- | 1,28 | up   |
| 5879145 | 7287337 | 1589968 | --- | --- | --- | 3,12 | down |
| 5879246 | 7127540 | 1195279 | --- | --- | --- | 1,07 | up   |
| 5879328 | 7333462 | 1703646 | --- | --- | --- | 1,02 | down |
| 5879421 | 7086672 | 1094321 | --- | --- | --- | 1,18 | down |
| 5879562 | 7378981 | 1818552 | --- | --- | --- | 1,48 | down |
| 5879613 | 7089080 | 1101129 | --- | --- | --- | 2,14 | up   |
| 5879624 | 7172373 | 1305577 | --- | --- | --- | 1,40 | down |
| 5879682 | 7069253 | 1054175 | --- | --- | --- | 1,04 | down |
| 5879701 | 7247848 | 1492047 | --- | --- | --- | 1,45 | down |
| 5879800 | 7355580 | 1758873 | --- | --- | --- | 1,40 | up   |
| 5879850 | 7243647 | 1482438 | --- | --- | --- | 1,03 | up   |
| 5879915 | 7243726 | 1482680 | --- | --- | --- | 1,05 | down |
| 5880025 | 7256070 | 1512592 | --- | --- | --- | 1,33 | up   |
| 5880035 | 7058507 | 1028299 | --- | --- | --- | 1,37 | up   |
| 5880061 | 7156052 | 1265776 | --- | --- | --- | 1,25 | down |
| 5880101 | 7330731 | 1697175 | --- | --- | --- | 1,39 | up   |
| 5880139 | 7250671 | 1499034 | --- | --- | --- | 1,01 | up   |
| 5880205 | 7324760 | 1683093 | --- | --- | --- | 1,23 | down |
| 5880353 | 7100523 | 1128848 | --- | --- | --- | 1,49 | down |
| 5880368 | 7141061 | 1228644 | --- | --- | --- | 1,02 | up   |
| 5880401 | 7261580 | 1526804 | --- | --- | --- | 1,38 | up   |
| 5880518 | 7306330 | 1638521 | --- | --- | --- | 1,09 | down |
| 5880536 | 7052176 | 1014215 | --- | --- | --- | 2,78 | down |
| 5880629 | 7139708 | 1225051 | --- | --- | --- | 1,11 | up   |
| 5880682 | 7085242 | 1091078 | --- | --- | --- | 1,28 | down |
| 5880689 | 7279489 | 1571798 | --- | --- | --- | 1,03 | up   |
| 5880783 | 7037235 | 978573  | --- | --- | --- | 1,28 | down |
| 5880863 | 7059766 | 1030971 | --- | --- | --- | 1,59 | up   |
| 5880905 | 7350489 | 1746121 | --- | --- | --- | 1,32 | up   |



|         |         |         |     |     |     |      |      |
|---------|---------|---------|-----|-----|-----|------|------|
| 5880982 | 7378997 | 1818661 | --- | --- | --- | 1,14 | up   |
| 5881089 | 7056736 | 1024421 | --- | --- | --- | 1,65 | down |
| 5881175 | 7137646 | 1220437 | --- | --- | --- | 1,17 | up   |
| 5881281 | 7223395 | 1431080 | --- | --- | --- | 1,06 | down |
| 5881341 | 7346229 | 1735595 | --- | --- | --- | 1,17 | down |
| 5881557 | 7180732 | 1326723 | --- | --- | --- | 1,19 | down |
| 5881609 | 7150047 | 1250776 | --- | --- | --- | 1,04 | down |
| 5881788 | 7121074 | 1179920 | --- | --- | --- | 1,05 | down |
| 5881813 | 7131766 | 1205865 | --- | --- | --- | 1,05 | up   |
| 5881819 | 7277783 | 1567437 | --- | --- | --- | 3,13 | up   |
| 5881835 | 7180243 | 1325517 | --- | --- | --- | 1,01 | up   |
| 5881844 | 7345465 | 1733851 | --- | --- | --- | 1,33 | down |
| 5881974 | 7344530 | 1731569 | --- | --- | --- | 3,46 | up   |
| 5881985 | 7240569 | 1475505 | --- | --- | --- | 1,16 | down |
| 5882003 | 7092549 | 1109195 | --- | --- | --- | 1,02 | down |
| 5882083 | 7377116 | 1814068 | --- | --- | --- | 1,03 | down |
| 5882102 | 7174114 | 1310422 | --- | --- | --- | 1,19 | up   |
| 5882240 | 7113483 | 1161004 | --- | --- | --- | 1,10 | down |
| 5882268 | 7102113 | 1132839 | --- | --- | --- | 1,51 | up   |
| 5882335 | 7363147 | 1777030 | --- | --- | --- | 1,44 | down |
| 5882410 | 7131372 | 1205026 | --- | --- | --- | 1,19 | up   |
| 5882616 | 7274892 | 1559540 | --- | --- | --- | 1,01 | up   |
| 5882653 | 7055793 | 1022302 | --- | --- | --- | 1,29 | up   |
| 5882763 | 7244290 | 1484157 | --- | --- | --- | 1,06 | up   |
| 5882929 | 7102040 | 1132630 | --- | --- | --- | 1,28 | up   |
| 5883035 | 7058507 | 1028320 | --- | --- | --- | 1,08 | down |
| 5883091 | 7107503 | 1145769 | --- | --- | --- | 1,07 | up   |
| 5883102 | 7297589 | 1615607 | --- | --- | --- | 1,10 | up   |
| 5883108 | 7027386 | 955063  | --- | --- | --- | 1,03 | up   |
| 5883130 | 7105780 | 1141699 | --- | --- | --- | 1,01 | down |
| 5883262 | 7215722 | 1412267 | --- | --- | --- | 1,96 | down |
| 5883293 | 7098867 | 1124962 | --- | --- | --- | 1,51 | down |
| 5883303 | 7235794 | 1462889 | --- | --- | --- | 1,28 | down |
| 5883309 | 7076160 | 1070909 | --- | --- | --- | 1,62 | up   |
| 5883348 | 7361223 | 1772619 | --- | --- | --- | 1,02 | up   |
| 5883372 | 7237672 | 1467305 | --- | --- | --- | 1,53 | down |
| 5883426 | 7059020 | 1029334 | --- | --- | --- | 1,44 | down |
| 5883536 | 7176235 | 1315241 | --- | --- | --- | 1,39 | down |
| 5883538 | 7088164 | 1098489 | --- | --- | --- | 1,72 | down |
| 5883569 | 7179785 | 1324460 | --- | --- | --- | 1,45 | down |
| 5883601 | 7252339 | 1503335 | --- | --- | --- | 1,07 | down |
| 5883678 | 7083030 | 1086270 | --- | --- | --- | 1,11 | down |
| 5883732 | 7361042 | 1772273 | --- | --- | --- | 1,06 | down |
| 5883780 | 7302327 | 1627686 | --- | --- | --- | 1,13 | up   |
| 5883870 | 7258455 | 1518734 | --- | --- | --- | 1,06 | down |
| 5883899 | 7303191 | 1629959 | --- | --- | --- | 1,25 | down |
| 5884057 | 7355580 | 1758871 | --- | --- | --- | 2,20 | up   |
| 5884115 | 7248790 | 1494490 | --- | --- | --- | 1,29 | down |
| 5884124 | 7070836 | 1058350 | --- | --- | --- | 1,12 | up   |
| 5884157 | 7049308 | 1008126 | --- | --- | --- | 1,13 | down |
| 5884317 | 7227433 | 1440961 | --- | --- | --- | 2,11 | down |
| 5884482 | 7361881 | 1773939 | --- | --- | --- | 1,14 | up   |
| 5884488 | 7257893 | 1517479 | --- | --- | --- | 1,08 | up   |
| 5884528 | 7377791 | 1815987 | --- | --- | --- | 2,08 | up   |
| 5884554 | 7059971 | 1031464 | --- | --- | --- | 1,03 | down |
| 5884573 | 7213908 | 1407669 | --- | --- | --- | 1,15 | down |
| 5884611 | 7102416 | 1133513 | --- | --- | --- | 1,13 | up   |

|         |         |         |     |     |     |      |      |
|---------|---------|---------|-----|-----|-----|------|------|
| 5884737 | 7361881 | 1773965 | --- | --- | --- | 1,09 | up   |
| 5884746 | 7070836 | 1058344 | --- | --- | --- | 1,01 | down |
| 5884811 | 7143971 | 1235934 | --- | --- | --- | 3,50 | up   |
| 5884840 | 7344380 | 1731134 | --- | --- | --- | 1,36 | up   |
| 5884852 | 7059506 | 1030399 | --- | --- | --- | 1,14 | down |
| 5884931 | 7115362 | 1165599 | --- | --- | --- | 1,29 | down |
| 5884952 | 7194400 | 1361769 | --- | --- | --- | 1,20 | down |
| 5884984 | 7239303 | 1472003 | --- | --- | --- | 1,01 | up   |
| 5885111 | 7155624 | 1264726 | --- | --- | --- | 1,07 | down |
| 5885133 | 7288284 | 1592651 | --- | --- | --- | 1,69 | down |
| 5885294 | 7149817 | 1250314 | --- | --- | --- | 1,43 | up   |
| 5885295 | 7210702 | 1400724 | --- | --- | --- | 2,16 | down |
| 5885425 | 7130889 | 1203883 | --- | --- | --- | 1,31 | down |
| 5885490 | 7221256 | 1425887 | --- | --- | --- | 1,11 | down |
| 5885500 | 7343052 | 1727528 | --- | --- | --- | 1,11 | up   |
| 5885589 | 7089080 | 1101136 | --- | --- | --- | 1,14 | down |
| 5885636 | 7310851 | 1649633 | --- | --- | --- | 1,12 | up   |
| 5885783 | 7043379 | 993646  | --- | --- | --- | 1,24 | up   |
| 5885879 | 7095960 | 1117070 | --- | --- | --- | 1,11 | down |
| 5885937 | 7087282 | 1096231 | --- | --- | --- | 1,21 | down |
| 5885940 | 7067828 | 1050784 | --- | --- | --- | 1,13 | down |
| 5885990 | 7313538 | 1655742 | --- | --- | --- | 1,33 | up   |
| 5886032 | 7079808 | 1079061 | --- | --- | --- | 1,27 | down |
| 5886040 | 7343250 | 1728033 | --- | --- | --- | 1,23 | up   |
| 5886354 | 7352044 | 1750001 | --- | --- | --- | 1,14 | up   |
| 5886412 | 7068504 | 1052167 | --- | --- | --- | 1,11 | down |
| 5886468 | 7286807 | 1588812 | --- | --- | --- | 1,03 | up   |
| 5886621 | 7193959 | 1360603 | --- | --- | --- | 1,15 | down |
| 5886640 | 7071264 | 1059285 | --- | --- | --- | 1,13 | down |
| 5886775 | 7034293 | 971971  | --- | --- | --- | 1,11 | up   |
| 5886847 | 7329135 | 1693493 | --- | --- | --- | 1,75 | up   |
| 5886884 | 7196029 | 1365620 | --- | --- | --- | 1,24 | up   |
| 5886935 | 7297589 | 1615601 | --- | --- | --- | 1,01 | up   |
| 5887047 | 7148978 | 1248535 | --- | --- | --- | 1,20 | down |
| 5887063 | 7367969 | 1789101 | --- | --- | --- | 1,09 | up   |
| 5887081 | 7344406 | 1731212 | --- | --- | --- | 1,62 | down |
| 5887101 | 7367060 | 1786192 | --- | --- | --- | 1,18 | up   |
| 5887209 | 7177428 | 1318365 | --- | --- | --- | 1,19 | up   |
| 5887273 | 7092549 | 1109197 | --- | --- | --- | 1,33 | up   |
| 5887284 | 7152007 | 1255324 | --- | --- | --- | 1,22 | down |
| 5887548 | 7326271 | 1686521 | --- | --- | --- | 1,21 | down |
| 5887578 | 7252877 | 1504688 | --- | --- | --- | 1,14 | down |
| 5887782 | 7056333 | 1023684 | --- | --- | --- | 1,25 | down |
| 5887860 | 7121849 | 1181771 | --- | --- | --- | 1,12 | down |
| 5887907 | 7079326 | 1077973 | --- | --- | --- | 1,73 | down |
| 5887913 | 7240569 | 1475364 | --- | --- | --- | 1,20 | up   |
| 5887931 | 7168979 | 1297195 | --- | --- | --- | 1,10 | up   |
| 5888009 | 7098411 | 1123732 | --- | --- | --- | 1,29 | up   |
| 5888020 | 7302860 | 1629063 | --- | --- | --- | 1,36 | up   |
| 5888031 | 7067335 | 1049470 | --- | --- | --- | 1,08 | down |
| 5888056 | 7326271 | 1686463 | --- | --- | --- | 1,07 | down |
| 5888158 | 7233012 | 1455407 | --- | --- | --- | 1,08 | down |
| 5888488 | 7340057 | 1720334 | --- | --- | --- | 2,82 | down |
| 5888646 | 7029442 | 959554  | --- | --- | --- | 1,32 | up   |
| 5888751 | 7370002 | 1795769 | --- | --- | --- | 1,28 | up   |
| 5888763 | 7087282 | 1096203 | --- | --- | --- | 1,45 | down |
| 5888954 | 7326271 | 1686515 | --- | --- | --- | 1,01 | down |

|         |         |         |     |     |     |      |      |
|---------|---------|---------|-----|-----|-----|------|------|
| 5888980 | 7078666 | 1076518 | --- | --- | --- | 1,02 | up   |
| 5888989 | 7169550 | 1298365 | --- | --- | --- | 1,07 | down |
| 5889027 | 7156052 | 1265763 | --- | --- | --- | 1,35 | up   |
| 5889074 | 7044349 | 996693  | --- | --- | --- | 1,01 | down |
| 5889125 | 7115146 | 1164934 | --- | --- | --- | 1,14 | up   |
| 5889171 | 7101206 | 1130457 | --- | --- | --- | 2,14 | up   |
| 5889179 | 7258455 | 1518729 | --- | --- | --- | 1,11 | up   |
| 5889249 | 7312566 | 1653321 | --- | --- | --- | 1,20 | up   |
| 5889296 | 7374493 | 1807962 | --- | --- | --- | 1,11 | up   |
| 5889329 | 7253215 | 1505381 | --- | --- | --- | 1,66 | down |
| 5889345 | 7340673 | 1721697 | --- | --- | --- | 1,40 | down |
| 5889371 | 7378997 | 1818644 | --- | --- | --- | 1,02 | up   |
| 5889412 | 7292624 | 1602751 | --- | --- | --- | 1,56 | up   |
| 5889508 | 7326245 | 1686390 | --- | --- | --- | 1,11 | up   |
| 5889615 | 7092549 | 1109156 | --- | --- | --- | 1,26 | up   |
| 5889633 | 7339387 | 1718391 | --- | --- | --- | 1,10 | down |
| 5889712 | 7279568 | 1572037 | --- | --- | --- | 1,75 | up   |
| 5889763 | 7253408 | 1505952 | --- | --- | --- | 1,28 | down |
| 5889771 | 7235840 | 1462999 | --- | --- | --- | 1,01 | up   |
| 5889941 | 7340673 | 1721701 | --- | --- | --- | 1,04 | up   |
| 5889989 | 7281577 | 1576874 | --- | --- | --- | 1,18 | up   |
| 5889997 | 7336854 | 1711684 | --- | --- | --- | 1,08 | up   |
| 5890059 | 7355138 | 1757853 | --- | --- | --- | 1,24 | up   |
| 5890177 | 7148741 | 1247826 | --- | --- | --- | 1,24 | down |
| 5890226 | 7033337 | 969495  | --- | --- | --- | 1,02 | down |
| 5890285 | 7122131 | 1182668 | --- | --- | --- | 1,34 | up   |
| 5890467 | 7279499 | 1571822 | --- | --- | --- | 1,42 | down |
| 5890472 | 7067670 | 1050374 | --- | --- | --- | 1,28 | down |
| 5890677 | 7358859 | 1767011 | --- | --- | --- | 1,11 | down |
| 5890731 | 7069727 | 1055364 | --- | --- | --- | 1,47 | up   |
| 5890790 | 7282927 | 1580011 | --- | --- | --- | 1,03 | down |
| 5890811 | 7087282 | 1096152 | --- | --- | --- | 1,09 | down |
| 5890917 | 7211363 | 1402051 | --- | --- | --- | 1,01 | up   |
| 5891011 | 7314270 | 1657753 | --- | --- | --- | 1,10 | up   |
| 5891038 | 7320068 | 1672649 | --- | --- | --- | 1,26 | up   |
| 5891281 | 7247512 | 1491205 | --- | --- | --- | 1,48 | up   |
| 5891317 | 7209811 | 1398665 | --- | --- | --- | 1,54 | up   |
| 5891374 | 7181001 | 1327622 | --- | --- | --- | 1,01 | up   |
| 5891384 | 7225543 | 1435935 | --- | --- | --- | 1,20 | down |
| 5891431 | 7121849 | 1181782 | --- | --- | --- | 1,18 | down |
| 5891441 | 7075790 | 1069993 | --- | --- | --- | 1,23 | up   |
| 5891515 | 7061550 | 1035287 | --- | --- | --- | 1,80 | down |
| 5891614 | 7198087 | 1370696 | --- | --- | --- | 1,19 | down |
| 5891627 | 7101258 | 1130563 | --- | --- | --- | 1,09 | up   |
| 5891664 | 7198087 | 1370686 | --- | --- | --- | 1,00 | down |
| 5891713 | 7318714 | 1669242 | --- | --- | --- | 1,21 | down |
| 5891799 | 7195680 | 1364900 | --- | --- | --- | 1,05 | down |
| 5891815 | 7288077 | 1591970 | --- | --- | --- | 1,24 | down |
| 5891889 | 7320735 | 1674172 | --- | --- | --- | 1,03 | up   |
| 5891938 | 7312627 | 1653489 | --- | --- | --- | 2,08 | up   |
| 5891955 | 7267802 | 1541733 | --- | --- | --- | 1,68 | down |
| 5891962 | 7360486 | 1770970 | --- | --- | --- | 1,04 | up   |
| 5891969 | 7358048 | 1764791 | --- | --- | --- | 1,03 | up   |
| 5891988 | 7261019 | 1525281 | --- | --- | --- | 1,10 | down |
| 5892031 | 7205944 | 1389476 | --- | --- | --- | 1,13 | down |
| 5892076 | 7034293 | 971945  | --- | --- | --- | 1,08 | down |
| 5892104 | 7065570 | 1045094 | --- | --- | --- | 2,56 | down |

|         |         |         |     |     |     |      |      |
|---------|---------|---------|-----|-----|-----|------|------|
| 5892179 | 7115963 | 1167067 | --- | --- | --- | 1,71 | up   |
| 5892261 | 7245874 | 1487587 | --- | --- | --- | 1,17 | up   |
| 5892276 | 7257337 | 1515972 | --- | --- | --- | 1,65 | down |
| 5892286 | 7180804 | 1326998 | --- | --- | --- | 1,21 | down |
| 5892289 | 7198087 | 1370703 | --- | --- | --- | 1,13 | up   |
| 5892382 | 7038153 | 981148  | --- | --- | --- | 1,07 | down |
| 5892402 | 7353232 | 1752850 | --- | --- | --- | 2,65 | up   |
| 5892419 | 7318714 | 1669235 | --- | --- | --- | 1,60 | down |
| 5892452 | 7228656 | 1444255 | --- | --- | --- | 1,08 | down |
| 5892526 | 7225543 | 1435939 | --- | --- | --- | 1,15 | down |
| 5892618 | 7344406 | 1731265 | --- | --- | --- | 1,01 | up   |
| 5892628 | 7297274 | 1614654 | --- | --- | --- | 1,06 | up   |
| 5892810 | 7238115 | 1468620 | --- | --- | --- | 1,01 | down |
| 5892860 | 7290463 | 1597958 | --- | --- | --- | 1,14 | down |
| 5892965 | 7121849 | 1181795 | --- | --- | --- | 1,11 | up   |
| 5892969 | 7095041 | 1115189 | --- | --- | --- | 1,01 | up   |
| 5893034 | 7153571 | 1259038 | --- | --- | --- | 1,01 | up   |
| 5893095 | 7302860 | 1629030 | --- | --- | --- | 1,08 | up   |
| 5893201 | 7196029 | 1365626 | --- | --- | --- | 1,54 | up   |
| 5893242 | 7186443 | 1341286 | --- | --- | --- | 1,12 | down |
| 5893272 | 7326612 | 1687199 | --- | --- | --- | 1,40 | down |
| 5893482 | 7099573 | 1126709 | --- | --- | --- | 1,28 | down |
| 5893687 | 7148741 | 1247855 | --- | --- | --- | 1,22 | down |
| 5893737 | 7365183 | 1781914 | --- | --- | --- | 1,11 | up   |
| 5893803 | 7331757 | 1700032 | --- | --- | --- | 1,29 | up   |
| 5893806 | 7363529 | 1777942 | --- | --- | --- | 1,26 | down |
| 5893848 | 7373678 | 1805858 | --- | --- | --- | 1,04 | down |
| 5893889 | 7237438 | 1466795 | --- | --- | --- | 1,92 | up   |
| 5893998 | 7358048 | 1764803 | --- | --- | --- | 1,28 | up   |
| 5894017 | 7263805 | 1532198 | --- | --- | --- | 2,07 | down |
| 5894060 | 7131550 | 1205558 | --- | --- | --- | 1,32 | down |
| 5894192 | 7076160 | 1070965 | --- | --- | --- | 1,36 | up   |
| 5894267 | 7223395 | 1431081 | --- | --- | --- | 1,16 | up   |
| 5894297 | 7121849 | 1181817 | --- | --- | --- | 1,19 | up   |
| 5894323 | 7052813 | 1015883 | --- | --- | --- | 1,17 | down |
| 5894344 | 7146425 | 1241887 | --- | --- | --- | 1,45 | down |
| 5894355 | 7350237 | 1745478 | --- | --- | --- | 1,26 | down |
| 5894365 | 7193403 | 1359180 | --- | --- | --- | 1,10 | down |
| 5894439 | 7208784 | 1396150 | --- | --- | --- | 1,03 | up   |
| 5894521 | 7131876 | 1206046 | --- | --- | --- | 1,20 | up   |
| 5894700 | 7078666 | 1076510 | --- | --- | --- | 1,32 | down |
| 5894726 | 7330396 | 1696366 | --- | --- | --- | 1,10 | up   |
| 5894839 | 7131372 | 1205029 | --- | --- | --- | 1,38 | up   |
| 5894868 | 7168521 | 1295895 | --- | --- | --- | 1,08 | down |
| 5894914 | 7259221 | 1520618 | --- | --- | --- | 1,23 | up   |
| 5894930 | 7286807 | 1588819 | --- | --- | --- | 1,11 | up   |
| 5894970 | 7117813 | 1171705 | --- | --- | --- | 1,11 | up   |
| 5895000 | 7111361 | 1155622 | --- | --- | --- | 1,28 | up   |
| 5895026 | 7217747 | 1417487 | --- | --- | --- | 1,39 | up   |
| 5895052 | 7330731 | 1697190 | --- | --- | --- | 1,31 | up   |
| 5895063 | 7350922 | 1747316 | --- | --- | --- | 1,26 | up   |
| 5895077 | 7156978 | 1268172 | --- | --- | --- | 1,49 | down |
| 5895146 | 7050716 | 1011225 | --- | --- | --- | 1,33 | down |
| 5895148 | 7256789 | 1514654 | --- | --- | --- | 1,62 | up   |
| 5895185 | 7326271 | 1686480 | --- | --- | --- | 1,03 | up   |
| 5895369 | 7340757 | 1721898 | --- | --- | --- | 1,00 | up   |
| 5895395 | 7101643 | 1131567 | --- | --- | --- | 1,17 | down |

|         |         |         |     |     |     |      |      |
|---------|---------|---------|-----|-----|-----|------|------|
| 5895488 | 7337872 | 1714437 | --- | --- | --- | 1,39 | down |
| 5895547 | 7253358 | 1505831 | --- | --- | --- | 1,08 | up   |
| 5895595 | 7374324 | 1807479 | --- | --- | --- | 1,01 | down |
| 5895670 | 7035525 | 974782  | --- | --- | --- | 1,12 | down |
| 5895783 | 7320068 | 1672647 | --- | --- | --- | 1,53 | up   |
| 5895804 | 7217434 | 1416398 | --- | --- | --- | 1,40 | down |
| 5895828 | 7297589 | 1615671 | --- | --- | --- | 1,30 | down |
| 5896014 | 7093255 | 1110763 | --- | --- | --- | 1,40 | down |
| 5896164 | 7240569 | 1475489 | --- | --- | --- | 1,41 | down |
| 5896185 | 7355044 | 1757423 | --- | --- | --- | 1,25 | down |
| 5896238 | 7066035 | 1046197 | --- | --- | --- | 1,01 | up   |
| 5896289 | 7320735 | 1674191 | --- | --- | --- | 1,24 | down |
| 5896301 | 7041635 | 989642  | --- | --- | --- | 1,18 | down |
| 5896467 | 7073609 | 1064857 | --- | --- | --- | 1,95 | down |
| 5896614 | 7363768 | 1778601 | --- | --- | --- | 1,31 | down |
| 5896641 | 7061003 | 1033922 | --- | --- | --- | 1,18 | up   |
| 5896698 | 7169732 | 1298771 | --- | --- | --- | 2,28 | up   |
| 5896818 | 7113169 | 1160173 | --- | --- | --- | 1,04 | down |
| 5896903 | 7098077 | 1122806 | --- | --- | --- | 1,11 | up   |
| 5897018 | 7244936 | 1485359 | --- | --- | --- | 1,38 | down |
| 5897039 | 7123129 | 1185073 | --- | --- | --- | 1,84 | up   |
| 5897301 | 7197056 | 1367840 | --- | --- | --- | 1,25 | down |
| 5897406 | 7280743 | 1574527 | --- | --- | --- | 1,49 | up   |
| 5897408 | 7198644 | 1372351 | --- | --- | --- | 1,07 | down |
| 5897415 | 7062233 | 1037186 | --- | --- | --- | 1,51 | up   |
| 5897437 | 7356115 | 1760117 | --- | --- | --- | 1,16 | up   |
| 5897639 | 7339379 | 1718354 | --- | --- | --- | 1,00 | up   |
| 5897663 | 7033006 | 968486  | --- | --- | --- | 1,11 | up   |
| 5897691 | 7142321 | 1231539 | --- | --- | --- | 1,38 | down |
| 5897890 | 7321414 | 1675630 | --- | --- | --- | 1,04 | up   |
| 5897922 | 7281924 | 1577732 | --- | --- | --- | 1,20 | down |
| 5897925 | 7191888 | 1354950 | --- | --- | --- | 1,13 | up   |
| 5898137 | 7309734 | 1646898 | --- | --- | --- | 1,25 | down |
| 5898306 | 7267953 | 1542234 | --- | --- | --- | 2,01 | down |
| 5898385 | 7339286 | 1718107 | --- | --- | --- | 1,10 | up   |
| 5898414 | 7166867 | 1291342 | --- | --- | --- | 2,07 | down |
| 5898429 | 7064732 | 1042928 | --- | --- | --- | 1,10 | down |
| 5898642 | 7113483 | 1161004 | --- | --- | --- | 1,20 | down |
| 5898680 | 7067670 | 1050319 | --- | --- | --- | 2,61 | up   |
| 5898762 | 7355138 | 1757705 | --- | --- | --- | 1,12 | down |
| 5898791 | 7100408 | 1128642 | --- | --- | --- | 1,17 | up   |
| 5898793 | 7148978 | 1248479 | --- | --- | --- | 1,27 | up   |
| 5898880 | 7052331 | 1014567 | --- | --- | --- | 1,27 | down |
| 5898889 | 7277783 | 1567465 | --- | --- | --- | 1,48 | down |
| 5898917 | 7228520 | 1443766 | --- | --- | --- | 1,09 | up   |
| 5898938 | 7295652 | 1610280 | --- | --- | --- | 1,45 | down |
| 5898963 | 7257893 | 1517477 | --- | --- | --- | 1,05 | up   |
| 5898983 | 7055793 | 1022298 | --- | --- | --- | 1,18 | up   |
| 5899095 | 7383823 | 1828933 | --- | --- | --- | 1,20 | down |
| 5899144 | 7039265 | 983658  | --- | --- | --- | 1,21 | up   |
| 5899383 | 7272431 | 1553892 | --- | --- | --- | 1,06 | down |
| 5899408 | 7297589 | 1615609 | --- | --- | --- | 1,04 | up   |
| 5899432 | 7330181 | 1695711 | --- | --- | --- | 3,02 | up   |
| 5899456 | 7281924 | 1577753 | --- | --- | --- | 1,03 | up   |
| 5899492 | 7200545 | 1376908 | --- | --- | --- | 1,55 | down |
| 5899506 | 7240569 | 1475454 | --- | --- | --- | 1,01 | up   |
| 5899598 | 7160687 | 1277011 | --- | --- | --- | 1,06 | down |

|         |         |         |     |     |     |      |      |
|---------|---------|---------|-----|-----|-----|------|------|
| 5899714 | 7069830 | 1055614 | --- | --- | --- | 1,14 | up   |
| 5899842 | 7370131 | 1796181 | --- | --- | --- | 1,09 | down |
| 5899985 | 7253408 | 1505938 | --- | --- | --- | 1,46 | up   |
| 5899990 | 7286807 | 1588810 | --- | --- | --- | 1,61 | down |
| 5900069 | 7181193 | 1328298 | --- | --- | --- | 1,31 | up   |
| 5900073 | 7329846 | 1695005 | --- | --- | --- | 2,08 | down |
| 5900181 | 7360486 | 1770935 | --- | --- | --- | 1,07 | up   |
| 5900306 | 7078666 | 1076510 | --- | --- | --- | 1,17 | up   |
| 5900354 | 7128704 | 1198021 | --- | --- | --- | 1,51 | down |
| 5900375 | 7191594 | 1354241 | --- | --- | --- | 2,59 | up   |
| 5900542 | 7377304 | 1814575 | --- | --- | --- | 1,03 | down |
| 5900559 | 7264653 | 1534054 | --- | --- | --- | 1,30 | up   |
| 5900567 | 7101258 | 1130573 | --- | --- | --- | 1,14 | up   |
| 5900578 | 7181452 | 1328933 | --- | --- | --- | 1,02 | down |
| 5900589 | 7238153 | 1468833 | --- | --- | --- | 1,06 | down |
| 5900601 | 7337224 | 1712600 | --- | --- | --- | 1,61 | down |
| 5900686 | 7297756 | 1616089 | --- | --- | --- | 1,11 | down |
| 5900823 | 7127257 | 1194810 | --- | --- | --- | 1,34 | up   |
| 5900843 | 7211144 | 1401548 | --- | --- | --- | 1,70 | down |
| 5900874 | 7030037 | 960716  | --- | --- | --- | 1,08 | down |
| 5900878 | 7062233 | 1037198 | --- | --- | --- | 1,06 | up   |
| 5900899 | 7323869 | 1680882 | --- | --- | --- | 1,07 | down |
| 5900981 | 7065640 | 1045207 | --- | --- | --- | 1,94 | down |
| 5901006 | 7104920 | 1140058 | --- | --- | --- | 1,01 | down |
| 5901012 | 7298920 | 1618834 | --- | --- | --- | 1,38 | down |
| 5901089 | 7049689 | 1008874 | --- | --- | --- | 1,24 | up   |
| 5901090 | 7283156 | 1580615 | --- | --- | --- | 2,11 | down |
| 5901108 | 7369938 | 1795531 | --- | --- | --- | 1,53 | down |
| 5901118 | 7033337 | 969519  | --- | --- | --- | 1,14 | down |
| 5901155 | 7383102 | 1827386 | --- | --- | --- | 1,69 | up   |
| 5901202 | 7297274 | 1614613 | --- | --- | --- | 1,19 | down |
| 5901229 | 7344406 | 1731218 | --- | --- | --- | 1,12 | down |
| 5901309 | 7087965 | 1098052 | --- | --- | --- | 1,07 | up   |
| 5901435 | 7252877 | 1504680 | --- | --- | --- | 1,37 | up   |
| 5901462 | 7053874 | 1018317 | --- | --- | --- | 2,17 | down |
| 5901490 | 7053874 | 1018316 | --- | --- | --- | 1,21 | down |
| 5901492 | 7217679 | 1417311 | --- | --- | --- | 1,43 | down |
| 5901593 | 7086966 | 1095248 | --- | --- | --- | 1,08 | down |
| 5901634 | 7088544 | 1099705 | --- | --- | --- | 1,06 | up   |
| 5901670 | 7207093 | 1392136 | --- | --- | --- | 1,01 | up   |
| 5901682 | 7183182 | 1333576 | --- | --- | --- | 1,26 | up   |
| 5901881 | 7039223 | 983552  | --- | --- | --- | 1,24 | down |
| 5901925 | 7138580 | 1222520 | --- | --- | --- | 1,24 | down |
| 5902075 | 7377304 | 1814600 | --- | --- | --- | 1,61 | up   |
| 5902105 | 7289075 | 1594453 | --- | --- | --- | 1,13 | down |
| 5902171 | 7205750 | 1388930 | --- | --- | --- | 1,98 | down |
| 5902198 | 7330314 | 1696138 | --- | --- | --- | 2,21 | up   |
| 5902253 | 7280982 | 1575244 | --- | --- | --- | 1,45 | up   |
| 5902414 | 7168439 | 1295662 | --- | --- | --- | 1,04 | up   |
| 5902465 | 7198210 | 1370989 | --- | --- | --- | 1,04 | down |
| 5902614 | 7378997 | 1818661 | --- | --- | --- | 1,01 | up   |
| 5902637 | 7281577 | 1576888 | --- | --- | --- | 1,34 | up   |
| 5902780 | 7058713 | 1028666 | --- | --- | --- | 1,07 | down |
| 5902804 | 7353232 | 1752855 | --- | --- | --- | 1,02 | up   |
| 5902845 | 7097485 | 1120938 | --- | --- | --- | 1,56 | down |
| 5902862 | 7213945 | 1407853 | --- | --- | --- | 1,28 | down |
| 5902990 | 7116540 | 1168645 | --- | --- | --- | 1,55 | down |

|         |         |         |     |     |     |      |      |
|---------|---------|---------|-----|-----|-----|------|------|
| 5903041 | 7231533 | 1451507 | --- | --- | --- | 2,17 | up   |
| 5903067 | 7125348 | 1190088 | --- | --- | --- | 1,02 | down |
| 5903120 | 7217434 | 1416381 | --- | --- | --- | 1,04 | up   |
| 5903142 | 7199743 | 1375182 | --- | --- | --- | 1,21 | down |
| 5903181 | 7212587 | 1404633 | --- | --- | --- | 1,47 | up   |
| 5903510 | 7166867 | 1291369 | --- | --- | --- | 1,04 | up   |
| 5903528 | 7294911 | 1608528 | --- | --- | --- | 1,13 | up   |
| 5903582 | 7237814 | 1467825 | --- | --- | --- | 2,15 | down |
| 5903616 | 7324760 | 1683099 | --- | --- | --- | 1,03 | up   |
| 5903690 | 7217679 | 1417312 | --- | --- | --- | 1,67 | down |
| 5903794 | 7289075 | 1594461 | --- | --- | --- | 1,08 | down |
| 5903804 | 7253088 | 1505123 | --- | --- | --- | 1,21 | down |
| 5903828 | 7211363 | 1402053 | --- | --- | --- | 1,13 | down |
| 5903832 | 7308262 | 1643187 | --- | --- | --- | 1,09 | down |
| 5903900 | 7261580 | 1526745 | --- | --- | --- | 1,50 | down |
| 5903969 | 7302860 | 1629027 | --- | --- | --- | 1,36 | up   |
| 5903973 | 7231557 | 1451568 | --- | --- | --- | 1,01 | down |
| 5903981 | 7098831 | 1124862 | --- | --- | --- | 2,42 | down |
| 5904008 | 7337425 | 1713161 | --- | --- | --- | 1,34 | down |
| 5904067 | 7236492 | 1464553 | --- | --- | --- | 2,68 | up   |
| 5904122 | 7221855 | 1427225 | --- | --- | --- | 1,39 | down |
| 5904180 | 7053874 | 1018317 | --- | --- | --- | 1,20 | down |
| 5904188 | 7355138 | 1757772 | --- | --- | --- | 1,13 | down |
| 5904205 | 7029078 | 958875  | --- | --- | --- | 1,05 | up   |
| 5904271 | 7341546 | 1723955 | --- | --- | --- | 1,16 | down |
| 5904278 | 7380497 | 1821850 | --- | --- | --- | 1,04 | down |
| 5904476 | 7080134 | 1079799 | --- | --- | --- | 2,47 | down |
| 5904682 | 7258455 | 1518738 | --- | --- | --- | 2,83 | up   |
| 5904691 | 7096924 | 1119615 | --- | --- | --- | 1,28 | up   |
| 5904826 | 7064134 | 1041456 | --- | --- | --- | 1,11 | up   |
| 5904914 | 7172373 | 1305563 | --- | --- | --- | 2,29 | down |
| 5904960 | 7330238 | 1695951 | --- | --- | --- | 1,14 | down |
| 5905048 | 7333333 | 1703393 | --- | --- | --- | 1,03 | down |
| 5905087 | 7363529 | 1777914 | --- | --- | --- | 1,48 | down |
| 5905102 | 7065860 | 1045796 | --- | --- | --- | 1,67 | up   |
| 5905151 | 7073677 | 1065124 | --- | --- | --- | 2,31 | up   |
| 5905170 | 7226812 | 1439351 | --- | --- | --- | 1,45 | up   |
| 5905526 | 7148741 | 1247862 | --- | --- | --- | 1,88 | down |
| 5905616 | 7100523 | 1128902 | --- | --- | --- | 1,11 | up   |
| 5905716 | 7293402 | 1604848 | --- | --- | --- | 1,06 | up   |
| 5905788 | 7089080 | 1101169 | --- | --- | --- | 1,19 | up   |
| 5905829 | 7265259 | 1535448 | --- | --- | --- | 1,34 | down |
| 5905833 | 7177180 | 1317764 | --- | --- | --- | 1,44 | up   |
| 5905862 | 7065860 | 1045805 | --- | --- | --- | 1,28 | up   |
| 5905912 | 7274892 | 1559567 | --- | --- | --- | 1,10 | down |
| 5906019 | 7118157 | 1172524 | --- | --- | --- | 1,00 | down |
| 5906148 | 7331413 | 1699131 | --- | --- | --- | 1,57 | up   |
| 5906167 | 7119179 | 1174970 | --- | --- | --- | 1,36 | up   |
| 5906209 | 7095066 | 1115290 | --- | --- | --- | 1,96 | up   |
| 5906265 | 7374790 | 1808782 | --- | --- | --- | 1,00 | down |
| 5906308 | 7312686 | 1653620 | --- | --- | --- | 1,00 | down |
| 5906313 | 7061003 | 1033923 | --- | --- | --- | 1,28 | up   |
| 5906378 | 7230698 | 1449067 | --- | --- | --- | 2,06 | up   |
| 5906509 | 7038153 | 981161  | --- | --- | --- | 1,32 | down |
| 5906532 | 7062233 | 1037209 | --- | --- | --- | 1,33 | up   |
| 5906544 | 7064134 | 1041468 | --- | --- | --- | 1,16 | up   |
| 5906559 | 7299650 | 1620951 | --- | --- | --- | 1,03 | up   |

|         |         |         |     |     |     |      |      |
|---------|---------|---------|-----|-----|-----|------|------|
| 5906581 | 7076236 | 1071188 | --- | --- | --- | 1,05 | down |
| 5906645 | 7243363 | 1481615 | --- | --- | --- | 1,60 | up   |
| 5906659 | 7130917 | 1203926 | --- | --- | --- | 1,20 | up   |
| 5906745 | 7341646 | 1724193 | --- | --- | --- | 1,41 | up   |
| 5906788 | 7079475 | 1078293 | --- | --- | --- | 1,14 | down |
| 5906861 | 7069142 | 1053874 | --- | --- | --- | 1,05 | down |
| 5906887 | 7243901 | 1483057 | --- | --- | --- | 1,07 | down |
| 5906918 | 7307424 | 1641138 | --- | --- | --- | 1,95 | up   |
| 5906938 | 7300392 | 1622753 | --- | --- | --- | 1,14 | up   |
| 5907103 | 7303777 | 1631908 | --- | --- | --- | 1,38 | down |
| 5907108 | 7371682 | 1800791 | --- | --- | --- | 1,77 | down |
| 5907159 | 7281877 | 1577530 | --- | --- | --- | 1,19 | down |
| 5907407 | 7065860 | 1045796 | --- | --- | --- | 1,10 | up   |
| 5907436 | 7339834 | 1719558 | --- | --- | --- | 1,29 | up   |
| 5907456 | 7227433 | 1440953 | --- | --- | --- | 1,14 | down |
| 5907490 | 7300392 | 1622752 | --- | --- | --- | 1,30 | up   |
| 5907542 | 7213908 | 1407761 | --- | --- | --- | 1,34 | up   |
| 5907742 | 7243363 | 1481594 | --- | --- | --- | 1,15 | down |
| 5907865 | 7120039 | 1177522 | --- | --- | --- | 1,12 | up   |
| 5907872 | 7358859 | 1767007 | --- | --- | --- | 1,03 | up   |
| 5907922 | 7374790 | 1808780 | --- | --- | --- | 1,10 | down |
| 5907996 | 7038659 | 982163  | --- | --- | --- | 1,02 | down |
| 5908045 | 7098867 | 1124950 | --- | --- | --- | 1,26 | up   |
| 5908163 | 7197138 | 1368012 | --- | --- | --- | 1,58 | down |
| 5908176 | 7100408 | 1128640 | --- | --- | --- | 1,02 | down |
| 5908272 | 7231152 | 1450232 | --- | --- | --- | 1,08 | down |
| 5908311 | 7151063 | 1253061 | --- | --- | --- | 1,20 | down |
| 5908320 | 7207069 | 1392031 | --- | --- | --- | 1,87 | down |
| 5908338 | 7383102 | 1827393 | --- | --- | --- | 2,11 | down |
| 5908341 | 7243627 | 1482355 | --- | --- | --- | 1,57 | down |
| 5908389 | 7225543 | 1435936 | --- | --- | --- | 2,21 | down |
| 5908423 | 7309646 | 1646517 | --- | --- | --- | 1,28 | down |
| 5908431 | 7280743 | 1574478 | --- | --- | --- | 1,12 | down |
| 5908689 | 7281188 | 1575803 | --- | --- | --- | 1,03 | down |
| 5908779 | 7097485 | 1120935 | --- | --- | --- | 1,29 | up   |
| 5908796 | 7253215 | 1505380 | --- | --- | --- | 1,33 | down |
| 5908872 | 7093936 | 1112479 | --- | --- | --- | 1,02 | up   |
| 5909079 | 7319773 | 1671870 | --- | --- | --- | 1,30 | down |
| 5909101 | 7281924 | 1577711 | --- | --- | --- | 1,08 | down |
| 5909120 | 7043379 | 993650  | --- | --- | --- | 1,03 | down |
| 5909184 | 7330238 | 1695935 | --- | --- | --- | 1,20 | up   |
| 5909378 | 7280982 | 1575212 | --- | --- | --- | 1,18 | up   |
| 5909380 | 7095041 | 1115164 | --- | --- | --- | 1,69 | up   |
| 5909454 | 7240569 | 1475462 | --- | --- | --- | 1,02 | up   |
| 5909469 | 7180732 | 1326734 | --- | --- | --- | 2,14 | down |
| 5909487 | 7167325 | 1292547 | --- | --- | --- | 1,10 | down |
| 5909494 | 7198210 | 1370973 | --- | --- | --- | 1,49 | up   |
| 5909528 | 7176456 | 1315829 | --- | --- | --- | 1,19 | up   |
| 5909586 | 7136746 | 1217968 | --- | --- | --- | 1,37 | up   |
| 5909596 | 7059917 | 1031331 | --- | --- | --- | 1,11 | up   |
| 5909663 | 7039303 | 983867  | --- | --- | --- | 1,03 | up   |
| 5909673 | 7050716 | 1011228 | --- | --- | --- | 1,65 | down |
| 5909677 | 7297589 | 1615687 | --- | --- | --- | 1,20 | up   |
| 5909707 | 7337425 | 1713194 | --- | --- | --- | 1,19 | up   |
| 5909708 | 7183182 | 1333559 | --- | --- | --- | 1,66 | down |
| 5909710 | 7088164 | 1098477 | --- | --- | --- | 1,22 | up   |
| 5909758 | 7131550 | 1205555 | --- | --- | --- | 1,09 | up   |



|         |         |         |     |     |     |      |      |
|---------|---------|---------|-----|-----|-----|------|------|
| 5909797 | 7200129 | 1375998 | --- | --- | --- | 1,18 | down |
| 5909848 | 7274585 | 1558769 | --- | --- | --- | 1,30 | up   |
| 5909856 | 7337522 | 1713596 | --- | --- | --- | 2,10 | down |
| 5909895 | 7264653 | 1534044 | --- | --- | --- | 1,31 | up   |
| 5909937 | 7062233 | 1037229 | --- | --- | --- | 1,08 | down |
| 5909987 | 7058713 | 1028666 | --- | --- | --- | 1,02 | up   |
| 5909993 | 7360486 | 1770949 | --- | --- | --- | 1,40 | up   |
| 5910013 | 7062233 | 1037215 | --- | --- | --- | 2,39 | up   |
| 5910056 | 7043515 | 994013  | --- | --- | --- | 1,13 | up   |
| 5910059 | 7073624 | 1064919 | --- | --- | --- | 2,20 | down |
| 5910069 | 7374324 | 1807496 | --- | --- | --- | 1,35 | up   |
| 5910111 | 7283429 | 1581219 | --- | --- | --- | 1,15 | down |
| 5910226 | 7186240 | 1340820 | --- | --- | --- | 1,02 | down |
| 5910328 | 7039532 | 984440  | --- | --- | --- | 1,51 | up   |
| 5910455 | 7381993 | 1825218 | --- | --- | --- | 2,59 | up   |
| 5910618 | 7255120 | 1510371 | --- | --- | --- | 1,15 | up   |
| 5910642 | 7193403 | 1359196 | --- | --- | --- | 1,01 | up   |
| 5910749 | 7127540 | 1195270 | --- | --- | --- | 1,32 | down |
| 5910871 | 7366728 | 1785433 | --- | --- | --- | 1,64 | down |
| 5910917 | 7070869 | 1058469 | --- | --- | --- | 1,14 | down |
| 5910988 | 7167325 | 1292547 | --- | --- | --- | 1,00 | up   |
| 5911067 | 7297589 | 1615649 | --- | --- | --- | 1,51 | down |
| 5911086 | 7208784 | 1396151 | --- | --- | --- | 1,23 | down |
| 5911108 | 7267204 | 1539852 | --- | --- | --- | 1,02 | up   |
| 5911165 | 7244027 | 1483290 | --- | --- | --- | 1,85 | up   |
| 5911181 | 7247848 | 1492065 | --- | --- | --- | 1,03 | up   |
| 5911185 | 7146542 | 1242262 | --- | --- | --- | 1,07 | up   |
| 5911216 | 7278010 | 1568046 | --- | --- | --- | 2,78 | up   |
| 5911241 | 7073854 | 1065633 | --- | --- | --- | 1,19 | down |
| 5911295 | 7361075 | 1772332 | --- | --- | --- | 1,60 | up   |
| 5911385 | 7280743 | 1574525 | --- | --- | --- | 1,60 | up   |
| 5911449 | 7365183 | 1781915 | --- | --- | --- | 1,00 | up   |
| 5911461 | 7029770 | 960158  | --- | --- | --- | 1,04 | down |
| 5911535 | 7289075 | 1594468 | --- | --- | --- | 1,01 | up   |
| 5911559 | 7121849 | 1181807 | --- | --- | --- | 1,21 | down |
| 5911594 | 7384073 | 1829452 | --- | --- | --- | 1,74 | down |
| 5911644 | 7071264 | 1059355 | --- | --- | --- | 1,04 | up   |
| 5911824 | 7156372 | 1266706 | --- | --- | --- | 1,17 | down |
| 5911852 | 7297589 | 1615687 | --- | --- | --- | 1,04 | up   |
| 5912085 | 7312566 | 1653322 | --- | --- | --- | 1,84 | down |
| 5912099 | 7069239 | 1054080 | --- | --- | --- | 1,44 | down |
| 5912153 | 7337845 | 1714340 | --- | --- | --- | 1,11 | up   |
| 5912260 | 7079326 | 1077973 | --- | --- | --- | 1,14 | down |
| 5912271 | 7176275 | 1315340 | --- | --- | --- | 1,37 | down |
| 5912288 | 7243628 | 1482364 | --- | --- | --- | 1,34 | down |
| 5912382 | 7059584 | 1030546 | --- | --- | --- | 2,10 | down |
| 5912435 | 7028326 | 957435  | --- | --- | --- | 1,00 | up   |
| 5912450 | 7069603 | 1055049 | --- | --- | --- | 1,13 | up   |
| 5912468 | 7188829 | 1346653 | --- | --- | --- | 1,54 | down |
| 5912548 | 7096924 | 1119603 | --- | --- | --- | 2,68 | down |
| 5912555 | 7099573 | 1126742 | --- | --- | --- | 2,07 | up   |
| 5912651 | 7223395 | 1431078 | --- | --- | --- | 1,04 | down |
| 5912688 | 7339387 | 1718396 | --- | --- | --- | 1,59 | down |
| 5912843 | 7289382 | 1595213 | --- | --- | --- | 1,02 | up   |
| 5912942 | 7057462 | 1025863 | --- | --- | --- | 1,23 | up   |
| 5913037 | 7043515 | 994016  | --- | --- | --- | 1,14 | down |
| 5913065 | 7288170 | 1592321 | --- | --- | --- | 1,01 | up   |

|         |         |         |     |     |     |      |      |
|---------|---------|---------|-----|-----|-----|------|------|
| 5913144 | 7240224 | 1474394 | --- | --- | --- | 1,09 | down |
| 5913248 | 7318139 | 1668068 | --- | --- | --- | 1,58 | down |
| 5913271 | 7095066 | 1115287 | --- | --- | --- | 1,01 | down |
| 5913302 | 7295652 | 1610305 | --- | --- | --- | 1,02 | up   |
| 5913328 | 7368004 | 1789332 | --- | --- | --- | 1,57 | up   |
| 5913407 | 7367969 | 1789094 | --- | --- | --- | 1,49 | down |
| 5913611 | 7329135 | 1693488 | --- | --- | --- | 1,06 | up   |
| 5913648 | 7356619 | 1761331 | --- | --- | --- | 1,43 | up   |
| 5913673 | 7122131 | 1182668 | --- | --- | --- | 1,05 | down |
| 5913690 | 7198210 | 1370972 | --- | --- | --- | 1,23 | down |
| 5913691 | 7148741 | 1247833 | --- | --- | --- | 1,31 | down |
| 5913766 | 7056333 | 1023680 | --- | --- | --- | 1,19 | up   |
| 5913860 | 7259925 | 1522548 | --- | --- | --- | 1,25 | up   |
| 5913937 | 7169732 | 1298782 | --- | --- | --- | 1,05 | down |
| 5913970 | 7110401 | 1153055 | --- | --- | --- | 1,19 | down |
| 5913987 | 7303777 | 1631901 | --- | --- | --- | 1,32 | down |
| 5914115 | 7353997 | 1754703 | --- | --- | --- | 1,02 | up   |
| 5914176 | 7353284 | 1752982 | --- | --- | --- | 1,24 | up   |
| 5914253 | 7280743 | 1574481 | --- | --- | --- | 1,25 | up   |
| 5914278 | 7031662 | 964367  | --- | --- | --- | 1,02 | down |
| 5914370 | 7166867 | 1291300 | --- | --- | --- | 1,06 | down |
| 5914417 | 7181105 | 1327967 | --- | --- | --- | 1,28 | up   |
| 5914511 | 7131550 | 1205555 | --- | --- | --- | 1,51 | down |
| 5914525 | 7360486 | 1770935 | --- | --- | --- | 1,05 | down |
| 5914688 | 7248790 | 1494513 | --- | --- | --- | 1,07 | up   |
| 5914754 | 7139026 | 1223494 | --- | --- | --- | 1,14 | down |
| 5914779 | 7075445 | 1069360 | --- | --- | --- | 1,45 | down |
| 5914825 | 7183927 | 1335500 | --- | --- | --- | 1,81 | up   |
| 5915004 | 7100523 | 1128925 | --- | --- | --- | 1,84 | up   |
| 5915033 | 7313841 | 1656721 | --- | --- | --- | 1,01 | up   |
| 5915088 | 7267000 | 1539308 | --- | --- | --- | 1,20 | down |
| 5915117 | 7094158 | 1112969 | --- | --- | --- | 3,23 | down |
| 5915119 | 7168521 | 1295960 | --- | --- | --- | 1,21 | up   |
| 5915148 | 7131766 | 1205862 | --- | --- | --- | 1,08 | down |
| 5915301 | 7346505 | 1736286 | --- | --- | --- | 2,09 | down |
| 5915379 | 7337425 | 1713214 | --- | --- | --- | 1,03 | down |
| 5915394 | 7069721 | 1055311 | --- | --- | --- | 1,14 | up   |
| 5915559 | 7025670 | 950443  | --- | --- | --- | 1,12 | up   |
| 5915637 | 7254053 | 1507638 | --- | --- | --- | 1,22 | up   |
| 5915655 | 7070461 | 1057368 | --- | --- | --- | 1,11 | up   |
| 5915663 | 7202749 | 1382053 | --- | --- | --- | 1,17 | down |
| 5915666 | 7327169 | 1688459 | --- | --- | --- | 1,03 | down |
| 5915683 | 7273251 | 1555948 | --- | --- | --- | 1,03 | up   |
| 5915827 | 7139825 | 1225356 | --- | --- | --- | 1,07 | down |
| 5915853 | 7335637 | 1708470 | --- | --- | --- | 1,88 | up   |
| 5916077 | 7336931 | 1711869 | --- | --- | --- | 1,03 | down |
| 5916109 | 7115963 | 1167042 | --- | --- | --- | 1,17 | down |
| 5916130 | 7115362 | 1165596 | --- | --- | --- | 1,04 | up   |
| 5916147 | 7186688 | 1341840 | --- | --- | --- | 1,09 | up   |
| 5916174 | 7326271 | 1686474 | --- | --- | --- | 1,08 | down |
| 5916279 | 7327169 | 1688468 | --- | --- | --- | 1,08 | down |
| 5916400 | 7264808 | 1534473 | --- | --- | --- | 1,14 | down |
| 5916427 | 7297274 | 1614654 | --- | --- | --- | 1,33 | up   |
| 5916431 | 7030549 | 961798  | --- | --- | --- | 1,26 | down |
| 5916522 | 7364346 | 1780021 | --- | --- | --- | 1,44 | up   |
| 5916569 | 7361881 | 1773956 | --- | --- | --- | 1,45 | up   |
| 5916762 | 7244287 | 1484085 | --- | --- | --- | 1,21 | up   |

|         |         |         |     |     |     |      |      |
|---------|---------|---------|-----|-----|-----|------|------|
| 5916848 | 7109292 | 1150747 | --- | --- | --- | 1,52 | down |
| 5916878 | 7148978 | 1248546 | --- | --- | --- | 1,03 | down |
| 5916901 | 7128704 | 1198021 | --- | --- | --- | 1,22 | up   |
| 5916904 | 7217679 | 1417307 | --- | --- | --- | 1,00 | up   |
| 5916923 | 7088164 | 1098472 | --- | --- | --- | 2,28 | down |
| 5916964 | 7120565 | 1178735 | --- | --- | --- | 1,10 | down |
| 5916976 | 7201422 | 1379187 | --- | --- | --- | 1,52 | up   |
| 5917150 | 7309738 | 1646950 | --- | --- | --- | 2,26 | down |
| 5917177 | 7231834 | 1452269 | --- | --- | --- | 2,14 | up   |
| 5917241 | 7344836 | 1732411 | --- | --- | --- | 1,10 | down |
| 5917249 | 7340673 | 1721694 | --- | --- | --- | 1,35 | down |
| 5917284 | 7280743 | 1574570 | --- | --- | --- | 1,26 | up   |
| 5917312 | 7097454 | 1120881 | --- | --- | --- | 1,88 | down |
| 5917351 | 7211363 | 1402044 | --- | --- | --- | 2,33 | down |
| 5917428 | 7291803 | 1600885 | --- | --- | --- | 1,06 | up   |
| 5917433 | 7381993 | 1825219 | --- | --- | --- | 2,85 | up   |
| 5917471 | 7038153 | 981158  | --- | --- | --- | 1,07 | down |
| 5917475 | 7309738 | 1646955 | --- | --- | --- | 1,10 | up   |
| 5917489 | 7249019 | 1495081 | --- | --- | --- | 1,36 | down |
| 5917501 | 7288077 | 1591997 | --- | --- | --- | 1,09 | up   |
| 5917557 | 7056333 | 1023677 | --- | --- | --- | 1,40 | down |
| 5917601 | 7074911 | 1068180 | --- | --- | --- | 1,02 | down |
| 5917658 | 7227474 | 1441146 | --- | --- | --- | 1,08 | up   |
| 5917739 | 7318714 | 1669233 | --- | --- | --- | 1,01 | down |
| 5917741 | 7038530 | 981874  | --- | --- | --- | 1,35 | up   |
| 5917756 | 7243628 | 1482367 | --- | --- | --- | 1,64 | up   |
| 5917834 | 7318651 | 1669071 | --- | --- | --- | 1,18 | up   |
| 5917899 | 7039302 | 983841  | --- | --- | --- | 1,54 | down |
| 5917917 | 7355138 | 1757825 | --- | --- | --- | 1,32 | down |
| 5918006 | 7041609 | 989592  | --- | --- | --- | 1,14 | up   |
| 5918172 | 7126400 | 1192530 | --- | --- | --- | 1,04 | down |
| 5918212 | 7100408 | 1128644 | --- | --- | --- | 1,24 | down |
| 5918287 | 7079475 | 1078289 | --- | --- | --- | 1,07 | up   |
| 5918290 | 7227433 | 1440973 | --- | --- | --- | 1,51 | up   |
| 5918301 | 7313841 | 1656711 | --- | --- | --- | 1,04 | up   |
| 5918381 | 7259221 | 1520632 | --- | --- | --- | 1,16 | down |
| 5918406 | 7364582 | 1780559 | --- | --- | --- | 2,06 | up   |
| 5918410 | 7099573 | 1126733 | --- | --- | --- | 1,04 | up   |
| 5918540 | 7223395 | 1431083 | --- | --- | --- | 1,19 | up   |
| 5918597 | 7380497 | 1821871 | --- | --- | --- | 1,13 | up   |
| 5918859 | 7350918 | 1747308 | --- | --- | --- | 1,69 | down |
| 5919000 | 7370002 | 1795788 | --- | --- | --- | 2,10 | up   |
| 5919051 | 7035525 | 974789  | --- | --- | --- | 1,10 | down |
| 5919089 | 7183182 | 1333574 | --- | --- | --- | 1,27 | down |
| 5919114 | 7380497 | 1821826 | --- | --- | --- | 1,06 | down |
| 5919192 | 7142917 | 1233182 | --- | --- | --- | 1,36 | up   |
| 5919193 | 7262570 | 1528975 | --- | --- | --- | 1,51 | down |
| 5919258 | 7181286 | 1328519 | --- | --- | --- | 1,23 | up   |
| 5919352 | 7035525 | 974784  | --- | --- | --- | 1,18 | down |
| 5919456 | 7087282 | 1096204 | --- | --- | --- | 1,42 | up   |
| 5919500 | 7143455 | 1234725 | --- | --- | --- | 1,03 | down |
| 5919533 | 7264745 | 1534279 | --- | --- | --- | 1,15 | down |
| 5919647 | 7140365 | 1226794 | --- | --- | --- | 1,40 | down |
| 5919666 | 7280743 | 1574485 | --- | --- | --- | 1,03 | up   |
| 5919668 | 7068259 | 1051649 | --- | --- | --- | 1,34 | down |
| 5919694 | 7339732 | 1719218 | --- | --- | --- | 1,39 | down |
| 5919727 | 7093936 | 1112469 | --- | --- | --- | 1,29 | down |

|         |         |         |     |     |     |      |      |
|---------|---------|---------|-----|-----|-----|------|------|
| 5919758 | 7080476 | 1080404 | --- | --- | --- | 1,08 | up   |
| 5919773 | 7384073 | 1829463 | --- | --- | --- | 1,08 | up   |
| 5919796 | 7127801 | 1195863 | --- | --- | --- | 1,80 | up   |
| 5919810 | 7167872 | 1294036 | --- | --- | --- | 1,19 | up   |
| 5919862 | 7179914 | 1324717 | --- | --- | --- | 1,03 | up   |
| 5919965 | 7368004 | 1789332 | --- | --- | --- | 1,46 | up   |
| 5919982 | 7373038 | 1804293 | --- | --- | --- | 1,45 | down |
| 5920001 | 7143412 | 1234610 | --- | --- | --- | 1,04 | up   |
| 5920142 | 7093936 | 1112479 | --- | --- | --- | 1,06 | down |
| 5920171 | 7099573 | 1126724 | --- | --- | --- | 1,11 | up   |
| 5920187 | 7341646 | 1724194 | --- | --- | --- | 2,22 | up   |
| 5920222 | 7071659 | 1060233 | --- | --- | --- | 1,01 | down |
| 5920269 | 7039532 | 984439  | --- | --- | --- | 1,07 | up   |
| 5920270 | 7212285 | 1403974 | --- | --- | --- | 2,31 | up   |
| 5920401 | 7285563 | 1586041 | --- | --- | --- | 1,03 | up   |
| 5920411 | 7259221 | 1520615 | --- | --- | --- | 1,30 | up   |
| 5920475 | 7217434 | 1416351 | --- | --- | --- | 1,08 | up   |
| 5920555 | 7367980 | 1789167 | --- | --- | --- | 1,33 | up   |
| 5920579 | 7260066 | 1522900 | --- | --- | --- | 1,24 | down |
| 5920599 | 7049689 | 1008886 | --- | --- | --- | 1,46 | up   |
| 5920644 | 7171091 | 1302468 | --- | --- | --- | 1,24 | down |
| 5920651 | 7317274 | 1665631 | --- | --- | --- | 1,27 | down |
| 5920677 | 7363674 | 1778439 | --- | --- | --- | 1,05 | up   |
| 5920708 | 7297756 | 1616095 | --- | --- | --- | 1,19 | up   |
| 5920741 | 7309734 | 1646874 | --- | --- | --- | 1,01 | down |
| 5920763 | 7309734 | 1646920 | --- | --- | --- | 1,23 | up   |
| 5920873 | 7059506 | 1030389 | --- | --- | --- | 1,31 | down |
| 5920894 | 7069830 | 1055636 | --- | --- | --- | 1,45 | up   |
| 5920949 | 7128112 | 1196567 | --- | --- | --- | 1,45 | down |
| 5920958 | 7340757 | 1721900 | --- | --- | --- | 1,07 | down |
| 5921053 | 7165644 | 1288009 | --- | --- | --- | 2,23 | down |
| 5921061 | 7093255 | 1110763 | --- | --- | --- | 1,12 | down |
| 5921103 | 7312566 | 1653304 | --- | --- | --- | 1,65 | down |
| 5921173 | 7132263 | 1206889 | --- | --- | --- | 1,02 | down |
| 5921292 | 7166867 | 1291308 | --- | --- | --- | 1,23 | up   |
| 5921303 | 7244290 | 1484145 | --- | --- | --- | 1,01 | down |
| 5921335 | 7357026 | 1762225 | --- | --- | --- | 1,01 | up   |
| 5921396 | 7071659 | 1060236 | --- | --- | --- | 1,08 | down |
| 5921408 | 7184151 | 1335967 | --- | --- | --- | 1,17 | down |
| 5921462 | 7128112 | 1196522 | --- | --- | --- | 1,11 | up   |
| 5921711 | 7363529 | 1777909 | --- | --- | --- | 1,15 | down |
| 5921779 | 7148741 | 1247828 | --- | --- | --- | 2,65 | down |
| 5921798 | 7179785 | 1324499 | --- | --- | --- | 1,27 | down |
| 5921822 | 7321414 | 1675632 | --- | --- | --- | 1,10 | down |
| 5921845 | 7355138 | 1757706 | --- | --- | --- | 1,00 | down |
| 5921850 | 7086522 | 1093935 | --- | --- | --- | 1,35 | down |
| 5921912 | 7293402 | 1604856 | --- | --- | --- | 1,01 | up   |
| 5921936 | 7059020 | 1029347 | --- | --- | --- | 1,31 | up   |
| 5922019 | 7277783 | 1567465 | --- | --- | --- | 1,03 | up   |
| 5922166 | 7197138 | 1368008 | --- | --- | --- | 1,16 | up   |
| 5922292 | 7056333 | 1023675 | --- | --- | --- | 1,15 | down |
| 5922461 | 7243363 | 1481603 | --- | --- | --- | 1,13 | up   |
| 5922469 | 7279073 | 1570680 | --- | --- | --- | 1,59 | down |
| 5922508 | 7371228 | 1799461 | --- | --- | --- | 1,06 | down |
| 5922575 | 7178752 | 1321784 | --- | --- | --- | 1,41 | up   |
| 5922583 | 7337425 | 1713145 | --- | --- | --- | 1,05 | up   |
| 5922591 | 7364346 | 1779980 | --- | --- | --- | 1,72 | down |

|         |         |         |     |     |     |      |      |
|---------|---------|---------|-----|-----|-----|------|------|
| 5922684 | 7200996 | 1378153 | --- | --- | --- | 1,68 | down |
| 5922712 | 7217747 | 1417495 | --- | --- | --- | 1,00 | down |
| 5922783 | 7043515 | 994009  | --- | --- | --- | 1,07 | up   |
| 5922799 | 7127540 | 1195270 | --- | --- | --- | 1,14 | up   |
| 5922810 | 7175946 | 1314642 | --- | --- | --- | 1,08 | up   |
| 5922835 | 7084792 | 1090341 | --- | --- | --- | 1,12 | down |
| 5922840 | 7168521 | 1295954 | --- | --- | --- | 1,08 | down |
| 5922862 | 7096924 | 1119619 | --- | --- | --- | 1,41 | up   |
| 5922869 | 7068259 | 1051626 | --- | --- | --- | 1,24 | down |
| 5922925 | 7198210 | 1370984 | --- | --- | --- | 1,04 | down |
| 5922975 | 7068259 | 1051610 | --- | --- | --- | 1,15 | down |
| 5922985 | 7132125 | 1206639 | --- | --- | --- | 1,29 | up   |
| 5923031 | 7096924 | 1119624 | --- | --- | --- | 2,72 | down |
| 5923316 | 7358859 | 1766970 | --- | --- | --- | 1,16 | down |
| 5923393 | 7148741 | 1247862 | --- | --- | --- | 1,06 | up   |
| 5923429 | 7305275 | 1635822 | --- | --- | --- | 1,15 | up   |
| 5923502 | 7281924 | 1577739 | --- | --- | --- | 1,71 | down |
| 5923564 | 7212735 | 1405035 | --- | --- | --- | 2,37 | up   |
| 5923565 | 7244027 | 1483278 | --- | --- | --- | 1,14 | up   |
| 5923679 | 7237346 | 1466593 | --- | --- | --- | 1,06 | down |
| 5923706 | 7337425 | 1713147 | --- | --- | --- | 1,05 | down |
| 5923742 | 7138349 | 1221926 | --- | --- | --- | 1,36 | up   |
| 5923821 | 7146093 | 1240986 | --- | --- | --- | 1,11 | down |
| 5923873 | 7309734 | 1646889 | --- | --- | --- | 1,09 | down |
| 5923888 | 7244288 | 1484120 | --- | --- | --- | 1,59 | down |
| 5923934 | 7039725 | 984831  | --- | --- | --- | 1,04 | up   |
| 5924026 | 7219605 | 1422065 | --- | --- | --- | 1,72 | down |
| 5924064 | 7137751 | 1220585 | --- | --- | --- | 1,37 | up   |
| 5924073 | 7058507 | 1028294 | --- | --- | --- | 1,08 | up   |
| 5924108 | 7268693 | 1544184 | --- | --- | --- | 1,48 | down |
| 5924121 | 7139026 | 1223508 | --- | --- | --- | 2,24 | up   |
| 5924315 | 7381090 | 1822986 | --- | --- | --- | 1,13 | up   |
| 5924333 | 7055793 | 1022296 | --- | --- | --- | 1,10 | up   |
| 5924391 | 7358859 | 1767006 | --- | --- | --- | 1,14 | down |
| 5924418 | 7097084 | 1119949 | --- | --- | --- | 4,06 | up   |
| 5924464 | 7030087 | 960788  | --- | --- | --- | 1,17 | down |
| 5924478 | 7309734 | 1646874 | --- | --- | --- | 1,02 | down |
| 5924516 | 7108556 | 1148719 | --- | --- | --- | 1,39 | down |
| 5924689 | 7217650 | 1417182 | --- | --- | --- | 1,44 | down |
| 5924727 | 7052331 | 1014597 | --- | --- | --- | 1,10 | up   |
| 5924821 | 7150348 | 1251398 | --- | --- | --- | 1,07 | down |
| 5924838 | 7330396 | 1696335 | --- | --- | --- | 1,07 | down |
| 5924874 | 7194540 | 1362117 | --- | --- | --- | 1,04 | up   |
| 5924934 | 7093835 | 1112220 | --- | --- | --- | 1,18 | up   |
| 5924944 | 7274892 | 1559526 | --- | --- | --- | 1,39 | up   |
| 5924956 | 7055876 | 1022469 | --- | --- | --- | 1,31 | down |
| 5925012 | 7110401 | 1153058 | --- | --- | --- | 1,21 | up   |
| 5925061 | 7290775 | 1598594 | --- | --- | --- | 1,11 | up   |
| 5925169 | 7231557 | 1451567 | --- | --- | --- | 1,08 | up   |
| 5925172 | 7274780 | 1559208 | --- | --- | --- | 1,06 | down |
| 5925207 | 7168403 | 1295573 | --- | --- | --- | 1,75 | down |
| 5925209 | 7146082 | 1240853 | --- | --- | --- | 1,06 | down |
| 5925269 | 7243363 | 1481583 | --- | --- | --- | 1,23 | down |
| 5925340 | 7217747 | 1417505 | --- | --- | --- | 1,00 | down |
| 5925348 | 7375937 | 1811362 | --- | --- | --- | 1,03 | down |
| 5925403 | 7115963 | 1167059 | --- | --- | --- | 1,07 | up   |
| 5925492 | 7250511 | 1498628 | --- | --- | --- | 1,08 | down |

|         |         |         |     |     |     |      |      |
|---------|---------|---------|-----|-----|-----|------|------|
| 5925553 | 7153895 | 1259919 | --- | --- | --- | 2,13 | down |
| 5925623 | 7312566 | 1653321 | --- | --- | --- | 1,60 | down |
| 5925642 | 7235840 | 1462994 | --- | --- | --- | 1,59 | up   |
| 5925689 | 7039725 | 984832  | --- | --- | --- | 1,97 | up   |
| 5925702 | 7138349 | 1221925 | --- | --- | --- | 1,76 | up   |
| 5925706 | 7330223 | 1695875 | --- | --- | --- | 1,08 | up   |
| 5925708 | 7033006 | 968471  | --- | --- | --- | 1,11 | up   |
| 5925736 | 7354896 | 1756996 | --- | --- | --- | 1,14 | down |
| 5925802 | 7070393 | 1057213 | --- | --- | --- | 1,25 | down |
| 5925871 | 7374324 | 1807472 | --- | --- | --- | 1,12 | down |
| 5925933 | 7363922 | 1778872 | --- | --- | --- | 1,32 | down |
| 5926114 | 7255911 | 1512225 | --- | --- | --- | 2,08 | up   |
| 5926192 | 7146872 | 1242900 | --- | --- | --- | 1,16 | up   |
| 5926230 | 7340673 | 1721711 | --- | --- | --- | 1,02 | up   |
| 5926476 | 7155866 | 1265336 | --- | --- | --- | 1,13 | up   |
| 5926483 | 7127691 | 1195628 | --- | --- | --- | 1,09 | up   |
| 5926728 | 7127540 | 1195298 | --- | --- | --- | 2,35 | down |
| 5926835 | 7231484 | 1451369 | --- | --- | --- | 1,03 | up   |
| 5926849 | 7174281 | 1310877 | --- | --- | --- | 1,40 | down |
| 5926971 | 7318143 | 1668091 | --- | --- | --- | 2,38 | down |
| 5927006 | 7068413 | 1051976 | --- | --- | --- | 1,10 | up   |
| 5927017 | 7286807 | 1588798 | --- | --- | --- | 1,03 | down |
| 5927052 | 7142081 | 1230973 | --- | --- | --- | 1,16 | up   |
| 5927140 | 7138349 | 1221926 | --- | --- | --- | 1,12 | up   |
| 5927171 | 7034293 | 971956  | --- | --- | --- | 1,09 | down |
| 5927348 | 7065273 | 1044610 | --- | --- | --- | 1,17 | down |
| 5927519 | 7340757 | 1721907 | --- | --- | --- | 1,11 | down |
| 5927548 | 7273744 | 1557022 | --- | --- | --- | 1,31 | up   |
| 5927591 | 7217650 | 1417194 | --- | --- | --- | 1,14 | up   |
| 5927610 | 7194400 | 1361755 | --- | --- | --- | 1,05 | up   |
| 5927615 | 7274892 | 1559555 | --- | --- | --- | 1,75 | down |
| 5927617 | 7373634 | 1805724 | --- | --- | --- | 1,00 | down |
| 5927637 | 7258784 | 1519674 | --- | --- | --- | 1,33 | down |
| 5927640 | 7374324 | 1807503 | --- | --- | --- | 1,23 | down |
| 5927643 | 7065810 | 1045682 | --- | --- | --- | 1,03 | down |
| 5927750 | 7093296 | 1110906 | --- | --- | --- | 1,28 | up   |
| 5927830 | 7098411 | 1123705 | --- | --- | --- | 1,06 | down |
| 5927863 | 7088489 | 1099518 | --- | --- | --- | 1,26 | up   |
| 5927966 | 7179785 | 1324491 | --- | --- | --- | 1,50 | down |
| 5927994 | 7131550 | 1205565 | --- | --- | --- | 1,02 | up   |
| 5928006 | 7122140 | 1182708 | --- | --- | --- | 1,10 | up   |
| 5928015 | 7088538 | 1099634 | --- | --- | --- | 1,59 | up   |
| 5928188 | 7168979 | 1297185 | --- | --- | --- | 1,23 | up   |
| 5928205 | 7318714 | 1669245 | --- | --- | --- | 1,10 | down |
| 5928492 | 7137646 | 1220437 | --- | --- | --- | 1,64 | down |
| 5928510 | 7258455 | 1518740 | --- | --- | --- | 1,27 | down |
| 5928642 | 7371001 | 1798852 | --- | --- | --- | 1,22 | up   |
| 5928810 | 7307473 | 1641271 | --- | --- | --- | 1,51 | down |
| 5928841 | 7279533 | 1571916 | --- | --- | --- | 1,56 | up   |
| 5928861 | 7364346 | 1780004 | --- | --- | --- | 1,60 | up   |
| 5928885 | 7217434 | 1416373 | --- | --- | --- | 1,03 | down |
| 5928888 | 7336854 | 1711688 | --- | --- | --- | 1,36 | down |
| 5928907 | 7043379 | 993638  | --- | --- | --- | 1,11 | up   |
| 5928934 | 7345456 | 1733791 | --- | --- | --- | 1,14 | up   |
| 5929018 | 7277719 | 1567068 | --- | --- | --- | 2,38 | up   |
| 5929029 | 7198210 | 1370985 | --- | --- | --- | 1,21 | down |
| 5929091 | 7099573 | 1126714 | --- | --- | --- | 1,03 | down |

|         |         |         |     |     |     |      |      |
|---------|---------|---------|-----|-----|-----|------|------|
| 5929118 | 7115362 | 1165593 | --- | --- | --- | 1,25 | down |
| 5929270 | 7337845 | 1714334 | --- | --- | --- | 1,39 | up   |
| 5929377 | 7180732 | 1326738 | --- | --- | --- | 1,31 | down |
| 5929526 | 7165644 | 1288026 | --- | --- | --- | 1,13 | up   |
| 5929614 | 7070393 | 1057214 | --- | --- | --- | 1,13 | down |
| 5929676 | 7227433 | 1440958 | --- | --- | --- | 1,21 | down |
| 5929713 | 7041609 | 989593  | --- | --- | --- | 1,39 | down |
| 5929760 | 7034293 | 971965  | --- | --- | --- | 1,09 | down |
| 5929776 | 7214605 | 1409375 | --- | --- | --- | 1,17 | up   |
| 5929815 | 7170764 | 1301447 | --- | --- | --- | 1,81 | up   |
| 5929930 | 7035525 | 974783  | --- | --- | --- | 1,32 | down |
| 5930035 | 7162959 | 1282088 | --- | --- | --- | 1,22 | up   |
| 5930116 | 7366749 | 1785486 | --- | --- | --- | 1,19 | down |
| 5930129 | 7068259 | 1051642 | --- | --- | --- | 1,83 | up   |
| 5930166 | 7155866 | 1265339 | --- | --- | --- | 1,23 | down |
| 5930223 | 7284934 | 1584914 | --- | --- | --- | 1,31 | down |
| 5930455 | 7080563 | 1080714 | --- | --- | --- | 2,44 | down |
| 5930610 | 7165954 | 1288770 | --- | --- | --- | 1,23 | down |
| 5930701 | 7049184 | 1007933 | --- | --- | --- | 1,44 | down |
| 5930732 | 7040674 | 987042  | --- | --- | --- | 2,41 | up   |
| 5930743 | 7372840 | 1803770 | --- | --- | --- | 1,49 | down |
| 5930856 | 7363576 | 1778194 | --- | --- | --- | 1,27 | up   |
| 5930886 | 7244290 | 1484160 | --- | --- | --- | 1,26 | down |
| 5930914 | 7384509 | 1830747 | --- | --- | --- | 1,96 | down |
| 5930927 | 7364582 | 1780527 | --- | --- | --- | 1,03 | down |
| 5931096 | 7236358 | 1464222 | --- | --- | --- | 1,82 | down |
| 5931221 | 7334855 | 1706951 | --- | --- | --- | 1,06 | up   |
| 5931302 | 7045955 | 1000739 | --- | --- | --- | 1,46 | down |
| 5931415 | 7148978 | 1248545 | --- | --- | --- | 1,09 | down |
| 5931448 | 7153136 | 1258046 | --- | --- | --- | 1,84 | down |
| 5931469 | 7061550 | 1035289 | --- | --- | --- | 1,50 | down |
| 5931490 | 7292869 | 1603424 | --- | --- | --- | 1,15 | up   |
| 5931499 | 7208784 | 1396147 | --- | --- | --- | 1,16 | up   |
| 5931704 | 7160053 | 1275382 | --- | --- | --- | 1,45 | down |
| 5931714 | 7359453 | 1768454 | --- | --- | --- | 2,53 | down |
| 5931730 | 7225317 | 1435358 | --- | --- | --- | 1,07 | down |
| 5931863 | 7329846 | 1694987 | --- | --- | --- | 1,42 | down |
| 5932034 | 7179176 | 1322915 | --- | --- | --- | 1,11 | down |
| 5932153 | 7376566 | 1812868 | --- | --- | --- | 1,67 | up   |
| 5932157 | 7297589 | 1615661 | --- | --- | --- | 1,00 | down |
| 5932188 | 7243894 | 1482967 | --- | --- | --- | 1,06 | up   |
| 5932245 | 7034356 | 972174  | --- | --- | --- | 1,06 | up   |
| 5932273 | 7063716 | 1040156 | --- | --- | --- | 1,09 | down |
| 5932274 | 7211363 | 1402043 | --- | --- | --- | 1,35 | down |
| 5932372 | 7132125 | 1206624 | --- | --- | --- | 1,00 | up   |
| 5932400 | 7069830 | 1055605 | --- | --- | --- | 1,77 | down |
| 5932424 | 7342356 | 1725893 | --- | --- | --- | 1,16 | down |
| 5932429 | 7280743 | 1574541 | --- | --- | --- | 1,46 | up   |
| 5932495 | 7320850 | 1674403 | --- | --- | --- | 2,20 | up   |
| 5932503 | 7232958 | 1455322 | --- | --- | --- | 1,06 | down |
| 5932553 | 7380497 | 1821833 | --- | --- | --- | 1,06 | up   |
| 5932731 | 7339379 | 1718343 | --- | --- | --- | 1,14 | up   |
| 5932774 | 7064732 | 1042910 | --- | --- | --- | 2,67 | down |
| 5932910 | 7344406 | 1731186 | --- | --- | --- | 1,18 | up   |
| 5932970 | 7095960 | 1117066 | --- | --- | --- | 1,12 | up   |
| 5932981 | 7281924 | 1577730 | --- | --- | --- | 1,24 | up   |
| 5933073 | 7231484 | 1451368 | --- | --- | --- | 1,34 | down |

|         |         |         |     |     |     |      |      |
|---------|---------|---------|-----|-----|-----|------|------|
| 5933077 | 7053874 | 1018331 | --- | --- | --- | 1,52 | up   |
| 5933159 | 7068987 | 1053587 | --- | --- | --- | 1,88 | down |
| 5933294 | 7237940 | 1468164 | --- | --- | --- | 1,14 | up   |
| 5933334 | 7076236 | 1071199 | --- | --- | --- | 1,04 | down |
| 5933470 | 7340990 | 1722516 | --- | --- | --- | 1,57 | down |
| 5933480 | 7088625 | 1099881 | --- | --- | --- | 1,37 | up   |
| 5933524 | 7118157 | 1172515 | --- | --- | --- | 1,05 | down |
| 5933533 | 7146245 | 1241349 | --- | --- | --- | 1,09 | up   |
| 5933577 | 7228520 | 1443766 | --- | --- | --- | 1,12 | up   |
| 5933737 | 7130889 | 1203866 | --- | --- | --- | 1,26 | down |
| 5933767 | 7053874 | 1018348 | --- | --- | --- | 1,07 | up   |
| 5933931 | 7071969 | 1060902 | --- | --- | --- | 1,08 | up   |
| 5933975 | 7075445 | 1069352 | --- | --- | --- | 1,02 | down |
| 5933993 | 7277783 | 1567476 | --- | --- | --- | 1,36 | down |
| 5934087 | 7055687 | 1022016 | --- | --- | --- | 1,74 | down |
| 5934099 | 7150047 | 1250783 | --- | --- | --- | 1,05 | down |
| 5934111 | 7293402 | 1604807 | --- | --- | --- | 1,07 | up   |
| 5934172 | 7075445 | 1069352 | --- | --- | --- | 1,17 | down |
| 5934229 | 7320735 | 1674154 | --- | --- | --- | 1,14 | up   |
| 5934231 | 7194400 | 1361754 | --- | --- | --- | 1,29 | up   |
| 5934345 | 7076099 | 1070671 | --- | --- | --- | 1,38 | up   |
| 5934422 | 7153136 | 1258043 | --- | --- | --- | 1,24 | up   |
| 5934463 | 7200129 | 1375996 | --- | --- | --- | 1,12 | down |
| 5934533 | 7267802 | 1541816 | --- | --- | --- | 1,05 | up   |
| 5934671 | 7355138 | 1757805 | --- | --- | --- | 1,54 | down |
| 5934711 | 7337425 | 1713146 | --- | --- | --- | 1,12 | up   |
| 5934749 | 7074911 | 1068173 | --- | --- | --- | 1,03 | down |
| 5934753 | 7181286 | 1328462 | --- | --- | --- | 1,03 | down |
| 5934773 | 7209927 | 1398916 | --- | --- | --- | 1,43 | down |
| 5934878 | 7376820 | 1813400 | --- | --- | --- | 1,08 | up   |
| 5934942 | 7113483 | 1161020 | --- | --- | --- | 1,21 | up   |
| 5934997 | 7366749 | 1785526 | --- | --- | --- | 1,30 | down |
| 5935003 | 7279881 | 1572746 | --- | --- | --- | 1,37 | up   |
| 5935074 | 7285563 | 1586040 | --- | --- | --- | 1,08 | up   |
| 5935130 | 7314270 | 1657753 | --- | --- | --- | 1,07 | down |
| 5935140 | 7322388 | 1677319 | --- | --- | --- | 1,26 | down |
| 5935172 | 7177834 | 1319597 | --- | --- | --- | 1,41 | up   |
| 5935199 | 7267953 | 1542238 | --- | --- | --- | 2,12 | down |
| 5935265 | 7243647 | 1482487 | --- | --- | --- | 1,10 | up   |
| 5935272 | 7194400 | 1361767 | --- | --- | --- | 1,13 | up   |
| 5935278 | 7210263 | 1399761 | --- | --- | --- | 1,08 | up   |
| 5935330 | 7198210 | 1371004 | --- | --- | --- | 1,72 | down |
| 5935349 | 7293402 | 1604692 | --- | --- | --- | 1,09 | up   |
| 5935366 | 7279568 | 1572023 | --- | --- | --- | 1,07 | up   |
| 5935459 | 7056333 | 1023671 | --- | --- | --- | 1,16 | down |
| 5935466 | 7281924 | 1577753 | --- | --- | --- | 1,80 | up   |
| 5935502 | 7086966 | 1095260 | --- | --- | --- | 1,02 | up   |
| 5935538 | 7132125 | 1206599 | --- | --- | --- | 1,71 | down |
| 5935577 | 7291803 | 1600885 | --- | --- | --- | 1,03 | down |
| 5935621 | 7337425 | 1713195 | --- | --- | --- | 1,21 | down |
| 5935731 | 7297589 | 1615679 | --- | --- | --- | 1,16 | up   |
| 5935743 | 7339379 | 1718320 | --- | --- | --- | 1,04 | up   |
| 5935778 | 7186688 | 1341844 | --- | --- | --- | 1,00 | down |
| 5935821 | 7280425 | 1573805 | --- | --- | --- | 2,14 | down |
| 5935979 | 7312250 | 1652646 | --- | --- | --- | 1,66 | up   |
| 5936042 | 7165954 | 1288767 | --- | --- | --- | 1,40 | down |
| 5936057 | 7282343 | 1578668 | --- | --- | --- | 1,09 | down |



|         |         |         |     |     |     |      |      |
|---------|---------|---------|-----|-----|-----|------|------|
| 5936208 | 7368000 | 1789293 | --- | --- | --- | 1,24 | down |
| 5936236 | 7264745 | 1534279 | --- | --- | --- | 1,50 | down |
| 5936279 | 7044349 | 996663  | --- | --- | --- | 1,26 | down |
| 5936378 | 7193403 | 1359190 | --- | --- | --- | 1,67 | up   |
| 5936417 | 7346505 | 1736288 | --- | --- | --- | 1,22 | up   |
| 5936481 | 7160687 | 1277001 | --- | --- | --- | 1,35 | up   |
| 5936526 | 7341243 | 1723220 | --- | --- | --- | 1,08 | down |
| 5936607 | 7099573 | 1126706 | --- | --- | --- | 1,20 | up   |
| 5936633 | 7321029 | 1674820 | --- | --- | --- | 1,15 | down |
| 5936690 | 7139708 | 1225051 | --- | --- | --- | 1,67 | down |
| 5936865 | 7302787 | 1628884 | --- | --- | --- | 1,01 | down |
| 5936927 | 7318143 | 1668088 | --- | --- | --- | 1,24 | up   |
| 5937130 | 7226277 | 1437988 | --- | --- | --- | 1,39 | down |
| 5937238 | 7080563 | 1080719 | --- | --- | --- | 1,35 | up   |
| 5937293 | 7053874 | 1018317 | --- | --- | --- | 1,08 | up   |
| 5937532 | 7374324 | 1807530 | --- | --- | --- | 1,06 | up   |
| 5937603 | 7119845 | 1176905 | --- | --- | --- | 1,08 | down |
| 5937619 | 7375673 | 1810748 | --- | --- | --- | 1,70 | down |
| 5937637 | 7146425 | 1241886 | --- | --- | --- | 1,21 | up   |
| 5937669 | 7084500 | 1089711 | --- | --- | --- | 2,07 | up   |
| 5937729 | 7070869 | 1058491 | --- | --- | --- | 1,26 | down |
| 5937779 | 7241163 | 1476819 | --- | --- | --- | 1,74 | up   |
| 5937788 | 7374313 | 1807388 | --- | --- | --- | 2,28 | up   |
| 5937816 | 7377791 | 1816004 | --- | --- | --- | 1,56 | down |
| 5937820 | 7327169 | 1688472 | --- | --- | --- | 2,21 | down |
| 5937902 | 7068413 | 1051980 | --- | --- | --- | 1,10 | up   |
| 5937953 | 7330731 | 1697189 | --- | --- | --- | 1,10 | down |
| 5938009 | 7237672 | 1467295 | --- | --- | --- | 1,35 | up   |
| 5938107 | 7274780 | 1559182 | --- | --- | --- | 1,07 | down |
| 5938236 | 7184850 | 1337601 | --- | --- | --- | 1,53 | up   |
| 5938237 | 7337872 | 1714460 | --- | --- | --- | 1,28 | up   |
| 5938406 | 7213908 | 1407758 | --- | --- | --- | 1,00 | up   |
| 5938532 | 7266544 | 1538346 | --- | --- | --- | 1,40 | up   |
| 5938556 | 7168439 | 1295711 | --- | --- | --- | 1,01 | down |
| 5938565 | 7116103 | 1167608 | --- | --- | --- | 1,49 | up   |
| 5938568 | 7379492 | 1819698 | --- | --- | --- | 1,11 | down |
| 5938575 | 7122585 | 1183686 | --- | --- | --- | 1,11 | down |
| 5938632 | 7240569 | 1475396 | --- | --- | --- | 1,00 | up   |
| 5938653 | 7237672 | 1467295 | --- | --- | --- | 1,14 | down |
| 5938678 | 7131876 | 1206049 | --- | --- | --- | 1,38 | up   |
| 5938701 | 7217650 | 1417171 | --- | --- | --- | 1,32 | up   |
| 5938760 | 7376566 | 1812866 | --- | --- | --- | 1,53 | down |
| 5938836 | 7247230 | 1490586 | --- | --- | --- | 1,30 | down |
| 5938965 | 7302787 | 1628884 | --- | --- | --- | 1,28 | up   |
| 5939028 | 7384904 | 1831598 | --- | --- | --- | 1,09 | down |
| 5939061 | 7158419 | 1271430 | --- | --- | --- | 1,11 | up   |
| 5939175 | 7225543 | 1435940 | --- | --- | --- | 1,02 | up   |
| 5939264 | 7027797 | 956300  | --- | --- | --- | 1,08 | up   |
| 5939374 | 7384509 | 1830744 | --- | --- | --- | 1,16 | up   |
| 5939472 | 7344406 | 1731193 | --- | --- | --- | 1,21 | down |
| 5939484 | 7261592 | 1526858 | --- | --- | --- | 1,25 | down |
| 5939551 | 7079238 | 1077823 | --- | --- | --- | 1,09 | up   |
| 5939578 | 7169732 | 1298758 | --- | --- | --- | 2,08 | down |
| 5939580 | 7236358 | 1464242 | --- | --- | --- | 1,11 | up   |
| 5939655 | 7060896 | 1033555 | --- | --- | --- | 1,08 | down |
| 5939684 | 7363674 | 1778437 | --- | --- | --- | 1,07 | up   |
| 5939864 | 7198210 | 1370960 | --- | --- | --- | 1,54 | down |

|         |         |         |     |     |     |      |      |
|---------|---------|---------|-----|-----|-----|------|------|
| 5939870 | 7121849 | 1181823 | --- | --- | --- | 1,08 | down |
| 5939880 | 7055793 | 1022297 | --- | --- | --- | 1,01 | down |
| 5940112 | 7340304 | 1720859 | --- | --- | --- | 1,35 | down |
| 5940132 | 7035525 | 974774  | --- | --- | --- | 1,03 | up   |
| 5940157 | 7197056 | 1367844 | --- | --- | --- | 2,35 | down |
| 5940169 | 7330731 | 1697165 | --- | --- | --- | 1,21 | up   |
| 5940461 | 7093255 | 1110763 | --- | --- | --- | 1,07 | down |
| 5940580 | 7044349 | 996663  | --- | --- | --- | 1,00 | up   |
| 5940755 | 7307473 | 1641275 | --- | --- | --- | 1,82 | up   |
| 5940762 | 7337224 | 1712543 | --- | --- | --- | 1,30 | up   |
| 5940802 | 7197056 | 1367832 | --- | --- | --- | 1,28 | down |
| 5940873 | 7031774 | 964706  | --- | --- | --- | 1,79 | up   |
| 5940886 | 7366749 | 1785519 | --- | --- | --- | 1,02 | up   |
| 5940895 | 7287337 | 1589985 | --- | --- | --- | 2,70 | down |
| 5940990 | 7033337 | 969494  | --- | --- | --- | 1,03 | down |
| 5941050 | 7186464 | 1341371 | --- | --- | --- | 1,02 | up   |
| 5941459 | 7380497 | 1821861 | --- | --- | --- | 1,29 | down |
| 5941503 | 7267802 | 1541788 | --- | --- | --- | 1,32 | up   |
| 5941549 | 7249019 | 1495081 | --- | --- | --- | 1,28 | down |
| 5941556 | 7236358 | 1464255 | --- | --- | --- | 1,64 | down |
| 5941563 | 7068259 | 1051649 | --- | --- | --- | 1,06 | up   |
| 5941722 | 7088544 | 1099678 | --- | --- | --- | 1,33 | up   |
| 5941738 | 7213908 | 1407652 | --- | --- | --- | 1,38 | down |
| 5941747 | 7162144 | 1280501 | --- | --- | --- | 1,12 | up   |
| 5941867 | 7040442 | 986513  | --- | --- | --- | 1,64 | up   |
| 5941907 | 7244027 | 1483281 | --- | --- | --- | 1,68 | up   |
| 5941918 | 7252877 | 1504785 | --- | --- | --- | 1,06 | up   |
| 5941988 | 7350993 | 1747545 | --- | --- | --- | 1,18 | up   |
| 5941989 | 7120379 | 1178332 | --- | --- | --- | 1,17 | down |
| 5941991 | 7061948 | 1036375 | --- | --- | --- | 1,13 | down |
| 5942148 | 7063873 | 1040642 | --- | --- | --- | 1,45 | down |
| 5942188 | 7318286 | 1668328 | --- | --- | --- | 1,16 | down |
| 5942277 | 7120427 | 1178425 | --- | --- | --- | 2,07 | down |
| 5942376 | 7140365 | 1226772 | --- | --- | --- | 1,40 | up   |
| 5942395 | 7274892 | 1559548 | --- | --- | --- | 1,03 | up   |
| 5942400 | 7107926 | 1146840 | --- | --- | --- | 1,33 | up   |
| 5942504 | 7052385 | 1014792 | --- | --- | --- | 1,54 | down |
| 5942520 | 7190242 | 1350323 | --- | --- | --- | 1,42 | down |
| 5942618 | 7198210 | 1370988 | --- | --- | --- | 1,50 | down |
| 5942727 | 7240569 | 1475470 | --- | --- | --- | 1,01 | down |
| 5943018 | 7371677 | 1800755 | --- | --- | --- | 2,74 | up   |
| 5943036 | 7384509 | 1830721 | --- | --- | --- | 1,89 | down |
| 5943071 | 7101206 | 1130456 | --- | --- | --- | 1,06 | down |
| 5943089 | 7243253 | 1481228 | --- | --- | --- | 2,03 | down |
| 5943092 | 7340263 | 1720748 | --- | --- | --- | 1,12 | down |
| 5943103 | 7243726 | 1482679 | --- | --- | --- | 1,07 | up   |
| 5943126 | 7102708 | 1134316 | --- | --- | --- | 1,20 | up   |
| 5943160 | 7243647 | 1482456 | --- | --- | --- | 1,00 | down |
| 5943221 | 7030519 | 961688  | --- | --- | --- | 1,37 | up   |
| 5943250 | 7239752 | 1473154 | --- | --- | --- | 1,40 | down |
| 5943331 | 7069253 | 1054170 | --- | --- | --- | 1,46 | down |
| 5943418 | 7039303 | 983865  | --- | --- | --- | 1,01 | up   |
| 5943510 | 7073677 | 1065160 | --- | --- | --- | 1,66 | down |
| 5943543 | 7216994 | 1415187 | --- | --- | --- | 1,41 | up   |
| 5943579 | 7040674 | 987054  | --- | --- | --- | 1,55 | up   |
| 5943640 | 7090581 | 1104741 | --- | --- | --- | 1,45 | up   |
| 5943785 | 7156978 | 1268176 | --- | --- | --- | 1,13 | up   |

|         |         |         |     |     |     |      |      |
|---------|---------|---------|-----|-----|-----|------|------|
| 5943851 | 7176368 | 1315589 | --- | --- | --- | 1,04 | up   |
| 5943904 | 7039725 | 984820  | --- | --- | --- | 1,30 | down |
| 5943970 | 7177428 | 1318395 | --- | --- | --- | 1,05 | down |
| 5944010 | 7216994 | 1415186 | --- | --- | --- | 1,11 | up   |
| 5944024 | 7233178 | 1455903 | --- | --- | --- | 1,02 | down |
| 5944102 | 7217650 | 1417187 | --- | --- | --- | 1,03 | up   |
| 5944134 | 7059971 | 1031460 | --- | --- | --- | 1,00 | down |
| 5944164 | 7107503 | 1145765 | --- | --- | --- | 1,02 | down |
| 5944295 | 7363529 | 1777901 | --- | --- | --- | 1,09 | up   |
| 5944333 | 7217679 | 1417317 | --- | --- | --- | 1,36 | down |
| 5944373 | 7098867 | 1124948 | --- | --- | --- | 1,08 | up   |
| 5944457 | 7190534 | 1351230 | --- | --- | --- | 1,44 | up   |
| 5944485 | 7335903 | 1709287 | --- | --- | --- | 1,84 | down |
| 5944517 | 7351844 | 1749495 | --- | --- | --- | 2,26 | down |
| 5944564 | 7096461 | 1118271 | --- | --- | --- | 1,08 | up   |
| 5944605 | 7209811 | 1398665 | --- | --- | --- | 1,33 | up   |
| 5944740 | 7207971 | 1394316 | --- | --- | --- | 1,19 | up   |
| 5944749 | 7321204 | 1675165 | --- | --- | --- | 1,05 | down |
| 5944776 | 7121849 | 1181787 | --- | --- | --- | 1,07 | down |
| 5944851 | 7243363 | 1481624 | --- | --- | --- | 1,94 | down |
| 5944862 | 7166867 | 1291333 | --- | --- | --- | 1,47 | up   |
| 5945189 | 7230628 | 1448867 | --- | --- | --- | 1,08 | down |
| 5945494 | 7267953 | 1542230 | --- | --- | --- | 2,16 | down |
| 5945506 | 7363674 | 1778421 | --- | --- | --- | 1,04 | down |
| 5945609 | 7277719 | 1567079 | --- | --- | --- | 1,03 | down |
| 5945651 | 7329846 | 1694993 | --- | --- | --- | 1,26 | down |
| 5945718 | 7313841 | 1656731 | --- | --- | --- | 1,11 | up   |
| 5945726 | 7317318 | 1665834 | --- | --- | --- | 1,42 | up   |
| 5945812 | 7336931 | 1711860 | --- | --- | --- | 1,07 | down |
| 5945846 | 7144389 | 1236781 | --- | --- | --- | 1,38 | up   |
| 5945864 | 7337224 | 1712606 | --- | --- | --- | 3,22 | up   |
| 5945911 | 7231484 | 1451384 | --- | --- | --- | 1,20 | up   |
| 5946002 | 7221855 | 1427255 | --- | --- | --- | 1,49 | down |
| 5946013 | 7156052 | 1265784 | --- | --- | --- | 1,69 | down |
| 5946265 | 7143455 | 1234731 | --- | --- | --- | 1,12 | up   |
| 5946272 | 7067828 | 1050795 | --- | --- | --- | 1,15 | up   |
| 5946304 | 7337845 | 1714347 | --- | --- | --- | 1,03 | down |
| 5946331 | 7069721 | 1055294 | --- | --- | --- | 1,05 | up   |
| 5946358 | 7315571 | 1660971 | --- | --- | --- | 2,75 | up   |
| 5946399 | 7059584 | 1030550 | --- | --- | --- | 1,50 | up   |
| 5946424 | 7028326 | 957436  | --- | --- | --- | 1,00 | down |
| 5946457 | 7223633 | 1431502 | --- | --- | --- | 1,00 | down |
| 5946506 | 7231484 | 1451385 | --- | --- | --- | 1,16 | down |
| 5946545 | 7071292 | 1059424 | --- | --- | --- | 1,04 | down |
| 5946594 | 7056736 | 1024421 | --- | --- | --- | 1,28 | down |
| 5946600 | 7128704 | 1198017 | --- | --- | --- | 1,03 | down |
| 5946601 | 7374740 | 1808627 | --- | --- | --- | 1,23 | up   |
| 5946672 | 7361881 | 1773954 | --- | --- | --- | 1,17 | up   |
| 5946853 | 7243253 | 1481232 | --- | --- | --- | 1,04 | down |
| 5946867 | 7087965 | 1098034 | --- | --- | --- | 1,19 | up   |
| 5946878 | 7068259 | 1051627 | --- | --- | --- | 1,34 | down |
| 5946956 | 7065860 | 1045809 | --- | --- | --- | 1,52 | up   |
| 5946970 | 7196331 | 1366388 | --- | --- | --- | 1,01 | up   |
| 5946991 | 7297589 | 1615663 | --- | --- | --- | 1,04 | down |
| 5947046 | 7081487 | 1082706 | --- | --- | --- | 1,20 | down |
| 5947152 | 7029770 | 960157  | --- | --- | --- | 1,09 | down |
| 5947158 | 7308679 | 1644246 | --- | --- | --- | 1,16 | up   |

|         |         |         |     |     |     |      |      |
|---------|---------|---------|-----|-----|-----|------|------|
| 5947165 | 7170764 | 1301472 | --- | --- | --- | 1,29 | up   |
| 5947217 | 7227433 | 1440971 | --- | --- | --- | 1,39 | up   |
| 5947349 | 7108434 | 1148302 | --- | --- | --- | 1,50 | down |
| 5947387 | 7340757 | 1721899 | --- | --- | --- | 1,66 | down |
| 5947413 | 7363674 | 1778440 | --- | --- | --- | 1,06 | up   |
| 5947506 | 7153895 | 1259914 | --- | --- | --- | 1,41 | down |
| 5947614 | 7095041 | 1115172 | --- | --- | --- | 1,24 | up   |
| 5947631 | 7142917 | 1233179 | --- | --- | --- | 1,47 | up   |
| 5947794 | 7306330 | 1638537 | --- | --- | --- | 1,58 | up   |
| 5947830 | 7369954 | 1795675 | --- | --- | --- | 1,28 | down |
| 5947947 | 7279593 | 1572093 | --- | --- | --- | 2,11 | down |
| 5948036 | 7172373 | 1305568 | --- | --- | --- | 1,00 | up   |
| 5948148 | 7063716 | 1040162 | --- | --- | --- | 1,28 | up   |
| 5948215 | 7235840 | 1462991 | --- | --- | --- | 1,21 | up   |
| 5948242 | 7312338 | 1652777 | --- | --- | --- | 5,12 | down |
| 5948271 | 7176368 | 1315564 | --- | --- | --- | 1,33 | down |
| 5948290 | 7295652 | 1610286 | --- | --- | --- | 1,56 | down |
| 5948317 | 7227474 | 1441113 | --- | --- | --- | 2,25 | down |
| 5948321 | 7309734 | 1646942 | --- | --- | --- | 1,02 | up   |
| 5948478 | 7353232 | 1752808 | --- | --- | --- | 1,01 | down |
| 5948503 | 7195680 | 1364871 | --- | --- | --- | 2,33 | up   |
| 5948550 | 7350489 | 1746118 | --- | --- | --- | 2,35 | down |
| 5948567 | 7096680 | 1118809 | --- | --- | --- | 1,40 | up   |
| 5948604 | 7100523 | 1128872 | --- | --- | --- | 1,05 | down |
| 5948628 | 7086966 | 1095242 | --- | --- | --- | 1,08 | up   |
| 5948646 | 7374324 | 1807531 | --- | --- | --- | 1,34 | down |
| 5948698 | 7380497 | 1821866 | --- | --- | --- | 1,46 | up   |
| 5948718 | 7236131 | 1463786 | --- | --- | --- | 1,13 | down |
| 5948757 | 7038179 | 981262  | --- | --- | --- | 1,12 | down |
| 5948847 | 7302860 | 1629005 | --- | --- | --- | 1,19 | up   |
| 5948896 | 7279568 | 1572033 | --- | --- | --- | 1,51 | up   |
| 5948932 | 7216970 | 1415120 | --- | --- | --- | 3,86 | up   |
| 5948973 | 7098077 | 1122727 | --- | --- | --- | 1,09 | down |
| 5948996 | 7350237 | 1745496 | --- | --- | --- | 1,04 | down |
| 5948999 | 7231484 | 1451394 | --- | --- | --- | 1,65 | up   |
| 5949015 | 7039308 | 983908  | --- | --- | --- | 1,23 | down |
| 5949121 | 7233513 | 1457171 | --- | --- | --- | 1,60 | up   |
| 5949163 | 7247907 | 1492244 | --- | --- | --- | 1,06 | down |
| 5949169 | 7256789 | 1514641 | --- | --- | --- | 2,29 | down |
| 5949183 | 7059309 | 1029905 | --- | --- | --- | 1,78 | down |
| 5949275 | 7309738 | 1646948 | --- | --- | --- | 1,32 | down |
| 5949313 | 7330396 | 1696372 | --- | --- | --- | 1,16 | up   |
| 5949344 | 7152974 | 1257656 | --- | --- | --- | 1,06 | up   |
| 5949373 | 7277742 | 1567162 | --- | --- | --- | 1,45 | down |
| 5949417 | 7280743 | 1574561 | --- | --- | --- | 1,38 | up   |
| 5949425 | 7297589 | 1615621 | --- | --- | --- | 1,06 | down |
| 5949461 | 7182739 | 1332585 | --- | --- | --- | 1,21 | up   |
| 5949580 | 7044349 | 996694  | --- | --- | --- | 1,01 | down |
| 5949584 | 7240569 | 1475304 | --- | --- | --- | 1,01 | down |
| 5949813 | 7043379 | 993638  | --- | --- | --- | 2,78 | up   |
| 5949854 | 7235794 | 1462895 | --- | --- | --- | 1,39 | down |
| 5949868 | 7237672 | 1467294 | --- | --- | --- | 1,20 | up   |
| 5949929 | 7363674 | 1778421 | --- | --- | --- | 2,03 | up   |
| 5950014 | 7238252 | 1469133 | --- | --- | --- | 1,00 | down |
| 5950027 | 7039725 | 984828  | --- | --- | --- | 1,34 | down |
| 5950066 | 7360325 | 1770511 | --- | --- | --- | 1,01 | down |
| 5950116 | 7253215 | 1505380 | --- | --- | --- | 2,45 | down |

|         |         |         |     |     |     |      |      |
|---------|---------|---------|-----|-----|-----|------|------|
| 5950234 | 7110330 | 1152890 | --- | --- | --- | 1,27 | down |
| 5950352 | 7365147 | 1781770 | --- | --- | --- | 1,13 | down |
| 5950502 | 7363674 | 1778430 | --- | --- | --- | 1,17 | down |
| 5950535 | 7071714 | 1060355 | --- | --- | --- | 1,17 | up   |
| 5950678 | 7181001 | 1327642 | --- | --- | --- | 1,24 | down |
| 5950679 | 7288077 | 1591998 | --- | --- | --- | 1,47 | up   |
| 5950718 | 7307424 | 1641141 | --- | --- | --- | 2,01 | up   |
| 5950823 | 7208784 | 1396161 | --- | --- | --- | 1,29 | up   |
| 5950837 | 7098831 | 1124861 | --- | --- | --- | 1,58 | up   |
| 5950891 | 7244288 | 1484128 | --- | --- | --- | 1,77 | down |
| 5950953 | 7184931 | 1337721 | --- | --- | --- | 1,31 | up   |
| 5950956 | 7286807 | 1588775 | --- | --- | --- | 1,20 | down |
| 5950998 | 7052385 | 1014804 | --- | --- | --- | 1,10 | up   |
| 5951019 | 7350993 | 1747526 | --- | --- | --- | 1,01 | up   |
| 5951083 | 7142321 | 1231570 | --- | --- | --- | 2,59 | up   |
| 5951087 | 7205750 | 1388925 | --- | --- | --- | 2,38 | down |
| 5951094 | 7252877 | 1504759 | --- | --- | --- | 1,12 | up   |
| 5951099 | 7099543 | 1126634 | --- | --- | --- | 1,09 | down |
| 5951157 | 7202749 | 1382061 | --- | --- | --- | 1,01 | up   |
| 5951223 | 7064732 | 1042933 | --- | --- | --- | 1,71 | down |
| 5951301 | 7361881 | 1773946 | --- | --- | --- | 1,04 | up   |
| 5951316 | 7364582 | 1780522 | --- | --- | --- | 1,24 | up   |
| 5951482 | 7236358 | 1464264 | --- | --- | --- | 1,42 | up   |
| 5951548 | 7089080 | 1101148 | --- | --- | --- | 1,34 | up   |
| 5951611 | 7056304 | 1023603 | --- | --- | --- | 1,12 | up   |
| 5951711 | 7373678 | 1805871 | --- | --- | --- | 1,36 | down |
| 5951751 | 7336854 | 1711682 | --- | --- | --- | 1,24 | down |
| 5951794 | 7326271 | 1686515 | --- | --- | --- | 1,13 | up   |
| 5951827 | 7252877 | 1504737 | --- | --- | --- | 1,57 | down |
| 5951954 | 7238153 | 1468830 | --- | --- | --- | 1,06 | down |
| 5952007 | 7358859 | 1766972 | --- | --- | --- | 1,03 | up   |
| 5952079 | 7147809 | 1245466 | --- | --- | --- | 1,42 | down |
| 5952226 | 7349643 | 1744191 | --- | --- | --- | 1,56 | down |
| 5952227 | 7369129 | 1793291 | --- | --- | --- | 1,50 | down |
| 5952248 | 7219304 | 1421275 | --- | --- | --- | 1,26 | down |
| 5952443 | 7337845 | 1714343 | --- | --- | --- | 1,13 | down |
| 5952475 | 7176275 | 1315350 | --- | --- | --- | 1,19 | down |
| 5952545 | 7240569 | 1475447 | --- | --- | --- | 1,02 | down |
| 5952594 | 7234040 | 1458504 | --- | --- | --- | 1,10 | up   |
| 5952600 | 7078666 | 1076529 | --- | --- | --- | 1,46 | up   |
| 5952617 | 7281924 | 1577720 | --- | --- | --- | 1,15 | down |
| 5952629 | 7330238 | 1695927 | --- | --- | --- | 1,13 | down |
| 5952670 | 7239939 | 1473785 | --- | --- | --- | 1,61 | down |
| 5952749 | 7162959 | 1282089 | --- | --- | --- | 1,05 | up   |
| 5952810 | 7041319 | 988753  | --- | --- | --- | 1,29 | down |
| 5952903 | 7109292 | 1150740 | --- | --- | --- | 1,00 | up   |
| 5952919 | 7312686 | 1653621 | --- | --- | --- | 1,08 | up   |
| 5952924 | 7219605 | 1422078 | --- | --- | --- | 1,75 | down |
| 5952930 | 7037235 | 978573  | --- | --- | --- | 1,14 | up   |
| 5953005 | 7042382 | 991289  | --- | --- | --- | 1,13 | down |
| 5953006 | 7032204 | 966154  | --- | --- | --- | 1,19 | down |
| 5953170 | 7289075 | 1594458 | --- | --- | --- | 1,29 | up   |
| 5953504 | 7032204 | 966173  | --- | --- | --- | 1,07 | up   |
| 5953547 | 7297589 | 1615623 | --- | --- | --- | 1,38 | up   |
| 5953576 | 7094139 | 1112914 | --- | --- | --- | 1,12 | up   |
| 5953625 | 7038530 | 981872  | --- | --- | --- | 1,04 | up   |
| 5953661 | 7274780 | 1559217 | --- | --- | --- | 2,16 | down |

|         |         |         |     |     |     |      |      |
|---------|---------|---------|-----|-----|-----|------|------|
| 5953795 | 7261592 | 1526843 | --- | --- | --- | 1,27 | up   |
| 5953902 | 7181105 | 1327967 | --- | --- | --- | 1,03 | down |
| 5953978 | 7132125 | 1206633 | --- | --- | --- | 1,02 | down |
| 5954111 | 7052813 | 1015930 | --- | --- | --- | 1,25 | down |
| 5954129 | 7279568 | 1572034 | --- | --- | --- | 1,14 | up   |
| 5954135 | 7181105 | 1327967 | --- | --- | --- | 1,57 | down |
| 5954150 | 7086966 | 1095274 | --- | --- | --- | 1,04 | down |
| 5954168 | 7088544 | 1099671 | --- | --- | --- | 1,28 | up   |
| 5954319 | 7346066 | 1735313 | --- | --- | --- | 1,00 | up   |
| 5954356 | 7255463 | 1511210 | --- | --- | --- | 1,41 | down |
| 5954374 | 7314270 | 1657723 | --- | --- | --- | 1,33 | up   |
| 5954393 | 7080563 | 1080718 | --- | --- | --- | 1,03 | down |
| 5954492 | 7319627 | 1671265 | --- | --- | --- | 1,22 | up   |
| 5954516 | 7171091 | 1302460 | --- | --- | --- | 1,49 | up   |
| 5954545 | 7028624 | 957994  | --- | --- | --- | 1,01 | down |
| 5954554 | 7341002 | 1722552 | --- | --- | --- | 1,16 | up   |
| 5954557 | 7041609 | 989560  | --- | --- | --- | 1,28 | down |
| 5954596 | 7069603 | 1055052 | --- | --- | --- | 1,04 | up   |
| 5954669 | 7149817 | 1250310 | --- | --- | --- | 1,63 | down |
| 5954674 | 7349313 | 1743115 | --- | --- | --- | 1,30 | down |
| 5954696 | 7225291 | 1435293 | --- | --- | --- | 1,04 | up   |
| 5954756 | 7212587 | 1404652 | --- | --- | --- | 1,16 | up   |
| 5954789 | 7106752 | 1144021 | --- | --- | --- | 1,40 | down |
| 5954792 | 7315206 | 1660026 | --- | --- | --- | 1,05 | down |
| 5954804 | 7239752 | 1473180 | --- | --- | --- | 1,51 | down |
| 5954915 | 7312627 | 1653488 | --- | --- | --- | 1,21 | down |
| 5955024 | 7373633 | 1805714 | --- | --- | --- | 1,17 | down |
| 5955028 | 7332059 | 1700727 | --- | --- | --- | 1,18 | up   |
| 5955121 | 7139026 | 1223493 | --- | --- | --- | 1,50 | up   |
| 5955126 | 7175946 | 1314652 | --- | --- | --- | 1,36 | up   |
| 5955237 | 7361042 | 1772258 | --- | --- | --- | 1,13 | up   |
| 5955263 | 7034356 | 972164  | --- | --- | --- | 1,05 | down |
| 5955266 | 7168979 | 1297178 | --- | --- | --- | 1,18 | up   |
| 5955341 | 7244290 | 1484153 | --- | --- | --- | 1,09 | down |
| 5955393 | 7217679 | 1417291 | --- | --- | --- | 1,08 | up   |
| 5955413 | 7306680 | 1639571 | --- | --- | --- | 1,11 | down |
| 5955422 | 7088625 | 1099866 | --- | --- | --- | 1,17 | down |
| 5955431 | 7233012 | 1455413 | --- | --- | --- | 1,02 | up   |
| 5955481 | 7050716 | 1011222 | --- | --- | --- | 1,09 | up   |
| 5955522 | 7052813 | 1015900 | --- | --- | --- | 1,51 | up   |
| 5955558 | 7139708 | 1225058 | --- | --- | --- | 2,09 | up   |
| 5955616 | 7100210 | 1128137 | --- | --- | --- | 1,51 | down |
| 5955621 | 7117951 | 1172082 | --- | --- | --- | 1,30 | up   |
| 5955643 | 7255522 | 1511454 | --- | --- | --- | 1,08 | down |
| 5955757 | 7096461 | 1118270 | --- | --- | --- | 1,22 | down |
| 5955793 | 7306229 | 1638245 | --- | --- | --- | 1,20 | down |
| 5955806 | 7156978 | 1268177 | --- | --- | --- | 1,03 | up   |
| 5955842 | 7128704 | 1198023 | --- | --- | --- | 1,15 | up   |
| 5955849 | 7274780 | 1559253 | --- | --- | --- | 1,33 | down |
| 5955893 | 7376828 | 1813466 | --- | --- | --- | 2,10 | down |
| 5955994 | 7374324 | 1807519 | --- | --- | --- | 1,05 | up   |
| 5956061 | 7217747 | 1417488 | --- | --- | --- | 1,11 | down |
| 5956129 | 7086522 | 1093957 | --- | --- | --- | 2,16 | down |
| 5956253 | 7278010 | 1568033 | --- | --- | --- | 1,33 | up   |
| 5956331 | 7342356 | 1725892 | --- | --- | --- | 1,85 | up   |
| 5956383 | 7100523 | 1128859 | --- | --- | --- | 1,25 | up   |
| 5956394 | 7172988 | 1307332 | --- | --- | --- | 1,37 | down |

|         |         |         |     |     |     |      |      |
|---------|---------|---------|-----|-----|-----|------|------|
| 5956561 | 7341546 | 1723944 | --- | --- | --- | 1,42 | down |
| 5956580 | 7344530 | 1731572 | --- | --- | --- | 1,17 | down |
| 5956647 | 7231152 | 1450276 | --- | --- | --- | 2,05 | up   |
| 5956658 | 7142081 | 1230948 | --- | --- | --- | 1,07 | up   |
| 5956693 | 7281924 | 1577752 | --- | --- | --- | 1,66 | down |
| 5956703 | 7244287 | 1484044 | --- | --- | --- | 1,06 | down |
| 5956714 | 7092549 | 1109177 | --- | --- | --- | 1,32 | down |
| 5956745 | 7097485 | 1120949 | --- | --- | --- | 1,06 | down |
| 5956842 | 7233513 | 1457177 | --- | --- | --- | 1,10 | up   |
| 5956948 | 7226277 | 1437987 | --- | --- | --- | 1,14 | up   |
| 5956982 | 7368815 | 1792322 | --- | --- | --- | 1,33 | down |
| 5957016 | 7340673 | 1721710 | --- | --- | --- | 1,02 | up   |
| 5957018 | 7211363 | 1402040 | --- | --- | --- | 1,01 | up   |
| 5957038 | 7234040 | 1458482 | --- | --- | --- | 1,19 | up   |
| 5957064 | 7235069 | 1460976 | --- | --- | --- | 1,38 | down |
| 5957106 | 7279568 | 1572008 | --- | --- | --- | 1,34 | up   |
| 5957112 | 7303191 | 1629956 | --- | --- | --- | 1,07 | up   |
| 5957268 | 7335637 | 1708476 | --- | --- | --- | 1,56 | down |
| 5957274 | 7205267 | 1387901 | --- | --- | --- | 1,15 | up   |
| 5957278 | 7330731 | 1697173 | --- | --- | --- | 1,93 | down |
| 5957390 | 7102369 | 1133428 | --- | --- | --- | 1,13 | up   |
| 5957429 | 7172373 | 1305565 | --- | --- | --- | 1,39 | down |
| 5957502 | 7039532 | 984441  | --- | --- | --- | 1,18 | up   |
| 5957704 | 7103420 | 1136177 | --- | --- | --- | 1,20 | down |
| 5957730 | 7277719 | 1567095 | --- | --- | --- | 1,04 | up   |
| 5957775 | 7307473 | 1641288 | --- | --- | --- | 1,13 | up   |
| 5957896 | 7295652 | 1610316 | --- | --- | --- | 1,32 | down |
| 5957924 | 7340757 | 1721905 | --- | --- | --- | 1,47 | down |
| 5958000 | 7363674 | 1778440 | --- | --- | --- | 1,06 | down |
| 5958036 | 7089080 | 1101173 | --- | --- | --- | 1,50 | down |
| 5958048 | 7083030 | 1086262 | --- | --- | --- | 1,27 | down |
| 5958127 | 7069721 | 1055302 | --- | --- | --- | 1,02 | down |
| 5958256 | 7240641 | 1475741 | --- | --- | --- | 1,07 | down |
| 5958388 | 7292869 | 1603422 | --- | --- | --- | 1,07 | up   |
| 5958510 | 7053786 | 1018129 | --- | --- | --- | 1,07 | up   |
| 5958617 | 7231655 | 1451905 | --- | --- | --- | 1,42 | down |
| 5958628 | 7050716 | 1011226 | --- | --- | --- | 1,65 | up   |
| 5958683 | 7155624 | 1264725 | --- | --- | --- | 1,11 | up   |
| 5958717 | 7062436 | 1037709 | --- | --- | --- | 1,25 | up   |
| 5958770 | 7193987 | 1360667 | --- | --- | --- | 2,34 | down |
| 5958900 | 7041609 | 989558  | --- | --- | --- | 1,37 | down |
| 5958987 | 7088164 | 1098471 | --- | --- | --- | 1,01 | up   |
| 5959039 | 7301900 | 1626739 | --- | --- | --- | 1,14 | down |
| 5959045 | 7035525 | 974756  | --- | --- | --- | 1,14 | up   |
| 5959127 | 7353382 | 1753225 | --- | --- | --- | 1,23 | down |
| 5959128 | 7372840 | 1803780 | --- | --- | --- | 1,39 | up   |
| 5959241 | 7350489 | 1746119 | --- | --- | --- | 1,53 | down |
| 5959253 | 7227433 | 1440968 | --- | --- | --- | 1,02 | down |
| 5959273 | 7322020 | 1676650 | --- | --- | --- | 1,33 | up   |
| 5959434 | 7138243 | 1221666 | --- | --- | --- | 1,11 | up   |
| 5959459 | 7330731 | 1697202 | --- | --- | --- | 1,04 | up   |
| 5959521 | 7162177 | 1280583 | --- | --- | --- | 2,02 | up   |
| 5959523 | 7350237 | 1745483 | --- | --- | --- | 1,37 | down |
| 5959536 | 7247848 | 1492058 | --- | --- | --- | 1,16 | down |
| 5959661 | 7326271 | 1686469 | --- | --- | --- | 1,65 | down |
| 5959712 | 7217434 | 1416358 | --- | --- | --- | 1,12 | down |
| 5959773 | 7340990 | 1722501 | --- | --- | --- | 1,16 | up   |

|         |         |         |     |     |     |      |      |
|---------|---------|---------|-----|-----|-----|------|------|
| 5959894 | 7079326 | 1077973 | --- | --- | --- | 1,03 | down |
| 5959918 | 7337224 | 1712615 | --- | --- | --- | 1,39 | up   |
| 5959979 | 7139708 | 1225068 | --- | --- | --- | 1,21 | down |
| 5960009 | 7142081 | 1230986 | --- | --- | --- | 1,74 | down |
| 5960039 | 7354896 | 1756992 | --- | --- | --- | 1,29 | down |
| 5960084 | 7309738 | 1646958 | --- | --- | --- | 1,72 | down |
| 5960161 | 7264274 | 1533174 | --- | --- | --- | 2,03 | down |
| 5960199 | 7297589 | 1615634 | --- | --- | --- | 1,29 | down |
| 5960280 | 7086966 | 1095289 | --- | --- | --- | 1,26 | down |
| 5960313 | 7087965 | 1098063 | --- | --- | --- | 1,07 | up   |
| 5960355 | 7039725 | 984820  | --- | --- | --- | 1,02 | down |
| 5960458 | 7286807 | 1588781 | --- | --- | --- | 1,23 | up   |
| 5960467 | 7313538 | 1655728 | --- | --- | --- | 3,06 | up   |
| 5960482 | 7096461 | 1118256 | --- | --- | --- | 1,08 | down |
| 5960484 | 7072429 | 1061870 | --- | --- | --- | 1,05 | up   |
| 5960536 | 7319609 | 1671205 | --- | --- | --- | 1,85 | down |
| 5960561 | 7243363 | 1481623 | --- | --- | --- | 1,80 | down |
| 5960686 | 7152915 | 1257441 | --- | --- | --- | 1,02 | up   |
| 5960806 | 7331508 | 1699461 | --- | --- | --- | 1,02 | down |
| 5960929 | 7360325 | 1770560 | --- | --- | --- | 3,86 | up   |
| 5960938 | 7350489 | 1746112 | --- | --- | --- | 1,13 | down |
| 5960969 | 7095041 | 1115167 | --- | --- | --- | 1,72 | up   |
| 5961010 | 7070869 | 1058491 | --- | --- | --- | 1,01 | up   |
| 5961027 | 7337425 | 1713169 | --- | --- | --- | 1,06 | down |
| 5961075 | 7150348 | 1251418 | --- | --- | --- | 1,16 | up   |
| 5961136 | 7367952 | 1789010 | --- | --- | --- | 1,27 | down |
| 5961144 | 7131103 | 1204322 | --- | --- | --- | 2,06 | down |
| 5961198 | 7197056 | 1367846 | --- | --- | --- | 1,36 | down |
| 5961272 | 7102416 | 1133516 | --- | --- | --- | 1,02 | down |
| 5961324 | 7100408 | 1128640 | --- | --- | --- | 1,73 | up   |
| 5961409 | 7368004 | 1789336 | --- | --- | --- | 1,27 | down |
| 5961432 | 7384509 | 1830728 | --- | --- | --- | 1,32 | down |
| 5961461 | 7172373 | 1305582 | --- | --- | --- | 1,03 | down |
| 5961573 | 7326322 | 1686608 | --- | --- | --- | 1,83 | up   |
| 5961704 | 7280743 | 1574476 | --- | --- | --- | 1,12 | up   |
| 5961909 | 7332059 | 1700731 | --- | --- | --- | 1,06 | up   |
| 5961938 | 7132125 | 1206627 | --- | --- | --- | 1,36 | up   |
| 5961943 | 7115963 | 1167048 | --- | --- | --- | 1,06 | down |
| 5961980 | 7180804 | 1327006 | --- | --- | --- | 1,03 | up   |
| 5961991 | 7293763 | 1605715 | --- | --- | --- | 1,06 | up   |
| 5962015 | 7079238 | 1077816 | --- | --- | --- | 1,18 | up   |
| 5962032 | 7183182 | 1333551 | --- | --- | --- | 1,39 | up   |
| 5962046 | 7262570 | 1528976 | --- | --- | --- | 1,15 | down |
| 5962064 | 7237699 | 1467372 | --- | --- | --- | 1,17 | up   |
| 5962129 | 7062233 | 1037187 | --- | --- | --- | 1,07 | down |
| 5962191 | 7193056 | 1358253 | --- | --- | --- | 1,03 | down |
| 5962218 | 7212735 | 1405027 | --- | --- | --- | 1,05 | down |
| 5962232 | 7264653 | 1534031 | --- | --- | --- | 1,18 | down |
| 5962242 | 7182739 | 1332592 | --- | --- | --- | 1,57 | down |
| 5962245 | 7073609 | 1064860 | --- | --- | --- | 1,21 | down |
| 5962322 | 7088164 | 1098464 | --- | --- | --- | 2,15 | up   |
| 5962338 | 7279881 | 1572714 | --- | --- | --- | 1,02 | up   |
| 5962623 | 7116540 | 1168640 | --- | --- | --- | 1,10 | up   |
| 5962655 | 7148978 | 1248546 | --- | --- | --- | 1,01 | down |
| 5962744 | 7069603 | 1055042 | --- | --- | --- | 1,14 | up   |
| 5962768 | 7088544 | 1099686 | --- | --- | --- | 1,11 | up   |
| 5962772 | 7327169 | 1688441 | --- | --- | --- | 1,08 | up   |



|         |         |         |     |     |     |      |      |
|---------|---------|---------|-----|-----|-----|------|------|
| 5962798 | 7120827 | 1179339 | --- | --- | --- | 2,12 | up   |
| 5962908 | 7181286 | 1328519 | --- | --- | --- | 1,04 | up   |
| 5962967 | 7101643 | 1131574 | --- | --- | --- | 1,09 | up   |
| 5963020 | 7034293 | 971990  | --- | --- | --- | 1,23 | up   |
| 5963103 | 7287337 | 1589995 | --- | --- | --- | 1,28 | down |
| 5963130 | 7337425 | 1713192 | --- | --- | --- | 1,18 | down |
| 5963168 | 7130889 | 1203884 | --- | --- | --- | 1,54 | up   |
| 5963255 | 7229061 | 1445323 | --- | --- | --- | 1,04 | up   |
| 5963283 | 7264745 | 1534266 | --- | --- | --- | 1,02 | up   |
| 5963332 | 7086522 | 1093952 | --- | --- | --- | 1,40 | up   |
| 5963388 | 7363674 | 1778409 | --- | --- | --- | 1,05 | down |
| 5963428 | 7267802 | 1541841 | --- | --- | --- | 1,09 | up   |
| 5963485 | 7122805 | 1184246 | --- | --- | --- | 1,18 | up   |
| 5963504 | 7320735 | 1674151 | --- | --- | --- | 1,22 | up   |
| 5963548 | 7237814 | 1467819 | --- | --- | --- | 1,12 | down |
| 5963615 | 7107926 | 1146831 | --- | --- | --- | 1,04 | up   |
| 5963672 | 7348924 | 1742181 | --- | --- | --- | 1,82 | up   |
| 5963798 | 7176362 | 1315507 | --- | --- | --- | 1,01 | up   |
| 5963849 | 7040674 | 987002  | --- | --- | --- | 1,30 | down |
| 5963962 | 7339379 | 1718318 | --- | --- | --- | 1,26 | down |
| 5964027 | 7282927 | 1580017 | --- | --- | --- | 1,45 | down |
| 5964031 | 7059917 | 1031331 | --- | --- | --- | 3,10 | down |
| 5964120 | 7088164 | 1098461 | --- | --- | --- | 3,08 | up   |
| 5964338 | 7318139 | 1668066 | --- | --- | --- | 1,16 | down |
| 5964375 | 7115362 | 1165592 | --- | --- | --- | 1,12 | up   |
| 5964389 | 7198210 | 1370978 | --- | --- | --- | 1,17 | up   |
| 5964443 | 7247907 | 1492241 | --- | --- | --- | 1,00 | up   |
| 5964506 | 7252877 | 1504755 | --- | --- | --- | 1,11 | up   |
| 5964593 | 7080476 | 1080408 | --- | --- | --- | 1,07 | down |
| 5964600 | 7153895 | 1259916 | --- | --- | --- | 1,23 | up   |
| 5964645 | 7360486 | 1770971 | --- | --- | --- | 1,02 | up   |
| 5964663 | 7148978 | 1248454 | --- | --- | --- | 1,48 | up   |
| 5964693 | 7107926 | 1146839 | --- | --- | --- | 1,35 | up   |
| 5964713 | 7175946 | 1314635 | --- | --- | --- | 1,02 | up   |
| 5964722 | 7193056 | 1358287 | --- | --- | --- | 1,10 | up   |
| 5964746 | 7307473 | 1641296 | --- | --- | --- | 1,04 | up   |
| 5964753 | 7032094 | 965719  | --- | --- | --- | 1,11 | up   |
| 5964788 | 7341115 | 1722918 | --- | --- | --- | 1,38 | down |
| 5964838 | 7243894 | 1482973 | --- | --- | --- | 2,14 | up   |
| 5964951 | 7128112 | 1196568 | --- | --- | --- | 1,11 | up   |
| 5964963 | 7253408 | 1505933 | --- | --- | --- | 1,17 | up   |
| 5964975 | 7173640 | 1308970 | --- | --- | --- | 1,07 | down |
| 5964992 | 7153571 | 1259032 | --- | --- | --- | 2,72 | up   |
| 5965044 | 7146542 | 1242295 | --- | --- | --- | 1,00 | down |
| 5965079 | 7255687 | 1511773 | --- | --- | --- | 1,06 | up   |
| 5965260 | 7068259 | 1051593 | --- | --- | --- | 1,09 | down |
| 5965275 | 7152915 | 1257507 | --- | --- | --- | 1,27 | down |
| 5965313 | 7374324 | 1807485 | --- | --- | --- | 1,23 | up   |
| 5965435 | 7025310 | 949265  | --- | --- | --- | 1,13 | down |
| 5965460 | 7110330 | 1152921 | --- | --- | --- | 1,04 | up   |
| 5965586 | 7186464 | 1341368 | --- | --- | --- | 1,05 | up   |
| 5965611 | 7140365 | 1226786 | --- | --- | --- | 1,04 | up   |
| 5965748 | 7198210 | 1370971 | --- | --- | --- | 2,30 | down |
| 5965761 | 7087965 | 1098062 | --- | --- | --- | 1,63 | down |
| 5965935 | 7239752 | 1473171 | --- | --- | --- | 1,23 | up   |
| 5966040 | 7069830 | 1055613 | --- | --- | --- | 1,02 | down |
| 5966065 | 7153571 | 1259034 | --- | --- | --- | 3,85 | up   |

|         |         |         |     |     |     |      |      |
|---------|---------|---------|-----|-----|-----|------|------|
| 5966086 | 7156052 | 1265760 | --- | --- | --- | 1,28 | down |
| 5966107 | 7246823 | 1489671 | --- | --- | --- | 1,74 | down |
| 5966231 | 7148741 | 1247828 | --- | --- | --- | 1,06 | up   |
| 5966251 | 7142917 | 1233181 | --- | --- | --- | 1,58 | down |
| 5966288 | 7062233 | 1037195 | --- | --- | --- | 1,08 | up   |
| 5966319 | 7182739 | 1332585 | --- | --- | --- | 1,22 | up   |
| 5966332 | 7194400 | 1361788 | --- | --- | --- | 1,29 | up   |
| 5966426 | 7384073 | 1829456 | --- | --- | --- | 1,06 | up   |
| 5966457 | 7355755 | 1759319 | --- | --- | --- | 1,02 | down |
| 5966633 | 7193056 | 1358289 | --- | --- | --- | 1,35 | down |
| 5966655 | 7328985 | 1693162 | --- | --- | --- | 1,01 | down |
| 5966670 | 7264653 | 1534042 | --- | --- | --- | 1,84 | down |
| 5966810 | 7156052 | 1265780 | --- | --- | --- | 1,08 | down |
| 5966925 | 7168979 | 1297182 | --- | --- | --- | 1,15 | up   |
| 5966981 | 7341439 | 1723709 | --- | --- | --- | 1,16 | down |
| 5966999 | 7365183 | 1781905 | --- | --- | --- | 1,05 | down |
| 5967110 | 7069830 | 1055605 | --- | --- | --- | 1,05 | up   |
| 5967185 | 7061550 | 1035285 | --- | --- | --- | 2,35 | up   |
| 5967244 | 7330731 | 1697191 | --- | --- | --- | 1,34 | up   |
| 5967259 | 7384509 | 1830734 | --- | --- | --- | 1,28 | up   |
| 5967265 | 7142081 | 1230959 | --- | --- | --- | 1,38 | down |
| 5967364 | 7344702 | 1732140 | --- | --- | --- | 1,07 | up   |
| 5967371 | 7374324 | 1807469 | --- | --- | --- | 1,38 | down |
| 5967380 | 7193056 | 1358281 | --- | --- | --- | 1,02 | up   |
| 5967498 | 7193513 | 1359444 | --- | --- | --- | 1,00 | up   |
| 5967520 | 7169599 | 1298443 | --- | --- | --- | 1,07 | up   |
| 5967526 | 7136746 | 1217967 | --- | --- | --- | 1,22 | down |
| 5967558 | 7032618 | 967329  | --- | --- | --- | 1,09 | up   |
| 5967650 | 7069830 | 1055640 | --- | --- | --- | 1,04 | down |
| 5967892 | 7155866 | 1265329 | --- | --- | --- | 1,28 | down |
| 5967915 | 7040442 | 986528  | --- | --- | --- | 1,35 | up   |
| 5967988 | 7318286 | 1668336 | --- | --- | --- | 1,11 | down |
| 5967998 | 7374313 | 1807380 | --- | --- | --- | 1,07 | down |
| 5968224 | 7034293 | 971885  | --- | --- | --- | 1,55 | up   |
| 5968265 | 7039265 | 983656  | --- | --- | --- | 1,24 | up   |
| 5968332 | 7243647 | 1482452 | --- | --- | --- | 1,09 | down |
| 5968375 | 7093296 | 1110952 | --- | --- | --- | 1,25 | down |
| 5968414 | 7205944 | 1389462 | --- | --- | --- | 1,06 | down |
| 5968437 | 7238414 | 1469559 | --- | --- | --- | 1,25 | down |
| 5968461 | 7369031 | 1793014 | --- | --- | --- | 1,21 | down |
| 5968470 | 7326271 | 1686476 | --- | --- | --- | 1,04 | down |
| 5968519 | 7144088 | 1236177 | --- | --- | --- | 1,04 | down |
| 5968552 | 7295410 | 1609733 | --- | --- | --- | 1,00 | up   |
| 5968554 | 7029078 | 958879  | --- | --- | --- | 1,04 | down |
| 5968683 | 7308679 | 1644252 | --- | --- | --- | 1,48 | up   |
| 5968780 | 7153136 | 1258044 | --- | --- | --- | 1,05 | down |
| 5968785 | 7364346 | 1780005 | --- | --- | --- | 1,01 | down |
| 5968834 | 7105375 | 1140970 | --- | --- | --- | 1,95 | down |
| 5968930 | 7376820 | 1813414 | --- | --- | --- | 1,04 | up   |
| 5968982 | 7053620 | 1017794 | --- | --- | --- | 1,40 | down |
| 5969169 | 7292701 | 1602921 | --- | --- | --- | 1,29 | up   |
| 5969210 | 7221443 | 1426313 | --- | --- | --- | 1,08 | up   |
| 5969357 | 7052813 | 1015929 | --- | --- | --- | 2,22 | up   |
| 5969506 | 7181286 | 1328468 | --- | --- | --- | 1,19 | down |
| 5969520 | 7320735 | 1674146 | --- | --- | --- | 1,16 | down |
| 5969549 | 7126400 | 1192527 | --- | --- | --- | 1,25 | down |
| 5969672 | 7257976 | 1517712 | --- | --- | --- | 2,07 | down |

|         |         |         |     |     |     |      |      |
|---------|---------|---------|-----|-----|-----|------|------|
| 5969801 | 7166855 | 1291249 | --- | --- | --- | 1,11 | down |
| 5969857 | 7070869 | 1058502 | --- | --- | --- | 1,15 | down |
| 5969901 | 7266532 | 1538297 | --- | --- | --- | 2,55 | up   |
| 5970047 | 7246518 | 1489048 | --- | --- | --- | 1,07 | up   |
| 5970072 | 7148978 | 1248495 | --- | --- | --- | 1,19 | up   |
| 5970096 | 7342356 | 1725900 | --- | --- | --- | 1,17 | up   |
| 5970224 | 7291032 | 1599340 | --- | --- | --- | 1,32 | down |
| 5970238 | 7383586 | 1828438 | --- | --- | --- | 1,20 | down |
| 5970360 | 7171417 | 1303156 | --- | --- | --- | 1,37 | down |
| 5970405 | 7067828 | 1050785 | --- | --- | --- | 2,83 | up   |
| 5970407 | 7056106 | 1022969 | --- | --- | --- | 1,31 | down |
| 5970668 | 7122140 | 1182707 | --- | --- | --- | 1,03 | up   |
| 5970690 | 7243647 | 1482464 | --- | --- | --- | 1,09 | up   |
| 5970692 | 7340757 | 1721908 | --- | --- | --- | 1,20 | down |
| 5970693 | 7166439 | 1290101 | --- | --- | --- | 1,62 | up   |
| 5970694 | 7136142 | 1216437 | --- | --- | --- | 1,30 | up   |
| 5970752 | 7319259 | 1670403 | --- | --- | --- | 1,05 | up   |
| 5970787 | 7153571 | 1259039 | --- | --- | --- | 1,22 | down |
| 5970801 | 7247848 | 1492070 | --- | --- | --- | 1,17 | up   |
| 5970869 | 7381352 | 1823742 | --- | --- | --- | 1,38 | down |
| 5970945 | 7058149 | 1027282 | --- | --- | --- | 1,06 | up   |
| 5970947 | 7339387 | 1718375 | --- | --- | --- | 1,27 | up   |
| 5970966 | 7264085 | 1532718 | --- | --- | --- | 1,18 | up   |
| 5970986 | 7294851 | 1608364 | --- | --- | --- | 1,43 | down |
| 5971009 | 7086672 | 1094394 | --- | --- | --- | 1,96 | down |
| 5971031 | 7151063 | 1253071 | --- | --- | --- | 2,02 | up   |
| 5971103 | 7057462 | 1025858 | --- | --- | --- | 2,35 | down |
| 5971145 | 7253272 | 1505547 | --- | --- | --- | 1,06 | down |
| 5971172 | 7267802 | 1541837 | --- | --- | --- | 1,57 | up   |
| 5971319 | 7092549 | 1109184 | --- | --- | --- | 1,09 | up   |
| 5971340 | 7080563 | 1080715 | --- | --- | --- | 1,13 | up   |
| 5971384 | 7355044 | 1757430 | --- | --- | --- | 1,51 | up   |
| 5971441 | 7278010 | 1568045 | --- | --- | --- | 1,02 | down |
| 5971487 | 7252877 | 1504740 | --- | --- | --- | 1,41 | down |
| 5971493 | 7313841 | 1656730 | --- | --- | --- | 1,10 | down |
| 5971507 | 7049184 | 1007927 | --- | --- | --- | 1,13 | up   |
| 5971847 | 7289382 | 1595198 | --- | --- | --- | 1,14 | down |
| 5971856 | 7166855 | 1291255 | --- | --- | --- | 1,49 | down |
| 5971987 | 7115507 | 1165971 | --- | --- | --- | 1,24 | up   |
| 5972020 | 7352044 | 1750008 | --- | --- | --- | 1,36 | up   |
| 5972074 | 7146542 | 1242283 | --- | --- | --- | 1,56 | up   |
| 5972118 | 7267802 | 1541754 | --- | --- | --- | 1,22 | down |
| 5972149 | 7193513 | 1359467 | --- | --- | --- | 1,05 | up   |
| 5972181 | 7297589 | 1615677 | --- | --- | --- | 1,00 | up   |
| 5972192 | 7217679 | 1417319 | --- | --- | --- | 1,07 | down |
| 5972213 | 7031774 | 964762  | --- | --- | --- | 1,48 | down |
| 5972223 | 7073928 | 1065804 | --- | --- | --- | 5,86 | down |
| 5972263 | 7115362 | 1165595 | --- | --- | --- | 1,27 | down |
| 5972282 | 7377583 | 1815457 | --- | --- | --- | 1,10 | up   |
| 5972331 | 7058149 | 1027285 | --- | --- | --- | 1,01 | up   |
| 5972606 | 7293763 | 1605717 | --- | --- | --- | 1,11 | up   |
| 5972780 | 7075460 | 1069410 | --- | --- | --- | 1,25 | down |
| 5972867 | 7280982 | 1575145 | --- | --- | --- | 1,20 | up   |
| 5972880 | 7117526 | 1171019 | --- | --- | --- | 1,29 | up   |
| 5973011 | 7266778 | 1538854 | --- | --- | --- | 1,18 | down |
| 5973021 | 7281577 | 1576883 | --- | --- | --- | 1,12 | down |
| 5973269 | 7380497 | 1821873 | --- | --- | --- | 1,04 | down |

|         |         |         |     |     |     |      |      |
|---------|---------|---------|-----|-----|-----|------|------|
| 5973296 | 7130917 | 1203919 | --- | --- | --- | 1,05 | down |
| 5973339 | 7252877 | 1504756 | --- | --- | --- | 1,93 | up   |
| 5973469 | 7213228 | 1405990 | --- | --- | --- | 1,20 | up   |
| 5973538 | 7281924 | 1577723 | --- | --- | --- | 1,15 | up   |
| 5973541 | 7148741 | 1247832 | --- | --- | --- | 2,11 | down |
| 5973572 | 7281877 | 1577533 | --- | --- | --- | 1,05 | up   |
| 5973614 | 7093296 | 1110885 | --- | --- | --- | 1,02 | up   |
| 5973629 | 7377116 | 1814067 | --- | --- | --- | 1,69 | up   |
| 5973662 | 7233298 | 1456282 | --- | --- | --- | 1,02 | down |
| 5973677 | 7088489 | 1099525 | --- | --- | --- | 1,02 | up   |
| 5973702 | 7244602 | 1484776 | --- | --- | --- | 1,07 | up   |
| 5973762 | 7353284 | 1752983 | --- | --- | --- | 1,25 | up   |
| 5973819 | 7068259 | 1051608 | --- | --- | --- | 1,36 | up   |
| 5973877 | 7248790 | 1494518 | --- | --- | --- | 1,10 | down |
| 5973946 | 7337425 | 1713200 | --- | --- | --- | 1,16 | up   |
| 5973953 | 7240569 | 1475464 | --- | --- | --- | 1,27 | down |
| 5973958 | 7167063 | 1291900 | --- | --- | --- | 1,13 | up   |
| 5974006 | 7166867 | 1291334 | --- | --- | --- | 1,28 | up   |
| 5974035 | 7073679 | 1065188 | --- | --- | --- | 1,12 | up   |
| 5974065 | 7189184 | 1347598 | --- | --- | --- | 1,31 | down |
| 5974083 | 7374324 | 1807457 | --- | --- | --- | 1,17 | up   |
| 5974124 | 7349817 | 1744643 | --- | --- | --- | 1,39 | down |
| 5974129 | 7058713 | 1028664 | --- | --- | --- | 1,04 | up   |
| 5974257 | 7231152 | 1450277 | --- | --- | --- | 2,81 | up   |
| 5974262 | 7032204 | 966150  | --- | --- | --- | 2,06 | up   |
| 5974317 | 7331757 | 1700023 | --- | --- | --- | 1,40 | down |
| 5974331 | 7076160 | 1070871 | --- | --- | --- | 1,49 | up   |
| 5974473 | 7326271 | 1686520 | --- | --- | --- | 1,32 | up   |
| 5974488 | 7249015 | 1495051 | --- | --- | --- | 1,70 | down |
| 5974494 | 7093296 | 1110970 | --- | --- | --- | 1,34 | down |
| 5974610 | 7252877 | 1504693 | --- | --- | --- | 1,13 | down |
| 5974676 | 7168979 | 1297183 | --- | --- | --- | 1,40 | down |
| 5974835 | 7059766 | 1030978 | --- | --- | --- | 1,49 | down |
| 5974851 | 7358048 | 1764802 | --- | --- | --- | 1,29 | up   |
| 5974906 | 7034293 | 971978  | --- | --- | --- | 1,23 | down |
| 5975083 | 7201422 | 1379185 | --- | --- | --- | 1,41 | up   |
| 5975135 | 7240569 | 1475451 | --- | --- | --- | 1,03 | up   |
| 5975189 | 7309738 | 1646956 | --- | --- | --- | 1,46 | down |
| 5975201 | 7244602 | 1484758 | --- | --- | --- | 1,02 | down |
| 5975216 | 7353284 | 1752983 | --- | --- | --- | 1,34 | down |
| 5975360 | 7380878 | 1822550 | --- | --- | --- | 1,41 | down |
| 5975371 | 7066035 | 1046214 | --- | --- | --- | 1,09 | up   |
| 5975388 | 7060896 | 1033539 | --- | --- | --- | 1,26 | up   |
| 5975427 | 7180598 | 1326318 | --- | --- | --- | 1,43 | up   |
| 5975441 | 7341038 | 1722632 | --- | --- | --- | 1,15 | down |
| 5975450 | 7092549 | 1109119 | --- | --- | --- | 1,32 | up   |
| 5975500 | 7229909 | 1447248 | --- | --- | --- | 1,53 | down |
| 5975687 | 7169599 | 1298444 | --- | --- | --- | 1,28 | up   |
| 5975726 | 7353224 | 1752668 | --- | --- | --- | 2,33 | up   |
| 5975759 | 7032618 | 967317  | --- | --- | --- | 1,21 | up   |
| 5975794 | 7092549 | 1109127 | --- | --- | --- | 1,56 | down |
| 5975864 | 7185355 | 1338694 | --- | --- | --- | 1,24 | up   |
| 5975918 | 7342430 | 1726155 | --- | --- | --- | 1,24 | up   |
| 5975999 | 7312161 | 1652463 | --- | --- | --- | 1,12 | down |
| 5976191 | 7339387 | 1718383 | --- | --- | --- | 1,16 | down |
| 5976213 | 7202837 | 1382305 | --- | --- | --- | 1,12 | up   |
| 5976330 | 7375958 | 1811479 | --- | --- | --- | 1,04 | up   |

|         |         |         |     |     |     |      |      |
|---------|---------|---------|-----|-----|-----|------|------|
| 5976449 | 7274780 | 1559213 | --- | --- | --- | 1,59 | down |
| 5976464 | 7186688 | 1341846 | --- | --- | --- | 1,18 | down |
| 5976476 | 7034356 | 972165  | --- | --- | --- | 1,08 | up   |
| 5976492 | 7100210 | 1128143 | --- | --- | --- | 1,13 | down |
| 5976501 | 7148661 | 1247674 | --- | --- | --- | 1,95 | down |
| 5976570 | 7349313 | 1743115 | --- | --- | --- | 1,15 | down |
| 5976586 | 7369129 | 1793282 | --- | --- | --- | 1,88 | down |
| 5976654 | 7027350 | 954945  | --- | --- | --- | 1,94 | down |
| 5976663 | 7360486 | 1770950 | --- | --- | --- | 1,04 | down |
| 5976676 | 7361881 | 1773964 | --- | --- | --- | 1,38 | down |
| 5976719 | 7286807 | 1588830 | --- | --- | --- | 1,73 | down |
| 5976744 | 7033673 | 970381  | --- | --- | --- | 1,05 | up   |
| 5976811 | 7380497 | 1821824 | --- | --- | --- | 1,70 | up   |
| 5976903 | 7126400 | 1192534 | --- | --- | --- | 1,04 | down |
| 5976989 | 7230628 | 1448867 | --- | --- | --- | 1,07 | down |
| 5977020 | 7083355 | 1086912 | --- | --- | --- | 2,40 | down |
| 5977030 | 7180243 | 1325513 | --- | --- | --- | 1,09 | down |
| 5977109 | 7353224 | 1752677 | --- | --- | --- | 1,05 | up   |
| 5977119 | 7213945 | 1407832 | --- | --- | --- | 1,18 | down |
| 5977197 | 7346066 | 1735322 | --- | --- | --- | 1,25 | up   |
| 5977291 | 7290474 | 1597971 | --- | --- | --- | 1,03 | down |
| 5977302 | 7196233 | 1366098 | --- | --- | --- | 1,07 | up   |
| 5977379 | 7069253 | 1054161 | --- | --- | --- | 1,12 | down |
| 5977451 | 7330238 | 1695920 | --- | --- | --- | 1,06 | up   |
| 5977517 | 7363576 | 1778195 | --- | --- | --- | 1,41 | down |
| 5977723 | 7292701 | 1602950 | --- | --- | --- | 1,05 | down |
| 5977776 | 7198730 | 1372678 | --- | --- | --- | 1,46 | up   |
| 5977836 | 7039223 | 983574  | --- | --- | --- | 1,24 | down |
| 5977850 | 7247230 | 1490588 | --- | --- | --- | 1,95 | down |
| 5977892 | 7350530 | 1746235 | --- | --- | --- | 1,11 | down |
| 5977993 | 7180732 | 1326733 | --- | --- | --- | 1,18 | up   |
| 5978053 | 7131876 | 1206055 | --- | --- | --- | 1,63 | up   |
| 5978056 | 7280982 | 1575259 | --- | --- | --- | 1,49 | up   |
| 5978130 | 7235069 | 1460986 | --- | --- | --- | 1,29 | down |
| 5978186 | 7286807 | 1588786 | --- | --- | --- | 1,37 | down |
| 5978209 | 7029770 | 960158  | --- | --- | --- | 1,45 | down |
| 5978287 | 7139708 | 1225069 | --- | --- | --- | 1,58 | down |
| 5978458 | 7240569 | 1475517 | --- | --- | --- | 1,12 | down |
| 5978462 | 7369939 | 1795621 | --- | --- | --- | 1,65 | down |
| 5978488 | 7038971 | 982984  | --- | --- | --- | 1,26 | down |
| 5978560 | 7053874 | 1018324 | --- | --- | --- | 1,28 | down |
| 5978705 | 7062233 | 1037227 | --- | --- | --- | 1,18 | down |
| 5978728 | 7363147 | 1777022 | --- | --- | --- | 1,37 | up   |
| 5978782 | 7282831 | 1579772 | --- | --- | --- | 1,14 | down |
| 5978783 | 7216676 | 1414428 | --- | --- | --- | 1,15 | up   |
| 5978823 | 7255911 | 1512216 | --- | --- | --- | 1,05 | down |
| 5978829 | 7142915 | 1233095 | --- | --- | --- | 1,56 | up   |
| 5978906 | 7289075 | 1594466 | --- | --- | --- | 1,06 | down |
| 5979002 | 7261766 | 1527160 | --- | --- | --- | 1,40 | down |
| 5979020 | 7212587 | 1404640 | --- | --- | --- | 1,46 | up   |
| 5979130 | 7233106 | 1455672 | --- | --- | --- | 1,06 | down |
| 5979234 | 7181001 | 1327628 | --- | --- | --- | 1,04 | up   |
| 5979268 | 7136062 | 1216304 | --- | --- | --- | 1,35 | down |
| 5979288 | 7083030 | 1086243 | --- | --- | --- | 1,05 | up   |
| 5979308 | 7225543 | 1435914 | --- | --- | --- | 1,21 | up   |
| 5979331 | 7073609 | 1064844 | --- | --- | --- | 1,46 | down |
| 5979354 | 7319259 | 1670401 | --- | --- | --- | 1,31 | down |

|         |         |         |     |     |     |      |      |
|---------|---------|---------|-----|-----|-----|------|------|
| 5979364 | 7267204 | 1539864 | --- | --- | --- | 1,01 | up   |
| 5979370 | 7093936 | 1112479 | --- | --- | --- | 1,20 | down |
| 5979390 | 7376073 | 1811710 | --- | --- | --- | 1,01 | down |
| 5979428 | 7115259 | 1165350 | --- | --- | --- | 1,07 | up   |
| 5979435 | 7301296 | 1624997 | --- | --- | --- | 1,04 | down |
| 5979450 | 7099573 | 1126713 | --- | --- | --- | 1,14 | down |
| 5979471 | 7267802 | 1541849 | --- | --- | --- | 1,64 | up   |
| 5979543 | 7377304 | 1814584 | --- | --- | --- | 1,56 | up   |
| 5979566 | 7377304 | 1814600 | --- | --- | --- | 1,08 | down |
| 5979572 | 7247848 | 1492067 | --- | --- | --- | 1,17 | up   |
| 5979655 | 7376820 | 1813412 | --- | --- | --- | 1,04 | down |
| 5979839 | 7237814 | 1467845 | --- | --- | --- | 1,23 | down |
| 5979934 | 7351333 | 1748159 | --- | --- | --- | 1,02 | down |
| 5979937 | 7280743 | 1574549 | --- | --- | --- | 1,11 | down |
| 5979944 | 7208784 | 1396113 | --- | --- | --- | 1,11 | up   |
| 5980028 | 7171091 | 1302455 | --- | --- | --- | 1,04 | up   |
| 5980101 | 7297589 | 1615607 | --- | --- | --- | 1,07 | up   |
| 5980131 | 7069464 | 1054673 | --- | --- | --- | 1,13 | up   |
| 5980186 | 7057277 | 1025526 | --- | --- | --- | 1,15 | down |
| 5980318 | 7136062 | 1216304 | --- | --- | --- | 1,34 | down |
| 5980351 | 7328985 | 1693158 | --- | --- | --- | 1,37 | down |
| 5980365 | 7313538 | 1655725 | --- | --- | --- | 1,43 | up   |
| 5980524 | 7207069 | 1392025 | --- | --- | --- | 1,69 | down |
| 5980705 | 7058713 | 1028664 | --- | --- | --- | 1,25 | up   |
| 5980738 | 7094158 | 1112970 | --- | --- | --- | 1,31 | down |
| 5980799 | 7341115 | 1722915 | --- | --- | --- | 1,50 | up   |
| 5980941 | 7365183 | 1781905 | --- | --- | --- | 1,21 | down |
| 5980967 | 7176368 | 1315560 | --- | --- | --- | 1,44 | down |
| 5981050 | 7197820 | 1370086 | --- | --- | --- | 1,96 | down |
| 5981082 | 7336039 | 1709682 | --- | --- | --- | 1,10 | up   |
| 5981102 | 7217434 | 1416384 | --- | --- | --- | 1,02 | up   |
| 5981164 | 7341038 | 1722653 | --- | --- | --- | 1,08 | down |
| 5981185 | 7341243 | 1723200 | --- | --- | --- | 1,26 | down |
| 5981268 | 7115907 | 1166942 | --- | --- | --- | 1,51 | down |
| 5981305 | 7112355 | 1158080 | --- | --- | --- | 1,27 | down |
| 5981352 | 7280743 | 1574532 | --- | --- | --- | 1,60 | down |
| 5981398 | 7166867 | 1291368 | --- | --- | --- | 1,03 | up   |
| 5981423 | 7363674 | 1778408 | --- | --- | --- | 1,16 | up   |
| 5981489 | 7073854 | 1065624 | --- | --- | --- | 1,47 | down |
| 5981559 | 7052957 | 1016275 | --- | --- | --- | 1,02 | up   |
| 5981568 | 7204548 | 1386286 | --- | --- | --- | 1,10 | up   |
| 5981635 | 7380497 | 1821837 | --- | --- | --- | 1,05 | up   |
| 5981659 | 7240569 | 1475490 | --- | --- | --- | 1,40 | up   |
| 5981664 | 7221443 | 1426320 | --- | --- | --- | 1,54 | down |
| 5981765 | 7142081 | 1230978 | --- | --- | --- | 1,21 | down |
| 5981841 | 7248790 | 1494493 | --- | --- | --- | 1,09 | up   |
| 5981857 | 7240569 | 1475471 | --- | --- | --- | 1,00 | up   |
| 5981880 | 7056304 | 1023547 | --- | --- | --- | 1,12 | up   |
| 5981903 | 7210263 | 1399749 | --- | --- | --- | 2,29 | down |
| 5981982 | 7364346 | 1779990 | --- | --- | --- | 1,31 | up   |
| 5982014 | 7030087 | 960784  | --- | --- | --- | 1,07 | down |
| 5982022 | 7218728 | 1419917 | --- | --- | --- | 1,32 | down |
| 5982061 | 7264085 | 1532719 | --- | --- | --- | 1,20 | up   |
| 5982111 | 7305275 | 1635823 | --- | --- | --- | 1,27 | down |
| 5982142 | 7311367 | 1650726 | --- | --- | --- | 2,18 | down |
| 5982179 | 7236492 | 1464535 | --- | --- | --- | 1,76 | up   |
| 5982273 | 7168521 | 1295928 | --- | --- | --- | 1,05 | up   |

|         |         |         |     |     |     |      |      |
|---------|---------|---------|-----|-----|-----|------|------|
| 5982284 | 7130917 | 1203925 | --- | --- | --- | 1,03 | up   |
| 5982400 | 7297589 | 1615633 | --- | --- | --- | 1,39 | down |
| 5982438 | 7361881 | 1773937 | --- | --- | --- | 1,00 | down |
| 5982463 | 7070393 | 1057216 | --- | --- | --- | 1,17 | up   |
| 5982510 | 7330238 | 1695952 | --- | --- | --- | 1,00 | down |
| 5982696 | 7150047 | 1250783 | --- | --- | --- | 2,56 | down |
| 5982731 | 7324760 | 1683099 | --- | --- | --- | 1,13 | up   |
| 5982851 | 7148741 | 1247834 | --- | --- | --- | 1,24 | up   |
| 5982928 | 7374324 | 1807514 | --- | --- | --- | 1,11 | up   |
| 5982930 | 7061948 | 1036368 | --- | --- | --- | 1,52 | down |
| 5982943 | 7148741 | 1247860 | --- | --- | --- | 1,07 | up   |
| 5983038 | 7355044 | 1757448 | --- | --- | --- | 1,41 | down |
| 5983063 | 7300906 | 1624051 | --- | --- | --- | 1,69 | up   |
| 5983108 | 7363529 | 1777949 | --- | --- | --- | 1,03 | up   |
| 5983212 | 7119845 | 1176879 | --- | --- | --- | 1,03 | up   |
| 5983242 | 7236358 | 1464247 | --- | --- | --- | 1,29 | up   |
| 5983284 | 7100408 | 1128643 | --- | --- | --- | 2,06 | down |
| 5983287 | 7095041 | 1115188 | --- | --- | --- | 1,35 | down |
| 5983337 | 7237907 | 1468079 | --- | --- | --- | 1,28 | up   |
| 5983458 | 7040442 | 986573  | --- | --- | --- | 2,15 | down |
| 5983498 | 7306330 | 1638506 | --- | --- | --- | 1,05 | up   |
| 5983619 | 7374324 | 1807532 | --- | --- | --- | 1,23 | down |
| 5983694 | 7068259 | 1051646 | --- | --- | --- | 1,01 | down |
| 5983793 | 7292517 | 1602555 | --- | --- | --- | 1,04 | up   |
| 5984009 | 7240569 | 1475324 | --- | --- | --- | 1,03 | up   |
| 5984033 | 7069721 | 1055288 | --- | --- | --- | 1,01 | down |
| 5984062 | 7156978 | 1268184 | --- | --- | --- | 1,15 | up   |
| 5984102 | 7156052 | 1265751 | --- | --- | --- | 1,17 | down |
| 5984106 | 7191983 | 1355170 | --- | --- | --- | 1,03 | down |
| 5984223 | 7156114 | 1266043 | --- | --- | --- | 1,11 | down |
| 5984242 | 7337872 | 1714458 | --- | --- | --- | 1,45 | up   |
| 5984367 | 7029119 | 958982  | --- | --- | --- | 1,31 | up   |
| 5984405 | 7217747 | 1417486 | --- | --- | --- | 1,65 | up   |
| 5984588 | 7339834 | 1719556 | --- | --- | --- | 1,35 | down |
| 5984594 | 7249809 | 1496942 | --- | --- | --- | 1,20 | up   |
| 5984608 | 7132125 | 1206626 | --- | --- | --- | 1,23 | down |
| 5984782 | 7244290 | 1484155 | --- | --- | --- | 1,03 | down |
| 5984827 | 7076236 | 1071193 | --- | --- | --- | 1,24 | up   |
| 5984854 | 7384073 | 1829462 | --- | --- | --- | 1,06 | up   |
| 5985091 | 7360325 | 1770559 | --- | --- | --- | 1,34 | down |
| 5985195 | 7292247 | 1601857 | --- | --- | --- | 1,05 | down |
| 5985252 | 7052385 | 1014795 | --- | --- | --- | 1,51 | down |
| 5985290 | 7292701 | 1602959 | --- | --- | --- | 1,12 | up   |
| 5985330 | 7340057 | 1720324 | --- | --- | --- | 1,15 | up   |
| 5985336 | 7240569 | 1475443 | --- | --- | --- | 1,29 | down |
| 5985350 | 7240569 | 1475390 | --- | --- | --- | 1,47 | down |
| 5985353 | 7340990 | 1722511 | --- | --- | --- | 1,05 | down |
| 5985415 | 7064134 | 1041468 | --- | --- | --- | 1,45 | up   |
| 5985458 | 7249917 | 1497390 | --- | --- | --- | 1,12 | down |
| 5985493 | 7103017 | 1135165 | --- | --- | --- | 1,34 | up   |
| 5985671 | 7350993 | 1747543 | --- | --- | --- | 1,12 | up   |
| 5985703 | 7245874 | 1487595 | --- | --- | --- | 1,44 | down |
| 5985723 | 7337425 | 1713153 | --- | --- | --- | 1,09 | up   |
| 5985769 | 7137646 | 1220431 | --- | --- | --- | 1,13 | down |
| 5985919 | 7198210 | 1370991 | --- | --- | --- | 1,19 | down |
| 5985993 | 7109292 | 1150739 | --- | --- | --- | 1,87 | up   |
| 5986111 | 7098867 | 1124951 | --- | --- | --- | 1,16 | down |

|         |         |         |     |     |     |      |      |
|---------|---------|---------|-----|-----|-----|------|------|
| 5986130 | 7252877 | 1504785 | --- | --- | --- | 1,47 | up   |
| 5986155 | 7238252 | 1469133 | --- | --- | --- | 1,13 | up   |
| 5986164 | 7142917 | 1233163 | --- | --- | --- | 1,09 | down |
| 5986286 | 7246548 | 1489157 | --- | --- | --- | 1,37 | down |
| 5986331 | 7308262 | 1643194 | --- | --- | --- | 1,67 | down |
| 5986358 | 7244027 | 1483286 | --- | --- | --- | 1,05 | up   |
| 5986382 | 7155116 | 1263435 | --- | --- | --- | 1,19 | down |
| 5986445 | 7154655 | 1262332 | --- | --- | --- | 1,08 | down |
| 5986453 | 7169732 | 1298771 | --- | --- | --- | 1,35 | up   |
| 5986476 | 7248790 | 1494558 | --- | --- | --- | 1,13 | down |
| 5986574 | 7172373 | 1305567 | --- | --- | --- | 1,06 | down |
| 5986767 | 7337425 | 1713216 | --- | --- | --- | 1,19 | down |
| 5986862 | 7351844 | 1749492 | --- | --- | --- | 1,36 | down |
| 5986889 | 7142081 | 1230953 | --- | --- | --- | 1,02 | up   |
| 5986901 | 7217434 | 1416346 | --- | --- | --- | 1,42 | down |
| 5986944 | 7384509 | 1830724 | --- | --- | --- | 1,09 | up   |
| 5986960 | 7213908 | 1407649 | --- | --- | --- | 1,07 | down |
| 5987038 | 7068695 | 1052737 | --- | --- | --- | 1,45 | down |
| 5987041 | 7279103 | 1570825 | --- | --- | --- | 1,14 | down |
| 5987233 | 7156978 | 1268185 | --- | --- | --- | 1,03 | up   |
| 5987269 | 7068259 | 1051602 | --- | --- | --- | 1,69 | up   |
| 5987270 | 7099573 | 1126710 | --- | --- | --- | 1,00 | up   |
| 5987370 | 7097485 | 1120947 | --- | --- | --- | 1,21 | up   |
| 5987404 | 7127540 | 1195294 | --- | --- | --- | 1,19 | up   |
| 5987487 | 7346066 | 1735293 | --- | --- | --- | 1,93 | down |
| 5987488 | 7059766 | 1030972 | --- | --- | --- | 1,23 | up   |
| 5987529 | 7374324 | 1807527 | --- | --- | --- | 1,29 | down |
| 5987546 | 7094139 | 1112914 | --- | --- | --- | 1,23 | up   |
| 5987600 | 7279303 | 1571211 | --- | --- | --- | 1,36 | up   |
| 5987622 | 7081487 | 1082716 | --- | --- | --- | 1,37 | down |
| 5987675 | 7294738 | 1607996 | --- | --- | --- | 1,00 | up   |
| 5987713 | 7088489 | 1099513 | --- | --- | --- | 1,26 | down |
| 5987733 | 7088544 | 1099675 | --- | --- | --- | 1,25 | down |
| 5987811 | 7267802 | 1541743 | --- | --- | --- | 1,72 | up   |
| 5987840 | 7319740 | 1671759 | --- | --- | --- | 1,48 | down |
| 5987914 | 7245921 | 1487678 | --- | --- | --- | 1,01 | up   |
| 5988103 | 7214605 | 1409378 | --- | --- | --- | 1,06 | up   |
| 5988117 | 7360486 | 1771019 | --- | --- | --- | 1,02 | up   |
| 5988120 | 7167872 | 1294040 | --- | --- | --- | 1,04 | up   |
| 5988161 | 7065640 | 1045210 | --- | --- | --- | 1,23 | down |
| 5988237 | 7066035 | 1046216 | --- | --- | --- | 1,16 | up   |
| 5988238 | 7261668 | 1526982 | --- | --- | --- | 1,34 | down |
| 5988417 | 7341646 | 1724193 | --- | --- | --- | 1,06 | up   |
| 5988469 | 7316589 | 1663879 | --- | --- | --- | 1,54 | up   |
| 5988488 | 7266544 | 1538335 | --- | --- | --- | 1,14 | down |
| 5988536 | 7221855 | 1427227 | --- | --- | --- | 3,26 | down |
| 5988597 | 7237814 | 1467817 | --- | --- | --- | 1,02 | up   |
| 5988639 | 7363529 | 1777896 | --- | --- | --- | 1,45 | down |
| 5988646 | 7141456 | 1229586 | --- | --- | --- | 1,10 | down |
| 5988694 | 7369781 | 1795026 | --- | --- | --- | 1,46 | up   |
| 5988697 | 7217434 | 1416344 | --- | --- | --- | 1,20 | up   |
| 5988712 | 7236358 | 1464220 | --- | --- | --- | 1,32 | down |
| 5988720 | 7364346 | 1780015 | --- | --- | --- | 1,36 | down |
| 5988909 | 7360486 | 1770945 | --- | --- | --- | 1,34 | up   |
| 5989130 | 7095960 | 1117066 | --- | --- | --- | 1,11 | down |
| 5989156 | 7085242 | 1091079 | --- | --- | --- | 1,10 | down |
| 5989212 | 7329135 | 1693497 | --- | --- | --- | 1,22 | down |



|         |         |         |     |     |     |      |      |
|---------|---------|---------|-----|-----|-----|------|------|
| 5989267 | 7267802 | 1541800 | --- | --- | --- | 1,03 | up   |
| 5989373 | 7056333 | 1023696 | --- | --- | --- | 1,30 | up   |
| 5989433 | 7156170 | 1266234 | --- | --- | --- | 1,26 | down |
| 5989468 | 7292178 | 1601749 | --- | --- | --- | 1,11 | down |
| 5989510 | 7317708 | 1666823 | --- | --- | --- | 1,08 | up   |
| 5989573 | 7144088 | 1236174 | --- | --- | --- | 1,21 | up   |
| 5989595 | 7143971 | 1235920 | --- | --- | --- | 1,09 | down |
| 5989649 | 7058149 | 1027289 | --- | --- | --- | 2,01 | down |
| 5989657 | 7038530 | 981886  | --- | --- | --- | 1,45 | down |
| 5989664 | 7160687 | 1277004 | --- | --- | --- | 1,56 | down |
| 5989751 | 7207069 | 1392021 | --- | --- | --- | 1,05 | up   |
| 5989767 | 7148978 | 1248504 | --- | --- | --- | 1,20 | down |
| 5989795 | 7207069 | 1392019 | --- | --- | --- | 1,06 | up   |
| 5989857 | 7160846 | 1277348 | --- | --- | --- | 1,21 | up   |
| 5989863 | 7371001 | 1798837 | --- | --- | --- | 1,06 | up   |
| 5990026 | 7078666 | 1076547 | --- | --- | --- | 1,03 | up   |
| 5990083 | 7352044 | 1750022 | --- | --- | --- | 1,27 | down |
| 5990152 | 7244290 | 1484151 | --- | --- | --- | 1,43 | down |
| 5990185 | 7217434 | 1416417 | --- | --- | --- | 1,02 | down |
| 5990203 | 7141061 | 1228644 | --- | --- | --- | 1,05 | down |
| 5990384 | 7155116 | 1263434 | --- | --- | --- | 1,49 | down |
| 5990391 | 7059766 | 1030973 | --- | --- | --- | 1,19 | up   |
| 5990421 | 7080563 | 1080717 | --- | --- | --- | 1,09 | up   |
| 5990445 | 7132020 | 1206318 | --- | --- | --- | 1,60 | down |
| 5990468 | 7040442 | 986537  | --- | --- | --- | 1,49 | down |
| 5990490 | 7128539 | 1197668 | --- | --- | --- | 1,29 | up   |
| 5990503 | 7259923 | 1522523 | --- | --- | --- | 1,18 | down |
| 5990593 | 7318143 | 1668090 | --- | --- | --- | 1,07 | up   |
| 5990667 | 7243627 | 1482352 | --- | --- | --- | 1,11 | down |
| 5990683 | 7207093 | 1392084 | --- | --- | --- | 1,04 | down |
| 5990703 | 7280743 | 1574524 | --- | --- | --- | 1,59 | down |
| 5990727 | 7329846 | 1694998 | --- | --- | --- | 1,62 | up   |
| 5990738 | 7337224 | 1712605 | --- | --- | --- | 1,82 | down |
| 5990774 | 7312566 | 1653308 | --- | --- | --- | 1,17 | down |
| 5990882 | 7125494 | 1190402 | --- | --- | --- | 1,36 | down |
| 5990910 | 7257893 | 1517469 | --- | --- | --- | 1,25 | down |
| 5990947 | 7035525 | 974766  | --- | --- | --- | 1,09 | up   |
| 5990964 | 7209811 | 1398677 | --- | --- | --- | 1,46 | up   |
| 5991044 | 7255517 | 1511366 | --- | --- | --- | 1,95 | up   |
| 5991071 | 7194400 | 1361771 | --- | --- | --- | 1,01 | up   |
| 5991140 | 7177834 | 1319639 | --- | --- | --- | 1,06 | down |
| 5991146 | 7063716 | 1040150 | --- | --- | --- | 1,16 | up   |
| 5991187 | 7326378 | 1686713 | --- | --- | --- | 1,60 | down |
| 5991226 | 7173640 | 1308968 | --- | --- | --- | 1,29 | up   |
| 5991248 | 7263348 | 1530809 | --- | --- | --- | 1,15 | up   |
| 5991331 | 7257893 | 1517460 | --- | --- | --- | 1,16 | down |
| 5991343 | 7209927 | 1398950 | --- | --- | --- | 1,96 | down |
| 5991433 | 7350489 | 1746113 | --- | --- | --- | 1,06 | down |
| 5991469 | 7267802 | 1541869 | --- | --- | --- | 1,09 | up   |
| 5991476 | 7150348 | 1251434 | --- | --- | --- | 1,09 | down |
| 5991503 | 7099573 | 1126720 | --- | --- | --- | 1,28 | down |
| 5991532 | 7079475 | 1078285 | --- | --- | --- | 1,03 | down |
| 5991564 | 7177520 | 1318613 | --- | --- | --- | 3,58 | up   |
| 5991754 | 7378546 | 1817579 | --- | --- | --- | 1,02 | up   |
| 5991755 | 7286613 | 1588476 | --- | --- | --- | 1,46 | up   |
| 5991786 | 7312532 | 1653213 | --- | --- | --- | 1,33 | up   |
| 5991808 | 7127801 | 1195877 | --- | --- | --- | 1,39 | down |

|         |         |         |     |     |     |      |      |
|---------|---------|---------|-----|-----|-----|------|------|
| 5991838 | 7319259 | 1670399 | --- | --- | --- | 1,20 | up   |
| 5991858 | 7337224 | 1712556 | --- | --- | --- | 1,01 | up   |
| 5991886 | 7252877 | 1504760 | --- | --- | --- | 1,03 | down |
| 5991892 | 7301843 | 1626481 | --- | --- | --- | 1,11 | up   |
| 5992013 | 7340057 | 1720334 | --- | --- | --- | 1,51 | up   |
| 5992113 | 7248790 | 1494504 | --- | --- | --- | 1,14 | up   |
| 5992183 | 7166867 | 1291334 | --- | --- | --- | 1,05 | up   |
| 5992226 | 7250511 | 1498629 | --- | --- | --- | 1,04 | down |
| 5992232 | 7075445 | 1069345 | --- | --- | --- | 1,27 | up   |
| 5992275 | 7073677 | 1065144 | --- | --- | --- | 1,08 | up   |
| 5992299 | 7039223 | 983559  | --- | --- | --- | 1,27 | down |
| 5992337 | 7314620 | 1658529 | --- | --- | --- | 1,17 | up   |
| 5992447 | 7168439 | 1295682 | --- | --- | --- | 1,27 | up   |
| 5992494 | 7041140 | 988279  | --- | --- | --- | 1,11 | up   |
| 5992508 | 7258784 | 1519674 | --- | --- | --- | 1,87 | up   |
| 5992606 | 7341243 | 1723207 | --- | --- | --- | 1,36 | down |
| 5992608 | 7173706 | 1309296 | --- | --- | --- | 1,48 | up   |
| 5992631 | 7198210 | 1370977 | --- | --- | --- | 1,59 | up   |
| 5992655 | 7312465 | 1653054 | --- | --- | --- | 1,44 | down |
| 5992680 | 7096924 | 1119609 | --- | --- | --- | 2,58 | up   |
| 5992705 | 7033337 | 969484  | --- | --- | --- | 1,01 | down |
| 5992862 | 7356115 | 1760116 | --- | --- | --- | 1,35 | down |
| 5992933 | 7321029 | 1674804 | --- | --- | --- | 1,40 | down |
| 5993052 | 7056333 | 1023690 | --- | --- | --- | 1,16 | up   |
| 5993071 | 7148978 | 1248486 | --- | --- | --- | 1,25 | up   |
| 5993137 | 7286807 | 1588818 | --- | --- | --- | 1,21 | up   |
| 5993251 | 7274593 | 1558805 | --- | --- | --- | 4,38 | down |
| 5993348 | 7099573 | 1126708 | --- | --- | --- | 1,18 | up   |
| 5993385 | 7274780 | 1559255 | --- | --- | --- | 1,18 | down |
| 5993590 | 7318139 | 1668065 | --- | --- | --- | 1,02 | up   |
| 5993675 | 7122131 | 1182670 | --- | --- | --- | 1,02 | down |
| 5993706 | 7083031 | 1086280 | --- | --- | --- | 1,13 | up   |
| 5993753 | 7205750 | 1388991 | --- | --- | --- | 1,02 | up   |
| 5993780 | 7374324 | 1807482 | --- | --- | --- | 1,08 | down |
| 5993862 | 7336050 | 1709744 | --- | --- | --- | 1,28 | up   |
| 5993885 | 7066035 | 1046212 | --- | --- | --- | 1,09 | up   |
| 5994016 | 7337425 | 1713163 | --- | --- | --- | 1,05 | down |
| 5994056 | 7243647 | 1482431 | --- | --- | --- | 1,06 | up   |
| 5994157 | 7070461 | 1057366 | --- | --- | --- | 1,64 | down |
| 5994218 | 7052933 | 1016219 | --- | --- | --- | 1,02 | down |
| 5994272 | 7030037 | 960716  | --- | --- | --- | 1,04 | up   |
| 5994307 | 7156052 | 1265751 | --- | --- | --- | 1,10 | down |
| 5994362 | 7056736 | 1024422 | --- | --- | --- | 2,55 | up   |
| 5994389 | 7084193 | 1089060 | --- | --- | --- | 1,01 | up   |
| 5994435 | 7369400 | 1793982 | --- | --- | --- | 1,24 | down |
| 5994437 | 7278575 | 1569553 | --- | --- | --- | 1,45 | down |
| 5994482 | 7070836 | 1058356 | --- | --- | --- | 1,08 | down |
| 5994494 | 7212308 | 1404015 | --- | --- | --- | 1,33 | down |
| 5994496 | 7080563 | 1080712 | --- | --- | --- | 1,05 | up   |
| 5994505 | 7025310 | 949266  | --- | --- | --- | 1,23 | up   |
| 5994585 | 7050167 | 1009824 | --- | --- | --- | 1,05 | up   |
| 5994681 | 7355580 | 1758885 | --- | --- | --- | 1,85 | up   |
| 5994765 | 7261019 | 1525252 | --- | --- | --- | 1,65 | down |
| 5994795 | 7237814 | 1467824 | --- | --- | --- | 1,23 | up   |
| 5994823 | 7122140 | 1182701 | --- | --- | --- | 1,61 | up   |
| 5994848 | 7093255 | 1110781 | --- | --- | --- | 2,42 | up   |
| 5994894 | 7166867 | 1291374 | --- | --- | --- | 2,31 | up   |

|         |         |         |     |     |     |      |      |
|---------|---------|---------|-----|-----|-----|------|------|
| 5994934 | 7365147 | 1781765 | --- | --- | --- | 1,00 | up   |
| 5994972 | 7149934 | 1250521 | --- | --- | --- | 1,06 | up   |
| 5995002 | 7086966 | 1095261 | --- | --- | --- | 1,11 | down |
| 5995066 | 7158419 | 1271374 | --- | --- | --- | 1,05 | up   |
| 5995078 | 7129578 | 1200072 | --- | --- | --- | 1,07 | up   |
| 5995161 | 7213945 | 1407866 | --- | --- | --- | 1,38 | up   |
| 5995162 | 7148978 | 1248455 | --- | --- | --- | 1,05 | up   |
| 5995297 | 7069603 | 1055050 | --- | --- | --- | 2,08 | up   |
| 5995324 | 7148978 | 1248486 | --- | --- | --- | 1,06 | up   |
| 5995365 | 7156611 | 1267349 | --- | --- | --- | 1,08 | down |
| 5995382 | 7125348 | 1190100 | --- | --- | --- | 2,50 | up   |
| 5995399 | 7052176 | 1014215 | --- | --- | --- | 1,85 | down |
| 5995426 | 7105449 | 1141131 | --- | --- | --- | 3,98 | down |
| 5995487 | 7243647 | 1482458 | --- | --- | --- | 1,24 | up   |
| 5995509 | 7141061 | 1228643 | --- | --- | --- | 1,14 | down |
| 5995619 | 7058713 | 1028654 | --- | --- | --- | 1,07 | down |
| 5995749 | 7236492 | 1464535 | --- | --- | --- | 1,14 | up   |
| 5995759 | 7281188 | 1575808 | --- | --- | --- | 2,14 | up   |
| 5995805 | 7371001 | 1798853 | --- | --- | --- | 1,09 | down |
| 5995963 | 7370415 | 1796853 | --- | --- | --- | 1,02 | down |
| 5996028 | 7122140 | 1182717 | --- | --- | --- | 1,09 | up   |
| 5996032 | 7072765 | 1062732 | --- | --- | --- | 1,08 | up   |
| 5996135 | 7194400 | 1361754 | --- | --- | --- | 1,45 | down |
| 5996291 | 7238115 | 1468609 | --- | --- | --- | 1,48 | down |
| 5996317 | 7156052 | 1265758 | --- | --- | --- | 1,04 | down |
| 5996320 | 7270592 | 1548560 | --- | --- | --- | 1,02 | down |
| 5996323 | 7337250 | 1712734 | --- | --- | --- | 1,10 | up   |
| 5996444 | 7376398 | 1812488 | --- | --- | --- | 1,09 | up   |
| 5996535 | 7069830 | 1055625 | --- | --- | --- | 1,30 | down |
| 5996578 | 7096924 | 1119618 | --- | --- | --- | 1,10 | down |
| 5996595 | 7113083 | 1159980 | --- | --- | --- | 1,42 | up   |
| 5996783 | 7098810 | 1124646 | --- | --- | --- | 1,01 | up   |
| 5996811 | 7312569 | 1653345 | --- | --- | --- | 1,39 | down |
| 5996851 | 7277719 | 1567091 | --- | --- | --- | 1,44 | down |
| 5996909 | 7217434 | 1416411 | --- | --- | --- | 1,09 | down |
| 5996911 | 7110999 | 1154760 | --- | --- | --- | 1,11 | up   |
| 5996913 | 7099973 | 1127535 | --- | --- | --- | 1,06 | down |
| 5996977 | 7092406 | 1108785 | --- | --- | --- | 1,31 | down |
| 5997018 | 7249019 | 1495083 | --- | --- | --- | 1,14 | down |
| 5997052 | 7208784 | 1396148 | --- | --- | --- | 1,42 | down |
| 5997059 | 7194356 | 1361622 | --- | --- | --- | 1,27 | down |
| 5997093 | 7155286 | 1263902 | --- | --- | --- | 1,19 | down |
| 5997177 | 7148741 | 1247828 | --- | --- | --- | 1,52 | up   |
| 5997268 | 7330731 | 1697178 | --- | --- | --- | 1,10 | down |
| 5997466 | 7080563 | 1080720 | --- | --- | --- | 1,01 | up   |
| 5997532 | 7350237 | 1745479 | --- | --- | --- | 1,02 | up   |
| 5997554 | 7079600 | 1078625 | --- | --- | --- | 1,11 | down |
| 5997614 | 7146245 | 1241377 | --- | --- | --- | 1,24 | down |
| 5997620 | 7236492 | 1464537 | --- | --- | --- | 1,23 | up   |
| 5997622 | 7032204 | 966173  | --- | --- | --- | 1,65 | up   |
| 5997631 | 7347427 | 1738676 | --- | --- | --- | 1,44 | down |
| 5997713 | 7247230 | 1490585 | --- | --- | --- | 1,30 | up   |
| 5998102 | 7122140 | 1182728 | --- | --- | --- | 1,01 | down |
| 5998115 | 7165644 | 1288022 | --- | --- | --- | 1,92 | up   |
| 5998125 | 7176368 | 1315575 | --- | --- | --- | 1,46 | up   |
| 5998430 | 7363674 | 1778417 | --- | --- | --- | 1,83 | up   |
| 5998478 | 7120379 | 1178329 | --- | --- | --- | 1,13 | up   |

|         |         |         |     |     |     |      |      |
|---------|---------|---------|-----|-----|-----|------|------|
| 5998535 | 7097536 | 1121129 | --- | --- | --- | 1,30 | up   |
| 5998557 | 7149934 | 1250520 | --- | --- | --- | 1,29 | down |
| 5998600 | 7191866 | 1354897 | --- | --- | --- | 1,07 | up   |
| 5998744 | 7324760 | 1683091 | --- | --- | --- | 1,77 | up   |
| 5998771 | 7073854 | 1065626 | --- | --- | --- | 1,74 | up   |
| 5998856 | 7267802 | 1541741 | --- | --- | --- | 2,39 | down |
| 5998892 | 7099573 | 1126741 | --- | --- | --- | 1,12 | down |
| 5998895 | 7149817 | 1250309 | --- | --- | --- | 1,68 | down |
| 5998906 | 7279533 | 1571916 | --- | --- | --- | 1,07 | down |
| 5998913 | 7305275 | 1635838 | --- | --- | --- | 1,01 | down |
| 5998993 | 7256070 | 1512589 | --- | --- | --- | 1,00 | up   |
| 5999008 | 7132125 | 1206609 | --- | --- | --- | 1,03 | up   |
| 5999244 | 7236358 | 1464222 | --- | --- | --- | 1,26 | up   |
| 5999283 | 7069603 | 1055056 | --- | --- | --- | 1,02 | down |
| 5999380 | 7335637 | 1708467 | --- | --- | --- | 1,00 | up   |
| 5999469 | 7240569 | 1475492 | --- | --- | --- | 1,76 | up   |
| 5999474 | 7227775 | 1441848 | --- | --- | --- | 1,13 | down |
| 5999583 | 7099573 | 1126722 | --- | --- | --- | 1,01 | down |
| 5999609 | 7279793 | 1572539 | --- | --- | --- | 1,30 | down |
| 5999826 | 7238153 | 1468823 | --- | --- | --- | 1,11 | up   |
| 5999858 | 7073928 | 1065805 | --- | --- | --- | 1,18 | down |
| 5999901 | 7132125 | 1206611 | --- | --- | --- | 1,02 | up   |
| 5999917 | 7069462 | 1054601 | --- | --- | --- | 1,37 | down |
| 6000258 | 7239939 | 1473792 | --- | --- | --- | 1,15 | up   |
| 6000308 | 7364346 | 1780006 | --- | --- | --- | 1,21 | up   |
| 6000463 | 7182056 | 1330576 | --- | --- | --- | 1,00 | up   |
| 6000478 | 7053620 | 1017794 | --- | --- | --- | 1,25 | down |
| 6000537 | 7340990 | 1722514 | --- | --- | --- | 1,51 | down |
| 6000544 | 7289879 | 1596407 | --- | --- | --- | 1,20 | up   |
| 6000579 | 7115907 | 1166941 | --- | --- | --- | 1,13 | down |
| 6000601 | 7240569 | 1475502 | --- | --- | --- | 1,26 | up   |
| 6000657 | 7196769 | 1367262 | --- | --- | --- | 1,12 | down |
| 6000677 | 7335637 | 1708466 | --- | --- | --- | 1,94 | down |
| 6000753 | 7344702 | 1732140 | --- | --- | --- | 1,00 | up   |
| 6000760 | 7279533 | 1571917 | --- | --- | --- | 2,32 | up   |
| 6000945 | 7075445 | 1069348 | --- | --- | --- | 1,31 | down |
| 6000968 | 7373038 | 1804288 | --- | --- | --- | 1,70 | up   |
| 6000971 | 7093296 | 1110906 | --- | --- | --- | 1,01 | up   |
| 6000987 | 7258455 | 1518700 | --- | --- | --- | 1,75 | down |
| 6001065 | 7025670 | 950408  | --- | --- | --- | 1,30 | down |
| 6001073 | 7100523 | 1128840 | --- | --- | --- | 1,21 | down |
| 6001084 | 7339379 | 1718357 | --- | --- | --- | 1,36 | up   |
| 6001087 | 7176275 | 1315332 | --- | --- | --- | 1,03 | up   |
| 6001206 | 7320068 | 1672649 | --- | --- | --- | 1,50 | down |
| 6001213 | 7181286 | 1328470 | --- | --- | --- | 2,07 | up   |
| 6001218 | 7196029 | 1365637 | --- | --- | --- | 1,08 | down |
| 6001254 | 7319259 | 1670395 | --- | --- | --- | 1,22 | down |
| 6001331 | 7361881 | 1773924 | --- | --- | --- | 1,03 | down |
| 6001475 | 7132125 | 1206597 | --- | --- | --- | 1,08 | down |
| 6001564 | 7369031 | 1793013 | --- | --- | --- | 1,27 | down |
| 6001607 | 7052385 | 1014785 | --- | --- | --- | 1,67 | up   |
| 6001610 | 7168521 | 1295907 | --- | --- | --- | 1,01 | down |
| 6001628 | 7344406 | 1731222 | --- | --- | --- | 1,55 | down |
| 6001638 | 7050716 | 1011224 | --- | --- | --- | 1,15 | up   |
| 6001791 | 7096461 | 1118275 | --- | --- | --- | 1,12 | down |
| 6001832 | 7075533 | 1069572 | --- | --- | --- | 1,33 | up   |
| 6001959 | 7071264 | 1059341 | --- | --- | --- | 2,06 | up   |

|         |         |         |     |     |     |      |      |
|---------|---------|---------|-----|-----|-----|------|------|
| 6001979 | 7363529 | 1777966 | --- | --- | --- | 1,01 | down |
| 6002115 | 7312686 | 1653622 | --- | --- | --- | 1,54 | down |
| 6002117 | 7029770 | 960150  | --- | --- | --- | 2,14 | up   |
| 6002162 | 7297589 | 1615592 | --- | --- | --- | 1,18 | down |
| 6002185 | 7156978 | 1268173 | --- | --- | --- | 1,06 | down |
| 6002436 | 7280982 | 1575205 | --- | --- | --- | 1,25 | down |
| 6002483 | 7181105 | 1327967 | --- | --- | --- | 1,13 | down |
| 6002690 | 7374324 | 1807487 | --- | --- | --- | 1,07 | up   |
| 6002703 | 7253215 | 1505382 | --- | --- | --- | 1,14 | down |
| 6002759 | 7243253 | 1481227 | --- | --- | --- | 1,00 | up   |
| 6002762 | 7173640 | 1308952 | --- | --- | --- | 1,51 | up   |
| 6002805 | 7262570 | 1528983 | --- | --- | --- | 2,42 | up   |
| 6002936 | 7207971 | 1394330 | --- | --- | --- | 1,14 | down |
| 6003110 | 7069721 | 1055314 | --- | --- | --- | 1,35 | up   |
| 6003230 | 7184151 | 1335953 | --- | --- | --- | 1,59 | down |
| 6003256 | 7277783 | 1567454 | --- | --- | --- | 1,52 | up   |
| 6003264 | 7190524 | 1351173 | --- | --- | --- | 1,24 | down |
| 6003272 | 7237814 | 1467832 | --- | --- | --- | 1,02 | down |
| 6003295 | 7041609 | 989556  | --- | --- | --- | 1,15 | down |
| 6003381 | 7373038 | 1804294 | --- | --- | --- | 1,84 | down |
| 6003490 | 7061550 | 1035284 | --- | --- | --- | 1,13 | up   |
| 6003559 | 7368565 | 1791286 | --- | --- | --- | 1,25 | down |
| 6003623 | 7141456 | 1229584 | --- | --- | --- | 1,09 | up   |
| 6003712 | 7148978 | 1248460 | --- | --- | --- | 1,02 | down |
| 6003761 | 7167872 | 1294018 | --- | --- | --- | 1,30 | down |
| 6003824 | 7209811 | 1398673 | --- | --- | --- | 1,01 | down |
| 6003844 | 7341038 | 1722690 | --- | --- | --- | 1,49 | down |
| 6004025 | 7380497 | 1821824 | --- | --- | --- | 1,43 | down |
| 6004039 | 7068942 | 1053374 | --- | --- | --- | 1,38 | down |
| 6004081 | 7289075 | 1594464 | --- | --- | --- | 1,09 | up   |
| 6004171 | 7231484 | 1451397 | --- | --- | --- | 1,29 | down |
| 6004248 | 7079475 | 1078284 | --- | --- | --- | 1,14 | up   |
| 6004328 | 7166439 | 1290100 | --- | --- | --- | 1,37 | down |
| 6004339 | 7312627 | 1653487 | --- | --- | --- | 1,29 | down |
| 6004342 | 7277783 | 1567444 | --- | --- | --- | 2,19 | up   |
| 6004487 | 7112606 | 1158780 | --- | --- | --- | 1,08 | down |
| 6004515 | 7332059 | 1700728 | --- | --- | --- | 2,22 | down |
| 6004544 | 7052331 | 1014567 | --- | --- | --- | 1,00 | up   |
| 6004597 | 7179176 | 1322916 | --- | --- | --- | 1,24 | up   |
| 6004653 | 7255522 | 1511418 | --- | --- | --- | 1,06 | down |
| 6004675 | 7031774 | 964789  | --- | --- | --- | 2,06 | down |
| 6004770 | 7343250 | 1728058 | --- | --- | --- | 1,23 | up   |
| 6004877 | 7066035 | 1046217 | --- | --- | --- | 1,01 | down |
| 6004898 | 7156611 | 1267342 | --- | --- | --- | 1,17 | up   |
| 6004942 | 7141061 | 1228644 | --- | --- | --- | 1,11 | down |
| 6004981 | 7222236 | 1428113 | --- | --- | --- | 1,11 | up   |
| 6005010 | 7243647 | 1482486 | --- | --- | --- | 1,29 | up   |
| 6005061 | 7068259 | 1051624 | --- | --- | --- | 1,02 | down |
| 6005093 | 7259221 | 1520636 | --- | --- | --- | 1,57 | down |
| 6005165 | 7146093 | 1240914 | --- | --- | --- | 1,05 | up   |
| 6005221 | 7120550 | 1178706 | --- | --- | --- | 2,33 | down |
| 6005235 | 7132024 | 1206337 | --- | --- | --- | 2,00 | down |
| 6005283 | 7361881 | 1773934 | --- | --- | --- | 1,36 | down |
| 6005305 | 7098077 | 1122730 | --- | --- | --- | 1,31 | down |
| 6005355 | 7339379 | 1718362 | --- | --- | --- | 1,11 | up   |
| 6005439 | 7148978 | 1248487 | --- | --- | --- | 1,02 | up   |
| 6005523 | 7064468 | 1042347 | --- | --- | --- | 1,16 | down |

|         |         |         |     |     |     |      |      |
|---------|---------|---------|-----|-----|-----|------|------|
| 6005571 | 7255510 | 1511325 | --- | --- | --- | 1,11 | up   |
| 6005585 | 7291828 | 1600940 | --- | --- | --- | 1,03 | down |
| 6005655 | 7083030 | 1086248 | --- | --- | --- | 2,53 | up   |
| 6005684 | 7361881 | 1773950 | --- | --- | --- | 1,29 | up   |
| 6005735 | 7100408 | 1128640 | --- | --- | --- | 1,06 | up   |
| 6005739 | 7350237 | 1745486 | --- | --- | --- | 1,23 | down |
| 6005743 | 7033504 | 969851  | --- | --- | --- | 1,02 | up   |
| 6005851 | 7231137 | 1450195 | --- | --- | --- | 1,18 | up   |
| 6005899 | 7115362 | 1165598 | --- | --- | --- | 1,52 | down |
| 6005951 | 7112355 | 1158070 | --- | --- | --- | 1,12 | up   |
| 6006014 | 7347427 | 1738676 | --- | --- | --- | 2,41 | up   |
| 6006086 | 7324018 | 1681255 | --- | --- | --- | 1,04 | down |
| 6006139 | 7171091 | 1302460 | --- | --- | --- | 1,80 | down |
| 6006187 | 7365147 | 1781779 | --- | --- | --- | 1,01 | up   |
| 6006220 | 7383102 | 1827381 | --- | --- | --- | 1,97 | down |
| 6006250 | 7321029 | 1674814 | --- | --- | --- | 1,41 | up   |
| 6006363 | 7309646 | 1646489 | --- | --- | --- | 1,05 | up   |
| 6006373 | 7128539 | 1197692 | --- | --- | --- | 1,11 | up   |
| 6006414 | 7235794 | 1462879 | --- | --- | --- | 1,03 | up   |
| 6006455 | 7312532 | 1653217 | --- | --- | --- | 1,63 | down |
| 6006464 | 7141151 | 1228924 | --- | --- | --- | 1,27 | up   |
| 6006488 | 7070836 | 1058341 | --- | --- | --- | 1,66 | up   |
| 6006500 | 7058149 | 1027268 | --- | --- | --- | 1,44 | up   |
| 6006549 | 7264745 | 1534271 | --- | --- | --- | 1,69 | up   |
| 6006735 | 7100307 | 1128390 | --- | --- | --- | 2,23 | down |
| 6006737 | 7345465 | 1733849 | --- | --- | --- | 1,35 | up   |
| 6006739 | 7162177 | 1280580 | --- | --- | --- | 1,21 | up   |
| 6006888 | 7194356 | 1361629 | --- | --- | --- | 1,63 | up   |
| 6006937 | 7213294 | 1406094 | --- | --- | --- | 1,05 | down |
| 6007124 | 7341002 | 1722555 | --- | --- | --- | 1,47 | up   |
| 6007130 | 7258455 | 1518702 | --- | --- | --- | 1,11 | down |
| 6007144 | 7119179 | 1174996 | --- | --- | --- | 1,24 | up   |
| 6007191 | 7243901 | 1483054 | --- | --- | --- | 1,83 | up   |
| 6007238 | 7238153 | 1468835 | --- | --- | --- | 1,09 | up   |
| 6007247 | 7231152 | 1450229 | --- | --- | --- | 1,06 | up   |
| 6007289 | 7194400 | 1361708 | --- | --- | --- | 1,07 | up   |
| 6007352 | 7217679 | 1417319 | --- | --- | --- | 1,01 | up   |
| 6007363 | 7257893 | 1517467 | --- | --- | --- | 1,25 | up   |
| 6007369 | 7297589 | 1615675 | --- | --- | --- | 1,09 | up   |
| 6007379 | 7131372 | 1205045 | --- | --- | --- | 1,32 | down |
| 6007496 | 7255911 | 1512223 | --- | --- | --- | 1,59 | up   |
| 6007513 | 7358859 | 1766961 | --- | --- | --- | 1,08 | up   |
| 6007549 | 7122140 | 1182698 | --- | --- | --- | 1,45 | up   |
| 6007586 | 7349817 | 1744643 | --- | --- | --- | 1,06 | down |
| 6007615 | 7312569 | 1653341 | --- | --- | --- | 1,06 | down |
| 6007681 | 7073854 | 1065630 | --- | --- | --- | 1,75 | down |
| 6007710 | 7030037 | 960713  | --- | --- | --- | 1,00 | down |
| 6007798 | 7121849 | 1181771 | --- | --- | --- | 1,13 | up   |
| 6007813 | 7055687 | 1022014 | --- | --- | --- | 2,48 | down |
| 6007949 | 7374790 | 1808784 | --- | --- | --- | 1,03 | up   |
| 6008029 | 7361881 | 1773953 | --- | --- | --- | 1,58 | up   |
| 6008040 | 7347427 | 1738676 | --- | --- | --- | 1,75 | down |
| 6008057 | 7367969 | 1789098 | --- | --- | --- | 1,25 | down |
| 6008125 | 7139026 | 1223500 | --- | --- | --- | 1,12 | up   |
| 6008222 | 7176368 | 1315568 | --- | --- | --- | 1,38 | up   |
| 6008327 | 7339834 | 1719548 | --- | --- | --- | 1,68 | up   |
| 6008448 | 7070668 | 1057962 | --- | --- | --- | 1,14 | up   |

|         |         |         |     |     |     |      |      |
|---------|---------|---------|-----|-----|-----|------|------|
| 6008457 | 7066035 | 1046198 | --- | --- | --- | 1,08 | down |
| 6008485 | 7146245 | 1241377 | --- | --- | --- | 1,13 | down |
| 6008558 | 7169550 | 1298365 | --- | --- | --- | 2,28 | up   |
| 6008581 | 7370415 | 1796850 | --- | --- | --- | 1,21 | up   |
| 6008608 | 7239752 | 1473182 | --- | --- | --- | 1,17 | down |
| 6008614 | 7330238 | 1695957 | --- | --- | --- | 1,07 | down |
| 6008633 | 7233012 | 1455415 | --- | --- | --- | 1,03 | down |
| 6008658 | 7040442 | 986508  | --- | --- | --- | 1,67 | down |
| 6008675 | 7190844 | 1352107 | --- | --- | --- | 1,20 | up   |
| 6008757 | 7113483 | 1160999 | --- | --- | --- | 1,14 | down |
| 6008820 | 7299083 | 1619263 | --- | --- | --- | 1,56 | up   |
| 6008824 | 7363768 | 1778604 | --- | --- | --- | 1,16 | down |
| 6008967 | 7039725 | 984827  | --- | --- | --- | 1,53 | down |
| 6009014 | 7355244 | 1758139 | --- | --- | --- | 2,27 | up   |
| 6009107 | 7088164 | 1098466 | --- | --- | --- | 1,34 | up   |
| 6009141 | 7238199 | 1468926 | --- | --- | --- | 1,13 | down |
| 6009229 | 7169732 | 1298780 | --- | --- | --- | 1,11 | down |
| 6009232 | 7087965 | 1098063 | --- | --- | --- | 1,71 | up   |
| 6009356 | 7073898 | 1065732 | --- | --- | --- | 1,97 | down |
| 6009571 | 7363529 | 1777948 | --- | --- | --- | 1,12 | down |
| 6009610 | 7257976 | 1517712 | --- | --- | --- | 1,31 | down |
| 6009692 | 7243647 | 1482475 | --- | --- | --- | 1,07 | down |
| 6009712 | 7061894 | 1036289 | --- | --- | --- | 1,17 | up   |
| 6009822 | 7243726 | 1482681 | --- | --- | --- | 1,61 | down |
| 6009984 | 7132715 | 1207974 | --- | --- | --- | 1,14 | down |
| 6010025 | 7366749 | 1785530 | --- | --- | --- | 1,36 | up   |
| 6010056 | 7381330 | 1823622 | --- | --- | --- | 1,45 | up   |
| 6010240 | 7089080 | 1101135 | --- | --- | --- | 1,03 | down |
| 6010330 | 7297589 | 1615641 | --- | --- | --- | 1,07 | down |
| 6010377 | 7337425 | 1713184 | --- | --- | --- | 1,16 | up   |
| 6010487 | 7131876 | 1206045 | --- | --- | --- | 1,38 | up   |
| 6010659 | 7247230 | 1490580 | --- | --- | --- | 1,09 | down |
| 6010666 | 7087965 | 1098025 | --- | --- | --- | 1,71 | up   |
| 6010702 | 7252877 | 1504699 | --- | --- | --- | 1,03 | down |
| 6010755 | 7118234 | 1172836 | --- | --- | --- | 1,32 | up   |
| 6010880 | 7233524 | 1457222 | --- | --- | --- | 1,13 | down |
| 6010886 | 7295652 | 1610292 | --- | --- | --- | 1,97 | down |
| 6010921 | 7083355 | 1086920 | --- | --- | --- | 1,22 | up   |
| 6010987 | 7059584 | 1030558 | --- | --- | --- | 1,04 | up   |
| 6011013 | 7285563 | 1586040 | --- | --- | --- | 1,19 | up   |
| 6011081 | 7053878 | 1018367 | --- | --- | --- | 1,43 | down |
| 6011094 | 7374313 | 1807388 | --- | --- | --- | 1,21 | down |
| 6011232 | 7235069 | 1460981 | --- | --- | --- | 1,04 | down |
| 6011234 | 7309738 | 1646946 | --- | --- | --- | 1,03 | down |
| 6011284 | 7380497 | 1821837 | --- | --- | --- | 1,16 | up   |
| 6011391 | 7376073 | 1811717 | --- | --- | --- | 1,06 | up   |
| 6011450 | 7380878 | 1822549 | --- | --- | --- | 1,20 | up   |
| 6011469 | 7244287 | 1484046 | --- | --- | --- | 1,30 | down |
| 6011479 | 7078605 | 1076350 | --- | --- | --- | 1,28 | up   |
| 6011493 | 7052331 | 1014605 | --- | --- | --- | 1,03 | down |
| 6011560 | 7115963 | 1167061 | --- | --- | --- | 1,28 | down |
| 6011595 | 7052331 | 1014568 | --- | --- | --- | 1,25 | up   |
| 6011601 | 7261668 | 1526981 | --- | --- | --- | 1,03 | up   |
| 6011680 | 7292517 | 1602552 | --- | --- | --- | 1,03 | down |
| 6011830 | 7336931 | 1711896 | --- | --- | --- | 1,05 | up   |
| 6011865 | 7142081 | 1230973 | --- | --- | --- | 1,29 | down |
| 6011970 | 7340757 | 1721902 | --- | --- | --- | 1,34 | up   |

|         |         |         |     |     |     |      |      |
|---------|---------|---------|-----|-----|-----|------|------|
| 6011984 | 7176368 | 1315565 | --- | --- | --- | 1,16 | up   |
| 6012027 | 7065860 | 1045803 | --- | --- | --- | 1,26 | down |
| 6012035 | 7033616 | 970191  | --- | --- | --- | 1,38 | down |
| 6012091 | 7217650 | 1417180 | --- | --- | --- | 1,48 | up   |
| 6012213 | 7247907 | 1492242 | --- | --- | --- | 2,06 | down |
| 6012280 | 7253408 | 1505940 | --- | --- | --- | 1,04 | down |
| 6012318 | 7226109 | 1437383 | --- | --- | --- | 1,55 | up   |
| 6012375 | 7184931 | 1337715 | --- | --- | --- | 1,16 | up   |
| 6012483 | 7053620 | 1017794 | --- | --- | --- | 1,50 | down |
| 6012506 | 7168439 | 1295659 | --- | --- | --- | 1,47 | up   |
| 6012522 | 7232732 | 1454582 | --- | --- | --- | 1,03 | up   |
| 6012583 | 7035525 | 974778  | --- | --- | --- | 1,37 | down |
| 6012601 | 7221247 | 1425838 | --- | --- | --- | 1,04 | down |
| 6012624 | 7235840 | 1463000 | --- | --- | --- | 1,00 | down |
| 6012726 | 7372840 | 1803781 | --- | --- | --- | 1,22 | up   |
| 6012744 | 7279073 | 1570710 | --- | --- | --- | 1,09 | up   |
| 6012801 | 7189669 | 1348994 | --- | --- | --- | 1,20 | down |
| 6012827 | 7115963 | 1167054 | --- | --- | --- | 1,14 | down |
| 6012843 | 7073673 | 1065088 | --- | --- | --- | 1,28 | up   |
| 6012892 | 7113985 | 1162241 | --- | --- | --- | 2,06 | up   |
| 6012923 | 7363768 | 1778601 | --- | --- | --- | 1,24 | down |
| 6012995 | 7213908 | 1407732 | --- | --- | --- | 1,40 | up   |
| 6013013 | 7065810 | 1045683 | --- | --- | --- | 1,33 | up   |
| 6013131 | 7372840 | 1803783 | --- | --- | --- | 1,31 | down |
| 6013161 | 7341038 | 1722683 | --- | --- | --- | 1,02 | up   |
| 6013276 | 7240569 | 1475485 | --- | --- | --- | 1,01 | up   |
| 6013306 | 7368005 | 1789339 | --- | --- | --- | 1,57 | down |
| 6013337 | 7198002 | 1370444 | --- | --- | --- | 2,98 | up   |
| 6013429 | 7031618 | 964199  | --- | --- | --- | 1,20 | up   |
| 6013545 | 7240569 | 1475382 | --- | --- | --- | 1,15 | down |
| 6013631 | 7170845 | 1301861 | --- | --- | --- | 1,31 | down |
| 6013646 | 7069253 | 1054148 | --- | --- | --- | 1,20 | up   |
| 6013674 | 7169732 | 1298749 | --- | --- | --- | 1,09 | up   |
| 6013680 | 7243901 | 1483044 | --- | --- | --- | 1,04 | up   |
| 6013715 | 7179785 | 1324499 | --- | --- | --- | 1,05 | down |
| 6013774 | 7268357 | 1543402 | --- | --- | --- | 1,76 | down |
| 6013778 | 7260553 | 1524109 | --- | --- | --- | 1,16 | down |
| 6013782 | 7312566 | 1653321 | --- | --- | --- | 1,25 | up   |
| 6013939 | 7176275 | 1315342 | --- | --- | --- | 1,01 | up   |
| 6013956 | 7109292 | 1150724 | --- | --- | --- | 1,57 | down |
| 6013974 | 7353287 | 1753024 | --- | --- | --- | 1,20 | down |
| 6013992 | 7186464 | 1341387 | --- | --- | --- | 1,06 | up   |
| 6014027 | 7083031 | 1086284 | --- | --- | --- | 1,40 | up   |
| 6014165 | 7384509 | 1830753 | --- | --- | --- | 1,10 | up   |
| 6014168 | 7331757 | 1700036 | --- | --- | --- | 1,28 | up   |
| 6014268 | 7138580 | 1222503 | --- | --- | --- | 1,01 | up   |
| 6014326 | 7367994 | 1789263 | --- | --- | --- | 1,02 | down |
| 6014331 | 7122805 | 1184248 | --- | --- | --- | 2,18 | down |
| 6014354 | 7056333 | 1023717 | --- | --- | --- | 1,23 | up   |
| 6014356 | 7298101 | 1616992 | --- | --- | --- | 1,13 | up   |
| 6014543 | 7374313 | 1807374 | --- | --- | --- | 1,65 | up   |
| 6014594 | 7049793 | 1009017 | --- | --- | --- | 1,15 | up   |
| 6014681 | 7329846 | 1695002 | --- | --- | --- | 1,43 | up   |
| 6014717 | 7231484 | 1451367 | --- | --- | --- | 1,41 | up   |
| 6014740 | 7274593 | 1558815 | --- | --- | --- | 1,42 | up   |
| 6014803 | 7197056 | 1367840 | --- | --- | --- | 2,04 | down |
| 6014852 | 7365183 | 1781902 | --- | --- | --- | 1,14 | up   |



|         |         |         |     |     |     |      |      |
|---------|---------|---------|-----|-----|-----|------|------|
| 6014877 | 7212587 | 1404642 | --- | --- | --- | 1,11 | down |
| 6014880 | 7070668 | 1057918 | --- | --- | --- | 1,53 | up   |
| 6014905 | 7102113 | 1132840 | --- | --- | --- | 1,14 | up   |
| 6014913 | 7109292 | 1150749 | --- | --- | --- | 1,12 | up   |
| 6014940 | 7384509 | 1830719 | --- | --- | --- | 1,12 | up   |
| 6015049 | 7281924 | 1577724 | --- | --- | --- | 1,18 | down |
| 6015088 | 7066035 | 1046215 | --- | --- | --- | 1,23 | down |
| 6015213 | 7203018 | 1382641 | --- | --- | --- | 1,04 | down |
| 6015336 | 7253408 | 1505949 | --- | --- | --- | 1,18 | down |
| 6015365 | 7095066 | 1115289 | --- | --- | --- | 2,50 | up   |
| 6015369 | 7373678 | 1805877 | --- | --- | --- | 1,07 | down |
| 6015374 | 7033504 | 969843  | --- | --- | --- | 1,02 | down |
| 6015416 | 7249917 | 1497395 | --- | --- | --- | 1,41 | up   |
| 6015446 | 7329802 | 1694915 | --- | --- | --- | 1,89 | down |
| 6015451 | 7078605 | 1076359 | --- | --- | --- | 1,03 | down |
| 6015476 | 7130889 | 1203865 | --- | --- | --- | 1,26 | up   |
| 6015505 | 7125348 | 1190075 | --- | --- | --- | 1,33 | up   |
| 6015517 | 7279568 | 1572041 | --- | --- | --- | 2,07 | up   |
| 6015612 | 7069830 | 1055629 | --- | --- | --- | 1,07 | up   |
| 6015684 | 7364346 | 1780025 | --- | --- | --- | 1,17 | down |
| 6015762 | 7355804 | 1759434 | --- | --- | --- | 1,14 | down |
| 6015802 | 7089080 | 1101172 | --- | --- | --- | 1,07 | down |
| 6015803 | 7301807 | 1626293 | --- | --- | --- | 1,37 | up   |
| 6015871 | 7279103 | 1570837 | --- | --- | --- | 1,21 | up   |
| 6015952 | 7340757 | 1721897 | --- | --- | --- | 1,12 | down |
| 6015957 | 7273744 | 1556972 | --- | --- | --- | 1,08 | up   |
| 6015967 | 7337224 | 1712628 | --- | --- | --- | 1,02 | down |
| 6015975 | 7194400 | 1361731 | --- | --- | --- | 1,14 | up   |
| 6016017 | 7062436 | 1037652 | --- | --- | --- | 1,08 | down |
| 6016222 | 7384509 | 1830722 | --- | --- | --- | 1,03 | up   |
| 6016227 | 7060896 | 1033561 | --- | --- | --- | 1,35 | down |
| 6016241 | 7239939 | 1473791 | --- | --- | --- | 1,16 | down |
| 6016293 | 7132020 | 1206319 | --- | --- | --- | 1,01 | down |
| 6016312 | 7376073 | 1811701 | --- | --- | --- | 1,12 | up   |
| 6016510 | 7374790 | 1808765 | --- | --- | --- | 1,23 | down |
| 6016554 | 7339379 | 1718332 | --- | --- | --- | 1,02 | up   |
| 6016618 | 7166867 | 1291323 | --- | --- | --- | 1,24 | down |
| 6016624 | 7344530 | 1731570 | --- | --- | --- | 1,09 | up   |
| 6016648 | 7236358 | 1464238 | --- | --- | --- | 1,04 | down |
| 6016674 | 7142917 | 1233164 | --- | --- | --- | 1,07 | up   |
| 6016744 | 7073679 | 1065190 | --- | --- | --- | 2,59 | down |
| 6016779 | 7068259 | 1051604 | --- | --- | --- | 1,04 | down |
| 6016822 | 7301807 | 1626292 | --- | --- | --- | 1,45 | up   |
| 6016889 | 7043379 | 993593  | --- | --- | --- | 2,24 | up   |
| 6016990 | 7252877 | 1504750 | --- | --- | --- | 1,02 | up   |
| 6016994 | 7276650 | 1564162 | --- | --- | --- | 1,19 | up   |
| 6017010 | 7183182 | 1333577 | --- | --- | --- | 1,59 | down |
| 6017065 | 7096924 | 1119606 | --- | --- | --- | 1,49 | up   |
| 6017079 | 7253408 | 1505956 | --- | --- | --- | 1,12 | down |
| 6017100 | 7131372 | 1205036 | --- | --- | --- | 1,76 | down |
| 6017127 | 7227474 | 1441145 | --- | --- | --- | 1,17 | down |
| 6017305 | 7039223 | 983568  | --- | --- | --- | 1,24 | up   |
| 6017388 | 7280743 | 1574503 | --- | --- | --- | 1,24 | down |
| 6017396 | 7186464 | 1341358 | --- | --- | --- | 1,50 | down |
| 6017434 | 7231484 | 1451373 | --- | --- | --- | 1,24 | up   |
| 6017493 | 7101643 | 1131573 | --- | --- | --- | 1,06 | down |
| 6017509 | 7352119 | 1750271 | --- | --- | --- | 1,03 | up   |

|         |         |         |     |     |     |      |      |
|---------|---------|---------|-----|-----|-----|------|------|
| 6017518 | 7336854 | 1711683 | --- | --- | --- | 2,55 | up   |
| 6017704 | 7309738 | 1646946 | --- | --- | --- | 1,24 | down |
| 6017825 | 7205944 | 1389468 | --- | --- | --- | 1,08 | up   |
| 6017926 | 7079600 | 1078631 | --- | --- | --- | 2,06 | down |
| 6017936 | 7086522 | 1093951 | --- | --- | --- | 1,82 | up   |
| 6017982 | 7293922 | 1605960 | --- | --- | --- | 1,12 | down |
| 6018027 | 7056736 | 1024426 | --- | --- | --- | 2,07 | up   |
| 6018059 | 7279555 | 1571953 | --- | --- | --- | 1,11 | down |
| 6018111 | 7336837 | 1711635 | --- | --- | --- | 1,05 | down |
| 6018234 | 7210822 | 1400975 | --- | --- | --- | 1,05 | up   |
| 6018303 | 7158517 | 1271591 | --- | --- | --- | 1,30 | down |
| 6018415 | 7346229 | 1735586 | --- | --- | --- | 1,13 | down |
| 6018613 | 7288077 | 1591986 | --- | --- | --- | 2,61 | up   |
| 6018619 | 7146542 | 1242212 | --- | --- | --- | 1,19 | down |
| 6018826 | 7230628 | 1448868 | --- | --- | --- | 1,07 | down |
| 6018956 | 7092549 | 1109194 | --- | --- | --- | 1,16 | down |
| 6019119 | 7258323 | 1518473 | --- | --- | --- | 5,01 | down |
| 6019214 | 7339732 | 1719209 | --- | --- | --- | 1,36 | up   |
| 6019433 | 7227433 | 1440954 | --- | --- | --- | 1,23 | down |
| 6019440 | 7050716 | 1011221 | --- | --- | --- | 1,09 | down |
| 6019467 | 7339452 | 1718596 | --- | --- | --- | 1,20 | down |
| 6019484 | 7363674 | 1778412 | --- | --- | --- | 1,14 | up   |
| 6019496 | 7140365 | 1226770 | --- | --- | --- | 1,13 | down |
| 6019542 | 7248790 | 1494490 | --- | --- | --- | 1,31 | down |
| 6019551 | 7188829 | 1346662 | --- | --- | --- | 1,50 | down |
| 6019657 | 7363529 | 1777903 | --- | --- | --- | 1,06 | down |
| 6019715 | 7109292 | 1150737 | --- | --- | --- | 2,26 | up   |
| 6019771 | 7321414 | 1675636 | --- | --- | --- | 1,23 | down |
| 6019809 | 7344380 | 1731129 | --- | --- | --- | 1,18 | up   |
| 6020015 | 7091954 | 1107705 | --- | --- | --- | 1,03 | down |
| 6020107 | 7041609 | 989577  | --- | --- | --- | 1,03 | down |
| 6020110 | 7293234 | 1604356 | --- | --- | --- | 1,09 | down |
| 6020225 | 7243363 | 1481615 | --- | --- | --- | 1,09 | down |
| 6020235 | 7207093 | 1392082 | --- | --- | --- | 1,05 | up   |
| 6020245 | 7376820 | 1813399 | --- | --- | --- | 1,96 | down |
| 6020271 | 7128112 | 1196542 | --- | --- | --- | 1,13 | up   |
| 6020318 | 7248790 | 1494484 | --- | --- | --- | 1,27 | down |
| 6020355 | 7100523 | 1128852 | --- | --- | --- | 1,36 | down |
| 6020359 | 7264653 | 1534040 | --- | --- | --- | 1,07 | down |
| 6020425 | 7086966 | 1095244 | --- | --- | --- | 1,04 | down |
| 6020463 | 7030144 | 960893  | --- | --- | --- | 2,34 | down |
| 6020500 | 7236492 | 1464560 | --- | --- | --- | 1,34 | down |
| 6020521 | 7217434 | 1416391 | --- | --- | --- | 1,07 | down |
| 6020576 | 7064372 | 1042174 | --- | --- | --- | 1,73 | down |
| 6020591 | 7144389 | 1236781 | --- | --- | --- | 1,17 | down |
| 6020613 | 7131372 | 1205028 | --- | --- | --- | 1,00 | down |
| 6020771 | 7195680 | 1364888 | --- | --- | --- | 1,21 | down |
| 6020904 | 7230886 | 1449530 | --- | --- | --- | 1,08 | up   |
| 6020929 | 7329135 | 1693500 | --- | --- | --- | 1,04 | up   |
| 6020973 | 7292869 | 1603455 | --- | --- | --- | 1,14 | up   |
| 6020981 | 7056736 | 1024414 | --- | --- | --- | 1,29 | down |
| 6021011 | 7363529 | 1777908 | --- | --- | --- | 1,51 | down |
| 6021216 | 7263248 | 1530602 | --- | --- | --- | 2,74 | up   |
| 6021251 | 7069253 | 1054162 | --- | --- | --- | 1,17 | down |
| 6021259 | 7330731 | 1697197 | --- | --- | --- | 1,00 | down |
| 6021374 | 7290942 | 1599138 | --- | --- | --- | 1,17 | down |
| 6021422 | 7257976 | 1517707 | --- | --- | --- | 1,09 | down |

|         |         |         |     |     |     |      |      |
|---------|---------|---------|-----|-----|-----|------|------|
| 6021480 | 7289075 | 1594465 | --- | --- | --- | 1,11 | down |
| 6021485 | 7298920 | 1618823 | --- | --- | --- | 1,77 | up   |
| 6021534 | 7193916 | 1360447 | --- | --- | --- | 1,13 | down |
| 6021549 | 7318596 | 1668935 | --- | --- | --- | 1,42 | up   |
| 6021693 | 7313841 | 1656719 | --- | --- | --- | 1,02 | down |
| 6021766 | 7279533 | 1571916 | --- | --- | --- | 1,09 | up   |
| 6021795 | 7371682 | 1800780 | --- | --- | --- | 4,71 | up   |
| 6021871 | 7083030 | 1086250 | --- | --- | --- | 1,32 | down |
| 6022070 | 7217747 | 1417462 | --- | --- | --- | 1,05 | down |
| 6022169 | 7176275 | 1315355 | --- | --- | --- | 3,02 | down |
| 6022181 | 7302787 | 1628885 | --- | --- | --- | 1,13 | down |
| 6022193 | 7360486 | 1770938 | --- | --- | --- | 1,02 | down |
| 6022298 | 7274780 | 1559234 | --- | --- | --- | 1,86 | up   |
| 6022344 | 7114274 | 1162813 | --- | --- | --- | 1,01 | up   |
| 6022347 | 7269637 | 1546244 | --- | --- | --- | 2,28 | down |
| 6022353 | 7279555 | 1571951 | --- | --- | --- | 1,08 | up   |
| 6022382 | 7098810 | 1124646 | --- | --- | --- | 2,75 | down |
| 6022443 | 7301807 | 1626289 | --- | --- | --- | 1,57 | up   |
| 6022447 | 7170764 | 1301488 | --- | --- | --- | 1,05 | up   |
| 6022614 | 7172691 | 1306453 | --- | --- | --- | 1,12 | up   |
| 6022685 | 7361881 | 1773965 | --- | --- | --- | 1,51 | down |
| 6022738 | 7249019 | 1495080 | --- | --- | --- | 1,29 | down |
| 6022760 | 7228520 | 1443758 | --- | --- | --- | 1,19 | up   |
| 6022811 | 7067670 | 1050313 | --- | --- | --- | 2,74 | up   |
| 6022919 | 7344530 | 1731575 | --- | --- | --- | 1,32 | down |
| 6022939 | 7277742 | 1567159 | --- | --- | --- | 1,50 | up   |
| 6023024 | 7351953 | 1749880 | --- | --- | --- | 1,34 | down |
| 6023153 | 7071741 | 1060453 | --- | --- | --- | 2,01 | down |
| 6023192 | 7368004 | 1789332 | --- | --- | --- | 1,36 | up   |
| 6023234 | 7068259 | 1051649 | --- | --- | --- | 1,11 | up   |
| 6023270 | 7099294 | 1126098 | --- | --- | --- | 1,47 | up   |
| 6023273 | 7281924 | 1577746 | --- | --- | --- | 1,25 | down |
| 6023337 | 7062233 | 1037216 | --- | --- | --- | 1,04 | up   |
| 6023468 | 7189669 | 1348992 | --- | --- | --- | 1,76 | down |
| 6023496 | 7186688 | 1341849 | --- | --- | --- | 1,36 | up   |
| 6023505 | 7295652 | 1610299 | --- | --- | --- | 1,14 | down |
| 6023601 | 7030454 | 961554  | --- | --- | --- | 1,16 | up   |
| 6023734 | 7365147 | 1781753 | --- | --- | --- | 1,44 | up   |
| 6023751 | 7142917 | 1233159 | --- | --- | --- | 1,54 | up   |
| 6023791 | 7142917 | 1233172 | --- | --- | --- | 1,20 | down |
| 6023848 | 7146872 | 1242917 | --- | --- | --- | 1,00 | up   |
| 6023849 | 7122140 | 1182729 | --- | --- | --- | 1,40 | down |
| 6023854 | 7197056 | 1367840 | --- | --- | --- | 1,05 | down |
| 6024041 | 7109292 | 1150750 | --- | --- | --- | 1,12 | up   |
| 6024079 | 7049689 | 1008872 | --- | --- | --- | 1,44 | down |
| 6024164 | 7166867 | 1291292 | --- | --- | --- | 1,41 | up   |
| 6024194 | 7210822 | 1400974 | --- | --- | --- | 1,20 | up   |
| 6024204 | 7254040 | 1507581 | --- | --- | --- | 1,02 | down |
| 6024260 | 7208436 | 1395315 | --- | --- | --- | 1,62 | up   |
| 6024375 | 7255755 | 1511922 | --- | --- | --- | 1,29 | up   |
| 6024381 | 7033337 | 969498  | --- | --- | --- | 1,06 | up   |
| 6024427 | 7147213 | 1243829 | --- | --- | --- | 1,03 | down |
| 6024430 | 7260488 | 1523923 | --- | --- | --- | 1,19 | down |
| 6024474 | 7292701 | 1602969 | --- | --- | --- | 1,31 | down |
| 6024627 | 7336050 | 1709754 | --- | --- | --- | 2,35 | down |
| 6024641 | 7380497 | 1821824 | --- | --- | --- | 1,13 | up   |
| 6024660 | 7321029 | 1674804 | --- | --- | --- | 1,15 | down |

|         |         |         |     |     |     |      |      |
|---------|---------|---------|-----|-----|-----|------|------|
| 6024672 | 7100408 | 1128641 | --- | --- | --- | 1,21 | down |
| 6025124 | 7075460 | 1069410 | --- | --- | --- | 5,74 | up   |
| 6025169 | 7244288 | 1484094 | --- | --- | --- | 1,07 | down |
| 6025180 | 7146000 | 1240656 | --- | --- | --- | 1,10 | up   |
| 6025193 | 7360486 | 1771006 | --- | --- | --- | 1,20 | down |
| 6025228 | 7148741 | 1247836 | --- | --- | --- | 1,47 | up   |
| 6025248 | 7140834 | 1227975 | --- | --- | --- | 2,20 | up   |
| 6025272 | 7205944 | 1389469 | --- | --- | --- | 1,12 | down |
| 6025320 | 7180243 | 1325515 | --- | --- | --- | 1,59 | down |
| 6025391 | 7217747 | 1417473 | --- | --- | --- | 1,34 | up   |
| 6025472 | 7190242 | 1350307 | --- | --- | --- | 1,13 | up   |
| 6025577 | 7337845 | 1714342 | --- | --- | --- | 1,23 | up   |
| 6025586 | 7349817 | 1744598 | --- | --- | --- | 1,15 | down |
| 6025640 | 7217192 | 1415699 | --- | --- | --- | 1,70 | down |
| 6025659 | 7053874 | 1018315 | --- | --- | --- | 1,02 | down |
| 6025697 | 7342430 | 1726127 | --- | --- | --- | 1,14 | down |
| 6025764 | 7358859 | 1767005 | --- | --- | --- | 1,02 | up   |
| 6025877 | 7064468 | 1042338 | --- | --- | --- | 1,48 | up   |
| 6025888 | 7064732 | 1042909 | --- | --- | --- | 2,09 | down |
| 6026038 | 7196803 | 1367333 | --- | --- | --- | 1,24 | down |
| 6026209 | 7285530 | 1585964 | --- | --- | --- | 2,18 | down |
| 6026229 | 7247230 | 1490600 | --- | --- | --- | 1,25 | down |
| 6026259 | 7340990 | 1722518 | --- | --- | --- | 2,07 | down |
| 6026269 | 7234040 | 1458500 | --- | --- | --- | 1,69 | up   |
| 6026272 | 7255911 | 1512224 | --- | --- | --- | 1,09 | up   |
| 6026298 | 7052957 | 1016277 | --- | --- | --- | 2,33 | up   |
| 6026432 | 7280743 | 1574484 | --- | --- | --- | 1,02 | up   |
| 6026456 | 7349817 | 1744641 | --- | --- | --- | 1,11 | down |
| 6026572 | 7248790 | 1494519 | --- | --- | --- | 1,35 | up   |
| 6026578 | 7176368 | 1315563 | --- | --- | --- | 1,17 | down |
| 6026613 | 7142917 | 1233180 | --- | --- | --- | 1,06 | down |
| 6026632 | 7095021 | 1115118 | --- | --- | --- | 1,55 | up   |
| 6026693 | 7360486 | 1770973 | --- | --- | --- | 1,41 | down |
| 6026889 | 7083030 | 1086272 | --- | --- | --- | 1,17 | down |
| 6026992 | 7044906 | 998123  | --- | --- | --- | 1,07 | down |
| 6027003 | 7060195 | 1031960 | --- | --- | --- | 1,26 | up   |
| 6027004 | 7096924 | 1119625 | --- | --- | --- | 1,95 | down |
| 6027095 | 7153136 | 1258039 | --- | --- | --- | 1,16 | down |
| 6027201 | 7330223 | 1695840 | --- | --- | --- | 1,04 | up   |
| 6027227 | 7235323 | 1461555 | --- | --- | --- | 1,12 | down |
| 6027249 | 7254209 | 1508007 | --- | --- | --- | 1,24 | up   |
| 6027299 | 7174281 | 1310907 | --- | --- | --- | 1,09 | down |
| 6027329 | 7031774 | 964715  | --- | --- | --- | 1,01 | up   |
| 6027351 | 7194400 | 1361709 | --- | --- | --- | 1,10 | down |
| 6027364 | 7168979 | 1297184 | --- | --- | --- | 1,14 | up   |
| 6027476 | 7111361 | 1155622 | --- | --- | --- | 1,13 | up   |
| 6027579 | 7073854 | 1065622 | --- | --- | --- | 1,53 | up   |
| 6027598 | 7339379 | 1718313 | --- | --- | --- | 1,42 | up   |
| 6027664 | 7169599 | 1298451 | --- | --- | --- | 1,11 | up   |
| 6027752 | 7155866 | 1265324 | --- | --- | --- | 1,09 | down |
| 6027809 | 7128112 | 1196527 | --- | --- | --- | 1,01 | down |
| 6027878 | 7243894 | 1482987 | --- | --- | --- | 1,65 | up   |
| 6027914 | 7058149 | 1027265 | --- | --- | --- | 1,08 | down |
| 6027925 | 7114274 | 1162821 | --- | --- | --- | 1,02 | up   |
| 6027966 | 7168521 | 1295971 | --- | --- | --- | 1,29 | down |
| 6027997 | 7350993 | 1747552 | --- | --- | --- | 1,42 | down |
| 6028043 | 7366749 | 1785491 | --- | --- | --- | 1,10 | down |

|         |         |         |     |     |     |      |      |
|---------|---------|---------|-----|-----|-----|------|------|
| 6028123 | 7184850 | 1337599 | --- | --- | --- | 1,07 | up   |
| 6028141 | 7062233 | 1037190 | --- | --- | --- | 1,28 | down |
| 6028149 | 7030087 | 960786  | --- | --- | --- | 1,17 | down |
| 6028209 | 7142416 | 1231798 | --- | --- | --- | 2,25 | up   |
| 6028329 | 7078143 | 1075433 | --- | --- | --- | 1,53 | down |
| 6028400 | 7098810 | 1124651 | --- | --- | --- | 1,18 | up   |
| 6028441 | 7043379 | 993650  | --- | --- | --- | 1,90 | down |
| 6028455 | 7279533 | 1571915 | --- | --- | --- | 1,07 | up   |
| 6028533 | 7087500 | 1096720 | --- | --- | --- | 2,31 | up   |
| 6028565 | 7112355 | 1158087 | --- | --- | --- | 2,31 | down |
| 6028593 | 7213908 | 1407677 | --- | --- | --- | 1,17 | down |
| 6028626 | 7352635 | 1751442 | --- | --- | --- | 1,38 | up   |
| 6028638 | 7363147 | 1777030 | --- | --- | --- | 1,04 | down |
| 6028653 | 7106752 | 1144046 | --- | --- | --- | 1,15 | down |
| 6028697 | 7100408 | 1128642 | --- | --- | --- | 1,04 | up   |
| 6028758 | 7353232 | 1752772 | --- | --- | --- | 1,07 | up   |
| 6028832 | 7122140 | 1182736 | --- | --- | --- | 1,10 | up   |
| 6028977 | 7141061 | 1228678 | --- | --- | --- | 1,09 | down |
| 6028996 | 7121849 | 1181777 | --- | --- | --- | 1,03 | up   |
| 6029069 | 7059971 | 1031459 | --- | --- | --- | 1,15 | up   |
| 6029077 | 7245932 | 1487788 | --- | --- | --- | 1,30 | up   |
| 6029100 | 7068259 | 1051615 | --- | --- | --- | 1,83 | down |
| 6029102 | 7292517 | 1602533 | --- | --- | --- | 1,01 | down |
| 6029143 | 7029770 | 960149  | --- | --- | --- | 1,14 | down |
| 6029161 | 7293402 | 1604720 | --- | --- | --- | 1,46 | up   |
| 6029218 | 7288077 | 1591963 | --- | --- | --- | 1,13 | up   |
| 6029233 | 7264653 | 1534029 | --- | --- | --- | 1,73 | down |
| 6029385 | 7243894 | 1482990 | --- | --- | --- | 1,01 | down |
| 6029416 | 7101258 | 1130576 | --- | --- | --- | 1,04 | down |
| 6029434 | 7218728 | 1419926 | --- | --- | --- | 1,66 | down |
| 6029485 | 7196029 | 1365641 | --- | --- | --- | 1,15 | down |
| 6029539 | 7258323 | 1518477 | --- | --- | --- | 5,55 | down |
| 6029597 | 7038530 | 981864  | --- | --- | --- | 1,08 | up   |
| 6029689 | 7237814 | 1467816 | --- | --- | --- | 1,03 | up   |
| 6029743 | 7371001 | 1798839 | --- | --- | --- | 1,02 | down |
| 6029755 | 7158419 | 1271400 | --- | --- | --- | 1,14 | down |
| 6029890 | 7301843 | 1626476 | --- | --- | --- | 1,05 | up   |
| 6029953 | 7084193 | 1089096 | --- | --- | --- | 1,53 | up   |
| 6030006 | 7359453 | 1768448 | --- | --- | --- | 1,47 | down |
| 6030020 | 7078143 | 1075434 | --- | --- | --- | 1,05 | up   |
| 6030147 | 7071969 | 1060903 | --- | --- | --- | 1,62 | down |
| 6030288 | 7227474 | 1441147 | --- | --- | --- | 1,05 | up   |
| 6030314 | 7374740 | 1808632 | --- | --- | --- | 2,24 | up   |
| 6030347 | 7321414 | 1675637 | --- | --- | --- | 1,02 | down |
| 6030378 | 7224182 | 1432759 | --- | --- | --- | 1,16 | up   |
| 6030407 | 7346687 | 1736695 | --- | --- | --- | 1,04 | down |
| 6030527 | 7261766 | 1527158 | --- | --- | --- | 1,32 | down |
| 6030545 | 7207069 | 1392018 | --- | --- | --- | 2,75 | down |
| 6030599 | 7279103 | 1570815 | --- | --- | --- | 1,04 | up   |
| 6030609 | 7108434 | 1148305 | --- | --- | --- | 1,03 | up   |
| 6030818 | 7277719 | 1567090 | --- | --- | --- | 1,06 | up   |
| 6030853 | 7252877 | 1504765 | --- | --- | --- | 1,01 | down |
| 6030918 | 7139026 | 1223496 | --- | --- | --- | 1,06 | down |
| 6031161 | 7164949 | 1286356 | --- | --- | --- | 1,24 | up   |
| 6031237 | 7083030 | 1086252 | --- | --- | --- | 1,02 | up   |
| 6031239 | 7148741 | 1247859 | --- | --- | --- | 1,66 | down |
| 6031256 | 7052331 | 1014570 | --- | --- | --- | 1,03 | up   |

|         |         |         |     |     |     |      |      |
|---------|---------|---------|-----|-----|-----|------|------|
| 6031382 | 7231834 | 1452270 | --- | --- | --- | 1,02 | down |
| 6031449 | 7030037 | 960707  | --- | --- | --- | 1,14 | down |
| 6031462 | 7374313 | 1807379 | --- | --- | --- | 1,18 | up   |
| 6031478 | 7383501 | 1828201 | --- | --- | --- | 1,93 | up   |
| 6031531 | 7312121 | 1652374 | --- | --- | --- | 1,30 | down |
| 6031576 | 7086672 | 1094341 | --- | --- | --- | 1,15 | up   |
| 6031622 | 7180732 | 1326720 | --- | --- | --- | 1,09 | up   |
| 6031640 | 7172373 | 1305585 | --- | --- | --- | 1,04 | up   |
| 6031644 | 7139708 | 1225059 | --- | --- | --- | 1,24 | down |
| 6031754 | 7148741 | 1247852 | --- | --- | --- | 1,01 | down |
| 6031834 | 7329135 | 1693490 | --- | --- | --- | 1,08 | down |
| 6031880 | 7033006 | 968487  | --- | --- | --- | 1,01 | down |
| 6031895 | 7138349 | 1221923 | --- | --- | --- | 1,19 | up   |
| 6032048 | 7339387 | 1718392 | --- | --- | --- | 1,01 | up   |
| 6032232 | 7383102 | 1827395 | --- | --- | --- | 1,27 | up   |
| 6032243 | 7258455 | 1518705 | --- | --- | --- | 1,29 | down |
| 6032245 | 7258455 | 1518723 | --- | --- | --- | 1,05 | down |
| 6032321 | 7038153 | 981154  | --- | --- | --- | 2,21 | up   |
| 6032509 | 7277783 | 1567465 | --- | --- | --- | 1,15 | up   |
| 6032518 | 7112355 | 1158078 | --- | --- | --- | 1,26 | up   |
| 6032522 | 7317318 | 1665827 | --- | --- | --- | 1,15 | down |
| 6032527 | 7207093 | 1392137 | --- | --- | --- | 1,18 | up   |
| 6032651 | 7237672 | 1467293 | --- | --- | --- | 1,48 | up   |
| 6032676 | 7225291 | 1435295 | --- | --- | --- | 2,50 | up   |
| 6032803 | 7059971 | 1031464 | --- | --- | --- | 1,75 | down |
| 6032955 | 7256070 | 1512582 | --- | --- | --- | 1,03 | up   |
| 6033007 | 7232732 | 1454584 | --- | --- | --- | 2,84 | down |
| 6033022 | 7071714 | 1060357 | --- | --- | --- | 1,12 | up   |
| 6033034 | 7244290 | 1484145 | --- | --- | --- | 4,14 | up   |
| 6033233 | 7089080 | 1101135 | --- | --- | --- | 1,16 | down |
| 6033243 | 7110401 | 1153074 | --- | --- | --- | 1,19 | down |
| 6033256 | 7060085 | 1031720 | --- | --- | --- | 1,10 | down |
| 6033260 | 7373678 | 1805863 | --- | --- | --- | 1,63 | up   |
| 6033284 | 7156170 | 1266282 | --- | --- | --- | 1,52 | up   |
| 6033300 | 7070836 | 1058332 | --- | --- | --- | 1,42 | down |
| 6033372 | 7245921 | 1487689 | --- | --- | --- | 1,50 | down |
| 6033418 | 7374493 | 1807964 | --- | --- | --- | 1,27 | down |
| 6033428 | 7307473 | 1641297 | --- | --- | --- | 1,00 | down |
| 6033430 | 7236131 | 1463767 | --- | --- | --- | 1,13 | down |
| 6033433 | 7350489 | 1746125 | --- | --- | --- | 1,03 | up   |
| 6033543 | 7210822 | 1400972 | --- | --- | --- | 1,94 | up   |
| 6033612 | 7069830 | 1055604 | --- | --- | --- | 1,04 | down |
| 6033743 | 7212735 | 1405026 | --- | --- | --- | 1,22 | down |
| 6033790 | 7324760 | 1683088 | --- | --- | --- | 1,27 | down |
| 6033850 | 7274780 | 1559241 | --- | --- | --- | 1,73 | down |
| 6033875 | 7058507 | 1028305 | --- | --- | --- | 1,09 | down |
| 6033893 | 7374493 | 1807962 | --- | --- | --- | 1,09 | down |
| 6033913 | 7082098 | 1084121 | --- | --- | --- | 1,17 | down |
| 6033940 | 7176368 | 1315582 | --- | --- | --- | 1,37 | up   |
| 6034048 | 7356619 | 1761352 | --- | --- | --- | 1,17 | down |
| 6034072 | 7264653 | 1534041 | --- | --- | --- | 1,28 | up   |
| 6034145 | 7039725 | 984826  | --- | --- | --- | 1,54 | down |
| 6034186 | 7324071 | 1681460 | --- | --- | --- | 2,14 | down |
| 6034198 | 7341546 | 1723964 | --- | --- | --- | 1,14 | down |
| 6034240 | 7370412 | 1796835 | --- | --- | --- | 1,86 | up   |
| 6034297 | 7094139 | 1112919 | --- | --- | --- | 1,43 | down |
| 6034318 | 7309734 | 1646886 | --- | --- | --- | 1,18 | up   |

|         |         |         |     |     |     |      |      |
|---------|---------|---------|-----|-----|-----|------|------|
| 6034320 | 7033616 | 970211  | --- | --- | --- | 1,22 | down |
| 6034385 | 7078982 | 1077349 | --- | --- | --- | 1,62 | up   |
| 6034433 | 7366749 | 1785518 | --- | --- | --- | 1,31 | up   |
| 6034525 | 7245874 | 1487595 | --- | --- | --- | 1,26 | down |
| 6034541 | 7188138 | 1345026 | --- | --- | --- | 1,52 | up   |
| 6034558 | 7049184 | 1007937 | --- | --- | --- | 1,13 | up   |
| 6034562 | 7353382 | 1753224 | --- | --- | --- | 1,57 | down |
| 6034602 | 7370002 | 1795789 | --- | --- | --- | 1,49 | up   |
| 6034607 | 7337425 | 1713156 | --- | --- | --- | 1,13 | down |
| 6034633 | 7384073 | 1829461 | --- | --- | --- | 2,15 | up   |
| 6034634 | 7364346 | 1779993 | --- | --- | --- | 1,13 | up   |
| 6034764 | 7353284 | 1752983 | --- | --- | --- | 1,01 | down |
| 6034775 | 7264653 | 1534051 | --- | --- | --- | 1,48 | up   |
| 6034781 | 7090581 | 1104745 | --- | --- | --- | 1,53 | down |
| 6034852 | 7368954 | 1792774 | --- | --- | --- | 1,22 | down |
| 6034856 | 7321029 | 1674804 | --- | --- | --- | 1,14 | up   |
| 6034972 | 7374324 | 1807539 | --- | --- | --- | 1,37 | down |
| 6034989 | 7330238 | 1695945 | --- | --- | --- | 2,48 | up   |
| 6035028 | 7069721 | 1055289 | --- | --- | --- | 1,13 | down |
| 6035061 | 7353284 | 1752983 | --- | --- | --- | 2,15 | down |
| 6035125 | 7195680 | 1364876 | --- | --- | --- | 1,10 | down |
| 6035127 | 7096589 | 1118530 | --- | --- | --- | 1,56 | down |
| 6035259 | 7245874 | 1487589 | --- | --- | --- | 2,12 | up   |
| 6035348 | 7341958 | 1724894 | --- | --- | --- | 1,17 | up   |
| 6035360 | 7168979 | 1297175 | --- | --- | --- | 2,03 | down |
| 6035439 | 7337872 | 1714429 | --- | --- | --- | 1,42 | up   |
| 6035487 | 7250671 | 1499016 | --- | --- | --- | 1,02 | down |
| 6035512 | 7166867 | 1291307 | --- | --- | --- | 1,06 | down |
| 6035515 | 7273251 | 1555942 | --- | --- | --- | 2,51 | down |
| 6035565 | 7186305 | 1341003 | --- | --- | --- | 1,24 | down |
| 6035676 | 7113483 | 1161015 | --- | --- | --- | 1,07 | down |
| 6035696 | 7136062 | 1216293 | --- | --- | --- | 2,12 | down |
| 6035747 | 7193403 | 1359177 | --- | --- | --- | 1,67 | down |
| 6035769 | 7039223 | 983577  | --- | --- | --- | 1,08 | up   |
| 6035777 | 7331508 | 1699465 | --- | --- | --- | 1,39 | up   |
| 6035792 | 7231834 | 1452269 | --- | --- | --- | 1,07 | down |
| 6035837 | 7373678 | 1805867 | --- | --- | --- | 1,20 | up   |
| 6035841 | 7302327 | 1627688 | --- | --- | --- | 1,15 | up   |
| 6035873 | 7337425 | 1713209 | --- | --- | --- | 1,09 | down |
| 6035956 | 7307473 | 1641272 | --- | --- | --- | 1,01 | down |
| 6035971 | 7083355 | 1086920 | --- | --- | --- | 1,23 | down |
| 6036031 | 7364346 | 1780008 | --- | --- | --- | 1,01 | up   |
| 6036035 | 7374790 | 1808786 | --- | --- | --- | 1,10 | down |
| 6036107 | 7122140 | 1182725 | --- | --- | --- | 1,06 | up   |
| 6036214 | 7198002 | 1370441 | --- | --- | --- | 1,00 | up   |
| 6036274 | 7166867 | 1291372 | --- | --- | --- | 1,04 | up   |
| 6036299 | 7288077 | 1592010 | --- | --- | --- | 1,09 | down |
| 6036433 | 7100307 | 1128385 | --- | --- | --- | 1,33 | down |
| 6036457 | 7320735 | 1674182 | --- | --- | --- | 1,10 | up   |
| 6036474 | 7174114 | 1310431 | --- | --- | --- | 1,14 | up   |
| 6036498 | 7371228 | 1799466 | --- | --- | --- | 2,08 | down |
| 6036782 | 7353232 | 1752687 | --- | --- | --- | 1,65 | up   |
| 6036806 | 7255522 | 1511454 | --- | --- | --- | 1,31 | down |
| 6036824 | 7188138 | 1345026 | --- | --- | --- | 1,03 | up   |
| 6036844 | 7355138 | 1757708 | --- | --- | --- | 1,11 | down |
| 6037118 | 7353287 | 1753022 | --- | --- | --- | 2,19 | up   |
| 6037165 | 7190317 | 1350513 | --- | --- | --- | 2,37 | down |

|         |         |         |     |     |     |      |      |
|---------|---------|---------|-----|-----|-----|------|------|
| 6037250 | 7092549 | 1109191 | --- | --- | --- | 1,77 | down |
| 6037330 | 7181442 | 1328885 | --- | --- | --- | 1,25 | up   |
| 6037382 | 7383655 | 1828573 | --- | --- | --- | 2,17 | up   |
| 6037407 | 7149934 | 1250512 | --- | --- | --- | 1,11 | down |
| 6037417 | 7364346 | 1780015 | --- | --- | --- | 1,12 | down |
| 6037459 | 7177520 | 1318613 | --- | --- | --- | 1,06 | down |
| 6037597 | 7181001 | 1327599 | --- | --- | --- | 1,29 | down |
| 6037633 | 7243627 | 1482360 | --- | --- | --- | 1,07 | up   |
| 6037651 | 7285563 | 1586039 | --- | --- | --- | 1,44 | up   |
| 6037659 | 7322020 | 1676644 | --- | --- | --- | 1,19 | up   |
| 6037673 | 7152915 | 1257449 | --- | --- | --- | 1,95 | up   |
| 6037682 | 7295652 | 1610282 | --- | --- | --- | 1,01 | up   |
| 6037814 | 7228530 | 1443902 | --- | --- | --- | 1,48 | up   |
| 6037957 | 7243894 | 1482975 | --- | --- | --- | 1,07 | up   |
| 6037958 | 7326378 | 1686712 | --- | --- | --- | 1,41 | down |
| 6038067 | 7365147 | 1781754 | --- | --- | --- | 1,22 | down |
| 6038160 | 7144389 | 1236776 | --- | --- | --- | 1,05 | up   |
| 6038292 | 7330396 | 1696390 | --- | --- | --- | 1,32 | down |
| 6038346 | 7182056 | 1330579 | --- | --- | --- | 2,12 | down |
| 6038351 | 7070393 | 1057212 | --- | --- | --- | 2,30 | up   |
| 6038420 | 7053786 | 1018132 | --- | --- | --- | 1,20 | up   |
| 6038462 | 7086672 | 1094348 | --- | --- | --- | 1,89 | up   |
| 6038521 | 7139026 | 1223505 | --- | --- | --- | 1,17 | up   |
| 6038804 | 7120827 | 1179351 | --- | --- | --- | 1,02 | down |
| 6038809 | 7371228 | 1799454 | --- | --- | --- | 1,06 | down |
| 6038837 | 7244288 | 1484135 | --- | --- | --- | 1,37 | down |
| 6038862 | 7258455 | 1518728 | --- | --- | --- | 1,05 | down |
| 6038890 | 7309734 | 1646894 | --- | --- | --- | 1,01 | down |
| 6039048 | 7099543 | 1126630 | --- | --- | --- | 1,10 | down |
| 6039053 | 7058507 | 1028304 | --- | --- | --- | 1,03 | up   |
| 6039076 | 7336854 | 1711688 | --- | --- | --- | 1,14 | up   |
| 6039098 | 7371228 | 1799459 | --- | --- | --- | 1,15 | down |
| 6039118 | 7382499 | 1826256 | --- | --- | --- | 1,31 | up   |
| 6039197 | 7158419 | 1271399 | --- | --- | --- | 1,17 | down |
| 6039348 | 7155286 | 1263910 | --- | --- | --- | 1,79 | up   |
| 6039590 | 7258784 | 1519672 | --- | --- | --- | 1,38 | down |
| 6039614 | 7378997 | 1818660 | --- | --- | --- | 1,10 | up   |
| 6039619 | 7058713 | 1028656 | --- | --- | --- | 1,20 | down |
| 6039624 | 7344380 | 1731116 | --- | --- | --- | 1,03 | up   |
| 6039633 | 7331508 | 1699461 | --- | --- | --- | 1,04 | down |
| 6039733 | 7363568 | 1778132 | --- | --- | --- | 1,14 | down |
| 6039811 | 7097305 | 1120448 | --- | --- | --- | 1,00 | down |
| 6039884 | 7044906 | 998155  | --- | --- | --- | 2,13 | up   |
| 6039917 | 7211389 | 1402113 | --- | --- | --- | 1,56 | down |
| 6039929 | 7333333 | 1703402 | --- | --- | --- | 1,10 | down |
| 6040295 | 7353287 | 1753033 | --- | --- | --- | 1,03 | up   |
| 6040297 | 7072748 | 1062586 | --- | --- | --- | 1,42 | down |
| 6040323 | 7374790 | 1808779 | --- | --- | --- | 1,42 | down |
| 6040324 | 7236358 | 1464235 | --- | --- | --- | 1,12 | down |
| 6040464 | 7243647 | 1482488 | --- | --- | --- | 1,03 | up   |
| 6040486 | 7039223 | 983566  | --- | --- | --- | 1,00 | down |
| 6040490 | 7052331 | 1014572 | --- | --- | --- | 1,12 | down |
| 6040534 | 7112566 | 1158631 | --- | --- | --- | 1,49 | up   |
| 6040586 | 7030519 | 961695  | --- | --- | --- | 1,08 | up   |
| 6040624 | 7272577 | 1554204 | --- | --- | --- | 1,30 | down |
| 6040746 | 7040442 | 986525  | --- | --- | --- | 1,41 | up   |
| 6040808 | 7326271 | 1686522 | --- | --- | --- | 1,14 | down |



|         |         |         |     |     |     |      |      |
|---------|---------|---------|-----|-----|-----|------|------|
| 6040819 | 7101258 | 1130559 | --- | --- | --- | 1,42 | up   |
| 6040843 | 7039725 | 984811  | --- | --- | --- | 1,36 | up   |
| 6041021 | 7329135 | 1693496 | --- | --- | --- | 1,09 | up   |
| 6041176 | 7033504 | 969866  | --- | --- | --- | 1,09 | up   |
| 6041239 | 7297274 | 1614612 | --- | --- | --- | 1,28 | down |
| 6041266 | 7122140 | 1182723 | --- | --- | --- | 1,16 | down |
| 6041287 | 7120427 | 1178424 | --- | --- | --- | 1,10 | up   |
| 6041298 | 7314270 | 1657731 | --- | --- | --- | 1,21 | up   |
| 6041316 | 7272110 | 1553084 | --- | --- | --- | 1,20 | up   |
| 6041550 | 7142917 | 1233182 | --- | --- | --- | 1,01 | up   |
| 6041564 | 7069830 | 1055631 | --- | --- | --- | 1,51 | down |
| 6041587 | 7269911 | 1546907 | --- | --- | --- | 1,34 | down |
| 6041608 | 7233921 | 1458156 | --- | --- | --- | 2,28 | down |
| 6041651 | 7028326 | 957435  | --- | --- | --- | 1,30 | up   |
| 6041728 | 7100523 | 1128864 | --- | --- | --- | 1,01 | up   |
| 6041819 | 7096680 | 1118809 | --- | --- | --- | 2,08 | down |
| 6041832 | 7137646 | 1220435 | --- | --- | --- | 1,33 | down |
| 6041926 | 7349817 | 1744643 | --- | --- | --- | 1,25 | down |
| 6042141 | 7058507 | 1028317 | --- | --- | --- | 1,16 | down |
| 6042224 | 7240569 | 1475483 | --- | --- | --- | 1,25 | up   |
| 6042268 | 7121849 | 1181793 | --- | --- | --- | 1,30 | down |
| 6042345 | 7286807 | 1588833 | --- | --- | --- | 1,52 | up   |
| 6042371 | 7282831 | 1579767 | --- | --- | --- | 1,75 | down |
| 6042372 | 7167325 | 1292547 | --- | --- | --- | 1,01 | down |
| 6042481 | 7217747 | 1417472 | --- | --- | --- | 1,47 | up   |
| 6042522 | 7274892 | 1559572 | --- | --- | --- | 1,03 | up   |
| 6042566 | 7052385 | 1014798 | --- | --- | --- | 1,01 | down |
| 6042570 | 7227474 | 1441154 | --- | --- | --- | 1,17 | up   |
| 6042628 | 7221168 | 1425632 | --- | --- | --- | 1,86 | up   |
| 6042673 | 7214605 | 1409395 | --- | --- | --- | 1,22 | down |
| 6042769 | 7101643 | 1131580 | --- | --- | --- | 1,10 | up   |
| 6042801 | 7314270 | 1657753 | --- | --- | --- | 1,08 | down |
| 6042805 | 7274892 | 1559547 | --- | --- | --- | 1,26 | down |
| 6042831 | 7279568 | 1572005 | --- | --- | --- | 1,50 | up   |
| 6042941 | 7165954 | 1288770 | --- | --- | --- | 1,24 | down |
| 6043009 | 7062233 | 1037210 | --- | --- | --- | 1,10 | down |
| 6043020 | 7031774 | 964766  | --- | --- | --- | 1,22 | down |
| 6043042 | 7108062 | 1147136 | --- | --- | --- | 1,19 | down |
| 6043047 | 7087965 | 1098057 | --- | --- | --- | 1,11 | down |
| 6043078 | 7027350 | 954943  | --- | --- | --- | 1,17 | up   |
| 6043146 | 7346687 | 1736696 | --- | --- | --- | 2,09 | down |
| 6043196 | 7329135 | 1693501 | --- | --- | --- | 1,27 | down |
| 6043309 | 7356115 | 1760126 | --- | --- | --- | 1,08 | up   |
| 6043338 | 7070836 | 1058339 | --- | --- | --- | 1,29 | up   |
| 6043407 | 7369939 | 1795601 | --- | --- | --- | 2,09 | up   |
| 6043422 | 7101258 | 1130564 | --- | --- | --- | 1,19 | down |
| 6043464 | 7365147 | 1781756 | --- | --- | --- | 1,25 | down |
| 6043501 | 7203018 | 1382647 | --- | --- | --- | 1,02 | up   |
| 6043561 | 7058713 | 1028655 | --- | --- | --- | 1,04 | down |
| 6043609 | 7306330 | 1638528 | --- | --- | --- | 1,07 | up   |
| 6043703 | 7288077 | 1591963 | --- | --- | --- | 1,08 | down |
| 6043745 | 7037235 | 978573  | --- | --- | --- | 1,00 | down |
| 6043850 | 7205944 | 1389489 | --- | --- | --- | 1,03 | up   |
| 6043853 | 7312566 | 1653305 | --- | --- | --- | 1,44 | down |
| 6043898 | 7122131 | 1182683 | --- | --- | --- | 1,22 | down |
| 6044165 | 7052813 | 1015935 | --- | --- | --- | 1,02 | down |
| 6044296 | 7352046 | 1750037 | --- | --- | --- | 1,43 | down |

|         |         |         |     |     |     |      |      |
|---------|---------|---------|-----|-----|-----|------|------|
| 6044393 | 7233178 | 1455907 | --- | --- | --- | 1,62 | up   |
| 6044416 | 7186688 | 1341847 | --- | --- | --- | 1,09 | up   |
| 6044492 | 7033006 | 968489  | --- | --- | --- | 1,20 | down |
| 6044534 | 7100523 | 1128850 | --- | --- | --- | 1,19 | down |
| 6044568 | 7288077 | 1591950 | --- | --- | --- | 1,18 | down |
| 6044618 | 7373678 | 1805864 | --- | --- | --- | 1,34 | up   |
| 6044743 | 7053874 | 1018322 | --- | --- | --- | 1,03 | up   |
| 6044784 | 7041319 | 988752  | --- | --- | --- | 1,10 | down |
| 6044830 | 7293402 | 1604808 | --- | --- | --- | 1,41 | down |
| 6044859 | 7156052 | 1265760 | --- | --- | --- | 1,06 | up   |
| 6044872 | 7081487 | 1082699 | --- | --- | --- | 1,58 | down |
| 6044886 | 7248790 | 1494492 | --- | --- | --- | 1,17 | up   |
| 6044892 | 7300392 | 1622751 | --- | --- | --- | 1,02 | down |
| 6044897 | 7027350 | 954944  | --- | --- | --- | 1,07 | down |
| 6044923 | 7153136 | 1258057 | --- | --- | --- | 1,01 | up   |
| 6044938 | 7240569 | 1475397 | --- | --- | --- | 1,02 | up   |
| 6044993 | 7088164 | 1098459 | --- | --- | --- | 1,43 | up   |
| 6045049 | 7141061 | 1228643 | --- | --- | --- | 1,28 | down |
| 6045075 | 7066035 | 1046207 | --- | --- | --- | 1,57 | up   |
| 6045250 | 7038659 | 982163  | --- | --- | --- | 1,62 | down |
| 6045265 | 7176368 | 1315570 | --- | --- | --- | 1,27 | down |
| 6045432 | 7302327 | 1627692 | --- | --- | --- | 1,25 | down |
| 6045542 | 7225543 | 1435934 | --- | --- | --- | 1,05 | up   |
| 6045659 | 7337872 | 1714437 | --- | --- | --- | 1,02 | down |
| 6045834 | 7264745 | 1534266 | --- | --- | --- | 1,23 | up   |
| 6045851 | 7297274 | 1614664 | --- | --- | --- | 1,05 | up   |
| 6045856 | 7302327 | 1627689 | --- | --- | --- | 1,10 | down |
| 6045891 | 7087282 | 1096212 | --- | --- | --- | 2,09 | down |
| 6045959 | 7285563 | 1586041 | --- | --- | --- | 1,30 | down |
| 6046035 | 7356333 | 1760495 | --- | --- | --- | 1,35 | down |
| 6046105 | 7213908 | 1407680 | --- | --- | --- | 1,27 | up   |
| 6046132 | 7092549 | 1109124 | --- | --- | --- | 1,19 | down |
| 6046171 | 7366749 | 1785514 | --- | --- | --- | 1,16 | up   |
| 6046277 | 7070393 | 1057217 | --- | --- | --- | 1,44 | up   |
| 6046287 | 7122140 | 1182705 | --- | --- | --- | 1,21 | down |
| 6046417 | 7063873 | 1040650 | --- | --- | --- | 1,49 | down |
| 6046435 | 7331413 | 1699130 | --- | --- | --- | 1,04 | down |
| 6046464 | 7341038 | 1722681 | --- | --- | --- | 1,22 | up   |
| 6046497 | 7288284 | 1592648 | --- | --- | --- | 1,33 | down |
| 6046519 | 7267344 | 1540263 | --- | --- | --- | 1,47 | up   |
| 6046702 | 7042382 | 991286  | --- | --- | --- | 1,60 | up   |
| 6046754 | 7168979 | 1297200 | --- | --- | --- | 1,16 | down |
| 6046815 | 7264797 | 1534428 | --- | --- | --- | 1,15 | up   |
| 6046871 | 7193513 | 1359467 | --- | --- | --- | 1,06 | down |
| 6046929 | 7250511 | 1498635 | --- | --- | --- | 1,11 | up   |
| 6047044 | 7376566 | 1812848 | --- | --- | --- | 1,71 | down |
| 6047074 | 7380497 | 1821870 | --- | --- | --- | 1,42 | down |
| 6047158 | 7380497 | 1821824 | --- | --- | --- | 1,01 | down |
| 6047235 | 7289879 | 1596430 | --- | --- | --- | 1,36 | down |
| 6047308 | 7069142 | 1053876 | --- | --- | --- | 1,09 | down |
| 6047403 | 7196233 | 1366103 | --- | --- | --- | 1,52 | up   |
| 6047499 | 7207069 | 1392008 | --- | --- | --- | 1,17 | up   |
| 6047545 | 7244288 | 1484135 | --- | --- | --- | 1,15 | down |
| 6047643 | 7176275 | 1315341 | --- | --- | --- | 1,19 | down |
| 6047656 | 7028278 | 957312  | --- | --- | --- | 1,61 | down |
| 6047696 | 7308679 | 1644238 | --- | --- | --- | 1,05 | up   |
| 6047726 | 7256070 | 1512593 | --- | --- | --- | 1,10 | up   |

|         |         |         |     |     |     |      |      |
|---------|---------|---------|-----|-----|-----|------|------|
| 6047745 | 7318651 | 1669091 | --- | --- | --- | 2,03 | down |
| 6047753 | 7373633 | 1805703 | --- | --- | --- | 1,11 | down |
| 6047761 | 7136062 | 1216276 | --- | --- | --- | 1,21 | up   |
| 6047772 | 7078982 | 1077350 | --- | --- | --- | 1,27 | up   |
| 6047862 | 7309738 | 1646958 | --- | --- | --- | 1,25 | up   |
| 6047891 | 7204929 | 1387148 | --- | --- | --- | 1,27 | down |
| 6047903 | 7194400 | 1361768 | --- | --- | --- | 1,39 | down |
| 6047904 | 7212285 | 1403988 | --- | --- | --- | 1,63 | down |
| 6047929 | 7116023 | 1167290 | --- | --- | --- | 1,05 | down |
| 6048002 | 7353284 | 1752984 | --- | --- | --- | 1,04 | up   |
| 6048088 | 7166867 | 1291368 | --- | --- | --- | 1,05 | down |
| 6048138 | 7150348 | 1251413 | --- | --- | --- | 1,16 | down |
| 6048166 | 7347427 | 1738667 | --- | --- | --- | 1,10 | up   |
| 6048171 | 7205750 | 1388974 | --- | --- | --- | 1,19 | up   |
| 6048193 | 7240569 | 1475517 | --- | --- | --- | 1,01 | down |
| 6048246 | 7248790 | 1494538 | --- | --- | --- | 1,15 | down |
| 6048344 | 7359453 | 1768458 | --- | --- | --- | 1,11 | down |
| 6048431 | 7196029 | 1365626 | --- | --- | --- | 1,08 | up   |
| 6048606 | 7069727 | 1055360 | --- | --- | --- | 1,31 | down |
| 6048664 | 7146000 | 1240656 | --- | --- | --- | 1,25 | up   |
| 6048689 | 7340304 | 1720867 | --- | --- | --- | 1,23 | down |
| 6048696 | 7062436 | 1037672 | --- | --- | --- | 1,39 | up   |
| 6048699 | 7253272 | 1505515 | --- | --- | --- | 1,04 | down |
| 6048970 | 7207093 | 1392099 | --- | --- | --- | 1,01 | down |
| 6048985 | 7280743 | 1574538 | --- | --- | --- | 1,06 | up   |
| 6049038 | 7243647 | 1482432 | --- | --- | --- | 1,29 | up   |
| 6049080 | 7286807 | 1588823 | --- | --- | --- | 1,22 | down |
| 6049146 | 7353287 | 1753029 | --- | --- | --- | 1,03 | down |
| 6049199 | 7074911 | 1068174 | --- | --- | --- | 1,08 | down |
| 6049219 | 7339732 | 1719202 | --- | --- | --- | 1,34 | down |
| 6049278 | 7030037 | 960709  | --- | --- | --- | 1,22 | up   |
| 6049297 | 7267802 | 1541874 | --- | --- | --- | 1,13 | down |
| 6049434 | 7374313 | 1807378 | --- | --- | --- | 1,14 | down |
| 6049490 | 7186305 | 1341015 | --- | --- | --- | 1,26 | up   |
| 6049521 | 7110999 | 1154759 | --- | --- | --- | 1,57 | down |
| 6049536 | 7086966 | 1095266 | --- | --- | --- | 1,02 | down |
| 6049712 | 7100210 | 1128144 | --- | --- | --- | 1,17 | down |
| 6049785 | 7243901 | 1483053 | --- | --- | --- | 1,00 | up   |
| 6049814 | 7319259 | 1670398 | --- | --- | --- | 1,33 | down |
| 6049895 | 7147809 | 1245458 | --- | --- | --- | 1,08 | up   |
| 6049958 | 7303777 | 1631907 | --- | --- | --- | 1,01 | up   |
| 6049992 | 7148978 | 1248501 | --- | --- | --- | 1,04 | down |
| 6050009 | 7275879 | 1562187 | --- | --- | --- | 1,71 | down |
| 6050081 | 7282831 | 1579768 | --- | --- | --- | 1,25 | down |
| 6050169 | 7328985 | 1693163 | --- | --- | --- | 1,03 | down |
| 6050246 | 7080563 | 1080725 | --- | --- | --- | 1,13 | up   |
| 6050391 | 7053874 | 1018317 | --- | --- | --- | 1,04 | down |
| 6050441 | 7059971 | 1031465 | --- | --- | --- | 1,08 | down |
| 6050480 | 7295652 | 1610283 | --- | --- | --- | 1,12 | down |
| 6050554 | 7052385 | 1014780 | --- | --- | --- | 1,12 | down |
| 6050598 | 7373678 | 1805852 | --- | --- | --- | 2,14 | up   |
| 6050635 | 7277783 | 1567463 | --- | --- | --- | 1,32 | up   |
| 6050643 | 7167872 | 1294022 | --- | --- | --- | 1,40 | down |
| 6050710 | 7079238 | 1077810 | --- | --- | --- | 1,06 | up   |
| 6050721 | 7252877 | 1504766 | --- | --- | --- | 1,27 | up   |
| 6050778 | 7318714 | 1669242 | --- | --- | --- | 1,18 | down |
| 6050838 | 7058713 | 1028662 | --- | --- | --- | 1,15 | down |

|         |         |         |     |     |     |      |      |
|---------|---------|---------|-----|-----|-----|------|------|
| 6050844 | 7198087 | 1370680 | --- | --- | --- | 2,24 | up   |
| 6050875 | 7039725 | 984832  | --- | --- | --- | 1,37 | down |
| 6050896 | 7197400 | 1368813 | --- | --- | --- | 1,24 | up   |
| 6051065 | 7165954 | 1288766 | --- | --- | --- | 1,15 | down |
| 6051106 | 7039725 | 984830  | --- | --- | --- | 1,69 | down |
| 6051155 | 7092549 | 1109158 | --- | --- | --- | 1,32 | down |
| 6051271 | 7257893 | 1517478 | --- | --- | --- | 1,16 | up   |
| 6051280 | 7217434 | 1416365 | --- | --- | --- | 1,31 | down |
| 6051297 | 7144782 | 1237777 | --- | --- | --- | 1,26 | down |
| 6051357 | 7340304 | 1720851 | --- | --- | --- | 1,01 | down |
| 6051360 | 7376206 | 1811977 | --- | --- | --- | 1,01 | up   |
| 6051373 | 7341274 | 1723385 | --- | --- | --- | 2,15 | down |
| 6051442 | 7361075 | 1772334 | --- | --- | --- | 1,07 | down |
| 6051454 | 7273744 | 1557044 | --- | --- | --- | 1,03 | down |
| 6051475 | 7027386 | 955062  | --- | --- | --- | 1,20 | up   |
| 6051510 | 7341243 | 1723206 | --- | --- | --- | 1,23 | up   |
| 6051650 | 7341546 | 1723939 | --- | --- | --- | 1,88 | up   |
| 6051747 | 7149817 | 1250309 | --- | --- | --- | 2,10 | down |
| 6051807 | 7055793 | 1022319 | --- | --- | --- | 1,01 | down |
| 6051906 | 7198730 | 1372677 | --- | --- | --- | 1,46 | down |
| 6051976 | 7176456 | 1315807 | --- | --- | --- | 1,14 | down |
| 6051990 | 7156611 | 1267352 | --- | --- | --- | 1,09 | down |
| 6051996 | 7380497 | 1821849 | --- | --- | --- | 1,05 | up   |
| 6052006 | 7207971 | 1394311 | --- | --- | --- | 1,04 | up   |
| 6052011 | 7052176 | 1014221 | --- | --- | --- | 1,35 | up   |
| 6052013 | 7344702 | 1732146 | --- | --- | --- | 1,43 | up   |
| 6052164 | 7256789 | 1514655 | --- | --- | --- | 1,03 | down |
| 6052209 | 7344530 | 1731566 | --- | --- | --- | 1,32 | down |
| 6052213 | 7380878 | 1822581 | --- | --- | --- | 1,01 | down |
| 6052248 | 7073609 | 1064856 | --- | --- | --- | 1,85 | down |
| 6052316 | 7153136 | 1258057 | --- | --- | --- | 1,44 | down |
| 6052326 | 7198069 | 1370607 | --- | --- | --- | 1,42 | down |
| 6052535 | 7088544 | 1099696 | --- | --- | --- | 1,11 | up   |
| 6052557 | 7253408 | 1505941 | --- | --- | --- | 1,18 | up   |
| 6052576 | 7160687 | 1277024 | --- | --- | --- | 1,50 | up   |
| 6052653 | 7049010 | 1007570 | --- | --- | --- | 1,01 | down |
| 6052804 | 7346066 | 1735283 | --- | --- | --- | 1,15 | down |
| 6052831 | 7064134 | 1041441 | --- | --- | --- | 1,54 | down |
| 6052855 | 7337425 | 1713134 | --- | --- | --- | 1,03 | down |
| 6052949 | 7337224 | 1712622 | --- | --- | --- | 1,28 | up   |
| 6053178 | 7032558 | 967067  | --- | --- | --- | 1,05 | down |
| 6053300 | 7056333 | 1023679 | --- | --- | --- | 1,01 | down |
| 6053352 | 7097454 | 1120882 | --- | --- | --- | 1,08 | up   |
| 6053408 | 7186305 | 1341002 | --- | --- | --- | 1,76 | down |
| 6053420 | 7340990 | 1722506 | --- | --- | --- | 1,04 | up   |
| 6053538 | 7097454 | 1120883 | --- | --- | --- | 1,16 | down |
| 6053617 | 7091439 | 1106624 | --- | --- | --- | 1,52 | up   |
| 6053629 | 7373634 | 1805724 | --- | --- | --- | 1,08 | down |
| 6053698 | 7337845 | 1714351 | --- | --- | --- | 1,48 | down |
| 6053767 | 7369939 | 1795597 | --- | --- | --- | 1,58 | up   |
| 6053805 | 7367980 | 1789175 | --- | --- | --- | 1,59 | up   |
| 6053862 | 7180243 | 1325507 | --- | --- | --- | 1,16 | down |
| 6053987 | 7340757 | 1721885 | --- | --- | --- | 1,63 | up   |
| 6053998 | 7059702 | 1030770 | --- | --- | --- | 1,19 | up   |
| 6054079 | 7351568 | 1748855 | --- | --- | --- | 1,26 | down |
| 6054082 | 7295652 | 1610268 | --- | --- | --- | 1,04 | down |
| 6054209 | 7358048 | 1764822 | --- | --- | --- | 1,72 | up   |

|         |         |         |     |     |     |      |      |
|---------|---------|---------|-----|-----|-----|------|------|
| 6054290 | 7380497 | 1821852 | --- | --- | --- | 1,27 | down |
| 6054409 | 7297589 | 1615620 | --- | --- | --- | 1,52 | up   |
| 6054420 | 7065640 | 1045208 | --- | --- | --- | 1,35 | down |
| 6054421 | 7079238 | 1077815 | --- | --- | --- | 1,05 | down |
| 6054561 | 7090581 | 1104805 | --- | --- | --- | 1,35 | down |
| 6054578 | 7217434 | 1416420 | --- | --- | --- | 1,07 | down |
| 6054718 | 7371228 | 1799469 | --- | --- | --- | 1,10 | down |
| 6054762 | 7056106 | 1022973 | --- | --- | --- | 2,07 | up   |
| 6054810 | 7326245 | 1686399 | --- | --- | --- | 1,03 | down |
| 6054813 | 7380497 | 1821827 | --- | --- | --- | 1,33 | up   |
| 6054828 | 7282927 | 1579992 | --- | --- | --- | 1,04 | down |
| 6054898 | 7068259 | 1051655 | --- | --- | --- | 1,07 | up   |
| 6054929 | 7373678 | 1805857 | --- | --- | --- | 1,24 | down |
| 6054932 | 7176456 | 1315836 | --- | --- | --- | 1,29 | down |
| 6055029 | 7294738 | 1607996 | --- | --- | --- | 1,22 | down |
| 6055041 | 7354896 | 1757004 | --- | --- | --- | 1,16 | down |
| 6055085 | 7141456 | 1229591 | --- | --- | --- | 2,24 | up   |
| 6055155 | 7363529 | 1777940 | --- | --- | --- | 1,12 | up   |
| 6055232 | 7067212 | 1049227 | --- | --- | --- | 1,15 | up   |
| 6055296 | 7258323 | 1518481 | --- | --- | --- | 6,26 | down |
| 6055328 | 7226277 | 1437982 | --- | --- | --- | 1,35 | down |
| 6055332 | 7237346 | 1466593 | --- | --- | --- | 1,28 | up   |
| 6055386 | 7041609 | 989550  | --- | --- | --- | 1,20 | up   |
| 6055442 | 7240569 | 1475524 | --- | --- | --- | 1,01 | down |
| 6055446 | 7330314 | 1696136 | --- | --- | --- | 1,00 | down |
| 6055562 | 7064134 | 1041434 | --- | --- | --- | 1,29 | down |
| 6055637 | 7120550 | 1178705 | --- | --- | --- | 1,13 | down |
| 6055759 | 7360325 | 1770510 | --- | --- | --- | 1,00 | up   |
| 6055767 | 7119845 | 1176904 | --- | --- | --- | 1,07 | up   |
| 6055821 | 7380497 | 1821836 | --- | --- | --- | 1,42 | down |
| 6055865 | 7339379 | 1718315 | --- | --- | --- | 1,14 | up   |
| 6055942 | 7143455 | 1234711 | --- | --- | --- | 1,10 | up   |
| 6056142 | 7274931 | 1559713 | --- | --- | --- | 2,33 | up   |
| 6056235 | 7063716 | 1040151 | --- | --- | --- | 1,12 | down |
| 6056298 | 7381330 | 1823647 | --- | --- | --- | 2,65 | down |
| 6056352 | 7099543 | 1126630 | --- | --- | --- | 1,03 | up   |
| 6056391 | 7344702 | 1732137 | --- | --- | --- | 1,30 | up   |
| 6056483 | 7355138 | 1757791 | --- | --- | --- | 1,09 | up   |
| 6056506 | 7205944 | 1389493 | --- | --- | --- | 1,25 | up   |
| 6056520 | 7068259 | 1051634 | --- | --- | --- | 1,37 | down |
| 6056522 | 7354935 | 1757088 | --- | --- | --- | 2,06 | up   |
| 6056572 | 7302327 | 1627693 | --- | --- | --- | 1,21 | up   |
| 6056610 | 7317708 | 1666831 | --- | --- | --- | 1,05 | down |
| 6056795 | 7128539 | 1197692 | --- | --- | --- | 1,13 | down |
| 6056852 | 7069603 | 1055048 | --- | --- | --- | 1,26 | down |
| 6056884 | 7031774 | 964780  | --- | --- | --- | 1,09 | down |
| 6056890 | 7282927 | 1579981 | --- | --- | --- | 1,27 | down |
| 6056947 | 7056333 | 1023689 | --- | --- | --- | 1,04 | down |
| 6056994 | 7240569 | 1475359 | --- | --- | --- | 1,02 | up   |
| 6056998 | 7374790 | 1808779 | --- | --- | --- | 1,16 | down |
| 6057012 | 7088625 | 1099881 | --- | --- | --- | 1,01 | down |
| 6057023 | 7378997 | 1818620 | --- | --- | --- | 1,22 | down |
| 6057037 | 7198644 | 1372269 | --- | --- | --- | 1,12 | down |
| 6057256 | 7030519 | 961689  | --- | --- | --- | 1,00 | down |
| 6057315 | 7156611 | 1267331 | --- | --- | --- | 1,10 | down |
| 6057365 | 7280743 | 1574563 | --- | --- | --- | 1,23 | up   |
| 6057421 | 7131372 | 1205055 | --- | --- | --- | 1,13 | up   |

|         |         |         |     |     |     |      |      |
|---------|---------|---------|-----|-----|-----|------|------|
| 6057470 | 7371677 | 1800756 | --- | --- | --- | 1,15 | up   |
| 6057540 | 7053620 | 1017794 | --- | --- | --- | 1,44 | down |
| 6057552 | 7374324 | 1807490 | --- | --- | --- | 1,13 | down |
| 6057577 | 7072765 | 1062743 | --- | --- | --- | 1,27 | up   |
| 6057584 | 7368005 | 1789344 | --- | --- | --- | 1,84 | down |
| 6057591 | 7263348 | 1530809 | --- | --- | --- | 1,29 | down |
| 6057673 | 7133749 | 1210800 | --- | --- | --- | 1,46 | down |
| 6057793 | 7377116 | 1814067 | --- | --- | --- | 1,04 | up   |
| 6057804 | 7264274 | 1533172 | --- | --- | --- | 1,67 | up   |
| 6057872 | 7210263 | 1399744 | --- | --- | --- | 1,21 | up   |
| 6058083 | 7095066 | 1115285 | --- | --- | --- | 1,24 | up   |
| 6058142 | 7380878 | 1822547 | --- | --- | --- | 1,31 | up   |
| 6058169 | 7156052 | 1265765 | --- | --- | --- | 1,81 | up   |
| 6058179 | 7237940 | 1468197 | --- | --- | --- | 1,20 | up   |
| 6058217 | 7312686 | 1653623 | --- | --- | --- | 1,01 | up   |
| 6058226 | 7086522 | 1093936 | --- | --- | --- | 1,97 | down |
| 6058309 | 7120010 | 1177380 | --- | --- | --- | 1,28 | down |
| 6058409 | 7363529 | 1777926 | --- | --- | --- | 1,13 | down |
| 6058447 | 7041584 | 989464  | --- | --- | --- | 1,14 | up   |
| 6058545 | 7190242 | 1350307 | --- | --- | --- | 1,14 | down |
| 6058597 | 7163357 | 1283041 | --- | --- | --- | 1,19 | down |
| 6058629 | 7350993 | 1747549 | --- | --- | --- | 1,02 | up   |
| 6058722 | 7341038 | 1722687 | --- | --- | --- | 1,22 | up   |
| 6058796 | 7260488 | 1523913 | --- | --- | --- | 1,07 | down |
| 6058854 | 7061003 | 1033925 | --- | --- | --- | 1,00 | up   |
| 6058882 | 7318714 | 1669236 | --- | --- | --- | 1,35 | down |
| 6058903 | 7337522 | 1713594 | --- | --- | --- | 1,66 | down |
| 6058960 | 7307473 | 1641295 | --- | --- | --- | 1,14 | up   |
| 6059017 | 7059971 | 1031467 | --- | --- | --- | 1,01 | down |
| 6059052 | 7340506 | 1721353 | --- | --- | --- | 1,53 | down |
| 6059071 | 7217434 | 1416388 | --- | --- | --- | 1,02 | up   |
| 6059147 | 7235794 | 1462891 | --- | --- | --- | 1,02 | up   |
| 6059167 | 7340304 | 1720864 | --- | --- | --- | 1,89 | down |
| 6059200 | 7074911 | 1068175 | --- | --- | --- | 1,47 | down |
| 6059322 | 7336931 | 1711872 | --- | --- | --- | 1,39 | down |
| 6059346 | 7070869 | 1058498 | --- | --- | --- | 1,18 | up   |
| 6059376 | 7110959 | 1154685 | --- | --- | --- | 1,80 | down |
| 6059410 | 7195680 | 1364878 | --- | --- | --- | 1,08 | up   |
| 6059485 | 7370484 | 1797165 | --- | --- | --- | 1,17 | up   |
| 6059607 | 7039265 | 983658  | --- | --- | --- | 1,07 | down |
| 6059613 | 7093806 | 1112163 | --- | --- | --- | 3,16 | down |
| 6059678 | 7219624 | 1422116 | --- | --- | --- | 1,42 | down |
| 6059724 | 7356115 | 1760130 | --- | --- | --- | 1,27 | up   |
| 6059814 | 7061703 | 1035736 | --- | --- | --- | 1,21 | down |
| 6059902 | 7337425 | 1713133 | --- | --- | --- | 1,49 | up   |
| 6059940 | 7237814 | 1467838 | --- | --- | --- | 1,31 | up   |
| 6060045 | 7086966 | 1095255 | --- | --- | --- | 1,14 | down |
| 6060085 | 7168979 | 1297198 | --- | --- | --- | 1,01 | down |
| 6060099 | 7101258 | 1130575 | --- | --- | --- | 1,17 | up   |
| 6060120 | 7041609 | 989578  | --- | --- | --- | 1,21 | up   |
| 6060138 | 7368555 | 1791229 | --- | --- | --- | 1,10 | up   |
| 6060206 | 7197820 | 1370103 | --- | --- | --- | 1,38 | down |
| 6060273 | 7075445 | 1069356 | --- | --- | --- | 1,07 | up   |
| 6060400 | 7292869 | 1603423 | --- | --- | --- | 1,12 | down |
| 6060461 | 7114274 | 1162813 | --- | --- | --- | 1,19 | up   |
| 6060528 | 7155286 | 1263841 | --- | --- | --- | 1,01 | up   |
| 6060624 | 7050167 | 1009820 | --- | --- | --- | 1,30 | up   |

|         |         |         |     |     |     |      |      |
|---------|---------|---------|-----|-----|-----|------|------|
| 6060675 | 7067828 | 1050791 | --- | --- | --- | 1,01 | down |
| 6060685 | 7069830 | 1055610 | --- | --- | --- | 1,13 | up   |
| 6060823 | 7068259 | 1051648 | --- | --- | --- | 1,48 | down |
| 6060927 | 7052331 | 1014601 | --- | --- | --- | 1,13 | up   |
| 6060963 | 7108434 | 1148310 | --- | --- | --- | 1,00 | down |
| 6060979 | 7125494 | 1190397 | --- | --- | --- | 1,04 | down |
| 6061008 | 7291909 | 1601134 | --- | --- | --- | 1,35 | up   |
| 6061060 | 7233513 | 1457173 | --- | --- | --- | 1,21 | down |
| 6061103 | 7317204 | 1665393 | --- | --- | --- | 1,11 | down |
| 6061216 | 7233106 | 1455668 | --- | --- | --- | 1,56 | up   |
| 6061269 | 7040674 | 987040  | --- | --- | --- | 1,06 | down |
| 6061276 | 7295652 | 1610316 | --- | --- | --- | 1,04 | up   |
| 6061305 | 7204917 | 1387126 | --- | --- | --- | 1,18 | up   |
| 6061308 | 7267802 | 1541770 | --- | --- | --- | 1,05 | down |
| 6061316 | 7069462 | 1054603 | --- | --- | --- | 1,29 | up   |
| 6061352 | 7071264 | 1059360 | --- | --- | --- | 1,20 | down |
| 6061451 | 7350237 | 1745491 | --- | --- | --- | 1,30 | down |
| 6061475 | 7339732 | 1719221 | --- | --- | --- | 1,20 | up   |
| 6061483 | 7281877 | 1577529 | --- | --- | --- | 2,62 | down |
| 6061542 | 7336854 | 1711677 | --- | --- | --- | 1,15 | down |
| 6061570 | 7236358 | 1464258 | --- | --- | --- | 1,03 | up   |
| 6061594 | 7065570 | 1045086 | --- | --- | --- | 1,66 | down |
| 6061607 | 7286613 | 1588467 | --- | --- | --- | 2,12 | down |
| 6061641 | 7116103 | 1167609 | --- | --- | --- | 1,03 | down |
| 6061668 | 7069721 | 1055314 | --- | --- | --- | 1,29 | down |
| 6061735 | 7071264 | 1059341 | --- | --- | --- | 1,14 | down |
| 6061780 | 7071264 | 1059356 | --- | --- | --- | 1,17 | down |
| 6061789 | 7274780 | 1559249 | --- | --- | --- | 1,01 | down |
| 6061798 | 7235069 | 1460970 | --- | --- | --- | 1,03 | down |
| 6061933 | 7341002 | 1722553 | --- | --- | --- | 1,54 | up   |
| 6061934 | 7088489 | 1099516 | --- | --- | --- | 1,16 | down |
| 6061962 | 7383102 | 1827400 | --- | --- | --- | 1,15 | down |
| 6062026 | 7288077 | 1591950 | --- | --- | --- | 1,38 | up   |
| 6062043 | 7337425 | 1713217 | --- | --- | --- | 1,17 | down |
| 6062169 | 7227474 | 1441130 | --- | --- | --- | 1,20 | up   |
| 6062202 | 7156114 | 1266042 | --- | --- | --- | 2,20 | down |
| 6062206 | 7059020 | 1029333 | --- | --- | --- | 1,53 | down |
| 6062236 | 7247512 | 1491222 | --- | --- | --- | 1,74 | up   |
| 6062334 | 7369938 | 1795564 | --- | --- | --- | 2,12 | down |
| 6062389 | 7067828 | 1050780 | --- | --- | --- | 1,00 | down |
| 6062435 | 7069721 | 1055310 | --- | --- | --- | 1,05 | up   |
| 6062519 | 7053874 | 1018319 | --- | --- | --- | 1,39 | up   |
| 6062610 | 7099294 | 1126105 | --- | --- | --- | 1,20 | up   |
| 6062627 | 7120827 | 1179353 | --- | --- | --- | 1,18 | up   |
| 6062715 | 7156114 | 1266052 | --- | --- | --- | 1,16 | down |
| 6062795 | 7341274 | 1723386 | --- | --- | --- | 1,25 | up   |
| 6062818 | 7186240 | 1340820 | --- | --- | --- | 1,12 | up   |
| 6062899 | 7068259 | 1051593 | --- | --- | --- | 1,21 | up   |
| 6062913 | 7169573 | 1298391 | --- | --- | --- | 1,11 | up   |
| 6063079 | 7034747 | 973192  | --- | --- | --- | 1,78 | down |
| 6063100 | 7279073 | 1570730 | --- | --- | --- | 1,36 | down |
| 6063109 | 7156611 | 1267352 | --- | --- | --- | 1,56 | up   |
| 6063173 | 7209927 | 1398921 | --- | --- | --- | 1,26 | down |
| 6063483 | 7190844 | 1352138 | --- | --- | --- | 1,19 | down |
| 6063694 | 7292701 | 1602961 | --- | --- | --- | 1,12 | up   |
| 6063719 | 7100523 | 1128868 | --- | --- | --- | 1,24 | down |
| 6063743 | 7129578 | 1200058 | --- | --- | --- | 1,03 | down |

|         |         |         |     |     |     |      |      |
|---------|---------|---------|-----|-----|-----|------|------|
| 6063799 | 7149498 | 1249782 | --- | --- | --- | 2,44 | up   |
| 6063801 | 7341038 | 1722654 | --- | --- | --- | 1,67 | down |
| 6063860 | 7355044 | 1757443 | --- | --- | --- | 1,32 | down |
| 6063873 | 7142321 | 1231530 | --- | --- | --- | 1,07 | up   |
| 6063919 | 7217650 | 1417197 | --- | --- | --- | 1,14 | down |
| 6064003 | 7075460 | 1069396 | --- | --- | --- | 1,41 | up   |
| 6064121 | 7069603 | 1055045 | --- | --- | --- | 1,11 | down |
| 6064134 | 7247672 | 1491757 | --- | --- | --- | 1,04 | down |
| 6064226 | 7069253 | 1054175 | --- | --- | --- | 1,35 | up   |
| 6064253 | 7267802 | 1541848 | --- | --- | --- | 1,09 | up   |
| 6064257 | 7217434 | 1416376 | --- | --- | --- | 1,13 | up   |
| 6064264 | 7061948 | 1036381 | --- | --- | --- | 1,66 | down |
| 6064360 | 7243647 | 1482443 | --- | --- | --- | 1,23 | down |
| 6064452 | 7364346 | 1779988 | --- | --- | --- | 1,43 | down |
| 6064494 | 7275927 | 1562338 | --- | --- | --- | 1,46 | up   |
| 6064522 | 7156170 | 1266282 | --- | --- | --- | 1,00 | up   |
| 6064555 | 7162144 | 1280494 | --- | --- | --- | 1,60 | down |
| 6064672 | 7193056 | 1358260 | --- | --- | --- | 1,31 | down |
| 6064679 | 7281924 | 1577751 | --- | --- | --- | 1,22 | up   |
| 6064689 | 7383501 | 1828207 | --- | --- | --- | 2,31 | up   |
| 6064814 | 7084193 | 1089097 | --- | --- | --- | 2,39 | up   |
| 6064826 | 7168521 | 1295956 | --- | --- | --- | 1,12 | up   |
| 6064842 | 7243901 | 1483041 | --- | --- | --- | 1,09 | down |
| 6064857 | 7131103 | 1204332 | --- | --- | --- | 1,00 | up   |
| 6064937 | 7168979 | 1297201 | --- | --- | --- | 1,28 | down |
| 6064940 | 7120565 | 1178738 | --- | --- | --- | 1,58 | down |
| 6065057 | 7383102 | 1827390 | --- | --- | --- | 1,14 | down |
| 6065092 | 7237438 | 1466791 | --- | --- | --- | 1,15 | up   |
| 6065215 | 7318139 | 1668069 | --- | --- | --- | 1,07 | down |
| 6065366 | 7063515 | 1039636 | --- | --- | --- | 1,47 | up   |
| 6065399 | 7210822 | 1400978 | --- | --- | --- | 1,16 | down |
| 6065402 | 7113261 | 1160476 | --- | --- | --- | 1,19 | down |
| 6065497 | 7167160 | 1292221 | --- | --- | --- | 1,81 | up   |
| 6065562 | 7172988 | 1307278 | --- | --- | --- | 1,09 | down |
| 6065584 | 7358859 | 1766995 | --- | --- | --- | 1,07 | down |
| 6065595 | 7266544 | 1538336 | --- | --- | --- | 1,03 | down |
| 6065697 | 7162389 | 1281185 | --- | --- | --- | 1,37 | down |
| 6065859 | 7029078 | 958873  | --- | --- | --- | 2,86 | up   |
| 6065897 | 7028624 | 957991  | --- | --- | --- | 1,14 | down |
| 6065919 | 7033337 | 969489  | --- | --- | --- | 1,16 | up   |
| 6066030 | 7340304 | 1720868 | --- | --- | --- | 1,61 | down |
| 6066059 | 7058507 | 1028305 | --- | --- | --- | 2,10 | up   |
| 6066085 | 7341274 | 1723397 | --- | --- | --- | 1,00 | up   |
| 6066160 | 7175946 | 1314649 | --- | --- | --- | 1,25 | up   |
| 6066180 | 7289382 | 1595206 | --- | --- | --- | 2,33 | up   |
| 6066251 | 7083377 | 1086984 | --- | --- | --- | 2,72 | up   |
| 6066273 | 7221443 | 1426315 | --- | --- | --- | 1,46 | up   |
| 6066355 | 7152915 | 1257438 | --- | --- | --- | 1,02 | up   |
| 6066378 | 7121849 | 1181780 | --- | --- | --- | 1,59 | up   |
| 6066468 | 7374324 | 1807486 | --- | --- | --- | 1,15 | up   |
| 6066478 | 7265259 | 1535442 | --- | --- | --- | 1,24 | down |
| 6066483 | 7319055 | 1669948 | --- | --- | --- | 1,69 | up   |
| 6066485 | 7240569 | 1475372 | --- | --- | --- | 1,14 | down |
| 6066550 | 7062436 | 1037666 | --- | --- | --- | 1,17 | up   |
| 6066557 | 7318286 | 1668329 | --- | --- | --- | 1,33 | up   |
| 6066683 | 7278010 | 1568049 | --- | --- | --- | 1,51 | up   |
| 6066691 | 7286807 | 1588828 | --- | --- | --- | 1,02 | up   |



|         |         |         |     |     |     |      |      |
|---------|---------|---------|-----|-----|-----|------|------|
| 6066715 | 7212735 | 1405028 | --- | --- | --- | 1,51 | down |
| 6066821 | 7059766 | 1030972 | --- | --- | --- | 1,10 | down |
| 6066955 | 7199536 | 1374706 | --- | --- | --- | 1,82 | up   |
| 6067058 | 7315206 | 1660024 | --- | --- | --- | 1,68 | down |
| 6067067 | 7196803 | 1367338 | --- | --- | --- | 1,47 | down |
| 6067114 | 7307473 | 1641284 | --- | --- | --- | 1,20 | up   |
| 6067179 | 7377304 | 1814600 | --- | --- | --- | 1,16 | up   |
| 6067183 | 7368954 | 1792772 | --- | --- | --- | 2,42 | down |
| 6067333 | 7146542 | 1242295 | --- | --- | --- | 1,03 | down |
| 6067380 | 7281924 | 1577729 | --- | --- | --- | 1,24 | down |
| 6067395 | 7243647 | 1482480 | --- | --- | --- | 1,22 | up   |
| 6067407 | 7233921 | 1458161 | --- | --- | --- | 1,39 | down |
| 6067410 | 7128112 | 1196531 | --- | --- | --- | 1,08 | up   |
| 6067489 | 7363922 | 1778857 | --- | --- | --- | 2,79 | up   |
| 6067511 | 7364346 | 1780003 | --- | --- | --- | 1,67 | down |
| 6067588 | 7297589 | 1615640 | --- | --- | --- | 1,37 | up   |
| 6067642 | 7337224 | 1712607 | --- | --- | --- | 1,79 | up   |
| 6067727 | 7123129 | 1185090 | --- | --- | --- | 2,63 | down |
| 6067802 | 7321029 | 1674822 | --- | --- | --- | 1,33 | down |
| 6067847 | 7297589 | 1615637 | --- | --- | --- | 1,15 | up   |
| 6067906 | 7286807 | 1588821 | --- | --- | --- | 1,16 | up   |
| 6067945 | 7353232 | 1752849 | --- | --- | --- | 1,13 | down |
| 6068024 | 7355865 | 1759581 | --- | --- | --- | 1,12 | up   |
| 6068144 | 7288077 | 1591999 | --- | --- | --- | 1,18 | up   |
| 6068174 | 7059971 | 1031470 | --- | --- | --- | 1,09 | down |
| 6068181 | 7120671 | 1179001 | --- | --- | --- | 1,13 | down |
| 6068183 | 7142081 | 1230974 | --- | --- | --- | 1,08 | down |
| 6068412 | 7115146 | 1164938 | --- | --- | --- | 1,16 | up   |
| 6068538 | 7038179 | 981252  | --- | --- | --- | 1,32 | up   |
| 6068679 | 7288077 | 1592005 | --- | --- | --- | 1,04 | down |
| 6068725 | 7318286 | 1668337 | --- | --- | --- | 1,28 | down |
| 6068750 | 7033337 | 969490  | --- | --- | --- | 1,09 | down |
| 6068898 | 7106414 | 1143193 | --- | --- | --- | 2,27 | up   |
| 6068976 | 7298692 | 1618405 | --- | --- | --- | 1,33 | down |
| 6069023 | 7227474 | 1441133 | --- | --- | --- | 1,18 | up   |
| 6069054 | 7140365 | 1226803 | --- | --- | --- | 1,00 | down |
| 6069079 | 7032618 | 967304  | --- | --- | --- | 1,10 | down |
| 6069148 | 7068259 | 1051596 | --- | --- | --- | 1,05 | up   |
| 6069188 | 7295410 | 1609750 | --- | --- | --- | 1,10 | up   |
| 6069305 | 7217143 | 1415617 | --- | --- | --- | 1,26 | up   |
| 6069355 | 7350489 | 1746131 | --- | --- | --- | 1,11 | up   |
| 6069512 | 7070668 | 1057922 | --- | --- | --- | 1,04 | up   |
| 6069684 | 7208784 | 1396139 | --- | --- | --- | 1,20 | up   |
| 6069700 | 7195680 | 1364892 | --- | --- | --- | 1,09 | down |
| 6069744 | 7376566 | 1812879 | --- | --- | --- | 1,19 | down |
| 6069776 | 7205750 | 1389047 | --- | --- | --- | 1,31 | down |
| 6069839 | 7168439 | 1295681 | --- | --- | --- | 1,71 | up   |
| 6069997 | 7121849 | 1181806 | --- | --- | --- | 1,16 | down |
| 6070034 | 7117951 | 1172095 | --- | --- | --- | 1,01 | down |
| 6070054 | 7062233 | 1037191 | --- | --- | --- | 1,64 | down |
| 6070063 | 7086966 | 1095290 | --- | --- | --- | 1,07 | down |
| 6070084 | 7377304 | 1814589 | --- | --- | --- | 1,05 | up   |
| 6070139 | 7087965 | 1098055 | --- | --- | --- | 1,17 | down |
| 6070262 | 7088489 | 1099522 | --- | --- | --- | 1,46 | down |
| 6070313 | 7380452 | 1821676 | --- | --- | --- | 1,46 | up   |
| 6070325 | 7366749 | 1785507 | --- | --- | --- | 1,11 | down |
| 6070472 | 7072765 | 1062743 | --- | --- | --- | 1,10 | up   |

|         |         |         |     |     |     |      |      |
|---------|---------|---------|-----|-----|-----|------|------|
| 6070582 | 7164949 | 1286389 | --- | --- | --- | 2,55 | down |
| 6070637 | 7166867 | 1291330 | --- | --- | --- | 1,13 | down |
| 6070714 | 7236131 | 1463783 | --- | --- | --- | 1,05 | down |
| 6070805 | 7237814 | 1467826 | --- | --- | --- | 1,67 | down |
| 6070833 | 7042529 | 991586  | --- | --- | --- | 1,06 | down |
| 6070882 | 7380497 | 1821823 | --- | --- | --- | 2,02 | up   |
| 6071149 | 7368489 | 1791026 | --- | --- | --- | 1,00 | up   |
| 6071156 | 7096924 | 1119613 | --- | --- | --- | 1,60 | down |
| 6071277 | 7212587 | 1404649 | --- | --- | --- | 1,08 | up   |
| 6071316 | 7073677 | 1065165 | --- | --- | --- | 1,72 | down |
| 6071333 | 7328695 | 1692314 | --- | --- | --- | 1,44 | down |
| 6071434 | 7078666 | 1076507 | --- | --- | --- | 1,12 | down |
| 6071493 | 7212141 | 1403604 | --- | --- | --- | 1,30 | up   |
| 6071581 | 7289382 | 1595202 | --- | --- | --- | 1,08 | up   |
| 6071667 | 7355138 | 1757792 | --- | --- | --- | 1,06 | down |
| 6071943 | 7062436 | 1037722 | --- | --- | --- | 1,13 | down |
| 6071972 | 7317708 | 1666832 | --- | --- | --- | 2,24 | down |
| 6072116 | 7049308 | 1008111 | --- | --- | --- | 1,16 | down |
| 6072229 | 7089952 | 1103316 | --- | --- | --- | 1,24 | up   |
| 6072424 | 7217650 | 1417171 | --- | --- | --- | 1,03 | up   |
| 6072447 | 7060896 | 1033554 | --- | --- | --- | 1,08 | down |
| 6072490 | 7302018 | 1626958 | --- | --- | --- | 1,09 | up   |
| 6072497 | 7301843 | 1626489 | --- | --- | --- | 1,08 | up   |
| 6072500 | 7160687 | 1277024 | --- | --- | --- | 1,21 | up   |
| 6072510 | 7247954 | 1492388 | --- | --- | --- | 1,53 | up   |
| 6072525 | 7277783 | 1567475 | --- | --- | --- | 1,35 | down |
| 6072546 | 7320735 | 1674155 | --- | --- | --- | 1,58 | down |
| 6072618 | 7149008 | 1248602 | --- | --- | --- | 1,06 | down |
| 6072629 | 7193403 | 1359198 | --- | --- | --- | 1,18 | down |
| 6072649 | 7363768 | 1778604 | --- | --- | --- | 1,20 | up   |
| 6072685 | 7365183 | 1781917 | --- | --- | --- | 1,41 | up   |
| 6072695 | 7062233 | 1037243 | --- | --- | --- | 1,35 | up   |
| 6072774 | 7329135 | 1693488 | --- | --- | --- | 1,38 | down |
| 6072839 | 7323869 | 1680880 | --- | --- | --- | 1,17 | down |
| 6073228 | 7064468 | 1042363 | --- | --- | --- | 1,45 | down |
| 6073260 | 7052957 | 1016262 | --- | --- | --- | 1,22 | down |
| 6073274 | 7363529 | 1777947 | --- | --- | --- | 1,01 | down |
| 6073290 | 7380497 | 1821851 | --- | --- | --- | 1,02 | up   |
| 6073315 | 7201422 | 1379188 | --- | --- | --- | 1,16 | up   |
| 6073331 | 7076236 | 1071186 | --- | --- | --- | 1,12 | down |
| 6073343 | 7370910 | 1798539 | --- | --- | --- | 2,01 | up   |
| 6073430 | 7072225 | 1061401 | --- | --- | --- | 1,06 | down |
| 6073518 | 7267204 | 1539863 | --- | --- | --- | 1,27 | up   |
| 6073626 | 7359426 | 1768357 | --- | --- | --- | 1,17 | up   |
| 6073679 | 7242451 | 1479349 | --- | --- | --- | 1,87 | down |
| 6073719 | 7030037 | 960708  | --- | --- | --- | 1,54 | down |
| 6073803 | 7261580 | 1526769 | --- | --- | --- | 1,04 | down |
| 6073888 | 7344406 | 1731224 | --- | --- | --- | 1,31 | up   |
| 6073902 | 7318139 | 1668074 | --- | --- | --- | 2,13 | down |
| 6073999 | 7168521 | 1295931 | --- | --- | --- | 1,29 | down |
| 6074000 | 7034747 | 973190  | --- | --- | --- | 1,23 | down |
| 6074037 | 7339379 | 1718349 | --- | --- | --- | 1,39 | down |
| 6074057 | 7099573 | 1126731 | --- | --- | --- | 1,64 | down |
| 6074139 | 7098411 | 1123735 | --- | --- | --- | 1,06 | up   |
| 6074227 | 7297274 | 1614658 | --- | --- | --- | 1,31 | up   |
| 6074232 | 7072429 | 1061869 | --- | --- | --- | 1,47 | up   |
| 6074287 | 7146982 | 1243285 | --- | --- | --- | 1,23 | up   |

|         |         |         |     |     |     |      |      |
|---------|---------|---------|-----|-----|-----|------|------|
| 6074601 | 7062436 | 1037666 | --- | --- | --- | 2,31 | down |
| 6074610 | 7162102 | 1280367 | --- | --- | --- | 1,26 | up   |
| 6074687 | 7146982 | 1243288 | --- | --- | --- | 1,33 | down |
| 6074738 | 7366749 | 1785509 | --- | --- | --- | 1,11 | down |
| 6074799 | 7280743 | 1574530 | --- | --- | --- | 1,02 | down |
| 6074858 | 7088625 | 1099865 | --- | --- | --- | 1,05 | down |
| 6074994 | 7153136 | 1258009 | --- | --- | --- | 1,15 | up   |
| 6075101 | 7346687 | 1736688 | --- | --- | --- | 1,00 | down |
| 6075149 | 7034293 | 971956  | --- | --- | --- | 1,02 | up   |
| 6075211 | 7186464 | 1341386 | --- | --- | --- | 1,27 | up   |
| 6075321 | 7050716 | 1011222 | --- | --- | --- | 1,10 | down |
| 6075402 | 7303612 | 1631285 | --- | --- | --- | 1,18 | down |
| 6075412 | 7245874 | 1487596 | --- | --- | --- | 1,30 | up   |
| 6075753 | 7320735 | 1674164 | --- | --- | --- | 1,26 | up   |
| 6075934 | 7374493 | 1807967 | --- | --- | --- | 1,01 | down |
| 6075984 | 7383586 | 1828430 | --- | --- | --- | 1,27 | down |
| 6076178 | 7339834 | 1719559 | --- | --- | --- | 1,19 | up   |
| 6076208 | 7073679 | 1065189 | --- | --- | --- | 1,63 | up   |
| 6076318 | 7100523 | 1128885 | --- | --- | --- | 1,24 | down |
| 6076359 | 7380497 | 1821843 | --- | --- | --- | 1,03 | up   |
| 6076385 | 7213908 | 1407650 | --- | --- | --- | 1,04 | down |
| 6076410 | 7196233 | 1366098 | --- | --- | --- | 2,29 | up   |
| 6076411 | 7078815 | 1076983 | --- | --- | --- | 1,10 | down |
| 6076458 | 7176368 | 1315590 | --- | --- | --- | 1,48 | down |
| 6076601 | 7264797 | 1534430 | --- | --- | --- | 1,08 | down |
| 6076662 | 7033006 | 968488  | --- | --- | --- | 2,28 | up   |
| 6076734 | 7364346 | 1780017 | --- | --- | --- | 1,04 | up   |
| 6076773 | 7280743 | 1574492 | --- | --- | --- | 1,03 | up   |
| 6076959 | 7282343 | 1578666 | --- | --- | --- | 1,49 | down |
| 6076998 | 7172373 | 1305578 | --- | --- | --- | 1,07 | down |
| 6077096 | 7327169 | 1688439 | --- | --- | --- | 1,74 | up   |
| 6077226 | 7337425 | 1713175 | --- | --- | --- | 1,00 | down |
| 6077272 | 7217434 | 1416377 | --- | --- | --- | 1,07 | up   |
| 6077274 | 7062233 | 1037253 | --- | --- | --- | 1,05 | down |
| 6077295 | 7060195 | 1031973 | --- | --- | --- | 1,74 | up   |
| 6077341 | 7190524 | 1351177 | --- | --- | --- | 1,04 | down |
| 6077357 | 7194400 | 1361734 | --- | --- | --- | 1,13 | up   |
| 6077362 | 7243901 | 1483062 | --- | --- | --- | 1,12 | up   |
| 6077403 | 7087282 | 1096214 | --- | --- | --- | 1,06 | down |
| 6077435 | 7166867 | 1291293 | --- | --- | --- | 1,12 | up   |
| 6077565 | 7034747 | 973186  | --- | --- | --- | 1,02 | down |
| 6077851 | 7174281 | 1310847 | --- | --- | --- | 1,10 | down |
| 6077872 | 7267204 | 1539856 | --- | --- | --- | 1,27 | up   |
| 6077939 | 7275023 | 1560002 | --- | --- | --- | 1,07 | up   |
| 6078016 | 7247848 | 1492071 | --- | --- | --- | 1,19 | down |
| 6078072 | 7176368 | 1315559 | --- | --- | --- | 1,05 | up   |
| 6078117 | 7374790 | 1808785 | --- | --- | --- | 1,48 | up   |
| 6078151 | 7162144 | 1280500 | --- | --- | --- | 1,06 | up   |
| 6078211 | 7279073 | 1570678 | --- | --- | --- | 1,54 | down |
| 6078266 | 7354935 | 1757104 | --- | --- | --- | 1,50 | up   |
| 6078272 | 7116023 | 1167283 | --- | --- | --- | 1,02 | up   |
| 6078290 | 7340990 | 1722505 | --- | --- | --- | 1,12 | down |
| 6078339 | 7088538 | 1099636 | --- | --- | --- | 1,09 | up   |
| 6078372 | 7227433 | 1440960 | --- | --- | --- | 1,50 | up   |
| 6078564 | 7329846 | 1694990 | --- | --- | --- | 1,80 | up   |
| 6078638 | 7041584 | 989462  | --- | --- | --- | 3,01 | up   |
| 6078668 | 7162177 | 1280582 | --- | --- | --- | 1,52 | down |

|         |         |         |     |     |     |      |      |
|---------|---------|---------|-----|-----|-----|------|------|
| 6078729 | 7088625 | 1099866 | --- | --- | --- | 1,19 | up   |
| 6078753 | 7337224 | 1712589 | --- | --- | --- | 1,04 | down |
| 6078976 | 7148978 | 1248526 | --- | --- | --- | 1,25 | up   |
| 6078977 | 7100210 | 1128136 | --- | --- | --- | 1,08 | down |
| 6078990 | 7367851 | 1788513 | --- | --- | --- | 2,04 | up   |
| 6079080 | 7370910 | 1798539 | --- | --- | --- | 1,06 | down |
| 6079106 | 7155116 | 1263389 | --- | --- | --- | 1,60 | up   |
| 6079117 | 7217434 | 1416363 | --- | --- | --- | 1,02 | up   |
| 6079207 | 7115963 | 1167080 | --- | --- | --- | 1,11 | down |
| 6079231 | 7205944 | 1389488 | --- | --- | --- | 1,06 | down |
| 6079241 | 7240569 | 1475493 | --- | --- | --- | 1,02 | down |
| 6079318 | 7217650 | 1417196 | --- | --- | --- | 1,21 | up   |
| 6079486 | 7038179 | 981266  | --- | --- | --- | 1,01 | up   |
| 6079534 | 7132125 | 1206631 | --- | --- | --- | 2,34 | down |
| 6079607 | 7148741 | 1247845 | --- | --- | --- | 1,00 | down |
| 6079640 | 7128921 | 1198509 | --- | --- | --- | 1,05 | up   |
| 6079682 | 7361881 | 1773936 | --- | --- | --- | 1,69 | down |
| 6079691 | 7052957 | 1016276 | --- | --- | --- | 1,94 | up   |
| 6079745 | 7069830 | 1055630 | --- | --- | --- | 1,07 | up   |
| 6079871 | 7313841 | 1656709 | --- | --- | --- | 1,30 | up   |
| 6079891 | 7141456 | 1229601 | --- | --- | --- | 1,20 | up   |
| 6079961 | 7272431 | 1553901 | --- | --- | --- | 1,02 | up   |
| 6079975 | 7211363 | 1402048 | --- | --- | --- | 1,08 | down |
| 6080044 | 7197056 | 1367847 | --- | --- | --- | 1,28 | down |
| 6080089 | 7341264 | 1723351 | --- | --- | --- | 1,25 | up   |
| 6080142 | 7172373 | 1305573 | --- | --- | --- | 1,10 | down |
| 6080155 | 7186464 | 1341381 | --- | --- | --- | 1,37 | down |
| 6080210 | 7096924 | 1119620 | --- | --- | --- | 2,07 | down |
| 6080220 | 7288077 | 1591994 | --- | --- | --- | 1,31 | down |
| 6080435 | 7166867 | 1291289 | --- | --- | --- | 1,05 | down |
| 6080561 | 7062436 | 1037711 | --- | --- | --- | 1,67 | up   |
| 6080678 | 7380497 | 1821856 | --- | --- | --- | 1,01 | up   |
| 6080735 | 7100210 | 1128141 | --- | --- | --- | 1,15 | down |
| 6080774 | 7337425 | 1713173 | --- | --- | --- | 1,36 | down |
| 6080821 | 7181001 | 1327633 | --- | --- | --- | 1,06 | up   |
| 6080841 | 7172691 | 1306443 | --- | --- | --- | 2,07 | up   |
| 6080901 | 7376566 | 1812872 | --- | --- | --- | 1,27 | up   |
| 6080912 | 7139026 | 1223514 | --- | --- | --- | 1,37 | up   |
| 6080919 | 7340757 | 1721890 | --- | --- | --- | 1,59 | down |
| 6080935 | 7052176 | 1014222 | --- | --- | --- | 1,55 | up   |
| 6080943 | 7158517 | 1271590 | --- | --- | --- | 1,22 | up   |
| 6080968 | 7361881 | 1773941 | --- | --- | --- | 1,13 | up   |
| 6081024 | 7167325 | 1292547 | --- | --- | --- | 1,08 | up   |
| 6081037 | 7069603 | 1055050 | --- | --- | --- | 1,06 | up   |
| 6081065 | 7166439 | 1290097 | --- | --- | --- | 1,14 | down |
| 6081170 | 7060085 | 1031720 | --- | --- | --- | 1,25 | down |
| 6081202 | 7235794 | 1462887 | --- | --- | --- | 1,19 | up   |
| 6081204 | 7267802 | 1541740 | --- | --- | --- | 1,42 | up   |
| 6081222 | 7366749 | 1785536 | --- | --- | --- | 1,18 | down |
| 6081259 | 7078666 | 1076532 | --- | --- | --- | 1,01 | down |
| 6081264 | 7279568 | 1572022 | --- | --- | --- | 1,16 | down |
| 6081388 | 7355041 | 1757404 | --- | --- | --- | 1,27 | down |
| 6081421 | 7073609 | 1064855 | --- | --- | --- | 2,03 | down |
| 6081596 | 7337224 | 1712606 | --- | --- | --- | 1,49 | down |
| 6081688 | 7102369 | 1133424 | --- | --- | --- | 1,16 | down |
| 6081701 | 7087965 | 1098059 | --- | --- | --- | 1,18 | down |
| 6081814 | 7341115 | 1722917 | --- | --- | --- | 1,13 | up   |

|         |         |         |     |     |     |      |      |
|---------|---------|---------|-----|-----|-----|------|------|
| 6081815 | 7240569 | 1475504 | --- | --- | --- | 1,35 | up   |
| 6081850 | 7250511 | 1498644 | --- | --- | --- | 1,09 | up   |
| 6081975 | 7190524 | 1351186 | --- | --- | --- | 1,01 | down |
| 6082026 | 7148741 | 1247828 | --- | --- | --- | 1,09 | down |
| 6082033 | 7380452 | 1821702 | --- | --- | --- | 1,35 | down |
| 6082106 | 7273251 | 1555957 | --- | --- | --- | 1,43 | down |
| 6082261 | 7030519 | 961702  | --- | --- | --- | 1,40 | down |
| 6082275 | 7317708 | 1666828 | --- | --- | --- | 1,10 | down |
| 6082357 | 7353232 | 1752825 | --- | --- | --- | 1,22 | down |
| 6082364 | 7231653 | 1451878 | --- | --- | --- | 1,20 | down |
| 6082481 | 7139026 | 1223503 | --- | --- | --- | 1,14 | up   |
| 6082613 | 7100523 | 1128881 | --- | --- | --- | 1,06 | down |
| 6082635 | 7368567 | 1791332 | --- | --- | --- | 1,37 | up   |
| 6082740 | 7217434 | 1416364 | --- | --- | --- | 1,15 | down |
| 6082763 | 7222236 | 1428129 | --- | --- | --- | 1,22 | down |
| 6082803 | 7176456 | 1315835 | --- | --- | --- | 1,19 | down |
| 6082890 | 7166867 | 1291296 | --- | --- | --- | 1,54 | down |
| 6082898 | 7237814 | 1467823 | --- | --- | --- | 1,04 | up   |
| 6082959 | 7098411 | 1123692 | --- | --- | --- | 1,02 | down |
| 6083050 | 7148741 | 1247825 | --- | --- | --- | 1,12 | up   |
| 6083083 | 7298101 | 1617068 | --- | --- | --- | 1,05 | down |
| 6083126 | 7034293 | 971933  | --- | --- | --- | 1,30 | down |
| 6083282 | 7363529 | 1777902 | --- | --- | --- | 1,41 | up   |
| 6083375 | 7148978 | 1248554 | --- | --- | --- | 1,25 | down |
| 6083480 | 7081487 | 1082718 | --- | --- | --- | 1,02 | down |
| 6083510 | 7294911 | 1608527 | --- | --- | --- | 1,10 | up   |
| 6083547 | 7121849 | 1181769 | --- | --- | --- | 1,01 | up   |
| 6083628 | 7355804 | 1759430 | --- | --- | --- | 1,49 | down |
| 6083638 | 7166855 | 1291248 | --- | --- | --- | 1,58 | up   |
| 6083672 | 7072765 | 1062743 | --- | --- | --- | 2,54 | down |
| 6083708 | 7208784 | 1396153 | --- | --- | --- | 1,40 | down |
| 6083831 | 7333333 | 1703403 | --- | --- | --- | 1,13 | up   |
| 6083839 | 7279103 | 1570839 | --- | --- | --- | 1,46 | down |
| 6084106 | 7355138 | 1757727 | --- | --- | --- | 1,10 | up   |
| 6084156 | 7264274 | 1533168 | --- | --- | --- | 2,42 | up   |
| 6084165 | 7042382 | 991287  | --- | --- | --- | 1,23 | down |
| 6084179 | 7146807 | 1242808 | --- | --- | --- | 1,37 | up   |
| 6084191 | 7350922 | 1747316 | --- | --- | --- | 1,11 | up   |
| 6084368 | 7168521 | 1295975 | --- | --- | --- | 1,01 | down |
| 6084384 | 7274780 | 1559232 | --- | --- | --- | 1,16 | down |
| 6084387 | 7298692 | 1618413 | --- | --- | --- | 1,59 | down |
| 6084507 | 7121849 | 1181802 | --- | --- | --- | 1,15 | up   |
| 6084517 | 7177834 | 1319618 | --- | --- | --- | 1,47 | down |
| 6084521 | 7366749 | 1785487 | --- | --- | --- | 1,97 | down |
| 6084586 | 7343250 | 1728050 | --- | --- | --- | 1,21 | down |
| 6084634 | 7155866 | 1265335 | --- | --- | --- | 1,05 | down |
| 6084644 | 7235840 | 1463002 | --- | --- | --- | 1,05 | down |
| 6084731 | 7212718 | 1404942 | --- | --- | --- | 1,46 | up   |
| 6084766 | 7349313 | 1743119 | --- | --- | --- | 1,34 | up   |
| 6084799 | 7269911 | 1546911 | --- | --- | --- | 1,01 | down |
| 6084804 | 7383655 | 1828573 | --- | --- | --- | 1,12 | up   |
| 6084817 | 7259221 | 1520635 | --- | --- | --- | 1,16 | up   |
| 6084838 | 7150047 | 1250776 | --- | --- | --- | 1,00 | down |
| 6084923 | 7147720 | 1245236 | --- | --- | --- | 1,25 | down |
| 6084924 | 7358048 | 1764804 | --- | --- | --- | 1,61 | down |
| 6084960 | 7237346 | 1466592 | --- | --- | --- | 1,06 | down |
| 6085052 | 7326245 | 1686401 | --- | --- | --- | 1,13 | down |

|         |         |         |     |     |     |      |      |
|---------|---------|---------|-----|-----|-----|------|------|
| 6085094 | 7148978 | 1248466 | --- | --- | --- | 1,31 | down |
| 6085102 | 7256191 | 1512862 | --- | --- | --- | 1,37 | up   |
| 6085128 | 7210263 | 1399764 | --- | --- | --- | 1,35 | up   |
| 6085169 | 7162959 | 1282084 | --- | --- | --- | 1,04 | up   |
| 6085291 | 7355865 | 1759581 | --- | --- | --- | 1,19 | down |
| 6085353 | 7068413 | 1051964 | --- | --- | --- | 1,55 | up   |
| 6085380 | 7345456 | 1733792 | --- | --- | --- | 1,19 | down |
| 6085458 | 7217747 | 1417489 | --- | --- | --- | 1,07 | down |
| 6085467 | 7172373 | 1305583 | --- | --- | --- | 1,06 | down |
| 6085481 | 7122140 | 1182736 | --- | --- | --- | 1,01 | up   |
| 6085565 | 7092549 | 1109120 | --- | --- | --- | 1,27 | down |
| 6085590 | 7380878 | 1822548 | --- | --- | --- | 1,45 | down |
| 6085621 | 7341546 | 1723975 | --- | --- | --- | 1,07 | up   |
| 6085715 | 7263805 | 1532190 | --- | --- | --- | 1,09 | up   |
| 6085872 | 7073950 | 1065906 | --- | --- | --- | 1,17 | up   |
| 6085890 | 7073854 | 1065635 | --- | --- | --- | 1,39 | up   |
| 6085979 | 7288077 | 1591995 | --- | --- | --- | 1,36 | down |
| 6085985 | 7318651 | 1669075 | --- | --- | --- | 1,09 | up   |
| 6085992 | 7259925 | 1522556 | --- | --- | --- | 1,23 | down |
| 6086146 | 7240569 | 1475498 | --- | --- | --- | 1,01 | down |
| 6086149 | 7253408 | 1505951 | --- | --- | --- | 2,20 | down |
| 6086447 | 7099573 | 1126718 | --- | --- | --- | 1,05 | down |
| 6086477 | 7247334 | 1490820 | --- | --- | --- | 1,19 | down |
| 6086553 | 7321414 | 1675632 | --- | --- | --- | 1,00 | down |
| 6086639 | 7234401 | 1459344 | --- | --- | --- | 1,04 | up   |
| 6086649 | 7191983 | 1355172 | --- | --- | --- | 1,34 | up   |
| 6086670 | 7198210 | 1370987 | --- | --- | --- | 1,69 | up   |
| 6086680 | 7108122 | 1147385 | --- | --- | --- | 1,64 | up   |
| 6086698 | 7052176 | 1014213 | --- | --- | --- | 1,36 | down |
| 6086757 | 7353232 | 1752772 | --- | --- | --- | 1,19 | up   |
| 6086765 | 7170764 | 1301490 | --- | --- | --- | 1,50 | down |
| 6086843 | 7225543 | 1435919 | --- | --- | --- | 1,02 | down |
| 6086866 | 7142917 | 1233176 | --- | --- | --- | 1,01 | up   |
| 6086955 | 7149817 | 1250307 | --- | --- | --- | 1,06 | down |
| 6087075 | 7070836 | 1058351 | --- | --- | --- | 1,19 | up   |
| 6087130 | 7330238 | 1695923 | --- | --- | --- | 1,44 | up   |
| 6087165 | 7235069 | 1460993 | --- | --- | --- | 1,12 | up   |
| 6087179 | 7222236 | 1428113 | --- | --- | --- | 1,04 | down |
| 6087194 | 7203018 | 1382662 | --- | --- | --- | 1,45 | up   |
| 6087375 | 7312686 | 1653621 | --- | --- | --- | 1,05 | down |
| 6087488 | 7317708 | 1666831 | --- | --- | --- | 1,17 | down |
| 6087554 | 7292517 | 1602551 | --- | --- | --- | 1,30 | up   |
| 6087570 | 7027797 | 956311  | --- | --- | --- | 1,08 | down |
| 6087670 | 7179785 | 1324461 | --- | --- | --- | 1,08 | down |
| 6087674 | 7267204 | 1539856 | --- | --- | --- | 1,01 | up   |
| 6087689 | 7256070 | 1512595 | --- | --- | --- | 1,21 | down |
| 6087703 | 7060896 | 1033540 | --- | --- | --- | 2,07 | up   |
| 6087711 | 7194400 | 1361773 | --- | --- | --- | 1,05 | down |
| 6087734 | 7101258 | 1130578 | --- | --- | --- | 1,11 | up   |
| 6087736 | 7375937 | 1811362 | --- | --- | --- | 1,19 | down |
| 6087750 | 7352635 | 1751446 | --- | --- | --- | 1,27 | up   |
| 6087797 | 7211389 | 1402114 | --- | --- | --- | 1,11 | down |
| 6087819 | 7243363 | 1481625 | --- | --- | --- | 1,62 | down |
| 6087834 | 7376206 | 1811974 | --- | --- | --- | 1,08 | up   |
| 6087904 | 7209927 | 1398930 | --- | --- | --- | 1,01 | up   |
| 6087961 | 7377791 | 1815985 | --- | --- | --- | 1,22 | up   |
| 6088003 | 7280743 | 1574552 | --- | --- | --- | 1,52 | up   |

|         |         |         |     |     |     |      |      |
|---------|---------|---------|-----|-----|-----|------|------|
| 6088190 | 7253408 | 1505944 | --- | --- | --- | 1,04 | up   |
| 6088205 | 7092549 | 1109174 | --- | --- | --- | 1,29 | down |
| 6088261 | 7238115 | 1468645 | --- | --- | --- | 1,33 | down |
| 6088319 | 7194400 | 1361772 | --- | --- | --- | 1,29 | down |
| 6088424 | 7107926 | 1146833 | --- | --- | --- | 1,25 | up   |
| 6088433 | 7063716 | 1040125 | --- | --- | --- | 1,12 | down |
| 6088548 | 7374313 | 1807368 | --- | --- | --- | 1,29 | up   |
| 6088569 | 7043379 | 993647  | --- | --- | --- | 1,63 | down |
| 6088653 | 7287337 | 1589978 | --- | --- | --- | 2,31 | down |
| 6088787 | 7069462 | 1054574 | --- | --- | --- | 1,48 | down |
| 6088870 | 7341243 | 1723205 | --- | --- | --- | 1,36 | up   |
| 6088957 | 7208784 | 1396094 | --- | --- | --- | 1,25 | down |
| 6088973 | 7356326 | 1760472 | --- | --- | --- | 1,37 | up   |
| 6089007 | 7141061 | 1228709 | --- | --- | --- | 1,18 | up   |
| 6089025 | 7381330 | 1823640 | --- | --- | --- | 1,28 | up   |
| 6089197 | 7196029 | 1365627 | --- | --- | --- | 1,54 | up   |
| 6089275 | 7355138 | 1757762 | --- | --- | --- | 1,54 | up   |
| 6089337 | 7238252 | 1469292 | --- | --- | --- | 1,00 | up   |
| 6089368 | 7308679 | 1644251 | --- | --- | --- | 1,70 | down |
| 6089458 | 7081487 | 1082701 | --- | --- | --- | 1,04 | down |
| 6089525 | 7371677 | 1800754 | --- | --- | --- | 1,04 | down |
| 6089589 | 7128112 | 1196568 | --- | --- | --- | 1,16 | down |
| 6089644 | 7078982 | 1077347 | --- | --- | --- | 1,13 | up   |
| 6089669 | 7079238 | 1077808 | --- | --- | --- | 1,35 | up   |
| 6089680 | 7184151 | 1335955 | --- | --- | --- | 1,43 | down |
| 6089682 | 7277719 | 1567088 | --- | --- | --- | 1,08 | down |
| 6089820 | 7350489 | 1746124 | --- | --- | --- | 1,06 | up   |
| 6089901 | 7310851 | 1649639 | --- | --- | --- | 1,01 | up   |
| 6090026 | 7052385 | 1014771 | --- | --- | --- | 1,26 | down |
| 6090046 | 7073677 | 1065162 | --- | --- | --- | 1,06 | down |
| 6090169 | 7274892 | 1559561 | --- | --- | --- | 1,53 | down |
| 6090189 | 7279533 | 1571906 | --- | --- | --- | 1,06 | up   |
| 6090222 | 7267953 | 1542256 | --- | --- | --- | 1,54 | up   |
| 6090257 | 7350993 | 1747504 | --- | --- | --- | 1,63 | down |
| 6090325 | 7060896 | 1033554 | --- | --- | --- | 1,02 | down |
| 6090489 | 7229061 | 1445261 | --- | --- | --- | 1,13 | up   |
| 6090519 | 7233513 | 1457172 | --- | --- | --- | 1,04 | down |
| 6090523 | 7256191 | 1512880 | --- | --- | --- | 1,06 | down |
| 6090562 | 7141151 | 1228924 | --- | --- | --- | 1,08 | up   |
| 6090612 | 7132024 | 1206337 | --- | --- | --- | 1,44 | up   |
| 6090711 | 7078143 | 1075434 | --- | --- | --- | 1,12 | down |
| 6090730 | 7102369 | 1133417 | --- | --- | --- | 1,31 | down |
| 6090838 | 7217434 | 1416360 | --- | --- | --- | 1,29 | up   |
| 6090843 | 7053874 | 1018312 | --- | --- | --- | 1,10 | up   |
| 6090886 | 7355044 | 1757423 | --- | --- | --- | 1,58 | up   |
| 6090930 | 7258455 | 1518740 | --- | --- | --- | 1,01 | up   |
| 6090952 | 7337224 | 1712591 | --- | --- | --- | 2,82 | down |
| 6090959 | 7329135 | 1693488 | --- | --- | --- | 1,27 | down |
| 6090962 | 7052176 | 1014223 | --- | --- | --- | 1,19 | down |
| 6091163 | 7358623 | 1766253 | --- | --- | --- | 1,03 | down |
| 6091173 | 7268694 | 1544232 | --- | --- | --- | 1,02 | down |
| 6091178 | 7228520 | 1443766 | --- | --- | --- | 1,19 | up   |
| 6091203 | 7233012 | 1455409 | --- | --- | --- | 1,11 | up   |
| 6091238 | 7103017 | 1135159 | --- | --- | --- | 1,05 | down |
| 6091440 | 7279303 | 1571205 | --- | --- | --- | 1,40 | down |
| 6091519 | 7360486 | 1770962 | --- | --- | --- | 1,23 | down |
| 6091571 | 7202145 | 1380718 | --- | --- | --- | 1,42 | down |

|         |         |         |     |     |     |      |      |
|---------|---------|---------|-----|-----|-----|------|------|
| 6091631 | 7133484 | 1209951 | --- | --- | --- | 1,03 | up   |
| 6091682 | 7240569 | 1475522 | --- | --- | --- | 1,16 | up   |
| 6091736 | 7170764 | 1301441 | --- | --- | --- | 1,06 | down |
| 6091885 | 7295652 | 1610313 | --- | --- | --- | 1,11 | up   |
| 6091894 | 7172373 | 1305581 | --- | --- | --- | 1,33 | down |
| 6091907 | 7059766 | 1030973 | --- | --- | --- | 1,67 | down |
| 6091927 | 7310810 | 1649370 | --- | --- | --- | 1,12 | up   |
| 6091942 | 7127257 | 1194803 | --- | --- | --- | 1,67 | up   |
| 6092059 | 7281577 | 1576858 | --- | --- | --- | 1,44 | up   |
| 6092100 | 7361881 | 1773925 | --- | --- | --- | 1,02 | down |
| 6092155 | 7175946 | 1314640 | --- | --- | --- | 1,03 | up   |
| 6092159 | 7181193 | 1328293 | --- | --- | --- | 1,25 | down |
| 6092173 | 7274780 | 1559197 | --- | --- | --- | 2,37 | up   |
| 6092286 | 7071659 | 1060230 | --- | --- | --- | 1,00 | up   |
| 6092327 | 7231834 | 1452269 | --- | --- | --- | 1,62 | up   |
| 6092352 | 7247954 | 1492394 | --- | --- | --- | 1,10 | up   |
| 6092371 | 7344380 | 1731135 | --- | --- | --- | 1,34 | up   |
| 6092410 | 7344630 | 1731939 | --- | --- | --- | 1,07 | up   |
| 6092437 | 7156052 | 1265744 | --- | --- | --- | 1,20 | down |
| 6092559 | 7328985 | 1693173 | --- | --- | --- | 1,08 | down |
| 6092568 | 7059020 | 1029330 | --- | --- | --- | 2,62 | down |
| 6092677 | 7279881 | 1572715 | --- | --- | --- | 1,60 | up   |
| 6092752 | 7059766 | 1030972 | --- | --- | --- | 2,62 | down |
| 6092913 | 7274780 | 1559242 | --- | --- | --- | 1,86 | down |
| 6092926 | 7122140 | 1182735 | --- | --- | --- | 1,04 | up   |
| 6092948 | 7288170 | 1592297 | --- | --- | --- | 1,20 | up   |
| 6092985 | 7297756 | 1616094 | --- | --- | --- | 1,12 | up   |
| 6093057 | 7350993 | 1747514 | --- | --- | --- | 1,25 | down |
| 6093069 | 7288077 | 1591968 | --- | --- | --- | 1,07 | up   |
| 6093171 | 7210263 | 1399752 | --- | --- | --- | 1,05 | up   |
| 6093223 | 7034743 | 973180  | --- | --- | --- | 1,27 | down |
| 6093252 | 7196029 | 1365627 | --- | --- | --- | 1,06 | up   |
| 6093420 | 7240569 | 1475464 | --- | --- | --- | 1,11 | down |
| 6093446 | 7355044 | 1757423 | --- | --- | --- | 1,22 | up   |
| 6093480 | 7234401 | 1459343 | --- | --- | --- | 1,14 | up   |
| 6093556 | 7169599 | 1298449 | --- | --- | --- | 1,35 | up   |
| 6093648 | 7058149 | 1027261 | --- | --- | --- | 1,19 | up   |
| 6093658 | 7158920 | 1272510 | --- | --- | --- | 1,14 | up   |
| 6093683 | 7240224 | 1474388 | --- | --- | --- | 1,09 | up   |
| 6093722 | 7041584 | 989457  | --- | --- | --- | 1,25 | up   |
| 6093879 | 7251318 | 1500760 | --- | --- | --- | 1,33 | up   |
| 6093933 | 7029770 | 960146  | --- | --- | --- | 1,43 | up   |
| 6093934 | 7196029 | 1365631 | --- | --- | --- | 1,12 | up   |
| 6094017 | 7086966 | 1095254 | --- | --- | --- | 1,15 | up   |
| 6094070 | 7340990 | 1722515 | --- | --- | --- | 1,17 | up   |
| 6094144 | 7380878 | 1822549 | --- | --- | --- | 2,10 | up   |
| 6094303 | 7318714 | 1669231 | --- | --- | --- | 1,69 | down |
| 6094326 | 7073569 | 1064738 | --- | --- | --- | 1,41 | down |
| 6094431 | 7279793 | 1572538 | --- | --- | --- | 1,50 | up   |
| 6094511 | 7031618 | 964199  | --- | --- | --- | 1,06 | down |
| 6094599 | 7243901 | 1483055 | --- | --- | --- | 1,30 | down |
| 6094709 | 7058713 | 1028658 | --- | --- | --- | 1,18 | up   |
| 6094748 | 7204831 | 1386772 | --- | --- | --- | 1,36 | down |
| 6094792 | 7073928 | 1065789 | --- | --- | --- | 1,40 | up   |
| 6094803 | 7049689 | 1008892 | --- | --- | --- | 1,44 | down |
| 6094928 | 7292657 | 1602844 | --- | --- | --- | 1,16 | up   |
| 6094965 | 7257893 | 1517458 | --- | --- | --- | 1,01 | down |



|         |         |         |     |     |     |      |      |
|---------|---------|---------|-----|-----|-----|------|------|
| 6095012 | 7316054 | 1662298 | --- | --- | --- | 2,21 | up   |
| 6095056 | 7229061 | 1445310 | --- | --- | --- | 1,00 | up   |
| 6095101 | 7370415 | 1796853 | --- | --- | --- | 1,06 | up   |
| 6095117 | 7256191 | 1512862 | --- | --- | --- | 1,37 | up   |
| 6095255 | 7181001 | 1327630 | --- | --- | --- | 1,94 | down |
| 6095390 | 7373038 | 1804277 | --- | --- | --- | 1,84 | up   |
| 6095401 | 7031618 | 964200  | --- | --- | --- | 1,84 | down |
| 6095428 | 7127540 | 1195286 | --- | --- | --- | 1,02 | down |
| 6095450 | 7240569 | 1475325 | --- | --- | --- | 1,24 | up   |
| 6095634 | 7028624 | 958003  | --- | --- | --- | 2,10 | down |
| 6095642 | 7211363 | 1402057 | --- | --- | --- | 1,40 | up   |
| 6095695 | 7099573 | 1126715 | --- | --- | --- | 1,05 | up   |
| 6095709 | 7176275 | 1315335 | --- | --- | --- | 1,22 | up   |
| 6095775 | 7281577 | 1576872 | --- | --- | --- | 1,16 | down |
| 6095832 | 7050878 | 1011550 | --- | --- | --- | 1,74 | up   |
| 6095839 | 7213908 | 1407660 | --- | --- | --- | 1,03 | down |
| 6095895 | 7087282 | 1096162 | --- | --- | --- | 1,09 | down |
| 6095967 | 7253088 | 1505113 | --- | --- | --- | 1,43 | up   |
| 6096009 | 7159036 | 1272962 | --- | --- | --- | 1,35 | up   |
| 6096023 | 7121849 | 1181780 | --- | --- | --- | 1,10 | up   |
| 6096231 | 7231484 | 1451356 | --- | --- | --- | 1,63 | down |
| 6096265 | 7330582 | 1696872 | --- | --- | --- | 2,14 | down |
| 6096332 | 7052385 | 1014791 | --- | --- | --- | 1,28 | up   |
| 6096546 | 7176456 | 1315848 | --- | --- | --- | 1,07 | down |
| 6096571 | 7067518 | 1049955 | --- | --- | --- | 1,33 | down |
| 6096579 | 7040674 | 987028  | --- | --- | --- | 2,18 | up   |
| 6096595 | 7052957 | 1016260 | --- | --- | --- | 1,22 | down |
| 6096741 | 7039223 | 983564  | --- | --- | --- | 1,15 | up   |
| 6096785 | 7149817 | 1250309 | --- | --- | --- | 1,49 | down |
| 6096816 | 7070836 | 1058344 | --- | --- | --- | 1,23 | up   |
| 6096829 | 7238153 | 1468828 | --- | --- | --- | 1,53 | down |
| 6096969 | 7340990 | 1722518 | --- | --- | --- | 1,04 | down |
| 6097009 | 7131766 | 1205865 | --- | --- | --- | 1,09 | down |
| 6097022 | 7079238 | 1077812 | --- | --- | --- | 1,04 | up   |
| 6097041 | 7191888 | 1354950 | --- | --- | --- | 1,26 | down |
| 6097093 | 7211363 | 1402057 | --- | --- | --- | 1,74 | down |
| 6097196 | 7038530 | 981882  | --- | --- | --- | 1,45 | down |
| 6097210 | 7042382 | 991291  | --- | --- | --- | 1,10 | up   |
| 6097225 | 7056333 | 1023704 | --- | --- | --- | 1,37 | down |
| 6097228 | 7081748 | 1083342 | --- | --- | --- | 1,12 | down |
| 6097245 | 7148978 | 1248542 | --- | --- | --- | 1,01 | down |
| 6097246 | 7069721 | 1055300 | --- | --- | --- | 1,03 | up   |
| 6097277 | 7227433 | 1440988 | --- | --- | --- | 1,45 | up   |
| 6097280 | 7336931 | 1711874 | --- | --- | --- | 1,08 | up   |
| 6097284 | 7228530 | 1443825 | --- | --- | --- | 1,05 | up   |
| 6097523 | 7053874 | 1018320 | --- | --- | --- | 1,82 | down |
| 6097641 | 7307733 | 1642049 | --- | --- | --- | 1,16 | down |
| 6097651 | 7252283 | 1503115 | --- | --- | --- | 1,16 | down |
| 6097667 | 7321029 | 1674821 | --- | --- | --- | 1,63 | down |
| 6097716 | 7154655 | 1262332 | --- | --- | --- | 1,31 | up   |
| 6097873 | 7115507 | 1165981 | --- | --- | --- | 1,09 | down |
| 6098117 | 7132024 | 1206337 | --- | --- | --- | 1,41 | down |
| 6098209 | 7374324 | 1807490 | --- | --- | --- | 1,19 | down |
| 6098221 | 7095021 | 1115131 | --- | --- | --- | 1,46 | up   |
| 6098250 | 7128112 | 1196525 | --- | --- | --- | 1,05 | down |
| 6098334 | 7052813 | 1015929 | --- | --- | --- | 1,07 | up   |
| 6098343 | 7297274 | 1614591 | --- | --- | --- | 1,02 | down |

|         |         |         |     |     |     |      |      |
|---------|---------|---------|-----|-----|-----|------|------|
| 6098485 | 7207093 | 1392120 | --- | --- | --- | 1,08 | up   |
| 6098553 | 7309734 | 1646917 | --- | --- | --- | 1,03 | down |
| 6098582 | 7194540 | 1362091 | --- | --- | --- | 1,19 | down |
| 6098910 | 7311178 | 1650229 | --- | --- | --- | 2,27 | down |
| 6098975 | 7239752 | 1473153 | --- | --- | --- | 1,04 | down |
| 6099024 | 7344380 | 1731121 | --- | --- | --- | 1,08 | up   |
| 6099119 | 7067670 | 1050343 | --- | --- | --- | 1,08 | down |
| 6099255 | 7033337 | 969516  | --- | --- | --- | 1,95 | down |
| 6099304 | 7155866 | 1265334 | --- | --- | --- | 1,62 | up   |
| 6099318 | 7077170 | 1073575 | --- | --- | --- | 1,05 | up   |
| 6099355 | 7196029 | 1365613 | --- | --- | --- | 1,42 | down |
| 6099625 | 7120468 | 1178502 | --- | --- | --- | 1,62 | down |
| 6099703 | 7215722 | 1412264 | --- | --- | --- | 3,07 | down |
| 6099710 | 7368567 | 1791330 | --- | --- | --- | 1,08 | up   |
| 6099759 | 7033337 | 969487  | --- | --- | --- | 1,33 | up   |
| 6099785 | 7028624 | 957999  | --- | --- | --- | 1,09 | down |
| 6099791 | 7162959 | 1282087 | --- | --- | --- | 1,18 | up   |
| 6099996 | 7156052 | 1265787 | --- | --- | --- | 1,13 | up   |
| 6100062 | 7081487 | 1082711 | --- | --- | --- | 1,31 | up   |
| 6100075 | 7223395 | 1431080 | --- | --- | --- | 2,25 | down |
| 6100087 | 7309734 | 1646904 | --- | --- | --- | 1,05 | up   |
| 6100134 | 7048014 | 1005625 | --- | --- | --- | 1,46 | up   |
| 6100136 | 7217650 | 1417174 | --- | --- | --- | 1,58 | up   |
| 6100164 | 7076236 | 1071181 | --- | --- | --- | 1,66 | down |
| 6100197 | 7193056 | 1358265 | --- | --- | --- | 1,34 | up   |
| 6100219 | 7120039 | 1177539 | --- | --- | --- | 1,33 | up   |
| 6100230 | 7176275 | 1315342 | --- | --- | --- | 1,36 | down |
| 6100233 | 7180687 | 1326630 | --- | --- | --- | 2,63 | down |
| 6100256 | 7330314 | 1696130 | --- | --- | --- | 1,20 | down |
| 6100273 | 7112566 | 1158635 | --- | --- | --- | 1,27 | up   |
| 6100288 | 7313538 | 1655728 | --- | --- | --- | 1,26 | down |
| 6100297 | 7130917 | 1203916 | --- | --- | --- | 1,33 | up   |
| 6100359 | 7350993 | 1747527 | --- | --- | --- | 1,12 | up   |
| 6100366 | 7134776 | 1212977 | --- | --- | --- | 2,24 | up   |
| 6100391 | 7180630 | 1326450 | --- | --- | --- | 1,14 | down |
| 6100399 | 7248790 | 1494549 | --- | --- | --- | 1,46 | up   |
| 6100437 | 7344406 | 1731189 | --- | --- | --- | 1,01 | down |
| 6100465 | 7055687 | 1022019 | --- | --- | --- | 1,54 | up   |
| 6100514 | 7089080 | 1101158 | --- | --- | --- | 1,23 | down |
| 6100552 | 7059971 | 1031471 | --- | --- | --- | 1,12 | down |
| 6100562 | 7315206 | 1660010 | --- | --- | --- | 1,33 | down |
| 6100602 | 7318286 | 1668336 | --- | --- | --- | 1,04 | up   |
| 6100603 | 7383823 | 1828948 | --- | --- | --- | 1,32 | up   |
| 6100614 | 7213945 | 1407836 | --- | --- | --- | 1,31 | up   |
| 6100786 | 7321746 | 1676233 | --- | --- | --- | 1,48 | up   |
| 6100937 | 7312532 | 1653223 | --- | --- | --- | 1,10 | down |
| 6100971 | 7196029 | 1365602 | --- | --- | --- | 1,21 | up   |
| 6100997 | 7247954 | 1492388 | --- | --- | --- | 1,56 | up   |
| 6100998 | 7071292 | 1059425 | --- | --- | --- | 1,06 | up   |
| 6101023 | 7282927 | 1580012 | --- | --- | --- | 1,12 | up   |
| 6101078 | 7376820 | 1813453 | --- | --- | --- | 1,16 | down |
| 6101186 | 7039589 | 984517  | --- | --- | --- | 1,08 | down |
| 6101326 | 7341439 | 1723710 | --- | --- | --- | 1,06 | up   |
| 6101336 | 7211389 | 1402114 | --- | --- | --- | 1,02 | up   |
| 6101352 | 7279793 | 1572529 | --- | --- | --- | 1,84 | down |
| 6101375 | 7235069 | 1460988 | --- | --- | --- | 1,16 | down |
| 6101379 | 7295652 | 1610313 | --- | --- | --- | 1,34 | up   |

|         |         |         |     |     |     |      |      |
|---------|---------|---------|-----|-----|-----|------|------|
| 6101454 | 7038153 | 981157  | --- | --- | --- | 1,49 | down |
| 6101552 | 7259923 | 1522527 | --- | --- | --- | 1,03 | down |
| 6101651 | 7320068 | 1672609 | --- | --- | --- | 1,00 | down |
| 6101665 | 7196029 | 1365642 | --- | --- | --- | 1,15 | down |
| 6101685 | 7115507 | 1165975 | --- | --- | --- | 1,78 | down |
| 6101884 | 7371253 | 1799581 | --- | --- | --- | 1,00 | up   |
| 6101913 | 7280743 | 1574526 | --- | --- | --- | 1,09 | up   |
| 6101936 | 7274593 | 1558812 | --- | --- | --- | 1,72 | down |
| 6101944 | 7091439 | 1106625 | --- | --- | --- | 1,61 | up   |
| 6102019 | 7293763 | 1605709 | --- | --- | --- | 1,06 | up   |
| 6102248 | 7288284 | 1592644 | --- | --- | --- | 1,09 | up   |
| 6102265 | 7063716 | 1040216 | --- | --- | --- | 1,81 | up   |
| 6102285 | 7114274 | 1162820 | --- | --- | --- | 1,23 | up   |
| 6102320 | 7295652 | 1610278 | --- | --- | --- | 1,15 | up   |
| 6102350 | 7349313 | 1743130 | --- | --- | --- | 1,18 | down |
| 6102529 | 7306330 | 1638519 | --- | --- | --- | 1,63 | down |
| 6102542 | 7227433 | 1440956 | --- | --- | --- | 1,54 | down |
| 6102547 | 7330396 | 1696358 | --- | --- | --- | 1,15 | down |
| 6102560 | 7360486 | 1770935 | --- | --- | --- | 1,23 | down |
| 6102571 | 7257038 | 1515284 | --- | --- | --- | 2,33 | down |
| 6102586 | 7337872 | 1714463 | --- | --- | --- | 1,22 | down |
| 6102626 | 7259925 | 1522548 | --- | --- | --- | 1,01 | up   |
| 6102673 | 7071264 | 1059362 | --- | --- | --- | 1,58 | down |
| 6102694 | 7217434 | 1416453 | --- | --- | --- | 1,02 | up   |
| 6102764 | 7058507 | 1028321 | --- | --- | --- | 1,05 | down |
| 6102975 | 7031774 | 964789  | --- | --- | --- | 1,08 | up   |
| 6103061 | 7071659 | 1060227 | --- | --- | --- | 1,06 | down |
| 6103115 | 7314270 | 1657749 | --- | --- | --- | 1,15 | up   |
| 6103151 | 7243647 | 1482426 | --- | --- | --- | 1,00 | down |
| 6103203 | 7063716 | 1040152 | --- | --- | --- | 1,08 | down |
| 6103230 | 7073677 | 1065153 | --- | --- | --- | 1,85 | down |
| 6103245 | 7213945 | 1407833 | --- | --- | --- | 1,61 | up   |
| 6103252 | 7258455 | 1518737 | --- | --- | --- | 1,01 | down |
| 6103265 | 7101684 | 1131710 | --- | --- | --- | 1,03 | down |
| 6103291 | 7095041 | 1115182 | --- | --- | --- | 1,08 | down |
| 6103339 | 7374090 | 1806815 | --- | --- | --- | 1,16 | down |
| 6103381 | 7244027 | 1483282 | --- | --- | --- | 1,20 | up   |
| 6103383 | 7115362 | 1165598 | --- | --- | --- | 1,07 | up   |
| 6103472 | 7089080 | 1101135 | --- | --- | --- | 1,09 | down |
| 6103475 | 7069721 | 1055307 | --- | --- | --- | 1,03 | down |
| 6103498 | 7278010 | 1568034 | --- | --- | --- | 1,46 | down |
| 6103532 | 7337425 | 1713133 | --- | --- | --- | 1,44 | down |
| 6103760 | 7052385 | 1014784 | --- | --- | --- | 1,09 | down |
| 6103822 | 7244287 | 1484060 | --- | --- | --- | 1,44 | up   |
| 6103889 | 7041609 | 989566  | --- | --- | --- | 1,33 | up   |
| 6103901 | 7052813 | 1015919 | --- | --- | --- | 1,10 | down |
| 6103910 | 7297274 | 1614660 | --- | --- | --- | 1,24 | down |
| 6103946 | 7093255 | 1110759 | --- | --- | --- | 1,10 | up   |
| 6104000 | 7049184 | 1007934 | --- | --- | --- | 1,24 | up   |
| 6104006 | 7107503 | 1145766 | --- | --- | --- | 1,07 | down |
| 6104053 | 7171091 | 1302451 | --- | --- | --- | 1,07 | up   |
| 6104087 | 7156052 | 1265784 | --- | --- | --- | 1,03 | up   |
| 6104446 | 7062233 | 1037203 | --- | --- | --- | 1,00 | up   |
| 6104459 | 7149934 | 1250520 | --- | --- | --- | 1,10 | down |
| 6104528 | 7097240 | 1120369 | --- | --- | --- | 1,65 | down |
| 6104605 | 7295410 | 1609777 | --- | --- | --- | 1,46 | down |
| 6104616 | 7034293 | 971982  | --- | --- | --- | 1,90 | up   |

|         |         |         |     |     |     |      |      |
|---------|---------|---------|-----|-----|-----|------|------|
| 6104709 | 7183190 | 1333645 | --- | --- | --- | 1,39 | up   |
| 6104713 | 7352046 | 1750028 | --- | --- | --- | 1,15 | up   |
| 6104793 | 7071714 | 1060359 | --- | --- | --- | 1,12 | up   |
| 6104801 | 7326271 | 1686518 | --- | --- | --- | 1,07 | up   |
| 6104933 | 7312465 | 1653052 | --- | --- | --- | 1,12 | up   |
| 6105131 | 7236358 | 1464218 | --- | --- | --- | 1,20 | down |
| 6105213 | 7383586 | 1828443 | --- | --- | --- | 1,23 | up   |
| 6105233 | 7268357 | 1543393 | --- | --- | --- | 1,29 | up   |
| 6105273 | 7368815 | 1792312 | --- | --- | --- | 1,05 | down |
| 6105299 | 7061703 | 1035736 | --- | --- | --- | 1,22 | down |
| 6105325 | 7142917 | 1233182 | --- | --- | --- | 1,50 | up   |
| 6105367 | 7059309 | 1029924 | --- | --- | --- | 1,20 | down |
| 6105611 | 7148978 | 1248474 | --- | --- | --- | 1,01 | down |
| 6105623 | 7374493 | 1807962 | --- | --- | --- | 1,39 | up   |
| 6105735 | 7309734 | 1646882 | --- | --- | --- | 2,09 | up   |
| 6105755 | 7041140 | 988280  | --- | --- | --- | 1,11 | up   |
| 6105787 | 7148978 | 1248496 | --- | --- | --- | 1,03 | up   |
| 6105811 | 7318286 | 1668329 | --- | --- | --- | 1,16 | down |
| 6105814 | 7258455 | 1518707 | --- | --- | --- | 1,00 | down |
| 6105883 | 7336854 | 1711680 | --- | --- | --- | 2,64 | up   |
| 6106003 | 7095066 | 1115285 | --- | --- | --- | 2,00 | up   |
| 6106143 | 7180243 | 1325513 | --- | --- | --- | 1,11 | up   |
| 6106150 | 7136746 | 1217966 | --- | --- | --- | 1,14 | down |
| 6106169 | 7217747 | 1417512 | --- | --- | --- | 1,25 | up   |
| 6106241 | 7236131 | 1463782 | --- | --- | --- | 1,04 | up   |
| 6106299 | 7374324 | 1807465 | --- | --- | --- | 1,00 | down |
| 6106388 | 7354935 | 1757101 | --- | --- | --- | 1,34 | down |
| 6106413 | 7148741 | 1247828 | --- | --- | --- | 1,31 | up   |
| 6106437 | 7233970 | 1458273 | --- | --- | --- | 1,02 | down |
| 6106504 | 7376820 | 1813402 | --- | --- | --- | 1,14 | up   |
| 6106812 | 7079236 | 1077780 | --- | --- | --- | 1,08 | up   |
| 6106990 | 7142416 | 1231800 | --- | --- | --- | 2,40 | up   |
| 6107060 | 7320735 | 1674158 | --- | --- | --- | 1,02 | down |
| 6107269 | 7361881 | 1773929 | --- | --- | --- | 1,41 | down |
| 6107277 | 7259221 | 1520618 | --- | --- | --- | 1,36 | up   |
| 6107387 | 7062233 | 1037241 | --- | --- | --- | 1,01 | up   |
| 6107574 | 7131876 | 1206051 | --- | --- | --- | 1,48 | up   |
| 6107675 | 7212698 | 1404851 | --- | --- | --- | 2,01 | up   |
| 6107726 | 7083031 | 1086290 | --- | --- | --- | 1,46 | down |
| 6107729 | 7173706 | 1309297 | --- | --- | --- | 1,68 | down |
| 6107788 | 7101094 | 1130225 | --- | --- | --- | 2,04 | up   |
| 6107812 | 7329136 | 1693546 | --- | --- | --- | 1,70 | down |
| 6107889 | 7226277 | 1437984 | --- | --- | --- | 1,02 | down |
| 6107935 | 7062233 | 1037201 | --- | --- | --- | 1,11 | down |
| 6107942 | 7067670 | 1050346 | --- | --- | --- | 1,19 | down |
| 6107945 | 7115362 | 1165614 | --- | --- | --- | 1,54 | down |
| 6107994 | 7318714 | 1669224 | --- | --- | --- | 1,54 | down |
| 6108243 | 7207093 | 1392119 | --- | --- | --- | 1,25 | down |
| 6108263 | 7267802 | 1541825 | --- | --- | --- | 1,18 | up   |
| 6108326 | 7361223 | 1772621 | --- | --- | --- | 1,37 | down |
| 6108440 | 7186464 | 1341382 | --- | --- | --- | 1,04 | down |
| 6108459 | 7133749 | 1210807 | --- | --- | --- | 1,35 | up   |
| 6108495 | 7190844 | 1352140 | --- | --- | --- | 1,06 | down |
| 6108524 | 7376073 | 1811693 | --- | --- | --- | 2,07 | down |
| 6108548 | 7100523 | 1128918 | --- | --- | --- | 1,13 | down |
| 6108689 | 7279793 | 1572530 | --- | --- | --- | 1,12 | up   |
| 6108845 | 7131103 | 1204320 | --- | --- | --- | 1,10 | down |

|         |         |         |     |     |     |      |      |
|---------|---------|---------|-----|-----|-----|------|------|
| 6108975 | 7339452 | 1718595 | --- | --- | --- | 1,03 | up   |
| 6109019 | 7294911 | 1608527 | --- | --- | --- | 1,17 | up   |
| 6109132 | 7068259 | 1051661 | --- | --- | --- | 1,11 | up   |
| 6109200 | 7355138 | 1757760 | --- | --- | --- | 1,05 | up   |
| 6109280 | 7052385 | 1014806 | --- | --- | --- | 1,06 | down |
| 6109325 | 7281924 | 1577726 | --- | --- | --- | 1,37 | down |
| 6109375 | 7067670 | 1050344 | --- | --- | --- | 1,01 | up   |
| 6109422 | 7355138 | 1757785 | --- | --- | --- | 1,35 | down |
| 6109458 | 7244290 | 1484154 | --- | --- | --- | 1,06 | up   |
| 6109722 | 7110999 | 1154762 | --- | --- | --- | 1,00 | up   |
| 6109837 | 7286807 | 1588821 | --- | --- | --- | 1,39 | up   |
| 6109885 | 7177180 | 1317766 | --- | --- | --- | 1,65 | up   |
| 6109935 | 7245921 | 1487708 | --- | --- | --- | 1,09 | down |
| 6110011 | 7339379 | 1718330 | --- | --- | --- | 1,08 | up   |
| 6110013 | 7248790 | 1494503 | --- | --- | --- | 1,00 | up   |
| 6110030 | 7272577 | 1554205 | --- | --- | --- | 1,39 | up   |
| 6110041 | 7331757 | 1700022 | --- | --- | --- | 1,27 | up   |
| 6110117 | 7112671 | 1158975 | --- | --- | --- | 1,06 | up   |
| 6110121 | 7095041 | 1115171 | --- | --- | --- | 1,13 | up   |
| 6110227 | 7244290 | 1484156 | --- | --- | --- | 1,33 | down |
| 6110232 | 7033504 | 969865  | --- | --- | --- | 1,13 | down |
| 6110333 | 7256070 | 1512590 | --- | --- | --- | 1,85 | up   |
| 6110388 | 7266544 | 1538346 | --- | --- | --- | 1,01 | up   |
| 6110407 | 7037495 | 979323  | --- | --- | --- | 1,41 | down |
| 6110423 | 7305275 | 1635847 | --- | --- | --- | 1,22 | down |
| 6110465 | 7199341 | 1374165 | --- | --- | --- | 1,94 | up   |
| 6110474 | 7186464 | 1341363 | --- | --- | --- | 1,06 | down |
| 6110536 | 7363674 | 1778416 | --- | --- | --- | 1,02 | down |
| 6110562 | 7115362 | 1165612 | --- | --- | --- | 1,08 | up   |
| 6110614 | 7355044 | 1757434 | --- | --- | --- | 1,28 | down |
| 6110678 | 7358859 | 1767004 | --- | --- | --- | 1,45 | up   |
| 6110700 | 7199341 | 1374128 | --- | --- | --- | 1,10 | down |
| 6110715 | 7146872 | 1242912 | --- | --- | --- | 1,16 | up   |
| 6110730 | 7248790 | 1494496 | --- | --- | --- | 1,20 | down |
| 6110771 | 7141456 | 1229590 | --- | --- | --- | 1,05 | up   |
| 6110782 | 7152915 | 1257483 | --- | --- | --- | 1,06 | down |
| 6110795 | 7261580 | 1526803 | --- | --- | --- | 1,16 | up   |
| 6110961 | 7111361 | 1155599 | --- | --- | --- | 1,12 | down |
| 6110963 | 7352044 | 1750009 | --- | --- | --- | 1,15 | up   |
| 6110968 | 7144389 | 1236778 | --- | --- | --- | 1,07 | down |
| 6110997 | 7039303 | 983881  | --- | --- | --- | 1,19 | down |
| 6111001 | 7265259 | 1535453 | --- | --- | --- | 1,08 | down |
| 6111073 | 7180732 | 1326724 | --- | --- | --- | 1,18 | up   |
| 6111338 | 7279568 | 1572024 | --- | --- | --- | 1,14 | up   |
| 6111363 | 7180166 | 1325227 | --- | --- | --- | 1,05 | up   |
| 6111375 | 7378997 | 1818642 | --- | --- | --- | 1,09 | down |
| 6111427 | 7281577 | 1576875 | --- | --- | --- | 1,06 | up   |
| 6111460 | 7033337 | 969518  | --- | --- | --- | 1,01 | down |
| 6111474 | 7225543 | 1435930 | --- | --- | --- | 1,04 | down |
| 6111487 | 7384509 | 1830748 | --- | --- | --- | 1,25 | down |
| 6111488 | 7343250 | 1728036 | --- | --- | --- | 1,28 | up   |
| 6111496 | 7235794 | 1462880 | --- | --- | --- | 1,02 | up   |
| 6111500 | 7086522 | 1093953 | --- | --- | --- | 1,96 | down |
| 6111540 | 7075445 | 1069350 | --- | --- | --- | 2,18 | down |
| 6111732 | 7306330 | 1638507 | --- | --- | --- | 1,56 | down |
| 6111831 | 7279568 | 1572015 | --- | --- | --- | 1,13 | down |
| 6111962 | 7084500 | 1089718 | --- | --- | --- | 1,11 | up   |

|         |         |         |     |     |     |      |      |
|---------|---------|---------|-----|-----|-----|------|------|
| 6112018 | 7272431 | 1553896 | --- | --- | --- | 1,59 | up   |
| 6112072 | 7043515 | 994008  | --- | --- | --- | 1,29 | down |
| 6112101 | 7227474 | 1441146 | --- | --- | --- | 1,68 | down |
| 6112115 | 7253215 | 1505383 | --- | --- | --- | 1,02 | up   |
| 6112260 | 7259925 | 1522559 | --- | --- | --- | 1,23 | down |
| 6112359 | 7069830 | 1055589 | --- | --- | --- | 1,69 | down |
| 6112381 | 7274892 | 1559551 | --- | --- | --- | 1,14 | down |
| 6112467 | 7113085 | 1159995 | --- | --- | --- | 1,33 | down |
| 6112480 | 7225213 | 1435121 | --- | --- | --- | 1,21 | up   |
| 6112525 | 7113483 | 1161002 | --- | --- | --- | 2,28 | up   |
| 6112533 | 7326271 | 1686462 | --- | --- | --- | 1,34 | down |
| 6112534 | 7117526 | 1171032 | --- | --- | --- | 1,54 | up   |
| 6112585 | 7105780 | 1141702 | --- | --- | --- | 1,02 | down |
| 6112611 | 7093936 | 1112472 | --- | --- | --- | 1,13 | up   |
| 6112694 | 7196803 | 1367342 | --- | --- | --- | 1,55 | up   |
| 6112695 | 7084500 | 1089696 | --- | --- | --- | 1,46 | down |
| 6112702 | 7383655 | 1828574 | --- | --- | --- | 1,01 | up   |
| 6112746 | 7377583 | 1815461 | --- | --- | --- | 1,34 | up   |
| 6112752 | 7244287 | 1484045 | --- | --- | --- | 1,51 | down |
| 6112827 | 7236358 | 1464221 | --- | --- | --- | 1,36 | down |
| 6112848 | 7312566 | 1653294 | --- | --- | --- | 1,57 | down |
| 6112857 | 7150047 | 1250776 | --- | --- | --- | 1,53 | down |
| 6112865 | 7222741 | 1429361 | --- | --- | --- | 1,36 | up   |
| 6112910 | 7380497 | 1821838 | --- | --- | --- | 1,06 | down |
| 6112930 | 7290775 | 1598593 | --- | --- | --- | 1,65 | up   |
| 6112943 | 7071969 | 1060891 | --- | --- | --- | 1,25 | up   |
| 6112997 | 7240569 | 1475449 | --- | --- | --- | 1,04 | up   |
| 6113006 | 7303777 | 1631923 | --- | --- | --- | 1,13 | down |
| 6113059 | 7198087 | 1370701 | --- | --- | --- | 1,38 | up   |
| 6113067 | 7089080 | 1101160 | --- | --- | --- | 1,17 | up   |
| 6113268 | 7212587 | 1404640 | --- | --- | --- | 1,59 | down |
| 6113295 | 7277783 | 1567470 | --- | --- | --- | 1,27 | down |
| 6113315 | 7059020 | 1029338 | --- | --- | --- | 1,44 | up   |
| 6113333 | 7194400 | 1361770 | --- | --- | --- | 1,19 | up   |
| 6113401 | 7117813 | 1171706 | --- | --- | --- | 1,27 | up   |
| 6113441 | 7222741 | 1429360 | --- | --- | --- | 1,01 | down |
| 6113451 | 7359361 | 1768262 | --- | --- | --- | 1,07 | down |
| 6113770 | 7115362 | 1165605 | --- | --- | --- | 1,38 | up   |
| 6113791 | 7277759 | 1567293 | --- | --- | --- | 1,04 | down |
| 6113962 | 7295652 | 1610290 | --- | --- | --- | 1,55 | up   |
| 6114010 | 7142321 | 1231547 | --- | --- | --- | 1,28 | down |
| 6114064 | 7344630 | 1731946 | --- | --- | --- | 1,26 | up   |
| 6114094 | 7235069 | 1460972 | --- | --- | --- | 1,35 | down |
| 6114105 | 7205750 | 1389050 | --- | --- | --- | 1,52 | down |
| 6114226 | 7301296 | 1624999 | --- | --- | --- | 1,37 | up   |
| 6114262 | 7113985 | 1162231 | --- | --- | --- | 1,83 | up   |
| 6114278 | 7073609 | 1064853 | --- | --- | --- | 1,42 | down |
| 6114338 | 7378878 | 1818329 | --- | --- | --- | 1,21 | down |
| 6114346 | 7343250 | 1728052 | --- | --- | --- | 1,22 | up   |
| 6114374 | 7350530 | 1746236 | --- | --- | --- | 1,17 | up   |
| 6114396 | 7191594 | 1354171 | --- | --- | --- | 1,62 | up   |
| 6114514 | 7248790 | 1494537 | --- | --- | --- | 1,21 | down |
| 6114554 | 7063716 | 1040134 | --- | --- | --- | 1,01 | down |
| 6114578 | 7052331 | 1014567 | --- | --- | --- | 1,04 | down |
| 6114579 | 7264808 | 1534468 | --- | --- | --- | 1,06 | up   |
| 6114621 | 7063515 | 1039643 | --- | --- | --- | 1,48 | down |
| 6114665 | 7233513 | 1457170 | --- | --- | --- | 1,12 | down |

|         |         |         |     |     |     |      |      |
|---------|---------|---------|-----|-----|-----|------|------|
| 6114691 | 7097485 | 1120940 | --- | --- | --- | 1,29 | down |
| 6114728 | 7236358 | 1464245 | --- | --- | --- | 1,14 | down |
| 6114822 | 7194400 | 1361764 | --- | --- | --- | 2,42 | down |
| 6114846 | 7147828 | 1245565 | --- | --- | --- | 1,14 | down |
| 6114869 | 7071264 | 1059284 | --- | --- | --- | 1,29 | up   |
| 6115052 | 7252513 | 1503829 | --- | --- | --- | 1,70 | up   |
| 6115075 | 7260066 | 1522886 | --- | --- | --- | 1,21 | down |
| 6115106 | 7364346 | 1780000 | --- | --- | --- | 1,16 | down |
| 6115117 | 7341546 | 1723971 | --- | --- | --- | 1,49 | up   |
| 6115121 | 7040674 | 987026  | --- | --- | --- | 1,15 | up   |
| 6115315 | 7264797 | 1534421 | --- | --- | --- | 1,06 | down |
| 6115375 | 7269918 | 1546944 | --- | --- | --- | 1,19 | up   |
| 6115382 | 7243628 | 1482382 | --- | --- | --- | 2,41 | up   |
| 6115387 | 7363529 | 1777929 | --- | --- | --- | 1,27 | down |
| 6115389 | 7073950 | 1065898 | --- | --- | --- | 1,42 | up   |
| 6115454 | 7067670 | 1050318 | --- | --- | --- | 2,81 | up   |
| 6115484 | 7313222 | 1654906 | --- | --- | --- | 1,17 | up   |
| 6115527 | 7084176 | 1089016 | --- | --- | --- | 1,16 | down |
| 6115535 | 7356027 | 1759981 | --- | --- | --- | 1,52 | up   |
| 6115553 | 7132125 | 1206629 | --- | --- | --- | 1,46 | up   |
| 6115615 | 7042382 | 991289  | --- | --- | --- | 1,06 | down |
| 6115631 | 7384509 | 1830750 | --- | --- | --- | 1,07 | up   |
| 6115697 | 7326245 | 1686395 | --- | --- | --- | 1,06 | up   |
| 6115785 | 7279568 | 1572003 | --- | --- | --- | 1,36 | down |
| 6115799 | 7217679 | 1417316 | --- | --- | --- | 1,00 | up   |
| 6115853 | 7350489 | 1746129 | --- | --- | --- | 1,62 | up   |
| 6116192 | 7378997 | 1818674 | --- | --- | --- | 1,21 | up   |
| 6116343 | 7288284 | 1592649 | --- | --- | --- | 1,26 | down |
| 6116400 | 7302327 | 1627682 | --- | --- | --- | 1,41 | up   |
| 6116468 | 7142081 | 1230979 | --- | --- | --- | 1,15 | down |
| 6116549 | 7096924 | 1119613 | --- | --- | --- | 1,28 | up   |
| 6116577 | 7207069 | 1392032 | --- | --- | --- | 1,52 | down |
| 6116672 | 7068504 | 1052161 | --- | --- | --- | 3,31 | up   |
| 6116674 | 7264797 | 1534431 | --- | --- | --- | 1,02 | up   |
| 6116803 | 7326271 | 1686458 | --- | --- | --- | 1,71 | up   |
| 6116895 | 7031473 | 963871  | --- | --- | --- | 1,12 | up   |
| 6116915 | 7061948 | 1036378 | --- | --- | --- | 1,07 | down |
| 6116964 | 7065860 | 1045795 | --- | --- | --- | 1,27 | down |
| 6117048 | 7239939 | 1473788 | --- | --- | --- | 1,10 | up   |
| 6117084 | 7374740 | 1808618 | --- | --- | --- | 1,39 | down |
| 6117110 | 7204917 | 1387129 | --- | --- | --- | 1,08 | up   |
| 6117252 | 7146872 | 1242901 | --- | --- | --- | 1,13 | up   |
| 6117257 | 7069253 | 1054156 | --- | --- | --- | 1,02 | up   |
| 6117337 | 7148741 | 1247841 | --- | --- | --- | 1,14 | down |
| 6117432 | 7073677 | 1065162 | --- | --- | --- | 2,41 | down |
| 6117441 | 7177180 | 1317787 | --- | --- | --- | 2,18 | down |
| 6117495 | 7089080 | 1101156 | --- | --- | --- | 1,01 | up   |
| 6117507 | 7149934 | 1250521 | --- | --- | --- | 1,20 | up   |
| 6117574 | 7312465 | 1653051 | --- | --- | --- | 1,19 | down |
| 6117705 | 7360486 | 1771001 | --- | --- | --- | 1,05 | up   |
| 6117851 | 7073677 | 1065170 | --- | --- | --- | 1,55 | up   |
| 6117873 | 7264745 | 1534278 | --- | --- | --- | 1,29 | down |
| 6117952 | 7073624 | 1064915 | --- | --- | --- | 1,19 | up   |
| 6117982 | 7245921 | 1487710 | --- | --- | --- | 1,55 | down |
| 6118067 | 7280743 | 1574554 | --- | --- | --- | 1,67 | up   |
| 6118099 | 7162959 | 1282085 | --- | --- | --- | 1,16 | up   |
| 6118158 | 7053874 | 1018338 | --- | --- | --- | 1,22 | down |

|         |         |         |     |     |     |      |      |
|---------|---------|---------|-----|-----|-----|------|------|
| 6118186 | 7289075 | 1594452 | --- | --- | --- | 1,23 | down |
| 6118256 | 7238115 | 1468659 | --- | --- | --- | 1,13 | down |
| 6118367 | 7359361 | 1768260 | --- | --- | --- | 1,02 | up   |
| 6118413 | 7364346 | 1779995 | --- | --- | --- | 1,64 | up   |
| 6118480 | 7321029 | 1674814 | --- | --- | --- | 1,32 | down |
| 6118546 | 7243647 | 1482446 | --- | --- | --- | 1,01 | up   |
| 6118587 | 7318714 | 1669233 | --- | --- | --- | 1,48 | down |
| 6118620 | 7243647 | 1482472 | --- | --- | --- | 1,21 | up   |
| 6118714 | 7197820 | 1370096 | --- | --- | --- | 2,08 | down |
| 6118899 | 7112355 | 1158076 | --- | --- | --- | 1,03 | down |
| 6118904 | 7339379 | 1718361 | --- | --- | --- | 1,20 | down |
| 6118920 | 7238202 | 1468945 | --- | --- | --- | 1,50 | up   |
| 6118937 | 7289382 | 1595211 | --- | --- | --- | 1,05 | down |
| 6118943 | 7177834 | 1319630 | --- | --- | --- | 1,32 | up   |
| 6118966 | 7107321 | 1145323 | --- | --- | --- | 1,19 | down |
| 6119042 | 7050716 | 1011222 | --- | --- | --- | 1,71 | up   |
| 6119072 | 7313538 | 1655719 | --- | --- | --- | 1,19 | down |
| 6119150 | 7280743 | 1574515 | --- | --- | --- | 1,31 | down |
| 6119235 | 7039223 | 983564  | --- | --- | --- | 1,22 | up   |
| 6119251 | 7079238 | 1077814 | --- | --- | --- | 1,09 | up   |
| 6119290 | 7261766 | 1527155 | --- | --- | --- | 1,17 | down |
| 6119318 | 7371228 | 1799467 | --- | --- | --- | 1,13 | up   |
| 6119382 | 7230698 | 1449061 | --- | --- | --- | 1,32 | down |
| 6119413 | 7148741 | 1247872 | --- | --- | --- | 1,56 | up   |
| 6119432 | 7215722 | 1412266 | --- | --- | --- | 1,28 | down |
| 6119446 | 7110330 | 1152925 | --- | --- | --- | 1,22 | up   |
| 6119617 | 7164949 | 1286470 | --- | --- | --- | 2,04 | up   |
| 6119652 | 7303635 | 1631459 | --- | --- | --- | 1,01 | up   |
| 6119718 | 7378997 | 1818659 | --- | --- | --- | 1,04 | up   |
| 6119735 | 7337425 | 1713215 | --- | --- | --- | 1,03 | up   |
| 6119800 | 7098648 | 1124274 | --- | --- | --- | 1,27 | up   |
| 6119885 | 7162102 | 1280361 | --- | --- | --- | 1,57 | down |
| 6119921 | 7354935 | 1757103 | --- | --- | --- | 1,15 | up   |
| 6120062 | 7033504 | 969852  | --- | --- | --- | 1,04 | up   |
| 6120205 | 7338101 | 1715194 | --- | --- | --- | 1,26 | up   |
| 6120222 | 7062436 | 1037708 | --- | --- | --- | 1,08 | down |
| 6120283 | 7330238 | 1695956 | --- | --- | --- | 1,13 | down |
| 6120316 | 7093835 | 1112220 | --- | --- | --- | 1,02 | down |
| 6120482 | 7176235 | 1315237 | --- | --- | --- | 1,05 | up   |
| 6120505 | 7230886 | 1449533 | --- | --- | --- | 1,19 | up   |
| 6120538 | 7235840 | 1462990 | --- | --- | --- | 2,07 | down |
| 6120759 | 7311391 | 1650872 | --- | --- | --- | 1,25 | up   |
| 6120811 | 7252877 | 1504752 | --- | --- | --- | 1,16 | down |
| 6120812 | 7101684 | 1131709 | --- | --- | --- | 1,01 | up   |
| 6120842 | 7039532 | 984436  | --- | --- | --- | 1,19 | up   |
| 6120850 | 7301900 | 1626742 | --- | --- | --- | 2,38 | down |
| 6120875 | 7358859 | 1766964 | --- | --- | --- | 1,03 | down |
| 6120964 | 7162144 | 1280513 | --- | --- | --- | 1,29 | up   |
| 6120981 | 7247954 | 1492399 | --- | --- | --- | 1,07 | down |
| 6121176 | 7064134 | 1041454 | --- | --- | --- | 1,13 | down |
| 6121180 | 7287337 | 1589972 | --- | --- | --- | 1,13 | down |
| 6121212 | 7337224 | 1712611 | --- | --- | --- | 1,71 | down |
| 6121253 | 7327169 | 1688462 | --- | --- | --- | 1,62 | down |
| 6121268 | 7346066 | 1735287 | --- | --- | --- | 1,19 | up   |
| 6121336 | 7302787 | 1628891 | --- | --- | --- | 1,20 | down |
| 6121337 | 7140365 | 1226774 | --- | --- | --- | 1,43 | down |
| 6121409 | 7078666 | 1076507 | --- | --- | --- | 1,13 | up   |



|         |         |         |     |     |     |      |      |
|---------|---------|---------|-----|-----|-----|------|------|
| 6121440 | 7227474 | 1441147 | --- | --- | --- | 1,07 | up   |
| 6121473 | 7200129 | 1375994 | --- | --- | --- | 2,46 | up   |
| 6121489 | 7333462 | 1703644 | --- | --- | --- | 1,00 | up   |
| 6121545 | 7207069 | 1392024 | --- | --- | --- | 1,14 | up   |
| 6121604 | 7069830 | 1055646 | --- | --- | --- | 1,09 | up   |
| 6121616 | 7065860 | 1045808 | --- | --- | --- | 1,20 | up   |
| 6121621 | 7374493 | 1807960 | --- | --- | --- | 1,19 | up   |
| 6121625 | 7252877 | 1504742 | --- | --- | --- | 1,00 | down |
| 6121648 | 7120827 | 1179350 | --- | --- | --- | 1,30 | up   |
| 6121662 | 7217434 | 1416436 | --- | --- | --- | 1,20 | up   |
| 6121743 | 7235069 | 1460978 | --- | --- | --- | 1,42 | down |
| 6121797 | 7115362 | 1165605 | --- | --- | --- | 1,17 | up   |
| 6121801 | 7078815 | 1076980 | --- | --- | --- | 1,18 | down |
| 6121830 | 7120827 | 1179345 | --- | --- | --- | 1,09 | up   |
| 6121854 | 7207093 | 1392115 | --- | --- | --- | 1,15 | down |
| 6121873 | 7312575 | 1653359 | --- | --- | --- | 2,20 | down |
| 6121882 | 7231834 | 1452268 | --- | --- | --- | 1,22 | down |
| 6121946 | 7331413 | 1699134 | --- | --- | --- | 1,05 | down |
| 6121947 | 7363529 | 1777921 | --- | --- | --- | 1,29 | up   |
| 6121960 | 7213908 | 1407759 | --- | --- | --- | 1,99 | up   |
| 6121969 | 7059309 | 1029906 | --- | --- | --- | 1,09 | down |
| 6122082 | 7330731 | 1697198 | --- | --- | --- | 1,00 | up   |
| 6122100 | 7217747 | 1417510 | --- | --- | --- | 1,20 | down |
| 6122132 | 7295652 | 1610294 | --- | --- | --- | 1,13 | up   |
| 6122139 | 7127691 | 1195635 | --- | --- | --- | 1,23 | up   |
| 6122255 | 7291309 | 1599947 | --- | --- | --- | 1,19 | up   |
| 6122274 | 7202749 | 1382125 | --- | --- | --- | 1,03 | up   |
| 6122299 | 7365147 | 1781750 | --- | --- | --- | 1,31 | down |
| 6122372 | 7039463 | 984254  | --- | --- | --- | 1,03 | up   |
| 6122441 | 7115362 | 1165597 | --- | --- | --- | 1,08 | up   |
| 6122509 | 7385253 | 1832225 | --- | --- | --- | 1,07 | down |
| 6122525 | 7258784 | 1519674 | --- | --- | --- | 1,45 | up   |
| 6122574 | 7039532 | 984441  | --- | --- | --- | 1,01 | down |
| 6122620 | 7032618 | 967334  | --- | --- | --- | 1,05 | up   |
| 6122668 | 7373634 | 1805723 | --- | --- | --- | 1,37 | up   |
| 6122761 | 7244290 | 1484150 | --- | --- | --- | 1,33 | down |
| 6122785 | 7092549 | 1109142 | --- | --- | --- | 1,17 | up   |
| 6122963 | 7068942 | 1053375 | --- | --- | --- | 1,89 | down |
| 6122965 | 7361223 | 1772619 | --- | --- | --- | 1,65 | up   |
| 6122970 | 7290793 | 1598636 | --- | --- | --- | 1,34 | up   |
| 6123096 | 7080563 | 1080716 | --- | --- | --- | 1,08 | up   |
| 6123149 | 7142321 | 1231557 | --- | --- | --- | 1,11 | down |
| 6123171 | 7155286 | 1263908 | --- | --- | --- | 1,00 | up   |
| 6123172 | 7258455 | 1518713 | --- | --- | --- | 1,27 | up   |
| 6123192 | 7061550 | 1035290 | --- | --- | --- | 1,06 | down |
| 6123221 | 7037235 | 978575  | --- | --- | --- | 1,43 | down |
| 6123246 | 7121849 | 1181768 | --- | --- | --- | 1,04 | down |
| 6123253 | 7210263 | 1399750 | --- | --- | --- | 1,35 | down |
| 6123406 | 7052933 | 1016214 | --- | --- | --- | 2,17 | up   |
| 6123772 | 7212587 | 1404651 | --- | --- | --- | 1,21 | down |
| 6123843 | 7068942 | 1053385 | --- | --- | --- | 1,10 | up   |
| 6123862 | 7240569 | 1475380 | --- | --- | --- | 1,21 | up   |
| 6123889 | 7062233 | 1037218 | --- | --- | --- | 1,36 | down |
| 6124223 | 7247230 | 1490583 | --- | --- | --- | 1,18 | up   |
| 6124244 | 7067670 | 1050314 | --- | --- | --- | 2,98 | up   |
| 6124250 | 7035525 | 974770  | --- | --- | --- | 1,19 | up   |
| 6124313 | 7136746 | 1217966 | --- | --- | --- | 1,14 | up   |

|         |         |         |     |     |     |      |      |
|---------|---------|---------|-----|-----|-----|------|------|
| 6124317 | 7373678 | 1805882 | --- | --- | --- | 1,26 | up   |
| 6124333 | 7355138 | 1757771 | --- | --- | --- | 1,28 | down |
| 6124368 | 7212587 | 1404656 | --- | --- | --- | 2,21 | up   |
| 6124484 | 7217679 | 1417323 | --- | --- | --- | 1,01 | up   |
| 6124564 | 7240569 | 1475460 | --- | --- | --- | 1,29 | up   |
| 6124708 | 7095041 | 1115195 | --- | --- | --- | 1,17 | down |
| 6124724 | 7230628 | 1448867 | --- | --- | --- | 1,63 | down |
| 6124736 | 7383102 | 1827378 | --- | --- | --- | 1,04 | down |
| 6124753 | 7213908 | 1407697 | --- | --- | --- | 1,03 | down |
| 6124819 | 7349817 | 1744600 | --- | --- | --- | 2,19 | up   |
| 6124857 | 7186240 | 1340827 | --- | --- | --- | 1,01 | up   |
| 6124925 | 7225543 | 1435937 | --- | --- | --- | 1,15 | down |
| 6124958 | 7207093 | 1392161 | --- | --- | --- | 1,01 | down |
| 6124961 | 7268693 | 1544175 | --- | --- | --- | 1,54 | down |
| 6125050 | 7305275 | 1635833 | --- | --- | --- | 1,38 | up   |
| 6125080 | 7307473 | 1641291 | --- | --- | --- | 1,08 | down |
| 6125134 | 7244287 | 1484074 | --- | --- | --- | 1,35 | up   |
| 6125145 | 7147213 | 1243837 | --- | --- | --- | 1,05 | down |
| 6125192 | 7380878 | 1822555 | --- | --- | --- | 1,64 | down |
| 6125431 | 7361042 | 1772263 | --- | --- | --- | 1,22 | down |
| 6125472 | 7295410 | 1609733 | --- | --- | --- | 1,05 | up   |
| 6125556 | 7383586 | 1828424 | --- | --- | --- | 1,64 | down |
| 6125584 | 7236358 | 1464255 | --- | --- | --- | 1,07 | down |
| 6125619 | 7200313 | 1376451 | --- | --- | --- | 1,17 | up   |
| 6125679 | 7330238 | 1695939 | --- | --- | --- | 1,04 | down |
| 6125686 | 7106776 | 1144108 | --- | --- | --- | 1,32 | down |
| 6125715 | 7181169 | 1328104 | --- | --- | --- | 1,33 | up   |
| 6125770 | 7353284 | 1752981 | --- | --- | --- | 1,15 | up   |
| 6125798 | 7231775 | 1452128 | --- | --- | --- | 1,20 | up   |
| 6125803 | 7198210 | 1371003 | --- | --- | --- | 1,14 | down |
| 6125818 | 7279555 | 1571950 | --- | --- | --- | 1,01 | up   |
| 6125881 | 7318651 | 1669073 | --- | --- | --- | 1,00 | up   |
| 6125892 | 7211389 | 1402113 | --- | --- | --- | 1,06 | up   |
| 6125925 | 7347427 | 1738661 | --- | --- | --- | 1,20 | down |
| 6126001 | 7059020 | 1029353 | --- | --- | --- | 1,51 | up   |
| 6126194 | 7061003 | 1033922 | --- | --- | --- | 1,20 | down |
| 6126421 | 7237814 | 1467827 | --- | --- | --- | 1,56 | down |
| 6126457 | 7231653 | 1451877 | --- | --- | --- | 1,01 | down |
| 6126697 | 7205944 | 1389458 | --- | --- | --- | 1,40 | down |
| 6126722 | 7093255 | 1110763 | --- | --- | --- | 1,15 | down |
| 6126728 | 7073950 | 1065859 | --- | --- | --- | 1,11 | up   |
| 6126729 | 7033504 | 969851  | --- | --- | --- | 1,07 | up   |
| 6126748 | 7259807 | 1522248 | --- | --- | --- | 2,00 | down |
| 6126791 | 7261580 | 1526778 | --- | --- | --- | 1,01 | up   |
| 6126798 | 7113483 | 1161007 | --- | --- | --- | 1,04 | up   |
| 6126880 | 7234040 | 1458505 | --- | --- | --- | 1,09 | down |
| 6126881 | 7186240 | 1340824 | --- | --- | --- | 1,09 | up   |
| 6126924 | 7082098 | 1084118 | --- | --- | --- | 1,04 | down |
| 6127011 | 7274780 | 1559244 | --- | --- | --- | 1,27 | down |
| 6127131 | 7231775 | 1452124 | --- | --- | --- | 1,01 | down |
| 6127176 | 7243627 | 1482352 | --- | --- | --- | 1,43 | down |
| 6127411 | 7257893 | 1517473 | --- | --- | --- | 1,19 | down |
| 6127433 | 7059020 | 1029334 | --- | --- | --- | 1,44 | down |
| 6127477 | 7331413 | 1699133 | --- | --- | --- | 1,54 | up   |
| 6127645 | 7333333 | 1703398 | --- | --- | --- | 2,02 | up   |
| 6127654 | 7186305 | 1341004 | --- | --- | --- | 1,65 | down |
| 6127692 | 7346687 | 1736691 | --- | --- | --- | 1,26 | up   |

|         |         |         |     |     |     |      |      |
|---------|---------|---------|-----|-----|-----|------|------|
| 6127750 | 7148741 | 1247856 | --- | --- | --- | 1,03 | down |
| 6127766 | 7127257 | 1194807 | --- | --- | --- | 1,39 | up   |
| 6127771 | 7093296 | 1110892 | --- | --- | --- | 1,37 | down |
| 6127774 | 7353287 | 1753021 | --- | --- | --- | 1,00 | up   |
| 6127787 | 7194540 | 1362112 | --- | --- | --- | 1,14 | up   |
| 6127821 | 7366749 | 1785485 | --- | --- | --- | 1,14 | down |
| 6127875 | 7086672 | 1094350 | --- | --- | --- | 1,38 | down |
| 6127975 | 7255911 | 1512231 | --- | --- | --- | 1,19 | down |
| 6128005 | 7337845 | 1714355 | --- | --- | --- | 2,21 | down |
| 6128031 | 7310851 | 1649634 | --- | --- | --- | 1,01 | up   |
| 6128108 | 7358048 | 1764794 | --- | --- | --- | 1,08 | down |
| 6128136 | 7292701 | 1602961 | --- | --- | --- | 2,42 | down |
| 6128154 | 7108434 | 1148307 | --- | --- | --- | 1,56 | up   |
| 6128199 | 7378809 | 1818116 | --- | --- | --- | 1,04 | down |
| 6128259 | 7152889 | 1257356 | --- | --- | --- | 1,73 | down |
| 6128318 | 7237711 | 1467468 | --- | --- | --- | 1,90 | down |
| 6128345 | 7100523 | 1128876 | --- | --- | --- | 1,03 | up   |
| 6128441 | 7190524 | 1351187 | --- | --- | --- | 1,16 | up   |
| 6128525 | 7370779 | 1798153 | --- | --- | --- | 1,01 | up   |
| 6128530 | 7146542 | 1242295 | --- | --- | --- | 1,40 | down |
| 6128635 | 7196029 | 1365634 | --- | --- | --- | 1,10 | up   |
| 6128723 | 7272431 | 1553895 | --- | --- | --- | 1,21 | up   |
| 6128743 | 7065860 | 1045796 | --- | --- | --- | 2,29 | up   |
| 6128755 | 7125348 | 1190098 | --- | --- | --- | 1,74 | up   |
| 6128790 | 7059584 | 1030546 | --- | --- | --- | 1,24 | down |
| 6128804 | 7344836 | 1732409 | --- | --- | --- | 1,05 | down |
| 6128857 | 7146542 | 1242295 | --- | --- | --- | 1,11 | down |
| 6128889 | 7142321 | 1231484 | --- | --- | --- | 1,12 | down |
| 6129043 | 7058507 | 1028312 | --- | --- | --- | 1,24 | down |
| 6129239 | 7095021 | 1115126 | --- | --- | --- | 1,08 | up   |
| 6129290 | 7112566 | 1158635 | --- | --- | --- | 1,19 | up   |
| 6129329 | 7280743 | 1574505 | --- | --- | --- | 1,19 | up   |
| 6129332 | 7274780 | 1559214 | --- | --- | --- | 2,42 | down |
| 6129339 | 7297589 | 1615661 | --- | --- | --- | 1,03 | up   |
| 6129484 | 7031774 | 964736  | --- | --- | --- | 2,23 | down |
| 6129515 | 7156052 | 1265770 | --- | --- | --- | 1,19 | down |
| 6129548 | 7341546 | 1723955 | --- | --- | --- | 1,03 | down |
| 6129628 | 7259925 | 1522547 | --- | --- | --- | 1,14 | up   |
| 6129716 | 7148741 | 1247869 | --- | --- | --- | 1,10 | up   |
| 6129780 | 7033337 | 969500  | --- | --- | --- | 1,04 | down |
| 6129835 | 7367851 | 1788508 | --- | --- | --- | 1,42 | up   |
| 6130040 | 7030037 | 960717  | --- | --- | --- | 1,09 | down |
| 6130111 | 7064372 | 1042164 | --- | --- | --- | 1,36 | up   |
| 6130127 | 7261580 | 1526811 | --- | --- | --- | 1,23 | up   |
| 6130298 | 7369938 | 1795527 | --- | --- | --- | 1,14 | up   |
| 6130324 | 7217434 | 1416407 | --- | --- | --- | 1,93 | down |
| 6130408 | 7128112 | 1196536 | --- | --- | --- | 2,40 | down |
| 6130475 | 7166867 | 1291313 | --- | --- | --- | 1,75 | down |
| 6130565 | 7195680 | 1364877 | --- | --- | --- | 1,12 | up   |
| 6130570 | 7083533 | 1087308 | --- | --- | --- | 1,02 | down |
| 6130676 | 7374313 | 1807382 | --- | --- | --- | 1,18 | down |
| 6130861 | 7275761 | 1561885 | --- | --- | --- | 1,77 | up   |
| 6130862 | 7221855 | 1427226 | --- | --- | --- | 1,55 | down |
| 6130906 | 7365147 | 1781777 | --- | --- | --- | 1,11 | down |
| 6130993 | 7265259 | 1535439 | --- | --- | --- | 1,23 | down |
| 6131015 | 7261592 | 1526855 | --- | --- | --- | 1,15 | down |
| 6131052 | 7034356 | 972169  | --- | --- | --- | 1,52 | up   |

|         |         |         |     |     |     |      |      |
|---------|---------|---------|-----|-----|-----|------|------|
| 6131087 | 7139026 | 1223504 | --- | --- | --- | 1,14 | down |
| 6131124 | 7297589 | 1615687 | --- | --- | --- | 1,37 | up   |
| 6131252 | 7243627 | 1482361 | --- | --- | --- | 1,24 | down |
| 6131256 | 7142321 | 1231509 | --- | --- | --- | 1,22 | up   |
| 6131259 | 7068259 | 1051651 | --- | --- | --- | 1,49 | up   |
| 6131290 | 7225543 | 1435924 | --- | --- | --- | 1,22 | up   |
| 6131375 | 7330731 | 1697184 | --- | --- | --- | 1,28 | up   |
| 6131388 | 7319609 | 1671206 | --- | --- | --- | 1,56 | down |
| 6131420 | 7374324 | 1807537 | --- | --- | --- | 1,46 | down |
| 6131444 | 7090581 | 1104744 | --- | --- | --- | 1,91 | up   |
| 6131448 | 7146542 | 1242260 | --- | --- | --- | 1,42 | up   |
| 6131450 | 7240641 | 1475740 | --- | --- | --- | 1,01 | down |
| 6131470 | 7330396 | 1696361 | --- | --- | --- | 1,25 | down |
| 6131472 | 7109292 | 1150745 | --- | --- | --- | 1,74 | down |
| 6131488 | 7376073 | 1811712 | --- | --- | --- | 1,02 | up   |
| 6131580 | 7101643 | 1131595 | --- | --- | --- | 1,65 | up   |
| 6131619 | 7358048 | 1764801 | --- | --- | --- | 1,35 | down |
| 6131657 | 7294851 | 1608363 | --- | --- | --- | 1,10 | up   |
| 6131788 | 7247672 | 1491756 | --- | --- | --- | 1,46 | up   |
| 6132048 | 7250671 | 1499014 | --- | --- | --- | 1,74 | down |
| 6132058 | 7365183 | 1781905 | --- | --- | --- | 1,30 | up   |
| 6132229 | 7337425 | 1713199 | --- | --- | --- | 1,03 | up   |
| 6132299 | 7142917 | 1233177 | --- | --- | --- | 1,01 | down |
| 6132333 | 7069830 | 1055648 | --- | --- | --- | 1,08 | down |
| 6132343 | 7197056 | 1367838 | --- | --- | --- | 1,53 | up   |
| 6132481 | 7277719 | 1567088 | --- | --- | --- | 1,14 | up   |
| 6132544 | 7333333 | 1703404 | --- | --- | --- | 1,94 | up   |
| 6132593 | 7355138 | 1757744 | --- | --- | --- | 1,12 | down |
| 6132725 | 7172373 | 1305583 | --- | --- | --- | 1,25 | up   |
| 6132799 | 7337902 | 1714547 | --- | --- | --- | 1,56 | up   |
| 6132808 | 7069721 | 1055314 | --- | --- | --- | 2,65 | up   |
| 6132927 | 7217679 | 1417310 | --- | --- | --- | 1,97 | down |
| 6133093 | 7360486 | 1771013 | --- | --- | --- | 1,21 | down |
| 6133131 | 7132024 | 1206337 | --- | --- | --- | 1,02 | down |
| 6133196 | 7312903 | 1654102 | --- | --- | --- | 1,14 | up   |
| 6133254 | 7344836 | 1732410 | --- | --- | --- | 1,36 | up   |
| 6133273 | 7317088 | 1665022 | --- | --- | --- | 1,13 | up   |
| 6133288 | 7277719 | 1567089 | --- | --- | --- | 1,18 | down |
| 6133306 | 7364346 | 1780043 | --- | --- | --- | 1,44 | down |
| 6133355 | 7184931 | 1337716 | --- | --- | --- | 1,39 | up   |
| 6133473 | 7033616 | 970207  | --- | --- | --- | 1,16 | up   |
| 6133592 | 7098810 | 1124656 | --- | --- | --- | 1,15 | up   |
| 6133597 | 7360325 | 1770490 | --- | --- | --- | 1,32 | down |
| 6133617 | 7243647 | 1482455 | --- | --- | --- | 1,06 | up   |
| 6133713 | 7235794 | 1462897 | --- | --- | --- | 2,10 | up   |
| 6133878 | 7180630 | 1326455 | --- | --- | --- | 1,58 | up   |
| 6133918 | 7265259 | 1535440 | --- | --- | --- | 1,56 | up   |
| 6134076 | 7344530 | 1731568 | --- | --- | --- | 1,03 | down |
| 6134203 | 7095021 | 1115130 | --- | --- | --- | 2,14 | up   |
| 6134220 | 7258455 | 1518709 | --- | --- | --- | 1,15 | down |
| 6134305 | 7078982 | 1077315 | --- | --- | --- | 1,65 | up   |
| 6134326 | 7369712 | 1794834 | --- | --- | --- | 1,77 | up   |
| 6134413 | 7375937 | 1811364 | --- | --- | --- | 1,16 | down |
| 6134490 | 7059020 | 1029340 | --- | --- | --- | 1,50 | up   |
| 6134513 | 7374317 | 1807407 | --- | --- | --- | 1,36 | up   |
| 6134562 | 7118503 | 1173569 | --- | --- | --- | 1,88 | down |
| 6134568 | 7162144 | 1280493 | --- | --- | --- | 2,04 | down |

|         |         |         |     |     |     |      |      |
|---------|---------|---------|-----|-----|-----|------|------|
| 6134608 | 7219624 | 1422101 | --- | --- | --- | 1,82 | up   |
| 6134629 | 7367980 | 1789167 | --- | --- | --- | 1,66 | up   |
| 6134759 | 7377304 | 1814580 | --- | --- | --- | 1,49 | up   |
| 6134776 | 7230886 | 1449525 | --- | --- | --- | 1,05 | down |
| 6134871 | 7237907 | 1468078 | --- | --- | --- | 1,89 | up   |
| 6134878 | 7286807 | 1588783 | --- | --- | --- | 1,45 | down |
| 6134882 | 7149817 | 1250310 | --- | --- | --- | 1,37 | down |
| 6135006 | 7058713 | 1028664 | --- | --- | --- | 1,03 | up   |
| 6135087 | 7243253 | 1481225 | --- | --- | --- | 1,09 | down |
| 6135143 | 7290814 | 1598679 | --- | --- | --- | 1,37 | up   |
| 6135358 | 7259923 | 1522532 | --- | --- | --- | 1,07 | down |
| 6135436 | 7346885 | 1737311 | --- | --- | --- | 1,01 | up   |
| 6135471 | 7093936 | 1112479 | --- | --- | --- | 1,01 | down |
| 6135554 | 7279568 | 1572006 | --- | --- | --- | 1,11 | down |
| 6135666 | 7315206 | 1660011 | --- | --- | --- | 1,60 | up   |
| 6135780 | 7205944 | 1389481 | --- | --- | --- | 1,23 | down |
| 6135815 | 7112566 | 1158625 | --- | --- | --- | 1,38 | up   |
| 6135818 | 7229061 | 1445300 | --- | --- | --- | 1,75 | up   |
| 6135879 | 7260579 | 1524190 | --- | --- | --- | 1,24 | down |
| 6135978 | 7194540 | 1362110 | --- | --- | --- | 1,03 | up   |
| 6136059 | 7095960 | 1117070 | --- | --- | --- | 1,81 | down |
| 6136184 | 7320998 | 1674716 | --- | --- | --- | 1,07 | down |
| 6136227 | 7371001 | 1798849 | --- | --- | --- | 1,14 | down |
| 6136238 | 7128539 | 1197666 | --- | --- | --- | 1,02 | down |
| 6136303 | 7209927 | 1398923 | --- | --- | --- | 1,05 | down |
| 6136348 | 7353382 | 1753229 | --- | --- | --- | 1,89 | down |
| 6136384 | 7179914 | 1324718 | --- | --- | --- | 2,09 | down |
| 6136428 | 7210387 | 1400042 | --- | --- | --- | 1,80 | up   |
| 6136451 | 7166439 | 1290099 | --- | --- | --- | 4,20 | up   |
| 6136526 | 7146872 | 1242914 | --- | --- | --- | 1,06 | down |
| 6136556 | 7211389 | 1402112 | --- | --- | --- | 1,67 | down |
| 6136561 | 7333462 | 1703640 | --- | --- | --- | 1,20 | up   |
| 6136577 | 7074911 | 1068171 | --- | --- | --- | 1,21 | down |
| 6136603 | 7031774 | 964723  | --- | --- | --- | 1,04 | up   |
| 6136719 | 7079238 | 1077819 | --- | --- | --- | 1,17 | down |
| 6136743 | 7243647 | 1482483 | --- | --- | --- | 1,14 | up   |
| 6136749 | 7381330 | 1823646 | --- | --- | --- | 1,53 | down |
| 6136829 | 7112566 | 1158630 | --- | --- | --- | 1,13 | up   |
| 6136858 | 7327169 | 1688466 | --- | --- | --- | 1,14 | down |
| 6136863 | 7127540 | 1195276 | --- | --- | --- | 1,20 | down |
| 6136874 | 7313538 | 1655740 | --- | --- | --- | 1,18 | up   |
| 6136887 | 7383102 | 1827392 | --- | --- | --- | 1,34 | down |
| 6136902 | 7095041 | 1115188 | --- | --- | --- | 1,26 | up   |
| 6136930 | 7352044 | 1750006 | --- | --- | --- | 1,23 | up   |
| 6136938 | 7115963 | 1167069 | --- | --- | --- | 1,03 | up   |
| 6137010 | 7367980 | 1789179 | --- | --- | --- | 1,57 | down |
| 6137033 | 7302327 | 1627675 | --- | --- | --- | 1,46 | up   |
| 6137035 | 7245921 | 1487689 | --- | --- | --- | 1,14 | down |
| 6137129 | 7297589 | 1615662 | --- | --- | --- | 1,08 | up   |
| 6137188 | 7031774 | 964706  | --- | --- | --- | 1,87 | up   |
| 6137257 | 7226277 | 1437992 | --- | --- | --- | 1,07 | down |
| 6137268 | 7086044 | 1092909 | --- | --- | --- | 1,87 | down |
| 6137279 | 7344406 | 1731203 | --- | --- | --- | 1,16 | up   |
| 6137290 | 7286807 | 1588815 | --- | --- | --- | 1,75 | down |
| 6137407 | 7329136 | 1693543 | --- | --- | --- | 1,44 | up   |
| 6137478 | 7368489 | 1791034 | --- | --- | --- | 1,08 | down |
| 6137483 | 7360325 | 1770490 | --- | --- | --- | 1,26 | up   |

|         |         |         |     |     |     |      |      |
|---------|---------|---------|-----|-----|-----|------|------|
| 6137553 | 7267204 | 1539851 | --- | --- | --- | 1,55 | up   |
| 6137573 | 7374324 | 1807535 | --- | --- | --- | 1,12 | down |
| 6137574 | 7072765 | 1062743 | --- | --- | --- | 1,28 | up   |
| 6137632 | 7350993 | 1747503 | --- | --- | --- | 1,16 | up   |
| 6137669 | 7363147 | 1777030 | --- | --- | --- | 1,12 | down |
| 6137762 | 7068259 | 1051597 | --- | --- | --- | 1,87 | up   |
| 6137764 | 7286613 | 1588476 | --- | --- | --- | 3,05 | up   |
| 6137773 | 7180243 | 1325502 | --- | --- | --- | 1,00 | up   |
| 6137814 | 7028278 | 957311  | --- | --- | --- | 1,03 | up   |
| 6137873 | 7146542 | 1242244 | --- | --- | --- | 1,20 | up   |
| 6137904 | 7142915 | 1233093 | --- | --- | --- | 1,03 | up   |
| 6137920 | 7111427 | 1155764 | --- | --- | --- | 1,71 | down |
| 6137994 | 7368555 | 1791241 | --- | --- | --- | 1,29 | up   |
| 6138015 | 7292701 | 1602943 | --- | --- | --- | 1,34 | up   |
| 6138096 | 7189455 | 1348345 | --- | --- | --- | 1,12 | up   |
| 6138174 | 7166867 | 1291301 | --- | --- | --- | 1,59 | down |
| 6138185 | 7350922 | 1747316 | --- | --- | --- | 1,08 | up   |
| 6138194 | 7038530 | 981884  | --- | --- | --- | 1,03 | up   |
| 6138228 | 7376820 | 1813392 | --- | --- | --- | 1,15 | down |
| 6138244 | 7306680 | 1639571 | --- | --- | --- | 1,84 | up   |
| 6138249 | 7211389 | 1402114 | --- | --- | --- | 1,07 | up   |
| 6138255 | 7031662 | 964364  | --- | --- | --- | 1,04 | up   |
| 6138353 | 7162144 | 1280495 | --- | --- | --- | 1,11 | up   |
| 6138496 | 7227474 | 1441156 | --- | --- | --- | 1,21 | up   |
| 6138505 | 7190534 | 1351226 | --- | --- | --- | 1,05 | down |
| 6138543 | 7350886 | 1747146 | --- | --- | --- | 1,64 | down |
| 6138552 | 7124991 | 1189293 | --- | --- | --- | 2,10 | up   |
| 6138565 | 7277719 | 1567080 | --- | --- | --- | 1,01 | down |
| 6138630 | 7320998 | 1674738 | --- | --- | --- | 1,60 | down |
| 6138729 | 7256070 | 1512598 | --- | --- | --- | 1,21 | down |
| 6138734 | 7364346 | 1779965 | --- | --- | --- | 1,74 | down |
| 6138752 | 7239752 | 1473185 | --- | --- | --- | 1,21 | up   |
| 6138820 | 7339379 | 1718337 | --- | --- | --- | 1,03 | up   |
| 6138830 | 7339834 | 1719557 | --- | --- | --- | 1,02 | up   |
| 6138865 | 7359789 | 1769107 | --- | --- | --- | 2,62 | down |
| 6138887 | 7087965 | 1098026 | --- | --- | --- | 2,30 | up   |
| 6138896 | 7033337 | 969494  | --- | --- | --- | 1,22 | up   |
| 6139029 | 7344380 | 1731124 | --- | --- | --- | 1,11 | up   |
| 6139063 | 7340304 | 1720851 | --- | --- | --- | 1,43 | down |
| 6139244 | 7162144 | 1280510 | --- | --- | --- | 1,31 | down |
| 6139307 | 7110401 | 1153075 | --- | --- | --- | 1,09 | up   |
| 6139405 | 7039532 | 984441  | --- | --- | --- | 1,01 | up   |
| 6139421 | 7131372 | 1205039 | --- | --- | --- | 1,15 | up   |
| 6139489 | 7374324 | 1807499 | --- | --- | --- | 1,13 | up   |
| 6139535 | 7227474 | 1441139 | --- | --- | --- | 1,11 | up   |
| 6139624 | 7068259 | 1051611 | --- | --- | --- | 1,26 | down |
| 6139806 | 7297589 | 1615600 | --- | --- | --- | 1,12 | up   |
| 6139814 | 7330731 | 1697174 | --- | --- | --- | 1,11 | down |
| 6139914 | 7172988 | 1307315 | --- | --- | --- | 1,23 | down |
| 6139936 | 7063716 | 1040124 | --- | --- | --- | 1,02 | down |
| 6139946 | 7078666 | 1076526 | --- | --- | --- | 1,25 | down |
| 6139979 | 7311178 | 1650228 | --- | --- | --- | 1,31 | down |
| 6139995 | 7210713 | 1400753 | --- | --- | --- | 1,08 | down |
| 6140062 | 7044988 | 998462  | --- | --- | --- | 1,11 | up   |
| 6140073 | 7063716 | 1040126 | --- | --- | --- | 1,10 | down |
| 6140148 | 7198087 | 1370699 | --- | --- | --- | 1,17 | up   |
| 6140155 | 7168521 | 1295973 | --- | --- | --- | 1,58 | up   |

|         |         |         |     |     |     |      |      |
|---------|---------|---------|-----|-----|-----|------|------|
| 6140166 | 7081487 | 1082703 | --- | --- | --- | 1,09 | up   |
| 6140167 | 7360325 | 1770559 | --- | --- | --- | 1,35 | down |
| 6140202 | 7113483 | 1161018 | --- | --- | --- | 1,13 | up   |
| 6140241 | 7380497 | 1821865 | --- | --- | --- | 1,05 | up   |
| 6140295 | 7068259 | 1051630 | --- | --- | --- | 1,35 | up   |
| 6140329 | 7067670 | 1050303 | --- | --- | --- | 2,33 | up   |
| 6140376 | 7341038 | 1722677 | --- | --- | --- | 1,22 | up   |
| 6140451 | 7033337 | 969483  | --- | --- | --- | 1,14 | down |
| 6140515 | 7216970 | 1415125 | --- | --- | --- | 1,35 | up   |
| 6140581 | 7255120 | 1510371 | --- | --- | --- | 1,05 | down |
| 6140658 | 7264808 | 1534469 | --- | --- | --- | 1,20 | up   |
| 6140677 | 7114274 | 1162811 | --- | --- | --- | 1,33 | down |
| 6140720 | 7088544 | 1099660 | --- | --- | --- | 1,20 | down |
| 6140806 | 7128112 | 1196531 | --- | --- | --- | 1,01 | up   |
| 6140879 | 7121849 | 1181762 | --- | --- | --- | 1,13 | down |
| 6140942 | 7350237 | 1745494 | --- | --- | --- | 1,03 | up   |
| 6140976 | 7378997 | 1818677 | --- | --- | --- | 1,25 | up   |
| 6140977 | 7031774 | 964778  | --- | --- | --- | 1,44 | down |
| 6141012 | 7358859 | 1767016 | --- | --- | --- | 1,30 | up   |
| 6141027 | 7240569 | 1475508 | --- | --- | --- | 1,00 | up   |
| 6141109 | 7088164 | 1098474 | --- | --- | --- | 2,03 | down |
| 6141158 | 7160687 | 1277018 | --- | --- | --- | 1,04 | down |
| 6141169 | 7217747 | 1417502 | --- | --- | --- | 1,46 | down |
| 6141241 | 7256191 | 1512880 | --- | --- | --- | 1,33 | down |
| 6141311 | 7177428 | 1318365 | --- | --- | --- | 1,10 | up   |
| 6141329 | 7380497 | 1821857 | --- | --- | --- | 1,12 | up   |
| 6141354 | 7237814 | 1467830 | --- | --- | --- | 1,14 | up   |
| 6141362 | 7266532 | 1538296 | --- | --- | --- | 1,57 | down |
| 6141388 | 7243647 | 1482467 | --- | --- | --- | 1,10 | up   |
| 6141414 | 7058149 | 1027294 | --- | --- | --- | 1,17 | down |
| 6141433 | 7231958 | 1452576 | --- | --- | --- | 3,10 | up   |
| 6141528 | 7347427 | 1738666 | --- | --- | --- | 1,05 | down |
| 6141555 | 7262114 | 1528016 | --- | --- | --- | 2,57 | down |
| 6141757 | 7383823 | 1828946 | --- | --- | --- | 1,22 | up   |
| 6141761 | 7073950 | 1065922 | --- | --- | --- | 1,33 | up   |
| 6141801 | 7285563 | 1586041 | --- | --- | --- | 1,16 | up   |
| 6141849 | 7193513 | 1359467 | --- | --- | --- | 1,15 | up   |
| 6141982 | 7056333 | 1023681 | --- | --- | --- | 1,05 | up   |
| 6142191 | 7380497 | 1821832 | --- | --- | --- | 1,13 | up   |
| 6142248 | 7052813 | 1015907 | --- | --- | --- | 1,19 | down |
| 6142267 | 7088544 | 1099691 | --- | --- | --- | 1,59 | up   |
| 6142372 | 7167883 | 1294108 | --- | --- | --- | 1,02 | up   |
| 6142446 | 7336579 | 1711006 | --- | --- | --- | 1,22 | up   |
| 6142469 | 7245921 | 1487691 | --- | --- | --- | 2,41 | down |
| 6142552 | 7032558 | 967066  | --- | --- | --- | 1,34 | down |
| 6142565 | 7238115 | 1468559 | --- | --- | --- | 1,14 | up   |
| 6142569 | 7067670 | 1050320 | --- | --- | --- | 2,37 | up   |
| 6142617 | 7029770 | 960147  | --- | --- | --- | 1,30 | up   |
| 6142637 | 7339387 | 1718382 | --- | --- | --- | 1,61 | up   |
| 6142668 | 7212587 | 1404639 | --- | --- | --- | 1,49 | up   |
| 6142849 | 7314270 | 1657742 | --- | --- | --- | 1,11 | up   |
| 6142958 | 7355044 | 1757433 | --- | --- | --- | 1,02 | up   |
| 6143040 | 7212141 | 1403604 | --- | --- | --- | 1,75 | up   |
| 6143123 | 7194400 | 1361751 | --- | --- | --- | 1,14 | up   |
| 6143286 | 7127691 | 1195629 | --- | --- | --- | 1,04 | up   |
| 6143437 | 7320735 | 1674178 | --- | --- | --- | 1,06 | up   |
| 6143445 | 7062436 | 1037701 | --- | --- | --- | 1,03 | up   |

|         |         |         |     |     |     |      |      |
|---------|---------|---------|-----|-----|-----|------|------|
| 6143462 | 7065570 | 1045091 | --- | --- | --- | 1,47 | up   |
| 6143522 | 7358859 | 1766960 | --- | --- | --- | 1,72 | down |
| 6143524 | 7269911 | 1546913 | --- | --- | --- | 1,21 | up   |
| 6143569 | 7340990 | 1722504 | --- | --- | --- | 1,11 | up   |
| 6143584 | 7213908 | 1407673 | --- | --- | --- | 1,15 | down |
| 6143642 | 7322388 | 1677328 | --- | --- | --- | 1,02 | up   |
| 6143697 | 7212141 | 1403604 | --- | --- | --- | 2,75 | up   |
| 6143814 | 7180721 | 1326701 | --- | --- | --- | 1,01 | up   |
| 6143855 | 7034747 | 973193  | --- | --- | --- | 1,20 | up   |
| 6143943 | 7073673 | 1065088 | --- | --- | --- | 1,35 | down |
| 6143951 | 7346229 | 1735598 | --- | --- | --- | 1,46 | down |
| 6144053 | 7258455 | 1518708 | --- | --- | --- | 1,13 | down |
| 6144080 | 7198210 | 1371005 | --- | --- | --- | 1,04 | up   |
| 6144081 | 7198644 | 1372295 | --- | --- | --- | 1,19 | down |
| 6144100 | 7384904 | 1831594 | --- | --- | --- | 1,07 | down |
| 6144200 | 7066035 | 1046200 | --- | --- | --- | 1,23 | up   |
| 6144310 | 7243647 | 1482453 | --- | --- | --- | 1,10 | up   |
| 6144409 | 7374324 | 1807491 | --- | --- | --- | 1,06 | up   |
| 6144533 | 7063716 | 1040125 | --- | --- | --- | 2,15 | down |
| 6144622 | 7034293 | 971976  | --- | --- | --- | 1,02 | up   |
| 6144649 | 7339834 | 1719553 | --- | --- | --- | 1,27 | up   |
| 6144771 | 7139026 | 1223490 | --- | --- | --- | 1,19 | down |
| 6144779 | 7346066 | 1735324 | --- | --- | --- | 2,08 | down |
| 6144790 | 7354935 | 1757098 | --- | --- | --- | 1,86 | up   |
| 6144984 | 7369031 | 1793013 | --- | --- | --- | 1,40 | down |
| 6144987 | 7353287 | 1753024 | --- | --- | --- | 1,33 | up   |
| 6144995 | 7297589 | 1615666 | --- | --- | --- | 1,19 | up   |
| 6145133 | 7208784 | 1396131 | --- | --- | --- | 1,05 | up   |
| 6145138 | 7278010 | 1568048 | --- | --- | --- | 1,48 | down |
| 6145244 | 7274892 | 1559579 | --- | --- | --- | 1,29 | down |
| 6145344 | 7186464 | 1341356 | --- | --- | --- | 1,35 | down |
| 6145392 | 7382499 | 1826256 | --- | --- | --- | 1,27 | up   |
| 6145506 | 7376820 | 1813453 | --- | --- | --- | 1,44 | up   |
| 6145517 | 7381330 | 1823636 | --- | --- | --- | 1,47 | down |
| 6145632 | 7094139 | 1112907 | --- | --- | --- | 1,63 | up   |
| 6145648 | 7383586 | 1828437 | --- | --- | --- | 1,17 | up   |
| 6145764 | 7097454 | 1120885 | --- | --- | --- | 1,40 | down |
| 6145814 | 7286807 | 1588802 | --- | --- | --- | 1,47 | down |
| 6145853 | 7313841 | 1656707 | --- | --- | --- | 1,07 | up   |
| 6145893 | 7130917 | 1203924 | --- | --- | --- | 1,14 | up   |
| 6145960 | 7098810 | 1124657 | --- | --- | --- | 1,11 | up   |
| 6145979 | 7071969 | 1060903 | --- | --- | --- | 1,08 | up   |
| 6146085 | 7143455 | 1234730 | --- | --- | --- | 1,00 | up   |
| 6146086 | 7068259 | 1051633 | --- | --- | --- | 1,45 | down |
| 6146172 | 7231152 | 1450263 | --- | --- | --- | 2,11 | up   |
| 6146178 | 7156052 | 1265753 | --- | --- | --- | 1,78 | down |
| 6146227 | 7306330 | 1638520 | --- | --- | --- | 1,85 | up   |
| 6146230 | 7293922 | 1605963 | --- | --- | --- | 1,05 | up   |
| 6146257 | 7294686 | 1607849 | --- | --- | --- | 1,11 | up   |
| 6146323 | 7149817 | 1250316 | --- | --- | --- | 1,18 | down |
| 6146327 | 7039725 | 984811  | --- | --- | --- | 1,73 | up   |
| 6146426 | 7337845 | 1714347 | --- | --- | --- | 1,21 | down |
| 6146431 | 7289382 | 1595211 | --- | --- | --- | 1,03 | down |
| 6146443 | 7240569 | 1475314 | --- | --- | --- | 1,03 | up   |
| 6146466 | 7274780 | 1559210 | --- | --- | --- | 2,09 | down |
| 6146483 | 7062436 | 1037671 | --- | --- | --- | 1,00 | up   |
| 6146605 | 7182056 | 1330579 | --- | --- | --- | 1,01 | down |



|         |         |         |     |     |     |      |      |
|---------|---------|---------|-----|-----|-----|------|------|
| 6146645 | 7341274 | 1723380 | --- | --- | --- | 1,01 | up   |
| 6146655 | 7146872 | 1242907 | --- | --- | --- | 1,09 | down |
| 6146779 | 7120235 | 1177953 | --- | --- | --- | 1,30 | down |
| 6146817 | 7260488 | 1523933 | --- | --- | --- | 1,21 | up   |
| 6146818 | 7169732 | 1298701 | --- | --- | --- | 1,14 | up   |
| 6146877 | 7337425 | 1713175 | --- | --- | --- | 1,05 | down |
| 6146886 | 7050384 | 1010451 | --- | --- | --- | 1,08 | up   |
| 6146976 | 7337224 | 1712618 | --- | --- | --- | 1,37 | up   |
| 6146997 | 7336931 | 1711861 | --- | --- | --- | 1,31 | up   |
| 6147003 | 7255911 | 1512229 | --- | --- | --- | 1,19 | up   |
| 6147034 | 7374324 | 1807455 | --- | --- | --- | 1,16 | up   |
| 6147094 | 7266530 | 1538284 | --- | --- | --- | 1,35 | up   |
| 6147374 | 7370412 | 1796836 | --- | --- | --- | 1,42 | down |
| 6147429 | 7210263 | 1399744 | --- | --- | --- | 1,32 | up   |
| 6147459 | 7156052 | 1265755 | --- | --- | --- | 1,25 | down |
| 6147526 | 7255517 | 1511342 | --- | --- | --- | 2,05 | up   |
| 6147580 | 7252339 | 1503299 | --- | --- | --- | 1,04 | down |
| 6147604 | 7341646 | 1724194 | --- | --- | --- | 1,06 | down |
| 6147637 | 7282927 | 1580007 | --- | --- | --- | 1,12 | down |
| 6147643 | 7186464 | 1341367 | --- | --- | --- | 1,56 | up   |
| 6147645 | 7092549 | 1109170 | --- | --- | --- | 1,20 | down |
| 6147702 | 7149817 | 1250317 | --- | --- | --- | 1,87 | down |
| 6147810 | 7121074 | 1179890 | --- | --- | --- | 1,82 | down |
| 6147941 | 7219729 | 1422379 | --- | --- | --- | 1,15 | up   |
| 6147989 | 7042382 | 991293  | --- | --- | --- | 1,11 | down |
| 6148050 | 7223395 | 1431088 | --- | --- | --- | 1,08 | up   |
| 6148089 | 7337425 | 1713221 | --- | --- | --- | 1,03 | up   |
| 6148188 | 7240641 | 1475744 | --- | --- | --- | 1,00 | up   |
| 6148208 | 7360486 | 1770978 | --- | --- | --- | 1,64 | up   |
| 6148226 | 7064134 | 1041447 | --- | --- | --- | 1,14 | down |
| 6148227 | 7050716 | 1011223 | --- | --- | --- | 1,61 | down |
| 6148257 | 7041609 | 989586  | --- | --- | --- | 1,02 | up   |
| 6148325 | 7365147 | 1781755 | --- | --- | --- | 1,01 | up   |
| 6148350 | 7089080 | 1101149 | --- | --- | --- | 1,04 | down |
| 6148366 | 7069721 | 1055296 | --- | --- | --- | 1,09 | down |
| 6148402 | 7263652 | 1531627 | --- | --- | --- | 1,05 | up   |
| 6148408 | 7139825 | 1225348 | --- | --- | --- | 1,09 | down |
| 6148467 | 7166867 | 1291334 | --- | --- | --- | 1,22 | up   |
| 6148535 | 7061948 | 1036374 | --- | --- | --- | 2,11 | down |
| 6148685 | 7320735 | 1674190 | --- | --- | --- | 1,00 | down |
| 6148698 | 7068413 | 1051951 | --- | --- | --- | 1,80 | up   |
| 6148777 | 7072765 | 1062736 | --- | --- | --- | 1,44 | up   |
| 6148894 | 7132125 | 1206630 | --- | --- | --- | 1,32 | down |
| 6148933 | 7353284 | 1752984 | --- | --- | --- | 1,26 | up   |
| 6149074 | 7030037 | 960708  | --- | --- | --- | 1,14 | down |
| 6149126 | 7308262 | 1643187 | --- | --- | --- | 1,51 | down |
| 6149229 | 7319259 | 1670394 | --- | --- | --- | 1,50 | up   |
| 6149287 | 7211389 | 1402118 | --- | --- | --- | 2,32 | up   |
| 6149366 | 7341274 | 1723377 | --- | --- | --- | 1,04 | up   |
| 6149459 | 7118356 | 1173130 | --- | --- | --- | 1,07 | down |
| 6149545 | 7264085 | 1532720 | --- | --- | --- | 1,68 | down |
| 6149667 | 7035525 | 974780  | --- | --- | --- | 1,08 | down |
| 6149713 | 7071292 | 1059449 | --- | --- | --- | 1,49 | up   |
| 6149788 | 7136142 | 1216416 | --- | --- | --- | 1,59 | up   |
| 6149868 | 7191983 | 1355153 | --- | --- | --- | 1,28 | up   |
| 6149986 | 7317204 | 1665394 | --- | --- | --- | 1,36 | down |
| 6150002 | 7368004 | 1789333 | --- | --- | --- | 1,57 | down |

|         |         |         |     |     |     |      |      |
|---------|---------|---------|-----|-----|-----|------|------|
| 6150120 | 7147213 | 1243829 | --- | --- | --- | 1,57 | down |
| 6150345 | 7309738 | 1646959 | --- | --- | --- | 1,58 | down |
| 6150377 | 7069830 | 1055592 | --- | --- | --- | 1,26 | down |
| 6150378 | 7083031 | 1086290 | --- | --- | --- | 1,36 | down |
| 6150553 | 7121074 | 1179920 | --- | --- | --- | 1,24 | up   |
| 6150584 | 7211363 | 1402047 | --- | --- | --- | 1,52 | up   |
| 6150628 | 7117951 | 1172068 | --- | --- | --- | 1,38 | up   |
| 6150631 | 7060195 | 1031960 | --- | --- | --- | 1,18 | down |
| 6150738 | 7115507 | 1165970 | --- | --- | --- | 2,15 | down |
| 6150811 | 7086966 | 1095287 | --- | --- | --- | 2,67 | up   |
| 6150847 | 7182056 | 1330579 | --- | --- | --- | 1,05 | down |
| 6150885 | 7144389 | 1236778 | --- | --- | --- | 1,05 | up   |
| 6150896 | 7350237 | 1745493 | --- | --- | --- | 1,08 | down |
| 6150908 | 7217650 | 1417171 | --- | --- | --- | 1,04 | up   |
| 6150993 | 7049308 | 1008108 | --- | --- | --- | 1,60 | down |
| 6151097 | 7248790 | 1494508 | --- | --- | --- | 1,17 | up   |
| 6151214 | 7120468 | 1178510 | --- | --- | --- | 2,20 | down |
| 6151263 | 7280743 | 1574556 | --- | --- | --- | 2,40 | up   |
| 6151323 | 7218728 | 1419927 | --- | --- | --- | 1,20 | up   |
| 6151332 | 7203041 | 1382733 | --- | --- | --- | 2,67 | down |
| 6151370 | 7181169 | 1328103 | --- | --- | --- | 1,30 | up   |
| 6151432 | 7349313 | 1743119 | --- | --- | --- | 1,55 | down |
| 6151450 | 7260066 | 1522899 | --- | --- | --- | 1,12 | up   |
| 6151594 | 7221855 | 1427225 | --- | --- | --- | 1,48 | down |
| 6151663 | 7237992 | 1468288 | --- | --- | --- | 1,47 | down |
| 6151685 | 7025310 | 949236  | --- | --- | --- | 1,07 | down |
| 6151707 | 7240641 | 1475739 | --- | --- | --- | 1,28 | up   |
| 6151714 | 7336931 | 1711870 | --- | --- | --- | 1,27 | down |
| 6151766 | 7086044 | 1092936 | --- | --- | --- | 1,58 | down |
| 6151776 | 7190844 | 1352139 | --- | --- | --- | 1,18 | up   |
| 6151821 | 7261580 | 1526786 | --- | --- | --- | 1,29 | up   |
| 6151916 | 7340673 | 1721711 | --- | --- | --- | 1,18 | up   |
| 6152082 | 7195680 | 1364867 | --- | --- | --- | 1,03 | down |
| 6152188 | 7365183 | 1781918 | --- | --- | --- | 1,85 | down |
| 6152212 | 7370446 | 1797009 | --- | --- | --- | 1,31 | down |
| 6152253 | 7100523 | 1128875 | --- | --- | --- | 1,11 | down |
| 6152305 | 7330582 | 1696871 | --- | --- | --- | 2,14 | up   |
| 6152306 | 7376073 | 1811707 | --- | --- | --- | 1,32 | up   |
| 6152328 | 7335637 | 1708478 | --- | --- | --- | 2,21 | down |
| 6152425 | 7255120 | 1510375 | --- | --- | --- | 1,25 | up   |
| 6152646 | 7377304 | 1814574 | --- | --- | --- | 1,04 | up   |
| 6152723 | 7176275 | 1315351 | --- | --- | --- | 1,13 | up   |
| 6152775 | 7154655 | 1262334 | --- | --- | --- | 2,29 | up   |
| 6152828 | 7116540 | 1168636 | --- | --- | --- | 1,47 | down |
| 6152867 | 7340990 | 1722503 | --- | --- | --- | 1,13 | up   |
| 6152899 | 7331413 | 1699139 | --- | --- | --- | 1,05 | up   |
| 6153022 | 7141456 | 1229585 | --- | --- | --- | 1,23 | up   |
| 6153055 | 7254209 | 1508013 | --- | --- | --- | 3,15 | up   |
| 6153465 | 7353224 | 1752672 | --- | --- | --- | 1,10 | down |
| 6153689 | 7189184 | 1347604 | --- | --- | --- | 1,28 | down |
| 6153724 | 7246823 | 1489671 | --- | --- | --- | 1,10 | up   |
| 6153765 | 7231484 | 1451368 | --- | --- | --- | 1,04 | down |
| 6153917 | 7132715 | 1207964 | --- | --- | --- | 1,32 | down |
| 6153936 | 7377791 | 1815990 | --- | --- | --- | 1,03 | up   |
| 6154012 | 7284901 | 1584808 | --- | --- | --- | 1,55 | down |
| 6154056 | 7252877 | 1504768 | --- | --- | --- | 1,55 | up   |
| 6154097 | 7209811 | 1398673 | --- | --- | --- | 1,27 | down |

|         |         |         |     |     |     |      |      |
|---------|---------|---------|-----|-----|-----|------|------|
| 6154183 | 7217434 | 1416385 | --- | --- | --- | 1,39 | down |
| 6154196 | 7231655 | 1451915 | --- | --- | --- | 2,63 | down |
| 6154233 | 7127801 | 1195861 | --- | --- | --- | 2,38 | down |
| 6154264 | 7216676 | 1414429 | --- | --- | --- | 4,19 | down |
| 6154341 | 7356115 | 1760135 | --- | --- | --- | 1,03 | up   |
| 6154350 | 7279568 | 1572011 | --- | --- | --- | 1,29 | down |
| 6154395 | 7091439 | 1106625 | --- | --- | --- | 1,05 | down |
| 6154449 | 7232709 | 1454524 | --- | --- | --- | 1,06 | down |
| 6154476 | 7288077 | 1591945 | --- | --- | --- | 1,12 | up   |
| 6154515 | 7337224 | 1712622 | --- | --- | --- | 1,00 | up   |
| 6154598 | 7364346 | 1780043 | --- | --- | --- | 1,26 | down |
| 6154625 | 7292869 | 1603424 | --- | --- | --- | 2,01 | up   |
| 6154703 | 7116023 | 1167289 | --- | --- | --- | 1,02 | down |
| 6154854 | 7241995 | 1478326 | --- | --- | --- | 1,05 | down |
| 6154901 | 7123421 | 1185842 | --- | --- | --- | 1,61 | up   |
| 6154907 | 7131372 | 1205027 | --- | --- | --- | 1,23 | down |
| 6154957 | 7162144 | 1280517 | --- | --- | --- | 1,55 | up   |
| 6154966 | 7306330 | 1638524 | --- | --- | --- | 1,22 | down |
| 6154979 | 7213294 | 1406094 | --- | --- | --- | 1,01 | up   |
| 6155011 | 7368489 | 1791032 | --- | --- | --- | 1,00 | up   |
| 6155051 | 7112566 | 1158635 | --- | --- | --- | 1,14 | down |
| 6155055 | 7031618 | 964199  | --- | --- | --- | 2,73 | down |
| 6155083 | 7314270 | 1657741 | --- | --- | --- | 1,28 | down |
| 6155148 | 7330238 | 1695954 | --- | --- | --- | 1,56 | up   |
| 6155169 | 7088164 | 1098492 | --- | --- | --- | 2,64 | up   |
| 6155320 | 7128539 | 1197667 | --- | --- | --- | 2,25 | up   |
| 6155396 | 7117526 | 1171034 | --- | --- | --- | 1,23 | up   |
| 6155464 | 7088544 | 1099701 | --- | --- | --- | 1,38 | down |
| 6155501 | 7033337 | 969501  | --- | --- | --- | 1,07 | down |
| 6155758 | 7048014 | 1005624 | --- | --- | --- | 2,17 | up   |
| 6155801 | 7106752 | 1144049 | --- | --- | --- | 1,05 | up   |
| 6155818 | 7063716 | 1040125 | --- | --- | --- | 1,31 | up   |
| 6155840 | 7373633 | 1805705 | --- | --- | --- | 1,04 | up   |
| 6156006 | 7209927 | 1398924 | --- | --- | --- | 1,46 | up   |
| 6156105 | 7128112 | 1196566 | --- | --- | --- | 1,16 | up   |
| 6156370 | 7312250 | 1652642 | --- | --- | --- | 1,21 | down |
| 6156412 | 7067089 | 1048925 | --- | --- | --- | 1,16 | up   |
| 6156437 | 7380878 | 1822552 | --- | --- | --- | 1,28 | up   |
| 6156450 | 7208784 | 1396095 | --- | --- | --- | 1,28 | down |
| 6156538 | 7147416 | 1244434 | --- | --- | --- | 1,09 | down |
| 6156741 | 7162177 | 1280576 | --- | --- | --- | 1,09 | up   |
| 6156751 | 7108974 | 1149800 | --- | --- | --- | 1,44 | down |
| 6156854 | 7240641 | 1475741 | --- | --- | --- | 1,21 | up   |
| 6156857 | 7374324 | 1807478 | --- | --- | --- | 1,16 | up   |
| 6156882 | 7032204 | 966175  | --- | --- | --- | 1,15 | down |
| 6156894 | 7068259 | 1051621 | --- | --- | --- | 1,45 | down |
| 6156914 | 7155286 | 1263839 | --- | --- | --- | 2,37 | up   |
| 6156966 | 7228530 | 1443902 | --- | --- | --- | 1,11 | up   |
| 6157008 | 7261019 | 1525281 | --- | --- | --- | 1,91 | down |
| 6157112 | 7081487 | 1082709 | --- | --- | --- | 1,54 | down |
| 6157134 | 7202749 | 1382124 | --- | --- | --- | 1,01 | down |
| 6157136 | 7035525 | 974786  | --- | --- | --- | 1,51 | up   |
| 6157189 | 7088489 | 1099523 | --- | --- | --- | 1,20 | down |
| 6157205 | 7131119 | 1204442 | --- | --- | --- | 1,18 | up   |
| 6157259 | 7341274 | 1723401 | --- | --- | --- | 1,01 | up   |
| 6157374 | 7053874 | 1018327 | --- | --- | --- | 1,76 | up   |
| 6157399 | 7199743 | 1375190 | --- | --- | --- | 1,35 | up   |

|         |         |         |     |     |     |      |      |
|---------|---------|---------|-----|-----|-----|------|------|
| 6157626 | 7146872 | 1242906 | --- | --- | --- | 1,36 | up   |
| 6157631 | 7153136 | 1258021 | --- | --- | --- | 1,14 | up   |
| 6157752 | 7072225 | 1061405 | --- | --- | --- | 1,64 | up   |
| 6157756 | 7371228 | 1799448 | --- | --- | --- | 1,23 | down |
| 6157823 | 7208784 | 1396149 | --- | --- | --- | 1,19 | down |
| 6157900 | 7344702 | 1732142 | --- | --- | --- | 1,05 | up   |
| 6157945 | 7358623 | 1766242 | --- | --- | --- | 1,00 | down |
| 6158169 | 7128112 | 1196565 | --- | --- | --- | 1,23 | up   |
| 6158172 | 7341274 | 1723389 | --- | --- | --- | 1,05 | down |
| 6158193 | 7041609 | 989553  | --- | --- | --- | 1,46 | down |
| 6158219 | 7131718 | 1205744 | --- | --- | --- | 1,09 | down |
| 6158227 | 7326271 | 1686469 | --- | --- | --- | 1,50 | up   |
| 6158273 | 7210263 | 1399766 | --- | --- | --- | 1,48 | up   |
| 6158360 | 7342356 | 1725875 | --- | --- | --- | 1,33 | down |
| 6158373 | 7368005 | 1789342 | --- | --- | --- | 1,05 | up   |
| 6158473 | 7222741 | 1429364 | --- | --- | --- | 1,22 | down |
| 6158520 | 7349817 | 1744588 | --- | --- | --- | 1,17 | up   |
| 6158621 | 7366749 | 1785516 | --- | --- | --- | 1,27 | up   |
| 6158640 | 7349817 | 1744596 | --- | --- | --- | 1,64 | up   |
| 6158699 | 7361881 | 1773967 | --- | --- | --- | 1,29 | up   |
| 6158716 | 7231775 | 1452126 | --- | --- | --- | 1,08 | up   |
| 6158767 | 7029770 | 960152  | --- | --- | --- | 1,24 | down |
| 6158855 | 7374324 | 1807529 | --- | --- | --- | 1,04 | up   |
| 6158862 | 7052338 | 1014662 | --- | --- | --- | 1,38 | down |
| 6158882 | 7142321 | 1231563 | --- | --- | --- | 1,12 | up   |
| 6158888 | 7069253 | 1054160 | --- | --- | --- | 1,39 | down |
| 6158905 | 7115362 | 1165599 | --- | --- | --- | 1,08 | up   |
| 6159009 | 7126400 | 1192534 | --- | --- | --- | 1,25 | down |
| 6159054 | 7244288 | 1484097 | --- | --- | --- | 1,09 | down |
| 6159088 | 7140834 | 1228016 | --- | --- | --- | 1,42 | down |
| 6159295 | 7098867 | 1124961 | --- | --- | --- | 1,16 | down |
| 6159318 | 7100523 | 1128919 | --- | --- | --- | 1,45 | up   |
| 6159407 | 7366728 | 1785433 | --- | --- | --- | 1,68 | down |
| 6159478 | 7365147 | 1781767 | --- | --- | --- | 1,03 | up   |
| 6159503 | 7219624 | 1422143 | --- | --- | --- | 1,11 | down |
| 6159514 | 7292517 | 1602555 | --- | --- | --- | 1,21 | up   |
| 6159584 | 7058507 | 1028299 | --- | --- | --- | 1,07 | up   |
| 6159638 | 7193403 | 1359190 | --- | --- | --- | 1,10 | down |
| 6159649 | 7253408 | 1505943 | --- | --- | --- | 1,65 | up   |
| 6159757 | 7247976 | 1492461 | --- | --- | --- | 1,08 | up   |
| 6159796 | 7059766 | 1030972 | --- | --- | --- | 1,09 | up   |
| 6159918 | 7207069 | 1392033 | --- | --- | --- | 1,14 | up   |
| 6160108 | 7196006 | 1365569 | --- | --- | --- | 1,21 | up   |
| 6160163 | 7358859 | 1766982 | --- | --- | --- | 1,62 | up   |
| 6160200 | 7076236 | 1071238 | --- | --- | --- | 1,45 | down |
| 6160222 | 7080476 | 1080411 | --- | --- | --- | 1,78 | up   |
| 6160287 | 7235074 | 1460999 | --- | --- | --- | 2,13 | up   |
| 6160296 | 7198210 | 1370974 | --- | --- | --- | 1,10 | up   |
| 6160315 | 7336854 | 1711688 | --- | --- | --- | 2,02 | up   |
| 6160325 | 7322388 | 1677318 | --- | --- | --- | 1,33 | down |
| 6160336 | 7302860 | 1629013 | --- | --- | --- | 1,10 | down |
| 6160372 | 7059971 | 1031472 | --- | --- | --- | 1,13 | up   |
| 6160386 | 7181001 | 1327593 | --- | --- | --- | 1,02 | up   |
| 6160574 | 7064134 | 1041466 | --- | --- | --- | 1,44 | down |
| 6160595 | 7378981 | 1818552 | --- | --- | --- | 1,18 | up   |
| 6160777 | 7280743 | 1574527 | --- | --- | --- | 1,59 | down |
| 6160821 | 7337224 | 1712622 | --- | --- | --- | 1,20 | up   |

|         |         |         |     |     |     |      |      |
|---------|---------|---------|-----|-----|-----|------|------|
| 6160897 | 7258455 | 1518736 | --- | --- | --- | 1,08 | up   |
| 6161127 | 7148978 | 1248459 | --- | --- | --- | 1,48 | up   |
| 6161142 | 7071714 | 1060350 | --- | --- | --- | 4,09 | down |
| 6161152 | 7281577 | 1576879 | --- | --- | --- | 1,35 | up   |
| 6161189 | 7363674 | 1778407 | --- | --- | --- | 1,61 | down |
| 6161428 | 7067670 | 1050315 | --- | --- | --- | 1,72 | up   |
| 6161506 | 7369400 | 1793984 | --- | --- | --- | 2,46 | down |
| 6161523 | 7039532 | 984441  | --- | --- | --- | 1,21 | down |
| 6161548 | 7317708 | 1666841 | --- | --- | --- | 1,03 | down |
| 6161573 | 7142416 | 1231814 | --- | --- | --- | 3,79 | up   |
| 6161584 | 7143455 | 1234737 | --- | --- | --- | 1,09 | down |
| 6161609 | 7035525 | 974790  | --- | --- | --- | 1,32 | down |
| 6161669 | 7039532 | 984426  | --- | --- | --- | 1,17 | up   |
| 6161862 | 7079600 | 1078635 | --- | --- | --- | 1,28 | up   |
| 6162024 | 7155866 | 1265318 | --- | --- | --- | 1,01 | up   |
| 6162225 | 7374324 | 1807462 | --- | --- | --- | 1,13 | down |
| 6162230 | 7340757 | 1721879 | --- | --- | --- | 1,04 | up   |
| 6162326 | 7186443 | 1341267 | --- | --- | --- | 1,01 | down |
| 6162370 | 7039532 | 984424  | --- | --- | --- | 1,21 | down |
| 6162531 | 7083030 | 1086269 | --- | --- | --- | 1,05 | up   |
| 6162597 | 7197056 | 1367844 | --- | --- | --- | 1,27 | up   |
| 6162630 | 7067828 | 1050785 | --- | --- | --- | 1,44 | up   |
| 6162721 | 7353232 | 1752828 | --- | --- | --- | 1,71 | down |
| 6162767 | 7376566 | 1812881 | --- | --- | --- | 1,15 | down |
| 6162778 | 7194400 | 1361756 | --- | --- | --- | 1,23 | down |
| 6162882 | 7131718 | 1205750 | --- | --- | --- | 1,00 | down |
| 6162903 | 7334855 | 1706941 | --- | --- | --- | 1,48 | up   |
| 6163033 | 7225213 | 1435122 | --- | --- | --- | 1,06 | down |
| 6163059 | 7230886 | 1449533 | --- | --- | --- | 1,12 | down |
| 6163077 | 7355138 | 1757757 | --- | --- | --- | 1,06 | up   |
| 6163206 | 7142081 | 1230984 | --- | --- | --- | 1,02 | down |
| 6163285 | 7108434 | 1148314 | --- | --- | --- | 1,24 | up   |
| 6163417 | 7371001 | 1798849 | --- | --- | --- | 1,02 | down |
| 6163465 | 7034293 | 971865  | --- | --- | --- | 1,34 | down |
| 6163469 | 7130030 | 1201367 | --- | --- | --- | 1,04 | up   |
| 6163534 | 7165644 | 1288026 | --- | --- | --- | 1,04 | up   |
| 6163535 | 7055876 | 1022458 | --- | --- | --- | 1,67 | down |
| 6163560 | 7088544 | 1099673 | --- | --- | --- | 1,03 | up   |
| 6163573 | 7088538 | 1099631 | --- | --- | --- | 1,06 | up   |
| 6163576 | 7056333 | 1023680 | --- | --- | --- | 1,34 | up   |
| 6163627 | 7149994 | 1250639 | --- | --- | --- | 1,67 | down |
| 6163649 | 7030454 | 961552  | --- | --- | --- | 1,30 | up   |
| 6163713 | 7207093 | 1392105 | --- | --- | --- | 1,02 | up   |
| 6163844 | 7263248 | 1530615 | --- | --- | --- | 1,47 | down |
| 6163887 | 7339379 | 1718357 | --- | --- | --- | 1,15 | up   |
| 6163901 | 7113083 | 1159979 | --- | --- | --- | 1,07 | up   |
| 6163905 | 7260066 | 1522894 | --- | --- | --- | 1,03 | down |
| 6164040 | 7279303 | 1571206 | --- | --- | --- | 1,70 | down |
| 6164111 | 7166855 | 1291260 | --- | --- | --- | 1,22 | up   |
| 6164197 | 7182056 | 1330579 | --- | --- | --- | 1,02 | up   |
| 6164246 | 7357026 | 1762227 | --- | --- | --- | 1,08 | up   |
| 6164257 | 7098411 | 1123703 | --- | --- | --- | 1,11 | up   |
| 6164438 | 7190242 | 1350307 | --- | --- | --- | 1,70 | up   |
| 6164450 | 7211690 | 1402643 | --- | --- | --- | 1,05 | down |
| 6164463 | 7088544 | 1099684 | --- | --- | --- | 1,23 | up   |
| 6164471 | 7295652 | 1610302 | --- | --- | --- | 1,34 | up   |
| 6164474 | 7240641 | 1475779 | --- | --- | --- | 1,07 | down |

|         |         |         |     |     |     |      |      |
|---------|---------|---------|-----|-----|-----|------|------|
| 6164502 | 7306330 | 1638558 | --- | --- | --- | 1,16 | down |
| 6164511 | 7269763 | 1546533 | --- | --- | --- | 1,08 | up   |
| 6164521 | 7269911 | 1546920 | --- | --- | --- | 1,11 | down |
| 6164522 | 7221443 | 1426312 | --- | --- | --- | 1,32 | down |
| 6164544 | 7033504 | 969860  | --- | --- | --- | 1,37 | up   |
| 6164577 | 7214605 | 1409351 | --- | --- | --- | 1,65 | down |
| 6164611 | 7193403 | 1359188 | --- | --- | --- | 1,06 | down |
| 6164614 | 7100523 | 1128964 | --- | --- | --- | 1,96 | up   |
| 6164733 | 7353232 | 1752848 | --- | --- | --- | 1,09 | up   |
| 6164740 | 7344530 | 1731559 | --- | --- | --- | 1,92 | up   |
| 6164848 | 7208330 | 1395091 | --- | --- | --- | 1,34 | down |
| 6164874 | 7068413 | 1051951 | --- | --- | --- | 2,10 | down |
| 6164926 | 7273251 | 1555953 | --- | --- | --- | 1,12 | down |
| 6165047 | 7190844 | 1352145 | --- | --- | --- | 1,03 | down |
| 6165160 | 7073928 | 1065780 | --- | --- | --- | 1,43 | up   |
| 6165192 | 7344406 | 1731225 | --- | --- | --- | 1,79 | down |
| 6165207 | 7240569 | 1475381 | --- | --- | --- | 1,06 | down |
| 6165257 | 7118503 | 1173581 | --- | --- | --- | 1,47 | down |
| 6165276 | 7330238 | 1695947 | --- | --- | --- | 1,12 | up   |
| 6165406 | 7238414 | 1469559 | --- | --- | --- | 1,37 | down |
| 6165408 | 7307473 | 1641292 | --- | --- | --- | 1,29 | up   |
| 6165475 | 7088544 | 1099699 | --- | --- | --- | 1,10 | down |
| 6165502 | 7162144 | 1280499 | --- | --- | --- | 1,31 | up   |
| 6165523 | 7058149 | 1027266 | --- | --- | --- | 1,22 | up   |
| 6165532 | 7307473 | 1641266 | --- | --- | --- | 1,05 | up   |
| 6165542 | 7069142 | 1053878 | --- | --- | --- | 1,00 | down |
| 6165577 | 7143455 | 1234720 | --- | --- | --- | 1,08 | up   |
| 6165613 | 7070869 | 1058491 | --- | --- | --- | 1,22 | up   |
| 6165668 | 7264797 | 1534422 | --- | --- | --- | 1,15 | down |
| 6165696 | 7097485 | 1120939 | --- | --- | --- | 1,22 | down |
| 6165764 | 7073569 | 1064738 | --- | --- | --- | 2,04 | up   |
| 6165915 | 7364346 | 1780014 | --- | --- | --- | 1,21 | up   |
| 6165949 | 7213945 | 1407833 | --- | --- | --- | 1,22 | up   |
| 6166085 | 7040442 | 986561  | --- | --- | --- | 1,31 | down |
| 6166362 | 7252283 | 1503112 | --- | --- | --- | 2,85 | up   |
| 6166444 | 7198210 | 1371008 | --- | --- | --- | 1,62 | down |
| 6166476 | 7205944 | 1389458 | --- | --- | --- | 1,19 | down |
| 6166515 | 7110401 | 1153070 | --- | --- | --- | 1,95 | down |
| 6166518 | 7092549 | 1109152 | --- | --- | --- | 1,21 | down |
| 6166764 | 7280982 | 1575267 | --- | --- | --- | 1,20 | down |
| 6166801 | 7337224 | 1712603 | --- | --- | --- | 2,44 | down |
| 6166848 | 7367946 | 1788962 | --- | --- | --- | 1,22 | down |
| 6166943 | 7258784 | 1519673 | --- | --- | --- | 2,49 | up   |
| 6166999 | 7061550 | 1035280 | --- | --- | --- | 1,19 | down |
| 6167018 | 7374324 | 1807525 | --- | --- | --- | 1,14 | down |
| 6167137 | 7247512 | 1491211 | --- | --- | --- | 1,07 | up   |
| 6167162 | 7217679 | 1417293 | --- | --- | --- | 1,19 | up   |
| 6167207 | 7243253 | 1481226 | --- | --- | --- | 1,00 | down |
| 6167250 | 7252877 | 1504770 | --- | --- | --- | 2,35 | up   |
| 6167329 | 7330396 | 1696377 | --- | --- | --- | 1,05 | up   |
| 6167507 | 7293234 | 1604337 | --- | --- | --- | 1,12 | down |
| 6167546 | 7252339 | 1503300 | --- | --- | --- | 1,01 | down |
| 6167623 | 7041609 | 989591  | --- | --- | --- | 1,11 | down |
| 6167696 | 7069253 | 1054149 | --- | --- | --- | 1,14 | down |
| 6167703 | 7040674 | 987028  | --- | --- | --- | 2,04 | up   |
| 6167840 | 7031774 | 964724  | --- | --- | --- | 1,09 | up   |
| 6167896 | 7119179 | 1174972 | --- | --- | --- | 1,33 | up   |

|         |         |         |     |     |     |      |      |
|---------|---------|---------|-----|-----|-----|------|------|
| 6167923 | 7050384 | 1010451 | --- | --- | --- | 1,15 | down |
| 6167987 | 7267204 | 1539849 | --- | --- | --- | 1,32 | down |
| 6168010 | 7272110 | 1553083 | --- | --- | --- | 1,19 | down |
| 6168086 | 7263248 | 1530612 | --- | --- | --- | 1,55 | up   |
| 6168230 | 7356115 | 1760115 | --- | --- | --- | 1,05 | up   |
| 6168243 | 7240569 | 1475472 | --- | --- | --- | 1,13 | up   |
| 6168251 | 7126400 | 1192533 | --- | --- | --- | 1,02 | up   |
| 6168318 | 7243647 | 1482469 | --- | --- | --- | 1,13 | down |
| 6168340 | 7172373 | 1305589 | --- | --- | --- | 1,26 | up   |
| 6168346 | 7039532 | 984421  | --- | --- | --- | 1,12 | down |
| 6168418 | 7102416 | 1133514 | --- | --- | --- | 2,18 | up   |
| 6168438 | 7363529 | 1777961 | --- | --- | --- | 1,15 | up   |
| 6168568 | 7337425 | 1713172 | --- | --- | --- | 1,06 | up   |
| 6168605 | 7071714 | 1060351 | --- | --- | --- | 1,23 | down |
| 6168835 | 7252339 | 1503334 | --- | --- | --- | 1,02 | down |
| 6168900 | 7319398 | 1670689 | --- | --- | --- | 1,09 | up   |
| 6168963 | 7118234 | 1172845 | --- | --- | --- | 1,32 | down |
| 6168981 | 7189184 | 1347598 | --- | --- | --- | 1,45 | down |
| 6169072 | 7233106 | 1455669 | --- | --- | --- | 1,15 | down |
| 6169077 | 7356326 | 1760469 | --- | --- | --- | 1,09 | up   |
| 6169121 | 7261580 | 1526776 | --- | --- | --- | 1,31 | up   |
| 6169152 | 7273251 | 1555958 | --- | --- | --- | 1,29 | down |
| 6169211 | 7064732 | 1042930 | --- | --- | --- | 1,09 | up   |
| 6169377 | 7131805 | 1205915 | --- | --- | --- | 1,44 | down |
| 6169384 | 7337425 | 1713133 | --- | --- | --- | 1,18 | down |
| 6169385 | 7067518 | 1049942 | --- | --- | --- | 1,04 | down |
| 6169492 | 7225317 | 1435354 | --- | --- | --- | 2,51 | down |
| 6169542 | 7059020 | 1029350 | --- | --- | --- | 1,28 | up   |
| 6169543 | 7373633 | 1805712 | --- | --- | --- | 1,12 | down |
| 6169554 | 7027797 | 956284  | --- | --- | --- | 1,25 | up   |
| 6169562 | 7059766 | 1030973 | --- | --- | --- | 1,32 | up   |
| 6169582 | 7148741 | 1247825 | --- | --- | --- | 1,56 | up   |
| 6169588 | 7108062 | 1147192 | --- | --- | --- | 3,04 | up   |
| 6169761 | 7128921 | 1198509 | --- | --- | --- | 1,11 | up   |
| 6169927 | 7147809 | 1245469 | --- | --- | --- | 1,05 | down |
| 6169989 | 7202837 | 1382308 | --- | --- | --- | 1,14 | down |
| 6170022 | 7131718 | 1205741 | --- | --- | --- | 1,15 | up   |
| 6170074 | 7213908 | 1407670 | --- | --- | --- | 1,03 | up   |
| 6170105 | 7040442 | 986507  | --- | --- | --- | 1,35 | down |
| 6170158 | 7103420 | 1136178 | --- | --- | --- | 1,81 | up   |
| 6170218 | 7073677 | 1065164 | --- | --- | --- | 1,24 | down |
| 6170311 | 7047524 | 1004665 | --- | --- | --- | 1,22 | up   |
| 6170319 | 7115507 | 1165985 | --- | --- | --- | 1,16 | up   |
| 6170427 | 7217650 | 1417171 | --- | --- | --- | 1,13 | up   |
| 6170539 | 7096461 | 1118261 | --- | --- | --- | 1,01 | up   |
| 6170876 | 7193056 | 1358274 | --- | --- | --- | 1,06 | down |
| 6170881 | 7052813 | 1015929 | --- | --- | --- | 1,42 | up   |
| 6170914 | 7322260 | 1677072 | --- | --- | --- | 2,05 | down |
| 6170920 | 7064468 | 1042373 | --- | --- | --- | 1,51 | down |
| 6170987 | 7380497 | 1821842 | --- | --- | --- | 1,28 | up   |
| 6171005 | 7063716 | 1040136 | --- | --- | --- | 1,22 | up   |
| 6171013 | 7041319 | 988753  | --- | --- | --- | 1,40 | down |
| 6171060 | 7369141 | 1793315 | --- | --- | --- | 2,11 | down |
| 6171067 | 7180243 | 1325516 | --- | --- | --- | 1,23 | down |
| 6171096 | 7087965 | 1098051 | --- | --- | --- | 1,05 | down |
| 6171134 | 7183182 | 1333568 | --- | --- | --- | 1,57 | down |
| 6171181 | 7126658 | 1193164 | --- | --- | --- | 1,77 | up   |

|         |         |         |     |     |     |      |      |
|---------|---------|---------|-----|-----|-----|------|------|
| 6171241 | 7236131 | 1463791 | --- | --- | --- | 1,09 | up   |
| 6171250 | 7307424 | 1641137 | --- | --- | --- | 1,43 | down |
| 6171291 | 7341989 | 1725052 | --- | --- | --- | 1,35 | down |
| 6171293 | 7070668 | 1057889 | --- | --- | --- | 1,08 | up   |
| 6171451 | 7039223 | 983560  | --- | --- | --- | 1,63 | up   |
| 6171575 | 7317708 | 1666835 | --- | --- | --- | 1,06 | up   |
| 6171679 | 7113261 | 1160480 | --- | --- | --- | 1,13 | down |
| 6171698 | 7380497 | 1821874 | --- | --- | --- | 1,09 | down |
| 6171705 | 7341038 | 1722658 | --- | --- | --- | 1,28 | up   |
| 6171719 | 7359361 | 1768262 | --- | --- | --- | 1,13 | up   |
| 6171738 | 7196029 | 1365624 | --- | --- | --- | 1,02 | up   |
| 6171790 | 7093936 | 1112480 | --- | --- | --- | 1,03 | down |
| 6171888 | 7171091 | 1302465 | --- | --- | --- | 1,01 | up   |
| 6171945 | 7232709 | 1454526 | --- | --- | --- | 1,05 | down |
| 6171953 | 7374324 | 1807493 | --- | --- | --- | 1,25 | down |
| 6171962 | 7071969 | 1060904 | --- | --- | --- | 2,38 | down |
| 6172002 | 7210702 | 1400724 | --- | --- | --- | 1,28 | up   |
| 6172015 | 7275927 | 1562409 | --- | --- | --- | 1,06 | up   |
| 6172029 | 7330623 | 1696959 | --- | --- | --- | 1,18 | down |
| 6172076 | 7028624 | 958003  | --- | --- | --- | 1,19 | down |
| 6172101 | 7112355 | 1158067 | --- | --- | --- | 1,15 | up   |
| 6172184 | 7344702 | 1732143 | --- | --- | --- | 1,27 | down |
| 6172198 | 7303191 | 1629963 | --- | --- | --- | 1,07 | up   |
| 6172203 | 7360486 | 1770935 | --- | --- | --- | 1,41 | down |
| 6172247 | 7076236 | 1071190 | --- | --- | --- | 1,29 | down |
| 6172257 | 7096924 | 1119623 | --- | --- | --- | 1,98 | down |
| 6172292 | 7030549 | 961790  | --- | --- | --- | 1,02 | up   |
| 6172294 | 7344380 | 1731117 | --- | --- | --- | 1,00 | up   |
| 6172347 | 7092549 | 1109118 | --- | --- | --- | 1,34 | up   |
| 6172428 | 7198087 | 1370688 | --- | --- | --- | 1,11 | down |
| 6172440 | 7340757 | 1721903 | --- | --- | --- | 1,02 | up   |
| 6172453 | 7227433 | 1440959 | --- | --- | --- | 1,10 | down |
| 6172519 | 7172373 | 1305576 | --- | --- | --- | 1,15 | down |
| 6172527 | 7330731 | 1697192 | --- | --- | --- | 1,08 | up   |
| 6172557 | 7181193 | 1328305 | --- | --- | --- | 1,15 | down |
| 6172561 | 7148978 | 1248538 | --- | --- | --- | 1,02 | down |
| 6172757 | 7207069 | 1392015 | --- | --- | --- | 1,27 | up   |
| 6172805 | 7146542 | 1242278 | --- | --- | --- | 1,01 | up   |
| 6172976 | 7376566 | 1812848 | --- | --- | --- | 1,20 | down |
| 6173069 | 7344702 | 1732140 | --- | --- | --- | 1,31 | down |
| 6173169 | 7034293 | 971945  | --- | --- | --- | 1,92 | up   |
| 6173172 | 7028624 | 957998  | --- | --- | --- | 1,05 | up   |
| 6173188 | 7168403 | 1295585 | --- | --- | --- | 1,13 | down |
| 6173242 | 7340057 | 1720327 | --- | --- | --- | 1,37 | up   |
| 6173261 | 7279810 | 1572590 | --- | --- | --- | 1,72 | down |
| 6173415 | 7142081 | 1230973 | --- | --- | --- | 1,22 | down |
| 6173468 | 7255911 | 1512223 | --- | --- | --- | 1,63 | up   |
| 6173494 | 7100523 | 1128906 | --- | --- | --- | 1,47 | down |
| 6173510 | 7181001 | 1327592 | --- | --- | --- | 1,08 | down |
| 6173526 | 7110401 | 1153052 | --- | --- | --- | 2,43 | up   |
| 6173530 | 7243647 | 1482485 | --- | --- | --- | 1,10 | up   |
| 6173570 | 7257893 | 1517484 | --- | --- | --- | 1,50 | up   |
| 6173661 | 7337425 | 1713151 | --- | --- | --- | 1,11 | down |
| 6173663 | 7111361 | 1155593 | --- | --- | --- | 1,28 | down |
| 6173777 | 7373678 | 1805858 | --- | --- | --- | 1,02 | up   |
| 6173883 | 7071969 | 1060899 | --- | --- | --- | 1,42 | up   |
| 6173926 | 7132125 | 1206614 | --- | --- | --- | 1,36 | down |



|         |         |         |     |     |     |      |      |
|---------|---------|---------|-----|-----|-----|------|------|
| 6174000 | 7056333 | 1023698 | --- | --- | --- | 1,58 | up   |
| 6174006 | 7289382 | 1595193 | --- | --- | --- | 1,03 | up   |
| 6174159 | 7182739 | 1332594 | --- | --- | --- | 1,09 | up   |
| 6174163 | 7365183 | 1781900 | --- | --- | --- | 1,22 | up   |
| 6174202 | 7248790 | 1494494 | --- | --- | --- | 1,04 | down |
| 6174209 | 7237814 | 1467823 | --- | --- | --- | 1,21 | up   |
| 6174224 | 7363529 | 1777916 | --- | --- | --- | 1,32 | up   |
| 6174282 | 7039223 | 983565  | --- | --- | --- | 1,31 | down |
| 6174295 | 7044906 | 998142  | --- | --- | --- | 1,62 | up   |
| 6174363 | 7261019 | 1525279 | --- | --- | --- | 1,47 | down |
| 6174422 | 7349313 | 1743119 | --- | --- | --- | 1,56 | down |
| 6174493 | 7207971 | 1394326 | --- | --- | --- | 3,19 | down |
| 6174556 | 7130917 | 1203940 | --- | --- | --- | 1,03 | up   |
| 6174576 | 7355138 | 1757792 | --- | --- | --- | 1,40 | down |
| 6174607 | 7075460 | 1069389 | --- | --- | --- | 1,64 | down |
| 6174645 | 7355044 | 1757449 | --- | --- | --- | 2,01 | down |
| 6174686 | 7333462 | 1703640 | --- | --- | --- | 1,42 | up   |
| 6174703 | 7231137 | 1450206 | --- | --- | --- | 1,38 | up   |
| 6174710 | 7238202 | 1468947 | --- | --- | --- | 1,20 | up   |
| 6174742 | 7127540 | 1195283 | --- | --- | --- | 1,01 | down |
| 6174768 | 7281924 | 1577750 | --- | --- | --- | 1,06 | down |
| 6174826 | 7155116 | 1263436 | --- | --- | --- | 1,90 | up   |
| 6174884 | 7264653 | 1534036 | --- | --- | --- | 1,62 | down |
| 6174889 | 7052813 | 1015939 | --- | --- | --- | 1,32 | up   |
| 6174904 | 7105066 | 1140367 | --- | --- | --- | 1,62 | down |
| 6174991 | 7281577 | 1576887 | --- | --- | --- | 1,44 | up   |
| 6175042 | 7150047 | 1250768 | --- | --- | --- | 1,19 | up   |
| 6175145 | 7072765 | 1062734 | --- | --- | --- | 1,09 | up   |
| 6175167 | 7217434 | 1416387 | --- | --- | --- | 1,03 | up   |
| 6175191 | 7326612 | 1687204 | --- | --- | --- | 1,12 | up   |
| 6175286 | 7069464 | 1054669 | --- | --- | --- | 2,71 | up   |
| 6175323 | 7321029 | 1674812 | --- | --- | --- | 1,08 | up   |
| 6175351 | 7095041 | 1115194 | --- | --- | --- | 1,06 | down |
| 6175383 | 7200129 | 1375995 | --- | --- | --- | 1,35 | up   |
| 6175429 | 7329135 | 1693499 | --- | --- | --- | 1,28 | down |
| 6175437 | 7240569 | 1475464 | --- | --- | --- | 1,37 | down |
| 6175458 | 7372840 | 1803754 | --- | --- | --- | 1,03 | down |
| 6175492 | 7190524 | 1351184 | --- | --- | --- | 1,14 | down |
| 6175519 | 7205216 | 1387721 | --- | --- | --- | 2,09 | up   |
| 6175609 | 7067670 | 1050301 | --- | --- | --- | 1,43 | up   |
| 6175763 | 7104920 | 1140071 | --- | --- | --- | 1,02 | down |
| 6175956 | 7261580 | 1526810 | --- | --- | --- | 1,21 | down |
| 6176039 | 7312569 | 1653344 | --- | --- | --- | 1,04 | down |
| 6176063 | 7117951 | 1172086 | --- | --- | --- | 1,16 | down |
| 6176243 | 7257038 | 1515284 | --- | --- | --- | 1,02 | up   |
| 6176265 | 7228530 | 1443789 | --- | --- | --- | 1,45 | up   |
| 6176452 | 7384073 | 1829465 | --- | --- | --- | 1,25 | up   |
| 6176476 | 7112672 | 1158977 | --- | --- | --- | 1,71 | up   |
| 6176499 | 7143455 | 1234737 | --- | --- | --- | 1,03 | up   |
| 6176577 | 7043515 | 994013  | --- | --- | --- | 1,81 | down |
| 6176583 | 7093806 | 1112152 | --- | --- | --- | 1,91 | down |
| 6176626 | 7067828 | 1050799 | --- | --- | --- | 1,07 | up   |
| 6176656 | 7058713 | 1028659 | --- | --- | --- | 1,22 | down |
| 6176715 | 7286807 | 1588843 | --- | --- | --- | 1,25 | up   |
| 6176720 | 7027797 | 956311  | --- | --- | --- | 1,61 | down |
| 6176732 | 7071264 | 1059362 | --- | --- | --- | 1,36 | down |
| 6176783 | 7069721 | 1055305 | --- | --- | --- | 1,26 | up   |

|         |         |         |     |     |     |      |      |
|---------|---------|---------|-----|-----|-----|------|------|
| 6176802 | 7207093 | 1392087 | --- | --- | --- | 1,10 | up   |
| 6176951 | 7341243 | 1723214 | --- | --- | --- | 1,51 | down |
| 6176953 | 7247907 | 1492242 | --- | --- | --- | 1,05 | up   |
| 6177101 | 7374324 | 1807461 | --- | --- | --- | 1,39 | down |
| 6177105 | 7156978 | 1268179 | --- | --- | --- | 1,42 | up   |
| 6177150 | 7071292 | 1059448 | --- | --- | --- | 1,20 | up   |
| 6177204 | 7355044 | 1757441 | --- | --- | --- | 1,45 | down |
| 6177322 | 7248790 | 1494486 | --- | --- | --- | 1,21 | up   |
| 6177352 | 7154655 | 1262315 | --- | --- | --- | 1,85 | up   |
| 6177370 | 7059766 | 1030976 | --- | --- | --- | 1,20 | up   |
| 6177507 | 7252877 | 1504705 | --- | --- | --- | 1,09 | up   |
| 6177552 | 7070511 | 1057477 | --- | --- | --- | 1,81 | down |
| 6177616 | 7180598 | 1326334 | --- | --- | --- | 1,08 | down |
| 6177619 | 7033504 | 969867  | --- | --- | --- | 1,09 | up   |
| 6177655 | 7098867 | 1124935 | --- | --- | --- | 1,42 | down |
| 6177742 | 7115362 | 1165601 | --- | --- | --- | 1,79 | down |
| 6177747 | 7048014 | 1005633 | --- | --- | --- | 2,63 | up   |
| 6177847 | 7143381 | 1234481 | --- | --- | --- | 1,21 | down |
| 6178015 | 7065640 | 1045203 | --- | --- | --- | 1,21 | down |
| 6178061 | 7344530 | 1731559 | --- | --- | --- | 1,11 | up   |
| 6178272 | 7294911 | 1608534 | --- | --- | --- | 1,09 | up   |
| 6178285 | 7243628 | 1482364 | --- | --- | --- | 1,08 | up   |
| 6178351 | 7353287 | 1753025 | --- | --- | --- | 1,03 | down |
| 6178384 | 7231775 | 1452131 | --- | --- | --- | 1,11 | up   |
| 6178396 | 7307473 | 1641268 | --- | --- | --- | 1,28 | down |
| 6178419 | 7337425 | 1713191 | --- | --- | --- | 1,47 | up   |
| 6178435 | 7333487 | 1703677 | --- | --- | --- | 1,62 | up   |
| 6178455 | 7368815 | 1792309 | --- | --- | --- | 1,29 | up   |
| 6178496 | 7252728 | 1504326 | --- | --- | --- | 1,30 | up   |
| 6178520 | 7255517 | 1511347 | --- | --- | --- | 1,05 | down |
| 6178537 | 7353232 | 1752826 | --- | --- | --- | 1,79 | down |
| 6178609 | 7384509 | 1830727 | --- | --- | --- | 1,05 | down |
| 6178614 | 7168521 | 1295980 | --- | --- | --- | 1,77 | down |
| 6178630 | 7341038 | 1722686 | --- | --- | --- | 1,00 | down |
| 6178632 | 7243647 | 1482439 | --- | --- | --- | 1,22 | up   |
| 6178637 | 7340673 | 1721692 | --- | --- | --- | 2,12 | up   |
| 6178688 | 7297589 | 1615644 | --- | --- | --- | 1,38 | up   |
| 6178783 | 7117951 | 1172094 | --- | --- | --- | 1,05 | up   |
| 6178926 | 7106752 | 1144059 | --- | --- | --- | 1,81 | up   |
| 6178939 | 7286807 | 1588805 | --- | --- | --- | 1,16 | up   |
| 6179042 | 7364346 | 1779999 | --- | --- | --- | 2,42 | up   |
| 6179062 | 7128704 | 1198021 | --- | --- | --- | 1,09 | up   |
| 6179085 | 7193056 | 1358284 | --- | --- | --- | 1,02 | up   |
| 6179128 | 7194400 | 1361716 | --- | --- | --- | 1,18 | up   |
| 6179155 | 7318139 | 1668075 | --- | --- | --- | 1,07 | up   |
| 6179199 | 7141151 | 1228925 | --- | --- | --- | 1,04 | up   |
| 6179209 | 7344406 | 1731249 | --- | --- | --- | 1,14 | down |
| 6179342 | 7209927 | 1398924 | --- | --- | --- | 1,09 | down |
| 6179388 | 7065860 | 1045804 | --- | --- | --- | 1,36 | up   |
| 6179432 | 7237814 | 1467821 | --- | --- | --- | 1,07 | down |
| 6179434 | 7217434 | 1416455 | --- | --- | --- | 1,70 | down |
| 6179531 | 7356326 | 1760473 | --- | --- | --- | 1,12 | up   |
| 6179718 | 7139026 | 1223510 | --- | --- | --- | 1,06 | down |
| 6179739 | 7121849 | 1181786 | --- | --- | --- | 1,02 | up   |
| 6179742 | 7227775 | 1441814 | --- | --- | --- | 1,00 | down |
| 6179772 | 7272110 | 1553031 | --- | --- | --- | 1,34 | down |
| 6179882 | 7234514 | 1459620 | --- | --- | --- | 1,67 | up   |

|         |         |         |     |     |     |      |      |
|---------|---------|---------|-----|-----|-----|------|------|
| 6179966 | 7244290 | 1484145 | --- | --- | --- | 1,41 | up   |
| 6180015 | 7361881 | 1773961 | --- | --- | --- | 1,14 | up   |
| 6180047 | 7127540 | 1195271 | --- | --- | --- | 1,49 | up   |
| 6180093 | 7344380 | 1731117 | --- | --- | --- | 1,73 | down |
| 6180268 | 7039532 | 984425  | --- | --- | --- | 1,05 | up   |
| 6180315 | 7231775 | 1452135 | --- | --- | --- | 1,11 | up   |
| 6180358 | 7368489 | 1791035 | --- | --- | --- | 1,06 | up   |
| 6180397 | 7301843 | 1626461 | --- | --- | --- | 1,06 | down |
| 6180436 | 7198087 | 1370716 | --- | --- | --- | 1,38 | up   |
| 6180455 | 7301296 | 1625003 | --- | --- | --- | 1,17 | down |
| 6180465 | 7168439 | 1295689 | --- | --- | --- | 1,05 | up   |
| 6180493 | 7068259 | 1051593 | --- | --- | --- | 1,16 | up   |
| 6180793 | 7113483 | 1160994 | --- | --- | --- | 1,46 | up   |
| 6180795 | 7277719 | 1567069 | --- | --- | --- | 1,54 | up   |
| 6180824 | 7073950 | 1065936 | --- | --- | --- | 1,27 | up   |
| 6180840 | 7095041 | 1115164 | --- | --- | --- | 1,57 | up   |
| 6180895 | 7257441 | 1516295 | --- | --- | --- | 1,46 | up   |
| 6180941 | 7176368 | 1315583 | --- | --- | --- | 1,82 | down |
| 6180957 | 7337425 | 1713221 | --- | --- | --- | 1,04 | down |
| 6181013 | 7374313 | 1807387 | --- | --- | --- | 1,10 | down |
| 6181084 | 7254209 | 1508007 | --- | --- | --- | 1,55 | up   |
| 6181368 | 7094008 | 1112618 | --- | --- | --- | 1,03 | down |
| 6181399 | 7364346 | 1780015 | --- | --- | --- | 1,05 | down |
| 6181681 | 7329846 | 1694992 | --- | --- | --- | 1,63 | up   |
| 6181715 | 7374324 | 1807535 | --- | --- | --- | 1,20 | down |
| 6181747 | 7069462 | 1054608 | --- | --- | --- | 2,82 | down |
| 6181756 | 7041584 | 989459  | --- | --- | --- | 1,84 | down |
| 6181785 | 7112355 | 1158079 | --- | --- | --- | 1,21 | up   |
| 6181791 | 7180732 | 1326737 | --- | --- | --- | 1,46 | down |
| 6181810 | 7371001 | 1798851 | --- | --- | --- | 1,19 | up   |
| 6181837 | 7286807 | 1588844 | --- | --- | --- | 1,15 | up   |
| 6181899 | 7259923 | 1522526 | --- | --- | --- | 1,88 | down |
| 6182155 | 7207093 | 1392096 | --- | --- | --- | 1,27 | up   |
| 6182247 | 7144389 | 1236781 | --- | --- | --- | 1,43 | down |
| 6182373 | 7312465 | 1653050 | --- | --- | --- | 1,14 | down |
| 6182491 | 7217747 | 1417479 | --- | --- | --- | 1,43 | down |
| 6182545 | 7233970 | 1458274 | --- | --- | --- | 2,75 | up   |
| 6182630 | 7312338 | 1652764 | --- | --- | --- | 3,26 | down |
| 6182675 | 7377304 | 1814585 | --- | --- | --- | 4,25 | down |
| 6182704 | 7231484 | 1451380 | --- | --- | --- | 1,10 | up   |
| 6182738 | 7171417 | 1303149 | --- | --- | --- | 1,08 | up   |
| 6182781 | 7234401 | 1459338 | --- | --- | --- | 1,05 | up   |
| 6182805 | 7339379 | 1718356 | --- | --- | --- | 1,68 | down |
| 6182871 | 7356115 | 1760127 | --- | --- | --- | 1,22 | up   |
| 6183086 | 7120671 | 1178995 | --- | --- | --- | 1,03 | up   |
| 6183266 | 7089080 | 1101129 | --- | --- | --- | 1,05 | up   |
| 6183311 | 7039589 | 984510  | --- | --- | --- | 1,35 | down |
| 6183316 | 7140365 | 1226760 | --- | --- | --- | 1,44 | up   |
| 6183325 | 7297274 | 1614657 | --- | --- | --- | 1,33 | down |
| 6183347 | 7083355 | 1086921 | --- | --- | --- | 1,12 | up   |
| 6183478 | 7237132 | 1466111 | --- | --- | --- | 1,44 | up   |
| 6183546 | 7280743 | 1574523 | --- | --- | --- | 2,59 | down |
| 6183554 | 7068942 | 1053377 | --- | --- | --- | 1,52 | down |
| 6183605 | 7122131 | 1182668 | --- | --- | --- | 1,68 | down |
| 6183815 | 7303722 | 1631713 | --- | --- | --- | 1,05 | up   |
| 6183828 | 7335637 | 1708472 | --- | --- | --- | 1,38 | down |
| 6183849 | 7034356 | 972151  | --- | --- | --- | 1,47 | down |

|         |         |         |     |     |     |      |      |
|---------|---------|---------|-----|-----|-----|------|------|
| 6183889 | 7369954 | 1795662 | --- | --- | --- | 1,22 | up   |
| 6183955 | 7337425 | 1713149 | --- | --- | --- | 1,01 | down |
| 6184057 | 7217434 | 1416423 | --- | --- | --- | 1,47 | up   |
| 6184111 | 7031618 | 964206  | --- | --- | --- | 1,17 | up   |
| 6184140 | 7062233 | 1037240 | --- | --- | --- | 1,03 | up   |
| 6184206 | 7193403 | 1359192 | --- | --- | --- | 1,62 | down |
| 6184226 | 7111427 | 1155773 | --- | --- | --- | 1,72 | down |
| 6184298 | 7100210 | 1128152 | --- | --- | --- | 1,58 | down |
| 6184319 | 7343250 | 1728046 | --- | --- | --- | 1,10 | down |
| 6184373 | 7237711 | 1467432 | --- | --- | --- | 1,34 | down |
| 6184421 | 7335903 | 1709266 | --- | --- | --- | 2,77 | up   |
| 6184451 | 7260553 | 1524109 | --- | --- | --- | 2,06 | down |
| 6184459 | 7267204 | 1539856 | --- | --- | --- | 1,04 | up   |
| 6184465 | 7364346 | 1780003 | --- | --- | --- | 1,02 | down |
| 6184478 | 7200545 | 1376896 | --- | --- | --- | 2,13 | up   |
| 6184524 | 7353232 | 1752707 | --- | --- | --- | 1,17 | down |
| 6184551 | 7117813 | 1171713 | --- | --- | --- | 1,05 | up   |
| 6184603 | 7168521 | 1295943 | --- | --- | --- | 1,80 | down |
| 6184674 | 7295410 | 1609794 | --- | --- | --- | 1,05 | down |
| 6184837 | 7052385 | 1014796 | --- | --- | --- | 1,05 | up   |
| 6184945 | 7279568 | 1572001 | --- | --- | --- | 1,51 | up   |
| 6184950 | 7337425 | 1713207 | --- | --- | --- | 1,12 | down |
| 6184983 | 7294911 | 1608535 | --- | --- | --- | 1,17 | down |
| 6185044 | 7069603 | 1055050 | --- | --- | --- | 1,12 | up   |
| 6185136 | 7252339 | 1503272 | --- | --- | --- | 1,29 | up   |
| 6185203 | 7297274 | 1614644 | --- | --- | --- | 1,45 | down |
| 6185204 | 7210702 | 1400724 | --- | --- | --- | 1,00 | up   |
| 6185226 | 7339379 | 1718361 | --- | --- | --- | 1,51 | down |
| 6185236 | 7355138 | 1757755 | --- | --- | --- | 1,16 | down |
| 6185290 | 7233513 | 1457172 | --- | --- | --- | 1,18 | down |
| 6185499 | 7260488 | 1523922 | --- | --- | --- | 1,54 | down |
| 6185535 | 7072332 | 1061647 | --- | --- | --- | 2,40 | up   |
| 6185540 | 7337224 | 1712548 | --- | --- | --- | 1,17 | down |
| 6185546 | 7088164 | 1098467 | --- | --- | --- | 1,65 | up   |
| 6185663 | 7337425 | 1713175 | --- | --- | --- | 1,71 | up   |
| 6185675 | 7119845 | 1176895 | --- | --- | --- | 1,04 | down |
| 6185676 | 7363768 | 1778601 | --- | --- | --- | 1,17 | up   |
| 6185687 | 7067406 | 1049591 | --- | --- | --- | 1,01 | down |
| 6185695 | 7133484 | 1209942 | --- | --- | --- | 1,10 | up   |
| 6185737 | 7131372 | 1205038 | --- | --- | --- | 1,08 | down |
| 6185801 | 7089952 | 1103315 | --- | --- | --- | 2,31 | up   |
| 6185952 | 7378997 | 1818651 | --- | --- | --- | 1,05 | down |
| 6186020 | 7377304 | 1814581 | --- | --- | --- | 1,04 | down |
| 6186211 | 7255911 | 1512223 | --- | --- | --- | 1,25 | up   |
| 6186271 | 7049184 | 1007926 | --- | --- | --- | 1,15 | up   |
| 6186440 | 7288077 | 1591978 | --- | --- | --- | 1,31 | up   |
| 6186666 | 7363529 | 1777941 | --- | --- | --- | 1,23 | up   |
| 6186698 | 7253408 | 1505953 | --- | --- | --- | 1,37 | up   |
| 6186722 | 7380878 | 1822559 | --- | --- | --- | 1,22 | up   |
| 6186724 | 7155116 | 1263398 | --- | --- | --- | 1,54 | up   |
| 6186744 | 7339834 | 1719545 | --- | --- | --- | 1,28 | down |
| 6186802 | 7121849 | 1181764 | --- | --- | --- | 1,10 | up   |
| 6186898 | 7110401 | 1153077 | --- | --- | --- | 1,26 | up   |
| 6186909 | 7075445 | 1069340 | --- | --- | --- | 2,04 | up   |
| 6186916 | 7267204 | 1539855 | --- | --- | --- | 1,31 | up   |
| 6186950 | 7311648 | 1651374 | --- | --- | --- | 1,30 | down |
| 6187070 | 7269911 | 1546908 | --- | --- | --- | 1,00 | up   |

|         |         |         |     |     |     |      |      |
|---------|---------|---------|-----|-----|-----|------|------|
| 6187086 | 7065860 | 1045802 | --- | --- | --- | 1,08 | down |
| 6187163 | 7100523 | 1128844 | --- | --- | --- | 1,95 | up   |
| 6187207 | 7313841 | 1656717 | --- | --- | --- | 1,10 | up   |
| 6187226 | 7300392 | 1622754 | --- | --- | --- | 1,08 | up   |
| 6187291 | 7361881 | 1773952 | --- | --- | --- | 1,18 | up   |
| 6187322 | 7068995 | 1053630 | --- | --- | --- | 2,06 | down |
| 6187365 | 7140365 | 1226756 | --- | --- | --- | 1,06 | up   |
| 6187653 | 7363529 | 1777895 | --- | --- | --- | 1,34 | down |
| 6187692 | 7370853 | 1798411 | --- | --- | --- | 1,10 | up   |
| 6187809 | 7121849 | 1181816 | --- | --- | --- | 1,06 | down |
| 6187839 | 7326612 | 1687195 | --- | --- | --- | 1,05 | down |
| 6187841 | 7253088 | 1505120 | --- | --- | --- | 1,49 | up   |
| 6187862 | 7339379 | 1718336 | --- | --- | --- | 1,19 | up   |
| 6187978 | 7069721 | 1055293 | --- | --- | --- | 1,14 | down |
| 6188109 | 7052385 | 1014780 | --- | --- | --- | 1,07 | down |
| 6188120 | 7298920 | 1618828 | --- | --- | --- | 1,41 | down |
| 6188134 | 7052338 | 1014664 | --- | --- | --- | 1,61 | down |
| 6188240 | 7151063 | 1253072 | --- | --- | --- | 1,12 | down |
| 6188270 | 7156052 | 1265759 | --- | --- | --- | 1,17 | up   |
| 6188285 | 7288077 | 1592007 | --- | --- | --- | 1,29 | down |
| 6188311 | 7291853 | 1600977 | --- | --- | --- | 1,79 | down |
| 6188364 | 7274780 | 1559230 | --- | --- | --- | 1,16 | down |
| 6188374 | 7059309 | 1029926 | --- | --- | --- | 1,09 | up   |
| 6188378 | 7058713 | 1028664 | --- | --- | --- | 1,11 | down |
| 6188411 | 7369712 | 1794827 | --- | --- | --- | 1,12 | up   |
| 6188518 | 7157189 | 1268638 | --- | --- | --- | 2,15 | down |
| 6188571 | 7244287 | 1484066 | --- | --- | --- | 1,63 | down |
| 6188624 | 7317204 | 1665395 | --- | --- | --- | 1,15 | up   |
| 6188627 | 7148978 | 1248498 | --- | --- | --- | 1,23 | down |
| 6188710 | 7099294 | 1126104 | --- | --- | --- | 1,52 | down |
| 6188717 | 7194400 | 1361733 | --- | --- | --- | 1,37 | up   |
| 6188858 | 7070836 | 1058362 | --- | --- | --- | 1,29 | down |
| 6188917 | 7153895 | 1259917 | --- | --- | --- | 1,10 | down |
| 6188927 | 7315206 | 1660029 | --- | --- | --- | 1,23 | up   |
| 6188969 | 7173706 | 1309270 | --- | --- | --- | 1,21 | up   |
| 6188983 | 7037495 | 979322  | --- | --- | --- | 1,04 | down |
| 6189044 | 7033337 | 969487  | --- | --- | --- | 1,39 | down |
| 6189060 | 7202837 | 1382306 | --- | --- | --- | 1,09 | up   |
| 6189126 | 7197056 | 1367835 | --- | --- | --- | 1,14 | down |
| 6189341 | 7148741 | 1247829 | --- | --- | --- | 1,15 | up   |
| 6189511 | 7146982 | 1243294 | --- | --- | --- | 1,01 | up   |
| 6189561 | 7120671 | 1178999 | --- | --- | --- | 1,03 | down |
| 6189570 | 7189184 | 1347606 | --- | --- | --- | 1,32 | down |
| 6189576 | 7034356 | 972169  | --- | --- | --- | 1,54 | up   |
| 6189594 | 7116103 | 1167599 | --- | --- | --- | 1,49 | down |
| 6189654 | 7360486 | 1771003 | --- | --- | --- | 1,47 | down |
| 6189656 | 7330238 | 1695925 | --- | --- | --- | 1,06 | up   |
| 6189663 | 7086672 | 1094348 | --- | --- | --- | 2,17 | up   |
| 6189673 | 7366749 | 1785500 | --- | --- | --- | 1,19 | down |
| 6189758 | 7293234 | 1604333 | --- | --- | --- | 1,79 | up   |
| 6189920 | 7297589 | 1615652 | --- | --- | --- | 1,25 | up   |
| 6189936 | 7341243 | 1723198 | --- | --- | --- | 1,48 | down |
| 6189953 | 7040442 | 986564  | --- | --- | --- | 1,32 | up   |
| 6189981 | 7040442 | 986577  | --- | --- | --- | 1,09 | up   |
| 6189984 | 7071264 | 1059283 | --- | --- | --- | 2,45 | up   |
| 6189992 | 7086966 | 1095251 | --- | --- | --- | 1,36 | down |
| 6190048 | 7289075 | 1594459 | --- | --- | --- | 1,08 | down |

|         |         |         |     |     |     |      |      |
|---------|---------|---------|-----|-----|-----|------|------|
| 6190108 | 7231484 | 1451369 | --- | --- | --- | 1,41 | up   |
| 6190118 | 7082098 | 1084120 | --- | --- | --- | 1,12 | down |
| 6190234 | 7067828 | 1050781 | --- | --- | --- | 1,01 | down |
| 6190264 | 7086522 | 1093956 | --- | --- | --- | 2,00 | down |
| 6190279 | 7092549 | 1109131 | --- | --- | --- | 1,44 | down |
| 6190352 | 7345465 | 1733851 | --- | --- | --- | 1,12 | down |
| 6190422 | 7138243 | 1221686 | --- | --- | --- | 1,45 | down |
| 6190641 | 7088489 | 1099519 | --- | --- | --- | 2,02 | down |
| 6190658 | 7127257 | 1194813 | --- | --- | --- | 1,95 | down |
| 6190700 | 7068942 | 1053394 | --- | --- | --- | 1,13 | down |
| 6190719 | 7053874 | 1018335 | --- | --- | --- | 1,25 | down |
| 6190766 | 7069830 | 1055603 | --- | --- | --- | 1,07 | up   |
| 6190798 | 7291318 | 1599973 | --- | --- | --- | 3,72 | up   |
| 6190814 | 7102113 | 1132841 | --- | --- | --- | 1,12 | up   |
| 6190927 | 7068259 | 1051617 | --- | --- | --- | 1,16 | down |
| 6191273 | 7367980 | 1789157 | --- | --- | --- | 1,32 | up   |
| 6191286 | 7384509 | 1830736 | --- | --- | --- | 1,44 | down |
| 6191323 | 7169573 | 1298391 | --- | --- | --- | 1,15 | down |
| 6191372 | 7381330 | 1823643 | --- | --- | --- | 1,13 | up   |
| 6191413 | 7065810 | 1045680 | --- | --- | --- | 1,02 | up   |
| 6191519 | 7160053 | 1275389 | --- | --- | --- | 1,01 | up   |
| 6191628 | 7034293 | 971995  | --- | --- | --- | 1,08 | down |
| 6191692 | 7168439 | 1295664 | --- | --- | --- | 1,02 | down |
| 6191709 | 7253272 | 1505701 | --- | --- | --- | 1,05 | down |
| 6191713 | 7132020 | 1206320 | --- | --- | --- | 1,41 | up   |
| 6191731 | 7156052 | 1265772 | --- | --- | --- | 1,13 | down |
| 6191749 | 7297274 | 1614660 | --- | --- | --- | 1,21 | up   |
| 6191839 | 7256789 | 1514637 | --- | --- | --- | 1,27 | up   |
| 6191856 | 7378997 | 1818661 | --- | --- | --- | 1,05 | up   |
| 6191939 | 7290793 | 1598625 | --- | --- | --- | 1,22 | down |
| 6192051 | 7154655 | 1262318 | --- | --- | --- | 1,15 | down |
| 6192093 | 7088625 | 1099864 | --- | --- | --- | 1,19 | down |
| 6192349 | 7303191 | 1629958 | --- | --- | --- | 1,05 | up   |
| 6192361 | 7217679 | 1417309 | --- | --- | --- | 1,02 | up   |
| 6192388 | 7355138 | 1757745 | --- | --- | --- | 1,47 | down |
| 6192397 | 7083030 | 1086269 | --- | --- | --- | 1,27 | up   |
| 6192407 | 7032618 | 967315  | --- | --- | --- | 1,65 | down |
| 6192418 | 7115146 | 1164935 | --- | --- | --- | 1,12 | up   |
| 6192525 | 7253215 | 1505371 | --- | --- | --- | 1,41 | up   |
| 6192595 | 7318651 | 1669075 | --- | --- | --- | 1,07 | up   |
| 6192608 | 7156611 | 1267316 | --- | --- | --- | 2,14 | down |
| 6192678 | 7141151 | 1228926 | --- | --- | --- | 1,66 | down |
| 6192740 | 7243901 | 1483056 | --- | --- | --- | 1,51 | down |
| 6192841 | 7350993 | 1747534 | --- | --- | --- | 1,22 | down |
| 6192846 | 7341546 | 1723950 | --- | --- | --- | 6,58 | down |
| 6192851 | 7243647 | 1482427 | --- | --- | --- | 1,28 | down |
| 6192944 | 7148978 | 1248457 | --- | --- | --- | 1,03 | up   |
| 6192953 | 7186528 | 1341559 | --- | --- | --- | 1,44 | up   |
| 6192978 | 7336931 | 1711853 | --- | --- | --- | 1,22 | up   |
| 6193029 | 7240569 | 1475493 | --- | --- | --- | 1,03 | down |
| 6193082 | 7295410 | 1609778 | --- | --- | --- | 1,26 | down |
| 6193084 | 7084193 | 1089126 | --- | --- | --- | 1,51 | up   |
| 6193116 | 7155866 | 1265338 | --- | --- | --- | 1,12 | down |
| 6193252 | 7341243 | 1723209 | --- | --- | --- | 1,69 | down |
| 6193372 | 7337224 | 1712627 | --- | --- | --- | 1,24 | down |
| 6193522 | 7067670 | 1050374 | --- | --- | --- | 1,13 | down |
| 6193645 | 7142081 | 1230967 | --- | --- | --- | 1,07 | up   |

|         |         |         |     |     |     |      |      |
|---------|---------|---------|-----|-----|-----|------|------|
| 6193661 | 7186305 | 1341002 | --- | --- | --- | 1,12 | down |
| 6193692 | 7069603 | 1055051 | --- | --- | --- | 1,04 | down |
| 6193693 | 7069253 | 1054141 | --- | --- | --- | 1,72 | down |
| 6193705 | 7142081 | 1230954 | --- | --- | --- | 1,03 | down |
| 6193752 | 7299650 | 1620957 | --- | --- | --- | 1,01 | up   |
| 6193865 | 7259923 | 1522532 | --- | --- | --- | 1,02 | down |
| 6194049 | 7281924 | 1577718 | --- | --- | --- | 1,03 | up   |
| 6194098 | 7244288 | 1484094 | --- | --- | --- | 1,81 | up   |
| 6194124 | 7286613 | 1588469 | --- | --- | --- | 1,28 | down |
| 6194150 | 7062233 | 1037192 | --- | --- | --- | 1,18 | down |
| 6194273 | 7143988 | 1235961 | --- | --- | --- | 1,99 | down |
| 6194286 | 7217434 | 1416419 | --- | --- | --- | 1,16 | down |
| 6194370 | 7076236 | 1071196 | --- | --- | --- | 1,08 | down |
| 6194444 | 7031774 | 964652  | --- | --- | --- | 1,28 | up   |
| 6194518 | 7270397 | 1548130 | --- | --- | --- | 1,62 | down |
| 6194561 | 7292701 | 1602969 | --- | --- | --- | 1,20 | up   |
| 6194598 | 7080563 | 1080713 | --- | --- | --- | 1,30 | down |
| 6194620 | 7169599 | 1298446 | --- | --- | --- | 1,02 | up   |
| 6194690 | 7034747 | 973191  | --- | --- | --- | 1,21 | down |
| 6194865 | 7234040 | 1458505 | --- | --- | --- | 1,10 | up   |
| 6194922 | 7321029 | 1674818 | --- | --- | --- | 1,12 | down |
| 6194961 | 7239939 | 1473798 | --- | --- | --- | 2,10 | up   |
| 6195035 | 7353232 | 1752686 | --- | --- | --- | 1,11 | up   |
| 6195045 | 7149817 | 1250304 | --- | --- | --- | 2,20 | up   |
| 6195106 | 7255120 | 1510371 | --- | --- | --- | 1,19 | down |
| 6195124 | 7289069 | 1594393 | --- | --- | --- | 1,30 | up   |
| 6195179 | 7105066 | 1140367 | --- | --- | --- | 1,18 | down |
| 6195202 | 7244290 | 1484145 | --- | --- | --- | 1,16 | up   |
| 6195287 | 7110401 | 1153076 | --- | --- | --- | 1,05 | down |
| 6195336 | 7212587 | 1404653 | --- | --- | --- | 1,36 | down |
| 6195417 | 7293922 | 1605958 | --- | --- | --- | 1,16 | up   |
| 6195468 | 7073928 | 1065816 | --- | --- | --- | 2,60 | down |
| 6195470 | 7088625 | 1099873 | --- | --- | --- | 1,20 | down |
| 6195520 | 7351568 | 1748824 | --- | --- | --- | 1,70 | up   |
| 6195548 | 7133484 | 1209937 | --- | --- | --- | 1,76 | up   |
| 6195550 | 7339387 | 1718372 | --- | --- | --- | 1,05 | down |
| 6195584 | 7288095 | 1592051 | --- | --- | --- | 1,32 | down |
| 6195588 | 7306229 | 1638250 | --- | --- | --- | 1,20 | down |
| 6195715 | 7142081 | 1230947 | --- | --- | --- | 1,03 | down |
| 6195823 | 7210387 | 1400042 | --- | --- | --- | 1,20 | down |
| 6195834 | 7299650 | 1620966 | --- | --- | --- | 1,34 | up   |
| 6195862 | 7380497 | 1821846 | --- | --- | --- | 1,44 | down |
| 6196106 | 7248790 | 1494539 | --- | --- | --- | 1,21 | down |
| 6196137 | 7313538 | 1655742 | --- | --- | --- | 1,21 | up   |
| 6196206 | 7068987 | 1053601 | --- | --- | --- | 1,61 | down |
| 6196294 | 7160687 | 1277000 | --- | --- | --- | 2,43 | up   |
| 6196315 | 7056333 | 1023674 | --- | --- | --- | 2,72 | down |
| 6196327 | 7146982 | 1243293 | --- | --- | --- | 1,02 | down |
| 6196357 | 7090581 | 1104751 | --- | --- | --- | 1,63 | down |
| 6196382 | 7070668 | 1057972 | --- | --- | --- | 1,58 | up   |
| 6196498 | 7087965 | 1098057 | --- | --- | --- | 2,16 | down |
| 6196533 | 7243901 | 1483038 | --- | --- | --- | 1,03 | up   |
| 6196585 | 7096461 | 1118263 | --- | --- | --- | 2,16 | down |
| 6196644 | 7350489 | 1746111 | --- | --- | --- | 1,07 | up   |
| 6196659 | 7093255 | 1110763 | --- | --- | --- | 1,24 | down |
| 6196674 | 7228656 | 1444244 | --- | --- | --- | 1,19 | down |
| 6196691 | 7257441 | 1516308 | --- | --- | --- | 1,64 | down |

|         |         |         |     |     |     |      |      |
|---------|---------|---------|-----|-----|-----|------|------|
| 6196751 | 7168521 | 1295969 | --- | --- | --- | 1,00 | down |
| 6196929 | 7204442 | 1386084 | --- | --- | --- | 1,02 | up   |
| 6197002 | 7093806 | 1112148 | --- | --- | --- | 1,51 | down |
| 6197081 | 7371753 | 1800970 | --- | --- | --- | 1,97 | down |
| 6197082 | 7355580 | 1758879 | --- | --- | --- | 1,09 | down |
| 6197097 | 7057277 | 1025523 | --- | --- | --- | 2,13 | up   |
| 6197151 | 7155866 | 1265330 | --- | --- | --- | 1,18 | down |
| 6197153 | 7044906 | 998149  | --- | --- | --- | 1,08 | down |
| 6197168 | 7243647 | 1482474 | --- | --- | --- | 1,09 | down |
| 6197212 | 7086966 | 1095241 | --- | --- | --- | 1,51 | up   |
| 6197289 | 7380497 | 1821830 | --- | --- | --- | 1,47 | down |
| 6197349 | 7148741 | 1247830 | --- | --- | --- | 1,21 | down |
| 6197368 | 7249917 | 1497394 | --- | --- | --- | 1,31 | down |
| 6197429 | 7383823 | 1828936 | --- | --- | --- | 1,49 | down |
| 6197525 | 7069830 | 1055628 | --- | --- | --- | 1,29 | down |
| 6197537 | 7220618 | 1424435 | --- | --- | --- | 1,02 | down |
| 6197547 | 7217679 | 1417314 | --- | --- | --- | 1,32 | up   |
| 6197836 | 7059766 | 1030973 | --- | --- | --- | 1,19 | up   |
| 6197896 | 7166867 | 1291296 | --- | --- | --- | 1,08 | up   |
| 6197903 | 7059648 | 1030676 | --- | --- | --- | 1,37 | up   |
| 6197919 | 7381330 | 1823648 | --- | --- | --- | 1,52 | down |
| 6198037 | 7256789 | 1514645 | --- | --- | --- | 1,02 | down |
| 6198052 | 7320998 | 1674735 | --- | --- | --- | 1,54 | down |
| 6198088 | 7360325 | 1770499 | --- | --- | --- | 1,03 | down |
| 6198156 | 7353287 | 1753015 | --- | --- | --- | 1,01 | up   |
| 6198234 | 7245874 | 1487588 | --- | --- | --- | 1,09 | down |
| 6198328 | 7067670 | 1050373 | --- | --- | --- | 1,74 | down |
| 6198401 | 7174114 | 1310424 | --- | --- | --- | 1,28 | up   |
| 6198533 | 7127257 | 1194802 | --- | --- | --- | 1,46 | down |
| 6198538 | 7274780 | 1559212 | --- | --- | --- | 1,15 | up   |
| 6198541 | 7207971 | 1394320 | --- | --- | --- | 1,20 | down |
| 6198555 | 7034356 | 972172  | --- | --- | --- | 1,35 | down |
| 6198623 | 7225317 | 1435356 | --- | --- | --- | 1,14 | up   |
| 6198645 | 7227474 | 1441155 | --- | --- | --- | 1,11 | down |
| 6198653 | 7092549 | 1109201 | --- | --- | --- | 1,88 | up   |
| 6198668 | 7240569 | 1475320 | --- | --- | --- | 1,61 | up   |
| 6198670 | 7346505 | 1736289 | --- | --- | --- | 1,24 | down |
| 6198732 | 7069830 | 1055656 | --- | --- | --- | 1,08 | up   |
| 6198804 | 7198087 | 1370637 | --- | --- | --- | 1,33 | up   |
| 6198826 | 7072225 | 1061405 | --- | --- | --- | 1,09 | up   |
| 6198881 | 7288170 | 1592319 | --- | --- | --- | 1,15 | down |
| 6198901 | 7148741 | 1247828 | --- | --- | --- | 1,11 | up   |
| 6198936 | 7180151 | 1325200 | --- | --- | --- | 1,00 | up   |
| 6198951 | 7263222 | 1530537 | --- | --- | --- | 1,09 | down |
| 6199107 | 7253088 | 1505124 | --- | --- | --- | 1,75 | up   |
| 6199221 | 7157189 | 1268634 | --- | --- | --- | 1,16 | down |
| 6199222 | 7280743 | 1574535 | --- | --- | --- | 1,02 | down |
| 6199273 | 7247954 | 1492393 | --- | --- | --- | 1,60 | up   |
| 6199309 | 7358859 | 1767015 | --- | --- | --- | 1,43 | up   |
| 6199335 | 7237672 | 1467308 | --- | --- | --- | 1,15 | up   |
| 6199401 | 7038153 | 981158  | --- | --- | --- | 1,25 | up   |
| 6199464 | 7029306 | 959282  | --- | --- | --- | 1,13 | down |
| 6199740 | 7100523 | 1128918 | --- | --- | --- | 2,68 | down |
| 6199804 | 7252051 | 1502480 | --- | --- | --- | 1,14 | up   |
| 6199911 | 7056304 | 1023537 | --- | --- | --- | 1,27 | up   |
| 6199962 | 7320735 | 1674179 | --- | --- | --- | 1,05 | down |
| 6200007 | 7330582 | 1696864 | --- | --- | --- | 1,10 | up   |



|         |         |         |     |     |     |      |      |
|---------|---------|---------|-----|-----|-----|------|------|
| 6200073 | 7237814 | 1467828 | --- | --- | --- | 1,46 | up   |
| 6200213 | 7101643 | 1131574 | --- | --- | --- | 1,02 | down |
| 6200255 | 7377791 | 1815988 | --- | --- | --- | 1,09 | down |
| 6200267 | 7173640 | 1308971 | --- | --- | --- | 1,19 | down |
| 6200269 | 7195680 | 1364901 | --- | --- | --- | 1,47 | up   |
| 6200340 | 7325643 | 1685175 | --- | --- | --- | 2,25 | up   |
| 6200422 | 7288077 | 1592010 | --- | --- | --- | 1,23 | up   |
| 6200512 | 7301198 | 1624741 | --- | --- | --- | 1,06 | down |
| 6200544 | 7313841 | 1656729 | --- | --- | --- | 1,33 | up   |
| 6200651 | 7050716 | 1011229 | --- | --- | --- | 1,02 | down |
| 6200676 | 7093752 | 1111998 | --- | --- | --- | 1,06 | up   |
| 6200709 | 7286613 | 1588472 | --- | --- | --- | 1,09 | up   |
| 6200725 | 7071659 | 1060235 | --- | --- | --- | 1,71 | down |
| 6200742 | 7039725 | 984818  | --- | --- | --- | 1,65 | up   |
| 6200864 | 7192902 | 1357765 | --- | --- | --- | 1,43 | down |
| 6200887 | 7255911 | 1512210 | --- | --- | --- | 1,06 | up   |
| 6201047 | 7279568 | 1572020 | --- | --- | --- | 1,19 | down |
| 6201083 | 7337224 | 1712556 | --- | --- | --- | 1,02 | down |
| 6201101 | 7113483 | 1161023 | --- | --- | --- | 1,07 | down |
| 6201199 | 7198210 | 1370979 | --- | --- | --- | 1,00 | up   |
| 6201213 | 7070668 | 1057974 | --- | --- | --- | 1,10 | down |
| 6201415 | 7069721 | 1055309 | --- | --- | --- | 1,00 | down |
| 6201452 | 7221855 | 1427254 | --- | --- | --- | 2,62 | down |
| 6201465 | 7059766 | 1030979 | --- | --- | --- | 1,36 | down |
| 6201468 | 7039532 | 984434  | --- | --- | --- | 1,45 | up   |
| 6201471 | 7279810 | 1572589 | --- | --- | --- | 1,18 | up   |
| 6201478 | 7150348 | 1251381 | --- | --- | --- | 1,64 | up   |
| 6201548 | 7268694 | 1544226 | --- | --- | --- | 1,46 | up   |
| 6201578 | 7282927 | 1579995 | --- | --- | --- | 1,20 | up   |
| 6201666 | 7274892 | 1559571 | --- | --- | --- | 1,33 | down |
| 6201705 | 7367943 | 1788928 | --- | --- | --- | 1,42 | up   |
| 6201744 | 7337845 | 1714347 | --- | --- | --- | 1,10 | up   |
| 6201817 | 7367952 | 1789010 | --- | --- | --- | 1,32 | up   |
| 6201892 | 7089080 | 1101165 | --- | --- | --- | 1,00 | down |
| 6201936 | 7134776 | 1212976 | --- | --- | --- | 1,48 | down |
| 6202066 | 7087965 | 1098051 | --- | --- | --- | 1,19 | down |
| 6202071 | 7254040 | 1507590 | --- | --- | --- | 1,08 | down |
| 6202096 | 7117813 | 1171700 | --- | --- | --- | 1,50 | up   |
| 6202125 | 7240224 | 1474390 | --- | --- | --- | 1,43 | up   |
| 6202143 | 7166867 | 1291368 | --- | --- | --- | 1,19 | down |
| 6202168 | 7168439 | 1295704 | --- | --- | --- | 1,48 | down |
| 6202258 | 7217747 | 1417493 | --- | --- | --- | 1,30 | up   |
| 6202306 | 7252513 | 1503830 | --- | --- | --- | 1,05 | down |
| 6202357 | 7069830 | 1055589 | --- | --- | --- | 1,07 | down |
| 6202430 | 7279793 | 1572538 | --- | --- | --- | 1,04 | up   |
| 6202534 | 7029078 | 958879  | --- | --- | --- | 1,11 | down |
| 6202665 | 7213945 | 1407853 | --- | --- | --- | 1,29 | down |
| 6202701 | 7073677 | 1065169 | --- | --- | --- | 1,59 | down |
| 6202756 | 7256070 | 1512588 | --- | --- | --- | 1,06 | down |
| 6202795 | 7176275 | 1315357 | --- | --- | --- | 1,18 | up   |
| 6202823 | 7150348 | 1251434 | --- | --- | --- | 2,00 | down |
| 6202890 | 7344406 | 1731194 | --- | --- | --- | 1,48 | down |
| 6202960 | 7330731 | 1697162 | --- | --- | --- | 1,05 | down |
| 6202980 | 7186240 | 1340823 | --- | --- | --- | 1,03 | down |
| 6203246 | 7171417 | 1303153 | --- | --- | --- | 1,10 | down |
| 6203481 | 7266778 | 1538857 | --- | --- | --- | 1,33 | up   |
| 6203573 | 7240569 | 1475379 | --- | --- | --- | 1,18 | up   |

|         |         |         |     |     |     |      |      |
|---------|---------|---------|-----|-----|-----|------|------|
| 6203648 | 7243647 | 1482427 | --- | --- | --- | 1,09 | up   |
| 6203846 | 7355138 | 1757761 | --- | --- | --- | 1,54 | up   |
| 6203865 | 7088164 | 1098490 | --- | --- | --- | 1,40 | down |
| 6203903 | 7278794 | 1570049 | --- | --- | --- | 1,31 | down |
| 6203955 | 7374324 | 1807524 | --- | --- | --- | 1,06 | up   |
| 6204010 | 7073609 | 1064861 | --- | --- | --- | 1,52 | down |
| 6204096 | 7365183 | 1781905 | --- | --- | --- | 1,18 | down |
| 6204142 | 7246548 | 1489158 | --- | --- | --- | 1,75 | down |
| 6204155 | 7381330 | 1823636 | --- | --- | --- | 1,36 | down |
| 6204169 | 7297589 | 1615660 | --- | --- | --- | 1,08 | up   |
| 6204222 | 7059971 | 1031470 | --- | --- | --- | 1,02 | up   |
| 6204327 | 7152915 | 1257491 | --- | --- | --- | 1,17 | up   |
| 6204447 | 7350993 | 1747518 | --- | --- | --- | 1,07 | up   |
| 6204565 | 7096589 | 1118504 | --- | --- | --- | 1,77 | down |
| 6204569 | 7031774 | 964724  | --- | --- | --- | 1,42 | up   |
| 6204629 | 7270397 | 1548127 | --- | --- | --- | 1,90 | down |
| 6204632 | 7092549 | 1109176 | --- | --- | --- | 1,08 | up   |
| 6204672 | 7066035 | 1046198 | --- | --- | --- | 1,03 | down |
| 6204711 | 7279568 | 1572023 | --- | --- | --- | 1,35 | down |
| 6204726 | 7244287 | 1484048 | --- | --- | --- | 1,16 | up   |
| 6204825 | 7084716 | 1090121 | --- | --- | --- | 2,11 | down |
| 6204926 | 7326612 | 1687189 | --- | --- | --- | 1,23 | down |
| 6205034 | 7148978 | 1248494 | --- | --- | --- | 1,17 | up   |
| 6205039 | 7328985 | 1693159 | --- | --- | --- | 1,00 | down |
| 6205043 | 7375937 | 1811355 | --- | --- | --- | 1,05 | down |
| 6205046 | 7068987 | 1053592 | --- | --- | --- | 2,21 | down |
| 6205056 | 7364346 | 1780020 | --- | --- | --- | 1,66 | up   |
| 6205105 | 7039532 | 984441  | --- | --- | --- | 2,54 | down |
| 6205136 | 7253272 | 1505699 | --- | --- | --- | 1,08 | up   |
| 6205244 | 7181442 | 1328882 | --- | --- | --- | 1,73 | down |
| 6205261 | 7339379 | 1718335 | --- | --- | --- | 1,35 | up   |
| 6205346 | 7303635 | 1631451 | --- | --- | --- | 1,03 | up   |
| 6205409 | 7255911 | 1512228 | --- | --- | --- | 1,03 | down |
| 6205451 | 7252339 | 1503273 | --- | --- | --- | 1,16 | down |
| 6205554 | 7033006 | 968471  | --- | --- | --- | 1,31 | down |
| 6205642 | 7112566 | 1158636 | --- | --- | --- | 1,00 | up   |
| 6205646 | 7146872 | 1242899 | --- | --- | --- | 1,01 | down |
| 6205647 | 7202749 | 1382103 | --- | --- | --- | 1,15 | up   |
| 6205675 | 7065860 | 1045797 | --- | --- | --- | 1,18 | down |
| 6205771 | 7344713 | 1732185 | --- | --- | --- | 1,10 | up   |
| 6205800 | 7095066 | 1115278 | --- | --- | --- | 2,31 | up   |
| 6205817 | 7133360 | 1209595 | --- | --- | --- | 2,99 | up   |
| 6205830 | 7298101 | 1617080 | --- | --- | --- | 1,65 | down |
| 6205850 | 7128704 | 1198018 | --- | --- | --- | 1,29 | up   |
| 6205996 | 7340057 | 1720323 | --- | --- | --- | 1,43 | down |
| 6206040 | 7142081 | 1230980 | --- | --- | --- | 1,07 | down |
| 6206090 | 7243627 | 1482359 | --- | --- | --- | 1,31 | up   |
| 6206181 | 7041584 | 989463  | --- | --- | --- | 1,81 | up   |
| 6206198 | 7155116 | 1263388 | --- | --- | --- | 1,19 | down |
| 6206348 | 7240569 | 1475488 | --- | --- | --- | 1,04 | up   |
| 6206361 | 7205750 | 1388930 | --- | --- | --- | 1,80 | down |
| 6206503 | 7180732 | 1326719 | --- | --- | --- | 1,31 | down |
| 6206561 | 7336931 | 1711856 | --- | --- | --- | 1,05 | up   |
| 6206650 | 7303722 | 1631715 | --- | --- | --- | 1,26 | down |
| 6206690 | 7098411 | 1123710 | --- | --- | --- | 1,13 | up   |
| 6206749 | 7095868 | 1116798 | --- | --- | --- | 1,34 | down |
| 6206808 | 7217747 | 1417472 | --- | --- | --- | 1,09 | up   |

|         |         |         |     |     |     |      |      |
|---------|---------|---------|-----|-----|-----|------|------|
| 6206920 | 7116103 | 1167605 | --- | --- | --- | 2,01 | up   |
| 6207085 | 7071969 | 1060902 | --- | --- | --- | 1,41 | down |
| 6207093 | 7378637 | 1817830 | --- | --- | --- | 1,76 | down |
| 6207152 | 7318714 | 1669226 | --- | --- | --- | 1,25 | down |
| 6207168 | 7221256 | 1425881 | --- | --- | --- | 1,10 | up   |
| 6207173 | 7263248 | 1530614 | --- | --- | --- | 1,14 | up   |
| 6207179 | 7203041 | 1382731 | --- | --- | --- | 3,68 | down |
| 6207260 | 7325643 | 1685176 | --- | --- | --- | 1,05 | down |
| 6207349 | 7273251 | 1555948 | --- | --- | --- | 2,19 | up   |
| 6207369 | 7162177 | 1280578 | --- | --- | --- | 1,14 | down |
| 6207405 | 7267802 | 1541849 | --- | --- | --- | 1,42 | down |
| 6207481 | 7053874 | 1018337 | --- | --- | --- | 1,20 | down |
| 6207511 | 7071292 | 1059431 | --- | --- | --- | 1,29 | down |
| 6207522 | 7297589 | 1615609 | --- | --- | --- | 1,00 | up   |
| 6207526 | 7185315 | 1338590 | --- | --- | --- | 1,30 | down |
| 6207532 | 7059971 | 1031470 | --- | --- | --- | 1,20 | down |
| 6207688 | 7131766 | 1205865 | --- | --- | --- | 2,93 | down |
| 6207698 | 7326271 | 1686478 | --- | --- | --- | 1,17 | down |
| 6207699 | 7363674 | 1778421 | --- | --- | --- | 1,07 | down |
| 6207841 | 7095021 | 1115128 | --- | --- | --- | 1,20 | down |
| 6207853 | 7332059 | 1700730 | --- | --- | --- | 1,01 | down |
| 6207987 | 7118503 | 1173581 | --- | --- | --- | 1,00 | up   |
| 6208010 | 7142321 | 1231519 | --- | --- | --- | 1,03 | down |
| 6208026 | 7093936 | 1112479 | --- | --- | --- | 1,13 | up   |
| 6208086 | 7100210 | 1128138 | --- | --- | --- | 1,30 | down |
| 6208141 | 7376566 | 1812880 | --- | --- | --- | 1,62 | down |
| 6208178 | 7343279 | 1728114 | --- | --- | --- | 1,50 | up   |
| 6208210 | 7281924 | 1577711 | --- | --- | --- | 1,03 | up   |
| 6208367 | 7321029 | 1674811 | --- | --- | --- | 1,35 | up   |
| 6208394 | 7132125 | 1206600 | --- | --- | --- | 1,04 | down |
| 6208400 | 7302860 | 1629008 | --- | --- | --- | 1,50 | up   |
| 6208426 | 7298920 | 1618823 | --- | --- | --- | 2,02 | up   |
| 6208441 | 7294738 | 1607995 | --- | --- | --- | 2,07 | down |
| 6208466 | 7234040 | 1458505 | --- | --- | --- | 1,35 | down |
| 6208479 | 7298101 | 1617009 | --- | --- | --- | 1,35 | down |
| 6208530 | 7222236 | 1428136 | --- | --- | --- | 1,55 | up   |
| 6208610 | 7056333 | 1023673 | --- | --- | --- | 1,21 | up   |
| 6208639 | 7098867 | 1124956 | --- | --- | --- | 1,14 | up   |
| 6208776 | 7208784 | 1396157 | --- | --- | --- | 1,12 | down |
| 6208794 | 7337224 | 1712592 | --- | --- | --- | 1,98 | up   |
| 6208874 | 7262570 | 1528988 | --- | --- | --- | 1,26 | down |
| 6208885 | 7101258 | 1130571 | --- | --- | --- | 1,17 | up   |
| 6208898 | 7120427 | 1178426 | --- | --- | --- | 1,23 | down |
| 6208981 | 7167325 | 1292547 | --- | --- | --- | 1,02 | up   |
| 6209026 | 7227433 | 1440972 | --- | --- | --- | 1,55 | up   |
| 6209065 | 7373420 | 1805135 | --- | --- | --- | 2,19 | down |
| 6209077 | 7190524 | 1351187 | --- | --- | --- | 1,22 | up   |
| 6209171 | 7148741 | 1247831 | --- | --- | --- | 1,00 | up   |
| 6209263 | 7115507 | 1165983 | --- | --- | --- | 1,05 | up   |
| 6209264 | 7100523 | 1128854 | --- | --- | --- | 1,84 | down |
| 6209307 | 7146872 | 1242902 | --- | --- | --- | 1,11 | up   |
| 6209333 | 7073609 | 1064861 | --- | --- | --- | 1,90 | up   |
| 6209392 | 7267802 | 1541741 | --- | --- | --- | 1,41 | down |
| 6209589 | 7288284 | 1592645 | --- | --- | --- | 1,37 | down |
| 6209592 | 7300392 | 1622758 | --- | --- | --- | 1,15 | up   |
| 6209713 | 7102369 | 1133411 | --- | --- | --- | 1,05 | down |
| 6209781 | 7286807 | 1588799 | --- | --- | --- | 1,19 | up   |

|         |         |         |     |     |     |      |      |
|---------|---------|---------|-----|-----|-----|------|------|
| 6209828 | 7113085 | 1160004 | --- | --- | --- | 1,10 | down |
| 6209901 | 7107926 | 1146841 | --- | --- | --- | 1,31 | down |
| 6209922 | 7068259 | 1051598 | --- | --- | --- | 1,35 | up   |
| 6209942 | 7308679 | 1644251 | --- | --- | --- | 3,44 | down |
| 6209961 | 7108434 | 1148313 | --- | --- | --- | 1,14 | down |
| 6210027 | 7035525 | 974781  | --- | --- | --- | 1,21 | down |
| 6210039 | 7143455 | 1234721 | --- | --- | --- | 1,17 | down |
| 6210164 | 7060896 | 1033617 | --- | --- | --- | 1,46 | up   |
| 6210224 | 7280743 | 1574493 | --- | --- | --- | 1,63 | up   |
| 6210253 | 7261580 | 1526812 | --- | --- | --- | 1,03 | down |
| 6210312 | 7146093 | 1240932 | --- | --- | --- | 1,53 | up   |
| 6210438 | 7097454 | 1120881 | --- | --- | --- | 1,14 | up   |
| 6210495 | 7384509 | 1830731 | --- | --- | --- | 1,11 | up   |
| 6210565 | 7181001 | 1327621 | --- | --- | --- | 1,09 | down |
| 6210596 | 7383823 | 1828933 | --- | --- | --- | 1,13 | down |
| 6210678 | 7139824 | 1225320 | --- | --- | --- | 1,10 | down |
| 6210870 | 7208784 | 1396193 | --- | --- | --- | 2,05 | up   |
| 6210921 | 7319486 | 1670928 | --- | --- | --- | 1,11 | up   |
| 6210958 | 7358859 | 1767010 | --- | --- | --- | 1,35 | up   |
| 6211056 | 7363674 | 1778467 | --- | --- | --- | 1,13 | down |
| 6211141 | 7368954 | 1792777 | --- | --- | --- | 1,75 | up   |
| 6211157 | 7216807 | 1414701 | --- | --- | --- | 1,61 | up   |
| 6211234 | 7231834 | 1452274 | --- | --- | --- | 1,08 | down |
| 6211240 | 7279303 | 1571202 | --- | --- | --- | 2,29 | down |
| 6211249 | 7110999 | 1154774 | --- | --- | --- | 1,27 | down |
| 6211315 | 7297274 | 1614663 | --- | --- | --- | 1,20 | up   |
| 6211321 | 7280425 | 1573806 | --- | --- | --- | 1,26 | up   |
| 6211398 | 7198087 | 1370709 | --- | --- | --- | 1,33 | down |
| 6211418 | 7128112 | 1196526 | --- | --- | --- | 1,33 | down |
| 6211519 | 7219624 | 1422101 | --- | --- | --- | 1,58 | down |
| 6211551 | 7330396 | 1696378 | --- | --- | --- | 1,09 | down |
| 6211593 | 7171091 | 1302462 | --- | --- | --- | 1,07 | down |
| 6211629 | 7052813 | 1015893 | --- | --- | --- | 1,40 | down |
| 6211653 | 7360486 | 1770996 | --- | --- | --- | 1,09 | up   |
| 6211725 | 7324760 | 1683092 | --- | --- | --- | 1,06 | up   |
| 6211753 | 7380497 | 1821835 | --- | --- | --- | 1,00 | up   |
| 6211869 | 7254040 | 1507575 | --- | --- | --- | 1,35 | down |
| 6211884 | 7118864 | 1174361 | --- | --- | --- | 1,35 | down |
| 6211889 | 7264653 | 1534028 | --- | --- | --- | 1,28 | down |
| 6211981 | 7131103 | 1204365 | --- | --- | --- | 1,10 | down |
| 6212177 | 7252877 | 1504708 | --- | --- | --- | 2,65 | up   |
| 6212312 | 7069142 | 1053877 | --- | --- | --- | 1,01 | down |
| 6212397 | 7286807 | 1588803 | --- | --- | --- | 1,08 | down |
| 6212405 | 7075460 | 1069390 | --- | --- | --- | 1,03 | down |
| 6212446 | 7181001 | 1327614 | --- | --- | --- | 1,11 | down |
| 6212547 | 7060195 | 1031975 | --- | --- | --- | 1,05 | down |
| 6212572 | 7353287 | 1753001 | --- | --- | --- | 1,05 | down |
| 6212673 | 7116103 | 1167603 | --- | --- | --- | 2,56 | down |
| 6212720 | 7350489 | 1746112 | --- | --- | --- | 1,04 | up   |
| 6212757 | 7321029 | 1674810 | --- | --- | --- | 1,14 | down |
| 6213014 | 7093936 | 1112472 | --- | --- | --- | 1,22 | up   |
| 6213024 | 7162144 | 1280498 | --- | --- | --- | 1,11 | up   |
| 6213176 | 7196029 | 1365625 | --- | --- | --- | 1,27 | up   |
| 6213178 | 7340304 | 1720866 | --- | --- | --- | 1,57 | down |
| 6213245 | 7209927 | 1398929 | --- | --- | --- | 1,08 | up   |
| 6213355 | 7256789 | 1514640 | --- | --- | --- | 1,05 | down |
| 6213366 | 7065273 | 1044604 | --- | --- | --- | 1,80 | down |

|         |         |         |     |     |     |      |      |
|---------|---------|---------|-----|-----|-----|------|------|
| 6213423 | 7197138 | 1368004 | --- | --- | --- | 1,16 | down |
| 6213468 | 7156052 | 1265769 | --- | --- | --- | 1,84 | down |
| 6213528 | 7189669 | 1348968 | --- | --- | --- | 1,17 | down |
| 6213572 | 7154655 | 1262335 | --- | --- | --- | 1,48 | up   |
| 6213605 | 7344713 | 1732177 | --- | --- | --- | 1,31 | up   |
| 6213627 | 7282927 | 1580006 | --- | --- | --- | 1,34 | down |
| 6213665 | 7128112 | 1196581 | --- | --- | --- | 1,08 | up   |
| 6213762 | 7344406 | 1731198 | --- | --- | --- | 1,05 | up   |
| 6213770 | 7092549 | 1109192 | --- | --- | --- | 1,07 | down |
| 6213896 | 7281924 | 1577710 | --- | --- | --- | 2,52 | up   |
| 6213918 | 7092549 | 1109130 | --- | --- | --- | 1,01 | down |
| 6213963 | 7339379 | 1718361 | --- | --- | --- | 1,22 | down |
| 6213967 | 7266532 | 1538297 | --- | --- | --- | 1,55 | up   |
| 6214022 | 7030037 | 960717  | --- | --- | --- | 1,17 | up   |
| 6214143 | 7112566 | 1158631 | --- | --- | --- | 1,65 | down |
| 6214236 | 7282927 | 1580013 | --- | --- | --- | 1,39 | down |
| 6214300 | 7099573 | 1126736 | --- | --- | --- | 1,58 | down |
| 6214305 | 7176362 | 1315499 | --- | --- | --- | 1,11 | up   |
| 6214321 | 7062233 | 1037243 | --- | --- | --- | 1,00 | up   |
| 6214383 | 7126400 | 1192525 | --- | --- | --- | 1,08 | down |
| 6214393 | 7176368 | 1315571 | --- | --- | --- | 1,32 | down |
| 6214420 | 7274780 | 1559223 | --- | --- | --- | 1,68 | down |
| 6214489 | 7073854 | 1065621 | --- | --- | --- | 1,65 | up   |
| 6214612 | 7190524 | 1351171 | --- | --- | --- | 1,28 | down |
| 6214629 | 7156611 | 1267339 | --- | --- | --- | 1,15 | down |
| 6214712 | 7330731 | 1697188 | --- | --- | --- | 1,14 | down |
| 6214935 | 7258455 | 1518738 | --- | --- | --- | 2,17 | up   |
| 6214960 | 7344406 | 1731205 | --- | --- | --- | 1,15 | up   |
| 6214969 | 7162144 | 1280499 | --- | --- | --- | 1,27 | up   |
| 6215064 | 7115362 | 1165600 | --- | --- | --- | 1,50 | down |
| 6215106 | 7053874 | 1018306 | --- | --- | --- | 1,11 | up   |
| 6215138 | 7140365 | 1226763 | --- | --- | --- | 1,02 | up   |
| 6215161 | 7212698 | 1404871 | --- | --- | --- | 1,80 | up   |
| 6215216 | 7180732 | 1326735 | --- | --- | --- | 1,14 | up   |
| 6215254 | 7343052 | 1727508 | --- | --- | --- | 1,98 | up   |
| 6215262 | 7247512 | 1491192 | --- | --- | --- | 1,41 | down |
| 6215333 | 7088625 | 1099861 | --- | --- | --- | 2,06 | down |
| 6215413 | 7037235 | 978575  | --- | --- | --- | 1,28 | up   |
| 6215426 | 7194400 | 1361776 | --- | --- | --- | 1,37 | down |
| 6215451 | 7380497 | 1821830 | --- | --- | --- | 1,09 | down |
| 6215459 | 7232709 | 1454535 | --- | --- | --- | 2,00 | up   |
| 6215494 | 7166867 | 1291308 | --- | --- | --- | 1,54 | down |
| 6215507 | 7373678 | 1805858 | --- | --- | --- | 2,59 | up   |
| 6215689 | 7100523 | 1128906 | --- | --- | --- | 1,05 | up   |
| 6215710 | 7083030 | 1086266 | --- | --- | --- | 1,05 | up   |
| 6215713 | 7334636 | 1706501 | --- | --- | --- | 1,31 | up   |
| 6215721 | 7191888 | 1354950 | --- | --- | --- | 1,31 | down |
| 6215767 | 7064134 | 1041480 | --- | --- | --- | 1,31 | down |
| 6215805 | 7383823 | 1828935 | --- | --- | --- | 1,43 | up   |
| 6215858 | 7184981 | 1337844 | --- | --- | --- | 1,17 | up   |
| 6215859 | 7154655 | 1262329 | --- | --- | --- | 1,56 | up   |
| 6215864 | 7089080 | 1101145 | --- | --- | --- | 1,01 | up   |
| 6215867 | 7052385 | 1014809 | --- | --- | --- | 1,31 | down |
| 6215900 | 7070836 | 1058355 | --- | --- | --- | 1,27 | up   |
| 6215940 | 7337845 | 1714352 | --- | --- | --- | 1,11 | down |
| 6215951 | 7193056 | 1358261 | --- | --- | --- | 1,03 | up   |
| 6216004 | 7320735 | 1674181 | --- | --- | --- | 1,16 | down |

|         |         |         |     |     |     |      |      |
|---------|---------|---------|-----|-----|-----|------|------|
| 6216018 | 7125494 | 1190401 | --- | --- | --- | 1,09 | up   |
| 6216037 | 7068259 | 1051628 | --- | --- | --- | 2,93 | up   |
| 6216065 | 7186305 | 1341002 | --- | --- | --- | 1,33 | down |
| 6216228 | 7321414 | 1675631 | --- | --- | --- | 1,90 | up   |
| 6216235 | 7133484 | 1209952 | --- | --- | --- | 1,82 | down |
| 6216256 | 7235069 | 1460984 | --- | --- | --- | 1,12 | up   |
| 6216338 | 7237346 | 1466575 | --- | --- | --- | 1,36 | down |
| 6216430 | 7280743 | 1574521 | --- | --- | --- | 1,10 | down |
| 6216600 | 7059429 | 1030243 | --- | --- | --- | 1,14 | down |
| 6216633 | 7073679 | 1065189 | --- | --- | --- | 1,29 | down |
| 6216692 | 7337425 | 1713138 | --- | --- | --- | 1,04 | down |
| 6216820 | 7033616 | 970211  | --- | --- | --- | 1,01 | up   |
| 6216901 | 7317204 | 1665392 | --- | --- | --- | 1,29 | up   |
| 6216964 | 7247230 | 1490571 | --- | --- | --- | 1,10 | up   |
| 6217017 | 7322388 | 1677320 | --- | --- | --- | 1,16 | down |
| 6217075 | 7363674 | 1778440 | --- | --- | --- | 1,03 | up   |
| 6217099 | 7121849 | 1181800 | --- | --- | --- | 1,21 | up   |
| 6217132 | 7197400 | 1368811 | --- | --- | --- | 2,79 | down |
| 6217136 | 7326271 | 1686468 | --- | --- | --- | 1,23 | up   |
| 6217240 | 7353997 | 1754710 | --- | --- | --- | 1,06 | up   |
| 6217327 | 7142416 | 1231800 | --- | --- | --- | 2,18 | up   |
| 6217366 | 7176456 | 1315831 | --- | --- | --- | 1,22 | down |
| 6217411 | 7200545 | 1376932 | --- | --- | --- | 1,45 | up   |
| 6217592 | 7142917 | 1233168 | --- | --- | --- | 1,13 | down |
| 6217724 | 7127801 | 1195882 | --- | --- | --- | 1,18 | up   |
| 6217754 | 7071648 | 1060196 | --- | --- | --- | 2,57 | down |
| 6217836 | 7340304 | 1720852 | --- | --- | --- | 2,37 | up   |
| 6217888 | 7319627 | 1671267 | --- | --- | --- | 1,21 | up   |
| 6217984 | 7337224 | 1712560 | --- | --- | --- | 1,02 | up   |
| 6218007 | 7089080 | 1101140 | --- | --- | --- | 1,01 | up   |
| 6218037 | 7131372 | 1205021 | --- | --- | --- | 1,61 | up   |
| 6218048 | 7239939 | 1473799 | --- | --- | --- | 1,02 | down |
| 6218107 | 7337250 | 1712728 | --- | --- | --- | 1,17 | down |
| 6218115 | 7196233 | 1366098 | --- | --- | --- | 1,79 | up   |
| 6218277 | 7373678 | 1805870 | --- | --- | --- | 1,35 | down |
| 6218312 | 7256191 | 1512886 | --- | --- | --- | 1,28 | up   |
| 6218393 | 7079238 | 1077817 | --- | --- | --- | 1,70 | up   |
| 6218628 | 7341646 | 1724198 | --- | --- | --- | 2,50 | down |
| 6218912 | 7217650 | 1417203 | --- | --- | --- | 1,13 | up   |
| 6218929 | 7058507 | 1028302 | --- | --- | --- | 1,09 | down |
| 6219107 | 7367946 | 1788964 | --- | --- | --- | 1,10 | down |
| 6219182 | 7194400 | 1361731 | --- | --- | --- | 1,08 | down |
| 6219244 | 7295410 | 1609684 | --- | --- | --- | 1,05 | down |
| 6219262 | 7366749 | 1785523 | --- | --- | --- | 3,20 | down |
| 6219295 | 7152915 | 1257483 | --- | --- | --- | 1,73 | up   |
| 6219354 | 7344702 | 1732141 | --- | --- | --- | 1,46 | down |
| 6219370 | 7237940 | 1468183 | --- | --- | --- | 1,24 | up   |
| 6219396 | 7062233 | 1037193 | --- | --- | --- | 1,07 | up   |
| 6219515 | 7286807 | 1588809 | --- | --- | --- | 1,09 | up   |
| 6219532 | 7156052 | 1265772 | --- | --- | --- | 1,27 | up   |
| 6219582 | 7030224 | 961134  | --- | --- | --- | 2,13 | up   |
| 6219609 | 7309734 | 1646922 | --- | --- | --- | 1,56 | down |
| 6219704 | 7118864 | 1174338 | --- | --- | --- | 1,18 | down |
| 6219871 | 7339387 | 1718389 | --- | --- | --- | 1,78 | down |
| 6219948 | 7235323 | 1461559 | --- | --- | --- | 1,10 | up   |
| 6220045 | 7264274 | 1533174 | --- | --- | --- | 3,41 | down |
| 6220066 | 7190844 | 1352141 | --- | --- | --- | 1,07 | down |

|         |         |         |     |     |     |      |      |
|---------|---------|---------|-----|-----|-----|------|------|
| 6220067 | 7292517 | 1602548 | --- | --- | --- | 1,23 | down |
| 6220099 | 7030037 | 960706  | --- | --- | --- | 1,09 | up   |
| 6220103 | 7147213 | 1243826 | --- | --- | --- | 1,00 | up   |
| 6220161 | 7113261 | 1160478 | --- | --- | --- | 1,02 | up   |
| 6220383 | 7094158 | 1112984 | --- | --- | --- | 1,88 | down |
| 6220412 | 7244027 | 1483293 | --- | --- | --- | 1,19 | up   |
| 6220414 | 7165954 | 1288769 | --- | --- | --- | 1,07 | down |
| 6220434 | 7264797 | 1534420 | --- | --- | --- | 1,17 | down |
| 6220457 | 7078605 | 1076359 | --- | --- | --- | 2,74 | down |
| 6220524 | 7264653 | 1534027 | --- | --- | --- | 1,39 | down |
| 6220534 | 7204917 | 1387127 | --- | --- | --- | 1,24 | up   |
| 6220541 | 7180598 | 1326324 | --- | --- | --- | 1,28 | up   |
| 6220654 | 7168979 | 1297200 | --- | --- | --- | 1,13 | down |
| 6220670 | 7119179 | 1174971 | --- | --- | --- | 1,14 | up   |
| 6220674 | 7033504 | 969853  | --- | --- | --- | 1,11 | up   |
| 6220694 | 7031774 | 964662  | --- | --- | --- | 1,38 | up   |
| 6220735 | 7200152 | 1376051 | --- | --- | --- | 1,61 | down |
| 6220754 | 7107926 | 1146847 | --- | --- | --- | 1,15 | up   |
| 6220797 | 7179785 | 1324498 | --- | --- | --- | 1,36 | up   |
| 6220829 | 7137646 | 1220438 | --- | --- | --- | 1,39 | down |
| 6220830 | 7041140 | 988293  | --- | --- | --- | 1,03 | down |
| 6220834 | 7344838 | 1732458 | --- | --- | --- | 2,06 | down |
| 6220907 | 7100408 | 1128642 | --- | --- | --- | 1,02 | up   |
| 6221094 | 7032558 | 967060  | --- | --- | --- | 1,45 | up   |
| 6221165 | 7118864 | 1174324 | --- | --- | --- | 1,53 | down |
| 6221178 | 7058507 | 1028301 | --- | --- | --- | 1,01 | down |
| 6221258 | 7264653 | 1534049 | --- | --- | --- | 1,27 | down |
| 6221294 | 7059648 | 1030673 | --- | --- | --- | 1,01 | down |
| 6221338 | 7091962 | 1107747 | --- | --- | --- | 1,57 | up   |
| 6221343 | 7366749 | 1785521 | --- | --- | --- | 1,25 | down |
| 6221447 | 7148741 | 1247874 | --- | --- | --- | 1,00 | up   |
| 6221462 | 7194540 | 1362120 | --- | --- | --- | 1,75 | up   |
| 6221463 | 7350993 | 1747517 | --- | --- | --- | 1,11 | down |
| 6221490 | 7324760 | 1683093 | --- | --- | --- | 1,01 | up   |
| 6221651 | 7095960 | 1117069 | --- | --- | --- | 1,03 | down |
| 6221664 | 7155882 | 1265361 | --- | --- | --- | 1,07 | down |
| 6221668 | 7279303 | 1571206 | --- | --- | --- | 3,06 | down |
| 6221693 | 7225213 | 1435125 | --- | --- | --- | 2,60 | down |
| 6221766 | 7025310 | 949236  | --- | --- | --- | 1,18 | down |
| 6221786 | 7095041 | 1115176 | --- | --- | --- | 1,03 | down |
| 6221796 | 7213908 | 1407652 | --- | --- | --- | 1,66 | down |
| 6221910 | 7279806 | 1572565 | --- | --- | --- | 1,28 | down |
| 6221921 | 7139708 | 1225051 | --- | --- | --- | 1,53 | down |
| 6221988 | 7252513 | 1503832 | --- | --- | --- | 2,22 | up   |
| 6222148 | 7247848 | 1492066 | --- | --- | --- | 1,13 | up   |
| 6222195 | 7356326 | 1760469 | --- | --- | --- | 1,43 | down |
| 6222260 | 7364346 | 1779982 | --- | --- | --- | 1,20 | down |
| 6222281 | 7106752 | 1144025 | --- | --- | --- | 1,00 | down |
| 6222346 | 7384073 | 1829457 | --- | --- | --- | 1,20 | up   |
| 6222451 | 7274780 | 1559240 | --- | --- | --- | 1,01 | down |
| 6222463 | 7219624 | 1422101 | --- | --- | --- | 1,39 | up   |
| 6222465 | 7257441 | 1516298 | --- | --- | --- | 1,06 | up   |
| 6222527 | 7359789 | 1769113 | --- | --- | --- | 1,26 | up   |
| 6222565 | 7231653 | 1451891 | --- | --- | --- | 1,27 | down |
| 6222784 | 7257337 | 1515972 | --- | --- | --- | 1,86 | down |
| 6222847 | 7371228 | 1799465 | --- | --- | --- | 1,07 | down |
| 6222958 | 7166439 | 1290104 | --- | --- | --- | 2,09 | down |

|         |         |         |     |     |     |      |      |
|---------|---------|---------|-----|-----|-----|------|------|
| 6222969 | 7062233 | 1037243 | --- | --- | --- | 1,14 | down |
| 6223040 | 7297274 | 1614664 | --- | --- | --- | 2,59 | down |
| 6223042 | 7050878 | 1011548 | --- | --- | --- | 1,03 | down |
| 6223094 | 7143971 | 1235931 | --- | --- | --- | 1,11 | down |
| 6223181 | 7148741 | 1247831 | --- | --- | --- | 1,05 | down |
| 6223200 | 7118234 | 1172841 | --- | --- | --- | 1,14 | up   |
| 6223228 | 7207093 | 1392079 | --- | --- | --- | 1,05 | up   |
| 6223283 | 7210822 | 1400971 | --- | --- | --- | 1,08 | up   |
| 6223288 | 7341038 | 1722669 | --- | --- | --- | 2,55 | down |
| 6223328 | 7364948 | 1781228 | --- | --- | --- | 1,44 | up   |
| 6223397 | 7340673 | 1721695 | --- | --- | --- | 1,44 | down |
| 6223426 | 7337425 | 1713183 | --- | --- | --- | 1,32 | up   |
| 6223439 | 7166867 | 1291375 | --- | --- | --- | 1,17 | down |
| 6223491 | 7027386 | 955088  | --- | --- | --- | 1,20 | down |
| 6223656 | 7069142 | 1053875 | --- | --- | --- | 2,24 | down |
| 6223670 | 7043515 | 994019  | --- | --- | --- | 1,15 | down |
| 6223757 | 7307424 | 1641135 | --- | --- | --- | 1,35 | down |
| 6223774 | 7369954 | 1795671 | --- | --- | --- | 1,20 | up   |
| 6223793 | 7101684 | 1131710 | --- | --- | --- | 1,15 | up   |
| 6223873 | 7309734 | 1646892 | --- | --- | --- | 1,10 | down |
| 6223893 | 7341243 | 1723210 | --- | --- | --- | 1,51 | down |
| 6224009 | 7083021 | 1086220 | --- | --- | --- | 1,32 | up   |
| 6224051 | 7222236 | 1428126 | --- | --- | --- | 1,03 | down |
| 6224072 | 7074911 | 1068175 | --- | --- | --- | 2,40 | down |
| 6224085 | 7038659 | 982163  | --- | --- | --- | 1,44 | down |
| 6224238 | 7083030 | 1086245 | --- | --- | --- | 1,54 | down |
| 6224327 | 7369400 | 1793984 | --- | --- | --- | 2,36 | up   |
| 6224357 | 7336854 | 1711686 | --- | --- | --- | 1,19 | down |
| 6224406 | 7339732 | 1719213 | --- | --- | --- | 1,01 | up   |
| 6224476 | 7185315 | 1338604 | --- | --- | --- | 1,13 | up   |
| 6224501 | 7361881 | 1773913 | --- | --- | --- | 1,22 | down |
| 6224512 | 7099573 | 1126732 | --- | --- | --- | 1,11 | down |
| 6224532 | 7181001 | 1327601 | --- | --- | --- | 1,16 | up   |
| 6224666 | 7309734 | 1646914 | --- | --- | --- | 1,19 | up   |
| 6224712 | 7337425 | 1713141 | --- | --- | --- | 1,16 | down |
| 6224732 | 7058149 | 1027304 | --- | --- | --- | 1,45 | up   |
| 6224787 | 7307473 | 1641298 | --- | --- | --- | 1,40 | down |
| 6224865 | 7076236 | 1071185 | --- | --- | --- | 1,05 | up   |
| 6224896 | 7031774 | 964764  | --- | --- | --- | 1,67 | down |
| 6224902 | 7100408 | 1128648 | --- | --- | --- | 2,57 | up   |
| 6224971 | 7238414 | 1469559 | --- | --- | --- | 1,80 | down |
| 6224982 | 7340673 | 1721711 | --- | --- | --- | 1,18 | down |
| 6224984 | 7369954 | 1795674 | --- | --- | --- | 1,23 | up   |
| 6224994 | 7341002 | 1722533 | --- | --- | --- | 1,24 | up   |
| 6225002 | 7337250 | 1712722 | --- | --- | --- | 1,55 | up   |
| 6225019 | 7168439 | 1295697 | --- | --- | --- | 1,13 | down |
| 6225085 | 7340673 | 1721690 | --- | --- | --- | 1,04 | up   |
| 6225163 | 7195680 | 1364903 | --- | --- | --- | 1,58 | up   |
| 6225183 | 7315571 | 1661011 | --- | --- | --- | 2,25 | up   |
| 6225296 | 7351568 | 1748791 | --- | --- | --- | 1,37 | up   |
| 6225310 | 7339732 | 1719192 | --- | --- | --- | 1,08 | down |
| 6225331 | 7139825 | 1225350 | --- | --- | --- | 1,37 | down |
| 6225428 | 7374324 | 1807440 | --- | --- | --- | 2,61 | up   |
| 6225512 | 7107926 | 1146845 | --- | --- | --- | 1,05 | down |
| 6225656 | 7209811 | 1398678 | --- | --- | --- | 1,04 | up   |
| 6225805 | 7288077 | 1592005 | --- | --- | --- | 1,41 | down |
| 6225833 | 7210263 | 1399756 | --- | --- | --- | 1,06 | down |



|         |         |         |     |     |     |      |      |
|---------|---------|---------|-----|-----|-----|------|------|
| 6225846 | 7289075 | 1594464 | --- | --- | --- | 2,22 | down |
| 6225864 | 7350237 | 1745524 | --- | --- | --- | 2,03 | up   |
| 6225937 | 7243363 | 1481615 | --- | --- | --- | 1,63 | up   |
| 6225944 | 7109292 | 1150753 | --- | --- | --- | 1,26 | down |
| 6226163 | 7334855 | 1706940 | --- | --- | --- | 1,50 | up   |
| 6226315 | 7363147 | 1777030 | --- | --- | --- | 1,37 | down |
| 6226363 | 7097536 | 1121129 | --- | --- | --- | 1,01 | down |
| 6226410 | 7239752 | 1473148 | --- | --- | --- | 1,33 | up   |
| 6226420 | 7349944 | 1744912 | --- | --- | --- | 1,11 | up   |
| 6226448 | 7345465 | 1733859 | --- | --- | --- | 1,32 | up   |
| 6226539 | 7065640 | 1045201 | --- | --- | --- | 2,10 | down |
| 6226573 | 7167883 | 1294104 | --- | --- | --- | 1,27 | up   |
| 6226590 | 7088135 | 1098419 | --- | --- | --- | 1,15 | down |
| 6226649 | 7170845 | 1301911 | --- | --- | --- | 1,00 | up   |
| 6226687 | 7248790 | 1494515 | --- | --- | --- | 1,03 | up   |
| 6226732 | 7039223 | 983555  | --- | --- | --- | 1,16 | up   |
| 6226852 | 7252051 | 1502510 | --- | --- | --- | 1,38 | down |
| 6226876 | 7059506 | 1030401 | --- | --- | --- | 1,19 | up   |
| 6226998 | 7325643 | 1685179 | --- | --- | --- | 1,05 | down |
| 6227134 | 7259807 | 1522248 | --- | --- | --- | 1,12 | down |
| 6227245 | 7330396 | 1696379 | --- | --- | --- | 2,38 | down |
| 6227261 | 7365183 | 1781905 | --- | --- | --- | 1,09 | up   |
| 6227262 | 7243253 | 1481232 | --- | --- | --- | 1,08 | up   |
| 6227284 | 7075445 | 1069347 | --- | --- | --- | 1,48 | down |
| 6227363 | 7306330 | 1638558 | --- | --- | --- | 1,35 | down |
| 6227365 | 7358859 | 1766997 | --- | --- | --- | 1,01 | down |
| 6227400 | 7318286 | 1668335 | --- | --- | --- | 1,32 | down |
| 6227438 | 7238252 | 1469220 | --- | --- | --- | 1,04 | down |
| 6227448 | 7226109 | 1437383 | --- | --- | --- | 1,77 | up   |
| 6227504 | 7172373 | 1305584 | --- | --- | --- | 1,62 | up   |
| 6227666 | 7111361 | 1155602 | --- | --- | --- | 1,09 | down |
| 6227678 | 7207069 | 1392010 | --- | --- | --- | 1,18 | up   |
| 6227728 | 7297589 | 1615647 | --- | --- | --- | 1,17 | down |
| 6227761 | 7302787 | 1628893 | --- | --- | --- | 1,14 | up   |
| 6227763 | 7069721 | 1055282 | --- | --- | --- | 1,07 | down |
| 6227795 | 7239303 | 1471969 | --- | --- | --- | 1,23 | up   |
| 6227840 | 7064468 | 1042368 | --- | --- | --- | 1,57 | up   |
| 6227970 | 7306229 | 1638245 | --- | --- | --- | 1,19 | down |
| 6228071 | 7090581 | 1104782 | --- | --- | --- | 1,34 | up   |
| 6228178 | 7293234 | 1604356 | --- | --- | --- | 1,28 | down |
| 6228186 | 7328833 | 1692793 | --- | --- | --- | 1,05 | down |
| 6228199 | 7139708 | 1225051 | --- | --- | --- | 1,14 | up   |
| 6228204 | 7349313 | 1743122 | --- | --- | --- | 1,15 | up   |
| 6228240 | 7364346 | 1780015 | --- | --- | --- | 1,16 | down |
| 6228250 | 7297589 | 1615687 | --- | --- | --- | 1,40 | down |
| 6228347 | 7217679 | 1417291 | --- | --- | --- | 1,43 | down |
| 6228352 | 7043379 | 993641  | --- | --- | --- | 1,14 | up   |
| 6228423 | 7092549 | 1109125 | --- | --- | --- | 1,12 | up   |
| 6228444 | 7341274 | 1723382 | --- | --- | --- | 1,54 | down |
| 6228481 | 7118503 | 1173560 | --- | --- | --- | 1,07 | down |
| 6228588 | 7363529 | 1777904 | --- | --- | --- | 1,01 | down |
| 6228594 | 7116023 | 1167296 | --- | --- | --- | 1,12 | up   |
| 6228625 | 7088164 | 1098486 | --- | --- | --- | 1,70 | down |
| 6228628 | 7368005 | 1789340 | --- | --- | --- | 1,34 | up   |
| 6228686 | 7244287 | 1484057 | --- | --- | --- | 1,73 | down |
| 6228708 | 7350489 | 1746112 | --- | --- | --- | 1,07 | up   |
| 6228819 | 7213945 | 1407863 | --- | --- | --- | 1,07 | down |

|         |         |         |     |     |     |      |      |
|---------|---------|---------|-----|-----|-----|------|------|
| 6228826 | 7059020 | 1029343 | --- | --- | --- | 1,29 | up   |
| 6228862 | 7284153 | 1583019 | --- | --- | --- | 1,11 | up   |
| 6228905 | 7269911 | 1546921 | --- | --- | --- | 1,88 | down |
| 6228917 | 7079238 | 1077820 | --- | --- | --- | 2,26 | up   |
| 6228959 | 7038179 | 981262  | --- | --- | --- | 1,09 | up   |
| 6229033 | 7236492 | 1464552 | --- | --- | --- | 1,12 | up   |
| 6229048 | 7132024 | 1206338 | --- | --- | --- | 2,50 | up   |
| 6229051 | 7353232 | 1752769 | --- | --- | --- | 1,15 | up   |
| 6229080 | 7114274 | 1162813 | --- | --- | --- | 1,40 | up   |
| 6229092 | 7143455 | 1234719 | --- | --- | --- | 1,14 | up   |
| 6229098 | 7312161 | 1652463 | --- | --- | --- | 1,34 | up   |
| 6229197 | 7227474 | 1441148 | --- | --- | --- | 1,48 | up   |
| 6229333 | 7330238 | 1695926 | --- | --- | --- | 1,02 | up   |
| 6229382 | 7331413 | 1699129 | --- | --- | --- | 1,78 | down |
| 6229518 | 7197138 | 1367998 | --- | --- | --- | 1,10 | down |
| 6229526 | 7213908 | 1407648 | --- | --- | --- | 1,36 | up   |
| 6229530 | 7303777 | 1631908 | --- | --- | --- | 1,17 | up   |
| 6229561 | 7209811 | 1398677 | --- | --- | --- | 1,97 | down |
| 6229574 | 7305275 | 1635846 | --- | --- | --- | 1,30 | down |
| 6229610 | 7343250 | 1728036 | --- | --- | --- | 1,29 | up   |
| 6229683 | 7376820 | 1813403 | --- | --- | --- | 1,68 | up   |
| 6229744 | 7264808 | 1534474 | --- | --- | --- | 1,25 | down |
| 6229824 | 7166867 | 1291330 | --- | --- | --- | 1,07 | up   |
| 6229944 | 7115507 | 1165976 | --- | --- | --- | 1,16 | up   |
| 6229949 | 7165954 | 1288770 | --- | --- | --- | 1,43 | down |
| 6229950 | 7166439 | 1290095 | --- | --- | --- | 1,84 | up   |
| 6229961 | 7235794 | 1462891 | --- | --- | --- | 1,15 | down |
| 6230120 | 7279793 | 1572532 | --- | --- | --- | 1,30 | up   |
| 6230136 | 7202837 | 1382308 | --- | --- | --- | 2,65 | down |
| 6230172 | 7274892 | 1559575 | --- | --- | --- | 1,10 | up   |
| 6230228 | 7319486 | 1670927 | --- | --- | --- | 1,13 | up   |
| 6230230 | 7329136 | 1693552 | --- | --- | --- | 1,21 | down |
| 6230258 | 7067670 | 1050316 | --- | --- | --- | 2,58 | up   |
| 6230266 | 7355755 | 1759320 | --- | --- | --- | 1,01 | up   |
| 6230556 | 7148741 | 1247860 | --- | --- | --- | 1,17 | down |
| 6230640 | 7176275 | 1315336 | --- | --- | --- | 1,46 | up   |
| 6230713 | 7370853 | 1798412 | --- | --- | --- | 1,04 | down |
| 6230842 | 7052385 | 1014777 | --- | --- | --- | 1,00 | up   |
| 6230896 | 7231484 | 1451364 | --- | --- | --- | 1,17 | up   |
| 6230918 | 7177180 | 1317778 | --- | --- | --- | 1,22 | down |
| 6231124 | 7272110 | 1553031 | --- | --- | --- | 1,55 | up   |
| 6231202 | 7343279 | 1728115 | --- | --- | --- | 1,31 | up   |
| 6231209 | 7341274 | 1723379 | --- | --- | --- | 1,17 | down |
| 6231248 | 7193513 | 1359467 | --- | --- | --- | 1,30 | down |
| 6231273 | 7281924 | 1577715 | --- | --- | --- | 1,19 | up   |
| 6231320 | 7041609 | 989587  | --- | --- | --- | 1,12 | down |
| 6231370 | 7110401 | 1153054 | --- | --- | --- | 1,02 | up   |
| 6231392 | 7061703 | 1035736 | --- | --- | --- | 1,03 | down |
| 6231421 | 7234040 | 1458505 | --- | --- | --- | 1,01 | up   |
| 6231434 | 7247954 | 1492398 | --- | --- | --- | 1,75 | down |
| 6231485 | 7249019 | 1495081 | --- | --- | --- | 1,34 | down |
| 6231495 | 7116103 | 1167598 | --- | --- | --- | 1,75 | up   |
| 6231510 | 7115362 | 1165598 | --- | --- | --- | 1,08 | down |
| 6231566 | 7056333 | 1023712 | --- | --- | --- | 1,49 | up   |
| 6231679 | 7071292 | 1059429 | --- | --- | --- | 1,01 | up   |
| 6231684 | 7060896 | 1033574 | --- | --- | --- | 2,02 | down |
| 6231706 | 7141061 | 1228643 | --- | --- | --- | 1,14 | up   |

|         |         |         |     |     |     |      |      |
|---------|---------|---------|-----|-----|-----|------|------|
| 6231730 | 7267953 | 1542240 | --- | --- | --- | 1,23 | up   |
| 6231768 | 7258455 | 1518726 | --- | --- | --- | 1,28 | down |
| 6231778 | 7384073 | 1829460 | --- | --- | --- | 1,98 | down |
| 6231879 | 7069142 | 1053876 | --- | --- | --- | 1,04 | down |
| 6232064 | 7212735 | 1405025 | --- | --- | --- | 1,05 | up   |
| 6232075 | 7055793 | 1022295 | --- | --- | --- | 1,04 | down |
| 6232076 | 7292701 | 1602933 | --- | --- | --- | 1,14 | up   |
| 6232124 | 7234040 | 1458500 | --- | --- | --- | 2,38 | up   |
| 6232133 | 7056025 | 1022801 | --- | --- | --- | 1,29 | down |
| 6232142 | 7137646 | 1220437 | --- | --- | --- | 1,13 | down |
| 6232156 | 7131372 | 1205023 | --- | --- | --- | 1,43 | down |
| 6232193 | 7059971 | 1031461 | --- | --- | --- | 1,85 | down |
| 6232240 | 7132125 | 1206613 | --- | --- | --- | 1,07 | up   |
| 6232377 | 7188458 | 1345725 | --- | --- | --- | 2,30 | up   |
| 6232491 | 7169599 | 1298443 | --- | --- | --- | 1,17 | up   |
| 6232551 | 7354896 | 1756996 | --- | --- | --- | 1,31 | down |
| 6232568 | 7216807 | 1414699 | --- | --- | --- | 1,30 | down |
| 6232735 | 7267802 | 1541816 | --- | --- | --- | 1,88 | down |
| 6232824 | 7326612 | 1687195 | --- | --- | --- | 1,01 | up   |
| 6232836 | 7373038 | 1804286 | --- | --- | --- | 1,22 | up   |
| 6232901 | 7208436 | 1395315 | --- | --- | --- | 2,11 | down |
| 6232957 | 7128704 | 1198020 | --- | --- | --- | 1,02 | up   |
| 6233072 | 7376828 | 1813467 | --- | --- | --- | 1,82 | up   |
| 6233090 | 7355044 | 1757452 | --- | --- | --- | 1,12 | up   |
| 6233261 | 7337425 | 1713194 | --- | --- | --- | 2,03 | up   |
| 6233315 | 7092549 | 1109133 | --- | --- | --- | 1,67 | up   |
| 6233346 | 7160846 | 1277348 | --- | --- | --- | 1,03 | up   |
| 6233353 | 7128921 | 1198517 | --- | --- | --- | 1,01 | up   |
| 6233526 | 7033504 | 969861  | --- | --- | --- | 1,96 | down |
| 6233566 | 7240569 | 1475491 | --- | --- | --- | 1,16 | down |
| 6233644 | 7263805 | 1532176 | --- | --- | --- | 1,09 | up   |
| 6233648 | 7180732 | 1326719 | --- | --- | --- | 1,17 | down |
| 6233657 | 7281924 | 1577721 | --- | --- | --- | 1,25 | up   |
| 6233798 | 7337425 | 1713161 | --- | --- | --- | 1,25 | down |
| 6233844 | 7274892 | 1559569 | --- | --- | --- | 1,78 | up   |
| 6233882 | 7071264 | 1059363 | --- | --- | --- | 1,66 | down |
| 6233917 | 7330181 | 1695694 | --- | --- | --- | 1,06 | down |
| 6233932 | 7326612 | 1687202 | --- | --- | --- | 1,22 | down |
| 6234049 | 7072765 | 1062740 | --- | --- | --- | 1,26 | down |
| 6234160 | 7143455 | 1234714 | --- | --- | --- | 1,05 | down |
| 6234193 | 7069142 | 1053876 | --- | --- | --- | 1,09 | up   |
| 6234251 | 7374324 | 1807529 | --- | --- | --- | 1,10 | down |
| 6234348 | 7209927 | 1398923 | --- | --- | --- | 1,28 | down |
| 6234578 | 7094158 | 1112982 | --- | --- | --- | 1,32 | up   |
| 6234581 | 7086966 | 1095272 | --- | --- | --- | 1,02 | up   |
| 6234589 | 7282927 | 1580005 | --- | --- | --- | 1,06 | up   |
| 6234604 | 7225213 | 1435124 | --- | --- | --- | 1,11 | up   |
| 6234636 | 7240569 | 1475497 | --- | --- | --- | 1,26 | up   |
| 6234676 | 7043515 | 994014  | --- | --- | --- | 1,39 | down |
| 6234677 | 7330396 | 1696342 | --- | --- | --- | 1,65 | down |
| 6234742 | 7186464 | 1341375 | --- | --- | --- | 2,30 | down |
| 6234848 | 7189184 | 1347597 | --- | --- | --- | 1,04 | up   |
| 6234869 | 7284153 | 1583011 | --- | --- | --- | 3,32 | down |
| 6234872 | 7355755 | 1759317 | --- | --- | --- | 1,30 | down |
| 6234904 | 7119845 | 1176903 | --- | --- | --- | 1,02 | down |
| 6235013 | 7341002 | 1722535 | --- | --- | --- | 1,00 | down |
| 6235039 | 7140834 | 1228016 | --- | --- | --- | 1,82 | down |

|         |         |         |     |     |     |      |      |
|---------|---------|---------|-----|-----|-----|------|------|
| 6235056 | 7288077 | 1591965 | --- | --- | --- | 1,10 | down |
| 6235128 | 7068259 | 1051662 | --- | --- | --- | 1,39 | up   |
| 6235148 | 7231152 | 1450255 | --- | --- | --- | 1,34 | up   |
| 6235165 | 7148741 | 1247859 | --- | --- | --- | 1,22 | down |
| 6235182 | 7217650 | 1417181 | --- | --- | --- | 1,55 | up   |
| 6235213 | 7329136 | 1693541 | --- | --- | --- | 1,49 | down |
| 6235296 | 7168439 | 1295675 | --- | --- | --- | 1,08 | down |
| 6235318 | 7253215 | 1505369 | --- | --- | --- | 1,37 | up   |
| 6235411 | 7320735 | 1674180 | --- | --- | --- | 1,16 | up   |
| 6235634 | 7141061 | 1228678 | --- | --- | --- | 1,25 | down |
| 6235654 | 7317708 | 1666822 | --- | --- | --- | 1,01 | down |
| 6235655 | 7061003 | 1033924 | --- | --- | --- | 1,05 | up   |
| 6235665 | 7364346 | 1779972 | --- | --- | --- | 1,61 | down |
| 6235684 | 7188829 | 1346669 | --- | --- | --- | 1,01 | down |
| 6235747 | 7184151 | 1335960 | --- | --- | --- | 1,09 | down |
| 6235771 | 7369712 | 1794828 | --- | --- | --- | 1,17 | up   |
| 6235974 | 7278010 | 1568048 | --- | --- | --- | 1,06 | down |
| 6236084 | 7180687 | 1326629 | --- | --- | --- | 1,21 | up   |
| 6236172 | 7027797 | 956287  | --- | --- | --- | 1,03 | down |
| 6236269 | 7298101 | 1616970 | --- | --- | --- | 1,07 | up   |
| 6236300 | 7322260 | 1677066 | --- | --- | --- | 1,12 | down |
| 6236345 | 7058149 | 1027307 | --- | --- | --- | 1,06 | down |
| 6236354 | 7131805 | 1205917 | --- | --- | --- | 1,04 | up   |
| 6236380 | 7245874 | 1487590 | --- | --- | --- | 1,17 | up   |
| 6236400 | 7247334 | 1490819 | --- | --- | --- | 1,10 | up   |
| 6236462 | 7336050 | 1709754 | --- | --- | --- | 1,47 | down |
| 6236552 | 7168979 | 1297175 | --- | --- | --- | 2,58 | down |
| 6236614 | 7336931 | 1711872 | --- | --- | --- | 2,07 | down |
| 6236623 | 7239939 | 1473790 | --- | --- | --- | 1,27 | up   |
| 6236645 | 7282927 | 1580015 | --- | --- | --- | 1,67 | up   |
| 6236687 | 7150348 | 1251398 | --- | --- | --- | 1,26 | down |
| 6236754 | 7233178 | 1455904 | --- | --- | --- | 1,04 | up   |
| 6236814 | 7041609 | 989573  | --- | --- | --- | 1,11 | up   |
| 6236936 | 7180721 | 1326699 | --- | --- | --- | 1,12 | down |
| 6236978 | 7322020 | 1676651 | --- | --- | --- | 1,17 | down |
| 6237027 | 7176409 | 1315673 | --- | --- | --- | 1,08 | down |
| 6237100 | 7229909 | 1447246 | --- | --- | --- | 1,70 | down |
| 6237141 | 7201422 | 1379171 | --- | --- | --- | 1,00 | up   |
| 6237241 | 7196029 | 1365638 | --- | --- | --- | 1,19 | up   |
| 6237321 | 7328695 | 1692382 | --- | --- | --- | 1,16 | up   |
| 6237322 | 7258455 | 1518738 | --- | --- | --- | 1,05 | down |
| 6237462 | 7374790 | 1808782 | --- | --- | --- | 1,35 | down |
| 6237475 | 7079238 | 1077817 | --- | --- | --- | 1,23 | up   |
| 6237592 | 7295652 | 1610276 | --- | --- | --- | 1,09 | down |
| 6237635 | 7252877 | 1504687 | --- | --- | --- | 1,49 | up   |
| 6237679 | 7260066 | 1522892 | --- | --- | --- | 1,02 | down |
| 6237727 | 7118864 | 1174320 | --- | --- | --- | 1,14 | down |
| 6237812 | 7174650 | 1311713 | --- | --- | --- | 1,11 | down |
| 6237815 | 7337224 | 1712613 | --- | --- | --- | 1,76 | down |
| 6237847 | 7344530 | 1731576 | --- | --- | --- | 1,01 | up   |
| 6237989 | 7162177 | 1280576 | --- | --- | --- | 2,51 | down |
| 6238053 | 7227433 | 1440991 | --- | --- | --- | 1,07 | up   |
| 6238087 | 7033504 | 969843  | --- | --- | --- | 1,04 | down |
| 6238141 | 7155286 | 1263909 | --- | --- | --- | 3,27 | up   |
| 6238164 | 7244287 | 1484049 | --- | --- | --- | 1,01 | down |
| 6238252 | 7062233 | 1037248 | --- | --- | --- | 1,03 | up   |
| 6238431 | 7302787 | 1628887 | --- | --- | --- | 1,31 | down |

|         |         |         |     |     |     |      |      |
|---------|---------|---------|-----|-----|-----|------|------|
| 6238458 | 7083030 | 1086253 | --- | --- | --- | 1,13 | up   |
| 6238549 | 7062436 | 1037699 | --- | --- | --- | 1,68 | down |
| 6238552 | 7056736 | 1024421 | --- | --- | --- | 1,11 | up   |
| 6238580 | 7274780 | 1559229 | --- | --- | --- | 1,79 | down |
| 6238653 | 7069603 | 1055053 | --- | --- | --- | 1,12 | down |
| 6238781 | 7330238 | 1695953 | --- | --- | --- | 1,20 | down |
| 6238812 | 7064468 | 1042369 | --- | --- | --- | 1,03 | down |
| 6238843 | 7212587 | 1404641 | --- | --- | --- | 1,14 | up   |
| 6238852 | 7256070 | 1512580 | --- | --- | --- | 1,68 | down |
| 6238955 | 7374324 | 1807523 | --- | --- | --- | 1,21 | down |
| 6238967 | 7249015 | 1495051 | --- | --- | --- | 2,32 | down |
| 6238990 | 7231484 | 1451386 | --- | --- | --- | 1,01 | down |
| 6239138 | 7281877 | 1577541 | --- | --- | --- | 1,20 | down |
| 6239350 | 7059917 | 1031330 | --- | --- | --- | 1,24 | down |
| 6239465 | 7068504 | 1052165 | --- | --- | --- | 1,53 | down |
| 6239493 | 7306680 | 1639576 | --- | --- | --- | 1,17 | down |
| 6239495 | 7181286 | 1328461 | --- | --- | --- | 1,13 | up   |
| 6239506 | 7354935 | 1757102 | --- | --- | --- | 1,12 | up   |
| 6239581 | 7330396 | 1696346 | --- | --- | --- | 1,23 | up   |
| 6239616 | 7384179 | 1829780 | --- | --- | --- | 1,01 | down |
| 6239667 | 7210713 | 1400753 | --- | --- | --- | 1,10 | up   |
| 6239714 | 7056333 | 1023709 | --- | --- | --- | 1,77 | up   |
| 6239802 | 7148741 | 1247864 | --- | --- | --- | 1,41 | up   |
| 6239803 | 7035525 | 974786  | --- | --- | --- | 1,34 | up   |
| 6239811 | 7086966 | 1095266 | --- | --- | --- | 1,01 | down |
| 6239963 | 7244288 | 1484114 | --- | --- | --- | 1,38 | up   |
| 6240006 | 7233921 | 1458158 | --- | --- | --- | 1,62 | down |
| 6240038 | 7100523 | 1128920 | --- | --- | --- | 1,21 | up   |
| 6240109 | 7268357 | 1543401 | --- | --- | --- | 1,57 | up   |
| 6240168 | 7303777 | 1631907 | --- | --- | --- | 1,01 | up   |
| 6240197 | 7295652 | 1610289 | --- | --- | --- | 1,24 | up   |
| 6240291 | 7279568 | 1572017 | --- | --- | --- | 1,55 | down |
| 6240329 | 7142917 | 1233169 | --- | --- | --- | 1,08 | down |
| 6240379 | 7231834 | 1452274 | --- | --- | --- | 1,31 | up   |
| 6240614 | 7142321 | 1231531 | --- | --- | --- | 1,48 | down |
| 6240785 | 7122140 | 1182710 | --- | --- | --- | 2,07 | down |
| 6240838 | 7060896 | 1033619 | --- | --- | --- | 1,11 | up   |
| 6240856 | 7278597 | 1569644 | --- | --- | --- | 1,07 | up   |
| 6240922 | 7208784 | 1396151 | --- | --- | --- | 1,33 | down |
| 6240927 | 7059309 | 1029928 | --- | --- | --- | 1,01 | down |
| 6240936 | 7330731 | 1697177 | --- | --- | --- | 1,01 | up   |
| 6241004 | 7336837 | 1711630 | --- | --- | --- | 1,61 | down |
| 6241014 | 7042529 | 991593  | --- | --- | --- | 1,50 | up   |
| 6241051 | 7314620 | 1658517 | --- | --- | --- | 1,28 | up   |
| 6241218 | 7041140 | 988285  | --- | --- | --- | 1,02 | up   |
| 6241266 | 7096924 | 1119623 | --- | --- | --- | 1,04 | down |
| 6241285 | 7378997 | 1818635 | --- | --- | --- | 1,02 | down |
| 6241329 | 7252877 | 1504772 | --- | --- | --- | 1,08 | down |
| 6241342 | 7261766 | 1527159 | --- | --- | --- | 2,74 | up   |
| 6241355 | 7238115 | 1468642 | --- | --- | --- | 1,07 | down |
| 6241441 | 7146542 | 1242296 | --- | --- | --- | 1,57 | down |
| 6241647 | 7167872 | 1294035 | --- | --- | --- | 1,39 | down |
| 6241699 | 7312903 | 1654102 | --- | --- | --- | 1,09 | up   |
| 6241764 | 7298101 | 1616993 | --- | --- | --- | 1,01 | down |
| 6241782 | 7339379 | 1718346 | --- | --- | --- | 1,38 | up   |
| 6242078 | 7032558 | 967064  | --- | --- | --- | 1,01 | down |
| 6242152 | 7348924 | 1742186 | --- | --- | --- | 1,05 | down |

|         |         |         |     |     |     |       |      |
|---------|---------|---------|-----|-----|-----|-------|------|
| 6242183 | 7258323 | 1518472 | --- | --- | --- | 11,92 | down |
| 6242199 | 7176275 | 1315335 | --- | --- | --- | 1,01  | up   |
| 6242209 | 7297589 | 1615592 | --- | --- | --- | 1,14  | down |
| 6242418 | 7247848 | 1492073 | --- | --- | --- | 1,31  | up   |
| 6242454 | 7367969 | 1789094 | --- | --- | --- | 1,58  | up   |
| 6242485 | 7086966 | 1095287 | --- | --- | --- | 1,28  | up   |
| 6242516 | 7176275 | 1315339 | --- | --- | --- | 1,25  | up   |
| 6242542 | 7168439 | 1295690 | --- | --- | --- | 1,03  | up   |
| 6242545 | 7313538 | 1655736 | --- | --- | --- | 1,07  | up   |
| 6242584 | 7149817 | 1250309 | --- | --- | --- | 1,35  | down |
| 6242597 | 7176275 | 1315349 | --- | --- | --- | 1,93  | up   |
| 6242672 | 7294686 | 1607848 | --- | --- | --- | 1,21  | down |
| 6242684 | 7217650 | 1417200 | --- | --- | --- | 1,54  | down |
| 6242891 | 7166867 | 1291298 | --- | --- | --- | 1,03  | down |
| 6242969 | 7180243 | 1325505 | --- | --- | --- | 1,32  | down |
| 6243091 | 7148978 | 1248553 | --- | --- | --- | 1,81  | down |
| 6243103 | 7212587 | 1404644 | --- | --- | --- | 1,29  | down |
| 6243125 | 7139708 | 1225063 | --- | --- | --- | 1,09  | up   |
| 6243212 | 7240569 | 1475494 | --- | --- | --- | 1,07  | down |
| 6243226 | 7096924 | 1119614 | --- | --- | --- | 1,92  | up   |
| 6243238 | 7091439 | 1106620 | --- | --- | --- | 1,39  | up   |
| 6243295 | 7315206 | 1660014 | --- | --- | --- | 1,47  | up   |
| 6243333 | 7344838 | 1732459 | --- | --- | --- | 1,06  | down |
| 6243551 | 7317088 | 1665058 | --- | --- | --- | 1,65  | down |
| 6243582 | 7383102 | 1827394 | --- | --- | --- | 1,38  | up   |
| 6243590 | 7367990 | 1789220 | --- | --- | --- | 1,55  | down |
| 6243632 | 7076236 | 1071238 | --- | --- | --- | 1,04  | down |
| 6243719 | 7153136 | 1258023 | --- | --- | --- | 2,40  | up   |
| 6243777 | 7148741 | 1247836 | --- | --- | --- | 1,33  | up   |
| 6243799 | 7247907 | 1492242 | --- | --- | --- | 1,28  | up   |
| 6243840 | 7099573 | 1126739 | --- | --- | --- | 1,29  | up   |
| 6243843 | 7132125 | 1206618 | --- | --- | --- | 1,18  | up   |
| 6244026 | 7382499 | 1826256 | --- | --- | --- | 1,09  | down |
| 6244057 | 7216970 | 1415122 | --- | --- | --- | 1,43  | up   |
| 6244073 | 7092549 | 1109128 | --- | --- | --- | 1,58  | down |
| 6244086 | 7221168 | 1425625 | --- | --- | --- | 1,12  | down |
| 6244309 | 7075460 | 1069400 | --- | --- | --- | 1,13  | down |
| 6244311 | 7031293 | 963509  | --- | --- | --- | 2,16  | up   |
| 6244348 | 7038530 | 981878  | --- | --- | --- | 1,07  | up   |
| 6244351 | 7070511 | 1057452 | --- | --- | --- | 1,84  | down |
| 6244452 | 7121849 | 1181810 | --- | --- | --- | 1,00  | up   |
| 6244474 | 7250511 | 1498640 | --- | --- | --- | 1,25  | down |
| 6244591 | 7101643 | 1131565 | --- | --- | --- | 1,13  | down |
| 6244732 | 7052176 | 1014220 | --- | --- | --- | 1,15  | up   |
| 6244735 | 7368804 | 1792265 | --- | --- | --- | 1,82  | down |
| 6244813 | 7154655 | 1262344 | --- | --- | --- | 1,11  | up   |
| 6244870 | 7160846 | 1277347 | --- | --- | --- | 1,85  | down |
| 6244910 | 7205944 | 1389482 | --- | --- | --- | 1,32  | down |
| 6244990 | 7096924 | 1119608 | --- | --- | --- | 1,21  | up   |
| 6245045 | 7175946 | 1314644 | --- | --- | --- | 1,45  | down |
| 6245109 | 7252877 | 1504704 | --- | --- | --- | 1,22  | down |
| 6245128 | 7355044 | 1757439 | --- | --- | --- | 1,40  | down |
| 6245310 | 7092549 | 1109161 | --- | --- | --- | 1,15  | up   |
| 6245412 | 7274585 | 1558795 | --- | --- | --- | 1,16  | up   |
| 6245547 | 7075460 | 1069392 | --- | --- | --- | 2,21  | up   |
| 6245564 | 7142416 | 1231800 | --- | --- | --- | 2,01  | up   |
| 6245625 | 7363674 | 1778432 | --- | --- | --- | 1,02  | up   |

|         |         |         |     |     |     |      |      |
|---------|---------|---------|-----|-----|-----|------|------|
| 6245653 | 7217434 | 1416412 | --- | --- | --- | 1,18 | down |
| 6245698 | 7197820 | 1370087 | --- | --- | --- | 1,36 | down |
| 6245765 | 7112355 | 1158064 | --- | --- | --- | 1,12 | up   |
| 6245773 | 7038659 | 982167  | --- | --- | --- | 1,34 | up   |
| 6245805 | 7131876 | 1206054 | --- | --- | --- | 1,78 | down |
| 6245912 | 7359460 | 1768474 | --- | --- | --- | 1,29 | up   |
| 6245926 | 7292701 | 1602956 | --- | --- | --- | 1,72 | up   |
| 6246001 | 7049508 | 1008557 | --- | --- | --- | 1,86 | down |
| 6246116 | 7260636 | 1524367 | --- | --- | --- | 1,15 | up   |
| 6246142 | 7280743 | 1574511 | --- | --- | --- | 1,67 | down |
| 6246187 | 7252877 | 1504739 | --- | --- | --- | 1,04 | up   |
| 6246201 | 7326612 | 1687193 | --- | --- | --- | 1,23 | down |
| 6246221 | 7353287 | 1753032 | --- | --- | --- | 1,01 | up   |
| 6246258 | 7280743 | 1574555 | --- | --- | --- | 1,38 | up   |
| 6246304 | 7082098 | 1084112 | --- | --- | --- | 1,05 | down |
| 6246327 | 7040442 | 986512  | --- | --- | --- | 1,89 | up   |
| 6246328 | 7337425 | 1713150 | --- | --- | --- | 1,08 | down |
| 6246383 | 7156052 | 1265743 | --- | --- | --- | 1,45 | up   |
| 6246413 | 7336579 | 1710983 | --- | --- | --- | 1,34 | up   |
| 6246470 | 7184151 | 1335952 | --- | --- | --- | 1,08 | down |
| 6246561 | 7079238 | 1077818 | --- | --- | --- | 1,01 | up   |
| 6246725 | 7086672 | 1094348 | --- | --- | --- | 1,67 | down |
| 6246735 | 7257976 | 1517713 | --- | --- | --- | 1,29 | down |
| 6246760 | 7075445 | 1069360 | --- | --- | --- | 1,08 | down |
| 6246803 | 7068259 | 1051653 | --- | --- | --- | 1,01 | down |
| 6246818 | 7370002 | 1795774 | --- | --- | --- | 1,59 | down |
| 6246839 | 7082098 | 1084120 | --- | --- | --- | 1,43 | up   |
| 6246870 | 7088625 | 1099879 | --- | --- | --- | 1,18 | down |
| 6246924 | 7375673 | 1810747 | --- | --- | --- | 1,21 | down |
| 6247043 | 7340990 | 1722501 | --- | --- | --- | 1,23 | down |
| 6247094 | 7297274 | 1614649 | --- | --- | --- | 1,77 | down |
| 6247151 | 7196029 | 1365636 | --- | --- | --- | 1,72 | down |
| 6247182 | 7186464 | 1341375 | --- | --- | --- | 1,28 | down |
| 6247233 | 7133484 | 1209936 | --- | --- | --- | 1,02 | down |
| 6247455 | 7344380 | 1731131 | --- | --- | --- | 1,05 | up   |
| 6247468 | 7293922 | 1605959 | --- | --- | --- | 1,25 | down |
| 6247540 | 7208784 | 1396086 | --- | --- | --- | 1,16 | down |
| 6247748 | 7240569 | 1475472 | --- | --- | --- | 1,04 | down |
| 6247955 | 7096461 | 1118263 | --- | --- | --- | 1,21 | up   |
| 6247972 | 7258455 | 1518701 | --- | --- | --- | 1,27 | up   |
| 6248012 | 7052933 | 1016219 | --- | --- | --- | 1,89 | down |
| 6248123 | 7165954 | 1288771 | --- | --- | --- | 1,25 | up   |
| 6248186 | 7211363 | 1402039 | --- | --- | --- | 1,40 | up   |
| 6248192 | 7352046 | 1750042 | --- | --- | --- | 2,19 | up   |
| 6248264 | 7217434 | 1416451 | --- | --- | --- | 1,11 | up   |
| 6248276 | 7355044 | 1757429 | --- | --- | --- | 1,38 | down |
| 6248313 | 7117813 | 1171714 | --- | --- | --- | 1,00 | down |
| 6248346 | 7302018 | 1626964 | --- | --- | --- | 1,03 | up   |
| 6248367 | 7124991 | 1189294 | --- | --- | --- | 1,87 | up   |
| 6248484 | 7142081 | 1230966 | --- | --- | --- | 1,02 | up   |
| 6248665 | 7252877 | 1504741 | --- | --- | --- | 1,16 | down |
| 6248715 | 7331508 | 1699461 | --- | --- | --- | 1,10 | down |
| 6248793 | 7200545 | 1376909 | --- | --- | --- | 1,65 | down |
| 6248796 | 7058149 | 1027255 | --- | --- | --- | 1,12 | down |
| 6248807 | 7361042 | 1772264 | --- | --- | --- | 1,53 | down |
| 6248890 | 7263248 | 1530604 | --- | --- | --- | 1,65 | up   |
| 6248941 | 7190534 | 1351222 | --- | --- | --- | 1,14 | down |

|         |         |         |     |     |     |      |      |
|---------|---------|---------|-----|-----|-----|------|------|
| 6248957 | 7033541 | 969977  | --- | --- | --- | 2,04 | down |
| 6248979 | 7312161 | 1652463 | --- | --- | --- | 2,01 | up   |
| 6249126 | 7248790 | 1494554 | --- | --- | --- | 1,28 | down |
| 6249185 | 7090581 | 1104742 | --- | --- | --- | 1,94 | up   |
| 6249270 | 7297274 | 1614655 | --- | --- | --- | 1,30 | down |
| 6249315 | 7335637 | 1708467 | --- | --- | --- | 1,35 | up   |
| 6249359 | 7319773 | 1671860 | --- | --- | --- | 1,04 | up   |
| 6249410 | 7176456 | 1315820 | --- | --- | --- | 1,41 | down |
| 6249427 | 7188829 | 1346665 | --- | --- | --- | 1,24 | down |
| 6249451 | 7067670 | 1050374 | --- | --- | --- | 1,50 | down |
| 6249458 | 7286807 | 1588787 | --- | --- | --- | 1,42 | down |
| 6249496 | 7076099 | 1070673 | --- | --- | --- | 1,16 | down |
| 6249502 | 7097240 | 1120364 | --- | --- | --- | 1,04 | up   |
| 6249538 | 7330396 | 1696363 | --- | --- | --- | 1,07 | down |
| 6249555 | 7110401 | 1153068 | --- | --- | --- | 1,02 | down |
| 6249573 | 7183182 | 1333564 | --- | --- | --- | 1,06 | up   |
| 6249961 | 7321029 | 1674831 | --- | --- | --- | 1,47 | up   |
| 6250029 | 7225370 | 1435522 | --- | --- | --- | 1,09 | up   |
| 6250051 | 7233524 | 1457218 | --- | --- | --- | 1,03 | down |
| 6250071 | 7257893 | 1517464 | --- | --- | --- | 1,00 | down |
| 6250078 | 7181193 | 1328292 | --- | --- | --- | 1,43 | down |
| 6250080 | 7240569 | 1475461 | --- | --- | --- | 1,07 | up   |
| 6250082 | 7210263 | 1399765 | --- | --- | --- | 1,24 | up   |
| 6250289 | 7061003 | 1033921 | --- | --- | --- | 1,02 | up   |
| 6250330 | 7128112 | 1196534 | --- | --- | --- | 1,85 | down |
| 6250331 | 7067670 | 1050366 | --- | --- | --- | 1,20 | down |
| 6250381 | 7257893 | 1517473 | --- | --- | --- | 1,02 | up   |
| 6250409 | 7341038 | 1722661 | --- | --- | --- | 1,08 | down |
| 6250451 | 7128921 | 1198507 | --- | --- | --- | 1,05 | up   |
| 6250557 | 7233524 | 1457219 | --- | --- | --- | 1,02 | up   |
| 6250661 | 7072765 | 1062747 | --- | --- | --- | 1,07 | down |
| 6250682 | 7058149 | 1027283 | --- | --- | --- | 1,12 | down |
| 6250700 | 7140834 | 1227950 | --- | --- | --- | 1,75 | up   |
| 6250707 | 7280570 | 1574091 | --- | --- | --- | 1,61 | up   |
| 6250727 | 7247907 | 1492240 | --- | --- | --- | 1,12 | up   |
| 6250754 | 7200996 | 1378152 | --- | --- | --- | 1,05 | up   |
| 6250816 | 7144389 | 1236781 | --- | --- | --- | 1,17 | down |
| 6250848 | 7086966 | 1095286 | --- | --- | --- | 1,20 | down |
| 6250941 | 7071264 | 1059361 | --- | --- | --- | 1,16 | down |
| 6251119 | 7144782 | 1237759 | --- | --- | --- | 1,40 | down |
| 6251137 | 7027350 | 954943  | --- | --- | --- | 1,33 | up   |
| 6251156 | 7252728 | 1504340 | --- | --- | --- | 1,00 | down |
| 6251197 | 7339379 | 1718347 | --- | --- | --- | 1,09 | up   |
| 6251253 | 7313841 | 1656733 | --- | --- | --- | 2,18 | down |
| 6251312 | 7319773 | 1671859 | --- | --- | --- | 1,39 | down |
| 6251595 | 7127540 | 1195288 | --- | --- | --- | 1,15 | down |
| 6251624 | 7233921 | 1458157 | --- | --- | --- | 1,88 | down |
| 6251633 | 7092549 | 1109145 | --- | --- | --- | 1,87 | up   |
| 6251666 | 7217650 | 1417201 | --- | --- | --- | 1,32 | down |
| 6251727 | 7193959 | 1360613 | --- | --- | --- | 1,31 | up   |
| 6251858 | 7152915 | 1257441 | --- | --- | --- | 1,33 | up   |
| 6251885 | 7380452 | 1821677 | --- | --- | --- | 1,07 | down |
| 6251906 | 7034356 | 972171  | --- | --- | --- | 1,19 | up   |
| 6251935 | 7197400 | 1368813 | --- | --- | --- | 1,18 | down |
| 6252016 | 7321029 | 1674825 | --- | --- | --- | 1,49 | down |
| 6252302 | 7071264 | 1059355 | --- | --- | --- | 2,18 | up   |
| 6252320 | 7186464 | 1341378 | --- | --- | --- | 1,26 | down |



|         |         |         |     |     |     |      |      |
|---------|---------|---------|-----|-----|-----|------|------|
| 6252343 | 7244027 | 1483276 | --- | --- | --- | 1,35 | down |
| 6252383 | 7250511 | 1498630 | --- | --- | --- | 1,32 | up   |
| 6252385 | 7088489 | 1099531 | --- | --- | --- | 1,04 | up   |
| 6252426 | 7217679 | 1417298 | --- | --- | --- | 1,24 | down |
| 6252469 | 7303777 | 1631903 | --- | --- | --- | 2,04 | up   |
| 6252471 | 7377304 | 1814597 | --- | --- | --- | 1,04 | up   |
| 6252494 | 7031774 | 964737  | --- | --- | --- | 1,31 | down |
| 6252654 | 7176275 | 1315337 | --- | --- | --- | 1,04 | down |
| 6252661 | 7180598 | 1326326 | --- | --- | --- | 1,02 | down |
| 6252679 | 7198087 | 1370689 | --- | --- | --- | 1,19 | down |
| 6252989 | 7043379 | 993638  | --- | --- | --- | 1,17 | down |
| 6253052 | 7059584 | 1030546 | --- | --- | --- | 1,18 | down |
| 6253318 | 7279194 | 1571006 | --- | --- | --- | 2,12 | down |
| 6253374 | 7084500 | 1089712 | --- | --- | --- | 1,20 | down |
| 6253423 | 7384509 | 1830752 | --- | --- | --- | 1,01 | up   |
| 6253438 | 7107321 | 1145319 | --- | --- | --- | 1,25 | down |
| 6253451 | 7205750 | 1388976 | --- | --- | --- | 1,23 | up   |
| 6253612 | 7353224 | 1752662 | --- | --- | --- | 1,75 | down |
| 6253682 | 7244288 | 1484094 | --- | --- | --- | 1,33 | up   |
| 6253692 | 7138580 | 1222505 | --- | --- | --- | 1,36 | up   |
| 6253707 | 7158419 | 1271378 | --- | --- | --- | 1,07 | down |
| 6253710 | 7356619 | 1761348 | --- | --- | --- | 1,55 | up   |
| 6253889 | 7035525 | 974781  | --- | --- | --- | 1,10 | up   |
| 6253895 | 7070668 | 1057928 | --- | --- | --- | 1,31 | down |
| 6253926 | 7263652 | 1531629 | --- | --- | --- | 1,23 | down |
| 6254003 | 7279073 | 1570681 | --- | --- | --- | 1,38 | down |
| 6254006 | 7069142 | 1053877 | --- | --- | --- | 1,31 | down |
| 6254183 | 7211363 | 1402036 | --- | --- | --- | 1,52 | up   |
| 6254186 | 7176368 | 1315576 | --- | --- | --- | 2,08 | down |
| 6254249 | 7384073 | 1829463 | --- | --- | --- | 1,13 | up   |
| 6254301 | 7148978 | 1248539 | --- | --- | --- | 1,35 | up   |
| 6254337 | 7196029 | 1365609 | --- | --- | --- | 1,11 | down |
| 6254439 | 7039265 | 983658  | --- | --- | --- | 2,02 | up   |
| 6254447 | 7085063 | 1090806 | --- | --- | --- | 2,03 | down |
| 6254480 | 7087965 | 1098055 | --- | --- | --- | 1,36 | down |
| 6254544 | 7052385 | 1014805 | --- | --- | --- | 1,02 | up   |
| 6254553 | 7329135 | 1693500 | --- | --- | --- | 1,20 | up   |
| 6254636 | 7202749 | 1382095 | --- | --- | --- | 1,20 | down |
| 6254666 | 7258455 | 1518701 | --- | --- | --- | 1,22 | down |
| 6254842 | 7217434 | 1416431 | --- | --- | --- | 1,54 | up   |
| 6254849 | 7219729 | 1422384 | --- | --- | --- | 1,03 | down |
| 6254889 | 7312566 | 1653298 | --- | --- | --- | 1,19 | down |
| 6255025 | 7301904 | 1626761 | --- | --- | --- | 2,01 | down |
| 6255029 | 7253408 | 1505945 | --- | --- | --- | 1,23 | up   |
| 6255065 | 7105057 | 1140311 | --- | --- | --- | 1,12 | down |
| 6255066 | 7035525 | 974775  | --- | --- | --- | 1,52 | up   |
| 6255107 | 7230698 | 1449061 | --- | --- | --- | 1,07 | down |
| 6255184 | 7290463 | 1597944 | --- | --- | --- | 1,05 | up   |
| 6255196 | 7213945 | 1407853 | --- | --- | --- | 1,08 | up   |
| 6255293 | 7267802 | 1541741 | --- | --- | --- | 1,24 | up   |
| 6255344 | 7193959 | 1360612 | --- | --- | --- | 1,11 | down |
| 6255390 | 7312338 | 1652767 | --- | --- | --- | 1,49 | down |
| 6255435 | 7288170 | 1592342 | --- | --- | --- | 1,22 | up   |
| 6255454 | 7039532 | 984424  | --- | --- | --- | 1,14 | down |
| 6255505 | 7359789 | 1769153 | --- | --- | --- | 1,32 | up   |
| 6255587 | 7233106 | 1455660 | --- | --- | --- | 2,30 | up   |
| 6255687 | 7198325 | 1371334 | --- | --- | --- | 1,17 | up   |

|         |         |         |     |     |     |      |      |
|---------|---------|---------|-----|-----|-----|------|------|
| 6255769 | 7141151 | 1228921 | --- | --- | --- | 1,37 | up   |
| 6255840 | 7181001 | 1327591 | --- | --- | --- | 1,01 | down |
| 6255991 | 7217747 | 1417496 | --- | --- | --- | 1,07 | down |
| 6256084 | 7380497 | 1821822 | --- | --- | --- | 1,05 | up   |
| 6256178 | 7355138 | 1757709 | --- | --- | --- | 1,15 | down |
| 6256197 | 7331413 | 1699138 | --- | --- | --- | 1,00 | up   |
| 6256346 | 7256070 | 1512580 | --- | --- | --- | 1,04 | down |
| 6256491 | 7029119 | 958982  | --- | --- | --- | 1,27 | down |
| 6256628 | 7194172 | 1361182 | --- | --- | --- | 1,12 | down |
| 6256753 | 7361223 | 1772615 | --- | --- | --- | 1,64 | up   |
| 6256896 | 7082098 | 1084107 | --- | --- | --- | 1,01 | up   |
| 6256901 | 7087965 | 1098030 | --- | --- | --- | 1,00 | up   |
| 6256943 | 7116540 | 1168645 | --- | --- | --- | 1,06 | up   |
| 6256990 | 7217679 | 1417299 | --- | --- | --- | 1,08 | down |
| 6257117 | 7203041 | 1382727 | --- | --- | --- | 1,91 | down |
| 6257141 | 7344836 | 1732409 | --- | --- | --- | 1,07 | up   |
| 6257175 | 7325643 | 1685176 | --- | --- | --- | 1,01 | up   |
| 6257243 | 7168439 | 1295666 | --- | --- | --- | 1,69 | up   |
| 6257254 | 7339286 | 1718108 | --- | --- | --- | 2,01 | up   |
| 6257319 | 7320735 | 1674157 | --- | --- | --- | 1,02 | down |
| 6257360 | 7257893 | 1517474 | --- | --- | --- | 1,28 | up   |
| 6257475 | 7112355 | 1158069 | --- | --- | --- | 1,19 | down |
| 6257490 | 7144782 | 1237758 | --- | --- | --- | 1,89 | down |
| 6257520 | 7350918 | 1747307 | --- | --- | --- | 1,12 | down |
| 6257594 | 7055876 | 1022500 | --- | --- | --- | 1,06 | down |
| 6257725 | 7089080 | 1101169 | --- | --- | --- | 1,01 | up   |
| 6257769 | 7209811 | 1398684 | --- | --- | --- | 1,72 | up   |
| 6257820 | 7307473 | 1641259 | --- | --- | --- | 1,18 | down |
| 6257867 | 7293234 | 1604332 | --- | --- | --- | 1,35 | down |
| 6258092 | 7279568 | 1572036 | --- | --- | --- | 1,06 | down |
| 6258105 | 7184850 | 1337606 | --- | --- | --- | 1,28 | down |
| 6258127 | 7347427 | 1738660 | --- | --- | --- | 1,30 | up   |
| 6258177 | 7181452 | 1328934 | --- | --- | --- | 1,32 | up   |
| 6258233 | 7340263 | 1720769 | --- | --- | --- | 1,00 | up   |
| 6258329 | 7337872 | 1714462 | --- | --- | --- | 1,71 | up   |
| 6258432 | 7191382 | 1353516 | --- | --- | --- | 1,24 | up   |
| 6258447 | 7120827 | 1179350 | --- | --- | --- | 1,04 | up   |
| 6258499 | 7158419 | 1271398 | --- | --- | --- | 1,29 | up   |
| 6258509 | 7292869 | 1603454 | --- | --- | --- | 1,02 | down |
| 6258520 | 7094346 | 1113394 | --- | --- | --- | 3,62 | up   |
| 6258551 | 7131372 | 1205022 | --- | --- | --- | 1,14 | up   |
| 6258611 | 7279533 | 1571917 | --- | --- | --- | 1,12 | down |
| 6258633 | 7231484 | 1451372 | --- | --- | --- | 1,36 | down |
| 6258637 | 7244027 | 1483283 | --- | --- | --- | 1,45 | down |
| 6258777 | 7367990 | 1789222 | --- | --- | --- | 2,05 | up   |
| 6258825 | 7374324 | 1807519 | --- | --- | --- | 1,04 | down |
| 6258826 | 7060195 | 1031972 | --- | --- | --- | 1,08 | up   |
| 6258830 | 7113483 | 1161008 | --- | --- | --- | 1,45 | up   |
| 6258836 | 7264085 | 1532719 | --- | --- | --- | 1,28 | up   |
| 6258838 | 7301904 | 1626755 | --- | --- | --- | 1,02 | up   |
| 6259012 | 7236358 | 1464257 | --- | --- | --- | 1,18 | up   |
| 6259043 | 7252877 | 1504702 | --- | --- | --- | 1,04 | down |
| 6259060 | 7255517 | 1511371 | --- | --- | --- | 1,02 | up   |
| 6259187 | 7109730 | 1151707 | --- | --- | --- | 1,09 | down |
| 6259259 | 7172691 | 1306448 | --- | --- | --- | 2,74 | down |
| 6259297 | 7243627 | 1482362 | --- | --- | --- | 1,12 | up   |
| 6259357 | 7267204 | 1539853 | --- | --- | --- | 1,07 | down |

|         |         |         |     |     |     |      |      |
|---------|---------|---------|-----|-----|-----|------|------|
| 6259465 | 7230628 | 1448868 | --- | --- | --- | 3,60 | down |
| 6259490 | 7131718 | 1205741 | --- | --- | --- | 1,40 | down |
| 6259544 | 7292517 | 1602549 | --- | --- | --- | 1,39 | up   |
| 6259563 | 7366749 | 1785521 | --- | --- | --- | 1,13 | down |
| 6259602 | 7264085 | 1532719 | --- | --- | --- | 1,04 | up   |
| 6259634 | 7075460 | 1069386 | --- | --- | --- | 1,03 | up   |
| 6259644 | 7297589 | 1615682 | --- | --- | --- | 1,48 | down |
| 6259678 | 7235069 | 1460991 | --- | --- | --- | 1,15 | up   |
| 6259783 | 7380878 | 1822551 | --- | --- | --- | 1,17 | down |
| 6259805 | 7189404 | 1348196 | --- | --- | --- | 1,11 | down |
| 6259820 | 7370853 | 1798414 | --- | --- | --- | 1,59 | up   |
| 6259822 | 7332128 | 1700853 | --- | --- | --- | 1,09 | down |
| 6259889 | 7326612 | 1687196 | --- | --- | --- | 1,20 | down |
| 6259972 | 7127801 | 1195863 | --- | --- | --- | 1,73 | up   |
| 6260029 | 7315352 | 1660334 | --- | --- | --- | 1,19 | up   |
| 6260051 | 7369712 | 1794822 | --- | --- | --- | 1,15 | down |
| 6260094 | 7039532 | 984423  | --- | --- | --- | 1,40 | up   |
| 6260101 | 7340757 | 1721896 | --- | --- | --- | 1,98 | down |
| 6260106 | 7131550 | 1205563 | --- | --- | --- | 1,10 | up   |
| 6260138 | 7237672 | 1467299 | --- | --- | --- | 1,04 | up   |
| 6260505 | 7375937 | 1811366 | --- | --- | --- | 1,36 | down |
| 6260515 | 7320735 | 1674161 | --- | --- | --- | 1,07 | up   |
| 6260564 | 7193959 | 1360603 | --- | --- | --- | 1,21 | up   |
| 6260581 | 7302787 | 1628904 | --- | --- | --- | 2,24 | up   |
| 6260594 | 7095041 | 1115172 | --- | --- | --- | 1,18 | up   |
| 6260695 | 7069727 | 1055360 | --- | --- | --- | 1,50 | up   |
| 6260769 | 7341546 | 1723973 | --- | --- | --- | 1,34 | up   |
| 6260901 | 7132125 | 1206614 | --- | --- | --- | 1,01 | down |
| 6260946 | 7028326 | 957433  | --- | --- | --- | 1,06 | up   |
| 6261045 | 7162144 | 1280508 | --- | --- | --- | 1,17 | up   |
| 6261129 | 7069721 | 1055285 | --- | --- | --- | 1,11 | down |
| 6261137 | 7090581 | 1104744 | --- | --- | --- | 1,11 | up   |
| 6261215 | 7343250 | 1728060 | --- | --- | --- | 1,23 | down |
| 6261219 | 7180598 | 1326316 | --- | --- | --- | 1,14 | up   |
| 6261231 | 7098648 | 1124273 | --- | --- | --- | 1,15 | down |
| 6261241 | 7292869 | 1603446 | --- | --- | --- | 1,14 | up   |
| 6261256 | 7076236 | 1071203 | --- | --- | --- | 1,00 | down |
| 6261368 | 7258455 | 1518710 | --- | --- | --- | 1,15 | up   |
| 6261508 | 7343250 | 1728036 | --- | --- | --- | 1,24 | up   |
| 6261648 | 7281924 | 1577722 | --- | --- | --- | 1,16 | up   |
| 6261744 | 7184981 | 1337834 | --- | --- | --- | 1,04 | up   |
| 6261974 | 7180721 | 1326697 | --- | --- | --- | 1,44 | down |
| 6262060 | 7359361 | 1768263 | --- | --- | --- | 1,03 | down |
| 6262198 | 7337425 | 1713202 | --- | --- | --- | 1,03 | down |
| 6262241 | 7289382 | 1595194 | --- | --- | --- | 1,02 | up   |
| 6262390 | 7040442 | 986537  | --- | --- | --- | 1,04 | down |
| 6262438 | 7227433 | 1440957 | --- | --- | --- | 1,30 | up   |
| 6262544 | 7176275 | 1315344 | --- | --- | --- | 1,03 | up   |
| 6262608 | 7320735 | 1674171 | --- | --- | --- | 1,11 | up   |
| 6262723 | 7243901 | 1483039 | --- | --- | --- | 1,05 | up   |
| 6262837 | 7303777 | 1631924 | --- | --- | --- | 1,15 | down |
| 6262873 | 7373038 | 1804289 | --- | --- | --- | 2,16 | up   |
| 6262938 | 7119845 | 1176883 | --- | --- | --- | 1,00 | down |
| 6263004 | 7194540 | 1362121 | --- | --- | --- | 1,04 | up   |
| 6263174 | 7361075 | 1772347 | --- | --- | --- | 1,15 | up   |
| 6263216 | 7383102 | 1827391 | --- | --- | --- | 1,40 | down |
| 6263278 | 7240569 | 1475395 | --- | --- | --- | 1,26 | down |

|         |         |         |     |     |     |      |      |
|---------|---------|---------|-----|-----|-----|------|------|
| 6263291 | 7086522 | 1093957 | --- | --- | --- | 2,63 | down |
| 6263332 | 7210713 | 1400753 | --- | --- | --- | 1,50 | down |
| 6263372 | 7313538 | 1655721 | --- | --- | --- | 1,15 | down |
| 6263415 | 7069603 | 1055050 | --- | --- | --- | 1,04 | up   |
| 6263452 | 7072225 | 1061405 | --- | --- | --- | 1,25 | down |
| 6263523 | 7361075 | 1772345 | --- | --- | --- | 1,30 | down |
| 6263555 | 7146807 | 1242809 | --- | --- | --- | 2,00 | up   |
| 6263584 | 7324760 | 1683093 | --- | --- | --- | 1,02 | down |
| 6263670 | 7363529 | 1777907 | --- | --- | --- | 1,03 | up   |
| 6263766 | 7328695 | 1692357 | --- | --- | --- | 1,19 | down |
| 6263900 | 7374313 | 1807365 | --- | --- | --- | 1,09 | up   |
| 6263933 | 7166867 | 1291318 | --- | --- | --- | 1,54 | down |
| 6264131 | 7280743 | 1574528 | --- | --- | --- | 1,46 | down |
| 6264163 | 7231152 | 1450226 | --- | --- | --- | 2,02 | up   |
| 6264192 | 7339452 | 1718595 | --- | --- | --- | 1,44 | up   |
| 6264243 | 7238115 | 1468608 | --- | --- | --- | 1,13 | up   |
| 6264342 | 7056333 | 1023688 | --- | --- | --- | 1,07 | down |
| 6264610 | 7276650 | 1564142 | --- | --- | --- | 1,27 | down |
| 6264611 | 7120671 | 1178996 | --- | --- | --- | 1,23 | down |
| 6264619 | 7217434 | 1416433 | --- | --- | --- | 1,15 | down |
| 6264695 | 7111361 | 1155578 | --- | --- | --- | 1,02 | up   |
| 6264833 | 7085063 | 1090805 | --- | --- | --- | 1,03 | down |
| 6264850 | 7264797 | 1534422 | --- | --- | --- | 1,06 | up   |
| 6265004 | 7070869 | 1058495 | --- | --- | --- | 1,03 | down |
| 6265031 | 7360325 | 1770519 | --- | --- | --- | 1,00 | up   |
| 6265039 | 7360486 | 1770947 | --- | --- | --- | 1,24 | up   |
| 6265069 | 7238153 | 1468834 | --- | --- | --- | 1,00 | up   |
| 6265177 | 7318596 | 1668935 | --- | --- | --- | 1,12 | up   |
| 6265185 | 7240569 | 1475464 | --- | --- | --- | 1,15 | up   |
| 6265207 | 7071714 | 1060363 | --- | --- | --- | 1,04 | up   |
| 6265211 | 7209927 | 1398943 | --- | --- | --- | 1,21 | up   |
| 6265213 | 7352046 | 1750036 | --- | --- | --- | 2,17 | down |
| 6265323 | 7257893 | 1517457 | --- | --- | --- | 1,65 | down |
| 6265395 | 7307473 | 1641294 | --- | --- | --- | 1,34 | up   |
| 6265410 | 7310810 | 1649369 | --- | --- | --- | 1,01 | up   |
| 6265516 | 7314270 | 1657752 | --- | --- | --- | 1,21 | up   |
| 6265669 | 7175355 | 1313244 | --- | --- | --- | 1,88 | down |
| 6266091 | 7253408 | 1505944 | --- | --- | --- | 1,35 | up   |
| 6266263 | 7337425 | 1713177 | --- | --- | --- | 1,31 | down |
| 6266298 | 7240569 | 1475510 | --- | --- | --- | 1,26 | down |
| 6266341 | 7367980 | 1789174 | --- | --- | --- | 1,35 | up   |
| 6266374 | 7181193 | 1328300 | --- | --- | --- | 1,07 | up   |
| 6266383 | 7099294 | 1126099 | --- | --- | --- | 1,85 | up   |
| 6266423 | 7168439 | 1295693 | --- | --- | --- | 1,36 | up   |
| 6266501 | 7091954 | 1107727 | --- | --- | --- | 1,18 | down |
| 6266536 | 7040442 | 986527  | --- | --- | --- | 1,32 | up   |
| 6266650 | 7204442 | 1386079 | --- | --- | --- | 1,28 | down |
| 6266685 | 7367959 | 1789070 | --- | --- | --- | 3,41 | up   |
| 6266727 | 7099573 | 1126730 | --- | --- | --- | 1,25 | up   |
| 6266940 | 7264653 | 1534060 | --- | --- | --- | 1,24 | up   |
| 6267001 | 7205944 | 1389479 | --- | --- | --- | 2,42 | up   |
| 6267082 | 7305275 | 1635833 | --- | --- | --- | 1,17 | up   |
| 6267087 | 7285530 | 1585965 | --- | --- | --- | 1,18 | down |
| 6267153 | 7329846 | 1695000 | --- | --- | --- | 1,10 | down |
| 6267159 | 7072332 | 1061646 | --- | --- | --- | 1,87 | up   |
| 6267248 | 7326612 | 1687197 | --- | --- | --- | 1,01 | up   |
| 6267435 | 7100408 | 1128642 | --- | --- | --- | 1,12 | down |

|         |         |         |     |     |     |      |      |
|---------|---------|---------|-----|-----|-----|------|------|
| 6267520 | 7152915 | 1257490 | --- | --- | --- | 1,05 | up   |
| 6267523 | 7274593 | 1558816 | --- | --- | --- | 1,08 | up   |
| 6267563 | 7067670 | 1050312 | --- | --- | --- | 2,59 | up   |
| 6267587 | 7261580 | 1526797 | --- | --- | --- | 1,61 | down |
| 6267727 | 7199341 | 1374145 | --- | --- | --- | 1,18 | up   |
| 6267834 | 7293763 | 1605709 | --- | --- | --- | 1,05 | up   |
| 6267896 | 7038659 | 982167  | --- | --- | --- | 1,58 | up   |
| 6267994 | 7115963 | 1167064 | --- | --- | --- | 1,05 | down |
| 6268054 | 7264653 | 1534047 | --- | --- | --- | 1,09 | down |
| 6268138 | 7027386 | 955058  | --- | --- | --- | 1,06 | down |
| 6268183 | 7221443 | 1426325 | --- | --- | --- | 1,15 | down |
| 6268199 | 7098077 | 1122729 | --- | --- | --- | 1,61 | down |
| 6268210 | 7331413 | 1699132 | --- | --- | --- | 1,05 | up   |
| 6268231 | 7319259 | 1670398 | --- | --- | --- | 1,02 | up   |
| 6268324 | 7136142 | 1216430 | --- | --- | --- | 1,02 | up   |
| 6268325 | 7163002 | 1282282 | --- | --- | --- | 1,06 | down |
| 6268355 | 7256191 | 1512866 | --- | --- | --- | 1,01 | up   |
| 6268903 | 7367943 | 1788926 | --- | --- | --- | 1,38 | up   |
| 6268910 | 7031774 | 964770  | --- | --- | --- | 1,22 | down |
| 6269172 | 7058507 | 1028293 | --- | --- | --- | 1,11 | down |
| 6269223 | 7339834 | 1719549 | --- | --- | --- | 1,66 | down |
| 6269226 | 7355138 | 1757774 | --- | --- | --- | 1,32 | up   |
| 6269244 | 7330396 | 1696355 | --- | --- | --- | 1,69 | up   |
| 6269319 | 7155866 | 1265314 | --- | --- | --- | 1,60 | down |
| 6269368 | 7207971 | 1394311 | --- | --- | --- | 1,03 | down |
| 6269391 | 7180598 | 1326319 | --- | --- | --- | 1,17 | down |
| 6269516 | 7172988 | 1307278 | --- | --- | --- | 1,18 | down |
| 6269693 | 7293402 | 1604809 | --- | --- | --- | 1,99 | up   |
| 6269697 | 7300906 | 1624048 | --- | --- | --- | 1,09 | up   |
| 6269702 | 7308262 | 1643190 | --- | --- | --- | 1,04 | down |
| 6269731 | 7358048 | 1764809 | --- | --- | --- | 1,04 | up   |
| 6269774 | 7090581 | 1104805 | --- | --- | --- | 1,41 | down |
| 6269796 | 7231557 | 1451569 | --- | --- | --- | 1,27 | up   |
| 6269798 | 7237438 | 1466795 | --- | --- | --- | 1,30 | up   |
| 6269844 | 7368004 | 1789336 | --- | --- | --- | 1,13 | up   |
| 6269955 | 7200545 | 1376911 | --- | --- | --- | 1,12 | up   |
| 6269975 | 7340057 | 1720330 | --- | --- | --- | 1,41 | down |
| 6270029 | 7337845 | 1714339 | --- | --- | --- | 1,07 | down |
| 6270100 | 7167883 | 1294108 | --- | --- | --- | 1,01 | down |
| 6270194 | 7120671 | 1179004 | --- | --- | --- | 1,43 | down |
| 6270222 | 7246518 | 1489051 | --- | --- | --- | 2,07 | up   |
| 6270273 | 7090581 | 1104783 | --- | --- | --- | 2,22 | up   |
| 6270301 | 7258455 | 1518717 | --- | --- | --- | 1,05 | down |
| 6270343 | 7269911 | 1546910 | --- | --- | --- | 1,26 | down |
| 6270396 | 7052385 | 1014782 | --- | --- | --- | 1,35 | down |
| 6270449 | 7376206 | 1811979 | --- | --- | --- | 1,49 | down |
| 6270465 | 7197056 | 1367839 | --- | --- | --- | 1,39 | up   |
| 6270493 | 7319055 | 1669950 | --- | --- | --- | 1,01 | down |
| 6270783 | 7269763 | 1546541 | --- | --- | --- | 1,52 | down |
| 6270786 | 7227433 | 1440978 | --- | --- | --- | 1,23 | down |
| 6270796 | 7177520 | 1318622 | --- | --- | --- | 1,27 | down |
| 6271266 | 7256070 | 1512580 | --- | --- | --- | 1,03 | up   |
| 6271275 | 7365183 | 1781935 | --- | --- | --- | 1,06 | down |
| 6271286 | 7212587 | 1404635 | --- | --- | --- | 1,29 | up   |
| 6271357 | 7376073 | 1811713 | --- | --- | --- | 1,05 | up   |
| 6271374 | 7265259 | 1535444 | --- | --- | --- | 1,10 | up   |
| 6271389 | 7069721 | 1055312 | --- | --- | --- | 1,03 | up   |

|         |         |         |     |     |     |      |      |
|---------|---------|---------|-----|-----|-----|------|------|
| 6271510 | 7197056 | 1367847 | --- | --- | --- | 1,41 | down |
| 6271512 | 7320735 | 1674166 | --- | --- | --- | 1,10 | up   |
| 6271530 | 7247954 | 1492400 | --- | --- | --- | 1,14 | down |
| 6271598 | 7217747 | 1417487 | --- | --- | --- | 1,33 | up   |
| 6271627 | 7079475 | 1078293 | --- | --- | --- | 2,38 | down |
| 6271638 | 7254040 | 1507583 | --- | --- | --- | 1,30 | up   |
| 6271686 | 7207093 | 1392113 | --- | --- | --- | 1,06 | down |
| 6271775 | 7303777 | 1631910 | --- | --- | --- | 1,22 | down |
| 6271824 | 7243901 | 1483052 | --- | --- | --- | 1,12 | down |
| 6271825 | 7373633 | 1805715 | --- | --- | --- | 1,13 | up   |
| 6271903 | 7083377 | 1086983 | --- | --- | --- | 1,99 | down |
| 6272004 | 7118864 | 1174360 | --- | --- | --- | 1,63 | down |
| 6272043 | 7148741 | 1247833 | --- | --- | --- | 1,16 | up   |
| 6272078 | 7181169 | 1328125 | --- | --- | --- | 1,19 | up   |
| 6272117 | 7253088 | 1505123 | --- | --- | --- | 1,13 | up   |
| 6272218 | 7166867 | 1291306 | --- | --- | --- | 1,46 | up   |
| 6272329 | 7208784 | 1396137 | --- | --- | --- | 1,88 | up   |
| 6272440 | 7068259 | 1051660 | --- | --- | --- | 1,84 | down |
| 6272456 | 7329802 | 1694915 | --- | --- | --- | 1,80 | down |
| 6272472 | 7244288 | 1484128 | --- | --- | --- | 1,75 | down |
| 6272507 | 7312686 | 1653624 | --- | --- | --- | 1,29 | down |
| 6272530 | 7059584 | 1030542 | --- | --- | --- | 1,51 | down |
| 6272619 | 7088164 | 1098488 | --- | --- | --- | 1,25 | up   |
| 6272644 | 7049508 | 1008562 | --- | --- | --- | 1,02 | down |
| 6272650 | 7238153 | 1468836 | --- | --- | --- | 1,07 | down |
| 6272711 | 7377791 | 1815999 | --- | --- | --- | 1,24 | up   |
| 6272724 | 7088164 | 1098478 | --- | --- | --- | 1,40 | up   |
| 6272731 | 7069727 | 1055363 | --- | --- | --- | 1,30 | up   |
| 6272766 | 7155340 | 1264094 | --- | --- | --- | 1,26 | up   |
| 6272779 | 7195680 | 1364897 | --- | --- | --- | 1,31 | down |
| 6272803 | 7200152 | 1376054 | --- | --- | --- | 1,48 | down |
| 6272818 | 7282927 | 1580011 | --- | --- | --- | 1,51 | down |
| 6272871 | 7069721 | 1055303 | --- | --- | --- | 1,25 | up   |
| 6272874 | 7053874 | 1018330 | --- | --- | --- | 1,18 | up   |
| 6272876 | 7110401 | 1153056 | --- | --- | --- | 1,24 | down |
| 6272921 | 7231484 | 1451366 | --- | --- | --- | 1,39 | down |
| 6273029 | 7288095 | 1592047 | --- | --- | --- | 1,65 | down |
| 6273133 | 7174281 | 1310845 | --- | --- | --- | 1,49 | up   |
| 6273277 | 7037235 | 978586  | --- | --- | --- | 1,09 | up   |
| 6273381 | 7168439 | 1295677 | --- | --- | --- | 1,04 | up   |
| 6273475 | 7247334 | 1490821 | --- | --- | --- | 1,43 | down |
| 6273523 | 7297589 | 1615672 | --- | --- | --- | 1,07 | down |
| 6273650 | 7295652 | 1610298 | --- | --- | --- | 1,19 | down |
| 6273706 | 7154655 | 1262336 | --- | --- | --- | 1,18 | up   |
| 6273764 | 7233012 | 1455403 | --- | --- | --- | 1,24 | down |
| 6273813 | 7198210 | 1370950 | --- | --- | --- | 1,11 | down |
| 6273844 | 7162177 | 1280583 | --- | --- | --- | 1,11 | up   |
| 6273942 | 7292701 | 1602958 | --- | --- | --- | 1,71 | up   |
| 6273957 | 7151063 | 1253073 | --- | --- | --- | 1,56 | up   |
| 6273965 | 7279593 | 1572085 | --- | --- | --- | 1,19 | up   |
| 6274010 | 7358053 | 1764837 | --- | --- | --- | 1,20 | down |
| 6274109 | 7121849 | 1181788 | --- | --- | --- | 1,13 | down |
| 6274198 | 7217434 | 1416430 | --- | --- | --- | 1,25 | down |
| 6274295 | 7307473 | 1641275 | --- | --- | --- | 1,07 | down |
| 6274377 | 7059412 | 1030188 | --- | --- | --- | 1,22 | up   |
| 6274389 | 7286807 | 1588808 | --- | --- | --- | 1,47 | down |
| 6274413 | 7235840 | 1462995 | --- | --- | --- | 1,49 | up   |

|         |         |         |     |     |     |      |      |
|---------|---------|---------|-----|-----|-----|------|------|
| 6274556 | 7293922 | 1605961 | --- | --- | --- | 1,02 | down |
| 6274667 | 7166855 | 1291262 | --- | --- | --- | 1,06 | up   |
| 6274760 | 7212285 | 1403979 | --- | --- | --- | 1,39 | up   |
| 6274918 | 7252877 | 1504753 | --- | --- | --- | 1,08 | up   |
| 6274958 | 7339452 | 1718595 | --- | --- | --- | 1,36 | down |
| 6274979 | 7244027 | 1483275 | --- | --- | --- | 1,28 | up   |
| 6275169 | 7244290 | 1484164 | --- | --- | --- | 1,08 | down |
| 6275247 | 7279593 | 1572095 | --- | --- | --- | 1,02 | up   |
| 6275276 | 7100523 | 1128885 | --- | --- | --- | 1,15 | down |
| 6275280 | 7148978 | 1248538 | --- | --- | --- | 1,29 | down |
| 6275370 | 7363529 | 1777936 | --- | --- | --- | 1,49 | up   |
| 6275451 | 7230698 | 1449070 | --- | --- | --- | 1,40 | down |
| 6275453 | 7183190 | 1333645 | --- | --- | --- | 1,20 | up   |
| 6275521 | 7353284 | 1752982 | --- | --- | --- | 1,79 | up   |
| 6275552 | 7240569 | 1475405 | --- | --- | --- | 1,02 | down |
| 6275597 | 7237992 | 1468282 | --- | --- | --- | 1,29 | up   |
| 6275701 | 7258784 | 1519670 | --- | --- | --- | 1,01 | down |
| 6275773 | 7177428 | 1318365 | --- | --- | --- | 1,27 | up   |
| 6275778 | 7112566 | 1158635 | --- | --- | --- | 1,71 | down |
| 6275830 | 7267953 | 1542259 | --- | --- | --- | 1,71 | up   |
| 6275879 | 7211690 | 1402642 | --- | --- | --- | 1,24 | up   |
| 6275895 | 7303777 | 1631925 | --- | --- | --- | 1,10 | up   |
| 6275896 | 7142917 | 1233158 | --- | --- | --- | 2,03 | up   |
| 6276023 | 7110401 | 1153052 | --- | --- | --- | 1,23 | up   |
| 6276040 | 7337425 | 1713211 | --- | --- | --- | 1,05 | down |
| 6276136 | 7374324 | 1807513 | --- | --- | --- | 1,23 | down |
| 6276162 | 7033504 | 969846  | --- | --- | --- | 1,53 | down |
| 6276315 | 7308679 | 1644238 | --- | --- | --- | 3,92 | down |
| 6276319 | 7207971 | 1394325 | --- | --- | --- | 1,04 | down |
| 6276452 | 7279103 | 1570843 | --- | --- | --- | 1,43 | down |
| 6276600 | 7059584 | 1030544 | --- | --- | --- | 1,76 | up   |
| 6276650 | 7207093 | 1392097 | --- | --- | --- | 1,25 | down |
| 6276671 | 7156052 | 1265771 | --- | --- | --- | 1,13 | down |
| 6276728 | 7313841 | 1656710 | --- | --- | --- | 1,04 | up   |
| 6277020 | 7093752 | 1112009 | --- | --- | --- | 1,18 | down |
| 6277179 | 7217650 | 1417173 | --- | --- | --- | 1,10 | down |
| 6277217 | 7059584 | 1030559 | --- | --- | --- | 1,15 | down |
| 6277241 | 7053874 | 1018309 | --- | --- | --- | 1,13 | down |
| 6277322 | 7148978 | 1248533 | --- | --- | --- | 1,09 | down |
| 6277375 | 7252877 | 1504700 | --- | --- | --- | 1,71 | down |
| 6277425 | 7384509 | 1830747 | --- | --- | --- | 1,02 | up   |
| 6277429 | 7088489 | 1099524 | --- | --- | --- | 1,16 | up   |
| 6277478 | 7038179 | 981261  | --- | --- | --- | 1,08 | down |
| 6277620 | 7223395 | 1431078 | --- | --- | --- | 1,11 | down |
| 6277639 | 7309734 | 1646912 | --- | --- | --- | 1,06 | down |
| 6277690 | 7028326 | 957437  | --- | --- | --- | 1,30 | up   |
| 6277704 | 7313841 | 1656723 | --- | --- | --- | 1,10 | down |
| 6277717 | 7034293 | 971987  | --- | --- | --- | 1,26 | down |
| 6277748 | 7231484 | 1451393 | --- | --- | --- | 1,18 | up   |
| 6277753 | 7336854 | 1711683 | --- | --- | --- | 1,13 | up   |
| 6277795 | 7263805 | 1532200 | --- | --- | --- | 1,23 | down |
| 6277856 | 7367994 | 1789254 | --- | --- | --- | 1,11 | up   |
| 6277897 | 7035525 | 974773  | --- | --- | --- | 1,15 | down |
| 6277913 | 7140834 | 1228017 | --- | --- | --- | 1,83 | down |
| 6278004 | 7267802 | 1541816 | --- | --- | --- | 1,19 | up   |
| 6278019 | 7165954 | 1288770 | --- | --- | --- | 1,99 | down |
| 6278079 | 7243647 | 1482464 | --- | --- | --- | 1,45 | down |

|         |         |         |     |     |     |      |      |
|---------|---------|---------|-----|-----|-----|------|------|
| 6278143 | 7317318 | 1665827 | --- | --- | --- | 1,25 | down |
| 6278155 | 7138220 | 1221619 | --- | --- | --- | 1,00 | up   |
| 6278164 | 7252877 | 1504684 | --- | --- | --- | 1,01 | down |
| 6278179 | 7381090 | 1822989 | --- | --- | --- | 1,71 | up   |
| 6278194 | 7168979 | 1297192 | --- | --- | --- | 1,13 | down |
| 6278197 | 7264745 | 1534278 | --- | --- | --- | 1,43 | down |
| 6278251 | 7095066 | 1115272 | --- | --- | --- | 2,92 | up   |
| 6278271 | 7359361 | 1768266 | --- | --- | --- | 1,06 | up   |
| 6278299 | 7095066 | 1115271 | --- | --- | --- | 1,51 | up   |
| 6278396 | 7238115 | 1468570 | --- | --- | --- | 1,59 | up   |
| 6278471 | 7044906 | 998120  | --- | --- | --- | 1,23 | up   |
| 6278581 | 7184850 | 1337598 | --- | --- | --- | 1,07 | up   |
| 6278791 | 7167823 | 1293873 | --- | --- | --- | 2,19 | up   |
| 6278881 | 7247230 | 1490596 | --- | --- | --- | 1,15 | down |
| 6278884 | 7369712 | 1794835 | --- | --- | --- | 1,49 | up   |
| 6278898 | 7090581 | 1104742 | --- | --- | --- | 1,24 | up   |
| 6278917 | 7068259 | 1051656 | --- | --- | --- | 1,33 | up   |
| 6278926 | 7350237 | 1745490 | --- | --- | --- | 1,18 | up   |
| 6279028 | 7281924 | 1577744 | --- | --- | --- | 1,01 | up   |
| 6279031 | 7039463 | 984246  | --- | --- | --- | 1,06 | up   |
| 6279269 | 7247907 | 1492245 | --- | --- | --- | 1,27 | down |
| 6279357 | 7361881 | 1773947 | --- | --- | --- | 1,14 | up   |
| 6279409 | 7341115 | 1722917 | --- | --- | --- | 1,29 | up   |
| 6279427 | 7096924 | 1119622 | --- | --- | --- | 2,05 | down |
| 6279442 | 7070668 | 1057967 | --- | --- | --- | 1,19 | down |
| 6279533 | 7076160 | 1070870 | --- | --- | --- | 1,18 | up   |
| 6279557 | 7273251 | 1555960 | --- | --- | --- | 2,67 | down |
| 6279591 | 7205750 | 1388931 | --- | --- | --- | 1,04 | up   |
| 6279639 | 7139026 | 1223512 | --- | --- | --- | 1,48 | down |
| 6279692 | 7252877 | 1504769 | --- | --- | --- | 1,59 | up   |
| 6279778 | 7330731 | 1697203 | --- | --- | --- | 1,04 | up   |
| 6279820 | 7268694 | 1544222 | --- | --- | --- | 1,29 | down |
| 6279847 | 7150348 | 1251421 | --- | --- | --- | 1,08 | down |
| 6279913 | 7146082 | 1240844 | --- | --- | --- | 1,41 | down |
| 6279915 | 7107926 | 1146837 | --- | --- | --- | 1,02 | down |
| 6280202 | 7346885 | 1737307 | --- | --- | --- | 1,32 | up   |
| 6280218 | 7168979 | 1297177 | --- | --- | --- | 1,15 | up   |
| 6280284 | 7320068 | 1672615 | --- | --- | --- | 1,46 | down |
| 6280292 | 7031618 | 964198  | --- | --- | --- | 1,21 | down |
| 6280597 | 7141061 | 1228722 | --- | --- | --- | 1,04 | up   |
| 6280613 | 7217434 | 1416438 | --- | --- | --- | 1,01 | down |
| 6280704 | 7208784 | 1396155 | --- | --- | --- | 1,11 | up   |
| 6280738 | 7300392 | 1622755 | --- | --- | --- | 1,17 | up   |
| 6280826 | 7247954 | 1492404 | --- | --- | --- | 2,26 | up   |
| 6280964 | 7292869 | 1603407 | --- | --- | --- | 1,31 | up   |
| 6281031 | 7368004 | 1789330 | --- | --- | --- | 1,05 | down |
| 6281057 | 7244027 | 1483288 | --- | --- | --- | 1,01 | up   |
| 6281088 | 7078666 | 1076514 | --- | --- | --- | 1,00 | down |
| 6281093 | 7075460 | 1069411 | --- | --- | --- | 1,76 | up   |
| 6281199 | 7243647 | 1482433 | --- | --- | --- | 1,44 | up   |
| 6281203 | 7107926 | 1146833 | --- | --- | --- | 1,17 | down |
| 6281296 | 7041140 | 988281  | --- | --- | --- | 1,29 | up   |
| 6281316 | 7160846 | 1277349 | --- | --- | --- | 1,05 | up   |
| 6281498 | 7374324 | 1807534 | --- | --- | --- | 1,19 | up   |
| 6281508 | 7115963 | 1167042 | --- | --- | --- | 1,03 | up   |
| 6281511 | 7065640 | 1045209 | --- | --- | --- | 1,19 | down |
| 6281522 | 7235840 | 1463001 | --- | --- | --- | 1,29 | up   |



|         |         |         |     |     |     |      |      |
|---------|---------|---------|-----|-----|-----|------|------|
| 6281613 | 7160687 | 1277000 | --- | --- | --- | 1,18 | up   |
| 6281639 | 7346687 | 1736694 | --- | --- | --- | 1,27 | up   |
| 6281836 | 7073950 | 1065867 | --- | --- | --- | 1,56 | up   |
| 6281862 | 7315206 | 1660029 | --- | --- | --- | 1,39 | up   |
| 6281902 | 7243627 | 1482359 | --- | --- | --- | 1,03 | down |
| 6281923 | 7358859 | 1766999 | --- | --- | --- | 1,04 | up   |
| 6281939 | 7079238 | 1077807 | --- | --- | --- | 1,08 | down |
| 6281993 | 7254209 | 1508006 | --- | --- | --- | 1,38 | up   |
| 6282028 | 7194540 | 1362079 | --- | --- | --- | 1,25 | down |
| 6282053 | 7073677 | 1065144 | --- | --- | --- | 1,21 | up   |
| 6282099 | 7248790 | 1494488 | --- | --- | --- | 1,41 | up   |
| 6282173 | 7128539 | 1197669 | --- | --- | --- | 1,53 | up   |
| 6282391 | 7274892 | 1559583 | --- | --- | --- | 1,15 | up   |
| 6282663 | 7285563 | 1586041 | --- | --- | --- | 2,62 | down |
| 6282692 | 7350237 | 1745487 | --- | --- | --- | 1,01 | up   |
| 6282728 | 7074911 | 1068174 | --- | --- | --- | 1,11 | down |
| 6282766 | 7247230 | 1490598 | --- | --- | --- | 1,13 | up   |
| 6282827 | 7127540 | 1195275 | --- | --- | --- | 1,14 | up   |
| 6282928 | 7056333 | 1023705 | --- | --- | --- | 1,27 | up   |
| 6282977 | 7337425 | 1713196 | --- | --- | --- | 1,19 | up   |
| 6283212 | 7218241 | 1418692 | --- | --- | --- | 1,06 | up   |
| 6283270 | 7101643 | 1131567 | --- | --- | --- | 1,27 | down |
| 6283301 | 7356326 | 1760469 | --- | --- | --- | 2,31 | up   |
| 6283370 | 7095021 | 1115136 | --- | --- | --- | 1,20 | down |
| 6283472 | 7366749 | 1785526 | --- | --- | --- | 1,21 | up   |
| 6283629 | 7368565 | 1791273 | --- | --- | --- | 1,05 | up   |
| 6283830 | 7253408 | 1505955 | --- | --- | --- | 2,23 | down |
| 6283847 | 7080134 | 1079806 | --- | --- | --- | 1,04 | up   |
| 6283889 | 7168979 | 1297201 | --- | --- | --- | 1,57 | down |
| 6283964 | 7235069 | 1460992 | --- | --- | --- | 1,14 | up   |
| 6284059 | 7321029 | 1674804 | --- | --- | --- | 1,03 | up   |
| 6284074 | 7205944 | 1389471 | --- | --- | --- | 1,05 | down |
| 6284083 | 7198087 | 1370717 | --- | --- | --- | 1,37 | up   |
| 6284111 | 7338101 | 1715193 | --- | --- | --- | 1,37 | down |
| 6284220 | 7136062 | 1216295 | --- | --- | --- | 1,10 | up   |
| 6284244 | 7071714 | 1060351 | --- | --- | --- | 1,14 | down |
| 6284262 | 7290793 | 1598626 | --- | --- | --- | 2,09 | down |
| 6284270 | 7381330 | 1823644 | --- | --- | --- | 1,12 | up   |
| 6284446 | 7091954 | 1107728 | --- | --- | --- | 1,08 | up   |
| 6284546 | 7268357 | 1543397 | --- | --- | --- | 1,28 | up   |
| 6284681 | 7310810 | 1649342 | --- | --- | --- | 1,19 | up   |
| 6284683 | 7039223 | 983568  | --- | --- | --- | 1,01 | down |
| 6284706 | 7148904 | 1248293 | --- | --- | --- | 1,07 | up   |
| 6284857 | 7252877 | 1504781 | --- | --- | --- | 1,30 | up   |
| 6284918 | 7233513 | 1457172 | --- | --- | --- | 1,14 | up   |
| 6284941 | 7353287 | 1753030 | --- | --- | --- | 1,31 | up   |
| 6285032 | 7329135 | 1693491 | --- | --- | --- | 1,14 | up   |
| 6285200 | 7166855 | 1291255 | --- | --- | --- | 1,09 | up   |
| 6285206 | 7148978 | 1248509 | --- | --- | --- | 1,26 | up   |
| 6285294 | 7044906 | 998135  | --- | --- | --- | 1,04 | down |
| 6285305 | 7218728 | 1419916 | --- | --- | --- | 1,24 | down |
| 6285412 | 7168519 | 1295885 | --- | --- | --- | 1,61 | down |
| 6285434 | 7288077 | 1591985 | --- | --- | --- | 1,03 | down |
| 6285528 | 7355138 | 1757743 | --- | --- | --- | 1,15 | down |
| 6285631 | 7377304 | 1814579 | --- | --- | --- | 1,15 | down |
| 6285663 | 7324760 | 1683032 | --- | --- | --- | 1,80 | down |
| 6285703 | 7279533 | 1571916 | --- | --- | --- | 1,06 | down |

|         |         |         |     |     |     |      |      |
|---------|---------|---------|-----|-----|-----|------|------|
| 6285729 | 7083030 | 1086247 | --- | --- | --- | 1,51 | up   |
| 6285737 | 7360486 | 1771020 | --- | --- | --- | 1,19 | down |
| 6285782 | 7173640 | 1308989 | --- | --- | --- | 1,22 | down |
| 6285814 | 7378997 | 1818638 | --- | --- | --- | 1,06 | down |
| 6285871 | 7056736 | 1024419 | --- | --- | --- | 1,08 | up   |
| 6285926 | 7374324 | 1807497 | --- | --- | --- | 1,26 | up   |
| 6286136 | 7363529 | 1777960 | --- | --- | --- | 1,01 | up   |
| 6286175 | 7231775 | 1452132 | --- | --- | --- | 1,45 | up   |
| 6286226 | 7055793 | 1022321 | --- | --- | --- | 1,02 | down |
| 6286239 | 7071292 | 1059428 | --- | --- | --- | 2,11 | down |
| 6286304 | 7341002 | 1722532 | --- | --- | --- | 1,01 | up   |
| 6286316 | 7367994 | 1789243 | --- | --- | --- | 1,17 | up   |
| 6286363 | 7261580 | 1526768 | --- | --- | --- | 1,18 | up   |
| 6286554 | 7185355 | 1338693 | --- | --- | --- | 1,00 | down |
| 6286573 | 7041486 | 989216  | --- | --- | --- | 1,03 | down |
| 6286640 | 7164949 | 1286388 | --- | --- | --- | 1,48 | down |
| 6286737 | 7052813 | 1015929 | --- | --- | --- | 1,10 | down |
| 6286835 | 7052957 | 1016274 | --- | --- | --- | 1,38 | up   |
| 6286892 | 7371001 | 1798872 | --- | --- | --- | 1,81 | down |
| 6286909 | 7339379 | 1718330 | --- | --- | --- | 1,97 | up   |
| 6286940 | 7088544 | 1099706 | --- | --- | --- | 1,49 | up   |
| 6287131 | 7257893 | 1517463 | --- | --- | --- | 1,04 | down |
| 6287161 | 7200996 | 1378150 | --- | --- | --- | 2,23 | up   |
| 6287387 | 7091900 | 1107631 | --- | --- | --- | 1,40 | down |
| 6287399 | 7088489 | 1099520 | --- | --- | --- | 1,00 | up   |
| 6287422 | 7078666 | 1076535 | --- | --- | --- | 1,29 | down |
| 6287440 | 7356115 | 1760128 | --- | --- | --- | 1,22 | down |
| 6287511 | 7098411 | 1123738 | --- | --- | --- | 1,45 | down |
| 6287563 | 7319773 | 1671874 | --- | --- | --- | 1,40 | up   |
| 6287608 | 7363922 | 1778856 | --- | --- | --- | 1,33 | up   |
| 6287645 | 7204917 | 1387108 | --- | --- | --- | 1,04 | down |
| 6287779 | 7110401 | 1153061 | --- | --- | --- | 1,23 | down |
| 6287785 | 7232709 | 1454530 | --- | --- | --- | 1,01 | down |
| 6287940 | 7292869 | 1603424 | --- | --- | --- | 1,08 | up   |
| 6288014 | 7239303 | 1471968 | --- | --- | --- | 1,10 | up   |
| 6288033 | 7313538 | 1655720 | --- | --- | --- | 1,10 | up   |
| 6288060 | 7371228 | 1799456 | --- | --- | --- | 1,15 | up   |
| 6288280 | 7360486 | 1770968 | --- | --- | --- | 1,25 | up   |
| 6288442 | 7248790 | 1494559 | --- | --- | --- | 1,49 | down |
| 6288519 | 7064732 | 1042907 | --- | --- | --- | 2,20 | down |
| 6288528 | 7180732 | 1326740 | --- | --- | --- | 1,21 | up   |
| 6288538 | 7105780 | 1141698 | --- | --- | --- | 1,08 | down |
| 6288631 | 7346687 | 1736693 | --- | --- | --- | 1,40 | up   |
| 6288763 | 7041584 | 989461  | --- | --- | --- | 1,01 | down |
| 6288907 | 7029770 | 960154  | --- | --- | --- | 1,28 | up   |
| 6288924 | 7066035 | 1046209 | --- | --- | --- | 3,40 | up   |
| 6288982 | 7374090 | 1806816 | --- | --- | --- | 1,01 | up   |
| 6289013 | 7043379 | 993627  | --- | --- | --- | 1,21 | up   |
| 6289033 | 7063716 | 1040138 | --- | --- | --- | 1,26 | up   |
| 6289340 | 7378997 | 1818679 | --- | --- | --- | 1,01 | up   |
| 6289374 | 7198644 | 1372299 | --- | --- | --- | 1,52 | down |
| 6289484 | 7198210 | 1370967 | --- | --- | --- | 1,81 | down |
| 6289527 | 7144389 | 1236780 | --- | --- | --- | 1,20 | down |
| 6289543 | 7252339 | 1503337 | --- | --- | --- | 1,10 | up   |
| 6289609 | 7176275 | 1315333 | --- | --- | --- | 1,23 | down |
| 6289677 | 7345465 | 1733865 | --- | --- | --- | 1,16 | up   |
| 6289722 | 7230628 | 1448864 | --- | --- | --- | 1,11 | up   |

|         |         |         |     |     |     |      |      |
|---------|---------|---------|-----|-----|-----|------|------|
| 6289757 | 7355580 | 1758886 | --- | --- | --- | 2,26 | up   |
| 6289827 | 7133484 | 1209949 | --- | --- | --- | 1,30 | up   |
| 6289963 | 7195680 | 1364878 | --- | --- | --- | 1,52 | up   |
| 6289964 | 7114274 | 1162813 | --- | --- | --- | 1,58 | down |
| 6290007 | 7058149 | 1027253 | --- | --- | --- | 1,62 | down |
| 6290083 | 7204917 | 1387119 | --- | --- | --- | 1,02 | up   |
| 6290106 | 7089080 | 1101162 | --- | --- | --- | 1,24 | down |
| 6290191 | 7096589 | 1118509 | --- | --- | --- | 1,02 | up   |
| 6290269 | 7313222 | 1654923 | --- | --- | --- | 1,10 | down |
| 6290460 | 7261580 | 1526818 | --- | --- | --- | 1,03 | down |
| 6290478 | 7273251 | 1555959 | --- | --- | --- | 1,42 | down |
| 6290548 | 7366749 | 1785489 | --- | --- | --- | 1,02 | up   |
| 6290549 | 7059766 | 1030972 | --- | --- | --- | 1,00 | down |
| 6290565 | 7267802 | 1541815 | --- | --- | --- | 1,28 | down |
| 6290608 | 7231775 | 1452130 | --- | --- | --- | 1,57 | down |
| 6290666 | 7179785 | 1324498 | --- | --- | --- | 1,15 | down |
| 6290782 | 7231484 | 1451358 | --- | --- | --- | 1,63 | up   |
| 6290801 | 7353382 | 1753226 | --- | --- | --- | 1,31 | up   |
| 6290810 | 7050167 | 1009815 | --- | --- | --- | 1,22 | up   |
| 6290824 | 7253272 | 1505700 | --- | --- | --- | 1,29 | down |
| 6290895 | 7247334 | 1490816 | --- | --- | --- | 1,10 | up   |
| 6291003 | 7260636 | 1524346 | --- | --- | --- | 1,51 | down |
| 6291086 | 7273744 | 1556989 | --- | --- | --- | 1,66 | down |
| 6291126 | 7319773 | 1671878 | --- | --- | --- | 1,17 | up   |
| 6291133 | 7039302 | 983850  | --- | --- | --- | 1,04 | up   |
| 6291252 | 7148978 | 1248535 | --- | --- | --- | 1,04 | up   |
| 6291333 | 7204442 | 1386086 | --- | --- | --- | 1,06 | down |
| 6291346 | 7295652 | 1610269 | --- | --- | --- | 1,18 | up   |
| 6291484 | 7208784 | 1396152 | --- | --- | --- | 1,31 | down |
| 6291517 | 7326271 | 1686477 | --- | --- | --- | 1,22 | up   |
| 6291541 | 7358859 | 1766961 | --- | --- | --- | 1,03 | down |
| 6291638 | 7370002 | 1795766 | --- | --- | --- | 1,04 | up   |
| 6291689 | 7093255 | 1110769 | --- | --- | --- | 1,29 | up   |
| 6291758 | 7038530 | 981861  | --- | --- | --- | 2,09 | up   |
| 6291857 | 7260488 | 1523933 | --- | --- | --- | 1,14 | down |
| 6291894 | 7253408 | 1505953 | --- | --- | --- | 1,22 | up   |
| 6291897 | 7384509 | 1830730 | --- | --- | --- | 1,17 | down |
| 6291899 | 7282343 | 1578679 | --- | --- | --- | 1,11 | down |
| 6291916 | 7056736 | 1024419 | --- | --- | --- | 1,92 | down |
| 6292004 | 7142321 | 1231499 | --- | --- | --- | 1,68 | up   |
| 6292022 | 7217747 | 1417482 | --- | --- | --- | 1,09 | up   |
| 6292095 | 7143455 | 1234739 | --- | --- | --- | 1,15 | up   |
| 6292106 | 7179176 | 1322920 | --- | --- | --- | 1,37 | down |
| 6292240 | 7225291 | 1435294 | --- | --- | --- | 1,12 | up   |
| 6292288 | 7133484 | 1209948 | --- | --- | --- | 1,07 | down |
| 6292291 | 7041609 | 989561  | --- | --- | --- | 1,10 | down |
| 6292331 | 7176456 | 1315843 | --- | --- | --- | 1,07 | up   |
| 6292351 | 7103782 | 1136947 | --- | --- | --- | 1,36 | down |
| 6292375 | 7321746 | 1676234 | --- | --- | --- | 2,28 | up   |
| 6292440 | 7315571 | 1660976 | --- | --- | --- | 1,22 | down |
| 6292471 | 7181193 | 1328288 | --- | --- | --- | 2,10 | up   |
| 6292618 | 7337425 | 1713148 | --- | --- | --- | 1,15 | down |
| 6292908 | 7297589 | 1615674 | --- | --- | --- | 1,02 | up   |
| 6292911 | 7255892 | 1512187 | --- | --- | --- | 1,03 | down |
| 6292919 | 7282343 | 1578686 | --- | --- | --- | 1,45 | down |
| 6292939 | 7068504 | 1052161 | --- | --- | --- | 1,17 | down |
| 6292999 | 7363576 | 1778175 | --- | --- | --- | 1,13 | down |

|         |         |         |     |     |     |      |      |
|---------|---------|---------|-----|-----|-----|------|------|
| 6293083 | 7253272 | 1505574 | --- | --- | --- | 1,08 | up   |
| 6293112 | 7330731 | 1697187 | --- | --- | --- | 1,02 | up   |
| 6293146 | 7301843 | 1626457 | --- | --- | --- | 1,03 | down |
| 6293157 | 7033504 | 969867  | --- | --- | --- | 1,71 | down |
| 6293172 | 7091954 | 1107704 | --- | --- | --- | 1,00 | down |
| 6293316 | 7058713 | 1028666 | --- | --- | --- | 1,14 | up   |
| 6293326 | 7333462 | 1703637 | --- | --- | --- | 1,45 | down |
| 6293483 | 7236358 | 1464261 | --- | --- | --- | 1,19 | up   |
| 6293556 | 7105780 | 1141704 | --- | --- | --- | 1,07 | up   |
| 6293570 | 7186305 | 1341002 | --- | --- | --- | 1,17 | down |
| 6293639 | 7062809 | 1038445 | --- | --- | --- | 2,38 | up   |
| 6293684 | 7181001 | 1327585 | --- | --- | --- | 1,21 | down |
| 6293710 | 7219729 | 1422379 | --- | --- | --- | 1,12 | down |
| 6293765 | 7156978 | 1268179 | --- | --- | --- | 1,38 | up   |
| 6293778 | 7343052 | 1727504 | --- | --- | --- | 1,01 | up   |
| 6293802 | 7041609 | 989582  | --- | --- | --- | 1,07 | up   |
| 6293808 | 7175946 | 1314630 | --- | --- | --- | 1,03 | up   |
| 6293834 | 7376566 | 1812870 | --- | --- | --- | 1,56 | up   |
| 6293903 | 7212735 | 1405002 | --- | --- | --- | 1,46 | up   |
| 6294005 | 7297756 | 1616092 | --- | --- | --- | 1,10 | down |
| 6294056 | 7180598 | 1326335 | --- | --- | --- | 1,20 | up   |
| 6294134 | 7056333 | 1023672 | --- | --- | --- | 1,69 | down |
| 6294142 | 7075460 | 1069385 | --- | --- | --- | 1,14 | down |
| 6294164 | 7231653 | 1451901 | --- | --- | --- | 2,11 | down |
| 6294179 | 7121074 | 1179906 | --- | --- | --- | 1,20 | down |
| 6294216 | 7200313 | 1376455 | --- | --- | --- | 1,07 | up   |
| 6294230 | 7267802 | 1541800 | --- | --- | --- | 1,16 | up   |
| 6294241 | 7341243 | 1723204 | --- | --- | --- | 1,34 | up   |
| 6294323 | 7184850 | 1337612 | --- | --- | --- | 1,18 | down |
| 6294344 | 7253408 | 1505955 | --- | --- | --- | 1,00 | up   |
| 6294445 | 7139026 | 1223496 | --- | --- | --- | 1,19 | up   |
| 6294526 | 7218728 | 1419927 | --- | --- | --- | 1,96 | up   |
| 6294531 | 7176275 | 1315348 | --- | --- | --- | 1,79 | up   |
| 6294607 | 7198644 | 1372355 | --- | --- | --- | 1,01 | down |
| 6294643 | 7243647 | 1482465 | --- | --- | --- | 1,09 | down |
| 6294719 | 7070836 | 1058331 | --- | --- | --- | 1,34 | down |
| 6294783 | 7068259 | 1051632 | --- | --- | --- | 1,28 | down |
| 6294814 | 7378997 | 1818649 | --- | --- | --- | 1,16 | down |
| 6294844 | 7218728 | 1419926 | --- | --- | --- | 1,71 | down |
| 6294854 | 7378637 | 1817829 | --- | --- | --- | 1,97 | down |
| 6294892 | 7170764 | 1301490 | --- | --- | --- | 2,02 | down |
| 6294950 | 7351953 | 1749880 | --- | --- | --- | 1,24 | up   |
| 6294986 | 7318714 | 1669239 | --- | --- | --- | 1,03 | down |
| 6295050 | 7292701 | 1602942 | --- | --- | --- | 1,00 | up   |
| 6295128 | 7080476 | 1080402 | --- | --- | --- | 1,51 | up   |
| 6295158 | 7184151 | 1335955 | --- | --- | --- | 1,45 | up   |
| 6295253 | 7039303 | 983873  | --- | --- | --- | 1,00 | up   |
| 6295259 | 7377304 | 1814596 | --- | --- | --- | 1,15 | down |
| 6295296 | 7365183 | 1781909 | --- | --- | --- | 1,12 | up   |
| 6295318 | 7341274 | 1723387 | --- | --- | --- | 1,01 | down |
| 6295502 | 7134773 | 1212969 | --- | --- | --- | 4,82 | down |
| 6295554 | 7356115 | 1760130 | --- | --- | --- | 1,14 | up   |
| 6295756 | 7282343 | 1578665 | --- | --- | --- | 1,68 | down |
| 6295786 | 7059971 | 1031468 | --- | --- | --- | 1,51 | up   |
| 6295790 | 7319773 | 1671861 | --- | --- | --- | 1,26 | down |
| 6295959 | 7285563 | 1586041 | --- | --- | --- | 1,22 | down |
| 6295979 | 7279568 | 1572027 | --- | --- | --- | 1,11 | down |

|         |         |         |     |     |     |      |      |
|---------|---------|---------|-----|-----|-----|------|------|
| 6295989 | 7360486 | 1770935 | --- | --- | --- | 2,52 | down |
| 6296045 | 7200545 | 1376928 | --- | --- | --- | 1,84 | up   |
| 6296086 | 7377304 | 1814576 | --- | --- | --- | 1,12 | up   |
| 6296212 | 7216970 | 1415120 | --- | --- | --- | 1,25 | up   |
| 6296237 | 7339379 | 1718321 | --- | --- | --- | 1,00 | down |
| 6296298 | 7058149 | 1027278 | --- | --- | --- | 1,02 | up   |
| 6296308 | 7076236 | 1071183 | --- | --- | --- | 1,38 | up   |
| 6296389 | 7337224 | 1712602 | --- | --- | --- | 1,43 | down |
| 6296397 | 7216309 | 1413742 | --- | --- | --- | 1,22 | down |
| 6296434 | 7266530 | 1538284 | --- | --- | --- | 1,15 | up   |
| 6296451 | 7277719 | 1567084 | --- | --- | --- | 1,17 | up   |
| 6296510 | 7286807 | 1588830 | --- | --- | --- | 1,17 | down |
| 6296533 | 7146093 | 1240951 | --- | --- | --- | 1,33 | up   |
| 6296541 | 7076236 | 1071196 | --- | --- | --- | 1,15 | down |
| 6296548 | 7073677 | 1065126 | --- | --- | --- | 1,29 | up   |
| 6296550 | 7100523 | 1128918 | --- | --- | --- | 1,15 | up   |
| 6296776 | 7043379 | 993638  | --- | --- | --- | 1,19 | down |
| 6296796 | 7374313 | 1807384 | --- | --- | --- | 1,27 | up   |
| 6297015 | 7279568 | 1572019 | --- | --- | --- | 1,18 | down |
| 6297132 | 7353232 | 1752858 | --- | --- | --- | 1,47 | up   |
| 6297156 | 7383102 | 1827382 | --- | --- | --- | 1,89 | down |
| 6297172 | 7286807 | 1588785 | --- | --- | --- | 1,91 | down |
| 6297189 | 7120671 | 1179000 | --- | --- | --- | 1,09 | down |
| 6297323 | 7243901 | 1483036 | --- | --- | --- | 1,21 | up   |
| 6297414 | 7095041 | 1115180 | --- | --- | --- | 1,04 | up   |
| 6297544 | 7381330 | 1823619 | --- | --- | --- | 1,97 | up   |
| 6297553 | 7367994 | 1789244 | --- | --- | --- | 1,00 | down |
| 6297566 | 7220650 | 1424522 | --- | --- | --- | 1,01 | up   |
| 6297582 | 7032204 | 966174  | --- | --- | --- | 1,26 | up   |
| 6297622 | 7377116 | 1814072 | --- | --- | --- | 1,01 | down |
| 6297759 | 7184931 | 1337717 | --- | --- | --- | 1,03 | down |
| 6297782 | 7169599 | 1298449 | --- | --- | --- | 1,02 | up   |
| 6297819 | 7041584 | 989458  | --- | --- | --- | 2,55 | up   |
| 6297825 | 7078815 | 1076983 | --- | --- | --- | 1,19 | down |
| 6297966 | 7098867 | 1124950 | --- | --- | --- | 1,35 | down |
| 6298001 | 7240569 | 1475375 | --- | --- | --- | 1,09 | down |
| 6298006 | 7107926 | 1146832 | --- | --- | --- | 1,10 | down |
| 6298165 | 7070836 | 1058354 | --- | --- | --- | 1,24 | down |
| 6298295 | 7156114 | 1266043 | --- | --- | --- | 1,10 | up   |
| 6298301 | 7359453 | 1768450 | --- | --- | --- | 1,26 | down |
| 6298452 | 7098077 | 1122807 | --- | --- | --- | 1,09 | down |
| 6298532 | 7337872 | 1714463 | --- | --- | --- | 1,86 | up   |
| 6298546 | 7272577 | 1554283 | --- | --- | --- | 1,16 | down |
| 6298547 | 7053786 | 1018130 | --- | --- | --- | 2,42 | down |
| 6298634 | 7106776 | 1144105 | --- | --- | --- | 1,12 | down |
| 6298635 | 7284153 | 1583018 | --- | --- | --- | 1,13 | up   |
| 6298821 | 7093936 | 1112477 | --- | --- | --- | 1,04 | up   |
| 6298907 | 7088432 | 1099412 | --- | --- | --- | 1,23 | down |
| 6298917 | 7052933 | 1016212 | --- | --- | --- | 1,11 | up   |
| 6298929 | 7243363 | 1481587 | --- | --- | --- | 1,66 | up   |
| 6299078 | 7165644 | 1288023 | --- | --- | --- | 1,04 | down |
| 6299155 | 7126400 | 1192532 | --- | --- | --- | 1,78 | up   |
| 6299208 | 7243647 | 1482445 | --- | --- | --- | 1,06 | down |
| 6299288 | 7255911 | 1512232 | --- | --- | --- | 1,16 | up   |
| 6299344 | 7164949 | 1286418 | --- | --- | --- | 1,37 | up   |
| 6299394 | 7338101 | 1715190 | --- | --- | --- | 2,35 | down |
| 6299420 | 7130889 | 1203863 | --- | --- | --- | 1,61 | down |

|         |         |         |     |     |     |      |      |
|---------|---------|---------|-----|-----|-----|------|------|
| 6299428 | 7088625 | 1099869 | --- | --- | --- | 1,34 | down |
| 6299462 | 7193987 | 1360670 | --- | --- | --- | 1,01 | up   |
| 6299533 | 7330238 | 1695937 | --- | --- | --- | 1,15 | down |
| 6299604 | 7240569 | 1475363 | --- | --- | --- | 2,18 | up   |
| 6299665 | 7235840 | 1462995 | --- | --- | --- | 1,23 | up   |
| 6299693 | 7346229 | 1735593 | --- | --- | --- | 1,67 | down |
| 6299761 | 7297589 | 1615681 | --- | --- | --- | 1,13 | down |
| 6299815 | 7083021 | 1086215 | --- | --- | --- | 1,13 | up   |
| 6299817 | 7276650 | 1564134 | --- | --- | --- | 1,86 | up   |
| 6299835 | 7310851 | 1649637 | --- | --- | --- | 1,02 | up   |
| 6299878 | 7247907 | 1492237 | --- | --- | --- | 1,41 | down |
| 6300158 | 7095066 | 1115268 | --- | --- | --- | 1,25 | up   |
| 6300180 | 7120671 | 1178994 | --- | --- | --- | 1,19 | down |
| 6300202 | 7069721 | 1055314 | --- | --- | --- | 2,19 | up   |
| 6300270 | 7166867 | 1291291 | --- | --- | --- | 1,15 | down |
| 6300294 | 7266544 | 1538337 | --- | --- | --- | 1,08 | down |
| 6300340 | 7231533 | 1451501 | --- | --- | --- | 1,20 | up   |
| 6300370 | 7118503 | 1173581 | --- | --- | --- | 1,12 | up   |
| 6300458 | 7374740 | 1808620 | --- | --- | --- | 1,27 | up   |
| 6300493 | 7267204 | 1539856 | --- | --- | --- | 1,45 | down |
| 6300504 | 7166855 | 1291264 | --- | --- | --- | 1,20 | up   |
| 6300680 | 7229856 | 1447073 | --- | --- | --- | 1,11 | down |
| 6300714 | 7156611 | 1267351 | --- | --- | --- | 1,23 | up   |
| 6300758 | 7068259 | 1051618 | --- | --- | --- | 2,48 | down |
| 6300849 | 7205944 | 1389486 | --- | --- | --- | 1,21 | up   |
| 6300933 | 7279533 | 1571916 | --- | --- | --- | 1,02 | up   |
| 6300978 | 7120550 | 1178704 | --- | --- | --- | 1,34 | down |
| 6300988 | 7287337 | 1589970 | --- | --- | --- | 2,34 | down |
| 6300994 | 7279806 | 1572566 | --- | --- | --- | 1,14 | up   |
| 6301048 | 7196331 | 1366381 | --- | --- | --- | 1,07 | down |
| 6301158 | 7118234 | 1172822 | --- | --- | --- | 1,12 | up   |
| 6301245 | 7356333 | 1760498 | --- | --- | --- | 1,10 | up   |
| 6301271 | 7100523 | 1128915 | --- | --- | --- | 1,47 | down |
| 6301305 | 7067670 | 1050319 | --- | --- | --- | 1,12 | up   |
| 6301342 | 7156052 | 1265759 | --- | --- | --- | 1,18 | up   |
| 6301409 | 7213908 | 1407693 | --- | --- | --- | 1,17 | up   |
| 6301494 | 7029119 | 958982  | --- | --- | --- | 1,03 | up   |
| 6301582 | 7234040 | 1458501 | --- | --- | --- | 1,26 | up   |
| 6301590 | 7182739 | 1332585 | --- | --- | --- | 1,22 | down |
| 6301652 | 7141061 | 1228644 | --- | --- | --- | 1,09 | up   |
| 6301656 | 7080476 | 1080414 | --- | --- | --- | 1,07 | up   |
| 6301684 | 7330238 | 1695963 | --- | --- | --- | 1,60 | down |
| 6301703 | 7359426 | 1768381 | --- | --- | --- | 1,14 | down |
| 6301722 | 7115362 | 1165603 | --- | --- | --- | 1,18 | down |
| 6301762 | 7205944 | 1389459 | --- | --- | --- | 1,02 | up   |
| 6301840 | 7360486 | 1770936 | --- | --- | --- | 1,32 | down |
| 6302019 | 7194540 | 1362109 | --- | --- | --- | 1,72 | up   |
| 6302221 | 7253215 | 1505373 | --- | --- | --- | 1,13 | down |
| 6302299 | 7269429 | 1545839 | --- | --- | --- | 1,11 | down |
| 6302481 | 7256789 | 1514647 | --- | --- | --- | 1,07 | up   |
| 6302580 | 7165644 | 1288024 | --- | --- | --- | 1,26 | up   |
| 6302593 | 7240569 | 1475470 | --- | --- | --- | 1,09 | up   |
| 6302624 | 7301904 | 1626757 | --- | --- | --- | 1,50 | down |
| 6302709 | 7310851 | 1649630 | --- | --- | --- | 1,17 | down |
| 6302718 | 7259221 | 1520616 | --- | --- | --- | 1,13 | up   |
| 6302729 | 7361223 | 1772624 | --- | --- | --- | 1,14 | down |
| 6302763 | 7196029 | 1365624 | --- | --- | --- | 1,45 | down |

|         |         |         |     |     |     |      |      |
|---------|---------|---------|-----|-----|-----|------|------|
| 6302798 | 7205944 | 1389488 | --- | --- | --- | 1,08 | up   |
| 6302910 | 7211389 | 1402113 | --- | --- | --- | 1,87 | down |
| 6302912 | 7103017 | 1135166 | --- | --- | --- | 1,04 | down |
| 6303020 | 7193987 | 1360668 | --- | --- | --- | 1,11 | down |
| 6303043 | 7200545 | 1376916 | --- | --- | --- | 1,05 | up   |
| 6303105 | 7324760 | 1683100 | --- | --- | --- | 1,04 | down |
| 6303116 | 7089490 | 1102345 | --- | --- | --- | 1,13 | down |
| 6303205 | 7281924 | 1577731 | --- | --- | --- | 1,40 | up   |
| 6303316 | 7185483 | 1338929 | --- | --- | --- | 1,16 | up   |
| 6303475 | 7368004 | 1789332 | --- | --- | --- | 1,04 | up   |
| 6303628 | 7228656 | 1444247 | --- | --- | --- | 1,19 | up   |
| 6303712 | 7290793 | 1598640 | --- | --- | --- | 1,31 | down |
| 6303888 | 7280743 | 1574569 | --- | --- | --- | 1,29 | up   |
| 6304005 | 7146093 | 1240932 | --- | --- | --- | 1,66 | up   |
| 6304054 | 7156047 | 1265723 | --- | --- | --- | 2,18 | up   |
| 6304143 | 7279073 | 1570679 | --- | --- | --- | 1,33 | down |
| 6304160 | 7029770 | 960151  | --- | --- | --- | 1,67 | down |
| 6304197 | 7212718 | 1404970 | --- | --- | --- | 1,33 | down |
| 6304251 | 7252877 | 1504750 | --- | --- | --- | 1,52 | up   |
| 6304252 | 7057226 | 1025432 | --- | --- | --- | 1,36 | down |
| 6304338 | 7188138 | 1345032 | --- | --- | --- | 1,05 | down |
| 6304380 | 7186240 | 1340825 | --- | --- | --- | 1,03 | up   |
| 6304435 | 7301807 | 1626302 | --- | --- | --- | 2,34 | down |
| 6304563 | 7096461 | 1118260 | --- | --- | --- | 1,33 | up   |
| 6304596 | 7258455 | 1518730 | --- | --- | --- | 1,19 | up   |
| 6304773 | 7358048 | 1764798 | --- | --- | --- | 1,05 | down |
| 6304818 | 7093936 | 1112473 | --- | --- | --- | 2,05 | up   |
| 6304832 | 7097485 | 1120943 | --- | --- | --- | 1,30 | up   |
| 6304852 | 7227433 | 1440989 | --- | --- | --- | 1,28 | down |
| 6304922 | 7078982 | 1077309 | --- | --- | --- | 1,16 | down |
| 6304943 | 7359789 | 1769163 | --- | --- | --- | 1,18 | down |
| 6304966 | 7198210 | 1371007 | --- | --- | --- | 2,20 | down |
| 6304987 | 7385253 | 1832225 | --- | --- | --- | 1,64 | down |
| 6304989 | 7088544 | 1099685 | --- | --- | --- | 1,07 | up   |
| 6305040 | 7071969 | 1060900 | --- | --- | --- | 1,64 | down |
| 6305058 | 7376073 | 1811715 | --- | --- | --- | 1,21 | down |
| 6305068 | 7072748 | 1062594 | --- | --- | --- | 1,29 | up   |
| 6305097 | 7091609 | 1107061 | --- | --- | --- | 1,24 | up   |
| 6305185 | 7374324 | 1807506 | --- | --- | --- | 1,16 | down |
| 6305219 | 7303777 | 1631911 | --- | --- | --- | 1,19 | up   |
| 6305285 | 7272110 | 1553031 | --- | --- | --- | 1,20 | down |
| 6305335 | 7302327 | 1627690 | --- | --- | --- | 1,07 | down |
| 6305359 | 7235069 | 1460989 | --- | --- | --- | 1,40 | down |
| 6305395 | 7027350 | 954942  | --- | --- | --- | 1,21 | down |
| 6305422 | 7197056 | 1367834 | --- | --- | --- | 1,22 | down |
| 6305558 | 7280743 | 1574475 | --- | --- | --- | 1,10 | down |
| 6305578 | 7059584 | 1030546 | --- | --- | --- | 1,26 | up   |
| 6305589 | 7280743 | 1574506 | --- | --- | --- | 1,14 | down |
| 6305612 | 7341002 | 1722547 | --- | --- | --- | 1,81 | up   |
| 6305655 | 7339379 | 1718325 | --- | --- | --- | 1,19 | up   |
| 6305747 | 7225543 | 1435921 | --- | --- | --- | 1,23 | down |
| 6305780 | 7196029 | 1365630 | --- | --- | --- | 1,08 | up   |
| 6305807 | 7069603 | 1055058 | --- | --- | --- | 1,11 | up   |
| 6305838 | 7117813 | 1171704 | --- | --- | --- | 1,33 | down |
| 6306031 | 7363768 | 1778603 | --- | --- | --- | 1,33 | up   |
| 6306124 | 7305275 | 1635836 | --- | --- | --- | 1,27 | down |
| 6306258 | 7100523 | 1128884 | --- | --- | --- | 1,20 | down |

|         |         |         |     |     |     |      |      |
|---------|---------|---------|-----|-----|-----|------|------|
| 6306270 | 7300392 | 1622754 | --- | --- | --- | 1,12 | up   |
| 6306316 | 7222236 | 1428121 | --- | --- | --- | 1,05 | up   |
| 6306371 | 7254040 | 1507596 | --- | --- | --- | 1,04 | up   |
| 6306464 | 7238153 | 1468835 | --- | --- | --- | 1,44 | up   |
| 6306628 | 7205750 | 1389049 | --- | --- | --- | 1,40 | down |
| 6306630 | 7063716 | 1040125 | --- | --- | --- | 1,25 | down |
| 6306643 | 7215722 | 1412264 | --- | --- | --- | 2,00 | down |
| 6306669 | 7117526 | 1171004 | --- | --- | --- | 1,37 | down |
| 6306701 | 7235840 | 1462991 | --- | --- | --- | 1,04 | up   |
| 6306998 | 7367994 | 1789246 | --- | --- | --- | 1,74 | down |
| 6307233 | 7156047 | 1265729 | --- | --- | --- | 1,55 | down |
| 6307437 | 7092549 | 1109189 | --- | --- | --- | 1,03 | up   |
| 6307440 | 7136746 | 1217972 | --- | --- | --- | 1,04 | down |
| 6307499 | 7280743 | 1574480 | --- | --- | --- | 1,03 | up   |
| 6307554 | 7363674 | 1778435 | --- | --- | --- | 1,68 | up   |
| 6307636 | 7211363 | 1402042 | --- | --- | --- | 1,14 | up   |
| 6307710 | 7131718 | 1205746 | --- | --- | --- | 1,08 | down |
| 6307757 | 7280743 | 1574568 | --- | --- | --- | 1,28 | up   |
| 6307839 | 7213908 | 1407647 | --- | --- | --- | 1,36 | down |
| 6307857 | 7336931 | 1711864 | --- | --- | --- | 1,24 | down |
| 6307885 | 7345465 | 1733844 | --- | --- | --- | 1,06 | up   |
| 6307903 | 7176275 | 1315356 | --- | --- | --- | 1,39 | up   |
| 6307927 | 7168979 | 1297197 | --- | --- | --- | 1,07 | down |
| 6308033 | 7189404 | 1348198 | --- | --- | --- | 1,17 | down |
| 6308114 | 7120671 | 1179004 | --- | --- | --- | 2,04 | up   |
| 6308127 | 7055793 | 1022313 | --- | --- | --- | 1,36 | up   |
| 6308199 | 7179176 | 1322916 | --- | --- | --- | 1,12 | up   |
| 6308250 | 7087282 | 1096217 | --- | --- | --- | 1,07 | down |
| 6308299 | 7115362 | 1165598 | --- | --- | --- | 1,27 | down |
| 6308314 | 7140113 | 1226054 | --- | --- | --- | 1,32 | down |
| 6308333 | 7244290 | 1484162 | --- | --- | --- | 1,27 | up   |
| 6308345 | 7248790 | 1494531 | --- | --- | --- | 1,03 | up   |
| 6308446 | 7378602 | 1817713 | --- | --- | --- | 1,06 | down |
| 6308458 | 7295652 | 1610287 | --- | --- | --- | 1,73 | up   |
| 6308504 | 7078143 | 1075435 | --- | --- | --- | 1,55 | up   |
| 6308601 | 7213908 | 1407672 | --- | --- | --- | 1,05 | up   |
| 6308607 | 7252283 | 1503111 | --- | --- | --- | 1,54 | up   |
| 6308627 | 7247230 | 1490573 | --- | --- | --- | 1,01 | up   |
| 6308636 | 7339732 | 1719240 | --- | --- | --- | 1,17 | down |
| 6308641 | 7092406 | 1108786 | --- | --- | --- | 1,06 | down |
| 6308743 | 7142321 | 1231485 | --- | --- | --- | 1,09 | up   |
| 6308779 | 7158517 | 1271592 | --- | --- | --- | 1,05 | down |
| 6308880 | 7131550 | 1205551 | --- | --- | --- | 3,23 | up   |
| 6308936 | 7171091 | 1302460 | --- | --- | --- | 1,39 | down |
| 6308982 | 7343052 | 1727539 | --- | --- | --- | 1,08 | up   |
| 6309122 | 7267802 | 1541741 | --- | --- | --- | 1,73 | down |
| 6309258 | 7069721 | 1055284 | --- | --- | --- | 1,16 | down |
| 6309259 | 7360486 | 1770957 | --- | --- | --- | 1,34 | down |
| 6309317 | 7243363 | 1481628 | --- | --- | --- | 1,05 | down |
| 6309372 | 7312566 | 1653300 | --- | --- | --- | 1,41 | down |
| 6309395 | 7330396 | 1696336 | --- | --- | --- | 1,15 | down |
| 6309417 | 7302787 | 1628904 | --- | --- | --- | 1,54 | down |
| 6309535 | 7231775 | 1452133 | --- | --- | --- | 1,16 | up   |
| 6309662 | 7107321 | 1145324 | --- | --- | --- | 1,04 | up   |
| 6309858 | 7213908 | 1407690 | --- | --- | --- | 1,03 | up   |
| 6309909 | 7166855 | 1291271 | --- | --- | --- | 1,21 | down |
| 6309912 | 7353284 | 1752981 | --- | --- | --- | 1,28 | up   |



|         |         |         |     |     |     |      |      |
|---------|---------|---------|-----|-----|-----|------|------|
| 6309966 | 7253215 | 1505369 | --- | --- | --- | 1,05 | up   |
| 6310025 | 7361223 | 1772619 | --- | --- | --- | 1,15 | down |
| 6310068 | 7336854 | 1711687 | --- | --- | --- | 1,70 | down |
| 6310153 | 7212587 | 1404639 | --- | --- | --- | 1,15 | up   |
| 6310159 | 7276650 | 1564139 | --- | --- | --- | 1,22 | up   |
| 6310219 | 7381352 | 1823743 | --- | --- | --- | 1,11 | down |
| 6310265 | 7029119 | 958979  | --- | --- | --- | 1,28 | up   |
| 6310298 | 7295652 | 1610301 | --- | --- | --- | 1,11 | up   |
| 6310307 | 7099973 | 1127535 | --- | --- | --- | 1,66 | down |
| 6310350 | 7318286 | 1668329 | --- | --- | --- | 1,02 | down |
| 6310367 | 7228530 | 1443903 | --- | --- | --- | 1,12 | down |
| 6310576 | 7212718 | 1404970 | --- | --- | --- | 1,60 | down |
| 6310603 | 7069603 | 1055043 | --- | --- | --- | 1,22 | up   |
| 6310665 | 7286613 | 1588470 | --- | --- | --- | 1,04 | down |
| 6310675 | 7182739 | 1332589 | --- | --- | --- | 1,56 | up   |
| 6310692 | 7281877 | 1577533 | --- | --- | --- | 1,13 | down |
| 6310761 | 7182133 | 1330843 | --- | --- | --- | 2,00 | down |
| 6310775 | 7360486 | 1771014 | --- | --- | --- | 1,01 | up   |
| 6310778 | 7110999 | 1154773 | --- | --- | --- | 1,09 | down |
| 6310863 | 7274892 | 1559580 | --- | --- | --- | 1,17 | down |
| 6310974 | 7142416 | 1231792 | --- | --- | --- | 1,01 | up   |
| 6311016 | 7285530 | 1585970 | --- | --- | --- | 2,18 | up   |
| 6311111 | 7119179 | 1174992 | --- | --- | --- | 1,01 | down |
| 6311200 | 7086966 | 1095257 | --- | --- | --- | 1,31 | up   |
| 6311239 | 7073854 | 1065631 | --- | --- | --- | 1,32 | up   |
| 6311246 | 7279533 | 1571917 | --- | --- | --- | 1,00 | down |
| 6311352 | 7346687 | 1736688 | --- | --- | --- | 1,07 | up   |
| 6311457 | 7245921 | 1487686 | --- | --- | --- | 1,25 | down |
| 6311476 | 7286807 | 1588820 | --- | --- | --- | 1,11 | down |
| 6311515 | 7176456 | 1315830 | --- | --- | --- | 1,21 | up   |
| 6311613 | 7364948 | 1781228 | --- | --- | --- | 1,13 | down |
| 6311964 | 7291909 | 1601127 | --- | --- | --- | 1,42 | up   |
| 6311969 | 7282831 | 1579771 | --- | --- | --- | 1,63 | down |
| 6312121 | 7185315 | 1338604 | --- | --- | --- | 1,06 | down |
| 6312145 | 7128921 | 1198516 | --- | --- | --- | 1,10 | down |
| 6312213 | 7243647 | 1482429 | --- | --- | --- | 1,19 | down |
| 6312316 | 7302860 | 1629006 | --- | --- | --- | 1,00 | up   |
| 6312423 | 7241163 | 1476819 | --- | --- | --- | 1,45 | up   |
| 6312515 | 7356619 | 1761345 | --- | --- | --- | 1,56 | down |
| 6312563 | 7182739 | 1332591 | --- | --- | --- | 1,02 | down |
| 6312590 | 7078666 | 1076507 | --- | --- | --- | 1,17 | up   |
| 6312617 | 7377116 | 1814067 | --- | --- | --- | 1,22 | down |
| 6312715 | 7165954 | 1288770 | --- | --- | --- | 1,48 | down |
| 6312717 | 7376820 | 1813394 | --- | --- | --- | 1,47 | up   |
| 6312739 | 7318714 | 1669230 | --- | --- | --- | 1,17 | up   |
| 6312740 | 7193056 | 1358266 | --- | --- | --- | 1,26 | down |
| 6312750 | 7355244 | 1758140 | --- | --- | --- | 3,20 | up   |
| 6312798 | 7044906 | 998125  | --- | --- | --- | 1,19 | down |
| 6312821 | 7264745 | 1534272 | --- | --- | --- | 2,63 | up   |
| 6312858 | 7247907 | 1492247 | --- | --- | --- | 1,17 | down |
| 6312913 | 7280743 | 1574534 | --- | --- | --- | 1,12 | down |
| 6312935 | 7148741 | 1247855 | --- | --- | --- | 1,29 | up   |
| 6312954 | 7341546 | 1723950 | --- | --- | --- | 1,41 | down |
| 6312955 | 7384509 | 1830725 | --- | --- | --- | 1,18 | up   |
| 6312969 | 7041486 | 989218  | --- | --- | --- | 1,13 | down |
| 6313016 | 7073677 | 1065134 | --- | --- | --- | 1,53 | up   |
| 6313035 | 7039302 | 983843  | --- | --- | --- | 1,11 | up   |

|         |         |         |     |     |     |      |      |
|---------|---------|---------|-----|-----|-----|------|------|
| 6313108 | 7231484 | 1451392 | --- | --- | --- | 1,65 | up   |
| 6313202 | 7088489 | 1099529 | --- | --- | --- | 1,03 | up   |
| 6313210 | 7363576 | 1778195 | --- | --- | --- | 1,70 | up   |
| 6313226 | 7120468 | 1178510 | --- | --- | --- | 1,52 | down |
| 6313275 | 7059971 | 1031467 | --- | --- | --- | 1,50 | up   |
| 6313292 | 7231533 | 1451501 | --- | --- | --- | 1,62 | up   |
| 6313389 | 7376073 | 1811692 | --- | --- | --- | 1,05 | down |
| 6313396 | 7217747 | 1417498 | --- | --- | --- | 1,26 | down |
| 6313424 | 7377791 | 1815997 | --- | --- | --- | 1,30 | down |
| 6313443 | 7148741 | 1247839 | --- | --- | --- | 1,01 | down |
| 6313508 | 7378997 | 1818655 | --- | --- | --- | 1,35 | up   |
| 6313559 | 7089080 | 1101168 | --- | --- | --- | 1,09 | down |
| 6313608 | 7195680 | 1364875 | --- | --- | --- | 1,43 | up   |
| 6313802 | 7243647 | 1482479 | --- | --- | --- | 1,17 | up   |
| 6313876 | 7088135 | 1098419 | --- | --- | --- | 1,06 | down |
| 6313897 | 7142321 | 1231525 | --- | --- | --- | 1,46 | down |
| 6313928 | 7376073 | 1811729 | --- | --- | --- | 1,18 | up   |
| 6313957 | 7112355 | 1158071 | --- | --- | --- | 1,01 | down |
| 6313968 | 7144782 | 1237784 | --- | --- | --- | 1,45 | down |
| 6313974 | 7236358 | 1464255 | --- | --- | --- | 1,56 | up   |
| 6313977 | 7243647 | 1482488 | --- | --- | --- | 1,08 | up   |
| 6314015 | 7076236 | 1071197 | --- | --- | --- | 1,38 | down |
| 6314021 | 7238202 | 1468949 | --- | --- | --- | 1,12 | up   |
| 6314050 | 7127691 | 1195630 | --- | --- | --- | 1,09 | up   |
| 6314117 | 7180732 | 1326728 | --- | --- | --- | 1,39 | down |
| 6314244 | 7208784 | 1396114 | --- | --- | --- | 1,99 | up   |
| 6314288 | 7099573 | 1126711 | --- | --- | --- | 1,13 | down |
| 6314302 | 7264745 | 1534278 | --- | --- | --- | 1,17 | down |
| 6314374 | 7183182 | 1333564 | --- | --- | --- | 1,80 | up   |
| 6314378 | 7378997 | 1818676 | --- | --- | --- | 1,06 | up   |
| 6314836 | 7217143 | 1415586 | --- | --- | --- | 2,77 | down |
| 6314858 | 7041061 | 988074  | --- | --- | --- | 1,28 | down |
| 6315035 | 7258455 | 1518700 | --- | --- | --- | 1,17 | up   |
| 6315059 | 7166867 | 1291334 | --- | --- | --- | 1,28 | up   |
| 6315080 | 7200152 | 1376050 | --- | --- | --- | 1,05 | down |
| 6315146 | 7269911 | 1546912 | --- | --- | --- | 1,20 | down |
| 6315238 | 7239752 | 1473197 | --- | --- | --- | 1,06 | down |
| 6315320 | 7306680 | 1639571 | --- | --- | --- | 1,07 | down |
| 6315447 | 7095041 | 1115169 | --- | --- | --- | 1,06 | up   |
| 6315589 | 7087500 | 1096725 | --- | --- | --- | 1,35 | up   |
| 6315642 | 7378997 | 1818640 | --- | --- | --- | 1,20 | up   |
| 6315684 | 7148978 | 1248541 | --- | --- | --- | 1,10 | down |
| 6315727 | 7360486 | 1770959 | --- | --- | --- | 1,08 | down |
| 6315735 | 7109730 | 1151737 | --- | --- | --- | 1,00 | down |
| 6315737 | 7343052 | 1727507 | --- | --- | --- | 1,05 | down |
| 6315785 | 7067670 | 1050366 | --- | --- | --- | 1,15 | up   |
| 6315869 | 7040442 | 986500  | --- | --- | --- | 1,15 | up   |
| 6315900 | 7253215 | 1505370 | --- | --- | --- | 1,50 | up   |
| 6315946 | 7350993 | 1747557 | --- | --- | --- | 1,80 | down |
| 6315950 | 7352044 | 1750003 | --- | --- | --- | 2,02 | up   |
| 6315992 | 7212698 | 1404871 | --- | --- | --- | 1,87 | up   |
| 6316023 | 7333462 | 1703646 | --- | --- | --- | 1,08 | up   |
| 6316036 | 7035525 | 974757  | --- | --- | --- | 1,02 | down |
| 6316061 | 7360325 | 1770493 | --- | --- | --- | 1,10 | down |
| 6316066 | 7374790 | 1808765 | --- | --- | --- | 1,17 | up   |
| 6316095 | 7295652 | 1610271 | --- | --- | --- | 1,12 | up   |
| 6316215 | 7370002 | 1795778 | --- | --- | --- | 2,12 | down |

|         |         |         |     |     |     |      |      |
|---------|---------|---------|-----|-----|-----|------|------|
| 6316242 | 7132125 | 1206640 | --- | --- | --- | 1,16 | up   |
| 6316265 | 7240569 | 1475464 | --- | --- | --- | 1,14 | up   |
| 6316276 | 7053874 | 1018322 | --- | --- | --- | 1,65 | up   |
| 6316390 | 7263348 | 1530806 | --- | --- | --- | 1,14 | up   |
| 6316423 | 7080476 | 1080407 | --- | --- | --- | 1,25 | down |
| 6316440 | 7182000 | 1330404 | --- | --- | --- | 1,01 | up   |
| 6316567 | 7209927 | 1398936 | --- | --- | --- | 1,11 | down |
| 6316692 | 7341274 | 1723399 | --- | --- | --- | 1,29 | down |
| 6316827 | 7141061 | 1228643 | --- | --- | --- | 1,05 | up   |
| 6316894 | 7341264 | 1723350 | --- | --- | --- | 1,30 | up   |
| 6316976 | 7383102 | 1827387 | --- | --- | --- | 1,83 | up   |
| 6317012 | 7274780 | 1559239 | --- | --- | --- | 1,16 | down |
| 6317018 | 7071292 | 1059446 | --- | --- | --- | 1,19 | up   |
| 6317103 | 7363147 | 1777030 | --- | --- | --- | 1,13 | up   |
| 6317149 | 7378981 | 1818552 | --- | --- | --- | 1,29 | down |
| 6317316 | 7331757 | 1700023 | --- | --- | --- | 1,38 | down |
| 6317377 | 7076160 | 1070882 | --- | --- | --- | 1,13 | up   |
| 6317409 | 7279568 | 1572032 | --- | --- | --- | 1,62 | up   |
| 6317549 | 7344380 | 1731118 | --- | --- | --- | 1,13 | down |
| 6317796 | 7292517 | 1602557 | --- | --- | --- | 1,11 | down |
| 6317844 | 7155866 | 1265331 | --- | --- | --- | 1,08 | up   |
| 6318034 | 7058713 | 1028669 | --- | --- | --- | 1,35 | up   |
| 6318060 | 7030037 | 960715  | --- | --- | --- | 1,01 | up   |
| 6318136 | 7259221 | 1520631 | --- | --- | --- | 1,09 | up   |
| 6318145 | 7260488 | 1523936 | --- | --- | --- | 1,19 | up   |
| 6318179 | 7084193 | 1089070 | --- | --- | --- | 1,83 | down |
| 6318249 | 7025310 | 949244  | --- | --- | --- | 1,43 | down |
| 6318270 | 7131876 | 1206059 | --- | --- | --- | 1,67 | up   |
| 6318297 | 7203074 | 1382783 | --- | --- | --- | 1,03 | up   |
| 6318305 | 7069830 | 1055590 | --- | --- | --- | 1,78 | down |
| 6318348 | 7153136 | 1258042 | --- | --- | --- | 1,53 | down |
| 6318376 | 7117526 | 1170978 | --- | --- | --- | 1,01 | down |
| 6318425 | 7373678 | 1805865 | --- | --- | --- | 1,23 | down |
| 6318485 | 7367990 | 1789225 | --- | --- | --- | 1,55 | up   |
| 6318502 | 7355044 | 1757435 | --- | --- | --- | 1,13 | down |
| 6318538 | 7361881 | 1773932 | --- | --- | --- | 1,30 | up   |
| 6318581 | 7114274 | 1162813 | --- | --- | --- | 1,52 | up   |
| 6318668 | 7071741 | 1060453 | --- | --- | --- | 1,15 | down |
| 6318675 | 7038530 | 981880  | --- | --- | --- | 1,79 | up   |
| 6318806 | 7168521 | 1295887 | --- | --- | --- | 1,15 | up   |
| 6318852 | 7075445 | 1069343 | --- | --- | --- | 2,15 | up   |
| 6318888 | 7280982 | 1575265 | --- | --- | --- | 1,25 | up   |
| 6318932 | 7353997 | 1754703 | --- | --- | --- | 1,09 | up   |
| 6318939 | 7381330 | 1823634 | --- | --- | --- | 1,68 | up   |
| 6318948 | 7069830 | 1055624 | --- | --- | --- | 1,18 | up   |
| 6319116 | 7255911 | 1512235 | --- | --- | --- | 1,18 | up   |
| 6319218 | 7090581 | 1104740 | --- | --- | --- | 1,76 | up   |
| 6319242 | 7139708 | 1225051 | --- | --- | --- | 1,82 | up   |
| 6319350 | 7195680 | 1364889 | --- | --- | --- | 1,35 | down |
| 6319471 | 7087965 | 1098063 | --- | --- | --- | 1,32 | down |
| 6319488 | 7320735 | 1674188 | --- | --- | --- | 1,15 | down |
| 6319506 | 7330396 | 1696343 | --- | --- | --- | 1,67 | up   |
| 6319521 | 7092549 | 1109186 | --- | --- | --- | 1,25 | down |
| 6319538 | 7374317 | 1807415 | --- | --- | --- | 1,68 | down |
| 6319539 | 7239303 | 1471999 | --- | --- | --- | 1,04 | down |
| 6319583 | 7049508 | 1008560 | --- | --- | --- | 1,37 | up   |
| 6319600 | 7090581 | 1104741 | --- | --- | --- | 4,04 | up   |

|         |         |         |     |     |     |      |      |
|---------|---------|---------|-----|-----|-----|------|------|
| 6319720 | 7339387 | 1718395 | --- | --- | --- | 1,09 | up   |
| 6319758 | 7069603 | 1055039 | --- | --- | --- | 1,02 | up   |
| 6319772 | 7088625 | 1099881 | --- | --- | --- | 1,11 | up   |
| 6319897 | 7211389 | 1402112 | --- | --- | --- | 1,42 | up   |
| 6319945 | 7053874 | 1018321 | --- | --- | --- | 1,28 | down |
| 6319985 | 7150047 | 1250768 | --- | --- | --- | 1,04 | up   |
| 6320033 | 7141061 | 1228697 | --- | --- | --- | 2,14 | down |
| 6320039 | 7185355 | 1338695 | --- | --- | --- | 1,12 | up   |
| 6320047 | 7205750 | 1388924 | --- | --- | --- | 1,09 | down |
| 6320178 | 7127540 | 1195273 | --- | --- | --- | 1,06 | up   |
| 6320264 | 7228656 | 1444247 | --- | --- | --- | 1,18 | up   |
| 6320268 | 7039223 | 983564  | --- | --- | --- | 1,23 | up   |
| 6320332 | 7211363 | 1402052 | --- | --- | --- | 1,12 | up   |
| 6320351 | 7083031 | 1086280 | --- | --- | --- | 2,06 | down |
| 6320354 | 7330238 | 1695931 | --- | --- | --- | 1,02 | up   |
| 6320401 | 7247334 | 1490817 | --- | --- | --- | 2,62 | up   |
| 6320466 | 7361881 | 1773938 | --- | --- | --- | 1,04 | down |
| 6320468 | 7214605 | 1409373 | --- | --- | --- | 1,31 | down |
| 6320514 | 7354935 | 1757098 | --- | --- | --- | 1,06 | down |
| 6320528 | 7253272 | 1505690 | --- | --- | --- | 1,32 | up   |
| 6320544 | 7350489 | 1746115 | --- | --- | --- | 1,09 | up   |
| 6320588 | 7374324 | 1807452 | --- | --- | --- | 1,20 | up   |
| 6320671 | 7030037 | 960707  | --- | --- | --- | 1,41 | up   |
| 6320728 | 7030519 | 961702  | --- | --- | --- | 1,10 | down |
| 6320769 | 7336288 | 1710269 | --- | --- | --- | 2,06 | up   |
| 6320788 | 7335637 | 1708476 | --- | --- | --- | 1,05 | up   |
| 6320835 | 7205944 | 1389492 | --- | --- | --- | 1,14 | down |
| 6320861 | 7279303 | 1571206 | --- | --- | --- | 2,15 | down |
| 6320909 | 7188829 | 1346668 | --- | --- | --- | 1,09 | down |
| 6320986 | 7099573 | 1126706 | --- | --- | --- | 1,01 | down |
| 6321060 | 7383823 | 1828942 | --- | --- | --- | 1,61 | down |
| 6321173 | 7357026 | 1762226 | --- | --- | --- | 1,38 | up   |
| 6321174 | 7358859 | 1767000 | --- | --- | --- | 1,37 | up   |
| 6321229 | 7100523 | 1128854 | --- | --- | --- | 1,08 | up   |
| 6321254 | 7212718 | 1404944 | --- | --- | --- | 1,31 | up   |
| 6321354 | 7214605 | 1409405 | --- | --- | --- | 3,17 | down |
| 6321367 | 7225543 | 1435915 | --- | --- | --- | 1,09 | up   |
| 6321486 | 7132125 | 1206602 | --- | --- | --- | 1,70 | down |
| 6321504 | 7337425 | 1713180 | --- | --- | --- | 1,16 | up   |
| 6321508 | 7127691 | 1195638 | --- | --- | --- | 1,00 | down |
| 6321515 | 7236131 | 1463743 | --- | --- | --- | 2,69 | up   |
| 6321518 | 7267802 | 1541753 | --- | --- | --- | 1,18 | down |
| 6321689 | 7155116 | 1263437 | --- | --- | --- | 1,22 | down |
| 6321693 | 7193056 | 1358262 | --- | --- | --- | 1,09 | down |
| 6321723 | 7307424 | 1641142 | --- | --- | --- | 1,02 | down |
| 6321801 | 7337425 | 1713192 | --- | --- | --- | 1,17 | down |
| 6321810 | 7376828 | 1813465 | --- | --- | --- | 1,12 | up   |
| 6321817 | 7302787 | 1628897 | --- | --- | --- | 1,18 | up   |
| 6321864 | 7216309 | 1413742 | --- | --- | --- | 1,26 | up   |
| 6321901 | 7153136 | 1258055 | --- | --- | --- | 1,05 | up   |
| 6321914 | 7035525 | 974788  | --- | --- | --- | 1,16 | up   |
| 6321936 | 7168439 | 1295668 | --- | --- | --- | 1,01 | down |
| 6321949 | 7177180 | 1317778 | --- | --- | --- | 1,63 | down |
| 6322067 | 7244936 | 1485370 | --- | --- | --- | 2,06 | down |
| 6322093 | 7093752 | 1112008 | --- | --- | --- | 1,80 | up   |
| 6322157 | 7198210 | 1370963 | --- | --- | --- | 1,58 | down |
| 6322223 | 7237814 | 1467840 | --- | --- | --- | 1,04 | up   |

|         |         |         |     |     |     |      |      |
|---------|---------|---------|-----|-----|-----|------|------|
| 6322226 | 7257337 | 1515979 | --- | --- | --- | 1,49 | down |
| 6322322 | 7307473 | 1641285 | --- | --- | --- | 1,09 | up   |
| 6322350 | 7243647 | 1482422 | --- | --- | --- | 1,00 | up   |
| 6322369 | 7197056 | 1367847 | --- | --- | --- | 1,12 | up   |
| 6322427 | 7196769 | 1367260 | --- | --- | --- | 1,06 | down |
| 6322485 | 7105814 | 1141775 | --- | --- | --- | 1,01 | up   |
| 6322490 | 7240569 | 1475455 | --- | --- | --- | 1,01 | down |
| 6322501 | 7364346 | 1779969 | --- | --- | --- | 1,03 | down |
| 6322520 | 7162144 | 1280518 | --- | --- | --- | 1,52 | up   |
| 6322542 | 7313538 | 1655712 | --- | --- | --- | 1,06 | up   |
| 6322576 | 7237814 | 1467827 | --- | --- | --- | 1,07 | up   |
| 6322636 | 7149817 | 1250308 | --- | --- | --- | 1,90 | up   |
| 6322637 | 7309738 | 1646960 | --- | --- | --- | 1,01 | up   |
| 6322760 | 7382499 | 1826256 | --- | --- | --- | 1,26 | down |
| 6322825 | 7028326 | 957442  | --- | --- | --- | 1,24 | down |
| 6322858 | 7177428 | 1318365 | --- | --- | --- | 1,74 | up   |
| 6322906 | 7267344 | 1540264 | --- | --- | --- | 1,21 | up   |
| 6322931 | 7141151 | 1228925 | --- | --- | --- | 2,01 | down |
| 6322932 | 7256191 | 1512880 | --- | --- | --- | 1,61 | down |
| 6322946 | 7041584 | 989452  | --- | --- | --- | 1,40 | up   |
| 6322999 | 7056736 | 1024423 | --- | --- | --- | 1,02 | up   |
| 6323008 | 7086044 | 1092939 | --- | --- | --- | 1,83 | down |
| 6323078 | 7376073 | 1811696 | --- | --- | --- | 1,07 | up   |
| 6323102 | 7049184 | 1007936 | --- | --- | --- | 1,46 | down |
| 6323145 | 7099573 | 1126739 | --- | --- | --- | 1,13 | up   |
| 6323218 | 7142416 | 1231818 | --- | --- | --- | 1,06 | down |
| 6323245 | 7052331 | 1014599 | --- | --- | --- | 1,10 | up   |
| 6323330 | 7237992 | 1468284 | --- | --- | --- | 1,31 | down |
| 6323364 | 7297589 | 1615681 | --- | --- | --- | 1,13 | up   |
| 6323440 | 7244288 | 1484107 | --- | --- | --- | 2,41 | up   |
| 6323485 | 7062233 | 1037240 | --- | --- | --- | 1,80 | down |
| 6323522 | 7318714 | 1669227 | --- | --- | --- | 1,00 | down |
| 6323557 | 7059584 | 1030548 | --- | --- | --- | 1,44 | down |
| 6323577 | 7212735 | 1405027 | --- | --- | --- | 1,07 | down |
| 6323621 | 7235069 | 1460989 | --- | --- | --- | 1,02 | down |
| 6323639 | 7217650 | 1417161 | --- | --- | --- | 1,54 | up   |
| 6323647 | 7315571 | 1660977 | --- | --- | --- | 1,30 | down |
| 6323688 | 7374324 | 1807476 | --- | --- | --- | 1,00 | down |
| 6323751 | 7235794 | 1462890 | --- | --- | --- | 1,02 | down |
| 6323808 | 7264085 | 1532719 | --- | --- | --- | 1,13 | down |
| 6323873 | 7243253 | 1481224 | --- | --- | --- | 1,12 | down |
| 6323911 | 7297589 | 1615598 | --- | --- | --- | 1,29 | up   |
| 6323947 | 7097536 | 1121127 | --- | --- | --- | 1,76 | down |
| 6324048 | 7095066 | 1115268 | --- | --- | --- | 1,31 | up   |
| 6324070 | 7095021 | 1115137 | --- | --- | --- | 1,55 | up   |
| 6324094 | 7244287 | 1484069 | --- | --- | --- | 2,08 | down |
| 6324184 | 7380497 | 1821831 | --- | --- | --- | 1,17 | down |
| 6324224 | 7363568 | 1778132 | --- | --- | --- | 1,02 | up   |
| 6324275 | 7093835 | 1112222 | --- | --- | --- | 1,45 | down |
| 6324427 | 7300906 | 1624053 | --- | --- | --- | 1,89 | up   |
| 6324450 | 7267802 | 1541787 | --- | --- | --- | 1,16 | up   |
| 6324497 | 7378524 | 1817520 | --- | --- | --- | 1,09 | down |
| 6324564 | 7030037 | 960701  | --- | --- | --- | 2,75 | up   |
| 6324573 | 7238115 | 1468655 | --- | --- | --- | 1,09 | down |
| 6324585 | 7109292 | 1150745 | --- | --- | --- | 1,41 | down |
| 6324726 | 7257651 | 1516926 | --- | --- | --- | 1,26 | down |
| 6324839 | 7155116 | 1263421 | --- | --- | --- | 1,28 | up   |

|         |         |         |     |     |     |      |      |
|---------|---------|---------|-----|-----|-----|------|------|
| 6324841 | 7319259 | 1670404 | --- | --- | --- | 1,01 | up   |
| 6324948 | 7148978 | 1248506 | --- | --- | --- | 1,73 | up   |
| 6324978 | 7292178 | 1601745 | --- | --- | --- | 1,10 | up   |
| 6325040 | 7194540 | 1362123 | --- | --- | --- | 1,14 | up   |
| 6325049 | 7096924 | 1119625 | --- | --- | --- | 1,62 | down |
| 6325091 | 7318596 | 1668937 | --- | --- | --- | 1,22 | up   |
| 6325111 | 7221443 | 1426316 | --- | --- | --- | 1,22 | up   |
| 6325138 | 7158517 | 1271594 | --- | --- | --- | 1,53 | down |
| 6325195 | 7353224 | 1752669 | --- | --- | --- | 1,02 | up   |
| 6325272 | 7235393 | 1461720 | --- | --- | --- | 3,25 | down |
| 6325282 | 7356333 | 1760497 | --- | --- | --- | 1,30 | down |
| 6325306 | 7191983 | 1355173 | --- | --- | --- | 1,38 | up   |
| 6325313 | 7149817 | 1250302 | --- | --- | --- | 1,15 | down |
| 6325365 | 7280743 | 1574547 | --- | --- | --- | 1,32 | down |
| 6325383 | 7267204 | 1539858 | --- | --- | --- | 1,04 | up   |
| 6325561 | 7165954 | 1288770 | --- | --- | --- | 1,22 | down |
| 6325620 | 7240569 | 1475452 | --- | --- | --- | 1,04 | down |
| 6325668 | 7031774 | 964776  | --- | --- | --- | 1,19 | up   |
| 6325674 | 7139026 | 1223494 | --- | --- | --- | 1,01 | up   |
| 6325721 | 7033504 | 969862  | --- | --- | --- | 1,03 | up   |
| 6325816 | 7069464 | 1054671 | --- | --- | --- | 1,05 | down |
| 6325969 | 7034293 | 971932  | --- | --- | --- | 1,06 | up   |
| 6325973 | 7148741 | 1247826 | --- | --- | --- | 1,07 | down |
| 6326091 | 7212587 | 1404650 | --- | --- | --- | 1,01 | down |
| 6326150 | 7312686 | 1653621 | --- | --- | --- | 1,01 | up   |
| 6326159 | 7138243 | 1221688 | --- | --- | --- | 1,59 | down |
| 6326171 | 7123421 | 1185841 | --- | --- | --- | 1,35 | up   |
| 6326180 | 7233442 | 1456946 | --- | --- | --- | 1,08 | down |
| 6326211 | 7318286 | 1668336 | --- | --- | --- | 1,16 | down |
| 6326247 | 7363529 | 1777924 | --- | --- | --- | 1,02 | up   |
| 6326474 | 7078143 | 1075450 | --- | --- | --- | 1,96 | up   |
| 6326563 | 7095021 | 1115131 | --- | --- | --- | 1,07 | up   |
| 6326682 | 7148741 | 1247825 | --- | --- | --- | 1,48 | up   |
| 6326743 | 7141061 | 1228643 | --- | --- | --- | 1,46 | down |
| 6326760 | 7350489 | 1746122 | --- | --- | --- | 1,76 | up   |
| 6326781 | 7172691 | 1306443 | --- | --- | --- | 1,25 | up   |
| 6326800 | 7374324 | 1807526 | --- | --- | --- | 1,06 | down |
| 6326846 | 7092549 | 1109144 | --- | --- | --- | 1,23 | down |
| 6326904 | 7286807 | 1588827 | --- | --- | --- | 1,21 | up   |
| 6326942 | 7059020 | 1029342 | --- | --- | --- | 1,15 | down |
| 6326943 | 7149817 | 1250307 | --- | --- | --- | 2,23 | up   |
| 6326950 | 7039725 | 984816  | --- | --- | --- | 1,38 | down |
| 6327042 | 7373678 | 1805876 | --- | --- | --- | 1,04 | down |
| 6327097 | 7050878 | 1011551 | --- | --- | --- | 1,30 | down |
| 6327104 | 7364346 | 1780006 | --- | --- | --- | 1,26 | up   |
| 6327143 | 7254040 | 1507591 | --- | --- | --- | 1,00 | up   |
| 6327168 | 7082098 | 1084123 | --- | --- | --- | 1,32 | down |
| 6327245 | 7121849 | 1181766 | --- | --- | --- | 1,39 | up   |
| 6327272 | 7028326 | 957433  | --- | --- | --- | 1,02 | up   |
| 6327295 | 7071714 | 1060356 | --- | --- | --- | 1,19 | up   |
| 6327369 | 7106752 | 1144057 | --- | --- | --- | 1,12 | down |
| 6327419 | 7373633 | 1805711 | --- | --- | --- | 1,37 | down |
| 6327475 | 7293234 | 1604333 | --- | --- | --- | 1,15 | up   |
| 6327600 | 7062233 | 1037197 | --- | --- | --- | 1,37 | up   |
| 6327625 | 7231775 | 1452135 | --- | --- | --- | 1,35 | up   |
| 6327635 | 7095041 | 1115188 | --- | --- | --- | 1,00 | up   |
| 6327743 | 7255510 | 1511320 | --- | --- | --- | 1,32 | down |

|         |         |         |     |     |     |      |      |
|---------|---------|---------|-----|-----|-----|------|------|
| 6327782 | 7126400 | 1192533 | --- | --- | --- | 1,07 | down |
| 6327859 | 7056106 | 1022971 | --- | --- | --- | 1,16 | up   |
| 6327926 | 7351953 | 1749875 | --- | --- | --- | 1,22 | up   |
| 6327930 | 7339379 | 1718310 | --- | --- | --- | 1,32 | down |
| 6327953 | 7205750 | 1388930 | --- | --- | --- | 1,04 | down |
| 6328076 | 7213908 | 1407688 | --- | --- | --- | 1,17 | down |
| 6328225 | 7064134 | 1041425 | --- | --- | --- | 1,29 | down |
| 6328238 | 7034356 | 972174  | --- | --- | --- | 1,32 | up   |
| 6328259 | 7053874 | 1018310 | --- | --- | --- | 1,12 | down |
| 6328260 | 7370002 | 1795769 | --- | --- | --- | 1,98 | down |
| 6328337 | 7168521 | 1295963 | --- | --- | --- | 1,24 | up   |
| 6328349 | 7092549 | 1109153 | --- | --- | --- | 1,12 | up   |
| 6328440 | 7189669 | 1348981 | --- | --- | --- | 1,68 | up   |
| 6328506 | 7108434 | 1148314 | --- | --- | --- | 1,24 | down |
| 6328513 | 7355041 | 1757405 | --- | --- | --- | 1,16 | up   |
| 6328525 | 7088489 | 1099521 | --- | --- | --- | 1,37 | down |
| 6328572 | 7240569 | 1475506 | --- | --- | --- | 1,03 | down |
| 6328575 | 7317708 | 1666829 | --- | --- | --- | 1,13 | down |
| 6328586 | 7196029 | 1365616 | --- | --- | --- | 1,04 | up   |
| 6328594 | 7330181 | 1695696 | --- | --- | --- | 1,52 | down |
| 6328655 | 7095041 | 1115170 | --- | --- | --- | 1,07 | up   |
| 6328808 | 7101362 | 1130827 | --- | --- | --- | 1,23 | down |
| 6328869 | 7377116 | 1814067 | --- | --- | --- | 1,12 | down |
| 6328929 | 7148741 | 1247825 | --- | --- | --- | 1,17 | down |
| 6328942 | 7295410 | 1609792 | --- | --- | --- | 1,40 | up   |
| 6329114 | 7378997 | 1818641 | --- | --- | --- | 1,17 | up   |
| 6329139 | 7335637 | 1708464 | --- | --- | --- | 1,92 | down |
| 6329195 | 7029770 | 960156  | --- | --- | --- | 1,19 | up   |
| 6329263 | 7087965 | 1098018 | --- | --- | --- | 3,98 | up   |
| 6329275 | 7340304 | 1720864 | --- | --- | --- | 2,15 | down |
| 6329374 | 7374324 | 1807466 | --- | --- | --- | 1,11 | up   |
| 6329433 | 7264797 | 1534420 | --- | --- | --- | 1,15 | down |
| 6329457 | 7353287 | 1753033 | --- | --- | --- | 1,72 | down |
| 6329771 | 7050716 | 1011221 | --- | --- | --- | 1,13 | down |
| 6329800 | 7249917 | 1497392 | --- | --- | --- | 1,43 | up   |
| 6329935 | 7041609 | 989572  | --- | --- | --- | 1,77 | down |
| 6329946 | 7060195 | 1031959 | --- | --- | --- | 1,05 | down |
| 6330028 | 7321029 | 1674816 | --- | --- | --- | 1,02 | up   |
| 6330066 | 7171091 | 1302460 | --- | --- | --- | 1,91 | down |
| 6330087 | 7293234 | 1604358 | --- | --- | --- | 2,23 | down |
| 6330089 | 7266530 | 1538289 | --- | --- | --- | 1,72 | up   |
| 6330156 | 7253215 | 1505380 | --- | --- | --- | 2,21 | down |
| 6330197 | 7171091 | 1302460 | --- | --- | --- | 1,92 | up   |
| 6330357 | 7227433 | 1440994 | --- | --- | --- | 1,04 | down |
| 6330365 | 7079326 | 1077974 | --- | --- | --- | 1,53 | up   |
| 6330373 | 7069253 | 1054166 | --- | --- | --- | 1,43 | up   |
| 6330399 | 7317274 | 1665628 | --- | --- | --- | 1,27 | down |
| 6330427 | 7070836 | 1058347 | --- | --- | --- | 1,53 | up   |
| 6330529 | 7368004 | 1789328 | --- | --- | --- | 1,19 | down |
| 6330545 | 7039223 | 983569  | --- | --- | --- | 1,32 | up   |
| 6330626 | 7052957 | 1016261 | --- | --- | --- | 1,58 | down |
| 6330663 | 7213908 | 1407757 | --- | --- | --- | 2,21 | up   |
| 6330743 | 7132125 | 1206606 | --- | --- | --- | 1,00 | up   |
| 6330754 | 7341038 | 1722683 | --- | --- | --- | 1,54 | down |
| 6330768 | 7146093 | 1240908 | --- | --- | --- | 1,51 | up   |
| 6330794 | 7033504 | 969858  | --- | --- | --- | 1,15 | down |
| 6330817 | 7100523 | 1128913 | --- | --- | --- | 1,27 | up   |

|         |         |         |     |     |     |      |      |
|---------|---------|---------|-----|-----|-----|------|------|
| 6330858 | 7265259 | 1535437 | --- | --- | --- | 1,82 | up   |
| 6330911 | 7322260 | 1677067 | --- | --- | --- | 1,00 | up   |
| 6330913 | 7080476 | 1080412 | --- | --- | --- | 1,16 | down |
| 6330914 | 7176275 | 1315356 | --- | --- | --- | 1,17 | up   |
| 6330931 | 7142081 | 1230979 | --- | --- | --- | 2,18 | down |
| 6330951 | 7142081 | 1230973 | --- | --- | --- | 1,56 | down |
| 6331088 | 7040442 | 986499  | --- | --- | --- | 1,28 | down |
| 6331113 | 7284901 | 1584807 | --- | --- | --- | 1,10 | down |
| 6331133 | 7231834 | 1452273 | --- | --- | --- | 1,03 | down |
| 6331136 | 7341274 | 1723396 | --- | --- | --- | 1,13 | up   |
| 6331151 | 7330396 | 1696341 | --- | --- | --- | 1,10 | up   |
| 6331156 | 7128704 | 1198021 | --- | --- | --- | 1,35 | down |
| 6331260 | 7247230 | 1490575 | --- | --- | --- | 1,44 | down |
| 6331301 | 7227433 | 1440969 | --- | --- | --- | 1,24 | down |
| 6331308 | 7363529 | 1777905 | --- | --- | --- | 1,05 | down |
| 6331311 | 7083030 | 1086268 | --- | --- | --- | 1,12 | down |
| 6331318 | 7034293 | 971970  | --- | --- | --- | 1,08 | up   |
| 6331336 | 7243363 | 1481594 | --- | --- | --- | 1,36 | up   |
| 6331340 | 7152981 | 1257717 | --- | --- | --- | 1,06 | up   |
| 6331369 | 7039532 | 984423  | --- | --- | --- | 1,21 | down |
| 6331370 | 7212587 | 1404634 | --- | --- | --- | 1,10 | down |
| 6331380 | 7149934 | 1250514 | --- | --- | --- | 1,08 | up   |
| 6331519 | 7278010 | 1568042 | --- | --- | --- | 1,05 | up   |
| 6331599 | 7227433 | 1440985 | --- | --- | --- | 1,34 | up   |
| 6331612 | 7351568 | 1748826 | --- | --- | --- | 1,13 | up   |
| 6331774 | 7306330 | 1638529 | --- | --- | --- | 1,07 | up   |
| 6331865 | 7243363 | 1481628 | --- | --- | --- | 1,10 | up   |
| 6331954 | 7069721 | 1055315 | --- | --- | --- | 1,07 | down |
| 6332050 | 7233513 | 1457172 | --- | --- | --- | 1,56 | up   |
| 6332314 | 7374324 | 1807458 | --- | --- | --- | 1,15 | up   |
| 6332342 | 7329802 | 1694915 | --- | --- | --- | 1,35 | down |
| 6332358 | 7110999 | 1154758 | --- | --- | --- | 1,00 | down |
| 6332367 | 7328985 | 1693165 | --- | --- | --- | 1,28 | up   |
| 6332505 | 7277742 | 1567166 | --- | --- | --- | 2,14 | up   |
| 6332651 | 7031774 | 964648  | --- | --- | --- | 1,39 | up   |
| 6332676 | 7215722 | 1412265 | --- | --- | --- | 1,41 | down |
| 6332721 | 7274780 | 1559211 | --- | --- | --- | 1,03 | down |
| 6332751 | 7356115 | 1760114 | --- | --- | --- | 1,27 | up   |
| 6332775 | 7274780 | 1559214 | --- | --- | --- | 1,11 | down |
| 6332873 | 7186464 | 1341379 | --- | --- | --- | 1,14 | down |
| 6333011 | 7260488 | 1523933 | --- | --- | --- | 1,02 | down |
| 6333093 | 7170764 | 1301478 | --- | --- | --- | 1,06 | down |
| 6333094 | 7366749 | 1785494 | --- | --- | --- | 1,27 | down |
| 6333105 | 7376566 | 1812849 | --- | --- | --- | 1,78 | up   |
| 6333117 | 7282927 | 1579988 | --- | --- | --- | 2,34 | down |
| 6333149 | 7096461 | 1118257 | --- | --- | --- | 1,08 | up   |
| 6333296 | 7083021 | 1086219 | --- | --- | --- | 1,55 | up   |
| 6333306 | 7147809 | 1245461 | --- | --- | --- | 1,91 | up   |
| 6333319 | 7190534 | 1351225 | --- | --- | --- | 1,04 | up   |
| 6333382 | 7148741 | 1247854 | --- | --- | --- | 1,05 | down |
| 6333384 | 7344530 | 1731561 | --- | --- | --- | 1,11 | down |
| 6333398 | 7239303 | 1471954 | --- | --- | --- | 1,07 | down |
| 6333402 | 7250511 | 1498638 | --- | --- | --- | 1,23 | down |
| 6333575 | 7167325 | 1292547 | --- | --- | --- | 1,82 | down |
| 6333643 | 7068259 | 1051655 | --- | --- | --- | 1,88 | up   |
| 6333784 | 7122140 | 1182700 | --- | --- | --- | 1,16 | down |
| 6333910 | 7344530 | 1731573 | --- | --- | --- | 1,17 | up   |



|         |         |         |     |     |     |      |      |
|---------|---------|---------|-----|-----|-----|------|------|
| 6333921 | 7350237 | 1745487 | --- | --- | --- | 1,16 | up   |
| 6333988 | 7383102 | 1827383 | --- | --- | --- | 1,20 | down |
| 6333989 | 7093936 | 1112463 | --- | --- | --- | 1,29 | down |
| 6333993 | 7172373 | 1305564 | --- | --- | --- | 1,50 | up   |
| 6333996 | 7264797 | 1534422 | --- | --- | --- | 1,03 | down |
| 6334160 | 7168979 | 1297190 | --- | --- | --- | 1,05 | down |
| 6334352 | 7356115 | 1760122 | --- | --- | --- | 2,55 | up   |
| 6334451 | 7050716 | 1011223 | --- | --- | --- | 1,07 | up   |
| 6334533 | 7059971 | 1031465 | --- | --- | --- | 1,07 | down |
| 6334567 | 7259131 | 1520421 | --- | --- | --- | 1,10 | down |
| 6334582 | 7067670 | 1050342 | --- | --- | --- | 1,05 | up   |
| 6334584 | 7285530 | 1585966 | --- | --- | --- | 1,17 | down |
| 6334626 | 7292178 | 1601735 | --- | --- | --- | 1,30 | up   |
| 6334648 | 7259925 | 1522558 | --- | --- | --- | 1,13 | up   |
| 6334698 | 7146872 | 1242905 | --- | --- | --- | 1,25 | down |
| 6334771 | 7213294 | 1406094 | --- | --- | --- | 1,14 | up   |
| 6334775 | 7319055 | 1669947 | --- | --- | --- | 1,12 | up   |
| 6334798 | 7339834 | 1719555 | --- | --- | --- | 1,01 | up   |
| 6334866 | 7374324 | 1807497 | --- | --- | --- | 1,06 | up   |
| 6334928 | 7324760 | 1683042 | --- | --- | --- | 1,41 | up   |
| 6334930 | 7184151 | 1335961 | --- | --- | --- | 1,19 | up   |
| 6335057 | 7340757 | 1721901 | --- | --- | --- | 1,37 | down |
| 6335181 | 7270397 | 1548130 | --- | --- | --- | 1,45 | down |
| 6335227 | 7103782 | 1136947 | --- | --- | --- | 1,11 | up   |
| 6335321 | 7172691 | 1306453 | --- | --- | --- | 1,12 | down |
| 6335332 | 7194540 | 1362095 | --- | --- | --- | 1,77 | down |
| 6335432 | 7172373 | 1305588 | --- | --- | --- | 1,29 | up   |
| 6335469 | 7315934 | 1661987 | --- | --- | --- | 3,34 | down |
| 6335507 | 7330238 | 1695925 | --- | --- | --- | 1,62 | down |
| 6335628 | 7183927 | 1335502 | --- | --- | --- | 1,02 | down |
| 6335630 | 7071714 | 1060354 | --- | --- | --- | 1,15 | down |
| 6335787 | 7352044 | 1750016 | --- | --- | --- | 1,40 | down |
| 6335882 | 7337425 | 1713181 | --- | --- | --- | 1,05 | down |
| 6336045 | 7255517 | 1511369 | --- | --- | --- | 1,04 | down |
| 6336060 | 7096924 | 1119605 | --- | --- | --- | 1,84 | down |
| 6336062 | 7127022 | 1194063 | --- | --- | --- | 2,58 | up   |
| 6336148 | 7374324 | 1807453 | --- | --- | --- | 1,16 | up   |
| 6336150 | 7229061 | 1445321 | --- | --- | --- | 1,28 | up   |
| 6336153 | 7260066 | 1522885 | --- | --- | --- | 1,37 | up   |
| 6336162 | 7380497 | 1821864 | --- | --- | --- | 1,07 | up   |
| 6336275 | 7376073 | 1811706 | --- | --- | --- | 1,43 | down |
| 6336303 | 7349817 | 1744602 | --- | --- | --- | 1,02 | up   |
| 6336347 | 7340304 | 1720858 | --- | --- | --- | 1,41 | up   |
| 6336352 | 7337224 | 1712625 | --- | --- | --- | 1,61 | up   |
| 6336376 | 7292869 | 1603425 | --- | --- | --- | 1,30 | down |
| 6336460 | 7191594 | 1354227 | --- | --- | --- | 2,01 | up   |
| 6336595 | 7326245 | 1686391 | --- | --- | --- | 1,04 | up   |
| 6336700 | 7361075 | 1772343 | --- | --- | --- | 1,05 | down |
| 6336726 | 7071292 | 1059461 | --- | --- | --- | 1,59 | up   |
| 6336759 | 7186688 | 1341842 | --- | --- | --- | 1,40 | down |
| 6336779 | 7180943 | 1327442 | --- | --- | --- | 1,48 | up   |
| 6336841 | 7148978 | 1248550 | --- | --- | --- | 1,19 | up   |
| 6336910 | 7383102 | 1827384 | --- | --- | --- | 2,03 | down |
| 6336957 | 7243901 | 1483062 | --- | --- | --- | 1,03 | up   |
| 6337008 | 7084716 | 1090109 | --- | --- | --- | 1,42 | down |
| 6337017 | 7070836 | 1058353 | --- | --- | --- | 1,01 | down |
| 6337208 | 7160053 | 1275381 | --- | --- | --- | 1,11 | up   |

|         |         |         |     |     |     |      |      |
|---------|---------|---------|-----|-----|-----|------|------|
| 6337408 | 7205944 | 1389480 | --- | --- | --- | 1,31 | up   |
| 6337416 | 7068695 | 1052733 | --- | --- | --- | 3,14 | up   |
| 6337463 | 7244290 | 1484145 | --- | --- | --- | 1,03 | up   |
| 6337493 | 7058507 | 1028325 | --- | --- | --- | 1,05 | down |
| 6337504 | 7243647 | 1482434 | --- | --- | --- | 1,19 | up   |
| 6337516 | 7133484 | 1209945 | --- | --- | --- | 1,36 | down |
| 6337561 | 7236131 | 1463788 | --- | --- | --- | 1,10 | up   |
| 6337566 | 7322388 | 1677328 | --- | --- | --- | 1,02 | up   |
| 6337584 | 7377791 | 1815989 | --- | --- | --- | 1,26 | down |
| 6337587 | 7223395 | 1431072 | --- | --- | --- | 1,01 | down |
| 6337588 | 7213945 | 1407830 | --- | --- | --- | 1,65 | up   |
| 6337652 | 7351844 | 1749506 | --- | --- | --- | 1,06 | up   |
| 6337735 | 7137646 | 1220429 | --- | --- | --- | 2,17 | down |
| 6337768 | 7243901 | 1483055 | --- | --- | --- | 1,01 | up   |
| 6337891 | 7240569 | 1475369 | --- | --- | --- | 1,25 | up   |
| 6337947 | 7109292 | 1150725 | --- | --- | --- | 2,01 | down |
| 6338023 | 7330238 | 1695960 | --- | --- | --- | 1,51 | up   |
| 6338066 | 7217434 | 1416409 | --- | --- | --- | 1,28 | down |
| 6338088 | 7353284 | 1752983 | --- | --- | --- | 1,03 | down |
| 6338199 | 7115362 | 1165598 | --- | --- | --- | 1,08 | up   |
| 6338287 | 7181105 | 1327962 | --- | --- | --- | 1,13 | down |
| 6338305 | 7168309 | 1295359 | --- | --- | --- | 1,08 | up   |
| 6338334 | 7318714 | 1669234 | --- | --- | --- | 1,20 | up   |
| 6338398 | 7052176 | 1014215 | --- | --- | --- | 1,03 | up   |
| 6338459 | 7030454 | 961549  | --- | --- | --- | 1,15 | up   |
| 6338492 | 7114274 | 1162811 | --- | --- | --- | 1,06 | down |
| 6338546 | 7307424 | 1641142 | --- | --- | --- | 1,78 | up   |
| 6338600 | 7326245 | 1686392 | --- | --- | --- | 1,75 | up   |
| 6339055 | 7373678 | 1805853 | --- | --- | --- | 1,01 | up   |
| 6339092 | 7040442 | 986548  | --- | --- | --- | 1,03 | down |
| 6339132 | 7360486 | 1770998 | --- | --- | --- | 1,13 | down |
| 6339208 | 7341002 | 1722551 | --- | --- | --- | 1,79 | up   |
| 6339435 | 7320735 | 1674173 | --- | --- | --- | 1,07 | up   |
| 6339440 | 7065860 | 1045809 | --- | --- | --- | 2,05 | down |
| 6339441 | 7132125 | 1206603 | --- | --- | --- | 1,01 | up   |
| 6339442 | 7281577 | 1576889 | --- | --- | --- | 1,53 | up   |
| 6339534 | 7063716 | 1040125 | --- | --- | --- | 1,01 | up   |
| 6339544 | 7314270 | 1657740 | --- | --- | --- | 1,06 | up   |
| 6339626 | 7038530 | 981865  | --- | --- | --- | 1,07 | down |
| 6339736 | 7100307 | 1128385 | --- | --- | --- | 1,03 | up   |
| 6339741 | 7125494 | 1190404 | --- | --- | --- | 1,32 | down |
| 6339777 | 7238414 | 1469559 | --- | --- | --- | 1,38 | down |
| 6339815 | 7208784 | 1396132 | --- | --- | --- | 1,03 | up   |
| 6339862 | 7075460 | 1069388 | --- | --- | --- | 1,21 | up   |
| 6339963 | 7363147 | 1777013 | --- | --- | --- | 2,03 | up   |
| 6340030 | 7094139 | 1112898 | --- | --- | --- | 1,43 | down |
| 6340113 | 7231834 | 1452268 | --- | --- | --- | 1,06 | down |
| 6340121 | 7238115 | 1468584 | --- | --- | --- | 1,07 | up   |
| 6340129 | 7131718 | 1205745 | --- | --- | --- | 1,39 | down |
| 6340150 | 7057462 | 1025857 | --- | --- | --- | 1,08 | up   |
| 6340257 | 7257337 | 1515983 | --- | --- | --- | 1,16 | down |
| 6340324 | 7373633 | 1805706 | --- | --- | --- | 1,29 | down |
| 6340364 | 7238252 | 1469294 | --- | --- | --- | 1,04 | down |
| 6340600 | 7244287 | 1484062 | --- | --- | --- | 1,02 | up   |
| 6340869 | 7186464 | 1341360 | --- | --- | --- | 1,06 | down |
| 6340913 | 7094008 | 1112615 | --- | --- | --- | 1,21 | down |
| 6340938 | 7374317 | 1807395 | --- | --- | --- | 1,45 | up   |

|         |         |         |     |     |     |      |      |
|---------|---------|---------|-----|-----|-----|------|------|
| 6340987 | 7264085 | 1532719 | --- | --- | --- | 1,19 | down |
| 6341011 | 7341264 | 1723357 | --- | --- | --- | 1,13 | up   |
| 6341033 | 7277783 | 1567465 | --- | --- | --- | 1,34 | up   |
| 6341078 | 7382499 | 1826256 | --- | --- | --- | 2,81 | up   |
| 6341207 | 7141151 | 1228924 | --- | --- | --- | 1,24 | down |
| 6341215 | 7240569 | 1475510 | --- | --- | --- | 1,01 | down |
| 6341270 | 7288077 | 1591967 | --- | --- | --- | 1,34 | down |
| 6341326 | 7082098 | 1084109 | --- | --- | --- | 1,03 | up   |
| 6341422 | 7120671 | 1179000 | --- | --- | --- | 1,10 | down |
| 6341424 | 7148978 | 1248477 | --- | --- | --- | 1,01 | down |
| 6341458 | 7204917 | 1387128 | --- | --- | --- | 1,29 | down |
| 6341540 | 7029770 | 960155  | --- | --- | --- | 1,81 | down |
| 6341564 | 7295652 | 1610290 | --- | --- | --- | 1,16 | down |
| 6341665 | 7336039 | 1709685 | --- | --- | --- | 2,08 | down |
| 6341714 | 7073854 | 1065621 | --- | --- | --- | 1,53 | up   |
| 6341903 | 7318596 | 1668936 | --- | --- | --- | 2,50 | down |
| 6341961 | 7359460 | 1768472 | --- | --- | --- | 1,13 | up   |
| 6341967 | 7337845 | 1714335 | --- | --- | --- | 1,03 | down |
| 6342036 | 7180732 | 1326739 | --- | --- | --- | 1,14 | up   |
| 6342041 | 7166867 | 1291328 | --- | --- | --- | 1,16 | down |
| 6342087 | 7112355 | 1158085 | --- | --- | --- | 1,28 | up   |
| 6342141 | 7339379 | 1718316 | --- | --- | --- | 1,40 | up   |
| 6342146 | 7123421 | 1185846 | --- | --- | --- | 1,11 | up   |
| 6342152 | 7317274 | 1665627 | --- | --- | --- | 1,10 | down |
| 6342163 | 7249019 | 1495084 | --- | --- | --- | 1,58 | down |
| 6342181 | 7289075 | 1594474 | --- | --- | --- | 1,15 | up   |
| 6342189 | 7112566 | 1158633 | --- | --- | --- | 1,24 | up   |
| 6342228 | 7049689 | 1008873 | --- | --- | --- | 1,20 | up   |
| 6342282 | 7116540 | 1168645 | --- | --- | --- | 1,59 | down |
| 6342394 | 7376073 | 1811720 | --- | --- | --- | 1,16 | down |
| 6342424 | 7231834 | 1452269 | --- | --- | --- | 1,48 | down |
| 6342474 | 7088489 | 1099527 | --- | --- | --- | 1,34 | up   |
| 6342483 | 7177428 | 1318397 | --- | --- | --- | 1,01 | down |
| 6342558 | 7359789 | 1769130 | --- | --- | --- | 1,16 | up   |
| 6342604 | 7377304 | 1814590 | --- | --- | --- | 1,02 | up   |
| 6342663 | 7073854 | 1065632 | --- | --- | --- | 1,49 | down |
| 6342820 | 7373678 | 1805879 | --- | --- | --- | 1,42 | down |
| 6342865 | 7374324 | 1807529 | --- | --- | --- | 1,30 | up   |
| 6343007 | 7253408 | 1505947 | --- | --- | --- | 1,03 | down |
| 6343041 | 7337425 | 1713178 | --- | --- | --- | 2,07 | up   |
| 6343120 | 7340757 | 1721906 | --- | --- | --- | 1,71 | down |
| 6343123 | 7355041 | 1757405 | --- | --- | --- | 2,15 | down |
| 6343169 | 7041140 | 988284  | --- | --- | --- | 1,24 | up   |
| 6343184 | 7336854 | 1711688 | --- | --- | --- | 1,05 | up   |
| 6343228 | 7069830 | 1055622 | --- | --- | --- | 1,29 | up   |
| 6343316 | 7243901 | 1483052 | --- | --- | --- | 1,02 | up   |
| 6343400 | 7303777 | 1631909 | --- | --- | --- | 1,03 | up   |
| 6343528 | 7116540 | 1168645 | --- | --- | --- | 1,28 | down |
| 6343535 | 7243363 | 1481583 | --- | --- | --- | 1,07 | up   |
| 6343553 | 7361042 | 1772264 | --- | --- | --- | 1,04 | down |
| 6343601 | 7114274 | 1162811 | --- | --- | --- | 1,02 | up   |
| 6343624 | 7309734 | 1646883 | --- | --- | --- | 1,11 | up   |
| 6343683 | 7056333 | 1023700 | --- | --- | --- | 1,04 | down |
| 6343721 | 7330731 | 1697168 | --- | --- | --- | 1,14 | down |
| 6343846 | 7312532 | 1653223 | --- | --- | --- | 1,31 | down |
| 6343873 | 7032618 | 967335  | --- | --- | --- | 1,37 | down |
| 6343891 | 7374090 | 1806815 | --- | --- | --- | 1,25 | up   |

|         |         |         |     |     |     |      |      |
|---------|---------|---------|-----|-----|-----|------|------|
| 6343960 | 7329846 | 1694988 | --- | --- | --- | 1,21 | up   |
| 6344036 | 7190242 | 1350306 | --- | --- | --- | 1,25 | up   |
| 6344366 | 7099573 | 1126740 | --- | --- | --- | 1,30 | down |
| 6344480 | 7110999 | 1154798 | --- | --- | --- | 1,04 | up   |
| 6344528 | 7343250 | 1728054 | --- | --- | --- | 1,11 | down |
| 6344567 | 7123714 | 1186423 | --- | --- | --- | 1,10 | down |
| 6344751 | 7248790 | 1494545 | --- | --- | --- | 2,58 | down |
| 6344852 | 7208784 | 1396113 | --- | --- | --- | 2,26 | up   |
| 6344861 | 7247848 | 1492072 | --- | --- | --- | 1,12 | up   |
| 6344869 | 7065810 | 1045681 | --- | --- | --- | 2,00 | down |
| 6344913 | 7140834 | 1227971 | --- | --- | --- | 3,03 | up   |
| 6344923 | 7353997 | 1754703 | --- | --- | --- | 1,80 | up   |
| 6345014 | 7268357 | 1543395 | --- | --- | --- | 2,56 | up   |
| 6345133 | 7199536 | 1374696 | --- | --- | --- | 1,08 | down |
| 6345188 | 7079475 | 1078287 | --- | --- | --- | 1,38 | up   |
| 6345199 | 7244290 | 1484163 | --- | --- | --- | 1,09 | up   |
| 6345304 | 7218728 | 1419928 | --- | --- | --- | 1,00 | up   |
| 6345403 | 7231775 | 1452127 | --- | --- | --- | 1,23 | down |
| 6345474 | 7252058 | 1502543 | --- | --- | --- | 1,15 | down |
| 6345505 | 7037488 | 979280  | --- | --- | --- | 2,46 | down |
| 6345511 | 7039532 | 984428  | --- | --- | --- | 1,38 | down |
| 6345594 | 7073673 | 1065081 | --- | --- | --- | 2,05 | down |
| 6345598 | 7343250 | 1728033 | --- | --- | --- | 1,70 | up   |
| 6345646 | 7045955 | 1000761 | --- | --- | --- | 6,06 | down |
| 6345653 | 7244290 | 1484145 | --- | --- | --- | 1,08 | down |
| 6345685 | 7375937 | 1811340 | --- | --- | --- | 1,02 | down |
| 6345695 | 7243901 | 1483050 | --- | --- | --- | 1,05 | up   |
| 6345720 | 7337522 | 1713590 | --- | --- | --- | 2,28 | down |
| 6345743 | 7232732 | 1454578 | --- | --- | --- | 1,83 | down |
| 6345997 | 7181193 | 1328293 | --- | --- | --- | 1,16 | down |
| 6346062 | 7252877 | 1504767 | --- | --- | --- | 1,08 | up   |
| 6346096 | 7089080 | 1101163 | --- | --- | --- | 1,27 | down |
| 6346197 | 7243647 | 1482423 | --- | --- | --- | 1,11 | up   |
| 6346389 | 7050167 | 1009816 | --- | --- | --- | 1,27 | down |
| 6346408 | 7100523 | 1128839 | --- | --- | --- | 1,09 | down |
| 6346491 | 7244288 | 1484128 | --- | --- | --- | 1,55 | down |
| 6346593 | 7341274 | 1723390 | --- | --- | --- | 1,08 | up   |
| 6346626 | 7350237 | 1745498 | --- | --- | --- | 1,17 | up   |
| 6346628 | 7350993 | 1747532 | --- | --- | --- | 1,02 | up   |
| 6346645 | 7292657 | 1602839 | --- | --- | --- | 1,19 | up   |
| 6346660 | 7033337 | 969493  | --- | --- | --- | 1,07 | up   |
| 6346773 | 7050167 | 1009817 | --- | --- | --- | 1,29 | down |
| 6346845 | 7032204 | 966119  | --- | --- | --- | 1,02 | up   |
| 6346908 | 7059020 | 1029330 | --- | --- | --- | 1,91 | down |
| 6346928 | 7093936 | 1112465 | --- | --- | --- | 1,01 | up   |
| 6346977 | 7377583 | 1815456 | --- | --- | --- | 1,25 | up   |
| 6347006 | 7031774 | 964650  | --- | --- | --- | 1,11 | up   |
| 6347101 | 7207093 | 1392079 | --- | --- | --- | 1,11 | up   |
| 6347133 | 7261580 | 1526771 | --- | --- | --- | 1,03 | down |
| 6347144 | 7261580 | 1526809 | --- | --- | --- | 1,17 | up   |
| 6347164 | 7280743 | 1574562 | --- | --- | --- | 1,11 | down |
| 6347207 | 7337845 | 1714352 | --- | --- | --- | 1,14 | down |
| 6347214 | 7146093 | 1240983 | --- | --- | --- | 1,01 | down |
| 6347259 | 7231834 | 1452273 | --- | --- | --- | 1,43 | down |
| 6347306 | 7147204 | 1243778 | --- | --- | --- | 1,09 | down |
| 6347307 | 7091900 | 1107629 | --- | --- | --- | 1,35 | up   |
| 6347314 | 7099573 | 1126707 | --- | --- | --- | 1,01 | down |

|         |         |         |     |     |     |      |      |
|---------|---------|---------|-----|-----|-----|------|------|
| 6347435 | 7225543 | 1435925 | --- | --- | --- | 1,17 | up   |
| 6347448 | 7217747 | 1417480 | --- | --- | --- | 1,24 | up   |
| 6347457 | 7171091 | 1302444 | --- | --- | --- | 1,92 | up   |
| 6347491 | 7107503 | 1145765 | --- | --- | --- | 1,13 | up   |
| 6347520 | 7162144 | 1280509 | --- | --- | --- | 1,61 | down |
| 6347574 | 7329135 | 1693497 | --- | --- | --- | 1,22 | down |
| 6347654 | 7067828 | 1050792 | --- | --- | --- | 1,03 | up   |
| 6347690 | 7186464 | 1341357 | --- | --- | --- | 1,05 | up   |
| 6347770 | 7195680 | 1364894 | --- | --- | --- | 1,63 | down |
| 6347866 | 7330396 | 1696367 | --- | --- | --- | 1,66 | up   |
| 6347886 | 7280743 | 1574504 | --- | --- | --- | 1,23 | down |
| 6348105 | 7368004 | 1789332 | --- | --- | --- | 1,08 | up   |
| 6348106 | 7259925 | 1522547 | --- | --- | --- | 1,39 | down |
| 6348145 | 7112566 | 1158632 | --- | --- | --- | 1,39 | up   |
| 6348153 | 7268694 | 1544228 | --- | --- | --- | 1,05 | up   |
| 6348223 | 7303777 | 1631903 | --- | --- | --- | 1,20 | down |
| 6348277 | 7243627 | 1482346 | --- | --- | --- | 1,08 | up   |
| 6348342 | 7065640 | 1045206 | --- | --- | --- | 1,13 | down |
| 6348425 | 7156052 | 1265767 | --- | --- | --- | 1,56 | down |
| 6348440 | 7266544 | 1538334 | --- | --- | --- | 1,30 | up   |
| 6348523 | 7055793 | 1022331 | --- | --- | --- | 1,05 | down |
| 6348591 | 7100523 | 1128973 | --- | --- | --- | 1,31 | down |
| 6348625 | 7128112 | 1196540 | --- | --- | --- | 1,17 | up   |
| 6348637 | 7197056 | 1367836 | --- | --- | --- | 1,18 | up   |
| 6348667 | 7352635 | 1751446 | --- | --- | --- | 1,47 | up   |
| 6348725 | 7330396 | 1696336 | --- | --- | --- | 1,09 | up   |
| 6348729 | 7330731 | 1697175 | --- | --- | --- | 1,18 | down |
| 6348735 | 7102723 | 1134387 | --- | --- | --- | 1,15 | down |
| 6348754 | 7299083 | 1619227 | --- | --- | --- | 1,04 | up   |
| 6348763 | 7356027 | 1759985 | --- | --- | --- | 1,32 | down |
| 6348776 | 7369400 | 1793984 | --- | --- | --- | 1,23 | down |
| 6348782 | 7258455 | 1518714 | --- | --- | --- | 1,10 | up   |
| 6348894 | 7373633 | 1805700 | --- | --- | --- | 1,25 | down |
| 6348901 | 7298101 | 1617096 | --- | --- | --- | 1,33 | up   |
| 6348925 | 7181001 | 1327615 | --- | --- | --- | 1,04 | up   |
| 6348927 | 7227433 | 1440965 | --- | --- | --- | 1,04 | down |
| 6348963 | 7280743 | 1574525 | --- | --- | --- | 1,12 | down |
| 6348979 | 7350237 | 1745481 | --- | --- | --- | 1,22 | up   |
| 6349074 | 7339387 | 1718390 | --- | --- | --- | 1,30 | up   |
| 6349094 | 7302860 | 1629008 | --- | --- | --- | 1,16 | down |
| 6349207 | 7072765 | 1062735 | --- | --- | --- | 1,06 | up   |
| 6349345 | 7156052 | 1265766 | --- | --- | --- | 2,02 | down |
| 6349427 | 7307473 | 1641273 | --- | --- | --- | 1,08 | down |
| 6349503 | 7218728 | 1419920 | --- | --- | --- | 1,08 | up   |
| 6349673 | 7330314 | 1696141 | --- | --- | --- | 1,38 | up   |
| 6349786 | 7308679 | 1644243 | --- | --- | --- | 1,69 | up   |
| 6349828 | 7341274 | 1723399 | --- | --- | --- | 1,03 | down |
| 6350035 | 7140365 | 1226765 | --- | --- | --- | 1,63 | down |
| 6350139 | 7058507 | 1028319 | --- | --- | --- | 1,10 | up   |
| 6350186 | 7148741 | 1247835 | --- | --- | --- | 1,16 | down |
| 6350222 | 7213908 | 1407663 | --- | --- | --- | 1,03 | up   |
| 6350345 | 7373678 | 1805878 | --- | --- | --- | 1,48 | down |
| 6350415 | 7359874 | 1769348 | --- | --- | --- | 2,48 | up   |
| 6350421 | 7127540 | 1195281 | --- | --- | --- | 1,08 | up   |
| 6350455 | 7189455 | 1348332 | --- | --- | --- | 1,20 | up   |
| 6350585 | 7344838 | 1732458 | --- | --- | --- | 1,11 | down |
| 6350649 | 7311391 | 1650854 | --- | --- | --- | 1,23 | down |

|         |         |         |     |     |     |      |      |
|---------|---------|---------|-----|-----|-----|------|------|
| 6350667 | 7340506 | 1721336 | --- | --- | --- | 1,02 | down |
| 6350727 | 7339379 | 1718322 | --- | --- | --- | 1,43 | up   |
| 6350763 | 7095021 | 1115138 | --- | --- | --- | 1,11 | up   |
| 6350809 | 7131103 | 1204344 | --- | --- | --- | 1,13 | down |
| 6350919 | 7384073 | 1829467 | --- | --- | --- | 1,13 | up   |
| 6350940 | 7110401 | 1153053 | --- | --- | --- | 1,22 | up   |
| 6350972 | 7290793 | 1598636 | --- | --- | --- | 1,03 | down |
| 6350977 | 7044906 | 998151  | --- | --- | --- | 1,31 | up   |
| 6351050 | 7119845 | 1176885 | --- | --- | --- | 1,83 | down |
| 6351060 | 7376206 | 1811978 | --- | --- | --- | 1,15 | up   |
| 6351169 | 7353232 | 1752748 | --- | --- | --- | 1,02 | down |
| 6351180 | 7142081 | 1230958 | --- | --- | --- | 1,13 | up   |
| 6351225 | 7341002 | 1722542 | --- | --- | --- | 1,08 | down |
| 6351231 | 7210263 | 1399751 | --- | --- | --- | 1,40 | down |
| 6351240 | 7089080 | 1101137 | --- | --- | --- | 1,01 | up   |
| 6351281 | 7237814 | 1467822 | --- | --- | --- | 1,06 | down |
| 6351348 | 7186464 | 1341373 | --- | --- | --- | 1,79 | up   |
| 6351399 | 7128539 | 1197665 | --- | --- | --- | 1,29 | up   |
| 6351410 | 7350237 | 1745487 | --- | --- | --- | 1,09 | down |
| 6351534 | 7115963 | 1167062 | --- | --- | --- | 1,09 | up   |
| 6351559 | 7346505 | 1736284 | --- | --- | --- | 1,19 | up   |
| 6351577 | 7255911 | 1512228 | --- | --- | --- | 1,40 | down |
| 6351624 | 7244290 | 1484153 | --- | --- | --- | 1,11 | up   |
| 6351638 | 7248790 | 1494491 | --- | --- | --- | 1,10 | down |
| 6351692 | 7190534 | 1351240 | --- | --- | --- | 1,16 | down |
| 6351729 | 7101094 | 1130215 | --- | --- | --- | 1,01 | up   |
| 6351730 | 7079236 | 1077792 | --- | --- | --- | 1,00 | down |
| 6351733 | 7097485 | 1120944 | --- | --- | --- | 1,09 | up   |
| 6351751 | 7095041 | 1115197 | --- | --- | --- | 1,08 | up   |
| 6351753 | 7198002 | 1370441 | --- | --- | --- | 1,10 | up   |
| 6351759 | 7384509 | 1830737 | --- | --- | --- | 1,17 | down |
| 6351812 | 7176275 | 1315345 | --- | --- | --- | 1,00 | up   |
| 6351829 | 7099573 | 1126716 | --- | --- | --- | 1,02 | down |
| 6351876 | 7214605 | 1409368 | --- | --- | --- | 3,43 | down |
| 6351954 | 7096589 | 1118515 | --- | --- | --- | 1,06 | up   |
| 6351973 | 7363674 | 1778439 | --- | --- | --- | 1,19 | down |
| 6352276 | 7068259 | 1051649 | --- | --- | --- | 1,24 | up   |
| 6352368 | 7180721 | 1326695 | --- | --- | --- | 1,25 | down |
| 6352375 | 7069464 | 1054665 | --- | --- | --- | 1,08 | down |
| 6352570 | 7190524 | 1351172 | --- | --- | --- | 1,25 | up   |
| 6352594 | 7112566 | 1158625 | --- | --- | --- | 1,10 | up   |
| 6352639 | 7267802 | 1541837 | --- | --- | --- | 1,26 | down |
| 6352781 | 7102708 | 1134323 | --- | --- | --- | 1,85 | up   |
| 6352816 | 7120671 | 1178996 | --- | --- | --- | 1,03 | down |
| 6352822 | 7044906 | 998150  | --- | --- | --- | 1,71 | up   |
| 6352921 | 7277783 | 1567474 | --- | --- | --- | 1,14 | up   |
| 6352936 | 7318596 | 1668938 | --- | --- | --- | 1,33 | down |
| 6352938 | 7349817 | 1744643 | --- | --- | --- | 1,01 | up   |
| 6353020 | 7344838 | 1732451 | --- | --- | --- | 1,37 | down |
| 6353072 | 7314270 | 1657735 | --- | --- | --- | 1,27 | down |
| 6353095 | 7213908 | 1407687 | --- | --- | --- | 1,22 | down |
| 6353125 | 7378997 | 1818637 | --- | --- | --- | 1,24 | down |
| 6353335 | 7086522 | 1093941 | --- | --- | --- | 1,13 | down |
| 6353356 | 7212718 | 1404944 | --- | --- | --- | 1,47 | up   |
| 6353383 | 7196803 | 1367343 | --- | --- | --- | 1,94 | up   |
| 6353399 | 7240569 | 1475470 | --- | --- | --- | 1,32 | down |
| 6353404 | 7274780 | 1559250 | --- | --- | --- | 1,31 | down |

|         |         |         |     |     |     |      |      |
|---------|---------|---------|-----|-----|-----|------|------|
| 6353426 | 7047524 | 1004659 | --- | --- | --- | 1,16 | down |
| 6353471 | 7245874 | 1487595 | --- | --- | --- | 1,01 | up   |
| 6353479 | 7327169 | 1688466 | --- | --- | --- | 1,12 | up   |
| 6353527 | 7176456 | 1315844 | --- | --- | --- | 1,06 | down |
| 6353663 | 7059971 | 1031466 | --- | --- | --- | 1,03 | up   |
| 6353742 | 7031774 | 964786  | --- | --- | --- | 1,53 | down |
| 6353744 | 7297756 | 1616093 | --- | --- | --- | 2,12 | up   |
| 6354058 | 7337902 | 1714546 | --- | --- | --- | 1,41 | up   |
| 6354184 | 7217434 | 1416386 | --- | --- | --- | 1,00 | up   |
| 6354232 | 7326271 | 1686475 | --- | --- | --- | 1,29 | down |
| 6354319 | 7147213 | 1243826 | --- | --- | --- | 1,05 | up   |
| 6354339 | 7221443 | 1426322 | --- | --- | --- | 1,04 | down |
| 6354599 | 7168521 | 1295941 | --- | --- | --- | 1,16 | up   |
| 6354613 | 7331757 | 1700016 | --- | --- | --- | 1,25 | up   |
| 6354634 | 7237814 | 1467843 | --- | --- | --- | 2,07 | up   |
| 6354722 | 7087282 | 1096205 | --- | --- | --- | 1,00 | up   |
| 6354875 | 7088164 | 1098492 | --- | --- | --- | 1,85 | up   |
| 6355019 | 7125348 | 1190072 | --- | --- | --- | 1,44 | up   |
| 6355281 | 7117526 | 1171003 | --- | --- | --- | 2,17 | up   |
| 6355316 | 7052813 | 1015929 | --- | --- | --- | 2,32 | up   |
| 6355326 | 7299083 | 1619242 | --- | --- | --- | 1,96 | up   |
| 6355340 | 7369521 | 1794256 | --- | --- | --- | 1,14 | up   |
| 6355351 | 7273251 | 1555944 | --- | --- | --- | 1,77 | up   |
| 6355362 | 7302327 | 1627698 | --- | --- | --- | 1,12 | down |
| 6355376 | 7033337 | 969519  | --- | --- | --- | 1,14 | down |
| 6355501 | 7238414 | 1469559 | --- | --- | --- | 1,18 | up   |
| 6355582 | 7366728 | 1785429 | --- | --- | --- | 1,36 | down |
| 6355588 | 7258455 | 1518722 | --- | --- | --- | 1,06 | down |
| 6355591 | 7374324 | 1807536 | --- | --- | --- | 1,07 | down |
| 6355615 | 7030519 | 961689  | --- | --- | --- | 1,59 | down |
| 6355661 | 7280959 | 1575041 | --- | --- | --- | 1,31 | down |
| 6355694 | 7160687 | 1277021 | --- | --- | --- | 1,00 | up   |
| 6355697 | 7042529 | 991599  | --- | --- | --- | 1,73 | down |
| 6355745 | 7268357 | 1543396 | --- | --- | --- | 1,17 | up   |
| 6355852 | 7255911 | 1512229 | --- | --- | --- | 1,03 | up   |
| 6355884 | 7228520 | 1443769 | --- | --- | --- | 1,41 | down |
| 6355900 | 7167160 | 1292197 | --- | --- | --- | 1,65 | down |
| 6355961 | 7065640 | 1045208 | --- | --- | --- | 1,01 | down |
| 6355963 | 7226277 | 1437972 | --- | --- | --- | 1,30 | down |
| 6356027 | 7368815 | 1792339 | --- | --- | --- | 1,70 | down |
| 6356139 | 7131876 | 1206053 | --- | --- | --- | 2,18 | down |
| 6356211 | 7247230 | 1490593 | --- | --- | --- | 1,28 | up   |
| 6356252 | 7333333 | 1703398 | --- | --- | --- | 1,23 | up   |
| 6356259 | 7073569 | 1064731 | --- | --- | --- | 3,98 | up   |
| 6356271 | 7177834 | 1319638 | --- | --- | --- | 1,09 | down |
| 6356301 | 7370853 | 1798407 | --- | --- | --- | 1,28 | down |
| 6356306 | 7361223 | 1772622 | --- | --- | --- | 1,16 | up   |
| 6356321 | 7233012 | 1455403 | --- | --- | --- | 1,34 | up   |
| 6356401 | 7132125 | 1206620 | --- | --- | --- | 1,04 | down |
| 6356403 | 7286807 | 1588780 | --- | --- | --- | 1,29 | down |
| 6356475 | 7032204 | 966151  | --- | --- | --- | 1,13 | up   |
| 6356490 | 7240569 | 1475470 | --- | --- | --- | 1,04 | down |
| 6356526 | 7348924 | 1742183 | --- | --- | --- | 1,13 | up   |
| 6356648 | 7230886 | 1449526 | --- | --- | --- | 1,92 | down |
| 6356781 | 7068413 | 1051948 | --- | --- | --- | 1,51 | down |
| 6356789 | 7341038 | 1722674 | --- | --- | --- | 1,09 | up   |
| 6356835 | 7382499 | 1826256 | --- | --- | --- | 1,17 | down |

|         |         |         |     |     |     |      |      |
|---------|---------|---------|-----|-----|-----|------|------|
| 6356905 | 7376398 | 1812490 | --- | --- | --- | 1,28 | up   |
| 6356934 | 7240569 | 1475510 | --- | --- | --- | 1,20 | up   |
| 6356942 | 7264653 | 1534055 | --- | --- | --- | 1,08 | up   |
| 6357037 | 7217434 | 1416457 | --- | --- | --- | 1,64 | down |
| 6357043 | 7263652 | 1531624 | --- | --- | --- | 1,14 | up   |
| 6357056 | 7207093 | 1392093 | --- | --- | --- | 1,34 | up   |
| 6357101 | 7100523 | 1128893 | --- | --- | --- | 1,14 | down |
| 6357120 | 7288170 | 1592289 | --- | --- | --- | 1,03 | up   |
| 6357192 | 7088544 | 1099663 | --- | --- | --- | 2,07 | down |
| 6357312 | 7330314 | 1696138 | --- | --- | --- | 1,08 | up   |
| 6357313 | 7071659 | 1060229 | --- | --- | --- | 1,15 | up   |
| 6357338 | 7321029 | 1674824 | --- | --- | --- | 1,24 | down |
| 6357566 | 7039463 | 984244  | --- | --- | --- | 2,05 | down |
| 6357645 | 7142081 | 1230958 | --- | --- | --- | 1,06 | down |
| 6357665 | 7287337 | 1589970 | --- | --- | --- | 1,27 | up   |
| 6357666 | 7041635 | 989642  | --- | --- | --- | 2,19 | down |
| 6357706 | 7140834 | 1228016 | --- | --- | --- | 1,33 | down |
| 6357715 | 7352252 | 1750569 | --- | --- | --- | 1,23 | down |
| 6357784 | 7269918 | 1546943 | --- | --- | --- | 2,23 | down |
| 6357853 | 7089080 | 1101143 | --- | --- | --- | 1,12 | down |
| 6357908 | 7327169 | 1688450 | --- | --- | --- | 1,26 | up   |
| 6357930 | 7208330 | 1395091 | --- | --- | --- | 3,19 | down |
| 6357954 | 7373634 | 1805721 | --- | --- | --- | 1,07 | up   |
| 6358036 | 7031774 | 964760  | --- | --- | --- | 1,34 | down |
| 6358042 | 7122140 | 1182739 | --- | --- | --- | 1,11 | down |
| 6358097 | 7342430 | 1726151 | --- | --- | --- | 1,08 | up   |
| 6358141 | 7139026 | 1223514 | --- | --- | --- | 1,29 | up   |
| 6358148 | 7217747 | 1417474 | --- | --- | --- | 1,17 | up   |
| 6358233 | 7288170 | 1592297 | --- | --- | --- | 1,25 | down |
| 6358303 | 7059971 | 1031462 | --- | --- | --- | 1,31 | up   |
| 6358402 | 7367969 | 1789095 | --- | --- | --- | 1,31 | down |
| 6358487 | 7313841 | 1656702 | --- | --- | --- | 1,09 | up   |
| 6358533 | 7383823 | 1828941 | --- | --- | --- | 1,19 | down |
| 6358559 | 7168439 | 1295712 | --- | --- | --- | 1,06 | up   |
| 6358640 | 7153136 | 1258056 | --- | --- | --- | 1,07 | up   |
| 6358668 | 7181105 | 1327965 | --- | --- | --- | 2,24 | down |
| 6358761 | 7309738 | 1646952 | --- | --- | --- | 1,21 | down |
| 6358781 | 7263805 | 1532207 | --- | --- | --- | 1,13 | down |
| 6358866 | 7233970 | 1458274 | --- | --- | --- | 1,13 | up   |
| 6358920 | 7252877 | 1504758 | --- | --- | --- | 1,15 | down |
| 6359004 | 7312627 | 1653490 | --- | --- | --- | 1,32 | down |
| 6359142 | 7376206 | 1811973 | --- | --- | --- | 1,03 | down |
| 6359206 | 7100523 | 1128847 | --- | --- | --- | 1,43 | up   |
| 6359312 | 7210387 | 1400042 | --- | --- | --- | 2,39 | up   |
| 6359376 | 7059584 | 1030555 | --- | --- | --- | 1,14 | up   |
| 6359406 | 7098411 | 1123690 | --- | --- | --- | 1,66 | down |
| 6359433 | 7070836 | 1058352 | --- | --- | --- | 1,86 | down |
| 6359527 | 7384073 | 1829454 | --- | --- | --- | 1,54 | down |
| 6359542 | 7056304 | 1023547 | --- | --- | --- | 1,28 | down |
| 6359650 | 7105814 | 1141785 | --- | --- | --- | 1,65 | down |
| 6359653 | 7279568 | 1572012 | --- | --- | --- | 1,06 | up   |
| 6359663 | 7146542 | 1242277 | --- | --- | --- | 1,02 | up   |
| 6359728 | 7076236 | 1071215 | --- | --- | --- | 1,42 | up   |
| 6359799 | 7260488 | 1523932 | --- | --- | --- | 1,17 | down |
| 6359810 | 7110999 | 1154758 | --- | --- | --- | 1,04 | up   |
| 6359814 | 7384509 | 1830742 | --- | --- | --- | 1,00 | down |
| 6359839 | 7117526 | 1171003 | --- | --- | --- | 1,03 | down |



|         |         |         |     |     |     |      |      |
|---------|---------|---------|-----|-----|-----|------|------|
| 6359928 | 7165644 | 1288009 | --- | --- | --- | 1,02 | down |
| 6360000 | 7337872 | 1714430 | --- | --- | --- | 2,38 | up   |
| 6360011 | 7079808 | 1079060 | --- | --- | --- | 2,67 | up   |
| 6360013 | 7040442 | 986537  | --- | --- | --- | 1,24 | up   |
| 6360056 | 7374493 | 1807969 | --- | --- | --- | 1,14 | down |
| 6360098 | 7240569 | 1475404 | --- | --- | --- | 1,43 | down |
| 6360118 | 7371001 | 1798871 | --- | --- | --- | 1,02 | down |
| 6360195 | 7130917 | 1203939 | --- | --- | --- | 1,19 | down |
| 6360226 | 7288077 | 1591990 | --- | --- | --- | 1,30 | down |
| 6360250 | 7128112 | 1196587 | --- | --- | --- | 1,37 | down |
| 6360329 | 7131372 | 1205025 | --- | --- | --- | 1,43 | down |
| 6360384 | 7075460 | 1069397 | --- | --- | --- | 1,87 | up   |
| 6360403 | 7258455 | 1518735 | --- | --- | --- | 1,19 | up   |
| 6360479 | 7181286 | 1328463 | --- | --- | --- | 1,12 | up   |
| 6360689 | 7237940 | 1468196 | --- | --- | --- | 1,22 | down |
| 6360692 | 7353232 | 1752773 | --- | --- | --- | 1,19 | up   |
| 6360693 | 7071969 | 1060903 | --- | --- | --- | 1,26 | down |
| 6360720 | 7167823 | 1293894 | --- | --- | --- | 1,30 | down |
| 6360822 | 7280743 | 1574537 | --- | --- | --- | 1,47 | down |
| 6360924 | 7112355 | 1158069 | --- | --- | --- | 1,06 | down |
| 6361024 | 7355044 | 1757446 | --- | --- | --- | 1,06 | down |
| 6361115 | 7269911 | 1546914 | --- | --- | --- | 1,02 | down |
| 6361157 | 7231137 | 1450198 | --- | --- | --- | 1,24 | up   |
| 6361209 | 7290296 | 1597397 | --- | --- | --- | 1,30 | up   |
| 6361229 | 7155116 | 1263411 | --- | --- | --- | 1,25 | down |
| 6361303 | 7330238 | 1695942 | --- | --- | --- | 1,64 | down |
| 6361372 | 7180243 | 1325504 | --- | --- | --- | 1,40 | down |
| 6361449 | 7361223 | 1772627 | --- | --- | --- | 1,39 | down |
| 6361507 | 7193056 | 1358288 | --- | --- | --- | 1,20 | up   |
| 6361626 | 7279593 | 1572103 | --- | --- | --- | 1,25 | down |
| 6361660 | 7064134 | 1041426 | --- | --- | --- | 2,73 | up   |
| 6361689 | 7095960 | 1117067 | --- | --- | --- | 1,18 | down |
| 6361894 | 7216970 | 1415126 | --- | --- | --- | 1,27 | down |
| 6361967 | 7118356 | 1173132 | --- | --- | --- | 1,25 | down |
| 6362083 | 7370412 | 1796838 | --- | --- | --- | 1,12 | down |
| 6362104 | 7257976 | 1517712 | --- | --- | --- | 1,41 | down |
| 6362128 | 7321029 | 1674833 | --- | --- | --- | 1,05 | down |
| 6362253 | 7117526 | 1171034 | --- | --- | --- | 1,43 | down |
| 6362258 | 7229061 | 1445326 | --- | --- | --- | 1,08 | up   |
| 6362384 | 7313538 | 1655733 | --- | --- | --- | 1,01 | down |
| 6362428 | 7330731 | 1697200 | --- | --- | --- | 1,03 | up   |
| 6362537 | 7339379 | 1718328 | --- | --- | --- | 1,07 | down |
| 6362580 | 7194400 | 1361789 | --- | --- | --- | 1,09 | down |
| 6362584 | 7032395 | 966581  | --- | --- | --- | 1,35 | up   |
| 6362608 | 7286807 | 1588841 | --- | --- | --- | 1,37 | up   |
| 6362687 | 7247907 | 1492242 | --- | --- | --- | 1,23 | down |
| 6362742 | 7344530 | 1731571 | --- | --- | --- | 1,15 | down |
| 6362769 | 7231484 | 1451362 | --- | --- | --- | 1,34 | up   |
| 6362846 | 7238202 | 1468951 | --- | --- | --- | 1,32 | down |
| 6362900 | 7198087 | 1370683 | --- | --- | --- | 1,11 | up   |
| 6363036 | 7212587 | 1404657 | --- | --- | --- | 1,15 | down |
| 6363048 | 7085242 | 1091079 | --- | --- | --- | 1,51 | down |
| 6363123 | 7349313 | 1743114 | --- | --- | --- | 1,27 | down |
| 6363229 | 7364346 | 1779981 | --- | --- | --- | 1,41 | down |
| 6363245 | 7286807 | 1588811 | --- | --- | --- | 1,28 | up   |
| 6363393 | 7079326 | 1077973 | --- | --- | --- | 1,04 | up   |
| 6363479 | 7381090 | 1822989 | --- | --- | --- | 1,74 | up   |

|         |         |         |     |     |     |      |      |
|---------|---------|---------|-----|-----|-----|------|------|
| 6363482 | 7078666 | 1076513 | --- | --- | --- | 1,00 | up   |
| 6363533 | 7039725 | 984829  | --- | --- | --- | 1,57 | down |
| 6363567 | 7290814 | 1598679 | --- | --- | --- | 1,01 | up   |
| 6363594 | 7146093 | 1240956 | --- | --- | --- | 1,56 | up   |
| 6363640 | 7162144 | 1280516 | --- | --- | --- | 1,27 | up   |
| 6363735 | 7367980 | 1789155 | --- | --- | --- | 2,06 | up   |
| 6363955 | 7376073 | 1811701 | --- | --- | --- | 1,13 | down |
| 6364022 | 7319259 | 1670398 | --- | --- | --- | 1,15 | down |
| 6364069 | 7330238 | 1695926 | --- | --- | --- | 1,30 | down |
| 6364078 | 7151519 | 1254297 | --- | --- | --- | 1,12 | down |
| 6364106 | 7181193 | 1328297 | --- | --- | --- | 1,29 | down |
| 6364132 | 7344530 | 1731557 | --- | --- | --- | 1,93 | up   |
| 6364135 | 7195680 | 1364898 | --- | --- | --- | 1,03 | down |
| 6364200 | 7165954 | 1288770 | --- | --- | --- | 1,31 | down |
| 6364259 | 7350993 | 1747512 | --- | --- | --- | 1,67 | down |
| 6364488 | 7267802 | 1541834 | --- | --- | --- | 1,11 | down |
| 6364522 | 7190844 | 1352169 | --- | --- | --- | 1,29 | down |
| 6364567 | 7064372 | 1042176 | --- | --- | --- | 1,15 | up   |
| 6364587 | 7302327 | 1627680 | --- | --- | --- | 1,02 | up   |
| 6364846 | 7127257 | 1194801 | --- | --- | --- | 1,44 | down |
| 6364858 | 7288077 | 1591992 | --- | --- | --- | 1,25 | up   |
| 6364884 | 7099573 | 1126728 | --- | --- | --- | 1,26 | up   |
| 6364945 | 7043379 | 993652  | --- | --- | --- | 1,47 | up   |
| 6364953 | 7052957 | 1016273 | --- | --- | --- | 1,06 | up   |
| 6364969 | 7255522 | 1511389 | --- | --- | --- | 1,03 | up   |
| 6365022 | 7222236 | 1428121 | --- | --- | --- | 1,06 | up   |
| 6365038 | 7095021 | 1115134 | --- | --- | --- | 1,53 | up   |
| 6365106 | 7277783 | 1567464 | --- | --- | --- | 2,94 | down |
| 6365141 | 7217434 | 1416380 | --- | --- | --- | 1,00 | up   |
| 6365182 | 7330731 | 1697170 | --- | --- | --- | 1,17 | down |
| 6365222 | 7186443 | 1341311 | --- | --- | --- | 1,11 | up   |
| 6365223 | 7041609 | 989579  | --- | --- | --- | 1,12 | down |
| 6365245 | 7159036 | 1272963 | --- | --- | --- | 1,10 | down |
| 6365398 | 7198325 | 1371352 | --- | --- | --- | 2,14 | down |
| 6365522 | 7291032 | 1599331 | --- | --- | --- | 1,00 | up   |
| 6365696 | 7070511 | 1057456 | --- | --- | --- | 1,36 | down |
| 6365735 | 7126658 | 1193170 | --- | --- | --- | 1,92 | up   |
| 6365860 | 7195673 | 1364848 | --- | --- | --- | 1,05 | up   |
| 6365876 | 7376073 | 1811704 | --- | --- | --- | 1,09 | up   |
| 6366034 | 7371253 | 1799568 | --- | --- | --- | 1,11 | up   |
| 6366052 | 7086966 | 1095282 | --- | --- | --- | 1,00 | up   |
| 6366198 | 7274892 | 1559541 | --- | --- | --- | 1,16 | up   |
| 6366219 | 7261580 | 1526785 | --- | --- | --- | 1,11 | up   |
| 6366259 | 7350993 | 1747550 | --- | --- | --- | 2,13 | up   |
| 6366371 | 7183182 | 1333580 | --- | --- | --- | 1,01 | up   |
| 6366415 | 7031774 | 964768  | --- | --- | --- | 1,25 | down |
| 6366591 | 7223395 | 1431077 | --- | --- | --- | 1,10 | down |
| 6366597 | 7371228 | 1799472 | --- | --- | --- | 1,71 | down |
| 6366608 | 7281924 | 1577741 | --- | --- | --- | 1,56 | up   |
| 6366673 | 7168979 | 1297187 | --- | --- | --- | 1,05 | down |
| 6366687 | 7073609 | 1064844 | --- | --- | --- | 1,35 | up   |
| 6366743 | 7225543 | 1435927 | --- | --- | --- | 1,18 | down |
| 6366831 | 7347427 | 1738668 | --- | --- | --- | 2,25 | up   |
| 6366975 | 7171417 | 1303152 | --- | --- | --- | 1,41 | up   |
| 6367004 | 7371228 | 1799448 | --- | --- | --- | 1,21 | down |
| 6367052 | 7217747 | 1417503 | --- | --- | --- | 1,13 | down |
| 6367111 | 7277719 | 1567090 | --- | --- | --- | 1,89 | down |

|         |         |         |     |     |     |      |      |
|---------|---------|---------|-----|-----|-----|------|------|
| 6367210 | 7069464 | 1054666 | --- | --- | --- | 1,15 | up   |
| 6367218 | 7381090 | 1822990 | --- | --- | --- | 1,01 | up   |
| 6367247 | 7312575 | 1653362 | --- | --- | --- | 1,13 | up   |
| 6367394 | 7061550 | 1035279 | --- | --- | --- | 2,11 | down |
| 6367396 | 7183927 | 1335498 | --- | --- | --- | 1,24 | up   |
| 6367476 | 7328695 | 1692381 | --- | --- | --- | 1,08 | down |
| 6367608 | 7179756 | 1324376 | --- | --- | --- | 1,09 | up   |
| 6367679 | 7350489 | 1746120 | --- | --- | --- | 1,06 | up   |
| 6367725 | 7267204 | 1539853 | --- | --- | --- | 1,07 | up   |
| 6367773 | 7128539 | 1197704 | --- | --- | --- | 1,09 | down |
| 6367787 | 7288077 | 1591950 | --- | --- | --- | 1,17 | down |
| 6367808 | 7043379 | 993595  | --- | --- | --- | 2,09 | down |
| 6367816 | 7243647 | 1482451 | --- | --- | --- | 1,12 | down |
| 6367835 | 7344406 | 1731265 | --- | --- | --- | 1,13 | up   |
| 6367873 | 7090581 | 1104746 | --- | --- | --- | 1,17 | down |
| 6367893 | 7190317 | 1350514 | --- | --- | --- | 1,21 | up   |
| 6368029 | 7363147 | 1777030 | --- | --- | --- | 1,09 | up   |
| 6368051 | 7158419 | 1271376 | --- | --- | --- | 2,04 | down |
| 6368064 | 7088544 | 1099681 | --- | --- | --- | 1,36 | up   |
| 6368108 | 7075790 | 1069992 | --- | --- | --- | 2,01 | up   |
| 6368125 | 7060896 | 1033619 | --- | --- | --- | 1,15 | up   |
| 6368295 | 7144389 | 1236782 | --- | --- | --- | 1,34 | up   |
| 6368310 | 7200545 | 1376933 | --- | --- | --- | 1,10 | up   |
| 6368497 | 7320735 | 1674175 | --- | --- | --- | 1,28 | up   |
| 6368530 | 7213908 | 1407689 | --- | --- | --- | 1,51 | up   |
| 6368562 | 7236358 | 1464246 | --- | --- | --- | 1,91 | up   |
| 6368610 | 7309734 | 1646900 | --- | --- | --- | 1,12 | up   |
| 6368612 | 7088544 | 1099704 | --- | --- | --- | 1,36 | up   |
| 6368617 | 7376073 | 1811698 | --- | --- | --- | 1,14 | down |
| 6368619 | 7240569 | 1475517 | --- | --- | --- | 1,70 | down |
| 6368654 | 7374324 | 1807449 | --- | --- | --- | 1,28 | up   |
| 6368769 | 7079475 | 1078291 | --- | --- | --- | 1,13 | up   |
| 6368943 | 7171091 | 1302447 | --- | --- | --- | 2,71 | up   |
| 6368996 | 7376566 | 1812859 | --- | --- | --- | 1,25 | down |
| 6369016 | 7166439 | 1290094 | --- | --- | --- | 1,60 | down |
| 6369108 | 7374324 | 1807473 | --- | --- | --- | 2,20 | up   |
| 6369309 | 7280743 | 1574482 | --- | --- | --- | 1,08 | down |
| 6369350 | 7340304 | 1720862 | --- | --- | --- | 1,54 | down |
| 6369480 | 7312465 | 1653055 | --- | --- | --- | 1,09 | down |
| 6369513 | 7272616 | 1554383 | --- | --- | --- | 2,27 | up   |
| 6369531 | 7213294 | 1406092 | --- | --- | --- | 1,00 | up   |
| 6369629 | 7233178 | 1455887 | --- | --- | --- | 2,22 | up   |
| 6369639 | 7329846 | 1694997 | --- | --- | --- | 1,03 | up   |
| 6369700 | 7032558 | 967064  | --- | --- | --- | 1,01 | down |
| 6369743 | 7340757 | 1721887 | --- | --- | --- | 1,08 | up   |
| 6369757 | 7148741 | 1247858 | --- | --- | --- | 1,12 | down |
| 6369833 | 7339379 | 1718349 | --- | --- | --- | 1,06 | down |
| 6369950 | 7326245 | 1686400 | --- | --- | --- | 1,49 | down |
| 6369987 | 7064732 | 1042908 | --- | --- | --- | 1,89 | down |
| 6370046 | 7317708 | 1666836 | --- | --- | --- | 1,03 | up   |
| 6370072 | 7040442 | 986564  | --- | --- | --- | 1,96 | up   |
| 6370105 | 7189669 | 1348969 | --- | --- | --- | 1,08 | down |
| 6370176 | 7120671 | 1178989 | --- | --- | --- | 1,27 | up   |
| 6370199 | 7277783 | 1567465 | --- | --- | --- | 1,50 | down |
| 6370201 | 7356115 | 1760125 | --- | --- | --- | 1,51 | up   |
| 6370314 | 7272110 | 1553046 | --- | --- | --- | 1,28 | down |
| 6370369 | 7312465 | 1653054 | --- | --- | --- | 2,43 | up   |

|         |         |         |     |     |     |      |      |
|---------|---------|---------|-----|-----|-----|------|------|
| 6370374 | 7245921 | 1487677 | --- | --- | --- | 1,19 | down |
| 6370392 | 7098810 | 1124657 | --- | --- | --- | 1,34 | down |
| 6370694 | 7095041 | 1115190 | --- | --- | --- | 1,05 | down |
| 6370874 | 7217434 | 1416404 | --- | --- | --- | 1,21 | up   |
| 6370917 | 7239303 | 1472004 | --- | --- | --- | 1,18 | down |
| 6371052 | 7034293 | 971909  | --- | --- | --- | 1,05 | up   |
| 6371070 | 7184931 | 1337714 | --- | --- | --- | 1,19 | up   |
| 6371161 | 7360325 | 1770514 | --- | --- | --- | 1,35 | down |
| 6371268 | 7028326 | 957435  | --- | --- | --- | 2,17 | down |
| 6371375 | 7363674 | 1778420 | --- | --- | --- | 1,44 | down |
| 6371384 | 7342430 | 1726154 | --- | --- | --- | 1,05 | up   |
| 6371407 | 7196029 | 1365604 | --- | --- | --- | 1,81 | down |
| 6371426 | 7124803 | 1188793 | --- | --- | --- | 2,05 | down |
| 6371493 | 7146425 | 1241887 | --- | --- | --- | 1,51 | up   |
| 6371496 | 7321746 | 1676235 | --- | --- | --- | 1,08 | up   |
| 6371554 | 7030224 | 961133  | --- | --- | --- | 1,20 | up   |
| 6371661 | 7330314 | 1696135 | --- | --- | --- | 1,12 | up   |
| 6371743 | 7309738 | 1646951 | --- | --- | --- | 1,34 | down |
| 6371797 | 7288077 | 1591977 | --- | --- | --- | 1,01 | up   |
| 6371806 | 7089080 | 1101154 | --- | --- | --- | 1,42 | down |
| 6371837 | 7244290 | 1484152 | --- | --- | --- | 1,05 | down |
| 6371845 | 7073677 | 1065154 | --- | --- | --- | 1,57 | down |
| 6371869 | 7374790 | 1808780 | --- | --- | --- | 1,06 | up   |
| 6371972 | 7357026 | 1762228 | --- | --- | --- | 1,13 | up   |
| 6371983 | 7231484 | 1451383 | --- | --- | --- | 1,00 | up   |
| 6371986 | 7211389 | 1402119 | --- | --- | --- | 1,04 | down |
| 6372276 | 7210387 | 1400037 | --- | --- | --- | 1,03 | down |
| 6372288 | 7244602 | 1484780 | --- | --- | --- | 1,22 | up   |
| 6372297 | 7030037 | 960714  | --- | --- | --- | 1,74 | down |
| 6372329 | 7073995 | 1066033 | --- | --- | --- | 1,03 | down |
| 6372353 | 7305275 | 1635826 | --- | --- | --- | 1,26 | down |
| 6372386 | 7261580 | 1526767 | --- | --- | --- | 1,24 | down |
| 6372428 | 7369938 | 1795531 | --- | --- | --- | 1,24 | down |
| 6372438 | 7374324 | 1807484 | --- | --- | --- | 1,09 | up   |
| 6372462 | 7146872 | 1242915 | --- | --- | --- | 1,30 | down |
| 6372471 | 7328833 | 1692796 | --- | --- | --- | 1,73 | down |
| 6372494 | 7111361 | 1155606 | --- | --- | --- | 1,08 | up   |
| 6372514 | 7029770 | 960159  | --- | --- | --- | 1,26 | down |
| 6372545 | 7319609 | 1671206 | --- | --- | --- | 1,00 | down |
| 6372602 | 7339379 | 1718345 | --- | --- | --- | 1,07 | down |
| 6372621 | 7039725 | 984816  | --- | --- | --- | 1,33 | down |
| 6372677 | 7186464 | 1341385 | --- | --- | --- | 1,29 | up   |
| 6372766 | 7056736 | 1024417 | --- | --- | --- | 1,54 | down |
| 6372904 | 7252877 | 1504697 | --- | --- | --- | 1,10 | down |
| 6372957 | 7211389 | 1402113 | --- | --- | --- | 1,01 | down |
| 6373043 | 7186305 | 1341002 | --- | --- | --- | 1,60 | down |
| 6373193 | 7121849 | 1181757 | --- | --- | --- | 1,17 | up   |
| 6373246 | 7210822 | 1400979 | --- | --- | --- | 1,91 | up   |
| 6373248 | 7103017 | 1135155 | --- | --- | --- | 1,51 | up   |
| 6373268 | 7041609 | 989564  | --- | --- | --- | 1,06 | up   |
| 6373352 | 7115362 | 1165602 | --- | --- | --- | 1,50 | up   |
| 6373386 | 7252877 | 1504764 | --- | --- | --- | 1,22 | up   |
| 6373469 | 7358859 | 1767001 | --- | --- | --- | 1,18 | up   |
| 6373484 | 7367959 | 1789074 | --- | --- | --- | 1,35 | down |
| 6373508 | 7313538 | 1655730 | --- | --- | --- | 1,03 | down |
| 6373631 | 7342430 | 1726153 | --- | --- | --- | 1,93 | up   |
| 6373678 | 7146082 | 1240853 | --- | --- | --- | 1,14 | up   |

|         |         |         |     |     |     |      |      |
|---------|---------|---------|-----|-----|-----|------|------|
| 6373731 | 7286807 | 1588833 | --- | --- | --- | 1,07 | up   |
| 6373932 | 7252339 | 1503371 | --- | --- | --- | 1,54 | down |
| 6373941 | 7056333 | 1023679 | --- | --- | --- | 1,13 | down |
| 6374030 | 7345465 | 1733842 | --- | --- | --- | 1,05 | down |
| 6374056 | 7346687 | 1736696 | --- | --- | --- | 1,01 | down |
| 6374074 | 7322020 | 1676645 | --- | --- | --- | 1,33 | up   |
| 6374199 | 7237711 | 1467431 | --- | --- | --- | 1,28 | down |
| 6374224 | 7244936 | 1485358 | --- | --- | --- | 1,58 | down |
| 6374237 | 7200545 | 1376917 | --- | --- | --- | 1,14 | down |
| 6374290 | 7121849 | 1181805 | --- | --- | --- | 1,11 | down |
| 6374295 | 7244027 | 1483273 | --- | --- | --- | 1,12 | up   |
| 6374363 | 7068987 | 1053603 | --- | --- | --- | 1,83 | down |
| 6374385 | 7140113 | 1226048 | --- | --- | --- | 1,33 | down |
| 6374498 | 7208784 | 1396160 | --- | --- | --- | 1,15 | up   |
| 6374610 | 7205944 | 1389478 | --- | --- | --- | 1,04 | up   |
| 6374688 | 7361881 | 1773913 | --- | --- | --- | 1,04 | down |
| 6374702 | 7339834 | 1719553 | --- | --- | --- | 1,10 | down |
| 6374741 | 7131805 | 1205917 | --- | --- | --- | 1,17 | down |
| 6374769 | 7200545 | 1376902 | --- | --- | --- | 1,34 | up   |
| 6374793 | 7244290 | 1484165 | --- | --- | --- | 1,22 | up   |
| 6374794 | 7280570 | 1574092 | --- | --- | --- | 1,05 | down |
| 6374831 | 7243647 | 1482428 | --- | --- | --- | 1,04 | up   |
| 6374972 | 7321029 | 1674819 | --- | --- | --- | 1,24 | down |
| 6374974 | 7056333 | 1023674 | --- | --- | --- | 1,56 | down |
| 6374981 | 7038530 | 981868  | --- | --- | --- | 1,10 | down |
| 6375044 | 7122140 | 1182727 | --- | --- | --- | 1,20 | up   |
| 6375064 | 7220278 | 1423736 | --- | --- | --- | 1,29 | up   |
| 6375166 | 7098867 | 1124951 | --- | --- | --- | 1,23 | up   |
| 6375190 | 7072429 | 1061871 | --- | --- | --- | 1,15 | down |
| 6375233 | 7200129 | 1375999 | --- | --- | --- | 1,37 | down |
| 6375282 | 7148741 | 1247841 | --- | --- | --- | 1,14 | up   |
| 6375288 | 7131550 | 1205552 | --- | --- | --- | 1,10 | up   |
| 6375299 | 7138243 | 1221687 | --- | --- | --- | 1,47 | down |
| 6375378 | 7295410 | 1609733 | --- | --- | --- | 1,01 | up   |
| 6375414 | 7121849 | 1181763 | --- | --- | --- | 1,03 | down |
| 6375443 | 7067670 | 1050374 | --- | --- | --- | 2,06 | down |
| 6375452 | 7241995 | 1478328 | --- | --- | --- | 1,23 | up   |
| 6375539 | 7162144 | 1280491 | --- | --- | --- | 2,02 | down |
| 6375572 | 7360486 | 1770935 | --- | --- | --- | 1,04 | up   |
| 6375625 | 7166867 | 1291301 | --- | --- | --- | 1,17 | down |
| 6375690 | 7312338 | 1652780 | --- | --- | --- | 2,62 | down |
| 6375723 | 7217434 | 1416400 | --- | --- | --- | 1,08 | down |
| 6375728 | 7034293 | 971972  | --- | --- | --- | 1,05 | down |
| 6375774 | 7129578 | 1200051 | --- | --- | --- | 1,02 | down |
| 6375787 | 7086966 | 1095281 | --- | --- | --- | 1,26 | up   |
| 6375890 | 7370002 | 1795766 | --- | --- | --- | 1,07 | up   |
| 6375984 | 7171417 | 1303153 | --- | --- | --- | 1,78 | up   |
| 6376058 | 7337425 | 1713136 | --- | --- | --- | 1,19 | down |
| 6376076 | 7210702 | 1400724 | --- | --- | --- | 1,08 | up   |
| 6376129 | 7191594 | 1354169 | --- | --- | --- | 1,45 | up   |
| 6376197 | 7280743 | 1574477 | --- | --- | --- | 1,07 | up   |
| 6376260 | 7068259 | 1051601 | --- | --- | --- | 1,14 | up   |
| 6376350 | 7280743 | 1574474 | --- | --- | --- | 1,15 | down |
| 6376375 | 7280743 | 1574561 | --- | --- | --- | 1,45 | down |
| 6376404 | 7350489 | 1746112 | --- | --- | --- | 1,14 | up   |
| 6376421 | 7384179 | 1829791 | --- | --- | --- | 1,40 | up   |
| 6376434 | 7052385 | 1014772 | --- | --- | --- | 1,01 | up   |

|         |         |         |     |     |     |      |      |
|---------|---------|---------|-----|-----|-----|------|------|
| 6376503 | 7280743 | 1574557 | --- | --- | --- | 1,05 | up   |
| 6376508 | 7193056 | 1358280 | --- | --- | --- | 1,31 | up   |
| 6376614 | 7040442 | 986546  | --- | --- | --- | 1,92 | down |
| 6376660 | 7274780 | 1559198 | --- | --- | --- | 1,13 | down |
| 6376664 | 7274780 | 1559224 | --- | --- | --- | 1,17 | down |
| 6376670 | 7228530 | 1443836 | --- | --- | --- | 1,32 | up   |
| 6376676 | 7088625 | 1099873 | --- | --- | --- | 1,13 | up   |
| 6376683 | 7243901 | 1483047 | --- | --- | --- | 1,06 | down |
| 6376741 | 7241163 | 1476819 | --- | --- | --- | 1,14 | down |
| 6376757 | 7087965 | 1098027 | --- | --- | --- | 2,42 | up   |
| 6376862 | 7033504 | 969858  | --- | --- | --- | 1,05 | down |
| 6376903 | 7235794 | 1462891 | --- | --- | --- | 1,03 | down |
| 6376942 | 7168521 | 1295961 | --- | --- | --- | 1,33 | down |
| 6376952 | 7148741 | 1247825 | --- | --- | --- | 2,06 | up   |
| 6376975 | 7321414 | 1675635 | --- | --- | --- | 1,04 | up   |
| 6377035 | 7229061 | 1445324 | --- | --- | --- | 1,92 | down |
| 6377058 | 7217434 | 1416421 | --- | --- | --- | 1,40 | down |
| 6377114 | 7114274 | 1162811 | --- | --- | --- | 1,19 | down |
| 6377116 | 7180721 | 1326700 | --- | --- | --- | 1,02 | up   |
| 6377187 | 7331757 | 1700032 | --- | --- | --- | 1,79 | up   |
| 6377195 | 7088164 | 1098492 | --- | --- | --- | 1,88 | up   |
| 6377211 | 7302787 | 1628883 | --- | --- | --- | 1,16 | down |
| 6377261 | 7072225 | 1061401 | --- | --- | --- | 1,12 | down |
| 6377325 | 7071659 | 1060226 | --- | --- | --- | 1,30 | up   |
| 6377414 | 7380878 | 1822567 | --- | --- | --- | 1,46 | down |
| 6377420 | 7318139 | 1668074 | --- | --- | --- | 1,89 | up   |
| 6377508 | 7100523 | 1128901 | --- | --- | --- | 1,06 | up   |
| 6377514 | 7353232 | 1752853 | --- | --- | --- | 2,27 | up   |
| 6377634 | 7065273 | 1044608 | --- | --- | --- | 1,09 | down |
| 6377720 | 7292657 | 1602835 | --- | --- | --- | 1,53 | down |
| 6377737 | 7132125 | 1206597 | --- | --- | --- | 1,12 | down |
| 6377743 | 7373678 | 1805856 | --- | --- | --- | 1,14 | down |
| 6377765 | 7383586 | 1828444 | --- | --- | --- | 1,57 | up   |
| 6377818 | 7119179 | 1175003 | --- | --- | --- | 1,03 | up   |
| 6377974 | 7302327 | 1627676 | --- | --- | --- | 1,15 | up   |
| 6378137 | 7198210 | 1370996 | --- | --- | --- | 1,24 | down |
| 6378295 | 7341546 | 1723951 | --- | --- | --- | 1,27 | down |
| 6378541 | 7160687 | 1276999 | --- | --- | --- | 1,16 | down |
| 6378617 | 7245921 | 1487685 | --- | --- | --- | 1,53 | down |
| 6378741 | 7075533 | 1069572 | --- | --- | --- | 1,06 | up   |
| 6378851 | 7180804 | 1327005 | --- | --- | --- | 1,10 | up   |
| 6379068 | 7378997 | 1818667 | --- | --- | --- | 1,26 | down |
| 6379105 | 7030037 | 960707  | --- | --- | --- | 1,12 | down |
| 6379112 | 7355138 | 1757776 | --- | --- | --- | 1,33 | down |
| 6379126 | 7364346 | 1779997 | --- | --- | --- | 2,07 | up   |
| 6379133 | 7346066 | 1735313 | --- | --- | --- | 1,15 | up   |
| 6379146 | 7248790 | 1494522 | --- | --- | --- | 1,42 | up   |
| 6379221 | 7382499 | 1826256 | --- | --- | --- | 1,29 | down |
| 6379309 | 7027797 | 956283  | --- | --- | --- | 2,54 | up   |
| 6379313 | 7193403 | 1359193 | --- | --- | --- | 1,12 | up   |
| 6379409 | 7058713 | 1028667 | --- | --- | --- | 1,24 | down |
| 6379516 | 7191888 | 1354945 | --- | --- | --- | 1,02 | up   |
| 6379551 | 7186464 | 1341387 | --- | --- | --- | 1,20 | down |
| 6379669 | 7313841 | 1656733 | --- | --- | --- | 1,33 | down |
| 6379724 | 7211363 | 1402054 | --- | --- | --- | 1,69 | up   |
| 6379890 | 7336837 | 1711637 | --- | --- | --- | 1,77 | down |
| 6380054 | 7376206 | 1811979 | --- | --- | --- | 5,50 | up   |

|         |         |         |     |     |     |      |      |
|---------|---------|---------|-----|-----|-----|------|------|
| 6380103 | 7128704 | 1198021 | --- | --- | --- | 1,04 | down |
| 6380145 | 7068259 | 1051645 | --- | --- | --- | 1,59 | down |
| 6380154 | 7041486 | 989220  | --- | --- | --- | 2,65 | up   |
| 6380172 | 7227775 | 1441850 | --- | --- | --- | 1,07 | down |
| 6380244 | 7037235 | 978583  | --- | --- | --- | 1,10 | down |
| 6380299 | 7049184 | 1007932 | --- | --- | --- | 1,55 | down |
| 6380315 | 7207971 | 1394311 | --- | --- | --- | 1,25 | down |
| 6380322 | 7093752 | 1112000 | --- | --- | --- | 1,26 | down |
| 6380327 | 7313841 | 1656720 | --- | --- | --- | 1,26 | up   |
| 6380375 | 7378997 | 1818669 | --- | --- | --- | 1,14 | down |
| 6380383 | 7368567 | 1791327 | --- | --- | --- | 1,02 | down |
| 6380393 | 7297589 | 1615612 | --- | --- | --- | 1,10 | down |
| 6380482 | 7366749 | 1785497 | --- | --- | --- | 1,56 | up   |
| 6380493 | 7166855 | 1291250 | --- | --- | --- | 1,05 | up   |
| 6380512 | 7031618 | 964187  | --- | --- | --- | 1,14 | up   |
| 6380573 | 7337425 | 1713204 | --- | --- | --- | 1,04 | down |
| 6380608 | 7069724 | 1055333 | --- | --- | --- | 1,01 | up   |
| 6380720 | 7120550 | 1178706 | --- | --- | --- | 1,17 | down |
| 6380728 | 7164949 | 1286455 | --- | --- | --- | 1,21 | up   |
| 6380871 | 7198210 | 1370976 | --- | --- | --- | 1,10 | up   |
| 6381095 | 7223395 | 1431082 | --- | --- | --- | 1,54 | down |
| 6381106 | 7339732 | 1719239 | --- | --- | --- | 1,38 | up   |
| 6381205 | 7258323 | 1518480 | --- | --- | --- | 3,98 | down |
| 6381216 | 7309734 | 1646883 | --- | --- | --- | 1,06 | up   |
| 6381296 | 7112671 | 1158976 | --- | --- | --- | 2,01 | up   |
| 6381297 | 7259221 | 1520611 | --- | --- | --- | 1,79 | up   |
| 6381313 | 7071741 | 1060455 | --- | --- | --- | 1,39 | down |
| 6381314 | 7217650 | 1417184 | --- | --- | --- | 2,14 | down |
| 6381377 | 7088625 | 1099867 | --- | --- | --- | 1,98 | down |
| 6381506 | 7302860 | 1629033 | --- | --- | --- | 1,04 | up   |
| 6381542 | 7113985 | 1162241 | --- | --- | --- | 1,30 | up   |
| 6381585 | 7207093 | 1392117 | --- | --- | --- | 1,07 | down |
| 6381586 | 7160687 | 1277005 | --- | --- | --- | 1,01 | down |
| 6381692 | 7356326 | 1760470 | --- | --- | --- | 1,16 | down |
| 6381884 | 7034356 | 972164  | --- | --- | --- | 1,07 | up   |
| 6381909 | 7373678 | 1805882 | --- | --- | --- | 1,37 | up   |
| 6381925 | 7033673 | 970382  | --- | --- | --- | 2,17 | up   |
| 6382025 | 7213908 | 1407758 | --- | --- | --- | 1,05 | up   |
| 6382034 | 7336931 | 1711871 | --- | --- | --- | 1,31 | up   |
| 6382117 | 7162144 | 1280505 | --- | --- | --- | 1,38 | up   |
| 6382222 | 7237132 | 1466106 | --- | --- | --- | 1,08 | up   |
| 6382253 | 7198210 | 1371000 | --- | --- | --- | 1,34 | up   |
| 6382306 | 7217747 | 1417511 | --- | --- | --- | 1,50 | down |
| 6382333 | 7253215 | 1505377 | --- | --- | --- | 1,39 | down |
| 6382441 | 7168521 | 1295956 | --- | --- | --- | 1,17 | down |
| 6382557 | 7039725 | 984815  | --- | --- | --- | 1,15 | up   |
| 6382565 | 7340673 | 1721690 | --- | --- | --- | 1,13 | up   |
| 6382572 | 7130917 | 1203931 | --- | --- | --- | 1,76 | down |
| 6382795 | 7070511 | 1057476 | --- | --- | --- | 1,46 | down |
| 6383055 | 7307473 | 1641261 | --- | --- | --- | 1,22 | up   |
| 6383114 | 7297589 | 1615613 | --- | --- | --- | 1,05 | down |
| 6383117 | 7267802 | 1541841 | --- | --- | --- | 1,10 | up   |
| 6383196 | 7155866 | 1265321 | --- | --- | --- | 1,64 | up   |
| 6383237 | 7064134 | 1041445 | --- | --- | --- | 1,04 | up   |
| 6383398 | 7343250 | 1728040 | --- | --- | --- | 1,12 | up   |
| 6383442 | 7371253 | 1799562 | --- | --- | --- | 1,05 | up   |
| 6383524 | 7253088 | 1505124 | --- | --- | --- | 1,08 | up   |

|         |         |         |     |     |     |      |      |
|---------|---------|---------|-----|-----|-----|------|------|
| 6383555 | 7071659 | 1060221 | --- | --- | --- | 1,27 | up   |
| 6383560 | 7132024 | 1206343 | --- | --- | --- | 1,04 | up   |
| 6383584 | 7118356 | 1173173 | --- | --- | --- | 1,27 | down |
| 6383767 | 7250511 | 1498632 | --- | --- | --- | 1,07 | up   |
| 6383775 | 7330396 | 1696340 | --- | --- | --- | 1,74 | down |
| 6383822 | 7068259 | 1051599 | --- | --- | --- | 1,36 | up   |
| 6383829 | 7213945 | 1407837 | --- | --- | --- | 2,56 | up   |
| 6383832 | 7068259 | 1051662 | --- | --- | --- | 1,26 | up   |
| 6383964 | 7086522 | 1093950 | --- | --- | --- | 2,37 | up   |
| 6384102 | 7274892 | 1559562 | --- | --- | --- | 1,44 | down |
| 6384197 | 7071264 | 1059296 | --- | --- | --- | 1,40 | up   |
| 6384279 | 7277783 | 1567472 | --- | --- | --- | 1,12 | up   |
| 6384289 | 7346229 | 1735599 | --- | --- | --- | 1,00 | up   |
| 6384360 | 7033337 | 969498  | --- | --- | --- | 1,49 | up   |
| 6384433 | 7188138 | 1345033 | --- | --- | --- | 1,37 | up   |
| 6384439 | 7103782 | 1136947 | --- | --- | --- | 2,02 | up   |
| 6384583 | 7062233 | 1037257 | --- | --- | --- | 1,26 | up   |
| 6384589 | 7282343 | 1578669 | --- | --- | --- | 1,10 | up   |
| 6384687 | 7339379 | 1718333 | --- | --- | --- | 1,06 | down |
| 6384815 | 7369400 | 1793984 | --- | --- | --- | 1,36 | up   |
| 6384884 | 7240569 | 1475371 | --- | --- | --- | 1,12 | up   |
| 6384906 | 7330238 | 1695946 | --- | --- | --- | 1,03 | up   |
| 6384959 | 7277783 | 1567451 | --- | --- | --- | 1,56 | up   |
| 6385079 | 7197820 | 1370103 | --- | --- | --- | 1,39 | down |
| 6385175 | 7321029 | 1674809 | --- | --- | --- | 1,10 | up   |
| 6385230 | 7237672 | 1467300 | --- | --- | --- | 1,22 | up   |
| 6385297 | 7063716 | 1040130 | --- | --- | --- | 1,04 | down |
| 6385331 | 7033504 | 969858  | --- | --- | --- | 1,00 | up   |
| 6385393 | 7356115 | 1760132 | --- | --- | --- | 1,24 | up   |
| 6385423 | 7363674 | 1778457 | --- | --- | --- | 3,02 | down |
| 6385604 | 7245932 | 1487785 | --- | --- | --- | 1,77 | up   |
| 6385624 | 7376206 | 1811979 | --- | --- | --- | 1,08 | up   |
| 6385791 | 7248790 | 1494506 | --- | --- | --- | 1,18 | up   |
| 6385819 | 7152915 | 1257444 | --- | --- | --- | 1,03 | down |
| 6385823 | 7377791 | 1815989 | --- | --- | --- | 1,47 | down |
| 6385986 | 7156170 | 1266237 | --- | --- | --- | 1,32 | down |
| 6386045 | 7289382 | 1595200 | --- | --- | --- | 1,18 | down |
| 6386058 | 7202837 | 1382281 | --- | --- | --- | 1,01 | down |
| 6386113 | 7258455 | 1518701 | --- | --- | --- | 1,30 | down |
| 6386118 | 7069253 | 1054165 | --- | --- | --- | 1,50 | up   |
| 6386191 | 7063716 | 1040125 | --- | --- | --- | 1,00 | down |
| 6386439 | 7367946 | 1788948 | --- | --- | --- | 1,52 | up   |
| 6386440 | 7142081 | 1230967 | --- | --- | --- | 1,04 | down |
| 6386575 | 7280743 | 1574543 | --- | --- | --- | 1,05 | down |
| 6386617 | 7244602 | 1484761 | --- | --- | --- | 1,13 | up   |
| 6386747 | 7106414 | 1143197 | --- | --- | --- | 1,39 | up   |
| 6386851 | 7280743 | 1574501 | --- | --- | --- | 1,10 | down |
| 6386909 | 7086966 | 1095285 | --- | --- | --- | 1,12 | up   |
| 6387130 | 7100523 | 1128871 | --- | --- | --- | 1,13 | down |
| 6387135 | 7156978 | 1268174 | --- | --- | --- | 1,23 | up   |
| 6387180 | 7155116 | 1263426 | --- | --- | --- | 1,34 | down |
| 6387264 | 7374313 | 1807377 | --- | --- | --- | 1,45 | down |
| 6387272 | 7355580 | 1758874 | --- | --- | --- | 2,95 | up   |
| 6387332 | 7350918 | 1747309 | --- | --- | --- | 1,55 | down |
| 6387344 | 7288095 | 1592077 | --- | --- | --- | 1,34 | down |
| 6387374 | 7336854 | 1711676 | --- | --- | --- | 1,09 | down |
| 6387430 | 7307473 | 1641275 | --- | --- | --- | 1,07 | up   |



|         |         |         |     |     |     |      |      |
|---------|---------|---------|-----|-----|-----|------|------|
| 6387732 | 7227433 | 1440963 | --- | --- | --- | 1,15 | up   |
| 6387740 | 7098867 | 1124949 | --- | --- | --- | 1,02 | up   |
| 6387781 | 7099543 | 1126634 | --- | --- | --- | 1,70 | up   |
| 6387801 | 7358048 | 1764806 | --- | --- | --- | 2,24 | down |
| 6387831 | 7168979 | 1297188 | --- | --- | --- | 1,22 | up   |
| 6387893 | 7214605 | 1409401 | --- | --- | --- | 1,20 | down |
| 6387979 | 7296131 | 1611504 | --- | --- | --- | 1,36 | up   |
| 6388025 | 7282927 | 1580014 | --- | --- | --- | 1,03 | up   |
| 6388161 | 7337425 | 1713201 | --- | --- | --- | 2,16 | down |
| 6388166 | 7301843 | 1626484 | --- | --- | --- | 1,11 | down |
| 6388268 | 7142321 | 1231500 | --- | --- | --- | 1,66 | up   |
| 6388303 | 7248790 | 1494552 | --- | --- | --- | 1,23 | up   |
| 6388321 | 7306330 | 1638506 | --- | --- | --- | 1,24 | up   |
| 6388440 | 7198210 | 1370954 | --- | --- | --- | 1,08 | up   |
| 6388555 | 7249388 | 1495887 | --- | --- | --- | 1,51 | up   |
| 6388683 | 7205944 | 1389497 | --- | --- | --- | 1,39 | up   |
| 6388703 | 7302327 | 1627669 | --- | --- | --- | 1,06 | up   |
| 6388711 | 7188138 | 1344999 | --- | --- | --- | 1,43 | up   |
| 6388770 | 7081487 | 1082706 | --- | --- | --- | 1,29 | up   |
| 6388790 | 7072225 | 1061405 | --- | --- | --- | 2,07 | down |
| 6388848 | 7169573 | 1298391 | --- | --- | --- | 2,28 | down |
| 6388885 | 7289075 | 1594456 | --- | --- | --- | 1,17 | down |
| 6389012 | 7297589 | 1615667 | --- | --- | --- | 1,29 | down |
| 6389050 | 7275927 | 1562353 | --- | --- | --- | 1,38 | up   |
| 6389106 | 7361881 | 1773949 | --- | --- | --- | 1,03 | down |
| 6389126 | 7377791 | 1815989 | --- | --- | --- | 1,27 | down |
| 6389150 | 7337425 | 1713220 | --- | --- | --- | 1,04 | up   |
| 6389376 | 7243363 | 1481603 | --- | --- | --- | 1,02 | up   |
| 6389392 | 7248790 | 1494553 | --- | --- | --- | 1,07 | up   |
| 6389404 | 7052331 | 1014567 | --- | --- | --- | 1,04 | down |
| 6389442 | 7244287 | 1484050 | --- | --- | --- | 1,46 | down |
| 6389564 | 7267802 | 1541812 | --- | --- | --- | 1,09 | up   |
| 6389572 | 7330731 | 1697182 | --- | --- | --- | 1,24 | up   |
| 6389592 | 7352046 | 1750027 | --- | --- | --- | 1,46 | up   |
| 6389634 | 7070836 | 1058348 | --- | --- | --- | 1,04 | up   |
| 6389649 | 7204442 | 1386085 | --- | --- | --- | 2,28 | down |
| 6389683 | 7337224 | 1712584 | --- | --- | --- | 1,29 | down |
| 6389692 | 7279303 | 1571202 | --- | --- | --- | 2,05 | down |
| 6389712 | 7318714 | 1669234 | --- | --- | --- | 1,03 | up   |
| 6389791 | 7101258 | 1130557 | --- | --- | --- | 1,94 | down |
| 6389971 | 7278010 | 1568039 | --- | --- | --- | 1,06 | up   |
| 6389991 | 7132263 | 1206895 | --- | --- | --- | 1,13 | up   |
| 6390025 | 7280743 | 1574496 | --- | --- | --- | 1,43 | up   |
| 6390100 | 7240569 | 1475326 | --- | --- | --- | 1,54 | down |
| 6390109 | 7244287 | 1484043 | --- | --- | --- | 1,65 | up   |
| 6390362 | 7071264 | 1059363 | --- | --- | --- | 1,02 | up   |
| 6390412 | 7244288 | 1484093 | --- | --- | --- | 1,33 | down |
| 6390434 | 7236492 | 1464540 | --- | --- | --- | 1,10 | down |
| 6390484 | 7330396 | 1696354 | --- | --- | --- | 1,23 | up   |
| 6390526 | 7336837 | 1711614 | --- | --- | --- | 1,00 | down |
| 6390672 | 7166867 | 1291290 | --- | --- | --- | 1,12 | down |
| 6390721 | 7376073 | 1811728 | --- | --- | --- | 1,19 | up   |
| 6390740 | 7355138 | 1757853 | --- | --- | --- | 1,01 | down |
| 6390799 | 7264797 | 1534438 | --- | --- | --- | 1,19 | up   |
| 6390808 | 7229856 | 1447080 | --- | --- | --- | 1,19 | down |
| 6390825 | 7029770 | 960158  | --- | --- | --- | 1,17 | down |
| 6390828 | 7127540 | 1195272 | --- | --- | --- | 1,24 | up   |

|         |         |         |     |     |     |      |      |
|---------|---------|---------|-----|-----|-----|------|------|
| 6390901 | 7109292 | 1150738 | --- | --- | --- | 1,88 | up   |
| 6390942 | 7092549 | 1109155 | --- | --- | --- | 1,42 | down |
| 6391117 | 7098810 | 1124649 | --- | --- | --- | 1,09 | down |
| 6391172 | 7076236 | 1071230 | --- | --- | --- | 3,23 | down |
| 6391202 | 7171091 | 1302460 | --- | --- | --- | 1,36 | up   |
| 6391216 | 7065570 | 1045093 | --- | --- | --- | 1,89 | down |
| 6391345 | 7335637 | 1708471 | --- | --- | --- | 1,04 | down |
| 6391442 | 7359460 | 1768473 | --- | --- | --- | 1,63 | up   |
| 6391451 | 7363529 | 1777898 | --- | --- | --- | 1,04 | down |
| 6391454 | 7069603 | 1055041 | --- | --- | --- | 1,08 | up   |
| 6391503 | 7326271 | 1686470 | --- | --- | --- | 1,05 | down |
| 6391766 | 7073573 | 1064744 | --- | --- | --- | 1,09 | up   |
| 6391768 | 7062233 | 1037199 | --- | --- | --- | 1,15 | down |
| 6391827 | 7210822 | 1400982 | --- | --- | --- | 1,70 | down |
| 6392065 | 7148741 | 1247865 | --- | --- | --- | 1,46 | up   |
| 6392110 | 7217434 | 1416382 | --- | --- | --- | 1,16 | up   |
| 6392202 | 7286807 | 1588834 | --- | --- | --- | 1,28 | down |
| 6392299 | 7119179 | 1174989 | --- | --- | --- | 1,07 | down |
| 6392311 | 7058713 | 1028668 | --- | --- | --- | 1,36 | down |
| 6392356 | 7156170 | 1266286 | --- | --- | --- | 1,37 | up   |
| 6392407 | 7381330 | 1823638 | --- | --- | --- | 1,84 | down |
| 6392430 | 7277742 | 1567210 | --- | --- | --- | 2,56 | up   |
| 6392559 | 7093835 | 1112225 | --- | --- | --- | 1,19 | up   |
| 6392562 | 7224182 | 1432758 | --- | --- | --- | 1,04 | down |
| 6392636 | 7302787 | 1628900 | --- | --- | --- | 1,25 | down |
| 6392640 | 7369521 | 1794256 | --- | --- | --- | 2,02 | up   |
| 6392672 | 7258784 | 1519670 | --- | --- | --- | 1,79 | up   |
| 6392679 | 7030454 | 961551  | --- | --- | --- | 1,02 | down |
| 6392832 | 7092549 | 1109188 | --- | --- | --- | 1,04 | up   |
| 6392871 | 7318714 | 1669232 | --- | --- | --- | 1,22 | down |
| 6392929 | 7136142 | 1216419 | --- | --- | --- | 2,13 | up   |
| 6392973 | 7307473 | 1641273 | --- | --- | --- | 1,25 | up   |
| 6392983 | 7253215 | 1505378 | --- | --- | --- | 1,15 | up   |
| 6393056 | 7027386 | 955072  | --- | --- | --- | 1,21 | up   |
| 6393129 | 7089080 | 1101157 | --- | --- | --- | 1,27 | up   |
| 6393150 | 7190844 | 1352146 | --- | --- | --- | 1,27 | up   |
| 6393254 | 7117813 | 1171701 | --- | --- | --- | 1,60 | up   |
| 6393324 | 7112355 | 1158087 | --- | --- | --- | 2,15 | down |
| 6393344 | 7207093 | 1392118 | --- | --- | --- | 1,02 | down |
| 6393363 | 7075460 | 1069408 | --- | --- | --- | 1,06 | up   |
| 6393422 | 7253272 | 1505553 | --- | --- | --- | 1,06 | up   |
| 6393455 | 7194540 | 1362122 | --- | --- | --- | 1,12 | up   |
| 6393466 | 7247848 | 1492067 | --- | --- | --- | 1,99 | up   |
| 6393525 | 7312575 | 1653359 | --- | --- | --- | 1,03 | up   |
| 6393689 | 7050716 | 1011221 | --- | --- | --- | 1,71 | up   |
| 6393794 | 7277783 | 1567452 | --- | --- | --- | 2,02 | up   |
| 6393961 | 7264745 | 1534267 | --- | --- | --- | 1,01 | down |
| 6394014 | 7376073 | 1811714 | --- | --- | --- | 1,36 | down |
| 6394055 | 7355041 | 1757402 | --- | --- | --- | 1,11 | down |
| 6394075 | 7274593 | 1558813 | --- | --- | --- | 1,15 | up   |
| 6394184 | 7225543 | 1435939 | --- | --- | --- | 1,33 | up   |
| 6394203 | 7369031 | 1793013 | --- | --- | --- | 1,86 | down |
| 6394328 | 7252877 | 1504771 | --- | --- | --- | 1,18 | up   |
| 6394501 | 7243647 | 1482459 | --- | --- | --- | 1,05 | down |
| 6394505 | 7059702 | 1030774 | --- | --- | --- | 1,12 | down |
| 6394507 | 7048014 | 1005636 | --- | --- | --- | 1,02 | up   |
| 6394510 | 7295652 | 1610304 | --- | --- | --- | 1,32 | down |

|         |         |         |     |     |     |      |      |
|---------|---------|---------|-----|-----|-----|------|------|
| 6394567 | 7274585 | 1558777 | --- | --- | --- | 1,05 | up   |
| 6394570 | 7231557 | 1451565 | --- | --- | --- | 1,16 | up   |
| 6394626 | 7231484 | 1451362 | --- | --- | --- | 1,09 | down |
| 6394631 | 7115362 | 1165604 | --- | --- | --- | 1,02 | up   |
| 6394705 | 7068259 | 1051639 | --- | --- | --- | 1,16 | down |
| 6394746 | 7142081 | 1230965 | --- | --- | --- | 1,25 | up   |
| 6394825 | 7068259 | 1051620 | --- | --- | --- | 1,63 | down |
| 6394843 | 7217747 | 1417500 | --- | --- | --- | 1,17 | up   |
| 6394856 | 7248790 | 1494560 | --- | --- | --- | 1,07 | down |
| 6394891 | 7250511 | 1498646 | --- | --- | --- | 1,07 | up   |
| 6395051 | 7280743 | 1574495 | --- | --- | --- | 1,15 | up   |
| 6395166 | 7113083 | 1159980 | --- | --- | --- | 1,14 | up   |
| 6395200 | 7319259 | 1670396 | --- | --- | --- | 1,89 | up   |
| 6395240 | 7088625 | 1099878 | --- | --- | --- | 1,05 | up   |
| 6395412 | 7255120 | 1510371 | --- | --- | --- | 1,26 | up   |
| 6395467 | 7028624 | 958003  | --- | --- | --- | 1,23 | up   |
| 6395668 | 7337425 | 1713171 | --- | --- | --- | 1,00 | down |
| 6395777 | 7279806 | 1572567 | --- | --- | --- | 1,66 | down |
| 6395813 | 7031774 | 964711  | --- | --- | --- | 1,94 | up   |
| 6395848 | 7237132 | 1466106 | --- | --- | --- | 1,32 | down |
| 6395894 | 7230628 | 1448866 | --- | --- | --- | 3,64 | down |
| 6396007 | 7348487 | 1741252 | --- | --- | --- | 1,09 | up   |
| 6396008 | 7093936 | 1112476 | --- | --- | --- | 1,29 | up   |
| 6396081 | 7353224 | 1752668 | --- | --- | --- | 1,03 | down |
| 6396109 | 7232534 | 1454141 | --- | --- | --- | 1,28 | down |
| 6396177 | 7267204 | 1539849 | --- | --- | --- | 1,25 | up   |
| 6396181 | 7231137 | 1450198 | --- | --- | --- | 1,15 | down |
| 6396271 | 7243363 | 1481628 | --- | --- | --- | 1,31 | up   |
| 6396305 | 7087282 | 1096169 | --- | --- | --- | 1,10 | up   |
| 6396403 | 7329135 | 1693489 | --- | --- | --- | 2,91 | down |
| 6396411 | 7056333 | 1023699 | --- | --- | --- | 1,09 | down |
| 6396422 | 7261019 | 1525281 | --- | --- | --- | 1,67 | down |
| 6396456 | 7261580 | 1526811 | --- | --- | --- | 1,07 | down |
| 6396512 | 7059766 | 1030977 | --- | --- | --- | 2,04 | down |
| 6396547 | 7146093 | 1240987 | --- | --- | --- | 1,22 | up   |
| 6396554 | 7288170 | 1592297 | --- | --- | --- | 1,33 | down |
| 6396559 | 7336854 | 1711678 | --- | --- | --- | 1,32 | up   |
| 6396580 | 7093806 | 1112151 | --- | --- | --- | 3,67 | down |
| 6396730 | 7073609 | 1064852 | --- | --- | --- | 1,32 | down |
| 6396739 | 7043515 | 994018  | --- | --- | --- | 1,33 | down |
| 6396743 | 7148741 | 1247842 | --- | --- | --- | 1,11 | down |
| 6396760 | 7282343 | 1578686 | --- | --- | --- | 2,39 | up   |
| 6396856 | 7330396 | 1696336 | --- | --- | --- | 1,10 | up   |
| 6396875 | 7261580 | 1526775 | --- | --- | --- | 1,11 | up   |
| 6396927 | 7067828 | 1050789 | --- | --- | --- | 1,04 | up   |
| 6396964 | 7239752 | 1473195 | --- | --- | --- | 1,04 | down |
| 6397047 | 7255755 | 1511913 | --- | --- | --- | 1,67 | up   |
| 6397062 | 7072765 | 1062743 | --- | --- | --- | 1,61 | down |
| 6397142 | 7344530 | 1731563 | --- | --- | --- | 1,34 | down |
| 6397204 | 7349313 | 1743114 | --- | --- | --- | 1,30 | down |
| 6397366 | 7148741 | 1247828 | --- | --- | --- | 1,00 | down |
| 6397469 | 7302860 | 1629031 | --- | --- | --- | 1,23 | up   |
| 6397489 | 7133484 | 1209937 | --- | --- | --- | 1,21 | up   |
| 6397503 | 7339379 | 1718360 | --- | --- | --- | 1,11 | down |
| 6397511 | 7070668 | 1057972 | --- | --- | --- | 1,12 | up   |
| 6397569 | 7333462 | 1703648 | --- | --- | --- | 1,35 | up   |
| 6397575 | 7068942 | 1053385 | --- | --- | --- | 1,31 | down |

|         |         |         |     |     |     |      |      |
|---------|---------|---------|-----|-----|-----|------|------|
| 6397723 | 7190534 | 1351213 | --- | --- | --- | 1,22 | up   |
| 6397724 | 7244290 | 1484166 | --- | --- | --- | 1,20 | up   |
| 6397728 | 7180732 | 1326729 | --- | --- | --- | 1,34 | up   |
| 6397790 | 7280743 | 1574483 | --- | --- | --- | 1,59 | down |
| 6397801 | 7384509 | 1830749 | --- | --- | --- | 1,03 | up   |
| 6397819 | 7070836 | 1058334 | --- | --- | --- | 1,22 | up   |
| 6397828 | 7128539 | 1197703 | --- | --- | --- | 1,53 | up   |
| 6397934 | 7089080 | 1101170 | --- | --- | --- | 1,39 | down |
| 6398050 | 7217434 | 1416426 | --- | --- | --- | 1,38 | down |
| 6398064 | 7352044 | 1750004 | --- | --- | --- | 1,08 | up   |
| 6398219 | 7071292 | 1059450 | --- | --- | --- | 1,57 | up   |
| 6398268 | 7364346 | 1779989 | --- | --- | --- | 2,92 | up   |
| 6398363 | 7317274 | 1665630 | --- | --- | --- | 1,37 | up   |
| 6398417 | 7093752 | 1112001 | --- | --- | --- | 1,16 | down |
| 6398433 | 7185483 | 1338926 | --- | --- | --- | 1,18 | up   |
| 6398458 | 7069253 | 1054163 | --- | --- | --- | 1,13 | up   |
| 6398705 | 7231533 | 1451502 | --- | --- | --- | 1,41 | up   |
| 6398744 | 7171549 | 1303545 | --- | --- | --- | 1,67 | down |
| 6398762 | 7196029 | 1365632 | --- | --- | --- | 1,48 | down |
| 6398884 | 7064468 | 1042376 | --- | --- | --- | 1,11 | up   |
| 6398910 | 7148741 | 1247823 | --- | --- | --- | 1,12 | up   |
| 6398996 | 7115963 | 1167057 | --- | --- | --- | 1,20 | up   |
| 6399002 | 7212587 | 1404635 | --- | --- | --- | 1,21 | up   |
| 6399133 | 7039725 | 984823  | --- | --- | --- | 1,97 | up   |
| 6399224 | 7258455 | 1518718 | --- | --- | --- | 1,04 | down |
| 6399362 | 7041609 | 989547  | --- | --- | --- | 1,34 | down |
| 6399393 | 7063716 | 1040163 | --- | --- | --- | 1,12 | down |
| 6399399 | 7140365 | 1226777 | --- | --- | --- | 1,19 | up   |
| 6399515 | 7058149 | 1027253 | --- | --- | --- | 1,08 | down |
| 6399583 | 7339387 | 1718380 | --- | --- | --- | 1,29 | up   |
| 6399641 | 7181105 | 1327967 | --- | --- | --- | 1,25 | up   |
| 6399651 | 7284901 | 1584815 | --- | --- | --- | 1,03 | up   |
| 6399707 | 7245874 | 1487596 | --- | --- | --- | 2,28 | down |
| 6399835 | 7211389 | 1402112 | --- | --- | --- | 1,20 | down |
| 6399869 | 7360486 | 1770976 | --- | --- | --- | 1,42 | down |
| 6399916 | 7259221 | 1520617 | --- | --- | --- | 1,10 | down |
| 6400014 | 7243647 | 1482460 | --- | --- | --- | 1,03 | up   |
| 6400019 | 7377304 | 1814588 | --- | --- | --- | 1,04 | down |
| 6400024 | 7350237 | 1745497 | --- | --- | --- | 1,04 | down |
| 6400129 | 7169550 | 1298365 | --- | --- | --- | 1,15 | down |
| 6400143 | 7067670 | 1050322 | --- | --- | --- | 1,01 | up   |
| 6400148 | 7121849 | 1181784 | --- | --- | --- | 1,35 | up   |
| 6400208 | 7321414 | 1675633 | --- | --- | --- | 1,49 | down |
| 6400254 | 7207093 | 1392125 | --- | --- | --- | 1,12 | down |
| 6400291 | 7167872 | 1294037 | --- | --- | --- | 1,24 | down |
| 6400419 | 7196966 | 1367633 | --- | --- | --- | 1,01 | down |
| 6400590 | 7197056 | 1367845 | --- | --- | --- | 1,14 | up   |
| 6400611 | 7127540 | 1195288 | --- | --- | --- | 1,04 | up   |
| 6400735 | 7070668 | 1057927 | --- | --- | --- | 1,13 | up   |
| 6400749 | 7255517 | 1511368 | --- | --- | --- | 1,47 | up   |
| 6400887 | 7050716 | 1011221 | --- | --- | --- | 1,43 | down |
| 6400905 | 7313841 | 1656728 | --- | --- | --- | 1,10 | down |
| 6400987 | 7218728 | 1419921 | --- | --- | --- | 1,13 | up   |
| 6401006 | 7064732 | 1042929 | --- | --- | --- | 1,16 | down |
| 6401034 | 7368004 | 1789332 | --- | --- | --- | 1,00 | down |
| 6401046 | 7078605 | 1076359 | --- | --- | --- | 1,01 | down |
| 6401062 | 7248790 | 1494535 | --- | --- | --- | 1,48 | up   |

|         |         |         |     |     |     |      |      |
|---------|---------|---------|-----|-----|-----|------|------|
| 6401090 | 7213945 | 1407828 | --- | --- | --- | 1,40 | up   |
| 6401240 | 7191594 | 1354228 | --- | --- | --- | 1,45 | up   |
| 6401338 | 7282927 | 1580019 | --- | --- | --- | 1,36 | up   |
| 6401394 | 7290775 | 1598602 | --- | --- | --- | 1,51 | up   |
| 6401515 | 7128112 | 1196580 | --- | --- | --- | 1,08 | up   |
| 6401543 | 7373633 | 1805699 | --- | --- | --- | 1,11 | down |
| 6401567 | 7053874 | 1018325 | --- | --- | --- | 1,22 | up   |
| 6401570 | 7280743 | 1574490 | --- | --- | --- | 1,04 | up   |
| 6401629 | 7176368 | 1315567 | --- | --- | --- | 1,15 | up   |
| 6401716 | 7067828 | 1050797 | --- | --- | --- | 1,08 | down |
| 6401724 | 7232709 | 1454528 | --- | --- | --- | 1,36 | up   |
| 6401776 | 7072608 | 1062297 | --- | --- | --- | 1,82 | up   |
| 6401785 | 7278898 | 1570296 | --- | --- | --- | 1,35 | down |
| 6401800 | 7053874 | 1018332 | --- | --- | --- | 1,16 | down |
| 6401802 | 7196803 | 1367332 | --- | --- | --- | 2,00 | up   |
| 6401822 | 7109292 | 1150746 | --- | --- | --- | 1,23 | down |
| 6401958 | 7043515 | 994007  | --- | --- | --- | 1,01 | down |
| 6401992 | 7119845 | 1176888 | --- | --- | --- | 1,03 | down |
| 6402120 | 7267204 | 1539856 | --- | --- | --- | 1,03 | up   |
| 6402238 | 7128112 | 1196534 | --- | --- | --- | 1,18 | down |
| 6402241 | 7067670 | 1050310 | --- | --- | --- | 1,77 | up   |
| 6402317 | 7331413 | 1699129 | --- | --- | --- | 1,18 | up   |
| 6402378 | 7132024 | 1206337 | --- | --- | --- | 1,04 | up   |
| 6402382 | 7221420 | 1426262 | --- | --- | --- | 1,53 | up   |
| 6402448 | 7321414 | 1675628 | --- | --- | --- | 1,15 | up   |
| 6402504 | 7062233 | 1037194 | --- | --- | --- | 1,36 | down |
| 6402568 | 7039303 | 983868  | --- | --- | --- | 1,06 | up   |
| 6402788 | 7333333 | 1703396 | --- | --- | --- | 1,43 | up   |
| 6402792 | 7222236 | 1428114 | --- | --- | --- | 1,04 | down |
| 6402852 | 7058507 | 1028323 | --- | --- | --- | 1,09 | down |
| 6402864 | 7140365 | 1226787 | --- | --- | --- | 1,32 | down |
| 6402889 | 7079238 | 1077809 | --- | --- | --- | 1,04 | down |
| 6402948 | 7196233 | 1366104 | --- | --- | --- | 1,52 | up   |
| 6402950 | 7345465 | 1733865 | --- | --- | --- | 1,11 | up   |
| 6403023 | 7376073 | 1811694 | --- | --- | --- | 1,66 | up   |
| 6403031 | 7179176 | 1322917 | --- | --- | --- | 1,13 | up   |
| 6403085 | 7374493 | 1807957 | --- | --- | --- | 1,53 | up   |
| 6403203 | 7244936 | 1485354 | --- | --- | --- | 2,06 | down |
| 6403245 | 7197056 | 1367843 | --- | --- | --- | 1,06 | down |
| 6403306 | 7318596 | 1668936 | --- | --- | --- | 1,08 | down |
| 6403324 | 7050878 | 1011546 | --- | --- | --- | 1,23 | down |
| 6403391 | 7041140 | 988293  | --- | --- | --- | 1,01 | down |
| 6403572 | 7353232 | 1752777 | --- | --- | --- | 1,33 | up   |
| 6403614 | 7371228 | 1799453 | --- | --- | --- | 1,39 | down |
| 6403621 | 7373678 | 1805854 | --- | --- | --- | 1,25 | up   |
| 6403638 | 7341243 | 1723226 | --- | --- | --- | 1,40 | down |
| 6403648 | 7240641 | 1475741 | --- | --- | --- | 1,07 | up   |
| 6403652 | 7137646 | 1220430 | --- | --- | --- | 1,65 | down |
| 6403664 | 7382499 | 1826256 | --- | --- | --- | 1,08 | down |
| 6403730 | 7326271 | 1686470 | --- | --- | --- | 1,23 | up   |
| 6403815 | 7193056 | 1358250 | --- | --- | --- | 1,17 | up   |
| 6403870 | 7248790 | 1494547 | --- | --- | --- | 1,14 | down |
| 6403920 | 7131718 | 1205746 | --- | --- | --- | 1,25 | down |
| 6403930 | 7253408 | 1505953 | --- | --- | --- | 1,10 | up   |
| 6404004 | 7069830 | 1055589 | --- | --- | --- | 1,23 | up   |
| 6404013 | 7134773 | 1212969 | --- | --- | --- | 1,02 | down |
| 6404021 | 7115963 | 1167063 | --- | --- | --- | 2,86 | down |

|         |         |         |     |     |     |      |      |
|---------|---------|---------|-----|-----|-----|------|------|
| 6404022 | 7196029 | 1365621 | --- | --- | --- | 1,35 | up   |
| 6404088 | 7309646 | 1646489 | --- | --- | --- | 1,14 | up   |
| 6404095 | 7056736 | 1024419 | --- | --- | --- | 1,12 | down |
| 6404163 | 7218728 | 1419925 | --- | --- | --- | 1,30 | down |
| 6404174 | 7280743 | 1574542 | --- | --- | --- | 1,54 | down |
| 6404221 | 7344380 | 1731118 | --- | --- | --- | 1,69 | up   |
| 6404242 | 7337902 | 1714543 | --- | --- | --- | 1,91 | up   |
| 6404264 | 7313905 | 1656853 | --- | --- | --- | 2,16 | down |
| 6404324 | 7038153 | 981148  | --- | --- | --- | 1,19 | down |
| 6404332 | 7333333 | 1703395 | --- | --- | --- | 1,60 | down |
| 6404364 | 7144088 | 1236189 | --- | --- | --- | 1,15 | up   |
| 6404375 | 7313841 | 1656733 | --- | --- | --- | 1,10 | down |
| 6404554 | 7217650 | 1417210 | --- | --- | --- | 1,11 | down |
| 6404573 | 7376566 | 1812851 | --- | --- | --- | 1,22 | down |
| 6404632 | 7069721 | 1055301 | --- | --- | --- | 1,26 | up   |
| 6404752 | 7340304 | 1720867 | --- | --- | --- | 1,80 | down |
| 6404774 | 7286807 | 1588782 | --- | --- | --- | 1,24 | down |
| 6404775 | 7333462 | 1703645 | --- | --- | --- | 1,15 | up   |
| 6404788 | 7102510 | 1133857 | --- | --- | --- | 1,25 | up   |
| 6404799 | 7052385 | 1014789 | --- | --- | --- | 1,11 | down |
| 6404855 | 7058507 | 1028311 | --- | --- | --- | 1,01 | down |
| 6404920 | 7237672 | 1467298 | --- | --- | --- | 1,11 | down |
| 6404937 | 7243363 | 1481594 | --- | --- | --- | 1,68 | up   |
| 6404944 | 7280743 | 1574544 | --- | --- | --- | 1,03 | down |
| 6404947 | 7106752 | 1144009 | --- | --- | --- | 1,11 | down |
| 6404974 | 7217434 | 1416366 | --- | --- | --- | 1,24 | up   |
| 6405009 | 7213908 | 1407661 | --- | --- | --- | 1,11 | up   |
| 6405028 | 7363674 | 1778408 | --- | --- | --- | 1,03 | up   |
| 6405037 | 7063716 | 1040153 | --- | --- | --- | 1,02 | up   |
| 6405073 | 7076160 | 1070912 | --- | --- | --- | 1,47 | up   |
| 6405127 | 7227433 | 1440978 | --- | --- | --- | 1,39 | up   |
| 6405182 | 7122585 | 1183696 | --- | --- | --- | 1,06 | up   |
| 6405225 | 7282927 | 1580024 | --- | --- | --- | 1,31 | down |
| 6405278 | 7198087 | 1370688 | --- | --- | --- | 1,34 | down |
| 6405288 | 7183927 | 1335503 | --- | --- | --- | 1,40 | up   |
| 6405432 | 7056333 | 1023678 | --- | --- | --- | 1,17 | up   |
| 6405537 | 7211363 | 1402038 | --- | --- | --- | 1,36 | down |
| 6405570 | 7039223 | 983558  | --- | --- | --- | 1,11 | up   |
| 6405630 | 7189669 | 1348967 | --- | --- | --- | 1,65 | down |
| 6405754 | 7380497 | 1821833 | --- | --- | --- | 1,15 | down |
| 6405840 | 7381330 | 1823639 | --- | --- | --- | 1,86 | up   |
| 6405847 | 7365183 | 1781903 | --- | --- | --- | 1,22 | up   |
| 6405854 | 7205750 | 1388930 | --- | --- | --- | 1,61 | down |
| 6405897 | 7092549 | 1109149 | --- | --- | --- | 1,13 | up   |
| 6405901 | 7213945 | 1407853 | --- | --- | --- | 1,12 | down |
| 6405918 | 7180732 | 1326741 | --- | --- | --- | 1,05 | up   |
| 6406025 | 7308679 | 1644240 | --- | --- | --- | 1,02 | up   |
| 6406092 | 7240569 | 1475445 | --- | --- | --- | 1,07 | up   |
| 6406202 | 7331757 | 1700023 | --- | --- | --- | 1,31 | down |
| 6406285 | 7120565 | 1178732 | --- | --- | --- | 1,27 | down |
| 6406310 | 7240569 | 1475470 | --- | --- | --- | 1,10 | up   |
| 6406339 | 7282927 | 1580018 | --- | --- | --- | 1,19 | up   |
| 6406357 | 7155286 | 1263908 | --- | --- | --- | 1,56 | down |
| 6406362 | 7096924 | 1119610 | --- | --- | --- | 1,22 | down |
| 6406576 | 7383586 | 1828442 | --- | --- | --- | 1,20 | up   |
| 6406588 | 7343279 | 1728117 | --- | --- | --- | 1,21 | up   |
| 6406732 | 7302327 | 1627683 | --- | --- | --- | 1,06 | down |

|         |         |         |     |     |     |      |      |
|---------|---------|---------|-----|-----|-----|------|------|
| 6406735 | 7045955 | 1000745 | --- | --- | --- | 2,97 | down |
| 6406746 | 7374324 | 1807508 | --- | --- | --- | 1,07 | down |
| 6406777 | 7078605 | 1076359 | --- | --- | --- | 1,02 | up   |
| 6406788 | 7235840 | 1463000 | --- | --- | --- | 1,51 | up   |
| 6406820 | 7052813 | 1015937 | --- | --- | --- | 1,03 | down |
| 6406825 | 7273251 | 1555946 | --- | --- | --- | 1,10 | down |
| 6406835 | 7287337 | 1589969 | --- | --- | --- | 1,03 | down |
| 6406910 | 7093936 | 1112461 | --- | --- | --- | 1,08 | up   |
| 6406922 | 7378878 | 1818322 | --- | --- | --- | 1,26 | down |
| 6407028 | 7146982 | 1243283 | --- | --- | --- | 1,06 | up   |
| 6407030 | 7317318 | 1665826 | --- | --- | --- | 1,54 | up   |
| 6407040 | 7078815 | 1076998 | --- | --- | --- | 1,33 | down |
| 6407375 | 7058713 | 1028664 | --- | --- | --- | 1,16 | down |
| 6407382 | 7376820 | 1813419 | --- | --- | --- | 1,25 | down |
| 6407459 | 7376206 | 1811980 | --- | --- | --- | 1,22 | down |
| 6407463 | 7101206 | 1130456 | --- | --- | --- | 1,33 | down |
| 6407476 | 7292178 | 1601750 | --- | --- | --- | 1,46 | down |
| 6407501 | 7148741 | 1247868 | --- | --- | --- | 1,15 | down |
| 6407526 | 7057277 | 1025526 | --- | --- | --- | 1,54 | down |
| 6407633 | 7272431 | 1553891 | --- | --- | --- | 1,08 | up   |
| 6407668 | 7363674 | 1778443 | --- | --- | --- | 1,30 | down |
| 6407737 | 7320068 | 1672626 | --- | --- | --- | 2,22 | up   |
| 6407748 | 7217679 | 1417302 | --- | --- | --- | 1,44 | down |
| 6407780 | 7213908 | 1407686 | --- | --- | --- | 1,18 | down |
| 6407867 | 7378997 | 1818656 | --- | --- | --- | 1,13 | down |
| 6407892 | 7111361 | 1155580 | --- | --- | --- | 1,68 | down |
| 6407938 | 7068259 | 1051627 | --- | --- | --- | 1,15 | down |
| 6407978 | 7305275 | 1635834 | --- | --- | --- | 1,09 | down |
| 6407987 | 7189184 | 1347568 | --- | --- | --- | 2,09 | down |
| 6408102 | 7277783 | 1567455 | --- | --- | --- | 1,69 | down |
| 6408114 | 7237814 | 1467818 | --- | --- | --- | 1,15 | down |
| 6408218 | 7095081 | 1115331 | --- | --- | --- | 2,09 | up   |
| 6408304 | 7294911 | 1608533 | --- | --- | --- | 1,13 | up   |
| 6408384 | 7068987 | 1053583 | --- | --- | --- | 1,13 | down |
| 6408487 | 7069721 | 1055316 | --- | --- | --- | 1,08 | down |
| 6408500 | 7128704 | 1198025 | --- | --- | --- | 1,17 | up   |
| 6408514 | 7200313 | 1376457 | --- | --- | --- | 1,09 | down |
| 6408530 | 7064732 | 1042918 | --- | --- | --- | 1,01 | down |
| 6408552 | 7301843 | 1626487 | --- | --- | --- | 1,02 | down |
| 6408626 | 7269385 | 1545750 | --- | --- | --- | 1,25 | down |
| 6408658 | 7376073 | 1811702 | --- | --- | --- | 1,10 | down |
| 6408757 | 7210822 | 1400972 | --- | --- | --- | 1,30 | down |
| 6408946 | 7168979 | 1297192 | --- | --- | --- | 1,10 | up   |
| 6408975 | 7298692 | 1618406 | --- | --- | --- | 1,30 | up   |
| 6409012 | 7057462 | 1025862 | --- | --- | --- | 1,16 | up   |
| 6409107 | 7240569 | 1475451 | --- | --- | --- | 1,37 | up   |
| 6409111 | 7274892 | 1559553 | --- | --- | --- | 1,06 | up   |
| 6409249 | 7350489 | 1746112 | --- | --- | --- | 1,16 | down |
| 6409250 | 7337425 | 1713155 | --- | --- | --- | 1,09 | up   |
| 6409304 | 7033673 | 970376  | --- | --- | --- | 1,06 | up   |
| 6409336 | 7363674 | 1778405 | --- | --- | --- | 1,14 | down |
| 6409341 | 7288170 | 1592320 | --- | --- | --- | 1,03 | down |
| 6409523 | 7243647 | 1482430 | --- | --- | --- | 1,05 | down |
| 6409542 | 7325643 | 1685177 | --- | --- | --- | 1,16 | down |
| 6409559 | 7372840 | 1803770 | --- | --- | --- | 2,03 | down |
| 6409696 | 7307473 | 1641269 | --- | --- | --- | 1,34 | down |
| 6409779 | 7376073 | 1811711 | --- | --- | --- | 1,11 | up   |

|         |         |         |     |     |     |      |      |
|---------|---------|---------|-----|-----|-----|------|------|
| 6409910 | 7278794 | 1570070 | --- | --- | --- | 1,31 | down |
| 6409930 | 7265259 | 1535441 | --- | --- | --- | 1,55 | down |
| 6410039 | 7277783 | 1567419 | --- | --- | --- | 1,40 | down |
| 6410142 | 7050716 | 1011231 | --- | --- | --- | 1,01 | down |
| 6410214 | 7319486 | 1670931 | --- | --- | --- | 1,12 | up   |
| 6410236 | 7219624 | 1422137 | --- | --- | --- | 2,08 | up   |
| 6410288 | 7078666 | 1076507 | --- | --- | --- | 3,30 | down |
| 6410386 | 7088544 | 1099683 | --- | --- | --- | 1,17 | up   |
| 6410449 | 7205944 | 1389477 | --- | --- | --- | 1,25 | down |
| 6410544 | 7350922 | 1747316 | --- | --- | --- | 1,21 | up   |
| 6410801 | 7353224 | 1752676 | --- | --- | --- | 1,11 | down |
| 6410841 | 7122140 | 1182719 | --- | --- | --- | 1,08 | up   |
| 6410877 | 7295652 | 1610267 | --- | --- | --- | 1,31 | down |
| 6410892 | 7044906 | 998134  | --- | --- | --- | 1,10 | down |
| 6410955 | 7184850 | 1337612 | --- | --- | --- | 1,09 | up   |
| 6410982 | 7184931 | 1337712 | --- | --- | --- | 1,21 | down |
| 6411027 | 7282831 | 1579742 | --- | --- | --- | 1,10 | up   |
| 6411039 | 7363529 | 1777962 | --- | --- | --- | 1,13 | up   |
| 6411098 | 7153136 | 1258043 | --- | --- | --- | 1,47 | down |
| 6411155 | 7180166 | 1325243 | --- | --- | --- | 1,19 | up   |
| 6411536 | 7041140 | 988276  | --- | --- | --- | 1,66 | up   |
| 6411632 | 7353224 | 1752674 | --- | --- | --- | 1,03 | down |
| 6411750 | 7100523 | 1128841 | --- | --- | --- | 1,10 | up   |
| 6411846 | 7253408 | 1505934 | --- | --- | --- | 1,75 | down |
| 6411920 | 7352046 | 1750029 | --- | --- | --- | 1,52 | up   |
| 6411981 | 7088544 | 1099702 | --- | --- | --- | 1,20 | up   |
| 6411987 | 7142321 | 1231528 | --- | --- | --- | 1,05 | down |
| 6412007 | 7130917 | 1203932 | --- | --- | --- | 1,50 | down |
| 6412057 | 7131550 | 1205558 | --- | --- | --- | 1,02 | up   |
| 6412153 | 7358048 | 1764795 | --- | --- | --- | 1,06 | down |
| 6412181 | 7193056 | 1358276 | --- | --- | --- | 1,15 | down |
| 6412225 | 7289075 | 1594455 | --- | --- | --- | 1,24 | down |
| 6412262 | 7248790 | 1494541 | --- | --- | --- | 1,09 | down |
| 6412291 | 7068259 | 1051607 | --- | --- | --- | 1,12 | up   |
| 6412319 | 7288077 | 1592000 | --- | --- | --- | 1,07 | up   |
| 6412368 | 7066035 | 1046223 | --- | --- | --- | 1,08 | down |
| 6412436 | 7355041 | 1757406 | --- | --- | --- | 1,05 | down |
| 6412443 | 7374790 | 1808768 | --- | --- | --- | 1,09 | up   |
| 6412569 | 7068259 | 1051629 | --- | --- | --- | 1,10 | up   |
| 6412582 | 7073677 | 1065155 | --- | --- | --- | 1,34 | down |
| 6412596 | 7256191 | 1512862 | --- | --- | --- | 2,02 | down |
| 6412605 | 7212587 | 1404646 | --- | --- | --- | 1,01 | up   |
| 6412727 | 7156052 | 1265784 | --- | --- | --- | 1,35 | up   |
| 6412742 | 7374313 | 1807381 | --- | --- | --- | 1,24 | down |
| 6412753 | 7340757 | 1721904 | --- | --- | --- | 1,05 | up   |
| 6412786 | 7318286 | 1668335 | --- | --- | --- | 1,15 | up   |
| 6412971 | 7184981 | 1337837 | --- | --- | --- | 1,19 | up   |
| 6412972 | 7034356 | 972167  | --- | --- | --- | 1,44 | up   |
| 6413006 | 7252877 | 1504694 | --- | --- | --- | 1,14 | down |
| 6413121 | 7247334 | 1490818 | --- | --- | --- | 1,26 | down |
| 6413132 | 7238199 | 1468926 | --- | --- | --- | 1,03 | down |
| 6413134 | 7121849 | 1181808 | --- | --- | --- | 1,32 | down |
| 6413138 | 7269637 | 1546235 | --- | --- | --- | 2,69 | down |
| 6413170 | 7237672 | 1467306 | --- | --- | --- | 2,24 | up   |
| 6413200 | 7370415 | 1796853 | --- | --- | --- | 1,61 | up   |
| 6413208 | 7227433 | 1440962 | --- | --- | --- | 1,02 | down |
| 6413280 | 7248790 | 1494540 | --- | --- | --- | 1,14 | up   |



|         |         |         |     |     |     |      |      |
|---------|---------|---------|-----|-----|-----|------|------|
| 6413326 | 7320735 | 1674168 | --- | --- | --- | 1,05 | down |
| 6413613 | 7358048 | 1764825 | --- | --- | --- | 1,99 | up   |
| 6413638 | 7165644 | 1288011 | --- | --- | --- | 1,63 | up   |
| 6413668 | 7148978 | 1248544 | --- | --- | --- | 1,02 | up   |
| 6413845 | 7231655 | 1451920 | --- | --- | --- | 1,11 | down |
| 6413931 | 7141456 | 1229594 | --- | --- | --- | 1,47 | up   |
| 6413941 | 7373678 | 1805861 | --- | --- | --- | 1,62 | up   |
| 6413944 | 7243901 | 1483065 | --- | --- | --- | 1,00 | up   |
| 6414014 | 7377583 | 1815451 | --- | --- | --- | 1,26 | down |
| 6414105 | 7128112 | 1196552 | --- | --- | --- | 1,57 | up   |
| 6414162 | 7217434 | 1416378 | --- | --- | --- | 1,16 | down |
| 6414263 | 7286807 | 1588784 | --- | --- | --- | 1,36 | down |
| 6414320 | 7292178 | 1601742 | --- | --- | --- | 1,33 | up   |
| 6414428 | 7030127 | 960865  | --- | --- | --- | 2,14 | up   |
| 6414526 | 7330223 | 1695837 | --- | --- | --- | 1,53 | up   |
| 6414607 | 7330238 | 1695949 | --- | --- | --- | 2,25 | up   |
| 6414625 | 7361881 | 1773931 | --- | --- | --- | 1,58 | down |
| 6414642 | 7280743 | 1574560 | --- | --- | --- | 1,01 | up   |
| 6414667 | 7378997 | 1818645 | --- | --- | --- | 1,11 | up   |
| 6414730 | 7367994 | 1789245 | --- | --- | --- | 1,43 | down |
| 6414735 | 7174281 | 1310876 | --- | --- | --- | 1,96 | down |
| 6414769 | 7305275 | 1635822 | --- | --- | --- | 1,26 | up   |
| 6414790 | 7355044 | 1757450 | --- | --- | --- | 1,78 | up   |
| 6414864 | 7069830 | 1055620 | --- | --- | --- | 1,06 | up   |
| 6414927 | 7330396 | 1696361 | --- | --- | --- | 1,26 | up   |
| 6414937 | 7147809 | 1245455 | --- | --- | --- | 1,13 | up   |
| 6414994 | 7186443 | 1341310 | --- | --- | --- | 1,05 | down |
| 6415020 | 7349313 | 1743101 | --- | --- | --- | 1,07 | up   |
| 6415030 | 7111442 | 1155806 | --- | --- | --- | 1,13 | up   |
| 6415044 | 7090581 | 1104783 | --- | --- | --- | 2,76 | up   |
| 6415050 | 7098411 | 1123691 | --- | --- | --- | 1,04 | down |
| 6415129 | 7196029 | 1365606 | --- | --- | --- | 1,23 | down |
| 6415166 | 7380497 | 1821863 | --- | --- | --- | 1,07 | down |
| 6415267 | 7087282 | 1096160 | --- | --- | --- | 1,07 | down |
| 6415307 | 7225543 | 1435913 | --- | --- | --- | 1,43 | up   |
| 6415357 | 7374324 | 1807471 | --- | --- | --- | 1,13 | up   |
| 6415527 | 7377791 | 1816000 | --- | --- | --- | 1,05 | down |
| 6415598 | 7095066 | 1115287 | --- | --- | --- | 1,55 | down |
| 6415623 | 7210263 | 1399763 | --- | --- | --- | 1,01 | down |
| 6415648 | 7344702 | 1732140 | --- | --- | --- | 1,00 | down |
| 6415667 | 7041584 | 989454  | --- | --- | --- | 1,41 | down |
| 6415713 | 7039463 | 984245  | --- | --- | --- | 1,18 | down |
| 6415755 | 7288077 | 1591982 | --- | --- | --- | 1,04 | up   |
| 6415788 | 7068413 | 1051966 | --- | --- | --- | 1,26 | down |
| 6415901 | 7339379 | 1718348 | --- | --- | --- | 1,05 | down |
| 6415960 | 7066035 | 1046199 | --- | --- | --- | 1,07 | up   |
| 6416015 | 7068259 | 1051660 | --- | --- | --- | 1,09 | down |
| 6416044 | 7302327 | 1627677 | --- | --- | --- | 1,02 | down |
| 6416278 | 7371753 | 1800975 | --- | --- | --- | 1,34 | up   |
| 6416317 | 7112355 | 1158065 | --- | --- | --- | 1,03 | up   |
| 6416389 | 7374740 | 1808618 | --- | --- | --- | 1,51 | up   |
| 6416437 | 7059584 | 1030546 | --- | --- | --- | 1,33 | down |
| 6416571 | 7095960 | 1117070 | --- | --- | --- | 1,58 | up   |
| 6416612 | 7321414 | 1675639 | --- | --- | --- | 2,44 | down |
| 6416623 | 7268357 | 1543390 | --- | --- | --- | 1,12 | up   |
| 6416672 | 7334855 | 1706958 | --- | --- | --- | 1,22 | up   |
| 6416675 | 7122140 | 1182712 | --- | --- | --- | 1,36 | up   |

|         |         |         |     |     |     |      |      |
|---------|---------|---------|-----|-----|-----|------|------|
| 6416691 | 7122140 | 1182737 | --- | --- | --- | 1,10 | up   |
| 6416796 | 7127540 | 1195274 | --- | --- | --- | 1,11 | down |
| 6416802 | 7168309 | 1295347 | --- | --- | --- | 1,39 | down |
| 6416890 | 7198210 | 1370994 | --- | --- | --- | 1,33 | up   |
| 6416905 | 7374324 | 1807518 | --- | --- | --- | 1,21 | up   |
| 6417058 | 7274892 | 1559577 | --- | --- | --- | 1,00 | up   |
| 6417159 | 7336931 | 1711874 | --- | --- | --- | 1,39 | down |
| 6417201 | 7297589 | 1615624 | --- | --- | --- | 1,07 | down |
| 6417220 | 7097240 | 1120370 | --- | --- | --- | 1,30 | up   |
| 6417400 | 7156372 | 1266705 | --- | --- | --- | 2,17 | up   |
| 6417414 | 7330396 | 1696356 | --- | --- | --- | 1,30 | up   |
| 6417473 | 7339379 | 1718353 | --- | --- | --- | 1,05 | down |
| 6417505 | 7288077 | 1591947 | --- | --- | --- | 1,22 | up   |
| 6417567 | 7086672 | 1094396 | --- | --- | --- | 1,74 | down |
| 6417673 | 7053874 | 1018326 | --- | --- | --- | 1,11 | down |
| 6417684 | 7365183 | 1781907 | --- | --- | --- | 1,14 | up   |
| 6417698 | 7128539 | 1197687 | --- | --- | --- | 1,12 | down |
| 6417743 | 7148741 | 1247867 | --- | --- | --- | 1,13 | up   |
| 6417776 | 7322020 | 1676648 | --- | --- | --- | 1,11 | up   |
| 6417835 | 7170764 | 1301467 | --- | --- | --- | 1,00 | up   |
| 6417987 | 7243901 | 1483046 | --- | --- | --- | 1,03 | up   |
| 6417990 | 7324760 | 1683032 | --- | --- | --- | 1,06 | down |
| 6418082 | 7076236 | 1071210 | --- | --- | --- | 1,16 | up   |
| 6418128 | 7029078 | 958880  | --- | --- | --- | 1,60 | up   |
| 6418139 | 7143412 | 1234611 | --- | --- | --- | 1,15 | down |
| 6418173 | 7281924 | 1577719 | --- | --- | --- | 1,01 | up   |
| 6418210 | 7375937 | 1811362 | --- | --- | --- | 2,75 | down |
| 6418265 | 7120827 | 1179326 | --- | --- | --- | 1,09 | up   |
| 6418354 | 7336931 | 1711872 | --- | --- | --- | 1,12 | up   |
| 6418420 | 7128112 | 1196568 | --- | --- | --- | 1,79 | down |
| 6418434 | 7311391 | 1650857 | --- | --- | --- | 1,14 | up   |
| 6418445 | 7240569 | 1475484 | --- | --- | --- | 1,21 | down |
| 6418512 | 7066035 | 1046220 | --- | --- | --- | 1,10 | up   |
| 6418557 | 7297589 | 1615666 | --- | --- | --- | 1,27 | up   |
| 6418634 | 7253272 | 1505515 | --- | --- | --- | 1,02 | up   |
| 6418657 | 7231484 | 1451357 | --- | --- | --- | 1,07 | up   |
| 6418684 | 7360486 | 1770961 | --- | --- | --- | 1,26 | up   |
| 6418695 | 7344406 | 1731218 | --- | --- | --- | 1,08 | down |
| 6418810 | 7240641 | 1475742 | --- | --- | --- | 1,18 | down |
| 6418887 | 7217434 | 1416389 | --- | --- | --- | 1,35 | up   |
| 6418964 | 7130917 | 1203933 | --- | --- | --- | 1,06 | down |
| 6419033 | 7154655 | 1262315 | --- | --- | --- | 1,62 | down |
| 6419380 | 7027797 | 956300  | --- | --- | --- | 1,18 | up   |
| 6419525 | 7375937 | 1811365 | --- | --- | --- | 1,20 | up   |
| 6419569 | 7355044 | 1757428 | --- | --- | --- | 1,02 | up   |
| 6419580 | 7069253 | 1054150 | --- | --- | --- | 1,19 | up   |
| 6419609 | 7062233 | 1037202 | --- | --- | --- | 1,53 | down |
| 6419624 | 7039223 | 983554  | --- | --- | --- | 1,32 | up   |
| 6419704 | 7067518 | 1049857 | --- | --- | --- | 1,38 | up   |
| 6419708 | 7041061 | 988083  | --- | --- | --- | 1,04 | up   |
| 6419762 | 7318143 | 1668094 | --- | --- | --- | 1,69 | down |
| 6419808 | 7368815 | 1792310 | --- | --- | --- | 1,58 | down |
| 6419926 | 7221443 | 1426318 | --- | --- | --- | 1,22 | down |
| 6419990 | 7072225 | 1061401 | --- | --- | --- | 1,06 | down |
| 6420059 | 7364346 | 1780011 | --- | --- | --- | 1,01 | up   |
| 6420114 | 7117951 | 1172083 | --- | --- | --- | 1,60 | down |
| 6420188 | 7071714 | 1060351 | --- | --- | --- | 1,46 | down |

|         |         |         |     |     |     |      |      |
|---------|---------|---------|-----|-----|-----|------|------|
| 6420189 | 7368815 | 1792322 | --- | --- | --- | 1,07 | up   |
| 6420198 | 7103420 | 1136168 | --- | --- | --- | 2,71 | up   |
| 6420288 | 7105814 | 1141776 | --- | --- | --- | 1,21 | down |
| 6420307 | 7252877 | 1504682 | --- | --- | --- | 2,32 | up   |
| 6420370 | 7058713 | 1028661 | --- | --- | --- | 1,19 | up   |
| 6420375 | 7244287 | 1484086 | --- | --- | --- | 1,09 | up   |
| 6420470 | 7336931 | 1711868 | --- | --- | --- | 1,13 | up   |
| 6420538 | 7065860 | 1045796 | --- | --- | --- | 1,13 | up   |
| 6420575 | 7076099 | 1070650 | --- | --- | --- | 1,43 | down |
| 6420591 | 7063716 | 1040173 | --- | --- | --- | 1,11 | up   |
| 6420652 | 7120468 | 1178504 | --- | --- | --- | 1,38 | down |
| 6420700 | 7078143 | 1075446 | --- | --- | --- | 1,08 | up   |
| 6420778 | 7168979 | 1297200 | --- | --- | --- | 1,12 | up   |
| 6420808 | 7101258 | 1130558 | --- | --- | --- | 1,26 | down |
| 6420924 | 7217747 | 1417462 | --- | --- | --- | 2,10 | up   |
| 6421054 | 7294911 | 1608526 | --- | --- | --- | 1,24 | down |
| 6421104 | 7059971 | 1031463 | --- | --- | --- | 1,30 | down |
| 6421169 | 7248790 | 1494511 | --- | --- | --- | 1,04 | down |
| 6421195 | 7063716 | 1040149 | --- | --- | --- | 1,03 | up   |
| 6421278 | 7291803 | 1600885 | --- | --- | --- | 1,62 | down |
| 6421323 | 7030454 | 961553  | --- | --- | --- | 1,57 | down |
| 6421375 | 7332059 | 1700725 | --- | --- | --- | 1,07 | up   |
| 6421464 | 7337224 | 1712605 | --- | --- | --- | 1,18 | up   |
| 6421467 | 7212698 | 1404857 | --- | --- | --- | 1,62 | up   |
| 6421526 | 7273744 | 1557007 | --- | --- | --- | 1,16 | down |
| 6421559 | 7102113 | 1132835 | --- | --- | --- | 1,31 | up   |
| 6421607 | 7034293 | 971981  | --- | --- | --- | 1,24 | down |
| 6421614 | 7232709 | 1454527 | --- | --- | --- | 1,40 | down |
| 6421639 | 7112566 | 1158632 | --- | --- | --- | 1,27 | down |
| 6421659 | 7196966 | 1367642 | --- | --- | --- | 1,09 | up   |
| 6421698 | 7302787 | 1628901 | --- | --- | --- | 1,29 | down |
| 6421766 | 7155286 | 1263908 | --- | --- | --- | 1,56 | down |
| 6421790 | 7050167 | 1009815 | --- | --- | --- | 1,08 | down |
| 6421797 | 7033616 | 970190  | --- | --- | --- | 1,33 | down |
| 6421907 | 7180721 | 1326695 | --- | --- | --- | 1,03 | up   |
| 6422078 | 7318714 | 1669233 | --- | --- | --- | 1,02 | up   |
| 6422086 | 7049689 | 1008898 | --- | --- | --- | 1,83 | up   |
| 6422125 | 7318714 | 1669237 | --- | --- | --- | 1,56 | up   |
| 6422180 | 7055793 | 1022326 | --- | --- | --- | 1,25 | down |
| 6422181 | 7073673 | 1065087 | --- | --- | --- | 1,35 | up   |
| 6422182 | 7059971 | 1031473 | --- | --- | --- | 1,31 | up   |
| 6422224 | 7281877 | 1577535 | --- | --- | --- | 1,38 | down |
| 6422267 | 7337522 | 1713619 | --- | --- | --- | 2,30 | down |
| 6422333 | 7276650 | 1564126 | --- | --- | --- | 1,02 | down |
| 6422345 | 7331413 | 1699128 | --- | --- | --- | 1,06 | down |
| 6422376 | 7227775 | 1441849 | --- | --- | --- | 1,27 | down |
| 6422500 | 7098867 | 1124960 | --- | --- | --- | 1,10 | up   |
| 6422547 | 7113483 | 1161011 | --- | --- | --- | 1,54 | up   |
| 6422588 | 7280743 | 1574522 | --- | --- | --- | 1,14 | down |
| 6422591 | 7371677 | 1800754 | --- | --- | --- | 1,22 | down |
| 6422608 | 7235069 | 1460987 | --- | --- | --- | 1,43 | up   |
| 6422636 | 7059917 | 1031329 | --- | --- | --- | 1,39 | up   |
| 6422844 | 7068259 | 1051593 | --- | --- | --- | 1,29 | up   |
| 6422931 | 7079238 | 1077802 | --- | --- | --- | 1,28 | up   |
| 6423032 | 7364346 | 1780002 | --- | --- | --- | 1,00 | up   |
| 6423088 | 7364346 | 1780024 | --- | --- | --- | 1,42 | up   |
| 6423122 | 7235069 | 1460970 | --- | --- | --- | 1,33 | up   |

|         |         |         |     |     |     |      |      |
|---------|---------|---------|-----|-----|-----|------|------|
| 6423138 | 7278794 | 1570049 | --- | --- | --- | 1,01 | up   |
| 6423188 | 7078666 | 1076510 | --- | --- | --- | 2,60 | down |
| 6423347 | 7321029 | 1674824 | --- | --- | --- | 1,46 | up   |
| 6423385 | 7368565 | 1791285 | --- | --- | --- | 1,56 | up   |
| 6423393 | 7264274 | 1533173 | --- | --- | --- | 1,39 | down |
| 6423418 | 7244288 | 1484108 | --- | --- | --- | 3,00 | up   |
| 6423419 | 7147809 | 1245472 | --- | --- | --- | 1,27 | up   |
| 6423470 | 7231484 | 1451364 | --- | --- | --- | 1,07 | down |
| 6423554 | 7155866 | 1265337 | --- | --- | --- | 1,17 | up   |
| 6423628 | 7118356 | 1173133 | --- | --- | --- | 1,04 | up   |
| 6423639 | 7267953 | 1542264 | --- | --- | --- | 1,21 | up   |
| 6423873 | 7314620 | 1658518 | --- | --- | --- | 1,67 | up   |
| 6423942 | 7085063 | 1090802 | --- | --- | --- | 1,08 | up   |
| 6424044 | 7093936 | 1112464 | --- | --- | --- | 1,03 | up   |
| 6424071 | 7256191 | 1512870 | --- | --- | --- | 1,03 | down |
| 6424080 | 7148978 | 1248461 | --- | --- | --- | 1,00 | up   |
| 6424105 | 7100210 | 1128139 | --- | --- | --- | 2,09 | down |
| 6424110 | 7288077 | 1591992 | --- | --- | --- | 1,10 | down |
| 6424124 | 7139708 | 1225066 | --- | --- | --- | 1,12 | down |
| 6424148 | 7376073 | 1811703 | --- | --- | --- | 1,20 | down |
| 6424247 | 7208784 | 1396107 | --- | --- | --- | 1,34 | up   |
| 6424272 | 7128921 | 1198535 | --- | --- | --- | 2,80 | down |
| 6424293 | 7254209 | 1508007 | --- | --- | --- | 1,44 | down |
| 6424346 | 7078666 | 1076528 | --- | --- | --- | 1,64 | up   |
| 6424422 | 7363576 | 1778196 | --- | --- | --- | 2,22 | up   |
| 6424487 | 7253408 | 1505951 | --- | --- | --- | 1,07 | up   |
| 6424514 | 7059449 | 1030298 | --- | --- | --- | 1,07 | up   |
| 6424612 | 7345851 | 1734747 | --- | --- | --- | 2,30 | down |
| 6424717 | 7313538 | 1655726 | --- | --- | --- | 1,16 | up   |
| 6424769 | 7312161 | 1652463 | --- | --- | --- | 1,33 | down |
| 6424836 | 7073677 | 1065163 | --- | --- | --- | 1,49 | down |
| 6424886 | 7350237 | 1745472 | --- | --- | --- | 1,23 | down |
| 6424890 | 7128112 | 1196568 | --- | --- | --- | 1,53 | down |
| 6424957 | 7279568 | 1572023 | --- | --- | --- | 1,88 | up   |
| 6424965 | 7256191 | 1512869 | --- | --- | --- | 2,65 | down |
| 6425040 | 7370484 | 1797177 | --- | --- | --- | 1,32 | up   |
| 6425159 | 7043515 | 994018  | --- | --- | --- | 1,55 | up   |
| 6425199 | 7108062 | 1147192 | --- | --- | --- | 1,17 | up   |
| 6425257 | 7180804 | 1327007 | --- | --- | --- | 1,00 | down |
| 6425272 | 7030037 | 960717  | --- | --- | --- | 1,28 | up   |
| 6425311 | 7361075 | 1772348 | --- | --- | --- | 1,09 | down |
| 6425344 | 7069830 | 1055635 | --- | --- | --- | 1,17 | down |
| 6425383 | 7334636 | 1706500 | --- | --- | --- | 2,58 | down |
| 6425431 | 7241163 | 1476819 | --- | --- | --- | 1,26 | down |
| 6425447 | 7039532 | 984438  | --- | --- | --- | 1,21 | up   |
| 6425674 | 7277719 | 1567095 | --- | --- | --- | 1,60 | up   |
| 6425675 | 7288077 | 1591948 | --- | --- | --- | 1,08 | down |
| 6425683 | 7110999 | 1154794 | --- | --- | --- | 1,55 | down |
| 6425763 | 7198087 | 1370695 | --- | --- | --- | 1,21 | down |
| 6425772 | 7267802 | 1541908 | --- | --- | --- | 1,14 | up   |
| 6425807 | 7186464 | 1341376 | --- | --- | --- | 1,27 | up   |
| 6425825 | 7179914 | 1324716 | --- | --- | --- | 1,04 | down |
| 6425954 | 7322388 | 1677325 | --- | --- | --- | 1,10 | up   |
| 6425969 | 7031774 | 964785  | --- | --- | --- | 1,39 | down |
| 6425998 | 7070393 | 1057217 | --- | --- | --- | 1,22 | down |
| 6426023 | 7237438 | 1466786 | --- | --- | --- | 1,28 | down |
| 6426101 | 7281577 | 1576888 | --- | --- | --- | 1,19 | up   |

|         |         |         |     |     |     |      |      |
|---------|---------|---------|-----|-----|-----|------|------|
| 6426175 | 7142416 | 1231794 | --- | --- | --- | 1,54 | up   |
| 6426201 | 7148978 | 1248508 | --- | --- | --- | 1,43 | up   |
| 6426202 | 7311391 | 1650865 | --- | --- | --- | 1,57 | up   |
| 6426206 | 7380878 | 1822565 | --- | --- | --- | 1,70 | up   |
| 6426372 | 7176368 | 1315565 | --- | --- | --- | 1,21 | down |
| 6426481 | 7313538 | 1655729 | --- | --- | --- | 1,13 | up   |
| 6426526 | 7344380 | 1731115 | --- | --- | --- | 1,06 | up   |
| 6426634 | 7346687 | 1736688 | --- | --- | --- | 1,14 | up   |
| 6426752 | 7256789 | 1514637 | --- | --- | --- | 1,78 | down |
| 6426787 | 7131876 | 1206058 | --- | --- | --- | 1,46 | up   |
| 6426851 | 7365147 | 1781761 | --- | --- | --- | 1,01 | up   |
| 6426884 | 7071659 | 1060228 | --- | --- | --- | 1,05 | up   |
| 6426904 | 7039223 | 983562  | --- | --- | --- | 1,05 | down |
| 6426934 | 7244288 | 1484135 | --- | --- | --- | 1,08 | down |
| 6426937 | 7214605 | 1409369 | --- | --- | --- | 1,15 | down |
| 6426973 | 7132024 | 1206345 | --- | --- | --- | 1,17 | down |
| 6426998 | 7208784 | 1396113 | --- | --- | --- | 1,55 | up   |
| 6427080 | 7268694 | 1544222 | --- | --- | --- | 1,17 | down |
| 6427130 | 7312569 | 1653339 | --- | --- | --- | 1,02 | up   |
| 6427317 | 7244027 | 1483284 | --- | --- | --- | 2,12 | down |
| 6427343 | 7336854 | 1711673 | --- | --- | --- | 1,10 | down |
| 6427344 | 7288077 | 1591977 | --- | --- | --- | 1,04 | up   |
| 6427441 | 7099573 | 1126708 | --- | --- | --- | 1,18 | down |
| 6427442 | 7328985 | 1693160 | --- | --- | --- | 1,26 | down |
| 6427507 | 7127691 | 1195630 | --- | --- | --- | 1,26 | up   |
| 6427512 | 7364346 | 1780022 | --- | --- | --- | 1,08 | up   |
| 6427513 | 7356326 | 1760471 | --- | --- | --- | 1,06 | down |
| 6427540 | 7127691 | 1195641 | --- | --- | --- | 1,01 | down |
| 6427641 | 7235323 | 1461558 | --- | --- | --- | 1,14 | down |
| 6427669 | 7377791 | 1816000 | --- | --- | --- | 1,11 | down |
| 6427723 | 7286807 | 1588834 | --- | --- | --- | 1,03 | up   |
| 6427804 | 7130917 | 1203939 | --- | --- | --- | 2,31 | down |
| 6427855 | 7102723 | 1134400 | --- | --- | --- | 1,01 | down |
| 6427889 | 7031774 | 964662  | --- | --- | --- | 1,09 | down |
| 6427944 | 7172373 | 1305562 | --- | --- | --- | 1,31 | down |
| 6427981 | 7208330 | 1395099 | --- | --- | --- | 1,55 | down |
| 6428038 | 7308262 | 1643181 | --- | --- | --- | 1,51 | down |
| 6428076 | 7361881 | 1773959 | --- | --- | --- | 1,22 | up   |
| 6428085 | 7064468 | 1042354 | --- | --- | --- | 1,05 | down |
| 6428181 | 7189455 | 1348349 | --- | --- | --- | 1,14 | down |
| 6428182 | 7196029 | 1365614 | --- | --- | --- | 1,18 | up   |
| 6428340 | 7168439 | 1295665 | --- | --- | --- | 1,01 | up   |
| 6428527 | 7212587 | 1404647 | --- | --- | --- | 1,30 | down |
| 6428616 | 7225543 | 1435929 | --- | --- | --- | 1,55 | down |
| 6428779 | 7267802 | 1541743 | --- | --- | --- | 1,19 | down |
| 6428784 | 7302327 | 1627682 | --- | --- | --- | 1,03 | up   |
| 6428826 | 7059309 | 1029924 | --- | --- | --- | 1,40 | down |
| 6428972 | 7288077 | 1591946 | --- | --- | --- | 1,02 | down |
| 6429036 | 7200313 | 1376446 | --- | --- | --- | 2,06 | up   |
| 6429037 | 7115963 | 1167070 | --- | --- | --- | 1,11 | down |
| 6429117 | 7069721 | 1055299 | --- | --- | --- | 1,04 | down |
| 6429119 | 7344702 | 1732143 | --- | --- | --- | 1,09 | down |
| 6429162 | 7219605 | 1422053 | --- | --- | --- | 1,08 | up   |
| 6429234 | 7341546 | 1723955 | --- | --- | --- | 1,57 | down |
| 6429299 | 7302327 | 1627691 | --- | --- | --- | 1,03 | down |
| 6429390 | 7303722 | 1631712 | --- | --- | --- | 1,62 | down |
| 6429398 | 7217747 | 1417501 | --- | --- | --- | 1,01 | down |

|         |         |         |     |     |     |      |      |
|---------|---------|---------|-----|-----|-----|------|------|
| 6429415 | 7295410 | 1609794 | --- | --- | --- | 1,05 | up   |
| 6429539 | 7111361 | 1155623 | --- | --- | --- | 1,11 | up   |
| 6429671 | 7067670 | 1050341 | --- | --- | --- | 1,61 | down |
| 6429744 | 7097485 | 1120934 | --- | --- | --- | 1,17 | down |
| 6429757 | 7315571 | 1661011 | --- | --- | --- | 1,56 | up   |
| 6429795 | 7131372 | 1205054 | --- | --- | --- | 1,12 | down |
| 6429892 | 7253272 | 1505613 | --- | --- | --- | 1,51 | down |
| 6429970 | 7259925 | 1522547 | --- | --- | --- | 1,27 | down |
| 6429991 | 7034356 | 972166  | --- | --- | --- | 1,27 | up   |
| 6430167 | 7233178 | 1455906 | --- | --- | --- | 1,05 | down |
| 6430239 | 7344380 | 1731120 | --- | --- | --- | 1,12 | down |
| 6430242 | 7297589 | 1615685 | --- | --- | --- | 1,11 | down |
| 6430273 | 7356115 | 1760120 | --- | --- | --- | 1,04 | down |
| 6430426 | 7229061 | 1445325 | --- | --- | --- | 1,18 | down |
| 6430533 | 7153136 | 1258024 | --- | --- | --- | 1,01 | down |
| 6430606 | 7210263 | 1399759 | --- | --- | --- | 1,39 | down |
| 6430744 | 7083355 | 1086914 | --- | --- | --- | 1,27 | down |
| 6430756 | 7039223 | 983553  | --- | --- | --- | 1,55 | up   |
| 6430799 | 7100523 | 1128912 | --- | --- | --- | 1,04 | up   |
| 6430841 | 7059506 | 1030402 | --- | --- | --- | 1,72 | down |
| 6430854 | 7083030 | 1086244 | --- | --- | --- | 1,11 | down |
| 6430888 | 7293234 | 1604358 | --- | --- | --- | 1,11 | down |
| 6430896 | 7373678 | 1805858 | --- | --- | --- | 1,25 | up   |
| 6430916 | 7229909 | 1447246 | --- | --- | --- | 3,02 | down |
| 6430930 | 7383586 | 1828440 | --- | --- | --- | 1,20 | up   |
| 6430963 | 7256789 | 1514653 | --- | --- | --- | 1,02 | down |
| 6431011 | 7290793 | 1598636 | --- | --- | --- | 1,21 | down |
| 6431132 | 7040674 | 987047  | --- | --- | --- | 2,04 | up   |
| 6431167 | 7127691 | 1195637 | --- | --- | --- | 1,49 | down |
| 6431171 | 7310851 | 1649629 | --- | --- | --- | 1,01 | up   |
| 6431239 | 7155116 | 1263439 | --- | --- | --- | 1,16 | down |
| 6431365 | 7098411 | 1123699 | --- | --- | --- | 1,00 | up   |
| 6431374 | 7376566 | 1812854 | --- | --- | --- | 1,23 | up   |
| 6431419 | 7323604 | 1680153 | --- | --- | --- | 1,11 | down |
| 6431441 | 7095041 | 1115191 | --- | --- | --- | 1,10 | down |
| 6431583 | 7297274 | 1614630 | --- | --- | --- | 1,08 | down |
| 6431589 | 7177520 | 1318669 | --- | --- | --- | 1,01 | down |
| 6431653 | 7193056 | 1358263 | --- | --- | --- | 1,16 | up   |
| 6431659 | 7292178 | 1601746 | --- | --- | --- | 2,01 | down |
| 6431660 | 7356333 | 1760508 | --- | --- | --- | 1,28 | up   |
| 6431662 | 7363674 | 1778441 | --- | --- | --- | 1,05 | up   |
| 6431766 | 7067670 | 1050309 | --- | --- | --- | 2,73 | up   |
| 6431866 | 7042382 | 991295  | --- | --- | --- | 1,25 | up   |
| 6432014 | 7167325 | 1292547 | --- | --- | --- | 1,07 | down |
| 6432029 | 7068259 | 1051616 | --- | --- | --- | 2,06 | down |
| 6432053 | 7277783 | 1567460 | --- | --- | --- | 1,00 | down |
| 6432055 | 7041140 | 988277  | --- | --- | --- | 1,02 | down |
| 6432061 | 7176456 | 1315836 | --- | --- | --- | 1,23 | down |
| 6432066 | 7181026 | 1327843 | --- | --- | --- | 1,10 | down |
| 6432084 | 7180151 | 1325201 | --- | --- | --- | 1,21 | up   |
| 6432160 | 7340673 | 1721707 | --- | --- | --- | 1,10 | down |
| 6432168 | 7198210 | 1371000 | --- | --- | --- | 1,90 | up   |
| 6432339 | 7313538 | 1655727 | --- | --- | --- | 1,11 | down |
| 6432367 | 7034293 | 971968  | --- | --- | --- | 1,09 | down |
| 6432463 | 7218728 | 1419919 | --- | --- | --- | 1,23 | up   |
| 6432506 | 7306229 | 1638251 | --- | --- | --- | 1,56 | down |
| 6432661 | 7177180 | 1317763 | --- | --- | --- | 1,11 | up   |

|         |         |         |     |     |     |      |      |
|---------|---------|---------|-----|-----|-----|------|------|
| 6432736 | 7340673 | 1721705 | --- | --- | --- | 1,61 | down |
| 6432785 | 7116023 | 1167285 | --- | --- | --- | 1,15 | down |
| 6432808 | 7235794 | 1462896 | --- | --- | --- | 2,15 | up   |
| 6432846 | 7073854 | 1065616 | --- | --- | --- | 1,35 | down |
| 6432892 | 7231834 | 1452273 | --- | --- | --- | 1,25 | up   |
| 6432895 | 7361881 | 1773928 | --- | --- | --- | 1,38 | up   |
| 6432931 | 7148741 | 1247843 | --- | --- | --- | 1,14 | up   |
| 6432995 | 7378997 | 1818636 | --- | --- | --- | 1,07 | down |
| 6433034 | 7233178 | 1455905 | --- | --- | --- | 1,11 | down |
| 6433318 | 7155116 | 1263412 | --- | --- | --- | 1,71 | up   |
| 6433425 | 7172988 | 1307338 | --- | --- | --- | 1,08 | down |
| 6433433 | 7306680 | 1639576 | --- | --- | --- | 1,01 | down |
| 6433608 | 7181105 | 1327967 | --- | --- | --- | 1,34 | down |
| 6433621 | 7041609 | 989593  | --- | --- | --- | 1,67 | down |
| 6433690 | 7233106 | 1455668 | --- | --- | --- | 1,57 | up   |
| 6433788 | 7173640 | 1308948 | --- | --- | --- | 1,91 | up   |
| 6433827 | 7213945 | 1407829 | --- | --- | --- | 1,05 | down |
| 6433852 | 7183182 | 1333575 | --- | --- | --- | 1,88 | down |
| 6433898 | 7210822 | 1400969 | --- | --- | --- | 1,05 | up   |
| 6433919 | 7067670 | 1050363 | --- | --- | --- | 1,15 | down |
| 6434052 | 7217679 | 1417305 | --- | --- | --- | 1,54 | up   |
| 6434216 | 7113085 | 1159989 | --- | --- | --- | 1,02 | up   |
| 6434237 | 7186464 | 1341362 | --- | --- | --- | 1,09 | down |
| 6434254 | 7210822 | 1400978 | --- | --- | --- | 1,10 | down |
| 6434303 | 7069253 | 1054169 | --- | --- | --- | 1,24 | up   |
| 6434411 | 7052957 | 1016259 | --- | --- | --- | 1,10 | down |
| 6434445 | 7088538 | 1099632 | --- | --- | --- | 1,54 | down |
| 6434457 | 7235069 | 1460967 | --- | --- | --- | 1,05 | down |
| 6434471 | 7179176 | 1322917 | --- | --- | --- | 1,07 | down |
| 6434559 | 7233012 | 1455404 | --- | --- | --- | 1,02 | up   |
| 6434587 | 7264797 | 1534422 | --- | --- | --- | 1,05 | down |
| 6434622 | 7244290 | 1484151 | --- | --- | --- | 1,10 | up   |
| 6434649 | 7263248 | 1530616 | --- | --- | --- | 1,04 | down |
| 6434685 | 7110401 | 1153060 | --- | --- | --- | 1,06 | down |
| 6434718 | 7367969 | 1789087 | --- | --- | --- | 1,49 | up   |
| 6434747 | 7273251 | 1555943 | --- | --- | --- | 1,56 | down |
| 6434851 | 7301843 | 1626477 | --- | --- | --- | 1,21 | down |
| 6434856 | 7312465 | 1653053 | --- | --- | --- | 1,01 | down |
| 6434926 | 7118356 | 1173179 | --- | --- | --- | 1,01 | up   |
| 6434997 | 7257441 | 1516297 | --- | --- | --- | 1,68 | down |
| 6435014 | 7142931 | 1233219 | --- | --- | --- | 1,11 | down |
| 6435043 | 7188829 | 1346667 | --- | --- | --- | 1,35 | up   |
| 6435073 | 7366749 | 1785499 | --- | --- | --- | 1,88 | up   |
| 6435119 | 7067670 | 1050351 | --- | --- | --- | 1,00 | down |
| 6435177 | 7093255 | 1110763 | --- | --- | --- | 1,29 | up   |
| 6435243 | 7084792 | 1090329 | --- | --- | --- | 1,09 | up   |
| 6435245 | 7378997 | 1818653 | --- | --- | --- | 1,12 | up   |
| 6435353 | 7292701 | 1602955 | --- | --- | --- | 1,10 | down |
| 6435380 | 7307473 | 1641285 | --- | --- | --- | 1,38 | down |
| 6435477 | 7194172 | 1361148 | --- | --- | --- | 1,38 | up   |
| 6435479 | 7122131 | 1182668 | --- | --- | --- | 1,20 | up   |
| 6435545 | 7041609 | 989580  | --- | --- | --- | 1,25 | down |
| 6435735 | 7069727 | 1055369 | --- | --- | --- | 1,59 | up   |
| 6435779 | 7140365 | 1226758 | --- | --- | --- | 1,57 | down |
| 6436009 | 7132125 | 1206612 | --- | --- | --- | 1,30 | down |
| 6436416 | 7374324 | 1807448 | --- | --- | --- | 1,02 | down |
| 6436472 | 7293763 | 1605711 | --- | --- | --- | 1,01 | up   |

|         |         |         |     |     |     |      |      |
|---------|---------|---------|-----|-----|-----|------|------|
| 6436478 | 7258455 | 1518712 | --- | --- | --- | 1,09 | up   |
| 6436606 | 7030454 | 961542  | --- | --- | --- | 1,08 | up   |
| 6436607 | 7193959 | 1360611 | --- | --- | --- | 1,08 | up   |
| 6436619 | 7336837 | 1711635 | --- | --- | --- | 1,19 | down |
| 6436659 | 7240224 | 1474391 | --- | --- | --- | 1,05 | down |
| 6436680 | 7198210 | 1370975 | --- | --- | --- | 1,13 | up   |
| 6436690 | 7363674 | 1778441 | --- | --- | --- | 1,25 | up   |
| 6436810 | 7258455 | 1518720 | --- | --- | --- | 1,02 | down |
| 6436824 | 7243894 | 1482965 | --- | --- | --- | 1,47 | up   |
| 6436899 | 7179785 | 1324498 | --- | --- | --- | 1,78 | down |
| 6437009 | 7364948 | 1781227 | --- | --- | --- | 1,36 | up   |
| 6437024 | 7102113 | 1132845 | --- | --- | --- | 1,08 | down |
| 6437042 | 7243628 | 1482365 | --- | --- | --- | 1,41 | up   |
| 6437058 | 7165954 | 1288810 | --- | --- | --- | 1,07 | up   |
| 6437082 | 7132125 | 1206612 | --- | --- | --- | 1,01 | down |
| 6437084 | 7098867 | 1124951 | --- | --- | --- | 1,34 | up   |
| 6437099 | 7090581 | 1104749 | --- | --- | --- | 1,53 | up   |
| 6437107 | 7196029 | 1365626 | --- | --- | --- | 1,22 | up   |
| 6437213 | 7194540 | 1362078 | --- | --- | --- | 1,05 | down |
| 6437355 | 7381090 | 1822989 | --- | --- | --- | 1,38 | down |
| 6437429 | 7146245 | 1241372 | --- | --- | --- | 1,22 | down |
| 6437540 | 7371677 | 1800754 | --- | --- | --- | 1,04 | down |
| 6437607 | 7227474 | 1441157 | --- | --- | --- | 1,49 | up   |
| 6437628 | 7099573 | 1126717 | --- | --- | --- | 1,06 | up   |
| 6437808 | 7264745 | 1534266 | --- | --- | --- | 1,13 | up   |
| 6437855 | 7087965 | 1098042 | --- | --- | --- | 1,15 | down |
| 6437895 | 7222236 | 1428113 | --- | --- | --- | 1,38 | down |
| 6437952 | 7360486 | 1770958 | --- | --- | --- | 1,39 | down |
| 6438000 | 7039532 | 984435  | --- | --- | --- | 1,74 | down |
| 6438060 | 7329135 | 1693495 | --- | --- | --- | 1,82 | down |
| 6438098 | 7257976 | 1517713 | --- | --- | --- | 1,33 | down |
| 6438153 | 7186443 | 1341313 | --- | --- | --- | 1,26 | down |
| 6438247 | 7340757 | 1721909 | --- | --- | --- | 1,24 | down |
| 6438272 | 7086966 | 1095260 | --- | --- | --- | 1,13 | up   |
| 6438345 | 7160846 | 1277345 | --- | --- | --- | 1,04 | down |
| 6438347 | 7179914 | 1324710 | --- | --- | --- | 1,02 | up   |
| 6438615 | 7166855 | 1291260 | --- | --- | --- | 1,22 | down |
| 6438626 | 7326271 | 1686471 | --- | --- | --- | 2,08 | up   |
| 6438716 | 7063716 | 1040147 | --- | --- | --- | 1,69 | up   |
| 6438934 | 7371253 | 1799564 | --- | --- | --- | 1,22 | down |
| 6438938 | 7265259 | 1535439 | --- | --- | --- | 1,43 | up   |
| 6438970 | 7063716 | 1040206 | --- | --- | --- | 1,07 | down |
| 6438996 | 7361042 | 1772280 | --- | --- | --- | 1,41 | down |
| 6439032 | 7096924 | 1119602 | --- | --- | --- | 2,67 | down |
| 6439033 | 7095960 | 1117070 | --- | --- | --- | 1,73 | down |
| 6439054 | 7210263 | 1399760 | --- | --- | --- | 1,09 | up   |
| 6439072 | 7364346 | 1780015 | --- | --- | --- | 1,02 | up   |
| 6439089 | 7337425 | 1713147 | --- | --- | --- | 1,02 | up   |
| 6439091 | 7258455 | 1518704 | --- | --- | --- | 1,29 | down |
| 6439215 | 7073677 | 1065166 | --- | --- | --- | 1,47 | down |
| 6439236 | 7068259 | 1051638 | --- | --- | --- | 1,01 | down |
| 6439360 | 7370779 | 1798156 | --- | --- | --- | 1,58 | down |
| 6439403 | 7038530 | 981875  | --- | --- | --- | 1,27 | down |
| 6439414 | 7240569 | 1475493 | --- | --- | --- | 1,05 | down |
| 6439539 | 7360325 | 1770560 | --- | --- | --- | 1,06 | up   |
| 6439541 | 7254040 | 1507579 | --- | --- | --- | 1,30 | down |
| 6439598 | 7280743 | 1574546 | --- | --- | --- | 1,34 | down |



|         |         |         |     |     |     |      |      |
|---------|---------|---------|-----|-----|-----|------|------|
| 6439661 | 7122140 | 1182736 | --- | --- | --- | 1,21 | up   |
| 6439819 | 7243253 | 1481232 | --- | --- | --- | 1,02 | down |
| 6439852 | 7274892 | 1559552 | --- | --- | --- | 1,32 | up   |
| 6439865 | 7240569 | 1475507 | --- | --- | --- | 1,05 | up   |
| 6439893 | 7376073 | 1811723 | --- | --- | --- | 1,07 | up   |
| 6439909 | 7260066 | 1522904 | --- | --- | --- | 1,40 | up   |
| 6439915 | 7114274 | 1162811 | --- | --- | --- | 1,05 | down |
| 6439917 | 7232709 | 1454538 | --- | --- | --- | 1,13 | down |
| 6439948 | 7033337 | 969491  | --- | --- | --- | 1,28 | down |
| 6439952 | 7225543 | 1435917 | --- | --- | --- | 1,49 | up   |
| 6440076 | 7252728 | 1504320 | --- | --- | --- | 1,03 | up   |
| 6440128 | 7319151 | 1670111 | --- | --- | --- | 1,30 | up   |
| 6440142 | 7148741 | 1247826 | --- | --- | --- | 1,14 | down |
| 6440284 | 7162959 | 1282085 | --- | --- | --- | 1,01 | up   |
| 6440291 | 7093936 | 1112479 | --- | --- | --- | 1,02 | up   |
| 6440298 | 7247954 | 1492358 | --- | --- | --- | 1,63 | down |
| 6440379 | 7292869 | 1603374 | --- | --- | --- | 1,16 | down |
| 6440432 | 7199536 | 1374708 | --- | --- | --- | 2,13 | down |
| 6440454 | 7088544 | 1099695 | --- | --- | --- | 1,22 | down |
| 6440464 | 7313841 | 1656732 | --- | --- | --- | 1,07 | down |
| 6440470 | 7239752 | 1473155 | --- | --- | --- | 1,39 | up   |
| 6440620 | 7115963 | 1167071 | --- | --- | --- | 1,85 | up   |
| 6440632 | 7244288 | 1484093 | --- | --- | --- | 1,47 | down |
| 6440643 | 7266544 | 1538338 | --- | --- | --- | 1,04 | down |
| 6440665 | 7337425 | 1713181 | --- | --- | --- | 1,14 | down |
| 6440673 | 7146872 | 1242904 | --- | --- | --- | 1,34 | down |
| 6440686 | 7052813 | 1015884 | --- | --- | --- | 1,46 | down |
| 6440697 | 7302860 | 1629032 | --- | --- | --- | 1,01 | up   |
| 6440713 | 7131119 | 1204441 | --- | --- | --- | 1,24 | up   |
| 6440782 | 7314620 | 1658541 | --- | --- | --- | 1,37 | down |
| 6440866 | 7069142 | 1053879 | --- | --- | --- | 1,03 | down |
| 6440918 | 7075790 | 1069996 | --- | --- | --- | 1,55 | down |
| 6441041 | 7055793 | 1022309 | --- | --- | --- | 1,65 | up   |
| 6441054 | 7292701 | 1602960 | --- | --- | --- | 1,64 | down |
| 6441183 | 7038659 | 982167  | --- | --- | --- | 1,30 | up   |
| 6441190 | 7374313 | 1807371 | --- | --- | --- | 1,01 | up   |
| 6441241 | 7143455 | 1234731 | --- | --- | --- | 1,37 | down |
| 6441291 | 7064732 | 1042909 | --- | --- | --- | 2,01 | down |
| 6441339 | 7079238 | 1077805 | --- | --- | --- | 1,12 | down |
| 6441351 | 7031774 | 964752  | --- | --- | --- | 1,18 | down |
| 6441354 | 7252877 | 1504744 | --- | --- | --- | 1,07 | down |
| 6441378 | 7309734 | 1646915 | --- | --- | --- | 1,46 | down |
| 6441424 | 7238199 | 1468930 | --- | --- | --- | 1,58 | up   |
| 6441549 | 7240569 | 1475322 | --- | --- | --- | 1,15 | down |
| 6441561 | 7063716 | 1040148 | --- | --- | --- | 1,50 | down |
| 6441744 | 7261668 | 1526982 | --- | --- | --- | 1,08 | down |
| 6441772 | 7341002 | 1722547 | --- | --- | --- | 1,25 | up   |
| 6441777 | 7356027 | 1759982 | --- | --- | --- | 1,10 | up   |
| 6441815 | 7301296 | 1625000 | --- | --- | --- | 1,31 | down |
| 6441949 | 7120379 | 1178329 | --- | --- | --- | 1,13 | up   |
| 6441986 | 7170764 | 1301438 | --- | --- | --- | 1,00 | up   |
| 6441988 | 7252877 | 1504691 | --- | --- | --- | 1,14 | down |
| 6442124 | 7208784 | 1396092 | --- | --- | --- | 1,30 | down |
| 6442187 | 7330731 | 1697194 | --- | --- | --- | 1,19 | up   |
| 6442206 | 7330731 | 1697169 | --- | --- | --- | 1,12 | up   |
| 6442278 | 7175946 | 1314631 | --- | --- | --- | 1,04 | up   |
| 6442296 | 7302787 | 1628890 | --- | --- | --- | 1,01 | up   |

|         |         |         |     |     |     |      |      |
|---------|---------|---------|-----|-----|-----|------|------|
| 6442379 | 7361075 | 1772344 | --- | --- | --- | 1,34 | up   |
| 6442549 | 7079600 | 1078630 | --- | --- | --- | 1,01 | down |
| 6442675 | 7243647 | 1482442 | --- | --- | --- | 1,17 | down |
| 6442747 | 7148978 | 1248547 | --- | --- | --- | 1,57 | up   |
| 6442846 | 7208784 | 1396113 | --- | --- | --- | 1,18 | down |
| 6442852 | 7096461 | 1118270 | --- | --- | --- | 1,13 | up   |
| 6442856 | 7267802 | 1541907 | --- | --- | --- | 2,03 | up   |
| 6442921 | 7293234 | 1604348 | --- | --- | --- | 1,93 | up   |
| 6443076 | 7240569 | 1475402 | --- | --- | --- | 1,03 | up   |
| 6443138 | 7244936 | 1485354 | --- | --- | --- | 2,01 | down |
| 6443156 | 7321965 | 1676532 | --- | --- | --- | 1,07 | up   |
| 6443166 | 7115507 | 1165980 | --- | --- | --- | 1,03 | up   |
| 6443187 | 7280570 | 1574099 | --- | --- | --- | 1,19 | up   |
| 6443210 | 7300392 | 1622754 | --- | --- | --- | 2,27 | up   |
| 6443524 | 7102416 | 1133491 | --- | --- | --- | 1,07 | up   |
| 6443545 | 7350993 | 1747547 | --- | --- | --- | 1,02 | up   |
| 6443644 | 7141456 | 1229592 | --- | --- | --- | 1,20 | up   |
| 6443792 | 7313905 | 1656846 | --- | --- | --- | 2,66 | down |
| 6443884 | 7258455 | 1518715 | --- | --- | --- | 1,10 | up   |
| 6443912 | 7210822 | 1400978 | --- | --- | --- | 1,35 | down |
| 6443930 | 7071292 | 1059418 | --- | --- | --- | 1,18 | up   |
| 6443976 | 7353232 | 1752773 | --- | --- | --- | 1,15 | up   |
| 6444019 | 7130889 | 1203867 | --- | --- | --- | 1,16 | up   |
| 6444054 | 7146982 | 1243277 | --- | --- | --- | 1,14 | down |
| 6444109 | 7248790 | 1494526 | --- | --- | --- | 1,07 | down |
| 6444246 | 7370412 | 1796828 | --- | --- | --- | 1,46 | down |
| 6444302 | 7079238 | 1077802 | --- | --- | --- | 1,33 | up   |
| 6444343 | 7112355 | 1158073 | --- | --- | --- | 1,04 | up   |
| 6444481 | 7113483 | 1161006 | --- | --- | --- | 1,49 | up   |
| 6444541 | 7376566 | 1812887 | --- | --- | --- | 1,90 | up   |
| 6444669 | 7295652 | 1610297 | --- | --- | --- | 1,28 | up   |
| 6444748 | 7201422 | 1379172 | --- | --- | --- | 1,43 | up   |
| 6444862 | 7290942 | 1599132 | --- | --- | --- | 2,33 | down |
| 6444888 | 7249917 | 1497393 | --- | --- | --- | 2,22 | up   |
| 6444975 | 7070393 | 1057214 | --- | --- | --- | 1,39 | up   |
| 6444984 | 7259925 | 1522545 | --- | --- | --- | 1,07 | down |
| 6444997 | 7065860 | 1045796 | --- | --- | --- | 1,00 | up   |
| 6445024 | 7170764 | 1301440 | --- | --- | --- | 1,09 | up   |
| 6445025 | 7193056 | 1358289 | --- | --- | --- | 1,13 | up   |
| 6445042 | 7337224 | 1712628 | --- | --- | --- | 1,36 | down |
| 6445092 | 7167325 | 1292548 | --- | --- | --- | 1,01 | up   |
| 6445110 | 7031774 | 964736  | --- | --- | --- | 1,46 | down |
| 6445233 | 7289382 | 1595200 | --- | --- | --- | 1,24 | up   |
| 6445378 | 7280743 | 1574512 | --- | --- | --- | 1,42 | down |
| 6445453 | 7255755 | 1511912 | --- | --- | --- | 1,12 | up   |
| 6445484 | 7318714 | 1669235 | --- | --- | --- | 1,35 | down |
| 6445546 | 7052813 | 1015899 | --- | --- | --- | 1,32 | down |
| 6445611 | 7059962 | 1031403 | --- | --- | --- | 2,09 | up   |
| 6445666 | 7106776 | 1144112 | --- | --- | --- | 2,67 | down |
| 6445687 | 7261668 | 1526982 | --- | --- | --- | 1,64 | up   |
| 6445928 | 7207069 | 1392035 | --- | --- | --- | 1,21 | up   |
| 6445971 | 7293402 | 1604806 | --- | --- | --- | 1,66 | up   |
| 6446033 | 7080563 | 1080712 | --- | --- | --- | 1,29 | down |
| 6446066 | 7368567 | 1791328 | --- | --- | --- | 1,26 | down |
| 6446096 | 7052331 | 1014567 | --- | --- | --- | 1,41 | down |
| 6446133 | 7154655 | 1262319 | --- | --- | --- | 1,60 | up   |
| 6446157 | 7346687 | 1736695 | --- | --- | --- | 1,11 | up   |

|         |         |         |     |     |     |      |      |
|---------|---------|---------|-----|-----|-----|------|------|
| 6446217 | 7074911 | 1068176 | --- | --- | --- | 1,04 | down |
| 6446298 | 7198087 | 1370677 | --- | --- | --- | 1,14 | down |
| 6446338 | 7030037 | 960707  | --- | --- | --- | 1,06 | down |
| 6446359 | 7225543 | 1435933 | --- | --- | --- | 1,59 | down |
| 6446569 | 7150348 | 1251434 | --- | --- | --- | 1,18 | up   |
| 6446612 | 7213908 | 1407698 | --- | --- | --- | 1,57 | up   |
| 6446718 | 7363147 | 1777030 | --- | --- | --- | 1,13 | down |
| 6446722 | 7068259 | 1051646 | --- | --- | --- | 1,14 | down |
| 6446726 | 7368986 | 1792860 | --- | --- | --- | 1,72 | up   |
| 6446792 | 7358859 | 1766990 | --- | --- | --- | 1,27 | down |
| 6446825 | 7200152 | 1376049 | --- | --- | --- | 1,09 | up   |
| 6446837 | 7248790 | 1494517 | --- | --- | --- | 1,15 | up   |
| 6446842 | 7058713 | 1028667 | --- | --- | --- | 1,20 | up   |
| 6446915 | 7350237 | 1745482 | --- | --- | --- | 1,34 | up   |
| 6446928 | 7069603 | 1055049 | --- | --- | --- | 1,24 | down |
| 6446989 | 7239752 | 1473191 | --- | --- | --- | 1,69 | down |
| 6447052 | 7083030 | 1086256 | --- | --- | --- | 1,57 | down |
| 6447103 | 7032558 | 967064  | --- | --- | --- | 1,47 | down |
| 6447114 | 7263652 | 1531625 | --- | --- | --- | 1,01 | up   |
| 6447252 | 7086522 | 1093955 | --- | --- | --- | 1,73 | down |
| 6447285 | 7333462 | 1703648 | --- | --- | --- | 1,71 | up   |
| 6447352 | 7344702 | 1732143 | --- | --- | --- | 1,10 | down |
| 6447407 | 7329341 | 1693876 | --- | --- | --- | 1,03 | up   |
| 6447479 | 7384509 | 1830735 | --- | --- | --- | 1,02 | up   |
| 6447525 | 7327169 | 1688462 | --- | --- | --- | 1,18 | down |
| 6447526 | 7297274 | 1614611 | --- | --- | --- | 1,23 | up   |
| 6447536 | 7340263 | 1720769 | --- | --- | --- | 1,05 | down |
| 6447573 | 7235794 | 1462881 | --- | --- | --- | 1,24 | up   |
| 6447587 | 7034293 | 971986  | --- | --- | --- | 1,14 | down |
| 6447670 | 7238115 | 1468568 | --- | --- | --- | 1,05 | up   |
| 6447699 | 7329135 | 1693488 | --- | --- | --- | 1,39 | down |
| 6447803 | 7217650 | 1417193 | --- | --- | --- | 1,25 | down |
| 6447870 | 7075445 | 1069342 | --- | --- | --- | 1,12 | down |
| 6448020 | 7231557 | 1451566 | --- | --- | --- | 1,00 | up   |
| 6448035 | 7222741 | 1429362 | --- | --- | --- | 1,45 | up   |
| 6448073 | 7342430 | 1726146 | --- | --- | --- | 1,03 | up   |
| 6448078 | 7112355 | 1158072 | --- | --- | --- | 1,32 | down |
| 6448143 | 7212587 | 1404631 | --- | --- | --- | 1,68 | up   |
| 6448187 | 7038971 | 982983  | --- | --- | --- | 2,47 | down |
| 6448304 | 7029770 | 960158  | --- | --- | --- | 1,69 | down |
| 6448307 | 7125348 | 1190075 | --- | --- | --- | 1,17 | down |
| 6448489 | 7062436 | 1037721 | --- | --- | --- | 1,29 | up   |
| 6448510 | 7031774 | 964725  | --- | --- | --- | 1,73 | up   |
| 6448558 | 7342430 | 1726152 | --- | --- | --- | 1,07 | up   |
| 6448576 | 7087282 | 1096196 | --- | --- | --- | 1,20 | up   |
| 6448604 | 7076236 | 1071200 | --- | --- | --- | 1,70 | down |
| 6448677 | 7073677 | 1065170 | --- | --- | --- | 1,51 | down |
| 6448788 | 7090581 | 1104742 | --- | --- | --- | 1,22 | down |
| 6448913 | 7378997 | 1818658 | --- | --- | --- | 1,09 | up   |
| 6449195 | 7168521 | 1295963 | --- | --- | --- | 1,34 | down |
| 6449258 | 7103782 | 1136948 | --- | --- | --- | 1,04 | up   |
| 6449444 | 7346066 | 1735287 | --- | --- | --- | 1,05 | down |
| 6449451 | 7201422 | 1379197 | --- | --- | --- | 3,33 | up   |
| 6449532 | 7380497 | 1821841 | --- | --- | --- | 1,02 | down |
| 6449576 | 7064468 | 1042372 | --- | --- | --- | 1,50 | up   |
| 6449586 | 7146542 | 1242249 | --- | --- | --- | 1,06 | up   |
| 6449632 | 7068413 | 1051971 | --- | --- | --- | 1,39 | up   |

|         |         |         |     |     |     |      |      |
|---------|---------|---------|-----|-----|-----|------|------|
| 6449644 | 7217650 | 1417195 | --- | --- | --- | 1,07 | down |
| 6449873 | 7180804 | 1327007 | --- | --- | --- | 1,34 | down |
| 6450033 | 7039265 | 983658  | --- | --- | --- | 1,97 | up   |
| 6450066 | 7076160 | 1070963 | --- | --- | --- | 1,32 | up   |
| 6450098 | 7344838 | 1732419 | --- | --- | --- | 1,10 | down |
| 6450175 | 7290775 | 1598601 | --- | --- | --- | 1,58 | up   |
| 6450194 | 7239939 | 1473784 | --- | --- | --- | 1,39 | down |
| 6450200 | 7196029 | 1365611 | --- | --- | --- | 1,12 | down |
| 6450267 | 7106752 | 1144014 | --- | --- | --- | 1,29 | down |
| 6450305 | 7217434 | 1416445 | --- | --- | --- | 1,43 | up   |
| 6450320 | 7240569 | 1475365 | --- | --- | --- | 3,56 | down |
| 6450394 | 7029770 | 960158  | --- | --- | --- | 1,35 | down |
| 6450491 | 7041609 | 989569  | --- | --- | --- | 1,17 | up   |
| 6450499 | 7363576 | 1778194 | --- | --- | --- | 1,19 | down |
| 6450546 | 7083965 | 1088219 | --- | --- | --- | 1,02 | up   |
| 6450867 | 7070836 | 1058335 | --- | --- | --- | 1,04 | up   |
| 6450869 | 7330731 | 1697197 | --- | --- | --- | 1,08 | up   |
| 6450942 | 7186688 | 1341843 | --- | --- | --- | 1,28 | up   |
| 6450976 | 7219304 | 1421273 | --- | --- | --- | 1,09 | up   |
| 6451095 | 7033673 | 970373  | --- | --- | --- | 1,03 | down |
| 6451100 | 7256070 | 1512594 | --- | --- | --- | 3,41 | up   |
| 6451121 | 7181001 | 1327602 | --- | --- | --- | 1,02 | down |
| 6451151 | 7082098 | 1084112 | --- | --- | --- | 1,12 | down |
| 6451166 | 7069464 | 1054663 | --- | --- | --- | 1,10 | down |
| 6451327 | 7301900 | 1626743 | --- | --- | --- | 1,40 | up   |
| 6451367 | 7333462 | 1703639 | --- | --- | --- | 1,19 | down |
| 6451453 | 7082098 | 1084114 | --- | --- | --- | 1,07 | up   |
| 6451535 | 7120039 | 1177548 | --- | --- | --- | 1,80 | up   |
| 6451638 | 7217747 | 1417494 | --- | --- | --- | 1,56 | down |
| 6451649 | 7156372 | 1266713 | --- | --- | --- | 1,09 | up   |
| 6451682 | 7302860 | 1629027 | --- | --- | --- | 2,27 | up   |
| 6451764 | 7027350 | 954944  | --- | --- | --- | 1,16 | up   |
| 6451816 | 7142321 | 1231501 | --- | --- | --- | 1,08 | up   |
| 6451860 | 7240224 | 1474395 | --- | --- | --- | 6,21 | up   |
| 6451863 | 7292701 | 1602967 | --- | --- | --- | 1,13 | up   |
| 6451991 | 7255522 | 1511410 | --- | --- | --- | 1,59 | up   |
| 6451999 | 7236358 | 1464237 | --- | --- | --- | 1,99 | up   |
| 6452015 | 7358859 | 1766996 | --- | --- | --- | 1,23 | down |
| 6452030 | 7344713 | 1732174 | --- | --- | --- | 1,21 | down |
| 6452033 | 7337224 | 1712615 | --- | --- | --- | 1,86 | up   |
| 6452149 | 7364346 | 1780012 | --- | --- | --- | 1,40 | up   |
| 6452215 | 7280743 | 1574531 | --- | --- | --- | 1,08 | down |
| 6452249 | 7350237 | 1745487 | --- | --- | --- | 1,02 | down |
| 6452259 | 7039532 | 984432  | --- | --- | --- | 1,20 | down |
| 6452273 | 7318084 | 1667937 | --- | --- | --- | 1,14 | up   |
| 6452418 | 7329135 | 1693486 | --- | --- | --- | 1,05 | up   |
| 6452453 | 7196029 | 1365642 | --- | --- | --- | 1,18 | down |
| 6452481 | 7308262 | 1643180 | --- | --- | --- | 2,62 | down |
| 6452490 | 7112566 | 1158635 | --- | --- | --- | 2,09 | down |
| 6452531 | 7100210 | 1128140 | --- | --- | --- | 1,78 | down |
| 6452617 | 7332059 | 1700734 | --- | --- | --- | 1,01 | up   |
| 6452640 | 7213908 | 1407664 | --- | --- | --- | 1,21 | down |
| 6452698 | 7208784 | 1396147 | --- | --- | --- | 1,03 | up   |
| 6452925 | 7340757 | 1721891 | --- | --- | --- | 1,01 | up   |
| 6452937 | 7069721 | 1055297 | --- | --- | --- | 1,40 | down |
| 6453008 | 7227775 | 1441827 | --- | --- | --- | 1,13 | up   |
| 6453057 | 7070511 | 1057472 | --- | --- | --- | 2,08 | down |

|         |         |         |     |     |     |      |      |
|---------|---------|---------|-----|-----|-----|------|------|
| 6453101 | 7140834 | 1227938 | --- | --- | --- | 1,46 | up   |
| 6453108 | 7166867 | 1291346 | --- | --- | --- | 1,67 | up   |
| 6453118 | 7127257 | 1194813 | --- | --- | --- | 1,34 | down |
| 6453238 | 7062233 | 1037227 | --- | --- | --- | 1,10 | down |
| 6453294 | 7035525 | 974752  | --- | --- | --- | 1,05 | down |
| 6453312 | 7132020 | 1206317 | --- | --- | --- | 1,21 | down |
| 6453338 | 7264797 | 1534422 | --- | --- | --- | 1,44 | down |
| 6453479 | 7247334 | 1490820 | --- | --- | --- | 1,51 | down |
| 6453531 | 7075460 | 1069393 | --- | --- | --- | 1,42 | up   |
| 6453603 | 7337224 | 1712601 | --- | --- | --- | 2,12 | down |
| 6453606 | 7341646 | 1724211 | --- | --- | --- | 1,01 | down |
| 6453658 | 7329136 | 1693551 | --- | --- | --- | 1,06 | up   |
| 6453662 | 7059766 | 1030972 | --- | --- | --- | 1,90 | down |
| 6453684 | 7243363 | 1481603 | --- | --- | --- | 1,47 | up   |
| 6453739 | 7171091 | 1302452 | --- | --- | --- | 1,31 | up   |
| 6453785 | 7274892 | 1559560 | --- | --- | --- | 1,18 | down |
| 6454048 | 7236492 | 1464544 | --- | --- | --- | 1,03 | down |
| 6454101 | 7350993 | 1747525 | --- | --- | --- | 1,06 | up   |
| 6454318 | 7100408 | 1128642 | --- | --- | --- | 1,81 | down |
| 6454373 | 7193056 | 1358256 | --- | --- | --- | 1,35 | down |
| 6454399 | 7217434 | 1416439 | --- | --- | --- | 1,67 | down |
| 6454411 | 7079238 | 1077821 | --- | --- | --- | 1,09 | down |
| 6454505 | 7070836 | 1058338 | --- | --- | --- | 1,11 | up   |
| 6454532 | 7369954 | 1795674 | --- | --- | --- | 1,53 | down |
| 6454549 | 7240569 | 1475446 | --- | --- | --- | 1,07 | up   |
| 6454586 | 7147809 | 1245465 | --- | --- | --- | 1,43 | down |
| 6454597 | 7181001 | 1327590 | --- | --- | --- | 1,23 | up   |
| 6454621 | 7225634 | 1436217 | --- | --- | --- | 1,08 | down |
| 6454627 | 7337425 | 1713191 | --- | --- | --- | 1,32 | up   |
| 6454636 | 7318714 | 1669235 | --- | --- | --- | 1,11 | down |
| 6454651 | 7341274 | 1723400 | --- | --- | --- | 1,86 | down |
| 6454745 | 7279533 | 1571917 | --- | --- | --- | 1,95 | down |
| 6454795 | 7067828 | 1050788 | --- | --- | --- | 1,02 | down |
| 6454830 | 7171091 | 1302460 | --- | --- | --- | 1,20 | down |
| 6454851 | 7344702 | 1732145 | --- | --- | --- | 2,10 | up   |
| 6455097 | 7102510 | 1133875 | --- | --- | --- | 1,15 | down |
| 6455140 | 7233513 | 1457175 | --- | --- | --- | 1,07 | up   |
| 6455182 | 7168521 | 1295972 | --- | --- | --- | 1,72 | down |
| 6455353 | 7038179 | 981263  | --- | --- | --- | 1,80 | down |
| 6455395 | 7217434 | 1416440 | --- | --- | --- | 1,61 | down |
| 6455436 | 7378997 | 1818670 | --- | --- | --- | 1,17 | down |
| 6455464 | 7058713 | 1028664 | --- | --- | --- | 1,01 | up   |
| 6455536 | 7237814 | 1467828 | --- | --- | --- | 1,05 | up   |
| 6455618 | 7243627 | 1482358 | --- | --- | --- | 1,05 | up   |
| 6455626 | 7088625 | 1099863 | --- | --- | --- | 1,18 | down |
| 6455746 | 7065640 | 1045205 | --- | --- | --- | 2,02 | up   |
| 6455891 | 7086966 | 1095284 | --- | --- | --- | 1,28 | down |
| 6455907 | 7230886 | 1449577 | --- | --- | --- | 1,04 | down |
| 6456046 | 7370415 | 1796853 | --- | --- | --- | 1,43 | down |
| 6456200 | 7120486 | 1178574 | --- | --- | --- | 2,21 | down |
| 6456279 | 7062436 | 1037715 | --- | --- | --- | 1,70 | up   |
| 6456282 | 7261580 | 1526788 | --- | --- | --- | 1,11 | up   |
| 6456393 | 7038179 | 981269  | --- | --- | --- | 1,01 | down |
| 6456397 | 7364346 | 1780034 | --- | --- | --- | 1,11 | up   |
| 6456519 | 7072269 | 1061513 | --- | --- | --- | 1,72 | down |
| 6456616 | 7107926 | 1146825 | --- | --- | --- | 1,43 | up   |
| 6456618 | 7119845 | 1176893 | --- | --- | --- | 1,62 | up   |

|         |         |         |     |     |     |      |      |
|---------|---------|---------|-----|-----|-----|------|------|
| 6456654 | 7063716 | 1040139 | --- | --- | --- | 1,03 | down |
| 6456694 | 7064134 | 1041477 | --- | --- | --- | 1,09 | down |
| 6456697 | 7333462 | 1703648 | --- | --- | --- | 1,05 | down |
| 6456747 | 7295652 | 1610288 | --- | --- | --- | 1,05 | up   |
| 6456780 | 7356027 | 1759985 | --- | --- | --- | 1,08 | up   |
| 6456825 | 7341038 | 1722674 | --- | --- | --- | 1,33 | down |
| 6456843 | 7234040 | 1458499 | --- | --- | --- | 1,53 | up   |
| 6457004 | 7041584 | 989456  | --- | --- | --- | 1,24 | up   |
| 6457027 | 7122585 | 1183682 | --- | --- | --- | 1,33 | down |
| 6457080 | 7339286 | 1718108 | --- | --- | --- | 1,41 | up   |
| 6457136 | 7366749 | 1785477 | --- | --- | --- | 2,05 | down |
| 6457173 | 7217650 | 1417202 | --- | --- | --- | 1,03 | up   |
| 6457201 | 7062436 | 1037658 | --- | --- | --- | 1,75 | up   |
| 6457240 | 7193403 | 1359181 | --- | --- | --- | 1,25 | down |
| 6457314 | 7330238 | 1695955 | --- | --- | --- | 1,18 | up   |
| 6457339 | 7284934 | 1584915 | --- | --- | --- | 2,14 | up   |
| 6457400 | 7366749 | 1785502 | --- | --- | --- | 1,12 | down |
| 6457446 | 7030519 | 961701  | --- | --- | --- | 1,04 | up   |
| 6457470 | 7279073 | 1570710 | --- | --- | --- | 1,40 | down |
| 6457521 | 7336931 | 1711872 | --- | --- | --- | 1,35 | down |
| 6457587 | 7110401 | 1153082 | --- | --- | --- | 1,09 | down |
| 6457813 | 7267802 | 1541838 | --- | --- | --- | 1,73 | up   |
| 6457820 | 7038153 | 981159  | --- | --- | --- | 1,04 | up   |
| 6457827 | 7244288 | 1484119 | --- | --- | --- | 1,65 | down |
| 6457847 | 7099573 | 1126735 | --- | --- | --- | 1,00 | up   |
| 6457905 | 7211389 | 1402113 | --- | --- | --- | 1,09 | down |
| 6457918 | 7295612 | 1610171 | --- | --- | --- | 1,03 | up   |
| 6457963 | 7295410 | 1609794 | --- | --- | --- | 1,11 | up   |
| 6458148 | 7340990 | 1722517 | --- | --- | --- | 1,31 | up   |
| 6458314 | 7243901 | 1483042 | --- | --- | --- | 1,11 | down |
| 6458317 | 7367943 | 1788930 | --- | --- | --- | 1,00 | down |
| 6458425 | 7148741 | 1247870 | --- | --- | --- | 1,04 | up   |
| 6458478 | 7377457 | 1815096 | --- | --- | --- | 1,31 | up   |
| 6458568 | 7238202 | 1468948 | --- | --- | --- | 1,46 | up   |
| 6458676 | 7337224 | 1712563 | --- | --- | --- | 1,08 | down |
| 6458679 | 7247512 | 1491205 | --- | --- | --- | 1,33 | up   |
| 6458719 | 7213908 | 1407757 | --- | --- | --- | 1,41 | down |
| 6458721 | 7377583 | 1815461 | --- | --- | --- | 1,69 | up   |
| 6458722 | 7068259 | 1051593 | --- | --- | --- | 1,25 | up   |
| 6458889 | 7279806 | 1572559 | --- | --- | --- | 1,45 | up   |
| 6458948 | 7195680 | 1364883 | --- | --- | --- | 1,37 | up   |
| 6459015 | 7303777 | 1631908 | --- | --- | --- | 1,31 | up   |
| 6459025 | 7301198 | 1624737 | --- | --- | --- | 1,24 | up   |
| 6459049 | 7120195 | 1177874 | --- | --- | --- | 3,14 | down |
| 6459129 | 7333462 | 1703637 | --- | --- | --- | 1,84 | up   |
| 6459191 | 7321029 | 1674804 | --- | --- | --- | 1,23 | down |
| 6459195 | 7101258 | 1130569 | --- | --- | --- | 1,03 | up   |
| 6459197 | 7183190 | 1333645 | --- | --- | --- | 1,18 | down |
| 6459223 | 7101258 | 1130565 | --- | --- | --- | 1,22 | down |
| 6459280 | 7286807 | 1588795 | --- | --- | --- | 1,36 | down |
| 6459382 | 7179785 | 1324460 | --- | --- | --- | 1,15 | down |
| 6459415 | 7330731 | 1697199 | --- | --- | --- | 1,11 | down |
| 6459417 | 7339732 | 1719212 | --- | --- | --- | 1,15 | down |
| 6459465 | 7132125 | 1206610 | --- | --- | --- | 1,18 | up   |
| 6459472 | 7113483 | 1161014 | --- | --- | --- | 1,31 | down |
| 6459509 | 7066035 | 1046215 | --- | --- | --- | 1,00 | up   |
| 6459531 | 7350993 | 1747524 | --- | --- | --- | 1,24 | down |

|         |         |         |     |     |     |      |      |
|---------|---------|---------|-----|-----|-----|------|------|
| 6459547 | 7317708 | 1666828 | --- | --- | --- | 1,30 | up   |
| 6459672 | 7365147 | 1781779 | --- | --- | --- | 1,62 | down |
| 6459719 | 7374324 | 1807521 | --- | --- | --- | 1,10 | down |
| 6459816 | 7349643 | 1744147 | --- | --- | --- | 1,00 | down |
| 6459834 | 7040442 | 986502  | --- | --- | --- | 1,51 | up   |
| 6459875 | 7200313 | 1376452 | --- | --- | --- | 1,11 | down |
| 6459885 | 7136142 | 1216422 | --- | --- | --- | 1,31 | up   |
| 6459890 | 7318651 | 1669085 | --- | --- | --- | 1,06 | up   |
| 6459919 | 7141061 | 1228677 | --- | --- | --- | 1,20 | down |
| 6460042 | 7380497 | 1821824 | --- | --- | --- | 1,42 | down |
| 6460180 | 7258546 | 1518930 | --- | --- | --- | 1,30 | up   |
| 6460452 | 7364346 | 1779987 | --- | --- | --- | 1,21 | down |
| 6460508 | 7237699 | 1467392 | --- | --- | --- | 2,18 | up   |
| 6460521 | 7297589 | 1615660 | --- | --- | --- | 2,07 | down |
| 6460593 | 7261580 | 1526798 | --- | --- | --- | 1,11 | down |
| 6460714 | 7053874 | 1018307 | --- | --- | --- | 1,08 | up   |
| 6460797 | 7227775 | 1441839 | --- | --- | --- | 1,15 | down |
| 6460835 | 7217434 | 1416425 | --- | --- | --- | 1,08 | down |
| 6461078 | 7177180 | 1317765 | --- | --- | --- | 1,64 | down |
| 6461127 | 7088164 | 1098475 | --- | --- | --- | 1,16 | up   |
| 6461204 | 7040442 | 986530  | --- | --- | --- | 1,71 | down |
| 6461234 | 7330238 | 1695929 | --- | --- | --- | 1,04 | down |
| 6461260 | 7108434 | 1148308 | --- | --- | --- | 1,35 | down |
| 6461321 | 7196029 | 1365624 | --- | --- | --- | 1,20 | down |
| 6461364 | 7109292 | 1150753 | --- | --- | --- | 1,81 | down |
| 6461424 | 7147809 | 1245447 | --- | --- | --- | 1,54 | down |
| 6461457 | 7102889 | 1134883 | --- | --- | --- | 1,14 | up   |
| 6461539 | 7347427 | 1738664 | --- | --- | --- | 1,13 | up   |
| 6461554 | 7175946 | 1314651 | --- | --- | --- | 1,72 | up   |
| 6461768 | 7270895 | 1549511 | --- | --- | --- | 1,19 | up   |
| 6461777 | 7263805 | 1532197 | --- | --- | --- | 1,18 | up   |
| 6461860 | 7181001 | 1327614 | --- | --- | --- | 1,31 | up   |
| 6461905 | 7378997 | 1818663 | --- | --- | --- | 1,05 | up   |
| 6461946 | 7252877 | 1504690 | --- | --- | --- | 1,17 | down |
| 6462002 | 7282927 | 1579973 | --- | --- | --- | 1,30 | up   |
| 6462027 | 7072765 | 1062738 | --- | --- | --- | 1,02 | up   |
| 6462158 | 7296860 | 1613436 | --- | --- | --- | 9,33 | down |
| 6462162 | 7378981 | 1818537 | --- | --- | --- | 1,31 | down |
| 6462189 | 7040442 | 986564  | --- | --- | --- | 1,07 | down |
| 6462248 | 7342356 | 1725873 | --- | --- | --- | 1,45 | down |
| 6462279 | 7243647 | 1482427 | --- | --- | --- | 1,66 | up   |
| 6462362 | 7350489 | 1746112 | --- | --- | --- | 1,17 | up   |
| 6462516 | 7383102 | 1827397 | --- | --- | --- | 1,24 | down |
| 6462618 | 7243363 | 1481629 | --- | --- | --- | 1,11 | up   |
| 6462632 | 7238115 | 1468591 | --- | --- | --- | 1,35 | down |
| 6462650 | 7136142 | 1216415 | --- | --- | --- | 1,80 | up   |
| 6462651 | 7156611 | 1267364 | --- | --- | --- | 1,10 | up   |
| 6462712 | 7118598 | 1173760 | --- | --- | --- | 1,00 | down |
| 6462726 | 7120827 | 1179350 | --- | --- | --- | 1,09 | down |
| 6462848 | 7309734 | 1646891 | --- | --- | --- | 1,02 | down |
| 6462938 | 7200996 | 1378163 | --- | --- | --- | 1,48 | up   |
| 6463031 | 7057462 | 1025863 | --- | --- | --- | 1,18 | up   |
| 6463067 | 7238202 | 1468937 | --- | --- | --- | 1,12 | down |
| 6463082 | 7146542 | 1242286 | --- | --- | --- | 1,10 | up   |
| 6463206 | 7133484 | 1209937 | --- | --- | --- | 1,43 | up   |
| 6463299 | 7330396 | 1696353 | --- | --- | --- | 1,05 | down |
| 6463495 | 7254040 | 1507596 | --- | --- | --- | 1,18 | up   |

|         |         |         |     |     |     |      |      |
|---------|---------|---------|-----|-----|-----|------|------|
| 6463531 | 7038153 | 981160  | --- | --- | --- | 1,12 | down |
| 6463556 | 7261580 | 1526773 | --- | --- | --- | 1,10 | down |
| 6463608 | 7240569 | 1475495 | --- | --- | --- | 1,04 | up   |
| 6463800 | 7063716 | 1040146 | --- | --- | --- | 1,36 | up   |
| 6463809 | 7266544 | 1538341 | --- | --- | --- | 1,83 | down |
| 6463874 | 7096924 | 1119603 | --- | --- | --- | 1,44 | up   |
| 6463878 | 7180732 | 1326734 | --- | --- | --- | 1,54 | up   |
| 6463893 | 7253408 | 1505953 | --- | --- | --- | 1,34 | up   |
| 6464303 | 7227433 | 1440970 | --- | --- | --- | 1,23 | up   |
| 6464532 | 7210263 | 1399754 | --- | --- | --- | 1,14 | up   |
| 6464566 | 7318143 | 1668094 | --- | --- | --- | 1,73 | down |
| 6464589 | 7148741 | 1247833 | --- | --- | --- | 1,02 | up   |
| 6464590 | 7355044 | 1757422 | --- | --- | --- | 1,08 | down |
| 6464616 | 7098867 | 1124947 | --- | --- | --- | 2,29 | down |
| 6464626 | 7168521 | 1295942 | --- | --- | --- | 1,04 | up   |
| 6464627 | 7355865 | 1759601 | --- | --- | --- | 1,24 | up   |
| 6464728 | 7039223 | 983556  | --- | --- | --- | 1,24 | down |
| 6464781 | 7096461 | 1118271 | --- | --- | --- | 1,30 | up   |
| 6464782 | 7041609 | 989576  | --- | --- | --- | 1,09 | up   |
| 6464814 | 7068259 | 1051660 | --- | --- | --- | 1,11 | up   |
| 6464817 | 7095041 | 1115187 | --- | --- | --- | 1,13 | down |
| 6464832 | 7384509 | 1830751 | --- | --- | --- | 1,55 | up   |
| 6465216 | 7273744 | 1557043 | --- | --- | --- | 1,15 | up   |
| 6465289 | 7337845 | 1714344 | --- | --- | --- | 1,11 | up   |
| 6465357 | 7071969 | 1060899 | --- | --- | --- | 1,02 | up   |
| 6465439 | 7193056 | 1358268 | --- | --- | --- | 1,12 | down |
| 6465553 | 7364346 | 1780015 | --- | --- | --- | 1,13 | up   |
| 6465573 | 7232709 | 1454525 | --- | --- | --- | 1,43 | up   |
| 6465742 | 7355044 | 1757424 | --- | --- | --- | 1,44 | down |
| 6465748 | 7364346 | 1779986 | --- | --- | --- | 1,38 | down |
| 6465774 | 7149817 | 1250303 | --- | --- | --- | 1,26 | down |
| 6465779 | 7088489 | 1099515 | --- | --- | --- | 1,72 | up   |
| 6465872 | 7344702 | 1732138 | --- | --- | --- | 1,00 | up   |
| 6465933 | 7213908 | 1407666 | --- | --- | --- | 1,03 | up   |
| 6465961 | 7093255 | 1110762 | --- | --- | --- | 1,19 | up   |
| 6465979 | 7211690 | 1402642 | --- | --- | --- | 1,06 | down |
| 6466002 | 7297589 | 1615638 | --- | --- | --- | 1,37 | down |
| 6466091 | 7109292 | 1150742 | --- | --- | --- | 1,57 | up   |
| 6466109 | 7156978 | 1268175 | --- | --- | --- | 1,13 | down |
| 6466733 | 7330314 | 1696134 | --- | --- | --- | 1,66 | down |
| 6466735 | 7317318 | 1665827 | --- | --- | --- | 1,28 | up   |
| 6466783 | 7244290 | 1484161 | --- | --- | --- | 1,01 | down |
| 6466987 | 7158419 | 1271427 | --- | --- | --- | 1,04 | up   |
| 6467021 | 7279593 | 1572093 | --- | --- | --- | 1,35 | down |
| 6467043 | 7243894 | 1482988 | --- | --- | --- | 1,43 | up   |
| 6467098 | 7240569 | 1475510 | --- | --- | --- | 1,48 | up   |
| 6467162 | 7244288 | 1484104 | --- | --- | --- | 2,87 | up   |
| 6467240 | 7321029 | 1674830 | --- | --- | --- | 1,02 | up   |
| 6467253 | 7055793 | 1022310 | --- | --- | --- | 1,33 | up   |
| 6467358 | 7177834 | 1319651 | --- | --- | --- | 1,75 | up   |
| 6467491 | 7371753 | 1800970 | --- | --- | --- | 1,36 | down |
| 6467667 | 7181001 | 1327610 | --- | --- | --- | 1,12 | down |
| 6467705 | 7142081 | 1230973 | --- | --- | --- | 1,05 | up   |
| 6467793 | 7374313 | 1807365 | --- | --- | --- | 1,41 | down |
| 6467964 | 7119845 | 1176894 | --- | --- | --- | 1,12 | down |
| 6468150 | 7372840 | 1803782 | --- | --- | --- | 1,06 | up   |
| 6468192 | 7344406 | 1731234 | --- | --- | --- | 1,34 | up   |



|         |         |         |     |     |     |      |      |
|---------|---------|---------|-----|-----|-----|------|------|
| 6468229 | 7330238 | 1695938 | --- | --- | --- | 1,02 | up   |
| 6468375 | 7380452 | 1821678 | --- | --- | --- | 2,74 | down |
| 6468582 | 7152007 | 1255303 | --- | --- | --- | 2,08 | up   |
| 6468668 | 7075460 | 1069383 | --- | --- | --- | 1,37 | down |
| 6468684 | 7288284 | 1592645 | --- | --- | --- | 1,29 | down |
| 6468699 | 7364948 | 1781222 | --- | --- | --- | 1,32 | down |
| 6468783 | 7041140 | 988283  | --- | --- | --- | 1,22 | up   |
| 6468896 | 7217679 | 1417306 | --- | --- | --- | 1,16 | down |
| 6468938 | 7213908 | 1407754 | --- | --- | --- | 1,23 | down |
| 6468944 | 7264653 | 1534024 | --- | --- | --- | 1,22 | down |
| 6468956 | 7274780 | 1559238 | --- | --- | --- | 1,15 | down |
| 6468975 | 7211690 | 1402643 | --- | --- | --- | 1,30 | down |
| 6469000 | 7239752 | 1473149 | --- | --- | --- | 2,71 | up   |
| 6469099 | 7217747 | 1417491 | --- | --- | --- | 1,15 | down |
| 6469101 | 7098831 | 1124860 | --- | --- | --- | 1,11 | down |
| 6469115 | 7071264 | 1059285 | --- | --- | --- | 1,48 | up   |
| 6469168 | 7050155 | 1009763 | --- | --- | --- | 1,22 | up   |
| 6469187 | 7217747 | 1417480 | --- | --- | --- | 1,15 | down |
| 6469413 | 7326245 | 1686398 | --- | --- | --- | 1,09 | up   |
| 6469568 | 7112355 | 1158069 | --- | --- | --- | 1,09 | up   |
| 6469579 | 7244602 | 1484776 | --- | --- | --- | 1,43 | down |
| 6469701 | 7303777 | 1631908 | --- | --- | --- | 1,32 | down |
| 6469733 | 7208784 | 1396155 | --- | --- | --- | 1,69 | up   |
| 6469735 | 7168979 | 1297200 | --- | --- | --- | 1,28 | down |
| 6469785 | 7340990 | 1722510 | --- | --- | --- | 2,58 | down |
| 6469797 | 7183182 | 1333579 | --- | --- | --- | 1,36 | up   |
| 6469844 | 7205944 | 1389485 | --- | --- | --- | 1,15 | up   |
| 6469876 | 7247230 | 1490567 | --- | --- | --- | 1,09 | down |
| 6469979 | 7126400 | 1192528 | --- | --- | --- | 1,12 | up   |
| 6470050 | 7249917 | 1497391 | --- | --- | --- | 1,52 | up   |
| 6470074 | 7243647 | 1482478 | --- | --- | --- | 1,11 | up   |
| 6470105 | 7280743 | 1574510 | --- | --- | --- | 1,04 | up   |
| 6470111 | 7358623 | 1766262 | --- | --- | --- | 1,68 | up   |
| 6470264 | 7168979 | 1297175 | --- | --- | --- | 1,08 | up   |
| 6470307 | 7373633 | 1805699 | --- | --- | --- | 1,52 | down |
| 6470399 | 7156611 | 1267369 | --- | --- | --- | 1,01 | down |
| 6470468 | 7217434 | 1416418 | --- | --- | --- | 1,21 | down |
| 6470530 | 7293266 | 1604451 | --- | --- | --- | 2,35 | down |
| 6470581 | 7198210 | 1370996 | --- | --- | --- | 1,05 | down |
| 6470785 | 7194540 | 1362111 | --- | --- | --- | 1,48 | up   |
| 6470945 | 7344380 | 1731134 | --- | --- | --- | 1,21 | up   |
| 6471025 | 7180804 | 1326998 | --- | --- | --- | 1,17 | down |
| 6471104 | 7374313 | 1807389 | --- | --- | --- | 1,20 | down |
| 6471192 | 7330238 | 1695920 | --- | --- | --- | 1,42 | up   |
| 6471283 | 7186688 | 1341848 | --- | --- | --- | 1,03 | down |
| 6471347 | 7277742 | 1567199 | --- | --- | --- | 1,09 | down |
| 6471423 | 7217434 | 1416374 | --- | --- | --- | 1,20 | up   |
| 6471483 | 7267953 | 1542237 | --- | --- | --- | 1,40 | down |
| 6471560 | 7029078 | 958874  | --- | --- | --- | 1,04 | up   |
| 6471681 | 7226277 | 1437985 | --- | --- | --- | 1,20 | down |
| 6471686 | 7361881 | 1773925 | --- | --- | --- | 1,28 | down |
| 6471944 | 7176362 | 1315509 | --- | --- | --- | 1,10 | up   |
| 6471975 | 7356115 | 1760129 | --- | --- | --- | 1,51 | down |
| 6471998 | 7330223 | 1695837 | --- | --- | --- | 1,21 | up   |
| 6472009 | 7132263 | 1206887 | --- | --- | --- | 1,16 | up   |
| 6472059 | 7238202 | 1468941 | --- | --- | --- | 1,27 | down |
| 6472152 | 7152007 | 1255304 | --- | --- | --- | 1,59 | up   |

|         |         |         |     |     |     |      |      |
|---------|---------|---------|-----|-----|-----|------|------|
| 6472214 | 7279533 | 1571916 | --- | --- | --- | 7,16 | down |
| 6472222 | 7162959 | 1282089 | --- | --- | --- | 1,55 | up   |
| 6472325 | 7069830 | 1055634 | --- | --- | --- | 1,01 | down |
| 6472366 | 7243647 | 1482422 | --- | --- | --- | 1,20 | down |
| 6472430 | 7176275 | 1315331 | --- | --- | --- | 1,03 | down |
| 6472478 | 7227775 | 1441827 | --- | --- | --- | 1,41 | up   |
| 6472503 | 7070836 | 1058324 | --- | --- | --- | 1,04 | down |
| 6472513 | 7332059 | 1700729 | --- | --- | --- | 1,06 | up   |
| 6472684 | 7337425 | 1713179 | --- | --- | --- | 1,04 | down |
| 6472691 | 7295652 | 1610275 | --- | --- | --- | 1,35 | down |
| 6472786 | 7246518 | 1489054 | --- | --- | --- | 2,07 | up   |
| 6472979 | 7326271 | 1686463 | --- | --- | --- | 1,11 | down |
| 6473016 | 7162177 | 1280581 | --- | --- | --- | 1,73 | up   |
| 6473083 | 7349944 | 1744923 | --- | --- | --- | 1,12 | up   |
| 6473100 | 7286807 | 1588804 | --- | --- | --- | 1,07 | down |
| 6473167 | 7092549 | 1109159 | --- | --- | --- | 1,00 | down |
| 6473241 | 7243647 | 1482448 | --- | --- | --- | 1,44 | down |
| 6473330 | 7142081 | 1230979 | --- | --- | --- | 1,48 | up   |
| 6473373 | 7281924 | 1577717 | --- | --- | --- | 1,70 | up   |
| 6473386 | 7038179 | 981252  | --- | --- | --- | 1,71 | down |
| 6473461 | 7113483 | 1161012 | --- | --- | --- | 1,45 | up   |
| 6473498 | 7055876 | 1022486 | --- | --- | --- | 2,26 | down |
| 6473507 | 7344838 | 1732426 | --- | --- | --- | 1,09 | up   |
| 6473517 | 7112566 | 1158636 | --- | --- | --- | 1,42 | down |
| 6473547 | 7041609 | 989562  | --- | --- | --- | 1,09 | down |
| 6473640 | 7258455 | 1518706 | --- | --- | --- | 1,13 | up   |
| 6473804 | 7197056 | 1367844 | --- | --- | --- | 1,00 | up   |
| 6473827 | 7212141 | 1403604 | --- | --- | --- | 1,33 | up   |
| 6473830 | 7155116 | 1263432 | --- | --- | --- | 1,31 | up   |
| 6473854 | 7289879 | 1596439 | --- | --- | --- | 1,54 | down |
| 6473873 | 7082098 | 1084112 | --- | --- | --- | 1,08 | down |
| 6473878 | 7056304 | 1023626 | --- | --- | --- | 1,39 | up   |
| 6473890 | 7301843 | 1626484 | --- | --- | --- | 1,03 | down |
| 6474078 | 7244287 | 1484051 | --- | --- | --- | 1,28 | up   |
| 6474111 | 7369400 | 1793984 | --- | --- | --- | 1,13 | up   |
| 6474185 | 7078666 | 1076536 | --- | --- | --- | 1,06 | down |
| 6474213 | 7374740 | 1808618 | --- | --- | --- | 1,07 | up   |
| 6474217 | 7088489 | 1099525 | --- | --- | --- | 1,07 | up   |
| 6474233 | 7147720 | 1245237 | --- | --- | --- | 1,60 | up   |
| 6474253 | 7258323 | 1518471 | --- | --- | --- | 6,58 | down |
| 6474299 | 7280570 | 1574101 | --- | --- | --- | 1,38 | down |
| 6474436 | 7210263 | 1399751 | --- | --- | --- | 1,23 | up   |
| 6474466 | 7321029 | 1674832 | --- | --- | --- | 1,04 | down |
| 6474471 | 7142770 | 1232734 | --- | --- | --- | 1,35 | down |
| 6474589 | 7058149 | 1027280 | --- | --- | --- | 1,14 | up   |
| 6474658 | 7227433 | 1440979 | --- | --- | --- | 1,05 | down |
| 6474664 | 7099573 | 1126719 | --- | --- | --- | 1,13 | up   |
| 6474691 | 7378546 | 1817601 | --- | --- | --- | 1,38 | down |
| 6474747 | 7120468 | 1178510 | --- | --- | --- | 1,00 | down |
| 6474753 | 7154655 | 1262343 | --- | --- | --- | 1,41 | up   |
| 6474844 | 7172691 | 1306434 | --- | --- | --- | 1,38 | up   |
| 6475096 | 7069253 | 1054171 | --- | --- | --- | 1,06 | up   |
| 6475118 | 7188138 | 1345027 | --- | --- | --- | 1,21 | up   |
| 6475120 | 7158419 | 1271379 | --- | --- | --- | 1,24 | down |
| 6475128 | 7274780 | 1559210 | --- | --- | --- | 2,17 | down |
| 6475223 | 7339379 | 1718337 | --- | --- | --- | 1,43 | down |
| 6475373 | 7244288 | 1484128 | --- | --- | --- | 1,41 | down |

|         |         |         |     |     |     |      |      |
|---------|---------|---------|-----|-----|-----|------|------|
| 6475426 | 7243647 | 1482468 | --- | --- | --- | 1,44 | down |
| 6475563 | 7050167 | 1009823 | --- | --- | --- | 1,02 | down |
| 6475630 | 7241995 | 1478324 | --- | --- | --- | 1,25 | up   |
| 6475809 | 7156372 | 1266705 | --- | --- | --- | 2,00 | up   |
| 6475818 | 7255517 | 1511372 | --- | --- | --- | 1,49 | down |
| 6475880 | 7177834 | 1319627 | --- | --- | --- | 1,10 | up   |
| 6476007 | 7146982 | 1243287 | --- | --- | --- | 1,15 | up   |
| 6476027 | 7139708 | 1225053 | --- | --- | --- | 1,04 | up   |
| 6476028 | 7327169 | 1688457 | --- | --- | --- | 1,34 | down |
| 6476088 | 7359453 | 1768460 | --- | --- | --- | 1,37 | up   |
| 6476173 | 7089080 | 1101142 | --- | --- | --- | 1,78 | down |
| 6476223 | 7306229 | 1638245 | --- | --- | --- | 1,13 | down |
| 6476281 | 7229856 | 1447074 | --- | --- | --- | 1,20 | up   |
| 6476308 | 7339834 | 1719557 | --- | --- | --- | 1,12 | up   |
| 6476313 | 7249019 | 1495080 | --- | --- | --- | 1,31 | down |
| 6476316 | 7361223 | 1772614 | --- | --- | --- | 2,52 | down |
| 6476338 | 7374324 | 1807474 | --- | --- | --- | 1,05 | down |
| 6476344 | 7073950 | 1065920 | --- | --- | --- | 1,12 | down |
| 6476363 | 7033337 | 969492  | --- | --- | --- | 1,09 | down |
| 6476391 | 7253215 | 1505380 | --- | --- | --- | 1,56 | down |
| 6476392 | 7243647 | 1482466 | --- | --- | --- | 1,05 | down |
| 6476423 | 7115963 | 1167077 | --- | --- | --- | 1,10 | up   |
| 6476450 | 7267802 | 1541733 | --- | --- | --- | 1,32 | down |
| 6476559 | 7072332 | 1061644 | --- | --- | --- | 1,20 | up   |
| 6476565 | 7301843 | 1626486 | --- | --- | --- | 1,11 | up   |
| 6476688 | 7277783 | 1567457 | --- | --- | --- | 1,47 | up   |
| 6476726 | 7360486 | 1770966 | --- | --- | --- | 1,13 | up   |
| 6476755 | 7212735 | 1405002 | --- | --- | --- | 1,24 | down |
| 6476783 | 7238252 | 1469221 | --- | --- | --- | 1,15 | up   |
| 6476785 | 7061550 | 1035289 | --- | --- | --- | 1,84 | down |
| 6476793 | 7067828 | 1050787 | --- | --- | --- | 1,06 | down |
| 6476898 | 7243894 | 1482955 | --- | --- | --- | 1,23 | up   |
| 6476927 | 7078982 | 1077323 | --- | --- | --- | 1,00 | down |
| 6477074 | 7168521 | 1295956 | --- | --- | --- | 1,03 | up   |
| 6477109 | 7249019 | 1495082 | --- | --- | --- | 1,13 | up   |
| 6477114 | 7167872 | 1294022 | --- | --- | --- | 1,78 | down |
| 6477158 | 7364582 | 1780555 | --- | --- | --- | 1,93 | down |
| 6477187 | 7350237 | 1745488 | --- | --- | --- | 1,20 | up   |
| 6477251 | 7243647 | 1482419 | --- | --- | --- | 2,65 | down |
| 6477285 | 7292869 | 1603426 | --- | --- | --- | 1,74 | up   |
| 6477302 | 7288077 | 1591988 | --- | --- | --- | 2,27 | up   |
| 6477343 | 7267344 | 1540261 | --- | --- | --- | 1,05 | down |
| 6477357 | 7119845 | 1176898 | --- | --- | --- | 1,16 | up   |
| 6477390 | 7217679 | 1417320 | --- | --- | --- | 1,09 | down |
| 6477426 | 7381330 | 1823629 | --- | --- | --- | 1,83 | up   |
| 6477455 | 7115963 | 1167060 | --- | --- | --- | 1,02 | down |
| 6477569 | 7350237 | 1745480 | --- | --- | --- | 1,02 | down |
| 6477575 | 7204831 | 1386812 | --- | --- | --- | 1,00 | down |
| 6477638 | 7340304 | 1720841 | --- | --- | --- | 1,20 | up   |
| 6477743 | 7231484 | 1451370 | --- | --- | --- | 1,18 | down |
| 6477784 | 7034293 | 971993  | --- | --- | --- | 1,15 | up   |
| 6477837 | 7330238 | 1695950 | --- | --- | --- | 1,28 | down |
| 6477861 | 7318139 | 1668070 | --- | --- | --- | 1,09 | down |
| 6477975 | 7056333 | 1023669 | --- | --- | --- | 1,08 | down |
| 6477998 | 7068259 | 1051649 | --- | --- | --- | 1,14 | down |
| 6478062 | 7110999 | 1154768 | --- | --- | --- | 1,10 | down |
| 6478139 | 7075460 | 1069409 | --- | --- | --- | 1,63 | down |

|         |         |         |     |     |     |      |      |
|---------|---------|---------|-----|-----|-----|------|------|
| 6478151 | 7210713 | 1400753 | --- | --- | --- | 1,61 | down |
| 6478224 | 7217747 | 1417494 | --- | --- | --- | 1,02 | up   |
| 6478272 | 7277742 | 1567211 | --- | --- | --- | 1,07 | up   |
| 6478283 | 7279103 | 1570838 | --- | --- | --- | 1,52 | down |
| 6478304 | 7052176 | 1014223 | --- | --- | --- | 1,02 | up   |
| 6478322 | 7079238 | 1077806 | --- | --- | --- | 1,35 | down |
| 6478377 | 7264797 | 1534422 | --- | --- | --- | 1,03 | up   |
| 6478483 | 7197056 | 1367837 | --- | --- | --- | 1,02 | up   |
| 6478520 | 7037495 | 979334  | --- | --- | --- | 1,02 | up   |
| 6478578 | 7314270 | 1657751 | --- | --- | --- | 1,09 | up   |
| 6478613 | 7027386 | 955085  | --- | --- | --- | 1,15 | up   |
| 6478650 | 7060896 | 1033549 | --- | --- | --- | 1,14 | up   |
| 6478757 | 7172691 | 1306453 | --- | --- | --- | 1,18 | up   |
| 6478803 | 7121849 | 1181760 | --- | --- | --- | 1,03 | down |
| 6478842 | 7261580 | 1526767 | --- | --- | --- | 1,02 | up   |
| 6478895 | 7147204 | 1243775 | --- | --- | --- | 1,62 | up   |
| 6478931 | 7286613 | 1588476 | --- | --- | --- | 4,56 | up   |
| 6479045 | 7363568 | 1778139 | --- | --- | --- | 2,28 | up   |
| 6479074 | 7118356 | 1173203 | --- | --- | --- | 1,74 | up   |
| 6479132 | 7148978 | 1248501 | --- | --- | --- | 1,03 | down |
| 6479156 | 7308679 | 1644252 | --- | --- | --- | 1,55 | up   |
| 6479227 | 7063716 | 1040125 | --- | --- | --- | 1,60 | down |
| 6479261 | 7076099 | 1070648 | --- | --- | --- | 1,10 | up   |
| 6479392 | 7281577 | 1576871 | --- | --- | --- | 1,06 | up   |
| 6479399 | 7132125 | 1206640 | --- | --- | --- | 1,03 | up   |
| 6479488 | 7173706 | 1309260 | --- | --- | --- | 1,58 | up   |
| 6479509 | 7189404 | 1348198 | --- | --- | --- | 1,53 | up   |
| 6479518 | 7227474 | 1441158 | --- | --- | --- | 1,16 | up   |
| 6479521 | 7384509 | 1830733 | --- | --- | --- | 1,05 | up   |
| 6479561 | 7180732 | 1326727 | --- | --- | --- | 1,09 | up   |
| 6479665 | 7344836 | 1732409 | --- | --- | --- | 1,10 | up   |
| 6479700 | 7092549 | 1109187 | --- | --- | --- | 1,09 | up   |
| 6479710 | 7330731 | 1697196 | --- | --- | --- | 1,04 | up   |
| 6479777 | 7069727 | 1055347 | --- | --- | --- | 2,13 | up   |
| 6479847 | 7371682 | 1800776 | --- | --- | --- | 1,22 | down |
| 6479857 | 7092549 | 1109165 | --- | --- | --- | 1,26 | down |
| 6479917 | 7084193 | 1089048 | --- | --- | --- | 1,07 | up   |
| 6479993 | 7212587 | 1404639 | --- | --- | --- | 1,19 | up   |
| 6480172 | 7180151 | 1325199 | --- | --- | --- | 1,09 | down |
| 6480179 | 7341274 | 1723394 | --- | --- | --- | 1,01 | up   |
| 6480257 | 7034356 | 972151  | --- | --- | --- | 2,13 | down |
| 6480261 | 7070668 | 1057934 | --- | --- | --- | 1,28 | down |
| 6480269 | 7336931 | 1711872 | --- | --- | --- | 1,33 | down |
| 6480363 | 7381330 | 1823632 | --- | --- | --- | 1,79 | up   |
| 6480389 | 7069253 | 1054168 | --- | --- | --- | 2,42 | up   |
| 6480458 | 7181105 | 1327967 | --- | --- | --- | 1,27 | up   |
| 6480590 | 7244287 | 1484067 | --- | --- | --- | 1,06 | up   |
| 6480607 | 7217650 | 1417171 | --- | --- | --- | 1,04 | up   |
| 6480610 | 7058507 | 1028322 | --- | --- | --- | 1,24 | up   |
| 6480666 | 7259221 | 1520618 | --- | --- | --- | 1,27 | up   |
| 6480773 | 7353232 | 1752773 | --- | --- | --- | 1,25 | up   |
| 6480806 | 7189669 | 1348963 | --- | --- | --- | 1,08 | up   |
| 6480989 | 7142081 | 1230987 | --- | --- | --- | 1,25 | up   |
| 6481079 | 7172373 | 1305575 | --- | --- | --- | 1,09 | up   |
| 6481150 | 7038530 | 981883  | --- | --- | --- | 1,43 | up   |
| 6481290 | 7337224 | 1712603 | --- | --- | --- | 1,13 | down |
| 6481309 | 7216994 | 1415185 | --- | --- | --- | 1,71 | down |

|         |         |         |     |     |     |      |      |
|---------|---------|---------|-----|-----|-----|------|------|
| 6481388 | 7247230 | 1490570 | --- | --- | --- | 1,08 | down |
| 6481408 | 7160846 | 1277345 | --- | --- | --- | 2,68 | up   |
| 6481655 | 7289382 | 1595200 | --- | --- | --- | 1,31 | down |
| 6481688 | 7340757 | 1721895 | --- | --- | --- | 1,19 | down |
| 6481757 | 7341274 | 1723395 | --- | --- | --- | 1,40 | down |
| 6481797 | 7315206 | 1660035 | --- | --- | --- | 2,18 | down |
| 6481810 | 7101258 | 1130570 | --- | --- | --- | 1,02 | down |
| 6481933 | 7068413 | 1051970 | --- | --- | --- | 1,04 | up   |
| 6481958 | 7217434 | 1416379 | --- | --- | --- | 1,31 | down |
| 6481976 | 7252728 | 1504324 | --- | --- | --- | 1,02 | up   |
| 6481977 | 7140113 | 1226055 | --- | --- | --- | 1,44 | down |
| 6481996 | 7227775 | 1441803 | --- | --- | --- | 1,20 | up   |
| 6482017 | 7088621 | 1099850 | --- | --- | --- | 2,26 | down |
| 6482066 | 7156611 | 1267316 | --- | --- | --- | 1,87 | down |
| 6482088 | 7203041 | 1382729 | --- | --- | --- | 1,58 | up   |
| 6482174 | 7033337 | 969501  | --- | --- | --- | 1,08 | up   |
| 6482237 | 7059020 | 1029357 | --- | --- | --- | 1,49 | down |
| 6482255 | 7376073 | 1811708 | --- | --- | --- | 1,31 | down |
| 6482257 | 7108434 | 1148306 | --- | --- | --- | 1,10 | down |
| 6482447 | 7320735 | 1674183 | --- | --- | --- | 1,06 | down |
| 6482497 | 7039223 | 983562  | --- | --- | --- | 2,44 | down |
| 6482560 | 7333462 | 1703642 | --- | --- | --- | 1,18 | down |
| 6482571 | 7061550 | 1035281 | --- | --- | --- | 2,16 | down |
| 6482637 | 7337425 | 1713203 | --- | --- | --- | 1,09 | up   |
| 6482660 | 7194400 | 1361762 | --- | --- | --- | 1,64 | up   |
| 6482793 | 7030037 | 960707  | --- | --- | --- | 1,37 | up   |
| 6482893 | 7330396 | 1696352 | --- | --- | --- | 1,31 | up   |
| 6483035 | 7252877 | 1504746 | --- | --- | --- | 1,09 | down |
| 6483041 | 7086966 | 1095239 | --- | --- | --- | 1,05 | up   |
| 6483188 | 7256191 | 1512883 | --- | --- | --- | 1,19 | down |
| 6483204 | 7318139 | 1668071 | --- | --- | --- | 1,02 | up   |
| 6483276 | 7040674 | 987029  | --- | --- | --- | 2,11 | up   |
| 6483277 | 7039532 | 984437  | --- | --- | --- | 1,13 | up   |
| 6483378 | 7356115 | 1760123 | --- | --- | --- | 1,13 | up   |
| 6483450 | 7326271 | 1686458 | --- | --- | --- | 1,19 | down |
| 6483468 | 7245921 | 1487678 | --- | --- | --- | 1,18 | up   |
| 6483525 | 7127691 | 1195635 | --- | --- | --- | 1,25 | down |
| 6483526 | 7112355 | 1158068 | --- | --- | --- | 1,15 | down |
| 6483528 | 7267204 | 1539861 | --- | --- | --- | 1,09 | down |
| 6483642 | 7087965 | 1098025 | --- | --- | --- | 1,82 | up   |
| 6483656 | 7074164 | 1066384 | --- | --- | --- | 1,47 | up   |
| 6483664 | 7274780 | 1559216 | --- | --- | --- | 1,10 | down |
| 6483752 | 7255517 | 1511370 | --- | --- | --- | 1,14 | up   |
| 6483756 | 7186443 | 1341312 | --- | --- | --- | 1,07 | up   |
| 6483758 | 7125348 | 1190074 | --- | --- | --- | 1,06 | up   |
| 6483955 | 7245874 | 1487592 | --- | --- | --- | 1,11 | up   |
| 6483971 | 7060896 | 1033577 | --- | --- | --- | 1,09 | up   |
| 6484086 | 7280743 | 1574552 | --- | --- | --- | 1,12 | up   |
| 6484108 | 7352046 | 1750031 | --- | --- | --- | 1,01 | up   |
| 6484193 | 7255510 | 1511325 | --- | --- | --- | 1,10 | down |
| 6484276 | 7371001 | 1798862 | --- | --- | --- | 1,40 | up   |
| 6484373 | 7227474 | 1441161 | --- | --- | --- | 1,28 | down |
| 6484504 | 7052813 | 1015884 | --- | --- | --- | 1,26 | down |
| 6484774 | 7253088 | 1505121 | --- | --- | --- | 1,44 | up   |
| 6484813 | 7255911 | 1512225 | --- | --- | --- | 1,81 | up   |
| 6484950 | 7264085 | 1532719 | --- | --- | --- | 1,53 | down |
| 6484996 | 7137646 | 1220437 | --- | --- | --- | 1,66 | down |

|         |         |         |     |     |     |      |      |
|---------|---------|---------|-----|-----|-----|------|------|
| 6484998 | 7194400 | 1361700 | --- | --- | --- | 1,04 | up   |
| 6485013 | 7235069 | 1460969 | --- | --- | --- | 1,33 | up   |
| 6485061 | 7238115 | 1468570 | --- | --- | --- | 1,29 | down |
| 6485096 | 7266532 | 1538302 | --- | --- | --- | 2,68 | up   |
| 6485217 | 7237672 | 1467305 | --- | --- | --- | 1,33 | down |
| 6485237 | 7127540 | 1195276 | --- | --- | --- | 1,12 | down |
| 6485314 | 7183182 | 1333562 | --- | --- | --- | 1,71 | down |
| 6485321 | 7171091 | 1302459 | --- | --- | --- | 1,04 | down |
| 6485399 | 7264653 | 1534048 | --- | --- | --- | 1,45 | up   |
| 6485476 | 7107503 | 1145801 | --- | --- | --- | 2,12 | down |
| 6485510 | 7274780 | 1559201 | --- | --- | --- | 1,06 | up   |
| 6485526 | 7339387 | 1718374 | --- | --- | --- | 2,04 | up   |
| 6485600 | 7094008 | 1112617 | --- | --- | --- | 1,25 | down |
| 6485664 | 7035525 | 974785  | --- | --- | --- | 1,05 | down |
| 6485686 | 7081487 | 1082702 | --- | --- | --- | 1,16 | up   |
| 6485767 | 7113483 | 1160997 | --- | --- | --- | 1,36 | up   |
| 6485846 | 7107926 | 1146847 | --- | --- | --- | 1,05 | up   |
| 6485850 | 7373633 | 1805709 | --- | --- | --- | 1,07 | up   |
| 6485855 | 7312250 | 1652651 | --- | --- | --- | 1,16 | down |
| 6485860 | 7236358 | 1464254 | --- | --- | --- | 1,50 | down |
| 6485874 | 7372840 | 1803782 | --- | --- | --- | 1,20 | down |
| 6485887 | 7306229 | 1638252 | --- | --- | --- | 1,46 | up   |
| 6486071 | 7098810 | 1124656 | --- | --- | --- | 1,25 | down |
| 6486125 | 7059584 | 1030541 | --- | --- | --- | 1,05 | down |
| 6486249 | 7231834 | 1452273 | --- | --- | --- | 1,20 | up   |
| 6486261 | 7243628 | 1482390 | --- | --- | --- | 1,04 | down |
| 6486271 | 7355044 | 1757436 | --- | --- | --- | 1,17 | up   |
| 6486338 | 7361881 | 1773958 | --- | --- | --- | 1,54 | up   |
| 6486367 | 7341274 | 1723384 | --- | --- | --- | 1,36 | up   |
| 6486478 | 7321029 | 1674826 | --- | --- | --- | 1,32 | up   |
| 6486524 | 7099573 | 1126726 | --- | --- | --- | 1,06 | up   |
| 6486716 | 7341546 | 1723976 | --- | --- | --- | 1,53 | down |
| 6486781 | 7244288 | 1484112 | --- | --- | --- | 2,38 | up   |
| 6486834 | 7126400 | 1192531 | --- | --- | --- | 1,40 | up   |
| 6486917 | 7264274 | 1533170 | --- | --- | --- | 2,46 | up   |
| 6486923 | 7095041 | 1115192 | --- | --- | --- | 1,47 | down |
| 6487033 | 7366749 | 1785517 | --- | --- | --- | 1,03 | up   |
| 6487036 | 7177520 | 1318631 | --- | --- | --- | 1,16 | down |
| 6487131 | 7374317 | 1807395 | --- | --- | --- | 1,20 | up   |
| 6487172 | 7068259 | 1051650 | --- | --- | --- | 2,80 | down |
| 6487202 | 7277783 | 1567442 | --- | --- | --- | 1,74 | up   |
| 6487320 | 7307473 | 1641303 | --- | --- | --- | 1,15 | down |
| 6487322 | 7196029 | 1365619 | --- | --- | --- | 1,36 | down |
| 6487430 | 7032558 | 967059  | --- | --- | --- | 1,07 | down |
| 6487500 | 7264274 | 1533169 | --- | --- | --- | 1,98 | up   |
| 6487555 | 7034356 | 972173  | --- | --- | --- | 1,25 | down |
| 6487732 | 7079600 | 1078634 | --- | --- | --- | 1,08 | up   |
| 6487843 | 7350993 | 1747554 | --- | --- | --- | 1,20 | down |
| 6487898 | 7341038 | 1722639 | --- | --- | --- | 1,15 | down |
| 6488004 | 7196029 | 1365605 | --- | --- | --- | 1,38 | down |
| 6488060 | 7059766 | 1030972 | --- | --- | --- | 1,29 | up   |
| 6488070 | 7295652 | 1610295 | --- | --- | --- | 1,09 | down |
| 6488094 | 7073677 | 1065168 | --- | --- | --- | 1,10 | down |
| 6488141 | 7198087 | 1370713 | --- | --- | --- | 1,43 | up   |
| 6488164 | 7359789 | 1769164 | --- | --- | --- | 1,14 | down |
| 6488520 | 7272110 | 1553077 | --- | --- | --- | 1,08 | up   |
| 6488539 | 7034293 | 971968  | --- | --- | --- | 1,12 | up   |

|         |         |         |     |     |     |      |      |
|---------|---------|---------|-----|-----|-----|------|------|
| 6488632 | 7121849 | 1181784 | --- | --- | --- | 1,28 | up   |
| 6488658 | 7199341 | 1374129 | --- | --- | --- | 1,31 | down |
| 6488687 | 7069721 | 1055306 | --- | --- | --- | 1,11 | up   |
| 6488753 | 7118234 | 1172841 | --- | --- | --- | 1,23 | down |
| 6488791 | 7069142 | 1053872 | --- | --- | --- | 1,18 | up   |
| 6488956 | 7162102 | 1280370 | --- | --- | --- | 1,10 | up   |
| 6489013 | 7196029 | 1365607 | --- | --- | --- | 1,41 | up   |
| 6489027 | 7240569 | 1475518 | --- | --- | --- | 1,07 | up   |
| 6489087 | 7374324 | 1807512 | --- | --- | --- | 1,26 | down |
| 6489090 | 7288170 | 1592288 | --- | --- | --- | 1,26 | down |
| 6489098 | 7064134 | 1041427 | --- | --- | --- | 1,14 | up   |
| 6489113 | 7236358 | 1464222 | --- | --- | --- | 1,00 | up   |
| 6489198 | 7059309 | 1029925 | --- | --- | --- | 1,01 | down |
| 6489275 | 7213908 | 1407690 | --- | --- | --- | 1,15 | up   |
| 6489314 | 7050716 | 1011222 | --- | --- | --- | 1,03 | down |
| 6489547 | 7212141 | 1403602 | --- | --- | --- | 1,26 | up   |
| 6489559 | 7326271 | 1686466 | --- | --- | --- | 1,23 | up   |
| 6489564 | 7307473 | 1641265 | --- | --- | --- | 1,25 | down |
| 6489584 | 7260553 | 1524113 | --- | --- | --- | 1,58 | up   |
| 6489644 | 7276650 | 1564148 | --- | --- | --- | 1,03 | up   |
| 6489661 | 7239303 | 1471967 | --- | --- | --- | 2,19 | down |
| 6489748 | 7272110 | 1553077 | --- | --- | --- | 1,11 | down |
| 6489785 | 7208847 | 1396341 | --- | --- | --- | 1,13 | up   |
| 6489962 | 7308679 | 1644241 | --- | --- | --- | 2,00 | up   |
| 6489998 | 7281877 | 1577532 | --- | --- | --- | 1,19 | up   |
| 6490086 | 7041486 | 989219  | --- | --- | --- | 1,31 | up   |
| 6490221 | 7259221 | 1520629 | --- | --- | --- | 1,64 | down |
| 6490297 | 7279793 | 1572538 | --- | --- | --- | 1,16 | up   |
| 6490399 | 7162177 | 1280575 | --- | --- | --- | 1,09 | down |
| 6490409 | 7133749 | 1210808 | --- | --- | --- | 1,22 | down |
| 6490474 | 7240852 | 1476252 | --- | --- | --- | 1,12 | up   |
| 6490586 | 7346066 | 1735309 | --- | --- | --- | 1,21 | up   |
| 6490675 | 7326245 | 1686403 | --- | --- | --- | 1,38 | up   |
| 6490708 | 7033337 | 969519  | --- | --- | --- | 1,21 | up   |
| 6490848 | 7310851 | 1649634 | --- | --- | --- | 1,02 | down |
| 6490898 | 7337425 | 1713200 | --- | --- | --- | 1,28 | up   |
| 6490907 | 7067828 | 1050794 | --- | --- | --- | 1,06 | up   |
| 6490940 | 7078666 | 1076506 | --- | --- | --- | 1,07 | down |
| 6490943 | 7038179 | 981265  | --- | --- | --- | 1,29 | down |
| 6490979 | 7034747 | 973193  | --- | --- | --- | 1,02 | up   |
| 6490996 | 7293234 | 1604333 | --- | --- | --- | 2,09 | down |
| 6491090 | 7371228 | 1799472 | --- | --- | --- | 1,00 | down |
| 6491134 | 7377583 | 1815456 | --- | --- | --- | 1,32 | down |
| 6491153 | 7279568 | 1572014 | --- | --- | --- | 1,11 | down |
| 6491198 | 7042382 | 991287  | --- | --- | --- | 1,20 | up   |
| 6491209 | 7041584 | 989459  | --- | --- | --- | 1,47 | down |
| 6491237 | 7147791 | 1245416 | --- | --- | --- | 1,39 | down |
| 6491302 | 7264274 | 1533166 | --- | --- | --- | 1,08 | up   |
| 6491367 | 7098810 | 1124657 | --- | --- | --- | 1,08 | up   |
| 6491409 | 7358859 | 1767001 | --- | --- | --- | 1,16 | up   |
| 6491431 | 7168521 | 1295888 | --- | --- | --- | 1,13 | up   |
| 6491482 | 7295652 | 1610290 | --- | --- | --- | 1,54 | down |
| 6491490 | 7370412 | 1796832 | --- | --- | --- | 1,42 | up   |
| 6491640 | 7329846 | 1694999 | --- | --- | --- | 1,19 | up   |
| 6491660 | 7276650 | 1564150 | --- | --- | --- | 1,03 | down |
| 6491742 | 7080563 | 1080721 | --- | --- | --- | 1,20 | down |
| 6491778 | 7236358 | 1464222 | --- | --- | --- | 1,01 | down |

|         |         |         |     |     |     |      |      |
|---------|---------|---------|-----|-----|-----|------|------|
| 6491877 | 7238826 | 1470532 | --- | --- | --- | 1,78 | down |
| 6491879 | 7140834 | 1227967 | --- | --- | --- | 1,46 | up   |
| 6491929 | 7087965 | 1098060 | --- | --- | --- | 1,21 | down |
| 6491948 | 7031774 | 964761  | --- | --- | --- | 1,62 | down |
| 6491962 | 7353284 | 1752982 | --- | --- | --- | 1,55 | down |
| 6492070 | 7198002 | 1370413 | --- | --- | --- | 2,15 | up   |
| 6492090 | 7043379 | 993631  | --- | --- | --- | 1,19 | down |
| 6492149 | 7037235 | 978573  | --- | --- | --- | 1,11 | down |
| 6492201 | 7084193 | 1089061 | --- | --- | --- | 1,62 | up   |
| 6492276 | 7369141 | 1793318 | --- | --- | --- | 1,21 | down |
| 6492319 | 7193056 | 1358264 | --- | --- | --- | 1,19 | up   |
| 6492328 | 7109730 | 1151719 | --- | --- | --- | 1,07 | up   |
| 6492342 | 7248790 | 1494516 | --- | --- | --- | 1,13 | up   |
| 6492344 | 7056736 | 1024422 | --- | --- | --- | 1,39 | down |
| 6492348 | 7144389 | 1236780 | --- | --- | --- | 1,71 | down |
| 6492449 | 7244027 | 1483294 | --- | --- | --- | 1,07 | up   |
| 6492453 | 7239752 | 1473156 | --- | --- | --- | 1,13 | up   |
| 6492490 | 7041609 | 989565  | --- | --- | --- | 1,07 | down |
| 6492640 | 7380878 | 1822551 | --- | --- | --- | 1,06 | down |
| 6492698 | 7205750 | 1388930 | --- | --- | --- | 1,14 | down |
| 6492838 | 7081487 | 1082713 | --- | --- | --- | 1,23 | up   |
| 6492839 | 7209927 | 1398922 | --- | --- | --- | 1,04 | down |
| 6492859 | 7079475 | 1078293 | --- | --- | --- | 1,07 | up   |
| 6492896 | 7083030 | 1086245 | --- | --- | --- | 1,04 | down |
| 6492946 | 7121849 | 1181783 | --- | --- | --- | 1,11 | up   |
| 6492953 | 7326245 | 1686401 | --- | --- | --- | 1,21 | down |
| 6492979 | 7377304 | 1814599 | --- | --- | --- | 1,14 | down |
| 6493008 | 7146245 | 1241349 | --- | --- | --- | 1,64 | up   |
| 6493025 | 7252877 | 1504703 | --- | --- | --- | 1,11 | down |
| 6493256 | 7364346 | 1779984 | --- | --- | --- | 1,29 | up   |
| 6493378 | 7267802 | 1541742 | --- | --- | --- | 1,07 | up   |
| 6493414 | 7295652 | 1610279 | --- | --- | --- | 1,00 | down |
| 6493466 | 7088538 | 1099635 | --- | --- | --- | 1,88 | down |
| 6493473 | 7252877 | 1504689 | --- | --- | --- | 1,35 | down |
| 6493508 | 7385253 | 1832225 | --- | --- | --- | 1,12 | up   |
| 6493543 | 7301843 | 1626487 | --- | --- | --- | 1,04 | up   |
| 6493546 | 7112566 | 1158626 | --- | --- | --- | 1,23 | down |
| 6493560 | 7305275 | 1635829 | --- | --- | --- | 1,23 | down |
| 6493594 | 7050167 | 1009819 | --- | --- | --- | 1,02 | down |
| 6493633 | 7045955 | 1000757 | --- | --- | --- | 4,36 | down |
| 6493781 | 7363147 | 1776999 | --- | --- | --- | 1,05 | down |
| 6493843 | 7040442 | 986537  | --- | --- | --- | 1,33 | down |
| 6493973 | 7028624 | 958001  | --- | --- | --- | 1,11 | up   |
| 6494089 | 7076099 | 1070661 | --- | --- | --- | 2,42 | up   |
| 6494118 | 7078666 | 1076515 | --- | --- | --- | 1,25 | up   |
| 6494154 | 7064732 | 1042918 | --- | --- | --- | 1,06 | down |
| 6494225 | 7208436 | 1395346 | --- | --- | --- | 1,00 | down |
| 6494291 | 7212718 | 1404949 | --- | --- | --- | 1,64 | up   |
| 6494349 | 7252728 | 1504338 | --- | --- | --- | 1,19 | down |
| 6494460 | 7109730 | 1151713 | --- | --- | --- | 1,25 | up   |
| 6494504 | 7144782 | 1237783 | --- | --- | --- | 2,13 | down |
| 6494510 | 7378637 | 1817829 | --- | --- | --- | 1,62 | down |
| 6494519 | 7198730 | 1372640 | --- | --- | --- | 1,11 | down |
| 6494532 | 7264797 | 1534422 | --- | --- | --- | 1,01 | up   |
| 6494541 | 7240569 | 1475472 | --- | --- | --- | 1,06 | down |
| 6494664 | 7309738 | 1646957 | --- | --- | --- | 1,31 | up   |
| 6494686 | 7278597 | 1569641 | --- | --- | --- | 2,01 | up   |



|         |         |         |     |     |     |      |      |
|---------|---------|---------|-----|-----|-----|------|------|
| 6494697 | 7350922 | 1747316 | --- | --- | --- | 1,01 | up   |
| 6494816 | 7333462 | 1703648 | --- | --- | --- | 1,27 | down |
| 6494888 | 7121849 | 1181791 | --- | --- | --- | 1,13 | down |
| 6494908 | 7252339 | 1503334 | --- | --- | --- | 1,23 | up   |
| 6494956 | 7376073 | 1811721 | --- | --- | --- | 1,02 | up   |
| 6495008 | 7078666 | 1076521 | --- | --- | --- | 1,10 | up   |
| 6495026 | 7174281 | 1310843 | --- | --- | --- | 1,23 | up   |
| 6495061 | 7172691 | 1306448 | --- | --- | --- | 1,33 | down |
| 6495158 | 7052813 | 1015936 | --- | --- | --- | 1,43 | down |
| 6495166 | 7228520 | 1443766 | --- | --- | --- | 1,45 | down |
| 6495217 | 7079475 | 1078294 | --- | --- | --- | 1,14 | up   |
| 6495263 | 7341546 | 1723952 | --- | --- | --- | 1,05 | down |
| 6495304 | 7120827 | 1179300 | --- | --- | --- | 1,13 | down |
| 6495436 | 7059971 | 1031470 | --- | --- | --- | 2,08 | up   |
| 6495520 | 7280743 | 1574485 | --- | --- | --- | 1,02 | up   |
| 6495613 | 7258455 | 1518721 | --- | --- | --- | 1,07 | down |
| 6495783 | 7330731 | 1697208 | --- | --- | --- | 1,51 | down |
| 6495895 | 7238414 | 1469570 | --- | --- | --- | 1,10 | up   |
| 6495947 | 7167700 | 1293611 | --- | --- | --- | 1,73 | down |
| 6495960 | 7087965 | 1098045 | --- | --- | --- | 1,09 | up   |
| 6495971 | 7320998 | 1674711 | --- | --- | --- | 1,79 | down |
| 6496063 | 7069253 | 1054158 | --- | --- | --- | 1,57 | down |
| 6496265 | 7243363 | 1481627 | --- | --- | --- | 1,30 | down |
| 6496305 | 7079326 | 1077973 | --- | --- | --- | 1,23 | down |
| 6496320 | 7127801 | 1195863 | --- | --- | --- | 1,50 | up   |
| 6496446 | 7100408 | 1128642 | --- | --- | --- | 2,09 | down |
| 6496451 | 7186464 | 1341356 | --- | --- | --- | 1,32 | up   |
| 6496540 | 7369521 | 1794256 | --- | --- | --- | 1,49 | down |
| 6496562 | 7257976 | 1517705 | --- | --- | --- | 1,07 | down |
| 6496758 | 7295410 | 1609698 | --- | --- | --- | 1,34 | up   |
| 6496812 | 7243363 | 1481603 | --- | --- | --- | 1,02 | down |
| 6496834 | 7330731 | 1697163 | --- | --- | --- | 1,48 | down |
| 6496835 | 7319151 | 1670111 | --- | --- | --- | 1,79 | down |
| 6497126 | 7191594 | 1354223 | --- | --- | --- | 2,06 | up   |
| 6497147 | 7200152 | 1376053 | --- | --- | --- | 2,14 | up   |
| 6497229 | 7028278 | 957313  | --- | --- | --- | 1,32 | down |
| 6497255 | 7122140 | 1182713 | --- | --- | --- | 1,03 | up   |
| 6497347 | 7240569 | 1475501 | --- | --- | --- | 1,16 | down |
| 6497375 | 7369712 | 1794832 | --- | --- | --- | 1,49 | up   |
| 6497376 | 7130889 | 1203864 | --- | --- | --- | 2,02 | down |
| 6497378 | 7114274 | 1162813 | --- | --- | --- | 1,01 | up   |
| 6497538 | 7193056 | 1358289 | --- | --- | --- | 1,34 | up   |
| 6497796 | 7096924 | 1119612 | --- | --- | --- | 1,77 | down |
| 6497879 | 7340757 | 1721904 | --- | --- | --- | 1,09 | down |
| 6497921 | 7029770 | 960156  | --- | --- | --- | 1,07 | up   |
| 6498098 | 7146982 | 1243281 | --- | --- | --- | 1,32 | down |
| 6498102 | 7168979 | 1297189 | --- | --- | --- | 1,23 | up   |
| 6498243 | 7235840 | 1463001 | --- | --- | --- | 1,04 | down |
| 6498292 | 7120550 | 1178699 | --- | --- | --- | 1,43 | down |
| 6498361 | 7193916 | 1360447 | --- | --- | --- | 2,04 | down |
| 6498363 | 7086672 | 1094340 | --- | --- | --- | 1,06 | down |
| 6498476 | 7235069 | 1460992 | --- | --- | --- | 1,23 | up   |
| 6498513 | 7355138 | 1757854 | --- | --- | --- | 1,02 | down |
| 6498516 | 7364346 | 1780000 | --- | --- | --- | 1,26 | up   |
| 6498520 | 7063716 | 1040126 | --- | --- | --- | 1,05 | up   |
| 6498630 | 7244027 | 1483282 | --- | --- | --- | 1,01 | down |
| 6498639 | 7280743 | 1574570 | --- | --- | --- | 1,02 | up   |

|         |         |         |     |     |     |      |      |
|---------|---------|---------|-----|-----|-----|------|------|
| 6498716 | 7142416 | 1231799 | --- | --- | --- | 1,28 | up   |
| 6498744 | 7156052 | 1265764 | --- | --- | --- | 1,16 | up   |
| 6498776 | 7260553 | 1524109 | --- | --- | --- | 1,16 | down |
| 6498813 | 7177428 | 1318395 | --- | --- | --- | 1,06 | up   |
| 6498826 | 7274780 | 1559235 | --- | --- | --- | 1,06 | down |
| 6498831 | 7148978 | 1248486 | --- | --- | --- | 1,23 | down |
| 6498911 | 7069253 | 1054157 | --- | --- | --- | 1,22 | up   |
| 6498948 | 7302018 | 1626995 | --- | --- | --- | 1,38 | up   |
| 6499105 | 7212698 | 1404863 | --- | --- | --- | 1,11 | up   |
| 6499109 | 7376073 | 1811695 | --- | --- | --- | 1,11 | down |
| 6499186 | 7239303 | 1471937 | --- | --- | --- | 1,02 | up   |
| 6499218 | 7286807 | 1588824 | --- | --- | --- | 1,32 | down |
| 6499315 | 7222236 | 1428113 | --- | --- | --- | 1,09 | up   |
| 6499325 | 7068942 | 1053377 | --- | --- | --- | 1,04 | down |
| 6499338 | 7298692 | 1618409 | --- | --- | --- | 1,39 | up   |
| 6499572 | 7093752 | 1111997 | --- | --- | --- | 1,09 | down |
| 6499685 | 7065860 | 1045804 | --- | --- | --- | 1,54 | down |
| 6499730 | 7062233 | 1037224 | --- | --- | --- | 1,53 | up   |
| 6499819 | 7089080 | 1101151 | --- | --- | --- | 1,01 | up   |
| 6499958 | 7329846 | 1694995 | --- | --- | --- | 1,96 | down |
| 6500000 | 7235393 | 1461717 | --- | --- | --- | 4,83 | down |
| 6500148 | 7247334 | 1490820 | --- | --- | --- | 1,29 | up   |
| 6500175 | 7297274 | 1614658 | --- | --- | --- | 1,27 | up   |
| 6500261 | 7075460 | 1069397 | --- | --- | --- | 1,20 | up   |
| 6500528 | 7064468 | 1042367 | --- | --- | --- | 1,23 | down |
| 6500556 | 7277719 | 1567090 | --- | --- | --- | 1,08 | up   |
| 6500564 | 7330314 | 1696145 | --- | --- | --- | 1,02 | down |
| 6500582 | 7207069 | 1392035 | --- | --- | --- | 1,03 | down |
| 6500630 | 7374324 | 1807494 | --- | --- | --- | 1,06 | up   |
| 6500690 | 7078666 | 1076517 | --- | --- | --- | 1,37 | up   |
| 6500763 | 7367994 | 1789235 | --- | --- | --- | 1,05 | down |
| 6500808 | 7328695 | 1692304 | --- | --- | --- | 1,78 | up   |
| 6500853 | 7195680 | 1364896 | --- | --- | --- | 1,02 | up   |
| 6500869 | 7059020 | 1029344 | --- | --- | --- | 1,42 | up   |
| 6500892 | 7268694 | 1544245 | --- | --- | --- | 1,15 | up   |
| 6500897 | 7149008 | 1248598 | --- | --- | --- | 1,76 | up   |
| 6500905 | 7032204 | 966146  | --- | --- | --- | 1,73 | up   |
| 6501015 | 7363529 | 1777934 | --- | --- | --- | 1,01 | down |
| 6501122 | 7256070 | 1512596 | --- | --- | --- | 1,70 | up   |
| 6501186 | 7071659 | 1060221 | --- | --- | --- | 1,05 | up   |
| 6501188 | 7093806 | 1112150 | --- | --- | --- | 2,72 | down |
| 6501238 | 7031774 | 964784  | --- | --- | --- | 1,45 | down |
| 6501278 | 7318651 | 1669091 | --- | --- | --- | 1,28 | up   |
| 6501329 | 7344702 | 1732140 | --- | --- | --- | 1,55 | down |
| 6501349 | 7068259 | 1051658 | --- | --- | --- | 1,16 | down |
| 6501409 | 7363529 | 1777933 | --- | --- | --- | 1,00 | down |
| 6501465 | 7262570 | 1528988 | --- | --- | --- | 1,01 | up   |
| 6501605 | 7237672 | 1467303 | --- | --- | --- | 1,40 | down |
| 6501607 | 7309734 | 1646874 | --- | --- | --- | 1,79 | down |
| 6501773 | 7277783 | 1567477 | --- | --- | --- | 1,47 | down |
| 6501951 | 7308679 | 1644250 | --- | --- | --- | 1,01 | up   |
| 6501971 | 7189184 | 1347597 | --- | --- | --- | 1,32 | down |
| 6501984 | 7344702 | 1732141 | --- | --- | --- | 1,40 | down |
| 6502055 | 7142917 | 1233173 | --- | --- | --- | 1,46 | up   |
| 6502104 | 7339387 | 1718394 | --- | --- | --- | 1,42 | up   |
| 6502205 | 7142917 | 1233173 | --- | --- | --- | 1,55 | down |
| 6502266 | 7361881 | 1773940 | --- | --- | --- | 1,03 | down |

|         |         |         |     |     |     |      |      |
|---------|---------|---------|-----|-----|-----|------|------|
| 6502269 | 7219304 | 1421272 | --- | --- | --- | 1,08 | down |
| 6502297 | 7148978 | 1248462 | --- | --- | --- | 1,30 | up   |
| 6502375 | 7219885 | 1422779 | --- | --- | --- | 1,54 | down |
| 6502474 | 7033616 | 970207  | --- | --- | --- | 1,01 | down |
| 6502514 | 7318286 | 1668328 | --- | --- | --- | 1,11 | up   |
| 6502516 | 7132024 | 1206337 | --- | --- | --- | 1,15 | down |
| 6502630 | 7352635 | 1751444 | --- | --- | --- | 1,03 | down |
| 6502671 | 7030454 | 961549  | --- | --- | --- | 1,44 | down |
| 6502770 | 7337224 | 1712607 | --- | --- | --- | 1,50 | up   |
| 6502817 | 7275927 | 1562337 | --- | --- | --- | 1,26 | up   |
| 6502822 | 7235794 | 1462889 | --- | --- | --- | 1,07 | up   |
| 6502931 | 7343250 | 1728037 | --- | --- | --- | 1,26 | down |
| 6502958 | 7031774 | 964735  | --- | --- | --- | 1,85 | up   |
| 6502971 | 7058507 | 1028303 | --- | --- | --- | 1,21 | down |
| 6502986 | 7356115 | 1760124 | --- | --- | --- | 1,05 | up   |
| 6503153 | 7123421 | 1185828 | --- | --- | --- | 1,53 | down |
| 6503275 | 7374317 | 1807405 | --- | --- | --- | 1,05 | up   |
| 6503321 | 7039728 | 984845  | --- | --- | --- | 2,57 | down |
| 6503503 | 7211363 | 1402041 | --- | --- | --- | 1,44 | up   |
| 6503613 | 7073854 | 1065629 | --- | --- | --- | 1,13 | down |
| 6503688 | 7117813 | 1171722 | --- | --- | --- | 1,18 | up   |
| 6503691 | 7377116 | 1814067 | --- | --- | --- | 1,40 | up   |
| 6503734 | 7176275 | 1315349 | --- | --- | --- | 1,09 | down |
| 6503794 | 7255687 | 1511771 | --- | --- | --- | 1,28 | down |
| 6503839 | 7038530 | 981884  | --- | --- | --- | 1,68 | down |
| 6503882 | 7355044 | 1757442 | --- | --- | --- | 1,15 | up   |
| 6503915 | 7214605 | 1409365 | --- | --- | --- | 1,44 | down |
| 6503919 | 7165644 | 1288028 | --- | --- | --- | 1,31 | up   |
| 6503943 | 7158419 | 1271380 | --- | --- | --- | 1,21 | up   |
| 6503970 | 7383102 | 1827379 | --- | --- | --- | 1,06 | down |
| 6504047 | 7308679 | 1644238 | --- | --- | --- | 1,49 | up   |
| 6504056 | 7186688 | 1341840 | --- | --- | --- | 1,39 | down |
| 6504100 | 7217434 | 1416414 | --- | --- | --- | 1,19 | up   |
| 6504137 | 7330731 | 1697172 | --- | --- | --- | 1,22 | up   |
| 6504221 | 7289075 | 1594476 | --- | --- | --- | 1,31 | down |
| 6504306 | 7261580 | 1526807 | --- | --- | --- | 2,20 | up   |
| 6504310 | 7281577 | 1576877 | --- | --- | --- | 1,01 | down |
| 6504315 | 7052813 | 1015929 | --- | --- | --- | 1,43 | up   |
| 6504343 | 7235069 | 1460994 | --- | --- | --- | 1,08 | up   |
| 6504361 | 7079600 | 1078632 | --- | --- | --- | 1,18 | down |
| 6504384 | 7069464 | 1054656 | --- | --- | --- | 1,66 | down |
| 6504398 | 7040442 | 986543  | --- | --- | --- | 1,69 | down |
| 6504440 | 7320998 | 1674733 | --- | --- | --- | 1,04 | down |
| 6504598 | 7273744 | 1557006 | --- | --- | --- | 1,09 | down |
| 6504607 | 7095021 | 1115129 | --- | --- | --- | 1,39 | up   |
| 6504713 | 7377116 | 1814070 | --- | --- | --- | 1,22 | up   |
| 6504715 | 7168979 | 1297181 | --- | --- | --- | 1,36 | down |
| 6504743 | 7041061 | 988079  | --- | --- | --- | 1,34 | up   |
| 6504752 | 7286807 | 1588797 | --- | --- | --- | 1,11 | down |
| 6504966 | 7127257 | 1194806 | --- | --- | --- | 1,49 | up   |
| 6504987 | 7277719 | 1567081 | --- | --- | --- | 2,27 | up   |
| 6505004 | 7076099 | 1070649 | --- | --- | --- | 1,18 | up   |
| 6505010 | 7198210 | 1370969 | --- | --- | --- | 1,06 | down |
| 6505032 | 7294911 | 1608531 | --- | --- | --- | 1,50 | up   |
| 6505034 | 7341002 | 1722547 | --- | --- | --- | 1,51 | up   |
| 6505135 | 7339379 | 1718338 | --- | --- | --- | 1,13 | down |
| 6505250 | 7091900 | 1107629 | --- | --- | --- | 1,61 | up   |

|         |         |         |     |     |     |      |      |
|---------|---------|---------|-----|-----|-----|------|------|
| 6505314 | 7128704 | 1198029 | --- | --- | --- | 1,05 | up   |
| 6505557 | 7097240 | 1120368 | --- | --- | --- | 2,72 | down |
| 6505622 | 7339834 | 1719557 | --- | --- | --- | 1,17 | up   |
| 6505651 | 7058507 | 1028300 | --- | --- | --- | 1,14 | up   |
| 6505706 | 7076236 | 1071194 | --- | --- | --- | 1,39 | up   |
| 6505815 | 7059020 | 1029330 | --- | --- | --- | 1,49 | down |
| 6505823 | 7102113 | 1132787 | --- | --- | --- | 1,15 | up   |
| 6505889 | 7363674 | 1778429 | --- | --- | --- | 1,18 | up   |
| 6505908 | 7196029 | 1365608 | --- | --- | --- | 1,12 | down |
| 6505911 | 7365183 | 1781940 | --- | --- | --- | 1,55 | up   |
| 6505999 | 7029078 | 958879  | --- | --- | --- | 1,46 | up   |
| 6506031 | 7028278 | 957315  | --- | --- | --- | 1,72 | up   |
| 6506168 | 7258455 | 1518731 | --- | --- | --- | 1,29 | up   |
| 6506174 | 7180151 | 1325202 | --- | --- | --- | 1,06 | down |
| 6506259 | 7302327 | 1627674 | --- | --- | --- | 1,04 | down |
| 6506443 | 7123853 | 1186753 | --- | --- | --- | 3,00 | down |
| 6506446 | 7295410 | 1609772 | --- | --- | --- | 1,07 | up   |
| 6506499 | 7281577 | 1576886 | --- | --- | --- | 1,19 | down |
| 6506542 | 7281577 | 1576868 | --- | --- | --- | 1,11 | down |
| 6506598 | 7095041 | 1115189 | --- | --- | --- | 1,16 | down |
| 6506608 | 7032558 | 967066  | --- | --- | --- | 1,21 | down |
| 6506666 | 7325643 | 1685178 | --- | --- | --- | 1,54 | up   |
| 6506672 | 7381352 | 1823742 | --- | --- | --- | 1,13 | down |
| 6506673 | 7320735 | 1674186 | --- | --- | --- | 1,29 | down |
| 6506919 | 7098810 | 1124658 | --- | --- | --- | 1,29 | down |
| 6506979 | 7186240 | 1340837 | --- | --- | --- | 2,39 | down |
| 6507076 | 7146093 | 1240975 | --- | --- | --- | 1,33 | down |
| 6507248 | 7092549 | 1109164 | --- | --- | --- | 1,10 | up   |
| 6507418 | 7031774 | 964706  | --- | --- | --- | 1,21 | up   |
| 6507423 | 7328985 | 1693166 | --- | --- | --- | 1,53 | down |
| 6507477 | 7367959 | 1789075 | --- | --- | --- | 1,20 | down |
| 6507508 | 7133484 | 1209947 | --- | --- | --- | 1,02 | up   |
| 6507591 | 7078666 | 1076505 | --- | --- | --- | 1,25 | up   |
| 6507644 | 7087500 | 1096729 | --- | --- | --- | 1,23 | down |
| 6507754 | 7108556 | 1148717 | --- | --- | --- | 1,02 | down |
| 6507774 | 7340990 | 1722501 | --- | --- | --- | 1,72 | down |
| 6507778 | 7383823 | 1828943 | --- | --- | --- | 1,34 | down |
| 6507873 | 7333333 | 1703387 | --- | --- | --- | 1,02 | down |
| 6507913 | 7028624 | 957997  | --- | --- | --- | 1,08 | down |
| 6507946 | 7320735 | 1674174 | --- | --- | --- | 1,24 | up   |
| 6507977 | 7097485 | 1120935 | --- | --- | --- | 1,43 | down |
| 6508097 | 7220292 | 1423773 | --- | --- | --- | 1,53 | up   |
| 6508121 | 7031774 | 964771  | --- | --- | --- | 1,01 | down |
| 6508214 | 7237711 | 1467423 | --- | --- | --- | 1,31 | down |
| 6508225 | 7292869 | 1603423 | --- | --- | --- | 1,12 | down |
| 6508278 | 7233106 | 1455668 | --- | --- | --- | 1,72 | up   |
| 6508393 | 7355044 | 1757421 | --- | --- | --- | 1,88 | down |
| 6508498 | 7041609 | 989581  | --- | --- | --- | 1,26 | up   |
| 6508527 | 7200996 | 1378167 | --- | --- | --- | 3,75 | up   |
| 6508586 | 7130917 | 1203929 | --- | --- | --- | 1,28 | up   |
| 6508594 | 7335637 | 1708473 | --- | --- | --- | 1,10 | up   |
| 6508601 | 7274780 | 1559222 | --- | --- | --- | 1,80 | up   |
| 6508630 | 7070668 | 1057974 | --- | --- | --- | 1,39 | up   |
| 6508756 | 7176409 | 1315676 | --- | --- | --- | 1,31 | down |
| 6508765 | 7252877 | 1504743 | --- | --- | --- | 1,15 | down |
| 6508915 | 7062233 | 1037207 | --- | --- | --- | 1,05 | up   |
| 6508940 | 7064468 | 1042377 | --- | --- | --- | 1,25 | down |

|         |         |         |     |     |     |      |      |
|---------|---------|---------|-----|-----|-----|------|------|
| 6508946 | 7040442 | 986507  | --- | --- | --- | 1,48 | up   |
| 6509077 | 7146872 | 1242910 | --- | --- | --- | 1,86 | up   |
| 6509239 | 7295652 | 1610287 | --- | --- | --- | 1,01 | down |
| 6509241 | 7115362 | 1165598 | --- | --- | --- | 1,20 | up   |
| 6509275 | 7072225 | 1061400 | --- | --- | --- | 1,16 | up   |
| 6509290 | 7031618 | 964198  | --- | --- | --- | 1,16 | up   |
| 6509298 | 7258455 | 1518719 | --- | --- | --- | 1,03 | down |
| 6509332 | 7227474 | 1441165 | --- | --- | --- | 1,40 | down |
| 6509343 | 7350993 | 1747538 | --- | --- | --- | 1,16 | up   |
| 6509370 | 7376073 | 1811699 | --- | --- | --- | 1,19 | up   |
| 6509593 | 7132125 | 1206621 | --- | --- | --- | 1,44 | down |
| 6509634 | 7180943 | 1327442 | --- | --- | --- | 1,02 | down |
| 6509706 | 7148741 | 1247846 | --- | --- | --- | 1,19 | down |
| 6509717 | 7176368 | 1315596 | --- | --- | --- | 1,14 | up   |
| 6509859 | 7355138 | 1757854 | --- | --- | --- | 1,13 | down |
| 6510014 | 7102708 | 1134317 | --- | --- | --- | 1,05 | down |
| 6510060 | 7305275 | 1635822 | --- | --- | --- | 1,27 | down |
| 6510098 | 7121849 | 1181792 | --- | --- | --- | 1,06 | down |
| 6510135 | 7358788 | 1766853 | --- | --- | --- | 1,99 | down |
| 6510297 | 7033337 | 969501  | --- | --- | --- | 1,63 | up   |
| 6510486 | 7282831 | 1579771 | --- | --- | --- | 1,36 | up   |
| 6510634 | 7342356 | 1725894 | --- | --- | --- | 2,04 | up   |
| 6510722 | 7151063 | 1253066 | --- | --- | --- | 1,12 | up   |
| 6510773 | 7225543 | 1435931 | --- | --- | --- | 1,60 | up   |
| 6510884 | 7221019 | 1425327 | --- | --- | --- | 7,42 | up   |
| 6510918 | 7353232 | 1752803 | --- | --- | --- | 1,71 | up   |
| 6510974 | 7248790 | 1494505 | --- | --- | --- | 1,32 | down |
| 6511006 | 7042382 | 991289  | --- | --- | --- | 1,18 | down |
| 6511163 | 7378997 | 1818652 | --- | --- | --- | 1,13 | down |
| 6511247 | 7065860 | 1045801 | --- | --- | --- | 1,90 | down |
| 6511256 | 7029770 | 960155  | --- | --- | --- | 2,83 | up   |
| 6511308 | 7030087 | 960787  | --- | --- | --- | 1,21 | up   |
| 6511313 | 7253215 | 1505383 | --- | --- | --- | 1,06 | down |
| 6511347 | 7059766 | 1030973 | --- | --- | --- | 1,40 | up   |
| 6511377 | 7100523 | 1128846 | --- | --- | --- | 1,05 | up   |
| 6511386 | 7239752 | 1473192 | --- | --- | --- | 1,21 | down |
| 6511410 | 7310851 | 1649631 | --- | --- | --- | 1,51 | down |
| 6511424 | 7302327 | 1627671 | --- | --- | --- | 1,14 | down |
| 6511451 | 7356115 | 1760131 | --- | --- | --- | 1,10 | down |
| 6511513 | 7101206 | 1130459 | --- | --- | --- | 1,09 | up   |
| 6511532 | 7098810 | 1124655 | --- | --- | --- | 1,17 | up   |
| 6511588 | 7198210 | 1370962 | --- | --- | --- | 1,04 | up   |
| 6511649 | 7344406 | 1731201 | --- | --- | --- | 1,00 | down |
| 6511675 | 7277719 | 1567080 | --- | --- | --- | 1,08 | down |
| 6511772 | 7279568 | 1572002 | --- | --- | --- | 1,13 | up   |
| 6511781 | 7340757 | 1721884 | --- | --- | --- | 1,36 | down |
| 6511814 | 7073569 | 1064738 | --- | --- | --- | 3,06 | up   |
| 6511969 | 7093936 | 1112481 | --- | --- | --- | 1,17 | up   |
| 6512033 | 7127540 | 1195287 | --- | --- | --- | 1,16 | up   |
| 6512080 | 7068942 | 1053390 | --- | --- | --- | 1,36 | down |
| 6512371 | 7106752 | 1144028 | --- | --- | --- | 1,50 | down |
| 6512447 | 7050167 | 1009828 | --- | --- | --- | 1,10 | up   |
| 6512518 | 7312575 | 1653354 | --- | --- | --- | 1,06 | down |
| 6512635 | 7328833 | 1692804 | --- | --- | --- | 1,39 | down |
| 6512682 | 7376820 | 1813429 | --- | --- | --- | 1,52 | up   |
| 6512751 | 7155286 | 1263891 | --- | --- | --- | 1,27 | up   |
| 6512756 | 7289075 | 1594467 | --- | --- | --- | 1,13 | down |

|         |         |         |     |     |     |      |      |
|---------|---------|---------|-----|-----|-----|------|------|
| 6512776 | 7366749 | 1785479 | --- | --- | --- | 1,64 | up   |
| 6512780 | 7237814 | 1467842 | --- | --- | --- | 1,19 | up   |
| 6512920 | 7359453 | 1768448 | --- | --- | --- | 2,00 | down |
| 6512930 | 7075445 | 1069349 | --- | --- | --- | 1,04 | up   |
| 6512988 | 7374313 | 1807370 | --- | --- | --- | 1,11 | down |
| 6513106 | 7363576 | 1778169 | --- | --- | --- | 2,09 | up   |
| 6513196 | 7056333 | 1023678 | --- | --- | --- | 1,20 | up   |
| 6513198 | 7279303 | 1571201 | --- | --- | --- | 1,60 | down |
| 6513246 | 7330731 | 1697180 | --- | --- | --- | 1,03 | down |
| 6513335 | 7261580 | 1526808 | --- | --- | --- | 1,19 | down |
| 6513377 | 7165954 | 1288770 | --- | --- | --- | 1,36 | down |
| 6513398 | 7295410 | 1609794 | --- | --- | --- | 1,12 | down |
| 6513402 | 7177520 | 1318622 | --- | --- | --- | 1,00 | up   |
| 6513407 | 7112606 | 1158780 | --- | --- | --- | 1,12 | down |
| 6513791 | 7062436 | 1037660 | --- | --- | --- | 1,03 | down |
| 6513819 | 7238153 | 1468830 | --- | --- | --- | 1,00 | up   |
| 6513858 | 7243628 | 1482385 | --- | --- | --- | 1,34 | up   |
| 6514037 | 7268357 | 1543400 | --- | --- | --- | 1,17 | up   |
| 6514079 | 7200545 | 1376898 | --- | --- | --- | 1,41 | down |
| 6514105 | 7303191 | 1629957 | --- | --- | --- | 1,43 | down |
| 6514163 | 7042382 | 991289  | --- | --- | --- | 1,35 | up   |
| 6514172 | 7093296 | 1110951 | --- | --- | --- | 1,05 | up   |
| 6514177 | 7121849 | 1181818 | --- | --- | --- | 1,11 | down |
| 6514184 | 7058507 | 1028298 | --- | --- | --- | 1,23 | up   |
| 6514210 | 7259221 | 1520618 | --- | --- | --- | 1,31 | up   |
| 6514212 | 7239774 | 1473319 | --- | --- | --- | 1,30 | up   |
| 6514280 | 7213908 | 1407711 | --- | --- | --- | 1,16 | down |
| 6514391 | 7346687 | 1736695 | --- | --- | --- | 1,00 | down |
| 6514458 | 7258784 | 1519671 | --- | --- | --- | 1,21 | down |
| 6514572 | 7059766 | 1030980 | --- | --- | --- | 1,42 | up   |
| 6514642 | 7086522 | 1093956 | --- | --- | --- | 3,18 | down |
| 6514667 | 7247976 | 1492430 | --- | --- | --- | 1,20 | down |
| 6514695 | 7180804 | 1327005 | --- | --- | --- | 1,19 | down |
| 6514892 | 7376566 | 1812869 | --- | --- | --- | 1,60 | up   |
| 6514917 | 7217747 | 1417481 | --- | --- | --- | 1,28 | up   |
| 6514961 | 7278010 | 1568048 | --- | --- | --- | 1,17 | down |
| 6514996 | 7243901 | 1483051 | --- | --- | --- | 1,42 | down |
| 6515005 | 7358859 | 1766960 | --- | --- | --- | 1,50 | up   |
| 6515030 | 7217434 | 1416437 | --- | --- | --- | 1,04 | up   |
| 6515073 | 7320998 | 1674711 | --- | --- | --- | 1,39 | down |
| 6515199 | 7061003 | 1033923 | --- | --- | --- | 1,07 | down |
| 6515205 | 7326271 | 1686526 | --- | --- | --- | 1,17 | down |
| 6515222 | 7264808 | 1534465 | --- | --- | --- | 1,03 | down |
| 6515250 | 7148978 | 1248467 | --- | --- | --- | 1,02 | up   |
| 6515284 | 7068413 | 1051951 | --- | --- | --- | 1,03 | up   |
| 6515291 | 7288077 | 1591983 | --- | --- | --- | 1,14 | up   |
| 6515345 | 7049184 | 1007926 | --- | --- | --- | 2,01 | up   |
| 6515390 | 7359426 | 1768370 | --- | --- | --- | 2,25 | down |
| 6515646 | 7110401 | 1153078 | --- | --- | --- | 1,04 | up   |
| 6515678 | 7319055 | 1669946 | --- | --- | --- | 2,62 | down |
| 6515822 | 7176275 | 1315353 | --- | --- | --- | 1,06 | up   |
| 6515930 | 7171091 | 1302453 | --- | --- | --- | 1,11 | down |
| 6516055 | 7371539 | 1800302 | --- | --- | --- | 1,27 | down |
| 6516078 | 7259221 | 1520614 | --- | --- | --- | 1,25 | up   |
| 6516113 | 7031618 | 964199  | --- | --- | --- | 1,09 | up   |
| 6516151 | 7162144 | 1280519 | --- | --- | --- | 1,77 | up   |
| 6516210 | 7378546 | 1817602 | --- | --- | --- | 1,21 | down |

|         |         |         |     |     |     |      |      |
|---------|---------|---------|-----|-----|-----|------|------|
| 6516235 | 7116103 | 1167606 | --- | --- | --- | 1,11 | up   |
| 6516257 | 7319486 | 1670927 | --- | --- | --- | 1,20 | down |
| 6516298 | 7377791 | 1815994 | --- | --- | --- | 1,34 | up   |
| 6516455 | 7120010 | 1177382 | --- | --- | --- | 1,12 | up   |
| 6516472 | 7267802 | 1541832 | --- | --- | --- | 1,08 | up   |
| 6516570 | 7372840 | 1803754 | --- | --- | --- | 1,05 | up   |
| 6516589 | 7243647 | 1482436 | --- | --- | --- | 1,26 | up   |
| 6516645 | 7140365 | 1226768 | --- | --- | --- | 1,48 | up   |
| 6516688 | 7237672 | 1467296 | --- | --- | --- | 1,16 | down |
| 6516719 | 7256789 | 1514642 | --- | --- | --- | 1,49 | down |
| 6516730 | 7365147 | 1781781 | --- | --- | --- | 1,34 | up   |
| 6516821 | 7299650 | 1620957 | --- | --- | --- | 1,28 | down |
| 6516863 | 7365183 | 1781908 | --- | --- | --- | 1,06 | up   |
| 6516894 | 7364346 | 1779970 | --- | --- | --- | 1,16 | down |
| 6516912 | 7198087 | 1370690 | --- | --- | --- | 1,30 | down |
| 6516968 | 7374493 | 1807958 | --- | --- | --- | 1,16 | up   |
| 6517071 | 7066035 | 1046220 | --- | --- | --- | 1,20 | up   |
| 6517111 | 7112355 | 1158063 | --- | --- | --- | 1,11 | down |
| 6517127 | 7327169 | 1688466 | --- | --- | --- | 1,07 | down |
| 6517129 | 7292517 | 1602550 | --- | --- | --- | 1,06 | up   |
| 6517196 | 7252877 | 1504745 | --- | --- | --- | 1,35 | down |
| 6517203 | 7086966 | 1095243 | --- | --- | --- | 1,08 | up   |
| 6517244 | 7228520 | 1443760 | --- | --- | --- | 1,36 | up   |
| 6517264 | 7356619 | 1761348 | --- | --- | --- | 2,28 | up   |
| 6517320 | 7050716 | 1011221 | --- | --- | --- | 1,60 | down |
| 6517351 | 7198644 | 1372351 | --- | --- | --- | 1,26 | down |
| 6517394 | 7363529 | 1777927 | --- | --- | --- | 1,02 | down |
| 6517405 | 7239939 | 1473783 | --- | --- | --- | 1,32 | down |
| 6517473 | 7321414 | 1675638 | --- | --- | --- | 1,40 | down |
| 6517495 | 7075445 | 1069355 | --- | --- | --- | 1,21 | down |
| 6517523 | 7360486 | 1771025 | --- | --- | --- | 1,03 | down |
| 6517761 | 7033504 | 969863  | --- | --- | --- | 2,11 | up   |
| 6517859 | 7295410 | 1609780 | --- | --- | --- | 1,95 | down |
| 6517994 | 7200313 | 1376454 | --- | --- | --- | 1,04 | down |
| 6518039 | 7207292 | 1392633 | --- | --- | --- | 1,14 | up   |
| 6518053 | 7101258 | 1130564 | --- | --- | --- | 2,20 | down |
| 6518094 | 7285239 | 1585482 | --- | --- | --- | 1,35 | down |
| 6518169 | 7363768 | 1778603 | --- | --- | --- | 2,36 | down |
| 6518310 | 7029119 | 958983  | --- | --- | --- | 1,64 | up   |
| 6518331 | 7233012 | 1455424 | --- | --- | --- | 1,10 | up   |
| 6518351 | 7069253 | 1054161 | --- | --- | --- | 1,25 | down |
| 6518375 | 7261668 | 1526981 | --- | --- | --- | 2,14 | up   |
| 6518451 | 7099294 | 1126105 | --- | --- | --- | 1,06 | up   |
| 6518456 | 7170764 | 1301434 | --- | --- | --- | 1,10 | up   |
| 6518538 | 7288095 | 1592077 | --- | --- | --- | 2,41 | down |
| 6518663 | 7303191 | 1629961 | --- | --- | --- | 1,15 | down |
| 6518683 | 7127257 | 1194812 | --- | --- | --- | 1,30 | down |
| 6518779 | 7186688 | 1341842 | --- | --- | --- | 1,11 | up   |
| 6518972 | 7295652 | 1610284 | --- | --- | --- | 1,24 | down |
| 6518976 | 7213908 | 1407692 | --- | --- | --- | 2,16 | up   |
| 6518978 | 7190524 | 1351184 | --- | --- | --- | 1,02 | down |
| 6519030 | 7305275 | 1635838 | --- | --- | --- | 1,01 | down |
| 6519126 | 7181286 | 1328498 | --- | --- | --- | 1,25 | down |
| 6519140 | 7281577 | 1576884 | --- | --- | --- | 1,24 | up   |
| 6519282 | 7149934 | 1250518 | --- | --- | --- | 1,29 | up   |
| 6519418 | 7073609 | 1064861 | --- | --- | --- | 1,07 | down |
| 6519476 | 7302787 | 1628886 | --- | --- | --- | 1,05 | down |

|         |         |         |     |     |     |      |      |
|---------|---------|---------|-----|-----|-----|------|------|
| 6519486 | 7353287 | 1753005 | --- | --- | --- | 1,54 | up   |
| 6519494 | 7264274 | 1533174 | --- | --- | --- | 1,86 | down |
| 6519495 | 7355138 | 1757744 | --- | --- | --- | 1,05 | up   |
| 6519518 | 7166439 | 1290093 | --- | --- | --- | 1,22 | down |
| 6519563 | 7139708 | 1225057 | --- | --- | --- | 1,11 | up   |
| 6519666 | 7070511 | 1057479 | --- | --- | --- | 1,04 | down |
| 6519669 | 7258323 | 1518474 | --- | --- | --- | 5,63 | down |
| 6519796 | 7276650 | 1564133 | --- | --- | --- | 1,22 | up   |
| 6519809 | 7374324 | 1807522 | --- | --- | --- | 1,07 | down |
| 6519965 | 7033337 | 969482  | --- | --- | --- | 1,25 | down |
| 6520058 | 7031774 | 964650  | --- | --- | --- | 1,27 | down |
| 6520062 | 7213228 | 1405990 | --- | --- | --- | 1,02 | down |
| 6520139 | 7181193 | 1328294 | --- | --- | --- | 1,17 | up   |
| 6520150 | 7303777 | 1631915 | --- | --- | --- | 1,21 | up   |
| 6520220 | 7125160 | 1189586 | --- | --- | --- | 1,25 | down |
| 6520312 | 7169573 | 1298391 | --- | --- | --- | 1,33 | down |
| 6520329 | 7139026 | 1223503 | --- | --- | --- | 1,01 | down |
| 6520471 | 7132024 | 1206341 | --- | --- | --- | 1,73 | down |
| 6520477 | 7374493 | 1807970 | --- | --- | --- | 1,46 | up   |
| 6520512 | 7225543 | 1435924 | --- | --- | --- | 1,03 | down |
| 6520596 | 7339834 | 1719550 | --- | --- | --- | 1,64 | up   |
| 6520606 | 7297589 | 1615687 | --- | --- | --- | 1,17 | down |
| 6520679 | 7198087 | 1370638 | --- | --- | --- | 1,51 | up   |
| 6520842 | 7368005 | 1789343 | --- | --- | --- | 1,17 | down |
| 6520850 | 7079635 | 1078694 | --- | --- | --- | 1,03 | down |
| 6520862 | 7258455 | 1518740 | --- | --- | --- | 1,04 | down |
| 6520941 | 7142081 | 1230961 | --- | --- | --- | 5,53 | up   |
| 6520974 | 7156372 | 1266707 | --- | --- | --- | 1,15 | up   |
| 6520995 | 7312161 | 1652461 | --- | --- | --- | 1,63 | up   |
| 6521015 | 7088544 | 1099704 | --- | --- | --- | 1,11 | down |
| 6521036 | 7096924 | 1119604 | --- | --- | --- | 1,87 | down |
| 6521054 | 7231653 | 1451877 | --- | --- | --- | 1,56 | down |
| 6521085 | 7264797 | 1534423 | --- | --- | --- | 1,00 | up   |
| 6521091 | 7365183 | 1781913 | --- | --- | --- | 2,60 | up   |
| 6521126 | 7384073 | 1829473 | --- | --- | --- | 1,33 | down |
| 6521135 | 7059766 | 1030982 | --- | --- | --- | 1,03 | up   |
| 6521154 | 7376073 | 1811705 | --- | --- | --- | 1,37 | up   |
| 6521198 | 7336931 | 1711872 | --- | --- | --- | 1,08 | down |
| 6521308 | 7377583 | 1815453 | --- | --- | --- | 1,59 | up   |
| 6521508 | 7303777 | 1631916 | --- | --- | --- | 1,00 | up   |
| 6521520 | 7353287 | 1753021 | --- | --- | --- | 1,25 | down |
| 6521542 | 7326271 | 1686524 | --- | --- | --- | 1,10 | down |
| 6521558 | 7193513 | 1359449 | --- | --- | --- | 2,21 | down |
| 6521585 | 7085063 | 1090804 | --- | --- | --- | 1,12 | up   |
| 6521592 | 7138335 | 1221895 | --- | --- | --- | 1,08 | down |
| 6521705 | 7280743 | 1574498 | --- | --- | --- | 1,19 | up   |
| 6521749 | 7076160 | 1070908 | --- | --- | --- | 1,08 | up   |
| 6521757 | 7096461 | 1118277 | --- | --- | --- | 1,11 | up   |
| 6521883 | 7317204 | 1665376 | --- | --- | --- | 1,49 | down |
| 6521950 | 7276650 | 1564110 | --- | --- | --- | 1,37 | down |
| 6522031 | 7140365 | 1226799 | --- | --- | --- | 1,49 | down |
| 6522053 | 7088544 | 1099701 | --- | --- | --- | 1,44 | down |
| 6522144 | 7244027 | 1483287 | --- | --- | --- | 1,06 | up   |
| 6522193 | 7091954 | 1107703 | --- | --- | --- | 1,20 | up   |
| 6522255 | 7095021 | 1115131 | --- | --- | --- | 1,11 | up   |
| 6522300 | 7121849 | 1181772 | --- | --- | --- | 1,04 | down |
| 6522342 | 7185355 | 1338695 | --- | --- | --- | 1,26 | up   |



|         |         |         |     |     |     |      |      |
|---------|---------|---------|-----|-----|-----|------|------|
| 6522442 | 7318714 | 1669240 | --- | --- | --- | 1,14 | down |
| 6522470 | 7176456 | 1315834 | --- | --- | --- | 1,03 | down |
| 6522585 | 7136062 | 1216294 | --- | --- | --- | 1,03 | up   |
| 6522602 | 7092549 | 1109121 | --- | --- | --- | 2,52 | up   |
| 6522610 | 7295652 | 1610314 | --- | --- | --- | 1,03 | down |
| 6522614 | 7097454 | 1120875 | --- | --- | --- | 1,25 | down |
| 6522659 | 7152781 | 1257155 | --- | --- | --- | 1,47 | up   |
| 6522803 | 7363529 | 1777952 | --- | --- | --- | 1,00 | up   |
| 6522857 | 7298692 | 1618407 | --- | --- | --- | 1,12 | down |
| 6522917 | 7175946 | 1314633 | --- | --- | --- | 1,01 | up   |
| 6522965 | 7088538 | 1099632 | --- | --- | --- | 1,28 | down |
| 6523002 | 7314270 | 1657722 | --- | --- | --- | 1,45 | down |
| 6523051 | 7376566 | 1812868 | --- | --- | --- | 2,02 | down |
| 6523200 | 7174114 | 1310421 | --- | --- | --- | 1,56 | up   |
| 6523215 | 7034293 | 971994  | --- | --- | --- | 1,90 | up   |
| 6523261 | 7087282 | 1096171 | --- | --- | --- | 1,13 | down |
| 6523284 | 7111427 | 1155764 | --- | --- | --- | 1,61 | down |
| 6523373 | 7268357 | 1543392 | --- | --- | --- | 1,01 | down |
| 6523506 | 7368004 | 1789333 | --- | --- | --- | 1,03 | down |
| 6523509 | 7068259 | 1051613 | --- | --- | --- | 1,28 | down |
| 6523633 | 7027350 | 954944  | --- | --- | --- | 1,02 | down |
| 6523642 | 7031774 | 964735  | --- | --- | --- | 1,29 | down |
| 6523730 | 7069253 | 1054152 | --- | --- | --- | 1,22 | up   |
| 6523739 | 7193056 | 1358275 | --- | --- | --- | 1,29 | up   |
| 6523780 | 7136062 | 1216295 | --- | --- | --- | 1,08 | up   |
| 6523871 | 7188829 | 1346655 | --- | --- | --- | 1,28 | up   |
| 6523935 | 7340990 | 1722507 | --- | --- | --- | 1,40 | down |
| 6523998 | 7264274 | 1533172 | --- | --- | --- | 1,09 | down |
| 6524153 | 7049689 | 1008873 | --- | --- | --- | 1,23 | down |
| 6524183 | 7113483 | 1161009 | --- | --- | --- | 1,96 | up   |
| 6524231 | 7317708 | 1666829 | --- | --- | --- | 1,38 | down |
| 6524391 | 7095960 | 1117065 | --- | --- | --- | 2,35 | up   |
| 6524432 | 7363529 | 1777906 | --- | --- | --- | 1,26 | down |
| 6524452 | 7281924 | 1577727 | --- | --- | --- | 1,10 | down |
| 6524465 | 7153136 | 1258009 | --- | --- | --- | 1,16 | up   |
| 6524486 | 7082098 | 1084112 | --- | --- | --- | 1,01 | up   |
| 6524549 | 7236358 | 1464221 | --- | --- | --- | 1,34 | up   |
| 6524561 | 7254040 | 1507613 | --- | --- | --- | 1,18 | up   |
| 6524589 | 7350922 | 1747316 | --- | --- | --- | 1,77 | down |
| 6524615 | 7207093 | 1392161 | --- | --- | --- | 1,00 | up   |
| 6524693 | 7177428 | 1318393 | --- | --- | --- | 1,38 | up   |
| 6524746 | 7057277 | 1025525 | --- | --- | --- | 1,18 | down |
| 6524791 | 7068259 | 1051643 | --- | --- | --- | 1,37 | down |
| 6524875 | 7282831 | 1579771 | --- | --- | --- | 1,14 | up   |
| 6524932 | 7367990 | 1789220 | --- | --- | --- | 1,57 | down |
| 6524948 | 7105066 | 1140342 | --- | --- | --- | 1,33 | up   |
| 6524952 | 7072608 | 1062297 | --- | --- | --- | 1,01 | up   |
| 6524965 | 7337224 | 1712621 | --- | --- | --- | 1,38 | down |
| 6525098 | 7094139 | 1112921 | --- | --- | --- | 1,09 | up   |
| 6525171 | 7346687 | 1736695 | --- | --- | --- | 1,29 | up   |
| 6525202 | 7041140 | 988269  | --- | --- | --- | 1,92 | down |
| 6525217 | 7080476 | 1080403 | --- | --- | --- | 1,01 | down |
| 6525415 | 7146093 | 1240914 | --- | --- | --- | 1,11 | up   |
| 6525439 | 7337425 | 1713184 | --- | --- | --- | 1,20 | up   |
| 6525445 | 7267953 | 1542265 | --- | --- | --- | 1,87 | up   |
| 6525457 | 7369521 | 1794256 | --- | --- | --- | 1,38 | up   |
| 6525511 | 7072765 | 1062750 | --- | --- | --- | 1,43 | down |

|         |         |         |     |     |     |      |      |
|---------|---------|---------|-----|-----|-----|------|------|
| 6525522 | 7281924 | 1577707 | --- | --- | --- | 1,06 | up   |
| 6525598 | 7231834 | 1452268 | --- | --- | --- | 1,08 | down |
| 6525609 | 7068259 | 1051593 | --- | --- | --- | 1,50 | up   |
| 6525661 | 7151519 | 1254299 | --- | --- | --- | 1,04 | up   |
| 6525879 | 7031774 | 964769  | --- | --- | --- | 1,92 | down |
| 6525890 | 7339379 | 1718315 | --- | --- | --- | 1,05 | up   |
| 6525972 | 7041609 | 989571  | --- | --- | --- | 1,00 | up   |
| 6525981 | 7344406 | 1731221 | --- | --- | --- | 1,02 | up   |
| 6525996 | 7374493 | 1807963 | --- | --- | --- | 1,09 | up   |
| 6526007 | 7363529 | 1777939 | --- | --- | --- | 1,01 | up   |
| 6526071 | 7170764 | 1301470 | --- | --- | --- | 1,40 | down |
| 6526096 | 7340304 | 1720863 | --- | --- | --- | 1,64 | down |
| 6526167 | 7340990 | 1722505 | --- | --- | --- | 1,10 | up   |
| 6526173 | 7077170 | 1073573 | --- | --- | --- | 2,39 | down |
| 6526222 | 7232069 | 1452938 | --- | --- | --- | 1,18 | up   |
| 6526265 | 7148741 | 1247877 | --- | --- | --- | 1,04 | down |
| 6526310 | 7277759 | 1567293 | --- | --- | --- | 1,04 | up   |
| 6526317 | 7339379 | 1718361 | --- | --- | --- | 1,58 | down |
| 6526353 | 7039532 | 984430  | --- | --- | --- | 1,07 | up   |
| 6526430 | 7340057 | 1720326 | --- | --- | --- | 1,22 | up   |
| 6526478 | 7377304 | 1814578 | --- | --- | --- | 1,02 | down |
| 6526525 | 7308679 | 1644238 | --- | --- | --- | 5,26 | down |
| 6526725 | 7384904 | 1831602 | --- | --- | --- | 1,29 | down |
| 6526788 | 7252877 | 1504784 | --- | --- | --- | 1,15 | up   |
| 6526802 | 7217650 | 1417188 | --- | --- | --- | 1,48 | up   |
| 6526892 | 7363922 | 1778870 | --- | --- | --- | 1,01 | up   |
| 6526908 | 7168979 | 1297190 | --- | --- | --- | 1,34 | up   |
| 6526943 | 7226277 | 1437982 | --- | --- | --- | 1,15 | down |
| 6527026 | 7073854 | 1065635 | --- | --- | --- | 1,08 | up   |
| 6527065 | 7084716 | 1090118 | --- | --- | --- | 2,81 | down |
| 6527123 | 7238202 | 1468950 | --- | --- | --- | 1,01 | down |
| 6527124 | 7193056 | 1358254 | --- | --- | --- | 1,03 | up   |
| 6527145 | 7071659 | 1060232 | --- | --- | --- | 1,06 | down |
| 6527190 | 7146872 | 1242900 | --- | --- | --- | 1,06 | up   |
| 6527379 | 7087965 | 1098033 | --- | --- | --- | 1,03 | up   |
| 6527410 | 7243647 | 1482462 | --- | --- | --- | 1,19 | down |
| 6527449 | 7373633 | 1805703 | --- | --- | --- | 1,16 | down |
| 6527454 | 7154655 | 1262319 | --- | --- | --- | 2,68 | up   |
| 6527474 | 7075460 | 1069384 | --- | --- | --- | 1,03 | up   |
| 6527552 | 7243901 | 1483048 | --- | --- | --- | 1,00 | up   |
| 6527740 | 7031774 | 964782  | --- | --- | --- | 1,17 | down |
| 6527755 | 7247848 | 1492049 | --- | --- | --- | 1,71 | down |
| 6527843 | 7115963 | 1167068 | --- | --- | --- | 1,04 | down |
| 6527907 | 7367060 | 1786192 | --- | --- | --- | 2,09 | down |
| 6527976 | 7068259 | 1051663 | --- | --- | --- | 1,27 | up   |
| 6527982 | 7286613 | 1588467 | --- | --- | --- | 1,26 | up   |
| 6528008 | 7217434 | 1416367 | --- | --- | --- | 1,20 | up   |
| 6528029 | 7184981 | 1337839 | --- | --- | --- | 1,39 | down |
| 6528136 | 7138349 | 1221924 | --- | --- | --- | 1,08 | down |
| 6528209 | 7344406 | 1731191 | --- | --- | --- | 1,17 | down |
| 6528229 | 7374740 | 1808636 | --- | --- | --- | 1,05 | up   |
| 6528231 | 7322260 | 1677076 | --- | --- | --- | 1,42 | up   |
| 6528329 | 7168439 | 1295688 | --- | --- | --- | 1,04 | down |
| 6528333 | 7094139 | 1112894 | --- | --- | --- | 1,15 | down |
| 6528391 | 7198087 | 1370684 | --- | --- | --- | 1,36 | down |
| 6528398 | 7106752 | 1144006 | --- | --- | --- | 1,71 | up   |
| 6528400 | 7374324 | 1807499 | --- | --- | --- | 1,13 | down |

|         |         |         |     |     |     |      |      |
|---------|---------|---------|-----|-----|-----|------|------|
| 6528507 | 7180687 | 1326630 | --- | --- | --- | 2,08 | up   |
| 6528512 | 7247512 | 1491191 | --- | --- | --- | 1,24 | up   |
| 6528614 | 7337845 | 1714341 | --- | --- | --- | 1,15 | up   |
| 6528690 | 7033673 | 970380  | --- | --- | --- | 1,11 | up   |
| 6528899 | 7236358 | 1464221 | --- | --- | --- | 1,26 | down |
| 6529038 | 7311391 | 1650863 | --- | --- | --- | 1,68 | up   |
| 6529058 | 7095021 | 1115131 | --- | --- | --- | 1,03 | down |
| 6529095 | 7167700 | 1293602 | --- | --- | --- | 1,17 | down |
| 6529166 | 7225543 | 1435923 | --- | --- | --- | 1,15 | down |
| 6529201 | 7337224 | 1712608 | --- | --- | --- | 1,58 | down |
| 6529263 | 7321414 | 1675639 | --- | --- | --- | 1,06 | up   |
| 6529277 | 7352044 | 1750011 | --- | --- | --- | 1,10 | down |
| 6529280 | 7079475 | 1078286 | --- | --- | --- | 1,14 | up   |
| 6529343 | 7115362 | 1165594 | --- | --- | --- | 1,02 | down |
| 6529670 | 7191866 | 1354903 | --- | --- | --- | 2,01 | up   |
| 6529744 | 7123421 | 1185843 | --- | --- | --- | 1,20 | up   |
| 6529834 | 7240224 | 1474396 | --- | --- | --- | 1,27 | down |
| 6529920 | 7039725 | 984818  | --- | --- | --- | 1,41 | down |
| 6529947 | 7096873 | 1119374 | --- | --- | --- | 1,90 | down |
| 6529948 | 7035525 | 974789  | --- | --- | --- | 1,13 | down |
| 6529969 | 7179176 | 1322918 | --- | --- | --- | 1,01 | down |
| 6530104 | 7070393 | 1057215 | --- | --- | --- | 1,15 | down |
| 6530206 | 7132125 | 1206598 | --- | --- | --- | 1,10 | up   |
| 6530277 | 7049673 | 1008836 | --- | --- | --- | 1,38 | up   |
| 6530355 | 7065570 | 1045086 | --- | --- | --- | 2,24 | down |
| 6530391 | 7331757 | 1700021 | --- | --- | --- | 1,65 | down |
| 6530466 | 7292517 | 1602560 | --- | --- | --- | 1,08 | up   |
| 6530493 | 7260553 | 1524111 | --- | --- | --- | 1,17 | down |
| 6530520 | 7381090 | 1822988 | --- | --- | --- | 1,54 | down |
| 6530533 | 7378809 | 1818116 | --- | --- | --- | 1,52 | down |
| 6530682 | 7069830 | 1055649 | --- | --- | --- | 1,08 | down |
| 6530711 | 7253408 | 1505943 | --- | --- | --- | 1,07 | down |
| 6530712 | 7062233 | 1037221 | --- | --- | --- | 1,13 | up   |
| 6530722 | 7374324 | 1807511 | --- | --- | --- | 1,21 | down |
| 6530822 | 7320735 | 1674162 | --- | --- | --- | 1,08 | down |
| 6530868 | 7167160 | 1292197 | --- | --- | --- | 1,67 | down |
| 6530957 | 7139026 | 1223502 | --- | --- | --- | 1,05 | down |
| 6530990 | 7210387 | 1400036 | --- | --- | --- | 1,23 | down |
| 6531027 | 7039725 | 984811  | --- | --- | --- | 1,90 | up   |
| 6531064 | 7302327 | 1627668 | --- | --- | --- | 1,03 | down |
| 6531066 | 7123129 | 1185073 | --- | --- | --- | 1,15 | down |
| 6531111 | 7355044 | 1757425 | --- | --- | --- | 1,24 | down |
| 6531116 | 7172691 | 1306448 | --- | --- | --- | 1,00 | up   |
| 6531132 | 7170764 | 1301474 | --- | --- | --- | 1,10 | up   |
| 6531213 | 7176275 | 1315352 | --- | --- | --- | 1,65 | down |
| 6531416 | 7366749 | 1785492 | --- | --- | --- | 1,05 | down |
| 6531516 | 7039108 | 983340  | --- | --- | --- | 1,22 | down |
| 6531789 | 7060896 | 1033548 | --- | --- | --- | 1,20 | up   |
| 6531827 | 7043379 | 993637  | --- | --- | --- | 1,68 | up   |
| 6531861 | 7058149 | 1027267 | --- | --- | --- | 1,03 | up   |
| 6531893 | 7320998 | 1674722 | --- | --- | --- | 1,13 | down |
| 6532004 | 7339379 | 1718342 | --- | --- | --- | 1,32 | down |
| 6532117 | 7058713 | 1028660 | --- | --- | --- | 1,02 | up   |
| 6532271 | 7147809 | 1245457 | --- | --- | --- | 1,02 | up   |
| 6532306 | 7300027 | 1621891 | --- | --- | --- | 1,07 | down |
| 6532346 | 7052385 | 1014777 | --- | --- | --- | 1,04 | up   |
| 6532361 | 7041609 | 989593  | --- | --- | --- | 1,08 | up   |

|         |         |         |     |     |     |      |      |
|---------|---------|---------|-----|-----|-----|------|------|
| 6532396 | 7380497 | 1821854 | --- | --- | --- | 1,01 | up   |
| 6532398 | 7364346 | 1780016 | --- | --- | --- | 1,06 | up   |
| 6532466 | 7231775 | 1452122 | --- | --- | --- | 1,54 | down |
| 6532604 | 7068259 | 1051603 | --- | --- | --- | 1,23 | up   |
| 6532651 | 7067828 | 1050785 | --- | --- | --- | 1,02 | up   |
| 6532757 | 7293922 | 1605959 | --- | --- | --- | 1,20 | up   |
| 6532950 | 7128704 | 1198018 | --- | --- | --- | 1,31 | up   |
| 6533128 | 7341038 | 1722658 | --- | --- | --- | 1,25 | up   |
| 6533246 | 7303777 | 1631913 | --- | --- | --- | 1,06 | up   |
| 6533271 | 7377791 | 1816005 | --- | --- | --- | 1,14 | up   |
| 6533313 | 7330238 | 1695964 | --- | --- | --- | 1,40 | down |
| 6533322 | 7160846 | 1277345 | --- | --- | --- | 1,08 | up   |
| 6533402 | 7148741 | 1247876 | --- | --- | --- | 1,68 | up   |
| 6533421 | 7286807 | 1588788 | --- | --- | --- | 1,78 | down |
| 6533431 | 7252283 | 1503114 | --- | --- | --- | 1,17 | down |
| 6533492 | 7231484 | 1451391 | --- | --- | --- | 1,04 | down |
| 6533570 | 7372840 | 1803759 | --- | --- | --- | 1,75 | up   |
| 6533598 | 7383102 | 1827403 | --- | --- | --- | 1,76 | up   |
| 6533676 | 7239939 | 1473787 | --- | --- | --- | 1,02 | down |
| 6533697 | 7212698 | 1404855 | --- | --- | --- | 2,18 | up   |
| 6533704 | 7069464 | 1054667 | --- | --- | --- | 1,30 | up   |
| 6533786 | 7237814 | 1467817 | --- | --- | --- | 1,15 | up   |
| 6533924 | 7113085 | 1159996 | --- | --- | --- | 1,17 | down |
| 6533998 | 7293922 | 1605959 | --- | --- | --- | 1,39 | down |
| 6534060 | 7168521 | 1295974 | --- | --- | --- | 1,61 | down |
| 6534099 | 7383823 | 1828933 | --- | --- | --- | 1,02 | down |
| 6534240 | 7088489 | 1099514 | --- | --- | --- | 1,03 | down |
| 6534241 | 7373038 | 1804278 | --- | --- | --- | 1,79 | up   |
| 6534358 | 7059020 | 1029353 | --- | --- | --- | 1,51 | up   |
| 6534385 | 7373678 | 1805868 | --- | --- | --- | 1,66 | up   |
| 6534479 | 7148741 | 1247832 | --- | --- | --- | 1,12 | down |
| 6534493 | 7355044 | 1757446 | --- | --- | --- | 1,05 | up   |
| 6534509 | 7301843 | 1626479 | --- | --- | --- | 1,26 | down |
| 6534527 | 7055793 | 1022294 | --- | --- | --- | 1,00 | up   |
| 6534532 | 7274892 | 1559544 | --- | --- | --- | 1,20 | up   |
| 6534638 | 7374324 | 1807500 | --- | --- | --- | 1,07 | up   |
| 6534674 | 7337425 | 1713198 | --- | --- | --- | 1,19 | up   |
| 6534717 | 7280982 | 1575207 | --- | --- | --- | 1,14 | down |
| 6534727 | 7141456 | 1229587 | --- | --- | --- | 1,08 | down |
| 6534731 | 7211363 | 1402056 | --- | --- | --- | 1,55 | down |
| 6534822 | 7183182 | 1333553 | --- | --- | --- | 2,27 | down |
| 6534910 | 7301904 | 1626758 | --- | --- | --- | 1,21 | down |
| 6535054 | 7267802 | 1541743 | --- | --- | --- | 1,58 | up   |
| 6535156 | 7259221 | 1520630 | --- | --- | --- | 1,11 | up   |
| 6535195 | 7217798 | 1417605 | --- | --- | --- | 1,40 | up   |
| 6535210 | 7227433 | 1440974 | --- | --- | --- | 1,01 | down |
| 6535254 | 7072332 | 1061647 | --- | --- | --- | 2,24 | up   |
| 6535279 | 7119845 | 1176900 | --- | --- | --- | 1,35 | up   |
| 6535314 | 7146872 | 1242911 | --- | --- | --- | 1,17 | down |
| 6535380 | 7069603 | 1055047 | --- | --- | --- | 1,05 | down |
| 6535584 | 7081487 | 1082714 | --- | --- | --- | 1,13 | up   |
| 6535588 | 7374324 | 1807481 | --- | --- | --- | 1,03 | down |
| 6535589 | 7148741 | 1247872 | --- | --- | --- | 1,09 | down |
| 6535626 | 7352252 | 1750567 | --- | --- | --- | 1,63 | down |
| 6535707 | 7257893 | 1517472 | --- | --- | --- | 1,36 | down |
| 6535719 | 7115259 | 1165351 | --- | --- | --- | 2,19 | up   |
| 6535821 | 7093835 | 1112220 | --- | --- | --- | 1,07 | down |

|         |         |         |     |     |     |      |      |
|---------|---------|---------|-----|-----|-----|------|------|
| 6535870 | 7282927 | 1579976 | --- | --- | --- | 1,04 | down |
| 6536035 | 7309738 | 1646950 | --- | --- | --- | 1,09 | up   |
| 6536074 | 7136062 | 1216292 | --- | --- | --- | 1,04 | up   |
| 6536077 | 7138580 | 1222479 | --- | --- | --- | 1,26 | down |
| 6536133 | 7329846 | 1694987 | --- | --- | --- | 1,43 | up   |
| 6536235 | 7372840 | 1803770 | --- | --- | --- | 1,07 | up   |
| 6536296 | 7061948 | 1036373 | --- | --- | --- | 1,83 | down |
| 6536383 | 7190242 | 1350324 | --- | --- | --- | 1,68 | down |
| 6536412 | 7049689 | 1008871 | --- | --- | --- | 1,12 | up   |
| 6536489 | 7162144 | 1280504 | --- | --- | --- | 1,19 | up   |
| 6536533 | 7092549 | 1109187 | --- | --- | --- | 1,30 | down |
| 6536575 | 7027797 | 956286  | --- | --- | --- | 1,67 | up   |
| 6536658 | 7375937 | 1811362 | --- | --- | --- | 1,35 | down |
| 6536688 | 7330582 | 1696864 | --- | --- | --- | 1,16 | up   |
| 6536696 | 7146425 | 1241887 | --- | --- | --- | 1,38 | up   |
| 6536720 | 7374324 | 1807463 | --- | --- | --- | 1,30 | down |
| 6536722 | 7340990 | 1722514 | --- | --- | --- | 1,03 | down |
| 6536777 | 7168439 | 1295694 | --- | --- | --- | 1,52 | down |
| 6536792 | 7353287 | 1753020 | --- | --- | --- | 1,02 | down |
| 6536984 | 7079238 | 1077813 | --- | --- | --- | 1,14 | down |
| 6537024 | 7198210 | 1370950 | --- | --- | --- | 1,10 | up   |
| 6537030 | 7326378 | 1686711 | --- | --- | --- | 2,19 | up   |
| 6537220 | 7056106 | 1022970 | --- | --- | --- | 1,39 | up   |
| 6537251 | 7380497 | 1821821 | --- | --- | --- | 1,07 | down |
| 6537456 | 7056736 | 1024421 | --- | --- | --- | 1,11 | up   |
| 6537700 | 7339379 | 1718361 | --- | --- | --- | 1,41 | down |
| 6537870 | 7184231 | 1336146 | --- | --- | --- | 2,07 | down |
| 6537938 | 7198087 | 1370695 | --- | --- | --- | 1,29 | down |
| 6538060 | 7253088 | 1505111 | --- | --- | --- | 1,93 | up   |
| 6538085 | 7376073 | 1811719 | --- | --- | --- | 1,06 | up   |
| 6538155 | 7102723 | 1134386 | --- | --- | --- | 1,46 | up   |
| 6538182 | 7100523 | 1128869 | --- | --- | --- | 1,66 | down |
| 6538205 | 7033616 | 970211  | --- | --- | --- | 1,18 | up   |
| 6538211 | 7234040 | 1458505 | --- | --- | --- | 1,59 | up   |
| 6538216 | 7341646 | 1724194 | --- | --- | --- | 1,07 | down |
| 6538297 | 7170764 | 1301427 | --- | --- | --- | 1,07 | up   |
| 6538317 | 7252728 | 1504323 | --- | --- | --- | 2,03 | down |
| 6538373 | 7214605 | 1409365 | --- | --- | --- | 1,16 | down |
| 6538479 | 7100307 | 1128385 | --- | --- | --- | 1,25 | down |
| 6538567 | 7156611 | 1267336 | --- | --- | --- | 1,33 | down |
| 6538621 | 7186240 | 1340821 | --- | --- | --- | 1,09 | down |
| 6538627 | 7349313 | 1743119 | --- | --- | --- | 1,06 | up   |
| 6538642 | 7200129 | 1375994 | --- | --- | --- | 2,13 | up   |
| 6538695 | 7374324 | 1807516 | --- | --- | --- | 1,18 | down |
| 6538737 | 7282927 | 1580025 | --- | --- | --- | 1,26 | up   |
| 6538849 | 7280982 | 1575166 | --- | --- | --- | 2,19 | up   |
| 6538856 | 7028326 | 957440  | --- | --- | --- | 1,73 | up   |
| 6538895 | 7217679 | 1417301 | --- | --- | --- | 1,08 | down |
| 6538906 | 7223833 | 1431984 | --- | --- | --- | 3,07 | down |
| 6539036 | 7098077 | 1122785 | --- | --- | --- | 1,15 | down |
| 6539057 | 7056106 | 1022968 | --- | --- | --- | 1,29 | down |
| 6539060 | 7148978 | 1248497 | --- | --- | --- | 1,03 | down |
| 6539077 | 7231137 | 1450198 | --- | --- | --- | 1,14 | down |
| 6539097 | 7070869 | 1058491 | --- | --- | --- | 1,53 | down |
| 6539111 | 7055793 | 1022314 | --- | --- | --- | 1,22 | down |
| 6539122 | 7279593 | 1572094 | --- | --- | --- | 1,15 | up   |
| 6539186 | 7376820 | 1813443 | --- | --- | --- | 1,04 | up   |

|         |         |         |     |     |     |      |      |
|---------|---------|---------|-----|-----|-----|------|------|
| 6539314 | 7034407 | 972309  | --- | --- | --- | 1,50 | down |
| 6539489 | 7091900 | 1107628 | --- | --- | --- | 1,32 | down |
| 6539502 | 7181001 | 1327630 | --- | --- | --- | 1,75 | up   |
| 6539612 | 7374324 | 1807522 | --- | --- | --- | 1,06 | up   |
| 6539767 | 7365147 | 1781771 | --- | --- | --- | 1,29 | down |
| 6539859 | 7219624 | 1422140 | --- | --- | --- | 1,39 | up   |
| 6540093 | 7143381 | 1234481 | --- | --- | --- | 1,34 | up   |
| 6540095 | 7125160 | 1189564 | --- | --- | --- | 1,01 | down |
| 6540110 | 7341002 | 1722556 | --- | --- | --- | 1,40 | up   |
| 6540147 | 7084193 | 1089088 | --- | --- | --- | 1,47 | up   |
| 6540162 | 7247954 | 1492402 | --- | --- | --- | 1,16 | up   |
| 6540219 | 7167883 | 1294108 | --- | --- | --- | 2,49 | down |
| 6540337 | 7146093 | 1240913 | --- | --- | --- | 1,01 | down |
| 6540350 | 7326612 | 1687198 | --- | --- | --- | 2,17 | down |
| 6540396 | 7067670 | 1050314 | --- | --- | --- | 2,92 | up   |
| 6540410 | 7280982 | 1575247 | --- | --- | --- | 1,12 | down |
| 6540480 | 7350530 | 1746237 | --- | --- | --- | 1,05 | down |
| 6540485 | 7330314 | 1696138 | --- | --- | --- | 1,03 | up   |
| 6540565 | 7108434 | 1148303 | --- | --- | --- | 1,58 | down |
| 6540709 | 7106776 | 1144104 | --- | --- | --- | 1,20 | down |
| 6540734 | 7364346 | 1779991 | --- | --- | --- | 1,32 | up   |
| 6540868 | 7176275 | 1315357 | --- | --- | --- | 1,31 | down |
| 6540989 | 7073609 | 1064844 | --- | --- | --- | 1,50 | up   |
| 6540991 | 7089080 | 1101148 | --- | --- | --- | 1,46 | down |
| 6541018 | 7301807 | 1626311 | --- | --- | --- | 1,22 | down |
| 6541074 | 7098867 | 1124952 | --- | --- | --- | 1,42 | up   |
| 6541128 | 7048014 | 1005627 | --- | --- | --- | 1,03 | up   |
| 6541149 | 7169599 | 1298453 | --- | --- | --- | 1,82 | up   |
| 6541352 | 7339834 | 1719546 | --- | --- | --- | 1,22 | up   |
| 6541436 | 7317204 | 1665390 | --- | --- | --- | 1,00 | down |
| 6541555 | 7138580 | 1222518 | --- | --- | --- | 1,04 | down |
| 6541573 | 7288077 | 1591995 | --- | --- | --- | 1,21 | up   |
| 6541588 | 7302327 | 1627672 | --- | --- | --- | 1,21 | up   |
| 6541597 | 7031774 | 964736  | --- | --- | --- | 1,19 | down |
| 6541653 | 7031774 | 964759  | --- | --- | --- | 1,02 | up   |
| 6541660 | 7361881 | 1773943 | --- | --- | --- | 1,04 | down |
| 6541703 | 7127540 | 1195282 | --- | --- | --- | 1,53 | up   |
| 6541709 | 7198087 | 1370685 | --- | --- | --- | 1,15 | down |
| 6541712 | 7139708 | 1225054 | --- | --- | --- | 1,13 | up   |
| 6541783 | 7100523 | 1128857 | --- | --- | --- | 1,23 | up   |
| 6541816 | 7052385 | 1014774 | --- | --- | --- | 1,01 | up   |
| 6541828 | 7156372 | 1266712 | --- | --- | --- | 1,12 | up   |
| 6541833 | 7188138 | 1345048 | --- | --- | --- | 1,42 | down |
| 6541854 | 7193916 | 1360448 | --- | --- | --- | 1,31 | down |
| 6541889 | 7297589 | 1615663 | --- | --- | --- | 1,28 | up   |
| 6542005 | 7162144 | 1280499 | --- | --- | --- | 1,44 | up   |
| 6542058 | 7225543 | 1435922 | --- | --- | --- | 1,04 | down |
| 6542132 | 7089080 | 1101151 | --- | --- | --- | 1,19 | down |
| 6542148 | 7380497 | 1821868 | --- | --- | --- | 1,79 | down |
| 6542286 | 7052813 | 1015928 | --- | --- | --- | 1,11 | down |
| 6542301 | 7373038 | 1804288 | --- | --- | --- | 1,66 | up   |
| 6542321 | 7067828 | 1050799 | --- | --- | --- | 1,33 | up   |
| 6542328 | 7314270 | 1657743 | --- | --- | --- | 2,24 | down |
| 6542380 | 7170764 | 1301486 | --- | --- | --- | 1,02 | down |
| 6542406 | 7196187 | 1365960 | --- | --- | --- | 1,24 | up   |
| 6542505 | 7058713 | 1028657 | --- | --- | --- | 1,27 | down |
| 6542529 | 7067670 | 1050362 | --- | --- | --- | 1,06 | up   |

|         |         |         |     |     |     |      |      |
|---------|---------|---------|-----|-----|-----|------|------|
| 6542541 | 7346066 | 1735293 | --- | --- | --- | 1,37 | down |
| 6542566 | 7066035 | 1046198 | --- | --- | --- | 1,04 | up   |
| 6542622 | 7158419 | 1271378 | --- | --- | --- | 1,27 | up   |
| 6542684 | 7266544 | 1538346 | --- | --- | --- | 1,70 | down |
| 6542759 | 7276650 | 1564148 | --- | --- | --- | 1,04 | down |
| 6542760 | 7033337 | 969485  | --- | --- | --- | 1,26 | down |
| 6542919 | 7033504 | 969853  | --- | --- | --- | 1,97 | down |
| 6543155 | 7289075 | 1594462 | --- | --- | --- | 1,08 | up   |
| 6543172 | 7148741 | 1247872 | --- | --- | --- | 1,30 | up   |
| 6543299 | 7341646 | 1724194 | --- | --- | --- | 1,54 | up   |
| 6543358 | 7248790 | 1494530 | --- | --- | --- | 1,21 | up   |
| 6543385 | 7317708 | 1666829 | --- | --- | --- | 1,36 | up   |
| 6543464 | 7083031 | 1086283 | --- | --- | --- | 1,20 | up   |
| 6543560 | 7189669 | 1348984 | --- | --- | --- | 1,47 | up   |
| 6543837 | 7148741 | 1247848 | --- | --- | --- | 1,12 | down |
| 6543935 | 7028326 | 957438  | --- | --- | --- | 1,24 | down |
| 6543953 | 7339379 | 1718349 | --- | --- | --- | 1,32 | up   |
| 6544003 | 7332059 | 1700726 | --- | --- | --- | 1,07 | down |
| 6544012 | 7286807 | 1588801 | --- | --- | --- | 1,35 | down |
| 6544075 | 7337845 | 1714332 | --- | --- | --- | 1,38 | up   |
| 6544103 | 7069603 | 1055040 | --- | --- | --- | 1,12 | down |
| 6544110 | 7281924 | 1577742 | --- | --- | --- | 1,04 | up   |
| 6544281 | 7226278 | 1438001 | --- | --- | --- | 1,86 | down |
| 6544330 | 7027386 | 955091  | --- | --- | --- | 1,15 | down |
| 6544334 | 7181105 | 1327962 | --- | --- | --- | 1,56 | up   |
| 6544385 | 7373678 | 1805860 | --- | --- | --- | 1,15 | down |
| 6544475 | 7252728 | 1504322 | --- | --- | --- | 1,13 | up   |
| 6544792 | 7186464 | 1341384 | --- | --- | --- | 1,28 | down |
| 6544799 | 7380878 | 1822558 | --- | --- | --- | 1,43 | down |
| 6544905 | 7339379 | 1718357 | --- | --- | --- | 1,66 | up   |
| 6544962 | 7070836 | 1058341 | --- | --- | --- | 2,25 | down |
| 6544974 | 7265259 | 1535443 | --- | --- | --- | 2,51 | up   |
| 6545055 | 7269911 | 1546909 | --- | --- | --- | 2,09 | down |
| 6545183 | 7189404 | 1348197 | --- | --- | --- | 1,03 | down |
| 6545257 | 7301900 | 1626743 | --- | --- | --- | 1,10 | up   |
| 6545281 | 7102369 | 1133413 | --- | --- | --- | 1,07 | down |
| 6545287 | 7075460 | 1069413 | --- | --- | --- | 5,72 | up   |
| 6545307 | 7176368 | 1315577 | --- | --- | --- | 1,54 | up   |
| 6545332 | 7209927 | 1398924 | --- | --- | --- | 1,08 | up   |
| 6545371 | 7113985 | 1162232 | --- | --- | --- | 1,40 | up   |
| 6545447 | 7279103 | 1570820 | --- | --- | --- | 1,11 | up   |
| 6545463 | 7186443 | 1341313 | --- | --- | --- | 1,04 | up   |
| 6545597 | 7307473 | 1641260 | --- | --- | --- | 1,58 | down |
| 6545609 | 7197056 | 1367833 | --- | --- | --- | 1,28 | down |
| 6545650 | 7188829 | 1346663 | --- | --- | --- | 1,21 | down |
| 6545699 | 7312686 | 1653619 | --- | --- | --- | 1,02 | up   |
| 6545810 | 7219304 | 1421274 | --- | --- | --- | 1,03 | down |
| 6545870 | 7052385 | 1014781 | --- | --- | --- | 1,04 | up   |
| 6545874 | 7287337 | 1589971 | --- | --- | --- | 1,92 | down |
| 6545939 | 7347427 | 1738662 | --- | --- | --- | 1,19 | up   |
| 6546232 | 7342356 | 1725906 | --- | --- | --- | 2,26 | up   |
| 6546421 | 7359361 | 1768267 | --- | --- | --- | 1,26 | down |
| 6546492 | 7340304 | 1720853 | --- | --- | --- | 2,86 | up   |
| 6546502 | 7062233 | 1037226 | --- | --- | --- | 1,36 | up   |
| 6546519 | 7281924 | 1577737 | --- | --- | --- | 1,66 | up   |
| 6546525 | 7259925 | 1522545 | --- | --- | --- | 1,28 | up   |
| 6546570 | 7101643 | 1131566 | --- | --- | --- | 1,25 | down |

|         |         |         |     |     |     |      |      |
|---------|---------|---------|-----|-----|-----|------|------|
| 6546583 | 7218728 | 1419926 | --- | --- | --- | 1,00 | up   |
| 6546623 | 7336854 | 1711683 | --- | --- | --- | 1,30 | up   |
| 6546637 | 7297756 | 1616088 | --- | --- | --- | 1,11 | down |
| 6546707 | 7330181 | 1695696 | --- | --- | --- | 1,55 | down |
| 6546722 | 7198087 | 1370655 | --- | --- | --- | 1,05 | up   |
| 6546723 | 7326245 | 1686391 | --- | --- | --- | 1,39 | up   |
| 6546737 | 7247512 | 1491204 | --- | --- | --- | 1,68 | up   |
| 6546815 | 7109292 | 1150744 | --- | --- | --- | 1,63 | down |
| 6546842 | 7121849 | 1181754 | --- | --- | --- | 1,28 | down |
| 6546861 | 7101643 | 1131595 | --- | --- | --- | 1,10 | down |
| 6546969 | 7197048 | 1367806 | --- | --- | --- | 1,43 | up   |
| 6546985 | 7088723 | 1100135 | --- | --- | --- | 1,08 | down |
| 6547029 | 7373678 | 1805865 | --- | --- | --- | 1,67 | up   |
| 6547502 | 7176456 | 1315799 | --- | --- | --- | 1,01 | down |
| 6547586 | 7039303 | 983869  | --- | --- | --- | 1,20 | down |
| 6547808 | 7294911 | 1608530 | --- | --- | --- | 2,09 | up   |
| 6547929 | 7373633 | 1805704 | --- | --- | --- | 2,34 | up   |
| 6548025 | 7207093 | 1392152 | --- | --- | --- | 1,34 | down |
| 6548075 | 7232958 | 1455301 | --- | --- | --- | 1,43 | up   |
| 6548243 | 7288077 | 1591941 | --- | --- | --- | 1,37 | down |
| 6548419 | 7173640 | 1308945 | --- | --- | --- | 1,27 | up   |
| 6548604 | 7231775 | 1452121 | --- | --- | --- | 2,67 | down |
| 6548639 | 7255911 | 1512227 | --- | --- | --- | 1,22 | up   |
| 6548656 | 7071264 | 1059362 | --- | --- | --- | 1,44 | down |
| 6548711 | 7131876 | 1206047 | --- | --- | --- | 1,26 | up   |
| 6548714 | 7177834 | 1319645 | --- | --- | --- | 1,49 | up   |
| 6548905 | 7217650 | 1417192 | --- | --- | --- | 1,75 | up   |
| 6548913 | 7372840 | 1803756 | --- | --- | --- | 1,90 | up   |
| 6548927 | 7307424 | 1641137 | --- | --- | --- | 1,05 | down |
| 6548935 | 7168439 | 1295684 | --- | --- | --- | 1,18 | down |
| 6549047 | 7208784 | 1396128 | --- | --- | --- | 1,13 | down |
| 6549151 | 7368005 | 1789342 | --- | --- | --- | 1,24 | up   |
| 6549174 | 7128112 | 1196540 | --- | --- | --- | 1,16 | down |
| 6549300 | 7371753 | 1800971 | --- | --- | --- | 1,31 | up   |
| 6549329 | 7069727 | 1055347 | --- | --- | --- | 1,36 | up   |
| 6549478 | 7030224 | 961132  | --- | --- | --- | 1,80 | down |
| 6549487 | 7156114 | 1266053 | --- | --- | --- | 1,01 | down |
| 6549511 | 7355138 | 1757812 | --- | --- | --- | 1,11 | up   |
| 6549595 | 7143455 | 1234722 | --- | --- | --- | 1,14 | up   |
| 6549679 | 7205944 | 1389497 | --- | --- | --- | 1,12 | up   |
| 6549698 | 7061948 | 1036377 | --- | --- | --- | 1,54 | down |
| 6549713 | 7288077 | 1591966 | --- | --- | --- | 1,04 | up   |
| 6549830 | 7337425 | 1713186 | --- | --- | --- | 1,10 | up   |
| 6549832 | 7365183 | 1781912 | --- | --- | --- | 1,03 | up   |
| 6549843 | 7093835 | 1112248 | --- | --- | --- | 1,26 | down |
| 6549852 | 7132024 | 1206344 | --- | --- | --- | 1,01 | down |
| 6549864 | 7289075 | 1594470 | --- | --- | --- | 1,36 | up   |
| 6549886 | 7088489 | 1099521 | --- | --- | --- | 1,19 | up   |
| 6550027 | 7034356 | 972156  | --- | --- | --- | 1,12 | up   |
| 6550198 | 7279881 | 1572736 | --- | --- | --- | 1,72 | up   |
| 6550424 | 7380497 | 1821833 | --- | --- | --- | 1,08 | down |
| 6550539 | 7367990 | 1789224 | --- | --- | --- | 1,72 | up   |
| 6550587 | 7088544 | 1099701 | --- | --- | --- | 1,44 | up   |
| 6550669 | 7264085 | 1532719 | --- | --- | --- | 1,04 | up   |
| 6550671 | 7300392 | 1622757 | --- | --- | --- | 1,13 | up   |
| 6550701 | 7089080 | 1101139 | --- | --- | --- | 1,13 | up   |
| 6550797 | 7153895 | 1259919 | --- | --- | --- | 1,52 | down |



|         |         |         |     |     |     |      |      |
|---------|---------|---------|-----|-----|-----|------|------|
| 6550803 | 7350237 | 1745489 | --- | --- | --- | 2,26 | up   |
| 6550817 | 7255911 | 1512216 | --- | --- | --- | 1,20 | up   |
| 6550833 | 7236358 | 1464256 | --- | --- | --- | 1,59 | up   |
| 6550851 | 7185483 | 1338927 | --- | --- | --- | 2,02 | down |
| 6550896 | 7201540 | 1379434 | --- | --- | --- | 1,37 | down |
| 6551047 | 7217192 | 1415689 | --- | --- | --- | 1,49 | down |
| 6551143 | 7135736 | 1215360 | --- | --- | --- | 1,23 | down |
| 6551166 | 7080131 | 1079793 | --- | --- | --- | 1,40 | down |
| 6551190 | 7027386 | 955057  | --- | --- | --- | 1,38 | down |
| 6551235 | 7225543 | 1435925 | --- | --- | --- | 1,33 | down |
| 6551366 | 7217434 | 1416444 | --- | --- | --- | 1,08 | up   |
| 6551380 | 7111361 | 1155580 | --- | --- | --- | 1,28 | down |
| 6551428 | 7075460 | 1069404 | --- | --- | --- | 2,00 | down |
| 6551490 | 7155116 | 1263424 | --- | --- | --- | 3,74 | up   |
| 6551497 | 7142321 | 1231476 | --- | --- | --- | 1,80 | up   |
| 6551545 | 7183182 | 1333556 | --- | --- | --- | 1,35 | down |
| 6551667 | 7185355 | 1338695 | --- | --- | --- | 1,52 | up   |
| 6551716 | 7373634 | 1805724 | --- | --- | --- | 1,30 | up   |
| 6551720 | 7252877 | 1504680 | --- | --- | --- | 1,30 | up   |
| 6551817 | 7277783 | 1567450 | --- | --- | --- | 1,24 | down |
| 6551923 | 7132020 | 1206307 | --- | --- | --- | 1,35 | down |
| 6551931 | 7154655 | 1262344 | --- | --- | --- | 1,08 | up   |
| 6551964 | 7121849 | 1181779 | --- | --- | --- | 1,08 | up   |
| 6552027 | 7340757 | 1721889 | --- | --- | --- | 1,48 | down |
| 6552037 | 7072332 | 1061645 | --- | --- | --- | 1,55 | up   |
| 6552039 | 7186688 | 1341839 | --- | --- | --- | 1,00 | down |
| 6552071 | 7301843 | 1626453 | --- | --- | --- | 2,05 | down |
| 6552190 | 7170764 | 1301471 | --- | --- | --- | 1,21 | down |
| 6552196 | 7247512 | 1491218 | --- | --- | --- | 1,01 | down |
| 6552336 | 7318286 | 1668335 | --- | --- | --- | 1,38 | down |
| 6552358 | 7042382 | 991294  | --- | --- | --- | 1,28 | down |
| 6552359 | 7291853 | 1600977 | --- | --- | --- | 2,41 | down |
| 6552369 | 7339379 | 1718321 | --- | --- | --- | 1,15 | down |
| 6552379 | 7155116 | 1263438 | --- | --- | --- | 1,15 | up   |
| 6552579 | 7263805 | 1532195 | --- | --- | --- | 1,10 | down |
| 6552586 | 7225543 | 1435930 | --- | --- | --- | 1,02 | up   |
| 6552618 | 7312121 | 1652374 | --- | --- | --- | 1,30 | down |
| 6552693 | 7339379 | 1718344 | --- | --- | --- | 1,52 | down |
| 6552803 | 7365183 | 1781905 | --- | --- | --- | 1,39 | down |
| 6552824 | 7166867 | 1291346 | --- | --- | --- | 1,10 | down |
| 6552828 | 7052813 | 1015912 | --- | --- | --- | 1,21 | down |
| 6552865 | 7079238 | 1077807 | --- | --- | --- | 1,13 | up   |
| 6552908 | 7273744 | 1556982 | --- | --- | --- | 1,83 | down |
| 6553087 | 7217434 | 1416362 | --- | --- | --- | 1,16 | up   |
| 6553114 | 7141061 | 1228644 | --- | --- | --- | 1,04 | down |
| 6553164 | 7341115 | 1722914 | --- | --- | --- | 1,21 | up   |
| 6553254 | 7313841 | 1656733 | --- | --- | --- | 1,13 | down |
| 6553346 | 7230628 | 1448868 | --- | --- | --- | 1,40 | up   |
| 6553357 | 7052813 | 1015921 | --- | --- | --- | 1,47 | up   |
| 6553571 | 7173706 | 1309298 | --- | --- | --- | 1,43 | down |
| 6553602 | 7073609 | 1064851 | --- | --- | --- | 1,23 | up   |
| 6553614 | 7112355 | 1158069 | --- | --- | --- | 1,38 | down |
| 6553636 | 7213945 | 1407831 | --- | --- | --- | 1,11 | down |
| 6553706 | 7337425 | 1713167 | --- | --- | --- | 1,06 | down |
| 6553720 | 7103782 | 1136947 | --- | --- | --- | 1,00 | down |
| 6553849 | 7069830 | 1055612 | --- | --- | --- | 1,03 | down |
| 6554118 | 7279806 | 1572566 | --- | --- | --- | 1,17 | up   |

|         |         |         |     |     |     |      |      |
|---------|---------|---------|-----|-----|-----|------|------|
| 6554187 | 7074519 | 1067174 | --- | --- | --- | 1,10 | down |
| 6554259 | 7376073 | 1811718 | --- | --- | --- | 1,10 | down |
| 6554288 | 7240569 | 1475480 | --- | --- | --- | 1,13 | down |
| 6554345 | 7217747 | 1417487 | --- | --- | --- | 1,33 | down |
| 6554376 | 7336931 | 1711872 | --- | --- | --- | 1,06 | up   |
| 6554460 | 7058507 | 1028310 | --- | --- | --- | 1,03 | down |
| 6554476 | 7118503 | 1173541 | --- | --- | --- | 1,49 | down |
| 6554482 | 7034293 | 971914  | --- | --- | --- | 1,03 | down |
| 6554493 | 7359453 | 1768448 | --- | --- | --- | 1,28 | down |
| 6554559 | 7069830 | 1055621 | --- | --- | --- | 1,08 | down |
| 6554755 | 7047524 | 1004657 | --- | --- | --- | 1,04 | down |
| 6554759 | 7180687 | 1326625 | --- | --- | --- | 1,05 | up   |
| 6554832 | 7034293 | 971810  | --- | --- | --- | 3,35 | up   |
| 6554858 | 7200996 | 1378167 | --- | --- | --- | 1,03 | down |
| 6554861 | 7084193 | 1089047 | --- | --- | --- | 1,19 | down |
| 6554882 | 7106752 | 1144024 | --- | --- | --- | 1,33 | up   |
| 6554933 | 7127691 | 1195633 | --- | --- | --- | 1,02 | down |
| 6554970 | 7345465 | 1733842 | --- | --- | --- | 2,13 | up   |
| 6554975 | 7312566 | 1653306 | --- | --- | --- | 1,07 | down |
| 6555247 | 7240224 | 1474389 | --- | --- | --- | 1,41 | up   |
| 6555337 | 7176409 | 1315668 | --- | --- | --- | 1,61 | down |
| 6555398 | 7367990 | 1789226 | --- | --- | --- | 1,23 | up   |
| 6555454 | 7252339 | 1503272 | --- | --- | --- | 1,03 | up   |
| 6555476 | 7236131 | 1463784 | --- | --- | --- | 1,07 | down |
| 6555559 | 7350922 | 1747318 | --- | --- | --- | 2,18 | down |
| 6555580 | 7277719 | 1567086 | --- | --- | --- | 1,95 | down |
| 6555609 | 7105780 | 1141703 | --- | --- | --- | 1,25 | up   |
| 6555826 | 7264797 | 1534436 | --- | --- | --- | 1,31 | up   |
| 6555869 | 7122140 | 1182723 | --- | --- | --- | 1,03 | down |
| 6555946 | 7031774 | 964766  | --- | --- | --- | 1,03 | down |
| 6555967 | 7233970 | 1458269 | --- | --- | --- | 1,09 | down |
| 6556149 | 7270397 | 1548131 | --- | --- | --- | 2,24 | down |
| 6556308 | 7383102 | 1827398 | --- | --- | --- | 1,05 | down |
| 6556387 | 7245921 | 1487689 | --- | --- | --- | 1,80 | down |
| 6556398 | 7078666 | 1076520 | --- | --- | --- | 1,15 | down |
| 6556460 | 7292869 | 1603408 | --- | --- | --- | 1,33 | up   |
| 6556593 | 7358859 | 1766985 | --- | --- | --- | 2,36 | down |
| 6556704 | 7263248 | 1530602 | --- | --- | --- | 1,15 | down |
| 6556783 | 7148741 | 1247882 | --- | --- | --- | 2,22 | down |
| 6556867 | 7210822 | 1400980 | --- | --- | --- | 1,13 | up   |
| 6556872 | 7309734 | 1646881 | --- | --- | --- | 1,29 | up   |
| 6556936 | 7290463 | 1597945 | --- | --- | --- | 1,26 | up   |
| 6556985 | 7337845 | 1714347 | --- | --- | --- | 1,54 | down |
| 6557020 | 7028326 | 957439  | --- | --- | --- | 1,00 | up   |
| 6557106 | 7302327 | 1627673 | --- | --- | --- | 2,04 | up   |
| 6557157 | 7384073 | 1829475 | --- | --- | --- | 1,28 | up   |
| 6557188 | 7148741 | 1247825 | --- | --- | --- | 1,06 | up   |
| 6557195 | 7312566 | 1653328 | --- | --- | --- | 1,34 | down |
| 6557215 | 7076236 | 1071177 | --- | --- | --- | 1,53 | up   |
| 6557298 | 7142917 | 1233158 | --- | --- | --- | 1,26 | up   |
| 6557328 | 7364346 | 1779984 | --- | --- | --- | 1,06 | down |
| 6557394 | 7331757 | 1700017 | --- | --- | --- | 1,33 | down |
| 6557397 | 7078815 | 1076996 | --- | --- | --- | 1,91 | down |
| 6557436 | 7294851 | 1608361 | --- | --- | --- | 2,87 | up   |
| 6557511 | 7093936 | 1112477 | --- | --- | --- | 1,32 | up   |
| 6557562 | 7335637 | 1708474 | --- | --- | --- | 1,26 | up   |
| 6557616 | 7243647 | 1482444 | --- | --- | --- | 1,01 | up   |

|         |         |         |     |     |     |      |      |
|---------|---------|---------|-----|-----|-----|------|------|
| 6557629 | 7136062 | 1216294 | --- | --- | --- | 1,02 | up   |
| 6557744 | 7317318 | 1665827 | --- | --- | --- | 1,06 | down |
| 6557760 | 7346687 | 1736696 | --- | --- | --- | 1,42 | up   |
| 6557773 | 7353284 | 1752984 | --- | --- | --- | 1,20 | down |
| 6557832 | 7374324 | 1807491 | --- | --- | --- | 1,21 | up   |
| 6557863 | 7223395 | 1431084 | --- | --- | --- | 1,21 | up   |
| 6557895 | 7039223 | 983564  | --- | --- | --- | 1,16 | up   |
| 6557939 | 7240569 | 1475328 | --- | --- | --- | 1,01 | down |
| 6557977 | 7143455 | 1234737 | --- | --- | --- | 2,41 | down |
| 6558069 | 7228656 | 1444240 | --- | --- | --- | 1,01 | up   |
| 6558120 | 7287337 | 1589970 | --- | --- | --- | 2,94 | down |
| 6558204 | 7110401 | 1153066 | --- | --- | --- | 1,06 | down |
| 6558218 | 7184931 | 1337717 | --- | --- | --- | 1,03 | down |
| 6558339 | 7360325 | 1770532 | --- | --- | --- | 1,20 | down |
| 6558385 | 7120039 | 1177523 | --- | --- | --- | 2,02 | up   |
| 6558412 | 7272110 | 1553031 | --- | --- | --- | 1,63 | down |
| 6558429 | 7303722 | 1631718 | --- | --- | --- | 1,52 | down |
| 6558454 | 7155866 | 1265339 | --- | --- | --- | 1,29 | up   |
| 6558520 | 7056025 | 1022800 | --- | --- | --- | 1,06 | up   |
| 6558692 | 7155624 | 1264727 | --- | --- | --- | 3,82 | down |
| 6558837 | 7204929 | 1387148 | --- | --- | --- | 1,01 | up   |
| 6558957 | 7367946 | 1788965 | --- | --- | --- | 1,16 | up   |
| 6559211 | 7127691 | 1195630 | --- | --- | --- | 1,05 | up   |
| 6559294 | 7236492 | 1464541 | --- | --- | --- | 1,23 | up   |
| 6559349 | 7217650 | 1417205 | --- | --- | --- | 1,05 | down |
| 6559370 | 7146245 | 1241377 | --- | --- | --- | 1,07 | up   |
| 6559434 | 7227474 | 1441140 | --- | --- | --- | 1,02 | down |
| 6559483 | 7353284 | 1752981 | --- | --- | --- | 1,05 | up   |
| 6559505 | 7376820 | 1813421 | --- | --- | --- | 1,28 | down |
| 6559557 | 7058507 | 1028308 | --- | --- | --- | 1,24 | down |
| 6559594 | 7281924 | 1577709 | --- | --- | --- | 1,27 | down |
| 6559635 | 7121849 | 1181804 | --- | --- | --- | 1,05 | down |
| 6559700 | 7377116 | 1814069 | --- | --- | --- | 1,06 | up   |
| 6559790 | 7282927 | 1579985 | --- | --- | --- | 1,20 | up   |
| 6559825 | 7359361 | 1768267 | --- | --- | --- | 1,07 | down |
| 6559880 | 7259925 | 1522557 | --- | --- | --- | 1,04 | up   |
| 6559898 | 7322020 | 1676634 | --- | --- | --- | 1,30 | up   |
| 6559919 | 7156052 | 1265757 | --- | --- | --- | 1,58 | down |
| 6560030 | 7027386 | 955090  | --- | --- | --- | 1,00 | up   |
| 6560031 | 7336050 | 1709754 | --- | --- | --- | 1,01 | down |
| 6560032 | 7295652 | 1610285 | --- | --- | --- | 1,75 | down |
| 6560056 | 7344406 | 1731203 | --- | --- | --- | 1,08 | down |
| 6560076 | 7297589 | 1615656 | --- | --- | --- | 1,01 | up   |
| 6560180 | 7232709 | 1454534 | --- | --- | --- | 1,59 | up   |
| 6560309 | 7318714 | 1669224 | --- | --- | --- | 1,12 | down |
| 6560315 | 7363674 | 1778424 | --- | --- | --- | 1,17 | up   |
| 6560350 | 7167872 | 1294017 | --- | --- | --- | 1,08 | down |
| 6560351 | 7120827 | 1179351 | --- | --- | --- | 1,44 | down |
| 6560355 | 7377791 | 1815991 | --- | --- | --- | 1,56 | down |
| 6560396 | 7264653 | 1534030 | --- | --- | --- | 1,04 | up   |
| 6560398 | 7184850 | 1337597 | --- | --- | --- | 1,07 | up   |
| 6560409 | 7137646 | 1220437 | --- | --- | --- | 1,32 | down |
| 6560450 | 7385253 | 1832224 | --- | --- | --- | 1,03 | down |
| 6560463 | 7125348 | 1190100 | --- | --- | --- | 1,78 | up   |
| 6560474 | 7100523 | 1128889 | --- | --- | --- | 1,67 | up   |
| 6560521 | 7069239 | 1054091 | --- | --- | --- | 2,85 | down |
| 6560524 | 7337425 | 1713142 | --- | --- | --- | 1,04 | up   |

|         |         |          |     |     |     |      |      |
|---------|---------|----------|-----|-----|-----|------|------|
| 6560534 | 7176368 | 1315561  | --- | --- | --- | 1,28 | up   |
| 6560558 | 7143381 | 1234470  | --- | --- | --- | 1,15 | down |
| 6560582 | 7089080 | 1101159  | --- | --- | --- | 1,35 | up   |
| 6560627 | 7193056 | 1358270  | --- | --- | --- | 1,01 | up   |
| 6560647 | 7069464 | 1054662  | --- | --- | --- | 1,33 | up   |
| 6560653 | 7065640 | 1045199  | --- | --- | --- | 1,10 | up   |
| 6560748 | 7127540 | 1195278  | --- | --- | --- | 1,19 | up   |
| 6560766 | 7217650 | 1417190  | --- | --- | --- | 1,21 | down |
| 6560806 | 7072765 | 1062737  | --- | --- | --- | 1,35 | up   |
| 6560852 | 7131372 | 1205017  | --- | --- | --- | 1,16 | down |
| 6560872 | 7344530 | 1731577  | --- | --- | --- | 1,08 | up   |
| 6560909 | 7146982 | 1243284  | --- | --- | --- | 1,17 | up   |
| 6560954 | 7312686 | 1653621  | --- | --- | --- | 1,13 | down |
| 6560997 | 7329185 | 1693647  | --- | --- | --- | 2,03 | up   |
| 6561003 | 7075460 | 1069396  | --- | --- | --- | 1,47 | down |
| 6561083 | 7069603 | 1055044  | --- | --- | --- | 1,05 | down |
| 6561233 | 7361881 | 1773930  | --- | --- | --- | 1,08 | down |
| 6561271 | 7264274 | 1533174  | --- | --- | --- | 2,35 | down |
| 6561294 | 7030454 | 961554   | --- | --- | --- | 1,35 | down |
| 6561382 | 7058713 | 1028667  | --- | --- | --- | 1,29 | up   |
| 6561401 | 7315571 | 1661011  | --- | --- | --- | 1,13 | up   |
| 6561430 | 7131718 | 1205745  | --- | --- | --- | 1,19 | up   |
| 6561513 | 7153136 | 1258009  | --- | --- | --- | 1,50 | up   |
| 6561539 | 7069464 | 1054672  | --- | --- | --- | 1,03 | down |
| 6561617 | 7244602 | 1484780  | --- | --- | --- | 1,28 | down |
| 6561624 | 7356027 | 1759985  | --- | --- | --- | 1,20 | up   |
| 6561787 | 7093296 | 11110953 | --- | --- | --- | 1,28 | up   |
| 6561884 | 7060896 | 1033617  | --- | --- | --- | 1,19 | up   |
| 6561897 | 7065570 | 1045092  | --- | --- | --- | 1,42 | down |
| 6562215 | 7253272 | 1505578  | --- | --- | --- | 1,14 | up   |
| 6562245 | 7086966 | 1095241  | --- | --- | --- | 1,02 | down |
| 6562278 | 7142915 | 1233092  | --- | --- | --- | 1,05 | down |
| 6562283 | 7329846 | 1694994  | --- | --- | --- | 1,02 | up   |
| 6562304 | 7211389 | 1402112  | --- | --- | --- | 1,40 | up   |
| 6562388 | 7327169 | 1688457  | --- | --- | --- | 1,33 | down |
| 6562389 | 7180804 | 1327008  | --- | --- | --- | 1,23 | down |
| 6562391 | 7156611 | 1267336  | --- | --- | --- | 1,13 | up   |
| 6562405 | 7069721 | 1055313  | --- | --- | --- | 1,05 | down |
| 6562429 | 7231533 | 1451506  | --- | --- | --- | 1,14 | up   |
| 6562576 | 7088164 | 1098469  | --- | --- | --- | 2,12 | up   |
| 6562617 | 7329846 | 1694989  | --- | --- | --- | 1,12 | up   |
| 6562661 | 7264653 | 1534038  | --- | --- | --- | 1,12 | down |
| 6562679 | 7132024 | 1206337  | --- | --- | --- | 1,03 | up   |
| 6562761 | 7042382 | 991295   | --- | --- | --- | 1,09 | up   |
| 6562790 | 7172691 | 1306453  | --- | --- | --- | 1,55 | up   |
| 6562881 | 7183182 | 1333557  | --- | --- | --- | 1,26 | up   |
| 6562959 | 7131550 | 1205554  | --- | --- | --- | 1,74 | down |
| 6563029 | 7105780 | 1141695  | --- | --- | --- | 1,09 | up   |
| 6563085 | 7076160 | 1070872  | --- | --- | --- | 1,15 | up   |
| 6563141 | 7191983 | 1355173  | --- | --- | --- | 1,22 | down |
| 6563200 | 7072748 | 1062585  | --- | --- | --- | 1,23 | up   |
| 6563210 | 7062233 | 1037259  | --- | --- | --- | 1,01 | up   |
| 6563237 | 7380497 | 1821828  | --- | --- | --- | 1,05 | down |
| 6563267 | 7267000 | 1539302  | --- | --- | --- | 1,00 | up   |
| 6563349 | 7051029 | 1011854  | --- | --- | --- | 1,75 | down |
| 6563365 | 7228530 | 1443904  | --- | --- | --- | 1,16 | down |
| 6563419 | 7305275 | 1635833  | --- | --- | --- | 1,44 | down |

|         |         |         |     |     |     |      |      |
|---------|---------|---------|-----|-----|-----|------|------|
| 6563578 | 7349817 | 1744642 | --- | --- | --- | 1,25 | up   |
| 6563639 | 7267802 | 1541836 | --- | --- | --- | 1,14 | down |
| 6563649 | 7140365 | 1226764 | --- | --- | --- | 1,03 | up   |
| 6563849 | 7282831 | 1579771 | --- | --- | --- | 1,41 | up   |
| 6563946 | 7280743 | 1574520 | --- | --- | --- | 1,47 | up   |
| 6563966 | 7095066 | 1115288 | --- | --- | --- | 1,00 | down |
| 6564030 | 7289382 | 1595211 | --- | --- | --- | 1,04 | down |
| 6564033 | 7339379 | 1718364 | --- | --- | --- | 1,60 | down |
| 6564037 | 7131718 | 1205748 | --- | --- | --- | 1,26 | up   |
| 6564050 | 7339834 | 1719554 | --- | --- | --- | 1,04 | down |
| 6564056 | 7301843 | 1626486 | --- | --- | --- | 1,38 | up   |
| 6564224 | 7197138 | 1368003 | --- | --- | --- | 1,00 | down |
| 6564478 | 7312338 | 1652775 | --- | --- | --- | 3,52 | down |
| 6564522 | 7240569 | 1475321 | --- | --- | --- | 1,46 | down |
| 6564582 | 7096924 | 1119618 | --- | --- | --- | 1,55 | up   |
| 6564600 | 7374740 | 1808626 | --- | --- | --- | 1,13 | down |
| 6564619 | 7127540 | 1195280 | --- | --- | --- | 1,75 | down |
| 6564646 | 7179176 | 1322915 | --- | --- | --- | 1,04 | up   |
| 6564762 | 7260066 | 1522903 | --- | --- | --- | 1,26 | down |
| 6564767 | 7276650 | 1564133 | --- | --- | --- | 1,06 | up   |
| 6564774 | 7121849 | 1181816 | --- | --- | --- | 1,07 | up   |
| 6564821 | 7034293 | 971849  | --- | --- | --- | 1,02 | up   |
| 6564918 | 7101258 | 1130564 | --- | --- | --- | 2,78 | down |
| 6564933 | 7150348 | 1251381 | --- | --- | --- | 1,13 | up   |
| 6564997 | 7095960 | 1117070 | --- | --- | --- | 1,12 | up   |
| 6565055 | 7075460 | 1069398 | --- | --- | --- | 1,62 | down |
| 6565070 | 7377583 | 1815459 | --- | --- | --- | 1,11 | up   |
| 6565074 | 7234040 | 1458493 | --- | --- | --- | 1,58 | up   |
| 6565105 | 7049916 | 1009199 | --- | --- | --- | 2,09 | up   |
| 6565155 | 7095041 | 1115168 | --- | --- | --- | 1,55 | up   |
| 6565202 | 7244027 | 1483274 | --- | --- | --- | 1,04 | up   |
| 6565232 | 7156052 | 1265772 | --- | --- | --- | 1,20 | up   |
| 6565285 | 7377304 | 1814593 | --- | --- | --- | 1,04 | up   |
| 6565295 | 7383501 | 1828201 | --- | --- | --- | 1,60 | up   |
| 6565335 | 7066035 | 1046217 | --- | --- | --- | 1,14 | up   |
| 6565383 | 7236131 | 1463759 | --- | --- | --- | 1,15 | up   |
| 6565479 | 7340673 | 1721686 | --- | --- | --- | 1,16 | down |
| 6565494 | 7180243 | 1325507 | --- | --- | --- | 2,49 | down |
| 6565506 | 7040442 | 986554  | --- | --- | --- | 1,13 | down |
| 6565550 | 7360486 | 1770948 | --- | --- | --- | 1,02 | up   |
| 6565574 | 7110401 | 1153063 | --- | --- | --- | 1,17 | down |
| 6565617 | 7368004 | 1789329 | --- | --- | --- | 1,01 | down |
| 6565674 | 7297589 | 1615665 | --- | --- | --- | 1,10 | up   |
| 6565692 | 7235069 | 1460983 | --- | --- | --- | 1,23 | down |
| 6565777 | 7028624 | 958000  | --- | --- | --- | 1,01 | up   |
| 6565782 | 7317708 | 1666830 | --- | --- | --- | 1,07 | down |
| 6565841 | 7265259 | 1535437 | --- | --- | --- | 1,46 | up   |
| 6565859 | 7363529 | 1777932 | --- | --- | --- | 1,22 | down |
| 6565869 | 7261592 | 1526846 | --- | --- | --- | 1,07 | down |
| 6565946 | 7306229 | 1638245 | --- | --- | --- | 1,16 | down |
| 6565948 | 7199341 | 1374162 | --- | --- | --- | 1,11 | down |
| 6565951 | 7252383 | 1503516 | --- | --- | --- | 1,08 | up   |
| 6566060 | 7068259 | 1051644 | --- | --- | --- | 1,03 | down |
| 6566075 | 7371539 | 1800303 | --- | --- | --- | 1,12 | up   |
| 6566187 | 7198210 | 1371006 | --- | --- | --- | 1,02 | up   |
| 6566200 | 7231137 | 1450203 | --- | --- | --- | 1,17 | up   |
| 6566206 | 7125160 | 1189600 | --- | --- | --- | 1,07 | up   |

|         |         |         |     |     |     |      |      |
|---------|---------|---------|-----|-----|-----|------|------|
| 6566306 | 7330396 | 1696337 | --- | --- | --- | 1,36 | down |
| 6566335 | 7280743 | 1574545 | --- | --- | --- | 1,62 | up   |
| 6566457 | 7218728 | 1419926 | --- | --- | --- | 1,02 | down |
| 6566460 | 7309734 | 1646895 | --- | --- | --- | 1,16 | up   |
| 6566503 | 7095021 | 1115131 | --- | --- | --- | 1,16 | down |
| 6566657 | 7337425 | 1713146 | --- | --- | --- | 1,40 | down |
| 6566747 | 7329846 | 1695001 | --- | --- | --- | 1,73 | down |
| 6566749 | 7153136 | 1258037 | --- | --- | --- | 1,47 | down |
| 6566788 | 7160687 | 1277020 | --- | --- | --- | 1,60 | up   |
| 6566803 | 7378637 | 1817829 | --- | --- | --- | 1,84 | down |
| 6566804 | 7217434 | 1416415 | --- | --- | --- | 1,24 | down |
| 6566818 | 7361881 | 1773963 | --- | --- | --- | 1,05 | down |
| 6566871 | 7039532 | 984440  | --- | --- | --- | 1,01 | up   |
| 6566962 | 7071969 | 1060899 | --- | --- | --- | 1,30 | up   |
| 6567003 | 7253408 | 1505950 | --- | --- | --- | 1,07 | down |
| 6567071 | 7369954 | 1795666 | --- | --- | --- | 1,68 | up   |
| 6567092 | 7363674 | 1778410 | --- | --- | --- | 1,14 | down |
| 6567237 | 7088723 | 1100102 | --- | --- | --- | 1,20 | down |
| 6567324 | 7257893 | 1517480 | --- | --- | --- | 2,84 | up   |
| 6567330 | 7353224 | 1752674 | --- | --- | --- | 1,07 | up   |
| 6567584 | 7132024 | 1206340 | --- | --- | --- | 1,10 | up   |
| 6567598 | 7378997 | 1818671 | --- | --- | --- | 1,15 | down |
| 6567627 | 7254040 | 1507597 | --- | --- | --- | 1,22 | up   |
| 6567651 | 7281924 | 1577713 | --- | --- | --- | 2,14 | up   |
| 6567695 | 7227474 | 1441137 | --- | --- | --- | 1,59 | up   |
| 6567722 | 7368954 | 1792774 | --- | --- | --- | 2,88 | down |
| 6568096 | 7293763 | 1605718 | --- | --- | --- | 2,65 | down |
| 6568097 | 7070869 | 1058470 | --- | --- | --- | 1,99 | down |
| 6568242 | 7361223 | 1772615 | --- | --- | --- | 1,03 | down |
| 6568251 | 7375937 | 1811355 | --- | --- | --- | 1,09 | up   |
| 6568456 | 7240569 | 1475463 | --- | --- | --- | 1,02 | down |
| 6568462 | 7340990 | 1722514 | --- | --- | --- | 1,59 | down |
| 6568793 | 7056736 | 1024423 | --- | --- | --- | 1,19 | down |
| 6568923 | 7256191 | 1512867 | --- | --- | --- | 1,01 | down |
| 6568930 | 7062233 | 1037217 | --- | --- | --- | 1,08 | up   |
| 6568964 | 7122140 | 1182732 | --- | --- | --- | 1,27 | up   |
| 6569040 | 7217650 | 1417199 | --- | --- | --- | 1,68 | down |
| 6569059 | 7363529 | 1777947 | --- | --- | --- | 1,29 | up   |
| 6569111 | 7257893 | 1517465 | --- | --- | --- | 1,01 | down |
| 6569158 | 7373633 | 1805713 | --- | --- | --- | 1,13 | up   |
| 6569160 | 7319259 | 1670398 | --- | --- | --- | 1,85 | down |
| 6569259 | 7108434 | 1148308 | --- | --- | --- | 1,13 | down |
| 6569372 | 7038530 | 981863  | --- | --- | --- | 1,07 | up   |
| 6569379 | 7342356 | 1725873 | --- | --- | --- | 1,65 | down |
| 6569382 | 7173640 | 1308965 | --- | --- | --- | 1,70 | down |
| 6569439 | 7180151 | 1325199 | --- | --- | --- | 1,53 | down |
| 6569453 | 7313538 | 1655713 | --- | --- | --- | 1,21 | up   |
| 6569508 | 7087965 | 1098031 | --- | --- | --- | 1,74 | up   |
| 6569510 | 7236492 | 1464545 | --- | --- | --- | 1,16 | up   |
| 6569611 | 7132715 | 1207973 | --- | --- | --- | 1,57 | up   |
| 6569616 | 7358859 | 1767008 | --- | --- | --- | 1,03 | up   |
| 6569619 | 7363529 | 1777924 | --- | --- | --- | 1,20 | down |
| 6569693 | 7245921 | 1487690 | --- | --- | --- | 2,24 | down |
| 6569698 | 7028326 | 957442  | --- | --- | --- | 1,13 | down |
| 6569700 | 7213908 | 1407760 | --- | --- | --- | 1,36 | down |
| 6569725 | 7168521 | 1295980 | --- | --- | --- | 1,10 | down |
| 6569794 | 7076236 | 1071195 | --- | --- | --- | 1,17 | up   |

|         |         |         |     |     |     |      |      |
|---------|---------|---------|-----|-----|-----|------|------|
| 6569802 | 7256191 | 1512884 | --- | --- | --- | 1,55 | up   |
| 6569939 | 7384073 | 1829466 | --- | --- | --- | 1,03 | down |
| 6570022 | 7364346 | 1779993 | --- | --- | --- | 1,17 | up   |
| 6570081 | 7209927 | 1398924 | --- | --- | --- | 1,17 | up   |
| 6570111 | 7267802 | 1541743 | --- | --- | --- | 1,34 | down |
| 6570138 | 7312465 | 1653048 | --- | --- | --- | 1,11 | up   |
| 6570161 | 7317318 | 1665798 | --- | --- | --- | 1,64 | down |
| 6570256 | 7137751 | 1220585 | --- | --- | --- | 1,78 | up   |
| 6570412 | 7240569 | 1475481 | --- | --- | --- | 1,95 | down |
| 6570551 | 7110959 | 1154684 | --- | --- | --- | 1,05 | down |
| 6570563 | 7091439 | 1106642 | --- | --- | --- | 2,24 | down |
| 6570591 | 7378878 | 1818318 | --- | --- | --- | 1,46 | down |
| 6570625 | 7193056 | 1358284 | --- | --- | --- | 1,23 | up   |
| 6570674 | 7301616 | 1625902 | --- | --- | --- | 1,07 | down |
| 6570692 | 7346687 | 1736689 | --- | --- | --- | 1,24 | up   |
| 6570874 | 7360486 | 1770942 | --- | --- | --- | 1,06 | down |
| 6570880 | 7243647 | 1482450 | --- | --- | --- | 1,18 | up   |
| 6571108 | 7212141 | 1403604 | --- | --- | --- | 1,47 | up   |
| 6571118 | 7068942 | 1053366 | --- | --- | --- | 1,03 | down |
| 6571197 | 7092406 | 1108786 | --- | --- | --- | 1,01 | down |
| 6571209 | 7181105 | 1327948 | --- | --- | --- | 1,11 | up   |
| 6571218 | 7034356 | 972158  | --- | --- | --- | 1,24 | up   |
| 6571277 | 7092549 | 1109189 | --- | --- | --- | 1,01 | up   |
| 6571296 | 7277719 | 1567080 | --- | --- | --- | 1,03 | down |
| 6571446 | 7058713 | 1028660 | --- | --- | --- | 1,41 | down |
| 6571518 | 7072429 | 1061868 | --- | --- | --- | 1,13 | down |
| 6571625 | 7076099 | 1070640 | --- | --- | --- | 1,21 | up   |
| 6571666 | 7162177 | 1280579 | --- | --- | --- | 1,09 | up   |
| 6571690 | 7345465 | 1733837 | --- | --- | --- | 1,00 | down |
| 6571725 | 7303777 | 1631924 | --- | --- | --- | 2,03 | down |
| 6571734 | 7208784 | 1396160 | --- | --- | --- | 1,14 | down |
| 6571746 | 7209927 | 1398932 | --- | --- | --- | 1,04 | up   |
| 6571749 | 7130889 | 1203882 | --- | --- | --- | 1,01 | down |
| 6571876 | 7226109 | 1437367 | --- | --- | --- | 1,57 | up   |
| 6571914 | 7041140 | 988269  | --- | --- | --- | 1,44 | down |
| 6571944 | 7197056 | 1367837 | --- | --- | --- | 1,01 | up   |
| 6571961 | 7267802 | 1541799 | --- | --- | --- | 1,01 | down |
| 6572051 | 7366749 | 1785531 | --- | --- | --- | 1,32 | up   |
| 6572099 | 7181105 | 1327948 | --- | --- | --- | 1,43 | up   |
| 6572459 | 7097454 | 1120884 | --- | --- | --- | 1,21 | down |
| 6572481 | 7030037 | 960710  | --- | --- | --- | 1,04 | down |
| 6572516 | 7364346 | 1779966 | --- | --- | --- | 1,16 | down |
| 6572616 | 7248790 | 1494548 | --- | --- | --- | 1,34 | down |
| 6572708 | 7121849 | 1181812 | --- | --- | --- | 1,05 | up   |
| 6572732 | 7166867 | 1291330 | --- | --- | --- | 1,31 | up   |
| 6572840 | 7343250 | 1728035 | --- | --- | --- | 1,02 | up   |
| 6572863 | 7210387 | 1400036 | --- | --- | --- | 1,13 | down |
| 6572884 | 7340263 | 1720748 | --- | --- | --- | 1,25 | down |
| 6572888 | 7297589 | 1615647 | --- | --- | --- | 1,25 | down |
| 6572910 | 7237814 | 1467815 | --- | --- | --- | 1,08 | up   |
| 6572964 | 7220650 | 1424529 | --- | --- | --- | 1,56 | down |
| 6572996 | 7167883 | 1294108 | --- | --- | --- | 1,53 | down |
| 6573016 | 7086672 | 1094396 | --- | --- | --- | 1,50 | down |
| 6573053 | 7170845 | 1301899 | --- | --- | --- | 1,18 | up   |
| 6573076 | 7258455 | 1518725 | --- | --- | --- | 1,19 | up   |
| 6573125 | 7371228 | 1799460 | --- | --- | --- | 1,11 | up   |
| 6573363 | 7068942 | 1053385 | --- | --- | --- | 2,02 | up   |

|         |         |         |     |     |     |      |      |
|---------|---------|---------|-----|-----|-----|------|------|
| 6573396 | 7146082 | 1240802 | --- | --- | --- | 2,05 | down |
| 6573402 | 7327169 | 1688466 | --- | --- | --- | 1,66 | down |
| 6573405 | 7211389 | 1402114 | --- | --- | --- | 1,00 | up   |
| 6573459 | 7247954 | 1492358 | --- | --- | --- | 1,33 | up   |
| 6573503 | 7225291 | 1435295 | --- | --- | --- | 1,28 | down |
| 6573557 | 7186240 | 1340826 | --- | --- | --- | 1,30 | down |
| 6573576 | 7237438 | 1466784 | --- | --- | --- | 1,32 | up   |
| 6573950 | 7146093 | 1240980 | --- | --- | --- | 1,44 | down |
| 6573966 | 7052385 | 1014799 | --- | --- | --- | 1,38 | down |
| 6574074 | 7115362 | 1165599 | --- | --- | --- | 1,16 | down |
| 6574125 | 7277783 | 1567447 | --- | --- | --- | 1,32 | up   |
| 6574133 | 7371001 | 1798870 | --- | --- | --- | 1,27 | down |
| 6574171 | 7301843 | 1626453 | --- | --- | --- | 1,21 | up   |
| 6574240 | 7231484 | 1451381 | --- | --- | --- | 1,83 | down |
| 6574283 | 7118864 | 1174352 | --- | --- | --- | 1,56 | down |
| 6574290 | 7337425 | 1713207 | --- | --- | --- | 1,12 | down |
| 6574346 | 7176456 | 1315832 | --- | --- | --- | 1,26 | up   |
| 6574600 | 7360486 | 1770964 | --- | --- | --- | 1,12 | up   |
| 6574610 | 7315206 | 1660027 | --- | --- | --- | 1,22 | up   |
| 6574671 | 7319398 | 1670688 | --- | --- | --- | 1,10 | up   |
| 6574701 | 7217434 | 1416390 | --- | --- | --- | 1,04 | up   |
| 6574729 | 7110959 | 1154684 | --- | --- | --- | 1,02 | down |
| 6574808 | 7122140 | 1182724 | --- | --- | --- | 1,01 | up   |
| 6574854 | 7148741 | 1247835 | --- | --- | --- | 1,06 | down |
| 6574874 | 7039223 | 983575  | --- | --- | --- | 2,30 | down |
| 6574883 | 7353997 | 1754702 | --- | --- | --- | 1,02 | up   |
| 6574942 | 7236131 | 1463774 | --- | --- | --- | 1,15 | down |
| 6575020 | 7279593 | 1572095 | --- | --- | --- | 1,01 | down |
| 6575037 | 7240569 | 1475510 | --- | --- | --- | 1,00 | up   |
| 6575156 | 7040442 | 986524  | --- | --- | --- | 1,90 | up   |
| 6575212 | 7264653 | 1534038 | --- | --- | --- | 1,54 | up   |
| 6575261 | 7268357 | 1543405 | --- | --- | --- | 1,35 | up   |
| 6575262 | 7039532 | 984431  | --- | --- | --- | 1,03 | up   |
| 6575270 | 7340673 | 1721691 | --- | --- | --- | 1,04 | up   |
| 6575350 | 7336050 | 1709730 | --- | --- | --- | 1,24 | down |
| 6575386 | 7266532 | 1538305 | --- | --- | --- | 1,40 | down |
| 6575656 | 7374324 | 1807456 | --- | --- | --- | 1,38 | up   |
| 6575667 | 7176275 | 1315354 | --- | --- | --- | 1,38 | down |
| 6575673 | 7041609 | 989568  | --- | --- | --- | 1,18 | up   |
| 6575684 | 7233513 | 1457171 | --- | --- | --- | 1,75 | up   |
| 6575745 | 7258455 | 1518716 | --- | --- | --- | 1,00 | up   |
| 6575765 | 7344530 | 1731565 | --- | --- | --- | 1,20 | up   |
| 6575983 | 7289075 | 1594475 | --- | --- | --- | 1,02 | up   |
| 6575999 | 7070668 | 1057922 | --- | --- | --- | 1,03 | down |
| 6576051 | 7363529 | 1777902 | --- | --- | --- | 1,21 | up   |
| 6576093 | 7068259 | 1051636 | --- | --- | --- | 2,16 | up   |
| 6576097 | 7219624 | 1422101 | --- | --- | --- | 1,05 | up   |
| 6576103 | 7075460 | 1069402 | --- | --- | --- | 1,26 | down |
| 6576166 | 7030037 | 960707  | --- | --- | --- | 1,58 | up   |
| 6576178 | 7025310 | 949236  | --- | --- | --- | 1,15 | up   |
| 6576234 | 7167160 | 1292196 | --- | --- | --- | 1,63 | down |
| 6576272 | 7281924 | 1577738 | --- | --- | --- | 1,90 | up   |
| 6576489 | 7072332 | 1061647 | --- | --- | --- | 1,69 | up   |
| 6576565 | 7188138 | 1345017 | --- | --- | --- | 1,38 | up   |
| 6576644 | 7058507 | 1028313 | --- | --- | --- | 1,35 | down |
| 6576661 | 7313841 | 1656701 | --- | --- | --- | 1,55 | down |
| 6576729 | 7139708 | 1225052 | --- | --- | --- | 1,02 | up   |



|         |         |         |     |     |     |      |      |
|---------|---------|---------|-----|-----|-----|------|------|
| 6576914 | 7349643 | 1744174 | --- | --- | --- | 1,13 | up   |
| 6576979 | 7199341 | 1374140 | --- | --- | --- | 1,13 | up   |
| 6577006 | 7039725 | 984811  | --- | --- | --- | 1,66 | up   |
| 6577043 | 7113261 | 1160479 | --- | --- | --- | 1,07 | up   |
| 6577127 | 7194400 | 1361781 | --- | --- | --- | 1,20 | up   |
| 6577169 | 7052176 | 1014223 | --- | --- | --- | 1,52 | up   |
| 6577174 | 7222741 | 1429360 | --- | --- | --- | 1,38 | up   |
| 6577241 | 7141151 | 1228924 | --- | --- | --- | 1,40 | down |
| 6577313 | 7297589 | 1615687 | --- | --- | --- | 1,29 | up   |
| 6577434 | 7246518 | 1489044 | --- | --- | --- | 1,02 | up   |
| 6577441 | 7342430 | 1726127 | --- | --- | --- | 1,32 | down |
| 6577455 | 7148978 | 1248548 | --- | --- | --- | 1,05 | up   |
| 6577518 | 7076099 | 1070641 | --- | --- | --- | 1,10 | up   |
| 6577557 | 7067518 | 1049944 | --- | --- | --- | 1,02 | down |
| 6577575 | 7158419 | 1271397 | --- | --- | --- | 1,05 | down |
| 6577634 | 7240569 | 1475360 | --- | --- | --- | 1,00 | up   |
| 6577650 | 7031618 | 964202  | --- | --- | --- | 1,02 | up   |
| 6577673 | 7374790 | 1808784 | --- | --- | --- | 1,05 | up   |
| 6577694 | 7041140 | 988293  | --- | --- | --- | 3,39 | down |
| 6577707 | 7198210 | 1370981 | --- | --- | --- | 1,07 | down |
| 6577799 | 7070511 | 1057476 | --- | --- | --- | 1,27 | up   |
| 6577811 | 7261766 | 1527159 | --- | --- | --- | 1,04 | up   |
| 6578077 | 7033337 | 969490  | --- | --- | --- | 1,05 | up   |
| 6578184 | 7194202 | 1361297 | --- | --- | --- | 2,40 | up   |
| 6578218 | 7122140 | 1182735 | --- | --- | --- | 1,44 | up   |
| 6578308 | 7353232 | 1752771 | --- | --- | --- | 1,17 | down |
| 6578330 | 7255755 | 1511912 | --- | --- | --- | 2,25 | up   |
| 6578339 | 7301616 | 1625898 | --- | --- | --- | 1,11 | up   |
| 6578379 | 7342430 | 1726149 | --- | --- | --- | 1,23 | up   |
| 6578401 | 7360486 | 1770963 | --- | --- | --- | 2,75 | down |
| 6578423 | 7373678 | 1805860 | --- | --- | --- | 1,48 | down |
| 6578426 | 7092549 | 1109198 | --- | --- | --- | 1,34 | down |
| 6578435 | 7247907 | 1492242 | --- | --- | --- | 1,30 | down |
| 6578604 | 7384073 | 1829471 | --- | --- | --- | 1,17 | up   |
| 6578807 | 7341243 | 1723213 | --- | --- | --- | 1,02 | down |
| 6578826 | 7138580 | 1222507 | --- | --- | --- | 1,12 | down |
| 6578883 | 7062233 | 1037234 | --- | --- | --- | 1,01 | up   |
| 6578887 | 7101643 | 1131595 | --- | --- | --- | 1,02 | up   |
| 6578983 | 7062233 | 1037196 | --- | --- | --- | 1,01 | down |
| 6579114 | 7142081 | 1230976 | --- | --- | --- | 1,10 | up   |
| 6579123 | 7106752 | 1144010 | --- | --- | --- | 1,02 | up   |
| 6579133 | 7171091 | 1302466 | --- | --- | --- | 1,30 | down |
| 6579152 | 7105449 | 1141135 | --- | --- | --- | 1,29 | down |
| 6579191 | 7326612 | 1687203 | --- | --- | --- | 1,10 | up   |
| 6579225 | 7339379 | 1718358 | --- | --- | --- | 2,92 | down |
| 6579339 | 7329846 | 1694997 | --- | --- | --- | 1,42 | down |
| 6579351 | 7208784 | 1396113 | --- | --- | --- | 1,25 | down |
| 6579405 | 7237346 | 1466595 | --- | --- | --- | 1,39 | down |
| 6579429 | 7056333 | 1023672 | --- | --- | --- | 1,18 | up   |
| 6579490 | 7315571 | 1661004 | --- | --- | --- | 1,17 | down |
| 6579498 | 7059412 | 1030187 | --- | --- | --- | 1,11 | up   |
| 6579549 | 7248790 | 1494496 | --- | --- | --- | 1,34 | up   |
| 6579597 | 7040442 | 986526  | --- | --- | --- | 1,04 | up   |
| 6579752 | 7223395 | 1431091 | --- | --- | --- | 1,07 | up   |
| 6579905 | 7059449 | 1030304 | --- | --- | --- | 2,01 | up   |
| 6579914 | 7088544 | 1099658 | --- | --- | --- | 1,97 | down |
| 6579923 | 7240569 | 1475366 | --- | --- | --- | 1,00 | up   |

|         |         |         |     |     |     |      |      |
|---------|---------|---------|-----|-----|-----|------|------|
| 6579988 | 7259807 | 1522244 | --- | --- | --- | 1,08 | down |
| 6580024 | 7264653 | 1534023 | --- | --- | --- | 1,02 | up   |
| 6580070 | 7166855 | 1291255 | --- | --- | --- | 1,06 | down |
| 6580095 | 7212285 | 1403962 | --- | --- | --- | 1,03 | down |
| 6580134 | 7355804 | 1759433 | --- | --- | --- | 2,11 | down |
| 6580161 | 7288077 | 1592010 | --- | --- | --- | 1,06 | up   |
| 6580260 | 7075445 | 1069351 | --- | --- | --- | 1,02 | up   |
| 6580292 | 7253408 | 1505950 | --- | --- | --- | 1,52 | down |
| 6580511 | 7380497 | 1821825 | --- | --- | --- | 1,00 | down |
| 6580589 | 7356115 | 1760113 | --- | --- | --- | 1,02 | down |
| 6580666 | 7095066 | 1115270 | --- | --- | --- | 1,95 | up   |
| 6580805 | 7128539 | 1197688 | --- | --- | --- | 1,07 | up   |
| 6580824 | 7128112 | 1196540 | --- | --- | --- | 1,42 | down |
| 6580940 | 7318286 | 1668329 | --- | --- | --- | 1,08 | down |
| 6580958 | 7037235 | 978585  | --- | --- | --- | 1,10 | up   |
| 6580961 | 7086966 | 1095268 | --- | --- | --- | 1,11 | down |
| 6580999 | 7300392 | 1622751 | --- | --- | --- | 1,31 | up   |
| 6581005 | 7088544 | 1099664 | --- | --- | --- | 2,35 | down |
| 6581007 | 7355044 | 1757432 | --- | --- | --- | 1,08 | down |
| 6581254 | 7217747 | 1417509 | --- | --- | --- | 1,78 | up   |
| 6581257 | 7067518 | 1049955 | --- | --- | --- | 1,04 | down |
| 6581290 | 7366749 | 1785490 | --- | --- | --- | 1,32 | up   |
| 6581346 | 7082098 | 1084110 | --- | --- | --- | 1,07 | up   |
| 6581389 | 7127257 | 1194805 | --- | --- | --- | 2,04 | up   |
| 6581398 | 7217747 | 1417485 | --- | --- | --- | 1,48 | down |
| 6581403 | 7267802 | 1541872 | --- | --- | --- | 1,33 | up   |
| 6581416 | 7148741 | 1247839 | --- | --- | --- | 1,54 | down |
| 6581444 | 7059971 | 1031469 | --- | --- | --- | 1,06 | up   |
| 6581569 | 7231484 | 1451375 | --- | --- | --- | 1,00 | down |
| 6581628 | 7209811 | 1398684 | --- | --- | --- | 1,14 | up   |
| 6581701 | 7069830 | 1055645 | --- | --- | --- | 1,01 | up   |
| 6581729 | 7209927 | 1398930 | --- | --- | --- | 1,75 | down |
| 6581801 | 7175946 | 1314634 | --- | --- | --- | 1,79 | down |
| 6581818 | 7070393 | 1057217 | --- | --- | --- | 1,06 | up   |
| 6581836 | 7081487 | 1082707 | --- | --- | --- | 1,50 | up   |
| 6581838 | 7307424 | 1641140 | --- | --- | --- | 2,02 | down |
| 6581862 | 7081487 | 1082700 | --- | --- | --- | 1,10 | up   |
| 6581873 | 7247334 | 1490820 | --- | --- | --- | 1,57 | up   |
| 6581960 | 7373634 | 1805725 | --- | --- | --- | 1,01 | down |
| 6581976 | 7061703 | 1035735 | --- | --- | --- | 1,16 | down |
| 6582078 | 7058149 | 1027277 | --- | --- | --- | 1,47 | down |
| 6582134 | 7193403 | 1359182 | --- | --- | --- | 1,18 | down |
| 6582155 | 7029770 | 960158  | --- | --- | --- | 1,30 | down |
| 6582258 | 7059506 | 1030393 | --- | --- | --- | 2,52 | up   |
| 6582322 | 7189404 | 1348190 | --- | --- | --- | 2,05 | down |
| 6582382 | 7062436 | 1037682 | --- | --- | --- | 1,12 | up   |
| 6582395 | 7115146 | 1164937 | --- | --- | --- | 1,56 | down |
| 6582506 | 7369939 | 1795606 | --- | --- | --- | 2,19 | up   |
| 6582579 | 7109292 | 1150726 | --- | --- | --- | 1,09 | up   |
| 6582610 | 7243647 | 1482477 | --- | --- | --- | 1,08 | down |
| 6582634 | 7050716 | 1011223 | --- | --- | --- | 1,46 | up   |
| 6582659 | 7068942 | 1053391 | --- | --- | --- | 1,03 | down |
| 6582664 | 7052813 | 1015941 | --- | --- | --- | 1,08 | up   |
| 6582666 | 7231484 | 1451359 | --- | --- | --- | 1,43 | up   |
| 6582899 | 7168979 | 1297196 | --- | --- | --- | 1,03 | down |
| 6582951 | 7098867 | 1124958 | --- | --- | --- | 1,29 | down |
| 6582965 | 7176275 | 1315346 | --- | --- | --- | 1,09 | down |

|         |         |         |     |     |     |      |      |
|---------|---------|---------|-----|-----|-----|------|------|
| 6583036 | 7248790 | 1494567 | --- | --- | --- | 1,20 | down |
| 6583126 | 7141061 | 1228643 | --- | --- | --- | 1,26 | down |
| 6583204 | 7194400 | 1361759 | --- | --- | --- | 1,07 | up   |
| 6583209 | 7256070 | 1512580 | --- | --- | --- | 3,45 | down |
| 6583216 | 7069603 | 1055049 | --- | --- | --- | 1,14 | up   |
| 6583383 | 7130889 | 1203865 | --- | --- | --- | 1,08 | up   |
| 6583466 | 7238115 | 1468627 | --- | --- | --- | 1,21 | up   |
| 6583504 | 7277759 | 1567293 | --- | --- | --- | 1,68 | down |
| 6583525 | 7087282 | 1096170 | --- | --- | --- | 1,16 | down |
| 6583533 | 7280743 | 1574517 | --- | --- | --- | 1,36 | down |
| 6583704 | 7280743 | 1574497 | --- | --- | --- | 1,06 | up   |
| 6583740 | 7147809 | 1245449 | --- | --- | --- | 1,31 | down |
| 6583745 | 7217434 | 1416405 | --- | --- | --- | 1,06 | up   |
| 6583812 | 7274892 | 1559581 | --- | --- | --- | 1,29 | down |
| 6583838 | 7376566 | 1812861 | --- | --- | --- | 1,62 | down |
| 6583939 | 7042382 | 991295  | --- | --- | --- | 1,40 | down |
| 6584000 | 7176368 | 1315574 | --- | --- | --- | 1,12 | up   |
| 6584060 | 7299785 | 1621353 | --- | --- | --- | 1,32 | up   |
| 6584084 | 7331757 | 1700018 | --- | --- | --- | 1,06 | up   |
| 6584126 | 7263348 | 1530809 | --- | --- | --- | 1,06 | up   |
| 6584170 | 7367980 | 1789171 | --- | --- | --- | 1,54 | up   |
| 6584235 | 7148741 | 1247832 | --- | --- | --- | 1,47 | down |
| 6584307 | 7337522 | 1713595 | --- | --- | --- | 1,74 | down |
| 6584315 | 7071292 | 1059445 | --- | --- | --- | 1,02 | down |
| 6584354 | 7084792 | 1090341 | --- | --- | --- | 1,27 | down |
| 6584486 | 7341264 | 1723334 | --- | --- | --- | 1,19 | up   |
| 6584497 | 7034293 | 971929  | --- | --- | --- | 1,04 | up   |
| 6584503 | 7374324 | 1807496 | --- | --- | --- | 1,07 | up   |
| 6584521 | 7227433 | 1440987 | --- | --- | --- | 1,03 | up   |
| 6584595 | 7068259 | 1051659 | --- | --- | --- | 1,25 | down |
| 6584641 | 7366749 | 1785532 | --- | --- | --- | 1,60 | down |
| 6584669 | 7248790 | 1494533 | --- | --- | --- | 1,99 | down |
| 6584677 | 7151519 | 1254296 | --- | --- | --- | 2,08 | up   |
| 6584759 | 7261580 | 1526807 | --- | --- | --- | 1,23 | down |
| 6584807 | 7288077 | 1591966 | --- | --- | --- | 1,30 | down |
| 6584809 | 7127691 | 1195630 | --- | --- | --- | 1,62 | down |
| 6584944 | 7042382 | 991292  | --- | --- | --- | 1,09 | up   |
| 6585004 | 7385253 | 1832225 | --- | --- | --- | 1,15 | down |
| 6585053 | 7121849 | 1181789 | --- | --- | --- | 1,04 | up   |
| 6585054 | 7217679 | 1417294 | --- | --- | --- | 1,12 | down |
| 6585059 | 7052933 | 1016219 | --- | --- | --- | 1,35 | down |
| 6585073 | 7188829 | 1346669 | --- | --- | --- | 1,05 | down |
| 6585076 | 7364582 | 1780526 | --- | --- | --- | 1,08 | up   |
| 6585095 | 7302787 | 1628894 | --- | --- | --- | 1,01 | up   |
| 6585288 | 7120195 | 1177874 | --- | --- | --- | 1,23 | up   |
| 6585293 | 7207093 | 1392078 | --- | --- | --- | 1,02 | up   |
| 6585321 | 7351953 | 1749881 | --- | --- | --- | 1,00 | up   |
| 6585360 | 7068259 | 1051635 | --- | --- | --- | 1,49 | up   |
| 6585401 | 7142081 | 1230973 | --- | --- | --- | 1,71 | down |
| 6585451 | 7380497 | 1821869 | --- | --- | --- | 1,06 | down |
| 6585536 | 7128112 | 1196524 | --- | --- | --- | 1,06 | down |
| 6585675 | 7378546 | 1817594 | --- | --- | --- | 1,09 | down |
| 6585684 | 7121849 | 1181796 | --- | --- | --- | 1,09 | down |
| 6585765 | 7253408 | 1505953 | --- | --- | --- | 1,96 | down |
| 6585798 | 7337845 | 1714345 | --- | --- | --- | 1,38 | up   |
| 6585826 | 7196029 | 1365624 | --- | --- | --- | 1,02 | down |
| 6585890 | 7354896 | 1756994 | --- | --- | --- | 1,10 | up   |

|         |         |         |     |     |     |      |      |
|---------|---------|---------|-----|-----|-----|------|------|
| 6585903 | 7052813 | 1015887 | --- | --- | --- | 1,20 | down |
| 6585970 | 7116540 | 1168645 | --- | --- | --- | 1,05 | up   |
| 6586049 | 7032094 | 965719  | --- | --- | --- | 1,06 | down |
| 6586262 | 7337425 | 1713201 | --- | --- | --- | 1,03 | down |
| 6586263 | 7087965 | 1098018 | --- | --- | --- | 1,39 | down |
| 6586312 | 7344380 | 1731122 | --- | --- | --- | 1,09 | down |
| 6586386 | 7267204 | 1539856 | --- | --- | --- | 1,06 | down |
| 6586395 | 7050716 | 1011224 | --- | --- | --- | 1,12 | down |
| 6586472 | 7198210 | 1370990 | --- | --- | --- | 1,06 | down |
| 6586550 | 7177180 | 1317778 | --- | --- | --- | 1,18 | down |
| 6586634 | 7261592 | 1526843 | --- | --- | --- | 1,42 | down |
| 6586657 | 7069142 | 1053873 | --- | --- | --- | 1,05 | down |
| 6586675 | 7380878 | 1822578 | --- | --- | --- | 1,14 | down |
| 6586718 | 7336837 | 1711610 | --- | --- | --- | 2,13 | down |
| 6586920 | 7034356 | 972176  | --- | --- | --- | 1,12 | down |
| 6587032 | 7217679 | 1417296 | --- | --- | --- | 1,66 | down |
| 6587071 | 7247005 | 1490116 | --- | --- | --- | 1,31 | down |
| 6587150 | 7050878 | 1011547 | --- | --- | --- | 1,01 | down |
| 6587231 | 7181193 | 1328289 | --- | --- | --- | 1,16 | up   |
| 6587250 | 7289382 | 1595205 | --- | --- | --- | 1,10 | down |
| 6587286 | 7244027 | 1483283 | --- | --- | --- | 1,25 | down |
| 6587297 | 7373633 | 1805702 | --- | --- | --- | 1,33 | down |
| 6587328 | 7247230 | 1490579 | --- | --- | --- | 2,08 | up   |
| 6587358 | 7073677 | 1065151 | --- | --- | --- | 1,75 | up   |
| 6587382 | 7247672 | 1491756 | --- | --- | --- | 1,11 | up   |
| 6587388 | 7292517 | 1602556 | --- | --- | --- | 1,40 | down |
| 6587451 | 7276650 | 1564140 | --- | --- | --- | 1,03 | down |
| 6587478 | 7166867 | 1291348 | --- | --- | --- | 1,46 | down |
| 6587505 | 7295652 | 1610252 | --- | --- | --- | 1,02 | up   |
| 6587696 | 7358859 | 1766980 | --- | --- | --- | 1,03 | up   |
| 6587717 | 7189669 | 1348977 | --- | --- | --- | 1,14 | up   |
| 6587719 | 7078605 | 1076351 | --- | --- | --- | 1,82 | down |
| 6587922 | 7247230 | 1490578 | --- | --- | --- | 1,05 | down |
| 6587930 | 7213908 | 1407671 | --- | --- | --- | 1,09 | down |
| 6587978 | 7039223 | 983567  | --- | --- | --- | 1,56 | up   |
| 6588060 | 7365183 | 1781905 | --- | --- | --- | 1,22 | up   |
| 6588062 | 7261019 | 1525281 | --- | --- | --- | 1,05 | up   |
| 6588134 | 7280743 | 1574481 | --- | --- | --- | 1,24 | up   |
| 6588312 | 7238115 | 1468641 | --- | --- | --- | 1,06 | down |
| 6588321 | 7050878 | 1011550 | --- | --- | --- | 1,15 | down |
| 6588326 | 7131718 | 1205744 | --- | --- | --- | 1,14 | up   |
| 6588345 | 7114274 | 1162819 | --- | --- | --- | 1,47 | down |
| 6588357 | 7056333 | 1023682 | --- | --- | --- | 1,15 | down |
| 6588359 | 7279303 | 1571203 | --- | --- | --- | 1,94 | down |
| 6588361 | 7070869 | 1058499 | --- | --- | --- | 1,32 | up   |
| 6588511 | 7059020 | 1029354 | --- | --- | --- | 1,27 | down |
| 6588696 | 7282343 | 1578678 | --- | --- | --- | 1,34 | down |
| 6588723 | 7281577 | 1576885 | --- | --- | --- | 1,23 | down |
| 6588742 | 7052933 | 1016211 | --- | --- | --- | 1,01 | up   |
| 6588859 | 7280743 | 1574475 | --- | --- | --- | 1,02 | up   |
| 6588907 | 7070393 | 1057214 | --- | --- | --- | 1,26 | up   |
| 6589040 | 7041609 | 989557  | --- | --- | --- | 1,23 | down |
| 6589078 | 7272110 | 1553078 | --- | --- | --- | 1,25 | down |
| 6589135 | 7181001 | 1327620 | --- | --- | --- | 1,58 | up   |
| 6589142 | 7259221 | 1520620 | --- | --- | --- | 1,11 | up   |
| 6589186 | 7115507 | 1165980 | --- | --- | --- | 1,50 | up   |
| 6589280 | 7069253 | 1054157 | --- | --- | --- | 1,15 | up   |

|         |         |         |     |     |     |      |      |
|---------|---------|---------|-----|-----|-----|------|------|
| 6589331 | 7312569 | 1653342 | --- | --- | --- | 1,08 | up   |
| 6589378 | 7257976 | 1517712 | --- | --- | --- | 1,00 | down |
| 6589427 | 7384073 | 1829470 | --- | --- | --- | 1,06 | up   |
| 6589462 | 7295410 | 1609779 | --- | --- | --- | 2,08 | up   |
| 6589550 | 7212698 | 1404870 | --- | --- | --- | 1,14 | up   |
| 6589862 | 7280743 | 1574553 | --- | --- | --- | 1,25 | down |
| 6589900 | 7107503 | 1145773 | --- | --- | --- | 1,17 | up   |
| 6589954 | 7355044 | 1757444 | --- | --- | --- | 1,35 | up   |
| 6589965 | 7146542 | 1242211 | --- | --- | --- | 1,27 | up   |
| 6589990 | 7326245 | 1686401 | --- | --- | --- | 1,06 | up   |
| 6590074 | 7212587 | 1404657 | --- | --- | --- | 1,22 | down |
| 6590117 | 7353284 | 1752983 | --- | --- | --- | 1,02 | down |
| 6590126 | 7371753 | 1800971 | --- | --- | --- | 2,17 | down |
| 6590300 | 7357026 | 1762223 | --- | --- | --- | 1,13 | down |
| 6590373 | 7376828 | 1813467 | --- | --- | --- | 1,37 | up   |
| 6590382 | 7280570 | 1574100 | --- | --- | --- | 1,25 | down |
| 6590420 | 7285563 | 1586043 | --- | --- | --- | 1,10 | down |
| 6590431 | 7336837 | 1711618 | --- | --- | --- | 1,38 | up   |
| 6590465 | 7041486 | 989217  | --- | --- | --- | 1,05 | down |
| 6590482 | 7367969 | 1789105 | --- | --- | --- | 2,40 | down |
| 6590711 | 7154535 | 1261901 | --- | --- | --- | 2,41 | up   |
| 6590924 | 7337224 | 1712599 | --- | --- | --- | 1,16 | down |
| 6590941 | 7101258 | 1130562 | --- | --- | --- | 1,00 | down |
| 6591002 | 7351568 | 1748855 | --- | --- | --- | 1,18 | up   |
| 6591003 | 7358859 | 1766974 | --- | --- | --- | 1,25 | up   |
| 6591064 | 7040674 | 987022  | --- | --- | --- | 2,29 | up   |
| 6591076 | 7043379 | 993641  | --- | --- | --- | 1,42 | down |
| 6591100 | 7056736 | 1024418 | --- | --- | --- | 1,99 | down |
| 6591128 | 7176275 | 1315338 | --- | --- | --- | 1,02 | up   |
| 6591156 | 7181193 | 1328288 | --- | --- | --- | 1,11 | down |
| 6591190 | 7084193 | 1089055 | --- | --- | --- | 1,36 | up   |
| 6591211 | 7366749 | 1785481 | --- | --- | --- | 1,29 | up   |
| 6591306 | 7027350 | 954942  | --- | --- | --- | 1,89 | down |
| 6591384 | 7103017 | 1135156 | --- | --- | --- | 1,17 | up   |
| 6591517 | 7056025 | 1022800 | --- | --- | --- | 1,08 | down |
| 6591684 | 7274780 | 1559244 | --- | --- | --- | 1,21 | down |
| 6591792 | 7363147 | 1777004 | --- | --- | --- | 1,02 | up   |
| 6591823 | 7156978 | 1268178 | --- | --- | --- | 2,08 | down |
| 6591877 | 7086522 | 1093943 | --- | --- | --- | 1,07 | up   |
| 6591948 | 7097305 | 1120448 | --- | --- | --- | 2,13 | down |
| 6592026 | 7198325 | 1371352 | --- | --- | --- | 1,19 | down |
| 6592151 | 7371677 | 1800755 | --- | --- | --- | 1,52 | down |
| 6592306 | 7295410 | 1609733 | --- | --- | --- | 1,06 | down |
| 6592376 | 7128539 | 1197698 | --- | --- | --- | 1,42 | up   |
| 6592393 | 7171091 | 1302460 | --- | --- | --- | 2,04 | down |
| 6592452 | 7339286 | 1718104 | --- | --- | --- | 1,05 | up   |
| 6592474 | 7131876 | 1206056 | --- | --- | --- | 1,03 | up   |
| 6592505 | 7113483 | 1160995 | --- | --- | --- | 1,04 | down |
| 6592680 | 7194540 | 1362112 | --- | --- | --- | 2,47 | up   |
| 6592685 | 7384073 | 1829471 | --- | --- | --- | 1,08 | up   |
| 6592855 | 7240569 | 1475458 | --- | --- | --- | 1,74 | down |
| 6593102 | 7321746 | 1676234 | --- | --- | --- | 1,11 | up   |
| 6593263 | 7069721 | 1055287 | --- | --- | --- | 1,01 | down |
| 6593279 | 7289879 | 1596429 | --- | --- | --- | 1,54 | down |
| 6593343 | 7267953 | 1542235 | --- | --- | --- | 1,88 | down |
| 6593633 | 7093296 | 1110968 | --- | --- | --- | 1,23 | down |
| 6593782 | 7067828 | 1050798 | --- | --- | --- | 1,30 | down |

|         |         |         |     |     |     |      |      |
|---------|---------|---------|-----|-----|-----|------|------|
| 6593814 | 7075445 | 1069357 | --- | --- | --- | 1,38 | down |
| 6593858 | 7330238 | 1695948 | --- | --- | --- | 1,22 | down |
| 6593934 | 7319486 | 1670926 | --- | --- | --- | 2,13 | down |
| 6593935 | 7297274 | 1614657 | --- | --- | --- | 1,56 | down |
| 6593952 | 7113483 | 1161023 | --- | --- | --- | 1,23 | down |
| 6593992 | 7172691 | 1306443 | --- | --- | --- | 1,43 | up   |
| 6594002 | 7247672 | 1491753 | --- | --- | --- | 1,39 | down |
| 6594014 | 7378997 | 1818678 | --- | --- | --- | 1,26 | up   |
| 6594077 | 7312532 | 1653222 | --- | --- | --- | 1,20 | down |
| 6594189 | 7059584 | 1030557 | --- | --- | --- | 1,53 | down |
| 6594224 | 7306330 | 1638506 | --- | --- | --- | 1,45 | down |
| 6594256 | 7326612 | 1687186 | --- | --- | --- | 1,21 | up   |
| 6594319 | 7363529 | 1777935 | --- | --- | --- | 1,02 | up   |
| 6594384 | 7043379 | 993638  | --- | --- | --- | 1,48 | up   |
| 6594469 | 7200129 | 1375997 | --- | --- | --- | 1,02 | up   |
| 6594506 | 7075445 | 1069358 | --- | --- | --- | 1,01 | up   |
| 6594542 | 7336039 | 1709684 | --- | --- | --- | 1,12 | down |
| 6594550 | 7059020 | 1029352 | --- | --- | --- | 1,33 | up   |
| 6594574 | 7320735 | 1674167 | --- | --- | --- | 1,19 | up   |
| 6594686 | 7279303 | 1571205 | --- | --- | --- | 1,56 | down |
| 6594752 | 7303947 | 1632388 | --- | --- | --- | 1,62 | down |
| 6594799 | 7030454 | 961546  | --- | --- | --- | 1,06 | up   |
| 6594831 | 7092549 | 1109169 | --- | --- | --- | 1,26 | down |
| 6594953 | 7233513 | 1457174 | --- | --- | --- | 1,34 | up   |
| 6595092 | 7122140 | 1182710 | --- | --- | --- | 1,15 | up   |
| 6595107 | 7127691 | 1195630 | --- | --- | --- | 1,40 | up   |
| 6595154 | 7288170 | 1592321 | --- | --- | --- | 1,13 | down |
| 6595342 | 7298920 | 1618822 | --- | --- | --- | 1,01 | up   |
| 6595562 | 7295410 | 1609765 | --- | --- | --- | 1,11 | up   |
| 6595700 | 7225339 | 1435430 | --- | --- | --- | 1,32 | up   |
| 6595756 | 7269911 | 1546905 | --- | --- | --- | 1,08 | down |
| 6596054 | 7146807 | 1242809 | --- | --- | --- | 1,26 | up   |
| 6596055 | 7326612 | 1687187 | --- | --- | --- | 1,05 | down |
| 6596072 | 7142416 | 1231814 | --- | --- | --- | 1,95 | up   |
| 6596097 | 7087965 | 1098038 | --- | --- | --- | 1,10 | up   |
| 6596106 | 7031618 | 964206  | --- | --- | --- | 1,01 | up   |
| 6596259 | 7148741 | 1247841 | --- | --- | --- | 1,22 | down |
| 6596365 | 7252728 | 1504321 | --- | --- | --- | 1,01 | up   |
| 6596385 | 7380497 | 1821847 | --- | --- | --- | 1,26 | down |
| 6596392 | 7096924 | 1119615 | --- | --- | --- | 1,36 | up   |
| 6596527 | 7039463 | 984254  | --- | --- | --- | 1,60 | down |
| 6596624 | 7071714 | 1060364 | --- | --- | --- | 1,08 | down |
| 6596628 | 7027797 | 956281  | --- | --- | --- | 1,55 | up   |
| 6596678 | 7177520 | 1318612 | --- | --- | --- | 1,04 | down |
| 6596805 | 7188829 | 1346667 | --- | --- | --- | 1,00 | up   |
| 6596808 | 7295652 | 1610300 | --- | --- | --- | 1,08 | up   |
| 6596825 | 7184151 | 1335956 | --- | --- | --- | 1,47 | up   |
| 6596839 | 7235069 | 1460990 | --- | --- | --- | 1,19 | down |
| 6596858 | 7267802 | 1541743 | --- | --- | --- | 1,12 | up   |
| 6597001 | 7050167 | 1009827 | --- | --- | --- | 1,07 | up   |
| 6597007 | 7378546 | 1817609 | --- | --- | --- | 1,03 | up   |
| 6597122 | 7039223 | 983552  | --- | --- | --- | 1,09 | down |
| 6597173 | 7038530 | 981858  | --- | --- | --- | 1,25 | down |
| 6597260 | 7339834 | 1719545 | --- | --- | --- | 1,31 | up   |
| 6597346 | 7266532 | 1538309 | --- | --- | --- | 1,25 | down |
| 6597371 | 7228530 | 1443826 | --- | --- | --- | 1,08 | down |
| 6597400 | 7282927 | 1580011 | --- | --- | --- | 1,14 | down |

|         |         |         |     |     |     |      |      |
|---------|---------|---------|-----|-----|-----|------|------|
| 6597488 | 7109292 | 1150745 | --- | --- | --- | 1,16 | down |
| 6597516 | 7146542 | 1242279 | --- | --- | --- | 1,40 | down |
| 6597645 | 7148978 | 1248480 | --- | --- | --- | 1,01 | down |
| 6597832 | 7225543 | 1435919 | --- | --- | --- | 1,27 | down |
| 6597920 | 7340263 | 1720760 | --- | --- | --- | 1,07 | up   |
| 6597934 | 7254040 | 1507607 | --- | --- | --- | 1,39 | up   |
| 6598076 | 7069830 | 1055615 | --- | --- | --- | 1,06 | up   |
| 6598103 | 7078143 | 1075452 | --- | --- | --- | 1,63 | up   |
| 6598187 | 7108434 | 1148312 | --- | --- | --- | 1,04 | down |
| 6598473 | 7383823 | 1828945 | --- | --- | --- | 1,66 | down |
| 6598522 | 7267204 | 1539864 | --- | --- | --- | 1,25 | up   |
| 6598608 | 7049793 | 1009016 | --- | --- | --- | 1,01 | up   |
| 6598674 | 7071648 | 1060194 | --- | --- | --- | 1,42 | down |
| 6598718 | 7256191 | 1512862 | --- | --- | --- | 1,32 | up   |
| 6598907 | 7288077 | 1591962 | --- | --- | --- | 1,45 | up   |
| 6598983 | 7210822 | 1400970 | --- | --- | --- | 1,08 | up   |
| 6599043 | 7030127 | 960858  | --- | --- | --- | 1,04 | up   |
| 6599067 | 7209927 | 1398922 | --- | --- | --- | 1,51 | down |
| 6599155 | 7089080 | 1101134 | --- | --- | --- | 1,27 | up   |
| 6599194 | 7149817 | 1250312 | --- | --- | --- | 1,26 | down |
| 6599217 | 7380497 | 1821872 | --- | --- | --- | 1,24 | up   |
| 6599344 | 7363529 | 1777894 | --- | --- | --- | 1,04 | up   |
| 6599356 | 7380878 | 1822563 | --- | --- | --- | 1,00 | down |
| 6599364 | 7291853 | 1600977 | --- | --- | --- | 2,43 | down |
| 6599439 | 7196769 | 1367271 | --- | --- | --- | 1,05 | down |
| 6599735 | 7060896 | 1033545 | --- | --- | --- | 1,18 | up   |
| 6599869 | 7071264 | 1059362 | --- | --- | --- | 1,18 | down |
| 6599886 | 7289075 | 1594471 | --- | --- | --- | 1,25 | down |
| 6599949 | 7172988 | 1307294 | --- | --- | --- | 1,06 | up   |
| 6600009 | 7227474 | 1441149 | --- | --- | --- | 1,19 | down |
| 6600021 | 7227474 | 1441160 | --- | --- | --- | 1,08 | down |
| 6600036 | 7363147 | 1776998 | --- | --- | --- | 1,44 | up   |
| 6600073 | 7213908 | 1407768 | --- | --- | --- | 1,07 | down |
| 6600111 | 7280982 | 1575183 | --- | --- | --- | 1,27 | up   |
| 6600168 | 7166855 | 1291249 | --- | --- | --- | 1,16 | up   |
| 6600195 | 7083030 | 1086262 | --- | --- | --- | 1,05 | down |
| 6600255 | 7294911 | 1608528 | --- | --- | --- | 1,07 | down |
| 6600409 | 7039725 | 984814  | --- | --- | --- | 2,23 | up   |
| 6600431 | 7182679 | 1332419 | --- | --- | --- | 1,49 | down |
| 6600467 | 7093255 | 1110760 | --- | --- | --- | 1,01 | up   |
| 6600751 | 7131766 | 1205864 | --- | --- | --- | 1,28 | down |
| 6600770 | 7194400 | 1361710 | --- | --- | --- | 1,08 | down |
| 6600822 | 7303777 | 1631918 | --- | --- | --- | 1,00 | down |
| 6600831 | 7031774 | 964727  | --- | --- | --- | 1,17 | up   |
| 6601006 | 7350237 | 1745485 | --- | --- | --- | 1,18 | down |
| 6601141 | 7068259 | 1051655 | --- | --- | --- | 1,08 | down |
| 6601162 | 7267204 | 1539850 | --- | --- | --- | 1,12 | down |
| 6601266 | 7073950 | 1065907 | --- | --- | --- | 2,20 | up   |
| 6601360 | 7078143 | 1075433 | --- | --- | --- | 1,33 | down |
| 6601378 | 7279881 | 1572709 | --- | --- | --- | 1,04 | up   |
| 6601389 | 7293234 | 1604352 | --- | --- | --- | 1,01 | up   |
| 6601437 | 7363674 | 1778434 | --- | --- | --- | 1,18 | down |
| 6601445 | 7120427 | 1178427 | --- | --- | --- | 1,22 | up   |
| 6601465 | 7223395 | 1431074 | --- | --- | --- | 1,32 | down |
| 6601469 | 7198210 | 1370966 | --- | --- | --- | 1,22 | down |
| 6601919 | 7032204 | 966152  | --- | --- | --- | 1,35 | up   |
| 6601984 | 7058507 | 1028315 | --- | --- | --- | 1,05 | up   |

|         |         |         |     |     |     |      |      |
|---------|---------|---------|-----|-----|-----|------|------|
| 6601985 | 7056333 | 1023685 | --- | --- | --- | 1,21 | down |
| 6601993 | 7282927 | 1580011 | --- | --- | --- | 1,18 | up   |
| 6602020 | 7067670 | 1050311 | --- | --- | --- | 2,01 | up   |
| 6602249 | 7112672 | 1158995 | --- | --- | --- | 1,91 | down |
| 6602333 | 7319259 | 1670389 | --- | --- | --- | 2,11 | down |
| 6602440 | 7383586 | 1828439 | --- | --- | --- | 1,21 | down |
| 6602442 | 7337845 | 1714336 | --- | --- | --- | 1,30 | up   |
| 6602445 | 7274780 | 1559251 | --- | --- | --- | 1,11 | down |
| 6602581 | 7059766 | 1030974 | --- | --- | --- | 1,37 | down |
| 6602609 | 7263348 | 1530810 | --- | --- | --- | 1,24 | up   |
| 6602635 | 7329136 | 1693554 | --- | --- | --- | 1,02 | up   |
| 6602643 | 7266778 | 1538857 | --- | --- | --- | 1,58 | up   |
| 6602673 | 7123421 | 1185828 | --- | --- | --- | 1,68 | down |
| 6602675 | 7123714 | 1186421 | --- | --- | --- | 1,00 | down |
| 6602893 | 7088164 | 1098492 | --- | --- | --- | 1,09 | down |
| 6602912 | 7027350 | 954943  | --- | --- | --- | 2,26 | up   |
| 6602968 | 7260488 | 1523931 | --- | --- | --- | 1,11 | down |
| 6603010 | 7156047 | 1265733 | --- | --- | --- | 1,10 | up   |
| 6603057 | 7340757 | 1721890 | --- | --- | --- | 1,24 | up   |
| 6603205 | 7065357 | 1044741 | --- | --- | --- | 1,25 | down |
| 6603225 | 7243363 | 1481627 | --- | --- | --- | 1,10 | down |
| 6603333 | 7326612 | 1687188 | --- | --- | --- | 1,30 | up   |
| 6603437 | 7048444 | 1006488 | --- | --- | --- | 1,56 | up   |
| 6603587 | 7288284 | 1592650 | --- | --- | --- | 1,34 | down |
| 6603610 | 7062233 | 1037238 | --- | --- | --- | 1,42 | up   |
| 6603635 | 7365183 | 1781900 | --- | --- | --- | 1,05 | up   |
| 6603702 | 7350530 | 1746237 | --- | --- | --- | 1,02 | down |
| 6603705 | 7263805 | 1532196 | --- | --- | --- | 1,41 | up   |
| 6603713 | 7097454 | 1120881 | --- | --- | --- | 1,01 | up   |
| 6603763 | 7278010 | 1568047 | --- | --- | --- | 1,20 | up   |
| 6603784 | 7094139 | 1112912 | --- | --- | --- | 1,31 | down |
| 6603934 | 7315206 | 1660018 | --- | --- | --- | 2,72 | up   |
| 6603935 | 7353232 | 1752698 | --- | --- | --- | 1,27 | down |
| 6603952 | 7245874 | 1487596 | --- | --- | --- | 1,74 | down |
| 6604059 | 7207292 | 1392627 | --- | --- | --- | 1,58 | down |
| 6604113 | 7377116 | 1814072 | --- | --- | --- | 1,03 | up   |
| 6604200 | 7041609 | 989559  | --- | --- | --- | 1,01 | up   |
| 6604201 | 7360486 | 1771012 | --- | --- | --- | 1,17 | down |
| 6604273 | 7196331 | 1366390 | --- | --- | --- | 1,23 | down |
| 6604583 | 7146093 | 1240939 | --- | --- | --- | 1,91 | up   |
| 6604736 | 7079238 | 1077807 | --- | --- | --- | 1,44 | down |
| 6604846 | 7222236 | 1428113 | --- | --- | --- | 1,05 | up   |
| 6604849 | 7059449 | 1030306 | --- | --- | --- | 1,45 | down |
| 6604858 | 7252339 | 1503336 | --- | --- | --- | 1,13 | up   |
| 6604891 | 7243253 | 1481223 | --- | --- | --- | 1,33 | up   |
| 6604958 | 7148741 | 1247825 | --- | --- | --- | 1,08 | up   |
| 6604995 | 7211830 | 1402916 | --- | --- | --- | 1,02 | up   |
| 6605020 | 7360213 | 1770193 | --- | --- | --- | 1,07 | up   |
| 6605072 | 7341546 | 1723961 | --- | --- | --- | 1,03 | down |
| 6605090 | 7298692 | 1618403 | --- | --- | --- | 1,14 | up   |
| 6605136 | 7243894 | 1482953 | --- | --- | --- | 2,41 | down |
| 6605200 | 7148741 | 1247857 | --- | --- | --- | 1,52 | down |
| 6605476 | 7218728 | 1419915 | --- | --- | --- | 1,32 | down |
| 6605484 | 7317318 | 1665817 | --- | --- | --- | 1,92 | up   |
| 6605578 | 7366749 | 1785495 | --- | --- | --- | 1,17 | down |
| 6605762 | 7177520 | 1318612 | --- | --- | --- | 1,08 | down |
| 6605771 | 7313538 | 1655731 | --- | --- | --- | 1,07 | down |



|         |         |         |     |     |     |      |      |
|---------|---------|---------|-----|-----|-----|------|------|
| 6605791 | 7158920 | 1272523 | --- | --- | --- | 1,25 | down |
| 6605810 | 7264808 | 1534466 | --- | --- | --- | 1,10 | up   |
| 6605900 | 7059449 | 1030307 | --- | --- | --- | 1,39 | up   |
| 6605951 | 7240569 | 1475453 | --- | --- | --- | 1,69 | down |
| 6606023 | 7350237 | 1745494 | --- | --- | --- | 1,12 | up   |
| 6606073 | 7156052 | 1265763 | --- | --- | --- | 1,07 | up   |
| 6606076 | 7350237 | 1745487 | --- | --- | --- | 2,18 | up   |
| 6606246 | 7205944 | 1389491 | --- | --- | --- | 1,22 | down |
| 6606273 | 7043515 | 994004  | --- | --- | --- | 1,74 | up   |
| 6606302 | 7350886 | 1747149 | --- | --- | --- | 1,14 | down |
| 6606424 | 7144389 | 1236777 | --- | --- | --- | 1,06 | down |
| 6606519 | 7235323 | 1461557 | --- | --- | --- | 1,19 | down |
| 6606561 | 7039223 | 983557  | --- | --- | --- | 1,47 | down |
| 6606711 | 7280743 | 1574533 | --- | --- | --- | 1,07 | down |
| 6606728 | 7042382 | 991286  | --- | --- | --- | 1,11 | down |
| 6606757 | 7040442 | 986556  | --- | --- | --- | 1,80 | down |
| 6606759 | 7314270 | 1657745 | --- | --- | --- | 1,52 | down |
| 6606786 | 7078982 | 1077349 | --- | --- | --- | 1,01 | up   |
| 6606791 | 7092406 | 1108782 | --- | --- | --- | 1,13 | up   |
| 6606819 | 7240569 | 1475385 | --- | --- | --- | 1,08 | up   |
| 6606888 | 7232958 | 1455287 | --- | --- | --- | 1,33 | up   |
| 6606934 | 7384073 | 1829474 | --- | --- | --- | 1,03 | down |
| 6607059 | 7166867 | 1291318 | --- | --- | --- | 1,01 | down |
| 6607119 | 7383655 | 1828573 | --- | --- | --- | 1,12 | up   |
| 6607131 | 7111361 | 1155580 | --- | --- | --- | 1,00 | up   |
| 6607148 | 7339379 | 1718312 | --- | --- | --- | 1,15 | up   |
| 6607225 | 7076160 | 1070910 | --- | --- | --- | 1,31 | up   |
| 6607269 | 7326271 | 1686472 | --- | --- | --- | 1,02 | down |
| 6607325 | 7142321 | 1231541 | --- | --- | --- | 1,09 | down |
| 6607332 | 7196803 | 1367333 | --- | --- | --- | 2,44 | up   |
| 6607419 | 7239752 | 1473160 | --- | --- | --- | 1,10 | up   |
| 6607453 | 7155286 | 1263908 | --- | --- | --- | 1,34 | down |
| 6607461 | 7238115 | 1468590 | --- | --- | --- | 1,04 | down |
| 6607571 | 7132125 | 1206601 | --- | --- | --- | 1,03 | down |
| 6607659 | 7108434 | 1148318 | --- | --- | --- | 1,39 | up   |
| 6607763 | 7225543 | 1435935 | --- | --- | --- | 1,00 | down |
| 6607825 | 7253215 | 1505369 | --- | --- | --- | 1,93 | down |
| 6607877 | 7102510 | 1133874 | --- | --- | --- | 1,12 | up   |
| 6608023 | 7277742 | 1567167 | --- | --- | --- | 1,35 | up   |
| 6608155 | 7059766 | 1030970 | --- | --- | --- | 1,40 | up   |
| 6608180 | 7038179 | 981264  | --- | --- | --- | 1,01 | up   |
| 6608206 | 7354935 | 1757098 | --- | --- | --- | 1,03 | up   |
| 6608249 | 7149817 | 1250307 | --- | --- | --- | 1,27 | up   |
| 6608323 | 7035525 | 974791  | --- | --- | --- | 1,01 | up   |
| 6608438 | 7113483 | 1161000 | --- | --- | --- | 1,47 | up   |
| 6608465 | 7095021 | 1115132 | --- | --- | --- | 1,03 | down |
| 6608529 | 7194400 | 1361773 | --- | --- | --- | 1,64 | up   |
| 6608614 | 7069830 | 1055596 | --- | --- | --- | 1,08 | up   |
| 6608625 | 7071648 | 1060195 | --- | --- | --- | 1,09 | up   |
| 6608632 | 7364346 | 1779983 | --- | --- | --- | 1,06 | down |
| 6608660 | 7323869 | 1680887 | --- | --- | --- | 2,21 | up   |
| 6608754 | 7207069 | 1392027 | --- | --- | --- | 1,46 | down |
| 6608777 | 7182056 | 1330579 | --- | --- | --- | 1,15 | down |
| 6608855 | 7030519 | 961702  | --- | --- | --- | 1,03 | down |
| 6608940 | 7196331 | 1366390 | --- | --- | --- | 1,22 | up   |
| 6608985 | 7033673 | 970376  | --- | --- | --- | 1,02 | down |
| 6609034 | 7247512 | 1491204 | --- | --- | --- | 1,08 | up   |

|         |         |         |     |     |     |      |      |
|---------|---------|---------|-----|-----|-----|------|------|
| 6609065 | 7033006 | 968480  | --- | --- | --- | 1,16 | down |
| 6609078 | 7229061 | 1445325 | --- | --- | --- | 1,02 | down |
| 6609107 | 7080563 | 1080717 | --- | --- | --- | 1,27 | down |
| 6609169 | 7351949 | 1749804 | --- | --- | --- | 2,02 | down |
| 6609193 | 7028624 | 957995  | --- | --- | --- | 1,37 | up   |
| 6609233 | 7322260 | 1677077 | --- | --- | --- | 1,01 | down |
| 6609348 | 7381090 | 1822989 | --- | --- | --- | 1,03 | up   |
| 6609397 | 7197056 | 1367848 | --- | --- | --- | 1,29 | down |
| 6609447 | 7294911 | 1608529 | --- | --- | --- | 1,59 | up   |
| 6609448 | 7329135 | 1693489 | --- | --- | --- | 2,36 | down |
| 6609473 | 7083355 | 1086920 | --- | --- | --- | 1,16 | down |
| 6609562 | 7150047 | 1250776 | --- | --- | --- | 1,04 | down |
| 6609598 | 7102708 | 1134318 | --- | --- | --- | 2,56 | up   |
| 6609618 | 7252382 | 1503510 | --- | --- | --- | 1,40 | down |
| 6609692 | 7260488 | 1523933 | --- | --- | --- | 2,24 | down |
| 6609860 | 7059766 | 1030972 | --- | --- | --- | 1,97 | up   |
| 6610115 | 7213908 | 1407732 | --- | --- | --- | 1,00 | down |
| 6610200 | 7088544 | 1099687 | --- | --- | --- | 1,36 | up   |
| 6610239 | 7340304 | 1720865 | --- | --- | --- | 1,58 | down |
| 6610261 | 7279533 | 1571917 | --- | --- | --- | 1,17 | down |
| 6610270 | 7069253 | 1054164 | --- | --- | --- | 1,06 | down |
| 6610324 | 7095041 | 1115179 | --- | --- | --- | 1,11 | up   |
| 6610497 | 7136062 | 1216276 | --- | --- | --- | 1,93 | up   |
| 6610576 | 7152915 | 1257443 | --- | --- | --- | 1,45 | down |
| 6610577 | 7339379 | 1718361 | --- | --- | --- | 1,30 | down |
| 6610595 | 7181001 | 1327617 | --- | --- | --- | 1,16 | up   |
| 6610861 | 7105780 | 1141705 | --- | --- | --- | 1,06 | down |
| 6610892 | 7176368 | 1315584 | --- | --- | --- | 1,49 | down |
| 6611039 | 7361042 | 1772279 | --- | --- | --- | 1,70 | up   |
| 6611097 | 7381330 | 1823620 | --- | --- | --- | 2,23 | up   |
| 6611127 | 7274780 | 1559234 | --- | --- | --- | 1,29 | down |
| 6611164 | 7096461 | 1118264 | --- | --- | --- | 1,21 | up   |
| 6611373 | 7341002 | 1722533 | --- | --- | --- | 2,13 | up   |
| 6611434 | 7236460 | 1464464 | --- | --- | --- | 1,58 | down |
| 6611482 | 7302327 | 1627670 | --- | --- | --- | 1,51 | down |
| 6611523 | 7039725 | 984824  | --- | --- | --- | 1,26 | up   |
| 6611671 | 7281577 | 1576888 | --- | --- | --- | 1,12 | down |
| 6611706 | 7207093 | 1392112 | --- | --- | --- | 1,51 | down |
| 6611723 | 7293402 | 1604805 | --- | --- | --- | 1,02 | up   |
| 6611772 | 7368555 | 1791241 | --- | --- | --- | 1,21 | up   |
| 6611786 | 7274780 | 1559256 | --- | --- | --- | 1,60 | down |
| 6611890 | 7070836 | 1058340 | --- | --- | --- | 1,30 | up   |
| 6611965 | 7339732 | 1719210 | --- | --- | --- | 2,07 | up   |
| 6612040 | 7041319 | 988752  | --- | --- | --- | 2,11 | up   |
| 6612042 | 7327169 | 1688457 | --- | --- | --- | 1,38 | up   |
| 6612080 | 7139708 | 1225051 | --- | --- | --- | 1,91 | down |
| 6612089 | 7180943 | 1327442 | --- | --- | --- | 1,01 | up   |
| 6612105 | 7059020 | 1029338 | --- | --- | --- | 2,10 | up   |
| 6612116 | 7268357 | 1543390 | --- | --- | --- | 1,21 | down |
| 6612396 | 7196187 | 1365952 | --- | --- | --- | 1,12 | up   |
| 6612471 | 7069721 | 1055304 | --- | --- | --- | 1,22 | down |
| 6612549 | 7369712 | 1794833 | --- | --- | --- | 1,27 | up   |
| 6612588 | 7101258 | 1130571 | --- | --- | --- | 1,16 | up   |
| 6612610 | 7120235 | 1177959 | --- | --- | --- | 1,50 | up   |
| 6612626 | 7252339 | 1503334 | --- | --- | --- | 1,28 | up   |
| 6612877 | 7031774 | 964662  | --- | --- | --- | 1,49 | up   |
| 6612942 | 7099294 | 1126098 | --- | --- | --- | 1,20 | up   |

|         |         |         |     |     |     |      |      |
|---------|---------|---------|-----|-----|-----|------|------|
| 6612944 | 7039532 | 984429  | --- | --- | --- | 1,07 | down |
| 6612986 | 7113085 | 1159997 | --- | --- | --- | 1,04 | down |
| 6613051 | 7052385 | 1014778 | --- | --- | --- | 1,17 | down |
| 6613078 | 7133484 | 1209943 | --- | --- | --- | 1,86 | up   |
| 6613366 | 7181193 | 1328305 | --- | --- | --- | 1,12 | down |
| 6613417 | 7059506 | 1030392 | --- | --- | --- | 1,02 | up   |
| 6613420 | 7194540 | 1362112 | --- | --- | --- | 1,15 | down |
| 6613587 | 7052331 | 1014567 | --- | --- | --- | 1,18 | down |
| 6613633 | 7099973 | 1127535 | --- | --- | --- | 1,61 | down |
| 6613658 | 7330396 | 1696369 | --- | --- | --- | 1,14 | up   |
| 6613749 | 7056736 | 1024420 | --- | --- | --- | 1,18 | down |
| 6613764 | 7060896 | 1033618 | --- | --- | --- | 1,08 | up   |
| 6613804 | 7155866 | 1265333 | --- | --- | --- | 1,09 | up   |
| 6613845 | 7279593 | 1572103 | --- | --- | --- | 1,63 | down |
| 6613850 | 7355044 | 1757431 | --- | --- | --- | 1,03 | up   |
| 6613899 | 7040442 | 986512  | --- | --- | --- | 1,43 | down |
| 6613915 | 7069253 | 1054154 | --- | --- | --- | 1,07 | down |
| 6613973 | 7210822 | 1400975 | --- | --- | --- | 1,10 | down |
| 6614057 | 7067828 | 1050782 | --- | --- | --- | 1,11 | up   |
| 6614203 | 7115362 | 1165613 | --- | --- | --- | 1,23 | up   |
| 6614221 | 7259923 | 1522525 | --- | --- | --- | 2,77 | up   |
| 6614251 | 7247230 | 1490594 | --- | --- | --- | 1,37 | up   |
| 6614399 | 7210702 | 1400724 | --- | --- | --- | 1,17 | up   |
| 6614431 | 7088164 | 1098479 | --- | --- | --- | 1,56 | up   |
| 6614459 | 7318596 | 1668925 | --- | --- | --- | 1,00 | down |
| 6614470 | 7088164 | 1098481 | --- | --- | --- | 3,00 | down |
| 6614490 | 7285239 | 1585483 | --- | --- | --- | 1,08 | up   |
| 6614506 | 7356619 | 1761349 | --- | --- | --- | 1,89 | up   |
| 6614531 | 7250671 | 1499026 | --- | --- | --- | 2,84 | up   |
| 6614535 | 7341038 | 1722683 | --- | --- | --- | 1,05 | down |
| 6614720 | 7318286 | 1668328 | --- | --- | --- | 1,11 | up   |
| 6614745 | 7193403 | 1359195 | --- | --- | --- | 1,04 | down |
| 6614780 | 7228530 | 1443902 | --- | --- | --- | 1,01 | up   |
| 6614792 | 7155866 | 1265336 | --- | --- | --- | 1,17 | up   |
| 6614814 | 7361881 | 1773942 | --- | --- | --- | 2,07 | up   |
| 6614817 | 7113483 | 1161022 | --- | --- | --- | 1,12 | up   |
| 6614897 | 7210822 | 1400969 | --- | --- | --- | 1,11 | up   |
| 6614935 | 7059020 | 1029341 | --- | --- | --- | 1,44 | up   |
| 6615217 | 7108434 | 1148316 | --- | --- | --- | 1,29 | down |
| 6615317 | 7041584 | 989465  | --- | --- | --- | 1,66 | up   |
| 6615337 | 7233178 | 1455899 | --- | --- | --- | 1,16 | down |
| 6615393 | 7344406 | 1731204 | --- | --- | --- | 1,21 | up   |
| 6615507 | 7231484 | 1451390 | --- | --- | --- | 1,27 | down |
| 6615571 | 7302787 | 1628903 | --- | --- | --- | 1,65 | down |
| 6615589 | 7190534 | 1351229 | --- | --- | --- | 1,41 | down |
| 6615659 | 7100210 | 1128144 | --- | --- | --- | 1,60 | down |
| 6615706 | 7376820 | 1813423 | --- | --- | --- | 1,69 | up   |
| 6615721 | 7282831 | 1579769 | --- | --- | --- | 1,02 | up   |
| 6615732 | 7181105 | 1327967 | --- | --- | --- | 1,34 | down |
| 6615809 | 7130917 | 1203941 | --- | --- | --- | 2,47 | up   |
| 6615920 | 7086044 | 1092951 | --- | --- | --- | 2,16 | down |
| 6616057 | 7177428 | 1318396 | --- | --- | --- | 1,36 | down |
| 6616075 | 7067828 | 1050783 | --- | --- | --- | 1,05 | down |
| 6616227 | 7344380 | 1731136 | --- | --- | --- | 1,22 | down |
| 6616430 | 7055876 | 1022521 | --- | --- | --- | 1,65 | down |
| 6616525 | 7339379 | 1718329 | --- | --- | --- | 1,25 | up   |
| 6616608 | 7269637 | 1546236 | --- | --- | --- | 2,08 | down |

|         |         |         |     |     |     |      |      |
|---------|---------|---------|-----|-----|-----|------|------|
| 6616731 | 7096589 | 1118529 | --- | --- | --- | 1,32 | down |
| 6616841 | 7244027 | 1483282 | --- | --- | --- | 1,08 | down |
| 6616856 | 7377457 | 1815072 | --- | --- | --- | 2,06 | down |
| 6616992 | 7038153 | 981156  | --- | --- | --- | 1,20 | up   |
| 6617036 | 7084500 | 1089703 | --- | --- | --- | 1,21 | down |
| 6617069 | 7368815 | 1792312 | --- | --- | --- | 1,20 | up   |
| 6617072 | 7172691 | 1306453 | --- | --- | --- | 1,25 | down |
| 6617111 | 7037495 | 979314  | --- | --- | --- | 1,27 | down |
| 6617141 | 7364346 | 1779965 | --- | --- | --- | 1,24 | down |
| 6617266 | 7035525 | 974767  | --- | --- | --- | 1,49 | down |
| 6617269 | 7069603 | 1055050 | --- | --- | --- | 1,04 | down |
| 6617270 | 7349817 | 1744644 | --- | --- | --- | 1,02 | down |
| 6617277 | 7168979 | 1297187 | --- | --- | --- | 1,13 | down |
| 6617278 | 7248790 | 1494485 | --- | --- | --- | 1,21 | up   |
| 6617416 | 7133484 | 1209946 | --- | --- | --- | 1,31 | up   |
| 6617431 | 7318084 | 1667937 | --- | --- | --- | 1,10 | down |
| 6617553 | 7384509 | 1830755 | --- | --- | --- | 1,13 | up   |
| 6617572 | 7353382 | 1753219 | --- | --- | --- | 1,73 | up   |
| 6617725 | 7302018 | 1626962 | --- | --- | --- | 1,17 | down |
| 6617788 | 7339732 | 1719238 | --- | --- | --- | 2,17 | down |
| 6617828 | 7146542 | 1242295 | --- | --- | --- | 1,41 | down |
| 6617855 | 7280570 | 1574099 | --- | --- | --- | 1,01 | down |
| 6617909 | 7093835 | 1112254 | --- | --- | --- | 1,32 | down |
| 6617917 | 7128112 | 1196568 | --- | --- | --- | 1,07 | down |
| 6617932 | 7193987 | 1360669 | --- | --- | --- | 1,15 | up   |
| 6618012 | 7267362 | 1540337 | --- | --- | --- | 2,69 | up   |
| 6618052 | 7355138 | 1757853 | --- | --- | --- | 1,05 | up   |
| 6618177 | 7207069 | 1392009 | --- | --- | --- | 1,10 | up   |
| 6618189 | 7078666 | 1076513 | --- | --- | --- | 1,11 | down |
| 6618199 | 7274892 | 1559554 | --- | --- | --- | 1,01 | down |
| 6618204 | 7031774 | 964690  | --- | --- | --- | 1,41 | up   |
| 6618273 | 7142770 | 1232669 | --- | --- | --- | 1,49 | down |
| 6618282 | 7147809 | 1245467 | --- | --- | --- | 1,77 | down |
| 6618314 | 7240569 | 1475513 | --- | --- | --- | 1,17 | up   |
| 6618322 | 7340757 | 1721892 | --- | --- | --- | 1,06 | down |
| 6618328 | 7170764 | 1301490 | --- | --- | --- | 1,24 | down |
| 6618469 | 7160687 | 1277016 | --- | --- | --- | 1,03 | down |
| 6618490 | 7194540 | 1362092 | --- | --- | --- | 1,06 | down |
| 6618546 | 7132125 | 1206636 | --- | --- | --- | 1,07 | up   |
| 6618601 | 7066035 | 1046198 | --- | --- | --- | 1,19 | down |
| 6618611 | 7099294 | 1126103 | --- | --- | --- | 1,17 | up   |
| 6618886 | 7310851 | 1649638 | --- | --- | --- | 1,31 | down |
| 6618915 | 7358859 | 1766965 | --- | --- | --- | 1,01 | down |
| 6619026 | 7337425 | 1713175 | --- | --- | --- | 1,31 | down |
| 6619138 | 7336050 | 1709731 | --- | --- | --- | 1,01 | up   |
| 6619298 | 7222236 | 1428116 | --- | --- | --- | 1,07 | down |
| 6619304 | 7082098 | 1084123 | --- | --- | --- | 2,13 | down |
| 6619384 | 7073677 | 1065158 | --- | --- | --- | 1,37 | down |
| 6619389 | 7280743 | 1574514 | --- | --- | --- | 1,04 | up   |
| 6619542 | 7248790 | 1494525 | --- | --- | --- | 1,04 | up   |
| 6619627 | 7146245 | 1241378 | --- | --- | --- | 1,00 | up   |
| 6619631 | 7286807 | 1588822 | --- | --- | --- | 1,04 | down |
| 6619686 | 7351844 | 1749491 | --- | --- | --- | 1,04 | down |
| 6619694 | 7205944 | 1389465 | --- | --- | --- | 1,04 | up   |
| 6619713 | 7341274 | 1723393 | --- | --- | --- | 1,38 | up   |
| 6619753 | 7276650 | 1564135 | --- | --- | --- | 1,09 | up   |
| 6619815 | 7093936 | 1112472 | --- | --- | --- | 1,03 | up   |

|         |         |         |     |     |     |      |      |
|---------|---------|---------|-----|-----|-----|------|------|
| 6619857 | 7365183 | 1781919 | --- | --- | --- | 1,00 | down |
| 6619863 | 7339379 | 1718351 | --- | --- | --- | 1,38 | down |
| 6619906 | 7115507 | 1165970 | --- | --- | --- | 1,15 | down |
| 6619914 | 7363768 | 1778604 | --- | --- | --- | 1,34 | down |
| 6620105 | 7156372 | 1266705 | --- | --- | --- | 1,04 | up   |
| 6620198 | 7337425 | 1713218 | --- | --- | --- | 1,52 | down |
| 6620269 | 7373678 | 1805859 | --- | --- | --- | 1,09 | down |
| 6620303 | 7155866 | 1265337 | --- | --- | --- | 1,09 | down |
| 6620311 | 7217434 | 1416428 | --- | --- | --- | 1,64 | up   |
| 6620333 | 7032094 | 965812  | --- | --- | --- | 1,18 | up   |
| 6620463 | 7280425 | 1573807 | --- | --- | --- | 1,03 | up   |
| 6620541 | 7309738 | 1646946 | --- | --- | --- | 1,11 | up   |
| 6620581 | 7247230 | 1490566 | --- | --- | --- | 1,17 | down |
| 6620669 | 7248790 | 1494486 | --- | --- | --- | 1,06 | up   |
| 6620934 | 7313841 | 1656733 | --- | --- | --- | 1,12 | down |
| 6620939 | 7142917 | 1233174 | --- | --- | --- | 1,51 | up   |
| 6620941 | 7082098 | 1084122 | --- | --- | --- | 1,28 | down |
| 6620976 | 7030037 | 960717  | --- | --- | --- | 1,09 | down |
| 6621103 | 7293922 | 1605958 | --- | --- | --- | 1,15 | up   |
| 6621173 | 7265259 | 1535437 | --- | --- | --- | 1,43 | up   |
| 6621253 | 7191866 | 1354898 | --- | --- | --- | 1,08 | up   |
| 6621286 | 7341264 | 1723351 | --- | --- | --- | 1,03 | up   |
| 6621396 | 7193914 | 1360444 | --- | --- | --- | 1,09 | down |
| 6621466 | 7142917 | 1233179 | --- | --- | --- | 1,70 | up   |
| 6621485 | 7374740 | 1808633 | --- | --- | --- | 1,41 | down |
| 6621573 | 7320068 | 1672643 | --- | --- | --- | 1,04 | down |
| 6621734 | 7309646 | 1646489 | --- | --- | --- | 1,42 | down |
| 6621829 | 7132263 | 1206897 | --- | --- | --- | 1,19 | up   |
| 6621936 | 7309734 | 1646911 | --- | --- | --- | 1,67 | down |
| 6621967 | 7211389 | 1402112 | --- | --- | --- | 1,03 | up   |
| 6622047 | 7350993 | 1747515 | --- | --- | --- | 1,02 | down |
| 6622056 | 7143455 | 1234733 | --- | --- | --- | 1,44 | down |
| 6622130 | 7343052 | 1727503 | --- | --- | --- | 1,08 | down |
| 6622209 | 7240569 | 1475327 | --- | --- | --- | 1,54 | down |
| 6622219 | 7197820 | 1370087 | --- | --- | --- | 1,64 | down |
| 6622252 | 7179785 | 1324498 | --- | --- | --- | 1,77 | down |
| 6622330 | 7053786 | 1018131 | --- | --- | --- | 1,08 | up   |
| 6622408 | 7337425 | 1713143 | --- | --- | --- | 1,02 | up   |
| 6622546 | 7231137 | 1450200 | --- | --- | --- | 2,59 | up   |
| 6622569 | 7058713 | 1028667 | --- | --- | --- | 1,17 | down |
| 6622581 | 7040442 | 986564  | --- | --- | --- | 1,05 | up   |
| 6622735 | 7238153 | 1468823 | --- | --- | --- | 1,06 | up   |
| 6622756 | 7266778 | 1538854 | --- | --- | --- | 1,41 | up   |
| 6622847 | 7146542 | 1242295 | --- | --- | --- | 1,09 | up   |
| 6622882 | 7320998 | 1674717 | --- | --- | --- | 1,05 | down |
| 6622884 | 7344530 | 1731567 | --- | --- | --- | 1,30 | up   |
| 6622927 | 7148741 | 1247872 | --- | --- | --- | 1,60 | down |
| 6622988 | 7222236 | 1428113 | --- | --- | --- | 2,17 | up   |
| 6623064 | 7208784 | 1396143 | --- | --- | --- | 1,04 | down |
| 6623066 | 7116540 | 1168636 | --- | --- | --- | 1,93 | down |
| 6623107 | 7094158 | 1112974 | --- | --- | --- | 2,01 | down |
| 6623140 | 7253408 | 1505934 | --- | --- | --- | 1,14 | up   |
| 6623149 | 7205944 | 1389475 | --- | --- | --- | 1,06 | down |
| 6623183 | 7193056 | 1358269 | --- | --- | --- | 1,60 | down |
| 6623266 | 7324760 | 1683097 | --- | --- | --- | 1,05 | up   |
| 6623272 | 7373633 | 1805697 | --- | --- | --- | 1,61 | down |
| 6623346 | 7280743 | 1574540 | --- | --- | --- | 1,62 | down |

|         |         |         |     |     |     |      |      |
|---------|---------|---------|-----|-----|-----|------|------|
| 6623432 | 7092549 | 1109143 | --- | --- | --- | 1,48 | down |
| 6623515 | 7305174 | 1635451 | --- | --- | --- | 6,61 | down |
| 6623664 | 7184931 | 1337724 | --- | --- | --- | 1,37 | up   |
| 6623793 | 7106752 | 1144048 | --- | --- | --- | 1,28 | down |
| 6623853 | 7177520 | 1318614 | --- | --- | --- | 1,33 | up   |
| 6624109 | 7142416 | 1231792 | --- | --- | --- | 2,14 | up   |
| 6624123 | 7174114 | 1310420 | --- | --- | --- | 1,74 | up   |
| 6624202 | 7039821 | 985071  | --- | --- | --- | 1,68 | down |
| 6624248 | 7186688 | 1341845 | --- | --- | --- | 1,03 | up   |
| 6624281 | 7083355 | 1086912 | --- | --- | --- | 1,12 | up   |
| 6624313 | 7286807 | 1588816 | --- | --- | --- | 1,08 | down |
| 6624338 | 7127540 | 1195277 | --- | --- | --- | 1,24 | up   |
| 6624361 | 7366728 | 1785432 | --- | --- | --- | 1,38 | down |
| 6624365 | 7044349 | 996704  | --- | --- | --- | 1,80 | up   |
| 6624444 | 7071969 | 1060895 | --- | --- | --- | 1,49 | up   |
| 6624537 | 7289597 | 1595868 | --- | --- | --- | 1,04 | down |
| 6624541 | 7337845 | 1714352 | --- | --- | --- | 1,45 | down |
| 6624549 | 7069603 | 1055057 | --- | --- | --- | 1,51 | down |
| 6624665 | 7128539 | 1197667 | --- | --- | --- | 1,17 | up   |
| 6624669 | 7171091 | 1302459 | --- | --- | --- | 1,03 | up   |
| 6624701 | 7097454 | 1120875 | --- | --- | --- | 1,67 | up   |
| 6624774 | 7224182 | 1432763 | --- | --- | --- | 1,35 | down |
| 6624965 | 7230886 | 1449579 | --- | --- | --- | 1,46 | up   |
| 6625148 | 7208330 | 1395089 | --- | --- | --- | 1,87 | down |
| 6625202 | 7280743 | 1574513 | --- | --- | --- | 1,14 | down |
| 6625210 | 7106752 | 1143984 | --- | --- | --- | 2,32 | up   |
| 6625263 | 7120827 | 1179353 | --- | --- | --- | 1,09 | up   |
| 6625312 | 7340304 | 1720852 | --- | --- | --- | 1,44 | down |
| 6625384 | 7260579 | 1524190 | --- | --- | --- | 1,56 | up   |
| 6625404 | 7147809 | 1245448 | --- | --- | --- | 1,13 | down |
| 6625497 | 7282831 | 1579762 | --- | --- | --- | 1,38 | up   |
| 6625546 | 7298101 | 1617095 | --- | --- | --- | 1,03 | down |
| 6625551 | 7336039 | 1709684 | --- | --- | --- | 1,08 | up   |
| 6625569 | 7190242 | 1350301 | --- | --- | --- | 1,56 | up   |
| 6625598 | 7333333 | 1703389 | --- | --- | --- | 1,07 | up   |
| 6625628 | 7027797 | 956280  | --- | --- | --- | 1,78 | up   |
| 6625652 | 7186240 | 1340828 | --- | --- | --- | 1,03 | up   |
| 6625720 | 7127257 | 1194809 | --- | --- | --- | 1,26 | up   |
| 6625788 | 7177834 | 1319636 | --- | --- | --- | 1,34 | down |
| 6625896 | 7363674 | 1778435 | --- | --- | --- | 1,25 | down |
| 6625903 | 7230886 | 1449522 | --- | --- | --- | 1,00 | down |
| 6625948 | 7083030 | 1086272 | --- | --- | --- | 1,04 | up   |
| 6625966 | 7277783 | 1567470 | --- | --- | --- | 1,34 | down |
| 6625968 | 7059449 | 1030305 | --- | --- | --- | 1,08 | up   |
| 6625991 | 7189669 | 1348993 | --- | --- | --- | 1,07 | down |
| 6626006 | 7249015 | 1495050 | --- | --- | --- | 1,57 | up   |
| 6626067 | 7292517 | 1602547 | --- | --- | --- | 1,03 | up   |
| 6626102 | 7081487 | 1082698 | --- | --- | --- | 1,06 | down |
| 6626130 | 7043515 | 994017  | --- | --- | --- | 1,05 | up   |
| 6626202 | 7072429 | 1061866 | --- | --- | --- | 1,19 | up   |
| 6626396 | 7267802 | 1541835 | --- | --- | --- | 1,25 | down |
| 6626403 | 7033504 | 969851  | --- | --- | --- | 1,21 | down |
| 6626418 | 7182739 | 1332588 | --- | --- | --- | 1,09 | down |
| 6626539 | 7269763 | 1546532 | --- | --- | --- | 1,09 | up   |
| 6626569 | 7248790 | 1494501 | --- | --- | --- | 1,93 | up   |
| 6626608 | 7313538 | 1655730 | --- | --- | --- | 1,11 | up   |
| 6626725 | 7373038 | 1804293 | --- | --- | --- | 1,29 | down |

|         |         |         |     |     |     |      |      |
|---------|---------|---------|-----|-----|-----|------|------|
| 6626749 | 7236358 | 1464245 | --- | --- | --- | 1,35 | down |
| 6626778 | 7088164 | 1098492 | --- | --- | --- | 1,88 | up   |
| 6626825 | 7118234 | 1172841 | --- | --- | --- | 1,12 | down |
| 6627116 | 7059648 | 1030674 | --- | --- | --- | 1,01 | down |
| 6627144 | 7309738 | 1646946 | --- | --- | --- | 1,03 | up   |
| 6627239 | 7380878 | 1822554 | --- | --- | --- | 1,21 | up   |
| 6627327 | 7312566 | 1653300 | --- | --- | --- | 1,49 | down |
| 6627367 | 7267802 | 1541739 | --- | --- | --- | 1,02 | up   |
| 6627368 | 7198087 | 1370724 | --- | --- | --- | 1,81 | down |
| 6627413 | 7381330 | 1823642 | --- | --- | --- | 1,40 | down |
| 6627444 | 7128704 | 1198029 | --- | --- | --- | 2,11 | down |
| 6627499 | 7240569 | 1475444 | --- | --- | --- | 1,02 | down |
| 6627587 | 7363674 | 1778431 | --- | --- | --- | 1,07 | down |
| 6627634 | 7276650 | 1564132 | --- | --- | --- | 1,24 | down |
| 6627639 | 7050167 | 1009822 | --- | --- | --- | 1,01 | down |
| 6627802 | 7088625 | 1099863 | --- | --- | --- | 1,14 | down |
| 6627826 | 7116023 | 1167299 | --- | --- | --- | 1,10 | down |
| 6627827 | 7062233 | 1037200 | --- | --- | --- | 1,05 | up   |
| 6627830 | 7289075 | 1594454 | --- | --- | --- | 1,06 | down |
| 6627999 | 7236131 | 1463785 | --- | --- | --- | 1,79 | down |
| 6628005 | 7226521 | 1438723 | --- | --- | --- | 1,45 | up   |
| 6628119 | 7337425 | 1713197 | --- | --- | --- | 1,21 | up   |
| 6628147 | 7033337 | 969486  | --- | --- | --- | 1,07 | down |
| 6628267 | 7156052 | 1265768 | --- | --- | --- | 1,21 | down |
| 6628270 | 7257893 | 1517466 | --- | --- | --- | 1,05 | up   |
| 6628288 | 7106752 | 1143999 | --- | --- | --- | 1,20 | up   |
| 6628300 | 7118234 | 1172845 | --- | --- | --- | 1,20 | down |
| 6628316 | 7217747 | 1417464 | --- | --- | --- | 1,17 | up   |
| 6628321 | 7109730 | 1151719 | --- | --- | --- | 1,29 | down |
| 6628378 | 7231484 | 1451378 | --- | --- | --- | 1,04 | up   |
| 6628478 | 7302860 | 1629009 | --- | --- | --- | 1,74 | up   |
| 6628494 | 7038153 | 981152  | --- | --- | --- | 1,04 | up   |
| 6628544 | 7373678 | 1805853 | --- | --- | --- | 1,02 | up   |
| 6628567 | 7337845 | 1714331 | --- | --- | --- | 1,01 | down |
| 6628569 | 7302445 | 1628173 | --- | --- | --- | 1,01 | up   |
| 6628626 | 7192914 | 1357822 | --- | --- | --- | 2,63 | up   |
| 6628651 | 7344380 | 1731130 | --- | --- | --- | 1,01 | up   |
| 6628696 | 7351568 | 1748855 | --- | --- | --- | 1,14 | up   |
| 6628788 | 7184931 | 1337706 | --- | --- | --- | 1,05 | up   |
| 6628799 | 7243363 | 1481594 | --- | --- | --- | 1,17 | up   |
| 6628807 | 7351953 | 1749862 | --- | --- | --- | 1,14 | down |
| 6628901 | 7059766 | 1030980 | --- | --- | --- | 1,20 | up   |
| 6628923 | 7254040 | 1507598 | --- | --- | --- | 1,29 | up   |
| 6628941 | 7210387 | 1400046 | --- | --- | --- | 1,22 | up   |
| 6628973 | 7099973 | 1127535 | --- | --- | --- | 2,03 | down |
| 6629020 | 7151063 | 1253070 | --- | --- | --- | 1,62 | up   |
| 6629069 | 7298101 | 1617083 | --- | --- | --- | 1,07 | down |
| 6629149 | 7344406 | 1731247 | --- | --- | --- | 1,23 | up   |
| 6629188 | 7258455 | 1518739 | --- | --- | --- | 1,17 | up   |
| 6629258 | 7197820 | 1370098 | --- | --- | --- | 1,51 | down |
| 6629263 | 7321204 | 1675172 | --- | --- | --- | 1,04 | down |
| 6629292 | 7082098 | 1084124 | --- | --- | --- | 1,01 | up   |
| 6629315 | 7089762 | 1102987 | --- | --- | --- | 1,29 | down |
| 6629335 | 7341002 | 1722547 | --- | --- | --- | 1,80 | up   |
| 6629469 | 7337425 | 1713187 | --- | --- | --- | 1,02 | up   |
| 6629481 | 7247848 | 1492069 | --- | --- | --- | 1,04 | up   |
| 6629492 | 7132024 | 1206338 | --- | --- | --- | 1,49 | down |

|         |         |         |     |     |     |      |      |
|---------|---------|---------|-----|-----|-----|------|------|
| 6629498 | 7243647 | 1482421 | --- | --- | --- | 1,88 | down |
| 6629543 | 7197820 | 1370099 | --- | --- | --- | 1,13 | down |
| 6629761 | 7361223 | 1772621 | --- | --- | --- | 1,01 | up   |
| 6629845 | 7084193 | 1089095 | --- | --- | --- | 1,77 | up   |
| 6629899 | 7095041 | 1115193 | --- | --- | --- | 1,02 | down |
| 6629917 | 7167325 | 1292548 | --- | --- | --- | 1,19 | up   |
| 6629931 | 7328833 | 1692798 | --- | --- | --- | 2,10 | up   |
| 6629934 | 7195680 | 1364891 | --- | --- | --- | 1,18 | down |
| 6630042 | 7147809 | 1245472 | --- | --- | --- | 1,31 | down |
| 6630110 | 7261766 | 1527154 | --- | --- | --- | 2,12 | down |
| 6630279 | 7302327 | 1627697 | --- | --- | --- | 1,42 | down |
| 6630292 | 7344380 | 1731123 | --- | --- | --- | 1,53 | down |
| 6630360 | 7322388 | 1677326 | --- | --- | --- | 1,08 | up   |
| 6630397 | 7253408 | 1505946 | --- | --- | --- | 1,14 | up   |
| 6630489 | 7078666 | 1076522 | --- | --- | --- | 1,23 | up   |
| 6630535 | 7249015 | 1495051 | --- | --- | --- | 1,31 | up   |
| 6630562 | 7376073 | 1811727 | --- | --- | --- | 1,02 | down |
| 6630563 | 7326271 | 1686481 | --- | --- | --- | 1,38 | down |
| 6630629 | 7088625 | 1099877 | --- | --- | --- | 1,45 | up   |
| 6630641 | 7098648 | 1124275 | --- | --- | --- | 1,04 | down |
| 6630687 | 7149817 | 1250309 | --- | --- | --- | 1,08 | down |
| 6630701 | 7315206 | 1660018 | --- | --- | --- | 1,27 | up   |
| 6630740 | 7075790 | 1069997 | --- | --- | --- | 1,04 | up   |
| 6630754 | 7289075 | 1594477 | --- | --- | --- | 1,74 | down |
| 6630760 | 7307473 | 1641290 | --- | --- | --- | 1,02 | down |
| 6630817 | 7083030 | 1086246 | --- | --- | --- | 1,04 | down |
| 6630833 | 7238115 | 1468635 | --- | --- | --- | 1,21 | up   |
| 6630984 | 7210822 | 1400983 | --- | --- | --- | 1,21 | down |
| 6631003 | 7318139 | 1668073 | --- | --- | --- | 1,09 | down |
| 6631018 | 7090581 | 1104741 | --- | --- | --- | 1,38 | up   |
| 6631078 | 7196331 | 1366380 | --- | --- | --- | 3,00 | down |
| 6631267 | 7121849 | 1181785 | --- | --- | --- | 1,04 | up   |
| 6631282 | 7093752 | 1111996 | --- | --- | --- | 2,47 | down |
| 6631529 | 7363674 | 1778433 | --- | --- | --- | 1,19 | down |
| 6631577 | 7260488 | 1523922 | --- | --- | --- | 1,62 | down |
| 6631605 | 7071648 | 1060193 | --- | --- | --- | 1,26 | up   |
| 6631628 | 7337425 | 1713164 | --- | --- | --- | 1,10 | up   |
| 6631656 | 7063873 | 1040651 | --- | --- | --- | 2,08 | down |
| 6631718 | 7247005 | 1490111 | --- | --- | --- | 1,06 | up   |
| 6631722 | 7337425 | 1713176 | --- | --- | --- | 1,52 | up   |
| 6631782 | 7184931 | 1337718 | --- | --- | --- | 1,04 | up   |
| 6631847 | 7073950 | 1065926 | --- | --- | --- | 1,04 | up   |
| 6631848 | 7058713 | 1028665 | --- | --- | --- | 1,34 | up   |
| 6631972 | 7332059 | 1700724 | --- | --- | --- | 1,01 | up   |
| 6631986 | 7253408 | 1505950 | --- | --- | --- | 1,01 | up   |
| 6632032 | 7222236 | 1428136 | --- | --- | --- | 1,07 | down |
| 6632040 | 7259923 | 1522528 | --- | --- | --- | 1,04 | down |
| 6632088 | 7376820 | 1813411 | --- | --- | --- | 1,18 | down |
| 6632097 | 7093255 | 1110766 | --- | --- | --- | 1,02 | down |
| 6632114 | 7293234 | 1604359 | --- | --- | --- | 1,09 | down |
| 6632314 | 7172691 | 1306453 | --- | --- | --- | 1,09 | up   |
| 6632367 | 7070393 | 1057217 | --- | --- | --- | 1,01 | up   |
| 6632369 | 7200545 | 1376931 | --- | --- | --- | 1,90 | up   |
| 6632381 | 7165954 | 1288769 | --- | --- | --- | 2,90 | down |
| 6632392 | 7227433 | 1440992 | --- | --- | --- | 1,04 | down |
| 6632409 | 7227433 | 1440975 | --- | --- | --- | 1,60 | up   |
| 6632510 | 7336854 | 1711683 | --- | --- | --- | 1,05 | down |



|         |         |         |     |     |     |      |      |
|---------|---------|---------|-----|-----|-----|------|------|
| 6632547 | 7155866 | 1265316 | --- | --- | --- | 1,60 | up   |
| 6632609 | 7217434 | 1416353 | --- | --- | --- | 1,08 | up   |
| 6632618 | 7181442 | 1328885 | --- | --- | --- | 2,48 | down |
| 6632716 | 7255120 | 1510370 | --- | --- | --- | 1,41 | up   |
| 6632809 | 7353287 | 1753001 | --- | --- | --- | 1,40 | down |
| 6633001 | 7070511 | 1057478 | --- | --- | --- | 1,43 | down |
| 6633071 | 7326271 | 1686463 | --- | --- | --- | 1,30 | up   |
| 6633090 | 7105814 | 1141784 | --- | --- | --- | 1,15 | up   |
| 6633181 | 7227433 | 1440994 | --- | --- | --- | 1,78 | up   |
| 6633247 | 7289382 | 1595199 | --- | --- | --- | 1,11 | up   |
| 6633249 | 7353224 | 1752666 | --- | --- | --- | 1,09 | up   |
| 6633251 | 7254053 | 1507648 | --- | --- | --- | 1,05 | down |
| 6633289 | 7280982 | 1575203 | --- | --- | --- | 1,08 | up   |
| 6633303 | 7087282 | 1096217 | --- | --- | --- | 1,10 | up   |
| 6633326 | 7260488 | 1523933 | --- | --- | --- | 1,11 | up   |
| 6633428 | 7245921 | 1487711 | --- | --- | --- | 1,45 | down |
| 6633581 | 7166867 | 1291301 | --- | --- | --- | 1,06 | up   |
| 6633620 | 7102889 | 1134877 | --- | --- | --- | 1,20 | down |
| 6633641 | 7357026 | 1762223 | --- | --- | --- | 2,02 | down |
| 6633664 | 7341264 | 1723358 | --- | --- | --- | 1,02 | down |
| 6633724 | 7363674 | 1778420 | --- | --- | --- | 1,14 | up   |
| 6633753 | 7142321 | 1231498 | --- | --- | --- | 1,11 | up   |
| 6633799 | 7277783 | 1567438 | --- | --- | --- | 2,54 | down |
| 6633950 | 7237814 | 1467827 | --- | --- | --- | 1,30 | down |
| 6634036 | 7146425 | 1241886 | --- | --- | --- | 1,03 | down |
| 6634096 | 7380497 | 1821822 | --- | --- | --- | 1,49 | down |
| 6634129 | 7073609 | 1064851 | --- | --- | --- | 1,35 | up   |
| 6634175 | 7376073 | 1811690 | --- | --- | --- | 1,07 | up   |
| 6634366 | 7213945 | 1407833 | --- | --- | --- | 1,20 | up   |
| 6634378 | 7361223 | 1772619 | --- | --- | --- | 1,07 | down |
| 6634381 | 7113483 | 1161000 | --- | --- | --- | 1,43 | down |
| 6634541 | 7028326 | 957435  | --- | --- | --- | 1,16 | down |
| 6634602 | 7240641 | 1475738 | --- | --- | --- | 2,17 | down |
| 6634671 | 7344380 | 1731133 | --- | --- | --- | 1,36 | up   |
| 6634784 | 7121849 | 1181759 | --- | --- | --- | 1,06 | up   |
| 6634836 | 7039725 | 984821  | --- | --- | --- | 1,80 | down |
| 6634843 | 7355044 | 1757420 | --- | --- | --- | 1,15 | down |
| 6635025 | 7179785 | 1324499 | --- | --- | --- | 1,10 | down |
| 6635028 | 7039223 | 983570  | --- | --- | --- | 1,70 | down |
| 6635225 | 7088625 | 1099877 | --- | --- | --- | 1,33 | up   |
| 6635495 | 7181193 | 1328303 | --- | --- | --- | 1,46 | down |
| 6635508 | 7040442 | 986555  | --- | --- | --- | 1,00 | up   |
| 6635547 | 7217143 | 1415596 | --- | --- | --- | 1,27 | down |
| 6635548 | 7231484 | 1451362 | --- | --- | --- | 1,08 | down |
| 6635554 | 7286807 | 1588800 | --- | --- | --- | 1,02 | down |
| 6635628 | 7080476 | 1080419 | --- | --- | --- | 1,29 | down |
| 6635648 | 7282927 | 1580017 | --- | --- | --- | 1,31 | up   |
| 6635664 | 7295652 | 1610293 | --- | --- | --- | 1,15 | up   |
| 6635665 | 7174281 | 1310846 | --- | --- | --- | 1,35 | down |
| 6635723 | 7189184 | 1347569 | --- | --- | --- | 1,05 | down |
| 6635758 | 7383102 | 1827396 | --- | --- | --- | 1,05 | up   |
| 6635833 | 7075460 | 1069403 | --- | --- | --- | 1,22 | down |
| 6635926 | 7060896 | 1033581 | --- | --- | --- | 1,03 | down |
| 6636003 | 7059449 | 1030297 | --- | --- | --- | 1,61 | down |
| 6636038 | 7188138 | 1345067 | --- | --- | --- | 1,93 | down |
| 6636055 | 7093296 | 1110945 | --- | --- | --- | 1,03 | down |
| 6636104 | 7234040 | 1458493 | --- | --- | --- | 2,50 | up   |

|         |         |         |     |     |     |      |      |
|---------|---------|---------|-----|-----|-----|------|------|
| 6636225 | 7286613 | 1588465 | --- | --- | --- | 1,58 | down |
| 6636349 | 7099573 | 1126734 | --- | --- | --- | 1,13 | up   |
| 6636388 | 7178752 | 1321791 | --- | --- | --- | 2,14 | up   |
| 6636492 | 7378997 | 1818667 | --- | --- | --- | 1,12 | up   |
| 6636543 | 7140365 | 1226784 | --- | --- | --- | 1,21 | up   |
| 6636579 | 7380497 | 1821833 | --- | --- | --- | 1,40 | up   |
| 6636660 | 7212698 | 1404866 | --- | --- | --- | 1,18 | up   |
| 6636725 | 7204442 | 1386083 | --- | --- | --- | 1,14 | down |
| 6636869 | 7297589 | 1615658 | --- | --- | --- | 1,07 | down |
| 6636953 | 7239939 | 1473795 | --- | --- | --- | 1,12 | up   |
| 6637261 | 7337872 | 1714437 | --- | --- | --- | 1,25 | down |
| 6637341 | 7181001 | 1327618 | --- | --- | --- | 1,36 | up   |
| 6637362 | 7239303 | 1471939 | --- | --- | --- | 1,50 | up   |
| 6637570 | 7208847 | 1396341 | --- | --- | --- | 1,07 | down |
| 6637592 | 7116023 | 1167298 | --- | --- | --- | 1,06 | up   |
| 6637594 | 7062233 | 1037264 | --- | --- | --- | 1,41 | down |
| 6637617 | 7339379 | 1718361 | --- | --- | --- | 1,71 | down |
| 6637622 | 7081748 | 1083342 | --- | --- | --- | 1,18 | down |
| 6637638 | 7139708 | 1225055 | --- | --- | --- | 1,18 | down |
| 6637639 | 7274892 | 1559573 | --- | --- | --- | 1,31 | down |
| 6637663 | 7297589 | 1615684 | --- | --- | --- | 1,08 | up   |
| 6637852 | 7339379 | 1718324 | --- | --- | --- | 1,10 | up   |
| 6637854 | 7302327 | 1627695 | --- | --- | --- | 1,15 | up   |
| 6637891 | 7181169 | 1328091 | --- | --- | --- | 2,09 | up   |
| 6637907 | 7253602 | 1506482 | --- | --- | --- | 1,56 | down |
| 6637914 | 7153571 | 1259033 | --- | --- | --- | 2,43 | up   |
| 6637932 | 7203018 | 1382661 | --- | --- | --- | 1,17 | up   |
| 6638089 | 7208784 | 1396123 | --- | --- | --- | 1,24 | down |
| 6638158 | 7252877 | 1504757 | --- | --- | --- | 1,27 | down |
| 6638162 | 7231653 | 1451880 | --- | --- | --- | 1,41 | down |
| 6638214 | 7128112 | 1196586 | --- | --- | --- | 1,41 | up   |
| 6638240 | 7142917 | 1233167 | --- | --- | --- | 1,22 | down |
| 6638279 | 7356333 | 1760489 | --- | --- | --- | 1,19 | down |
| 6638288 | 7350993 | 1747532 | --- | --- | --- | 1,07 | up   |
| 6638317 | 7363529 | 1777930 | --- | --- | --- | 1,37 | up   |
| 6638333 | 7213945 | 1407838 | --- | --- | --- | 1,17 | down |
| 6638437 | 7261019 | 1525253 | --- | --- | --- | 2,31 | down |
| 6638513 | 7181442 | 1328882 | --- | --- | --- | 1,06 | up   |
| 6638613 | 7366749 | 1785498 | --- | --- | --- | 1,83 | up   |
| 6638616 | 7306330 | 1638517 | --- | --- | --- | 1,25 | down |
| 6638628 | 7213908 | 1407691 | --- | --- | --- | 1,18 | down |
| 6638650 | 7049508 | 1008561 | --- | --- | --- | 2,00 | up   |
| 6638685 | 7344702 | 1732140 | --- | --- | --- | 1,27 | down |
| 6638763 | 7111361 | 1155580 | --- | --- | --- | 1,73 | up   |
| 6638774 | 7139026 | 1223501 | --- | --- | --- | 1,02 | up   |
| 6638831 | 7358859 | 1766981 | --- | --- | --- | 1,08 | up   |
| 6638834 | 7190534 | 1351240 | --- | --- | --- | 1,06 | up   |
| 6638969 | 7318139 | 1668073 | --- | --- | --- | 1,25 | down |
| 6639010 | 7200152 | 1376048 | --- | --- | --- | 1,46 | up   |
| 6639021 | 7147809 | 1245458 | --- | --- | --- | 1,76 | up   |
| 6639088 | 7363147 | 1777007 | --- | --- | --- | 1,54 | up   |
| 6639103 | 7239752 | 1473162 | --- | --- | --- | 1,18 | up   |
| 6639155 | 7058713 | 1028659 | --- | --- | --- | 2,24 | down |
| 6639188 | 7361881 | 1773960 | --- | --- | --- | 1,04 | down |
| 6639227 | 7367980 | 1789188 | --- | --- | --- | 1,44 | up   |
| 6639509 | 7063716 | 1040125 | --- | --- | --- | 1,07 | down |
| 6639646 | 7040442 | 986512  | --- | --- | --- | 1,48 | down |

|         |         |         |     |     |     |      |      |
|---------|---------|---------|-----|-----|-----|------|------|
| 6639647 | 7034293 | 971915  | --- | --- | --- | 1,01 | down |
| 6639666 | 7309734 | 1646887 | --- | --- | --- | 1,31 | up   |
| 6639709 | 7092549 | 1109147 | --- | --- | --- | 1,05 | down |
| 6639777 | 7156611 | 1267357 | --- | --- | --- | 1,05 | up   |
| 6639786 | 7233106 | 1455670 | --- | --- | --- | 1,10 | up   |
| 6639812 | 7062233 | 1037199 | --- | --- | --- | 1,37 | down |
| 6639892 | 7136746 | 1217971 | --- | --- | --- | 2,44 | up   |
| 6640033 | 7092406 | 1108784 | --- | --- | --- | 1,30 | down |
| 6640046 | 7193056 | 1358277 | --- | --- | --- | 1,10 | down |
| 6640060 | 7069253 | 1054161 | --- | --- | --- | 1,19 | down |
| 6640101 | 7079326 | 1077973 | --- | --- | --- | 1,49 | down |
| 6640150 | 7356027 | 1759985 | --- | --- | --- | 1,74 | up   |
| 6640153 | 7371753 | 1800975 | --- | --- | --- | 1,64 | up   |
| 6640159 | 7132024 | 1206339 | --- | --- | --- | 1,16 | up   |
| 6640166 | 7237438 | 1466795 | --- | --- | --- | 1,17 | down |
| 6640187 | 7301843 | 1626461 | --- | --- | --- | 1,30 | down |
| 6640409 | 7090581 | 1104745 | --- | --- | --- | 1,50 | up   |
| 6640560 | 7333462 | 1703648 | --- | --- | --- | 1,22 | down |
| 6640578 | 7231484 | 1451396 | --- | --- | --- | 1,05 | up   |
| 6640603 | 7238202 | 1468944 | --- | --- | --- | 1,27 | up   |
| 6640626 | 7098411 | 1123700 | --- | --- | --- | 1,20 | up   |
| 6640629 | 7243627 | 1482352 | --- | --- | --- | 1,05 | up   |
| 6640804 | 7171417 | 1303153 | --- | --- | --- | 1,30 | up   |
| 6640877 | 7307473 | 1641272 | --- | --- | --- | 1,11 | up   |
| 6640985 | 7190844 | 1352141 | --- | --- | --- | 1,03 | down |
| 6641042 | 7253215 | 1505373 | --- | --- | --- | 1,76 | up   |
| 6641077 | 7041609 | 989550  | --- | --- | --- | 2,50 | up   |
| 6641123 | 7350993 | 1747541 | --- | --- | --- | 1,04 | down |
| 6641153 | 7139026 | 1223492 | --- | --- | --- | 1,00 | up   |
| 6641165 | 7033504 | 969864  | --- | --- | --- | 1,13 | down |
| 6641240 | 7253408 | 1505937 | --- | --- | --- | 1,07 | up   |
| 6641259 | 7029386 | 959410  | --- | --- | --- | 1,19 | down |
| 6641291 | 7088489 | 1099517 | --- | --- | --- | 1,27 | up   |
| 6641352 | 7056304 | 1023628 | --- | --- | --- | 1,21 | up   |
| 6641505 | 7158517 | 1271590 | --- | --- | --- | 2,01 | up   |
| 6641565 | 7239752 | 1473188 | --- | --- | --- | 1,22 | up   |
| 6641657 | 7280743 | 1574567 | --- | --- | --- | 1,31 | up   |
| 6641674 | 7266532 | 1538309 | --- | --- | --- | 1,12 | down |
| 6641784 | 7132125 | 1206615 | --- | --- | --- | 1,28 | up   |
| 6641842 | 7128921 | 1198509 | --- | --- | --- | 1,25 | down |
| 6641847 | 7069239 | 1054081 | --- | --- | --- | 1,53 | down |
| 6641861 | 7380452 | 1821701 | --- | --- | --- | 1,02 | down |
| 6641872 | 7221443 | 1426312 | --- | --- | --- | 1,12 | down |
| 6641946 | 7356027 | 1759985 | --- | --- | --- | 1,13 | down |
| 6642031 | 7146093 | 1240913 | --- | --- | --- | 1,24 | up   |
| 6642033 | 7122585 | 1183685 | --- | --- | --- | 1,07 | down |
| 6642118 | 7028326 | 957436  | --- | --- | --- | 1,09 | down |
| 6642123 | 7095041 | 1115196 | --- | --- | --- | 1,38 | down |
| 6642159 | 7339379 | 1718341 | --- | --- | --- | 1,20 | up   |
| 6642376 | 7330731 | 1697201 | --- | --- | --- | 1,23 | down |
| 6642447 | 7039532 | 984422  | --- | --- | --- | 1,43 | up   |
| 6642450 | 7075533 | 1069573 | --- | --- | --- | 1,13 | up   |
| 6642473 | 7168979 | 1297180 | --- | --- | --- | 1,03 | up   |
| 6642909 | 7356027 | 1759985 | --- | --- | --- | 1,05 | down |
| 6642960 | 7280982 | 1575264 | --- | --- | --- | 1,17 | up   |
| 6643018 | 7315206 | 1660034 | --- | --- | --- | 1,10 | down |
| 6643033 | 7140113 | 1226054 | --- | --- | --- | 1,19 | down |

|         |         |         |     |     |     |      |      |
|---------|---------|---------|-----|-----|-----|------|------|
| 6643072 | 7072765 | 1062738 | --- | --- | --- | 1,00 | down |
| 6643074 | 7243647 | 1482457 | --- | --- | --- | 1,21 | up   |
| 6643143 | 7071659 | 1060225 | --- | --- | --- | 1,19 | up   |
| 6643165 | 7244288 | 1484094 | --- | --- | --- | 1,36 | up   |
| 6643212 | 7279568 | 1572025 | --- | --- | --- | 1,02 | down |
| 6643236 | 7380497 | 1821853 | --- | --- | --- | 1,64 | down |
| 6643250 | 7184981 | 1337855 | --- | --- | --- | 1,08 | down |
| 6643367 | 7082619 | 1085244 | --- | --- | --- | 1,11 | up   |
| 6643372 | 7340990 | 1722509 | --- | --- | --- | 1,03 | down |
| 6643387 | 7236358 | 1464222 | --- | --- | --- | 1,13 | up   |
| 6643428 | 7191594 | 1354232 | --- | --- | --- | 1,57 | up   |
| 6643439 | 7193403 | 1359186 | --- | --- | --- | 1,93 | down |
| 6643487 | 7314270 | 1657754 | --- | --- | --- | 1,68 | up   |
| 6643522 | 7264653 | 1534024 | --- | --- | --- | 1,24 | up   |
| 6643546 | 7273744 | 1557005 | --- | --- | --- | 1,39 | up   |
| 6643590 | 7317708 | 1666838 | --- | --- | --- | 1,26 | up   |
| 6643665 | 7370002 | 1795779 | --- | --- | --- | 1,14 | up   |
| 6643697 | 7350237 | 1745476 | --- | --- | --- | 1,25 | down |
| 6643712 | 7376566 | 1812885 | --- | --- | --- | 1,05 | down |
| 6643857 | 7358048 | 1764800 | --- | --- | --- | 1,05 | down |
| 6644203 | 7176368 | 1315591 | --- | --- | --- | 1,33 | up   |
| 6644211 | 7355138 | 1757778 | --- | --- | --- | 1,05 | up   |
| 6644293 | 7318139 | 1668073 | --- | --- | --- | 1,08 | up   |
| 6644316 | 7335637 | 1708464 | --- | --- | --- | 1,11 | down |
| 6644381 | 7345851 | 1734746 | --- | --- | --- | 1,31 | up   |
| 6644438 | 7301198 | 1624760 | --- | --- | --- | 2,47 | up   |
| 6644579 | 7243647 | 1482441 | --- | --- | --- | 1,18 | up   |
| 6644609 | 7146982 | 1243289 | --- | --- | --- | 1,30 | down |
| 6644644 | 7169732 | 1298758 | --- | --- | --- | 1,04 | down |
| 6644833 | 7101258 | 1130566 | --- | --- | --- | 1,02 | up   |
| 6644849 | 7025310 | 949244  | --- | --- | --- | 1,35 | down |
| 6644960 | 7292701 | 1602955 | --- | --- | --- | 1,03 | up   |
| 6644982 | 7366749 | 1785503 | --- | --- | --- | 1,30 | up   |
| 6645056 | 7089080 | 1101148 | --- | --- | --- | 1,10 | up   |
| 6645086 | 7249019 | 1495081 | --- | --- | --- | 1,43 | up   |
| 6645109 | 7027386 | 955064  | --- | --- | --- | 1,12 | up   |
| 6645114 | 7128921 | 1198534 | --- | --- | --- | 1,49 | up   |
| 6645127 | 7341274 | 1723398 | --- | --- | --- | 1,34 | up   |
| 6645134 | 7154655 | 1262332 | --- | --- | --- | 1,23 | up   |
| 6645135 | 7038179 | 981266  | --- | --- | --- | 1,09 | down |
| 6645141 | 7095041 | 1115185 | --- | --- | --- | 1,16 | down |
| 6645175 | 7064134 | 1041414 | --- | --- | --- | 1,60 | down |
| 6645194 | 7042382 | 991288  | --- | --- | --- | 2,26 | up   |
| 6645209 | 7237438 | 1466794 | --- | --- | --- | 1,41 | down |
| 6645286 | 7052176 | 1014237 | --- | --- | --- | 1,80 | up   |
| 6645377 | 7353287 | 1753026 | --- | --- | --- | 1,31 | up   |
| 6645387 | 7059766 | 1030972 | --- | --- | --- | 1,37 | up   |
| 6645398 | 7096461 | 1118268 | --- | --- | --- | 1,26 | down |
| 6645480 | 7337425 | 1713189 | --- | --- | --- | 1,09 | up   |
| 6645597 | 7295410 | 1609794 | --- | --- | --- | 1,03 | up   |
| 6645601 | 7376398 | 1812484 | --- | --- | --- | 1,34 | up   |
| 6645663 | 7331413 | 1699137 | --- | --- | --- | 1,08 | down |
| 6645712 | 7197820 | 1370097 | --- | --- | --- | 1,63 | down |
| 6645853 | 7093806 | 1112161 | --- | --- | --- | 1,44 | down |
| 6645909 | 7247954 | 1492358 | --- | --- | --- | 1,09 | down |
| 6645927 | 7264808 | 1534469 | --- | --- | --- | 2,16 | down |
| 6645996 | 7321029 | 1674817 | --- | --- | --- | 1,13 | down |

|         |         |         |     |     |     |      |      |
|---------|---------|---------|-----|-----|-----|------|------|
| 6646003 | 7176456 | 1315828 | --- | --- | --- | 1,01 | down |
| 6646031 | 7172988 | 1307324 | --- | --- | --- | 1,29 | down |
| 6646087 | 7287337 | 1589971 | --- | --- | --- | 1,02 | down |
| 6646126 | 7243726 | 1482682 | --- | --- | --- | 1,01 | up   |
| 6646204 | 7068259 | 1051641 | --- | --- | --- | 1,03 | down |
| 6646212 | 7303191 | 1629961 | --- | --- | --- | 1,17 | up   |
| 6646224 | 7169732 | 1298781 | --- | --- | --- | 1,01 | down |
| 6646261 | 7302787 | 1628894 | --- | --- | --- | 1,17 | down |
| 6646281 | 7181193 | 1328296 | --- | --- | --- | 1,26 | up   |
| 6646342 | 7212718 | 1404938 | --- | --- | --- | 1,17 | up   |
| 6646352 | 7363147 | 1777026 | --- | --- | --- | 1,09 | up   |
| 6646380 | 7142917 | 1233162 | --- | --- | --- | 1,10 | up   |
| 6646522 | 7087282 | 1096240 | --- | --- | --- | 1,10 | down |
| 6646576 | 7041609 | 989577  | --- | --- | --- | 1,01 | up   |
| 6646615 | 7028624 | 958004  | --- | --- | --- | 1,05 | up   |
| 6646660 | 7200996 | 1378159 | --- | --- | --- | 2,19 | up   |
| 6646666 | 7346229 | 1735600 | --- | --- | --- | 1,14 | down |
| 6646668 | 7028624 | 957997  | --- | --- | --- | 1,00 | down |
| 6646673 | 7168439 | 1295683 | --- | --- | --- | 1,12 | up   |
| 6646716 | 7318143 | 1668091 | --- | --- | --- | 1,03 | up   |
| 6646772 | 7149934 | 1250522 | --- | --- | --- | 1,09 | down |
| 6646801 | 7312569 | 1653340 | --- | --- | --- | 1,02 | up   |
| 6646823 | 7373678 | 1805869 | --- | --- | --- | 2,30 | up   |
| 6647001 | 7149008 | 1248600 | --- | --- | --- | 1,20 | down |
| 6647068 | 7318139 | 1668065 | --- | --- | --- | 1,08 | up   |
| 6647113 | 7073854 | 1065628 | --- | --- | --- | 1,39 | up   |
| 6647172 | 7268357 | 1543394 | --- | --- | --- | 1,52 | down |
| 6647267 | 7152889 | 1257332 | --- | --- | --- | 2,24 | up   |
| 6647276 | 7339387 | 1718397 | --- | --- | --- | 1,40 | down |
| 6647312 | 7355804 | 1759435 | --- | --- | --- | 1,46 | up   |
| 6647420 | 7093255 | 1110767 | --- | --- | --- | 1,34 | up   |
| 6647497 | 7301616 | 1625899 | --- | --- | --- | 1,20 | up   |
| 6647589 | 7356115 | 1760121 | --- | --- | --- | 1,03 | up   |
| 6647777 | 7131103 | 1204356 | --- | --- | --- | 1,01 | up   |
| 6647800 | 7340757 | 1721894 | --- | --- | --- | 1,68 | up   |
| 6647932 | 7198210 | 1370986 | --- | --- | --- | 1,32 | up   |
| 6648028 | 7078605 | 1076359 | --- | --- | --- | 1,16 | up   |
| 6648054 | 7312566 | 1653322 | --- | --- | --- | 1,36 | down |
| 6648085 | 7058149 | 1027264 | --- | --- | --- | 1,24 | down |
| 6648263 | 7316589 | 1663876 | --- | --- | --- | 3,33 | down |
| 6648269 | 7059020 | 1029355 | --- | --- | --- | 1,36 | up   |
| 6648413 | 7320735 | 1674144 | --- | --- | --- | 1,03 | up   |
| 6648437 | 7075445 | 1069350 | --- | --- | --- | 1,01 | up   |
| 6648518 | 7142081 | 1230969 | --- | --- | --- | 1,00 | down |
| 6648548 | 7102723 | 1134432 | --- | --- | --- | 2,51 | up   |
| 6648655 | 7315206 | 1660016 | --- | --- | --- | 1,52 | down |
| 6648768 | 7238115 | 1468585 | --- | --- | --- | 1,07 | down |
| 6648831 | 7148978 | 1248478 | --- | --- | --- | 1,78 | down |
| 6648845 | 7034293 | 971947  | --- | --- | --- | 1,22 | up   |
| 6648905 | 7072225 | 1061405 | --- | --- | --- | 2,03 | down |
| 6648955 | 7117951 | 1172094 | --- | --- | --- | 1,25 | down |
| 6649115 | 7274931 | 1559717 | --- | --- | --- | 1,04 | up   |
| 6649117 | 7039463 | 984254  | --- | --- | --- | 1,76 | down |
| 6649123 | 7309734 | 1646893 | --- | --- | --- | 1,04 | up   |
| 6649158 | 7142416 | 1231785 | --- | --- | --- | 1,41 | up   |
| 6649171 | 7033337 | 969488  | --- | --- | --- | 1,13 | down |
| 6649364 | 7302327 | 1627684 | --- | --- | --- | 1,09 | down |

|         |         |         |     |     |     |      |      |
|---------|---------|---------|-----|-----|-----|------|------|
| 6649420 | 7233106 | 1455671 | --- | --- | --- | 1,29 | up   |
| 6649519 | 7313905 | 1656848 | --- | --- | --- | 2,93 | down |
| 6649687 | 7059506 | 1030391 | --- | --- | --- | 1,37 | up   |
| 6649719 | 7217679 | 1417321 | --- | --- | --- | 1,00 | down |
| 6649721 | 7170845 | 1301860 | --- | --- | --- | 1,06 | up   |
| 6649740 | 7087282 | 1096160 | --- | --- | --- | 1,02 | down |
| 6650007 | 7236485 | 1464518 | --- | --- | --- | 2,13 | up   |
| 6650144 | 7096461 | 1118270 | --- | --- | --- | 1,13 | down |
| 6650186 | 7039532 | 984428  | --- | --- | --- | 1,21 | up   |
| 6650196 | 7153136 | 1258029 | --- | --- | --- | 1,71 | down |
| 6650317 | 7307473 | 1641280 | --- | --- | --- | 1,37 | down |
| 6650323 | 7068259 | 1051593 | --- | --- | --- | 1,88 | up   |
| 6650348 | 7237814 | 1467832 | --- | --- | --- | 1,08 | up   |
| 6650384 | 7034293 | 971996  | --- | --- | --- | 1,21 | down |
| 6650449 | 7365183 | 1781920 | --- | --- | --- | 1,61 | down |
| 6650470 | 7196803 | 1367339 | --- | --- | --- | 1,15 | down |
| 6650514 | 7252877 | 1504774 | --- | --- | --- | 1,10 | up   |
| 6650565 | 7080563 | 1080723 | --- | --- | --- | 1,01 | down |
| 6650716 | 7038530 | 981881  | --- | --- | --- | 1,17 | up   |
| 6650765 | 7147809 | 1245462 | --- | --- | --- | 1,16 | up   |
| 6650838 | 7113483 | 1161017 | --- | --- | --- | 1,24 | down |
| 6650879 | 7259925 | 1522548 | --- | --- | --- | 1,16 | down |
| 6650945 | 7274780 | 1559227 | --- | --- | --- | 1,24 | up   |
| 6651037 | 7268694 | 1544244 | --- | --- | --- | 1,21 | down |
| 6651061 | 7243894 | 1482971 | --- | --- | --- | 1,32 | up   |
| 6651251 | 7063716 | 1040183 | --- | --- | --- | 1,75 | down |
| 6651344 | 7306330 | 1638515 | --- | --- | --- | 1,16 | up   |
| 6651436 | 7061948 | 1036360 | --- | --- | --- | 1,02 | down |
| 6651534 | 7142081 | 1230977 | --- | --- | --- | 1,08 | down |
| 6651584 | 7131550 | 1205553 | --- | --- | --- | 1,43 | up   |
| 6651589 | 7280743 | 1574570 | --- | --- | --- | 1,49 | down |
| 6651597 | 7318714 | 1669229 | --- | --- | --- | 1,36 | down |
| 6651674 | 7140834 | 1228016 | --- | --- | --- | 1,21 | down |
| 6651760 | 7303722 | 1631719 | --- | --- | --- | 1,10 | down |
| 6651911 | 7299785 | 1621352 | --- | --- | --- | 1,07 | down |
| 6651914 | 7162177 | 1280582 | --- | --- | --- | 1,29 | up   |
| 6651975 | 7330238 | 1695927 | --- | --- | --- | 1,10 | down |
| 6651981 | 7201422 | 1379188 | --- | --- | --- | 1,77 | up   |
| 6652020 | 7213908 | 1407665 | --- | --- | --- | 1,14 | down |
| 6652058 | 7071659 | 1060231 | --- | --- | --- | 1,70 | up   |
| 6652090 | 7156047 | 1265731 | --- | --- | --- | 1,17 | up   |
| 6652173 | 7148741 | 1247878 | --- | --- | --- | 1,21 | down |
| 6652447 | 7240569 | 1475464 | --- | --- | --- | 1,05 | down |
| 6652448 | 7156052 | 1265761 | --- | --- | --- | 1,21 | up   |
| 6652499 | 7151063 | 1253063 | --- | --- | --- | 2,05 | up   |
| 6652548 | 7297589 | 1615654 | --- | --- | --- | 1,18 | up   |
| 6652597 | 7289075 | 1594460 | --- | --- | --- | 1,40 | up   |
| 6652717 | 7099573 | 1126706 | --- | --- | --- | 1,07 | down |
| 6652795 | 7148741 | 1247847 | --- | --- | --- | 1,08 | up   |
| 6652997 | 7191866 | 1354895 | --- | --- | --- | 1,07 | up   |
| 6652999 | 7064468 | 1042371 | --- | --- | --- | 1,49 | up   |
| 6653039 | 7208847 | 1396344 | --- | --- | --- | 1,06 | down |
| 6653118 | 7053874 | 1018323 | --- | --- | --- | 1,00 | down |
| 6653190 | 7043379 | 993653  | --- | --- | --- | 1,22 | up   |
| 6653193 | 7290793 | 1598637 | --- | --- | --- | 1,11 | up   |
| 6653221 | 7266532 | 1538304 | --- | --- | --- | 1,01 | up   |
| 6653223 | 7070668 | 1057925 | --- | --- | --- | 1,16 | up   |

|         |         |         |     |     |     |      |      |
|---------|---------|---------|-----|-----|-----|------|------|
| 6653335 | 7147720 | 1245225 | --- | --- | --- | 1,45 | down |
| 6653350 | 7038530 | 981888  | --- | --- | --- | 1,10 | down |
| 6653440 | 7308679 | 1644242 | --- | --- | --- | 1,41 | up   |
| 6653470 | 7165954 | 1288770 | --- | --- | --- | 1,04 | up   |
| 6653504 | 7247230 | 1490576 | --- | --- | --- | 1,92 | down |
| 6653508 | 7148741 | 1247851 | --- | --- | --- | 1,16 | down |
| 6653538 | 7282927 | 1579986 | --- | --- | --- | 1,12 | down |
| 6653547 | 7222741 | 1429362 | --- | --- | --- | 2,02 | up   |
| 6653548 | 7280425 | 1573807 | --- | --- | --- | 1,05 | up   |
| 6653637 | 7083030 | 1086262 | --- | --- | --- | 1,64 | down |
| 6653639 | 7220618 | 1424433 | --- | --- | --- | 1,21 | down |
| 6653650 | 7288077 | 1591947 | --- | --- | --- | 1,20 | up   |
| 6653655 | 7337425 | 1713177 | --- | --- | --- | 1,68 | up   |
| 6653659 | 7248790 | 1494523 | --- | --- | --- | 1,41 | up   |
| 6653700 | 7247848 | 1492064 | --- | --- | --- | 1,16 | up   |
| 6653788 | 7101258 | 1130572 | --- | --- | --- | 1,04 | up   |
| 6653805 | 7374740 | 1808628 | --- | --- | --- | 1,10 | down |
| 6653815 | 7087500 | 1096725 | --- | --- | --- | 1,91 | down |
| 6653868 | 7361881 | 1773926 | --- | --- | --- | 1,09 | down |
| 6653930 | 7122585 | 1183689 | --- | --- | --- | 1,11 | down |
| 6654018 | 7364346 | 1779996 | --- | --- | --- | 1,03 | down |
| 6654061 | 7100523 | 1128892 | --- | --- | --- | 1,20 | down |
| 6654115 | 7339379 | 1718323 | --- | --- | --- | 1,07 | down |
| 6654118 | 7333462 | 1703644 | --- | --- | --- | 1,31 | down |
| 6654170 | 7071741 | 1060458 | --- | --- | --- | 1,16 | down |
| 6654210 | 7330238 | 1695957 | --- | --- | --- | 1,18 | down |
| 6654261 | 7067670 | 1050325 | --- | --- | --- | 2,40 | up   |
| 6654314 | 7233298 | 1456272 | --- | --- | --- | 1,29 | down |
| 6654394 | 7341002 | 1722534 | --- | --- | --- | 1,47 | up   |
| 6654398 | 7122140 | 1182715 | --- | --- | --- | 1,15 | up   |
| 6654424 | 7231533 | 1451505 | --- | --- | --- | 1,32 | up   |
| 6654460 | 7315571 | 1661010 | --- | --- | --- | 1,57 | up   |
| 6654525 | 7366749 | 1785504 | --- | --- | --- | 1,17 | up   |
| 6654645 | 7369712 | 1794855 | --- | --- | --- | 2,26 | up   |
| 6654706 | 7373038 | 1804279 | --- | --- | --- | 1,54 | down |
| 6654743 | 7083355 | 1086912 | --- | --- | --- | 1,15 | down |
| 6654783 | 7279533 | 1571916 | --- | --- | --- | 1,14 | down |
| 6654892 | 7106752 | 1144051 | --- | --- | --- | 1,19 | up   |
| 6654911 | 7297589 | 1615680 | --- | --- | --- | 1,07 | down |
| 6654923 | 7156114 | 1266045 | --- | --- | --- | 1,01 | up   |
| 6654992 | 7361881 | 1773945 | --- | --- | --- | 1,68 | up   |
| 6655003 | 7260066 | 1522905 | --- | --- | --- | 1,01 | up   |
| 6655008 | 7248790 | 1494514 | --- | --- | --- | 1,04 | up   |
| 6655084 | 7369781 | 1795034 | --- | --- | --- | 1,68 | down |
| 6655086 | 7278010 | 1568045 | --- | --- | --- | 1,38 | up   |
| 6655300 | 7309738 | 1646953 | --- | --- | --- | 1,11 | down |
| 6655336 | 7158517 | 1271585 | --- | --- | --- | 2,03 | up   |
| 6655371 | 7358048 | 1764821 | --- | --- | --- | 1,60 | up   |
| 6655443 | 7247230 | 1490594 | --- | --- | --- | 1,17 | down |
| 6655495 | 7092549 | 1109193 | --- | --- | --- | 1,54 | up   |
| 6655536 | 7337845 | 1714352 | --- | --- | --- | 1,05 | down |
| 6655714 | 7209927 | 1398918 | --- | --- | --- | 1,05 | up   |
| 6655772 | 7039223 | 983576  | --- | --- | --- | 1,42 | down |
| 6655800 | 7240569 | 1475493 | --- | --- | --- | 1,17 | up   |
| 6655811 | 7243901 | 1483049 | --- | --- | --- | 1,21 | up   |
| 6655851 | 7260066 | 1522885 | --- | --- | --- | 1,04 | down |
| 6655867 | 7254053 | 1507653 | --- | --- | --- | 1,00 | down |

|         |         |         |     |     |     |      |      |
|---------|---------|---------|-----|-----|-----|------|------|
| 6655882 | 7031774 | 964767  | --- | --- | --- | 1,12 | up   |
| 6655913 | 7177520 | 1318641 | --- | --- | --- | 1,13 | up   |
| 6655920 | 7043515 | 994010  | --- | --- | --- | 1,22 | up   |
| 6655954 | 7166867 | 1291306 | --- | --- | --- | 1,48 | down |
| 6656009 | 7350918 | 1747308 | --- | --- | --- | 2,93 | down |
| 6656012 | 7221817 | 1427151 | --- | --- | --- | 3,48 | down |
| 6656128 | 7052385 | 1014779 | --- | --- | --- | 1,42 | down |
| 6656141 | 7196029 | 1365618 | --- | --- | --- | 1,02 | up   |
| 6656320 | 7361223 | 1772619 | --- | --- | --- | 1,06 | up   |
| 6656370 | 7350993 | 1747519 | --- | --- | --- | 1,02 | down |
| 6656387 | 7079238 | 1077806 | --- | --- | --- | 1,10 | up   |
| 6656495 | 7227433 | 1440973 | --- | --- | --- | 1,33 | down |
| 6656607 | 7155286 | 1263861 | --- | --- | --- | 1,22 | down |
| 6656667 | 7346687 | 1736696 | --- | --- | --- | 1,09 | down |
| 6656722 | 7255120 | 1510375 | --- | --- | --- | 1,07 | up   |
| 6656731 | 7363529 | 1777950 | --- | --- | --- | 1,06 | up   |
| 6656738 | 7086966 | 1095269 | --- | --- | --- | 1,17 | down |
| 6656747 | 7170764 | 1301426 | --- | --- | --- | 1,29 | down |
| 6656748 | 7274737 | 1559118 | --- | --- | --- | 1,33 | down |
| 6656904 | 7068413 | 1051969 | --- | --- | --- | 1,07 | down |
| 6656972 | 7274780 | 1559236 | --- | --- | --- | 1,24 | down |
| 6656989 | 7123714 | 1186433 | --- | --- | --- | 1,10 | down |
| 6657228 | 7069603 | 1055054 | --- | --- | --- | 1,19 | down |
| 6657236 | 7056304 | 1023547 | --- | --- | --- | 1,05 | up   |
| 6657281 | 7337224 | 1712615 | --- | --- | --- | 1,09 | up   |
| 6657390 | 7033504 | 969858  | --- | --- | --- | 1,07 | down |
| 6657436 | 7063716 | 1040193 | --- | --- | --- | 1,42 | up   |
| 6657451 | 7377304 | 1814592 | --- | --- | --- | 1,53 | down |
| 6657512 | 7120550 | 1178678 | --- | --- | --- | 1,10 | up   |
| 6657514 | 7090581 | 1104741 | --- | --- | --- | 1,84 | down |
| 6657611 | 7192914 | 1357831 | --- | --- | --- | 1,19 | down |
| 6657621 | 7265259 | 1535452 | --- | --- | --- | 1,04 | up   |
| 6657640 | 7253215 | 1505379 | --- | --- | --- | 1,08 | down |
| 6657677 | 7210822 | 1400973 | --- | --- | --- | 1,53 | down |
| 6657705 | 7175946 | 1314651 | --- | --- | --- | 1,15 | up   |
| 6657764 | 7030037 | 960718  | --- | --- | --- | 1,04 | up   |
| 6657795 | 7039532 | 984428  | --- | --- | --- | 1,05 | up   |
| 6657830 | 7184981 | 1337835 | --- | --- | --- | 1,25 | up   |
| 6657950 | 7065575 | 1045106 | --- | --- | --- | 2,25 | up   |
| 6657958 | 7373678 | 1805865 | --- | --- | --- | 1,96 | up   |
| 6658041 | 7371228 | 1799454 | --- | --- | --- | 2,08 | up   |
| 6658088 | 7281577 | 1576876 | --- | --- | --- | 1,26 | down |
| 6658101 | 7255510 | 1511326 | --- | --- | --- | 1,44 | up   |
| 6658106 | 7087965 | 1098057 | --- | --- | --- | 1,20 | up   |
| 6658202 | 7245932 | 1487783 | --- | --- | --- | 2,39 | down |
| 6658227 | 7122131 | 1182671 | --- | --- | --- | 1,01 | up   |
| 6658291 | 7233012 | 1455408 | --- | --- | --- | 1,16 | up   |
| 6658305 | 7267344 | 1540264 | --- | --- | --- | 1,44 | down |
| 6658362 | 7083031 | 1086286 | --- | --- | --- | 1,25 | up   |
| 6658416 | 7322260 | 1677067 | --- | --- | --- | 1,15 | down |
| 6658442 | 7116103 | 1167599 | --- | --- | --- | 6,36 | down |
| 6658450 | 7088538 | 1099633 | --- | --- | --- | 1,05 | up   |
| 6658489 | 7240569 | 1475464 | --- | --- | --- | 1,02 | down |
| 6658564 | 7237346 | 1466589 | --- | --- | --- | 1,06 | up   |
| 6658782 | 7115963 | 1167065 | --- | --- | --- | 1,31 | down |
| 6658846 | 7140365 | 1226766 | --- | --- | --- | 1,22 | up   |
| 6658847 | 7190242 | 1350308 | --- | --- | --- | 1,33 | up   |



|         |         |         |     |     |     |      |      |
|---------|---------|---------|-----|-----|-----|------|------|
| 6658860 | 7093806 | 1112162 | --- | --- | --- | 3,17 | down |
| 6658932 | 7331413 | 1699137 | --- | --- | --- | 1,18 | up   |
| 6658938 | 7374324 | 1807509 | --- | --- | --- | 1,06 | down |
| 6659050 | 7286807 | 1588826 | --- | --- | --- | 1,68 | down |
| 6659084 | 7231484 | 1451381 | --- | --- | --- | 1,17 | up   |
| 6659188 | 7308679 | 1644251 | --- | --- | --- | 1,14 | up   |
| 6659266 | 7100523 | 1128924 | --- | --- | --- | 1,32 | up   |
| 6659321 | 7146082 | 1240845 | --- | --- | --- | 1,04 | up   |
| 6659402 | 7236358 | 1464260 | --- | --- | --- | 1,19 | up   |
| 6659520 | 7205750 | 1388975 | --- | --- | --- | 1,06 | down |
| 6659558 | 7340057 | 1720334 | --- | --- | --- | 1,27 | down |
| 6659612 | 7079238 | 1077822 | --- | --- | --- | 1,43 | down |
| 6659641 | 7292869 | 1603427 | --- | --- | --- | 1,60 | up   |
| 6659664 | 7102416 | 1133493 | --- | --- | --- | 1,21 | up   |
| 6659744 | 7374324 | 1807444 | --- | --- | --- | 1,10 | up   |
| 6659771 | 7091954 | 1107727 | --- | --- | --- | 1,49 | down |
| 6659807 | 7295652 | 1610291 | --- | --- | --- | 1,00 | up   |
| 6659994 | 7071969 | 1060899 | --- | --- | --- | 1,17 | down |
| 6660080 | 7194400 | 1361729 | --- | --- | --- | 1,41 | up   |
| 6660132 | 7156372 | 1266710 | --- | --- | --- | 1,62 | down |
| 6660228 | 7256191 | 1512885 | --- | --- | --- | 1,21 | down |
| 6660230 | 7278010 | 1568047 | --- | --- | --- | 1,23 | down |
| 6660292 | 7235069 | 1460985 | --- | --- | --- | 1,27 | up   |
| 6660302 | 7209927 | 1398947 | --- | --- | --- | 1,58 | up   |
| 6660404 | 7086966 | 1095270 | --- | --- | --- | 1,29 | up   |
| 6660464 | 7038530 | 981869  | --- | --- | --- | 1,44 | up   |
| 6660475 | 7347427 | 1738676 | --- | --- | --- | 1,22 | down |
| 6660532 | 7121849 | 1181803 | --- | --- | --- | 1,13 | down |
| 6660549 | 7247907 | 1492239 | --- | --- | --- | 1,01 | up   |
| 6660623 | 7071741 | 1060455 | --- | --- | --- | 1,10 | down |
| 6660838 | 7337224 | 1712616 | --- | --- | --- | 1,07 | up   |
| 6660893 | 7345465 | 1733850 | --- | --- | --- | 1,50 | down |
| 6661165 | 7349643 | 1744192 | --- | --- | --- | 1,17 | down |
| 6661168 | 7267802 | 1541743 | --- | --- | --- | 1,50 | up   |
| 6661172 | 7100523 | 1128915 | --- | --- | --- | 1,08 | up   |
| 6661252 | 7195680 | 1364903 | --- | --- | --- | 1,21 | up   |
| 6661266 | 7276650 | 1564111 | --- | --- | --- | 1,17 | down |
| 6661328 | 7068413 | 1051979 | --- | --- | --- | 1,19 | up   |
| 6661330 | 7158920 | 1272522 | --- | --- | --- | 1,23 | up   |
| 6661371 | 7034356 | 972176  | --- | --- | --- | 1,11 | down |
| 6661372 | 7214605 | 1409364 | --- | --- | --- | 1,19 | up   |
| 6661484 | 7115146 | 1164936 | --- | --- | --- | 1,04 | up   |
| 6661487 | 7156052 | 1265775 | --- | --- | --- | 1,22 | down |
| 6661495 | 7238845 | 1470567 | --- | --- | --- | 1,31 | up   |
| 6661591 | 7261580 | 1526818 | --- | --- | --- | 1,45 | down |
| 6661659 | 7080563 | 1080724 | --- | --- | --- | 1,01 | down |
| 6661681 | 7212141 | 1403604 | --- | --- | --- | 1,19 | up   |
| 6661713 | 7070668 | 1057930 | --- | --- | --- | 1,11 | up   |
| 6661846 | 7310810 | 1649337 | --- | --- | --- | 1,28 | down |
| 6662023 | 7155866 | 1265315 | --- | --- | --- | 1,14 | down |
| 6662054 | 7115963 | 1167073 | --- | --- | --- | 1,41 | down |
| 6662080 | 7128112 | 1196530 | --- | --- | --- | 1,11 | up   |
| 6662133 | 7040442 | 986524  | --- | --- | --- | 1,48 | up   |
| 6662316 | 7351953 | 1749880 | --- | --- | --- | 1,99 | down |
| 6662350 | 7067670 | 1050323 | --- | --- | --- | 2,42 | up   |
| 6662442 | 7281924 | 1577733 | --- | --- | --- | 1,02 | down |
| 6662455 | 7345465 | 1733858 | --- | --- | --- | 1,07 | down |

|         |         |         |     |     |     |      |      |
|---------|---------|---------|-----|-----|-----|------|------|
| 6662496 | 7112566 | 1158625 | --- | --- | --- | 1,28 | up   |
| 6662540 | 7228520 | 1443769 | --- | --- | --- | 1,52 | down |
| 6662618 | 7127801 | 1195868 | --- | --- | --- | 1,70 | up   |
| 6662667 | 7110401 | 1153059 | --- | --- | --- | 1,43 | up   |
| 6662845 | 7320735 | 1674165 | --- | --- | --- | 1,15 | up   |
| 6662854 | 7090581 | 1104843 | --- | --- | --- | 4,06 | up   |
| 6662862 | 7175946 | 1314632 | --- | --- | --- | 1,03 | down |
| 6662864 | 7264274 | 1533174 | --- | --- | --- | 1,05 | down |
| 6662969 | 7350237 | 1745496 | --- | --- | --- | 1,25 | down |
| 6663106 | 7244287 | 1484071 | --- | --- | --- | 1,32 | up   |
| 6663272 | 7194540 | 1362108 | --- | --- | --- | 1,08 | down |
| 6663502 | 7247848 | 1492069 | --- | --- | --- | 1,02 | up   |
| 6663527 | 7383823 | 1828947 | --- | --- | --- | 1,06 | up   |
| 6663601 | 7062233 | 1037222 | --- | --- | --- | 1,02 | down |
| 6663638 | 7244027 | 1483280 | --- | --- | --- | 1,18 | up   |
| 6663750 | 7356333 | 1760482 | --- | --- | --- | 1,25 | down |
| 6663783 | 7261592 | 1526857 | --- | --- | --- | 1,19 | down |
| 6663792 | 7240569 | 1475312 | --- | --- | --- | 1,13 | down |
| 6663903 | 7261580 | 1526787 | --- | --- | --- | 1,14 | up   |
| 6664038 | 7252382 | 1503507 | --- | --- | --- | 1,09 | up   |
| 6664323 | 7312686 | 1653621 | --- | --- | --- | 1,23 | down |
| 6664350 | 7062233 | 1037220 | --- | --- | --- | 1,07 | up   |
| 6664410 | 7068942 | 1053389 | --- | --- | --- | 1,29 | up   |
| 6664438 | 7181001 | 1327630 | --- | --- | --- | 1,53 | down |
| 6664540 | 7212587 | 1404654 | --- | --- | --- | 1,95 | down |
| 6664542 | 7088544 | 1099703 | --- | --- | --- | 2,26 | down |
| 6664552 | 7341274 | 1723388 | --- | --- | --- | 1,28 | down |
| 6664601 | 7321204 | 1675179 | --- | --- | --- | 1,38 | up   |
| 6664686 | 7130917 | 1203927 | --- | --- | --- | 1,46 | up   |
| 6664855 | 7253408 | 1505955 | --- | --- | --- | 1,20 | down |
| 6665013 | 7207069 | 1392030 | --- | --- | --- | 1,17 | down |
| 6665118 | 7311178 | 1650228 | --- | --- | --- | 1,76 | up   |
| 6665144 | 7091439 | 1106625 | --- | --- | --- | 1,01 | down |
| 6665185 | 7141456 | 1229588 | --- | --- | --- | 1,44 | down |
| 6665194 | 7034356 | 972162  | --- | --- | --- | 1,17 | down |
| 6665208 | 7075460 | 1069387 | --- | --- | --- | 1,17 | up   |
| 6665253 | 7337425 | 1713168 | --- | --- | --- | 1,72 | up   |
| 6665298 | 7197056 | 1367841 | --- | --- | --- | 1,12 | down |
| 6665357 | 7274780 | 1559199 | --- | --- | --- | 1,15 | up   |
| 6665456 | 7105066 | 1140340 | --- | --- | --- | 1,25 | down |
| 6665461 | 7034356 | 972164  | --- | --- | --- | 1,12 | down |
| 6665464 | 7247512 | 1491193 | --- | --- | --- | 1,30 | up   |
| 6665532 | 7294911 | 1608532 | --- | --- | --- | 1,22 | up   |
| 6665594 | 7344406 | 1731203 | --- | --- | --- | 1,20 | up   |
| 6665608 | 7374324 | 1807468 | --- | --- | --- | 1,03 | down |
| 6665671 | 7384509 | 1830732 | --- | --- | --- | 1,09 | up   |
| 6665715 | 7331413 | 1699139 | --- | --- | --- | 1,26 | up   |
| 6665768 | 7243647 | 1482449 | --- | --- | --- | 1,03 | up   |
| 6665776 | 7064468 | 1042376 | --- | --- | --- | 1,12 | down |
| 6665872 | 7131876 | 1206053 | --- | --- | --- | 1,45 | up   |
| 6665886 | 7028624 | 958005  | --- | --- | --- | 1,30 | down |
| 6665899 | 7274585 | 1558790 | --- | --- | --- | 1,02 | down |
| 6665924 | 7132020 | 1206309 | --- | --- | --- | 1,44 | up   |
| 6666088 | 7034293 | 971905  | --- | --- | --- | 1,30 | down |
| 6666096 | 7213228 | 1406008 | --- | --- | --- | 2,99 | down |
| 6666279 | 7318143 | 1668094 | --- | --- | --- | 1,18 | down |
| 6666408 | 7032618 | 967305  | --- | --- | --- | 1,11 | down |

|         |         |         |     |     |     |      |      |
|---------|---------|---------|-----|-----|-----|------|------|
| 6666417 | 7061550 | 1035303 | --- | --- | --- | 2,11 | down |
| 6666440 | 7264745 | 1534266 | --- | --- | --- | 1,43 | up   |
| 6666461 | 7247230 | 1490572 | --- | --- | --- | 1,17 | up   |
| 6666503 | 7088544 | 1099663 | --- | --- | --- | 1,06 | down |
| 6666551 | 7382499 | 1826256 | --- | --- | --- | 1,28 | down |
| 6666553 | 7100523 | 1128876 | --- | --- | --- | 1,13 | up   |
| 6666595 | 7330396 | 1696401 | --- | --- | --- | 1,27 | up   |
| 6666619 | 7280743 | 1574489 | --- | --- | --- | 1,11 | up   |
| 6666713 | 7146542 | 1242286 | --- | --- | --- | 1,68 | up   |
| 6666767 | 7168521 | 1295960 | --- | --- | --- | 1,34 | down |
| 6666784 | 7156047 | 1265727 | --- | --- | --- | 1,31 | up   |
| 6666789 | 7031774 | 964730  | --- | --- | --- | 1,54 | up   |
| 6666826 | 7176456 | 1315830 | --- | --- | --- | 1,11 | up   |
| 6666852 | 7146542 | 1242211 | --- | --- | --- | 1,83 | down |
| 6666960 | 7337224 | 1712620 | --- | --- | --- | 1,09 | up   |
| 6666975 | 7326271 | 1686464 | --- | --- | --- | 1,44 | up   |
| 6667016 | 7267802 | 1541821 | --- | --- | --- | 1,11 | down |
| 6667057 | 7324760 | 1683098 | --- | --- | --- | 1,16 | down |
| 6667062 | 7062436 | 1037722 | --- | --- | --- | 1,08 | down |
| 6667131 | 7180732 | 1326730 | --- | --- | --- | 1,07 | up   |
| 6667356 | 7252339 | 1503292 | --- | --- | --- | 1,05 | down |
| 6667377 | 7337425 | 1713193 | --- | --- | --- | 1,08 | down |
| 6667385 | 7197048 | 1367807 | --- | --- | --- | 1,11 | up   |
| 6667537 | 7069721 | 1055314 | --- | --- | --- | 1,18 | down |
| 6667540 | 7367851 | 1788507 | --- | --- | --- | 1,00 | up   |
| 6667655 | 7191983 | 1355175 | --- | --- | --- | 1,09 | up   |
| 6667718 | 7280743 | 1574551 | --- | --- | --- | 1,56 | down |
| 6667784 | 7173640 | 1308951 | --- | --- | --- | 1,02 | down |
| 6667795 | 7091900 | 1107630 | --- | --- | --- | 1,48 | down |
| 6667884 | 7039303 | 983866  | --- | --- | --- | 1,67 | down |
| 6667964 | 7168439 | 1295675 | --- | --- | --- | 2,08 | up   |
| 6667996 | 7121849 | 1181798 | --- | --- | --- | 1,56 | down |
| 6668031 | 7205944 | 1389459 | --- | --- | --- | 1,19 | down |
| 6668048 | 7248790 | 1494524 | --- | --- | --- | 1,29 | down |
| 6668075 | 7041584 | 989460  | --- | --- | --- | 2,03 | down |
| 6668077 | 7186464 | 1341356 | --- | --- | --- | 1,01 | down |
| 6668116 | 7312903 | 1654107 | --- | --- | --- | 1,10 | down |
| 6668260 | 7330731 | 1697164 | --- | --- | --- | 1,20 | down |
| 6668309 | 7181001 | 1327594 | --- | --- | --- | 1,04 | up   |
| 6668367 | 7088135 | 1098384 | --- | --- | --- | 1,06 | down |
| 6668378 | 7128704 | 1198018 | --- | --- | --- | 1,12 | up   |
| 6668411 | 7189404 | 1348195 | --- | --- | --- | 1,03 | up   |
| 6668569 | 7331508 | 1699464 | --- | --- | --- | 1,21 | down |
| 6668589 | 7217650 | 1417171 | --- | --- | --- | 1,01 | up   |
| 6668660 | 7052933 | 1016213 | --- | --- | --- | 1,28 | down |
| 6668717 | 7092549 | 1109166 | --- | --- | --- | 1,00 | down |
| 6668749 | 7359361 | 1768265 | --- | --- | --- | 2,46 | down |
| 6668769 | 7147809 | 1245471 | --- | --- | --- | 2,99 | up   |
| 6668909 | 7034356 | 972168  | --- | --- | --- | 1,03 | up   |
| 6668999 | 7319259 | 1670397 | --- | --- | --- | 1,40 | up   |
| 6669002 | 7297274 | 1614657 | --- | --- | --- | 1,08 | up   |
| 6669009 | 7217434 | 1416355 | --- | --- | --- | 1,35 | up   |
| 6669028 | 7321029 | 1674828 | --- | --- | --- | 1,17 | down |
| 6669037 | 7177520 | 1318614 | --- | --- | --- | 1,14 | up   |
| 6669053 | 7238202 | 1468943 | --- | --- | --- | 1,08 | down |
| 6669108 | 7312532 | 1653215 | --- | --- | --- | 1,64 | up   |
| 6669218 | 7348924 | 1742183 | --- | --- | --- | 2,06 | down |

|         |         |         |     |     |     |      |      |
|---------|---------|---------|-----|-----|-----|------|------|
| 6669336 | 7336449 | 1710618 | --- | --- | --- | 1,01 | up   |
| 6669357 | 7350489 | 1746114 | --- | --- | --- | 1,01 | down |
| 6669472 | 7106752 | 1144004 | --- | --- | --- | 1,21 | up   |
| 6669591 | 7087965 | 1098048 | --- | --- | --- | 1,37 | down |
| 6669620 | 7278010 | 1568044 | --- | --- | --- | 1,07 | up   |
| 6669645 | 7106776 | 1144104 | --- | --- | --- | 1,21 | down |
| 6669719 | 7184151 | 1335955 | --- | --- | --- | 1,48 | down |
| 6669733 | 7313538 | 1655724 | --- | --- | --- | 1,14 | down |
| 6669866 | 7243901 | 1483062 | --- | --- | --- | 1,66 | down |
| 6669867 | 7366749 | 1785483 | --- | --- | --- | 1,29 | up   |
| 6669901 | 7114274 | 1162818 | --- | --- | --- | 1,07 | down |
| 6669918 | 7280743 | 1574570 | --- | --- | --- | 1,24 | up   |
| 6669924 | 7082098 | 1084119 | --- | --- | --- | 1,10 | down |
| 6669951 | 7374324 | 1807510 | --- | --- | --- | 1,19 | down |
| 6669968 | 7243726 | 1482684 | --- | --- | --- | 1,28 | down |
| 6670057 | 7375937 | 1811368 | --- | --- | --- | 1,27 | down |
| 6670100 | 7142917 | 1233161 | --- | --- | --- | 1,09 | up   |
| 6670175 | 7188829 | 1346666 | --- | --- | --- | 1,38 | down |
| 6670270 | 7068942 | 1053392 | --- | --- | --- | 1,77 | up   |
| 6670315 | 7146872 | 1242914 | --- | --- | --- | 1,03 | down |
| 6670449 | 7314270 | 1657749 | --- | --- | --- | 1,14 | down |
| 6670531 | 7039265 | 983658  | --- | --- | --- | 1,15 | down |
| 6670574 | 7289075 | 1594463 | --- | --- | --- | 1,02 | up   |
| 6670577 | 7093936 | 1112473 | --- | --- | --- | 1,09 | up   |
| 6670681 | 7369781 | 1795032 | --- | --- | --- | 1,08 | up   |
| 6670712 | 7209811 | 1398664 | --- | --- | --- | 2,52 | up   |
| 6670762 | 7039223 | 983551  | --- | --- | --- | 1,02 | up   |
| 6670771 | 7182739 | 1332586 | --- | --- | --- | 2,23 | down |
| 6670784 | 7245932 | 1487794 | --- | --- | --- | 1,20 | up   |
| 6670985 | 7198730 | 1372634 | --- | --- | --- | 2,17 | up   |
| 6670997 | 7176275 | 1315361 | --- | --- | --- | 1,12 | down |
| 6671029 | 7367952 | 1789010 | --- | --- | --- | 1,24 | down |
| 6671052 | 7363568 | 1778133 | --- | --- | --- | 1,20 | up   |
| 6671062 | 7381330 | 1823635 | --- | --- | --- | 2,02 | down |
| 6671082 | 7194172 | 1361160 | --- | --- | --- | 1,00 | down |
| 6671085 | 7337845 | 1714333 | --- | --- | --- | 1,20 | down |
| 6671345 | 7368555 | 1791224 | --- | --- | --- | 1,01 | down |
| 6671410 | 7147204 | 1243773 | --- | --- | --- | 1,87 | down |
| 6671501 | 7180166 | 1325243 | --- | --- | --- | 1,30 | down |
| 6671512 | 7279533 | 1571917 | --- | --- | --- | 1,23 | up   |
| 6671514 | 7363674 | 1778415 | --- | --- | --- | 1,22 | down |
| 6671631 | 7039589 | 984513  | --- | --- | --- | 1,19 | up   |
| 6671843 | 7253408 | 1505936 | --- | --- | --- | 1,35 | down |
| 6671845 | 7109292 | 1150736 | --- | --- | --- | 1,27 | up   |
| 6671874 | 7255120 | 1510375 | --- | --- | --- | 1,03 | down |
| 6672005 | 7269911 | 1546914 | --- | --- | --- | 1,17 | down |
| 6672022 | 7221443 | 1426326 | --- | --- | --- | 1,01 | up   |
| 6672036 | 7140365 | 1226777 | --- | --- | --- | 1,54 | up   |
| 6672156 | 7064134 | 1041432 | --- | --- | --- | 1,02 | down |
| 6672217 | 7058713 | 1028678 | --- | --- | --- | 1,43 | up   |
| 6672390 | 7312566 | 1653303 | --- | --- | --- | 1,27 | up   |
| 6672490 | 7243363 | 1481603 | --- | --- | --- | 1,11 | up   |
| 6672537 | 7277783 | 1567457 | --- | --- | --- | 1,53 | up   |
| 6672743 | 7295652 | 1610259 | --- | --- | --- | 1,23 | down |
| 6672785 | 7089080 | 1101166 | --- | --- | --- | 1,61 | down |
| 6672838 | 7116540 | 1168645 | --- | --- | --- | 1,03 | down |
| 6672846 | 7363674 | 1778438 | --- | --- | --- | 1,83 | down |

|         |         |         |     |     |     |      |      |
|---------|---------|---------|-----|-----|-----|------|------|
| 6672981 | 7067828 | 1050769 | --- | --- | --- | 1,29 | down |
| 6672986 | 7292869 | 1603375 | --- | --- | --- | 1,19 | down |
| 6673022 | 7038530 | 981862  | --- | --- | --- | 1,31 | down |
| 6673287 | 7261668 | 1526982 | --- | --- | --- | 1,41 | down |
| 6673301 | 7056333 | 1023703 | --- | --- | --- | 1,14 | down |
| 6673325 | 7373678 | 1805858 | --- | --- | --- | 1,20 | down |
| 6673553 | 7142081 | 1230975 | --- | --- | --- | 1,72 | down |
| 6673637 | 7121849 | 1181774 | --- | --- | --- | 1,03 | up   |
| 6673642 | 7381090 | 1822987 | --- | --- | --- | 1,51 | up   |
| 6673671 | 7198087 | 1370696 | --- | --- | --- | 1,46 | up   |
| 6673691 | 7313538 | 1655742 | --- | --- | --- | 1,23 | down |
| 6673716 | 7101258 | 1130574 | --- | --- | --- | 1,01 | up   |
| 6673774 | 7131766 | 1205863 | --- | --- | --- | 1,10 | up   |
| 6673805 | 7101206 | 1130460 | --- | --- | --- | 1,05 | up   |
| 6673832 | 7312566 | 1653307 | --- | --- | --- | 1,58 | down |
| 6673920 | 7073854 | 1065631 | --- | --- | --- | 1,18 | down |
| 6673927 | 7118503 | 1173574 | --- | --- | --- | 2,05 | down |
| 6673970 | 7039303 | 983875  | --- | --- | --- | 1,25 | down |
| 6673993 | 7034293 | 971994  | --- | --- | --- | 1,06 | down |
| 6674019 | 7180166 | 1325237 | --- | --- | --- | 1,15 | up   |
| 6674021 | 7052813 | 1015921 | --- | --- | --- | 1,03 | up   |
| 6674031 | 7377791 | 1815980 | --- | --- | --- | 1,21 | up   |
| 6674043 | 7222236 | 1428113 | --- | --- | --- | 1,13 | down |
| 6674088 | 7257976 | 1517713 | --- | --- | --- | 2,02 | down |
| 6674091 | 7166867 | 1291285 | --- | --- | --- | 1,19 | up   |
| 6674139 | 7045955 | 1000763 | --- | --- | --- | 3,07 | down |
| 6674196 | 7358053 | 1764845 | --- | --- | --- | 1,02 | up   |
| 6674202 | 7050167 | 1009815 | --- | --- | --- | 1,10 | up   |
| 6674229 | 7301843 | 1626488 | --- | --- | --- | 1,12 | up   |
| 6674476 | 7122140 | 1182730 | --- | --- | --- | 1,22 | down |
| 6674568 | 7080476 | 1080409 | --- | --- | --- | 1,01 | up   |
| 6674594 | 7199341 | 1374122 | --- | --- | --- | 1,12 | up   |
| 6674710 | 7069830 | 1055609 | --- | --- | --- | 1,01 | down |
| 6674759 | 7296860 | 1613437 | --- | --- | --- | 5,96 | down |
| 6674818 | 7102369 | 1133412 | --- | --- | --- | 1,48 | down |
| 6674927 | 7142917 | 1233182 | --- | --- | --- | 1,32 | up   |
| 6675029 | 7172373 | 1305586 | --- | --- | --- | 1,19 | up   |
| 6675042 | 7346066 | 1735301 | --- | --- | --- | 1,07 | down |
| 6675097 | 7233524 | 1457226 | --- | --- | --- | 1,03 | up   |
| 6675105 | 7181001 | 1327629 | --- | --- | --- | 1,01 | down |
| 6675211 | 7312566 | 1653299 | --- | --- | --- | 1,75 | down |
| 6675220 | 7155866 | 1265327 | --- | --- | --- | 1,64 | up   |
| 6675284 | 7288077 | 1592008 | --- | --- | --- | 1,00 | up   |
| 6675449 | 7053874 | 1018333 | --- | --- | --- | 1,18 | down |
| 6675471 | 7355044 | 1757427 | --- | --- | --- | 1,49 | up   |
| 6675600 | 7121849 | 1181762 | --- | --- | --- | 1,12 | down |
| 6675611 | 7350237 | 1745473 | --- | --- | --- | 1,01 | up   |
| 6675648 | 7040442 | 986553  | --- | --- | --- | 1,15 | down |
| 6675675 | 7257337 | 1515982 | --- | --- | --- | 1,30 | down |
| 6675731 | 7091439 | 1106624 | --- | --- | --- | 1,37 | down |
| 6675769 | 7317708 | 1666843 | --- | --- | --- | 1,63 | up   |
| 6675797 | 7347427 | 1738670 | --- | --- | --- | 1,14 | up   |
| 6675830 | 7337425 | 1713185 | --- | --- | --- | 1,21 | down |
| 6675839 | 7366749 | 1785493 | --- | --- | --- | 1,10 | up   |
| 6675854 | 7121849 | 1181815 | --- | --- | --- | 1,19 | down |
| 6675902 | 7089080 | 1101138 | --- | --- | --- | 1,06 | up   |
| 6676040 | 7281924 | 1577711 | --- | --- | --- | 1,18 | down |

|         |         |         |     |     |     |      |      |
|---------|---------|---------|-----|-----|-----|------|------|
| 6676145 | 7190844 | 1352111 | --- | --- | --- | 1,53 | up   |
| 6676164 | 7181001 | 1327643 | --- | --- | --- | 1,02 | up   |
| 6676275 | 7313538 | 1655723 | --- | --- | --- | 1,21 | down |
| 6676278 | 7230698 | 1449064 | --- | --- | --- | 1,07 | down |
| 6676334 | 7100523 | 1128878 | --- | --- | --- | 1,03 | up   |
| 6676402 | 7244027 | 1483279 | --- | --- | --- | 1,10 | up   |
| 6676403 | 7093296 | 1110906 | --- | --- | --- | 1,39 | up   |
| 6676419 | 7305275 | 1635848 | --- | --- | --- | 2,13 | up   |
| 6676530 | 7359453 | 1768453 | --- | --- | --- | 1,17 | down |
| 6676588 | 7244287 | 1484089 | --- | --- | --- | 1,10 | up   |
| 6676612 | 7109292 | 1150722 | --- | --- | --- | 1,45 | down |
| 6676671 | 7344702 | 1732143 | --- | --- | --- | 1,19 | up   |
| 6676680 | 7340757 | 1721885 | --- | --- | --- | 1,09 | down |
| 6676698 | 7264745 | 1534276 | --- | --- | --- | 1,08 | down |
| 6676720 | 7097536 | 1121126 | --- | --- | --- | 1,57 | down |
| 6676803 | 7336039 | 1709683 | --- | --- | --- | 1,35 | up   |
| 6676977 | 7093296 | 1110923 | --- | --- | --- | 1,10 | up   |
| 6677008 | 7098077 | 1122798 | --- | --- | --- | 1,49 | up   |
| 6677029 | 7212698 | 1404857 | --- | --- | --- | 1,57 | up   |
| 6677204 | 7381993 | 1825217 | --- | --- | --- | 2,46 | up   |
| 6677208 | 7109730 | 1151719 | --- | --- | --- | 1,15 | down |
| 6677250 | 7352044 | 1750004 | --- | --- | --- | 1,47 | up   |
| 6677283 | 7050716 | 1011224 | --- | --- | --- | 1,94 | up   |
| 6677298 | 7343052 | 1727548 | --- | --- | --- | 1,10 | up   |
| 6677301 | 7195680 | 1364896 | --- | --- | --- | 1,21 | down |
| 6677317 | 7329135 | 1693492 | --- | --- | --- | 1,41 | down |
| 6677333 | 7217650 | 1417162 | --- | --- | --- | 1,04 | down |
| 6677345 | 7032204 | 966137  | --- | --- | --- | 1,03 | up   |
| 6677390 | 7196187 | 1365978 | --- | --- | --- | 1,10 | up   |
| 6677406 | 7110999 | 1154771 | --- | --- | --- | 1,07 | up   |
| 6677448 | 7247848 | 1492063 | --- | --- | --- | 1,10 | up   |
| 6677458 | 7344836 | 1732409 | --- | --- | --- | 1,49 | down |
| 6677645 | 7195680 | 1364902 | --- | --- | --- | 1,14 | up   |
| 6677659 | 7052385 | 1014788 | --- | --- | --- | 1,04 | up   |
| 6677661 | 7032558 | 967061  | --- | --- | --- | 1,20 | down |
| 6677732 | 7259807 | 1522237 | --- | --- | --- | 1,05 | down |
| 6677809 | 7127691 | 1195638 | --- | --- | --- | 2,36 | down |
| 6677830 | 7384073 | 1829464 | --- | --- | --- | 1,11 | up   |
| 6677859 | 7367994 | 1789247 | --- | --- | --- | 1,21 | up   |
| 6678053 | 7089080 | 1101150 | --- | --- | --- | 1,57 | down |
| 6678086 | 7163002 | 1282279 | --- | --- | --- | 1,17 | down |
| 6678094 | 7093835 | 1112251 | --- | --- | --- | 1,25 | up   |
| 6678148 | 7093936 | 1112478 | --- | --- | --- | 1,12 | down |
| 6678190 | 7217679 | 1417315 | --- | --- | --- | 3,59 | up   |
| 6678444 | 7146982 | 1243277 | --- | --- | --- | 1,08 | down |
| 6678449 | 7181169 | 1328155 | --- | --- | --- | 1,39 | up   |
| 6678499 | 7180166 | 1325237 | --- | --- | --- | 1,13 | down |
| 6678502 | 7289075 | 1594450 | --- | --- | --- | 1,01 | down |
| 6678515 | 7071264 | 1059284 | --- | --- | --- | 2,30 | up   |
| 6678603 | 7297589 | 1615612 | --- | --- | --- | 1,13 | down |
| 6678623 | 7274892 | 1559568 | --- | --- | --- | 1,28 | up   |
| 6678646 | 7355138 | 1757685 | --- | --- | --- | 1,11 | down |
| 6678764 | 7160687 | 1277017 | --- | --- | --- | 1,03 | down |
| 6678776 | 7166867 | 1291331 | --- | --- | --- | 1,58 | up   |
| 6678835 | 7243647 | 1482473 | --- | --- | --- | 1,01 | up   |
| 6678928 | 7353287 | 1753033 | --- | --- | --- | 1,45 | up   |
| 6678942 | 7330223 | 1695875 | --- | --- | --- | 1,00 | up   |

|         |         |         |     |     |     |      |      |
|---------|---------|---------|-----|-----|-----|------|------|
| 6679010 | 7252283 | 1503113 | --- | --- | --- | 1,11 | up   |
| 6679050 | 7261580 | 1526790 | --- | --- | --- | 1,01 | up   |
| 6679079 | 7125348 | 1190100 | --- | --- | --- | 1,62 | up   |
| 6679092 | 7253272 | 1505658 | --- | --- | --- | 1,50 | up   |
| 6679106 | 7120010 | 1177375 | --- | --- | --- | 1,12 | up   |
| 6679274 | 7366749 | 1785496 | --- | --- | --- | 1,10 | up   |
| 6679281 | 7056333 | 1023673 | --- | --- | --- | 1,15 | up   |
| 6679393 | 7079600 | 1078632 | --- | --- | --- | 1,29 | up   |
| 6679434 | 7240569 | 1475401 | --- | --- | --- | 1,31 | down |
| 6679567 | 7127801 | 1195872 | --- | --- | --- | 1,09 | down |
| 6679588 | 7042382 | 991295  | --- | --- | --- | 1,03 | down |
| 6679661 | 7368004 | 1789335 | --- | --- | --- | 1,03 | down |
| 6679698 | 7225543 | 1435929 | --- | --- | --- | 1,04 | down |
| 6679704 | 7315571 | 1661003 | --- | --- | --- | 1,93 | down |
| 6679712 | 7331757 | 1700022 | --- | --- | --- | 1,17 | up   |
| 6679731 | 7139026 | 1223491 | --- | --- | --- | 1,57 | up   |
| 6679782 | 7217434 | 1416446 | --- | --- | --- | 1,02 | down |
| 6679815 | 7030037 | 960703  | --- | --- | --- | 1,16 | up   |
| 6679965 | 7375937 | 1811340 | --- | --- | --- | 1,05 | down |
| 6680038 | 7363568 | 1778134 | --- | --- | --- | 1,04 | up   |
| 6680146 | 7335700 | 1708717 | --- | --- | --- | 3,08 | up   |
| 6680147 | 7262570 | 1528988 | --- | --- | --- | 2,10 | up   |
| 6680164 | 7363529 | 1777900 | --- | --- | --- | 1,07 | up   |
| 6680274 | 7326271 | 1686473 | --- | --- | --- | 1,28 | up   |
| 6680283 | 7062233 | 1037214 | --- | --- | --- | 2,14 | up   |
| 6680423 | 7029770 | 960158  | --- | --- | --- | 1,23 | up   |
| 6680437 | 7313064 | 1654512 | --- | --- | --- | 1,63 | down |
| 6680471 | 7329846 | 1694991 | --- | --- | --- | 1,25 | down |
| 6680577 | 7344838 | 1732451 | --- | --- | --- | 1,58 | down |
| 6680667 | 7329135 | 1693500 | --- | --- | --- | 1,18 | up   |
| 6680820 | 7320735 | 1674130 | --- | --- | --- | 2,04 | up   |
| 6680841 | 7344530 | 1731578 | --- | --- | --- | 1,12 | up   |
| 6680929 | 7211144 | 1401547 | --- | --- | --- | 1,09 | down |
| 6680940 | 7128704 | 1198019 | --- | --- | --- | 1,48 | down |
| 6680959 | 7370415 | 1796852 | --- | --- | --- | 1,61 | down |
| 6680961 | 7140365 | 1226793 | --- | --- | --- | 1,25 | up   |
| 6680978 | 7319609 | 1671206 | --- | --- | --- | 1,24 | down |
| 6681038 | 7032558 | 967065  | --- | --- | --- | 1,04 | up   |
| 6681223 | 7355138 | 1757775 | --- | --- | --- | 2,40 | up   |
| 6681233 | 7039532 | 984422  | --- | --- | --- | 1,18 | up   |
| 6681243 | 7248790 | 1494536 | --- | --- | --- | 1,02 | up   |
| 6681268 | 7244077 | 1483438 | --- | --- | --- | 1,21 | up   |
| 6681301 | 7295652 | 1610281 | --- | --- | --- | 1,09 | down |
| 6681601 | 7322260 | 1677066 | --- | --- | --- | 1,05 | down |
| 6681675 | 7358859 | 1767003 | --- | --- | --- | 1,15 | down |
| 6681681 | 7351568 | 1748823 | --- | --- | --- | 1,04 | up   |
| 6681731 | 7148978 | 1248499 | --- | --- | --- | 1,55 | down |
| 6681734 | 7175946 | 1314636 | --- | --- | --- | 2,09 | up   |
| 6681897 | 7168521 | 1295956 | --- | --- | --- | 4,45 | down |
| 6682020 | 7180804 | 1326998 | --- | --- | --- | 1,28 | down |
| 6682039 | 7099573 | 1126725 | --- | --- | --- | 1,08 | up   |
| 6682066 | 7053874 | 1018308 | --- | --- | --- | 1,01 | up   |
| 6682067 | 7294911 | 1608534 | --- | --- | --- | 1,30 | down |
| 6682078 | 7248790 | 1494528 | --- | --- | --- | 1,41 | down |
| 6682209 | 7221443 | 1426320 | --- | --- | --- | 1,22 | up   |
| 6682259 | 7298692 | 1618409 | --- | --- | --- | 1,52 | down |
| 6682286 | 7049689 | 1008897 | --- | --- | --- | 1,03 | up   |

|         |         |         |     |     |     |      |      |
|---------|---------|---------|-----|-----|-----|------|------|
| 6682432 | 7243647 | 1482472 | --- | --- | --- | 2,18 | up   |
| 6682434 | 7096589 | 1118504 | --- | --- | --- | 2,07 | up   |
| 6682500 | 7335637 | 1708469 | --- | --- | --- | 2,07 | up   |
| 6682547 | 7305275 | 1635822 | --- | --- | --- | 1,39 | down |
| 6682750 | 7244288 | 1484128 | --- | --- | --- | 1,07 | down |
| 6682764 | 7180598 | 1326317 | --- | --- | --- | 1,14 | down |
| 6682770 | 7030127 | 960857  | --- | --- | --- | 1,37 | up   |
| 6682823 | 7373633 | 1805701 | --- | --- | --- | 1,31 | up   |
| 6682843 | 7045955 | 1000736 | --- | --- | --- | 1,69 | up   |
| 6682907 | 7339379 | 1718355 | --- | --- | --- | 1,44 | down |
| 6682922 | 7171091 | 1302460 | --- | --- | --- | 1,12 | down |
| 6682998 | 7330238 | 1695950 | --- | --- | --- | 1,06 | down |
| 6683004 | 7034293 | 971945  | --- | --- | --- | 1,33 | up   |
| 6683040 | 7252877 | 1504783 | --- | --- | --- | 1,41 | up   |
| 6683309 | 7202749 | 1382104 | --- | --- | --- | 1,04 | up   |
| 6683320 | 7364346 | 1779979 | --- | --- | --- | 1,49 | up   |
| 6683331 | 7030549 | 961802  | --- | --- | --- | 1,61 | up   |
| 6683346 | 7121849 | 1181807 | --- | --- | --- | 1,64 | down |
| 6683351 | 7334636 | 1706499 | --- | --- | --- | 3,60 | down |
| 6683392 | 7031774 | 964662  | --- | --- | --- | 1,94 | up   |
| 6683420 | 7303777 | 1631919 | --- | --- | --- | 1,02 | down |
| 6683473 | 7279806 | 1572566 | --- | --- | --- | 1,28 | up   |
| 6683495 | 7373633 | 1805703 | --- | --- | --- | 1,38 | up   |
| 6683531 | 7211363 | 1402042 | --- | --- | --- | 1,89 | down |
| 6683605 | 7374324 | 1807492 | --- | --- | --- | 1,21 | down |
| 6683619 | 7337425 | 1713190 | --- | --- | --- | 1,23 | up   |
| 6683638 | 7170845 | 1301881 | --- | --- | --- | 1,06 | down |
| 6683709 | 7306229 | 1638244 | --- | --- | --- | 1,25 | up   |
| 6683723 | 7069830 | 1055641 | --- | --- | --- | 1,52 | down |
| 6683761 | 7268694 | 1544225 | --- | --- | --- | 1,24 | up   |
| 6683819 | 7084193 | 1089126 | --- | --- | --- | 1,11 | up   |
| 6683867 | 7186240 | 1340828 | --- | --- | --- | 1,55 | down |
| 6683928 | 7374313 | 1807383 | --- | --- | --- | 1,13 | down |
| 6683962 | 7312627 | 1653486 | --- | --- | --- | 1,76 | down |
| 6683967 | 7087965 | 1098057 | --- | --- | --- | 1,80 | down |
| 6684034 | 7324760 | 1683032 | --- | --- | --- | 1,01 | down |
| 6684087 | 7309734 | 1646874 | --- | --- | --- | 1,13 | up   |
| 6684151 | 7364948 | 1781232 | --- | --- | --- | 1,15 | down |
| 6684184 | 7069462 | 1054602 | --- | --- | --- | 1,26 | up   |
| 6684185 | 7366749 | 1785506 | --- | --- | --- | 1,68 | down |
| 6684206 | 7148741 | 1247824 | --- | --- | --- | 1,33 | up   |
| 6684270 | 7244287 | 1484063 | --- | --- | --- | 1,13 | down |
| 6684319 | 7087282 | 1096204 | --- | --- | --- | 1,07 | up   |
| 6684325 | 7237132 | 1466115 | --- | --- | --- | 1,29 | up   |
| 6684405 | 7350993 | 1747548 | --- | --- | --- | 1,22 | up   |
| 6684431 | 7312121 | 1652374 | --- | --- | --- | 1,27 | up   |
| 6684617 | 7270895 | 1549510 | --- | --- | --- | 1,26 | up   |
| 6684647 | 7349643 | 1744149 | --- | --- | --- | 1,14 | down |
| 6684713 | 7168521 | 1295980 | --- | --- | --- | 1,41 | up   |
| 6684911 | 7193959 | 1360603 | --- | --- | --- | 3,25 | down |
| 6684924 | 7340304 | 1720857 | --- | --- | --- | 1,68 | down |
| 6684926 | 7368489 | 1791034 | --- | --- | --- | 1,08 | up   |
| 6684930 | 7244288 | 1484116 | --- | --- | --- | 1,05 | down |
| 6685061 | 7133484 | 1209944 | --- | --- | --- | 1,01 | up   |
| 6685092 | 7380878 | 1822557 | --- | --- | --- | 1,38 | up   |
| 6685124 | 7242451 | 1479346 | --- | --- | --- | 1,81 | down |
| 6685150 | 7248790 | 1494561 | --- | --- | --- | 1,09 | down |



|         |         |         |     |     |     |      |      |
|---------|---------|---------|-----|-----|-----|------|------|
| 6685199 | 7244288 | 1484100 | --- | --- | --- | 2,99 | up   |
| 6685277 | 7341375 | 1723553 | --- | --- | --- | 1,17 | up   |
| 6685327 | 7086966 | 1095264 | --- | --- | --- | 1,07 | up   |
| 6685452 | 7207971 | 1394321 | --- | --- | --- | 1,06 | up   |
| 6685466 | 7035525 | 974772  | --- | --- | --- | 1,19 | up   |
| 6685481 | 7155286 | 1263908 | --- | --- | --- | 1,32 | down |
| 6685530 | 7315206 | 1660029 | --- | --- | --- | 1,47 | up   |
| 6685584 | 7239752 | 1473193 | --- | --- | --- | 1,25 | down |
| 6685594 | 7073609 | 1064854 | --- | --- | --- | 1,07 | down |
| 6685612 | 7180949 | 1327485 | --- | --- | --- | 1,36 | up   |
| 6685637 | 7358859 | 1767018 | --- | --- | --- | 1,07 | down |
| 6685641 | 7209811 | 1398676 | --- | --- | --- | 1,05 | up   |
| 6685902 | 7243647 | 1482447 | --- | --- | --- | 1,06 | up   |
| 6685910 | 7293234 | 1604336 | --- | --- | --- | 1,44 | up   |
| 6685976 | 7382499 | 1826256 | --- | --- | --- | 1,25 | down |
| 6686004 | 7038530 | 981858  | --- | --- | --- | 1,32 | down |
| 6686066 | 7252877 | 1504701 | --- | --- | --- | 1,07 | down |
| 6686107 | 7116103 | 1167604 | --- | --- | --- | 1,37 | up   |
| 6686177 | 7244288 | 1484127 | --- | --- | --- | 1,44 | down |
| 6686229 | 7252877 | 1504761 | --- | --- | --- | 1,06 | down |
| 6686245 | 7335903 | 1709293 | --- | --- | --- | 1,19 | down |
| 6686303 | 7289069 | 1594419 | --- | --- | --- | 2,87 | down |
| 6686391 | 7288077 | 1591976 | --- | --- | --- | 1,01 | down |
| 6686393 | 7352635 | 1751443 | --- | --- | --- | 1,25 | up   |
| 6686394 | 7217650 | 1417198 | --- | --- | --- | 1,26 | up   |
| 6686423 | 7177428 | 1318394 | --- | --- | --- | 1,20 | down |
| 6686466 | 7060896 | 1033617 | --- | --- | --- | 1,45 | up   |
| 6686487 | 7034356 | 972158  | --- | --- | --- | 1,59 | down |
| 6686519 | 7238199 | 1468930 | --- | --- | --- | 1,09 | up   |
| 6686588 | 7065860 | 1045796 | --- | --- | --- | 1,30 | down |
| 6686622 | 7278010 | 1568047 | --- | --- | --- | 1,38 | down |
| 6686641 | 7297589 | 1615678 | --- | --- | --- | 1,01 | down |
| 6686647 | 7259221 | 1520618 | --- | --- | --- | 1,17 | up   |
| 6686677 | 7217747 | 1417472 | --- | --- | --- | 2,03 | up   |
| 6686694 | 7181105 | 1327962 | --- | --- | --- | 1,07 | down |
| 6686706 | 7364346 | 1779998 | --- | --- | --- | 1,59 | down |
| 6686720 | 7131550 | 1205567 | --- | --- | --- | 1,11 | down |
| 6686868 | 7113483 | 1161019 | --- | --- | --- | 1,12 | down |
| 6686880 | 7330731 | 1697172 | --- | --- | --- | 1,05 | down |
| 6686924 | 7370508 | 1797227 | --- | --- | --- | 1,84 | up   |
| 6687079 | 7243628 | 1482366 | --- | --- | --- | 1,05 | up   |
| 6687310 | 7297589 | 1615635 | --- | --- | --- | 1,26 | up   |
| 6687409 | 7307473 | 1641291 | --- | --- | --- | 2,24 | up   |
| 6687438 | 7123421 | 1185811 | --- | --- | --- | 1,53 | down |
| 6687465 | 7241163 | 1476819 | --- | --- | --- | 3,67 | up   |
| 6687467 | 7027386 | 955068  | --- | --- | --- | 1,05 | up   |
| 6687503 | 7235069 | 1460993 | --- | --- | --- | 1,03 | up   |
| 6687516 | 7059766 | 1030975 | --- | --- | --- | 1,84 | down |
| 6687552 | 7141151 | 1228920 | --- | --- | --- | 1,15 | down |
| 6687652 | 7326245 | 1686391 | --- | --- | --- | 1,13 | down |
| 6688006 | 7096924 | 1119611 | --- | --- | --- | 1,28 | up   |
| 6688011 | 7029770 | 960148  | --- | --- | --- | 2,12 | down |
| 6688084 | 7341243 | 1723217 | --- | --- | --- | 1,14 | up   |
| 6688088 | 7280743 | 1574491 | --- | --- | --- | 1,01 | down |
| 6688103 | 7193959 | 1360603 | --- | --- | --- | 1,13 | down |
| 6688155 | 7265259 | 1535446 | --- | --- | --- | 2,17 | down |
| 6688157 | 7078143 | 1075454 | --- | --- | --- | 1,20 | down |

|         |         |         |     |     |     |      |      |
|---------|---------|---------|-----|-----|-----|------|------|
| 6688197 | 7118503 | 1173570 | --- | --- | --- | 1,02 | down |
| 6688248 | 7295652 | 1610303 | --- | --- | --- | 1,14 | down |
| 6688297 | 7244936 | 1485371 | --- | --- | --- | 2,06 | down |
| 6688301 | 7071264 | 1059325 | --- | --- | --- | 1,06 | down |
| 6688351 | 7067670 | 1050321 | --- | --- | --- | 2,96 | up   |
| 6688398 | 7374313 | 1807372 | --- | --- | --- | 1,31 | down |
| 6688577 | 7044349 | 996665  | --- | --- | --- | 1,19 | down |
| 6688600 | 7110401 | 1153079 | --- | --- | --- | 1,48 | up   |
| 6688691 | 7216807 | 1414698 | --- | --- | --- | 1,27 | down |
| 6688749 | 7198644 | 1372285 | --- | --- | --- | 1,48 | down |
| 6688761 | 7186464 | 1341383 | --- | --- | --- | 1,14 | down |
| 6688786 | 7196331 | 1366389 | --- | --- | --- | 1,25 | down |
| 6688798 | 7191866 | 1354901 | --- | --- | --- | 1,32 | down |
| 6688922 | 7052385 | 1014787 | --- | --- | --- | 1,04 | down |
| 6688945 | 7059648 | 1030677 | --- | --- | --- | 1,46 | up   |
| 6689085 | 7239939 | 1473786 | --- | --- | --- | 1,14 | down |
| 6689118 | 7322020 | 1676642 | --- | --- | --- | 1,13 | up   |
| 6689156 | 7062233 | 1037246 | --- | --- | --- | 2,22 | down |
| 6689225 | 7329135 | 1693497 | --- | --- | --- | 1,28 | down |
| 6689279 | 7146542 | 1242296 | --- | --- | --- | 1,06 | down |
| 6689327 | 7040442 | 986549  | --- | --- | --- | 1,73 | down |
| 6689382 | 7056736 | 1024424 | --- | --- | --- | 1,78 | up   |
| 6689541 | 7374324 | 1807477 | --- | --- | --- | 1,05 | down |
| 6689550 | 7259131 | 1520420 | --- | --- | --- | 1,33 | up   |
| 6689616 | 7329135 | 1693500 | --- | --- | --- | 1,03 | down |
| 6689705 | 7087965 | 1098025 | --- | --- | --- | 1,37 | down |
| 6689746 | 7110401 | 1153071 | --- | --- | --- | 2,13 | down |
| 6689870 | 7264274 | 1533167 | --- | --- | --- | 1,50 | down |
| 6689916 | 7295652 | 1610298 | --- | --- | --- | 1,06 | up   |
| 6689926 | 7268694 | 1544233 | --- | --- | --- | 2,04 | up   |
| 6690012 | 7345465 | 1733848 | --- | --- | --- | 1,17 | up   |
| 6690071 | 7181001 | 1327708 | --- | --- | --- | 1,14 | up   |
| 6690080 | 7197400 | 1368812 | --- | --- | --- | 1,27 | up   |
| 6690233 | 7279793 | 1572538 | --- | --- | --- | 1,30 | down |
| 6690244 | 7378637 | 1817832 | --- | --- | --- | 1,78 | down |
| 6690287 | 7373678 | 1805869 | --- | --- | --- | 1,03 | up   |
| 6690351 | 7280743 | 1574499 | --- | --- | --- | 1,73 | up   |
| 6690374 | 7198087 | 1370714 | --- | --- | --- | 1,06 | down |
| 6690410 | 7170764 | 1301487 | --- | --- | --- | 1,16 | down |
| 6690481 | 7297274 | 1614653 | --- | --- | --- | 1,35 | down |
| 6690514 | 7194400 | 1361763 | --- | --- | --- | 1,27 | up   |
| 6690520 | 7060896 | 1033550 | --- | --- | --- | 1,23 | up   |
| 6690577 | 7257038 | 1515288 | --- | --- | --- | 1,19 | down |
| 6690629 | 7367994 | 1789251 | --- | --- | --- | 1,76 | down |
| 6690641 | 7033337 | 969492  | --- | --- | --- | 1,12 | up   |
| 6690681 | 7083030 | 1086260 | --- | --- | --- | 1,94 | down |
| 6690726 | 7211690 | 1402642 | --- | --- | --- | 1,29 | up   |
| 6690732 | 7073677 | 1065167 | --- | --- | --- | 1,40 | down |
| 6690740 | 7068413 | 1051974 | --- | --- | --- | 1,14 | down |
| 6690799 | 7247230 | 1490574 | --- | --- | --- | 1,33 | up   |
| 6690859 | 7380878 | 1822549 | --- | --- | --- | 2,74 | down |
| 6690915 | 7109292 | 1150739 | --- | --- | --- | 1,27 | up   |
| 6691033 | 7030127 | 960865  | --- | --- | --- | 2,18 | up   |
| 6691143 | 7197400 | 1368815 | --- | --- | --- | 1,37 | down |
| 6691255 | 7274892 | 1559563 | --- | --- | --- | 1,85 | up   |
| 6691309 | 7327169 | 1688439 | --- | --- | --- | 1,48 | up   |
| 6691378 | 7263805 | 1532199 | --- | --- | --- | 1,21 | up   |

|         |         |         |     |     |     |      |      |
|---------|---------|---------|-----|-----|-----|------|------|
| 6691535 | 7156047 | 1265728 | --- | --- | --- | 1,34 | up   |
| 6691565 | 7374324 | 1807480 | --- | --- | --- | 1,16 | up   |
| 6691702 | 7118356 | 1173130 | --- | --- | --- | 1,43 | up   |
| 6691743 | 7253215 | 1505369 | --- | --- | --- | 1,27 | up   |
| 6691899 | 7329846 | 1695004 | --- | --- | --- | 1,34 | down |
| 6691978 | 7233106 | 1455672 | --- | --- | --- | 1,13 | up   |
| 6692017 | 7281924 | 1577753 | --- | --- | --- | 1,43 | up   |
| 6692121 | 7339286 | 1718108 | --- | --- | --- | 1,02 | up   |
| 6692124 | 7142081 | 1230973 | --- | --- | --- | 1,23 | down |
| 6692211 | 7353382 | 1753218 | --- | --- | --- | 1,08 | up   |
| 6692290 | 7071264 | 1059284 | --- | --- | --- | 1,31 | down |
| 6692473 | 7038530 | 981870  | --- | --- | --- | 1,12 | down |
| 6692550 | 7160687 | 1276996 | --- | --- | --- | 1,27 | down |
| 6692609 | 7383102 | 1827385 | --- | --- | --- | 1,55 | down |
| 6692763 | 7116103 | 1167602 | --- | --- | --- | 2,97 | up   |
| 6692766 | 7247954 | 1492403 | --- | --- | --- | 1,16 | down |
| 6692811 | 7055876 | 1022487 | --- | --- | --- | 1,75 | down |
| 6693067 | 7062233 | 1037197 | --- | --- | --- | 1,03 | down |
| 6693091 | 7261592 | 1526834 | --- | --- | --- | 1,20 | down |
| 6693131 | 7128112 | 1196566 | --- | --- | --- | 1,28 | down |
| 6693151 | 7156052 | 1265784 | --- | --- | --- | 1,03 | down |
| 6693246 | 7254040 | 1507609 | --- | --- | --- | 1,08 | down |
| 6693270 | 7377583 | 1815458 | --- | --- | --- | 1,07 | down |
| 6693279 | 7039308 | 983921  | --- | --- | --- | 1,25 | down |
| 6693304 | 7252728 | 1504337 | --- | --- | --- | 1,49 | up   |
| 6693414 | 7268693 | 1544213 | --- | --- | --- | 2,12 | down |
| 6693456 | 7180166 | 1325244 | --- | --- | --- | 1,12 | down |
| 6693472 | 7043515 | 994011  | --- | --- | --- | 1,07 | down |
| 6693501 | 7070668 | 1057971 | --- | --- | --- | 1,44 | up   |
| 6693586 | 7282927 | 1579993 | --- | --- | --- | 1,07 | down |
| 6693731 | 7321029 | 1674832 | --- | --- | --- | 1,06 | up   |
| 6693744 | 7101684 | 1131710 | --- | --- | --- | 1,65 | up   |
| 6693761 | 7148978 | 1248527 | --- | --- | --- | 1,52 | up   |
| 6693782 | 7055876 | 1022469 | --- | --- | --- | 1,93 | down |
| 6693862 | 7142917 | 1233174 | --- | --- | --- | 1,05 | up   |
| 6693874 | 7337425 | 1713213 | --- | --- | --- | 1,05 | up   |
| 6693952 | 7168979 | 1297200 | --- | --- | --- | 1,20 | up   |
| 6693963 | 7060896 | 1033574 | --- | --- | --- | 1,30 | up   |
| 6693970 | 7337872 | 1714437 | --- | --- | --- | 1,05 | up   |
| 6694007 | 7069253 | 1054175 | --- | --- | --- | 1,05 | up   |
| 6694055 | 7376566 | 1812878 | --- | --- | --- | 1,10 | down |
| 6694087 | 7260066 | 1522900 | --- | --- | --- | 1,26 | down |
| 6694192 | 7360486 | 1770995 | --- | --- | --- | 1,08 | up   |
| 6694196 | 7259807 | 1522244 | --- | --- | --- | 1,15 | down |
| 6694216 | 7236358 | 1464249 | --- | --- | --- | 1,22 | up   |
| 6694221 | 7116540 | 1168645 | --- | --- | --- | 3,83 | down |
| 6694311 | 7300392 | 1622760 | --- | --- | --- | 1,02 | up   |
| 6694349 | 7101258 | 1130582 | --- | --- | --- | 1,02 | up   |
| 6694362 | 7064468 | 1042347 | --- | --- | --- | 1,13 | down |
| 6694363 | 7274892 | 1559565 | --- | --- | --- | 1,20 | down |
| 6694369 | 7180732 | 1326732 | --- | --- | --- | 1,04 | down |
| 6694468 | 7158517 | 1271596 | --- | --- | --- | 1,25 | down |
| 6694492 | 7166867 | 1291332 | --- | --- | --- | 1,05 | up   |
| 6694543 | 7332059 | 1700732 | --- | --- | --- | 1,52 | down |
| 6694782 | 7217747 | 1417499 | --- | --- | --- | 1,24 | down |
| 6694894 | 7100408 | 1128645 | --- | --- | --- | 1,54 | down |
| 6694947 | 7100408 | 1128650 | --- | --- | --- | 1,67 | up   |

|         |         |         |     |     |     |      |      |
|---------|---------|---------|-----|-----|-----|------|------|
| 6695006 | 7358048 | 1764807 | --- | --- | --- | 1,53 | down |
| 6695054 | 7238115 | 1468666 | --- | --- | --- | 1,12 | down |
| 6695229 | 7083030 | 1086258 | --- | --- | --- | 1,14 | down |
| 6695360 | 7297274 | 1614649 | --- | --- | --- | 1,05 | down |
| 6695463 | 7101258 | 1130557 | --- | --- | --- | 1,16 | down |
| 6695473 | 7288077 | 1591953 | --- | --- | --- | 1,01 | down |
| 6695474 | 7277783 | 1567440 | --- | --- | --- | 3,93 | down |
| 6695572 | 7355244 | 1758143 | --- | --- | --- | 2,56 | up   |
| 6695687 | 7247848 | 1492068 | --- | --- | --- | 1,08 | up   |
| 6695931 | 7266532 | 1538307 | --- | --- | --- | 1,10 | up   |
| 6695958 | 7247954 | 1492401 | --- | --- | --- | 1,21 | up   |
| 6696035 | 7374324 | 1807538 | --- | --- | --- | 1,10 | down |
| 6696037 | 7063716 | 1040133 | --- | --- | --- | 1,40 | down |
| 6696061 | 7292701 | 1602962 | --- | --- | --- | 1,86 | down |
| 6696125 | 7199341 | 1374130 | --- | --- | --- | 1,32 | down |
| 6696205 | 7257893 | 1517480 | --- | --- | --- | 1,32 | down |
| 6696265 | 7131876 | 1206059 | --- | --- | --- | 1,17 | up   |
| 6696270 | 7074911 | 1068171 | --- | --- | --- | 1,00 | up   |
| 6696316 | 7075445 | 1069346 | --- | --- | --- | 1,40 | up   |
| 6696443 | 7337425 | 1713162 | --- | --- | --- | 1,01 | down |
| 6696513 | 7254040 | 1507608 | --- | --- | --- | 1,46 | up   |
| 6696519 | 7193403 | 1359183 | --- | --- | --- | 2,43 | down |
| 6696565 | 7295410 | 1609773 | --- | --- | --- | 1,25 | up   |
| 6696609 | 7282831 | 1579771 | --- | --- | --- | 1,19 | down |
| 6696626 | 7055793 | 1022299 | --- | --- | --- | 1,04 | up   |
| 6696634 | 7263348 | 1530811 | --- | --- | --- | 2,04 | down |
| 6696690 | 7106776 | 1144110 | --- | --- | --- | 1,13 | down |
| 6696862 | 7193916 | 1360447 | --- | --- | --- | 1,03 | down |
| 6696971 | 7186528 | 1341560 | --- | --- | --- | 1,36 | up   |
| 6696988 | 7220292 | 1423772 | --- | --- | --- | 1,18 | up   |
| 6697036 | 7247334 | 1490820 | --- | --- | --- | 1,22 | up   |
| 6697190 | 7326271 | 1686467 | --- | --- | --- | 1,07 | down |
| 6697286 | 7088164 | 1098481 | --- | --- | --- | 2,08 | down |
| 6697372 | 7096589 | 1118516 | --- | --- | --- | 1,17 | down |
| 6697389 | 7313538 | 1655722 | --- | --- | --- | 1,11 | up   |
| 6697394 | 7096924 | 1119617 | --- | --- | --- | 1,10 | down |
| 6697405 | 7086966 | 1095283 | --- | --- | --- | 1,42 | down |
| 6697563 | 7265259 | 1535437 | --- | --- | --- | 1,94 | up   |
| 6697619 | 7381330 | 1823633 | --- | --- | --- | 1,77 | down |
| 6697659 | 7250671 | 1499034 | --- | --- | --- | 1,78 | up   |
| 6697787 | 7209927 | 1398931 | --- | --- | --- | 1,02 | up   |
| 6697843 | 7182056 | 1330596 | --- | --- | --- | 1,09 | down |
| 6697915 | 7114934 | 1164529 | --- | --- | --- | 1,14 | up   |
| 6698057 | 7086522 | 1093950 | --- | --- | --- | 2,05 | up   |
| 6698083 | 7081487 | 1082706 | --- | --- | --- | 1,06 | up   |
| 6698130 | 7241163 | 1476819 | --- | --- | --- | 2,00 | up   |
| 6698235 | 7216970 | 1415126 | --- | --- | --- | 1,04 | up   |
| 6698303 | 7311391 | 1650857 | --- | --- | --- | 1,16 | down |
| 6698361 | 7363529 | 1777919 | --- | --- | --- | 1,05 | up   |
| 6698499 | 7369712 | 1794822 | --- | --- | --- | 1,21 | up   |
| 6698519 | 7281577 | 1576881 | --- | --- | --- | 1,44 | down |
| 6698532 | 7355138 | 1757763 | --- | --- | --- | 1,07 | up   |
| 6698538 | 7092549 | 1109148 | --- | --- | --- | 1,38 | up   |
| 6698566 | 7211144 | 1401550 | --- | --- | --- | 1,29 | down |
| 6698620 | 7225543 | 1435939 | --- | --- | --- | 1,06 | up   |
| 6698667 | 7149008 | 1248595 | --- | --- | --- | 1,07 | down |
| 6698693 | 7303191 | 1629961 | --- | --- | --- | 1,04 | down |

|         |         |         |     |     |     |      |      |
|---------|---------|---------|-----|-----|-----|------|------|
| 6698752 | 7301843 | 1626490 | --- | --- | --- | 1,16 | up   |
| 6698755 | 7059020 | 1029354 | --- | --- | --- | 1,01 | up   |
| 6698762 | 7113083 | 1159965 | --- | --- | --- | 1,23 | down |
| 6698905 | 7099573 | 1126744 | --- | --- | --- | 1,08 | up   |
| 6698967 | 7369400 | 1793983 | --- | --- | --- | 1,09 | up   |
| 6698994 | 7061948 | 1036378 | --- | --- | --- | 1,15 | down |
| 6699069 | 7069830 | 1055611 | --- | --- | --- | 1,21 | up   |
| 6699085 | 7166867 | 1291295 | --- | --- | --- | 1,12 | down |
| 6699127 | 7289879 | 1596427 | --- | --- | --- | 1,01 | down |
| 6699179 | 7211389 | 1402113 | --- | --- | --- | 1,10 | down |
| 6699309 | 7336837 | 1711617 | --- | --- | --- | 1,21 | up   |
| 6699399 | 7121074 | 1179920 | --- | --- | --- | 1,00 | up   |
| 6699408 | 7181105 | 1327964 | --- | --- | --- | 1,23 | up   |
| 6699441 | 7374740 | 1808620 | --- | --- | --- | 1,44 | up   |
| 6699472 | 7172691 | 1306453 | --- | --- | --- | 1,21 | down |
| 6699539 | 7313538 | 1655742 | --- | --- | --- | 1,04 | down |
| 6699621 | 7337425 | 1713140 | --- | --- | --- | 1,13 | down |
| 6699645 | 7274892 | 1559550 | --- | --- | --- | 1,11 | down |
| 6699646 | 7336931 | 1711858 | --- | --- | --- | 1,01 | up   |
| 6699735 | 7253272 | 1505576 | --- | --- | --- | 1,26 | up   |
| 6699749 | 7297274 | 1614637 | --- | --- | --- | 1,07 | up   |
| 6699923 | 7028278 | 957313  | --- | --- | --- | 1,17 | down |
| 6699930 | 7183182 | 1333565 | --- | --- | --- | 1,19 | down |
| 6699931 | 7038659 | 982165  | --- | --- | --- | 1,17 | down |
| 6700195 | 7248790 | 1494527 | --- | --- | --- | 1,87 | up   |
| 6700225 | 7383102 | 1827388 | --- | --- | --- | 1,17 | up   |
| 6700264 | 7217143 | 1415595 | --- | --- | --- | 1,19 | up   |
| 6700314 | 7359426 | 1768366 | --- | --- | --- | 1,28 | down |
| 6700335 | 7321414 | 1675641 | --- | --- | --- | 1,01 | up   |
| 6700346 | 7203018 | 1382642 | --- | --- | --- | 1,10 | up   |
| 6700371 | 7359426 | 1768380 | --- | --- | --- | 1,80 | down |
| 6700372 | 7205944 | 1389460 | --- | --- | --- | 1,09 | up   |
| 6700438 | 7282927 | 1580023 | --- | --- | --- | 1,06 | down |
| 6700445 | 7298101 | 1617020 | --- | --- | --- | 2,24 | down |
| 6700494 | 7313538 | 1655735 | --- | --- | --- | 1,10 | up   |
| 6700609 | 7092549 | 1109137 | --- | --- | --- | 1,10 | up   |
| 6700688 | 7360325 | 1770527 | --- | --- | --- | 1,20 | down |
| 6700692 | 7071714 | 1060366 | --- | --- | --- | 1,12 | up   |
| 6700751 | 7314270 | 1657750 | --- | --- | --- | 1,13 | up   |
| 6700776 | 7257976 | 1517712 | --- | --- | --- | 1,20 | down |
| 6700865 | 7336854 | 1711679 | --- | --- | --- | 1,42 | up   |
| 6700913 | 7195680 | 1364902 | --- | --- | --- | 1,21 | up   |
| 6701177 | 7235069 | 1460971 | --- | --- | --- | 1,44 | up   |
| 6701187 | 7158419 | 1271393 | --- | --- | --- | 1,02 | down |
| 6701203 | 7297274 | 1614655 | --- | --- | --- | 1,37 | up   |
| 6701215 | 7168979 | 1297200 | --- | --- | --- | 1,28 | down |
| 6701219 | 7142416 | 1231785 | --- | --- | --- | 2,40 | up   |
| 6701309 | 7196029 | 1365615 | --- | --- | --- | 1,40 | up   |
| 6701323 | 7277759 | 1567293 | --- | --- | --- | 1,18 | down |
| 6701335 | 7280425 | 1573806 | --- | --- | --- | 1,07 | down |
| 6701349 | 7277719 | 1567068 | --- | --- | --- | 1,00 | up   |
| 6701446 | 7076160 | 1070897 | --- | --- | --- | 1,02 | down |
| 6701486 | 7219624 | 1422102 | --- | --- | --- | 1,03 | down |
| 6701488 | 7301198 | 1624778 | --- | --- | --- | 1,17 | up   |
| 6701514 | 7295410 | 1609781 | --- | --- | --- | 1,10 | up   |
| 6701562 | 7099573 | 1126707 | --- | --- | --- | 1,21 | up   |
| 6701746 | 7355138 | 1757769 | --- | --- | --- | 1,06 | up   |

|         |         |         |     |     |     |      |      |
|---------|---------|---------|-----|-----|-----|------|------|
| 6701808 | 7245921 | 1487686 | --- | --- | --- | 1,51 | down |
| 6701885 | 7049508 | 1008559 | --- | --- | --- | 1,24 | down |
| 6701919 | 7341274 | 1723382 | --- | --- | --- | 1,02 | down |
| 6701935 | 7280743 | 1574514 | --- | --- | --- | 1,47 | down |
| 6701952 | 7248790 | 1494532 | --- | --- | --- | 1,28 | up   |
| 6701978 | 7200545 | 1376898 | --- | --- | --- | 1,59 | up   |
| 6702014 | 7329135 | 1693493 | --- | --- | --- | 1,31 | up   |
| 6702062 | 7147809 | 1245452 | --- | --- | --- | 1,15 | down |
| 6702063 | 7373678 | 1805865 | --- | --- | --- | 1,10 | up   |
| 6702154 | 7343250 | 1728041 | --- | --- | --- | 1,64 | down |
| 6702176 | 7295652 | 1610252 | --- | --- | --- | 1,16 | down |
| 6702213 | 7083030 | 1086263 | --- | --- | --- | 1,31 | down |
| 6702293 | 7315206 | 1660036 | --- | --- | --- | 1,58 | up   |
| 6702308 | 7349643 | 1744160 | --- | --- | --- | 1,00 | down |
| 6702332 | 7227433 | 1440977 | --- | --- | --- | 1,16 | up   |
| 6702358 | 7358048 | 1764813 | --- | --- | --- | 1,58 | up   |
| 6702419 | 7056304 | 1023520 | --- | --- | --- | 1,06 | down |
| 6702539 | 7288284 | 1592646 | --- | --- | --- | 1,03 | up   |
| 6702864 | 7297589 | 1615599 | --- | --- | --- | 1,09 | up   |
| 6702899 | 7244027 | 1483284 | --- | --- | --- | 1,12 | up   |
| 6702914 | 7099543 | 1126634 | --- | --- | --- | 1,45 | up   |
| 6702938 | 7034747 | 973189  | --- | --- | --- | 1,40 | down |
| 6703018 | 7309646 | 1646548 | --- | --- | --- | 1,35 | down |
| 6703022 | 7148741 | 1247826 | --- | --- | --- | 1,04 | down |
| 6703041 | 7159036 | 1272965 | --- | --- | --- | 1,05 | up   |
| 6703087 | 7312566 | 1653303 | --- | --- | --- | 2,03 | down |
| 6703112 | 7196029 | 1365635 | --- | --- | --- | 1,20 | down |
| 6703182 | 7260066 | 1522900 | --- | --- | --- | 1,45 | up   |
| 6703314 | 7194400 | 1361753 | --- | --- | --- | 1,02 | up   |
| 6703337 | 7098411 | 1123717 | --- | --- | --- | 1,08 | up   |
| 6703390 | 7075460 | 1069405 | --- | --- | --- | 1,37 | up   |
| 6703401 | 7380497 | 1821844 | --- | --- | --- | 1,24 | down |
| 6703407 | 7073928 | 1065815 | --- | --- | --- | 6,79 | down |
| 6703437 | 7366749 | 1785528 | --- | --- | --- | 1,19 | up   |
| 6703485 | 7227433 | 1440955 | --- | --- | --- | 1,20 | down |
| 6703574 | 7317318 | 1665827 | --- | --- | --- | 2,07 | down |
| 6703583 | 7062233 | 1037211 | --- | --- | --- | 1,07 | down |
| 6703600 | 7068259 | 1051647 | --- | --- | --- | 1,28 | up   |
| 6703687 | 7075445 | 1069354 | --- | --- | --- | 1,18 | up   |
| 6703767 | 7330396 | 1696339 | --- | --- | --- | 1,35 | up   |
| 6703800 | 7116103 | 1167597 | --- | --- | --- | 1,42 | up   |
| 6703926 | 7221613 | 1426800 | --- | --- | --- | 2,67 | down |
| 6703976 | 7156047 | 1265728 | --- | --- | --- | 1,19 | up   |
| 6704038 | 7189184 | 1347597 | --- | --- | --- | 1,41 | down |
| 6704063 | 7067828 | 1050790 | --- | --- | --- | 1,10 | down |
| 6704116 | 7040442 | 986555  | --- | --- | --- | 1,02 | up   |
| 6704140 | 7116023 | 1167289 | --- | --- | --- | 1,04 | up   |
| 6704166 | 7326271 | 1686461 | --- | --- | --- | 1,01 | up   |
| 6704227 | 7127691 | 1195634 | --- | --- | --- | 1,11 | up   |
| 6704299 | 7302860 | 1629008 | --- | --- | --- | 1,25 | up   |
| 6704347 | 7193056 | 1358273 | --- | --- | --- | 1,07 | down |
| 6704459 | 7292624 | 1602751 | --- | --- | --- | 1,93 | up   |
| 6704496 | 7292178 | 1601744 | --- | --- | --- | 1,33 | down |
| 6704498 | 7376566 | 1812885 | --- | --- | --- | 1,01 | down |
| 6704516 | 7309738 | 1646946 | --- | --- | --- | 1,13 | down |
| 6704528 | 7125348 | 1190076 | --- | --- | --- | 1,04 | down |
| 6704538 | 7261580 | 1526799 | --- | --- | --- | 1,12 | up   |

|         |         |         |     |     |     |      |      |
|---------|---------|---------|-----|-----|-----|------|------|
| 6704544 | 7071969 | 1060898 | --- | --- | --- | 1,34 | up   |
| 6704550 | 7238202 | 1468938 | --- | --- | --- | 1,23 | up   |
| 6704602 | 7221247 | 1425833 | --- | --- | --- | 1,01 | up   |
| 6704672 | 7208784 | 1396113 | --- | --- | --- | 1,32 | up   |
| 6704697 | 7158920 | 1272523 | --- | --- | --- | 2,93 | down |
| 6704707 | 7162177 | 1280583 | --- | --- | --- | 1,01 | down |
| 6704708 | 7107321 | 1145323 | --- | --- | --- | 1,01 | down |
| 6704730 | 7038530 | 981887  | --- | --- | --- | 1,15 | up   |
| 6704780 | 7127540 | 1195276 | --- | --- | --- | 1,02 | up   |
| 6704920 | 7340125 | 1720449 | --- | --- | --- | 1,20 | down |
| 6704979 | 7148741 | 1247879 | --- | --- | --- | 1,17 | up   |
| 6704995 | 7127801 | 1195863 | --- | --- | --- | 2,14 | up   |
| 6705063 | 7133749 | 1210819 | --- | --- | --- | 1,04 | up   |
| 6705073 | 7227433 | 1440966 | --- | --- | --- | 1,09 | down |
| 6705112 | 7142321 | 1231563 | --- | --- | --- | 1,39 | up   |
| 6705132 | 7297589 | 1615616 | --- | --- | --- | 1,36 | up   |
| 6705400 | 7041609 | 989589  | --- | --- | --- | 1,21 | up   |
| 6705445 | 7358859 | 1766998 | --- | --- | --- | 1,44 | down |
| 6705474 | 7349643 | 1744141 | --- | --- | --- | 1,06 | up   |
| 6705507 | 7337224 | 1712623 | --- | --- | --- | 1,03 | down |
| 6705549 | 7038530 | 981867  | --- | --- | --- | 1,40 | down |
| 6705580 | 7043379 | 993646  | --- | --- | --- | 1,08 | down |
| 6705677 | 7227474 | 1441165 | --- | --- | --- | 1,42 | up   |
| 6705685 | 7368005 | 1789344 | --- | --- | --- | 1,38 | up   |
| 6705693 | 7130917 | 1203918 | --- | --- | --- | 1,20 | down |
| 6705738 | 7080476 | 1080405 | --- | --- | --- | 1,08 | up   |
| 6705792 | 7056333 | 1023674 | --- | --- | --- | 1,22 | up   |
| 6705909 | 7377304 | 1814591 | --- | --- | --- | 1,14 | down |
| 6705911 | 7238115 | 1468588 | --- | --- | --- | 1,01 | up   |
| 6705954 | 7153895 | 1259915 | --- | --- | --- | 1,32 | up   |
| 6705971 | 7297274 | 1614568 | --- | --- | --- | 1,24 | up   |
| 6705991 | 7376398 | 1812492 | --- | --- | --- | 1,00 | up   |
| 6706077 | 7189669 | 1348981 | --- | --- | --- | 1,23 | down |
| 6706158 | 7110999 | 1154762 | --- | --- | --- | 1,09 | up   |
| 6706184 | 7119179 | 1174995 | --- | --- | --- | 1,19 | up   |
| 6706206 | 7120039 | 1177491 | --- | --- | --- | 1,12 | down |
| 6706271 | 7034293 | 971945  | --- | --- | --- | 2,14 | up   |
| 6706298 | 7160687 | 1276989 | --- | --- | --- | 1,17 | down |
| 6706454 | 7363529 | 1777959 | --- | --- | --- | 1,17 | down |
| 6706483 | 7247848 | 1492073 | --- | --- | --- | 1,08 | down |
| 6706502 | 7121849 | 1181814 | --- | --- | --- | 1,48 | down |
| 6706544 | 7239752 | 1473174 | --- | --- | --- | 1,50 | down |
| 6706551 | 7230628 | 1448868 | --- | --- | --- | 1,73 | up   |
| 6706555 | 7146542 | 1242296 | --- | --- | --- | 1,04 | up   |
| 6706625 | 7340757 | 1721886 | --- | --- | --- | 1,03 | up   |
| 6706670 | 7344380 | 1731127 | --- | --- | --- | 1,08 | down |
| 6706696 | 7108062 | 1147192 | --- | --- | --- | 3,43 | up   |
| 6706704 | 7211363 | 1402049 | --- | --- | --- | 1,23 | down |
| 6706868 | 7207093 | 1392103 | --- | --- | --- | 1,14 | up   |
| 6706940 | 7270592 | 1548561 | --- | --- | --- | 1,07 | up   |
| 6707151 | 7231775 | 1452135 | --- | --- | --- | 1,32 | up   |
| 6707260 | 7339379 | 1718361 | --- | --- | --- | 1,00 | up   |
| 6707372 | 7058507 | 1028314 | --- | --- | --- | 1,25 | up   |
| 6707440 | 7162177 | 1280583 | --- | --- | --- | 1,83 | up   |
| 6707508 | 7159036 | 1272921 | --- | --- | --- | 1,37 | up   |
| 6707523 | 7095041 | 1115177 | --- | --- | --- | 1,27 | up   |
| 6707532 | 7030127 | 960860  | --- | --- | --- | 2,05 | up   |

|         |         |         |     |     |     |      |      |
|---------|---------|---------|-----|-----|-----|------|------|
| 6707702 | 7353284 | 1752984 | --- | --- | --- | 1,09 | up   |
| 6707715 | 7374313 | 1807389 | --- | --- | --- | 1,05 | up   |
| 6707778 | 7059020 | 1029339 | --- | --- | --- | 1,20 | down |
| 6707807 | 7293922 | 1605961 | --- | --- | --- | 1,21 | down |
| 6707902 | 7302860 | 1629005 | --- | --- | --- | 1,03 | down |
| 6708040 | 7270895 | 1549511 | --- | --- | --- | 1,12 | up   |
| 6708048 | 7109292 | 1150748 | --- | --- | --- | 1,37 | down |
| 6708050 | 7247230 | 1490579 | --- | --- | --- | 1,16 | down |
| 6708114 | 7158419 | 1271381 | --- | --- | --- | 1,08 | down |
| 6708129 | 7343250 | 1728047 | --- | --- | --- | 1,03 | down |
| 6708131 | 7279881 | 1572738 | --- | --- | --- | 1,14 | up   |
| 6708316 | 7243901 | 1483063 | --- | --- | --- | 1,17 | down |
| 6708348 | 7237711 | 1467463 | --- | --- | --- | 1,22 | down |
| 6708360 | 7181105 | 1327957 | --- | --- | --- | 1,15 | up   |
| 6708381 | 7243647 | 1482447 | --- | --- | --- | 1,00 | up   |
| 6708446 | 7173640 | 1308949 | --- | --- | --- | 1,35 | down |
| 6708484 | 7314270 | 1657726 | --- | --- | --- | 1,02 | up   |
| 6708496 | 7363674 | 1778419 | --- | --- | --- | 1,02 | down |
| 6708523 | 7376566 | 1812870 | --- | --- | --- | 2,21 | up   |
| 6708561 | 7068942 | 1053387 | --- | --- | --- | 1,31 | up   |
| 6708576 | 7239752 | 1473181 | --- | --- | --- | 1,21 | down |
| 6708592 | 7377791 | 1815993 | --- | --- | --- | 1,06 | down |
| 6708757 | 7064134 | 1041466 | --- | --- | --- | 1,04 | up   |
| 6708762 | 7268357 | 1543398 | --- | --- | --- | 1,18 | up   |
| 6708959 | 7258455 | 1518699 | --- | --- | --- | 1,04 | up   |
| 6709180 | 7306229 | 1638249 | --- | --- | --- | 2,30 | up   |
| 6709231 | 7177520 | 1318612 | --- | --- | --- | 1,18 | up   |
| 6709515 | 7173706 | 1309259 | --- | --- | --- | 1,02 | down |
| 6709608 | 7112566 | 1158626 | --- | --- | --- | 1,44 | down |
| 6709678 | 7209927 | 1398920 | --- | --- | --- | 1,09 | down |
| 6709742 | 7368489 | 1791031 | --- | --- | --- | 2,25 | up   |
| 6709785 | 7039532 | 984441  | --- | --- | --- | 1,04 | up   |
| 6709791 | 7190534 | 1351228 | --- | --- | --- | 1,30 | up   |
| 6709829 | 7344530 | 1731583 | --- | --- | --- | 1,06 | up   |
| 6709869 | 7259131 | 1520416 | --- | --- | --- | 1,05 | down |
| 6709870 | 7166855 | 1291265 | --- | --- | --- | 1,07 | down |
| 6709970 | 7376820 | 1813434 | --- | --- | --- | 2,05 | down |
| 6710070 | 7069253 | 1054162 | --- | --- | --- | 1,60 | up   |
| 6710252 | 7235069 | 1460977 | --- | --- | --- | 1,29 | down |
| 6710289 | 7297589 | 1615643 | --- | --- | --- | 1,48 | down |
| 6710388 | 7039308 | 983921  | --- | --- | --- | 1,01 | up   |
| 6710536 | 7341243 | 1723232 | --- | --- | --- | 1,30 | down |
| 6710583 | 7266530 | 1538285 | --- | --- | --- | 1,07 | up   |
| 6710781 | 7170764 | 1301433 | --- | --- | --- | 1,21 | down |
| 6710859 | 7069603 | 1055046 | --- | --- | --- | 1,03 | up   |
| 6710896 | 7168439 | 1295678 | --- | --- | --- | 1,35 | down |
| 6710919 | 7297589 | 1615634 | --- | --- | --- | 1,03 | down |
| 6710954 | 7280743 | 1574548 | --- | --- | --- | 1,06 | down |
| 6711025 | 7063716 | 1040167 | --- | --- | --- | 1,01 | up   |
| 6711077 | 7360486 | 1770953 | --- | --- | --- | 1,64 | down |
| 6711101 | 7143412 | 1234584 | --- | --- | --- | 1,15 | up   |
| 6711233 | 7125348 | 1190073 | --- | --- | --- | 1,17 | up   |
| 6711298 | 7072765 | 1062743 | --- | --- | --- | 1,17 | up   |
| 6711391 | 7133484 | 1209938 | --- | --- | --- | 1,32 | up   |
| 6711463 | 7340990 | 1722505 | --- | --- | --- | 1,02 | down |
| 6711469 | 7168521 | 1295900 | --- | --- | --- | 1,36 | up   |
| 6711554 | 7267204 | 1539854 | --- | --- | --- | 1,65 | down |



|         |         |         |     |     |     |      |      |
|---------|---------|---------|-----|-----|-----|------|------|
| 6711611 | 7301843 | 1626487 | --- | --- | --- | 1,22 | up   |
| 6711644 | 7183182 | 1333553 | --- | --- | --- | 1,03 | up   |
| 6711654 | 7313538 | 1655737 | --- | --- | --- | 1,62 | up   |
| 6711679 | 7351844 | 1749493 | --- | --- | --- | 1,20 | down |
| 6711722 | 7321029 | 1674803 | --- | --- | --- | 1,09 | up   |
| 6711776 | 7193403 | 1359197 | --- | --- | --- | 1,13 | down |
| 6711818 | 7069603 | 1055050 | --- | --- | --- | 1,27 | down |
| 6711887 | 7331757 | 1700023 | --- | --- | --- | 1,26 | down |
| 6711920 | 7039223 | 983572  | --- | --- | --- | 1,08 | up   |
| 6712093 | 7143412 | 1234612 | --- | --- | --- | 1,00 | up   |
| 6712144 | 7356619 | 1761354 | --- | --- | --- | 1,56 | up   |
| 6712362 | 7115963 | 1167058 | --- | --- | --- | 1,21 | down |
| 6712687 | 7307473 | 1641274 | --- | --- | --- | 1,74 | up   |
| 6712757 | 7277719 | 1567070 | --- | --- | --- | 1,08 | up   |
| 6712770 | 7368004 | 1789332 | --- | --- | --- | 1,30 | down |
| 6712860 | 7383823 | 1828938 | --- | --- | --- | 1,04 | down |
| 6712936 | 7341274 | 1723383 | --- | --- | --- | 1,03 | down |
| 6712964 | 7330731 | 1697171 | --- | --- | --- | 1,12 | down |
| 6712974 | 7073677 | 1065152 | --- | --- | --- | 1,37 | down |
| 6712979 | 7195680 | 1364888 | --- | --- | --- | 1,04 | up   |
| 6713021 | 7071292 | 1059446 | --- | --- | --- | 1,23 | down |
| 6713024 | 7028326 | 957441  | --- | --- | --- | 1,05 | up   |
| 6713053 | 7330396 | 1696363 | --- | --- | --- | 1,37 | up   |
| 6713118 | 7041486 | 989221  | --- | --- | --- | 1,32 | down |
| 6713379 | 7280743 | 1574481 | --- | --- | --- | 1,53 | down |
| 6713392 | 7115507 | 1165984 | --- | --- | --- | 1,22 | down |
| 6713416 | 7088544 | 1099670 | --- | --- | --- | 1,19 | up   |
| 6713435 | 7277719 | 1567087 | --- | --- | --- | 1,18 | down |
| 6713467 | 7313841 | 1656727 | --- | --- | --- | 1,30 | down |
| 6713516 | 7030454 | 961550  | --- | --- | --- | 1,33 | up   |
| 6713550 | 7340125 | 1720448 | --- | --- | --- | 2,90 | down |
| 6713683 | 7030087 | 960789  | --- | --- | --- | 1,28 | up   |
| 6713696 | 7294911 | 1608526 | --- | --- | --- | 1,22 | down |
| 6713729 | 7247230 | 1490582 | --- | --- | --- | 1,17 | up   |
| 6713731 | 7378997 | 1818668 | --- | --- | --- | 1,02 | down |
| 6713891 | 7094139 | 1112917 | --- | --- | --- | 1,43 | up   |
| 6713973 | 7340057 | 1720328 | --- | --- | --- | 1,08 | up   |
| 6713981 | 7041609 | 989552  | --- | --- | --- | 1,05 | down |
| 6714031 | 7336931 | 1711897 | --- | --- | --- | 1,04 | down |
| 6714167 | 7113261 | 1160469 | --- | --- | --- | 1,05 | up   |
| 6714247 | 7370131 | 1796180 | --- | --- | --- | 1,08 | down |
| 6714434 | 7319259 | 1670400 | --- | --- | --- | 1,14 | down |
| 6714454 | 7264797 | 1534434 | --- | --- | --- | 1,15 | up   |
| 6714487 | 7115362 | 1165593 | --- | --- | --- | 1,51 | up   |
| 6714489 | 7100408 | 1128649 | --- | --- | --- | 1,32 | up   |
| 6714578 | 7373678 | 1805874 | --- | --- | --- | 1,10 | down |
| 6714607 | 7261668 | 1526981 | --- | --- | --- | 1,47 | up   |
| 6714637 | 7276650 | 1564132 | --- | --- | --- | 1,06 | up   |
| 6714644 | 7071648 | 1060194 | --- | --- | --- | 1,31 | down |
| 6714678 | 7120671 | 1179002 | --- | --- | --- | 1,12 | up   |
| 6714780 | 7030549 | 961799  | --- | --- | --- | 1,09 | down |
| 6714883 | 7170845 | 1301886 | --- | --- | --- | 1,18 | up   |
| 6714900 | 7131876 | 1206048 | --- | --- | --- | 1,28 | up   |
| 6715012 | 7071969 | 1060897 | --- | --- | --- | 1,41 | up   |
| 6715031 | 7380497 | 1821839 | --- | --- | --- | 1,11 | up   |
| 6715040 | 7212587 | 1404639 | --- | --- | --- | 1,53 | down |
| 6715100 | 7030037 | 960702  | --- | --- | --- | 1,12 | down |

|         |         |         |     |     |     |      |      |
|---------|---------|---------|-----|-----|-----|------|------|
| 6715175 | 7373678 | 1805872 | --- | --- | --- | 1,27 | down |
| 6715178 | 7264808 | 1534473 | --- | --- | --- | 1,02 | down |
| 6715257 | 7243901 | 1483037 | --- | --- | --- | 1,17 | down |
| 6715269 | 7146542 | 1242295 | --- | --- | --- | 1,31 | down |
| 6715311 | 7302860 | 1629015 | --- | --- | --- | 1,02 | up   |
| 6715390 | 7108062 | 1147174 | --- | --- | --- | 1,77 | up   |
| 6715396 | 7028326 | 957439  | --- | --- | --- | 1,79 | up   |
| 6715416 | 7088544 | 1099700 | --- | --- | --- | 1,10 | up   |
| 6715445 | 7299650 | 1620967 | --- | --- | --- | 1,14 | up   |
| 6715510 | 7255911 | 1512233 | --- | --- | --- | 1,04 | down |
| 6715531 | 7368986 | 1792868 | --- | --- | --- | 1,16 | down |
| 6715578 | 7033006 | 968471  | --- | --- | --- | 1,07 | down |
| 6715609 | 7155116 | 1263425 | --- | --- | --- | 1,09 | down |
| 6715614 | 7146093 | 1240939 | --- | --- | --- | 1,02 | up   |
| 6715696 | 7240569 | 1475496 | --- | --- | --- | 1,03 | up   |
| 6715698 | 7377304 | 1814585 | --- | --- | --- | 1,27 | down |
| 6715699 | 7237711 | 1467466 | --- | --- | --- | 1,19 | up   |
| 6715732 | 7279103 | 1570819 | --- | --- | --- | 1,26 | down |
| 6715756 | 7235794 | 1462895 | --- | --- | --- | 1,68 | up   |
| 6715790 | 7330731 | 1697175 | --- | --- | --- | 1,06 | down |
| 6715804 | 7355044 | 1757447 | --- | --- | --- | 1,34 | down |
| 6715905 | 7096924 | 1119611 | --- | --- | --- | 1,52 | up   |
| 6715938 | 7101258 | 1130579 | --- | --- | --- | 1,14 | down |
| 6715976 | 7141456 | 1229593 | --- | --- | --- | 1,19 | down |
| 6716025 | 7205750 | 1388937 | --- | --- | --- | 1,59 | down |
| 6716027 | 7196029 | 1365633 | --- | --- | --- | 1,14 | down |
| 6716101 | 7224182 | 1432784 | --- | --- | --- | 1,02 | down |
| 6716167 | 7112355 | 1158084 | --- | --- | --- | 1,07 | down |
| 6716169 | 7236131 | 1463778 | --- | --- | --- | 1,27 | down |
| 6716308 | 7364346 | 1779977 | --- | --- | --- | 1,37 | down |
| 6716349 | 7075460 | 1069407 | --- | --- | --- | 2,27 | down |
| 6716361 | 7355044 | 1757445 | --- | --- | --- | 1,13 | up   |
| 6716393 | 7100307 | 1128402 | --- | --- | --- | 1,48 | down |
| 6716579 | 7301904 | 1626756 | --- | --- | --- | 1,02 | up   |
| 6716584 | 7117813 | 1171718 | --- | --- | --- | 1,14 | up   |
| 6716625 | 7341243 | 1723198 | --- | --- | --- | 2,33 | down |
| 6716633 | 7168439 | 1295671 | --- | --- | --- | 1,01 | down |
| 6716702 | 7239752 | 1473197 | --- | --- | --- | 1,02 | up   |
| 6716769 | 7156052 | 1265764 | --- | --- | --- | 1,13 | up   |
| 6716788 | 7248790 | 1494511 | --- | --- | --- | 1,01 | up   |
| 6716796 | 7092549 | 1109173 | --- | --- | --- | 1,00 | down |
| 6716818 | 7118157 | 1172526 | --- | --- | --- | 1,04 | down |
| 6716827 | 7128704 | 1198017 | --- | --- | --- | 1,17 | down |
| 6716845 | 7117526 | 1170987 | --- | --- | --- | 1,62 | up   |
| 6716897 | 7101258 | 1130568 | --- | --- | --- | 1,07 | down |
| 6716925 | 7252877 | 1504748 | --- | --- | --- | 1,76 | down |
| 6716958 | 7261580 | 1526818 | --- | --- | --- | 1,09 | down |
| 6717014 | 7109292 | 1150743 | --- | --- | --- | 1,00 | down |
| 6717016 | 7344530 | 1731557 | --- | --- | --- | 1,30 | down |
| 6717113 | 7062233 | 1037239 | --- | --- | --- | 1,10 | down |
| 6717213 | 7160687 | 1277002 | --- | --- | --- | 1,20 | up   |
| 6717289 | 7321414 | 1675626 | --- | --- | --- | 1,17 | up   |
| 6717335 | 7092549 | 1109122 | --- | --- | --- | 1,35 | down |
| 6717393 | 7166855 | 1291255 | --- | --- | --- | 1,12 | down |
| 6717395 | 7226278 | 1438004 | --- | --- | --- | 1,03 | up   |
| 6717520 | 7166867 | 1291286 | --- | --- | --- | 1,01 | down |
| 6717523 | 7189987 | 1349813 | --- | --- | --- | 1,07 | down |

|         |         |         |     |     |     |      |      |
|---------|---------|---------|-----|-----|-----|------|------|
| 6717544 | 7211144 | 1401546 | --- | --- | --- | 2,21 | up   |
| 6717554 | 7303722 | 1631720 | --- | --- | --- | 1,25 | down |
| 6717584 | 7184850 | 1337601 | --- | --- | --- | 1,11 | down |
| 6717595 | 7198644 | 1372300 | --- | --- | --- | 1,05 | down |
| 6717727 | 7260488 | 1523933 | --- | --- | --- | 1,25 | down |
| 6717752 | 7236358 | 1464239 | --- | --- | --- | 1,22 | down |
| 6717807 | 7213908 | 1407655 | --- | --- | --- | 1,37 | down |
| 6718020 | 7179785 | 1324498 | --- | --- | --- | 1,07 | up   |
| 6718141 | 7364346 | 1780042 | --- | --- | --- | 1,19 | up   |
| 6718199 | 7105814 | 1141784 | --- | --- | --- | 1,23 | up   |
| 6718261 | 7330396 | 1696389 | --- | --- | --- | 1,76 | down |
| 6718363 | 7198325 | 1371351 | --- | --- | --- | 1,14 | down |
| 6718525 | 7350993 | 1747506 | --- | --- | --- | 1,13 | up   |
| 6718587 | 7032558 | 967064  | --- | --- | --- | 1,02 | down |
| 6718772 | 7234401 | 1459337 | --- | --- | --- | 1,38 | up   |
| 6718783 | 7131550 | 1205571 | --- | --- | --- | 1,12 | up   |
| 6718959 | 7231557 | 1451560 | --- | --- | --- | 5,29 | down |
| 6719083 | 7381330 | 1823624 | --- | --- | --- | 1,69 | down |
| 6719160 | 7167823 | 1293896 | --- | --- | --- | 1,25 | up   |
| 6719175 | 7125348 | 1190099 | --- | --- | --- | 2,14 | up   |
| 6719229 | 7240569 | 1475519 | --- | --- | --- | 1,01 | down |
| 6719266 | 7071264 | 1059296 | --- | --- | --- | 1,26 | down |
| 6719435 | 7282927 | 1579990 | --- | --- | --- | 1,24 | up   |
| 6719455 | 7253408 | 1505950 | --- | --- | --- | 1,72 | up   |
| 6719730 | 7230698 | 1449061 | --- | --- | --- | 1,01 | up   |
| 6719798 | 7334855 | 1706951 | --- | --- | --- | 1,25 | down |
| 6719991 | 7292869 | 1603372 | --- | --- | --- | 1,29 | down |
| 6720157 | 7211363 | 1402064 | --- | --- | --- | 1,37 | down |
| 6720258 | 7058149 | 1027263 | --- | --- | --- | 1,34 | up   |
| 6720284 | 7309734 | 1646941 | --- | --- | --- | 1,35 | up   |
| 6720295 | 7167160 | 1292210 | --- | --- | --- | 1,14 | down |
| 6720365 | 7083030 | 1086271 | --- | --- | --- | 1,17 | up   |
| 6720482 | 7195680 | 1364893 | --- | --- | --- | 1,12 | down |
| 6720507 | 7303777 | 1631922 | --- | --- | --- | 1,22 | down |
| 6720508 | 7330238 | 1695937 | --- | --- | --- | 1,38 | up   |
| 6720518 | 7034293 | 971942  | --- | --- | --- | 1,37 | up   |
| 6720629 | 7340673 | 1721698 | --- | --- | --- | 1,26 | down |
| 6720729 | 7384179 | 1829775 | --- | --- | --- | 1,13 | up   |
| 6720747 | 7284153 | 1583020 | --- | --- | --- | 2,03 | down |
| 6720782 | 7236358 | 1464236 | --- | --- | --- | 1,32 | down |
| 6721093 | 7142081 | 1230978 | --- | --- | --- | 1,43 | down |
| 6721104 | 7203018 | 1382660 | --- | --- | --- | 1,74 | down |
| 6721110 | 7350237 | 1745471 | --- | --- | --- | 1,10 | up   |
| 6721166 | 7035525 | 974768  | --- | --- | --- | 1,18 | up   |
| 6721200 | 7064468 | 1042364 | --- | --- | --- | 1,07 | up   |
| 6721239 | 7170845 | 1301878 | --- | --- | --- | 1,41 | up   |
| 6721367 | 7350922 | 1747316 | --- | --- | --- | 1,04 | down |
| 6721443 | 7035525 | 974769  | --- | --- | --- | 1,16 | up   |
| 6721448 | 7064054 | 1041217 | --- | --- | --- | 1,78 | down |
| 6721484 | 7070836 | 1058341 | --- | --- | --- | 1,05 | down |
| 6721554 | 7071264 | 1059296 | --- | --- | --- | 1,05 | up   |
| 6721564 | 7171417 | 1303153 | --- | --- | --- | 2,37 | down |
| 6721599 | 7033504 | 969851  | --- | --- | --- | 1,48 | up   |
| 6721605 | 7170845 | 1301903 | --- | --- | --- | 1,44 | down |
| 6721690 | 7330731 | 1697175 | --- | --- | --- | 1,11 | up   |
| 6721907 | 7321414 | 1675634 | --- | --- | --- | 1,65 | down |
| 6721919 | 7043379 | 993645  | --- | --- | --- | 1,25 | up   |

|         |         |         |     |     |     |      |      |
|---------|---------|---------|-----|-----|-----|------|------|
| 6721994 | 7156047 | 1265732 | --- | --- | --- | 1,16 | down |
| 6722023 | 7146542 | 1242261 | --- | --- | --- | 1,02 | up   |
| 6722150 | 7131119 | 1204440 | --- | --- | --- | 1,35 | down |
| 6722153 | 7152889 | 1257377 | --- | --- | --- | 1,16 | up   |
| 6722238 | 7065570 | 1045089 | --- | --- | --- | 1,51 | down |
| 6722338 | 7070836 | 1058357 | --- | --- | --- | 1,09 | down |
| 6722346 | 7088489 | 1099520 | --- | --- | --- | 1,03 | up   |
| 6722403 | 7256191 | 1512862 | --- | --- | --- | 1,22 | up   |
| 6722644 | 7186464 | 1341369 | --- | --- | --- | 1,78 | down |
| 6722765 | 7034293 | 971976  | --- | --- | --- | 1,24 | down |
| 6722769 | 7056106 | 1022980 | --- | --- | --- | 1,63 | down |
| 6722901 | 7370853 | 1798410 | --- | --- | --- | 1,59 | down |
| 6722959 | 7038530 | 981866  | --- | --- | --- | 1,25 | up   |
| 6723255 | 7178644 | 1321612 | --- | --- | --- | 1,24 | down |
| 6723293 | 7217434 | 1416447 | --- | --- | --- | 1,03 | down |
| 6723361 | 7073854 | 1065633 | --- | --- | --- | 2,07 | down |
| 6723372 | 7313841 | 1656733 | --- | --- | --- | 1,65 | down |
| 6723373 | 7029770 | 960156  | --- | --- | --- | 1,15 | down |
| 6723463 | 7255911 | 1512232 | --- | --- | --- | 1,00 | down |
| 6723471 | 7028278 | 957314  | --- | --- | --- | 1,10 | down |
| 6723554 | 7295410 | 1609702 | --- | --- | --- | 1,14 | up   |
| 6723571 | 7252877 | 1504763 | --- | --- | --- | 1,00 | up   |
| 6723911 | 7083030 | 1086261 | --- | --- | --- | 1,16 | down |
| 6724093 | 7236358 | 1464250 | --- | --- | --- | 1,14 | down |
| 6724125 | 7371253 | 1799562 | --- | --- | --- | 1,22 | up   |
| 6724223 | 7088164 | 1098468 | --- | --- | --- | 1,01 | down |
| 6724233 | 7250511 | 1498645 | --- | --- | --- | 1,21 | up   |
| 6724337 | 7217434 | 1416383 | --- | --- | --- | 1,06 | up   |
| 6724411 | 7030037 | 960704  | --- | --- | --- | 1,04 | up   |
| 6724430 | 7265259 | 1535445 | --- | --- | --- | 1,35 | down |
| 6724468 | 7131550 | 1205556 | --- | --- | --- | 1,24 | down |
| 6724495 | 7295410 | 1609752 | --- | --- | --- | 1,31 | up   |
| 6724530 | 7034356 | 972173  | --- | --- | --- | 1,01 | down |
| 6724559 | 7056333 | 1023680 | --- | --- | --- | 1,19 | up   |
| 6724630 | 7189669 | 1348990 | --- | --- | --- | 1,07 | down |
| 6724740 | 7346898 | 1737336 | --- | --- | --- | 1,11 | up   |
| 6724808 | 7232732 | 1454582 | --- | --- | --- | 1,18 | up   |
| 6724839 | 7083031 | 1086282 | --- | --- | --- | 1,01 | down |
| 6724870 | 7227474 | 1441159 | --- | --- | --- | 2,28 | down |
| 6724978 | 7237672 | 1467293 | --- | --- | --- | 1,13 | up   |
| 6725081 | 7376566 | 1812878 | --- | --- | --- | 1,65 | down |
| 6725090 | 7132024 | 1206337 | --- | --- | --- | 1,34 | up   |
| 6725141 | 7358859 | 1767012 | --- | --- | --- | 1,47 | down |
| 6725260 | 7240569 | 1475334 | --- | --- | --- | 1,24 | down |
| 6725268 | 7274780 | 1559237 | --- | --- | --- | 1,17 | down |
| 6725271 | 7146542 | 1242290 | --- | --- | --- | 1,24 | down |
| 6725298 | 7192902 | 1357749 | --- | --- | --- | 1,28 | up   |
| 6725321 | 7154584 | 1262107 | --- | --- | --- | 1,03 | down |
| 6725345 | 7193403 | 1359191 | --- | --- | --- | 1,31 | up   |
| 6725357 | 7148978 | 1248458 | --- | --- | --- | 1,31 | up   |
| 6725387 | 7340057 | 1720331 | --- | --- | --- | 1,15 | up   |
| 6725401 | 7377116 | 1814067 | --- | --- | --- | 1,23 | down |
| 6725426 | 7363529 | 1777954 | --- | --- | --- | 1,02 | down |
| 6725829 | 7166867 | 1291374 | --- | --- | --- | 1,09 | up   |
| 6725892 | 7207069 | 1392012 | --- | --- | --- | 2,31 | up   |
| 6725926 | 7337250 | 1712720 | --- | --- | --- | 1,02 | up   |
| 6725956 | 7364346 | 1779965 | --- | --- | --- | 1,26 | down |

|         |         |         |     |     |     |      |      |
|---------|---------|---------|-----|-----|-----|------|------|
| 6725983 | 7037235 | 978573  | --- | --- | --- | 1,21 | down |
| 6726078 | 7139026 | 1223492 | --- | --- | --- | 1,02 | down |
| 6726081 | 7128112 | 1196529 | --- | --- | --- | 1,16 | down |
| 6726127 | 7089080 | 1101147 | --- | --- | --- | 1,01 | up   |
| 6726204 | 7052331 | 1014567 | --- | --- | --- | 1,06 | up   |
| 6726217 | 7105057 | 1140311 | --- | --- | --- | 1,44 | down |
| 6726557 | 7068259 | 1051623 | --- | --- | --- | 1,72 | up   |
| 6726651 | 7030037 | 960696  | --- | --- | --- | 1,12 | up   |
| 6726832 | 7277783 | 1567455 | --- | --- | --- | 1,46 | up   |
| 6726857 | 7083030 | 1086254 | --- | --- | --- | 1,00 | down |
| 6726894 | 7169573 | 1298391 | --- | --- | --- | 1,28 | up   |
| 6726951 | 7307473 | 1641289 | --- | --- | --- | 1,32 | up   |
| 6726978 | 7196187 | 1365964 | --- | --- | --- | 1,11 | down |
| 6726980 | 7115507 | 1165969 | --- | --- | --- | 1,87 | up   |
| 6727074 | 7071741 | 1060449 | --- | --- | --- | 1,29 | up   |
| 6727125 | 7099573 | 1126737 | --- | --- | --- | 1,37 | down |
| 6727171 | 7223395 | 1431073 | --- | --- | --- | 1,19 | up   |
| 6727231 | 7249015 | 1495051 | --- | --- | --- | 1,26 | down |
| 6727248 | 7093936 | 1112478 | --- | --- | --- | 1,05 | down |
| 6727370 | 7140365 | 1226761 | --- | --- | --- | 1,32 | up   |
| 6727434 | 7371001 | 1798837 | --- | --- | --- | 1,03 | down |
| 6727660 | 7088135 | 1098419 | --- | --- | --- | 1,13 | up   |
| 6727728 | 7094346 | 1113394 | --- | --- | --- | 1,21 | down |
| 6727799 | 7122140 | 1182738 | --- | --- | --- | 1,20 | down |
| 6727901 | 7268694 | 1544247 | --- | --- | --- | 1,08 | down |
| 6727974 | 7080131 | 1079796 | --- | --- | --- | 3,56 | down |
| 6727983 | 7339387 | 1718398 | --- | --- | --- | 1,23 | down |
| 6728049 | 7376073 | 1811697 | --- | --- | --- | 1,06 | up   |
| 6728130 | 7258455 | 1518727 | --- | --- | --- | 1,22 | up   |
| 6728212 | 7052385 | 1014783 | --- | --- | --- | 1,10 | up   |
| 6728216 | 7083965 | 1088219 | --- | --- | --- | 1,33 | up   |
| 6728327 | 7363529 | 1777982 | --- | --- | --- | 1,14 | up   |
| 6728385 | 7280743 | 1574550 | --- | --- | --- | 1,01 | down |
| 6728387 | 7356115 | 1760135 | --- | --- | --- | 1,13 | down |
| 6728429 | 7368005 | 1789342 | --- | --- | --- | 1,16 | up   |
| 6728548 | 7243363 | 1481603 | --- | --- | --- | 1,26 | down |
| 6728572 | 7080476 | 1080406 | --- | --- | --- | 1,03 | up   |
| 6728624 | 7029380 | 959374  | --- | --- | --- | 1,08 | up   |
| 6728782 | 7039223 | 983551  | --- | --- | --- | 1,36 | down |
| 6728930 | 7297589 | 1615687 | --- | --- | --- | 1,29 | up   |
| 6729002 | 7156611 | 1267335 | --- | --- | --- | 1,02 | down |
| 6729037 | 7062436 | 1037669 | --- | --- | --- | 1,11 | up   |
| 6729073 | 7346066 | 1735292 | --- | --- | --- | 1,13 | down |
| 6729084 | 7316054 | 1662261 | --- | --- | --- | 3,08 | up   |
| 6729091 | 7075460 | 1069391 | --- | --- | --- | 1,01 | up   |
| 6729175 | 7280743 | 1574519 | --- | --- | --- | 1,23 | down |
| 6729191 | 7312903 | 1654099 | --- | --- | --- | 1,06 | up   |
| 6729216 | 7127540 | 1195275 | --- | --- | --- | 1,20 | down |
| 6729452 | 7302327 | 1627685 | --- | --- | --- | 1,05 | up   |
| 6729630 | 7088544 | 1099668 | --- | --- | --- | 1,02 | up   |
| 6729658 | 7217747 | 1417487 | --- | --- | --- | 1,08 | up   |
| 6729685 | 7227433 | 1440976 | --- | --- | --- | 1,17 | up   |
| 6729690 | 7068259 | 1051657 | --- | --- | --- | 1,25 | up   |
| 6729794 | 7240569 | 1475367 | --- | --- | --- | 1,25 | up   |
| 6729905 | 7247230 | 1490580 | --- | --- | --- | 1,15 | up   |
| 6729961 | 7353232 | 1752771 | --- | --- | --- | 1,51 | down |
| 6730053 | 7378546 | 1817609 | --- | --- | --- | 1,04 | down |

|         |         |         |     |     |     |      |      |
|---------|---------|---------|-----|-----|-----|------|------|
| 6730134 | 7146082 | 1240821 | --- | --- | --- | 1,19 | down |
| 6730135 | 7231775 | 1452134 | --- | --- | --- | 1,04 | up   |
| 6730150 | 7150047 | 1250764 | --- | --- | --- | 1,84 | down |
| 6730252 | 7171091 | 1302450 | --- | --- | --- | 1,30 | down |
| 6730325 | 7365183 | 1781900 | --- | --- | --- | 1,03 | down |
| 6730354 | 7315935 | 1661992 | --- | --- | --- | 2,28 | up   |
| 6730693 | 7056333 | 1023674 | --- | --- | --- | 1,07 | down |
| 6730735 | 7180732 | 1326731 | --- | --- | --- | 1,44 | down |
| 6731020 | 7176456 | 1315830 | --- | --- | --- | 1,06 | up   |
| 6731027 | 7108434 | 1148318 | --- | --- | --- | 1,06 | up   |
| 6731035 | 7243647 | 1482454 | --- | --- | --- | 1,22 | up   |
| 6731171 | 7148741 | 1247863 | --- | --- | --- | 1,56 | down |
| 6731241 | 7274892 | 1559559 | --- | --- | --- | 1,33 | down |
| 6731261 | 7321029 | 1674804 | --- | --- | --- | 1,12 | up   |
| 6731322 | 7117526 | 1170987 | --- | --- | --- | 1,47 | up   |
| 6731518 | 7252728 | 1504327 | --- | --- | --- | 1,05 | down |
| 6731586 | 7039223 | 983554  | --- | --- | --- | 1,21 | down |
| 6731604 | 7109730 | 1151710 | --- | --- | --- | 1,03 | down |
| 6731622 | 7073950 | 1065927 | --- | --- | --- | 1,14 | up   |
| 6731642 | 7256191 | 1512862 | --- | --- | --- | 1,37 | up   |
| 6731791 | 7158517 | 1271594 | --- | --- | --- | 1,16 | down |
| 6731807 | 7032558 | 967064  | --- | --- | --- | 1,13 | up   |
| 6731828 | 7060195 | 1031972 | --- | --- | --- | 1,30 | down |
| 6731841 | 7148741 | 1247871 | --- | --- | --- | 1,11 | down |
| 6731896 | 7272110 | 1553074 | --- | --- | --- | 1,18 | up   |
| 6731910 | 7067670 | 1050308 | --- | --- | --- | 2,43 | up   |
| 6731912 | 7213908 | 1407732 | --- | --- | --- | 1,12 | down |
| 6731962 | 7119845 | 1176852 | --- | --- | --- | 1,28 | down |
| 6732004 | 7326271 | 1686523 | --- | --- | --- | 1,32 | down |
| 6732060 | 7099573 | 1126743 | --- | --- | --- | 1,70 | up   |
| 6732075 | 7073950 | 1065899 | --- | --- | --- | 1,27 | down |
| 6732137 | 7336931 | 1711853 | --- | --- | --- | 1,10 | up   |
| 6732156 | 7198730 | 1372661 | --- | --- | --- | 1,51 | down |
| 6732325 | 7292701 | 1602962 | --- | --- | --- | 1,33 | down |
| 6732390 | 7247512 | 1491195 | --- | --- | --- | 1,09 | down |
| 6732432 | 7374324 | 1807540 | --- | --- | --- | 1,32 | down |
| 6732488 | 7149817 | 1250307 | --- | --- | --- | 1,51 | up   |
| 6732623 | 7320735 | 1674153 | --- | --- | --- | 1,62 | up   |
| 6732699 | 7264653 | 1534032 | --- | --- | --- | 1,08 | up   |
| 6732756 | 7287337 | 1589991 | --- | --- | --- | 4,42 | down |
| 6732829 | 7264085 | 1532719 | --- | --- | --- | 1,05 | up   |
| 6732852 | 7353382 | 1753227 | --- | --- | --- | 2,03 | down |
| 6732882 | 7222741 | 1429360 | --- | --- | --- | 1,01 | down |
| 6732981 | 7071648 | 1060192 | --- | --- | --- | 1,18 | up   |
| 6733012 | 7364346 | 1780007 | --- | --- | --- | 1,08 | up   |
| 6733119 | 7235069 | 1460969 | --- | --- | --- | 1,29 | down |
| 6733248 | 7282927 | 1579987 | --- | --- | --- | 1,07 | up   |
| 6733390 | 7255911 | 1512219 | --- | --- | --- | 1,04 | up   |
| 6733401 | 7343052 | 1727538 | --- | --- | --- | 1,63 | up   |
| 6733423 | 7331757 | 1700017 | --- | --- | --- | 1,04 | up   |
| 6733459 | 7376073 | 1811717 | --- | --- | --- | 1,47 | down |
| 6733465 | 7227775 | 1441827 | --- | --- | --- | 1,04 | up   |
| 6733474 | 7366749 | 1785511 | --- | --- | --- | 1,20 | down |
| 6733538 | 7058507 | 1028318 | --- | --- | --- | 1,13 | down |
| 6733544 | 7293922 | 1605959 | --- | --- | --- | 1,34 | down |
| 6733581 | 7240569 | 1475486 | --- | --- | --- | 1,00 | up   |
| 6733653 | 7312532 | 1653211 | --- | --- | --- | 2,06 | up   |

|         |         |         |     |     |     |      |      |
|---------|---------|---------|-----|-----|-----|------|------|
| 6733839 | 7288077 | 1591941 | --- | --- | --- | 1,06 | down |
| 6733970 | 7140365 | 1226759 | --- | --- | --- | 1,17 | up   |
| 6733996 | 7252877 | 1504747 | --- | --- | --- | 1,18 | up   |
| 6734042 | 7205750 | 1388941 | --- | --- | --- | 1,04 | up   |
| 6734069 | 7156372 | 1266715 | --- | --- | --- | 1,04 | up   |
| 6734148 | 7305728 | 1637007 | --- | --- | --- | 2,04 | down |
| 6734162 | 7121849 | 1181801 | --- | --- | --- | 1,02 | up   |
| 6734213 | 7264653 | 1534033 | --- | --- | --- | 1,28 | down |
| 6734264 | 7097485 | 1120945 | --- | --- | --- | 1,29 | down |
| 6734269 | 7353614 | 1753735 | --- | --- | --- | 2,02 | down |
| 6734272 | 7365183 | 1781921 | --- | --- | --- | 1,97 | up   |
| 6734273 | 7065860 | 1045799 | --- | --- | --- | 1,39 | down |
| 6734275 | 7232709 | 1454536 | --- | --- | --- | 1,01 | down |
| 6734289 | 7076236 | 1071211 | --- | --- | --- | 1,59 | up   |
| 6734389 | 7239939 | 1473789 | --- | --- | --- | 1,13 | down |
| 6734397 | 7295652 | 1610274 | --- | --- | --- | 1,43 | down |
| 6734443 | 7274892 | 1559564 | --- | --- | --- | 1,05 | down |
| 6734469 | 7370415 | 1796852 | --- | --- | --- | 1,41 | up   |
| 6734556 | 7258455 | 1518708 | --- | --- | --- | 1,08 | up   |
| 6734629 | 7312161 | 1652463 | --- | --- | --- | 1,02 | down |
| 6734640 | 7232069 | 1452950 | --- | --- | --- | 1,10 | down |
| 6734819 | 7254040 | 1507577 | --- | --- | --- | 1,19 | up   |
| 6734838 | 7128704 | 1198026 | --- | --- | --- | 1,24 | down |
| 6734842 | 7249019 | 1495081 | --- | --- | --- | 1,12 | up   |
| 6734881 | 7279881 | 1572739 | --- | --- | --- | 1,17 | down |
| 6734921 | 7123421 | 1185811 | --- | --- | --- | 1,09 | down |
| 6734947 | 7280743 | 1574539 | --- | --- | --- | 1,01 | down |
| 6734997 | 7243647 | 1482482 | --- | --- | --- | 1,17 | up   |
| 6735141 | 7286807 | 1588817 | --- | --- | --- | 1,06 | up   |
| 6735191 | 7034747 | 973194  | --- | --- | --- | 1,11 | up   |
| 6735210 | 7069464 | 1054652 | --- | --- | --- | 1,14 | down |
| 6735293 | 7369781 | 1795033 | --- | --- | --- | 1,02 | down |
| 6735303 | 7224724 | 1433961 | --- | --- | --- | 1,03 | down |
| 6735341 | 7074911 | 1068177 | --- | --- | --- | 1,24 | up   |
| 6735370 | 7248790 | 1494555 | --- | --- | --- | 1,23 | down |
| 6735390 | 7288077 | 1591949 | --- | --- | --- | 1,14 | down |
| 6735417 | 7115362 | 1165608 | --- | --- | --- | 1,39 | down |
| 6735439 | 7056333 | 1023674 | --- | --- | --- | 1,05 | down |
| 6735444 | 7055687 | 1022015 | --- | --- | --- | 1,25 | up   |
| 6735454 | 7381330 | 1823637 | --- | --- | --- | 1,13 | up   |
| 6735462 | 7240569 | 1475472 | --- | --- | --- | 1,88 | up   |
| 6735476 | 7274780 | 1559225 | --- | --- | --- | 1,09 | up   |
| 6735660 | 7309734 | 1646903 | --- | --- | --- | 1,07 | up   |
| 6735663 | 7073677 | 1065161 | --- | --- | --- | 1,37 | up   |
| 6735748 | 7205944 | 1389488 | --- | --- | --- | 1,19 | up   |
| 6735819 | 7095041 | 1115165 | --- | --- | --- | 1,21 | up   |
| 6735822 | 7330396 | 1696359 | --- | --- | --- | 1,58 | down |
| 6735836 | 7133749 | 1210818 | --- | --- | --- | 1,28 | down |
| 6735885 | 7158920 | 1272515 | --- | --- | --- | 1,14 | down |
| 6736065 | 7182739 | 1332590 | --- | --- | --- | 1,11 | down |
| 6736169 | 7307473 | 1641262 | --- | --- | --- | 1,07 | up   |
| 6736180 | 7248790 | 1494569 | --- | --- | --- | 1,48 | down |
| 6736193 | 7293402 | 1604847 | --- | --- | --- | 1,54 | up   |
| 6736212 | 7134776 | 1212978 | --- | --- | --- | 1,02 | down |
| 6736222 | 7273744 | 1557024 | --- | --- | --- | 2,21 | down |
| 6736263 | 7227775 | 1441826 | --- | --- | --- | 1,02 | down |
| 6736277 | 7176456 | 1315855 | --- | --- | --- | 1,15 | up   |

|         |         |         |     |     |     |      |      |
|---------|---------|---------|-----|-----|-----|------|------|
| 6736379 | 7294911 | 1608533 | --- | --- | --- | 1,16 | down |
| 6736465 | 7259925 | 1522570 | --- | --- | --- | 1,22 | up   |
| 6736468 | 7128704 | 1198024 | --- | --- | --- | 1,12 | up   |
| 6736549 | 7169550 | 1298365 | --- | --- | --- | 1,16 | down |
| 6736661 | 7344836 | 1732409 | --- | --- | --- | 1,07 | up   |
| 6736690 | 7364346 | 1780015 | --- | --- | --- | 1,50 | down |
| 6736748 | 7249015 | 1495050 | --- | --- | --- | 2,17 | down |
| 6736774 | 7213908 | 1407762 | --- | --- | --- | 1,55 | up   |
| 6736775 | 7198210 | 1370995 | --- | --- | --- | 1,15 | down |
| 6736836 | 7281877 | 1577538 | --- | --- | --- | 1,18 | down |
| 6736868 | 7040442 | 986512  | --- | --- | --- | 1,24 | up   |
| 6736967 | 7321029 | 1674829 | --- | --- | --- | 1,19 | up   |
| 6736987 | 7095041 | 1115185 | --- | --- | --- | 1,23 | down |
| 6737193 | 7075460 | 1069397 | --- | --- | --- | 1,31 | down |
| 6737196 | 7327169 | 1688457 | --- | --- | --- | 1,21 | up   |
| 6737253 | 7261580 | 1526794 | --- | --- | --- | 1,12 | up   |
| 6737261 | 7235069 | 1460969 | --- | --- | --- | 2,27 | up   |
| 6737300 | 7113483 | 1161000 | --- | --- | --- | 1,34 | down |
| 6737444 | 7346687 | 1736692 | --- | --- | --- | 1,20 | up   |
| 6737552 | 7315571 | 1660967 | --- | --- | --- | 1,48 | up   |
| 6737633 | 7384073 | 1829455 | --- | --- | --- | 1,17 | down |
| 6737646 | 7211363 | 1402055 | --- | --- | --- | 1,41 | down |
| 6737651 | 7033673 | 970372  | --- | --- | --- | 1,01 | up   |
| 6737718 | 7259925 | 1522547 | --- | --- | --- | 1,45 | down |
| 6737855 | 7335903 | 1709283 | --- | --- | --- | 1,90 | up   |
| 6737910 | 7087965 | 1098051 | --- | --- | --- | 1,02 | up   |
| 6737950 | 7339387 | 1718373 | --- | --- | --- | 1,11 | down |
| 6737979 | 7208784 | 1396090 | --- | --- | --- | 1,24 | down |
| 6738015 | 7353287 | 1753028 | --- | --- | --- | 1,76 | down |
| 6738068 | 7352635 | 1751450 | --- | --- | --- | 1,09 | down |
| 6738119 | 7102889 | 1134873 | --- | --- | --- | 1,66 | down |
| 6738169 | 7309646 | 1646489 | --- | --- | --- | 1,07 | up   |
| 6738264 | 7156052 | 1265763 | --- | --- | --- | 1,02 | down |
| 6738267 | 7353232 | 1752852 | --- | --- | --- | 1,20 | up   |
| 6738277 | 7197820 | 1370087 | --- | --- | --- | 1,10 | up   |
| 6738282 | 7347427 | 1738669 | --- | --- | --- | 1,12 | down |
| 6738289 | 7039725 | 984813  | --- | --- | --- | 1,20 | up   |
| 6738368 | 7346229 | 1735586 | --- | --- | --- | 1,47 | up   |
| 6738378 | 7374324 | 1807491 | --- | --- | --- | 1,33 | up   |
| 6738405 | 7277783 | 1567420 | --- | --- | --- | 2,11 | down |
| 6738421 | 7336039 | 1709687 | --- | --- | --- | 1,04 | up   |
| 6738443 | 7115362 | 1165605 | --- | --- | --- | 2,12 | down |
| 6738458 | 7142770 | 1232719 | --- | --- | --- | 1,15 | up   |
| 6738475 | 7028326 | 957435  | --- | --- | --- | 1,00 | up   |
| 6738518 | 7317708 | 1666837 | --- | --- | --- | 2,56 | up   |
| 6738550 | 7321029 | 1674815 | --- | --- | --- | 1,05 | up   |
| 6738553 | 7139026 | 1223507 | --- | --- | --- | 1,09 | up   |
| 6738566 | 7330731 | 1697179 | --- | --- | --- | 1,20 | down |
| 6738637 | 7059971 | 1031467 | --- | --- | --- | 1,18 | down |
| 6738641 | 7065273 | 1044609 | --- | --- | --- | 1,03 | up   |
| 6738670 | 7112566 | 1158635 | --- | --- | --- | 1,12 | down |
| 6738676 | 7100408 | 1128642 | --- | --- | --- | 1,19 | up   |
| 6738681 | 7306229 | 1638263 | --- | --- | --- | 1,35 | up   |
| 6738741 | 7235076 | 1461023 | --- | --- | --- | 1,32 | down |
| 6738963 | 7138243 | 1221677 | --- | --- | --- | 1,33 | up   |
| 6739008 | 7307424 | 1641139 | --- | --- | --- | 1,04 | up   |
| 6739032 | 7373678 | 1805854 | --- | --- | --- | 2,13 | down |



|         |         |         |     |     |     |      |      |
|---------|---------|---------|-----|-----|-----|------|------|
| 6739222 | 7115507 | 1165979 | --- | --- | --- | 1,15 | up   |
| 6739410 | 7140365 | 1226788 | --- | --- | --- | 1,13 | down |
| 6739469 | 7240569 | 1475358 | --- | --- | --- | 1,23 | down |
| 6739616 | 7226301 | 1438070 | --- | --- | --- | 2,08 | down |
| 6739662 | 7143455 | 1234736 | --- | --- | --- | 1,00 | up   |
| 6739666 | 7078666 | 1076526 | --- | --- | --- | 1,38 | down |
| 6739747 | 7340757 | 1721888 | --- | --- | --- | 1,01 | up   |
| 6739842 | 7239774 | 1473320 | --- | --- | --- | 1,35 | down |
| 6739879 | 7384509 | 1830738 | --- | --- | --- | 1,64 | up   |
| 6739916 | 7374324 | 1807456 | --- | --- | --- | 1,07 | up   |
| 6739962 | 7160687 | 1277014 | --- | --- | --- | 1,13 | down |
| 6739976 | 7244287 | 1484053 | --- | --- | --- | 1,34 | down |
| 6739985 | 7365147 | 1781762 | --- | --- | --- | 1,06 | down |
| 6740079 | 7268694 | 1544226 | --- | --- | --- | 1,31 | down |
| 6740096 | 7295410 | 1609685 | --- | --- | --- | 1,18 | down |
| 6740155 | 7257893 | 1517483 | --- | --- | --- | 1,15 | up   |
| 6740182 | 7039223 | 983559  | --- | --- | --- | 1,77 | down |
| 6740198 | 7069721 | 1055295 | --- | --- | --- | 1,10 | up   |
| 6740232 | 7121849 | 1181794 | --- | --- | --- | 1,55 | up   |
| 6740317 | 7252877 | 1504686 | --- | --- | --- | 1,03 | down |
| 6740328 | 7256789 | 1514647 | --- | --- | --- | 1,43 | down |
| 6740458 | 7069724 | 1055338 | --- | --- | --- | 1,26 | down |
| 6740460 | 7084193 | 1089125 | --- | --- | --- | 1,47 | up   |
| 6740475 | 7214605 | 1409374 | --- | --- | --- | 1,18 | down |
| 6740535 | 7068942 | 1053383 | --- | --- | --- | 1,06 | up   |
| 6740541 | 7331757 | 1700017 | --- | --- | --- | 1,30 | up   |
| 6740606 | 7058713 | 1028664 | --- | --- | --- | 1,18 | down |
| 6740697 | 7092549 | 1109129 | --- | --- | --- | 1,46 | down |
| 6740708 | 7194400 | 1361760 | --- | --- | --- | 1,13 | up   |
| 6740740 | 7372840 | 1803770 | --- | --- | --- | 1,13 | up   |
| 6740822 | 7378997 | 1818638 | --- | --- | --- | 1,09 | down |
| 6740871 | 7191983 | 1355173 | --- | --- | --- | 2,67 | up   |
| 6740879 | 7146542 | 1242287 | --- | --- | --- | 2,47 | down |
| 6740888 | 7341115 | 1722920 | --- | --- | --- | 2,51 | up   |
| 6741066 | 7321029 | 1674823 | --- | --- | --- | 1,49 | down |
| 6741080 | 7217650 | 1417183 | --- | --- | --- | 1,04 | up   |
| 6741137 | 7176409 | 1315677 | --- | --- | --- | 1,08 | up   |
| 6741161 | 7321029 | 1674803 | --- | --- | --- | 1,15 | up   |
| 6741238 | 7076236 | 1071185 | --- | --- | --- | 1,32 | up   |
| 6741242 | 7330731 | 1697183 | --- | --- | --- | 1,11 | up   |
| 6741265 | 7374324 | 1807459 | --- | --- | --- | 1,05 | up   |
| 6741395 | 7351949 | 1749805 | --- | --- | --- | 2,05 | down |
| 6741475 | 7152915 | 1257502 | --- | --- | --- | 1,14 | down |
| 6741545 | 7377304 | 1814598 | --- | --- | --- | 1,00 | down |
| 6741706 | 7080476 | 1080410 | --- | --- | --- | 2,41 | up   |
| 6741754 | 7127540 | 1195275 | --- | --- | --- | 5,05 | up   |
| 6741888 | 7186688 | 1341839 | --- | --- | --- | 2,82 | down |
| 6741904 | 7197056 | 1367848 | --- | --- | --- | 1,73 | up   |
| 6741951 | 7039223 | 983561  | --- | --- | --- | 1,22 | up   |
| 6742037 | 7050167 | 1009826 | --- | --- | --- | 1,01 | down |
| 6742125 | 7176409 | 1315677 | --- | --- | --- | 1,09 | up   |
| 6742163 | 7244287 | 1484083 | --- | --- | --- | 1,12 | down |
| 6742288 | 7092549 | 1109150 | --- | --- | --- | 1,22 | down |
| 6742363 | 7148741 | 1247856 | --- | --- | --- | 1,01 | down |
| 6742372 | 7349313 | 1743114 | --- | --- | --- | 1,06 | up   |
| 6742408 | 7052813 | 1015919 | --- | --- | --- | 1,30 | down |
| 6742431 | 7366749 | 1785488 | --- | --- | --- | 1,36 | up   |

|         |         |         |     |     |     |      |      |
|---------|---------|---------|-----|-----|-----|------|------|
| 6742446 | 7176362 | 1315498 | --- | --- | --- | 1,04 | up   |
| 6742454 | 7239752 | 1473161 | --- | --- | --- | 1,06 | up   |
| 6742544 | 7381090 | 1822985 | --- | --- | --- | 1,28 | down |
| 6742615 | 7029442 | 959559  | --- | --- | --- | 1,06 | up   |
| 6742656 | 7213945 | 1407837 | --- | --- | --- | 1,50 | down |
| 6742710 | 7297589 | 1615680 | --- | --- | --- | 1,44 | up   |
| 6742739 | 7105780 | 1141705 | --- | --- | --- | 1,38 | up   |
| 6742836 | 7237699 | 1467378 | --- | --- | --- | 1,01 | up   |
| 6742930 | 7173640 | 1308950 | --- | --- | --- | 1,25 | up   |
| 6742995 | 7384073 | 1829468 | --- | --- | --- | 1,09 | up   |
| 6743025 | 7250511 | 1498647 | --- | --- | --- | 1,12 | up   |
| 6743073 | 7238252 | 1469270 | --- | --- | --- | 1,05 | up   |
| 6743142 | 7217747 | 1417495 | --- | --- | --- | 1,01 | down |
| 6743153 | 7115963 | 1167066 | --- | --- | --- | 1,41 | up   |
| 6743166 | 7095960 | 1117066 | --- | --- | --- | 1,19 | up   |
| 6743403 | 7329846 | 1694992 | --- | --- | --- | 2,50 | down |
| 6743462 | 7247512 | 1491205 | --- | --- | --- | 1,40 | down |
| 6743464 | 7205944 | 1389466 | --- | --- | --- | 1,16 | down |
| 6743475 | 7155866 | 1265328 | --- | --- | --- | 1,01 | up   |
| 6743596 | 7200152 | 1376050 | --- | --- | --- | 1,26 | down |
| 6743653 | 7281577 | 1576888 | --- | --- | --- | 1,25 | up   |
| 6743683 | 7079238 | 1077818 | --- | --- | --- | 1,03 | down |
| 6743777 | 7292701 | 1602968 | --- | --- | --- | 1,05 | up   |
| 6743929 | 7346066 | 1735284 | --- | --- | --- | 1,17 | up   |
| 6743935 | 7095960 | 1117068 | --- | --- | --- | 1,01 | down |
| 6743947 | 7333333 | 1703403 | --- | --- | --- | 1,11 | up   |
| 6743959 | 7330731 | 1697166 | --- | --- | --- | 1,26 | up   |
| 6744002 | 7376073 | 1811722 | --- | --- | --- | 1,40 | down |
| 6744020 | 7079238 | 1077818 | --- | --- | --- | 1,17 | up   |
| 6744041 | 7156611 | 1267373 | --- | --- | --- | 1,09 | down |
| 6744082 | 7230886 | 1449515 | --- | --- | --- | 1,35 | up   |
| 6744108 | 7337425 | 1713218 | --- | --- | --- | 1,35 | down |
| 6744170 | 7110999 | 1154794 | --- | --- | --- | 1,17 | down |
| 6744184 | 7070836 | 1058362 | --- | --- | --- | 1,32 | up   |
| 6744231 | 7100408 | 1128640 | --- | --- | --- | 1,01 | up   |
| 6744238 | 7314270 | 1657736 | --- | --- | --- | 1,77 | up   |
| 6744263 | 7344380 | 1731132 | --- | --- | --- | 1,25 | up   |
| 6744305 | 7320735 | 1674155 | --- | --- | --- | 1,10 | down |
| 6744360 | 7188138 | 1345047 | --- | --- | --- | 1,09 | down |
| 6744432 | 7330396 | 1696336 | --- | --- | --- | 1,32 | down |
| 6744439 | 7087965 | 1098041 | --- | --- | --- | 1,11 | down |
| 6744444 | 7253215 | 1505369 | --- | --- | --- | 1,24 | down |
| 6744472 | 7344406 | 1731265 | --- | --- | --- | 1,08 | up   |
| 6744521 | 7363529 | 1777951 | --- | --- | --- | 1,08 | down |
| 6744574 | 7372840 | 1803777 | --- | --- | --- | 1,65 | up   |
| 6744589 | 7267953 | 1542230 | --- | --- | --- | 1,33 | down |
| 6744609 | 7353232 | 1752827 | --- | --- | --- | 1,23 | down |
| 6744662 | 7169732 | 1298700 | --- | --- | --- | 1,13 | up   |
| 6744791 | 7376566 | 1812871 | --- | --- | --- | 1,37 | up   |
| 6744856 | 7279568 | 1572040 | --- | --- | --- | 1,96 | up   |
| 6744895 | 7318139 | 1668075 | --- | --- | --- | 1,02 | down |
| 6744922 | 7100523 | 1128876 | --- | --- | --- | 1,33 | up   |
| 6745004 | 7083030 | 1086264 | --- | --- | --- | 1,49 | down |
| 6745034 | 7371682 | 1800783 | --- | --- | --- | 2,14 | up   |
| 6745113 | 7146093 | 1240933 | --- | --- | --- | 1,03 | down |
| 6745126 | 7261580 | 1526818 | --- | --- | --- | 1,06 | up   |
| 6745164 | 7240569 | 1475459 | --- | --- | --- | 1,09 | down |

|         |         |         |     |     |     |      |      |
|---------|---------|---------|-----|-----|-----|------|------|
| 6745184 | 7067670 | 1050334 | --- | --- | --- | 1,06 | down |
| 6745349 | 7253408 | 1505937 | --- | --- | --- | 1,18 | up   |
| 6745418 | 7202749 | 1382052 | --- | --- | --- | 1,55 | up   |
| 6745492 | 7281924 | 1577735 | --- | --- | --- | 1,20 | up   |
| 6745512 | 7132024 | 1206337 | --- | --- | --- | 1,99 | down |
| 6745572 | 7350993 | 1747532 | --- | --- | --- | 1,07 | up   |
| 6745605 | 7174114 | 1310429 | --- | --- | --- | 1,06 | up   |
| 6745708 | 7331757 | 1700028 | --- | --- | --- | 1,24 | up   |
| 6745732 | 7297274 | 1614664 | --- | --- | --- | 1,86 | down |
| 6745810 | 7309734 | 1646913 | --- | --- | --- | 1,02 | up   |
| 6745840 | 7198002 | 1370425 | --- | --- | --- | 3,15 | up   |
| 6745860 | 7319259 | 1670398 | --- | --- | --- | 1,08 | down |
| 6745876 | 7253408 | 1505948 | --- | --- | --- | 1,47 | up   |
| 6745934 | 7047524 | 1004652 | --- | --- | --- | 1,10 | up   |
| 6745945 | 7269763 | 1546532 | --- | --- | --- | 1,18 | down |
| 6745948 | 7297274 | 1614630 | --- | --- | --- | 1,47 | down |
| 6745998 | 7281575 | 1576845 | --- | --- | --- | 1,98 | up   |
| 6746070 | 7240569 | 1475315 | --- | --- | --- | 1,16 | down |
| 6746072 | 7363674 | 1778436 | --- | --- | --- | 1,03 | up   |
| 6746112 | 7288284 | 1592654 | --- | --- | --- | 1,69 | down |
| 6746160 | 7363147 | 1777019 | --- | --- | --- | 1,09 | down |
| 6746330 | 7213908 | 1407658 | --- | --- | --- | 1,45 | down |
| 6746448 | 7091962 | 1107750 | --- | --- | --- | 1,25 | down |
| 6746570 | 7318139 | 1668075 | --- | --- | --- | 1,26 | down |
| 6746608 | 7303722 | 1631717 | --- | --- | --- | 1,19 | down |
| 6746618 | 7198210 | 1370965 | --- | --- | --- | 1,32 | up   |
| 6746670 | 7030037 | 960717  | --- | --- | --- | 1,12 | down |
| 6746675 | 7316054 | 1662303 | --- | --- | --- | 1,91 | up   |
| 6746676 | 7253272 | 1505515 | --- | --- | --- | 1,25 | down |
| 6746714 | 7208784 | 1396147 | --- | --- | --- | 1,01 | up   |
| 6746770 | 7217650 | 1417179 | --- | --- | --- | 2,19 | up   |
| 6746784 | 7040442 | 986578  | --- | --- | --- | 1,11 | up   |
| 6746793 | 7240569 | 1475389 | --- | --- | --- | 1,02 | up   |
| 6746801 | 7344406 | 1731186 | --- | --- | --- | 1,80 | down |
| 6746818 | 7062233 | 1037223 | --- | --- | --- | 1,08 | up   |
| 6746829 | 7094139 | 1112916 | --- | --- | --- | 2,22 | down |
| 6746950 | 7043515 | 994005  | --- | --- | --- | 1,16 | down |

Primary rat  $\beta$ -cells were left untreated or exposed to IL-1 $\beta$ +IFN- $\gamma$  for 24h. Data are results obtained from a pool of 3 independent biological experiments. Splicing index is the fold change of a spliced variant compared to control cells. up/down indicate respectively up- or down-regulation of splicing
