# Supplementary material for: Cytokines Interleukin-1β and Tumor Necrosis Factor-α Regulate Different Transcriptional and Alternative Splicing Networks in Primary β-Cells
Source: PubMed Central journal article supplement — Diabetes. 2009 Nov 23;59(2):358–74. doi: 10.2337/db09-1159 (PMC2809955; doi:10.2337/db09-1159), 2009-11-23
Supplement: supp_db09-1159_Suppl_Table_V.pdf [file supp_db09-1159_Suppl_Table_V.pdf]

**Suppl. Table V: Up and down regulated genes after exposure to IL-1 $\beta$  + IFN- $\gamma$  for 24h detected by array analysis**

| probe        | GenBank   | gene names/functional groups                                                                  | Symbol  | FC     | localization        |
|--------------|-----------|-----------------------------------------------------------------------------------------------|---------|--------|---------------------|
|              |           | <b>Cytokine</b>                                                                               |         |        |                     |
| 1367973_at   | NM_031530 | chemokine (C-C motif) ligand 13                                                               | CCL13   | 511,88 | Extracellular Space |
| 1369814_at   | AF053312  | chemokine (C-C motif) ligand 20                                                               | CCL20   | 139,69 | Extracellular Space |
| 1369983_at   | NM_031116 | chemokine (C-C motif) ligand 5                                                                | CCL5    | 4,42   | Extracellular Space |
| 1379935_at   | BF419899  | chemokine (C-C motif) ligand 7                                                                | CCL7    | 59,30  | Extracellular Space |
| 1388032_a_at | D87927    | chemokine (C-X-C motif) ligand 1 (melanoma growth stimulating activity, alpha)                | CXCL1   | 2,96   | Extracellular Space |
| 1370633_at   | D87927    | chemokine (C-X-C motif) ligand 1 (melanoma growth stimulating activity, alpha)                | CXCL1   | 4,23   | Extracellular Space |
| 1387969_at   | U22520    | chemokine (C-X-C motif) ligand 10                                                             | CXCL10  | 80,67  | Extracellular Space |
| 1379365_at   | BF281987  | chemokine (C-X-C motif) ligand 11                                                             | CXCL11  | 128,18 | Extracellular Space |
| 1372064_at   | BI296385  | chemokine (C-X-C motif) ligand 16                                                             | CXCL16  | 17,06  | Extracellular Space |
| 1387316_at   | NM_030845 | chemokine (C-X-C motif) ligand 2                                                              | CXCL2   | 189,83 | Extracellular Space |
| 1368760_at   | NM_053647 | chemokine (C-X-C motif) ligand 3                                                              | CXCL3   | 47,34  | Extracellular Space |
| 1382454_at   | AI044222  | chemokine (C-X-C motif) ligand 9                                                              | CXCL9   | 197,18 | Extracellular Space |
| 1373544_at   | AI170387  | chemokine (C-X-C motif) ligand 9                                                              | CXCL9   | 199,85 | Extracellular Space |
| 1368375_a_at | AF015718  | interleukin 15                                                                                | IL15    | 6,84   | Extracellular Space |
| 1387642_at   | NM_130410 | interleukin 23, alpha subunit p19                                                             | IL23A   | 5,90   | Extracellular Space |
| 1379499_at   | BF282228  | lymphotoxin beta (TNF superfamily, member 3)                                                  | LTB     | 5,38   | Extracellular Space |
| 1389014_at   | BI297612  | nicotinamide phosphoribosyltransferase                                                        | NAMPT   | 3,80   | Extracellular Space |
| 1368044_at   | NM_022669 | secretogranin II (chromogranin C)                                                             | SCG2    | -2,20  | Extracellular Space |
| 1374279_at   | BI288244  | small inducible cytokine subfamily E, member 1 (endothelial monocyte-activating)              | SCYE1   | 1,94   | Extracellular Space |
| 1379810_at   | AI454911  | small inducible cytokine subfamily E, member 1 (endothelial monocyte-activating)              | SCYE1   | 2,06   | Extracellular Space |
| 1393605_at   | AI145306  | vav 3 guanine nucleotide exchange factor                                                      | VAV3    | -2,22  | Extracellular Space |
|              |           | <b>Enzyme</b>                                                                                 |         |        |                     |
| 1382227_at   | AW533203  | 1-acylglycerol-3-phosphate O-acyltransferase 3                                                | AGPAT3  | -5,01  | Cytoplasm           |
| 1372276_at   | BG378613  | 1-acylglycerol-3-phosphate O-acyltransferase 3                                                | AGPAT3  | -2,56  | Cytoplasm           |
| 1368194_at   | NM_133406 | 1-acylglycerol-3-phosphate O-acyltransferase 4 (lysophosphatidic acid acyltransferase, delta) | AGPAT4  | 2,21   | Cytoplasm           |
| 1390966_at   | BE111759  | 1-acylglycerol-3-phosphate O-acyltransferase 6 (lysophosphatidic acid acyltransferase, zeta)  | AGPAT6  | -2,27  | Cytoplasm           |
| 1387897_at   | L16532    | 2',3'-cyclic nucleotide 3' phosphodiesterase                                                  | CNP     | 1,84   | Cytoplasm           |
| 1367777_at   | NM_057197 | 2,4-dienoyl CoA reductase 1, mitochondrial                                                    | DECR1   | -2,80  | Cytoplasm           |
| 1371152_a_at | Z18877    | 2',5'-oligoadenylate synthetase 1, 40/46kDa                                                   | OAS1    | 6,21   | Cytoplasm           |
| 1371012_at   | AJ245707  | 2-hydroxyacyl-CoA lyase 1                                                                     | HAACL1  | -3,60  | Cytoplasm           |
| 1367932_at   | NM_017268 | 3-hydroxy-3-methylglutaryl-Coenzyme A synthase 1 (soluble)                                    | HMGCS1  | -1,75  | Cytoplasm           |
| 1371421_at   | BM391873  | 3-oxoacid CoA transferase 1                                                                   | OXCT1   | -2,96  | Cytoplasm           |
| 1395721_at   | AW917486  | 3'-phosphoadenosine 5'-phosphosulfate synthase 2                                              | PAPSS2  | -6,20  | Cytoplasm           |
| 1369799_at   | U29701    | 4-aminobutyrate aminotransferase                                                              | ABAT    | -1,59  | Cytoplasm           |
| 1381768_at   | AW535082  | 5,10-methenyltetrahydrofolate synthetase (5-formyltetrahydrofolate cyclo-ligase)              | MTHFS   | 2,30   | Cytoplasm           |
| 1391412_at   | AA996841  | 5'-3' exoribonuclease 2                                                                       | XRN2    | 2,56   | Nucleus             |
| 1369962_at   | NM_031014 | 5-aminoimidazole-4-carboxamide ribonucleotide formyltransferase/IMP cyclohydrolase            | ATIC    | 1,62   | Unknown             |
| 1387545_at   | NM_030864 | 5-methyltetrahydrofolate-homocysteine methyltransferase                                       | MTR     | 2,15   | Cytoplasm           |
| 1388988_at   | AI175070  | abhydrolase domain containing 14B                                                             | ABHD14B | -2,57  | Cytoplasm           |
| 1377900_at   | BF409560  | abhydrolase domain containing 14B                                                             | ABHD14B | -2,16  | Cytoplasm           |
| 1390455_at   | AI013474  | abhydrolase domain containing 2                                                               | ABHD2   | 20,38  | Unknown             |
| 1382137_at   | BG662490  | abhydrolase domain containing 3                                                               | ABHD3   | -2,00  | Unknown             |
| 1379854_at   | AA996933  | abhydrolase domain containing 5                                                               | ABHD5   | 10,95  | Cytoplasm           |
| 1367763_at   | D13921    | acetyl-Coenzyme A acetyltransferase 1                                                         | ACAT1   | -3,30  | Cytoplasm           |
| 1383416_at   | AA899304  | acetyl-Coenzyme A acetyltransferase 1                                                         | ACAT1   | -2,80  | Cytoplasm           |
| 1389363_at   | AA997430  | acireductone dioxygenase 1                                                                    | AD1     | -1,85  | Nucleus             |
| 1386916_at   | NM_017321 | aconitase 1, soluble                                                                          | ACO1    | -2,42  | Cytoplasm           |
| 1367589_at   | NM_024398 | aconitase 2, mitochondrial                                                                    | ACO2    | -1,63  | Cytoplasm           |
| 1377755_at   | AI179403  | activating signal cointegrator 1 complex subunit 3                                            | ASCC3   | 1,90   | Nucleus             |
| 1370939_at   | D90109    | acyl-CoA synthetase long-chain family member 1                                                | ACSL1   | -1,63  | Cytoplasm           |
| 1368177_at   | NM_057107 | acyl-CoA synthetase long-chain family member 3                                                | ACSL3   | 1,92   | Cytoplasm           |
| 1386926_at   | NM_053607 | acyl-CoA synthetase long-chain family member 5                                                | ACSL5   | 2,35   | Cytoplasm           |
| 1368182_at   | NM_130739 | acyl-CoA synthetase long-chain family member 6                                                | ACSL6   | -2,73  | Cytoplasm           |
| 1383303_at   | BI282211  | acyl-CoA synthetase medium-chain family member 3                                              | ACSM3   | -4,33  | Cytoplasm           |

|              |           |                                                                                                        |           |        |                     |
|--------------|-----------|--------------------------------------------------------------------------------------------------------|-----------|--------|---------------------|
| 1384115_at   | BF555448  | acyl-CoA thioesterase 2                                                                                | ACOT2     | 1,53   | Cytoplasm           |
| 1373389_at   | BM391807  | acyl-Coenzyme A dehydrogenase family, member 9                                                         | ACAD9     | -1,56  | Cytoplasm           |
| 1368342_at   | NM_031544 | adenosine monophosphate deaminase (isoform E)                                                          | AMPD3     | 5,95   | Unknown             |
| 1372782_a_at | BE111787  | adenosine monophosphate deaminase 2 (isoform L)                                                        | AMPD2     | -2,25  | Unknown             |
| 1367933_at   | NM_031011 | adenosylmethionine decarboxylase 1                                                                     | AMD1      | -2,07  | Unknown             |
| 1367644_at   | L01115    | adenylate cyclase 6                                                                                    | ADCY6     | -1,82  | Plasma Membrane     |
| 1376091_at   | AA963616  | adenylosuccinate lyase                                                                                 | ADSL      | 1,85   | Cytoplasm           |
| 1370223_at   | AI170798  | ADP-ribosylation factor related protein 1                                                              | ARFRP1    | 1,82   | Cytoplasm           |
| 1367960_at   | NM_019186 | ADP-ribosylation factor-like 4A                                                                        | ARL4A     | 4,43   | Nucleus             |
| 1380383_at   | AI030650  | ADP-ribosylation factor-like 4D                                                                        | ARL4D     | -3,36  | Nucleus             |
| 1397815_at   | BG671292  | ADP-ribosylation factor-like 8B                                                                        | ARL8B     | 3,32   | Plasma Membrane     |
| 1372634_at   | AI009334  | ADP-ribosylhydrolase like 2                                                                            | ADPRHL2   | 2,13   | Cytoplasm           |
| 1388394_at   | BI282672  | alanyl-tRNA synthetase                                                                                 | AARS      | 2,09   | Cytoplasm           |
| 1374661_at   | AW524523  | aldehyde dehydrogenase 16 family, member A1                                                            | ALDH16A1  | 1,94   | Unknown             |
| 1368365_at   | NM_031731 | aldehyde dehydrogenase 3 family, member A2                                                             | ALDH3A2   | -4,39  | Cytoplasm           |
| 1387344_at   | AI407458  | aldehyde dehydrogenase 6 family, member A1                                                             | ALDH6A1   | -1,98  | Cytoplasm           |
| 1371567_at   | AI411279  | aldehyde dehydrogenase 7 family, member A1                                                             | ALDH7A1   | -3,88  | Cytoplasm           |
| 1367734_at   | NM_012498 | aldo-keto reductase family 1, member B1 (aldose reductase)                                             | AKR1B1    | 1,61   | Cytoplasm           |
| 1371997_at   | BM390833  | aldo-keto reductase family 1, member C-like 2                                                          | AKR1CL2   | -3,06  | Cytoplasm           |
| 1371772_at   | AI410425  | alkB, alkylation repair homolog 3 (E. coli)                                                            | ALKBH3    | 2,22   | Nucleus             |
| 1367775_at   | NM_012816 | alpha-methylacyl-CoA racemase                                                                          | AMACR     | -2,46  | Cytoplasm           |
| 1377375_at   | AA944898  | aminoadipate-semialdehyde synthase                                                                     | AASS      | -4,68  | Cytoplasm           |
| 1367982_at   | NM_024484 | aminolevulinate, delta-, synthase 1                                                                    | ALAS1     | 2,49   | Cytoplasm           |
| 1369502_a_at | NM_031502 | amylase 2, pancreatic                                                                                  | AMY2      | -2,90  | Extracellular Space |
| 1395414_at   | BI296064  | amylo-1, 6-glucosidase, 4-alpha-glucanotransferase                                                     | AGL       | -7,53  | Unknown             |
| 1372736_at   | BG374196  | amylo-1, 6-glucosidase, 4-alpha-glucanotransferase                                                     | AGL       | -4,11  | Unknown             |
| 1388417_at   | BI281876  | anaphase promoting complex subunit 5                                                                   | ANAPC5    | -1,67  | Nucleus             |
| 1371217_at   | AF311054  | APEX nuclease (multifunctional DNA repair enzyme) 1                                                    | APEX1     | 1,65   | Nucleus             |
| 1392689_at   | AI105029  | arachidonate lipoxygenase 3                                                                            | ALOXE3    | 2,19   | Unknown             |
| 1383278_at   | BF558819  | ArfGAP with GTPase domain, ankyrin repeat and PH domain 1                                              | AGAP1     | 2,95   | Cytoplasm           |
| 1368266_at   | NM_017134 | arginase, liver                                                                                        | ARG1      | -6,89  | Cytoplasm           |
| 1368916_at   | NM_021577 | argininosuccinate lyase                                                                                | ASL       | -2,00  | Cytoplasm           |
| 1370964_at   | BF283456  | argininosuccinate synthetase 1                                                                         | ASS1      | 14,22  | Cytoplasm           |
| 1372255_at   | BF283284  | arginyl-tRNA synthetase                                                                                | RARS      | 2,46   | Cytoplasm           |
| 1374823_at   | BI291651  | ariadne homolog, ubiquitin-conjugating enzyme E2 binding protein, 1 (Drosophila)                       | ARIH1     | -2,56  | Cytoplasm           |
| 1375595_at   | AI231433  | ariadne homolog, ubiquitin-conjugating enzyme E2 binding protein, 1 (Drosophila)                       | ARIH1     | 4,56   | Cytoplasm           |
| 1375973_at   | AI600108  | ariadne homolog, ubiquitin-conjugating enzyme E2 binding protein, 1 (Drosophila)                       | ARIH1     | 4,58   | Cytoplasm           |
| 1368244_at   | NM_080890 | arsenic (+3 oxidation state) methyltransferase                                                         | AS3MT     | -2,23  | Cytoplasm           |
| 1375412_at   | AI101331  | arylsulfatase B                                                                                        | ARSB      | -3,11  | Cytoplasm           |
| 1372902_at   | BI289064  | asparagine-linked glycosylation 12, alpha-1,6-mannosyltransferase homolog (S. cerevisiae)              | ALG12     | 2,86   | Cytoplasm           |
| 1374459_at   | AI178448  | asparagine-linked glycosylation 2, alpha-1,3-mannosyltransferase homolog (S. cerevisiae)               | ALG2      | -1,81  | Unknown             |
| 1382019_at   | AA998062  | asparagine-linked glycosylation 5, dolichyl-phosphate beta-glucosyltransferase homolog (S. cerevisiae) | ALG5      | -2,09  | Cytoplasm           |
| 1374437_at   | BF419336  | asparaginyl-tRNA synthetase                                                                            | NARS      | 2,61   | Cytoplasm           |
| 1372421_at   | AA943766  | aspartylglucosaminidase                                                                                | AGA       | -3,05  | Cytoplasm           |
| 1398805_at   | NM_134394 | ATG3 autophagy related 3 homolog (S. cerevisiae)                                                       | ATG3      | 2,48   | Cytoplasm           |
| 1367854_at   | NM_016987 | ATP citrate lyase                                                                                      | ACLY      | -1,64  | Cytoplasm           |
| 1370113_at   | NM_023987 | baculoviral IAP repeat-containing 3                                                                    | BIRC3     | 52,50  | Cytoplasm           |
| 1398373_at   | AA799400  | beta-1,3-N-acetylgalactosaminyltransferase 1 (globoside blood group)                                   | B3GALNT1  | 3,44   | Cytoplasm           |
| 1386773_at   | BF524794  | biotinidase                                                                                            | BTD       | -3,28  | Extracellular Space |
| 1388617_at   | AW914746  | biphenyl hydrolase-like (serine hydrolase)                                                             | BPHL      | -2,73  | Cytoplasm           |
| 1370869_at   | AI102790  | branched chain aminotransferase 1, cytosolic                                                           | BCAT1     | 18,58  | Cytoplasm           |
| 1388680_at   | BM385686  | C1GALT1-specific chaperone 1                                                                           | C1GALT1C1 | -3,58  | Unknown             |
| 1371797_at   | BM391890  | carbamoyl-phosphate synthetase 2, aspartate transcarbamylase, and dihydroorotase                       | CAD       | 1,67   | Cytoplasm           |
| 1392444_at   | AW531000  | carbohydrate (N-acetylglucosamine 6-O) sulfotransferase 6                                              | CHST6     | -13,95 | Cytoplasm           |
| 1394264_at   | BF558607  | carbohydrate (N-acetylglucosamine 6-O) sulfotransferase 6                                              | CHST6     | -11,18 | Cytoplasm           |
| 1379525_at   | BF559514  | cardiolipin synthase 1                                                                                 | CRLS1     | -2,48  | Cytoplasm           |
| 1386927_at   | NM_012930 | carnitine palmitoyltransferase II                                                                      | CPT2      | -5,98  | Cytoplasm           |
| 1392847_at   | BE118227  | Cas-Br-M (murine) ecotropic retroviral transforming sequence-like 1                                    | CBLL1     | 2,25   | Nucleus             |

|              |           |                                                                                     |                            |        |                     |
|--------------|-----------|-------------------------------------------------------------------------------------|----------------------------|--------|---------------------|
| 1367995_at   | NM_012520 | catalase                                                                            | CAT                        | 1,96   | Cytoplasm           |
| 1368826_at   | NM_012531 | catechol-O-methyltransferase                                                        | COMT                       | 2,80   | Cytoplasm           |
| 1389646_at   | BE100584  | CDC23 (cell division cycle 23, yeast, homolog)                                      | CDC23 (includes EG:291689) | -1,75  | Unknown             |
| 1368248_at   | NM_031242 | CDP-diacylglycerol synthase (phosphatidate cytidyltransferase) 1                    | CDS1                       | 1,86   | Cytoplasm           |
| 1388400_at   | BG375350  | cell division cycle 34 homolog (S. cerevisiae)                                      | CDC34 (includes EG:299602) | 1,93   | Nucleus             |
| 1388286_a_at | L38482    | cell division cycle 34 homolog (S. cerevisiae)                                      | CDC34 (includes EG:299602) | 2,57   | Nucleus             |
| 1375977_at   | AA958015  | centrin, EF-hand protein, 2                                                         | CETN2                      | -2,08  | Nucleus             |
| 1368419_at   | AF202115  | ceruloplasmin (ferroxidase)                                                         | CP                         | 38,54  | Extracellular Space |
| 1368420_at   | NM_012532 | ceruloplasmin (ferroxidase)                                                         | CP                         | 40,23  | Extracellular Space |
| 1368418_a_at | AF202115  | ceruloplasmin (ferroxidase)                                                         | CP                         | 41,97  | Extracellular Space |
| 1383313_at   | BE120149  | checkpoint with forkhead and ring finger domains                                    | CHFR                       | -1,79  | Nucleus             |
| 1388977_at   | BM390401  | choline/ethanolamine phosphotransferase 1                                           | CEPT1                      | 1,91   | Cytoplasm           |
| 1373561_at   | AI012498  | chondroitin polymerizing factor                                                     | CHPF                       | -1,93  | Cytoplasm           |
| 1382129_at   | AI136136  | chromatin modifying protein 1B                                                      | CHMP1B                     | -4,78  | Plasma Membrane     |
| 1385158_at   | BI301125  | chromatin modifying protein 1B                                                      | CHMP1B                     | -3,91  | Plasma Membrane     |
| 1382112_at   | BM385698  | chromatin modifying protein 1B                                                      | CHMP1B                     | -1,72  | Plasma Membrane     |
| 1382009_at   | AA955721  | chromodomain helicase DNA binding protein 1                                         | CHD1 (includes EG:308215)  | 1,80   | Unknown             |
| 1379580_at   | BF398050  | chromodomain helicase DNA binding protein 6                                         | CHD6                       | -2,47  | Nucleus             |
| 1374190_at   | BG380750  | citrate lyase beta like                                                             | CLYBL                      | -8,54  | Unknown             |
| 1369967_at   | NM_130755 | citrate synthase                                                                    | CS                         | 3,23   | Cytoplasm           |
| 1377192_a_at | BM384629  | ClpX caseinolytic peptidase X homolog (E. coli)                                     | CLPX                       | 2,44   | Cytoplasm           |
| 1377598_at   | AJ225648  | coenzyme Q2 homolog, prenyltransferase (yeast)                                      | COQ2                       | -2,26  | Unknown             |
| 1372753_at   | BI285643  | coenzyme Q6 homolog, monooxygenase (S. cerevisiae)                                  | COQ6                       | 2,15   | Unknown             |
| 1367632_at   | NM_017073 | coiled-coil domain containing 92                                                    | CCDC92 (includes EG:80212) | -2,15  | Cytoplasm           |
| 1370169_at   | BI289608  | cold shock domain containing E1, RNA-binding                                        | CSDE1                      | 2,15   | Cytoplasm           |
| 1387446_at   | NM_022950 | core 1 synthase, glycoprotein-N-acetylgalactosamine 3-beta-galactosyltransferase, 1 | C1GALT1                    | 5,45   | Extracellular Space |
| 1392640_at   | AI412155  | cryptochrome 1 (photolyase-like)                                                    | CRY1                       | 2,38   | Nucleus             |
| 1389135_at   | AW140637  | CTP synthase II                                                                     | CTPS2                      | 1,62   | Unknown             |
| 1388855_at   | BI284428  | cullin 1                                                                            | CUL1                       | 1,57   | Nucleus             |
| 1373667_at   | BF400674  | cysteine conjugate-beta lyase, cytoplasmic                                          | CCBL1                      | -1,78  | Cytoplasm           |
| 1367755_at   | NM_052809 | cysteine dioxygenase, type I                                                        | CDO1                       | -2,96  | Cytoplasm           |
| 1379344_at   | AI176057  | cytochrome b-245, beta polypeptide                                                  | CYBB                       | 5,08   | Cytoplasm           |
| 1370808_at   | J03867    | cytochrome b5 reductase 3                                                           | CYB5R3                     | -9,55  | Cytoplasm           |
| 1370827_at   | AF307840  | cytochrome b5 reductase 4                                                           | CYB5R4                     | 1,62   | Cytoplasm           |
| 1386904_a_at | AF007107  | cytochrome b5 type A (microsomal)                                                   | CYB5A                      | -2,47  | Cytoplasm           |
| 1371337_at   | BG378939  | cytochrome c oxidase subunit VIIa polypeptide 2 like                                | COX7A2L                    | 1,62   | Cytoplasm           |
| 1387914_at   | M73231    | cytochrome P450, family 27, subfamily A, polypeptide 1                              | CYP27A1                    | 6,50   | Cytoplasm           |
| 1397405_at   | BM385221  | DEAD (Asp-Glu-Ala-Asp) box polypeptide 17                                           | DDX17                      | -4,33  | Nucleus             |
| 1397529_at   | BI296754  | DEAD (Asp-Glu-Ala-Asp) box polypeptide 17                                           | DDX17                      | -2,62  | Nucleus             |
| 1371362_at   | BI285402  | DEAD (Asp-Glu-Ala-Asp) box polypeptide 17                                           | DDX17                      | -1,94  | Nucleus             |
| 1376739_at   | AW252511  | DEAD (Asp-Glu-Ala-Asp) box polypeptide 24                                           | DDX24                      | 1,72   | Nucleus             |
| 1368619_at   | NM_031630 | DEAD (Asp-Glu-Ala-Asp) box polypeptide 25                                           | DDX25                      | -2,43  | Nucleus             |
| 1385214_at   | BF391513  | DEAD (Asp-Glu-Ala-Asp) box polypeptide 3, X-linked                                  | DDX3X                      | 2,35   | Nucleus             |
| 1387048_at   | NM_053563 | DEAD (Asp-Glu-Ala-Asp) box polypeptide 39                                           | DDX39                      | 2,96   | Nucleus             |
| 1379896_at   | BM390256  | DEAD (Asp-Glu-Ala-Asp) box polypeptide 42                                           | DDX42                      | 2,23   | Unknown             |
| 1387912_at   | U25746    | DEAD (Asp-Glu-Ala-Asp) box polypeptide 46                                           | DDX46                      | -2,93  | Nucleus             |
| 1371837_at   | AA851926  | DEAD (Asp-Glu-Ala-Asp) box polypeptide 5                                            | DDX5                       | -2,99  | Nucleus             |
| 1390688_at   | AA799576  | DEAD (Asp-Glu-Ala-Asp) box polypeptide 50                                           | DDX50                      | 2,12   | Nucleus             |
| 1391463_at   | AI575264  | DEAD (Asp-Glu-Ala-Asp) box polypeptide 58                                           | DDX58                      | 5,00   | Cytoplasm           |
| 1381556_at   | BI303853  | DEAD (Asp-Glu-Ala-Asp) box polypeptide 60                                           | DDX60                      | 16,38  | Unknown             |
| 1393432_a_at | AA899840  | DEAH (Asp-Glu-Ala-His) box polypeptide 36                                           | DHX36                      | -2,68  | Unknown             |
| 1377785_at   | BI275330  | DEAH (Asp-Glu-Ala-His) box polypeptide 40                                           | DHX40                      | 2,01   | Unknown             |
| 1374299_at   | BF398414  | DEAH (Asp-Glu-Ala-His) box polypeptide 9                                            | DHX9                       | -1,64  | Nucleus             |
| 1390172_at   | AI409946  | dehydrogenase E1 and transketolase domain containing 1                              | DHTKD1                     | -2,24  | Unknown             |
| 1389407_at   | BE099453  | dehydrogenase/reductase (SDR family) member 1                                       | DHRS1                      | -3,98  | Cytoplasm           |
| 1373240_at   | BI276935  | dehydrogenase/reductase (SDR family) member 3                                       | DHRS3                      | -2,08  | Cytoplasm           |
| 1370814_at   | AB062758  | dehydrogenase/reductase (SDR family) member 4                                       | DHRS4                      | -14,49 | Cytoplasm           |
| 1379420_at   | AI145019  | dehydrogenase/reductase (SDR family) member 7                                       | DHRS7 (includes EG:51635)  | -2,17  | Unknown             |

|              |           |                                                                                                |         |        |                     |
|--------------|-----------|------------------------------------------------------------------------------------------------|---------|--------|---------------------|
| 1372677_at   | BM392053  | deoxyhypusine hydroxylase/monooxygenase                                                        | DOHH    | 1,85   | Unknown             |
| 1385481_at   | AW526551  | dermatan sulfate epimerase-like                                                                | DSEL    | -1,96  | Unknown             |
| 1385277_x_at | AA818849  | DEXH (Asp-Glu-X-His) box polypeptide 58                                                        | DHX58   | 1,85   | Cytoplasm           |
| 1385276_a_at | AA818849  | DEXH (Asp-Glu-X-His) box polypeptide 58                                                        | DHX58   | 3,70   | Cytoplasm           |
| 1385439_x_at | BF417541  | DEXH (Asp-Glu-X-His) box polypeptide 58                                                        | DHX58   | 4,11   | Cytoplasm           |
| 1382440_at   | AI410813  | diacylglycerol lipase, beta                                                                    | DAGLB   | -3,32  | Unknown             |
| 1373201_at   | AI412898  | dihydrolipoamide branched chain transacylase E2                                                | DBT     | -1,65  | Cytoplasm           |
| 1387141_at   | NM_023023 | dihydropyrimidinase-like 5                                                                     | DPYSL5  | -2,22  | Cytoplasm           |
| 1387780_at   | NM_032079 | DnaJ (Hsp40) homolog, subfamily A, member 2                                                    | DNAJA2  | 1,71   | Nucleus             |
| 1373813_at   | BM388610  | DnaJ (Hsp40) homolog, subfamily C, member 10                                                   | DNAJC10 | -2,05  | Cytoplasm           |
| 1377593_at   | BI284172  | dolichyl-phosphate mannosyltransferase polypeptide 1, catalytic subunit                        | DPM1    | -1,54  | Cytoplasm           |
| 1368064_a_at | U31884    | dopa decarboxylase (aromatic L-amino acid decarboxylase)                                       | DDC     | -6,04  | Cytoplasm           |
| 1390272_at   | BM386608  | DPH5 homolog (S. cerevisiae)                                                                   | DPH5    | 2,22   | Unknown             |
| 1370845_at   | BI288690  | ectonucleoside triphosphate diphosphohydrolase 2                                               | ENTPD2  | 4,09   | Cytoplasm           |
| 1368536_at   | NM_057104 | ectonucleotide pyrophosphatase/phosphodiesterase 2                                             | ENPP2   | -2,44  | Plasma Membrane     |
| 1389207_at   | BI282122  | egl nine homolog 1 (C. elegans)                                                                | EGLN1   | 2,70   | Cytoplasm           |
| 1368174_at   | NM_019371 | egl nine homolog 3 (C. elegans)                                                                | EGLN3   | 3,91   | Cytoplasm           |
| 1375739_at   | BF395171  | EH-domain containing 4                                                                         | EHD4    | 6,18   | Plasma Membrane     |
| 1374399_at   | AA801107  | EH-domain containing 4                                                                         | EHD4    | 6,63   | Plasma Membrane     |
| 1391534_at   | BG666735  | elongation of very long chain fatty acids (FEN1/Elo2, SUR4/Elo3, yeast)-like 2                 | ELOVL2  | -2,97  | Cytoplasm           |
| 1388108_at   | BE116152  | ELOVL family member 6, elongation of long chain fatty acids (FEN1/Elo2, SUR4/Elo3-like, yeast) | ELOVL6  | -2,79  | Cytoplasm           |
| 1376315_at   | BI282297  | ER degradation enhancer, mannosidase alpha-like 2                                              | EDEM2   | -2,45  | Cytoplasm           |
| 1392508_at   | BE119831  | exoribonuclease 1                                                                              | THEX1   | 1,69   | Unknown             |
| 1373393_at   | BM384468  | exostoses (multiple) 1                                                                         | EXT1    | 1,76   | Cytoplasm           |
| 1371611_at   | BM387363  | exostoses (multiple) 2                                                                         | EXT2    | -1,67  | Cytoplasm           |
| 1368717_at   | NM_024132 | fatty acid amide hydrolase                                                                     | FAAH    | -4,01  | Plasma Membrane     |
| 1384341_at   | AI136853  | fatty acid amide hydrolase                                                                     | FAAH    | -2,16  | Plasma Membrane     |
| 1367857_at   | NM_053445 | fatty acid desaturase 1                                                                        | FADS1   | -3,57  | Plasma Membrane     |
| 1368453_at   | NM_031344 | fatty acid desaturase 2                                                                        | FADS2   | -4,15  | Plasma Membrane     |
| 1367707_at   | NM_017332 | fatty acid synthase                                                                            | FASN    | -2,02  | Cytoplasm           |
| 1382629_at   | BM383809  | fatty acyl CoA reductase 1                                                                     | FAR1    | 2,79   | Cytoplasm           |
| 1372969_at   | BI289651  | F-box and leucine-rich repeat protein 3                                                        | FBXL3   | 1,99   | Nucleus             |
| 1389320_at   | BF419881  | F-box protein 25                                                                               | FBXO25  | -3,61  | Unknown             |
| 1370820_at   | AF393484  | F-box protein 6                                                                                | FBXO6   | 2,48   | Cytoplasm           |
| 1399133_at   | AW520767  | F-box protein 7                                                                                | FBXO7   | 2,84   | Cytoplasm           |
| 1388470_at   | AA892772  | F-box protein 9                                                                                | FBXO9   | -2,50  | Cytoplasm           |
| 1370234_at   | AA893484  | fibronectin 1                                                                                  | FN1     | -16,35 | Plasma Membrane     |
| 1398828_at   | U09386    | FK506 binding protein 1A, 12kDa                                                                | FKBP1A  | 1,68   | Cytoplasm           |
| 1389844_at   | BE113154  | FK506 binding protein 4, 59kDa                                                                 | FKBP4   | 2,54   | Nucleus             |
| 1384344_at   | AI060231  | FK506 binding protein 7                                                                        | FKBP7   | -4,00  | Cytoplasm           |
| 1376753_at   | BE105571  | fucose-1-phosphate guanylyltransferase                                                         | FPGT    | -1,67  | Cytoplasm           |
| 1367737_at   | NM_012562 | fucosidase, alpha-L- 1, tissue                                                                 | FUCA1   | -3,60  | Cytoplasm           |
| 1376249_at   | BM389993  | fucosidase, alpha-L- 2, plasma                                                                 | FUCA2   | -2,90  | Extracellular Space |
| 1368709_at   | NM_031236 | fucosyltransferase 1 (galactoside 2-alpha-L-fucosyltransferase, H blood group)                 | FUT1    | -2,47  | Cytoplasm           |
| 1367670_at   | NM_017005 | fumarate hydratase                                                                             | FH      | -1,57  | Cytoplasm           |
| 1372676_at   | BI275774  | fumarylacetoacetate hydrolase domain containing 1                                              | FAHD1   | -1,82  | Cytoplasm           |
| 1373134_at   | BE329450  | fumarylacetoacetate hydrolase domain containing 2A                                             | FAHD2A  | -3,21  | Unknown             |
| 1373199_at   | AA943573  | galactosidase, alpha                                                                           | GLA     | -1,74  | Cytoplasm           |
| 1371727_at   | AA893350  | galactosidase, beta 1                                                                          | GLB1    | -3,79  | Cytoplasm           |
| 1368314_at   | NM_031756 | gamma-glutamyl carboxylase                                                                     | GGCX    | -2,18  | Cytoplasm           |
| 1386215_at   | AI101566  | geranylgeranyl diphosphate synthase 1                                                          | GGPS1   | -2,24  | Cytoplasm           |
| 1373669_at   | BG374650  | glucosamine-6-phosphate deaminase 2                                                            | GNPDA2  | 1,89   | Unknown             |
| 1374903_at   | AI234819  | glucosaminyl (N-acetyl) transferase 2, I-branching enzyme (I blood group)                      | GCNT2   | -1,78  | Cytoplasm           |
| 1373366_at   | BM389337  | glucosidase, alpha; neutral AB                                                                 | GANAB   | -2,33  | Cytoplasm           |
| 1390385_at   | AA964674  | glucuronic acid epimerase                                                                      | GLCE    | 1,76   | Cytoplasm           |
| 1367901_at   | NM_017015 | glucuronidase, beta                                                                            | GUSB    | -3,89  | Cytoplasm           |
| 1368344_at   | NM_017007 | glutamate decarboxylase 1 (brain, 67kDa)                                                       | GAD1    | -1,64  | Cytoplasm           |
| 1369462_at   | NM_012563 | glutamate decarboxylase 2 (pancreatic islets and brain, 65kDa)                                 | GAD2    | -8,19  | Cytoplasm           |

|              |           |                                                                                         |                           |        |                     |
|--------------|-----------|-----------------------------------------------------------------------------------------|---------------------------|--------|---------------------|
| 1370200_at   | BI284411  | glutamate dehydrogenase 1                                                               | GLUD1                     | -3,91  | Cytoplasm           |
| 1387878_at   | AW916644  | glutamate dehydrogenase 1                                                               | GLUD1                     | -2,22  | Cytoplasm           |
| 1372523_at   | AA892770  | glutamate-cysteine ligase, catalytic subunit                                            | GCLC                      | 3,40   | Cytoplasm           |
| 1370030_at   | NM_017305 | glutamate-cysteine ligase, modifier subunit                                             | GCLM                      | 2,30   | Cytoplasm           |
| 1367805_at   | NM_012569 | glutaminase                                                                             | GLS                       | -2,68  | Cytoplasm           |
| 1370375_at   | J05499    | glutaminase 2 (liver, mitochondrial)                                                    | GLS2                      | -2,98  | Cytoplasm           |
| 1373418_at   | BM388143  | glutamyl-prolyl-tRNA synthetase                                                         | EPRS                      | 1,50   | Cytoplasm           |
| 1367705_at   | AF319950  | glutaredoxin (thioltransferase)                                                         | GLRX                      | -15,71 | Cytoplasm           |
| 1386908_at   | NM_022278 | glutaredoxin (thioltransferase)                                                         | GLRX                      | -11,31 | Cytoplasm           |
| 1367870_at   | NM_032614 | glutaredoxin 3                                                                          | GLRX3                     | 2,12   | Cytoplasm           |
| 1367576_at   | S41066    | glutathione peroxidase 1                                                                | GPX1                      | 2,40   | Cytoplasm           |
| 1374070_at   | AA800587  | glutathione peroxidase 2 (gastrointestinal)                                             | GPX2                      | 14,74  | Cytoplasm           |
| 1369926_at   | NM_022525 | glutathione peroxidase 3 (plasma)                                                       | GPX3                      | -6,14  | Extracellular Space |
| 1367774_at   | NM_031509 | glutathione S-transferase alpha 1                                                       | GSTA1                     | 6,34   | Cytoplasm           |
| 1387023_at   | NM_031154 | glutathione S-transferase mu 2 (muscle)                                                 | GSTM2                     | -7,37  | Cytoplasm           |
| 1389832_at   | BE113459  | glutathione S-transferase omega 1                                                       | GSTO1                     | 1,54   | Cytoplasm           |
| 1388122_at   | X02904    | glutathione S-transferase pi 1                                                          | GSTP1                     | 4,61   | Cytoplasm           |
| 1398296_at   | NM_032615 | glycerophosphodiester phosphodiesterase 1                                               | GDE1                      | -3,48  | Plasma Membrane     |
| 1374541_at   | BM392117  | glycogen synthase 1 (muscle)                                                            | GYS1                      | 6,47   | Cytoplasm           |
| 1368187_at   | NM_133298 | glycoprotein (transmembrane) nmb                                                        | GNPMB                     | 12,60  | Plasma Membrane     |
| 1388887_at   | AI178222  | glycoprotein, alpha-galactosyltransferase 1                                             | GGTA1                     | -1,76  | Cytoplasm           |
| 1380833_at   | AI045802  | glycosylphosphatidylinositol specific phospholipase D1                                  | GPLD1                     | -2,42  | Cytoplasm           |
| 1369897_s_at | BI277035  | GNAS complex locus                                                                      | GNAS                      | -2,56  | Plasma Membrane     |
| 1387906_a_at | AF107845  | GNAS complex locus                                                                      | GNAS                      | -2,30  | Plasma Membrane     |
| 1374489_at   | BF282573  | GTP binding protein 2                                                                   | GTPBP2                    | 8,71   | Unknown             |
| 1382351_at   | AI069972  | GTP binding protein overexpressed in skeletal muscle                                    | GEM                       | -3,10  | Plasma Membrane     |
| 1370976_at   | BE118966  | GTPase activating protein (SH3 domain) binding protein 1                                | G3BP1                     | 1,90   | Nucleus             |
| 1387659_at   | AF245172  | guanine deaminase                                                                       | GDA                       | 3,54   | Cytoplasm           |
| 1377577_at   | BI283031  | guanine monophosphate synthetase                                                        | GMPS                      | 1,81   | Nucleus             |
| 1368029_at   | NM_013106 | guanine nucleotide binding protein (G protein), alpha inhibiting activity polypeptide 3 | GNAI3                     | 1,80   | Cytoplasm           |
| 1368185_at   | NM_013189 | guanine nucleotide binding protein (G protein), alpha z polypeptide                     | GNAZ                      | -1,68  | Plasma Membrane     |
| 1382105_at   | AI603217  | guanine nucleotide binding protein (G protein), beta 5                                  | GNB5                      | -2,73  | Plasma Membrane     |
| 1367731_at   | NM_030987 | guanine nucleotide binding protein (G protein), beta polypeptide 1                      | GNB1                      | -1,62  | Plasma Membrane     |
| 1367732_at   | U34958    | guanine nucleotide binding protein (G protein), beta polypeptide 1                      | GNB1                      | 2,88   | Plasma Membrane     |
| 1388455_at   | AA799996  | guanine nucleotide binding protein (G protein), gamma 10                                | NGN10                     | -2,04  | Plasma Membrane     |
| 1377739_at   | AI576549  | guanine nucleotide binding protein (G protein), gamma 12                                | NGN12                     | 4,27   | Plasma Membrane     |
| 1387342_at   | BM389548  | guanine nucleotide binding protein (G protein), gamma 5                                 | NGN5                      | 3,77   | Plasma Membrane     |
| 1368332_at   | NM_133624 | guanylate binding protein 2, interferon-inducible                                       | GBP2                      | 429,26 | Cytoplasm           |
| 1385051_at   | BE108569  | guanylate binding protein 4                                                             | GBP4 (includes EG:115361) | 41,99  | Cytoplasm           |
| 1386898_at   | NM_012966 | heat shock 10kDa protein 1 (chaperonin 10)                                              | HSPE1                     | 2,72   | Cytoplasm           |
| 1398240_at   | NM_024351 | heat shock 70kDa protein 8                                                              | HSPA8                     | 1,51   | Cytoplasm           |
| 1389164_at   | BI295026  | hect domain and RLD 3                                                                   | HERC3                     | -2,77  | Cytoplasm           |
| 1370080_at   | NM_012580 | heme oxygenase (decycling) 1                                                            | HMOX1                     | 9,15   | Cytoplasm           |
| 1373222_at   | AI230271  | hexosaminidase A (alpha polypeptide)                                                    | HEXA                      | -1,64  | Cytoplasm           |
| 1374173_at   | AA799841  | hexosaminidase B (beta polypeptide)                                                     | HEXB                      | -1,54  | Cytoplasm           |
| 1388158_at   | BG057565  | HLA-B associated transcript 1                                                           | BAT1                      | 1,84   | Nucleus             |
| 1370237_at   | AA799574  | hydroxyacyl-Coenzyme A dehydrogenase                                                    | HADH                      | -8,02  | Cytoplasm           |
| 1369986_at   | NM_033349 | hydroxyacylglutathione hydrolase                                                        | HAGH                      | -2,70  | Cytoplasm           |
| 1387631_at   | NM_024390 | hydroxyprostaglandin dehydrogenase 15-(NAD)                                             | HPGD                      | -12,44 | Cytoplasm           |
| 1376191_at   | AA848820  | hydroxyprostaglandin dehydrogenase 15-(NAD)                                             | HPGD                      | -3,49  | Cytoplasm           |
| 1367672_at   | NM_024392 | hydroxysteroid (17-beta) dehydrogenase 4                                                | HSD17B4                   | -5,27  | Cytoplasm           |
| 1373924_at   | AI712686  | hypothetical protein FLJ11151                                                           | FLJ11151                  | -2,79  | Unknown             |
| 1375843_at   | BM383777  | iduronate 2-sulfatase                                                                   | IDS                       | -1,57  | Cytoplasm           |
| 1388629_at   | BF281278  | IMP (inosine monophosphate) dehydrogenase 2                                             | IMPDH2                    | 1,90   | Cytoplasm           |
| 1387608_at   | NM_023973 | indoleamine-pyrrole 2,3 dioxygenase                                                     | INDO                      | 8,00   | Cytoplasm           |
| 1395036_at   | BF386788  | inositol monophosphatase domain containing 1                                            | IMPAD1                    | 1,53   | Unknown             |
| 1399123_at   | BI302415  | integrator complex subunit 6                                                            | INTS6                     | -1,64  | Nucleus             |
| 1375796_at   | BI300770  | interferon gamma induced GTPase                                                         | IGTP                      | 7,96   | Cytoplasm           |

|              |           |                                                                                                                               |                           |        |                     |
|--------------|-----------|-------------------------------------------------------------------------------------------------------------------------------|---------------------------|--------|---------------------|
| 1376151_a_at | AI407953  | interferon gamma induced GTPase                                                                                               | IGTP                      | 10,47  | Cytoplasm           |
| 1397304_at   | AW525366  | interferon gamma induced GTPase                                                                                               | IGTP                      | 60,31  | Cytoplasm           |
| 1377950_at   | AA955213  | interferon inducible GTPase 1                                                                                                 | IIGP1                     | 29,14  | Unknown             |
| 1373992_at   | AI408440  | interferon inducible GTPase 1                                                                                                 | IIGP1                     | 144,38 | Unknown             |
| 1390507_at   | BI296097  | interferon stimulated exonuclease gene 20kDa                                                                                  | ISG20                     | 3,13   | Nucleus             |
| 1372310_at   | AI227941  | isochorismatase domain containing 1                                                                                           | ISOC1                     | -1,60  | Cytoplasm           |
| 1370865_at   | BI277627  | isocitrate dehydrogenase 3 (NAD+) gamma                                                                                       | IDH3G                     | -1,77  | Cytoplasm           |
| 1380561_at   | BI287928  | isoleucyl-tRNA synthetase 2, mitochondrial                                                                                    | IARS2                     | -2,38  | Cytoplasm           |
| 1368878_at   | NM_053539 | isopentenyl-diphosphate delta isomerase 1                                                                                     | ID1I                      | -1,68  | Cytoplasm           |
| 1373809_at   | BI296325  | KIAA1279                                                                                                                      | KIAA1279                  | -2,67  | Unknown             |
| 1373750_at   | BF406832  | leprecan-like 2                                                                                                               | LEPREL2                   | -1,63  | Nucleus             |
| 1390561_at   | BF282191  | ligase IV, DNA, ATP-dependent                                                                                                 | LIG4                      | -3,54  | Nucleus             |
| 1372884_at   | BG381486  | like-glycosyltransferase                                                                                                      | LARGE                     | -3,20  | Cytoplasm           |
| 1371923_at   | BG380281  | lysophosphatidylcholine acyltransferase 1                                                                                     | LPCAT1                    | -8,44  | Cytoplasm           |
| 1367832_at   | NM_013006 | lysophospholipase 1                                                                                                           | LYPLA1                    | -1,52  | Cytoplasm           |
| 1372281_at   | AA819059  | lysophospholipase-like 1                                                                                                      | LYPLAL1                   | -2,04  | Cytoplasm           |
| 1372006_at   | BM391274  | lysyl oxidase-like 2                                                                                                          | LOXL2                     | -5,18  | Extracellular Space |
| 1371662_at   | AA892250  | lysyl-tRNA synthetase                                                                                                         | KARS                      | 2,69   | Cytoplasm           |
| 1372790_at   | BG671530  | malate dehydrogenase 1, NAD (soluble)                                                                                         | MDH1                      | -5,09  | Cytoplasm           |
| 1367653_a_at | NM_033235 | malate dehydrogenase 1, NAD (soluble)                                                                                         | MDH1                      | -1,93  | Cytoplasm           |
| 1370870_at   | M30596    | malic enzyme 1, NADP(+)-dependent, cytosolic                                                                                  | ME1                       | -1,85  | Cytoplasm           |
| 1370067_at   | NM_012600 | malic enzyme 1, NADP(+)-dependent, cytosolic                                                                                  | ME1                       | -1,79  | Cytoplasm           |
| 1389572_at   | AI410864  | malic enzyme 3, NADP(+)-dependent, mitochondrial                                                                              | ME3                       | 1,87   | Cytoplasm           |
| 1383574_at   | AI502956  | mannosidase, alpha, class 1A, member 1                                                                                        | MAN1A1                    | 3,69   | Cytoplasm           |
| 1374696_at   | AI170182  | mannosidase, alpha, class 1A, member 2                                                                                        | MAN1A2                    | 2,34   | Cytoplasm           |
| 1388667_at   | AI178793  | mannosidase, alpha, class 2A, member 1                                                                                        | MAN2A1                    | -2,38  | Cytoplasm           |
| 1377463_at   | BE099244  | mannosidase, alpha, class 2A, member 2                                                                                        | MAN2A2                    | 2,04   | Cytoplasm           |
| 1388699_at   | BE114558  | mannosidase, alpha, class 2B, member 1                                                                                        | MAN2B1                    | -1,96  | Cytoplasm           |
| 1371875_at   | BM388852  | mannosidase, beta A, lysosomal                                                                                                | MANBA                     | 3,34   | Cytoplasm           |
| 1373560_at   | AI233172  | mannosyl (alpha-1,3-)-glycoprotein beta-1,4-N-acetylglucosaminyltransferase, isozyme B                                        | MGAT4B                    | 2,85   | Unknown             |
| 1386982_at   | NM_053604 | mannosyl (alpha-1,6-)-glycoprotein beta-1,2-N-acetylglucosaminyltransferase                                                   | MGAT2                     | -3,69  | Cytoplasm           |
| 1370129_at   | NM_131904 | meningioma expressed antigen 5 (hyaluronidase)                                                                                | MGEA5                     | 9,75   | Unknown             |
| 1383025_at   | BE097791  | meningioma expressed antigen 5 (hyaluronidase)                                                                                | MGEA5                     | 11,02  | Unknown             |
| 1371031_at   | AI454484  | methionine adenosyltransferase I, alpha                                                                                       | MAT1A                     | 4,98   | Cytoplasm           |
| 1377287_at   | AA957673  | methionyl-tRNA synthetase 2, mitochondrial                                                                                    | MARS2                     | 2,38   | Cytoplasm           |
| 1376852_at   | BI274460  | methylcrotonoyl-Coenzyme A carboxylase 1 (alpha)                                                                              | MCCC1                     | -1,75  | Cytoplasm           |
| 1368181_at   | NM_022508 | methylenetetrahydrofolate dehydrogenase (NADP+ dependent) 1, methylenetetrahydrofolate cyclohydrolase, formyltetrahydrofolate | MTHFD1                    | 4,92   | Cytoplasm           |
| 1393152_at   | AI007821  | methylmalonyl Coenzyme A mutase                                                                                               | MUT                       | -2,33  | Cytoplasm           |
| 1397644_at   | BI278369  | methylthioadenosine phosphorylase                                                                                             | MTAP (includes EG:298227) | 2,94   | Unknown             |
| 1388668_at   | BM384972  | methyltransferase like 2B                                                                                                     | METTL2B                   | 2,40   | Unknown             |
| 1368020_at   | NM_031062 | mevalonate (diphospho) decarboxylase                                                                                          | MVD                       | 2,69   | Cytoplasm           |
| 1372599_at   | BI290559  | microsomal glutathione S-transferase 2                                                                                        | MGST2                     | 2,46   | Cytoplasm           |
| 1374062_x_at | AA946204  | microtubule-associated protein, RP/EB family, member 3                                                                        | MAPRE3                    | -2,13  | Cytoplasm           |
| 1372619_at   | AI172185  | mitochondrial ribosomal protein L49                                                                                           | MRPL49                    | -3,01  | Cytoplasm           |
| 1373241_at   | AW252569  | mitochondrial ribosomal protein L49                                                                                           | MRPL49                    | -2,23  | Cytoplasm           |
| 1371717_at   | AA943135  | mitofusin 1                                                                                                                   | MFN1                      | 2,06   | Cytoplasm           |
| 1387919_at   | U41803    | mitofusin 2                                                                                                                   | MFN2                      | 1,52   | Cytoplasm           |
| 1368514_at   | NM_013198 | monoamine oxidase B                                                                                                           | MAOB                      | -6,84  | Cytoplasm           |
| 1374725_at   | AW252811  | Mov10, Moloney leukemia virus 10, homolog (mouse)                                                                             | MOV10                     | 13,78  | Nucleus             |
| 1372863_at   | BF409872  | MYC binding protein 2                                                                                                         | MYCBP2                    | 1,67   | Nucleus             |
| 1387866_at   | AI178160  | myosin IXB                                                                                                                    | MYO9B                     | 5,39   | Cytoplasm           |
| 1371725_at   | BM392410  | myosin, heavy chain 9, non-muscle                                                                                             | MYH9                      | 1,91   | Cytoplasm           |
| 1387283_at   | NM_134350 | myxovirus (influenza virus) resistance 1, interferon-inducible protein p78 (mouse)                                            | MX1                       | 3,12   | Nucleus             |
| 1371015_at   | X52711    | myxovirus (influenza virus) resistance 2 (mouse)                                                                              | MX2                       | 3,36   | Nucleus             |
| 1372401_at   | AA859401  | N-acetylneuraminic acid synthase                                                                                              | NANS                      | 1,68   | Cytoplasm           |
| 1398382_at   | AI175556  | N-acetyltransferase 13 (GCN5-related)                                                                                         | NAT13                     | 1,54   | Cytoplasm           |
| 1397556_at   | BF563329  | N-acetyltransferase 13 (GCN5-related)                                                                                         | NAT13                     | 5,26   | Cytoplasm           |
| 1369077_at   | NM_053407 | N-acylsphingosine amidohydrolase (acid ceramidase) 1                                                                          | ASAHI                     | -2,46  | Cytoplasm           |

|              |           |                                                                                                                          |                          |        |                     |
|--------------|-----------|--------------------------------------------------------------------------------------------------------------------------|--------------------------|--------|---------------------|
| 1387599_a_at | J02679    | NAD(P)H dehydrogenase, quinone 1                                                                                         | NQO1                     | 3,72   | Cytoplasm           |
| 1391126_at   | BG379351  | NADH dehydrogenase (ubiquinone) 1 alpha subcomplex, 12                                                                   | NDUFA12                  | -4,55  | Cytoplasm           |
| 1389288_at   | BI279838  | NADH dehydrogenase (ubiquinone) 1 alpha subcomplex, 2, 8kDa                                                              | NDUFA2                   | -2,04  | Cytoplasm           |
| 1371323_at   | BG666002  | NADH dehydrogenase (ubiquinone) 1 alpha subcomplex, 4, 9kDa                                                              | NDUFA4                   | -3,01  | Cytoplasm           |
| 1388304_at   | BI281307  | NADH dehydrogenase (ubiquinone) 1 beta subcomplex, 5, 16kDa                                                              | NDUFB5                   | -1,78  | Cytoplasm           |
| 1371577_at   | AI171362  | NADH dehydrogenase (ubiquinone) Fe-S protein 1, 75kDa (NADH-coenzyme Q reductase)                                        | NDUFS1                   | -1,71  | Cytoplasm           |
| 1371482_at   | AA851675  | NADH dehydrogenase (ubiquinone) Fe-S protein 2, 49kDa (NADH-coenzyme Q reductase)                                        | NDUFS2                   | -1,66  | Cytoplasm           |
| 1393654_at   | BM391891  | nei endonuclease VIII-like 1 (E. coli)                                                                                   | NEIL1                    | -1,67  | Nucleus             |
| 1371314_at   | BM389736  | neural precursor cell expressed, developmentally down-regulated 4                                                        | NEDD4                    | -2,40  | Cytoplasm           |
| 1368895_at   | NM_053992 | neuroigin 2                                                                                                              | NLGN2                    | -1,70  | Plasma Membrane     |
| 1387859_at   | AI410876  | NFS1 nitrogen fixation 1 homolog (S. cerevisiae)                                                                         | NFS1                     | -2,25  | Cytoplasm           |
| 1371483_at   | AA891872  | nicotinamide nucleotide transhydrogenase                                                                                 | NNT                      | -2,04  | Cytoplasm           |
| 1387667_at   | L12562    | nitric oxide synthase 2, inducible                                                                                       | NOS2                     | 113,75 | Cytoplasm           |
| 1398049_at   | BF405475  | nitrilase 1                                                                                                              | NIT1                     | -2,68  | Unknown             |
| 1388324_at   | BG668463  | nitrilase 1                                                                                                              | NIT1                     | -1,51  | Unknown             |
| 1372438_at   | AI411100  | nitrilase family, member 2                                                                                               | NIT2                     | -2,09  | Cytoplasm           |
| 1375522_at   | AI010491  | N-myrystoyltransferase 1                                                                                                 | NMT1                     | 4,46   | Cytoplasm           |
| 1384878_at   | AI501085  | N-myrystoyltransferase 2                                                                                                 | NMT2                     | 3,80   | Cytoplasm           |
| 1372364_a_at | AA894101  | N-terminal asparagine amidase                                                                                            | NTAN1                    | -2,22  | Nucleus             |
| 1372295_at   | BF551356  | nuclear prelamin A recognition factor                                                                                    | NARF                     | -1,98  | Nucleus             |
| 1384009_at   | AI535383  | nuclear prelamin A recognition factor                                                                                    | NARF                     | -1,83  | Nucleus             |
| 1372763_at   | AI407545  | nuclear undecaprenyl pyrophosphate synthase 1 homolog (S. cerevisiae)                                                    | NUS1 (includes EG:52014) | -2,82  | Unknown             |
| 1392522_at   | AA925790  | nuclear undecaprenyl pyrophosphate synthase 1 homolog (S. cerevisiae)                                                    | NUS1 (includes EG:52014) | 9,72   | Unknown             |
| 1368173_at   | NM_021754 | nucleolar protein NOP5/NOP58                                                                                             | NOP5/NOP58               | 1,97   | Nucleus             |
| 1389251_at   | AA944380  | nudix (nucleoside diphosphate linked moiety X)-type motif 7                                                              | NUDT7                    | -3,98  | Cytoplasm           |
| 1368311_at   | NM_012861 | O-6-methylguanine-DNA methyltransferase                                                                                  | MGMT                     | 4,51   | Nucleus             |
| 1370543_at   | U76557    | O-linked N-acetylglucosamine (GlcNAc) transferase (UDP-N-acetylglucosamine:polypeptide-N-acetylglucosaminyl transferase) | OGT                      | -2,90  | Cytoplasm           |
| 1388758_at   | AI009074  | O-linked N-acetylglucosamine (GlcNAc) transferase (UDP-N-acetylglucosamine:polypeptide-N-acetylglucosaminyl transferase) | OGT                      | -2,32  | Cytoplasm           |
| 1370163_at   | BF281299  | ornithine decarboxylase 1                                                                                                | ODC1                     | 4,86   | Cytoplasm           |
| 1376118_at   | BE109604  | OTU domain, ubiquitin aldehyde binding 2                                                                                 | OTUB2                    | -5,07  | Unknown             |
| 1385154_at   | BE121382  | OTU domain, ubiquitin aldehyde binding 2                                                                                 | OTUB2                    | 1,62   | Unknown             |
| 1390020_at   | BI277513  | oxoglutarate (alpha-ketoglutarate) dehydrogenase (lipoamide)                                                             | OGDH                     | -2,25  | Cytoplasm           |
| 1370236_at   | AI234353  | palmitoyl-protein thioesterase 1                                                                                         | PPT1                     | -2,60  | Cytoplasm           |
| 1375848_at   | BG668051  | paraoxonase 2                                                                                                            | PON2                     | -4,09  | Extracellular Space |
| 1390794_at   | BI289098  | peptide deformylase (mitochondrial)                                                                                      | PDF                      | -2,35  | Cytoplasm           |
| 1367687_a_at | M25719    | peptidylglycine alpha-amidating monooxygenase                                                                            | PAM                      | -2,93  | Plasma Membrane     |
| 1375440_at   | BI283709  | peptidylprolyl isomerase (cyclophilin)-like 2                                                                            | PPIL2                    | -1,57  | Nucleus             |
| 1379665_at   | AI177835  | peptidylprolyl isomerase domain and WD repeat containing 1                                                               | PPWD1                    | 1,95   | Nucleus             |
| 1389055_at   | AI104479  | peptidylprolyl isomerase E (cyclophilin E)                                                                               | PPIE                     | 2,38   | Nucleus             |
| 1383666_at   | BG378435  | peptidyl-tRNA hydrolase 1 homolog (S. cerevisiae)                                                                        | PTRH1                    | 2,97   | Unknown             |
| 1389655_at   | AA892330  | peptidyl-tRNA hydrolase 2                                                                                                | PTRH2                    | 3,37   | Cytoplasm           |
| 1387891_at   | BI282076  | peroxiredoxin 4                                                                                                          | PRDX4                    | -3,42  | Cytoplasm           |
| 1388908_at   | BI278268  | peroxisomal D3,D2-enoyl-CoA isomerase                                                                                    | PECI                     | -1,94  | Cytoplasm           |
| 1368262_at   | NM_021657 | PH domain and leucine rich repeat protein phosphatase                                                                    | PHLPP                    | 3,21   | Cytoplasm           |
| 1390267_at   | AW915175  | phenylalanyl-tRNA synthetase 2, mitochondrial                                                                            | FARS2                    | 2,02   | Cytoplasm           |
| 1389299_at   | BG673255  | phosphate cytidylyltransferase 1, choline, alpha                                                                         | PCYT1A                   | 2,56   | Cytoplasm           |
| 1371863_at   | BM387059  | phosphatidylglycerophosphate synthase 1                                                                                  | PGS1                     | 5,27   | Cytoplasm           |
| 1396561_x_at | BF409296  | phosphatidylinositol glycan anchor biosynthesis, class A                                                                 | PIGA                     | 1,59   | Cytoplasm           |
| 1373099_at   | BI284221  | phosphatidylinositol glycan anchor biosynthesis, class S                                                                 | PIGS                     | -2,17  | Cytoplasm           |
| 1372900_at   | BI274156  | phosphatidylinositol glycan anchor biosynthesis, class T                                                                 | PIGT                     | -2,10  | Cytoplasm           |
| 1385553_at   | AI136699  | phosphatidylinositol glycan anchor biosynthesis, class Z                                                                 | PIGZ (includes EG:80235) | 1,81   | Cytoplasm           |
| 1372532_at   | BI289477  | phosphatidylinositol transfer protein, membrane-associated 2                                                             | PITPNM2                  | 2,21   | Cytoplasm           |
| 1385901_at   | BE118197  | phosphatidylserine synthase 2                                                                                            | PTDSS2                   | -1,95  | Cytoplasm           |
| 1370669_a_at | AB027156  | phosphodiesterase 10A                                                                                                    | PDE10A                   | -5,02  | Cytoplasm           |
| 1368438_at   | NM_022236 | phosphodiesterase 10A                                                                                                    | PDE10A                   | -2,28  | Cytoplasm           |
| 1384400_at   | BM389421  | phosphodiesterase 4C, cAMP-specific (phosphodiesterase E1 dunce homolog, Drosophila)                                     | PDE4C                    | 2,07   | Cytoplasm           |
| 1376057_at   | BG377379  | phosphodiesterase 8A                                                                                                     | PDE8A                    | -2,91  | Cytoplasm           |
| 1379338_at   | AI044115  | phosphoglucomutase 2-like 1                                                                                              | PGM2L1                   | 2,36   | Unknown             |

|              |           |                                                                                       |                           |       |                     |
|--------------|-----------|---------------------------------------------------------------------------------------|---------------------------|-------|---------------------|
| 1374969_at   | AA799832  | phosphoglucomutase 5                                                                  | PGM5                      | -2,20 | Cytoplasm           |
| 1391577_at   | BI293450  | phosphoglycerate mutase family member 5                                               | PGAM5                     | 1,56  | Cytoplasm           |
| 1378382_at   | AI230014  | phosphoglycerate mutase family member 5                                               | PGAM5                     | 1,64  | Cytoplasm           |
| 1368128_at   | NM_031598 | phospholipase A2, group IIA (platelets, synovial fluid)                               | PLA2G2A                   | 8,30  | Extracellular Space |
| 1371014_at   | BE097028  | phospholipase C, beta 1 (phosphoinositide-specific)                                   | PLCB1                     | -1,98 | Cytoplasm           |
| 1386962_at   | NM_024353 | phospholipase C, beta 4                                                               | PLCB4                     | -3,47 | Cytoplasm           |
| 1370530_a_at | AB000779  | phospholipase D1, phosphatidylcholine-specific                                        | PLD1                      | 2,86  | Cytoplasm           |
| 1370531_a_at | U69550    | phospholipase D1, phosphatidylcholine-specific                                        | PLD1                      | 3,43  | Cytoplasm           |
| 1369029_at   | NM_057194 | phospholipid scramblase 1                                                             | PLSCR1                    | 3,22  | Plasma Membrane     |
| 1373417_at   | BI285973  | phospholipid scramblase 3                                                             | PLSCR3                    | 3,09  | Cytoplasm           |
| 1371455_at   | AI411429  | phosphomannomutase 1                                                                  | PMM1                      | 2,08  | Cytoplasm           |
| 1371535_at   | AI411161  | phosphomannomutase 2                                                                  | PMM2                      | 1,54  | Cytoplasm           |
| 1387271_at   | NM_053674 | phytanoyl-CoA 2-hydroxylase                                                           | PHYH                      | -1,89 | Cytoplasm           |
| 1393245_at   | AI029057  | phytanoyl-CoA 2-hydroxylase                                                           | PHYH                      | -1,51 | Cytoplasm           |
| 1392890_at   | BG663460  | platelet-activating factor acetylhydrolase, isoform Ib, alpha subunit 45kDa           | PAFAH1B1                  | -2,52 | Cytoplasm           |
| 1387807_at   | NM_031763 | platelet-activating factor acetylhydrolase, isoform Ib, alpha subunit 45kDa           | PAFAH1B1                  | 1,98  | Cytoplasm           |
| 1369963_at   | NM_053654 | platelet-activating factor acetylhydrolase, isoform Ib, gamma subunit 29kDa           | PAFAH1B3                  | 1,59  | Cytoplasm           |
| 1389784_at   | AI177507  | pogo transposable element with ZNF domain                                             | POGZ                      | -1,50 | Nucleus             |
| 1399093_at   | BM392394  | polyamine oxidase (exo-N4-amino)                                                      | PAOX (includes EG:196743) | -1,86 | Cytoplasm           |
| 1397164_at   | AI175779  | polymerase (DNA directed), alpha 2 (70kD subunit)                                     | POLA2                     | 3,75  | Nucleus             |
| 1371595_at   | BM384301  | polymerase (DNA directed), alpha 2 (70kD subunit)                                     | POLA2                     | 16,95 | Nucleus             |
| 1388883_at   | BF281976  | polymerase (DNA-directed), delta 4                                                    | POLD4                     | -5,45 | Nucleus             |
| 1376001_at   | BG380440  | polymerase (RNA) I polypeptide E, 53kDa                                               | POLR1E                    | 2,06  | Nucleus             |
| 1386008_at   | AW914833  | polymerase (RNA) III (DNA directed) polypeptide F, 39 kDa                             | POLR3F                    | -1,89 | Nucleus             |
| 1391496_at   | AA819635  | polymerase (RNA) III (DNA directed) polypeptide F, 39 kDa                             | POLR3F                    | -1,80 | Nucleus             |
| 1370407_at   | AF332142  | prenylcysteine oxidase 1                                                              | PCYOX1                    | -1,63 | Cytoplasm           |
| 1367807_at   | NM_053827 | procollagen-lysine 1, 2-oxoglutarate 5-dioxygenase 1                                  | PLOD1                     | 1,96  | Cytoplasm           |
| 1372877_at   | BI04070   | procollagen-lysine, 2-oxoglutarate 5-dioxygenase 3                                    | PLOD3                     | -1,59 | Cytoplasm           |
| 1368259_at   | NM_017043 | prostaglandin-endoperoxide synthase 1 (prostaglandin G/H synthase and cyclooxygenase) | PTGS1                     | 9,54  | Cytoplasm           |
| 1386897_at   | NM_024363 | protein arginine methyltransferase 1                                                  | PRMT1                     | 2,14  | Nucleus             |
| 1388717_at   | BM384163  | protein O-fucosyltransferase 2                                                        | POFUT2                    | -2,90 | Cytoplasm           |
| 1374538_at   | AW915001  | protein O-linked mannose beta1,2-N-acetylglucosaminyltransferase                      | POMGNT1                   | -1,60 | Cytoplasm           |
| 1374454_at   | BM388557  | protein-L-isoaspartate (D-aspartate) O-methyltransferase domain containing 2          | PCMTD2                    | -4,90 | Cytoplasm           |
| 1377079_a_at | BF386283  | protoporphyrinogen oxidase                                                            | PPOX                      | -2,29 | Cytoplasm           |
| 1373741_at   | BM386451  | pseudouridylate synthase 1                                                            | PUS1                      | 3,41  | Nucleus             |
| 1369989_at   | NM_022601 | pyridoxamine 5'-phosphate oxidase                                                     | PNPO                      | -2,02 | Unknown             |
| 1388960_at   | AI412958  | pyrophosphatase (inorganic) 1                                                         | PPA1                      | 1,58  | Cytoplasm           |
| 1377576_at   | AA891800  | pyrophosphatase (inorganic) 2                                                         | PPA2                      | -2,93 | Cytoplasm           |
| 1386917_at   | NM_012744 | pyruvate carboxylase                                                                  | PC                        | -2,13 | Cytoplasm           |
| 1398429_at   | AA893184  | pyruvate dehydrogenase complex, component X                                           | PDHX                      | 2,85  | Cytoplasm           |
| 1387911_at   | L10416    | Rab geranylgeranyltransferase, beta subunit                                           | RABGGTB                   | 2,40  | Cytoplasm           |
| 1375338_at   | AA945841  | RAB10, member RAS oncogene family                                                     | RAB10                     | -1,74 | Cytoplasm           |
| 1368847_at   | NM_017359 | RAB10, member RAS oncogene family                                                     | RAB10                     | 1,81  | Cytoplasm           |
| 1374069_at   | BE118560  | RAB11A, member RAS oncogene family                                                    | RAB11A                    | -2,17 | Cytoplasm           |
| 1383089_at   | BM386264  | RAB21, member RAS oncogene family                                                     | RAB21                     | 2,31  | Cytoplasm           |
| 1376705_a_at | BF289020  | RAB24, member RAS oncogene family                                                     | RAB24                     | 1,78  | Cytoplasm           |
| 1377669_at   | BM389524  | RAB27A, member RAS oncogene family                                                    | RAB27A                    | -3,27 | Cytoplasm           |
| 1370087_at   | NM_031718 | RAB2A, member RAS oncogene family                                                     | RAB2A                     | 1,60  | Cytoplasm           |
| 1375985_at   | BF282984  | RAB2B, member RAS oncogene family                                                     | RAB2B                     | -2,16 | Plasma Membrane     |
| 1374502_at   | AI180286  | RAB3 GTPase activating protein subunit 2 (non-catalytic)                              | RAB3GAP2                  | 1,79  | Cytoplasm           |
| 1370061_at   | NM_031091 | RAB3B, member RAS oncogene family                                                     | RAB3B                     | -2,97 | Cytoplasm           |
| 1370055_at   | M83681    | RAB3D, member RAS oncogene family                                                     | RAB3D                     | -1,86 | Cytoplasm           |
| 1372636_at   | AI007924  | RAB40C, member RAS oncogene family                                                    | RAB40C                    | 2,37  | Plasma Membrane     |
| 1370181_at   | BF281403  | RAB4A, member RAS oncogene family                                                     | RAB4A                     | -2,18 | Cytoplasm           |
| 1388800_at   | AI406667  | RAB5A, member RAS oncogene family                                                     | RAB5A                     | 2,00  | Cytoplasm           |
| 1371103_at   | AA686757  | RAB6A, member RAS oncogene family                                                     | RAB6A                     | 3,82  | Cytoplasm           |
| 1368096_at   | NM_133590 | RAB7, member RAS oncogene family-like 1                                               | RAB7L1                    | -2,37 | Cytoplasm           |
| 1387186_at   | NM_053458 | RAB9A, member RAS oncogene family                                                     | RAB9A                     | 2,10  | Cytoplasm           |



|            |           |                                                                                         |                          |        |                 |
|------------|-----------|-----------------------------------------------------------------------------------------|--------------------------|--------|-----------------|
| 1370913_at | AI409634  | radical S-adenosyl methionine domain containing 2                                       | RSAD2                    | 107,26 | Unknown         |
| 1367590_at | NM_053439 | RAN, member RAS oncogene family                                                         | RAN                      | 2,53   | Nucleus         |
| 1374035_at | BI296482  | RAS (RAD and GEM)-like GTP binding 2                                                    | REM2                     | -7,08  | Plasma Membrane |
| 1399027_at | AI408053  | ras homolog gene family, member A                                                       | RHOA                     | 1,58   | Cytoplasm       |
| 1382197_at | AA955648  | ras homolog gene family, member D                                                       | RHOD                     | 2,62   | Cytoplasm       |
| 1386967_at | NM_053522 | ras homolog gene family, member Q                                                       | RHOQ                     | 1,61   | Plasma Membrane |
| 1387908_at | AF239157  | RAS, dexamethasone-induced 1                                                            | RASD1                    | 2,23   | Cytoplasm       |
| 1373774_at | AI412619  | Ras-like without CAAX 2                                                                 | RIT2                     | -6,96  | Plasma Membrane |
| 1383699_at | BG673521  | Ras-like without CAAX 2                                                                 | RIT2                     | -1,87  | Plasma Membrane |
| 1388332_at | AA799542  | ras-related C3 botulinum toxin substrate 1 (rho family, small GTP binding protein Rac1) | RAC1                     | -1,53  | Cytoplasm       |
| 1372513_at | AI103616  | ras-related C3 botulinum toxin substrate 1 (rho family, small GTP binding protein Rac1) | RAC1                     | 3,11   | Cytoplasm       |
| 1367736_at | NM_053973 | Ras-related GTP binding A                                                               | RRAGA                    | -1,69  | Cytoplasm       |
| 1376881_at | AW528057  | Ras-related GTP binding B                                                               | RRAGB                    | -11,06 | Nucleus         |
| 1369696_at | NM_053972 | Ras-related GTP binding B                                                               | RRAGB                    | -3,74  | Nucleus         |
| 1371723_at | BE110635  | Ras-related GTP binding C                                                               | RRAGC                    | 3,04   | Cytoplasm       |
| 1373427_at | BI288816  | Ras-related GTP binding D                                                               | RRAGD                    | 6,30   | Cytoplasm       |
| 1388729_at | BF282474  | related RAS viral (r-ras) oncogene homolog                                              | RRAS                     | 2,34   | Cytoplasm       |
| 1382058_at | BI292115  | related RAS viral (r-ras) oncogene homolog 2                                            | RRAS2                    | 2,93   | Plasma Membrane |
| 1372133_at | AA955287  | related RAS viral (r-ras) oncogene homolog 2                                            | RRAS2                    | 3,03   | Plasma Membrane |
| 1386027_at | AI409701  | retinitis pigmentosa 2 (X-linked recessive)                                             | RP2                      | -7,69  | Cytoplasm       |
| 1373923_at | BF283756  | retinol dehydrogenase 10 (all-trans)                                                    | RDH10                    | 1,62   | Unknown         |
| 1393351_at | BE109501  | retinol dehydrogenase 10 (all-trans)                                                    | RDH10                    | 2,57   | Unknown         |
| 1384391_at | BE096510  | retinol dehydrogenase 10 (all-trans)                                                    | RDH10                    | 8,15   | Unknown         |
| 1373918_at | BG374035  | retinol dehydrogenase 11 (all-trans/9-cis/11-cis)                                       | RDH11                    | -1,78  | Cytoplasm       |
| 1398494_at | BF404279  | REV1 homolog (S. cerevisiae)                                                            | REV1                     | 3,74   | Nucleus         |
| 1376066_at | AI103572  | Rho family GTPase 3                                                                     | RND3                     | 2,11   | Cytoplasm       |
| 1386062_at | AI060227  | Rho family GTPase 3                                                                     | RND3                     | 4,76   | Cytoplasm       |
| 1389632_at | AA799294  | Rho-related BTB domain containing 1                                                     | RHOBTB1                  | -4,47  | Unknown         |
| 1380425_at | AI012859  | ribonuclease L (2',5'-oligoadenylate synthetase-dependent)                              | RNASEL                   | -1,76  | Cytoplasm       |
| 1398776_at | NM_031698 | ribophorin II                                                                           | RPN2                     | -1,70  | Cytoplasm       |
| 1388884_at | BM390774  | RIKEN cDNA 1810022C23 gene                                                              | 1810022C23RIK            | -1,98  | Unknown         |
| 1390524_at | BM392295  | ring finger protein 12                                                                  | RNF12                    | 4,59   | Nucleus         |
| 1393047_at | BF416560  | ring finger protein 217                                                                 | RNF217                   | 2,55   | Unknown         |
| 1383679_at | BF411972  | ring finger protein 31                                                                  | RNF31                    | 2,41   | Cytoplasm       |
| 1388538_at | AI179646  | ring-box 1                                                                              | RBX1 (includes EG:56438) | -2,81  | Cytoplasm       |
| 1373452_at | AI232273  | RNA terminal phosphate cyclase-like 1                                                   | RCL1                     | 3,34   | Nucleus         |
| 1371844_at | AW144530  | S-adenosylhomocysteine hydrolase-like 1                                                 | AHCYL1                   | -1,82  | Cytoplasm       |
| 1373078_at | AI409271  | S-adenosylhomocysteine hydrolase-like 2                                                 | AHCYL2                   | -2,16  | Unknown         |
| 1367470_at | AA851321  | SAR1 homolog A (S. cerevisiae)                                                          | SAR1A                    | -1,67  | Cytoplasm       |
| 1398353_at | AI236260  | SAR1 homolog A (S. cerevisiae)                                                          | SAR1A                    | 3,20   | Cytoplasm       |
| 1379957_at | BE107457  | schlafen family member 13                                                               | SLFN13                   | 10,40  | Nucleus         |
| 1374524_at | BM384384  | selenocysteine lyase                                                                    | SCLY                     | 4,27   | Cytoplasm       |
| 1374457_at | AI180194  | serine palmitoyltransferase, long chain base subunit 2                                  | SPTLC2                   | 3,73   | Cytoplasm       |
| 1375441_at | BI278468  | seryl-tRNA synthetase                                                                   | SARS                     | 2,60   | Cytoplasm       |
| 1372376_at | BF408879  | SET domain containing 2                                                                 | SETD2                    | 2,59   | Cytoplasm       |
| 1387266_at | NM_080905 | seven in absentia homolog 1 (Drosophila)                                                | SIAH1                    | 2,54   | Nucleus         |
| 1390096_at | BF284481  | SH3-domain GRB2-like endophilin B1                                                      | SH3GLB1                  | -3,17  | Cytoplasm       |
| 1381203_at | AA819246  | SH3-domain GRB2-like endophilin B1                                                      | SH3GLB1                  | 1,96   | Cytoplasm       |
| 1382007_at | AA964563  | SH3-domain GRB2-like endophilin B1                                                      | SH3GLB1                  | 2,17   | Cytoplasm       |
| 1370902_at | AI233740  | similar to aldo-keto reductase family 1, member B10                                     | TCAG7.1260               | 60,37  | Cytoplasm       |
| 1398420_at | BF393807  | SMAD specific E3 ubiquitin protein ligase 2                                             | SMURF2                   | 1,87   | Cytoplasm       |
| 1388565_at | BI289536  | spastic paraplegia 21 (autosomal recessive, Mast syndrome)                              | SPG21                    | 3,12   | Plasma Membrane |
| 1371774_at | AA893220  | spermidine/spermine N1-acetyltransferase 1                                              | SAT1                     | 11,18  | Cytoplasm       |
| 1374556_at | BI289700  | spermine oxidase                                                                        | SMOX                     | 3,17   | Cytoplasm       |
| 1394621_at | BI292153  | spermine oxidase                                                                        | SMOX                     | 7,77   | Cytoplasm       |
| 1394243_at | AI101062  | spermine synthase                                                                       | SMS                      | -2,38  | Unknown         |
| 1375889_at | AI228536  | spermine synthase                                                                       | SMS                      | -1,76  | Unknown         |
| 1384106_at | AW141276  | sphingomyelin synthase 1                                                                | SGMS1                    | 5,63   | Cytoplasm       |

|              |           |                                                                                                                 |          |        |                     |
|--------------|-----------|-----------------------------------------------------------------------------------------------------------------|----------|--------|---------------------|
| 1373224_at   | BI295550  | ST3 beta-galactoside alpha-2,3-sialyltransferase 4                                                              | ST3GAL4  | -1,70  | Cytoplasm           |
| 1370907_at   | M83143    | ST6 beta-galactosamide alpha-2,6-sialyltransferase 1                                                            | ST6GAL1  | -6,55  | Cytoplasm           |
| 1387435_at   | NM_013029 | ST8 alpha-N-acetyl-neuraminide alpha-2,8-sialyltransferase 3                                                    | ST8SIA3  | -3,29  | Cytoplasm           |
| 1388253_at   | M15114    | stearoyl-Coenzyme A desaturase 2                                                                                | SCD2     | -1,93  | Cytoplasm           |
| 1373869_at   | AI012418  | sterol O-acyltransferase 1                                                                                      | SOAT1    | -3,59  | Cytoplasm           |
| 1387926_at   | AB052846  | sterol-C5-desaturase (ERG3 delta-5-desaturase homolog, <i>S. cerevisiae</i> )-like                              | SC5DL    | -1,90  | Cytoplasm           |
| 1389309_at   | AW251323  | strawberry notch homolog 1 ( <i>Drosophila</i> )                                                                | SBNO1    | 2,10   | Unknown             |
| 1373017_at   | AI237518  | succinate-CoA ligase, GDP-forming, beta subunit                                                                 | SUCLG2   | -1,55  | Cytoplasm           |
| 1372510_at   | AI172302  | sulfiredoxin 1 homolog ( <i>S. cerevisiae</i> )                                                                 | SRXN1    | 3,53   | Cytoplasm           |
| 1370036_at   | NM_031127 | sulfite oxidase                                                                                                 | SUOX     | -12,15 | Cytoplasm           |
| 1370173_at   | BG671549  | superoxide dismutase 2, mitochondrial                                                                           | SOD2     | 7,51   | Cytoplasm           |
| 1370172_at   | AA892254  | superoxide dismutase 2, mitochondrial                                                                           | SOD2     | 13,07  | Cytoplasm           |
| 1375981_a_at | AA997899  | suppressor of variegation 3-9 homolog 1 ( <i>Drosophila</i> )                                                   | SUV39H1  | 6,04   | Nucleus             |
| 1390198_at   | AW523642  | suppressor of variegation 4-20 homolog 1 ( <i>Drosophila</i> )                                                  | SUV420H1 | -4,23  | Nucleus             |
| 1377012_at   | AI012630  | SWI/SNF-related, matrix-associated actin-dependent regulator of chromatin, subfamily a, containing DEAD/H box 1 | SMARCAD1 | -2,60  | Nucleus             |
| 1379438_at   | AA944576  | SWI/SNF-related, matrix-associated actin-dependent regulator of chromatin, subfamily a, containing DEAD/H box 1 | SMARCAD1 | -2,35  | Nucleus             |
| 1398762_at   | NM_031986 | syndecan binding protein (syntenin)                                                                             | SDCBP    | 2,30   | Plasma Membrane     |
| 1372008_at   | BM385175  | tafazzin                                                                                                        | TAZ      | -1,84  | Nucleus             |
| 1376999_at   | BF389721  | tankyrase, TRF1-interacting ankyrin-related ADP-ribose polymerase 2                                             | TNKS2    | -1,82  | Nucleus             |
| 1398839_at   | NM_053800 | thioredoxin                                                                                                     | TXN      | 1,54   | Cytoplasm           |
| 1367510_at   | BG381690  | thioredoxin domain containing 15                                                                                | TXNDC15  | -2,15  | Unknown             |
| 1398791_at   | NM_031614 | thioredoxin reductase 1                                                                                         | TXNRD1   | 1,65   | Cytoplasm           |
| 1386958_at   | U63923    | thioredoxin reductase 1                                                                                         | TXNRD1   | 3,24   | Cytoplasm           |
| 1380191_s_at | BF555110  | thioredoxin-like 1                                                                                              | TXNL1    | 1,57   | Cytoplasm           |
| 1391789_at   | BF555110  | thioredoxin-like 1                                                                                              | TXNL1    | 2,55   | Cytoplasm           |
| 1372145_at   | BI289683  | threonyl-tRNA synthetase                                                                                        | TARS     | 1,75   | Nucleus             |
| 1374490_at   | AI177845  | thyroid hormone receptor interactor 12                                                                          | TRIP12   | -2,13  | Cytoplasm           |
| 1388650_at   | BM385445  | topoisomerase (DNA) II alpha 170kDa                                                                             | TOP2A    | -16,06 | Nucleus             |
| 1372868_at   | BF284295  | torsin family 3, member A                                                                                       | TOR3A    | 2,15   | Unknown             |
| 1369940_at   | NM_031811 | transaldolase 1                                                                                                 | TALDO1   | 2,13   | Cytoplasm           |
| 1383171_at   | BG373674  | transcription factor B2, mitochondrial                                                                          | TFB2M    | -2,19  | Cytoplasm           |
| 1386859_at   | NM_022592 | transketolase                                                                                                   | TKT      | 1,56   | Cytoplasm           |
| 1389725_at   | BM390364  | transmembrane 7 superfamily member 2                                                                            | TM7SF2   | -2,91  | Cytoplasm           |
| 1377854_at   | AI406343  | transmembrane protein 62                                                                                        | TMEM62   | 2,54   | Unknown             |
| 1389056_at   | BF394168  | TRM1 tRNA methyltransferase 1 homolog ( <i>S. cerevisiae</i> )                                                  | TRMT1    | 1,91   | Unknown             |
| 1374133_at   | BG373110  | tRNA isopentenyltransferase 1                                                                                   | TRIT1    | 2,14   | Cytoplasm           |
| 1388574_at   | BG670966  | tryptophanyl-tRNA synthetase                                                                                    | WARS     | 4,11   | Cytoplasm           |
| 1395124_at   | BE101688  | tryptophanyl-tRNA synthetase                                                                                    | WARS     | 7,20   | Cytoplasm           |
| 1390419_a_at | AI454905  | tumor suppressor candidate 3                                                                                    | TUSC3    | -1,79  | Extracellular Space |
| 1398994_at   | BI301193  | tyrosylprotein sulfotransferase 2                                                                               | TPST2    | -2,51  | Cytoplasm           |
| 1372009_at   | AI407490  | tyrosyl-tRNA synthetase                                                                                         | YARS     | 2,21   | Cytoplasm           |
| 1392199_at   | BF398981  | ubiquitin protein ligase E3 component n-recognin 5                                                              | UBR5     | -5,09  | Nucleus             |
| 1373409_at   | BI294738  | ubiquitin protein ligase E3C                                                                                    | UBE3C    | -1,66  | Nucleus             |
| 1372888_at   | BI294856  | ubiquitination factor E4A (UFD2 homolog, yeast)                                                                 | UBE4A    | -2,29  | Cytoplasm           |
| 1376862_at   | BI296848  | ubiquitination factor E4B (UFD2 homolog, yeast)                                                                 | UBE4B    | -2,75  | Cytoplasm           |
| 1373495_at   | AW915822  | ubiquitin-conjugating enzyme E2, J1 (UBC6 homolog, yeast)                                                       | UBE2J1   | 4,66   | Cytoplasm           |
| 1375642_at   | AA892795  | ubiquitin-conjugating enzyme E2B (RAD6 homolog)                                                                 | UBE2B    | -1,57  | Cytoplasm           |
| 1399160_a_at | U13177    | ubiquitin-conjugating enzyme E2D 3 (UBC4/5 homolog, yeast)                                                      | UBE2D3   | 3,80   | Cytoplasm           |
| 1388798_at   | AW921519  | ubiquitin-conjugating enzyme E2E 2 (UBC4/5 homolog, yeast)                                                      | UBE2E2   | 2,18   | Cytoplasm           |
| 1375663_at   | AI232346  | ubiquitin-conjugating enzyme E2F (putative)                                                                     | UBE2F    | 2,15   | Cytoplasm           |
| 1388474_at   | AI104523  | ubiquitin-conjugating enzyme E2I (UBC9 homolog, yeast)                                                          | UBE2I    | -2,93  | Nucleus             |
| 1371945_at   | AI407788  | ubiquitin-conjugating enzyme E2L 3                                                                              | UBE2L3   | -1,56  | Cytoplasm           |
| 1373037_at   | BI279216  | ubiquitin-conjugating enzyme E2L 6                                                                              | UBE2L6   | 15,10  | Cytoplasm           |
| 1372788_at   | AI144725  | ubiquitin-conjugating enzyme E2Q family member 1                                                                | UBE2Q1   | -1,68  | Unknown             |
| 1376314_at   | AI172148  | ubiquitin-conjugating enzyme E2Q family member 2                                                                | UBE2Q2   | -1,78  | Unknown             |
| 1392906_at   | AW528860  | ubiquitin-like 4A                                                                                               | UBL4A    | 3,17   | Unknown             |
| 1372119_at   | BM389270  | ubiquitin-like modifier activating enzyme 5                                                                     | UBA5     | 2,71   | Cytoplasm           |
| 1379471_at   | BI275767  | ubiquitin-like modifier activating enzyme 6                                                                     | UBA6     | -1,84  | Cytoplasm           |

|                                   |           |                                                                                                |         |        |                     |
|-----------------------------------|-----------|------------------------------------------------------------------------------------------------|---------|--------|---------------------|
| 1379633_a_at                      | BE096453  | ubiquitin-like modifier activating enzyme 7                                                    | UBA7    | 4,43   | Cytoplasm           |
| 1368858_at                        | L21698    | UDP glycosyltransferase 8                                                                      | UGT8    | -5,15  | Cytoplasm           |
| 1387206_at                        | NM_031740 | UDP-Gal:betaGlcNAc beta 1,4- galactosyltransferase, polypeptide 6                              | B4GALT6 | -2,52  | Cytoplasm           |
| 1376202_at                        | BF416236  | UDP-GlcNAc:betaGal beta-1,3-N-acetylglucosaminyltransferase 1                                  | B3GNT1  | -3,44  | Cytoplasm           |
| 1372779_at                        | BG373352  | UDP-GlcNAc:betaGal beta-1,3-N-acetylglucosaminyltransferase 2                                  | B3GNT2  | 1,60   | Cytoplasm           |
| 1367938_at                        | NM_031325 | UDP-glucose dehydrogenase                                                                      | UGDH    | 4,47   | Nucleus             |
| 1388410_at                        | AI170679  | UDP-glucose pyrophosphorylase 2                                                                | UGP2    | 1,82   | Cytoplasm           |
| 1375912_a_at                      | BI285430  | UDP-N-acetyl-alpha-D-galactosamine:polypeptide N-acetylgalactosaminyltransferase 2 (GalNAc-T2) | GALNT2  | -4,06  | Cytoplasm           |
| 1387554_at                        | NM_031796 | UDP-N-acetyl-alpha-D-galactosamine:polypeptide N-acetylgalactosaminyltransferase 5 (GalNAc-T5) | GALNT5  | -4,04  | Cytoplasm           |
| 1379910_at                        | AI136097  | UDP-N-acetylglucosamine pyrophosphorylase 1                                                    | UAP1    | 1,77   | Nucleus             |
| 1389738_at                        | AA848420  | uracil-DNA glycosylase                                                                         | UNG     | 2,38   | Nucleus             |
| 1368245_at                        | NM_053845 | ureidopropionase, beta                                                                         | UPB1    | -8,68  | Cytoplasm           |
| 1389587_at                        | BM384966  | uridine monophosphate synthetase                                                               | UMPS    | 1,57   | Cytoplasm           |
| 1370878_at                        | Y00350    | uroporphyrinogen decarboxylase                                                                 | UROD    | -1,91  | Cytoplasm           |
| 1372578_at                        | AI704469  | valyl-tRNA synthetase                                                                          | VARS    | 2,92   | Cytoplasm           |
| 1372905_at                        | AW433888  | vinculin                                                                                       | VCL     | 1,65   | Plasma Membrane     |
| 1388330_at                        | BM384958  | vitamin K epoxide reductase complex, subunit 1                                                 | VKORC1  | -2,11  | Cytoplasm           |
| 1368405_at                        | NM_031093 | v-ral simian leukemia viral oncogene homolog A (ras related)                                   | RALA    | 4,16   | Cytoplasm           |
| 1387001_at                        | NM_053821 | v-ral simian leukemia viral oncogene homolog B (ras related; GTP binding protein)              | RALB    | 2,34   | Cytoplasm           |
| 1388731_at                        | AA850919  | zinc binding alcohol dehydrogenase domain containing 2                                         | ZADH2   | -4,53  | Cytoplasm           |
| <b>G-protein coupled receptor</b> |           |                                                                                                |         |        |                     |
| 1376714_at                        | AI236072  | antagonist of mitotic exit network 1 homolog (S. cerevisiae)                                   | AMN1    | 1,76   | Plasma Membrane     |
| 1374910_at                        | BE103601  | cadherin, EGF LAG seven-pass G-type receptor 2 (flamingo homolog, Drosophila)                  | CELSR2  | -5,93  | Plasma Membrane     |
| 1369787_at                        | NM_012688 | cholecystokinin A receptor                                                                     | CCKAR   | -18,10 | Plasma Membrane     |
| 1388994_at                        | AW917849  | frizzled homolog 6 (Drosophila)                                                                | FZD6    | -2,12  | Plasma Membrane     |
| 1374530_at                        | AI010048  | frizzled homolog 7 (Drosophila)                                                                | FZD7    | 5,96   | Plasma Membrane     |
| 1394169_at                        | AI639265  | G protein-coupled receptor 150                                                                 | GPR150  | -3,41  | Plasma Membrane     |
| 1374648_at                        | BM390626  | G protein-coupled receptor 155                                                                 | GPR155  | -10,74 | Plasma Membrane     |
| 1384004_at                        | AI030360  | G protein-coupled receptor 158                                                                 | GPR158  | -1,57  | Plasma Membrane     |
| 1382739_at                        | AI045718  | G protein-coupled receptor 19                                                                  | GPR19   | 8,11   | Plasma Membrane     |
| 1371696_at                        | AI412938  | G protein-coupled receptor 56                                                                  | GPR56   | 2,30   | Plasma Membrane     |
| 1369792_at                        | U12006    | G protein-coupled receptor 6                                                                   | GPR6    | -11,51 | Plasma Membrane     |
| 1373336_at                        | AI411074  | G protein-coupled receptor, family C, group 5, member B                                        | GPRC5B  | -2,69  | Plasma Membrane     |
| 1371671_at                        | AI228513  | G protein-coupled receptor, family C, group 5, member B                                        | GPRC5B  | 1,72   | Plasma Membrane     |
| 1387383_at                        | NM_031802 | gamma-aminobutyric acid (GABA) B receptor, 2                                                   | GABBR2  | -3,30  | Plasma Membrane     |
| 1368481_at                        | NM_012714 | gastric inhibitory polypeptide receptor                                                        | GIPR    | -7,24  | Plasma Membrane     |
| 1369699_at                        | NM_012728 | glucagon-like peptide 1 receptor                                                               | GLP1R   | -3,17  | Plasma Membrane     |
| 1374196_at                        | AI710389  | LanC lantibiotic synthetase component C-like 1 (bacterial)                                     | LANCL1  | -1,56  | Plasma Membrane     |
| 1389257_at                        | BI288578  | LanC lantibiotic synthetase component C-like 2 (bacterial)                                     | LANCL2  | -1,89  | Plasma Membrane     |
| 1370048_at                        | NM_053936 | lysophosphatidic acid receptor 1                                                               | LPAR1   | 2,98   | Plasma Membrane     |
| 1370606_at                        | U22830    | purinergic receptor P2Y, G-protein coupled, 1                                                  | P2RY1   | -9,74  | Plasma Membrane     |
| 1377702_at                        | BG380173  | purinergic receptor P2Y, G-protein coupled, 5                                                  | P2RY5   | -5,31  | Plasma Membrane     |
| 1385839_x_at                      | BF287928  | TM2 domain containing 1                                                                        | TM2D1   | -2,17  | Plasma Membrane     |
| 1385838_a_at                      | BF287928  | TM2 domain containing 1                                                                        | TM2D1   | -2,16  | Plasma Membrane     |
| 1367550_a_at                      | BI287742  | TM2 domain containing 1                                                                        | TM2D1   | -2,11  | Plasma Membrane     |
| 1387177_at                        | NM_017238 | vasoactive intestinal peptide receptor 2                                                       | VIPR2   | -7,59  | Plasma Membrane     |
| <b>Growth factor</b>              |           |                                                                                                |         |        |                     |
| 1387663_at                        | NM_031032 | glia maturation factor, beta                                                                   | GMFB    | 9,92   | Cytoplasm           |
| 1386893_at                        | NM_017113 | granulin                                                                                       | GRN     | 3,66   | Extracellular Space |
| 1369735_at                        | NM_057100 | growth arrest-specific 6                                                                       | GAS6    | -2,44  | Extracellular Space |
| 1374706_at                        | BF407916  | growth differentiation factor 11                                                               | GDF11   | -1,84  | Extracellular Space |
| 1370153_at                        | NM_019216 | growth differentiation factor 15                                                               | GDF15   | 12,84  | Extracellular Space |
| 1368983_at                        | NM_012945 | heparin-binding EGF-like growth factor                                                         | HBEGF   | 6,40   | Extracellular Space |
| 1367817_at                        | NM_053707 | hepatoma-derived growth factor (high-mobility group protein 1-like)                            | HDGF    | 2,05   | Extracellular Space |
| 1368725_at                        | NM_019147 | jagged 1 (Alagille syndrome)                                                                   | JAG1    | 4,90   | Extracellular Space |
| 1379375_at                        | BE100812  | platelet-derived growth factor alpha polypeptide                                               | PDGFA   | 2,48   | Extracellular Space |
| 1370427_at                        | L06238    | platelet-derived growth factor alpha polypeptide                                               | PDGFA   | 3,49   | Extracellular Space |
| 1376425_at                        | BF420705  | transforming growth factor, beta 2                                                             | TGFB2   | -6,08  | Extracellular Space |

|                    |           |                                                                                               |                            |        |                     |
|--------------------|-----------|-----------------------------------------------------------------------------------------------|----------------------------|--------|---------------------|
| 1387172_at         | NM_031131 | transforming growth factor, beta 2                                                            | TGFB2                      | -3,99  | Extracellular Space |
| 1378963_at         | AA963004  | transforming growth factor, beta 2                                                            | TGFB2                      | -3,04  | Extracellular Space |
| 1392382_at         | BE117736  | transforming growth factor, beta 2                                                            | TGFB2                      | -2,73  | Extracellular Space |
| <b>Ion channel</b> |           |                                                                                               |                            |        |                     |
| 1368143_at         | AI013902  | annexin A7                                                                                    | ANXA7                      | 2,03   | Plasma Membrane     |
| 1370248_at         | AA851939  | FXYD domain containing ion transport regulator 6                                              | FXYD6                      | -13,71 | Plasma Membrane     |
| 1369904_at         | NM_012956 | gamma-aminobutyric acid (GABA) A receptor, beta 1                                             | GABRB1                     | -1,92  | Plasma Membrane     |
| 1374857_at         | AI579023  | GAR1 ribonucleoprotein homolog (yeast)                                                        | GAR1                       | 2,31   | Nucleus             |
| 1376892_at         | AI102061  | glutamate receptor, ionotropic, AMPA 3                                                        | GRIA3                      | -6,76  | Plasma Membrane     |
| 1387171_at         | NM_017261 | glutamate receptor, ionotropic, AMPA 2                                                        | GRIA2                      | -16,74 | Plasma Membrane     |
| 1368401_at         | M85035    | glutamate receptor, ionotropic, AMPA 2                                                        | GRIA2                      | -4,97  | Plasma Membrane     |
| 1372724_at         | BI284904  | glutamate receptor, ionotropic, N-methyl D-aspartate-associated protein 1 (glutamate binding) | GRINA                      | 2,21   | Unknown             |
| 1387907_at         | J05510    | inositol 1,4,5-triphosphate receptor, type 1                                                  | ITPR1                      | -4,43  | Cytoplasm           |
| 1368005_at         | NM_013138 | inositol 1,4,5-triphosphate receptor, type 3                                                  | ITPR3                      | 2,49   | Cytoplasm           |
| 1386750_at         | BF290862  | polycystic kidney disease 2-like 2                                                            | PKD2L2                     | 2,31   | Unknown             |
| 1392785_at         | AA800908  | potassium channel tetramerisation domain containing 12                                        | KCTD12                     | 3,06   | Unknown             |
| 1373045_at         | AI235230  | potassium channel tetramerisation domain containing 13                                        | KCTD13                     | 2,46   | Cytoplasm           |
| 1370111_at         | NM_019314 | potassium intermediate/small conductance calcium-activated channel, subfamily N, member 2     | KCNN2                      | -2,36  | Plasma Membrane     |
| 1368626_at         | NM_019315 | potassium intermediate/small conductance calcium-activated channel, subfamily N, member 3     | KCNN3                      | 3,44   | Plasma Membrane     |
| 1387698_at         | AB043638  | potassium inwardly-rectifying channel, subfamily J, member 11                                 | KCNJ11                     | -1,88  | Plasma Membrane     |
| 1391007_s_at       | BE113377  | potassium inwardly-rectifying channel, subfamily J, member 11                                 | KCNJ11                     | -1,67  | Plasma Membrane     |
| 1369334_at         | NM_031828 | potassium large conductance calcium-activated channel, subfamily M, alpha member 1            | KCNMA1                     | -2,12  | Plasma Membrane     |
| 1391546_at         | AI412209  | potassium voltage-gated channel, KQT-like subfamily, member 2                                 | KCNQ2                      | -7,05  | Plasma Membrane     |
| 1369017_at         | NM_053937 | potassium voltage-gated channel, subfamily H (eag-related), member 6                          | KCNH6                      | -3,92  | Plasma Membrane     |
| 1370850_at         | AA685184  | sodium channel, voltage-gated, type III, beta                                                 | SCN3B                      | -2,78  | Plasma Membrane     |
| 1383435_at         | BF542912  | sodium channel, voltage-gated, type III, beta                                                 | SCN3B                      | -2,39  | Plasma Membrane     |
| 1370411_at         | AF061266  | transient receptor potential cation channel, subfamily C, member 1                            | TRPC1                      | -2,77  | Plasma Membrane     |
| 1384238_at         | BM385249  | tweety homolog 2 (Drosophila)                                                                 | TTYH2                      | -4,07  | Unknown             |
| 1376313_at         | BI296463  | two pore segment channel 2                                                                    | TPCN2                      | 1,52   | Unknown             |
| <b>Kinase</b>      |           |                                                                                               |                            |        |                     |
| 1388044_at         | L27084    | 6-phosphofructo-2-kinase/fructose-2,6-biphosphatase 2                                         | PFKFB2                     | -1,94  | Cytoplasm           |
| 1389043_at         | AI101347  | aarF domain containing kinase 4                                                               | ADCK4                      | 3,27   | Unknown             |
| 1375506_at         | BG376675  | aarF domain containing kinase 5                                                               | ADCK5                      | -1,81  | Unknown             |
| 1381220_at         | BM383968  | activin A receptor, type IIA                                                                  | ACVR2A                     | 2,25   | Plasma Membrane     |
| 1369629_at         | U90340    | adenosine kinase                                                                              | ADK                        | -1,98  | Nucleus             |
| 1371824_at         | AA891949  | adenylate kinase 3-like 2                                                                     | AK3L2 (includes EG:645619) | 34,02  | Cytoplasm           |
| 1388521_at         | BG380693  | aldehyde dehydrogenase 18 family, member A1                                                   | ALDH18A1                   | -1,60  | Cytoplasm           |
| 1372348_at         | AI104502  | AP2 associated kinase 1                                                                       | AAK1                       | -2,13  | Cytoplasm           |
| 1371538_at         | BF407786  | BR serine/threonine kinase 1                                                                  | BRSK1                      | -2,21  | Cytoplasm           |
| 1373494_at         | BE120831  | breakpoint cluster region                                                                     | BCR                        | 3,09   | Cytoplasm           |
| 1389029_at         | BE108923  | bromodomain containing 3                                                                      | BRD3                       | -2,38  | Nucleus             |
| 1372855_at         | BF287135  | bromodomain containing 4                                                                      | BRD4                       | -4,23  | Nucleus             |
| 1372351_at         | AI229448  | bromodomain containing 4                                                                      | BRD4                       | 1,53   | Nucleus             |
| 1375650_at         | BM389207  | bromodomain containing 4                                                                      | BRD4                       | 2,32   | Nucleus             |
| 1391229_at         | BG381458  | calcium/calmodulin-dependent protein kinase IG                                                | CAMK1G                     | -2,72  | Cytoplasm           |
| 1375575_at         | BF403410  | calcium/calmodulin-dependent protein kinase II beta                                           | CAMK2B                     | -1,93  | Cytoplasm           |
| 1368834_at         | AA894330  | calcium/calmodulin-dependent protein kinase II delta                                          | CAMK2D                     | 2,45   | Cytoplasm           |
| 1370819_at         | AB063114  | casein kinase 1, delta                                                                        | CSNK1D                     | 3,34   | Cytoplasm           |
| 1392650_at         | AI059349  | casein kinase 2, alpha 1 polypeptide                                                          | CSNK2A1                    | 2,12   | Cytoplasm           |
| 1371326_at         | BI276957  | casein kinase 2, alpha prime polypeptide                                                      | CSNK2A2                    | 1,58   | Cytoplasm           |
| 1373823_at         | AA944180  | CDC28 protein kinase regulatory subunit 2                                                     | CKS2 (includes EG:1164)    | 12,15  | Unknown             |
| 1373425_at         | BF284224  | CDC-like kinase 2                                                                             | CLK2                       | 1,51   | Nucleus             |
| 1368235_at         | NM_134340 | CDC-like kinase 3                                                                             | CLK3                       | 1,52   | Nucleus             |
| 1375987_at         | AW525194  | ceramide kinase                                                                               | CERK                       | -2,25  | Plasma Membrane     |
| 1372536_at         | AI105042  | chaperone, ABC1 activity of bc1 complex homolog (S. pombe)                                    | CABC1                      | -11,90 | Cytoplasm           |
| 1368692_a_at       | AW140851  | choline kinase alpha                                                                          | CHKA                       | 2,11   | Cytoplasm           |
| 1374911_at         | AW251534  | chromosome 20 open reading frame 111                                                          | C20ORF111                  | 8,44   | Unknown             |
| 1392994_at         | AW522671  | chromosome 9 open reading frame 95                                                            | C9ORF95                    | -5,90  | Unknown             |

|              |           |                                                                      |
|--------------|-----------|----------------------------------------------------------------------|
| 1373304_at   | BM392002  | Coenzyme A synthase                                                  |
| 1371893_at   | BE111640  | collagen, type IV, alpha 3 (Goodpasture antigen) binding protein     |
| 1367740_at   | M14400    | creatine kinase, brain                                               |
| 1390566_a_at | BI301453  | creatine kinase, mitochondrial 1B                                    |
| 1372759_at   | H31766    | cyclin-dependent kinase 9                                            |
| 1388674_at   | AI010427  | cyclin-dependent kinase inhibitor 1A (p21, Cip1)                     |
| 1394431_at   | AI704014  | cytidine and dCMP deaminase domain containing 1                      |
| 1371804_at   | AI172266  | cytidine and dCMP deaminase domain containing 1                      |
| 1393044_at   | BF282370  | cytidine monophosphate (UMP-CMP) kinase 2, mitochondrial             |
| 1383424_at   | BI276216  | cytidine monophosphate (UMP-CMP) kinase 2, mitochondrial             |
| 1376788_at   | AA818353  | death-associated protein kinase 1                                    |
| 1369686_at   | U78857    | doublecortin-like kinase 1                                           |
| 1380938_at   | BE106206  | dual serine/threonine and tyrosine protein kinase                    |
| 1395736_at   | BG666455  | dual serine/threonine and tyrosine protein kinase                    |
| 1370183_at   | BI303285  | dual-specificity tyrosine-(Y)-phosphorylation regulated kinase 1A    |
| 1373915_at   | AI044427  | dystrophia myotonica-protein kinase                                  |
| 1377213_at   | BI280353  | endoplasmic reticulum to nucleus signaling 1                         |
| 1374143_at   | AI602491  | EPH receptor A2                                                      |
| 1393151_at   | BG668816  | ethanolamine kinase 1                                                |
| 1371710_at   | BM391283  | ethanolamine kinase 1                                                |
| 1368326_at   | NM_031599 | eukaryotic translation initiation factor 2-alpha kinase 3            |
| 1395404_at   | BE110529  | fructosamine-3-kinase-related protein                                |
| 1372362_at   | BE329241  | galactokinase 2                                                      |
| 1387312_a_at | NM_012565 | glucokinase (hexokinase 4)                                           |
| 1376650_at   | BF399323  | golgi autoantigen, golgin subfamily a, 5                             |
| 1388721_at   | BG380282  | heat shock 22kDa protein 8                                           |
| 1383519_at   | BI294137  | hexokinase 2                                                         |
| 1388500_at   | AI180252  | inositol 1,4,5-trisphosphate 3-kinase B                              |
| 1387063_at   | NM_021660 | inositol hexakisphosphate kinase 2                                   |
| 1383474_at   | BI274988  | interleukin-1 receptor-associated kinase 2                           |
| 1383478_at   | BG671504  | Janus kinase 1 (a protein tyrosine kinase)                           |
| 1384060_at   | BG663208  | Janus kinase 1 (a protein tyrosine kinase)                           |
| 1368856_at   | NM_031514 | Janus kinase 2 (a protein tyrosine kinase)                           |
| 1380110_at   | AI229643  | Janus kinase 2 (a protein tyrosine kinase)                           |
| 1371530_at   | BF281337  | keratin 8                                                            |
| 1372038_at   | BM383395  | MAP kinase interacting serine/threonine kinase 2                     |
| 1368831_at   | NM_130749 | MAP/microtubule affinity-regulating kinase 3                         |
| 1398866_at   | AF255614  | membrane associated guanylate kinase, WW and PDZ domain containing 3 |
| 1383324_at   | AI703599  | membrane protein, palmitoylated 6 (MAGUK p55 subfamily member 6)     |
| 1388399_at   | BE106597  | microtubule associated serine/threonine kinase 2                     |
| 1372740_at   | AA925557  | misshapen-like kinase 1 (zebrafish)                                  |
| 1383645_at   | BF411062  | mitogen-activated protein kinase 13                                  |
| 1368273_at   | NM_031622 | mitogen-activated protein kinase 6                                   |
| 1388858_at   | BI283843  | mitogen-activated protein kinase kinase 3                            |
| 1368886_at   | NM_013055 | mitogen-activated protein kinase kinase kinase 12                    |
| 1369393_at   | NM_053847 | mitogen-activated protein kinase kinase kinase 8                     |
| 1371446_at   | BI283703  | mitogen-activated protein kinase-activated protein kinase 2          |
| 1371541_at   | AI177055  | myosin light chain kinase                                            |
| 1398441_at   | AA957410  | NCK adaptor protein 2                                                |
| 1382365_at   | AA997745  | nemo-like kinase                                                     |
| 1379218_at   | BE101792  | nemo-like kinase                                                     |
| 1375615_at   | AI575310  | neurotrophic tyrosine kinase, receptor, type 1                       |
| 1397246_at   | BE102996  | neurotrophic tyrosine kinase, receptor, type 2                       |
| 1368863_at   | NM_053507 | non-metastatic cells 3, protein expressed in                         |
| 1377676_at   | AI599187  | nuclear casein kinase and cyclin-dependent kinase substrate 1        |
| 1378380_at   | BE098920  | p21 protein (Cdc42/Rac)-activated kinase 4                           |
| 1382924_at   | AA850195  | pantothenate kinase 1                                                |
| 1374987_at   | AI232974  | pantothenate kinase 3                                                |

|                         |       |                     |
|-------------------------|-------|---------------------|
| COASY                   | -2,54 | Cytoplasm           |
| COL4A3BP                | -1,64 | Cytoplasm           |
| CKB                     | -8,12 | Cytoplasm           |
| CKMT1B                  | 6,07  | Cytoplasm           |
| CDK9                    | 1,63  | Nucleus             |
| CDKN1A                  | 20,31 | Nucleus             |
| CDADC1                  | -1,70 | Unknown             |
| CDADC1                  | 1,97  | Unknown             |
| CMPK2                   | 26,60 | Cytoplasm           |
| CMPK2                   | 43,35 | Cytoplasm           |
| DAPK1                   | 1,59  | Cytoplasm           |
| DCLK1                   | -4,71 | Cytoplasm           |
| RIPK5                   | -2,03 | Cytoplasm           |
| RIPK5                   | -1,76 | Cytoplasm           |
| DYRK1A                  | 2,16  | Nucleus             |
| DMPK                    | -2,06 | Cytoplasm           |
| ERN1 (includes EG:2081) | 3,44  | Cytoplasm           |
| EPHA2                   | 1,80  | Plasma Membrane     |
| ETNK1                   | -4,88 | Cytoplasm           |
| ETNK1                   | -2,40 | Cytoplasm           |
| EIF2AK3                 | 2,13  | Cytoplasm           |
| FN3KRP                  | -1,52 | Unknown             |
| GALK2                   | 1,67  | Cytoplasm           |
| GCK                     | -4,50 | Cytoplasm           |
| GOLGA5                  | -2,70 | Cytoplasm           |
| HSPB8                   | 9,02  | Cytoplasm           |
| HK2                     | 16,77 | Cytoplasm           |
| ITPKB                   | -6,07 | Cytoplasm           |
| IHPK2                   | -1,89 | Cytoplasm           |
| IRAK2                   | 3,01  | Plasma Membrane     |
| JAK1                    | 2,71  | Cytoplasm           |
| JAK1                    | 3,71  | Cytoplasm           |
| JAK2                    | 4,23  | Cytoplasm           |
| JAK2                    | 7,27  | Cytoplasm           |
| KRT8                    | 2,74  | Cytoplasm           |
| MKNK2                   | -3,12 | Cytoplasm           |
| MARK3                   | 1,88  | Cytoplasm           |
| MAGI3                   | 2,36  | Cytoplasm           |
| MPP6                    | 3,73  | Plasma Membrane     |
| MAST2                   | 2,10  | Cytoplasm           |
| MINK1                   | 1,72  | Cytoplasm           |
| MAPK13                  | -4,27 | Cytoplasm           |
| MAPK6                   | 3,37  | Cytoplasm           |
| MAP2K3                  | 2,19  | Cytoplasm           |
| MAP3K12                 | -1,57 | Cytoplasm           |
| MAP3K8                  | 3,28  | Cytoplasm           |
| MAPKAPK2                | 2,34  | Nucleus             |
| MYLK                    | -2,14 | Cytoplasm           |
| NCK2                    | 1,69  | Cytoplasm           |
| NLK                     | -1,65 | Nucleus             |
| NLK                     | -1,53 | Nucleus             |
| NTRK1                   | -2,47 | Plasma Membrane     |
| NTRK2                   | -4,19 | Plasma Membrane     |
| NME3                    | -5,02 | Extracellular Space |
| NUCKS1                  | 2,29  | Nucleus             |
| PAK4                    | 2,25  | Cytoplasm           |
| PANK1                   | -1,61 | Cytoplasm           |
| PANK3                   | -1,82 | Cytoplasm           |

|              |           |                                                                                            |         |        |                 |
|--------------|-----------|--------------------------------------------------------------------------------------------|---------|--------|-----------------|
| 1374747_at   | BM384279  | PFTAIRE protein kinase 1                                                                   | PFTK1   | -7,35  | Nucleus         |
| 1369039_at   | NM_031083 | phosphatidylinositol 4-kinase, catalytic, beta                                             | PI4KB   | -3,54  | Cytoplasm       |
| 1391451_at   | AI228633  | phosphoenolpyruvate carboxykinase 2 (mitochondrial)                                        | PCK2    | -1,91  | Cytoplasm       |
| 1367743_at   | NM_013190 | phosphofructokinase, liver                                                                 | PFKL    | 1,89   | Cytoplasm       |
| 1367864_at   | NM_031715 | phosphofructokinase, muscle                                                                | PFKM    | -4,84  | Cytoplasm       |
| 1372182_at   | BM389769  | phosphofructokinase, platelet                                                              | PFKP    | 7,76   | Cytoplasm       |
| 1387361_s_at | NM_053291 | phosphoglycerate kinase 1                                                                  | PGK1    | 1,99   | Cytoplasm       |
| 1388318_at   | BI279760  | phosphoglycerate kinase 1                                                                  | PGK1    | 2,08   | Cytoplasm       |
| 1378506_at   | BM385647  | phosphoinositide-3-kinase, class 2, alpha polypeptide                                      | PIK3C2A | -1,76  | Cytoplasm       |
| 1389723_at   | AI172265  | phosphoinositide-3-kinase, regulatory subunit 4                                            | PIK3R4  | -3,39  | Cytoplasm       |
| 1373731_at   | AI409901  | phosphoserine kinase                                                                       | PSTK    | 1,85   | Unknown         |
| 1367725_at   | NM_022602 | pim-3 oncogene                                                                             | PIM3    | 3,06   | Unknown         |
| 1374616_at   | BM384311  | platelet-derived growth factor receptor-like                                               | PDGFRL  | -1,58  | Plasma Membrane |
| 1372176_at   | BF415343  | protein kinase C, alpha                                                                    | PRKCA   | 7,67   | Cytoplasm       |
| 1370585_a_at | X04440    | protein kinase C, beta                                                                     | PRKCB   | -3,32  | Cytoplasm       |
| 1387114_at   | NM_133307 | protein kinase C, delta                                                                    | PRKCD   | 2,87   | Cytoplasm       |
| 1386945_a_at | NM_031976 | protein kinase, AMP-activated, beta 1 non-catalytic subunit                                | PRKAB1  | 1,53   | Nucleus         |
| 1371578_at   | AW915101  | protein kinase, cAMP-dependent, catalytic, alpha                                           | PRKACA  | -2,36  | Cytoplasm       |
| 1371835_at   | AI411907  | protein kinase, cAMP-dependent, catalytic, beta                                            | PRKACB  | -1,92  | Cytoplasm       |
| 1388375_at   | AI234096  | protein kinase, cAMP-dependent, regulatory, type I, alpha (tissue specific extinguisher 1) | PRKAR1A | -2,32  | Cytoplasm       |
| 1373951_at   | AI407792  | protein kinase, cAMP-dependent, regulatory, type I, alpha (tissue specific extinguisher 1) | PRKAR1A | -1,79  | Cytoplasm       |
| 1382813_at   | BG377386  | protein kinase-like protein SgK196                                                         | SGK196  | -2,67  | Unknown         |
| 1377053_at   | BE117757  | protein kinase-like protein SgK196                                                         | SGK196  | -2,66  | Unknown         |
| 1390288_at   | AI013362  | protein serine kinase H1                                                                   | PSKH1   | -3,06  | Nucleus         |
| 1372229_at   | AI179119  | pyruvate dehydrogenase kinase, isozyme 3                                                   | PDK3    | -11,29 | Cytoplasm       |
| 1387263_at   | NM_012624 | pyruvate kinase, liver and RBC                                                             | PKLR    | -6,68  | Cytoplasm       |
| 1368651_at   | M17685    | pyruvate kinase, liver and RBC                                                             | PKLR    | -4,97  | Cytoplasm       |
| 1381279_at   | BF412519  | receptor-interacting serine-threonine kinase 2                                             | RIPK2   | 32,07  | Plasma Membrane |
| 1370989_at   | AI639318  | ret proto-oncogene                                                                         | RET     | -3,72  | Plasma Membrane |
| 1389735_at   | BE107296  | ribosomal protein S6 kinase, 90kDa, polypeptide 6                                          | RPS6KA6 | -3,10  | Cytoplasm       |
| 1393236_at   | AI137233  | RIO kinase 3 (yeast)                                                                       | RIOK3   | 2,78   | Unknown         |
| 1390047_at   | BG378174  | RIO kinase 3 (yeast)                                                                       | RIOK3   | 3,30   | Unknown         |
| 1395699_at   | BE126478  | RIO kinase 3 (yeast)                                                                       | RIOK3   | 3,82   | Unknown         |
| 1394363_at   | H34775    | RIO kinase 3 (yeast)                                                                       | RIOK3   | 17,16  | Unknown         |
| 1368596_at   | NM_021693 | salt-inducible kinase 1                                                                    | SNFILK  | -2,84  | Cytoplasm       |
| 1394434_at   | BF414439  | salt-inducible kinase 2                                                                    | SNFILK2 | 2,38   | Cytoplasm       |
| 1372292_at   | AI009732  | serine/threonine kinase 24 (STE20 homolog, yeast)                                          | STK24   | -4,17  | Cytoplasm       |
| 1373943_at   | AI237047  | serine/threonine kinase 4                                                                  | STK4    | -1,72  | Cytoplasm       |
| 1367802_at   | NM_019232 | serum/glucocorticoid regulated kinase 1                                                    | SGK1    | 2,28   | Cytoplasm       |
| 1371714_at   | BG378760  | SFRS protein kinase 1                                                                      | SRPK1   | -2,46  | Nucleus         |
| 1380323_at   | BE105023  | STE20-like kinase (yeast)                                                                  | SLK     | 3,32   | Nucleus         |
| 1398400_at   | AW433595  | STE20-related kinase adaptor alpha                                                         | STRADA  | -2,24  | Nucleus         |
| 1376880_at   | AI639447  | TANK-binding kinase 1                                                                      | TBK1    | 1,86   | Cytoplasm       |
| 1370940_at   | BG378746  | tight junction protein 2 (zona occludens 2)                                                | TJP2    | 2,95   | Plasma Membrane |
| 1384319_at   | BE098518  | tousled-like kinase 2                                                                      | TLK2    | 3,02   | Cytoplasm       |
| 1396144_at   | BF560978  | TRAF2 and NCK interacting kinase                                                           | TNIK    | -1,69  | Cytoplasm       |
| 1380100_at   | AW526268  | TRAF2 and NCK interacting kinase                                                           | TNIK    | -1,54  | Cytoplasm       |
| 1388821_at   | AI010430  | tribbles homolog 2 (Drosophila)                                                            | TRIB2   | -2,24  | Plasma Membrane |
| 1370695_s_at | AB020967  | tribbles homolog 3 (Drosophila)                                                            | TRIB3   | 8,15   | Nucleus         |
| 1370694_at   | AB020967  | tribbles homolog 3 (Drosophila)                                                            | TRIB3   | 9,76   | Nucleus         |
| 1386321_s_at | H31287    | tribbles homolog 3 (Drosophila)                                                            | TRIB3   | 14,66  | Nucleus         |
| 1383945_at   | AA859827  | uridine-cytidine kinase 2                                                                  | UCK2    | 9,55   | Cytoplasm       |
| 1395605_at   | BM384452  | v-crk sarcoma virus CT10 oncogene homolog (avian)-like                                     | CRKL    | 4,11   | Cytoplasm       |
| 1397409_s_at | BE113999  | WEE1 homolog (S. pombe)                                                                    | WEE1    | 1,89   | Nucleus         |
| 1372791_at   | AI235474  | WNK lysine deficient protein kinase 1                                                      | WNK1    | -2,30  | Cytoplasm       |
| 1387072_at   | NM_053794 | WNK lysine deficient protein kinase 1                                                      | WNK1    | 2,56   | Cytoplasm       |
| 1398458_at   | BE104506  | WNK lysine deficient protein kinase 2                                                      | WNK2    | -2,48  | Unknown         |

**Ligand-dependent nuclear receptor**

|              |           |                                                                    |         |        |                     |
|--------------|-----------|--------------------------------------------------------------------|---------|--------|---------------------|
| 1370816_at   | M25804    | nuclear receptor subfamily 1, group D, member 1                    | NR1D1   | 13,65  | Nucleus             |
| 1389854_at   | AA956855  | nuclear receptor subfamily 1, group H, member 2                    | NR1H2   | 1,54   | Nucleus             |
| 1369073_at   | NM_021745 | nuclear receptor subfamily 1, group H, member 4                    | NR1H4   | -4,41  | Nucleus             |
| 1389169_at   | AA944158  | progesterone receptor membrane component 2                         | PGRMC2  | -1,67  | Nucleus             |
| 1379397_at   | BE106199  | RAR-related orphan receptor A                                      | RORA    | 5,64   | Nucleus             |
|              |           | <b>Peptidase</b>                                                   |         |        |                     |
| 1367922_at   | NM_020306 | ADAM metallopeptidase domain 17                                    | ADAM17  | 2,04   | Plasma Membrane     |
| 1373570_at   | AI11240   | aminopeptidase-like 1                                              | NPEPL1  | -3,19  | Unknown             |
| 1367987_at   | NM_031097 | arginyl aminopeptidase (aminopeptidase B)                          | RNPEP   | -1,52  | Cytoplasm           |
| 1389273_at   | BG374362  | ATG4 autophagy related 4 homolog B (S. cerevisiae)                 | ATG4B   | -2,01  | Cytoplasm           |
| 1399042_at   | AI228455  | ATG4 autophagy related 4 homolog B (S. cerevisiae)                 | ATG4B   | 1,79   | Cytoplasm           |
| 1373378_at   | BF410522  | ATP/GTP binding protein 1                                          | AGTPBP1 | 1,53   | Nucleus             |
| 1380339_at   | AW520369  | ATP/GTP binding protein 1                                          | AGTPBP1 | 1,54   | Nucleus             |
| 1377390_at   | BG381587  | beta-site APP-cleaving enzyme 2                                    | BACE2   | 2,97   | Cytoplasm           |
| 1396386_at   | BF408665  | beta-site APP-cleaving enzyme 2                                    | BACE2   | 9,50   | Cytoplasm           |
| 1373466_at   | AA946474  | calpastatin                                                        | CAST    | -2,99  | Cytoplasm           |
| 1393397_at   | AI576488  | carboxypeptidase A2 (pancreatic)                                   | CPA2    | -4,04  | Extracellular Space |
| 1387503_at   | NM_053526 | carboxypeptidase N, polypeptide 1                                  | CPN1    | -2,47  | Extracellular Space |
| 1387818_at   | NM_053736 | caspase 4, apoptosis-related cysteine peptidase                    | CASP4   | 41,24  | Cytoplasm           |
| 1389170_at   | BF283754  | caspase 7, apoptosis-related cysteine peptidase                    | CASP7   | -1,75  | Cytoplasm           |
| 1370245_at   | AI232474  | cathepsin L2                                                       | CTSL2   | 2,81   | Cytoplasm           |
| 1388386_at   | AA799822  | chromatin modifying protein 1A                                     | CHMP1A  | -1,53  | Extracellular Space |
| 1373961_at   | AI170410  | chromosome 3 open reading frame 38                                 | C3ORF38 | 6,85   | Unknown             |
| 1383241_at   | BI292425  | complement component 1, r subcomponent                             | C1R     | 146,09 | Extracellular Space |
| 1387893_at   | D88250    | complement component 1, s subcomponent                             | C1S     | 34,47  | Extracellular Space |
| 1368000_at   | NM_016994 | complement component 3                                             | C3      | 96,78  | Extracellular Space |
| 1389470_at   | AI639117  | complement factor B                                                | CFB     | 25,85  | Extracellular Space |
| 1367722_at   | NM_031973 | dipeptidyl-peptidase 7                                             | DPP7    | 2,31   | Cytoplasm           |
| 1388486_at   | BG671315  | dipeptidyl-peptidase 8                                             | DPP8    | -3,75  | Cytoplasm           |
| 1382710_at   | AA997271  | ectodermal-neural cortex (with BTB-like domain)                    | ENC1    | 5,51   | Nucleus             |
| 1388666_at   | AI179988  | ectodermal-neural cortex (with BTB-like domain)                    | ENC1    | 7,62   | Nucleus             |
| 1384687_at   | AI071307  | ectodermal-neural cortex (with BTB-like domain)                    | ENC1    | 18,57  | Nucleus             |
| 1399161_a_at | AF148323  | endoplasmic reticulum aminopeptidase 1                             | ERAP1   | 2,05   | Extracellular Space |
| 1368356_a_at | NM_030836 | endoplasmic reticulum aminopeptidase 1                             | ERAP1   | 2,27   | Extracellular Space |
| 1367801_at   | NM_053596 | endothelin converting enzyme 1                                     | ECE1    | -2,39  | Plasma Membrane     |
| 1392894_at   | AI716194  | fibrinogen-like 2                                                  | FGL2    | -5,97  | Extracellular Space |
| 1367778_at   | NM_019331 | furin (paired basic amino acid cleaving enzyme)                    | FURIN   | -1,50  | Cytoplasm           |
| 1368470_at   | NM_012960 | gamma-glutamyl hydrolase (conjugase, folylpolyglutamyld hydrolase) | GGH     | -2,48  | Cytoplasm           |
| 1387652_at   | BI291249  | insulin-degrading enzyme                                           | IDE     | 6,25   | Extracellular Space |
| 1398247_at   | NM_133404 | lon peptidase 1, mitochondrial                                     | LONP1   | 6,04   | Cytoplasm           |
| 1388204_at   | M60616    | matrix metallopeptidase 13 (collagenase 3)                         | MMP13   | 22,56  | Extracellular Space |
| 1368595_at   | NM_031757 | matrix metallopeptidase 24 (membrane-inserted)                     | MMP24   | -3,65  | Extracellular Space |
| 1368657_at   | NM_133523 | matrix metallopeptidase 3 (stromelysin 1, progelatinase)           | MMP3    | 4,53   | Extracellular Space |
| 1398833_at   | NM_053569 | membrane-bound transcription factor peptidase, site 1              | MBTPS1  | -1,70  | Cytoplasm           |
| 1389634_at   | AI101470  | methionyl aminopeptidase 1                                         | METAP1  | 1,93   | Cytoplasm           |
| 1398815_at   | NM_012500 | N-acetylaminoacyl-peptide hydrolase                                | APEH    | -2,40  | Cytoplasm           |
| 1369669_at   | NM_053970 | neurolysin (metallopeptidase M3 family)                            | NLN     | 2,85   | Cytoplasm           |
| 1367511_at   | BI285459  | nicastatin                                                         | NCSTN   | -1,81  | Plasma Membrane     |
| 1387781_at   | NM_022395 | peptidase (mitochondrial processing) beta                          | PMPCB   | -1,61  | Cytoplasm           |
| 1373101_at   | AI236743  | phosphatidylinositol glycan anchor biosynthesis, class K           | PIGK    | -2,13  | Cytoplasm           |
| 1368399_a_at | NM_031640 | plasma glutamate carboxypeptidase                                  | PGCP    | -1,80  | Extracellular Space |
| 1367800_at   | NM_013151 | plasminogen activator, tissue                                      | PLAT    | 21,70  | Extracellular Space |
| 1387247_at   | M83745    | proprotein convertase subtilisin/kexin type 1                      | PCSK1   | -5,99  | Extracellular Space |
| 1368559_at   | NM_017091 | proprotein convertase subtilisin/kexin type 1                      | PCSK1   | -5,58  | Extracellular Space |
| 1387155_at   | NM_012746 | proprotein convertase subtilisin/kexin type 2                      | PCSK2   | -2,22  | Extracellular Space |
| 1387812_at   | NM_012999 | proprotein convertase subtilisin/kexin type 6                      | PCSK6   | 5,69   | Extracellular Space |
| 1373152_at   | AI177099  | protease, serine, 23                                               | PRSS23  | 2,93   | Extracellular Space |
| 1367710_at   | NM_017257 | proteasome (prosome, macropain) activator subunit 2 (PA28 beta)    | PSME2   | 6,03   | Cytoplasm           |

|                    |           |                                                                                           |                            |        |                     |
|--------------------|-----------|-------------------------------------------------------------------------------------------|----------------------------|--------|---------------------|
| 1369930_at         | NM_017283 | proteasome (prosome, macropain) subunit, alpha type, 6                                    | PSMA6                      | 1,66   | Cytoplasm           |
| 1371869_at         | BF282262  | proteasome (prosome, macropain) subunit, alpha type, 7                                    | PSMA7                      | 2,52   | Cytoplasm           |
| 1374033_at         | BG373505  | proteasome (prosome, macropain) subunit, beta type, 10                                    | PSMB10                     | 20,52  | Cytoplasm           |
| 1367786_at         | NM_080767 | proteasome (prosome, macropain) subunit, beta type, 8 (large multifunctional peptidase 7) | PSMB8                      | 182,63 | Cytoplasm           |
| 1370186_at         | AI599350  | proteasome (prosome, macropain) subunit, beta type, 9 (large multifunctional peptidase 2) | PSMB9                      | 314,54 | Cytoplasm           |
| 1375215_x_at       | BE109558  | pyroglutamyl-peptidase I                                                                  | PGPEP1                     | 1,98   | Cytoplasm           |
| 1376949_at         | BE099848  | RCE1 homolog, prenyl protein peptidase (S. cerevisiae)                                    | RCE1                       | 2,18   | Cytoplasm           |
| 1371092_at         | X15679    | RIKEN cDNA 1810009J06 gene                                                                | 1810009J06RIK              | -8,64  | Extracellular Space |
| 1371579_at         | AI012456  | signal peptidase complex subunit 3 homolog (S. cerevisiae)                                | SPCS3                      | -1,63  | Cytoplasm           |
| 1372594_at         | AI233721  | SUMO/sentrin specific protease 5                                                          | SEN5 (includes EG:303874)  | -1,67  | Unknown             |
| 1387195_at         | AB049189  | suppression of tumorigenicity 14 (colon carcinoma)                                        | ST14                       | 7,78   | Plasma Membrane     |
| 1367976_at         | NM_031137 | tripeptidyl peptidase II                                                                  | TPP2                       | -1,62  | Cytoplasm           |
| 1390046_at         | BI288110  | tubulin, gamma complex associated protein 2                                               | TUBGCP2                    | 5,74   | Cytoplasm           |
| 1376687_at         | AI010241  | ubiquitin specific peptidase 1                                                            | USP1                       | 2,13   | Cytoplasm           |
| 1370460_at         | AF106657  | ubiquitin specific peptidase 15                                                           | USP15                      | 2,17   | Cytoplasm           |
| 1389034_at         | BI295179  | ubiquitin specific peptidase 18                                                           | USP18                      | 8,30   | Cytoplasm           |
| 1384456_at         | BE118916  | ubiquitin specific peptidase 24                                                           | USP24                      | 3,50   | Unknown             |
| 1378679_at         | BG372484  | ubiquitin specific peptidase 25                                                           | USP25                      | 2,61   | Unknown             |
| 1389091_at         | AI411205  | ubiquitin specific peptidase 3                                                            | USP3                       | 3,51   | Cytoplasm           |
| 1395921_at         | BE097603  | ubiquitin specific peptidase 35                                                           | USP35                      | -2,17  | Unknown             |
| 1374940_at         | BM388945  | ubiquitin specific peptidase 36                                                           | USP36                      | -1,57  | Nucleus             |
| 1373450_at         | AI409857  | ubiquitin specific peptidase 38                                                           | USP38                      | -1,87  | Unknown             |
| 1399036_at         | AA964374  | ubiquitin specific peptidase 47                                                           | USP47                      | 1,69   | Unknown             |
| 1399029_at         | BI285965  | ubiquitin specific peptidase 48                                                           | USP48                      | -2,78  | Plasma Membrane     |
| 1376849_at         | BM384872  | ubiquitin specific peptidase 48                                                           | USP48                      | 2,40   | Plasma Membrane     |
| 1394393_at         | BE114562  | ubiquitin specific peptidase 7 (herpes virus-associated)                                  | USP7                       | 2,20   | Nucleus             |
| 1372121_at         | BF284408  | ubiquitin specific peptidase 9, X-linked                                                  | USP9X                      | -3,91  | Plasma Membrane     |
| 1389316_at         | AW914946  | ubiquitin specific peptidase 9, X-linked                                                  | USP9X                      | -2,48  | Plasma Membrane     |
| 1385663_at         | BF567505  | ubiquitin specific protease 13 (isopeptidase T-3)                                         | USP13 (includes EG:310306) | -2,96  | Unknown             |
| 1381605_at         | AW521619  | ubiquitin specific protease 13 (isopeptidase T-3)                                         | USP13 (includes EG:310306) | -1,65  | Unknown             |
| 1394059_s_at       | AA849923  | YME1-like 1 (S. cerevisiae)                                                               | YME1L1                     | -1,54  | Cytoplasm           |
| 1386793_at         | BF552772  | zinc finger protein 61                                                                    | ZFP61                      | -2,16  | Unknown             |
| <b>Phosphatase</b> |           |                                                                                           |                            |        |                     |
| 1373412_at         | AI409146  | 5'-nucleotidase, cytosolic III                                                            | NT5C3                      | -2,02  | Cytoplasm           |
| 1398938_at         | AI170780  | acid phosphatase 1, soluble                                                               | ACPI                       | 1,52   | Cytoplasm           |
| 1387371_at         | NM_133571 | cell division cycle 25 homolog A (S. pombe)                                               | CDC25A                     | 1,53   | Nucleus             |
| 1370034_at         | NM_133572 | cell division cycle 25 homolog B (S. pombe)                                               | CDC25B                     | -3,89  | Nucleus             |
| 1390535_at         | BE098745  | CTD (carboxy-terminal domain, RNA polymerase II, polypeptide A) phosphatase, subunit 1    | CTDP1                      | 2,55   | Nucleus             |
| 1388533_at         | BM390302  | CTD (carboxy-terminal domain, RNA polymerase II, polypeptide A) small phosphatase 1       | CTDSP1                     | -1,65  | Nucleus             |
| 1368146_at         | U02553    | dual specificity phosphatase 1                                                            | DUSP1                      | 7,23   | Nucleus             |
| 1394028_at         | AW916472  | dual specificity phosphatase 10                                                           | DUSP10                     | -2,18  | Nucleus             |
| 1372354_at         | BM389898  | dual specificity phosphatase 16                                                           | DUSP16                     | 6,51   | Nucleus             |
| 1368124_at         | NM_133578 | dual specificity phosphatase 5                                                            | DUSP5                      | -3,51  | Nucleus             |
| 1399125_at         | BI275516  | inositol polyphosphate-1-phosphatase                                                      | INPP1                      | 5,15   | Cytoplasm           |
| 1388502_at         | AI412624  | inositol polyphosphate-5-phosphatase, 75kDa                                               | INPP5B                     | 1,81   | Plasma Membrane     |
| 1398808_at         | NM_032057 | inositol(myo)-1(or 4)-monophosphatase 1                                                   | IMPA1                      | -1,78  | Cytoplasm           |
| 1383619_at         | BE105983  | myotubularin related protein 4                                                            | MTMR4                      | 3,42   | Cytoplasm           |
| 1385014_at         | BG377996  | nudix (nucleoside diphosphate linked moiety X)-type motif 11                              | NUDT11                     | -2,19  | Cytoplasm           |
| 1395601_at         | BI302615  | nudix (nucleoside diphosphate linked moiety X)-type motif 12                              | NUDT12                     | -5,99  | Cytoplasm           |
| 1383957_at         | BG376322  | nudix (nucleoside diphosphate linked moiety X)-type motif 3                               | NUDT3                      | 3,57   | Cytoplasm           |
| 1370180_at         | AA891213  | nudix (nucleoside diphosphate linked moiety X)-type motif 4                               | NUDT4                      | -2,04  | Cytoplasm           |
| 1373840_at         | BM384191  | nudix (nucleoside diphosphate linked moiety X)-type motif 9                               | NUDT9                      | 2,38   | Cytoplasm           |
| 1383283_at         | BM385645  | oculocerebrorenal syndrome of Lowe                                                        | OCRL                       | -1,85  | Cytoplasm           |
| 1370112_at         | NM_031606 | phosphatase and tensin homolog                                                            | PTEN                       | 2,17   | Cytoplasm           |
| 1373083_at         | AW915681  | phosphatidic acid phosphatase type 2 domain containing 2                                  | PPAPDC2                    | -2,19  | Unknown             |
| 1386864_at         | NM_053290 | phosphoglycerate mutase 1 (brain)                                                         | PGAM1                      | 1,53   | Cytoplasm           |
| 1385981_at         | BF394800  | plasticity related gene 1                                                                 | LPPR4                      | -3,28  | Plasma Membrane     |
| 1379374_at         | AW526088  | plasticity related gene 1                                                                 | LPPR4                      | -2,53  | Plasma Membrane     |



|                                |           |                                                                                       |                          |        |                 |
|--------------------------------|-----------|---------------------------------------------------------------------------------------|--------------------------|--------|-----------------|
| 1376584_at                     | BE116408  | protein phosphatase 1 (formerly 2C)-like                                              | PPM1L                    | -2,48  | Unknown         |
| 1367637_a_at                   | NM_022498 | protein phosphatase 1, catalytic subunit, gamma isoform                               | PPP1CC                   | -1,61  | Cytoplasm       |
| 1383191_at                     | BE097583  | protein phosphatase 1, regulatory (inhibitor) subunit 1A                              | PPP1R1A                  | -8,91  | Cytoplasm       |
| 1386968_at                     | NM_022676 | protein phosphatase 1, regulatory (inhibitor) subunit 1A                              | PPP1R1A                  | -4,67  | Cytoplasm       |
| 1373656_at                     | AI713313  | protein phosphatase 1, regulatory (inhibitor) subunit 3D                              | PPP1R3D                  | -3,15  | Unknown         |
| 1398807_at                     | NM_033096 | protein phosphatase 1B (formerly 2C), magnesium-dependent, beta isoform               | PPM1B                    | -1,71  | Unknown         |
| 1378124_at                     | AI501282  | protein phosphatase 1B (formerly 2C), magnesium-dependent, beta isoform               | PPM1B                    | 2,12   | Unknown         |
| 1398332_at                     | BM386294  | protein phosphatase 1F (PP2C domain containing)                                       | PPM1F                    | -2,50  | Cytoplasm       |
| 1390954_at                     | AI548159  | protein phosphatase 1H (PP2C domain containing)                                       | PPM1H                    | 2,08   | Unknown         |
| 1398790_at                     | NM_017039 | protein phosphatase 2 (formerly 2A), catalytic subunit, alpha isoform                 | PPP2CA                   | 1,59   | Cytoplasm       |
| 1388805_at                     | BF408792  | protein phosphatase 2 (formerly 2A), catalytic subunit, alpha isoform                 | PPP2CA                   | 2,53   | Cytoplasm       |
| 1387801_at                     | NM_133589 | protein phosphatase 6, catalytic subunit                                              | PPP6C                    | 1,70   | Nucleus         |
| 1370193_at                     | AI172261  | protein tyrosine phosphatase type IVA, member 1                                       | PTP4A1                   | 3,90   | Nucleus         |
| 1367971_at                     | NM_053475 | protein tyrosine phosphatase type IVA, member 2                                       | PTP4A2                   | 1,58   | Plasma Membrane |
| 1372084_at                     | AI104546  | protein tyrosine phosphatase type IVA, member 3                                       | PTP4A3                   | -2,92  | Plasma Membrane |
| 1388379_at                     | AI172465  | protein tyrosine phosphatase, non-receptor type 11                                    | PTPN11                   | 1,72   | Cytoplasm       |
| 1382154_at                     | BI289625  | protein tyrosine phosphatase, non-receptor type 12                                    | PTPN12                   | 1,79   | Cytoplasm       |
| 1368361_a_at                   | NM_053990 | protein tyrosine phosphatase, non-receptor type 2                                     | PTPN2                    | 2,43   | Cytoplasm       |
| 1368087_a_at                   | NM_133545 | protein tyrosine phosphatase, non-receptor type 21                                    | PTPN21                   | 3,25   | Cytoplasm       |
| 1370473_a_at                   | AF077000  | protein tyrosine phosphatase, non-receptor type 23                                    | PTPN23                   | 4,44   | Cytoplasm       |
| 1389362_at                     | AI317821  | protein tyrosine phosphatase, non-receptor type 3                                     | PTPN3                    | 4,47   | Cytoplasm       |
| 1370362_at                     | D45414    | protein tyrosine phosphatase, receptor type, N                                        | PTPRN                    | -1,53  | Plasma Membrane |
| 1370182_at                     | AI574884  | protein tyrosine phosphatase, receptor type, N polypeptide 2                          | PTPRN2                   | -3,96  | Plasma Membrane |
| 1387901_at                     | L19180    | protein tyrosine phosphatase, receptor type, S                                        | PTPRS (includes EG:5802) | -2,73  | Plasma Membrane |
| 1369094_a_at                   | NM_019140 | protein tyrosine phosphatase, receptor type, S                                        | PTPRS (includes EG:5802) | -2,48  | Plasma Membrane |
| 1391632_at                     | AA964568  | SEC16 homolog A (S. cerevisiae)                                                       | SEC16A                   | 2,21   | Cytoplasm       |
| 1372461_at                     | BG381708  | SET nuclear oncogene                                                                  | SET                      | 1,95   | Nucleus         |
| 1373874_at                     | AI169638  | sphingosine-1-phosphate phosphatase 1                                                 | SGPP1                    | -1,54  | Cytoplasm       |
| 1388713_at                     | AW919094  | thiamine triphosphatase                                                               | THTPA                    | -1,87  | Cytoplasm       |
| 1372540_at                     | BG671872  | ubiquitin-like domain containing CTD phosphatase 1                                    | UBLCP1                   | -1,97  | Unknown         |
| <b>Transcription regulator</b> |           |                                                                                       |                          |        |                 |
| 1369268_at                     | NM_012912 | activating transcription factor 3                                                     | ATF3                     | 53,89  | Nucleus         |
| 1367624_at                     | NM_024403 | activating transcription factor 4 (tax-responsive enhancer element B67)               | ATF4                     | 2,33   | Nucleus         |
| 1392475_at                     | BE104169  | activating transcription factor 6                                                     | ATF6                     | 1,72   | Cytoplasm       |
| 1382070_at                     | AA819758  | activating transcription factor 7 interacting protein                                 | ATF7IP                   | 1,56   | Nucleus         |
| 1389346_at                     | BI274136  | activity-dependent neuroprotector homeobox                                            | ADNP                     | -4,25  | Nucleus         |
| 1377700_at                     | BE111648  | alpha thalassemia/mental retardation syndrome X-linked (RAD54 homolog, S. cerevisiae) | ATRX                     | -1,70  | Nucleus         |
| 1387861_at                     | BI274118  | amino-terminal enhancer of split                                                      | AES                      | -1,60  | Nucleus         |
| 1373289_at                     | BI281935  | ankyrin repeat and SOCS box-containing 8                                              | ASB8                     | -2,16  | Nucleus         |
| 1386065_at                     | AI169118  | ankyrin repeat domain 57                                                              | ANKRD57                  | 5,04   | Nucleus         |
| 1368330_at                     | NM_053720 | apoptosis antagonizing transcription factor                                           | AATF                     | 10,61  | Nucleus         |
| 1369049_at                     | NM_053885 | arginine-glutamic acid dipeptide (RE) repeats                                         | RERE                     | 3,81   | Nucleus         |
| 1369244_at                     | NM_012780 | aryl hydrocarbon receptor nuclear translocator                                        | ARNT                     | 2,22   | Nucleus         |
| 1392502_at                     | BI275796  | AT hook containing transcription factor 1                                             | AHCTF1                   | 1,72   | Nucleus         |
| 1377597_at                     | BI300688  | AT rich interactive domain 2 (ARID, RFX-like)                                         | ARID2                    | -2,57  | Nucleus         |
| 1386972_at                     | NM_017228 | atrophin 1                                                                            | ATN1                     | 1,77   | Nucleus         |
| 1369415_at                     | NM_053328 | basic helix-loop-helix domain containing, class B, 2                                  | BHLHB2                   | 6,32   | Nucleus         |
| 1379483_at                     | AI548256  | basic helix-loop-helix domain containing, class B, 2                                  | BHLHB2                   | 10,40  | Nucleus         |
| 1368511_at                     | NM_133303 | basic helix-loop-helix domain containing, class B, 3                                  | BHLHB3                   | 3,37   | Nucleus         |
| 1398482_at                     | AI411774  | B-cell CLL/lymphoma 3                                                                 | BCL3                     | 15,92  | Nucleus         |
| 1379368_at                     | AI237606  | B-cell CLL/lymphoma 6                                                                 | BCL6                     | 9,64   | Nucleus         |
| 1386832_a_at                   | BF554138  | B-cell CLL/lymphoma 6, member B (zinc finger protein)                                 | BCL6B                    | -12,79 | Nucleus         |
| 1394375_x_at                   | BF554138  | B-cell CLL/lymphoma 6, member B (zinc finger protein)                                 | BCL6B                    | -8,72  | Nucleus         |
| 1381804_at                     | BI293313  | B-cell CLL/lymphoma 6, member B (zinc finger protein)                                 | BCL6B                    | -7,05  | Nucleus         |
| 1386833_at                     | BF554138  | B-cell CLL/lymphoma 6, member B (zinc finger protein)                                 | BCL6B                    | -4,85  | Nucleus         |
| 1373868_at                     | AI717547  | BCL2-associated transcription factor 1                                                | BCLAF1                   | 2,63   | Nucleus         |
| 1385592_at                     | BI289386  | BCL6 co-repressor                                                                     | BCOR                     | 2,48   | Nucleus         |
| 1386994_at                     | NM_017259 | BTG family, member 2                                                                  | BTG2                     | -1,58  | Nucleus         |

|              |           |                                                                             |                        |       |           |
|--------------|-----------|-----------------------------------------------------------------------------|------------------------|-------|-----------|
| 1386995_at   | BI288701  | BTG family, member 2                                                        | BTG2                   | 2,33  | Nucleus   |
| 1374575_at   | BI304123  | cAMP responsive element binding protein 3-like 1                            | CREB3L1                | 2,43  | Nucleus   |
| 1368571_at   | NM_021997 | CAP-GLY domain containing linker protein 2                                  | CLIP2                  | 2,61  | Cytoplasm |
| 1380069_at   | BF389717  | Cas-Br-M (murine) ecotropic retroviral transforming sequence                | CBL                    | -2,41 | Nucleus   |
| 1386229_at   | AI101392  | CBF1 interacting corepressor                                                | CIR (includes EG:9541) | -1,58 | Nucleus   |
| 1387343_at   | NM_013154 | CCAAT/enhancer binding protein (C/EBP), delta                               | CEBPD                  | 10,82 | Nucleus   |
| 1372885_at   | AI230467  | CCAAT/enhancer binding protein (C/EBP), gamma                               | CEBPG                  | 1,91  | Nucleus   |
| 1377869_at   | BI284261  | CCR4 carbon catabolite repression 4-like ( <i>S. cerevisiae</i> )           | CCRN4L                 | -2,40 | Nucleus   |
| 1376067_at   | AA800637  | CCR4-NOT transcription complex, subunit 2                                   | CNOT2                  | -1,96 | Nucleus   |
| 1375428_at   | BE099979  | cellular repressor of E1A-stimulated genes 1                                | CREG1                  | 2,81  | Nucleus   |
| 1381968_at   | AI029175  | cellular repressor of E1A-stimulated genes 1                                | CREG1                  | 7,04  | Nucleus   |
| 1382126_at   | AW528959  | chromosome 20 open reading frame 191                                        | C20ORF191              | -2,04 | Nucleus   |
| 1398976_at   | AA848674  | chromosome 20 open reading frame 191                                        | C20ORF191              | 1,60  | Nucleus   |
| 1370376_a_at | AA866458  | cold shock domain protein A                                                 | CSDA                   | 2,44  | Nucleus   |
| 1373029_at   | AI169377  | COP9 constitutive photomorphogenic homolog subunit 2 ( <i>Arabidopsis</i> ) | COPS2                  | 1,68  | Cytoplasm |
| 1399033_at   | AA945869  | core-binding factor, beta subunit                                           | CBFB                   | -2,58 | Nucleus   |
| 1379674_at   | BE115481  | core-binding factor, runt domain, alpha subunit 2; translocated to, 3       | CBFA2T3                | -1,74 | Nucleus   |
| 1394943_at   | AA893197  | CREB/ATF bZIP transcription factor                                          | CREBZF                 | -2,45 | Nucleus   |
| 1391454_at   | BF286105  | CREB/ATF bZIP transcription factor                                          | CREBZF                 | -1,63 | Nucleus   |
| 1370421_a_at | AB029342  | cullin-associated and neddylation-dissociated 2 (putative)                  | CAND2                  | -1,77 | Nucleus   |
| 1388875_at   | AI410353  | CXXC finger 1 (PHD domain)                                                  | CXXC1                  | 2,29  | Nucleus   |
| 1370054_at   | NM_131902 | cyclin-dependent kinase inhibitor 2C (p18, inhibits CDK4)                   | CDKN2C                 | -3,08 | Nucleus   |
| 1372245_at   | AA894272  | cytosolic iron-sulfur protein assembly 1 homolog ( <i>S. cerevisiae</i> )   | CIAO1                  | -1,80 | Nucleus   |
| 1387874_at   | AI230048  | D site of albumin promoter (albumin D-box) binding protein                  | DBP                    | 5,77  | Nucleus   |
| 1388864_at   | BI276976  | DEAD (Asp-Glu-Ala-Asp) box polypeptide 54                                   | DDX54                  | 2,27  | Nucleus   |
| 1387800_at   | NM_080891 | death-domain associated protein                                             | DAXX                   | 2,23  | Nucleus   |
| 1386988_at   | NM_031801 | deformed epidermal autoregulatory factor 1 ( <i>Drosophila</i> )            | DEAF1                  | -3,63 | Nucleus   |
| 1369590_a_at | NM_024134 | DNA-damage-inducible transcript 3                                           | DDIT3                  | 7,86  | Nucleus   |
| 1372453_at   | AI012637  | down-regulator of transcription 1, TBP-binding (negative cofactor 2)        | DR1                    | -1,66 | Nucleus   |
| 1374119_at   | BI279615  | E74-like factor 3 (ets domain transcription factor, epithelial-specific )   | ELF3                   | 4,96  | Nucleus   |
| 1368321_at   | NM_012551 | early growth response 1                                                     | EGR1                   | -4,53 | Nucleus   |
| 1374797_at   | BM391920  | ELL associated factor 1                                                     | EAF1                   | 2,45  | Nucleus   |
| 1388714_at   | AI008458  | elongation factor RNA polymerase II                                         | ELL                    | 2,48  | Nucleus   |
| 1373462_at   | AI170325  | embryonic ectoderm development                                              | EED                    | 2,07  | Nucleus   |
| 1367575_at   | NM_012554 | enolase 1, (alpha)                                                          | ENO1                   | 1,71  | Cytoplasm |
| 1388503_at   | BE107430  | EP300 interacting inhibitor of differentiation 1                            | EID1                   | -1,95 | Nucleus   |
| 1376292_at   | BM383423  | ets homologous factor                                                       | EHF                    | 6,19  | Nucleus   |
| 1392555_at   | AI112936  | ets variant 1                                                               | ETV1                   | -3,15 | Nucleus   |
| 1392477_at   | AI059914  | ets variant 1                                                               | ETV1                   | -2,07 | Nucleus   |
| 1383447_at   | AI101323  | ets variant 5                                                               | ETV5                   | 6,52  | Nucleus   |
| 1385294_at   | BM387000  | ets variant 6                                                               | ETV6                   | 4,81  | Nucleus   |
| 1374055_at   | BF285169  | Ets2 repressor factor                                                       | ERF                    | 3,23  | Nucleus   |
| 1372126_at   | BI288075  | fem-1 homolog b ( <i>C. elegans</i> )                                       | FEM1B                  | -1,53 | Nucleus   |
| 1377347_at   | AW531892  | forkhead box J3                                                             | FOXJ3                  | 2,46  | Nucleus   |
| 1372652_at   | BM386443  | forkhead box O4                                                             | FOXO4                  | -4,72 | Nucleus   |
| 1368550_at   | NM_022858 | forkhead box Q1                                                             | FOXQ1                  | 1,81  | Nucleus   |
| 1385464_at   | AI070944  | forkhead box Q1                                                             | FOXQ1                  | 3,26  | Nucleus   |
| 1383860_at   | BI296947  | FOS-like antigen 2                                                          | FOSL2                  | 3,25  | Nucleus   |
| 1372073_at   | AI008814  | GATA zinc finger domain containing 2A                                       | GATAD2A                | 2,11  | Nucleus   |
| 1392552_at   | BE109744  | GATA zinc finger domain containing 2B                                       | GATAD2B                | 2,48  | Nucleus   |
| 1388563_at   | AI169287  | GC-rich promoter binding protein 1                                          | GPBP1                  | 2,11  | Nucleus   |
| 1371931_at   | BI274753  | general transcription factor II, i                                          | GTF2I                  | -3,01 | Nucleus   |
| 1373094_at   | AW917124  | general transcription factor IIH, polypeptide 1, 62kDa                      | GTF2H1                 | 2,88  | Nucleus   |
| 1372415_at   | BM385649  | general transcription factor IIH, polypeptide 3, 34kDa                      | GTF2H3                 | -2,20 | Nucleus   |
| 1371035_at   | BE098763  | general transcription factor IIIA                                           | GTF3A                  | 1,82  | Nucleus   |
| 1370231_at   | AI234022  | general transcription factor IIIC, polypeptide 1, alpha 220kDa              | GTF3C1                 | -1,94 | Nucleus   |
| 1395486_at   | BF413851  | general transcription factor IIIC, polypeptide 1, alpha 220kDa              | GTF3C1                 | 3,77  | Nucleus   |
| 1388067_a_at | AF205779  | glucocorticoid modulatory element binding protein 2                         | GMEB2                  | 2,61  | Nucleus   |

|              |           |                                                                                                 |           |       |                 |
|--------------|-----------|-------------------------------------------------------------------------------------------------|-----------|-------|-----------------|
| 1379550_a_at | BF290483  | GTF2I repeat domain containing 1                                                                | GTF2IRD1  | 1,69  | Nucleus         |
| 1385988_at   | BF287243  | H6 family homeobox 1                                                                            | HMX1      | 27,25 | Nucleus         |
| 1389580_at   | BM384827  | helicase-like transcription factor                                                              | HLTF      | -2,33 | Nucleus         |
| 1388314_at   | BF281178  | high-mobility group nucleosome binding domain 1                                                 | HMGN1     | 1,80  | Nucleus         |
| 1388761_at   | AI180339  | histone deacetylase 1                                                                           | HDAC1     | -2,96 | Nucleus         |
| 1396820_at   | AW530195  | histone deacetylase 1                                                                           | HDAC1     | -1,86 | Nucleus         |
| 1369060_a_at | NM_053448 | histone deacetylase 3                                                                           | HDAC3     | -1,84 | Nucleus         |
| 1369148_at   | NM_012669 | HNF1 homeobox A                                                                                 | HNF1A     | 2,17  | Nucleus         |
| 1391560_at   | AI237082  | human immunodeficiency virus type I enhancer binding protein 1                                  | HIVEP1    | 1,81  | Nucleus         |
| 1387076_at   | NM_024359 | hypoxia inducible factor 1, alpha subunit (basic helix-loop-helix transcription factor)         | HIF1A     | 2,07  | Nucleus         |
| 1392165_at   | AI071247  | inhibitor of growth family, member 2                                                            | ING2      | 1,52  | Nucleus         |
| 1368073_at   | NM_012591 | interferon regulatory factor 1                                                                  | IRF1      | 19,85 | Nucleus         |
| 1377379_at   | BF410603  | interferon regulatory factor 6                                                                  | IRF6      | 1,67  | Nucleus         |
| 1383564_at   | BF411036  | interferon regulatory factor 7                                                                  | IRF7      | 22,64 | Nucleus         |
| 1372097_at   | BF284262  | interferon regulatory factor 8                                                                  | IRF8      | 12,28 | Nucleus         |
| 1383448_at   | AI029121  | interferon regulatory factor 9                                                                  | IRF9      | 10,22 | Nucleus         |
| 1382336_at   | AI236491  | JAZF zinc finger 1                                                                              | JAZF1     | -1,70 | Nucleus         |
| 1393138_at   | BE329377  | jun D proto-oncogene                                                                            | JUND      | 2,25  | Nucleus         |
| 1374404_at   | BI288619  | jun oncogene                                                                                    | JUN       | 4,95  | Nucleus         |
| 1369788_s_at | NM_021835 | jun oncogene                                                                                    | JUN       | 7,39  | Nucleus         |
| 1389528_s_at | BI288619  | jun oncogene                                                                                    | JUN       | 9,13  | Nucleus         |
| 1386896_at   | AF393783  | KH domain containing, RNA binding, signal transduction associated 1                             | KHDRBS1   | 2,15  | Nucleus         |
| 1393545_at   | AI043906  | Kruppel-like factor 11                                                                          | KLF11     | 3,02  | Nucleus         |
| 1374231_at   | AI103472  | Kruppel-like factor 16                                                                          | KLF16     | 2,33  | Nucleus         |
| 1368363_at   | NM_053394 | Kruppel-like factor 5 (intestinal)                                                              | KLF5      | 9,08  | Nucleus         |
| 1385961_at   | BF561079  | Kruppel-like factor 5 (intestinal)                                                              | KLF5      | 11,56 | Nucleus         |
| 1394039_at   | BM382886  | Kruppel-like factor 5 (intestinal)                                                              | KLF5      | 15,03 | Nucleus         |
| 1387060_at   | NM_031642 | Kruppel-like factor 6                                                                           | KLF6      | 16,15 | Nucleus         |
| 1370209_at   | BE101336  | Kruppel-like factor 9                                                                           | KLF9      | 2,14  | Nucleus         |
| 1389351_at   | BM387864  | leucine rich repeat (in FLII) interacting protein 1                                             | LRRFIP1   | 4,12  | Nucleus         |
| 1389982_at   | BF419586  | LIM homeobox 1                                                                                  | LHX1      | 1,98  | Nucleus         |
| 1370928_at   | BI284739  | lipopolysaccharide-induced TNF factor                                                           | LITAF     | 2,19  | Nucleus         |
| 1388516_at   | AI104258  | LRRGT00141                                                                                      | LOC499235 | 3,88  | Unknown         |
| 1372320_at   | BE103894  | male-specific lethal 3 homolog (Drosophila)                                                     | MSL3      | 1,63  | Nucleus         |
| 1375929_at   | BI289109  | MAX binding protein                                                                             | MNT       | 1,81  | Nucleus         |
| 1373779_at   | AI011878  | MAX dimerization protein 4                                                                      | MXD4      | -2,50 | Nucleus         |
| 1383288_at   | BE117716  | Mdm2 p53 binding protein homolog (mouse)                                                        | MDM2      | 2,81  | Nucleus         |
| 1384427_at   | BI296301  | Mdm2 p53 binding protein homolog (mouse)                                                        | MDM2      | 8,04  | Nucleus         |
| 1379567_at   | AI105643  | mediator complex subunit 13                                                                     | MED13     | 2,13  | Nucleus         |
| 1391474_at   | AA858511  | mediator complex subunit 14                                                                     | MED14     | -2,71 | Nucleus         |
| 1388847_at   | AI177083  | mediator complex subunit 15                                                                     | MED15     | 2,55  | Nucleus         |
| 1376196_a_at | BG375059  | mediator complex subunit 4                                                                      | MED4      | 2,48  | Nucleus         |
| 1384308_at   | AW532697  | Meis homeobox 1                                                                                 | MEIS1     | -2,12 | Nucleus         |
| 1389728_at   | BE104098  | Meis homeobox 2                                                                                 | MEIS2     | -1,97 | Nucleus         |
| 1386895_at   | NM_053409 | melanoma antigen family D, 1                                                                    | MAGED1    | -1,53 | Plasma Membrane |
| 1388774_at   | BM389032  | methyl-CpG binding domain protein 2                                                             | MBD2      | 1,67  | Nucleus         |
| 1387732_at   | NM_053499 | mitochondrial transcription termination factor                                                  | MTERF     | 2,10  | Cytoplasm       |
| 1368614_at   | NM_133552 | MLX interacting protein-like                                                                    | MLXIPL    | -2,24 | Nucleus         |
| 1376810_at   | AI103325  | M-phase phosphoprotein 8                                                                        | MPHOSPH8  | 2,13  | Nucleus         |
| 1398785_at   | NM_019208 | multiple endocrine neoplasia I                                                                  | MEN1      | 1,88  | Nucleus         |
| 1387779_at   | NM_031668 | MYB binding protein (P160) 1a                                                                   | MYBBP1A   | 2,12  | Nucleus         |
| 1372090_at   | AI231566  | MYC associated factor X                                                                         | MAX       | 1,51  | Nucleus         |
| 1372327_at   | BF552877  | myelin expression factor 2                                                                      | MYEF2     | -2,76 | Nucleus         |
| 1383512_at   | AW918674  | myeloid/lymphoid or mixed-lineage leukemia (trithorax homolog, Drosophila); translocated to, 10 | MLLT10    | 2,50  | Nucleus         |
| 1388951_at   | BI294789  | myeloid/lymphoid or mixed-lineage leukemia 4                                                    | MLL4      | 1,85  | Nucleus         |
| 1398427_at   | AW526160  | myocyte enhancer factor 2D                                                                      | MEF2D     | 3,05  | Nucleus         |
| 1387785_at   | U21661    | myotrophin                                                                                      | MTPN      | 2,31  | Nucleus         |
| 1392770_at   | BF415817  | neogenin homolog 1 (chicken)                                                                    | NEO1      | -1,63 | Plasma Membrane |

|              |           |                                                                                                     |                           |       |                 |
|--------------|-----------|-----------------------------------------------------------------------------------------------------|---------------------------|-------|-----------------|
| 1387288_at   | NM_019218 | neurogenic differentiation 1                                                                        | NEUROD1                   | -1,93 | Nucleus         |
| 1385387_at   | AA925143  | NK2 homeobox 2                                                                                      | NKX2-2                    | -4,31 | Nucleus         |
| 1368998_at   | NM_031737 | NK6 homeobox 1                                                                                      | NKX6-1                    | -2,15 | Nucleus         |
| 1393144_at   | BM388202  | N-myc (and STAT) interactor                                                                         | NMI                       | 7,36  | Cytoplasm       |
| 1381875_at   | BM386847  | N-myc (and STAT) interactor                                                                         | NMI                       | 14,40 | Cytoplasm       |
| 1398362_at   | AI011448  | Notch homolog 2 (Drosophila)                                                                        | NOTCH2                    | 2,48  | Plasma Membrane |
| 1367826_at   | NM_031789 | nuclear factor (erythroid-derived 2)-like 2                                                         | NFE2L2                    | 2,53  | Nucleus         |
| 1370968_at   | AA858801  | nuclear factor of kappa light polypeptide gene enhancer in B-cells 1                                | NFKB1                     | 7,67  | Nucleus         |
| 1375989_a_at | AI170362  | nuclear factor of kappa light polypeptide gene enhancer in B-cells 2 (p49/p100)                     | NFKB2                     | 10,63 | Nucleus         |
| 1367943_at   | NM_030867 | nuclear factor of kappa light polypeptide gene enhancer in B-cells inhibitor, beta                  | NFKBIB                    | 7,26  | Nucleus         |
| 1378032_at   | AI176265  | nuclear factor of kappa light polypeptide gene enhancer in B-cells inhibitor, zeta                  | NFKBIZ                    | 13,48 | Nucleus         |
| 1368488_at   | NM_053727 | nuclear factor, interleukin 3 regulated                                                             | NFL3                      | 9,02  | Nucleus         |
| 1398956_at   | BE113384  | nuclear receptor binding SET domain protein 1                                                       | NSD1                      | -1,54 | Nucleus         |
| 1388549_at   | AI228248  | nuclear receptor coactivator 4                                                                      | NCOA4                     | -1,61 | Nucleus         |
| 1389028_at   | BI291460  | nuclear receptor coactivator 6                                                                      | NCOA6                     | 1,62  | Nucleus         |
| 1381895_at   | AW435074  | nuclear respiratory factor 1                                                                        | NRF1                      | 6,54  | Nucleus         |
| 1378637_at   | BG374464  | nuclear transcription factor, X-box binding 1                                                       | NFX1                      | 2,48  | Nucleus         |
| 1382718_at   | AA900547  | nuclear transcription factor, X-box binding 1                                                       | NFX1                      | 2,79  | Nucleus         |
| 1398757_at   | NM_012992 | nucleophosmin 1                                                                                     | NPM1 (includes EG:18148)  | 1,70  | Nucleus         |
| 1398756_at   | J04943    | nucleophosmin 1                                                                                     | NPM1 (includes EG:18148)  | 2,87  | Nucleus         |
| 1379529_at   | BE121400  | nucleosomal binding protein 1                                                                       | NSBP1                     | -3,17 | Nucleus         |
| 1373433_at   | BE108745  | nucleosomal binding protein 1                                                                       | NSBP1                     | -1,81 | Nucleus         |
| 1369242_at   | NM_013001 | paired box 6                                                                                        | PAX6                      | -2,86 | Nucleus         |
| 1369516_at   | NM_022852 | pancreatic and duodenal homeobox 1                                                                  | PDX1 (includes EG:29535)  | -4,66 | Cytoplasm       |
| 1387122_at   | NM_012760 | pleiomorphic adenoma gene-like 1                                                                    | PLAGL1                    | -3,44 | Nucleus         |
| 1384265_at   | BI278347  | polymerase (DNA-directed), delta 3, accessory subunit                                               | POLD3                     | 5,13  | Nucleus         |
| 1398875_at   | AI105044  | polymerase (RNA) III (DNA directed) polypeptide K, 12.3 kDa                                         | POLR3K                    | -1,50 | Nucleus         |
| 1372205_at   | AI713121  | POZ (BTB) and AT hook containing zinc finger 1                                                      | PATZ1                     | -2,30 | Nucleus         |
| 1368702_at   | U05989    | PRKC, apoptosis, WT1, regulator                                                                     | PAWR                      | 3,39  | Nucleus         |
| 1388353_at   | BI296168  | proliferation-associated 2G4, 38kDa                                                                 | PA2G4                     | 2,31  | Nucleus         |
| 1374532_at   | AI704291  | prostaglandin E synthase 2                                                                          | PTGES2                    | 2,00  | Cytoplasm       |
| 1387784_at   | NM_053925 | proteasome (prosome, macropain) 26S subunit, non-ATPase, 10                                         | PSMD10                    | 2,78  | Cytoplasm       |
| 1385540_at   | AI044916  | protein inhibitor of activated STAT, 1                                                              | PIAS1                     | -2,16 | Nucleus         |
| 1382191_at   | AI228848  | protein inhibitor of activated STAT, 1                                                              | PIAS1                     | 1,58  | Nucleus         |
| 1370196_at   | AW532051  | protein inhibitor of activated STAT, 3                                                              | PIAS3                     | 2,45  | Nucleus         |
| 1372485_at   | BF281220  | pterin-4 alpha-carbinolamine dehydratase/dimerization cofactor of hepatocyte nuclear factor 1 alpha | PCBD1                     | -3,59 | Nucleus         |
| 1382400_at   | BE104395  | rearranged L-myc fusion                                                                             | RLF                       | 3,13  | Nucleus         |
| 1383034_at   | AA998572  | RING1 and YY1 binding protein                                                                       | RYBP                      | 5,25  | Nucleus         |
| 1399101_at   | AA849715  | RNA binding motif protein 39                                                                        | RBM39                     | -1,76 | Nucleus         |
| 1381967_at   | BE114972  | RNA binding motif protein 39                                                                        | RBM39                     | 1,58  | Nucleus         |
| 1398993_at   | AI045458  | RNA binding motif protein 39                                                                        | RBM39                     | 1,94  | Nucleus         |
| 1389437_at   | BF392952  | sal-like 2 (Drosophila)                                                                             | SALL2                     | -3,36 | Nucleus         |
| 1379626_at   | AA946353  | SATB homeobox 1                                                                                     | SATB1                     | -4,31 | Nucleus         |
| 1378629_at   | AI227638  | SATB homeobox 1                                                                                     | SATB1                     | -4,30 | Nucleus         |
| 1371353_at   | BG663093  | sequestosome 1                                                                                      | SQSTM1                    | 3,07  | Cytoplasm       |
| 1389381_at   | AI411586  | sequestosome 1                                                                                      | SQSTM1                    | 23,58 | Cytoplasm       |
| 1388842_at   | BG380385  | serum response factor (c-fos serum response element-binding transcription factor)                   | SRF                       | 3,28  | Nucleus         |
| 1377647_at   | AA924088  | sex comb on midleg homolog 1 (Drosophila)                                                           | SCMH1                     | 1,70  | Nucleus         |
| 1372757_at   | BM386875  | signal transducer and activator of transcription 1, 91kDa                                           | STAT1                     | 4,74  | Nucleus         |
| 1368835_at   | AW434718  | signal transducer and activator of transcription 1, 91kDa                                           | STAT1                     | 5,50  | Nucleus         |
| 1387354_at   | NM_032612 | signal transducer and activator of transcription 1, 91kDa                                           | STAT1                     | 9,90  | Nucleus         |
| 1373670_at   | AA799569  | signal transducer and activator of transcription 2, 113kDa                                          | STAT2                     | 4,28  | Nucleus         |
| 1389571_at   | BG666368  | signal transducer and activator of transcription 2, 113kDa                                          | STAT2                     | 32,83 | Nucleus         |
| 1387876_at   | AI177626  | signal transducer and activator of transcription 5B                                                 | STAT5B                    | 3,24  | Nucleus         |
| 1388653_at   | AA849552  | SIN3 homolog B, transcription regulator (yeast)                                                     | SIN3B (includes EG:23309) | -1,79 | Nucleus         |
| 1371521_at   | BI284797  | SIN3 homolog B, transcription regulator (yeast)                                                     | SIN3B (includes EG:23309) | 1,72  | Nucleus         |
| 1382698_at   | AI030699  | single-minded homolog 1 (Drosophila)                                                                | SIM1                      | -2,60 | Nucleus         |
| 1389373_at   | AI029555  | SMAD family member 1                                                                                | SMAD1                     | 2,01  | Nucleus         |

|            |           |                                                                                                   |                            |       |           |
|------------|-----------|---------------------------------------------------------------------------------------------------|----------------------------|-------|-----------|
| 1368214_at | NM_019191 | SMAD family member 2                                                                              | SMAD2                      | 2,07  | Nucleus   |
| 1386984_at | NM_019275 | SMAD family member 4                                                                              | SMAD4                      | 2,41  | Nucleus   |
| 1390373_at | BE107528  | SMAD family member 5                                                                              | SMAD5                      | 2,50  | Nucleus   |
| 1373993_at | AA799470  | small nuclear RNA activating complex, polypeptide 5, 19kDa                                        | SNAPC5                     | -1,72 | Nucleus   |
| 1371880_at | AI179662  | Sp1 transcription factor                                                                          | SP1                        | 2,61  | Nucleus   |
| 1392180_at | AI705174  | Sp1 transcription factor                                                                          | SP1                        | 2,80  | Nucleus   |
| 1374838_at | BI293504  | SP140 nuclear body protein                                                                        | SP140                      | 4,69  | Nucleus   |
| 1372437_at | BM390921  | S-phase kinase-associated protein 1                                                               | SKP1                       | -1,94 | Nucleus   |
| 1371839_at | AA819369  | splicing factor, arginine/serine-rich 2                                                           | SFRS2                      | 1,59  | Nucleus   |
| 1374682_at | BM383170  | SRY (sex determining region Y)-box 13                                                             | SOX13                      | 1,55  | Nucleus   |
| 1371979_at | AI170663  | sterol regulatory element binding transcription factor 2                                          | SREBF2                     | -2,23 | Nucleus   |
| 1384437_at | AI576309  | SWI/SNF related, matrix associated, actin dependent regulator of chromatin, subfamily a, member 1 | SMARCA1                    | -1,72 | Nucleus   |
| 1376337_at | AI170385  | SWI/SNF related, matrix associated, actin dependent regulator of chromatin, subfamily a, member 2 | SMARCA2                    | -1,96 | Nucleus   |
| 1394093_at | BF557855  | SWI/SNF related, matrix associated, actin dependent regulator of chromatin, subfamily a, member 5 | SMARCA5                    | -2,16 | Nucleus   |
| 1384246_at | AA996404  | SWI/SNF related, matrix associated, actin dependent regulator of chromatin, subfamily a, member 5 | SMARCA5                    | -1,75 | Nucleus   |
| 1379327_at | BI292524  | SWI/SNF related, matrix associated, actin dependent regulator of chromatin, subfamily a, member 5 | SMARCA5                    | 1,60  | Nucleus   |
| 1371716_at | BE107610  | SWI/SNF related, matrix associated, actin dependent regulator of chromatin, subfamily c, member 2 | SMARCC2 (includes EG:6601) | -4,02 | Nucleus   |
| 1392792_at | AI071152  | TAF1 RNA polymerase II, TATA box binding protein (TBP)-associated factor, 250kDa                  | TAF1                       | -1,63 | Nucleus   |
| 1374177_at | AI230912  | TAF13 RNA polymerase II, TATA box binding protein (TBP)-associated factor, 18kDa                  | TAF13                      | -3,20 | Nucleus   |
| 1383108_at | BE120513  | TAF13 RNA polymerase II, TATA box binding protein (TBP)-associated factor, 18kDa                  | TAF13                      | -1,73 | Nucleus   |
| 1392511_at | AA998513  | TAF2 RNA polymerase II, TATA box binding protein (TBP)-associated factor, 150kDa                  | TAF2                       | -2,11 | Nucleus   |
| 1376050_at | AI177663  | TAF5 RNA polymerase II, TATA box binding protein (TBP)-associated factor, 100kDa                  | TAF5                       | 1,64  | Nucleus   |
| 1368429_at | NM_133615 | TAF9B RNA polymerase II, TATA box binding protein (TBP)-associated factor, 31kDa                  | TAF9B                      | -4,02 | Nucleus   |
| 1371367_at | BE107459  | TAR DNA binding protein                                                                           | TARDBP                     | -2,52 | Nucleus   |
| 1392611_at | BE117629  | teashirt zinc finger homeobox 1                                                                   | TSHZ1                      | -6,17 | Nucleus   |
| 1380283_at | BF411100  | teashirt zinc finger homeobox 1                                                                   | TSHZ1                      | -3,87 | Nucleus   |
| 1383573_at | BE117444  | teashirt zinc finger homeobox 1                                                                   | TSHZ1                      | -3,32 | Nucleus   |
| 1373421_at | BM392224  | TGFB-induced factor homeobox 1                                                                    | TGIF1                      | 8,61  | Nucleus   |
| 1367525_at | AI179833  | thyroid hormone receptor associated protein 3                                                     | THRAP3                     | -1,54 | Nucleus   |
| 1382861_at | AA997486  | transcription elongation factor A (SII), 1                                                        | TCEA1                      | 2,22  | Nucleus   |
| 1391212_at | BF418812  | transcription elongation factor A (SII)-like 1                                                    | TCEAL1                     | -5,52 | Nucleus   |
| 1372151_at | AI317851  | transcription elongation regulator 1                                                              | TCERG1                     | 2,30  | Nucleus   |
| 1390817_at | BF394639  | transcription factor 20 (AR1)                                                                     | TCF20                      | -2,18 | Nucleus   |
| 1368842_at | BG377130  | transcription factor 4                                                                            | TCF4                       | -3,17 | Nucleus   |
| 1392592_at | AI137045  | transcription factor 7-like 2 (T-cell specific, HMG-box)                                          | TCF7L2 (includes EG:6934)  | 2,55  | Nucleus   |
| 1388967_at | AI012945  | transcription factor binding to IGHM enhancer 3                                                   | TFE3                       | 1,67  | Nucleus   |
| 1389545_at | BF281994  | transducin (beta)-like 1 X-linked receptor 1                                                      | TBL1XR1                    | 1,66  | Nucleus   |
| 1393391_at | BF406888  | trimethylguanosine synthase homolog (S. cerevisiae)                                               | TGS1                       | 2,50  | Nucleus   |
| 1390662_at | AW435169  | tripartite motif-containing 24                                                                    | TRIM24                     | 1,96  | Nucleus   |
| 1389163_at | BG372673  | tripartite motif-containing 32                                                                    | TRIM32                     | -2,95 | Nucleus   |
| 1389070_at | AI179506  | tripartite motif-containing 33                                                                    | TRIM33                     | 1,55  | Nucleus   |
| 1375965_at | AI229167  | ubiquitin-conjugating enzyme E2K (UBC1 homolog, yeast)                                            | UBE2K                      | -4,43 | Cytoplasm |
| 1383515_at | AW143503  | ubiquitin-conjugating enzyme E2K (UBC1 homolog, yeast)                                            | UBE2K                      | -3,05 | Cytoplasm |
| 1383537_at | BF522715  | vascular endothelial zinc finger 1                                                                | VEZF1                      | 1,68  | Nucleus   |
| 1376594_at | AW524517  | vascular endothelial zinc finger 1                                                                | VEZF1                      | 3,16  | Nucleus   |
| 1380229_at | AW530004  | v-maf musculoaponeurotic fibrosarcoma oncogene homolog F (avian)                                  | MAFF                       | 54,33 | Nucleus   |
| 1372211_at | BI284461  | v-maf musculoaponeurotic fibrosarcoma oncogene homolog K (avian)                                  | MAFK                       | 4,49  | Nucleus   |
| 1368308_at | NM_012603 | v-myc myelocytomatosis viral oncogene homolog (avian)                                             | MYC                        | 49,60 | Nucleus   |
| 1372853_at | BF283772  | v-rel reticuloendotheliosis viral oncogene homolog A (avian)                                      | RELA                       | 2,41  | Nucleus   |
| 1377668_at | BI276788  | YY1 transcription factor                                                                          | YY1                        | 3,15  | Nucleus   |
| 1387107_at | NM_054002 | zinc finger and BTB domain containing 7A                                                          | ZBTB7A                     | 2,11  | Nucleus   |
| 1370965_at | BG381660  | zinc finger E-box binding homeobox 1                                                              | ZEB1                       | 6,82  | Nucleus   |
| 1394476_at | AW535213  | zinc finger protein 14                                                                            | ZNF14                      | -1,92 | Nucleus   |
| 1374189_at | BG668883  | zinc finger protein 219                                                                           | ZNF219                     | 2,08  | Nucleus   |
| 1376917_at | BF388585  | zinc finger protein 292                                                                           | ZNF292                     | 2,17  | Nucleus   |
| 1399119_at | BI282030  | zinc finger protein 292                                                                           | ZNF292                     | 2,33  | Nucleus   |
| 1381902_at | BE116321  | zinc finger protein 292                                                                           | ZNF292                     | 2,37  | Nucleus   |
| 1390945_at | BI294878  | zinc finger protein 292                                                                           | ZNF292                     | 3,40  | Nucleus   |

|                               |           |                                                                                  |                          |        |                 |
|-------------------------------|-----------|----------------------------------------------------------------------------------|--------------------------|--------|-----------------|
| 1387870_at                    | AB025017  | zinc finger protein 36, C3H type, homolog (mouse)                                | ZFP36                    | 4,64   | Nucleus         |
| 1373106_at                    | AI178069  | zinc finger protein 36, C3H type-like 2                                          | ZFP36L2                  | 3,62   | Nucleus         |
| 1370175_a_at                  | AI177799  | zinc finger protein 384                                                          | ZNF384                   | 1,56   | Nucleus         |
| 1391702_at                    | BM389392  | zinc finger protein 446                                                          | ZNF446                   | -2,05  | Nucleus         |
| 1373950_at                    | AI598911  | zinc finger protein 496                                                          | ZNF496                   | 2,85   | Nucleus         |
| 1399044_at                    | AA819804  | zinc finger protein 91 homolog (mouse)                                           | ZFP91                    | 1,81   | Nucleus         |
| 1377105_at                    | BM385715  | zinc finger protein 91 homolog (mouse)                                           | ZFP91                    | 2,60   | Nucleus         |
| 1383054_at                    | BE111631  | zinc finger protein 91 homolog (mouse)                                           | ZFP91                    | 3,08   | Nucleus         |
| 1383226_at                    | BI293943  | zinc finger protein, X-linked                                                    | ZFX                      | -1,88  | Nucleus         |
| 1377244_at                    | BM390979  | zinc finger with KRAB and SCAN domains 5                                         | ZKSCAN5                  | -1,79  | Nucleus         |
| 1396265_at                    | BE097728  | zinc finger, NFX1-type containing 1                                              | ZNFX1                    | -2,79  | Nucleus         |
| 1368175_at                    | NM_133620 | zinc fingers and homeoboxes 1                                                    | ZHX1                     | -2,43  | Nucleus         |
| 1388590_at                    | AI010455  | zinc ribbon domain containing 1                                                  | ZNRD1                    | 2,54   | Nucleus         |
| <b>Translation regulator</b>  |           |                                                                                  |                          |        |                 |
| 1388554_at                    | AI229287  | basic leucine zipper and W2 domains 1                                            | BZW1                     | -1,53  | Cytoplasm       |
| 1371949_at                    | BM390332  | basic leucine zipper and W2 domains 1                                            | BZW1                     | 4,25   | Cytoplasm       |
| 1391163_at                    | BM385306  | elongation factor Tu GTP binding domain containing 1                             | EFTUD1                   | 3,71   | Cytoplasm       |
| 1384147_at                    | AA955540  | eukaryotic translation initiation factor 1A, Y-linked                            | EIF1AY                   | 2,89   | Cytoplasm       |
| 1385118_at                    | BI292531  | eukaryotic translation initiation factor 2, subunit 1 alpha, 35kDa               | EIF2S1                   | -1,83  | Cytoplasm       |
| 1383011_at                    | AI501182  | eukaryotic translation initiation factor 2A, 65kDa                               | EIF2A                    | 1,87   | Cytoplasm       |
| 1368967_at                    | NM_133609 | eukaryotic translation initiation factor 2B, subunit 3 gamma, 58kDa              | EIF2B3                   | 2,21   | Cytoplasm       |
| 1368867_at                    | BF281131  | eukaryotic translation initiation factor 2C, 2                                   | EIF2C2                   | 10,32  | Cytoplasm       |
| 1388576_at                    | BF281368  | eukaryotic translation initiation factor 3, subunit B                            | EIF3B                    | 1,81   | Cytoplasm       |
| 1388568_at                    | AA891553  | eukaryotic translation initiation factor 3, subunit D                            | EIF3D                    | 1,79   | Cytoplasm       |
| 1388390_at                    | AI231784  | eukaryotic translation initiation factor 3, subunit H                            | EIF3H                    | 1,51   | Cytoplasm       |
| 1388424_at                    | AI407015  | eukaryotic translation initiation factor 3, subunit J                            | EIF3J                    | 1,65   | Cytoplasm       |
| 1373364_at                    | BI294767  | eukaryotic translation initiation factor 4 gamma, 3                              | EIF4G3                   | -1,93  | Cytoplasm       |
| 1397697_at                    | BF558764  | eukaryotic translation initiation factor 4A, isoform 2                           | EIF4A2                   | -2,52  | Cytoplasm       |
| 1372124_at                    | BI278814  | eukaryotic translation initiation factor 4B                                      | EIF4B                    | 3,46   | Cytoplasm       |
| 1386888_at                    | NM_053857 | eukaryotic translation initiation factor 4E binding protein 1                    | EIF4EBP1                 | 4,30   | Cytoplasm       |
| 1367537_at                    | AI012479  | eukaryotic translation initiation factor 4E nuclear import factor 1              | EIF4ENIF1                | 1,60   | Cytoplasm       |
| 1388206_a_at                  | K01677    | eukaryotic translation initiation factor 5                                       | EIF5                     | 2,79   | Cytoplasm       |
| 1388507_at                    | AI104279  | eukaryotic translation initiation factor 6                                       | EIF6                     | 2,63   | Cytoplasm       |
| 1389038_at                    | BF285301  | eukaryotic translation termination factor 1                                      | ETF1                     | 1,68   | Cytoplasm       |
| 1377249_at                    | AW526060  | G1 to S phase transition 2                                                       | GSPT2                    | -3,77  | Cytoplasm       |
| 1372344_at                    | AI175760  | HBS1-like (S. cerevisiae)                                                        | HBS1L                    | 2,56   | Cytoplasm       |
| 1398535_at                    | AA998579  | HBS1-like (S. cerevisiae)                                                        | HBS1L                    | 3,67   | Cytoplasm       |
| 1390874_at                    | BE109206  | iron-responsive element binding protein 2                                        | IREB2                    | -2,64  | Cytoplasm       |
| 1398902_at                    | BF282978  | KIAA0664                                                                         | KIAA0664                 | 1,61   | Cytoplasm       |
| 1379335_at                    | AI639045  | poly(A) binding protein interacting protein 1                                    | PAIP1                    | -1,88  | Cytoplasm       |
| 1374385_at                    | AI009789  | poly(rC) binding protein 1                                                       | PCBP1 (includes EG:5093) | 2,19   | Nucleus         |
| 1368094_at                    | NM_024002 | SECIS binding protein 2                                                          | SECISBP2                 | 1,72   | Cytoplasm       |
| <b>Transmembrane receptor</b> |           |                                                                                  |                          |        |                 |
| 1367595_s_at                  | NM_012512 | beta-2-microglobulin                                                             | B2M                      | 1,62   | Plasma Membrane |
| 1371440_at                    | AW916647  | beta-2-microglobulin                                                             | B2M                      | 6,20   | Plasma Membrane |
| 1374620_at                    | BM392373  | carcinoembryonic antigen-related cell adhesion molecule 1 (biliary glycoprotein) | CEACAM1                  | -1,84  | Plasma Membrane |
| 1377698_at                    | AW433947  | CD40 molecule, TNF receptor superfamily member 5                                 | CD40                     | 98,06  | Plasma Membrane |
| 1384837_at                    | AI137672  | CD69 molecule                                                                    | CD69                     | 120,69 | Plasma Membrane |
| 1367679_at                    | NM_013069 | CD74 molecule, major histocompatibility complex, class II invariant chain        | CD74                     | 18,00  | Plasma Membrane |
| 1388547_at                    | BE328951  | claudin 4                                                                        | CLDN4                    | 4,21   | Plasma Membrane |
| 1369182_at                    | NM_013057 | coagulation factor III (thromboplastin, tissue factor)                           | F3                       | 5,66   | Plasma Membrane |
| 1371429_at                    | BF281192  | dystroglycan 1 (dystrophin-associated glycoprotein 1)                            | DAG1                     | -2,30  | Plasma Membrane |
| 1371430_at                    | AW251326  | dystroglycan 1 (dystrophin-associated glycoprotein 1)                            | DAG1                     | -1,94  | Plasma Membrane |
| 1384842_s_at                  | AI231531  | Fas (TNF receptor superfamily, member 6)                                         | FAS                      | 5,43   | Plasma Membrane |
| 1378160_at                    | AI179412  | ferric-chelate reductase 1                                                       | FRRS1                    | 2,49   | Plasma Membrane |
| 1368924_at                    | NM_017094 | growth hormone receptor                                                          | GHR                      | -3,25  | Plasma Membrane |
| 1398491_at                    | BM383434  | immunoglobulin-like domain containing receptor 1                                 | ILDR1                    | -2,05  | Plasma Membrane |
| 1368123_at                    | NM_052807 | insulin-like growth factor 1 receptor                                            | IGF1R                    | 1,86   | Plasma Membrane |

|                    |           |                                                                                          |                           |        |                     |
|--------------------|-----------|------------------------------------------------------------------------------------------|---------------------------|--------|---------------------|
| 1387202_at         | NM_012967 | intercellular adhesion molecule 1                                                        | ICAM1                     | 93,19  | Plasma Membrane     |
| 1369956_at         | NM_053783 | interferon gamma receptor 1                                                              | IFNGR1                    | 1,81   | Plasma Membrane     |
| 1370750_a_at       | U14010    | interleukin 1 receptor, type I                                                           | IL1R1                     | -3,46  | Plasma Membrane     |
| 1383616_at         | AA997562  | interleukin 10 receptor, beta                                                            | IL10RB                    | 2,26   | Plasma Membrane     |
| 1388711_at         | BF282650  | interleukin 13 receptor, alpha 1                                                         | IL13RA1                   | 2,08   | Plasma Membrane     |
| 1387946_at         | AF065438  | lectin, galactoside-binding, soluble, 3 binding protein                                  | LGALS3BP                  | 5,46   | Plasma Membrane     |
| 1382386_at         | BI274268  | limb region 1 homolog (mouse)                                                            | LMBR1                     | 2,34   | Plasma Membrane     |
| 1374108_at         | BM388942  | low density lipoprotein-related protein 12                                               | LRP12                     | -1,89  | Plasma Membrane     |
| 1371267_at         | M64795    | major histocompatibility complex, class I, C                                             | HLA-C                     | 1,85   | Plasma Membrane     |
| 1370463_x_at       | U50449    | major histocompatibility complex, class I, C                                             | HLA-C                     | 2,69   | Plasma Membrane     |
| 1388071_x_at       | M24024    | major histocompatibility complex, class I, C                                             | HLA-C                     | 3,80   | Plasma Membrane     |
| 1388202_at         | BI395698  | major histocompatibility complex, class I, C                                             | HLA-C                     | 5,29   | Plasma Membrane     |
| 1371171_at         | M10094    | major histocompatibility complex, class I, C                                             | HLA-C                     | 5,55   | Plasma Membrane     |
| 1388236_x_at       | M24026    | major histocompatibility complex, class I, C                                             | HLA-C                     | 5,83   | Plasma Membrane     |
| 1388203_x_at       | BI395698  | major histocompatibility complex, class I, C                                             | HLA-C                     | 5,99   | Plasma Membrane     |
| 1370428_x_at       | AJ249701  | major histocompatibility complex, class I, C                                             | HLA-C                     | 6,74   | Plasma Membrane     |
| 1370972_x_at       | BI300597  | major histocompatibility complex, class I, C                                             | HLA-C                     | 7,42   | Plasma Membrane     |
| 1388255_x_at       | AJ243338  | major histocompatibility complex, class I, C                                             | HLA-C                     | 9,57   | Plasma Membrane     |
| 1369110_x_at       | NM_012645 | major histocompatibility complex, class I, C                                             | HLA-C                     | 12,97  | Plasma Membrane     |
| 1397859_x_at       | BI291927  | major histocompatibility complex, class I, C                                             | HLA-C                     | 15,03  | Plasma Membrane     |
| 1371078_at         | AI500830  | major histocompatibility complex, class I, C                                             | HLA-C                     | 16,38  | Plasma Membrane     |
| 1388212_a_at       | AJ243974  | major histocompatibility complex, class I, E                                             | HLA-E                     | 35,00  | Plasma Membrane     |
| 1388164_at         | AF029241  | major histocompatibility complex, class I, E                                             | HLA-E                     | 36,96  | Plasma Membrane     |
| 1371123_x_at       | AJ243973  | major histocompatibility complex, class I, E                                             | HLA-E                     | 49,82  | Plasma Membrane     |
| 1388213_a_at       | AJ243973  | major histocompatibility complex, class I, E                                             | HLA-E                     | 78,73  | Plasma Membrane     |
| 1387205_at         | NM_022921 | major histocompatibility complex, class I, G                                             | HLA-G                     | 6,85   | Plasma Membrane     |
| 1370883_at         | Y00480    | major histocompatibility complex, class II, DR alpha                                     | HLA-DRA                   | 10,00  | Plasma Membrane     |
| 1370177_at         | AI548856  | poliovirus receptor                                                                      | PVR                       | 12,73  | Plasma Membrane     |
| 1370384_a_at       | M57668    | prolactin receptor                                                                       | PRLR                      | -5,76  | Plasma Membrane     |
| 1370789_a_at       | L48060    | prolactin receptor                                                                       | PRLR                      | -4,68  | Plasma Membrane     |
| 1379693_at         | AI409154  | roundabout, axon guidance receptor, homolog 2 (Drosophila)                               | ROBO2                     | -6,72  | Plasma Membrane     |
| 1367715_at         | NM_013091 | tumor necrosis factor receptor superfamily, member 1A                                    | TNFRSF1A                  | 1,76   | Plasma Membrane     |
| 1382201_at         | AA926250  | unc-5 homolog C (C. elegans)                                                             | UNC5C                     | -3,03  | Plasma Membrane     |
| <b>Transporter</b> |           |                                                                                          |                           |        |                     |
| 1368869_at         | BG663107  | A kinase (PRKA) anchor protein 12                                                        | AKAP12                    | 3,96   | Cytoplasm           |
| 1373816_at         | BM383443  | adaptor-related protein complex 1, gamma 1 subunit                                       | AP1G1                     | 1,78   | Cytoplasm           |
| 1393359_at         | AW534487  | adaptor-related protein complex 3, beta 2 subunit                                        | AP3B2                     | -1,88  | Cytoplasm           |
| 1393562_at         | BF564312  | adaptor-related protein complex 3, mu 1 subunit                                          | AP3M1                     | -2,62  | Cytoplasm           |
| 1368062_at         | NM_133593 | adaptor-related protein complex 3, mu 1 subunit                                          | AP3M1                     | -2,24  | Cytoplasm           |
| 1376874_a_at       | BF560100  | adaptor-related protein complex 4, beta 1 subunit                                        | AP4B1                     | 1,58   | Cytoplasm           |
| 1369998_at         | NM_024152 | ADP-ribosylation factor 6                                                                | ARF6                      | 3,04   | Plasma Membrane     |
| 1385709_x_at       | AW529028  | ankylosis, progressive homolog (mouse)                                                   | ANKH                      | -5,78  | Plasma Membrane     |
| 1393439_a_at       | AI045767  | ankylosis, progressive homolog (mouse)                                                   | ANKH                      | -4,81  | Plasma Membrane     |
| 1386344_at         | BG662519  | ankylosis, progressive homolog (mouse)                                                   | ANKH                      | -2,74  | Plasma Membrane     |
| 1372604_at         | BI289459  | apolipoprotein L, 3                                                                      | APOL3 (includes EG:80833) | 34,71  | Cytoplasm           |
| 1370378_at         | J05266    | ATP synthase, H+ transporting, mitochondrial F1 complex, alpha subunit 1, cardiac muscle | ATP5A1                    | -2,28  | Cytoplasm           |
| 1370284_at         | AF010323  | ATP synthase, H+ transporting, mitochondrial F1 complex, epsilon subunit                 | ATP5E                     | -1,69  | Cytoplasm           |
| 1371925_at         | AA893621  | ATPase type 13A1                                                                         | ATP13A1                   | 1,61   | Extracellular Space |
| 1369065_a_at       | NM_017290 | ATPase, Ca++ transporting, cardiac muscle, slow twitch 2                                 | ATP2A2                    | -4,68  | Cytoplasm           |
| 1370426_a_at       | AI175492  | ATPase, Ca++ transporting, cardiac muscle, slow twitch 2                                 | ATP2A2                    | -1,60  | Cytoplasm           |
| 1397224_at         | AW534277  | ATPase, Ca++ transporting, plasma membrane 1                                             | ATP2B1                    | -1,90  | Plasma Membrane     |
| 1368698_at         | J03754    | ATPase, Ca++ transporting, plasma membrane 2                                             | ATP2B2                    | -13,24 | Plasma Membrane     |
| 1370925_at         | BG380816  | ATPase, class II, type 9B                                                                | ATP9B                     | -2,13  | Cytoplasm           |
| 1384002_at         | BG663077  | ATPase, class VI, type 11B                                                               | ATP11B                    | -2,92  | Plasma Membrane     |
| 1398905_at         | BI285183  | ATPase, H+ transporting, lysosomal 13kDa, V1 subunit G1                                  | ATP6V1G1                  | 2,49   | Cytoplasm           |
| 1398930_at         | BI278546  | ATPase, H+ transporting, lysosomal 21kDa, V0 subunit b                                   | ATP6V0B                   | 1,74   | Cytoplasm           |
| 1388325_at         | BF281358  | ATPase, H+ transporting, lysosomal 34kDa, V1 subunit D                                   | ATP6V1D                   | 1,98   | Cytoplasm           |
| 1388365_at         | BI276424  | ATPase, H+ transporting, lysosomal 38kDa, V0 subunit d1                                  | ATP6V0D1                  | -1,58  | Cytoplasm           |

|              |           |                                                                          |                               |         |                     |
|--------------|-----------|--------------------------------------------------------------------------|-------------------------------|---------|---------------------|
| 1374396_at   | BI293306  | ATPase, H+ transporting, lysosomal 42kDa, V1 subunit C1                  | ATP6V1C1                      | 2,20    | Cytoplasm           |
| 1387664_at   | NM_057213 | ATPase, H+ transporting, lysosomal 56/58kDa, V1 subunit B2               | ATP6V1B2                      | 5,36    | Cytoplasm           |
| 1374431_at   | BE120644  | ATPase, H+ transporting, lysosomal 70kDa, V1 subunit A                   | ATP6V1A                       | -1,59   | Cytoplasm           |
| 1379255_at   | AI012226  | ATPase, H+ transporting, lysosomal accessory protein 2                   | ATP6AP2                       | 1,57    | Cytoplasm           |
| 1367585_a_at | M28647    | ATPase, Na+/K+ transporting, alpha 1 polypeptide                         | ATP1A1                        | -1,97   | Plasma Membrane     |
| 1386937_at   | AI232036  | ATPase, Na+/K+ transporting, beta 1 polypeptide                          | ATP1B1                        | -1,74   | Plasma Membrane     |
| 1398300_at   | BI303655  | ATPase, Na+/K+ transporting, beta 3 polypeptide                          | ATP1B3                        | -1,64   | Plasma Membrane     |
| 1394490_at   | AI502114  | ATP-binding cassette, sub-family A (ABC1), member 1                      | ABCA1                         | -2,64   | Plasma Membrane     |
| 1383355_at   | AW918387  | ATP-binding cassette, sub-family A (ABC1), member 1                      | ABCA1                         | 3,22    | Plasma Membrane     |
| 1370464_at   | AF286167  | ATP-binding cassette, sub-family B (MDR/TAP), member 1                   | ABCB1                         | 9,62    | Plasma Membrane     |
| 1370465_at   | AF257746  | ATP-binding cassette, sub-family B (MDR/TAP), member 1                   | ABCB1                         | 17,26   | Plasma Membrane     |
| 1368484_at   | NM_022238 | ATP-binding cassette, sub-family B (MDR/TAP), member 9                   | ABCB9                         | -1,92   | Cytoplasm           |
| 1368057_at   | NM_012804 | ATP-binding cassette, sub-family D (ALD), member 3                       | ABCD3                         | -4,96   | Cytoplasm           |
| 1379717_at   | BM385804  | ATP-binding cassette, sub-family G (WHITE), member 3                     | ABCG3                         | 6,37    | Plasma Membrane     |
| 1367945_at   | NM_053359 | ATX1 antioxidant protein 1 homolog (yeast)                               | ATOX1                         | -1,69   | Cytoplasm           |
| 1372709_at   | AII72204  | B-cell receptor-associated protein 29                                    | BCAP29                        | 3,46    | Cytoplasm           |
| 1372710_at   | AII75027  | blocked early in transport 1 homolog (S. cerevisiae)                     | BET1                          | -1,88   | Cytoplasm           |
| 1371810_at   | BF284093  | coatamer protein complex, subunit gamma                                  | COPG                          | -2,59   | Cytoplasm           |
| 1393123_at   | BM392153  | complement component 8, gamma polypeptide                                | C8G                           | -2,51   | Extracellular Space |
| 1374301_at   | BI294695  | component of oligomeric golgi complex 1                                  | COG1                          | -1,51   | Cytoplasm           |
| 1398471_at   | BF288063  | component of oligomeric golgi complex 6                                  | COG6                          | -1,64   | Cytoplasm           |
| 1379876_at   | AI407943  | component of oligomeric golgi complex 7                                  | COG7                          | -1,66   | Cytoplasm           |
| 1374045_at   | AI598851  | component of oligomeric golgi complex 8                                  | COG8                          | -3,35   | Cytoplasm           |
| 1387077_at   | NM_031660 | cyclic AMP phosphoprotein, 19 kD                                         | ARPP-19                       | 3,05    | Cytoplasm           |
| 1388609_at   | AI406723  | DDI1, DNA-damage inducible 1, homolog 2 (S. cerevisiae)                  | DDI2                          | 2,26    | Plasma Membrane     |
| 1387031_at   | U36482    | endoplasmic reticulum protein 29                                         | ERP29                         | -2,21   | Cytoplasm           |
| 1388150_at   | AW533924  | exportin 1 (CRM1 homolog, yeast)                                         | XPO1                          | 3,18    | Nucleus             |
| 1385428_at   | AI072630  | exportin 4                                                               | XPO4                          | 1,91    | Nucleus             |
| 1389063_at   | BG378160  | exportin 6                                                               | XPO6                          | 2,49    | Cytoplasm           |
| 1372496_at   | BG371538  | ferredoxin 1-like                                                        | FDX1L                         | 3,26    | Unknown             |
| 1380170_at   | BI303388  | GABA(A) receptor-associated protein-like 2                               | GABARAPL2 (includes EG:11345) | -2,13   | Cytoplasm           |
| 1391928_at   | BF418827  | golgi associated PDZ and coiled-coil motif containing                    | GOPC                          | 2,46    | Cytoplasm           |
| 1378079_at   | BI295829  | golgi autoantigen, golgin subfamily a, 3                                 | GOLGA3                        | 3,10    | Cytoplasm           |
| 1368288_at   | NM_012564 | group-specific component (vitamin D binding protein)                     | GC                            | -2,66   | Extracellular Space |
| 1368289_at   | AA944965  | group-specific component (vitamin D binding protein)                     | GC                            | -1,97   | Extracellular Space |
| 1370065_at   | NM_053318 | hemopexin                                                                | HPX                           | 10,77   | Extracellular Space |
| 1370171_at   | AI058964  | heterogeneous nuclear ribonucleoprotein U (scaffold attachment factor A) | HNRNPU                        | -1,72   | Nucleus             |
| 1388918_at   | BG378074  | high density lipoprotein binding protein                                 | HDLBP                         | -2,65   | Nucleus             |
| 1384244_at   | AA964752  | hydroxysteroid dehydrogenase like 2                                      | HSDL2                         | 1,51    | Cytoplasm           |
| 1374135_at   | AI233262  | importin 4                                                               | IPO4                          | 2,39    | Nucleus             |
| 1373955_at   | BI280339  | importin 5                                                               | IPO5                          | 4,32    | Nucleus             |
| 1375185_at   | BM390183  | importin 7                                                               | IPO7                          | 2,15    | Nucleus             |
| 1372723_at   | BF396318  | importin 9                                                               | IPO9                          | -1,56   | Nucleus             |
| 1371357_at   | AI233246  | insulin-like growth factor binding protein 7                             | IGFBP7                        | -2,66   | Extracellular Space |
| 1372183_at   | AI230596  | karyopherin alpha 1 (importin alpha 5)                                   | KPNA1                         | 1,55    | Nucleus             |
| 1382756_at   | AI101822  | karyopherin alpha 1 (importin alpha 5)                                   | KPNA1                         | 1,92    | Nucleus             |
| 1382251_at   | BE120157  | karyopherin alpha 1 (importin alpha 5)                                   | KPNA1                         | 3,06    | Nucleus             |
| 1367683_at   | NM_053483 | karyopherin alpha 2 (RAG cohort 1, importin alpha 1)                     | KPNA2                         | -1,58   | Nucleus             |
| 1392446_at   | AII45435  | kelch-like 2, Mayven (Drosophila)                                        | KLHL2                         | -1,60   | Cytoplasm           |
| 1387011_at   | NM_130741 | lipocalin 2                                                              | LCN2                          | 1483,00 | Extracellular Space |
| 1381984_at   | AI600142  | major facilitator superfamily domain containing 1                        | MFSD1                         | 1,70    | Unknown             |
| 1372520_at   | AII72056  | myeloid cell leukemia sequence 1 (BCL2-related)                          | MCL1                          | 3,58    | Cytoplasm           |
| 1370141_at   | NM_021846 | myeloid cell leukemia sequence 1 (BCL2-related)                          | MCL1                          | 8,57    | Cytoplasm           |
| 1372528_at   | AII02069  | N-ethylmaleimide-sensitive factor                                        | NSF                           | -2,15   | Cytoplasm           |
| 1369690_at   | AI547471  | N-ethylmaleimide-sensitive factor                                        | NSF                           | -1,98   | Cytoplasm           |
| 1374075_at   | AII75533  | N-ethylmaleimide-sensitive factor attachment protein, gamma              | NAPG                          | -2,32   | Cytoplasm           |
| 1369999_a_at | NM_053601 | neuronatin                                                               | NNAT                          | -3,47   | Plasma Membrane     |
| 1376112_a_at | AI231712  | nuclear transport factor 2                                               | NUTF2                         | -2,89   | Nucleus             |



|              |           |                                                                                                                                         |          |       |                     |
|--------------|-----------|-----------------------------------------------------------------------------------------------------------------------------------------|----------|-------|---------------------|
| 1370934_at   | L06821    | nucleoporin 153kDa                                                                                                                      | NUP153   | 1,64  | Nucleus             |
| 1398259_at   | NM_053952 | nucleoporin 155kDa                                                                                                                      | NUP155   | 3,49  | Nucleus             |
| 1383092_a_at | BE115060  | nucleoporin 214kDa                                                                                                                      | NUP214   | 1,77  | Nucleus             |
| 1367803_at   | NM_017361 | nucleoporin 54kDa                                                                                                                       | NUP54    | 4,23  | Nucleus             |
| 1388909_at   | AA891742  | oxidoreductase NAD-binding domain containing 1                                                                                          | OXNAD1   | -1,63 | Unknown             |
| 1379784_at   | AA997675  | peroxisomal biogenesis factor 7                                                                                                         | PEX7     | -4,08 | Cytoplasm           |
| 1389347_at   | BE100607  | phosphatidylinositol transfer protein, membrane-associated 1                                                                            | PITPNM1  | -1,86 | Cytoplasm           |
| 1388339_at   | BE112895  | phosphoprotein enriched in astrocytes 15                                                                                                | PEA15    | 2,50  | Cytoplasm           |
| 1387399_at   | NM_020098 | piccolo (presynaptic cytomatrix protein)                                                                                                | PCLO     | -4,87 | Cytoplasm           |
| 1386913_at   | NM_019358 | podoplanin                                                                                                                              | PDPN     | 1,98  | Plasma Membrane     |
| 1368068_a_at | NM_130740 | protein kinase C and casein kinase substrate in neurons 2                                                                               | PACSN2   | 1,83  | Cytoplasm           |
| 1388393_at   | BM385031  | proteolipid protein 2 (colonic epithelium-enriched)                                                                                     | PLP2     | 3,75  | Cytoplasm           |
| 1371481_at   | BI274372  | receptor accessory protein 5                                                                                                            | REEP5    | 1,55  | Extracellular Space |
| 1367939_at   | NM_012733 | retinol binding protein 1, cellular                                                                                                     | RBP1     | 4,15  | Extracellular Space |
| 1388413_at   | BI282760  | ribosome binding protein 1 homolog 180kDa (dog)                                                                                         | RRBP1    | 1,74  | Cytoplasm           |
| 1367661_at   | AF140232  | S100 calcium binding protein A6                                                                                                         | S100A6   | 7,37  | Cytoplasm           |
| 1389024_at   | BG380647  | sec1 family domain containing 2                                                                                                         | SCFD2    | -2,12 | Unknown             |
| 1369092_at   | NM_057147 | SEC22 vesicle trafficking protein homolog A (S. cerevisiae)                                                                             | SEC22A   | 1,66  | Cytoplasm           |
| 1389383_at   | BI289855  | SEC24 family, member A (S. cerevisiae)                                                                                                  | SEC24A   | -1,62 | Cytoplasm           |
| 1373610_at   | AI232694  | SEC24 family, member D (S. cerevisiae)                                                                                                  | SEC24D   | -1,91 | Cytoplasm           |
| 1371368_at   | BI279499  | Sec61 alpha 1 subunit (S. cerevisiae)                                                                                                   | SEC61A1  | -1,54 | Cytoplasm           |
| 1374917_at   | AI548571  | SEC63 homolog (S. cerevisiae)                                                                                                           | SEC63    | -2,07 | Cytoplasm           |
| 1390115_at   | BM384667  | SEC63 homolog (S. cerevisiae)                                                                                                           | SEC63    | -1,88 | Cytoplasm           |
| 1388819_at   | BM386698  | secretory carrier membrane protein 1                                                                                                    | SCAMP1   | -1,77 | Cytoplasm           |
| 1387008_at   | NM_022948 | sideroflexin 3                                                                                                                          | SFXN3    | -6,91 | Cytoplasm           |
| 1376431_at   | BM387357  | SIL1 homolog, endoplasmic reticulum chaperone (S. cerevisiae)                                                                           | SIL1     | -2,02 | Cytoplasm           |
| 1369693_a_at | NM_017215 | solute carrier family 1 (glial high affinity glutamate transporter), member 2                                                           | SLC1A2   | 4,30  | Plasma Membrane     |
| 1367877_at   | NM_013173 | solute carrier family 11 (proton-coupled divalent metal ion transporters), member 2                                                     | SLC11A2  | 17,19 | Plasma Membrane     |
| 1374885_at   | AI172278  | solute carrier family 12 (potassium/chloride transporters), member 6                                                                    | SLC12A6  | -5,35 | Plasma Membrane     |
| 1367853_at   | NM_031798 | solute carrier family 12 (sodium/potassium/chloride transporters), member 2                                                             | SLC12A2  | -3,49 | Plasma Membrane     |
| 1370548_at   | AB047324  | solute carrier family 16, member 10 (aromatic amino acid transporter)                                                                   | SLC16A10 | -9,26 | Plasma Membrane     |
| 1390591_at   | AI169163  | solute carrier family 17 (sodium phosphate), member 3                                                                                   | SLC17A3  | 7,00  | Plasma Membrane     |
| 1390863_at   | BF283298  | solute carrier family 19 (thiamine transporter), member 2                                                                               | SLC19A2  | 3,22  | Plasma Membrane     |
| 1370848_at   | BI284218  | solute carrier family 2 (facilitated glucose transporter), member 1                                                                     | SLC2A1   | 12,80 | Plasma Membrane     |
| 1387228_at   | NM_012879 | solute carrier family 2 (facilitated glucose transporter), member 2                                                                     | SLC2A2   | -3,76 | Plasma Membrane     |
| 1370314_at   | AB000489  | solute carrier family 20 (phosphate transporter), member 1                                                                              | SLC20A1  | 4,99  | Plasma Membrane     |
| 1371889_at   | AW915448  | solute carrier family 22, member 17                                                                                                     | SLC22A17 | -3,71 | Plasma Membrane     |
| 1388000_at   | AF021923  | solute carrier family 24 (sodium/potassium/calcium exchanger), member 2                                                                 | SLC24A2  | -7,12 | Plasma Membrane     |
| 1383444_at   | AA964069  | solute carrier family 24 (sodium/potassium/calcium exchanger), member 2                                                                 | SLC24A2  | -3,59 | Plasma Membrane     |
| 1371534_at   | AI407908  | solute carrier family 25 (mitochondrial carrier: glutamate), member 22                                                                  | SLC25A22 | 2,05  | Cytoplasm           |
| 1367773_at   | NM_017307 | solute carrier family 25 (mitochondrial carrier; citrate transporter), member 1                                                         | SLC25A1  | -1,74 | Plasma Membrane     |
| 1393947_at   | BG377383  | solute carrier family 25 (mitochondrial carrier; ornithine transporter) member 15                                                       | SLC25A15 | -1,98 | Cytoplasm           |
| 1370060_at   | NM_022398 | solute carrier family 25 (mitochondrial carrier; oxoglutarate carrier), member 11                                                       | SLC25A11 | -1,55 | Cytoplasm           |
| 1379073_at   | AA859663  | solute carrier family 25 (mitochondrial carrier; phosphate carrier), member 23                                                          | SLC25A23 | -2,90 | Unknown             |
| 1371754_at   | AI177358  | solute carrier family 25 (mitochondrial carrier; phosphate carrier), member 25                                                          | SLC25A25 | -1,76 | Cytoplasm           |
| 1392789_at   | BI296353  | solute carrier family 25, member 36                                                                                                     | SLC25A36 | 7,00  | Unknown             |
| 1382688_at   | AI229706  | solute carrier family 25, member 37                                                                                                     | SLC25A37 | 6,59  | Cytoplasm           |
| 1398771_at   | NM_019283 | solute carrier family 3 (activators of dibasic and neutral amino acid transport), member 2                                              | SLC3A2   | 2,17  | Plasma Membrane     |
| 1368440_at   | NM_017216 | solute carrier family 3 (cystine, dibasic and neutral amino acid transporters, activator of cystine, dibasic and neutral amino acid tra | SLC3A1   | -9,18 | Plasma Membrane     |
| 1388982_at   | BM389066  | solute carrier family 30 (zinc transporter), member 9                                                                                   | SLC30A9  | -2,11 | Nucleus             |
| 1394954_at   | BE101666  | solute carrier family 31 (copper transporters), member 2                                                                                | SLC31A2  | -3,73 | Plasma Membrane     |
| 1373657_at   | BF417391  | solute carrier family 31 (copper transporters), member 2                                                                                | SLC31A2  | -3,18 | Plasma Membrane     |
| 1394304_at   | BF556357  | solute carrier family 33 (acetyl-CoA transporter), member 1                                                                             | SLC33A1  | -2,10 | Cytoplasm           |
| 1393216_at   | BI282044  | solute carrier family 33 (acetyl-CoA transporter), member 1                                                                             | SLC33A1  | -1,54 | Cytoplasm           |
| 1374662_at   | AA891848  | solute carrier family 35 (CMP-sialic acid transporter), member A1                                                                       | SLC35A1  | -3,65 | Cytoplasm           |
| 1367499_at   | BM390900  | solute carrier family 35, member C1                                                                                                     | SLC35C1  | -1,55 | Cytoplasm           |
| 1386960_at   | NM_031589 | solute carrier family 37 (glucose-6-phosphate transporter), member 4                                                                    | SLC37A4  | -5,46 | Cytoplasm           |
| 1382076_at   | AA955403  | solute carrier family 37 (glycerol-3-phosphate transporter), member 1                                                                   | SLC37A1  | 1,93  | Plasma Membrane     |

|              |           |                                                                                 |         |        |                     |
|--------------|-----------|---------------------------------------------------------------------------------|---------|--------|---------------------|
| 1370409_at   | AF075704  | solute carrier family 38, member 1                                              | SLC38A1 | 4,25   | Plasma Membrane     |
| 1387970_at   | AF276870  | solute carrier family 38, member 5                                              | SLC38A5 | -8,74  | Unknown             |
| 1372778_at   | AA799420  | solute carrier family 39 (zinc transporter), member 1                           | SLC39A1 | 2,12   | Plasma Membrane     |
| 1393162_at   | AI502079  | solute carrier family 39 (zinc transporter), member 6                           | SLC39A6 | 1,68   | Plasma Membrane     |
| 1373326_at   | AI716512  | solute carrier family 4, sodium bicarbonate transporter, member 10              | SLC4A10 | 2,70   | Unknown             |
| 1383319_at   | BI293444  | solute carrier family 4, sodium borate transporter, member 11                   | SLC4A11 | 2,62   | Unknown             |
| 1384756_at   | BF394311  | solute carrier family 43, member 2                                              | SLC43A2 | -7,85  | Plasma Membrane     |
| 1368414_at   | NM_022590 | solute carrier family 5 (sodium/glucose cotransporter), member 2                | SLC5A2  | -2,57  | Plasma Membrane     |
| 1392349_at   | BE116021  | solute carrier family 5 (sodium/myo-inositol cotransporter), member 3           | SLC5A3  | 2,79   | Plasma Membrane     |
| 1367810_at   | AI412218  | solute carrier family 6 (neurotransmitter transporter, creatine), member 8      | SLC6A8  | 23,34  | Cytoplasm           |
| 1373787_at   | AA943735  | solute carrier family 6 (neurotransmitter transporter, glycine), member 9       | SLC6A9  | 4,79   | Plasma Membrane     |
| 1368391_at   | NM_013111 | solute carrier family 7 (cationic amino acid transporter, y+ system), member 1  | SLC7A1  | 1,52   | Plasma Membrane     |
| 1368392_at   | BF420160  | solute carrier family 7 (cationic amino acid transporter, y+ system), member 1  | SLC7A1  | 2,48   | Plasma Membrane     |
| 1369460_at   | NM_022619 | solute carrier family 7 (cationic amino acid transporter, y+ system), member 2  | SLC7A2  | 2,92   | Plasma Membrane     |
| 1382145_at   | AW531444  | solute carrier family 7 (cationic amino acid transporter, y+ system), member 4  | SLC7A4  | -4,36  | Plasma Membrane     |
| 1387057_at   | NM_053442 | solute carrier family 7 (cationic amino acid transporter, y+ system), member 8  | SLC7A8  | -3,58  | Plasma Membrane     |
| 1378133_at   | AW532618  | solute carrier family 7, (cationic amino acid transporter, y+ system) member 11 | SLC7A11 | 14,68  | Plasma Membrane     |
| 1390440_at   | BG380512  | solute carrier family 9 (sodium/hydrogen exchanger), member 6                   | SLC9A6  | -2,60  | Plasma Membrane     |
| 1373734_at   | AI101171  | solute carrier organic anion transporter family, member 3A1                     | SLCO3A1 | -2,63  | Plasma Membrane     |
| 1372728_at   | BE103745  | sortilin 1                                                                      | SORT1   | -7,82  | Cytoplasm           |
| 1393626_at   | BF562507  | sortilin-related receptor, L(DLR class) A repeats-containing                    | SORL1   | -14,57 | Plasma Membrane     |
| 1394786_at   | AW526631  | sortilin-related receptor, L(DLR class) A repeats-containing                    | SORL1   | -7,89  | Plasma Membrane     |
| 1393933_at   | AW144823  | sortilin-related receptor, L(DLR class) A repeats-containing                    | SORL1   | -4,62  | Plasma Membrane     |
| 1390710_x_at | AA850618  | sortilin-related receptor, L(DLR class) A repeats-containing                    | SORL1   | -4,10  | Plasma Membrane     |
| 1377457_a_at | AA850618  | sortilin-related receptor, L(DLR class) A repeats-containing                    | SORL1   | -3,95  | Plasma Membrane     |
| 1377458_at   | AA850618  | sortilin-related receptor, L(DLR class) A repeats-containing                    | SORL1   | -3,48  | Plasma Membrane     |
| 1368043_at   | NM_053411 | sorting nexin 1                                                                 | SNX1    | 1,91   | Cytoplasm           |
| 1379388_at   | BI296311  | sorting nexin 13                                                                | SNX13   | 1,94   | Cytoplasm           |
| 1372656_at   | BI282899  | sorting nexin 15                                                                | SNX15   | 4,90   | Cytoplasm           |
| 1374401_at   | AI549249  | sorting nexin 2                                                                 | SNX2    | 1,52   | Cytoplasm           |
| 1383742_at   | AA997003  | sorting nexin 7                                                                 | SNX7    | 12,56  | Unknown             |
| 1383751_at   | AI555007  | sorting nexin 8                                                                 | SNX8    | 3,18   | Unknown             |
| 1388675_at   | BE349771  | spinster homolog 1 (Drosophila)                                                 | SPNS1   | 2,00   | Cytoplasm           |
| 1386279_at   | AI235655  | StAR-related lipid transfer (START) domain containing 4                         | STARD4  | -2,10  | Cytoplasm           |
| 1393183_at   | H33503    | StAR-related lipid transfer (START) domain containing 5                         | STARD5  | -3,36  | Cytoplasm           |
| 1370296_at   | M34728    | sterol carrier protein 2                                                        | SCP2    | -2,35  | Cytoplasm           |
| 1387896_at   | M62763    | sterol carrier protein 2                                                        | SCP2    | -1,84  | Cytoplasm           |
| 1389359_at   | BE120823  | structural maintenance of chromosomes 4                                         | SMC4    | 1,73   | Nucleus             |
| 1383399_at   | AI574728  | synaptic vesicle glycoprotein 2A                                                | SV2A    | -1,85  | Cytoplasm           |
| 1370194_at   | AA945699  | synaptosomal-associated protein, 23kDa                                          | SNAP23  | 2,16   | Plasma Membrane     |
| 1387073_at   | NM_030991 | synaptosomal-associated protein, 25kDa                                          | SNAP25  | -1,74  | Plasma Membrane     |
| 1387517_at   | NM_030839 | synaptotagmin XIII                                                              | SYT13   | -6,15  | Unknown             |
| 1374427_at   | AI144986  | synaptotagmin XIII                                                              | SYT13   | -2,09  | Unknown             |
| 1369457_a_at | AF419342  | synaptotagmin-like 4                                                            | SYTL4   | -8,82  | Cytoplasm           |
| 1367530_at   | AI412967  | syntaxin 16                                                                     | STX16   | -2,61  | Cytoplasm           |
| 1390447_at   | BI295918  | syntaxin 3                                                                      | STX3    | 1,80   | Plasma Membrane     |
| 1388556_at   | BG381589  | syntaxin 6                                                                      | STX6    | 2,31   | Cytoplasm           |
| 1398330_at   | BM388715  | syntaxin binding protein 1                                                      | STXBP1  | -1,55  | Cytoplasm           |
| 1369726_at   | NM_033098 | TAP binding protein (tapasin)                                                   | TAPBP   | 8,77   | Cytoplasm           |
| 1372020_at   | BI285561  | target of myb1 (chicken)                                                        | TOM1    | 2,10   | Cytoplasm           |
| 1372092_at   | BI278968  | trafficking protein, kinesin binding 2                                          | TRAK2   | -4,44  | Plasma Membrane     |
| 1370176_at   | BG378620  | trafficking protein, kinesin binding 2                                          | TRAK2   | -2,13  | Plasma Membrane     |
| 1367765_at   | NM_022534 | transcobalamin II; macrocytic anemia                                            | TCN2    | -1,81  | Extracellular Space |
| 1388750_at   | BF417032  | transferrin receptor (p90, CD71)                                                | TFRC    | 2,42   | Plasma Membrane     |
| 1371113_a_at | M58040    | transferrin receptor (p90, CD71)                                                | TFRC    | 5,69   | Plasma Membrane     |
| 1370366_at   | AF150091  | translocase of inner mitochondrial membrane 10 homolog (yeast)                  | TIMM10  | 2,94   | Cytoplasm           |
| 1398868_at   | AI408157  | translocase of inner mitochondrial membrane 13 homolog (yeast)                  | TIMM13  | 2,32   | Cytoplasm           |
| 1390237_at   | BF558361  | translocase of inner mitochondrial membrane 8 homolog A (yeast)                 | TIMM8A  | 1,97   | Cytoplasm           |

|              |           |                                                                                         |                             |        |                 |
|--------------|-----------|-----------------------------------------------------------------------------------------|-----------------------------|--------|-----------------|
| 1367496_at   | AI179901  | transmembrane 9 superfamily member 2                                                    | TM9SF2                      | -1,66  | Plasma Membrane |
| 1398973_at   | BI296499  | transmembrane 9 superfamily member 3                                                    | TM9SF3                      | -3,35  | Cytoplasm       |
| 1379627_at   | AW534630  | transmembrane 9 superfamily member 3                                                    | TM9SF3                      | -3,10  | Cytoplasm       |
| 1367513_at   | BI284935  | transmembrane 9 superfamily protein member 4                                            | TM9SF4                      | -1,72  | Cytoplasm       |
| 1390432_at   | AA997338  | transmembrane and coiled-coil domains 3                                                 | TMCO3                       | -6,31  | Unknown         |
| 1391134_at   | BF404933  | transmembrane and coiled-coil domains 3                                                 | TMCO3                       | -2,43  | Unknown         |
| 1373056_at   | AI409861  | transmembrane emp24 protein transport domain containing 4                               | TMED4                       | -1,79  | Cytoplasm       |
| 1388369_at   | BM385547  | transmembrane emp24 protein transport domain containing 9                               | TMED9                       | 1,56   | Cytoplasm       |
| 1388149_at   | X57523    | transporter 1, ATP-binding cassette, sub-family B (MDR/TAP)                             | TAP1                        | 130,82 | Cytoplasm       |
| 1368732_at   | NM_032056 | transporter 2, ATP-binding cassette, sub-family B (MDR/TAP)                             | TAP2                        | 45,62  | Cytoplasm       |
| 1368669_at   | NM_019354 | uncoupling protein 2 (mitochondrial, proton carrier)                                    | UCP2                        | -2,70  | Cytoplasm       |
| 1373498_at   | BI295924  | vacuolar protein sorting 11 homolog (S. cerevisiae)                                     | VPS11                       | 1,90   | Cytoplasm       |
| 1388934_at   | BI285570  | vacuolar protein sorting 16 homolog (S. cerevisiae)                                     | VPS16                       | 1,93   | Cytoplasm       |
| 1371705_at   | BI285508  | vacuolar protein sorting 26 homolog A (S. pombe)                                        | VPS26A                      | 1,74   | Cytoplasm       |
| 1382099_at   | BI289595  | vacuolar protein sorting 26 homolog A (S. pombe)                                        | VPS26A                      | 1,80   | Cytoplasm       |
| 1373145_at   | BI281884  | vacuolar protein sorting 41 homolog (S. cerevisiae)                                     | VPS41                       | -1,62  | Cytoplasm       |
| 1369098_at   | NM_013155 | very low density lipoprotein receptor                                                   | VLDLR                       | 2,10   | Plasma Membrane |
| 1389611_at   | AA849857  | very low density lipoprotein receptor                                                   | VLDLR                       | 2,39   | Plasma Membrane |
| 1387455_a_at | NM_013155 | very low density lipoprotein receptor                                                   | VLDLR                       | 2,79   | Plasma Membrane |
| 1371432_at   | BI284849  | vesicle amine transport protein 1 homolog (T. californica)                              | VAT1                        | 2,27   | Plasma Membrane |
| 1394570_at   | BF284360  | X-linked Kx blood group (McLeod syndrome)                                               | XK                          | -1,66  | Plasma Membrane |
| <b>Other</b> |           |                                                                                         |                             |        |                 |
| 1391754_at   | BM391818  | 2'-5' oligoadenylate synthetase II                                                      | OASII                       | 2,78   | Unknown         |
| 1378345_at   | BF389196  | 2-oxoglutarate and iron-dependent oxygenase domain containing 1                         | OGFOD1                      | -1,92  | Unknown         |
| 1383358_at   | AI072577  | A kinase (PRKA) anchor protein 1                                                        | AKAP1                       | 2,04   | Cytoplasm       |
| 1390883_at   | AI501759  | A kinase (PRKA) anchor protein 11                                                       | AKAP11                      | -3,22  | Cytoplasm       |
| 1398369_at   | AI599048  | A kinase (PRKA) anchor protein 13                                                       | AKAP13                      | -1,99  | Cytoplasm       |
| 1374746_at   | AA891922  | Ab1-152                                                                                 | LOC500877                   | 1,52   | Unknown         |
| 1394895_at   | AI548194  | Abelson helper integration site 1                                                       | AH1                         | 1,63   | Unknown         |
| 1387909_at   | U94904    | abl interactor 2                                                                        | ABI2                        | -1,97  | Cytoplasm       |
| 1386915_at   | NM_131911 | acidic (leucine-rich) nuclear phosphoprotein 32 family, member B                        | ANP32B                      | 2,06   | Nucleus         |
| 1371873_at   | AA850735  | acidic (leucine-rich) nuclear phosphoprotein 32 family, member E                        | ANP32E                      | -2,19  | Nucleus         |
| 1372620_at   | AI008642  | acidic (leucine-rich) nuclear phosphoprotein 32 family, member E                        | ANP32E                      | 1,88   | Nucleus         |
| 1375641_at   | BI296526  | actin related protein 2/3 complex, subunit 5-like                                       | ARPC5L (includes EG:296710) | 2,72   | Unknown         |
| 1398835_at   | NM_031144 | actin, beta                                                                             | ACTB                        | 1,95   | Cytoplasm       |
| 1398836_s_at | NM_031144 | actin, beta                                                                             | ACTB                        | 2,07   | Cytoplasm       |
| 1384581_at   | BI850151  | actin, gamma 1                                                                          | ACTG1                       | 2,53   | Cytoplasm       |
| 1371327_a_at | BG666668  | actin, gamma 1                                                                          | ACTG1                       | 4,40   | Cytoplasm       |
| 1389189_at   | BF555956  | actinin, alpha 1                                                                        | ACTN1                       | 2,00   | Cytoplasm       |
| 1398294_at   | NM_031005 | actinin, alpha 1                                                                        | ACTN1                       | 5,43   | Cytoplasm       |
| 1369942_at   | NM_031675 | actinin, alpha 4                                                                        | ACTN4                       | 2,85   | Cytoplasm       |
| 1373507_at   | AI232810  | acyl-Coenzyme A binding domain containing 5                                             | ACBD5                       | -2,71  | Unknown         |
| 1374555_at   | AI501425  | acyl-Coenzyme A binding domain containing 6                                             | ACBD6                       | 1,67   | Unknown         |
| 1382556_a_at | AI412140  | adaptor protein, phosphotyrosine interaction, PH domain and leucine zipper containing 1 | APPL1                       | 3,25   | Cytoplasm       |
| 1397579_x_at | BI294552  | adenomatosis polyposis coli 2                                                           | APC2                        | -3,15  | Cytoplasm       |
| 1383499_at   | BG371995  | adhesion molecule with Ig-like domain 1                                                 | AMIGO1                      | -2,18  | Unknown         |
| 1395146_at   | BI290608  | adiponectin receptor 2                                                                  | ADIPOR2                     | 1,74   | Plasma Membrane |
| 1390850_at   | AA874941  | adipose differentiation-related protein                                                 | ADFP                        | 1,60   | Plasma Membrane |
| 1392038_at   | BF387389  | ADP-ribosylation factor-like 6 interacting protein 1                                    | ARL6IP1                     | 5,26   | Cytoplasm       |
| 1372429_at   | BF419113  | adrenocortical dysplasia homolog (mouse)                                                | ACD                         | -1,73  | Nucleus         |
| 1390500_at   | BG375508  | aftiphilin                                                                              | AFTPH                       | -1,79  | Cytoplasm       |
| 1395226_at   | BI274777  | aftiphilin                                                                              | AFTPH                       | 2,19   | Cytoplasm       |
| 1370307_at   | M64780    | agrin                                                                                   | AGRN                        | 8,51   | Plasma Membrane |
| 1397481_at   | BE120751  | Alstrom syndrome 1                                                                      | ALMS1                       | -2,92  | Cytoplasm       |
| 1371572_at   | BM986220  | amyloid beta (A4) precursor protein                                                     | APP                         | -1,72  | Plasma Membrane |
| 1371571_at   | BG671677  | amyloid beta (A4) precursor protein                                                     | APP                         | -1,64  | Plasma Membrane |
| 1377697_at   | BI275738  | amyloid beta (A4) precursor protein-binding, family B, member 2                         | APBB2                       | -3,40  | Cytoplasm       |
| 1378248_at   | BE110453  | amyloid beta (A4) precursor protein-binding, family B, member 2                         | APBB2                       | -2,71  | Cytoplasm       |

|              |           |                                                                     |                             |       |                     |
|--------------|-----------|---------------------------------------------------------------------|-----------------------------|-------|---------------------|
| 1389307_at   | AW435479  | amyloid beta (A4) precursor-like protein 1                          | APLP1                       | -2,70 | Extracellular Space |
| 1388121_at   | M31322    | amyloid beta (A4) precursor-like protein 2                          | APLP2                       | -2,56 | Extracellular Space |
| 1375880_at   | AI170384  | amyloid beta precursor protein (cytoplasmic tail) binding protein 2 | APPBP2                      | -3,96 | Cytoplasm           |
| 1378475_at   | BF396428  | amyloid beta precursor protein (cytoplasmic tail) binding protein 2 | APPBP2                      | -2,58 | Cytoplasm           |
| 1389606_at   | BI303298  | anaphase promoting complex subunit 1                                | ANAPC1                      | -1,56 | Nucleus             |
| 1395884_at   | BF414572  | angel homolog 2 (Drosophila)                                        | ANGEL2                      | 2,37  | Nucleus             |
| 1371627_at   | BI277433  | angiominin like 1                                                   | AMOTL1                      | -4,76 | Plasma Membrane     |
| 1383018_at   | BF420082  | angiopoietin-like 6                                                 | ANGPTL6                     | 2,06  | Extracellular Space |
| 1370638_at   | AF069525  | ankyrin 3, node of Ranvier (ankyrin G)                              | ANK3                        | -1,71 | Plasma Membrane     |
| 1381809_at   | BE097847  | ankyrin repeat domain 11                                            | ANKRD11                     | 3,12  | Nucleus             |
| 1389124_at   | AI009814  | ankyrin repeat domain 40                                            | ANKRD40                     | -2,43 | Unknown             |
| 1383964_at   | AI549551  | ankyrin repeat domain 50                                            | ANKRD50                     | -3,53 | Unknown             |
| 1367584_at   | NM_019905 | annexin A2                                                          | ANXA2                       | 44,50 | Plasma Membrane     |
| 1386862_at   | NM_013132 | annexin A5                                                          | ANXA5                       | 1,62  | Plasma Membrane     |
| 1387673_a_at | BI285568  | annexin A6                                                          | ANXA6                       | -1,60 | Plasma Membrane     |
| 1372624_at   | BF551377  | anoctamin 6                                                         | ANO6                        | -1,67 | Unknown             |
| 1384675_at   | AI029113  | antisense paternally expressed gene 3                               | APEG3 (includes EG:619476)  | -2,41 | Unknown             |
| 1382118_at   | BE104676  | antisense paternally expressed gene 3                               | APEG3 (includes EG:619476)  | -1,95 | Unknown             |
| 1372390_at   | AI710604  | antisense paternally expressed gene 3                               | APEG3 (includes EG:619476)  | -1,77 | Unknown             |
| 1367536_at   | AI172106  | APAF1 interacting protein                                           | APIP                        | 1,61  | Unknown             |
| 1376496_at   | AI717736  | apolipoprotein L 9a                                                 | APOL9A (includes EG:503164) | 4,08  | Unknown             |
| 1383491_at   | BM391709  | apoptosis enhancing nuclease                                        | AEN                         | 7,09  | Unknown             |
| 1376300_at   | BI289802  | archaelysin family metallopeptidase 2                               | AMZ2                        | -3,57 | Unknown             |
| 1398896_at   | AA892567  | archain 1                                                           | ARCN1                       | 1,64  | Cytoplasm           |
| 1390441_at   | AW527409  | ArfGAP with SH3 domain, ankyrin repeat and PH domain 1              | ASAP1                       | -2,57 | Plasma Membrane     |
| 1385228_x_at | AI059117  | ArfGAP with SH3 domain, ankyrin repeat and PH domain 1              | ASAP1                       | 1,59  | Plasma Membrane     |
| 1372522_at   | AI556235  | arginine and glutamate rich 1                                       | ARGLU1                      | -1,81 | Unknown             |
| 1373983_at   | AI168986  | arginine/serine-rich coiled-coil 2                                  | RSRC2                       | 2,05  | Unknown             |
| 1392930_at   | BI276980  | armadillo repeat containing 1                                       | ARMC1                       | -2,49 | Unknown             |
| 1383592_at   | AA925988  | armadillo repeat containing 8                                       | ARMC8                       | 3,86  | Unknown             |
| 1375424_at   | BE107525  | ARP2 actin-related protein 2 homolog (yeast)                        | ACTR2                       | 1,80  | Plasma Membrane     |
| 1370890_at   | AI012420  | ARP3 actin-related protein 3 homolog (yeast)                        | ACTR3                       | 2,28  | Plasma Membrane     |
| 1376297_at   | BE112202  | arrestin domain containing 1                                        | ARRDC1                      | 3,47  | Unknown             |
| 1389057_at   | AI007774  | ARV1 homolog (S. cerevisiae)                                        | ARV1                        | 1,60  | Unknown             |
| 1379422_at   | AI145871  | asparagine-linked glycosylation 13 homolog (S. cerevisiae)          | ALG13 (includes EG:67574)   | -2,14 | Unknown             |
| 1388963_at   | AI102087  | astrotactin 1                                                       | ASTN1                       | -5,96 | Unknown             |
| 1388826_at   | BE349657  | ataxin 2-like                                                       | ATXN2L                      | 1,63  | Unknown             |
| 1371614_at   | AI169001  | ATG12 autophagy related 12 homolog (S. cerevisiae)                  | ATG12                       | 1,97  | Cytoplasm           |
| 1385526_at   | AA956721  | ATG5 autophagy related 5 homolog (S. cerevisiae)                    | LOC365601                   | 2,10  | Cytoplasm           |
| 1373729_at   | BG376772  | ATP synthase mitochondrial F1 complex assembly factor 1             | ATPAF1                      | -1,54 | Unknown             |
| 1392161_at   | AI030731  | ATP synthase mitochondrial F1 complex assembly factor 1             | ATPAF1                      | 2,39  | Unknown             |
| 1393217_at   | BF282804  | ATP-binding cassette, sub-family G (WHITE), member 3-like 1         | ABCG3L1                     | 2,61  | Unknown             |
| 1387127_at   | NM_031351 | attractin                                                           | ATRN                        | -2,57 | Extracellular Space |
| 1388738_at   | AI411227  | attractin-like 1                                                    | ATRNL1                      | -4,79 | Unknown             |
| 1389402_at   | AI178746  | AXIN1 up-regulated 1                                                | AXUD1                       | 5,28  | Nucleus             |
| 1368291_at   | NM_021752 | baculoviral IAP repeat-containing 2                                 | BIRC                        | 3,05  | Cytoplasm           |
| 1375941_at   | BI292120  | BAIL-associated protein 2-like 1                                    | BAIAP2L1                    | 2,45  | Cytoplasm           |
| 1368509_at   | NM_053618 | Bardet-Biedl syndrome 2                                             | BBS2                        | -4,24 | Unknown             |
| 1367820_at   | NM_053631 | barrier to autointegration factor 1                                 | BANF1                       | 1,72  | Nucleus             |
| 1367643_at   | NM_012783 | basigin (Ok blood group)                                            | BSG                         | -1,60 | Plasma Membrane     |
| 1388418_at   | BG378875  | B-cell CLL/Lymphoma 9                                               | BCL9                        | -2,00 | Nucleus             |
| 1393641_at   | AA925583  | B-cell linker                                                       | BLNK                        | 12,63 | Cytoplasm           |
| 1382993_at   | AI236152  | BCL2 binding component 3                                            | BBC3                        | 2,96  | Cytoplasm           |
| 1387805_at   | NM_053420 | BCL2/adenovirus E1B 19kDa interacting protein 3                     | BNIP3 (includes EG:664)     | 1,66  | Cytoplasm           |
| 1386978_at   | NM_080888 | BCL2/adenovirus E1B 19kDa interacting protein 3-like                | BNIP3L                      | -1,71 | Cytoplasm           |
| 1368066_at   | NM_053812 | BCL2-antagonist/killer 1                                            | BAK1                        | 3,83  | Cytoplasm           |
| 1375550_at   | BI280304  | BCL2-associated athanogene                                          | BAG1                        | 1,84  | Cytoplasm           |
| 1369122_at   | AF235993  | BCL2-associated X protein                                           | BAX                         | 2,34  | Cytoplasm           |

|              |           |                                                                              |                            |       |                     |
|--------------|-----------|------------------------------------------------------------------------------|----------------------------|-------|---------------------|
| 1371958_at   | BM392148  | BCL2-like 2                                                                  | BCL2L2                     | -3,43 | Cytoplasm           |
| 1393707_at   | AW527957  | BCL2-like 2                                                                  | BCL2L2                     | -2,03 | Cytoplasm           |
| 1377759_at   | BG666928  | BH3 interacting domain death agonist                                         | BID                        | 9,39  | Cytoplasm           |
| 1383822_at   | AI029990  | bicaudal D homolog 2 (Drosophila)                                            | BICD2                      | 2,11  | Cytoplasm           |
| 1392910_at   | AA859968  | block of proliferation 1                                                     | BOP1                       | 1,94  | Nucleus             |
| 1390738_at   | BM385476  | bone marrow stromal cell antigen 2                                           | BST2                       | 6,60  | Plasma Membrane     |
| 1398350_at   | BG380454  | brain abundant, membrane attached signal protein 1                           | BASP1                      | 1,67  | Plasma Membrane     |
| 1371833_at   | AI230753  | brain protein I3                                                             | BRI3                       | 2,04  | Unknown             |
| 1388690_at   | AI105439  | breast cancer metastasis-suppressor 1-like                                   | BRMS1L                     | -2,11 | Unknown             |
| 1399105_at   | AA926279  | bridging integrator 3                                                        | BIN3                       | 2,09  | Cytoplasm           |
| 1392514_at   | BE095565  | brix domain containing 1                                                     | BXDC1                      | 2,69  | Nucleus             |
| 1389569_at   | AW917092  | brix domain containing 2                                                     | BXDC2                      | 2,45  | Nucleus             |
| 1371522_at   | BI295010  | bromo adjacent homology domain containing 1                                  | BAHD1                      | 1,95  | Unknown             |
| 1374113_at   | BM387384  | bromodomain adjacent to zinc finger domain, 1A                               | BAZ1A                      | 1,81  | Nucleus             |
| 1385853_at   | BF560180  | bromodomain adjacent to zinc finger domain, 1A                               | BAZ1A                      | 2,23  | Nucleus             |
| 1373430_at   | BG378867  | bromodomain adjacent to zinc finger domain, 2B                               | BAZ2B                      | -1,73 | Unknown             |
| 1372720_at   | AA848449  | BTB (POZ) domain containing 1                                                | BTBD1                      | -4,66 | Cytoplasm           |
| 1376333_at   | BI275800  | BTB (POZ) domain containing 1                                                | BTBD1                      | -3,02 | Cytoplasm           |
| 1381974_at   | AI101499  | BTB (POZ) domain containing 3                                                | BTBD3                      | -1,68 | Unknown             |
| 1374592_at   | BI282671  | BTB (POZ) domain containing 6                                                | BTBD6                      | -2,09 | Unknown             |
| 1373179_at   | BI300727  | BTB (POZ) domain containing 8                                                | BTBD8 (includes EG:284697) | -2,08 | Unknown             |
| 1377812_a_at | BG378195  | C2CD2-like                                                                   | C2CD2L                     | -1,51 | Unknown             |
| 1368523_at   | NM_013219 | Ca <sup>++</sup> -dependent secretion activator                              | CADPS                      | -2,35 | Plasma Membrane     |
| 1386947_at   | NM_031334 | cadherin 1, type 1, E-cadherin (epithelial)                                  | CDH1                       | 1,95  | Plasma Membrane     |
| 1368642_at   | NM_031333 | cadherin 2, type 1, N-cadherin (neuronal)                                    | CDH2                       | -2,45 | Plasma Membrane     |
| 1388045_a_at | D83348    | cadherin-like 22                                                             | CDH22                      | -2,37 | Plasma Membrane     |
| 1370562_at   | M11596    | calcitonin-related polypeptide, beta                                         | CALCB (includes EG:116903) | 5,40  | Extracellular Space |
| 1367675_at   | NM_031145 | calcium and integrin binding 1 (calmyrin)                                    | CIB1                       | 3,11  | Nucleus             |
| 1396749_at   | BF390144  | calcium binding protein 1                                                    | CABP1                      | 4,58  | Cytoplasm           |
| 1383341_at   | BG662592  | calcium binding protein 39-like                                              | CAB39L                     | 5,09  | Unknown             |
| 1387086_at   | NM_053334 | calcium modulating ligand                                                    | CAMLG                      | -5,07 | Cytoplasm           |
| 1388659_at   | BI295783  | calcium regulated heat stable protein 1, 24kDa                               | CARHSP1                    | 2,48  | Cytoplasm           |
| 1392912_at   | BG664561  | calcyclin binding protein                                                    | CACYBP                     | 2,21  | Nucleus             |
| 1369936_at   | X13933    | calmodulin 1 (phosphorylase kinase, delta)                                   | CALM1                      | -2,07 | Plasma Membrane     |
| 1387772_at   | NM_031969 | calmodulin 1 (phosphorylase kinase, delta)                                   | CALM1                      | -1,89 | Plasma Membrane     |
| 1370873_at   | AI411316  | calmodulin 3 (phosphorylase kinase, delta)                                   | CALM3                      | -3,10 | Plasma Membrane     |
| 1392468_at   | AW526683  | calmodulin regulated spectrin-associated protein 1-like 1                    | CAMSAP1L1                  | -1,67 | Unknown             |
| 1387856_at   | BI274457  | calponin 3, acidic                                                           | CNN3                       | 1,64  | Cytoplasm           |
| 1374081_at   | AI011704  | cancer susceptibility candidate 4                                            | CASC4                      | -1,85 | Unknown             |
| 1372584_at   | BG672517  | cannabinoid receptor interacting protein 1                                   | CNRIP1                     | -3,80 | Unknown             |
| 1373790_at   | AI045400  | carbonic anhydrase 14                                                        | CAR14                      | -3,20 | Unknown             |
| 1368585_at   | NM_017110 | CART prepropeptide                                                           | CARTPT                     | -6,70 | Extracellular Space |
| 1368545_at   | NM_057138 | CASP8 and FADD-like apoptosis regulator                                      | CFLAR                      | 4,48  | Cytoplasm           |
| 1371921_at   | BM986272  | catenin (cadherin-associated protein), alpha 1, 102kDa                       | CTNNA1                     | 1,67  | Plasma Membrane     |
| 1398354_at   | AI555457  | catenin (cadherin-associated protein), alpha-like 1                          | CTNNAL1                    | -2,40 | Plasma Membrane     |
| 1373279_at   | BI275726  | catenin, beta interacting protein 1                                          | CTNNBIP1                   | -3,23 | Cytoplasm           |
| 1371633_at   | BI285669  | catenin, beta like 1                                                         | CTNNB1                     | -1,56 | Nucleus             |
| 1382603_at   | AW521319  | CD274 molecule                                                               | CD274                      | 10,26 | Plasma Membrane     |
| 1379269_at   | BM385296  | CD2-associated protein                                                       | CD2AP                      | -1,61 | Cytoplasm           |
| 1387952_a_at | AF065147  | CD44 molecule (Indian blood group)                                           | CD44                       | 8,06  | Plasma Membrane     |
| 1368921_a_at | NM_012924 | CD44 molecule (Indian blood group)                                           | CD44                       | 11,35 | Plasma Membrane     |
| 1369559_a_at | NM_019195 | CD47 molecule                                                                | CD47                       | 3,61  | Plasma Membrane     |
| 1387951_at   | AB032395  | CD55 molecule, decay accelerating factor for complement (Cromer blood group) | CD55                       | 2,85  | Plasma Membrane     |
| 1367929_at   | NM_012925 | CD59 molecule, complement regulatory protein                                 | CD59                       | -4,49 | Plasma Membrane     |
| 1386976_at   | NM_031797 | CD82 molecule                                                                | CD82                       | 10,52 | Plasma Membrane     |
| 1368528_at   | NM_134459 | CD99 molecule-like 2                                                         | CD99L2                     | -2,24 | Plasma Membrane     |
| 1388530_at   | BM389459  | CDC42 small effector 1                                                       | CDC42SE1                   | 5,42  | Plasma Membrane     |
| 1388448_at   | AI235065  | CDC42 small effector 2                                                       | CDC42SE2                   | 2,61  | Plasma Membrane     |

|              |           |                                                                                   |           |       |                     |
|--------------|-----------|-----------------------------------------------------------------------------------|-----------|-------|---------------------|
| 1392542_at   | AA944330  | CDC42 small effector 2                                                            | CDC42SE2  | 10,57 | Plasma Membrane     |
| 1373919_at   | AA943801  | CDGSH iron sulfur domain 2                                                        | CISD2     | -1,99 | Unknown             |
| 1382193_at   | BI294188  | CDGSH iron sulfur domain 2                                                        | CISD2     | -1,97 | Unknown             |
| 1392662_at   | AI229905  | CDGSH iron sulfur domain 2                                                        | CISD2     | 2,75  | Unknown             |
| 1383028_at   | BE120656  | CDV3 homolog (mouse)                                                              | CDV3      | 3,89  | Unknown             |
| 1396317_at   | AI764350  | cell cycle progression 1                                                          | CCPG1     | -4,68 | Unknown             |
| 1378739_at   | AA818135  | cell death-inducing DFFA-like effector c                                          | CIDEC     | 10,04 | Cytoplasm           |
| 1388105_at   | BE113021  | cell division cycle 123 homolog (S. cerevisiae)                                   | CDC123    | -1,53 | Cytoplasm           |
| 1388727_at   | BM387151  | cell division cycle 26 homolog (S. cerevisiae)                                    | CDC26     | -2,95 | Nucleus             |
| 1382664_at   | AW525662  | cell division cycle 27 homolog (S. cerevisiae)                                    | CDC27     | 2,11  | Nucleus             |
| 1367453_at   | NM_053743 | cell division cycle 37 homolog (S. cerevisiae)                                    | CDC37     | 1,82  | Cytoplasm           |
| 1376864_at   | BF396386  | cell division cycle and apoptosis regulator 1                                     | CCAR1     | -1,97 | Nucleus             |
| 1387244_at   | NM_053899 | cell growth regulator with ring finger domain 1                                   | CGRRF1    | 1,92  | Unknown             |
| 1382200_at   | AW917547  | centromere protein V                                                              | CENPV     | -2,11 | Nucleus             |
| 1377829_at   | BI291153  | centrosomal protein 57kDa                                                         | CEP57     | -1,60 | Cytoplasm           |
| 1393142_at   | BF562621  | centrosomal protein 70kDa                                                         | CEP70     | -1,68 | Cytoplasm           |
| 1374139_at   | BG671589  | cerebellar degeneration-related protein 2, 62kDa                                  | CDR2      | 2,47  | Cytoplasm           |
| 1389791_at   | AI179775  | ceroid-lipofuscinosis, neuronal 8 (epilepsy, progressive with mental retardation) | CLN8      | -2,58 | Cytoplasm           |
| 1382427_at   | BG373237  | CGG triplet repeat binding protein 1                                              | CGGBP1    | 10,23 | Nucleus             |
| 1389682_at   | BF284967  | ChaC, cation transport regulator homolog 2 (E. coli)                              | CHAC2     | -1,71 | Unknown             |
| 1371403_at   | AA799545  | chaperonin containing TCP1, subunit 3 (gamma)                                     | CCT3      | 1,68  | Cytoplasm           |
| 1371656_at   | BI283657  | chaperonin containing TCP1, subunit 4 (delta)                                     | CCT4      | 1,75  | Cytoplasm           |
| 1376570_at   | BF417274  | chaperonin containing TCP1, subunit 5 (epsilon)                                   | CCT5      | 1,81  | Cytoplasm           |
| 1371641_at   | BM388827  | chaperonin containing TCP1, subunit 7 (eta)                                       | CCT7      | 1,73  | Cytoplasm           |
| 1374695_at   | BF564593  | chromobox homolog 1 (HP1 beta homolog Drosophila )                                | CBX1      | 1,78  | Nucleus             |
| 1385157_at   | BF389675  | chromobox homolog 1 (HP1 beta homolog Drosophila )                                | CBX1      | 2,65  | Nucleus             |
| 1371672_at   | AI406275  | chromobox homolog 7                                                               | CBX7      | -2,88 | Nucleus             |
| 1387235_at   | NM_021655 | chromogranin A (parathyroid secretory protein 1)                                  | CHGA      | -3,35 | Extracellular Space |
| 1368034_at   | NM_012526 | chromogranin B (secretogranin 1)                                                  | CHGB      | -3,35 | Extracellular Space |
| 1390695_at   | BM385951  | chromosome 1 open reading frame 112                                               | C1ORF112  | -2,55 | Unknown             |
| 1374554_at   | BF281325  | chromosome 1 open reading frame 128                                               | C1ORF128  | 1,96  | Unknown             |
| 1375645_at   | AI408842  | chromosome 1 open reading frame 144                                               | C1ORF144  | 3,01  | Unknown             |
| 1390218_at   | BI295950  | chromosome 1 open reading frame 149                                               | C1ORF149  | 2,16  | Nucleus             |
| 1398446_at   | BG376030  | chromosome 1 open reading frame 2                                                 | C1ORF2    | -2,15 | Unknown             |
| 1373652_at   | BG374986  | chromosome 1 open reading frame 71                                                | C1ORF71   | -1,79 | Unknown             |
| 1377414_at   | BF400262  | chromosome 10 open reading frame 28                                               | C10ORF28  | 2,71  | Unknown             |
| 1389782_at   | AI408993  | chromosome 10 open reading frame 35                                               | C10ORF35  | -1,80 | Unknown             |
| 1372895_at   | AI169367  | chromosome 10 open reading frame 58                                               | C10ORF58  | 10,94 | Extracellular Space |
| 1394566_at   | AI549119  | chromosome 10 open reading frame 84                                               | C10ORF84  | -2,20 | Unknown             |
| 1392663_at   | AI179925  | chromosome 10 open reading frame 84                                               | C10ORF84  | -1,52 | Unknown             |
| 1383176_at   | BF561368  | chromosome 11 open reading frame 17                                               | C11ORF17  | 2,19  | Nucleus             |
| 1371763_at   | BI274533  | chromosome 11 open reading frame 54                                               | C11ORF54  | -4,59 | Nucleus             |
| 1388980_at   | BG381728  | chromosome 11 open reading frame 59                                               | C11ORF59  | 2,66  | Unknown             |
| 1372670_at   | BI281686  | chromosome 11 open reading frame 60                                               | C11ORF60  | -2,88 | Cytoplasm           |
| 1371467_at   | AA891221  | chromosome 11 open reading frame 73                                               | C11ORF73  | 1,84  | Unknown             |
| 1371828_at   | BM386571  | chromosome 12 open reading frame 24                                               | C12ORF24  | -1,59 | Unknown             |
| 1385066_a_at | BM390527  | chromosome 12 open reading frame 30                                               | C12ORF30  | 2,14  | Unknown             |
| 1384553_at   | BE118056  | chromosome 12 open reading frame 30                                               | C12ORF30  | 2,30  | Unknown             |
| 1378980_at   | AI044779  | chromosome 12 open reading frame 30                                               | C12ORF30  | 2,61  | Unknown             |
| 1373143_at   | BM390131  | chromosome 12 open reading frame 35                                               | C12ORF35  | 4,24  | Unknown             |
| 1388564_at   | BF283612  | chromosome 12 open reading frame 41                                               | C12ORF41  | 2,15  | Unknown             |
| 1372454_at   | BG378568  | chromosome 12 open reading frame 43                                               | C12ORF43  | -1,66 | Unknown             |
| 1368080_at   | NM_054008 | chromosome 13 open reading frame 15                                               | C13ORF15  | 15,85 | Cytoplasm           |
| 1383508_at   | AW528853  | chromosome 13 open reading frame 23                                               | C13ORF23  | -2,31 | Unknown             |
| 1390957_at   | AI112360  | chromosome 14 open reading frame 101                                              | C14ORF101 | -1,60 | Unknown             |
| 1376581_at   | AW433895  | chromosome 14 open reading frame 126                                              | C14ORF126 | -1,84 | Unknown             |
| 1378568_a_at | BM389379  | chromosome 14 open reading frame 138                                              | C14ORF138 | 2,36  | Unknown             |
| 1371715_at   | AI012212  | chromosome 14 open reading frame 147                                              | C14ORF147 | -1,66 | Unknown             |

|              |          |                                                                            |           |       |                     |
|--------------|----------|----------------------------------------------------------------------------|-----------|-------|---------------------|
| 1379100_at   | BF407311 | chromosome 14 open reading frame 43                                        | C14ORF43  | 16,73 | Unknown             |
| 1390249_at   | BF558075 | chromosome 15 open reading frame 39                                        | C15ORF39  | 3,87  | Unknown             |
| 1392547_at   | AI716211 | chromosome 15 open reading frame 48                                        | C15ORF48  | 21,06 | Nucleus             |
| 1382464_at   | BF547020 | chromosome 15 open reading frame 61                                        | C15ORF61  | -1,81 | Unknown             |
| 1389330_at   | AA894060 | chromosome 16 open reading frame 58                                        | C16ORF58  | -2,59 | Unknown             |
| 1378098_at   | AI406802 | chromosome 16 open reading frame 72                                        | C16ORF72  | -1,70 | Unknown             |
| 1398998_at   | AI407273 | chromosome 16 open reading frame 72                                        | C16ORF72  | 2,20  | Unknown             |
| 1391069_at   | AI231713 | chromosome 16 open reading frame 72                                        | C16ORF72  | 2,27  | Unknown             |
| 1377644_at   | BF284809 | chromosome 16 open reading frame 87                                        | C16ORF87  | 2,33  | Unknown             |
| 1373831_at   | AW920524 | chromosome 17 open reading frame 62                                        | C17ORF62  | 5,51  | Unknown             |
| 1390264_at   | BF413854 | chromosome 17 open reading frame 85                                        | C17ORF85  | 2,15  | Unknown             |
| 1388465_at   | AA891733 | chromosome 18 open reading frame 19                                        | C18ORF19  | -1,56 | Unknown             |
| 1392967_at   | BF550692 | chromosome 18 open reading frame 21                                        | C18ORF21  | -1,90 | Unknown             |
| 1371409_at   | AI231196 | chromosome 18 open reading frame 32                                        | C18ORF32  | -1,52 | Unknown             |
| 1377893_at   | BM390475 | chromosome 19 open reading frame 12                                        | C19ORF12  | -3,20 | Unknown             |
| 1389365_at   | AI228291 | chromosome 19 open reading frame 12                                        | C19ORF12  | 2,60  | Unknown             |
| 1394524_at   | AW921279 | chromosome 19 open reading frame 42                                        | C19ORF42  | -4,61 | Unknown             |
| 1399080_at   | BI292036 | chromosome 19 open reading frame 42                                        | C19ORF42  | -1,96 | Unknown             |
| 1383662_at   | AI043759 | chromosome 19 open reading frame 66                                        | C19ORF66  | 2,11  | Unknown             |
| 1371965_at   | BF283269 | chromosome 2 open reading frame 25                                         | C2ORF25   | -1,93 | Cytoplasm           |
| 1371807_at   | BE110607 | chromosome 2 open reading frame 28                                         | C2ORF28   | -3,41 | Unknown             |
| 1395331_at   | BF548263 | chromosome 2 open reading frame 30                                         | C2ORF30   | -4,83 | Extracellular Space |
| 1373346_at   | AI009492 | chromosome 2 open reading frame 30                                         | C2ORF30   | -2,00 | Extracellular Space |
| 1376328_at   | BI278776 | chromosome 2 open reading frame 55                                         | C2ORF55   | 3,38  | Unknown             |
| 1371405_at   | BE109143 | chromosome 2 open reading frame 64                                         | C2ORF64   | -1,62 | Unknown             |
| 1371507_at   | BM384151 | chromosome 20 open reading frame 152                                       | C20ORF152 | -2,17 | Unknown             |
| 1393046_at   | AI709474 | chromosome 20 open reading frame 20                                        | C20ORF20  | 1,53  | Nucleus             |
| 1371478_at   | AI409756 | chromosome 20 open reading frame 24                                        | C20ORF24  | 1,89  | Cytoplasm           |
| 1373899_at   | BI275244 | chromosome 20 open reading frame 7                                         | C20ORF7   | 1,80  | Unknown             |
| 1379475_at   | BF396403 | chromosome 20 open reading frame 94                                        | C20ORF94  | -3,67 | Unknown             |
| 1372044_at   | AI410321 | chromosome 22 open reading frame 25                                        | C22ORF25  | -3,24 | Unknown             |
| 1370360_at   | AF146738 | chromosome 3 open reading frame 34                                         | C3ORF34   | -3,51 | Unknown             |
| 1376156_at   | BM391273 | chromosome 3 open reading frame 39                                         | C3ORF39   | -2,30 | Unknown             |
| 1372329_at   | BM389011 | chromosome 4 open reading frame 16                                         | C4ORF16   | 2,42  | Unknown             |
| 1390579_at   | BI294760 | chromosome 4 open reading frame 43                                         | C4ORF43   | 7,97  | Unknown             |
| 1371412_a_at | BE107450 | chromosome 5 open reading frame 13                                         | C5ORF13   | -5,60 | Cytoplasm           |
| 1371619_at   | BI296718 | chromosome 5 open reading frame 15                                         | C5ORF15   | -2,37 | Unknown             |
| 1373049_at   | AI169619 | chromosome 5 open reading frame 30                                         | C5ORF30   | 3,72  | Unknown             |
| 1383714_at   | H32348   | chromosome 5 open reading frame 51                                         | C5ORF51   | 1,73  | Unknown             |
| 1383912_at   | BM390524 | chromosome 6 open reading frame 115                                        | C6ORF115  | 2,29  | Unknown             |
| 1390805_at   | BM390762 | chromosome 6 open reading frame 129                                        | C6ORF129  | -2,18 | Unknown             |
| 1378875_a_at | AW522817 | chromosome 6 open reading frame 134                                        | C6ORF134  | -2,68 | Unknown             |
| 1388423_at   | BM385163 | chromosome 6 open reading frame 136                                        | C6ORF136  | 1,89  | Unknown             |
| 1397184_at   | AI574688 | chromosome 6 open reading frame 174                                        | C6ORF174  | -3,25 | Unknown             |
| 1391282_at   | AI029285 | chromosome 6 open reading frame 192                                        | C6ORF192  | -1,54 | Unknown             |
| 1389384_at   | BE111733 | chromosome 6 open reading frame 66                                         | C6ORF66   | 3,20  | Unknown             |
| 1372596_at   | BI284774 | chromosome 7 open reading frame 20                                         | C7ORF20   | 2,23  | Unknown             |
| 1373547_at   | AA849782 | chromosome 7 open reading frame 25                                         | C7ORF25   | -6,89 | Unknown             |
| 1392504_at   | BI297184 | chromosome 7 open reading frame 36                                         | C7ORF36   | 2,43  | Unknown             |
| 1393413_at   | BI290400 | chromosome 7 open reading frame 51                                         | C7ORF51   | 3,10  | Unknown             |
| 1377728_at   | BI280802 | chromosome 8 open reading frame 59                                         | C8ORF59   | 1,70  | Unknown             |
| 1396228_at   | BG380184 | chromosome 9 open reading frame 5                                          | C9ORF5    | 3,08  | Unknown             |
| 1379778_at   | AI713278 | chromosome 9 open reading frame 80                                         | C9ORF80   | 2,94  | Unknown             |
| 1392591_at   | AI170983 | chromosome 9 open reading frame 82                                         | C9ORF82   | -1,71 | Unknown             |
| 1391817_at   | AA901178 | chromosome 9 open reading frame 91                                         | C9ORF91   | 2,42  | Cytoplasm           |
| 1374516_at   | AI008492 | chromosome transmission fidelity factor 8 homolog ( <i>S. cerevisiae</i> ) | CTF8      | -2,01 | Unknown             |
| 1384615_at   | AI071319 | cisplatin resistance-associated overexpressed protein                      | CROP      | -1,93 | Nucleus             |
| 1382957_at   | BF408881 | cisplatin resistance-associated overexpressed protein                      | CROP      | -1,54 | Nucleus             |

|              |           |                                                                    |                            |        |                     |
|--------------|-----------|--------------------------------------------------------------------|----------------------------|--------|---------------------|
| 1398842_at   | BM386513  | clathrin, heavy chain (Hc)                                         | CLTC                       | -1,57  | Plasma Membrane     |
| 1386875_a_at | M19261    | clathrin, light chain (Lca)                                        | CLTA                       | 2,04   | Plasma Membrane     |
| 1389293_at   | BM390250  | cleavage and polyadenylation specific factor 2, 100kDa             | CPSF2                      | -1,71  | Nucleus             |
| 1382515_at   | AI059408  | cleavage and polyadenylation specific factor 2, 100kDa             | CPSF2                      | 1,65   | Nucleus             |
| 1390967_a_at | AW919980  | cleavage and polyadenylation specific factor 3-like                | CPSF3L                     | 2,53   | Unknown             |
| 1398878_at   | Y17326    | cleavage and polyadenylation specific factor 4, 30kDa              | CPSF4                      | 2,10   | Nucleus             |
| 1383504_at   | AW530604  | cleavage and polyadenylation specific factor 6, 68kDa              | CPSF6                      | -1,86  | Nucleus             |
| 1376811_a_at | BE108383  | cleavage and polyadenylation specific factor 6, 68kDa              | CPSF6                      | 2,64   | Nucleus             |
| 1378936_at   | AW533986  | cleavage stimulation factor, 3' pre-RNA subunit 2                  | CSTF2 (includes EG:683927) | 1,54   | Unknown             |
| 1389368_at   | AW253242  | CNKSR family member 3                                              | CNKSR3                     | 17,04  | Plasma Membrane     |
| 1390281_a_at | AI407062  | coenzyme Q10 homolog A (S. cerevisiae)                             | COQ10A                     | -1,93  | Cytoplasm           |
| 1388483_at   | BI296011  | cofilin 2 (muscle)                                                 | CFL2                       | 2,05   | Nucleus             |
| 1384378_at   | BI293046  | coiled-coil alpha-helical rod protein 1                            | CCHCR1                     | 4,90   | Cytoplasm           |
| 1374874_at   | AI410818  | coiled-coil and C2 domain containing 2A                            | CC2D2A                     | -3,20  | Unknown             |
| 1394424_at   | AI547622  | coiled-coil domain containing 104                                  | CCDC104                    | -4,63  | Unknown             |
| 1373806_at   | AI044859  | coiled-coil domain containing 104                                  | CCDC104                    | -3,47  | Unknown             |
| 1379826_at   | AA859429  | coiled-coil domain containing 107                                  | CCDC107                    | -6,20  | Unknown             |
| 1390101_at   | AI170609  | coiled-coil domain containing 107                                  | CCDC107                    | -3,04  | Unknown             |
| 1396315_at   | BF408941  | coiled-coil domain containing 112                                  | CCDC112                    | 2,96   | Unknown             |
| 1385383_at   | AI145747  | coiled-coil domain containing 113                                  | CCDC113                    | -9,09  | Unknown             |
| 1379500_at   | AA860044  | coiled-coil domain containing 117                                  | CCDC117                    | 6,49   | Unknown             |
| 1393346_at   | BI279863  | coiled-coil domain containing 125                                  | CCDC125                    | -1,95  | Unknown             |
| 1375634_at   | AA799472  | coiled-coil domain containing 53                                   | CCDC53                     | -2,69  | Unknown             |
| 1370953_at   | BE113639  | coiled-coil domain containing 58                                   | CCDC58                     | 1,85   | Unknown             |
| 1373475_at   | BM390469  | coiled-coil domain containing 58                                   | CCDC58                     | 2,68   | Unknown             |
| 1374579_at   | BF281860  | coiled-coil domain containing 66                                   | CCDC66                     | -1,79  | Unknown             |
| 1393952_at   | BI278833  | coiled-coil domain containing 68                                   | CCDC68                     | -22,71 | Unknown             |
| 1390138_at   | BE107413  | coiled-coil domain containing 8                                    | CCDC8                      | -1,52  | Plasma Membrane     |
| 1397881_at   | AI575768  | coiled-coil domain containing 88A                                  | CCDC88A                    | -2,13  | Cytoplasm           |
| 1395779_at   | BF523321  | coiled-coil domain containing 88A                                  | CCDC88A                    | -1,96  | Cytoplasm           |
| 1377194_a_at | BE107471  | coiled-coil domain containing 90B                                  | CCDC90B                    | 1,54   | Unknown             |
| 1385269_s_at | BI289167  | coiled-coil domain containing 93                                   | CCDC93                     | 3,29   | Unknown             |
| 1385268_at   | BI289167  | coiled-coil domain containing 93                                   | CCDC93                     | 3,56   | Unknown             |
| 1389126_at   | BG373580  | coiled-coil-helix-coiled-coil-helix domain containing 1            | CHCHD1                     | 1,57   | Nucleus             |
| 1373001_at   | AA817990  | coiled-coil-helix-coiled-coil-helix domain containing 4            | CHCHD4                     | 3,99   | Unknown             |
| 1372134_at   | AW918650  | coiled-coil-helix-coiled-coil-helix domain containing 6            | CHCHD6                     | 1,66   | Unknown             |
| 1385904_at   | BG153342  | cold inducible RNA binding protein                                 | CIRBP                      | -4,48  | Nucleus             |
| 1391812_at   | AI145876  | collagen type VI alpha 6                                           | COL6A6                     | -17,05 | Unknown             |
| 1374705_at   | AA891834  | collagen, type IV, alpha 5                                         | COL4A5                     | -2,71  | Extracellular Space |
| 1388973_at   | BM388861  | collagen, type IX, alpha 1                                         | COL9A1                     | -16,25 | Extracellular Space |
| 1390846_at   | BG380309  | collagen, type XVI, alpha 1                                        | COL16A1                    | -5,32  | Extracellular Space |
| 1375708_at   | BF392901  | collagen, type XXVII, alpha 1                                      | COL27A1                    | -1,86  | Extracellular Space |
| 1374870_at   | BF286402  | collagen, type XXVII, alpha 1                                      | COL27A1                    | -1,78  | Extracellular Space |
| 1377126_at   | BM386954  | COMM domain containing 7                                           | COMMMD7                    | 1,78   | Unknown             |
| 1398784_at   | NM_019259 | complement component 1, q subcomponent binding protein             | C1QBP                      | 2,55   | Cytoplasm           |
| 1369764_at   | NM_012516 | complement component 4 binding protein, alpha                      | C4BPA                      | 43,18  | Extracellular Space |
| 1368695_at   | NM_016995 | complement component 4 binding protein, beta                       | C4BPB                      | 15,08  | Extracellular Space |
| 1379019_at   | AI639534  | complement factor properdin                                        | CFP                        | 1,99   | Extracellular Space |
| 1393740_at   | BI294230  | connector enhancer of kinase suppressor of Ras 1                   | CNKSR1                     | 3,70   | Cytoplasm           |
| 1398972_at   | AW916366  | COP9 constitutive photomorphogenic homolog subunit 3 (Arabidopsis) | COPS3                      | -1,63  | Cytoplasm           |
| 1398955_at   | BG378922  | COP9 constitutive photomorphogenic homolog subunit 8 (Arabidopsis) | COPS8                      | 1,80   | Cytoplasm           |
| 1388682_at   | AI598397  | cornichon homolog (Drosophila)                                     | CNIH                       | -1,71  | Plasma Membrane     |
| 1389980_at   | AI412591  | cornichon homolog 4 (Drosophila)                                   | CNIH4                      | 2,73   | Plasma Membrane     |
| 1396250_at   | BF558291  | coronin, actin binding protein, 1C                                 | CORO1C                     | 2,66   | Cytoplasm           |
| 1371465_at   | BM390681  | cortactin                                                          | CTTN                       | -1,99  | Plasma Membrane     |
| 1371646_at   | AI008441  | cortistatin                                                        | CORT                       | 1,98   | Extracellular Space |
| 1375943_at   | BI288873  | CP110 protein                                                      | CP110                      | -5,16  | Cytoplasm           |
| 1373824_at   | AW433973  | craniofacial development protein 1                                 | CFDP1                      | 1,85   | Extracellular Space |



|              |           |                                                                              |                             |        |                     |
|--------------|-----------|------------------------------------------------------------------------------|-----------------------------|--------|---------------------|
| 1373828_at   | AI412614  | CREB regulated transcription coactivator 2                                   | CRTC2                       | 2,12   | Nucleus             |
| 1383648_x_at | BI283883  | crumbs homolog 3 (Drosophila)                                                | CRB3                        | 1,85   | Plasma Membrane     |
| 1383647_a_at | BI283883  | crumbs homolog 3 (Drosophila)                                                | CRB3                        | 2,03   | Plasma Membrane     |
| 1388385_at   | BG371710  | crystallin, beta A2                                                          | CRYBA2                      | -4,79  | Unknown             |
| 1376051_at   | BI293393  | crystallin, lambda 1                                                         | CRYL1                       | -1,64  | Unknown             |
| 1389249_at   | BE114850  | Ctr9, Paf1/RNA polymerase II complex component, homolog (S. cerevisiae)      | CTR9                        | -1,74  | Nucleus             |
| 1381685_a_at | BI276419  | C-type lectin domain family 16, member A                                     | CLEC16A                     | 1,69   | Unknown             |
| 1376877_at   | AA893164  | CUB domain containing protein 1                                              | CDCP1                       | 3,11   | Plasma Membrane     |
| 1397247_at   | BI276505  | CUB domain containing protein 1                                              | CDCP1                       | 9,11   | Plasma Membrane     |
| 1377005_at   | BM390962  | cullin 4B                                                                    | CUL4B                       | -4,32  | Unknown             |
| 1398928_at   | BG378296  | cutA divalent cation tolerance homolog (E. coli)                             | CUTA                        | 1,55   | Unknown             |
| 1368801_at   | NM_053342 | CXXC finger 4                                                                | CXXC4                       | -5,18  | Cytoplasm           |
| 1375231_a_at | BI281838  | CXXC finger 5                                                                | CXXC5                       | 1,54   | Unknown             |
| 1390343_at   | AA998893  | cyclin C                                                                     | CCNC                        | -2,10  | Nucleus             |
| 1371643_at   | AW143798  | cyclin D1                                                                    | CCND1                       | -2,34  | Nucleus             |
| 1369935_at   | NM_012766 | cyclin D3                                                                    | CCND3                       | -1,62  | Nucleus             |
| 1398340_at   | AI317832  | cyclin D-type binding-protein 1                                              | CCNDBP1                     | -3,13  | Nucleus             |
| 1371953_at   | AI408309  | cyclin G2                                                                    | CCNG2                       | 2,45   | Nucleus             |
| 1368050_at   | NM_053662 | cyclin L1                                                                    | CCNL1                       | 2,76   | Nucleus             |
| 1390815_at   | BF282870  | cyclin M1                                                                    | CNNM1                       | -2,05  | Plasma Membrane     |
| 1391270_at   | BE112177  | cyclin M3                                                                    | CNNM3                       | -5,21  | Unknown             |
| 1384268_at   | AW435305  | cyclin Y-like 1                                                              | CCNYL1                      | -7,47  | Unknown             |
| 1388443_at   | AI177871  | cyclin-dependent kinase 2 associated protein 1                               | CDK2AP1                     | -1,53  | Nucleus             |
| 1373901_at   | BI278570  | cyclin-dependent kinase 2 associated protein 2                               | CDK2AP2                     | 2,48   | Nucleus             |
| 1370855_at   | BG666933  | cystatin C                                                                   | CST3                        | -1,60  | Extracellular Space |
| 1370282_at   | U44948    | cysteine and glycine-rich protein 2                                          | CSRP2                       | -10,69 | Nucleus             |
| 1377738_a_at | AI176855  | cysteine/histidine-rich 1                                                    | CYHR1                       | -3,28  | Unknown             |
| 1396327_at   | BG374493  | cytochrome P450, family 2, subfamily j, polypeptide 12                       | CYP2J12                     | 12,58  | Unknown             |
| 1398968_at   | AI168979  | cytokine-like nuclear factor n-pac                                           | N-PAC                       | -1,50  | Unknown             |
| 1374939_at   | BE112927  | cytoplasmic FMR1 interacting protein 2                                       | CYFIP2 (includes EG:303073) | -1,65  | Unknown             |
| 1368099_at   | NM_053722 | cytoplasmic linker associated protein 2                                      | CLASP2                      | -1,70  | Cytoplasm           |
| 1392996_at   | BG668435  | cytoplasmic polyadenylation element binding protein 1                        | CPEB1                       | 1,64   | Cytoplasm           |
| 1393294_at   | BG671389  | cytoplasmic polyadenylation element binding protein 4                        | CPEB4                       | 2,03   | Unknown             |
| 1383723_at   | BF418837  | cytospin A                                                                   | SPECCIL                     | 2,03   | Unknown             |
| 1389732_at   | BM386323  | damage-regulated autophagy modulator                                         | DRAM (includes EG:679937)   | 3,11   | Unknown             |
| 1399162_a_at | AJ277077  | damage-specific DNA binding protein 1, 127kDa                                | DDB1                        | -2,45  | Nucleus             |
| 1371648_at   | BF284000  | damage-specific DNA binding protein 1, 127kDa                                | DDB1                        | -2,00  | Nucleus             |
| 1383205_at   | BI288833  | dapper, antagonist of beta-catenin, homolog 2 (Xenopus laevis)               | DACT2                       | 2,21   | Unknown             |
| 1373046_at   | AW918273  | DAZ associated protein 1                                                     | DAZAP1                      | 2,82   | Cytoplasm           |
| 1378036_at   | AI029387  | DCN1, defective in cullin neddylation 1, domain containing 1 (S. cerevisiae) | DCUN1D1                     | -1,82  | Unknown             |
| 1391549_at   | BF288456  | DCN1, defective in cullin neddylation 1, domain containing 4 (S. cerevisiae) | DCUN1D4                     | -3,48  | Nucleus             |
| 1374079_at   | AW915055  | DCN1, defective in cullin neddylation 1, domain containing 4 (S. cerevisiae) | DCUN1D4                     | -2,31  | Nucleus             |
| 1377270_a_at | BF396493  | DCP1 decapping enzyme homolog B (S. cerevisiae)                              | DCP1B                       | 1,70   | Cytoplasm           |
| 1372434_at   | BE098114  | deafness, autosomal recessive 31                                             | DFNB31                      | 4,24   | Plasma Membrane     |
| 1383432_at   | AI716676  | death associated protein-like 1                                              | DAPL1                       | -11,85 | Unknown             |
| 1385210_at   | BF389450  | dedicator of cytokinesis 5                                                   | DOCK5                       | 11,74  | Unknown             |
| 1374519_at   | AI231782  | dedicator of cytokinesis 7                                                   | DOCK7 (includes EG:313388)  | -3,80  | Plasma Membrane     |
| 1377835_at   | BM390876  | dedicator of cytokinesis 8                                                   | DOCK8                       | -3,25  | Unknown             |
| 1374718_at   | AA945915  | deltex 3-like (Drosophila)                                                   | DTX3L                       | 6,35   | Cytoplasm           |
| 1380021_at   | AI059486  | DENN/MADD domain containing 2D                                               | DENND2D                     | 13,24  | Cytoplasm           |
| 1367529_at   | BE113989  | Der1-like domain family, member 1                                            | DERL1                       | 1,52   | Cytoplasm           |
| 1374581_at   | BM384392  | Der1-like domain family, member 1                                            | DERL1                       | 1,73   | Cytoplasm           |
| 1389615_at   | BI284801  | Der1-like domain family, member 1                                            | DERL1                       | 2,34   | Cytoplasm           |
| 1371375_at   | BI285599  | destrin (actin depolymerizing factor)                                        | DSTN                        | 1,54   | Cytoplasm           |
| 1374979_at   | AI102764  | dihydrouridine synthase 3-like (S. cerevisiae)                               | DUS3L                       | 2,25   | Unknown             |
| 1395349_at   | BF561061  | DIP2 disco-interacting protein 2 homolog B (Drosophila)                      | DIP2B                       | 2,49   | Unknown             |
| 1382552_at   | AW522677  | DIP2 disco-interacting protein 2 homolog C (Drosophila)                      | DIP2C                       | 2,06   | Unknown             |
| 1369997_at   | NM_031820 | dishevelled, dsh homolog 1 (Drosophila)                                      | DVL1                        | 2,24   | Cytoplasm           |

|            |           |                                                                            |
|------------|-----------|----------------------------------------------------------------------------|
| 1375433_at | AI412473  | dispatched homolog 2 (Drosophila)                                          |
| 1397473_at | AI029288  | distrobrevin binding protein 1                                             |
| 1367516_at | BG375549  | distrobrevin binding protein 1                                             |
| 1387817_at | NM_024128 | DNA segment on chromosome 4 (unique) 234 expressed sequence                |
| 1368025_at | NM_080906 | DNA-damage-inducible transcript 4                                          |
| 1368852_at | BG668811  | DnaJ (Hsp40) homolog, subfamily A, member 1                                |
| 1388722_at | AA945704  | DnaJ (Hsp40) homolog, subfamily B, member 1                                |
| 1383302_at | BM384926  | DnaJ (Hsp40) homolog, subfamily B, member 1                                |
| 1389487_at | AA818949  | DnaJ (Hsp40) homolog, subfamily B, member 12                               |
| 1387905_at | AB062135  | DnaJ (Hsp40) homolog, subfamily C, member 12                               |
| 1369813_at | U39320    | DnaJ (Hsp40) homolog, subfamily C, member 5                                |
| 1386648_at | AW914996  | DnaJ (Hsp40) homolog, subfamily C, member 6                                |
| 1377125_at | AW523481  | DnaJ (Hsp40) homolog, subfamily C, member 6                                |
| 1399146_at | AI576776  | dolichol kinase                                                            |
| 1374651_at | BM386987  | dopey family member 2                                                      |
| 1374966_at | BE109057  | doublecortin                                                               |
| 1391648_at | BF545697  | Down syndrome critical region gene 6                                       |
| 1376026_at | AI178243  | downstream neighbor of SON                                                 |
| 1389483_at | AI408686  | dpy-19-like 1 (C. elegans)                                                 |
| 1387236_at | NM_053404 | dynactin 4 (p62)                                                           |
| 1368402_at | NM_031026 | dynein, cytoplasmic 1, light intermediate chain 2                          |
| 1388903_at | AI179335  | dynein, light chain, Tctex-type 3                                          |
| 1388992_at | AI169305  | E1A binding protein p400                                                   |
| 1374183_at | AI705068  | E2F-associated phosphoprotein                                              |
| 1388397_at | BI281160  | EBNA1 binding protein 2                                                    |
| 1372105_at | BF284932  | EF-hand domain family, member A1                                           |
| 1373196_at | BF404514  | EF-hand domain family, member A2                                           |
| 1374400_at | BI291528  | EFR3 homolog A (S. cerevisiae)                                             |
| 1395739_at | BG672302  | EFR3 homolog A (S. cerevisiae)                                             |
| 1389975_at | BE116949  | ELAV (embryonic lethal, abnormal vision, Drosophila)-like 4 (Hu antigen D) |
| 1368541_at | NM_053719 | embigin homolog (mouse)                                                    |
| 1373535_at | BF397848  | enabled homolog (Drosophila)                                               |
| 1367861_at | NM_024147 | Enah/Vasp-like                                                             |
| 1379396_at | AI101913  | engulfment and cell motility 1                                             |
| 1374585_at | AW915152  | enoyl Coenzyme A hydratase domain containing 1                             |
| 1375855_at | AI171799  | ependymin related protein 1 (zebrafish)                                    |
| 1372568_at | AI411270  | EPM2A (laforin) interacting protein 1                                      |
| 1372654_at | BI285918  | EPS8-like 2                                                                |
| 1392223_at | AW521110  | epsin 2                                                                    |
| 1371580_at | AI102725  | ER lipid raft associated 1                                                 |
| 1373093_at | AI169756  | ERBB receptor feedback inhibitor 1                                         |
| 1389970_at | BG378319  | ERGIC and golgi 2                                                          |
| 1372233_at | AI228649  | ERGIC and golgi 3                                                          |
| 1387910_at | AB019256  | erythrocyte membrane protein band 4.1-like 1                               |
| 1368515_at | NM_053927 | erythrocyte membrane protein band 4.1-like 3                               |
| 1391510_at | BF398331  | estrogen receptor binding site associated, antigen, 9                      |
| 1390439_at | BG372835  | estrogen receptor binding site associated, antigen, 9                      |
| 1371631_at | BF420639  | eukaryotic translation initiation factor 1A domain containing              |
| 1387841_at | NM_022204 | exocyst complex component 5                                                |
| 1393983_at | AA998204  | exportin, tRNA (nuclear export receptor for tRNAs)                         |
| 1370875_at | AA851304  | ezrin                                                                      |
| 1387279_at | NM_053796 | F11 receptor                                                               |
| 1377938_at | AA859585  | family with sequence similarity 100, member A                              |
| 1378014_at | BF405144  | family with sequence similarity 105, member B                              |
| 1389435_at | BE329046  | family with sequence similarity 114, member A1                             |
| 1376034_at | AW141824  | family with sequence similarity 115, member A                              |
| 1376708_at | BM385170  | family with sequence similarity 115, member C                              |
| 1383155_at | AA945854  | family with sequence similarity 117, member B                              |

|                             |        |                 |
|-----------------------------|--------|-----------------|
| DISP2                       | -2,61  | Unknown         |
| DTNBP1 (includes EG:641528) | 1,57   | Plasma Membrane |
| DTNBP1 (includes EG:641528) | 3,96   | Plasma Membrane |
| D4S234E                     | -10,49 | Cytoplasm       |
| DDIT4                       | 3,36   | Cytoplasm       |
| DNAJA1                      | -1,53  | Nucleus         |
| DNAJB1                      | 2,58   | Nucleus         |
| DNAJB1                      | 19,69  | Nucleus         |
| DNAJB12                     | 2,53   | Cytoplasm       |
| DNAJC12                     | -2,48  | Unknown         |
| DNAJC5                      | 24,50  | Plasma Membrane |
| DNAJC6                      | -2,81  | Cytoplasm       |
| DNAJC6                      | -2,20  | Cytoplasm       |
| DOLK                        | -2,58  | Unknown         |
| DOPEY2                      | -2,49  | Unknown         |
| DCX                         | -8,71  | Cytoplasm       |
| DSCR6                       | -11,27 | Unknown         |
| DONSON                      | 3,97   | Unknown         |
| DPY19L1                     | -1,62  | Unknown         |
| DCTN4                       | 2,47   | Nucleus         |
| DYNC1L2                     | -1,69  | Cytoplasm       |
| DYNLT3                      | -2,44  | Cytoplasm       |
| EP400                       | 1,58   | Nucleus         |
| EAPP                        | 4,31   | Cytoplasm       |
| EBNA1BP2                    | 2,04   | Nucleus         |
| EFHA1                       | 1,51   | Unknown         |
| EFHA2                       | -3,08  | Unknown         |
| EFR3A                       | -1,73  | Plasma Membrane |
| EFR3A                       | 3,30   | Plasma Membrane |
| ELAVL4                      | -3,09  | Cytoplasm       |
| EMB                         | -1,84  | Plasma Membrane |
| ENAH                        | 1,63   | Cytoplasm       |
| EVL                         | -2,79  | Cytoplasm       |
| ELMO1                       | -4,99  | Cytoplasm       |
| ECHDC1                      | -2,05  | Unknown         |
| EPDR1                       | -1,66  | Nucleus         |
| EPM2AIP1                    | -1,99  | Cytoplasm       |
| EPS8L2                      | 1,62   | Unknown         |
| EPN2                        | 1,72   | Cytoplasm       |
| ERLIN1                      | 2,02   | Plasma Membrane |
| ERRF1                       | 3,19   | Cytoplasm       |
| ERGIC2                      | -1,88  | Unknown         |
| ERGIC3                      | -1,82  | Unknown         |
| EPB41L1                     | -1,81  | Plasma Membrane |
| EPB41L3                     | -2,24  | Plasma Membrane |
| EBAG9                       | -2,29  | Cytoplasm       |
| EBAG9                       | -1,60  | Cytoplasm       |
| EIF1AD                      | 2,92   | Unknown         |
| EXOC5                       | 4,08   | Cytoplasm       |
| XPOT                        | 3,21   | Nucleus         |
| EZR                         | 7,30   | Plasma Membrane |
| F11R                        | 2,03   | Plasma Membrane |
| FAM100A                     | 3,42   | Unknown         |
| FAM105B                     | -1,62  | Cytoplasm       |
| FAM114A1                    | -1,74  | Unknown         |
| FAM115A                     | -2,46  | Unknown         |
| FAM115C                     | 5,44   | Unknown         |
| FAM117B                     | -2,14  | Unknown         |

|            |           |                                                                 |           |       |                     |
|------------|-----------|-----------------------------------------------------------------|-----------|-------|---------------------|
| 1377648_at | BF414047  | family with sequence similarity 120B                            | FAM120B   | -2,61 | Unknown             |
| 1382469_at | AA900787  | family with sequence similarity 120C                            | FAM120C   | -2,22 | Unknown             |
| 1392562_at | BM391400  | family with sequence similarity 128, member B                   | FAM128B   | 1,73  | Unknown             |
| 1388482_at | BM384306  | family with sequence similarity 129, member B                   | FAM129B   | 7,92  | Unknown             |
| 1378606_at | AI010216  | family with sequence similarity 13, member B1                   | FAM13B1   | -1,62 | Unknown             |
| 1373709_at | BI281706  | family with sequence similarity 149, member B1                  | FAM149B1  | -1,99 | Unknown             |
| 1383798_at | AI411061  | family with sequence similarity 151, member A                   | FAM151A   | -2,33 | Unknown             |
| 1383700_at | AA965075  | family with sequence similarity 152, member B                   | FAM152B   | 2,64  | Unknown             |
| 1383800_at | AW523537  | family with sequence similarity 155, member A                   | FAM155A   | -2,31 | Unknown             |
| 1389638_at | BG380701  | family with sequence similarity 160, member A2                  | FAM160A2  | 2,76  | Unknown             |
| 1390409_at | BI294742  | family with sequence similarity 160, member B1                  | FAM160B1  | 1,96  | Unknown             |
| 1373906_at | AI104594  | family with sequence similarity 173, member B                   | FAM173B   | -2,31 | Unknown             |
| 1376072_at | AI170779  | family with sequence similarity 174, member A                   | FAM174A   | -1,81 | Extracellular Space |
| 1377848_at | AW535219  | family with sequence similarity 175, member A                   | FAM175A   | -3,70 | Unknown             |
| 1391944_at | BI296237  | family with sequence similarity 184, member A                   | FAM184A   | -2,29 | Unknown             |
| 1377654_at | BE328936  | family with sequence similarity 3, member A                     | FAM3A     | -1,77 | Extracellular Space |
| 1390844_at | AI230339  | family with sequence similarity 33, member A                    | FAM33A    | -2,30 | Unknown             |
| 1373857_at | BM387116  | family with sequence similarity 36, member A                    | FAM36A    | -2,76 | Unknown             |
| 1372823_at | BE117126  | family with sequence similarity 36, member A                    | FAM36A    | 1,66  | Unknown             |
| 1399020_at | AI232979  | family with sequence similarity 40, member A                    | FAM40A    | -1,91 | Unknown             |
| 1390403_at | BE108405  | family with sequence similarity 43, member A                    | FAM43A    | -2,28 | Unknown             |
| 1374853_at | AI137833  | family with sequence similarity 44, member B                    | FAM44B    | 2,33  | Nucleus             |
| 1394940_at | BI294811  | family with sequence similarity 46, member A                    | FAM46A    | -2,77 | Unknown             |
| 1394695_at | BE111700  | family with sequence similarity 46, member A                    | FAM46A    | 2,27  | Unknown             |
| 1382907_at | BI289723  | family with sequence similarity 46, member C                    | FAM46C    | -2,69 | Extracellular Space |
| 1390730_at | BM383911  | family with sequence similarity 58, member A                    | FAM58A    | -3,35 | Unknown             |
| 1373761_at | AI176129  | family with sequence similarity 60, member A                    | LOC686611 | 4,50  | Unknown             |
| 1391218_at | BI294343  | family with sequence similarity 76, member B                    | FAM76B    | -1,88 | Unknown             |
| 1372302_at | BF284897  | family with sequence similarity 82, member A2                   | FAM82A2   | 2,86  | Unknown             |
| 1377616_at | BE114214  | family with sequence similarity 92, member A1                   | FAM92A1   | -2,74 | Unknown             |
| 1390124_at | AA801136  | family with sequence similarity 98, member B                    | FAM98B    | 1,74  | Unknown             |
| 1369995_at | NM_130406 | Fas (TNFRSF6) associated factor 1                               | FAF1      | 1,87  | Nucleus             |
| 1370044_at | NM_080895 | Fas apoptotic inhibitory molecule                               | FAIM      | -2,20 | Cytoplasm           |
| 1380555_at | BI293042  | Fas associated factor family member 2                           | FAF2      | -2,17 | Unknown             |
| 1383070_at | AA925934  | Fas associated factor family member 2                           | FAF2      | -1,90 | Unknown             |
| 1370281_at | U13253    | fatty acid binding protein 5-like 2                             | FABP5L2   | 19,42 | Cytoplasm           |
| 1378294_at | BF282402  | F-box and leucine-rich repeat protein 12                        | FBXL12    | 1,93  | Cytoplasm           |
| 1373892_at | AA945986  | F-box and leucine-rich repeat protein 17                        | FBXL17    | -1,61 | Unknown             |
| 1384457_at | AI030755  | F-box and WD-40 domain protein 17                               | FBXW17    | 7,07  | Unknown             |
| 1375041_at | AI599362  | F-box protein 27                                                | FBXO27    | 6,97  | Unknown             |
| 1392747_at | AI030920  | F-box protein 30                                                | FBXO30    | 2,80  | Unknown             |
| 1382059_at | BI289529  | F-box protein 30                                                | FBXO30    | 2,91  | Unknown             |
| 1372873_at | BM385705  | F-box protein 38                                                | FBXO38    | -1,86 | Nucleus             |
| 1384502_at | BI290539  | F-box protein 42                                                | FBXO42    | 2,33  | Unknown             |
| 1380379_at | AI228000  | F-box protein 44                                                | FBXO44    | -2,05 | Unknown             |
| 1383544_at | AI385372  | FCH and double SH3 domains 1                                    | FCHSD1    | 2,38  | Unknown             |
| 1377393_at | H31625    | FERM domain containing 5                                        | FRMD5     | -1,82 | Unknown             |
| 1373588_at | H33457    | FERM domain containing 8                                        | FRMD8     | 3,29  | Unknown             |
| 1374239_at | BI282835  | FERM, RhoGEF and pleckstrin domain protein 2                    | FARP2     | -1,73 | Cytoplasm           |
| 1367559_at | L01122    | ferritin, light polypeptide                                     | FTL       | 2,41  | Cytoplasm           |
| 1385727_at | BE107623  | FGFR1 oncogene partner 2                                        | FGFR1OP2  | 3,59  | Cytoplasm           |
| 1372086_at | BM387251  | FH2 domain containing 1                                         | FHDC1     | 8,65  | Unknown             |
| 1388528_at | AW433875  | fibrillarlin                                                    | FBL       | 2,66  | Nucleus             |
| 1370511_at | U05675    | fibrinogen beta chain                                           | FGB       | 10,33 | Extracellular Space |
| 1399072_at | BI283002  | fibroblast growth factor (acidic) intracellular binding protein | FIBP      | -2,40 | Nucleus             |
| 1373206_at | BI289093  | fibronectin type III domain containing 3B                       | FNDC3B    | 1,68  | Unknown             |
| 1390289_at | BI283804  | FIG4 homolog (S. cerevisiae)                                    | FIG4      | -3,44 | Cytoplasm           |
| 1379463_at | AW525176  | filamin A interacting protein 1                                 | FILIP1    | -5,61 | Cytoplasm           |

|              |           |                                                                             |                            |        |                     |
|--------------|-----------|-----------------------------------------------------------------------------|----------------------------|--------|---------------------|
| 1389621_at   | BE113454  | FIP1 like 1 ( <i>S. cerevisiae</i> )                                        | FIP1L1                     | 1,74   | Nucleus             |
| 1367746_a_at | NM_031830 | flotillin 2                                                                 | FLOT2                      | 1,86   | Plasma Membrane     |
| 1372526_at   | BI278582  | folliculin                                                                  | FLCN                       | 2,20   | Unknown             |
| 1388684_at   | BI274480  | formin binding protein 4                                                    | FNBP4                      | 2,71   | Nucleus             |
| 1391411_at   | AI179941  | formin-like 2                                                               | FMNL2 (includes EG:114793) | 2,82   | Cytoplasm           |
| 1373836_at   | AI236582  | forty-two-three domain containing 1                                         | FYTTD1                     | -1,63  | Nucleus             |
| 1383098_at   | BG667845  | forty-two-three domain containing 1                                         | FYTTD1                     | -1,56  | Nucleus             |
| 1369313_at   | NM_031677 | four and a half LIM domains 2                                               | FHL2                       | 19,80  | Nucleus             |
| 1371951_at   | AA800031  | four and a half LIM domains 2                                               | FHL2                       | 28,62  | Nucleus             |
| 1383236_at   | BE118678  | fragile X mental retardation, autosomal homolog 1                           | FXR1                       | 1,90   | Cytoplasm           |
| 1373435_at   | BG373419  | fragile X mental retardation, autosomal homolog 2                           | FXR2                       | 2,07   | Cytoplasm           |
| 1375961_at   | AI072892  | frizzled-related protein                                                    | FRZB                       | -5,03  | Extracellular Space |
| 1379263_at   | AW251362  | fukutin related protein                                                     | FKRP                       | -2,23  | Cytoplasm           |
| 1373956_at   | BF284313  | FUN14 domain containing 1                                                   | FUNDC1                     | -2,52  | Unknown             |
| 1377011_at   | BF415061  | furry homolog ( <i>Drosophila</i> )                                         | FRY                        | -1,89  | Unknown             |
| 1379434_at   | BE100206  | FYVE, RhoGEF and PH domain containing 1                                     | FGD1                       | 1,93   | Cytoplasm           |
| 1381882_at   | AI072357  | FYVE, RhoGEF and PH domain containing 6                                     | FGD6                       | 23,73  | Cytoplasm           |
| 1382186_a_at | AI136314  | G patch domain containing 4                                                 | GPATCH4                    | 5,23   | Unknown             |
| 1372313_at   | BI275972  | G protein-coupled receptor 89B                                              | GPR89B                     | -2,09  | Unknown             |
| 1388395_at   | AI406939  | G0/G1switch 2                                                               | G0S2                       | 5,91   | Unknown             |
| 1378842_at   | AI102520  | GABA(A) receptor-associated protein like 1                                  | GABARAPL1                  | 2,95   | Cytoplasm           |
| 1373515_at   | BI275737  | galectin-related protein                                                    | HSPC159                    | -1,79  | Unknown             |
| 1382721_at   | BI280928  | gametogenetin binding protein 2                                             | GGNBP2                     | 1,66   | Unknown             |
| 1372201_at   | AI233698  | gametogenetin binding protein 2                                             | GGNBP2                     | 2,21   | Unknown             |
| 1385717_at   | AW524331  | ganglioside-induced differentiation-associated protein 1                    | GDAP1                      | -2,52  | Cytoplasm           |
| 1372605_at   | AA925258  | GATA zinc finger domain containing 1                                        | GATAD1                     | -1,78  | Unknown             |
| 1389390_at   | AI599847  | GATA zinc finger domain containing 1                                        | GATAD1                     | 1,76   | Unknown             |
| 1387855_at   | BI278628  | GDP dissociation inhibitor 1                                                | GDI1                       | -1,86  | Cytoplasm           |
| 1372702_at   | BI284972  | gene model 884, (NCBI)                                                      | GM884                      | -3,64  | Unknown             |
| 1375960_at   | BF281879  | germ cell-less homolog 1 ( <i>Drosophila</i> )                              | GMCL1                      | -2,21  | Nucleus             |
| 1390623_at   | BI279799  | GINS complex subunit 3 ( <i>Psf3</i> homolog)                               | GINS3                      | 3,12   | Unknown             |
| 1374690_at   | AI599770  | GLE1 RNA export mediator homolog ( <i>yeast</i> )                           | GLE1                       | 1,64   | Nucleus             |
| 1380410_at   | AI043958  | GLI pathogenesis-related 2                                                  | GLIPR2                     | 7,86   | Cytoplasm           |
| 1373021_at   | AI171823  | glioblastoma amplified sequence                                             | GBAS                       | -2,61  | Plasma Membrane     |
| 1369888_at   | NM_012707 | glucagon                                                                    | GCG                        | -10,51 | Extracellular Space |
| 1389679_at   | AI178923  | glucocorticoid induced transcript 1                                         | GLCC1                      | -2,16  | Unknown             |
| 1389254_at   | AA800519  | glutamine and serine rich 1                                                 | QSER1                      | -1,92  | Unknown             |
| 1382866_at   | BI285368  | glutamyl-tRNA(Gln) amidotransferase, subunit C homolog ( <i>bacterial</i> ) | GATC                       | -1,54  | Nucleus             |
| 1373964_at   | AA818815  | glutaredoxin-like protein                                                   | LOC100174910               | -1,74  | Unknown             |
| 1388526_at   | AI169075  | glutathione transferase zeta 1                                              | LOC681913                  | -5,24  | Unknown             |
| 1371358_at   | BI282960  | glycoprotein, synaptic 2                                                    | GPSN2                      | -3,03  | Plasma Membrane     |
| 1373600_at   | AI412518  | glycosyltransferase 8 domain containing 3                                   | GLT8D3                     | 1,55   | Unknown             |
| 1376132_at   | BI289512  | glycosyltransferase-like domain containing 1                                | GTDC1                      | 1,99   | Unknown             |
| 1398606_at   | BM391878  | golgi integral membrane protein 4                                           | GOLIM4                     | -1,51  | Cytoplasm           |
| 1373754_at   | AI599232  | golgi membrane protein 1                                                    | GOLM1                      | -1,64  | Unknown             |
| 1387000_at   | NM_019385 | golgi reassembly stacking protein 1, 65kDa                                  | GORASP1                    | 1,62   | Cytoplasm           |
| 1372330_at   | BM391371  | goliath                                                                     | LOC652955                  | -2,16  | Nucleus             |
| 1372383_at   | AW435429  | G-protein signaling modulator 1 (AGS3-like, <i>C. elegans</i> )             | GPSM1                      | -2,47  | Cytoplasm           |
| 1374043_at   | AI317841  | GRAM domain containing 3                                                    | GRAMD3                     | -1,69  | Unknown             |
| 1398664_at   | C06752    | GRAM domain containing 3                                                    | GRAMD3                     | 1,68   | Unknown             |
| 1372016_at   | BI287978  | growth arrest and DNA-damage-inducible, beta                                | GADD45B                    | 131,04 | Cytoplasm           |
| 1388792_at   | AI599423  | growth arrest and DNA-damage-inducible, gamma                               | GADD45G                    | 3,53   | Nucleus             |
| 1379452_at   | AI411492  | growth arrest-specific 2                                                    | GAS2                       | -4,05  | Cytoplasm           |
| 1373499_at   | BF287008  | growth arrest-specific 5 (non-protein coding)                               | GAS5                       | 2,78   | Unknown             |
| 1368385_a_at | X62853    | growth factor receptor-bound protein 2                                      | GRB2                       | 2,72   | Cytoplasm           |
| 1367867_at   | NM_013222 | growth factor, augmentor of liver regeneration                              | GFER                       | 7,17   | Nucleus             |
| 1371574_at   | BF284759  | growth hormone inducible transmembrane protein                              | GHITM                      | 2,25   | Cytoplasm           |
| 1392482_at   | BF409567  | GrpE-like 2, mitochondrial ( <i>E. coli</i> )                               | GRPEL2                     | 1,56   | Cytoplasm           |

|              |           |                                                                                                |              |       |                 |
|--------------|-----------|------------------------------------------------------------------------------------------------|--------------|-------|-----------------|
| 1388953_at   | AA892598  | guanine nucleotide binding protein-like 3 (nucleolar)                                          | GNL3         | 2,25  | Nucleus         |
| 1376285_at   | BM390519  | GULP, engulfment adaptor PTB domain containing 1                                               | GULP1        | -4,84 | Cytoplasm       |
| 1367759_at   | NM_012578 | H1 histone family, member 0                                                                    | H1F0         | -1,61 | Nucleus         |
| 1370004_at   | M99065    | H2A histone family, member Y                                                                   | H2AFY        | 1,70  | Nucleus         |
| 1398849_at   | AI177503  | H3 histone, family 3B (H3.3B)                                                                  | H3F3B        | 2,32  | Nucleus         |
| 1388996_at   | AI406527  | haloacid dehalogenase-like hydrolase domain containing 2                                       | HDHD2        | -3,22 | Unknown         |
| 1379816_at   | AI502578  | HBV X-transactivated gene 9 protein                                                            | KIAA1545     | -1,61 | Unknown         |
| 1374957_at   | AI408197  | hCG21078                                                                                       | HCG 21078    | -4,91 | Unknown         |
| 1393096_at   | BF393086  | hCG21078                                                                                       | HCG 21078    | -1,71 | Unknown         |
| 1393331_at   | AI575856  | headcase homolog (Drosophila)                                                                  | HECA         | 11,50 | Unknown         |
| 1383710_at   | BE098872  | HEAT repeat containing 5B                                                                      | HEATR5B      | -2,16 | Unknown         |
| 1384472_at   | AA926022  | HEAT repeat containing 5B                                                                      | HEATR5B      | -1,64 | Unknown         |
| 1388898_at   | AI236601  | heat shock 105kDa/110kDa protein 1                                                             | HSPH1        | 2,02  | Cytoplasm       |
| 1385620_at   | BF525282  | heat shock 105kDa/110kDa protein 1                                                             | HSPH1        | 3,56  | Cytoplasm       |
| 1370912_at   | BI278231  | heat shock 70kDa protein 1A                                                                    | HSPA1A       | 6,15  | Cytoplasm       |
| 1368247_at   | NM_031971 | heat shock 70kDa protein 1B                                                                    | HSPA1B       | 5,57  | Cytoplasm       |
| 1388851_at   | BI282281  | heat shock 70kDa protein 9 (mortalin)                                                          | HSPA9        | 1,97  | Cytoplasm       |
| 1391915_at   | BE120145  | heat shock 70kDa protein 9 (mortalin)                                                          | HSPA9        | 7,12  | Cytoplasm       |
| 1372701_at   | AI237597  | heat shock protein 90kDa alpha (cytosolic), class A member 1                                   | HSP90AA1     | 2,79  | Cytoplasm       |
| 1388850_at   | BG671521  | heat shock protein 90kDa alpha (cytosolic), class A member 1                                   | HSP90AA1     | 3,06  | Cytoplasm       |
| 1387898_at   | D29960    | heat shock protein, alpha-crystallin-related, B6                                               | HSPB6        | -5,01 | Cytoplasm       |
| 1368060_at   | NM_031714 | heat-responsive protein 12                                                                     | HRSP12       | -3,09 | Cytoplasm       |
| 1384882_at   | AI229056  | HECT domain containing 2                                                                       | HECTD2       | 6,41  | Unknown         |
| 1371336_at   | AA942716  | hematological and neurological expressed 1                                                     | HN1          | 2,46  | Nucleus         |
| 1373447_at   | BF281350  | hematological and neurological expressed 1-like                                                | HN1L         | 1,57  | Cytoplasm       |
| 1372004_at   | AI102065  | heme binding protein 1                                                                         | HEBP1        | 3,82  | Cytoplasm       |
| 1386795_at   | BF291091  | HEPACAM family member 2                                                                        | HEPACAM2     | -5,93 | Unknown         |
| 1373228_at   | BI288760  | heparan-alpha-glucosaminide N-acetyltransferase                                                | HGSNAT       | -2,03 | Unknown         |
| 1372076_at   | BI294704  | hepatitis B virus x interacting protein                                                        | HBXIP        | 2,25  | Cytoplasm       |
| 1368026_at   | NM_133548 | hepatoma-derived growth factor-related protein 2                                               | HDGF2        | 1,74  | Nucleus         |
| 1377283_at   | BI274486  | Hermansky-Pudlak syndrome 4                                                                    | HPS4         | -3,34 | Cytoplasm       |
| 1371637_at   | AI411691  | heterochromatin protein 1, binding protein 3                                                   | HP1BP3       | -1,52 | Nucleus         |
| 1374405_at   | AI233336  | heterogeneous nuclear ribonucleoprotein A3                                                     | HNRNPA3      | 2,26  | Nucleus         |
| 1371505_at   | BG381750  | heterogeneous nuclear ribonucleoprotein C (C1/C2)                                              | HNRNPC       | 2,25  | Nucleus         |
| 1372810_at   | BF281256  | heterogeneous nuclear ribonucleoprotein D-like                                                 | HNRPDL       | 1,69  | Nucleus         |
| 1391786_at   | BI297047  | heterogeneous nuclear ribonucleoprotein H2 (H')                                                | HNRNPH2      | -1,73 | Nucleus         |
| 1375019_at   | AI101886  | heterogeneous nuclear ribonucleoprotein H3 (2H9)                                               | HNRNPH3      | 1,74  | Nucleus         |
| 1398797_at   | NM_057141 | heterogeneous nuclear ribonucleoprotein K                                                      | HNRNPK       | -1,50 | Nucleus         |
| 1392062_a_at | BE097702  | hexosaminidase (glycosyl hydrolase family 20, catalytic domain) containing                     | RCG 34541    | -2,66 | Unknown         |
| 1374105_at   | H31665    | HIG1 domain family, member 1A                                                                  | HIGD1A       | 2,33  | Plasma Membrane |
| 1371989_at   | BM386357  | high mobility group nucleosomal binding domain 3                                               | HMGN3        | -2,17 | Nucleus         |
| 1379395_a_at | BI280018  | histidine triad nucleotide binding protein 2                                                   | HINT2        | -1,81 | Cytoplasm       |
| 1386059_at   | BF284475  | histone cluster 1, H2bl                                                                        | HIST1H2BL    | -1,69 | Nucleus         |
| 1371985_a_at | BE097389  | HLA-B associated transcript 5                                                                  | BAT5         | 1,66  | Unknown         |
| 1372118_at   | BI281674  | HMP19 protein                                                                                  | HMP19        | -4,16 | Cytoplasm       |
| 1367741_at   | NM_053523 | homocysteine-inducible, endoplasmic reticulum stress-inducible, ubiquitin-like domain member 1 | HERPUD1      | 2,29  | Cytoplasm       |
| 1368195_at   | NM_134419 | HSPB (heat shock 27kDa) associated protein 1                                                   | HSPBAP1      | 3,89  | Unknown         |
| 1390382_at   | BF414043  | Huntingtin interacting protein K                                                               | HYPK         | 1,54  | Unknown         |
| 1369358_a_at | AI412750  | huntingtin-associated protein 1                                                                | HAP1         | -7,35 | Cytoplasm       |
| 1376400_at   | BG380445  | hypermethylated in cancer 2                                                                    | HIC2         | 2,42  | Nucleus         |
| 1383221_at   | BG378463  | hypothetical gene supported by BC022385; BC035868; BC048326                                    | LOC440335    | 1,62  | Unknown         |
| 1371736_at   | AI411283  | hypothetical gene supported by BC032431                                                        | LOC389203    | -2,87 | Unknown         |
| 1373216_at   | AI236521  | hypothetical LOC145788                                                                         | FLJ27352     | -3,43 | Unknown         |
| 1393050_at   | BG664069  | hypothetical LOC302495                                                                         | LOC302495    | 2,25  | Unknown         |
| 1390146_at   | BF414998  | hypothetical LOC441027                                                                         | FLJ12993     | -1,68 | Unknown         |
| 1384187_at   | BF551686  | hypothetical LOC653653                                                                         | LOC653653    | -1,89 | Cytoplasm       |
| 1398616_at   | AI045228  | hypothetical LOC653653                                                                         | LOC653653    | -1,73 | Cytoplasm       |
| 1375911_at   | AI171772  | hypothetical protein KIAA1434                                                                  | RP5-1022P6.2 | 3,33  | Unknown         |

|            |           |                                                                           |                           |        |                     |
|------------|-----------|---------------------------------------------------------------------------|---------------------------|--------|---------------------|
| 1388407_at | AI008077  | hypothetical protein LOC348262                                            | LOC348262                 | 2,93   | Unknown             |
| 1388942_at | BM390129  | hypothetical protein LOC679880                                            | LOC679880                 | -2,18  | Unknown             |
| 1377461_at | AI409983  | hypothetical protein LOC680485                                            | LOC680485                 | 11,07  | Unknown             |
| 1373088_at | BI295811  | hypothetical protein LOC682888                                            | LOC682888                 | 1,52   | Unknown             |
| 1374499_at | BM383402  | hypothetical protein LOC682999                                            | LOC682999                 | 1,68   | Unknown             |
| 1390151_at | BM392146  | hypothetical protein LOC683034                                            | LOC683034                 | -3,65  | Unknown             |
| 1377885_at | BI281851  | hypothetical protein LOC685203                                            | LOC685203                 | 1,61   | Unknown             |
| 1388501_at | AW916335  | hypothetical protein LOC686179                                            | MGC125239                 | 1,75   | Unknown             |
| 1376737_at | BE110674  | hypothetical protein LOC686259                                            | LOC686259                 | 3,27   | Unknown             |
| 1377626_at | AA924350  | hypothetical protein LOC686634                                            | LOC686634                 | 319,96 | Unknown             |
| 1393234_at | BI285850  | hypothetical protein LOC687105                                            | LOC687105                 | 7,97   | Unknown             |
| 1390796_at | AA998424  | hypothetical protein LOC688211                                            | LOC688211                 | -1,53  | Unknown             |
| 1371434_at | AI172362  | hypothetical protein LOC691807                                            | RCG 28701                 | 1,84   | Unknown             |
| 1385061_at | AI145445  | hypothetical protein LOC730130                                            | TCAG7.977                 | -2,06  | Unknown             |
| 1398931_at | BI282246  | hypothetical protein MGC3196                                              | MGC3196                   | -4,19  | Unknown             |
| 1389355_at | BF285187  | immediate early response 5                                                | IER5                      | 4,31   | Unknown             |
| 1391489_at | AI407339  | immunity-related GTPase family, M                                         | IRGM                      | 38,52  | Cytoplasm           |
| 1376733_at | AI407898  | immunoglobulin superfamily, member 11                                     | IGSF11                    | -2,18  | Unknown             |
| 1374743_at | BE115056  | InaD-like (Drosophila)                                                    | INADL (includes EG:10207) | 2,35   | Plasma Membrane     |
| 1393690_at | AA818627  | insulin induced gene 2                                                    | INSIG2                    | 2,21   | Cytoplasm           |
| 1368160_at | NM_013144 | insulin-like growth factor binding protein 1                              | IGFBP1                    | 5,87   | Extracellular Space |
| 1367716_at | NM_133557 | integrin alpha FG-GAP repeat containing 1                                 | ITFG1                     | -2,34  | Plasma Membrane     |
| 1386581_at | AW141214  | integrin, alpha V (vitronectin receptor, alpha polypeptide, antigen CD51) | ITGAV                     | 3,70   | Plasma Membrane     |
| 1383880_at | BF418243  | integrin, alpha V (vitronectin receptor, alpha polypeptide, antigen CD51) | ITGAV                     | 6,86   | Plasma Membrane     |
| 1387770_at | NM_130743 | interferon, alpha-inducible protein 27                                    | IFI27                     | 2,27   | Cytoplasm           |
| 1374551_at | BM388891  | interferon-induced protein 35                                             | IFI35                     | 2,30   | Nucleus             |
| 1381014_at | BI274623  | interferon-induced protein 44                                             | IFI44                     | 7,77   | Cytoplasm           |
| 1379748_at | AA819629  | interferon-induced protein 44-like                                        | IFI44L                    | 12,38  | Unknown             |
| 1367795_at | NM_019242 | interferon-related developmental regulator 1                              | IFRD1                     | 2,09   | Nucleus             |
| 1373068_at | AI236977  | interferon-related developmental regulator 2                              | IFRD2                     | 3,09   | Unknown             |
| 1369031_at | NM_053374 | interleukin 18 binding protein                                            | IL18BP                    | 11,89  | Extracellular Space |
| 1387226_at | NM_019128 | internexin neuronal intermediate filament protein, alpha                  | INA                       | -2,09  | Cytoplasm           |
| 1387046_at | NM_053792 | intraflagellar transport 172 homolog (Chlamydomonas)                      | IFT172                    | -2,04  | Nucleus             |
| 1380548_at | BF420494  | intraflagellar transport 57 homolog (Chlamydomonas)                       | IFT57                     | 3,72   | Cytoplasm           |
| 1394038_at | BG371654  | intraflagellar transport 81 homolog (Chlamydomonas)                       | IFT81                     | -1,63  | Unknown             |
| 1386473_at | AA848540  | IQ motif and WD repeats 1                                                 | IQWD1                     | -1,94  | Nucleus             |
| 1388762_at | BF284125  | IQ motif containing GTPase activating protein 1                           | IQGAP1                    | 2,76   | Cytoplasm           |
| 1382314_at | BE096523  | ISG15 ubiquitin-like modifier                                             | ISG15 (includes EG:9636)  | 235,92 | Extracellular Space |
| 1387660_at | M25390    | islet amyloid polypeptide                                                 | IAPP                      | -2,06  | Extracellular Space |
| 1367787_at | NM_030844 | islet cell autoantigen 1, 69kDa                                           | ICA1                      | -1,89  | Cytoplasm           |
| 1377756_at | AI232228  | ISY1 splicing factor homolog (S. cerevisiae)                              | ISY1                      | 1,93   | Nucleus             |
| 1371983_at | AA945181  | Josephin domain containing 1                                              | JOSD1                     | -2,04  | Unknown             |
| 1371498_at | AI412685  | JTV1 gene                                                                 | JTV1                      | 1,57   | Plasma Membrane     |
| 1370975_at | AI172079  | jumonji domain containing 1A                                              | JMJD1A                    | 4,08   | Unknown             |
| 1374632_at | AI232697  | jumonji domain containing 6                                               | JMJD6                     | 2,65   | Plasma Membrane     |
| 1379945_at | AI137329  | kelch repeat and BTB (POZ) domain containing 8                            | KBTBD8                    | -2,82  | Unknown             |
| 1383433_at | BI281874  | kelch-like 23 (Drosophila)                                                | KLHL23                    | -4,07  | Unknown             |
| 1388799_at | BG374559  | kelch-like 7 (Drosophila)                                                 | KLHL7                     | -1,96  | Nucleus             |
| 1390526_at | BI289484  | kelch-like 9 (Drosophila)                                                 | KLHL9                     | -1,70  | Unknown             |
| 1388155_at | BI286012  | keratin 18                                                                | KRT18                     | 2,53   | Cytoplasm           |
| 1388433_at | BI279605  | keratin 19                                                                | KRT19                     | 7,01   | Cytoplasm           |
| 1377708_at | BF281491  | KIAA0020                                                                  | KIAA0020                  | 3,79   | Nucleus             |
| 1382364_at | BI293914  | KIAA0090                                                                  | KIAA0090                  | -2,18  | Plasma Membrane     |
| 1399124_at | AI598517  | KIAA0090                                                                  | KIAA0090                  | -1,88  | Plasma Membrane     |
| 1388340_at | BF281153  | KIAA0101                                                                  | KIAA0101                  | -2,97  | Nucleus             |
| 1381174_at | BG381120  | KIAA0141                                                                  | KIAA0141                  | 2,66   | Cytoplasm           |
| 1396239_at | AI502035  | KIAA0146                                                                  | KIAA0146                  | 2,69   | Unknown             |
| 1389890_at | BI288731  | KIAA0182                                                                  | KIAA0182                  | 3,42   | Unknown             |

|              |           |                                                                                       |          |        |                     |
|--------------|-----------|---------------------------------------------------------------------------------------|----------|--------|---------------------|
| 1378007_at   | BE103359  | KIAA0368                                                                              | KIAA0368 | -2,63  | Cytoplasm           |
| 1393065_at   | BI276770  | KIAA0406                                                                              | KIAA0406 | -2,74  | Unknown             |
| 1375548_at   | BI296537  | KIAA0494                                                                              | KIAA0494 | -1,74  | Unknown             |
| 1383933_at   | AI136714  | KIAA0564                                                                              | KIAA0564 | -2,01  | Unknown             |
| 1383405_at   | AW254703  | KIAA0649                                                                              | KIAA0649 | -1,96  | Unknown             |
| 1376104_at   | BG381010  | KIAA0802                                                                              | KIAA0802 | -1,51  | Unknown             |
| 1385253_at   | AW529791  | KIAA0831                                                                              | KIAA0831 | 2,01   | Unknown             |
| 1397575_at   | BF415880  | KIAA0922                                                                              | KIAA0922 | -8,43  | Unknown             |
| 1377157_at   | BI273815  | KIAA0947 protein                                                                      | KIAA0947 | -2,04  | Unknown             |
| 1375853_at   | BF284358  | KIAA1033                                                                              | KIAA1033 | 1,72   | Unknown             |
| 1392838_at   | BF398054  | KIAA1033                                                                              | KIAA1033 | 2,41   | Unknown             |
| 1380182_at   | BF291123  | KIAA1217                                                                              | KIAA1217 | -3,34  | Cytoplasm           |
| 1383165_at   | BM390462  | KIAA1324                                                                              | KIAA1324 | -1,84  | Unknown             |
| 1374574_at   | AI547611  | KIAA1370                                                                              | KIAA1370 | -4,28  | Unknown             |
| 1393352_at   | BI293882  | KIAA1370                                                                              | KIAA1370 | -1,62  | Unknown             |
| 1394760_at   | BF387238  | KIAA1409                                                                              | KIAA1409 | -4,80  | Unknown             |
| 1374230_at   | BI395805  | KIAA1429                                                                              | KIAA1429 | -1,82  | Nucleus             |
| 1373300_at   | BI296249  | KIAA1467                                                                              | KIAA1467 | -2,81  | Unknown             |
| 1374253_at   | BI291355  | KIAA1468                                                                              | KIAA1468 | -1,81  | Unknown             |
| 1375873_at   | AI231506  | KIAA1522                                                                              | KIAA1522 | 1,68   | Unknown             |
| 1382630_at   | BI302656  | KIAA1598                                                                              | KIAA1598 | 1,55   | Unknown             |
| 1384655_at   | AW142820  | kin of IRRE like 3 (Drosophila)                                                       | KIRREL3  | -1,95  | Extracellular Space |
| 1391611_at   | BI296819  | kinesin family member 12                                                              | KIF12    | -1,52  | Unknown             |
| 1382785_at   | BE105549  | kinesin family member 1A                                                              | KIF1A    | 10,53  | Cytoplasm           |
| 1373977_at   | BE108253  | kinesin family member 5C                                                              | KIF5C    | -2,59  | Cytoplasm           |
| 1380172_at   | BE104278  | kinesin family member 5C                                                              | KIF5C    | -2,39  | Cytoplasm           |
| 1389556_at   | BI286000  | kinesin-associated protein 3                                                          | KIFAP3   | -1,87  | Cytoplasm           |
| 1373422_at   | BE108280  | La ribonucleoprotein domain family, member 1                                          | LARP1    | 1,85   | Unknown             |
| 1390851_at   | AA799676  | lactamase, beta 2                                                                     | LACTB2   | -1,64  | Cytoplasm           |
| 1374195_at   | AA799544  | ladinin 1                                                                             | LAD1     | 6,34   | Extracellular Space |
| 1368055_a_at | BI282866  | lamin A/C                                                                             | LMNA     | 4,38   | Nucleus             |
| 1371322_at   | BI275624  | laminin, gamma 1 (formerly LAMB2)                                                     | LAMC1    | 2,33   | Extracellular Space |
| 1379340_at   | BM385282  | laminin, gamma 2                                                                      | LAMC2    | 28,30  | Extracellular Space |
| 1391565_at   | AA899663  | large subunit GTPase 1 homolog (S. cerevisiae)                                        | LSG1     | -8,34  | Cytoplasm           |
| 1369716_s_at | NM_012976 | lectin, galactose binding, soluble 5                                                  | LGALS5   | 6,89   | Unknown             |
| 1386879_at   | NM_031832 | lectin, galactoside-binding, soluble, 3                                               | LGALS3   | 7,19   | Extracellular Space |
| 1389329_at   | AI411914  | lectin, galactoside-binding, soluble, 8                                               | LGALS8   | 1,51   | Extracellular Space |
| 1368960_at   | NM_053862 | lectin, galactoside-binding, soluble, 8                                               | LGALS8   | 3,88   | Extracellular Space |
| 1387027_a_at | U72741    | lectin, galactoside-binding, soluble, 9B                                              | LGALS9B  | 5,27   | Cytoplasm           |
| 1379282_at   | AI145899  | leucine rich repeat (in FLII) interacting protein 2                                   | LRRFIP2  | 2,01   | Unknown             |
| 1393011_at   | BE104363  | leucine rich repeat containing 16B                                                    | LRRC16B  | -7,64  | Unknown             |
| 1371445_at   | BF285649  | leucine rich repeat containing 59                                                     | LRRC59   | 1,76   | Cytoplasm           |
| 1391601_at   | AA964579  | leucine rich repeat neuronal 2                                                        | LRRN2    | -3,73  | Plasma Membrane     |
| 1383132_at   | BG377939  | leucine zipper and CTNBP1 domain containing                                           | LZIC     | 1,51   | Unknown             |
| 1393177_at   | AA924403  | leucine-rich repeats and calponin homology (CH) domain containing 1                   | LRCH1    | 1,64   | Unknown             |
| 1398569_at   | BF412229  | leucine-rich repeats and death domain containing                                      | LRDD     | 2,43   | Cytoplasm           |
| 1392932_at   | BI279191  | leukocyte receptor cluster (LRC) member 8                                             | LENG8    | -2,05  | Unknown             |
| 1383906_at   | BF416847  | likely ortholog of mouse lung-inducible Neutralized-related C3HC4 RING domain protein | LINCR    | 117,72 | Unknown             |
| 1392883_at   | AI013730  | LIM and calponin homology domains 1                                                   | LIMCH1   | 2,43   | Unknown             |
| 1383863_at   | BF288303  | LIM domain only 2 (rhombotin-like 1)                                                  | LMO2     | 3,22   | Nucleus             |
| 1373071_at   | AI103101  | lin-37 homolog (C. elegans)                                                           | LIN37    | 2,37   | Unknown             |
| 1380320_at   | AI176284  | lin-54 homolog (C. elegans)                                                           | LIN54    | 3,41   | Unknown             |
| 1383665_at   | BE096055  | lipin 2                                                                               | LPIN2    | 2,59   | Nucleus             |
| 1373875_at   | BG381541  | LLP homolog, long-term synaptic facilitation (Aplysia)                                | LLPH     | 2,27   | Unknown             |
| 1372443_at   | AI409038  | low density lipoprotein receptor-related protein 11                                   | LRP11    | 1,90   | Unknown             |
| 1385487_at   | AW530957  | LSM1 homolog, U6 small nuclear RNA associated (S. cerevisiae)                         | LSM1     | 2,43   | Nucleus             |
| 1381970_at   | AA945865  | LSM14A, SCD6 homolog A (S. cerevisiae)                                                | LSM14A   | 1,65   | Unknown             |
| 1376483_at   | AW251852  | LSM5 homolog, U6 small nuclear RNA associated (S. cerevisiae)                         | LSM5     | 1,59   | Cytoplasm           |

|              |           |                                                                              |                           |       |                     |
|--------------|-----------|------------------------------------------------------------------------------|---------------------------|-------|---------------------|
| 1388772_at   | AI177016  | LSM8 homolog, U6 small nuclear RNA associated ( <i>S. cerevisiae</i> )       | LSM8                      | -1,86 | Nucleus             |
| 1392425_x_at | BI275713  | LUC7-like ( <i>S. cerevisiae</i> )                                           | LUC7L                     | 2,69  | Cytoplasm           |
| 1391195_at   | BF401728  | LUC7-like ( <i>S. cerevisiae</i> )                                           | LUC7L                     | 2,91  | Cytoplasm           |
| 1382277_at   | AA894336  | lymphocyte antigen 96                                                        | LY96                      | 4,67  | Plasma Membrane     |
| 1389210_at   | BE109711  | lymphocyte cytosolic protein 1 (L-plastin)                                   | LCP1                      | 21,25 | Cytoplasm           |
| 1373904_at   | AI103948  | LysM, putative peptidoglycan-binding, domain containing 2                    | LYSMD2                    | 1,90  | Unknown             |
| 1376436_at   | AI071181  | LysM, putative peptidoglycan-binding, domain containing 3                    | LYSMD3                    | 3,17  | Unknown             |
| 1381193_at   | BE115518  | lysophosphatidylglycerol acyltransferase 1                                   | LPGAT1                    | 2,77  | Cytoplasm           |
| 1388728_at   | BI282923  | lysosomal protein transmembrane 4 beta                                       | LAPTM4B                   | -2,21 | Unknown             |
| 1371734_at   | BI282245  | macrophage erythroblast attacher                                             | MAEA                      | 1,78  | Plasma Membrane     |
| 1367925_at   | NM_022715 | major vault protein                                                          | MVP                       | 2,07  | Nucleus             |
| 1376626_at   | AI145815  | makorin ring finger protein 1                                                | MKRN1                     | 1,52  | Unknown             |
| 1379325_at   | BI274837  | makorin ring finger protein 1                                                | MKRN1                     | 2,53  | Unknown             |
| 1399118_at   | AI168933  | male-specific lethal 1 homolog ( <i>Drosophila</i> )                         | MSL1                      | 2,08  | Unknown             |
| 1379972_at   | AI070438  | male-specific lethal 3-like 2 ( <i>Drosophila</i> )                          | 1700060H10RIK             | -1,76 | Unknown             |
| 1372029_at   | BI281957  | mannose-6-phosphate receptor binding protein 1                               | M6PRBP1                   | 2,17  | Cytoplasm           |
| 1370876_at   | BI285436  | MAP7 domain containing 1                                                     | MAP7D1                    | 1,78  | Unknown             |
| 1392463_at   | AI576058  | MAP7 domain containing 2                                                     | MAP7D2                    | -1,63 | Unknown             |
| 1371587_at   | AA817829  | MAPK scaffold protein 1                                                      | MAPKSP1                   | 3,34  | Cytoplasm           |
| 1389306_at   | BM387419  | matrilin 2                                                                   | MATN2                     | -9,75 | Extracellular Space |
| 1391849_at   | BF547270  | MBD2-interacting zinc finger                                                 | MIZF                      | 1,53  | Nucleus             |
| 1389433_at   | BI298816  | McKusick-Kaufman syndrome                                                    | MKKS                      | -5,00 | Cytoplasm           |
| 1388368_at   | BM389891  | mediator complex subunit 28                                                  | MED28                     | 3,09  | Nucleus             |
| 1389312_at   | AI104484  | mediator of cell motility 1                                                  | MEMO1 (includes EG:51072) | -1,70 | Unknown             |
| 1367744_at   | NM_080479 | melanoma antigen family D, 2                                                 | MAGED2                    | -3,05 | Plasma Membrane     |
| 1377267_at   | BF402385  | melanoma antigen family E, 1                                                 | MAGEE1                    | -2,31 | Plasma Membrane     |
| 1395316_at   | H32543    | melanoma antigen family H, 1                                                 | MAGEH1                    | -2,82 | Cytoplasm           |
| 1372571_at   | AW143187  | membrane-associated ring finger (C3HC4) 2                                    | MARCH2                    | -1,91 | Cytoplasm           |
| 1385790_at   | BF560024  | membrane-associated ring finger (C3HC4) 5                                    | MARCH5                    | 2,96  | Unknown             |
| 1390485_at   | BI290680  | membrane-associated ring finger (C3HC4) 5                                    | MARCH5                    | 4,90  | Unknown             |
| 1373087_at   | AI175452  | membrane-associated ring finger (C3HC4) 7                                    | MARCH7                    | 1,94  | Unknown             |
| 1373113_at   | AI231778  | membrane-associated ring finger (C3HC4) 8                                    | MARCH8                    | 1,72  | Cytoplasm           |
| 1375956_at   | AI104569  | menage a trois homolog 1, cyclin H assembly factor ( <i>Xenopus laevis</i> ) | MNAT1                     | 1,75  | Nucleus             |
| 1368441_at   | NM_031658 | mesothelin                                                                   | MSLN                      | -2,19 | Extracellular Space |
| 1391857_at   | AI044397  | mesothelin-like                                                              | MSLNL                     | -3,25 | Unknown             |
| 1392872_at   | BF397413  | metadherin                                                                   | MTDH                      | 1,55  | Cytoplasm           |
| 1388271_at   | BM383531  | metallothionein 1E                                                           | MT1E                      | 58,25 | Cytoplasm           |
| 1388267_a_at | M24327    | metallothionein 1F                                                           | MT1F                      | 26,36 | Cytoplasm           |
| 1371237_a_at | AF411318  | metallothionein 1F                                                           | MT1F                      | 36,70 | Cytoplasm           |
| 1385433_at   | AI576354  | metastasis suppressor 1                                                      | MTSS1                     | 13,18 | Cytoplasm           |
| 1377302_a_at | AI145027  | methylmalonic aciduria (cobalamin deficiency) cblA type                      | MMAA                      | 1,60  | Cytoplasm           |
| 1372185_at   | BF557934  | methyltransferase like 11A                                                   | METTL11A                  | 3,49  | Unknown             |
| 1377623_at   | AA925355  | mex-3 homolog D ( <i>C. elegans</i> )                                        | MEX3D                     | 1,98  | Unknown             |
| 1379059_at   | BG373522  | MICAL-like 2                                                                 | MICAL2                    | 16,50 | Cytoplasm           |
| 1390063_at   | BG380473  | microfibrillar-associated protein 3                                          | MFAP3                     | -2,65 | Extracellular Space |
| 1371940_at   | AW920000  | microtubule-actin crosslinking factor 1                                      | MACF1                     | -1,70 | Cytoplasm           |
| 1371003_at   | BG378086  | microtubule-associated protein 1B                                            | MAP1B                     | 1,86  | Cytoplasm           |
| 1388152_at   | BG374290  | microtubule-associated protein 2                                             | MAP2                      | -3,01 | Cytoplasm           |
| 1373397_at   | AI180161  | microtubule-associated protein, RP/EB family, member 1                       | MAPRE1                    | 3,23  | Cytoplasm           |
| 1382289_at   | BI291954  | mindbomb homolog 1 ( <i>Drosophila</i> )                                     | MIB1                      | -5,09 | Cytoplasm           |
| 1392989_at   | BI295986  | mindbomb homolog 1 ( <i>Drosophila</i> )                                     | MIB1                      | -2,70 | Cytoplasm           |
| 1375131_at   | BF284715  | mitochondrial carrier homolog 2 ( <i>C. elegans</i> )                        | MTCH2                     | 1,69  | Cytoplasm           |
| 1396209_at   | BE117343  | mitochondrial carrier triple repeat 1-like                                   | MCART1L                   | -6,87 | Unknown             |
| 1373477_at   | BM390306  | mitochondrial ribosomal protein L19                                          | MRPL19                    | 2,16  | Cytoplasm           |
| 1371720_at   | AI599839  | mitochondrial ribosomal protein L20                                          | MRPL20                    | -3,64 | Unknown             |
| 1371888_at   | AA892843  | mitochondrial ribosomal protein L24                                          | MRPL24                    | 2,50  | Unknown             |
| 1383618_at   | BG378538  | mitochondrial ribosomal protein L38                                          | MRPL38                    | 2,45  | Unknown             |
| 1372927_at   | AA891839  | mitochondrial ribosomal protein L50                                          | MRPL50                    | -1,88 | Cytoplasm           |



|              |           |                                                                                                 |                              |       |                 |
|--------------|-----------|-------------------------------------------------------------------------------------------------|------------------------------|-------|-----------------|
| 1379874_at   | BE107929  | mitochondrial ribosomal protein L51                                                             | MRPL51                       | -2,10 | Cytoplasm       |
| 1390509_a_at | BI294860  | mitochondrial ribosomal protein L51                                                             | MRPL51                       | -1,65 | Cytoplasm       |
| 1376930_at   | BI294860  | mitochondrial ribosomal protein L51                                                             | MRPL51                       | -1,58 | Cytoplasm       |
| 1388654_at   | AI409180  | mitochondrial ribosomal protein L52                                                             | MRPL52                       | -1,99 | Unknown         |
| 1377937_at   | AA859719  | mitochondrial ribosomal protein S14                                                             | MRPS14                       | -1,59 | Cytoplasm       |
| 1399002_at   | BM384239  | mitochondrial ribosomal protein S17                                                             | MRPS17                       | -2,08 | Cytoplasm       |
| 1371809_at   | BM389296  | mitochondrial ribosomal protein S18B                                                            | MRPS18B                      | 4,53  | Cytoplasm       |
| 1380447_a_at | AI071722  | mitochondrial ribosomal protein S18C                                                            | MRPS18C                      | 1,78  | Cytoplasm       |
| 1373609_at   | AI232274  | mitochondrial ribosomal protein S21                                                             | MRPS21 (includes EG:54460)   | -1,85 | Cytoplasm       |
| 1371608_at   | BI275958  | mitochondrial ribosomal protein S34                                                             | MRPS34                       | 2,40  | Cytoplasm       |
| 1397748_at   | AW521583  | mitochondrial rRNA methyltransferase 1 homolog (S. cerevisiae)                                  | MRM1                         | -2,07 | Unknown         |
| 1380321_at   | BI287786  | mitochondrial tumor suppressor 1                                                                | MTUS1                        | -2,09 | Unknown         |
| 1392133_at   | AI502069  | mitogen-activated protein kinase 1 interacting protein 1-like                                   | MAPK1IP1L                    | 4,26  | Nucleus         |
| 1388593_at   | AI176465  | mitogen-activated protein kinase 8 interacting protein 3                                        | MAPK8IP3                     | 1,80  | Cytoplasm       |
| 1388990_at   | AA924622  | MKI67 (FHA domain) interacting nucleolar phosphoprotein                                         | MKI67IP                      | 1,60  | Nucleus         |
| 1368071_at   | NM_134410 | MOCO sulphurase C-terminal domain containing 2                                                  | MOSC2                        | -1,50 | Cytoplasm       |
| 1372043_at   | BI282363  | mRNA turnover 4 homolog (S. cerevisiae)                                                         | MRTO4                        | 4,98  | Cytoplasm       |
| 1378034_at   | BF552141  | MTERF domain containing 3                                                                       | MTERFD3                      | -3,50 | Unknown         |
| 1371023_at   | AW524873  | multiple EGF-like-domains 8                                                                     | MEGF8                        | -1,80 | Unknown         |
| 1388870_at   | BF284305  | musashi homolog 2 (Drosophila)                                                                  | MSI2                         | -2,77 | Cytoplasm       |
| 1380541_at   | AA957801  | musashi homolog 2 (Drosophila)                                                                  | MSI2                         | -1,94 | Cytoplasm       |
| 1375140_at   | AA818999  | muscleblind-like 2 (Drosophila)                                                                 | MBNL2                        | -4,51 | Unknown         |
| 1389301_at   | AI176665  | muscleblind-like 2 (Drosophila)                                                                 | MBNL2                        | -2,07 | Unknown         |
| 1375675_at   | AA892813  | muscleblind-like 2 (Drosophila)                                                                 | MBNL2                        | -1,63 | Unknown         |
| 1394511_at   | BF419160  | myb-like, SWIRM and MPN domains 1                                                               | MYSM1                        | 1,76  | Nucleus         |
| 1386074_at   | AA850705  | MYC induced nuclear antigen                                                                     | MINA                         | -1,99 | Nucleus         |
| 1386075_at   | AI710379  | MYC induced nuclear antigen                                                                     | MINA                         | -1,98 | Nucleus         |
| 1371692_at   | AI009661  | myeloid/lymphoid or mixed-lineage leukemia (trithorax homolog, Drosophila); translocated to, 11 | MLLT11                       | -1,88 | Unknown         |
| 1373027_at   | AA944375  | myeloid/lymphoid or mixed-lineage leukemia (trithorax homolog, Drosophila); translocated to, 4  | MLLT4                        | 1,75  | Nucleus         |
| 1392472_at   | BI281877  | myocyte enhancer factor 2a                                                                      | MEF2A (includes EG:309957)   | 2,85  | Unknown         |
| 1369720_at   | NM_053986 | myosin IB                                                                                       | MYO1B                        | 7,12  | Cytoplasm       |
| 1388917_at   | BI279786  | myosin ID                                                                                       | MYO1D                        | -4,05 | Plasma Membrane |
| 1376098_a_at | BF282304  | myosin IG                                                                                       | MYO1G                        | 6,84  | Cytoplasm       |
| 1388114_at   | X05566    | myosin regulatory light chain MRLC2                                                             | MRLC2                        | 3,28  | Cytoplasm       |
| 1370478_at   | AY004215  | myosin XVI                                                                                      | MYO16                        | -4,89 | Cytoplasm       |
| 1370158_at   | AA946388  | myosin, heavy chain 10, non-muscle                                                              | MYH10                        | -4,31 | Cytoplasm       |
| 1372117_at   | BE329026  | myotubularin related protein 10                                                                 | MTMR10                       | -2,22 | Unknown         |
| 1370949_at   | M59859    | myristoylated alanine rich protein kinase C substrate                                           | MARCKS (includes EG:25603)   | -1,52 | Unknown         |
| 1398452_at   | BI298587  | N-acetyltransferase 12 (GCN5-related, putative)                                                 | NAT12                        | 5,85  | Unknown         |
| 1371559_at   | AI103384  | NAD kinase                                                                                      | NADK (includes EG:100125370) | -1,62 | Unknown         |
| 1370903_a_at | AI146115  | NDRG family member 3                                                                            | NDRG3                        | -2,19 | Cytoplasm       |
| 1371947_at   | BG671865  | necdin homolog (mouse)                                                                          | NDN                          | -2,97 | Nucleus         |
| 1390514_at   | BI295160  | NEDD4 binding protein 2-like 2                                                                  | N4BP2L2                      | 1,99  | Unknown         |
| 1398893_at   | BG671512  | Nedd4 family interacting protein 1                                                              | NDFIP1                       | -1,58 | Cytoplasm       |
| 1373861_at   | AI228114  | Nedd4 family interacting protein 2                                                              | NDFIP2 (includes EG:54602)   | 2,16  | Cytoplasm       |
| 1389364_at   | BF406709  | Nedd4 family interacting protein 2                                                              | NDFIP2 (includes EG:54602)   | 4,78  | Cytoplasm       |
| 1373775_at   | AI232313  | negative regulator of ubiquitin-like proteins 1                                                 | NUB1                         | 2,52  | Nucleus         |
| 1381509_at   | BF393724  | neighbor of BRCA1 gene 1                                                                        | NBR1                         | 9,17  | Unknown         |
| 1374650_at   | BM392374  | neural precursor cell expressed, developmentally down-regulated 9                               | NEDD9                        | -2,06 | Nucleus         |
| 1376893_at   | AI406821  | neurensin 1                                                                                     | NRSN1                        | 4,90  | Plasma Membrane |
| 1392581_at   | BF420172  | neurocalcin delta                                                                               | NCALD                        | -7,29 | Cytoplasm       |
| 1372953_at   | AI101330  | neurocalcin delta                                                                               | NCALD                        | -5,97 | Cytoplasm       |
| 1367956_at   | NM_053543 | neurochondrin                                                                                   | NCDN                         | -1,72 | Unknown         |
| 1367845_at   | NM_017029 | neurofilament, medium polypeptide                                                               | NEFM                         | 3,54  | Cytoplasm       |
| 1372433_at   | AI104715  | neuroguidin, EIF4E binding protein                                                              | NGDN                         | 2,96  | Nucleus         |
| 1392973_at   | AI073173  | neuron navigator 2                                                                              | NAV2 (includes EG:89797)     | -2,82 | Nucleus         |
| 1371036_at   | BG671431  | neuronal cell adhesion molecule                                                                 | NRCAM                        | 1,54  | Plasma Membrane |
| 1392734_at   | AI145667  | neuronal cell adhesion molecule                                                                 | NRCAM                        | 2,07  | Plasma Membrane |

|              |           |                                                                                     |                             |        |                     |
|--------------|-----------|-------------------------------------------------------------------------------------|-----------------------------|--------|---------------------|
| 1370517_at   | U18772    | neuronal pentraxin I                                                                | NPTX1                       | -10,48 | Extracellular Space |
| 1395083_at   | AA926313  | neuro-oncological ventral antigen 1                                                 | NOVA1                       | -4,49  | Nucleus             |
| 1368255_at   | NM_017354 | neurotrimin                                                                         | HNT                         | -3,76  | Plasma Membrane     |
| 1389162_at   | BI277328  | NFU1 iron-sulfur cluster scaffold homolog (S. cerevisiae)                           | NFU1                        | 3,20   | Unknown             |
| 1371539_at   | AW921151  | NHP2 ribonucleoprotein homolog (yeast)                                              | NHP2                        | 2,36   | Nucleus             |
| 1387977_at   | AF218575  | nibrin                                                                              | NBN                         | 1,59   | Nucleus             |
| 1374025_at   | AA963282  | nicotinamide nucleotide adenyllyltransferase 3                                      | NMNAT3 (includes EG:363118) | 2,11   | Unknown             |
| 1371032_at   | BG372942  | nidogen 1                                                                           | NID1                        | -1,82  | Extracellular Space |
| 1388878_at   | BI279756  | NIN1/RPN12 binding protein 1 homolog (S. cerevisiae)                                | NOB1                        | 2,16   | Nucleus             |
| 1370348_at   | U72660    | ninjurin 1                                                                          | NINJ1                       | 3,30   | Plasma Membrane     |
| 1393248_at   | BF407833  | NMD3 homolog (S. cerevisiae)                                                        | NMD3                        | 2,11   | Nucleus             |
| 1388852_at   | AI406307  | NODAL modulator 1                                                                   | NOMO1                       | -1,74  | Plasma Membrane     |
| 1389658_at   | BI283104  | NOL1/NOP2/Sun domain family, member 2                                               | NSUN2                       | 1,83   | Unknown             |
| 1374245_at   | BI282085  | nonhomologous end-joining factor 1                                                  | NHEJ1                       | 1,75   | Nucleus             |
| 1384257_at   | BF555394  | non-POU domain containing, octamer-binding                                          | NONO                        | 2,48   | Nucleus             |
| 1378642_at   | AI112858  | non-protein coding RNA 153                                                          | NCRNA00153                  | 2,01   | Unknown             |
| 1372028_at   | AA893215  | NOP16 nucleolar protein homolog (yeast)                                             | NOP16                       | 1,55   | Nucleus             |
| 1383752_at   | BG375714  | NOP2 nucleolar protein homolog (yeast)                                              | NOP2                        | 2,46   | Nucleus             |
| 1368436_at   | NM_017271 | nuclear distribution gene C homolog (A. nidulans)                                   | NUDC                        | 1,93   | Cytoplasm           |
| 1389538_at   | AW672589  | nuclear factor of kappa light polypeptide gene enhancer in B-cells inhibitor, alpha | NFKBIA                      | 25,93  | Cytoplasm           |
| 1394371_at   | BF556765  | nuclear fragile X mental retardation protein interacting protein 1                  | NUFIP1                      | 1,80   | Nucleus             |
| 1376250_at   | BI284814  | nuclear fragile X mental retardation protein interacting protein 1                  | NUFIP1                      | 2,91   | Nucleus             |
| 1387950_at   | AF158186  | nuclear import 7 homolog (S. cerevisiae)                                            | NIP7                        | 2,45   | Nucleus             |
| 1383530_at   | AA925994  | nuclear receptor interacting protein 3                                              | NRIP3                       | 2,09   | Unknown             |
| 1370000_at   | NM_021663 | nucleobindin 2                                                                      | NUCB2                       | -2,14  | Nucleus             |
| 1368032_at   | M94288    | nucleolar and coiled-body phosphoprotein 1                                          | NOLC1                       | 2,12   | Nucleus             |
| 1378323_at   | AW524892  | nucleolar protein 4                                                                 | NOL4                        | -2,51  | Nucleus             |
| 1398832_at   | NM_012749 | nucleolin                                                                           | NCL                         | 2,42   | Nucleus             |
| 1395212_at   | BE105805  | nucleophosmin/nucleoplasmin, 2                                                      | NPM2                        | -1,56  | Nucleus             |
| 1383673_at   | BI288925  | nucleosome assembly protein 1-like 2                                                | NAP1L2                      | -3,47  | Nucleus             |
| 1388438_at   | AI230346  | nucleosome assembly protein 1-like 4                                                | NAP1L4                      | 1,75   | Nucleus             |
| 1375861_at   | BE111332  | nucleosome assembly protein 1-like 5                                                | NAP1L5                      | -7,03  | Unknown             |
| 1371503_at   | BI289647  | nucleotide binding protein 1 (MinD homolog, E. coli)                                | NUBP1                       | 1,57   | Unknown             |
| 1393753_at   | BE114265  | NudC domain containing 1                                                            | NUDCD1                      | 1,75   | Unknown             |
| 1367761_at   | NM_133320 | nudE nuclear distribution gene E homolog (A. nidulans)-like 1                       | NDEL1                       | 1,69   | Nucleus             |
| 1388645_at   | AI175494  | Obg-like ATPase 1                                                                   | OLA1                        | 1,56   | Cytoplasm           |
| 1382814_at   | AW521702  | odz, odd Oz/ten-m homolog 3 (Drosophila)                                            | ODZ3                        | -4,20  | Plasma Membrane     |
| 1392579_at   | BI295501  | oligonucleotide/oligosaccharide-binding fold containing 2A                          | OBFC2A                      | -1,77  | Unknown             |
| 1388432_at   | BI294994  | optineurin                                                                          | OPTN                        | 3,12   | Cytoplasm           |
| 1370618_at   | AB069907  | optineurin                                                                          | OPTN                        | 6,14   | Cytoplasm           |
| 1376964_at   | BM384263  | oral-facial-digital syndrome 1                                                      | OFD1                        | -1,73  | Plasma Membrane     |
| 1389141_at   | BF288111  | origin recognition complex, subunit 2-like (yeast)                                  | ORC2L                       | 1,50   | Nucleus             |
| 1393745_at   | BE118179  | origin recognition complex, subunit 3-like (yeast)                                  | ORC3L                       | 1,75   | Nucleus             |
| 1391703_at   | BF414253  | origin recognition complex, subunit 4-like (yeast)                                  | ORC4L                       | 1,95   | Nucleus             |
| 1398439_a_at | AI070593  | origin recognition complex, subunit 6 like (yeast)                                  | ORC6L                       | -5,42  | Nucleus             |
| 1376316_at   | AI070593  | origin recognition complex, subunit 6 like (yeast)                                  | ORC6L                       | -2,26  | Nucleus             |
| 1376317_at   | BI282917  | origin recognition complex, subunit 6 like (yeast)                                  | ORC6L                       | -1,50  | Nucleus             |
| 1398907_at   | BI296182  | ORM1-like 2 (S. cerevisiae)                                                         | ORMDL2                      | -2,12  | Cytoplasm           |
| 1388454_at   | AI230759  | ornithine decarboxylase antizyme 2                                                  | OAZ2 (includes EG:501454)   | -2,28  | Unknown             |
| 1368731_at   | NM_053288 | orosomucoid 2                                                                       | ORM2                        | 6,40   | Extracellular Space |
| 1384254_at   | AI717553  | OTU domain containing 1                                                             | OTUD1                       | 4,41   | Unknown             |
| 1397207_at   | AI171260  | OTU domain containing 4                                                             | OTUD4                       | 3,02   | Unknown             |
| 1367869_at   | NM_057153 | oxidation resistance 1                                                              | OXR1                        | -4,92  | Cytoplasm           |
| 1371978_at   | AI406375  | oxysterol binding protein-like 9                                                    | OSBPL9                      | 1,74   | Cytoplasm           |
| 1372941_at   | BI273897  | p53 and DNA damage regulated 1                                                      | PDRG1                       | 2,61   | Cytoplasm           |
| 1382275_at   | AI236989  | PAK1 interacting protein 1                                                          | PAK1IP1                     | 1,91   | Nucleus             |
| 1384253_at   | AW251334  | palladin, cytoskeletal associated protein                                           | PALLD                       | -3,62  | Cytoplasm           |
| 1376894_at   | AA849956  | pallidin homolog (mouse)                                                            | PLDN                        | -2,33  | Cytoplasm           |

|              |           |                                                                               |                              |        |                     |
|--------------|-----------|-------------------------------------------------------------------------------|------------------------------|--------|---------------------|
| 1384352_at   | AI547390  | PAP associated domain containing 4                                            | PAPD4                        | 4,47   | Unknown             |
| 1376598_at   | AI179993  | PAX interacting (with transcription-activation domain) protein 1              | PAXIP1                       | -2,46  | Nucleus             |
| 1377100_at   | AI172172  | PDS5, regulator of cohesion maintenance, homolog B (S. cerevisiae)            | PDS5B                        | 1,93   | Nucleus             |
| 1373748_at   | AW532566  | PDZ domain containing ring finger 3                                           | PDZRN3                       | -16,70 | Extracellular Space |
| 1390942_at   | AI043817  | pellino homolog 2 (Drosophila)                                                | PELI2                        | 2,05   | Cytoplasm           |
| 1371684_at   | AA799330  | pelota homolog (Drosophila)                                                   | PELO                         | 4,61   | Nucleus             |
| 1393907_at   | AA998735  | peptide YY                                                                    | PYY                          | -14,69 | Extracellular Space |
| 1374855_at   | BI279017  | period homolog 1 (Drosophila)                                                 | PER1                         | 3,66   | Nucleus             |
| 1368303_at   | NM_031678 | period homolog 2 (Drosophila)                                                 | PER2                         | 1,59   | Nucleus             |
| 1376595_at   | BF282695  | peroxisomal biogenesis factor 1                                               | PEX1                         | -3,55  | Cytoplasm           |
| 1379312_at   | AI706508  | peroxisome proliferator-activated receptor gamma, coactivator-related 1       | PPRC1                        | 3,34   | Extracellular Space |
| 1389238_at   | BG376577  | pescadillo homolog 1, containing BRCT domain (zebrafish)                      | PES1                         | 3,27   | Nucleus             |
| 1389040_at   | AI170825  | PEST proteolytic signal containing nuclear protein                            | PCNP                         | -1,66  | Nucleus             |
| 1373446_at   | AI102512  | PHD finger protein 13                                                         | PHF13                        | 2,56   | Unknown             |
| 1383002_at   | AA998043  | PHD finger protein 20-like 1                                                  | PHF20L1                      | -2,40  | Unknown             |
| 1376169_at   | BE104290  | PHD finger protein 20-like 1                                                  | PHF20L1                      | -2,17  | Unknown             |
| 1376043_at   | BI292073  | PHD finger protein 23                                                         | PHF23                        | 2,89   | Unknown             |
| 1383570_at   | BF547887  | PHD finger protein 3                                                          | PHF3                         | 1,51   | Nucleus             |
| 1373311_at   | BF405581  | PHD finger protein 3                                                          | PHF3                         | 3,22   | Nucleus             |
| 1373052_at   | BI275649  | phosducin-like 3                                                              | PDCL3                        | 3,65   | Cytoplasm           |
| 1376654_at   | AW521378  | phosphatidylinositol-specific phospholipase C, X domain containing 3          | PLCXD3                       | -1,63  | Unknown             |
| 1368668_at   | NM_053866 | phospholipase A2-activating protein                                           | PLAA                         | 1,78   | Cytoplasm           |
| 1389903_at   | AA799616  | pituitary tumor-transforming 1 interacting protein                            | PTTG1IP                      | 1,62   | Nucleus             |
| 1389654_at   | BM392070  | plastin 1 (I isoform)                                                         | PLS1 (includes EG:5357)      | -1,83  | Cytoplasm           |
| 1389522_at   | BE109446  | pleckstrin homology domain containing, family A member 6                      | PLEKHA6                      | -5,02  | Unknown             |
| 1379536_at   | BF547014  | pleckstrin homology domain containing, family A member 6                      | PLEKHA6                      | 3,17   | Unknown             |
| 1370334_at   | AF081582  | pleckstrin homology domain containing, family B (evectins) member 1           | PLEKHB1                      | -3,76  | Cytoplasm           |
| 1375631_at   | AI177176  | pleckstrin homology domain containing, family B (evectins) member 2           | PLEKHB2                      | 1,68   | Unknown             |
| 1372824_at   | AI103367  | pleckstrin homology domain containing, family F (with FYVE domain) member 2   | PLEKHF2 (includes EG:362484) | 2,58   | Unknown             |
| 1375767_at   | BI287681  | pleckstrin homology domain containing, family G (with RhoGef domain) member 3 | PLEKHG3                      | 4,30   | Unknown             |
| 1395020_at   | BI275435  | pleckstrin homology domain containing, family H (with MyTH4 domain) member 1  | PLEKHH1                      | 2,32   | Cytoplasm           |
| 1375224_at   | AW520812  | pleckstrin homology-like domain, family A, member 3                           | PHLDA3                       | 5,18   | Unknown             |
| 1379724_at   | BE103244  | pleckstrin homology-like domain, family B, member 2                           | PHLDB2                       | -3,93  | Cytoplasm           |
| 1373985_at   | BI282311  | PNMA-like 2                                                                   | PNMAL2                       | -11,57 | Unknown             |
| 1385491_at   | BF403514  | PNMA-like 2                                                                   | PNMAL2                       | -4,49  | Unknown             |
| 1380071_at   | BI285978  | poly (ADP-ribose) polymerase family, member 12                                | PARP12                       | 2,89   | Nucleus             |
| 1379613_at   | BM390301  | poly (ADP-ribose) polymerase family, member 14                                | PARP14                       | 5,22   | Cytoplasm           |
| 1372034_at   | BF284106  | poly (ADP-ribose) polymerase family, member 14                                | PARP14                       | 11,80  | Cytoplasm           |
| 1374031_at   | BI295824  | poly (ADP-ribose) polymerase family, member 6                                 | PARP6                        | 1,77   | Unknown             |
| 1377970_at   | BE105494  | poly (ADP-ribose) polymerase family, member 8                                 | PARP8                        | 3,38   | Unknown             |
| 1376144_at   | AA819679  | poly (ADP-ribose) polymerase family, member 9                                 | PARP9                        | 15,17  | Nucleus             |
| 1371777_at   | BM383696  | poly(A) binding protein, cytoplasmic 4 (inducible form)                       | PABPC4                       | 1,74   | Cytoplasm           |
| 1382922_at   | BG375109  | poly(A) binding protein, nuclear 1                                            | PABPN1                       | -2,22  | Nucleus             |
| 1377042_at   | BI288196  | polycomb group ring finger 5                                                  | PCGF5                        | 2,25   | Unknown             |
| 1371920_at   | AA851255  | polymerase (DNA-directed), delta interacting protein 2                        | POLDIP2                      | -2,05  | Nucleus             |
| 1367464_at   | AI598391  | poly-U binding splicing factor 60KDa                                          | PUF60                        | 1,66   | Nucleus             |
| 1377768_at   | BE107485  | potassium channel tetramerisation domain containing 1                         | KCTD1                        | -1,77  | Unknown             |
| 1375940_a_at | BF396656  | potassium channel tetramerisation domain containing 17                        | KCTD17                       | -2,31  | Unknown             |
| 1374326_at   | AI178019  | PPAN-P2RY11 readthrough transcript                                            | PPAN-P2RY11                  | 2,94   | Nucleus             |
| 1387903_at   | D32249    | praja ring finger 2                                                           | PJA2                         | -1,61  | Cytoplasm           |
| 1394612_at   | AW535206  | predicted gene, EG214321                                                      | EG214321                     | -2,29  | Unknown             |
| 1371351_at   | AI233192  | predicted gene, OTTMUSG00000008305                                            | OTTMUSG00000008305           | 1,89   | Unknown             |
| 1377496_at   | BM391768  | pre-mRNA cleavage factor I, 59 kDa subunit                                    | FLJ12529                     | 2,19   | Unknown             |
| 1386653_at   | AW917558  | prickle homolog 2 (Drosophila)                                                | PRICKLE2                     | -3,28  | Nucleus             |
| 1370156_at   | BI278802  | prion protein                                                                 | PRNP                         | -1,94  | Plasma Membrane     |
| 1386912_at   | NM_019237 | procollagen C-endopeptidase enhancer                                          | PCOLCE                       | -1,97  | Extracellular Space |
| 1389325_at   | AA848545  | programmed cell death 10                                                      | PDCD10                       | 1,95   | Cytoplasm           |
| 1396326_at   | BM390873  | programmed cell death 11                                                      | PDCD11                       | -3,98  | Nucleus             |

|              |           |                                                                              |                              |       |                     |
|--------------|-----------|------------------------------------------------------------------------------|------------------------------|-------|---------------------|
| 1371002_at   | AI704628  | programmed cell death 2                                                      | PDCD2                        | 2,10  | Nucleus             |
| 1376212_at   | AI102437  | programmed cell death 2-like                                                 | PDCD2L                       | 4,47  | Unknown             |
| 1387521_at   | NM_022265 | programmed cell death 4 (neoplastic transformation inhibitor)                | PDCD4                        | -5,41 | Nucleus             |
| 1383328_x_at | AI576297  | programmed cell death 4 (neoplastic transformation inhibitor)                | PDCD4                        | -4,59 | Nucleus             |
| 1383327_at   | AI576297  | programmed cell death 4 (neoplastic transformation inhibitor)                | PDCD4                        | -3,42 | Nucleus             |
| 1383326_a_at | AI576297  | programmed cell death 4 (neoplastic transformation inhibitor)                | PDCD4                        | -2,25 | Nucleus             |
| 1388120_at   | BE328942  | programmed cell death 6 interacting protein                                  | PDCD6IP                      | 2,25  | Cytoplasm           |
| 1370381_at   | U61729    | proline-rich nuclear receptor coactivator 1                                  | PNRC1                        | 1,80  | Nucleus             |
| 1377744_at   | BF392982  | proline-serine-threonine phosphatase interacting protein 2                   | PSTPIP2                      | 2,19  | Cytoplasm           |
| 1368008_at   | NM_021751 | prominin 1                                                                   | PROM1                        | -2,82 | Plasma Membrane     |
| 1367835_at   | NM_019279 | proprotein convertase subtilisin/kexin type 1 inhibitor                      | PCSK1N                       | -3,47 | Extracellular Space |
| 1369929_at   | NM_013013 | prosaposin                                                                   | PSAP                         | -1,59 | Extracellular Space |
| 1367986_at   | NM_019243 | prostaglandin F2 receptor negative regulator                                 | PTGFRN                       | 2,99  | Plasma Membrane     |
| 1374712_at   | AA946509  | proteasome (prosome, macropain) 26S subunit, non-ATPase, 11                  | PSMD11                       | 2,19  | Cytoplasm           |
| 1392983_at   | BE103250  | proteasome (prosome, macropain) 26S subunit, non-ATPase, 12                  | PSMD12                       | 1,56  | Cytoplasm           |
| 1386930_at   | NM_031331 | proteasome (prosome, macropain) 26S subunit, non-ATPase, 4                   | PSMD4                        | 2,03  | Cytoplasm           |
| 1367663_at   | NM_017264 | proteasome (prosome, macropain) activator subunit 1 (PA28 alpha)             | PSME1                        | 3,76  | Cytoplasm           |
| 1368818_at   | AW531920  | proteasome (prosome, macropain) activator subunit 4                          | PSME4                        | -4,99 | Unknown             |
| 1387345_at   | NM_023986 | proteasome (prosome, macropain) activator subunit 4                          | PSME4                        | -1,90 | Unknown             |
| 1371876_at   | BM387084  | proteasome (prosome, macropain) assembly chaperone 2                         | PSMG2                        | 2,76  | Nucleus             |
| 1399051_at   | BE104409  | protein associated with topoisomerase II homolog 1 (yeast)                   | PATL1                        | 3,15  | Unknown             |
| 1387398_at   | AA996685  | protein kinase (cAMP-dependent, catalytic) inhibitor alpha                   | PKIA                         | 1,96  | Unknown             |
| 1371600_at   | AA943815  | protein kinase (cAMP-dependent, catalytic) inhibitor gamma                   | PKIG                         | 1,77  | Unknown             |
| 1371899_at   | AI102009  | protein kinase, interferon-inducible double stranded RNA dependent activator | PRKRA                        | -2,38 | Cytoplasm           |
| 1386971_at   | NM_022951 | protein phosphatase 1, regulatory (inhibitor) subunit 10                     | PPP1R10                      | -3,88 | Nucleus             |
| 1368716_at   | NM_133425 | protein phosphatase 1, regulatory (inhibitor) subunit 14C                    | PPP1R14C                     | 3,00  | Cytoplasm           |
| 1370174_at   | BI284349  | protein phosphatase 1, regulatory (inhibitor) subunit 15A                    | PPP1R15A (includes EG:23645) | 21,46 | Cytoplasm           |
| 1393231_at   | BM386467  | protein phosphatase 4, regulatory subunit 2                                  | PPP4R2                       | -2,08 | Cytoplasm           |
| 1367888_at   | NM_053572 | protocadherin 21                                                             | PCDH21                       | 5,87  | Plasma Membrane     |
| 1391013_at   | AW523567  | protocadherin 8                                                              | PCDH8                        | 5,07  | Plasma Membrane     |
| 1383783_at   | AW521192  | protocadherin 9                                                              | PCDH9                        | -4,98 | Plasma Membrane     |
| 1388551_at   | AW434022  | protocadherin gamma subfamily B, 7                                           | PCDHGB7                      | -1,96 | Unknown             |
| 1372088_at   | AI012434  | PTPRF interacting protein, binding protein 1 (liprin beta 1)                 | PPFIBP1                      | 2,60  | Plasma Membrane     |
| 1368145_at   | NM_013002 | Purkinje cell protein 4                                                      | PCP4                         | -2,31 | Cytoplasm           |
| 1390647_at   | AI410924  | putative homeodomain transcription factor 2                                  | PHTF2                        | -5,90 | Cytoplasm           |
| 1388580_at   | AI100850  | pygopus homolog 2 (Drosophila)                                               | PYGO2                        | -1,59 | Nucleus             |
| 1374463_at   | AI172068  | quaking homolog, KH domain RNA binding (mouse)                               | QKI                          | 1,87  | Nucleus             |
| 1373481_at   | AI227908  | R3H domain containing 1                                                      | R3HDM1                       | 1,79  | Unknown             |
| 1384089_at   | AI575052  | RAB guanine nucleotide exchange factor (GEF) 1                               | RABGEF1                      | 1,76  | Cytoplasm           |
| 1376498_at   | BI282766  | Rab interacting lysosomal protein-like 1                                     | RILPL1                       | 2,01  | Unknown             |
| 1383786_at   | AW915417  | RAB32, member RAS oncogene family                                            | RAB32                        | 4,01  | Cytoplasm           |
| 1387821_at   | NM_017313 | RAB3A interacting protein (rabn3)                                            | RAB3IP                       | 1,74  | Cytoplasm           |
| 1385090_at   | BF389852  | RAD17 homolog (S. pombe)                                                     | RAD17                        | 1,81  | Nucleus             |
| 1388550_at   | BI295122  | RAD23 homolog B (S. cerevisiae)                                              | RAD23B                       | 1,84  | Nucleus             |
| 1382797_at   | AW526331  | RAD50 interactor 1                                                           | RINT1                        | 1,79  | Nucleus             |
| 1389453_at   | AA818364  | RAD52 motif 1                                                                | RDM1                         | 2,66  | Unknown             |
| 1376029_at   | BI295991  | ral guanine nucleotide dissociation stimulator-like 2                        | RGL2                         | 11,71 | Cytoplasm           |
| 1371081_at   | U78517    | Rap guanine nucleotide exchange factor (GEF) 4                               | RAPGEF4                      | -2,60 | Cytoplasm           |
| 1374750_at   | AI172313  | Rap guanine nucleotide exchange factor (GEF) 6                               | RAPGEF6                      | 3,16  | Plasma Membrane     |
| 1388646_at   | BM391469  | raptor                                                                       | KIAA1303                     | -2,72 | Cytoplasm           |
| 1372365_at   | BM392293  | Ras and Rab interactor 2                                                     | RIN2                         | -1,92 | Cytoplasm           |
| 1374525_at   | BF284017  | Ras association (RalGDS/AF-6) and pleckstrin homology domains 1              | RAPH1                        | 1,81  | Plasma Membrane     |
| 1376658_at   | BF391087  | Ras association (RalGDS/AF-6) and pleckstrin homology domains 1              | RAPH1                        | 7,15  | Plasma Membrane     |
| 1373624_at   | AA945713  | Ras association (RalGDS/AF-6) domain family (N-terminal) member 8            | RASSF8                       | 1,58  | Unknown             |
| 1373989_at   | AI103943  | Ras association (RalGDS/AF-6) domain family member 1                         | RASSF1                       | 2,71  | Nucleus             |
| 1374165_at   | AA818264  | RAS p21 protein activator 4                                                  | RASA4 (includes EG:10156)    | 4,17  | Cytoplasm           |
| 1374331_at   | AI178068  | RCD1 required for cell differentiation1 homolog (S. pombe)                   | RQCD1                        | -1,70 | Unknown             |
| 1379285_at   | AA819788  | receptor (chemosensory) transporter protein 4                                | RTP4                         | 11,76 | Plasma Membrane     |

|              |           |                                                                   |               |        |                     |
|--------------|-----------|-------------------------------------------------------------------|---------------|--------|---------------------|
| 1367701_at   | NM_031646 | receptor (G protein-coupled) activity modifying protein 2         | RAMP2         | 1,81   | Plasma Membrane     |
| 1372175_at   | BE112899  | receptor accessory protein 3                                      | REEP3         | -1,54  | Unknown             |
| 1367904_at   | NM_019278 | regulated endocrine-specific protein 18                           | RESP18        | -1,94  | Extracellular Space |
| 1369333_a_at | NM_053945 | regulating synaptic membrane exocytosis 2                         | RIMS2         | 3,13   | Cytoplasm           |
| 1393097_at   | AI709802  | regulation of nuclear pre-mRNA domain containing 1A               | RPRD1A        | 3,22   | Unknown             |
| 1373777_at   | BF391820  | regulator of G-protein signaling 16                               | RGS16         | -5,89  | Cytoplasm           |
| 1394280_at   | AW140991  | regulator of G-protein signaling 17                               | RGS17         | 3,01   | Cytoplasm           |
| 1394600_at   | AI146026  | regulator of G-protein signaling 17                               | RGS17         | 3,27   | Cytoplasm           |
| 1391075_at   | AI179271  | regulator of G-protein signaling 17                               | RGS17         | 3,66   | Cytoplasm           |
| 1383357_a_at | BF403558  | RELT-like 1                                                       | RELL1         | 1,59   | Unknown             |
| 1388458_at   | BI291451  | replication factor C (activator 1) 4, 37kDa                       | RFC4          | 4,18   | Nucleus             |
| 1376401_at   | AI412569  | replication initiator 1                                           | REPIN1        | 2,11   | Unknown             |
| 1398308_at   | BM383451  | replication protein A3, 14kDa                                     | RPA3          | -1,65  | Nucleus             |
| 1377492_at   | BM387395  | reprimo-like                                                      | RPRML         | -4,75  | Unknown             |
| 1389053_at   | AI171280  | required for meiotic nuclear division 1 homolog (S. cerevisiae)   | RMND1         | 2,73   | Unknown             |
| 1388749_at   | BI278823  | required for meiotic nuclear division 5 homolog A (S. cerevisiae) | RMND5A        | -2,36  | Unknown             |
| 1387081_at   | NM_017132 | reticulocalbin 2, EF-hand calcium binding domain                  | RCN2          | 4,44   | Cytoplasm           |
| 1368097_a_at | NM_053865 | reticulin 1                                                       | RTN1          | -3,12  | Cytoplasm           |
| 1372527_at   | BG380684  | reticulin 2                                                       | RTN2          | -1,72  | Cytoplasm           |
| 1392823_at   | AI146105  | RGD1563912                                                        | RGD1563912    | -7,01  | Unknown             |
| 1395249_at   | BF400750  | RGD1563912                                                        | RGD1563912    | -4,39  | Unknown             |
| 1375305_at   | BI282028  | RGD1563912                                                        | RGD1563912    | -3,87  | Unknown             |
| 1388900_at   | BG381414  | RGD1566118                                                        | RGD1566118    | 7,07   | Unknown             |
| 1372585_at   | BM388445  | RGD1566254                                                        | RGD1566254    | 547,22 | Unknown             |
| 1372222_at   | BI285621  | RGP1 retrograde golgi transport homolog (S. cerevisiae)           | RGP1          | -1,74  | Unknown             |
| 1371366_at   | AI408677  | Rho GDP dissociation inhibitor (GDI) alpha                        | ARHGDI1       | 3,63   | Cytoplasm           |
| 1387035_a_at | NM_022244 | Rho GTPase activating protein 17                                  | ARHGAP17      | 2,07   | Cytoplasm           |
| 1374086_at   | BF282296  | Rho GTPase activating protein 21                                  | ARHGAP21      | 2,08   | Cytoplasm           |
| 1392590_at   | BG377201  | Rho GTPase activating protein 24                                  | ARHGAP24      | -5,30  | Cytoplasm           |
| 1376501_at   | AA945062  | Rho GTPase activating protein 8                                   | ARHGAP8       | 6,07   | Cytoplasm           |
| 1395229_at   | BG375118  | Rho guanine nucleotide exchange factor (GEF) 12                   | ARHGEF12      | 3,37   | Cytoplasm           |
| 1377750_at   | AI454536  | Rho guanine nucleotide exchange factor (GEF) 3                    | ARHGEF3       | -2,52  | Cytoplasm           |
| 1381297_at   | BI292668  | Rho guanine nucleotide exchange factor (GEF) 5                    | ARHGEF5       | 7,01   | Cytoplasm           |
| 1383523_at   | BE110369  | rho/rac guanine nucleotide exchange factor (GEF) 18               | ARHGEF18      | 1,71   | Cytoplasm           |
| 1390786_at   | BE099756  | rho/rac guanine nucleotide exchange factor (GEF) 2                | ARHGEF2       | 2,92   | Cytoplasm           |
| 1374376_at   | BM386483  | Rho-guanine nucleotide exchange factor                            | RGNEF         | 3,93   | Unknown             |
| 1384765_at   | BI289371  | rhomboid 5 homolog 2 (Drosophila)                                 | RHBDF2        | 15,38  | Unknown             |
| 1383012_at   | BE115155  | rhophilin, Rho GTPase binding protein 2                           | RHPN2         | 1,92   | Cytoplasm           |
| 1370880_at   | X62528    | ribonuclease/angiogenin inhibitor 1                               | RNH1          | 3,79   | Cytoplasm           |
| 1371761_at   | AI013910  | ribosomal protein L34                                             | RPL34         | 1,62   | Cytoplasm           |
| 1371295_at   | AW914097  | ribosomal protein S20                                             | RPS20         | 1,53   | Cytoplasm           |
| 1371488_at   | AW915978  | RIKEN cDNA 0610010E21 gene                                        | 0610010E21RIK | 1,99   | Unknown             |
| 1385060_at   | BF401036  | RIKEN cDNA 1110012D08 gene                                        | 1110012D08RIK | -3,90  | Unknown             |
| 1382218_at   | AI012175  | RIKEN cDNA 1300002K09 gene                                        | 1300002K09RIK | 3,91   | Unknown             |
| 1376845_at   | AA819034  | RIKEN cDNA 1810023F06 gene                                        | 1810023F06RIK | 3,29   | Unknown             |
| 1380105_at   | C07059    | RIKEN cDNA 2010107G12 gene                                        | 2010107G12RIK | -4,87  | Unknown             |
| 1389228_at   | AI412292  | RIKEN cDNA 2010309E21 gene                                        | 2010309E21RIK | 2,35   | Unknown             |
| 1373659_at   | AI639350  | RIKEN cDNA 2210020M01 gene                                        | 2210020M01RIK | -6,59  | Unknown             |
| 1382436_at   | BM386497  | RIKEN cDNA 2610002M06 gene                                        | 2610002M06RIK | 2,93   | Cytoplasm           |
| 1390907_at   | AI145039  | RIKEN cDNA 2610008E11 gene                                        | 2610008E11RIK | -1,78  | Unknown             |
| 1377245_a_at | AI146147  | RIKEN cDNA 5830418K08 gene                                        | 5830418K08RIK | 1,60   | Unknown             |
| 1384483_at   | BI274216  | RIKEN cDNA 9530082P21 gene                                        | 9530082P21RIK | 8,06   | Unknown             |
| 1399057_at   | BE109080  | RIKEN cDNA A730098P11 gene                                        | A730098P11RIK | 1,94   | Nucleus             |
| 1385016_at   | AI136882  | RIKEN cDNA B630019K06 gene                                        | B630019K06RIK | -11,15 | Unknown             |
| 1397267_at   | BF410275  | RIMS binding protein 2                                            | RIMBP2        | -3,49  | Plasma Membrane     |
| 1371020_at   | BE102826  | RIMS binding protein 2                                            | RIMBP2        | -2,10  | Plasma Membrane     |
| 1368122_at   | NM_053438 | ring finger protein 103                                           | RNF103        | -1,59  | Unknown             |
| 1377837_at   | AI231532  | ring finger protein 113A                                          | RNF113A       | -2,07  | Nucleus             |

|              |           |                                                                                                                  |           |       |                     |
|--------------|-----------|------------------------------------------------------------------------------------------------------------------|-----------|-------|---------------------|
| 1375955_at   | BI289415  | ring finger protein 114                                                                                          | RNF114    | 2,09  | Unknown             |
| 1372865_at   | AI171206  | ring finger protein 115                                                                                          | RNF115    | 3,39  | Cytoplasm           |
| 1382379_at   | AW529177  | ring finger protein 138                                                                                          | RNF138    | 1,86  | Unknown             |
| 1387201_at   | NM_053588 | ring finger protein 138                                                                                          | RNF138    | 5,23  | Unknown             |
| 1379441_at   | AA965092  | ring finger protein 160                                                                                          | ZNF294    | -2,56 | Nucleus             |
| 1373471_at   | AI548624  | ring finger protein 166                                                                                          | RNF166    | -1,58 | Unknown             |
| 1374701_at   | BG378096  | ring finger protein 185                                                                                          | RNF185    | 1,83  | Unknown             |
| 1371597_at   | BI281621  | ring finger protein 187                                                                                          | RNF187    | -2,12 | Unknown             |
| 1382074_at   | AI113237  | ring finger protein 19B                                                                                          | RNF19B    | 4,07  | Unknown             |
| 1374559_at   | AI171211  | ring finger protein 26                                                                                           | RNF26     | -1,86 | Unknown             |
| 1378916_at   | AI029234  | ring finger protein 43                                                                                           | RNF43     | -2,39 | Unknown             |
| 1385199_a_at | AI073196  | RNA binding motif protein 34                                                                                     | RBM34     | 2,15  | Nucleus             |
| 1383496_at   | BM387466  | RNA binding motif protein 35A                                                                                    | RBM35A    | 2,61  | Unknown             |
| 1393832_at   | AI136337  | RNA binding motif protein 43                                                                                     | RBM43     | 4,79  | Unknown             |
| 1376307_a_at | BI289591  | RNA binding motif protein 45                                                                                     | RBM45     | -1,58 | Cytoplasm           |
| 1374181_at   | BF290678  | RNA binding motif protein, X-linked                                                                              | RBMX      | -1,93 | Nucleus             |
| 1375870_a_at | BF420140  | RNA binding motif, single stranded interacting protein 1                                                         | RBMS1     | 1,51  | Nucleus             |
| 1371596_at   | AI008971  | RNA binding protein S1, serine-rich domain                                                                       | RNPS1     | 1,84  | Nucleus             |
| 1375898_at   | AW252379  | RNA binding protein with multiple splicing                                                                       | RBPMS     | -2,41 | Unknown             |
| 1372380_at   | AI231308  | RNA binding protein with multiple splicing                                                                       | RBPMS     | 2,71  | Unknown             |
| 1380513_at   | BE095638  | RNA polymerase II associated protein 2                                                                           | RPAP2     | 2,55  | Unknown             |
| 1376065_at   | AI058889  | RRS1 ribosome biogenesis regulator homolog (S. cerevisiae)                                                       | RRS1      | 2,54  | Nucleus             |
| 1389480_at   | AI598462  | RWD domain containing 4A                                                                                         | RWDD4A    | -2,23 | Unknown             |
| 1386890_at   | NM_031114 | S100 calcium binding protein A10                                                                                 | S100A10   | 2,71  | Cytoplasm           |
| 1375170_at   | BG378926  | S100 calcium binding protein A11                                                                                 | S100A11   | 16,80 | Cytoplasm           |
| 1372741_at   | AI412013  | saccharopine dehydrogenase (putative)                                                                            | SCCPDH    | -1,93 | Cytoplasm           |
| 1388820_at   | BI286365  | SAFB-like, transcription modulator                                                                               | SLTM      | 2,16  | Nucleus             |
| 1373284_at   | AI176607  | salvador homolog 1 (Drosophila)                                                                                  | SAV1      | 1,69  | Unknown             |
| 1388815_at   | BE329438  | SAPS domain family, member 1                                                                                     | SAPS1     | 1,62  | Unknown             |
| 1375037_at   | AI176244  | SAPS domain family, member 3                                                                                     | SAPS3     | -1,65 | Unknown             |
| 1374796_at   | AI413058  | sarcoglycan, beta (43kDa dystrophin-associated glycoprotein)                                                     | SGCB      | -6,09 | Plasma Membrane     |
| 1383766_at   | BG663338  | sarcoglycan, beta (43kDa dystrophin-associated glycoprotein)                                                     | SGCB      | -2,11 | Plasma Membrane     |
| 1372489_at   | AI172498  | sarcolemma associated protein                                                                                    | SLMAP     | -2,23 | Plasma Membrane     |
| 1389367_at   | AI409747  | schwannomin interacting protein 1                                                                                | SCHIP1    | -1,93 | Cytoplasm           |
| 1368129_at   | NM_031647 | Scm-like with four mbt domains 1                                                                                 | SFMBT1    | 6,80  | Nucleus             |
| 1380815_at   | AW523684  | SCY1-like 1 binding protein 1                                                                                    | SCYL1BP1  | 1,70  | Cytoplasm           |
| 1382921_at   | AA997613  | SDA1 domain containing 1                                                                                         | SDAD1     | 5,13  | Nucleus             |
| 1390755_at   | BE105876  | secretion regulating guanine nucleotide exchange factor                                                          | SERGEF    | 5,09  | Cytoplasm           |
| 1367992_at   | NM_013175 | secretogranin V (7B2 protein)                                                                                    | SCG5      | -1,78 | Extracellular Space |
| 1374825_at   | BG380338  | seizure related 6 homolog (mouse)-like 2                                                                         | SEZ6L2    | -2,52 | Unknown             |
| 1376073_at   | BI285936  | sel-1 suppressor of lin-12-like (C. elegans)                                                                     | SEL1L     | 3,07  | Cytoplasm           |
| 1368806_at   | AA799627  | selenoprotein P, plasma, 1                                                                                       | SEPP1     | -7,60 | Extracellular Space |
| 1387915_at   | AF367467  | selenoprotein S                                                                                                  | SELS      | 1,62  | Cytoplasm           |
| 1376319_at   | BM390322  | sema domain, immunoglobulin domain (Ig), short basic domain, secreted, (semaphorin) 3C                           | SEMA3C    | 3,47  | Extracellular Space |
| 1388745_at   | AI228417  | sema domain, immunoglobulin domain (Ig), transmembrane domain (TM) and short cytoplasmic domain, (semaphorin) 4A | SEMA4A    | 4,87  | Plasma Membrane     |
| 1383290_at   | BI280343  | serine peptidase inhibitor, Kunitz type 1                                                                        | SPINT1    | 2,85  | Extracellular Space |
| 1377914_at   | AI059437  | serine/arginine repetitive matrix 1                                                                              | SRRM1     | 2,37  | Nucleus             |
| 1390048_at   | BF408990  | serine/arginine repetitive matrix 2                                                                              | SRRM2     | -1,62 | Nucleus             |
| 1373459_at   | AI103051  | serine/threonine kinase 11 interacting protein                                                                   | STK11IP   | 3,48  | Unknown             |
| 1372077_at   | AI009198  | serine/threonine kinase receptor associated protein                                                              | STRAP     | 2,24  | Plasma Membrane     |
| 1372874_at   | BI299261  | serologically defined colon cancer antigen 8                                                                     | SDCCAG8   | -2,87 | Cytoplasm           |
| 1368790_at   | NM_133617 | serpin peptidase inhibitor, clade A (alpha-1 antiproteinase, antitrypsin), member 10                             | SERPINA10 | -1,68 | Extracellular Space |
| 1373686_at   | AA893495  | serpin peptidase inhibitor, clade A (alpha-1 antiproteinase, antitrypsin), member 6                              | SERPINA6  | 4,39  | Extracellular Space |
| 1373672_at   | BM384419  | serpin peptidase inhibitor, clade B (ovalbumin), member 9                                                        | SERPINB9  | 2,20  | Cytoplasm           |
| 1372254_at   | AW915763  | serpin peptidase inhibitor, clade G (C1 inhibitor), member 1                                                     | SERPING1  | 16,40 | Extracellular Space |
| 1368256_at   | NM_053779 | serpin peptidase inhibitor, clade I (neuroserpin), member 1                                                      | SERPINI1  | -5,36 | Extracellular Space |
| 1387131_at   | AF193015  | serpin peptidase inhibitor, clade I (neuroserpin), member 1                                                      | SERPINI1  | -2,60 | Extracellular Space |
| 1389153_at   | BI296087  | SERPINE1 mRNA binding protein 1                                                                                  | SERBP1    | -1,75 | Nucleus             |

|              |           |                                                                                                                         |                              |       |           |
|--------------|-----------|-------------------------------------------------------------------------------------------------------------------------|------------------------------|-------|-----------|
| 1375928_at   | BI285329  | SET domain containing (lysine methyltransferase) 8                                                                      | SETD8 (includes EG:498178)   | 1,70  | Unknown   |
| 1372458_at   | AI235220  | SET domain containing (lysine methyltransferase) 8                                                                      | SETD8 (includes EG:498178)   | 1,72  | Unknown   |
| 1382117_at   | BF417345  | SET domain containing 6                                                                                                 | SETD6                        | 2,31  | Unknown   |
| 1388775_at   | AI176439  | SFRS12-interacting protein 1                                                                                            | SFRS12IP1                    | -2,13 | Unknown   |
| 1373033_at   | BI289505  | SFT2 domain containing 1                                                                                                | SFT2D1                       | 2,52  | Unknown   |
| 1372627_at   | BI299197  | SGT1, suppressor of G2 allele of SKP1 ( <i>S. cerevisiae</i> )                                                          | SUGT1                        | 1,75  | Nucleus   |
| 1371882_a_at | AI104139  | SH2B adaptor protein 1                                                                                                  | SH2B1                        | 1,75  | Cytoplasm |
| 1369777_a_at | NM_133440 | SH3 and multiple ankyrin repeat domains 2                                                                               | SHANK2                       | 1,72  | Cytoplasm |
| 1387294_at   | NM_054011 | SH3-domain binding protein 5 (BTK-associated)                                                                           | SH3BP5                       | 2,20  | Cytoplasm |
| 1367699_at   | AB008161  | SH3-domain GRB2-like 1                                                                                                  | SH3GL1                       | 1,84  | Cytoplasm |
| 1376486_at   | BG381092  | SH3-domain GRB2-like endophilin B2                                                                                      | SH3GLB2 (includes EG:311848) | -1,93 | Unknown   |
| 1388822_at   | AI409077  | short coiled-coil protein                                                                                               | SCOC                         | -1,51 | Cytoplasm |
| 1389140_at   | AI172437  | signal peptidase complex subunit 2 homolog ( <i>S. cerevisiae</i> )                                                     | SPCS2                        | 2,03  | Cytoplasm |
| 1383410_at   | BI290777  | signal recognition particle 54kDa                                                                                       | SRP54                        | 1,50  | Cytoplasm |
| 1367690_at   | NM_017199 | signal sequence receptor, delta (translocon-associated protein delta)                                                   | SSR4                         | -1,69 | Cytoplasm |
| 1392497_at   | BE104938  | similar to 4930429A08Rik protein                                                                                        | RGD1564943                   | -1,76 | Unknown   |
| 1388689_at   | AI170755  | similar to Acylphosphatase, muscle type isozyme (Acylphosphate phosphohydrolase)                                        | LOC682245                    | -3,40 | Unknown   |
| 1375062_at   | BM392237  | similar to Adaptor-related protein complex 1, mu 2 subunit (AP1M2)                                                      | RGD1561490                   | -2,96 | Unknown   |
| 1398474_at   | BI300593  | similar to Adenosine deaminase CG11994-PA                                                                               | LOC311352                    | -3,42 | Unknown   |
| 1388981_at   | AI104127  | similar to ADP-ribosylation factor GTPase-activating protein 3 (ARF GAP 3)                                              | LOC503165                    | 1,61  | Unknown   |
| 1371398_at   | BF281400  | similar to ATP synthase, H+ transporting, mitochondrial F0 complex, subunit f, isoform 2                                | LOC684567                    | -1,53 | Unknown   |
| 1383587_at   | BF283779  | similar to Butyrate-induced transcript 1                                                                                | RGD1565496                   | -1,97 | Unknown   |
| 1373469_at   | BF408841  | similar to Butyrate-induced transcript 1                                                                                | RGD1565496                   | -1,87 | Unknown   |
| 1388763_at   | AI230762  | similar to Calponin-2 (Calponin H2, smooth muscle) (Neutral calponin)                                                   | LOC690976                    | 4,96  | Unknown   |
| 1373075_at   | BM390707  | similar to Cell division protein kinase 8 (Protein kinase K35)                                                          | RGD1560888                   | 1,53  | Unknown   |
| 1373671_at   | AA944790  | similar to CG14483-PA                                                                                                   | LOC681884                    | -2,40 | Unknown   |
| 1373514_at   | AA899109  | similar to chromosome 17 open reading frame 27                                                                          | LOC688296                    | 24,66 | Unknown   |
| 1377980_at   | AI549077  | similar to chromosome 20 open reading frame 102                                                                         | RGD1305725                   | -5,39 | Unknown   |
| 1371599_at   | AI228587  | similar to chromosome 6 open reading frame 106 isoform a                                                                | LOC294154                    | 2,08  | Unknown   |
| 1371731_at   | AI408151  | similar to Coatomer gamma-2 subunit (Gamma-2 coat protein) (Gamma-2 COP)                                                | RGD1566215                   | -2,42 | Unknown   |
| 1372563_at   | AA799488  | similar to D330021B20 protein                                                                                           | RGD1308143                   | -3,29 | Unknown   |
| 1377523_at   | BE113698  | similar to dachshund b                                                                                                  | LOC686314                    | -4,52 | Unknown   |
| 1388663_at   | AI100783  | similar to death effector domain-containing DNA binding protein 2                                                       | LOC687118                    | 12,41 | Unknown   |
| 1373506_at   | AA944568  | similar to early estrogen-induced gene 1 protein                                                                        | LOC687750                    | -2,95 | Unknown   |
| 1391062_at   | AA875129  | similar to elongation protein 4 homolog                                                                                 | LOC687694                    | -5,34 | Unknown   |
| 1390163_at   | BF282174  | similar to expressed sequence AI553587                                                                                  | RGD1563863                   | -3,00 | Unknown   |
| 1389783_s_at | BI280865  | similar to Fc fragment of IgG binding protein; IgG Fc binding protein                                                   | RGD1311906                   | -2,77 | Unknown   |
| 1376760_at   | BF402128  | similar to GC-rich sequence DNA-binding factor homolog                                                                  | LOC683880                    | 3,68  | Unknown   |
| 1374953_at   | AI599484  | similar to hCG2030844                                                                                                   | LOC100130890                 | -1,82 | Unknown   |
| 1393841_at   | AA859317  | similar to hypothetical protein FLJ31810                                                                                | RGD1310773                   | -8,06 | Unknown   |
| 1390226_at   | AI408343  | similar to hypothetical protein LOC340061                                                                               | RGD1562552                   | 5,43  | Unknown   |
| 1374670_at   | BM384543  | similar to hypothetical protein MGC20700                                                                                | RGD1307722                   | 2,52  | Unknown   |
| 1376718_at   | AI575121  | similar to hypothetical protein MGC49416                                                                                | LOC255374                    | -2,21 | Unknown   |
| 1372869_at   | BE109202  | similar to isopenentenyl diphosphate delta-isomerase type 2                                                             | RGD1560805                   | 1,93  | Unknown   |
| 1389000_at   | AA964998  | similar to jumonji domain containing 1B                                                                                 | LOC682469                    | -1,55 | Unknown   |
| 1383382_at   | BI294931  | similar to jumonji protein                                                                                              | LOC681740                    | -3,03 | Unknown   |
| 1389984_at   | AI072294  | similar to jumonji protein                                                                                              | LOC681740                    | -2,51 | Unknown   |
| 1382080_at   | AW523680  | similar to KIAA0853 protein                                                                                             | RGD1563689                   | 1,80  | Unknown   |
| 1385271_at   | AI763870  | similar to KIAA1680 protein                                                                                             | MGC48628                     | -2,13 | Unknown   |
| 1388447_at   | AA800701  | similar to limb-bud and heart                                                                                           | LOC683626                    | -2,80 | Unknown   |
| 1371531_at   | AI012962  | similar to mammalian retrotransposon derived 8b                                                                         | LOC678880                    | -2,34 | Unknown   |
| 1383384_at   | BG381725  | similar to mediator of RNA polymerase II transcription, subunit 18 homolog                                              | LOC682988                    | -2,21 | Unknown   |
| 1398486_at   | BF400868  | similar to melanoma inhibitory activity 3                                                                               | LOC683007                    | -2,02 | Unknown   |
| 1374522_at   | BG670847  | similar to melanoma inhibitory activity 3                                                                               | LOC683007                    | -1,69 | Unknown   |
| 1373333_at   | AI102732  | similar to Microsomal signal peptidase 23 kDa subunit (SPase 22 kDa subunit) (SPC22/23)                                 | MGC109340                    | -1,95 | Unknown   |
| 1372472_at   | AA859614  | similar to Microtubule-associated protein RP/EB family member 2 (APC-binding protein EB2) (End-binding protein 2) (EB2) | LOC679221                    | -2,33 | Unknown   |
| 1392733_at   | BM391545  | similar to mirror-image polydactyly 1                                                                                   | LOC687620                    | 3,16  | Unknown   |
| 1373121_at   | BE097240  | similar to Mitochondrial 28S ribosomal protein S28 (S28mt) (MRP-S28)                                                    | LOC679330                    | 2,71  | Unknown   |

|              |          |                                                                                                                            |              |       |           |
|--------------|----------|----------------------------------------------------------------------------------------------------------------------------|--------------|-------|-----------|
| 1371866_at   | BM389317 | similar to myosin XVIIIa                                                                                                   | LOC360570    | 1,52  | Unknown   |
| 1373330_at   | AI406704 | similar to Myosin-15 (Myosin XV) (Unconventional myosin-15)                                                                | LOC690323    | -3,52 | Unknown   |
| 1375523_at   | BE108178 | similar to Myristoylated alanine-rich C-kinase substrate (MARCKS) (ACAMP-81)                                               | LOC294446    | -5,79 | Unknown   |
| 1373432_at   | BE111604 | similar to Myristoylated alanine-rich C-kinase substrate (MARCKS) (ACAMP-81)                                               | LOC294446    | -2,20 | Unknown   |
| 1376240_at   | BG378240 | similar to MYST histone acetyltransferase monocytic leukemia 4                                                             | RGD1566399   | 2,02  | Unknown   |
| 1383146_at   | BM388077 | similar to neurobeachin                                                                                                    | RGD1562629   | -1,85 | Unknown   |
| 1373232_at   | AI008975 | similar to nidogen 2 protein                                                                                               | LOC302022    | 2,44  | Unknown   |
| 1381434_s_at | AW253721 | similar to nidogen 2 protein                                                                                               | LOC302022    | 8,36  | Unknown   |
| 1383728_at   | BM387529 | similar to NMDA receptor regulated 1-like                                                                                  | LOC686240    | 3,77  | Unknown   |
| 1391028_at   | AI511126 | similar to nuclear receptor interacting protein 2                                                                          | LOC689619    | 5,19  | Unknown   |
| 1389582_at   | AI407405 | similar to Nucleoporin Nup43                                                                                               | LOC683983    | 3,40  | Unknown   |
| 1385503_at   | BM387442 | similar to O-acetyltransferase                                                                                             | LOC678772    | -3,27 | Unknown   |
| 1389023_at   | AI599504 | similar to Oligosaccharyl transferase 3 CG7748-PA                                                                          | RGD1311563   | -1,89 | Unknown   |
| 1372659_at   | BE113269 | similar to potassium channel modulatory factor 1                                                                           | LOC684322    | 1,92  | Unknown   |
| 1371956_at   | BG372686 | similar to praja1, RING-H2 motif containing                                                                                | LOC683077    | -2,34 | Unknown   |
| 1373403_at   | AI230625 | similar to Protein C8orf4 (Thyroid cancer protein 1) (TC-1)                                                                | LOC684871    | 21,66 | Unknown   |
| 1372767_at   | AI231284 | similar to Protein KIAA0280                                                                                                | LOC503175    | 1,52  | Unknown   |
| 1383081_at   | BM388245 | similar to Protein phosphatase 2A, 59 kDa regulatory subunit B (PP2A PR59) (PP2A B-PR59)                                   | LOC682033    | -2,25 | Unknown   |
| 1390576_at   | BE116370 | similar to Putative RNA-binding protein 15 (RNA-binding motif protein 15) (One-twenty two protein)                         | LOC684233    | 1,53  | Unknown   |
| 1381969_at   | AA998296 | similar to Recombining binding protein suppressor of hairless (J kappa-recombination signal binding protein) (RBP-J kappa) | LOC679028    | 1,61  | Unknown   |
| 1375181_at   | AI170643 | similar to ribosomal protein L12                                                                                           | LOC646875    | 1,61  | Unknown   |
| 1389424_at   | BI289475 | similar to ribosomal protein L22 proprotein                                                                                | LOC365157    | -1,96 | Unknown   |
| 1376042_at   | BF284673 | similar to RIKEN cDNA 2310007F12                                                                                           | RGD1562416   | -3,62 | Unknown   |
| 1376985_at   | AA866482 | similar to RIKEN cDNA 2310007F12                                                                                           | RGD1562416   | 1,77  | Unknown   |
| 1391169_at   | BE120139 | similar to RIKEN cDNA B930062P21 gene                                                                                      | RGD1562562   | 4,70  | Unknown   |
| 1389476_at   | AI010238 | similar to RIKEN cDNA D630029K19                                                                                           | RGD1307100   | -1,52 | Unknown   |
| 1398886_at   | BI285703 | similar to Selenoprotein H                                                                                                 | RGD1563348   | 2,09  | Unknown   |
| 1391607_at   | BE109653 | similar to Sestrin 2 (Hi95)                                                                                                | RGD1566319   | 1,66  | Unknown   |
| 1398625_at   | BG673169 | similar to SMAD-interacting zinc finger protein 2                                                                          | LOC679126    | -1,75 | Unknown   |
| 1371848_at   | AA799526 | similar to small nuclear ribonucleoprotein D3                                                                              | LOC687711    | 1,73  | Unknown   |
| 1371712_at   | AI176503 | similar to snRNP core protein SMX5                                                                                         | LOC684148    | 2,22  | Unknown   |
| 1397391_at   | AI454739 | similar to spermatogenesis associated glutamate (E)-rich protein 4d                                                        | LOC301977    | -2,25 | Unknown   |
| 1399097_at   | AI236783 | similar to spindlin                                                                                                        | LOC682571    | 1,64  | Unknown   |
| 1373505_at   | BI287800 | similar to stromal membrane-associated protein 1                                                                           | LOC684800    | 1,72  | Unknown   |
| 1372322_at   | BF398016 | similar to Suppressor of S. cerevisiae gcr2                                                                                | RGD1565023   | -1,88 | Unknown   |
| 1392658_at   | AI230409 | similar to transcription elongation factor A 1 isoform 2                                                                   | LOC498453    | 2,43  | Unknown   |
| 1392527_at   | AI137840 | similar to translocase of the inner mitochondrial membrane 14 isoform a                                                    | LOC683663    | -1,75 | Unknown   |
| 1393414_at   | AW142650 | similar to transmembrane protein 64                                                                                        | LOC679161    | -1,99 | Unknown   |
| 1376691_at   | AI103213 | similar to transmembrane protein 64                                                                                        | LOC679161    | -1,73 | Unknown   |
| 1372115_at   | AI408477 | similar to ubiquitin protein ligase E3 component n-recognin 2                                                              | LOC363188    | -1,67 | Unknown   |
| 1381349_a_at | AI231906 | similar to ubiquitin protein ligase E3 component n-recognin 2                                                              | LOC363188    | 1,52  | Unknown   |
| 1384116_at   | AA924216 | similar to vacuolar protein sorting 37D                                                                                    | RCG 21373    | 3,65  | Unknown   |
| 1375045_at   | BM387520 | similar to WD repeat domain 59                                                                                             | LOC686799    | 1,84  | Unknown   |
| 1373980_at   | AW916138 | similar to XPA binding protein 1                                                                                           | LOC688393    | 1,68  | Unknown   |
| 1396091_at   | BI296193 | similar to zinc finger protein 146                                                                                         | LOC687516    | 1,75  | Unknown   |
| 1383896_at   | BM387943 | similar to zinc finger protein 639                                                                                         | LOC683504    | 1,70  | Unknown   |
| 1379558_at   | AA957033 | similar to zinc finger protein 748 isoform 2                                                                               | LOC680222    | -2,89 | Unknown   |
| 1382903_at   | BF420492 | similar to zinc finger, ZZ domain containing 3                                                                             | LOC310958    | 2,57  | Unknown   |
| 1372793_at   | BE108903 | single-stranded DNA binding protein 1                                                                                      | SSBP1        | -1,70 | Cytoplasm |
| 1386287_at   | AI407974 | SLAIN motif family, member 2                                                                                               | SLAIN2       | 6,67  | Unknown   |
| 1381126_at   | BE099652 | SLIT-ROBO Rho GTPase activating protein 2                                                                                  | SRGAP2       | 2,45  | Unknown   |
| 1372561_at   | AI234095 | small ArfGAP2                                                                                                              | SMAP2        | -3,69 | Unknown   |
| 1390350_at   | BE097445 | small ArfGAP2                                                                                                              | SMAP2        | -3,44 | Unknown   |
| 1377920_at   | AI413026 | small glutamine-rich tetratricopeptide repeat (TPR)-containing, beta                                                       | SGTB         | 2,63  | Unknown   |
| 1382466_at   | BF407231 | small nuclear ribonucleoprotein 48kDa (U11/U12)                                                                            | SNRNP48      | 2,00  | Nucleus   |
| 1372167_at   | AW525656 | Small nuclear ribonucleoprotein G-like protein                                                                             | LOC100130932 | 1,78  | Nucleus   |
| 1393161_at   | AW916962 | small nuclear RNA activating complex, polypeptide 3, 50kDa                                                                 | SNAPC3       | 1,55  | Nucleus   |
| 1372734_at   | AI408095 | small trans-membrane and glycosylated protein                                                                              | LOC57228     | 5,60  | Cytoplasm |



|              |           |                                                                                          |                              |        |                     |
|--------------|-----------|------------------------------------------------------------------------------------------|------------------------------|--------|---------------------|
| 1376546_at   | BE120498  | small VCP/p97-interacting protein                                                        | SVIP (includes EG:258010)    | -1,73  | Cytoplasm           |
| 1383998_at   | BF545601  | SMEK homolog 2, suppressor of mek1 (Dictyostelium)                                       | SMEK2                        | 1,84   | Unknown             |
| 1390261_at   | AI059850  | Smg-5 homolog, nonsense mediated mRNA decay factor (C. elegans)                          | SMG5                         | 1,90   | Nucleus             |
| 1389497_at   | BF414808  | SMYD family member 5                                                                     | SMYD5                        | 3,65   | Unknown             |
| 1392978_at   | BE117086  | solute carrier family 25, member 28                                                      | SLC25A28                     | 4,26   | Unknown             |
| 1390416_at   | H35736    | solute carrier family 25, member 30                                                      | SLC25A30                     | 2,09   | Unknown             |
| 1372866_at   | BM386202  | solute carrier family 25, member 38                                                      | SLC25A38                     | 2,89   | Unknown             |
| 1382150_at   | BG377042  | solute carrier family 25, member 46                                                      | SLC25A46                     | -2,70  | Unknown             |
| 1386088_at   | AW141957  | solute carrier family 25, member 46                                                      | SLC25A46                     | -2,13  | Unknown             |
| 1378899_at   | BE108523  | solute carrier family 35, member D3                                                      | SLC35D3                      | -1,60  | Unknown             |
| 1389530_at   | BI274313  | solute carrier family 35, member E1                                                      | SLC35E1                      | 1,78   | Unknown             |
| 1399102_at   | BG377901  | solute carrier family 38, member 10                                                      | SLC38A10                     | -2,19  | Unknown             |
| 1376117_at   | BI289103  | solute carrier family 44, member 4                                                       | SLC44A4                      | 2,60   | Unknown             |
| 1384302_at   | AI712791  | solute carrier family 6 (neurotransmitter transporter), member 17                        | SLC6A17 (includes EG:613226) | -2,50  | Unknown             |
| 1372899_at   | AI104683  | solute carrier family 9 (sodium/hydrogen exchanger), member 8                            | SLC9A8                       | -1,63  | Cytoplasm           |
| 1367762_at   | NM_012659 | somatostatin                                                                             | SST                          | -12,11 | Extracellular Space |
| 1398989_at   | BI275248  | SON DNA binding protein                                                                  | SON                          | -1,59  | Nucleus             |
| 1388380_at   | BI278122  | sorting and assembly machinery component 50 homolog (S. cerevisiae)                      | SAMM50                       | -1,59  | Cytoplasm           |
| 1384760_at   | AI711126  | sorting nexin 32                                                                         | SNX32                        | -1,61  | Unknown             |
| 1383942_at   | BI275795  | sorting nexin 9                                                                          | SNX9 (includes EG:683687)    | 1,87   | Unknown             |
| 1372930_at   | AI411381  | SP110 nuclear body protein                                                               | SP110                        | 2,54   | Nucleus             |
| 1396268_at   | BF523991  | SP110 nuclear body protein                                                               | SP110                        | 3,38   | Nucleus             |
| 1394819_at   | AI177957  | SP110 nuclear body protein                                                               | SP110                        | 4,78   | Nucleus             |
| 1388452_at   | AI716904  | sparc/osteonectin, cwcv and kazal-like domains proteoglycan (testican) 2                 | SPOCK2                       | -3,63  | Extracellular Space |
| 1372633_at   | AI178531  | spastic paraplegia 20 (Troyer syndrome)                                                  | SPG20                        | -3,62  | Cytoplasm           |
| 1383839_at   | AI576427  | spastic paraplegia 20 (Troyer syndrome)                                                  | SPG20                        | -2,43  | Cytoplasm           |
| 1370264_at   | BI288556  | spectrin repeat containing, nuclear envelope 1                                           | SYNE1                        | -3,82  | Nucleus             |
| 1388520_at   | BI278854  | sperm associated antigen 9                                                               | SPAG9                        | -2,65  | Plasma Membrane     |
| 1375047_at   | BI295760  | spermatogenesis associated 5                                                             | SPATA5                       | 3,07   | Cytoplasm           |
| 1391885_at   | AA925352  | spermatogenesis associated 9                                                             | SPATA9                       | -6,48  | Unknown             |
| 1391839_at   | AA891521  | spermatogenesis associated 9                                                             | SPATA9                       | -3,01  | Unknown             |
| 1374168_at   | BE099608  | SPHK1 interactor, AKAP domain containing                                                 | SPHKAP                       | -2,02  | Unknown             |
| 1376195_at   | BI288682  | spindlin 1                                                                               | SPIN1                        | 14,60  | Nucleus             |
| 1374834_at   | AA943520  | splicing factor 3b, subunit 4, 49kDa                                                     | SF3B4                        | 1,98   | Nucleus             |
| 1370899_at   | AI599699  | splicing factor proline/glutamine-rich (polypyrimidine tract binding protein associated) | SFPQ                         | -2,48  | Nucleus             |
| 1370188_at   | AW252670  | splicing factor, arginine/serine-rich 10 (transformer 2 homolog, Drosophila)             | SFRS10                       | 2,18   | Nucleus             |
| 1387824_at   | NM_020092 | splicing factor, arginine/serine-rich 12                                                 | SFRS12                       | 4,74   | Nucleus             |
| 1376160_at   | BF408850  | splicing factor, arginine/serine-rich 16                                                 | SFRS16                       | 2,63   | Nucleus             |
| 1398440_at   | BI292166  | splicing factor, arginine/serine-rich 18                                                 | SFRS18                       | -4,24  | Nucleus             |
| 1374154_at   | AI411610  | splicing factor, arginine/serine-rich 2, interacting protein                             | SFRS2IP                      | 2,89   | Nucleus             |
| 1376252_at   | AI145784  | splicing factor, arginine/serine-rich 3                                                  | SFRS3                        | -2,60  | Nucleus             |
| 1379010_at   | AA956727  | splicing factor, arginine/serine-rich 3                                                  | SFRS3                        | 3,98   | Nucleus             |
| 1381623_at   | BF391476  | splicing factor, arginine/serine-rich 4                                                  | SFRS4                        | 2,08   | Nucleus             |
| 1368992_a_at | AI104005  | splicing factor, arginine/serine-rich 5                                                  | SFRS5                        | -1,89  | Nucleus             |
| 1372075_at   | AI177866  | splicing factor, arginine/serine-rich 6                                                  | SFRS6                        | -1,67  | Nucleus             |
| 1374864_at   | BM390457  | sprouty homolog 2 (Drosophila)                                                           | SPRY2                        | 2,83   | Plasma Membrane     |
| 1387012_at   | NM_031596 | squamous cell carcinoma antigen recognized by T cells                                    | SART1                        | 2,23   | Nucleus             |
| 1389639_at   | BF283302  | Src homology 2 domain containing adaptor protein B                                       | SHB                          | 2,95   | Unknown             |
| 1381103_a_at | AA996485  | SRR1 domain containing                                                                   | SRRD                         | 3,36   | Unknown             |
| 1372602_at   | BI295979  | starch binding domain 1                                                                  | STBD1                        | 13,73  | Cytoplasm           |
| 1391871_at   | AI763550  | StAR-related lipid transfer (START) domain containing 13                                 | STARD13                      | -2,19  | Cytoplasm           |
| 1368157_at   | NM_024346 | stathmin-like 3                                                                          | STMN3                        | -1,86  | Nucleus             |
| 1379754_at   | AI070598  | staufen, RNA binding protein, homolog 2 (Drosophila)                                     | STAU2                        | 2,37   | Cytoplasm           |
| 1385397_at   | AA859085  | STEAP family member 4                                                                    | STEAP4                       | 2,44   | Plasma Membrane     |
| 1393932_at   | AI060175  | sterile alpha motif domain containing 8                                                  | SAMD8                        | 4,27   | Unknown             |
| 1376693_at   | AA998964  | sterile alpha motif domain containing 9                                                  | SAMD9                        | 48,44  | Unknown             |
| 1371823_at   | BM392158  | stromal antigen 2                                                                        | STAG2                        | -1,90  | Nucleus             |
| 1376024_at   | AW914992  | stromal interaction molecule 1                                                           | STIM1                        | -2,14  | Plasma Membrane     |

|              |           |                                                                                |
|--------------|-----------|--------------------------------------------------------------------------------|
| 1382121_at   | BI292282  | stromal interaction molecule 1                                                 |
| 1380257_at   | BF419367  | structural maintenance of chromosomes 5                                        |
| 1377202_at   | AI172197  | structural maintenance of chromosomes 6                                        |
| 1384200_at   | BE107328  | structural maintenance of chromosomes flexible hinge domain containing 1       |
| 1388129_at   | L08814    | structure specific recognition protein 1                                       |
| 1389142_at   | AI013361  | sulfide quinone reductase-like (yeast)                                         |
| 1398848_at   | BG377057  | suppression of tumorigenicity 13 (colon carcinoma) (Hsp70 interacting protein) |
| 1376666_at   | AI170864  | suppressor of cytokine signaling 6                                             |
| 1371740_at   | AI178732  | suppressor of IKK epsilon                                                      |
| 1373871_at   | AW435481  | suppressor of Ty 7 (S. cerevisiae)-like                                        |
| 1367883_at   | NM_022509 | survival of motor neuron 1, telomeric                                          |
| 1368038_at   | AF260258  | synaptojanin 2 binding protein                                                 |
| 1373585_at   | BE116774  | synaptojanin 2 binding protein                                                 |
| 1370166_at   | AI169682  | syndecan 2                                                                     |
| 1382189_at   | AI574779  | syndecan 2                                                                     |
| 1370167_at   | BG668421  | syndecan 2                                                                     |
| 1367721_at   | NM_012649 | syndecan 4                                                                     |
| 1388431_at   | AA851282  | synovial sarcoma translocation, chromosome 18                                  |
| 1391628_at   | BF418596  | synovial sarcoma translocation, chromosome 18                                  |
| 1368070_at   | NM_031656 | syntaxin 8                                                                     |
| 1385109_at   | AA900775  | TATA box binding protein (TBP)-associated factor, RNA polymerase I, D, 41kDa   |
| 1374608_at   | BF415553  | TatD DNase domain containing 2                                                 |
| 1374101_at   | BF282437  | TBC1 domain family, member 10A                                                 |
| 1382045_at   | BI304056  | TBC1 domain family, member 15                                                  |
| 1385596_at   | BF392191  | TBC1 domain family, member 15                                                  |
| 1383265_at   | BF408403  | TBC1 domain family, member 23                                                  |
| 1398484_at   | AI070306  | TBC1 domain family, member 9 (with GRAM domain)                                |
| 1375074_at   | BE113756  | TBK1 binding protein 1                                                         |
| 1374446_at   | AI179464  | TCDD-inducible poly(ADP-ribose) polymerase                                     |
| 1372507_at   | AA901093  | T-cell leukemia translocation altered gene                                     |
| 1392980_at   | AI716456  | T-cell lymphoma invasion and metastasis 1                                      |
| 1381167_at   | BF390767  | T-cell lymphoma invasion and metastasis 1                                      |
| 1388099_a_at | AB029495  | TCF3 (E2A) fusion partner (in childhood Leukemia)                              |
| 1382115_at   | BE099174  | tectonic family member 3                                                       |
| 1388780_at   | BF395792  | telomeric repeat binding factor 2, interacting protein                         |
| 1389409_at   | AI177869  | testis derived transcript (3 LIM domains)                                      |
| 1376038_at   | AI411054  | testis expressed 2                                                             |
| 1388463_at   | AW252660  | testis expressed 264                                                           |
| 1388209_at   | AF092091  | testis specific, 10                                                            |
| 1372455_at   | AI410264  | tetraspanin 12                                                                 |
| 1398325_at   | AI172464  | tetraspanin 3                                                                  |
| 1372739_at   | AA818865  | tetraspanin 31                                                                 |
| 1372980_at   | AA819250  | tetraspanin 33                                                                 |
| 1380725_at   | AW251317  | tetraspanin 5                                                                  |
| 1382146_at   | BF412968  | tetraspanin 6                                                                  |
| 1389052_at   | BI278584  | tetratricopeptide repeat domain 13                                             |
| 1389139_at   | BG665007  | tetratricopeptide repeat domain 15                                             |
| 1386805_at   | BF554446  | tetratricopeptide repeat domain 28                                             |
| 1383948_at   | AA998083  | tetratricopeptide repeat domain 28                                             |
| 1383215_at   | BF557467  | tetratricopeptide repeat domain 28                                             |
| 1376610_a_at | BE109163  | tetratricopeptide repeat domain 28                                             |
| 1386309_at   | AI176361  | tetratricopeptide repeat domain 28                                             |
| 1377860_at   | BM392227  | tetratricopeptide repeat domain 39B                                            |
| 1376974_at   | BG381669  | tetratricopeptide repeat domain 7A                                             |
| 1376035_at   | BI274308  | tetratricopeptide repeat domain 7B                                             |
| 1378416_at   | AA892565  | tetratricopeptide repeat domain 8                                              |
| 1371131_a_at | U30789    | thioredoxin interacting protein                                                |
| 1379981_at   | AI170356  | THO complex 1                                                                  |

|                            |        |                     |
|----------------------------|--------|---------------------|
| STIM1                      | -1,83  | Plasma Membrane     |
| SMC5                       | 7,30   | Nucleus             |
| SMC6                       | -2,48  | Nucleus             |
| SMCHD1                     | 2,90   | Unknown             |
| SSRP1                      | 1,91   | Nucleus             |
| SQRDL (includes EG:691966) | -2,35  | Unknown             |
| ST13                       | 2,02   | Cytoplasm           |
| SOCS6                      | 1,51   | Cytoplasm           |
| RP5-1000E10.4              | -2,39  | Unknown             |
| SUPT7L                     | -1,93  | Nucleus             |
| SMN1                       | 2,56   | Nucleus             |
| SYNJ2BP                    | -2,61  | Cytoplasm           |
| SYNJ2BP                    | -2,16  | Cytoplasm           |
| SDC2                       | -3,10  | Plasma Membrane     |
| SDC2                       | -2,36  | Plasma Membrane     |
| SDC2                       | -2,31  | Plasma Membrane     |
| SDC4                       | 2,75   | Plasma Membrane     |
| SS18                       | -1,69  | Nucleus             |
| SS18                       | 1,55   | Nucleus             |
| STX8                       | 1,88   | Plasma Membrane     |
| TAF1D                      | 2,32   | Nucleus             |
| TATDN2                     | 2,10   | Nucleus             |
| TBC1D10A                   | 2,07   | Plasma Membrane     |
| TBC1D15                    | 1,58   | Cytoplasm           |
| TBC1D15                    | 4,99   | Cytoplasm           |
| TBC1D23                    | -2,91  | Unknown             |
| TBC1D9                     | -3,51  | Plasma Membrane     |
| TBKBP1                     | 2,33   | Unknown             |
| TIPARP                     | 3,78   | Unknown             |
| TCTA                       | -2,17  | Unknown             |
| TIAM1                      | 2,05   | Cytoplasm           |
| TIAM1                      | 3,69   | Cytoplasm           |
| TFPT                       | 1,85   | Nucleus             |
| TCTN3                      | -2,23  | Extracellular Space |
| TERF2IP                    | -2,03  | Nucleus             |
| TES                        | 2,42   | Plasma Membrane     |
| TEX2                       | -1,93  | Unknown             |
| TEX264                     | 4,05   | Extracellular Space |
| TSGA10                     | -24,74 | Cytoplasm           |
| TSPAN12                    | -1,76  | Unknown             |
| TSPAN3                     | -1,68  | Plasma Membrane     |
| TSPAN31                    | 1,68   | Plasma Membrane     |
| TSPAN33                    | -1,86  | Unknown             |
| TSPAN5                     | 5,92   | Plasma Membrane     |
| TSPAN6                     | -3,45  | Plasma Membrane     |
| TTC13                      | -2,07  | Unknown             |
| TTC15                      | -2,41  | Unknown             |
| TTC28                      | -10,02 | Unknown             |
| TTC28                      | -9,86  | Unknown             |
| TTC28                      | -8,78  | Unknown             |
| TTC28                      | -5,52  | Unknown             |
| TTC28                      | -3,02  | Unknown             |
| TTC39B                     | 5,88   | Unknown             |
| TTC7A                      | 2,89   | Plasma Membrane     |
| TTC7B                      | 1,70   | Unknown             |
| TTC8                       | -3,77  | Cytoplasm           |
| TXNIP                      | -4,98  | Cytoplasm           |
| THOC1                      | -3,21  | Nucleus             |

|              |           |                                                                                |                            |        |                     |
|--------------|-----------|--------------------------------------------------------------------------------|----------------------------|--------|---------------------|
| 1376641_at   | BM384228  | THO complex 1                                                                  | THOC1                      | 1,58   | Nucleus             |
| 1389114_at   | AW523874  | threonine synthase-like 2 (S. cerevisiae)                                      | THNSL2                     | -1,74  | Unknown             |
| 1388567_at   | BF282947  | THUMP domain containing 1                                                      | THUMPD1                    | -2,18  | Unknown             |
| 1393317_at   | BI303231  | THUMP domain containing 3                                                      | THUMPD3                    | 1,98   | Unknown             |
| 1367655_at   | NM_021261 | thymosin beta 10                                                               | TMSB10                     | 2,21   | Cytoplasm           |
| 1372473_at   | AW434048  | tight junction protein 1 (zona occludens 1)                                    | TJP1                       | 1,63   | Plasma Membrane     |
| 1367712_at   | NM_053819 | TIMP metalloproteinase inhibitor 1                                             | TIMP1                      | 20,15  | Extracellular Space |
| 1368323_at   | NM_017200 | tissue factor pathway inhibitor (lipoprotein-associated coagulation inhibitor) | TFPI                       | -9,78  | Extracellular Space |
| 1391559_at   | AW525904  | TLC domain containing 1                                                        | TLCD1                      | 2,42   | Unknown             |
| 1398984_at   | AA818129  | TM2 domain containing 2                                                        | TM2D2                      | -1,92  | Extracellular Space |
| 1388492_at   | AW919111  | TNFAIP3 interacting protein 1                                                  | TNP1                       | 5,14   | Nucleus             |
| 1383655_at   | BF545192  | TNFAIP3 interacting protein 2                                                  | TNP2                       | 14,28  | Cytoplasm           |
| 1392531_at   | AI178693  | tocopherol (alpha) transfer protein-like                                       | TTPAL                      | 2,30   | Unknown             |
| 1378572_at   | BF408962  | toll interacting protein                                                       | TOLLIP                     | 6,99   | Cytoplasm           |
| 1375969_at   | BI296555  | torsin A interacting protein 2                                                 | TOR1AIP2                   | 3,02   | Cytoplasm           |
| 1373406_at   | BM384991  | torsin family 1, member B (torsin B)                                           | TOR1B                      | -2,03  | Cytoplasm           |
| 1384318_at   | BE100696  | torsin family 2, member A                                                      | TOR2A                      | -3,56  | Extracellular Space |
| 1382579_at   | BE107165  | TOX high mobility group box family member 3                                    | TOX3                       | 1,54   | Unknown             |
| 1382014_at   | AW521951  | TP53RK binding protein                                                         | TPRKB                      | -1,59  | Unknown             |
| 1378582_at   | BM383666  | TraB domain containing                                                         | TRABD                      | -2,70  | Unknown             |
| 1372252_at   | BE112892  | trafficking protein particle complex 1                                         | TRAPPC1                    | -2,10  | Cytoplasm           |
| 1371466_at   | AI177397  | trafficking protein particle complex 2                                         | TRAPPC2                    | -4,02  | Cytoplasm           |
| 1382311_at   | BM384466  | TRAF-interacting protein with forkhead-associated domain                       | TIFA                       | 7,05   | Unknown             |
| 1373238_at   | AI234844  | transcriptional adaptor 1 (HF11 homolog, yeast)-like                           | TADAIL                     | 2,72   | Unknown             |
| 1388478_at   | BE108225  | transducin (beta)-like 1X-linked                                               | TBL1X                      | 1,66   | Plasma Membrane     |
| 1387169_at   | NM_053400 | transducin-like enhancer of split 3 (E(sp1) homolog, Drosophila)               | TLE3                       | 2,67   | Nucleus             |
| 1371509_at   | BG666773  | transforming growth factor beta regulated gene 1                               | TBRG1 (includes EG:21376)  | 1,69   | Nucleus             |
| 1374577_at   | AW254561  | transforming growth factor beta regulator 4                                    | TBRG4                      | 1,81   | Cytoplasm           |
| 1372231_at   | AA893532  | transforming growth factor, beta receptor associated protein 1                 | TGFBRAP1                   | 1,72   | Cytoplasm           |
| 1390149_at   | BI286164  | transforming, acidic coiled-coil containing protein 2                          | TACC2                      | 2,16   | Nucleus             |
| 1387529_a_at | NM_031676 | transgelin 3                                                                   | TAGLN3                     | -19,61 | Extracellular Space |
| 1371028_at   | AW917192  | trans-golgi network protein 2                                                  | TGOLN2 (includes EG:10618) | -3,66  | Cytoplasm           |
| 1389965_at   | AA799818  | trans-golgi network protein 2                                                  | TGOLN2 (includes EG:10618) | -1,95  | Cytoplasm           |
| 1389471_at   | AI412736  | translocase of outer mitochondrial membrane 34                                 | TOMM34                     | -1,71  | Cytoplasm           |
| 1389518_at   | AI009763  | translocase of outer mitochondrial membrane 5 homolog (yeast)                  | TOMM5 (includes EG:68512)  | 1,75   | Unknown             |
| 1379186_at   | BF414701  | translocase of outer mitochondrial membrane 70 homolog A (S. cerevisiae)       | TOMM70A                    | 2,23   | Cytoplasm           |
| 1371688_at   | AI178493  | translocation associated membrane protein 1                                    | TRAM1                      | -2,68  | Cytoplasm           |
| 1368706_at   | NM_053785 | transmembrane 4 L six family member 4                                          | TM4SF4                     | -3,80  | Plasma Membrane     |
| 1374160_at   | BE111296  | transmembrane and coiled-coil domain family 2                                  | TMCC2                      | -4,54  | Unknown             |
| 1390832_at   | BI294696  | transmembrane and coiled-coil domain family 3                                  | TMCC3                      | 3,66   | Unknown             |
| 1376686_at   | BI279363  | transmembrane and tetratricopeptide repeat containing 2                        | TMTC2                      | 1,55   | Cytoplasm           |
| 1379541_at   | BE329099  | transmembrane and tetratricopeptide repeat containing 4                        | TMTC4                      | -5,17  | Unknown             |
| 1376102_at   | BI292351  | transmembrane BAX inhibitor motif containing 1                                 | TMBIM1                     | 20,51  | Unknown             |
| 1371968_at   | AI013781  | transmembrane BAX inhibitor motif containing 4                                 | TMBIM4                     | 3,08   | Nucleus             |
| 1378952_at   | H31535    | transmembrane protein 101                                                      | TMEM101                    | -1,53  | Extracellular Space |
| 1374948_at   | BI275815  | transmembrane protein 106A                                                     | TMEM106A                   | 6,02   | Unknown             |
| 1383731_at   | AA818065  | transmembrane protein 106B                                                     | TMEM106B                   | -2,61  | Unknown             |
| 1372657_at   | BM391494  | transmembrane protein 106C                                                     | TMEM106C                   | -5,26  | Unknown             |
| 1388930_at   | AI171651  | transmembrane protein 123                                                      | TMEM123                    | -2,85  | Plasma Membrane     |
| 1371634_at   | BE107851  | transmembrane protein 126A                                                     | TMEM126A                   | 1,83   | Cytoplasm           |
| 1377615_at   | AI112395  | transmembrane protein 130                                                      | TMEM130                    | -2,28  | Unknown             |
| 1372554_at   | AA943110  | transmembrane protein 131                                                      | TMEM131                    | -1,77  | Unknown             |
| 1390042_at   | AI071166  | transmembrane protein 140                                                      | TMEM140                    | 5,70   | Unknown             |
| 1387636_a_at | NM_134395 | transmembrane protein 14C                                                      | TMEM14C                    | -2,51  | Plasma Membrane     |
| 1373392_at   | AW523924  | transmembrane protein 165                                                      | TMEM165                    | -1,54  | Plasma Membrane     |
| 1377964_at   | BM390539  | transmembrane protein 167B                                                     | TMEM167B                   | 4,14   | Unknown             |
| 1378243_at   | AA923937  | transmembrane protein 17                                                       | TMEM17                     | 5,01   | Unknown             |
| 1372848_at   | BI296915  | transmembrane protein 179                                                      | TMEM179                    | -2,72  | Unknown             |

|              |           |                                                                |                              |        |                     |
|--------------|-----------|----------------------------------------------------------------|------------------------------|--------|---------------------|
| 1382065_at   | BM388726  | transmembrane protein 18                                       | TMEM18                       | -1,54  | Unknown             |
| 1388633_at   | BM388921  | transmembrane protein 180                                      | TMEM180                      | -1,57  | Unknown             |
| 1392518_at   | AI577870  | transmembrane protein 184B                                     | TMEM184B                     | 1,82   | Unknown             |
| 1379419_at   | AA962979  | transmembrane protein 184C                                     | TMEM184C                     | -3,23  | Unknown             |
| 1383307_at   | AI717533  | transmembrane protein 186                                      | TMEM186                      | -1,74  | Cytoplasm           |
| 1371932_at   | AI232287  | transmembrane protein 192                                      | TMEM192                      | 1,96   | Unknown             |
| 1379323_at   | BE109498  | transmembrane protein 203                                      | TMEM203                      | -2,34  | Unknown             |
| 1393165_at   | BG377684  | transmembrane protein 206                                      | TMEM206                      | -1,71  | Unknown             |
| 1383118_at   | BI288120  | transmembrane protein 209                                      | TMEM209                      | -3,08  | Unknown             |
| 1398219_at   | BE109914  | transmembrane protein 215                                      | TMEM215 (includes EG:401498) | -7,09  | Unknown             |
| 1389561_at   | BE110624  | transmembrane protein 218                                      | TMEM218                      | -3,63  | Extracellular Space |
| 1383674_at   | BF419619  | transmembrane protein 219                                      | TMEM219                      | -1,62  | Cytoplasm           |
| 1392045_at   | BE110277  | transmembrane protein 22                                       | TMEM22                       | -2,30  | Cytoplasm           |
| 1387013_at   | NM_020976 | transmembrane protein 27                                       | TMEM27                       | -3,57  | Plasma Membrane     |
| 1373058_at   | AI409051  | transmembrane protein 30A                                      | TMEM30A                      | -2,16  | Unknown             |
| 1397227_at   | BE120895  | transmembrane protein 35                                       | TMEM35                       | -4,06  | Unknown             |
| 1389171_at   | AI104326  | transmembrane protein 38A                                      | TMEM38A                      | -8,80  | Unknown             |
| 1374484_at   | AI230318  | transmembrane protein 39A                                      | TMEM39A                      | 1,81   | Unknown             |
| 1376571_at   | BI285997  | transmembrane protein 42                                       | TMEM42                       | -1,70  | Unknown             |
| 1373595_at   | BM385463  | transmembrane protein 43                                       | TMEM43                       | 2,04   | Nucleus             |
| 1370807_at   | AF411216  | transmembrane protein 49                                       | TMEM49                       | 2,63   | Plasma Membrane     |
| 1371347_at   | BI279371  | transmembrane protein 50B                                      | TMEM50B                      | -3,85  | Plasma Membrane     |
| 1372780_at   | BM391310  | transmembrane protein 53                                       | TMEM53                       | -4,53  | Unknown             |
| 1383375_at   | BI293584  | transmembrane protein 55A                                      | TMEM55A                      | 1,61   | Unknown             |
| 1386632_at   | BF547901  | transmembrane protein 55A                                      | TMEM55A                      | 1,63   | Unknown             |
| 1372206_at   | AI412469  | transmembrane protein 55B                                      | TMEM55B                      | 1,92   | Cytoplasm           |
| 1393136_at   | BF393285  | transmembrane protein 57                                       | TMEM57                       | 2,03   | Unknown             |
| 1399012_at   | BI285976  | transmembrane protein 59                                       | TMEM59 (includes EG:9528)    | -2,00  | Plasma Membrane     |
| 1389883_at   | BF284719  | transmembrane protein 65                                       | TMEM65                       | -1,54  | Unknown             |
| 1390292_at   | AW527467  | transmembrane protein 8 (five membrane-spanning domains)       | TMEM8                        | -2,10  | Plasma Membrane     |
| 1371454_at   | BI285673  | transmembrane protein 93                                       | TMEM93                       | 1,66   | Unknown             |
| 1373161_at   | BM386009  | transmembrane protein 98                                       | TMEM98                       | -4,24  | Cytoplasm           |
| 1372483_at   | AI230979  | trinucleotide repeat containing 18                             | TNRC18                       | -1,57  | Unknown             |
| 1372508_at   | BE113266  | trinucleotide repeat containing 6A                             | TNRC6A                       | -2,05  | Nucleus             |
| 1378293_at   | AI556246  | tripartite motif-containing 26                                 | TRIM26                       | 4,73   | Cytoplasm           |
| 1383369_at   | AI028875  | tripartite motif-containing 26                                 | TRIM26                       | 8,92   | Cytoplasm           |
| 1371786_at   | BE111791  | tripartite motif-containing 35                                 | TRIM35                       | -3,19  | Cytoplasm           |
| 1378592_at   | BF396210  | tripartite motif-containing 59                                 | TRIM59                       | 3,10   | Unknown             |
| 1385252_at   | BI280655  | tripartite motif-containing 6                                  | TRIM6                        | 3,66   | Unknown             |
| 1399120_at   | BF407592  | TRM5 tRNA methyltransferase 5 homolog ( <i>S. cerevisiae</i> ) | TRMT5                        | -1,87  | Unknown             |
| 1368540_at   | NM_031807 | trophoblast glycoprotein                                       | TPBG                         | 3,57   | Plasma Membrane     |
| 1372500_at   | BG378269  | tropomodulin 3 (ubiquitous)                                    | TMOD3                        | 2,28   | Cytoplasm           |
| 1370287_a_at | M23764    | tropomyosin 1 (alpha)                                          | TPM1                         | 1,68   | Cytoplasm           |
| 1395794_at   | BF395218  | tropomyosin 1 (alpha)                                          | TPM1                         | 4,39   | Cytoplasm           |
| 1389846_at   | BE104273  | tropomyosin 3                                                  | TPM3                         | 1,63   | Cytoplasm           |
| 1370339_at   | L24775    | tropomyosin 3                                                  | TPM3                         | 2,01   | Cytoplasm           |
| 1383986_at   | AI071098  | tropomyosin 3                                                  | TPM3                         | 2,23   | Cytoplasm           |
| 1371653_at   | BI281955  | tropomyosin 4                                                  | TPM4                         | 2,32   | Cytoplasm           |
| 1392496_at   | AI178581  | Trypsin V-A                                                    | LOC312273                    | -10,76 | Unknown             |
| 1374602_at   | BF407207  | TSPY-like 1                                                    | TSPYL1                       | -1,82  | Nucleus             |
| 1390097_at   | BI281738  | TSPY-like 4                                                    | TSPYL4                       | -5,30  | Nucleus             |
| 1371885_at   | BI282366  | tubulin folding cofactor B                                     | TBCB                         | 2,76   | Cytoplasm           |
| 1389108_at   | AI710235  | tubulin folding cofactor D                                     | TBCD                         | -2,78  | Cytoplasm           |
| 1388959_at   | BI297049  | tubulin tyrosine ligase-like family, member 12                 | TTLL12                       | 1,85   | Unknown             |
| 1387892_at   | BI285440  | tubulin, beta                                                  | TUBB                         | 2,81   | Cytoplasm           |
| 1388131_at   | X03369    | tubulin, beta 2B                                               | TUBB2B                       | 14,43  | Cytoplasm           |
| 1371618_s_at | AI229029  | tubulin, beta 3                                                | TUBB3                        | 1,85   | Cytoplasm           |
| 1376100_at   | BI274903  | tubulin, beta 6                                                | TUBB6                        | 15,13  | Cytoplasm           |

|              |           |                                                                                          |                            |        |                     |
|--------------|-----------|------------------------------------------------------------------------------------------|----------------------------|--------|---------------------|
| 1370351_at   | AB030644  | tudor domain containing 7                                                                | TDRD7                      | 1,91   | Cytoplasm           |
| 1376335_at   | BI282368  | tuftelin interacting protein 11                                                          | TFIP11                     | 2,31   | Extracellular Space |
| 1381376_at   | AI103284  | tumor necrosis factor, alpha-induced protein 2                                           | TNFAIP2                    | 4,39   | Extracellular Space |
| 1388773_at   | BI278479  | tumor necrosis factor, alpha-induced protein 2                                           | TNFAIP2                    | 70,73  | Extracellular Space |
| 1372436_at   | BG668434  | tumor protein D52-like 2                                                                 | TPD52L2                    | 3,81   | Cytoplasm           |
| 1388812_at   | AI230362  | tumor protein p53 inducible protein 13                                                   | TP53I13                    | -2,08  | Unknown             |
| 1398800_at   | NM_019377 | tyrosine 3-monooxygenase/tryptophan 5-monooxygenase activation protein, beta polypeptide | YWHAB                      | -1,69  | Cytoplasm           |
| 1388797_at   | AI232163  | U2 small nuclear ribonucleoprotein auxiliary factor (U2AF) 2                             | U2AF2 (includes EG:308335) | 1,57   | Nucleus             |
| 1382135_at   | AI012683  | U2-associated SR140 protein                                                              | SR140                      | 1,66   | Nucleus             |
| 1388719_at   | BI279735  | ubiquilin 1                                                                              | UBQLN1                     | -1,73  | Cytoplasm           |
| 1387041_at   | NM_053747 | ubiquilin 1                                                                              | UBQLN1                     | 2,40   | Cytoplasm           |
| 1372131_at   | BF398140  | ubiquilin 2                                                                              | UBQLN2                     | -1,60  | Nucleus             |
| 1388691_at   | AI177410  | ubiquilin 4                                                                              | UBQLN4                     | 1,86   | Cytoplasm           |
| 1388677_at   | BI275991  | ubiquitin associated protein 1                                                           | UBAP1                      | 3,79   | Cytoplasm           |
| 1398767_at   | NM_017314 | ubiquitin C                                                                              | UBC                        | 1,92   | Cytoplasm           |
| 1368762_at   | NM_053299 | ubiquitin D                                                                              | UBD                        | 94,66  | Nucleus             |
| 1384773_at   | AI044323  | ubiquitin domain containing 2                                                            | UBTD2                      | -1,60  | Unknown             |
| 1383538_at   | BF545850  | ubiquitin protein ligase E3 component n-recognin 3 (putative)                            | UBR3                       | -2,39  | Unknown             |
| 1375029_at   | AI235912  | ubiquitin specific peptidase like 1                                                      | USPL1                      | 2,95   | Unknown             |
| 1373299_at   | BI295816  | UBX domain protein 1                                                                     | UBXN1                      | 1,90   | Cytoplasm           |
| 1388444_at   | BI291633  | UBX domain protein 4                                                                     | UBXN4                      | 1,74   | Extracellular Space |
| 1396059_at   | BF289251  | UBX domain protein 4                                                                     | UBXN4                      | 2,82   | Extracellular Space |
| 1381982_at   | BF403568  | UDP-N-acetylglucosamine pyrophosphorylase 1-like 1                                       | UAP1L1                     | 8,86   | Unknown             |
| 1389672_at   | BI301467  | UHRF1 binding protein 1-like                                                             | UHRF1BP1L                  | -1,84  | Unknown             |
| 1392559_at   | BM383442  | UHRF1 binding protein 1-like                                                             | UHRF1BP1L                  | 2,15   | Unknown             |
| 1398865_at   | U96638    | unc-50 homolog (C. elegans)                                                              | UNC50                      | -2,07  | Cytoplasm           |
| 1371972_at   | BM388888  | unc-84 homolog B (C. elegans)                                                            | UNC84B                     | 4,36   | Nucleus             |
| 1393320_at   | BF396985  | UTP15, U3 small nucleolar ribonucleoprotein, homolog (S. cerevisiae)                     | UTP15                      | 2,07   | Nucleus             |
| 1382972_at   | BE103344  | UTP15, U3 small nucleolar ribonucleoprotein, homolog (S. cerevisiae)                     | UTP15                      | 2,87   | Nucleus             |
| 1372787_at   | BE106508  | UTP3, small subunit (SSU) processome component, homolog (S. cerevisiae)                  | UTP3                       | 2,18   | Nucleus             |
| 1389041_at   | BF408597  | Vac14 homolog (S. cerevisiae)                                                            | VAC14                      | 2,77   | Unknown             |
| 1371651_at   | BI295882  | vacuolar protein sorting 25 homolog (S. cerevisiae)                                      | VPS25                      | -2,37  | Nucleus             |
| 1374472_at   | AI710526  | vacuolar protein sorting 37 homolog A (S. cerevisiae)                                    | VPS37A                     | 1,87   | Unknown             |
| 1376680_at   | BG379765  | vacuolar protein sorting 37 homolog C (S. cerevisiae)                                    | VPS37C                     | 7,87   | Cytoplasm           |
| 1398843_at   | AI411103  | VAMP (vesicle-associated membrane protein)-associated protein A, 33kDa                   | VAPA                       | 1,52   | Plasma Membrane     |
| 1394435_at   | AI703874  | vang-like 1 (van gogh, Drosophila)                                                       | VANGL1                     | 10,61  | Cytoplasm           |
| 1392667_at   | AI070793  | vang-like 2 (van gogh, Drosophila)                                                       | VANGL2                     | -3,98  | Plasma Membrane     |
| 1393349_x_at | BI288992  | vav 2 guanine nucleotide exchange factor                                                 | VAV2                       | -1,99  | Cytoplasm           |
| 1384169_a_at | AA900477  | vav 2 guanine nucleotide exchange factor                                                 | VAV2                       | -1,95  | Cytoplasm           |
| 1369974_at   | NM_012663 | vesicle-associated membrane protein 2 (synaptobrevin 2)                                  | VAMP2                      | -2,90  | Plasma Membrane     |
| 1369970_at   | NM_031827 | vesicle-associated membrane protein 8 (endobrevin)                                       | VAMP8                      | 2,12   | Plasma Membrane     |
| 1379393_at   | AI231564  | villin 1                                                                                 | VIL1                       | -2,24  | Cytoplasm           |
| 1373338_at   | AI175767  | vimentin-type IF-associated coiled-coil protein                                          | VMAC                       | -9,64  | Unknown             |
| 1368853_at   | NM_012686 | visinin-like 1                                                                           | VSNL1                      | -25,51 | Cytoplasm           |
| 1368854_at   | AI227991  | visinin-like 1                                                                           | VSNL1                      | -10,69 | Cytoplasm           |
| 1368076_at   | NM_052801 | von Hippel-Lindau tumor suppressor                                                       | VHL                        | 2,58   | Nucleus             |
| 1391037_at   | BF412161  | von Willebrand factor A domain containing 5B2                                            | VWA5B2                     | -3,23  | Unknown             |
| 1377000_at   | BI297041  | WAS protein homology region 2 domain containing 1                                        | WHDC1                      | 3,26   | Unknown             |
| 1371606_at   | AA819633  | WD and tetratricopeptide repeats 1                                                       | WDC1                       | -1,73  | Unknown             |
| 1376256_at   | BE108131  | WD repeat and FYVE domain containing 1                                                   | WDFY1                      | 4,27   | Cytoplasm           |
| 1374204_at   | BM388946  | WD repeat and SOCS box-containing 1                                                      | WSB1                       | 2,23   | Unknown             |
| 1398424_at   | AA799515  | WD repeat and SOCS box-containing 2                                                      | WSB2                       | -2,14  | Unknown             |
| 1372314_at   | AI179677  | WD repeat domain 26                                                                      | WDR26                      | -1,75  | Cytoplasm           |
| 1374793_at   | BE113663  | WD repeat domain 3                                                                       | WDR3                       | 1,92   | Cytoplasm           |
| 1399138_at   | BG672805  | WD repeat domain 42A                                                                     | WDR42A                     | -4,22  | Unknown             |
| 1382679_at   | BF396190  | WD repeat domain 43                                                                      | WDR43                      | 2,91   | Nucleus             |
| 1372781_at   | BG378912  | WD repeat domain 47                                                                      | WDR47                      | -3,28  | Unknown             |
| 1373399_at   | BI291997  | WD repeat domain 6                                                                       | WDR6 (includes EG:301007)  | -3,97  | Unknown             |

|              |           |                                                               |                           |       |                     |
|--------------|-----------|---------------------------------------------------------------|---------------------------|-------|---------------------|
| 1374715_at   | BE097245  | WD repeat domain 70                                           | WDR70                     | 2,81  | Unknown             |
| 1373263_at   | AW523737  | WD repeat domain 74                                           | WDR74                     | 2,94  | Nucleus             |
| 1388560_at   | AI412580  | WD repeat domain 77                                           | WDR77                     | 1,83  | Nucleus             |
| 1376136_at   | BI296118  | WD repeat domain 90                                           | WDR90                     | -1,95 | Unknown             |
| 1389068_at   | BI288819  | WD repeat domain, phosphoinositide interacting 2              | WIPI2                     | 3,95  | Cytoplasm           |
| 1383651_a_at | AA964509  | WDR45-like                                                    | WDR45L                    | 1,51  | Unknown             |
| 1383461_at   | AA946382  | WDYHV motif containing 1                                      | WDYHV1                    | 1,66  | Unknown             |
| 1379249_at   | AA900400  | Wilms tumor 1 associated protein                              | WTAP                      | 1,51  | Nucleus             |
| 1382175_at   | AW534129  | Wilms tumor 1 associated protein                              | WTAP                      | 2,57  | Nucleus             |
| 1373842_at   | BM390718  | Wiskott-Aldrich syndrome-like                                 | WASL (includes EG:682507) | -1,95 | Unknown             |
| 1384101_at   | BM388523  | Wiskott-Aldrich syndrome-like                                 | WASL (includes EG:682507) | 3,12  | Unknown             |
| 1369203_at   | NM_053738 | WNT inhibitory factor 1                                       | WIF1                      | -3,18 | Extracellular Space |
| 1391161_at   | BE107322  | Wolf-Hirschhorn syndrome candidate 1                          | WHSC1                     | 2,69  | Nucleus             |
| 1372232_at   | AI170808  | WW domain binding protein 1                                   | WBP1                      | -2,35 | Cytoplasm           |
| 1374394_at   | AI105305  | WW domain binding protein 2                                   | WBP2                      | 2,32  | Cytoplasm           |
| 1379321_at   | AI180133  | XK, Kell blood group complex subunit-related family, member 6 | XKR6                      | -1,71 | Unknown             |
| 1372893_at   | BI284198  | Yip1 domain family, member 1                                  | YIPF1                     | -1,80 | Unknown             |
| 1389035_at   | BF284830  | Yip1 domain family, member 3                                  | YIPF3                     | -3,57 | Unknown             |
| 1394414_at   | BF386706  | Yip1 domain family, member 4                                  | YIPF4                     | -1,80 | Cytoplasm           |
| 1389715_at   | BG381499  | yippee-like 4 (Drosophila)                                    | YPEL4                     | -2,26 | Nucleus             |
| 1371729_at   | AI169150  | yippee-like 5 (Drosophila)                                    | YPEL5                     | 1,65  | Unknown             |
| 1373826_at   | AI170754  | yippee-like 5 (Drosophila)                                    | YPEL5                     | 2,13  | Unknown             |
| 1379247_at   | BI275237  | YLP motif containing 1                                        | YLPM1                     | -1,92 | Nucleus             |
| 1368063_a_at | NM_133423 | YTH domain containing 1                                       | YTHDC1                    | 1,53  | Cytoplasm           |
| 1383389_at   | BM388790  | zer-1 homolog (C. elegans)                                    | ZER1                      | -2,70 | Unknown             |
| 1376916_at   | AW529183  | zinc finger and BTB domain containing 2                       | ZBTB2                     | 4,70  | Nucleus             |
| 1382524_at   | AA850361  | zinc finger and BTB domain containing 20                      | ZBTB20                    | -1,96 | Nucleus             |
| 1375867_at   | AW524493  | zinc finger and BTB domain containing 4                       | ZBTB4                     | -2,12 | Nucleus             |
| 1375302_at   | BM384146  | zinc finger and BTB domain containing 4                       | ZBTB4                     | -1,55 | Nucleus             |
| 1373763_at   | AI013512  | zinc finger and BTB domain containing 43                      | ZBTB43                    | 1,95  | Nucleus             |
| 1379439_at   | AA850609  | zinc finger and BTB domain containing 44                      | ZBTB44                    | 1,66  | Unknown             |
| 1393140_at   | AI574699  | zinc finger CCCH-type containing 12A                          | ZC3H12A                   | 22,73 | Unknown             |
| 1387921_at   | AB032932  | zinc finger CCCH-type containing 14                           | ZC3H14                    | 3,11  | Nucleus             |
| 1373380_at   | AI169085  | zinc finger CCCH-type containing 15                           | ZC3H15                    | 1,51  | Nucleus             |
| 1374322_at   | AA893980  | zinc finger CCCH-type containing 4                            | ZC3H4                     | -3,21 | Unknown             |
| 1374208_at   | BE116569  | zinc finger CCCH-type containing 7A                           | ZC3H7A                    | 2,46  | Unknown             |
| 1378119_at   | BG381574  | zinc finger CCCH-type containing 8                            | ZC3H8                     | 1,67  | Nucleus             |
| 1395007_at   | BE120572  | zinc finger protein 23 (KOX 16)                               | ZNF23                     | -3,22 | Nucleus             |
| 1389531_at   | AW523471  | zinc finger protein 330                                       | ZNF330                    | 2,12  | Nucleus             |
| 1380810_at   | BE102637  | zinc finger protein 40                                        | ZFP40                     | -2,16 | Unknown             |
| 1381607_at   | AI145754  | zinc finger protein 407                                       | ZNF407                    | -1,80 | Nucleus             |
| 1392966_at   | BF396256  | zinc finger protein 410                                       | ZNF410                    | 1,97  | Nucleus             |
| 1373853_at   | AI705797  | zinc finger protein 414                                       | ZNF414                    | -2,96 | Unknown             |
| 1382242_at   | BE105280  | zinc finger protein 451                                       | ZNF451                    | -1,56 | Nucleus             |
| 1393613_at   | BE117871  | zinc finger protein 462                                       | ZNF462                    | -2,54 | Nucleus             |
| 1389366_at   | BI293689  | zinc finger protein 48                                        | ZNF48                     | 1,62  | Unknown             |
| 1380203_at   | BI285498  | zinc finger protein 512B                                      | ZNF512B                   | -2,21 | Nucleus             |
| 1367524_at   | AW533822  | zinc finger protein 592                                       | ZNF592                    | 2,37  | Nucleus             |
| 1393292_at   | BE114251  | zinc finger protein 592                                       | ZNF592                    | 5,25  | Nucleus             |
| 1389523_at   | BM386127  | zinc finger protein 598                                       | ZNF598                    | 3,24  | Unknown             |
| 1373647_at   | BM392399  | zinc finger protein 622                                       | ZNF622                    | 1,66  | Nucleus             |
| 1392676_at   | AI548984  | zinc finger protein 667                                       | ZNF667                    | -2,27 | Nucleus             |
| 1385153_at   | AI555743  | zinc finger protein 68                                        | ZFP68                     | 3,26  | Nucleus             |
| 1379342_at   | BI297113  | zinc finger protein 692                                       | ZNF692                    | -2,27 | Unknown             |
| 1383540_at   | BF551093  | zinc finger protein 780A                                      | ZNF780A                   | -2,13 | Nucleus             |
| 1374664_at   | AI235511  | zinc finger protein 787                                       | ZNF787                    | 2,61  | Unknown             |
| 1368775_at   | NM_133563 | zinc finger protein 808                                       | ZNF808                    | -2,47 | Unknown             |
| 1380008_at   | BI291914  | zinc finger protein 828                                       | ZNF828                    | 1,86  | Unknown             |

|                              |          |                                                                      |                   |        |                 |
|------------------------------|----------|----------------------------------------------------------------------|-------------------|--------|-----------------|
| 1392551_at                   | AI104921 | zinc finger protein ZFP                                              | LOC503192         | -2,62  | Unknown         |
| 1395866_at                   | BF543899 | zinc finger protein ZFP                                              | LOC503192         | -2,04  | Unknown         |
| 1393080_at                   | BF389264 | zinc finger RNA binding protein                                      | ZFR               | 2,39   | Nucleus         |
| 1373767_at                   | AI406908 | zinc finger, AN1-type domain 2A                                      | ZFAND2A           | 6,70   | Unknown         |
| 1376432_at                   | BM383785 | zinc finger, AN1-type domain 3                                       | ZFAND3            | 4,08   | Unknown         |
| 1374147_at                   | BF420306 | zinc finger, CCCH-type with G patch domain                           | ZGPAT             | 2,63   | Unknown         |
| 1373891_at                   | AI101009 | zinc finger, CCHC domain containing 12                               | ZCCHC12           | -2,43  | Unknown         |
| 1384452_at                   | AA924571 | zinc finger, CCHC domain containing 7                                | ZCCHC7            | 1,70   | Unknown         |
| 1383239_at                   | BF406915 | zinc finger, CCHC domain containing 7                                | ZCCHC7            | 1,84   | Unknown         |
| 1372989_at                   | BI296586 | zinc finger, DHHC-type containing 14                                 | ZDHHC14           | 1,75   | Unknown         |
| 1374949_at                   | BM385443 | zinc finger, FYVE domain containing 19                               | ZFYVE19           | 1,99   | Unknown         |
| 1367540_at                   | AI044872 | zinc finger, FYVE domain containing 26                               | ZFYVE26           | 3,06   | Unknown         |
| 1389152_at                   | AI412984 | zinc finger, FYVE domain containing 27                               | ZFYVE27           | -3,85  | Unknown         |
| 1392454_at                   | BI296999 | zinc finger, HIT type 6                                              | ZNHIT6            | 2,16   | Unknown         |
| 1398587_at                   | AA860035 | zinc finger, matrin type 2                                           | ZMAT2             | -1,93  | Nucleus         |
| 1377701_at                   | AI012404 | zinc finger, MYM-type 6                                              | ZMYM6             | 1,53   | Nucleus         |
| 1391255_at                   | BE110035 | zinc finger, MYND-type containing 15                                 | ZMYND15           | 6,62   | Unknown         |
| 1391972_a_at                 | BE108410 | zinc finger, SWIM-type containing 4                                  | ZSWIM4            | 6,88   | Unknown         |
| 1374938_at                   | BI295067 | ZW10, kinetochore associated, homolog (Drosophila)                   | ZW10              | 1,95   | Nucleus         |
| 1394599_at                   | AA998165 | ZXD family zinc finger C                                             | ZXDC              | 4,89   | Unknown         |
| 1388130_at                   | AA943537 | zyxin                                                                | ZYX               | 4,78   | Plasma Membrane |
| <b>Not classified by IPA</b> |          |                                                                      |                   |        |                 |
| 1376047_at                   | BI285321 | 3'-phosphoadenosine 5'-phosphosulfate synthase 2 (predicted)         | Papss2_predicted  | -3,23  |                 |
| 1391365_at                   | BF416465 | 4-aminobutyrate aminotransferase                                     | Abat              | -2,49  |                 |
| 1382712_at                   | AI044245 | 6-phosphofructo-2-kinase/fructose-2,6-biphosphatase 2                | Pfkfb2            | -1,96  |                 |
| 1383127_at                   | BI295823 | a disintegrin and metalloprotease domain 10                          | Adam10            | -2,29  |                 |
| 1383147_at                   | AW526373 | abl-interactor 2                                                     | Abi2              | -5,99  |                 |
| 1383607_at                   | BG377487 | Ac1158                                                               | LOC302898         | -2,89  |                 |
| 1375036_at                   | AI172146 | Ac1158                                                               | LOC302898         | -1,67  |                 |
| 1371793_at                   | AI008697 | acetylcholinesterase                                                 | Ache              | -2,16  |                 |
| 1374432_at                   | BE118251 | activated leukocyte cell adhesion molecule                           | Alcam             | -1,74  |                 |
| 1396217_at                   | BF542447 | adaptor-related protein complex 1, sigma 2 subunit (predicted)       | Ap1s2_predicted   | -3,20  |                 |
| 1393048_at                   | BF561277 | adrenergic receptor, alpha 2a                                        | Adra2a            | -13,99 |                 |
| 1381994_at                   | BM385862 | AE binding protein 2 (predicted)                                     | Aebp2_predicted   | -5,07  |                 |
| 1372025_at                   | BI296467 | antisense paternally expressed gene 3                                | Apeg3             | -2,02  |                 |
| 1377963_at                   | AW526938 | arginine-tRNA-protein transferase 1 (predicted)                      | Ate1_predicted    | -2,65  |                 |
| 1393345_at                   | BF561145 | aspartate-beta-hydroxylase (predicted)                               | Asph_predicted    | -2,99  |                 |
| 1397030_at                   | AI406451 | ATPase, Ca++ transporting, plasma membrane 1                         | Atp2b1            | 1,79   |                 |
| 1370583_s_at                 | AY082609 | ATP-binding cassette, sub-family B (MDR/TAP), member 1               | Abcb1             | 10,52  |                 |
| 1381121_at                   | AW533010 | basic helix-loop-helix domain containing, class B2                   | Bhlhb2            | 7,29   |                 |
| 1373524_at                   | AA946482 | BCL2-associated transcription factor 1                               | Bclaf1            | -3,09  |                 |
| 1379588_at                   | AA874805 | bridging integrator 1                                                | Bin1              | -3,20  |                 |
| 1381826_at                   | AI070839 | bridging integrator 1                                                | Bin1              | -2,55  |                 |
| 1393066_at                   | AI070787 | cadherin 1                                                           | Cdh1              | -4,86  |                 |
| 1376225_at                   | BF411924 | calsenilin, presenilin binding protein, EF hand transcription factor | Csen              | -3,86  |                 |
| 1398716_at                   | BG670822 | carnitine palmitoyltransferase 1a, liver                             | Cpt1a             | -2,12  |                 |
| 1382882_x_at                 | AA963228 | carnitine palmitoyltransferase 1a, liver                             | Cpt1a             | -1,95  |                 |
| 1392166_at                   | BE099838 | carnitine palmitoyltransferase 1a, liver                             | Cpt1a             | -1,92  |                 |
| 1397700_x_at                 | BG670822 | carnitine palmitoyltransferase 1a, liver                             | Cpt1a             | -1,83  |                 |
| 1394461_at                   | BF409715 | casein kinase 1, alpha 1                                             | Csnk1a1           | 3,28   |                 |
| 1376616_at                   | BF551036 | casein kinase II, alpha 1 polypeptide                                | Csnk2a1           | -2,15  |                 |
| 1382160_at                   | AI236331 | casein kinase II, alpha 2, polypeptide (predicted)                   | Csnk2a2_predicted | 3,05   |                 |
| 1381173_at                   | BG375010 | caspase 4, apoptosis-related cysteine peptidase                      | Casp4             | 5,70   |                 |
| 1382602_at                   | BE120211 | catenin (cadherin associated protein), beta 1                        | Ctnnb1            | -2,58  |                 |
| 1379912_at                   | BM392147 | CCR4-NOT transcription complex, subunit 6-like (predicted)           | Cnot6l_predicted  | -1,71  |                 |
| 1373246_at                   | BF397920 | CDC23 (cell division cycle 23, yeast, homolog)                       | Cdc23             | -1,71  |                 |
| 1372651_at                   | AI144726 | CDW92 antigen                                                        | Cdw92             | -5,16  |                 |
| 1390886_at                   | BE111565 | coiled-coil domain containing 39 (predicted)                         | Ccdc39_predicted  | -1,96  |                 |

|              |          |                                                                            |
|--------------|----------|----------------------------------------------------------------------------|
| 1376302_at   | AA955175 | coilin                                                                     |
| 1393623_at   | AI502247 | coilin                                                                     |
| 1374273_at   | BG665433 | coxsackie virus and adenovirus receptor                                    |
| 1377406_at   | BI275251 | cullin-associated and neddylation-dissociated 2 (putative)                 |
| 1384214_a_at | AI045459 | cyclin T2 (predicted)                                                      |
| 1390470_at   | BE107044 | cyclin T2 (predicted)                                                      |
| 1385334_at   | AA818166 | cytochrome P450-like protein                                               |
| 1374786_at   | BI298817 | cytotoxic granule-associated RNA binding protein 1                         |
| 1376825_at   | BF557258 | DEAH (Asp-Glu-Ala-His) box polypeptide 30                                  |
| 1391259_at   | BE104618 | dehydrogenase/reductase (SDR family) member 1                              |
| 1373291_at   | AI176713 | deleted in liver cancer 1                                                  |
| 1394793_at   | AI715674 | disabled homolog 1 (Drosophila)                                            |
| 1393305_at   | BF399398 | discs, large homolog-associated protein 4 (Drosophila)                     |
| 1396528_at   | BF404786 | Down syndrome critical region gene 1-like 1                                |
| 1372385_at   | AA957292 | dual specificity phosphatase 8 (predicted)                                 |
| 1375866_at   | BF396191 | dynein-like protein 2                                                      |
| 1384449_at   | AA964588 | E1A binding protein p300                                                   |
| 1394546_at   | AI556229 | ELAV (embryonic lethal, abnormal vision, Drosophila)-like 4 (Hu antigen D) |
| 1381525_at   | BF419130 | enabled homolog (Drosophila)                                               |
| 1398098_at   | AW522192 | FCH domain only 2 (predicted)                                              |
| 1391085_at   | BE118077 | fibronigen-like protein 1                                                  |
| 1375720_at   | AI171785 | gamma-aminobutyric acid (GABA) B receptor 1                                |
| 1394578_at   | BI299761 | glutamate receptor, ionotropic, AMPA2                                      |
| 1383062_at   | BE105102 | glutaredoxin 2 (thioltransferase)                                          |
| 1393159_at   | BG671304 | glutaredoxin 2 (thioltransferase)                                          |
| 1384638_at   | AI030545 | glutaryl-Coenzyme A dehydrogenase (predicted)                              |
| 1381703_at   | AW525915 | glutathione reductase                                                      |
| 1389714_at   | AI103146 | glycogen synthase kinase 3 alpha                                           |
| 1376079_at   | BI295806 | GTPase, IMAP family member 7                                               |
| 1375745_at   | BE117491 | guanine nucleotide binding protein, alpha q polypeptide                    |
| 1383055_at   | AW143805 | guanine nucleotide binding protein, alpha q polypeptide                    |
| 1386660_at   | BF565021 | guanine nucleotide binding protein, gamma 2                                |
| 1398883_at   | BI296284 | heterogeneous nuclear ribonucleoprotein A2/B1 (predicted)                  |
| 1371333_at   | AI180251 | heterogeneous nuclear ribonucleoprotein D-like                             |
| 1380219_at   | BE117902 | high mobility group nucleosomal binding domain 2                           |
| 1376935_at   | BE113667 | high mobility group nucleosomal binding domain 2                           |
| 1377578_at   | AI072161 | histocompatibility 13 (predicted)                                          |
| 1381428_a_at | AI177364 | histone cluster 1, H2bh                                                    |
| 1393030_at   | BE115641 | hypothetical gene supported by BC082068 (predicted)                        |
| 1388553_at   | BI290534 | hypothetical LOC290577                                                     |
| 1388895_at   | AI175791 | hypothetical LOC290577                                                     |
| 1375927_at   | BE100774 | hypothetical protein LOC499120                                             |
| 1373193_at   | BE108670 | hypothetical protein LOC690089                                             |
| 1382944_at   | AA891161 | immunoglobulin superfamily, member 6                                       |
| 1374201_at   | AI712727 | inhibitor of kappaB kinase epsilon (predicted)                             |
| 1390671_at   | AI044666 | insulin-like growth factor 1 receptor                                      |
| 1383476_at   | AW528065 | inter-alpha trypsin inhibitor, heavy chain 3                               |
| 1371926_at   | AI171807 | interleukin 6 signal transducer                                            |
| 1383911_at   | AA924574 | jumonji domain containing 2C (predicted)                                   |
| 1372550_at   | AI169278 | karyopherin (importin) beta 1                                              |
| 1382567_at   | AI013639 | kin of IRRE like 1 (Drosophila)                                            |
| 1389922_at   | AA891362 | L-3-hydroxyacyl-Coenzyme A dehydrogenase, short chain                      |
| 1374296_at   | BM387574 | leucine-rich repeat-containing 8                                           |
| 1391155_at   | AW528765 | ligand of numb-protein X 1 (predicted)                                     |
| 1396470_at   | BF561077 | LIM domain only 4                                                          |
| 1397153_at   | BE115262 | LMBR1 domain containing 1                                                  |
| 1394283_at   | AW144132 | LUC7-like 2 (S. cerevisiae) (predicted)                                    |
| 1384936_at   | AI136316 | MAWD binding protein                                                       |

|                      |        |
|----------------------|--------|
| Coil                 | -3,16  |
| Coil                 | -2,41  |
| Cxadr                | -2,78  |
| Cand2                | -1,52  |
| Ccnt2_predicted      | -3,76  |
| Ccnt2_predicted      | -1,87  |
| LOC266761            | -2,70  |
| Tia1                 | -2,20  |
| Dhx30                | -2,66  |
| Dhrs1                | -2,17  |
| Dlc1                 | -3,21  |
| Dab1                 | -3,82  |
| Dlgap4               | -2,99  |
| Dscr111              | -6,75  |
| Dusp8_predicted      | 1,89   |
| DLP2                 | 1,94   |
| Ep300                | 1,71   |
| Elav14               | -10,08 |
| Enah                 | 1,58   |
| Fcho2_predicted      | 1,80   |
| Fgl1                 | -2,87  |
| Gabbr1               | -1,77  |
| Gria2                | -3,68  |
| Glr2                 | -1,53  |
| Glr2                 | 1,60   |
| Gcdh_predicted       | -2,82  |
| Gsr                  | 3,39   |
| Gsk3a                | 5,74   |
| Gimap7               | -1,61  |
| Gnaq                 | -2,50  |
| Gnaq                 | -2,24  |
| Gng2                 | -4,19  |
| Hnrpa2b1_predicted   | -2,23  |
| Hnrpd1               | -1,85  |
| Hmgn2                | 1,70   |
| Hmgn2                | 4,71   |
| H13_predicted        | -1,80  |
| Hist1h2bh            | -1,84  |
| RGD1564998_predicted | -2,87  |
| LOC290577            | -1,62  |
| LOC290577            | 3,25   |
| LOC499120            | -2,08  |
| LOC690089            | -2,03  |
| Igsf6                | -2,36  |
| Ikbke_predicted      | -1,54  |
| Igfl1r               | 2,00   |
| Itih3                | 3,09   |
| Il6st                | 5,59   |
| Jmjd2c_predicted     | 1,87   |
| Kpn1                 | 2,23   |
| Kirrel1              | 2,89   |
| Hadhsc               | -8,07  |
| Lrrc8                | -2,51  |
| Lnx1_predicted       | -4,96  |
| Lmo4                 | 1,80   |
| Lmbrd1               | 1,89   |
| Luc712_predicted     | 1,66   |
| Mawbp                | -3,91  |



|              |          |                                                                              |
|--------------|----------|------------------------------------------------------------------------------|
| 1398205_at   | BF392849 | membrane protein, palmitoylated 5 (MAGUK p55 subfamily member 5) (predicted) |
| 1376076_at   | BI282296 | membrane protein, palmitoylated 5 (MAGUK p55 subfamily member 5) (predicted) |
| 1397809_at   | AW920788 | mitogen-activated protein kinase 8 interacting protein 3                     |
| 1392484_at   | AA892339 | modulator of apoptosis 1                                                     |
| 1395069_at   | BF400622 | mouse zinc finger protein 14-like                                            |
| 1373153_at   | AI230720 | myelin oligodendrocyte glycoprotein                                          |
| 1391225_at   | BF392551 | myotubularin related protein 7 (predicted)                                   |
| 1383135_at   | BG669126 | neurotrophic tyrosine kinase, receptor, type 2                               |
| 1374566_at   | AI237243 | nischarin                                                                    |
| 1381624_at   | BF391717 | nuclear protein in the AT region (predicted)                                 |
| 1374438_at   | AI103962 | OTU domain containing 4                                                      |
| 1378263_at   | BF403483 | oxysterol binding protein-like 1A                                            |
| 1383633_at   | BI289884 | oxysterol binding protein-like 1A                                            |
| 1376121_at   | BE107051 | PHD finger protein 10                                                        |
| 1374077_at   | AI172029 | phosphatidylserine synthase 1                                                |
| 1389429_at   | AA925367 | phosphodiesterase 4D interacting protein (myomegalin)                        |
| 1379811_at   | AI763912 | phosphodiesterase 4D interacting protein (myomegalin)                        |
| 1380570_at   | AI145593 | piccolo (presynaptic cytomatrix protein)                                     |
| 1378038_at   | BF393884 | polypyrimidine tract binding protein 2                                       |
| 1373818_at   | AI408351 | potassium channel tetramerisation domain containing 12 (predicted)           |
| 1382255_at   | BE110785 | pre-B-cell colony enhancing factor 1                                         |
| 1375815_at   | BF391129 | progressive ankylosis homolog (mouse)                                        |
| 1392612_at   | AW142962 | prolactin receptor                                                           |
| 1376944_at   | AI407163 | prolactin receptor                                                           |
| 1371593_at   | BI296121 | proliferating cell nuclear antigen                                           |
| 1383421_at   | BM386110 | proliferating cell nuclear antigen                                           |
| 1371854_at   | BG374451 | proline-rich protein PRP2                                                    |
| 1397662_at   | BF395791 | proprotein convertase subtilisin/kexin type 2                                |
| 1378532_at   | AI407172 | protein disulfide isomerase associated 4                                     |
| 1383475_at   | AW521250 | protein phosphatase 1A, magnesium dependent, alpha isoform                   |
| 1383931_at   | AA901043 | protein tyrosine phosphatase, receptor type, K, extracellular region         |
| 1378665_at   | BF415436 | protocadherin 9 (predicted)                                                  |
| 1390821_at   | AI103156 | protocadherin alpha 4                                                        |
| 1389022_at   | AI102760 | putative aminopeptidase Fxna                                                 |
| 1374609_at   | AI011183 | RAB3 GTPase activating protein subunit 2                                     |
| 1373191_at   | BG375890 | RAB34, member of RAS oncogene family                                         |
| 1381996_at   | BG666712 | RAB9, member RAS oncogene family                                             |
| 1399140_at   | AA965202 | Rap guanine nucleotide exchange factor (GEF) 1                               |
| 1383894_at   | BI289486 | Rap guanine nucleotide exchange factor (GEF) 6 (predicted)                   |
| 1377791_at   | BI299500 | Ras-related GTP binding B                                                    |
| 1389972_at   | AA943681 | response gene to complement 32                                               |
| 1395965_at   | BI298589 | retinoblastoma binding protein 6                                             |
| 1393263_at   | AW522530 | RGD1563912 (predicted)                                                       |
| 1378800_at   | BI291526 | Rho GTPase activating protein 8                                              |
| 1378062_at   | BF398677 | Rho guanine nucleotide exchange factor (GEF) 12                              |
| 1382389_at   | AI179755 | Rho guanine nucleotide exchange factor (GEF) 5                               |
| 1380174_at   | BE116115 | ribosomal protein L35                                                        |
| 1377843_at   | BF548385 | ribosomal protein S5                                                         |
| 1395991_at   | BE107556 | RIM binding protein 2                                                        |
| 1397788_at   | AW521711 | RIM binding protein 2                                                        |
| 1382437_at   | BM383464 | RT1 class Ib, locus Aw2                                                      |
| 1380415_at   | AI233027 | RT1 class Ib, locus Aw2                                                      |
| 1390562_s_at | BE102350 | RT1 class Ib, locus Aw2                                                      |
| 1379357_at   | AI408767 | RT1 class Ib, locus Aw2                                                      |
| 1393108_at   | BM387813 | RT1 class Ib, locus Aw2                                                      |
| 1379496_at   | AI029460 | RT1 class Ib, locus Aw2                                                      |
| 1392954_at   | AI029637 | RT1 class Ib, locus Aw2                                                      |
| 1380129_at   | AA818937 | RT1 class Ib, locus Aw2                                                      |

|                      |        |
|----------------------|--------|
| Mpp5_predicted       | 2,57   |
| Mpp5_predicted       | 7,79   |
| Mapk8ip3             | 1,67   |
| Moap1                | 2,52   |
| LOC499124            | 2,83   |
| Mog                  | -2,33  |
| Mtmr7_predicted      | -2,53  |
| Ntrk2                | -7,97  |
| Nisch                | -2,23  |
| Npat_predicted       | 4,20   |
| Otud4                | 1,89   |
| Osbp1a               | -2,32  |
| Osbp1a               | -2,02  |
| Phf10                | -1,53  |
| Ptdss1               | -3,41  |
| Pde4dip              | -3,67  |
| Pde4dip              | -1,64  |
| Pclo                 | -3,24  |
| Ptbp2                | 2,81   |
| Kctd12_predicted     | -4,23  |
| Pbef1                | 2,33   |
| Ank                  | -3,70  |
| Prlr                 | -7,45  |
| Prlr                 | -5,95  |
| Pcna                 | -1,58  |
| Pcna                 | 6,31   |
| Prp2                 | 5,68   |
| Pcsk2                | -3,78  |
| Pdia4                | 12,43  |
| Ppm1a                | 1,72   |
| Ptprk                | -5,62  |
| Pcdh9_predicted      | -5,77  |
| Pcdh4                | -1,94  |
| Fxna                 | 2,51   |
| Rab3gap2             | -2,01  |
| Rab34                | 1,71   |
| Rab9                 | -2,13  |
| Rapgef1              | 2,45   |
| Rapgef6_predicted    | 10,41  |
| RragB                | -14,28 |
| Rgc32                | 15,35  |
| Rbbp6                | -3,72  |
| RGD1563912_predicted | -5,73  |
| Arhgap8              | 3,73   |
| Arhgef12             | 2,00   |
| Arhgef5              | 3,20   |
| Rpl35                | -2,21  |
| Rps5                 | 1,66   |
| Rimbp2               | -2,76  |
| Rimbp2               | -2,57  |
| RT1-Aw2              | 2,04   |
| RT1-Aw2              | 2,58   |
| RT1-Aw2              | 4,61   |
| RT1-Aw2              | 5,54   |
| RT1-Aw2              | 5,65   |
| RT1-Aw2              | 7,10   |
| RT1-Aw2              | 9,52   |
| RT1-Aw2              | 10,52  |

|              |          |                                                                                                                         |                      |        |
|--------------|----------|-------------------------------------------------------------------------------------------------------------------------|----------------------|--------|
| 1379818_at   | BF288109 | RT1 class Ib, locus Aw2                                                                                                 | RT1-Aw2              | 16,65  |
| 1382215_at   | AA875331 | ryanodine receptor 3                                                                                                    | Ryr3                 | 2,23   |
| 1374100_at   | AI102771 | secernin 1                                                                                                              | Secn1                | -1,95  |
| 1398906_at   | BM391354 | sedlin-like                                                                                                             | LOC287274            | -2,50  |
| 1375374_at   | BF400606 | sequestosome 1                                                                                                          | Sqstm1               | 2,38   |
| 1392262_at   | BF402235 | seryl-aminoacyl-tRNA synthetase 1                                                                                       | Sars1                | 7,66   |
| 1389550_at   | BM385941 | SH3-domain GRB2-like 2                                                                                                  | Sh3gl2               | -2,56  |
| 1374789_at   | BF550398 | SH3-domain GRB2-like 2                                                                                                  | Sh3gl2               | -1,80  |
| 1374822_at   | BE118465 | similar to 106 kDa O-GlcNAc transferase-interacting protein (predicted)                                                 | RGD1307844_predicted | 2,61   |
| 1388481_at   | AI407731 | similar to 40S ribosomal protein S28                                                                                    | LOC691531            | 1,71   |
| 1388754_at   | AI176839 | similar to Ab1-133                                                                                                      | RGD1306344           | 5,09   |
| 1389918_at   | BM391364 | similar to AL023001 protein (predicted)                                                                                 | RGD1305001_predicted | 3,87   |
| 1395717_at   | BF394620 | similar to amyloid beta (A4) precursor protein-binding, family B, member 2 (predicted)                                  | RGD1562438_predicted | -3,17  |
| 1376441_at   | AI102249 | similar to B0511.12                                                                                                     | LOC690217            | -2,81  |
| 1374498_at   | AW916866 | similar to CG13379-PA (predicted)                                                                                       | RGD1311493_predicted | -4,93  |
| 1377067_at   | AI137309 | similar to chromosome 10 open reading frame 6 (predicted)                                                               | RGD1564591_predicted | -2,02  |
| 1384907_at   | AI411835 | similar to Dachshund homolog 1 (Dach1)                                                                                  | LOC306096            | -3,57  |
| 1372103_at   | BM386931 | similar to DnaJ (Hsp40) homolog, subfamily A, member 4                                                                  | LOC498996            | -3,93  |
| 1398991_at   | BM389704 | similar to expressed sequence AA408877                                                                                  | RGD1308513           | -4,65  |
| 1375672_at   | BG380279 | similar to expressed sequence AA408877                                                                                  | RGD1308513           | -2,07  |
| 1374766_at   | BE103616 | similar to F33H2.2                                                                                                      | LOC689997            | -2,26  |
| 1389345_at   | AI231218 | similar to F-box only protein 3 isoform 1                                                                               | LOC690634            | -1,61  |
| 1376237_at   | AI145040 | similar to Fgfr1 oncogene partner                                                                                       | LOC683722            | 1,68   |
| 1373252_at   | AI411930 | similar to formin-like 3 protein                                                                                        | LOC300225            | 4,22   |
| 1385926_at   | BF550565 | similar to GLI pathogenesis-related 2                                                                                   | LOC679819            | 4,90   |
| 1392148_at   | BF391605 | similar to H43E16.1                                                                                                     | LOC689994            | -1,63  |
| 1376990_at   | BE118704 | similar to HCDI protein (predicted)                                                                                     | RGD1309307_predicted | 1,62   |
| 1382823_at   | AI070008 | similar to HR21spA                                                                                                      | MGC116373            | 15,50  |
| 1396489_at   | BF404442 | similar to hypothetical protein FLJ10154                                                                                | RGD1310061           | -8,38  |
| 1398020_at   | BF393027 | similar to hypothetical protein FLJ14675                                                                                | RGD1309592           | -11,08 |
| 1392680_at   | AA900508 | similar to hypothetical protein FLJ20037 (predicted)                                                                    | RGD1311381_predicted | -3,63  |
| 1373822_at   | BI275708 | similar to hypothetical protein MGC15523                                                                                | RGD1306356           | 1,79   |
| 1376723_a_at | AW142765 | similar to hypothetical protein MGC20460 (predicted)                                                                    | RGD1310651_predicted | 2,68   |
| 1392637_at   | AA923988 | similar to interferon-inducible GTPase                                                                                  | MGC108823            | 13,69  |
| 1381975_at   | BG371767 | similar to KIAA0367                                                                                                     | RGD1311350           | -2,86  |
| 1373543_at   | BI296461 | similar to KIAA0368 (predicted)                                                                                         | RGD1306148_predicted | -2,41  |
| 1374030_at   | BE100868 | similar to KIAA0999 protein                                                                                             | LOC684112            | -3,56  |
| 1380900_at   | BE120504 | similar to KIAA1731 protein (predicted)                                                                                 | RGD1311723_predicted | -2,33  |
| 1373339_at   | AI599410 | similar to LETM1 domain containing 1 isoform 4                                                                          | LOC681352            | 1,92   |
| 1391952_at   | BE110628 | similar to leucine rich repeat containing 39 isoform 2                                                                  | LOC691307            | -1,93  |
| 1383173_at   | BI281630 | similar to Microtubule-associated protein RP/EB family member 2 (APC-binding protein EB2) (End-binding protein 2) (EB2) | LOC679221            | -6,99  |
| 1383216_at   | BM390667 | similar to mKIAA0431 protein                                                                                            | RGD1305781           | 2,68   |
| 1382897_at   | BF393872 | similar to mKIAA1461 protein                                                                                            | LOC311026            | -1,64  |
| 1372063_at   | BG377807 | similar to novel protein of unknown function (DUF423) family member (predicted)                                         | RGD1563438_predicted | -1,95  |
| 1393800_at   | AW526472 | similar to nuclear RNA export factor 2                                                                                  | LOC680025            | -1,95  |
| 1397676_at   | BF290784 | similar to osteoclast inhibitory lectin (predicted)                                                                     | RGD1563148_predicted | 1,97   |
| 1389446_at   | AI576586 | similar to p150 target of rapamycin (TOR)-scaffold protein containing WD-repeats (predicted)                            | RGD1311784_predicted | 3,09   |
| 1378094_at   | BM389654 | similar to pleckstrin homology-like domain, family B, member 2                                                          | LOC685611            | -4,12  |
| 1397320_at   | BI293372 | similar to Progesterone-induced blocking factor 1 (predicted)                                                           | RGD1305077_predicted | 2,74   |
| 1398669_at   | AA893160 | similar to Protein C12orf11 (Sarcoma antigen NY-SAR-95)                                                                 | LOC690728            | 2,55   |
| 1396817_at   | AI599545 | similar to RAD54B homolog isoform 1; RAD54, S. cerevisiae, homolog of, B (predicted)                                    | RGD1306507_predicted | -2,95  |
| 1389500_at   | BM383122 | similar to ras homolog gene family, member U                                                                            | LOC678766            | 7,34   |
| 1385110_at   | AI029476 | similar to RIKEN cDNA 1110003E01                                                                                        | RGD1311122           | 1,52   |
| 1389593_at   | BM392287 | similar to RIKEN cDNA 1500031M22 (predicted)                                                                            | RGD1311752_predicted | -5,18  |
| 1382288_at   | AI172553 | similar to RIKEN cDNA 1500041N16                                                                                        | RGD1306947           | 1,73   |
| 1381844_at   | BM389974 | similar to RIKEN cDNA 4121402D02 (predicted)                                                                            | RGD1564778_predicted | -2,88  |
| 1397410_at   | BI301687 | similar to RIKEN cDNA 4631427C17 (predicted)                                                                            | RGD1564895_predicted | -2,11  |
| 1399069_at   | AI234008 | similar to RIKEN cDNA 4732418C07 (predicted)                                                                            | RGD1310351_predicted | -2,97  |

|              |          |                                                                                                                               |                      |       |
|--------------|----------|-------------------------------------------------------------------------------------------------------------------------------|----------------------|-------|
| 1384431_at   | AI070150 | similar to RIKEN cDNA 4930431B11 gene                                                                                         | RGD1308555           | 4,26  |
| 1392541_at   | AW919608 | similar to RIKEN cDNA A030007L17; EST AA673177 (predicted)                                                                    | RGD1304876_predicted | 3,04  |
| 1383204_at   | BE099804 | similar to RIKEN cDNA A530089I17 (predicted)                                                                                  | RGD1311375_predicted | 3,68  |
| 1372826_at   | BI285718 | similar to RIKEN cDNA A530089I17 (predicted)                                                                                  | RGD1311375_predicted | 4,91  |
| 1371755_at   | AA799607 | similar to RIKEN cDNA B230219D22 (predicted)                                                                                  | RGD1566359_predicted | -2,32 |
| 1375678_at   | AI412430 | similar to RIKEN cDNA D030012E24 gene (predicted)                                                                             | RGD1311298_predicted | 1,83  |
| 1382755_at   | AI058343 | similar to RIKEN cDNA G430041M01 (predicted)                                                                                  | RGD1562563_predicted | 2,31  |
| 1393261_at   | AI058850 | similar to Serine/threonine-protein phosphatase 2A 56 kDa regulatory subunit gamma isoform (PP2A, B subunit, B gamma isoform) | LOC691318            | -3,24 |
| 1392647_at   | BF282318 | similar to Serum amyloid A-3 protein precursor                                                                                | LOC691143            | 5,87  |
| 1382490_at   | BF284288 | similar to solute carrier family 25 (mitochondrial carrier; phosphate carrier), member 23                                     | LOC301113            | -1,67 |
| 1394275_at   | BF559096 | similar to StAR-related protein 1-4E (predicted)                                                                              | RGD1561783_predicted | -3,51 |
| 1381461_at   | AI058509 | similar to StAR-related protein 1-4E (predicted)                                                                              | RGD1561783_predicted | -2,41 |
| 1384087_at   | AA925049 | similar to sterile alpha motif domain containing 12 (predicted)                                                               | RGD1561402_predicted | 3,70  |
| 1376920_at   | BF408536 | similar to sterile alpha motif domain containing 9-like                                                                       | LOC500013            | 11,10 |
| 1389439_at   | AI172618 | similar to TBP-associated factor 172 (TAF-172) (TAF(II)170) (predicted)                                                       | RGD1564130_predicted | 3,26  |
| 1383805_at   | BG666454 | similar to Traf2 and NCK interacting kinase, splice variant 4 (predicted)                                                     | RGD1561817_predicted | -2,09 |
| 1398691_at   | AI408578 | similar to TSC22 domain family protein 2 (TSC22-related-inducible leucine zipper protein 4)                                   | LOC499624            | 1,56  |
| 1377141_at   | AI103397 | similar to UPF0308 protein C9orf21                                                                                            | LOC498685            | -4,54 |
| 1393561_at   | BF396511 | similar to vacuolar protein sorting 13C protein (predicted)                                                                   | RGD1560364_predicted | -1,60 |
| 1377273_at   | BF389637 | similar to Wolf-Hirschhorn syndrome candidate 1 protein isoform 1                                                             | LOC680537            | -3,26 |
| 1373283_at   | BE113158 | solute carrier family 25 (mitochondrial carrier; adenine nucleotide translocator), member 3                                   | Slc25a3              | 2,12  |
| 1381028_at   | BF417583 | solute carrier family 27 (fatty acid transporter), member 4                                                                   | Slc27a4              | 1,87  |
| 1375182_at   | BE109671 | solute carrier family 3, member 1                                                                                             | Slc3a1               | -7,75 |
| 1392145_at   | BI281801 | solute carrier family 45, member 3 (predicted)                                                                                | Slc45a3_predicted    | 2,68  |
| 1378910_at   | BG378480 | solute carrier family 6 (neurotransmitter transporter, taurine), member 6                                                     | Slc6a6               | 39,57 |
| 1383585_s_at | AI043753 | sorting nexin 10                                                                                                              | Snx10                | 4,06  |
| 1395359_at   | BF559566 | spectrin beta 2                                                                                                               | Spnb2                | 1,80  |
| 1377303_at   | BG373000 | splA/ryanodine receptor domain and SOCS box containing 3 (predicted)                                                          | Spsb3_predicted      | -1,68 |
| 1389008_at   | AI409218 | sprouty-related, EVH1 domain containing 2                                                                                     | Spred2               | -2,76 |
| 1380813_at   | AA891239 | succinate dehydrogenase complex, subunit B, iron sulfur (Ip) (predicted)                                                      | Sdhb_predicted       | -1,51 |
| 1389833_at   | BF285924 | sulfatase modifying factor 1 (predicted)                                                                                      | Sumf1_predicted      | -4,75 |
| 1377473_at   | BE349749 | SWI/SNF related, matrix associated, actin dependent regulator of chromatin, subfamily d, member 3                             | Smardc3              | -3,07 |
| 1388811_at   | BF401593 | synapsin II                                                                                                                   | Syn2                 | -3,10 |
| 1390109_at   | BI303073 | synaptotagmin binding, cytoplasmic RNA interacting protein                                                                    | Syncrip              | 4,47  |
| 1379023_at   | BF406975 | thioredoxin domain containing 12 (endoplasmic reticulum)                                                                      | Txndc12              | 2,22  |
| 1376712_at   | AI144967 | thioredoxin domain containing 4 (endoplasmic reticulum)                                                                       | Txndc4               | -1,83 |
| 1374529_at   | AI406660 | thrombospondin 1                                                                                                              | Thbs1                | -6,72 |
| 1394109_at   | BF558056 | thrombospondin 1                                                                                                              | Thbs1                | -2,31 |
| 1395928_at   | BE102495 | thyroid hormone receptor alpha                                                                                                | Thra                 | 1,59  |
| 1374798_at   | AA924151 | torsin A interacting protein 2                                                                                                | Tor1aip2             | -2,40 |
| 1376673_at   | BM391853 | transcription factor 8                                                                                                        | Tcf8                 | 2,22  |
| 1372104_at   | BF289002 | transmembrane BAX inhibitor motif containing 1                                                                                | Tmbim1               | -2,35 |
| 1374194_at   | AI170007 | transmembrane protein 16C (predicted)                                                                                         | Tmem16c_predicted    | -1,56 |
| 1375644_at   | AI170561 | transthyretin                                                                                                                 | Ttr                  | 2,21  |
| 1390345_at   | BG375523 | U1 small nuclear ribonucleoprotein polypeptide A (predicted)                                                                  | Snrp70_predicted     | -2,00 |
| 1391302_at   | BE098463 | ubiquitin specific protease 43 (predicted)                                                                                    | Usp43_predicted      | -4,03 |
| 1379673_at   | AI230747 | UDP-N-acetylglucosamine pyrophosphorylase 1-like 1 (predicted)                                                                | Uap111_predicted     | 2,17  |
| 1383214_at   | AI555989 | USP6 N-terminal like (predicted)                                                                                              | Usp6n1_predicted     | 3,18  |
| 1380590_at   | BE115496 | vitamin K epoxide reductase complex, subunit 1-like 1                                                                         | Vkorc111             | 2,17  |
| 1374285_at   | AW531275 | v-ral simian leukemia viral oncogene homolog A (ras related)                                                                  | Rala                 | -1,64 |
| 1392710_at   | AI101727 | WD repeat and FYVE domain containing 1                                                                                        | Wdly1                | 2,25  |
| 1376448_at   | AI575081 | WD repeat and FYVE domain containing 1                                                                                        | Wdly1                | 3,91  |
| 1392806_at   | AI234807 | Wolf-Hirschhorn syndrome candidate 1-like 1 (predicted)                                                                       | Whsc111_predicted    | 2,08  |
| 1385217_at   | BM385870 | zinc finger and BTB domain containing 10                                                                                      | Zbtb10               | 6,07  |
| 1375179_at   | AI231282 | zinc finger protein 216 (predicted)                                                                                           | Zfp216_predicted     | 2,55  |
| 1378302_at   | BF403965 | zinc finger, CSL-type containing 3 (predicted)                                                                                | Zcsl3_predicted      | 1,82  |
| 1393000_at   | AI045970 | zinc finger, DHHC domain containing 6                                                                                         | Zdhhc6               | -2,80 |

Not Classified

|              |          |        |
|--------------|----------|--------|
| 1393482_at   | AI045330 | -30,80 |
| 1382098_at   | AI228756 | -25,13 |
| 1372318_at   | AI235528 | -25,03 |
| 1391672_at   | BF399539 | -18,90 |
| 1384922_at   | AW527642 | -18,29 |
| 1393528_at   | AI059227 | -17,59 |
| 1379373_at   | AI556457 | -17,58 |
| 1373165_at   | BF404539 | -17,52 |
| 1385881_at   | BE100612 | -16,80 |
| 1376463_at   | AA955579 | -16,09 |
| 1382651_at   | AA998677 | -16,01 |
| 1376398_at   | BF417784 | -15,47 |
| 1377013_at   | AI639108 | -14,21 |
| 1390872_at   | AI178134 | -12,64 |
| 1377424_at   | AI712672 | -12,37 |
| 1396276_at   | BG662898 | -11,97 |
| 1386114_at   | BF550033 | -11,76 |
| 1393109_at   | BI274436 | -10,73 |
| 1375856_at   | AI102258 | -10,59 |
| 1384422_at   | AI045140 | -10,50 |
| 1380741_at   | BF412788 | -10,31 |
| 1385098_at   | AW526343 | -10,07 |
| 1376820_at   | AI045220 | -9,80  |
| 1377875_at   | BF400747 | -9,74  |
| 1390324_at   | BE101809 | -9,70  |
| 1389411_at   | AW435329 | -9,55  |
| 1383750_at   | BF418523 | -9,26  |
| 1388743_at   | BI297291 | -9,15  |
| 1391923_at   | BG376838 | -8,83  |
| 1398707_at   | BE108582 | -8,78  |
| 1391256_at   | AA900781 | -8,77  |
| 1378861_at   | BE105498 | -8,53  |
| 1386286_at   | AI639322 | -8,39  |
| 1398406_at   | AI102382 | -8,34  |
| 1394207_at   | AI236188 | -8,26  |
| 1372163_at   | BG670246 | -7,89  |
| 1375667_at   | AW434286 | -7,81  |
| 1389584_at   | AI101266 | -7,64  |
| 1384460_at   | AI072669 | -7,61  |
| 1383649_a_at | BI291080 | -7,60  |
| 1376395_at   | AI145359 | -7,58  |
| 1381416_at   | AI029400 | -7,56  |
| 1371494_at   | BE110614 | -7,50  |
| 1373967_at   | AI229311 | -7,25  |
| 1389285_at   | AI229933 | -7,24  |
| 1395660_at   | BE114185 | -7,19  |
| 1376283_at   | BG378070 | -7,19  |
| 1372381_at   | BM383457 | -7,13  |
| 1376989_at   | BE099568 | -7,04  |
| 1380712_at   | AI406475 | -7,02  |
| 1392711_at   | AA996440 | -6,90  |
| 1374633_at   | BF284700 | -6,85  |
| 1373710_at   | BI296600 | -6,78  |
| 1377412_at   | AI146237 | -6,73  |
| 1376764_at   | AI406412 | -6,55  |
| 1397189_at   | BE108217 | -6,51  |
| 1392877_at   | AA859524 | -6,48  |
| 1390453_at   | AI599873 | -6,27  |

|              |          |       |
|--------------|----------|-------|
| 1378350_at   | AA859902 | -6,25 |
| 1377883_at   | AI717530 | -6,17 |
| 1391979_at   | AA851345 | -6,08 |
| 1389706_at   | AI007639 | -5,91 |
| 1377155_at   | BI294806 | -5,91 |
| 1373740_at   | AA851385 | -5,82 |
| 1397214_at   | BF288533 | -5,73 |
| 1393262_at   | BG379771 | -5,72 |
| 1376726_at   | AI101117 | -5,72 |
| 1374833_at   | BF290953 | -5,71 |
| 1389687_at   | BI273981 | -5,69 |
| 1374350_at   | BM382988 | -5,68 |
| 1380137_at   | BF406176 | -5,58 |
| 1395368_at   | BF408886 | -5,57 |
| 1372110_at   | BE113148 | -5,55 |
| 1392969_at   | BI282309 | -5,47 |
| 1384215_at   | AI144991 | -5,47 |
| 1379445_at   | BF283378 | -5,45 |
| 1396328_at   | BF390586 | -5,44 |
| 1398368_at   | AI406502 | -5,42 |
| 1391936_a_at | BI289110 | -5,40 |
| 1378860_at   | AW525986 | -5,39 |
| 1371999_at   | BI303641 | -5,34 |
| 1392473_at   | AW525353 | -5,34 |
| 1385841_at   | BM383983 | -5,22 |
| 1372449_at   | AW253616 | -5,18 |
| 1380872_at   | BF396681 | -5,16 |
| 1383650_at   | BI291080 | -5,14 |
| 1378444_at   | AI175473 | -5,01 |
| 1389412_at   | AA800693 | -4,93 |
| 1396119_at   | AW534209 | -4,93 |
| 1397652_at   | BE108399 | -4,92 |
| 1394450_at   | AI228600 | -4,91 |
| 1376808_at   | BG672572 | -4,89 |
| 1391436_at   | BF283714 | -4,89 |
| 1391535_at   | BF284610 | -4,88 |
| 1381336_at   | BF408248 | -4,88 |
| 1383254_at   | BF403169 | -4,87 |
| 1377469_at   | AI103161 | -4,84 |
| 1376183_at   | AI101484 | -4,83 |
| 1376242_at   | BF402365 | -4,81 |
| 1395726_at   | AW143353 | -4,80 |
| 1377957_at   | AI716128 | -4,77 |
| 1385581_at   | BF551187 | -4,77 |
| 1393094_at   | AI385367 | -4,77 |
| 1376891_at   | AA818282 | -4,69 |
| 1390986_at   | AW526072 | -4,69 |
| 1391202_at   | AW252232 | -4,69 |
| 1377238_at   | BM386889 | -4,69 |
| 1393003_at   | AA899900 | -4,66 |
| 1394488_at   | AW524157 | -4,62 |
| 1377045_at   | BG372832 | -4,60 |
| 1395468_at   | BF409952 | -4,59 |
| 1382183_at   | AA849479 | -4,57 |
| 1390303_at   | BF390840 | -4,57 |
| 1376577_at   | AI145247 | -4,55 |
| 1372345_at   | AA894210 | -4,53 |
| 1376637_at   | AI102401 | -4,51 |

|            |          |       |
|------------|----------|-------|
| 1379647_at | BI295140 | -4,49 |
| 1373023_at | BF555947 | -4,48 |
| 1378603_at | BM387125 | -4,44 |
| 1391361_at | BF411568 | -4,42 |
| 1382032_at | AI407730 | -4,39 |
| 1374315_at | AI228079 | -4,38 |
| 1378068_at | AW529368 | -4,38 |
| 1393192_at | AW528963 | -4,37 |
| 1377165_at | BF420664 | -4,36 |
| 1393516_at | AA892335 | -4,36 |
| 1379076_at | BE328961 | -4,30 |
| 1390263_at | AI179936 | -4,28 |
| 1392946_at | AI029194 | -4,24 |
| 1378531_at | AI555775 | -4,19 |
| 1373220_at | BI296489 | -4,18 |
| 1377069_at | BG379055 | -4,16 |
| 1381225_at | BE119934 | -4,15 |
| 1394475_at | BE096857 | -4,15 |
| 1398990_at | BI281754 | -4,11 |
| 1394563_at | AI230657 | -4,10 |
| 1383174_at | AI576562 | -4,10 |
| 1391694_at | AW521119 | -4,07 |
| 1377856_at | BE113045 | -4,06 |
| 1382917_at | AI043869 | -4,05 |
| 1389486_at | BE108354 | -4,02 |
| 1376520_at | BE117616 | -4,02 |
| 1373511_at | BI296596 | -4,01 |
| 1372849_at | AI229183 | -3,98 |
| 1378070_at | BE099891 | -3,97 |
| 1379400_at | AI044556 | -3,97 |
| 1376633_at | AW529927 | -3,96 |
| 1384188_at | AW142766 | -3,95 |
| 1396405_at | BE097557 | -3,94 |
| 1381147_at | BF409065 | -3,92 |
| 1382060_at | BE115085 | -3,90 |
| 1394395_at | BG668719 | -3,89 |
| 1381077_at | AA996843 | -3,88 |
| 1394209_at | AI236275 | -3,88 |
| 1392636_at | AA964319 | -3,87 |
| 1390543_at | BF396416 | -3,86 |
| 1374688_at | AA945696 | -3,85 |
| 1379698_at | AI178631 | -3,85 |
| 1380347_at | AI030806 | -3,81 |
| 1389774_at | AI008371 | -3,79 |
| 1392968_at | BI300566 | -3,77 |
| 1383299_at | BI291730 | -3,77 |
| 1384284_at | BI290838 | -3,77 |
| 1374466_at | AI715484 | -3,76 |
| 1378397_at | BM385449 | -3,76 |
| 1377201_at | BE109156 | -3,74 |
| 1388561_at | AI412886 | -3,74 |
| 1392217_at | AI172126 | -3,73 |
| 1374060_at | AI411374 | -3,72 |
| 1373576_at | BE107337 | -3,69 |
| 1398415_at | BG380708 | -3,69 |
| 1375194_at | AI231460 | -3,66 |
| 1394460_at | BF564428 | -3,62 |
| 1373859_at | AA819884 | -3,62 |

|            |          |
|------------|----------|
| 1376560_at | BM388282 |
| 1383423_at | BI295136 |
| 1372041_at | BI290059 |
| 1385892_at | AA900322 |
| 1392526_at | AA901274 |
| 1374241_at | AI406271 |
| 1397238_at | AW524239 |
| 1372669_at | BF404426 |
| 1389376_at | BE113330 |
| 1385826_at | AA860047 |
| 1384059_at | BE115159 |
| 1377232_at | BF406608 |
| 1372484_at | AI176231 |
| 1381817_at | AI044318 |
| 1389281_at | BE116601 |
| 1384275_at | BI300393 |
| 1378909_at | BE120180 |
| 1374307_at | AI236027 |
| 1383458_at | BF403759 |
| 1390457_at | BM385762 |
| 1398047_at | BF394787 |
| 1377071_at | BG375652 |
| 1374896_at | AI101385 |
| 1378000_at | AA801075 |
| 1376966_at | BE108930 |
| 1389612_at | AI410941 |
| 1383744_at | AI146250 |
| 1376194_at | BM384889 |
| 1382989_at | BE116242 |
| 1389794_at | AI044984 |
| 1383234_at | BF405850 |
| 1379591_at | AI228518 |
| 1395745_at | AI113308 |
| 1396460_at | AW522969 |
| 1376946_at | BG380358 |
| 1393273_at | AW533027 |
| 1379545_at | BG372752 |
| 1385749_at | BF392886 |
| 1393478_at | AI029492 |
| 1377047_at | AI710879 |
| 1383084_at | BG671922 |
| 1397765_at | BF406754 |
| 1383185_at | BE105131 |
| 1384595_at | AI030888 |
| 1395355_at | AI555210 |
| 1376814_at | BE107949 |
| 1393736_at | BE116820 |
| 1378570_at | AA849985 |
| 1380976_at | BF396723 |
| 1373076_at | AI411577 |
| 1376330_at | BF393046 |
| 1374758_at | BM387112 |
| 1390145_at | AW524532 |
| 1388778_at | BF284876 |
| 1385798_at | AW533857 |
| 1395174_at | BI289214 |
| 1377199_at | BI274530 |
| 1376464_at | BE102505 |

|       |
|-------|
| -3,61 |
| -3,60 |
| -3,59 |
| -3,57 |
| -3,56 |
| -3,50 |
| -3,49 |
| -3,49 |
| -3,48 |
| -3,47 |
| -3,46 |
| -3,45 |
| -3,45 |
| -3,44 |
| -3,43 |
| -3,42 |
| -3,42 |
| -3,40 |
| -3,40 |
| -3,40 |
| -3,39 |
| -3,38 |
| -3,38 |
| -3,37 |
| -3,36 |
| -3,35 |
| -3,35 |
| -3,34 |
| -3,31 |
| -3,29 |
| -3,27 |
| -3,26 |
| -3,24 |
| -3,24 |
| -3,24 |
| -3,23 |
| -3,23 |
| -3,21 |
| -3,20 |
| -3,20 |
| -3,19 |
| -3,19 |
| -3,18 |
| -3,18 |
| -3,15 |
| -3,15 |
| -3,15 |
| -3,15 |
| -3,14 |
| -3,12 |
| -3,12 |
| -3,11 |
| -3,11 |
| -3,09 |
| -3,08 |
| -3,08 |
| -3,08 |
| -3,08 |

|            |          |       |
|------------|----------|-------|
| 1391774_at | AW526131 | -3,06 |
| 1391090_at | BG380796 | -3,06 |
| 1391862_at | BG377635 | -3,06 |
| 1389896_at | AI232217 | -3,05 |
| 1376911_at | BM386385 | -3,05 |
| 1393360_at | BE105636 | -3,04 |
| 1382516_at | AI170660 | -3,02 |
| 1389565_at | BE113491 | -3,02 |
| 1389206_at | BE116867 | -3,01 |
| 1377890_at | AI411360 | -3,01 |
| 1379126_at | AI555608 | -3,00 |
| 1379431_at | AW918368 | -3,00 |
| 1381252_at | BE098160 | -2,99 |
| 1393344_at | AW528051 | -2,99 |
| 1374795_at | AA891859 | -2,98 |
| 1386123_at | BF553538 | -2,98 |
| 1378441_at | AI176859 | -2,96 |
| 1392982_at | AA818059 | -2,96 |
| 1384025_at | AA943432 | -2,94 |
| 1390431_at | AI111559 | -2,94 |
| 1396252_at | BE117174 | -2,94 |
| 1398430_at | AW524711 | -2,93 |
| 1378965_at | AA818967 | -2,93 |
| 1375056_at | AA943310 | -2,92 |
| 1389388_at | BF291161 | -2,91 |
| 1390990_at | AI409862 | -2,90 |
| 1378580_at | AI007848 | -2,89 |
| 1375841_at | BI282607 | -2,89 |
| 1395714_at | AT005664 | -2,87 |
| 1398920_at | AI228651 | -2,86 |
| 1377781_at | AA899278 | -2,86 |
| 1383638_at | AW524125 | -2,85 |
| 1394065_at | AI179423 | -2,85 |
| 1380156_at | BF396185 | -2,84 |
| 1392604_at | AA997187 | -2,83 |
| 1374800_at | BI303627 | -2,83 |
| 1384708_at | BF400572 | -2,83 |
| 1378325_at | BE098737 | -2,82 |
| 1375563_at | AA944394 | -2,81 |
| 1380180_at | AW528635 | -2,81 |
| 1397583_at | BF394946 | -2,81 |
| 1398531_at | AI058947 | -2,80 |
| 1378139_at | AI412468 | -2,78 |
| 1373638_at | BG380827 | -2,78 |
| 1385822_at | AI030314 | -2,77 |
| 1376622_at | BM389574 | -2,77 |
| 1381775_at | BF391321 | -2,76 |
| 1395674_at | BF408259 | -2,76 |
| 1385442_at | AW529552 | -2,76 |
| 1393879_at | BF391763 | -2,76 |
| 1380349_at | BF395595 | -2,75 |
| 1395456_at | AW919228 | -2,75 |
| 1374721_at | AI178647 | -2,75 |
| 1399109_at | BI281673 | -2,75 |
| 1373736_at | AI178446 | -2,72 |
| 1383095_at | BM387808 | -2,72 |
| 1384621_at | AA924327 | -2,71 |
| 1383164_at | AW524366 | -2,70 |



|              |          |       |
|--------------|----------|-------|
| 1377723_at   | AI234810 | -2,69 |
| 1374093_at   | BE108840 | -2,69 |
| 1376421_at   | BI278838 | -2,69 |
| 1378395_at   | BF411826 | -2,68 |
| 1374197_at   | AI177275 | -2,68 |
| 1380078_at   | AW144384 | -2,67 |
| 1380345_at   | AW529036 | -2,67 |
| 1378367_at   | BF389087 | -2,66 |
| 1389698_at   | AI010312 | -2,66 |
| 1386257_at   | AA858641 | -2,65 |
| 1383954_at   | BI273721 | -2,65 |
| 1383403_at   | AW523626 | -2,64 |
| 1372258_at   | AI102935 | -2,62 |
| 1384470_at   | BE114218 | -2,62 |
| 1373079_at   | BI296427 | -2,62 |
| 1398594_at   | AI029767 | -2,61 |
| 1377751_at   | AI233227 | -2,61 |
| 1375011_at   | AA818819 | -2,60 |
| 1374613_at   | BE100609 | -2,60 |
| 1393181_at   | BG663084 | -2,60 |
| 1390153_at   | BG378721 | -2,59 |
| 1377861_at   | AI011151 | -2,59 |
| 1389242_at   | BG377726 | -2,59 |
| 1375733_at   | AW520755 | -2,58 |
| 1380255_at   | AI235931 | -2,56 |
| 1382352_at   | AI030845 | -2,56 |
| 1374552_at   | BF412718 | -2,55 |
| 1390456_at   | AW524471 | -2,55 |
| 1390530_at   | AI169239 | -2,55 |
| 1394693_at   | AW919728 | -2,54 |
| 1393699_at   | BF391905 | -2,54 |
| 1393024_at   | BI300589 | -2,53 |
| 1374458_at   | AI600031 | -2,53 |
| 1383593_at   | BE113211 | -2,53 |
| 1393937_at   | AI577369 | -2,51 |
| 1384204_at   | BG379466 | -2,50 |
| 1378018_at   | BE098045 | -2,49 |
| 1373415_at   | AI407050 | -2,49 |
| 1374994_at   | BF394281 | -2,48 |
| 1390974_a_at | BI285675 | -2,48 |
| 1398392_at   | BF405932 | -2,48 |
| 1388872_at   | BI290053 | -2,48 |
| 1374644_at   | BM386365 | -2,48 |
| 1371986_at   | AI576652 | -2,45 |
| 1374259_at   | BG378156 | -2,45 |
| 1389649_at   | AI411897 | -2,45 |
| 1398581_at   | AA956307 | -2,45 |
| 1397784_at   | BI297092 | -2,44 |
| 1396704_at   | BF394808 | -2,44 |
| 1374685_at   | BE117446 | -2,44 |
| 1385891_at   | AI101553 | -2,43 |
| 1392044_at   | BE117009 | -2,43 |
| 1382132_at   | AW524858 | -2,43 |
| 1382142_at   | AI029975 | -2,42 |
| 1379562_at   | AA858498 | -2,42 |
| 1372060_at   | AI010668 | -2,42 |
| 1375879_at   | BE111762 | -2,42 |
| 1389218_at   | AI169490 | -2,41 |

|            |          |       |
|------------|----------|-------|
| 1393765_at | AI043706 | -2,41 |
| 1388451_at | AA817802 | -2,40 |
| 1374380_at | BF403474 | -2,40 |
| 1382654_at | AA859319 | -2,39 |
| 1383866_at | BI293248 | -2,39 |
| 1391410_at | BM392039 | -2,39 |
| 1372771_at | BI279659 | -2,39 |
| 1379277_at | AI575341 | -2,38 |
| 1371795_at | AA848795 | -2,37 |
| 1383022_at | BF390046 | -2,37 |
| 1389159_at | BM385437 | -2,37 |
| 1377357_at | BE106428 | -2,36 |
| 1391331_at | BE106891 | -2,36 |
| 1389208_at | AA944562 | -2,36 |
| 1383267_at | BF554347 | -2,35 |
| 1383139_at | BM386881 | -2,35 |
| 1392118_at | BE099845 | -2,35 |
| 1382391_at | BF397532 | -2,34 |
| 1380437_at | BE104421 | -2,34 |
| 1385577_at | AW531898 | -2,32 |
| 1383201_at | BI289300 | -2,32 |
| 1375000_at | BF415422 | -2,32 |
| 1391773_at | BM390802 | -2,31 |
| 1374149_at | AW144301 | -2,31 |
| 1395423_at | AW920217 | -2,30 |
| 1373695_at | AI176675 | -2,30 |
| 1381058_at | AI548492 | -2,29 |
| 1390463_at | BG378294 | -2,28 |
| 1374298_at | BG373455 | -2,27 |
| 1377221_at | AI411226 | -2,27 |
| 1398389_at | AI236136 | -2,27 |
| 1376310_at | BI285686 | -2,26 |
| 1382021_at | AA850650 | -2,26 |
| 1389019_at | AI178561 | -2,26 |
| 1385381_at | AA996491 | -2,26 |
| 1382431_at | AI103530 | -2,25 |
| 1380883_at | BF386294 | -2,25 |
| 1374607_at | AI599854 | -2,25 |
| 1375223_at | BI294737 | -2,24 |
| 1389082_at | BF398612 | -2,24 |
| 1398412_at | BF402250 | -2,24 |
| 1398481_at | BF402699 | -2,22 |
| 1386818_at | AA848601 | -2,21 |
| 1388648_at | AA799764 | -2,21 |
| 1383534_at | AA997058 | -2,20 |
| 1379934_at | BI285676 | -2,19 |
| 1396349_at | BE099657 | -2,19 |
| 1378620_at | BE104164 | -2,19 |
| 1380449_at | AI112513 | -2,19 |
| 1390985_at | AA956519 | -2,18 |
| 1376984_at | AW915048 | -2,17 |
| 1390215_at | AI235499 | -2,17 |
| 1397485_at | BI298636 | -2,17 |
| 1379996_at | AI411753 | -2,16 |
| 1373519_at | AI412601 | -2,16 |
| 1389613_at | AI234712 | -2,16 |
| 1372696_at | AA893807 | -2,15 |
| 1383404_at | BI295203 | -2,15 |

|              |          |
|--------------|----------|
| 1377725_at   | AI575322 |
| 1380860_at   | AA819536 |
| 1388751_at   | AW433787 |
| 1399104_at   | BI287258 |
| 1372544_at   | AI410305 |
| 1383929_at   | AI230265 |
| 1373178_at   | AA945183 |
| 1399096_at   | AA894279 |
| 1389352_at   | BF281980 |
| 1377556_at   | AW535380 |
| 1389194_at   | AI406491 |
| 1398945_at   | AA851439 |
| 1374329_at   | BI286364 |
| 1372928_at   | AI169749 |
| 1385667_x_at | AI029796 |
| 1391763_at   | BF420184 |
| 1398496_at   | BF390696 |
| 1376204_at   | AW531412 |
| 1397743_at   | BF410216 |
| 1391264_at   | AA875301 |
| 1386029_at   | BF284035 |
| 1375315_at   | BE098345 |
| 1391444_at   | BF285611 |
| 1392716_at   | BF282115 |
| 1393342_at   | BG380998 |
| 1382362_at   | AA997890 |
| 1399142_at   | BF398045 |
| 1374611_at   | AW535065 |
| 1374038_at   | AA799964 |
| 1383907_at   | BE117969 |
| 1373586_at   | AI411113 |
| 1379267_a_at | AA924312 |
| 1377310_at   | BG374304 |
| 1383194_a_at | AI030349 |
| 1380811_at   | BE105756 |
| 1398447_at   | AA801323 |
| 1392645_at   | AA998765 |
| 1378052_at   | AW253907 |
| 1374379_at   | BF396810 |
| 1374509_at   | BI275722 |
| 1383918_at   | AI070651 |
| 1375591_at   | AI101245 |
| 1376235_at   | BI289136 |
| 1391901_at   | AA956085 |
| 1392501_at   | BE120710 |
| 1384839_at   | AW522827 |
| 1379274_at   | AW535515 |
| 1395718_at   | BE102746 |
| 1374243_at   | AI102744 |
| 1373580_at   | BI289991 |
| 1390466_at   | AW531623 |
| 1382969_at   | AI029559 |
| 1374702_at   | BI291393 |
| 1374809_at   | BG672598 |
| 1374674_at   | AW528792 |
| 1388495_at   | BI303583 |
| 1374927_at   | AI714124 |
| 1389707_at   | AW251681 |

|       |
|-------|
| -2,15 |
| -2,14 |
| -2,14 |
| -2,14 |
| -2,14 |
| -2,13 |
| -2,13 |
| -2,13 |
| -2,13 |
| -2,13 |
| -2,12 |
| -2,11 |
| -2,11 |
| -2,10 |
| -2,10 |
| -2,10 |
| -2,10 |
| -2,10 |
| -2,10 |
| -2,09 |
| -2,09 |
| -2,09 |
| -2,09 |
| -2,08 |
| -2,08 |
| -2,07 |
| -2,07 |
| -2,07 |
| -2,07 |
| -2,07 |
| -2,06 |
| -2,06 |
| -2,05 |
| -2,04 |
| -2,04 |
| -2,04 |
| -2,04 |
| -2,04 |
| -2,03 |
| -2,03 |
| -2,03 |
| -2,02 |
| -2,02 |
| -2,01 |
| -2,01 |
| -2,01 |
| -2,01 |
| -2,00 |
| -2,00 |
| -2,00 |
| -2,00 |
| -2,00 |
| -1,99 |
| -1,99 |
| -1,98 |
| -1,98 |
| -1,98 |
| -1,98 |
| -1,97 |
| -1,97 |

|              |          |       |
|--------------|----------|-------|
| 1383934_at   | BI299169 | -1,96 |
| 1385560_at   | AI716213 | -1,96 |
| 1389602_at   | BF396759 | -1,95 |
| 1389730_at   | AI176502 | -1,94 |
| 1388704_at   | AA892394 | -1,94 |
| 1397621_at   | AI502942 | -1,93 |
| 1396344_at   | AI548117 | -1,92 |
| 1381075_at   | AA956937 | -1,92 |
| 1390545_at   | AI178155 | -1,91 |
| 1397888_at   | BM389787 | -1,91 |
| 1372334_at   | AW144821 | -1,91 |
| 1384296_at   | AI136388 | -1,90 |
| 1372081_at   | BI299305 | -1,90 |
| 1373019_at   | AI172468 | -1,90 |
| 1396451_at   | BF393275 | -1,90 |
| 1378010_at   | BG662522 | -1,90 |
| 1388437_at   | AI103153 | -1,89 |
| 1398964_at   | AI231773 | -1,89 |
| 1378076_at   | AA963273 | -1,88 |
| 1372486_at   | AI236691 | -1,88 |
| 1391338_at   | AI603449 | -1,88 |
| 1382240_at   | AI029959 | -1,87 |
| 1383468_at   | BM958512 | -1,86 |
| 1372816_at   | BE107319 | -1,84 |
| 1386745_at   | BF523839 | -1,84 |
| 1389867_at   | BI281086 | -1,84 |
| 1389797_at   | AI317854 | -1,84 |
| 1392951_at   | AW521231 | -1,84 |
| 1395684_at   | AW534805 | -1,84 |
| 1372722_at   | AI175031 | -1,83 |
| 1398978_at   | AA850525 | -1,83 |
| 1393153_at   | BG663023 | -1,83 |
| 1386589_at   | AW143518 | -1,83 |
| 1396057_at   | AW521804 | -1,83 |
| 1393712_at   | BF419515 | -1,82 |
| 1393455_at   | AA998007 | -1,82 |
| 1388978_at   | BF283704 | -1,81 |
| 1374920_at   | AI228955 | -1,81 |
| 1385671_at   | AA956689 | -1,81 |
| 1388383_at   | AI412740 | -1,81 |
| 1392490_at   | BM390676 | -1,81 |
| 1373513_at   | AI012419 | -1,81 |
| 1385087_at   | BF406606 | -1,81 |
| 1376600_at   | BI289616 | -1,80 |
| 1374703_at   | BI304209 | -1,80 |
| 1385594_at   | AW144020 | -1,80 |
| 1398942_at   | BI278885 | -1,80 |
| 1373367_at   | AI556297 | -1,80 |
| 1397895_at   | BI290793 | -1,79 |
| 1374615_at   | AI175668 | -1,79 |
| 1391476_at   | BE113113 | -1,79 |
| 1381191_at   | AI145988 | -1,79 |
| 1374339_at   | BI303362 | -1,78 |
| 1375863_a_at | AI411621 | -1,78 |
| 1377975_at   | AI100827 | -1,78 |
| 1372515_at   | BI281177 | -1,78 |
| 1385106_at   | BE107024 | -1,78 |
| 1389442_at   | AI406804 | -1,78 |

|            |          |
|------------|----------|
| 1395335_at | BF544005 |
| 1393481_at | BM390812 |
| 1373634_at | AI177753 |
| 1380033_at | AI408858 |
| 1397572_at | BE109994 |
| 1397757_at | AW523345 |
| 1381977_at | BI299008 |
| 1375946_at | BF415909 |
| 1374714_at | BI284781 |
| 1372655_at | BG380323 |
| 1374392_at | BE113385 |
| 1388656_at | BI294968 |
| 1373858_at | BE109064 |
| 1383169_at | BF563716 |
| 1395625_at | BF415216 |
| 1384032_at | AI058837 |
| 1399085_at | BM384770 |
| 1393019_at | BG372243 |
| 1380717_at | BF397758 |
| 1392924_at | BG371591 |
| 1397377_at | AA955664 |
| 1377197_at | BE108892 |
| 1385836_at | AI454586 |
| 1389418_at | AI410452 |
| 1372192_at | AI145385 |
| 1376376_at | AI501923 |
| 1367527_at | AI600258 |
| 1383121_at | BM384218 |
| 1385138_at | BF401469 |
| 1392774_at | BF284310 |
| 1371798_at | AI013011 |
| 1394256_at | BG664811 |
| 1382228_at | BE095590 |
| 1398600_at | AW524565 |
| 1394576_at | AA900572 |
| 1384043_at | BG667918 |
| 1390856_at | BF289100 |
| 1385238_at | AA926087 |
| 1377331_at | AW532469 |
| 1393107_at | BI303078 |
| 1389134_at | BF551369 |
| 1375970_at | AI010423 |
| 1384261_at | AI072173 |
| 1376662_at | BF390141 |
| 1373030_at | AJ225654 |
| 1373207_at | AI235503 |
| 1391676_at | AI511097 |
| 1397871_at | AI144643 |
| 1399066_at | AI236763 |
| 1373854_at | AI175795 |
| 1378927_at | BE329364 |
| 1374687_at | BF283386 |
| 1398448_at | BE108346 |
| 1382390_at | AI177572 |
| 1376982_at | BI295869 |
| 1381837_at | AI502137 |
| 1388862_at | AI412143 |
| 1385191_at | AA997253 |

|       |
|-------|
| -1,77 |
| -1,76 |
| -1,76 |
| -1,75 |
| -1,75 |
| -1,75 |
| -1,75 |
| -1,73 |
| -1,73 |
| -1,73 |
| -1,72 |
| -1,72 |
| -1,72 |
| -1,72 |
| -1,71 |
| -1,71 |
| -1,70 |
| -1,70 |
| -1,70 |
| -1,70 |
| -1,69 |
| -1,69 |
| -1,68 |
| -1,68 |
| -1,66 |
| -1,66 |
| -1,65 |
| -1,65 |
| -1,64 |
| -1,64 |
| -1,64 |
| -1,64 |
| -1,63 |
| -1,62 |
| -1,62 |
| -1,62 |
| -1,62 |
| -1,61 |
| -1,61 |
| -1,61 |
| -1,61 |
| -1,60 |
| -1,60 |
| -1,59 |
| -1,59 |
| -1,59 |
| -1,58 |
| -1,58 |
| -1,56 |
| -1,56 |
| -1,56 |
| -1,55 |
| -1,55 |
| -1,55 |
| -1,55 |
| -1,54 |
| -1,54 |
| -1,54 |
| -1,54 |

|              |          |       |
|--------------|----------|-------|
| 1383123_at   | BF559503 | -1,54 |
| 1390351_at   | AI231225 | -1,53 |
| 1392119_at   | BF390340 | -1,53 |
| 1393117_at   | BI286900 | -1,53 |
| 1372822_at   | BI287226 | -1,53 |
| 1367538_at   | BF284303 | -1,53 |
| 1385734_at   | BE118753 | -1,53 |
| 1380064_at   | BE113961 | -1,52 |
| 1373070_at   | AI406379 | -1,52 |
| 1373555_at   | BM392315 | -1,52 |
| 1377720_x_at | AA892765 | -1,51 |
| 1389111_at   | BF396316 | -1,51 |
| 1383487_at   | AW530484 | -1,50 |
| 1371699_at   | BI295739 | 1,51  |
| 1389375_at   | AI232407 | 1,54  |
| 1389172_at   | AI179391 | 1,57  |
| 1383383_at   | BE115992 | 1,57  |
| 1381470_at   | AI454052 | 1,58  |
| 1383963_at   | AW521925 | 1,59  |
| 1373707_at   | BM382865 | 1,59  |
| 1382381_at   | AA818480 | 1,61  |
| 1388742_at   | AA945877 | 1,62  |
| 1390497_at   | AI175594 | 1,62  |
| 1372796_at   | AA894188 | 1,63  |
| 1390199_at   | BM389647 | 1,64  |
| 1374150_at   | AA875425 | 1,65  |
| 1371666_at   | BM385852 | 1,66  |
| 1390134_at   | AI411274 | 1,67  |
| 1396556_at   | BF413366 | 1,68  |
| 1389818_at   | AA997712 | 1,69  |
| 1378941_at   | AA957447 | 1,71  |
| 1372719_at   | BF283702 | 1,71  |
| 1392655_at   | AA997266 | 1,71  |
| 1383338_at   | AA875190 | 1,72  |
| 1389776_at   | BE105589 | 1,72  |
| 1381284_at   | BF386160 | 1,73  |
| 1389640_at   | BM391811 | 1,75  |
| 1382372_at   | AA858521 | 1,75  |
| 1382789_at   | BM389812 | 1,75  |
| 1372717_at   | BI296012 | 1,76  |
| 1374180_at   | AI236753 | 1,76  |
| 1381206_at   | BE121026 | 1,77  |
| 1380395_at   | AI230394 | 1,77  |
| 1380003_at   | BI281665 | 1,78  |
| 1374719_at   | BF285339 | 1,79  |
| 1391828_at   | AI030836 | 1,79  |
| 1383901_at   | BI287446 | 1,80  |
| 1390335_at   | AW252589 | 1,81  |
| 1389371_at   | AI104077 | 1,83  |
| 1375899_at   | BF283736 | 1,84  |
| 1389216_at   | AW523499 | 1,84  |
| 1391799_at   | AA899247 | 1,84  |
| 1374543_at   | AA858791 | 1,87  |
| 1389790_at   | AI410565 | 1,87  |
| 1376021_at   | BM384049 | 1,88  |
| 1373880_at   | AI408513 | 1,89  |
| 1383498_at   | BG373354 | 1,89  |
| 1392536_at   | AI136839 | 1,89  |

|              |          |
|--------------|----------|
| 1379982_at   | BE117278 |
| 1375895_at   | BI275908 |
| 1391286_at   | AA818116 |
| 1383770_at   | BE117323 |
| 1383737_at   | BM383406 |
| 1390698_at   | BF395822 |
| 1376906_at   | BM391974 |
| 1380402_at   | AA818127 |
| 1390708_at   | AI012518 |
| 1382736_at   | AI407047 |
| 1380155_at   | AI137306 |
| 1389559_at   | AA892872 |
| 1373922_at   | BG377024 |
| 1398319_at   | AI071000 |
| 1375006_at   | BE121050 |
| 1375673_at   | AI102620 |
| 1373082_at   | AA893743 |
| 1389287_at   | BI279573 |
| 1389477_at   | BI278855 |
| 1377117_at   | BF387780 |
| 1380598_at   | AI101569 |
| 1376593_at   | BF283990 |
| 1385800_at   | AW531915 |
| 1372347_at   | BI289462 |
| 1381713_at   | BE106279 |
| 1389150_at   | AW524559 |
| 1375950_a_at | BI294235 |
| 1393494_at   | AA866419 |
| 1389633_at   | BI290172 |
| 1379310_at   | AI101880 |
| 1372024_at   | AI104846 |
| 1381915_at   | AI111735 |
| 1396095_at   | BG673600 |
| 1375268_at   | AA858591 |
| 1380200_at   | AI102906 |
| 1367521_at   | BI281185 |
| 1391125_at   | AI639331 |
| 1385585_at   | AI111674 |
| 1392653_at   | BE118116 |
| 1374736_at   | AI172004 |
| 1385393_at   | BE099283 |
| 1389419_at   | BI296079 |
| 1379043_at   | BI284837 |
| 1382404_at   | BG669741 |
| 1373808_at   | BF417211 |
| 1397178_at   | AA899041 |
| 1374893_at   | BG380384 |
| 1376842_at   | BF395964 |
| 1377052_at   | AW533469 |
| 1385445_at   | BE119167 |
| 1372951_at   | BI274172 |
| 1392603_at   | AI717425 |
| 1388759_at   | BM389875 |
| 1398376_at   | AI104587 |
| 1372466_at   | AI408571 |
| 1382317_at   | AI408597 |
| 1379761_at   | BE104517 |
| 1384584_at   | AA892774 |

|      |
|------|
| 1,89 |
| 1,94 |
| 1,94 |
| 1,94 |
| 1,94 |
| 1,96 |
| 1,97 |
| 1,97 |
| 1,98 |
| 1,98 |
| 1,99 |
| 2,01 |
| 2,01 |
| 2,01 |
| 2,01 |
| 2,01 |
| 2,02 |
| 2,02 |
| 2,02 |
| 2,02 |
| 2,03 |
| 2,04 |
| 2,05 |
| 2,09 |
| 2,11 |
| 2,16 |
| 2,20 |
| 2,22 |
| 2,22 |
| 2,22 |
| 2,24 |
| 2,24 |
| 2,25 |
| 2,25 |
| 2,30 |
| 2,30 |
| 2,33 |
| 2,34 |
| 2,35 |
| 2,35 |
| 2,36 |
| 2,37 |
| 2,38 |
| 2,39 |
| 2,39 |
| 2,40 |
| 2,41 |
| 2,47 |
| 2,47 |
| 2,48 |
| 2,49 |
| 2,49 |
| 2,49 |
| 2,52 |
| 2,52 |
| 2,54 |
| 2,54 |
| 2,55 |
| 2,56 |

|              |          |
|--------------|----------|
| 1374760_at   | BG374448 |
| 1375191_at   | AI230379 |
| 1384184_at   | BE117485 |
| 1374179_at   | BF285334 |
| 1376660_at   | BG672127 |
| 1392844_at   | BE119432 |
| 1375028_at   | AI409635 |
| 1382568_at   | BE098457 |
| 1383348_at   | BF545309 |
| 1396755_at   | BF399394 |
| 1381163_at   | AI229248 |
| 1391958_at   | BE119699 |
| 1393166_at   | AA998749 |
| 1379232_at   | AA955771 |
| 1395542_at   | BF549929 |
| 1393743_at   | AI453930 |
| 1384163_at   | BE103875 |
| 1388986_at   | AI598339 |
| 1377151_at   | AI102833 |
| 1390930_at   | BF406924 |
| 1395759_at   | AI556251 |
| 1380119_at   | AA996432 |
| 1371735_at   | AI105202 |
| 1378591_at   | AI556452 |
| 1373986_at   | AI410107 |
| 1390631_at   | BE107619 |
| 1384546_at   | AA924204 |
| 1383179_at   | BI291413 |
| 1395518_at   | BF544403 |
| 1393052_at   | BM392406 |
| 1373843_at   | BE107419 |
| 1394779_at   | AI717218 |
| 1383941_at   | BF411395 |
| 1392633_at   | AI045724 |
| 1392600_a_at | AI176989 |
| 1388933_at   | AI233748 |
| 1373678_at   | BE098848 |
| 1377826_at   | AI176721 |
| 1382884_at   | AI009813 |
| 1377994_at   | AI501237 |
| 1373566_at   | AI103026 |
| 1383044_at   | BM385117 |
| 1374845_at   | AI176367 |
| 1374429_at   | AI598401 |
| 1390364_at   | AI044316 |
| 1383727_at   | BF564921 |
| 1385569_at   | BF559640 |
| 1389001_at   | AW433944 |
| 1375979_at   | AA945734 |
| 1395557_at   | BF565718 |
| 1383939_at   | BG378849 |
| 1373730_at   | BI282077 |
| 1388509_at   | BI274303 |
| 1381534_at   | BI278449 |
| 1394950_at   | AI502833 |
| 1383531_at   | AA901061 |
| 1382613_at   | AW144049 |
| 1382933_at   | BE102157 |

|      |
|------|
| 2,58 |
| 2,60 |
| 2,61 |
| 2,62 |
| 2,64 |
| 2,65 |
| 2,71 |
| 2,73 |
| 2,74 |
| 2,75 |
| 2,78 |
| 2,79 |
| 2,80 |
| 2,81 |
| 2,82 |
| 2,83 |
| 2,85 |
| 2,87 |
| 2,88 |
| 2,89 |
| 2,96 |
| 2,97 |
| 2,98 |
| 2,98 |
| 2,99 |
| 3,01 |
| 3,02 |
| 3,03 |
| 3,10 |
| 3,13 |
| 3,13 |
| 3,15 |
| 3,16 |
| 3,17 |
| 3,19 |
| 3,25 |
| 3,31 |
| 3,33 |
| 3,48 |
| 3,57 |
| 3,57 |
| 3,64 |
| 3,75 |
| 3,77 |
| 3,89 |
| 3,92 |
| 3,95 |
| 4,09 |
| 4,09 |
| 4,13 |
| 4,17 |
| 4,17 |
| 4,19 |
| 4,25 |
| 4,31 |
| 4,36 |
| 4,40 |
| 4,57 |



|            |          |       |
|------------|----------|-------|
| 1374433_at | BI301532 | 4,77  |
| 1373072_at | AI170552 | 4,98  |
| 1395147_at | BE116565 | 5,02  |
| 1376006_at | BG373799 | 5,06  |
| 1373932_at | BE098739 | 5,10  |
| 1393469_at | BE102340 | 5,25  |
| 1385925_at | AA963975 | 5,83  |
| 1380917_at | BE109049 | 5,87  |
| 1390136_at | BE109274 | 5,88  |
| 1395110_at | BE110272 | 5,93  |
| 1385463_at | AI043627 | 5,93  |
| 1392777_at | BF287676 | 6,34  |
| 1379371_at | BF284791 | 6,54  |
| 1382087_at | BE109382 | 6,67  |
| 1374610_at | AI599365 | 6,80  |
| 1392876_at | BG375098 | 7,56  |
| 1388146_at | AW523578 | 7,64  |
| 1374627_at | BF283727 | 7,76  |
| 1393119_at | BM388725 | 8,04  |
| 1373679_at | AA946467 | 8,73  |
| 1383285_at | BG671375 | 12,43 |
| 1382278_at | BI278180 | 13,01 |
| 1390659_at | BI302830 | 13,40 |
| 1385641_at | AI070558 | 14,62 |
| 1390391_at | BF283381 | 15,69 |
| 1397611_at | AW525619 | 19,80 |
| 1383757_at | AI044802 | 21,20 |
| 1374337_at | AI408954 | 22,63 |
| 1393957_at | AI548358 | 25,31 |
| 1393728_at | AA964541 | 27,40 |
| 1391106_at | BM385061 | 28,31 |
| 1385380_at | AI044983 | 29,02 |
| 1393018_at | AI071984 | 31,83 |
| 1378261_at | BE102806 | 32,40 |
| 1395183_at | BM391096 | 39,51 |
| 1382950_at | AA901350 | 55,94 |

Primary rat  $\beta$ -cells were left untreated or exposed to IL1 $\beta$ +IFN- $\gamma$  (IL+IFN) for 24h. Data are mean of three independent experiments and are expressed as fold change versus control cells, studied at the same time point. Gene expression was considered modified by treatment when  $P \leq 0.02$  (paired *t-test*) and expression  $\geq 1.5$  fold higher or lower as compared to control conditions.

Pval = p value of Student t-test against control condition at the same time point. Some genes are represented by more than one probe. Classification was done using the IPA software
