# Supplementary material for: Cytokines Interleukin-1β and Tumor Necrosis Factor-α Regulate Different Transcriptional and Alternative Splicing Networks in Primary β-Cells
Source: PubMed Central journal article supplement — Diabetes. 2009 Nov 23;59(2):358–74. doi: 10.2337/db09-1159 (PMC2809955; doi:10.2337/db09-1159), 2009-11-23
Supplement: supp_db09-1159_Suppl_Table_VI.pdf [file supp_db09-1159_Suppl_Table_VI.pdf]

Suppl. Table VI: Up and down regulated genes after exposure to TNF- $\alpha$  + IFN- $\gamma$  for 6h detected by array analysis

| probe        | GenBank   | gene names/functional groups                                                                           | Symbol   | FC     | localization        |
|--------------|-----------|--------------------------------------------------------------------------------------------------------|----------|--------|---------------------|
|              |           | <b>Cytokine</b>                                                                                        |          |        |                     |
| 1367973_at   | NM_031530 | chemokine (C-C motif) ligand 13                                                                        | CCL13    | 987,11 | Extracellular Space |
| 1369814_at   | AF053312  | chemokine (C-C motif) ligand 20                                                                        | CCL20    | 62,21  | Extracellular Space |
| 1369983_at   | NM_031116 | chemokine (C-C motif) ligand 5                                                                         | CCL5     | 77,43  | Extracellular Space |
| 1379935_at   | BF419899  | chemokine (C-C motif) ligand 7                                                                         | CCL7     | 128,02 | Extracellular Space |
| 1368200_at   | NM_134455 | chemokine (C-X3-C motif) ligand 1                                                                      | CX3CL1   | 13,33  | Extracellular Space |
| 1387969_at   | U22520    | chemokine (C-X-C motif) ligand 10                                                                      | CXCL10   | 332,41 | Extracellular Space |
| 1379365_at   | BF281987  | chemokine (C-X-C motif) ligand 11                                                                      | CXCL11   | 93,69  | Extracellular Space |
| 1372064_at   | BI296385  | chemokine (C-X-C motif) ligand 16                                                                      | CXCL16   | 19,87  | Extracellular Space |
| 1373544_at   | AI170387  | chemokine (C-X-C motif) ligand 9                                                                       | CXCL9    | 587,95 | Extracellular Space |
| 1382454_at   | AI044222  | chemokine (C-X-C motif) ligand 9                                                                       | CXCL9    | 913,84 | Extracellular Space |
| 1372056_at   | AI406687  | CKLF-like MARVEL transmembrane domain containing 6                                                     | CMTM6    | 4,08   | Extracellular Space |
| 1368375_a_at | AF015718  | interleukin 15                                                                                         | IL15     | 32,08  | Extracellular Space |
| 1369665_a_at | AJ222813  | interleukin 18 (interferon-gamma-inducing factor)                                                      | IL18     | 1,83   | Extracellular Space |
| 1379499_at   | BF282228  | lymphotoxin beta (TNF superfamily, member 3)                                                           | LTB      | 36,25  | Extracellular Space |
| 1396262_at   | BM384211  | nicotinamide phosphoribosyltransferase                                                                 | NAMPT    | 2,93   | Extracellular Space |
| 1389014_at   | BI297612  | nicotinamide phosphoribosyltransferase                                                                 | NAMPT    | 3,49   | Extracellular Space |
| 1391384_at   | AA819227  | tumor necrosis factor (TNF superfamily, member 2)                                                      | TNF      | 33,13  | Extracellular Space |
|              |           | <b>Enzyme</b>                                                                                          |          |        |                     |
| 1372919_at   | AA851904  | 1-acylglycerol-3-phosphate O-acyltransferase 6 (lysophosphatidic acid acyltransferase, zeta)           | AGPAT6   | 1,80   | Cytoplasm           |
| 1387897_at   | L16532    | 2',3'-cyclic nucleotide 3' phosphodiesterase                                                           | CNP      | 3,60   | Cytoplasm           |
| 1371152_a_at | Z18877    | 2',5'-oligoadenylate synthetase 1, 40/46kDa                                                            | OAS1     | 41,43  | Cytoplasm           |
| 1388056_at   | AF068268  | 2'-5' oligoadenylate synthetase 1B                                                                     | OAS1B    | 23,47  | Unknown             |
| 1377497_at   | BF419319  | 2'-5'-oligoadenylate synthetase-like                                                                   | OASL     | 41,18  | Unknown             |
| 1371421_at   | BM391873  | 3-oxoacid CoA transferase 1                                                                            | OXCT1    | -3,99  | Cytoplasm           |
| 1369962_at   | NM_031014 | 5-aminoimidazole-4-carboxamide ribonucleotide formyltransferase/IMP cyclohydrolase                     | ATIC     | -1,95  | Unknown             |
| 1367763_at   | D13921    | acetyl-Coenzyme A acetyltransferase 1                                                                  | ACAT1    | -1,70  | Cytoplasm           |
| 1389363_at   | AA997430  | acireductone dioxygenase 1                                                                             | ADII     | -1,63  | Nucleus             |
| 1386916_at   | NM_017321 | aconitase 1, soluble                                                                                   | ACO1     | -2,65  | Cytoplasm           |
| 1367589_at   | NM_024398 | aconitase 2, mitochondrial                                                                             | ACO2     | -1,88  | Cytoplasm           |
| 1391433_at   | AA899721  | acyl-CoA thioesterase 2                                                                                | ACOT2    | -1,55  | Cytoplasm           |
| 1368206_at   | NM_130756 | acyl-CoA thioesterase 8                                                                                | ACOT8    | -1,98  | Cytoplasm           |
| 1390789_at   | BI296347  | acyl-Coenzyme A dehydrogenase family, member 11                                                        | ACAD11   | -2,67  | Cytoplasm           |
| 1367680_at   | NM_017340 | acyl-Coenzyme A oxidase 1, palmitoyl                                                                   | ACOX1    | -1,59  | Cytoplasm           |
| 1367933_at   | NM_031011 | adenosylmethionine decarboxylase 1                                                                     | AMD1     | -1,99  | Unknown             |
| 1367960_at   | NM_019186 | ADP-ribosylation factor-like 4A                                                                        | ARL4A    | 2,04   | Nucleus             |
| 1383395_at   | AI028979  | agmatine ureohydrolase (agmatinase)                                                                    | AGMAT    | 2,43   | Cytoplasm           |
| 1368365_at   | NM_031731 | aldehyde dehydrogenase 3 family, member A2                                                             | ALDH3A2  | -6,60  | Cytoplasm           |
| 1371567_at   | AI411279  | aldehyde dehydrogenase 7 family, member A1                                                             | ALDH7A1  | -2,12  | Cytoplasm           |
| 1387867_at   | BG672075  | aldehyde dehydrogenase 9 family, member A1                                                             | ALDH9A1  | -2,07  | Cytoplasm           |
| 1367617_at   | NM_012495 | aldolase A, fructose-bisphosphate                                                                      | ALDOA    | -1,51  | Cytoplasm           |
| 1377375_at   | AA944898  | aminoadipate-semialdehyde synthase                                                                     | AASS     | -3,03  | Cytoplasm           |
| 1372736_at   | BG374196  | amylo-1, 6-glucosidase, 4-alpha-glucanotransferase                                                     | AGL      | -3,97  | Unknown             |
| 1392689_at   | AI105029  | arachidonate lipoygenase 3                                                                             | ALOXE3   | 2,02   | Unknown             |
| 1372255_at   | BF283284  | arginyl-tRNA synthetase                                                                                | RARS     | 2,07   | Cytoplasm           |
| 1389021_at   | BF284746  | asparagine synthetase domain containing 1                                                              | ASNSD1   | -1,77  | Unknown             |
| 1379521_at   | AW525817  | asparagine-linked glycosylation 3, alpha-1,3- mannosyltransferase homolog (S. cerevisiae)              | ALG3     | -2,19  | Cytoplasm           |
| 1382019_at   | AA998062  | asparagine-linked glycosylation 5, dolichyl-phosphate beta-glucosyltransferase homolog (S. cerevisiae) | ALG5     | -1,71  | Cytoplasm           |
| 1372421_at   | AA943766  | aspartylglucosaminidase                                                                                | AGA      | -1,80  | Cytoplasm           |
| 1367854_at   | NM_016987 | ATP citrate lyase                                                                                      | ACLY     | -1,50  | Cytoplasm           |
| 1372907_at   | BI285242  | ATPase, H+ transporting V0 subunit e2                                                                  | ATP6V0E2 | -1,68  | Unknown             |
| 1370113_at   | NM_023987 | baculoviral IAP repeat-containing 3                                                                    | BIRC3    | 75,27  | Cytoplasm           |
| 1388617_at   | AW914746  | biphenyl hydrolase-like (serine hydrolase)                                                             | BPHL     | -2,59  | Cytoplasm           |
| 1368037_at   | NM_019170 | carbonyl reductase 1                                                                                   | CBR1     | -4,56  | Cytoplasm           |
| 1372372_at   | BG372437  | carboxymethylglutaminase homolog (Pseudomonas)                                                         | CMBL     | -2,37  | Unknown             |

|              |           |                                                                                                |                           |        |                     |
|--------------|-----------|------------------------------------------------------------------------------------------------|---------------------------|--------|---------------------|
| 1368426_at   | NM_031987 | carnitine O-octanoyltransferase                                                                | CROT                      | 7,46   | Cytoplasm           |
| 1386927_at   | NM_012930 | carnitine palmitoyltransferase II                                                              | CPT2                      | -3,25  | Cytoplasm           |
| 1368418_a_at | AF202115  | ceruloplasmin (ferroxidase)                                                                    | CP                        | 52,47  | Extracellular Space |
| 1368420_at   | NM_012532 | ceruloplasmin (ferroxidase)                                                                    | CP                        | 121,71 | Extracellular Space |
| 1368419_at   | AF202115  | ceruloplasmin (ferroxidase)                                                                    | CP                        | 145,01 | Extracellular Space |
| 1393365_at   | AW433625  | chromodomain helicase DNA binding protein 1                                                    | CHD1 (includes EG:308215) | 6,19   | Unknown             |
| 1374945_at   | BI281827  | chromosome 14 open reading frame 172                                                           | C14ORF172                 | -2,36  | Unknown             |
| 1375295_at   | AI009657  | citrate synthase                                                                               | CS                        | -1,66  | Cytoplasm           |
| 1377598_at   | AJ225648  | coenzyme Q2 homolog, prenyltransferase (yeast)                                                 | COQ2                      | -2,37  | Unknown             |
| 1372774_at   | AI170570  | coenzyme Q6 homolog, monooxygenase ( <i>S. cerevisiae</i> )                                    | COQ6                      | -1,69  | Unknown             |
| 1387038_at   | NM_053425 | copper chaperone for superoxide dismutase                                                      | CCS                       | -3,94  | Cytoplasm           |
| 1390692_at   | BE105721  | CTP synthase                                                                                   | CTPS                      | -2,33  | Nucleus             |
| 1383106_at   | BI295890  | cullin 2                                                                                       | CUL2                      | 1,67   | Nucleus             |
| 1367755_at   | NM_052809 | cysteine dioxygenase, type I                                                                   | CDO1                      | -8,32  | Cytoplasm           |
| 1373650_at   | AI172078  | cytidine monophosphate N-acetylneuraminic acid synthetase                                      | CMAS                      | -2,43  | Nucleus             |
| 1370808_at   | J03867    | cytochrome b5 reductase 3                                                                      | CYB5R3                    | -5,51  | Cytoplasm           |
| 1398383_at   | BI282164  | cytochrome b-561                                                                               | CYB561                    | -2,04  | Cytoplasm           |
| 1399111_at   | AI102191  | cytochrome b-561 domain containing 2                                                           | CYB561D2                  | -2,18  | Unknown             |
| 1387914_at   | M73231    | cytochrome P450, family 27, subfamily A, polypeptide 1                                         | CYP27A1                   | 36,64  | Cytoplasm           |
| 1367793_at   | NM_024131 | D-dopachrome tautomerase                                                                       | DDT                       | -3,29  | Cytoplasm           |
| 1391463_at   | AI575264  | DEAD (Asp-Glu-Ala-Asp) box polypeptide 58                                                      | DDX58                     | 14,63  | Cytoplasm           |
| 1383635_at   | BM385099  | DEAD (Asp-Glu-Ala-Asp) box polypeptide 59                                                      | DDX59                     | -1,73  | Unknown             |
| 1381556_at   | BI303853  | DEAD (Asp-Glu-Ala-Asp) box polypeptide 60                                                      | DDX60                     | 255,87 | Unknown             |
| 1388687_at   | BI274588  | dehydrodolichyl diphosphate synthase                                                           | DHDDS                     | -3,04  | Unknown             |
| 1389407_at   | BE099453  | dehydrogenase/reductase (SDR family) member 1                                                  | DHRS1                     | -2,54  | Cytoplasm           |
| 1379420_at   | AI145019  | dehydrogenase/reductase (SDR family) member 7                                                  | DHRS7 (includes EG:51635) | -2,16  | Unknown             |
| 1368294_at   | NM_053907 | deoxyribonuclease I-like 3                                                                     | DNASE1L3                  | 2,45   | Nucleus             |
| 1387865_at   | AI411157  | deoxyuridine triphosphatase                                                                    | DUT (includes EG:497778)  | -3,68  | Unknown             |
| 1385481_at   | AW526551  | dermatan sulfate epimerase-like                                                                | DSEL                      | -2,70  | Unknown             |
| 1385277_x_at | AA818849  | DEXH (Asp-Glu-X-His) box polypeptide 58                                                        | DHX58                     | 16,83  | Cytoplasm           |
| 1385276_a_at | AA818849  | DEXH (Asp-Glu-X-His) box polypeptide 58                                                        | DHX58                     | 57,31  | Cytoplasm           |
| 1385439_x_at | BF417541  | DEXH (Asp-Glu-X-His) box polypeptide 58                                                        | DHX58                     | 61,10  | Cytoplasm           |
| 1382440_at   | AI410813  | diacylglycerol lipase, beta                                                                    | DAGLB                     | -3,23  | Unknown             |
| 1384788_at   | BF393298  | diacylglycerol lipase, beta                                                                    | DAGLB                     | -2,08  | Unknown             |
| 1367909_at   | NM_134387 | dicarbonyl/L-xylulose reductase                                                                | DCXR                      | -3,78  | Cytoplasm           |
| 1373201_at   | AI412898  | dihydrolipoamide branched chain transacylase E2                                                | DBT                       | -2,06  | Cytoplasm           |
| 1382348_at   | AI230216  | dihydroorotate dehydrogenase                                                                   | DHODH                     | -1,84  | Cytoplasm           |
| 1385711_at   | AW507178  | DIM1 dimethyladenosine transferase 1-like ( <i>S. cerevisiae</i> )                             | DIMT1L                    | -2,97  | Cytoplasm           |
| 1383363_at   | BF418817  | DIRAS family, GTP-binding RAS-like 2                                                           | DIRAS2                    | -2,42  | Plasma Membrane     |
| 1392678_a_at | AA956455  | DNA (cytosine-5-)-methyltransferase 3 alpha                                                    | DNMT3A                    | 1,71   | Nucleus             |
| 1377593_at   | BI284172  | dolichyl-phosphate mannosyltransferase polypeptide 1, catalytic subunit                        | DPM1                      | -1,96  | Cytoplasm           |
| 1371533_at   | BI282273  | dynactin 6                                                                                     | DCTN6                     | -1,52  | Cytoplasm           |
| 1373912_at   | AI170859  | ectonucleotide pyrophosphatase/phosphodiesterase 4 (putative function)                         | ENPP4                     | 10,77  | Unknown             |
| 1375739_at   | BF395171  | EH-domain containing 4                                                                         | EHD4                      | 3,52   | Plasma Membrane     |
| 1374399_at   | AA801107  | EH-domain containing 4                                                                         | EHD4                      | 5,43   | Plasma Membrane     |
| 1372106_at   | BI284307  | EH-domain containing 4                                                                         | EHD4                      | 10,09  | Plasma Membrane     |
| 1391534_at   | BG666735  | elongation of very long chain fatty acids (FEN1/Elo2, SUR4/Elo3, yeast)-like 2                 | ELOVL2                    | -2,76  | Cytoplasm           |
| 1388108_at   | BE116152  | ELOVL family member 6, elongation of long chain fatty acids (FEN1/Elo2, SUR4/Elo3-like, yeast) | ELOVL6                    | -2,65  | Cytoplasm           |
| 1391462_at   | AI179635  | emopamil binding protein-like                                                                  | EBPL                      | -1,91  | Cytoplasm           |
| 1370341_at   | AF019973  | enolase 2 (gamma, neuronal)                                                                    | ENO2                      | -1,92  | Cytoplasm           |
| 1386885_at   | NM_022594 | enoyl Coenzyme A hydratase 1, peroxisomal                                                      | ECH1                      | -3,19  | Cytoplasm           |
| 1372533_at   | AI175790  | ER degradation enhancer, mannosidase alpha-like 1                                              | EDEM1                     | 2,06   | Cytoplasm           |
| 1376315_at   | BI282297  | ER degradation enhancer, mannosidase alpha-like 2                                              | EDEM2                     | -1,66  | Cytoplasm           |
| 1389297_at   | AI146215  | ERO1-like ( <i>S. cerevisiae</i> )                                                             | ERO1L                     | -2,03  | Cytoplasm           |
| 1372592_at   | AI411391  | ES cell expressed Ras                                                                          | ERAS                      | -2,80  | Plasma Membrane     |
| 1398903_at   | AI411425  | esterase D/formylglutathione hydrolase                                                         | ESD                       | -1,85  | Cytoplasm           |
| 1378976_x_at | AI070952  | exosome component 4                                                                            | EXOSC4                    | -2,35  | Nucleus             |
| 1373393_at   | BM384468  | exostoses (multiple) 1                                                                         | EXT1                      | 2,29   | Cytoplasm           |

|              |           |                                                                                |                           |         |                     |
|--------------|-----------|--------------------------------------------------------------------------------|---------------------------|---------|---------------------|
| 1371611_at   | BM387363  | exostoses (multiple) 2                                                         | EXT2                      | -2,31   | Cytoplasm           |
| 1386154_at   | AI639161  | family with sequence similarity 135, member A                                  | FAM135A                   | -2,26   | Unknown             |
| 1389320_at   | BF419881  | F-box protein 25                                                               | FBXO25                    | -1,55   | Unknown             |
| 1399133_at   | AW520767  | F-box protein 7                                                                | FBXO7                     | 1,64    | Cytoplasm           |
| 1389844_at   | BE113154  | FK506 binding protein 4, 59kDa                                                 | FKBP4                     | -4,57   | Nucleus             |
| 1376512_at   | BI290160  | FtsJ homolog 2 (E. coli)                                                       | FTSJ2                     | -2,08   | Nucleus             |
| 1367737_at   | NM_012562 | fucosidase, alpha-L- 1, tissue                                                 | FUCA1                     | -1,53   | Cytoplasm           |
| 1376249_at   | BM389993  | fucosidase, alpha-L- 2, plasma                                                 | FUCA2                     | -2,24   | Extracellular Space |
| 1368709_at   | NM_031236 | fucosyltransferase 1 (galactoside 2-alpha-L-fucosyltransferase, H blood group) | FUT1                      | -3,51   | Cytoplasm           |
| 1367670_at   | NM_017005 | fumarate hydratase                                                             | FH                        | -1,73   | Cytoplasm           |
| 1373134_at   | BE329450  | fumarylacetoacetate hydrolase domain containing 2A                             | FAHD2A                    | -3,72   | Unknown             |
| 1386215_at   | AI101566  | geranylgeranyl diphosphate synthase 1                                          | GGPS1                     | 1,72    | Cytoplasm           |
| 1373669_at   | BG374650  | glucosamine-6-phosphate deaminase 2                                            | GNPDA2                    | 4,14    | Unknown             |
| 1374903_at   | AI234819  | glucosaminyl (N-acetyl) transferase 2, 1-branching enzyme (I blood group)      | GCNT2                     | 5,04    | Cytoplasm           |
| 1371392_at   | BI283882  | glucose phosphate isomerase                                                    | GPI                       | -1,94   | Extracellular Space |
| 1367991_at   | NM_031749 | glucosidase I                                                                  | GCS1                      | -3,16   | Cytoplasm           |
| 1370200_at   | BI284411  | glutamate dehydrogenase 1                                                      | GLUD1                     | -4,21   | Cytoplasm           |
| 1387878_at   | AW916644  | glutamate dehydrogenase 1                                                      | GLUD1                     | -3,79   | Cytoplasm           |
| 1377761_at   | BI296057  | glutamine-fructose-6-phosphate transaminase 2                                  | GFPT2                     | 6,03    | Unknown             |
| 1386871_at   | NM_017165 | glutathione peroxidase 4 (phospholipid hydroperoxidase)                        | GPX4                      | -1,79   | Cytoplasm           |
| 1387023_at   | NM_031154 | glutathione S-transferase mu 2 (muscle)                                        | GSTM2                     | -2,60   | Cytoplasm           |
| 1378235_at   | AI549590  | glycerophosphodiester phosphodiesterase domain containing 1                    | GDPD1                     | -1,59   | Unknown             |
| 1367908_at   | NM_133598 | glycine cleavage system protein H (aminomethyl carrier)                        | GCSH                      | -2,94   | Cytoplasm           |
| 1388715_at   | AA818089  | glycyl-tRNA synthetase                                                         | GARS                      | -2,35   | Cytoplasm           |
| 1373337_at   | AI412065  | glyoxylate reductase/hydroxypyruvate reductase                                 | GRHPR                     | -3,63   | Cytoplasm           |
| 1387906_a_at | AF107845  | GNAS complex locus                                                             | GNAS                      | -1,71   | Plasma Membrane     |
| 1398985_at   | AI716480  | GTP binding protein 1                                                          | GTPBP1                    | 4,06    | Cytoplasm           |
| 1374489_at   | BF282573  | GTP binding protein 2                                                          | GTPBP2                    | 2,02    | Unknown             |
| 1382351_at   | AI069972  | GTP binding protein overexpressed in skeletal muscle                           | GEM                       | -3,19   | Plasma Membrane     |
| 1382105_at   | AI603217  | guanine nucleotide binding protein (G protein), beta 5                         | GNB5                      | -3,20   | Plasma Membrane     |
| 1373621_at   | BI285949  | guanosine monophosphate reductase 2                                            | GMPR2                     | -2,95   | Unknown             |
| 1368332_at   | NM_133624 | guanylate binding protein 2, interferon-inducible                              | GBP2                      | 1223,38 | Cytoplasm           |
| 1385051_at   | BE108569  | guanylate binding protein 4                                                    | GBP4 (includes EG:115361) | 427,68  | Cytoplasm           |
| 1386898_at   | NM_012966 | heat shock 10kDa protein 1 (chaperonin 10)                                     | HSPE1                     | -2,07   | Cytoplasm           |
| 1382902_at   | AA943147  | hect domain and RLD 6                                                          | HERC6                     | 35,98   | Unknown             |
| 1367903_at   | J05405    | heme oxygenase (decycling) 2                                                   | HMOX2                     | -1,83   | Cytoplasm           |
| 1370309_a_at | AJ238854  | heterogeneous nuclear ribonucleoprotein A/B                                    | HNRNPAB                   | -1,72   | Nucleus             |
| 1387175_a_at | NM_053609 | HLA-B associated transcript 3                                                  | BAT3                      | -1,56   | Nucleus             |
| 1370237_at   | AA799574  | hydroxyacyl-Coenzyme A dehydrogenase                                           | HADH                      | -5,07   | Cytoplasm           |
| 1386983_at   | NM_013168 | hydroxymethylbilane synthase                                                   | HMBS                      | -4,80   | Cytoplasm           |
| 1376191_at   | AA848820  | hydroxyprostaglandin dehydrogenase 15-(NAD)                                    | HPGD                      | -3,49   | Cytoplasm           |
| 1367672_at   | NM_024392 | hydroxysteroid (17-beta) dehydrogenase 4                                       | HSD17B4                   | -2,09   | Cytoplasm           |
| 1373924_at   | AI712686  | hypothetical protein FLJ11151                                                  | FLJ11151                  | -4,09   | Unknown             |
| 1388629_at   | BF281278  | IMP (inosine monophosphate) dehydrogenase 2                                    | IMPDH2                    | -2,07   | Cytoplasm           |
| 1387608_at   | NM_023973 | indoleamine-pyrrole 2,3 dioxygenase                                            | INDO                      | 30,37   | Cytoplasm           |
| 1396163_at   | BF563316  | interferon gamma induced GTPase                                                | IGTP                      | 3,93    | Cytoplasm           |
| 1375796_at   | BI300770  | interferon gamma induced GTPase                                                | IGTP                      | 45,65   | Cytoplasm           |
| 1376151_a_at | AI407953  | interferon gamma induced GTPase                                                | IGTP                      | 49,29   | Cytoplasm           |
| 1397304_at   | AW525366  | interferon gamma induced GTPase                                                | IGTP                      | 217,64  | Cytoplasm           |
| 1377950_at   | AA955213  | interferon inducible GTPase 1                                                  | IIGP1                     | 235,04  | Unknown             |
| 1373992_at   | AI408440  | interferon inducible GTPase 1                                                  | IIGP1                     | 482,20  | Unknown             |
| 1390507_at   | BI296097  | interferon stimulated exonuclease gene 20kDa                                   | ISG20                     | 2,72    | Nucleus             |
| 1369954_at   | NM_031510 | isocitrate dehydrogenase 1 (NADP+), soluble                                    | IDH1                      | -4,22   | Cytoplasm           |
| 1388403_at   | AI172491  | isocitrate dehydrogenase 2 (NADP+), mitochondrial                              | IDH2                      | -3,92   | Cytoplasm           |
| 1367911_at   | NM_053638 | isocitrate dehydrogenase 3 (NAD+) alpha                                        | IDH3A                     | -2,68   | Cytoplasm           |
| 1370865_at   | BI277627  | isocitrate dehydrogenase 3 (NAD+) gamma                                        | IDH3G                     | -1,64   | Cytoplasm           |
| 1389472_at   | AI169015  | KIAA0859                                                                       | KIAA0859                  | -1,69   | Unknown             |
| 1382462_at   | BF290937  | L-2-hydroxyglutarate dehydrogenase                                             | L2HGDH                    | -2,90   | Cytoplasm           |

|              |           |                                                                                                                                          |                              |        |                     |
|--------------|-----------|------------------------------------------------------------------------------------------------------------------------------------------|------------------------------|--------|---------------------|
| 1370218_at   | AA848319  | lactate dehydrogenase B                                                                                                                  | LDHB                         | -4,26  | Cytoplasm           |
| 1383743_at   | BI275464  | leucine rich repeat containing 16A                                                                                                       | LRRC16A                      | 1,59   | Unknown             |
| 1372884_at   | BG381486  | like-glycosyltransferase                                                                                                                 | LARGE                        | -2,68  | Cytoplasm           |
| 1368075_at   | NM_012732 | lipase A, lysosomal acid, cholesterol esterase                                                                                           | LIPA                         | 7,84   | Cytoplasm           |
| 1371662_at   | AA892250  | lysyl-tRNA synthetase                                                                                                                    | KARS                         | 3,42   | Cytoplasm           |
| 1372790_at   | BG671530  | malate dehydrogenase 1, NAD (soluble)                                                                                                    | MDH1                         | -1,87  | Cytoplasm           |
| 1369927_at   | NM_031151 | malate dehydrogenase 2, NAD (mitochondrial)                                                                                              | MDH2                         | -2,10  | Cytoplasm           |
| 1370870_at   | M30596    | malic enzyme 1, NADP(+)-dependent, cytosolic                                                                                             | ME1                          | -1,75  | Cytoplasm           |
| 1374696_at   | AI170182  | mannosidase, alpha, class 1A, member 2                                                                                                   | MAN1A2                       | 3,66   | Cytoplasm           |
| 1388667_at   | AI178793  | mannosidase, alpha, class 2A, member 1                                                                                                   | MAN2A1                       | -2,19  | Cytoplasm           |
| 1377463_at   | BE099244  | mannosidase, alpha, class 2A, member 2                                                                                                   | MAN2A2                       | 1,89   | Cytoplasm           |
| 1376674_at   | BI274940  | mannosidase, alpha, class 2A, member 2                                                                                                   | MAN2A2                       | 2,40   | Cytoplasm           |
| 1371875_at   | BM388852  | mannosidase, beta A, lysosomal                                                                                                           | MANBA                        | 1,99   | Cytoplasm           |
| 1367796_at   | NM_030861 | mannosyl (alpha-1,3-)-glycoprotein beta-1,2-N-acetylglucosaminyltransferase                                                              | MGAT1                        | -2,42  | Cytoplasm           |
| 1378394_at   | BE113263  | metallophosphoesterase 1                                                                                                                 | MPPE1                        | 4,68   | Unknown             |
| 1371350_at   | AI412159  | methionine adenosyltransferase II, alpha                                                                                                 | MAT2A                        | -1,63  | Cytoplasm           |
| 1368181_at   | NM_022508 | methylenetetrahydrofolate dehydrogenase (NADP+ dependent) 1, methylenetetrahydrofolate cyclohydrolase, formyltetrahydrofolate synthetase | MTHFD1                       | 4,24   | Cytoplasm           |
| 1373194_at   | BF282281  | midasin homolog (yeast)                                                                                                                  | MDN1 (includes EG:362498)    | -1,87  | Nucleus             |
| 1383157_at   | AW520344  | mitochondrial ribosomal protein L44                                                                                                      | MRPL44                       | -1,60  | Cytoplasm           |
| 1373069_at   | BG378230  | mitochondrial ribosomal protein S30                                                                                                      | MRPS30                       | -2,56  | Cytoplasm           |
| 1377493_at   | BM386301  | mitochondrial translation optimization 1 homolog (S. cerevisiae)                                                                         | MTO1                         | -3,54  | Cytoplasm           |
| 1371717_at   | AA943135  | mitofusin 1                                                                                                                              | MFN1                         | 1,54   | Cytoplasm           |
| 1372177_at   | AI180033  | molybdenum cofactor synthesis 2                                                                                                          | MOCS2                        | 1,93   | Cytoplasm           |
| 1368514_at   | NM_013198 | monoamine oxidase B                                                                                                                      | MAOB                         | -2,17  | Cytoplasm           |
| 1393287_at   | AW915147  | Mov10, Moloney leukemia virus 10, homolog (mouse)                                                                                        | MOV10                        | 5,22   | Nucleus             |
| 1374725_at   | AW252811  | Mov10, Moloney leukemia virus 10, homolog (mouse)                                                                                        | MOV10                        | 74,85  | Nucleus             |
| 1387368_at   | NM_012981 | muscle RAS oncogene homolog                                                                                                              | MRAS                         | 1,98   | Plasma Membrane     |
| 1372863_at   | BF409872  | MYC binding protein 2                                                                                                                    | MYCBP2                       | 1,98   | Nucleus             |
| 1390423_at   | BE104245  | MYC binding protein 2                                                                                                                    | MYCBP2                       | 2,43   | Nucleus             |
| 1370933_at   | BI275813  | myosin IE                                                                                                                                | MYO1E                        | 3,73   | Cytoplasm           |
| 1387866_at   | AI178160  | myosin IXB                                                                                                                               | MYO9B                        | 5,98   | Cytoplasm           |
| 1389474_at   | AA818380  | myosin regulatory light chain interacting protein                                                                                        | MYLIP                        | -1,64  | Cytoplasm           |
| 1387283_at   | NM_134350 | myxovirus (influenza virus) resistance 1, interferon-inducible protein p78 (mouse)                                                       | MX1                          | 17,39  | Nucleus             |
| 1369202_at   | NM_017028 | myxovirus (influenza virus) resistance 1, interferon-inducible protein p78 (mouse)                                                       | MX1                          | 47,53  | Nucleus             |
| 1371015_at   | X52711    | myxovirus (influenza virus) resistance 2 (mouse)                                                                                         | MX2                          | 71,77  | Nucleus             |
| 1388406_at   | AI412090  | N-acetyltransferase 15 (GCN5-related, putative)                                                                                          | NAT15                        | -3,09  | Unknown             |
| 1387599_a_at | J02679    | NAD(P)H dehydrogenase, quinone 1                                                                                                         | NQO1                         | -2,21  | Cytoplasm           |
| 1374959_at   | AA945624  | NAD(P)H dehydrogenase, quinone 2                                                                                                         | NQO2                         | 9,03   | Cytoplasm           |
| 1389334_at   | BI277594  | NADH dehydrogenase (ubiquinone) 1 alpha subcomplex 10                                                                                    | NDUFA10 (includes EG:678759) | -2,03  | Unknown             |
| 1375220_at   | AA818971  | NADH dehydrogenase (ubiquinone) 1 alpha subcomplex, 11, 14.7kDa                                                                          | NDUFA11                      | -1,83  | Cytoplasm           |
| 1391126_at   | BG379351  | NADH dehydrogenase (ubiquinone) 1 alpha subcomplex, 12                                                                                   | NDUFA12                      | -2,52  | Cytoplasm           |
| 1389288_at   | BI279838  | NADH dehydrogenase (ubiquinone) 1 alpha subcomplex, 2, 8kDa                                                                              | NDUFA2                       | -2,70  | Cytoplasm           |
| 1388323_at   | BG381033  | NADH dehydrogenase (ubiquinone) 1 alpha subcomplex, 9                                                                                    | NDUFA9 (includes EG:362440)  | -1,60  | Cytoplasm           |
| 1388304_at   | BI281307  | NADH dehydrogenase (ubiquinone) 1 beta subcomplex, 5, 16kDa                                                                              | NDUFB5                       | -1,89  | Cytoplasm           |
| 1371701_at   | BG666921  | NADH dehydrogenase (ubiquinone) 1 beta subcomplex, 9, 22kDa                                                                              | NDUFB9                       | -1,79  | Cytoplasm           |
| 1371041_at   | M22756    | NADH dehydrogenase (ubiquinone) flavoprotein 2, 24kDa                                                                                    | NDUFV2                       | -1,58  | Cytoplasm           |
| 1387055_at   | U90829    | NEDD8 activating enzyme E1 subunit 1                                                                                                     | NAE1                         | -1,87  | Cytoplasm           |
| 1389507_at   | AI072446  | neural precursor cell expressed, developmentally down-regulated 4-like                                                                   | NEDD4L                       | -1,72  | Cytoplasm           |
| 1387667_at   | L12562    | nitric oxide synthase 2, inducible                                                                                                       | NOS2                         | 109,35 | Cytoplasm           |
| 1388324_at   | BG668463  | nitrilase 1                                                                                                                              | NIT1                         | -2,06  | Unknown             |
| 1368410_at   | NM_012601 | N-methylpurine-DNA glycosylase                                                                                                           | MPG                          | -2,20  | Nucleus             |
| 1372364_a_at | AA894101  | N-terminal asparagine amidase                                                                                                            | NTAN1                        | -1,76  | Nucleus             |
| 1372295_at   | BF551356  | nuclear prelamin A recognition factor                                                                                                    | NARF                         | -1,81  | Nucleus             |
| 1388337_at   | AI102495  | nucleoside phosphorylase                                                                                                                 | NP                           | 5,50   | Nucleus             |
| 1376118_at   | BE109604  | OTU domain, ubiquitin aldehyde binding 2                                                                                                 | OTUB2                        | -4,64  | Unknown             |
| 1372291_at   | BI274517  | oxidase (cytochrome c) assembly 1-like                                                                                                   | OXA1L                        | -2,39  | Cytoplasm           |
| 1375848_at   | BG668051  | paraoxonase 2                                                                                                                            | PON2                         | -1,88  | Extracellular Space |
| 1371697_at   | BI278288  | patatin-like phospholipase domain containing 2                                                                                           | PNPLA2                       | 2,12   | Cytoplasm           |

|              |           |                                                                                                                            |        |         |                 |
|--------------|-----------|----------------------------------------------------------------------------------------------------------------------------|--------|---------|-----------------|
| 1390794_at   | BI289098  | peptide deformylase (mitochondrial)                                                                                        | PDF    | -3,57   | Cytoplasm       |
| 1375686_at   | AI706907  | peptidylprolyl isomerase (cyclophilin)-like 3                                                                              | PIL3   | -2,06   | Cytoplasm       |
| 1372827_at   | AA957342  | peptidylprolyl isomerase D                                                                                                 | PPID   | -1,70   | Cytoplasm       |
| 1389655_at   | AA892330  | peptidyl-tRNA hydrolase 2                                                                                                  | PTRH2  | -1,61   | Cytoplasm       |
| 1390993_at   | AW532101  | phenazine biosynthesis-like protein domain containing                                                                      | PBLD   | -2,58   | Unknown         |
| 1371863_at   | BM387059  | phosphatidylglycerophosphate synthase 1                                                                                    | PGS1   | 2,85    | Cytoplasm       |
| 1372900_at   | BI274156  | phosphatidylinositol glycan anchor biosynthesis, class T                                                                   | PIGT   | -2,10   | Cytoplasm       |
| 1367497_at   | AA851302  | phosphatidylserine synthase 1                                                                                              | PTDSS1 | -2,73   | Cytoplasm       |
| 1368438_at   | NM_022236 | phosphodiesterase 10A                                                                                                      | PDE10A | -2,19   | Cytoplasm       |
| 1384400_at   | BM389421  | phosphodiesterase 4C, cAMP-specific (phosphodiesterase E1 dunce homolog, Drosophila)                                       | PDE4C  | 2,75    | Cytoplasm       |
| 1374452_at   | BF399743  | phosphodiesterase 9A                                                                                                       | PDE9A  | 2,45    | Cytoplasm       |
| 1374969_at   | AA799832  | phosphoglucomutase 5                                                                                                       | PGM5   | -1,64   | Cytoplasm       |
| 1370385_at   | U51898    | phospholipase A2, group VI (cytosolic, calcium-independent)                                                                | PLA2G6 | 1,88    | Cytoplasm       |
| 1392099_at   | AI549022  | phospholipase C, eta 1                                                                                                     | PLCH1  | 6,56    | Cytoplasm       |
| 1374590_at   | BF420110  | phospholipase C-like 2                                                                                                     | PLCL2  | -1,86   | Cytoplasm       |
| 1370531_a_at | U69550    | phospholipase D1, phosphatidylcholine-specific                                                                             | PLD1   | 2,26    | Cytoplasm       |
| 1370530_a_at | AB000779  | phospholipase D1, phosphatidylcholine-specific                                                                             | PLD1   | 2,80    | Cytoplasm       |
| 1369029_at   | NM_057194 | phospholipid scramblase 1                                                                                                  | PLSCR1 | 12,28   | Plasma Membrane |
| 1373417_at   | BI285973  | phospholipid scramblase 3                                                                                                  | PLSCR3 | 2,51    | Cytoplasm       |
| 1371455_at   | AI411429  | phosphomannomutase 1                                                                                                       | PMM1   | -3,21   | Cytoplasm       |
| 1387790_at   | NM_080910 | phosphoribosylaminoimidazole carboxylase, phosphoribosylaminoimidazole succinocarboxamide synthetase                       | PAICS  | -2,28   | Unknown         |
| 1392499_at   | H32997    | phosphoribosylformylglycinamide synthase                                                                                   | PFAS   | -1,57   | Cytoplasm       |
| 1388641_at   | AI410319  | phosphoribosylglycinamide formyltransferase, phosphoribosylglycinamide synthetase, phosphoribosylaminoimidazole synthetase | GART   | -3,19   | Cytoplasm       |
| 1387271_at   | NM_053674 | phytanoyl-CoA 2-hydroxylase                                                                                                | PHYH   | -3,35   | Cytoplasm       |
| 1393245_at   | AI029057  | phytanoyl-CoA 2-hydroxylase                                                                                                | PHYH   | -1,70   | Cytoplasm       |
| 1380101_at   | BE109349  | poly(A) polymerase gamma                                                                                                   | PAPOLG | 2,00    | Nucleus         |
| 1388883_at   | BF281976  | polymerase (DNA-directed), delta 4                                                                                         | POLD4  | -3,06   | Nucleus         |
| 1387268_at   | NM_031773 | polymerase (RNA) I polypeptide B, 128kDa                                                                                   | POLR1B | -2,38   | Nucleus         |
| 1374289_at   | AA818183  | polymerase (RNA) I polypeptide C, 30kDa                                                                                    | POLR1C | -2,54   | Nucleus         |
| 1367471_at   | BI279090  | polymerase (RNA) II (DNA directed) polypeptide E, 25kDa                                                                    | POLR2E | -2,00   | Nucleus         |
| 1367769_at   | NM_053948 | polymerase (RNA) II (DNA directed) polypeptide G                                                                           | POLR2G | -2,96   | Nucleus         |
| 1398914_at   | AW530341  | polymerase (RNA) II (DNA directed) polypeptide J, 13.3kDa                                                                  | POLR2J | -2,30   | Nucleus         |
| 1380256_at   | BE103946  | polymerase (RNA) III (DNA directed) polypeptide C (62kD)                                                                   | POLR3C | 2,20    | Nucleus         |
| 1382604_at   | BE117925  | polymerase (RNA) III (DNA directed) polypeptide G (32kD)                                                                   | POLR3G | -3,01   | Nucleus         |
| 1399035_at   | BE097233  | polymerase (RNA) III (DNA directed) polypeptide H (22.9kD)                                                                 | POLR3H | -2,55   | Nucleus         |
| 1367931_a_at | X60790    | polypyrimidine tract binding protein 1                                                                                     | PTBP1  | -1,66   | Nucleus         |
| 1373913_at   | BF282271  | polyribonucleotide nucleotidyltransferase 1                                                                                | PNPT1  | 1,82    | Cytoplasm       |
| 1370407_at   | AF332142  | prenylcysteine oxidase 1                                                                                                   | PCYOX1 | -2,34   | Cytoplasm       |
| 1381386_at   | AI407297  | processing of precursor 5, ribonuclease P/MRP subunit (S. cerevisiae)                                                      | POP5   | -2,54   | Nucleus         |
| 1374424_at   | BE112720  | protein arginine methyltransferase 5                                                                                       | PRMT5  | -1,54   | Cytoplasm       |
| 1388717_at   | BM384163  | protein O-fucosyltransferase 2                                                                                             | POFUT2 | -2,80   | Cytoplasm       |
| 1388960_at   | AI412958  | pyrophosphatase (inorganic) 1                                                                                              | PPA1   | -1,81   | Cytoplasm       |
| 1377576_at   | AA891800  | pyrophosphatase (inorganic) 2                                                                                              | PPA2   | -12,31  | Cytoplasm       |
| 1371388_at   | BM389223  | pyruvate dehydrogenase (lipoamide) beta                                                                                    | PDHB   | -1,93   | Cytoplasm       |
| 1371871_at   | AI409731  | RAB12, member RAS oncogene family                                                                                          | RAB12  | 2,12    | Cytoplasm       |
| 1383089_at   | BM386264  | RAB21, member RAS oncogene family                                                                                          | RAB21  | 1,60    | Cytoplasm       |
| 1372862_at   | BM390237  | RAB22A, member RAS oncogene family                                                                                         | RAB22A | -1,63   | Cytoplasm       |
| 1391434_at   | BF389910  | RAB3A, member RAS oncogene family                                                                                          | RAB3A  | -16,01  | Cytoplasm       |
| 1370055_at   | M83681    | RAB3D, member RAS oncogene family                                                                                          | RAB3D  | -3,11   | Cytoplasm       |
| 1388823_at   | BI274642  | RAB5B, member RAS oncogene family                                                                                          | RAB5B  | 2,38    | Cytoplasm       |
| 1387797_at   | AA946057  | RAB7A, member RAS oncogene family                                                                                          | RAB7A  | 1,67    | Cytoplasm       |
| 1391347_at   | BF398743  | RAB8B, member RAS oncogene family                                                                                          | RAB8B  | 5,62    | Cytoplasm       |
| 1370913_at   | AI409634  | radical S-adenosyl methionine domain containing 2                                                                          | RSAD2  | 1285,11 | Unknown         |
| 1374035_at   | BI296482  | RAS (RAD and GEM)-like GTP binding 2                                                                                       | REM2   | -7,32   | Plasma Membrane |
| 1371659_at   | AA891940  | ras homolog gene family, member C                                                                                          | RHOC   | 3,08    | Plasma Membrane |
| 1389227_at   | BG375902  | ras homolog gene family, member G (rho G)                                                                                  | RHOG   | 1,68    | Cytoplasm       |
| 1397581_at   | BF416022  | ras homolog gene family, member V                                                                                          | RHOV   | 3,31    | Plasma Membrane |
| 1387908_at   | AF239157  | RAS, dexamethasone-induced 1                                                                                               | RASD1  | 3,72    | Cytoplasm       |

|              |           |                                                                            |         |       |                     |
|--------------|-----------|----------------------------------------------------------------------------|---------|-------|---------------------|
| 1373774_at   | AI412619  | Ras-like without CAAX 2                                                    | RIT2    | -2,35 | Plasma Membrane     |
| 1369696_at   | NM_053972 | Ras-related GTP binding B                                                  | RRAGB   | -3,00 | Nucleus             |
| 1374921_at   | BI274548  | regulator of telomere elongation helicase 1                                | RTEL1   | -1,53 | Nucleus             |
| 1372133_at   | AA955287  | related RAS viral (r-ras) oncogene homolog 2                               | RRAS2   | 2,52  | Plasma Membrane     |
| 1393351_at   | BE109501  | retinol dehydrogenase 10 (all-trans)                                       | RDH10   | 9,78  | Unknown             |
| 1373923_at   | BF283756  | retinol dehydrogenase 10 (all-trans)                                       | RDH10   | 11,95 | Unknown             |
| 1384391_at   | BE096510  | retinol dehydrogenase 10 (all-trans)                                       | RDH10   | 15,98 | Unknown             |
| 1373918_at   | BG374035  | retinol dehydrogenase 11 (all-trans/9-cis/11-cis)                          | RDH11   | -2,25 | Cytoplasm           |
| 1389217_at   | AI599568  | RFNG O-fucosylpeptide 3-beta-N-acetylglucosaminyltransferase               | RFNG    | -2,35 | Cytoplasm           |
| 1377663_at   | AI598323  | Rho family GTPase 3                                                        | RND3    | 1,95  | Cytoplasm           |
| 1394077_at   | BF548080  | Rho family GTPase 3                                                        | RND3    | 2,80  | Cytoplasm           |
| 1376066_at   | AI103572  | Rho family GTPase 3                                                        | RND3    | 4,66  | Cytoplasm           |
| 1386062_at   | AI060227  | Rho family GTPase 3                                                        | RND3    | 7,46  | Cytoplasm           |
| 1389632_at   | AA799294  | Rho-related BTB domain containing 1                                        | RHOBTB1 | -2,24 | Unknown             |
| 1380425_at   | AI012859  | ribonuclease L (2',5'-oligoadenylate synthetase-dependent)                 | RNASEL  | 9,40  | Cytoplasm           |
| 1372845_at   | BG380782  | ribonuclease P/MRP 21kDa subunit                                           | RPP21   | 2,23  | Nucleus             |
| 1376440_at   | BF391522  | ring finger protein 139                                                    | RNF139  | 4,52  | Cytoplasm           |
| 1383679_at   | BF411972  | ring finger protein 31                                                     | RNF31   | 2,62  | Cytoplasm           |
| 1388529_at   | AI237372  | RNA terminal phosphate cyclase domain 1                                    | RTCD1   | -2,04 | Nucleus             |
| 1367798_at   | NM_017201 | S-adenosylhomocysteine hydrolase                                           | AHCY    | -1,89 | Cytoplasm           |
| 1367470_at   | AA851321  | SAR1 homolog A (S. cerevisiae)                                             | SAR1A   | -1,70 | Cytoplasm           |
| 1379957_at   | BE107457  | schlafen family member 13                                                  | SLFN13  | 33,71 | Nucleus             |
| 1374524_at   | BM384384  | selenocysteine lyase                                                       | SCLY    | 7,57  | Cytoplasm           |
| 1393134_at   | BG375377  | selenophosphate synthetase 1                                               | SEPHS1  | -1,56 | Unknown             |
| 1367593_at   | NM_013027 | selenoprotein W, 1                                                         | SEPW1   | 3,21  | Cytoplasm           |
| 1390096_at   | BF284481  | SH3-domain GRB2-like endophilin B1                                         | SH3GLB1 | 2,16  | Cytoplasm           |
| 1381203_at   | AA819246  | SH3-domain GRB2-like endophilin B1                                         | SH3GLB1 | 4,24  | Cytoplasm           |
| 1388565_at   | BI289536  | spastic paraplegia 21 (autosomal recessive, Mast syndrome)                 | SPG21   | 2,20  | Plasma Membrane     |
| 1367834_at   | NM_053464 | spermidine synthase                                                        | SRM     | -3,07 | Unknown             |
| 1375889_at   | AI228536  | spermine synthase                                                          | SMS     | -1,73 | Unknown             |
| 1388809_at   | BM389498  | sphingomyelin phosphodiesterase, acid-like 3A                              | SMPDL3A | -2,34 | Extracellular Space |
| 1384106_at   | AW141276  | sphingomyelin synthase 1                                                   | SGMS1   | 9,10  | Cytoplasm           |
| 1393919_at   | AW535116  | sphingomyelin synthase 2                                                   | SGMS2   | 3,67  | Plasma Membrane     |
| 1374442_at   | AI227831  | splicing factor, arginine/serine-rich 9                                    | SFRS9   | -1,63 | Nucleus             |
| 1373869_at   | AI012418  | sterol O-acyltransferase 1                                                 | SOAT1   | -4,90 | Cytoplasm           |
| 1387926_at   | AB052846  | sterol-C5-desaturase (ERG3 delta-5-desaturase homolog, S. cerevisiae)-like | SC5DL   | -4,23 | Cytoplasm           |
| 1390777_at   | AI710051  | sterol-C5-desaturase (ERG3 delta-5-desaturase homolog, S. cerevisiae)-like | SC5DL   | -2,03 | Cytoplasm           |
| 1388294_at   | AI176608  | succinate dehydrogenase complex, subunit D, integral membrane protein      | SDHD    | -2,27 | Cytoplasm           |
| 1388975_at   | AA923982  | succinate-CoA ligase, ADP-forming, beta subunit                            | SUCLA2  | -2,83 | Cytoplasm           |
| 1372510_at   | AI172302  | sulfiredoxin 1 homolog (S. cerevisiae)                                     | SRXN1   | -4,71 | Cytoplasm           |
| 1384331_at   | H31896    | sulfiredoxin 1 homolog (S. cerevisiae)                                     | SRXN1   | -2,75 | Cytoplasm           |
| 1370036_at   | NM_031127 | sulfite oxidase                                                            | SUOX    | -3,13 | Cytoplasm           |
| 1370173_at   | BG671549  | superoxide dismutase 2, mitochondrial                                      | SOD2    | 7,02  | Cytoplasm           |
| 1370172_at   | AA892254  | superoxide dismutase 2, mitochondrial                                      | SOD2    | 9,23  | Cytoplasm           |
| 1375981_a_at | AA997899  | suppressor of variegation 3-9 homolog 1 (Drosophila)                       | SUV39H1 | 2,76  | Nucleus             |
| 1398857_at   | AF182952  | surfeit 1                                                                  | SURF1   | -1,52 | Cytoplasm           |
| 1368012_at   | NM_022591 | telomerase-associated protein 1                                            | TEP1    | 2,60  | Nucleus             |
| 1367510_at   | BG381690  | thioredoxin domain containing 15                                           | TXNDC15 | -2,12 | Unknown             |
| 1398953_at   | BM386183  | tissue specific transplantation antigen P35B                               | TSTA3   | -2,51 | Plasma Membrane     |
| 1383778_at   | AW917920  | TNF receptor-associated factor 6                                           | TRAF6   | 1,62  | Cytoplasm           |
| 1384582_at   | BE107130  | TNF receptor-associated factor 6                                           | TRAF6   | 1,71  | Cytoplasm           |
| 1374467_at   | BM389034  | TNF receptor-associated protein 1                                          | TRAP1   | -2,88 | Cytoplasm           |
| 1372868_at   | BF284295  | torsin family 3, member A                                                  | TOR3A   | 2,67  | Unknown             |
| 1386859_at   | NM_022592 | transketolase                                                              | TKT     | -2,28 | Cytoplasm           |
| 1383430_at   | BF414509  | tRNA splicing endonuclease 2 homolog (S. cerevisiae)                       | TSEN2   | -2,77 | Cytoplasm           |
| 1388718_at   | AI104913  | tropomodulin 1                                                             | TMOD1   | -1,77 | Cytoplasm           |
| 1388574_at   | BG670966  | tryptophanyl-tRNA synthetase                                               | WARS    | 4,75  | Cytoplasm           |
| 1395124_at   | BE101688  | tryptophanyl-tRNA synthetase                                               | WARS    | 14,35 | Cytoplasm           |

|                                   |           |                                                                                               |         |        |                     |
|-----------------------------------|-----------|-----------------------------------------------------------------------------------------------|---------|--------|---------------------|
| 1398994_at                        | BI301193  | tyrosylprotein sulfotransferase 2                                                             | TPST2   | -3,11  | Cytoplasm           |
| 1392199_at                        | BF398981  | ubiquitin protein ligase E3 component n-recogin 5                                             | UBR5    | -2,88  | Nucleus             |
| 1388739_at                        | BF398626  | ubiquitin protein ligase E3 component n-recogin 7 (putative)                                  | UBR7    | -2,28  | Unknown             |
| 1373409_at                        | BI294738  | ubiquitin protein ligase E3C                                                                  | UBE3C   | -1,77  | Nucleus             |
| 1373037_at                        | BI279216  | ubiquitin-conjugating enzyme E2L 6                                                            | UBE2L6  | 18,34  | Cytoplasm           |
| 1373438_at                        | BE329352  | ubiquitin-conjugating enzyme E2O                                                              | UBE2O   | -1,83  | Unknown             |
| 1371365_at                        | BI279788  | ubiquitin-conjugating enzyme E2S                                                              | UBE2S   | -2,12  | Unknown             |
| 1392906_at                        | AW528860  | ubiquitin-like 4A                                                                             | UBL4A   | -3,13  | Unknown             |
| 1379634_at                        | AW921187  | ubiquitin-like modifier activating enzyme 7                                                   | UBA7    | 1,64   | Cytoplasm           |
| 1386277_at                        | AI177396  | ubiquitin-like modifier activating enzyme 7                                                   | UBA7    | 10,64  | Cytoplasm           |
| 1379633_a_at                      | BE096453  | ubiquitin-like modifier activating enzyme 7                                                   | UBA7    | 12,74  | Cytoplasm           |
| 1370613_s_at                      | AF461738  | UDP glucuronosyltransferase 1 family, polypeptide A6                                          | UGT1A6  | -1,94  | Cytoplasm           |
| 1368858_at                        | L21698    | UDP glycosyltransferase 8                                                                     | UGT8    | -2,93  | Cytoplasm           |
| 1387206_at                        | NM_031740 | UDP-Gal:betaGlcNAc beta 1,4- galactosyltransferase, polypeptide 6                             | B4GALT6 | 1,86   | Cytoplasm           |
| 1376202_at                        | BF416236  | UDP-GlcNAc:betaGal beta-1,3-N-acetylglucosaminyltransferase 1                                 | B3GNT1  | -11,43 | Cytoplasm           |
| 1372779_at                        | BG373352  | UDP-GlcNAc:betaGal beta-1,3-N-acetylglucosaminyltransferase 2                                 | B3GNT2  | -1,64  | Cytoplasm           |
| 1367938_at                        | NM_031325 | UDP-glucose dehydrogenase                                                                     | UGDH    | 2,14   | Nucleus             |
| 1379910_at                        | AI136097  | UDP-N-acteylglucosamine pyrophosphorylase 1                                                   | UAP1    | 2,20   | Nucleus             |
| 1389587_at                        | BM384966  | uridine monophosphate synthetase                                                              | UMPS    | -2,84  | Cytoplasm           |
| 1370878_at                        | Y00350    | uroporphyrinogen decarboxylase                                                                | UROD    | -2,40  | Cytoplasm           |
| 1372578_at                        | AI704469  | valyl-tRNA synthetase                                                                         | VARS    | 1,89   | Cytoplasm           |
| 1371255_at                        | BG379941  | v-Ha-ras Harvey rat sarcoma viral oncogene homolog                                            | HRAS    | -2,44  | Plasma Membrane     |
| 1388330_at                        | BM384958  | vitamin K epoxide reductase complex, subunit 1                                                | VKORC1  | -1,50  | Cytoplasm           |
| 1368839_at                        | AI407433  | Wolfram syndrome 1 (wolframin)                                                                | WFS1    | -1,75  | Cytoplasm           |
| <b>G-protein coupled receptor</b> |           |                                                                                               |         |        |                     |
| 1369787_at                        | NM_012688 | cholecystokinin A receptor                                                                    | CCKAR   | -3,95  | Plasma Membrane     |
| 1384809_at                        | AW526563  | G protein-coupled receptor 123                                                                | GPR123  | -3,48  | Plasma Membrane     |
| 1382739_at                        | AI045718  | G protein-coupled receptor 19                                                                 | GPR19   | 6,00   | Plasma Membrane     |
| 1369792_at                        | U12006    | G protein-coupled receptor 6                                                                  | GPR6    | -8,21  | Plasma Membrane     |
| 1387702_at                        | U30290    | galanin receptor 1                                                                            | GALR1   | -2,40  | Plasma Membrane     |
| 1387383_at                        | NM_031802 | gamma-aminobutyric acid (GABA) B receptor, 2                                                  | GABBR2  | -2,00  | Plasma Membrane     |
| 1370735_at                        | AF010293  | olfactory receptor 937                                                                        | OLFR937 | 2,25   | Plasma Membrane     |
| 1386986_at                        | NM_053340 | opioid growth factor receptor                                                                 | OGFR    | 10,69  | Plasma Membrane     |
| 1377702_at                        | BG380173  | purinergic receptor P2Y, G-protein coupled, 5                                                 | P2RY5   | 1,97   | Plasma Membrane     |
| 1375846_at                        | BE113490  | xenotropic and polytropic retrovirus receptor                                                 | XPR1    | 1,90   | Plasma Membrane     |
| <b>Growth factor</b>              |           |                                                                                               |         |        |                     |
| 1368945_at                        | NM_017178 | bone morphogenetic protein 2                                                                  | BMP2    | 1,58   | Extracellular Space |
| 1386893_at                        | NM_017113 | granulin                                                                                      | GRN     | 2,79   | Extracellular Space |
| 1383047_at                        | AA957335  | growth arrest-specific 6                                                                      | GAS6    | -1,68  | Extracellular Space |
| 1370427_at                        | L06238    | platelet-derived growth factor alpha polypeptide                                              | PDGFA   | 6,15   | Extracellular Space |
| 1379375_at                        | BE100812  | platelet-derived growth factor alpha polypeptide                                              | PDGFA   | 7,32   | Extracellular Space |
| 1381449_s_at                      | BG670310  | transforming growth factor, alpha                                                             | TGFA    | -2,09  | Extracellular Space |
| 1368359_a_at                      | NM_030997 | VGF nerve growth factor inducible                                                             | VGFB    | 1,90   | Extracellular Space |
| <b>Ion channel</b>                |           |                                                                                               |         |        |                     |
| 1378232_at                        | BF417445  | chloride channel 3                                                                            | CLCN3   | -1,52  | Plasma Membrane     |
| 1377765_at                        | AA848723  | chloride intracellular channel 4                                                              | CLIC4   | 7,16   | Cytoplasm           |
| 1387171_at                        | NM_017261 | glutamate receptor, ionotropic, AMPA 2                                                        | GRIA2   | -2,92  | Plasma Membrane     |
| 1368401_at                        | M85035    | glutamate receptor, ionotropic, AMPA 2                                                        | GRIA2   | -1,82  | Plasma Membrane     |
| 1372724_at                        | BI284904  | glutamate receptor, ionotropic, N-methyl D-aspartate-associated protein 1 (glutamate binding) | GRINA   | 2,40   | Unknown             |
| 1370408_at                        | AF313411  | MSTP150                                                                                       | MST150  | 4,91   | Unknown             |
| 1387698_at                        | AB043638  | potassium inwardly-rectifying channel, subfamily J, member 11                                 | KCNJ11  | -3,17  | Plasma Membrane     |
| 1391007_s_at                      | BE113377  | potassium inwardly-rectifying channel, subfamily J, member 11                                 | KCNJ11  | -2,46  | Plasma Membrane     |
| 1372929_at                        | AI010839  | potassium large conductance calcium-activated channel, subfamily M, alpha member 1            | KCNMA1  | -1,65  | Plasma Membrane     |
| 1371911_at                        | BM390023  | tumor necrosis factor, alpha-induced protein 1 (endothelial)                                  | TNFAIP1 | 1,61   | Plasma Membrane     |
| 1384238_at                        | BM385249  | tweety homolog 2 (Drosophila)                                                                 | TTYH2   | -3,05  | Unknown             |
| <b>Kinase</b>                     |           |                                                                                               |         |        |                     |
| 1373494_at                        | BE120831  | breakpoint cluster region                                                                     | BCR     | 2,41   | Cytoplasm           |
| 1367889_at                        | NM_134468 | calcium/calmodulin-dependent protein kinase I                                                 | CAMK1   | -2,38  | Cytoplasm           |

|              |           |                                                                                                    |                         |        |                     |
|--------------|-----------|----------------------------------------------------------------------------------------------------|-------------------------|--------|---------------------|
| 1375575_at   | BF403410  | calcium/calmodulin-dependent protein kinase II beta                                                | CAMK2B                  | -1,79  | Cytoplasm           |
| 1368834_at   | AA894330  | calcium/calmodulin-dependent protein kinase II delta                                               | CAMK2D                  | 2,18   | Cytoplasm           |
| 1371326_at   | BI276957  | casein kinase 2, alpha prime polypeptide                                                           | CSNK2A2                 | 1,70   | Cytoplasm           |
| 1373823_at   | AA944180  | CDC28 protein kinase regulatory subunit 2                                                          | CKS2 (includes EG:1164) | 12,38  | Unknown             |
| 1399022_at   | AI177513  | CDC-like kinase 1                                                                                  | CLK1                    | 1,81   | Nucleus             |
| 1375987_at   | AW525194  | ceramide kinase                                                                                    | CERK                    | -1,51  | Plasma Membrane     |
| 1372536_at   | AI105042  | chaperone, ABC1 activity of bc1 complex homolog (S. pombe)                                         | CABC1                   | -3,17  | Cytoplasm           |
| 1387062_a_at | NM_080400 | CHK1 checkpoint homolog (S. pombe)                                                                 | CHEK1                   | 1,98   | Nucleus             |
| 1373304_at   | BM392002  | Coenzyme A synthase                                                                                | COASY                   | -2,42  | Cytoplasm           |
| 1371993_at   | AI237636  | copine III                                                                                         | CPNE3                   | 2,60   | Cytoplasm           |
| 1367740_at   | M14400    | creatine kinase, brain                                                                             | CKB                     | -6,83  | Cytoplasm           |
| 1390566_a_at | BI301453  | creatine kinase, mitochondrial 1B                                                                  | CKMT1B                  | 5,46   | Cytoplasm           |
| 1369950_at   | NM_053593 | cyclin-dependent kinase 4                                                                          | CDK4                    | -2,06  | Nucleus             |
| 1368088_at   | NM_080885 | cyclin-dependent kinase 5                                                                          | CDK5                    | -3,80  | Nucleus             |
| 1388171_at   | AW916118  | cyclin-dependent kinase 7                                                                          | CDK7                    | -1,65  | Nucleus             |
| 1388674_at   | AI010427  | cyclin-dependent kinase inhibitor 1A (p21, Cip1)                                                   | CDKN1A                  | 3,70   | Nucleus             |
| 1383424_at   | BI276216  | cytidine monophosphate (UMP-CMP) kinase 2, mitochondrial                                           | CMPK2                   | 156,71 | Cytoplasm           |
| 1393044_at   | BF282370  | cytidine monophosphate (UMP-CMP) kinase 2, mitochondrial                                           | CMPK2                   | 276,24 | Cytoplasm           |
| 1370217_at   | L26525    | discoidin domain receptor tyrosine kinase 1                                                        | DDR1                    | -2,15  | Plasma Membrane     |
| 1398276_at   | NM_022282 | discs, large homolog 2 (Drosophila)                                                                | DLG2                    | -6,08  | Plasma Membrane     |
| 1392588_at   | BG664535  | dual serine/threonine and tyrosine protein kinase                                                  | RIPK5                   | -2,09  | Cytoplasm           |
| 1370699_a_at | AF187818  | epidermal growth factor receptor (erythroblastic leukemia viral (v-erb-b) oncogene homolog, avian) | EGFR                    | -1,88  | Plasma Membrane     |
| 1387242_at   | NM_019335 | eukaryotic translation initiation factor 2-alpha kinase 2                                          | EIF2AK2                 | 9,64   | Cytoplasm           |
| 1368326_at   | NM_031599 | eukaryotic translation initiation factor 2-alpha kinase 3                                          | EIF2AK3                 | 2,74   | Cytoplasm           |
| 1383654_a_at | BE112523  | fructosamine 3 kinase                                                                              | FN3K                    | -11,86 | Unknown             |
| 1395404_at   | BE110529  | fructosamine-3-kinase-related protein                                                              | FN3KRP                  | -1,75  | Unknown             |
| 1368408_at   | NM_030829 | G protein-coupled receptor kinase 5                                                                | GRK5                    | 2,57   | Plasma Membrane     |
| 1376650_at   | BF399323  | golgi autoantigen, golgin subfamily a, 5                                                           | GOLGA5                  | -3,82  | Cytoplasm           |
| 1369162_at   | NM_013170 | guanylate cyclase 2C (heat stable enterotoxin receptor)                                            | GUCY2C                  | -2,71  | Plasma Membrane     |
| 1388721_at   | BG380282  | heat shock 22kDa protein 8                                                                         | HSPB8                   | 12,67  | Cytoplasm           |
| 1383519_at   | BI294137  | hexokinase 2                                                                                       | HK2                     | 17,22  | Cytoplasm           |
| 1381016_at   | BI288152  | inositol 1,3,4,5,6-pentakisphosphate 2-kinase                                                      | IPPK                    | -3,45  | Cytoplasm           |
| 1388500_at   | AI180252  | inositol 1,4,5-trisphosphate 3-kinase B                                                            | ITPKB                   | -2,53  | Cytoplasm           |
| 1387777_at   | NM_133409 | integrin-linked kinase                                                                             | ILK                     | 1,81   | Plasma Membrane     |
| 1380110_at   | AI229643  | Janus kinase 2 (a protein tyrosine kinase)                                                         | JAK2                    | 14,91  | Cytoplasm           |
| 1368856_at   | NM_031514 | Janus kinase 2 (a protein tyrosine kinase)                                                         | JAK2                    | 17,89  | Cytoplasm           |
| 1368251_at   | NM_012855 | Janus kinase 3 (a protein tyrosine kinase, leukocyte)                                              | JAK3                    | 3,24   | Cytoplasm           |
| 1372038_at   | BM383395  | MAP kinase interacting serine/threonine kinase 2                                                   | MKMK2                   | -2,38  | Cytoplasm           |
| 1397535_at   | BF555544  | membrane protein, palmitoylated 5 (MAGUK p55 subfamily member 5)                                   | MPP5                    | -1,52  | Plasma Membrane     |
| 1380682_at   | BF396302  | mex-3 homolog B (C. elegans)                                                                       | MEX3B                   | -1,91  | Unknown             |
| 1398834_at   | D14592    | mitogen-activated protein kinase kinase 2                                                          | MAP2K2                  | -1,78  | Cytoplasm           |
| 1372010_at   | BF283797  | mitogen-activated protein kinase-activated protein kinase 5                                        | MAPKAPK5                | -1,55  | Cytoplasm           |
| 1373939_at   | AI236719  | N-acetylglucosamine kinase                                                                         | NAGK                    | -2,46  | Cytoplasm           |
| 1370687_a_at | M55292    | neurotrophic tyrosine kinase, receptor, type 2                                                     | NTRK2                   | -2,15  | Plasma Membrane     |
| 1373501_at   | AA955361  | NIMA (never in mitosis gene a)-related kinase 7                                                    | NEK7                    | 1,63   | Nucleus             |
| 1368863_at   | NM_053507 | non-metastatic cells 3, protein expressed in                                                       | NME3                    | -3,62  | Extracellular Space |
| 1383614_at   | BI295051  | NUAK family, SNF1-like kinase, 2                                                                   | NUAK2                   | 7,17   | Unknown             |
| 1396994_at   | BM382872  | pantothenate kinase 2                                                                              | PANK2                   | 2,95   | Cytoplasm           |
| 1394706_at   | AI044545  | pantothenate kinase 3                                                                              | PANK3                   | -2,41  | Cytoplasm           |
| 1374747_at   | BM384279  | PFTAIRE protein kinase 1                                                                           | PFTK1                   | -2,91  | Nucleus             |
| 1375213_at   | BM384604  | phosphoenolpyruvate carboxykinase 2 (mitochondrial)                                                | PCK2                    | -2,68  | Cytoplasm           |
| 1372182_at   | BM389769  | phosphofructokinase, platelet                                                                      | PFKP                    | 4,95   | Cytoplasm           |
| 1387361_s_at | NM_053291 | phosphoglycerate kinase 1                                                                          | PGK1                    | -1,65  | Cytoplasm           |
| 1369050_at   | NM_053923 | phosphoinositide-3-kinase, class 2, gamma polypeptide                                              | PIK3C2G                 | 5,04   | Cytoplasm           |
| 1368106_at   | NM_031821 | polo-like kinase 2 (Drosophila)                                                                    | PLK2                    | 1,71   | Nucleus             |
| 1387114_at   | NM_133307 | protein kinase C, delta                                                                            | PRKCD                   | 4,33   | Cytoplasm           |
| 1388830_at   | BM390687  | protein kinase N2                                                                                  | PKN2                    | 1,89   | Cytoplasm           |
| 1371835_at   | AI411907  | protein kinase, cAMP-dependent, catalytic, beta                                                    | PRKACB                  | -2,01  | Cytoplasm           |



|                                          |           |                                                                                            |          |        |                     |
|------------------------------------------|-----------|--------------------------------------------------------------------------------------------|----------|--------|---------------------|
| 1388375_at                               | AI234096  | protein kinase, cAMP-dependent, regulatory, type I, alpha (tissue specific extinguisher 1) | PRKARIA  | -1,52  | Cytoplasm           |
| 1389463_at                               | BG375376  | protein kinase, cAMP-dependent, regulatory, type I, beta                                   | PRKAR1B  | -2,17  | Cytoplasm           |
| 1371133_a_at                             | M12492    | protein kinase, cAMP-dependent, regulatory, type II, beta                                  | PRKAR2B  | -1,71  | Cytoplasm           |
| 1389431_at                               | BF400782  | protein kinase, DNA-activated, catalytic polypeptide                                       | PRKDC    | -1,58  | Nucleus             |
| 1377053_at                               | BE117757  | protein kinase-like protein SgK196                                                         | SGK196   | -2,43  | Unknown             |
| 1372316_at                               | BM384131  | protein kinase-like protein SgK493                                                         | SGK493   | 3,04   | Unknown             |
| 1382646_at                               | AI145475  | PRP4 pre-mRNA processing factor 4 homolog B (yeast)                                        | PRPF4B   | -3,10  | Nucleus             |
| 1387875_at                               | BI294798  | PTK2 protein tyrosine kinase 2                                                             | PTK2     | 2,07   | Cytoplasm           |
| 1394338_x_at                             | BF290004  | PTK2 protein tyrosine kinase 2                                                             | PTK2     | 3,09   | Cytoplasm           |
| 1371529_at                               | BF289001  | receptor (TNFRSF)-interacting serine-threonine kinase 1                                    | RIPK1    | 3,63   | Plasma Membrane     |
| 1381279_at                               | BF412519  | receptor-interacting serine-threonine kinase 2                                             | RIPK2    | 35,59  | Plasma Membrane     |
| 1375093_at                               | AI236089  | ribokinase                                                                                 | RBKS     | -1,88  | Unknown             |
| 1389735_at                               | BE107296  | ribosomal protein S6 kinase, 90kDa, polypeptide 6                                          | RPS6KA6  | 2,27   | Cytoplasm           |
| 1372292_at                               | AI009732  | serine/threonine kinase 24 (STE20 homolog, yeast)                                          | STK24    | -2,54  | Cytoplasm           |
| 1369712_at                               | NM_031735 | serine/threonine kinase 3 (STE20 homolog, yeast)                                           | STK3     | 2,61   | Cytoplasm           |
| 1371943_at                               | BF420075  | serine/threonine kinase 40                                                                 | STK40    | 1,97   | Cytoplasm           |
| 1376880_at                               | AI639447  | TANK-binding kinase 1                                                                      | TBK1     | 2,66   | Cytoplasm           |
| 1382487_at                               | AI500925  | testis expressed 14                                                                        | TEX14    | 3,43   | Plasma Membrane     |
| 1380164_at                               | AI411787  | thymidine kinase 2, mitochondrial                                                          | TK2      | 2,82   | Cytoplasm           |
| 1390709_at                               | AI102364  | triple functional domain (PTPRF interacting)                                               | TRIO     | 1,82   | Plasma Membrane     |
| 1383126_at                               | AA998057  | v-akt murine thymoma viral oncogene homolog 1                                              | AKT1     | -1,51  | Cytoplasm           |
| 1397409_s_at                             | BE113999  | WEE1 homolog (S. pombe)                                                                    | WEE1     | -1,84  | Nucleus             |
| 1382856_at                               | BI295313  | XRCC6 binding protein 1                                                                    | XRCC6BP1 | 1,95   | Unknown             |
| <b>Ligand-dependent nuclear receptor</b> |           |                                                                                            |          |        |                     |
| 1368221_at                               | NM_012576 | nuclear receptor subfamily 3, group C, member 1 (glucocorticoid receptor)                  | NR3C1    | 2,39   | Nucleus             |
| 1388531_at                               | BF283382  | progesterone receptor membrane component 2                                                 | PGRMC2   | -1,90  | Nucleus             |
| 1377029_at                               | AI235414  | RAR-related orphan receptor A                                                              | RORA     | 2,59   | Nucleus             |
| 1371668_at                               | BI285959  | retinoid X receptor, alpha                                                                 | RXRA     | -2,55  | Nucleus             |
| <b>Peptidase</b>                         |           |                                                                                            |          |        |                     |
| 1367922_at                               | NM_020306 | ADAM metallopeptidase domain 17                                                            | ADAM17   | 3,60   | Plasma Membrane     |
| 1373570_at                               | AI411240  | aminopeptidase-like 1                                                                      | NPEPL1   | -3,40  | Unknown             |
| 1399042_at                               | AI228455  | ATG4 autophagy related 4 homolog B (S. cerevisiae)                                         | ATG4B    | -1,75  | Cytoplasm           |
| 1396386_at                               | BF408665  | beta-site APP-cleaving enzyme 2                                                            | BACE2    | 3,54   | Cytoplasm           |
| 1371808_at                               | AI012747  | bleomycin hydrolase                                                                        | BLMH     | -2,66  | Cytoplasm           |
| 1387009_at                               | NM_019152 | calpain 1, (mu/I) large subunit                                                            | CAPN1    | -2,38  | Cytoplasm           |
| 1373466_at                               | AA946474  | calpastatin                                                                                | CAST     | -2,16  | Cytoplasm           |
| 1387503_at                               | NM_053526 | carboxypeptidase N, polypeptide 1                                                          | CPN1     | -2,74  | Extracellular Space |
| 1387818_at                               | NM_053736 | caspase 4, apoptosis-related cysteine peptidase                                            | CASP4    | 26,13  | Cytoplasm           |
| 1373258_at                               | AI169359  | cathepsin F                                                                                | CTSF     | -1,87  | Cytoplasm           |
| 1373961_at                               | AI170410  | chromosome 3 open reading frame 38                                                         | C3ORF38  | 8,19   | Unknown             |
| 1383241_at                               | BI292425  | complement component 1, r subcomponent                                                     | C1R      | 129,92 | Extracellular Space |
| 1387893_at                               | D88250    | complement component 1, s subcomponent                                                     | C1S      | 51,49  | Extracellular Space |
| 1368000_at                               | NM_016994 | complement component 3                                                                     | C3       | 11,81  | Extracellular Space |
| 1389470_at                               | AI639117  | complement factor B                                                                        | CFB      | 28,53  | Extracellular Space |
| 1388666_at                               | AI179988  | ectodermal-neural cortex (with BTB-like domain)                                            | ENC1     | 3,10   | Nucleus             |
| 1399161_a_at                             | AF148323  | endoplasmic reticulum aminopeptidase 1                                                     | ERAP1    | 2,13   | Extracellular Space |
| 1368356_a_at                             | NM_030836 | endoplasmic reticulum aminopeptidase 1                                                     | ERAP1    | 2,43   | Extracellular Space |
| 1387149_at                               | NM_030836 | endoplasmic reticulum aminopeptidase 1                                                     | ERAP1    | 4,06   | Extracellular Space |
| 1367778_at                               | NM_019331 | furin (paired basic amino acid cleaving enzyme)                                            | FURIN    | -1,97  | Cytoplasm           |
| 1368470_at                               | NM_012960 | gamma-glutamyl hydrolase (conjugase, folylpolyglutamyl hydrolase)                          | GGH      | -1,57  | Cytoplasm           |
| 1367478_at                               | AI600136  | Htra serine peptidase 2                                                                    | HTRA2    | 2,42   | Cytoplasm           |
| 1388204_at                               | M60616    | matrix metallopeptidase 13 (collagenase 3)                                                 | MMP13    | 4,36   | Extracellular Space |
| 1368595_at                               | NM_031757 | matrix metallopeptidase 24 (membrane-inserted)                                             | MMP24    | -3,77  | Extracellular Space |
| 1369669_at                               | NM_053970 | neurolysin (metallopeptidase M3 family)                                                    | NLN      | 4,34   | Cytoplasm           |
| 1371008_at                               | BE099971  | peptidase (mitochondrial processing) alpha                                                 | PMPCA    | -2,33  | Cytoplasm           |
| 1382181_at                               | AI555069  | pigeon homolog (Drosophila)                                                                | PION     | 13,77  | Unknown             |
| 1368234_at                               | NM_031324 | prolyl endopeptidase                                                                       | PREP     | -1,64  | Cytoplasm           |
| 1384323_at                               | BF418369  | proteasome (prosome, macropain) 26S subunit, ATPase, 6                                     | PSMC6    | -1,60  | Nucleus             |

|            |           |                                                                                           |
|------------|-----------|-------------------------------------------------------------------------------------------|
| 1367710_at | NM_017257 | proteasome (prosome, macropain) activator subunit 2 (PA28 beta)                           |
| 1371869_at | BF282262  | proteasome (prosome, macropain) subunit, alpha type, 7                                    |
| 1374033_at | BG373505  | proteasome (prosome, macropain) subunit, beta type, 10                                    |
| 1367786_at | NM_080767 | proteasome (prosome, macropain) subunit, beta type, 8 (large multifunctional peptidase 7) |
| 1370186_at | AI599350  | proteasome (prosome, macropain) subunit, beta type, 9 (large multifunctional peptidase 2) |
| 1394086_at | AI069981  | SUMO1/sentrin specific peptidase 7                                                        |
| 1368665_at | NM_053418 | ubiquitin fusion degradation 1 like (yeast)                                               |
| 1372150_at | AI229488  | ubiquitin specific peptidase 10                                                           |
| 1389034_at | BI295179  | ubiquitin specific peptidase 18                                                           |
| 1378679_at | BG372484  | ubiquitin specific peptidase 25                                                           |
| 1389091_at | AI411205  | ubiquitin specific peptidase 3                                                            |
| 1388896_at | BF404603  | ubiquitin specific peptidase 33                                                           |
| 1374940_at | BM388945  | ubiquitin specific peptidase 36                                                           |
| 1390339_at | BE099435  | ubiquitin specific protease 13 (isopeptidase T-3)                                         |
| 1385663_at | BF567505  | ubiquitin specific protease 13 (isopeptidase T-3)                                         |
| 1377849_at | BI284363  | valosin containing protein (p97)/p47 complex interacting protein 1                        |

#### Phosphatase

|              |           |                                                                                     |
|--------------|-----------|-------------------------------------------------------------------------------------|
| 1388544_at   | BI294941  | 2,3-bisphosphoglycerate mutase                                                      |
| 1373412_at   | AI409146  | 5'-nucleotidase, cytosolic III                                                      |
| 1388533_at   | BM390302  | CTD (carboxy-terminal domain, RNA polymerase II, polypeptide A) small phosphatase 1 |
| 1372354_at   | BM389898  | dual specificity phosphatase 16                                                     |
| 1368124_at   | NM_133578 | dual specificity phosphatase 5                                                      |
| 1386396_at   | AW528387  | dual specificity phosphatase 8                                                      |
| 1368077_at   | NM_012558 | fructose-1,6-bisphosphatase 1                                                       |
| 1399125_at   | BI275516  | inositol polyphosphate-1-phosphatase                                                |
| 1388502_at   | AI412624  | inositol polyphosphate-5-phosphatase, 75kDa                                         |
| 1377422_at   | AI029466  | myotubularin related protein 1                                                      |
| 1378853_at   | BG377853  | myotubularin related protein 14                                                     |
| 1383619_at   | BE105983  | myotubularin related protein 4                                                      |
| 1372101_at   | AI177031  | phosphatidic acid phosphatase type 2B                                               |
| 1385981_at   | BF394800  | plasticity related gene 1                                                           |
| 1379374_at   | AW526088  | plasticity related gene 1                                                           |
| 1386863_at   | NM_031527 | protein phosphatase 1, catalytic subunit, alpha isoform                             |
| 1389815_at   | BF547738  | protein phosphatase 1, regulatory (inhibitor) subunit 14B                           |
| 1375104_at   | AI408517  | protein phosphatase 1, regulatory (inhibitor) subunit 14B                           |
| 1383191_at   | BE097583  | protein phosphatase 1, regulatory (inhibitor) subunit 1A                            |
| 1386968_at   | NM_022676 | protein phosphatase 1, regulatory (inhibitor) subunit 1A                            |
| 1373656_at   | AI713313  | protein phosphatase 1, regulatory (inhibitor) subunit 3D                            |
| 1398807_at   | NM_033096 | protein phosphatase 1B (formerly 2C), magnesium-dependent, beta isoform             |
| 1377235_a_at | BI281643  | protein phosphatase 2, regulatory subunit B', beta isoform                          |
| 1369990_at   | NM_022183 | protein tyrosine phosphatase, mitochondrial 1                                       |
| 1382154_at   | BI289625  | protein tyrosine phosphatase, non-receptor type 12                                  |
| 1368361_a_at | NM_053990 | protein tyrosine phosphatase, non-receptor type 2                                   |
| 1368087_a_at | NM_133545 | protein tyrosine phosphatase, non-receptor type 21                                  |
| 1373419_at   | AI556884  | protein tyrosine phosphatase, receptor type, G                                      |
| 1387901_at   | L19180    | protein tyrosine phosphatase, receptor type, S                                      |
| 1391632_at   | AA964568  | SEC16 homolog A (S. cerevisiae)                                                     |
| 1372460_at   | AI172405  | SET nuclear oncogene                                                                |
| 1372461_at   | BG381708  | SET nuclear oncogene                                                                |
| 1378508_at   | BE108221  | slingshot homolog 1 (Drosophila)                                                    |

#### Transcription regulator

|            |           |                                                  |
|------------|-----------|--------------------------------------------------|
| 1369268_at | NM_012912 | activating transcription factor 3                |
| 1374526_at | BF396420  | ankyrin repeat and FYVE domain containing 1      |
| 1379113_at | BE119226  | ankyrin repeat and SOCS box-containing 3         |
| 1371805_at | AI406508  | ankyrin repeat domain 46                         |
| 1373315_at | AI176425  | aryl-hydrocarbon receptor nuclear translocator 2 |
| 1399156_at | AA900891  | AT rich interactive domain 2 (ARID, RFX-like)    |
| 1379311_at | AI177813  | AT rich interactive domain 5A (MRF1-like)        |

|                            |        |                 |
|----------------------------|--------|-----------------|
| PSME2                      | 6,00   | Cytoplasm       |
| PSMA7                      | 2,14   | Cytoplasm       |
| PSMB10                     | 14,31  | Cytoplasm       |
| PSMB8                      | 211,00 | Cytoplasm       |
| PSMB9                      | 286,06 | Cytoplasm       |
| SEN7                       | 3,11   | Nucleus         |
| UFD1L                      | -2,50  | Cytoplasm       |
| USP10                      | -1,61  | Cytoplasm       |
| USP18                      | 18,39  | Cytoplasm       |
| USP25                      | 12,59  | Unknown         |
| USP3                       | 2,05   | Cytoplasm       |
| USP33                      | -1,52  | Cytoplasm       |
| USP36                      | -1,93  | Nucleus         |
| USP13 (includes EG:310306) | -4,43  | Unknown         |
| USP13 (includes EG:310306) | -3,74  | Unknown         |
| VCPIP1                     | 2,47   | Cytoplasm       |
| BPGM                       | 3,10   | Unknown         |
| NT5C3                      | 3,08   | Cytoplasm       |
| CTDSP1                     | -2,01  | Nucleus         |
| DUSP16                     | 2,60   | Nucleus         |
| DUSP5                      | -4,45  | Nucleus         |
| DUSP8                      | 1,65   | Nucleus         |
| FBP1                       | 4,09   | Cytoplasm       |
| INPP1                      | 7,43   | Cytoplasm       |
| INPP5B                     | 3,45   | Plasma Membrane |
| MTMR1                      | -1,59  | Cytoplasm       |
| MTMR14                     | 6,56   | Unknown         |
| MTMR4                      | 1,60   | Cytoplasm       |
| PPAP2B                     | 4,39   | Plasma Membrane |
| LPPR4                      | -5,56  | Plasma Membrane |
| LPPR4                      | -3,47  | Plasma Membrane |
| PPP1CA                     | -1,82  | Cytoplasm       |
| PPP1R14B                   | -2,58  | Cytoplasm       |
| PPP1R14B                   | -2,22  | Cytoplasm       |
| PPP1R1A                    | -4,12  | Cytoplasm       |
| PPP1R1A                    | -3,69  | Cytoplasm       |
| PPP1R3D                    | -3,57  | Unknown         |
| PPM1B                      | -2,09  | Unknown         |
| PPP2R5B                    | 3,22   | Cytoplasm       |
| PTPMT1                     | -2,94  | Cytoplasm       |
| PTPN12                     | 2,31   | Cytoplasm       |
| PTPN2                      | 2,16   | Cytoplasm       |
| PTPN21                     | 3,92   | Cytoplasm       |
| PTPRG                      | 2,09   | Plasma Membrane |
| PTPRS (includes EG:5802)   | -1,83  | Plasma Membrane |
| SEC16A                     | -1,67  | Cytoplasm       |
| SET                        | -1,67  | Nucleus         |
| SET                        | -1,54  | Nucleus         |
| SSH1                       | 2,50   | Cytoplasm       |
| ATF3                       | 23,27  | Nucleus         |
| ANKFY1                     | 2,77   | Nucleus         |
| ASB3                       | -2,47  | Nucleus         |
| ANKRD46                    | -1,84  | Nucleus         |
| ARNT2                      | -2,14  | Nucleus         |
| ARID2                      | 1,67   | Nucleus         |
| ARID5A                     | 4,71   | Nucleus         |

|              |           |                                                                          |                              |        |                 |
|--------------|-----------|--------------------------------------------------------------------------|------------------------------|--------|-----------------|
| 1382312_at   | AW530903  | AT rich interactive domain 5B (MRF1-like)                                | ARID5B                       | 2,24   | Nucleus         |
| 1387212_at   | NM_012863 | basic helix-loop-helix domain containing, class B, 8                     | BHLHB8                       | -2,75  | Nucleus         |
| 1398482_at   | AI411774  | B-cell CLL/lymphoma 3                                                    | BCL3                         | 51,59  | Nucleus         |
| 1367657_at   | NM_017258 | B-cell translocation gene 1, anti-proliferative                          | BTG1                         | 1,65   | Nucleus         |
| 1373868_at   | AI717547  | BCL2-associated transcription factor 1                                   | BCLAF1                       | 1,77   | Nucleus         |
| 1394359_at   | BF553498  | BCL2-associated transcription factor 1                                   | BCLAF1                       | 1,92   | Nucleus         |
| 1374575_at   | BI304123  | cAMP responsive element binding protein 3-like 1                         | CREB3L1                      | 1,73   | Nucleus         |
| 1393550_at   | BF564195  | cAMP responsive element modulator                                        | CREM                         | -3,66  | Nucleus         |
| 1378925_at   | AW529408  | cAMP responsive element modulator                                        | CREM                         | -1,79  | Nucleus         |
| 1369737_at   | NM_017334 | cAMP responsive element modulator                                        | CREM                         | -1,55  | Nucleus         |
| 1368571_at   | NM_021997 | CAP-GLY domain containing linker protein 2                               | CLIP2                        | 3,04   | Cytoplasm       |
| 1379538_at   | BE104961  | centromere protein J                                                     | CENPJ                        | 11,66  | Nucleus         |
| 1370376_a_at | AA866458  | cold shock domain protein A                                              | CSDA                         | -1,95  | Nucleus         |
| 1387113_at   | NM_053335 | C-terminal binding protein 2                                             | CTBP2                        | 2,40   | Nucleus         |
| 1367972_at   | NM_054004 | cullin-associated and neddylation-dissociated 1                          | CAND1                        | -1,58  | Cytoplasm       |
| 1370054_at   | NM_131902 | cyclin-dependent kinase inhibitor 2C (p18, inhibits CDK4)                | CDKN2C                       | -2,04  | Nucleus         |
| 1391091_at   | AI406286  | cyllindromatosis (turban tumor syndrome)                                 | CYLD                         | 2,36   | Nucleus         |
| 1392958_at   | AI547426  | cyllindromatosis (turban tumor syndrome)                                 | CYLD                         | 3,35   | Nucleus         |
| 1387800_at   | NM_080891 | death-domain associated protein                                          | DAXX                         | 9,10   | Nucleus         |
| 1372259_at   | BI295054  | DEK oncogene                                                             | DEK                          | 2,17   | Nucleus         |
| 1368321_at   | NM_012551 | early growth response 1                                                  | EGR1                         | 2,81   | Nucleus         |
| 1373420_at   | AI175479  | ECSIT homolog (Drosophila)                                               | ECSIT                        | -2,41  | Nucleus         |
| 1372204_at   | BM391843  | ELK4, ETS-domain protein (SRF accessory protein 1)                       | ELK4                         | 2,13   | Nucleus         |
| 1393843_at   | AI071911  | fem-1 homolog b (C. elegans)                                             | FEM1B                        | -7,68  | Nucleus         |
| 1393106_x_at | BF420770  | general transcription factor IIF, polypeptide 1, 74kDa                   | GTF2F1                       | -3,12  | Nucleus         |
| 1388067_a_at | AF205779  | glucocorticoid modulatory element binding protein 2                      | GMEB2                        | 1,70   | Nucleus         |
| 1373370_at   | AI407467  | high-mobility group 20A                                                  | HMG20A                       | 2,45   | Nucleus         |
| 1388314_at   | BF281178  | high-mobility group nucleosome binding domain 1                          | HMGN1                        | -2,27  | Nucleus         |
| 1390208_at   | BG378579  | HIV-1 Tat interactive protein 2, 30kDa                                   | HTATIP2                      | -2,96  | Nucleus         |
| 1367816_at   | NM_133621 | HOP homeobox                                                             | HOPX                         | 7,09   | Nucleus         |
| 1391560_at   | AI237082  | human immunodeficiency virus type I enhancer binding protein 1           | HIVEP1                       | 1,97   | Nucleus         |
| 1370395_at   | U18650    | huntingtin                                                               | HTT                          | 1,58   | Cytoplasm       |
| 1392165_at   | AI071247  | inhibitor of growth family, member 2                                     | ING2                         | -1,99  | Nucleus         |
| 1386129_at   | BF523624  | inhibitor of growth family, member 2                                     | ING2                         | -1,76  | Nucleus         |
| 1368073_at   | NM_012591 | interferon regulatory factor 1                                           | IRF1                         | 105,83 | Nucleus         |
| 1398561_at   | BI302791  | interferon regulatory factor 2                                           | IRF2                         | 9,40   | Nucleus         |
| 1383564_at   | BF411036  | interferon regulatory factor 7                                           | IRF7                         | 427,28 | Nucleus         |
| 1372097_at   | BF284262  | interferon regulatory factor 8                                           | IRF8                         | 57,63  | Nucleus         |
| 1383448_at   | AI029121  | interferon regulatory factor 9                                           | IRF9                         | 11,57  | Nucleus         |
| 1376299_at   | BI298889  | jumonji, AT rich interactive domain 1A (Rbp2 like)                       | JARID1A (includes EG:312678) | -1,51  | Nucleus         |
| 1369788_s_at | NM_021835 | jun oncogene                                                             | JUN                          | 6,30   | Nucleus         |
| 1375205_at   | Z83046    | K(lysine) acetyltransferase 2B                                           | KAT2B                        | 3,05   | Nucleus         |
| 1368363_at   | NM_053394 | Kruppel-like factor 5 (intestinal)                                       | KLF5                         | 8,85   | Nucleus         |
| 1385961_at   | BF561079  | Kruppel-like factor 5 (intestinal)                                       | KLF5                         | 16,86  | Nucleus         |
| 1394039_at   | BM382886  | Kruppel-like factor 5 (intestinal)                                       | KLF5                         | 17,79  | Nucleus         |
| 1387060_at   | NM_031642 | Kruppel-like factor 6                                                    | KLF6                         | 5,93   | Nucleus         |
| 1391471_at   | BE116100  | Kruppel-like factor 7 (ubiquitous)                                       | KLF7                         | 2,14   | Nucleus         |
| 1371676_at   | BG380464  | LAG1 homolog, ceramide synthase 5                                        | LASS5                        | -2,63  | Cytoplasm       |
| 1389913_at   | BI276990  | leucine rich repeat (in FLII) interacting protein 1                      | LRRFIP1                      | 3,66   | Nucleus         |
| 1368368_a_at | NM_032616 | lipolysis stimulated lipoprotein receptor                                | LSR                          | 1,72   | Nucleus         |
| 1398344_at   | BI287962  | mediator complex subunit 17                                              | MED17                        | 3,77   | Nucleus         |
| 1372269_at   | AI229534  | mediator complex subunit 6                                               | MED6                         | -1,65  | Nucleus         |
| 1384308_at   | AW532697  | Meis homeobox 1                                                          | MEIS1                        | 2,22   | Nucleus         |
| 1386895_at   | NM_053409 | melanoma antigen family D, 1                                             | MAGED1                       | -2,01  | Plasma Membrane |
| 1377124_at   | AA964824  | metal-regulatory transcription factor 1                                  | MTF1                         | 1,90   | Nucleus         |
| 1376810_at   | AI103325  | M-phase phosphoprotein 8                                                 | MPHOSPH8                     | 5,33   | Nucleus         |
| 1372090_at   | AI231566  | MYC associated factor X                                                  | MAX                          | 3,22   | Nucleus         |
| 1388540_at   | BM390828  | MYC-associated zinc finger protein (purine-binding transcription factor) | MAZ                          | -1,53  | Nucleus         |

|              |           |                                                                                                     |                             |       |                 |
|--------------|-----------|-----------------------------------------------------------------------------------------------------|-----------------------------|-------|-----------------|
| 1381069_at   | BF413433  | myeloid/lymphoid or mixed-lineage leukemia (trithorax homolog, Drosophila)                          | MLL                         | 2,47  | Nucleus         |
| 1378210_at   | BE114473  | myeloid/lymphoid or mixed-lineage leukemia (trithorax homolog, Drosophila)                          | MLL                         | 2,49  | Nucleus         |
| 1375793_at   | BI295700  | myeloid/lymphoid or mixed-lineage leukemia (trithorax homolog, Drosophila)                          | MLL                         | 3,07  | Nucleus         |
| 1378211_s_at | BE114473  | myeloid/lymphoid or mixed-lineage leukemia (trithorax homolog, Drosophila)                          | MLL                         | 3,76  | Nucleus         |
| 1388701_at   | AI555336  | myeloid/lymphoid or mixed-lineage leukemia (trithorax homolog, Drosophila); translocated to, 6      | MLLT6                       | 7,52  | Nucleus         |
| 1392770_at   | BF415817  | neogenin homolog 1 (chicken)                                                                        | NEO1                        | -2,01 | Plasma Membrane |
| 1378359_at   | AI072632  | NFKB repressing factor                                                                              | NKRF                        | -2,01 | Nucleus         |
| 1369409_at   | NM_022856 | NGFI-A binding protein 1 (EGR1 binding protein 1)                                                   | NAB1                        | 1,97  | Nucleus         |
| 1393172_at   | AA848648  | NGFI-A binding protein 1 (EGR1 binding protein 1)                                                   | NAB1                        | 2,75  | Nucleus         |
| 1391527_at   | BE109296  | NGFI-A binding protein 2 (EGR1 binding protein 2)                                                   | NAB2                        | 2,22  | Nucleus         |
| 1368998_at   | NM_031737 | NK6 homeobox 1                                                                                      | NKX6-1                      | -2,03 | Nucleus         |
| 1393144_at   | BM388202  | N-myc (and STAT) interactor                                                                         | NMI                         | 12,69 | Cytoplasm       |
| 1381875_at   | BM386847  | N-myc (and STAT) interactor                                                                         | NMI                         | 18,04 | Cytoplasm       |
| 1390426_at   | BF389398  | Notch homolog 1, translocation-associated (Drosophila)                                              | NOTCH1                      | 4,96  | Plasma Membrane |
| 1370968_at   | AA858801  | nuclear factor of kappa light polypeptide gene enhancer in B-cells 1                                | NFKB1                       | 17,76 | Nucleus         |
| 1375989_a_at | AI170362  | nuclear factor of kappa light polypeptide gene enhancer in B-cells 2 (p49/p100)                     | NFKB2                       | 18,22 | Nucleus         |
| 1367943_at   | NM_030867 | nuclear factor of kappa light polypeptide gene enhancer in B-cells inhibitor, beta                  | NFKBIB                      | 5,78  | Nucleus         |
| 1376835_at   | BI293600  | nuclear factor of kappa light polypeptide gene enhancer in B-cells inhibitor, epsilon               | NFKBIE (includes EG:4794)   | 41,27 | Nucleus         |
| 1378032_at   | AI176265  | nuclear factor of kappa light polypeptide gene enhancer in B-cells inhibitor, zeta                  | NFKBIZ                      | 9,86  | Nucleus         |
| 1382082_at   | AI145337  | nuclear transcription factor Y, beta                                                                | NFYB                        | 1,82  | Nucleus         |
| 1398756_at   | J04943    | nucleophosmin 1                                                                                     | NPM1 (includes EG:18148)    | -1,57 | Nucleus         |
| 1369516_at   | NM_022852 | pancreatic and duodenal homeobox 1                                                                  | PDX1 (includes EG:29535)    | -2,04 | Cytoplasm       |
| 1390531_at   | BE098021  | peroxisomal proliferator-activated receptor A interacting complex 285                               | PRIC285 (includes EG:85441) | 13,44 | Nucleus         |
| 1377662_at   | AI176041  | pirin (iron-binding nuclear protein)                                                                | PIR                         | -4,13 | Nucleus         |
| 1387122_at   | NM_012760 | pleiomorphic adenoma gene-like 1                                                                    | PLAGL1                      | -3,88 | Nucleus         |
| 1384265_at   | BI278347  | polymerase (DNA-directed), delta 3, accessory subunit                                               | POLD3                       | 1,53  | Nucleus         |
| 1370995_at   | AW528459  | POU class 2 homeobox 1                                                                              | POU2F1                      | 1,91  | Nucleus         |
| 1367926_at   | NM_031851 | prohibitin                                                                                          | PHB (includes EG:25344)     | -1,52 | Cytoplasm       |
| 1367463_at   | AI235510  | prohibitin 2                                                                                        | PHB2                        | -2,10 | Cytoplasm       |
| 1388353_at   | BI296168  | proliferation-associated 2G4, 38kDa                                                                 | PA2G4                       | -2,47 | Nucleus         |
| 1374532_at   | AI704291  | prostaglandin E synthase 2                                                                          | PTGES2                      | -1,67 | Cytoplasm       |
| 1387120_at   | NM_031595 | proteasome (prosome, macropain) 26S subunit, ATPase, 3                                              | PSMC3                       | -2,00 | Nucleus         |
| 1367833_at   | NM_031149 | proteasome (prosome, macropain) 26S subunit, ATPase, 5                                              | PSMC5                       | -2,36 | Nucleus         |
| 1387784_at   | NM_053925 | proteasome (prosome, macropain) 26S subunit, non-ATPase, 10                                         | PSMD10                      | 1,80  | Cytoplasm       |
| 1372485_at   | BF281220  | pterin-4 alpha-carbinolamine dehydratase/dimerization cofactor of hepatocyte nuclear factor 1 alpha | PCBD1                       | -2,56 | Nucleus         |
| 1391550_at   | BE108780  | RAD54-like 2 (S. cerevisiae)                                                                        | RAD54L2                     | 2,61  | Nucleus         |
| 1384937_at   | AI715121  | RB-associated KRAB zinc finger                                                                      | RBAK                        | -3,07 | Nucleus         |
| 1383349_at   | BE115594  | regulatory factor X, 5 (influences HLA class II expression)                                         | RFX5                        | 5,91  | Nucleus         |
| 1389515_at   | AW251269  | regulatory factor X-associated ankyrin-containing protein                                           | RFXANK                      | -2,08 | Nucleus         |
| 1377622_at   | AI717078  | remodeling and spacing factor 1                                                                     | RSF1                        | -1,62 | Nucleus         |
| 1398993_at   | AI045458  | RNA binding motif protein 39                                                                        | RBM39                       | 1,59  | Nucleus         |
| 1381162_at   | AI136863  | septin 10                                                                                           | SEPT10                      | 2,08  | Cytoplasm       |
| 1372757_at   | BM386875  | signal transducer and activator of transcription 1, 91kDa                                           | STAT1                       | 8,27  | Nucleus         |
| 1368835_at   | AW434718  | signal transducer and activator of transcription 1, 91kDa                                           | STAT1                       | 19,51 | Nucleus         |
| 1387354_at   | NM_032612 | signal transducer and activator of transcription 1, 91kDa                                           | STAT1                       | 23,80 | Nucleus         |
| 1373670_at   | AA799569  | signal transducer and activator of transcription 2, 113kDa                                          | STAT2                       | 22,18 | Nucleus         |
| 1389571_at   | BG666368  | signal transducer and activator of transcription 2, 113kDa                                          | STAT2                       | 25,50 | Nucleus         |
| 1370224_at   | BE113920  | signal transducer and activator of transcription 3 (acute-phase response factor)                    | STAT3                       | 2,86  | Nucleus         |
| 1371781_at   | BI285863  | signal transducer and activator of transcription 3 (acute-phase response factor)                    | STAT3                       | 2,96  | Nucleus         |
| 1368517_at   | NM_053358 | single stranded DNA binding protein 3                                                               | SSBP3                       | 2,05  | Nucleus         |
| 1389373_at   | AI029555  | SMAD family member 1                                                                                | SMAD1                       | 2,91  | Nucleus         |
| 1386984_at   | NM_019275 | SMAD family member 4                                                                                | SMAD4                       | 1,74  | Nucleus         |
| 1390373_at   | BE107528  | SMAD family member 5                                                                                | SMAD5                       | -2,05 | Nucleus         |
| 1373993_at   | AA799470  | small nuclear RNA activating complex, polypeptide 5, 19kDa                                          | SNAPC5                      | -1,68 | Nucleus         |
| 1374838_at   | BI293504  | SP140 nuclear body protein                                                                          | SP140                       | 15,22 | Nucleus         |
| 1374682_at   | BM383170  | SRY (sex determining region Y)-box 13                                                               | SOX13                       | 2,41  | Nucleus         |
| 1384000_at   | BF560932  | SRY (sex determining region Y)-box 4                                                                | SOX4                        | -2,12 | Nucleus         |
| 1371718_at   | BI283124  | steroid receptor RNA activator 1                                                                    | SRA1                        | -1,95 | Nucleus         |

|                               |           |                                                                                                   |                           |        |                 |
|-------------------------------|-----------|---------------------------------------------------------------------------------------------------|---------------------------|--------|-----------------|
| 1370159_at                    | AB003505  | SWI/SNF related, matrix associated, actin dependent regulator of chromatin, subfamily d, member 2 | SMARCD2                   | 3,04   | Nucleus         |
| 1398963_at                    | BM392226  | TAF10 RNA polymerase II, TATA box binding protein (TBP)-associated factor, 30kDa                  | TAF10                     | -2,64  | Nucleus         |
| 1380283_at                    | BF411100  | teashirt zinc finger homeobox 1                                                                   | TSHZ1                     | -2,33  | Nucleus         |
| 1383573_at                    | BE117444  | teashirt zinc finger homeobox 1                                                                   | TSHZ1                     | -1,69  | Nucleus         |
| 1373421_at                    | BM392224  | TGFB-induced factor homeobox 1                                                                    | TGIF1                     | 4,20   | Nucleus         |
| 1391212_at                    | BF418812  | transcription elongation factor A (SII)-like 1                                                    | TCEAL1                    | -2,15  | Nucleus         |
| 1392592_at                    | AI137045  | transcription factor 7-like 2 (T-cell specific, HMG-box)                                          | TCF7L2 (includes EG:6934) | 6,25   | Nucleus         |
| 1367941_at                    | NM_031326 | transcription factor A, mitochondrial                                                             | TFAM                      | -1,53  | Cytoplasm       |
| 1390662_at                    | AW435169  | tripartite motif-containing 24                                                                    | TRIM24                    | 2,51   | Nucleus         |
| 1377726_at                    | BI293740  | tripartite motif-containing 25                                                                    | TRIM25                    | 7,73   | Cytoplasm       |
| 1389163_at                    | BG372673  | tripartite motif-containing 32                                                                    | TRIM32                    | -2,23  | Nucleus         |
| 1371550_at                    | AW533431  | TSC22 domain family, member 4                                                                     | TSC22D4                   | 2,32   | Nucleus         |
| 1367831_at                    | NM_030989 | tumor protein p53                                                                                 | TP53                      | 2,79   | Nucleus         |
| 1367693_at                    | NM_013052 | tyrosine 3-monooxygenase/tryptophan 5-monooxygenase activation protein, eta polypeptide           | YWHAH                     | 1,91   | Cytoplasm       |
| 1398897_at                    | AI411988  | ubiquitin-conjugating enzyme E2 variant 1                                                         | UBE2V1                    | 1,50   | Nucleus         |
| 1375043_at                    | BF415939  | v-fos FBJ murine osteosarcoma viral oncogene homolog                                              | FOS                       | -3,03  | Nucleus         |
| 1380229_at                    | AW530004  | v-maf musculoaponeurotic fibrosarcoma oncogene homolog F (avian)                                  | MAFF                      | 9,31   | Nucleus         |
| 1372211_at                    | BI284461  | v-maf musculoaponeurotic fibrosarcoma oncogene homolog K (avian)                                  | MAFK                      | 2,88   | Nucleus         |
| 1372853_at                    | BF283772  | v-rel reticuloendotheliosis viral oncogene homolog A (avian)                                      | RELA                      | 3,09   | Nucleus         |
| 1375122_at                    | AI233235  | YY1 associated factor 2                                                                           | YAF2                      | 1,50   | Nucleus         |
| 1370965_at                    | BG381660  | zinc finger E-box binding homeobox 1                                                              | ZEB1                      | 6,70   | Nucleus         |
| 1393834_at                    | BF402667  | zinc finger protein 141                                                                           | ZNF141                    | 2,93   | Nucleus         |
| 1381998_at                    | AW519820  | zinc finger protein 148                                                                           | ZNF148                    | -1,58  | Nucleus         |
| 1388779_at                    | BG381516  | zinc finger protein 180                                                                           | ZNF180                    | -1,58  | Nucleus         |
| 1382158_at                    | BF557889  | zinc finger protein 202                                                                           | ZNF202                    | 2,86   | Nucleus         |
| 1387870_at                    | AB025017  | zinc finger protein 36, C3H type, homolog (mouse)                                                 | ZFP36                     | 19,57  | Nucleus         |
| 1373106_at                    | AI178069  | zinc finger protein 36, C3H type-like 2                                                           | ZFP36L2                   | 1,54   | Nucleus         |
| 1379461_at                    | BE120147  | zinc finger protein 445                                                                           | ZNF445                    | 1,56   | Nucleus         |
| <b>Translation regulator</b>  |           |                                                                                                   |                           |        |                 |
| 1383558_at                    | BI290282  | eukaryotic elongation factor, selenocysteine-tRNA-specific                                        | EEFSEC                    | -2,91  | Cytoplasm       |
| 1388134_at                    | BG380216  | eukaryotic translation elongation factor 1 delta (guanine nucleotide exchange protein)            | EEF1D                     | -1,71  | Cytoplasm       |
| 1367713_at                    | NM_019356 | eukaryotic translation initiation factor 2, subunit 1 alpha, 35kDa                                | EIF2S1                    | -2,54  | Cytoplasm       |
| 1370311_at                    | U05821    | eukaryotic translation initiation factor 2B, subunit 1 alpha, 26kDa                               | EIF2B1                    | -1,60  | Cytoplasm       |
| 1386970_at                    | NM_053950 | eukaryotic translation initiation factor 2B, subunit 4 delta, 67kDa                               | EIF2B4                    | -1,57  | Cytoplasm       |
| 1368867_at                    | BF281131  | eukaryotic translation initiation factor 2C, 2                                                    | EIF2C2                    | 2,20   | Cytoplasm       |
| 1397674_at                    | AI502930  | eukaryotic translation initiation factor 3, subunit C                                             | EIF3C                     | -1,82  | Cytoplasm       |
| 1372735_at                    | BI283109  | eukaryotic translation initiation factor 3, subunit K                                             | EIF3K                     | -1,64  | Cytoplasm       |
| 1367537_at                    | AI012479  | eukaryotic translation initiation factor 4E nuclear import factor 1                               | EIF4ENIF1                 | 1,70   | Cytoplasm       |
| 1377249_at                    | AW526060  | G1 to S phase transition 2                                                                        | GSPT2                     | -3,85  | Cytoplasm       |
| 1398902_at                    | BF282978  | KIAA0664                                                                                          | KIAA0664                  | -2,10  | Cytoplasm       |
| 1399058_at                    | BI288800  | mitochondrial ribosomal protein L18                                                               | MRPL18                    | -2,47  | Cytoplasm       |
| 1398620_at                    | BF397903  | sterile alpha motif domain containing 4A                                                          | SAMD4A                    | 11,91  | Cytoplasm       |
| 1371962_at                    | AI412102  | Tu translation elongation factor, mitochondrial                                                   | TUFM                      | -2,84  | Cytoplasm       |
| <b>Transmembrane receptor</b> |           |                                                                                                   |                           |        |                 |
| 1367595_s_at                  | NM_012512 | beta-2-microglobulin                                                                              | B2M                       | 2,13   | Plasma Membrane |
| 1371440_at                    | AW916647  | beta-2-microglobulin                                                                              | B2M                       | 9,63   | Plasma Membrane |
| 1377698_at                    | AW433947  | CD40 molecule, TNF receptor superfamily member 5                                                  | CD40                      | 947,69 | Plasma Membrane |
| 1384837_at                    | AI137672  | CD69 molecule                                                                                     | CD69                      | 92,21  | Plasma Membrane |
| 1367679_at                    | NM_013069 | CD74 molecule, major histocompatibility complex, class II invariant chain                         | CD74                      | 49,92  | Plasma Membrane |
| 1371429_at                    | BF281192  | dystroglycan 1 (dystrophin-associated glycoprotein 1)                                             | DAG1                      | -2,98  | Plasma Membrane |
| 1384842_s_at                  | AI231531  | Fas (TNF receptor superfamily, member 6)                                                          | FAS                       | 7,65   | Plasma Membrane |
| 1378160_at                    | AI179412  | ferric-chelate reductase 1                                                                        | FRRS1                     | -1,56  | Plasma Membrane |
| 1387039_at                    | NM_030828 | glypican 1                                                                                        | GPC1                      | -3,78  | Plasma Membrane |
| 1373803_a_at                  | AI170771  | growth hormone receptor                                                                           | GHR                       | -1,58  | Plasma Membrane |
| 1387202_at                    | NM_012967 | intercellular adhesion molecule 1                                                                 | ICAM1                     | 541,52 | Plasma Membrane |
| 1374601_at                    | BI274482  | interferon gamma receptor 2 (interferon gamma transducer 1)                                       | IFNGR2                    | 4,22   | Plasma Membrane |
| 1383616_at                    | AA997562  | interleukin 10 receptor, beta                                                                     | IL10RB                    | 14,72  | Plasma Membrane |
| 1388711_at                    | BF282650  | interleukin 13 receptor, alpha 1                                                                  | IL13RA1                   | 3,10   | Plasma Membrane |

|                    |           |                                                                                    |                           |        |                 |
|--------------------|-----------|------------------------------------------------------------------------------------|---------------------------|--------|-----------------|
| 1387946_at         | AF065438  | lectin, galactoside-binding, soluble, 3 binding protein                            | LGALS3BP                  | 14,63  | Plasma Membrane |
| 1370463_x_at       | U50449    | major histocompatibility complex, class I, C                                       | HLA-C                     | 2,47   | Plasma Membrane |
| 1388071_x_at       | M24024    | major histocompatibility complex, class I, C                                       | HLA-C                     | 4,42   | Plasma Membrane |
| 1370972_x_at       | BI300597  | major histocompatibility complex, class I, C                                       | HLA-C                     | 6,40   | Plasma Membrane |
| 1370428_x_at       | AJ249701  | major histocompatibility complex, class I, C                                       | HLA-C                     | 6,40   | Plasma Membrane |
| 1371171_at         | M10094    | major histocompatibility complex, class I, C                                       | HLA-C                     | 7,67   | Plasma Membrane |
| 1369110_x_at       | NM_012645 | major histocompatibility complex, class I, C                                       | HLA-C                     | 10,62  | Plasma Membrane |
| 1370429_at         | L40362    | major histocompatibility complex, class I, C                                       | HLA-C                     | 11,45  | Plasma Membrane |
| 1371078_at         | AI500830  | major histocompatibility complex, class I, C                                       | HLA-C                     | 19,22  | Plasma Membrane |
| 1397859_x_at       | BI291927  | major histocompatibility complex, class I, C                                       | HLA-C                     | 23,44  | Plasma Membrane |
| 1371123_x_at       | AJ243973  | major histocompatibility complex, class I, E                                       | HLA-E                     | 51,75  | Plasma Membrane |
| 1388212_a_at       | AJ243974  | major histocompatibility complex, class I, E                                       | HLA-E                     | 54,93  | Plasma Membrane |
| 1388164_at         | AF029241  | major histocompatibility complex, class I, E                                       | HLA-E                     | 79,40  | Plasma Membrane |
| 1388213_a_at       | AJ243973  | major histocompatibility complex, class I, E                                       | HLA-E                     | 126,89 | Plasma Membrane |
| 1387205_at         | NM_022921 | major histocompatibility complex, class I, G                                       | HLA-G                     | 11,50  | Plasma Membrane |
| 1370883_at         | Y00480    | major histocompatibility complex, class II, DR alpha                               | HLA-DRA                   | 6,40   | Plasma Membrane |
| 1376362_at         | BG380575  | neuronal pentraxin receptor                                                        | NPTXR                     | -2,61  | Plasma Membrane |
| 1370177_at         | AI548856  | poliovirus receptor                                                                | PVR                       | 19,86  | Plasma Membrane |
| 1389804_at         | BF392605  | RELT tumor necrosis factor receptor                                                | RELT                      | 7,96   | Plasma Membrane |
| 1368901_at         | BG666306  | thrombomodulin                                                                     | THBD                      | -4,68  | Plasma Membrane |
| 1376327_at         | AI169601  | tumor necrosis factor receptor superfamily, member 14 (herpesvirus entry mediator) | TNFRSF14                  | 71,65  | Plasma Membrane |
| 1367715_at         | NM_013091 | tumor necrosis factor receptor superfamily, member 1A                              | TNFRSF1A                  | 1,51   | Plasma Membrane |
| 1384506_at         | H33706    | unc-5 homolog C (C. elegans)                                                       | UNC5C                     | 8,70   | Plasma Membrane |
| <b>Transporter</b> |           |                                                                                    |                           |        |                 |
| 1368869_at         | BG663107  | A kinase (PRKA) anchor protein 12                                                  | AKAP12                    | 17,53  | Cytoplasm       |
| 1371858_at         | BM385719  | adaptor-related protein complex 1, sigma 1 subunit                                 | AP1S1                     | -1,62  | Cytoplasm       |
| 1369982_at         | NM_031008 | adaptor-related protein complex 2, alpha 2 subunit                                 | AP2A2                     | -1,95  | Cytoplasm       |
| 1368062_at         | NM_133593 | adaptor-related protein complex 3, mu 1 subunit                                    | AP3M1                     | -1,61  | Cytoplasm       |
| 1368246_at         | NM_133305 | adaptor-related protein complex 3, mu 2 subunit                                    | AP3M2                     | 2,11   | Cytoplasm       |
| 1372628_at         | AA800277  | adaptor-related protein complex 4, sigma 1 subunit                                 | AP4S1                     | -1,54  | Cytoplasm       |
| 1370364_at         | U35776    | ADP-ribosylation factor GTPase activating protein 1                                | ARFGAP1                   | -2,19  | Cytoplasm       |
| 1369249_at         | NM_053714 | ankylosis, progressive homolog (mouse)                                             | ANKH                      | -7,74  | Plasma Membrane |
| 1385709_x_at       | AW529028  | ankylosis, progressive homolog (mouse)                                             | ANKH                      | -4,87  | Plasma Membrane |
| 1386344_at         | BG662519  | ankylosis, progressive homolog (mouse)                                             | ANKH                      | -4,66  | Plasma Membrane |
| 1393439_a_at       | AI045767  | ankylosis, progressive homolog (mouse)                                             | ANKH                      | -3,50  | Plasma Membrane |
| 1394202_x_at       | AI176117  | ankylosis, progressive homolog (mouse)                                             | ANKH                      | -1,91  | Plasma Membrane |
| 1372604_at         | BI289459  | apolipoprotein L, 3                                                                | APOL3 (includes EG:80833) | 47,18  | Cytoplasm       |
| 1372142_at         | AI406558  | arsA arsenite transporter, ATP-binding, homolog 1 (bacterial)                      | ASNA1                     | -1,89  | Nucleus         |
| 1367599_at         | NM_017311 | ATP synthase, H+ transporting, mitochondrial F0 complex, subunit C1 (subunit 9)    | ATP5G1                    | -1,79  | Cytoplasm       |
| 1370278_at         | U00926    | ATP synthase, H+ transporting, mitochondrial F1 complex, delta subunit             | ATP5D                     | -2,09  | Cytoplasm       |
| 1370276_at         | D13127    | ATP synthase, H+ transporting, mitochondrial F1 complex, O subunit                 | ATP5O                     | -2,06  | Cytoplasm       |
| 1398862_at         | J04024    | ATPase, Ca++ transporting, cardiac muscle, slow twitch 2                           | ATP2A2                    | -2,98  | Cytoplasm       |
| 1370426_a_at       | AI175492  | ATPase, Ca++ transporting, cardiac muscle, slow twitch 2                           | ATP2A2                    | -1,91  | Cytoplasm       |
| 1397224_at         | AW534277  | ATPase, Ca++ transporting, plasma membrane 1                                       | ATP2B1                    | -1,67  | Plasma Membrane |
| 1370925_at         | BG380816  | ATPase, class II, type 9B                                                          | ATP9B                     | -2,12  | Cytoplasm       |
| 1370464_at         | AF286167  | ATP-binding cassette, sub-family B (MDR/TAP), member 1                             | ABCB1                     | 1,91   | Plasma Membrane |
| 1370465_at         | AF257746  | ATP-binding cassette, sub-family B (MDR/TAP), member 1                             | ABCB1                     | 6,31   | Plasma Membrane |
| 1368057_at         | NM_012804 | ATP-binding cassette, sub-family D (ALD), member 3                                 | ABCD3                     | -2,09  | Cytoplasm       |
| 1371456_at         | BI281218  | ATP-binding cassette, sub-family F (GCN20), member 3                               | ABCF3                     | -1,65  | Unknown         |
| 1368103_at         | NM_053502 | ATP-binding cassette, sub-family G (WHITE), member 1                               | ABCG1                     | 1,94   | Plasma Membrane |
| 1373995_at         | AW523571  | ATP-binding cassette, sub-family G (WHITE), member 1                               | ABCG1                     | 2,59   | Plasma Membrane |
| 1379717_at         | BM385804  | ATP-binding cassette, sub-family G (WHITE), member 3                               | ABCG3                     | 20,04  | Plasma Membrane |
| 1388358_at         | AW252650  | electron-transfer-flavoprotein, beta polypeptide                                   | ETFB                      | -2,01  | Cytoplasm       |
| 1387369_at         | NM_019277 | exocyst complex component 6                                                        | EXOC6                     | 6,94   | Unknown         |
| 1389063_at         | BG378160  | exportin 6                                                                         | XPO6                      | 2,67   | Cytoplasm       |
| 1376177_at         | AI179609  | family with sequence similarity 117, member A                                      | FAM117A                   | -2,11  | Unknown         |
| 1368336_at         | NM_017126 | ferredoxin 1                                                                       | FDX1                      | -1,91  | Cytoplasm       |
| 1389827_at         | AI408556  | ferredoxin 1                                                                       | FDX1                      | -1,81  | Cytoplasm       |

|              |           |                                                                                                         |          |       |                     |
|--------------|-----------|---------------------------------------------------------------------------------------------------------|----------|-------|---------------------|
| 1372408_at   | BI278620  | golgi associated, gamma adaptin ear containing, ARF binding protein 2                                   | GGA2     | -2,56 | Cytoplasm           |
| 1374900_at   | BM388807  | golgi SNAP receptor complex member 2                                                                    | GOSR2    | -2,39 | Cytoplasm           |
| 1375438_at   | AA964687  | golgi SNAP receptor complex member 2                                                                    | GOSR2    | -1,81 | Cytoplasm           |
| 1368289_at   | AA944965  | group-specific component (vitamin D binding protein)                                                    | GC       | -1,66 | Extracellular Space |
| 1370065_at   | NM_053318 | hemopexin                                                                                               | HPX      | 12,10 | Extracellular Space |
| 1388918_at   | BG378074  | high density lipoprotein binding protein                                                                | HDLBP    | -1,55 | Nucleus             |
| 1384244_at   | AA964752  | hydroxysteroid dehydrogenase like 2                                                                     | HSDL2    | 1,60  | Cytoplasm           |
| 1374135_at   | AI233262  | importin 4                                                                                              | IPO4     | -1,55 | Nucleus             |
| 1382756_at   | AI101822  | karyopherin alpha 1 (importin alpha 5)                                                                  | KPNA1    | -1,78 | Nucleus             |
| 1367683_at   | NM_053483 | karyopherin alpha 2 (RAG cohort 1, importin alpha 1)                                                    | KPNA2    | -1,77 | Nucleus             |
| 1373116_at   | AA945320  | karyopherin alpha 3 (importin alpha 4)                                                                  | KPNA3    | 1,75  | Nucleus             |
| 1373722_at   | BE111697  | kinesin family member 20A                                                                               | KIF20A   | -1,77 | Cytoplasm           |
| 1372520_at   | AI172056  | myeloid cell leukemia sequence 1 (BCL2-related)                                                         | MCL1     | 2,50  | Cytoplasm           |
| 1398782_at   | NM_080585 | N-ethylmaleimide-sensitive factor attachment protein, alpha                                             | NAPA     | -1,56 | Cytoplasm           |
| 1374210_at   | BM383870  | non-SMC element 1 homolog (S. cerevisiae)                                                               | NSMCE1   | 1,75  | Nucleus             |
| 1379476_at   | AA963457  | nucleoporin 35kDa                                                                                       | NUP35    | -2,13 | Nucleus             |
| 1376703_at   | AI501977  | nucleoporin 37kDa                                                                                       | NUP37    | -2,12 | Nucleus             |
| 1388909_at   | AA891742  | oxidoreductase NAD-binding domain containing 1                                                          | OXNAD1   | -1,97 | Unknown             |
| 1374638_at   | AI012951  | peroxisomal biogenesis factor 13                                                                        | PEX13    | -1,57 | Cytoplasm           |
| 1398806_at   | NM_017231 | phosphatidylinositol transfer protein, alpha                                                            | PITPNA   | -2,03 | Cytoplasm           |
| 1387399_at   | NM_020098 | piccolo (presynaptic cytomatrix protein)                                                                | PCLO     | -5,96 | Cytoplasm           |
| 1367939_at   | NM_012733 | retinol binding protein 1, cellular                                                                     | RBP1     | 2,15  | Extracellular Space |
| 1389024_at   | BG380647  | sec1 family domain containing 2                                                                         | SCFD2    | -2,18 | Unknown             |
| 1389383_at   | BI289855  | SEC24 family, member A (S. cerevisiae)                                                                  | SEC24A   | 3,24  | Cytoplasm           |
| 1372715_at   | AA819349  | sideroflexin 1                                                                                          | SFXN1    | -2,64 | Cytoplasm           |
| 1387008_at   | NM_022948 | sideroflexin 3                                                                                          | SFXN3    | -2,60 | Cytoplasm           |
| 1370367_at   | D63772    | solute carrier family 1 (neuronal/epithelial high affinity glutamate transporter, system Xag), member 1 | SLC1A1   | 7,78  | Plasma Membrane     |
| 1374885_at   | AI172278  | solute carrier family 12 (potassium/chloride transporters), member 6                                    | SLC12A6  | -2,12 | Plasma Membrane     |
| 1371525_at   | BI277550  | solute carrier family 12 (potassium/chloride transporters), member 7                                    | SLC12A7  | 1,98  | Plasma Membrane     |
| 1367853_at   | NM_031798 | solute carrier family 12 (sodium/potassium/chloride transporters), member 2                             | SLC12A2  | -2,84 | Plasma Membrane     |
| 1370548_at   | AB047324  | solute carrier family 16, member 10 (aromatic amino acid transporter)                                   | SLC16A10 | -2,71 | Plasma Membrane     |
| 1390036_at   | BI289867  | solute carrier family 16, member 6 (monocarboxylic acid transporter 7)                                  | SLC16A6  | 4,55  | Plasma Membrane     |
| 1387228_at   | NM_012879 | solute carrier family 2 (facilitated glucose transporter), member 2                                     | SLC2A2   | -2,63 | Plasma Membrane     |
| 1370314_at   | AB000489  | solute carrier family 20 (phosphate transporter), member 1                                              | SLC20A1  | 2,64  | Plasma Membrane     |
| 1384368_at   | AA900084  | solute carrier family 25 (mitochondrial carrier; Graves disease autoantigen), member 16                 | SLC25A16 | -1,87 | Cytoplasm           |
| 1370060_at   | NM_022398 | solute carrier family 25 (mitochondrial carrier; oxoglutarate carrier), member 11                       | SLC25A11 | -1,85 | Cytoplasm           |
| 1372538_at   | BM389148  | solute carrier family 25 (mitochondrial carrier; peroxisomal membrane protein, 34kDa), member 17        | SLC25A17 | -2,71 | Cytoplasm           |
| 1371754_at   | AI177358  | solute carrier family 25 (mitochondrial carrier; phosphate carrier), member 25                          | SLC25A25 | -1,85 | Cytoplasm           |
| 1372341_at   | AI233213  | solute carrier family 25, member 36                                                                     | SLC25A36 | -1,91 | Unknown             |
| 1370357_at   | Y16774    | solute carrier family 30 (zinc transporter), member 4                                                   | SLC30A4  | -2,34 | Cytoplasm           |
| 1388982_at   | BM389066  | solute carrier family 30 (zinc transporter), member 9                                                   | SLC30A9  | -1,85 | Nucleus             |
| 1384413_at   | AA900068  | solute carrier family 35, member A5                                                                     | SLC35A5  | 3,21  | Unknown             |
| 1386960_at   | NM_031589 | solute carrier family 37 (glucose-6-phosphate transporter), member 4                                    | SLC37A4  | -4,94 | Cytoplasm           |
| 1382076_at   | AA955403  | solute carrier family 37 (glycerol-3-phosphate transporter), member 1                                   | SLC37A1  | 2,98  | Plasma Membrane     |
| 1372778_at   | AA799420  | solute carrier family 39 (zinc transporter), member 1                                                   | SLC39A1  | 2,84  | Plasma Membrane     |
| 1373984_at   | AA850715  | solute carrier family 39 (zinc transporter), member 14                                                  | SLC39A14 | -2,67 | Plasma Membrane     |
| 1368082_at   | NM_017048 | solute carrier family 4, anion exchanger, member 2 (erythrocyte membrane protein band 3-like 1)         | SLC4A2   | -1,60 | Plasma Membrane     |
| 1373326_at   | AI716512  | solute carrier family 4, sodium bicarbonate transporter, member 10                                      | SLC4A10  | -2,05 | Unknown             |
| 1376972_at   | AI407028  | solute carrier family 40 (iron-regulated transporter), member 1                                         | SLC40A1  | -3,70 | Plasma Membrane     |
| 1368480_at   | NM_053492 | solute carrier family 44, member 1                                                                      | SLC44A1  | 2,40  | Plasma Membrane     |
| 1382145_at   | AW531444  | solute carrier family 7 (cationic amino acid transporter, y+ system), member 4                          | SLC7A4   | -2,72 | Plasma Membrane     |
| 1387057_at   | NM_053442 | solute carrier family 7 (cationic amino acid transporter, y+ system), member 8                          | SLC7A8   | -2,33 | Plasma Membrane     |
| 1377457_a_at | AA850618  | sortilin-related receptor, L(DLR class) A repeats-containing                                            | SORL1    | -1,89 | Plasma Membrane     |
| 1390710_x_at | AA850618  | sortilin-related receptor, L(DLR class) A repeats-containing                                            | SORL1    | -1,55 | Plasma Membrane     |
| 1383653_at   | BG374126  | sorting nexin 11                                                                                        | SNX11    | 3,58  | Unknown             |
| 1372656_at   | BI282899  | sorting nexin 15                                                                                        | SNX15    | 2,01  | Cytoplasm           |
| 1377603_at   | BF284123  | sorting nexin 24                                                                                        | SNX24    | 2,12  | Unknown             |
| 1381625_at   | AI146135  | sorting nexin 24                                                                                        | SNX24    | 3,17  | Unknown             |

|              |           |                                                                                          |              |                              |        |                     |
|--------------|-----------|------------------------------------------------------------------------------------------|--------------|------------------------------|--------|---------------------|
| 1373305_at   | BI280349  | sorting nexin 4                                                                          |              | SNX4                         | 2,12   | Cytoplasm           |
| 1387051_at   | NM_053436 | staufen, RNA binding protein, homolog 1 (Drosophila)                                     |              | STAU1                        | -1,68  | Cytoplasm           |
| 1390196_at   | BG378858  | synapsin I                                                                               |              | SYN1                         | 3,56   | Plasma Membrane     |
| 1383399_at   | AI574728  | synaptic vesicle glycoprotein 2A                                                         |              | SV2A                         | -3,27  | Cytoplasm           |
| 1387073_at   | NM_030991 | synaptosomal-associated protein, 25kDa                                                   |              | SNAP25                       | -1,56  | Plasma Membrane     |
| 1375877_at   | AI454612  | synaptotagmin IV                                                                         |              | SYT4                         | -1,58  | Cytoplasm           |
| 1374427_at   | AI144986  | synaptotagmin XIII                                                                       |              | SYT13                        | -2,25  | Unknown             |
| 1388556_at   | BG381589  | syntaxin 6                                                                               |              | STX6                         | 2,57   | Cytoplasm           |
| 1369726_at   | NM_033098 | TAP binding protein (tapasin)                                                            |              | TAPBP                        | 4,27   | Cytoplasm           |
| 1372092_at   | BI278968  | trafficking protein, kinesin binding 2                                                   |              | TRAK2                        | -2,73  | Plasma Membrane     |
| 1398868_at   | AI408157  | translocase of inner mitochondrial membrane 13 homolog (yeast)                           |              | TIMM13                       | -1,72  | Cytoplasm           |
| 1370304_at   | AB006450  | translocase of inner mitochondrial membrane 17 homolog A (yeast)                         |              | TIMM17A (includes EG:10440)  | -3,44  | Cytoplasm           |
| 1370353_at   | AF223951  | translocase of inner mitochondrial membrane 22 homolog (yeast)                           |              | TIMM22                       | -2,23  | Cytoplasm           |
| 1375565_at   | BF420723  | translocase of inner mitochondrial membrane 22 homolog (yeast)                           |              | TIMM22                       | -1,77  | Cytoplasm           |
| 1367808_at   | NM_022541 | translocase of inner mitochondrial membrane 8 homolog B (yeast)                          |              | TIMM8B                       | -1,77  | Cytoplasm           |
| 1388136_at   | BF282660  | translocase of inner mitochondrial membrane 9 homolog (yeast)                            |              | TIMM9                        | -3,89  | Cytoplasm           |
| 1390432_at   | AA997338  | transmembrane and coiled-coil domains 3                                                  |              | TMCO3                        | -2,42  | Unknown             |
| 1388149_at   | X57523    | transporter 1, ATP-binding cassette, sub-family B (MDR/TAP)                              |              | TAP1                         | 217,33 | Cytoplasm           |
| 1368732_at   | NM_032056 | transporter 2, ATP-binding cassette, sub-family B (MDR/TAP)                              |              | TAP2                         | 70,00  | Cytoplasm           |
| 1368669_at   | NM_019354 | uncoupling protein 2 (mitochondrial, proton carrier)                                     |              | UCP2                         | -2,47  | Cytoplasm           |
| 1382099_at   | BI289595  | vacuolar protein sorting 26 homolog A (S. pombe)                                         |              | VPS26A                       | 1,97   | Cytoplasm           |
| 1379273_at   | BE109836  | vacuolar protein sorting 26 homolog B (S. pombe)                                         |              | VPS26B                       | -3,57  | Cytoplasm           |
| 1387455_a_at | NM_013155 | very low density lipoprotein receptor                                                    |              | VLDLR                        | -2,01  | Plasma Membrane     |
|              |           |                                                                                          | <b>Other</b> |                              |        |                     |
| 1391754_at   | BM391818  | 2'-5' oligoadenylate synthetase 11                                                       |              | OAS11                        | 7,76   | Unknown             |
| 1378345_at   | BF389196  | 2-oxoglutarate and iron-dependent oxygenase domain containing 1                          |              | OGFOD1                       | -2,05  | Unknown             |
| 1388631_at   | AI177093  | 5-azacytidine induced 2                                                                  |              | AZI2                         | 2,27   | Cytoplasm           |
| 1382206_a_at | BF398063  | A kinase (PRKA) anchor protein 2                                                         |              | AKAP2                        | 16,59  | Cytoplasm           |
| 1389496_at   | BI300893  | A kinase (PRKA) anchor protein 7                                                         |              | AKAP7                        | -3,87  | Plasma Membrane     |
| 1394895_at   | AI548194  | Abelson helper integration site 1                                                        |              | AHI1                         | -1,51  | Unknown             |
| 1389189_at   | BF555956  | actinin, alpha 1                                                                         |              | ACTN1                        | 2,19   | Cytoplasm           |
| 1373048_at   | AI177051  | actin-related protein 10 homolog (S. cerevisiae)                                         |              | ACTR10                       | -1,55  | Cytoplasm           |
| 1370043_at   | NM_031753 | activated leukocyte cell adhesion molecule                                               |              | ALCAM                        | 2,55   | Plasma Membrane     |
| 1388487_at   | AI600061  | adducin 1 (alpha)                                                                        |              | ADD1                         | -1,71  | Cytoplasm           |
| 1371907_at   | BE101624  | ADP-ribosylation-like factor 6 interacting protein 4                                     |              | ARL6IP4                      | -2,68  | Nucleus             |
| 1370307_at   | M64780    | agrin                                                                                    |              | AGRN                         | 20,72  | Plasma Membrane     |
| 1371703_at   | AI407114  | AHNAK nucleoprotein                                                                      |              | AHNAK                        | 42,61  | Nucleus             |
| 1398612_at   | BM383010  | aldo-keto reductase family 1, member C12                                                 |              | AKR1C12 (includes EG:361266) | -1,85  | Unknown             |
| 1378475_at   | BF396428  | amyloid beta precursor protein (cytoplasmic tail) binding protein 2                      |              | APPBP2                       | -4,01  | Cytoplasm           |
| 1383091_at   | BE113611  | amyloid beta precursor protein (cytoplasmic tail) binding protein 2                      |              | APPBP2                       | -3,07  | Cytoplasm           |
| 1375880_at   | AI170384  | amyloid beta precursor protein (cytoplasmic tail) binding protein 2                      |              | APPBP2                       | -1,82  | Cytoplasm           |
| 1371627_at   | BI277433  | angiomotin like 1                                                                        |              | AMOTL1                       | -2,97  | Plasma Membrane     |
| 1383018_at   | BF420082  | angiopoietin-like 6                                                                      |              | ANGPTL6                      | 3,71   | Extracellular Space |
| 1373351_at   | BI286775  | ankyrin 2, neuronal                                                                      |              | ANK2                         | 2,67   | Plasma Membrane     |
| 1377811_at   | AI577496  | ankyrin repeat domain 12                                                                 |              | ANKRD12                      | 2,09   | Nucleus             |
| 1386097_at   | AW527230  | ankyrin repeat domain 12                                                                 |              | ANKRD12                      | 2,12   | Nucleus             |
| 1388445_at   | BF287964  | annexin A11                                                                              |              | ANXA11                       | 2,03   | Nucleus             |
| 1376496_at   | AI717736  | apolipoprotein L 9a                                                                      |              | APOL9A (includes EG:503164)  | 37,49  | Unknown             |
| 1369197_at   | NM_023979 | apoptotic peptidase activating factor 1                                                  |              | APAF1                        | 3,75   | Cytoplasm           |
| 1388941_at   | AI172403  | archaelysin family metallopeptidase 2                                                    |              | AMZ2                         | -2,61  | Unknown             |
| 1382330_at   | BE116838  | ArfGAP with SH3 domain, ankyrin repeat and PH domain 2                                   |              | ASAP2                        | -1,80  | Nucleus             |
| 1373156_at   | AI385330  | armadillo repeat containing, X-linked 2                                                  |              | ARMCX2                       | -2,07  | Unknown             |
| 1392422_at   | AI236397  | asparagine-linked glycosylation 9, alpha-1,2-mannosyltransferase homolog (S. cerevisiae) |              | ALG9                         | -1,90  | Cytoplasm           |
| 1398874_at   | BI274345  | ataxin 10                                                                                |              | ATXN10                       | -1,78  | Cytoplasm           |
| 1379561_at   | AW433567  | ATPase family, AAA domain containing 1                                                   |              | ATAD1                        | 4,07   | Unknown             |
| 1393217_at   | BF282804  | ATP-binding cassette, sub-family G (WHITE), member 3-like 1                              |              | ABC3L1                       | 14,39  | Unknown             |
| 1375941_at   | BI292120  | BAIL-associated protein 2-like 1                                                         |              | BALAP2L1                     | 2,72   | Cytoplasm           |
| 1373846_at   | BF408064  | basic transcription factor 3-like 4                                                      |              | BTF3L4                       | -1,52  | Unknown             |



|              |           |                                                                                   |                            |       |                     |
|--------------|-----------|-----------------------------------------------------------------------------------|----------------------------|-------|---------------------|
| 1393641_at   | AA925583  | B-cell linker                                                                     | BLNK                       | 11,65 | Cytoplasm           |
| 1382993_at   | AI236152  | BCL2 binding component 3                                                          | BBC3                       | 2,68  | Cytoplasm           |
| 1386978_at   | NM_080888 | BCL2/adenovirus E1B 19kDa interacting protein 3-like                              | BNIP3L                     | -1,88 | Cytoplasm           |
| 1367898_at   | AF441118  | BCL2/adenovirus E1B 19kDa interacting protein 3-like                              | BNIP3L                     | -1,50 | Cytoplasm           |
| 1368066_at   | NM_053812 | BCL2-antagonist/killer 1                                                          | BAK1                       | 5,77  | Cytoplasm           |
| 1376261_at   | BI282898  | BCL2-associated athanogene 5                                                      | BAG5                       | -2,08 | Unknown             |
| 1393707_at   | AW527957  | BCL2-like 2                                                                       | BCL2L2                     | -2,00 | Cytoplasm           |
| 1371811_at   | BI278232  | Bernardinelli-Seip congenital lipodystrophy 2 (seipin)                            | BSCL2                      | -3,90 | Cytoplasm           |
| 1388733_at   | AI177631  | bifunctional apoptosis regulator                                                  | BFAR                       | 1,55  | Cytoplasm           |
| 1392910_at   | AA859968  | block of proliferation 1                                                          | BOP1                       | -1,61 | Nucleus             |
| 1370823_at   | AF387513  | BMP and activin membrane-bound inhibitor homolog (Xenopus laevis)                 | BAMBI                      | -3,47 | Plasma Membrane     |
| 1383829_at   | BF392234  | bobby sox homolog (Drosophila)                                                    | BBX                        | 2,87  | Nucleus             |
| 1390738_at   | BM385476  | bone marrow stromal cell antigen 2                                                | BST2                       | 7,45  | Plasma Membrane     |
| 1398350_at   | BG380454  | brain abundant, membrane attached signal protein 1                                | BASP1                      | 1,66  | Plasma Membrane     |
| 1388802_at   | AI579422  | brain expressed gene 1                                                            | BEX1 (includes EG:19716)   | -2,38 | Unknown             |
| 1382467_at   | C07140    | brain expressed gene 1                                                            | BEX1 (includes EG:19716)   | -1,83 | Unknown             |
| 1376333_at   | BI275800  | BTB (POZ) domain containing 1                                                     | BTBD1                      | -1,63 | Cytoplasm           |
| 1381974_at   | AI101499  | BTB (POZ) domain containing 3                                                     | BTBD3                      | -2,66 | Unknown             |
| 1373179_at   | BI300727  | BTB (POZ) domain containing 8                                                     | BTBD8 (includes EG:284697) | -5,03 | Unknown             |
| 1368072_at   | NM_019290 | BTG family, member 3                                                              | BTG3                       | -1,88 | Nucleus             |
| 1389200_at   | AA851296  | bystin-like                                                                       | BYSL                       | -2,47 | Cytoplasm           |
| 1390754_at   | BF412921  | Ca <sup>++</sup> -dependent secretion activator                                   | CADPS                      | 5,07  | Plasma Membrane     |
| 1390865_at   | AW524822  | Ca <sup>++</sup> -dependent secretion activator 2                                 | CADPS2                     | 3,83  | Plasma Membrane     |
| 1386947_at   | NM_031334 | cadherin 1, type 1, E-cadherin (epithelial)                                       | CDH1                       | 2,52  | Plasma Membrane     |
| 1370562_at   | M11596    | calcitonin-related polypeptide, beta                                              | CALCB (includes EG:116903) | 7,96  | Extracellular Space |
| 1387086_at   | NM_053334 | calcium modulating ligand                                                         | CAMLG                      | -5,94 | Cytoplasm           |
| 1388659_at   | BI295783  | calcium regulated heat stable protein 1, 24kDa                                    | CARHSP1                    | 2,41  | Cytoplasm           |
| 1368101_at   | NM_012518 | calmodulin 3 (phosphorylase kinase, delta)                                        | CALM3                      | -2,31 | Plasma Membrane     |
| 1389598_at   | BI280367  | calmodulin-like 4                                                                 | CALML4                     | -2,84 | Unknown             |
| 1372584_at   | BG672517  | cannabinoid receptor interacting protein 1                                        | CNRIP1                     | -1,57 | Unknown             |
| 1375345_at   | AW919569  | canopy 2 homolog (zebrafish)                                                      | CNPY2                      | -2,00 | Plasma Membrane     |
| 1375854_at   | AI175992  | catenin, beta interacting protein 1                                               | CTNBP1                     | -3,37 | Cytoplasm           |
| 1382603_at   | AW521319  | CD274 molecule                                                                    | CD274                      | 21,49 | Plasma Membrane     |
| 1379269_at   | BM385296  | CD2-associated protein                                                            | CD2AP                      | 3,98  | Cytoplasm           |
| 1368921_a_at | NM_012924 | CD44 molecule (Indian blood group)                                                | CD44                       | 9,25  | Plasma Membrane     |
| 1369559_a_at | NM_019195 | CD47 molecule                                                                     | CD47                       | 3,31  | Plasma Membrane     |
| 1386976_at   | NM_031797 | CD82 molecule                                                                     | CD82                       | 5,89  | Plasma Membrane     |
| 1390529_at   | AI412355  | CD83 molecule                                                                     | CD83                       | 12,98 | Plasma Membrane     |
| 1388327_at   | AI232357  | CDGSH iron sulfur domain 1                                                        | CISD1                      | -2,39 | Cytoplasm           |
| 1375353_at   | BI296696  | Cdk5 and Abl enzyme substrate 1                                                   | CABLES1                    | -2,20 | Nucleus             |
| 1393057_at   | BF404098  | cDNA sequence BC023179                                                            | BC023179                   | 2,17  | Unknown             |
| 1378739_at   | AA818135  | cell death-inducing DFFA-like effector c                                          | CIDEC                      | 7,23  | Cytoplasm           |
| 1388727_at   | BM387151  | cell division cycle 26 homolog (S. cerevisiae)                                    | CDC26                      | -2,88 | Nucleus             |
| 1372883_at   | BE109061  | centromere protein B, 80kDa                                                       | CENPB                      | -1,54 | Nucleus             |
| 1378479_at   | BI285912  | ceroid-lipofuscinosis, neuronal 3                                                 | CLN3                       | 6,79  | Cytoplasm           |
| 1389791_at   | AI179775  | ceroid-lipofuscinosis, neuronal 8 (epilepsy, progressive with mental retardation) | CLN8                       | -3,31 | Cytoplasm           |
| 1388771_at   | BG668182  | CGG triplet repeat binding protein 1                                              | CGGBP1                     | 1,53  | Nucleus             |
| 1371403_at   | AA799545  | chaperonin containing TCP1, subunit 3 (gamma)                                     | CCT3                       | -1,70 | Cytoplasm           |
| 1374695_at   | BF564593  | chromobox homolog 1 (HP1 beta homolog Drosophila )                                | CBX1                       | 2,00  | Nucleus             |
| 1385157_at   | BF389675  | chromobox homolog 1 (HP1 beta homolog Drosophila )                                | CBX1                       | 2,95  | Nucleus             |
| 1371395_at   | AA851329  | chromobox homolog 3 (HP1 gamma homolog, Drosophila)                               | CBX3                       | -1,94 | Nucleus             |
| 1387235_at   | NM_021655 | chromogranin A (parathyroid secretory protein 1)                                  | CHGA                       | -1,54 | Extracellular Space |
| 1368034_at   | NM_012526 | chromogranin B (secretogranin 1)                                                  | CHGB                       | -1,51 | Extracellular Space |
| 1391206_at   | AW533313  | chromosome 1 open reading frame 106                                               | C1ORF106                   | 1,52  | Unknown             |
| 1371443_at   | AI409584  | chromosome 1 open reading frame 174                                               | C1ORF174                   | -3,18 | Unknown             |
| 1374478_at   | AA819329  | chromosome 1 open reading frame 210                                               | C1ORF210                   | -3,53 | Unknown             |
| 1390108_at   | AI233162  | chromosome 1 open reading frame 57                                                | C1ORF57                    | -2,53 | Unknown             |
| 1372895_at   | AI169367  | chromosome 10 open reading frame 58                                               | C10ORF58                   | 15,11 | Extracellular Space |

|              |          |                                      |           |       |                     |
|--------------|----------|--------------------------------------|-----------|-------|---------------------|
| 1392663_at   | AI179925 | chromosome 10 open reading frame 84  | C10ORF84  | -2,40 | Unknown             |
| 1382100_at   | AA997169 | chromosome 10 open reading frame 97  | C10ORF97  | -1,53 | Unknown             |
| 1390232_at   | BM388441 | chromosome 11 open reading frame 24  | C11ORF24  | -2,92 | Extracellular Space |
| 1381118_at   | AW526652 | chromosome 11 open reading frame 46  | C11ORF46  | -2,45 | Unknown             |
| 1375423_at   | BE098181 | chromosome 11 open reading frame 52  | C11ORF52  | -6,10 | Unknown             |
| 1371763_at   | BI274533 | chromosome 11 open reading frame 54  | C11ORF54  | -5,72 | Nucleus             |
| 1372588_at   | AA944403 | chromosome 11 open reading frame 68  | C11ORF68  | 2,49  | Unknown             |
| 1372843_at   | BG377188 | chromosome 11 open reading frame 75  | C11ORF75  | -1,74 | Unknown             |
| 1385066_a_at | BM390527 | chromosome 12 open reading frame 30  | C12ORF30  | 1,75  | Unknown             |
| 1384553_at   | BE118056 | chromosome 12 open reading frame 30  | C12ORF30  | 1,77  | Unknown             |
| 1378980_at   | AI044779 | chromosome 12 open reading frame 30  | C12ORF30  | 3,55  | Unknown             |
| 1395297_at   | AI556097 | chromosome 12 open reading frame 35  | C12ORF35  | 2,98  | Unknown             |
| 1373143_at   | BM390131 | chromosome 12 open reading frame 35  | C12ORF35  | 6,72  | Unknown             |
| 1373551_at   | AA817753 | chromosome 12 open reading frame 51  | C12ORF51  | 1,82  | Unknown             |
| 1376645_at   | AW916327 | chromosome 13 open reading frame 33  | C13ORF33  | -5,62 | Unknown             |
| 1398919_at   | BI296033 | chromosome 14 open reading frame 166 | C14ORF166 | -1,72 | Nucleus             |
| 1384185_at   | BI289594 | chromosome 14 open reading frame 169 | C14ORF169 | -1,71 | Nucleus             |
| 1372154_at   | AW521019 | chromosome 15 open reading frame 44  | C15ORF44  | -1,52 | Cytoplasm           |
| 1392547_at   | AI716211 | chromosome 15 open reading frame 48  | C15ORF48  | 47,22 | Nucleus             |
| 1377524_at   | AI044320 | chromosome 16 open reading frame 13  | C16ORF13  | -2,56 | Unknown             |
| 1373603_at   | BG673166 | chromosome 16 open reading frame 42  | C16ORF42  | -1,53 | Unknown             |
| 1374169_at   | AI236128 | chromosome 16 open reading frame 5   | C16ORF5   | -2,02 | Unknown             |
| 1374898_at   | AW527473 | chromosome 17 open reading frame 28  | C17ORF28  | -2,09 | Unknown             |
| 1373982_at   | BM385377 | chromosome 17 open reading frame 42  | C17ORF42  | -2,31 | Unknown             |
| 1373830_at   | AA893539 | chromosome 17 open reading frame 62  | C17ORF62  | 2,54  | Unknown             |
| 1373831_at   | AW920524 | chromosome 17 open reading frame 62  | C17ORF62  | 6,12  | Unknown             |
| 1394605_at   | AI409909 | chromosome 17 open reading frame 63  | C17ORF63  | 1,68  | Unknown             |
| 1388532_at   | AI599496 | chromosome 18 open reading frame 10  | C18ORF10  | -3,25 | Nucleus             |
| 1388465_at   | AA891733 | chromosome 18 open reading frame 19  | C18ORF19  | -2,41 | Unknown             |
| 1388946_at   | AI233763 | chromosome 18 open reading frame 22  | C18ORF22  | -1,91 | Cytoplasm           |
| 1371409_at   | AI231196 | chromosome 18 open reading frame 32  | C18ORF32  | -1,88 | Unknown             |
| 1377893_at   | BM390475 | chromosome 19 open reading frame 12  | C19ORF12  | 4,18  | Unknown             |
| 1389365_at   | AI228291 | chromosome 19 open reading frame 12  | C19ORF12  | 7,75  | Unknown             |
| 1372396_at   | BE113316 | chromosome 19 open reading frame 39  | C19ORF39  | -1,97 | Unknown             |
| 1372184_at   | BM392213 | chromosome 19 open reading frame 52  | C19ORF52  | -1,72 | Unknown             |
| 1373168_at   | BG380214 | chromosome 19 open reading frame 53  | C19ORF53  | -1,81 | Unknown             |
| 1383662_at   | AI043759 | chromosome 19 open reading frame 66  | C19ORF66  | 3,16  | Unknown             |
| 1371807_at   | BE110607 | chromosome 2 open reading frame 28   | C2ORF28   | -1,84 | Unknown             |
| 1372202_at   | BF284058 | chromosome 2 open reading frame 49   | C2ORF49   | -1,77 | Unknown             |
| 1374082_at   | BI275982 | chromosome 2 open reading frame 56   | C2ORF56   | -1,80 | Unknown             |
| 1394392_at   | BI289554 | chromosome 20 open reading frame 142 | C20ORF142 | -1,61 | Unknown             |
| 1371507_at   | BM384151 | chromosome 20 open reading frame 152 | C20ORF152 | -1,52 | Unknown             |
| 1371609_at   | AI232270 | chromosome 21 open reading frame 33  | C21ORF33  | -2,09 | Cytoplasm           |
| 1373137_at   | BI284360 | chromosome 3 open reading frame 21   | C3ORF21   | -2,05 | Unknown             |
| 1370360_at   | AF146738 | chromosome 3 open reading frame 34   | C3ORF34   | -3,24 | Unknown             |
| 1376156_at   | BM391273 | chromosome 3 open reading frame 39   | C3ORF39   | -3,01 | Unknown             |
| 1373584_at   | BE113205 | chromosome 3 open reading frame 59   | C3ORF59   | 1,79  | Unknown             |
| 1368230_a_at | U95161   | chromosome 3 open reading frame 60   | C3ORF60   | -2,62 | Nucleus             |
| 1372689_at   | BG381479 | chromosome 3 open reading frame 75   | TMEM103   | -2,35 | Unknown             |
| 1372329_at   | BM389011 | chromosome 4 open reading frame 16   | C4ORF16   | 2,38  | Unknown             |
| 1389054_at   | BE113616 | chromosome 4 open reading frame 19   | C4ORF19   | -2,87 | Unknown             |
| 1373049_at   | AI169619 | chromosome 5 open reading frame 30   | C5ORF30   | 6,66  | Unknown             |
| 1377439_at   | BF408617 | chromosome 5 open reading frame 42   | C5ORF42   | 20,47 | Unknown             |
| 1372547_at   | AI175034 | chromosome 5 open reading frame 44   | C5ORF44   | -1,65 | Unknown             |
| 1383912_at   | BM390524 | chromosome 6 open reading frame 115  | C6ORF115  | 2,06  | Unknown             |
| 1394240_at   | AI014154 | chromosome 6 open reading frame 162  | C6ORF162  | -3,22 | Unknown             |
| 1399164_a_at | BE112193 | chromosome 6 open reading frame 162  | C6ORF162  | -3,20 | Unknown             |
| 1389481_at   | BI282891 | chromosome 6 open reading frame 89   | C6ORF89   | -1,55 | Unknown             |

|              |           |                                                                    |           |       |                     |
|--------------|-----------|--------------------------------------------------------------------|-----------|-------|---------------------|
| 1376016_at   | BF285425  | chromosome 7 open reading frame 20                                 | C7ORF20   | -1,71 | Unknown             |
| 1397703_at   | BF288942  | chromosome 7 open reading frame 23                                 | C7ORF23   | 4,04  | Unknown             |
| 1393413_at   | BI290400  | chromosome 7 open reading frame 51                                 | C7ORF51   | 2,24  | Unknown             |
| 1390394_at   | AW251900  | chromosome 7 open reading frame 60                                 | C7ORF60   | 1,80  | Unknown             |
| 1389558_at   | BF281962  | chromosome 7 open reading frame 60                                 | C7ORF60   | 2,23  | Unknown             |
| 1370901_at   | AI407120  | chromosome 9 open reading frame 142                                | C9ORF142  | -2,68 | Unknown             |
| 1390801_at   | AI412174  | chromosome 9 open reading frame 71                                 | C9ORF71   | 2,47  | Unknown             |
| 1390602_a_at | BG381320  | chromosome 9 open reading frame 75                                 | C9ORF75   | -1,90 | Unknown             |
| 1372971_at   | BI291301  | chromosome 9 open reading frame 78                                 | C9ORF78   | -1,70 | Unknown             |
| 1384143_at   | BE114778  | cingulin                                                           | CGN       | 2,95  | Plasma Membrane     |
| 1389577_at   | AI101160  | cirrhosis, autosomal recessive 1A (cirhin)                         | CIRH1A    | -2,75 | Nucleus             |
| 1367907_a_at | M19262    | clathrin, light chain (Lcb)                                        | CLTB      | -1,86 | Plasma Membrane     |
| 1376711_at   | BG673439  | claudin 11                                                         | CLDN11    | 1,79  | Plasma Membrane     |
| 1390407_at   | AA955196  | claudin domain containing 1                                        | CLDND1    | -1,51 | Plasma Membrane     |
| 1374711_at   | BF283512  | cleavage and polyadenylation specific factor 3, 73kDa              | CPSF3     | -2,46 | Nucleus             |
| 1389361_at   | AI012506  | clusterin associated protein 1                                     | CLUAP1    | -2,47 | Unknown             |
| 1389368_at   | AW253242  | CNKSR family member 3                                              | CNKSR3    | 21,04 | Plasma Membrane     |
| 1384378_at   | BI293046  | coiled-coil alpha-helical rod protein 1                            | CCHCR1    | 8,96  | Cytoplasm           |
| 1373806_at   | AI044859  | coiled-coil domain containing 104                                  | CCDC104   | -2,38 | Unknown             |
| 1379826_at   | AA859429  | coiled-coil domain containing 107                                  | CCDC107   | -2,38 | Unknown             |
| 1390101_at   | AI170609  | coiled-coil domain containing 107                                  | CCDC107   | -2,21 | Unknown             |
| 1374929_at   | AI010233  | coiled-coil domain containing 126                                  | CCDC126   | -3,09 | Unknown             |
| 1390875_a_at | BF290046  | coiled-coil domain containing 41                                   | CCDC41    | 3,32  | Unknown             |
| 1375634_at   | AA799472  | coiled-coil domain containing 53                                   | CCDC53    | -2,90 | Unknown             |
| 1389466_at   | BG374280  | coiled-coil domain containing 6                                    | CCDC6     | -1,78 | Cytoplasm           |
| 1393952_at   | BI278833  | coiled-coil domain containing 68                                   | CCDC68    | -4,15 | Unknown             |
| 1395779_at   | BF523321  | coiled-coil domain containing 88A                                  | CCDC88A   | 1,87  | Cytoplasm           |
| 1385268_at   | BI289167  | coiled-coil domain containing 93                                   | CCDC93    | 2,16  | Unknown             |
| 1399165_a_at | AA943500  | coiled-coil domain containing 97                                   | CCDC97    | -4,56 | Unknown             |
| 1398326_at   | BI282332  | coiled-coil-helix-coiled-coil-helix domain containing 10           | CHCHD10   | -2,81 | Unknown             |
| 1385904_at   | BG153342  | cold inducible RNA binding protein                                 | CIRBP     | -2,36 | Nucleus             |
| 1369764_at   | NM_012516 | complement component 4 binding protein, alpha                      | C4BPA     | 6,12  | Extracellular Space |
| 1368695_at   | NM_016995 | complement component 4 binding protein, beta                       | C4BPB     | 10,19 | Extracellular Space |
| 1393740_at   | BI294230  | connector enhancer of kinase suppressor of Ras 1                   | CNKSR1    | 7,16  | Cytoplasm           |
| 1398972_at   | AW916366  | COP9 constitutive photomorphogenic homolog subunit 3 (Arabidopsis) | COPS3     | -1,54 | Cytoplasm           |
| 1388682_at   | AI598397  | cornichon homolog (Drosophila)                                     | CNIH      | -1,92 | Plasma Membrane     |
| 1383647_a_at | BI283883  | crumbs homolog 3 (Drosophila)                                      | CRB3      | 1,94  | Plasma Membrane     |
| 1383648_x_at | BI283883  | crumbs homolog 3 (Drosophila)                                      | CRB3      | 1,96  | Plasma Membrane     |
| 1388385_at   | BG371710  | crystallin, beta A2                                                | CRYBA2    | -2,90 | Unknown             |
| 1379450_at   | BM383195  | CTTNBP2 N-terminal like                                            | CTTNBP2NL | 13,92 | Cytoplasm           |
| 1397247_at   | BI276505  | CUB domain containing protein 1                                    | CDCP1     | 10,58 | Plasma Membrane     |
| 1398928_at   | BG378296  | cutA divalent cation tolerance homolog (E. coli)                   | CUTA      | -1,76 | Unknown             |
| 1385024_at   | AW535558  | cutC copper transporter homolog (E. coli)                          | CUTC      | -2,33 | Unknown             |
| 1368801_at   | NM_053342 | CXXC finger 4                                                      | CXXC4     | -2,06 | Cytoplasm           |
| 1369935_at   | NM_012766 | cyclin D3                                                          | CCND3     | -1,94 | Nucleus             |
| 1371953_at   | AI408309  | cyclin G2                                                          | CCNG2     | 4,51  | Nucleus             |
| 1368050_at   | NM_053662 | cyclin L1                                                          | CCNL1     | 1,96  | Nucleus             |
| 1391270_at   | BE112177  | cyclin M3                                                          | CNNM3     | -2,99 | Unknown             |
| 1382124_at   | BE105042  | cyclin M3                                                          | CNNM3     | -1,62 | Unknown             |
| 1388443_at   | AI177871  | cyclin-dependent kinase 2 associated protein 1                     | CDK2AP1   | -3,08 | Nucleus             |
| 1372062_at   | BF394161  | cyclin-dependent kinase 2-interacting protein                      | CINP      | -2,91 | Unknown             |
| 1370282_at   | U44948    | cysteine and glycine-rich protein 2                                | CSRP2     | -8,08 | Nucleus             |
| 1396327_at   | BG374493  | cytochrome P450, family 2, subfamily j, polypeptide 12             | CYP2J12   | 38,83 | Unknown             |
| 1375685_at   | BI282257  | cytoplasmic linker associated protein 1                            | CLASP1    | 3,03  | Cytoplasm           |
| 1372166_at   | AI169146  | D4, zinc and double PHD fingers family 2                           | DPF2      | 1,65  | Nucleus             |
| 1399162_a_at | AJ277077  | damage-specific DNA binding protein 1, 127kDa                      | DDB1      | -1,87 | Nucleus             |
| 1371648_at   | BF284000  | damage-specific DNA binding protein 1, 127kDa                      | DDB1      | -1,70 | Nucleus             |
| 1385369_at   | BI290883  | DAZ interacting protein 1-like                                     | DZIP1L    | 3,32  | Unknown             |

|              |           |                                                                            |                            |       |                     |
|--------------|-----------|----------------------------------------------------------------------------|----------------------------|-------|---------------------|
| 1383432_at   | AI1716676 | death associated protein-like 1                                            | DAPL1                      | -4,04 | Unknown             |
| 1385210_at   | BF389450  | dedicator of cytokinesis 5                                                 | DOCK5                      | 2,50  | Unknown             |
| 1374519_at   | AI231782  | dedicator of cytokinesis 7                                                 | DOCK7 (includes EG:313388) | 5,84  | Plasma Membrane     |
| 1374718_at   | AA945915  | deltex 3-like (Drosophila)                                                 | DTX3L                      | 14,75 | Cytoplasm           |
| 1374564_at   | BE099401  | deltex homolog 2 (Drosophila)                                              | DTX2                       | 2,53  | Nucleus             |
| 1380021_at   | AI059486  | DENN/MADD domain containing 2D                                             | DENND2D                    | 13,39 | Cytoplasm           |
| 1379703_at   | BF288207  | DENN/MADD domain containing 3                                              | DENND3                     | 4,57  | Unknown             |
| 1383256_at   | BF410997  | deoxynucleotidyltransferase, terminal, interacting protein 2               | DNTTIP2                    | -1,54 | Unknown             |
| 1389615_at   | BI284801  | Der1-like domain family, member 1                                          | DERL1                      | -1,83 | Cytoplasm           |
| 1389318_at   | BF282986  | dishevelled associated activator of morphogenesis 1                        | DAAMI                      | 2,13  | Cytoplasm           |
| 1374480_at   | BE107255  | dishevelled associated activator of morphogenesis 1                        | DAAMI                      | 2,49  | Cytoplasm           |
| 1369997_at   | NM_031820 | dishevelled, dsh homolog 1 (Drosophila)                                    | DVL1                       | -1,95 | Cytoplasm           |
| 1387817_at   | NM_024128 | DNA segment on chromosome 4 (unique) 234 expressed sequence                | D4S234E                    | -1,81 | Cytoplasm           |
| 1373064_at   | BM390416  | DnaJ (Hsp40) homolog, subfamily C, member 15                               | DNAJC15                    | -2,32 | Cytoplasm           |
| 1390168_a_at | BI289564  | DnaJ (Hsp40) homolog, subfamily C, member 24                               | DNAJC24                    | -1,76 | Unknown             |
| 1377125_at   | AW523481  | DnaJ (Hsp40) homolog, subfamily C, member 6                                | DNAJC6                     | -1,70 | Cytoplasm           |
| 1386648_at   | AW914996  | DnaJ (Hsp40) homolog, subfamily C, member 6                                | DNAJC6                     | -1,57 | Cytoplasm           |
| 1383181_at   | AI704947  | DnaJ (Hsp40) homolog, subfamily C, member 9                                | DNAJC9                     | -3,58 | Unknown             |
| 1372882_at   | BG379301  | DNL-type zinc finger                                                       | DNLZ                       | -3,36 | Unknown             |
| 1399146_at   | AI576776  | dolichol kinase                                                            | DOLK                       | -7,08 | Unknown             |
| 1374651_at   | BM386987  | dopey family member 2                                                      | DOPEY2                     | -1,71 | Unknown             |
| 1376026_at   | AI178243  | downstream neighbor of SON                                                 | DONSON                     | 33,43 | Unknown             |
| 1371622_at   | AA943541  | DPH1 homolog (S. cerevisiae)                                               | DPH1                       | -1,99 | Cytoplasm           |
| 1375186_at   | AI169144  | DPH3, KTI11 homolog (S. cerevisiae)                                        | DPH3                       | -1,66 | Cytoplasm           |
| 1389483_at   | AI408686  | dpy-19-like 1 (C. elegans)                                                 | DPY19L1                    | -1,71 | Unknown             |
| 1368274_at   | NM_031352 | drebrin-like                                                               | DBNL                       | 4,08  | Cytoplasm           |
| 1373502_at   | BM389188  | dymecilin                                                                  | DYM                        | -4,93 | Unknown             |
| 1398900_at   | AA893211  | dynactin 3 (p22)                                                           | DCTN3                      | -1,85 | Nucleus             |
| 1380671_at   | BF409069  | dynein heavy chain domain 1                                                | DNHD1                      | 1,62  | Unknown             |
| 1387025_at   | NM_019234 | dynein, cytoplasmic 1, intermediate chain 1                                | DYNC1H1                    | -2,55 | Cytoplasm           |
| 1374297_at   | BE100843  | dynein, cytoplasmic 1, light intermediate chain 1                          | DYNC1LI1                   | -2,21 | Cytoplasm           |
| 1369976_at   | NM_053319 | dynein, light chain, LC8-type 1                                            | DYNLL1                     | -2,09 | Cytoplasm           |
| 1386882_at   | NM_031318 | dynein, light chain, Tctex-type 1                                          | DYNLT1                     | 1,91  | Cytoplasm           |
| 1388992_at   | AI169305  | E1A binding protein p400                                                   | EP400                      | 1,88  | Nucleus             |
| 1370544_at   | AF335571  | echinoderm microtubule associated protein like 2                           | EML2                       | 1,95  | Cytoplasm           |
| 1389526_at   | BG373853  | EFR3 homolog A (S. cerevisiae)                                             | EFR3A                      | 1,88  | Plasma Membrane     |
| 1395739_at   | BG672302  | EFR3 homolog A (S. cerevisiae)                                             | EFR3A                      | 2,13  | Plasma Membrane     |
| 1378346_at   | AI385237  | elastin microfibril interfacer 2                                           | EMILIN2                    | 2,32  | Extracellular Space |
| 1389319_at   | AA800719  | endoplasmic reticulum-golgi intermediate compartment (ERGIC) 1             | ERGIC1                     | -1,74 | Cytoplasm           |
| 1393058_at   | BE101947  | EP300 interacting inhibitor of differentiation 2                           | EID2                       | -2,83 | Nucleus             |
| 1375855_at   | AI171799  | ependymin related protein 1 (zebrafish)                                    | EPDR1                      | -3,72 | Nucleus             |
| 1374209_at   | AI010575  | ER lipid raft associated 2                                                 | ERLIN2                     | 1,74  | Plasma Membrane     |
| 1372643_at   | BE110569  | erythrocyte membrane protein band 4.1-like 2                               | EPB41L2                    | -2,21 | Plasma Membrane     |
| 1370503_s_at | AB032828  | erythrocyte membrane protein band 4.1-like 3                               | EPB41L3                    | -1,55 | Plasma Membrane     |
| 1398929_at   | AW525691  | eukaryotic translation initiation factor 3, subunit 6 interacting protein  | EIF3S6IP                   | -1,81 | Nucleus             |
| 1371818_at   | AW251204  | exportin, tRNA (nuclear export receptor for tRNAs)                         | XPOT                       | -1,95 | Nucleus             |
| 1370875_at   | AA851304  | ezrin                                                                      | EZR                        | 9,22  | Plasma Membrane     |
| 1376708_at   | BM385170  | family with sequence similarity 115, member C                              | FAM115C                    | 11,74 | Unknown             |
| 1388457_at   | AI176633  | family with sequence similarity 125, member A                              | FAM125A                    | -1,53 | Unknown             |
| 1374414_at   | AI412962  | family with sequence similarity 134, member A                              | FAM134A                    | -1,85 | Unknown             |
| 1393443_a_at | AW434918  | family with sequence similarity 158, member A                              | FAM158A                    | -3,84 | Plasma Membrane     |
| 1380184_at   | AW521222  | family with sequence similarity 19 (chemokine (C-C motif)-like), member A5 | FAM19A5                    | 3,09  | Extracellular Space |
| 1391214_at   | BI289378  | family with sequence similarity 26, member F                               | FAM26F                     | 8,61  | Unknown             |
| 1394940_at   | BI294811  | family with sequence similarity 46, member A                               | FAM46A                     | -3,10 | Unknown             |
| 1380102_at   | BM386836  | family with sequence similarity 50, member A                               | FAM50A                     | -2,93 | Nucleus             |
| 1373761_at   | AI176129  | family with sequence similarity 60, member A                               | LOC686611                  | 2,62  | Unknown             |
| 1388817_at   | BI284848  | family with sequence similarity 63, member A                               | FAM63A                     | -1,83 | Unknown             |
| 1372302_at   | BF284897  | family with sequence similarity 82, member A2                              | FAM82A2                    | 5,08  | Unknown             |

|              |           |                                                                             |                             |        |                     |
|--------------|-----------|-----------------------------------------------------------------------------|-----------------------------|--------|---------------------|
| 1377616_at   | BE114214  | family with sequence similarity 92, member A1                               | FAM92A1                     | -3,93  | Unknown             |
| 1369995_at   | NM_130406 | Fas (TNFRSF6) associated factor 1                                           | FAF1                        | -2,02  | Nucleus             |
| 1367918_at   | NM_031066 | fasciculation and elongation protein zeta 1 (zygin I)                       | FEZ1                        | 2,55   | Cytoplasm           |
| 1384011_a_at | BF287623  | FAST kinase domains 3                                                       | FASTKD3                     | 2,17   | Unknown             |
| 1367518_at   | BI274976  | fat mass and obesity associated                                             | FTO                         | -2,03  | Nucleus             |
| 1367654_at   | NM_031819 | FAT tumor suppressor homolog 1 (Drosophila)                                 | FAT1                        | -1,65  | Plasma Membrane     |
| 1393101_at   | BM385838  | F-box and leucine-rich repeat protein 10                                    | FBXL10                      | -2,06  | Nucleus             |
| 1384457_at   | AI030755  | F-box and WD-40 domain protein 17                                           | FBXW17                      | 24,71  | Unknown             |
| 1375041_at   | AI599362  | F-box protein 27                                                            | FBXO27                      | 16,76  | Unknown             |
| 1377393_at   | H31625    | FERM domain containing 5                                                    | FRMD5                       | -2,44  | Unknown             |
| 1373588_at   | H33457    | FERM domain containing 8                                                    | FRMD8                       | 3,57   | Unknown             |
| 1382143_at   | AA964898  | FERM, RhoGEF (ARHGEF) and pleckstrin domain protein 1 (chondrocyte-derived) | FARP1                       | 4,72   | Unknown             |
| 1398327_at   | BM386598  | fermitin family homolog 2 (Drosophila)                                      | FERMT2                      | 1,95   | Cytoplasm           |
| 1388528_at   | AW433875  | fibrillarin                                                                 | FBL                         | -1,67  | Nucleus             |
| 1383396_at   | AA894079  | fibronectin type III domain containing 3A                                   | FNDC3A                      | 1,80   | Unknown             |
| 1390289_at   | BI283804  | FIG4 homolog (S. cerevisiae)                                                | FIG4                        | -2,15  | Cytoplasm           |
| 1379463_at   | AW525176  | filamin A interacting protein 1                                             | FILIP1                      | -17,85 | Cytoplasm           |
| 1367746_a_at | NM_031830 | flotillin 2                                                                 | FLOT2                       | 1,80   | Plasma Membrane     |
| 1388684_at   | BI274480  | formin binding protein 4                                                    | FNBP4                       | 2,46   | Nucleus             |
| 1391411_at   | AI179941  | formin-like 2                                                               | FMNL2 (includes EG:114793)  | 6,42   | Cytoplasm           |
| 1375961_at   | AI072892  | frizzled-related protein                                                    | FRZB                        | -1,80  | Extracellular Space |
| 1398925_at   | BI274664  | FtsJ methyltransferase domain containing 2                                  | FTSJD2                      | 1,60   | Unknown             |
| 1375872_at   | AI144944  | fukutin                                                                     | FKTN                        | -2,06  | Extracellular Space |
| 1377011_at   | BF415061  | furry homolog (Drosophila)                                                  | FRY                         | -2,37  | Unknown             |
| 1383255_at   | BE116202  | G patch domain and KOW motifs                                               | GPKOW                       | 4,27   | Unknown             |
| 1382186_a_at | AI136314  | G patch domain containing 4                                                 | GPATCH4                     | -4,95  | Unknown             |
| 1398783_at   | NM_053969 | G protein pathway suppressor 1                                              | GPS1 (includes EG:2873)     | -1,89  | Nucleus             |
| 1372313_at   | BI275972  | G protein-coupled receptor 89B                                              | GPR89B                      | -2,15  | Unknown             |
| 1377868_at   | AW530090  | G protein-coupled receptor associated sorting protein 2                     | GPRASP2                     | -1,77  | Cytoplasm           |
| 1374533_at   | AI234190  | GA repeat binding protein, beta 1                                           | GABPB1 (includes EG:499883) | 3,39   | Unknown             |
| 1371680_at   | BI303631  | GABA(A) receptor-associated protein like 1                                  | GABARAPL1                   | -1,65  | Cytoplasm           |
| 1379377_at   | BG371655  | ganglioside induced differentiation associated protein 2                    | GDAP2                       | 1,94   | Unknown             |
| 1385717_at   | AW524331  | ganglioside-induced differentiation-associated protein 1                    | GDAP1                       | -1,93  | Cytoplasm           |
| 1375960_at   | BF281879  | germ cell-less homolog 1 (Drosophila)                                       | GMCL1                       | -1,78  | Nucleus             |
| 1374690_at   | AI599770  | GLE1 RNA export mediator homolog (yeast)                                    | GLE1                        | 4,96   | Nucleus             |
| 1380410_at   | AI043958  | GLI pathogenesis-related 2                                                  | GLIPR2                      | 30,24  | Cytoplasm           |
| 1388526_at   | AI169075  | glutathione transferase zeta 1                                              | LOC681913                   | -2,55  | Unknown             |
| 1371358_at   | BI282960  | glycoprotein, synaptic 2                                                    | GPSN2                       | -2,15  | Plasma Membrane     |
| 1394347_at   | BF568007  | golgi autoantigen, golgin subfamily a, 4                                    | GOLGA4                      | -2,81  | Cytoplasm           |
| 1373754_at   | AI599232  | golgi membrane protein 1                                                    | GOLM1                       | -4,02  | Unknown             |
| 1390050_at   | BI288898  | golgi membrane protein 1                                                    | GOLM1                       | -2,91  | Unknown             |
| 1378352_at   | BM392166  | golgi phosphoprotein 3-like                                                 | GOLPH3L                     | -1,84  | Cytoplasm           |
| 1372383_at   | AW435429  | G-protein signaling modulator 1 (AGS3-like, C. elegans)                     | GPSM1                       | -16,20 | Cytoplasm           |
| 1384177_at   | BI281497  | GRAM domain containing 3                                                    | GRAMD3                      | 1,98   | Unknown             |
| 1374043_at   | AI317841  | GRAM domain containing 3                                                    | GRAMD3                      | 2,24   | Unknown             |
| 1399167_a_at | BI278183  | GRB2-associated binding protein 1                                           | GAB1                        | 3,59   | Cytoplasm           |
| 1389552_at   | BG371715  | GRIP and coiled-coil domain containing 2                                    | GCC2                        | -1,76  | Cytoplasm           |
| 1368909_a_at | NM_053807 | GRIP1 associated protein 1                                                  | GRIPAP1                     | 2,39   | Plasma Membrane     |
| 1372016_at   | BI287978  | growth arrest and DNA-damage-inducible, beta                                | GADD45B                     | 21,01  | Cytoplasm           |
| 1388792_at   | AI599423  | growth arrest and DNA-damage-inducible, gamma                               | GADD45G                     | 2,43   | Nucleus             |
| 1371896_at   | AI411436  | growth arrest and DNA-damage-inducible, gamma interacting protein 1         | GADD45GIP1                  | -1,80  | Nucleus             |
| 1367867_at   | NM_013222 | growth factor, augments of liver regeneration                               | GFER                        | -1,97  | Nucleus             |
| 1370144_at   | NM_053689 | GTP binding protein 4                                                       | GTPBP4                      | -1,52  | Nucleus             |
| 1373572_at   | BF282247  | GTP binding protein 5 (putative)                                            | GTPBP5                      | -1,87  | Unknown             |
| 1376285_at   | BM390519  | GULP, engulfment adaptor PTB domain containing 1                            | GULP1                       | -2,70  | Cytoplasm           |
| 1393096_at   | BF393086  | hCG21078                                                                    | HCG 21078                   | -1,92  | Unknown             |
| 1372762_at   | AA849729  | HD domain containing 3                                                      | HDCC3                       | -2,95  | Unknown             |
| 1383685_at   | BI276972  | HEAT repeat containing 1                                                    | HEATR1                      | -1,57  | Nucleus             |

|              |           |                                                                                          |              |        |                     |
|--------------|-----------|------------------------------------------------------------------------------------------|--------------|--------|---------------------|
| 1386894_at   | NM_022229 | heat shock 60kDa protein 1 (chaperonin)                                                  | HSPD1        | -2,02  | Cytoplasm           |
| 1387898_at   | D29960    | heat shock protein, alpha-crystallin-related, B6                                         | HSPB6        | -2,44  | Cytoplasm           |
| 1373228_at   | BI288760  | heparan-alpha-glucosaminide N-acetyltransferase                                          | HGSNAT       | -2,85  | Unknown             |
| 1391786_at   | BI297047  | heterogeneous nuclear ribonucleoprotein H2 (H')                                          | HNRNPH2      | 1,58   | Nucleus             |
| 1375019_at   | AI101886  | heterogeneous nuclear ribonucleoprotein H3 (2H9)                                         | HNRNPH3      | 2,32   | Nucleus             |
| 1371352_at   | BM391736  | high-mobility group nucleosomal binding domain 2                                         | HMGN2        | -1,51  | Nucleus             |
| 1379395_a_at | BI280018  | histidine triad nucleotide binding protein 2                                             | HINT2        | -1,86  | Cytoplasm           |
| 1371959_at   | AI235236  | histone cluster 2, H2aa3                                                                 | HIST2H2AA3   | -2,48  | Nucleus             |
| 1371765_at   | AA850895  | histone cluster 3, H2a                                                                   | HIST3H2A     | -2,55  | Unknown             |
| 1381208_at   | BE104595  | histone cluster 3, H2a                                                                   | HIST3H2A     | -2,42  | Unknown             |
| 1371985_a_at | BE097389  | HLA-B associated transcript 5                                                            | BAT5         | 1,79   | Unknown             |
| 1372118_at   | BI281674  | HMP19 protein                                                                            | HMP19        | -2,27  | Cytoplasm           |
| 1399163_a_at | BM388880  | homer homolog 1 (Drosophila)                                                             | HOMER1       | -1,82  | Plasma Membrane     |
| 1380824_at   | AI501458  | hook homolog 3 (Drosophila)                                                              | HOOK3        | -1,51  | Cytoplasm           |
| 1370316_at   | AF187860  | HSPA (heat shock 70kDa) binding protein, cytoplasmic cochaperone 1                       | HSPBP1       | -2,30  | Unknown             |
| 1389665_at   | BG375619  | hyaluronan binding protein 4                                                             | HABP4        | -3,41  | Cytoplasm           |
| 1371736_at   | AI411283  | hypothetical gene supported by BC032431                                                  | LOC389203    | -2,06  | Unknown             |
| 1372850_at   | AA799464  | hypothetical LOC100151767                                                                | LOC100151767 | 3,14   | Unknown             |
| 1373216_at   | AI236521  | hypothetical LOC145788                                                                   | FLJ27352     | -3,01  | Unknown             |
| 1393050_at   | BG664069  | hypothetical LOC302495                                                                   | LOC302495    | 2,53   | Unknown             |
| 1380081_at   | AA819551  | hypothetical LOC302495                                                                   | LOC302495    | 3,68   | Unknown             |
| 1382210_at   | BE117392  | hypothetical LOC302495                                                                   | LOC302495    | 3,70   | Unknown             |
| 1390895_at   | AA957047  | hypothetical LOC302495                                                                   | LOC302495    | 4,11   | Unknown             |
| 1384187_at   | BF551686  | hypothetical LOC653653                                                                   | LOC653653    | -1,80  | Cytoplasm           |
| 1376998_a_at | BI276006  | hypothetical protein FLJ10357                                                            | FLJ10357     | 2,45   | Unknown             |
| 1367508_at   | BI281225  | hypothetical protein LOC283951                                                           | LOC283951    | -2,61  | Unknown             |
| 1381757_at   | AA965058  | hypothetical protein LOC51057                                                            | LOC51057     | -1,73  | Unknown             |
| 1377133_at   | BE100973  | hypothetical protein LOC680687                                                           | LOC680687    | 1,51   | Unknown             |
| 1389220_at   | BE112918  | hypothetical protein LOC682679                                                           | LOC682679    | -2,82  | Unknown             |
| 1374499_at   | BM383402  | hypothetical protein LOC682999                                                           | LOC682999    | 4,91   | Unknown             |
| 1390151_at   | BM392146  | hypothetical protein LOC683034                                                           | LOC683034    | -1,62  | Unknown             |
| 1388501_at   | AW916335  | hypothetical protein LOC686179                                                           | MGC125239    | 3,05   | Unknown             |
| 1377626_at   | AA924350  | hypothetical protein LOC686634                                                           | LOC686634    | 512,07 | Unknown             |
| 1393234_at   | BI285850  | hypothetical protein LOC687105                                                           | LOC687105    | 7,27   | Unknown             |
| 1372420_at   | AI408084  | hypothetical protein MGC12972                                                            | FKSG24       | -1,99  | Unknown             |
| 1389355_at   | BF285187  | immediate early response 5                                                               | IER5         | 6,52   | Unknown             |
| 1391489_at   | AI407339  | immunity-related GTPase family, M                                                        | IRGM         | 361,75 | Cytoplasm           |
| 1394293_at   | BG664973  | IMP1 inner mitochondrial membrane peptidase-like (S. cerevisiae)                         | IMMP1L       | -1,94  | Unknown             |
| 1388321_at   | BG378108  | IMP3, U3 small nucleolar ribonucleoprotein, homolog (yeast)                              | IMP3         | -2,40  | Cytoplasm           |
| 1385423_at   | AW521399  | inner membrane protein, mitochondrial (mitofilin)                                        | IMMT         | -1,65  | Cytoplasm           |
| 1372080_at   | BI287936  | inner membrane protein, mitochondrial (mitofilin)                                        | IMMT         | -1,64  | Cytoplasm           |
| 1371091_at   | BE118080  | insulin receptor substrate 2                                                             | IRS2         | -4,88  | Cytoplasm           |
| 1393238_at   | AA900649  | integrator complex subunit 7                                                             | INTS7        | -1,57  | Unknown             |
| 1398395_at   | AW434272  | integrin beta 1 binding protein 1                                                        | ITGB1BP1     | -1,99  | Plasma Membrane     |
| 1370526_at   | AF020045  | integrin, alpha E (antigen CD103, human mucosal lymphocyte antigen 1; alpha polypeptide) | ITGAE        | -2,76  | Plasma Membrane     |
| 1382439_at   | AI070686  | integrin, beta 6                                                                         | ITGB6        | 2,47   | Plasma Membrane     |
| 1387995_a_at | BI285494  | interferon induced transmembrane protein 3 (1-8U)                                        | IFITM3       | 7,30   | Plasma Membrane     |
| 1387770_at   | NM_130743 | interferon, alpha-inducible protein 27                                                   | IFI27        | 3,81   | Cytoplasm           |
| 1374551_at   | BM388891  | interferon-induced protein 35                                                            | IFI35        | 5,64   | Nucleus             |
| 1381014_at   | BI274623  | interferon-induced protein 44                                                            | IFI44        | 27,60  | Cytoplasm           |
| 1379748_at   | AA819629  | interferon-induced protein 44-like                                                       | IFI44L       | 46,55  | Unknown             |
| 1379568_at   | AI009765  | interferon-induced protein with tetratricopeptide repeats 2                              | IFIT2        | 8,74   | Unknown             |
| 1384180_at   | BE118697  | interferon-induced protein with tetratricopeptide repeats 2                              | IFIT2        | 183,35 | Unknown             |
| 1376908_at   | AW531805  | interferon-induced protein with tetratricopeptide repeats 3                              | IFIT3        | 87,30  | Cytoplasm           |
| 1369031_at   | NM_053374 | interleukin 18 binding protein                                                           | IL18BP       | 15,34  | Extracellular Space |
| 1375915_at   | AI073247  | interleukin-1 receptor-associated kinase 1 binding protein 1                             | IRAK1BP1     | -2,87  | Unknown             |
| 1387226_at   | NM_019128 | internexin neuronal intermediate filament protein, alpha                                 | INA          | -3,19  | Cytoplasm           |
| 1378061_at   | AI043888  | intraflagellar transport 122 homolog (Chlamydomonas)                                     | IFT122       | 4,35   | Nucleus             |

|              |           |                                                                                       |                            |        |                     |
|--------------|-----------|---------------------------------------------------------------------------------------|----------------------------|--------|---------------------|
| 1388603_a_at | BM384289  | iron-sulfur cluster assembly 1 homolog ( <i>S. cerevisiae</i> )-like                  | ISCA1L                     | -2,09  | Cytoplasm           |
| 1367467_at   | BG380638  | iron-sulfur cluster scaffold homolog ( <i>E. coli</i> )                               | ISCU                       | -1,67  | Cytoplasm           |
| 1382314_at   | BE096523  | ISG15 ubiquitin-like modifier                                                         | ISG15 (includes EG:9636)   | 750,73 | Extracellular Space |
| 1371983_at   | AA945181  | Josephin domain containing 1                                                          | JOSD1                      | -3,20  | Unknown             |
| 1371498_at   | AI412685  | JTV1 gene                                                                             | JTV1                       | -2,26  | Plasma Membrane     |
| 1374406_at   | AA925512  | kelch domain containing 2                                                             | KLHDC2                     | -2,03  | Cytoplasm           |
| 1389478_at   | BM392031  | kelch-like 22 ( <i>Drosophila</i> )                                                   | KLHL22                     | -4,82  | Unknown             |
| 1383142_at   | BI289244  | kelch-like 26 ( <i>Drosophila</i> )                                                   | KLHL26                     | -1,52  | Unknown             |
| 1391805_at   | BE096676  | kelch-like 32 ( <i>Drosophila</i> )                                                   | KLHL32                     | 1,91   | Unknown             |
| 1390023_at   | AI171686  | KIAA0232                                                                              | KIAA0232                   | 1,75   | Unknown             |
| 1393683_at   | BF415479  | KIAA0368                                                                              | KIAA0368                   | 1,57   | Cytoplasm           |
| 1367865_at   | NM_133421 | KIAA0430                                                                              | KIAA0430                   | 1,69   | Unknown             |
| 1383933_at   | AI136714  | KIAA0564                                                                              | KIAA0564                   | -1,87  | Unknown             |
| 1392838_at   | BF398054  | KIAA1033                                                                              | KIAA1033                   | 2,38   | Unknown             |
| 1375853_at   | BF284358  | KIAA1033                                                                              | KIAA1033                   | 2,64   | Unknown             |
| 1373300_at   | BI296249  | KIAA1467                                                                              | KIAA1467                   | -2,09  | Unknown             |
| 1385595_at   | BE114414  | KIN, antigenic determinant of recA protein homolog (mouse)                            | KIN                        | -2,70  | Nucleus             |
| 1384133_at   | BF522755  | kinesin family member 1A                                                              | KIF1A                      | -2,42  | Cytoplasm           |
| 1388670_at   | BI286860  | kinesin family member 1A                                                              | KIF1A                      | -2,24  | Cytoplasm           |
| 1372516_at   | AI317842  | kinesin family member 22                                                              | KIF22                      | -2,55  | Nucleus             |
| 1369637_at   | NM_053486 | kinesin family member 3C                                                              | KIF3C                      | 2,42   | Cytoplasm           |
| 1373977_at   | BE108253  | kinesin family member 5C                                                              | KIF5C                      | -2,52  | Cytoplasm           |
| 1380172_at   | BE104278  | kinesin family member 5C                                                              | KIF5C                      | -2,35  | Cytoplasm           |
| 1389556_at   | BI286000  | kinesin-associated protein 3                                                          | KIFAP3                     | -1,72  | Cytoplasm           |
| 1376451_at   | BG377849  | KRIT1, ankyrin repeat containing                                                      | KRIT1                      | 1,77   | Plasma Membrane     |
| 1389197_at   | BI290535  | KTEL (Lys-Tyr-Glu-Leu) containing 1                                                   | KTELC1                     | -1,72  | Extracellular Space |
| 1371565_at   | BM390478  | KTI12 homolog, chromatin associated ( <i>S. cerevisiae</i> )                          | KTI12                      | -2,07  | Unknown             |
| 1374006_at   | BI295878  | kynurenine aminotransferase III                                                       | KAT3                       | 3,41   | Unknown             |
| 1384256_at   | BI293599  | La ribonucleoprotein domain family, member 7                                          | LARP7 (includes EG:686883) | -1,69  | Unknown             |
| 1379340_at   | BM385282  | laminin, gamma 2                                                                      | LAMC2                      | 13,59  | Extracellular Space |
| 1391565_at   | AA899663  | large subunit GTPase 1 homolog ( <i>S. cerevisiae</i> )                               | LSG1                       | -5,33  | Cytoplasm           |
| 1369716_s_at | NM_012976 | lectin, galactose binding, soluble 5                                                  | LGALS5                     | 15,35  | Unknown             |
| 1387027_a_at | U72741    | lectin, galactoside-binding, soluble, 9B                                              | LGALS9B                    | 3,33   | Cytoplasm           |
| 1392901_at   | BM385213  | leucine rich repeat containing 1                                                      | LRRC1                      | 1,96   | Cytoplasm           |
| 1391601_at   | AA964579  | leucine rich repeat neuronal 2                                                        | LRN2                       | -2,96  | Plasma Membrane     |
| 1390667_at   | BF408543  | leucine rich transmembrane and 0-methyltransferase domain containing                  | LRTOMT                     | -2,44  | Unknown             |
| 1373500_at   | BI294727  | leucine-rich PPR-motif containing                                                     | LRPPRC                     | -2,10  | Cytoplasm           |
| 1393177_at   | AA924403  | leucine-rich repeats and calponin homology (CH) domain containing 1                   | LRCH1                      | 4,02   | Unknown             |
| 1383359_at   | BI389176  | ligand of numb-protein X 2                                                            | LNXC2                      | -2,31  | Unknown             |
| 1383906_at   | BF416847  | likely ortholog of mouse lung-inducible Neutralized-related C3HC4 RING domain protein | LINCR                      | 255,50 | Unknown             |
| 1389885_at   | BI294855  | LIM domain containing 2                                                               | LIMD2                      | -1,78  | Unknown             |
| 1383863_at   | BF288303  | LIM domain only 2 (rhombotin-like 1)                                                  | LMO2                       | 19,14  | Nucleus             |
| 1377599_at   | BM385286  | lipin 1                                                                               | LPIN1                      | -3,51  | Nucleus             |
| 1392070_at   | AI112117  | Lix1 homolog (mouse)-like                                                             | LIX1L                      | 1,54   | Unknown             |
| 1388772_at   | AI177016  | LSM8 homolog, U6 small nuclear RNA associated ( <i>S. cerevisiae</i> )                | LSM8                       | -1,99  | Nucleus             |
| 1372312_at   | AI176212  | LTV1 homolog ( <i>S. cerevisiae</i> )                                                 | LTV1                       | -2,10  | Unknown             |
| 1388347_at   | AI233210  | lymphocyte antigen 6 complex, locus E                                                 | LY6E                       | 3,29   | Plasma Membrane     |
| 1382277_at   | AA894336  | lymphocyte antigen 96                                                                 | LY96                       | 4,85   | Plasma Membrane     |
| 1389210_at   | BE109711  | lymphocyte cytosolic protein 1 (L-plastin)                                            | LCPI                       | 6,95   | Cytoplasm           |
| 1376436_at   | AI071181  | LysM, putative peptidoglycan-binding, domain containing 3                             | LYSMD3                     | 1,90   | Unknown             |
| 1397880_at   | BF389592  | lysophosphatidylglycerol acyltransferase 1                                            | LPGAT1                     | -1,69  | Cytoplasm           |
| 1388728_at   | BI282923  | lysosomal protein transmembrane 4 beta                                                | LAPTM4B                    | -1,62  | Unknown             |
| 1371734_at   | BI282245  | macrophage erythroblast attacher                                                      | MAEA                       | -1,61  | Plasma Membrane     |
| 1372815_at   | BG673028  | mago-nashi homolog, proliferation-associated ( <i>Drosophila</i> )                    | MAGOH                      | -1,58  | Nucleus             |
| 1372966_at   | AI178784  | major facilitator superfamily domain containing 2                                     | MFS2                       | -1,73  | Unknown             |
| 1375697_at   | AI407016  | malectin                                                                              | MLEC                       | -1,53  | Plasma Membrane     |
| 1388660_at   | BI295915  | malignant T cell amplified sequence 1                                                 | MCTS1                      | -1,85  | Cytoplasm           |
| 1391280_at   | AW529333  | malignant T cell amplified sequence 2                                                 | MCTS2                      | -3,61  | Unknown             |

|              |           |                                                                                                 |                              |       |                 |
|--------------|-----------|-------------------------------------------------------------------------------------------------|------------------------------|-------|-----------------|
| 1382536_at   | BE109224  | mediator complex subunit 13-like                                                                | MED13L                       | -2,11 | Nucleus         |
| 1389312_at   | AI104484  | mediator of cell motility 1                                                                     | MEMO1 (includes EG:51072)    | -1,77 | Unknown         |
| 1395316_at   | H32543    | melanoma antigen family H, 1                                                                    | MAGEH1                       | -2,23 | Cytoplasm       |
| 1375430_at   | BM389077  | membrane magnesium transporter 2                                                                | MMGT2                        | -3,63 | Unknown         |
| 1388491_at   | AI234849  | membrane-associated ring finger (C3HC4) 5                                                       | MARCH5                       | 2,26  | Unknown         |
| 1385790_at   | BF560024  | membrane-associated ring finger (C3HC4) 5                                                       | MARCH5                       | 2,58  | Unknown         |
| 1390485_at   | BI290680  | membrane-associated ring finger (C3HC4) 5                                                       | MARCH5                       | 3,48  | Unknown         |
| 1372395_at   | AA850978  | membrane-associated ring finger (C3HC4) 6                                                       | MARCH6                       | -2,85 | Unknown         |
| 1376589_at   | BG380345  | methyltransferase like 9                                                                        | METTL9                       | -1,52 | Unknown         |
| 1367882_at   | NM_030995 | microtubule-associated protein 1A                                                               | MAP1A                        | -2,82 | Cytoplasm       |
| 1388152_at   | BG374290  | microtubule-associated protein 2                                                                | MAP2                         | -2,52 | Cytoplasm       |
| 1387071_a_at | BE107978  | microtubule-associated protein tau                                                              | MAPT                         | -1,81 | Cytoplasm       |
| 1393085_at   | BI290341  | MIT, microtubule interacting and transport, domain containing 1                                 | MITD1                        | 6,52  | Unknown         |
| 1371474_at   | BG665132  | mitochondrial carrier homolog 1 (C. elegans)                                                    | MTCH1                        | -1,51 | Cytoplasm       |
| 1379456_at   | AA957383  | mitochondrial carrier triple repeat 2                                                           | MCART2                       | -2,92 | Unknown         |
| 1378765_at   | BM384731  | mitochondrial E3 ubiquitin ligase 1                                                             | MUL1                         | 2,24  | Cytoplasm       |
| 1372948_at   | BG376761  | mitochondrial ribosomal protein 63                                                              | MRP63                        | -2,15 | Unknown         |
| 1388931_at   | AA799440  | mitochondrial ribosomal protein L13                                                             | MRPL13                       | -2,03 | Cytoplasm       |
| 1398891_at   | AI103129  | mitochondrial ribosomal protein L15                                                             | MRPL15                       | -1,76 | Cytoplasm       |
| 1371967_at   | AI410349  | mitochondrial ribosomal protein L16                                                             | MRPL16                       | -2,03 | Unknown         |
| 1368004_at   | NM_022529 | mitochondrial ribosomal protein L23                                                             | MRPL23                       | -2,00 | Cytoplasm       |
| 1373705_at   | AI235502  | mitochondrial ribosomal protein L28                                                             | MRPL28                       | -1,90 | Cytoplasm       |
| 1371604_at   | AA858969  | mitochondrial ribosomal protein L34                                                             | MRPL34                       | -2,94 | Cytoplasm       |
| 1371553_at   | BF288120  | mitochondrial ribosomal protein L36                                                             | MRPL36                       | -3,21 | Cytoplasm       |
| 1388517_at   | AI599474  | mitochondrial ribosomal protein L40                                                             | MRPL40                       | -3,42 | Cytoplasm       |
| 1371853_at   | AI176602  | mitochondrial ribosomal protein L42                                                             | MRPL42 (includes EG:28977)   | -2,77 | Cytoplasm       |
| 1382144_at   | AW520527  | mitochondrial ribosomal protein L47                                                             | MRPL47                       | -2,75 | Cytoplasm       |
| 1372927_at   | AA891839  | mitochondrial ribosomal protein L50                                                             | MRPL50                       | -1,77 | Cytoplasm       |
| 1376930_at   | BI294860  | mitochondrial ribosomal protein L51                                                             | MRPL51                       | -1,59 | Cytoplasm       |
| 1372697_at   | AW254612  | mitochondrial ribosomal protein S15                                                             | MRPS15                       | -3,18 | Cytoplasm       |
| 1398946_at   | AI230278  | mitochondrial ribosomal protein S16                                                             | MRPS16                       | -2,13 | Cytoplasm       |
| 1380447_a_at | AI071722  | mitochondrial ribosomal protein S18C                                                            | MRPS18C                      | -1,87 | Cytoplasm       |
| 1372116_at   | AI008955  | mitochondrial ribosomal protein S2                                                              | MRPS2                        | -3,52 | Cytoplasm       |
| 1371649_at   | BI289411  | mitochondrial ribosomal protein S24                                                             | MRPS24                       | -2,29 | Cytoplasm       |
| 1372214_at   | AI104277  | mitochondrial ribosomal protein S33                                                             | MRPS33                       | -2,87 | Cytoplasm       |
| 1371576_at   | AW142276  | mitochondrial ribosomal protein S36                                                             | MRPS36                       | -2,20 | Cytoplasm       |
| 1392133_at   | AI502069  | mitogen-activated protein kinase 1 interacting protein 1-like                                   | MAPK1IP1L                    | 3,31  | Nucleus         |
| 1386973_a_at | NM_053777 | mitogen-activated protein kinase 8 interacting protein 1                                        | MAPK8IP1                     | -1,72 | Cytoplasm       |
| 1369915_at   | NM_139186 | MKI67 (FHA domain) interacting nucleolar phosphoprotein                                         | MKI67IP                      | -2,04 | Nucleus         |
| 1388990_at   | AA924622  | MKI67 (FHA domain) interacting nucleolar phosphoprotein                                         | MKI67IP                      | -1,77 | Nucleus         |
| 1372904_at   | BI285628  | MOB1, Mps One Binder kinase activator-like 2A (yeast)                                           | MOBKL2A                      | 3,96  | Unknown         |
| 1387089_at   | NM_133528 | MOB1, Mps One Binder kinase activator-like 3 (yeast)                                            | MOBKL3                       | -1,56 | Cytoplasm       |
| 1389357_at   | AW532663  | MORC family CW-type zinc finger 2                                                               | MORC2                        | -2,38 | Unknown         |
| 1390142_at   | BE111888  | MORC family CW-type zinc finger 3                                                               | MORC3                        | 3,03  | Nucleus         |
| 1382085_at   | BI293662  | MTERF domain containing 2                                                                       | MTERFD2                      | -2,34 | Unknown         |
| 1380541_at   | AA957801  | musashi homolog 2 (Drosophila)                                                                  | MSI2                         | 1,83  | Cytoplasm       |
| 1389301_at   | AI176665  | muscleblind-like 2 (Drosophila)                                                                 | MBNL2                        | -1,76 | Unknown         |
| 1375675_at   | AA892813  | muscleblind-like 2 (Drosophila)                                                                 | MBNL2                        | -1,71 | Unknown         |
| 1386074_at   | AA850705  | MYC induced nuclear antigen                                                                     | MINA                         | -1,65 | Nucleus         |
| 1371692_at   | AI009661  | myeloid/lymphoid or mixed-lineage leukemia (trithorax homolog, Drosophila); translocated to, 11 | MLLT11                       | -3,47 | Unknown         |
| 1385953_at   | AI454608  | myeloid/lymphoid or mixed-lineage leukemia (trithorax homolog, Drosophila); translocated to, 3  | MLLT3                        | 1,91  | Nucleus         |
| 1368279_at   | NM_053718 | myeloid/lymphoid or mixed-lineage leukemia (trithorax homolog, Drosophila); translocated to, 3  | MLLT3                        | 2,71  | Nucleus         |
| 1369631_at   | AI012566  | myosin IC                                                                                       | MYO1C                        | -1,86 | Cytoplasm       |
| 1370478_at   | AY004215  | myosin XVI                                                                                      | MYO16                        | -5,91 | Cytoplasm       |
| 1370158_at   | AA946388  | myosin, heavy chain 10, non-muscle                                                              | MYH10                        | -2,22 | Cytoplasm       |
| 1371559_at   | AI103384  | NAD kinase                                                                                      | NADK (includes EG:100125370) | -1,86 | Unknown         |
| 1370229_at   | BG666709  | NDRG family member 4                                                                            | NDRG4                        | -2,15 | Unknown         |
| 1388907_at   | BF400873  | NECAP endocytosis associated 1                                                                  | NECAP1                       | -1,88 | Plasma Membrane |



|              |           |                                                                                     |                            |        |                     |
|--------------|-----------|-------------------------------------------------------------------------------------|----------------------------|--------|---------------------|
| 1372913_at   | AA849734  | NEFA-interacting nuclear protein NIP30                                              | NIP30                      | 3,00   | Nucleus             |
| 1373775_at   | AI232313  | negative regulator of ubiquitin-like proteins 1                                     | NUB1                       | 4,87   | Nucleus             |
| 1374508_at   | BG663343  | nephronophthisis 1 (juvenile)                                                       | NPHP1                      | -2,19  | Nucleus             |
| 1369948_at   | NM_053401 | nerve growth factor receptor (TNFRSF16) associated protein 1                        | NGFRAP1                    | -2,77  | Plasma Membrane     |
| 1368320_at   | NM_031521 | neural cell adhesion molecule 1                                                     | NCAM1                      | -2,31  | Plasma Membrane     |
| 1374650_at   | BM392374  | neural precursor cell expressed, developmentally down-regulated 9                   | NEDD9                      | -2,23  | Nucleus             |
| 1372953_at   | AI101330  | neurocalcin delta                                                                   | NCALD                      | -4,39  | Cytoplasm           |
| 1367956_at   | NM_053543 | neurochondrin                                                                       | NCDN                       | -2,22  | Unknown             |
| 1372502_at   | AI579645  | neurofibromin 2 (merlin)                                                            | NF2                        | -2,11  | Plasma Membrane     |
| 1370815_at   | AF031879  | neurofilament, heavy polypeptide                                                    | NEFH                       | -3,68  | Cytoplasm           |
| 1367845_at   | NM_017029 | neurofilament, medium polypeptide                                                   | NEFM                       | 3,60   | Cytoplasm           |
| 1371036_at   | BG671431  | neuronal cell adhesion molecule                                                     | NRCAM                      | -1,89  | Plasma Membrane     |
| 1370517_at   | U18772    | neuronal pentraxin I                                                                | NPTX1                      | -8,46  | Extracellular Space |
| 1371539_at   | AW921151  | NHP2 ribonucleoprotein homolog (yeast)                                              | NHP2                       | -2,11  | Nucleus             |
| 1398610_at   | BG375744  | nicolin 1                                                                           | NICN1 (includes EG:619581) | -2,59  | Unknown             |
| 1388852_at   | AI406307  | NODAL modulator 1                                                                   | NOMO1                      | -1,62  | Plasma Membrane     |
| 1373509_at   | BE113288  | NOL1/NOP2/Sun domain family, member 4                                               | NSUN4                      | -1,76  | Unknown             |
| 1383774_at   | BG376677  | non-protein coding RNA 117                                                          | NCRNA00117                 | -2,37  | Unknown             |
| 1373978_at   | AI410277  | nuclear cap binding protein subunit 1, 80kDa                                        | NCBP1 (includes EG:4686)   | -1,94  | Nucleus             |
| 1389538_at   | AW672589  | nuclear factor of kappa light polypeptide gene enhancer in B-cells inhibitor, alpha | NFKBIA                     | 82,84  | Cytoplasm           |
| 1381570_at   | BI293518  | nuclear factor of kappa light polypeptide gene enhancer in B-cells inhibitor, delta | NFKBID                     | 3,80   | Unknown             |
| 1394371_at   | BF556765  | nuclear fragile X mental retardation protein interacting protein 1                  | NUFIP1                     | 2,86   | Nucleus             |
| 1376250_at   | BI284814  | nuclear fragile X mental retardation protein interacting protein 1                  | NUFIP1                     | 2,93   | Nucleus             |
| 1395081_at   | BI290843  | nuclear receptor coactivator 7                                                      | NCOA7                      | 3,26   | Nucleus             |
| 1383938_at   | BI286738  | nuclear receptor coactivator 7                                                      | NCOA7                      | 5,26   | Nucleus             |
| 1368031_at   | NM_022869 | nucleolar and coiled-body phosphoprotein 1                                          | NOLC1                      | -2,16  | Nucleus             |
| 1368032_at   | M94288    | nucleolar and coiled-body phosphoprotein 1                                          | NOLC1                      | -1,87  | Nucleus             |
| 1390650_at   | BI290593  | nucleoporin 85kDa                                                                   | NUP85                      | -2,03  | Cytoplasm           |
| 1383673_at   | BI288925  | nucleosome assembly protein 1-like 2                                                | NAP1L2                     | -3,71  | Nucleus             |
| 1375861_at   | BE111332  | nucleosome assembly protein 1-like 5                                                | NAP1L5                     | -7,42  | Unknown             |
| 1372236_at   | BI279079  | nucleotide-binding oligomerization domain containing 1                              | NOD1                       | 3,30   | Cytoplasm           |
| 1367507_at   | BI281661  | nudix (nucleoside diphosphate linked moiety X)-type motif 22                        | NUDT22                     | 2,52   | Unknown             |
| 1388432_at   | BI294994  | optineurin                                                                          | OPTN                       | 3,03   | Cytoplasm           |
| 1398907_at   | BI296182  | ORM1-like 2 (S. cerevisiae)                                                         | ORMDL2                     | -2,01  | Cytoplasm           |
| 1384254_at   | AI717553  | OTU domain containing 1                                                             | OTUD1                      | 4,96   | Unknown             |
| 1393368_at   | BG372522  | oxysterol binding protein-like 5                                                    | OSBPL5                     | 2,44   | Cytoplasm           |
| 1384465_at   | AI136693  | paraspeckle component 1                                                             | PSPC1                      | -2,24  | Nucleus             |
| 1391415_at   | AI043694  | partner of NOB1 homolog (S. cerevisiae)                                             | PNO1                       | -1,67  | Nucleus             |
| 1398810_at   | NM_022595 | PDGFA associated protein 1                                                          | PDAP1                      | -2,05  | Cytoplasm           |
| 1390799_at   | AI177748  | PDZ domain containing 8                                                             | PDZD8                      | -2,32  | Unknown             |
| 1373748_at   | AW532566  | PDZ domain containing ring finger 3                                                 | PDZRN3                     | -19,88 | Extracellular Space |
| 1399034_at   | AI009650  | pecanex homolog (Drosophila)                                                        | PCNX                       | 1,98   | Plasma Membrane     |
| 1399081_at   | AI712911  | pellino homolog 1 (Drosophila)                                                      | PELI1                      | 3,06   | Cytoplasm           |
| 1390814_at   | AA848897  | pellino homolog 1 (Drosophila)                                                      | PELI1                      | 3,45   | Cytoplasm           |
| 1393907_at   | AA998735  | peptide YY                                                                          | PYY                        | -2,74  | Extracellular Space |
| 1382546_at   | AW920026  | PHD finger protein 11                                                               | PHF11 (includes EG:51131)  | 21,63  | Unknown             |
| 1390103_at   | BE095970  | PHD finger protein 2                                                                | PHF2                       | 1,91   | Nucleus             |
| 1383002_at   | AA998043  | PHD finger protein 20-like 1                                                        | PHF20L1                    | 1,59   | Unknown             |
| 1376169_at   | BE104290  | PHD finger protein 20-like 1                                                        | PHF20L1                    | 1,70   | Unknown             |
| 1386891_at   | NM_017236 | phosphatidylethanolamine binding protein 1                                          | PEBP1                      | -2,13  | Cytoplasm           |
| 1399130_at   | AW918690  | phosphatidylinositol glycan anchor biosynthesis, class Y                            | PIGY (includes EG:66459)   | -2,85  | Unknown             |
| 1370202_at   | BG378637  | phospholipase A2, group XVI                                                         | PLA2G16                    | 39,97  | Nucleus             |
| 1383336_at   | BF549763  | pinin, desmosome associated protein                                                 | PNN                        | 2,39   | Plasma Membrane     |
| 1374111_at   | BI301101  | pinin, desmosome associated protein                                                 | PNN                        | 2,42   | Plasma Membrane     |
| 1380001_at   | AW526140  | pinin, desmosome associated protein                                                 | PNN                        | 3,01   | Plasma Membrane     |
| 1375767_at   | BI287681  | pleckstrin homology domain containing, family G (with RhoGef domain) member 3       | PLEKHG3                    | 3,47   | Unknown             |
| 1380867_a_at | BM383086  | pleckstrin homology domain containing, family M (with RUN domain) member 1          | PLEKHM1                    | 2,45   | Cytoplasm           |
| 1379724_at   | BE103244  | pleckstrin homology-like domain, family B, member 2                                 | PHLDB2                     | -3,04  | Cytoplasm           |

|              |           |                                                                   |                              |         |                 |
|--------------|-----------|-------------------------------------------------------------------|------------------------------|---------|-----------------|
| 1398644_at   | AI535104  | plexin C1                                                         | PLXNC1                       | 1,71    | Plasma Membrane |
| 1375216_at   | AA850909  | poliovirus receptor-related 2 (herpesvirus entry mediator B)      | PVRL2                        | 4,70    | Plasma Membrane |
| 1380071_at   | BI285978  | poly (ADP-ribose) polymerase family, member 12                    | PARP12                       | 8,87    | Nucleus         |
| 1379613_at   | BM390301  | poly (ADP-ribose) polymerase family, member 14                    | PARP14                       | 49,88   | Cytoplasm       |
| 1372034_at   | BF284106  | poly (ADP-ribose) polymerase family, member 14                    | PARP14                       | 52,25   | Cytoplasm       |
| 1377970_at   | BE105494  | poly (ADP-ribose) polymerase family, member 8                     | PARP8                        | 6,39    | Unknown         |
| 1376144_at   | AA819679  | poly (ADP-ribose) polymerase family, member 9                     | PARP9                        | 48,25   | Nucleus         |
| 1382922_at   | BG375109  | poly(A) binding protein, nuclear 1                                | PABPN1                       | -1,86   | Nucleus         |
| 1371800_at   | AI230538  | polyhomeotic homolog 2 (Drosophila)                               | PHC2                         | 4,09    | Nucleus         |
| 1371920_at   | AA851255  | polymerase (DNA-directed), delta interacting protein 2            | POLDIP2                      | -1,84   | Nucleus         |
| 1388404_at   | AA799724  | predicted gene, OTTMUSG00000008305                                | OTTMUSG00000008305           | -2,31   | Unknown         |
| 1371399_at   | AA818196  | prickle homolog 4 (Drosophila)                                    | PRICKLE4 (includes EG:29964) | -1,53   | Unknown         |
| 1387015_at   | NM_030873 | profilin 2                                                        | PFN2                         | -2,60   | Cytoplasm       |
| 1367671_at   | NM_022381 | proliferating cell nuclear antigen                                | PCNA                         | -1,84   | Nucleus         |
| 1370381_at   | U61729    | proline-rich nuclear receptor coactivator 1                       | PNRC1                        | 2,41    | Nucleus         |
| 1367986_at   | NM_019243 | prostaglandin F2 receptor negative regulator                      | PTGFRN                       | 3,26    | Plasma Membrane |
| 1367663_at   | NM_017264 | proteasome (prosome, macropain) activator subunit 1 (PA28 alpha)  | PSME1                        | 3,86    | Cytoplasm       |
| 1368818_at   | AW531920  | proteasome (prosome, macropain) activator subunit 4               | PSME4                        | -1,85   | Unknown         |
| 1368716_at   | NM_133425 | protein phosphatase 1, regulatory (inhibitor) subunit 14C         | PPP1R14C                     | 2,56    | Cytoplasm       |
| 1393082_at   | AI044747  | protein phosphatase 1, regulatory (inhibitor) subunit 14C         | PPP1R14C                     | 4,37    | Cytoplasm       |
| 1367888_at   | NM_053572 | protocadherin 21                                                  | PCDH21                       | 6,77    | Plasma Membrane |
| 1383783_at   | AW521192  | protocadherin 9                                                   | PCDH9                        | -2,96   | Plasma Membrane |
| 1373273_at   | BM384975  | PRP38 pre-mRNA processing factor 38 (yeast) domain containing A   | PRPF38A                      | -1,68   | Nucleus         |
| 1392461_at   | BI291012  | PRP4 pre-mRNA processing factor 4 homolog (yeast)                 | PRPF4                        | -1,95   | Nucleus         |
| 1372088_at   | AI012434  | PTPRF interacting protein, binding protein 1 (liprin beta 1)      | PPFIBP1                      | 2,33    | Plasma Membrane |
| 1390647_at   | AI410924  | putative homeodomain transcription factor 2                       | PHTF2                        | -2,03   | Cytoplasm       |
| 1391897_at   | BG379295  | RAB GTPase activating protein 1-like                              | RABGAP1L                     | 4,79    | Unknown         |
| 1392762_at   | BF559727  | RAD18 homolog (S. cerevisiae)                                     | RAD18                        | -1,93   | Nucleus         |
| 1377902_a_at | AA893822  | RAD52 homolog (S. cerevisiae)                                     | RAD52                        | -1,64   | Nucleus         |
| 1376029_at   | BI295991  | ral guanine nucleotide dissociation stimulator-like 2             | RGL2                         | 19,72   | Cytoplasm       |
| 1374750_at   | AI172313  | Rap guanine nucleotide exchange factor (GEF) 6                    | RAPGEF6                      | 2,11    | Plasma Membrane |
| 1388646_at   | BM391469  | raptor                                                            | KIAA1303                     | -1,87   | Cytoplasm       |
| 1372365_at   | BM392293  | Ras and Rab interactor 2                                          | RIN2                         | 2,43    | Cytoplasm       |
| 1382384_at   | BM383783  | Ras association (RalGDS/AF-6) domain family member 6              | RASSF6                       | -2,35   | Unknown         |
| 1374165_at   | AA818264  | RAS p21 protein activator 4                                       | RASA4 (includes EG:10156)    | 12,61   | Cytoplasm       |
| 1379285_at   | AA819788  | receptor (chemosensory) transporter protein 4                     | RTP4                         | 35,57   | Plasma Membrane |
| 1374235_at   | AI138048  | regulator of calcineurin 2                                        | RCAN2                        | -2,20   | Unknown         |
| 1373777_at   | BF391820  | regulator of G-protein signaling 16                               | RGS16                        | -2,74   | Cytoplasm       |
| 1396870_at   | BF419761  | regulator of G-protein signaling 20                               | RGS20                        | -1,75   | Cytoplasm       |
| 1370910_at   | BF283113  | replication factor C (activator 1) 2, 40kDa                       | RFC2                         | -2,37   | Nucleus         |
| 1389053_at   | AI171280  | required for meiotic nuclear division 1 homolog (S. cerevisiae)   | RMND1                        | 3,69    | Unknown         |
| 1388749_at   | BI278823  | required for meiotic nuclear division 5 homolog A (S. cerevisiae) | RMND5A                       | -1,69   | Unknown         |
| 1368097_a_at | NM_053865 | reticulin 1                                                       | RTN1                         | -1,57   | Cytoplasm       |
| 1393404_at   | BF554746  | reticulin 4 receptor-like 1                                       | RTN4RL1                      | -3,73   | Plasma Membrane |
| 1384290_at   | BG373809  | retinoblastoma binding protein 6                                  | RBBP6 (includes EG:5930)     | -1,59   | Nucleus         |
| 1376947_at   | AI178158  | retinoblastoma binding protein 6                                  | RBBP6 (includes EG:5930)     | 2,06    | Nucleus         |
| 1368403_at   | NM_031094 | retinoblastoma-like 2 (p130)                                      | RBL2                         | -2,04   | Nucleus         |
| 1374852_at   | AI407613  | RGD1559909                                                        | RGD1559909                   | -1,94   | Unknown         |
| 1372585_at   | BM388445  | RGD1566254                                                        | RGD1566254                   | 1259,58 | Unknown         |
| 1387035_a_at | NM_022244 | Rho GTPase activating protein 17                                  | ARHGAP17                     | 4,31    | Cytoplasm       |
| 1392590_at   | BG377201  | Rho GTPase activating protein 24                                  | ARHGAP24                     | -5,16   | Cytoplasm       |
| 1376501_at   | AA945062  | Rho GTPase activating protein 8                                   | ARHGAP8                      | 12,25   | Cytoplasm       |
| 1377750_at   | AI454536  | Rho guanine nucleotide exchange factor (GEF) 3                    | ARHGEF3                      | 1,61    | Cytoplasm       |
| 1381297_at   | BI292668  | Rho guanine nucleotide exchange factor (GEF) 5                    | ARHGEF5                      | 10,14   | Cytoplasm       |
| 1383523_at   | BE110369  | rho/rac guanine nucleotide exchange factor (GEF) 18               | ARHGEF18                     | 2,14    | Cytoplasm       |
| 1384765_at   | BI289371  | rhomboid 5 homolog 2 (Drosophila)                                 | RHBDF2                       | 12,91   | Unknown         |
| 1394397_at   | BF522734  | ribosomal L1 domain containing 1                                  | RSL1D1                       | -2,42   | Cytoplasm       |
| 1367623_at   | NM_031102 | ribosomal protein L18                                             | RPL18                        | -1,51   | Cytoplasm       |

|              |           |                                                                                                                  |               |        |                     |
|--------------|-----------|------------------------------------------------------------------------------------------------------------------|---------------|--------|---------------------|
| 1389228_at   | AI412292  | RIKEN cDNA 2010309E21 gene                                                                                       | 2010309E21RIK | -1,57  | Unknown             |
| 1373659_at   | AI639350  | RIKEN cDNA 2210020M01 gene                                                                                       | 2210020M01RIK | -2,63  | Unknown             |
| 1384483_at   | BI274216  | RIKEN cDNA 9530082P21 gene                                                                                       | 9530082P21RIK | 15,69  | Unknown             |
| 1385016_at   | AI136882  | RIKEN cDNA B630019K06 gene                                                                                       | B630019K06RIK | -4,50  | Unknown             |
| 1368122_at   | NM_053438 | ring finger protein 103                                                                                          | RNF103        | -2,78  | Unknown             |
| 1377837_at   | AI231532  | ring finger protein 113A                                                                                         | RNF113A       | -1,68  | Nucleus             |
| 1375955_at   | BI289415  | ring finger protein 114                                                                                          | RNF114        | 3,58   | Unknown             |
| 1372865_at   | AI171206  | ring finger protein 115                                                                                          | RNF115        | 4,11   | Cytoplasm           |
| 1372731_at   | AI228628  | ring finger protein 135                                                                                          | RNF135        | -1,64  | Unknown             |
| 1389258_at   | AI317840  | ring finger protein 138                                                                                          | RNF138        | 1,63   | Unknown             |
| 1382379_at   | AW529177  | ring finger protein 138                                                                                          | RNF138        | 3,03   | Unknown             |
| 1393547_at   | BE101549  | ring finger protein 182                                                                                          | RNF182        | -3,61  | Unknown             |
| 1371597_at   | BI281621  | ring finger protein 187                                                                                          | RNF187        | -1,92  | Unknown             |
| 1382074_at   | AI113237  | ring finger protein 19B                                                                                          | RNF19B        | 5,97   | Unknown             |
| 1378916_at   | AI029234  | ring finger protein 43                                                                                           | RNF43         | -1,76  | Unknown             |
| 1377746_at   | AI010418  | RNA binding motif protein 12                                                                                     | RBM12         | -2,14  | Nucleus             |
| 1389664_at   | BM387379  | RNA binding motif protein 15B                                                                                    | RBM15B        | 1,80   | Nucleus             |
| 1383496_at   | BM387466  | RNA binding motif protein 35A                                                                                    | RBM35A        | 1,50   | Unknown             |
| 1393832_at   | AI136337  | RNA binding motif protein 43                                                                                     | RBM43         | 19,99  | Unknown             |
| 1375870_a_at | BF420140  | RNA binding motif, single stranded interacting protein 1                                                         | RBMS1         | 7,71   | Nucleus             |
| 1390032_at   | BG374052  | RNA binding motif, single stranded interacting protein 2                                                         | RBMS2         | -1,94  | Nucleus             |
| 1380513_at   | BE095638  | RNA polymerase II associated protein 2                                                                           | RPAP2         | 5,71   | Unknown             |
| 1376065_at   | AI058889  | RRS1 ribosome biogenesis regulator homolog (S. cerevisiae)                                                       | RRS1          | -2,65  | Nucleus             |
| 1378166_at   | BE096995  | Rtf1, Paf1/RNA polymerase II complex component, homolog (S. cerevisiae)                                          | RTF1          | 1,75   | Nucleus             |
| 1383667_at   | AI603411  | RUN domain containing 1                                                                                          | RUNDC1        | 1,68   | Unknown             |
| 1386890_at   | NM_031114 | S100 calcium binding protein A10                                                                                 | S100A10       | 3,88   | Cytoplasm           |
| 1372741_at   | AI412013  | saccharopine dehydrogenase (putative)                                                                            | SCCPDH        | -2,47  | Cytoplasm           |
| 1388815_at   | BE329438  | SAPS domain family, member 1                                                                                     | SAPS1         | 2,39   | Unknown             |
| 1374796_at   | AI413058  | sarcoglycan, beta (43kDa dystrophin-associated glycoprotein)                                                     | SGCB          | -2,39  | Plasma Membrane     |
| 1368129_at   | NM_031647 | Scm-like with four mbt domains 1                                                                                 | SFMBT1        | 8,57   | Nucleus             |
| 1388991_at   | AA892491  | SEC14 and spectrin domains 1                                                                                     | SESTD1        | 1,60   | Unknown             |
| 1368806_at   | AA799627  | selenoprotein P, plasma, 1                                                                                       | SEPP1         | -1,93  | Extracellular Space |
| 1376319_at   | BM390322  | sema domain, immunoglobulin domain (Ig), short basic domain, secreted, (semaphorin) 3C                           | SEMA3C        | 1,70   | Extracellular Space |
| 1388745_at   | AI228417  | sema domain, immunoglobulin domain (Ig), transmembrane domain (TM) and short cytoplasmic domain, (semaphorin) 4A | SEMA4A        | 7,95   | Plasma Membrane     |
| 1374678_at   | BE109578  | sema domain, immunoglobulin domain (Ig), transmembrane domain (TM) and short cytoplasmic domain, (semaphorin) 4B | SEMA4B        | 6,16   | Plasma Membrane     |
| 1383290_at   | BI280343  | serine peptidase inhibitor, Kunitz type 1                                                                        | SPINT1        | 2,46   | Extracellular Space |
| 1368790_at   | NM_133617 | serpin peptidase inhibitor, clade A (alpha-1 antiproteinase, antitrypsin), member 10                             | SERPINA10     | 5,01   | Extracellular Space |
| 1368224_at   | NM_031531 | serpin peptidase inhibitor, clade A (alpha-1 antiproteinase, antitrypsin), member 3                              | SERPINA3      | 3,67   | Extracellular Space |
| 1373672_at   | BM384419  | serpin peptidase inhibitor, clade B (ovalbumin), member 9                                                        | SERPINB9      | 11,53  | Cytoplasm           |
| 1372254_at   | AW915763  | serpin peptidase inhibitor, clade G (C1 inhibitor), member 1                                                     | SERPING1      | 24,45  | Extracellular Space |
| 1371487_at   | BG666075  | SH3 domain binding glutamic acid-rich protein like 3                                                             | SH3BGRL3      | -2,91  | Nucleus             |
| 1388776_at   | AI169176  | shisa homolog 5 (Xenopus laevis)                                                                                 | SHISA5        | 2,73   | Nucleus             |
| 1393673_at   | BE120005  | short chain dehydrogenase/reductase family 39U, member 1                                                         | SDR39U1       | 1,90   | Unknown             |
| 1389420_at   | BI279446  | signal transducing adaptor family member 2                                                                       | STAP2         | 20,30  | Cytoplasm           |
| 1372277_at   | BI274673  | similar to aldehyde dehydrogenase 4 family, member A1                                                            | LOC641316     | 4,78   | Unknown             |
| 1397953_at   | AI113261  | similar to AMSH-family protein                                                                                   | LOC687696     | 2,89   | Unknown             |
| 1383587_at   | BF283779  | similar to Butyrate-induced transcript 1                                                                         | RGD1565496    | -4,50  | Unknown             |
| 1373469_at   | BF408841  | similar to Butyrate-induced transcript 1                                                                         | RGD1565496    | -3,53  | Unknown             |
| 1372338_at   | AI599079  | similar to CG9240-PA                                                                                             | LOC687395     | -1,52  | Unknown             |
| 1373514_at   | AA899109  | similar to chromosome 17 open reading frame 27                                                                   | LOC688296     | 163,64 | Unknown             |
| 1371731_at   | AI408151  | similar to Coatomer gamma-2 subunit (Gamma-2 coat protein) (Gamma-2 COP)                                         | RGD1566215    | -20,52 | Unknown             |
| 1388647_at   | AI233753  | similar to coiled-coil-helix-coiled-coil-helix domain containing 7                                               | LOC684258     | -1,54  | Unknown             |
| 1398966_at   | AI169154  | similar to differentially expressed in B16F10 1                                                                  | LOC687029     | -2,39  | Unknown             |
| 1373506_at   | AA944568  | similar to early estrogen-induced gene 1 protein                                                                 | LOC687750     | 1,68   | Unknown             |
| 1391062_at   | AA875129  | similar to elongation protein 4 homolog                                                                          | LOC687694     | -1,88  | Unknown             |
| 1389783_s_at | BI280865  | similar to Fc fragment of IgG binding protein; IgG Fc binding protein                                            | RGD1311906    | -4,70  | Unknown             |
| 1374953_at   | AI599484  | similar to hCG2030844                                                                                            | LOC100130890  | -2,05  | Unknown             |
| 1371332_at   | AA848821  | similar to Histone H1.2 (H1 VAR.1) (H1c)                                                                         | LOC684681     | -2,14  | Unknown             |

|            |           |                                                                                                                                     |                           |       |                     |
|------------|-----------|-------------------------------------------------------------------------------------------------------------------------------------|---------------------------|-------|---------------------|
| 1393841_at | AA859317  | similar to hypothetical protein FLJ31810                                                                                            | RGD1310773                | -3,58 | Unknown             |
| 1390226_at | AI408343  | similar to hypothetical protein LOC340061                                                                                           | RGD1562552                | 3,55  | Unknown             |
| 1374670_at | BM384543  | similar to hypothetical protein MGC20700                                                                                            | RGD1307722                | 9,02  | Unknown             |
| 1376718_at | AI575121  | similar to hypothetical protein MGC49416                                                                                            | LOC255374                 | -1,98 | Unknown             |
| 1388447_at | AA800701  | similar to limb-bud and heart                                                                                                       | LOC683626                 | -4,01 | Unknown             |
| 1372472_at | AA859614  | similar to Microtubule-associated protein RP/EB family member 2 (APC-binding protein EB2) (End-binding protein 2) (EB2)             | LOC679221                 | -2,29 | Unknown             |
| 1392733_at | BM391545  | similar to mirror-image polydactyly 1                                                                                               | LOC687620                 | 1,79  | Unknown             |
| 1380079_at | AW533923  | similar to mKIAA2005 protein                                                                                                        | RGD1561472                | 34,08 | Unknown             |
| 1385571_at | AA923865  | similar to Nuclear autoantigen Sp-100 (Speckled 100 kDa) (Nuclear dot-associated Sp100 protein)                                     | LOC679623                 | 8,24  | Unknown             |
| 1371956_at | BG372686  | similar to praja1, RING-H2 motif containing                                                                                         | LOC683077                 | -2,16 | Unknown             |
| 1367495_at | AI412457  | similar to prefoldin 4                                                                                                              | RGD1560211                | -1,72 | Unknown             |
| 1392975_at | AI058938  | similar to Protease-associated domain-containing protein of 21 kDa precursor                                                        | LOC686393                 | -2,12 | Unknown             |
| 1389387_at | BF561377  | similar to Proteasome inhibitor PI31 subunit                                                                                        | RCG 37297                 | 3,21  | Unknown             |
| 1373403_at | AI230625  | similar to Protein C8orf4 (Thyroid cancer protein 1) (TC-1)                                                                         | LOC684871                 | 56,06 | Unknown             |
| 1386669_at | BF565188  | similar to Protein KIAA0690                                                                                                         | LOC679127                 | -2,19 | Unknown             |
| 1373197_at | AI578263  | similar to Protein KIAA1404                                                                                                         | LOC686701                 | 25,42 | Unknown             |
| 1399131_at | AI703580  | similar to ribosomal protein, mitochondrial, S22                                                                                    | LOC683519                 | -1,86 | Unknown             |
| 1376985_at | AA866482  | similar to RIKEN cDNA 2310007F12                                                                                                    | RGD1562416                | -1,63 | Unknown             |
| 1388616_at | AI233746  | similar to RIKEN cDNA 2310042G06                                                                                                    | MGC72955                  | -2,03 | Unknown             |
| 1398886_at | BI285703  | similar to Selenoprotein H                                                                                                          | RGD1563348                | -1,69 | Unknown             |
| 1371848_at | AA799526  | similar to small nuclear ribonucleoprotein D3                                                                                       | LOC687711                 | -1,63 | Unknown             |
| 1371546_at | BI284988  | similar to TR4 orphan receptor associated protein TRA16                                                                             | LOC361128                 | -1,87 | Unknown             |
| 1377156_at | BI273936  | similar to Transcription factor 7-like 2 (HMG box transcription factor 4) (T-cell-specific transcription factor 4) (TCF-4) (hTCF-4) | LOC683733                 | 14,08 | Unknown             |
| 1376691_at | AI103213  | similar to transmembrane protein 64                                                                                                 | LOC679161                 | -2,24 | Unknown             |
| 1384116_at | AA924216  | similar to vacuolar protein sorting 37D                                                                                             | RCG 21373                 | 7,75  | Unknown             |
| 1375045_at | BM387520  | similar to WD repeat domain 59                                                                                                      | LOC686799                 | 1,56  | Unknown             |
| 1379558_at | AA957033  | similar to zinc finger protein 748 isoform 2                                                                                        | LOC680222                 | 6,19  | Unknown             |
| 1383962_at | BI275530  | SIVA1, apoptosis-inducing factor                                                                                                    | SIVA1                     | -3,01 | Cytoplasm           |
| 1388655_at | AW252465  | Sjogren syndrome nuclear autoantigen 1                                                                                              | SSNA1                     | -3,03 | Plasma Membrane     |
| 1372167_at | AW525656  | Small nuclear ribonucleoprotein G-like protein                                                                                      | LOC100130932              | -1,68 | Nucleus             |
| 1376546_at | BE120498  | small VCP/p97-interacting protein                                                                                                   | SVIP (includes EG:258010) | -2,03 | Cytoplasm           |
| 1388640_at | BI279654  | SMT3 suppressor of mif two 3 homolog 3 (S. cerevisiae)                                                                              | SUMO3                     | -2,48 | Nucleus             |
| 1380909_at | BM385894  | solute carrier family 25 (mitochondrial carrier; phosphate carrier), member 24                                                      | SLC25A24                  | 1,97  | Cytoplasm           |
| 1392978_at | BE117086  | solute carrier family 25, member 28                                                                                                 | SLC25A28                  | 5,51  | Unknown             |
| 1381765_at | AI137388  | solute carrier family 25, member 39                                                                                                 | SLC25A39                  | -1,60 | Cytoplasm           |
| 1379632_at | AI502790  | solute carrier family 25, member 40                                                                                                 | SLC25A40                  | -2,25 | Cytoplasm           |
| 1382150_at | BG377042  | solute carrier family 25, member 46                                                                                                 | SLC25A46                  | -1,66 | Unknown             |
| 1378899_at | BE108523  | solute carrier family 35, member D3                                                                                                 | SLC35D3                   | -1,90 | Unknown             |
| 1389391_at | AI411981  | solute carrier family 35, member E3                                                                                                 | SLC35E3                   | -1,52 | Unknown             |
| 1376117_at | BI289103  | solute carrier family 44, member 4                                                                                                  | SLC44A4                   | 4,51  | Unknown             |
| 1367762_at | NM_012659 | somatostatin                                                                                                                        | SST                       | -2,09 | Extracellular Space |
| 1375349_at | BI295776  | sorbin and SH3 domain containing 1                                                                                                  | SORBS1                    | 4,34  | Plasma Membrane     |
| 1379742_at | BI301216  | SP100 nuclear antigen                                                                                                               | SP100                     | 4,16  | Nucleus             |
| 1396268_at | BF523991  | SP110 nuclear body protein                                                                                                          | SP110                     | 11,76 | Nucleus             |
| 1372930_at | AI411381  | SP110 nuclear body protein                                                                                                          | SP110                     | 13,19 | Nucleus             |
| 1394819_at | AI177957  | SP110 nuclear body protein                                                                                                          | SP110                     | 20,47 | Nucleus             |
| 1388452_at | AI716904  | sparc/osteonectin, cwcv and kazal-like domains proteoglycan (testican) 2                                                            | SPOCK2                    | -1,66 | Extracellular Space |
| 1383839_at | AI576427  | spastic paraplegia 20 (Troyer syndrome)                                                                                             | SPG20                     | -3,92 | Cytoplasm           |
| 1372633_at | AI178531  | spastic paraplegia 20 (Troyer syndrome)                                                                                             | SPG20                     | -2,58 | Cytoplasm           |
| 1382020_at | BE105500  | sperm associated antigen 9                                                                                                          | SPAG9                     | 1,50  | Plasma Membrane     |
| 1397828_at | BF387796  | SPHK1 interactor, AKAP domain containing                                                                                            | SPHKAP                    | 2,77  | Unknown             |
| 1370899_at | AI599699  | splicing factor proline/glutamine-rich (polypyrimidine tract binding protein associated)                                            | SFPQ                      | -2,10 | Nucleus             |
| 1376160_at | BF408850  | splicing factor, arginine/serine-rich 16                                                                                            | SFRS16                    | 10,97 | Nucleus             |
| 1374441_at | AI180035  | SPRY domain containing 4                                                                                                            | SPRYD4                    | -3,37 | Unknown             |
| 1389639_at | BF283302  | Src homology 2 domain containing adaptor protein B                                                                                  | SHB                       | 2,73  | Unknown             |
| 1368157_at | NM_024346 | stathmin-like 3                                                                                                                     | STMN3                     | -1,92 | Nucleus             |
| 1370680_at | AF483620  | staufen, RNA binding protein, homolog 2 (Drosophila)                                                                                | STAU2                     | 6,10  | Cytoplasm           |
| 1379754_at | AI070598  | staufen, RNA binding protein, homolog 2 (Drosophila)                                                                                | STAU2                     | 8,37  | Cytoplasm           |

|              |           |                                                                  |           |        |                     |
|--------------|-----------|------------------------------------------------------------------|-----------|--------|---------------------|
| 1385397_at   | AA859085  | STEAP family member 4                                            | STEAP4    | 16,68  | Plasma Membrane     |
| 1378043_at   | AW532890  | sterile alpha motif domain containing 9                          | SAMD9     | 35,57  | Unknown             |
| 1376693_at   | AA998964  | sterile alpha motif domain containing 9                          | SAMD9     | 285,27 | Unknown             |
| 1390312_at   | BG670441  | sterile alpha motif domain containing 9-like                     | SAMD9L    | 51,28  | Unknown             |
| 1379279_at   | AI234719  | stromal interaction molecule 2                                   | STIM2     | 2,11   | Plasma Membrane     |
| 1372422_at   | AI175506  | sulfatase modifying factor 1                                     | SUMF1     | -4,76  | Cytoplasm           |
| 1371679_at   | BE113393  | synaptopodin 2                                                   | SYNPO2    | -3,02  | Cytoplasm           |
| 1373865_at   | BF281248  | synaptosomal-associated protein, 91kDa homolog (mouse)           | SNAP91    | 2,49   | Plasma Membrane     |
| 1370418_s_at | U30831    | synaptotagmin XVII                                               | SYT17     | -2,75  | Plasma Membrane     |
| 1367721_at   | NM_012649 | syndecan 4                                                       | SDC4      | 10,83  | Plasma Membrane     |
| 1391628_at   | BF418596  | synovial sarcoma translocation, chromosome 18                    | SS18      | 1,58   | Nucleus             |
| 1371568_at   | AI145381  | synuclein, beta                                                  | SNCB      | -4,91  | Cytoplasm           |
| 1393095_at   | BI276113  | tankyrase 1 binding protein 1, 182kDa                            | TNKS1BP1  | 3,69   | Nucleus             |
| 1373050_at   | AW917731  | TBC1 (tre-2/USP6, BUB2, cdc16) domain family, member 1           | TBC1D1    | 3,57   | Nucleus             |
| 1389642_at   | H35643    | TBC1 domain family, member 13                                    | TBC1D13   | 2,12   | Unknown             |
| 1388679_at   | AI412244  | TBC1 domain family, member 14                                    | TBC1D14   | -2,27  | Unknown             |
| 1375074_at   | BE113756  | TBK1 binding protein 1                                           | TBKBP1    | 1,58   | Unknown             |
| 1372507_at   | AA901093  | T-cell leukemia translocation altered gene                       | TCTA      | -2,39  | Unknown             |
| 1381167_at   | BF390767  | T-cell lymphoma invasion and metastasis 1                        | TIAM1     | 2,11   | Cytoplasm           |
| 1392980_at   | AI716456  | T-cell lymphoma invasion and metastasis 1                        | TIAM1     | 2,67   | Cytoplasm           |
| 1374257_at   | BM389265  | T-cell lymphoma invasion and metastasis 1                        | TIAM1     | 4,01   | Cytoplasm           |
| 1368049_at   | NM_012670 | t-complex 1                                                      | TCP1      | -2,01  | Cytoplasm           |
| 1389557_at   | BM384037  | testis expressed 261                                             | TEX261    | -1,96  | Extracellular Space |
| 1372980_at   | AA819250  | tetraspanin 33                                                   | TSPAN33   | -2,12  | Unknown             |
| 1380725_at   | AW251317  | tetraspanin 5                                                    | TSPAN5    | -3,77  | Plasma Membrane     |
| 1399037_at   | AI227962  | tetratricopeptide repeat domain 19                               | TTC19     | -1,93  | Unknown             |
| 1383948_at   | AA998083  | tetratricopeptide repeat domain 28                               | TTC28     | -4,10  | Unknown             |
| 1386309_at   | AI176361  | tetratricopeptide repeat domain 28                               | TTC28     | -1,56  | Unknown             |
| 1376974_at   | BG381669  | tetratricopeptide repeat domain 7A                               | TTC7A     | 2,67   | Plasma Membrane     |
| 1376035_at   | BI274308  | tetratricopeptide repeat domain 7B                               | TTC7B     | -2,33  | Unknown             |
| 1378416_at   | AA892565  | tetratricopeptide repeat domain 8                                | TTC8      | -3,18  | Cytoplasm           |
| 1376013_at   | BF282700  | tetratricopeptide repeat domain 9                                | TTC9      | -1,76  | Unknown             |
| 1376613_at   | BI279201  | tetratricopeptide repeat domain 9C                               | TTC9C     | 2,04   | Unknown             |
| 1371557_at   | BI275281  | THAP domain containing 4                                         | THAP4     | -1,60  | Unknown             |
| 1379849_at   | BE098416  | THO complex 3                                                    | THOC3     | -1,66  | Nucleus             |
| 1388567_at   | BF282947  | THUMP domain containing 1                                        | THUMPD1   | -2,29  | Unknown             |
| 1367655_at   | NM_021261 | thymosin beta 10                                                 | TMSB10    | 1,83   | Cytoplasm           |
| 1372473_at   | AW434048  | tight junction protein 1 (zona occludens 1)                      | TJP1      | 2,58   | Plasma Membrane     |
| 1367712_at   | NM_053819 | TIMP metalloproteinase inhibitor 1                               | TIMP1     | 18,59  | Extracellular Space |
| 1398984_at   | AA818129  | TM2 domain containing 2                                          | TM2D2     | -2,08  | Extracellular Space |
| 1388492_at   | AW919111  | TNFAIP3 interacting protein 1                                    | TNIP1     | 35,16  | Nucleus             |
| 1378572_at   | BF408962  | toll interacting protein                                         | TOLLIP    | 1,95   | Cytoplasm           |
| 1381958_at   | BE107587  | topoisomerase (DNA) II binding protein 1                         | TOPBP1    | -3,14  | Nucleus             |
| 1387917_at   | U19614    | torsin A interacting protein 1                                   | TOR1AIP1  | 2,53   | Nucleus             |
| 1388024_s_at | U20286    | torsin A interacting protein 1                                   | TOR1AIP1  | 2,99   | Nucleus             |
| 1381980_at   | BI278862  | torsin A interacting protein 2                                   | TOR1AIP2  | 2,04   | Cytoplasm           |
| 1367603_at   | NM_022922 | TPII pseudogene                                                  | LOC729708 | -2,70  | Unknown             |
| 1372252_at   | BE112892  | trafficking protein particle complex 1                           | TRAPPC1   | -1,91  | Cytoplasm           |
| 1371466_at   | AI177397  | trafficking protein particle complex 2                           | TRAPPC2   | -1,65  | Cytoplasm           |
| 1367523_at   | AI409145  | trafficking protein particle complex 2-like                      | TRAPPC2L  | -2,26  | Unknown             |
| 1382311_at   | BM384466  | TRAF-interacting protein with forkhead-associated domain         | TIFA      | 78,65  | Unknown             |
| 1373757_at   | AW529298  | TRAF-type zinc finger domain containing 1                        | TRAFD1    | 4,93   | Unknown             |
| 1387169_at   | NM_053400 | transducin-like enhancer of split 3 (E(sp1) homolog, Drosophila) | TLE3      | 2,22   | Nucleus             |
| 1390278_at   | BI279652  | transformer-2 alpha                                              | TRA2A     | 1,57   | Nucleus             |
| 1377762_at   | BG381701  | transformer-2 alpha                                              | TRA2A     | 1,82   | Nucleus             |
| 1368706_at   | NM_053785 | transmembrane 4 L six family member 4                            | TM4SF4    | -2,61  | Plasma Membrane     |
| 1390832_at   | BI294696  | transmembrane and coiled-coil domain family 3                    | TMCC3     | 6,97   | Unknown             |
| 1379541_at   | BE329099  | transmembrane and tetratricopeptide repeat containing 4          | TMTC4     | -4,38  | Unknown             |

|              |           |                                                              |           |        |                     |
|--------------|-----------|--------------------------------------------------------------|-----------|--------|---------------------|
| 1376102_at   | BI292351  | transmembrane BAX inhibitor motif containing 1               | TMBIM1    | 4,69   | Unknown             |
| 1371968_at   | AI013781  | transmembrane BAX inhibitor motif containing 4               | TMBIM4    | 3,48   | Nucleus             |
| 1393845_a_at | AI556940  | transmembrane channel-like 4                                 | TMC4      | 2,60   | Unknown             |
| 1385436_at   | AI556940  | transmembrane channel-like 4                                 | TMC4      | 3,24   | Unknown             |
| 1385714_at   | BF545988  | transmembrane channel-like 4                                 | TMC4      | 4,83   | Unknown             |
| 1375904_at   | AI011285  | transmembrane emp24 protein transport domain containing 5    | TMED5     | 1,50   | Cytoplasm           |
| 1389467_at   | BM391248  | transmembrane protein 100                                    | TMEM100   | -4,36  | Unknown             |
| 1374948_at   | BI275815  | transmembrane protein 106A                                   | TMEM106A  | 14,12  | Unknown             |
| 1390042_at   | AI071166  | transmembrane protein 140                                    | TMEM140   | 52,78  | Unknown             |
| 1387636_a_at | NM_134395 | transmembrane protein 14C                                    | TMEM14C   | -3,35  | Plasma Membrane     |
| 1376904_at   | AI716115  | transmembrane protein 151A                                   | TMEM151A  | 14,19  | Unknown             |
| 1382471_at   | AI709698  | transmembrane protein 177                                    | TMEM177   | -5,67  | Unknown             |
| 1392518_at   | AI577870  | transmembrane protein 184B                                   | TMEM184B  | 3,36   | Unknown             |
| 1386346_at   | BI275715  | transmembrane protein 19                                     | TMEM19    | 2,41   | Unknown             |
| 1394842_at   | BF289172  | transmembrane protein 19                                     | TMEM19    | 3,44   | Unknown             |
| 1372217_at   | BM385348  | transmembrane protein 199                                    | TMEM199   | -1,76  | Unknown             |
| 1379323_at   | BE109498  | transmembrane protein 203                                    | TMEM203   | -4,88  | Unknown             |
| 1393165_at   | BG377684  | transmembrane protein 206                                    | TMEM206   | -3,15  | Unknown             |
| 1383118_at   | BI288120  | transmembrane protein 209                                    | TMEM209   | -2,61  | Unknown             |
| 1389561_at   | BE110624  | transmembrane protein 218                                    | TMEM218   | -2,86  | Extracellular Space |
| 1389171_at   | AI104326  | transmembrane protein 38A                                    | TMEM38A   | -8,43  | Unknown             |
| 1382689_at   | BI276519  | transmembrane protein 41B                                    | TMEM41B   | -1,78  | Unknown             |
| 1372100_at   | BI283746  | transmembrane protein 50A                                    | TMEM50A   | 1,55   | Plasma Membrane     |
| 1383375_at   | BI293584  | transmembrane protein 55A                                    | TMEM55A   | -2,36  | Unknown             |
| 1373309_at   | BI281129  | transmembrane protein 86A                                    | TMEM86A   | 4,60   | Unknown             |
| 1371454_at   | BI285673  | transmembrane protein 93                                     | TMEM93    | -1,63  | Unknown             |
| 1373161_at   | BM386009  | transmembrane protein 98                                     | TMEM98    | -2,13  | Cytoplasm           |
| 1387218_at   | NM_013042 | trefoil factor 3 (intestinal)                                | TFF3      | -2,51  | Extracellular Space |
| 1375664_at   | BI294732  | trinucleotide repeat containing 6A                           | TNRC6A    | 1,58   | Nucleus             |
| 1373550_at   | BI280318  | tripartite motif-containing 11                               | TRIM11    | -1,88  | Cytoplasm           |
| 1383369_at   | AI028875  | tripartite motif-containing 26                               | TRIM26    | 3,07   | Cytoplasm           |
| 1378293_at   | AI556246  | tripartite motif-containing 26                               | TRIM26    | 3,90   | Cytoplasm           |
| 1371786_at   | BE111791  | tripartite motif-containing 35                               | TRIM35    | -2,17  | Cytoplasm           |
| 1373398_at   | BI275184  | tripartite motif-containing 37                               | TRIM37    | -1,98  | Cytoplasm           |
| 1372112_at   | AA945761  | tripartite motif-containing 5                                | TRIM5     | 6,84   | Cytoplasm           |
| 1385252_at   | BI280655  | tripartite motif-containing 6                                | TRIM6     | 26,34  | Unknown             |
| 1374017_at   | BI289517  | tripartite motif-containing 72                               | TRIM72    | 4,56   | Unknown             |
| 1372500_at   | BG378269  | tropomodulin 3 (ubiquitous)                                  | TMOD3     | 1,71   | Cytoplasm           |
| 1383986_at   | AI071098  | tropomyosin 3                                                | TPM3      | 1,90   | Cytoplasm           |
| 1379959_at   | BI280216  | tryptophan rich basic protein                                | WRB       | -5,14  | Extracellular Space |
| 1373034_at   | AI177128  | tryptophan rich basic protein                                | WRB       | -2,51  | Extracellular Space |
| 1389108_at   | AI710235  | tubulin folding cofactor D                                   | TBCD      | -1,58  | Cytoplasm           |
| 1371542_at   | BI284599  | tubulin, alpha 4a                                            | TUBA4A    | -1,79  | Cytoplasm           |
| 1371390_at   | AA892044  | tubulin, beta 2C                                             | TUBB2C    | -2,22  | Cytoplasm           |
| 1370351_at   | AB030644  | tudor domain containing 7                                    | TDRD7     | 2,55   | Cytoplasm           |
| 1378343_at   | BF405132  | tuftelin interacting protein 11                              | TFIP11    | -2,83  | Extracellular Space |
| 1371785_at   | BI303379  | tumor necrosis factor receptor superfamily, member 12A       | TNFRSF12A | 5,01   | Plasma Membrane     |
| 1391573_at   | AA891842  | tumor necrosis factor receptor superfamily, member 21        | TNFRSF21  | -4,89  | Plasma Membrane     |
| 1388773_at   | BI278479  | tumor necrosis factor, alpha-induced protein 2               | TNFAIP2   | 35,44  | Extracellular Space |
| 1391880_at   | AA893670  | tumor protein D52                                            | TPD52     | -1,56  | Cytoplasm           |
| 1372626_at   | AI231999  | tumor protein D52-like 1                                     | TPD52L1   | -2,60  | Cytoplasm           |
| 1379385_at   | AW534879  | tumor suppressing subtransferable candidate 1                | TSSC1     | -1,96  | Unknown             |
| 1398342_at   | BF549775  | tumor suppressor candidate 2                                 | TUSC2     | -1,96  | Nucleus             |
| 1368762_at   | NM_053299 | ubiquitin D                                                  | UBD       | 551,61 | Nucleus             |
| 1383538_at   | BF545850  | ubiquitin protein ligase E3 component n-recogin 3 (putative) | UBR3      | -1,58  | Unknown             |
| 1388770_at   | BI275670  | ubiquitin-fold modifier 1                                    | UFM1      | -1,78  | Cytoplasm           |
| 1373299_at   | BI295816  | UBX domain protein 1                                         | UBXN1     | 1,63   | Cytoplasm           |
| 1381982_at   | BF403568  | UDP-N-acetylglucosamine pyrophosphorylase 1-like 1           | UAP1L1    | -3,83  | Unknown             |

|                              |           |                                                             |                            |        |                     |
|------------------------------|-----------|-------------------------------------------------------------|----------------------------|--------|---------------------|
| 1371972_at                   | BM388888  | unc-84 homolog B (C. elegans)                               | UNC84B                     | 2,95   | Nucleus             |
| 1382043_at                   | AI234533  | unc-93 homolog B1 (C. elegans)                              | UNC93B1                    | 3,96   | Unknown             |
| 1371651_at                   | BI295882  | vacuolar protein sorting 25 homolog (S. cerevisiae)         | VPS25                      | -1,57  | Nucleus             |
| 1376680_at                   | BG379765  | vacuolar protein sorting 37 homolog C (S. cerevisiae)       | VPS37C                     | 3,74   | Cytoplasm           |
| 1370974_at                   | AJ010392  | vacuolar protein sorting 54 homolog (S. cerevisiae)         | VPS54                      | 4,35   | Unknown             |
| 1368474_at                   | NM_012889 | vascular cell adhesion molecule 1                           | VCAMI                      | 34,83  | Plasma Membrane     |
| 1389213_at                   | AI408955  | vasohibin 1                                                 | VASH1                      | 2,46   | Extracellular Space |
| 1373338_at                   | AI175767  | vimentin-type IF-associated coiled-coil protein             | VMAC                       | -5,05  | Unknown             |
| 1388791_at                   | BI275911  | viral DNA polymerase-transactivated protein 6               | LOC26010                   | 2,72   | Unknown             |
| 1368854_at                   | AI227991  | visinin-like 1                                              | VSNL1                      | -12,89 | Cytoplasm           |
| 1377000_at                   | BI297041  | WAS protein homology region 2 domain containing 1           | WHDC1                      | 2,36   | Unknown             |
| 1374204_at                   | BM388946  | WD repeat and SOCS box-containing 1                         | WSB1                       | 1,88   | Unknown             |
| 1398424_at                   | AA799515  | WD repeat and SOCS box-containing 2                         | WSB2                       | -2,59  | Unknown             |
| 1372218_at                   | BM384448  | WD repeat domain 12                                         | WDR12                      | -1,76  | Cytoplasm           |
| 1385804_x_at                 | AA956841  | WD repeat domain 36                                         | WDR36 (includes EG:361305) | -1,68  | Unknown             |
| 1373399_at                   | BI291997  | WD repeat domain 6                                          | WDR6 (includes EG:301007)  | -2,51  | Unknown             |
| 1389644_at                   | BI289857  | WD repeat domain 67                                         | WDR67                      | -2,79  | Unknown             |
| 1388560_at                   | AI412580  | WD repeat domain 77                                         | WDR77                      | -1,66  | Nucleus             |
| 1376339_at                   | BM385270  | WWC family member 3                                         | WWC3                       | -1,71  | Unknown             |
| 1371843_at                   | AI234128  | Yip1 domain family, member 5                                | YIPF5                      | -1,73  | Unknown             |
| 1370305_at                   | U96490    | Yip1 interacting factor homolog A (S. cerevisiae)           | YIF1A                      | -2,81  | Cytoplasm           |
| 1375429_at                   | BI294768  | ZH16 protein                                                | ZH16                       | -1,65  | Unknown             |
| 1394849_at                   | BF402012  | zinc finger and BTB domain containing 20                    | ZBTB20                     | 2,19   | Nucleus             |
| 1375867_at                   | AW524493  | zinc finger and BTB domain containing 4                     | ZBTB4                      | -1,88  | Nucleus             |
| 1389907_at                   | AI169317  | zinc finger and BTB domain containing 8 opposite strand     | ZBTB8OS                    | -3,97  | Unknown             |
| 1378049_at                   | AI603565  | zinc finger and SCAN domain containing 20                   | ZSCAN20                    | -2,51  | Nucleus             |
| 1374208_at                   | BE116569  | zinc finger CCCH-type containing 7A                         | ZC3H7A                     | 2,75   | Unknown             |
| 1372789_at                   | BF397881  | zinc finger protein 32                                      | ZNF32                      | -2,16  | Nucleus             |
| 1392995_at                   | BG669396  | zinc finger protein 322A                                    | ZNF322A                    | -1,57  | Cytoplasm           |
| 1390148_a_at                 | BM388100  | zinc finger protein 395                                     | ZNF395                     | -5,99  | Cytoplasm           |
| 1389523_at                   | BM386127  | zinc finger protein 598                                     | ZNF598                     | 3,25   | Unknown             |
| 1392913_at                   | AA964151  | zinc finger protein 710                                     | ZNF710                     | 1,69   | Nucleus             |
| 1373136_at                   | AI013609  | zinc finger with UFM1-specific peptidase domain             | ZUFSP                      | 3,07   | Unknown             |
| 1373264_at                   | BE110658  | zinc finger, BED-type containing 3                          | ZBED3                      | -2,09  | Unknown             |
| 1367540_at                   | AI044872  | zinc finger, FYVE domain containing 26                      | ZFYVE26                    | 6,24   | Unknown             |
| 1389152_at                   | AI412984  | zinc finger, FYVE domain containing 27                      | ZFYVE27                    | -2,80  | Unknown             |
| 1392454_at                   | BI296999  | zinc finger, HIT type 6                                     | ZNHIT6                     | 2,70   | Unknown             |
| 1371842_at                   | AI227747  | zinc finger, matrin type 2                                  | ZMAT2                      | -1,60  | Nucleus             |
| 1391255_at                   | BE110035  | zinc finger, MYND-type containing 15                        | ZMYND15                    | 70,10  | Unknown             |
| 1391972_a_at                 | BE108410  | zinc finger, SWIM-type containing 4                         | ZSWIM4                     | 13,23  | Unknown             |
| <b>Not classified by IPA</b> |           |                                                             |                            |        |                     |
| 1386521_at                   | AI511291  | A kinase (PRKA) anchor protein 2                            | Akap2                      | 18,78  |                     |
| 1391548_at                   | AA955786  | A kinase (PRKA) anchor protein 5                            | Akap5                      | 1,78   |                     |
| 1393028_at                   | BM383152  | abhydrolase domain containing 4 (predicted)                 | Abhd4_predicted            | -2,51  |                     |
| 1374432_at                   | BE118251  | activated leukocyte cell adhesion molecule                  | Alcam                      | 1,73   |                     |
| 1382294_at                   | AI576111  | activated leukocyte cell adhesion molecule                  | Alcam                      | 3,07   |                     |
| 1395163_at                   | BI296281  | ADP-dependent glucokinase                                   | Adpgk                      | 2,50   |                     |
| 1393048_at                   | BF561277  | adrenergic receptor, alpha 2a                               | Adra2a                     | -6,03  |                     |
| 1393114_at                   | AI136684  | alpha-2,6-sialyltransferase ST6GalNAc IV                    | siat7D                     | 2,27   |                     |
| 1370583_s_at                 | AY082609  | ATP-binding cassette, sub-family B (MDR/TAP), member 1      | Abcb1                      | 32,80  |                     |
| 1392397_at                   | BF389365  | BMP-2 inducible kinase                                      | Bmp2k                      | -3,05  |                     |
| 1377345_at                   | AI502211  | bobby sox homolog (Drosophila) (predicted)                  | Bbx_predicted              | 2,10   |                     |
| 1391009_a_at                 | AA851338  | branched chain ketoacid dehydrogenase E1, alpha polypeptide | Bckdha                     | 1,53   |                     |
| 1375636_at                   | AI600042  | casein kinase II, alpha 1 polypeptide                       | Csnk2a1                    | -1,61  |                     |
| 1392184_at                   | BI298049  | CASP8 and FADD-like apoptosis regulator                     | Cflar                      | 1,71   |                     |
| 1381173_at                   | BG375010  | caspace 4, apoptosis-related cysteine peptidase             | Casp4                      | 15,89  |                     |
| 1377712_at                   | AI556865  | catenin (cadherin-associated protein), delta 2              | Ctnd2                      | -2,32  |                     |
| 1392897_at                   | AA924586  | CCAAT/enhancer binding protein zeta (predicted)             | Cebpz_predicted            | -2,03  |                     |

|              |          |                                                                                 |
|--------------|----------|---------------------------------------------------------------------------------|
| 1372225_at   | BE119802 | centrosome-associated protein 350                                               |
| 1396754_at   | BF403379 | coatamer protein complex, subunit zeta 1 (predicted)                            |
| 1374731_at   | BI275929 | coilin                                                                          |
| 1380670_at   | BE095613 | CUG triplet repeat, RNA binding protein 2                                       |
| 1379535_at   | AI073064 | cyclin H                                                                        |
| 1374932_at   | BI282731 | dedicator of cytokinesis 6 (predicted)                                          |
| 1391259_at   | BE104618 | dehydrogenase/reductase (SDR family) member 1                                   |
| 1388479_at   | BI294841 | dihydropyrimidinase-like 3                                                      |
| 1381525_at   | BF419130 | enabled homolog (Drosophila)                                                    |
| 1380327_at   | AI408747 | glutamate receptor interacting protein 1                                        |
| 1393735_at   | AI712582 | glutamine and serine rich 1 (predicted)                                         |
| 1383055_at   | AW143805 | guanine nucleotide binding protein, alpha q polypeptide                         |
| 1376618_at   | AI236218 | hypothetical protein LOC691931                                                  |
| 1376728_at   | BM392264 | hypothetical RNA binding protein RGD1359713                                     |
| 1378212_at   | BI303251 | inositol hexaphosphate kinase 1                                                 |
| 1390671_at   | AI044666 | insulin-like growth factor 1 receptor                                           |
| 1375790_at   | BI300458 | insulin-like growth factor binding protein 7                                    |
| 1383476_at   | AW528065 | inter-alpha trypsin inhibitor, heavy chain 3                                    |
| 1394097_at   | AA849706 | Kv channel-interacting protein 1                                                |
| 1379228_at   | BF418531 | latent transforming growth factor beta binding protein 4                        |
| 1394716_at   | AI011137 | lectin, mannose-binding 2-like (predicted)                                      |
| 1380049_at   | AI599448 | leucine-rich repeats and calponin homology (CH) domain containing 3 (predicted) |
| 1383080_at   | BI292252 | lysosomal membrane glycoprotein 2                                               |
| 1380097_at   | BE098726 | lysosomal-associated protein transmembrane 4A                                   |
| 1390827_at   | AA997679 | MAD homolog 3 (Drosophila)                                                      |
| 1377831_at   | BF285316 | monoamine oxidase A                                                             |
| 1397114_at   | BF388191 | nuclear fragile X mental retardation protein interacting protein 1              |
| 1397004_at   | BF394158 | nuclear receptor subfamily 3, group C, member 1                                 |
| 1376863_at   | BE109118 | phosphatidylinositol 3-kinase, regulatory subunit, polypeptide 1                |
| 1396138_at   | BF544511 | phosphatidylinositol-4-phosphate 5-kinase, type 1 beta (predicted)              |
| 1391295_at   | AI136393 | phosphodiesterase 10A                                                           |
| 1380570_at   | AI145593 | piccolo (presynaptic cytomatrix protein)                                        |
| 1378689_at   | BF409044 | plakophilin 4 (predicted)                                                       |
| 1373818_at   | AI408351 | potassium channel tetramerisation domain containing 12 (predicted)              |
| 1382255_at   | BE110785 | pre-B-cell colony enhancing factor 1                                            |
| 1371593_at   | BI296121 | proliferating cell nuclear antigen                                              |
| 1383421_at   | BM386110 | proliferating cell nuclear antigen                                              |
| 1378510_at   | BF386239 | protein kinase inhibitor, gamma                                                 |
| 1390821_at   | AI103156 | protocadherin alpha 4                                                           |
| 1389022_at   | AI102760 | putative aminopeptidase Fxna                                                    |
| 1373237_at   | BI281233 | rap2 interacting protein x                                                      |
| 1377791_at   | BI299500 | Ras-related GTP binding B                                                       |
| 1396139_at   | BE120196 | Rho GTPase activating protein 26 (predicted)                                    |
| 1378800_at   | BI291526 | Rho GTPase activating protein 8                                                 |
| 1382389_at   | AI179755 | Rho guanine nucleotide exchange factor (GEF) 5                                  |
| 1391266_at   | AI072881 | RT1 class Ib, locus Aw2                                                         |
| 1377036_at   | BE102350 | RT1 class Ib, locus Aw2                                                         |
| 1382437_at   | BM383464 | RT1 class Ib, locus Aw2                                                         |
| 1379496_at   | AI029460 | RT1 class Ib, locus Aw2                                                         |
| 1390562_s_at | BE102350 | RT1 class Ib, locus Aw2                                                         |
| 1379357_at   | AI408767 | RT1 class Ib, locus Aw2                                                         |
| 1393108_at   | BM387813 | RT1 class Ib, locus Aw2                                                         |
| 1380129_at   | AA818937 | RT1 class Ib, locus Aw2                                                         |
| 1380415_at   | AI233027 | RT1 class Ib, locus Aw2                                                         |
| 1392954_at   | AI029637 | RT1 class Ib, locus Aw2                                                         |
| 1379818_at   | BF288109 | RT1 class Ib, locus Aw2                                                         |
| 1382088_at   | AI548753 | ryanodine receptor 2, cardiac                                                   |
| 1375374_at   | BF400606 | sequestosome 1                                                                  |

|                    |       |
|--------------------|-------|
| Cap350             | 4,07  |
| Copz1_predicted    | 2,20  |
| Coil               | 4,91  |
| Cugbp2             | 2,85  |
| Ccnh               | 2,65  |
| Dock6_predicted    | -1,88 |
| Dhrs1              | -3,70 |
| Dpysl3             | 5,80  |
| Enah               | 2,73  |
| Grip1              | 1,98  |
| Qser1_predicted    | 2,93  |
| Gnaq               | -1,66 |
| LOC691931          | 2,20  |
| RGD1359713         | 1,72  |
| Ihpk1              | 1,63  |
| Igf1r              | 1,78  |
| Igfbp7             | 2,13  |
| Itih3              | 7,76  |
| Kcnip1             | -2,42 |
| Ltbp4              | 2,31  |
| Lman2l_predicted   | -2,59 |
| Lrch3_predicted    | 1,99  |
| Lamp2              | 1,66  |
| Laptm4a            | 2,26  |
| Smad3              | -1,72 |
| Maoa               | -1,93 |
| Nufip1             | 1,83  |
| Nr3c1              | 2,25  |
| Pik3r1             | -2,19 |
| Pip5k1b_predicted  | 1,62  |
| Pde10a             | -6,47 |
| Pclo               | -5,00 |
| Pkp4_predicted     | 1,96  |
| Kctd12_predicted   | -5,52 |
| Pbef1              | 5,42  |
| Pcna               | -1,98 |
| Pcna               | -1,52 |
| Pkig               | 1,78  |
| Pcdha4             | 2,02  |
| Fxna               | 3,09  |
| Ripx               | -1,83 |
| RragB              | -6,32 |
| Arhgap26_predicted | 1,75  |
| Arhgap8            | 3,61  |
| Arhgef5            | 4,42  |
| RT1-Aw2            | 3,42  |
| RT1-Aw2            | 7,13  |
| RT1-Aw2            | 7,44  |
| RT1-Aw2            | 7,62  |
| RT1-Aw2            | 7,86  |
| RT1-Aw2            | 7,96  |
| RT1-Aw2            | 10,23 |
| RT1-Aw2            | 10,50 |
| RT1-Aw2            | 12,40 |
| RT1-Aw2            | 19,49 |
| RT1-Aw2            | 37,73 |
| Ryr2               | 13,05 |
| Sqstm1             | 1,82  |



|              |          |                                                                                                  |
|--------------|----------|--------------------------------------------------------------------------------------------------|
| 1384643_at   | AI071465 | serine (or cysteine) proteinase inhibitor, clade A, member 3M                                    |
| 1385218_at   | AI044551 | similar to AD24 (predicted)                                                                      |
| 1377733_at   | AA944531 | similar to beta-catenin-interacting protein ICAT                                                 |
| 1378987_at   | BE119446 | similar to CG18769-PB, isoform B                                                                 |
| 1378097_at   | AI599593 | similar to endoplasmic oxidoreductase 1 beta (predicted)                                         |
| 1398991_at   | BM389704 | similar to expressed sequence AA408877                                                           |
| 1382942_at   | BF397627 | similar to Ext1                                                                                  |
| 1374766_at   | BE103616 | similar to F33H2.2                                                                               |
| 1397223_at   | AI231513 | similar to FYVE, RhoGEF and PH domain containing 6 (predicted)                                   |
| 1385926_at   | BF550565 | similar to GLI pathogenesis-related 2                                                            |
| 1376990_at   | BE118704 | similar to HCDI protein (predicted)                                                              |
| 1392251_at   | BF397284 | similar to hypothetical protein (predicted)                                                      |
| 1395524_at   | AW525958 | similar to hypothetical protein FLJ13089                                                         |
| 1392637_at   | AA923988 | similar to interferon-inducible GTPase                                                           |
| 1394405_at   | AI232356 | similar to KIAA0303 (predicted)                                                                  |
| 1378783_at   | AI144739 | similar to KIAA0303 (predicted)                                                                  |
| 1381975_at   | BG371767 | similar to kIAA0367                                                                              |
| 1389636_at   | AI231088 | similar to KIAA0833 protein                                                                      |
| 1381234_at   | BF398454 | similar to mastermind-like 2                                                                     |
| 1398393_at   | BF414412 | similar to mitogen-activated protein kinase 11                                                   |
| 1390804_at   | AI176434 | similar to mKIAA0518 protein (predicted)                                                         |
| 1390987_at   | AI406858 | similar to novel protein (predicted)                                                             |
| 1397676_at   | BF290784 | similar to osteoclast inhibitory lectin (predicted)                                              |
| 1378094_at   | BM389654 | similar to pleckstrin homology-like domain, family B, member 2                                   |
| 1379477_at   | AI555261 | similar to Programmed cell death 6 interacting protein (ALG-2 interacting protein X) (predicted) |
| 1389500_at   | BM383122 | similar to ras homolog gene family, member U                                                     |
| 1389835_at   | AI598405 | similar to RER1 homolog                                                                          |
| 1379347_at   | BM389290 | similar to RIKEN cDNA 1700023M03                                                                 |
| 1376824_at   | AI408131 | similar to RIKEN cDNA 1700027M01                                                                 |
| 1383295_at   | AA901194 | similar to RIKEN cDNA 5430432M24                                                                 |
| 1384520_at   | AW523106 | similar to RIKEN cDNA 9330182L06 (predicted)                                                     |
| 1372826_at   | BI285718 | similar to RIKEN cDNA A530089I17 (predicted)                                                     |
| 1383204_at   | BE099804 | similar to RIKEN cDNA A530089I17 (predicted)                                                     |
| 1397350_at   | BE096697 | similar to RIKEN cDNA A730011L01 gene                                                            |
| 1371755_at   | AA799607 | similar to RIKEN cDNA B230219D22 (predicted)                                                     |
| 1375678_at   | AI412430 | similar to RIKEN cDNA D030012E24 gene (predicted)                                                |
| 1382755_at   | AI058343 | similar to RIKEN cDNA G430041M01 (predicted)                                                     |
| 1374501_at   | BF550209 | similar to RNA-binding protein isoform G3BP-2a                                                   |
| 1397453_at   | BM390792 | similar to sorbin and SH3 domain containing 1 isoform 3                                          |
| 1381393_at   | BI301735 | similar to sperm antigen HCMOGT-1                                                                |
| 1376920_at   | BF408536 | similar to sterile alpha motif domain containing 9-like                                          |
| 1377141_at   | AI103397 | similar to UPF0308 protein C9orf21                                                               |
| 1374729_at   | BM385616 | similar to UV radiation resistance associated                                                    |
| 1393561_at   | BF396511 | similar to vacuolar protein sorting 13C protein (predicted)                                      |
| 1389744_at   | AW527194 | sodium channel, voltage-gated, type XI, alpha                                                    |
| 1373283_at   | BE113158 | solute carrier family 25 (mitochondrial carrier; adenine nucleotide translocator), member 3      |
| 1380031_at   | BE098261 | solute carrier family 25 (mitochondrial oxocarboxylate carrier), member 21                       |
| 1375182_at   | BE109671 | solute carrier family 3, member 1                                                                |
| 1383585_s_at | AI043753 | sorting nexin 10                                                                                 |
| 1393571_at   | AA963158 | SRY-box containing gene 4 (predicted)                                                            |
| 1376673_at   | BM391853 | transcription factor 8                                                                           |
| 1378081_at   | BI285065 | transforming growth factor beta 1 induced transcript 4                                           |
| 1372104_at   | BF289002 | transmembrane BAX inhibitor motif containing 1                                                   |
| 1395143_at   | BF389774 | U2AF homology motif (UHM) kinase 1                                                               |
| 1384394_at   | BF548081 | ubiquitin-conjugating enzyme E2D 2                                                               |
| 1375814_at   | BG380887 | unc-84 homolog A (C. elegans)                                                                    |
| 1395193_at   | BM384656 | vacuolar protein sorting 54 (yeast)                                                              |
| 1385385_at   | BE116745 | wingless-type MMTV integration site 5A                                                           |

|                      |        |
|----------------------|--------|
| Serpina3m            | 1,51   |
| RGD1560656_predicted | 2,14   |
| LOC503000            | -2,73  |
| LOC294560            | -3,08  |
| RGD1563548_predicted | 3,12   |
| RGD1308513           | -1,72  |
| LOC299907            | 3,85   |
| LOC689997            | -1,77  |
| RGD1565609_predicted | 1,82   |
| LOC679819            | 14,89  |
| RGD1309307_predicted | 3,62   |
| RGD1306694_predicted | 2,27   |
| RGD1305685           | 2,15   |
| MGC108823            | 78,15  |
| RGD1310139_predicted | 1,79   |
| RGD1310139_predicted | 7,60   |
| RGD1311350           | -2,34  |
| LOC362665            | -1,76  |
| LOC689844            | 3,27   |
| LOC689314            | 14,96  |
| RGD1561597_predicted | 1,87   |
| RGD1565283_predicted | 3,07   |
| RGD1563148_predicted | 5,53   |
| LOC685611            | -2,12  |
| RGD1561176_predicted | 3,30   |
| LOC678766            | 2,52   |
| RGD1306324           | -2,86  |
| RGD1305457           | -1,78  |
| RGD1311815           | 1,56   |
| RGD1308904           | 2,32   |
| RGD1563349_predicted | -1,71  |
| RGD1311375_predicted | 5,07   |
| RGD1311375_predicted | 6,75   |
| LOC498029            | 10,53  |
| RGD1566359_predicted | -1,78  |
| RGD1311298_predicted | 3,26   |
| RGD1562563_predicted | 1,69   |
| RGD1309571           | 1,61   |
| LOC686098            | 2,41   |
| RGD1309718           | 1,67   |
| LOC500013            | 239,42 |
| LOC498685            | -3,42  |
| LOC308846            | 1,71   |
| RGD1560364_predicted | 2,21   |
| Scn11a               | -2,07  |
| Slc25a3              | -4,77  |
| Slc25a21             | 1,56   |
| Slc3a1               | -2,72  |
| Snx10                | 5,15   |
| Sox4_predicted       | -1,57  |
| Tcf8                 | 4,44   |
| Tgfb1i4              | -10,80 |
| Tmbim1               | -2,25  |
| Uhmk1                | 2,38   |
| Ube2d2               | -1,90  |
| Unc84a               | 2,15   |
| Vps54                | 7,35   |
| Wnt5a                | 2,01   |

|            |          |                                                             |                       |                 |        |
|------------|----------|-------------------------------------------------------------|-----------------------|-----------------|--------|
| 1385073_at | AI145639 | xenotropic and polytropic retrovirus receptor 1 (predicted) |                       | Xpr1_predicted  | -4,38  |
| 1374751_at | BM383668 | Yamaguchi sarcoma viral (v-yes) oncogene homolog 1          |                       | Yes1            | 3,32   |
| 1378302_at | BF403965 | zinc finger, CSL-type containing 3 (predicted)              |                       | Zcsl3_predicted | 18,10  |
|            |          |                                                             | <b>Not classified</b> |                 |        |
| 1390324_at | BE101809 |                                                             |                       |                 | -15,36 |
| 1383967_at | BI275739 |                                                             |                       |                 | -13,88 |
| 1372318_at | AI235528 |                                                             |                       |                 | -13,13 |
| 1376398_at | BF417784 |                                                             |                       |                 | -12,02 |
| 1373740_at | AA851385 |                                                             |                       |                 | -11,95 |
| 1393528_at | AI059227 |                                                             |                       |                 | -11,00 |
| 1393482_at | AI045330 |                                                             |                       |                 | -10,89 |
| 1384460_at | AI072669 |                                                             |                       |                 | -8,88  |
| 1389584_at | AI101266 |                                                             |                       |                 | -7,86  |
| 1392982_at | AA818059 |                                                             |                       |                 | -7,31  |
| 1398412_at | BF402250 |                                                             |                       |                 | -7,19  |
| 1394475_at | BE096857 |                                                             |                       |                 | -7,10  |
| 1389412_at | AA800693 |                                                             |                       |                 | -6,41  |
| 1380741_at | BF412788 |                                                             |                       |                 | -6,37  |
| 1398333_at | AI598434 |                                                             |                       |                 | -6,31  |
| 1378496_at | BM384963 |                                                             |                       |                 | -6,10  |
| 1372345_at | AA894210 |                                                             |                       |                 | -5,92  |
| 1384470_at | BE114218 |                                                             |                       |                 | -5,67  |
| 1376463_at | AA955579 |                                                             |                       |                 | -5,59  |
| 1393109_at | BI274436 |                                                             |                       |                 | -5,42  |
| 1398707_at | BE108582 |                                                             |                       |                 | -4,93  |
| 1398990_at | BI281754 |                                                             |                       |                 | -4,90  |
| 1382438_at | BF393639 |                                                             |                       |                 | -4,87  |
| 1381416_at | AI029400 |                                                             |                       |                 | -4,80  |
| 1379373_at | AI556457 |                                                             |                       |                 | -4,79  |
| 1377424_at | AI712672 |                                                             |                       |                 | -4,38  |
| 1377442_at | BF409997 |                                                             |                       |                 | -4,28  |
| 1384922_at | AW527642 |                                                             |                       |                 | -3,90  |
| 1372381_at | BM383457 |                                                             |                       |                 | -3,87  |
| 1380466_at | BG670778 |                                                             |                       |                 | -3,79  |
| 1374241_at | AI406271 |                                                             |                       |                 | -3,77  |
| 1379400_at | AI044556 |                                                             |                       |                 | -3,66  |
| 1379647_at | BI295140 |                                                             |                       |                 | -3,63  |
| 1390294_at | BE100986 |                                                             |                       |                 | -3,60  |
| 1393154_at | BM384240 |                                                             |                       |                 | -3,59  |
| 1378018_at | BE098045 |                                                             |                       |                 | -3,58  |
| 1379903_at | AI059853 |                                                             |                       |                 | -3,50  |
| 1372921_at | AI073219 |                                                             |                       |                 | -3,50  |
| 1390367_at | BF406195 |                                                             |                       |                 | -3,41  |
| 1391672_at | BF399539 |                                                             |                       |                 | -3,37  |
| 1389687_at | BI273981 |                                                             |                       |                 | -3,37  |
| 1376637_at | AI102401 |                                                             |                       |                 | -3,35  |
| 1390263_at | AI179936 |                                                             |                       |                 | -3,30  |
| 1391305_at | AI576233 |                                                             |                       |                 | -3,30  |
| 1389206_at | BE116867 |                                                             |                       |                 | -3,29  |
| 1389707_at | AW251681 |                                                             |                       |                 | -3,28  |
| 1384006_at | AI045457 |                                                             |                       |                 | -3,23  |
| 1398497_at | BF391243 |                                                             |                       |                 | -3,19  |
| 1385381_at | AA996491 |                                                             |                       |                 | -3,12  |
| 1383650_at | BI291080 |                                                             |                       |                 | -3,11  |
| 1385138_at | BF401469 |                                                             |                       |                 | -3,06  |
| 1384743_at | BF418132 |                                                             |                       |                 | -3,06  |
| 1376635_at | BF283341 |                                                             |                       |                 | -3,02  |
| 1377856_at | BE113045 |                                                             |                       |                 | -3,02  |

|            |          |       |
|------------|----------|-------|
| 1389610_at | AW520754 | -3,01 |
| 1391825_at | BE120422 | -2,98 |
| 1391802_at | BE107950 | -2,96 |
| 1392125_at | BF390331 | -2,95 |
| 1373055_at | AI407547 | -2,91 |
| 1385929_at | AI171447 | -2,90 |
| 1381400_at | AI137973 | -2,82 |
| 1374542_at | AI409904 | -2,81 |
| 1378603_at | BM387125 | -2,77 |
| 1377165_at | BF420664 | -2,74 |
| 1375856_at | AI102258 | -2,72 |
| 1396328_at | BF390586 | -2,72 |
| 1373855_at | AI171776 | -2,72 |
| 1390872_at | AI178134 | -2,72 |
| 1389159_at | BM385437 | -2,71 |
| 1393062_at | BI275419 | -2,69 |
| 1379607_at | AW527767 | -2,69 |
| 1379324_at | AW535283 | -2,64 |
| 1372655_at | BG380323 | -2,64 |
| 1373035_at | AI031032 | -2,62 |
| 1391535_at | BF284610 | -2,59 |
| 1384468_at | BI283314 | -2,59 |
| 1391292_at | AI556811 | -2,56 |
| 1391459_at | BI296636 | -2,56 |
| 1374633_at | BF284700 | -2,55 |
| 1372452_at | BG666882 | -2,54 |
| 1378070_at | BE099891 | -2,54 |
| 1377366_at | BF389753 | -2,53 |
| 1372515_at | BI281177 | -2,52 |
| 1373638_at | BG380827 | -2,51 |
| 1392645_at | AA998765 | -2,48 |
| 1376304_at | AI716243 | -2,47 |
| 1380156_at | BF396185 | -2,45 |
| 1383642_at | BG374114 | -2,45 |
| 1384439_at | BM385726 | -2,43 |
| 1393699_at | BF391905 | -2,42 |
| 1393977_at | BI288958 | -2,41 |
| 1392473_at | AW525353 | -2,41 |
| 1395518_at | BF544403 | -2,39 |
| 1389486_at | BE108354 | -2,38 |
| 1391670_at | BI295819 | -2,36 |
| 1384699_at | BM384930 | -2,36 |
| 1378965_at | AA818967 | -2,36 |
| 1373999_at | AI406350 | -2,35 |
| 1374329_at | BI286364 | -2,35 |
| 1381459_at | BE099644 | -2,34 |
| 1397185_at | BE102060 | -2,34 |
| 1372722_at | AI175031 | -2,33 |
| 1389194_at | AI406491 | -2,28 |
| 1380947_at | BE108752 | -2,27 |
| 1383978_at | BM384029 | -2,27 |
| 1389395_at | BI275654 | -2,26 |
| 1376283_at | BG378070 | -2,24 |
| 1396252_at | BE117174 | -2,24 |
| 1378068_at | AW529368 | -2,22 |
| 1395285_at | BE108376 | -2,22 |
| 1388446_at | BF397834 | -2,22 |
| 1390461_at | AI071102 | -2,21 |

|              |          |       |
|--------------|----------|-------|
| 1393120_at   | BG381381 | -2,20 |
| 1378909_at   | BE120180 | -2,20 |
| 1372978_at   | BI291218 | -2,19 |
| 1393478_at   | AI029492 | -2,19 |
| 1390203_at   | AI411149 | -2,19 |
| 1393516_at   | AA892335 | -2,17 |
| 1385731_at   | BE113552 | -2,17 |
| 1391251_at   | BI290666 | -2,16 |
| 1373053_at   | AI169620 | -2,16 |
| 1376966_at   | BE108930 | -2,15 |
| 1374652_at   | BF285372 | -2,14 |
| 1371798_at   | AI013011 | -2,12 |
| 1372831_at   | BE349838 | -2,12 |
| 1383150_at   | BE114751 | -2,11 |
| 1398495_at   | BE121436 | -2,10 |
| 1392716_at   | BF282115 | -2,09 |
| 1385964_at   | AI237569 | -2,09 |
| 1391444_at   | BF285611 | -2,07 |
| 1388751_at   | AW433787 | -2,07 |
| 1398448_at   | BE108346 | -2,03 |
| 1383675_at   | BG371620 | -2,03 |
| 1390153_at   | BG378721 | -1,99 |
| 1373328_at   | AI009678 | -1,99 |
| 1396441_at   | BE108895 | -1,97 |
| 1384422_at   | AI045140 | -1,97 |
| 1394576_at   | AA900572 | -1,97 |
| 1379283_at   | BE117687 | -1,96 |
| 1390463_at   | BG378294 | -1,96 |
| 1378395_at   | BF411826 | -1,95 |
| 1390545_at   | AI178155 | -1,95 |
| 1386583_at   | AA859497 | -1,95 |
| 1383121_at   | BM384218 | -1,95 |
| 1394620_at   | BI288579 | -1,94 |
| 1371391_at   | BM390196 | -1,93 |
| 1377040_a_at | AI172225 | -1,92 |
| 1373529_at   | BE117883 | -1,92 |
| 1382098_at   | AI228756 | -1,92 |
| 1374758_at   | BM387112 | -1,92 |
| 1379410_at   | AA925019 | -1,91 |
| 1373039_at   | AI600081 | -1,91 |
| 1394456_at   | AW525722 | -1,91 |
| 1391979_at   | AA851345 | -1,90 |
| 1376622_at   | BM389574 | -1,90 |
| 1392131_at   | AI012870 | -1,90 |
| 1374702_at   | BI291393 | -1,89 |
| 1383404_at   | BI295203 | -1,88 |
| 1382352_at   | AI030845 | -1,88 |
| 1389401_at   | BI294956 | -1,88 |
| 1395536_at   | BG673248 | -1,86 |
| 1392102_at   | BE118959 | -1,84 |
| 1393119_at   | BM388725 | -1,84 |
| 1395958_at   | BF396619 | -1,83 |
| 1383254_at   | BF403169 | -1,83 |
| 1378009_at   | BF282481 | -1,82 |
| 1393465_at   | BE103258 | -1,80 |
| 1398581_at   | AA956307 | -1,80 |
| 1372524_at   | BG378238 | -1,79 |
| 1376310_at   | BI285686 | -1,79 |

|              |          |       |
|--------------|----------|-------|
| 1389589_at   | BE105898 | -1,78 |
| 1377794_at   | BF288862 | -1,76 |
| 1391916_at   | BE116043 | -1,76 |
| 1397918_at   | BF411420 | -1,76 |
| 1393268_at   | AI071071 | -1,75 |
| 1394553_at   | AI007661 | -1,74 |
| 1392388_at   | BE112281 | -1,74 |
| 1383194_a_at | AI030349 | -1,73 |
| 1372642_at   | BE113397 | -1,69 |
| 1394488_at   | AW524157 | -1,65 |
| 1388146_at   | AW523578 | -1,64 |
| 1377456_at   | BE116775 | -1,64 |
| 1380811_at   | BE105756 | -1,62 |
| 1371773_at   | AI179413 | -1,62 |
| 1389845_at   | BI282224 | -1,61 |
| 1372262_at   | BI285626 | -1,60 |
| 1397406_at   | BF411788 | -1,59 |
| 1395625_at   | BF415216 | -1,59 |
| 1394450_at   | AI228600 | -1,59 |
| 1373736_at   | AI178446 | -1,58 |
| 1378937_at   | BE349836 | -1,58 |
| 1373576_at   | BE107337 | -1,57 |
| 1389602_at   | BF396759 | -1,56 |
| 1374685_at   | BE117446 | -1,55 |
| 1385909_at   | BE118035 | -1,55 |
| 1388888_at   | BI274615 | -1,54 |
| 1375687_at   | BE097926 | -1,54 |
| 1394388_at   | AA858844 | -1,54 |
| 1380872_at   | BF396681 | -1,53 |
| 1393166_at   | AA998749 | -1,53 |
| 1380859_at   | AA891931 | -1,53 |
| 1391571_at   | BG666079 | -1,51 |
| 1392536_at   | AI136839 | -1,51 |
| 1393077_at   | AA925179 | -1,50 |
| 1389683_at   | AI170768 | 1,50  |
| 1388781_at   | AW434329 | 1,54  |
| 1392761_at   | BM389886 | 1,55  |
| 1389331_at   | AI104371 | 1,55  |
| 1395770_at   | BM391695 | 1,56  |
| 1383087_at   | BF409251 | 1,57  |
| 1374505_at   | AI411031 | 1,58  |
| 1380232_at   | BE119516 | 1,59  |
| 1380158_at   | BF284973 | 1,59  |
| 1398450_at   | BI291373 | 1,60  |
| 1382915_at   | AI237079 | 1,62  |
| 1375191_at   | AI230379 | 1,65  |
| 1391477_at   | BF396595 | 1,66  |
| 1392471_at   | BI302750 | 1,66  |
| 1390574_at   | BE101126 | 1,66  |
| 1373178_at   | AA945183 | 1,72  |
| 1394460_at   | BF564428 | 1,72  |
| 1381470_at   | AI454052 | 1,72  |
| 1390356_at   | AW535401 | 1,72  |
| 1377996_at   | BE103975 | 1,73  |
| 1384281_at   | BI295209 | 1,74  |
| 1376996_at   | AI556018 | 1,75  |
| 1380023_at   | AA997863 | 1,75  |
| 1383593_at   | BE113211 | 1,75  |

|              |          |      |
|--------------|----------|------|
| 1382107_at   | AI176848 | 1,76 |
| 1373932_at   | BE098739 | 1,77 |
| 1381471_at   | AI060117 | 1,77 |
| 1384184_at   | BE117485 | 1,77 |
| 1384019_a_at | BM383449 | 1,79 |
| 1392840_at   | AI764605 | 1,80 |
| 1377682_at   | AW522708 | 1,80 |
| 1379774_at   | AI137801 | 1,81 |
| 1384179_at   | BI294722 | 1,83 |
| 1382094_at   | BI285519 | 1,83 |
| 1396989_at   | BF402350 | 1,84 |
| 1390836_at   | AI031048 | 1,85 |
| 1384163_at   | BE103875 | 1,85 |
| 1385978_at   | AI072788 | 1,86 |
| 1384134_at   | AI059390 | 1,86 |
| 1396770_at   | BE099410 | 1,88 |
| 1385749_at   | BF392886 | 1,89 |
| 1390376_at   | BF406135 | 1,90 |
| 1378778_a_at | BF394727 | 1,90 |
| 1374552_at   | BF412718 | 1,90 |
| 1399121_at   | BE111600 | 1,92 |
| 1372032_at   | AA851914 | 1,93 |
| 1394399_at   | AW523958 | 1,93 |
| 1372951_at   | BI274172 | 1,96 |
| 1398348_at   | AA945604 | 1,98 |
| 1389001_at   | AW433944 | 1,98 |
| 1378292_at   | BE096367 | 2,00 |
| 1383280_at   | BG669130 | 2,02 |
| 1389287_at   | BI279573 | 2,02 |
| 1371821_at   | BM391330 | 2,08 |
| 1376869_at   | BE108193 | 2,08 |
| 1383094_at   | BI304048 | 2,09 |
| 1383169_at   | BF563716 | 2,12 |
| 1382381_at   | AA818480 | 2,13 |
| 1391752_at   | BF394182 | 2,13 |
| 1382931_at   | AA924607 | 2,14 |
| 1389718_at   | AA956417 | 2,17 |
| 1372583_at   | AI009094 | 2,17 |
| 1377999_at   | BE103242 | 2,20 |
| 1390669_at   | AI639410 | 2,21 |
| 1381795_at   | AA963295 | 2,21 |
| 1389586_at   | BE107169 | 2,21 |
| 1373225_at   | AI102618 | 2,22 |
| 1383589_at   | BE103947 | 2,22 |
| 1384287_at   | BI278552 | 2,24 |
| 1394779_at   | AI717218 | 2,26 |
| 1378668_at   | BG672426 | 2,27 |
| 1390122_at   | BI275740 | 2,27 |
| 1389427_at   | BM386487 | 2,29 |
| 1372910_at   | AI408770 | 2,31 |
| 1378421_at   | BG671734 | 2,32 |
| 1374164_at   | BF410020 | 2,35 |
| 1389205_at   | AI012582 | 2,35 |
| 1389150_at   | AW524559 | 2,37 |
| 1381246_at   | BI293437 | 2,38 |
| 1376205_at   | BI286851 | 2,40 |
| 1374736_at   | AI172004 | 2,42 |
| 1378132_at   | AI716098 | 2,44 |

|            |          |      |
|------------|----------|------|
| 1390136_at | BE109274 | 2,44 |
| 1383348_at | BF545309 | 2,44 |
| 1381081_at | AW523873 | 2,46 |
| 1384032_at | AI058837 | 2,50 |
| 1384188_at | AW142766 | 2,55 |
| 1389465_at | AI231286 | 2,57 |
| 1375006_at | BE121050 | 2,61 |
| 1390449_at | BI289132 | 2,61 |
| 1384242_at | BI303239 | 2,62 |
| 1378467_at | AA851361 | 2,64 |
| 1376232_at | AW521352 | 2,65 |
| 1390841_at | BI290420 | 2,67 |
| 1384845_at | AI176044 | 2,68 |
| 1396975_at | BI281220 | 2,69 |
| 1378237_at | BG376172 | 2,69 |
| 1379089_at | BM382838 | 2,72 |
| 1372178_at | BM385981 | 2,75 |
| 1390809_at | AI599392 | 2,76 |
| 1389790_at | AI410565 | 2,77 |
| 1376056_at | BF291214 | 2,79 |
| 1381145_at | BE112469 | 2,82 |
| 1383901_at | BI287446 | 2,82 |
| 1379316_at | BG373832 | 2,84 |
| 1383486_at | AA926109 | 2,89 |
| 1373223_at | AI101361 | 2,91 |
| 1395744_at | BF291140 | 2,91 |
| 1382506_at | AI044841 | 2,93 |
| 1389418_at | AI410452 | 2,93 |
| 1380917_at | BE109049 | 2,94 |
| 1372987_at | BF393934 | 2,96 |
| 1371616_at | AW524495 | 3,04 |
| 1377117_at | BF387780 | 3,05 |
| 1372719_at | BF283702 | 3,09 |
| 1377411_at | BF404135 | 3,10 |
| 1391574_at | AW253369 | 3,13 |
| 1390685_at | BF395810 | 3,17 |
| 1376022_at | BI292196 | 3,21 |
| 1389613_at | AI234712 | 3,21 |
| 1396077_at | BF554876 | 3,23 |
| 1398464_at | AI575255 | 3,24 |
| 1385580_at | AI071620 | 3,25 |
| 1381948_at | AI547876 | 3,28 |
| 1374676_at | AA818911 | 3,40 |
| 1376672_at | AW533083 | 3,46 |
| 1384110_at | AI045668 | 3,51 |
| 1384462_at | AA819526 | 3,53 |
| 1380186_at | AI101272 | 3,62 |
| 1390204_at | AI227856 | 3,63 |
| 1396363_at | BF399356 | 3,66 |
| 1391125_at | AI639331 | 3,67 |
| 1377380_at | AI060045 | 3,69 |
| 1379788_at | AI231019 | 3,69 |
| 1394527_at | AI501679 | 3,77 |
| 1376002_at | AI406363 | 3,86 |
| 1382610_at | AA957105 | 3,86 |
| 1390134_at | AI411274 | 4,13 |
| 1382177_at | BF415064 | 4,19 |
| 1397904_at | BI292042 | 4,27 |

|              |          |       |
|--------------|----------|-------|
| 1376700_at   | AI179472 | 4,31  |
| 1379381_at   | AI045321 | 4,31  |
| 1395557_at   | BF565718 | 4,42  |
| 1373678_at   | BE098848 | 4,46  |
| 1397706_at   | BF388794 | 4,49  |
| 1374137_at   | AA818055 | 4,54  |
| 1398397_at   | AI407483 | 4,68  |
| 1382736_at   | AI407047 | 4,76  |
| 1376006_at   | BG373799 | 4,80  |
| 1396996_at   | BF409811 | 4,80  |
| 1380297_at   | AW915533 | 4,84  |
| 1383999_at   | AW527651 | 4,90  |
| 1386566_at   | BF558962 | 4,90  |
| 1372332_at   | AI170687 | 4,97  |
| 1373488_at   | BF289154 | 5,00  |
| 1377052_at   | AW533469 | 5,02  |
| 1379336_at   | BF289150 | 5,08  |
| 1396297_at   | BG374359 | 5,12  |
| 1396993_at   | BM390929 | 5,12  |
| 1375585_at   | BE111820 | 5,14  |
| 1380200_at   | AI102906 | 5,35  |
| 1388759_at   | BM389875 | 5,37  |
| 1389006_at   | AI170394 | 5,51  |
| 1391808_at   | AI535140 | 5,75  |
| 1389789_at   | AI059662 | 5,85  |
| 1372466_at   | AI408571 | 5,89  |
| 1382278_at   | BI278180 | 6,21  |
| 1388915_at   | BI295753 | 6,30  |
| 1377994_at   | AI501237 | 6,44  |
| 1392683_at   | AW142773 | 6,63  |
| 1392600_a_at | AI176989 | 6,65  |
| 1373066_at   | AI407797 | 6,92  |
| 1390364_at   | AI044316 | 7,14  |
| 1393469_at   | BE102340 | 7,36  |
| 1376267_at   | AA859652 | 7,38  |
| 1388986_at   | AI598339 | 8,00  |
| 1389722_at   | BF408457 | 8,00  |
| 1392012_at   | BE100353 | 8,22  |
| 1374429_at   | AI598401 | 8,38  |
| 1374627_at   | BF283727 | 8,50  |
| 1388600_at   | AI011713 | 9,04  |
| 1398408_at   | AI948410 | 9,92  |
| 1393494_at   | AA866419 | 10,00 |
| 1379371_at   | BF284791 | 10,20 |
| 1373703_at   | BE113247 | 10,95 |
| 1374622_at   | BE107309 | 11,30 |
| 1390240_at   | BM389611 | 11,77 |
| 1392777_at   | BF287676 | 12,10 |
| 1380119_at   | AA996432 | 12,37 |
| 1391958_at   | BE119699 | 12,92 |
| 1379696_at   | BI291833 | 13,14 |
| 1390391_at   | BF283381 | 13,15 |
| 1396755_at   | BF399394 | 13,65 |
| 1390024_at   | AI237685 | 13,95 |
| 1379379_at   | BF392753 | 14,21 |
| 1390659_at   | BI302830 | 14,54 |
| 1395110_at   | BE110272 | 16,51 |
| 1377826_at   | AI176721 | 18,23 |



|            |          |  |  |        |
|------------|----------|--|--|--------|
| 1372479_at | AI175666 |  |  | 18,45  |
| 1385925_at | AA963975 |  |  | 18,75  |
| 1386695_at | BF565756 |  |  | 19,90  |
| 1383939_at | BG378849 |  |  | 20,28  |
| 1381228_at | AI073001 |  |  | 21,81  |
| 1392655_at | AA997266 |  |  | 23,51  |
| 1393728_at | AA964541 |  |  | 33,00  |
| 1393957_at | AI548358 |  |  | 34,49  |
| 1383189_at | AA818143 |  |  | 34,96  |
| 1383757_at | AI044802 |  |  | 37,96  |
| 1373843_at | BE107419 |  |  | 46,87  |
| 1391106_at | BM385061 |  |  | 87,76  |
| 1374337_at | AI408954 |  |  | 114,11 |
| 1385641_at | AI070558 |  |  | 124,37 |
| 1397611_at | AW525619 |  |  | 246,48 |
| 1385380_at | AI044983 |  |  | 292,90 |
| 1382950_at | AA901350 |  |  | 407,52 |

Primary rat  $\beta$ -cells were left untreated or exposed to TNF- $\alpha$ +IFN- $\gamma$  (TNF+IFN) for 6h. Data are mean of three independent experiments and are expressed as fold change versus control cells, studied at the same time point. Gene expression was considered modified by treatment when  $P \leq 0.02$  (paired *t-test*) and expression  $\geq 1.5$  fold higher or lower as compared to control conditions.

Pval = p value of Student t-test against control condition at the same time point. Some genes are represented by more than one probe. Classification was done using the IPA software
