# Supplementary material for: Cytokines Interleukin-1β and Tumor Necrosis Factor-α Regulate Different Transcriptional and Alternative Splicing Networks in Primary β-Cells
Source: PubMed Central journal article supplement — Diabetes. 2009 Nov 23;59(2):358–74. doi: 10.2337/db09-1159 (PMC2809955; doi:10.2337/db09-1159), 2009-11-23
Supplement: supp_db09-1159_Suppl_Table_VII.pdf [file supp_db09-1159_Suppl_Table_VII.pdf]

Suppl. Table VII: Up and down regulated genes after exposure to TNF- $\alpha$  + IFN- $\gamma$  for 24h detected by array analysis

| probe        | GenBank   | gene names/functional groups                                                                  | Symbol   | FC    | localization        |
|--------------|-----------|-----------------------------------------------------------------------------------------------|----------|-------|---------------------|
|              |           | <b>Cytokine</b>                                                                               |          |       |                     |
| 1367973_at   | NM_031530 | chemokine (C-C motif) ligand 13                                                               | CCL13    | 124,1 | Extracellular Space |
| 1369814_at   | AF053312  | chemokine (C-C motif) ligand 20                                                               | CCL20    | 14,9  | Extracellular Space |
| 1369983_at   | NM_031116 | chemokine (C-C motif) ligand 5                                                                | CCL5     | 182,1 | Extracellular Space |
| 1379935_at   | BF419899  | chemokine (C-C motif) ligand 7                                                                | CCL7     | 7,4   | Extracellular Space |
| 1387969_at   | U22520    | chemokine (C-X-C motif) ligand 10                                                             | CXCL10   | 188,8 | Extracellular Space |
| 1379365_at   | BF281987  | chemokine (C-X-C motif) ligand 11                                                             | CXCL11   | 151,4 | Extracellular Space |
| 1372064_at   | BI296385  | chemokine (C-X-C motif) ligand 16                                                             | CXCL16   | 24,7  | Extracellular Space |
| 1387316_at   | NM_030845 | chemokine (C-X-C motif) ligand 2                                                              | CXCL2    | 6,6   | Extracellular Space |
| 1373544_at   | AI170387  | chemokine (C-X-C motif) ligand 9                                                              | CXCL9    | 288,0 | Extracellular Space |
| 1382454_at   | AI044222  | chemokine (C-X-C motif) ligand 9                                                              | CXCL9    | 334,7 | Extracellular Space |
| 1372478_at   | AI137605  | CKLF-like MARVEL transmembrane domain containing 7                                            | CMTM7    | -1,7  | Extracellular Space |
| 1368375_a_at | AF015718  | interleukin 15                                                                                | IL15     | 20,4  | Extracellular Space |
| 1369665_a_at | AJ222813  | interleukin 18 (interferon-gamma-inducing factor)                                             | IL18     | 2,2   | Extracellular Space |
| 1379499_at   | BF282228  | lymphotoxin beta (TNF superfamily, member 3)                                                  | LTB      | 48,0  | Extracellular Space |
| 1389014_at   | BI297612  | nicotinamide phosphoribosyltransferase                                                        | NAMPT    | 3,8   | Extracellular Space |
| 1368044_at   | NM_022669 | secretogranin II (chromogranin C)                                                             | SCG2     | -1,9  | Extracellular Space |
| 1374279_at   | BI288244  | small inducible cytokine subfamily E, member 1 (endothelial monocyte-activating)              | SCYE1    | 1,7   | Extracellular Space |
| 1379810_at   | AI454911  | small inducible cytokine subfamily E, member 1 (endothelial monocyte-activating)              | SCYE1    | 2,1   | Extracellular Space |
|              |           | <b>Enzyme</b>                                                                                 |          |       |                     |
| 1398752_at   | NM_133297 | 15 kDa selenoprotein                                                                          | SEP15    | -1,7  | Cytoplasm           |
| 1382227_at   | AW533203  | 1-acylglycerol-3-phosphate O-acyltransferase 3                                                | AGPAT3   | -4,3  | Cytoplasm           |
| 1368194_at   | NM_133406 | 1-acylglycerol-3-phosphate O-acyltransferase 4 (lysophosphatidic acid acyltransferase, delta) | AGPAT4   | 1,8   | Cytoplasm           |
| 1370693_a_at | M18630    | 2',3'-cyclic nucleotide 3' phosphodiesterase                                                  | CNP      | 1,9   | Cytoplasm           |
| 1387897_at   | L16532    | 2',3'-cyclic nucleotide 3' phosphodiesterase                                                  | CNP      | 2,5   | Cytoplasm           |
| 1367777_at   | NM_057197 | 2,4-dienoyl CoA reductase 1, mitochondrial                                                    | DECR1    | -2,2  | Cytoplasm           |
| 1371152_a_at | Z18877    | 2',5'-oligoadenylate synthetase 1, 40/46kDa                                                   | OAS1     | 13,2  | Cytoplasm           |
| 1388056_at   | AF068268  | 2'-5' oligoadenylate synthetase 1B                                                            | OAS1B    | 6,5   | Unknown             |
| 1377497_at   | BF419319  | 2'-5'-oligoadenylate synthetase-like                                                          | OASL     | 17,6  | Unknown             |
| 1371012_at   | AJ245707  | 2-hydroxyacyl-CoA lyase 1                                                                     | HACL1    | -2,5  | Cytoplasm           |
| 1371421_at   | BM391873  | 3-oxoacid CoA transferase 1                                                                   | OXCT1    | -2,4  | Cytoplasm           |
| 1395721_at   | AW917486  | 3'-phosphoadenosine 5'-phosphosulfate synthase 2                                              | PAPSS2   | -5,2  | Cytoplasm           |
| 1381768_at   | AW535082  | 5,10-methenyltetrahydrofolate synthetase (5-formyltetrahydrofolate cyclo-ligase)              | MTHFS    | 2,0   | Cytoplasm           |
| 1391412_at   | AA996841  | 5'-3' exoribonuclease 2                                                                       | XRN2     | 1,8   | Nucleus             |
| 1369962_at   | NM_031014 | 5-aminoimidazole-4-carboxamide ribonucleotide formyltransferase/IMP cyclohydrolase            | ATIC     | 1,7   | Unknown             |
| 1374523_at   | AI231339  | 6-phosphogluconolactonase                                                                     | PGLS     | -2,1  | Cytoplasm           |
| 1388988_at   | AI175070  | abhydrolase domain containing 14B                                                             | ABHD14B  | -2,4  | Cytoplasm           |
| 1390455_at   | AI013474  | abhydrolase domain containing 2                                                               | ABHD2    | 7,1   | Unknown             |
| 1379854_at   | AA996933  | abhydrolase domain containing 5                                                               | ABHD5    | 5,3   | Cytoplasm           |
| 1393197_at   | BG376055  | abhydrolase domain containing 8                                                               | ABHD8    | -1,8  | Unknown             |
| 1367763_at   | D13921    | acetyl-Coenzyme A acetyltransferase 1                                                         | ACAT1    | -4,4  | Cytoplasm           |
| 1383416_at   | AA899304  | acetyl-Coenzyme A acetyltransferase 1                                                         | ACAT1    | -2,9  | Cytoplasm           |
| 1389363_at   | AA997430  | acireductone dioxygenase 1                                                                    | ADI1     | -1,8  | Nucleus             |
| 1367589_at   | NM_024398 | aconitase 2, mitochondrial                                                                    | ACO2     | -1,8  | Cytoplasm           |
| 1377755_at   | AI179403  | activating signal cointegrator 1 complex subunit 3                                            | ASCC3    | 2,2   | Nucleus             |
| 1386926_at   | NM_053607 | acyl-CoA synthetase long-chain family member 5                                                | ACSL5    | 2,2   | Cytoplasm           |
| 1383303_at   | BI282211  | acyl-CoA synthetase medium-chain family member 3                                              | ACSM3    | -3,6  | Cytoplasm           |
| 1372782_a_at | BE111787  | adenosine monophosphate deaminase 2 (isoform L)                                               | AMPD2    | -2,0  | Unknown             |
| 1367933_at   | NM_031011 | adenosylmethionine decarboxylase 1                                                            | AMD1     | -1,6  | Unknown             |
| 1370505_at   | M86341    | ADP-ribosylarginine hydrolase                                                                 | ADPRH    | -1,9  | Unknown             |
| 1367960_at   | NM_019186 | ADP-ribosylation factor-like 4A                                                               | ARL4A    | 3,2   | Nucleus             |
| 1380383_at   | AI030650  | ADP-ribosylation factor-like 4D                                                               | ARL4D    | -2,1  | Nucleus             |
| 1372634_at   | AI009334  | ADP-ribosylhydrolase like 2                                                                   | ADPRHL2  | 2,5   | Cytoplasm           |
| 1388394_at   | BI282672  | alanyl-tRNA synthetase                                                                        | AARS     | 1,8   | Cytoplasm           |
| 1374661_at   | AW524523  | aldehyde dehydrogenase 16 family, member A1                                                   | ALDH16A1 | 1,8   | Unknown             |

|              |           |                                                                                                          |                            |       |                     |
|--------------|-----------|----------------------------------------------------------------------------------------------------------|----------------------------|-------|---------------------|
| 1368365_at   | NM_031731 | aldehyde dehydrogenase 3 family, member A2                                                               | ALDH3A2                    | -2,3  | Cytoplasm           |
| 1387344_at   | AI407458  | aldehyde dehydrogenase 6 family, member A1                                                               | ALDH6A1                    | -2,2  | Cytoplasm           |
| 1371567_at   | AI411279  | aldehyde dehydrogenase 7 family, member A1                                                               | ALDH7A1                    | -3,0  | Cytoplasm           |
| 1386998_at   | NM_012497 | aldolase C, fructose-bisphosphate                                                                        | ALDOC                      | 3,8   | Cytoplasm           |
| 1371772_at   | AI410425  | alkB, alkylation repair homolog 3 (E. coli)                                                              | ALKBH3                     | 1,9   | Nucleus             |
| 1377375_at   | AA944898  | aminoadipate-semialdehyde synthase                                                                       | AASS                       | -5,0  | Cytoplasm           |
| 1367982_at   | NM_024484 | aminolevulinate, delta-, synthase 1                                                                      | ALAS1                      | 1,9   | Cytoplasm           |
| 1372736_at   | BG374196  | amylase-1, 6-galactosidase, 4-alpha-galactanotransferase                                                 | AGL                        | -4,1  | Unknown             |
| 1388417_at   | BI281876  | anaphase promoting complex subunit 5                                                                     | ANAPC5                     | -1,8  | Nucleus             |
| 1383278_at   | BF558819  | ArfGAP with GTPase domain, ankyrin repeat and PH domain 1                                                | AGAP1                      | 3,1   | Cytoplasm           |
| 1368916_at   | NM_021577 | argininosuccinate lyase                                                                                  | ASL                        | -2,0  | Cytoplasm           |
| 1372255_at   | BF283284  | arginyl-tRNA synthetase                                                                                  | RARS                       | 2,7   | Cytoplasm           |
| 1375973_at   | AI600108  | ariadne homolog, ubiquitin-conjugating enzyme E2 binding protein, 1 (Drosophila)                         | ARIH1                      | 3,0   | Cytoplasm           |
| 1375595_at   | AI231433  | ariadne homolog, ubiquitin-conjugating enzyme E2 binding protein, 1 (Drosophila)                         | ARIH1                      | 3,6   | Cytoplasm           |
| 1368244_at   | NM_080890 | arsenic (+3 oxidation state) methyltransferase                                                           | AS3MT                      | -2,7  | Cytoplasm           |
| 1374459_at   | AI178448  | asparagine-linked glycosylation 2, alpha-1,3-mannosyltransferase homolog (S. cerevisiae)                 | ALG2                       | -1,6  | Unknown             |
| 1382019_at   | AA998062  | asparagine-linked glycosylation 5, dolichyl-phosphate beta-galactosyltransferase homolog (S. cerevisiae) | ALG5                       | -1,8  | Cytoplasm           |
| 1374437_at   | BF419336  | asparaginyl-tRNA synthetase                                                                              | NARS                       | 2,3   | Cytoplasm           |
| 1372421_at   | AA943766  | aspartylglucosaminidase                                                                                  | AGA                        | -2,5  | Cytoplasm           |
| 1370113_at   | NM_023987 | baculoviral IAP repeat-containing 3                                                                      | BIRC3                      | 53,0  | Cytoplasm           |
| 1386773_at   | BF524794  | biotinidase                                                                                              | BTD                        | -4,0  | Extracellular Space |
| 1388617_at   | AW914746  | biphenyl hydrolase-like (serine hydrolase)                                                               | BPHL                       | -3,2  | Cytoplasm           |
| 1370869_at   | AI102790  | branched chain aminotransferase 1, cytosolic                                                             | BCAT1                      | 7,1   | Cytoplasm           |
| 1388680_at   | BM385686  | C1GALT1-specific chaperone 1                                                                             | C1GALT1C1                  | -2,6  | Unknown             |
| 1394264_at   | BF558607  | carbohydrate (N-acetylglucosamine 6-O) sulfotransferase 6                                                | CHST6                      | -5,3  | Cytoplasm           |
| 1372372_at   | BG372437  | carboxymethylenebutenolidase homolog (Pseudomonas)                                                       | CMBL                       | -1,6  | Unknown             |
| 1392847_at   | BE118227  | Cas-Br-M (murine) ecotropic retroviral transforming sequence-like 1                                      | CBLL1                      | 1,7   | Nucleus             |
| 1367995_at   | NM_012520 | catalase                                                                                                 | CAT                        | 2,1   | Cytoplasm           |
| 1368826_at   | NM_012531 | catechol-O-methyltransferase                                                                             | COMT                       | 2,9   | Cytoplasm           |
| 1368248_at   | NM_031242 | CDP-diacylglycerol synthase (phosphatidate cytidylyltransferase) 1                                       | CDS1                       | 2,0   | Cytoplasm           |
| 1388400_at   | BG375350  | cell division cycle 34 homolog (S. cerevisiae)                                                           | CDC34 (includes EG:299602) | 2,3   | Nucleus             |
| 1388286_a_at | L38482    | cell division cycle 34 homolog (S. cerevisiae)                                                           | CDC34 (includes EG:299602) | 2,4   | Nucleus             |
| 1368419_at   | AF202115  | ceruloplasmin (ferroxidase)                                                                              | CP                         | 42,0  | Extracellular Space |
| 1368420_at   | NM_012532 | ceruloplasmin (ferroxidase)                                                                              | CP                         | 55,0  | Extracellular Space |
| 1368418_a_at | AF202115  | ceruloplasmin (ferroxidase)                                                                              | CP                         | 60,3  | Extracellular Space |
| 1383313_at   | BE120149  | checkpoint with forkhead and ring finger domains                                                         | CHFR                       | -1,7  | Nucleus             |
| 1388977_at   | BM390401  | choline/ethanolamine phosphotransferase 1                                                                | CEPT1                      | 2,2   | Cytoplasm           |
| 1373561_at   | AI012498  | chondroitin polymerizing factor                                                                          | CHPF                       | -2,4  | Cytoplasm           |
| 1374537_at   | AI406533  | chondroitin sulfate synthase 1                                                                           | CHSY1                      | -1,9  | Cytoplasm           |
| 1374190_at   | BG380750  | citrate lyase beta like                                                                                  | CLYBL                      | -8,9  | Unknown             |
| 1369967_at   | NM_130755 | citrate synthase                                                                                         | CS                         | 2,8   | Cytoplasm           |
| 1367632_at   | NM_017073 | coiled-coil domain containing 92                                                                         | CCDC92 (includes EG:80212) | -2,0  | Cytoplasm           |
| 1387446_at   | NM_022950 | core 1 synthase, glycoprotein-N-acetylgalactosamine 3-beta-galactosyltransferase, 1                      | C1GALT1                    | 2,1   | Extracellular Space |
| 1389135_at   | AW140637  | CTP synthase II                                                                                          | CTPS2                      | 2,3   | Unknown             |
| 1388855_at   | BI284428  | cullin 1                                                                                                 | CUL1                       | 1,6   | Nucleus             |
| 1367755_at   | NM_052809 | cysteine dioxygenase, type I                                                                             | CDO1                       | -3,2  | Cytoplasm           |
| 1379344_at   | AI176057  | cytochrome b-245, beta polypeptide                                                                       | CYBB                       | 2,5   | Cytoplasm           |
| 1370808_at   | J03867    | cytochrome b5 reductase 3                                                                                | CYB5R3                     | -17,4 | Cytoplasm           |
| 1370827_at   | AF307840  | cytochrome b5 reductase 4                                                                                | CYB5R4                     | 1,6   | Cytoplasm           |
| 1387914_at   | M73231    | cytochrome P450, family 27, subfamily A, polypeptide 1                                                   | CYP27A1                    | 31,5  | Cytoplasm           |
| 1397405_at   | BM385221  | DEAD (Asp-Glu-Ala-Asp) box polypeptide 17                                                                | DDX17                      | -4,2  | Nucleus             |
| 1397529_at   | BI296754  | DEAD (Asp-Glu-Ala-Asp) box polypeptide 17                                                                | DDX17                      | -2,5  | Nucleus             |
| 1371362_at   | BI285402  | DEAD (Asp-Glu-Ala-Asp) box polypeptide 17                                                                | DDX17                      | -1,8  | Nucleus             |
| 1375901_at   | AI178527  | DEAD (Asp-Glu-Ala-Asp) box polypeptide 21                                                                | DDX21                      | 1,6   | Nucleus             |
| 1376739_at   | AW252511  | DEAD (Asp-Glu-Ala-Asp) box polypeptide 24                                                                | DDX24                      | 1,5   | Nucleus             |
| 1368619_at   | NM_031630 | DEAD (Asp-Glu-Ala-Asp) box polypeptide 25                                                                | DDX25                      | -3,2  | Nucleus             |
| 1387048_at   | NM_053563 | DEAD (Asp-Glu-Ala-Asp) box polypeptide 39                                                                | DDX39                      | 2,4   | Nucleus             |
| 1371837_at   | AA851926  | DEAD (Asp-Glu-Ala-Asp) box polypeptide 5                                                                 | DDX5                       | -2,3  | Nucleus             |

|              |           |                                                                                                |                           |       |                     |
|--------------|-----------|------------------------------------------------------------------------------------------------|---------------------------|-------|---------------------|
| 1390688_at   | AA799576  | DEAD (Asp-Glu-Ala-Asp) box polypeptide 50                                                      | DDX50                     | 1,5   | Nucleus             |
| 1391463_at   | AI575264  | DEAD (Asp-Glu-Ala-Asp) box polypeptide 58                                                      | DDX58                     | 14,7  | Cytoplasm           |
| 1381556_at   | BI303853  | DEAD (Asp-Glu-Ala-Asp) box polypeptide 60                                                      | DDX60                     | 103,4 | Unknown             |
| 1393432_a_at | AA899840  | DEAH (Asp-Glu-Ala-His) box polypeptide 36                                                      | DHX36                     | -2,0  | Unknown             |
| 1374299_at   | BF398414  | DEAH (Asp-Glu-Ala-His) box polypeptide 9                                                       | DHX9                      | -1,7  | Nucleus             |
| 1390172_at   | AI409946  | dehydrogenase E1 and transketolase domain containing 1                                         | DHTKD1                    | -1,9  | Unknown             |
| 1373240_at   | BI276935  | dehydrogenase/reductase (SDR family) member 3                                                  | DHRS3                     | -2,9  | Cytoplasm           |
| 1370814_at   | AB062758  | dehydrogenase/reductase (SDR family) member 4                                                  | DHRS4                     | -9,1  | Cytoplasm           |
| 1379420_at   | AI145019  | dehydrogenase/reductase (SDR family) member 7                                                  | DHRS7 (includes EG:51635) | -2,2  | Unknown             |
| 1387865_at   | AI411157  | deoxyuridine triphosphatase                                                                    | DUT (includes EG:497778)  | -2,6  | Unknown             |
| 1385439_x_at | BF417541  | DEXH (Asp-Glu-X-His) box polypeptide 58                                                        | DHX58                     | 11,8  | Cytoplasm           |
| 1385276_a_at | AA818849  | DEXH (Asp-Glu-X-His) box polypeptide 58                                                        | DHX58                     | 17,1  | Cytoplasm           |
| 1373201_at   | AI412898  | dihydro-lipoamide branched chain transacylase E2                                               | DBT                       | -1,9  | Cytoplasm           |
| 1387141_at   | NM_023023 | dihydropyrimidinase-like 5                                                                     | DPYSL5                    | -1,9  | Cytoplasm           |
| 1393611_at   | AA964538  | DNA helicase HEL308                                                                            | HEL308                    | -3,1  | Nucleus             |
| 1387780_at   | NM_032079 | DnaJ (Hsp40) homolog, subfamily A, member 2                                                    | DNAJA2                    | 1,7   | Nucleus             |
| 1368064_a_at | U31884    | dopa decarboxylase (aromatic L-amino acid decarboxylase)                                       | DDC                       | -7,2  | Cytoplasm           |
| 1370845_at   | BI288690  | ectonucleoside triphosphate diphosphohydrolase 2                                               | ENTPD2                    | 2,7   | Cytoplasm           |
| 1373912_at   | AI170859  | ectonucleotide pyrophosphatase/phosphodiesterase 4 (putative function)                         | ENPP4                     | 2,8   | Unknown             |
| 1389207_at   | BI282122  | egl nine homolog 1 (C. elegans)                                                                | EGLN1                     | 2,9   | Cytoplasm           |
| 1375739_at   | BF395171  | EH-domain containing 4                                                                         | EHD4                      | 4,7   | Plasma Membrane     |
| 1374399_at   | AA801107  | EH-domain containing 4                                                                         | EHD4                      | 5,9   | Plasma Membrane     |
| 1377729_at   | BG668988  | elongation of very long chain fatty acids (FEN1/Elo2, SUR4/Elo3, yeast)-like 4                 | ELOVL4                    | -1,6  | Cytoplasm           |
| 1388108_at   | BE116152  | ELOVL family member 6, elongation of long chain fatty acids (FEN1/Elo2, SUR4/Elo3-like, yeast) | ELOVL6                    | -2,8  | Cytoplasm           |
| 1386885_at   | NM_022594 | enoyl Coenzyme A hydratase 1, peroxisomal                                                      | ECH1                      | -1,6  | Cytoplasm           |
| 1376315_at   | BI282297  | ER degradation enhancer, mannosidase alpha-like 2                                              | EDEM2                     | -3,1  | Cytoplasm           |
| 1372592_at   | AI411391  | ES cell expressed Ras                                                                          | ERAS                      | -1,9  | Plasma Membrane     |
| 1383346_at   | BF387821  | excision repair cross-complementing rodent repair deficiency, complementation group 4          | ERCC4                     | -1,5  | Nucleus             |
| 1392508_at   | BE119831  | exoribonuclease 1                                                                              | THEX1                     | 1,7   | Unknown             |
| 1373393_at   | BM384468  | exostoses (multiple) 1                                                                         | EXT1                      | 2,0   | Cytoplasm           |
| 1371611_at   | BM387363  | exostoses (multiple) 2                                                                         | EXT2                      | -1,6  | Cytoplasm           |
| 1373147_at   | AI145387  | F-box and leucine-rich repeat protein 3                                                        | FBXL3                     | -1,5  | Nucleus             |
| 1372969_at   | BI289651  | F-box and leucine-rich repeat protein 3                                                        | FBXL3                     | 1,7   | Nucleus             |
| 1392469_at   | AI102773  | F-box and WD repeat domain containing 2                                                        | FBXW2                     | 1,7   | Cytoplasm           |
| 1389320_at   | BF419881  | F-box protein 25                                                                               | FBXO25                    | -2,5  | Unknown             |
| 1370820_at   | AF393484  | F-box protein 6                                                                                | FBXO6                     | 3,2   | Cytoplasm           |
| 1399133_at   | AW520767  | F-box protein 7                                                                                | FBXO7                     | 2,4   | Cytoplasm           |
| 1388470_at   | AA892772  | F-box protein 9                                                                                | FBXO9                     | -2,0  | Cytoplasm           |
| 1370234_at   | AA893484  | fibronectin 1                                                                                  | FN1                       | -19,5 | Plasma Membrane     |
| 1398828_at   | U09386    | FK506 binding protein 1A, 12kDa                                                                | FKBP1A                    | 1,5   | Cytoplasm           |
| 1384344_at   | AI060231  | FK506 binding protein 7                                                                        | FKBP7                     | -2,1  | Cytoplasm           |
| 1367737_at   | NM_012562 | fucosidase, alpha-L- 1, tissue                                                                 | FUCA1                     | -2,6  | Cytoplasm           |
| 1376249_at   | BM389993  | fucosidase, alpha-L- 2, plasma                                                                 | FUCA2                     | -2,9  | Extracellular Space |
| 1368314_at   | NM_031756 | gamma-glutamyl carboxylase                                                                     | GGCX                      | -1,9  | Cytoplasm           |
| 1368307_at   | NM_130423 | gamma-glutamyltransferase 7                                                                    | GGT7                      | -1,8  | Unknown             |
| 1372859_at   | AI598958  | GDP-mannose pyrophosphorylase A                                                                | GMPPA                     | -1,7  | Unknown             |
| 1389265_at   | BI284270  | glucan (1,4-alpha-), branching enzyme 1                                                        | GBE1                      | 1,7   | Cytoplasm           |
| 1371894_at   | AI409037  | glucosamine (N-acetyl)-6-sulfatase                                                             | GNS                       | 1,7   | Cytoplasm           |
| 1373669_at   | BG374650  | glucosamine-6-phosphate deaminase 2                                                            | GNPDA2                    | 2,4   | Unknown             |
| 1373366_at   | BM389337  | glucosidase, alpha; neutral AB                                                                 | GANAB                     | -2,2  | Cytoplasm           |
| 1367901_at   | NM_017015 | glucuronidase, beta                                                                            | GUSB                      | -2,0  | Cytoplasm           |
| 1369462_at   | NM_012563 | glutamate decarboxylase 2 (pancreatic islets and brain, 65kDa)                                 | GAD2                      | -5,3  | Cytoplasm           |
| 1370200_at   | BI284411  | glutamate dehydrogenase 1                                                                      | GLUD1                     | -3,2  | Cytoplasm           |
| 1387878_at   | AW916644  | glutamate dehydrogenase 1                                                                      | GLUD1                     | -2,3  | Cytoplasm           |
| 1372523_at   | AA892770  | glutamate-cysteine ligase, catalytic subunit                                                   | GCLC                      | 2,3   | Cytoplasm           |
| 1370030_at   | NM_017305 | glutamate-cysteine ligase, modifier subunit                                                    | GCLM                      | 2,2   | Cytoplasm           |
| 1367805_at   | NM_012569 | glutaminase                                                                                    | GLS                       | -3,4  | Cytoplasm           |
| 1370375_at   | J05499    | glutaminase 2 (liver, mitochondrial)                                                           | GLS2                      | -2,8  | Cytoplasm           |

|              |           |                                                                    |                           |       |                     |
|--------------|-----------|--------------------------------------------------------------------|---------------------------|-------|---------------------|
| 1377761_at   | BI296057  | glutamine-fructose-6-phosphate transaminase 2                      | GFPT2                     | 1,5   | Unknown             |
| 1367705_at   | AF319950  | glutaredoxin (thioltransferase)                                    | GLRX                      | -10,5 | Cytoplasm           |
| 1386908_at   | NM_022278 | glutaredoxin (thioltransferase)                                    | GLRX                      | -4,5  | Cytoplasm           |
| 1367870_at   | NM_032614 | glutaredoxin 3                                                     | GLRX3                     | 2,4   | Cytoplasm           |
| 1374070_at   | AA800587  | glutathione peroxidase 2 (gastrointestinal)                        | GPX2                      | 10,7  | Cytoplasm           |
| 1387023_at   | NM_031154 | glutathione S-transferase mu 2 (muscle)                            | GSTM2                     | -8,3  | Cytoplasm           |
| 1389832_at   | BE113459  | glutathione S-transferase omega 1                                  | GSTO1                     | 1,6   | Cytoplasm           |
| 1388122_at   | X02904    | glutathione S-transferase pi 1                                     | GSTP1                     | 6,3   | Cytoplasm           |
| 1398296_at   | NM_032615 | glycerophosphodiester phosphodiesterase 1                          | GDE1                      | -4,5  | Plasma Membrane     |
| 1374541_at   | BM392117  | glycogen synthase 1 (muscle)                                       | GYS1                      | 2,6   | Cytoplasm           |
| 1368187_at   | NM_133298 | glycoprotein (transmembrane) nmb                                   | GNPMB                     | 7,3   | Plasma Membrane     |
| 1388887_at   | AI178222  | glycoprotein, alpha-galactosyltransferase 1                        | GGTA1                     | -1,5  | Cytoplasm           |
| 1380833_at   | AI045802  | glycosylphosphatidylinositol specific phospholipase D1             | GPLD1                     | -1,9  | Cytoplasm           |
| 1387906_a_at | AF107845  | GNAS complex locus                                                 | GNAS                      | -3,1  | Plasma Membrane     |
| 1369897_s_at | BI277035  | GNAS complex locus                                                 | GNAS                      | -2,9  | Plasma Membrane     |
| 1374489_at   | BF282573  | GTP binding protein 2                                              | GTPBP2                    | 6,8   | Unknown             |
| 1382351_at   | AI069972  | GTP binding protein overexpressed in skeletal muscle               | GEM                       | -3,1  | Plasma Membrane     |
| 1370976_at   | BE118966  | GTPase activating protein (SH3 domain) binding protein 1           | G3BP1                     | 1,9   | Nucleus             |
| 1367732_at   | U34958    | guanine nucleotide binding protein (G protein), beta polypeptide 1 | GNB1                      | 2,6   | Plasma Membrane     |
| 1377739_at   | AI576549  | guanine nucleotide binding protein (G protein), gamma 12           | GNG12                     | 3,5   | Plasma Membrane     |
| 1392905_at   | BF552733  | guanine nucleotide binding protein (G protein), gamma 2            | GNG2                      | -2,5  | Plasma Membrane     |
| 1387342_at   | BM389548  | guanine nucleotide binding protein (G protein), gamma 5            | GNG5                      | 3,4   | Plasma Membrane     |
| 1368332_at   | NM_133624 | guanylate binding protein 2, interferon-inducible                  | GBP2                      | 615,9 | Cytoplasm           |
| 1385051_at   | BE108569  | guanylate binding protein 4                                        | GBP4 (includes EG:115361) | 123,4 | Cytoplasm           |
| 1382902_at   | AA943147  | hect domain and RLD 6                                              | HERC6                     | 22,1  | Unknown             |
| 1370080_at   | NM_012580 | heme oxygenase (decycling) 1                                       | HMOX1                     | 7,1   | Cytoplasm           |
| 1373222_at   | AI230271  | hexosaminidase A (alpha polypeptide)                               | HEXA                      | -1,6  | Cytoplasm           |
| 1395533_at   | BF552813  | histidyl-tRNA synthetase                                           | HARS                      | -4,9  | Cytoplasm           |
| 1388158_at   | BG057565  | HLA-B associated transcript 1                                      | BAT1                      | 1,7   | Nucleus             |
| 1370237_at   | AA799574  | hydroxyacyl-Coenzyme A dehydrogenase                               | HADH                      | -6,4  | Cytoplasm           |
| 1369986_at   | NM_033349 | hydroxyacylglutathione hydrolase                                   | HAGH                      | -3,4  | Cytoplasm           |
| 1387631_at   | NM_024390 | hydroxyprostaglandin dehydrogenase 15-(NAD)                        | HPGD                      | -10,5 | Cytoplasm           |
| 1376191_at   | AA848820  | hydroxyprostaglandin dehydrogenase 15-(NAD)                        | HPGD                      | -3,9  | Cytoplasm           |
| 1387608_at   | NM_023973 | indoleamine-pyrrole 2,3 dioxygenase                                | INDO                      | 19,8  | Cytoplasm           |
| 1399123_at   | BI302415  | integrator complex subunit 6                                       | INTS6                     | -1,8  | Nucleus             |
| 1375796_at   | BI300770  | interferon gamma induced GTPase                                    | IGTP                      | 11,2  | Cytoplasm           |
| 1376151_a_at | AI407953  | interferon gamma induced GTPase                                    | IGTP                      | 16,1  | Cytoplasm           |
| 1397304_at   | AW525366  | interferon gamma induced GTPase                                    | IGTP                      | 98,7  | Cytoplasm           |
| 1377950_at   | AA955213  | interferon inducible GTPase 1                                      | IIGP1                     | 142,2 | Unknown             |
| 1373992_at   | AI408440  | interferon inducible GTPase 1                                      | IIGP1                     | 370,8 | Unknown             |
| 1390507_at   | BI296097  | interferon stimulated exonuclease gene 20kDa                       | ISG20                     | 3,5   | Nucleus             |
| 1372070_at   | BM389261  | interferon, gamma-inducible protein 30                             | IFI30                     | 2,0   | Cytoplasm           |
| 1379339_at   | BM390448  | isochorismatase domain containing 1                                | ISOC1                     | 2,4   | Cytoplasm           |
| 1370865_at   | BI277627  | isocitrate dehydrogenase 3 (NAD+) gamma                            | IDH3G                     | -1,5  | Cytoplasm           |
| 1380561_at   | BI287928  | isoleucyl-tRNA synthetase 2, mitochondrial                         | IARS2                     | -2,0  | Cytoplasm           |
| 1368878_at   | NM_053539 | isopentenyl-diphosphate delta isomerase 1                          | IDII                      | -2,3  | Cytoplasm           |
| 1389472_at   | AI169015  | KIAA0859                                                           | KIAA0859                  | 1,5   | Unknown             |
| 1373809_at   | BI296325  | KIAA1279                                                           | KIAA1279                  | -3,8  | Unknown             |
| 1370218_at   | AA848319  | lactate dehydrogenase B                                            | LDHB                      | -2,2  | Cytoplasm           |
| 1390561_at   | BF282191  | ligase IV, DNA, ATP-dependent                                      | LIG4                      | -1,8  | Nucleus             |
| 1372884_at   | BG381486  | like-glycosyltransferase                                           | LARGE                     | -1,8  | Cytoplasm           |
| 1368075_at   | NM_012732 | lipase A, lysosomal acid, cholesterol esterase                     | LIPA                      | 7,2   | Cytoplasm           |
| 1371923_at   | BG380281  | lysophosphatidylcholine acyltransferase 1                          | LPCAT1                    | -4,3  | Cytoplasm           |
| 1372006_at   | BM391274  | lysyl oxidase-like 2                                               | LOXL2                     | -3,4  | Extracellular Space |
| 1380474_at   | AI013470  | lysyl oxidase-like 2                                               | LOXL2                     | -2,0  | Extracellular Space |
| 1371662_at   | AA892250  | lysyl-tRNA synthetase                                              | KARS                      | 3,4   | Cytoplasm           |
| 1369868_at   | NM_053946 | magnesium transporter 1                                            | MAGT1                     | -1,6  | Extracellular Space |
| 1372790_at   | BG671530  | malate dehydrogenase 1, NAD (soluble)                              | MDH1                      | -3,4  | Cytoplasm           |

|              |           |                                                                                                                                         |                           |      |                 |
|--------------|-----------|-----------------------------------------------------------------------------------------------------------------------------------------|---------------------------|------|-----------------|
| 1367653_a_at | NM_033235 | malate dehydrogenase 1, NAD (soluble)                                                                                                   | MDH1                      | -1,9 | Cytoplasm       |
| 1383574_at   | AI502956  | mannosidase, alpha, class 1A, member 1                                                                                                  | MAN1A1                    | 4,7  | Cytoplasm       |
| 1374696_at   | AI170182  | mannosidase, alpha, class 1A, member 2                                                                                                  | MAN1A2                    | 3,7  | Cytoplasm       |
| 1388667_at   | AI178793  | mannosidase, alpha, class 2A, member 1                                                                                                  | MAN2A1                    | -2,8 | Cytoplasm       |
| 1377463_at   | BE099244  | mannosidase, alpha, class 2A, member 2                                                                                                  | MAN2A2                    | 2,2  | Cytoplasm       |
| 1388699_at   | BE114558  | mannosidase, alpha, class 2B, member 1                                                                                                  | MAN2B1                    | -2,2 | Cytoplasm       |
| 1371875_at   | BM388852  | mannosidase, beta A, lysosomal                                                                                                          | MANBA                     | 3,0  | Cytoplasm       |
| 1367796_at   | NM_030861 | mannosyl (alpha-1,3-)-glycoprotein beta-1,2-N-acetylglucosaminyltransferase                                                             | MGAT1                     | -1,6 | Cytoplasm       |
| 1395741_at   | BF548107  | meningioma expressed antigen 5 (hyaluronidase)                                                                                          | MGEA5                     | -1,7 | Unknown         |
| 1370129_at   | NM_131904 | meningioma expressed antigen 5 (hyaluronidase)                                                                                          | MGEA5                     | 6,1  | Unknown         |
| 1383025_at   | BE097791  | meningioma expressed antigen 5 (hyaluronidase)                                                                                          | MGEA5                     | 9,6  | Unknown         |
| 1371031_at   | AI454484  | methionine adenosyltransferase I, alpha                                                                                                 | MAT1A                     | 3,5  | Cytoplasm       |
| 1376852_at   | BI274460  | methylcrotonoyl-Coenzyme A carboxylase 1 (alpha)                                                                                        | MCCC1                     | -1,8 | Cytoplasm       |
| 1368181_at   | NM_022508 | methylenetetrahydrofolate dehydrogenase (NADP+ dependent) 1, methenyltetrahydrofolate cyclohydrolase, formyltetrahydrofolate synthetase | MTHFD1                    | 5,2  | Cytoplasm       |
| 1393152_at   | AI007821  | methylmalonyl Coenzyme A mutase                                                                                                         | MUT                       | -1,8 | Cytoplasm       |
| 1397644_at   | BI278369  | methylthioadenosine phosphorylase                                                                                                       | MTAP (includes EG:298227) | 2,7  | Unknown         |
| 1379858_at   | AA955134  | methyltransferase like 2B                                                                                                               | METTL2B                   | 1,6  | Unknown         |
| 1373241_at   | AW252569  | mitochondrial ribosomal protein L49                                                                                                     | MRPL49                    | -1,9 | Cytoplasm       |
| 1377493_at   | BM386301  | mitochondrial translation optimization 1 homolog (S. cerevisiae)                                                                        | MTO1                      | 3,2  | Cytoplasm       |
| 1371717_at   | AA943135  | mitofusin 1                                                                                                                             | MFN1                      | 2,2  | Cytoplasm       |
| 1368514_at   | NM_013198 | monoamine oxidase B                                                                                                                     | MAOB                      | -5,6 | Cytoplasm       |
| 1374725_at   | AW252811  | Mov10, Moloney leukemia virus 10, homolog (mouse)                                                                                       | MOV10                     | 13,6 | Nucleus         |
| 1372863_at   | BF409872  | MYC binding protein 2                                                                                                                   | MYCBP2                    | 2,3  | Nucleus         |
| 1387866_at   | AI178160  | myosin IXB                                                                                                                              | MYO9B                     | 2,5  | Cytoplasm       |
| 1371725_at   | BM392410  | myosin, heavy chain 9, non-muscle                                                                                                       | MYH9                      | 1,8  | Cytoplasm       |
| 1374606_at   | BF283073  | MYST histone acetyltransferase 1                                                                                                        | MYST1                     | -1,6 | Nucleus         |
| 1387283_at   | NM_134350 | myxovirus (influenza virus) resistance 1, interferon-inducible protein p78 (mouse)                                                      | MX1                       | 12,2 | Nucleus         |
| 1369202_at   | NM_017028 | myxovirus (influenza virus) resistance 1, interferon-inducible protein p78 (mouse)                                                      | MX1                       | 12,5 | Nucleus         |
| 1371015_at   | X52711    | myxovirus (influenza virus) resistance 2 (mouse)                                                                                        | MX2                       | 31,5 | Nucleus         |
| 1397556_at   | BF563329  | N-acetyltransferase 13 (GCN5-related)                                                                                                   | NAT13                     | 3,2  | Cytoplasm       |
| 1369077_at   | NM_053407 | N-acylsphingosine amidohydrolase (acid ceramidase) 1                                                                                    | ASAH1                     | -2,7 | Cytoplasm       |
| 1387599_a_at | J02679    | NAD(P)H dehydrogenase, quinone 1                                                                                                        | NQO1                      | 3,8  | Cytoplasm       |
| 1391126_at   | BG379351  | NADH dehydrogenase (ubiquinone) 1 alpha subcomplex, 12                                                                                  | NDUFA12                   | -4,5 | Cytoplasm       |
| 1389288_at   | BI279838  | NADH dehydrogenase (ubiquinone) 1 alpha subcomplex, 2, 8kDa                                                                             | NDUFA2                    | -1,6 | Cytoplasm       |
| 1371323_at   | BG666002  | NADH dehydrogenase (ubiquinone) 1 alpha subcomplex, 4, 9kDa                                                                             | NDUFA4                    | -2,1 | Cytoplasm       |
| 1371346_at   | AI104528  | NADH dehydrogenase (ubiquinone) 1 beta subcomplex, 6, 17kDa                                                                             | NDUFB6                    | -1,5 | Cytoplasm       |
| 1371314_at   | BM389736  | neural precursor cell expressed, developmentally down-regulated 4                                                                       | NEDD4                     | -2,4 | Cytoplasm       |
| 1387859_at   | AI410876  | NFS1 nitrogen fixation 1 homolog (S. cerevisiae)                                                                                        | NFS1                      | -2,1 | Cytoplasm       |
| 1371483_at   | AA891872  | nicotinamide nucleotide transhydrogenase                                                                                                | NNT                       | -1,6 | Cytoplasm       |
| 1387667_at   | L12562    | nitric oxide synthase 2, inducible                                                                                                      | NOS2                      | 57,8 | Cytoplasm       |
| 1398049_at   | BF405475  | nitrilase 1                                                                                                                             | NIT1                      | -1,8 | Unknown         |
| 1375522_at   | AI010491  | N-myristoyltransferase 1                                                                                                                | NMT1                      | 2,9  | Cytoplasm       |
| 1372364_a_at | AA894101  | N-terminal asparagine amidase                                                                                                           | NTAN1                     | -1,8 | Nucleus         |
| 1384009_at   | AI535383  | nuclear prelamin A recognition factor                                                                                                   | NARF                      | -2,0 | Nucleus         |
| 1372763_at   | AI407545  | nuclear undecaprenyl pyrophosphate synthase 1 homolog (S. cerevisiae)                                                                   | NUS1 (includes EG:52014)  | -2,1 | Unknown         |
| 1392522_at   | AA925790  | nuclear undecaprenyl pyrophosphate synthase 1 homolog (S. cerevisiae)                                                                   | NUS1 (includes EG:52014)  | 5,0  | Unknown         |
| 1368173_at   | NM_021754 | nucleolar protein NOP5/NOP58                                                                                                            | NOP5/NOP58                | 1,9  | Nucleus         |
| 1368311_at   | NM_012861 | O-6-methylguanine-DNA methyltransferase                                                                                                 | MGMT                      | 3,7  | Nucleus         |
| 1370543_at   | U76557    | O-linked N-acetylglucosamine (GlcNAc) transferase (UDP-N-acetylglucosamine:polypeptide-N-acetylglucosaminyl transferase)                | OGT                       | -2,2 | Cytoplasm       |
| 1388758_at   | AI009074  | O-linked N-acetylglucosamine (GlcNAc) transferase (UDP-N-acetylglucosamine:polypeptide-N-acetylglucosaminyl transferase)                | OGT                       | -1,5 | Cytoplasm       |
| 1370163_at   | BF281299  | ornithine decarboxylase 1                                                                                                               | ODC1                      | 4,3  | Cytoplasm       |
| 1376118_at   | BE109604  | OTU domain, ubiquitin aldehyde binding 2                                                                                                | OTUB2                     | -5,7 | Unknown         |
| 1370236_at   | AI234353  | palmitoyl-protein thioesterase 1                                                                                                        | PPT1                      | -2,4 | Cytoplasm       |
| 1371697_at   | BI278288  | patatin-like phospholipase domain containing 2                                                                                          | PNPLA2                    | 2,5  | Cytoplasm       |
| 1367687_a_at | M25719    | peptidylglycine alpha-amidating monooxygenase                                                                                           | PAM                       | -2,4 | Plasma Membrane |
| 1379665_at   | AI177835  | peptidylprolyl isomerase domain and WD repeat containing 1                                                                              | PPWD1                     | 1,8  | Nucleus         |
| 1383666_at   | BG378435  | peptidyl-tRNA hydrolase 1 homolog (S. cerevisiae)                                                                                       | PTRH1                     | 2,1  | Unknown         |
| 1389655_at   | AA892330  | peptidyl-tRNA hydrolase 2                                                                                                               | PTRH2                     | 3,3  | Cytoplasm       |

|              |           |                                                                                       |                           |       |                 |
|--------------|-----------|---------------------------------------------------------------------------------------|---------------------------|-------|-----------------|
| 1367591_at   | NM_022540 | peroxiredoxin 3                                                                       | PRDX3                     | -1,6  | Cytoplasm       |
| 1368262_at   | NM_021657 | PH domain and leucine rich repeat protein phosphatase                                 | PHLPP                     | 2,2   | Cytoplasm       |
| 1389299_at   | BG673255  | phosphate cytidyltransferase 1, choline, alpha                                        | PCYT1A                    | 1,6   | Cytoplasm       |
| 1371863_at   | BM387059  | phosphatidylglycerophosphate synthase 1                                               | PGS1                      | 2,6   | Cytoplasm       |
| 1388793_at   | AI408261  | phosphatidylinositol glycan anchor biosynthesis, class Q                              | PIGQ                      | -4,0  | Cytoplasm       |
| 1373099_at   | BI284221  | phosphatidylinositol glycan anchor biosynthesis, class S                              | PIGS                      | -1,8  | Cytoplasm       |
| 1372900_at   | BI274156  | phosphatidylinositol glycan anchor biosynthesis, class T                              | PIGT                      | -1,7  | Cytoplasm       |
| 1372532_at   | BI289477  | phosphatidylinositol transfer protein, membrane-associated 2                          | PITPNM2                   | 2,0   | Cytoplasm       |
| 1370669_a_at | AB027156  | phosphodiesterase 10A                                                                 | PDE10A                    | -4,3  | Cytoplasm       |
| 1368438_at   | NM_022236 | phosphodiesterase 10A                                                                 | PDE10A                    | -2,6  | Cytoplasm       |
| 1384400_at   | BM389421  | phosphodiesterase 4C, cAMP-specific (phosphodiesterase E1 dunce homolog, Drosophila)  | PDE4C                     | 2,6   | Cytoplasm       |
| 1391577_at   | BI293450  | phosphoglycerate mutase family member 5                                               | PGAM5                     | 1,5   | Cytoplasm       |
| 1378382_at   | AI230014  | phosphoglycerate mutase family member 5                                               | PGAM5                     | 1,6   | Cytoplasm       |
| 1371014_at   | BE097028  | phospholipase C, beta 1 (phosphoinositide-specific)                                   | PLCB1                     | -1,6  | Cytoplasm       |
| 1370530_a_at | AB000779  | phospholipase D1, phosphatidylcholine-specific                                        | PLD1                      | 2,8   | Cytoplasm       |
| 1369029_at   | NM_057194 | phospholipid scramblase 1                                                             | PLSCR1                    | 3,2   | Plasma Membrane |
| 1373417_at   | BI285973  | phospholipid scramblase 3                                                             | PLSCR3                    | 3,4   | Cytoplasm       |
| 1387271_at   | NM_053674 | phytanoyl-CoA 2-hydroxylase                                                           | PHYH                      | -2,1  | Cytoplasm       |
| 1392890_at   | BG663460  | platelet-activating factor acetylhydrolase, isoform Ib, alpha subunit 45kDa           | PAFAH1B1                  | -2,5  | Cytoplasm       |
| 1387807_at   | NM_031763 | platelet-activating factor acetylhydrolase, isoform Ib, alpha subunit 45kDa           | PAFAH1B1                  | 1,8   | Cytoplasm       |
| 1369963_at   | NM_053654 | platelet-activating factor acetylhydrolase, isoform Ib, gamma subunit 29kDa           | PAFAH1B3                  | 2,3   | Cytoplasm       |
| 1389784_at   | AI177507  | pogo transposable element with ZNF domain                                             | POGZ                      | -1,6  | Nucleus         |
| 1399093_at   | BM392394  | polyamine oxidase (exo-N4-amino)                                                      | PAOX (includes EG:196743) | -1,9  | Cytoplasm       |
| 1397164_at   | AI175779  | polymerase (DNA directed), alpha 2 (70kD subunit)                                     | POLA2                     | 2,7   | Nucleus         |
| 1371595_at   | BM384301  | polymerase (DNA directed), alpha 2 (70kD subunit)                                     | POLA2                     | 9,4   | Nucleus         |
| 1388883_at   | BF281976  | polymerase (DNA-directed), delta 4                                                    | POLD4                     | -4,3  | Nucleus         |
| 1387268_at   | NM_031773 | polymerase (RNA) I polypeptide B, 128kDa                                              | POLR1B                    | 1,8   | Nucleus         |
| 1380256_at   | BE103946  | polymerase (RNA) III (DNA directed) polypeptide C (62kD)                              | POLR3C                    | 2,0   | Nucleus         |
| 1391496_at   | AA819635  | polymerase (RNA) III (DNA directed) polypeptide F, 39 kDa                             | POLR3F                    | -1,6  | Nucleus         |
| 1382604_at   | BE117925  | polymerase (RNA) III (DNA directed) polypeptide G (32kD)                              | POLR3G                    | -1,7  | Nucleus         |
| 1399035_at   | BE097233  | polymerase (RNA) III (DNA directed) polypeptide H (22.9kD)                            | POLR3H                    | -1,7  | Nucleus         |
| 1383722_at   | H33436    | proline synthetase co-transcribed homolog (bacterial)                                 | PROSC                     | -4,9  | Cytoplasm       |
| 1371963_at   | BF395042  | propionyl Coenzyme A carboxylase, alpha polypeptide                                   | PCCA                      | -1,5  | Cytoplasm       |
| 1368259_at   | NM_017043 | prostaglandin-endoperoxide synthase 1 (prostaglandin G/H synthase and cyclooxygenase) | PTGS1                     | 7,4   | Cytoplasm       |
| 1368527_at   | U03389    | prostaglandin-endoperoxide synthase 2 (prostaglandin G/H synthase and cyclooxygenase) | PTGS2                     | 1,7   | Cytoplasm       |
| 1386897_at   | NM_024363 | protein arginine methyltransferase 1                                                  | PRMT1                     | 1,8   | Nucleus         |
| 1388717_at   | BM384163  | protein O-fucosyltransferase 2                                                        | POFUT2                    | -3,1  | Cytoplasm       |
| 1377079_a_at | BF386283  | protoporphyrinogen oxidase                                                            | PPOX                      | -2,1  | Cytoplasm       |
| 1369989_at   | NM_022601 | pyridoxamine 5'-phosphate oxidase                                                     | PNPO                      | -1,7  | Unknown         |
| 1377576_at   | AA891800  | pyrophosphatase (inorganic) 2                                                         | PPA2                      | -2,0  | Cytoplasm       |
| 1398429_at   | AA893184  | pyruvate dehydrogenase complex, component X                                           | PDHX                      | 2,1   | Cytoplasm       |
| 1383238_at   | AI060136  | queuine tRNA-ribosyltransferase 1                                                     | QTRT1                     | 1,8   | Unknown         |
| 1368847_at   | NM_017359 | RAB10, member RAS oncogene family                                                     | RAB10                     | 1,6   | Cytoplasm       |
| 1374069_at   | BE118560  | RAB11A, member RAS oncogene family                                                    | RAB11A                    | -1,7  | Cytoplasm       |
| 1371871_at   | AI409731  | RAB12, member RAS oncogene family                                                     | RAB12                     | 1,9   | Cytoplasm       |
| 1383089_at   | BM386264  | RAB21, member RAS oncogene family                                                     | RAB21                     | 2,5   | Cytoplasm       |
| 1389692_at   | BM391905  | RAB22A, member RAS oncogene family                                                    | RAB22A                    | -2,1  | Cytoplasm       |
| 1376409_at   | AI176677  | RAB23, member RAS oncogene family                                                     | RAB23                     | -1,7  | Cytoplasm       |
| 1377669_at   | BM389524  | RAB27A, member RAS oncogene family                                                    | RAB27A                    | -2,9  | Cytoplasm       |
| 1375985_at   | BF282984  | RAB2B, member RAS oncogene family                                                     | RAB2B                     | -1,8  | Plasma Membrane |
| 1370055_at   | M83681    | RAB3D, member RAS oncogene family                                                     | RAB3D                     | -2,0  | Cytoplasm       |
| 1388800_at   | AI406667  | RAB5A, member RAS oncogene family                                                     | RAB5A                     | 1,6   | Cytoplasm       |
| 1388823_at   | BI274642  | RAB5B, member RAS oncogene family                                                     | RAB5B                     | 2,0   | Cytoplasm       |
| 1387186_at   | NM_053458 | RAB9A, member RAS oncogene family                                                     | RAB9A                     | 2,6   | Cytoplasm       |
| 1370913_at   | AI409634  | radical S-adenosyl methionine domain containing 2                                     | RSAD2                     | 150,8 | Unknown         |
| 1367590_at   | NM_053439 | RAN, member RAS oncogene family                                                       | RAN                       | 2,2   | Nucleus         |
| 1369958_at   | NM_022542 | ras homolog gene family, member B                                                     | RHOB                      | -2,4  | Cytoplasm       |
| 1373774_at   | AI412619  | Ras-like without CAAX 2                                                               | RIT2                      | -6,9  | Plasma Membrane |

|              |           |                                                                                   |            |      |                     |
|--------------|-----------|-----------------------------------------------------------------------------------|------------|------|---------------------|
| 1383699_at   | BG673521  | Ras-like without CAAX 2                                                           | RIT2       | -1,9 | Plasma Membrane     |
| 1371723_at   | BE110635  | Ras-related GTP binding C                                                         | RRAGC      | 3,3  | Cytoplasm           |
| 1373427_at   | BI288816  | Ras-related GTP binding D                                                         | RRAGD      | 4,2  | Cytoplasm           |
| 1372133_at   | AA955287  | related RAS viral (r-ras) oncogene homolog 2                                      | RRAS2      | 2,7  | Plasma Membrane     |
| 1382058_at   | BI292115  | related RAS viral (r-ras) oncogene homolog 2                                      | RRAS2      | 2,8  | Plasma Membrane     |
| 1384391_at   | BE096510  | retinol dehydrogenase 10 (all-trans)                                              | RDH10      | 3,7  | Unknown             |
| 1374680_at   | AA858731  | retinol dehydrogenase 13 (all-trans/9-cis)                                        | RDH13      | 1,9  | Cytoplasm           |
| 1389217_at   | AI599568  | RFNG O-fucosylpeptide 3-beta-N-acetylglucosaminyltransferase                      | RFNG       | -2,0 | Cytoplasm           |
| 1386062_at   | AI060227  | Rho family GTPase 3                                                               | RND3       | 2,7  | Cytoplasm           |
| 1376066_at   | AI103572  | Rho family GTPase 3                                                               | RND3       | 3,0  | Cytoplasm           |
| 1389632_at   | AA799294  | Rho-related BTB domain containing 1                                               | RHOBTB1    | -3,3 | Unknown             |
| 1378181_at   | BI279714  | ribonuclease P/MRP 40kDa subunit                                                  | RPP40      | 2,0  | Nucleus             |
| 1375211_at   | BM391506  | ribonuclease T2                                                                   | RNASET2    | 1,6  | Extracellular Space |
| 1398776_at   | NM_031698 | ribophorin II                                                                     | RPN2       | -1,6 | Cytoplasm           |
| 1389202_at   | AA944520  | ribulose-5-phosphate-3-epimerase                                                  | RPE        | 1,6  | Unknown             |
| 1376554_at   | BE121079  | ring finger protein 139                                                           | RNF139     | 1,7  | Cytoplasm           |
| 1376440_at   | BF391522  | ring finger protein 139                                                           | RNF139     | 2,9  | Cytoplasm           |
| 1383679_at   | BF411972  | ring finger protein 31                                                            | RNF31      | 2,6  | Cytoplasm           |
| 1383004_at   | BF397074  | S-adenosylhomocysteine hydrolase-like 1                                           | AHCYL1     | -3,4 | Cytoplasm           |
| 1371844_at   | AW144530  | S-adenosylhomocysteine hydrolase-like 1                                           | AHCYL1     | -1,8 | Cytoplasm           |
| 1373078_at   | AI409271  | S-adenosylhomocysteine hydrolase-like 2                                           | AHCYL2     | -2,1 | Unknown             |
| 1367470_at   | AA851321  | SAR1 homolog A (S. cerevisiae)                                                    | SAR1A      | -2,1 | Cytoplasm           |
| 1398353_at   | AI236260  | SAR1 homolog A (S. cerevisiae)                                                    | SAR1A      | 2,3  | Cytoplasm           |
| 1379957_at   | BE107457  | schlafen family member 13                                                         | SLFN13     | 23,8 | Nucleus             |
| 1374524_at   | BM384384  | selenocysteine lyase                                                              | SCLY       | 6,4  | Cytoplasm           |
| 1393256_at   | AI137711  | selenophosphate synthetase 1                                                      | SEPHS1     | -1,6 | Unknown             |
| 1367593_at   | NM_013027 | selenoprotein W, 1                                                                | SEPW1      | 1,9  | Cytoplasm           |
| 1374457_at   | AI180194  | serine palmitoyltransferase, long chain base subunit 2                            | SPTLC2     | 2,3  | Cytoplasm           |
| 1375441_at   | BI278468  | seryl-tRNA synthetase                                                             | SARS       | 2,4  | Cytoplasm           |
| 1372376_at   | BF408879  | SET domain containing 2                                                           | SETD2      | 1,7  | Cytoplasm           |
| 1387266_at   | NM_080905 | seven in absentia homolog 1 (Drosophila)                                          | SIAH1      | 2,2  | Nucleus             |
| 1390096_at   | BF284481  | SH3-domain GRB2-like endophilin B1                                                | SH3GLB1    | -2,0 | Cytoplasm           |
| 1382007_at   | AA964563  | SH3-domain GRB2-like endophilin B1                                                | SH3GLB1    | 2,4  | Cytoplasm           |
| 1381203_at   | AA819246  | SH3-domain GRB2-like endophilin B1                                                | SH3GLB1    | 2,6  | Cytoplasm           |
| 1370902_at   | AI233740  | similar to aldo-keto reductase family 1, member B10                               | TCAG7.1260 | 16,2 | Cytoplasm           |
| 1388565_at   | BI289536  | spastic paraplegia 21 (autosomal recessive, Mast syndrome)                        | SPG21      | 3,6  | Plasma Membrane     |
| 1371774_at   | AA893220  | spermidine/spermine N1-acetyltransferase 1                                        | SAT1       | 8,7  | Cytoplasm           |
| 1375889_at   | AI228536  | spermine synthase                                                                 | SMS        | -2,0 | Unknown             |
| 1388552_at   | BI283738  | sphingomyelin phosphodiesterase 1, acid lysosomal                                 | SMPD1      | -1,7 | Cytoplasm           |
| 1368991_at   | NM_053605 | sphingomyelin phosphodiesterase 3, neutral membrane (neutral sphingomyelinase II) | SMPD3      | -2,2 | Cytoplasm           |
| 1384106_at   | AW141276  | sphingomyelin synthase 1                                                          | SGMS1      | 8,6  | Cytoplasm           |
| 1393919_at   | AW535116  | sphingomyelin synthase 2                                                          | SGMS2      | 4,0  | Plasma Membrane     |
| 1387017_at   | NM_017136 | squalene epoxidase                                                                | SQLE       | -1,5 | Cytoplasm           |
| 1373607_at   | BF418530  | ST3 beta-galactoside alpha-2,3-sialyltransferase 3                                | ST3GAL3    | -1,5 | Cytoplasm           |
| 1370907_at   | M83143    | ST6 beta-galactosamide alpha-2,6-sialyltransferase 1                              | ST6GAL1    | -4,8 | Cytoplasm           |
| 1387435_at   | NM_013029 | ST8 alpha-N-acetyl-neuraminide alpha-2,8-sialyltransferase 3                      | ST8SIA3    | -2,5 | Cytoplasm           |
| 1370355_at   | J02585    | stearoyl-CoA desaturase (delta-9-desaturase)                                      | SCD        | 2,1  | Cytoplasm           |
| 1386889_at   | BE107760  | stearoyl-Coenzyme A desaturase 2                                                  | SCD2       | -3,4 | Cytoplasm           |
| 1388253_at   | M15114    | stearoyl-Coenzyme A desaturase 2                                                  | SCD2       | -1,6 | Cytoplasm           |
| 1373869_at   | AI012418  | sterol O-acyltransferase 1                                                        | SOAT1      | -4,0 | Cytoplasm           |
| 1374976_a_at | AI548897  | sterol O-acyltransferase 1                                                        | SOAT1      | -2,2 | Cytoplasm           |
| 1387926_at   | AB052846  | sterol-C5-desaturase (ERG3 delta-5-desaturase homolog, S. cerevisiae)-like        | SC5DL      | -2,1 | Cytoplasm           |
| 1389309_at   | AW251323  | strawberry notch homolog 1 (Drosophila)                                           | SBN01      | 2,2  | Unknown             |
| 1372510_at   | AI172302  | sulfiredoxin 1 homolog (S. cerevisiae)                                            | SRXN1      | 2,9  | Cytoplasm           |
| 1384331_at   | H31896    | sulfiredoxin 1 homolog (S. cerevisiae)                                            | SRXN1      | 4,4  | Cytoplasm           |
| 1370036_at   | NM_031127 | sulfite oxidase                                                                   | SUOX       | -8,0 | Cytoplasm           |
| 1370173_at   | BG671549  | superoxide dismutase 2, mitochondrial                                             | SOD2       | 5,5  | Cytoplasm           |
| 1370172_at   | AA892254  | superoxide dismutase 2, mitochondrial                                             | SOD2       | 9,2  | Cytoplasm           |

|                                   |           |                                                                                                |          |       |                 |
|-----------------------------------|-----------|------------------------------------------------------------------------------------------------|----------|-------|-----------------|
| 1375981_a_at                      | AA997899  | suppressor of variegation 3-9 homolog 1 (Drosophila)                                           | SUV39H1  | 4,5   | Nucleus         |
| 1390198_at                        | AW523642  | suppressor of variegation 4-20 homolog 1 (Drosophila)                                          | SUV420H1 | -2,6  | Nucleus         |
| 1398762_at                        | NM_031986 | syndecan binding protein (syntenin)                                                            | SDCBP    | 1,6   | Plasma Membrane |
| 1372008_at                        | BM385175  | tafazzin                                                                                       | TAZ      | -1,7  | Nucleus         |
| 1376999_at                        | BF389721  | tankyrase, TRF1-interacting ankyrin-related ADP-ribose polymerase 2                            | TNKS2    | -1,8  | Nucleus         |
| 1398839_at                        | NM_053800 | thioredoxin                                                                                    | TXN      | 1,7   | Cytoplasm       |
| 1398844_at                        | AA800180  | thioredoxin 2                                                                                  | TXN2     | 1,5   | Cytoplasm       |
| 1367510_at                        | BG381690  | thioredoxin domain containing 15                                                               | TXNDC15  | -2,4  | Unknown         |
| 1386958_at                        | U63923    | thioredoxin reductase 1                                                                        | TXNRD1   | 2,3   | Cytoplasm       |
| 1372145_at                        | BI289683  | threonyl-tRNA synthetase                                                                       | TARS     | 1,7   | Nucleus         |
| 1388650_at                        | BM385445  | topoisomerase (DNA) II alpha 170kDa                                                            | TOP2A    | -16,3 | Nucleus         |
| 1372868_at                        | BF284295  | torsin family 3, member A                                                                      | TOR3A    | 2,6   | Unknown         |
| 1378675_at                        | BE119678  | transglutaminase 3 (E polypeptide, protein-glutamine-gamma-glutamyltransferase)                | TGM3     | -2,5  | Cytoplasm       |
| 1377854_at                        | AI406343  | transmembrane protein 62                                                                       | TMEM62   | 2,2   | Unknown         |
| 1374133_at                        | BG373110  | tRNA isopentenyltransferase 1                                                                  | TRIT1    | 2,2   | Cytoplasm       |
| 1395124_at                        | BE101688  | tryptophanyl-tRNA synthetase                                                                   | WARS     | 5,6   | Cytoplasm       |
| 1388574_at                        | BG670966  | tryptophanyl-tRNA synthetase                                                                   | WARS     | 6,1   | Cytoplasm       |
| 1398994_at                        | BI301193  | tyrosylprotein sulfotransferase 2                                                              | TPST2    | -2,4  | Cytoplasm       |
| 1372009_at                        | AI407490  | tyrosyl-tRNA synthetase                                                                        | YARS     | 2,2   | Cytoplasm       |
| 1392199_at                        | BF398981  | ubiquitin protein ligase E3 component n-recognin 5                                             | UBR5     | -3,8  | Nucleus         |
| 1373409_at                        | BI294738  | ubiquitin protein ligase E3C                                                                   | UBE3C    | -1,7  | Nucleus         |
| 1372888_at                        | BI294856  | ubiquitination factor E4A (UFD2 homolog, yeast)                                                | UBE4A    | -2,0  | Cytoplasm       |
| 1376862_at                        | BI296848  | ubiquitination factor E4B (UFD2 homolog, yeast)                                                | UBE4B    | -1,8  | Cytoplasm       |
| 1373495_at                        | AW915822  | ubiquitin-conjugating enzyme E2, J1 (UBC6 homolog, yeast)                                      | UBE2J1   | 3,8   | Cytoplasm       |
| 1371764_at                        | AI411771  | ubiquitin-conjugating enzyme E2, J2 (UBC6 homolog, yeast)                                      | UBE2J2   | 1,5   | Cytoplasm       |
| 1375642_at                        | AA892795  | ubiquitin-conjugating enzyme E2B (RAD6 homolog)                                                | UBE2B    | -1,6  | Cytoplasm       |
| 1399160_a_at                      | U13177    | ubiquitin-conjugating enzyme E2D 3 (UBC4/5 homolog, yeast)                                     | UBE2D3   | 3,3   | Cytoplasm       |
| 1388798_at                        | AW921519  | ubiquitin-conjugating enzyme E2E 2 (UBC4/5 homolog, yeast)                                     | UBE2E2   | 4,7   | Cytoplasm       |
| 1375663_at                        | AI232346  | ubiquitin-conjugating enzyme E2F (putative)                                                    | UBE2F    | 1,7   | Cytoplasm       |
| 1373037_at                        | BI279216  | ubiquitin-conjugating enzyme E2L 6                                                             | UBE2L6   | 17,6  | Cytoplasm       |
| 1372788_at                        | AI144725  | ubiquitin-conjugating enzyme E2Q family member 1                                               | UBE2Q1   | -1,6  | Unknown         |
| 1376314_at                        | AI172148  | ubiquitin-conjugating enzyme E2Q family member 2                                               | UBE2Q2   | -2,1  | Unknown         |
| 1372119_at                        | BM389270  | ubiquitin-like modifier activating enzyme 5                                                    | UBA5     | 2,3   | Cytoplasm       |
| 1379633_a_at                      | BE096453  | ubiquitin-like modifier activating enzyme 7                                                    | UBA7     | 8,1   | Cytoplasm       |
| 1368858_at                        | L21698    | UDP glycosyltransferase 8                                                                      | UGT8     | -4,3  | Cytoplasm       |
| 1368346_at                        | NM_133553 | UDP-Gal:betaGlcNAc beta 1,3-galactosyltransferase, polypeptide 4                               | B3GALT4  | -2,1  | Cytoplasm       |
| 1387206_at                        | NM_031740 | UDP-Gal:betaGlcNAc beta 1,4- galactosyltransferase, polypeptide 6                              | B4GALT6  | -2,6  | Cytoplasm       |
| 1367938_at                        | NM_031325 | UDP-glucose dehydrogenase                                                                      | UGDH     | 3,7   | Nucleus         |
| 1388410_at                        | AI170679  | UDP-glucose pyrophosphorylase 2                                                                | UGP2     | 1,9   | Cytoplasm       |
| 1387554_at                        | NM_031796 | UDP-N-acetyl-alpha-D-galactosamine:polypeptide N-acetylgalactosaminyltransferase 5 (GalNAc-T5) | GALNT5   | -3,3  | Cytoplasm       |
| 1368245_at                        | NM_053845 | ureidopropionase, beta                                                                         | UPB1     | -4,4  | Cytoplasm       |
| 1372578_at                        | AI704469  | valyl-tRNA synthetase                                                                          | VARS     | 2,4   | Cytoplasm       |
| 1389253_at                        | BI289085  | vanin 1                                                                                        | VNN1     | -2,8  | Plasma Membrane |
| 1388330_at                        | BM384958  | vitamin K epoxide reductase complex, subunit 1                                                 | VKORC1   | -2,3  | Cytoplasm       |
| 1368405_at                        | NM_031093 | v-ral simian leukemia viral oncogene homolog A (ras related)                                   | RALA     | 3,7   | Cytoplasm       |
| 1387001_at                        | NM_053821 | v-ral simian leukemia viral oncogene homolog B (ras related; GTP binding protein)              | RALB     | 2,0   | Cytoplasm       |
| 1390820_at                        | BE108198  | zinc finger, CCHC domain containing 11                                                         | ZCCHC11  | 2,2   | Nucleus         |
| 1370828_at                        | AF228917  | zinc finger, DHHC-type containing 2                                                            | ZDHHC2   | -2,1  | Nucleus         |
| <b>G-protein coupled receptor</b> |           |                                                                                                |          |       |                 |
| 1376714_at                        | AI236072  | antagonist of mitotic exit network 1 homolog (S. cerevisiae)                                   | AMN1     | 1,6   | Plasma Membrane |
| 1388994_at                        | AW917849  | frizzled homolog 6 (Drosophila)                                                                | FZD6     | -1,6  | Plasma Membrane |
| 1374530_at                        | AI010048  | frizzled homolog 7 (Drosophila)                                                                | FZD7     | 5,0   | Plasma Membrane |
| 1374648_at                        | BM390626  | G protein-coupled receptor 155                                                                 | GPR155   | -10,8 | Plasma Membrane |
| 1382739_at                        | AI045718  | G protein-coupled receptor 19                                                                  | GPR19    | 8,4   | Plasma Membrane |
| 1371696_at                        | AI412938  | G protein-coupled receptor 56                                                                  | GPR56    | 1,6   | Plasma Membrane |
| 1369792_at                        | U12006    | G protein-coupled receptor 6                                                                   | GPR6     | -17,1 | Plasma Membrane |
| 1388039_a_at                      | AF283276  | gamma-aminobutyric acid (GABA) B receptor, 1                                                   | GABBR1   | -1,8  | Plasma Membrane |
| 1368481_at                        | NM_012714 | gastric inhibitory polypeptide receptor                                                        | GIPR     | -8,1  | Plasma Membrane |



|                      |           |                                                                                               |                            |      |                     |
|----------------------|-----------|-----------------------------------------------------------------------------------------------|----------------------------|------|---------------------|
| 1369699_at           | NM_012728 | glucagon-like peptide 1 receptor                                                              | GLP1R                      | -2,5 | Plasma Membrane     |
| 1389257_at           | BI288578  | LanC lantibiotic synthetase component C-like 2 (bacterial)                                    | LANCL2                     | -1,8 | Plasma Membrane     |
| 1370606_at           | U22830    | purinergic receptor P2Y, G-protein coupled, 1                                                 | P2RY1                      | -6,5 | Plasma Membrane     |
| 1377702_at           | BG380173  | purinergic receptor P2Y, G-protein coupled, 5                                                 | P2RY5                      | -2,4 | Plasma Membrane     |
| 1385839_x_at         | BF287928  | TM2 domain containing 1                                                                       | TM2D1                      | -1,6 | Plasma Membrane     |
| 1367550_a_at         | BI287742  | TM2 domain containing 1                                                                       | TM2D1                      | -1,6 | Plasma Membrane     |
| 1385838_a_at         | BF287928  | TM2 domain containing 1                                                                       | TM2D1                      | -1,5 | Plasma Membrane     |
| 1387177_at           | NM_017238 | vasoactive intestinal peptide receptor 2                                                      | VIPR2                      | -9,0 | Plasma Membrane     |
| <b>Growth factor</b> |           |                                                                                               |                            |      |                     |
| 1368945_at           | NM_017178 | bone morphogenetic protein 2                                                                  | BMP2                       | 2,3  | Extracellular Space |
| 1387663_at           | NM_031032 | glia maturation factor, beta                                                                  | GMFB                       | 9,6  | Cytoplasm           |
| 1386893_at           | NM_017113 | granulin                                                                                      | GRN                        | 4,5  | Extracellular Space |
| 1374706_at           | BF407916  | growth differentiation factor 11                                                              | GDF11                      | -1,7 | Extracellular Space |
| 1370153_at           | NM_019216 | growth differentiation factor 15                                                              | GDF15                      | 6,5  | Extracellular Space |
| 1367817_at           | NM_053707 | hepatoma-derived growth factor (high-mobility group protein 1-like)                           | HDGF                       | 1,7  | Extracellular Space |
| 1368725_at           | NM_019147 | jagged 1 (Alagille syndrome)                                                                  | JAG1                       | 5,2  | Extracellular Space |
| 1370427_at           | L06238    | platelet-derived growth factor alpha polypeptide                                              | PDGFA                      | 2,9  | Extracellular Space |
| 1376425_at           | BF420705  | transforming growth factor, beta 2                                                            | TGFB2                      | -6,2 | Extracellular Space |
| 1378963_at           | AA963004  | transforming growth factor, beta 2                                                            | TGFB2                      | -3,4 | Extracellular Space |
| 1387172_a_at         | NM_031131 | transforming growth factor, beta 2                                                            | TGFB2                      | -2,2 | Extracellular Space |
| <b>Ion channel</b>   |           |                                                                                               |                            |      |                     |
| 1368143_at           | AI013902  | annexin A7                                                                                    | ANXA7                      | 1,6  | Plasma Membrane     |
| 1387042_at           | NM_012828 | calcium channel, voltage-dependent, beta 3 subunit                                            | CACNB3                     | 1,6  | Plasma Membrane     |
| 1368398_at           | NM_031601 | calcium channel, voltage-dependent, T type, alpha 1H subunit                                  | CACNA1H                    | -1,6 | Plasma Membrane     |
| 1377765_at           | AA848723  | chloride intracellular channel 4                                                              | CLIC4                      | 6,4  | Cytoplasm           |
| 1369904_at           | NM_012956 | gamma-aminobutyric acid (GABA) A receptor, beta 1                                             | GABRB1                     | -1,9 | Plasma Membrane     |
| 1376892_at           | AI102061  | glutamate receptor, ionotropic, AMPA 3                                                        | GRIA3                      | -5,0 | Plasma Membrane     |
| 1368401_at           | M85035    | glutamate receptor, ionotropic, AMPA 2                                                        | GRIA2                      | -2,6 | Plasma Membrane     |
| 1372724_at           | BI284904  | glutamate receptor, ionotropic, N-methyl D-aspartate-associated protein 1 (glutamate binding) | GRINA                      | 2,8  | Unknown             |
| 1368005_at           | NM_013138 | inositol 1,4,5-triphosphate receptor, type 3                                                  | ITPR3                      | 1,8  | Cytoplasm           |
| 1386750_at           | BF290862  | polycystic kidney disease 2-like 2                                                            | PKD2L2                     | 2,0  | Unknown             |
| 1387441_at           | NM_033376 | potassium channel, subfamily K, member 3                                                      | KCNK3                      | -1,6 | Plasma Membrane     |
| 1370111_at           | NM_019314 | potassium intermediate/small conductance calcium-activated channel, subfamily N, member 2     | KCNN2                      | -1,8 | Plasma Membrane     |
| 1368626_at           | NM_019315 | potassium intermediate/small conductance calcium-activated channel, subfamily N, member 3     | KCNN3                      | 2,7  | Plasma Membrane     |
| 1387698_at           | AB043638  | potassium inwardly-rectifying channel, subfamily J, member 11                                 | KCNJ11                     | -2,5 | Plasma Membrane     |
| 1369334_at           | NM_031828 | potassium large conductance calcium-activated channel, subfamily M, alpha member 1            | KCNMA1                     | -2,0 | Plasma Membrane     |
| 1391546_at           | AI412209  | potassium voltage-gated channel, KQT-like subfamily, member 2                                 | KCNQ2                      | -4,5 | Plasma Membrane     |
| 1379836_at           | BF400850  | potassium voltage-gated channel, KQT-like subfamily, member 3                                 | KCNQ3                      | 2,4  | Plasma Membrane     |
| 1378738_at           | BE097574  | potassium voltage-gated channel, shaker-related subfamily, beta member 1                      | KCNAB1                     | -2,1 | Plasma Membrane     |
| 1369017_at           | NM_053937 | potassium voltage-gated channel, subfamily H (eag-related), member 6                          | KCNH6                      | -4,1 | Plasma Membrane     |
| 1369691_at           | NM_013119 | sodium channel, voltage-gated, type III, alpha subunit                                        | SCN3A                      | -1,8 | Plasma Membrane     |
| 1370850_at           | AA685184  | sodium channel, voltage-gated, type III, beta                                                 | SCN3B                      | -1,9 | Plasma Membrane     |
| 1370411_at           | AF061266  | transient receptor potential cation channel, subfamily C, member 1                            | TRPC1                      | -2,4 | Plasma Membrane     |
| 1384238_at           | BM385249  | tweety homolog 2 (Drosophila)                                                                 | TTYH2                      | -3,8 | Unknown             |
| <b>Kinase</b>        |           |                                                                                               |                            |      |                     |
| 1381220_at           | BM383968  | activin A receptor, type IIA                                                                  | ACVR2A                     | 2,1  | Plasma Membrane     |
| 1371824_at           | AA891949  | adenylate kinase 3-like 2                                                                     | AK3L2 (includes EG:645619) | 22,2 | Cytoplasm           |
| 1373494_at           | BE120831  | breakpoint cluster region                                                                     | BCR                        | 3,4  | Cytoplasm           |
| 1389029_at           | BE108923  | bromodomain containing 3                                                                      | BRD3                       | -2,0 | Nucleus             |
| 1372855_at           | BF287135  | bromodomain containing 4                                                                      | BRD4                       | -3,5 | Nucleus             |
| 1372351_at           | AI229448  | bromodomain containing 4                                                                      | BRD4                       | 1,5  | Nucleus             |
| 1391229_at           | BG381458  | calcium/calmodulin-dependent protein kinase IG                                                | CAMK1G                     | -2,5 | Cytoplasm           |
| 1368834_at           | AA894330  | calcium/calmodulin-dependent protein kinase II delta                                          | CAMK2D                     | 2,1  | Cytoplasm           |
| 1395914_at           | AA684862  | casein kinase 1, delta                                                                        | CSNK1D                     | -2,8 | Cytoplasm           |
| 1370819_at           | AB063114  | casein kinase 1, delta                                                                        | CSNK1D                     | 2,1  | Cytoplasm           |
| 1370527_a_at         | L07578    | casein kinase 1, delta                                                                        | CSNK1D                     | 3,7  | Cytoplasm           |
| 1378282_at           | BI290750  | casein kinase 2, alpha prime polypeptide                                                      | CSNK2A2                    | 2,5  | Cytoplasm           |
| 1373823_at           | AA944180  | CDC28 protein kinase regulatory subunit 2                                                     | CKS2 (includes EG:1164)    | 6,7  | Unknown             |

|              |           |                                                                                            |
|--------------|-----------|--------------------------------------------------------------------------------------------|
| 1375987_at   | AW525194  | ceramide kinase                                                                            |
| 1372536_at   | AI105042  | chaperone, ABC1 activity of bc1 complex homolog ( <i>S. pombe</i> )                        |
| 1374911_at   | AW251534  | chromosome 20 open reading frame 111                                                       |
| 1373304_at   | BM392002  | Coenzyme A synthase                                                                        |
| 1367740_at   | M14400    | creatine kinase, brain                                                                     |
| 1390566_a_at | BI301453  | creatine kinase, mitochondrial 1B                                                          |
| 1368088_at   | NM_080885 | cyclin-dependent kinase 5                                                                  |
| 1388674_at   | AI010427  | cyclin-dependent kinase inhibitor 1A (p21, Cip1)                                           |
| 1394431_at   | AI704014  | cytidine and dCMP deaminase domain containing 1                                            |
| 1393044_at   | BF282370  | cytidine monophosphate (UMP-CMP) kinase 2, mitochondrial                                   |
| 1383424_at   | BI276216  | cytidine monophosphate (UMP-CMP) kinase 2, mitochondrial                                   |
| 1376788_at   | AA818353  | death-associated protein kinase 1                                                          |
| 1372799_at   | BF285179  | deoxyguanosine kinase                                                                      |
| 1369686_at   | U78857    | doublecortin-like kinase 1                                                                 |
| 1392588_at   | BG664535  | dual serine/threonine and tyrosine protein kinase                                          |
| 1380938_at   | BE106206  | dual serine/threonine and tyrosine protein kinase                                          |
| 1377213_at   | BI280353  | endoplasmic reticulum to nucleus signaling 1                                               |
| 1393151_at   | BG668816  | ethanolamine kinase 1                                                                      |
| 1371710_at   | BM391283  | ethanolamine kinase 1                                                                      |
| 1387312_a_at | NM_012565 | glucokinase (hexokinase 4)                                                                 |
| 1376650_at   | BF399323  | golgi autoantigen, golgin subfamily a, 5                                                   |
| 1388721_at   | BG380282  | heat shock 22kDa protein 8                                                                 |
| 1383519_at   | BI294137  | hexokinase 2                                                                               |
| 1381016_at   | BI288152  | inositol 1,3,4,5,6-pentakisphosphate 2-kinase                                              |
| 1388500_at   | AI180252  | inositol 1,4,5-trisphosphate 3-kinase B                                                    |
| 1387063_at   | NM_021660 | inositol hexakisphosphate kinase 2                                                         |
| 1383478_at   | BG671504  | Janus kinase 1 (a protein tyrosine kinase)                                                 |
| 1384060_at   | BG663208  | Janus kinase 1 (a protein tyrosine kinase)                                                 |
| 1368856_at   | NM_031514 | Janus kinase 2 (a protein tyrosine kinase)                                                 |
| 1380110_at   | AI229643  | Janus kinase 2 (a protein tyrosine kinase)                                                 |
| 1371530_at   | BF281337  | keratin 8                                                                                  |
| 1390207_at   | BM390283  | LATS, large tumor suppressor, homolog 2 ( <i>Drosophila</i> )                              |
| 1368831_at   | NM_130749 | MAP/microtubule affinity-regulating kinase 3                                               |
| 1383324_at   | AI703599  | membrane protein, palmitoylated 6 (MAGUK p55 subfamily member 6)                           |
| 1383645_at   | BF411062  | mitogen-activated protein kinase 13                                                        |
| 1368273_at   | NM_031622 | mitogen-activated protein kinase 6                                                         |
| 1368886_at   | NM_013055 | mitogen-activated protein kinase kinase kinase 12                                          |
| 1371446_at   | BI283703  | mitogen-activated protein kinase-activated protein kinase 2                                |
| 1398441_at   | AA957410  | NCK adaptor protein 2                                                                      |
| 1375615_at   | AI575310  | neurotrophic tyrosine kinase, receptor, type 1                                             |
| 1397246_at   | BE102996  | neurotrophic tyrosine kinase, receptor, type 2                                             |
| 1389996_at   | AI406369  | NIMA (never in mitosis gene a)-related kinase 1                                            |
| 1374747_at   | BM384279  | PFTAIRE protein kinase 1                                                                   |
| 1370318_at   | U39572    | phosphatidylinositol 4-kinase, catalytic, alpha                                            |
| 1369039_at   | NM_031083 | phosphatidylinositol 4-kinase, catalytic, beta                                             |
| 1389109_at   | AI407351  | phosphatidylinositol-5-phosphate 4-kinase, type II, alpha                                  |
| 1375213_at   | BM384604  | phosphoenolpyruvate carboxykinase 2 (mitochondrial)                                        |
| 1372182_at   | BM389769  | phosphofructokinase, platelet                                                              |
| 1378506_at   | BM385647  | phosphoinositide-3-kinase, class 2, alpha polypeptide                                      |
| 1389723_at   | AI172265  | phosphoinositide-3-kinase, regulatory subunit 4                                            |
| 1367725_at   | NM_022602 | pim-3 oncogene                                                                             |
| 1368106_at   | NM_031821 | polo-like kinase 2 ( <i>Drosophila</i> )                                                   |
| 1370585_a_at | X04440    | protein kinase C, beta                                                                     |
| 1387114_at   | NM_133307 | protein kinase C, delta                                                                    |
| 1386992_at   | NM_017175 | protein kinase N1                                                                          |
| 1371578_at   | AW915101  | protein kinase, cAMP-dependent, catalytic, alpha                                           |
| 1371835_at   | AI411907  | protein kinase, cAMP-dependent, catalytic, beta                                            |
| 1373951_at   | AI407792  | protein kinase, cAMP-dependent, regulatory, type I, alpha (tissue specific extinguisher 1) |

|                         |       |                 |
|-------------------------|-------|-----------------|
| CERK                    | -1,8  | Plasma Membrane |
| CABC1                   | -8,3  | Cytoplasm       |
| C20ORF111               | 6,5   | Unknown         |
| COASY                   | -1,8  | Cytoplasm       |
| CKB                     | -11,1 | Cytoplasm       |
| CKMT1B                  | 3,8   | Cytoplasm       |
| CDK5                    | -2,4  | Nucleus         |
| CDKN1A                  | 21,1  | Nucleus         |
| CDADC1                  | -1,5  | Unknown         |
| CMPK2                   | 52,6  | Cytoplasm       |
| CMPK2                   | 78,6  | Cytoplasm       |
| DAPK1                   | 1,9   | Cytoplasm       |
| DGUOK                   | -2,2  | Cytoplasm       |
| DCLK1                   | -6,8  | Cytoplasm       |
| RIPK5                   | -2,3  | Cytoplasm       |
| RIPK5                   | -2,0  | Cytoplasm       |
| ERN1 (includes EG:2081) | 3,1   | Cytoplasm       |
| ETNK1                   | -3,9  | Cytoplasm       |
| ETNK1                   | -2,0  | Cytoplasm       |
| GCK                     | -4,2  | Cytoplasm       |
| GOLGA5                  | -2,6  | Cytoplasm       |
| HSPB8                   | 5,9   | Cytoplasm       |
| HK2                     | 20,4  | Cytoplasm       |
| IPPK                    | -2,1  | Cytoplasm       |
| ITPKB                   | -5,9  | Cytoplasm       |
| IHPK2                   | -1,6  | Cytoplasm       |
| JAK1                    | 2,7   | Cytoplasm       |
| JAK1                    | 3,4   | Cytoplasm       |
| JAK2                    | 5,8   | Cytoplasm       |
| JAK2                    | 9,6   | Cytoplasm       |
| KRT8                    | 2,3   | Cytoplasm       |
| LATS2                   | -1,9  | Nucleus         |
| MARK3                   | 1,6   | Cytoplasm       |
| MPP6                    | 2,2   | Plasma Membrane |
| MAPK13                  | -4,6  | Cytoplasm       |
| MAPK6                   | 2,3   | Cytoplasm       |
| MAP3K12                 | -2,0  | Cytoplasm       |
| MAPKAPK2                | 1,6   | Nucleus         |
| NCK2                    | 1,6   | Cytoplasm       |
| NTRK1                   | -2,5  | Plasma Membrane |
| NTRK2                   | -4,0  | Plasma Membrane |
| NEK1                    | -1,6  | Nucleus         |
| PFTK1                   | -3,4  | Nucleus         |
| PI4KA                   | -1,6  | Cytoplasm       |
| PI4KB                   | -3,1  | Cytoplasm       |
| PIP4K2A                 | 1,6   | Cytoplasm       |
| PCK2                    | -1,9  | Cytoplasm       |
| PFKP                    | 6,1   | Cytoplasm       |
| PIK3C2A                 | -1,8  | Cytoplasm       |
| PIK3R4                  | -2,5  | Cytoplasm       |
| PIM3                    | 2,5   | Unknown         |
| PLK2                    | 1,7   | Nucleus         |
| PRKCB                   | -4,0  | Cytoplasm       |
| PRKCD                   | 2,4   | Cytoplasm       |
| PKN1                    | 1,9   | Cytoplasm       |
| PRKACA                  | -2,6  | Cytoplasm       |
| PRKACB                  | -2,0  | Cytoplasm       |
| PRKAR1A                 | -1,6  | Cytoplasm       |

|              |           |                                                                         |
|--------------|-----------|-------------------------------------------------------------------------|
| 1377053_at   | BE117757  | protein kinase-like protein SgK196                                      |
| 1369688_s_at | U69109    | PTK2B protein tyrosine kinase 2 beta                                    |
| 1387263_at   | NM_012624 | pyruvate kinase, liver and RBC                                          |
| 1381279_at   | BF412519  | receptor-interacting serine-threonine kinase 2                          |
| 1370989_at   | AI639318  | ret proto-oncogene                                                      |
| 1388208_a_at | AJ299017  | ret proto-oncogene                                                      |
| 1383454_a_at | BM389456  | ribosomal protein S6 kinase, 52kDa, polypeptide 1                       |
| 1393236_at   | AII37233  | RIO kinase 3 (yeast)                                                    |
| 1394363_at   | H34775    | RIO kinase 3 (yeast)                                                    |
| 1368596_at   | NM_021693 | salt-inducible kinase 1                                                 |
| 1372292_at   | AI009732  | serine/threonine kinase 24 (STE20 homolog, yeast)                       |
| 1377534_at   | BE097305  | serine/threonine kinase 32C                                             |
| 1371943_at   | BF420075  | serine/threonine kinase 40                                              |
| 1367802_at   | NM_019232 | serum/glucocorticoid regulated kinase 1                                 |
| 1371714_at   | BG378760  | SFRS protein kinase 1                                                   |
| 1380323_at   | BE105023  | STE20-like kinase (yeast)                                               |
| 1375896_at   | BM392055  | STE20-related kinase adaptor beta                                       |
| 1376880_at   | AI639447  | TANK-binding kinase 1                                                   |
| 1371560_at   | AA893384  | testis-specific kinase substrate                                        |
| 1399088_at   | AA819648  | tousled-like kinase 2                                                   |
| 1396144_at   | BF560978  | TRAF2 and NCK interacting kinase                                        |
| 1388821_at   | AI010430  | tribbles homolog 2 (Drosophila)                                         |
| 1370695_s_at | AB020967  | tribbles homolog 3 (Drosophila)                                         |
| 1370694_at   | AB020967  | tribbles homolog 3 (Drosophila)                                         |
| 1386321_s_at | H31287    | tribbles homolog 3 (Drosophila)                                         |
| 1375178_at   | BE111601  | v-akt murine thymoma viral oncogene homolog 1                           |
| 1387592_at   | NM_031575 | v-akt murine thymoma viral oncogene homolog 3 (protein kinase B, gamma) |
| 1370663_at   | D31838    | WEE1 homolog (S. pombe)                                                 |
| 1372791_at   | AI235474  | WNK lysine deficient protein kinase 1                                   |
| 1387072_at   | NM_053794 | WNK lysine deficient protein kinase 1                                   |
| 1398458_at   | BE104506  | WNK lysine deficient protein kinase 2                                   |

**Ligand-dependent nuclear receptor**

|            |          |                                                 |
|------------|----------|-------------------------------------------------|
| 1370816_at | M25804   | nuclear receptor subfamily 1, group D, member 1 |
| 1389169_at | AA944158 | progesterone receptor membrane component 2      |

**Peptidase**

|              |           |                                                                   |
|--------------|-----------|-------------------------------------------------------------------|
| 1373570_at   | AI411240  | aminopeptidase-like 1                                             |
| 1377390_at   | BG381587  | beta-site APP-cleaving enzyme 2                                   |
| 1396386_at   | BF408665  | beta-site APP-cleaving enzyme 2                                   |
| 1371173_a_at | Y13591    | calpastatin                                                       |
| 1387818_at   | NM_053736 | caspase 4, apoptosis-related cysteine peptidase                   |
| 1370245_at   | AI232474  | cathepsin L2                                                      |
| 1373961_at   | AII70410  | chromosome 3 open reading frame 38                                |
| 1383241_at   | BI292425  | complement component 1, r subcomponent                            |
| 1387893_at   | D88250    | complement component 1, s subcomponent                            |
| 1368000_at   | NM_016994 | complement component 3                                            |
| 1389470_at   | AI639117  | complement factor B                                               |
| 1367722_at   | NM_031973 | dipeptidyl-peptidase 7                                            |
| 1398803_at   | NM_019226 | dynein, cytoplasmic 1, heavy chain 1                              |
| 1388666_at   | AI179988  | ectodermal-neural cortex (with BTB-like domain)                   |
| 1384687_at   | AI071307  | ectodermal-neural cortex (with BTB-like domain)                   |
| 1399161_a_at | AF148323  | endoplasmic reticulum aminopeptidase 1                            |
| 1368356_a_at | NM_030836 | endoplasmic reticulum aminopeptidase 1                            |
| 1367801_at   | NM_053596 | endothelin converting enzyme 1                                    |
| 1378949_at   | BF412698  | endothelin converting enzyme 2                                    |
| 1387669_a_at | NM_012844 | epoxide hydrolase 1, microsomal (xenobiotic)                      |
| 1392894_at   | AI716194  | fibrinogen-like 2                                                 |
| 1367778_at   | NM_019331 | furin (paired basic amino acid cleaving enzyme)                   |
| 1368470_at   | NM_012960 | gamma-glutamyl hydrolase (conjugase, folylpolyglutamyl hydrolase) |

|         |      |                 |
|---------|------|-----------------|
| SGK196  | -1,8 | Unknown         |
| PTK2B   | -2,0 | Cytoplasm       |
| PKLR    | -3,6 | Cytoplasm       |
| RIPK2   | 10,4 | Plasma Membrane |
| RET     | -3,4 | Plasma Membrane |
| RET     | -2,7 | Plasma Membrane |
| RPS6KC1 | -2,1 | Cytoplasm       |
| RIOK3   | 3,0  | Unknown         |
| RIOK3   | 11,8 | Unknown         |
| SNF1LK  | -3,1 | Cytoplasm       |
| STK24   | -3,4 | Cytoplasm       |
| STK32C  | -3,5 | Unknown         |
| STK40   | 1,8  | Cytoplasm       |
| SGK1    | 1,9  | Cytoplasm       |
| SRPK1   | -2,1 | Nucleus         |
| SLK     | 2,2  | Nucleus         |
| STRADB  | -1,7 | Cytoplasm       |
| TBK1    | 1,8  | Cytoplasm       |
| TSKS    | -1,7 | Cytoplasm       |
| TLK2    | 1,6  | Cytoplasm       |
| TNIK    | -1,7 | Cytoplasm       |
| TRIB2   | -2,5 | Plasma Membrane |
| TRIB3   | 7,7  | Nucleus         |
| TRIB3   | 7,8  | Nucleus         |
| TRIB3   | 10,5 | Nucleus         |
| AKT1    | -1,9 | Cytoplasm       |
| AKT3    | 1,6  | Cytoplasm       |
| WEE1    | 1,7  | Nucleus         |
| WNK1    | -2,0 | Cytoplasm       |
| WNK1    | 2,0  | Cytoplasm       |
| WNK2    | -2,2 | Unknown         |

|        |      |         |
|--------|------|---------|
| NR1D1  | 7,7  | Nucleus |
| PGRMC2 | -1,8 | Nucleus |

|         |       |                     |
|---------|-------|---------------------|
| NPEPL1  | -2,9  | Unknown             |
| BACE2   | 3,0   | Cytoplasm           |
| BACE2   | 4,9   | Cytoplasm           |
| CAST    | -3,5  | Cytoplasm           |
| CASP4   | 65,6  | Cytoplasm           |
| CTSL2   | 2,6   | Cytoplasm           |
| C3ORF38 | 9,2   | Unknown             |
| C1R     | 153,9 | Extracellular Space |
| C1S     | 59,2  | Extracellular Space |
| C3      | 15,8  | Extracellular Space |
| CFB     | 58,4  | Extracellular Space |
| DPP7    | 1,8   | Cytoplasm           |
| DYNC1H1 | 1,6   | Cytoplasm           |
| ENC1    | 4,9   | Nucleus             |
| ENC1    | 13,9  | Nucleus             |
| ERAP1   | 2,8   | Extracellular Space |
| ERAP1   | 3,0   | Extracellular Space |
| ECE1    | -1,9  | Plasma Membrane     |
| ECE2    | -2,0  | Plasma Membrane     |
| EPHX1   | 2,3   | Cytoplasm           |
| FGL2    | -4,3  | Extracellular Space |
| FURIN   | -1,8  | Cytoplasm           |
| GGH     | -2,6  | Cytoplasm           |

|                    |           |                                                                                           |                            |       |                     |
|--------------------|-----------|-------------------------------------------------------------------------------------------|----------------------------|-------|---------------------|
| 1367478_at         | AI600136  | HtrA serine peptidase 2                                                                   | HTRA2                      | 2,3   | Cytoplasm           |
| 1367961_at         | NM_031523 | kallikrein 1                                                                              | KLK1                       | -1,9  | Unknown             |
| 1398247_at         | NM_133404 | lon peptidase 1, mitochondrial                                                            | LONP1                      | 3,7   | Cytoplasm           |
| 1368595_at         | NM_031757 | matrix metallopeptidase 24 (membrane-inserted)                                            | MMP24                      | -4,0  | Extracellular Space |
| 1369669_at         | NM_053970 | neurolysin (metallopeptidase M3 family)                                                   | NLN                        | 3,0   | Cytoplasm           |
| 1387781_at         | NM_022395 | peptidase (mitochondrial processing) beta                                                 | PMPCB                      | -1,6  | Cytoplasm           |
| 1373101_at         | AI236743  | phosphatidylinositol glycan anchor biosynthesis, class K                                  | PIGK                       | -1,8  | Cytoplasm           |
| 1368399_a_at       | NM_031640 | plasma glutamate carboxypeptidase                                                         | PGCP                       | -1,6  | Extracellular Space |
| 1367800_at         | NM_013151 | plasminogen activator, tissue                                                             | PLAT                       | 7,9   | Extracellular Space |
| 1376075_at         | BM385544  | presenilin 1                                                                              | PSEN1                      | 2,7   | Plasma Membrane     |
| 1368559_at         | NM_017091 | proprotein convertase subtilisin/kexin type 1                                             | PCSK1                      | -3,7  | Extracellular Space |
| 1387155_at         | NM_012746 | proprotein convertase subtilisin/kexin type 2                                             | PCSK2                      | -1,7  | Extracellular Space |
| 1373152_at         | AII77099  | protease, serine, 23                                                                      | PRSS23                     | 2,1   | Extracellular Space |
| 1367710_at         | NM_017257 | proteasome (prosome, macropain) activator subunit 2 (PA28 beta)                           | PSME2                      | 8,5   | Cytoplasm           |
| 1368507_at         | NM_017280 | proteasome (prosome, macropain) subunit, alpha type, 3                                    | PSMA3                      | 2,2   | Cytoplasm           |
| 1367837_at         | NM_017281 | proteasome (prosome, macropain) subunit, alpha type, 4                                    | PSMA4                      | 1,6   | Cytoplasm           |
| 1387884_at         | AI011191  | proteasome (prosome, macropain) subunit, alpha type, 5                                    | PSMA5                      | 1,7   | Cytoplasm           |
| 1369930_at         | NM_017283 | proteasome (prosome, macropain) subunit, alpha type, 6                                    | PSMA6                      | 1,8   | Cytoplasm           |
| 1371869_at         | BF282262  | proteasome (prosome, macropain) subunit, alpha type, 7                                    | PSMA7                      | 2,7   | Cytoplasm           |
| 1374033_at         | BG373505  | proteasome (prosome, macropain) subunit, beta type, 10                                    | PSMB10                     | 36,2  | Cytoplasm           |
| 1367786_at         | NM_080767 | proteasome (prosome, macropain) subunit, beta type, 8 (large multifunctional peptidase 7) | PSMB8                      | 229,1 | Cytoplasm           |
| 1370186_at         | AI599350  | proteasome (prosome, macropain) subunit, beta type, 9 (large multifunctional peptidase 2) | PSMB9                      | 395,9 | Cytoplasm           |
| 1373384_at         | BM391893  | protein phosphatase 2, regulatory subunit B', gamma isoform                               | PPP2R5C                    | -1,6  | Nucleus             |
| 1376949_at         | BE099848  | RCE1 homolog, prenyl protein peptidase ( <i>S. cerevisiae</i> )                           | RCE1                       | 1,8   | Cytoplasm           |
| 1375362_at         | BI304125  | signal peptide peptidase-like 2A                                                          | SPPL2A                     | 2,3   | Plasma Membrane     |
| 1370460_at         | AF106657  | ubiquitin specific peptidase 15                                                           | USP15                      | 2,2   | Cytoplasm           |
| 1389034_at         | BI295179  | ubiquitin specific peptidase 18                                                           | USP18                      | 22,1  | Cytoplasm           |
| 1378679_at         | BG372484  | ubiquitin specific peptidase 25                                                           | USP25                      | 4,4   | Unknown             |
| 1389091_at         | AI411205  | ubiquitin specific peptidase 3                                                            | USP3                       | 2,0   | Cytoplasm           |
| 1395921_at         | BE097603  | ubiquitin specific peptidase 35                                                           | USP35                      | -2,1  | Unknown             |
| 1374940_at         | BM388945  | ubiquitin specific peptidase 36                                                           | USP36                      | -1,5  | Nucleus             |
| 1376849_at         | BM384872  | ubiquitin specific peptidase 48                                                           | USP48                      | 2,3   | Plasma Membrane     |
| 1372121_at         | BF284408  | ubiquitin specific peptidase 9, X-linked                                                  | USP9X                      | -3,1  | Plasma Membrane     |
| 1389316_at         | AW914946  | ubiquitin specific peptidase 9, X-linked                                                  | USP9X                      | -2,1  | Plasma Membrane     |
| 1385663_at         | BF567505  | ubiquitin specific protease 13 (isopeptidase T-3)                                         | USP13 (includes EG:310306) | -3,0  | Unknown             |
| 1381605_at         | AW521619  | ubiquitin specific protease 13 (isopeptidase T-3)                                         | USP13 (includes EG:310306) | -2,0  | Unknown             |
| 1386793_at         | BF552772  | zinc finger protein 61                                                                    | ZFP61                      | -2,5  | Unknown             |
| <b>Phosphatase</b> |           |                                                                                           |                            |       |                     |
| 1388544_at         | BI294941  | 2,3-bisphosphoglycerate mutase                                                            | BPGM                       | 2,0   | Unknown             |
| 1398317_at         | BF283428  | 3'(2'), 5'-bisphosphate nucleotidase 1                                                    | BPNT1                      | 1,6   | Nucleus             |
| 1370034_at         | NM_133572 | cell division cycle 25 homolog B ( <i>S. pombe</i> )                                      | CDC25B                     | -4,6  | Nucleus             |
| 1388533_at         | BM390302  | CTD (carboxy-terminal domain, RNA polymerase II, polypeptide A) small phosphatase 1       | CTDSP1                     | -1,9  | Nucleus             |
| 1368146_at         | U02553    | dual specificity phosphatase 1                                                            | DUSP1                      | 4,8   | Nucleus             |
| 1372354_at         | BM389898  | dual specificity phosphatase 16                                                           | DUSP16                     | 7,3   | Nucleus             |
| 1399125_at         | BI275516  | inositol polyphosphate-1-phosphatase                                                      | INPP1                      | 3,3   | Cytoplasm           |
| 1387078_at         | NM_031002 | inositol polyphosphate-4-phosphatase, type I, 107kDa                                      | INPP4A                     | -2,4  | Cytoplasm           |
| 1388502_at         | AI412624  | inositol polyphosphate-5-phosphatase, 75kDa                                               | INPP5B                     | 2,9   | Plasma Membrane     |
| 1398808_at         | NM_032057 | inositol(myo)-1(or 4)-monophosphatase 1                                                   | IMPA1                      | -1,8  | Cytoplasm           |
| 1377422_at         | AI029466  | myotubularin related protein 1                                                            | MTMR1                      | 2,7   | Cytoplasm           |
| 1383619_at         | BE105983  | myotubularin related protein 4                                                            | MTMR4                      | 3,5   | Cytoplasm           |
| 1374883_at         | BF392344  | myotubularin related protein 7                                                            | MTMR7                      | -1,6  | Cytoplasm           |
| 1395601_at         | BI302615  | nudix (nucleoside diphosphate linked moiety X)-type motif 12                              | NUDT12                     | -2,9  | Cytoplasm           |
| 1383957_at         | BG376322  | nudix (nucleoside diphosphate linked moiety X)-type motif 3                               | NUDT3                      | 1,7   | Cytoplasm           |
| 1383283_at         | BM385645  | oculocerebrorenal syndrome of Lowe                                                        | OCRL                       | -2,8  | Cytoplasm           |
| 1386864_at         | NM_053290 | phosphoglycerate mutase 1 (brain)                                                         | PGAM1                      | 1,5   | Cytoplasm           |
| 1385981_at         | BF394800  | plasticity related gene 1                                                                 | LPPR4                      | -3,5  | Plasma Membrane     |
| 1379374_at         | AW526088  | plasticity related gene 1                                                                 | LPPR4                      | -3,1  | Plasma Membrane     |
| 1376584_at         | BE116408  | protein phosphatase 1 (formerly 2C)-like                                                  | PPM1L                      | -2,2  | Unknown             |

|                                |           |                                                                                                                |                          |      |                 |
|--------------------------------|-----------|----------------------------------------------------------------------------------------------------------------|--------------------------|------|-----------------|
| 1383191_at                     | BE097583  | protein phosphatase 1, regulatory (inhibitor) subunit 1A                                                       | PPP1R1A                  | -4,6 | Cytoplasm       |
| 1386968_at                     | NM_022676 | protein phosphatase 1, regulatory (inhibitor) subunit 1A                                                       | PPP1R1A                  | -3,9 | Cytoplasm       |
| 1373108_at                     | BM390827  | protein phosphatase 1, regulatory (inhibitor) subunit 3C                                                       | PPP1R3C                  | 2,1  | Cytoplasm       |
| 1373656_at                     | AI713313  | protein phosphatase 1, regulatory (inhibitor) subunit 3D                                                       | PPP1R3D                  | -2,7 | Unknown         |
| 1398332_at                     | BM386294  | protein phosphatase 1F (PP2C domain containing)                                                                | PPM1F                    | -3,7 | Cytoplasm       |
| 1398790_at                     | NM_017039 | protein phosphatase 2 (formerly 2A), catalytic subunit, alpha isoform                                          | PPP2CA                   | 1,5  | Cytoplasm       |
| 1388805_at                     | BF408792  | protein phosphatase 2 (formerly 2A), catalytic subunit, alpha isoform                                          | PPP2CA                   | 1,6  | Cytoplasm       |
| 1367827_at                     | NM_017040 | protein phosphatase 2 (formerly 2A), catalytic subunit, beta isoform                                           | PPP2CB                   | 1,6  | Cytoplasm       |
| 1370193_at                     | AI172261  | protein tyrosine phosphatase type IVA, member 1                                                                | PTP4A1                   | 2,7  | Nucleus         |
| 1372084_at                     | AI104546  | protein tyrosine phosphatase type IVA, member 3                                                                | PTP4A3                   | -3,8 | Plasma Membrane |
| 1388379_at                     | AI172465  | protein tyrosine phosphatase, non-receptor type 11                                                             | PTPN11                   | 1,7  | Cytoplasm       |
| 1382154_at                     | BI289625  | protein tyrosine phosphatase, non-receptor type 12                                                             | PTPN12                   | 1,9  | Cytoplasm       |
| 1368361_a_at                   | NM_053990 | protein tyrosine phosphatase, non-receptor type 2                                                              | PTPN2                    | 2,3  | Cytoplasm       |
| 1368087_a_at                   | NM_133545 | protein tyrosine phosphatase, non-receptor type 21                                                             | PTPN21                   | 4,7  | Cytoplasm       |
| 1370473_a_at                   | AF077000  | protein tyrosine phosphatase, non-receptor type 23                                                             | PTPN23                   | 2,8  | Cytoplasm       |
| 1389362_at                     | AI317821  | protein tyrosine phosphatase, non-receptor type 3                                                              | PTPN3                    | 2,6  | Cytoplasm       |
| 1370362_at                     | D45414    | protein tyrosine phosphatase, receptor type, N                                                                 | PTPRN                    | -1,5 | Plasma Membrane |
| 1370182_at                     | AI574884  | protein tyrosine phosphatase, receptor type, N polypeptide 2                                                   | PTPRN2                   | -3,3 | Plasma Membrane |
| 1369094_a_at                   | NM_019140 | protein tyrosine phosphatase, receptor type, S                                                                 | PTPRS (includes EG:5802) | -2,4 | Plasma Membrane |
| 1368350_at                     | NM_013080 | protein tyrosine phosphatase, receptor-type, Z polypeptide 1                                                   | PTPRZ1                   | 1,6  | Plasma Membrane |
| 1367881_at                     | NM_013016 | signal-regulatory protein alpha                                                                                | SIRPA                    | -1,9 | Plasma Membrane |
| <b>Transcription regulator</b> |           |                                                                                                                |                          |      |                 |
| 1369268_at                     | NM_012912 | activating transcription factor 3                                                                              | ATF3                     | 26,6 | Nucleus         |
| 1367624_at                     | NM_024403 | activating transcription factor 4 (tax-responsive enhancer element B67)                                        | ATF4                     | 2,2  | Nucleus         |
| 1389346_at                     | BI274136  | activity-dependent neuroprotector homeobox                                                                     | ADNP                     | -2,5 | Nucleus         |
| 1386683_at                     | BF562870  | alpha thalassemia/mental retardation syndrome X-linked (RAD54 homolog, <i>S. cerevisiae</i> )                  | ATRX                     | -2,0 | Nucleus         |
| 1374526_at                     | BF396420  | ankyrin repeat and FYVE domain containing 1                                                                    | ANKFY1                   | 1,8  | Nucleus         |
| 1371805_at                     | AI406508  | ankyrin repeat domain 46                                                                                       | ANKRD46                  | -2,1 | Nucleus         |
| 1386065_at                     | AI169118  | ankyrin repeat domain 57                                                                                       | ANKRD57                  | 4,6  | Nucleus         |
| 1368330_at                     | NM_053720 | apoptosis antagonizing transcription factor                                                                    | AATF                     | 6,3  | Nucleus         |
| 1369049_at                     | NM_053885 | arginine-glutamic acid dipeptide (RE) repeats                                                                  | RERE                     | 4,3  | Nucleus         |
| 1392502_at                     | BI275796  | AT hook containing transcription factor 1                                                                      | AHCTF1                   | 1,7  | Nucleus         |
| 1377597_at                     | BI300688  | AT rich interactive domain 2 (ARID, RFX-like)                                                                  | ARID2                    | -1,6 | Nucleus         |
| 1379311_at                     | AI177813  | AT rich interactive domain 5A (MRF1-like)                                                                      | ARID5A                   | 1,9  | Nucleus         |
| 1369415_at                     | NM_053328 | basic helix-loop-helix domain containing, class B, 2                                                           | BHLHB2                   | 3,7  | Nucleus         |
| 1379483_at                     | AI548256  | basic helix-loop-helix domain containing, class B, 2                                                           | BHLHB2                   | 9,2  | Nucleus         |
| 1368511_at                     | NM_133303 | basic helix-loop-helix domain containing, class B, 3                                                           | BHLHB3                   | 2,8  | Nucleus         |
| 1368118_at                     | NM_031328 | B-cell CLL/lymphoma 10                                                                                         | BCL10                    | 1,8  | Cytoplasm       |
| 1398482_at                     | AI411774  | B-cell CLL/lymphoma 3                                                                                          | BCL3                     | 15,4 | Nucleus         |
| 1379368_at                     | AI237606  | B-cell CLL/lymphoma 6                                                                                          | BCL6                     | 10,9 | Nucleus         |
| 1381804_at                     | BI293313  | B-cell CLL/lymphoma 6, member B (zinc finger protein)                                                          | BCL6B                    | -3,9 | Nucleus         |
| 1394375_x_at                   | BF554138  | B-cell CLL/lymphoma 6, member B (zinc finger protein)                                                          | BCL6B                    | -3,5 | Nucleus         |
| 1367657_at                     | NM_017258 | B-cell translocation gene 1, anti-proliferative                                                                | BTG1                     | 1,7  | Nucleus         |
| 1373868_at                     | AI717547  | BCL2-associated transcription factor 1                                                                         | BCLAF1                   | 2,3  | Nucleus         |
| 1385592_at                     | BI289386  | BCL6 co-repressor                                                                                              | BCOR                     | 1,8  | Nucleus         |
| 1373467_at                     | BG374179  | BTAF1 RNA polymerase II, B-TFIID transcription factor-associated, 170kDa (Mot1 homolog, <i>S. cerevisiae</i> ) | BTAF1                    | 2,6  | Nucleus         |
| 1390873_at                     | BE118616  | BTB (POZ) domain containing 11                                                                                 | BTBD11                   | -1,8 | Nucleus         |
| 1386994_at                     | NM_017259 | BTG family, member 2                                                                                           | BTG2                     | -1,5 | Nucleus         |
| 1369738_s_at                   | NM_017334 | cAMP responsive element modulator                                                                              | CREM                     | -2,3 | Nucleus         |
| 1368571_at                     | NM_021997 | CAP-GLY domain containing linker protein 2                                                                     | CLIP2                    | 2,1  | Cytoplasm       |
| 1380069_at                     | BF389717  | Cas-Br-M (murine) ecotropic retroviral transforming sequence                                                   | CBL                      | -2,1 | Nucleus         |
| 1387343_at                     | NM_013154 | CCAAT/enhancer binding protein (C/EBP), delta                                                                  | CEBPD                    | 5,4  | Nucleus         |
| 1372885_at                     | AI230467  | CCAAT/enhancer binding protein (C/EBP), gamma                                                                  | CEBPG                    | 1,9  | Nucleus         |
| 1377869_at                     | BI284261  | CCR4 carbon catabolite repression 4-like ( <i>S. cerevisiae</i> )                                              | CCRN4L                   | -1,7 | Nucleus         |
| 1376067_at                     | AA800637  | CCR4-NOT transcription complex, subunit 2                                                                      | CNOT2                    | -1,8 | Nucleus         |
| 1367515_at                     | BE111850  | CCR4-NOT transcription complex, subunit 7                                                                      | CNOT7                    | 1,6  | Nucleus         |
| 1381968_at                     | AI029175  | cellular repressor of E1A-stimulated genes 1                                                                   | CREG1                    | 4,7  | Nucleus         |
| 1379538_at                     | BE104961  | centromere protein J                                                                                           | CENPJ                    | 2,7  | Nucleus         |

|              |           |                                                                                         |
|--------------|-----------|-----------------------------------------------------------------------------------------|
| 1379887_at   | BI290897  | chromosome 2 open reading frame 3                                                       |
| 1399033_at   | AA945869  | core-binding factor, beta subunit                                                       |
| 1388875_at   | AI410353  | CXXC finger 1 (PHD domain)                                                              |
| 1370054_at   | NM_131902 | cyclin-dependent kinase inhibitor 2C (p18, inhibits CDK4)                               |
| 1392958_at   | AI547426  | cyldromatosis (turban tumor syndrome)                                                   |
| 1391091_at   | AI406286  | cyldromatosis (turban tumor syndrome)                                                   |
| 1372245_at   | AA894272  | cytosolic iron-sulfur protein assembly 1 homolog (S. cerevisiae)                        |
| 1387874_at   | AI230048  | D site of albumin promoter (albumin D-box) binding protein                              |
| 1387800_at   | NM_080891 | death-domain associated protein                                                         |
| 1386988_at   | NM_031801 | deformed epidermal autoregulatory factor 1 (Drosophila)                                 |
| 1369590_a_at | NM_024134 | DNA-damage-inducible transcript 3                                                       |
| 1374119_at   | BI279615  | E74-like factor 3 (ets domain transcription factor, epithelial-specific )               |
| 1368321_at   | NM_012551 | early growth response 1                                                                 |
| 1372204_at   | BM391843  | ELK4, ETS-domain protein (SRF accessory protein 1)                                      |
| 1374797_at   | BM391920  | ELL associated factor 1                                                                 |
| 1388714_at   | AI008458  | elongation factor RNA polymerase II                                                     |
| 1367575_at   | NM_012554 | enolase 1, (alpha)                                                                      |
| 1388503_at   | BE107430  | EP300 interacting inhibitor of differentiation 1                                        |
| 1376292_at   | BM383423  | ets homologous factor                                                                   |
| 1383447_at   | AI101323  | ets variant 5                                                                           |
| 1372126_at   | BI288075  | fem-1 homolog b (C. elegans)                                                            |
| 1386643_at   | BF552914  | fem-1 homolog b (C. elegans)                                                            |
| 1377347_at   | AW531892  | forkhead box J3                                                                         |
| 1372652_at   | BM386443  | forkhead box O4                                                                         |
| 1368550_at   | NM_022858 | forkhead box Q1                                                                         |
| 1385464_at   | AI070944  | forkhead box Q1                                                                         |
| 1368220_at   | NM_031041 | general transcription factor IIB                                                        |
| 1383627_a_at | BF420770  | general transcription factor IIF, polypeptide 1, 74kDa                                  |
| 1373094_at   | AW917124  | general transcription factor IIH, polypeptide 1, 62kDa                                  |
| 1372415_at   | BM385649  | general transcription factor IIH, polypeptide 3, 34kDa                                  |
| 1388067_a_at | AF205779  | glucocorticoid modulatory element binding protein 2                                     |
| 1385988_at   | BF287243  | H6 family homeobox 1                                                                    |
| 1371490_at   | BG666149  | heat shock factor binding protein 1                                                     |
| 1388314_at   | BF281178  | high-mobility group nucleosome binding domain 1                                         |
| 1396820_at   | AW530195  | histone deacetylase 1                                                                   |
| 1388761_at   | AI180339  | histone deacetylase 1                                                                   |
| 1367816_at   | NM_133621 | HOP homeobox                                                                            |
| 1391560_at   | AI237082  | human immunodeficiency virus type 1 enhancer binding protein 1                          |
| 1387076_at   | NM_024359 | hypoxia inducible factor 1, alpha subunit (basic helix-loop-helix transcription factor) |
| 1368073_at   | NM_012591 | interferon regulatory factor 1                                                          |
| 1398561_at   | BI302791  | interferon regulatory factor 2                                                          |
| 1377379_at   | BF410603  | interferon regulatory factor 6                                                          |
| 1383564_at   | BF411036  | interferon regulatory factor 7                                                          |
| 1383448_at   | AI029121  | interferon regulatory factor 9                                                          |
| 1369681_at   | NM_017339 | ISL LIM homeobox 1                                                                      |
| 1382336_at   | AI236491  | JAZF zinc finger 1                                                                      |
| 1393138_at   | BE329377  | jun D proto-oncogene                                                                    |
| 1374404_at   | BI288619  | jun oncogene                                                                            |
| 1369788_s_at | NM_021835 | jun oncogene                                                                            |
| 1389528_s_at | BI288619  | jun oncogene                                                                            |
| 1386896_at   | AF393783  | KH domain containing, RNA binding, signal transduction associated 1                     |
| 1368363_at   | NM_053394 | Kruppel-like factor 5 (intestinal)                                                      |
| 1385961_at   | BF561079  | Kruppel-like factor 5 (intestinal)                                                      |
| 1394039_at   | BM382886  | Kruppel-like factor 5 (intestinal)                                                      |
| 1387060_at   | NM_031642 | Kruppel-like factor 6                                                                   |
| 1370209_at   | BE101336  | Kruppel-like factor 9                                                                   |
| 1371444_at   | BI284504  | LAG1 homolog, ceramide synthase 2                                                       |
| 1389351_at   | BM387864  | leucine rich repeat (in FLII) interacting protein 1                                     |

|         |       |           |
|---------|-------|-----------|
| C2ORF3  | 1,8   | Nucleus   |
| CBFB    | -2,1  | Nucleus   |
| CXXC1   | 2,2   | Nucleus   |
| CDKN2C  | -2,2  | Nucleus   |
| CYLD    | 1,6   | Nucleus   |
| CYLD    | 2,1   | Nucleus   |
| CIAO1   | -1,5  | Nucleus   |
| DBP     | 7,1   | Nucleus   |
| DAXX    | 4,1   | Nucleus   |
| DEAF1   | -2,1  | Nucleus   |
| DDIT3   | 7,1   | Nucleus   |
| ELF3    | 3,6   | Nucleus   |
| EGR1    | -3,6  | Nucleus   |
| ELK4    | 1,9   | Nucleus   |
| EAF1    | 2,5   | Nucleus   |
| ELL     | 1,9   | Nucleus   |
| ENO1    | 1,6   | Cytoplasm |
| EID1    | -1,8  | Nucleus   |
| EHF     | 3,0   | Nucleus   |
| ETV5    | 8,3   | Nucleus   |
| FEM1B   | -1,7  | Nucleus   |
| FEM1B   | -1,5  | Nucleus   |
| FOXJ3   | 2,1   | Nucleus   |
| FOXO4   | -2,8  | Nucleus   |
| FOXQ1   | 2,2   | Nucleus   |
| FOXQ1   | 3,1   | Nucleus   |
| GTF2B   | -2,0  | Nucleus   |
| GTF2F1  | -1,7  | Nucleus   |
| GTF2H1  | 1,7   | Nucleus   |
| GTF2H3  | -2,0  | Nucleus   |
| GMEB2   | 1,9   | Nucleus   |
| HMX1    | 9,5   | Nucleus   |
| HSBP1   | -2,1  | Nucleus   |
| HMGN1   | 1,6   | Nucleus   |
| HDAC1   | -1,8  | Nucleus   |
| HDAC1   | -1,8  | Nucleus   |
| HOPX    | 10,5  | Nucleus   |
| HIVEP1  | 1,6   | Nucleus   |
| HIF1A   | 2,2   | Nucleus   |
| IRF1    | 34,8  | Nucleus   |
| IRF2    | 2,0   | Nucleus   |
| IRF6    | 1,7   | Nucleus   |
| IRF7    | 104,7 | Nucleus   |
| IRF9    | 13,8  | Nucleus   |
| ISL1    | -3,4  | Nucleus   |
| JAZF1   | -1,5  | Nucleus   |
| JUND    | 1,8   | Nucleus   |
| JUN     | 2,8   | Nucleus   |
| JUN     | 6,7   | Nucleus   |
| JUN     | 7,0   | Nucleus   |
| KHDRBS1 | 1,7   | Nucleus   |
| KLF5    | 1,5   | Nucleus   |
| KLF5    | 11,3  | Nucleus   |
| KLF5    | 17,5  | Nucleus   |
| KLF6    | 4,1   | Nucleus   |
| KLF9    | 1,7   | Nucleus   |
| LASS2   | -1,6  | Nucleus   |
| LRRFIP1 | 4,3   | Nucleus   |

|              |           |                                                                                                     |                             |      |                 |
|--------------|-----------|-----------------------------------------------------------------------------------------------------|-----------------------------|------|-----------------|
| 1370928_at   | BI284739  | lipopolysaccharide-induced TNF factor                                                               | LITAF                       | 2,0  | Nucleus         |
| 1388516_at   | AI104258  | LRRGT00141                                                                                          | LOC499235                   | 3,0  | Unknown         |
| 1375929_at   | BI289109  | MAX binding protein                                                                                 | MNT                         | 1,6  | Nucleus         |
| 1373779_at   | AI011878  | MAX dimerization protein 4                                                                          | MXD4                        | -2,0 | Nucleus         |
| 1384427_at   | BI296301  | Mdm2 p53 binding protein homolog (mouse)                                                            | MDM2                        | 5,4  | Nucleus         |
| 1391474_at   | AA858511  | mediator complex subunit 14                                                                         | MED14                       | -2,3 | Nucleus         |
| 1388847_at   | AI177083  | mediator complex subunit 15                                                                         | MED15                       | 2,0  | Nucleus         |
| 1386895_at   | NM_053409 | melanoma antigen family D, 1                                                                        | MAGED1                      | -1,7 | Plasma Membrane |
| 1398785_at   | NM_019208 | multiple endocrine neoplasia I                                                                      | MEN1                        | 1,5  | Nucleus         |
| 1387779_at   | NM_031668 | MYB binding protein (P160) 1a                                                                       | MYBBP1A                     | 1,9  | Nucleus         |
| 1372090_at   | AI231566  | MYC associated factor X                                                                             | MAX                         | 2,0  | Nucleus         |
| 1372327_at   | BF552877  | myelin expression factor 2                                                                          | MYEF2                       | -2,2 | Nucleus         |
| 1383512_at   | AW918674  | myeloid/lymphoid or mixed-lineage leukemia (trithorax homolog, Drosophila); translocated to, 10     | MLLT10                      | 2,1  | Nucleus         |
| 1371056_at   | U68726    | neogenin homolog 1 (chicken)                                                                        | NEO1                        | -2,2 | Plasma Membrane |
| 1369409_at   | NM_022856 | NGFI-A binding protein 1 (EGR1 binding protein 1)                                                   | NAB1                        | 1,6  | Nucleus         |
| 1368998_at   | NM_031737 | NK6 homeobox 1                                                                                      | NKX6-1                      | -1,8 | Nucleus         |
| 1393144_at   | BM388202  | N-myc (and STAT) interactor                                                                         | NMI                         | 9,0  | Cytoplasm       |
| 1381875_at   | BM386847  | N-myc (and STAT) interactor                                                                         | NMI                         | 18,0 | Cytoplasm       |
| 1390426_at   | BF389398  | Notch homolog 1, translocation-associated (Drosophila)                                              | NOTCH1                      | 1,9  | Plasma Membrane |
| 1367826_at   | NM_031789 | nuclear factor (erythroid-derived 2)-like 2                                                         | NFE2L2                      | 2,3  | Nucleus         |
| 1370968_at   | AA858801  | nuclear factor of kappa light polypeptide gene enhancer in B-cells 1                                | NFKB1                       | 7,5  | Nucleus         |
| 1375989_a_at | AI170362  | nuclear factor of kappa light polypeptide gene enhancer in B-cells 2 (p49/p100)                     | NFKB2                       | 11,3 | Nucleus         |
| 1367943_at   | NM_030867 | nuclear factor of kappa light polypeptide gene enhancer in B-cells inhibitor, beta                  | NFKBIB                      | 5,7  | Nucleus         |
| 1376835_at   | BI293600  | nuclear factor of kappa light polypeptide gene enhancer in B-cells inhibitor, epsilon               | NFKBIE (includes EG:4794)   | 7,9  | Nucleus         |
| 1378032_at   | AI176265  | nuclear factor of kappa light polypeptide gene enhancer in B-cells inhibitor, zeta                  | NFKBIZ                      | 10,7 | Nucleus         |
| 1368488_at   | NM_053727 | nuclear factor, interleukin 3 regulated                                                             | NFIL3                       | 6,0  | Nucleus         |
| 1379560_at   | BE099674  | nuclear receptor binding SET domain protein 1                                                       | NSD1                        | 2,2  | Nucleus         |
| 1388549_at   | AI228248  | nuclear receptor coactivator 4                                                                      | NCOA4                       | -1,8 | Nucleus         |
| 1381895_at   | AW435074  | nuclear respiratory factor 1                                                                        | NRF1                        | 4,7  | Nucleus         |
| 1378637_at   | BG374464  | nuclear transcription factor, X-box binding 1                                                       | NFX1                        | 1,9  | Nucleus         |
| 1382718_at   | AA900547  | nuclear transcription factor, X-box binding 1                                                       | NFX1                        | 2,2  | Nucleus         |
| 1398756_at   | J04943    | nucleophosmin 1                                                                                     | NPM1 (includes EG:18148)    | 2,1  | Nucleus         |
| 1379529_at   | BE121400  | nucleosomal binding protein 1                                                                       | NSBP1                       | -2,7 | Nucleus         |
| 1373433_at   | BE108745  | nucleosomal binding protein 1                                                                       | NSBP1                       | -2,1 | Nucleus         |
| 1369242_at   | NM_013001 | paired box 6                                                                                        | PAX6                        | -1,9 | Nucleus         |
| 1390531_at   | BE098021  | peroxisomal proliferator-activated receptor A interacting complex 285                               | PRIC285 (includes EG:85441) | 4,3  | Nucleus         |
| 1370089_at   | NM_031347 | peroxisome proliferator-activated receptor gamma, coactivator 1 alpha                               | PPARGC1A                    | 2,4  | Nucleus         |
| 1392715_at   | BE113289  | peroxisome proliferator-activated receptor gamma, coactivator 1 beta                                | PPARGC1B                    | -1,7 | Nucleus         |
| 1387122_at   | NM_012760 | pleiomorphic adenoma gene-like 1                                                                    | PLAGL1                      | -3,7 | Nucleus         |
| 1384265_at   | BI278347  | polymerase (DNA-directed), delta 3, accessory subunit                                               | POLD3                       | 4,0  | Nucleus         |
| 1370432_at   | M72711    | POU class 3 homeobox 1                                                                              | POU3F1                      | 2,5  | Nucleus         |
| 1389432_at   | BE101096  | pre-B-cell leukemia homeobox 2                                                                      | PBX2                        | -1,7 | Nucleus         |
| 1368702_at   | U05989    | PRKC, apoptosis, WT1, regulator                                                                     | PAWR                        | 2,8  | Nucleus         |
| 1374532_at   | AI704291  | prostaglandin E synthase 2                                                                          | PTGES2                      | 2,2  | Cytoplasm       |
| 1387784_at   | NM_053925 | proteasome (prosome, macropain) 26S subunit, non-ATPase, 10                                         | PSMD10                      | 2,6  | Cytoplasm       |
| 1385540_at   | AI044916  | protein inhibitor of activated STAT, 1                                                              | PIAS1                       | -2,1 | Nucleus         |
| 1387299_at   | NM_053337 | protein inhibitor of activated STAT, 2                                                              | PIAS2                       | -2,1 | Nucleus         |
| 1372485_at   | BF281220  | pterin-4 alpha-carbinolamine dehydratase/dimerization cofactor of hepatocyte nuclear factor 1 alpha | PCBD1                       | -3,4 | Nucleus         |
| 1382400_at   | BE104395  | rearranged L-myc fusion                                                                             | RLF                         | 2,9  | Nucleus         |
| 1388686_at   | AI170193  | regulator of calcineurin 1                                                                          | RCAN1                       | 1,7  | Nucleus         |
| 1383349_at   | BE115594  | regulatory factor X, 5 (influences HLA class II expression)                                         | RFX5                        | 1,8  | Nucleus         |
| 1372391_at   | AI598937  | ribosomal protein L7-like 1                                                                         | RPL7L1                      | 1,6  | Cytoplasm       |
| 1380651_at   | BI296352  | ring finger protein (C3H2C3 type) 6                                                                 | RNF6                        | -1,9 | Nucleus         |
| 1381967_at   | BE114972  | RNA binding motif protein 39                                                                        | RBM39                       | 1,6  | Nucleus         |
| 1389437_at   | BF392952  | sal-like 2 (Drosophila)                                                                             | SALL2                       | -2,6 | Nucleus         |
| 1378629_at   | AI227638  | SATB homeobox 1                                                                                     | SATB1                       | -3,5 | Nucleus         |
| 1379626_at   | AA946353  | SATB homeobox 1                                                                                     | SATB1                       | -2,7 | Nucleus         |
| 1371353_at   | BG663093  | sequestosome 1                                                                                      | SQSTM1                      | 3,2  | Cytoplasm       |

|              |           |                                                                                  |                           |      |           |
|--------------|-----------|----------------------------------------------------------------------------------|---------------------------|------|-----------|
| 1389381_at   | AI411586  | sequestosome 1                                                                   | SQSTM1                    | 12,7 | Cytoplasm |
| 1372757_at   | BM386875  | signal transducer and activator of transcription 1, 91kDa                        | STAT1                     | 7,3  | Nucleus   |
| 1368835_at   | AW434718  | signal transducer and activator of transcription 1, 91kDa                        | STAT1                     | 8,7  | Nucleus   |
| 1387354_at   | NM_032612 | signal transducer and activator of transcription 1, 91kDa                        | STAT1                     | 13,4 | Nucleus   |
| 1373670_at   | AA799569  | signal transducer and activator of transcription 2, 113kDa                       | STAT2                     | 4,6  | Nucleus   |
| 1389571_at   | BG666368  | signal transducer and activator of transcription 2, 113kDa                       | STAT2                     | 49,4 | Nucleus   |
| 1371781_at   | BI285863  | signal transducer and activator of transcription 3 (acute-phase response factor) | STAT3                     | 1,7  | Nucleus   |
| 1375413_at   | AA799614  | sirtuin (silent mating type information regulation 2 homolog) 2 (S. cerevisiae)  | SIRT2                     | 1,9  | Nucleus   |
| 1389373_at   | AI029555  | SMAD family member 1                                                             | SMAD1                     | 1,6  | Nucleus   |
| 1386984_at   | NM_019275 | SMAD family member 4                                                             | SMAD4                     | 2,3  | Nucleus   |
| 1373993_at   | AA799470  | small nuclear RNA activating complex, polypeptide 5, 19kDa                       | SNAPC5                    | -1,8 | Nucleus   |
| 1377757_at   | AA858978  | SNF2 histone linker PHD RING helicase                                            | SHPRH                     | -1,9 | Nucleus   |
| 1371880_at   | AII79662  | Sp1 transcription factor                                                         | SP1                       | 2,1  | Nucleus   |
| 1374838_at   | BI293504  | SP140 nuclear body protein                                                       | SP140                     | 5,2  | Nucleus   |
| 1372437_at   | BM390921  | S-phase kinase-associated protein 1                                              | SKP1                      | -1,9 | Nucleus   |
| 1387275_at   | NM_053349 | SRY (sex determining region Y)-box 11                                            | SOX11                     | 3,8  | Nucleus   |
| 1371979_at   | AII70663  | sterol regulatory element binding transcription factor 2                         | SREBF2                    | -2,3 | Nucleus   |
| 1370658_a_at | AF031942  | suppression of tumorigenicity 18 (breast carcinoma) (zinc finger protein)        | ST18                      | -2,8 | Nucleus   |
| 1392792_at   | AI071152  | TAF1 RNA polymerase II, TATA box binding protein (TBP)-associated factor, 250kDa | TAF1                      | -2,0 | Nucleus   |
| 1374177_at   | AI230912  | TAF13 RNA polymerase II, TATA box binding protein (TBP)-associated factor, 18kDa | TAF13                     | -2,5 | Nucleus   |
| 1376050_at   | AII77663  | TAF5 RNA polymerase II, TATA box binding protein (TBP)-associated factor, 100kDa | TAF5                      | 2,8  | Nucleus   |
| 1388058_at   | D49446    | TAF6 RNA polymerase II, TATA box binding protein (TBP)-associated factor, 80kDa  | TAF6                      | 1,6  | Nucleus   |
| 1394499_at   | AI501768  | TAF8 RNA polymerase II, TATA box binding protein (TBP)-associated factor, 43kDa  | TAF8                      | 1,7  | Nucleus   |
| 1371367_at   | BE107459  | TAR DNA binding protein                                                          | TARDBP                    | -2,0 | Nucleus   |
| 1392611_at   | BE117629  | teashirt zinc finger homeobox 1                                                  | TSHZ1                     | -4,8 | Nucleus   |
| 1380283_at   | BF411100  | teashirt zinc finger homeobox 1                                                  | TSHZ1                     | -3,3 | Nucleus   |
| 1383573_at   | BE117444  | teashirt zinc finger homeobox 1                                                  | TSHZ1                     | -2,3 | Nucleus   |
| 1373421_at   | BM392224  | TGFB-induced factor homeobox 1                                                   | TGIF1                     | 9,9  | Nucleus   |
| 1367485_at   | BM388871  | transcription elongation factor A (SII), 1                                       | TCEA1                     | 2,0  | Nucleus   |
| 1382861_at   | AA997486  | transcription elongation factor A (SII), 1                                       | TCEA1                     | 3,6  | Nucleus   |
| 1391212_at   | BF418812  | transcription elongation factor A (SII)-like 1                                   | TCEAL1                    | -2,7 | Nucleus   |
| 1372151_at   | AI317851  | transcription elongation regulator 1                                             | TCERG1                    | 1,8  | Nucleus   |
| 1390817_at   | BF394639  | transcription factor 20 (AR1)                                                    | TCF20                     | -1,6 | Nucleus   |
| 1368842_at   | BG377130  | transcription factor 4                                                           | TCF4                      | -2,1 | Nucleus   |
| 1392592_at   | AII37045  | transcription factor 7-like 2 (T-cell specific, HMG-box)                         | TCF7L2 (includes EG:6934) | 4,3  | Nucleus   |
| 1388967_at   | AI012945  | transcription factor binding to IGHM enhancer 3                                  | TFE3                      | 1,7  | Nucleus   |
| 1389545_at   | BF281994  | transducin (beta)-like 1 X-linked receptor 1                                     | TBL1XR1                   | 1,8  | Nucleus   |
| 1390662_at   | AW435169  | tripartite motif-containing 24                                                   | TRIM24                    | 2,1  | Nucleus   |
| 1389163_at   | BG372673  | tripartite motif-containing 32                                                   | TRIM32                    | -1,6 | Nucleus   |
| 1367831_at   | NM_030989 | tumor protein p53                                                                | TP53                      | 2,9  | Nucleus   |
| 1375965_at   | AI229167  | ubiquitin-conjugating enzyme E2K (UBC1 homolog, yeast)                           | UBE2K                     | -3,8 | Cytoplasm |
| 1383515_at   | AW143503  | ubiquitin-conjugating enzyme E2K (UBC1 homolog, yeast)                           | UBE2K                     | -2,1 | Cytoplasm |
| 1383537_at   | BF522715  | vascular endothelial zinc finger 1                                               | VEZF1                     | 1,8  | Nucleus   |
| 1380229_at   | AW530004  | v-maf musculoaponeurotic fibrosarcoma oncogene homolog F (avian)                 | MAFF                      | 26,1 | Nucleus   |
| 1372211_at   | BI284461  | v-maf musculoaponeurotic fibrosarcoma oncogene homolog K (avian)                 | MAFK                      | 4,2  | Nucleus   |
| 1368308_at   | NM_012603 | v-myc myelocytomatosis viral oncogene homolog (avian)                            | MYC                       | 33,8 | Nucleus   |
| 1372853_at   | BF283772  | v-rel reticuloendotheliosis viral oncogene homolog A (avian)                     | RELA                      | 2,5  | Nucleus   |
| 1377668_at   | BI276788  | YY1 transcription factor                                                         | YY1                       | 2,8  | Nucleus   |
| 1387107_at   | NM_054002 | zinc finger and BTB domain containing 7A                                         | ZBTB7A                    | 1,9  | Nucleus   |
| 1370965_at   | BG381660  | zinc finger E-box binding homeobox 1                                             | ZEB1                      | 6,1  | Nucleus   |
| 1394476_at   | AW535213  | zinc finger protein 14                                                           | ZNF14                     | -1,5 | Nucleus   |
| 1368067_at   | NM_031615 | zinc finger protein 148                                                          | ZNF148                    | -1,8 | Nucleus   |
| 1374189_at   | BG668883  | zinc finger protein 219                                                          | ZNF219                    | 2,0  | Nucleus   |
| 1390189_at   | BF398121  | zinc finger protein 277                                                          | ZNF277                    | 2,0  | Nucleus   |
| 1381902_at   | BE116321  | zinc finger protein 292                                                          | ZNF292                    | 1,9  | Nucleus   |
| 1390945_at   | BI294878  | zinc finger protein 292                                                          | ZNF292                    | 2,7  | Nucleus   |
| 1368877_at   | NM_052798 | zinc finger protein 354A                                                         | ZNF354A                   | 2,4  | Nucleus   |
| 1387870_at   | AB025017  | zinc finger protein 36, C3H type, homolog (mouse)                                | ZFP36                     | 9,9  | Nucleus   |



|            |          |                                         |
|------------|----------|-----------------------------------------|
| 1373106_at | AI178069 | zinc finger protein 36, C3H type-like 2 |
| 1391702_at | BM389392 | zinc finger protein 446                 |
| 1373950_at | AI598911 | zinc finger protein 496                 |
| 1399044_at | AA819804 | zinc finger protein 91 homolog (mouse)  |
| 1383054_at | BE111631 | zinc finger protein 91 homolog (mouse)  |
| 1383226_at | BI293943 | zinc finger protein, X-linked           |
| 1388590_at | AI010455 | zinc ribbon domain containing 1         |

**Translation regulator**

|              |           |                                                                     |
|--------------|-----------|---------------------------------------------------------------------|
| 1371949_at   | BM390332  | basic leucine zipper and W2 domains 1                               |
| 1391163_at   | BM385306  | elongation factor Tu GTP binding domain containing 1                |
| 1383558_at   | BI290282  | eukaryotic elongation factor, selenocysteine-tRNA-specific          |
| 1384147_at   | AA955540  | eukaryotic translation initiation factor 1A, Y-linked               |
| 1383011_at   | AI501182  | eukaryotic translation initiation factor 2A, 65kDa                  |
| 1374968_at   | AI599930  | eukaryotic translation initiation factor 2C, 1                      |
| 1368866_at   | NM_021597 | eukaryotic translation initiation factor 2C, 2                      |
| 1368867_at   | BF281131  | eukaryotic translation initiation factor 2C, 2                      |
| 1388359_at   | AI599478  | eukaryotic translation initiation factor 4 gamma, 2                 |
| 1397697_at   | BF558764  | eukaryotic translation initiation factor 4A, isoform 2              |
| 1372124_at   | BI278814  | eukaryotic translation initiation factor 4B                         |
| 1367537_at   | AI012479  | eukaryotic translation initiation factor 4E nuclear import factor 1 |
| 1388206_a_at | K01677    | eukaryotic translation initiation factor 5                          |
| 1388507_at   | AI104279  | eukaryotic translation initiation factor 6                          |
| 1389038_at   | BF285301  | eukaryotic translation termination factor 1                         |
| 1377249_at   | AW526060  | G1 to S phase transition 2                                          |
| 1372344_at   | AI175760  | HBS1-like (S. cerevisiae)                                           |
| 1374385_at   | AI009789  | poly(rC) binding protein 1                                          |
| 1368094_at   | NM_024002 | SECIS binding protein 2                                             |

**Transmembrane receptor**

|              |           |                                                                                  |
|--------------|-----------|----------------------------------------------------------------------------------|
| 1388373_at   | BI289063  | adiponectin receptor 1                                                           |
| 1367595_s_at | NM_012512 | beta-2-microglobulin                                                             |
| 1371440_at   | AW916647  | beta-2-microglobulin                                                             |
| 1374620_at   | BM392373  | carcinoembryonic antigen-related cell adhesion molecule 1 (biliary glycoprotein) |
| 1377698_at   | AW433947  | CD40 molecule, TNF receptor superfamily member 5                                 |
| 1384837_at   | AI137672  | CD69 molecule                                                                    |
| 1367679_at   | NM_013069 | CD74 molecule, major histocompatibility complex, class II invariant chain        |
| 1388547_at   | BE328951  | claudin 4                                                                        |
| 1369182_at   | NM_013057 | coagulation factor III (thromboplastin, tissue factor)                           |
| 1371429_at   | BF281192  | dystroglycan 1 (dystrophin-associated glycoprotein 1)                            |
| 1387039_at   | NM_030828 | glypican 1                                                                       |
| 1368924_at   | NM_017094 | growth hormone receptor                                                          |
| 1373803_a_at | AI170771  | growth hormone receptor                                                          |
| 1398491_at   | BM383434  | immunoglobulin-like domain containing receptor 1                                 |
| 1387202_at   | NM_012967 | intercellular adhesion molecule 1                                                |
| 1369956_at   | NM_053783 | interferon gamma receptor 1                                                      |
| 1374601_at   | BI274482  | interferon gamma receptor 2 (interferon gamma transducer 1)                      |
| 1383616_at   | AA997562  | interleukin 10 receptor, beta                                                    |
| 1388711_at   | BF282650  | interleukin 13 receptor, alpha 1                                                 |
| 1387946_at   | AF065438  | lectin, galactoside-binding, soluble, 3 binding protein                          |
| 1382386_at   | BI274268  | limb region 1 homolog (mouse)                                                    |
| 1374108_at   | BM388942  | low density lipoprotein-related protein 12                                       |
| 1370463_x_at | U50449    | major histocompatibility complex, class I, C                                     |
| 1388071_x_at | M24024    | major histocompatibility complex, class I, C                                     |
| 1388236_x_at | M24026    | major histocompatibility complex, class I, C                                     |
| 1371171_at   | M10094    | major histocompatibility complex, class I, C                                     |
| 1370428_x_at | AJ249701  | major histocompatibility complex, class I, C                                     |
| 1388203_x_at | BI395698  | major histocompatibility complex, class I, C                                     |
| 1388202_at   | BI395698  | major histocompatibility complex, class I, C                                     |
| 1370429_at   | L40362    | major histocompatibility complex, class I, C                                     |

|                           |       |                 |
|---------------------------|-------|-----------------|
| ZFP36L2                   | 3,0   | Nucleus         |
| ZNF446                    | -1,6  | Nucleus         |
| ZNF496                    | 2,0   | Nucleus         |
| ZFP91                     | 1,7   | Nucleus         |
| ZFP91                     | 2,0   | Nucleus         |
| ZFX                       | -1,7  | Nucleus         |
| ZNRD1                     | 1,9   | Nucleus         |
| BZW1                      | 3,2   | Cytoplasm       |
| EFTUD1                    | 2,9   | Cytoplasm       |
| EEFSEC                    | 1,9   | Cytoplasm       |
| EIF1AY                    | 2,8   | Cytoplasm       |
| EIF2A                     | 1,7   | Cytoplasm       |
| EIF2C1                    | -1,8  | Cytoplasm       |
| EIF2C2                    | 5,1   | Cytoplasm       |
| EIF2C2                    | 5,1   | Cytoplasm       |
| EIF4G2 (includes EG:1982) | -1,9  | Cytoplasm       |
| EIF4A2                    | -1,7  | Cytoplasm       |
| EIF4B                     | 2,2   | Cytoplasm       |
| EIF4ENIF1                 | 1,5   | Cytoplasm       |
| EIF5                      | 2,0   | Cytoplasm       |
| EIF6                      | 2,6   | Cytoplasm       |
| ETF1                      | 1,5   | Cytoplasm       |
| GSPT2                     | -2,1  | Cytoplasm       |
| HBS1L                     | 1,9   | Cytoplasm       |
| PCBP1 (includes EG:5093)  | 1,8   | Nucleus         |
| SECISBP2                  | 1,6   | Cytoplasm       |
| ADIPOR1                   | -1,5  | Plasma Membrane |
| B2M                       | 1,8   | Plasma Membrane |
| B2M                       | 9,1   | Plasma Membrane |
| CEACAM1                   | -1,6  | Plasma Membrane |
| CD40                      | 47,6  | Plasma Membrane |
| CD69                      | 87,2  | Plasma Membrane |
| CD74                      | 73,9  | Plasma Membrane |
| CLDN4                     | 2,3   | Plasma Membrane |
| F3                        | 2,9   | Plasma Membrane |
| DAG1                      | -1,8  | Plasma Membrane |
| GPC1                      | -1,8  | Plasma Membrane |
| GHR                       | -2,3  | Plasma Membrane |
| GHR                       | -2,2  | Plasma Membrane |
| ILDR1                     | -3,2  | Plasma Membrane |
| ICAM1                     | 152,8 | Plasma Membrane |
| IFNGR1                    | 1,7   | Plasma Membrane |
| IFNGR2                    | 2,2   | Plasma Membrane |
| IL10RB                    | 3,2   | Plasma Membrane |
| IL13RA1                   | 3,2   | Plasma Membrane |
| LGALS3BP                  | 10,3  | Plasma Membrane |
| LMBR1                     | 2,3   | Plasma Membrane |
| LRP12                     | -1,7  | Plasma Membrane |
| HLA-C                     | 3,7   | Plasma Membrane |
| HLA-C                     | 4,9   | Plasma Membrane |
| HLA-C                     | 8,1   | Plasma Membrane |
| HLA-C                     | 8,1   | Plasma Membrane |
| HLA-C                     | 8,3   | Plasma Membrane |
| HLA-C                     | 8,6   | Plasma Membrane |
| HLA-C                     | 8,9   | Plasma Membrane |
| HLA-C                     | 12,6  | Plasma Membrane |

|              |           |                                                                                    |
|--------------|-----------|------------------------------------------------------------------------------------|
| 1397859_x_at | BI291927  | major histocompatibility complex, class I, C                                       |
| 1370972_x_at | BI300597  | major histocompatibility complex, class I, C                                       |
| 1369110_x_at | NM_012645 | major histocompatibility complex, class I, C                                       |
| 1388255_x_at | AJ243338  | major histocompatibility complex, class I, C                                       |
| 1371078_at   | AI500830  | major histocompatibility complex, class I, C                                       |
| 1388212_a_at | AJ243974  | major histocompatibility complex, class I, E                                       |
| 1388164_at   | AF029241  | major histocompatibility complex, class I, E                                       |
| 1371123_x_at | AJ243973  | major histocompatibility complex, class I, E                                       |
| 1388213_a_at | AJ243973  | major histocompatibility complex, class I, E                                       |
| 1387205_at   | NM_022921 | major histocompatibility complex, class I, G                                       |
| 1370882_at   | AI171966  | major histocompatibility complex, class II, DM beta                                |
| 1370822_at   | AF307302  | major histocompatibility complex, class II, DQ alpha 1                             |
| 1371033_at   | AI715202  | major histocompatibility complex, class II, DQ beta 2                              |
| 1370883_at   | Y00480    | major histocompatibility complex, class II, DR alpha                               |
| 1370383_s_at | BI279526  | major histocompatibility complex, class II, DR beta 1                              |
| 1376362_at   | BG380575  | neuronal pentraxin receptor                                                        |
| 1370177_at   | AI548856  | poliovirus receptor                                                                |
| 1370789_a_at | L48060    | prolactin receptor                                                                 |
| 1376327_at   | AI169601  | tumor necrosis factor receptor superfamily, member 14 (herpesvirus entry mediator) |
| 1367715_at   | NM_013091 | tumor necrosis factor receptor superfamily, member 1A                              |
| 1395132_at   | BE115432  | utrophin                                                                           |

**Transporter**

|              |           |                                                                                          |
|--------------|-----------|------------------------------------------------------------------------------------------|
| 1368869_at   | BG663107  | A kinase (PRKA) anchor protein 12                                                        |
| 1371493_at   | BI285640  | adaptor-related protein complex 2, alpha 2 subunit                                       |
| 1388813_at   | BE112160  | ADP-ribosylation factor 2                                                                |
| 1369998_at   | NM_024152 | ADP-ribosylation factor 6                                                                |
| 1385709_x_at | AW529028  | ankylosis, progressive homolog (mouse)                                                   |
| 1369249_at   | NM_053714 | ankylosis, progressive homolog (mouse)                                                   |
| 1393439_a_at | AI045767  | ankylosis, progressive homolog (mouse)                                                   |
| 1386344_at   | BG662519  | ankylosis, progressive homolog (mouse)                                                   |
| 1372604_at   | BI289459  | apolipoprotein L, 3                                                                      |
| 1373472_at   | AI177008  | ARP6 actin-related protein 6 homolog (yeast)                                             |
| 1370378_at   | J05266    | ATP synthase, H+ transporting, mitochondrial F1 complex, alpha subunit 1, cardiac muscle |
| 1369065_a_at | NM_017290 | ATPase, Ca++ transporting, cardiac muscle, slow twitch 2                                 |
| 1398862_at   | J04024    | ATPase, Ca++ transporting, cardiac muscle, slow twitch 2                                 |
| 1370426_a_at | AI175492  | ATPase, Ca++ transporting, cardiac muscle, slow twitch 2                                 |
| 1397224_at   | AW534277  | ATPase, Ca++ transporting, plasma membrane 1                                             |
| 1387126_at   | NM_131907 | ATPase, Ca++ transporting, type 2C, member 1                                             |
| 1373546_at   | AI409922  | ATPase, class VI, type 11A                                                               |
| 1384002_at   | BG663077  | ATPase, class VI, type 11B                                                               |
| 1398905_at   | BI285183  | ATPase, H+ transporting, lysosomal 13kDa, V1 subunit G1                                  |
| 1398930_at   | BI278546  | ATPase, H+ transporting, lysosomal 21kDa, V0 subunit b                                   |
| 1388325_at   | BF281358  | ATPase, H+ transporting, lysosomal 34kDa, V1 subunit D                                   |
| 1387664_at   | NM_057213 | ATPase, H+ transporting, lysosomal 56/58kDa, V1 subunit B2                               |
| 1386937_at   | AI232036  | ATPase, Na+/K+ transporting, beta 1 polypeptide                                          |
| 1383355_at   | AW918387  | ATP-binding cassette, sub-family A (ABC1), member 1                                      |
| 1370464_at   | AF286167  | ATP-binding cassette, sub-family B (MDR/TAP), member 1                                   |
| 1370465_at   | AF257746  | ATP-binding cassette, sub-family B (MDR/TAP), member 1                                   |
| 1368484_at   | NM_022238 | ATP-binding cassette, sub-family B (MDR/TAP), member 9                                   |
| 1371005_at   | AI059506  | ATP-binding cassette, sub-family C (CFTR/MRP), member 1                                  |
| 1368057_at   | NM_012804 | ATP-binding cassette, sub-family D (ALD), member 3                                       |
| 1368103_at   | NM_053502 | ATP-binding cassette, sub-family G (WHITE), member 1                                     |
| 1379717_at   | BM385804  | ATP-binding cassette, sub-family G (WHITE), member 3                                     |
| 1372709_at   | AI172204  | B-cell receptor-associated protein 29                                                    |
| 1372710_at   | AI175027  | blocked early in transport 1 homolog (S. cerevisiae)                                     |
| 1371810_at   | BF284093  | coatamer protein complex, subunit gamma                                                  |
| 1394565_at   | BF406339  | coatamer protein complex, subunit zeta 1                                                 |
| 1374045_at   | AI598851  | component of oligomeric golgi complex 8                                                  |

|                           |       |                 |
|---------------------------|-------|-----------------|
| HLA-C                     | 17,0  | Plasma Membrane |
| HLA-C                     | 17,7  | Plasma Membrane |
| HLA-C                     | 22,9  | Plasma Membrane |
| HLA-C                     | 23,2  | Plasma Membrane |
| HLA-C                     | 23,5  | Plasma Membrane |
| HLA-E                     | 62,6  | Plasma Membrane |
| HLA-E                     | 96,7  | Plasma Membrane |
| HLA-E                     | 107,0 | Plasma Membrane |
| HLA-E                     | 174,7 | Plasma Membrane |
| HLA-G                     | 10,8  | Plasma Membrane |
| HLA-DMB                   | 2,8   | Plasma Membrane |
| HLA-DQA1                  | 73,0  | Plasma Membrane |
| HLA-DQB2                  | 12,4  | Plasma Membrane |
| HLA-DRA                   | 77,6  | Plasma Membrane |
| HLA-DRB1                  | 23,2  | Plasma Membrane |
| NPTXR                     | -2,2  | Plasma Membrane |
| PVR                       | 13,0  | Plasma Membrane |
| PRLR                      | -4,7  | Plasma Membrane |
| TNFRSF14                  | 46,2  | Plasma Membrane |
| TNFRSF1A                  | 2,0   | Plasma Membrane |
| UTRN                      | -3,1  | Plasma Membrane |
| AKAP12                    | 3,5   | Cytoplasm       |
| AP2A2                     | -2,2  | Cytoplasm       |
| ARF2                      | 2,4   | Cytoplasm       |
| ARF6                      | 1,9   | Plasma Membrane |
| ANKH                      | -4,2  | Plasma Membrane |
| ANKH                      | -3,8  | Plasma Membrane |
| ANKH                      | -3,6  | Plasma Membrane |
| ANKH                      | -2,5  | Plasma Membrane |
| APOL3 (includes EG:80833) | 94,3  | Cytoplasm       |
| ACTR6                     | 2,0   | Unknown         |
| ATP5A1                    | -1,9  | Cytoplasm       |
| ATP2A2                    | -4,0  | Cytoplasm       |
| ATP2A2                    | -1,9  | Cytoplasm       |
| ATP2A2                    | -1,5  | Cytoplasm       |
| ATP2B1                    | -2,0  | Plasma Membrane |
| ATP2C1                    | -1,7  | Cytoplasm       |
| ATP11A                    | 1,9   | Plasma Membrane |
| ATP11B                    | -1,8  | Plasma Membrane |
| ATP6V1G1                  | 2,1   | Cytoplasm       |
| ATP6V0B                   | 1,6   | Cytoplasm       |
| ATP6VID                   | 2,0   | Cytoplasm       |
| ATP6V1B2                  | 4,4   | Cytoplasm       |
| ATP1B1                    | -1,6  | Plasma Membrane |
| ABCA1                     | 2,3   | Plasma Membrane |
| ABCB1                     | 4,5   | Plasma Membrane |
| ABCB1                     | 14,2  | Plasma Membrane |
| ABCB9                     | -1,8  | Cytoplasm       |
| ABCC1                     | 2,6   | Plasma Membrane |
| ABCD3                     | -3,8  | Cytoplasm       |
| ABCG1                     | 1,5   | Plasma Membrane |
| ABCG3                     | 11,5  | Plasma Membrane |
| BCAP29                    | 3,0   | Cytoplasm       |
| BET1                      | -1,7  | Cytoplasm       |
| COPG                      | -2,5  | Cytoplasm       |
| COPZ1                     | -1,8  | Cytoplasm       |
| COG8                      | -2,2  | Cytoplasm       |

|              |           |                                                                                                  |                               |      |                     |
|--------------|-----------|--------------------------------------------------------------------------------------------------|-------------------------------|------|---------------------|
| 1387077_at   | NM_031660 | cyclic AMP phosphoprotein, 19 kD                                                                 | ARPP-19                       | 2,5  | Cytoplasm           |
| 1387031_at   | U36482    | endoplasmic reticulum protein 29                                                                 | ERP29                         | -2,5 | Cytoplasm           |
| 1387369_at   | NM_019277 | exocyst complex component 6                                                                      | EXOC6                         | 3,9  | Unknown             |
| 1388150_at   | AW533924  | exportin 1 (CRM1 homolog, yeast)                                                                 | XPO1                          | 3,3  | Nucleus             |
| 1385428_at   | AI072630  | exportin 4                                                                                       | XPO4                          | 1,7  | Nucleus             |
| 1389063_at   | BG378160  | exportin 6                                                                                       | XPO6                          | 2,9  | Cytoplasm           |
| 1372496_at   | BG371538  | ferredoxin 1-like                                                                                | FDX1L                         | 1,9  | Unknown             |
| 1387148_at   | NM_134386 | G protein-coupled receptor associated sorting protein 1                                          | GPRASP1                       | -1,7 | Cytoplasm           |
| 1380170_at   | BI303388  | GABA(A) receptor-associated protein-like 2                                                       | GABARAPL2 (includes EG:11345) | -2,7 | Cytoplasm           |
| 1378079_at   | BI295829  | golgi autoantigen, golgin subfamily a, 3                                                         | GOLGA3                        | 1,8  | Cytoplasm           |
| 1370065_at   | NM_053318 | hemopexin                                                                                        | HPX                           | 12,1 | Extracellular Space |
| 1388918_at   | BG378074  | high density lipoprotein binding protein                                                         | HDLBP                         | -2,2 | Nucleus             |
| 1384244_at   | AA964752  | hydroxysteroid dehydrogenase like 2                                                              | HSDL2                         | 2,1  | Cytoplasm           |
| 1374135_at   | AI233262  | importin 4                                                                                       | IPO4                          | 1,9  | Nucleus             |
| 1373955_at   | BI280339  | importin 5                                                                                       | IPO5                          | 3,2  | Nucleus             |
| 1373722_at   | BE111697  | kinesin family member 20A                                                                        | KIF20A                        | -1,9 | Cytoplasm           |
| 1387011_at   | NM_130741 | lipocalin 2                                                                                      | LCN2                          | 34,1 | Extracellular Space |
| 1381984_at   | AI600142  | major facilitator superfamily domain containing 1                                                | MFSD1                         | 1,8  | Unknown             |
| 1372520_at   | AI172056  | myeloid cell leukemia sequence 1 (BCL2-related)                                                  | MCL1                          | 2,8  | Cytoplasm           |
| 1370141_at   | NM_021846 | myeloid cell leukemia sequence 1 (BCL2-related)                                                  | MCL1                          | 5,5  | Cytoplasm           |
| 1369690_at   | AI547471  | N-ethylmaleimide-sensitive factor                                                                | NSF                           | -1,9 | Cytoplasm           |
| 1374075_at   | AI175533  | N-ethylmaleimide-sensitive factor attachment protein, gamma                                      | NAPG                          | -1,6 | Cytoplasm           |
| 1369999_a_at | NM_053601 | neuronatin                                                                                       | NNAT                          | -3,4 | Plasma Membrane     |
| 1376112_a_at | AI231712  | nuclear transport factor 2                                                                       | NUTF2                         | -2,3 | Nucleus             |
| 1378185_at   | AW528873  | nuclear transport factor 2-like export factor 2                                                  | NXT2                          | 3,0  | Nucleus             |
| 1370934_at   | L06821    | nucleoporin 153kDa                                                                               | NUP153                        | 1,6  | Nucleus             |
| 1382413_at   | AA874825  | nucleoporin 155kDa                                                                               | NUP155                        | -1,6 | Nucleus             |
| 1398259_at   | NM_053952 | nucleoporin 155kDa                                                                               | NUP155                        | 1,8  | Nucleus             |
| 1383092_a_at | BE115060  | nucleoporin 214kDa                                                                               | NUP214                        | 1,6  | Nucleus             |
| 1367803_at   | NM_017361 | nucleoporin 54kDa                                                                                | NUP54                         | 2,7  | Nucleus             |
| 1368199_at   | NM_053616 | nucleoporin 88kDa                                                                                | NUP88                         | -1,5 | Nucleus             |
| 1387399_at   | NM_020098 | piccolo (presynaptic cytomatrix protein)                                                         | PCLO                          | -4,6 | Cytoplasm           |
| 1388393_at   | BM385031  | proteolipid protein 2 (colonic epithelium-enriched)                                              | PLP2                          | 2,3  | Cytoplasm           |
| 1367939_at   | NM_012733 | retinol binding protein 1, cellular                                                              | RBP1                          | 3,5  | Extracellular Space |
| 1367661_at   | AF140232  | S100 calcium binding protein A6                                                                  | S100A6                        | 2,6  | Cytoplasm           |
| 1373610_at   | AI232694  | SEC24 family, member D (S. cerevisiae)                                                           | SEC24D                        | -1,6 | Cytoplasm           |
| 1382615_at   | BI284366  | Sec61 alpha 1 subunit (S. cerevisiae)                                                            | SEC61A1                       | -1,8 | Cytoplasm           |
| 1390115_at   | BM384667  | SEC63 homolog (S. cerevisiae)                                                                    | SEC63                         | -1,7 | Cytoplasm           |
| 1371769_at   | BI279666  | secretory carrier membrane protein 2                                                             | SCAMP2                        | -1,6 | Cytoplasm           |
| 1374885_at   | AI172278  | solute carrier family 12 (potassium/chloride transporters), member 6                             | SLC12A6                       | -5,0 | Plasma Membrane     |
| 1393364_at   | BM385460  | solute carrier family 12 (potassium/chloride transporters), member 8                             | SLC12A8                       | -1,5 | Unknown             |
| 1390036_at   | BI289867  | solute carrier family 16, member 6 (monocarboxylic acid transporter 7)                           | SLC16A6                       | 2,2  | Plasma Membrane     |
| 1390591_at   | AI169163  | solute carrier family 17 (sodium phosphate), member 3                                            | SLC17A3                       | 7,1  | Plasma Membrane     |
| 1369131_at   | NM_013031 | solute carrier family 18 (vesicular monoamine), member 2                                         | SLC18A2                       | -1,9 | Plasma Membrane     |
| 1390863_at   | BF283298  | solute carrier family 19 (thiamine transporter), member 2                                        | SLC19A2                       | 2,5  | Plasma Membrane     |
| 1370848_at   | BI284218  | solute carrier family 2 (facilitated glucose transporter), member 1                              | SLC2A1                        | 9,1  | Plasma Membrane     |
| 1387228_at   | NM_012879 | solute carrier family 2 (facilitated glucose transporter), member 2                              | SLC2A2                        | -2,7 | Plasma Membrane     |
| 1370314_at   | AB000489  | solute carrier family 20 (phosphate transporter), member 1                                       | SLC20A1                       | 4,1  | Plasma Membrane     |
| 1398435_at   | BE112977  | solute carrier family 22, member 15                                                              | SLC22A15                      | 1,7  | Unknown             |
| 1371889_at   | AW915448  | solute carrier family 22, member 17                                                              | SLC22A17                      | -2,8 | Plasma Membrane     |
| 1388000_at   | AF021923  | solute carrier family 24 (sodium/potassium/calcium exchanger), member 2                          | SLC24A2                       | -5,6 | Plasma Membrane     |
| 1387103_s_at | NM_031720 | solute carrier family 25 (mitochondrial carrier, brain), member 14                               | SLC25A14                      | -1,6 | Cytoplasm           |
| 1371534_at   | AI407908  | solute carrier family 25 (mitochondrial carrier: glutamate), member 22                           | SLC25A22                      | 2,0  | Cytoplasm           |
| 1384368_at   | AA900084  | solute carrier family 25 (mitochondrial carrier; Graves disease autoantigen), member 16          | SLC25A16                      | -1,9 | Cytoplasm           |
| 1393947_at   | BG377383  | solute carrier family 25 (mitochondrial carrier; ornithine transporter) member 15                | SLC25A15                      | -2,0 | Cytoplasm           |
| 1372538_at   | BM389148  | solute carrier family 25 (mitochondrial carrier; peroxisomal membrane protein, 34kDa), member 17 | SLC25A17                      | -1,6 | Cytoplasm           |
| 1371754_at   | AI177358  | solute carrier family 25 (mitochondrial carrier; phosphate carrier), member 25                   | SLC25A25                      | -1,6 | Cytoplasm           |
| 1392789_at   | BI296353  | solute carrier family 25, member 36                                                              | SLC25A36                      | 4,6  | Unknown             |

|              |           |                                                                                                                                                     |          |       |                     |
|--------------|-----------|-----------------------------------------------------------------------------------------------------------------------------------------------------|----------|-------|---------------------|
| 1368440_at   | NM_017216 | solute carrier family 3 (cystine, dibasic and neutral amino acid transporters, activator of cystine, dibasic and neutral amino acid transport), mem | SLC3A1   | -6,0  | Plasma Membrane     |
| 1388982_at   | BM389066  | solute carrier family 30 (zinc transporter), member 9                                                                                               | SLC30A9  | -2,2  | Nucleus             |
| 1373657_at   | BF417391  | solute carrier family 31 (copper transporters), member 2                                                                                            | SLC31A2  | -2,5  | Plasma Membrane     |
| 1394304_at   | BF556357  | solute carrier family 33 (acetyl-CoA transporter), member 1                                                                                         | SLC33A1  | -1,8  | Cytoplasm           |
| 1386960_at   | NM_031589 | solute carrier family 37 (glucose-6-phosphate transporter), member 4                                                                                | SLC37A4  | -5,5  | Cytoplasm           |
| 1370409_at   | AF075704  | solute carrier family 38, member 1                                                                                                                  | SLC38A1  | 3,5   | Plasma Membrane     |
| 1387970_at   | AF276870  | solute carrier family 38, member 5                                                                                                                  | SLC38A5  | -7,5  | Unknown             |
| 1372778_at   | AA799420  | solute carrier family 39 (zinc transporter), member 1                                                                                               | SLC39A1  | 2,4   | Plasma Membrane     |
| 1373984_at   | AA850715  | solute carrier family 39 (zinc transporter), member 14                                                                                              | SLC39A14 | -1,9  | Plasma Membrane     |
| 1373326_at   | AI716512  | solute carrier family 4, sodium bicarbonate transporter, member 10                                                                                  | SLC4A10  | 2,3   | Unknown             |
| 1384756_at   | BF394311  | solute carrier family 43, member 2                                                                                                                  | SLC43A2  | -6,6  | Plasma Membrane     |
| 1368414_at   | NM_022590 | solute carrier family 5 (sodium/glucose cotransporter), member 2                                                                                    | SLC5A2   | -2,1  | Plasma Membrane     |
| 1367810_at   | AI412218  | solute carrier family 6 (neurotransmitter transporter, creatine), member 8                                                                          | SLC6A8   | 14,0  | Cytoplasm           |
| 1373787_at   | AA943735  | solute carrier family 6 (neurotransmitter transporter, glycine), member 9                                                                           | SLC6A9   | 5,9   | Plasma Membrane     |
| 1368392_at   | BF420160  | solute carrier family 7 (cationic amino acid transporter, y+ system), member 1                                                                      | SLC7A1   | 1,5   | Plasma Membrane     |
| 1368391_at   | NM_013111 | solute carrier family 7 (cationic amino acid transporter, y+ system), member 1                                                                      | SLC7A1   | 1,6   | Plasma Membrane     |
| 1387280_a_at | NM_017353 | solute carrier family 7 (cationic amino acid transporter, y+ system), member 5                                                                      | SLC7A5   | -1,8  | Plasma Membrane     |
| 1387057_at   | NM_053442 | solute carrier family 7 (cationic amino acid transporter, y+ system), member 8                                                                      | SLC7A8   | -3,9  | Plasma Membrane     |
| 1378133_at   | AW532618  | solute carrier family 7, (cationic amino acid transporter, y+ system) member 11                                                                     | SLC7A11  | 8,8   | Plasma Membrane     |
| 1390440_at   | BG380512  | solute carrier family 9 (sodium/hydrogen exchanger), member 6                                                                                       | SLC9A6   | -2,1  | Plasma Membrane     |
| 1368606_at   | NM_030838 | solute carrier organic anion transporter family, member 1a5                                                                                         | SLCO1A5  | 2,0   | Plasma Membrane     |
| 1373734_at   | AI101171  | solute carrier organic anion transporter family, member 3A1                                                                                         | SLCO3A1  | -3,3  | Plasma Membrane     |
| 1372728_at   | BE103745  | sortilin 1                                                                                                                                          | SORT1    | -4,9  | Cytoplasm           |
| 1393626_at   | BF562507  | sortilin-related receptor, L(DLR class) A repeats-containing                                                                                        | SORL1    | -10,3 | Plasma Membrane     |
| 1394786_at   | AW526631  | sortilin-related receptor, L(DLR class) A repeats-containing                                                                                        | SORL1    | -3,9  | Plasma Membrane     |
| 1393933_at   | AW144823  | sortilin-related receptor, L(DLR class) A repeats-containing                                                                                        | SORL1    | -3,0  | Plasma Membrane     |
| 1377458_at   | AA850618  | sortilin-related receptor, L(DLR class) A repeats-containing                                                                                        | SORL1    | -2,9  | Plasma Membrane     |
| 1377457_a_at | AA850618  | sortilin-related receptor, L(DLR class) A repeats-containing                                                                                        | SORL1    | -2,4  | Plasma Membrane     |
| 1390710_x_at | AA850618  | sortilin-related receptor, L(DLR class) A repeats-containing                                                                                        | SORL1    | -2,4  | Plasma Membrane     |
| 1368043_at   | NM_053411 | sorting nexin 1                                                                                                                                     | SNX1     | 1,8   | Cytoplasm           |
| 1379388_at   | BI296311  | sorting nexin 13                                                                                                                                    | SNX13    | 2,2   | Cytoplasm           |
| 1372656_at   | BI282899  | sorting nexin 15                                                                                                                                    | SNX15    | 3,6   | Cytoplasm           |
| 1387510_at   | NM_022289 | sorting nexin 16                                                                                                                                    | SNX16    | 2,1   | Unknown             |
| 1383742_at   | AA997003  | sorting nexin 7                                                                                                                                     | SNX7     | 14,9  | Unknown             |
| 1393183_at   | H33503    | StAR-related lipid transfer (START) domain containing 5                                                                                             | STARD5   | -2,5  | Cytoplasm           |
| 1370296_at   | M34728    | sterol carrier protein 2                                                                                                                            | SCP2     | -2,0  | Cytoplasm           |
| 1387026_at   | NM_031683 | structural maintenance of chromosomes 1A                                                                                                            | SMC1A    | 2,2   | Nucleus             |
| 1389359_at   | BE120823  | structural maintenance of chromosomes 4                                                                                                             | SMC4     | 1,6   | Nucleus             |
| 1370194_at   | AA945699  | synaptosomal-associated protein, 23kDa                                                                                                              | SNAP23   | 1,7   | Plasma Membrane     |
| 1387073_at   | NM_030991 | synaptosomal-associated protein, 25kDa                                                                                                              | SNAP25   | -1,7  | Plasma Membrane     |
| 1374427_at   | AI144986  | synaptotagmin XIII                                                                                                                                  | SYT13    | -1,9  | Unknown             |
| 1369457_a_at | AF419342  | synaptotagmin-like 4                                                                                                                                | SYTL4    | -10,4 | Cytoplasm           |
| 1367530_at   | AI412967  | syntaxin 16                                                                                                                                         | STX16    | -3,0  | Cytoplasm           |
| 1370014_at   | NM_031125 | syntaxin 4                                                                                                                                          | STX4     | 1,9   | Plasma Membrane     |
| 1370519_at   | U06069    | syntaxin binding protein 1                                                                                                                          | STXBP1   | -1,8  | Cytoplasm           |
| 1369726_at   | NM_033098 | TAP binding protein (tapasin)                                                                                                                       | TAPBP    | 14,9  | Cytoplasm           |
| 1372092_at   | BI278968  | trafficking protein, kinesin binding 2                                                                                                              | TRAK2    | -3,0  | Plasma Membrane     |
| 1370176_at   | BG378620  | trafficking protein, kinesin binding 2                                                                                                              | TRAK2    | -2,2  | Plasma Membrane     |
| 1367765_at   | NM_022534 | transcobalamin II; macrocytic anemia                                                                                                                | TCN2     | -1,9  | Extracellular Space |
| 1388750_at   | BF417032  | transferrin receptor (p90, CD71)                                                                                                                    | TFRC     | 2,6   | Plasma Membrane     |
| 1371113_a_at | M58040    | transferrin receptor (p90, CD71)                                                                                                                    | TFRC     | 4,3   | Plasma Membrane     |
| 1370366_at   | AF150091  | translocase of inner mitochondrial membrane 10 homolog (yeast)                                                                                      | TIMM10   | 3,1   | Cytoplasm           |
| 1398868_at   | AI408157  | translocase of inner mitochondrial membrane 13 homolog (yeast)                                                                                      | TIMM13   | 2,0   | Cytoplasm           |
| 1390237_at   | BF558361  | translocase of inner mitochondrial membrane 8 homolog A (yeast)                                                                                     | TIMM8A   | 2,6   | Cytoplasm           |
| 1398973_at   | BI296499  | transmembrane 9 superfamily member 3                                                                                                                | TM9SF3   | -4,9  | Cytoplasm           |
| 1379627_at   | AW534630  | transmembrane 9 superfamily member 3                                                                                                                | TM9SF3   | -2,2  | Cytoplasm           |
| 1367513_at   | BI284935  | transmembrane 9 superfamily protein member 4                                                                                                        | TM9SF4   | -2,2  | Cytoplasm           |
| 1390432_at   | AA997338  | transmembrane and coiled-coil domains 3                                                                                                             | TMCO3    | -5,8  | Unknown             |

|              |           |                                                                                         |  |                             |       |                     |
|--------------|-----------|-----------------------------------------------------------------------------------------|--|-----------------------------|-------|---------------------|
| 1391134_at   | BF404933  | transmembrane and coiled-coil domains 3                                                 |  | TMCO3                       | -2,2  | Unknown             |
| 1388628_at   | BI284430  | transmembrane emp24 protein transport domain containing 3                               |  | TMED3                       | -1,7  | Cytoplasm           |
| 1388149_at   | X57523    | transporter 1, ATP-binding cassette, sub-family B (MDR/TAP)                             |  | TAP1                        | 158,1 | Cytoplasm           |
| 1368732_at   | NM_032056 | transporter 2, ATP-binding cassette, sub-family B (MDR/TAP)                             |  | TAP2                        | 38,3  | Cytoplasm           |
| 1368669_at   | NM_019354 | uncoupling protein 2 (mitochondrial, proton carrier)                                    |  | UCP2                        | -2,7  | Cytoplasm           |
| 1373498_at   | BI295924  | vacuolar protein sorting 11 homolog (S. cerevisiae)                                     |  | VPS11                       | 1,9   | Cytoplasm           |
| 1382099_at   | BI289595  | vacuolar protein sorting 26 homolog A (S. pombe)                                        |  | VPS26A                      | 1,7   | Cytoplasm           |
| 1370521_at   | U35245    | vacuolar protein sorting 33 homolog B (yeast)                                           |  | VPS33B                      | -1,5  | Cytoplasm           |
| 1389611_at   | AA849857  | very low density lipoprotein receptor                                                   |  | VLDLR                       | 2,3   | Plasma Membrane     |
| 1387455_a_at | NM_013155 | very low density lipoprotein receptor                                                   |  | VLDLR                       | 2,3   | Plasma Membrane     |
|              |           | <b>Other</b>                                                                            |  |                             |       |                     |
| 1391754_at   | BM391818  | 2'-5' oligoadenylate synthetase II                                                      |  | OAS1I                       | 4,6   | Unknown             |
| 1378345_at   | BF389196  | 2-oxoglutarate and iron-dependent oxygenase domain containing 1                         |  | OGFOD1                      | -1,9  | Unknown             |
| 1383358_at   | AI072577  | A kinase (PRKA) anchor protein 1                                                        |  | AKAP1                       | 1,6   | Cytoplasm           |
| 1382268_at   | AW526712  | A kinase (PRKA) anchor protein 13                                                       |  | AKAP13                      | -1,7  | Cytoplasm           |
| 1385713_at   | BF392577  | A kinase (PRKA) anchor protein 8-like                                                   |  | AKAP8L                      | -1,7  | Nucleus             |
| 1374746_at   | AA891922  | Ab1-152                                                                                 |  | LOC500877                   | 2,0   | Unknown             |
| 1377022_at   | BF395328  | abhydrolase domain containing 10                                                        |  | ABHD10                      | 2,0   | Unknown             |
| 1387909_at   | U94904    | abl interactor 2                                                                        |  | ABI2                        | -1,7  | Cytoplasm           |
| 1372249_at   | BE108148  | Ac1254                                                                                  |  | LOC362901                   | -1,7  | Unknown             |
| 1386915_at   | NM_131911 | acidic (leucine-rich) nuclear phosphoprotein 32 family, member B                        |  | ANP32B                      | 1,7   | Nucleus             |
| 1371873_at   | AA850735  | acidic (leucine-rich) nuclear phosphoprotein 32 family, member E                        |  | ANP32E                      | -1,7  | Nucleus             |
| 1372620_at   | AI008642  | acidic (leucine-rich) nuclear phosphoprotein 32 family, member E                        |  | ANP32E                      | 1,7   | Nucleus             |
| 1375641_at   | BI296526  | actin related protein 2/3 complex, subunit 5-like                                       |  | ARPC5L (includes EG:296710) | 2,8   | Unknown             |
| 1384581_at   | BI850151  | actin, gamma 1                                                                          |  | ACTG1                       | 2,2   | Cytoplasm           |
| 1371327_a_at | BG666668  | actin, gamma 1                                                                          |  | ACTG1                       | 3,1   | Cytoplasm           |
| 1369942_at   | NM_031675 | actinin, alpha 4                                                                        |  | ACTN4                       | 2,4   | Cytoplasm           |
| 1376363_at   | AI233337  | actin-related protein 10 homolog (S. cerevisiae)                                        |  | ACTR10                      | -2,6  | Cytoplasm           |
| 1373507_at   | AI232810  | acyl-Coenzyme A binding domain containing 5                                             |  | ACBD5                       | -2,0  | Unknown             |
| 1382556_a_at | AI412140  | adaptor protein, phosphotyrosine interaction, PH domain and leucine zipper containing 1 |  | APPL1                       | 2,8   | Cytoplasm           |
| 1397579_x_at | BI294552  | adenomatosis polyposis coli 2                                                           |  | APC2                        | -3,8  | Cytoplasm           |
| 1383499_at   | BG371995  | adhesion molecule with Ig-like domain 1                                                 |  | AMIGO1                      | -2,8  | Unknown             |
| 1373345_at   | AW523747  | adhesion molecule with Ig-like domain 2                                                 |  | AMIGO2                      | -2,4  | Plasma Membrane     |
| 1392038_at   | BF387389  | ADP-ribosylation factor-like 6 interacting protein 1                                    |  | ARL6IP1                     | 2,7   | Cytoplasm           |
| 1370307_at   | M64780    | agrin                                                                                   |  | AGRN                        | 7,1   | Plasma Membrane     |
| 1371703_at   | AI407114  | AHNAK nucleoprotein                                                                     |  | AHNAK                       | 8,3   | Nucleus             |
| 1371571_at   | BG671677  | amyloid beta (A4) precursor protein                                                     |  | APP                         | -1,6  | Plasma Membrane     |
| 1377697_at   | BI275738  | amyloid beta (A4) precursor protein-binding, family B, member 2                         |  | APBB2                       | -2,2  | Cytoplasm           |
| 1389307_at   | AW435479  | amyloid beta (A4) precursor-like protein 1                                              |  | APLP1                       | -2,8  | Extracellular Space |
| 1388121_at   | M31322    | amyloid beta (A4) precursor-like protein 2                                              |  | APLP2                       | -2,2  | Extracellular Space |
| 1375880_at   | AI170384  | amyloid beta precursor protein (cytoplasmic tail) binding protein 2                     |  | APPBP2                      | -3,1  | Cytoplasm           |
| 1389606_at   | BI303298  | anaphase promoting complex subunit 1                                                    |  | ANAPC1                      | -1,5  | Nucleus             |
| 1371627_at   | BI277433  | angiominin like 1                                                                       |  | AMOTL1                      | -8,4  | Plasma Membrane     |
| 1383018_at   | BF420082  | angiopoietin-like 6                                                                     |  | ANGPTL6                     | 2,1   | Extracellular Space |
| 1389124_at   | AI009814  | ankyrin repeat domain 40                                                                |  | ANKRD40                     | -1,9  | Unknown             |
| 1383964_at   | AI549551  | ankyrin repeat domain 50                                                                |  | ANKRD50                     | -2,8  | Unknown             |
| 1367584_at   | NM_019905 | annexin A2                                                                              |  | ANXA2                       | 17,5  | Plasma Membrane     |
| 1368908_at   | NM_024155 | annexin A4                                                                              |  | ANXA4                       | 2,0   | Plasma Membrane     |
| 1387673_a_at | BI285568  | annexin A6                                                                              |  | ANXA6                       | -1,9  | Plasma Membrane     |
| 1384675_at   | AI029113  | antisense paternally expressed gene 3                                                   |  | APEG3 (includes EG:619476)  | -1,7  | Unknown             |
| 1372390_at   | AI710604  | antisense paternally expressed gene 3                                                   |  | APEG3 (includes EG:619476)  | -1,6  | Unknown             |
| 1382118_at   | BE104676  | antisense paternally expressed gene 3                                                   |  | APEG3 (includes EG:619476)  | -1,5  | Unknown             |
| 1376496_at   | AI717736  | apolipoprotein L 9a                                                                     |  | APOL9A (includes EG:503164) | 13,8  | Unknown             |
| 1383491_at   | BM391709  | apoptosis enhancing nuclease                                                            |  | AEN                         | 5,9   | Unknown             |
| 1369197_at   | NM_023979 | apoptotic peptidase activating factor 1                                                 |  | APAF1                       | 2,5   | Cytoplasm           |
| 1376300_at   | BI289802  | archaelysin family metallopeptidase 2                                                   |  | AMZ2                        | -2,2  | Unknown             |
| 1385228_x_at | AI059117  | ArfGAP with SH3 domain, ankyrin repeat and PH domain 1                                  |  | ASAP1                       | 1,6   | Plasma Membrane     |
| 1373983_at   | AI168986  | arginine/serine-rich coiled-coil 2                                                      |  | RSRC2                       | 1,6   | Unknown             |

|              |           |                                                             |                            |      |                     |
|--------------|-----------|-------------------------------------------------------------|----------------------------|------|---------------------|
| 1392930_at   | BI276980  | armadillo repeat containing 1                               | ARMC1                      | -3,0 | Unknown             |
| 1393118_at   | BI295562  | armadillo repeat containing 1                               | ARMC1                      | 1,6  | Unknown             |
| 1383592_at   | AA925988  | armadillo repeat containing 8                               | ARMC8                      | 2,8  | Unknown             |
| 1376297_at   | BE112202  | arrestin domain containing 1                                | ARRDC1                     | 3,1  | Unknown             |
| 1371614_at   | AII69001  | ATG12 autophagy related 12 homolog (S. cerevisiae)          | ATG12                      | 1,7  | Cytoplasm           |
| 1385526_at   | AA956721  | ATG5 autophagy related 5 homolog (S. cerevisiae)            | LOC365601                  | 1,8  | Cytoplasm           |
| 1374831_at   | AII72579  | ATH1, acid trehalase-like 1 (yeast)                         | ATHL1                      | -2,6 | Unknown             |
| 1373729_at   | BG376772  | ATP synthase mitochondrial F1 complex assembly factor 1     | ATPAF1                     | -1,5 | Unknown             |
| 1379561_at   | AW433567  | ATPase family, AAA domain containing 1                      | ATAD1                      | 2,1  | Unknown             |
| 1393217_at   | BF282804  | ATP-binding cassette, sub-family G (WHITE), member 3-like 1 | ABCG3L1                    | 3,6  | Unknown             |
| 1387127_at   | NM_031351 | atractin                                                    | ATRN                       | -2,6 | Extracellular Space |
| 1389402_at   | AII78746  | AXIN1 up-regulated 1                                        | AXUD1                      | 3,0  | Nucleus             |
| 1368291_at   | NM_021752 | baculoviral IAP repeat-containing 2                         | BIRC2                      | 2,2  | Cytoplasm           |
| 1375941_at   | BI292120  | BAI1-associated protein 2-like 1                            | BAIAP2L1                   | 2,1  | Cytoplasm           |
| 1368509_at   | NM_053618 | Bardet-Biedl syndrome 2                                     | BBS2                       | -1,9 | Unknown             |
| 1367820_at   | NM_053631 | barrier to autointegration factor 1                         | BANF1                      | 2,1  | Nucleus             |
| 1367643_at   | NM_012783 | basigin (Ok blood group)                                    | BSG                        | -1,6 | Plasma Membrane     |
| 1393641_at   | AA925583  | B-cell linker                                               | BLNK                       | 3,0  | Cytoplasm           |
| 1387805_at   | NM_053420 | BCL2/adenovirus E1B 19kDa interacting protein 3             | BNIP3 (includes EG:664)    | 1,7  | Cytoplasm           |
| 1386978_at   | NM_080888 | BCL2/adenovirus E1B 19kDa interacting protein 3-like        | BNIP3L                     | -1,7 | Cytoplasm           |
| 1368066_at   | NM_053812 | BCL2-antagonist/killer 1                                    | BAK1                       | 6,8  | Cytoplasm           |
| 1369122_at   | AF235993  | BCL2-associated X protein                                   | BAX                        | 2,3  | Cytoplasm           |
| 1372279_at   | AA892271  | BCL2-like 13 (apoptosis facilitator)                        | BCL2L13                    | 2,7  | Cytoplasm           |
| 1371958_at   | BM392148  | BCL2-like 2                                                 | BCL2L2                     | -4,2 | Cytoplasm           |
| 1393707_at   | AW527957  | BCL2-like 2                                                 | BCL2L2                     | -1,8 | Cytoplasm           |
| 1371811_at   | BI278232  | Bernardinelli-Seip congenital lipodystrophy 2 (seipin)      | BCL2L2                     | -2,3 | Cytoplasm           |
| 1377759_at   | BG666928  | BH3 interacting domain death agonist                        | BID                        | 4,3  | Cytoplasm           |
| 1392910_at   | AA859968  | block of proliferation 1                                    | BOP1                       | 1,9  | Nucleus             |
| 1390738_at   | BM385476  | bone marrow stromal cell antigen 2                          | BST2                       | 11,4 | Plasma Membrane     |
| 1398350_at   | BG380454  | brain abundant, membrane attached signal protein 1          | BASP1                      | 1,7  | Plasma Membrane     |
| 1390040_at   | AA851481  | brain and reproductive organ-expressed (TNFRSF1A modulator) | BRE                        | -1,8 | Cytoplasm           |
| 1388690_at   | AII05439  | breast cancer metastasis-suppressor 1-like                  | BRMS1L                     | -2,0 | Unknown             |
| 1388639_at   | BF284148  | breast carcinoma amplified sequence 3                       | BCAS3                      | -2,2 | Nucleus             |
| 1392514_at   | BE095565  | brix domain containing 1                                    | BXDC1                      | 1,6  | Nucleus             |
| 1389569_at   | AW917092  | brix domain containing 2                                    | BXDC2                      | 1,7  | Nucleus             |
| 1371522_at   | BI295010  | bromo adjacent homology domain containing 1                 | BAHD1                      | 2,0  | Unknown             |
| 1372720_at   | AA848449  | BTB (POZ) domain containing 1                               | BTBD1                      | -2,8 | Cytoplasm           |
| 1381974_at   | AII01499  | BTB (POZ) domain containing 3                               | BTBD3                      | -2,3 | Unknown             |
| 1390865_at   | AW524822  | Ca <sup>++</sup> -dependent secretion activator 2           | CADPS2                     | 2,6  | Plasma Membrane     |
| 1386947_at   | NM_031334 | cadherin 1, type 1, E-cadherin (epithelial)                 | CDH1                       | 1,9  | Plasma Membrane     |
| 1370562_at   | M11596    | calcitonin-related polypeptide, beta                        | CALCB (includes EG:116903) | 7,0  | Extracellular Space |
| 1387086_at   | NM_053334 | calcium modulating ligand                                   | CAMLG                      | -5,4 | Cytoplasm           |
| 1388659_at   | BI295783  | calcium regulated heat stable protein 1, 24kDa              | CARHSP1                    | 2,6  | Cytoplasm           |
| 1392912_at   | BG664561  | calcyclin binding protein                                   | CACYBP                     | 1,6  | Nucleus             |
| 1387772_at   | NM_031969 | calmodulin 1 (phosphorylase kinase, delta)                  | CALM1                      | -1,6 | Plasma Membrane     |
| 1370873_at   | A1411316  | calmodulin 3 (phosphorylase kinase, delta)                  | CALM3                      | -4,0 | Plasma Membrane     |
| 1387856_at   | BI274457  | calponin 3, acidic                                          | CNN3                       | 2,0  | Cytoplasm           |
| 1371393_at   | AA851222  | calsyntenin 1                                               | CLSTN1                     | -4,2 | Plasma Membrane     |
| 1374081_at   | A1011704  | cancer susceptibility candidate 4                           | CASC4                      | -2,2 | Unknown             |
| 1372584_at   | BG672517  | cannabinoid receptor interacting protein 1                  | CNRIP1                     | -2,6 | Unknown             |
| 1373790_at   | A1045400  | carbonic anhydrase 14                                       | CAR14                      | -3,5 | Unknown             |
| 1368585_at   | NM_017110 | CART prepropeptide                                          | CARTPT                     | -8,4 | Extracellular Space |
| 1368545_at   | NM_057138 | CASP8 and FADD-like apoptosis regulator                     | CFLAR                      | 2,7  | Cytoplasm           |
| 1398354_at   | AI555457  | catenin (cadherin-associated protein), alpha-like 1         | CTNNAL1                    | -2,7 | Plasma Membrane     |
| 1373279_at   | BI275726  | catenin, beta interacting protein 1                         | CTNNBIP1                   | -2,7 | Cytoplasm           |
| 1371633_at   | BI285669  | catenin, beta like 1                                        | CTNNBL1                    | -1,7 | Nucleus             |
| 1368593_at   | NM_017079 | CD1d molecule                                               | CD1D                       | 1,6  | Plasma Membrane     |
| 1369953_a_at | BI285141  | CD24 molecule                                               | CD24                       | -4,1 | Plasma Membrane     |

|              |           |                                                                                   |           |      |                     |
|--------------|-----------|-----------------------------------------------------------------------------------|-----------|------|---------------------|
| 1382603_at   | AW521319  | CD274 molecule                                                                    | CD274     | 13,5 | Plasma Membrane     |
| 1372071_at   | AI102320  | CD320 molecule                                                                    | CD320     | -1,8 | Plasma Membrane     |
| 1387952_a_at | AF065147  | CD44 molecule (Indian blood group)                                                | CD44      | 4,8  | Plasma Membrane     |
| 1368921_a_at | NM_012924 | CD44 molecule (Indian blood group)                                                | CD44      | 8,4  | Plasma Membrane     |
| 1369559_a_at | NM_019195 | CD47 molecule                                                                     | CD47      | 4,1  | Plasma Membrane     |
| 1387951_at   | AB032395  | CD55 molecule, decay accelerating factor for complement (Cromer blood group)      | CD55      | 2,6  | Plasma Membrane     |
| 1367929_at   | NM_012925 | CD59 molecule, complement regulatory protein                                      | CD59      | -2,9 | Plasma Membrane     |
| 1386976_at   | NM_031797 | CD82 molecule                                                                     | CD82      | 11,9 | Plasma Membrane     |
| 1390529_at   | AI412355  | CD83 molecule                                                                     | CD83      | 2,1  | Plasma Membrane     |
| 1388530_at   | BM389459  | CDC42 small effector 1                                                            | CDC42SE1  | 3,4  | Plasma Membrane     |
| 1388448_at   | AI235065  | CDC42 small effector 2                                                            | CDC42SE2  | 2,7  | Plasma Membrane     |
| 1392542_at   | AA944330  | CDC42 small effector 2                                                            | CDC42SE2  | 6,8  | Plasma Membrane     |
| 1373919_at   | AA943801  | CDGSH iron sulfur domain 2                                                        | CISD2     | -2,0 | Unknown             |
| 1382193_at   | BI294188  | CDGSH iron sulfur domain 2                                                        | CISD2     | -1,8 | Unknown             |
| 1392662_at   | AI229905  | CDGSH iron sulfur domain 2                                                        | CISD2     | 2,4  | Unknown             |
| 1383028_at   | BE120656  | CDV3 homolog (mouse)                                                              | CDV3      | 3,7  | Unknown             |
| 1396317_at   | AI764350  | cell cycle progression 1                                                          | CCPG1     | -2,8 | Unknown             |
| 1378739_at   | AA818135  | cell death-inducing DFFA-like effector c                                          | CIDEC     | 5,6  | Cytoplasm           |
| 1374074_at   | BF285292  | cell division cycle 37 homolog (S. cerevisiae)-like 1                             | CDC37L1   | -1,5 | Cytoplasm           |
| 1376864_at   | BF396386  | cell division cycle and apoptosis regulator 1                                     | CCAR1     | -1,9 | Nucleus             |
| 1387244_at   | NM_053899 | cell growth regulator with ring finger domain 1                                   | CGRRF1    | 2,2  | Unknown             |
| 1382200_at   | AW917547  | centromere protein V                                                              | CENPV     | -1,9 | Nucleus             |
| 1377829_at   | BI291153  | centrosomal protein 57kDa                                                         | CEP57     | -1,6 | Cytoplasm           |
| 1374139_at   | BG671589  | cerebellar degeneration-related protein 2, 62kDa                                  | CDR2      | 2,3  | Cytoplasm           |
| 1389791_at   | AI179775  | ceroid-lipofuscinosis, neuronal 8 (epilepsy, progressive with mental retardation) | CLN8      | -2,1 | Cytoplasm           |
| 1371656_at   | BI283657  | chaperonin containing TCP1, subunit 4 (delta)                                     | CCT4      | 1,5  | Cytoplasm           |
| 1376570_at   | BF417274  | chaperonin containing TCP1, subunit 5 (epsilon)                                   | CCT5      | 1,8  | Cytoplasm           |
| 1371641_at   | BM388827  | chaperonin containing TCP1, subunit 7 (eta)                                       | CCT7      | 1,6  | Cytoplasm           |
| 1383152_at   | BF544427  | chitinase domain containing 1                                                     | CHID1     | -2,4 | Extracellular Space |
| 1374695_at   | BF564593  | chromobox homolog 1 (HP1 beta homolog Drosophila)                                 | CBX1      | 1,7  | Nucleus             |
| 1387235_at   | NM_021655 | chromogranin A (parathyroid secretory protein 1)                                  | CHGA      | -3,8 | Extracellular Space |
| 1368034_at   | NM_012526 | chromogranin B (secretogranin 1)                                                  | CHGB      | -2,9 | Extracellular Space |
| 1390218_at   | BI295950  | chromosome 1 open reading frame 149                                               | C1ORF149  | 1,6  | Nucleus             |
| 1374478_at   | AA819329  | chromosome 1 open reading frame 210                                               | C1ORF210  | -2,7 | Unknown             |
| 1373652_at   | BG374986  | chromosome 1 open reading frame 71                                                | C1ORF71   | -1,6 | Unknown             |
| 1372895_at   | AI169367  | chromosome 10 open reading frame 58                                               | C10ORF58  | 13,7 | Extracellular Space |
| 1392938_s_at | BF561368  | chromosome 11 open reading frame 17                                               | C11ORF17  | 1,7  | Nucleus             |
| 1371763_at   | BI274533  | chromosome 11 open reading frame 54                                               | C11ORF54  | -3,7 | Nucleus             |
| 1388980_at   | BG381728  | chromosome 11 open reading frame 59                                               | C11ORF59  | 2,2  | Unknown             |
| 1372843_at   | BG377188  | chromosome 11 open reading frame 75                                               | C11ORF75  | 1,5  | Unknown             |
| 1384553_at   | BE118056  | chromosome 12 open reading frame 30                                               | C12ORF30  | 2,2  | Unknown             |
| 1385066_a_at | BM390527  | chromosome 12 open reading frame 30                                               | C12ORF30  | 2,3  | Unknown             |
| 1378980_at   | AI044779  | chromosome 12 open reading frame 30                                               | C12ORF30  | 3,5  | Unknown             |
| 1373143_at   | BM390131  | chromosome 12 open reading frame 35                                               | C12ORF35  | 2,7  | Unknown             |
| 1388564_at   | BF283612  | chromosome 12 open reading frame 41                                               | C12ORF41  | 1,8  | Unknown             |
| 1378568_a_at | BM389379  | chromosome 14 open reading frame 138                                              | C14ORF138 | 1,5  | Unknown             |
| 1371715_at   | AI012212  | chromosome 14 open reading frame 147                                              | C14ORF147 | -1,7 | Unknown             |
| 1392641_at   | AA957091  | chromosome 15 open reading frame 29                                               | C15ORF29  | -1,5 | Nucleus             |
| 1390249_at   | BF558075  | chromosome 15 open reading frame 39                                               | C15ORF39  | 1,8  | Unknown             |
| 1392547_at   | AI716211  | chromosome 15 open reading frame 48                                               | C15ORF48  | 19,2 | Nucleus             |
| 1382464_at   | BF547020  | chromosome 15 open reading frame 61                                               | C15ORF61  | -1,8 | Unknown             |
| 1373603_at   | BG673166  | chromosome 16 open reading frame 42                                               | C16ORF42  | 1,7  | Unknown             |
| 1398998_at   | AI407273  | chromosome 16 open reading frame 72                                               | C16ORF72  | 1,8  | Unknown             |
| 1377644_at   | BF284809  | chromosome 16 open reading frame 87                                               | C16ORF87  | 2,7  | Unknown             |
| 1373830_at   | AA893539  | chromosome 17 open reading frame 62                                               | C17ORF62  | 1,5  | Unknown             |
| 1373831_at   | AW920524  | chromosome 17 open reading frame 62                                               | C17ORF62  | 4,5  | Unknown             |
| 1388465_at   | AA891733  | chromosome 18 open reading frame 19                                               | C18ORF19  | -1,5 | Unknown             |
| 1392967_at   | BF550692  | chromosome 18 open reading frame 21                                               | C18ORF21  | -1,5 | Unknown             |

|              |          |                                                       |           |      |                 |
|--------------|----------|-------------------------------------------------------|-----------|------|-----------------|
| 1371409_at   | AI231196 | chromosome 18 open reading frame 32                   | C18ORF32  | -1,8 | Unknown         |
| 1389365_at   | AI228291 | chromosome 19 open reading frame 12                   | C19ORF12  | 3,7  | Unknown         |
| 1384016_at   | AI044937 | chromosome 19 open reading frame 29                   | C19ORF29  | 1,9  | Unknown         |
| 1394524_at   | AW921279 | chromosome 19 open reading frame 42                   | C19ORF42  | -5,0 | Unknown         |
| 1399080_at   | BI292036 | chromosome 19 open reading frame 42                   | C19ORF42  | -2,4 | Unknown         |
| 1383662_at   | AI043759 | chromosome 19 open reading frame 66                   | C19ORF66  | 2,1  | Unknown         |
| 1371807_at   | BE110607 | chromosome 2 open reading frame 28                    | C2ORF28   | -2,9 | Unknown         |
| 1392481_at   | BG057566 | chromosome 2 open reading frame 29                    | C2ORF29   | 1,9  | Unknown         |
| 1391224_at   | AI169436 | chromosome 20 open reading frame 152                  | C20ORF152 | 3,7  | Unknown         |
| 1371478_at   | AI409756 | chromosome 20 open reading frame 24                   | C20ORF24  | 1,6  | Cytoplasm       |
| 1372044_at   | AI410321 | chromosome 22 open reading frame 25                   | C22ORF25  | -2,2 | Unknown         |
| 1379939_a_at | AW526107 | chromosome 3 open reading frame 14                    | C3ORF14   | 3,3  | Unknown         |
| 1389386_at   | AI170759 | chromosome 3 open reading frame 23                    | C3ORF23   | -1,8 | Cytoplasm       |
| 1370360_at   | AF146738 | chromosome 3 open reading frame 34                    | C3ORF34   | -2,3 | Unknown         |
| 1389199_at   | AI407536 | chromosome 3 open reading frame 58                    | C3ORF58   | 1,9  | Unknown         |
| 1378638_a_at | BM384709 | chromosome 4 open reading frame 27                    | C4ORF27   | -1,6 | Nucleus         |
| 1390579_at   | BI294760 | chromosome 4 open reading frame 43                    | C4ORF43   | 2,7  | Unknown         |
| 1376309_at   | BI296018 | chromosome 4 open reading frame 8                     | C4ORF8    | -1,6 | Unknown         |
| 1371412_a_at | BE107450 | chromosome 5 open reading frame 13                    | C5ORF13   | -5,1 | Cytoplasm       |
| 1371619_at   | BI296718 | chromosome 5 open reading frame 15                    | C5ORF15   | -2,6 | Unknown         |
| 1373049_at   | AI169619 | chromosome 5 open reading frame 30                    | C5ORF30   | 4,0  | Unknown         |
| 1377439_at   | BF408617 | chromosome 5 open reading frame 42                    | C5ORF42   | 3,4  | Unknown         |
| 1383912_at   | BM390524 | chromosome 6 open reading frame 115                   | C6ORF115  | 2,5  | Unknown         |
| 1397184_at   | AI574688 | chromosome 6 open reading frame 174                   | C6ORF174  | -2,7 | Unknown         |
| 1393027_at   | AI058848 | chromosome 6 open reading frame 211                   | C6ORF211  | 1,7  | Unknown         |
| 1389384_at   | BE111733 | chromosome 6 open reading frame 66                    | C6ORF66   | 4,1  | Unknown         |
| 1375874_at   | AA799680 | chromosome 6 open reading frame 72                    | C6ORF72   | -1,9 | Unknown         |
| 1376016_at   | BF285425 | chromosome 7 open reading frame 20                    | C7ORF20   | -1,6 | Unknown         |
| 1373547_at   | AA849782 | chromosome 7 open reading frame 25                    | C7ORF25   | -3,1 | Unknown         |
| 1389459_at   | BE116947 | chromosome 7 open reading frame 36                    | C7ORF36   | 2,0  | Unknown         |
| 1377728_at   | BI280802 | chromosome 8 open reading frame 59                    | C8ORF59   | 1,7  | Unknown         |
| 1396228_at   | BG380184 | chromosome 9 open reading frame 5                     | C9ORF5    | 2,3  | Unknown         |
| 1374333_at   | AI227700 | chromosome 9 open reading frame 89                    | C9ORF89   | -2,4 | Cytoplasm       |
| 1372543_at   | BI282107 | chromosome X open reading frame 26                    | CXORF26   | 1,6  | Unknown         |
| 1380185_at   | BI303290 | chromosome X open reading frame 56                    | CXORF56   | -2,0 | Unknown         |
| 1384615_at   | AI071319 | cisplatin resistance-associated overexpressed protein | CROP      | -2,5 | Nucleus         |
| 1391077_at   | AA851257 | claspin homolog ( <i>Xenopus laevis</i> )             | CLSPN     | -1,9 | Nucleus         |
| 1386875_a_at | M19261   | clathrin, light chain (Lca)                           | CLTA      | 1,9  | Plasma Membrane |
| 1398878_at   | Y17326   | cleavage and polyadenylation specific factor 4, 30kDa | CPSF4     | 1,9  | Nucleus         |
| 1383504_at   | AW530604 | cleavage and polyadenylation specific factor 6, 68kDa | CPSF6     | -1,5 | Nucleus         |
| 1376811_a_at | BE108383 | cleavage and polyadenylation specific factor 6, 68kDa | CPSF6     | 2,1  | Nucleus         |
| 1389368_at   | AW253242 | CNKSR family member 3                                 | CNKSR3    | 14,1 | Plasma Membrane |
| 1376868_at   | BM389293 | COBL-like 1                                           | COBLL1    | -1,8 | Unknown         |
| 1390281_a_at | AI407062 | coenzyme Q10 homolog A ( <i>S. cerevisiae</i> )       | COQ10A    | -2,1 | Cytoplasm       |
| 1388483_at   | BI296011 | cofilin 2 (muscle)                                    | CFL2      | 1,8  | Nucleus         |
| 1384378_at   | BI293046 | coiled-coil alpha-helical rod protein 1               | CCHCR1    | 7,4  | Cytoplasm       |
| 1374874_at   | AI410818 | coiled-coil and C2 domain containing 2A               | CC2D2A    | -3,2 | Unknown         |
| 1394424_at   | AI547622 | coiled-coil domain containing 104                     | CCDC104   | -3,5 | Unknown         |
| 1373806_at   | AI044859 | coiled-coil domain containing 104                     | CCDC104   | -3,5 | Unknown         |
| 1379826_at   | AA859429 | coiled-coil domain containing 107                     | CCDC107   | -3,5 | Unknown         |
| 1396315_at   | BF408941 | coiled-coil domain containing 112                     | CCDC112   | 3,1  | Unknown         |
| 1379500_at   | AA860044 | coiled-coil domain containing 117                     | CCDC117   | 3,3  | Unknown         |
| 1374929_at   | AI010233 | coiled-coil domain containing 126                     | CCDC126   | -2,0 | Unknown         |
| 1398371_at   | AI409075 | coiled-coil domain containing 132                     | CCDC132   | 2,5  | Unknown         |
| 1376776_at   | AW915484 | coiled-coil domain containing 17                      | CCDC17    | -2,7 | Unknown         |
| 1390875_a_at | BF290046 | coiled-coil domain containing 41                      | CCDC41    | 1,9  | Unknown         |
| 1387944_at   | AF092207 | coiled-coil domain containing 5 (spindle associated)  | CCDC5     | -1,9 | Nucleus         |
| 1375634_at   | AA799472 | coiled-coil domain containing 53                      | CCDC53    | -2,5 | Unknown         |



|              |           |                                                                         |                             |       |                     |
|--------------|-----------|-------------------------------------------------------------------------|-----------------------------|-------|---------------------|
| 1393952_at   | BI278833  | coiled-coil domain containing 68                                        | CCDC68                      | -18,3 | Unknown             |
| 1378958_at   | AA998314  | coiled-coil domain containing 86                                        | CCDC86                      | 1,8   | Unknown             |
| 1377194_a_at | BE107471  | coiled-coil domain containing 90B                                       | CCDC90B                     | 1,5   | Unknown             |
| 1385269_s_at | BI289167  | coiled-coil domain containing 93                                        | CCDC93                      | 2,0   | Unknown             |
| 1385268_at   | BI289167  | coiled-coil domain containing 93                                        | CCDC93                      | 2,8   | Unknown             |
| 1373001_at   | AA817990  | coiled-coil-helix-coiled-coil-helix domain containing 4                 | CHCHD4                      | 2,6   | Unknown             |
| 1388973_at   | BM388861  | collagen, type IX, alpha 1                                              | COL9A1                      | -7,1  | Extracellular Space |
| 1390846_at   | BG380309  | collagen, type XVI, alpha 1                                             | COL16A1                     | -3,4  | Extracellular Space |
| 1398894_at   | AI178763  | COMM domain containing 3                                                | COMMD3                      | 1,5   | Unknown             |
| 1398784_at   | NM_019259 | complement component 1, q subcomponent binding protein                  | C1QBP                       | 2,1   | Cytoplasm           |
| 1393740_at   | BI294230  | connector enhancer of kinase suppressor of Ras 1                        | CNKSR1                      | 7,4   | Cytoplasm           |
| 1399010_at   | BG381740  | COP9 constitutive photomorphogenic homolog subunit 7A (Arabidopsis)     | COPS7A                      | 1,7   | Cytoplasm           |
| 1373747_at   | BG381691  | cornichon homolog 2 (Drosophila)                                        | CNIH2                       | 2,7   | Extracellular Space |
| 1389980_at   | AI412591  | cornichon homolog 4 (Drosophila)                                        | CNIH4                       | 2,2   | Plasma Membrane     |
| 1396250_at   | BF558291  | coronin, actin binding protein, 1C                                      | CORO1C                      | 2,3   | Cytoplasm           |
| 1371465_at   | BM390681  | cortactin                                                               | CTTN                        | -1,7  | Plasma Membrane     |
| 1371646_at   | AI008441  | cortistatin                                                             | CORT                        | 2,1   | Extracellular Space |
| 1375943_at   | BI288873  | CP110 protein                                                           | CP110                       | -3,3  | Cytoplasm           |
| 1383647_a_at | BI283883  | crumbs homolog 3 (Drosophila)                                           | CRB3                        | 1,6   | Plasma Membrane     |
| 1383648_x_at | BI283883  | crumbs homolog 3 (Drosophila)                                           | CRB3                        | 1,6   | Plasma Membrane     |
| 1388385_at   | BG371710  | crystallin, beta A2                                                     | CRYBA2                      | -3,5  | Unknown             |
| 1376051_at   | BI293393  | crystallin, lambda 1                                                    | CRYL1                       | -1,9  | Unknown             |
| 1389249_at   | BE114850  | Ctr9, Paf1/RNA polymerase II complex component, homolog (S. cerevisiae) | CTR9                        | -1,7  | Nucleus             |
| 1381685_a_at | BI276419  | C-type lectin domain family 16, member A                                | CLEC16A                     | 1,9   | Unknown             |
| 1397247_at   | BI276505  | CUB domain containing protein 1                                         | CDCP1                       | 4,7   | Plasma Membrane     |
| 1377005_at   | BM390962  | cullin 4B                                                               | CUL4B                       | -2,8  | Unknown             |
| 1368801_at   | NM_053342 | CXXC finger 4                                                           | CXXC4                       | -4,4  | Cytoplasm           |
| 1389101_at   | BE120340  | cyclin C                                                                | CCNC                        | 1,6   | Nucleus             |
| 1371643_at   | AW143798  | cyclin D1                                                               | CCND1                       | -1,8  | Nucleus             |
| 1383075_at   | BI295861  | cyclin D1                                                               | CCND1                       | -1,5  | Nucleus             |
| 1398340_at   | AI317832  | cyclin D-type binding-protein 1                                         | CCNDBP1                     | -2,7  | Nucleus             |
| 1371953_at   | AI408309  | cyclin G2                                                               | CCNG2                       | 2,5   | Nucleus             |
| 1368050_at   | NM_053662 | cyclin L1                                                               | CCNL1                       | 1,8   | Nucleus             |
| 1390815_at   | BF282870  | cyclin M1                                                               | CNNM1                       | -2,6  | Plasma Membrane     |
| 1391270_at   | BE112177  | cyclin M3                                                               | CNNM3                       | -2,7  | Unknown             |
| 1384268_at   | AW435305  | cyclin Y-like 1                                                         | CCNYL1                      | -6,6  | Unknown             |
| 1388443_at   | AI177871  | cyclin-dependent kinase 2 associated protein 1                          | CDK2AP1                     | -1,6  | Nucleus             |
| 1370226_at   | AI409867  | cystatin B (stefin B)                                                   | CSTB                        | 1,9   | Cytoplasm           |
| 1396327_at   | BG374493  | cytochrome P450, family 2, subfamily j, polypeptide 12                  | CYP2J12                     | 25,2  | Unknown             |
| 1372498_at   | BF285068  | cytokine induced apoptosis inhibitor 1                                  | CIAPIN1                     | 1,7   | Cytoplasm           |
| 1392996_at   | BG668435  | cytoplasmic polyadenylation element binding protein 1                   | CPEB1                       | 1,8   | Cytoplasm           |
| 1372166_at   | AI169146  | D4, zinc and double PHD fingers family 2                                | DPF2                        | 1,6   | Nucleus             |
| 1373046_at   | AW918273  | DAZ associated protein 1                                                | DAZAP1                      | 2,4   | Cytoplasm           |
| 1388626_at   | AI638949  | DDRGK domain containing 1                                               | DDRGK1                      | -1,5  | Extracellular Space |
| 1372434_at   | BE098114  | deafness, autosomal recessive 31                                        | DFNB31                      | 2,9   | Plasma Membrane     |
| 1383432_at   | AI716676  | death associated protein-like 1                                         | DAPL1                       | -6,7  | Unknown             |
| 1385210_at   | BF389450  | dedicator of cytokinesis 5                                              | DOCK5                       | 9,7   | Unknown             |
| 1377835_at   | BM390876  | dedicator of cytokinesis 8                                              | DOCK8                       | -1,9  | Unknown             |
| 1374718_at   | AA945915  | deltex 3-like (Drosophila)                                              | DTX3L                       | 9,1   | Cytoplasm           |
| 1380021_at   | AI059486  | DENN/MADD domain containing 2D                                          | DENN2D                      | 13,5  | Cytoplasm           |
| 1389615_at   | BI284801  | Der1-like domain family, member 1                                       | DERL1                       | 2,1   | Cytoplasm           |
| 1388685_at   | AI011749  | DiGeorge syndrome critical region gene 2                                | DGCR2                       | -1,7  | Plasma Membrane     |
| 1382552_at   | AW522677  | DIP2 disco-interacting protein 2 homolog C (Drosophila)                 | DIP2C                       | 1,7   | Unknown             |
| 1370507_at   | U67140    | discs, large (Drosophila) homolog-associated protein 4                  | DLGAP4                      | 2,2   | Plasma Membrane     |
| 1369997_at   | NM_031820 | dishevelled, dsh homolog 1 (Drosophila)                                 | DVL1                        | 1,7   | Cytoplasm           |
| 1375433_at   | AI412473  | dispatched homolog 2 (Drosophila)                                       | DISP2                       | -2,3  | Unknown             |
| 1367516_at   | BG375549  | distrobrevin binding protein 1                                          | DTNBP1 (includes EG:641528) | 3,5   | Plasma Membrane     |
| 1383495_at   | AI556858  | DNA cross-link repair 1A (PSO2 homolog, S. cerevisiae)                  | DCLRE1A                     | -1,8  | Nucleus             |

|              |           |                                                                            |           |       |                     |
|--------------|-----------|----------------------------------------------------------------------------|-----------|-------|---------------------|
| 1387817_at   | NM_024128 | DNA segment on chromosome 4 (unique) 234 expressed sequence                | D4S234E   | -12,5 | Cytoplasm           |
| 1368025_at   | NM_080906 | DNA-damage-inducible transcript 4                                          | DDIT4     | 3,1   | Cytoplasm           |
| 1389487_at   | AA818949  | DnaJ (Hsp40) homolog, subfamily B, member 12                               | DNAJB12   | 1,6   | Cytoplasm           |
| 1387905_at   | AB062135  | DnaJ (Hsp40) homolog, subfamily C, member 12                               | DNAJC12   | -2,2  | Unknown             |
| 1369813_at   | U39320    | DnaJ (Hsp40) homolog, subfamily C, member 5                                | DNAJC5    | 15,7  | Plasma Membrane     |
| 1386648_at   | AW914996  | DnaJ (Hsp40) homolog, subfamily C, member 6                                | DNAJC6    | -2,1  | Cytoplasm           |
| 1377125_at   | AW523481  | DnaJ (Hsp40) homolog, subfamily C, member 6                                | DNAJC6    | -1,7  | Cytoplasm           |
| 1374651_at   | BM386987  | dopey family member 2                                                      | DOPEY2    | -3,2  | Unknown             |
| 1374966_at   | BE109057  | doublecortin                                                               | DCX       | -8,9  | Cytoplasm           |
| 1376026_at   | AII78243  | downstream neighbor of SON                                                 | DONSON    | 14,9  | Unknown             |
| 1368402_at   | NM_031026 | dynein, cytoplasmic 1, light intermediate chain 2                          | DYNC1LI2  | -1,5  | Cytoplasm           |
| 1388903_at   | AII79335  | dynein, light chain, Tctex-type 3                                          | DYNLT3    | -1,8  | Cytoplasm           |
| 1388992_at   | AII69305  | E1A binding protein p400                                                   | EP400     | 1,6   | Nucleus             |
| 1374183_at   | AI705068  | E2F-associated phosphoprotein                                              | EAPP      | 2,4   | Cytoplasm           |
| 1388397_at   | BI281160  | EBNA1 binding protein 2                                                    | EBNA1BP2  | 1,9   | Nucleus             |
| 1395739_at   | BG672302  | EFR3 homolog A (S. cerevisiae)                                             | EFR3A     | 4,2   | Plasma Membrane     |
| 1389975_at   | BE116949  | ELAV (embryonic lethal, abnormal vision, Drosophila)-like 4 (Hu antigen D) | ELAVL4    | -3,1  | Cytoplasm           |
| 1368541_at   | NM_053719 | embigin homolog (mouse)                                                    | EMB       | -2,0  | Plasma Membrane     |
| 1373535_at   | BF397848  | enabled homolog (Drosophila)                                               | ENAH      | 1,8   | Cytoplasm           |
| 1388889_at   | AI598417  | endoplasmic reticulum metalloproteinase 1                                  | ERMP1     | 1,8   | Cytoplasm           |
| 1379396_at   | AII01913  | engulfment and cell motility 1                                             | ELMO1     | -4,6  | Cytoplasm           |
| 1374585_at   | AW915152  | enoyl Coenzyme A hydratase domain containing 1                             | ECHDC1    | -1,7  | Unknown             |
| 1383747_at   | AI578135  | epithelial cell transforming sequence 2 oncogene                           | ECT2      | -2,0  | Nucleus             |
| 1372568_at   | AI411270  | EPM2A (laforin) interacting protein 1                                      | EPM2AIP1  | -1,8  | Cytoplasm           |
| 1371580_at   | AII02725  | ER lipid raft associated 1                                                 | ERLIN1    | 1,9   | Plasma Membrane     |
| 1373093_at   | AI169756  | ERBB receptor feedback inhibitor 1                                         | ERRF1     | 2,3   | Cytoplasm           |
| 1389970_at   | BG378319  | ERGIC and golgi 2                                                          | ERGIC2    | -1,6  | Unknown             |
| 1372643_at   | BE110569  | erythrocyte membrane protein band 4.1-like 2                               | EPB41L2   | -2,4  | Plasma Membrane     |
| 1393583_at   | BE119096  | Ewing tumor-associated antigen 1                                           | ETAA1     | 2,1   | Unknown             |
| 1393983_at   | AA998204  | exportin, tRNA (nuclear export receptor for tRNAs)                         | XPOT      | 3,0   | Nucleus             |
| 1370875_at   | AA851304  | ezzrin                                                                     | EZR       | 9,8   | Plasma Membrane     |
| 1387279_at   | NM_053796 | F11 receptor                                                               | F11R      | 2,1   | Plasma Membrane     |
| 1377938_at   | AA859585  | family with sequence similarity 100, member A                              | FAM100A   | 2,8   | Unknown             |
| 1389146_at   | BF283267  | family with sequence similarity 107, member B                              | FAM107B   | -2,2  | Unknown             |
| 1389435_at   | BE329046  | family with sequence similarity 114, member A1                             | FAM114A1  | -2,3  | Unknown             |
| 1376708_at   | BM385170  | family with sequence similarity 115, member C                              | FAM115C   | 9,0   | Unknown             |
| 1399150_at   | AW144400  | family with sequence similarity 116, member A                              | FAM116A   | -1,8  | Unknown             |
| 1383155_at   | AA945854  | family with sequence similarity 117, member B                              | FAM117B   | -1,6  | Unknown             |
| 1377648_at   | BF414047  | family with sequence similarity 120B                                       | FAM120B   | -2,5  | Unknown             |
| 1382469_at   | AA900787  | family with sequence similarity 120C                                       | FAM120C   | -1,9  | Unknown             |
| 1388482_at   | BM384306  | family with sequence similarity 129, member B                              | FAM129B   | 2,8   | Unknown             |
| 1378606_at   | AI010216  | family with sequence similarity 13, member B1                              | FAM13B1   | -1,6  | Unknown             |
| 1383800_at   | AW523537  | family with sequence similarity 155, member A                              | FAM155A   | -1,5  | Unknown             |
| 1377848_at   | AW535219  | family with sequence similarity 175, member A                              | FAM175A   | -2,6  | Unknown             |
| 1391944_at   | BI296237  | family with sequence similarity 184, member A                              | FAM184A   | -1,8  | Unknown             |
| 1390844_at   | AI230339  | family with sequence similarity 33, member A                               | FAM33A    | -1,8  | Unknown             |
| 1379261_at   | BE111490  | family with sequence similarity 33, member A                               | FAM33A    | -1,7  | Unknown             |
| 1390403_at   | BE108405  | family with sequence similarity 43, member A                               | FAM43A    | -1,6  | Unknown             |
| 1374853_at   | AII37833  | family with sequence similarity 44, member B                               | FAM44B    | 1,9   | Nucleus             |
| 1394940_at   | BI294811  | family with sequence similarity 46, member A                               | FAM46A    | -1,9  | Unknown             |
| 1382907_at   | BI289723  | family with sequence similarity 46, member C                               | FAM46C    | -2,4  | Extracellular Space |
| 1390730_at   | BM383911  | family with sequence similarity 58, member A                               | FAM58A    | -2,9  | Unknown             |
| 1373761_at   | AII76129  | family with sequence similarity 60, member A                               | LOC686611 | 3,0   | Unknown             |
| 1390171_at   | AA924717  | family with sequence similarity 76, member A                               | FAM76A    | 1,6   | Unknown             |
| 1379636_at   | AW528443  | family with sequence similarity 82, member A1                              | FAM82A1   | -1,8  | Unknown             |
| 1372302_at   | BF284897  | family with sequence similarity 82, member A2                              | FAM82A2   | 4,6   | Unknown             |
| 1370044_at   | NM_080895 | Fas apoptotic inhibitory molecule                                          | FAIM      | -2,4  | Cytoplasm           |
| 1388137_a_at | AA955230  | fasciculation and elongation protein zeta 2 (zygin II)                     | FEZ2      | 1,5   | Cytoplasm           |

|              |           |                                                                             |                            |      |                     |
|--------------|-----------|-----------------------------------------------------------------------------|----------------------------|------|---------------------|
| 1370281_at   | U13253    | fatty acid binding protein 5-like 2                                         | FABP5L2                    | 7,7  | Cytoplasm           |
| 1378294_at   | BF282402  | F-box and leucine-rich repeat protein 12                                    | FBXL12                     | 2,0  | Cytoplasm           |
| 1384457_at   | AI030755  | F-box and WD-40 domain protein 17                                           | FBXW17                     | 6,2  | Unknown             |
| 1376561_at   | AW523739  | F-box protein 16                                                            | FBXO16                     | -2,2 | Unknown             |
| 1375041_at   | AI599362  | F-box protein 27                                                            | FBXO27                     | 12,6 | Unknown             |
| 1382059_at   | BI289529  | F-box protein 30                                                            | FBXO30                     | 2,3  | Unknown             |
| 1372873_at   | BM385705  | F-box protein 38                                                            | FBXO38                     | -1,5 | Nucleus             |
| 1380379_at   | AI228000  | F-box protein 44                                                            | FBXO44                     | -1,9 | Unknown             |
| 1373835_at   | AI009785  | F-box protein 8                                                             | FBXO8                      | -1,6 | Unknown             |
| 1373588_at   | H33457    | FERM domain containing 8                                                    | FRMD8                      | 3,6  | Unknown             |
| 1382143_at   | AA964898  | FERM, RhoGEF (ARHGEF) and pleckstrin domain protein 1 (chondrocyte-derived) | FARP1                      | 2,1  | Unknown             |
| 1374239_at   | BI282835  | FERM, RhoGEF and pleckstrin domain protein 2                                | FARP2                      | -1,8 | Cytoplasm           |
| 1367559_at   | L01122    | ferritin, light polypeptide                                                 | FTL                        | 2,1  | Cytoplasm           |
| 1372086_at   | BM387251  | FH2 domain containing 1                                                     | FHDC1                      | 4,5  | Unknown             |
| 1389621_at   | BE113454  | FIP1 like 1 (S. cerevisiae)                                                 | FIP1L1                     | 1,7  | Nucleus             |
| 1367746_a_at | NM_031830 | flotillin 2                                                                 | FLOT2                      | 1,9  | Plasma Membrane     |
| 1372526_at   | BI278582  | folliculin                                                                  | FLCN                       | 1,9  | Unknown             |
| 1388684_at   | BI274480  | formin binding protein 4                                                    | FNBP4                      | 2,6  | Nucleus             |
| 1391411_at   | AI179941  | formin-like 2                                                               | FMNL2 (includes EG:114793) | 3,0  | Cytoplasm           |
| 1383098_at   | BG667845  | forty-two-three domain containing 1                                         | FYTTD1                     | -2,2 | Nucleus             |
| 1373836_at   | AI236582  | forty-two-three domain containing 1                                         | FYTTD1                     | -1,6 | Nucleus             |
| 1371951_at   | AA800031  | four and a half LIM domains 2                                               | FHL2                       | 7,0  | Nucleus             |
| 1377011_at   | BF415061  | furry homolog (Drosophila)                                                  | FRY                        | -2,4 | Unknown             |
| 1379434_at   | BE100206  | FYVE, RhoGEF and PH domain containing 1                                     | FGD1                       | 1,7  | Cytoplasm           |
| 1381882_at   | AI072357  | FYVE, RhoGEF and PH domain containing 6                                     | FGD6                       | 8,8  | Cytoplasm           |
| 1396280_at   | BI277872  | G patch domain and KOW motifs                                               | GPKOW                      | 3,1  | Unknown             |
| 1382186_a_at | AI136314  | G patch domain containing 4                                                 | GPATCH4                    | 5,5  | Unknown             |
| 1372313_at   | BI275972  | G protein-coupled receptor 89B                                              | GPR89B                     | -2,3 | Unknown             |
| 1378842_at   | AI102520  | GABA(A) receptor-associated protein like 1                                  | GABARAPL1                  | 2,2  | Cytoplasm           |
| 1372201_at   | AI233698  | gametogenetin binding protein 2                                             | GGNBP2                     | 2,0  | Unknown             |
| 1385717_at   | AW524331  | ganglioside-induced differentiation-associated protein 1                    | GDAP1                      | -1,8 | Cytoplasm           |
| 1389390_at   | AI599847  | GATA zinc finger domain containing 1                                        | GATAD1                     | 1,8  | Unknown             |
| 1387855_at   | BI278628  | GDP dissociation inhibitor 1                                                | GDI1                       | -1,8 | Cytoplasm           |
| 1398822_at   | NM_017276 | GDP dissociation inhibitor 2                                                | GDI2                       | -1,9 | Cytoplasm           |
| 1372702_at   | BI284972  | gene model 884, (NCBI)                                                      | GM884                      | -4,0 | Unknown             |
| 1390623_at   | BI279799  | GINS complex subunit 3 (Psf3 homolog)                                       | GINS3                      | 2,2  | Unknown             |
| 1393357_at   | AW253109  | GLE1 RNA export mediator homolog (yeast)                                    | GLE1                       | 1,6  | Nucleus             |
| 1374690_at   | AI599770  | GLE1 RNA export mediator homolog (yeast)                                    | GLE1                       | 2,0  | Nucleus             |
| 1380410_at   | AI043958  | GLI pathogenesis-related 2                                                  | GLIPR2                     | 10,8 | Cytoplasm           |
| 1373021_at   | AI171823  | glioblastoma amplified sequence                                             | GBAS                       | -2,3 | Plasma Membrane     |
| 1376175_at   | BF283433  | glioblastoma amplified sequence                                             | GBAS                       | -1,6 | Plasma Membrane     |
| 1369888_at   | NM_012707 | glucagon                                                                    | GCG                        | -6,1 | Extracellular Space |
| 1373491_at   | BI276464  | glucosidase, beta, acid                                                     | GBA (includes EG:684536)   | -1,9 | Unknown             |
| 1371358_at   | BI282960  | glycoprotein, synaptic 2                                                    | GPSN2                      | -3,1 | Plasma Membrane     |
| 1398606_at   | BM391878  | golgi integral membrane protein 4                                           | GOLIM4                     | -1,9 | Cytoplasm           |
| 1372330_at   | BM391371  | goliath                                                                     | LOC652955                  | -2,1 | Nucleus             |
| 1370417_at   | M15527    | gonadotropin-releasing hormone 1 (luteinizing-releasing hormone)            | GNRH1                      | 2,0  | Extracellular Space |
| 1374922_at   | AI013096  | GPN-loop GTPase 2                                                           | GPN2                       | 1,5  | Unknown             |
| 1372016_at   | BI287978  | growth arrest and DNA-damage-inducible, beta                                | GADD45B                    | 38,8 | Cytoplasm           |
| 1373499_at   | BF287008  | growth arrest-specific 5 (non-protein coding)                               | GAS5                       | 2,2  | Unknown             |
| 1367930_at   | NM_017195 | growth associated protein 43                                                | GAP43                      | -2,0 | Plasma Membrane     |
| 1368385_a_at | X62853    | growth factor receptor-bound protein 2                                      | GRB2                       | 1,5  | Cytoplasm           |
| 1367867_at   | NM_013222 | growth factor, augmenter of liver regeneration                              | GFER                       | 3,7  | Nucleus             |
| 1373142_at   | AA858928  | growth hormone inducible transmembrane protein                              | GHITM                      | 1,8  | Cytoplasm           |
| 1371574_at   | BF284759  | growth hormone inducible transmembrane protein                              | GHITM                      | 2,3  | Cytoplasm           |
| 1388953_at   | AA892598  | guanine nucleotide binding protein-like 3 (nucleolar)                       | GNL3                       | 1,7  | Nucleus             |
| 1376285_at   | BM390519  | GULP, engulfment adaptor PTB domain containing 1                            | GULP1                      | -2,5 | Cytoplasm           |
| 1390019_at   | BM390456  | H3 histone, family 3B (H3.3B)                                               | H3F3B                      | -1,7 | Nucleus             |

|              |           |                                                                                                |              |       |                 |
|--------------|-----------|------------------------------------------------------------------------------------------------|--------------|-------|-----------------|
| 1398849_at   | AI177503  | H3 histone, family 3B (H3.3B)                                                                  | H3F3B        | 1,9   | Nucleus         |
| 1388996_at   | AI406527  | haloacid dehalogenase-like hydrolase domain containing 2                                       | HDHD2        | -2,9  | Unknown         |
| 1374957_at   | AI408197  | hCG21078                                                                                       | HCG 21078    | -3,5  | Unknown         |
| 1393096_at   | BF393086  | hCG21078                                                                                       | HCG 21078    | -1,7  | Unknown         |
| 1393331_at   | AI575856  | headcase homolog (Drosophila)                                                                  | HECA         | 8,1   | Unknown         |
| 1383710_at   | BE098872  | HEAT repeat containing 5B                                                                      | HEATR5B      | -2,4  | Unknown         |
| 1388851_at   | BI282281  | heat shock 70kDa protein 9 (mortalin)                                                          | HSPA9        | 1,9   | Cytoplasm       |
| 1372701_at   | AI237597  | heat shock protein 90kDa alpha (cytosolic), class A member 1                                   | HSP90AA1     | 1,6   | Cytoplasm       |
| 1368060_at   | NM_031714 | heat-responsive protein 12                                                                     | HRSP12       | -2,0  | Cytoplasm       |
| 1388923_at   | BG381657  | HEC1/NDC80 interacting, centrosome associated 1                                                | NY-SAR-48    | -2,0  | Unknown         |
| 1384882_at   | AI229056  | HECT domain containing 2                                                                       | HECTD2       | 3,9   | Unknown         |
| 1372076_at   | BI294704  | hepatitis B virus x interacting protein                                                        | HBXIP        | 2,0   | Cytoplasm       |
| 1377283_at   | BI274486  | Hermansky-Pudlak syndrome 4                                                                    | HPS4         | -3,2  | Cytoplasm       |
| 1371637_at   | AI411691  | heterochromatin protein 1, binding protein 3                                                   | HP1BP3       | -1,6  | Nucleus         |
| 1374405_at   | AI233336  | heterogeneous nuclear ribonucleoprotein A3                                                     | HNRNPA3      | 1,7   | Nucleus         |
| 1371505_at   | BG381750  | heterogeneous nuclear ribonucleoprotein C (C1/C2)                                              | HNRNPC       | 2,0   | Nucleus         |
| 1375019_at   | AI101886  | heterogeneous nuclear ribonucleoprotein H3 (2H9)                                               | HNRNPH3      | 1,8   | Nucleus         |
| 1374105_at   | H31665    | HIG1 domain family, member 1A                                                                  | HIGD1A       | 1,8   | Plasma Membrane |
| 1371989_at   | BM386357  | high mobility group nucleosomal binding domain 3                                               | HMGN3        | -1,7  | Nucleus         |
| 1372263_at   | BF396485  | HLA-B associated transcript 2-like                                                             | BAT2L        | 1,9   | Unknown         |
| 1372118_at   | BI281674  | HMP19 protein                                                                                  | HMP19        | -3,4  | Cytoplasm       |
| 1367741_at   | NM_053523 | homocysteine-inducible, endoplasmic reticulum stress-inducible, ubiquitin-like domain member 1 | HERPUD1      | 1,9   | Cytoplasm       |
| 1369358_a_at | AI412750  | huntingtin-associated protein 1                                                                | HAP1         | -4,8  | Cytoplasm       |
| 1371736_at   | AI411283  | hypothetical gene supported by BC032431                                                        | LOC389203    | -2,9  | Unknown         |
| 1372850_at   | AA799464  | hypothetical LOC100151767                                                                      | LOC100151767 | 1,9   | Unknown         |
| 1393050_at   | BG664069  | hypothetical LOC302495                                                                         | LOC302495    | 2,9   | Unknown         |
| 1383874_at   | BG670036  | hypothetical protein FLJ36031                                                                  | FLJ36031     | 2,4   | Unknown         |
| 1375911_at   | AI171772  | hypothetical protein KIAA1434                                                                  | RP5-1022P6.2 | 2,2   | Unknown         |
| 1388407_at   | AI008077  | hypothetical protein LOC348262                                                                 | LOC348262    | 2,8   | Unknown         |
| 1388942_at   | BM390129  | hypothetical protein LOC679880                                                                 | LOC679880    | -2,6  | Unknown         |
| 1377461_at   | AI409983  | hypothetical protein LOC680485                                                                 | LOC680485    | 7,5   | Unknown         |
| 1374499_at   | BM383402  | hypothetical protein LOC682999                                                                 | LOC682999    | 2,6   | Unknown         |
| 1390151_at   | BM392146  | hypothetical protein LOC683034                                                                 | LOC683034    | -2,0  | Unknown         |
| 1373177_x_at | AI409900  | hypothetical protein LOC685786                                                                 | LOC685786    | -1,6  | Unknown         |
| 1388501_at   | AW916335  | hypothetical protein LOC686179                                                                 | MGC125239    | 2,6   | Unknown         |
| 1376737_at   | BE110674  | hypothetical protein LOC686259                                                                 | LOC686259    | 2,4   | Unknown         |
| 1377626_at   | AA924350  | hypothetical protein LOC686634                                                                 | LOC686634    | 489,7 | Unknown         |
| 1393234_at   | BI285850  | hypothetical protein LOC687105                                                                 | LOC687105    | 6,7   | Unknown         |
| 1371434_at   | AI172362  | hypothetical protein LOC691807                                                                 | RCG 28701    | 2,2   | Unknown         |
| 1385061_at   | AI145445  | hypothetical protein LOC730130                                                                 | TCAG7.977    | -1,7  | Unknown         |
| 1388587_at   | AI176519  | immediate early response 3                                                                     | IER3         | 4,0   | Cytoplasm       |
| 1389355_at   | BF285187  | immediate early response 5                                                                     | IER5         | 5,4   | Unknown         |
| 1391489_at   | AI407339  | immunity-related GTPase family, M                                                              | IRGM         | 115,2 | Cytoplasm       |
| 1394293_at   | BG664973  | IMP1 inner mitochondrial membrane peptidase-like (S. cerevisiae)                               | IMMP1L       | -1,6  | Unknown         |
| 1389521_at   | AI408553  | influenza virus NS1A binding protein                                                           | IVNS1ABP     | -1,5  | Nucleus         |
| 1374281_at   | BE109901  | INO80 homolog (S. cerevisiae)                                                                  | INO80        | 1,6   | Unknown         |
| 1393690_at   | AA818627  | insulin induced gene 2                                                                         | INSIG2       | 2,0   | Cytoplasm       |
| 1369771_at   | NM_012969 | insulin receptor substrate 1                                                                   | IRS1         | -2,3  | Cytoplasm       |
| 1371334_at   | BG668228  | integral membrane protein 2C                                                                   | ITM2C        | -1,6  | Cytoplasm       |
| 1367716_at   | NM_133557 | integrin alpha FG-GAP repeat containing 1                                                      | ITFG1        | -2,0  | Plasma Membrane |
| 1386581_at   | AW141214  | integrin, alpha V (vitronectin receptor, alpha polypeptide, antigen CD51)                      | ITGAV        | 5,3   | Plasma Membrane |
| 1383880_at   | BF418243  | integrin, alpha V (vitronectin receptor, alpha polypeptide, antigen CD51)                      | ITGAV        | 10,4  | Plasma Membrane |
| 1387995_a_at | BI285494  | interferon induced transmembrane protein 3 (I-8U)                                              | IFITM3       | 9,6   | Plasma Membrane |
| 1387770_at   | NM_130743 | interferon, alpha-inducible protein 27                                                         | IFI27        | 3,5   | Cytoplasm       |
| 1374551_at   | BM388891  | interferon-induced protein 35                                                                  | IFI35        | 3,0   | Nucleus         |
| 1381014_at   | BI274623  | interferon-induced protein 44                                                                  | IFI44        | 16,1  | Cytoplasm       |
| 1379748_at   | AA819629  | interferon-induced protein 44-like                                                             | IFI44L       | 40,0  | Unknown         |
| 1379568_at   | AI009765  | interferon-induced protein with tetratricopeptide repeats 2                                    | IFIT2        | 4,5   | Unknown         |

|              |           |                                                             |                          |       |                     |
|--------------|-----------|-------------------------------------------------------------|--------------------------|-------|---------------------|
| 1384180_at   | BE118697  | interferon-induced protein with tetratricopeptide repeats 2 | IFIT2                    | 30,9  | Unknown             |
| 1367795_at   | NM_019242 | interferon-related developmental regulator 1                | IFRD1                    | 1,9   | Nucleus             |
| 1373068_at   | AI236977  | interferon-related developmental regulator 2                | IFRD2                    | 2,3   | Unknown             |
| 1369031_at   | NM_053374 | interleukin 18 binding protein                              | IL18BP                   | 22,3  | Extracellular Space |
| 1373630_at   | BG378832  | intermediate filament family orphan 1                       | IFFO1                    | -1,9  | Unknown             |
| 1387226_at   | NM_019128 | internexin neuronal intermediate filament protein, alpha    | INA                      | -2,5  | Cytoplasm           |
| 1378061_at   | AI043888  | intraflagellar transport 122 homolog (Chlamydomonas)        | IFT122                   | 2,7   | Nucleus             |
| 1387046_at   | NM_053792 | intraflagellar transport 172 homolog (Chlamydomonas)        | IFT172                   | -2,2  | Nucleus             |
| 1380548_at   | BF420494  | intraflagellar transport 57 homolog (Chlamydomonas)         | IFT57                    | 4,0   | Cytoplasm           |
| 1394038_at   | BG371654  | intraflagellar transport 81 homolog (Chlamydomonas)         | IFT81                    | -1,5  | Unknown             |
| 1382314_at   | BE096523  | ISG15 ubiquitin-like modifier                               | ISG15 (includes EG:9636) | 649,3 | Extracellular Space |
| 1387660_at   | M25390    | islet amyloid polypeptide                                   | IAPP                     | -1,7  | Extracellular Space |
| 1367787_at   | NM_030844 | islet cell autoantigen 1, 69kDa                             | ICA1                     | -1,6  | Cytoplasm           |
| 1377756_at   | AI232228  | ISY1 splicing factor homolog (S. cerevisiae)                | ISY1                     | 1,7   | Nucleus             |
| 1371983_at   | AA945181  | Josephin domain containing 1                                | JOSD1                    | -2,4  | Unknown             |
| 1370975_at   | AI172079  | jumonji domain containing 1A                                | JMJD1A                   | 3,8   | Unknown             |
| 1374632_at   | AI232697  | jumonji domain containing 6                                 | JMJD6                    | 2,1   | Plasma Membrane     |
| 1374124_at   | AA851397  | jumonji domain containing 8                                 | JMJD8                    | -1,7  | Unknown             |
| 1388799_at   | BG374559  | kelch-like 7 (Drosophila)                                   | KLHL7                    | -1,8  | Nucleus             |
| 1390526_at   | BI289484  | kelch-like 9 (Drosophila)                                   | KLHL9                    | -1,8  | Unknown             |
| 1388155_at   | BI286012  | keratin 18                                                  | KRT18                    | 1,9   | Cytoplasm           |
| 1388433_at   | BI279605  | keratin 19                                                  | KRT19                    | 8,5   | Cytoplasm           |
| 1376408_at   | BF418111  | KIAA0020                                                    | KIAA0020                 | 3,2   | Nucleus             |
| 1377708_at   | BF281491  | KIAA0020                                                    | KIAA0020                 | 3,5   | Nucleus             |
| 1382364_at   | BI293914  | KIAA0090                                                    | KIAA0090                 | -2,6  | Plasma Membrane     |
| 1399124_at   | AI598517  | KIAA0090                                                    | KIAA0090                 | -2,2  | Plasma Membrane     |
| 1398971_at   | BI283725  | KIAA0100                                                    | KIAA0100                 | -1,9  | Extracellular Space |
| 1381174_at   | BG381120  | KIAA0141                                                    | KIAA0141                 | 2,3   | Cytoplasm           |
| 1396239_at   | AI502035  | KIAA0146                                                    | KIAA0146                 | 1,9   | Unknown             |
| 1398607_at   | AI717510  | KIAA0240                                                    | KIAA0240                 | -1,7  | Unknown             |
| 1393065_at   | BI276770  | KIAA0406                                                    | KIAA0406                 | -2,1  | Unknown             |
| 1375548_at   | BI296537  | KIAA0494                                                    | KIAA0494                 | -1,7  | Unknown             |
| 1383933_at   | AI136714  | KIAA0564                                                    | KIAA0564                 | -1,7  | Unknown             |
| 1397290_at   | AI408310  | KIAA0892                                                    | KIAA0892                 | -2,0  | Unknown             |
| 1397575_at   | BF415880  | KIAA0922                                                    | KIAA0922                 | -3,9  | Unknown             |
| 1377157_at   | BI273815  | KIAA0947 protein                                            | KIAA0947                 | -2,0  | Unknown             |
| 1375853_at   | BF284358  | KIAA1033                                                    | KIAA1033                 | 2,0   | Unknown             |
| 1392838_at   | BF398054  | KIAA1033                                                    | KIAA1033                 | 2,2   | Unknown             |
| 1383165_at   | BM390462  | KIAA1324                                                    | KIAA1324                 | -1,8  | Unknown             |
| 1393352_at   | BI293882  | KIAA1370                                                    | KIAA1370                 | -1,8  | Unknown             |
| 1373300_at   | BI296249  | KIAA1467                                                    | KIAA1467                 | -2,9  | Unknown             |
| 1382785_at   | BE105549  | kinesin family member 1A                                    | KIF1A                    | 6,9   | Cytoplasm           |
| 1380172_at   | BE104278  | kinesin family member 5C                                    | KIF5C                    | -3,1  | Cytoplasm           |
| 1378197_at   | AW433953  | kinesin family member C2                                    | KIFC2                    | -2,8  | Cytoplasm           |
| 1389556_at   | BI286000  | kinesin-associated protein 3                                | KIFAP3                   | -1,9  | Cytoplasm           |
| 1374006_at   | BI295878  | kynurenine aminotransferase III                             | KAT3                     | 2,1   | Unknown             |
| 1398943_at   | BI274583  | L antigen family, member 3                                  | LAGE3                    | -2,2  | Unknown             |
| 1390113_a_at | BI300539  | La ribonucleoprotein domain family, member 1                | LARP1                    | 1,8   | Unknown             |
| 1373422_at   | BE108280  | La ribonucleoprotein domain family, member 1                | LARP1                    | 2,0   | Unknown             |
| 1374195_at   | AA799544  | ladinin 1                                                   | LAD1                     | 2,9   | Extracellular Space |
| 1368055_a_at | BI282866  | lamin A/C                                                   | LMNA                     | 2,2   | Nucleus             |
| 1379340_at   | BM385282  | laminin, gamma 2                                            | LAMC2                    | 27,2  | Extracellular Space |
| 1391565_at   | AA899663  | large subunit GTPase 1 homolog (S. cerevisiae)              | LSG1                     | -6,5  | Cytoplasm           |
| 1367768_at   | NM_031655 | latexin                                                     | LXN                      | 1,6   | Cytoplasm           |
| 1369716_s_at | NM_012976 | lectin, galactose binding, soluble 5                        | LGALS5                   | 25,1  | Unknown             |
| 1386879_at   | NM_031832 | lectin, galactoside-binding, soluble, 3                     | LGALS3                   | 5,8   | Extracellular Space |
| 1368960_at   | NM_053862 | lectin, galactoside-binding, soluble, 8                     | LGALS8                   | 2,6   | Extracellular Space |
| 1387027_a_at | U72741    | lectin, galactoside-binding, soluble, 9B                    | LGALS9B                  | 8,2   | Cytoplasm           |

|              |           |                                                                                       |                            |      |                     |
|--------------|-----------|---------------------------------------------------------------------------------------|----------------------------|------|---------------------|
| 1368848_at   | NM_053886 | lectin, mannose-binding, 1                                                            | LMAN1                      | -1,9 | Cytoplasm           |
| 1371445_at   | BF285649  | leucine rich repeat containing 59                                                     | LRR59                      | 1,7  | Cytoplasm           |
| 1372405_at   | BE107128  | leucine rich repeat containing 68                                                     | LRR68 (includes EG:308398) | -2,0 | Unknown             |
| 1391601_at   | AA964579  | leucine rich repeat neuronal 2                                                        | LRRN2                      | -3,4 | Plasma Membrane     |
| 1396013_at   | BI293141  | leucine zipper-EF-hand containing transmembrane protein 1                             | LETM1                      | 1,9  | Cytoplasm           |
| 1398569_at   | BF412229  | leucine-rich repeats and death domain containing                                      | LRDD                       | 2,2  | Cytoplasm           |
| 1383906_at   | BF416847  | likely ortholog of mouse lung-inducible Neutralized-related C3HC4 RING domain protein | LINCR                      | 99,7 | Unknown             |
| 1383863_at   | BF288303  | LIM domain only 2 (rhombotin-like 1)                                                  | LMO2                       | 5,9  | Nucleus             |
| 1373071_at   | AI103101  | lin-37 homolog (C. elegans)                                                           | LIN37                      | 1,8  | Unknown             |
| 1383665_at   | BE096055  | lipin 2                                                                               | LPIN2                      | 2,0  | Nucleus             |
| 1373875_at   | BG381541  | LLP homolog, long-term synaptic facilitation (Aplysia)                                | LLPH                       | 2,0  | Unknown             |
| 1385487_at   | AW530957  | LSM1 homolog, U6 small nuclear RNA associated (S. cerevisiae)                         | LSM1                       | 2,4  | Nucleus             |
| 1381970_at   | AA945865  | LSM14A, SCD6 homolog A (S. cerevisiae)                                                | LSM14A                     | 2,1  | Unknown             |
| 1376483_at   | AW251852  | LSM5 homolog, U6 small nuclear RNA associated (S. cerevisiae)                         | LSM5                       | 1,6  | Cytoplasm           |
| 1388347_at   | AI233210  | lymphocyte antigen 6 complex, locus E                                                 | LY6E                       | 2,9  | Plasma Membrane     |
| 1382277_at   | AA894336  | lymphocyte antigen 96                                                                 | LY96                       | 4,5  | Plasma Membrane     |
| 1373904_at   | AI103948  | LysM, putative peptidoglycan-binding, domain containing 2                             | LYSMD2                     | 1,6  | Unknown             |
| 1381193_at   | BE115518  | lysophosphatidylglycerol acyltransferase 1                                            | LPGAT1                     | 2,8  | Cytoplasm           |
| 1388748_at   | AW525776  | lysosomal protein transmembrane 4 alpha                                               | LAPTM4A                    | 1,6  | Cytoplasm           |
| 1388728_at   | BI282923  | lysosomal protein transmembrane 4 beta                                                | LAPTM4B                    | -2,0 | Unknown             |
| 1367925_at   | NM_022715 | major vault protein                                                                   | MVP                        | 2,2  | Nucleus             |
| 1379325_at   | BI274837  | makorin ring finger protein 1                                                         | MKRN1                      | 2,5  | Unknown             |
| 1375173_at   | BM392302  | mannose-6-phosphate protein p76                                                       | P76                        | 1,5  | Extracellular Space |
| 1371587_at   | AA817829  | MAPK scaffold protein 1                                                               | MAPKSP1                    | 2,7  | Cytoplasm           |
| 1389306_at   | BM387419  | matrilin 2                                                                            | MATN2                      | -6,4 | Extracellular Space |
| 1389433_at   | BI298816  | McKusick-Kaufman syndrome                                                             | MKKS                       | -2,5 | Cytoplasm           |
| 1388368_at   | BM389891  | mediator complex subunit 28                                                           | MED28                      | 3,1  | Nucleus             |
| 1388491_at   | AI234849  | membrane-associated ring finger (C3HC4) 5                                             | MARCH5                     | 2,1  | Unknown             |
| 1385790_at   | BF560024  | membrane-associated ring finger (C3HC4) 5                                             | MARCH5                     | 3,2  | Unknown             |
| 1390485_at   | BI290680  | membrane-associated ring finger (C3HC4) 5                                             | MARCH5                     | 6,9  | Unknown             |
| 1373087_at   | AI175452  | membrane-associated ring finger (C3HC4) 7                                             | MARCH7                     | 1,9  | Unknown             |
| 1373113_at   | AI231778  | membrane-associated ring finger (C3HC4) 8                                             | MARCH8                     | 1,6  | Cytoplasm           |
| 1388271_at   | BM383531  | metallothionein 1E                                                                    | MT1E                       | 65,9 | Cytoplasm           |
| 1388267_a_at | M24327    | metallothionein 1F                                                                    | MT1F                       | 30,5 | Cytoplasm           |
| 1371237_a_at | AF411318  | metallothionein 1F                                                                    | MT1F                       | 40,6 | Cytoplasm           |
| 1398185_at   | BF410350  | microfibrillar-associated protein 3-like                                              | MFAP3L                     | -1,6 | Unknown             |
| 1388152_at   | BG374290  | microtubule-associated protein 2                                                      | MAP2                       | -2,9 | Cytoplasm           |
| 1373397_at   | AI180161  | microtubule-associated protein, RP/EB family, member 1                                | MAPRE1                     | 1,9  | Cytoplasm           |
| 1372091_at   | BI275959  | MID1 interacting protein 1 (gastrulation specific G12 homolog (zebrafish))            | MIDI1P1                    | -1,6 | Cytoplasm           |
| 1382289_at   | BI291954  | mindbomb homolog 1 (Drosophila)                                                       | MIB1                       | -4,2 | Cytoplasm           |
| 1392989_at   | BI295986  | mindbomb homolog 1 (Drosophila)                                                       | MIB1                       | -2,4 | Cytoplasm           |
| 1393085_at   | BI290341  | MIT, microtubule interacting and transport, domain containing 1                       | MITD1                      | 2,7  | Unknown             |
| 1372566_at   | AI412014  | mitochondrial carrier homolog 2 (C. elegans)                                          | MTCH2                      | -2,9 | Cytoplasm           |
| 1375131_at   | BF284715  | mitochondrial carrier homolog 2 (C. elegans)                                          | MTCH2                      | 1,5  | Cytoplasm           |
| 1372597_at   | BE113348  | mitochondrial ribosomal protein L14                                                   | MRPL14                     | 4,8  | Unknown             |
| 1373477_at   | BM390306  | mitochondrial ribosomal protein L19                                                   | MRPL19                     | 2,0  | Cytoplasm           |
| 1371888_at   | AA892843  | mitochondrial ribosomal protein L24                                                   | MRPL24                     | 1,7  | Unknown             |
| 1383618_at   | BG378538  | mitochondrial ribosomal protein L38                                                   | MRPL38                     | 1,9  | Unknown             |
| 1379874_at   | BE107929  | mitochondrial ribosomal protein L51                                                   | MRPL51                     | -2,4 | Cytoplasm           |
| 1390509_a_at | BI294860  | mitochondrial ribosomal protein L51                                                   | MRPL51                     | -1,5 | Cytoplasm           |
| 1371809_at   | BM389296  | mitochondrial ribosomal protein S18B                                                  | MRPS18B                    | 3,4  | Cytoplasm           |
| 1380447_a_at | AI071722  | mitochondrial ribosomal protein S18C                                                  | MRPS18C                    | 1,5  | Cytoplasm           |
| 1371608_at   | BI275958  | mitochondrial ribosomal protein S34                                                   | MRPS34                     | 2,9  | Cytoplasm           |
| 1372457_at   | BF284182  | mitochondrial tumor suppressor 1                                                      | MTUS1                      | -2,4 | Unknown             |
| 1387971_a_at | AF092450  | mitogen-activated protein kinase 8 interacting protein 1                              | MAPK8IP1                   | -1,8 | Cytoplasm           |
| 1388990_at   | AA924622  | MKI67 (FHA domain) interacting nucleolar phosphoprotein                               | MKI67IP                    | 1,5  | Nucleus             |
| 1368071_at   | NM_134410 | MOCO sulphurase C-terminal domain containing 2                                        | MOSC2                      | -1,7 | Cytoplasm           |
| 1372043_at   | BI282363  | mRNA turnover 4 homolog (S. cerevisiae)                                               | MRT04                      | 3,5  | Cytoplasm           |

|              |           |                                                                                                 |                              |      |                     |
|--------------|-----------|-------------------------------------------------------------------------------------------------|------------------------------|------|---------------------|
| 1378034_at   | BF552141  | MTERF domain containing 3                                                                       | MTERFD3                      | -3,6 | Unknown             |
| 1392572_at   | BI282339  | musashi homolog 2 (Drosophila)                                                                  | MSI2                         | 1,8  | Cytoplasm           |
| 1375140_at   | AA818999  | muscleblind-like 2 (Drosophila)                                                                 | MBNL2                        | -3,3 | Unknown             |
| 1389301_at   | AI176665  | muscleblind-like 2 (Drosophila)                                                                 | MBNL2                        | -1,6 | Unknown             |
| 1386074_at   | AA850705  | MYC induced nuclear antigen                                                                     | MINA                         | -1,8 | Nucleus             |
| 1371692_at   | AI009661  | myeloid/lymphoid or mixed-lineage leukemia (trithorax homolog, Drosophila); translocated to, 11 | MLLT11                       | -1,8 | Unknown             |
| 1368279_at   | NM_053718 | myeloid/lymphoid or mixed-lineage leukemia (trithorax homolog, Drosophila); translocated to, 3  | MLLT3                        | 2,2  | Nucleus             |
| 1373027_at   | AA944375  | myeloid/lymphoid or mixed-lineage leukemia (trithorax homolog, Drosophila); translocated to, 4  | MLLT4                        | 1,6  | Nucleus             |
| 1375703_at   | BE117891  | myeloid/lymphoid or mixed-lineage leukemia 5 (trithorax homolog, Drosophila)                    | MLL5                         | -1,8 | Nucleus             |
| 1369720_at   | NM_053986 | myosin IB                                                                                       | MYO1B                        | 3,2  | Cytoplasm           |
| 1376098_a_at | BF282304  | myosin IG                                                                                       | MYO1G                        | 5,7  | Cytoplasm           |
| 1369980_s_at | NM_053814 | myosin phosphatase Rho interacting protein                                                      | MPRIIP                       | 1,6  | Cytoplasm           |
| 1388114_at   | X05566    | myosin regulatory light chain MRLC2                                                             | MRLC2                        | 2,3  | Cytoplasm           |
| 1370158_at   | AA946388  | myosin, heavy chain 10, non-muscle                                                              | MYH10                        | -3,3 | Cytoplasm           |
| 1370949_at   | M59859    | myristoylated alanine rich protein kinase C substrate                                           | MARCKS (includes EG:25603)   | -2,3 | Unknown             |
| 1398452_at   | BI298587  | N-acetyltransferase 12 (GCN5-related, putative)                                                 | NAT12                        | 4,8  | Unknown             |
| 1371559_at   | AI103384  | NAD kinase                                                                                      | NADK (includes EG:100125370) | -1,5 | Unknown             |
| 1388362_at   | BM390197  | NADH dehydrogenase (ubiquinone) 1 alpha subcomplex 13 pseudogene                                | RGD1561358                   | 1,6  | Unknown             |
| 1388907_at   | BF400873  | NECAP endocytosis associated 1                                                                  | NECAP1                       | -2,1 | Plasma Membrane     |
| 1390514_at   | BI295160  | NEDD4 binding protein 2-like 2                                                                  | N4BP2L2                      | 1,8  | Unknown             |
| 1398893_at   | BG671512  | Nedd4 family interacting protein 1                                                              | NDFIP1                       | -1,6 | Cytoplasm           |
| 1373861_at   | AI228114  | Nedd4 family interacting protein 2                                                              | NDFIP2 (includes EG:54602)   | 1,9  | Cytoplasm           |
| 1389364_at   | BF406709  | Nedd4 family interacting protein 2                                                              | NDFIP2 (includes EG:54602)   | 3,1  | Cytoplasm           |
| 1373775_at   | AI232313  | negative regulator of ubiquitin-like proteins 1                                                 | NUB1                         | 3,6  | Nucleus             |
| 1381509_at   | BF393724  | neighbor of BRCA1 gene 1                                                                        | NBR1                         | 4,0  | Unknown             |
| 1374650_at   | BM392374  | neural precursor cell expressed, developmentally down-regulated 9                               | NEDD9                        | -1,9 | Nucleus             |
| 1392581_at   | BF420172  | neurocalcin delta                                                                               | NCALD                        | -7,2 | Cytoplasm           |
| 1372953_at   | AI101330  | neurocalcin delta                                                                               | NCALD                        | -5,0 | Cytoplasm           |
| 1367956_at   | NM_053543 | neurochondrin                                                                                   | NCDN                         | -1,7 | Unknown             |
| 1367845_at   | NM_017029 | neurofilament, medium polypeptide                                                               | NEFM                         | 4,3  | Cytoplasm           |
| 1372433_at   | AI104715  | neuroguidin, EIF4E binding protein                                                              | NGDN                         | 1,9  | Nucleus             |
| 1395083_at   | AA926313  | neuro-oncological ventral antigen 1                                                             | NOVA1                        | -2,7 | Nucleus             |
| 1368255_at   | NM_017354 | neurotrimin                                                                                     | HNT                          | -2,8 | Plasma Membrane     |
| 1374014_at   | AI410079  | neutral sphingomyelinase (N-SMase) activation associated factor                                 | NSMAF                        | 1,7  | Cytoplasm           |
| 1389162_at   | BI277328  | NFU1 iron-sulfur cluster scaffold homolog (S. cerevisiae)                                       | NFU1                         | 2,6  | Unknown             |
| 1371539_at   | AW921151  | NHP2 ribonucleoprotein homolog (yeast)                                                          | NHP2                         | 2,1  | Nucleus             |
| 1387977_at   | AF218575  | nibrin                                                                                          | NBN                          | 1,7  | Nucleus             |
| 1398610_at   | BG375744  | nicolin 1                                                                                       | NICN1 (includes EG:619581)   | -1,5 | Unknown             |
| 1371032_at   | BG372942  | nidogen 1                                                                                       | NID1                         | -1,7 | Extracellular Space |
| 1388878_at   | BI279756  | NIN1/RPN12 binding protein 1 homolog (S. cerevisiae)                                            | NOB1                         | 1,9  | Nucleus             |
| 1370348_at   | U72660    | ninjurin 1                                                                                      | NINJ1                        | 2,9  | Plasma Membrane     |
| 1384801_at   | AA963592  | Nipped-B homolog (Drosophila)                                                                   | NIPBL                        | 1,9  | Nucleus             |
| 1393248_at   | BF407833  | NMD3 homolog (S. cerevisiae)                                                                    | NMD3                         | 1,8  | Nucleus             |
| 1384257_at   | BF555394  | non-POU domain containing, octamer-binding                                                      | NONO                         | 2,0  | Nucleus             |
| 1378642_at   | AI112858  | non-protein coding RNA 153                                                                      | NCRNA00153                   | 2,0  | Unknown             |
| 1383752_at   | BG375714  | NOP2 nucleolar protein homolog (yeast)                                                          | NOP2                         | 1,6  | Nucleus             |
| 1373978_at   | AI410277  | nuclear cap binding protein subunit 1, 80kDa                                                    | NCBP1 (includes EG:4686)     | 1,6  | Nucleus             |
| 1368436_at   | NM_017271 | nuclear distribution gene C homolog (A. nidulans)                                               | NUDC                         | 1,9  | Cytoplasm           |
| 1389538_at   | AW672589  | nuclear factor of kappa light polypeptide gene enhancer in B-cells inhibitor, alpha             | NFKBIA                       | 20,1 | Cytoplasm           |
| 1394371_at   | BF556765  | nuclear fragile X mental retardation protein interacting protein 1                              | NUFIP1                       | 3,0  | Nucleus             |
| 1376250_at   | BI284814  | nuclear fragile X mental retardation protein interacting protein 1                              | NUFIP1                       | 3,9  | Nucleus             |
| 1387950_at   | AF158186  | nuclear import 7 homolog (S. cerevisiae)                                                        | NIP7                         | 1,7  | Nucleus             |
| 1383530_at   | AA925994  | nuclear receptor interacting protein 3                                                          | NRIP3                        | 1,9  | Unknown             |
| 1370000_at   | NM_021663 | nucleobindin 2                                                                                  | NUCB2                        | -2,1 | Nucleus             |
| 1384280_at   | AA964152  | nucleolar and spindle associated protein 1                                                      | NUSAP1                       | -1,9 | Nucleus             |
| 1398832_at   | NM_012749 | nucleolin                                                                                       | NCL                          | 1,9  | Nucleus             |
| 1395212_at   | BE105805  | nucleophosmin/nucleoplasmin, 2                                                                  | NPM2                         | -1,7 | Nucleus             |
| 1383673_at   | BI288925  | nucleosome assembly protein 1-like 2                                                            | NAP1L2                       | -3,4 | Nucleus             |

|              |           |                                                                               |                              |      |                 |
|--------------|-----------|-------------------------------------------------------------------------------|------------------------------|------|-----------------|
| 1388438_at   | AI230346  | nucleosome assembly protein 1-like 4                                          | NAP1L4                       | 1,5  | Nucleus         |
| 1375861_at   | BE111332  | nucleosome assembly protein 1-like 5                                          | NAP1L5                       | -6,3 | Unknown         |
| 1371503_at   | BI289647  | nucleotide binding protein 1 (MinD homolog, E. coli)                          | NUBP1                        | 2,1  | Unknown         |
| 1393753_at   | BE114265  | NudC domain containing 1                                                      | NUDCD1                       | 1,7  | Unknown         |
| 1372939_at   | AI010173  | NudC domain containing 2                                                      | NUDCD2                       | 1,8  | Unknown         |
| 1367761_at   | NM_133320 | nudE nuclear distribution gene E homolog (A. nidulans)-like 1                 | NDEL1                        | 1,5  | Nucleus         |
| 1388645_at   | AI175494  | Obg-like ATPase 1                                                             | OLA1                         | 2,1  | Cytoplasm       |
| 1382814_at   | AW521702  | odz, odd Oz/ten-m homolog 3 (Drosophila)                                      | ODZ3                         | -3,9 | Plasma Membrane |
| 1369008_a_at | NM_053573 | olfactomedin 1                                                                | OLFM1                        | 2,0  | Cytoplasm       |
| 1388432_at   | BI294994  | optineurin                                                                    | OPTN                         | 2,9  | Cytoplasm       |
| 1370618_at   | AB069907  | optineurin                                                                    | OPTN                         | 6,6  | Cytoplasm       |
| 1379977_at   | AI176858  | ORAI calcium release-activated calcium modulator 3                            | ORAI3                        | -2,2 | Unknown         |
| 1389141_at   | BF288111  | origin recognition complex, subunit 2-like (yeast)                            | ORC2L                        | 1,7  | Nucleus         |
| 1391703_at   | BF414253  | origin recognition complex, subunit 4-like (yeast)                            | ORC4L                        | 1,9  | Nucleus         |
| 1376316_at   | AI070593  | origin recognition complex, subunit 6 like (yeast)                            | ORC6L                        | -2,0 | Nucleus         |
| 1398907_at   | BI296182  | ORM1-like 2 (S. cerevisiae)                                                   | ORMDL2                       | -2,2 | Cytoplasm       |
| 1388454_at   | AI230759  | ornithine decarboxylase antizyme 2                                            | OAZ2 (includes EG:501454)    | -1,8 | Unknown         |
| 1384254_at   | AI717553  | OTU domain containing 1                                                       | OTUD1                        | 3,8  | Unknown         |
| 1367869_at   | NM_057153 | oxidation resistance 1                                                        | OXR1                         | -2,7 | Cytoplasm       |
| 1371978_at   | AI406375  | oxysterol binding protein-like 9                                              | OSBPL9                       | 1,9  | Cytoplasm       |
| 1372941_at   | BI273897  | p53 and DNA damage regulated 1                                                | PDRG1                        | 2,1  | Cytoplasm       |
| 1373653_at   | BF550883  | PAP associated domain containing 1                                            | PAPD1                        | 1,9  | Unknown         |
| 1384352_at   | AI547390  | PAP associated domain containing 4                                            | PAPD4                        | 3,7  | Unknown         |
| 1391415_at   | AI043694  | partner of NOB1 homolog (S. cerevisiae)                                       | PNO1                         | 2,4  | Nucleus         |
| 1376598_at   | AI179993  | PAX interacting (with transcription-activation domain) protein 1              | PAXIP1                       | -1,9 | Nucleus         |
| 1375012_at   | BF399627  | PDZ domain containing 4                                                       | PDZD4                        | -2,0 | Cytoplasm       |
| 1399034_at   | AI009650  | pecanex homolog (Drosophila)                                                  | PCNX                         | 1,6  | Plasma Membrane |
| 1371684_at   | AA799330  | pelota homolog (Drosophila)                                                   | PELO                         | 3,9  | Nucleus         |
| 1371064_at   | U95920    | pericentriolar material 1                                                     | PCMI                         | -1,5 | Cytoplasm       |
| 1374855_at   | BI279017  | period homolog 1 (Drosophila)                                                 | PER1                         | 4,0  | Nucleus         |
| 1384237_at   | BF420822  | peroxisomal biogenesis factor 10                                              | PEX10                        | 1,6  | Cytoplasm       |
| 1382546_at   | AW920026  | PHD finger protein 11                                                         | PHF11 (includes EG:51131)    | 8,5  | Unknown         |
| 1376169_at   | BE104290  | PHD finger protein 20-like 1                                                  | PHF20L1                      | -1,7 | Unknown         |
| 1373052_at   | BI275649  | phosducin-like 3                                                              | PDCL3                        | 2,9  | Cytoplasm       |
| 1374571_at   | AI172192  | phosphatidylinositol glycan anchor biosynthesis, class X                      | PIGX                         | -3,4 | Unknown         |
| 1370202_at   | BG378637  | phospholipase A2, group XVI                                                   | PLA2G16                      | 52,9 | Nucleus         |
| 1389654_at   | BM392070  | plastin 1 (I isoform)                                                         | PLS1 (includes EG:5357)      | -1,9 | Cytoplasm       |
| 1389522_at   | BE109446  | pleckstrin homology domain containing, family A member 6                      | PLEKHA6                      | -2,4 | Unknown         |
| 1379536_at   | BF547014  | pleckstrin homology domain containing, family A member 6                      | PLEKHA6                      | 2,3  | Unknown         |
| 1375631_at   | AI177176  | pleckstrin homology domain containing, family B (evectins) member 2           | PLEKHB2                      | 1,6  | Unknown         |
| 1372824_at   | AI103367  | pleckstrin homology domain containing, family F (with FYVE domain) member 2   | PLEKHF2 (includes EG:362484) | 2,7  | Unknown         |
| 1375767_at   | BI287681  | pleckstrin homology domain containing, family G (with RhoGef domain) member 3 | PLEKHG3                      | 4,7  | Unknown         |
| 1380867_a_at | BM383086  | pleckstrin homology domain containing, family M (with RUN domain) member 1    | PLEKHM1                      | 1,6  | Cytoplasm       |
| 1379724_at   | BE103244  | pleckstrin homology-like domain, family B, member 2                           | PHLDB2                       | -4,1 | Cytoplasm       |
| 1385491_at   | BF403514  | PNMA-like 2                                                                   | PNMAL2                       | -5,9 | Unknown         |
| 1378027_at   | AW525315  | poliovirus receptor-related 3                                                 | PVRL3                        | 1,8  | Plasma Membrane |
| 1380071_at   | BI285978  | poly (ADP-ribose) polymerase family, member 12                                | PARP12                       | 5,0  | Nucleus         |
| 1379613_at   | BM390301  | poly (ADP-ribose) polymerase family, member 14                                | PARP14                       | 13,0 | Cytoplasm       |
| 1372034_at   | BF284106  | poly (ADP-ribose) polymerase family, member 14                                | PARP14                       | 26,2 | Cytoplasm       |
| 1374031_at   | BI295824  | poly (ADP-ribose) polymerase family, member 6                                 | PARP6                        | 2,0  | Unknown         |
| 1377970_at   | BE105494  | poly (ADP-ribose) polymerase family, member 8                                 | PARP8                        | 3,3  | Unknown         |
| 1376144_at   | AA819679  | poly (ADP-ribose) polymerase family, member 9                                 | PARP9                        | 22,4 | Nucleus         |
| 1371777_at   | BM383696  | poly(A) binding protein, cytoplasmic 4 (inducible form)                       | PABPC4                       | 1,9  | Cytoplasm       |
| 1379645_at   | BE113614  | polybromo 1                                                                   | PBRM1                        | -1,8 | Nucleus         |
| 1377042_at   | BI288196  | polycomb group ring finger 5                                                  | PCGF5                        | 2,4  | Unknown         |
| 1371920_at   | AA851255  | polymerase (DNA-directed), delta interacting protein 2                        | POLDIP2                      | -1,7 | Nucleus         |
| 1399134_at   | AW144008  | POT1 protection of telomeres 1 homolog (S. pombe)                             | POT1                         | -2,0 | Nucleus         |
| 1375940_a_at | BF396656  | potassium channel tetramerisation domain containing 17                        | KCTD17                       | -1,7 | Unknown         |



|              |           |                                                                   |                              |      |                     |
|--------------|-----------|-------------------------------------------------------------------|------------------------------|------|---------------------|
| 1374326_at   | AI178019  | PPAN-P2RY11 readthrough transcript                                | PPAN-P2RY11                  | 1,9  | Nucleus             |
| 1387903_at   | D32249    | praja ring finger 2                                               | PJA2                         | -1,7 | Cytoplasm           |
| 1370156_at   | BI278802  | prion protein                                                     | PRNP                         | -1,6 | Plasma Membrane     |
| 1386912_at   | NM_019237 | procollagen C-endopeptidase enhancer                              | PCOLCE                       | -1,6 | Extracellular Space |
| 1389325_at   | AA848545  | programmed cell death 10                                          | PDCD10                       | 2,0  | Cytoplasm           |
| 1376212_at   | AI102437  | programmed cell death 2-like                                      | PDCD2L                       | 3,1  | Unknown             |
| 1387521_at   | NM_022265 | programmed cell death 4 (neoplastic transformation inhibitor)     | PDCD4                        | -5,6 | Nucleus             |
| 1383328_x_at | AI576297  | programmed cell death 4 (neoplastic transformation inhibitor)     | PDCD4                        | -4,5 | Nucleus             |
| 1383327_at   | AI576297  | programmed cell death 4 (neoplastic transformation inhibitor)     | PDCD4                        | -3,8 | Nucleus             |
| 1388120_at   | BE328942  | programmed cell death 6 interacting protein                       | PDCD6IP                      | 1,7  | Cytoplasm           |
| 1370381_at   | U61729    | proline-rich nuclear receptor coactivator 1                       | PNRC1                        | 1,9  | Nucleus             |
| 1377744_at   | BF392982  | proline-serine-threonine phosphatase interacting protein 2        | PSTPIP2                      | 1,6  | Cytoplasm           |
| 1367835_at   | NM_019279 | proprotein convertase subtilisin/kexin type 1 inhibitor           | PCSK1N                       | -2,5 | Extracellular Space |
| 1369929_at   | NM_013013 | prosaposin                                                        | PSAP                         | -1,6 | Extracellular Space |
| 1367986_at   | NM_019243 | prostaglandin F2 receptor negative regulator                      | PTGFRN                       | 3,4  | Plasma Membrane     |
| 1388430_at   | BI280292  | prostate tumor overexpressed 1                                    | PTOV1                        | -1,9 | Nucleus             |
| 1367663_at   | NM_017264 | proteasome (prosome, macropain) activator subunit 1 (PA28 alpha)  | PSME1                        | 5,0  | Cytoplasm           |
| 1387345_at   | NM_023986 | proteasome (prosome, macropain) activator subunit 4               | PSME4                        | -1,8 | Unknown             |
| 1371876_at   | BM387084  | proteasome (prosome, macropain) assembly chaperone 2              | PSMG2                        | 2,4  | Nucleus             |
| 1399051_at   | BE104409  | protein associated with topoisomerase II homolog 1 (yeast)        | PATL1                        | 2,5  | Unknown             |
| 1371600_at   | AA943815  | protein kinase (cAMP-dependent, catalytic) inhibitor gamma        | PKIG                         | 1,8  | Unknown             |
| 1386971_at   | NM_022951 | protein phosphatase 1, regulatory (inhibitor) subunit 10          | PPP1R10                      | -2,0 | Nucleus             |
| 1393082_at   | AI044747  | protein phosphatase 1, regulatory (inhibitor) subunit 14C         | PPP1R14C                     | 2,1  | Cytoplasm           |
| 1368716_at   | NM_133425 | protein phosphatase 1, regulatory (inhibitor) subunit 14C         | PPP1R14C                     | 2,3  | Cytoplasm           |
| 1370174_at   | BI284349  | protein phosphatase 1, regulatory (inhibitor) subunit 15A         | PPP1R15A (includes EG:23645) | 9,7  | Cytoplasm           |
| 1367888_at   | NM_053572 | protocadherin 21                                                  | PCDH21                       | 11,7 | Plasma Membrane     |
| 1391013_at   | AW523567  | protocadherin 8                                                   | PCDH8                        | 1,8  | Plasma Membrane     |
| 1383783_at   | AW521192  | protocadherin 9                                                   | PCDH9                        | -2,9 | Plasma Membrane     |
| 1368145_at   | NM_013002 | Purkinje cell protein 4                                           | PCP4                         | -4,0 | Cytoplasm           |
| 1390647_at   | AI410924  | putative homeodomain transcription factor 2                       | PHTF2                        | -3,9 | Cytoplasm           |
| 1375378_at   | BE108882  | quaking homolog, KH domain RNA binding (mouse)                    | QKI                          | 1,7  | Nucleus             |
| 1373481_at   | AI227908  | R3H domain containing 1                                           | R3HDM1                       | 1,5  | Unknown             |
| 1392464_at   | BM392372  | RAE1 RNA export 1 homolog (S. pombe)                              | RAE1                         | 1,6  | Nucleus             |
| 1376029_at   | BI295991  | ral guanine nucleotide dissociation stimulator-like 2             | RGL2                         | 19,1 | Cytoplasm           |
| 1374750_at   | AI172313  | Rap guanine nucleotide exchange factor (GEF) 6                    | RAPGEF6                      | 2,6  | Plasma Membrane     |
| 1377833_at   | BF396950  | RAP1 interacting factor homolog (yeast)                           | RIF1                         | 1,6  | Nucleus             |
| 1388646_at   | BM391469  | raptor                                                            | KIAA1303                     | -2,8 | Cytoplasm           |
| 1373989_at   | AI103943  | Ras association (RalGDS/AF-6) domain family member 1              | RASSF1                       | 2,3  | Nucleus             |
| 1374165_at   | AA818264  | RAS p21 protein activator 4                                       | RASA4 (includes EG:10156)    | 6,2  | Cytoplasm           |
| 1379285_at   | AA819788  | receptor (chemosensory) transporter protein 4                     | RTP4                         | 30,2 | Plasma Membrane     |
| 1372175_at   | BE112899  | receptor accessory protein 3                                      | REEP3                        | -1,5 | Unknown             |
| 1393097_at   | AI709802  | regulation of nuclear pre-mRNA domain containing 1A               | RPRD1A                       | 2,4  | Unknown             |
| 1389066_at   | BI274408  | regulator of calcineurin 2                                        | RCAN2                        | -7,0 | Unknown             |
| 1374235_at   | AI138048  | regulator of calcineurin 2                                        | RCAN2                        | -1,5 | Unknown             |
| 1371563_at   | BE109154  | regulator of chromosome condensation 2                            | RCC2                         | 1,9  | Nucleus             |
| 1398483_at   | AI229118  | regulator of G-protein signaling 17                               | RGS17                        | 1,6  | Cytoplasm           |
| 1391075_at   | AI179271  | regulator of G-protein signaling 17                               | RGS17                        | 2,8  | Cytoplasm           |
| 1394280_at   | AW140991  | regulator of G-protein signaling 17                               | RGS17                        | 3,2  | Cytoplasm           |
| 1383357_a_at | BF403558  | RELT-like 1                                                       | RELL1                        | 1,5  | Unknown             |
| 1376401_at   | AI412569  | replication initiator 1                                           | REPIN1                       | 2,0  | Unknown             |
| 1389053_at   | AI171280  | required for meiotic nuclear division 1 homolog (S. cerevisiae)   | RMND1                        | 3,8  | Unknown             |
| 1388749_at   | BI278823  | required for meiotic nuclear division 5 homolog A (S. cerevisiae) | RMND5A                       | -2,1 | Unknown             |
| 1387081_at   | NM_017132 | reticulocalbin 2, EF-hand calcium binding domain                  | RCN2                         | 4,9  | Cytoplasm           |
| 1368097_a_at | NM_053865 | reticulum 1                                                       | RTN1                         | -2,4 | Cytoplasm           |
| 1373571_at   | AI170276  | reticulum 3                                                       | RTN3                         | -1,5 | Cytoplasm           |
| 1374852_at   | AI407613  | RGD1559909                                                        | RGD1559909                   | -1,6 | Unknown             |
| 1375305_at   | BI282028  | RGD1563912                                                        | RGD1563912                   | -4,4 | Unknown             |
| 1392823_at   | AI146105  | RGD1563912                                                        | RGD1563912                   | -3,9 | Unknown             |

|              |           |                                                                                        |               |       |                     |
|--------------|-----------|----------------------------------------------------------------------------------------|---------------|-------|---------------------|
| 1388900_at   | BG381414  | RGD1566118                                                                             | RGD1566118    | 4,0   | Unknown             |
| 1372585_at   | BM388445  | RGD1566254                                                                             | RGD1566254    | 613,0 | Unknown             |
| 1371366_at   | AI408677  | Rho GDP dissociation inhibitor (GDI) alpha                                             | ARHGDI A      | 2,3   | Cytoplasm           |
| 1387035_a_at | NM_022244 | Rho GTPase activating protein 17                                                       | ARHGAP17      | 2,5   | Cytoplasm           |
| 1374086_at   | BF282296  | Rho GTPase activating protein 21                                                       | ARHGAP21      | 2,2   | Cytoplasm           |
| 1376501_at   | AA945062  | Rho GTPase activating protein 8                                                        | ARHGAP8       | 10,6  | Cytoplasm           |
| 1395229_at   | BG375118  | Rho guanine nucleotide exchange factor (GEF) 12                                        | ARHGEF12      | 3,4   | Cytoplasm           |
| 1377750_at   | AI454536  | Rho guanine nucleotide exchange factor (GEF) 3                                         | ARHGEF3       | -2,3  | Cytoplasm           |
| 1381297_at   | BI292668  | Rho guanine nucleotide exchange factor (GEF) 5                                         | ARHGEF5       | 6,0   | Cytoplasm           |
| 1383523_at   | BE110369  | rho/rac guanine nucleotide exchange factor (GEF) 18                                    | ARHGEF18      | 2,1   | Cytoplasm           |
| 1390786_at   | BE099756  | rho/rac guanine nucleotide exchange factor (GEF) 2                                     | ARHGEF2       | 2,3   | Cytoplasm           |
| 1374376_at   | BM386483  | Rho-guanine nucleotide exchange factor                                                 | RGNEF         | 3,1   | Unknown             |
| 1384765_at   | BI289371  | rhomboid 5 homolog 2 (Drosophila)                                                      | RHBDF2        | 13,0  | Unknown             |
| 1373581_at   | BG380767  | Rho-type GTPase-activating protein RICH2                                               | RICH2         | 2,4   | Unknown             |
| 1370880_at   | X62528    | ribonuclease/angiogenin inhibitor 1                                                    | RNHI          | 2,8   | Cytoplasm           |
| 1390769_at   | AI535312  | ribose-phosphate pyrophosphokinase I -like                                             | LOC314140     | 1,7   | Unknown             |
| 1371295_at   | AW914097  | ribosomal protein S20                                                                  | RPS20         | 1,5   | Cytoplasm           |
| 1371488_at   | AW915978  | RIKEN cDNA 0610010E21 gene                                                             | 0610010E21RIK | 2,0   | Unknown             |
| 1385060_at   | BF401036  | RIKEN cDNA 1110012D08 gene                                                             | 1110012D08RIK | -3,0  | Unknown             |
| 1376845_at   | AA819034  | RIKEN cDNA 1810023F06 gene                                                             | 1810023F06RIK | 3,6   | Unknown             |
| 1380105_at   | C07059    | RIKEN cDNA 2010107G12 gene                                                             | 2010107G12RIK | -3,6  | Unknown             |
| 1382436_at   | BM386497  | RIKEN cDNA 2610002M06 gene                                                             | 2610002M06RIK | 3,4   | Cytoplasm           |
| 1390907_at   | AI145039  | RIKEN cDNA 2610008E11 gene                                                             | 2610008E11RIK | -2,0  | Unknown             |
| 1380619_at   | AI177390  | RIKEN cDNA 3110001I22 gene                                                             | 3110001I22RIK | 2,2   | Unknown             |
| 1384483_at   | BI274216  | RIKEN cDNA 9530082P21 gene                                                             | 9530082P21RIK | 10,9  | Unknown             |
| 1399057_at   | BE109080  | RIKEN cDNA A730098P11 gene                                                             | A730098P11RIK | 1,6   | Nucleus             |
| 1397267_at   | BF410275  | RIMS binding protein 2                                                                 | RIMBP2        | -3,7  | Plasma Membrane     |
| 1375955_at   | BI289415  | ring finger protein 114                                                                | RNF114        | 3,2   | Unknown             |
| 1372865_at   | AI171206  | ring finger protein 115                                                                | RNF115        | 4,4   | Cytoplasm           |
| 1382379_at   | AW529177  | ring finger protein 138                                                                | RNF138        | 1,6   | Unknown             |
| 1387201_at   | NM_053588 | ring finger protein 138                                                                | RNF138        | 4,3   | Unknown             |
| 1371597_at   | BI281621  | ring finger protein 187                                                                | RNF187        | -2,1  | Unknown             |
| 1382074_at   | AI113237  | ring finger protein 19B                                                                | RNF19B        | 4,8   | Unknown             |
| 1374559_at   | AI171211  | ring finger protein 26                                                                 | RNF26         | -1,7  | Unknown             |
| 1378916_at   | AI029234  | ring finger protein 43                                                                 | RNF43         | -2,3  | Unknown             |
| 1383496_at   | BM387466  | RNA binding motif protein 35A                                                          | RBM35A        | 2,5   | Unknown             |
| 1393832_at   | AI136337  | RNA binding motif protein 43                                                           | RBM43         | 8,4   | Unknown             |
| 1375870_a_at | BF420140  | RNA binding motif, single stranded interacting protein 1                               | RBMS1         | 2,9   | Nucleus             |
| 1371596_at   | AI008971  | RNA binding protein S1, serine-rich domain                                             | RNPS1         | 1,5   | Nucleus             |
| 1372380_at   | AI231308  | RNA binding protein with multiple splicing                                             | RBPMS         | 2,4   | Unknown             |
| 1380513_at   | BE095638  | RNA polymerase II associated protein 2                                                 | RPAP2         | 4,3   | Unknown             |
| 1376065_at   | AI058889  | RRS1 ribosome biogenesis regulator homolog (S. cerevisiae)                             | RRS1          | 2,4   | Nucleus             |
| 1389480_at   | AI598462  | RWD domain containing 4A                                                               | RWDD4A        | -2,5  | Unknown             |
| 1386890_at   | NM_031114 | S100 calcium binding protein A10                                                       | S100A10       | 2,0   | Cytoplasm           |
| 1375170_at   | BG378926  | S100 calcium binding protein A11                                                       | S100A11       | 9,3   | Cytoplasm           |
| 1372741_at   | AI412013  | saccharopine dehydrogenase (putative)                                                  | SCCPDH        | -2,1  | Cytoplasm           |
| 1388820_at   | BI286365  | SAFB-like, transcription modulator                                                     | SLTM          | 1,9   | Nucleus             |
| 1388815_at   | BE329438  | SAPS domain family, member 1                                                           | SAPS1         | 2,2   | Unknown             |
| 1383766_at   | BG663338  | sarcoglycan, beta (43kDa dystrophin-associated glycoprotein)                           | SGCB          | -4,1  | Plasma Membrane     |
| 1374796_at   | AI413058  | sarcoglycan, beta (43kDa dystrophin-associated glycoprotein)                           | SGCB          | -4,0  | Plasma Membrane     |
| 1368379_at   | NM_054001 | scavenger receptor class B, member 2                                                   | SCARB2        | 2,1   | Plasma Membrane     |
| 1368129_at   | NM_031647 | Scm-like with four mbt domains 1                                                       | SFMBT1        | 7,0   | Nucleus             |
| 1382921_at   | AA997613  | SDA1 domain containing 1                                                               | SDAD1         | 3,5   | Nucleus             |
| 1390755_at   | BE105876  | secretion regulating guanine nucleotide exchange factor                                | SERGEF        | 4,5   | Cytoplasm           |
| 1367992_at   | NM_013175 | secretogranin V (7B2 protein)                                                          | SCG5          | -1,7  | Extracellular Space |
| 1376073_at   | BI285936  | sel-1 suppressor of lin-12-like (C. elegans)                                           | SEL1L         | 2,5   | Cytoplasm           |
| 1368806_at   | AA799627  | selenoprotein P, plasma, 1                                                             | SEPP1         | -4,5  | Extracellular Space |
| 1376319_at   | BM390322  | sema domain, immunoglobulin domain (Ig), short basic domain, secreted, (semaphorin) 3C | SEMA3C        | 2,9   | Extracellular Space |

|              |           |                                                                                                                         |
|--------------|-----------|-------------------------------------------------------------------------------------------------------------------------|
| 1388745_at   | AI228417  | sema domain, immunoglobulin domain (Ig), transmembrane domain (TM) and short cytoplasmic domain, (semaphorin) 4A        |
| 1383290_at   | BI280343  | serine peptidase inhibitor, Kunitz type 1                                                                               |
| 1373459_at   | AII03051  | serine/threonine kinase 11 interacting protein                                                                          |
| 1372077_at   | AI009198  | serine/threonine kinase receptor associated protein                                                                     |
| 1372874_at   | BI299261  | serologically defined colon cancer antigen 8                                                                            |
| 1373592_at   | AI407094  | serpin peptidase inhibitor, clade B (ovalbumin), member 9                                                               |
| 1373672_at   | BM384419  | serpin peptidase inhibitor, clade B (ovalbumin), member 9                                                               |
| 1372254_at   | AW915763  | serpin peptidase inhibitor, clade G (C1 inhibitor), member 1                                                            |
| 1387131_at   | AF193015  | serpin peptidase inhibitor, clade I (neuroserpin), member 1                                                             |
| 1389153_at   | BI296087  | SERPINE1 mRNA binding protein 1                                                                                         |
| 1399070_at   | AII80081  | SET domain containing 5                                                                                                 |
| 1382117_at   | BF417345  | SET domain containing 6                                                                                                 |
| 1388775_at   | AII76439  | SFRS12-interacting protein 1                                                                                            |
| 1373033_at   | BI289505  | SFT2 domain containing 1                                                                                                |
| 1383085_at   | BG672648  | SH3 domain binding glutamic acid-rich protein like                                                                      |
| 1389140_at   | AII72437  | signal peptidase complex subunit 2 homolog (S. cerevisiae)                                                              |
| 1367690_at   | NM_017199 | signal sequence receptor, delta (translocon-associated protein delta)                                                   |
| 1389420_at   | BI279446  | signal transducing adaptor family member 2                                                                              |
| 1395064_at   | BE118876  | similar to 4930429A08Rik protein                                                                                        |
| 1375062_at   | BM392237  | similar to Adaptor-related protein complex 1, mu 2 subunit (AP1M2)                                                      |
| 1397953_at   | AII13261  | similar to AMSH-family protein                                                                                          |
| 1373469_at   | BF408841  | similar to Butyrate-induced transcript 1                                                                                |
| 1388763_at   | AI230762  | similar to Calponin-2 (Calponin H2, smooth muscle) (Neutral calponin)                                                   |
| 1373514_at   | AA899109  | similar to chromosome 17 open reading frame 27                                                                          |
| 1377980_at   | AI549077  | similar to chromosome 20 open reading frame 102                                                                         |
| 1393951_at   | BI302706  | similar to coiled-coil domain containing 9                                                                              |
| 1377523_at   | BE113698  | similar to dachshund b                                                                                                  |
| 1388663_at   | AII00783  | similar to death effector domain-containing DNA binding protein 2                                                       |
| 1377763_at   | BF283765  | similar to Der1-like domain family, member 2                                                                            |
| 1373506_at   | AA944568  | similar to early estrogen-induced gene 1 protein                                                                        |
| 1391062_at   | AA875129  | similar to elongation protein 4 homolog                                                                                 |
| 1390163_at   | BF282174  | similar to expressed sequence AI553587                                                                                  |
| 1376760_at   | BF402128  | similar to GC-rich sequence DNA-binding factor homolog                                                                  |
| 1377445_at   | BF388223  | similar to GTL2, imprinted maternally expressed untranslated                                                            |
| 1390226_at   | AI408343  | similar to hypothetical protein LOC340061                                                                               |
| 1374670_at   | BM384543  | similar to hypothetical protein MGC20700                                                                                |
| 1388447_at   | AA800701  | similar to limb-bud and heart                                                                                           |
| 1398486_at   | BF400868  | similar to melanoma inhibitory activity 3                                                                               |
| 1373333_at   | AII02732  | similar to Microsomal signal peptidase 23 kDa subunit (SPase 22 kDa subunit) (SPC22/23)                                 |
| 1372472_at   | AA859614  | similar to Microtubule-associated protein RP/EB family member 2 (APC-binding protein EB2) (End-binding protein 2) (EB2) |
| 1392733_at   | BM391545  | similar to mirror-image polydactyly 1                                                                                   |
| 1380079_at   | AW533923  | similar to mKIAA2005 protein                                                                                            |
| 1371866_at   | BM389317  | similar to myosin XVIIIa                                                                                                |
| 1373330_at   | AI406704  | similar to Myosin-15 (Myosin XV) (Unconventional myosin-15)                                                             |
| 1375523_at   | BE108178  | similar to Myristoylated alanine-rich C-kinase substrate (MARCKS) (ACAMP-81)                                            |
| 1376240_at   | BG378240  | similar to MYST histone acetyltransferase monocytic leukemia 4                                                          |
| 1373232_at   | AI008975  | similar to nidogen 2 protein                                                                                            |
| 1381434_s_at | AW253721  | similar to nidogen 2 protein                                                                                            |
| 1383728_at   | BM387529  | similar to NMDA receptor regulated 1-like                                                                               |
| 1391028_at   | AI511126  | similar to nuclear receptor interacting protein 2                                                                       |
| 1385503_at   | BM387442  | similar to O-acetyltransferase                                                                                          |
| 1389023_at   | AI599504  | similar to Oligosaccharyl transferase 3 CG7748-PA                                                                       |
| 1372659_at   | BE113269  | similar to potassium channel modulatory factor 1                                                                        |
| 1371956_at   | BG372686  | similar to praja1, RING-H2 motif containing                                                                             |
| 1389387_at   | BF561377  | similar to Proteasome inhibitor PI31 subunit                                                                            |
| 1373403_at   | AI230625  | similar to Protein C8orf4 (Thyroid cancer protein 1) (TC-1)                                                             |
| 1383081_at   | BM388245  | similar to Protein phosphatase 2A, 59 kDa regulatory subunit B (PP2A PR59) (PP2A B-PR59)                                |
| 1376042_at   | BF284673  | similar to RIKEN cDNA 2310007F12                                                                                        |

|            |      |                     |
|------------|------|---------------------|
| SEMA4A     | 2,1  | Plasma Membrane     |
| SPINT1     | 2,6  | Extracellular Space |
| STK11IP    | 2,0  | Unknown             |
| STRAP      | 1,7  | Plasma Membrane     |
| SDCCAG8    | -2,4 | Cytoplasm           |
| SERPINB9   | 5,1  | Cytoplasm           |
| SERPINB9   | 6,0  | Cytoplasm           |
| SERPING1   | 19,7 | Extracellular Space |
| SERPINI1   | -1,7 | Extracellular Space |
| SERBP1     | -1,5 | Nucleus             |
| SETD5      | 2,3  | Unknown             |
| SETD6      | 2,7  | Unknown             |
| SFRS12IP1  | -1,7 | Unknown             |
| SFT2D1     | 1,9  | Unknown             |
| SH3BGRL    | -3,7 | Unknown             |
| SPCS2      | 1,9  | Cytoplasm           |
| SSR4       | -1,7 | Cytoplasm           |
| STAP2      | 8,8  | Cytoplasm           |
| RGD1564943 | -2,0 | Unknown             |
| RGD1561490 | -2,1 | Unknown             |
| LOC687696  | 2,5  | Unknown             |
| RGD1565496 | -1,7 | Unknown             |
| LOC690976  | 4,5  | Unknown             |
| LOC688296  | 53,4 | Unknown             |
| RGD1305725 | -3,2 | Unknown             |
| LOC684934  | 1,8  | Unknown             |
| LOC686314  | -3,3 | Unknown             |
| LOC687118  | 7,7  | Unknown             |
| LOC687738  | -1,8 | Unknown             |
| LOC687750  | -2,8 | Unknown             |
| LOC687694  | -5,6 | Unknown             |
| RGD1563863 | -2,8 | Unknown             |
| LOC683880  | 4,1  | Unknown             |
| RGD1566401 | -5,4 | Unknown             |
| RGD1562552 | 3,3  | Unknown             |
| RGD1307722 | 2,8  | Unknown             |
| LOC683626  | -2,7 | Unknown             |
| LOC683007  | -2,5 | Unknown             |
| MGC109340  | -2,5 | Unknown             |
| LOC679221  | -2,3 | Unknown             |
| LOC687620  | 5,6  | Unknown             |
| RGD1561472 | 10,0 | Unknown             |
| LOC360570  | 2,1  | Unknown             |
| LOC690323  | -5,1 | Unknown             |
| LOC294446  | -4,6 | Unknown             |
| RGD1566399 | 1,8  | Unknown             |
| LOC302022  | 2,2  | Unknown             |
| LOC302022  | 5,7  | Unknown             |
| LOC686240  | 4,1  | Unknown             |
| LOC689619  | 6,5  | Unknown             |
| LOC678772  | -3,0 | Unknown             |
| RGD1311563 | -1,7 | Unknown             |
| LOC684322  | 1,8  | Unknown             |
| LOC683077  | -2,0 | Unknown             |
| RCG 37297  | 3,7  | Unknown             |
| LOC684871  | 78,4 | Unknown             |
| LOC682033  | -1,9 | Unknown             |
| RGD1562416 | -1,9 | Unknown             |

|              |           |                                                                                      |
|--------------|-----------|--------------------------------------------------------------------------------------|
| 1398886_at   | BI285703  | similar to Selenoprotein H                                                           |
| 1397173_at   | BE109095  | similar to Serine/threonine-protein kinase WNK3 (Protein kinase, lysine-deficient 3) |
| 1391607_at   | BE109653  | similar to Sestrin 2 (Hi95)                                                          |
| 1371848_at   | AA799526  | similar to small nuclear ribonucleoprotein D3                                        |
| 1372770_at   | BF281357  | similar to sorcin                                                                    |
| 1372322_at   | BF398016  | similar to Suppressor of <i>S. cerevisiae</i> gcr2                                   |
| 1392658_at   | AI230409  | similar to transcription elongation factor A 1 isoform 2                             |
| 1388867_at   | AI227852  | similar to transcription factor                                                      |
| 1392527_at   | AI137840  | similar to translocase of the inner mitochondrial membrane 14 isoform a              |
| 1384116_at   | AA924216  | similar to vacuolar protein sorting 37D                                              |
| 1373980_at   | AW916138  | similar to XPA binding protein 1                                                     |
| 1376983_at   | BF417687  | similar to zinc finger protein 455                                                   |
| 1382903_at   | BF420492  | similar to zinc finger, ZZ domain containing 3                                       |
| 1386287_at   | AI407974  | SLAIN motif family, member 2                                                         |
| 1381126_at   | BE099652  | SLIT-ROBO Rho GTPase activating protein 2                                            |
| 1390350_at   | BE097445  | small ArfGAP2                                                                        |
| 1382466_at   | BF407231  | small nuclear ribonucleoprotein 48kDa (U11/U12)                                      |
| 1393161_at   | AW916962  | small nuclear RNA activating complex, polypeptide 3, 50kDa                           |
| 1372734_at   | AI408095  | small trans-membrane and glycosylated protein                                        |
| 1383998_at   | BF545601  | SMEK homolog 2, suppressor of mek1 (Dictyostelium)                                   |
| 1392978_at   | BE117086  | solute carrier family 25, member 28                                                  |
| 1372866_at   | BM386202  | solute carrier family 25, member 38                                                  |
| 1386088_at   | AW141957  | solute carrier family 25, member 46                                                  |
| 1382150_at   | BG377042  | solute carrier family 25, member 46                                                  |
| 1389530_at   | BI274313  | solute carrier family 35, member E1                                                  |
| 1399102_at   | BG377901  | solute carrier family 38, member 10                                                  |
| 1376117_at   | BI289103  | solute carrier family 44, member 4                                                   |
| 1372899_at   | AI104683  | solute carrier family 9 (sodium/hydrogen exchanger), member 8                        |
| 1384760_at   | AI711126  | sorting nexin 32                                                                     |
| 1383942_at   | BI275795  | sorting nexin 9                                                                      |
| 1372930_at   | AI411381  | SP110 nuclear body protein                                                           |
| 1394819_at   | AI177957  | SP110 nuclear body protein                                                           |
| 1373636_at   | AI406342  | sparc/osteonectin, cwcv and kazal-like domains proteoglycan (testican) 1             |
| 1383140_at   | BG665046  | sparc/osteonectin, cwcv and kazal-like domains proteoglycan (testican) 2             |
| 1372633_at   | AI178531  | spastic paraplegia 20 (Troyer syndrome)                                              |
| 1383839_at   | AI576427  | spastic paraplegia 20 (Troyer syndrome)                                              |
| 1370264_at   | BI288556  | spectrin repeat containing, nuclear envelope 1                                       |
| 1388520_at   | BI278854  | sperm associated antigen 9                                                           |
| 1391885_at   | AA925352  | spermatogenesis associated 9                                                         |
| 1376195_at   | BI288682  | spindlin 1                                                                           |
| 1376160_at   | BF408850  | splicing factor, arginine/serine-rich 16                                             |
| 1398440_at   | BI292166  | splicing factor, arginine/serine-rich 18                                             |
| 1374154_at   | AI411610  | splicing factor, arginine/serine-rich 2, interacting protein                         |
| 1379010_at   | AA956727  | splicing factor, arginine/serine-rich 3                                              |
| 1381623_at   | BF391476  | splicing factor, arginine/serine-rich 4                                              |
| 1374864_at   | BM390457  | sprouty homolog 2 (Drosophila)                                                       |
| 1387012_at   | NM_031596 | squamous cell carcinoma antigen recognized by T cells                                |
| 1373003_at   | BF414266  | squamous cell carcinoma antigen recognized by T cells 3                              |
| 1381103_a_at | AA996485  | SRR1 domain containing                                                               |
| 1372602_at   | BI295979  | starch binding domain 1                                                              |
| 1374815_at   | AA997695  | STARD3 N-terminal like                                                               |
| 1368157_at   | NM_024346 | stathmin-like 3                                                                      |
| 1370680_at   | AF483620  | staufer, RNA binding protein, homolog 2 (Drosophila)                                 |
| 1379754_at   | AI070598  | staufer, RNA binding protein, homolog 2 (Drosophila)                                 |
| 1393932_at   | AI060175  | sterile alpha motif domain containing 8                                              |
| 1378043_at   | AW532890  | sterile alpha motif domain containing 9                                              |
| 1376693_at   | AA998964  | sterile alpha motif domain containing 9                                              |
| 1390312_at   | BG670441  | sterile alpha motif domain containing 9-like                                         |

|                           |       |                     |
|---------------------------|-------|---------------------|
| RGD1563348                | 2,3   | Unknown             |
| RGD1563131                | -2,7  | Unknown             |
| RGD1566319                | 1,6   | Unknown             |
| LOC687711                 | 1,7   | Unknown             |
| LOC683667                 | 3,1   | Unknown             |
| RGD1565023                | -1,5  | Unknown             |
| LOC498453                 | 3,1   | Unknown             |
| MGC112830                 | -2,2  | Unknown             |
| LOC683663                 | -1,8  | Unknown             |
| RCG 21373                 | 3,4   | Unknown             |
| LOC688393                 | 1,5   | Unknown             |
| LOC680200                 | 3,3   | Unknown             |
| LOC310958                 | 2,2   | Unknown             |
| SLAIN2                    | 6,2   | Unknown             |
| SRGAP2                    | 1,5   | Unknown             |
| SMAP2                     | -3,6  | Unknown             |
| SNRNP48                   | 1,7   | Nucleus             |
| SNAPC3                    | 1,9   | Nucleus             |
| LOC57228                  | 4,5   | Cytoplasm           |
| SMEK2                     | 1,6   | Unknown             |
| SLC25A28                  | 4,4   | Unknown             |
| SLC25A38                  | 1,9   | Unknown             |
| SLC25A46                  | -2,2  | Unknown             |
| SLC25A46                  | -2,1  | Unknown             |
| SLC35E1                   | 1,6   | Unknown             |
| SLC38A10                  | -2,2  | Unknown             |
| SLC44A4                   | 3,2   | Unknown             |
| SLC9A8                    | -1,5  | Cytoplasm           |
| SNX32                     | -1,6  | Unknown             |
| SNX9 (includes EG:683687) | 1,7   | Unknown             |
| SP110                     | 3,1   | Nucleus             |
| SP110                     | 6,4   | Nucleus             |
| SPOCK1                    | -3,4  | Extracellular Space |
| SPOCK2                    | -2,2  | Extracellular Space |
| SPG20                     | -2,2  | Cytoplasm           |
| SPG20                     | -2,0  | Cytoplasm           |
| SYNE1                     | -2,1  | Nucleus             |
| SPAG9                     | -1,7  | Plasma Membrane     |
| SPATA9                    | -2,8  | Unknown             |
| SPIN1                     | 10,6  | Nucleus             |
| SFRS16                    | 6,3   | Nucleus             |
| SFRS18                    | -2,1  | Nucleus             |
| SFRS2IP                   | 2,5   | Nucleus             |
| SFRS3                     | 2,0   | Nucleus             |
| SFRS4                     | 1,9   | Nucleus             |
| SPRY2                     | 2,7   | Plasma Membrane     |
| SART1                     | 1,8   | Nucleus             |
| SART3                     | 1,8   | Nucleus             |
| SRRD                      | 2,7   | Unknown             |
| STBD1                     | 11,3  | Cytoplasm           |
| STARD3NL                  | 1,6   | Cytoplasm           |
| STMN3                     | -2,5  | Nucleus             |
| STAU2                     | 2,6   | Cytoplasm           |
| STAU2                     | 2,8   | Cytoplasm           |
| SAMD8                     | 3,5   | Unknown             |
| SAMD9                     | 14,2  | Unknown             |
| SAMD9                     | 110,1 | Unknown             |
| SAMD9L                    | 15,0  | Unknown             |

|              |           |                                                                                |
|--------------|-----------|--------------------------------------------------------------------------------|
| 1371823_at   | BM392158  | stromal antigen 2                                                              |
| 1387778_at   | NM_130412 | stromal cell derived factor 4                                                  |
| 1376024_at   | AW914992  | stromal interaction molecule 1                                                 |
| 1384200_at   | BE107328  | structural maintenance of chromosomes flexible hinge domain containing 1       |
| 1389142_at   | AI013361  | sulfide quinone reductase-like (yeast)                                         |
| 1398848_at   | BG377057  | suppression of tumorigenicity 13 (colon carcinoma) (Hsp70 interacting protein) |
| 1390290_at   | BF396659  | surfeit 6                                                                      |
| 1367883_at   | NM_022509 | survival of motor neuron 1, telomeric                                          |
| 1373585_at   | BE116774  | synaptojanin 2 binding protein                                                 |
| 1390489_at   | BE108860  | synaptotagmin binding, cytoplasmic RNA interacting protein                     |
| 1382923_at   | AI072424  | synaptotagmin binding, cytoplasmic RNA interacting protein                     |
| 1382189_at   | AI574779  | syndecan 2                                                                     |
| 1370166_at   | AII69682  | syndecan 2                                                                     |
| 1367721_at   | NM_012649 | syndecan 4                                                                     |
| 1368070_at   | NM_031656 | syntaxin 8                                                                     |
| 1388679_at   | AI412244  | TBC1 domain family, member 14                                                  |
| 1385596_at   | BF392191  | TBC1 domain family, member 15                                                  |
| 1383265_at   | BF408403  | TBC1 domain family, member 23                                                  |
| 1398484_at   | AI070306  | TBC1 domain family, member 9 (with GRAM domain)                                |
| 1385407_at   | AI511405  | TCDD-inducible poly(ADP-ribose) polymerase                                     |
| 1374446_at   | AI179464  | TCDD-inducible poly(ADP-ribose) polymerase                                     |
| 1372507_at   | AA901093  | T-cell leukemia translocation altered gene                                     |
| 1381167_at   | BF390767  | T-cell lymphoma invasion and metastasis 1                                      |
| 1388780_at   | BF395792  | telomeric repeat binding factor 2, interacting protein                         |
| 1373708_at   | BG378168  | terminal uridylyl transferase 1, U6 snRNA-specific                             |
| 1391440_at   | AW521245  | testis expressed 10                                                            |
| 1376038_at   | AI411054  | testis expressed 2                                                             |
| 1389557_at   | BM384037  | testis expressed 261                                                           |
| 1388463_at   | AW252660  | testis expressed 264                                                           |
| 1388209_at   | AF092091  | testis specific, 10                                                            |
| 1372455_at   | AI410264  | tetraspanin 12                                                                 |
| 1377630_at   | AI408602  | tetraspanin 13                                                                 |
| 1398325_at   | AII72464  | tetraspanin 3                                                                  |
| 1372739_at   | AA818865  | tetraspanin 31                                                                 |
| 1380725_at   | AW251317  | tetraspanin 5                                                                  |
| 1372286_at   | BI295929  | tetraspanin 6                                                                  |
| 1383948_at   | AA998083  | tetratricopeptide repeat domain 28                                             |
| 1383215_at   | BF557467  | tetratricopeptide repeat domain 28                                             |
| 1386805_at   | BF554446  | tetratricopeptide repeat domain 28                                             |
| 1376610_a_at | BE109163  | tetratricopeptide repeat domain 28                                             |
| 1386309_at   | AI176361  | tetratricopeptide repeat domain 28                                             |
| 1377860_at   | BM392227  | tetratricopeptide repeat domain 39B                                            |
| 1388567_at   | BF282947  | THUMP domain containing 1                                                      |
| 1367655_at   | NM_021261 | thymosin beta 10                                                               |
| 1375865_at   | BF408844  | tight junction associated protein 1 (peripheral)                               |
| 1372473_at   | AW434048  | tight junction protein 1 (zona occludens 1)                                    |
| 1367712_at   | NM_053819 | TIMP metalloproteinase inhibitor 1                                             |
| 1368323_at   | NM_017200 | tissue factor pathway inhibitor (lipoprotein-associated coagulation inhibitor) |
| 1391559_at   | AW525904  | TLC domain containing 1                                                        |
| 1398984_at   | AA818129  | TM2 domain containing 2                                                        |
| 1371551_at   | BM383323  | TNF receptor-associated factor 4                                               |
| 1388492_at   | AW919111  | TNFAIP3 interacting protein 1                                                  |
| 1383655_at   | BF545192  | TNFAIP3 interacting protein 2                                                  |
| 1392531_at   | AII78693  | tocopherol (alpha) transfer protein-like                                       |
| 1378582_at   | BM383666  | TraB domain containing                                                         |
| 1372252_at   | BE112892  | trafficking protein particle complex 1                                         |
| 1371466_at   | AII77397  | trafficking protein particle complex 2                                         |
| 1367523_at   | AI409145  | trafficking protein particle complex 2-like                                    |

|                            |       |                     |
|----------------------------|-------|---------------------|
| STAG2                      | -1,6  | Nucleus             |
| SDF4                       | -1,6  | Cytoplasm           |
| STIM1                      | -1,7  | Plasma Membrane     |
| SMCHD1                     | 2,4   | Unknown             |
| SQRDL (includes EG:691966) | -2,3  | Unknown             |
| ST13                       | 1,9   | Cytoplasm           |
| SURF6                      | 1,6   | Nucleus             |
| SMN1                       | 2,0   | Nucleus             |
| SYNJ2BP                    | -1,9  | Cytoplasm           |
| SYNCRIP                    | 1,5   | Nucleus             |
| SYNCRIP                    | 3,4   | Nucleus             |
| SDC2                       | -2,8  | Plasma Membrane     |
| SDC2                       | -2,1  | Plasma Membrane     |
| SDC4                       | 2,5   | Plasma Membrane     |
| STX8                       | 1,7   | Plasma Membrane     |
| TBC1D14                    | -2,9  | Unknown             |
| TBC1D15                    | 3,0   | Cytoplasm           |
| TBC1D23                    | -2,1  | Unknown             |
| TBC1D9                     | -3,2  | Plasma Membrane     |
| TIPARP                     | 2,1   | Unknown             |
| TIPARP                     | 3,4   | Unknown             |
| TCTA                       | -2,2  | Unknown             |
| TIAM1                      | 2,7   | Cytoplasm           |
| TERF2IP                    | -1,5  | Nucleus             |
| TUT1                       | 1,6   | Unknown             |
| TEX10                      | 3,2   | Nucleus             |
| TEX2                       | -1,6  | Unknown             |
| TEX261                     | -2,0  | Extracellular Space |
| TEX264                     | 2,4   | Extracellular Space |
| TSGA10                     | -24,1 | Cytoplasm           |
| TSPAN12                    | -3,0  | Unknown             |
| TSPAN13                    | -1,6  | Plasma Membrane     |
| TSPAN3                     | -1,8  | Plasma Membrane     |
| TSPAN31                    | 1,5   | Plasma Membrane     |
| TSPAN5                     | 3,8   | Plasma Membrane     |
| TSPAN6                     | -2,0  | Plasma Membrane     |
| TTC28                      | -10,4 | Unknown             |
| TTC28                      | -10,2 | Unknown             |
| TTC28                      | -10,0 | Unknown             |
| TTC28                      | -2,8  | Unknown             |
| TTC28                      | -2,7  | Unknown             |
| TTC39B                     | 4,4   | Unknown             |
| THUMPD1                    | -2,0  | Unknown             |
| TMSB10                     | 1,8   | Cytoplasm           |
| TJAP1                      | 1,8   | Plasma Membrane     |
| TJP1                       | 2,2   | Plasma Membrane     |
| TIMP1                      | 19,4  | Extracellular Space |
| TFPI                       | -7,4  | Extracellular Space |
| TLCD1                      | 2,3   | Unknown             |
| TM2D2                      | -1,5  | Extracellular Space |
| TRAF4                      | 1,7   | Cytoplasm           |
| TNIP1                      | 6,4   | Nucleus             |
| TNIP2                      | 10,6  | Cytoplasm           |
| TTPAL                      | 2,1   | Unknown             |
| TRABD                      | -2,4  | Unknown             |
| TRAPPC1                    | -2,0  | Cytoplasm           |
| TRAPPC2                    | -3,1  | Cytoplasm           |
| TRAPPC2L                   | 2,0   | Unknown             |

|              |           |                                                                          |                              |      |                     |
|--------------|-----------|--------------------------------------------------------------------------|------------------------------|------|---------------------|
| 1382311_at   | BM384466  | TRAF-interacting protein with forkhead-associated domain                 | TIFA                         | 15,5 | Unknown             |
| 1373757_at   | AW529298  | TRAF-type zinc finger domain containing 1                                | TRAFD1                       | 1,6  | Unknown             |
| 1375521_at   | AI230334  | transcription elongation factor A (SII)-like 8                           | TCEAL8                       | -1,8 | Unknown             |
| 1373238_at   | AI234844  | transcriptional adaptor 1 (HF11 homolog, yeast)-like                     | TADAIL                       | 2,1  | Unknown             |
| 1388478_at   | BE108225  | transducin (beta)-like 1X-linked                                         | TBL1X                        | 1,9  | Plasma Membrane     |
| 1387169_at   | NM_053400 | transducin-like enhancer of split 3 (E(sp1) homolog, Drosophila)         | TLE3                         | 2,3  | Nucleus             |
| 1371509_at   | BG666773  | transforming growth factor beta regulated gene 1                         | TBRG1 (includes EG:21376)    | 2,1  | Nucleus             |
| 1390149_at   | BI286164  | transforming, acidic coiled-coil containing protein 2                    | TACC2                        | 2,9  | Nucleus             |
| 1387529_a_at | NM_031676 | transgelin 3                                                             | TAGLN3                       | -5,9 | Extracellular Space |
| 1371028_at   | AW917192  | trans-golgi network protein 2                                            | TGOLN2 (includes EG:10618)   | -2,9 | Cytoplasm           |
| 1389965_at   | AA799818  | trans-golgi network protein 2                                            | TGOLN2 (includes EG:10618)   | -1,7 | Cytoplasm           |
| 1389471_at   | AI412736  | translocase of outer mitochondrial membrane 34                           | TOMM34                       | -1,5 | Cytoplasm           |
| 1379186_at   | BF414701  | translocase of outer mitochondrial membrane 70 homolog A (S. cerevisiae) | TOMM70A                      | 2,1  | Cytoplasm           |
| 1371688_at   | AI178493  | translocation associated membrane protein 1                              | TRAM1                        | -2,1 | Cytoplasm           |
| 1368706_at   | NM_053785 | transmembrane 4 L six family member 4                                    | TM4SF4                       | -3,7 | Plasma Membrane     |
| 1390832_at   | BI294696  | transmembrane and coiled-coil domain family 3                            | TMCC3                        | 3,8  | Unknown             |
| 1393822_at   | AA925789  | transmembrane and coiled-coil domain family 3                            | TMCC3                        | 4,8  | Unknown             |
| 1379541_at   | BE329099  | transmembrane and tetratricopeptide repeat containing 4                  | TMTC4                        | -3,7 | Unknown             |
| 1376102_at   | BI292351  | transmembrane BAX inhibitor motif containing 1                           | TMBIM1                       | 5,3  | Unknown             |
| 1371968_at   | AI013781  | transmembrane BAX inhibitor motif containing 4                           | TMBIM4                       | 4,4  | Nucleus             |
| 1385436_at   | AI556940  | transmembrane channel-like 4                                             | TMC4                         | 1,5  | Unknown             |
| 1385714_at   | BF545988  | transmembrane channel-like 4                                             | TMC4                         | 1,6  | Unknown             |
| 1375904_at   | AI011285  | transmembrane emp24 protein transport domain containing 5                | TMED5                        | 1,7  | Cytoplasm           |
| 1378952_at   | H31535    | transmembrane protein 101                                                | TMEM101                      | -2,2 | Extracellular Space |
| 1374948_at   | BI275815  | transmembrane protein 106A                                               | TMEM106A                     | 6,5  | Unknown             |
| 1372657_at   | BM391494  | transmembrane protein 106C                                               | TMEM106C                     | -5,1 | Unknown             |
| 1388930_at   | AI171651  | transmembrane protein 123                                                | TMEM123                      | -1,9 | Plasma Membrane     |
| 1371634_at   | BE107851  | transmembrane protein 126A                                               | TMEM126A                     | 1,9  | Cytoplasm           |
| 1377615_at   | AI112395  | transmembrane protein 130                                                | TMEM130                      | -2,3 | Unknown             |
| 1390042_at   | AI071166  | transmembrane protein 140                                                | TMEM140                      | 13,7 | Unknown             |
| 1376904_at   | AI716115  | transmembrane protein 151A                                               | TMEM151A                     | 5,4  | Unknown             |
| 1374605_at   | AA818020  | transmembrane protein 161B                                               | TMEM161B                     | 1,5  | Unknown             |
| 1377964_at   | BM390539  | transmembrane protein 167B                                               | TMEM167B                     | 2,7  | Unknown             |
| 1378243_at   | AA923937  | transmembrane protein 17                                                 | TMEM17                       | 2,1  | Unknown             |
| 1372848_at   | BI296915  | transmembrane protein 179                                                | TMEM179                      | -3,6 | Unknown             |
| 1383307_at   | AI717533  | transmembrane protein 186                                                | TMEM186                      | -1,5 | Cytoplasm           |
| 1386346_at   | BI275715  | transmembrane protein 19                                                 | TMEM19                       | 1,9  | Unknown             |
| 1394842_at   | BF289172  | transmembrane protein 19                                                 | TMEM19                       | 2,1  | Unknown             |
| 1371932_at   | AI232287  | transmembrane protein 192                                                | TMEM192                      | 2,0  | Unknown             |
| 1393165_at   | BG377684  | transmembrane protein 206                                                | TMEM206                      | -2,1 | Unknown             |
| 1388346_at   | BM386531  | transmembrane protein 208                                                | TMEM208                      | -1,8 | Unknown             |
| 1398219_at   | BE109914  | transmembrane protein 215                                                | TMEM215 (includes EG:401498) | -6,6 | Unknown             |
| 1389561_at   | BE110624  | transmembrane protein 218                                                | TMEM218                      | -3,8 | Extracellular Space |
| 1383674_at   | BF419619  | transmembrane protein 219                                                | TMEM219                      | -1,9 | Cytoplasm           |
| 1392045_at   | BE110277  | transmembrane protein 22                                                 | TMEM22                       | -2,2 | Cytoplasm           |
| 1387013_at   | NM_020976 | transmembrane protein 27                                                 | TMEM27                       | -2,2 | Plasma Membrane     |
| 1373058_at   | AI409051  | transmembrane protein 30A                                                | TMEM30A                      | -1,8 | Unknown             |
| 1389171_at   | AI104326  | transmembrane protein 38A                                                | TMEM38A                      | -8,6 | Unknown             |
| 1373595_at   | BM385463  | transmembrane protein 43                                                 | TMEM43                       | 2,0  | Nucleus             |
| 1370807_at   | AF411216  | transmembrane protein 49                                                 | TMEM49                       | 2,6  | Plasma Membrane     |
| 1372100_at   | BI283746  | transmembrane protein 50A                                                | TMEM50A                      | 1,7  | Plasma Membrane     |
| 1371347_at   | BI279371  | transmembrane protein 50B                                                | TMEM50B                      | -3,6 | Plasma Membrane     |
| 1372780_at   | BM391310  | transmembrane protein 53                                                 | TMEM53                       | -3,1 | Unknown             |
| 1386632_at   | BF547901  | transmembrane protein 55A                                                | TMEM55A                      | 1,8  | Unknown             |
| 1383375_at   | BI293584  | transmembrane protein 55A                                                | TMEM55A                      | 1,9  | Unknown             |
| 1399012_at   | BI285976  | transmembrane protein 59                                                 | TMEM59 (includes EG:9528)    | -1,6 | Plasma Membrane     |
| 1377102_at   | BI288335  | transmembrane protein 63A                                                | TMEM63A                      | -1,7 | Unknown             |
| 1389883_at   | BF284719  | transmembrane protein 65                                                 | TMEM65                       | -1,8 | Unknown             |

|              |           |                                                                                          |         |       |                     |
|--------------|-----------|------------------------------------------------------------------------------------------|---------|-------|---------------------|
| 1373309_at   | BI281129  | transmembrane protein 86A                                                                | TMEM86A | 2,0   | Unknown             |
| 1373161_at   | BM386009  | transmembrane protein 98                                                                 | TMEM98  | -3,6  | Cytoplasm           |
| 1372508_at   | BE113266  | trinucleotide repeat containing 6A                                                       | TNRC6A  | -1,5  | Nucleus             |
| 1378293_at   | AI556246  | tripartite motif-containing 26                                                           | TRIM26  | 2,6   | Cytoplasm           |
| 1383369_at   | AI028875  | tripartite motif-containing 26                                                           | TRIM26  | 8,6   | Cytoplasm           |
| 1371786_at   | BE111791  | tripartite motif-containing 35                                                           | TRIM35  | -2,8  | Cytoplasm           |
| 1372112_at   | AA945761  | tripartite motif-containing 5                                                            | TRIM5   | 2,8   | Cytoplasm           |
| 1378592_at   | BF396210  | tripartite motif-containing 59                                                           | TRIM59  | 3,8   | Unknown             |
| 1385252_at   | BI280655  | tripartite motif-containing 6                                                            | TRIM6   | 7,9   | Unknown             |
| 1368540_at   | NM_031807 | trophoblast glycoprotein                                                                 | TPBG    | 2,1   | Plasma Membrane     |
| 1372500_at   | BG378269  | tropomodulin 3 (ubiquitous)                                                              | TMOD3   | 1,9   | Cytoplasm           |
| 1383986_at   | AI071098  | tropomyosin 3                                                                            | TPM3    | 2,0   | Cytoplasm           |
| 1389846_at   | BE104273  | tropomyosin 3                                                                            | TPM3    | 2,1   | Cytoplasm           |
| 1370339_at   | L24775    | tropomyosin 3                                                                            | TPM3    | 2,4   | Cytoplasm           |
| 1374602_at   | BF407207  | TSPY-like 1                                                                              | TSPYL1  | -1,8  | Nucleus             |
| 1390097_at   | BI281738  | TSPY-like 4                                                                              | TSPYL4  | -4,3  | Nucleus             |
| 1371885_at   | BI282366  | tubulin folding cofactor B                                                               | TBCB    | 2,1   | Cytoplasm           |
| 1389108_at   | AI710235  | tubulin folding cofactor D                                                               | TBCD    | -2,6  | Cytoplasm           |
| 1388869_at   | BF281319  | tubulin folding cofactor E                                                               | TBCE    | 1,5   | Cytoplasm           |
| 1388959_at   | BI297049  | tubulin tyrosine ligase-like family, member 12                                           | TTL12   | 1,7   | Unknown             |
| 1387892_at   | BI285440  | tubulin, beta                                                                            | TUBB    | 1,7   | Cytoplasm           |
| 1373718_at   | BM384071  | tubulin, beta 2A                                                                         | TUBB2A  | 2,0   | Cytoplasm           |
| 1371618_s_at | AI229029  | tubulin, beta 3                                                                          | TUBB3   | 1,6   | Cytoplasm           |
| 1376100_at   | BI274903  | tubulin, beta 6                                                                          | TUBB6   | 11,7  | Cytoplasm           |
| 1370351_at   | AB030644  | tudor domain containing 7                                                                | TDRD7   | 2,6   | Cytoplasm           |
| 1376335_at   | BI282368  | tuftelin interacting protein 11                                                          | TFIP11  | 1,6   | Extracellular Space |
| 1388773_at   | BI278479  | tumor necrosis factor, alpha-induced protein 2                                           | TNFAIP2 | 6,2   | Extracellular Space |
| 1372626_at   | AI231999  | tumor protein D52-like 1                                                                 | TPD52L1 | -1,5  | Cytoplasm           |
| 1372436_at   | BG668434  | tumor protein D52-like 2                                                                 | TPD52L2 | 2,9   | Cytoplasm           |
| 1375420_at   | AII70535  | tumor protein p53 inducible protein 11                                                   | TP53I11 | 1,5   | Unknown             |
| 1388812_at   | AI230362  | tumor protein p53 inducible protein 13                                                   | TP53I13 | -2,1  | Unknown             |
| 1376575_at   | BI302686  | twisted gastrulation homolog 1 (Drosophila)                                              | TWSG1   | 1,5   | Extracellular Space |
| 1398800_at   | NM_019377 | tyrosine 3-monooxygenase/tryptophan 5-monooxygenase activation protein, beta polypeptide | YWHAB   | -1,5  | Cytoplasm           |
| 1387041_at   | NM_053747 | ubiquilin 1                                                                              | UBQLN1  | 2,4   | Cytoplasm           |
| 1398767_at   | NM_017314 | ubiquitin C                                                                              | UBC     | 1,6   | Cytoplasm           |
| 1368762_at   | NM_053299 | ubiquitin D                                                                              | UBD     | 128,6 | Nucleus             |
| 1384773_at   | AI044323  | ubiquitin domain containing 2                                                            | UBTD2   | -2,0  | Unknown             |
| 1383538_at   | BF545850  | ubiquitin protein ligase E3 component n-recognin 3 (putative)                            | UBR3    | -2,9  | Unknown             |
| 1379025_at   | BF392966  | ubiquitin protein ligase E3 component n-recognin 4                                       | UBR4    | -2,2  | Nucleus             |
| 1375029_at   | AI235912  | ubiquitin specific peptidase like 1                                                      | USPL1   | 1,8   | Unknown             |
| 1373299_at   | BI295816  | UBX domain protein 1                                                                     | UBXN1   | 2,1   | Cytoplasm           |
| 1389260_at   | AI008393  | UBX domain protein 6                                                                     | UBXN6   | 2,2   | Cytoplasm           |
| 1397349_at   | BF394199  | UBX domain protein 8                                                                     | UBXN8   | 2,1   | Unknown             |
| 1381982_at   | BF403568  | UDP-N-acetylglucosamine pyrophosphorylase 1-like 1                                       | UAP1L1  | 3,8   | Unknown             |
| 1398865_at   | U96638    | unc-50 homolog (C. elegans)                                                              | UNC50   | -1,8  | Cytoplasm           |
| 1371972_at   | BM388888  | unc-84 homolog B (C. elegans)                                                            | UNC84B  | 3,0   | Nucleus             |
| 1388910_at   | BI285944  | up-regulated gene 4                                                                      | URG4    | 1,8   | Unknown             |
| 1379341_at   | BG378132  | USP6 N-terminal like                                                                     | USP6NL  | 2,3   | Plasma Membrane     |
| 1382972_at   | BE103344  | UTP15, U3 small nucleolar ribonucleoprotein, homolog (S. cerevisiae)                     | UTP15   | 1,9   | Nucleus             |
| 1393320_at   | BF396985  | UTP15, U3 small nucleolar ribonucleoprotein, homolog (S. cerevisiae)                     | UTP15   | 2,0   | Nucleus             |
| 1372787_at   | BE106508  | UTP3, small subunit (SSU) processome component, homolog (S. cerevisiae)                  | UTP3    | 1,9   | Nucleus             |
| 1371651_at   | BI295882  | vacuolar protein sorting 25 homolog (S. cerevisiae)                                      | VPS25   | -1,9  | Nucleus             |
| 1374472_at   | AI710526  | vacuolar protein sorting 37 homolog A (S. cerevisiae)                                    | VPS37A  | 1,9   | Unknown             |
| 1376680_at   | BG379765  | vacuolar protein sorting 37 homolog C (S. cerevisiae)                                    | VPS37C  | 4,9   | Cytoplasm           |
| 1394435_at   | AI703874  | vang-like 1 (van gogh, Drosophila)                                                       | VANGL1  | 10,2  | Cytoplasm           |
| 1392667_at   | AI070793  | vang-like 2 (van gogh, Drosophila)                                                       | VANGL2  | -3,3  | Plasma Membrane     |
| 1368474_at   | NM_012889 | vascular cell adhesion molecule 1                                                        | VCAM1   | 28,4  | Plasma Membrane     |
| 1384169_a_at | AA900477  | vav 2 guanine nucleotide exchange factor                                                 | VAV2    | -2,2  | Cytoplasm           |

|              |           |                                                         |                           |       |                     |
|--------------|-----------|---------------------------------------------------------|---------------------------|-------|---------------------|
| 1393349_x_at | BI288992  | vav 2 guanine nucleotide exchange factor                | VAV2                      | -2,1  | Cytoplasm           |
| 1384171_x_at | AA900477  | vav 2 guanine nucleotide exchange factor                | VAV2                      | -1,5  | Cytoplasm           |
| 1369974_at   | NM_012663 | vesicle-associated membrane protein 2 (synaptobrevin 2) | VAMP2                     | -3,8  | Plasma Membrane     |
| 1368853_at   | NM_012686 | visinin-like 1                                          | VSNL1                     | -16,9 | Cytoplasm           |
| 1368076_at   | NM_052801 | von Hippel-Lindau tumor suppressor                      | VHL                       | 2,4   | Nucleus             |
| 1374204_at   | BM388946  | WD repeat and SOCS box-containing 1                     | WSB1                      | 2,0   | Unknown             |
| 1374793_at   | BE113663  | WD repeat domain 3                                      | WDR3                      | 1,6   | Cytoplasm           |
| 1382104_at   | AI113277  | WD repeat domain 33                                     | WDR33                     | 1,7   | Nucleus             |
| 1399138_at   | BG672805  | WD repeat domain 42A                                    | WDR42A                    | -3,8  | Unknown             |
| 1382679_at   | BF396190  | WD repeat domain 43                                     | WDR43                     | 2,6   | Nucleus             |
| 1372781_at   | BG378912  | WD repeat domain 47                                     | WDR47                     | -1,8  | Unknown             |
| 1373399_at   | BI291997  | WD repeat domain 6                                      | WDR6 (includes EG:301007) | -2,9  | Unknown             |
| 1374715_at   | BE097245  | WD repeat domain 70                                     | WDR70                     | 2,9   | Unknown             |
| 1373263_at   | AW523737  | WD repeat domain 74                                     | WDR74                     | 2,7   | Nucleus             |
| 1388560_at   | AI412580  | WD repeat domain 77                                     | WDR77                     | 1,7   | Nucleus             |
| 1389643_at   | H31790    | widely interspaced zinc finger motifs                   | WIZ                       | 1,8   | Nucleus             |
| 1382175_at   | AW534129  | Wilms tumor 1 associated protein                        | WTAP                      | 2,4   | Nucleus             |
| 1373842_at   | BM390718  | Wiskott-Aldrich syndrome-like                           | WASL (includes EG:682507) | -1,6  | Unknown             |
| 1369203_at   | NM_053738 | WNT inhibitory factor 1                                 | WIF1                      | -1,8  | Extracellular Space |
| 1374394_at   | AI105305  | WW domain binding protein 2                             | WBP2                      | 1,9   | Cytoplasm           |
| 1389857_at   | BG378874  | WW domain binding protein 5                             | WBP5                      | -1,6  | Unknown             |
| 1372893_at   | BI284198  | Yip1 domain family, member 1                            | YIPF1                     | -1,8  | Unknown             |
| 1373149_at   | BF285344  | yippee-like 3 (Drosophila)                              | YPEL3                     | -2,1  | Unknown             |
| 1373826_at   | AI170754  | yippee-like 5 (Drosophila)                              | YPEL5                     | 1,8   | Unknown             |
| 1383389_at   | BM388790  | zer-1 homolog (C. elegans)                              | ZER1                      | -2,0  | Unknown             |
| 1375429_at   | BI294768  | ZH16 protein                                            | ZH16                      | -1,6  | Unknown             |
| 1382524_at   | AA850361  | zinc finger and BTB domain containing 20                | ZBTB20                    | -1,9  | Nucleus             |
| 1375867_at   | AW524493  | zinc finger and BTB domain containing 4                 | ZBTB4                     | -1,9  | Nucleus             |
| 1373763_at   | AI013512  | zinc finger and BTB domain containing 43                | ZBTB43                    | 1,6   | Nucleus             |
| 1387921_at   | AB032932  | zinc finger CCCH-type containing 14                     | ZC3H14                    | 2,7   | Nucleus             |
| 1374208_at   | BE116569  | zinc finger CCCH-type containing 7A                     | ZC3H7A                    | 2,0   | Unknown             |
| 1387105_at   | NM_133579 | zinc finger protein 22 (KOX 15)                         | ZNF22                     | -1,5  | Nucleus             |
| 1395007_at   | BE120572  | zinc finger protein 23 (KOX 16)                         | ZNF23                     | -2,5  | Nucleus             |
| 1393613_at   | BE117871  | zinc finger protein 462                                 | ZNF462                    | -2,0  | Nucleus             |
| 1372480_at   | BE117893  | zinc finger protein 462                                 | ZNF462                    | -1,7  | Nucleus             |
| 1393292_at   | BE114251  | zinc finger protein 592                                 | ZNF592                    | 3,4   | Nucleus             |
| 1389523_at   | BM386127  | zinc finger protein 598                                 | ZNF598                    | 1,8   | Unknown             |
| 1384795_at   | BE116205  | zinc finger protein 638                                 | ZNF638                    | -1,6  | Nucleus             |
| 1392676_at   | AI548984  | zinc finger protein 667                                 | ZNF667                    | -2,5  | Nucleus             |
| 1385153_at   | AI555743  | zinc finger protein 68                                  | ZFP68                     | 1,9   | Nucleus             |
| 1379342_at   | BI297113  | zinc finger protein 692                                 | ZNF692                    | -1,6  | Unknown             |
| 1373819_at   | AI232337  | zinc finger protein 706                                 | ZNF706                    | -1,5  | Unknown             |
| 1389627_at   | BF550270  | zinc finger protein 746                                 | ZNF746                    | -1,6  | Unknown             |
| 1372699_at   | AI112403  | zinc finger protein 775                                 | ZNF775                    | 2,7   | Unknown             |
| 1368726_a_at | AB047638  | zinc finger protein 808                                 | ZNF808                    | 1,7   | Unknown             |
| 1393543_at   | BF399884  | zinc finger protein 846                                 | ZNF846                    | -1,7  | Unknown             |
| 1392551_at   | AI104921  | zinc finger protein ZFP                                 | LOC503192                 | -1,7  | Unknown             |
| 1393080_at   | BF389264  | zinc finger RNA binding protein                         | ZFR                       | 2,7   | Nucleus             |
| 1373136_at   | AI013609  | zinc finger with UFM1-specific peptidase domain         | ZUFSP                     | 1,8   | Unknown             |
| 1373767_at   | AI406908  | zinc finger, AN1-type domain 2A                         | ZFAND2A                   | 4,9   | Unknown             |
| 1398918_at   | BG380742  | zinc finger, AN1-type domain 3                          | ZFAND3                    | 1,9   | Unknown             |
| 1376432_at   | BM383785  | zinc finger, AN1-type domain 3                          | ZFAND3                    | 3,8   | Unknown             |
| 1373891_at   | AI101009  | zinc finger, CCHC domain containing 12                  | ZCCHC12                   | -2,2  | Unknown             |
| 1383239_at   | BF406915  | zinc finger, CCHC domain containing 7                   | ZCCHC7                    | 1,7   | Unknown             |
| 1384452_at   | AA924571  | zinc finger, CCHC domain containing 7                   | ZCCHC7                    | 1,7   | Unknown             |
| 1372989_at   | BI296586  | zinc finger, DHHC-type containing 14                    | ZDHHC14                   | 2,1   | Unknown             |
| 1373335_at   | BE349808  | zinc finger, DHHC-type containing 9                     | ZDHHC9                    | -2,2  | Cytoplasm           |
| 1367540_at   | AI044872  | zinc finger, FYVE domain containing 26                  | ZFYVE26                   | 2,6   | Unknown             |



|                              |          |                                                                            |
|------------------------------|----------|----------------------------------------------------------------------------|
| 1389152_at                   | AI412984 | zinc finger, FYVE domain containing 27                                     |
| 1392454_at                   | BI296999 | zinc finger, HIT type 6                                                    |
| 1391255_at                   | BE110035 | zinc finger, MYND-type containing 15                                       |
| 1391972_a_at                 | BE108410 | zinc finger, SWIM-type containing 4                                        |
| 1394599_at                   | AA998165 | ZXD family zinc finger C                                                   |
| <b>Not classified by IPA</b> |          |                                                                            |
| 1376047_at                   | BI285321 | 3'-phosphoadenosine 5'-phosphosulfate synthase 2 (predicted)               |
| 1382712_at                   | AI044245 | 6-phosphofructo-2-kinase/fructose-2,6-biphosphatase 2                      |
| 1395278_at                   | BI299865 | A kinase (PRKA) anchor protein 10 (predicted)                              |
| 1386521_at                   | AI511291 | A kinase (PRKA) anchor protein 2                                           |
| 1378880_at                   | AW532591 | A kinase (PRKA) anchor protein 5                                           |
| 1371793_at                   | AI008697 | acetylcholinesterase                                                       |
| 1374432_at                   | BE118251 | activated leukocyte cell adhesion molecule                                 |
| 1381994_at                   | BM385862 | AE binding protein 2 (predicted)                                           |
| 1377963_at                   | AW526938 | arginine-tRNA-protein transferase 1 (predicted)                            |
| 1393345_at                   | BF561145 | aspartate-beta-hydroxylase (predicted)                                     |
| 1380858_at                   | BE120316 | AT hook, DNA binding motif, containing 1 (predicted)                       |
| 1371438_at                   | BE113144 | AT-hook transcription factor (predicted)                                   |
| 1370583_s_at                 | AY082609 | ATP-binding cassette, sub-family B (MDR/TAP), member 1                     |
| 1376225_at                   | BF411924 | calsenilin, presenilin binding protein, EF hand transcription factor       |
| 1397700_x_at                 | BG670822 | carnitine palmitoyltransferase 1a, liver                                   |
| 1382882_x_at                 | AA963228 | carnitine palmitoyltransferase 1a, liver                                   |
| 1392166_at                   | BE099838 | carnitine palmitoyltransferase 1a, liver                                   |
| 1376616_at                   | BF551036 | casein kinase II, alpha 1 polypeptide                                      |
| 1382160_at                   | AI236331 | casein kinase II, alpha 2, polypeptide (predicted)                         |
| 1381173_at                   | BG375010 | caspase 4, apoptosis-related cysteine peptidase                            |
| 1382602_at                   | BE120211 | catenin (cadherin associated protein), beta 1                              |
| 1373246_at                   | BF397920 | CDC23 (cell division cycle 23, yeast, homolog)                             |
| 1375027_at                   | AI407365 | cell cycle progression 1 (predicted)                                       |
| 1397288_at                   | BM390376 | cleavage and polyadenylation specific factor 5                             |
| 1376302_at                   | AA955175 | coilin                                                                     |
| 1393623_at                   | AI502247 | coilin                                                                     |
| 1374273_at                   | BG665433 | coxsackie virus and adenovirus receptor                                    |
| 1376825_at                   | BF557258 | DEAH (Asp-Glu-Ala-His) box polypeptide 30                                  |
| 1392216_at                   | BF403731 | death-associated protein kinase 3                                          |
| 1391259_at                   | BE104618 | dehydrogenase/reductase (SDR family) member 1                              |
| 1373291_at                   | AI176713 | deleted in liver cancer 1                                                  |
| 1394793_at                   | AI715674 | disabled homolog 1 (Drosophila)                                            |
| 1376178_at                   | BF403703 | DNA-damage inducible transcript 3                                          |
| 1396528_at                   | BF404786 | Down syndrome critical region gene 1-like 1                                |
| 1375866_at                   | BF396191 | dynein-like protein 2                                                      |
| 1384449_at                   | AA964588 | E1A binding protein p300                                                   |
| 1394546_at                   | AI556229 | ELAV (embryonic lethal, abnormal vision, Drosophila)-like 4 (Hu antigen D) |
| 1381525_at                   | BF419130 | enabled homolog (Drosophila)                                               |
| 1397698_at                   | AW917627 | F-box and leucine-rich repeat protein 17 (predicted)                       |
| 1391085_at                   | BE118077 | fibronigen-like protein 1                                                  |
| 1375720_at                   | AI171785 | gamma-aminobutyric acid (GABA) B receptor 1                                |
| 1394578_at                   | BI299761 | glutamate receptor, ionotropic, AMPA2                                      |
| 1393995_at                   | AW534561 | glutamate receptor, ionotropic, AMPA2                                      |
| 1382232_at                   | AI454322 | glutamic pyruvate transaminase (alanine aminotransferase) 2 (predicted)    |
| 1384638_at                   | AI030545 | glutaryl-Coenzyme A dehydrogenase (predicted)                              |
| 1381703_at                   | AW525915 | glutathione reductase                                                      |
| 1389714_at                   | AI103146 | glycogen synthase kinase 3 alpha                                           |
| 1376079_at                   | BI295806 | GTPase, IMAP family member 7                                               |
| 1381988_at                   | AI029833 | guanine nucleotide binding protein, alpha q polypeptide                    |
| 1375745_at                   | BE117491 | guanine nucleotide binding protein, alpha q polypeptide                    |
| 1375705_at                   | AI103622 | guanine nucleotide binding protein, beta 1                                 |
| 1386660_at                   | BF565021 | guanine nucleotide binding protein, gamma 2                                |

|                   |      |         |
|-------------------|------|---------|
| ZFYVE27           | -2,9 | Unknown |
| ZNHIT6            | 2,5  | Unknown |
| ZMYND15           | 11,6 | Unknown |
| ZSWIM4            | 5,3  | Unknown |
| ZXDC              | 2,5  | Unknown |
| Papss2_predicted  | -2,2 |         |
| Pfkfb2            | -3,5 |         |
| Akap10_predicted  | 1,5  |         |
| Akap2             | 10,2 |         |
| Akap5             | 1,6  |         |
| Ache              | -1,8 |         |
| Alcam             | -1,8 |         |
| Aebp2_predicted   | -3,2 |         |
| Ate1_predicted    | -2,7 |         |
| Asph_predicted    | -1,9 |         |
| Ahdcl1_predicted  | -4,1 |         |
| Akna_predicted    | -1,6 |         |
| Abcb1             | 23,2 |         |
| Csen              | -3,0 |         |
| Cpt1a             | -2,5 |         |
| Cpt1a             | -2,2 |         |
| Cpt1a             | -2,1 |         |
| Csnk2a1           | -1,7 |         |
| Csnk2a2_predicted | 2,5  |         |
| Casp4             | 17,3 |         |
| Ctnnb1            | -2,6 |         |
| Cdc23             | -1,6 |         |
| Ccpg1_predicted   | -1,5 |         |
| Cpsf5             | -3,0 |         |
| Coil              | -3,1 |         |
| Coil              | -2,3 |         |
| Cxadr             | -2,2 |         |
| Dhx30             | -2,6 |         |
| Dapk3             | 3,2  |         |
| Dhrs1             | -3,1 |         |
| Dlc1              | -2,6 |         |
| Dab1              | -3,1 |         |
| Ddit3             | 1,7  |         |
| Dscr111           | -4,1 |         |
| DLP2              | 1,9  |         |
| Ep300             | 1,8  |         |
| Elavl4            | -4,9 |         |
| Enah              | 1,7  |         |
| Fbxl17_predicted  | -1,6 |         |
| Fgl1              | -2,0 |         |
| Gabbr1            | -1,5 |         |
| Gria2             | -2,3 |         |
| Gria2             | -1,9 |         |
| Gpt2_predicted    | -1,8 |         |
| Gcdh_predicted    | -3,3 |         |
| Gsr               | 3,1  |         |
| Gsk3a             | 2,4  |         |
| Gimap7            | -1,7 |         |
| Gnaq              | -2,8 |         |
| Gnaq              | -2,0 |         |
| Gnb1              | -2,1 |         |
| Gng2              | -3,7 |         |

|              |          |                                                                                                |                   |      |
|--------------|----------|------------------------------------------------------------------------------------------------|-------------------|------|
| 1371333_at   | AI180251 | heterogeneous nuclear ribonucleoprotein D-like                                                 | Hnrpd1            | -2,0 |
| 1376935_at   | BE113667 | high mobility group nucleosomal binding domain 2                                               | Hmgn2             | 3,3  |
| 1381905_at   | AI230826 | homocysteine-inducible, endoplasmic reticulum stress-inducible, ubiquitin-like domain member 1 | Herpud1           | -4,6 |
| 1388895_at   | AI175791 | hypothetical LOC290577                                                                         | LOC290577         | 2,6  |
| 1385634_at   | AA817959 | hypothetical protein LOC307347                                                                 | LOC307347         | 2,0  |
| 1375927_at   | BE100774 | hypothetical protein LOC499120                                                                 | LOC499120         | -1,7 |
| 1376618_at   | AI236218 | hypothetical protein LOC691931                                                                 | LOC691931         | 1,9  |
| 1383476_at   | AW528065 | inter-alpha trypsin inhibitor, heavy chain 3                                                   | Itih3             | 3,3  |
| 1371926_at   | AI171807 | interleukin 6 signal transducer                                                                | Il6st             | 4,7  |
| 1372550_at   | AI169278 | karyopherin (importin) beta 1                                                                  | Kpnb1             | 1,7  |
| 1394097_at   | AA849706 | Kv channel-interacting protein 1                                                               | Kcnipl            | -1,5 |
| 1389922_at   | AA891362 | L-3-hydroxyacyl-Coenzyme A dehydrogenase, short chain                                          | Hadhsc            | -9,6 |
| 1374296_at   | BM387574 | leucine-rich repeat-containing 8                                                               | Lrrc8             | -2,0 |
| 1391155_at   | AW528765 | ligand of numb-protein X 1 (predicted)                                                         | Lnx1_predicted    | -5,0 |
| 1396470_at   | BF561077 | LIM domain only 4                                                                              | Lmo4              | 2,0  |
| 1381363_at   | BF388580 | low density lipoprotein receptor-related protein 6 (predicted)                                 | Lrp6_predicted    | -1,9 |
| 1394283_at   | AW144132 | LUC7-like 2 (S. cerevisiae) (predicted)                                                        | Luc7l2_predicted  | 1,6  |
| 1384936_at   | AI136316 | MAWD binding protein                                                                           | Mawbp             | -3,6 |
| 1376076_at   | BI282296 | membrane protein, palmitoylated 5 (MAGUK p55 subfamily member 5) (predicted)                   | Mpp5_predicted    | 6,8  |
| 1383621_at   | AW526365 | membrane-bound transcription factor peptidase, site 2                                          | Mbtps2            | 1,8  |
| 1390372_at   | BF521975 | mitogen activated protein kinase kinase kinase 12                                              | Map3k12           | -1,9 |
| 1392484_at   | AA892339 | modulator of apoptosis 1                                                                       | Moap1             | 2,0  |
| 1383135_at   | BG669126 | neurotrophic tyrosine kinase, receptor, type 2                                                 | Ntrk2             | -3,8 |
| 1381035_at   | AI235476 | peptidase (prosome, macropain) 26S subunit, ATPase 1                                           | Psmc1             | 1,6  |
| 1376121_at   | BE107051 | PHD finger protein 10                                                                          | Phf10             | -1,9 |
| 1378172_at   | AI008119 | phosphatase and actin regulator 2                                                              | Phactr2           | 3,6  |
| 1384062_at   | AI072443 | phosphatidylinositol 4-kinase, catalytic, beta polypeptide                                     | Pik4cb            | -1,6 |
| 1374077_at   | AI172029 | phosphatidylserine synthase 1                                                                  | Ptdss1            | -2,6 |
| 1371933_at   | AI228039 | phosphodiesterase 4D interacting protein (myomegalin)                                          | Pde4dip           | -2,7 |
| 1380570_at   | AI145593 | piccolo (presynaptic cytomatrix protein)                                                       | Pclo              | -2,8 |
| 1373818_at   | AI408351 | potassium channel tetramerisation domain containing 12 (predicted)                             | Kctd12_predicted  | -2,2 |
| 1397599_at   | BF394205 | potassium voltage-gated channel, subfamily Q, member 3                                         | Kcnq3             | 2,8  |
| 1382255_at   | BE110785 | pre-B-cell colony enhancing factor 1                                                           | Pbef1             | 2,2  |
| 1382971_at   | BF389407 | programmed cell death 6 interacting protein                                                    | Pdcd6ip           | -1,6 |
| 1375815_at   | BF391129 | progressive ankylosis homolog (mouse)                                                          | Ank               | -3,1 |
| 1376944_at   | AI407163 | prolactin receptor                                                                             | Prlr              | -2,9 |
| 1371593_at   | BI296121 | proliferating cell nuclear antigen                                                             | Pcna              | -1,8 |
| 1383421_at   | BM386110 | proliferating cell nuclear antigen                                                             | Pcna              | 4,7  |
| 1383931_at   | AA901043 | protein tyrosine phosphatase, receptor type, K, extracellular region                           | Ptprk             | -5,7 |
| 1378665_at   | BF415436 | protocadherin 9 (predicted)                                                                    | Pcdh9_predicted   | -2,2 |
| 1389022_at   | AI102760 | putative aminopeptidase Fxna                                                                   | Fxna              | 2,8  |
| 1374609_at   | AI011183 | RAB3 GTPase activating protein subunit 2                                                       | Rab3gap2          | -1,6 |
| 1399140_at   | AA965202 | Rap guanine nucleotide exchange factor (GEF) 1                                                 | Rapgef1           | 3,0  |
| 1383894_at   | BI289486 | Rap guanine nucleotide exchange factor (GEF) 6 (predicted)                                     | Rapgef6_predicted | 3,8  |
| 1377791_at   | BI299500 | Ras-related GTP binding B                                                                      | RragB             | -4,9 |
| 1389972_at   | AA943681 | response gene to complement 32                                                                 | Rgc32             | 9,9  |
| 1378800_at   | BI291526 | Rho GTPase activating protein 8                                                                | Arhgap8           | 5,2  |
| 1382389_at   | AI179755 | Rho guanine nucleotide exchange factor (GEF) 5                                                 | Arhgef5           | 3,2  |
| 1380174_at   | BE116115 | ribosomal protein L35                                                                          | Rpl35             | -1,7 |
| 1382998_at   | AI044778 | RNA (guanine-7-) methyltransferase                                                             | Rnmt              | 2,0  |
| 1377036_at   | BE102350 | RT1 class Ib, locus Aw2                                                                        | RT1-Aw2           | 2,6  |
| 1382437_at   | BM383464 | RT1 class Ib, locus Aw2                                                                        | RT1-Aw2           | 3,7  |
| 1396304_at   | BI292055 | RT1 class Ib, locus Aw2                                                                        | RT1-Aw2           | 3,8  |
| 1380415_at   | AI233027 | RT1 class Ib, locus Aw2                                                                        | RT1-Aw2           | 6,5  |
| 1393108_at   | BM387813 | RT1 class Ib, locus Aw2                                                                        | RT1-Aw2           | 6,7  |
| 1390562_s_at | BE102350 | RT1 class Ib, locus Aw2                                                                        | RT1-Aw2           | 7,1  |
| 1379357_at   | AI408767 | RT1 class Ib, locus Aw2                                                                        | RT1-Aw2           | 8,0  |
| 1379496_at   | AI029460 | RT1 class Ib, locus Aw2                                                                        | RT1-Aw2           | 10,0 |

|            |           |                                                                                                                                          |
|------------|-----------|------------------------------------------------------------------------------------------------------------------------------------------|
| 1380129_at | AA818937  | RT1 class Ib, locus Aw2                                                                                                                  |
| 1392954_at | AI029637  | RT1 class Ib, locus Aw2                                                                                                                  |
| 1379818_at | BF288109  | RT1 class Ib, locus Aw2                                                                                                                  |
| 1398906_at | BM391354  | sedlin-like                                                                                                                              |
| 1375374_at | BF400606  | sequestosome 1                                                                                                                           |
| 1392262_at | BF402235  | seryl-aminoacyl-tRNA synthetase 1                                                                                                        |
| 1374789_at | BF550398  | SH3-domain GRB2-like 2                                                                                                                   |
| 1381987_at | AII175803 | signal sequence receptor, alpha                                                                                                          |
| 1374822_at | BE118465  | similar to 106 kDa O-GlcNAc transferase-interacting protein (predicted)                                                                  |
| 1388754_at | AII176839 | similar to Ab1-133                                                                                                                       |
| 1374558_at | AI010316  | similar to B7-like protein GL50-B (predicted)                                                                                            |
| 1377733_at | AA944531  | similar to beta-catenin-interacting protein ICAT                                                                                         |
| 1377067_at | AII137309 | similar to chromosome 10 open reading frame 6 (predicted)                                                                                |
| 1374202_at | BM389779  | similar to chromosome 9 open reading frame 7 (predicted)                                                                                 |
| 1378033_at | AI029178  | similar to cyclin B2                                                                                                                     |
| 1372103_at | BM386931  | similar to DnaJ (Hsp40) homolog, subfamily A, member 4                                                                                   |
| 1398991_at | BM389704  | similar to expressed sequence AA408877                                                                                                   |
| 1382942_at | BF397627  | similar to Ext1                                                                                                                          |
| 1374766_at | BE103616  | similar to F33H2.2                                                                                                                       |
| 1376237_at | AII45040  | similar to Fgfr1 oncogene partner                                                                                                        |
| 1373252_at | AI411930  | similar to formin-like 3 protein                                                                                                         |
| 1385926_at | BF550565  | similar to GLI pathogenesis-related 2                                                                                                    |
| 1376990_at | BE118704  | similar to HCDI protein (predicted)                                                                                                      |
| 1382823_at | AI070008  | similar to HR21spA                                                                                                                       |
| 1396489_at | BF404442  | similar to hypothetical protein FLJ10154                                                                                                 |
| 1398020_at | BF393027  | similar to hypothetical protein FLJ14675                                                                                                 |
| 1392680_at | AA900508  | similar to hypothetical protein FLJ20037 (predicted)                                                                                     |
| 1383529_at | BF549256  | similar to hypothetical protein MGC17943 (predicted)                                                                                     |
| 1392637_at | AA923988  | similar to interferon-inducible GTPase                                                                                                   |
| 1381975_at | BG371767  | similar to KIAA0367                                                                                                                      |
| 1373543_at | BI296461  | similar to KIAA0368 (predicted)                                                                                                          |
| 1374030_at | BE100868  | similar to KIAA0999 protein                                                                                                              |
| 1376488_at | AII01689  | similar to KIAA1582 protein (predicted)                                                                                                  |
| 1379153_at | BF387484  | similar to microfilament and actin filament cross-linker protein isoform b                                                               |
| 1383173_at | BI281630  | similar to Microtubule-associated protein RP/EB family member 2 (APC-binding protein EB2) (End-binding protein 2) (EB2)                  |
| 1398393_at | BF414412  | similar to mitogen-activated protein kinase 11                                                                                           |
| 1383216_at | BM390667  | similar to mKIAA0431 protein                                                                                                             |
| 1378806_at | BF392451  | similar to nemo like kinase (predicted)                                                                                                  |
| 1397676_at | BF290784  | similar to osteoclast inhibitory lectin (predicted)                                                                                      |
| 1389446_at | AI576586  | similar to p150 target of rapamycin (TOR)-scaffold protein containing WD-repeats (predicted)                                             |
| 1378094_at | BM389654  | similar to pleckstrin homology-like domain, family B, member 2                                                                           |
| 1398669_at | AA893160  | similar to Protein C12orf11 (Sarcoma antigen NY-SAR-95)                                                                                  |
| 1396817_at | AI599545  | similar to RAD54B homolog isoform 1; RAD54, S. cerevisiae, homolog of, B (predicted)                                                     |
| 1389500_at | BM383122  | similar to ras homolog gene family, member U                                                                                             |
| 1389593_at | BM392287  | similar to RIKEN cDNA 1500031M22 (predicted)                                                                                             |
| 1380750_at | BF398240  | similar to RIKEN cDNA 2900010J23                                                                                                         |
| 1381844_at | BM389974  | similar to RIKEN cDNA 4121402D02 (predicted)                                                                                             |
| 1397410_at | BI301687  | similar to RIKEN cDNA 4631427C17 (predicted)                                                                                             |
| 1399069_at | AI234008  | similar to RIKEN cDNA 4732418C07 (predicted)                                                                                             |
| 1384431_at | AI070150  | similar to RIKEN cDNA 4930431B11 gene                                                                                                    |
| 1377149_at | BM386122  | similar to RIKEN cDNA 4933411K20                                                                                                         |
| 1383295_at | AA901194  | similar to RIKEN cDNA 5430432M24                                                                                                         |
| 1392541_at | AW919608  | similar to RIKEN cDNA A030007L17; EST AA673177 (predicted)                                                                               |
| 1383204_at | BE099804  | similar to RIKEN cDNA A530089I17 (predicted)                                                                                             |
| 1371755_at | AA799607  | similar to RIKEN cDNA B230219D22 (predicted)                                                                                             |
| 1375678_at | AI412430  | similar to RIKEN cDNA D030012E24 gene (predicted)                                                                                        |
| 1393261_at | AI058850  | similar to Serine/threonine-protein phosphatase 2A 56 kDa regulatory subunit gamma isoform (PP2A, B subunit, B gamma isoform) (PP2A, B s |
| 1389222_at | BI282847  | similar to Serum amyloid A-3 protein precursor                                                                                           |

|                      |       |
|----------------------|-------|
| RT1-Aw2              | 11,4  |
| RT1-Aw2              | 13,5  |
| RT1-Aw2              | 17,9  |
| LOC287274            | -1,8  |
| Sqstm1               | 2,5   |
| Sars1                | 2,8   |
| Sh3gl2               | -2,2  |
| Ssr1                 | -1,8  |
| RGD1307844_predicted | 1,9   |
| RGD1306344           | 3,8   |
| RGD1562791_predicted | -2,4  |
| LOC503000            | -1,6  |
| RGD1564591_predicted | -1,7  |
| RGD1311501_predicted | 2,0   |
| LOC498601            | -1,8  |
| LOC498996            | -3,4  |
| RGD1308513           | -3,4  |
| LOC299907            | 1,6   |
| LOC689997            | -2,3  |
| LOC683722            | 1,7   |
| LOC300225            | 4,6   |
| LOC679819            | 6,9   |
| RGD1309307_predicted | 2,0   |
| MGC116373            | 12,9  |
| RGD1310061           | -6,5  |
| RGD1309592           | -10,6 |
| RGD1311381_predicted | -3,3  |
| RGD1563325_predicted | -2,0  |
| MGC108823            | 38,1  |
| RGD1311350           | -2,2  |
| RGD1306148_predicted | -2,0  |
| LOC684112            | -2,5  |
| RGD1310027_predicted | -1,5  |
| LOC362587            | -1,5  |
| LOC679221            | -3,3  |
| LOC689314            | 3,6   |
| RGD1305781           | 2,0   |
| RGD1561602_predicted | -2,2  |
| RGD1563148_predicted | 2,9   |
| RGD1311784_predicted | 2,5   |
| LOC685611            | -3,3  |
| LOC690728            | 1,5   |
| RGD1306507_predicted | -2,9  |
| LOC678766            | 3,6   |
| RGD1311752_predicted | -5,1  |
| LOC499779            | -1,5  |
| RGD1564778_predicted | -2,1  |
| RGD1564895_predicted | -2,1  |
| RGD1310351_predicted | -2,6  |
| RGD1308555           | 5,5   |
| RGD1307325           | -1,8  |
| RGD1308904           | 2,3   |
| RGD1304876_predicted | 2,2   |
| RGD1311375_predicted | 2,7   |
| RGD1566359_predicted | -1,7  |
| RGD1311298_predicted | 1,8   |
| LOC691318            | -3,3  |
| LOC691143            | 1,5   |

|              |          |                                                                                          |
|--------------|----------|------------------------------------------------------------------------------------------|
| 1392647_at   | BF282318 | similar to Serum amyloid A-3 protein precursor                                           |
| 1375171_at   | BF396622 | similar to SET binding factor 2                                                          |
| 1394275_at   | BF559096 | similar to StAR-related protein 1-4E (predicted)                                         |
| 1381461_at   | AI058509 | similar to StAR-related protein 1-4E (predicted)                                         |
| 1384087_at   | AA925049 | similar to sterile alpha motif domain containing 12 (predicted)                          |
| 1376920_at   | BF408536 | similar to sterile alpha motif domain containing 9-like                                  |
| 1383805_at   | BG666454 | similar to Traf2 and NCK interacting kinase, splice variant 4 (predicted)                |
| 1377141_at   | AI103397 | similar to UPF0308 protein C9orf21                                                       |
| 1374729_at   | BM385616 | similar to UV radiation resistance associated                                            |
| 1377273_at   | BF389637 | similar to Wolf-Hirschhorn syndrome candidate 1 protein isoform 1                        |
| 1375182_at   | BE109671 | solute carrier family 3, member 1                                                        |
| 1392145_at   | BI281801 | solute carrier family 45, member 3 (predicted)                                           |
| 1375266_at   | BG380633 | solute carrier family 6 (neurotransmitter transporter, glycine), member 9                |
| 1378910_at   | BG378480 | solute carrier family 6 (neurotransmitter transporter, taurine), member 6                |
| 1383585_s_at | AI043753 | sorting nexin 10                                                                         |
| 1383859_at   | AA963376 | splicing factor proline/glutamine rich (polypyrimidine tract binding protein associated) |
| 1389008_at   | AI409218 | sprouty-related, EVH1 domain containing 2                                                |
| 1389833_at   | BF285924 | sulfatase modifying factor 1 (predicted)                                                 |
| 1388811_at   | BF401593 | synapsin II                                                                              |
| 1388571_at   | BF285314 | synaptogyrin 2                                                                           |
| 1390109_at   | BI303073 | synaptotagmin binding, cytoplasmic RNA interacting protein                               |
| 1383871_at   | BE120348 | syntaxin binding protein 2                                                               |
| 1390599_at   | BE101766 | thioredoxin domain containing 1                                                          |
| 1374529_at   | AI406660 | thrombospondin 1                                                                         |
| 1374798_at   | AA924151 | torsin A interacting protein 2                                                           |
| 1376673_at   | BM391853 | transcription factor 8                                                                   |
| 1372104_at   | BF289002 | transmembrane BAX inhibitor motif containing 1                                           |
| 1374194_at   | AI170007 | transmembrane protein 16C (predicted)                                                    |
| 1392697_at   | AI230361 | transmembrane protein 55A                                                                |
| 1375644_at   | AI170561 | transthyretin                                                                            |
| 1379913_at   | BE100916 | ubiquitin specific protease 13 (isopeptidase T-3) (predicted)                            |
| 1391302_at   | BE098463 | ubiquitin specific protease 43 (predicted)                                               |
| 1374890_at   | AW533905 | ubiquitin-conjugating enzyme E2D 2                                                       |
| 1377377_at   | BF415808 | utrophin                                                                                 |
| 1392710_at   | AI101727 | WD repeat and FYVE domain containing 1                                                   |
| 1376448_at   | AI575081 | WD repeat and FYVE domain containing 1                                                   |
| 1397061_at   | BF394045 | WD repeat domain 22                                                                      |
| 1392806_at   | AI234807 | Wolf-Hirschhorn syndrome candidate 1-like 1 (predicted)                                  |
| 1377183_at   | BE098555 | WW domain-containing oxidoreductase (predicted)                                          |
| 1374751_at   | BM383668 | Yamaguchi sarcoma viral (v-yes) oncogene homolog 1                                       |
| 1385217_at   | BM385870 | zinc finger and BTB domain containing 10                                                 |
| 1383905_at   | BF401729 | zinc finger protein 216 (predicted)                                                      |
| 1374780_at   | AI232806 | zinc finger protein 422 (predicted)                                                      |
| 1378302_at   | BF403965 | zinc finger, CSL-type containing 3 (predicted)                                           |

**Not Classified**

|            |          |  |
|------------|----------|--|
| 1372318_at | AI235528 |  |
| 1376463_at | AA955579 |  |
| 1385881_at | BE100612 |  |
| 1380712_at | AI406475 |  |
| 1382651_at | AA998677 |  |
| 1394475_at | BE096857 |  |
| 1393482_at | AI045330 |  |
| 1384422_at | AI045140 |  |
| 1375667_at | AW434286 |  |
| 1373740_at | AA851385 |  |
| 1391672_at | BF399539 |  |
| 1385098_at | AW526343 |  |
| 1376764_at | AI406412 |  |

|                      |      |
|----------------------|------|
| LOC691143            | 2,8  |
| LOC691036            | 1,7  |
| RGD1561783_predicted | -2,5 |
| RGD1561783_predicted | -1,9 |
| RGD1561402_predicted | 3,6  |
| LOC500013            | 51,4 |
| RGD1561817_predicted | -3,5 |
| LOC498685            | -4,5 |
| LOC308846            | 2,6  |
| LOC680537            | -2,8 |
| Slc3a1               | -4,2 |
| Slc45a3_predicted    | 2,2  |
| Slc6a9               | -2,8 |
| Slc6a6               | 14,0 |
| Snx10                | 7,0  |
| Sfpq                 | -2,1 |
| Spred2               | -2,4 |
| Sumf1_predicted      | -4,7 |
| Syn2                 | -3,7 |
| Syngn2               | 1,9  |
| Syncrip              | 3,4  |
| Stxbp2               | -2,1 |
| Txndc1               | -2,4 |
| Thbs1                | -6,5 |
| Tor1aip2             | -1,6 |
| Tcf8                 | 2,3  |
| Tmbim1               | -2,4 |
| Tmem16c_predicted    | -1,7 |
| Tmem55a              | 2,8  |
| Trt                  | 1,6  |
| Usp13_predicted      | -2,5 |
| Usp43_predicted      | -6,9 |
| Ube2d2               | -1,5 |
| Utrn                 | -1,9 |
| Wdfy1                | 1,9  |
| Wdfy1                | 3,0  |
| Wdr22                | -1,8 |
| Whsc111_predicted    | 1,7  |
| Wwox_predicted       | -5,5 |
| Yes1                 | 1,6  |
| Zbtb10               | 3,3  |
| Zfp216_predicted     | -1,9 |
| Zfp422_predicted     | -1,6 |
| Zcs13_predicted      | 3,3  |

|       |
|-------|
| -29,1 |
| -17,7 |
| -16,8 |
| -15,6 |
| -14,8 |
| -13,9 |
| -13,2 |
| -13,0 |
| -11,6 |
| -9,4  |
| -9,1  |
| -8,6  |
| -8,4  |

|              |          |      |
|--------------|----------|------|
| 1376820_at   | AI045220 | -8,2 |
| 1397189_at   | BE108217 | -7,8 |
| 1393003_at   | AA899900 | -7,8 |
| 1393109_at   | BI274436 | -7,7 |
| 1389706_at   | AI007639 | -7,7 |
| 1380741_at   | BF412788 | -7,0 |
| 1382098_at   | AI228756 | -6,6 |
| 1390263_at   | AI179936 | -6,5 |
| 1378861_at   | BE105498 | -6,5 |
| 1391256_at   | AA900781 | -6,4 |
| 1376395_at   | AI145359 | -6,3 |
| 1374633_at   | BF284700 | -6,2 |
| 1389285_at   | AI229933 | -6,1 |
| 1373220_at   | BI296489 | -6,0 |
| 1391923_at   | BG376838 | -5,9 |
| 1376726_at   | AI101117 | -5,8 |
| 1377412_at   | AI146237 | -5,6 |
| 1391979_at   | AA851345 | -5,6 |
| 1383254_at   | BF403169 | -5,5 |
| 1395726_at   | AW143353 | -5,5 |
| 1372381_at   | BM383457 | -5,4 |
| 1372345_at   | AA894210 | -5,4 |
| 1389412_at   | AA800693 | -5,4 |
| 1375856_at   | AI102258 | -5,4 |
| 1393262_at   | BG379771 | -5,2 |
| 1373165_at   | BF404539 | -5,2 |
| 1390453_at   | AI599873 | -5,0 |
| 1383650_at   | BI291080 | -4,9 |
| 1392217_at   | AI172126 | -4,8 |
| 1377875_at   | BF400747 | -4,8 |
| 1377201_at   | BE109156 | -4,8 |
| 1384922_at   | AW527642 | -4,7 |
| 1374833_at   | BF290953 | -4,5 |
| 1377232_at   | BF406608 | -4,5 |
| 1390986_at   | AW526072 | -4,3 |
| 1392473_at   | AW525353 | -4,3 |
| 1381336_at   | BF408248 | -4,3 |
| 1397214_at   | BF288533 | -4,2 |
| 1373511_at   | BI296596 | -4,2 |
| 1374315_at   | AI228079 | -4,2 |
| 1391361_at   | BF411568 | -4,2 |
| 1393094_at   | AI385367 | -4,2 |
| 1378350_at   | AA859902 | -4,2 |
| 1381225_at   | BE119934 | -4,2 |
| 1392982_at   | AA818059 | -4,1 |
| 1382917_at   | AI043869 | -4,1 |
| 1383649_a_at | BI291080 | -4,1 |
| 1381077_at   | AA996843 | -4,0 |
| 1378531_at   | AI555775 | -4,0 |
| 1396276_at   | BG662898 | -4,0 |
| 1392526_at   | AA901274 | -3,8 |
| 1374307_at   | AI236027 | -3,8 |
| 1396460_at   | AW522969 | -3,7 |
| 1389411_at   | AW435329 | -3,7 |
| 1391090_at   | BG380796 | -3,6 |
| 1384470_at   | BE114218 | -3,6 |
| 1398368_at   | AI406502 | -3,5 |
| 1382989_at   | BE116242 | -3,5 |

|            |          |  |  |  |      |
|------------|----------|--|--|--|------|
| 1376891_at | AA818282 |  |  |  | -3,5 |
| 1378441_at | AI176859 |  |  |  | -3,5 |
| 1374241_at | AI406271 |  |  |  | -3,5 |
| 1395714_at | AT005664 |  |  |  | -3,5 |
| 1376577_at | AI145247 |  |  |  | -3,4 |
| 1374350_at | BM382988 |  |  |  | -3,4 |
| 1379562_at | AA858498 |  |  |  | -3,4 |
| 1384275_at | BI300393 |  |  |  | -3,4 |
| 1376633_at | AW529927 |  |  |  | -3,3 |
| 1378065_at | BI274450 |  |  |  | -3,3 |
| 1373023_at | BF555947 |  |  |  | -3,3 |
| 1374994_at | BF394281 |  |  |  | -3,3 |
| 1379607_at | AW527767 |  |  |  | -3,3 |
| 1382352_at | AI030845 |  |  |  | -3,3 |
| 1383466_at | BG667930 |  |  |  | -3,3 |
| 1378580_at | AI007848 |  |  |  | -3,3 |
| 1397888_at | BM389787 |  |  |  | -3,3 |
| 1394209_at | AI236275 |  |  |  | -3,3 |
| 1376911_at | BM386385 |  |  |  | -3,3 |
| 1380883_at | BF386294 |  |  |  | -3,2 |
| 1377856_at | BE113045 |  |  |  | -3,2 |
| 1397569_at | BF546710 |  |  |  | -3,2 |
| 1378068_at | AW529368 |  |  |  | -3,2 |
| 1392118_at | BE099845 |  |  |  | -3,2 |
| 1376808_at | BG672572 |  |  |  | -3,1 |
| 1377221_at | AI411226 |  |  |  | -3,1 |
| 1377071_at | BG375652 |  |  |  | -3,1 |
| 1383234_at | BF405850 |  |  |  | -3,1 |
| 1389486_at | BE108354 |  |  |  | -3,1 |
| 1376183_at | AI101484 |  |  |  | -3,1 |
| 1376966_at | BE108930 |  |  |  | -3,1 |
| 1377333_at | BE114427 |  |  |  | -3,1 |
| 1393273_at | AW533027 |  |  |  | -3,1 |
| 1377890_at | AI411360 |  |  |  | -3,0 |
| 1372449_at | AW253616 |  |  |  | -3,0 |
| 1373967_at | AI229311 |  |  |  | -3,0 |
| 1392946_at | AI029194 |  |  |  | -3,0 |
| 1391694_at | AW521119 |  |  |  | -3,0 |
| 1379431_at | AW918368 |  |  |  | -3,0 |
| 1380872_at | BF396681 |  |  |  | -3,0 |
| 1391535_at | BF284610 |  |  |  | -3,0 |
| 1383299_at | BI291730 |  |  |  | -2,9 |
| 1382270_at | BM384387 |  |  |  | -2,9 |
| 1383066_at | BG379237 |  |  |  | -2,9 |
| 1394488_at | AW524157 |  |  |  | -2,9 |
| 1372110_at | BE113148 |  |  |  | -2,9 |
| 1393699_at | BF391905 |  |  |  | -2,9 |
| 1376330_at | BF393046 |  |  |  | -2,9 |
| 1398047_at | BF394787 |  |  |  | -2,9 |
| 1373079_at | BI296427 |  |  |  | -2,9 |
| 1376464_at | BE102505 |  |  |  | -2,9 |
| 1385581_at | BF551187 |  |  |  | -2,8 |
| 1396405_at | BE097557 |  |  |  | -2,8 |
| 1378000_at | AA801075 |  |  |  | -2,8 |
| 1372849_at | AI229183 |  |  |  | -2,8 |
| 1389687_at | BI273981 |  |  |  | -2,8 |
| 1373859_at | AA819884 |  |  |  | -2,8 |
| 1397583_at | BF394946 |  |  |  | -2,8 |

|            |          |      |
|------------|----------|------|
| 1378325_at | BE098737 | -2,8 |
| 1377155_at | BI294806 | -2,8 |
| 1378139_at | AI412468 | -2,8 |
| 1372515_at | BI281177 | -2,8 |
| 1391552_at | BM391661 | -2,8 |
| 1394065_at | AI179423 | -2,7 |
| 1395509_at | BG666117 | -2,7 |
| 1397238_at | AW524239 | -2,7 |
| 1374896_at | AI101385 | -2,7 |
| 1377045_at | BG372832 | -2,7 |
| 1374155_at | BF410502 | -2,7 |
| 1382628_at | BE111904 | -2,7 |
| 1378018_at | BE098045 | -2,7 |
| 1395720_at | BE098012 | -2,7 |
| 1392968_at | BI300566 | -2,7 |
| 1381144_at | AW524106 | -2,7 |
| 1379277_at | AI575341 | -2,7 |
| 1398581_at | AA956307 | -2,6 |
| 1380078_at | AW144384 | -2,6 |
| 1395745_at | AI113308 | -2,6 |
| 1389376_at | BE113330 | -2,6 |
| 1388872_at | BI290053 | -2,6 |
| 1374758_at | BM387112 | -2,6 |
| 1398412_at | BF402250 | -2,6 |
| 1374380_at | BF403474 | -2,6 |
| 1383423_at | BI295136 | -2,6 |
| 1375563_at | AA944394 | -2,6 |
| 1382969_at | AI029559 | -2,5 |
| 1377238_at | BM386889 | -2,5 |
| 1374795_at | AA891859 | -2,5 |
| 1389649_at | AI411897 | -2,5 |
| 1382142_at | AI029975 | -2,5 |
| 1398613_at | AW532063 | -2,5 |
| 1384621_at | AA924327 | -2,5 |
| 1377047_at | AI710879 | -2,5 |
| 1383954_at | BI273721 | -2,5 |
| 1377165_at | BF420664 | -2,5 |
| 1386257_at | AA858641 | -2,5 |
| 1389612_at | AI410941 | -2,5 |
| 1373676_at | AI712626 | -2,5 |
| 1391436_at | BF283714 | -2,5 |
| 1375194_at | AI231460 | -2,5 |
| 1383404_at | BI295203 | -2,4 |
| 1389159_at | BM385437 | -2,4 |
| 1371775_at | AI172057 | -2,4 |
| 1390431_at | AI111559 | -2,4 |
| 1380180_at | AW528635 | -2,4 |
| 1380976_at | BF396723 | -2,4 |
| 1393360_at | BE105636 | -2,4 |
| 1377781_at | AA899278 | -2,4 |
| 1380349_at | BF395595 | -2,4 |
| 1383084_at | BG671922 | -2,4 |
| 1371795_at | AA848795 | -2,4 |
| 1396344_at | AI548117 | -2,4 |
| 1373695_at | AI176675 | -2,3 |
| 1372484_at | AI176231 | -2,3 |
| 1382654_at | AA859319 | -2,3 |
| 1385924_at | AI454060 | -2,3 |

|              |          |  |  |  |      |
|--------------|----------|--|--|--|------|
| 1372258_at   | AI102935 |  |  |  | -2,3 |
| 1391305_at   | AI576233 |  |  |  | -2,3 |
| 1372544_at   | AI410305 |  |  |  | -2,3 |
| 1374920_at   | AI228955 |  |  |  | -2,3 |
| 1382431_at   | AI103530 |  |  |  | -2,3 |
| 1390990_at   | AI409862 |  |  |  | -2,3 |
| 1374466_at   | AI715484 |  |  |  | -2,3 |
| 1377725_at   | AI575322 |  |  |  | -2,2 |
| 1381837_at   | AI502137 |  |  |  | -2,2 |
| 1374688_at   | AA945696 |  |  |  | -2,2 |
| 1390456_at   | AW524471 |  |  |  | -2,2 |
| 1393184_at   | BF420805 |  |  |  | -2,2 |
| 1378965_at   | AA818967 |  |  |  | -2,2 |
| 1393192_at   | AW528963 |  |  |  | -2,2 |
| 1384059_at   | BE115159 |  |  |  | -2,2 |
| 1389281_at   | BE116601 |  |  |  | -2,2 |
| 1393478_at   | AI029492 |  |  |  | -2,2 |
| 1377469_at   | AI103161 |  |  |  | -2,2 |
| 1388495_at   | BI303583 |  |  |  | -2,2 |
| 1385841_at   | BM383983 |  |  |  | -2,1 |
| 1385909_at   | BE118035 |  |  |  | -2,1 |
| 1382021_at   | AA850650 |  |  |  | -2,1 |
| 1397784_at   | BI297092 |  |  |  | -2,1 |
| 1375886_at   | AI236778 |  |  |  | -2,1 |
| 1398920_at   | AI228651 |  |  |  | -2,1 |
| 1377861_at   | AI011151 |  |  |  | -2,1 |
| 1389896_at   | AI232217 |  |  |  | -2,1 |
| 1375000_at   | BF415422 |  |  |  | -2,1 |
| 1381075_at   | AA956937 |  |  |  | -2,1 |
| 1377711_at   | BF284137 |  |  |  | -2,1 |
| 1393959_at   | BI293249 |  |  |  | -2,1 |
| 1376622_at   | BM389574 |  |  |  | -2,1 |
| 1375343_at   | BE116572 |  |  |  | -2,1 |
| 1393481_at   | BM390812 |  |  |  | -2,1 |
| 1380471_at   | H31701   |  |  |  | -2,1 |
| 1384188_at   | AW142766 |  |  |  | -2,1 |
| 1385594_at   | AW144020 |  |  |  | -2,0 |
| 1389388_at   | BF291161 |  |  |  | -2,0 |
| 1390466_at   | AW531623 |  |  |  | -2,0 |
| 1382013_at   | AI071118 |  |  |  | -2,0 |
| 1393765_at   | AI043706 |  |  |  | -2,0 |
| 1399142_at   | BF398045 |  |  |  | -2,0 |
| 1374685_at   | BE117446 |  |  |  | -2,0 |
| 1391584_at   | AA850595 |  |  |  | -2,0 |
| 1393153_at   | BG663023 |  |  |  | -2,0 |
| 1382516_at   | AI170660 |  |  |  | -2,0 |
| 1386709_at   | AW916606 |  |  |  | -2,0 |
| 1383095_at   | BM387808 |  |  |  | -2,0 |
| 1383534_at   | AA997058 |  |  |  | -2,0 |
| 1389242_at   | BG377726 |  |  |  | -2,0 |
| 1384595_at   | AI030888 |  |  |  | -2,0 |
| 1374771_at   | BM388859 |  |  |  | -2,0 |
| 1381817_at   | AI044318 |  |  |  | -1,9 |
| 1389613_at   | AI234712 |  |  |  | -1,9 |
| 1391936_a_at | BI289110 |  |  |  | -1,9 |
| 1378373_at   | BF522207 |  |  |  | -1,9 |
| 1398690_at   | BF284365 |  |  |  | -1,9 |
| 1393310_at   | BG672309 |  |  |  | -1,9 |



|              |          |  |  |  |      |
|--------------|----------|--|--|--|------|
| 1373586_at   | AI411113 |  |  |  | -1,9 |
| 1374800_at   | BI303627 |  |  |  | -1,9 |
| 1394818_at   | AI176867 |  |  |  | -1,9 |
| 1381507_at   | BE097981 |  |  |  | -1,9 |
| 1398945_at   | AA851439 |  |  |  | -1,9 |
| 1378860_at   | AW525986 |  |  |  | -1,9 |
| 1398389_at   | AI236136 |  |  |  | -1,9 |
| 1372771_at   | BI279659 |  |  |  | -1,9 |
| 1384124_at   | AW534915 |  |  |  | -1,9 |
| 1391338_at   | AI603449 |  |  |  | -1,9 |
| 1395189_at   | BE111371 |  |  |  | -1,9 |
| 1385087_at   | BF406606 |  |  |  | -1,9 |
| 1398496_at   | BF390696 |  |  |  | -1,9 |
| 1384043_at   | BG667918 |  |  |  | -1,9 |
| 1383918_at   | AI070651 |  |  |  | -1,9 |
| 1386818_at   | AA848601 |  |  |  | -1,9 |
| 1374038_at   | AA799964 |  |  |  | -1,9 |
| 1392490_at   | BM390676 |  |  |  | -1,9 |
| 1385667_x_at | AI029796 |  |  |  | -1,9 |
| 1376946_at   | BG380358 |  |  |  | -1,9 |
| 1390427_at   | BF397491 |  |  |  | -1,9 |
| 1397377_at   | AA955664 |  |  |  | -1,9 |
| 1380437_at   | BE104421 |  |  |  | -1,9 |
| 1385732_at   | BE115744 |  |  |  | -1,9 |
| 1389430_at   | AI176172 |  |  |  | -1,9 |
| 1395151_at   | AW527014 |  |  |  | -1,9 |
| 1372816_at   | BE107319 |  |  |  | -1,9 |
| 1374714_at   | BI284781 |  |  |  | -1,9 |
| 1390841_at   | BI290420 |  |  |  | -1,9 |
| 1383487_at   | AW530484 |  |  |  | -1,8 |
| 1378672_at   | BG381207 |  |  |  | -1,8 |
| 1384261_at   | AI072173 |  |  |  | -1,8 |
| 1382304_at   | AW528823 |  |  |  | -1,8 |
| 1385191_at   | AA997253 |  |  |  | -1,8 |
| 1374197_at   | AI177275 |  |  |  | -1,8 |
| 1378570_at   | AA849985 |  |  |  | -1,8 |
| 1392877_at   | AA859524 |  |  |  | -1,8 |
| 1384829_at   | AI454917 |  |  |  | -1,8 |
| 1390545_at   | AI178155 |  |  |  | -1,8 |
| 1395684_at   | AW534805 |  |  |  | -1,8 |
| 1392125_at   | BF390331 |  |  |  | -1,8 |
| 1383133_at   | BI295765 |  |  |  | -1,8 |
| 1383174_at   | AI576562 |  |  |  | -1,8 |
| 1388751_at   | AW433787 |  |  |  | -1,8 |
| 1374927_at   | AI714124 |  |  |  | -1,8 |
| 1395704_at   | BF561525 |  |  |  | -1,8 |
| 1396704_at   | BF394808 |  |  |  | -1,8 |
| 1391331_at   | BE106891 |  |  |  | -1,8 |
| 1389218_at   | AI169490 |  |  |  | -1,8 |
| 1396057_at   | AW521804 |  |  |  | -1,8 |
| 1382362_at   | AA997890 |  |  |  | -1,8 |
| 1374509_at   | BI275722 |  |  |  | -1,8 |
| 1386589_at   | AW143518 |  |  |  | -1,8 |
| 1374721_at   | AI178647 |  |  |  | -1,8 |
| 1393378_at   | BM388654 |  |  |  | -1,7 |
| 1375841_at   | BI282607 |  |  |  | -1,7 |
| 1378076_at   | AA963273 |  |  |  | -1,7 |
| 1374613_at   | BE100609 |  |  |  | -1,7 |

|              |          |      |
|--------------|----------|------|
| 1390215_at   | AI235499 | -1,7 |
| 1392026_at   | BF391823 | -1,7 |
| 1382228_at   | BE095590 | -1,7 |
| 1397765_at   | BF406754 | -1,7 |
| 1384366_at   | BI283477 | -1,7 |
| 1377237_at   | AI137274 | -1,7 |
| 1378084_at   | BF396266 | -1,7 |
| 1379996_at   | AI411753 | -1,7 |
| 1374259_at   | BG378156 | -1,7 |
| 1395405_at   | BE116248 | -1,7 |
| 1391773_at   | BM390802 | -1,7 |
| 1381640_at   | BM389537 | -1,7 |
| 1389707_at   | AW251681 | -1,7 |
| 1373765_at   | BG371708 | -1,7 |
| 1383660_at   | AI713166 | -1,7 |
| 1384215_at   | AI144991 | -1,7 |
| 1377180_at   | BF394102 | -1,7 |
| 1397871_at   | AI144643 | -1,7 |
| 1398448_at   | BE108346 | -1,7 |
| 1390463_at   | BG378294 | -1,7 |
| 1373858_at   | BE109064 | -1,7 |
| 1372836_at   | AI170399 | -1,7 |
| 1378008_at   | BF417386 | -1,7 |
| 1377556_at   | AW535380 | -1,7 |
| 1393342_at   | BG380998 | -1,7 |
| 1394553_at   | AI007661 | -1,7 |
| 1374611_at   | AW535065 | -1,6 |
| 1399066_at   | AI236763 | -1,6 |
| 1394573_at   | BF288475 | -1,6 |
| 1375437_at   | BI298111 | -1,6 |
| 1372308_at   | BM386869 | -1,6 |
| 1394460_at   | BF564428 | -1,6 |
| 1373634_at   | AI177753 | -1,6 |
| 1383934_at   | BI299169 | -1,6 |
| 1383064_at   | AI137878 | -1,6 |
| 1376984_at   | AW915048 | -1,6 |
| 1372486_at   | AI236691 | -1,6 |
| 1388825_at   | BE119400 | -1,6 |
| 1385238_at   | AA926087 | -1,6 |
| 1393024_at   | BI300589 | -1,6 |
| 1374552_at   | BF412718 | -1,6 |
| 1392951_at   | AW521231 | -1,6 |
| 1397572_at   | BE109994 | -1,6 |
| 1384346_at   | AA964754 | -1,6 |
| 1375946_at   | BF415909 | -1,6 |
| 1398447_at   | AA801323 | -1,6 |
| 1376786_a_at | BF397709 | -1,6 |
| 1375591_at   | AI101245 | -1,6 |
| 1377741_at   | BF389042 | -1,6 |
| 1385138_at   | BF401469 | -1,6 |
| 1374809_at   | BG672598 | -1,6 |
| 1380860_at   | AA819536 | -1,6 |
| 1391264_at   | AA875301 | -1,6 |
| 1395355_at   | AI555210 | -1,6 |
| 1378602_at   | BE098753 | -1,6 |
| 1392895_at   | BE101114 | -1,6 |
| 1390400_a_at | BM390922 | -1,6 |
| 1396984_at   | BM390248 | -1,6 |

|              |          |      |
|--------------|----------|------|
| 1374644_at   | BM386365 | -1,6 |
| 1367538_at   | BF284303 | -1,6 |
| 1373576_at   | BE107337 | -1,6 |
| 1379252_at   | AW522833 | -1,6 |
| 1383334_at   | AW921244 | -1,6 |
| 1390981_at   | AI028965 | -1,6 |
| 1374615_at   | AI175668 | -1,5 |
| 1388702_at   | BI285078 | -1,5 |
| 1389796_at   | BI298018 | -1,5 |
| 1374392_at   | BE113385 | -1,5 |
| 1393961_at   | AA926088 | -1,5 |
| 1373367_at   | AI556297 | -1,5 |
| 1398396_at   | BF281315 | -1,5 |
| 1388451_at   | AA817802 | -1,5 |
| 1388862_at   | AI412143 | -1,5 |
| 1379324_at   | AW535283 | -1,5 |
| 1389602_at   | BF396759 | -1,5 |
| 1377883_at   | AI717530 | -1,5 |
| 1388978_at   | BF283704 | -1,5 |
| 1397531_at   | BF522208 | -1,5 |
| 1376374_at   | AI406775 | -1,5 |
| 1374687_at   | BF283386 | -1,5 |
| 1376004_at   | BF285297 | -1,5 |
| 1375370_at   | BE119626 | 1,5  |
| 1389371_at   | AI104077 | 1,5  |
| 1380926_at   | AA957632 | 1,5  |
| 1383094_at   | BI304048 | 1,5  |
| 1384001_at   | AW143174 | 1,5  |
| 1377413_at   | BF548480 | 1,5  |
| 1377823_at   | AW531363 | 1,5  |
| 1375673_at   | AI102620 | 1,5  |
| 1396153_at   | AI555740 | 1,5  |
| 1377611_at   | AI145868 | 1,6  |
| 1377500_at   | BE119198 | 1,6  |
| 1381246_at   | BI293437 | 1,6  |
| 1375950_a_at | BI294235 | 1,6  |
| 1383362_at   | BI275850 | 1,6  |
| 1378237_at   | BG376172 | 1,6  |
| 1386540_at   | BG666051 | 1,6  |
| 1376206_at   | BF398576 | 1,6  |
| 1379310_at   | AI101880 | 1,6  |
| 1374178_at   | AI103954 | 1,6  |
| 1383999_at   | AW527651 | 1,6  |
| 1374180_at   | AI236753 | 1,6  |
| 1371666_at   | BM385852 | 1,7  |
| 1382372_at   | AA858521 | 1,7  |
| 1398376_at   | AI104587 | 1,7  |
| 1384439_at   | BM385726 | 1,7  |
| 1384892_at   | AI029798 | 1,7  |
| 1389331_at   | AI104371 | 1,7  |
| 1386566_at   | BF558962 | 1,7  |
| 1374483_at   | BE098873 | 1,7  |
| 1372024_at   | AI104846 | 1,7  |
| 1372347_at   | BI289462 | 1,7  |
| 1383869_at   | AI071350 | 1,7  |
| 1389559_at   | AA892872 | 1,7  |
| 1380395_at   | AI230394 | 1,7  |
| 1376205_at   | BI286851 | 1,8  |

|            |          |     |
|------------|----------|-----|
| 1383589_at | BE103947 | 1,8 |
| 1381163_at | AI229248 | 1,8 |
| 1386641_at | BF546770 | 1,8 |
| 1374765_at | BI288055 | 1,8 |
| 1375899_at | BF283736 | 1,8 |
| 1385033_at | AI548918 | 1,8 |
| 1389465_at | AI231286 | 1,8 |
| 1397917_at | BF412498 | 1,8 |
| 1380158_at | BF284973 | 1,8 |
| 1395578_at | BF419340 | 1,8 |
| 1374150_at | AA875425 | 1,8 |
| 1372178_at | BM385981 | 1,8 |
| 1375895_at | BI275908 | 1,8 |
| 1389287_at | BI279573 | 1,8 |
| 1383338_at | AA875190 | 1,9 |
| 1373082_at | AA893743 | 1,9 |
| 1389491_at | BE102814 | 1,9 |
| 1377790_at | BE115859 | 1,9 |
| 1374164_at | BF410020 | 1,9 |
| 1383901_at | BI287446 | 1,9 |
| 1390631_at | BE107619 | 1,9 |
| 1390708_at | AI012518 | 1,9 |
| 1392868_at | AA859495 | 1,9 |
| 1382381_at | AA818480 | 1,9 |
| 1395744_at | BF291140 | 1,9 |
| 1375585_at | BE111820 | 1,9 |
| 1395110_at | BE110272 | 1,9 |
| 1375191_at | AI230379 | 1,9 |
| 1381915_at | AI111735 | 1,9 |
| 1391828_at | AI030836 | 1,9 |
| 1382404_at | BG669741 | 1,9 |
| 1385755_at | BF396388 | 1,9 |
| 1389633_at | BI290172 | 2,0 |
| 1382148_at | AA923980 | 2,0 |
| 1382568_at | BE098457 | 2,0 |
| 1376660_at | BG672127 | 2,0 |
| 1398319_at | AI071000 | 2,0 |
| 1383737_at | BM383406 | 2,0 |
| 1376021_at | BM384049 | 2,0 |
| 1389150_at | AW524559 | 2,0 |
| 1379104_at | BF400861 | 2,0 |
| 1377117_at | BF387780 | 2,0 |
| 1389216_at | AW523499 | 2,0 |
| 1395542_at | BF549929 | 2,0 |
| 1383603_at | BM385552 | 2,1 |
| 1396095_at | BG673600 | 2,1 |
| 1373932_at | BE098739 | 2,1 |
| 1374736_at | AI172004 | 2,1 |
| 1374622_at | BE107309 | 2,1 |
| 1384584_at | AA892774 | 2,1 |
| 1390698_at | BF395822 | 2,1 |
| 1383179_at | BI291413 | 2,1 |
| 1373566_at | AI103026 | 2,1 |
| 1381713_at | BE106279 | 2,1 |
| 1393166_at | AA998749 | 2,2 |
| 1392603_at | AI717425 | 2,2 |
| 1385445_at | BE119167 | 2,2 |
| 1390134_at | AI411274 | 2,2 |

|              |          |     |
|--------------|----------|-----|
| 1393928_at   | AA899202 | 2,2 |
| 1375006_at   | BE121050 | 2,2 |
| 1397154_at   | BF403248 | 2,2 |
| 1374543_at   | AA858791 | 2,2 |
| 1388986_at   | AI598339 | 2,3 |
| 1393052_at   | BM392406 | 2,3 |
| 1391125_at   | AI639331 | 2,3 |
| 1378591_at   | AI556452 | 2,3 |
| 1395260_at   | BM383147 | 2,3 |
| 1380200_at   | AI102906 | 2,3 |
| 1375699_at   | BM389190 | 2,3 |
| 1392600_a_at | AI176989 | 2,4 |
| 1373986_at   | AI410107 | 2,4 |
| 1374893_at   | BG380384 | 2,4 |
| 1385879_at   | AA893004 | 2,4 |
| 1377092_at   | BF389682 | 2,4 |
| 1375979_at   | AA945734 | 2,4 |
| 1373808_at   | BF417211 | 2,4 |
| 1389790_at   | AI410565 | 2,4 |
| 1381206_at   | BE121026 | 2,4 |
| 1376842_at   | BF395964 | 2,5 |
| 1372951_at   | BI274172 | 2,5 |
| 1382317_at   | AI408597 | 2,5 |
| 1390930_at   | BF406924 | 2,5 |
| 1382884_at   | AI009813 | 2,5 |
| 1372466_at   | AI408571 | 2,5 |
| 1388933_at   | AI233748 | 2,5 |
| 1388915_at   | BI295753 | 2,5 |
| 1396941_at   | AA997470 | 2,6 |
| 1382177_at   | BF415064 | 2,6 |
| 1382951_at   | AA957549 | 2,6 |
| 1374760_at   | BG374448 | 2,6 |
| 1375268_at   | AA858591 | 2,6 |
| 1395518_at   | BF544403 | 2,7 |
| 1382395_at   | AA963192 | 2,7 |
| 1380003_at   | BI281665 | 2,8 |
| 1371735_at   | AI105202 | 2,8 |
| 1383348_at   | BF545309 | 2,8 |
| 1374494_at   | AI137375 | 2,9 |
| 1384184_at   | BE117485 | 3,0 |
| 1373223_at   | AI101361 | 3,0 |
| 1389001_at   | AW433944 | 3,0 |
| 1384163_at   | BE103875 | 3,1 |
| 1397178_at   | AA899041 | 3,1 |
| 1396363_at   | BF399356 | 3,1 |
| 1388509_at   | BI274303 | 3,2 |
| 1395557_at   | BF565718 | 3,2 |
| 1390493_at   | AI556256 | 3,2 |
| 1376006_at   | BG373799 | 3,2 |
| 1388759_at   | BM389875 | 3,2 |
| 1384546_at   | AA924204 | 3,3 |
| 1388146_at   | AW523578 | 3,3 |
| 1379336_at   | BF289150 | 3,3 |
| 1383044_at   | BM385117 | 3,3 |
| 1373678_at   | BE098848 | 3,6 |
| 1391958_at   | BE119699 | 3,6 |
| 1373072_at   | AI170552 | 3,6 |
| 1379379_at   | BF392753 | 3,7 |

|            |          |      |
|------------|----------|------|
| 1374429_at | AI598401 | 3,7  |
| 1393743_at | AI453930 | 3,8  |
| 1373730_at | BI282077 | 3,8  |
| 1396755_at | BF399394 | 3,9  |
| 1377052_at | AW533469 | 4,1  |
| 1378261_at | BE102806 | 4,1  |
| 1390024_at | AI237685 | 4,1  |
| 1380119_at | AA996432 | 4,6  |
| 1374433_at | BI301532 | 4,6  |
| 1374610_at | AI599365 | 4,8  |
| 1379371_at | BF284791 | 5,1  |
| 1377826_at | AI176721 | 5,2  |
| 1377151_at | AI102833 | 5,4  |
| 1395147_at | BE116565 | 5,6  |
| 1381228_at | AI073001 | 5,6  |
| 1390136_at | BE109274 | 5,6  |
| 1392655_at | AA997266 | 5,6  |
| 1372606_at | BM390528 | 5,8  |
| 1382087_at | BE109382 | 5,9  |
| 1392876_at | BG375098 | 5,9  |
| 1381534_at | BI278449 | 6,3  |
| 1392777_at | BF287676 | 6,7  |
| 1393119_at | BM388725 | 6,8  |
| 1380552_at | AI555855 | 6,9  |
| 1385925_at | AA963975 | 7,4  |
| 1385569_at | BF559640 | 7,8  |
| 1374627_at | BF283727 | 8,2  |
| 1383189_at | AA818143 | 8,6  |
| 1382278_at | BI278180 | 8,7  |
| 1383939_at | BG378849 | 9,8  |
| 1390659_at | BI302830 | 9,9  |
| 1390391_at | BF283381 | 10,1 |
| 1373679_at | AA946467 | 10,3 |
| 1380917_at | BE109049 | 10,4 |
| 1373843_at | BE107419 | 15,5 |
| 1385641_at | AI070558 | 15,9 |
| 1393018_at | AI071984 | 19,2 |
| 1398408_at | AI948410 | 19,4 |
| 1393728_at | AA964541 | 24,4 |
| 1393957_at | AI548358 | 26,8 |
| 1395183_at | BM391096 | 30,4 |
| 1397611_at | AW525619 | 32,5 |
| 1383757_at | AI044802 | 37,8 |
| 1385380_at | AI044983 | 41,2 |
| 1374337_at | AI408954 | 49,2 |
| 1382950_at | AA901350 | 74,1 |
| 1391106_at | BM385061 | 86,2 |

Primary rat  $\beta$ -cells were left untreated or exposed to TNF- $\alpha$ +IFN- $\gamma$  (TNF+IFN) for 24h. Data are mean of three independent experiments and are expressed as fold change versus control cells, studied at the same time point

Gene expression was considered modified by treatment when  $P \leq 0.02$  (paired *t-test*) and expression  $\geq 1.5$  fold higher or lower as compared to control conditions.

Pval = p value of Student t-test against control condition at the same time point. Some genes are represented by more than one probe. Classification was done using the IPA software
