# Supplementary material for: Cytokines Interleukin-1β and Tumor Necrosis Factor-α Regulate Different Transcriptional and Alternative Splicing Networks in Primary β-Cells
Source: PubMed Central journal article supplement — Diabetes. 2009 Nov 23;59(2):358–74. doi: 10.2337/db09-1159 (PMC2809955; doi:10.2337/db09-1159), 2009-11-23
Supplement: supp_db09-1159_Suppl_Table_VIII.pdf [file supp_db09-1159_Suppl_Table_VIII.pdf]

Supplementary Table VIII - Lst of transcription factors with enriched binding sites in the promoter region of hormone receptor genes

| <b>Affymetrix ID</b> | <b>Gene name</b>                               | <b>Symbol</b> | <b>TRANSFAC Matrix</b>                           | <b>over-representation Pvalue</b> |
|----------------------|------------------------------------------------|---------------|--------------------------------------------------|-----------------------------------|
| 1382372_at           | aryl hydrocarbon receptor                      | Ahr           | V\$AHR_Q5; V\$AHRHIF_Q6                          | 0.013; 0.041                      |
| 1369244_at           | aryl hydrocarbon receptor nuclear translocator | Arnt          | V\$AHRHIF_Q6                                     | 0,041                             |
| 1375437_at           | aryl hydrocarbon receptor nuclear translocator | Arnt          | V\$AHRHIF_Q6                                     | 0,041                             |
| 1387076_at           | hypoxia-inducible factor 1, alpha subunit      | Hif1a         | V\$AHRHIF_Q6                                     | 0,041                             |
| 1386641_at           | hepatic leukemia factor                        | Hlf           | V\$HLF_01                                        | 0,036                             |
| 1370917_at           | heat shock transcription factor 1              | Hsf1          | V\$HSF_Q6; V\$HSF1_Q6                            | 0.015; 0.026                      |
| 1398561_at           | interferon regulatory factor 2                 | Irf2          | V\$IRF2_01                                       | 0,025                             |
| 1369242_at           | paired box 6                                   | Pax6          | V\$PAX6_Q2                                       | 0,048                             |
| 1379397_at           | RAR-related orphan receptor alpha              | Rora          | V\$RORA1_01                                      | 0,041                             |
| 1392180_at           | Sp1 transcription factor                       | Sp1           | V\$SP1_Q6; V\$SP1_Q4_01; V\$SF1_Q6; V\$SP1_Q2_01 | 0.003; 0.009; 0.011; 0.047        |

The 1 kb upstream sequences, starting from the transcription start site (TSS), of 6 hormone receptor genes (GLP-1R, Prlr, Gpr, Ghr, Vpr2 and Cckar ) were retrieved from the ENSEMBL database together with a large set of background sequences (2 kb upstream sequences of the whole rat genome) and analyzed by the Clover program. The p-value indicates the probability that the motif's presence in the target sequences is explained just by chance. Motifs were declared as significantly over-represented in the promoter sequences of the hormone receptor genes if their p-value was  $\leq 0.05$
